# Supplementary material
Source: publisher site journal article supplement (https://www.dovepress.com/article/439924)
Supplement: Supplementary file 1 [file get_supplementary_file.php]

Supplementary Table 1. The gene expression matrix of the GSE134431 dataset, modified according to the NetworkAnalyst file upload requirements.

| #NAME       | GSM394648 | GSM394648 | GSM394648 | GSM394648  | GSM394648  | GSM394649  | GSM394649 | GSM394649 | GSM394649 | GSM394649  | GSM394649 | GSM394649  | GSM394649 | GSM394649  | GSM394649 |
|-------------|-----------|-----------|-----------|------------|------------|------------|-----------|-----------|-----------|------------|-----------|------------|-----------|------------|-----------|
|             | 5         | 6         | 7         | 8          | 9          | 0          | 1         | 2         | 3         | 4          | 5         | 6          | 7         | 8          | 9         |
| #CLASS      | DFS       | DFS       | DFS       | DFS        | DFS        | DFS        | DFS       | DFS       | DFU       | DFU        | DFU       | DFU        | DFU       | DFU        | DFU       |
| A1BG        | 0.435172  | 0.526118  | 0.405485  | 0.615839   | 1.67414    | 0.870406   | 0.307516  | 0.304082  | 0.191522  | 1.05266    | 3.8151    | 0.450047   | 0.990302  | 0.781184   | 0.771625  |
| A1BG-AS1    | 0.285845  | 0.358682  | 0.438479  | 0.153347   | 0.391235   | 0.216666   | 0.249317  | 0.272527  | 0.0828751 | 0.254337   | 0.485322  | 0.338396   | 0.277565  | 0.567048   | 1.16151   |
| A1CF        | 0.0388591 | 0.0070211 | 0.0241103 | 0.00250284 | 0.00754521 | 0.00413601 | 0.0249571 | 0.0280595 | 0         | 0.00304826 | 0.0137085 | 0.00521339 | 0         | 0.00634671 | 0.0244154 |
| A2M         | 63.6312   | 21.164    | 21.4812   | 38.616     | 50.1926    | 229.666    | 32.2456   | 29.0685   | 12.1009   | 60.2291    | 128.183   | 10.947     | 50.4399   | 43.6812    | 189.116   |
| A2M-AS1     | 1.06751   | 0.401082  | 0.509094  | 0.216553   | 0.353894   | 0.647301   | 0.498305  | 0.527031  | 0         | 0.158194   | 0.475354  | 0.0895265  | 0.14813   | 0.207344   | 1.08541   |
| A2ML1       | 34.4205   | 24.5533   | 22.749    | 73.2727    | 30.009     | 22.1251    | 18.1052   | 32.9067   | 80.3626   | 140.983    | 34.2561   | 82.5911    | 165.84    | 48.7513    | 22.974    |
| A2MP1       | 0.192698  | 0.0928449 | 0.0797068 | 0.0992905  | 0.0598654  | 0.213304   | 0         | 0.102752  | 0         | 0.0241856  | 0.0435064 | 0.0137881  | 0         | 0          | 0.332087  |
| A3GALT2     | 0.0452455 | 0.0109    | 0.0187151 | 0.0466268  | 0.140564   | 0.0385259  | 0.0774897 | 0.0603156 | 0         | 0          | 0         | 0          | 0         | 0          | 0.194935  |
| A4GALT      | 3.91462   | 1.9287    | 2.84369   | 3.72451    | 5.66897    | 9.51818    | 5.13548   | 1.93975   | 0.484289  | 2.46217    | 4.18967   | 1.27089    | 5.78685   | 5.47283    | 8.57879   |
| A4GNT       | 0.0653389 | 0.226665  | 0.118917  | 0.0134667  | 0.0405976  | 0.0333811  | 0.0596815 | 0.104522  | 0         | 0          | 0.0295038 | 0.0280511  | 0         | 0.034149   | 0.056301  |
| AA06        | 0         | 0.0176435 | 0         | 0          | 0          | 0          | 0         | 0         | 0         | 0          | 0         | 0          | 0         | 0          | 0         |
| AAAS        | 3.93067   | 5.15957   | 4.1793    | 8.54269    | 9.25642    | 10.0621    | 4.94821   | 3.44846   | 4.4342    | 4.22185    | 7.53757   | 4.1917     | 4.97455   | 5.26095    | 4.74031   |
| AACS        | 6.14426   | 10.4998   | 10.0971   | 10.9789    | 13.2455    | 9.43124    | 10.6219   | 6.32237   | 10.4187   | 9.92       | 7.03777   | 9.59562    | 14.2256   | 9.16319    | 3.43207   |
| AACSP1      | 1.67122   | 0.88416   | 0.304974  | 0.0337693  | 0.636268   | 0.0627802  | 0.196426  | 0.356748  | 0.159635  | 0.0205642  | 0.018496  | 0.169991   | 0         | 0.102759   | 0.0352952 |
| AADAC       | 0.475542  | 1.4164    | 1.15636   | 0.697964   | 0.492454   | 0.233135   | 1.92504   | 1.28067   | 3.51004   | 0.289384   | 0.748305  | 0.340263   | 0.018595  | 0.0527204  | 0         |
| AADACL2     | 4.04232   | 7.18847   | 8.09219   | 2.17826    | 3.06766    | 0.722553   | 8.63184   | 7.1164    | 30.3277   | 2.1882     | 4.82453   | 4.96784    | 0.19909   | 0.112892   | 0         |
| AADACL2-AS1 | 0.209846  | 0.404429  | 0.1984    | 2.90397    | 0.139699   | 0.0765777  | 0.205368  | 0.186494  | 0.0730198 | 0.0376255  | 0.135366  | 0.0858004  | 0         | 0.0470035  | 0         |
| AADACL3     | 0         | 0         | 0         | 0.0471219  | 0          | 0          | 0         | 0         | 0.0278445 | 0          | 0         | 0.00408977 | 0         | 0          | 0         |
| AADACL4     | 0         | 0         | 0         | 0          | 0          | 0.0625587  | 0         | 0         | 0         | 0          | 0         | 0          | 0         | 0          | 0         |
| AADACP1     | 0.0897713 | 0.0432532 | 0.0445591 | 0.277536   | 0          | 0.0458635  | 0.0204996 | 0.063825  | 0.0218663 | 0.0450689  | 0.0608044 | 0.0899273  | 0         | 0.131372   | 0.0257846 |

|          |           |           |           |           |           |           |           |           |            |           |            |            |           |           |           |
|----------|-----------|-----------|-----------|-----------|-----------|-----------|-----------|-----------|------------|-----------|------------|------------|-----------|-----------|-----------|
| AADAT    | 0.538419  | 0.432364  | 0.430571  | 0.295924  | 0.376358  | 0.840504  | 0.36885   | 0.414702  | 0.0765023  | 0.281571  | 0.628069   | 0.192627   | 0.266329  | 0.370512  | 0.902111  |
| AAGAB    | 3.36342   | 2.78605   | 2.89489   | 7.03718   | 2.57534   | 6.86755   | 2.56016   | 2.43358   | 4.0135     | 6.4132    | 6.32813    | 4.18606    | 7.856     | 5.579     | 3.96181   |
| AAK1     | 2.30377   | 2.07069   | 1.92072   | 2.24772   | 1.69445   | 2.65177   | 2.07286   | 2.09617   | 2.28315    | 2.13173   | 1.92886    | 2.04253    | 2.60566   | 2.37265   | 3.04261   |
| AAMDC    | 2.28595   | 1.96375   | 2.19895   | 1.36962   | 2.06446   | 2.92723   | 1.2949    | 1.46462   | 1.35964    | 1.17878   | 4.02086    | 0.710054   | 0.868924  | 0.981723  | 1.34879   |
| AAMP     | 14.7436   | 14.3349   | 15.379    | 22.9008   | 30.0133   | 33.6876   | 12.8304   | 9.3143    | 21.3814    | 17.0167   | 18.2949    | 13.5091    | 20.5385   | 14.2512   | 8.49474   |
| AANAT    | 0.118461  | 0.0985867 | 0.195999  | 0.11098   | 0.267653  | 0.0641889 | 0.0368878 | 0.172274  | 0.0655785  | 0.121648  | 0          | 0.0770566  | 0.027793  | 0.0562846 | 0.0618638 |
| AAR2     | 5.44883   | 4.28683   | 4.71544   | 6.98665   | 6.13671   | 7.8182    | 5.83911   | 4.02429   | 4.77066    | 4.71683   | 8.70215    | 2.92859    | 8.13835   | 4.27832   | 4.39945   |
| AARD     | 1.0496    | 0.305926  | 0.321594  | 0.0133536 | 0.140898  | 0.408243  | 0.325491  | 0.460641  | 0          | 0.0325273 | 0.07314    | 0          | 0.0501628 | 0.047407  | 0.111656  |
| AARS     | 5.67503   | 6.84579   | 6.89904   | 12.3741   | 11.9651   | 15.6399   | 8.23379   | 4.28082   | 7.56056    | 8.96424   | 8.90646    | 7.18039    | 18.178    | 10.7572   | 10.4062   |
| AARS2    | 1.90197   | 2.78883   | 2.57436   | 3.23181   | 6.20954   | 3.54807   | 1.96163   | 2.01719   | 1.48532    | 1.23307   | 0.912375   | 2.17122    | 1.40512   | 1.9274    | 1.88353   |
| AARSD1   | 3.24053   | 2.55052   | 2.75921   | 6.22467   | 6.5776    | 7.31029   | 2.72635   | 2.51818   | 1.826      | 3.19545   | 5.93691    | 2.54852    | 4.26017   | 3.48695   | 3.264     |
| AASDH    | 1.93866   | 2.05108   | 1.78463   | 2.58474   | 0.795296  | 1.37643   | 1.06405   | 1.85073   | 1.26811    | 1.70397   | 1.57156    | 1.16488    | 1.01698   | 1.34095   | 1.33838   |
| AASDHPPT | 3.07388   | 3.14916   | 3.20543   | 6.17705   | 1.89735   | 5.23473   | 1.95802   | 3.47946   | 4.98495    | 4.34536   | 5.79859    | 4.42203    | 6.30464   | 4.70548   | 3.04366   |
| AASS     | 3.80644   | 3.0086    | 3.0544    | 2.76153   | 1.28241   | 3.12818   | 1.59691   | 2.92352   | 0.847282   | 1.0327    | 1.34388    | 1.40892    | 1.0422    | 1.61983   | 2.27692   |
| AATBC    | 0.966391  | 2.54394   | 1.5448    | 1.09445   | 3.54175   | 0.9943    | 1.87347   | 1.14066   | 1.07888    | 0.631729  | 0.647743   | 1.91597    | 0.48387   | 0.649762  | 0.534904  |
| AATF     | 7.27477   | 6.87477   | 7.95869   | 10.6159   | 10.6958   | 13.889    | 5.89942   | 6.08094   | 9.43909    | 6.33578   | 4.53934    | 6.36546    | 12.3932   | 7.09577   | 4.82789   |
| AATK     | 0.30789   | 0.310667  | 0.454501  | 0.614508  | 0.536755  | 1.01142   | 0.675641  | 0.409235  | 0.0578652  | 0.612598  | 0.570492   | 0.870459   | 0.29819   | 0.44503   | 0.694749  |
| ABALON   | 0.884706  | 1.067     | 0.733658  | 1.19303   | 1.37519   | 0.930456  | 1.25778   | 0.660576  | 0.964621   | 1.12403   | 0.706032   | 0.750793   | 0.918823  | 0.968389  | 0.561008  |
| ABAT     | 0.37466   | 0.458814  | 0.606976  | 0.249355  | 0.37586   | 0.618098  | 0.43223   | 0.440487  | 0.104567   | 0.235118  | 0.16301    | 0.0921522  | 0.498565  | 0.167258  | 0.409149  |
| ABCA1    | 5.43428   | 4.80449   | 4.75266   | 11.0187   | 7.49996   | 11.7519   | 6.44119   | 6.08686   | 9.745      | 5.91891   | 6.91575    | 3.55567    | 6.37821   | 4.15663   | 10.5798   |
| ABCA10   | 1.81637   | 1.32188   | 1.85587   | 0.316437  | 0.300949  | 0.477379  | 1.09548   | 1.40253   | 0.147253   | 0.408336  | 0.210458   | 0.400189   | 0.0353778 | 0.296132  | 0.579809  |
| ABCA11P  | 1.88537   | 2.17884   | 2.46195   | 1.0698    | 1.08183   | 1.40081   | 1.2347    | 1.55471   | 0.561297   | 0.939781  | 1.26779    | 0.619884   | 0.790511  | 0.979052  | 1.21934   |
| ABCA12   | 9.09676   | 9.96118   | 9.72166   | 14.1695   | 6.58754   | 7.00549   | 8.47711   | 14.118    | 53.4813    | 19.2427   | 17.7135    | 21.5394    | 24.8195   | 12.2409   | 3.313     |
| ABCA13   | 0.653188  | 0.0661877 | 0.0557075 | 0.0735584 | 0.410035  | 0.135318  | 0.0322919 | 0.0706174 | 0.306722   | 0.082827  | 0.0456104  | 0.300661   | 0.066908  | 0.079567  | 0.278517  |
| ABCA17P  | 0.0110521 | 0.0639007 | 0.077716  | 0.022779  | 0.0772546 | 0.0988123 | 0.0630945 | 0.0343776 | 0.00673009 | 0.0138715 | 0.00623821 | 0.00790806 | 0         | 0.0115526 | 0.0396805 |
| ABCA2    | 2.56069   | 2.781     | 3.37567   | 1.27806   | 5.302     | 4.1133    | 3.85297   | 2.31017   | 1.30477    | 1.48014   | 1.20315    | 1.47372    | 1.88434   | 1.79986   | 4.00347   |

|           |           |           |           |            |           |           |           |           |           |           |           |            |           |            |            |
|-----------|-----------|-----------|-----------|------------|-----------|-----------|-----------|-----------|-----------|-----------|-----------|------------|-----------|------------|------------|
| ABCA3     | 1.62138   | 1.84021   | 2.24613   | 0.565361   | 2.3123    | 2.25535   | 2.57737   | 1.40368   | 0.685171  | 0.635936  | 0.30374   | 0.777593   | 1.26479   | 0.704951   | 0.68751    |
| ABCA4     | 0.0663487 | 0.0365346 | 0.0757981 | 0.0553506  | 0.47605   | 0.172175  | 0.13708   | 0.0870438 | 0.0384787 | 0.178445  | 0.0606328 | 0.063299   | 0.0835772 | 0.224573   | 0.0453739  |
| ABCA5     | 4.27365   | 5.55084   | 6.09134   | 2.39739    | 0.935138  | 2.04334   | 3.4481    | 6.31342   | 1.71855   | 2.49901   | 1.48453   | 2.47863    | 1.09362   | 2.55706    | 2.0004     |
| ABCA6     | 5.18709   | 2.50343   | 3.59702   | 1.12133    | 0.610918  | 2.97302   | 2.89387   | 4.50888   | 0.149018  | 0.61977   | 1.14941   | 0.347074   | 0.315778  | 0.641778   | 1.38066    |
| ABCA7     | 1.12355   | 2.38943   | 1.75506   | 1.87495    | 9.01629   | 2.27755   | 2.22848   | 1.34845   | 2.35225   | 2.01513   | 0.957965  | 2.4215     | 1.70167   | 1.29507    | 1.83292    |
| ABCA8     | 4.19765   | 1.58791   | 2.14606   | 1.63658    | 0.580791  | 3.59725   | 4.04455   | 2.56582   | 0.145529  | 0.319303  | 0.504759  | 0.159968   | 0.281028  | 0.245779   | 2.71802    |
| ABCA9     | 2.72918   | 1.70773   | 2.5334    | 0.323355   | 0.205391  | 4.00625   | 2.01116   | 2.29798   | 0.0871399 | 0.214366  | 0.294385  | 0.213905   | 0.0355462 | 0.232275   | 0.390333   |
| ABCA9-AS1 | 0.177002  | 0.0639618 | 0.146429  | 0          | 0         | 0.414467  | 0.101048  | 0.157305  | 0         | 0.055539  | 0         | 0          | 0         | 0          | 0.0635494  |
| ABCB1     | 0.604297  | 0.75384   | 0.464785  | 0.538617   | 0.735406  | 0.419044  | 0.344076  | 0.480077  | 0.367015  | 0.502337  | 0.457132  | 0.32344    | 0.338883  | 0.323368   | 1.25101    |
| ABCB10    | 2.45411   | 2.0613    | 2.09971   | 2.98043    | 2.23692   | 2.82025   | 1.83605   | 1.5731    | 1.85614   | 2.98979   | 4.3283    | 1.70017    | 3.77069   | 2.47431    | 2.13705    |
| ABCB11    | 0.166881  | 0.119001  | 0.0745501 | 0.0240766  | 0.098505  | 0.0227355 | 0.247701  | 0.059324  | 0.0325188 | 0.0293234 | 0.0113033 | 0.0358223  | 0.0193807 | 0.0209326  | 0.00479324 |
| ABCB4     | 0.317216  | 0.25646   | 0.257714  | 0.227253   | 0.229456  | 0.753471  | 0.357797  | 0.197408  | 0.0636085 | 0.342328  | 0.458574  | 0.128722   | 0.304971  | 0.383978   | 0.866745   |
| ABCB5     | 0.15273   | 0.0331865 | 0.0371614 | 0.00617225 | 0.0744289 | 0.0643209 | 0.0854813 | 0.383247  | 0         | 0.0150346 | 0.0338064 | 0.00857116 | 0         | 0.00469549 | 0.05591    |
| ABCB6     | 2.1585    | 2.51211   | 2.25095   | 5.18501    | 9.76354   | 4.38774   | 2.81162   | 1.91154   | 3.31379   | 3.5486    | 2.34229   | 4.75846    | 4.7419    | 4.67936    | 2.44497    |
| ABCB7     | 2.25859   | 2.00387   | 2.12362   | 2.52748    | 0.888683  | 2.8678    | 1.829     | 1.84808   | 1.66618   | 1.86694   | 2.38118   | 1.3669     | 2.45546   | 1.87466    | 1.19314    |
| ABCB8     | 1.78888   | 2.07472   | 2.0581    | 3.55605    | 4.19851   | 3.91625   | 2.80702   | 1.58112   | 2.26794   | 2.20842   | 2.46634   | 2.19628    | 3.03682   | 2.52385    | 2.47079    |
| ABCB9     | 0.716376  | 0.419327  | 0.401621  | 0.366072   | 0.864472  | 0.932621  | 0.588101  | 0.389359  | 0.0504731 | 0.1932    | 0.521309  | 0.216048   | 0.359066  | 0.365126   | 0.595176   |
| ABCC1     | 5.64207   | 5.12765   | 4.54499   | 11.4615    | 10.495    | 12.8751   | 7.10223   | 4.75722   | 11.7286   | 6.68305   | 6.56425   | 9.62332    | 13.4029   | 9.15415    | 9.80429    |
| ABCC10    | 1.86503   | 2.53207   | 2.50978   | 2.45158    | 5.35632   | 2.80557   | 2.7588    | 1.80114   | 1.06504   | 1.59695   | 1.52524   | 2.01359    | 2.11248   | 2.31125    | 2.66057    |
| ABCC11    | 0.0895921 | 0.0522546 | 0.035108  | 0.043734   | 0.0952198 | 0.0722714 | 0.0430709 | 0.0293344 | 0.028714  | 0.0473462 | 0.0425846 | 0.195691   | 0.0212963 | 0.0246446  | 0          |
| ABCC12    | 0         | 0         | 0         | 0          | 0         | 0         | 0         | 0         | 0         | 0         | 0         | 0          | 0         | 0          | 0          |
| ABCC13    | 0         | 0         | 0         | 0          | 0         | 0         | 0         | 0         | 0         | 0         | 0         | 0.0169899  | 0         | 0          | 0          |
| ABCC2     | 0.314899  | 0.293843  | 0.435276  | 0.221818   | 0.35912   | 0.339408  | 0.400501  | 0.318823  | 0.145637  | 0.230134  | 0.0989948 | 0.30803    | 0.146592  | 0.197912   | 0.108765   |
| ABCC3     | 1.3128    | 2.13028   | 2.90217   | 2.55644    | 1.76643   | 4.96857   | 3.71468   | 2.14221   | 0.582856  | 0.721902  | 1.17469   | 0.420977   | 1.10763   | 1.09       | 1.06563    |
| ABCC4     | 1.30399   | 1.77094   | 2.18807   | 1.59505    | 0.998429  | 2.4377    | 1.32436   | 2.33089   | 0.526372  | 1.70619   | 2.68555   | 0.78502    | 2.80285   | 1.6874     | 3.01329    |
| ABCC5     | 3.55388   | 5.65959   | 4.12706   | 2.83611    | 7.08703   | 2.47881   | 4.72605   | 2.60417   | 2.63103   | 1.26985   | 1.56955   | 2.79786    | 0.802631  | 2.08023    | 2.73237    |

|            |            |            |            |            |           |            |           |            |           |           |           |            |            |           |           |
|------------|------------|------------|------------|------------|-----------|------------|-----------|------------|-----------|-----------|-----------|------------|------------|-----------|-----------|
| ABCC5-AS1  | 0.197382   | 0.213979   | 0.285755   | 0.050852   | 0.153301  | 0.0420171  | 0.0563411 | 0.219271   | 0         | 0         | 0.055705  | 0.105924   | 0          | 0         | 0.425198  |
| ABCC6      | 0.199116   | 0.0716022  | 0.066418   | 0.0674661  | 0.103098  | 0.175723   | 0.189453  | 0.111237   | 0.0505209 | 0.0572712 | 0.0692319 | 0.0623318  | 0.0401464  | 0.0737138 | 0.131063  |
| ABCC6P1    | 4.66E-35   | 0.0063491  | 0.0115678  | 4.93E-20   | 7.55E-34  | 0.00904739 | 1.09E-20  | 3.78E-27   | 0         | 3.16E-39  | 0         | 0          | 0          | 3.10E-42  | 0         |
| ABCC6P2    | 0.065561   | 0.0256553  | 0.0542367  | 0.0411468  | 0.0509195 | 4.18E-40   | 0         | 0.0532162  | 0         | 0         | 0.119004  | 0          | 0          | 0         | 0         |
| ABCC8      | 0.0399324  | 0.00855113 | 0.00734109 | 0.00914478 | 0.0206763 | 0.0415579  | 0.0709233 | 0.00788636 | 0         | 0         | 0         | 0          | 0          | 0         | 0         |
| ABCC9      | 21.0717    | 19.3905    | 19.8198    | 10.2586    | 5.42595   | 13.2794    | 15.4371   | 19.6881    | 3.60675   | 8.90187   | 5.44665   | 9.31821    | 3.3844     | 13.4378   | 17.5538   |
| ABCD1      | 0.871654   | 0.642138   | 0.945782   | 1.41249    | 1.81512   | 3.54966    | 1.19716   | 0.600637   | 0.253855  | 0.80862   | 1.06955   | 0.27569    | 1.30001    | 0.815395  | 1.88678   |
| ABCD2      | 0.173324   | 0.0375795  | 0.0250925  | 0.0535845  | 0.0134616 | 0.0737914  | 0.0296843 | 0.107825   | 0         | 0.0163154 | 0.0391322 | 0.00620089 | 0.0111828  | 0.0158526 | 0.186686  |
| ABCD3      | 6.33279    | 7.19201    | 8.30464    | 6.6329     | 2.69832   | 5.26773    | 4.18942   | 7.59436    | 11.1569   | 5.70686   | 7.46544   | 5.21162    | 5.51734    | 4.16353   | 3.07241   |
| ABCD4      | 2.9134     | 3.19627    | 3.27579    | 3.39702    | 5.39663   | 4.76346    | 2.69394   | 2.0908     | 1.61584   | 1.83689   | 2.81021   | 1.60506    | 2.47981    | 2.41626   | 3.71257   |
| ABCE1      | 5.67233    | 5.33299    | 5.76565    | 11.6633    | 1.71363   | 8.32133    | 3.98816   | 6.69894    | 5.81988   | 5.87308   | 7.1326    | 5.36985    | 12.194     | 8.98624   | 5.42053   |
| ABCF1      | 0.939151   | 1.10502    | 1.11804    | 1.79503    | 1.65306   | 2.24061    | 1.10173   | 0.841432   | 1.70988   | 0.983483  | 0.73912   | 1.15686    | 2.25376    | 1.36432   | 1.11299   |
| ABCF2      | 3.55042    | 4.05438    | 4.12824    | 8.73409    | 5.12422   | 8.99009    | 4.61769   | 2.80336    | 5.94695   | 4.78365   | 5.03368   | 4.87749    | 9.89052    | 6.01491   | 3.84757   |
| ABCF3      | 5.98069    | 6.40774    | 6.21573    | 9.45939    | 10.9004   | 12.6445    | 5.97876   | 4.45686    | 7.48878   | 5.68263   | 5.09112   | 6.32078    | 9.30654    | 6.19599   | 5.48426   |
| ABCG1      | 3.90959    | 3.0189     | 3.64321    | 5.75565    | 6.62143   | 6.40655    | 4.82303   | 3.45742    | 21.4536   | 10.4666   | 13.0518   | 10.2711    | 12.9685    | 7.3043    | 3.76156   |
| ABCG2      | 0.553923   | 0.291151   | 0.208293   | 0.168655   | 0.391106  | 0.450218   | 0.196443  | 0.238681   | 0.296422  | 0.221209  | 0.345815  | 0.150131   | 0.151619   | 0.168877  | 0.132584  |
| ABCG4      | 0.284213   | 0.234751   | 0.0575806  | 1.82309    | 1.44157   | 1.03222    | 0.0662255 | 0.350526   | 8.85836   | 2.77365   | 3.39829   | 2.89273    | 1.47821    | 1.70066   | 0.383176  |
| ABCG5      | 0.0337855  | 0.069183   | 0.0908366  | 0.00870423 | 0         | 0.0287679  | 0.0289314 | 0.0375322  | 0         | 0         | 0         | 0.0181308  | 0          | 0.0176578 | 0.0363902 |
| ABCG8      | 0.00868407 | 0.0125524  | 0.00718408 | 0          | 0.0269787 | 0          | 0.0198304 | 0.00771768 | 0         | 0         | 0         | 0.00621369 | 0.00560292 | 0.0181547 | 0.0124714 |
| ABHD1      | 0.288088   | 0.200496   | 0.0794422  | 0.0164935  | 0.248611  | 0.136279   | 0.182738  | 0.142238   | 0.0584764 | 0.0200878 | 0         | 0.0458077  | 0.0309788  | 0.0752836 | 0.18388   |
| ABHD10     | 2.07842    | 1.78029    | 1.82859    | 1.39392    | 0.75588   | 2.97064    | 1.41254   | 1.70786    | 0.431925  | 2.16351   | 4.22703   | 1.02685    | 1.50595    | 1.18111   | 1.40952   |
| ABHD11     | 1.64398    | 1.84078    | 2.3082     | 1.87313    | 2.21198   | 3.34184    | 2.94775   | 1.50219    | 0.549895  | 0.79919   | 1.37228   | 0.579871   | 1.53874    | 1.22226   | 1.47976   |
| ABHD11-AS1 | 0.195713   | 0.165021   | 0.323815   | 0.352954   | 0.0760024 | 0.166647   | 0.223459  | 0.13045    | 0.119178  | 0.12282   | 0.386637  | 0.0350095  | 0.126273   | 0.0511441 | 0         |
| ABHD12     | 5.96091    | 5.11513    | 6.27332    | 5.07459    | 8.67787   | 9.35848    | 9.10759   | 4.63219    | 21.9079   | 7.32495   | 12.4181   | 4.43007    | 7.28934    | 4.40479   | 4.05287   |
| ABHD12B    | 1.01624    | 2.88559    | 3.7103     | 0.377013   | 1.05238   | 0.473037   | 4.0688    | 2.13142    | 1.91425   | 0.238089  | 0.428289  | 0.0872572  | 0.157361   | 0.184125  | 0.525399  |
| ABHD13     | 1.5452     | 1.18615    | 1.27107    | 1.45293    | 0.474621  | 0.984929   | 1.11138   | 1.86978    | 1.78619   | 2.02704   | 2.74955   | 0.99944    | 2.26145    | 1.48514   | 1.46686   |

|              |          |          |          |           |          |          |          |            |           |           |           |          |          |          |          |
|--------------|----------|----------|----------|-----------|----------|----------|----------|------------|-----------|-----------|-----------|----------|----------|----------|----------|
| ABHD14A      | 2.14995  | 1.23267  | 1.25612  | 2.03434   | 2.13747  | 1.74852  | 1.76186  | 1.29898    | 0.712127  | 1.18476   | 2.92902   | 0.633091 | 1.17174  | 1.17563  | 1.11008  |
| ABHD14A-ACY1 | 0.452154 | 0.386288 | 0.302903 | 0.0500806 | 1.08803  | 0.995274 | 0.893125 | 0.00334669 | 0.0011899 | 0.0898514 | 1.02294   | 0.54878  | 0.432433 | 0.689205 | 0.183153 |
| ABHD14B      | 6.41967  | 5.7012   | 5.91573  | 7.28111   | 6.75613  | 9.88135  | 4.83591  | 5.60399    | 4.70724   | 3.44462   | 8.29756   | 3.46547  | 3.06969  | 2.86878  | 3.21862  |
| ABHD15       | 1.52916  | 1.36975  | 1.33908  | 1.79849   | 2.78593  | 3.10127  | 1.16565  | 1.15663    | 1.10894   | 2.45016   | 2.10251   | 1.58931  | 2.80833  | 1.73251  | 1.75838  |
| ABHD16A      | 0.462408 | 0.482831 | 0.510415 | 1.06016   | 1.01221  | 1.10517  | 0.415371 | 0.297258   | 0.787124  | 0.705811  | 1.08763   | 0.59975  | 0.91051  | 0.629607 | 0.660248 |
| ABHD16B      | 0.716705 | 1.13641  | 0.862413 | 2.75291   | 3.62325  | 3.41748  | 1.17539  | 0.822241   | 2.74556   | 1.81543   | 1.22096   | 1.669    | 2.00099  | 1.98188  | 1.06671  |
| ABHD17A      | 15.7929  | 19.0135  | 19.3578  | 25.6431   | 61.404   | 30.3633  | 18.3859  | 11.9138    | 44.2819   | 26.3215   | 60.1228   | 23.6137  | 34.8682  | 23.4789  | 14.8362  |
| ABHD17B      | 2.6233   | 2.76638  | 2.42757  | 5.66909   | 3.51474  | 3.25121  | 3.05979  | 2.51361    | 20.9952   | 6.57615   | 12.548    | 4.77102  | 6.40977  | 4.08358  | 2.35589  |
| ABHD17C      | 3.28514  | 2.74987  | 3.35047  | 9.45899   | 3.32073  | 8.92615  | 2.50804  | 4.08738    | 10.9996   | 6.57248   | 8.91149   | 5.59233  | 9.11092  | 5.41225  | 3.15464  |
| ABHD18       | 1.65393  | 1.30243  | 1.47426  | 0.932688  | 0.603404 | 1.01275  | 1.05166  | 1.41294    | 0.687692  | 0.758969  | 1.22965   | 0.753615 | 0.529679 | 1.1114   | 0.874186 |
| ABHD2        | 9.40153  | 5.78371  | 6.54695  | 6.77128   | 4.23533  | 17.8387  | 7.99972  | 6.63888    | 4.09528   | 9.70011   | 9.10792   | 5.32683  | 12.7502  | 6.54923  | 11.7619  |
| ABHD3        | 0.831819 | 0.988599 | 0.978687 | 2.09541   | 0.531198 | 1.51887  | 0.654268 | 0.657113   | 0.574068  | 2.07644   | 3.25527   | 0.88617  | 2.3316   | 1.33805  | 1.15478  |
| ABHD4        | 3.84641  | 4.68426  | 3.99852  | 6.48283   | 7.66552  | 13.7918  | 5.59232  | 3.30361    | 3.60605   | 4.50349   | 8.30938   | 3.92042  | 3.56482  | 3.1191   | 4.39795  |
| ABHD5        | 4.19081  | 4.02662  | 4.24782  | 5.05672   | 2.60391  | 2.86167  | 4.31108  | 5.26848    | 21.5458   | 6.33235   | 7.75775   | 5.8488   | 7.48699  | 3.99993  | 1.86984  |
| ABHD6        | 1.72876  | 4.30354  | 5.19008  | 1.72407   | 3.53717  | 2.55624  | 2.97137  | 2.0898     | 7.23318   | 2.36808   | 3.59883   | 2.12812  | 3.65799  | 2.2491   | 1.52166  |
| ABHD8        | 1.41737  | 1.80865  | 1.43821  | 2.23661   | 4.90216  | 2.99833  | 2.92055  | 1.13171    | 10.1819   | 1.4454    | 2.95007   | 1.36279  | 1.30028  | 1.34267  | 1.06547  |
| ABI1         | 9.86317  | 10.6936  | 11.2385  | 14.7727   | 4.6202   | 11.4001  | 7.66318  | 10.4952    | 19.3236   | 18.7614   | 14.9766   | 12.6789  | 23.2481  | 11.0361  | 7.4485   |
| ABI2         | 3.40781  | 2.53053  | 2.80536  | 2.26204   | 1.65552  | 3.97135  | 2.79613  | 2.95433    | 1.32241   | 1.72344   | 2.71551   | 1.38892  | 1.49383  | 2.22458  | 4.13116  |
| ABI3         | 1.14124  | 0.771929 | 1.02574  | 2.69142   | 2.57025  | 3.84028  | 0.88957  | 1.10195    | 0.561307  | 1.37718   | 3.54288   | 0.855848 | 2.3364   | 2.57511  | 4.05013  |
| ABI3BP       | 7.57505  | 4.04038  | 5.4807   | 2.396     | 1.02078  | 7.63603  | 6.8955   | 5.1292     | 0.561103  | 1.02202   | 2.95929   | 0.204438 | 1.86647  | 1.07703  | 6.48828  |
| ABL1         | 7.97515  | 5.88533  | 7.12058  | 10.6728   | 9.7118   | 23.6782  | 8.53881  | 5.72364    | 5.43834   | 7.25227   | 8.43387   | 5.32973  | 11.4993  | 9.48615  | 16.3211  |
| ABL2         | 3.04106  | 1.9026   | 2.28577  | 4.00902   | 1.57461  | 5.00236  | 2.67846  | 2.38144    | 1.05844   | 9.70292   | 4.57288   | 3.51927  | 10.853   | 5.80131  | 8.82351  |
| ABLIM1       | 18.3577  | 24.3586  | 24.8437  | 20.8803   | 16.8101  | 21.3935  | 31.4143  | 22.7269    | 75.0954   | 38.6546   | 30.8942   | 43.6694  | 43.3041  | 30.6446  | 14.5238  |
| ABLIM2       | 1.07515  | 1.50578  | 1.62059  | 2.00468   | 1.53562  | 1.34994  | 3.303    | 0.647799   | 1.3316    | 0.731891  | 0.498855  | 1.17677  | 1.64602  | 1.25241  | 0.922505 |
| ABLIM3       | 2.73062  | 1.34577  | 1.80161  | 1.58039   | 1.73995  | 4.40867  | 2.36026  | 1.28174    | 0.310311  | 6.8484    | 3.75006   | 2.61429  | 8.52982  | 3.48242  | 3.85248  |
| ABO          | 0.381076 | 1.2217   | 1.92789  | 0.10573   | 1.00175  | 0.436802 | 0.384897 | 0.377746   | 1.12457   | 1.39808   | 0.0827284 | 0.188772 | 1.1726   | 0.168526 | 1.0314   |

|          |          |          |           |           |           |           |          |          |          |           |          |           |           |           |           |
|----------|----------|----------|-----------|-----------|-----------|-----------|----------|----------|----------|-----------|----------|-----------|-----------|-----------|-----------|
| ABR      | 4.53172  | 7.85522  | 7.64292   | 7.585     | 10.8328   | 12.9331   | 7.08229  | 5.14902  | 8.42693  | 8.59591   | 5.95513  | 7.84219   | 11.8276   | 6.43052   | 7.59225   |
| ABRA     | 0.151262 | 0.194347 | 0.201605  | 0.0606199 | 0.0783206 | 0.0429325 | 0.115137 | 0.209112 | 0.071641 | 0.0738302 | 0.066405 | 0.0180386 | 0.0108437 | 0.026352  | 0.0120684 |
| ABRACL   | 3.50569  | 2.66561  | 2.80953   | 10.9793   | 3.02058   | 10.7975   | 2.40787  | 2.4097   | 4.16947  | 8.25001   | 12.7382  | 3.50786   | 6.99761   | 6.69908   | 4.75929   |
| ABRAXAS1 | 1.53512  | 1.539    | 2.04145   | 1.41491   | 0.127111  | 1.26646   | 1.06162  | 2.14591  | 0.822639 | 1.24902   | 1.98479  | 0.704999  | 0.849671  | 1.22166   | 1.60693   |
| ABRAXAS2 | 2.89288  | 2.72431  | 2.84752   | 3.73845   | 1.35771   | 4.10322   | 2.11957  | 3.279    | 4.5877   | 3.3202    | 3.34429  | 2.61786   | 5.25507   | 3.20581   | 1.83289   |
| ABT1     | 4.55089  | 4.00597  | 4.28089   | 6.92407   | 4.79746   | 7.00116   | 4.28529  | 3.7627   | 4.50871  | 5.10856   | 8.34681  | 2.94895   | 6.84236   | 4.21715   | 3.06955   |
| ABTB1    | 3.159    | 3.54594  | 3.50339   | 4.88315   | 9.60066   | 7.44579   | 3.35853  | 2.04456  | 2.67638  | 5.28649   | 6.61539  | 2.56336   | 5.57542   | 4.93514   | 5.29283   |
| ABTB2    | 1.6379   | 1.63064  | 2.1672    | 1.46415   | 2.22162   | 1.80059   | 2.0749   | 1.16199  | 3.11577  | 1.02491   | 0.953801 | 1.30031   | 0.855768  | 0.996657  | 1.06427   |
| ACAA1    | 7.36105  | 6.33018  | 5.60779   | 18.0883   | 19.5214   | 18.9817   | 5.61195  | 4.39922  | 17.8589  | 28.0817   | 21.0897  | 15.8012   | 26.0756   | 15.8149   | 9.16639   |
| ACAA2    | 7.34738  | 3.04424  | 2.95994   | 3.69952   | 4.53547   | 12.0029   | 3.44304  | 3.61582  | 11.0615  | 7.17912   | 13.8868  | 5.38568   | 8.36921   | 11.0136   | 6.92567   |
| ACACA    | 4.55334  | 6.35339  | 5.14295   | 12.907    | 7.6857    | 8.68233   | 6.64538  | 3.93641  | 14.9972  | 8.30838   | 5.02764  | 10.2568   | 10.3604   | 7.48553   | 4.27573   |
| ACACB    | 4.36388  | 1.83976  | 2.05759   | 0.701383  | 2.98119   | 2.74636   | 3.1198   | 1.89687  | 0.152371 | 0.411411  | 0.446302 | 0.354501  | 0.594107  | 0.680041  | 2.2136    |
| ACAD10   | 2.05679  | 3.07344  | 2.86229   | 2.94999   | 3.71134   | 3.20035   | 2.82449  | 2.20351  | 1.32452  | 1.5206    | 1.78115  | 1.80231   | 1.99236   | 1.96145   | 2.17691   |
| ACAD11   | 3.84717  | 4.94248  | 4.22916   | 2.41649   | 2.91363   | 2.3958    | 2.70833  | 2.92223  | 8.38511  | 2.60669   | 3.87081  | 2.60722   | 0.667367  | 2.58508   | 3.54478   |
| ACAD8    | 4.63702  | 3.60712  | 4.10573   | 4.59438   | 5.25926   | 6.13295   | 3.62564  | 2.70061  | 9.33545  | 3.10133   | 5.37706  | 2.64079   | 2.67293   | 2.30261   | 2.38589   |
| ACAD9    | 6.08365  | 10.8278  | 12.0378   | 9.99386   | 20.2163   | 8.87935   | 11.5456  | 8.1945   | 16.0388  | 7.33318   | 7.97467  | 8.00532   | 8.54183   | 6.07096   | 4.75633   |
| ACADL    | 0.622725 | 0.59112  | 0.415205  | 0.306501  | 0.0433122 | 0.648953  | 0.498766 | 0.313883 | 0.633894 | 0.0233308 | 0        | 0.232764  | 0.0239868 | 0.0194306 | 0         |
| ACADM    | 3.1755   | 2.44801  | 2.71106   | 4.70358   | 0.986531  | 5.6097    | 1.43094  | 2.03192  | 1.52633  | 3.20972   | 5.32452  | 1.55113   | 3.95558   | 2.70857   | 2.80922   |
| ACADS    | 2.49505  | 1.44259  | 1.30267   | 2.4341    | 4.59916   | 5.81641   | 2.01314  | 1.10377  | 1.66115  | 2.2408    | 3.59274  | 1.55518   | 2.26803   | 1.98791   | 1.71994   |
| ACADSB   | 3.51374  | 4.04211  | 5.0079    | 0.919299  | 0.736256  | 2.6602    | 3.31824  | 2.93738  | 1.43277  | 0.933842  | 1.49955  | 0.737432  | 0.85705   | 0.876217  | 1.39301   |
| ACADVL   | 23.2615  | 19.6695  | 21.8354   | 29.0937   | 47.3044   | 38.6276   | 21.4407  | 15.9107  | 52.8475  | 42.3188   | 28.7181  | 40.0448   | 50.6578   | 33.2667   | 29.3958   |
| ACAN     | 0.290597 | 0.132446 | 0.0519789 | 0.0593542 | 1.43552   | 0.263044  | 0.367664 | 0.104699 | 0.188117 | 0.946325  | 1.54567  | 0.134873  | 0.423968  | 0.584253  | 9.62875   |
| ACAP1    | 1.04273  | 1.04037  | 1.51149   | 1.26475   | 2.70909   | 1.72074   | 1.00091  | 0.943093 | 0.842872 | 0.9497    | 1.2292   | 0.726293  | 1.24431   | 0.877749  | 1.74928   |
| ACAP2    | 6.27154  | 5.89726  | 6.63286   | 6.28006   | 2.57711   | 7.73124   | 4.89046  | 6.93332  | 11.3136  | 7.34478   | 8.13647  | 5.99328   | 8.17187   | 4.66616   | 5.33543   |
| ACAP3    | 6.13823  | 12.2423  | 12.5396   | 7.4296    | 29.6755   | 9.46245   | 12.14    | 6.21023  | 8.24799  | 7.25593   | 3.67663  | 13.4802   | 5.88691   | 8.19886   | 7.40059   |
| ACAT1    | 6.3985   | 4.95353  | 6.11869   | 5.11861   | 1.81936   | 6.17775   | 5.80733  | 4.21183  | 6.07563  | 6.30212   | 9.80629  | 3.77128   | 5.07988   | 4.05831   | 4.31418   |

|                 |           |           |           |           |           |           |           |           |           |           |           |          |           |            |           |
|-----------------|-----------|-----------|-----------|-----------|-----------|-----------|-----------|-----------|-----------|-----------|-----------|----------|-----------|------------|-----------|
| ACAT2           | 2.9405    | 3.4533    | 3.1462    | 9.05939   | 3.10661   | 9.20894   | 3.05806   | 2.07014   | 4.98807   | 8.14589   | 11.0704   | 4.79397  | 8.07382   | 5.46647    | 2.27599   |
| ACBD3           | 7.47598   | 6.30782   | 6.70845   | 10.8524   | 5.58866   | 10.3675   | 4.2926    | 6.97717   | 12.3932   | 12.2662   | 11.8286   | 7.03608  | 16.3144   | 8.34651    | 8.20438   |
| ACBD3-AS1       | 0.807466  | 1.92968   | 1.81702   | 1.39506   | 0.308523  | 0.28728   | 0.53101   | 1.28917   | 1.62836   | 0.627833  | 0.765194  | 0.759962 | 0.0980636 | 1.04178    | 0.676911  |
| ACBD4           | 1.07858   | 1.27682   | 1.47728   | 0.493186  | 2.40771   | 1.54485   | 1.2478    | 0.736372  | 0.704641  | 0.358604  | 0.475744  | 0.383321 | 0.188952  | 0.55998    | 0.93349   |
| ACBD5           | 2.57597   | 2.66213   | 2.69053   | 2.25851   | 1.84281   | 2.37592   | 1.98749   | 2.46667   | 3.58734   | 2.60225   | 3.27092   | 1.95424  | 2.79702   | 1.96828    | 1.78336   |
| ACBD6           | 7.21788   | 5.54774   | 5.59202   | 7.60058   | 7.45233   | 11.5846   | 5.15072   | 4.54371   | 3.85459   | 5.89566   | 9.66777   | 3.95542  | 5.76574   | 6.01036    | 4.73042   |
| ACBD7           | 0.0756056 | 0.0597827 | 0.0569608 | 0.0638648 | 0.0427286 | 0.0584748 | 0.0392047 | 0.0979045 | 0.0501821 | 0.0604539 | 0.0310528 | 0.108656 | 0.0177232 | 0.0538452  | 0.0493797 |
| ACBD7-DCLRE1CP1 | 0         | 2.84E-06  | 0         | 0         | 0         | 5.01E-06  | 0         | 0         | 0         | 0         | 0         | 8.33E-28 | 0         | 0          | 0         |
| ACCS            | 2.4928    | 2.35272   | 2.54596   | 1.22631   | 4.57332   | 2.19246   | 3.34985   | 1.81425   | 0.799593  | 0.630895  | 0.706411  | 1.15241  | 0.602301  | 0.986519   | 2.29826   |
| ACCSL           | 0         | 0.0298625 | 0.0307642 | 0         | 0         | 0.0527745 | 0.0990723 | 0.0220328 | 0         | 0         | 0         | 0        | 0         | 0.00647861 | 0         |
| ACD             | 1.88392   | 1.88919   | 1.97664   | 3.01474   | 4.42524   | 7.17289   | 2.43079   | 1.29313   | 1.13787   | 1.73013   | 4.44361   | 1.45758  | 3.50814   | 2.37748    | 2.52957   |
| ACE             | 2.40344   | 1.02341   | 0.854746  | 2.07468   | 3.87113   | 6.36232   | 3.12896   | 1.58424   | 0.918098  | 1.73647   | 2.96347   | 0.73929  | 1.23311   | 1.4995     | 5.9735    |
| ACE2            | 0.0725901 | 0.101746  | 0.0655109 | 0.217618  | 0.0820055 | 0.185429  | 0.0904157 | 0.0527826 | 0.241109  | 0.115956  | 0.148991  | 0.250257 | 0.123474  | 0.0896735  | 0.0189543 |
| ACER1           | 5.48797   | 8.58848   | 9.16805   | 2.8716    | 12.7871   | 3.18774   | 17.7293   | 6.18163   | 44.8949   | 2.96343   | 11.3819   | 7.94489  | 0.521514  | 1.15619    | 0.549866  |
| ACER2           | 0.900729  | 1.77113   | 2.33613   | 2.00698   | 1.46217   | 1.83103   | 1.50094   | 0.872609  | 1.4923    | 1.21199   | 0.659553  | 1.39931  | 1.71202   | 0.805806   | 0.617646  |
| ACER3           | 1.52151   | 1.22695   | 1.2779    | 2.68164   | 0.509672  | 2.75212   | 1.11112   | 1.70257   | 0.813276  | 2.76237   | 3.13351   | 1.27687  | 4.82937   | 2.75162    | 2.39824   |
| ACHE            | 0.153945  | 0.234881  | 0.31131   | 0.0528816 | 0.332124  | 0.233035  | 0.146474  | 0.121612  | 0.0520799 | 0.397168  | 0.0675829 | 0.079554 | 0.480069  | 0.214556   | 0.0736948 |
| ACIN1           | 9.67034   | 12.237    | 11.401    | 16.2841   | 18.139    | 17.5682   | 9.5256    | 9.00518   | 10.0292   | 8.2741    | 5.75545   | 10.4933  | 12.5139   | 12.0858    | 11.0055   |
| ACKR1           | 16.7447   | 4.81846   | 5.67436   | 9.91759   | 11.3704   | 32.243    | 10.163    | 7.25916   | 0.318842  | 4.33731   | 15.4743   | 1.00406  | 6.70236   | 4.83271    | 8.30157   |
| ACKR2           | 1.36044   | 0.715753  | 0.795576  | 6.45389   | 7.88209   | 1.83079   | 2.06214   | 1.51478   | 5.65617   | 1.83506   | 1.10328   | 1.68392  | 5.41781   | 1.77756    | 1.01056   |
| ACKR3           | 6.96496   | 4.16823   | 6.01718   | 13.6851   | 4.26254   | 11.5421   | 15.1498   | 3.56505   | 1.59719   | 6.80528   | 12.08     | 2.46815  | 21.4733   | 14.6068    | 17.9001   |
| ACKR4           | 1.95537   | 2.37898   | 2.67388   | 1.83104   | 0.790549  | 5.00257   | 3.20106   | 2.90422   | 4.65411   | 1.5913    | 3.00364   | 0.983858 | 4.58554   | 2.34259    | 10.5916   |
| ACLX            | 7.89798   | 9.0987    | 9.64505   | 29.7063   | 14.3911   | 27.8472   | 11.3281   | 6.73656   | 15.0893   | 20.6499   | 15.4337   | 15.0549  | 28.5693   | 22.2384    | 15.2526   |
| ACMSD           | 0.136437  | 0.0739544 | 0.0141087 | 0.0175752 | 0.0264916 | 0.0145217 | 0.0584171 | 0.0757834 | 0         | 0.0214052 | 0         | 0        | 0         | 0.0713077  | 0.244925  |
| ACO1            | 4.04044   | 2.63364   | 3.13628   | 5.75156   | 2.63163   | 10.4191   | 4.56216   | 2.76697   | 1.7908    | 5.15941   | 6.74075   | 2.32382  | 5.84067   | 3.49167    | 5.93112   |
| ACO2            | 11.7987   | 9.77941   | 10.6838   | 17.9471   | 16.9645   | 17.1779   | 11.8229   | 9.21829   | 13.1434   | 10.251    | 11.4729   | 9.22458  | 17.7517   | 11.3991    | 11.713    |

|           |           |           |            |            |           |            |            |            |           |            |           |            |           |           |           |
|-----------|-----------|-----------|------------|------------|-----------|------------|------------|------------|-----------|------------|-----------|------------|-----------|-----------|-----------|
| ACOD1     | 0         | 0.0266763 | 0.00916056 | 0.0114113  | 0         | 0.00942871 | 0.0252861  | 0          | 0         | 0          | 0         | 0          | 0.693006  | 0         | 0.0636102 |
| ACOT1     | 1.25436   | 0.338088  | 0.374219   | 0.710242   | 0.710058  | 3.78845    | 0.511704   | 0.221732   | 0.291321  | 0.314735   | 1.33351   | 0.146513   | 0.463836  | 0.0991728 | 0.173395  |
| ACOT11    | 0.970301  | 1.17317   | 1.13038    | 4.04971    | 2.00712   | 3.8726     | 0.832545   | 0.974291   | 0.92262   | 1.48834    | 1.50236   | 1.03208    | 3.51204   | 2.97533   | 1.33297   |
| ACOT12    | 0.0465421 | 0.033637  | 0.0288772  | 0          | 0         | 0          | 0          | 0          | 0         | 0          | 0         | 0          | 0         | 0         | 0         |
| ACOT13    | 1.92543   | 1.99711   | 2.14598    | 2.61955    | 1.36661   | 2.70697    | 1.47107    | 2.20422    | 3.0565    | 2.37502    | 4.24096   | 1.87903    | 1.47823   | 1.69542   | 1.83931   |
| ACOT2     | 3.47594   | 1.68531   | 1.72054    | 3.06911    | 4.25453   | 6.00598    | 2.44356    | 1.95114    | 1.87552   | 1.87499    | 5.30075   | 0.94657    | 1.76633   | 1.69998   | 2.10415   |
| ACOT4     | 0.411243  | 0.163981  | 0.164239   | 0.453025   | 0.28636   | 0.809009   | 0.27525    | 0.113424   | 0.241789  | 0.177984   | 0.832434  | 0.0811739  | 0.29278   | 0.133407  | 0.325847  |
| ACOT6     | 0.0230508 | 0         | 0.0190693  | 0          | 0         | 0          | 0.0789561  | 0.061457   | 0         | 0          | 0         | 0          | 0         | 0         | 0.0331039 |
| ACOT7     | 2.2184    | 2.13772   | 1.73103    | 9.3142     | 5.43225   | 5.79878    | 2.32274    | 1.851      | 7.37381   | 11.806     | 10.0281   | 6.5295     | 20.7504   | 8.0148    | 4.34063   |
| ACOT8     | 2.29477   | 3.17074   | 3.82805    | 4.30394    | 6.09342   | 3.80064    | 4.1583     | 2.32357    | 5.28686   | 2.96519    | 5.2446    | 3.28439    | 2.44264   | 2.19396   | 1.64946   |
| ACOT9     | 2.95034   | 1.97004   | 2.04278    | 4.37883    | 1.23705   | 3.477      | 2.44102    | 1.50576    | 1.71848   | 4.2061     | 4.63985   | 1.9466     | 6.20725   | 3.26272   | 4.74366   |
| ACOX1     | 5.75593   | 8.31804   | 10.5029    | 6.64975    | 4.37451   | 7.2227     | 7.80461    | 9.43758    | 9.11104   | 4.74927    | 6.0046    | 4.68427    | 6.0856    | 4.39634   | 4.02159   |
| ACOX2     | 0.791815  | 0.511898  | 0.538961   | 0.454475   | 0.482643  | 2.108      | 0.423425   | 0.302858   | 0.207517  | 0.427715   | 0.803343  | 0.0860605  | 0.323339  | 0.324784  | 0.820473  |
| ACOX3     | 3.83303   | 6.13015   | 4.56323    | 7.037      | 12.2958   | 5.61561    | 5.90264    | 3.49234    | 12.0236   | 4.15389    | 4.35426   | 6.07869    | 5.06558   | 4.57056   | 2.61358   |
| ACOXL     | 0.029258  | 0.0140969 | 0.0322723  | 0.0201008  | 0.0454477 | 0.0747383  | 0.0445411  | 0.00866735 | 0         | 0.0122406  | 0.0330286 | 0.00697829 | 0.0188771 | 0.0203887 | 0         |
| ACOXL-AS1 | 0.0144104 | 0.0138863 | 0.00596064 | 0.00742515 | 0         | 0.0184054  | 0.00822665 | 0.0256135  | 0         | 0.00904325 | 0         | 0          | 0         | 0         | 0.0103476 |
| ACP1      | 9.77619   | 6.62403   | 7.22279    | 12.2796    | 3.41918   | 13.6853    | 6.14968    | 7.86859    | 6.9191    | 10.5569    | 18.4073   | 5.78087    | 13.8447   | 8.74063   | 8.00005   |
| ACP2      | 3.53741   | 2.71545   | 2.52133    | 5.92121    | 4.82738   | 9.37659    | 3.79931    | 2.61092    | 1.59426   | 3.77509    | 8.30243   | 2.38811    | 6.00233   | 3.34247   | 4.82185   |
| ACP4      | 0.223355  | 0.190398  | 0.270056   | 0.0708228  | 0.266883  | 0          | 0.294254   | 0.152692   | 0.0209247 | 0          | 0.0775817 | 0.159817   | 0         | 0.134695  | 0.074023  |
| ACP5      | 9.05752   | 6.38569   | 4.77901    | 15.0054    | 15.8604   | 16.7101    | 5.70007    | 5.94738    | 55.8647   | 28.0469    | 65.0272   | 22.8023    | 15.6143   | 13.1454   | 7.13548   |
| ACP6      | 1.52247   | 1.53894   | 1.76588    | 0.938133   | 2.04797   | 1.71734    | 1.37989    | 1.33909    | 0.219827  | 0.344741   | 0.584704  | 0.320071   | 0.237977  | 0.410158  | 0.642412  |
| ACP7      | 0.609645  | 1.25403   | 1.30612    | 35.2071    | 6.10684   | 3.99978    | 2.65935    | 1.84768    | 49.0043   | 8.78956    | 19.164    | 31.5924    | 4.24607   | 17.083    | 1.54901   |
| ACPP      | 4.52798   | 6.55377   | 6.7546     | 3.48562    | 3.02244   | 3.18971    | 5.15607    | 8.44147    | 15.8792   | 2.38887    | 4.7694    | 3.84277    | 1.13807   | 0.734986  | 0.496195  |
| ACR       | 0.726388  | 0.325567  | 0.251548   | 0.139268   | 0.183682  | 0.40275    | 0.520765   | 0.390334   | 0.0205735 | 0.0848085  | 0.0762792 | 0.0725232  | 0.217982  | 0.0882888 | 0.485202  |
| ACRBP     | 0.171794  | 0.112334  | 0.172574   | 0.164393   | 0.400282  | 0.313457   | 0.070053   | 0.130865   | 0.044834  | 0.169415   | 0.263196  | 0.0614615  | 0.0870888 | 0.109027  | 0.158604  |
| ACRV1     | 0.0590886 | 0.0474497 | 0.0651764  | 0.0811901  | 0.152975  | 0.536674   | 0.0674655  | 0.0525131  | 0.143927  | 0.0247208  | 0.355753  | 0.0986522  | 0.0381237 | 0.216176  | 0.198004  |



|           |            |            |           |           |           |           |           |            |            |           |            |            |            |            |           |
|-----------|------------|------------|-----------|-----------|-----------|-----------|-----------|------------|------------|-----------|------------|------------|------------|------------|-----------|
| ACSBG1    | 1.35131    | 1.10384    | 0.970126  | 0.600241  | 0.373968  | 0.555472  | 2.04831   | 1.35967    | 3.03611    | 0.731046  | 0.955602   | 0.944669   | 0.235501   | 0.267888   | 0.0669188 |
| ACSBG2    | 0.0497878  | 0.155926   | 0.0549174 | 0.0256539 | 0.0515585 | 0.0353281 | 0.123167  | 0.0958691  | 0          | 0.0104148 | 0.00936738 | 0.041562   | 0.0107076  | 0.0303582  | 0         |
| ACSF2     | 2.59691    | 3.1007     | 2.8355    | 1.83004   | 4.52331   | 2.97541   | 2.74705   | 1.83276    | 1.63951    | 1.06649   | 1.64902    | 0.874428   | 0.400398   | 0.718548   | 0.740414  |
| ACSF3     | 1.25382    | 2.02047    | 1.80865   | 2.25846   | 3.59246   | 2.76772   | 2.00902   | 1.30625    | 1.46286    | 0.892632  | 1.4392     | 1.18363    | 1.46837    | 1.45103    | 1.40723   |
| ACSL1     | 19.5668    | 20.5917    | 18.3387   | 26.7155   | 19.7972   | 21.0729   | 21.5437   | 15.958     | 45.8831    | 17.7233   | 17.4887    | 14.0527    | 18.0829    | 8.72922    | 9.35504   |
| ACSL3     | 4.25773    | 3.29562    | 3.24309   | 7.94144   | 2.07824   | 8.629     | 2.20548   | 4.35493    | 4.26426    | 5.80837   | 5.92658    | 4.18714    | 8.11262    | 4.89265    | 4.41517   |
| ACSL4     | 4.92617    | 3.37582    | 3.74254   | 12.9699   | 1.1421    | 9.90275   | 2.42464   | 4.17039    | 2.35451    | 6.25879   | 7.9778     | 1.79799    | 14.0523    | 7.97692    | 10.7703   |
| ACSL5     | 1.41943    | 0.768602   | 0.775786  | 2.27213   | 0.689774  | 3.41527   | 0.770685  | 1.02179    | 0.308657   | 1.28011   | 1.98063    | 0.520994   | 2.32439    | 1.41972    | 2.35084   |
| ACSL6     | 0.1125     | 0.0636644  | 0.0786448 | 0.0454996 | 0.0467931 | 0.0859983 | 0.0625105 | 0.0628561  | 0.0163041  | 0.0298986 | 0.0151124  | 0.0336587  | 0.0410291  | 0.0245229  | 0.151238  |
| ACSM1     | 0.204354   | 0.177229   | 0.0929807 | 0.189533  | 0.0952295 | 0.0696018 | 0.0699973 | 0.136209   | 0.049776   | 0.0128242 | 0.0115345  | 0.0584882  | 0          | 0.0106804  | 0.0146739 |
| ACSM2A    | 0          | 0.00334253 | 0         | 0         | 0.0107761 | 0.0236283 | 0         | 0.00616535 | 0          | 0         | 0.0156628  | 0          | 0          | 0          | 0         |
| ACSM2B    | 0.00948097 | 0.00913615 | 0         | 0         | 0.0147272 | 0.0242188 | 0         | 0.0084259  | 0          | 0         | 0          | 0          | 0          | 0          | 0         |
| ACSM3     | 0.451559   | 0.446959   | 0.439613  | 0.287588  | 0.282446  | 0.327117  | 0.274747  | 0.36485    | 0.712497   | 0.121283  | 0.210398   | 0.110946   | 0.0130357  | 0.0569117  | 0.229567  |
| ACSM4     | 0.0132777  | 0.0063974  | 0.0219685 | 0         | 0         | 0.0226116 | 0         | 0          | 0          | 0         | 0.0149889  | 0.00950056 | 0          | 0.027758   | 0.0190685 |
| ACSM5     | 0.347294   | 0.192253   | 0.262854  | 0.0456889 | 0.367297  | 0.843105  | 0.295287  | 0.249543   | 0.00899924 | 0.0649197 | 0.141806   | 0.0158616  | 0.0715123  | 0.00772386 | 0.148566  |
| ACSM6     | 0.162123   | 0.162736   | 0.122943  | 0.0974589 | 0.335777  | 0.126542  | 0.740427  | 0.168095   | 0.246809   | 0.067827  | 0.10676    | 0.135337   | 0.00871674 | 0.211831   | 0.0194024 |
| ACSS1     | 2.35461    | 3.12332    | 2.89565   | 1.12722   | 2.8348    | 3.57354   | 2.34661   | 1.93397    | 0.67309    | 0.60695   | 1.02683    | 0.700276   | 0.876593   | 0.878583   | 1.40552   |
| ACSS2     | 4.29087    | 5.39201    | 5.8642    | 7.01367   | 6.05719   | 10.0041   | 5.88392   | 3.4333     | 4.49313    | 6.71362   | 5.75205    | 4.07636    | 7.92177    | 4.6746     | 3.206     |
| ACSS3     | 1.67389    | 0.377103   | 0.510423  | 0.576958  | 0.443707  | 3.32243   | 0.724035  | 0.741266   | 0.104365   | 0.602306  | 1.22534    | 0.0572285  | 0.206413   | 0.334412   | 1.22247   |
| ACTA1     | 0.775571   | 0.0224209  | 0.0256643 | 0.015985  | 0         | 1.78305   | 1.91273   | 0.0275705  | 0          | 0         | 0.0175105  | 0          | 0          | 0.0162139  | 0         |
| ACTA2     | 70.0203    | 18.8117    | 25.9324   | 13.082    | 37.5823   | 101.182   | 79.3445   | 18.1713    | 16.9439    | 59.309    | 166.498    | 11.9588    | 28.5248    | 32.9459    | 98.9677   |
| ACTA2-AS1 | 2.6399     | 0.775285   | 0.892227  | 0.118032  | 0.566119  | 0.41426   | 1.90872   | 0.665339   | 0.242723   | 0.212397  | 0.348399   | 0.212468   | 0.0552396  | 0.549965   | 1.96463   |
| ACTB      | 385.738    | 334.619    | 395.572   | 1260.34   | 616.504   | 1436.07   | 637.338   | 347.199    | 853.605    | 1308.92   | 1675.57    | 942.494    | 2777.86    | 1022.34    | 941.875   |
| ACTBL2    | 0.0165663  | 0          | 0         | 0.008536  | 0         | 0.0141059 | 0.0283722 | 0.0220841  | 0          | 0.0415847 | 0          | 0.0355608  | 0.0106885  | 0.0909116  | 0         |
| ACTC1     | 0.683074   | 0          | 0.0259214 | 0.0129161 | 0.895565  | 4.2635    | 0.729826  | 0.0668322  | 0.00763218 | 0.298885  | 0.813552   | 0.00448402 | 0.177904   | 0.085157   | 0.422992  |
| ACTG1     | 237.595    | 293.25     | 338.05    | 810.923   | 395.084   | 946.274   | 447.611   | 215.384    | 992.32     | 992.975   | 1206.34    | 698.171    | 1920.18    | 789.821    | 500.335   |

|           |            |           |           |            |           |           |           |           |            |           |           |           |            |            |           |
|-----------|------------|-----------|-----------|------------|-----------|-----------|-----------|-----------|------------|-----------|-----------|-----------|------------|------------|-----------|
| ACTG1P17  | 0.210137   | 0.161995  | 0.0813542 | 0.101058   | 0.0870439 | 0.0715714 | 0.0959709 | 0.211652  | 0.0170615  | 0.0175829 | 0.0474436 | 0.140335  | 0          | 0.153757   | 0.0603566 |
| ACTG1P20  | 0.794124   | 0.818635  | 0.851876  | 0.395694   | 0.867551  | 0.662494  | 0.755096  | 0.798818  | 0.286958   | 0.700981  | 0.128067  | 0.686903  | 0.354714   | 1.23855    | 0.576498  |
| ACTG1P4   | 0.828622   | 0.596052  | 0.695149  | 0.144324   | 0.362573  | 0.258374  | 0.572986  | 0.601574  | 0.0426409  | 0.117184  | 0.0395244 | 0.0501043 | 0          | 0.0853948  | 0.0335213 |
| ACTG2     | 21.613     | 2.29548   | 3.0351    | 0.913846   | 7.67058   | 67.9137   | 55.3897   | 2.85876   | 1.82116    | 4.25556   | 15.7028   | 1.33123   | 2.86071    | 6.10685    | 13.1097   |
| ACTL10    | 0.479294   | 0.632311  | 0.575877  | 0.364565   | 2.28671   | 0.971696  | 0.729656  | 0.314397  | 0.986775   | 0.272136  | 0.399356  | 0.653234  | 0.47122    | 0.453286   | 0.475273  |
| ACTL6A    | 5.66091    | 5.15708   | 6.02113   | 10.7728    | 2.64169   | 10.096    | 4.45378   | 4.32278   | 4.60588    | 7.32888   | 11.7203   | 3.79525   | 7.86495    | 6.95523    | 5.00424   |
| ACTL6B    | 0          | 0         | 0.0123679 | 0          | 0         | 0         | 0         | 0         | 0.0182078  | 0         | 0         | 0         | 0          | 0          | 0         |
| ACTL7A    | 0.15146    | 0.175141  | 0.187947  | 0.0156084  | 0.0941077 | 0.0128966 | 0.293984  | 0.107684  | 0          | 0.0190098 | 0         | 0.0108374 | 0          | 0.0474957  | 0         |
| ACTL7B    | 0          | 0.0792514 | 0.0544295 | 0          | 0.0766506 | 0.0280114 | 0.150243  | 0.0292361 | 0          | 0.0412891 | 0         | 0.0588467 | 0          | 0          | 0         |
| ACTL8     | 0          | 0         | 0         | 0.0256309  | 0.0386342 | 0         | 0         | 0         | 0          | 0         | 0.028077  | 0         | 0.00802352 | 0.012999   | 0         |
| ACTL9     | 0          | 0         | 0         | 0          | 0         | 0         | 0         | 0         | 0          | 0         | 0         | 0         | 0          | 0          | 0         |
| ACTN1     | 17.7346    | 12.9297   | 16.3577   | 81.9367    | 25.6701   | 81.4771   | 17.7809   | 11.7296   | 17.1747    | 56.1901   | 42.675    | 29.8444   | 128.041    | 62.4069    | 52.1724   |
| ACTN1-AS1 | 0.115908   | 0.037231  | 0.0319625 | 0.0796313  | 0.0600153 | 0         | 0.088227  | 0         | 0          | 0         | 0         | 0.0276452 | 0          | 0.0403859  | 0         |
| ACTN2     | 0.0135869  | 0.0283677 | 0         | 0.00466724 | 0.0211052 | 0.0347072 | 0.0258552 | 0.0281748 | 0.00551578 | 0         | 0.0255632 | 0.0129624 | 0.00584414 | 0.00946816 | 0.0325209 |
| ACTN3     | 0.00694778 | 0.0167377 | 0.0114954 | 0.0429593  | 0.0647538 | 0         | 0.031731  | 0         | 0          | 0.0174404 | 0         | 0         | 0.026896   | 0.0145249  | 0         |
| ACTN4     | 45.4827    | 49.5694   | 56.5205   | 70.7892    | 59.4463   | 94.518    | 65.1189   | 36.2201   | 79.213     | 71.0336   | 37.7417   | 56.43     | 124.893    | 59.1787    | 47.83     |
| ACTR10    | 6.75993    | 6.5963    | 6.79232   | 10.6204    | 3.71126   | 9.57449   | 5.41253   | 4.87017   | 10.1727    | 9.86476   | 12.8113   | 6.53967   | 12.1852    | 7.44267    | 5.17403   |
| ACTR1A    | 12.6308    | 13.0719   | 14.1276   | 27.1452    | 26.1392   | 28.6159   | 14.8721   | 10.4162   | 31.8744    | 30.9679   | 30.0631   | 21.5279   | 42.706     | 20.9662    | 17.5379   |
| ACTR1B    | 8.06625    | 8.73585   | 9.69149   | 10.4883    | 12.3227   | 10.9701   | 9.52574   | 5.41061   | 8.30091    | 7.82131   | 11.7554   | 6.52698   | 8.78184    | 7.45661    | 7.69823   |
| ACTR2     | 20.8151    | 18.0681   | 19.0585   | 39.8682    | 7.77971   | 39.5939   | 14.7793   | 21.3405   | 30.6781    | 47.3046   | 49.0676   | 26.9089   | 78.5807    | 35.2864    | 33.6229   |
| ACTR3     | 8.01595    | 10.6063   | 12.1981   | 30.3411    | 6.21056   | 15.8328   | 9.17926   | 10.4219   | 35.2671    | 38.8286   | 39.3174   | 21.3641   | 54.3731    | 25.8689    | 17.7966   |
| ACTR3-AS1 | 0.117677   | 0.170095  | 0.1298    | 0.040423   | 0.0609308 | 0.1336    | 0.0447864 | 0.104581  | 0.143317   | 0.196928  | 0.221404  | 0.0280669 | 0          | 0.102505   | 0.0563328 |
| ACTR3B    | 2.28838    | 1.58285   | 1.67923   | 1.3197     | 1.41883   | 2.59667   | 1.8567    | 1.744     | 1.13932    | 0.685214  | 0.896167  | 1.04482   | 1.15032    | 1.10389    | 1.24658   |
| ACTR3BP2  | 0.0518903  | 1.60E-13  | 0         | 0          | 0         | 0         | 0.0394977 | 0         | 0          | 0         | 0         | 0         | 0          | 0          | 0         |
| ACTR3BP5  | 1.23E-30   | 0.0135571 | 0.0581932 | 0          | 0         | 0         | 6.22E-22  | 0.0250062 | 0.0171341  | 0         | 0.0158818 | 0         | 0          | 0          | 0         |
| ACTR3C    | 0.417931   | 0.68329   | 0.498728  | 0.397557   | 0.887764  | 0.113989  | 0.435091  | 0.612728  | 0.401038   | 0.415404  | 0.255553  | 0.677278  | 0.174878   | 0.349617   | 0.27153   |

|            |          |            |           |           |           |          |           |            |           |           |           |           |           |            |           |
|------------|----------|------------|-----------|-----------|-----------|----------|-----------|------------|-----------|-----------|-----------|-----------|-----------|------------|-----------|
| ACTR5      | 1.82979  | 1.8442     | 1.71453   | 2.82847   | 2.66827   | 2.17807  | 1.64151   | 1.29429    | 1.7282    | 1.64041   | 1.90752   | 1.81025   | 2.33704   | 2.01999    | 1.20664   |
| ACTR6      | 1.69663  | 1.35817    | 1.3524    | 2.5771    | 0.343157  | 1.71553  | 0.867683  | 1.61777    | 1.67887   | 2.10726   | 3.03252   | 0.600668  | 1.36832   | 1.28853    | 1.11676   |
| ACTR8      | 2.88969  | 2.55716    | 2.23752   | 2.76755   | 2.30875   | 4.68751  | 2.45449   | 2.22797    | 4.06314   | 2.68212   | 3.34131   | 2.25935   | 2.72871   | 2.46045    | 2.62923   |
| ACTRT1     | 0        | 0          | 0         | 0         | 0         | 0        | 0         | 0          | 0         | 0         | 0         | 0         | 0         | 0          | 0         |
| ACTRT2     | 0        | 0          | 0         | 0         | 0         | 0        | 0         | 0          | 0         | 0         | 0         | 0         | 0         | 0          | 0         |
| ACTRT3     | 0.335072 | 0.205979   | 0.277195  | 0.952555  | 0.412796  | 1.04285  | 0.290229  | 0.112952   | 0.394008  | 0.536563  | 0.860854  | 0.281089  | 1.28221   | 0.471021   | 0.381646  |
| ACVR1      | 4.19007  | 3.50479    | 3.2941    | 6.20882   | 3.73944   | 7.63427  | 3.75893   | 3.20338    | 4.36611   | 8.51728   | 9.60705   | 4.08752   | 9.08416   | 6.47453    | 6.80234   |
| ACVR1B     | 7.67425  | 10.631     | 11.7134   | 8.58331   | 9.60229   | 13.3602  | 8.81159   | 8.26213    | 9.69223   | 5.32962   | 4.1251    | 5.70803   | 6.27161   | 3.64098    | 2.85555   |
| ACVR1C     | 0.124932 | 0.0847633  | 0.0337478 | 0.0578044 | 0.0514861 | 0.156311 | 0.0465775 | 0.0838385  | 0.0776293 | 0.240004  | 0.146789  | 0.087568  | 0.310908  | 0.167902   | 0.0109848 |
| ACVR2A     | 3.45581  | 4.15392    | 4.83399   | 1.63413   | 1.01791   | 1.92998  | 2.64993   | 5.15071    | 1.69768   | 1.51679   | 1.53022   | 1.25601   | 1.31843   | 1.17249    | 2.0472    |
| ACVR2B     | 0.706114 | 0.570623   | 0.503343  | 0.740254  | 0.843966  | 0.878479 | 0.569232  | 0.538921   | 0.10161   | 0.411198  | 0.429569  | 0.228597  | 0.431949  | 0.440303   | 0.876717  |
| ACVR2B-AS1 | 0.413761 | 0.283529   | 0.228195  | 0.161082  | 0.285651  | 0.344483 | 0.367437  | 0.187944   | 0.0335943 | 0.0577014 | 0.124556  | 0.0592115 | 0.0711885 | 0.0864999  | 0.132047  |
| ACVRL1     | 5.42317  | 1.95213    | 2.4258    | 5.30171   | 5.71403   | 11.361   | 3.69001   | 2.33044    | 0.915201  | 3.66715   | 6.12208   | 1.61309   | 6.55725   | 4.94644    | 7.68268   |
| ACY1       | 2.55646  | 1.2521     | 1.33012   | 8.99039   | 3.7117    | 8.52344  | 1.25369   | 1.70028    | 2.7535    | 4.08517   | 5.5304    | 2.68791   | 4.68628   | 3.36804    | 2.23105   |
| ACY3       | 0        | 0.00857744 | 0.0294547 | 0.0183458 | 0.0829596 | 0        | 0         | 0.0474637  | 0.0216813 | 0         | 0         | 0         | 0         | 0.00930428 | 0         |
| ACYP1      | 1.18561  | 1.42811    | 1.29468   | 1.51503   | 0.69983   | 1.97868  | 0.568549  | 0.716495   | 0.779725  | 1.63686   | 2.14144   | 1.1707    | 1.4228    | 1.61109    | 1.08972   |
| ACYP2      | 0.769445 | 0.690326   | 0.735313  | 0.594702  | 0.855196  | 0.751189 | 0.68919   | 0.607184   | 0.767451  | 0.482866  | 0.666432  | 0.678706  | 0.423688  | 0.45068    | 0.495354  |
| ADA        | 1.60427  | 1.18091    | 1.53607   | 4.82195   | 1.61517   | 3.46563  | 1.69602   | 1.14851    | 0.307545  | 2.79656   | 5.53367   | 1.28607   | 4.14026   | 3.10541    | 2.3466    |
| ADA2       | 2.80969  | 1.09949    | 1.43552   | 2.41044   | 1.66158   | 5.24224  | 1.86726   | 2.52659    | 0.179489  | 1.92134   | 5.31852   | 0.275538  | 2.44466   | 1.29454    | 6.11746   |
| ADAD1      | 0        | 0.00988973 | 0         | 0         | 0         | 0        | 0         | 0.00912089 | 0         | 0         | 0         | 0         | 0         | 0          | 0         |
| ADAD2      | 0.167262 | 0.280828   | 0.151373  | 0.154638  | 0.492061  | 0.157967 | 0.164517  | 0.137469   | 0.0839271 | 0.0587448 | 0.0231651 | 0.103909  | 5.75E-44  | 0.0271056  | 0.057702  |
| ADAL       | 0.865281 | 0.477476   | 0.411966  | 0.553823  | 0.320908  | 0.531924 | 0.360468  | 0.503333   | 0.202405  | 0.511172  | 0.871477  | 0.220025  | 0.34862   | 0.445052   | 0.416033  |
| ADAM10     | 5.42484  | 5.1788     | 5.64779   | 13.5354   | 3.07075   | 10.1391  | 3.76886   | 4.91929    | 7.43552   | 13.9235   | 14.3813   | 7.67767   | 23.5467   | 11.9968    | 9.42817   |
| ADAM11     | 0.17267  | 0.272275   | 0.272704  | 0.118628  | 0.601455  | 0.169303 | 0.31066   | 0.209257   | 0.388723  | 0.157614  | 0.336686  | 0.131038  | 0.0168797 | 0.0929797  | 0.240462  |
| ADAM12     | 0.323697 | 0.321906   | 0.310631  | 1.23291   | 4.12707   | 2.56881  | 0.440548  | 0.766368   | 0.416304  | 7.98901   | 14.9501   | 0.770814  | 4.03822   | 3.19414    | 13.6749   |
| ADAM15     | 27.7394  | 26.3913    | 24.8155   | 32.3126   | 50.2067   | 58.7542  | 33.8707   | 19.6425    | 47.7207   | 31.1339   | 42.0802   | 29.0954   | 40.8498   | 26.435     | 23.8305   |

|          |           |            |           |            |          |           |            |            |           |           |           |           |           |            |           |
|----------|-----------|------------|-----------|------------|----------|-----------|------------|------------|-----------|-----------|-----------|-----------|-----------|------------|-----------|
| ADAM17   | 5.39739   | 5.49529    | 6.0383    | 9.09406    | 2.85727  | 7.63878   | 3.85137    | 5.77796    | 6.18724   | 6.79045   | 6.98239   | 5.32471   | 10.1021   | 7.14486    | 4.2009    |
| ADAM18   | 0         | 0          | 0         | 0          | 0        | 0         | 0          | 0          | 0         | 0         | 0         | 0         | 0         | 0          | 0         |
| ADAM19   | 1.05631   | 0.498698   | 0.507303  | 1.60726    | 1.48113  | 2.73753   | 1.33152    | 0.64579    | 0.366944  | 2.92738   | 4.04949   | 0.72538   | 3.39618   | 3.87562    | 5.81343   |
| ADAM1A   | 2.02909   | 2.24977    | 2.04938   | 1.00773    | 1.0886   | 0.839587  | 2.11206    | 1.69466    | 0.367207  | 0.439795  | 0.202382  | 0.466464  | 0.352264  | 0.928463   | 1.35754   |
| ADAM2    | 0         | 0          | 0         | 0          | 0        | 0         | 0          | 0          | 0         | 0         | 0         | 0         | 0         | 0          | 0         |
| ADAM20   | 0.588523  | 0.670958   | 0.617156  | 0.503985   | 0.502155 | 0.183509  | 0.425888   | 0.758762   | 0.171617  | 0.364127  | 0.0374293 | 0.480414  | 0.123005  | 0.602179   | 0.226179  |
| ADAM20P1 | 0.381144  | 0.52154    | 0.441433  | 0.439913   | 0.343388 | 0.129816  | 0.243699   | 0.447122   | 0.111406  | 0.468807  | 0.0860528 | 0.343625  | 0.0393459 | 0.374501   | 0.29558   |
| ADAM21   | 0.179806  | 0.247889   | 0.231313  | 0.14091    | 0.12145  | 0.0739715 | 0.0867843  | 0.252146   | 0.0423208 | 0.163552  | 0.0490346 | 0.150279  | 0.0392352 | 0.2039     | 0.0623805 |
| ADAM21P1 | 0.0147118 | 0.0368809  | 0.0449814 | 0.0495884  | 5.89E-44 | 2.00E-31  | 0.0290241  | 0.0234987  | 0         | 7.67E-25  | 0         | 0.0389858 | 0         | 0.00644585 | 1.69E-31  |
| ADAM22   | 0.434007  | 0.251623   | 0.254485  | 0.081096   | 0.144463 | 0.221325  | 0.302222   | 0.341204   | 0.0348509 | 0.0718316 | 0.0942191 | 0.0307131 | 0.0230785 | 0.0859963  | 0.232877  |
| ADAM23   | 0.9629    | 1.37391    | 0.123024  | 2.60142    | 4.23305  | 2.86489   | 0.233465   | 0.832617   | 10.3098   | 7.97915   | 4.93134   | 10.066    | 9.21573   | 4.62255    | 2.21042   |
| ADAM28   | 0.381279  | 0.300345   | 0.438085  | 0.324315   | 0.112811 | 0.435449  | 0.138201   | 0.537856   | 0.0479097 | 0.159515  | 0.389425  | 0.0606257 | 0.177666  | 0.12336    | 0.638827  |
| ADAM29   | 0         | 0          | 0         | 0          | 0        | 0         | 0          | 0.00597896 | 0         | 0         | 0         | 0         | 0         | 0          | 0         |
| ADAM30   | 0         | 0          | 0         | 0.00797112 | 0        | 0         | 0          | 0          | 0         | 0.0194164 | 0         | 0         | 0         | 0.00404264 | 0         |
| ADAM32   | 0.228971  | 0.196128   | 0.154343  | 0.305876   | 0.171249 | 0.180524  | 0.222701   | 0.278857   | 0.0413128 | 0.255451  | 0.22976   | 0.0485437 | 0.14226   | 0.101941   | 0.414084  |
| ADAM33   | 3.29815   | 2.97008    | 4.1623    | 1.3526     | 11.0392  | 5.21069   | 4.96332    | 2.29305    | 0.314236  | 1.53471   | 2.62142   | 1.41273   | 0.680361  | 4.05729    | 9.98058   |
| ADAM3A   | 0         | 0          | 0         | 0          | 0        | 0         | 0          | 0          | 0         | 0         | 0         | 0         | 0         | 0          | 0         |
| ADAM3B   | 0.123101  | 0.0355873  | 0.0814705 | 0.0253719  | 0.114731 | 0.0628915 | 0.140553   | 0.196924   | 0         | 0.030901  | 0         | 0.105699  | 0         | 0.0643381  | 0.282863  |
| ADAM5    | 0         | 0          | 0         | 0          | 0        | 0         | 0          | 0          | 0         | 0         | 0         | 0         | 0         | 0          | 0         |
| ADAM6    | 0         | 0          | 0         | 0          | 0        | 0         | 0          | 0          | 0         | 0         | 0         | 0         | 0         | 0          | 0         |
| ADAM7    | 0         | 0.00328347 | 0.0394638 | 0          | 0        | 0         | 0.00778091 | 0.00605642 | 0         | 0         | 0         | 0         | 0         | 0          | 0         |
| ADAM8    | 0.490764  | 1.00664    | 1.32238   | 3.87257    | 2.09096  | 2.45355   | 0.672407   | 0.77261    | 0.333002  | 4.38213   | 3.90973   | 1.20396   | 15.3709   | 3.6239     | 3.97708   |
| ADAM9    | 7.49973   | 4.96859    | 5.54564   | 17.0115    | 5.06166  | 14.811    | 5.56466    | 5.88223    | 9.04444   | 21.4913   | 21.5422   | 7.93217   | 35.7337   | 14.7321    | 14.8418   |
| ADAMDEC1 | 0.531588  | 0.0777529  | 0.0628238 | 1.6728     | 0.117963 | 8.3981    | 0.0325152  | 0.43025    | 0.0231219 | 0.488484  | 0.932293  | 0.0407534 | 0.655332  | 0.0496127  | 0.490775  |
| ADAMTS1  | 6.08556   | 1.9995     | 2.73743   | 8.0866     | 2.27243  | 37.6918   | 3.99399    | 2.48969    | 1.11506   | 4.88383   | 6.88669   | 2.69167   | 18.6495   | 8.01257    | 16.1715   |
| ADAMTS10 | 2.169     | 2.15654    | 3.10172   | 1.27336    | 4.95083  | 5.26067   | 3.5785     | 1.40919    | 0.251888  | 0.732163  | 0.939901  | 0.683021  | 0.656944  | 2.46678    | 5.38453   |

|              |            |           |           |            |            |           |           |            |            |           |           |            |           |            |           |
|--------------|------------|-----------|-----------|------------|------------|-----------|-----------|------------|------------|-----------|-----------|------------|-----------|------------|-----------|
| ADAMTS12     | 0.608145   | 0.371233  | 0.38159   | 1.70752    | 1.20484    | 1.88041   | 0.567847  | 0.563371   | 0.61512    | 3.9393    | 7.78146   | 1.02886    | 2.57868   | 2.98173    | 7.99      |
| ADAMTS13     | 0.171691   | 0.333014  | 0.407895  | 0.294887   | 0.813762   | 0.487309  | 0.236243  | 0.183884   | 0.150123   | 0.0828807 | 0.0745452 | 0.144899   | 0.0284036 | 0.156458   | 0.41095   |
| ADAMTS14     | 0.178855   | 0.330673  | 0.251191  | 0.428641   | 2.67487    | 0.846467  | 0.351433  | 0.151559   | 0.39006    | 1.74364   | 2.11766   | 1.42559    | 0.778256  | 1.72608    | 4.56373   |
| ADAMTS15     | 1.17815    | 0.225881  | 0.232701  | 0.487326   | 1.01319    | 3.52674   | 0.614403  | 0.826038   | 0.124122   | 0.613991  | 0.427987  | 0.376285   | 1.56235   | 1.09727    | 2.31841   |
| ADAMTS16     | 0.02325    | 0.0358471 | 0.0692426 | 0          | 0.288922   | 0.0316753 | 0.0530922 | 0.0289277  | 0.0113264  | 0.0175087 | 0.0629913 | 0.0199632  | 0.0180009 | 0.0194423  | 0.447425  |
| ADAMTS17     | 1.02284    | 1.01194   | 0.76787   | 0.753974   | 1.6284     | 1.18397   | 1.27174   | 0.562876   | 0.753627   | 0.53909   | 0.226     | 1.00795    | 0.570686  | 0.722919   | 0.799805  |
| ADAMTS18     | 0.449797   | 0.0508819 | 0.100306  | 0.0927059  | 0.0303779  | 0.0532865 | 0.209891  | 0.0417123  | 0.009527   | 0.368179  | 0.644641  | 0.0167918  | 0.0731826 | 0.386355   | 0.415665  |
| ADAMTS19     | 0.00442168 | 0.0106522 | 0.0146317 | 0.00911333 | 0.00686839 | 0.03765   | 0.0151456 | 0.0275073  | 0          | 0         | 0         | 0          | 0         | 0          | 0.0190503 |
| ADAMTS19-AS1 | 0          | 0         | 0         | 0          | 0.0457368  | 0.0250713 | 0.0336183 | 0.0523349  | 0          | 0         | 0         | 0          | 0         | 0          | 0         |
| ADAMTS2      | 3.71244    | 1.75039   | 2.1343    | 4.43552    | 7.65929    | 9.26656   | 4.48209   | 2.96005    | 1.47611    | 8.72402   | 14.6877   | 2.59033    | 8.49311   | 9.1029     | 33.0445   |
| ADAMTS20     | 0          | 0         | 0         | 0          | 0          | 0         | 0         | 0          | 0          | 0         | 0         | 0          | 0         | 0          | 0         |
| ADAMTS3      | 0.290183   | 0.10534   | 0.164424  | 0.33591    | 0.0926206  | 0.578792  | 0.181546  | 0.162506   | 0.396981   | 0.369198  | 0.74042   | 0.096706   | 0.377013  | 0.290859   | 0.707885  |
| ADAMTS4      | 0.47361    | 0.269216  | 0.264137  | 19.7098    | 3.25682    | 12.5649   | 0.261263  | 0.406718   | 0.375895   | 3.21261   | 6.22958   | 1.11945    | 8.84087   | 6.07984    | 8.58998   |
| ADAMTS5      | 3.37218    | 1.28089   | 1.79508   | 2.8507     | 1.36907    | 1.89657   | 3.01895   | 2.80322    | 0.239183   | 1.48195   | 2.55497   | 0.448989   | 3.20176   | 2.39583    | 2.34921   |
| ADAMTS6      | 0.492867   | 0.170262  | 0.128218  | 0.204443   | 0.226307   | 0.699449  | 0.208815  | 0.305787   | 0.075504   | 0.727534  | 1.08828   | 0.29721    | 0.447993  | 1.21344    | 1.97655   |
| ADAMTS7      | 0.748546   | 0.688587  | 0.492334  | 1.22652    | 5.37588    | 2.18723   | 1.30605   | 0.576898   | 0.984245   | 1.17596   | 2.10441   | 1.24415    | 1.38713   | 1.78277    | 5.77797   |
| ADAMTS7P1    | 0.0171723  | 0.0212586 | 0         | 0.0120114  | 0.152344   | 0.0179879 | 0.0107779 | 0.00849117 | 0.0174534  | 0.0246045 | 0.0451038 | 0.00850979 | 0.0120117 | 0.00620261 | 0.0100978 |
| ADAMTS8      | 0.00576846 | 0.0778213 | 0.104986  | 0.00594456 | 0.143367   | 0.38803   | 0.0724486 | 0.0563918  | 0          | 0.02172   | 0.0260475 | 0.0288924  | 0.033496  | 0.00904454 | 0.0745581 |
| ADAMTS9      | 1.35664    | 0.65099   | 0.703271  | 5.46269    | 2.23033    | 12.1383   | 1.24499   | 0.781174   | 0.71308    | 3.93903   | 5.71854   | 1.19743    | 4.12666   | 7.41485    | 13.5921   |
| ADAMTS9-AS1  | 0.13764    | 0.10531   | 0.109169  | 0.353175   | 0.103854   | 0.310984  | 0.0772542 | 0.127092   | 0.00724805 | 0.143587  | 0.31563   | 0.0516659  | 0.0386622 | 0.830274   | 1.02939   |
| ADAMTS9-AS2  | 1.32958    | 0.875838  | 0.988214  | 0.256908   | 0.984245   | 0.566061  | 0.842057  | 0.867754   | 0.0506026  | 0.130372  | 0.293151  | 0.111487   | 0.140739  | 0.396309   | 1.31275   |
| ADAMTSL1     | 0.344425   | 0.288668  | 0.399864  | 0.271425   | 0.73283    | 0.640765  | 0.386644  | 0.272657   | 0.0352497  | 0.414125  | 0.754755  | 0.190529   | 0.338     | 0.721559   | 3.03018   |
| ADAMTSL2     | 0.296778   | 0.207743  | 0.0833826 | 0.352002   | 0.782828   | 0.400509  | 0.313277  | 0.0646937  | 0.334163   | 0.491963  | 0.265491  | 0.596991   | 0.578051  | 0.813592   | 0.868505  |
| ADAMTSL3     | 0.346264   | 1.28614   | 1.763     | 0.204369   | 0.195588   | 0.385972  | 1.68564   | 0.794504   | 0.0460048  | 0.0395088 | 0.0319819 | 0.0765808  | 0.237625  | 0.176037   | 0.447551  |
| ADAMTSL4     | 2.95176    | 3.24535   | 3.84904   | 13.0522    | 9.7799     | 13.654    | 7.70253   | 2.97212    | 3.97735    | 21.401    | 8.24775   | 16.2071    | 24.1263   | 14.0296    | 8.5909    |
| ADAMTSL4-AS1 | 2.16687    | 2.00196   | 2.91988   | 2.0949     | 1.5615     | 1.00813   | 2.52507   | 2.89853    | 1.14266    | 3.30843   | 0.428702  | 2.23777    | 0.562104  | 3.32745    | 2.11737   |

|            |            |            |           |           |           |           |           |            |           |            |            |            |            |            |           |
|------------|------------|------------|-----------|-----------|-----------|-----------|-----------|------------|-----------|------------|------------|------------|------------|------------|-----------|
| ADAMTSL5   | 0.0891052  | 0.156117   | 0.201038  | 0.258781  | 0.452982  | 0.186231  | 0.508687  | 0.100786   | 0.128251  | 0.711685   | 0.685832   | 0.660756   | 0.700335   | 0.685853   | 0.279199  |
| ADAP1      | 0.423197   | 0.491765   | 0.473662  | 1.35111   | 1.14718   | 1.3142    | 0.786372  | 0.604713   | 0.35371   | 0.968578   | 1.41447    | 0.623429   | 2.63407    | 0.442362   | 0.893771  |
| ADAP2      | 2.86047    | 3.00629    | 2.23491   | 12.9547   | 9.62715   | 12.8406   | 5.1855    | 2.89893    | 39.1768   | 21.0371    | 18.1001    | 22.0233    | 34.5084    | 14.0233    | 8.69643   |
| ADAR       | 17.2505    | 16.7334    | 16.3863   | 35.7221   | 15.6428   | 47.7417   | 19.4448   | 15.9709    | 14.3471   | 12.6106    | 14.82      | 11.0956    | 21.0464    | 14.0814    | 19.3457   |
| ADARB1     | 2.89444    | 2.66817    | 2.72692   | 2.5946    | 4.88621   | 5.77656   | 3.52701   | 2.32962    | 1.56374   | 1.60365    | 1.48135    | 2.2193     | 2.96529    | 3.62933    | 4.75642   |
| ADARB2     | 0.00823987 | 0.00529346 | 0.011361  | 0.0141524 | 0.0170658 | 0.0397581 | 0.018816  | 0.00976388 | 0.0100352 | 0.00689459 | 0          | 0.00196528 | 0.00886054 | 0.00717753 | 0.015778  |
| ADARB2-AS1 | 0          | 0          | 0         | 0         | 0         | 0         | 0         | 0          | 0         | 0          | 0          | 0          | 0          | 0          | 0         |
| ADAT1      | 2.25681    | 2.34131    | 2.28474   | 3.06226   | 2.19629   | 3.72424   | 2.47031   | 2.04019    | 1.91594   | 2.13537    | 2.49943    | 1.77602    | 2.39341    | 2.21691    | 2.7948    |
| ADAT2      | 1.56593    | 1.50004    | 1.63017   | 1.1745    | 0.37422   | 0.820535  | 0.85341   | 1.63048    | 0.349828  | 0.608617   | 0.456754   | 0.979025   | 0.316849   | 1.0541     | 0.64317   |
| ADAT3      | 0.90808    | 1.83761    | 1.79221   | 2.13898   | 4.97727   | 3.42587   | 1.5256    | 1.34888    | 2.35407   | 1.38396    | 2.1088     | 1.94174    | 2.21801    | 1.82382    | 0.894251  |
| ADCK1      | 0.96343    | 1.13304    | 1.12268   | 1.62271   | 1.7862    | 1.90532   | 1.514     | 0.672085   | 0.883167  | 0.689117   | 0.982342   | 0.904322   | 1.12289    | 0.909604   | 0.862895  |
| ADCK2      | 4.77741    | 5.46213    | 4.93217   | 6.45674   | 15.5567   | 8.60262   | 5.38763   | 3.81945    | 10.0867   | 6.02072    | 6.22196    | 4.86837    | 7.90803    | 4.70213    | 3.31801   |
| ADCK5      | 1.25727    | 1.8061     | 1.65646   | 2.30338   | 5.84083   | 3.14226   | 1.4488    | 1.00355    | 1.55957   | 1.85561    | 1.86612    | 1.69926    | 1.75005    | 1.83137    | 1.75544   |
| ADCY1      | 0.21828    | 0.15517    | 0.257544  | 0.200975  | 0.60309   | 0.821147  | 0.298253  | 0.178088   | 0.372613  | 0.110035   | 0.127245   | 0.0576093  | 0.0669535  | 0.161773   | 0.727165  |
| ADCY10     | 0.0465485  | 0.0244666  | 0.0210045 | 0.0305261 | 0.0131465 | 0.0252225 | 0.0144948 | 0.0526507  | 0.0154611 | 0.0531119  | 0.00955408 | 0.00908364 | 0          | 0.0265399  | 0.0486178 |
| ADCY10P1   | 0.217805   | 0.287599   | 0.270083  | 0.282282  | 0.394845  | 0.0777319 | 0.144583  | 0.302334   | 0.0370133 | 0.108335   | 0.0344985  | 0.09446    | 0.0196084  | 0.2132     | 0.103162  |
| ADCY2      | 0.649828   | 1.3698     | 1.92244   | 0.251125  | 0.290753  | 0.890123  | 1.53633   | 1.07656    | 0.0215059 | 0.0487587  | 0.043855   | 0.0480131  | 0.0182289  | 0.0609116  | 0.2891    |
| ADCY3      | 7.07129    | 5.68086    | 6.68699   | 8.39867   | 10.5712   | 23.7803   | 8.37596   | 5.1447     | 3.52004   | 4.52068    | 5.44368    | 3.83942    | 7.07089    | 6.99297    | 11.0627   |
| ADCY4      | 4.12468    | 1.98133    | 1.87854   | 2.09645   | 6.88059   | 5.95944   | 3.18225   | 2.10652    | 0.492491  | 1.85057    | 2.12095    | 1.91413    | 1.8745     | 3.10517    | 8.84515   |
| ADCY5      | 1.15031    | 0.368897   | 0.462039  | 0.175337  | 0.936506  | 2.2172    | 1.6259    | 0.374733   | 0.0540559 | 0.106773   | 0.108561   | 0.0635172  | 0.112161   | 0.110188   | 0.674607  |
| ADCY6      | 2.79901    | 3.83019    | 3.2725    | 2.58351   | 8.71923   | 5.74516   | 3.3214    | 2.1808     | 1.36263   | 1.95645    | 1.68691    | 1.61741    | 1.85485    | 3.20725    | 6.01326   |
| ADCY7      | 3.64289    | 4.13701    | 5.02786   | 5.98909   | 6.30142   | 6.08417   | 5.28143   | 3.51003    | 3.76619   | 8.34221    | 5.14254    | 6.04059    | 13.5541    | 7.38599    | 6.62183   |
| ADCY8      | 1.2133     | 0.353472   | 0.718951  | 0.0116311 | 0.596084  | 0.480517  | 1.26933   | 0.651985   | 0         | 0          | 0.0127411  | 0          | 0          | 0          | 0         |
| ADCY9      | 2.29723    | 2.44169    | 2.58429   | 3.17912   | 3.94059   | 4.70781   | 3.53255   | 1.46398    | 2.03176   | 2.23669    | 1.53839    | 2.04234    | 4.51219    | 2.60164    | 3.64752   |
| ADCYAP1    | 0.637342   | 0.0198117  | 0.0170082 | 0.112998  | 0.872914  | 0.0291768 | 0.0704222 | 0.621231   | 0.600937  | 0.6193     | 1.06761    | 0.529589   | 0.592496   | 0.705604   | 2.05698   |
| ADCYAP1R1  | 0.71101    | 0.347663   | 0.4659    | 0.290185  | 0.579561  | 0.701326  | 0.550584  | 0.240868   | 0.0771622 | 0.185547   | 0.1947     | 0.214077   | 0.199847   | 0.0754248  | 0.394287  |

|            |            |            |            |           |           |            |            |            |            |            |           |            |            |            |           |
|------------|------------|------------|------------|-----------|-----------|------------|------------|------------|------------|------------|-----------|------------|------------|------------|-----------|
| ADD1       | 16.934     | 14.5123    | 15.6605    | 21.0816   | 21.6038   | 31.0147    | 18.1849    | 12.7033    | 14.8378    | 15.9782    | 15.3835   | 12.6107    | 26.5218    | 15.0089    | 18.9235   |
| ADD2       | 0.124613   | 0.0525356  | 0.048323   | 0.0963133 | 0.102833  | 0.315004   | 0.244543   | 0.0969028  | 0          | 0.0879765  | 0.0219802 | 0.00557277 | 0.125625   | 0.0488463  | 0.190146  |
| ADD3       | 9.8863     | 6.95059    | 9.83887    | 4.43805   | 1.5978    | 7.19051    | 6.18356    | 7.75798    | 1.39792    | 3.46087    | 5.75165   | 1.13513    | 2.96209    | 2.44086    | 5.64716   |
| ADD3-AS1   | 0.147946   | 0.202387   | 0.19547    | 0.0561548 | 0.127695  | 0.110305   | 0.212587   | 0.25893    | 0          | 0.0460589  | 0.0414483 | 0.0388113  | 0.0823861  | 0.0480441  | 0.136427  |
| ADGB       | 0.0306299  | 0.0527069  | 0.0687778  | 0.0180371 | 0         | 0.00372585 | 0.00999205 | 0.101108   | 0.0159873  | 0.00549195 | 0         | 0.0313093  | 0          | 0.00686079 | 0         |
| ADGRA1     | 0.00541105 | 0.00521425 | 0          | 0         | 0         | 0          | 0          | 0.00480889 | 0.00659005 | 0          | 0         | 0          | 0.00698236 | 0          | 0         |
| ADGRA1-AS1 | 0          | 0          | 0          | 0         | 0         | 0          | 0          | 0          | 0          | 0          | 0         | 0          | 0          | 0          | 0         |
| ADGRA2     | 7.17995    | 5.22792    | 6.44108    | 5.56409   | 13.1428   | 11.4892    | 8.47372    | 3.74267    | 1.7797     | 5.96439    | 8.39536   | 2.48365    | 8.0103     | 7.7333     | 16.3042   |
| ADGRA3     | 3.15195    | 1.65295    | 1.58463    | 2.66852   | 1.5192    | 4.73341    | 1.92669    | 1.79691    | 1.17877    | 2.49319    | 2.8431    | 1.73318    | 3.05698    | 2.73587    | 5.45813   |
| ADGRB1     | 0.230258   | 0.851227   | 1.04248    | 0.263174  | 1.80786   | 0.520455   | 1.09941    | 0.301371   | 0.724016   | 0.220689   | 0.283563  | 0.853735   | 0.0864358  | 0.560142   | 0.300618  |
| ADGRB2     | 0.0935417  | 0.124966   | 0.172356   | 0.0920157 | 0.601024  | 0.25343    | 0.174768   | 0.0982469  | 0.03107    | 0.314857   | 0.580782  | 0.0760586  | 0.0850423  | 0.235556   | 0.915938  |
| ADGRB3     | 0.123167   | 0.0692343  | 0.112082   | 0.160774  | 0.24234   | 0.447466   | 0.131253   | 0.160542   | 0.0200004  | 0.0669877  | 0.111232  | 0.0293764  | 0.04768    | 0.195263   | 0.707533  |
| ADGRD1     | 1.40082    | 0.96565    | 1.43112    | 0.521777  | 0.635746  | 3.22266    | 3.70464    | 0.779956   | 0.0308321  | 0.0635484  | 0.157182  | 0.0724571  | 0.588014   | 0.282266   | 1.67242   |
| ADGRD1-AS1 | 0.0586643  | 0.0565307  | 0.194125   | 0         | 0         | 0.0749278  | 0.7033     | 0.13034    | 0          | 0          | 0         | 0.0209879  | 0.0189249  | 0          | 0.0421246 |
| ADGRE1     | 0.00713411 | 0.00687465 | 0.0118037  | 0.514634  | 0.0664904 | 0.358402   | 0.0081455  | 0.0063402  | 0.00868854 | 0.152219   | 0.314087  | 0.0153139  | 0.363628   | 0.0820291  | 0.235646  |
| ADGRE2     | 0.538369   | 0.612542   | 0.560688   | 3.16044   | 0.662431  | 2.66302    | 0.513639   | 0.579769   | 0.149539   | 1.91193    | 2.98777   | 0.617145   | 2.99748    | 1.85499    | 2.73011   |
| ADGRE3     | 0.0095514  | 0          | 0          | 0.09843   | 0.0148366 | 0.081329   | 0          | 0          | 0          | 0.662349   | 0.700853  | 0.0136686  | 0.3951     | 0.299519   | 0.50753   |
| ADGRE4P    | 0.551724   | 0.593178   | 0.904446   | 0.345132  | 0.201426  | 0.175194   | 0.373654   | 0.784054   | 0.0310894  | 0.131018   | 0.37458   | 0.185414   | 0.0438294  | 0.166867   | 0.356073  |
| ADGRE5     | 3.09122    | 2.49092    | 3.38311    | 3.96061   | 3.38065   | 6.65405    | 6.69593    | 2.80074    | 0.550175   | 4.84743    | 7.12734   | 1.36256    | 8.58524    | 4.36594    | 6.57491   |
| ADGRF1     | 0.0114193  | 0.00733597 | 0.00314894 | 0.415799  | 0.0177381 | 0.0680635  | 0          | 0.0236798  | 0          | 0.879051   | 0.0386728 | 0.0381304  | 0.451883   | 0.0417775  | 0.0273325 |
| ADGRF2     | 0.397306   | 0.883179   | 0.829168   | 0.0651374 | 0.890664  | 0.111485   | 0.845403   | 0.726246   | 0.923759   | 0.793322   | 0.244641  | 0.684863   | 0.568025   | 0.122702   | 0.110226  |
| ADGRF3     | 0.146973   | 0.197456   | 0.195082   | 0.133871  | 0.315704  | 0.124288   | 0.152791   | 0.158754   | 0.0445127  | 0.102054   | 0.0550175 | 0.145843   | 0.0183618  | 0.146413   | 0.116333  |
| ADGRF4     | 4.03728    | 6.41952    | 5.96709    | 6.73353   | 7.51872   | 2.9217     | 6.4018     | 4.399      | 13.7461    | 7.48626    | 6.39543   | 8.62972    | 8.67161    | 5.36855    | 1.99208   |
| ADGRF5     | 4.50409    | 1.96275    | 1.81536    | 4.67724   | 1.83268   | 3.60938    | 2.70296    | 2.07656    | 1.17947    | 4.90546    | 7.86123   | 1.88639    | 7.53524    | 4.95322    | 12.2637   |
| ADGRG1     | 11.1473    | 13.4486    | 12.9723    | 13.5977   | 26.1847   | 21.3158    | 17.3196    | 10.2387    | 36.1781    | 17.9447    | 16.4574   | 22.9582    | 25.0626    | 12.0208    | 6.81549   |
| ADGRG2     | 0.357661   | 0.195303   | 0.197255   | 0.0933736 | 0.0666685 | 0.121817   | 0.337582   | 0.228859   | 0.00580788 | 0.0359121  | 0.0646008 | 0.0375343  | 0.0707667  | 0.117142   | 0.294491  |

|            |            |                 |            |            |           |            |            |            |            |            |            |            |           |            |            |
|------------|------------|-----------------|------------|------------|-----------|------------|------------|------------|------------|------------|------------|------------|-----------|------------|------------|
| ADGRG3     | 0.208027   | 0.0334103       | 0.0932181  | 1.27734    | 0.175033  | 0.509256   | 0.415658   | 0.069329   | 0.0422257  | 1.94734    | 2.46578    | 0.0930307  | 1.6945    | 1.41794    | 0.883813   |
| ADGRG4     | 0.00233038 | 0.012351        | 0.00578358 | 0          | 0         | 0.00595288 | 0.00266076 | 0.00207105 | 0.00283815 | 0          | 0.00263071 | 0.00500236 | 0         | 0.00365388 | 0          |
| ADGRG5     | 0.0849955  | 0.122856        | 0.160718   | 0.056308   | 0.169749  | 0.0568641  | 0.0901133  | 0.0863279  | 0.0369696  | 0.00761986 | 0.0479746  | 0.0434404  | 0.0509216 | 0.0380763  | 0.113345   |
| ADGRG6     | 1.70223    | 3.25822         | 3.95787    | 3.57349    | 0.717847  | 2.03258    | 2.14854    | 2.77739    | 1.41718    | 3.30903    | 1.69267    | 2.42887    | 3.5565    | 1.94789    | 0.744845   |
| ADGRG7     | 0          | 0.00339856      | 0.00583528 | 0          | 0         | 0          | 0.00805364 | 0.0062687  | 0          | 0          | 0.0159254  | 4.68367    | 0         | 0.0073731  | 0          |
| ADGRL1     | 3.38397    | 4.02826         | 4.06872    | 3.11756    | 6.59529   | 5.25164    | 5.686      | 2.98604    | 4.64709    | 2.14265    | 1.88839    | 4.66157    | 3.26537   | 2.49018    | 3.3278     |
| ADGRL2     | 3.79159    | 3.2831          | 2.461      | 6.28497    | 2.9402    | 5.01027    | 2.6002     | 3.46236    | 17.5343    | 11.5564    | 10.8825    | 10.1779    | 10.4814   | 8.63717    | 6.39981    |
| ADGRL3     | 1.12274    | 0.636461        | 0.527764   | 0.559004   | 0.419902  | 1.3304     | 1.50207    | 0.469266   | 1.67024    | 0.398089   | 0.775104   | 0.336553   | 0.118598  | 0.234527   | 0.509856   |
| ADGRL3-AS1 | 0          | 0               | 0          | 0          | 0         | 0          | 0          | 0          | 0.0603547  | 0          | 0          | 0          | 0         | 0          | 1.26E-44   |
| ADGRL4     | 4.17585    | 1.16159         | 1.33315    | 3.15007    | 0.486739  | 5.67385    | 1.5041     | 2.46084    | 0.97353    | 5.59428    | 10.3376    | 0.860232   | 5.11617   | 3.11497    | 7.04401    |
| ADGRV1     | 0.161605   | 0.0876689       | 0.145575   | 0.0111026  | 0.0762383 | 0.059119   | 0.0915743  | 0.134046   | 0.0131211  | 0.163767   | 0.0189189  | 0.0188439  | 0.0332109 | 0.0100103  | 0.00171915 |
| ADH1A      | 0.437728   | 0.115339        | 0.18338    | 0.0794986  | 0.0302932 | 0.295797   | 0.506127   | 0.256857   | 0          | 0.0193646  | 0.0362634  | 0.0331189  | 0.019909  | 0.0322549  | 0.0221576  |
| ADH1B      | 27.1458    | 4.186           | 7.01193    | 0.193983   | 0.0638755 | 16.2335    | 13.2699    | 15.5766    | 0.0200324  | 9.84E-12   | 0.102126   | 1.98E-20   | 0         | 0          | 0.0118111  |
| ADH1C      | 0.275399   | 0.0260882       | 0.0112281  | 0.0286522  | 0         | 0.0936783  | 0.0617269  | 0.0835527  | 0          | 0.0165227  | 0          | 0.0282585  | 0         | 0          | 0          |
| ADH4       | 0.40866    | 0.186535        | 0.115656   | 0.17732    | 0.083525  | 0.814979   | 0.061394   | 0.229379   | 0.0130974  | 0.0269953  | 0.0364205  | 0.0307797  | 0         | 0.0393443  | 0.0463332  |
| ADH5       | 14.9107    | 6.8351          | 7.48201    | 20.233     | 6.35992   | 31.5326    | 9.51901    | 8.06102    | 6.21976    | 14.3646    | 23.583     | 6.03412    | 16.1315   | 11.0097    | 9.97968    |
| ADH6       | 0.207872   | 0.21144         | 0.159228   | 0.0793399  | 0.0239183 | 0.203222   | 0.105485   | 0.239477   | 0.0468823  | 0.00966298 | 0.0347646  | 0.0495793  | 0         | 0.0442619  | 0.0110567  |
| ADH7       | 1.61239    | 0.679182        | 0.103835   | 0.328342   | 1.18481   | 0.394613   | 0.308666   | 0.15445    | 4.11555    | 0.339305   | 0.490469   | 1.16061    | 0.0809817 | 0.24726    | 0.0831949  |
| ADHFE1     | 1.25791    | 0.788491        | 0.838566   | 0.352395   | 0.853674  | 0.499149   | 0.822699   | 0.770607   | 0.148737   | 0.383205   | 0.179226   | 0.64665    | 0.133953  | 0.42127    | 0.789254   |
| ADI1       | 4.26953    | 2.98212         | 2.79552    | 5.394      | 3.49992   | 6.19445    | 3.99922    | 3.97894    | 3.511      | 4.91459    | 8.28603    | 3.68785    | 6.29164   | 5.08081    | 3.78012    |
| ADIG       | 0          | 0.0144439       | 0          | 0          | 0         | 0.0255259  | 0.034228   | 0          | 0          | 0.0376255  | 0          | 0          | 0         | 0          | 0.215261   |
| ADIPOQ     | 3.81954    | 0.0577266       | 0.115808   | 0.00515221 | 0.0698885 | 2.02357    | 1.16549    | 0.622049   | 4.98E-08   | 0          | 0.0056439  | 0          | 0         | 0          | 0          |
| ADIPOQ-AS1 | 0.0649994  | 0.00011199<br>5 | 7.34E-24   | 0          | 7.96E-06  | 0.0146687  | 0.0283283  | 1.04E-10   | 0.00789286 | 0          | 0          | 0          | 0         | 0          | 0          |
| ADIPOR1    | 22.6943    | 25.026          | 25.633     | 49.088     | 28.9313   | 37.8588    | 26.0208    | 16.8074    | 134.127    | 45.734     | 61.9109    | 40.3226    | 54.6349   | 28.1312    | 14.6499    |
| ADIPOR2    | 10.0043    | 9.21864         | 10.0387    | 18.8511    | 6.10184   | 16.9278    | 10.7295    | 8.25298    | 38.0808    | 17.7285    | 16.0509    | 12.3496    | 20.8518   | 10.3262    | 7.20889    |



|             |           |           |           |            |           |           |           |           |            |            |            |           |           |           |           |
|-------------|-----------|-----------|-----------|------------|-----------|-----------|-----------|-----------|------------|------------|------------|-----------|-----------|-----------|-----------|
| ADIRF       | 60.6928   | 22.1354   | 29.8402   | 23.775     | 25.1788   | 75.8771   | 54.7416   | 17.3912   | 16.0222    | 125.38     | 100.886    | 32.6121   | 131.605   | 30.3221   | 42.5774   |
| ADK         | 6.06329   | 6.97196   | 6.35832   | 9.89576    | 3.96487   | 8.54008   | 5.47114   | 5.97885   | 8.93297    | 9.22978    | 13.5503    | 6.85057   | 8.97495   | 6.64035   | 3.92459   |
| ADM         | 6.56448   | 3.89923   | 4.80445   | 25.7846    | 11.3048   | 40.1061   | 6.41488   | 4.5404    | 19.5881    | 38.9119    | 65.5277    | 35.2852   | 66.7986   | 43.7342   | 14.2561   |
| ADM2        | 0.0573984 | 0.124449  | 0.123458  | 0.40814    | 0.401218  | 0.425204  | 0.176946  | 0.0969208 | 0.28661    | 1.11663    | 0.369335   | 0.332668  | 2.5701    | 0.425985  | 0.222565  |
| ADM5        | 1.2492    | 0.881706  | 0.951839  | 0.553328   | 1.48086   | 2.51923   | 1.11351   | 0.934892  | 0.987565   | 0.467611   | 0.828796   | 0.399874  | 0.523178  | 0.549799  | 0.566529  |
| ADNP        | 10.8471   | 8.74352   | 8.58997   | 9.86902    | 5.24305   | 11.169    | 8.53496   | 8.8222    | 6.36057    | 8.75285    | 8.9153     | 6.56241   | 11.3875   | 8.26238   | 8.68399   |
| ADNP-AS1    | 0.852993  | 0.562401  | 0.779935  | 0.161927   | 0.313814  | 0.420497  | 0.794514  | 0.917663  | 0.136691   | 0.309909   | 0.354761   | 0.562155  | 0.318622  | 0.656985  | 0.838162  |
| ADNP2       | 5.36582   | 4.66768   | 5.25641   | 5.10462    | 3.56355   | 5.50905   | 5.58205   | 4.63125   | 5.34727    | 4.30285    | 4.77216    | 3.91931   | 7.76663   | 4.35593   | 4.14606   |
| ADO         | 2.37397   | 2.21876   | 2.47288   | 3.40708    | 3.03116   | 3.94755   | 1.95129   | 2.47982   | 2.37655    | 2.82357    | 5.33878    | 1.99656   | 4.10985   | 2.72183   | 2.31155   |
| ADORA1      | 0.515347  | 0.343803  | 0.544392  | 0.130727   | 1.23156   | 1.23542   | 0.751351  | 0.34526   | 0.00965592 | 0.179118   | 0.322207   | 0.005673  | 0.204615  | 0.215474  | 0.409904  |
| ADORA2A     | 0.048731  | 5.39E-10  | 0.0712602 | 0.139456   | 0.715024  | 0.164626  | 0.0902419 | 1.17E-09  | 0.0333923  | 0.00471561 | 0.00163972 | 2.62E-10  | 0.182413  | 0.063527  | 0.177585  |
| ADORA2A-AS1 | 0.103574  | 0.144417  | 0.227263  | 0.0483884  | 0.149265  | 0.0651911 | 0.221945  | 0.0880884 | 0          | 0.132097   | 0.0872161  | 0.0254552 | 0.0299511 | 0.108963  | 0.123955  |
| ADORA2B     | 1.9644    | 2.89267   | 2.9861    | 4.85848    | 1.23963   | 4.63117   | 1.82234   | 2.45502   | 1.39059    | 1.64882    | 3.54809    | 1.14203   | 2.52692   | 3.28537   | 1.11082   |
| ADORA3      | 0.420963  | 0.0198958 | 0.0497503 | 0.526777   | 0.170601  | 1.12235   | 0.137234  | 0.311404  | 0.085448   | 0.401474   | 0.644925   | 0.0215151 | 0.181069  | 0.0819964 | 0.187125  |
| ADPGK       | 5.6545    | 5.10611   | 5.24792   | 7.37487    | 5.4271    | 8.19908   | 4.97317   | 4.33866   | 3.10567    | 5.91533    | 11.0235    | 4.30861   | 6.08429   | 6.33873   | 6.61626   |
| ADPGK-AS1   | 0.669603  | 0.491267  | 0.549507  | 0.29617    | 0.409131  | 0.18341   | 0.742638  | 0.788205  | 0.0333772  | 0.26472    | 0.230837   | 0.278856  | 0.12724   | 0.455268  | 0.676771  |
| ADPRH       | 0.710257  | 0.548146  | 0.571975  | 1.52866    | 0.917767  | 2.43514   | 0.753536  | 0.44688   | 0.474609   | 1.065      | 2.08608    | 0.409265  | 1.57753   | 1.22861   | 2.02198   |
| ADPRHL1     | 0.743808  | 0.522208  | 0.369198  | 0.438009   | 0.330112  | 0.669534  | 0.715802  | 0.472168  | 0.129411   | 0.226721   | 0.239905   | 0.167267  | 0.157682  | 0.127731  | 0.19838   |
| ADPRHL2     | 3.85946   | 3.87075   | 4.29105   | 9.5483     | 9.65164   | 11.9098   | 5.43793   | 3.11373   | 12.2177    | 7.31755    | 11.2629    | 5.78749   | 12.1856   | 7.6107    | 3.12512   |
| ADPRM       | 2.24522   | 1.93593   | 1.88728   | 2.30648    | 0.568366  | 1.97522   | 1.22714   | 1.78243   | 0.710308   | 1.36138    | 1.82335    | 0.879611  | 1.34049   | 0.865472  | 1.60177   |
| ADRA1A      | 0.0742104 | 0.034242  | 0.0282106 | 0.00292849 | 0.0971121 | 0.0362954 | 0.0648919 | 0.0176785 | 0.00692182 | 0.0142667  | 0.0160398  | 0         | 0.031169  | 0.0608937 | 0.0530541 |
| ADRA1B      | 0.0924079 | 0.0247353 | 0.0254821 | 0.010581   | 0.127592  | 0.201082  | 0.164124  | 0.0182499 | 0.0125047  | 0          | 0          | 0.0073467 | 0.0198737 | 0.0536627 | 0.265419  |
| ADRA1D      | 0.295148  | 0.0878335 | 0.093358  | 0.0447292  | 0.337108  | 0.340014  | 0.40637   | 0.123437  | 0.0528613  | 0.16343    | 0.382183   | 0.0745363 | 0.145621  | 0.503604  | 0.598404  |
| ADRA2A      | 3.94382   | 1.50576   | 1.69557   | 1.85353    | 5.84765   | 19.1412   | 3.89571   | 1.35949   | 0.531255   | 0.419991   | 0.708286   | 0.504523  | 0.586013  | 0.437227  | 4.61687   |
| ADRA2B      | 0.578232  | 0.179101  | 0.290429  | 0.0567509  | 0.128313  | 0.691644  | 0.471576  | 0.201883  | 0          | 0.0259193  | 0.0621669  | 0.0492548 | 0.039972  | 0.0179887 | 0.217489  |
| ADRA2C      | 1.47747   | 0.375865  | 0.342234  | 0.487223   | 0.624245  | 4.38806   | 1.80838   | 0.766821  | 0.0863707  | 0.14835    | 0.213488   | 0.0592014 | 0.152521  | 0.142083  | 0.339493  |

|           |           |          |          |            |           |           |            |           |           |           |           |            |            |            |           |
|-----------|-----------|----------|----------|------------|-----------|-----------|------------|-----------|-----------|-----------|-----------|------------|------------|------------|-----------|
| ADRB1     | 0.24259   | 0.112987 | 0.113723 | 0.00833319 | 0.113048  | 0.151479  | 0.193887   | 0.0718645 | 0.0295447 | 0         | 0         | 0.00578598 | 0.00521725 | 0.00422626 | 0.023226  |
| ADRB2     | 6.91345   | 7.25722  | 10.1728  | 3.04836    | 2.8872    | 2.76965   | 10.9992    | 6.34554   | 8.83389   | 13.9118   | 7.67648   | 14.5889    | 27.6625    | 8.09136    | 3.74357   |
| ADRB3     | 0.0174929 | 0        | 0        | 0.0540807  | 0         | 0.0297899 | 0.00998639 | 0.0077731 | 0         | 0.0219553 | 0         | 0          | 0.0507884  | 0.0502839  | 0.0753659 |
| ADRM1     | 15.4651   | 13.8778  | 15.0706  | 26.8628    | 25.5046   | 37.429    | 15.533     | 10.6035   | 28.9477   | 27.3198   | 36.6465   | 17.8909    | 37.5922    | 22.2455    | 11.9247   |
| ADSL      | 4.68793   | 3.58867  | 3.50074  | 9.46222    | 3.63212   | 7.83771   | 4.57113    | 3.31475   | 3.33393   | 6.45645   | 12.5671   | 3.63182    | 8.25701    | 6.6409     | 5.11077   |
| ADSS      | 8.6932    | 6.91807  | 7.72842  | 11.4533    | 4.85869   | 10.2922   | 4.7681     | 7.39311   | 4.92387   | 7.93517   | 9.78537   | 5.18451    | 11.4269    | 8.00864    | 7.27568   |
| ADSSL1    | 1.5681    | 1.92271  | 1.21673  | 0.791271   | 2.97337   | 3.10324   | 1.49407    | 1.4801    | 4.21468   | 1.84597   | 3.32064   | 2.0119     | 0.816363   | 0.830863   | 0.978453  |
| ADTRP     | 0.597883  | 1.41033  | 1.92693  | 1.2066     | 0.541753  | 2.01515   | 0.682643   | 1.62726   | 1.82038   | 1.96981   | 1.42018   | 1.25666    | 0.369678   | 0.5859     | 0.751306  |
| AEBP1     | 28.6428   | 16.333   | 21.2916  | 47.8451    | 87.295    | 151.745   | 45.5662    | 22.3596   | 4.97353   | 28.6346   | 46.3432   | 9.73872    | 48.9613    | 37.8527    | 176.146   |
| AEBP2     | 3.9973    | 4.85621  | 4.78719  | 3.7292     | 2.5877    | 3.5903    | 2.33434    | 4.48049   | 4.17906   | 3.20632   | 3.00082   | 3.65293    | 3.30418    | 3.11393    | 2.34091   |
| AEN       | 2.23558   | 1.81789  | 1.874    | 5.19701    | 3.98025   | 6.16603   | 1.72994    | 1.59076   | 4.96595   | 4.01772   | 5.4079    | 3.59249    | 10.0583    | 5.70231    | 4.38387   |
| AES       | 39.5081   | 35.3884  | 42.2611  | 51.1845    | 46.5514   | 91.425    | 38.6224    | 26.7393   | 31.7391   | 37.434    | 64.9334   | 25.3292    | 47.9159    | 28.7408    | 30.1227   |
| AFAP1     | 3.27741   | 1.46452  | 1.68327  | 2.40731    | 2.82031   | 5.36796   | 2.88911    | 2.10017   | 0.851829  | 2.44727   | 3.29389   | 1.10394    | 3.15323    | 2.8112     | 6.74446   |
| AFAP1-AS1 | 0.315095  | 0.168104 | 0.190998 | 0.0972999  | 0.1966    | 0.183336  | 0.246786   | 0.210697  | 0.017317  | 0.129642  | 0.0860268 | 0.104628   | 0.0113094  | 0.281182   | 0.416266  |
| AFAP1L1   | 2.62194   | 0.967206 | 1.09685  | 2.31818    | 1.45208   | 4.43338   | 1.93055    | 1.08895   | 1.27003   | 3.59932   | 1.82888   | 1.62824    | 5.5388     | 4.0604     | 4.61051   |
| AFAP1L2   | 3.33833   | 3.9126   | 3.26999  | 9.40273    | 10.236    | 7.98701   | 2.05195    | 3.1261    | 3.62299   | 5.1089    | 3.63562   | 5.44048    | 9.02522    | 5.00949    | 3.581     |
| AFDN      | 8.75141   | 8.66038  | 10.2343  | 11.3855    | 8.51619   | 9.28973   | 10.5455    | 8.27464   | 16.4534   | 11.2841   | 6.48126   | 12.031     | 18.5988    | 9.863      | 6.34225   |
| AFDN-DT   | 0.160229  | 0.222491 | 0.36452  | 0.216721   | 0.420003  | 0.366663  | 0.22868    | 0.177998  | 0.47699   | 0.35255   | 0.271318  | 0.301321   | 0.264908   | 0.266929   | 0.0862908 |
| AFF1      | 12.2641   | 13.1987  | 13.925   | 10.3451    | 5.676     | 11.3466   | 11.9291    | 11.6693   | 6.15196   | 8.72414   | 7.47071   | 7.36832    | 9.40861    | 7.33778    | 8.87487   |
| AFF1-AS1  | 0.773418  | 0.796886 | 0.797322 | 0.343336   | 0.499037  | 0.678819  | 0.638523   | 0.719074  | 0.43474   | 0.462958  | 0.470127  | 0.332041   | 0.115155   | 0.335815   | 0.461379  |
| AFF2      | 0.236647  | 0.303518 | 0.312958 | 0.116783   | 0.0517738 | 0.153255  | 0.165542   | 0.208831  | 0.0710374 | 0.202891  | 0.370616  | 0.0655844  | 0.120426   | 0.102778   | 0.275234  |
| AFF3      | 0.808822  | 0.361189 | 0.470945 | 0.136499   | 0.214504  | 0.256763  | 1.52842    | 0.408246  | 0.0514837 | 0.0636683 | 0.0922605 | 0.0645279  | 0.0963693  | 0.0633353  | 0.352114  |
| AFF4      | 11.5087   | 10.2242  | 11.1016  | 12.0343    | 4.96083   | 11.3711   | 9.39734    | 11.207    | 14.3929   | 14.6902   | 13.4582   | 11.5553    | 17.5612    | 11.9377    | 11.8201   |
| AFG1L     | 0.521885  | 0.453949 | 0.32476  | 0.466426   | 0.487835  | 0.503366  | 0.311118   | 0.41045   | 0.286862  | 0.301425  | 0.667347  | 0.380032   | 0.217525   | 0.603451   | 0.338267  |
| AFG3L1P   | 1.96008   | 1.97465  | 1.83185  | 1.61706    | 1.98909   | 2.25524   | 1.49156    | 1.20676   | 1.22229   | 1.005     | 0.735351  | 1.86991    | 1.23403    | 1.83188    | 1.66054   |
| AFG3L2    | 12.2564   | 9.22244  | 10.1731  | 12.9158    | 11.1555   | 16.4359   | 9.39455    | 8.67749   | 11.5028   | 8.62127   | 8.91216   | 7.32632    | 13.5386    | 8.12691    | 6.36996   |

|           |           |           |           |           |           |           |           |           |           |           |           |           |            |           |           |
|-----------|-----------|-----------|-----------|-----------|-----------|-----------|-----------|-----------|-----------|-----------|-----------|-----------|------------|-----------|-----------|
| AFM       | 0         | 0         | 0         | 0         | 0         | 0         | 0         | 0         | 0         | 0         | 0         | 0         | 0          | 0         | 0         |
| AFMID     | 1.92859   | 2.39533   | 2.1716    | 3.54431   | 4.46036   | 3.44856   | 1.82277   | 1.79015   | 1.34404   | 1.51958   | 3.60437   | 1.67895   | 1.32036    | 1.54554   | 1.43101   |
| AFP       | 0         | 0         | 0         | 0         | 0         | 0         | 0         | 0         | 0         | 0.0141969 | 0.0127691 | 0         | 0          | 0.0118236 | 0         |
| AFTPH     | 6.30359   | 7.75907   | 8.71599   | 6.81999   | 2.85989   | 5.63984   | 4.50546   | 7.48282   | 10.439    | 6.55191   | 6.58367   | 5.22133   | 7.71756    | 5.1927    | 3.79682   |
| AGA       | 3.56725   | 3.50644   | 3.25165   | 4.30019   | 3.36916   | 5.08117   | 3.13016   | 2.89629   | 7.14696   | 4.38052   | 8.02909   | 4.5456    | 6.1375     | 2.94622   | 2.18203   |
| AGAP1     | 2.9298    | 2.46515   | 2.90207   | 2.05408   | 3.04873   | 3.73765   | 4.0216    | 2.22376   | 1.44313   | 1.75809   | 2.15588   | 1.38542   | 2.10044    | 1.76853   | 2.78945   |
| AGAP1-IT1 | 1.04562   | 0.940418  | 1.09568   | 0.610607  | 2.65287   | 0.38581   | 1.51222   | 1.05316   | 0.0424482 | 0.306217  | 0.236075  | 0.72323   | 0.112438   | 1.12941   | 1.20131   |
| AGAP11    | 3.08081   | 1.84646   | 2.16551   | 0.497462  | 0.864014  | 1.3118    | 2.40744   | 1.11481   | 0.353062  | 2.2733    | 0.563606  | 0.825907  | 1.50501    | 0.983433  | 3.1032    |
| AGAP12P   | 1.73131   | 2.10998   | 2.15778   | 0.53177   | 2.10501   | 0.93967   | 1.96284   | 1.85775   | 0.638337  | 1.34729   | 1.05618   | 0.663863  | 0.295056   | 0.502989  | 0.0440343 |
| AGAP2     | 0.450173  | 0.613791  | 0.534458  | 1.06999   | 3.66471   | 1.07128   | 0.473253  | 0.588482  | 1.62764   | 0.52445   | 0.594033  | 0.817571  | 0.365103   | 0.485028  | 0.894454  |
| AGAP2-AS1 | 2.24594   | 2.21327   | 2.32661   | 6.80544   | 5.92606   | 8.7144    | 3.4685    | 1.38116   | 2.69586   | 3.53039   | 9.99248   | 2.88167   | 5.60932    | 3.57791   | 4.1716    |
| AGAP3     | 3.7844    | 5.599     | 5.6301    | 8.27015   | 13.8223   | 7.40281   | 5.071     | 3.11503   | 7.12426   | 5.37191   | 4.25434   | 6.01805   | 8.88845    | 5.8206    | 3.73436   |
| AGAP4     | 2.29421   | 2.50362   | 2.377     | 1.50712   | 3.00324   | 1.87125   | 1.9636    | 1.75757   | 0.76046   | 1.37788   | 0.745671  | 2.06177   | 0.232439   | 1.68201   | 1.57132   |
| AGAP5     | 2.26837   | 2.64677   | 2.48705   | 1.51882   | 2.05618   | 1.7025    | 1.83439   | 2.20412   | 0.87076   | 1.64873   | 1.14616   | 1.61685   | 0.903801   | 1.95322   | 1.63396   |
| AGAP6     | 3.84349   | 3.89183   | 4.26107   | 2.19154   | 4.05202   | 2.34334   | 3.15636   | 2.41336   | 0.829544  | 1.43333   | 0.97286   | 3.06776   | 0.908091   | 3.63386   | 3.50967   |
| AGAP7P    | 0.296295  | 0.365359  | 0.363273  | 0.284464  | 0.768852  | 0.175879  | 0.558966  | 0.369553  | 0.0947956 | 0.490846  | 0.439828  | 0.101196  | 0.169115   | 0.42735   | 0.110009  |
| AGAP9     | 3.40603   | 2.52685   | 1.80359   | 1.56728   | 3.0462    | 0.912301  | 1.7957    | 2.94117   | 0.479519  | 0.721362  | 0.412844  | 1.98214   | 0.15996    | 2.22658   | 1.76672   |
| AGBL1     | 0         | 0.0420101 | 0.0463698 | 0         | 0         | 0.010606  | 0.0568869 | 0.0332093 | 0         | 0         | 0         | 0         | 0          | 0         | 0         |
| AGBL1-AS1 | 0         | 0.0740089 | 0.0635362 | 0         | 0.0397668 | 0.479571  | 0.0292301 | 0.0455036 | 0         | 0         | 0.0289    | 0.018318  | 0          | 0         | 0         |
| AGBL2     | 0.045088  | 0.127241  | 0.101243  | 0.106205  | 0.0800426 | 0.0767838 | 0.0514801 | 0.0744167 | 0.0235338 | 0.0646744 | 0.0872551 | 0.0460881 | 0.0540254  | 0.0605957 | 0.0555018 |
| AGBL3     | 0.24237   | 0.211462  | 0.195086  | 0.0742557 | 0.0508762 | 0.273307  | 0.149584  | 0.203755  | 0.0558447 | 0.15621   | 0.118316  | 0.0234354 | 0.00422637 | 0.0582012 | 0         |
| AGBL4     | 0.0588133 | 0.0389636 | 0.0121636 | 0         | 0         | 0.100158  | 0.0587573 | 0.0457349 | 0         | 0         | 0         | 0         | 0          | 0         | 0.0105579 |
| AGBL4-IT1 | 0         | 0         | 0         | 0         | 0         | 0         | 0.0514085 | 0         | 0         | 0         | 0         | 0         | 0          | 0         | 0         |
| AGBL5     | 3.04714   | 3.18133   | 3.57948   | 2.53308   | 2.98847   | 5.63682   | 3.60094   | 2.74068   | 2.72998   | 2.10894   | 3.38016   | 2.06777   | 1.77925    | 2.16706   | 1.59789   |
| AGBL5-AS1 | 0.113725  | 0.0821917 | 0         | 0         | 0.0883272 | 0.145253  | 0.194771  | 0.151604  | 0         | 0         | 0.128381  | 0.0813733 | 0          | 0.0594377 | 0         |
| AGER      | 0.155201  | 0.237378  | 0.223942  | 0.165519  | 0.398065  | 0.30733   | 0.158659  | 0.168403  | 0.0659365 | 0.0883367 | 0.0590801 | 0.107177  | 0.0384239  | 0.178264  | 0.282499  |

|            |           |           |           |           |           |           |           |           |           |           |           |           |           |           |           |
|------------|-----------|-----------|-----------|-----------|-----------|-----------|-----------|-----------|-----------|-----------|-----------|-----------|-----------|-----------|-----------|
| AGFG1      | 4.01251   | 3.3039    | 3.73359   | 6.87815   | 1.12727   | 4.14731   | 2.9696    | 4.58527   | 4.73523   | 5.13591   | 6.18319   | 3.3885    | 7.04014   | 4.36029   | 4.23348   |
| AGFG2      | 2.11179   | 3.57165   | 4.24617   | 1.54668   | 4.87193   | 3.90761   | 5.70661   | 2.27864   | 3.5503    | 0.851302  | 1.31416   | 0.912131  | 0.955932  | 0.844754  | 1.16752   |
| AGGF1      | 3.4807    | 3.38626   | 3.27021   | 4.11601   | 2.20097   | 5.02267   | 2.12775   | 3.11617   | 3.49507   | 3.92404   | 5.19267   | 2.49788   | 4.74319   | 3.15268   | 3.49468   |
| AGK        | 3.38814   | 3.21734   | 2.7059    | 3.00822   | 1.96522   | 3.53131   | 2.12801   | 2.74235   | 1.49572   | 2.19982   | 3.69242   | 1.86349   | 2.4528    | 2.06431   | 2.80958   |
| AGL        | 3.18349   | 2.53015   | 2.19388   | 3.32884   | 1.20678   | 3.25286   | 2.32427   | 2.55409   | 1.4228    | 2.467     | 2.37056   | 1.87873   | 2.8247    | 2.48354   | 2.01331   |
| AGMAT      | 0.183442  | 0.141416  | 0.133545  | 0.317591  | 0.170969  | 0.18119   | 0.0586455 | 0.0912957 | 0.107238  | 0.0920955 | 0.331333  | 0.126007  | 0.478158  | 0.203255  | 0.200219  |
| AGMO       | 0.215067  | 0.0856011 | 0.100563  | 0         | 0         | 0.111468  | 0.224204  | 0.182823  | 0         | 0.093889  | 0.116114  | 0.0066907 | 0.0241322 | 0.0342097 | 0.147717  |
| AGO1       | 5.54786   | 6.82715   | 7.15818   | 4.59202   | 6.14464   | 9.60094   | 8.31933   | 5.20424   | 4.95886   | 3.69783   | 3.78731   | 3.53318   | 4.4866    | 3.91179   | 4.07351   |
| AGO2       | 6.40086   | 6.74283   | 7.9589    | 6.53856   | 5.02844   | 7.61179   | 7.72321   | 6.61711   | 5.37369   | 5.48801   | 3.62371   | 5.77576   | 10.4809   | 6.98663   | 6.89766   |
| AGO3       | 4.19687   | 4.54287   | 4.8061    | 3.29116   | 3.86614   | 2.88697   | 4.21913   | 3.47024   | 2.2966    | 3.06806   | 3.23973   | 2.43963   | 2.85527   | 4.03853   | 4.73241   |
| AGO4       | 5.05522   | 6.22773   | 6.65297   | 3.66073   | 2.76648   | 3.73751   | 4.44702   | 5.00971   | 4.62942   | 3.03858   | 2.86433   | 2.5718    | 3.01555   | 2.99346   | 3.36543   |
| AGPAT1     | 0.702278  | 0.656549  | 0.687235  | 1.56685   | 1.59837   | 2.49415   | 0.988347  | 0.5534    | 0.498214  | 0.944513  | 2.08521   | 0.596401  | 1.45751   | 1.10404   | 1.72638   |
| AGPAT2     | 9.34396   | 7.21762   | 7.00025   | 14.4978   | 13.748    | 25.0656   | 10.754    | 5.03561   | 9.66837   | 18.4826   | 23.8471   | 10.3979   | 25.9379   | 12.166    | 9.29675   |
| AGPAT3     | 4.67834   | 5.79216   | 5.2289    | 8.74358   | 10.2042   | 11.5153   | 6.05725   | 4.00832   | 10.1246   | 6.82552   | 6.54621   | 7.33891   | 10.4721   | 5.06589   | 4.6216    |
| AGPAT4     | 1.21311   | 0.939719  | 1.16152   | 1.35306   | 1.32773   | 1.13049   | 1.24423   | 1.09638   | 0.339845  | 2.11612   | 1.35618   | 1.65616   | 1.46494   | 3.24688   | 4.81735   |
| AGPAT4-IT1 | 0.525126  | 0.319279  | 0.341331  | 0.335002  | 0.407851  | 0.361969  | 0.628123  | 0.433353  | 0.0761362 | 0.612009  | 0.155258  | 1.5477    | 0.0806687 | 2.40474   | 3.26797   |
| AGPAT5     | 1.24542   | 0.955657  | 0.971328  | 2.528     | 0.612289  | 2.18162   | 0.804354  | 1.25217   | 1.22058   | 1.77892   | 2.84499   | 0.960143  | 2.92467   | 2.3275    | 1.61996   |
| AGPS       | 2.8291    | 2.16613   | 2.3754    | 4.9535    | 1.12561   | 3.28305   | 1.92362   | 2.49012   | 1.97465   | 4.4603    | 5.3376    | 2.85389   | 6.05258   | 4.95658   | 3.82446   |
| AGR2       | 0.117716  | 0.283588  | 0.40901   | 0.169834  | 0.0365709 | 0.120281  | 0.5645    | 0.481236  | 0.0860192 | 0.236394  | 0.265774  | 0.269534  | 0.03038   | 0.418362  | 0.135245  |
| AGR3       | 0         | 0.0297351 | 0.0765823 | 0         | 0         | 0         | 0         | 0         | 0         | 0.0387292 | 0         | 0.132476  | 0.0597271 | 0         | 0         |
| AGRN       | 4.98553   | 6.72175   | 6.53144   | 19.402    | 26.4035   | 25.4211   | 8.62651   | 4.55004   | 3.6062    | 7.81639   | 5.35736   | 8.22755   | 20.3879   | 12.013    | 12.7534   |
| AGRP       | 0.0908759 | 0.131356  | 0.125298  | 0.0624335 | 0.141162  | 0.0515864 | 0.103759  | 0.107684  | 0         | 0         | 0.0683917 | 0.0433494 | 0         | 0         | 0.0435031 |
| AGT        | 0.448335  | 0.0518435 | 0.126104  | 0.286454  | 1.53212   | 8.32218   | 1.31045   | 0.175315  | 0         | 0.596469  | 1.61957   | 0.0449114 | 0.0289263 | 0.323361  | 3.97909   |
| AGTPBP1    | 3.58439   | 2.32643   | 3.01587   | 2.76906   | 0.641525  | 3.42542   | 1.73482   | 2.42425   | 1.95605   | 2.95013   | 3.3096    | 1.40093   | 3.07911   | 2.11052   | 2.453     |
| AGTR1      | 0.45908   | 0.359979  | 0.70744   | 0.120593  | 0.153808  | 0.651502  | 1.09971   | 0.679988  | 0.0219258 | 0.282448  | 0.518244  | 0         | 0.0232311 | 0.0141138 | 0.271475  |
| AGTR2      | 0         | 0.0115392 | 0         | 0         | 0         | 0         | 0.0182297 | 0         | 0         | 0         | 0         | 0         | 0         | 0         | 0         |

|          |            |            |           |           |            |           |           |            |           |           |           |            |           |            |           |
|----------|------------|------------|-----------|-----------|------------|-----------|-----------|------------|-----------|-----------|-----------|------------|-----------|------------|-----------|
| AGTRAP   | 5.35183    | 3.50201    | 2.84192   | 26.0111   | 10.5881    | 22.4311   | 4.17003   | 2.92446    | 9.35853   | 14.0015   | 22.0232   | 9.59927    | 17.2065   | 8.78813    | 5.24511   |
| AGXT     | 0          | 0.0279116  | 0.011981  | 0.0746232 | 0          | 0         | 0.0165357 | 0.0643542  | 0.0352761 | 0         | 0         | 0.0518131  | 0.0186881 | 0          | 0         |
| AGXT2    | 0.00961889 | 0.0139036  | 0         | 0         | 0          | 0         | 0.0109825 | 0.0341939  | 0         | 0         | 0         | 0          | 0         | 0          | 0         |
| AHCTF1   | 6.82379    | 5.33719    | 5.99789   | 4.72941   | 1.99521    | 5.90012   | 3.49901   | 4.57696    | 4.25125   | 4.36413   | 4.11634   | 3.4873     | 6.16387   | 5.09966    | 4.72073   |
| AHCTF1P1 | 0.0203574  | 0.0376741  | 0.0278825 | 0.0107408 | 0.00474688 | 0.0290236 | 3.43E-32  | 0.00889851 | 0.0452514 | 0.0215543 | 0.0428503 | 0.00242893 | 0.0529898 | 0.0392339  | 0.0143941 |
| AHCY     | 7.29904    | 5.10354    | 4.65874   | 18.8291   | 9.2915     | 15.6737   | 6.03685   | 4.46687    | 8.84584   | 11.7527   | 15.0657   | 9.35828    | 17.4819   | 12.9854    | 4.78944   |
| AHCYL1   | 7.02491    | 7.02737    | 7.65348   | 10.811    | 6.75126    | 11.1859   | 6.91455   | 6.91379    | 11.659    | 9.48357   | 10.2652   | 6.76318    | 13.7265   | 7.62051    | 8.18196   |
| AHCYL2   | 7.97464    | 6.33198    | 5.45072   | 6.22043   | 4.74718    | 6.00603   | 5.61134   | 3.96542    | 6.25366   | 5.46453   | 3.56302   | 4.55398    | 3.48872   | 3.33897    | 1.91549   |
| AHDC1    | 7.69494    | 9.49158    | 10.8526   | 5.19154   | 11.9246    | 13.8357   | 12.0732   | 7.84468    | 5.16899   | 5.61933   | 3.7968    | 7.46452    | 9.19674   | 6.11817    | 4.73087   |
| AHI1     | 3.8095     | 2.84234    | 3.36285   | 2.14564   | 0.610111   | 3.04894   | 1.48904   | 2.14522    | 1.21678   | 1.46455   | 1.4421    | 1.13507    | 1.07762   | 2.44541    | 3.3187    |
| AHNAK    | 199.12     | 270.749    | 302.572   | 239.25    | 252.747    | 247.946   | 302.568   | 195.965    | 177.131   | 209.481   | 91.2228   | 206.768    | 342.341   | 147.116    | 172.51    |
| AHNAK2   | 35.1323    | 69.7067    | 83.6507   | 47.9477   | 72.6318    | 44.6861   | 78.5925   | 47.138     | 51.414    | 50.0231   | 16.5428   | 57.2223    | 82.1773   | 27.6897    | 27.8351   |
| AHR      | 13.3146    | 11.5701    | 13.5708   | 19.589    | 9.25344    | 14.7156   | 11.023    | 12.149     | 6.7678    | 19.2778   | 39.2533   | 6.44672    | 22.0977   | 18.7852    | 34.6782   |
| AHRR     | 0.887288   | 0.990949   | 1.0114    | 0.661552  | 2.12774    | 0.98878   | 1.56863   | 0.795816   | 0.23903   | 0.543989  | 0.604675  | 0.766534   | 0.849476  | 1.72032    | 2.28426   |
| AHSA1    | 8.29834    | 9.01831    | 8.79732   | 20.4292   | 11.9114    | 17.7692   | 9.24665   | 6.17302    | 15.4216   | 14.5814   | 19.6721   | 12.1611    | 24.2819   | 14.0312    | 7.23874   |
| AHSA2P   | 5.61681    | 9.60687    | 9.5176    | 3.51942   | 9.74023    | 4.04794   | 5.11451   | 4.28919    | 1.1325    | 1.89852   | 1.64184   | 2.57655    | 0.620739  | 4.29456    | 6.15361   |
| AHSG     | 0.0135024  | 0.0650564  | 0.0223402 | 0.0139146 | 0.0629215  | 0.0114971 | 0.0154166 | 0.0119998  | 0.0328887 | 0.0508406 | 0.0914549 | 0.0096613  | 0         | 0.00705692 | 0         |
| AHSP     | 0          | 0          | 0         | 0         | 0          | 0         | 0         | 0          | 0         | 0         | 0.0908717 | 0          | 0         | 0          | 0         |
| AICDA    | 0.0328853  | 0.00396116 | 0.0136025 | 0         | 0          | 0         | 0.0375474 | 0          | 0         | 0         | 0.0185617 | 0.00588258 | 0         | 0.00429683 | 0         |
| AIDA     | 10.4398    | 8.43163    | 8.85307   | 11.5836   | 3.9226     | 12.8751   | 6.29394   | 8.47747    | 10.0609   | 12.3589   | 17.1477   | 6.04867    | 12.8455   | 9.33524    | 11.1451   |
| AIF1     | 0.884139   | 0.337048   | 0.462162  | 1.98747   | 0.822514   | 2.91207   | 0.576846  | 0.790066   | 0.100578  | 1.88402   | 5.86786   | 0.111231   | 1.097     | 0.332603   | 1.44415   |
| AIF1L    | 3.90623    | 2.5725     | 4.07053   | 4.70654   | 3.80124    | 6.19542   | 4.20604   | 2.74467    | 2.67751   | 10.2817   | 5.05967   | 5.63214    | 10.2164   | 6.3162     | 4.64202   |
| AIFM1    | 2.11297    | 1.97443    | 1.82451   | 4.01769   | 2.65226    | 5.28845   | 1.79517   | 1.48582    | 1.52495   | 2.16088   | 2.30497   | 1.87331    | 3.84198   | 2.42059    | 2.01278   |
| AIFM2    | 1.31737    | 0.868037   | 0.895423  | 1.24752   | 1.51539    | 3.31061   | 1.11387   | 0.829033   | 0.31221   | 0.813313  | 1.06914   | 0.44838    | 0.969417  | 0.893211   | 1.12492   |
| AIFM3    | 0.0915469  | 0.0617521  | 0.0908808 | 0.056605  | 0.255967   | 0.140312  | 0.0522626 | 0.0732233  | 0.0557469 | 0.0229801 | 0.0930105 | 0.0393025  | 0.0649721 | 0.0622003  | 0.0788837 |
| AIG1     | 1.80006    | 1.48811    | 1.29822   | 2.66757   | 1.5056     | 2.25651   | 1.68197   | 1.35363    | 2.92303   | 2.15305   | 3.54738   | 2.41911    | 1.78179   | 1.47953    | 1.9554    |

|        |           |            |           |           |           |            |           |            |           |           |            |           |           |           |           |
|--------|-----------|------------|-----------|-----------|-----------|------------|-----------|------------|-----------|-----------|------------|-----------|-----------|-----------|-----------|
| AIM2   | 0.332994  | 0.0802207  | 0.187824  | 0.733114  | 0.0235115 | 0.734626   | 0.0345638 | 0.174872   | 0.0737361 | 0.740896  | 1.98206    | 0.184114  | 0.185549  | 0.371806  | 0.782543  |
| AIMP1  | 4.35489   | 3.32439    | 3.40306   | 4.80663   | 1.94772   | 4.79365    | 1.62653   | 2.82998    | 3.65797   | 5.20653   | 7.17972    | 2.43846   | 5.4132    | 4.31482   | 2.84477   |
| AIMP2  | 2.59026   | 2.09744    | 1.83631   | 5.93089   | 2.54784   | 6.50421    | 3.20146   | 1.99355    | 3.28225   | 3.51125   | 6.70549    | 3.20192   | 5.54231   | 2.96258   | 2.45083   |
| AIP    | 4.40896   | 3.16701    | 3.447     | 7.28972   | 10.2855   | 8.69098    | 4.0936    | 2.48304    | 3.08803   | 5.10803   | 10.0456    | 2.46139   | 5.19954   | 4.3723    | 5.31132   |
| AIPL1  | 0         | 0.00310258 | 0.0106542 | 0.0132719 | 0         | 0.00548303 | 0         | 0.00572276 | 0         | 0.0161641 | 0          | 0         | 0         | 0         | 0         |
| AIRE   | 0.0301997 | 0.0485023  | 0.0832778 | 0.0103739 | 0.156369  | 0.0514293  | 0.0689621 | 0.00894633 | 0.01226   | 0         | 0          | 0.0072029 | 0         | 0.0789185 | 0.274681  |
| AIRN   | 0.248679  | 0.290621   | 0.293268  | 0.223556  | 0.443817  | 0.220758   | 0.235605  | 0.23041    | 0.0451073 | 0.225788  | 0.0657023  | 0.393732  | 0.0307238 | 0.342901  | 0.121578  |
| AJAP1  | 0.272107  | 0.168084   | 0.109667  | 0.244464  | 0.444352  | 0.291105   | 0.398312  | 0.148816   | 0.322898  | 5.68328   | 3.20565    | 3.0503    | 9.4218    | 3.69393   | 1.9539    |
| AJM1   | 0.388405  | 0.480206   | 0.539568  | 0.422919  | 1.58231   | 0.524162   | 0.610814  | 0.312617   | 0.133877  | 0.17476   | 0.049637   | 0.524366  | 0.18913   | 0.252789  | 0.273637  |
| AJUBA  | 5.24485   | 9.52248    | 8.27255   | 8.34139   | 18.3621   | 7.22572    | 6.64927   | 4.41977    | 14.0709   | 8.23683   | 6.88074    | 6.34922   | 13.5614   | 9.83366   | 2.84535   |
| AK1    | 2.62636   | 1.84302    | 1.9456    | 4.13052   | 6.51039   | 7.40237    | 2.73748   | 1.15485    | 4.40226   | 6.00696   | 6.94201    | 4.1055    | 7.3331    | 3.86443   | 4.57344   |
| AK2    | 8.82254   | 7.70942    | 7.36493   | 14.5099   | 9.50587   | 14.164     | 7.29393   | 7.42013    | 6.03664   | 7.80656   | 13.0017    | 5.83068   | 10.4686   | 8.96851   | 5.51732   |
| AK3    | 6.77241   | 6.84104    | 7.09996   | 7.52762   | 2.90978   | 8.69705    | 5.68309   | 5.97354    | 9.79768   | 7.36732   | 9.94776    | 6.08742   | 7.78317   | 5.7807    | 4.19184   |
| AK4    | 5.1855    | 6.85416    | 8.85615   | 8.41612   | 2.28643   | 8.16341    | 5.52843   | 7.86609    | 4.76522   | 5.32813   | 5.17614    | 4.44799   | 6.71684   | 4.13703   | 1.57402   |
| AK5    | 0.309642  | 0.239219   | 0.211992  | 0.148544  | 0.190734  | 0.386392   | 0.29868   | 0.469711   | 0.110532  | 0.448937  | 1.43435    | 0.129878  | 0.0172224 | 0.13393   | 0.360348  |
| AK6    | 1.95542   | 1.68502    | 1.60642   | 3.70601   | 0.506031  | 2.29337    | 0.420156  | 1.20421    | 2.39904   | 3.36639   | 5.43106    | 1.52343   | 3.10682   | 2.62809   | 1.46188   |
| AK7    | 0.416196  | 0.683625   | 0.959886  | 0.311929  | 0.333044  | 0.445667   | 0.5688    | 0.409111   | 0.529921  | 0.0870616 | 0.149493   | 0.103779  | 0.138333  | 0.0889865 | 0.0633936 |
| AK8    | 0.526993  | 0.692882   | 0.39902   | 0.285348  | 0.665982  | 0.5476     | 0.673093  | 0.388967   | 1.0008    | 0.358742  | 0.554577   | 0.300384  | 0.207466  | 0.121376  | 0.218069  |
| AK9    | 0.448689  | 0.457416   | 0.407401  | 0.228374  | 0.174242  | 0.372734   | 0.371729  | 0.330677   | 0.369855  | 0.164825  | 0.216195   | 0.227083  | 0.22418   | 0.204476  | 0.125732  |
| AKAIN1 | 0         | 0.00331372 | 0         | 0         | 0         | 0          | 0         | 0          | 0         | 0         | 0.00776393 | 0         | 0         | 0         | 0         |
| AKAP1  | 6.86745   | 4.81262    | 5.00801   | 4.56125   | 6.15852   | 7.25892    | 5.20666   | 4.30843    | 2.46564   | 1.72512   | 1.36118    | 2.72321   | 3.43844   | 2.43778   | 2.4514    |
| AKAP10 | 3.68365   | 3.4188     | 3.29549   | 3.92438   | 2.00401   | 4.105      | 2.65532   | 3.32403    | 2.59805   | 3.66461   | 4.58       | 2.32805   | 3.53031   | 3.33294   | 3.93311   |
| AKAP11 | 5.51747   | 5.35727    | 5.81508   | 4.53671   | 1.55103   | 5.16488    | 3.85705   | 5.38656    | 5.00636   | 5.42873   | 5.82823    | 3.50053   | 5.57082   | 4.8809    | 5.37745   |
| AKAP12 | 3.43635   | 1.14184    | 1.43989   | 1.40563   | 1.63609   | 4.86998    | 2.48637   | 1.41345    | 0.266175  | 1.48391   | 1.60221    | 0.231746  | 1.99624   | 2.21984   | 3.06307   |
| AKAP13 | 12.1318   | 10.9446    | 11.9981   | 9.41652   | 12.7588   | 13.9897    | 11.5898   | 10.2009    | 8.4686    | 10.9324   | 8.17583    | 9.26784   | 11.4703   | 10.2669   | 16.5592   |
| AKAP14 | 0         | 0          | 0         | 0.0523017 | 0         | 0          | 0         | 0.112761   | 0         | 0         | 0          | 0         | 0         | 0         | 0         |

|         |            |            |           |           |           |            |           |           |           |           |           |           |           |           |           |
|---------|------------|------------|-----------|-----------|-----------|------------|-----------|-----------|-----------|-----------|-----------|-----------|-----------|-----------|-----------|
| AKAP17A | 2.22395    | 2.83189    | 2.70127   | 3.12124   | 6.43202   | 3.97064    | 1.94673   | 1.70665   | 1.81856   | 2.07795   | 1.19948   | 2.91227   | 2.47801   | 3.36524   | 3.09247   |
| AKAP2   | 6.18828    | 2.52258    | 3.57994   | 5.70596   | 2.25188   | 10.9482    | 4.89706   | 4.20578   | 1.14174   | 3.62642   | 4.99651   | 1.93624   | 7.86465   | 5.89974   | 13.4575   |
| AKAP3   | 0.0485034  | 0.230358   | 0.194895  | 0.164234  | 0.139922  | 0.1652     | 0.134493  | 0.166265  | 0.0421941 | 0.113057  | 0.148619  | 0.0495793 | 0.0447059 | 0.0796714 | 0.019902  |
| AKAP4   | 0.00770151 | 0          | 0         | 0         | 0         | 0          | 0         | 0         | 0         | 0         | 0         | 0         | 0         | 0         | 0         |
| AKAP5   | 0.453086   | 0.381602   | 0.487276  | 0.191859  | 0.0554172 | 0.103284   | 0.309577  | 0.662653  | 0.057461  | 0.125693  | 0.24567   | 0.122942  | 0.119694  | 0.121957  | 0.358647  |
| AKAP6   | 1.2455     | 0.439071   | 0.438687  | 0.371968  | 0.280339  | 0.756975   | 0.735201  | 0.619781  | 0.189948  | 0.385913  | 0.372253  | 0.267834  | 0.276009  | 0.307426  | 0.396775  |
| AKAP7   | 0.929467   | 0.521933   | 0.641689  | 0.764896  | 0.197352  | 0.865447   | 0.435183  | 0.635867  | 0.138444  | 0.201423  | 0.437817  | 0.22966   | 0.319258  | 0.192215  | 0.374521  |
| AKAP8   | 5.87231    | 4.8436     | 5.12278   | 5.74867   | 6.05748   | 8.05371    | 4.6613    | 4.24356   | 4.2004    | 4.15659   | 3.54683   | 3.60822   | 7.16456   | 4.80682   | 5.66603   |
| AKAP8L  | 6.65731    | 7.02253    | 7.23455   | 6.24149   | 11.2896   | 10.8759    | 6.67908   | 5.88146   | 7.96398   | 4.88235   | 4.46915   | 6.58852   | 5.22292   | 6.7426    | 7.41099   |
| AKAP9   | 7.4667     | 6.95875    | 6.78367   | 3.84257   | 2.01048   | 4.09518    | 2.01206   | 4.31379   | 4.02781   | 4.7172    | 3.87807   | 4.38197   | 4.43175   | 3.89659   | 5.69359   |
| AKIP1   | 2.15073    | 1.6028     | 1.45503   | 4.60447   | 1.90748   | 4.83622    | 1.46992   | 0.969155  | 1.54947   | 2.85146   | 7.74535   | 1.60615   | 3.40069   | 3.21388   | 2.67544   |
| AKIRIN1 | 4.77972    | 4.87591    | 5.33776   | 8.37276   | 3.41557   | 7.82897    | 3.31511   | 4.60999   | 10.0603   | 8.97201   | 10.8969   | 4.51344   | 12.8011   | 10.0769   | 5.51097   |
| AKIRIN2 | 4.71965    | 3.97661    | 5.04404   | 10.9496   | 7.81503   | 9.9958     | 5.18359   | 4.77995   | 7.89256   | 8.56974   | 12.887    | 6.90835   | 16.0988   | 8.41431   | 5.96947   |
| AKNA    | 3.13164    | 2.02868    | 3.11163   | 4.37802   | 5.37968   | 7.18825    | 2.84705   | 2.70854   | 0.35788   | 1.90731   | 2.46423   | 1.616     | 4.43913   | 2.78199   | 5.81167   |
| AKNAD1  | 0.0712532  | 0.0995596  | 0.106102  | 0.0734285 | 0.0442724 | 0.109208   | 0.0732192 | 0.0379944 | 0.0173557 | 0.0447151 | 0.104567  | 0.101967  | 0.0919444 | 0.0782041 | 0.0511643 |
| AKR1A1  | 10.3411    | 9.29459    | 8.50644   | 23.1553   | 19.9996   | 26.2913    | 10.7368   | 6.35252   | 15.395    | 16.4537   | 32.3427   | 12.8179   | 13.2873   | 10.8248   | 12.4531   |
| AKR1B1  | 5.35678    | 2.2471     | 2.72077   | 5.71302   | 5.80929   | 14.7514    | 4.29515   | 3.13793   | 2.46491   | 10.1747   | 15.2482   | 3.76996   | 8.53042   | 7.25505   | 7.89836   |
| AKR1B10 | 8.41945    | 4.66717    | 0.849863  | 105.583   | 29.4427   | 76.5497    | 2.35613   | 5.71793   | 30.9378   | 42.0348   | 75.7642   | 80.068    | 63.4786   | 29.5234   | 6.06001   |
| AKR1B15 | 0.916818   | 0.617482   | 0.154982  | 8.84175   | 3.80202   | 7.39956    | 0.222622  | 0.586038  | 2.93404   | 3.77826   | 1.73011   | 3.9036    | 3.03247   | 2.51894   | 1.39081   |
| AKR1C1  | 15.8915    | 6.23289    | 6.33131   | 5.00239   | 7.61426   | 27.057     | 13.5382   | 4.98777   | 19.857    | 16.1993   | 18.1177   | 14.1244   | 14.743    | 17.5636   | 7.28774   |
| AKR1C2  | 2.43891    | 3.25277    | 2.89188   | 1.48089   | 3.01629   | 8.04522    | 4.0125    | 1.43881   | 1.8472    | 4.53592   | 7.46756   | 4.41766   | 3.00804   | 4.75915   | 1.91106   |
| AKR1C3  | 4.81823    | 3.19937    | 3.09783   | 3.1289    | 2.78328   | 9.32836    | 4.70469   | 1.46384   | 3.97412   | 4.7106    | 10.4112   | 2.11863   | 3.93954   | 3.55382   | 3.93998   |
| AKR1C4  | 0          | 0.0188218  | 0         | 0         | 0         | 0          | 0.022277  | 0         | 0         | 0         | 0         | 0         | 0         | 0.0204451 | 0         |
| AKR1C6P | 0.0496988  | 0.00798187 | 0.0137048 | 0.017072  | 0.0257331 | 0          | 0.0378296 | 0.0441681 | 0         | 0.0207923 | 0         | 0.0355608 | 0         | 0.0519495 | 0         |
| AKR1C8P | 0.0435224  | 0          | 0.0180024 | 0.0224256 | 0.0169013 | 0.00926469 | 0.0124231 | 0         | 0         | 0.0136563 | 0.0245657 | 0         | 0         | 0.0113734 | 0.0937556 |
| AKR1D1  | 0.0170797  | 0          | 0         | 0         | 0         | 0          | 0.0292516 | 0         | 0         | 0         | 0         | 0         | 0         | 0         | 0         |

|             |            |           |           |           |           |           |           |           |            |           |           |           |           |           |           |
|-------------|------------|-----------|-----------|-----------|-----------|-----------|-----------|-----------|------------|-----------|-----------|-----------|-----------|-----------|-----------|
| AKR1E2      | 1.51669    | 1.04395   | 1.24351   | 1.75837   | 1.87213   | 0.830212  | 0.850392  | 0.794302  | 0.395819   | 0.594875  | 1.71215   | 0.44572   | 0.6116    | 0.849308  | 0.875152  |
| AKR7A2      | 4.9474     | 5.34578   | 5.47149   | 7.90199   | 8.74278   | 6.85225   | 5.85182   | 4.34942   | 6.34935    | 6.26581   | 13.0979   | 4.5457    | 4.58389   | 4.5325    | 5.93917   |
| AKR7A2P1    | 0.559349   | 0.454786  | 0.404891  | 1.02676   | 0.488735  | 0.163721  | 0.299365  | 0.310689  | 0.106441   | 0.767856  | 0.138126  | 0.500286  | 0.0112778 | 1.51651   | 0.527163  |
| AKR7A3      | 1.22052    | 1.06056   | 1.04763   | 0.349967  | 0.388699  | 0.498958  | 0.761633  | 0.524359  | 0.0686214  | 0.0877461 | 0.182383  | 0.233515  | 0.0240641 | 0.481584  | 0.753372  |
| AKR7L       | 0.712106   | 0.313346  | 0.53197   | 0.061031  | 0.177211  | 0.27433   | 0.338187  | 0.318048  | 0          | 0.0651617 | 0.0369054 | 0.0880971 | 0.018965  | 0.118719  | 0.30774   |
| AKT1        | 13.5025    | 10.3544   | 11.3884   | 21.7203   | 19.0262   | 35.1722   | 13.1713   | 8.94134   | 8.49564    | 15.4536   | 17.6395   | 8.28982   | 22.3707   | 17.8534   | 16.1271   |
| AKT1S1      | 6.03564    | 6.20142   | 6.11895   | 13.0976   | 14.1647   | 16.8649   | 8.15544   | 5.78761   | 16.593     | 9.42818   | 14.4602   | 10.1173   | 12.8384   | 9.01338   | 7.59688   |
| AKT2        | 7.34026    | 8.82176   | 9.06695   | 13.3286   | 14.9156   | 15.2072   | 9.41791   | 6.14315   | 14.0078    | 11.9805   | 10.2384   | 9.67653   | 16.6534   | 9.5214    | 7.21162   |
| AKT3        | 4.57089    | 1.9085    | 2.58842   | 2.41149   | 1.34098   | 4.73436   | 2.36141   | 2.77478   | 0.612197   | 3.47485   | 5.56786   | 0.821401  | 3.64826   | 3.22842   | 7.80712   |
| AKTIP       | 4.01957    | 3.94878   | 3.69204   | 4.1591    | 2.16942   | 4.24995   | 3.7176    | 4.22698   | 14.9059    | 5.62051   | 8.30452   | 4.2447    | 7.96386   | 3.5457    | 2.81036   |
| ALAD        | 6.7413     | 8.52398   | 6.81139   | 7.72272   | 13.9994   | 11.2128   | 7.68963   | 5.24079   | 9.4777     | 3.29406   | 4.17446   | 5.87733   | 5.19407   | 3.29072   | 4.18273   |
| ALAS1       | 3.68098    | 3.76541   | 3.67762   | 9.83357   | 6.55354   | 12.8989   | 4.27827   | 3.69916   | 21.5183    | 11.3841   | 10.0049   | 9.33329   | 15.5283   | 7.19219   | 6.91292   |
| ALAS2       | 0.0650695  | 0.0522525 | 0.116632  | 0.022352  | 0.0336918 | 0.0277029 | 0.0495295 | 0.0963806 | 0.0396237  | 0.0680574 | 0.134668  | 0.046559  | 0         | 0.0736843 | 0.0155747 |
| ALB         | 0.0396455  | 0.0334281 | 0.0491963 | 0         | 0.0153958 | 0.0928334 | 0         | 0.0528504 | 0          | 0         | 0         | 0.0141837 | 0         | 0         | 0         |
| ALCAM       | 2.64367    | 1.40674   | 1.9497    | 0.928087  | 0.372296  | 7.77664   | 1.58801   | 2.00093   | 0.234401   | 1.95074   | 3.4681    | 0.327396  | 3.17242   | 1.91312   | 4.38077   |
| ALDH16A1    | 4.46318    | 3.88806   | 3.94498   | 9.02225   | 16.3079   | 12.9744   | 3.75176   | 2.74809   | 6.72425    | 4.3299    | 4.07111   | 5.61397   | 6.18235   | 5.65061   | 4.60128   |
| ALDH18A1    | 4.7317     | 5.65366   | 5.39693   | 10.3089   | 8.09354   | 13.498    | 6.34149   | 4.62513   | 7.42199    | 7.17124   | 9.2004    | 5.26953   | 10.2316   | 6.4631    | 8.49633   |
| ALDH1A1     | 8.41121    | 1.91101   | 1.55169   | 1.46984   | 1.89685   | 10.4478   | 2.50967   | 4.54068   | 0.725759   | 0.711153  | 1.45571   | 0.356493  | 0.863509  | 0.321664  | 1.83789   |
| ALDH1A2     | 1.52071    | 0.281554  | 0.427947  | 0.238559  | 0.283884  | 1.09895   | 0.672122  | 0.395219  | 0.00741922 | 0.0764593 | 0.0825237 | 0.0217945 | 0.306575  | 0.162378  | 1.17233   |
| ALDH1A3     | 1.97977    | 0.782312  | 1.0604    | 16.1409   | 2.78608   | 3.59059   | 1.33256   | 1.04884   | 0.602027   | 13.0407   | 3.71844   | 6.24569   | 39.4971   | 7.05598   | 1.99679   |
| ALDH1B1     | 2.42738    | 0.515764  | 0.69847   | 1.42942   | 1.6745    | 8.32531   | 3.93347   | 0.58956   | 0.266249   | 1.48546   | 3.44654   | 0.204971  | 1.4494    | 0.933762  | 3.08546   |
| ALDH1L1     | 0.381985   | 0.107889  | 0.147106  | 0         | 0.153454  | 0.62808   | 0.285746  | 0.146326  | 0          | 0         | 0         | 0         | 0         | 0.0103263 | 0.0472913 |
| ALDH1L1-AS1 | 0.105918   | 0         | 0.131434  | 0.0545757 | 0         | 0.0450938 | 0.0604668 | 0         | 0          | 0         | 0         | 0         | 0         | 0         | 0         |
| ALDH1L1-AS2 | 0.00996257 | 0         | 0         | 0         | 0         | 0.025449  | 0         | 0.0088539 | 0          | 0         | 0         | 0         | 0         | 0.0156206 | 0         |
| ALDH1L2     | 1.77741    | 0.828271  | 0.893919  | 1.28755   | 1.27317   | 2.41259   | 1.00242   | 1.41592   | 2.43761    | 3.42134   | 5.00404   | 2.48864   | 3.33935   | 2.1098    | 6.82892   |
| ALDH2       | 32.9052    | 44.0623   | 37.4279   | 40.2207   | 74.2524   | 45.4867   | 52.2845   | 32.3683   | 76.3226    | 29.7945   | 38.3127   | 52.8616   | 34.2418   | 19.3415   | 11.5681   |



|         |           |           |           |           |           |           |          |           |           |           |           |           |            |           |          |
|---------|-----------|-----------|-----------|-----------|-----------|-----------|----------|-----------|-----------|-----------|-----------|-----------|------------|-----------|----------|
| ALDH3A1 | 10.1045   | 8.9067    | 4.37056   | 9.53556   | 13.0507   | 39.6198   | 11.3614  | 7.92255   | 7.48368   | 2.30469   | 4.47007   | 8.38984   | 0.919999   | 4.85755   | 0.559832 |
| ALDH3A2 | 15.529    | 29.2278   | 33.8262   | 15.5671   | 12.9255   | 20.3708   | 22.3503  | 23.2109   | 26.3528   | 11.0208   | 13.6667   | 10.2206   | 10.0039    | 7.6549    | 4.94158  |
| ALDH3B1 | 1.34064   | 0.580324  | 0.936446  | 1.16641   | 1.74061   | 3.82113   | 1.64035  | 0.7638    | 0.294616  | 1.16489   | 2.68824   | 0.358169  | 1.03832    | 0.931544  | 2.37833  |
| ALDH3B2 | 20.2677   | 28.6985   | 19.7837   | 45.9622   | 41.3306   | 34.0613   | 23.6053  | 19.9213   | 119.339   | 41.7375   | 66.1642   | 48.6941   | 34.4929    | 22.0064   | 5.89395  |
| ALDH4A1 | 3.06334   | 5.97864   | 4.71555   | 8.87778   | 14.5765   | 5.89362   | 5.03982  | 2.61905   | 10.1377   | 4.28282   | 4.37737   | 8.21733   | 5.42064    | 4.2559    | 2.00476  |
| ALDH5A1 | 1.58146   | 1.94974   | 2.05527   | 1.12375   | 1.8496    | 1.57038   | 1.36976  | 1.88569   | 2.51871   | 0.325865  | 0.752943  | 0.582944  | 0.280151   | 0.201203  | 0.353578 |
| ALDH6A1 | 2.3964    | 2.63393   | 2.74191   | 2.15255   | 1.97896   | 2.49445   | 1.92514  | 2.46887   | 1.94567   | 1.02306   | 2.18355   | 0.903069  | 0.973521   | 0.97514   | 1.56406  |
| ALDH7A1 | 6.02495   | 5.37651   | 4.55363   | 13.2388   | 5.28752   | 15.071    | 3.96147  | 4.07933   | 4.90512   | 3.97217   | 5.67395   | 4.3177    | 3.47583    | 4.30064   | 3.35327  |
| ALDH8A1 | 0.171899  | 0.135133  | 0.232022  | 0.0932353 | 0.112429  | 0.0308147 | 0.134289 | 0.0804051 | 0.0330559 | 0.0227106 | 0         | 0.135946  | 0.0175119  | 0.0756564 | 0.142924 |
| ALDH9A1 | 16.4871   | 18.1845   | 15.9521   | 23.7351   | 13.258    | 34.9348   | 14.2795  | 15.508    | 23.022    | 15.2903   | 19.7405   | 16.8112   | 17.7688    | 12.0956   | 7.60448  |
| ALDOA   | 67.466    | 52.9378   | 59.3597   | 176.456   | 80.5594   | 250.101   | 83.423   | 52.4755   | 97.7674   | 119.874   | 199.027   | 98.5814   | 220.929    | 116.726   | 56.4325  |
| ALDOB   | 0.076506  | 0.0506849 | 0.0553797 | 0.0689864 | 0.02971   | 0.0651438 | 0.021838 | 0.0424951 | 0         | 0.0120029 | 0.0215914 | 0.0136855 | 0.00617016 | 0.0549799 | 0        |
| ALDOC   | 4.92018   | 8.23975   | 11.1557   | 5.04149   | 7.90402   | 10.5035   | 13.316   | 5.55612   | 14.3233   | 6.08736   | 10.7762   | 7.02098   | 9.30636    | 4.76936   | 2.35533  |
| ALG1    | 1.69175   | 1.17686   | 1.13058   | 2.46607   | 2.15964   | 3.77002   | 1.73095  | 1.15162   | 0.946184  | 1.96739   | 3.68486   | 1.27628   | 2.79725    | 1.71976   | 1.81773  |
| ALG10   | 1.32069   | 1.07865   | 1.36895   | 1.3424    | 0.247331  | 1.53203   | 1.26685  | 1.92673   | 0.440727  | 0.626395  | 1.48881   | 0.557752  | 0.793428   | 0.865062  | 1.1613   |
| ALG10B  | 0.924789  | 0.653621  | 0.814194  | 0.501882  | 0.162318  | 0.649226  | 0.663829 | 1.27414   | 0.23811   | 0.370702  | 0.60893   | 0.236174  | 0.364387   | 0.436276  | 0.665587 |
| ALG11   | 1.79483   | 1.70808   | 1.61899   | 2.70321   | 0.563094  | 1.94006   | 1.47945  | 1.6421    | 1.60162   | 1.62465   | 2.11454   | 0.866054  | 1.82858    | 1.35648   | 2.02398  |
| ALG12   | 3.25739   | 3.684     | 3.42087   | 4.85434   | 7.27164   | 6.26141   | 4.09778  | 2.40086   | 3.52766   | 3.69666   | 5.3176    | 3.33562   | 7.65781    | 4.6741    | 3.40347  |
| ALG13   | 2.48067   | 3.18182   | 3.23586   | 2.23795   | 1.47295   | 2.09784   | 2.26201  | 2.43034   | 1.48997   | 1.91273   | 2.54709   | 2.25356   | 1.86272    | 2.42266   | 3.16131  |
| ALG14   | 3.4905    | 1.41677   | 1.19004   | 3.57526   | 0.788647  | 4.16097   | 2.0289   | 2.01164   | 1.82923   | 3.23923   | 7.04486   | 2.05858   | 4.53139    | 2.6314    | 2.88616  |
| ALG1L   | 0.0412394 | 0.29867   | 0.451292  | 0.0747996 | 0.0842053 | 0.0513716 | 0.415482 | 0.143275  | 0.108938  | 0.0346933 | 4.85E-36  | 0.135808  | 2.98E-20   | 0.034702  | 8.50E-10 |
| ALG1L2  | 0.0503116 | 0.0690444 | 0.0621493 | 0         | 0.0741985 | 0         | 0        | 0.0872093 | 0         | 0.0599523 | 0.0322047 | 0.0968317 | 0          | 0.0297693 | 0        |
| ALG1L9P | 0.416903  | 0.366824  | 0.31      | 0.165394  | 0.308059  | 0.338408  | 0.409674 | 0.228382  | 0.032188  | 0.0945883 | 0.0540065 | 0.0599051 | 0.0879943  | 0.146475  | 0.195328 |
| ALG2    | 3.57716   | 2.8688    | 2.88881   | 4.88322   | 3.62017   | 5.53804   | 3.12066  | 3.47496   | 4.02651   | 4.55771   | 7.00996   | 2.77007   | 6.39425    | 3.67035   | 3.62498  |
| ALG3    | 3.97712   | 3.41273   | 3.59305   | 8.24914   | 6.62893   | 11.4387   | 6.01136  | 3.66918   | 4.79755   | 4.46875   | 9.23592   | 4.78806   | 7.68178    | 5.56939   | 4.33361  |
| ALG5    | 7.11654   | 3.93445   | 4.11953   | 8.02197   | 2.01529   | 7.16435   | 3.8122   | 3.78118   | 4.55431   | 7.44733   | 13.289    | 3.49482   | 7.33662    | 4.97584   | 5.37043  |

|            |           |            |          |           |           |           |           |           |           |           |           |           |           |            |           |
|------------|-----------|------------|----------|-----------|-----------|-----------|-----------|-----------|-----------|-----------|-----------|-----------|-----------|------------|-----------|
| ALG6       | 1.87424   | 1.51829    | 1.48235  | 1.64846   | 0.245278  | 1.27437   | 0.877925  | 2.17818   | 1.50502   | 0.939221  | 1.64302   | 1.03159   | 0.943479  | 1.13385    | 0.946511  |
| ALG8       | 2.54932   | 2.33506    | 2.15291  | 5.24061   | 1.03124   | 5.13281   | 2.16789   | 2.11222   | 2.24774   | 3.33298   | 6.52014   | 1.92861   | 4.0863    | 3.64323    | 3.54673   |
| ALG9       | 2.04947   | 2.08912    | 2.2571   | 1.70283   | 1.02968   | 2.26591   | 2.16818   | 1.75595   | 1.87592   | 1.83276   | 2.1437    | 1.74829   | 2.31198   | 1.85442    | 1.61882   |
| ALK        | 0.237114  | 0.270493   | 0.328853 | 0.0790554 | 0.287073  | 0.0831352 | 0.318505  | 0.275805  | 0.123156  | 0.109413  | 0.0708545 | 0.244512  | 0.0179982 | 0.138506   | 0.0250387 |
| ALKAL1     | 0         | 0.00952235 | 0        | 0         | 0         | 0         | 0.0225653 | 0.0175641 | 0         | 0         | 0         | 0         | 0         | 0          | 0         |
| ALKAL2     | 0.595958  | 0.239285   | 0.232814 | 0.170598  | 0.205718  | 0.845751  | 0.207914  | 1.02985   | 0.0403228 | 0.0623324 | 0.317694  | 0.0355353 | 0.0106808 | 0.00865205 | 0         |
| ALKBH1     | 1.33397   | 1.08272    | 1.1554   | 1.6238    | 0.890037  | 1.88293   | 1.05287   | 1.00252   | 1.35204   | 1.14614   | 1.39471   | 0.787936  | 1.58271   | 1.39438    | 0.912875  |
| ALKBH2     | 2.95813   | 2.61766    | 3.15094  | 3.70595   | 3.33363   | 5.67967   | 2.45034   | 2.14783   | 2.2605    | 2.28104   | 4.05962   | 1.79844   | 1.92105   | 2.23318    | 1.22172   |
| ALKBH3     | 4.29231   | 3.90167    | 3.47768  | 6.0802    | 3.59721   | 7.93766   | 3.9577    | 3.15921   | 4.04192   | 4.5542    | 8.19236   | 3.27179   | 6.03362   | 3.85455    | 2.60553   |
| ALKBH3-AS1 | 0.444366  | 0.422418   | 0.4769   | 0.173272  | 0.111933  | 0.132941  | 0.342812  | 0.522996  | 0.0146267 | 0.0904419 | 0.040673  | 0.103121  | 0         | 0.188307   | 0.517431  |
| ALKBH4     | 1.59676   | 1.78702    | 1.38309  | 2.234     | 3.53201   | 3.27437   | 2.33426   | 1.15738   | 1.57692   | 1.25572   | 2.42412   | 1.08675   | 1.93005   | 1.17112    | 1.30636   |
| ALKBH5     | 11.3322   | 10.3192    | 11.2598  | 14.2556   | 15.6027   | 26.9616   | 11.4147   | 7.80048   | 8.76029   | 11.0586   | 14.9996   | 8.41238   | 19.6249   | 13.5472    | 12.2083   |
| ALKBH6     | 2.09597   | 1.93559    | 1.71587  | 2.38496   | 3.49317   | 5.03804   | 1.74498   | 1.7075    | 3.35037   | 2.35663   | 3.42591   | 1.45286   | 2.39472   | 2.1909     | 1.69317   |
| ALKBH7     | 7.56366   | 5.35066    | 4.81876  | 8.61882   | 16.5284   | 12.3455   | 7.74257   | 3.44544   | 9.80462   | 8.24923   | 18.7257   | 4.59087   | 5.91213   | 4.79811    | 4.29246   |
| ALKBH8     | 1.41692   | 1.22282    | 1.16747  | 1.30184   | 0.353569  | 2.08834   | 0.974575  | 1.07718   | 0.471262  | 1.19273   | 1.42609   | 0.602606  | 1.35844   | 1.06175    | 1.62627   |
| ALLC       | 0         | 0          | 0        | 0         | 0         | 0.0272936 | 0         | 0.0142435 | 0         | 0         | 0         | 0         | 0         | 0          | 0         |
| ALMS1      | 4.48641   | 3.05906    | 3.63591  | 2.68543   | 1.27694   | 3.03322   | 2.71356   | 3.35843   | 0.811411  | 2.03657   | 2.65057   | 1.70695   | 1.95169   | 2.30173    | 4.41368   |
| ALMS1-IT1  | 0.52568   | 0.417913   | 0.510983 | 0.230235  | 0.122484  | 0.0559512 | 0.300102  | 0.513898  | 0.0640219 | 0.0989673 | 0.0741784 | 0.131648  | 0.0508749 | 0.329692   | 0.585081  |
| ALMS1P1    | 0.116297  | 0.161096   | 0.21647  | 0.0449427 | 0.135487  | 0.247563  | 0.033196  | 0.0645968 | 0.0354091 | 0.0182455 | 0         | 0         | 0.037517  | 0.0151954  | 0.229648  |
| ALOX12     | 1.39369   | 2.09016    | 2.28155  | 3.8839    | 3.90288   | 0.827351  | 3.54113   | 2.21551   | 9.86139   | 11.9489   | 13.7941   | 9.36123   | 16.7302   | 12.6957    | 1.79008   |
| ALOX12-AS1 | 0.3555    | 0.205542   | 0.55878  | 0.293082  | 0.38655   | 0.635678  | 0.365309  | 0.315939  | 0.303071  | 0.223095  | 0.642104  | 0.203496  | 0.0917467 | 0.26012    | 0.306326  |
| ALOX12B    | 12.5335   | 16.1244    | 16.6739  | 48.7001   | 51.1219   | 23.2109   | 43.7971   | 17.0328   | 144.218   | 34.515    | 40.3162   | 56.5219   | 68.0703   | 23.4418    | 8.94007   |
| ALOX12P2   | 0.587269  | 0.476556   | 0.511401 | 1.1228    | 0.648165  | 0.651384  | 0.564653  | 0.748538  | 0.122342  | 0.581908  | 0.348923  | 0.475497  | 0.0897402 | 1.38524    | 0.410599  |
| ALOX15     | 0.103164  | 0.236463   | 0.393652 | 0.062016  | 0.0534163 | 0.102483  | 0.130867  | 0.278788  | 0.23299   | 0.0431603 | 0.106754  | 0.0246055 | 0.0499205 | 0.00898631 | 0.0864244 |
| ALOX15B    | 4.3047    | 1.87282    | 2.59505  | 6.03485   | 2.70115   | 14.6836   | 2.61806   | 1.61359   | 0.747464  | 4.86788   | 3.73362   | 2.04324   | 9.06899   | 4.92734    | 1.38332   |
| ALOX15P1   | 0.0344391 | 0.529541   | 0.189456 | 0.106471  | 0.267479  | 0         | 0.0655728 | 0.291093  | 0.32494   | 0.0864491 | 0.116632  | 0.0739262 | 0.133319  | 0.0899968  | 0         |

|          |           |           |           |           |           |           |           |           |           |           |           |           |           |            |           |
|----------|-----------|-----------|-----------|-----------|-----------|-----------|-----------|-----------|-----------|-----------|-----------|-----------|-----------|------------|-----------|
| ALOX5    | 1.51685   | 1.39757   | 2.15745   | 3.42798   | 1.21254   | 4.03334   | 1.266     | 2.08909   | 0.345703  | 2.3714    | 3.90533   | 0.507765  | 3.65712   | 1.02458    | 2.93      |
| ALOX5AP  | 1.96807   | 0.895566  | 1.17587   | 3.51171   | 1.10395   | 1.30339   | 1.93499   | 1.24701   | 0.177547  | 6.42691   | 7.07655   | 0.456363  | 2.99811   | 0.971455   | 1.54405   |
| ALOXE3   | 3.04868   | 7.01527   | 8.29785   | 7.36061   | 12.2502   | 6.47545   | 16.2875   | 5.4069    | 34.5595   | 8.39288   | 10.9299   | 13.5921   | 12.3641   | 4.11823    | 2.82904   |
| ALPG     | 0         | 0         | 0         | 0         | 0         | 0         | 0         | 3.47E-14  | 0         | 0         | 0.0209508 | 0         | 0         | 0          | 0         |
| ALPI     | 0         | 0         | 0         | 0         | 0         | 0         | 0         | 0         | 0         | 0         | 0         | 0         | 0         | 0          | 0         |
| ALPK1    | 2.63843   | 2.90514   | 2.93266   | 2.63086   | 1.8599    | 3.80501   | 1.94322   | 2.23463   | 2.15611   | 1.2237    | 1.33717   | 1.49316   | 0.949102  | 1.05266    | 2.3091    |
| ALPK2    | 0.158514  | 0.294806  | 0.393402  | 0.0784096 | 0.182208  | 0.229453  | 0.318536  | 0.259208  | 0.162164  | 0.600833  | 1.00566   | 0.342532  | 0.292499  | 1.01901    | 1.56165   |
| ALPK3    | 0.629613  | 0.159339  | 0.161344  | 0.436926  | 0.592731  | 0.983766  | 0.532498  | 0.212892  | 0.188472  | 0.465623  | 0.433154  | 0.359494  | 0.693452  | 0.823212   | 1.38827   |
| ALPL     | 1.90266   | 0.424094  | 0.375115  | 7.53145   | 2.55498   | 7.50236   | 0.304541  | 1.12201   | 0.822938  | 3.04641   | 5.72093   | 1.9085    | 4.70383   | 2.01669    | 5.86074   |
| ALPP     | 0         | 0         | 0         | 0         | 0         | 0.0132656 | 0         | 0.0138456 | 0         | 0         | 0         | 0         | 0.0251292 | 0          | 0         |
| ALS2     | 2.42778   | 2.2459    | 2.19665   | 1.90431   | 1.56881   | 2.50667   | 1.94196   | 1.83212   | 1.69634   | 1.5462    | 2.11736   | 1.30236   | 1.89578   | 1.94898    | 2.07205   |
| ALS2CL   | 6.0063    | 16.9628   | 14.0697   | 10.1272   | 32.1012   | 9.57169   | 12.7926   | 7.74286   | 11.6223   | 12.1441   | 3.22561   | 21.3152   | 7.87431   | 10.2085    | 5.34943   |
| ALS2CR12 | 0.177644  | 0.152163  | 0.163288  | 0.162726  | 0.0766506 | 0.109244  | 0.169023  | 0.184188  | 0.0480778 | 0.049547  | 0.0668459 | 0.0564929 | 0.05094   | 0.185689   | 0.155906  |
| ALX1     | 0         | 0.068991  | 0.133264  | 0.0553355 | 0.111212  | 0.0762026 | 0.0408724 | 0.0318138 | 0.0217986 | 0.0449295 | 0.0808217 | 0         | 0         | 0.00935466 | 0         |
| ALX3     | 0.923843  | 1.06377   | 1.21765   | 1.42      | 3.089     | 1.42662   | 1.00118   | 0.556634  | 0.610244  | 0.530627  | 0.459585  | 1.07558   | 1.19212   | 0.769272   | 0.449748  |
| ALX4     | 0.453038  | 0.322321  | 0.518394  | 0.109082  | 0.815531  | 0.533569  | 0.628452  | 0.263398  | 0.0464088 | 0.0743975 | 0.014339  | 0.072709  | 0.207613  | 0.0973665  | 0.54117   |
| ALYREF   | 10.1475   | 8.05044   | 8.23765   | 20.545    | 15.0744   | 18.4486   | 9.94814   | 7.04961   | 13.4376   | 15.6753   | 22.7676   | 8.98166   | 23.2348   | 12.5917    | 7.78645   |
| AMACR    | 1.13879   | 1.3488    | 0.490443  | 1.75192   | 3.37123   | 1.78905   | 0.902709  | 0.977022  | 13.3126   | 2.72319   | 5.29458   | 3.18601   | 1.1597    | 1.0755     | 0.563455  |
| AMBN     | 0         | 0         | 0         | 0.0357386 | 0         | 0         | 0         | 0         | 0.0140787 | 0         | 0         | 0         | 0         | 0          | 0         |
| AMBP     | 0.11305   | 0.0466881 | 0.0534419 | 0         | 0         | 0.0687579 | 0.0368793 | 0.0287057 | 0.0393379 | 0         | 0         | 0.0115558 | 0         | 0.0506444  | 0.0231935 |
| AMBRA1   | 4.46071   | 4.58796   | 4.54281   | 5.96648   | 5.98326   | 5.33991   | 6.27893   | 4.02444   | 5.96574   | 3.74073   | 3.3735    | 4.45874   | 4.31321   | 4.51505    | 4.11455   |
| AMD1     | 12.4414   | 9.65283   | 10.2076   | 25.451    | 5.24631   | 15.6482   | 8.53776   | 13.4617   | 21.9536   | 19.766    | 19.93     | 15.3376   | 38.4686   | 19.8653    | 11.9607   |
| AMDHD1   | 0.0758433 | 0.0574239 | 0.134449  | 0.0558277 | 0.100981  | 0.295221  | 0.222674  | 0.0481452 | 0.343084  | 0         | 0.256853  | 0.0775256 | 0.118839  | 0.039639   | 0.0311202 |
| AMDHD2   | 1.8237    | 2.98718   | 2.86022   | 2.25001   | 8.90176   | 6.209     | 2.37436   | 1.84968   | 1.85786   | 2.20171   | 4.0671    | 2.48922   | 1.73322   | 2.0469     | 2.5568    |
| AMELX    | 0.0277162 | 0         | 0.0229288 | 0         | 0         | 0         | 0         | 0.0246319 | 0         | 0         | 0         | 0         | 0         | 0.0434571  | 0         |
| AMELY    | 0.0274207 | 0         | 0         | 0         | 0         | 0.0233483 | 0         | 0         | 0.0667906 | 0         | 0         | 0         | 0         | 0          | 0         |

|          |           |            |           |           |           |            |            |            |           |           |           |           |           |           |           |
|----------|-----------|------------|-----------|-----------|-----------|------------|------------|------------|-----------|-----------|-----------|-----------|-----------|-----------|-----------|
| AMER1    | 1.52679   | 1.63635    | 1.46489   | 1.16098   | 1.39232   | 1.64314    | 1.90598    | 1.08892    | 1.02487   | 0.426604  | 0.522946  | 0.715884  | 0.827676  | 0.65184   | 0.810931  |
| AMER2    | 0         | 0.00841164 | 0.0144427 | 0.0022489 | 0         | 0.00185818 | 0.0249165  | 0.00193943 | 0         | 0         | 0         | 0         | 0         | 0         | 0         |
| AMER3    | 0         | 0          | 0         | 0         | 0         | 0          | 0          | 0          | 0         | 0         | 0         | 0         | 0         | 0         | 0         |
| AMFR     | 12.2293   | 9.8208     | 10.4563   | 13.7635   | 15.7165   | 20.4299    | 12.1462    | 8.12706    | 20.6485   | 15.818    | 19.4645   | 11.8166   | 20.955    | 10.3521   | 9.80135   |
| AMH      | 0.137385  | 0.240705   | 0.0826576 | 0.16732   | 0.543214  | 0.191424   | 0.299462   | 0.188694   | 0.0456324 | 0.0470268 | 0.0986937 | 0.0804292 | 0.0564071 | 0.0326378 | 0.197302  |
| AMHR2    | 0.046263  | 0.050153   | 0.04784   | 0.0238377 | 0.0359312 | 0          | 0.0132054  | 0          | 0         | 0.0435486 | 0         | 0.0165512 | 0         | 0         | 0.0498296 |
| AMIGO1   | 0.354528  | 0.486504   | 0.571731  | 0.605836  | 0.320663  | 1.28775    | 0.635364   | 0.287157   | 0.0874482 | 0.236566  | 0.263435  | 0.0417439 | 0.338766  | 0.250965  | 0.451143  |
| AMIGO2   | 1.18688   | 0.474136   | 0.535343  | 1.15898   | 0.571833  | 1.58975    | 0.646027   | 0.400837   | 0.825267  | 1.2448    | 1.99033   | 0.479959  | 1.69937   | 1.62377   | 2.20399   |
| AMIGO3   | 1.54962   | 1.92848    | 1.92615   | 0.930872  | 3.15704   | 1.65101    | 2.23164    | 1.66091    | 0.976824  | 0.791655  | 0.659294  | 1.42082   | 0.909371  | 1.13142   | 1.25251   |
| AMMECR1  | 2.04515   | 2.30679    | 2.03869   | 5.8463    | 2.15439   | 3.44282    | 2.12483    | 2.89347    | 6.61335   | 5.44351   | 5.32955   | 5.57301   | 8.33174   | 4.94725   | 2.01996   |
| AMMECR1L | 2.69775   | 3.07045    | 3.41445   | 3.30715   | 2.83823   | 4.46299    | 2.60609    | 2.34271    | 3.27315   | 3.63248   | 3.69061   | 2.99415   | 4.72702   | 3.74229   | 3.59413   |
| AMN      | 0.891832  | 1.06708    | 0.983716  | 0.857789  | 3.87891   | 1.26564    | 1.01827    | 0.369874   | 1.4301    | 1.138     | 1.49337   | 1.91439   | 1.36179   | 1.46825   | 0.0426928 |
| AMN1     | 0.615609  | 0.917637   | 0.83553   | 0.753353  | 0.239063  | 0.737132   | 0.571092   | 1.10275    | 0.609166  | 0.965816  | 1.21616   | 0.502428  | 0.769551  | 0.764142  | 0.939348  |
| AMOT     | 1.89569   | 1.2289     | 1.54751   | 0.539248  | 0.958839  | 1.47808    | 1.6278     | 1.16678    | 0.400689  | 0.271356  | 0.332495  | 0.201781  | 0.190033  | 0.201429  | 1.05748   |
| AMOTL1   | 7.76412   | 10.2853    | 11.4777   | 12.639    | 11.0099   | 15.8005    | 9.41089    | 8.14363    | 12.6942   | 11.4652   | 8.28562   | 9.79191   | 19.1262   | 12.7252   | 11.2425   |
| AMOTL2   | 9.18597   | 6.28536    | 6.57227   | 7.01933   | 9.90616   | 8.68685    | 8.92195    | 5.28952    | 15.1159   | 7.11045   | 5.25357   | 5.67821   | 12.8507   | 7.77553   | 7.5874    |
| AMPD1    | 0.0192378 | 0.00926906 | 0         | 0         | 0.0149415 | 0          | 0          | 0          | 0         | 0         | 0         | 0         | 0         | 0         | 0         |
| AMPD2    | 1.47918   | 2.23154    | 2.25478   | 3.10863   | 4.51248   | 5.72765    | 2.70774    | 1.35767    | 3.30762   | 2.66      | 3.77759   | 1.87387   | 3.28238   | 3.04669   | 5.349     |
| AMPD3    | 1.74217   | 2.92806    | 3.65724   | 9.52891   | 3.37956   | 3.46133    | 2.77362    | 2.48962    | 10.4294   | 9.10565   | 7.6406    | 6.75674   | 11.6789   | 6.21981   | 5.11553   |
| AMPH     | 0.222919  | 0.0911322  | 0.111766  | 0.306299  | 0.419722  | 1.67955    | 0.13883    | 0.192108   | 0.0246809 | 0.618921  | 0.937961  | 0.0241674 | 0.261502  | 0.275381  | 1.18355   |
| AMT      | 2.44492   | 2.97418    | 2.50678   | 0.929964  | 3.72585   | 2.07587    | 2.0333     | 1.93365    | 0.592488  | 0.552071  | 0.723996  | 1.16694   | 0.14697   | 1.04394   | 2.4442    |
| AMTN     | 0         | 0          | 0         | 0         | 0         | 0.0587654  | 0          | 0.0817798  | 0         | 0         | 0         | 0         | 0         | 0         | 0         |
| AMY1A    | 1.50E-41  | 1.32E-41   | 7.69E-40  | 0         | 1.78E-34  | 7.45E-40   | 0.00520176 | 1.43E-40   | 4.80E-35  | 2.57E-36  | 7.79E-43  | 1.53E-37  | 0         | 0         | 1.27E-26  |
| AMY1B    | 3.17E-42  | 2.79E-42   | 1.62E-40  | 0         | 3.76E-35  | 1.57E-40   | 0.00109866 | 3.02E-41   | 1.01E-35  | 5.43E-37  | 1.65E-43  | 3.22E-38  | 0         | 0         | 2.68E-27  |
| AMY1C    | 1.20E-41  | 1.06E-41   | 6.17E-40  | 0         | 1.43E-34  | 5.98E-40   | 0.00417426 | 1.15E-40   | 3.85E-35  | 2.06E-36  | 6.26E-43  | 1.22E-37  | 0         | 0         | 1.02E-26  |
| AMY2A    | 0.0182947 | 8.86E-29   | 0.0145846 | 1.11E-28  | 0.0265109 | 4.04E-31   | 1.94E-28   | 0.0337408  | 6.41E-30  | 0         | 2.72E-30  | 7.04E-28  | 1.14E-33  | 5.79E-36  | 5.17E-30  |

|          |           |           |           |           |           |           |           |           |            |            |           |           |            |            |           |
|----------|-----------|-----------|-----------|-----------|-----------|-----------|-----------|-----------|------------|------------|-----------|-----------|------------|------------|-----------|
| AMY2B    | 7.30495   | 5.93841   | 7.51237   | 1.27652   | 1.08652   | 3.71795   | 3.42515   | 3.94698   | 0.502866   | 1.1142     | 1.75958   | 0.812463  | 0.313021   | 0.534104   | 1.52692   |
| AMZ1     | 0.176694  | 0.166566  | 0.17795   | 0.122712  | 0.2506    | 0.104663  | 0.206129  | 0.136549  | 0.00935623 | 0.101242   | 0.0910603 | 0.104442  | 0.109045   | 0.325226   | 0.35305   |
| AMZ2     | 4.09153   | 4.21286   | 3.96635   | 6.20904   | 5.02473   | 7.69461   | 3.79246   | 3.4553    | 8.09737    | 5.9801     | 9.37016   | 3.82329   | 3.55498    | 3.41447    | 3.76221   |
| AMZ2P1   | 0.97079   | 0.804392  | 0.765054  | 0.272133  | 0.375993  | 0.747341  | 0.525127  | 0.742393  | 0.230323   | 0.406682   | 0.754735  | 0.488442  | 0.178646   | 0.201171   | 0.367981  |
| ANAPC1   | 4.13917   | 3.57444   | 3.64812   | 5.25785   | 1.76087   | 5.2141    | 3.88087   | 3.59983   | 1.85371    | 2.75648    | 3.57212   | 2.70271   | 4.84985    | 3.88883    | 3.31936   |
| ANAPC10  | 1.71627   | 1.15779   | 1.19946   | 1.59682   | 0.345211  | 1.03666   | 0.88459   | 1.30822   | 0.498742   | 1.70864    | 3.31099   | 0.926571  | 1.48532    | 1.3137     | 0.762958  |
| ANAPC11  | 6.1839    | 4.50036   | 4.58164   | 12.7898   | 11.6339   | 12.9012   | 5.60261   | 3.03478   | 9.57578    | 13.3619    | 26.8869   | 7.62782   | 9.73853    | 8.09869    | 4.88346   |
| ANAPC13  | 5.2747    | 3.38299   | 3.24445   | 5.74396   | 1.95453   | 7.82907   | 2.83519   | 3.93416   | 6.50609    | 6.31442    | 12.523    | 3.57843   | 6.31657    | 5.63627    | 3.92571   |
| ANAPC15  | 1.83784   | 1.86515   | 1.6619    | 2.77653   | 1.74933   | 3.80521   | 1.9126    | 1.41726   | 2.25182    | 2.11443    | 4.4973    | 1.58713   | 2.3986     | 1.88459    | 1.29332   |
| ANAPC16  | 7.4766    | 6.25169   | 6.4961    | 7.67147   | 4.66362   | 8.51404   | 5.11497   | 5.90118   | 5.58341    | 5.71333    | 11.5292   | 3.73505   | 4.90335    | 4.09059    | 3.55738   |
| ANAPC1P1 | 0.0162964 | 0.0289832 | 0.0520651 | 0.015808  | 0.0446099 | 1.32E-41  | 0.0339856 | 0.0446604 | 0.0186033  | 0          | 4.26E-39  | 0.0108452 | 0          | 4.20E-45   | 0.020246  |
| ANAPC2   | 4.48289   | 5.78596   | 6.21167   | 5.49424   | 15.6179   | 8.43709   | 6.19496   | 3.95355   | 6.42006    | 3.4426     | 2.57386   | 5.55049   | 5.84551    | 5.49228    | 4.99776   |
| ANAPC4   | 3.64232   | 3.89752   | 3.90069   | 4.44004   | 1.57236   | 4.19902   | 2.40038   | 3.29082   | 1.73856    | 3.56165    | 4.13128   | 2.30285   | 4.05253    | 3.63999    | 2.49739   |
| ANAPC5   | 16.7134   | 14.8605   | 14.4291   | 18.8824   | 11.1453   | 24.5895   | 14.3533   | 11.7294   | 15.857     | 15.81      | 22.0904   | 12.1771   | 16.0797    | 15.2831    | 15.6205   |
| ANAPC7   | 4.80771   | 5.47441   | 4.78115   | 7.78841   | 4.321     | 7.17616   | 4.10429   | 3.92274   | 5.45306    | 5.76315    | 5.52051   | 5.53955   | 6.43739    | 6.39636    | 3.62097   |
| ANG      | 2.03503   | 1.71641   | 2.44683   | 0.569955  | 0.894729  | 2.31768   | 2.44032   | 1.47569   | 2.16925    | 1.36129    | 3.004     | 0.927998  | 0.827564   | 0.744877   | 1.4772    |
| ANGEL1   | 2.50515   | 1.89054   | 2.02121   | 3.25459   | 3.67274   | 5.21052   | 2.37822   | 1.631     | 1.8443     | 1.79468    | 2.87884   | 1.81264   | 1.65989    | 2.97461    | 4.61638   |
| ANGEL2   | 3.13567   | 2.60615   | 2.52508   | 2.17223   | 0.967393  | 2.95924   | 2.47135   | 2.7364    | 1.22523    | 1.5797     | 3.06782   | 1.27764   | 1.47238    | 1.9484     | 2.48929   |
| ANGPT1   | 1.00823   | 0.26024   | 0.24682   | 0.895885  | 0.319619  | 1.30089   | 0.387638  | 0.502876  | 0.225535   | 1.4914     | 2.58991   | 0.187716  | 0.753394   | 0.475865   | 1.84688   |
| ANGPT2   | 0.865612  | 0.823546  | 0.948737  | 1.2724    | 0.443648  | 1.88941   | 0.64718   | 0.804429  | 0.337136   | 2.04602    | 3.56641   | 0.594216  | 1.50254    | 2.13572    | 2.05716   |
| ANGPT4   | 0.650945  | 0.128305  | 0.0693532 | 0.0559014 | 0.0766016 | 0.197354  | 0.146393  | 0.276105  | 0.0420412  | 0.00618941 | 0         | 0.0141142 | 0.00318171 | 0.0206189  | 0.0283284 |
| ANGPTL1  | 7.20528   | 3.05653   | 3.90902   | 0.6524    | 0.385242  | 3.00647   | 2.74225   | 4.15297   | 0.230509   | 1.26968    | 1.68719   | 0.807893  | 0.202122   | 0.498013   | 2.8025    |
| ANGPTL2  | 12.4462   | 6.21528   | 8.80096   | 15.8641   | 15.5089   | 55.7528   | 25.5733   | 10.1974   | 1.51502    | 20.5573    | 33.6152   | 6.52273   | 37.806     | 18.079     | 69.5432   |
| ANGPTL3  | 0.117637  | 0.204045  | 0.181659  | 0.0404093 | 0         | 0.0667774 | 0.152222  | 0.23697   | 0.0764097  | 0.0885877  | 0.123944  | 0.0617263 | 0.0252995  | 0.143458   | 0.045051  |
| ANGPTL4  | 3.14648   | 2.4233    | 3.22609   | 19.1423   | 5.39709   | 15.8683   | 1.58128   | 4.05954   | 6.02181    | 12.7166    | 18.665    | 9.62273   | 10.1033    | 9.36543    | 3.66386   |
| ANGPTL5  | 0.693901  | 0.682791  | 1.05915   | 0         | 0.0151812 | 0.0748961 | 0.758797  | 0.469025  | 0.0238054  | 0          | 0         | 0         | 0          | 0.00510793 | 0.0982493 |

|                 |           |           |           |           |          |            |           |           |            |           |           |           |            |           |           |
|-----------------|-----------|-----------|-----------|-----------|----------|------------|-----------|-----------|------------|-----------|-----------|-----------|------------|-----------|-----------|
| ANGPTL6         | 0.0907407 | 0.163127  | 0.112625  | 0.200535  | 0.114225 | 0.281723   | 0.109801  | 0.118843  | 0.115785   | 1.63E-36  | 0.130761  | 0.0326139 | 0.114706   | 0.126428  | 0.163061  |
| ANGPTL7         | 24.467    | 1.97206   | 2.83421   | 0.562392  | 0.753519 | 1.81571    | 1.88083   | 1.85019   | 0.160006   | 0.177579  | 0.114086  | 0.571266  | 0.136929   | 0.411989  | 1.94483   |
| ANGPTL8         | 0.132701  | 0.601011  | 0.241515  | 0.218804  | 0.494713 | 0.112993   | 0.606055  | 0.165107  | 0.129292   | 0.299796  | 0         | 0.512736  | 0.102742   | 0.735166  | 0.381151  |
| ANHX            | 0         | 0         | 0         | 0         | 0        | 0          | 0         | 0         | 0          | 0         | 0         | 0.0187643 | 0          | 0         | 0         |
| ANK1            | 0.244372  | 0.0528639 | 0.0474462 | 0.105359  | 0.174304 | 0.581775   | 0.193603  | 0.0620508 | 0.00911075 | 0.153356  | 0.146378  | 0.076722  | 0.555055   | 0.407921  | 0.762778  |
| ANK2            | 3.10274   | 1.19862   | 1.83572   | 0.363996  | 0.966074 | 2.16661    | 3.16302   | 1.84774   | 0.0674782  | 0.39464   | 0.575426  | 0.29436   | 0.46025    | 0.55671   | 2.96396   |
| ANK3            | 3.51705   | 3.90822   | 3.73298   | 3.67103   | 2.31618  | 3.2141     | 2.78169   | 3.7291    | 6.8685     | 4.49859   | 2.66893   | 4.41534   | 4.29331    | 2.70111   | 1.4276    |
| ANKAR           | 0.770387  | 0.537838  | 0.658996  | 0.378051  | 0.170954 | 0.285594   | 0.508614  | 0.754519  | 0.0702088  | 0.157864  | 0.266226  | 0.146245  | 0.0912948  | 0.246513  | 0.579529  |
| ANKDD1A         | 1.2568    | 0.713041  | 0.676739  | 0.475152  | 0.612245 | 1.44376    | 0.93401   | 0.872405  | 0.108685   | 0.466692  | 0.604449  | 0.329912  | 0.278291   | 0.617993  | 1.51657   |
| ANKDD1B         | 0.0544116 | 0.161667  | 0.187555  | 0.0934545 | 0.2113   | 0.154436   | 0.0621254 | 0.112832  | 0.0110445  | 0.0682921 | 0.0204746 | 0.0454217 | 0.00585101 | 0.0521361 | 0.0130236 |
| ANKEF1          | 1.428     | 1.29077   | 0.878683  | 2.54793   | 1.23741  | 3.04986    | 0.572677  | 1.16421   | 1.41575    | 1.28126   | 1.36557   | 1.43555   | 2.88586    | 1.65612   | 0.694895  |
| ANKFN1          | 0.295727  | 0.321742  | 0.473509  | 0.0491541 | 0.177819 | 0.146211   | 0.675304  | 0.313686  | 0.0116182  | 0.0239463 | 0.010769  | 0.08191   | 0          | 0.0598297 | 0         |
| ANKFY1          | 5.38056   | 6.21104   | 6.30384   | 8.44448   | 6.3157   | 10.1177    | 6.92774   | 5.17822   | 5.39374    | 4.25942   | 4.69397   | 4.68205   | 6.57822    | 5.1998    | 6.074     |
| ANKH            | 8.08299   | 7.64764   | 8.71016   | 4.09676   | 6.41975  | 5.92006    | 8.1204    | 6.80352   | 10.5062    | 3.76329   | 5.08034   | 3.65613   | 3.97067    | 4.56731   | 5.81328   |
| ANKHD1          | 7.06499   | 8.61199   | 8.49147   | 5.95366   | 3.05137  | 4.88526    | 5.0227    | 7.47072   | 3.99022    | 4.15769   | 3.02108   | 3.94734   | 5.24889    | 4.01018   | 4.46641   |
| ANKHD1-EIF4EBP3 | 8.39105   | 7.54      | 7.81801   | 6.05331   | 5.9605   | 7.81112    | 6.9962    | 5.46185   | 10.1698    | 5.79917   | 3.77404   | 8.05403   | 5.17867    | 5.71086   | 4.62037   |
| ANKIB1          | 4.78769   | 5.32687   | 5.61994   | 5.14957   | 3.29283  | 5.93027    | 4.20194   | 4.6946    | 4.89923    | 5.13014   | 5.50782   | 3.54009   | 5.23754    | 4.26458   | 5.24698   |
| ANKK1           | 0.673451  | 0.819967  | 0.760402  | 0.365762  | 0.848191 | 0.472696   | 0.581889  | 0.452924  | 0.875606   | 0.159912  | 0.14383   | 0.280007  | 0.405149   | 0.147449  | 0.0784184 |
| ANKLE1          | 0.107876  | 0.159394  | 0.11899   | 0.0667018 | 0.145227 | 0.165339   | 0.156015  | 0.121437  | 0.0175175  | 0.0902639 | 0.0487115 | 0.0617507 | 0.0324806  | 0.0902094 | 0.0826261 |
| ANKLE2          | 8.58699   | 9.20764   | 9.60268   | 14.2342   | 11.1088  | 12.7197    | 8.50143   | 6.97977   | 12.9357    | 12.4302   | 8.58613   | 12.2146   | 15.9979    | 13.8254   | 9.92938   |
| ANKMY1          | 1.40283   | 1.50265   | 1.56578   | 0.855713  | 2.96902  | 1.50473    | 1.45361   | 1.2977    | 0.680599   | 0.532486  | 0.430894  | 0.683599  | 0.516634   | 0.647079  | 1.38281   |
| ANKMY2          | 3.15217   | 2.62728   | 2.67513   | 1.81089   | 1.33666  | 2.80743    | 1.3755    | 2.18959   | 1.21347    | 1.71667   | 2.37227   | 0.641639  | 0.98766    | 1.0841    | 1.82117   |
| ANKRA2          | 2.72705   | 2.31841   | 2.2473    | 2.68009   | 2.33882  | 2.65377    | 1.44262   | 1.91827   | 1.62856    | 1.83691   | 4.51671   | 1.09241   | 1.66437    | 1.62338   | 1.22482   |
| ANKRD1          | 0.105515  | 0.0451902 | 0.0290966 | 0.084573  | 0        | 0.00998278 | 0.107088  | 0.0520963 | 0.0571137  | 0.0147147 | 0.0397046 | 0.0251664 | 0.0226927  | 0         | 0         |
| ANKRD10         | 7.78416   | 5.37536   | 6.48908   | 5.45573   | 5.78439  | 9.46149    | 5.40432   | 4.65181   | 2.14011    | 5.5372    | 10.7457   | 3.451     | 5.32621    | 9.16063   | 10.5132   |
| ANKRD11         | 6.0312    | 7.87569   | 7.65482   | 6.92096   | 12.299   | 10.7808    | 6.39424   | 5.88993   | 5.24938    | 4.26013   | 2.94095   | 5.9199    | 7.91573    | 6.63836   | 6.86739   |

|                       |            |           |           |                 |           |            |            |           |           |            |            |                 |            |            |           |
|-----------------------|------------|-----------|-----------|-----------------|-----------|------------|------------|-----------|-----------|------------|------------|-----------------|------------|------------|-----------|
| ANKRD12               | 7.53029    | 6.40916   | 6.65873   | 4.172           | 1.35925   | 4.02287    | 2.67212    | 4.80837   | 4.6996    | 4.64576    | 4.35395    | 3.40693         | 5.4754     | 3.22811    | 4.52568   |
| ANKRD13A              | 11.0622    | 9.27891   | 10.146    | 12.2238         | 7.48787   | 14.1794    | 11.5081    | 9.57857   | 22.9351   | 16.2627    | 18.0165    | 10.1569         | 19.4212    | 9.31928    | 9.25311   |
| ANKRD13B              | 0.736668   | 1.09996   | 0.953356  | 1.47322         | 3.2403    | 1.92526    | 1.84044    | 0.550976  | 0.577392  | 0.595036   | 0.683399   | 0.621045        | 1.01177    | 0.861519   | 1.66548   |
| ANKRD13C              | 3.28748    | 2.83342   | 3.04397   | 3.28263         | 2.56281   | 3.41821    | 3.29192    | 2.79098   | 8.77351   | 2.91135    | 4.5963     | 2.30553         | 3.96811    | 3.08632    | 2.96177   |
| ANKRD13D              | 3.1203     | 5.41617   | 5.22152   | 6.83964         | 15.7721   | 7.95344    | 3.88758    | 3.26083   | 7.01857   | 8.02399    | 6.24169    | 6.91619         | 7.77739    | 7.30415    | 4.53953   |
| ANKRD16               | 1.37263    | 1.59012   | 1.69918   | 1.27198         | 2.88682   | 1.92177    | 1.36832    | 0.906551  | 0.902217  | 0.859084   | 1.65819    | 0.69123         | 1.08138    | 0.80659    | 0.909941  |
| ANKRD17               | 10.2385    | 10.5348   | 10.4904   | 11.6089         | 6.43737   | 14.0596    | 8.65891    | 9.82663   | 10.7043   | 8.26664    | 7.46045    | 8.8751          | 11.6785    | 9.33577    | 8.93207   |
| ANKRD18A              | 0.166863   | 0.846643  | 1.31013   | 0.0714516       | 0.151439  | 0.0248149  | 0.343357   | 0.576983  | 0.0438986 | 0.0153875  | 0.00618504 | 0.0833565       | 0.0115956  | 0.0491938  | 0.0393423 |
| ANKRD18B              | 0.731488   | 1.37932   | 1.39974   | 0.31816         | 0.438513  | 0.28646    | 0.365391   | 1.04146   | 0.563255  | 0.591216   | 0.223481   | 0.716194        | 0.419111   | 0.286437   | 0.119225  |
| ANKRD18CP             | 0.118544   | 0.0429399 | 0.0195363 | 0.0121682       | 0         | 0.0255538  | 0.00674081 | 0.0807149 | 0         | 0          | 0          | 0               | 0          | 0          | 0         |
| ANKRD18DP             | 0.0159883  | 0.0115551 | 0.0462932 | 0.0164764       | 0         | 0.0204207  | 0.00912746 | 0.0426272 | 0         | 0.0301004  | 0          | 0               | 0.0206311  | 0.0417809  | 0.137767  |
| ANKRD19P              | 0.260823   | 0.294838  | 0.414945  | 0.258448        | 0.498645  | 0.316048   | 0.171807   | 0.490342  | 0.183262  | 0.125908   | 0.271788   | 0.308651        | 0.0582514  | 0.277878   | 0.633897  |
| ANKRD2                | 0.0608627  | 0.139292  | 0.276925  | 0.109761        | 0.378163  | 0.155471   | 0.104237   | 0.0405673 | 0.018531  | 0.076389   | 0.240473   | 0.0435489       | 0.107988   | 0.0556667  | 0.0874066 |
| ANKRD20A1             | 0.068231   | 0.425638  | 0.0245717 | 0.00218826      | 0.0664455 | 0.0774727  | 0.018385   | 0.0211754 | 0.0292044 | 1.68E-09   | 0.00840904 | 0.3249          | 0.0113757  | 0.05963    | 0.0369386 |
| ANKRD20A11P           | 0.068786   | 0.0409575 | 0.140647  | 0               | 0.0330112 | 0.135365   | 0.0242645  | 0.0188867 | 0.0258821 | 0.106692   | 0.0479809  | 0.0608245       | 0          | 0.011107   | 0         |
| ANKRD20A12P           | 1.57914    | 0.760855  | 0.625744  | 0.218804        | 0.226744  | 0.214687   | 0.651509   | 1.10858   | 0.11313   | 0.366417   | 0.449409   | 0.294348        | 0.273978   | 0.755973   | 0.381151  |
| ANKRD20A19P           | 0.317899   | 0.168485  | 0.221662  | 0               | 0.0564351 | 0.00773391 | 0.0777786  | 0.181621  | 0         | 0.00569994 | 0          | 0.00974851      | 0          | 0.0237354  | 0         |
| ANKRD20A2             | 0.00744511 | 0.0727567 | 0.0156941 | 0.127601        | 0.0276112 | 0.0320839  | 0.00748679 | 0.0183403 | 6.37E-06  | 1.45E-20   | 9.33E-13   | 0.0169688       | 0.0341266  | 0.00236258 | 0.0235914 |
| ANKRD20A3             | 0.0529061  | 0.0992251 | 0.209008  | 0.00030576<br>2 | 0.0288408 | 0.00016826 | 0.0730015  | 0.0596161 | 3.47E-05  | 0.0202881  | 9.99E-06   | 0.0138229       | 9.46E-05   | 0.00977768 | 0.0991294 |
| ANKRD20A4             | 0.280469   | 0.0348698 | 0.256391  | 0.00152116      | 0.0542986 | 0.00289653 | 0.0193926  | 0.228377  | 0.0268146 | 4.78E-14   | 0.00772093 | 0.00074587<br>8 | 3.62E-07   | 0.049854   | 3.75E-05  |
| ANKRD20A4-ANKRD20A20P | 0.231905   | 0.574021  | 0.675528  | 0.147488        | 0.0991759 | 0.105729   | 0.373907   | 0.750989  | 4.25E-07  | 7.58E-19   | 0.0875337  | 0.134341        | 8.86E-16   | 7.91E-07   | 5.94E-10  |
| ANKRD20A5P            | 0.790752   | 0.290481  | 0.179012  | 0.034215        | 0.32535   | 0.14629    | 0.0641532  | 0.183035  | 0.0456201 | 0.0156714  | 0.0336716  | 0.0755563       | 0          | 0.0130516  | 0.197248  |
| ANKRD20A8P            | 0.0473371  | 0.137981  | 0.10507   | 0.073337        | 0.0263907 | 0.0569633  | 0.0384262  | 0.165192  | 0.01536   | 0.0377148  | 0.0151444  | 0.1182          | 0.00895741 | 0.00426022 | 0.0447855 |
| ANKRD20A9P            | 0.100795   | 0.0350541 | 0.0365793 | 0.00718794      | 0.0108346 | 0          | 0.0398191  | 0.187004  | 0         | 0          | 0.00962419 | 0.0210507       | 0          | 0          | 0.020034  |

|              |            |            |            |            |            |            |            |            |           |            |            |            |           |            |           |
|--------------|------------|------------|------------|------------|------------|------------|------------|------------|-----------|------------|------------|------------|-----------|------------|-----------|
| ANKRD22      | 2.25699    | 4.69181    | 4.96904    | 5.57653    | 1.12649    | 2.13732    | 2.92339    | 4.91226    | 14.5237   | 7.81214    | 7.94469    | 4.99601    | 10.5987   | 3.33879    | 1.43131   |
| ANKRD23      | 1.36241    | 2.51344    | 2.38022    | 0.61887    | 4.98443    | 1.2135     | 2.24123    | 1.40994    | 0.480313  | 0.49499    | 0.293433   | 1.2891     | 0.138793  | 0.688632   | 1.42883   |
| ANKRD24      | 0.0747292  | 0.0470843  | 0.0618212  | 0.0414672  | 0.24109    | 0.210471   | 0.0459433  | 0.0408696  | 0.0070009 | 0.00721483 | 0.00648923 | 0.00822627 | 0         | 0.00600873 | 0.057788  |
| ANKRD26      | 1.33826    | 1.61034    | 1.56464    | 1.19969    | 0.397726   | 1.39242    | 0.541811   | 0.995159   | 0.540512  | 0.916956   | 1.34501    | 0.718172   | 0.627755  | 1.17761    | 1.39731   |
| ANKRD26P1    | 0.00377969 | 0.00182111 | 0          | 0          | 0          | 0          | 0.00431553 | 0          | 0         | 0.0047439  | 0          | 0          | 0         | 0          | 0         |
| ANKRD26P3    | 0.0124225  | 0.00598533 | 0.00513837 | 0.0128017  | 0.00964819 | 0          | 0.00709178 | 0.0220801  | 0         | 0          | 0          | 0          | 0         | 0          | 0.0356805 |
| ANKRD27      | 2.56741    | 3.84126    | 3.88673    | 4.74528    | 4.64199    | 5.25729    | 4.0351     | 2.22627    | 5.82955   | 4.03121    | 3.31484    | 3.39519    | 6.35431   | 4.16676    | 3.299     |
| ANKRD28      | 5.07072    | 3.45838    | 3.727      | 3.64804    | 1.26701    | 4.6811     | 2.98325    | 4.16572    | 2.50002   | 3.79466    | 4.4259     | 2.1925     | 3.76453   | 4.05558    | 6.84483   |
| ANKRD29      | 1.97621    | 1.87116    | 0.746228   | 1.57531    | 1.76483    | 1.20194    | 0.778332   | 0.966881   | 3.15317   | 2.368      | 3.21809    | 2.40435    | 1.86147   | 1.4971     | 1.46355   |
| ANKRD30A     | 0          | 0.0227823  | 0.0608486  | 0.0162426  | 0          | 0          | 0          | 0.0140075  | 0         | 0          | 0          | 0          | 0         | 0          | 0         |
| ANKRD30B     | 0.00501257 | 0.0120757  | 0.0207338  | 0          | 0          | 0.00426814 | 0          | 0.0133643  | 0         | 0          | 0.00565857 | 0          | 0         | 0          | 0         |
| ANKRD30BL    | 0          | 0.00770606 | 0.0198468  | 0          | 0.0621098  | 0.0204278  | 0.0365224  | 0.00710699 | 0         | 0          | 0          | 0          | 0.0103191 | 7.28E-09   | 0.0228304 |
| ANKRD30BP2   | 0          | 0.0163117  | 0.00560139 | 0.00697764 | 0          | 0          | 0.0154617  | 0          | 0         | 0.0169964  | 0          | 0.00484478 | 0         | 0.0106163  | 0.0292892 |
| ANKRD30BP3   | 0          | 0.0594024  | 0.0437113  | 0          | 0          | 0          | 0          | 0          | 0         | 0          | 0          | 0          | 0         | 0          | 0         |
| ANKRD31      | 0.0920201  | 0.118231   | 0.0697817  | 0.568976   | 0.0595579  | 0.528889   | 0.048155   | 0.0851873  | 0.658412  | 1.87198    | 1.51491    | 0.905339   | 1.55106   | 1.17028    | 0.209241  |
| ANKRD33      | 0.0113114  | 0.00544999 | 0          | 0          | 0.0175705  | 0.019263   | 0          | 0.0100526  | 0         | 0.0567877  | 0          | 0.00809358 | 0         | 0.00591181 | 0.113712  |
| ANKRD33B     | 1.07371    | 4.60579    | 7.4096     | 0.296427   | 0.959106   | 0.60387    | 2.24801    | 3.12051    | 0.05436   | 0.149389   | 0.179154   | 0.133072   | 0.233584  | 0.158112   | 0.445146  |
| ANKRD34A     | 0.108924   | 0.142007   | 0.164317   | 0.0924403  | 0.228912   | 0.289152   | 0.175575   | 0.14805    | 0.0390167 | 0.0402089  | 0.122961   | 0.0412611  | 0.0413394 | 0.0636256  | 0.303654  |
| ANKRD34B     | 0          | 0.00283372 | 0          | 0.00606089 | 0          | 0.0200315  | 0          | 0.0156805  | 0         | 0          | 0          | 0          | 0         | 0.00614768 | 0         |
| ANKRD34C     | 0.0213339  | 0.010279   | 0.00705957 | 0          | 0.00662779 | 0.0181656  | 0.0584601  | 0.00758393 | 0.0155894 | 0.0107105  | 0.01445    | 0          | 0         | 0          | 0.0245106 |
| ANKRD34C-AS1 | 0          | 0          | 0          | 0          | 0          | 0          | 0          | 0          | 0         | 0          | 0          | 0          | 0         | 0          | 0         |
| ANKRD35      | 7.563      | 7.42037    | 9.97971    | 1.47509    | 19.0487    | 1.7579     | 5.94799    | 9.68756    | 10.9542   | 0.578692   | 0.986606   | 5.7414     | 0.195361  | 0.593449   | 0.375552  |
| ANKRD36      | 4.44719    | 3.69467    | 4.23897    | 2.30675    | 1.61277    | 1.59452    | 2.2926     | 3.21838    | 0.265745  | 0.925066   | 0.781292   | 1.05092    | 0.426312  | 1.73316    | 4.36869   |
| ANKRD36B     | 2.84421    | 2.81421    | 3.20921    | 1.4077     | 0.859626   | 1.12199    | 1.69164    | 2.08211    | 0.282566  | 1.03268    | 1.30174    | 0.619169   | 0.457737  | 1.44405    | 2.39959   |
| ANKRD36BP1   | 7.15558    | 7.00383    | 8.63103    | 7.2709     | 1.32137    | 6.21005    | 9.66975    | 15.409     | 11.3657   | 8.07033    | 7.95066    | 7.1698     | 11.1625   | 5.8451     | 7.52758   |
| ANKRD36BP2   | 0.882914   | 0.393174   | 0.30987    | 0.46872    | 0.270138   | 0.29616    | 0.427671   | 0.368553   | 0.0162923 | 0.688395   | 1.26853    | 0.258443   | 0.55239   | 0.643233   | 0.922164  |



|                   |           |            |           |           |           |            |            |           |           |            |           |           |            |            |           |
|-------------------|-----------|------------|-----------|-----------|-----------|------------|------------|-----------|-----------|------------|-----------|-----------|------------|------------|-----------|
| ANKRD36C          | 3.87709   | 3.1334     | 3.7491    | 1.30517   | 1.24323   | 1.07954    | 2.67462    | 2.71817   | 0.234016  | 0.964794   | 1.66378   | 0.562398  | 0.344972   | 1.32337    | 2.89215   |
| ANKRD37           | 1.25123   | 1.98434    | 2.07629   | 2.55779   | 1.54655   | 2.15448    | 1.40605    | 0.837336  | 2.32788   | 10.7091    | 20.3143   | 6.23128   | 11.0043    | 7.38675    | 1.04013   |
| ANKRD39           | 2.0102    | 3.21606    | 3.07011   | 3.29326   | 5.36435   | 3.55498    | 3.14852    | 1.69488   | 3.10732   | 2.55535    | 6.08046   | 2.37881   | 2.8101     | 2.62654    | 1.62851   |
| ANKRD40           | 5.34583   | 4.39447    | 5.03782   | 5.30881   | 2.78522   | 9.99717    | 3.7649     | 4.02077   | 2.2919    | 3.52548    | 5.99717   | 1.89864   | 5.97773    | 4.23882    | 5.28561   |
| ANKRD40CL         | 0         | 0.0385837  | 0         | 0         | 0         | 0          | 0          | 0.0237227 | 0         | 0          | 0         | 0         | 0          | 0          | 0         |
| ANKRD42           | 0.851798  | 0.831812   | 0.915438  | 0.838615  | 1.02779   | 1.2725     | 0.577455   | 0.784043  | 0.60669   | 0.553638   | 0.669668  | 0.612205  | 0.809644   | 0.830751   | 0.851934  |
| ANKRD44           | 1.93786   | 1.35558    | 1.45766   | 1.17972   | 1.07585   | 1.4545     | 1.13907    | 1.85616   | 0.603135  | 0.995405   | 1.72982   | 0.52639   | 0.886785   | 0.819625   | 2.12849   |
| ANKRD44-IT1       | 0.476284  | 0.657149   | 0.519384  | 0.200792  | 0.100886  | 0.147472   | 0.395495   | 0.711882  | 0.0263664 | 0.108688   | 0.0733179 | 0.170397  | 0.027936   | 0.271556   | 0.808368  |
| ANKRD45           | 0.0953102 | 0.00834944 | 0.0501756 | 0.0357163 | 0.0403772 | 0.0811554  | 0.00989292 | 0.0308014 | 0.0105525 | 0          | 0.0195624 | 0         | 0.00559033 | 0.0498133  | 0.0746605 |
| ANKRD46           | 1.48708   | 1.46895    | 1.53888   | 1.35671   | 1.56481   | 1.27985    | 1.21105    | 1.42107   | 1.80461   | 2.06713    | 2.14204   | 2.07089   | 1.46154    | 1.37614    | 0.742498  |
| ANKRD49           | 1.99237   | 1.58041    | 1.76883   | 2.2535    | 0.452903  | 1.7482     | 1.06806    | 1.75985   | 1.83466   | 2.18042    | 2.92113   | 0.982268  | 2.02226    | 1.26353    | 1.22128   |
| ANKRD50           | 4.38283   | 4.39216    | 5.07104   | 4.20224   | 1.75721   | 4.3772     | 2.74842    | 5.478     | 3.14634   | 6.46838    | 6.13563   | 4.25984   | 7.36341    | 6.26145    | 5.38005   |
| ANKRD52           | 3.67359   | 5.06521    | 5.01863   | 6.03679   | 7.97809   | 9.42045    | 6.02904    | 3.89207   | 4.37633   | 5.01005    | 3.79691   | 5.20927   | 9.66529    | 6.73529    | 5.96304   |
| ANKRD53           | 0.229247  | 0.147273   | 0.19868   | 0.146247  | 0.271314  | 0.371811   | 0.174498   | 0.223139  | 0.0265902 | 0.0548055  | 0.110911  | 0.0156221 | 0.112693   | 0.074171   | 0.235163  |
| ANKRD54           | 1.73475   | 2.00409    | 1.95696   | 2.71541   | 3.37852   | 3.13327    | 1.50801    | 1.47162   | 1.7606    | 1.94636    | 2.35887   | 2.06406   | 2.63277    | 2.6444     | 1.32115   |
| ANKRD55           | 0.0462861 | 0.0669041  | 0.0536076 | 0.0476992 | 0.0143797 | 0.0867064  | 0.052848   | 0.13986   | 0.0338228 | 0.0116188  | 0.0731517 | 0         | 0.00597271 | 0.00483823 | 0.0132945 |
| ANKRD6            | 0.923034  | 0.622812   | 0.446796  | 0.872866  | 0.566662  | 1.71459    | 0.672712   | 0.414219  | 0.725564  | 0.968941   | 0.708451  | 0.56403   | 1.28132    | 0.645859   | 0.517763  |
| ANKRD60           | 0         | 0.00327287 | 0         | 0         | 0         | 0          | 0          | 0         | 0         | 0.00852566 | 0         | 0         | 0          | 0          | 0         |
| ANKRD61           | 0.95955   | 0.940324   | 1.04944   | 0.502802  | 0.530522  | 0.443143   | 0.817045   | 0.997305  | 0.0792288 | 0.285774   | 0.128517  | 0.267651  | 0          | 0.374002   | 0.560557  |
| ANKRD62           | 0.0349297 | 0.064159   | 0.0286343 | 0.030234  | 0.0379771 | 0.00832707 | 0.0111708  | 0.0521469 | 0.0178654 | 0.0184113  | 0         | 0.0279898 | 0          | 0.023996   | 0         |
| ANKRD62P1-PARP4P3 | 0.208506  | 0.230425   | 0.335126  | 0.0155069 | 0.0701219 | 0.0384382  | 0.154627   | 0.320951  | 0.0733046 | 0.0755446  | 0         | 0.247638  | 0.0194171  | 0.0991739  | 0.0216101 |
| ANKRD63           | 0.0933409 | 0.121692   | 0.149894  | 0.0169748 | 0.0341154 | 0.023376   | 0.169264   | 0.156148  | 0.013374  | 0.0344566  | 0         | 0.0353583 | 0.00354253 | 0.0229572  | 0         |
| ANKRD65           | 0.580688  | 0.824092   | 0.777351  | 2.50247   | 3.24723   | 1.33051    | 0.337533   | 0.43162   | 0.720071  | 0.649315   | 1.3468    | 0.423052  | 0.796997   | 0.463516   | 0.788454  |
| ANKRD66           | 0         | 0          | 0         | 0.0225635 | 0         | 0          | 0          | 0         | 0         | 0          | 0         | 0         | 0          | 0          | 0         |
| ANKRD7            | 0         | 0.0246515  | 0         | 0.0175752 | 0         | 0.0145217  | 0          | 0.04547   | 0         | 0          | 0.0577575 | 0         | 0          | 0.0178269  | 0         |
| ANKRD9            | 2.18142   | 2.11584    | 2.53357   | 4.16719   | 4.69801   | 4.78154    | 2.56137    | 1.33759   | 4.58837   | 3.71233    | 3.75833   | 3.43184   | 5.82952    | 3.58959    | 2.37354   |

|            |           |            |            |           |            |            |           |           |           |            |           |            |            |            |           |
|------------|-----------|------------|------------|-----------|------------|------------|-----------|-----------|-----------|------------|-----------|------------|------------|------------|-----------|
| ANKS1A     | 5.57897   | 5.65873    | 5.33881    | 7.31147   | 7.87927    | 8.65376    | 5.86645   | 4.23918   | 6.58153   | 5.51118    | 3.48835   | 7.86907    | 7.3354     | 5.57642    | 4.1866    |
| ANKS1B     | 0.397582  | 0.266927   | 0.354196   | 0.129766  | 0.139158   | 0.179237   | 0.266877  | 0.213423  | 0.136991  | 0.074791   | 0.0346146 | 0.0246595  | 0.00625004 | 0.0235829  | 0.271288  |
| ANKS3      | 1.26178   | 1.31784    | 1.51712    | 1.37299   | 3.62779    | 2.70265    | 0.957456  | 0.995994  | 0.754035  | 0.895113   | 0.86702   | 1.12714    | 1.03152    | 1.69986    | 1.5307    |
| ANKS4B     | 0.0477833 | 0.0268598  | 0.00658829 | 0         | 0.0262159  | 0.00678114 | 0.0363716 | 0.0424658 | 0         | 0.00999549 | 0         | 0.00574834 | 0          | 0.00832455 | 0.0228743 |
| ANKS6      | 2.28948   | 1.44336    | 1.2031     | 1.9307    | 3.16565    | 3.6875     | 2.43364   | 0.831073  | 2.30528   | 1.27083    | 1.62716   | 1.4859     | 1.50004    | 1.73588    | 1.93111   |
| ANKUB1     | 0         | 0.00418255 | 0          | 0         | 0          | 0          | 0         | 0.0231444 | 0         | 0.0108953  | 0         | 0          | 0          | 0          | 0.0124667 |
| ANKZF1     | 3.96686   | 6.90942    | 6.62147    | 4.8296    | 9.51553    | 7.16654    | 4.40902   | 3.73602   | 3.6341    | 4.39503    | 3.60626   | 4.52766    | 3.43707    | 4.27954    | 3.6425    |
| ANLN       | 0.888818  | 1.29637    | 1.40665    | 4.90335   | 0.442705   | 4.4586     | 1.74285   | 0.746976  | 1.45311   | 5.12912    | 6.28194   | 1.71436    | 6.63536    | 6.24348    | 2.09505   |
| ANO1       | 5.50616   | 6.70055    | 8.56245    | 1.35503   | 7.10611    | 4.80114    | 8.51776   | 4.60531   | 2.52442   | 4.65298    | 3.18001   | 3.18841    | 5.05777    | 4.28081    | 7.25173   |
| ANO10      | 5.65173   | 4.51056    | 4.72943    | 5.7496    | 5.2787     | 6.27458    | 5.94827   | 4.17921   | 12.0014   | 6.47507    | 7.86057   | 5.32973    | 6.05872    | 4.76778    | 3.93342   |
| ANO2       | 1.20486   | 0.486222   | 0.602093   | 0.378165  | 0.446514   | 0.958222   | 0.865902  | 0.402221  | 0.11173   | 0.360783   | 0.759467  | 0.192552   | 0.232816   | 0.524227   | 0.676321  |
| ANO3       | 0.0430836 | 0.0259479  | 0.0178209  | 0.0295992 | 0.00557697 | 0.0275138  | 0.028695  | 0.0191445 | 0.0131177 | 0.0630867  | 0.12159   | 0          | 0.0880248  | 0.0318996  | 0.0257806 |
| ANO4       | 0.0437797 | 0.0210937  | 0.0271632  | 0.0112791 | 0.00850063 | 0.0279584  | 0.0812277 | 0.0437712 | 0         | 0.199187   | 0.0741328 | 0.0587354  | 0.240095   | 0.145868   | 0.235774  |
| ANO5       | 0.0799114 | 0.0619389  | 0.0776055  | 0.0358048 | 0.0539696  | 0.0650851  | 0.0555376 | 0.0833697 | 0         | 0.0218037  | 0.0235331 | 0.00497207 | 0.0493168  | 0.0381335  | 0         |
| ANO6       | 6.68758   | 4.56603    | 5.08012    | 8.32885   | 3.09083    | 9.72215    | 5.89584   | 5.33381   | 2.70732   | 8.94188    | 10.6832   | 3.72027    | 11.9069    | 6.68968    | 9.86451   |
| ANO7       | 0.166497  | 0.17799    | 0.129129   | 0.117961  | 0.185888   | 0.363285   | 0.207923  | 0.134096  | 0.0253468 | 0.104485   | 0.105724  | 0.0670123  | 0.137636   | 0.155002   | 0.149444  |
| ANO8       | 3.40011   | 5.24501    | 5.07689    | 3.08459   | 19.1175    | 4.41866    | 7.96156   | 3.09604   | 21.0374   | 5.05103    | 2.74973   | 9.66767    | 4.65       | 3.65023    | 3.49014   |
| ANO9       | 2.7333    | 9.84117    | 12.3296    | 3.97898   | 17.202     | 6.522      | 9.51444   | 5.88143   | 8.49854   | 6.92018    | 2.63466   | 11.516     | 4.2648     | 5.25571    | 2.00205   |
| ANOS1      | 0.648665  | 0.803414   | 0.87921    | 0.800651  | 0.751431   | 0.449353   | 0.690413  | 0.882633  | 0.660566  | 0.712949   | 1.34041   | 0.38547    | 0.529647   | 0.444366   | 0.636833  |
| ANP32A     | 11.168    | 7.2303     | 6.10236    | 13.5496   | 6.38513    | 14.8794    | 4.58616   | 5.98012   | 5.95487   | 7.77411    | 9.95867   | 4.18352    | 11.2442    | 7.53889    | 5.55287   |
| ANP32A-IT1 | 1.02983   | 1.14871    | 0.986163   | 0.479754  | 0.964195   | 0.180183   | 0.861739  | 0.883887  | 0.0859056 | 0.274445   | 0.135366  | 0.383578   | 0.0273059  | 0.623027   | 0.891435  |
| ANP32AP1   | 0.344951  | 0.543935   | 0.674505   | 0.161583  | 0.29227    | 0.0801057  | 0.751902  | 0.613127  | 0.0381919 | 0.118077   | 0         | 0.179506   | 0          | 0.278624   | 0.0900714 |
| ANP32B     | 26.3796   | 22.3428    | 23.1974    | 38.5637   | 25.3824    | 38.534     | 14.144    | 19.6512   | 20.7904   | 17.9206    | 21.5181   | 14.4383    | 32.7095    | 23.031     | 12.9984   |
| ANP32C     | 0         | 0          | 0          | 0         | 0          | 0          | 0         | 0         | 0         | 0          | 0         | 0          | 0          | 0          | 0         |
| ANP32D     | 0.116884  | 0.0844748  | 0.19339    | 0         | 0          | 0          | 0         | 0.0519384 | 0         | 0          | 0         | 0          | 0          | 0          | 0         |
| ANP32E     | 4.6247    | 3.74725    | 4.47249    | 3.79928   | 1.56828    | 5.65723    | 2.5063    | 4.89731   | 2.5068    | 3.9078     | 3.77215   | 1.81767    | 5.6693     | 3.66646    | 3.12439   |

|          |           |           |           |           |           |           |           |           |           |           |           |           |           |            |           |
|----------|-----------|-----------|-----------|-----------|-----------|-----------|-----------|-----------|-----------|-----------|-----------|-----------|-----------|------------|-----------|
| ANPEP    | 6.48005   | 3.45213   | 5.07226   | 19.8311   | 5.25941   | 16.9958   | 9.61399   | 5.9956    | 0.872596  | 12.0405   | 17.2143   | 2.96709   | 27.7077   | 12.1022    | 22.8921   |
| ANTXR1   | 12.8111   | 11.9334   | 13.5413   | 18.3284   | 17.4723   | 25.0073   | 15.4324   | 16.0138   | 6.15709   | 17.278    | 30.5632   | 5.075     | 17.9024   | 14.2439    | 28.23     |
| ANTXR2   | 3.04152   | 1.57379   | 2.44639   | 2.48548   | 1.92125   | 6.07477   | 2.07014   | 1.92111   | 0.171175  | 2.93187   | 4.56317   | 0.325839  | 3.05782   | 2.06857    | 4.16211   |
| ANTXRL   | 0.018559  | 0.017884  | 0         | 0         | 0         | 0         | 0.010595  | 0         | 0         | 0.0232934 | 0         | 0         | 0         | 0          | 0         |
| ANTXRLP1 | 0.0397306 | 0.0191428 | 0.0657358 | 0         | 0         | 0         | 0.0226815 | 0.0706184 | 0         | 0         | 0.0448509 | 0         | 0.0384509 | 0.0415299  | 0.142645  |
| ANXA1    | 49.8721   | 32.1017   | 44.4486   | 544.348   | 38.8045   | 73.4613   | 20.6781   | 21.7192   | 53.5637   | 2324.4    | 1036.57   | 410.753   | 4397.41   | 848.911    | 272.036   |
| ANXA10   | 0         | 0         | 0         | 0.0164821 | 0         | 0.0136185 | 0         | 0         | 0         | 0.0200739 | 0         | 0         | 0         | 0          | 0         |
| ANXA11   | 14.0299   | 11.1967   | 13.4742   | 22.8636   | 15.1663   | 32.7172   | 17.956    | 9.87862   | 5.81733   | 15.4478   | 22.1954   | 7.69791   | 32.7188   | 13.3321    | 17.0165   |
| ANXA13   | 0         | 0.0138346 | 0.0118769 | 0.0295901 | 0.022301  | 0.0366737 | 0         | 0         | 0         | 0         | 0.0648278 | 0.0205452 | 0         | 0.00750346 | 0         |
| ANXA2    | 158.932   | 135.367   | 143.148   | 496.932   | 127.138   | 376.353   | 152.767   | 110.612   | 176.512   | 485.44    | 551.822   | 221.362   | 629.284   | 285.464    | 176.817   |
| ANXA2P1  | 0.551435  | 0.249084  | 0.199581  | 0.177584  | 0.107071  | 0.0586964 | 0.472208  | 0.245035  | 0.104946  | 0.0865135 | 0         | 0.0493208 | 0         | 0.072051   | 0.29701   |
| ANXA2P2  | 0.0355102 | 0         | 0.0294092 | 0.183295  | 0.0551721 | 0.211798  | 0.0608879 | 0.0157566 | 0         | 0.111602  | 0.140212  | 0.0381617 | 0.263398  | 0.120755   | 0.0255777 |
| ANXA2P3  | 0         | 0         | 0         | 0         | 0         | 0         | 0         | 0         | 0         | 0         | 0         | 0         | 0         | 0          | 0         |
| ANXA2R   | 1.27963   | 0.775086  | 0.665407  | 0.602833  | 1.16423   | 0.793844  | 0.751393  | 0.796061  | 0.111318  | 0.573596  | 1.30009   | 0.640927  | 0.365628  | 0.869429   | 0.840097  |
| ANXA3    | 2.56033   | 1.26117   | 1.60927   | 8.18079   | 0.733203  | 2.27752   | 1.51881   | 1.33473   | 2.52591   | 18.078    | 10.1241   | 6.92878   | 46.2996   | 14.5326    | 2.50608   |
| ANXA4    | 7.17605   | 6.17509   | 6.44768   | 11.2912   | 6.96556   | 6.43846   | 6.33532   | 6.07844   | 6.88439   | 6.04279   | 8.39083   | 4.83262   | 5.41139   | 4.46989    | 4.86727   |
| ANXA5    | 33.6363   | 17.0224   | 20.6542   | 66.7759   | 26.5066   | 89.2131   | 34.6205   | 23.2559   | 14.8243   | 64.7424   | 96.7906   | 23.0942   | 88.965    | 59.2373    | 90.3555   |
| ANXA6    | 12.3923   | 5.43752   | 7.36319   | 10.3131   | 11.1599   | 23.8054   | 10.7816   | 6.53011   | 2.09017   | 15.0595   | 25.2868   | 2.21147   | 11.9262   | 9.02406    | 26.3221   |
| ANXA7    | 18.2608   | 14.0261   | 15.9524   | 23.9721   | 11.0428   | 26.2259   | 15.5042   | 12.7493   | 18.2829   | 28.6696   | 28.7834   | 20.5165   | 38.7003   | 22.4651    | 17.7057   |
| ANXA8    | 7.74288   | 14.3849   | 11.1601   | 15.1742   | 16.8751   | 19.1467   | 7.52106   | 11.487    | 13.0138   | 38.43     | 41.8012   | 22.8204   | 17.2545   | 12.5569    | 6.5613    |
| ANXA8L1  | 26.8656   | 37.2284   | 29.762    | 31.5565   | 47.0296   | 34.8403   | 30.7619   | 25.3017   | 41.2497   | 87.8367   | 82.8786   | 69.7697   | 58.9811   | 32.8639    | 12.2982   |
| ANXA9    | 2.70256   | 5.06182   | 5.38469   | 1.17679   | 11.9831   | 1.69619   | 9.89451   | 2.5033    | 30.8744   | 3.28052   | 6.94678   | 2.64189   | 0.769511  | 1.04112    | 0.655981  |
| AOAH     | 0.669764  | 0.409919  | 0.471713  | 2.63958   | 1.39185   | 3.02873   | 0.578703  | 0.627405  | 0.0661376 | 1.23821   | 2.60541   | 0.174856  | 1.30806   | 0.704826   | 3.30153   |
| AOAH-IT1 | 0         | 0.0194602 | 0.0334129 | 0.0416223 | 0.0627385 | 0         | 0.0461152 | 0         | 0         | 0         | 0.0455945 | 0         | 0         | 0.0211092  | 0.232016  |
| AOC1     | 0.881905  | 0.617245  | 0.606699  | 0.76533   | 0.475861  | 0.387322  | 0.487567  | 0.486759  | 0.407013  | 0.104862  | 0.324867  | 0.172702  | 0.670822  | 0.121295   | 0.0533275 |
| AOC2     | 0.509683  | 0.524444  | 0.643188  | 0.284877  | 0.483079  | 0.647305  | 0.621392  | 0.345481  | 0.452401  | 0.40117   | 0.19504   | 0.432685  | 0.161636  | 0.776572   | 0.459031  |

|             |            |           |           |           |            |           |           |           |          |           |            |            |           |           |          |
|-------------|------------|-----------|-----------|-----------|------------|-----------|-----------|-----------|----------|-----------|------------|------------|-----------|-----------|----------|
| AOC3        | 7.89455    | 2.23331   | 2.80206   | 1.65214   | 7.05278    | 14.1124   | 8.61126   | 2.31062   | 0.508889 | 3.16638   | 7.04725    | 0.972155   | 2.41028   | 2.39148   | 13.0627  |
| AOC4P       | 0.680908   | 0.102297  | 0.21278   | 0.0257539 | 0.174022   | 0.323899  | 0.487733  | 0.211605  | 3.17E-34 | 0.0304825 | 0.0437867  | 0.00904079 | 0.0249418 | 0.0682066 | 0.439816 |
| AOX1        | 4.2927     | 2.99732   | 4.41671   | 5.46805   | 0.692311   | 18.4317   | 4.36025   | 3.11037   | 0.137129 | 0.529946  | 0.905632   | 0.080565   | 4.19228   | 1.25786   | 2.6007   |
| AOX3P-AOX2P | 0.00457553 | 0.0154319 | 0.018926  | 0.0377218 | 0.00710738 | 0.0545441 | 0.0156726 | 0.0203318 | 0.11145  | 0.0114855 | 0.00516521 | 0.00327392 | 0.0177127 | 0.0215224 | 0        |
| AP1AR       | 1.63007    | 1.40997   | 1.5283    | 1.17188   | 0.681243   | 1.42764   | 0.948302  | 1.7384    | 1.87652  | 1.80721   | 2.09864    | 1.20246    | 1.58758   | 1.24749   | 0.746884 |
| AP1B1       | 10.7959    | 10.2699   | 10.1179   | 22.109    | 22.9051    | 31.5309   | 14.6412   | 9.06778   | 29.3063  | 20.5092   | 15.4387    | 23.314     | 32.2767   | 15.8364   | 11.6941  |
| AP1B1P1     | 0          | 0         | 0.0231506 | 0.0288387 | 0          | 0         | 0         | 0         | 0        | 0         | 0          | 0          | 0         | 0         | 0        |
| AP1G1       | 8.40825    | 8.7878    | 9.47244   | 12.113    | 4.36762    | 9.45332   | 8.20361   | 8.41277   | 11.9775  | 10.3707   | 9.15984    | 8.2602     | 15.6361   | 9.20206   | 7.74602  |
| AP1G2       | 5.67391    | 8.79112   | 7.9838    | 9.26858   | 18.0925    | 8.84622   | 8.13263   | 6.47291   | 11.018   | 5.32442   | 5.30583    | 8.75568    | 5.5759    | 5.55559   | 4.05123  |
| AP1M1       | 5.45906    | 4.96206   | 4.94852   | 9.79526   | 6.82599    | 15.1729   | 7.02873   | 3.18278   | 5.02178  | 8.88052   | 11.6368    | 6.38558    | 13.5268   | 6.97609   | 7.07544  |
| AP1M2       | 4.46529    | 5.57212   | 5.23042   | 11.2258   | 8.73666    | 9.06236   | 7.02334   | 4.27273   | 16.1864  | 9.75399   | 9.01092    | 7.9357     | 14.6427   | 6.13386   | 2.83748  |
| AP1S1       | 7.14686    | 8.57021   | 9.62413   | 18.9152   | 19.7238    | 25.3233   | 9.88115   | 4.87003   | 19.136   | 16.4265   | 31.4108    | 13.882     | 19.5887   | 13.8751   | 5.57759  |
| AP1S2       | 1.40845    | 1.15015   | 1.5004    | 2.32013   | 0.764133   | 3.18707   | 1.41585   | 1.89793   | 1.14792  | 3.01314   | 4.70749    | 0.871956   | 3.53473   | 1.88325   | 3.11032  |
| AP1S3       | 0.481073   | 0.438742  | 0.402715  | 0.985617  | 0.249542   | 0.799748  | 0.294254  | 0.473346  | 0.774216 | 2.56613   | 1.84903    | 1.74569    | 3.48446   | 2.3287    | 0.863602 |
| AP2A1       | 9.21401    | 11.9103   | 12.59     | 18.1683   | 19.8888    | 28.6995   | 15.7421   | 9.20885   | 30.3888  | 20.3436   | 22.6325    | 18.179     | 30.386    | 16.3166   | 14.3444  |
| AP2A2       | 4.16039    | 5.29279   | 5.05776   | 7.3864    | 11.6896    | 10.6529   | 6.86702   | 3.98894   | 4.60679  | 5.334     | 6.09374    | 4.31413    | 7.57823   | 5.66069   | 6.45312  |
| AP2B1       | 11.4772    | 7.58082   | 8.18589   | 14.3727   | 5.88864    | 18.8511   | 11.1924   | 7.57683   | 3.6681   | 9.79319   | 13.0061    | 4.56298    | 11.465    | 10.9286   | 13.5067  |
| AP2M1       | 29.3795    | 22.0142   | 21.8823   | 53.9743   | 36.4667    | 80.5776   | 30.1348   | 19.812    | 32.3111  | 45.8841   | 74.0599    | 27.1033    | 57.9739   | 39.5095   | 33.2856  |
| AP2S1       | 16.5729    | 13.347    | 12.0156   | 43.2487   | 36.2934    | 57.9856   | 20.3343   | 12.6949   | 64.9135  | 43.1538   | 76.9603    | 34.9284    | 48.2734   | 27.8177   | 16.6182  |
| AP3B1       | 9.35101    | 7.39437   | 6.79484   | 11.7748   | 5.06077    | 11.0526   | 4.84236   | 7.79223   | 11.6043  | 12.2958   | 9.91739    | 8.6578     | 13.4858   | 8.73184   | 8.34801  |
| AP3B2       | 0.194454   | 0.161031  | 0.145785  | 0.22857   | 0.212382   | 0.377718  | 0.145701  | 0.189016  | 0.185018 | 0.0648283 | 0.075458   | 0.136963   | 0.0686113 | 0.0698707 | 0.130903 |
| AP3D1       | 8.87352    | 8.85951   | 8.87607   | 19.3771   | 20.3633    | 21.1092   | 9.78063   | 6.91067   | 13.0451  | 12.0379   | 7.66176    | 12.7602    | 25.3479   | 13.3872   | 11.3361  |
| AP3M1       | 3.54115    | 3.39088   | 3.57973   | 4.906     | 1.17691    | 5.29219   | 2.51194   | 3.70518   | 3.0791   | 4.21056   | 4.56009    | 2.57437    | 5.56547   | 3.84554   | 3.75887  |
| AP3M2       | 1.91702    | 1.86554   | 1.97716   | 3.16477   | 1.43992    | 3.63515   | 1.656     | 1.49633   | 0.798721 | 1.74915   | 2.39901    | 1.11901    | 1.59896   | 1.74018   | 2.28217  |
| AP3S1       | 7.22614    | 5.62117   | 5.41885   | 11.6413   | 1.73012    | 12.3501   | 5.78805   | 7.89772   | 9.07399  | 13.141    | 19.6084    | 6.65843    | 15.4794   | 7.51961   | 7.9747   |
| AP3S2       | 1.29491    | 1.31199   | 1.40963   | 1.14809   | 1.56144    | 1.38519   | 1.40555   | 1.22062   | 0.925177 | 1.45011   | 1.20417    | 0.740605   | 0.764274  | 1.03407   | 0.880125 |

|            |           |           |          |           |           |          |           |           |           |           |           |           |          |          |          |
|------------|-----------|-----------|----------|-----------|-----------|----------|-----------|-----------|-----------|-----------|-----------|-----------|----------|----------|----------|
| AP4B1      | 2.05048   | 1.60217   | 1.67051  | 2.22061   | 1.55069   | 2.51718  | 1.27323   | 1.26539   | 1.0371    | 1.00595   | 1.52596   | 1.05241   | 1.36914  | 1.43951  | 1.71113  |
| AP4B1-AS1  | 0.546895  | 0.396613  | 0.244635 | 0.289503  | 0.216409  | 0.161498 | 0.336638  | 0.564552  | 0.0392175 | 0.0204897 | 0.082669  | 0.161101  | 2.77E-33 | 0.24754  | 0.555302 |
| AP4E1      | 2.33751   | 2.40708   | 2.53899  | 3.13328   | 1.02833   | 2.47269  | 1.75718   | 2.43524   | 2.46448   | 3.53344   | 2.8776    | 2.77622   | 5.16298  | 2.88391  | 2.11219  |
| AP4M1      | 1.29521   | 2.18625   | 2.06734  | 4.13388   | 6.03834   | 5.31106  | 2.36803   | 1.0976    | 3.7527    | 3.399     | 5.33319   | 2.62988   | 4.06766  | 2.45564  | 2.46437  |
| AP4S1      | 1.0651    | 0.932898  | 1.1385   | 0.795866  | 1.13141   | 0.486183 | 0.89849   | 0.962836  | 0.913816  | 0.702859  | 0.826368  | 0.568307  | 0.573844 | 0.696314 | 0.709617 |
| AP5B1      | 2.91262   | 4.60399   | 5.55642  | 4.46615   | 5.65811   | 6.34955  | 5.36493   | 3.05941   | 4.91913   | 2.64263   | 2.86807   | 2.79716   | 7.53268  | 3.77631  | 2.76676  |
| AP5M1      | 4.56131   | 3.47312   | 3.60022  | 4.50792   | 1.38221   | 4.03671  | 2.74058   | 4.25974   | 3.72469   | 4.43916   | 6.179     | 2.87851   | 5.15738  | 3.63064  | 4.40288  |
| AP5S1      | 1.90104   | 1.5702    | 1.62151  | 3.07854   | 3.06302   | 3.88088  | 1.96832   | 1.11233   | 1.65375   | 2.20816   | 3.94551   | 1.60525   | 3.39012  | 2.3142   | 2.25532  |
| AP5Z1      | 2.25687   | 4.33189   | 4.30048  | 3.83793   | 7.57415   | 6.47411  | 6.60209   | 2.93671   | 2.96128   | 4.19367   | 2.919     | 4.52131   | 4.57041  | 2.32191  | 3.0014   |
| APAF1      | 1.35473   | 1.52336   | 1.63335  | 1.62482   | 1.37648   | 1.93186  | 0.929706  | 1.25796   | 0.515448  | 1.67474   | 2.21077   | 0.670591  | 1.59614  | 1.37517  | 1.92898  |
| APBA1      | 1.64856   | 1.81046   | 1.97737  | 0.644779  | 2.21133   | 1.28101  | 2.16722   | 1.30266   | 0.933242  | 0.516174  | 0.777737  | 0.565899  | 0.371934 | 0.420699 | 0.807688 |
| APBA2      | 0.176152  | 0.161663  | 0.163074 | 0.674253  | 0.729668  | 0.864235 | 0.325631  | 0.175186  | 0.127699  | 0.694852  | 0.866435  | 0.201066  | 1.46936  | 1.37878  | 1.99972  |
| APBA3      | 1.45851   | 2.02035   | 2.12926  | 3.28236   | 5.08086   | 3.64351  | 1.81221   | 1.1723    | 3.19994   | 2.50358   | 4.03143   | 1.91071   | 3.0514   | 2.66798  | 2.29482  |
| APBB1      | 2.41927   | 1.63436   | 1.95374  | 1.62911   | 2.67432   | 4.56682  | 2.37495   | 1.16034   | 0.374146  | 0.996078  | 1.49558   | 0.27019   | 1.86647  | 1.74275  | 3.08833  |
| APBB1IP    | 1.53585   | 0.866852  | 1.32139  | 2.20679   | 1.18604   | 4.09514  | 1.81371   | 1.46633   | 0.106885  | 1.80648   | 3.77469   | 0.144432  | 1.99883  | 1.30267  | 3.34002  |
| APBB2      | 5.4898    | 3.2536    | 3.55183  | 2.37613   | 2.33881   | 3.85818  | 3.55602   | 4.12393   | 2.43454   | 2.72139   | 3.84025   | 2.33551   | 2.36231  | 3.0066   | 4.52255  |
| APBB3      | 2.42369   | 3.02796   | 2.62609  | 2.75187   | 5.7139    | 3.99965  | 2.09384   | 1.99195   | 2.53383   | 1.70943   | 2.22758   | 3.03872   | 1.52916  | 2.94261  | 4.00438  |
| APC        | 4.38779   | 3.78046   | 3.89398  | 3.22059   | 1.37132   | 3.9288   | 2.72869   | 3.34473   | 3.84059   | 4.02645   | 3.6876    | 2.40528   | 5.3349   | 3.10726  | 3.49013  |
| APC2       | 0.132233  | 0.306477  | 0.25462  | 0.195007  | 1.04118   | 0.209659 | 0.450335  | 0.307977  | 0.0416495 | 0.117321  | 0.0386055 | 0.340944  | 0.242709 | 0.268102 | 0.320871 |
| APCDD1     | 30.4419   | 38.566    | 31.6402  | 18.5249   | 40.8322   | 35.5047  | 42.6682   | 30.6507   | 31.7171   | 30.7022   | 56.7381   | 35.9435   | 16.7968  | 28.1239  | 18.4603  |
| APCDD1L    | 0.32135   | 0.287142  | 0.410849 | 0.0903165 | 0.417486  | 0.174125 | 0.633748  | 0.384247  | 0.0498105 | 0.41066   | 0.619997  | 0.242476  | 1.3307   | 0.656539 | 0.763572 |
| APCDD1L-DT | 0.0772907 | 0.0851197 | 0.118746 | 0         | 0.0514539 | 0.065812 | 0.113462  | 0.0588768 | 0.0134473 | 0.332598  | 0.274219  | 0.189612  | 0.484428 | 0.138499 | 0.142713 |
| APCS       | 0         | 0         | 0        | 0         | 0         | 0        | 0         | 0         | 0         | 0         | 0         | 0         | 0        | 0        | 0        |
| APEH       | 5.92422   | 6.63865   | 6.36566  | 16.6203   | 13.9991   | 19.2416  | 7.30061   | 4.3104    | 10.9758   | 10.7109   | 11.4809   | 10.105    | 18.8623  | 10.1878  | 7.09797  |
| APELA      | 0.0794384 | 0.148846  | 0.065717 | 0.745868  | 0.260501  | 1.40542  | 0.0806224 | 0.251016  | 0.096747  | 0.232641  | 0.468308  | 0.0821026 | 0.335993 | 0.433632 | 4.17039  |
| APEX1      | 18.4789   | 17.7995   | 18.1225  | 33.1403   | 14.1436   | 41.9497  | 15.7386   | 14.4621   | 12.9948   | 16.1414   | 33.2757   | 11.7506   | 20.2003  | 17.501   | 13.0548  |

|              |           |           |           |           |           |           |           |           |           |            |           |           |           |            |           |
|--------------|-----------|-----------|-----------|-----------|-----------|-----------|-----------|-----------|-----------|------------|-----------|-----------|-----------|------------|-----------|
| APEX2        | 2.64019   | 3.67788   | 3.86565   | 8.32168   | 6.88098   | 9.26518   | 3.39287   | 2.61145   | 8.71803   | 4.88044    | 6.50957   | 4.43429   | 7.93264   | 5.32323    | 3.10946   |
| APH1A        | 24.7876   | 23.3985   | 26.5896   | 30.7434   | 28.5564   | 44.847    | 32.2663   | 18.589    | 28.5961   | 28.2651    | 51.9291   | 23.3193   | 40.1228   | 22.1096    | 18.5102   |
| APH1B        | 1.71655   | 1.12757   | 1.26937   | 0.966951  | 0.643021  | 2.25588   | 1.41163   | 1.29498   | 0.430212  | 1.21924    | 1.99385   | 0.552903  | 1.36391   | 0.897144   | 1.51399   |
| API5         | 10.6772   | 9.4796    | 10.3126   | 17.1304   | 3.65124   | 17.3082   | 7.29244   | 11.3096   | 10.9652   | 11.4519    | 13.4653   | 8.17166   | 17.2634   | 11.2145    | 9.1378    |
| APIP         | 3.04313   | 2.18683   | 2.40546   | 3.80053   | 0.563025  | 3.7474    | 1.72616   | 1.97305   | 2.38375   | 3.04799    | 6.18295   | 1.34037   | 3.274     | 2.37744    | 3.14786   |
| APLF         | 2.15858   | 2.3408    | 2.46719   | 1.86509   | 0.990026  | 1.3721    | 1.10529   | 1.73133   | 4.10079   | 2.48284    | 2.70148   | 1.91021   | 1.30736   | 1.15331    | 1.10529   |
| APLN         | 0.150746  | 0.214436  | 0.285046  | 1.22799   | 0.412568  | 2.27377   | 0.417997  | 0.159488  | 0.865502  | 2.79297    | 5.63192   | 0.354406  | 2.57971   | 4.77595    | 1.2577    |
| APLNR        | 4.57964   | 1.44418   | 1.32873   | 4.65792   | 6.9097    | 11.6171   | 2.72011   | 1.99521   | 1.86886   | 8.31838    | 21.4678   | 1.6662    | 2.70052   | 6.9902     | 17.956    |
| APLP1        | 0.138636  | 0.129141  | 0.0917519 | 0.266689  | 0.473771  | 0.157396  | 0.126633  | 0.082139  | 0.225125  | 0.185603   | 0.406909  | 0.132264  | 0.107337  | 0.275339   | 0.517659  |
| APLP2        | 33.4623   | 28.1533   | 30.1188   | 58.5893   | 40.4516   | 94.6291   | 29.4032   | 30.3205   | 40.7107   | 55.7953    | 48.0235   | 33.8496   | 80.4965   | 36.1159    | 34.0443   |
| APMAP        | 7.54416   | 5.41217   | 5.65488   | 13.7879   | 9.46882   | 16.645    | 6.43646   | 5.34332   | 3.97213   | 8.81478    | 14.5626   | 4.14546   | 11.698    | 8.01107    | 9.03861   |
| APOA1        | 0.070991  | 0.0256534 | 0.0293644 | 0.0548687 | 0.110273  | 0.0604479 | 0.0202638 | 0         | 0.0432295 | 0          | 0.020035  | 0.0380969 | 0         | 0.0185515  | 0.203904  |
| APOA1-AS     | 0.36996   | 0.792233  | 0.612114  | 0.169446  | 0.638528  | 0         | 0.563211  | 0.219193  | 0         | 0.206372   | 0.185617  | 0.176477  | 0.0530436 | 0.730461   | 0.708412  |
| APOA2        | 0         | 0         | 0.0404769 | 0.050422  | 0.0760024 | 0.0416617 | 0         | 0         | 0         | 0.12282    | 0         | 0         | 0         | 0          | 0.281068  |
| APOA4        | 0         | 0         | 0         | 0         | 0         | 0.0269945 | 0         | 0         | 0         | 0          | 0         | 0         | 0         | 0          | 0         |
| APOA5        | 0.0479152 | 0         | 0         | 0         | 0         | 0         | 0         | 0         | 0         | 0          | 0         | 0         | 0         | 0          | 0         |
| APOB         | 0.10489   | 0.117658  | 0.014914  | 0.0692467 | 0.636448  | 0.284684  | 0.153443  | 0.0961308 | 1.23553   | 0.026741   | 0.0573539 | 0.102024  | 0.0232632 | 0.00599596 | 0.0141221 |
| APOBEC1      | 0         | 0         | 0         | 0         | 0         | 0         | 0         | 0         | 0         | 0          | 0         | 0         | 0         | 0          | 0         |
| APOBEC2      | 1.06226   | 0.791602  | 0.703019  | 0.204342  | 0.506016  | 0.410039  | 0.889424  | 0.944046  | 0.0517484 | 0.124436   | 0.143899  | 0.172283  | 0         | 0.399731   | 0.467831  |
| APOBEC3A     | 1.01163   | 0.996668  | 1.32002   | 4.14201   | 0.94418   | 3.23622   | 0.850902  | 0.548882  | 0.415499  | 7.0577     | 4.74882   | 6.45123   | 7.32169   | 2.39097    | 3.26181   |
| APOBEC3A_B   | 2.37E-36  | 5.30E-33  | 0         | 4.13E-05  | 1.78E-33  | 1.59E-10  | 0         | 4.20E-45  | 4.34E-19  | 0.00268935 | 0.0669403 | 9.91E-08  | 9.9145    | 1.76E-10   | 1.64E-08  |
| APOBEC3B     | 0.29013   | 0.30593   | 0.0848296 | 1.27009   | 0.0428783 | 1.51145   | 0.273875  | 0.0761382 | 0.31814   | 1.07377    | 2.65221   | 0.843051  | 1.4982    | 0.353808   | 1.19986   |
| APOBEC3B-AS1 | 0         | 0         | 0         | 0         | 0         | 0         | 0         | 0         | 0         | 0.0853318  | 0.0385489 | 0.0783352 | 0.0436172 | 0.018488   | 0         |
| APOBEC3C     | 3.88152   | 2.97619   | 3.03843   | 9.785     | 5.41344   | 16.2766   | 4.97981   | 3.06011   | 1.70283   | 4.68836    | 12.5092   | 1.83662   | 5.34528   | 3.14114    | 6.83308   |
| APOBEC3D     | 0.36741   | 0.314255  | 0.505969  | 0.369982  | 1.0796    | 0.906857  | 0.547497  | 0.357069  | 0.0717076 | 0.102514   | 0.379264  | 0.130563  | 0.297096  | 0.363795   | 1.15142   |
| APOBEC3F     | 0.31694   | 0.352012  | 0.339059  | 0.433105  | 0.503356  | 1.40101   | 0.514111  | 0.397458  | 0.0646054 | 0.169008   | 0.53818   | 0.0731112 | 0.279     | 0.188958   | 0.520507  |

|             |           |            |           |           |           |           |           |           |           |           |           |           |           |            |           |
|-------------|-----------|------------|-----------|-----------|-----------|-----------|-----------|-----------|-----------|-----------|-----------|-----------|-----------|------------|-----------|
| APOBEC3G    | 0.441452  | 0.345987   | 0.292419  | 0.320341  | 0.597311  | 1.97751   | 0.38692   | 0.274023  | 0.0943766 | 0.392929  | 1.18403   | 0.0742843 | 0.618308  | 0.314731   | 1.61658   |
| APOBEC3H    | 0.121168  | 0.0194602  | 0.100239  | 0.0208112 | 0.0941077 | 0.103173  | 0.0461152 | 0.107684  | 0.0245948 | 0.0506927 | 0.0227972 | 0.0144498 | 0.0521179 | 0.0422184  | 0.203014  |
| APOBEC4     | 0.0749775 | 0.0963341  | 0.165404  | 0.051511  | 0.0258813 | 0.0425616 | 0.104631  | 0.133268  | 0         | 0.0313682 | 0.0940447 | 0         | 0         | 0.0609568  | 0.095713  |
| APOBR       | 0.268538  | 0.629284   | 0.822977  | 1.3711    | 0.834263  | 0.836674  | 0.146335  | 0.428492  | 0.0743292 | 0.497903  | 0.523615  | 0.161577  | 1.03168   | 0.555018   | 1.13067   |
| APOC1       | 1.45178   | 0.397749   | 0.494535  | 2.05347   | 0.751704  | 1.6967    | 0.292516  | 0.632461  | 0.104006  | 1.46485   | 6.16989   | 0.0203684 | 0.220395  | 0.327309   | 0.204406  |
| APOC1P1     | 0         | 0.0118751  | 0         | 0.0253989 | 0         | 0         | 0         | 0.0219037 | 0         | 0         | 0.111291  | 0         | 0         | 0          | 0.0357547 |
| APOC2       | 0.105946  | 0.153139   | 0.21896   | 0.501766  | 0         | 0.459536  | 0.0724938 | 0.338562  | 0.0386634 | 0.199224  | 0.609239  | 0.0908613 | 0.143378  | 0.033184   | 0         |
| APOC3       | 0         | 0          | 0         | 0         | 0         | 0         | 0         | 0         | 0         | 0         | 0         | 0         | 0         | 0          | 0         |
| APOC4       | 0         | 0          | 0         | 0         | 0         | 0.0320422 | 0.0859316 | 0.0334432 | 0         | 0         | 0         | 0         | 0         | 0          | 0.0540428 |
| APOC4-APOC2 | 0.0210391 | 0.0304109  | 0.0174051 | 0.0216814 | 0         | 8.90E-08  | 1.60E-08  | 5.61E-08  | 4.10E-22  | 2.11E-21  | 6.46E-21  | 9.64E-22  | 1.52E-21  | 3.52E-22   | 1.16E-25  |
| APOD        | 110.493   | 28.1727    | 44.4414   | 10.8484   | 8.20786   | 112.708   | 56.3088   | 57.4073   | 3.06799   | 2.00501   | 4.90144   | 0.923227  | 1.30818   | 0.749283   | 10.4415   |
| APOE        | 16.533    | 20.3765    | 27.0665   | 19.7166   | 23.5146   | 42.4215   | 12.9406   | 12.0729   | 8.93833   | 10.3653   | 32.5854   | 1.87145   | 3.54886   | 2.07944    | 10.153    |
| APOF        | 0.0411067 | 0.00660194 | 0.0226709 | 0.0141205 | 0         | 0.0233345 | 0         | 0         | 0.0166878 | 0         | 0         | 0         | 0         | 0.00716138 | 0.0393562 |
| APOH        | 0         | 0          | 0         | 0         | 0         | 0         | 0         | 0         | 0         | 0         | 0         | 0         | 0         | 0          | 0         |
| APOL1       | 2.20154   | 1.57247    | 1.46787   | 5.21896   | 2.89924   | 8.35952   | 1.36902   | 1.4542    | 0.570801  | 1.17414   | 1.78673   | 0.840304  | 3.26677   | 1.43995    | 4.92386   |
| APOL2       | 2.62534   | 2.30024    | 1.96436   | 5.3162    | 4.50664   | 13.7254   | 1.78515   | 1.93193   | 1.97544   | 1.88889   | 2.85042   | 1.07059   | 3.39308   | 1.69111    | 4.38269   |
| APOL3       | 3.56829   | 1.79543    | 1.66747   | 2.66482   | 2.37673   | 7.55263   | 1.88236   | 1.60065   | 0.446954  | 0.758238  | 1.09627   | 0.206034  | 1.85053   | 0.72591    | 2.68389   |
| APOL4       | 1.56922   | 2.01505    | 1.63173   | 1.52594   | 2.61668   | 3.71841   | 1.60412   | 2.17978   | 0.72155   | 0.925874  | 1.553     | 0.80715   | 1.45254   | 0.824975   | 2.42226   |
| APOL5       | 0.0161051 | 0.00775969 | 0.0266466 | 0         | 0.0500336 | 0         | 0         | 0.0143129 | 0         | 0         | 0         | 0         | 0         | 0.0420862  | 0         |
| APOL6       | 2.47203   | 1.77065    | 1.83544   | 5.30906   | 1.5849    | 9.79761   | 1.50116   | 2.34705   | 0.442008  | 1.48973   | 2.25208   | 0.718628  | 4.98364   | 1.51388    | 4.48768   |
| APOLD1      | 3.18486   | 0.896676   | 1.15072   | 2.01671   | 0.946226  | 5.76683   | 1.74152   | 1.11683   | 1.68822   | 2.62476   | 4.08805   | 1.44145   | 2.98326   | 3.20129    | 4.57387   |
| APOM        | 0.171891  | 0.12952    | 0.0981613 | 0.0813663 | 0.08589   | 0.185975  | 0.149582  | 0.136201  | 0.0819943 | 0.116079  | 0.161946  | 0.0839442 | 0.0514236 | 0.0677349  | 0.057905  |
| APOO        | 2.11137   | 1.19507    | 1.1701    | 3.50667   | 0.477624  | 3.01961   | 1.17024   | 1.02018   | 0.848814  | 2.16115   | 4.32727   | 1.29073   | 1.82514   | 2.18556    | 1.41306   |
| APOOL       | 2.25812   | 2.12427    | 2.11676   | 2.29018   | 0.739328  | 2.17872   | 1.89181   | 2.60474   | 2.74142   | 2.03917   | 2.81173   | 1.72585   | 3.03392   | 1.62347    | 1.42875   |
| APOOP5      | 0         | 0          | 0         | 0         | 0         | 0         | 0         | 0         | 0         | 0         | 0         | 0         | 0         | 0          | 0         |
| APOPT1      | 2.72359   | 2.71058    | 2.42551   | 3.26686   | 2.03442   | 2.64859   | 2.30254   | 1.85175   | 2.71887   | 3.25961   | 5.17471   | 2.08192   | 2.33339   | 2.01852    | 2.07326   |

|          |           |            |            |            |           |           |           |           |           |            |            |            |            |            |           |
|----------|-----------|------------|------------|------------|-----------|-----------|-----------|-----------|-----------|------------|------------|------------|------------|------------|-----------|
| APP      | 57.55     | 38.832     | 42.5641    | 71.501     | 82.3512   | 117.248   | 45.0957   | 44.1237   | 47.8761   | 79.4022    | 61.6322    | 50.582     | 122.608    | 61.4679    | 75.7776   |
| APPBP2   | 3.10878   | 2.76406    | 2.96652    | 2.84039    | 1.22799   | 3.16865   | 2.2159    | 3.07614   | 2.88839   | 3.4817     | 4.14451    | 1.89571    | 2.71107    | 2.7545     | 2.94058   |
| APPL1    | 7.80548   | 7.51606    | 8.18629    | 8.09498    | 2.29431   | 7.58274   | 5.42476   | 8.37174   | 8.38086   | 6.11292    | 7.07248    | 5.60515    | 8.63316    | 5.17136    | 4.88425   |
| APPL2    | 11.0422   | 13.2918    | 12.4612    | 17.1361    | 9.30257   | 14.8941   | 11.9474   | 9.65752   | 47.8604   | 12.9784    | 16.4978    | 15.9364    | 16.7257    | 10.8567    | 6.70697   |
| APRT     | 26.7564   | 25.1201    | 20.8299    | 62.2386    | 56.0841   | 70.2043   | 33.8242   | 19.9559   | 48.5477   | 34.05      | 58.3377    | 42.1272    | 42.0942    | 32.5546    | 18.4921   |
| APTR     | 0.723411  | 0.613192   | 0.773457   | 0.699442   | 1.51768   | 0.849054  | 0.525251  | 0.593925  | 0.385668  | 0.669579   | 0.598215   | 0.377776   | 0.370582   | 0.748936   | 0.57728   |
| APTX     | 4.28575   | 4.19088    | 4.16593    | 5.07908    | 3.37402   | 5.66464   | 3.41421   | 2.99511   | 3.78418   | 3.83869    | 5.89366    | 3.50564    | 5.02124    | 4.12858    | 2.92357   |
| AQP1     | 82.9134   | 26.6598    | 32.6555    | 25.9528    | 61.7223   | 129.935   | 74.1044   | 30.9871   | 19.2383   | 29.0872    | 51.9436    | 22.1457    | 33.8285    | 45.4856    | 78.3779   |
| AQP10    | 0.0258437 | 0.0435816  | 0.0748291  | 0          | 0.0401442 | 0         | 0.0442613 | 0.0459355 | 0         | 0          | 0.0145872  | 0.00924594 | 0.0166742  | 0.0135071  | 0         |
| AQP11    | 0.902933  | 0.875274   | 0.800325   | 0.365553   | 0.367339  | 0.347807  | 0.687294  | 0.983959  | 0.130913  | 0.229353   | 0.315497   | 0.376876   | 0.083224   | 0.382024   | 0.571177  |
| AQP12A   | 0         | 0          | 0          | 0          | 0         | 0         | 0         | 0         | 0         | 0          | 0          | 0          | 0          | 0          | 0         |
| AQP12B   | 0         | 0          | 0          | 0          | 0         | 0         | 0.0237199 | 0         | 0         | 0          | 0          | 0          | 0          | 0          | 0         |
| AQP2     | 0.088607  | 0.0373557  | 0.0549765  | 0.00570701 | 0.051614  | 0.0660168 | 0.0758765 | 0.123042  | 0.0472121 | 0.00695068 | 0.0375099  | 0.0356629  | 0.0142922  | 0.00868311 | 0         |
| AQP3     | 87.7437   | 230.992    | 199.225    | 184.454    | 246.257   | 243.631   | 149.911   | 105.663   | 605.399   | 235.658    | 302.633    | 449.904    | 344.909    | 175.158    | 87.0443   |
| AQP4     | 0         | 0.00800336 | 0.00343541 | 0          | 0         | 0         | 0         | 0.0258341 | 0         | 0          | 0          | 0          | 0          | 0          | 0.0178914 |
| AQP4-AS1 | 0.0585267 | 0.0800444  | 0.121898   | 0.0301445  | 0.092054  | 0.0334047 | 0.0558495 | 0.0259777 | 0.0118413 | 0          | 0.0219726  | 0.0279917  | 0          | 0.0152991  | 0.0281208 |
| AQP5     | 24.4112   | 17.9022    | 11.844     | 6.11595    | 97.565    | 31.2489   | 22.9925   | 12.4307   | 296.899   | 31.7049    | 69.8878    | 58.0081    | 21.1254    | 8.31115    | 3.13241   |
| AQP6     | 0.0610405 | 0.054619   | 0.050497   | 0.00898628 | 0.0948169 | 0.170775  | 0.149344  | 0.046498  | 0.0212401 | 0.0218892  | 0.00984387 | 0.199662   | 0.0281307  | 0.0273449  | 0.0125231 |
| AQP7     | 0.680072  | 0.203552   | 0.247205   | 0.0106187  | 0.912334  | 0.307084  | 0.188239  | 0.302196  | 0         | 0.0129327  | 0.0348962  | 0.0368644  | 0.00664816 | 0.0269269  | 0.162778  |
| AQP7P1   | 0.269275  | 0.57156    | 0.439505   | 0.104998   | 0.859162  | 0.396599  | 0.299139  | 0.258712  | 0.115224  | 0.137014   | 0.0082156  | 0.286406   | 0          | 0.832997   | 0.888393  |
| AQP7P3   | 0.262492  | 0.252945   | 0.144768   | 0          | 0.543654  | 0.186257  | 0.199803  | 0.0777604 | 0.159843  | 0.164727   | 0          | 0.500854   | 0.0282264  | 0.27438    | 0.4398    |
| AQP8     | 0.141548  | 0.01705    | 0.102461   | 0          | 0.0549681 | 0.0150658 | 0.101009  | 0.125796  | 0         | 0          | 0.0199737  | 0.0633007  | 0          | 0.0369895  | 0         |
| AQP9     | 1.50456   | 4.03263    | 5.88564    | 6.82534    | 1.2214    | 2.0279    | 4.5752    | 3.25211   | 3.72923   | 7.0316     | 10.0371    | 0.29754    | 5.3903     | 0.541357   | 1.78071   |
| AQR      | 6.06366   | 5.65216    | 5.9095     | 9.05627    | 2.21498   | 7.56043   | 4.15085   | 5.50224   | 9.12149   | 5.96376    | 5.77027    | 5.04282    | 7.45707    | 5.70492    | 4.69104   |
| AR       | 1.10602   | 1.13592    | 1.66302    | 0.221959   | 0.364706  | 0.842631  | 1.17199   | 1.45199   | 0.106343  | 0.175348   | 0.376759   | 0.0944114  | 0.199057   | 0.1866     | 0.657648  |
| ARAF     | 6.51617   | 6.35752    | 6.73671    | 9.77157    | 10.0874   | 13.805    | 7.53285   | 5.38348   | 6.89106   | 5.26354    | 8.29099    | 5.53573    | 8.40846    | 6.45947    | 7.21235   |



|           |            |            |          |           |          |          |          |            |          |          |          |          |           |            |          |
|-----------|------------|------------|----------|-----------|----------|----------|----------|------------|----------|----------|----------|----------|-----------|------------|----------|
| ARAP1     | 4.87286    | 6.3629     | 6.89508  | 11.6293   | 19.1369  | 14.8078  | 10.7193  | 3.89245    | 4.34654  | 9.05839  | 6.68853  | 7.10022  | 11.3735   | 7.59063    | 9.19459  |
| ARAP1-AS2 | 0.345206   | 0.636637   | 0.584366 | 0.562106  | 1.27074  | 0.718526 | 1.34142  | 0.535465   | 0.174885 | 0.768839 | 0.108055 | 1.1456   | 0.135697  | 0.841109   | 1.44085  |
| ARAP2     | 7.46397    | 8.50943    | 7.45535  | 9.18357   | 3.55707  | 5.23713  | 5.00306  | 7.0056     | 18.1479  | 9.92494  | 7.71939  | 11.0441  | 10.7464   | 6.7291     | 3.04348  |
| ARAP3     | 1.51736    | 0.91333    | 0.855038 | 2.09851   | 3.50473  | 3.63636  | 1.66217  | 0.742654   | 0.621348 | 2.02037  | 1.67319  | 1.45391  | 2.8178    | 2.88942    | 4.78775  |
| ARC       | 0.141308   | 0.276119   | 0.435126 | 0.145622  | 0.146333 | 0.287435 | 0.439205 | 0.104652   | 3.2316   | 0.266033 | 0.310175 | 2.60076  | 0.0759758 | 0.201046   | 0.21421  |
| ARCN1     | 12.9923    | 12.0259    | 12.7413  | 20.6303   | 6.58097  | 22.5519  | 10.6287  | 11.7003    | 17.3182  | 18.9475  | 21.8698  | 11.1975  | 27.0158   | 16.0243    | 17.0196  |
| AREG      | 0.290195   | 0.266533   | 0.17255  | 1.52331   | 0.662073 | 1.66791  | 0.155313 | 0.314317   | 5.41183  | 4.33656  | 4.49419  | 4.40594  | 18.957    | 6.87711    | 3.02149  |
| AREL1     | 5.1429     | 3.95649    | 4.28622  | 5.50139   | 3.75667  | 5.44313  | 5.16833  | 3.98887    | 5.37831  | 4.49707  | 4.11676  | 4.0722   | 6.82556   | 4.17625    | 4.23618  |
| ARF1      | 42.5263    | 33.5074    | 36.2621  | 78.3274   | 46.7103  | 93.6222  | 46.1029  | 32.6002    | 76.2253  | 77.5576  | 109.164  | 53.8184  | 115.182   | 57.9302    | 50.4432  |
| ARF3      | 24.5695    | 31.6677    | 25.2243  | 41.8598   | 33.7843  | 52.6942  | 27.8957  | 21.2829    | 50.6178  | 33.3584  | 35.6984  | 32.7865  | 45.2893   | 23.8389    | 20.4568  |
| ARF4      | 13.4602    | 10.0548    | 11.3663  | 27.9342   | 6.632    | 28.3246  | 12.4375  | 15.3075    | 24.5247  | 36.4756  | 57.6565  | 17.3303  | 44.6323   | 22.5853    | 36.1398  |
| ARF4-AS1  | 0.507709   | 0.468858   | 0.490014 | 0.0872014 | 0.394323 | 0.360256 | 0.483071 | 0.413608   | 0.154583 | 0.318613 | 0.334332 | 0.302733 | 0         | 0.1769     | 0        |
| ARF5      | 25.2124    | 24.8652    | 25.3294  | 42.716    | 47.3309  | 57.374   | 33.1264  | 17.9967    | 47.4732  | 42.0597  | 78.1862  | 32.2426  | 37.9289   | 28.9918    | 20.985   |
| ARF6      | 16.2924    | 18.0919    | 16.8757  | 25.5328   | 19.5398  | 24.0234  | 15.3352  | 15.0485    | 49.3875  | 29.718   | 29.8465  | 22.3568  | 43.5179   | 20.8195    | 11.5429  |
| ARFGAP1   | 2.54154    | 4.16139    | 4.38326  | 5.5712    | 11.9356  | 8.76183  | 4.36505  | 2.51233    | 3.59369  | 4.42665  | 3.95105  | 4.4346   | 6.23957   | 6.07029    | 8.97796  |
| ARFGAP2   | 11.6024    | 13.0584    | 13.3929  | 15.5391   | 25.0168  | 18.1602  | 14.9519  | 8.63681    | 18.8865  | 11.9858  | 7.83242  | 11.3262  | 16.3594   | 10.8911    | 7.45673  |
| ARFGAP3   | 6.1268     | 4.56972    | 6.01464  | 7.34099   | 2.2841   | 9.83567  | 4.01069  | 4.36326    | 2.60665  | 6.52091  | 11.2783  | 3.64158  | 10.1353   | 6.85687    | 10.8638  |
| ARFGEF1   | 8.81198    | 8.58409    | 8.57244  | 8.58915   | 4.66717  | 7.86331  | 5.50058  | 7.71464    | 11.4264  | 9.74529  | 7.57191  | 7.07989  | 10.6021   | 7.48502    | 7.3051   |
| ARFGEF2   | 7.2971     | 6.654      | 7.29122  | 6.90536   | 5.2183   | 6.83276  | 6.88773  | 6.46222    | 7.24362  | 5.40032  | 4.60477  | 5.01529  | 7.0115    | 5.04161    | 5.07183  |
| ARFGEF3   | 1.54733    | 0.747025   | 0.961009 | 0.245195  | 0.500032 | 1.43935  | 1.22869  | 1.17474    | 0.119318 | 0.130772 | 0.163263 | 0.10237  | 0.165552  | 0.177183   | 0.299266 |
| ARFIP1    | 3.17411    | 3.74221    | 3.62759  | 4.42289   | 2.21483  | 5.3505   | 2.87146  | 3.75693    | 4.32819  | 4.29857  | 7.38474  | 3.07606  | 5.08507   | 3.72978    | 4.2703   |
| ARFIP2    | 4.60936    | 3.61829    | 3.69371  | 5.74844   | 5.29049  | 6.12292  | 4.3628   | 2.96267    | 5.07135  | 4.4484   | 7.28886  | 3.77173  | 6.25071   | 4.09478    | 3.07648  |
| ARFRP1    | 3.04651    | 4.11581    | 3.89498  | 9.49881   | 13.565   | 8.94654  | 3.72545  | 2.50749    | 2.94083  | 5.68122  | 7.08346  | 4.1182   | 8.02435   | 5.808      | 5.12093  |
| ARG1      | 22.741     | 23.0314    | 14.9991  | 9.26245   | 21.1946  | 22.1168  | 40.7853  | 13.5422    | 389.154  | 47.1035  | 128.069  | 54.6047  | 3.35367   | 17.4885    | 1.44409  |
| ARG2      | 1.68744    | 1.47825    | 1.52136  | 3.88541   | 0.995628 | 2.46987  | 1.59506  | 1.79757    | 29.7582  | 15.3671  | 21.6152  | 9.42537  | 21.5913   | 13.6549    | 2.96622  |
| ARGFX     | 0.00913842 | 0.00220152 | 0        | 0         | 0        | 0        | 0        | 0.00406073 | 0        | 0        | 0        | 0        | 0         | 0.00238807 | 0        |

|                |           |           |           |           |           |           |           |                 |                 |           |           |           |            |                 |          |
|----------------|-----------|-----------|-----------|-----------|-----------|-----------|-----------|-----------------|-----------------|-----------|-----------|-----------|------------|-----------------|----------|
| ARGFXP2        | 0.730429  | 1.25028   | 1.47885   | 0.475407  | 0.865885  | 0.147304  | 1.25097   | 1.04205         | 0.11705         | 0.193003  | 0.021699  | 0.453873  | 0.0248036  | 0.602769        | 0.386469 |
| ARGLU1         | 24.4119   | 23.1738   | 21.9228   | 15.9088   | 28.7018   | 18.8169   | 14.7437   | 14.8002         | 11.0264         | 14.9796   | 20.8438   | 16.9661   | 9.59352    | 19.3142         | 17.3679  |
| ARHGAP1        | 17.824    | 17.5673   | 16.0398   | 27.6492   | 32.2666   | 47.4923   | 24.3536   | 16.8313         | 45.7219         | 30.2523   | 50.8866   | 29.1641   | 37.5028    | 20.6671         | 29.6967  |
| ARHGAP10       | 5.36168   | 3.57581   | 3.75268   | 4.16743   | 2.188     | 4.94585   | 3.85638   | 3.85643         | 2.41644         | 3.35522   | 4.56514   | 2.22166   | 3.96259    | 3.60967         | 4.74183  |
| ARHGAP11A      | 0.889042  | 0.771935  | 0.567121  | 1.99891   | 0.479031  | 2.07742   | 0.430657  | 0.542024        | 1.11182         | 1.67585   | 1.67496   | 0.858727  | 2.79714    | 2.17758         | 0.866447 |
| ARHGAP11B      | 0.463703  | 0.440096  | 0.425157  | 0.577032  | 0.189445  | 0.530149  | 0.161954  | 0.350593        | 0.190351        | 0.546438  | 0.341404  | 0.461423  | 0.172701   | 1.06853         | 0.426934 |
| ARHGAP12       | 5.93876   | 4.36202   | 5.498     | 3.2983    | 1.28868   | 4.47776   | 4.0063    | 5.27789         | 2.79924         | 3.1579    | 3.57724   | 1.90085   | 2.8138     | 2.85745         | 3.48965  |
| ARHGAP15       | 1.24991   | 0.893829  | 1.22993   | 1.09825   | 0.694867  | 1.31075   | 0.465687  | 0.993887        | 0.192284        | 1.28804   | 2.43582   | 0.216525  | 0.84039    | 0.611999        | 1.85171  |
| ARHGAP17       | 5.59946   | 5.65001   | 6.03994   | 6.50443   | 7.57096   | 11.1137   | 6.06949   | 4.54846         | 6.62674         | 8.02949   | 8.9046    | 6.55489   | 11.8933    | 7.11811         | 9.27286  |
| ARHGAP18       | 2.96977   | 1.77506   | 2.12303   | 3.74886   | 1.67468   | 5.32214   | 2.39394   | 2.24545         | 0.781368        | 3.51983   | 6.817     | 0.880269  | 2.45805    | 2.3161          | 4.24597  |
| ARHGAP19       | 1.3753    | 1.42638   | 1.69817   | 1.98357   | 0.898521  | 1.94928   | 1.07243   | 1.50402         | 0.678493        | 1.02256   | 1.44411   | 0.529464  | 1.27141    | 1.0344          | 1.10712  |
| ARHGAP19-SLIT1 | 0.48669   | 0.320865  | 0.0738968 | 0.0268545 | 0.279695  | 0.0670544 | 0.374327  | 0.00060317<br>2 | 0.00055343<br>7 | 0.0013786 | 0.318943  | 0.0783692 | 0.00117573 | 0.00054718<br>9 | 0.444547 |
| ARHGAP20       | 0.737963  | 0.290619  | 0.264826  | 0.173628  | 0.1832    | 0.898074  | 0.696379  | 0.410274        | 0.147741        | 0.203007  | 0.330945  | 0.236288  | 0.119576   | 0.114475        | 0.27584  |
| ARHGAP21       | 7.73373   | 4.84487   | 5.68463   | 8.79842   | 3.0848    | 9.30172   | 5.40868   | 4.85565         | 3.72426         | 11.956    | 6.62345   | 4.82667   | 18.0173    | 9.88809         | 10.7866  |
| ARHGAP22       | 0.303388  | 0.194903  | 0.157669  | 0.661375  | 1.21442   | 0.556405  | 0.226491  | 0.259256        | 0.0900045       | 0.663929  | 0.737664  | 0.230998  | 0.639933   | 0.42487         | 0.575352 |
| ARHGAP22-IT1   | 0.263219  | 0.0585337 | 0.0670011 | 0.0834631 | 0.0314516 | 0.120684  | 0.0231181 | 0.215933        | 0               | 0.0508257 | 0.0228571 | 0.0724386 | 0          | 0.190481        | 0.145391 |
| ARHGAP23       | 8.43275   | 14.5132   | 16.1632   | 16.1205   | 26.4414   | 27.5704   | 15.2611   | 10.35           | 10.1461         | 10.1758   | 5.60909   | 11.563    | 22.9261    | 11.8846         | 12.3243  |
| ARHGAP24       | 1.46526   | 1.0522    | 1.01291   | 0.889448  | 1.85826   | 2.01674   | 1.48964   | 0.899052        | 1.09027         | 1.4007    | 2.38824   | 0.568738  | 0.893578   | 1.14977         | 2.33491  |
| ARHGAP25       | 1.04254   | 0.739426  | 0.792821  | 2.89612   | 1.73007   | 3.66662   | 0.791093  | 0.920766        | 0.441633        | 1.66609   | 2.41958   | 0.412365  | 3.22949    | 1.12698         | 1.8971   |
| ARHGAP26       | 1.85506   | 1.36756   | 1.36826   | 1.74297   | 1.87863   | 2.87616   | 1.57421   | 1.30455         | 1.23945         | 1.61794   | 1.59747   | 1.11166   | 1.33355    | 1.27459         | 2.16449  |
| ARHGAP26-AS1   | 0.0473757 | 0.0913054 | 0.0979814 | 0.024411  | 0.110386  | 0.0605097 | 0.027046  | 0.23157         | 0               | 0.237846  | 0.133703  | 0.0508479 | 0          | 0.0990425       | 0.374207 |
| ARHGAP26-IT1   | 0.298235  | 0.229911  | 0.197377  | 0.245872  | 0.0926525 | 0         | 0.136206  | 0.159028        | 0               | 0.0748632 | 0         | 0.256074  | 0.0769679  | 0.218219        | 0.256982 |
| ARHGAP27       | 2.23742   | 2.56639   | 2.53078   | 4.0137    | 6.00344   | 4.41983   | 2.5257    | 1.98025         | 4.27804         | 3.5969    | 2.15677   | 3.3748    | 3.84211    | 2.46748         | 1.98016  |
| ARHGAP27P1     | 3.60212   | 6.18567   | 6.3469    | 4.83188   | 14.8111   | 5.50532   | 5.80573   | 3.97022         | 5.8603          | 5.3614    | 1.99644   | 7.0557    | 3.1911     | 6.242           | 5.5594   |

|                           |          |          |          |            |          |            |          |          |           |           |          |           |           |           |          |
|---------------------------|----------|----------|----------|------------|----------|------------|----------|----------|-----------|-----------|----------|-----------|-----------|-----------|----------|
| ARHGAP27P1-BPTFP1-KPNA2P3 | 5.4531   | 6.29861  | 6.54644  | 3.79795    | 4.92956  | 4.50664    | 5.28003  | 4.85572  | 3.97861   | 4.94337   | 2.19564  | 5.82258   | 1.41009   | 5.21303   | 5.6074   |
| ARHGAP27P2                | 0.309889 | 0.244324 | 0.279667 | 0.348381   | 0.503244 | 0.503744   | 0.17691  | 0.187775 | 0.188705  | 0.0707168 | 0.127209 | 0.100788  | 0.0272644 | 0.110428  | 0.141603 |
| ARHGAP28                  | 0.807559 | 0.63505  | 0.771915 | 0.638174   | 0.46147  | 1.21492    | 0.640176 | 1.16764  | 0.157974  | 0.898033  | 1.79965  | 0.218557  | 0.764002  | 0.461429  | 3.70161  |
| ARHGAP29                  | 6.00125  | 3.90806  | 5.07158  | 2.41236    | 1.30471  | 5.95858    | 5.75414  | 5.30707  | 10.4082   | 3.1595    | 5.03548  | 1.66608   | 3.17455   | 3.59509   | 4.99277  |
| ARHGAP30                  | 5.07837  | 3.87814  | 4.21419  | 4.53278    | 5.22381  | 6.2258     | 5.00415  | 3.96015  | 1.61152   | 3.80072   | 2.15499  | 4.46825   | 4.3429    | 2.92206   | 3.48511  |
| ARHGAP31                  | 5.82945  | 4.37939  | 5.56902  | 4.14172    | 4.86798  | 6.11498    | 6.59373  | 4.96688  | 3.02126   | 3.32211   | 4.54345  | 1.36305   | 4.87006   | 4.07527   | 8.54049  |
| ARHGAP31-AS1              | 0.927206 | 1.0007   | 1.59546  | 0.152882   | 0.633719 | 0.315801   | 1.27038  | 0.988828 | 0.0903386 | 0.372396  | 0.251208 | 0.185763  | 0.119646  | 0.581518  | 0.585897 |
| ARHGAP32                  | 9.09667  | 10.9184  | 9.78738  | 10.1874    | 8.48306  | 8.34944    | 10.0171  | 9.73864  | 15.6762   | 12.3069   | 6.08989  | 13.3147   | 10.7016   | 7.83798   | 5.64432  |
| ARHGAP33                  | 0.573186 | 1.31244  | 1.03972  | 0.644877   | 2.9488   | 1.48657    | 1.99936  | 1.02815  | 0.422688  | 0.561006  | 0.421477 | 1.25673   | 0.227319  | 0.648615  | 1.57082  |
| ARHGAP35                  | 9.40772  | 8.61016  | 8.40742  | 8.08761    | 9.38367  | 12.4559    | 8.47898  | 6.82888  | 7.03372   | 6.96433   | 4.94118  | 6.81159   | 11.4458   | 7.6931    | 7.31065  |
| ARHGAP36                  | 0        | 0        | 0        | 0.00754018 | 0        | 0.00623016 | 0        | 0        | 0         | 0         | 0        | 0         | 0         | 0         | 0        |
| ARHGAP39                  | 0.711418 | 0.920404 | 0.715688 | 0.991093   | 2.07373  | 1.922      | 1.16326  | 0.585416 | 0.631102  | 0.639363  | 0.292488 | 1.29145   | 0.784838  | 1.00299   | 0.693738 |
| ARHGAP4                   | 2.28548  | 1.19047  | 1.28319  | 2.31989    | 5.37315  | 5.60444    | 1.48106  | 1.15281  | 0.267479  | 1.36104   | 1.93695  | 0.672789  | 2.02368   | 1.79713   | 4.24817  |
| ARHGAP40                  | 1.32106  | 4.22767  | 5.39692  | 1.73956    | 4.50948  | 0.534659   | 4.22709  | 2.49304  | 4.70754   | 0.931384  | 1.21515  | 1.94302   | 0.210455  | 1.34253   | 0.257646 |
| ARHGAP42                  | 2.14557  | 0.941061 | 1.11274  | 1.21201    | 0.830001 | 1.56595    | 1.29035  | 1.47566  | 0.809875  | 1.67388   | 3.17491  | 0.635393  | 1.26972   | 1.01173   | 2.45778  |
| ARHGAP44                  | 0.644504 | 0.364875 | 0.342123 | 0.365299   | 0.709138 | 1.13873    | 0.637757 | 0.357988 | 0.124281  | 0.256158  | 0.551736 | 0.134505  | 0.145541  | 0.440706  | 0.779037 |
| ARHGAP45                  | 1.61544  | 1.32557  | 1.55031  | 1.61589    | 3.05044  | 2.79008    | 1.51491  | 1.2183   | 0.46291   | 1.16181   | 1.06516  | 0.702244  | 1.53968   | 1.28939   | 1.98962  |
| ARHGAP5                   | 8.7811   | 8.0123   | 7.89429  | 9.87884    | 1.73682  | 6.27269    | 4.87538  | 9.13786  | 9.72013   | 13.4769   | 8.85994  | 7.24345   | 17.8817   | 8.44321   | 6.03886  |
| ARHGAP5-AS1               | 0.776855 | 0.853057 | 0.926639 | 2.21554    | 1.45929  | 2.06136    | 0.886988 | 0.915187 | 1.5402    | 2.13147   | 2.10066  | 1.6288    | 2.61102   | 1.10475   | 0.778369 |
| ARHGAP6                   | 1.36008  | 0.401529 | 0.659575 | 0.226785   | 0.5716   | 1.24718    | 0.897961 | 0.564287 | 0.123024  | 0.294318  | 0.562016 | 0.172952  | 0.230436  | 0.335622  | 1.5025   |
| ARHGAP8                   | 0.72138  | 0.320431 | 0.495882 | 1.82657    | 0.488493 | 1.87857    | 0.656342 | 0.731151 | 0.288516  | 1.61776   | 0.717684 | 1.51419   | 2.79622   | 1.7883    | 0.76206  |
| ARHGAP9                   | 0.31818  | 0.387598 | 0.600937 | 0.952746   | 0.969834 | 1.61533    | 0.45925  | 0.410819 | 0.109672  | 0.828835  | 1.76204  | 0.158937  | 0.902492  | 0.684003  | 1.60362  |
| ARHGDIA                   | 31.6542  | 28.3873  | 31.3148  | 96.0169    | 67.8687  | 117.061    | 46.003   | 27.5273  | 46.7285   | 61.7275   | 86.26    | 54.202    | 137.693   | 66.2128   | 50.2317  |
| ARHGDIB                   | 14.721   | 8.74659  | 10.8999  | 24.1776    | 8.68498  | 27.7004    | 10.8416  | 13.6174  | 5.77505   | 13.8424   | 31.2919  | 5.98401   | 20.0382   | 10.0612   | 19.0237  |
| ARHGDIG                   | 0        | 0        | 0        | 0.025318   | 0        | 0.062758   | 0        | 0.021834 | 0.0299211 | 0         | 0.138671 | 0.0351581 | 0         | 0.0385209 | 0        |

|              |          |           |           |           |           |           |           |           |            |           |            |            |           |            |          |
|--------------|----------|-----------|-----------|-----------|-----------|-----------|-----------|-----------|------------|-----------|------------|------------|-----------|------------|----------|
| ARHGEF1      | 5.97351  | 7.14674   | 7.59957   | 12.6773   | 21.0968   | 20.2388   | 8.04312   | 5.50655   | 6.03854    | 12.8128   | 5.97401    | 8.64797    | 17.3588   | 9.80968    | 13.0628  |
| ARHGEF10     | 4.09172  | 3.48041   | 4.50206   | 3.21905   | 2.65354   | 5.30923   | 4.61145   | 2.65317   | 0.926311   | 1.70504   | 1.86415    | 1.63558    | 3.20678   | 2.58066    | 5.56668  |
| ARHGEF10L    | 6.41089  | 7.18424   | 7.80781   | 7.78794   | 14.5023   | 10.3357   | 9.67088   | 5.74282   | 13.1803    | 5.87225   | 4.00201    | 7.297      | 8.80139   | 4.44682    | 4.57298  |
| ARHGEF11     | 4.56209  | 4.27316   | 4.36605   | 5.54611   | 5.70361   | 11.6222   | 5.94916   | 3.95888   | 2.78215    | 3.45746   | 3.46243    | 2.66335    | 5.56402   | 4.12428    | 6.49382  |
| ARHGEF12     | 20.7118  | 22.1869   | 24.2806   | 20.3419   | 13.3222   | 22.9746   | 19.2265   | 18.6947   | 24.1865    | 21.3475   | 15.6669    | 18.2852    | 28.3482   | 19.2758    | 18.7114  |
| ARHGEF15     | 2.56176  | 1.2448    | 1.11374   | 2.57257   | 4.0809    | 6.36287   | 1.98522   | 1.67602   | 0.597434   | 1.55975   | 2.17816    | 0.971103   | 2.44057   | 2.87434    | 6.29346  |
| ARHGEF16     | 1.08383  | 0.959941  | 0.698839  | 3.18651   | 1.06461   | 3.58291   | 1.56506   | 0.375373  | 0.698817   | 1.74041   | 0.62975    | 1.71639    | 4.22656   | 2.76565    | 0.675256 |
| ARHGEF17     | 3.84284  | 2.36794   | 2.55971   | 2.27112   | 8.0702    | 9.27951   | 4.58207   | 2.10524   | 0.965317   | 2.83797   | 3.76278    | 1.4525     | 2.86114   | 4.23198    | 10.0132  |
| ARHGEF18     | 2.79247  | 3.35503   | 3.4114    | 6.58327   | 7.0847    | 6.27789   | 3.33225   | 2.5902    | 7.7036     | 4.86418   | 2.86776    | 3.56774    | 7.59313   | 4.59249    | 3.64265  |
| ARHGEF19     | 3.10329  | 6.73847   | 7.20896   | 3.13378   | 8.89852   | 5.29662   | 3.29806   | 4.42625   | 2.45496    | 1.33889   | 1.79853    | 1.48693    | 1.14413   | 2.15773    | 1.21366  |
| ARHGEF2      | 3.6939   | 2.2987    | 2.62047   | 4.29885   | 6.23757   | 10.3864   | 3.96166   | 2.22177   | 1.56092    | 4.63625   | 5.1877     | 2.0817     | 7.32912   | 5.40721    | 8.25839  |
| ARHGEF25     | 1.92466  | 1.08252   | 1.35176   | 0.809558  | 3.48997   | 4.2743    | 1.86565   | 0.851748  | 0.267888   | 1.65644   | 2.68705    | 0.39347    | 0.892054  | 1.77779    | 5.15581  |
| ARHGEF26     | 1.84238  | 3.42515   | 5.00029   | 0.722449  | 1.04912   | 1.15963   | 3.47016   | 2.46174   | 2.04598    | 0.332639  | 0.33779    | 0.984884   | 0.303379  | 0.359695   | 0.429728 |
| ARHGEF26-AS1 | 0.537319 | 0.565453  | 0.685427  | 0.432942  | 0.0968607 | 0.196291  | 0.424159  | 0.559254  | 0.151886   | 0.258179  | 0.0301682  | 0.270453   | 0.0804638 | 0.461306   | 0.128269 |
| ARHGEF28     | 4.51624  | 5.27043   | 6.05135   | 3.00136   | 3.01601   | 2.55863   | 4.03183   | 3.41004   | 2.82809    | 4.19545   | 3.5768     | 2.99486    | 3.66872   | 2.63174    | 2.16026  |
| ARHGEF3      | 3.88863  | 3.39767   | 3.48102   | 4.25652   | 2.83236   | 4.9255    | 3.32992   | 3.22378   | 3.36344    | 4.64388   | 3.54893    | 3.09385    | 7.43622   | 3.14208    | 3.89667  |
| ARHGEF3-AS1  | 0.380173 | 0.251863  | 0.23588   | 0.0489725 | 0.369088  | 0.161856  | 0         | 0.168933  | 0          | 0.119289  | 0          | 0.272024   | 0.183964  | 0.149021   | 0        |
| ARHGEF33     | 0.16669  | 0.149942  | 0.162124  | 0.0664951 | 0.088572  | 0.148732  | 0.0670701 | 0.0994514 | 0.0654871  | 0.0463074 | 0.0733995  | 0.0461695  | 1.83E-32  | 0.0944722  | 0.167655 |
| ARHGEF34P    | 3.18736  | 7.35857   | 9.00104   | 7.85922   | 6.38014   | 3.94886   | 11.1494   | 3.74462   | 5.93492    | 3.50894   | 0.941054   | 5.1153     | 7.7828    | 3.70643    | 1.34576  |
| ARHGEF35     | 6.54833  | 7.42844   | 8.4886    | 7.19619   | 7.63114   | 4.96289   | 6.20634   | 7.20724   | 9.44779    | 5.88206   | 2.80053    | 4.61274    | 10.6201   | 5.17584    | 1.64436  |
| ARHGEF37     | 11.6072  | 13.3877   | 13.5219   | 9.95653   | 16.7886   | 11.4631   | 10.298    | 9.6095    | 19.617     | 8.44241   | 6.03601    | 8.84306    | 9.14629   | 7.09822    | 2.10417  |
| ARHGEF38     | 0.326761 | 0.139132  | 0.27032   | 0.0469865 | 0.0354121 | 0.213528  | 0.143161  | 0.276891  | 0.00925485 | 0.0286129 | 0.00428922 | 0.00271868 | 0.0122572 | 0.00595743 | 0        |
| ARHGEF38-IT1 | 0.153265 | 0.0246152 | 0.0422639 | 0         | 0         | 0.0435011 | 0         | 0.0908063 | 0          | 0         | 0          | 0          | 0         | 0          | 0        |
| ARHGEF39     | 0.417146 | 0.394554  | 0.569957  | 0.686485  | 0.218801  | 0.742052  | 0.497017  | 0.466898  | 0.130847   | 0.419368  | 0.617317   | 0.220129   | 0.428747  | 0.612764   | 0.333459 |
| ARHGEF4      | 6.93152  | 14.6112   | 10.9907   | 12.3545   | 28.2121   | 10.3473   | 11.2054   | 7.20616   | 22.8758    | 15.1697   | 5.85015    | 25.6858    | 16.8444   | 11.4975    | 4.75027  |
| ARHGEF40     | 2.60233  | 2.22527   | 2.64186   | 2.62612   | 7.30455   | 7.1746    | 4.19869   | 1.62041   | 0.591344   | 2.78144   | 3.67894    | 1.18666    | 3.04088   | 3.12049    | 6.0848   |

|             |           |           |           |           |           |           |           |           |          |           |           |           |           |            |           |
|-------------|-----------|-----------|-----------|-----------|-----------|-----------|-----------|-----------|----------|-----------|-----------|-----------|-----------|------------|-----------|
| ARHGEF5     | 5.26342   | 13.8442   | 16.2597   | 17.7428   | 17.6293   | 9.42457   | 13.0597   | 6.98142   | 15.0575  | 8.63649   | 2.64337   | 9.65667   | 14.6361   | 7.86253    | 1.83868   |
| ARHGEF6     | 4.4122    | 2.06321   | 2.60225   | 2.1481    | 1.42024   | 3.67478   | 2.44223   | 2.49735   | 0.633385 | 2.20563   | 3.92971   | 0.441146  | 1.91585   | 1.44016    | 3.9874    |
| ARHGEF7     | 5.31612   | 4.3948    | 4.86232   | 3.56958   | 3.26743   | 5.62693   | 4.53171   | 3.75527   | 3.00836  | 4.16455   | 4.64573   | 4.22188   | 4.20962   | 4.87702    | 5.57826   |
| ARHGEF7-AS1 | 0.055234  | 0.0798378 | 0.0913869 | 0         | 0         | 0.047031  | 0         | 0         | 0        | 0         | 0         | 0.118564  | 0         | 0.0577354  | 0.317292  |
| ARHGEF7-AS2 | 0.161538  | 0.0269992 | 0.0321528 | 0         | 0.187375  | 0.0518406 | 0.0519276 | 0.0166002 | 0        | 0.0279102 | 0.0843442 | 0.0447227 | 0.024103  | 0.0319138  | 0.391977  |
| ARHGEF9     | 3.37263   | 2.39024   | 2.78052   | 1.5654    | 2.39542   | 3.29743   | 2.82769   | 2.15997   | 1.33481  | 1.11014   | 1.6627    | 1.03187   | 1.01481   | 1.19187    | 2.0821    |
| ARHGEF9-IT1 | 0.115715  | 0.16726   | 0.0478639 | 0.059624  | 0         | 0         | 0.26424   | 0.154257  | 0        | 0.145235  | 0         | 0.0413987 | 0         | 0.0302389  | 0         |
| ARID1A      | 7.78979   | 10.3748   | 10.3318   | 10.6566   | 11.56     | 14.4611   | 10.7074   | 8.63407   | 8.33451  | 8.77892   | 5.75588   | 8.69326   | 14.7518   | 8.67083    | 9.19304   |
| ARID1B      | 8.4055    | 10.2026   | 9.92803   | 8.11416   | 9.38747   | 10.9629   | 10.2883   | 7.33662   | 11.0391  | 4.66716   | 4.34906   | 5.92506   | 6.96318   | 5.12267    | 5.94768   |
| ARID2       | 5.42451   | 5.55558   | 6.23388   | 4.42654   | 1.55359   | 3.84347   | 4.08094   | 5.31442   | 3.7536   | 4.19864   | 3.86254   | 3.565     | 3.65951   | 4.16666    | 3.32627   |
| ARID3A      | 0.873012  | 1.32141   | 1.09695   | 1.53622   | 1.98296   | 3.18382   | 0.855723  | 1.20771   | 1.48451  | 2.53256   | 2.38943   | 0.960567  | 2.52937   | 1.72609    | 1.18279   |
| ARID3B      | 0.942183  | 1.20012   | 1.03926   | 0.976527  | 1.41307   | 1.40164   | 1.00157   | 0.85177   | 1.37169  | 1.37963   | 0.97803   | 1.1236    | 2.01582   | 1.4518     | 1.22867   |
| ARID3C      | 0.0747153 | 0.143996  | 0.108167  | 0         | 0.0580293 | 0.0795238 | 0.0426537 | 0.0332003 | 0        | 0.0703315 | 0.0843442 | 0.0267304 | 0         | 0.00976236 | 0         |
| ARID4A      | 3.78899   | 3.69957   | 4.11968   | 2.01639   | 1.42003   | 2.43082   | 1.57024   | 2.76515   | 2.30486  | 2.4407    | 2.71124   | 1.49472   | 1.82638   | 1.92371    | 2.24569   |
| ARID4B      | 4.08618   | 4.01927   | 3.98222   | 3.29375   | 2.60581   | 3.59958   | 1.60084   | 2.96288   | 3.2431   | 4.00708   | 3.935     | 2.42594   | 2.91891   | 3.51994    | 3.76845   |
| ARID5A      | 3.15625   | 2.45686   | 2.99086   | 3.90312   | 4.4443    | 10.1846   | 2.7332    | 1.66115   | 1.17815  | 3.03536   | 4.60877   | 1.16145   | 4.77099   | 4.23325    | 9.59534   |
| ARID5B      | 7.91717   | 7.77588   | 9.43522   | 15.1999   | 5.60638   | 23.4657   | 7.9072    | 7.52683   | 10.9086  | 9.33928   | 14.9108   | 6.08225   | 12.4931   | 9.67173    | 19.9852   |
| ARIH1       | 8.69132   | 9.59625   | 10.9528   | 9.26096   | 6.27792   | 10.1063   | 6.61732   | 8.92269   | 11.1057  | 8.54093   | 7.5924    | 6.5973    | 9.98959   | 7.90324    | 8.37396   |
| ARIH2       | 4.50701   | 4.13403   | 4.09674   | 4.93049   | 4.61047   | 6.43956   | 3.95474   | 3.15544   | 4.67127  | 4.56825   | 4.52359   | 3.53983   | 5.98934   | 4.80099    | 4.74003   |
| ARIH2OS     | 0.556301  | 0.529111  | 0.452231  | 0.495778  | 0.98402   | 0.899298  | 0.872938  | 0.23287   | 0.304453 | 0.44068   | 0.426757  | 0.567683  | 0.424417  | 0.500977   | 0.546669  |
| ARL1        | 7.63335   | 6.30295   | 6.72844   | 7.77822   | 1.83018   | 8.67037   | 5.56039   | 7.33604   | 5.87888  | 8.39764   | 13.2683   | 4.3174    | 7.38079   | 5.62798    | 8.09112   |
| ARL10       | 1.02481   | 2.09279   | 2.35811   | 1.26592   | 4.65969   | 1.05754   | 1.54204   | 1.20028   | 1.41341  | 1.28624   | 1.63955   | 1.36943   | 1.00713   | 1.68132    | 1.32556   |
| ARL11       | 0.141567  | 0.204627  | 0.168033  | 0.551839  | 0.372877  | 0.414036  | 0.154608  | 0.185984  | 0.232382 | 0.432614  | 0.69483   | 0.07487   | 0.274014  | 0.106158   | 0.353578  |
| ARL13A      | 0.120458  | 0.304703  | 0.112108  | 0.0310339 | 0.0467783 | 0.0641054 | 0.275071  | 0.173962  | 0.110028 | 0.0188984 | 0         | 0.096965  | 0.0291447 | 0.0472176  | 0.0216242 |
| ARL13B      | 1.19259   | 1.20614   | 1.2379    | 1.20002   | 0.611677  | 1.62381   | 0.629449  | 0.869899  | 0.726222 | 1.23559   | 1.82892   | 0.736602  | 1.30662   | 1.11724    | 1.30069   |
| ARL14       | 0.0539046 | 0         | 0.0148646 | 0.0925838 | 0.0279108 | 0.214196  | 0         | 0.0638746 | 0        | 0.202968  | 0.26369   | 0.205708  | 0.23186   | 0.0845187  | 0.0258046 |

|            |           |            |           |          |           |           |           |            |           |           |           |           |           |           |            |
|------------|-----------|------------|-----------|----------|-----------|-----------|-----------|------------|-----------|-----------|-----------|-----------|-----------|-----------|------------|
| ARL14EP    | 2.61795   | 2.48522    | 2.34288   | 3.10907  | 0.907043  | 2.95839   | 1.63344   | 2.58609    | 1.90828   | 3.59117   | 5.25149   | 1.0724    | 2.46142   | 1.94302   | 2.4459     |
| ARL14EPL   | 0         | 0          | 0         | 0        | 0         | 0         | 0         | 0          | 0         | 0         | 0         | 0         | 0         | 0         | 0          |
| ARL15      | 3.13725   | 2.55219    | 2.14868   | 2.00505  | 0.723032  | 2.47316   | 2.37029   | 3.23489    | 3.85483   | 3.69221   | 5.50677   | 2.5845    | 2.60075   | 2.16514   | 2.52682    |
| ARL16      | 3.88206   | 3.90273    | 3.42767   | 3.2697   | 3.90416   | 5.27612   | 2.77025   | 2.27792    | 2.78825   | 2.63921   | 5.73079   | 3.57899   | 2.07118   | 3.68719   | 2.23363    |
| ARL17A     | 0.706236  | 0.892149   | 0.943389  | 0.369796 | 0.558877  | 0.258402  | 1.09502   | 0.837797   | 0.337422  | 0.521763  | 0.311517  | 0.884965  | 0.134151  | 0.522807  | 0.455854   |
| ARL17B     | 0.140481  | 0.163841   | 0.190964  | 0.109003 | 0.228048  | 0.125884  | 0.287133  | 0.107106   | 0.164206  | 0.247816  | 0.203759  | 0.207293  | 0.0421087 | 0.15398   | 0.0698625  |
| ARL2       | 12.5835   | 7.86933    | 9.31401   | 15.9251  | 17.3236   | 21.6206   | 14.5239   | 6.48231    | 12.3443   | 11.7532   | 24.2292   | 7.65057   | 11.5464   | 9.40066   | 9.86806    |
| ARL2-SNX15 | 0.101334  | 0.186261   | 0.0158684 | 0.1324   | 0.0791098 | 0.0476987 | 0.128713  | 0.00923827 | 0.0660546 | 0.0410026 | 0.0143925 | 0.0136364 | 0.108867  | 0.127774  | 0.00436763 |
| ARL2BP     | 9.90743   | 8.64443    | 8.46052   | 13.3558  | 6.6078    | 16.3278   | 7.73845   | 6.92443    | 11.3279   | 12.7668   | 20.7263   | 7.04172   | 15.9201   | 8.82401   | 12.25      |
| ARL3       | 1.50543   | 1.37872    | 1.70995   | 1.52061  | 0.807325  | 2.01435   | 1.75978   | 1.32729    | 1.40419   | 1.81449   | 4.27559   | 0.765138  | 0.84025   | 1.2489    | 1.21827    |
| ARL4A      | 5.779     | 5.08421    | 4.94275   | 6.44243  | 1.81424   | 5.64509   | 3.30686   | 7.07985    | 9.78436   | 3.68594   | 5.61685   | 2.46846   | 2.33036   | 2.27586   | 2.53054    |
| ARL4C      | 12.0966   | 8.03226    | 6.98147   | 6.43202  | 11.0482   | 13.9445   | 4.99899   | 5.9827     | 10.3905   | 8.16667   | 12.4834   | 2.55905   | 9.06264   | 5.71005   | 8.11035    |
| ARL4D      | 6.11794   | 10.9326    | 9.02318   | 25.1888  | 27.1717   | 19.2584   | 7.00194   | 5.86534    | 50.0228   | 23.5857   | 25.796    | 21.9191   | 26.6417   | 12.9655   | 4.59228    |
| ARL5A      | 8.96801   | 9.87684    | 8.66346   | 8.17307  | 7.79332   | 6.53547   | 10.0893   | 14.6744    | 57.5646   | 12.264    | 20.808    | 11.5953   | 8.89595   | 6.54585   | 6.11449    |
| ARL5B      | 1.669     | 1.46097    | 1.39389   | 2.9771   | 0.697609  | 2.03678   | 1.66195   | 2.74292    | 5.01569   | 6.00047   | 5.90397   | 4.49198   | 7.03228   | 4.1617    | 2.79943    |
| ARL5C      | 0.0491882 | 0          | 0         | 0        | 0.0764063 | 0         | 0.0561615 | 0.109286   | 0         | 0         | 0         | 0.0351955 | 0         | 0         | 0          |
| ARL6       | 0.479625  | 0.482373   | 0.462267  | 0.499066 | 0.108498  | 0.487694  | 0.313685  | 0.500741   | 0.459363  | 0.374045  | 0.714906  | 0.266551  | 0.498728  | 0.304215  | 0.48818    |
| ARL6IP1    | 13.6293   | 10.8049    | 10.7782   | 22.3809  | 5.68276   | 21.9588   | 9.99216   | 13.5551    | 20.9456   | 25.2768   | 34.3342   | 13.7689   | 31.3833   | 16.5941   | 10.5981    |
| ARL6IP4    | 14.2495   | 10.5189    | 10.8979   | 18.6869  | 27.8986   | 28.7108   | 12.1457   | 7.3542     | 15.9533   | 16.5495   | 36.7377   | 10.3198   | 13.9741   | 12.9812   | 10.7827    |
| ARL6IP5    | 15.8782   | 8.33681    | 10.6164   | 12.6421  | 6.11541   | 18.3355   | 10.0828   | 13.0577    | 2.62254   | 12.1074   | 23.9894   | 3.75856   | 13.2618   | 9.04894   | 13.9162    |
| ARL6IP6    | 2.25407   | 2.74227    | 2.91359   | 2.75675  | 2.75417   | 2.65836   | 2.41092   | 1.9802     | 1.65658   | 1.82915   | 4.02157   | 1.66309   | 2.31102   | 1.82871   | 1.53485    |
| ARL8A      | 9.91238   | 8.76398    | 9.83598   | 11.1291  | 11.2725   | 17.6021   | 11.579    | 7.7845     | 11.4449   | 10.5809   | 16.3866   | 7.87558   | 14.6721   | 7.87271   | 7.6089     |
| ARL8B      | 11.8855   | 12.1443    | 11.6926   | 19.9506  | 7.84017   | 14.6227   | 9.34798   | 16.7366    | 31.3677   | 23.9284   | 27.1409   | 15.9326   | 29.3283   | 14.1459   | 9.6313     |
| ARL9       | 0.34928   | 0.268015   | 0.278247  | 0.613237 | 0.180851  | 0.220302  | 0.369256  | 0.183947   | 0.110285  | 0.1786    | 0.131431  | 0.268432  | 0.217007  | 0.175788  | 0.0557345  |
| ARLNC1     | 0         | 0.00477954 | 0.0246192 | 0        | 0         | 0         | 0         | 0          | 0         | 0         | 0         | 0         | 0.0192007 | 0.0155537 | 0          |
| ARMC1      | 3.27136   | 2.66488    | 2.78814   | 4.35124  | 0.886321  | 4.0552    | 2.41482   | 3.8201     | 3.21512   | 4.16319   | 5.54805   | 2.64559   | 5.09511   | 3.44734   | 2.99367    |

|                |            |           |           |            |           |            |           |            |            |           |           |           |            |           |            |
|----------------|------------|-----------|-----------|------------|-----------|------------|-----------|------------|------------|-----------|-----------|-----------|------------|-----------|------------|
| ARMC10         | 4.99441    | 5.88418   | 5.86044   | 9.23051    | 3.44906   | 7.49623    | 4.14747   | 5.62331    | 7.81621    | 5.40438   | 7.50635   | 3.82866   | 5.99487    | 5.31094   | 4.14385    |
| ARMC12         | 0.207985   | 0.11843   | 0.140776  | 0.136395   | 0.0293702 | 0.177096   | 0.151118  | 0.168036   | 0          | 0.0237311 | 0.0213445 | 0.0541159 | 0.0609958  | 0.09882   | 0          |
| ARMC2          | 0.576099   | 0.468591  | 0.532961  | 0.293651   | 0.259804  | 0.7068     | 0.551679  | 0.578051   | 0.0603547  | 0.310995  | 0.405591  | 0.265944  | 0.21982    | 0.401459  | 0.631633   |
| ARMC2-AS1      | 0.193666   | 0.155518  | 0.213619  | 0.033263   | 0.100277  | 0.164904   | 0.184268  | 0.2008     | 0          | 0.0405117 | 0.0364374 | 0.0692865 | 0          | 0.168697  | 0.0463547  |
| ARMC3          | 0.00559687 | 0         | 0         | 0          | 0         | 0          | 0         | 0          | 0.00681636 | 0         | 0         | 0         | 0          | 0         | 0          |
| ARMC4          | 0.108012   | 0.0164343 | 0.0423262 | 0.0351505  | 0.097136  | 0.280754   | 0.0194724 | 0.0555745  | 0          | 0.0142702 | 0.0320875 | 0.0203383 | 0.0110035  | 0.038625  | 0.0898059  |
| ARMC4P1        | 0          | 0.0084262 | 0.0192902 | 0.00600745 | 0         | 0.00496373 | 0.0332796 | 0.00518076 | 0          | 0         | 0         | 0         | 0.0188058  | 0         | 0.00837188 |
| ARMC5          | 1.45402    | 2.43286   | 2.41407   | 2.86062    | 8.02349   | 4.51238    | 2.23381   | 1.34466    | 3.69363    | 2.63173   | 1.83874   | 3.58176   | 3.86616    | 2.30992   | 2.28648    |
| ARMC6          | 2.37108    | 2.28899   | 2.2454    | 5.5734     | 6.70892   | 6.97411    | 2.73959   | 1.45589    | 3.40446    | 3.99555   | 5.40526   | 3.86133   | 6.85063    | 4.48727   | 2.47177    |
| ARMC7          | 1.27935    | 1.71883   | 1.66896   | 2.04521    | 2.96816   | 3.49849    | 2.16298   | 1.10053    | 1.1486     | 1.52337   | 2.05524   | 1.12665   | 1.40746    | 1.90306   | 1.51931    |
| ARMC8          | 3.44173    | 2.97485   | 2.83862   | 3.11689    | 1.25285   | 2.59609    | 2.24268   | 2.95986    | 2.74362    | 3.32053   | 3.08076   | 2.24126   | 2.972      | 2.57464   | 2.22674    |
| ARMC9          | 0.392417   | 0.413973  | 0.445384  | 0.545257   | 1.13363   | 1.3284     | 0.505868  | 0.404215   | 0.160278   | 0.579676  | 0.853566  | 0.264026  | 0.48015    | 0.509035  | 1.79721    |
| ARMCX1         | 3.07055    | 1.68332   | 2.16319   | 2.41515    | 3.45503   | 5.76491    | 2.46525   | 1.79352    | 0.964628   | 2.26057   | 5.09529   | 0.869508  | 1.8621     | 2.38736   | 4.16039    |
| ARMCX2         | 1.21176    | 0.775901  | 0.844173  | 1.78276    | 1.98135   | 3.68597    | 0.846514  | 0.779344   | 0.291274   | 1.74101   | 3.56382   | 0.176832  | 1.26532    | 1.19581   | 3.73237    |
| ARMCX3         | 3.23935    | 2.20117   | 2.6964    | 3.07669    | 2.80123   | 7.37048    | 2.08952   | 3.02726    | 0.691422   | 3.52921   | 6.02436   | 0.755092  | 2.87863    | 3.29181   | 7.29953    |
| ARMCX4         | 0.628655   | 0.700401  | 0.85125   | 0.340395   | 0.52018   | 0.596209   | 0.610025  | 0.443711   | 0.0778609  | 0.177674  | 0.233694  | 0.221098  | 0.22981    | 0.253781  | 0.723574   |
| ARMCX5         | 2.70756    | 2.07618   | 2.22942   | 2.04888    | 1.46203   | 3.07928    | 1.84721   | 2.16123    | 1.48213    | 1.52474   | 2.76487   | 0.918193  | 2.06443    | 1.43171   | 1.62758    |
| ARMCX5-GPRASP2 | 0.31507    | 0.381982  | 0.353608  | 0.361407   | 0.286613  | 0.360548   | 0.300791  | 0.271298   | 0.103406   | 0.227694  | 0.310709  | 0.160746  | 0.21813    | 0.241832  | 0.223813   |
| ARMCX6         | 2.58207    | 2.11955   | 2.17563   | 3.35077    | 3.58378   | 4.98758    | 2.57962   | 1.49795    | 1.06278    | 2.23553   | 5.45183   | 1.17182   | 1.85104    | 2.07424   | 1.9056     |
| ARMH1          | 0.151082   | 0.0992642 | 0.0795365 | 0.0566162  | 0.170678  | 0.315764   | 0.203865  | 0.134269   | 0.0334548  | 0.0689541 | 0.217067  | 0.0393103 | 0.00886159 | 0.0358919 | 0.0788993  |
| ARMH2          | 0          | 0.0543273 | 0.0233198 | 0          | 0         | 0.0240024  | 0.0321851 | 0          | 0          | 0.10614   | 0         | 0         | 0          | 0         | 0.0809655  |
| ARMH3          | 3.99544    | 4.75012   | 4.5518    | 6.26917    | 4.30408   | 5.42984    | 4.22681   | 3.47558    | 5.82819    | 5.12092   | 5.14103   | 4.17116   | 6.05136    | 4.48312   | 4.39261    |
| ARMH4          | 1.09713    | 0.982602  | 0.907625  | 0.638472   | 1.47365   | 1.02212    | 0.913713  | 0.573553   | 0.345836   | 0.858609  | 1.66837   | 0.318629  | 0.328949   | 0.398014  | 2.06684    |
| ARMS2          | 0.0848767  | 0.0408949 | 0         | 0          | 0.0878952 | 0          | 0.0323032 | 0          | 0          | 0         | 0         | 0         | 0          | 0.0147868 | 0.121894   |
| ARMT1          | 1.28029    | 1.40936   | 1.25038   | 2.68457    | 0.317645  | 2.1576     | 0.690292  | 1.49338    | 1.29938    | 3.24727   | 6.28297   | 1.02423   | 3.44755    | 2.12823   | 1.49391    |
| ARNT           | 7.21259    | 7.67326   | 8.43822   | 6.66186    | 5.05669   | 11.1623    | 7.96091   | 6.60279    | 8.42985    | 6.31127   | 7.33413   | 4.76763   | 7.33778    | 5.53372   | 6.97615    |

|             |           |           |           |           |           |           |           |           |           |          |           |           |           |           |          |
|-------------|-----------|-----------|-----------|-----------|-----------|-----------|-----------|-----------|-----------|----------|-----------|-----------|-----------|-----------|----------|
| ARNT2       | 0.539934  | 0.32306   | 0.420397  | 0.792804  | 0.531727  | 3.49768   | 0.749445  | 0.435941  | 0.10315   | 0.248037 | 0.557729  | 0.118679  | 0.737709  | 0.638162  | 1.19606  |
| ARNTL       | 3.47547   | 2.21586   | 1.58312   | 3.01539   | 2.49314   | 1.73459   | 1.19116   | 3.20392   | 1.90962   | 0.821278 | 1.16377   | 0.746479  | 0.788608  | 2.45847   | 1.16137  |
| ARNTL2      | 1.69439   | 2.65732   | 2.48449   | 14.9175   | 2.86859   | 3.98407   | 1.99494   | 2.35896   | 7.14107   | 13.1812  | 8.88296   | 5.42781   | 27.6757   | 7.73748   | 4.17911  |
| ARNTL2-AS1  | 0.113865  | 0.109724  | 0.164845  | 0.616041  | 0.0442179 | 0         | 0.162509  | 0.354178  | 0.0693374 | 0.821745 | 0.0964045 | 0.325894  | 0.0734651 | 0.803396  | 0        |
| ARPC1A      | 16.1729   | 16.4525   | 16.1194   | 43.9442   | 19.1714   | 37.1198   | 21.5569   | 13.8227   | 50.2857   | 45.4949  | 54.0388   | 29.8017   | 67.4448   | 33.2151   | 16.7321  |
| ARPC1B      | 12.717    | 6.86635   | 8.64849   | 52.5766   | 17.9455   | 53.0382   | 9.10324   | 6.65775   | 6.01012   | 36.8206  | 70.6322   | 13.6493   | 51.1466   | 30.1293   | 28.8521  |
| ARPC2       | 56.3919   | 55.9946   | 54.3042   | 147.172   | 46.6586   | 112.792   | 51.7379   | 49.4226   | 124.444   | 158.742  | 211.874   | 102.396   | 198.11    | 109.301   | 65.1199  |
| ARPC3       | 29.4085   | 20.9092   | 20.3712   | 72.8233   | 13.3536   | 61.0397   | 15.4717   | 22.4452   | 54.6857   | 69.2487  | 110.119   | 41.0593   | 76.7419   | 40.5507   | 34.7711  |
| ARPC4       | 15.4715   | 14.0723   | 14.2191   | 35.3433   | 26.7412   | 39.9329   | 18.651    | 10.8763   | 26.8297   | 33.9522  | 55.931    | 20.517    | 45.4808   | 23.085    | 19.3642  |
| ARPC4-TTLL3 | 1.06007   | 1.38655   | 1.1903    | 0.613794  | 2.38457   | 2.1446    | 0.539703  | 1.00204   | 0.413621  | 0.593713 | 0.328943  | 0.862497  | 0.15639   | 0.957182  | 1.30587  |
| ARPC5       | 16.9636   | 13.8022   | 15.2451   | 34.4932   | 12.9596   | 28.7458   | 10.9572   | 15.4013   | 24.321    | 35.9541  | 51.6614   | 18.3301   | 42.5183   | 24.5632   | 23.8197  |
| ARPC5L      | 4.7407    | 4.89585   | 4.71989   | 12.9615   | 6.70746   | 9.66134   | 4.46869   | 3.82938   | 19.7825   | 13.3876  | 14.6237   | 9.03901   | 19.9525   | 8.09572   | 3.41731  |
| ARPIN       | 4.62603   | 5.10971   | 4.8039    | 7.76683   | 8.28375   | 8.53102   | 4.91829   | 4.43088   | 4.46644   | 4.01924  | 4.02045   | 3.63897   | 4.25696   | 4.11659   | 4.97013  |
| ARPP19      | 10.1663   | 8.52582   | 8.4712    | 14.5422   | 2.775     | 11.4825   | 7.21692   | 10.989    | 15.1046   | 18.8112  | 21.4595   | 10.3026   | 28.923    | 13.7854   | 10.2094  |
| ARPP21      | 0         | 0         | 0         | 0         | 0         | 0         | 0         | 0         | 0         | 0        | 0         | 0         | 0         | 0         | 0        |
| ARR3        | 0.0353599 | 0.136295  | 0.204765  | 0.0182197 | 0.0823892 | 0.135488  | 0.0807456 | 0.0157125 | 0         | 0        | 0.0199585 | 0.0885533 | 0         | 0.110884  | 0        |
| ARRB1       | 4.2612    | 3.29533   | 4.16406   | 5.4757    | 6.98245   | 7.84886   | 4.60896   | 3.79252   | 4.10678   | 3.16264  | 4.34157   | 2.7893    | 4.01582   | 3.27716   | 5.70438  |
| ARRB2       | 4.97147   | 2.56603   | 2.18401   | 9.38673   | 7.27858   | 12.1544   | 4.006     | 3.87991   | 4.73241   | 7.84624  | 18.5395   | 2.96026   | 9.74802   | 4.87407   | 8.45271  |
| ARRDC1      | 4.24173   | 7.01661   | 7.08674   | 11.5617   | 13.9075   | 11.2236   | 6.3102    | 5.48879   | 8.59874   | 7.9944   | 11.1365   | 9.46114   | 13.2382   | 9.82076   | 5.3575   |
| ARRDC1-AS1  | 1.66271   | 2.10744   | 2.18098   | 1.97589   | 4.81649   | 2.56369   | 2.27469   | 1.58417   | 1.38648   | 1.22204  | 1.53879   | 1.78992   | 1.17908   | 2.16076   | 2.28029  |
| ARRDC2      | 3.46556   | 1.84393   | 2.24285   | 2.83443   | 4.6508    | 6.11584   | 2.10853   | 1.78089   | 1.95242   | 3.41264  | 3.65492   | 1.4732    | 3.00157   | 3.75393   | 4.74     |
| ARRDC3      | 13.3581   | 13.4902   | 12.7278   | 19.0172   | 4.2595    | 16.8163   | 9.54051   | 16.8212   | 14.4247   | 13.8898  | 21.7588   | 7.8484    | 10.0763   | 8.73686   | 11.0832  |
| ARRDC3-AS1  | 1.75898   | 1.43551   | 1.49455   | 1.34404   | 1.56613   | 1.23655   | 1.44828   | 1.21696   | 0.998664  | 1.11451  | 0.918887  | 0.734653  | 0.757928  | 1.04982   | 0.890022 |
| ARRDC4      | 7.12444   | 9.28355   | 9.73048   | 46.4501   | 9.90878   | 10.7227   | 5.52909   | 8.72366   | 28.0955   | 51.3874  | 27.0506   | 14.8087   | 57.5353   | 12.5506   | 6.86465  |
| ARRDC5      | 0.0282577 | 0.0476525 | 0.0701303 | 0         | 0.109735  | 0.0481221 | 0.0806593 | 0.113009  | 0         | 0        | 0.0318994 | 0.0202191 | 0.0273476 | 0.0812279 | 0.121745 |
| ARSA        | 1.89328   | 2.50405   | 2.63999   | 4.886     | 7.22081   | 6.00543   | 2.75568   | 1.95428   | 3.69711   | 4.90061  | 6.02436   | 4.98895   | 5.37058   | 3.57123   | 4.11316  |



|          |            |                 |            |           |           |           |           |           |           |                 |           |                 |                 |            |           |
|----------|------------|-----------------|------------|-----------|-----------|-----------|-----------|-----------|-----------|-----------------|-----------|-----------------|-----------------|------------|-----------|
| ARSB     | 1.21275    | 0.638462        | 0.916731   | 2.59938   | 1.65512   | 4.03818   | 1.43334   | 1.01237   | 0.377507  | 2.66494         | 5.90921   | 0.712503        | 2.92236         | 2.03111    | 4.32912   |
| ARSD     | 2.32379    | 2.5191          | 2.34526    | 3.38774   | 2.79976   | 4.41779   | 2.49951   | 2.10969   | 0.990919  | 1.47911         | 1.70107   | 1.28706         | 1.81498         | 1.08503    | 1.76583   |
| ARSD-AS1 | 0.00275547 | 0.00034837<br>9 | 0.00011075 | 7.41E-11  | 1.35E-19  | 8.07E-09  | 1.80E-09  | 0.0090029 | 8.26E-10  | 0.00018193<br>8 | 6.74E-11  | 3.52E-16        | 3.02E-11        | 3.36E-07   | 2.89E-06  |
| ARSE     | 0.0433715  | 0.0835883       | 0.078936   | 0.214539  | 0.377278  | 0.28067   | 0.0297121 | 0.061672  | 0.0105643 | 0.141533        | 0.332935  | 0.0248268       | 0.0671594       | 0.131474   | 0.199318  |
| ARSF     | 0.709365   | 0.403494        | 0.513482   | 0.13199   | 0.857025  | 0.0419455 | 0.202483  | 0.928126  | 0.911923  | 0.0123656       | 0.011122  | 0.190339        | 0               | 0          | 0         |
| ARSG     | 2.26188    | 2.37956         | 1.88409    | 1.10109   | 1.0646    | 1.69802   | 1.99918   | 1.96504   | 0.749553  | 0.57758         | 1.20077   | 0.858973        | 0.349994        | 0.938867   | 1.54598   |
| ARSH     | 0          | 0.00660194      | 0.0226709  | 0         | 0         | 0.0116673 | 0         | 0.0121774 | 0.0166878 | 0               | 0.0309362 | 0               | 0.0088406       | 0          | 0         |
| ARSI     | 0.160412   | 0.333747        | 0.295568   | 0.728863  | 1.43842   | 0.658109  | 0.690986  | 0.162001  | 3.09918   | 3.66976         | 3.30892   | 2.17558         | 4.74674         | 1.77966    | 2.5655    |
| ARSJ     | 0.925721   | 0.307064        | 0.32711    | 0.982745  | 0.989957  | 1.08928   | 0.244322  | 0.372077  | 0.24928   | 3.17618         | 3.26112   | 0.951961        | 2.75227         | 3.65172    | 1.89731   |
| ARSK     | 0.560415   | 0.5567          | 0.526575   | 0.534744  | 0.171954  | 0.453621  | 0.379178  | 0.608728  | 0.345474  | 0.677327        | 1.1325    | 0.455447        | 0.486566        | 0.495394   | 0.447126  |
| ART1     | 0.0176395  | 0.033996        | 0.0291853  | 0.018178  | 0         | 0.0450595 | 0         | 0.0470296 | 0         | 0.0221394       | 0         | 0.0252431       | 0.0227619       | 0.0276576  | 0         |
| ART3     | 0.0267859  | 0.0258117       | 0.0443184  | 0.0552074 | 0         | 0.114039  | 0.107042  | 0.0595128 | 0         | 0.0336191       | 0.090714  | 0               | 0               | 0.0349988  | 0         |
| ART4     | 0.559349   | 0.10899         | 0.132695   | 0.0593379 | 0.0191661 | 0.0665388 | 0.220709  | 0.190069  | 0         | 0.0361344       | 0.0557148 | 0.0176572       | 0.167176        | 0.0967302  | 0.0767856 |
| ART5     | 0          | 0               | 0          | 0.0141289 | 0.0851876 | 0.0933934 | 0.031308  | 0.0121846 | 0.0166977 | 0.0344158       | 0.232159  | 0               | 0               | 0          | 0.0590693 |
| ARTN     | 0.285717   | 0.137663        | 0.108334   | 0.466196  | 0.610248  | 0.354789  | 0.149518  | 0.158701  | 0.666944  | 2.824           | 1.89491   | 1.32033         | 6.5288          | 2.38302    | 1.21388   |
| ARV1     | 3.31747    | 3.54073         | 2.60231    | 3.58221   | 0.656981  | 4.37787   | 2.03726   | 2.87783   | 3.89545   | 3.56658         | 6.41576   | 2.08057         | 4.68164         | 2.19669    | 2.29675   |
| ARVCF    | 1.03788    | 1.50573         | 2.03979    | 0.939565  | 2.877     | 2.39245   | 1.28323   | 0.642101  | 0.893895  | 0.582953        | 0.459593  | 0.599029        | 1.16169         | 0.872104   | 1.02937   |
| ARX      | 0.0161051  | 0               | 0.0133233  | 0         | 0         | 0         | 0         | 0         | 0         | 0               | 0         | 0.0115236       | 0.0103909       | 0          | 0         |
| AS-PTPRE | 1.37711    | 0.737234        | 0.506329   | 0.729285  | 1.06956   | 0.488579  | 0.87352   | 1.03688   | 0.512466  | 1.10426         | 0.237506  | 2.25811         | 0.345529        | 1.86931    | 1.78542   |
| AS3MT    | 0.534897   | 0.319893        | 0.186824   | 0.138384  | 0.62006   | 0.677562  | 0.573945  | 0.260133  | 0.101499  | 0.12425         | 0.114918  | 0.00050782<br>1 | 0.00062151<br>2 | 0.00401014 | 0.114152  |
| ASAH1    | 12.0264    | 8.85261         | 10.0585    | 13.9059   | 5.0151    | 15.1137   | 9.08168   | 10.9751   | 13.789    | 15.3156         | 29.0747   | 10.5059         | 13.4501         | 8.91258    | 11.6653   |
| ASAH2    | 0.136834   | 0.138722        | 0.0998806  | 0.176418  | 0.011874  | 0.248823  | 0.0441882 | 0.203455  | 0.0234972 | 0.15761         | 0.243873  | 0.0830475       | 0.226212        | 0.10015    | 0.0825958 |
| ASAH2B   | 0.709741   | 0.746173        | 0.572204   | 0.968215  | 0.204564  | 1.00164   | 0.54194   | 0.991899  | 0.297394  | 0.629728        | 0.468774  | 0.756836        | 1.40183         | 0.593013   | 0.789791  |
| ASAP1    | 7.13417    | 4.92699         | 5.43784    | 6.28614   | 3.25833   | 8.40321   | 5.90435   | 6.26256   | 5.21574   | 5.74081         | 7.5438    | 4.67469         | 7.37073         | 6.711      | 11.6575   |

|           |            |            |            |            |           |            |            |            |           |           |            |           |           |            |          |
|-----------|------------|------------|------------|------------|-----------|------------|------------|------------|-----------|-----------|------------|-----------|-----------|------------|----------|
| ASAP1-IT1 | 1.74702    | 1.04981    | 1.28287    | 0.930518   | 0.670807  | 0.551568   | 1.45679    | 1.51771    | 0.143438  | 0.837655  | 0.421024   | 1.02531   | 0.139313  | 1.70302    | 1.71961  |
| ASAP1-IT2 | 0.763459   | 0.768633   | 0.73528    | 0.42274    | 0.548707  | 0.145539   | 0.78062    | 0.658245   | 0.0555108 | 0.414751  | 0.0643171  | 0.701189  | 0.0661674 | 0.702746   | 1.27643  |
| ASAP2     | 3.9874     | 4.09202    | 5.79019    | 3.37073    | 2.28888   | 3.90534    | 5.92542    | 3.50768    | 1.26705   | 5.98518   | 3.44107    | 3.1775    | 9.99025   | 4.98681    | 6.12169  |
| ASAP3     | 9.74884    | 10.863     | 9.41579    | 4.64121    | 20.9182   | 8.88963    | 11.5702    | 8.06459    | 30.7388   | 3.81274   | 7.28656    | 6.15396   | 1.67227   | 2.35386    | 4.63486  |
| ASB1      | 2.43524    | 2.23338    | 2.24801    | 1.99728    | 3.33926   | 3.62944    | 2.27422    | 1.42092    | 0.7568    | 1.96034   | 2.16134    | 1.13201   | 2.71544   | 3.08092    | 3.52623  |
| ASB10     | 0          | 0          | 0          | 0          | 0         | 0          | 0          | 0          | 0         | 0         | 0.0225707  | 0         | 0         | 0          | 0        |
| ASB11     | 0          | 0.074887   | 0.090006   | 0.00800859 | 0         | 0.0198516  | 0.106477   | 0.0345326  | 0.0378585 | 0         | 0          | 0.0166818 | 0         | 0.00406164 | 0        |
| ASB12     | 0.0715949  | 0.0776149  | 0.133264   | 0.0368903  | 0.111212  | 0.0457216  | 0.0408724  | 0.0954414  | 0.0217986 | 0         | 0          | 0.012807  | 0         | 0.0374186  | 0        |
| ASB13     | 3.32146    | 2.61294    | 2.43411    | 3.99193    | 4.69849   | 7.63544    | 3.17124    | 1.99963    | 3.75407   | 2.50333   | 4.51244    | 2.27044   | 3.21714   | 2.17099    | 2.78153  |
| ASB14     | 1.04353    | 0.926922   | 0.890058   | 0.346005   | 0.212982  | 0.221209   | 0.454098   | 1.01174    | 0.131832  | 0.367076  | 0.179222   | 0.404685  | 0.176928  | 0.340724   | 0.471309 |
| ASB15     | 0.00763042 | 0.0183823  | 0.0189373  | 0.0235901  | 0         | 0          | 0          | 0.00678128 | 0         | 0.0191539 | 0.00861379 | 0.0491379 | 0         | 0          | 0        |
| ASB16     | 0.473951   | 0.510128   | 0.66583    | 0.417914   | 0.962404  | 0.38612    | 0.544341   | 0.561957   | 0.190401  | 0.237732  | 0.229554   | 0.215348  | 0.145275  | 0.33594    | 0.351831 |
| ASB16-AS1 | 0.832197   | 1.62047    | 1.48053    | 1.27295    | 1.84261   | 1.81603    | 1.28651    | 0.861301   | 0.468727  | 0.508044  | 0.812295   | 0.918056  | 0.37157   | 0.91382    | 1.53607  |
| ASB17     | 0          | 0          | 0          | 0          | 0         | 0          | 0.0238699  | 0          | 0         | 0         | 0          | 0         | 0         | 0          | 0        |
| ASB18     | 0.00820385 | 0.0197637  | 0.0067868  | 0          | 0         | 0.00698547 | 0.00936689 | 0.0072909  | 0         | 0         | 0          | 0         | 0         | 0.00428769 | 0        |
| ASB2      | 0.236154   | 0.0870101  | 0.160887   | 0.28631    | 0.323672  | 0.650559   | 0.483753   | 0.123455   | 0.287609  | 0.78458   | 1.56032    | 0.144125  | 0.179253  | 0.261369   | 0.498745 |
| ASB3      | 1.4408     | 1.28478    | 1.52117    | 1.20615    | 0.715082  | 1.14652    | 1.21677    | 1.85333    | 1.70184   | 1.61657   | 1.66318    | 1.22167   | 0.746469  | 0.614271   | 0.461679 |
| ASB4      | 0.00535471 | 0.00515996 | 0.00442979 | 0          | 0.0249531 | 0.00911893 | 0.00611383 | 0.0142765  | 0         | 0         | 0          | 0         | 0         | 0          | 0        |
| ASB5      | 0          | 0          | 0          | 0          | 0         | 0          | 0.00872367 | 0.0135805  | 0         | 0         | 0          | 0         | 0         | 0          | 0        |
| ASB6      | 3.27831    | 3.64725    | 3.66259    | 3.37747    | 6.42798   | 4.40055    | 3.28616    | 2.78177    | 4.20121   | 2.95884   | 2.7272     | 2.55089   | 4.37565   | 3.181      | 2.36294  |
| ASB7      | 1.75941    | 1.56066    | 1.57867    | 1.99444    | 1.54168   | 2.3701     | 1.49891    | 1.43933    | 2.25815   | 2.19126   | 2.64312    | 1.3267    | 2.60798   | 1.7047     | 1.68449  |
| ASB8      | 4.73055    | 4.03666    | 3.98592    | 4.76006    | 3.204     | 6.46923    | 4.64649    | 3.56006    | 4.68468   | 3.98819   | 6.12234    | 2.93466   | 4.81968   | 2.83451    | 3.65989  |
| ASB9      | 0.281135   | 0.214554   | 0.102333   | 0.231774   | 0.251606  | 0.373437   | 0.218274   | 0.119928   | 0.0547826 | 0.282283  | 0.875932   | 0.040232  | 0.232175  | 0.217462   | 0.306847 |
| ASB9P1    | 0.199386   | 0.558572   | 0.648004   | 0.0733833  | 0.433517  | 0.206155   | 0.569132   | 0.569565   | 0.017345  | 0.125125  | 0.0482319  | 0.152857  | 0.0367551 | 0.208416   | 0.184078 |
| ASCC1     | 2.20692    | 1.9743     | 2.01102    | 3.10934    | 1.39171   | 4.67829    | 1.80523    | 1.8091     | 1.78918   | 2.36477   | 4.14974    | 1.53669   | 2.31649   | 2.10028    | 2.27063  |
| ASCC2     | 6.75516    | 7.36273    | 6.25979    | 12.3935    | 10.4931   | 13.0538    | 7.14185    | 5.85041    | 11.8014   | 10.742    | 8.22734    | 9.8842    | 14.4238   | 9.0662     | 6.7226   |

|           |           |            |            |            |           |           |            |           |            |           |            |            |            |           |           |
|-----------|-----------|------------|------------|------------|-----------|-----------|------------|-----------|------------|-----------|------------|------------|------------|-----------|-----------|
| ASCC3     | 3.23645   | 3.44587    | 3.51326    | 6.06297    | 1.57262   | 4.00388   | 2.98036    | 3.60801   | 4.77851    | 5.29445   | 4.88362    | 4.17911    | 6.69725    | 4.2936    | 4.21586   |
| ASCL1     | 0         | 0.004489   | 0          | 0          | 0         | 0.0317327 | 0          | 0         | 0          | 0         | 0          | 0          | 0          | 0         | 0         |
| ASCL2     | 1.07642   | 1.47148    | 1.42893    | 3.18596    | 5.13282   | 3.93267   | 1.97215    | 0.834273  | 2.04266    | 1.28818   | 1.41296    | 1.10158    | 1.78471    | 1.86438   | 0.233679  |
| ASCL3     | 0.0356047 | 0.0686195  | 0.0589094  | 0.110075   | 0.0553064 | 0.0909508 | 0.121957   | 0         | 0          | 0         | 0.0803865  | 0.0254761  | 0          | 0         | 0         |
| ASCL4     | 0.0614417 | 0.0296036  | 0.00847149 | 0          | 0.0159067 | 0.0174389 | 0.0233841  | 0.063705  | 0          | 0.0128526 | 0.02312    | 0.0073272  | 0          | 0         | 0         |
| ASCL5     | 0         | 0.00785259 | 0.0134828  | 0.18475    | 0         | 0.0832648 | 0.0186084  | 0.0144842 | 0          | 0.0204556 | 0          | 0.0233232  | 0.105153   | 0.034072  | 0         |
| ASDURF    | 0.064409  | 0.333054   | 1.40E-10   | 3.12E-07   | 4.27E-10  | 5.41E-05  | 0.527884   | 0.427115  | 0.395033   | 0.152048  | 1.34041    | 0.00749367 | 0.732923   | 0.154987  | 3.88E-09  |
| ASF1A     | 3.67262   | 3.46791    | 3.58788    | 3.81327    | 0.974698  | 3.27648   | 2.37057    | 3.87078   | 4.15817    | 3.90303   | 5.26054    | 2.33734    | 3.29237    | 2.27636   | 2.33238   |
| ASF1B     | 0.708597  | 0.566874   | 0.82953    | 4.28493    | 0.768411  | 3.79093   | 1.16015    | 0.475277  | 0.618749   | 1.69482   | 2.98837    | 0.927943   | 4.68397    | 1.87967   | 0.825628  |
| ASGR1     | 0.477335  | 0.430299   | 0.611435   | 0.301492   | 1.14808   | 0.708     | 0.63291    | 0.314741  | 0.581341   | 0.347867  | 1.51226    | 0.176282   | 0.218562   | 0.281667  | 0.287473  |
| ASGR2     | 0.29978   | 0.25999    | 0.483599   | 0.216253   | 0.325964  | 0.242496  | 0.855699   | 0.439593  | 0.0730198  | 0.0376255 | 0.389177   | 0.0643503  | 0.715642   | 0.094007  | 0.301366  |
| ASH1L     | 12.3316   | 12.2257    | 12.9624    | 8.88429    | 5.74997   | 11.2623   | 9.29982    | 10.5766   | 6.77433    | 6.9777    | 5.51813    | 7.38275    | 8.6562     | 7.92978   | 8.83275   |
| ASH1L-AS1 | 1.30721   | 1.08709    | 1.17911    | 0.88821    | 1.62891   | 0.896016  | 1.22799    | 0.687451  | 0.16677    | 0.399486  | 0.521943   | 0.503578   | 0.684383   | 0.650719  | 0.852032  |
| ASH2L     | 5.93821   | 5.79656    | 5.50411    | 8.1425     | 4.58485   | 9.52183   | 4.41067    | 4.49857   | 5.53296    | 5.15647   | 6.31571    | 4.35932    | 7.4409     | 4.64989   | 3.88646   |
| ASIC1     | 0.532642  | 0.28018    | 0.262767   | 0.463294   | 0.463028  | 0.936202  | 0.36266    | 0.243198  | 0.0416595  | 0.245329  | 0.402696   | 0.115385   | 0.113502   | 0.329461  | 0.435104  |
| ASIC2     | 0.0162559 | 0.0261079  | 0.00448269 | 0.0111682  | 0.0673363 | 0.0461391 | 0.00618684 | 0         | 0.00659931 | 0.0204029 | 0          | 0          | 0.0349608  | 0.0169921 | 0.0856005 |
| ASIC3     | 0.360048  | 0.298765   | 0.388868   | 0.24736    | 0.264104  | 0.476896  | 0.742247   | 0.26665   | 0.024361   | 0.112974  | 0.0564512  | 0.200374   | 0.0387168  | 0.250902  | 0.315989  |
| ASIC4     | 0.0717985 | 0.0614998  | 0.0659964  | 0          | 0.0743519 | 0.108685  | 0.0728686  | 0.0354492 | 0          | 0.0400509 | 0          | 0.0114164  | 0.00514711 | 0.0333556 | 0.0114569 |
| ASIC5     | 0         | 0          | 0          | 0          | 0         | 0.0232931 | 0          | 0         | 0          | 0         | 0          | 0          | 0          | 0.0142974 | 0         |
| ASIP      | 0.396285  | 0.381872   | 0.786804   | 0.204192   | 0.307784  | 0.404918  | 0.271479   | 0.281748  | 0          | 0         | 0          | 0          | 0.102272   | 0.103558  | 0.227646  |
| ASL       | 2.92839   | 1.70577    | 2.061      | 4.72938    | 4.58275   | 7.20136   | 2.40785    | 1.81593   | 12.2431    | 5.95202   | 7.17899    | 4.38614    | 7.56458    | 4.44306   | 3.09138   |
| ASMT      | 0.0163094 | 0.00392906 | 0.0134923  | 0.00840366 | 0.0253341 | 0.0208309 | 0.0372431  | 0.0217417 | 0          | 0         | 0.00920565 | 0.0116698  | 0.0210455  | 0         | 0         |
| ASMTL     | 3.02242   | 2.16202    | 2.39202    | 2.41001    | 4.22508   | 5.49338   | 2.66581    | 2.07011   | 1.58374    | 1.56056   | 2.02408    | 0.889059   | 1.45135    | 1.72484   | 2.03802   |
| ASMTL-AS1 | 0.295329  | 0.550018   | 0.424476   | 0.31073    | 1.2186    | 0.626835  | 0.417613   | 0.417364  | 0.135463   | 0.313994  | 0.0304074  | 0.429201   | 0.0548435  | 0.507776  | 0.653436  |
| ASNA1     | 10.4091   | 8.97824    | 9.00453    | 19.9291    | 13.351    | 21.4457   | 11.382     | 7.18458   | 22.437     | 18.193    | 29.8039    | 13.5601    | 20.159     | 12.0311   | 8.01821   |
| ASNS      | 2.2226    | 2.09433    | 2.05522    | 2.08121    | 1.47697   | 2.63064   | 1.63104    | 1.29592   | 2.36805    | 2.89378   | 2.11795    | 2.06212    | 8.77048    | 3.37831   | 1.27144   |

|           |            |           |           |           |           |           |           |           |           |           |           |           |           |            |            |
|-----------|------------|-----------|-----------|-----------|-----------|-----------|-----------|-----------|-----------|-----------|-----------|-----------|-----------|------------|------------|
| ASNSD1    | 4.23378    | 3.34837   | 3.54087   | 6.78524   | 2.10952   | 5.78181   | 2.70502   | 3.5159    | 6.7658    | 6.17521   | 7.54831   | 3.46925   | 9.23049   | 5.12989    | 3.99481    |
| ASNSP1    | 0          | 0         | 0         | 0         | 0         | 0         | 0         | 0         | 0         | 0         | 0         | 0         | 0         | 0          | 0          |
| ASPA      | 0.624223   | 0.706785  | 0.839152  | 0.546787  | 0.218167  | 0.996594  | 0.534538  | 0.527019  | 0.152047  | 0.0391732 | 0.0880837 | 0.0334986 | 0.191304  | 0.163123   | 0.112058   |
| ASPDH     | 0.147291   | 0.20403   | 0.182774  | 0.0379468 | 0.400388  | 0.172447  | 0.210215  | 0.147262  | 0         | 0.0693244 | 0.0415682 | 0.0922166 | 0.0356367 | 0.115471   | 0.185087   |
| ASPG      | 0.692414   | 0.712467  | 0.786405  | 1.99553   | 1.76829   | 1.61885   | 0.723578  | 0.667509  | 2.74424   | 1.3404    | 1.40432   | 1.57029   | 0.810193  | 1.20833    | 0.421353   |
| ASPH      | 6.00487    | 3.92634   | 4.45297   | 4.83908   | 2.83197   | 7.22002   | 3.84856   | 5.01972   | 2.92241   | 5.84244   | 8.04599   | 3.64296   | 5.11108   | 4.44154    | 6.10932    |
| ASPHD1    | 0.219217   | 0.128255  | 0.0647685 | 0.355001  | 0.0972913 | 0.319989  | 0.232417  | 0.208738  | 0.0762805 | 0.334098  | 0.830788  | 0.156856  | 0.67688   | 0.679251   | 0.877008   |
| ASPHD2    | 0.905014   | 1.5844    | 2.27164   | 0.501208  | 0.495712  | 0.589597  | 1.16566   | 0.771899  | 0.595159  | 0.407637  | 1.01271   | 0.553972  | 0.581496  | 0.247406   | 0.253253   |
| ASPM      | 0.446367   | 0.416819  | 0.455428  | 1.73702   | 0.105655  | 1.30312   | 0.485378  | 0.457143  | 0.352061  | 1.59268   | 2.22913   | 0.507978  | 1.64842   | 2.23738    | 1.00429    |
| ASPN      | 4.12186    | 1.93291   | 2.23276   | 0.586543  | 1.02671   | 1.38356   | 5.38749   | 2.55362   | 0.894427  | 18.988    | 40.5      | 2.90332   | 2.90817   | 15.483     | 55.3594    |
| ASPRV1    | 40.4418    | 64.7242   | 69.8364   | 17.9036   | 188.08    | 100.57    | 160.683   | 40.7757   | 1272.27   | 87.114    | 263.732   | 106.783   | 9.08682   | 9.86451    | 4.61701    |
| ASPSCR1   | 2.2366     | 2.62577   | 2.65814   | 2.54295   | 7.19311   | 5.23944   | 3.32098   | 1.89439   | 2.18682   | 1.25202   | 2.25221   | 2.07369   | 1.95793   | 2.03606    | 2.27708    |
| ASRGL1    | 0.746242   | 0.161337  | 0.395733  | 0.354934  | 0.63903   | 2.4439    | 0.284011  | 0.314594  | 0.0699106 | 0.324211  | 0.702011  | 0.0342279 | 0.425917  | 0.330016   | 0.659506   |
| ASS1      | 12.348     | 7.85008   | 8.33992   | 10.0405   | 7.11979   | 25.7844   | 14.2987   | 5.21984   | 8.0378    | 6.46013   | 8.29859   | 5.65423   | 7.36086   | 7.79527    | 9.5501     |
| ASTE1     | 1.76356    | 1.16285   | 1.54022   | 1.176     | 0.67403   | 1.36026   | 1.09419   | 1.38944   | 0.240866  | 0.920623  | 1.52688   | 0.61721   | 0.970324  | 0.931625   | 1.06606    |
| ASTL      | 0.0357146  | 0.103247  | 0.0443184 | 0         | 0.166431  | 0.0152053 | 0.122333  | 0.0476102 | 0.108741  | 0.0672382 | 0.060476  | 0.140551  | 0.115214  | 0.018666   | 0          |
| ASTN1     | 0.00598863 | 0.0129844 | 0.0247711 | 0.0216001 | 0.0837217 | 0.140229  | 0.0307693 | 0.0133055 | 0.0145869 | 0.0150327 | 0         | 0.0428502 | 0.0328426 | 0.0782479  | 0.0344017  |
| ASTN2     | 1.05944    | 0.881972  | 0.95441   | 0.445506  | 0.732722  | 0.379268  | 0.715754  | 0.910709  | 0.135862  | 0.374727  | 0.243977  | 0.495163  | 0.0945871 | 0.657771   | 0.907877   |
| ASTN2-AS1 | 0.0263588  | 0         | 0.0218059 | 0         | 0         | 0         | 0         | 0.0351383 | 0         | 0         | 0         | 0         | 0         | 0.00688814 | 0          |
| ASXL1     | 5.11589    | 5.08477   | 5.1752    | 5.12321   | 6.07328   | 8.81193   | 5.54235   | 3.66178   | 3.25629   | 3.54829   | 3.72106   | 3.40443   | 4.65708   | 5.15261    | 7.86961    |
| ASXL2     | 2.73878    | 3.9146    | 3.88025   | 4.27063   | 2.68823   | 4.93951   | 3.10038   | 3.17985   | 3.47779   | 3.1916    | 3.3291    | 3.86019   | 4.81532   | 3.53813    | 3.96162    |
| ASXL3     | 0.322756   | 0.333513  | 0.0486994 | 0.054389  | 0.135586  | 0.176301  | 0.0533069 | 0.0649447 | 0.155749  | 0.0152865 | 0.0160406 | 0.0319541 | 0.0183357 | 0.026523   | 0.00874564 |
| ASZ1      | 0          | 0         | 0         | 0         | 0         | 0         | 0         | 0         | 0         | 0         | 0         | 0         | 0         | 0          | 0.0178211  |
| ATAD1     | 4.83881    | 3.73671   | 4.9431    | 4.34736   | 0.978158  | 5.14017   | 3.06514   | 4.78846   | 3.67312   | 4.27857   | 6.15192   | 2.86944   | 5.00069   | 3.72914    | 4.11375    |
| ATAD2     | 1.81767    | 1.56318   | 1.52091   | 3.23195   | 0.69133   | 3.06357   | 1.21577   | 1.40469   | 1.26643   | 2.42754   | 3.02389   | 1.33631   | 3.48068   | 2.4565     | 1.85177    |
| ATAD2B    | 4.75292    | 4.94729   | 5.19994   | 3.14747   | 3.18907   | 2.43302   | 3.41977   | 4.76885   | 3.43883   | 3.42392   | 2.97481   | 3.83153   | 2.53128   | 3.75553    | 2.87572    |

|          |           |            |           |          |          |           |            |           |            |           |           |           |           |          |          |
|----------|-----------|------------|-----------|----------|----------|-----------|------------|-----------|------------|-----------|-----------|-----------|-----------|----------|----------|
| ATAD3A   | 2.91548   | 2.7826     | 2.91961   | 6.74312  | 7.2222   | 9.51204   | 3.28316    | 1.83583   | 3.53796    | 4.54861   | 3.49608   | 3.94365   | 9.89412   | 6.30454  | 3.67146  |
| ATAD3B   | 3.22035   | 4.20656    | 3.93766   | 4.7236   | 7.75333  | 4.56215   | 2.22236    | 2.69316   | 2.85917    | 4.23221   | 3.05235   | 5.28762   | 7.14316   | 6.54066  | 3.9247   |
| ATAD3C   | 0.16137   | 0.171722   | 0.235053  | 0.096258 | 0.144988 | 0.225536  | 0.0925405  | 0.120156  | 0.00762144 | 0.0854307 | 0.119756  | 0.0807936 | 0.116811  | 0.126848 | 0.305721 |
| ATAD5    | 1.07203   | 0.820261   | 0.886859  | 0.962321 | 0.141388 | 0.85541   | 0.577363   | 1.09954   | 0.242236   | 0.600825  | 0.711652  | 0.39077   | 0.885249  | 0.852768 | 0.769786 |
| ATAT1    | 0.133432  | 0.210937   | 0.187581  | 0.158176 | 0.205911 | 0.21832   | 0.173259   | 0.14416   | 0.0711624  | 0.0788099 | 0.102388  | 0.144771  | 0.0557051 | 0.143121 | 0.185363 |
| ATCAY    | 0.0183821 | 0.00664258 | 0.0114052 | 0        | 0        | 0.0117391 | 0.00531037 | 0.0122524 | 0          | 0         | 0         | 0         | 0         | 0        | 0        |
| ATE1     | 3.40807   | 2.80986    | 2.66276   | 3.74934  | 1.85466  | 3.83809   | 2.64938    | 2.88545   | 3.24078    | 3.46624   | 4.4804    | 2.68189   | 4.81702   | 3.30718  | 2.92607  |
| ATE1-AS1 | 0.243355  | 0.381346   | 0.404896  | 0.05408  | 0.624716 | 0.933545  | 0.531855   | 0.225724  | 0          | 0.0610871 | 0.0379374 | 0.0693739 | 0.0339348 | 0.195291 | 0.089356 |
| ATF1     | 2.16187   | 2.00757    | 2.06359   | 3.07522  | 0.961514 | 3.76027   | 1.38185    | 1.60107   | 2.20534    | 2.89889   | 4.70365   | 1.52043   | 3.26055   | 2.71849  | 2.74648  |
| ATF2     | 3.73475   | 2.81295    | 2.86474   | 3.78488  | 0.903915 | 3.24103   | 2.41258    | 3.16229   | 1.15601    | 3.23874   | 5.4222    | 1.62113   | 2.72971   | 2.984    | 3.97301  |
| ATF3     | 1.21853   | 2.55875    | 4.26542   | 1.24636  | 0.52264  | 2.45454   | 2.16999    | 0.897055  | 1.30684    | 4.23434   | 3.07964   | 8.44565   | 7.99103   | 2.46189  | 1.4496   |
| ATF4     | 39.093    | 33.4225    | 34.7876   | 63.4802  | 49.0907  | 102.192   | 30.5434    | 22.232    | 65.8989    | 72.0654   | 102.316   | 40.308    | 98.548    | 61.4368  | 43.2223  |
| ATF5     | 2.95955   | 3.20731    | 3.02917   | 6.43867  | 6.04675  | 15.7027   | 3.26748    | 3.00931   | 2.42457    | 3.50259   | 7.39421   | 4.19074   | 9.75378   | 5.22098  | 4.09711  |
| ATF6     | 5.84188   | 5.58325    | 6.08129   | 6.30401  | 2.84308  | 6.83308   | 6.13993    | 5.9814    | 10.1505    | 6.26051   | 8.07134   | 5.33018   | 7.65272   | 4.09323  | 5.35557  |
| ATF6B    | 2.47928   | 3.21183    | 3.05369   | 4.48538  | 6.18735  | 5.40484   | 4.13632    | 2.55327   | 4.71377    | 3.76407   | 4.23192   | 4.0274    | 4.26097   | 2.94303  | 3.10638  |
| ATF7     | 5.45798   | 6.46151    | 6.41585   | 7.2134   | 4.48132  | 10.1743   | 8.23988    | 6.56463   | 2.78507    | 3.62513   | 6.23017   | 4.1536    | 4.74491   | 5.05597  | 7.74716  |
| ATF7IP   | 7.06254   | 7.3673     | 6.87709   | 8.53237  | 4.29053  | 8.63093   | 5.49299    | 7.67322   | 3.97998    | 4.05908   | 5.37999   | 4.00845   | 6.22211   | 5.02     | 6.2647   |
| ATF7IP2  | 1.40001   | 2.73665    | 3.27135   | 0.99347  | 0.410139 | 0.345077  | 1.83685    | 1.91542   | 0.583306   | 0.269738  | 0.540674  | 0.663434  | 0.261475  | 0.622589 | 0.714286 |
| ATG10    | 1.6421    | 1.26436    | 1.33005   | 1.51723  | 1.1645   | 1.26094   | 1.14932    | 1.13012   | 1.9616     | 1.53848   | 2.70414   | 1.46045   | 0.851708  | 0.939853 | 1.11966  |
| ATG101   | 4.89597   | 5.73445    | 5.82229   | 8.84612  | 15.9106  | 10.5044   | 5.82908    | 3.19177   | 13.1022    | 8.69181   | 11.8356   | 6.10751   | 13.5187   | 6.66642  | 3.9088   |
| ATG12    | 2.51976   | 2.14226    | 2.21575   | 2.83248  | 0.800805 | 3.69758   | 1.96038    | 2.63294   | 1.7465     | 3.51997   | 5.71632   | 1.4465    | 3.61708   | 2.22154  | 2.34941  |
| ATG13    | 4.53491   | 4.04024    | 4.32602   | 7.13846  | 5.97089  | 7.09198   | 5.8037     | 3.8472    | 11.7905    | 6.26305   | 8.6335    | 4.80429   | 7.73599   | 4.61182  | 4.52313  |
| ATG14    | 4.44027   | 3.57583    | 3.6289    | 2.66504  | 2.80438  | 3.53154   | 3.81624    | 3.48648   | 2.94157    | 2.49866   | 3.67951   | 2.49981   | 2.22576   | 2.20592  | 3.15335  |
| ATG16L1  | 3.65627   | 4.02661    | 4.41523   | 3.31244  | 3.30782  | 4.88658   | 3.89937    | 3.73145   | 3.46612    | 3.21903   | 3.86291   | 4.03925   | 4.99025   | 4.40986  | 2.84662  |
| ATG16L2  | 2.7179    | 7.61595    | 8.56268   | 5.08581  | 20.8076  | 4.32401   | 6.32311    | 3.7957    | 5.31359    | 5.65549   | 2.3415    | 7.72776   | 3.01273   | 5.50576  | 4.6663   |
| ATG2A    | 2.7272    | 4.20272    | 4.41913   | 5.70699  | 10.5202  | 8.70428   | 5.94571    | 3.05949   | 16.8857    | 3.98808   | 3.5214    | 6.49075   | 7.08984   | 3.34037  | 2.73797  |

|            |           |          |           |           |           |           |           |           |           |          |           |           |            |           |          |
|------------|-----------|----------|-----------|-----------|-----------|-----------|-----------|-----------|-----------|----------|-----------|-----------|------------|-----------|----------|
| ATG2B      | 5.95607   | 5.70655  | 5.95447   | 3.36764   | 2.62512   | 4.52575   | 5.11284   | 6.09636   | 4.34462   | 3.37397  | 3.5882    | 3.48733   | 3.40555    | 2.97561   | 3.45064  |
| ATG3       | 5.11987   | 4.35786  | 4.40456   | 6.63206   | 3.14849   | 9.5694    | 3.74771   | 4.89958   | 7.02796   | 7.88691  | 11.7897   | 4.6526    | 9.16145    | 5.82946   | 5.86527  |
| ATG4A      | 1.50193   | 1.24055  | 1.09561   | 1.69265   | 0.884937  | 2.11675   | 0.963022  | 1.11123   | 3.10871   | 2.7394   | 2.94831   | 2.04347   | 2.99305    | 2.09584   | 1.85945  |
| ATG4B      | 4.32983   | 5.16159  | 5.7562    | 6.24027   | 11.2055   | 9.14905   | 5.16255   | 3.37231   | 5.90565   | 4.4117   | 5.13136   | 4.49855   | 5.89125    | 4.82243   | 4.50875  |
| ATG4C      | 0.892078  | 0.900568 | 1.0121    | 1.33081   | 0.369521  | 1.40344   | 0.397718  | 0.989118  | 0.631176  | 0.9597   | 1.40986   | 0.516724  | 0.91542    | 1.03017   | 0.988306 |
| ATG4D      | 5.12879   | 6.82445  | 6.28151   | 5.98231   | 15.3668   | 7.9885    | 5.31341   | 4.51656   | 13.6654   | 6.31144  | 8.87871   | 7.16472   | 8.48736    | 5.3181    | 2.63476  |
| ATG5       | 3.11384   | 2.07682  | 2.32851   | 4.41398   | 0.98216   | 3.24768   | 1.59134   | 2.29603   | 1.68915   | 3.25114  | 4.76617   | 1.42049   | 3.92158    | 2.97771   | 2.36286  |
| ATG7       | 3.42569   | 3.30887  | 3.21823   | 4.26573   | 4.37181   | 4.03444   | 4.0052    | 2.78818   | 2.73022   | 3.04635  | 3.81773   | 2.25633   | 3.4352     | 2.90081   | 3.17266  |
| ATG9A      | 6.71524   | 7.38432  | 7.43381   | 12.2618   | 13.5256   | 14.875    | 9.368     | 5.63431   | 14.8155   | 12.4715  | 11.0874   | 10.2468   | 21.0651    | 10.0765   | 8.20907  |
| ATG9B      | 2.10036   | 3.26144  | 3.26905   | 9.87767   | 10.2882   | 4.60047   | 7.55401   | 3.36485   | 11.0768   | 3.58498  | 3.85513   | 7.32822   | 0.866745   | 2.66617   | 0.914129 |
| ATIC       | 5.98565   | 5.15799  | 5.00688   | 13.63     | 6.08928   | 15.2334   | 6.23829   | 5.43798   | 4.61195   | 5.74248  | 9.12642   | 5.0775    | 11.4066    | 7.98633   | 5.05562  |
| ATL1       | 1.97399   | 2.19514  | 2.26664   | 1.45653   | 0.968947  | 1.91614   | 1.62276   | 2.11921   | 2.60604   | 2.2298   | 3.11082   | 0.915263  | 1.77796    | 0.788213  | 1.56487  |
| ATL2       | 7.53405   | 7.97388  | 7.23019   | 6.91555   | 2.68094   | 4.80474   | 5.12902   | 6.74772   | 8.66373   | 7.17744  | 6.32725   | 6.77856   | 6.45227    | 5.49874   | 2.27578  |
| ATL3       | 13.8883   | 10.9346  | 12.4672   | 18.9752   | 5.56345   | 20.3652   | 12.7932   | 11.9916   | 10.6666   | 19.8241  | 20.4393   | 11.012    | 26.3916    | 12.942    | 14.3585  |
| ATM        | 3.68307   | 3.32491  | 3.38437   | 3.65706   | 1.20687   | 3.45302   | 2.19088   | 3.34215   | 0.891688  | 3.06166  | 3.86609   | 1.30029   | 2.09297    | 2.55673   | 4.40626  |
| ATMIN      | 7.49004   | 6.10471  | 5.92167   | 9.39646   | 2.99576   | 7.58071   | 5.32578   | 6.26601   | 18.0644   | 10.8361  | 10.9668   | 8.33748   | 13.525     | 6.11327   | 5.06916  |
| ATN1       | 14.3237   | 18.0571  | 18.7301   | 18.7924   | 28.8471   | 43.8211   | 22.2025   | 16.8254   | 8.72558   | 9.64273  | 10.5176   | 11.8903   | 19.9775    | 14.7532   | 23.571   |
| ATOH1      | 0         | 0        | 0         | 0.022394  | 0.0337551 | 0         | 0         | 0         | 0         | 0        | 0         | 0         | 0          | 0         | 0        |
| ATOH7      | 0.0609429 | 0.073408 | 0.0126041 | 0.0157008 | 0.0236663 | 0.0648651 | 0.0347913 | 0.0406207 | 0         | 0        | 0         | 0.0218031 | 0.00983001 | 0.0159257 | 0        |
| ATOH8      | 1.15261   | 0.407001 | 0.548602  | 0.402713  | 1.0117    | 1.10243   | 1.48277   | 0.613906  | 0.0336516 | 0.128811 | 0.155961  | 0.124274  | 0.539918   | 0.303266  | 0.555545 |
| ATOX1      | 13.8196   | 10.6718  | 7.8305    | 25.9956   | 16.0999   | 25.6702   | 11.9962   | 6.30909   | 46.9761   | 23.1662  | 47.9237   | 23.4339   | 17.0998    | 15.0885   | 11.4866  |
| ATP10A     | 1.2027    | 0.679607 | 0.764506  | 0.9569    | 1.39428   | 1.75449   | 1.11068   | 0.597302  | 0.193864  | 0.349628 | 0.324449  | 0.319547  | 0.815913   | 0.580051  | 1.98758  |
| ATP10B     | 2.61835   | 3.23202  | 3.15297   | 0.917292  | 2.95062   | 1.84662   | 4.81262   | 3.70793   | 12.3717   | 1.5203   | 2.19613   | 4.01402   | 0.371025   | 1.26935   | 0.535928 |
| ATP10D     | 6.34226   | 7.91272  | 6.98594   | 8.56036   | 5.05483   | 8.42996   | 6.09164   | 6.36811   | 10.8525   | 9.57883  | 8.90664   | 9.57668   | 9.58369    | 10.5111   | 5.49034  |
| ATP11A     | 4.03532   | 4.66679  | 5.52202   | 4.74837   | 3.34118   | 7.56417   | 6.28454   | 3.89289   | 2.52413   | 2.64391  | 3.01823   | 2.67417   | 4.69284    | 4.11984   | 4.23006  |
| ATP11A-AS1 | 0.425593  | 0.501559 | 0.68513   | 0.266708  | 0.562822  | 0.230165  | 0.847091  | 0.557125  | 0.0980614 | 0.223771 | 0.0194774 | 0.547319  | 0.00371068 | 0.426832  | 0.412976 |

|             |            |            |           |           |           |            |            |            |           |            |            |            |           |            |           |
|-------------|------------|------------|-----------|-----------|-----------|------------|------------|------------|-----------|------------|------------|------------|-----------|------------|-----------|
| ATP11AUN    | 0          | 0.00497576 | 0.0170866 | 0         | 0         | 0.0087934  | 0.0235823  | 0          | 0         | 0          | 0          | 0          | 0         | 0          |           |
| ATP11B      | 7.82501    | 8.70575    | 10.156    | 13.8373   | 4.16951   | 7.22553    | 7.07527    | 10.5114    | 19.7916   | 16.9996    | 15.2507    | 12.8132    | 23.1443   | 13.2242    | 6.73354   |
| ATP11C      | 2.22411    | 1.47984    | 1.74702   | 2.48385   | 1.2563    | 3.54163    | 1.33384    | 1.66287    | 0.820827  | 2.05838    | 3.13755    | 0.803743   | 2.56971   | 2.07493    | 3.15263   |
| ATP12A      | 1.08464    | 0.14334    | 0.179458  | 4.10055   | 0.539141  | 0.459138   | 0.700582   | 5.5247     | 12.2209   | 3.32943    | 3.43536    | 3.08662    | 0.203942  | 0.0583075  | 0.062307  |
| ATP13A1     | 3.74338    | 4.97221    | 5.02918   | 9.22752   | 12.5878   | 11.7655    | 5.77854    | 4.15185    | 6.64522   | 5.54026    | 5.9567     | 7.59404    | 10.1091   | 6.35769    | 7.04466   |
| ATP13A2     | 3.75215    | 4.16771    | 3.89548   | 9.43365   | 9.45893   | 12.0624    | 4.5588     | 2.74405    | 10.8558   | 12.8482    | 7.71477    | 8.8578     | 14.4031   | 8.84724    | 5.91513   |
| ATP13A3     | 4.20668    | 3.17417    | 4.20377   | 10.649    | 1.06945   | 7.52959    | 3.04337    | 4.25779    | 2.027     | 9.10491    | 9.45485    | 2.62131    | 19.6387   | 7.37651    | 11.2118   |
| ATP13A4     | 2.47533    | 3.45256    | 3.77902   | 3.36098   | 3.09843   | 0.832387   | 4.70752    | 3.0145     | 7.05061   | 0.565591   | 1.07907    | 2.72809    | 0.155232  | 0.409075   | 0.100597  |
| ATP13A4-AS1 | 0.0934893  | 0.058869   | 0.0755181 | 0.0636787 | 0.0710372 | 0.0129857  | 0.140744   | 0.150037   | 0.0569556 | 0.0194958  | 0.0361933  | 0.0333054  | 0         | 0.0392204  | 0         |
| ATP13A5     | 1.88693    | 0.60856    | 1.16852   | 0.142103  | 0.0446241 | 0.360297   | 0.603527   | 0.561678   | 0.0419846 | 0.00721125 | 0.012972   | 0.0164444  | 0.003707  | 0.024023   | 0         |
| ATP13A5-AS1 | 0.203518   | 0.0556215  | 0.0650724 | 0         | 0         | 0.197175   | 0.0832252  | 0.0647799  | 0         | 0          | 0          | 0          | 0         | 0          | 0         |
| ATP1A1      | 118.407    | 55.436     | 55.3744   | 124.625   | 60.3881   | 204.283    | 66.6787    | 58.9047    | 23.0257   | 52.4366    | 60.1487    | 46.2802    | 96.3615   | 67.1253    | 44.7252   |
| ATP1A1-AS1  | 1.93245    | 1.21571    | 1.22424   | 0.910955  | 0.919454  | 1.06917    | 1.03291    | 1.16325    | 0.151402  | 0.35554    | 0.45759    | 0.503851   | 0.189302  | 0.557449   | 0.623366  |
| ATP1A2      | 1.2892     | 0.265638   | 0.31576   | 0.0611864 | 0.368912  | 1.05445    | 1.66554    | 0.244987   | 0.0361553 | 0.14904    | 0.105326   | 0.145434   | 0.062934  | 0.10861    | 1.25466   |
| ATP1A3      | 0.037418   | 0.0270429  | 0.0309548 | 0.0385604 | 0.0968719 | 0.0690321  | 0.0783249  | 0.049881   | 0.0151903 | 0.0156545  | 0.00704005 | 0.0178491  | 0.0160946 | 0          | 0.0447809 |
| ATP1A4      | 0.00593428 | 0          | 0         | 0         | 0         | 0          | 0.0136187  | 0          | 0         | 0.00734435 | 0          | 0.0128702  | 0         | 0          | 0         |
| ATP1B1      | 27.2458    | 7.07385    | 9.8748    | 8.33225   | 4.52633   | 18.6543    | 11.8243    | 19.2725    | 21.7144   | 7.14501    | 9.28782    | 4.15159    | 7.65789   | 3.05218    | 2.62646   |
| ATP1B2      | 0.630017   | 0.603874   | 0.781791  | 0.172673  | 1.21809   | 2.67085    | 0.948907   | 0.416951   | 0.24488   | 0.328071   | 0.968456   | 0.17744    | 0.0778373 | 0.238198   | 2.40634   |
| ATP1B3      | 69.5023    | 61.4022    | 47.5662   | 68.7074   | 29.127    | 64.7171    | 38.1804    | 36.4297    | 75.3449   | 65.7192    | 71.8902    | 57.0809    | 85.9935   | 54.2483    | 29.5045   |
| ATP1B4      | 0.0145462  | 0.0023362  | 0         | 0         | 0.0150635 | 0.00825728 | 0.00553614 | 0.00861832 | 0         | 0.0121713  | 0          | 0.00693881 | 0         | 0.00253417 | 0         |
| ATP23       | 0.605443   | 0.7074     | 0.738776  | 0.951487  | 0.352673  | 1.03105    | 0.691275   | 0.874359   | 0.27651   | 1.13984    | 1.77702    | 0.487362   | 0.898446  | 0.498379   | 0.23911   |
| ATP2A1      | 0.335407   | 0.298346   | 0.288144  | 0.146235  | 0.430829  | 0.32404    | 0.471331   | 0.315278   | 0.0471332 | 0.0809557  | 0.0291256  | 0.124611   | 0.0124848 | 0.0741646  | 0.277896  |
| ATP2A1-AS1  | 0.118886   | 0.133655   | 0.196701  | 0.24503   | 0         | 0.168716   | 0.633452   | 0.140874   | 0.193052  | 0.0994757  | 0.536828   | 0.0850658  | 0         | 0.248539   | 0         |
| ATP2A2      | 18.124     | 16.5969    | 16.3826   | 38.6839   | 21.1958   | 45.9908    | 17.5183    | 15.6244    | 34.9524   | 32.0089    | 25.802     | 25.9307    | 67.5509   | 29.6123    | 33.0404   |
| ATP2A3      | 6.01198    | 2.37167    | 3.0727    | 1.61113   | 9.30921   | 7.2087     | 5.32269    | 2.88409    | 0.461587  | 1.71844    | 1.88789    | 1.00679    | 2.82129   | 1.83971    | 3.59239   |
| ATP2B1      | 3.80879    | 4.87344    | 6.72429   | 5.2116    | 1.24445   | 5.30098    | 2.81276    | 5.89181    | 2.77263   | 7.12656    | 6.50419    | 4.13934    | 7.9044    | 7.31882    | 7.45447   |

|              |            |           |            |            |            |            |            |            |            |           |            |            |           |           |           |
|--------------|------------|-----------|------------|------------|------------|------------|------------|------------|------------|-----------|------------|------------|-----------|-----------|-----------|
| ATP2B1-AS1   | 0.409133   | 0.386815  | 0.325692   | 0.2307     | 0.57557    | 0.631013   | 0.449507   | 0.425348   | 0.150424   | 0.687902  | 0.949864   | 0.0994231  | 0.333699  | 0.31066   | 0.576481  |
| ATP2B2       | 0.0959986  | 0.0569275 | 0.0753442  | 0.0101466  | 0.0420592  | 0.0419188  | 0.17987    | 0.041564   | 0.00299783 | 0.0123578 | 0.0194511  | 0.0123289  | 0.0174696 | 0.0192973 | 0.0848407 |
| ATP2B2-IT2   | 0          | 0         | 0          | 0          | 0          | 0          | 0          | 0          | 0          | 0         | 0          | 0          | 0         | 0         | 0         |
| ATP2B3       | 0.00704078 | 0.0152656 | 0.0349478  | 0.00362787 | 0.00546838 | 0.00599513 | 0.0200973  | 0.00938589 | 0          | 0         | 0          | 0.00251893 | 0         | 0.0110395 | 0.0202229 |
| ATP2B4       | 18.8841    | 27.339    | 29.9595    | 20.0859    | 22.2061    | 25.6667    | 34.2016    | 19.0968    | 18.2518    | 25.8371   | 16.6449    | 19.7801    | 37.7641   | 17.4249   | 23.6121   |
| ATP2C1       | 7.91052    | 8.36777   | 8.50883    | 10.1254    | 6.93371    | 9.6339     | 5.73268    | 8.77132    | 17.9294    | 9.65866   | 9.27155    | 8.19262    | 9.68487   | 7.62402   | 5.66528   |
| ATP2C2       | 2.94462    | 5.42328   | 5.98755    | 3.56896    | 8.54708    | 5.78046    | 6.42501    | 5.2157     | 14.6045    | 5.2588    | 7.26823    | 6.173      | 3.22909   | 5.21359   | 1.59865   |
| ATP2C2-AS1   | 1.07177    | 1.53331   | 1.35726    | 0.831758   | 3.16354    | 0.724218   | 1.12579    | 1.28845    | 1.0039     | 1.6806    | 0.441916   | 1.77371    | 0.387923  | 2.40056   | 0.907121  |
| ATP4A        | 0          | 0.0156655 | 0.00537948 | 0          | 0.0303027  | 0.0110739  | 0.00742455 | 0          | 0          | 0         | 0.00734072 | 0.0186114  | 0         | 0.0101958 | 0         |
| ATP4B        | 0.0463789  | 0.0148974 | 0.0255786  | 0          | 0.0240141  | 0.0658183  | 0.0176513  | 0.0274784  | 0          | 0         | 0          | 0.0221235  | 0         | 0.0242396 | 0         |
| ATP5F1A      | 57.8983    | 39.0774   | 42.8338    | 71.0195    | 40.584     | 81.9462    | 47.0798    | 37.1034    | 57.5223    | 59.3004   | 80.9264    | 44.8511    | 73.7374   | 54.1668   | 34.1265   |
| ATP5F1B      | 93.0745    | 63.6006   | 66.7757    | 138.426    | 65.949     | 155.595    | 82.971     | 58.9352    | 113.92     | 107.582   | 161.744    | 72.0872    | 136.695   | 96.4102   | 56.9689   |
| ATP5F1C      | 31.3968    | 20.6171   | 20.9752    | 44.6869    | 9.44737    | 35.1579    | 19.1191    | 21.1294    | 30.1333    | 44.4627   | 81.5175    | 21.6886    | 35.6604   | 30.7858   | 18.2063   |
| ATP5F1D      | 20.8659    | 16.0543   | 16.3968    | 37.8817    | 54.7538    | 61.0174    | 23.7445    | 11.9978    | 29.9119    | 28.0262   | 48.1592    | 25.6373    | 33.8815   | 24.4219   | 15.1499   |
| ATP5F1E      | 61.7442    | 34.8332   | 35.1164    | 108.208    | 17.7896    | 68.012     | 23.3972    | 29.2961    | 55.8953    | 127.835   | 266.86     | 60.9642    | 70.8694   | 69.9925   | 39.6053   |
| ATP5IF1      | 7.34566    | 8.35288   | 7.70794    | 10.9646    | 9.26274    | 11.3424    | 7.53597    | 6.02605    | 17.2334    | 12.2525   | 20.2353    | 8.51632    | 8.82724   | 7.99882   | 4.98977   |
| ATP5MC1      | 17.9484    | 13.2911   | 11.6771    | 30.8639    | 16.0269    | 33.6467    | 16.6479    | 10.7932    | 15.0527    | 17.1764   | 36.8025    | 14.5856    | 16.5729   | 18.7051   | 9.36378   |
| ATP5MC2      | 17.6486    | 12.761    | 13.6853    | 26.7113    | 16.1504    | 30.6763    | 18.4086    | 13.4452    | 18.55      | 13.62     | 36.7294    | 14.3213    | 10.4191   | 13.2332   | 10.4387   |
| ATP5MC3      | 8.38794    | 4.93488   | 5.14103    | 16.2057    | 3.95419    | 14.2447    | 6.45043    | 5.23937    | 7.54419    | 10.953    | 20.2431    | 7.16689    | 11.5784   | 10.206    | 5.26896   |
| ATP5MD       | 15.7487    | 10.2381   | 9.25081    | 28.475     | 1.77328    | 13.4761    | 6.20531    | 9.08481    | 24.3939    | 32.2706   | 51.6369    | 16.4666    | 24.2557   | 21.7503   | 8.56991   |
| ATP5ME       | 39.2481    | 22.3013   | 17.9916    | 54.1679    | 27.9713    | 50.9119    | 18.6054    | 19.2716    | 42.626     | 50.0562   | 108.01     | 32.9375    | 32.7679   | 30.9184   | 19.5776   |
| ATP5MF       | 24.8888    | 23.206    | 20.5111    | 63.8244    | 18.1815    | 51.6615    | 22.1151    | 21.712     | 33.7523    | 53.1313   | 103.832    | 40.8379    | 55.0425   | 41.0136   | 20.277    |
| ATP5MF-PTCD1 | 0.32648    | 0.191714  | 0.455281   | 0.307403   | 0.302675   | 0.855612   | 0.371248   | 0.38522    | 0.0798406  | 0.36009   | 0.150234   | 0.454702   | 0.344025  | 0.288184  | 0.374262  |
| ATP5MG       | 24.158     | 14.9104   | 14.3831    | 27.467     | 14.7311    | 30.1616    | 16.2039    | 14.2981    | 33.7982    | 32.7011   | 64.3458    | 20.9646    | 23.4443   | 20.5918   | 14.3841   |
| ATP5MGL      | 0.260685   | 0.404718  | 0.5032     | 0.0895479  | 0.809868   | 0.0986533  | 0.363785   | 0.411867   | 0          | 0.145416  | 0          | 0.186527   | 0.0560643 | 0.227076  | 0.249585  |
| ATP5MPL      | 14.9763    | 11.0781   | 10.6433    | 21.2602    | 5.11329    | 19.7701    | 8.89406    | 9.29004    | 20.0453    | 26.7444   | 56.1948    | 15.4087    | 15.5801   | 14.8403   | 7.93919   |



|              |           |            |           |           |          |           |           |           |            |            |           |            |           |           |           |
|--------------|-----------|------------|-----------|-----------|----------|-----------|-----------|-----------|------------|------------|-----------|------------|-----------|-----------|-----------|
| ATP5PB       | 17.5525   | 12.7708    | 12.6989   | 28.3084   | 4.22629  | 26.1456   | 11.6427   | 11.9019   | 22.0233    | 29.0607    | 50.672    | 17.1586    | 32.108    | 19.9693   | 14.1425   |
| ATP5PD       | 45.1323   | 32.0898    | 33.7664   | 96.3205   | 32.0767  | 93.748    | 30.4172   | 27.1809   | 82.8337    | 87.1879    | 143.479   | 61.2867    | 70.1938   | 58.5721   | 33.0761   |
| ATP5PF       | 6.79584   | 4.8543     | 3.81912   | 12.2322   | 3.00737  | 10.5945   | 3.57182   | 4.42771   | 9.35618    | 9.67789    | 19.7327   | 7.11478    | 9.42827   | 7.37018   | 4.93667   |
| ATP5PO       | 42.9841   | 25.262     | 26.2955   | 50.8357   | 15.1647  | 61.6363   | 27.1452   | 23.0939   | 43.8871    | 51.4988    | 108.165   | 30.3659    | 41.4607   | 39.9934   | 23.5458   |
| ATP5S        | 2.32806   | 2.24849    | 2.36365   | 2.02836   | 1.5287   | 1.75705   | 2.1869    | 1.97494   | 2.33269    | 1.48754    | 2.47279   | 1.40835    | 1.29723   | 1.46563   | 1.04861   |
| ATP6AP1      | 14.4589   | 15.9242    | 13.9307   | 18.8298   | 27.4412  | 27.2694   | 22.9763   | 12.3993   | 53.1769    | 22.7396    | 32.2465   | 25.3596    | 25.6471   | 14.2901   | 15.9693   |
| ATP6AP1L     | 0.557849  | 0.515367   | 0.461492  | 0.385011  | 0.270294 | 0.679818  | 0.298015  | 0.559446  | 0.205689   | 0.231245   | 0.363979  | 0.223381   | 0.0495304 | 0.197937  | 0.690893  |
| ATP6AP2      | 18.5394   | 13.6864    | 14.7823   | 29.1326   | 10.9119  | 32.5207   | 15.9375   | 20.7596   | 39.0667    | 27.3064    | 37.0712   | 18.3569    | 30.3916   | 16.4205   | 20.2911   |
| ATP6V0A1     | 8.78786   | 10.9709    | 12.2714   | 12.4323   | 13.3567  | 14.2123   | 15.152    | 9.68803   | 23.1522    | 14.1639    | 10.1965   | 15.7756    | 16.5179   | 10.1421   | 7.62812   |
| ATP6V0A2     | 3.06758   | 2.95601    | 3.53787   | 1.80121   | 1.75322  | 2.929     | 3.21968   | 2.83312   | 3.15855    | 1.80738    | 3.07548   | 1.8481     | 2.31704   | 2.0723    | 2.2205    |
| ATP6V0A4     | 3.74573   | 1.15013    | 1.6233    | 0.142089  | 1.84253  | 1.30777   | 1.85177   | 1.99121   | 0.00839608 | 0.0173053  | 0         | 0.00986564 | 0.0177918 | 0.039634  | 0.0297018 |
| ATP6V0B      | 8.98639   | 7.69984    | 8.21188   | 15.5461   | 10.8473  | 16.9138   | 10.0048   | 6.45473   | 23.252     | 20.0011    | 37.217    | 11.699     | 21.6465   | 12.6803   | 7.42512   |
| ATP6V0C      | 42.4127   | 43.7061    | 42.6295   | 84.9563   | 55.6317  | 106.552   | 72.8115   | 43.4081   | 145.029    | 80.9591    | 130.444   | 91.7528    | 146.972   | 60.9782   | 36.287    |
| ATP6V0CP3    | 0.0373878 | 0.018014   | 0         | 0         | 0.116152 | 0.0955057 | 0.0853764 | 0         | 0          | 0          | 0         | 0          | 0.0723673 | 0.039081  | 0         |
| ATP6V0D1     | 17.4751   | 15.7512    | 15.2247   | 37.9308   | 26.908   | 36.8514   | 21.8987   | 15.358    | 46.0422    | 35.726     | 44.5387   | 35.935     | 47.9158   | 24.1187   | 16.2599   |
| ATP6V0D2     | 0.01953   | 0.00470493 | 0.0323132 | 0.0100631 | 0        | 0.0498886 | 0.0222987 | 0         | 0          | 0.28189    | 0.82676   | 0.0279485  | 0.037802  | 0.0255181 | 0.0701189 |
| ATP6V0E1     | 22.1722   | 18.104     | 19.5797   | 49.7813   | 16.5073  | 46.3158   | 23.5179   | 18.189    | 48.6378    | 61.6506    | 105.835   | 30.9035    | 55.8164   | 31.8023   | 27.5839   |
| ATP6V0E2     | 1.79249   | 1.34487    | 1.51507   | 0.621571  | 1.67598  | 2.81989   | 2.39568   | 1.24736   | 0.211317   | 0.528315   | 1.01589   | 0.195095   | 0.238934  | 0.233188  | 0.355977  |
| ATP6V0E2-AS1 | 0.105985  | 0.0841954  | 0.145628  | 0.0388556 | 0.274269 | 0.290118  | 0.138219  | 0.0879861 | 0.0367359  | 0.00997992 | 0.0943494 | 0.0269786  | 0.0154679 | 0.0472945 | 0.162445  |
| ATP6V1A      | 10.7729   | 9.15263    | 8.35352   | 13.6669   | 6.39461  | 15.4842   | 9.78602   | 10.1696   | 24.3318    | 17.2144    | 22.0188   | 13.8699    | 18.8752   | 9.65697   | 9.27694   |
| ATP6V1B1     | 12.2459   | 2.55333    | 3.4855    | 0.418198  | 4.95019  | 5.07132   | 6.05067   | 4.78391   | 0.0436085  | 0          | 0.148211  | 0.0512413  | 0.0616061 | 0.174665  | 0.342819  |
| ATP6V1B1-AS1 | 1.49547   | 0.413425   | 0.425908  | 0         | 0.456981 | 0.104375  | 0.755771  | 0.566481  | 0          | 0          | 0         | 0.0526254  | 0         | 0.0896917 | 0         |
| ATP6V1B2     | 15.4642   | 14.5831    | 13.6296   | 28.7464   | 12.8727  | 35.476    | 16.5541   | 13.7703   | 52.4823    | 38.1408    | 38.2443   | 26.8629    | 42.2397   | 19.7527   | 15.8211   |
| ATP6V1C1     | 3.86259   | 2.77398    | 3.18869   | 4.67459   | 1.0399   | 6.06658   | 2.50157   | 3.54092   | 2.24833    | 3.98733    | 5.44131   | 1.82317    | 5.09419   | 3.38863   | 3.71753   |
| ATP6V1C2     | 8.75104   | 11.2881    | 12.937    | 12.6124   | 9.62961  | 7.91933   | 10.2206   | 11.118    | 37.5683    | 4.48369    | 9.2608    | 12.2301    | 0.516382  | 2.17061   | 0.478631  |
| ATP6V1D      | 7.06081   | 8.25496    | 6.8483    | 25.8701   | 8.51951  | 11.0751   | 5.85249   | 7.4253    | 38.2363    | 37.2817    | 40.7508   | 21.5842    | 33.7991   | 21.1572   | 9.86416   |

|                 |           |           |           |            |           |            |           |           |            |            |           |            |            |            |           |
|-----------------|-----------|-----------|-----------|------------|-----------|------------|-----------|-----------|------------|------------|-----------|------------|------------|------------|-----------|
| ATP6V1E1        | 19.2227   | 15.8409   | 17.0062   | 27.6012    | 13.3562   | 33.5638    | 14.5003   | 13.7314   | 39.1785    | 30.5771    | 42.6376   | 20.8964    | 33.2647    | 17.6912    | 14.5484   |
| ATP6V1E2        | 0.523664  | 0.74992   | 0.577616  | 0.689554   | 1.06198   | 1.25098    | 0.680945  | 0.374897  | 0.726343   | 0.474682   | 0.394101  | 0.156123   | 0.506798   | 0.311702   | 0.292463  |
| ATP6V1F         | 19.9705   | 17.7565   | 18.8644   | 32.7239    | 26.4009   | 37.7714    | 25.3245   | 13.5188   | 62.3738    | 49.5614    | 77.0025   | 40.5377    | 39.2757    | 25.9827    | 16.3131   |
| ATP6V1FNB       | 0.293329  | 0.248049  | 0.406088  | 0.289946   | 0.576525  | 0.805367   | 0.375923  | 0.266006  | 0.415567   | 0.638641   | 0.223007  | 0.316969   | 0.247189   | 0.497464   | 0.361078  |
| ATP6V1G1        | 15.874    | 10.8461   | 11.9437   | 24.6786    | 11.5368   | 20.9537    | 8.44715   | 13.4692   | 21.8522    | 25.0983    | 43.9157   | 15.5624    | 23.9409    | 13.3494    | 11.1613   |
| ATP6V1G2        | 0.0104129 | 0.0110671 | 0.0106463 | 0.00652865 | 0.0128212 | 0.0176643  | 0.0282584 | 0.0146637 | 0          | 0.00776586 | 0.0395807 | 0.00295151 | 0          | 0.00323382 | 0.0210081 |
| ATP6V1G2-DDX39B | 0.0750752 | 0.0675001 | 0.144904  | 0.0848285  | 0.0882279 | 0.0889046  | 0.0793691 | 0.0588293 | 0.0590703  | 0.0430878  | 0.0447279 | 0.0563192  | 0.0496873  | 0.0331743  | 0.0815149 |
| ATP6V1G3        | 0         | 0         | 0         | 0          | 0         | 0          | 0         | 0         | 0          | 0          | 0         | 0          | 0          | 0          | 0         |
| ATP6V1H         | 5.80299   | 5.56349   | 5.78687   | 8.78237    | 6.1063    | 7.52502    | 5.33204   | 5.05215   | 16.2706    | 8.73015    | 9.52041   | 7.98708    | 10.088     | 5.63325    | 4.37208   |
| ATP7A           | 3.0092    | 4.71042   | 5.51082   | 2.61453    | 1.65647   | 2.7749     | 4.25681   | 4.33109   | 10.7504    | 2.53721    | 3.3756    | 2.58035    | 1.41807    | 1.81098    | 1.67175   |
| ATP7B           | 0.634247  | 0.446632  | 0.487216  | 0.391448   | 0.682065  | 0.821948   | 0.437681  | 0.384036  | 0.386221   | 0.336789   | 0.417003  | 0.423899   | 0.636303   | 0.582831   | 0.845798  |
| ATP8A1          | 0.749055  | 0.503934  | 0.60131   | 0.566077   | 0.271493  | 0.689782   | 0.91543   | 0.734731  | 0.125014   | 0.292489   | 0.479168  | 0.0714626  | 0.415269   | 0.198645   | 1.46221   |
| ATP8A2          | 0.0286247 | 0.0494206 | 0.0453873 | 0.0786629  | 0.0741067 | 0.0974941  | 0.043577  | 0.0360389 | 0.0290514  | 0.0538904  | 0.13464   | 0.0136545  | 0.035398   | 0.0336611  | 0.0650887 |
| ATP8B1          | 4.57779   | 4.05571   | 4.69239   | 4.90729    | 3.10499   | 5.32132    | 3.08923   | 4.47398   | 3.15307    | 4.27691    | 4.76809   | 3.18825    | 5.19695    | 4.03532    | 4.33583   |
| ATP8B2          | 4.29963   | 2.42722   | 3.03146   | 2.61842    | 4.79094   | 10.6144    | 4.63247   | 2.4441    | 0.572388   | 3.71439    | 5.55424   | 1.09556    | 4.04388    | 4.54233    | 12.7662   |
| ATP8B3          | 0.0413269 | 0.0975684 | 0.0717959 | 0.102213   | 0.224682  | 0.0738975  | 0.0754971 | 0.0734558 | 0.0402652  | 0.0778042  | 0.130628  | 0.0798403  | 0.0506614  | 0.168474   | 0.207727  |
| ATP8B4          | 0.841709  | 0.420708  | 0.527121  | 1.03359    | 0.201618  | 2.1702     | 0.467045  | 0.782997  | 0.0910141  | 0.888587   | 1.45636   | 0.106944   | 0.309598   | 0.639313   | 2.30463   |
| ATP8B5P         | 0.0367009 | 0.030341  | 0.0173341 | 0          | 0         | 0.00446039 | 0.0239577 | 0.0186559 | 0.00639647 | 0          | 0         | 0.0112998  | 0.00680452 | 0.0137488  | 0.030159  |
| ATP9A           | 4.78832   | 4.11969   | 3.95873   | 6.74309    | 7.07003   | 8.79298    | 4.11856   | 3.43783   | 7.5142     | 7.60662    | 5.03523   | 6.38307    | 11.8874    | 4.08634    | 5.5205    |
| ATP9B           | 4.01938   | 3.71545   | 3.60384   | 3.65026    | 3.22715   | 4.51019    | 3.98552   | 3.39744   | 2.66697    | 3.37687    | 2.74145   | 2.63827    | 2.88614    | 2.9909     | 3.15833   |
| ATPAF1          | 4.36622   | 3.78251   | 3.29175   | 4.84305    | 3.3577    | 4.97228    | 2.73817   | 2.84812   | 4.75436    | 4.30574    | 7.41762   | 2.97794    | 4.62802    | 3.28805    | 2.62555   |
| ATPAF2          | 3.02709   | 2.67271   | 2.92365   | 3.90322    | 3.79875   | 3.18699    | 3.4392    | 2.62396   | 3.88642    | 2.50792    | 4.74705   | 2.48605    | 3.80029    | 2.71215    | 2.56982   |
| ATR             | 3.59586   | 2.68938   | 2.72415   | 3.97157    | 0.923673  | 2.80389    | 2.23216   | 3.2156    | 1.35274    | 2.21433    | 2.65975   | 2.12939    | 2.43764    | 3.11374    | 2.67068   |
| ATRAID          | 14.1745   | 11.7501   | 13.1741   | 16.5526    | 12.2745   | 24.8664    | 14.1555   | 9.59936   | 9.45443    | 14.4694    | 32.0258   | 8.45463    | 10.9623    | 10.3505    | 10.4906   |
| ATRIP           | 0.973355  | 0.795847  | 1.12901   | 1.26367    | 1.12025   | 1.59528    | 0.829916  | 0.456054  | 1.34655    | 0.774345   | 1.46949   | 1.12041    | 1.7081     | 1.18159    | 0.393354  |
| ATRIP-TREX1     | 0.620327  | 1.09106   | 0.678641  | 1.37682    | 1.38771   | 1.0333     | 0.742016  | 0.556538  | 0.559078   | 0.489079   | 0.380659  | 0.653325   | 0.37342    | 0.95609    | 1.42297   |

|          |           |           |           |           |           |          |          |           |          |          |          |          |           |           |           |
|----------|-----------|-----------|-----------|-----------|-----------|----------|----------|-----------|----------|----------|----------|----------|-----------|-----------|-----------|
| ATRN     | 5.72201   | 5.35978   | 5.39127   | 5.64427   | 4.55865   | 10.3808  | 5.93676  | 4.792     | 5.94279  | 5.52826  | 6.57512  | 4.53243  | 6.57883   | 4.9542    | 5.42092   |
| ATRN1    | 0.0507634 | 0.101503  | 0.0188978 | 0.0993951 | 0.0788531 | 0.172898 | 0.060858 | 0.0383472 | 1.37868  | 0.143355 | 0.137533 | 0.404997 | 0.221078  | 0.0822467 | 0.0437416 |
| ATRX     | 5.70334   | 5.31083   | 5.58676   | 4.61683   | 1.57638   | 5.3604   | 2.26558  | 3.87697   | 2.53221  | 3.8211   | 4.02835  | 2.45589  | 4.49826   | 3.88747   | 5.6728    |
| ATXN1    | 3.22882   | 3.19339   | 3.51295   | 3.75725   | 3.14529   | 4.57173  | 3.37418  | 3.36772   | 2.85872  | 5.74168  | 4.77692  | 4.40687  | 7.29762   | 4.21687   | 5.97724   |
| ATXN10   | 6.15068   | 4.66785   | 4.53054   | 9.1674    | 4.00515   | 9.47411  | 4.74518  | 5.27473   | 5.59483  | 7.82427  | 11.2426  | 4.91815  | 7.9502    | 6.67247   | 7.26611   |
| ATXN1L   | 6.2333    | 5.64886   | 6.31469   | 5.87016   | 5.72561   | 10.1629  | 7.30128  | 5.50574   | 5.87945  | 4.71837  | 4.5155   | 3.83644  | 8.25546   | 5.24254   | 5.74029   |
| ATXN2    | 3.29439   | 3.71845   | 4.30045   | 3.2951    | 2.15981   | 4.6037   | 3.78356  | 3.41429   | 2.37782  | 2.92477  | 2.90952  | 2.79054  | 3.66338   | 3.34232   | 4.06323   |
| ATXN2-AS | 0.430346  | 0.0691158 | 0.0791139 | 0.049276  | 0.0742751 | 0.325719 | 0.054595 | 0.16998   | 0        | 0        | 0.593764 | 0.171069 | 0.0925523 | 0.0999634 | 0.20601   |
| ATXN2L   | 8.66158   | 12.7365   | 13.6355   | 18.4928   | 17.9581   | 24.4479  | 15.7709  | 10.7713   | 11.8151  | 11.2976  | 11.3525  | 13.7821  | 21.8087   | 14.2636   | 15.8231   |
| ATXN3    | 2.98113   | 3.26804   | 3.13415   | 2.50624   | 1.34048   | 2.18213  | 2.69838  | 3.3495    | 2.98178  | 2.01442  | 2.63839  | 1.7799   | 2.53714   | 1.75796   | 2.52558   |
| ATXN3L   | 0         | 0         | 0         | 0         | 0         | 0        | 0        | 0.0117462 | 0        | 0        | 0        | 0        | 0         | 0.0138156 | 0.0569441 |
| ATXN7    | 5.98574   | 5.54859   | 5.87794   | 3.8101    | 3.27287   | 4.66199  | 6.04409  | 5.95391   | 4.39791  | 3.29692  | 3.27093  | 4.10688  | 4.23698   | 4.27625   | 4.52783   |
| ATXN7L1  | 1.34473   | 1.69719   | 1.56778   | 1.19876   | 1.1923    | 1.80113  | 1.52858  | 1.58111   | 0.70292  | 0.545166 | 0.72879  | 0.898329 | 0.493311  | 0.735467  | 0.991238  |
| ATXN7L2  | 0.525032  | 0.634428  | 0.696327  | 1.07353   | 1.19097   | 1.51857  | 0.780255 | 0.562887  | 0.710477 | 0.491611 | 0.856116 | 0.995836 | 0.77428   | 1.00615   | 0.813853  |
| ATXN7L3  | 7.63957   | 8.40559   | 8.56238   | 15.9824   | 18.1876   | 18.1383  | 8.10501  | 5.71673   | 26.7669  | 16.4615  | 12.7882  | 12.824   | 24.4873   | 14.2019   | 9.55557   |
| ATXN7L3B | 10.7356   | 11.2052   | 12.1883   | 14.1012   | 8.24038   | 15.9703  | 11.4466  | 9.61908   | 9.5381   | 8.44112  | 11.5869  | 5.97256  | 14.8385   | 8.42288   | 8.90936   |
| ATXN8OS  | 0         | 0         | 0         | 0         | 0         | 0        | 0        | 0         | 0        | 0        | 0        | 0        | 0         | 0         | 0         |
| AUH      | 3.04276   | 2.80785   | 2.46386   | 2.64405   | 3.84525   | 3.0849   | 1.88427  | 2.70416   | 2.08841  | 1.48875  | 2.67806  | 1.46683  | 1.54725   | 1.86656   | 2.25896   |
| AUNIP    | 0.370205  | 0.27321   | 0.175314  | 0.563257  | 0.230835  | 0.481599 | 0.188272 | 0.215764  | 0.163885 | 0.458382 | 0.718339 | 0.292507 | 0.905494  | 0.604356  | 0.317457  |
| AUP1     | 10.6944   | 10.9697   | 11.4776   | 23.2754   | 20.9082   | 20.0639  | 15.3577  | 9.21081   | 20.5991  | 22.0591  | 34.4415  | 17.7938  | 33.4319   | 21.4447   | 14.597    |
| AURKA    | 0.455889  | 0.426388  | 0.229244  | 2.33803   | 0.20828   | 2.36715  | 0.398044 | 0.349546  | 0.348374 | 1.86241  | 2.57195  | 0.741946 | 3.40276   | 2.36866   | 0.795927  |
| AURKAIP1 | 10.9561   | 9.42997   | 9.56446   | 22.7684   | 28.0197   | 30.0484  | 11.6339  | 6.84988   | 23.8608  | 20.614   | 40.3165  | 14.697   | 25.6588   | 17.7058   | 10.1419   |
| AURKAP1  | 1.0239    | 0.964893  | 0.7723    | 0.654727  | 0.584729  | 0.487201 | 1.16905  | 0.843045  | 0.220057 | 0.642547 | 0.427067 | 0.732625 | 0.204013  | 1.66048   | 1.53532   |
| AURKB    | 0.380893  | 0.433107  | 0.34031   | 3.56409   | 0.970319  | 4.06056  | 0.991552 | 0.406207  | 0.500996 | 1.37681  | 2.92387  | 1.27548  | 3.27339   | 1.86331   | 0.700173  |
| AURKC    | 0.53366   | 0.179988  | 0.309037  | 0.329971  | 0.303951  | 0.530139 | 0.162484 | 0.395227  | 0.173317 | 0.446532 | 0.441786 | 0.330935 | 0.275452  | 0.371885  | 0.178827  |
| AUTS2    | 5.4075    | 5.27302   | 4.6402    | 3.88414   | 7.08618   | 8.334    | 6.3062   | 5.80682   | 3.06559  | 1.74961  | 2.90864  | 2.97812  | 2.90494   | 2.85388   | 4.74399   |

|           |           |           |           |            |            |           |           |            |           |           |           |            |            |            |            |
|-----------|-----------|-----------|-----------|------------|------------|-----------|-----------|------------|-----------|-----------|-----------|------------|------------|------------|------------|
| AVEN      | 3.25      | 2.92059   | 2.62611   | 6.60498    | 4.79009    | 4.32477   | 2.51986   | 1.96138    | 5.19161   | 8.84119   | 8.49808   | 4.51032    | 10.3674    | 6.04383    | 2.51823    |
| AVIL      | 0.654399  | 1.0163    | 1.0258    | 0.701514   | 1.24873    | 0.614184  | 0.450108  | 0.822975   | 0.425002  | 0.487516  | 0.227198  | 0.456665   | 0.22535    | 0.643201   | 0.669887   |
| AVL9      | 3.94785   | 2.96981   | 3.17002   | 3.81038    | 2.00793    | 3.90525   | 2.84267   | 3.36233    | 2.66043   | 2.90331   | 3.63409   | 2.31346    | 4.90876    | 3.28575    | 3.32542    |
| AVP       | 0         | 0         | 0         | 0          | 0          | 0         | 0         | 0          | 0         | 0         | 0         | 0          | 0          | 0          | 0          |
| AVPI1     | 8.29625   | 7.46583   | 6.79447   | 5.48266    | 14.4365    | 9.88132   | 11.8642   | 5.33399    | 49.9323   | 9.20236   | 21.5649   | 14.5014    | 10.3836    | 5.89138    | 2.81745    |
| AVPR1A    | 0.880683  | 0.310413  | 0.295826  | 0.283235   | 0.449881   | 1.45952   | 0.492645  | 0.546299   | 0.0935802 | 0.589766  | 1.09093   | 0.175512   | 0.356563   | 0.379966   | 1.78681    |
| AVPR1B    | 0.034564  | 0.0142744 | 0.0204241 | 0.00508845 | 0.0153399  | 0         | 0.0225509 | 0.0570469  | 0         | 0         | 0         | 0.0141323  | 0          | 0          | 0.00709118 |
| AVPR2     | 0.565217  | 0.207961  | 0.272051  | 0.25417    | 1.58036    | 0.743788  | 0.445875  | 0.383588   | 0.112642  | 0.270864  | 0.417639  | 0.169124   | 0.29837    | 0.295407   | 0.575585   |
| AWAT1     | 0.0992554 | 0.135498  | 0.260018  | 0.0340952  | 0.077089   | 0.0563431 | 0.264429  | 0.279331   | 0.040294  | 0.0415252 | 0         | 0.0118366  | 0          | 0.0432293  | 0.0950289  |
| AWAT2     | 0.0217919 | 0.0104997 | 0.0721114 | 0.0786003  | 0.0677008  | 0         | 0.0248813 | 0.00968344 | 0         | 0.0136756 | 0.061501  | 0          | 0.00703003 | 0.00569471 | 0          |
| AXDND1    | 0.07191   | 0.0230982 | 0.0148723 | 0.00617545 | 0.00930843 | 0.0408203 | 0.0615784 | 0.0426051  | 0         | 0.0150424 | 0.0202944 | 0.0042878  | 0.00386633 | 0.0250556  | 0.00860599 |
| AXIN1     | 3.92042   | 4.49376   | 4.21098   | 4.73734    | 8.38812    | 7.71548   | 4.57008   | 2.8435     | 5.25208   | 3.4761    | 2.6768    | 3.57432    | 6.98851    | 4.20701    | 3.31455    |
| AXIN2     | 2.61977   | 3.11106   | 3.05304   | 1.4619     | 6.23074    | 2.93878   | 5.85819   | 2.28475    | 1.48276   | 1.29613   | 2.15361   | 1.4895     | 1.0871     | 1.80951    | 2.74759    |
| AXL       | 9.05876   | 5.34787   | 7.2636    | 4.19555    | 6.42685    | 17.4133   | 11.1088   | 4.4367     | 1.2022    | 4.05471   | 5.95558   | 1.67961    | 8.55995    | 7.91641    | 14.7937    |
| AZGP1     | 58.7632   | 52.6418   | 57.3762   | 46.3794    | 96.6791    | 61.5482   | 84.891    | 47.1185    | 646.242   | 55.591    | 158.385   | 79.6556    | 3.71819    | 15.6621    | 3.10031    |
| AZGP1P1   | 1.5481    | 1.71839   | 1.23206   | 2.26177    | 2.64824    | 2.05236   | 2.3493    | 2.42074    | 12.2432   | 0.910022  | 2.67671   | 5.25809    | 0.03793    | 1.96643    | 0.0562851  |
| AZI2      | 4.28187   | 3.2135    | 3.00634   | 4.95304    | 1.73468    | 5.84715   | 2.04291   | 3.7944     | 7.54418   | 7.38758   | 9.53501   | 4.04827    | 7.88971    | 4.68857    | 4.25313    |
| AZIN1     | 12.2629   | 11.7635   | 12.5041   | 16.3642    | 5.08277    | 11.9686   | 10.4158   | 12.5413    | 14.7621   | 13.7764   | 13.3117   | 9.09338    | 14.739     | 11.6243    | 10.2932    |
| AZIN1-AS1 | 0.890118  | 0.870358  | 0.779684  | 0.485625   | 1.42333    | 1.47126   | 0.747285  | 0.418798   | 0.159421  | 0.295726  | 0.886616  | 0.187324   | 0.101347   | 0.15051    | 0.0751954  |
| AZIN2     | 0.741601  | 0.542132  | 0.486572  | 0.78181    | 0.940107   | 1.57503   | 0.545025  | 0.348475   | 0.134959  | 0.417248  | 0.75057   | 0.390352   | 0.467477   | 0.850922   | 1.06503    |
| AZU1      | 0.0756309 | 0.0242934 | 0.0417115 | 0          | 0          | 0.128797  | 0.0575686 | 0.0672144  | 0         | 0.063283  | 0.0853778 | 0          | 0          | 0.013176   | 0.108616   |
| B2M       | 235.202   | 189.681   | 237.759   | 396.644    | 77.0063    | 467.168   | 165.801   | 245.326    | 104.615   | 307.637   | 691.463   | 73.2868    | 240.522    | 121.172    | 314.247    |
| B3GALNT1  | 1.25026   | 0.745942  | 0.801033  | 0.707264   | 0.611549   | 1.77127   | 0.613522  | 1.08748    | 0.907124  | 1.01497   | 1.86783   | 0.2246     | 0.621299   | 0.386502   | 1.51283    |
| B3GALNT2  | 3.9174    | 4.77587   | 5.61838   | 5.78542    | 3.15967    | 4.62969   | 3.72071   | 3.24883    | 5.20934   | 4.89677   | 5.00876   | 4.14717    | 5.96946    | 6.44825    | 3.24974    |
| B3GALT1   | 0.0747239 | 0.0257165 | 0.0308861 | 0          | 0.0331634  | 0.0636264 | 0.0609409 | 0.073233   | 0         | 0.013398  | 0.0120506 | 0.00763813 | 0.0619862  | 0.0111583  | 0.0306608  |
| B3GALT2   | 0.795787  | 0.61599   | 0.690708  | 0.537758   | 0.0911901  | 0.383234  | 0.498987  | 0.678244   | 0.166826  | 0.417529  | 0.434445  | 0.527401   | 0.210425   | 0.675006   | 0.71194    |

|             |           |           |           |           |           |           |           |            |           |           |           |           |            |            |           |
|-------------|-----------|-----------|-----------|-----------|-----------|-----------|-----------|------------|-----------|-----------|-----------|-----------|------------|------------|-----------|
| B3GALT4     | 0.612206  | 0.797611  | 0.754013  | 0.529048  | 2.11516   | 0.855563  | 1.14723   | 0.500162   | 1.71855   | 0.957893  | 1.407     | 0.656093  | 1.36033    | 0.539494   | 0.343009  |
| B3GALT5     | 0.889583  | 0.378386  | 0.224227  | 0.150403  | 0.151138  | 0.585855  | 0.714162  | 0.419999   | 0         | 0.0087228 | 0         | 0.0298369 | 0.0179361  | 0.0181615  | 0.0598853 |
| B3GALT5-AS1 | 0.158369  | 0.0508699 | 0.0786086 | 0.0108803 | 0.0820008 | 0.269699  | 0.132602  | 0.0187661  | 0.0257168 | 0.0265027 | 0.0119186 | 0.0075545 | 0.00681194 | 0          | 0         |
| B3GALT6     | 2.51987   | 2.37231   | 2.4412    | 4.51024   | 6.12887   | 8.09555   | 2.14837   | 1.81956    | 2.15026   | 1.98709   | 4.52894   | 1.85642   | 3.5832     | 2.05781    | 3.30935   |
| B3GAT1      | 0.0759619 | 0.0670993 | 0.0890248 | 0.0521873 | 0.147494  | 0.0700706 | 0.29633   | 0.129392   | 0.115641  | 0         | 0.0142919 | 0.0724703 | 0.00408418 | 0.00330842 | 0.0545454 |
| B3GAT2      | 0         | 0.0122685 | 0         | 0         | 0         | 0         | 0.0149588 | 0          | 0         | 0.0486547 | 0         | 0         | 0          | 0          | 5.61E-45  |
| B3GAT3      | 3.39019   | 4.01636   | 3.71198   | 4.39795   | 9.99022   | 6.97904   | 3.44958   | 2.54326    | 1.87014   | 2.99104   | 5.61683   | 2.22601   | 3.35176    | 3.53331    | 3.59428   |
| B3GLCT      | 1.65896   | 0.960763  | 1.1361    | 1.57941   | 0.563172  | 1.89436   | 0.802818  | 1.25954    | 0.936622  | 2.42      | 2.72232   | 0.911891  | 4.18217    | 1.63361    | 1.7908    |
| B3GNT10     | 0.517019  | 0.6072    | 0.7485    | 0.619383  | 0.321243  | 0.885972  | 0.560799  | 0.930454   | 0.35419   | 0.389347  | 0.70038   | 0.286704  | 0.400293   | 0.314127   | 0.120657  |
| B3GNT2      | 4.29659   | 2.14858   | 2.57159   | 3.98332   | 2.14886   | 5.16905   | 2.35066   | 3.39178    | 3.14164   | 11.2346   | 12.1718   | 3.10345   | 17.0792    | 7.75752    | 5.58613   |
| B3GNT3      | 0.663661  | 0.364857  | 0.541988  | 1.35908   | 0.383281  | 0.970811  | 0.174865  | 0.695669   | 7.28474   | 2.63772   | 1.86337   | 1.50983   | 5.16574    | 1.36075    | 1.29524   |
| B3GNT4      | 1.04153   | 1.27535   | 1.57435   | 1.00077   | 1.36182   | 1.85512   | 1.02228   | 1.08459    | 1.04495   | 1.32287   | 1.95703   | 1.38027   | 1.05067    | 1.40254    | 0.594252  |
| B3GNT5      | 2.44172   | 3.37252   | 3.53378   | 7.65871   | 1.42123   | 3.81407   | 1.73682   | 4.45973    | 8.15558   | 12.2091   | 8.88385   | 11.7157   | 15.0223    | 9.07681    | 3.73234   |
| B3GNT6      | 0         | 0         | 0         | 0         | 0.028273  | 0         | 0         | 0.00808793 | 0         | 0         | 0.0205471 | 0.0130236 | 0          | 0          | 0         |
| B3GNT7      | 0.395826  | 0.380799  | 0.507027  | 0.565811  | 0.525601  | 2.01681   | 0.969487  | 0.363125   | 0.23326   | 0.616996  | 1.05944   | 0.274088  | 0.560199   | 1.0911     | 0.669311  |
| B3GNT8      | 0.802721  | 1.74936   | 1.50181   | 3.18164   | 3.93254   | 3.27031   | 1.25493   | 1.26215    | 4.69259   | 4.89798   | 8.75501   | 3.52574   | 8.08738    | 2.98839    | 1.20601   |
| B3GNT9      | 1.87109   | 2.72457   | 2.72821   | 2.52855   | 6.30206   | 5.7698    | 2.61614   | 1.8022     | 3.16673   | 3.80994   | 6.95233   | 2.88875   | 4.18932    | 2.54245    | 5.19024   |
| B3GNTL1     | 0.520276  | 0.686303  | 0.828374  | 0.484782  | 0.963103  | 0.509607  | 0.788809  | 0.446156   | 0.336447  | 0.233786  | 0.304246  | 0.314164  | 0.185268   | 0.412683   | 0.604829  |
| B4GALNT1    | 0.147153  | 0.0544901 | 0.0394551 | 0.0808116 | 0.157699  | 0.683214  | 0.32434   | 0.0608037  | 0.0145212 | 0.458675  | 1.21488   | 0.031877  | 0.15001    | 0.301434   | 0.895942  |
| B4GALNT2    | 0.0658096 | 0.015854  | 0.0272212 | 0         | 0.102225  | 0.028018  | 0.0751393 | 0.0389907  | 0         | 0         | 0         | 0.0784809 | 0          | 0.034395   | 0         |
| B4GALNT3    | 3.45328   | 4.46611   | 5.01193   | 5.91731   | 7.5809    | 4.45936   | 4.22722   | 2.85362    | 17.6591   | 13.9405   | 3.85273   | 12.6099   | 15.9568    | 10.5968    | 3.82827   |
| B4GALNT4    | 0.301516  | 0.732832  | 0.548758  | 0.628348  | 2.90383   | 2.00255   | 0.742075  | 0.494242   | 0.424335  | 0.630723  | 0.620238  | 0.872561  | 0.146983   | 0.58832    | 1.21244   |
| B4GALT1     | 14.5726   | 10.5797   | 10.797    | 27.7403   | 14.3232   | 34.611    | 11.2329   | 11.2071    | 11.8475   | 25.1454   | 39.2102   | 12.4857   | 41.2002    | 21.3077    | 32.7456   |
| B4GALT1-AS1 | 0.206327  | 0.132549  | 0.170689  | 0.194907  | 0.267081  | 0.0878425 | 0.274841  | 0.229208   | 0.523507  | 0.755306  | 1.02872   | 0.307568  | 0.576859   | 0.251617   | 0.0987707 |
| B4GALT2     | 8.40781   | 8.5527    | 9.51357   | 16.0802   | 12.9417   | 22.6558   | 10.8203   | 4.73269    | 8.77537   | 11.3912   | 19.8336   | 11.2808   | 15.1412    | 11.4273    | 10.4712   |
| B4GALT3     | 2.84616   | 4.2248    | 4.25722   | 5.47107   | 7.20472   | 7.4907    | 4.20157   | 3.06598    | 7.60951   | 4.69081   | 6.71801   | 4.51871   | 5.89229    | 5.23391    | 3.33052   |

|             |            |            |            |           |           |                 |           |            |           |           |            |            |            |            |          |
|-------------|------------|------------|------------|-----------|-----------|-----------------|-----------|------------|-----------|-----------|------------|------------|------------|------------|----------|
| B4GALT4     | 2.82377    | 3.35853    | 3.58571    | 2.55386   | 2.19314   | 3.7495          | 2.67171   | 3.036      | 4.88199   | 4.75854   | 5.04902    | 2.13352    | 5.61213    | 2.62138    | 2.96347  |
| B4GALT4-AS1 | 0.255254   | 0.266468   | 0.351941   | 0         | 0.198249  | 0               | 0.485735  | 0.680546   | 0         | 0.0533951 | 0          | 0.273962   | 0.0823444  | 0.088938   | 0.366577 |
| B4GALT5     | 3.43205    | 2.2575     | 2.57596    | 6.59433   | 2.37278   | 8.27094         | 2.37576   | 2.82386    | 1.77688   | 3.90815   | 5.72586    | 1.75859    | 6.48507    | 4.24509    | 6.89055  |
| B4GALT6     | 0.445649   | 0.223976   | 0.228832   | 0.423623  | 0.107418  | 0.75893         | 0.27196   | 0.314114   | 0.0888989 | 0.303777  | 0.490073   | 0.140195   | 0.396594   | 0.281105   | 0.496559 |
| B4GALT7     | 3.40378    | 3.49306    | 3.5697     | 5.24774   | 6.55703   | 8.6606          | 3.61092   | 2.87018    | 1.95847   | 3.27976   | 7.1403     | 3.1067     | 3.88209    | 4.35637    | 3.79129  |
| B4GAT1      | 2.47083    | 2.16549    | 2.31227    | 2.63843   | 3.14338   | 5.28349         | 2.47645   | 1.65932    | 1.26631   | 2.11888   | 3.33196    | 1.35196    | 1.92598    | 1.49588    | 2.08731  |
| B9D1        | 0.957034   | 1.55902    | 1.82459    | 0.749741  | 1.79084   | 1.123           | 1.90737   | 1.07313    | 0.840716  | 0.725113  | 1.01778    | 1.10734    | 0.371807   | 0.774367   | 0.52509  |
| B9D2        | 0.670299   | 0.736207   | 1.22561    | 1.31855   | 1.18552   | 1.89224         | 0.871402  | 0.631881   | 0.327521  | 0.875744  | 1.92537    | 0.570397   | 1.52069    | 1.46687    | 0.96711  |
| BAALC       | 0.603255   | 0.532242   | 0.492574   | 0.33102   | 0.279902  | 1.93458         | 0.420422  | 0.445609   | 0.295787  | 0.816146  | 1.69808    | 0.218625   | 0.272957   | 0.212921   | 0.585068 |
| BAALC-AS1   | 0.350652   | 0.307181   | 0.342827   | 0.0328507 | 0.346617  | 0.407149        | 0.181983  | 0.283301   | 0.310585  | 0.200048  | 0.0719714  | 0.159664   | 0          | 0.0499817  | 0.732481 |
| BAALC-AS2   | 0.00104333 | 0.164859   | 2.26E-08   | 0.19185   | 0.438625  | 0.00049265<br>3 | 5.77E-11  | 0.0263964  | 0.632249  | 2.34E-08  | 0.00176669 | 0.29046    | 7.21E-18   | 1.40E-05   | 0        |
| BAAT        | 0.0327991  | 0.00948187 | 0.00542675 | 0         | 0.0101897 | 0.027928        | 0.0149796 | 0.00582982 | 0.0159783 | 0.0164665 | 0          | 0.00938746 | 0.00423236 | 0.00342845 | 0        |
| BABAM1      | 8.72887    | 8.08386    | 8.55034    | 14.504    | 14.6868   | 15.378          | 9.56061   | 6.15106    | 10.1792   | 11.7506   | 21.8181    | 8.06969    | 10.4662    | 9.13219    | 8.65298  |
| BABAM2      | 5.28499    | 4.49356    | 4.5324     | 5.6163    | 4.9004    | 7.60336         | 5.78034   | 4.49382    | 8.1682    | 4.81512   | 7.67739    | 5.11402    | 3.47688    | 3.6427     | 4.75676  |
| BACE1       | 5.14763    | 4.24354    | 4.34116    | 4.86048   | 6.07313   | 10.3312         | 5.3243    | 4.07936    | 3.69877   | 4.98433   | 8.41052    | 3.77677    | 4.78962    | 5.00679    | 9.63957  |
| BACE1-AS    | 1.00988    | 1.55434    | 1.50844    | 0.871474  | 2.00444   | 1.28985         | 1.82566   | 0.498609   | 0.649124  | 0.528126  | 0.285007   | 0.602163   | 0.289586   | 0.661409   | 0.322292 |
| BACE2       | 2.92072    | 1.52423    | 1.96509    | 7.28771   | 2.92264   | 7.90726         | 2.35113   | 1.92425    | 0.508374  | 3.09916   | 5.88913    | 1.0768     | 5.68327    | 3.65162    | 4.2722   |
| BACH1       | 7.92995    | 8.52948    | 8.87338    | 13.7437   | 4.4688    | 8.94372         | 6.8002    | 10.4994    | 12.9811   | 11.1072   | 11.5493    | 7.19983    | 12.1345    | 8.1729     | 8.31634  |
| BACH1-IT2   | 1.12541    | 1.05667    | 1.36072    | 0.951604  | 1.16543   | 0.417708        | 1.25201   | 1.59002    | 0.175721  | 1.05032   | 0.29318    | 0.929147   | 0.167564   | 1.85506    | 1.24325  |
| BACH1-IT3   | 0.633268   | 0.388332   | 0.476258   | 0.652601  | 0.268277  | 0               | 0.394388  | 0.511632   | 0.140227  | 0.505792  | 0.194967   | 0.411927   | 0          | 0.330973   | 0.66142  |
| BACH2       | 0.87285    | 1.05739    | 1.21929    | 0.400919  | 0.565579  | 0.724111        | 0.72609   | 0.817826   | 0.92636   | 0.616622  | 0.411028   | 0.210562   | 0.390994   | 0.483563   | 1.55437  |
| BAD         | 7.46855    | 6.33239    | 6.51131    | 7.03406   | 17.2992   | 14.9243         | 10.4487   | 4.06646    | 11.0987   | 10.0619   | 23.1802    | 5.47925    | 9.80813    | 6.59749    | 6.16394  |
| BAG1        | 10.6809    | 10.2925    | 9.69145    | 9.66426   | 17.0833   | 14.6675         | 9.79298   | 6.06617    | 15.7307   | 10.8551   | 13.3732    | 10.2641    | 11.5729    | 8.36256    | 3.8627   |
| BAG2        | 0.92482    | 0.836844   | 1.19427    | 0.627621  | 0.788359  | 1.85344         | 1.40361   | 0.671555   | 0.357128  | 2.46304   | 6.73511    | 0.710153   | 2.35765    | 2.39318    | 4.84292  |
| BAG3        | 12.8462    | 14.7142    | 12.1178    | 36.5217   | 19.3809   | 34.1806         | 13.6183   | 11.5207    | 34.0773   | 24.5808   | 20.7052    | 20.2401    | 53.6533    | 16.479     | 13.649   |

|           |           |          |          |          |           |           |             |           |            |           |           |            |           |            |          |
|-----------|-----------|----------|----------|----------|-----------|-----------|-------------|-----------|------------|-----------|-----------|------------|-----------|------------|----------|
| BAG4      | 3.30109   | 3.13737  | 3.29814  | 3.52615  | 1.07106   | 3.24459   | 2.87681     | 3.62862   | 1.85       | 2.60424   | 3.83925   | 1.95593    | 3.03384   | 2.77188    | 2.29319  |
| BAG5      | 8.32523   | 7.09906  | 7.72156  | 7.44445  | 3.50323   | 7.03999   | 6.21123     | 7.32047   | 11.4536    | 5.46223   | 5.16147   | 5.43682    | 8.91536   | 5.44235    | 4.16245  |
| BAG6      | 2.23447   | 2.57422  | 2.64578  | 3.67014  | 4.16734   | 5.34575   | 3.61417     | 2.1066    | 5.23785    | 2.91103   | 2.81577   | 3.10365    | 5.00997   | 2.74145    | 2.57502  |
| BAGE      | 0.26769   | 0.117252 | 0.140924 | 0.200627 | 0.0378014 | 0.0621641 | 0.0555709   | 0.194646  | 0          | 0.0610871 | 0         | 0.19154    | 0.0314023 | 0.330689   | 0.174744 |
| BAGE2     | 0         | 0        | 0        | 0        | 0         | 5.37E-17  | 0.000194129 | 9.66E-17  | 0          | 0         | 0         | 0          | 2.80E-45  | 1.11E-16   | 0        |
| BAGE3     | 0         | 0        | 0        | 0        | 0         | 5.37E-17  | 0.000194129 | 9.66E-17  | 0          | 0         | 0         | 0          | 2.80E-45  | 1.11E-16   | 0        |
| BAGE4     | 0.0221916 | 0        | 0        | 0        | 0.0116358 | 0.0122629 | 0.00787843  | 0.0129363 | 0          | 1.12E-44  | 0         | 0.00509551 | 6.59E-44  | 0.00771705 | 0        |
| BAGE5     | 0.0228327 | 0        | 0        | 0        | 0.011972  | 0.0126177 | 0.00810605  | 0.0133103 | 0          | 1.12E-44  | 0         | 0.00524267 | 6.59E-44  | 0.00794014 | 0        |
| BAHCC1    | 1.5925    | 1.61262  | 1.94824  | 1.94478  | 3.6896    | 5.93727   | 2.61954     | 1.45127   | 0.421867   | 0.90057   | 0.784607  | 0.68401    | 2.29005   | 1.33664    | 5.34288  |
| BAHD1     | 2.51451   | 3.30921  | 3.24507  | 3.30695  | 6.49496   | 5.31797   | 3.37408     | 2.08996   | 3.61653    | 3.05377   | 1.93022   | 2.52229    | 6.06293   | 3.05392    | 2.49685  |
| BAIAP2    | 5.63675   | 7.78015  | 9.91022  | 11.0015  | 6.41607   | 11.0945   | 8.78459     | 6.28491   | 6.74566    | 9.91169   | 5.34568   | 12.2153    | 18.1487   | 7.84437    | 3.66503  |
| BAIAP2-DT | 0.832333  | 0.786928 | 0.857458 | 1.19221  | 1.75639   | 2.97306   | 0.8547      | 0.511748  | 0.357022   | 0.801566  | 0.774136  | 0.303397   | 1.37801   | 0.818045   | 0.992354 |
| BAIAP2L1  | 3.19715   | 4.94944  | 5.77497  | 7.42359  | 5.37768   | 5.06342   | 3.996       | 4.16957   | 3.1488     | 6.21025   | 3.48104   | 4.67455    | 10.5418   | 5.62145    | 3.9304   |
| BAIAP2L2  | 0.388415  | 0.285915 | 0.276696 | 0.611528 | 0.804457  | 1.00138   | 0.320291    | 0.27807   | 1.6031     | 0.379167  | 1.54683   | 0.640763   | 0.556896  | 0.355254   | 0.340886 |
| BAIAP3    | 0.219153  | 0.352485 | 0.542348 | 0.117614 | 0.604273  | 0.315611  | 0.272416    | 0.28074   | 0.094727   | 0.0860113 | 0.0463502 | 0.183391   | 0.103108  | 0.198412   | 0.105581 |
| BAK1      | 3.50364   | 4.53044  | 4.41754  | 19.0753  | 8.91762   | 10.9268   | 3.07256     | 3.13251   | 6.07925    | 10.5432   | 13.2117   | 4.85533    | 17.097    | 12.4375    | 7.00191  |
| BAMBI     | 2.41633   | 0.672663 | 0.677424 | 1.09288  | 0.834087  | 1.62312   | 0.950283    | 0.835112  | 1.5695     | 1.87019   | 1.2881    | 1.06618    | 2.90148   | 0.989255   | 0.231343 |
| BANCR     | 0         | 0        | 0        | 0.105998 | 0         | 0.321135  | 0           | 0         | 0          | 0         | 0         | 0          | 0.0884846 | 0.0358387  | 0        |
| BANF1     | 13.5202   | 11.6346  | 12.315   | 34.2631  | 23.5292   | 31.6288   | 14.1754     | 9.6589    | 10.3739    | 15.8346   | 35.5595   | 12.6064    | 19.1961   | 17.7129    | 14.1658  |
| BANF2     | 0         | 0        | 0        | 0        | 0         | 0         | 0.0412875   | 0         | 0          | 0         | 0         | 0          | 0         | 0.0188993  | 0        |
| BANK1     | 0.195135  | 0.178637 | 0.199097 | 0.187686 | 0.151556  | 0.559389  | 0.118826    | 0.213885  | 0.00792176 | 0.122457  | 0.26434   | 0.0232708  | 0.193047  | 0.0611918  | 0.177485 |
| BANP      | 1.42136   | 1.92603  | 2.01937  | 2.43936  | 3.23815   | 3.63913   | 1.74959     | 1.24175   | 1.48159    | 2.28358   | 2.90194   | 1.71773    | 1.99268   | 2.17432    | 2.13611  |
| BAP1      | 8.817     | 10.2709  | 10.5479  | 14.9245  | 13.8901   | 20.4088   | 11.1094     | 7.30231   | 7.75276    | 12.9969   | 8.56265   | 9.91958    | 20.5357   | 13.2198    | 10.507   |
| BARD1     | 2.30758   | 2.52947  | 2.90347  | 1.92754  | 0.56803   | 1.45665   | 1.76128     | 2.75679   | 1.58691    | 1.915     | 2.51957   | 1.58497    | 1.89834   | 1.92219    | 1.72641  |

|           |           |            |           |           |          |           |           |           |            |           |           |            |           |           |           |
|-----------|-----------|------------|-----------|-----------|----------|-----------|-----------|-----------|------------|-----------|-----------|------------|-----------|-----------|-----------|
| BARHL1    | 0.0606792 | 0.0701668  | 0.0602377 | 0.0625317 | 0.131958 | 0.0103335 | 0.0692816 | 0.118639  | 0.0147801  | 0         | 0         | 0.00868352 | 0         | 0.0190282 | 0.0174286 |
| BARHL2    | 0         | 0          | 0         | 0         | 0        | 0         | 0         | 0         | 0          | 0         | 0         | 0          | 0         | 0         | 0         |
| BARX1     | 0         | 0          | 0         | 0.0160928 | 0        | 0.146266  | 0.01783   | 0         | 0          | 0.0783992 | 0.282058  | 0.0335212  | 0.221659  | 0.253011  | 0.0448534 |
| BARX1-DT  | 0         | 0          | 0         | 0         | 0        | 0         | 0         | 0         | 0          | 0         | 0         | 0          | 0         | 0.0167413 | 0.0460019 |
| BARX2     | 5.82833   | 8.21629    | 5.72092   | 4.68354   | 8.911    | 8.44224   | 5.44331   | 4.65594   | 11.8836    | 10.5207   | 7.52572   | 8.18134    | 7.47856   | 2.6012    | 1.29785   |
| BASP1     | 5.06955   | 4.4648     | 4.02808   | 13.3889   | 13.3505  | 25.8001   | 4.26714   | 4.11771   | 7.95458    | 10.7576   | 20.243    | 3.64426    | 10.5201   | 6.74715   | 12.0383   |
| BASP1-AS1 | 0.0139584 | 0.0302642  | 0.0346422 | 0.0431537 | 0.184299 | 0.0831978 | 0.0318745 | 0.0682279 | 0.00849989 | 0.0350385 | 0.0315146 | 0.00499381 | 0         | 0.0291811 | 0.010023  |
| BASP1P1   | 0         | 0.00967941 | 0         | 0.0207028 | 0        | 0.0171059 | 0.0229375 | 0         | 0          | 0         | 0         | 0.0143745  | 0         | 0         | 0         |
| BATF      | 0.861709  | 0.225386   | 0.305514  | 1.57306   | 0.803119 | 1.71903   | 0.365438  | 0.656413  | 0.0599694  | 0.618019  | 1.44525   | 0.193781   | 1.08017   | 0.334558  | 0.919303  |
| BATF2     | 0.0394933 | 0.0570854  | 0.0490074 | 0.620659  | 0.168703 | 2.37077   | 0.011273  | 0.0350983 | 0.0601229  | 0.0743522 | 0.0668745 | 0.0211939  | 0.8982    | 0.0670829 | 0.155973  |
| BATF3     | 0.448234  | 0.0909331  | 0.195164  | 0.923837  | 0.329809 | 0.783419  | 0.242422  | 0.125796  | 0.114926   | 0.858675  | 1.70442   | 0.303844   | 1.18724   | 0.75212   | 1.32132   |
| BAX       | 4.23846   | 4.03304    | 3.71174   | 11.7695   | 9.88946  | 15.9913   | 4.81909   | 2.78963   | 4.7948     | 7.81262   | 18.8785   | 4.64427    | 7.66614   | 7.89688   | 7.56413   |
| BAZ1A     | 5.03951   | 7.24725    | 8.11206   | 9.29642   | 4.07533  | 8.3231    | 2.73199   | 5.17263   | 7.64617    | 8.13572   | 7.08716   | 5.91817    | 12.5633   | 9.33946   | 5.78434   |
| BAZ1B     | 5.54828   | 5.71484    | 6.20861   | 9.39553   | 6.96056  | 11.105    | 4.30389   | 3.84445   | 4.06537    | 6.65015   | 6.04969   | 4.70652    | 9.97243   | 7.35426   | 8.3648    |
| BAZ2A     | 9.20388   | 11.1235    | 11.1748   | 11.5598   | 12.4836  | 17.6168   | 12.5279   | 9.75595   | 10.2691    | 8.9372    | 5.34622   | 8.41037    | 12.8366   | 8.5983    | 8.65941   |
| BAZ2B     | 6.32422   | 5.9452     | 5.53371   | 3.79199   | 2.26047  | 4.33723   | 2.86103   | 4.64074   | 4.47757    | 4.2262    | 4.08643   | 3.36432    | 3.39524   | 3.93811   | 4.49605   |
| BBC3      | 0.839557  | 1.21886    | 1.33425   | 0.808268  | 3.44906  | 2.70899   | 0.971192  | 0.697041  | 0.726503   | 0.928946  | 1.48398   | 0.545395   | 0.620079  | 0.519619  | 1.12639   |
| BBIP1     | 1.2973    | 0.839257   | 0.865843  | 0.934826  | 0.111979 | 0.834318  | 0.538483  | 1.19689   | 0.583056   | 1.28297   | 2.28837   | 0.422893   | 1.36108   | 0.96415   | 0.847392  |
| BBOF1     | 0.775458  | 0.588121   | 0.593592  | 0.451813  | 0.12934  | 0.928855  | 0.407113  | 0.537423  | 0.43839    | 1.09501   | 1.34845   | 0.353761   | 0.499741  | 0.490214  | 0.779889  |
| BBOX1     | 5.06791   | 8.14129    | 7.72522   | 2.64293   | 5.58489  | 2.63304   | 6.16466   | 4.61299   | 24.3747    | 6.69958   | 10.4447   | 12.0816    | 2.60475   | 3.15537   | 1.63891   |
| BBOX1-AS1 | 0.64647   | 0.550414   | 0.610694  | 0.111406  | 1.33009  | 0.201153  | 0.850059  | 0.335358  | 0.357863   | 0.404691  | 0.140076  | 0.431411   | 0.0393738 | 0.536366  | 0.365087  |
| BBS1      | 3.1649    | 3.1358     | 3.08966   | 2.5265    | 3.73657  | 5.41361   | 3.29547   | 2.53891   | 1.16255    | 1.24979   | 2.34123   | 1.2481     | 1.63053   | 1.93934   | 3.02776   |
| BBS10     | 1.12389   | 1.19816    | 1.08472   | 1.49102   | 0.361197 | 1.45746   | 0.818605  | 1.32028   | 0.904646   | 1.15118   | 2.04893   | 0.540736   | 1.24188   | 1.12752   | 0.964717  |
| BBS12     | 0.573182  | 0.289164   | 0.407234  | 0.437799  | 0.104747 | 0.855535  | 0.22328   | 0.281666  | 0.246378   | 0.634767  | 0.692724  | 0.207476   | 0.40897   | 0.352435  | 0.610108  |
| BBS2      | 8.15024   | 8.89201    | 10.0218   | 5.36489   | 4.31799  | 7.6331    | 5.34302   | 5.88377   | 2.43394    | 2.84895   | 4.41926   | 2.45391    | 2.4674    | 3.04323   | 3.21261   |
| BBS4      | 2.09367   | 2.0408     | 1.67874   | 1.66798   | 1.15077  | 2.46154   | 1.34235   | 1.74617   | 0.225564   | 1.71815   | 2.66347   | 0.800893   | 0.727366  | 1.21208   | 1.36461   |



|             |          |           |           |          |          |           |          |          |           |           |           |           |           |           |           |
|-------------|----------|-----------|-----------|----------|----------|-----------|----------|----------|-----------|-----------|-----------|-----------|-----------|-----------|-----------|
| BBS5        | 10.4     | 11.8201   | 12.2582   | 7.34266  | 22.4846  | 9.24914   | 10.1735  | 7.34983  | 2.64699   | 5.50121   | 3.09979   | 8.65719   | 1.96889   | 10.2663   | 9.85076   |
| BBS7        | 1.05933  | 1.24215   | 1.2251    | 1.59851  | 0.638051 | 1.86383   | 0.937984 | 0.744507 | 1.75749   | 2.08931   | 2.64185   | 1.05962   | 1.91093   | 1.69485   | 1.49804   |
| BBS9        | 2.64104  | 2.10184   | 2.08702   | 1.60682  | 1.52396  | 1.63347   | 1.68525  | 1.89951  | 1.00815   | 1.00598   | 1.56734   | 0.874356  | 0.689507  | 1.14226   | 2.23924   |
| BBX         | 3.83877  | 3.23958   | 3.6912    | 3.30328  | 1.69289  | 4.73159   | 2.6351   | 3.55746  | 1.57715   | 3.20883   | 3.60984   | 1.71741   | 3.08232   | 2.80111   | 3.54645   |
| BCAM        | 10.5968  | 6.73065   | 6.29446   | 4.92842  | 25.8387  | 23.7038   | 13.185   | 5.55107  | 4.84683   | 9.10938   | 9.10694   | 8.99645   | 7.15469   | 12.0321   | 12.1767   |
| BCAN        | 0.434289 | 0.845249  | 1.01164   | 0.270884 | 0.142021 | 1.76624   | 1.60501  | 0.731293 | 0.347971  | 0.0358604 | 0.0129015 | 0.0327101 | 0         | 0.0388253 | 0.0820651 |
| BCAP29      | 2.44178  | 1.78174   | 1.98312   | 2.37845  | 0.473395 | 3.10132   | 1.64222  | 2.38805  | 1.14064   | 3.19996   | 3.87249   | 1.35359   | 4.38337   | 2.24546   | 2.38584   |
| BCAP31      | 16.9033  | 14.6178   | 15.1663   | 31.564   | 30.1576  | 37.727    | 16.7189  | 12.4384  | 26.9619   | 25.9804   | 31.6967   | 21.1069   | 39.6349   | 19.2791   | 10.9447   |
| BCAR1       | 3.48804  | 2.23014   | 2.64645   | 7.55133  | 7.65095  | 8.92333   | 3.46523  | 1.84675  | 2.12641   | 5.14754   | 5.03989   | 3.72554   | 10.3628   | 6.89      | 7.11845   |
| BCAR3       | 2.61745  | 2.08298   | 2.67104   | 0.911122 | 2.19978  | 1.94566   | 2.50823  | 1.97437  | 0.780362  | 1.30173   | 1.38536   | 0.531508  | 2.12661   | 1.68434   | 2.17382   |
| BCAR4       | 0        | 0.0170239 | 0.0146149 | 0        | 0        | 0.0150428 | 0        | 0        | 0         | 0         | 0         | 0.0126408 | 0         | 0         | 0         |
| BCAS1       | 0.564945 | 0.180411  | 0.331501  | 0.311405 | 0.306124 | 1.12989   | 0.315018 | 0.251038 | 0.152009  | 0.0329797 | 0.081573  | 0.0564047 | 0.135628  | 0.116733  | 0.122643  |
| BCAS2       | 6.24382  | 5.47677   | 4.9593    | 8.81756  | 2.18292  | 8.14899   | 2.17323  | 5.26442  | 6.95433   | 5.76026   | 7.34971   | 4.48035   | 5.3254    | 4.82521   | 3.32108   |
| BCAS3       | 4.9295   | 4.77884   | 4.56502   | 3.69509  | 4.61833  | 3.68096   | 5.37032  | 3.97929  | 5.63424   | 2.23897   | 3.16166   | 3.09319   | 2.23286   | 2.3122    | 3.21945   |
| BCAS4       | 0.554224 | 0.347953  | 0.305662  | 0.311533 | 1.04352  | 0.65782   | 0.47939  | 0.388068 | 0.184086  | 0.695608  | 0.966914  | 0.276392  | 0.455105  | 0.175553  | 0.98889   |
| BCAT1       | 0.590627 | 0.250773  | 0.417469  | 0.988774 | 0.161696 | 1.50102   | 0.656271 | 0.66769  | 0.057876  | 2.95951   | 4.52416   | 0.121439  | 1.03663   | 0.811337  | 2.49915   |
| BCAT2       | 2.67035  | 2.60539   | 2.71536   | 4.65524  | 4.21712  | 5.38126   | 3.27759  | 1.74034  | 1.13827   | 2.19248   | 3.71787   | 1.51265   | 2.91457   | 2.33188   | 1.96542   |
| BCCIP       | 3.4648   | 2.86587   | 3.03639   | 5.4129   | 1.90245  | 5.65981   | 1.74317  | 2.89059  | 3.0584    | 3.74767   | 5.5386    | 2.48785   | 4.48356   | 4.06226   | 2.40848   |
| BCDIN3D     | 1.25049  | 1.49807   | 1.57462   | 1.96549  | 1.20318  | 2.10536   | 1.13054  | 0.947047 | 0.896656  | 1.36843   | 1.46777   | 1.04395   | 1.22672   | 1.12642   | 0.944035  |
| BCDIN3D-AS1 | 0.182584 | 0.227271  | 0.292581  | 0.16245  | 0.171701 | 0.171092  | 0.150479 | 0.197028 | 0.0573849 | 0.0262545 | 0.0392836 | 0.0536537 | 0.0108469 | 0.0924424 | 0.0149643 |
| BCHE        | 0.292256 | 1.16611   | 1.66976   | 0.272943 | 0.12768  | 0.536588  | 2.24198  | 1.07952  | 0.100107  | 0.298035  | 0.587672  | 0.0196047 | 0.294629  | 0.105013  | 0.118045  |
| BCKDHA      | 6.97945  | 6.56853   | 6.13007   | 10.1502  | 8.3287   | 13.3298   | 8.34124  | 6.2607   | 13.0282   | 7.76116   | 13.7551   | 8.41981   | 9.30913   | 6.94786   | 4.60887   |
| BCKDHB      | 2.11272  | 2.08546   | 1.5024    | 1.79667  | 1.47633  | 2.36596   | 1.79017  | 1.49563  | 1.01005   | 1.18528   | 2.26199   | 1.05689   | 0.851458  | 0.968151  | 1.52141   |
| BCKDK       | 6.28333  | 8.25889   | 7.93922   | 11.9839  | 16.9305  | 18.6856   | 11.9925  | 6.73241  | 43.7316   | 15.7725   | 31.4067   | 15.9482   | 17.6548   | 11.2787   | 6.27014   |
| BCL10       | 3.45952  | 3.47062   | 3.44176   | 6.71352  | 1.71934  | 6.73423   | 2.48473  | 3.64363  | 5.10887   | 6.77248   | 9.07277   | 4.48786   | 9.69213   | 6.35588   | 4.26727   |
| BCL11A      | 2.74136  | 5.00773   | 4.89827   | 3.22864  | 3.34097  | 3.27638   | 2.91707  | 4.60189  | 1.31351   | 1.31464   | 1.2947    | 1.77248   | 1.00267   | 0.934051  | 0.473147  |

|               |           |           |           |           |           |           |           |           |           |           |           |            |            |           |          |
|---------------|-----------|-----------|-----------|-----------|-----------|-----------|-----------|-----------|-----------|-----------|-----------|------------|------------|-----------|----------|
| BCL11B        | 4.76499   | 8.07849   | 7.44822   | 4.99938   | 6.36471   | 4.6625    | 7.42479   | 5.22951   | 2.96118   | 3.57535   | 2.39071   | 4.51301    | 5.22042    | 2.4528    | 1.75624  |
| BCL2          | 1.55219   | 1.86125   | 2.50165   | 0.641273  | 1.05349   | 1.60148   | 1.49284   | 1.66529   | 0.374673  | 0.421224  | 0.670899  | 0.237636   | 0.717267   | 0.359944  | 0.913748 |
| BCL2A1        | 0.441755  | 0.153721  | 0.162423  | 7.56205   | 0.152488  | 0.919474  | 0.0560424 | 0.0872433 | 0.298893  | 11.3662   | 17.8695   | 0.245846   | 4.78197    | 1.01331   | 2.60815  |
| BCL2L1        | 10.6044   | 6.44576   | 6.79917   | 18.7923   | 14.3157   | 16.565    | 9.24536   | 6.87548   | 26.1093   | 15.3373   | 17.1939   | 9.38948    | 33.8802    | 9.62705   | 7.47896  |
| BCL2L10       | 0.8108    | 1.60509   | 0.918637  | 3.12425   | 5.50327   | 1.05059   | 1.18737   | 1.04953   | 5.47398   | 2.10164   | 4.19841   | 2.48455    | 1.05762    | 0.902792  | 0.329073 |
| BCL2L11       | 2.47003   | 1.39832   | 1.16809   | 2.94857   | 1.34838   | 3.43554   | 1.3782    | 1.92697   | 0.957368  | 1.46357   | 2.32153   | 1.06896    | 2.40129    | 1.6648    | 2.46116  |
| BCL2L12       | 1.17831   | 1.65707   | 1.66523   | 3.20434   | 2.85265   | 4.15069   | 1.48925   | 1.07121   | 1.09574   | 1.72698   | 4.09665   | 1.19697    | 2.93034    | 2.64637   | 1.4732   |
| BCL2L13       | 3.80749   | 4.79682   | 4.99485   | 5.59397   | 5.15491   | 6.56969   | 5.23051   | 3.29154   | 6.03193   | 3.89196   | 4.30953   | 3.32581    | 4.92398    | 3.0226    | 3.24621  |
| BCL2L14       | 0.103734  | 0.114955  | 0.180214  | 0.0641405 | 0.0322269 | 0.0794953 | 0.130284  | 0.138285  | 0.0252673 | 0.0260394 | 0         | 0.00742244 | 0.0267715  | 0.0325295 | 0.05959  |
| BCL2L15       | 0.176842  | 0.0986587 | 0.0500487 | 0.076733  | 0.0726508 | 0.0634016 | 0.0371944 | 0.11994   | 0.0113355 | 0.0233637 | 0         | 0.0166494  | 0.00600514 | 0.0364837 | 0.093567 |
| BCL2L2        | 9.39184   | 12.2262   | 12.7162   | 12.4163   | 20.7466   | 17.711    | 9.7209    | 7.2531    | 22.5027   | 15.3064   | 9.8386    | 13.0898    | 15.1194    | 13.1115   | 8.57828  |
| BCL2L2-PABPN1 | 1.00997   | 1.01324   | 2.08901   | 2.26667   | 0.743699  | 5.37313   | 2.50344   | 0.899661  | 4.24396   | 2.34543   | 4.415     | 0.364325   | 6.30937    | 0.993964  | 0.177542 |
| BCL3          | 4.54418   | 6.38292   | 6.06002   | 30.4901   | 14.1752   | 40.8604   | 4.93323   | 6.14601   | 8.51315   | 12.3262   | 18.9635   | 6.95604    | 29.7594    | 13.03     | 15.5127  |
| BCL6          | 11.4986   | 12.0625   | 15.7453   | 13.2239   | 6.92759   | 20.5791   | 14.7774   | 13.8512   | 8.31033   | 5.37095   | 7.06536   | 7.28193    | 5.89756    | 3.79146   | 7.52521  |
| BCL6B         | 2.25193   | 1.09451   | 1.15145   | 3.26113   | 2.04987   | 8.67064   | 1.65665   | 1.16112   | 0.903539  | 2.31551   | 4.25421   | 0.765729   | 2.60088    | 3.85686   | 8.31616  |
| BCL7A         | 2.64894   | 2.92106   | 3.31494   | 3.21524   | 3.78211   | 3.15151   | 2.57045   | 2.27804   | 2.03402   | 1.45887   | 1.45718   | 1.8166     | 3.61157    | 1.85447   | 1.12457  |
| BCL7B         | 4.75189   | 3.65029   | 4.17217   | 7.49556   | 6.80683   | 11.2224   | 4.38907   | 2.82867   | 8.16225   | 6.66742   | 12.7149   | 5.09212    | 12.7697    | 6.44318   | 6.5185   |
| BCL7C         | 6.12922   | 4.92361   | 5.65627   | 8.09142   | 12.5412   | 11.4996   | 5.67089   | 3.3622    | 8.71312   | 6.84395   | 14.9118   | 3.9395     | 6.08864    | 5.21934   | 3.90034  |
| BCL9          | 2.38083   | 2.2024    | 2.43339   | 2.35337   | 1.95073   | 4.34092   | 3.17924   | 2.13582   | 1.27454   | 1.07425   | 1.17717   | 1.05101    | 2.30054    | 1.30488   | 1.94845  |
| BCL9L         | 7.18748   | 12.4899   | 11.253    | 10.1982   | 20.2928   | 22.4585   | 12.8778   | 8.43214   | 9.61251   | 9.71822   | 5.92186   | 11.2775    | 19.962     | 8.95013   | 12.2021  |
| BCLAF1        | 12.9879   | 9.48534   | 10.6758   | 11.7062   | 3.34595   | 9.87895   | 6.24679   | 12.2026   | 8.5374    | 9.13453   | 7.64013   | 6.81931    | 10.6803    | 8.24043   | 9.53211  |
| BCLAF3        | 1.72183   | 2.02677   | 2.05847   | 1.16823   | 0.670032  | 0.913664  | 1.19665   | 1.47636   | 0.855294  | 0.961966  | 0.998021  | 0.790733   | 0.82571    | 0.931575  | 1.04951  |
| BCO1          | 0.0381426 | 0.128644  | 0.126217  | 0.0687874 | 0.0888731 | 0.0405975 | 0.119763  | 0.067796  | 0.0812935 | 0.0359047 | 0.0215291 | 0.013646   | 0          | 0.019935  | 0        |
| BCO2          | 0.662992  | 0.364013  | 0.47832   | 0.166836  | 0.323327  | 0.111593  | 0.352085  | 0.41793   | 0.0563337 | 0.174165  | 0.104433  | 0.231678   | 0.0547134  | 0.326363  | 0.431785 |
| BCOR          | 3.57472   | 4.36202   | 4.189     | 4.85052   | 3.86883   | 5.92407   | 4.05015   | 4.1373    | 2.42331   | 2.77293   | 1.9054    | 2.50382    | 6.07148    | 2.25918   | 3.70497  |
| BCORL1        | 0.69596   | 1.33523   | 1.34689   | 1.08717   | 2.4165    | 2.34093   | 1.84813   | 0.817217  | 0.997177  | 1.30037   | 0.792762  | 1.21003    | 1.55637    | 1.11096   | 1.54219  |

|           |           |            |            |            |           |           |            |            |           |           |            |            |            |            |           |
|-----------|-----------|------------|------------|------------|-----------|-----------|------------|------------|-----------|-----------|------------|------------|------------|------------|-----------|
| BCORP1    | 0.0820228 | 0.0364799  | 0.0626354  | 0.00650207 | 0.0196015 | 0.0107448 | 0.00720392 | 0.0168219  | 0         | 0         | 0          | 0.00902916 | 0          | 0.00989278 | 0.0634281 |
| BCR       | 6.52896   | 5.83065    | 6.52618    | 12.8121    | 11.8653   | 11.8419   | 7.25075    | 4.71786    | 9.28652   | 7.4855    | 3.33055    | 6.75852    | 13.9827    | 8.37294    | 6.73948   |
| BCRP2     | 0.403786  | 0.392774   | 0.487244   | 0.394482   | 0.341357  | 0.626272  | 0.26029    | 0.326388   | 0.187835  | 0.208553  | 0.205905   | 0.262028   | 0.644249   | 0.520436   | 0.323787  |
| BCRP3     | 0.115707  | 0.112297   | 0.171424   | 0.0274715  | 0.372271  | 0.0770079 | 0.296058   | 0.0247183  | 1.93E-39  | 0.110341  | 0.0764993  | 0.114143   | 0.0194166  | 0.101082   | 3.39E-28  |
| BCS1L     | 3.02689   | 3.29355    | 2.85879    | 5.35478    | 5.68133   | 5.55206   | 2.6352     | 2.11841    | 1.47456   | 2.73848   | 3.33155    | 2.78849    | 3.60478    | 4.27135    | 3.18779   |
| BCYRN1    | 7.63357   | 4.67044    | 3.1074     | 5.74388    | 14.4926   | 4.12691   | 7.19396    | 3.3382     | 15.6423   | 6.08312   | 7.93343    | 10.8363    | 2.42348    | 8.16926    | 4.87234   |
| BDH1      | 2.42785   | 3.08921    | 3.11913    | 5.32723    | 5.84699   | 6.24462   | 4.89228    | 2.78211    | 10.8113   | 8.85029   | 11.0621    | 6.5807     | 11.9163    | 6.94781    | 1.32441   |
| BDH2      | 3.21784   | 2.57764    | 2.70136    | 2.44213    | 1.87133   | 4.10317   | 1.84606    | 1.83136    | 1.52511   | 2.8848    | 6.30773    | 1.15689    | 1.17102    | 1.64036    | 3.17566   |
| BDKRB1    | 0.320196  | 0.548534   | 0.70637    | 0.549952   | 0.746062  | 0.348377  | 0.467142   | 0.189709   | 1.32154   | 1.47356   | 1.54625    | 1.15827    | 2.10032    | 1.03198    | 1.04742   |
| BDKRB2    | 1.68183   | 2.99689    | 2.26718    | 7.47253    | 7.55472   | 5.03332   | 2.4743     | 1.37706    | 7.40066   | 7.34997   | 5.5899     | 5.79601    | 14.7468    | 8.5767     | 7.56271   |
| BDNF      | 0.300287  | 0.406977   | 0.164104   | 0.120308   | 0.423964  | 0.139087  | 0.217189   | 0.222827   | 0.910692  | 0.284744  | 0.416957   | 0.610098   | 0.101316   | 0.131797   | 0.203911  |
| BDNF-AS   | 0.597372  | 0.771188   | 0.525849   | 0.266      | 0.422532  | 0.319541  | 0.550009   | 0.426692   | 1.36112   | 0.240297  | 0.416705   | 0.685436   | 0.105537   | 0.126039   | 0.267887  |
| BDP1      | 5.67762   | 5.27983    | 5.12047    | 4.73762    | 2.63573   | 4.7419    | 2.6245     | 4.12281    | 3.32629   | 4.21475   | 3.82154    | 3.67523    | 4.94805    | 5.18226    | 4.81664   |
| BEAN1     | 0.964477  | 0.538629   | 0.598412   | 0.356908   | 0.578836  | 0.664457  | 0.645708   | 0.432469   | 0.528581  | 1.72224   | 0.519642   | 0.77794    | 1.54155    | 0.423883   | 0.642187  |
| BEAN1-AS1 | 0.335407  | 0.207777   | 0.35675    | 0.24689    | 0.223287  | 0.163197  | 0.437664   | 0.255498   | 0.233421  | 0.781801  | 0.108181   | 0.137138   | 1.08201    | 0.475809   | 0.206437  |
| BECN1     | 12.2567   | 9.49733    | 9.46437    | 15.6328    | 13.5444   | 19.059    | 8.15093    | 8.92662    | 16.3282   | 13.5268   | 14.5799    | 9.88176    | 18.5444    | 10.2524    | 8.75049   |
| BECN2     | 0         | 0          | 0          | 0.0184025  | 0         | 0         | 0          | 0.0317402  | 0         | 0         | 0          | 0          | 0          | 0          | 0         |
| BEGAIN    | 0.18963   | 0.25821    | 0.245543   | 0.195419   | 0.384209  | 0.610767  | 0.583644   | 0.263781   | 0         | 0.0724362 | 0.0837658  | 0.147484   | 0.0478753  | 0.168054   | 0.22497   |
| BEND2     | 0         | 0          | 0          | 0          | 0         | 0         | 0.00562691 | 0.00437982 | 0         | 0         | 0.0111268  | 0          | 0.00317968 | 0.00515143 | 0         |
| BEND3     | 0.552514  | 0.343226   | 0.34784    | 1.37511    | 0.512788  | 1.28119   | 0.543557   | 0.398382   | 0.655972  | 0.523368  | 0.560956   | 0.5122     | 1.75101    | 0.911708   | 0.533977  |
| BEND3P3   | 1.84519   | 1.93253    | 1.672      | 0.302148   | 1.47562   | 0.898754  | 2.20497    | 1.61901    | 0.347559  | 0.495564  | 0.251547   | 0.86154    | 0.292582   | 0.866304   | 1.16215   |
| BEND4     | 0.0104601 | 0.00251993 | 0.00865336 | 0.00269487 | 0         | 0.0378533 | 0.0149288  | 0.00464805 | 0         | 0         | 0.00295205 | 0          | 0          | 0.00273346 | 0         |
| BEND5     | 0.817583  | 0.341401   | 0.34269    | 0.20221    | 0.643461  | 0.835393  | 0.385842   | 0.397208   | 0.039829  | 0.177866  | 0.6153     | 0.0390002  | 0.1688     | 0.170922   | 0.43835   |
| BEND6     | 0.15248   | 0.116323   | 0.147166   | 0.235702   | 0.151323  | 0.205571  | 0.140244   | 0.139276   | 0.0928516 | 0.669823  | 1.38661    | 0.103042   | 0.18856    | 0.163813   | 0.553534  |
| BEND7     | 0.486199  | 0.230654   | 0.383654   | 0.146458   | 0.174285  | 1.01269   | 0.469722   | 0.405502   | 0.0455489 | 0.0751051 | 0.109772   | 0.0535212  | 0.0579125  | 0.203287   | 0.225586  |
| BEST1     | 0.652069  | 0.55636    | 0.662788   | 0.682098   | 0.556492  | 1.08474   | 0.858114   | 0.597344   | 0.0848392 | 0.630825  | 0.921099   | 0.110384   | 0.398156   | 0.340726   | 1.20829   |

|             |            |           |           |            |           |            |           |            |           |           |           |            |            |           |            |
|-------------|------------|-----------|-----------|------------|-----------|------------|-----------|------------|-----------|-----------|-----------|------------|------------|-----------|------------|
| BEST2       | 0.0848175  | 0.554615  | 0.741765  | 0.0374601  | 0.225859  | 0.0206346  | 0.290525  | 0.527651   | 0.0147569 | 0         | 0.041035  | 0.0433494  | 0.0156354  | 0.0506621 | 0.0870061  |
| BEST3       | 0.14604    | 0.370447  | 0.0639607 | 0.06197    | 0.146786  | 0          | 0.117702  | 0.0801633  | 0.146473  | 0.0161731 | 0.0145466 | 0.0399542  | 0.00554261 | 0.0179593 | 0.00616859 |
| BEST4       | 0.154581   | 0.127679  | 0.182687  | 0.091029   | 0.0171513 | 0.206838   | 0.138675  | 0.17663    | 0         | 0.0277165 | 0.024929  | 0.0711046  | 0.0569915  | 0.0692494 | 0.0475711  |
| BET1        | 0.716625   | 0.801713  | 0.901446  | 1.41631    | 0.609954  | 1.57146    | 0.47636   | 0.754655   | 0.968414  | 1.41076   | 2.54884   | 0.660272   | 0.953226   | 0.713164  | 1.05031    |
| BET1L       | 7.21072    | 6.44303   | 7.65566   | 9.10911    | 11.7723   | 17.1191    | 8.55467   | 5.62202    | 5.98805   | 7.91019   | 11.3923   | 5.14827    | 9.09229    | 7.20168   | 9.2986     |
| BEX1        | 0.167533   | 0.067479  | 0.0666319 | 0.110671   | 0.0417044 | 0.29719    | 0.0919628 | 0.0749247  | 0         | 0.0336971 | 0.155289  | 0          | 0.0519667  | 0.028064  | 0          |
| BEX2        | 1.47124    | 1.37282   | 1.69314   | 0.648968   | 0.794794  | 1.94379    | 1.59533   | 1.18683    | 1.94136   | 0.271697  | 0.863663  | 0.422435   | 0.48249    | 0.205707  | 0          |
| BEX3        | 9.55463    | 7.04946   | 4.25615   | 14.2675    | 35.3387   | 16.8826    | 5.52289   | 5.86345    | 38.9898   | 24.799    | 42.0248   | 24.6314    | 12.7594    | 11.7738   | 9.76961    |
| BEX4        | 4.18813    | 2.80941   | 2.76281   | 3.21839    | 2.35548   | 8.42342    | 2.53522   | 4.41193    | 3.58367   | 3.01345   | 6.74539   | 1.44669    | 1.59567    | 1.45298   | 1.99626    |
| BEX5        | 0.341343   | 0.274107  | 0.33886   | 0.211058   | 0         | 0.484415   | 0.545628  | 0.303357   | 0.055429  | 0.0571227 | 0.2312    | 0.0162827  | 0.293644   | 0.0356801 | 0          |
| BFAR        | 3.31593    | 2.77759   | 3.05776   | 5.35305    | 2.87073   | 5.93191    | 2.81347   | 2.08853    | 1.53756   | 3.52227   | 7.07441   | 2.00804    | 4.62721    | 4.12592   | 4.47811    |
| BFSP1       | 0.215356   | 0.16676   | 0.159069  | 0.32497    | 0.453994  | 0.635255   | 0.193196  | 0.157213   | 0.580761  | 0.926721  | 1.05058   | 0.693418   | 0.506162   | 0.542672  | 0.629602   |
| BFSP2       | 0          | 0         | 0         | 0          | 0         | 0          | 0.0167559 | 0          | 0.0357459 | 0         | 0         | 0          | 0.00946847 | 0         | 0          |
| BFSP2-AS1   | 0.00788788 | 0.015202  | 0.0261017 | 0.00812869 | 0         | 0.00671643 | 0         | 0          | 0         | 0         | 0         | 0          | 0          | 0         | 0          |
| BGLAP       | 0.0802556  | 0.677193  | 0.627797  | 0.339018   | 1.17277   | 0.136436   | 0.358317  | 0.498091   | 0.372254  | 0.556704  | 0.660781  | 1.22506    | 0.349836   | 0.310057  | 0.376594   |
| BGLT3       | 0          | 0         | 0         | 0          | 0         | 0          | 0         | 0          | 0         | 0         | 0         | 0          | 0          | 0         | 0          |
| BGN         | 28.1549    | 11.3417   | 13.594    | 37.8364    | 67.7785   | 99.1408    | 40.7029   | 17.8918    | 10.6443   | 45.3591   | 152.907   | 11.6294    | 49.0154    | 29.3165   | 167.293    |
| BHLHA15     | 0.458927   | 0.126353  | 0.0542367 | 0.101344   | 0.203678  | 0.195385   | 0.261994  | 0.203928   | 0.079846  | 0.164572  | 0.370051  | 0.140732   | 0.105749   | 0.102795  | 0.141231   |
| BHLHA9      | 0          | 0         | 0         | 0          | 0         | 0          | 0         | 0          | 0         | 0         | 0         | 0          | 0          | 0         | 0          |
| BHLHB9      | 0.429121   | 0.513418  | 0.477218  | 0.381677   | 0.40032   | 0.84197    | 0.696321  | 0.489121   | 0.211708  | 0.473257  | 0.448732  | 0.217137   | 0.152118   | 0.220147  | 0.154579   |
| BHLHE22     | 0.163449   | 0.0820627 | 0.0958124 | 0.262369   | 0.772528  | 0.527891   | 0.062229  | 0.0968743  | 0.0497833 | 0.135229  | 0.246105  | 0.0389979  | 0.464521   | 0.104986  | 1.48683    |
| BHLHE23     | 0          | 0         | 0         | 0          | 0         | 0          | 0         | 0          | 0         | 0         | 0         | 0          | 0          | 0         | 0          |
| BHLHE40     | 20.5801    | 42.5703   | 42.8346   | 55.4342    | 31.4348   | 64.1582    | 33.2869   | 29.882     | 48.6606   | 53.4314   | 41.4789   | 72.5691    | 89.0592    | 31.7499   | 24.1002    |
| BHLHE40-AS1 | 0.306531   | 0.402048  | 0.359243  | 0.201818   | 0.264527  | 0.195755   | 0.223602  | 0.264852   | 0.22814   | 0.438162  | 0.269138  | 0.621437   | 0.153823   | 0.338213  | 0.0366847  |
| BHLHE41     | 1.70206    | 1.6254    | 2.64391   | 1.00951    | 0.599153  | 1.86634    | 2.35579   | 1.27867    | 0.104391  | 0.79149   | 1.58274   | 0.153328   | 0.525377   | 0.172794  | 1.91681    |
| BHMG1       | 0          | 0.0040489 | 0.0139038 | 0.00865998 | 0.0522137 | 0.0286216  | 0         | 0.00746827 | 0         | 0         | 0         | 0.00601288 | 0          | 0.004392  | 0          |

|            |           |          |          |           |           |          |           |           |           |           |           |           |           |           |           |
|------------|-----------|----------|----------|-----------|-----------|----------|-----------|-----------|-----------|-----------|-----------|-----------|-----------|-----------|-----------|
| BHMT       | 0.195811  | 0.118632 | 0.129409 | 0.0485282 | 0.0913836 | 0.111085 | 0.0436122 | 0.0861684 | 0.135291  | 0.0600643 | 0.0731517 | 0.236357  | 0.0121983 | 0.0822499 | 0.0566248 |
| BHMT2      | 1.08991   | 0.476995 | 0.73016  | 0.50302   | 0.646094  | 1.08459  | 0.646633  | 0.640274  | 0.0318962 | 0.29398   | 0.67014   | 0.101924  | 0.540482  | 0.460827  | 0.598539  |
| BICC1      | 2.85111   | 1.41651  | 1.81622  | 2.67223   | 0.834499  | 6.37176  | 2.73368   | 1.8421    | 0.180314  | 2.93071   | 4.70366   | 0.432828  | 4.33133   | 3.26985   | 10.2668   |
| BICD1      | 0.895531  | 0.393797 | 0.342925 | 0.582336  | 0.649976  | 0.805821 | 0.509013  | 0.648168  | 0.473888  | 0.696968  | 0.723994  | 0.759697  | 0.644654  | 1.14354   | 1.58375   |
| BICD2      | 20.1203   | 25.8271  | 22.2489  | 26.3409   | 51.6148   | 21.6469  | 20.1021   | 17.5767   | 83.9988   | 39.6181   | 21.2969   | 43.6307   | 60.4552   | 31.4229   | 10.6454   |
| BICDL1     | 4.16891   | 6.42576  | 6.38543  | 1.62888   | 10.7725   | 1.96836  | 5.27125   | 3.31281   | 8.90321   | 1.07459   | 1.00369   | 5.15536   | 0.594891  | 1.0051    | 0.397247  |
| BICDL2     | 6.19285   | 7.61097  | 5.59894  | 16.3399   | 30.971    | 7.94673  | 6.96186   | 4.696     | 24.7125   | 11.1828   | 5.56672   | 13.0228   | 8.52649   | 6.88566   | 1.56866   |
| BICRA      | 1.40737   | 2.35099  | 2.22181  | 2.40615   | 5.19913   | 4.35737  | 3.43019   | 1.86718   | 1.38006   | 1.2957    | 1.7754    | 2.52764   | 2.82296   | 2.02963   | 2.68717   |
| BICRAL     | 4.40723   | 4.07658  | 4.41261  | 3.19848   | 1.77623   | 3.64772  | 4.62099   | 3.80427   | 2.8543    | 2.08792   | 2.78491   | 1.90831   | 2.94248   | 1.86785   | 3.02105   |
| BID        | 1.35726   | 1.32467  | 1.41073  | 3.03051   | 1.25687   | 3.19296  | 1.30133   | 1.13663   | 0.731131  | 3.82197   | 7.41537   | 0.933804  | 2.63832   | 1.75522   | 2.39902   |
| BIK        | 0.801386  | 0.842443 | 0.602693 | 0.850877  | 0.377221  | 0.620336 | 0.637725  | 0.410057  | 0.916846  | 0.54863   | 1.17881   | 0.590789  | 0.846082  | 0.215766  | 0.0348755 |
| BIN1       | 1.76976   | 0.94966  | 1.43469  | 2.15317   | 3.10763   | 4.672    | 2.58833   | 1.09413   | 0.6704    | 3.87044   | 2.49229   | 2.3971    | 5.45717   | 2.44697   | 3.62114   |
| BIN2       | 0.92353   | 0.418575 | 0.492074 | 1.60503   | 0.680809  | 1.39948  | 0.268082  | 0.632957  | 0.295487  | 1.31629   | 1.88189   | 0.168003  | 1.17152   | 0.564487  | 2.47278   |
| BIN3       | 3.779     | 3.52535  | 3.80251  | 5.52393   | 5.37051   | 6.65233  | 4.23824   | 2.85827   | 3.80269   | 4.45712   | 4.53832   | 3.23136   | 6.79584   | 4.54546   | 3.59884   |
| BIN3-IT1   | 0.591475  | 0.982278 | 0.593419 | 0.505782  | 0.723284  | 0.557212 | 1.32192   | 0.805257  | 0.199246  | 0.442259  | 0.0142064 | 0.864442  | 0.0811951 | 1.05894   | 0.469899  |
| BIRC2      | 5.31774   | 4.57014  | 4.97386  | 5.31792   | 1.34019   | 4.91611  | 3.25267   | 5.04905   | 4.30878   | 5.48247   | 7.90197   | 3.43224   | 6.3508    | 5.09633   | 4.83931   |
| BIRC3      | 1.57367   | 1.19863  | 1.84752  | 0.793605  | 0.114422  | 0.898062 | 0.290542  | 2.76735   | 0.0652445 | 0.626156  | 0.994075  | 0.203639  | 1.23784   | 0.500483  | 0.985742  |
| BIRC5      | 0.385718  | 0.437767 | 0.624003 | 4.40776   | 0.718983  | 4.64917  | 1.30163   | 0.350411  | 0.741178  | 2.80787   | 5.31221   | 1.37382   | 3.97075   | 3.57939   | 0.910922  |
| BIRC6      | 12.6298   | 11.6492  | 12.4186  | 11.261    | 5.08719   | 9.24307  | 9.63595   | 11.054    | 8.86747   | 9.37892   | 9.72681   | 8.64252   | 9.36683   | 9.85856   | 10.2596   |
| BIRC6-AS2  | 0.826538  | 1.27057  | 1.20474  | 0.608408  | 0.30569   | 0.100541 | 1.03359   | 0.734558  | 0.239674  | 0.691593  | 0.533176  | 0.788546  | 0         | 0.843399  | 0.621768  |
| BIRC7      | 0.0507523 | 0.105964 | 0.335887 | 0.156905  | 0.131393  | 0.432149 | 0.309052  | 0.105244  | 0         | 0.0212331 | 0.057293  | 0.0363146 | 0         | 0         | 0         |
| BIRC8      | 0         | 0        | 0        | 0         | 0         | 0        | 0         | 0         | 0         | 0         | 0         | 0         | 0         | 0         | 0         |
| BISPR      | 0.314571  | 0.1301   | 0.168202 | 0.42722   | 0.455032  | 0.861559 | 0.259217  | 0.338495  | 0.0538922 | 0.0280687 | 0.494682  | 0.0316625 | 0.181545  | 0.228369  | 0.293258  |
| BIVM       | 1.70776   | 1.43608  | 1.63067  | 1.47744   | 0.644014  | 1.30043  | 0.655401  | 1.20696   | 0.47676   | 1.42855   | 2.02283   | 0.918406  | 1.16128   | 1.66228   | 1.93547   |
| BIVM-ERCC5 | 2.06445   | 1.88807  | 1.46953  | 1.8554    | 0.514805  | 1.57285  | 0.988387  | 1.68249   | 0.918335  | 2.26332   | 2.01773   | 1.00933   | 1.5249    | 1.38551   | 2.12517   |
| BLACAT1    | 0.159241  | 0.242962 | 0.131736 | 0.774929  | 0.645875  | 0.866281 | 0.0707064 | 0.149383  | 0.463296  | 1.68774   | 0.529303  | 1.02547   | 1.524     | 1.43797   | 0.736891  |

|                |           |            |           |            |            |           |           |            |            |            |            |            |            |            |            |
|----------------|-----------|------------|-----------|------------|------------|-----------|-----------|------------|------------|------------|------------|------------|------------|------------|------------|
| BLACE          | 0.160453  | 0.0954993  | 0.109314  | 0.0389063  | 0.483818   | 0         | 0.193977  | 0.0251643  | 0.0574748  | 0.0236924  | 0          | 0.0945484  | 0.0487171  | 0.0887929  | 0.0406644  |
| BLCAP          | 15.2946   | 18.1079    | 17.8969   | 20.2203    | 13.8848    | 23.0762   | 18.43     | 14.6209    | 13.3575    | 12.0607    | 15.8364    | 12.1075    | 17.7614    | 12.6082    | 7.1771     |
| BLID           | 0.375873  | 0.129358   | 0.133264  | 0.0553355  | 0.0417044  | 0.0685824 | 0.245234  | 0.214743   | 0          | 0.134788   | 0.0606163  | 0.0768421  | 0.069289   | 0.266608   | 1.11816    |
| BLK            | 0.0708009 | 0.00426412 | 0.0146429 | 0.0182406  | 0.15122    | 0.0452145 | 0.0707334 | 0.117979   | 0.0323353  | 0.0111078  | 0.0199814  | 0.012665   | 0          | 0.0138764  | 0          |
| BLM            | 0.239526  | 0.117716   | 0.134744  | 0.933051   | 0.11162    | 0.522122  | 0.147681  | 0.208614   | 0.0991836  | 0.384807   | 0.62191    | 0.226232   | 0.951974   | 0.588378   | 0.447187   |
| BLMH           | 9.94321   | 12.2539    | 12.98     | 7.73678    | 19.3136    | 11.022    | 32.0587   | 9.68794    | 90.3007    | 10.2815    | 11.41      | 13.6027    | 9.94667    | 5.71643    | 5.43677    |
| BLNK           | 3.32966   | 5.15446    | 2.58695   | 10.2548    | 4.93612    | 6.66208   | 2.76093   | 3.07164    | 23.6063    | 12.3624    | 11.1763    | 10.9974    | 17.3987    | 8.66143    | 2.8        |
| BLOC1S1        | 10.7219   | 7.98892    | 7.68456   | 15.9817    | 9.5955     | 16.9213   | 11.7649   | 6.48395    | 12.5617    | 13.7846    | 31.4333    | 8.01472    | 9.85552    | 8.03789    | 7.54606    |
| BLOC1S1-RDH5   | 0.540589  | 0.318386   | 0.387635  | 0.151152   | 0.00191905 | 0.748038  | 0.560574  | 0.475618   | 0.20195    | 0.679662   | 1.10029    | 0.00477842 | 0.287096   | 0.194224   | 0.00837653 |
| BLOC1S2        | 4.11047   | 3.55119    | 2.59921   | 6.76777    | 1.5779     | 5.16285   | 2.4455    | 3.856      | 8.31471    | 10.4368    | 12.5517    | 6.11331    | 7.36176    | 5.16915    | 2.86111    |
| BLOC1S3        | 2.66933   | 2.94951    | 2.87809   | 3.09925    | 7.02121    | 5.28069   | 3.383     | 2.22994    | 12.061     | 2.72489    | 5.34365    | 3.87725    | 3.63966    | 1.9113     | 2.00619    |
| BLOC1S4        | 2.00593   | 1.52907    | 1.60991   | 3.23959    | 2.69735    | 3.54351   | 1.00842   | 0.984478   | 2.3883     | 1.89763    | 4.22471    | 1.25321    | 3.62187    | 1.83077    | 1.87035    |
| BLOC1S5        | 1.31784   | 1.22096    | 1.47724   | 1.19054    | 0.607571   | 0.791216  | 0.494838  | 0.725953   | 0.643894   | 0.532989   | 0.125142   | 0.163708   | 0.267202   | 0.408049   | 0.630985   |
| BLOC1S5-TXNDC5 | 1.189     | 0.510559   | 0.320093  | 0.745484   | 0.604168   | 1.79693   | 0.508452  | 0.657001   | 0.437119   | 0.613908   | 1.22057    | 0.525619   | 0.776188   | 0.821418   | 0.511978   |
| BLOC1S6        | 3.97205   | 2.96418    | 3.24794   | 5.32447    | 1.76058    | 5.9861    | 2.15099   | 3.59809    | 2.21978    | 6.83721    | 9.88999    | 2.84576    | 7.14143    | 4.63759    | 6.75282    |
| BLVRA          | 7.34665   | 7.03205    | 6.90867   | 15.1825    | 13.3394    | 17.8778   | 7.33127   | 5.3213     | 11.0344    | 20.2712    | 32.974     | 10.3726    | 17.1176    | 8.39993    | 8.14641    |
| BLVRB          | 13.1126   | 10.2909    | 10.4674   | 16.4384    | 15.6228    | 26.4281   | 15.3111   | 8.67396    | 28.5478    | 14.3877    | 35.8312    | 11.0074    | 14.1643    | 11.6717    | 6.44537    |
| BLZF1          | 2.54436   | 2.94736    | 2.74422   | 6.38355    | 1.20046    | 3.68507   | 1.7444    | 2.71558    | 6.17578    | 7.43892    | 6.55654    | 4.23665    | 11.0999    | 4.60457    | 2.72345    |
| BMF            | 1.5306    | 1.4796     | 0.993742  | 1.20795    | 3.32556    | 2.17765   | 1.21115   | 1.21822    | 0.460125   | 0.942293   | 2.14342    | 0.42629    | 1.81255    | 1.28347    | 2.12857    |
| BMI1           | 3.62413   | 3.22094    | 3.99324   | 2.90615    | 1.26818    | 4.39219   | 2.34977   | 3.54046    | 2.22611    | 2.60923    | 4.22909    | 1.49299    | 4.22358    | 2.35903    | 3.33025    |
| BMP1           | 2.30391   | 2.27549    | 2.44469   | 4.81053    | 6.622      | 11.7005   | 2.86172   | 2.40742    | 1.51958    | 6.85477    | 11.4969    | 2.22411    | 6.44019    | 7.6966     | 19.7029    |
| BMP10          | 0         | 0          | 0         | 0.00387861 | 0          | 0         | 0         | 0.00334487 | 0.00458378 | 0          | 0.00849752 | 0          | 0.00485665 | 0          | 0.00540516 |
| BMP15          | 0         | 0          | 0         | 0.0377965  | 0          | 0         | 0         | 0          | 0          | 0          | 0          | 0          | 0          | 0          | 0          |
| BMP2           | 1.77686   | 2.72689    | 3.75652   | 3.9787     | 3.02132    | 2.49672   | 2.98887   | 1.59212    | 3.24157    | 6.22237    | 13.8594    | 5.73434    | 7.17103    | 7.37199    | 3.61242    |
| BMP2K          | 5.346     | 6.17066    | 6.15034   | 9.37007    | 5.34078    | 8.13585   | 4.4414    | 5.19033    | 12.9893    | 15.8072    | 14.1577    | 11.9131    | 22.7494    | 13.7314    | 6.76175    |
| BMP3           | 0.142956  | 0.0822716  | 0.177395  | 0.016369   | 0          | 0.0101438 | 0.0770775 | 0.0282328  | 0          | 0.00996805 | 0.00448278 | 0          | 0          | 0.00207542 | 0          |

|           |           |            |            |            |            |            |           |           |            |            |           |           |           |           |          |
|-----------|-----------|------------|------------|------------|------------|------------|-----------|-----------|------------|------------|-----------|-----------|-----------|-----------|----------|
| BMP4      | 1.61714   | 1.16874    | 1.36754    | 0.611053   | 1.4095     | 2.13431    | 2.03103   | 0.902228  | 0.481432   | 0.236795   | 0.567948  | 0.430701  | 0.631818  | 0.563458  | 0.528995 |
| BMP5      | 0.145737  | 0.00280873 | 0.00964512 | 0.00600745 | 0.0090552  | 0.00496373 | 0.0732151 | 0.0414461 | 0          | 0.0073166  | 0.026323  | 0         | 0         | 0         | 0.117206 |
| BMP6      | 1.98954   | 1.01957    | 1.16546    | 1.01734    | 2.0414     | 1.58244    | 1.41073   | 0.71756   | 0.135326   | 0.906468   | 0.949951  | 0.323412  | 1.90194   | 1.18052   | 1.90477  |
| BMP7      | 4.13371   | 4.81488    | 3.81866    | 3.48484    | 4.43458    | 3.72512    | 8.44309   | 3.5425    | 4.55893    | 3.40838    | 2.14527   | 2.5059    | 2.30033   | 2.26548   | 0.841009 |
| BMP7-AS1  | 0.114343  | 0.451757   | 0.26486    | 0.0471336  | 0.284183   | 0.0778893  | 0.678877  | 0.243885  | 0.0557028  | 0.11481    | 0         | 0.21272   | 0         | 0.0119521 | 0.131369 |
| BMP8A     | 0.588035  | 0.676846   | 0.768111   | 0.509083   | 1.04882    | 0.495679   | 0.82278   | 0.57899   | 0.151079   | 1.2431     | 2.4764    | 0.627539  | 0.577509  | 1.17412   | 1.76949  |
| BMP8B     | 0.663484  | 0.634509   | 0.641067   | 0.434801   | 0.526924   | 0.360489   | 0.58536   | 0.584395  | 0.205474   | 1.20011    | 1.22568   | 0.355543  | 0.842817  | 1.78566   | 2.25027  |
| BMPER     | 0.243805  | 0.0421115  | 0.0532773  | 0.0663674  | 0.250093   | 0.458279   | 0.0577746 | 0.0981162 | 0          | 0.0866038  | 0.150595  | 0.0427893 | 0.062327  | 0.0480842 | 0.165158 |
| BMPR1A    | 6.28498   | 5.82512    | 6.49657    | 4.51137    | 3.09187    | 5.7167     | 4.70604   | 5.7562    | 4.89507    | 4.91612    | 6.66146   | 2.99041   | 4.96762   | 3.86349   | 4.45786  |
| BMPR1B    | 0.424393  | 0.532772   | 0.711839   | 0.50556    | 0.229823   | 0.779088   | 0.41343   | 0.287199  | 0.436251   | 0.977351   | 0.839501  | 0.788413  | 1.10531   | 0.791582  | 1.17423  |
| BMPR1B-DT | 0         | 0          | 0          | 0          | 0          | 0          | 0         | 0         | 0          | 0.180696   | 0         | 0         | 0         | 0         | 0        |
| BMPR2     | 7.90737   | 6.88164    | 7.35526    | 9.02016    | 5.49215    | 8.74444    | 6.17362   | 7.16033   | 6.20458    | 9.77295    | 12.0953   | 5.6305    | 12.4526   | 7.87565   | 10.808   |
| BMS1      | 3.72331   | 3.84134    | 3.98831    | 5.67878    | 4.01211    | 6.68378    | 2.54025   | 3.06094   | 3.05128    | 2.72122    | 2.45344   | 3.21553   | 5.2273    | 4.01827   | 3.36133  |
| BMS1P1    | 3.68718   | 2.81377    | 2.52617    | 1.47285    | 1.63069    | 1.11148    | 2.59737   | 3.95679   | 0.669426   | 1.30084    | 1.06173   | 1.94107   | 0.460033  | 2.47225   | 1.94304  |
| BMS1P14   | 0.430408  | 1.05052    | 0.967595   | 0.425698   | 0.732332   | 0.76413    | 0.408223  | 0.470327  | 0.439825   | 0.75664    | 0.254555  | 0.625669  | 0.222685  | 1.25837   | 1.38667  |
| BMS1P17   | 0.0585227 | 0.0240645  | 0.0236051  | 0.0876177  | 0.00915351 | 0.143295   | 0.0607448 | 0.0275136 | 0.00647946 | 0.00667745 | 0.0497548 | 0.0648558 | 0.0402276 | 0.289349  | 0.269368 |
| BMS1P18   | 0.0585227 | 0.0240645  | 0.0236051  | 0.0876177  | 0.00915351 | 0.143295   | 0.0607448 | 0.0275136 | 0.00647946 | 0.00667745 | 0.0497548 | 0.0648558 | 0.0402276 | 0.289349  | 0.269368 |
| BMS1P2    | 4.93188   | 3.69645    | 3.39708    | 2.08287    | 2.12819    | 1.33892    | 3.49938   | 5.54562   | 0.740371   | 1.61334    | 1.12065   | 2.45717   | 0.361253  | 2.97647   | 2.17572  |
| BMS1P20   | 3.04507   | 2.96848    | 3.14255    | 2.80661    | 2.09766    | 2.68502    | 2.38465   | 1.87697   | 2.2966     | 2.27299    | 1.83734   | 2.85101   | 2.77013   | 2.92887   | 2.24442  |
| BMS1P21   | 0.301474  | 0.173373   | 0.122512   | 0.204092   | 0.390352   | 0.512667   | 0.207308  | 0.148872  | 0          | 0.177548   | 5.06E-25  | 0.166848  | 0         | 0.302473  | 0.573099 |
| BMS1P22   | 0.0231662 | 0.0759684  | 0.0827606  | 0.0599121  | 0.32193    | 0.240342   | 0.105802  | 0.0121568 | 0.0141069  | 0.014538   | 0.0747374 | 0.041134  | 0.106725  | 0.399188  | 0.494801 |
| BMS1P4    | 2.81009   | 3.01062    | 2.66484    | 2.29673    | 2.66802    | 1.65184    | 3.16858   | 2.46603   | 0.67717    | 1.42028    | 1.41253   | 1.87542   | 0.5817    | 2.33378   | 2.34789  |
| BMT2      | 1.56166   | 1.21351    | 1.26763    | 1.43388    | 0.583649   | 1.34973    | 1.2669    | 1.79484   | 1.53727    | 1.89372    | 3.77105   | 0.91577   | 1.39015   | 1.32247   | 1.76215  |
| BMX       | 1.12052   | 0.431907   | 0.328006   | 0.799427   | 0.334722   | 2.06234    | 0.629846  | 0.41365   | 0.0524872  | 0.346183   | 0.700575  | 0.0740088 | 0.589486  | 0.50905   | 0.519898 |
| BNC1      | 6.28872   | 5.64651    | 4.52741    | 20.143     | 3.87536    | 19.6336    | 3.56604   | 3.55089   | 7.09353    | 14.0789    | 8.50739   | 11.6168   | 29.5539   | 15.3554   | 6.74829  |
| BNC2      | 1.38734   | 0.523685   | 0.682778   | 0.637444   | 0.680824   | 1.49582    | 0.964543  | 1.12772   | 0.0774863  | 1.20225    | 2.53576   | 0.0821967 | 0.624864  | 0.707536  | 3.28433  |

|              |           |           |           |            |          |           |          |           |           |            |          |           |           |           |          |
|--------------|-----------|-----------|-----------|------------|----------|-----------|----------|-----------|-----------|------------|----------|-----------|-----------|-----------|----------|
| BNC2-AS1     | 0.540725  | 0.234477  | 0.313128  | 0.111447   | 0.167987 | 0.322294  | 0.37043  | 0.480552  | 0.0658543 | 0.135733   | 0.488329 | 0         | 0.104662  | 0.0565214 | 0.62124  |
| BNIP1        | 1.30242   | 1.09415   | 1.18797   | 2.08211    | 1.29687  | 2.64453   | 1.1439   | 1.00909   | 2.21662   | 2.03286    | 3.58143  | 1.12308   | 2.43476   | 1.46613   | 1.34288  |
| BNIP2        | 6.81296   | 4.72145   | 5.11058   | 6.32975    | 1.7821   | 6.97948   | 3.9378   | 6.28699   | 5.27516   | 6.47309    | 8.33664  | 3.55136   | 8.11485   | 5.1806    | 5.59178  |
| BNIP3        | 5.90977   | 5.12808   | 3.75173   | 23.4407    | 7.35274  | 23.0004   | 4.30421  | 7.39326   | 72.6993   | 59.5702    | 117.541  | 46.0177   | 42.6831   | 41.3234   | 10.5225  |
| BNIP3L       | 12.9204   | 11.9869   | 13.1627   | 26.8263    | 8.09329  | 26.3861   | 11.5193  | 18.0569   | 75.7204   | 35.7454    | 60.4397  | 26.0701   | 47.9667   | 22.2855   | 13.3438  |
| BNIPL        | 13.1548   | 28.7227   | 25.5112   | 20.0132    | 51.1061  | 15.9971   | 27.5417  | 16.2614   | 68.7956   | 31.0942    | 18.7388  | 37.7948   | 29.491    | 17.1601   | 5.3327   |
| BOC          | 11.0788   | 10.7583   | 7.56647   | 3.31589    | 8.59487  | 9.23504   | 9.69432  | 6.25723   | 1.28398   | 1.58734    | 2.52695  | 1.44074   | 1.3497    | 1.79389   | 4.16486  |
| BOD1         | 5.62421   | 4.86038   | 5.63278   | 7.55938    | 4.94441  | 9.99559   | 3.83926  | 3.54138   | 3.94949   | 5.21163    | 11.5363  | 3.09955   | 5.28092   | 5.25979   | 5.29307  |
| BOD1L1       | 8.07219   | 6.09786   | 6.01681   | 4.87308    | 3.43396  | 7.40237   | 2.89506  | 4.48734   | 3.54259   | 4.86319    | 3.38776  | 4.12023   | 6.13022   | 4.83387   | 5.82944  |
| BOD1L2       | 0         | 0         | 0         | 0          | 0        | 0         | 0        | 0         | 0         | 0          | 0        | 0         | 0         | 0         | 0        |
| BOK          | 3.61925   | 6.29767   | 6.14056   | 15.9748    | 24.1177  | 9.44704   | 6.18881  | 3.13101   | 19.7409   | 15.5927    | 18.7824  | 11.2728   | 22.2476   | 10.9299   | 5.42318  |
| BOK-AS1      | 0.0853456 | 0.0138857 | 0.0238052 | 0          | 0.181567 | 0.0246007 | 0.065317 | 0.0758791 | 0.10471   | 0.0724457  | 0        | 0.0413409 | 0.0561428 | 0.0745066 | 0.164505 |
| BOLA1        | 2.49911   | 2.43857   | 2.93612   | 3.91722    | 4.92588  | 3.96981   | 2.46975  | 1.45578   | 2.40422   | 2.08231    | 6.35359  | 1.38246   | 1.19237   | 1.33907   | 0.965121 |
| BOLA2        | 0.594672  | 0.295074  | 0.281516  | 0.356644   | 0.436421 | 0.699491  | 0.231545 | 0.0083335 | 0.598668  | 0.141319   | 0.63111  | 0.171853  | 0.050952  | 0.286637  | 0.509359 |
| BOLA2-SMG1P6 | 1.1014    | 0.693261  | 0.841943  | 1.23558    | 0.711214 | 1.32209   | 0.989402 | 1.89364   | 0.504833  | 0.973387   | 2.09198  | 0.847982  | 0.811719  | 1.0291    | 1.18229  |
| BOLA2B       | 5.38051   | 4.29345   | 3.49544   | 14.6023    | 8.46721  | 9.43971   | 5.06069  | 3.24829   | 7.94447   | 13.0298    | 30.8892  | 8.1573    | 10.2552   | 9.56602   | 5.44763  |
| BOLA3        | 3.63438   | 1.65046   | 1.41691   | 8.60996    | 0.778682 | 8.11005   | 1.5263   | 1.67065   | 1.06841   | 5.29556    | 12.7327  | 1.97279   | 5.41749   | 5.85128   | 3.23964  |
| BOLA3-AS1    | 0.701472  | 0.489671  | 0.507198  | 0.307369   | 0.377509 | 0.442092  | 0.586499 | 0.451604  | 0.0605419 | 0.221838   | 0.230704 | 0.0948514 | 0.171056  | 0.329092  | 0.333157 |
| BOLL         | 0.0256007 | 0.030837  | 0.0211787 | 0.00659557 | 0        | 0.0272483 | 0.014615 | 0.0511915 | 0         | 0.00803288 | 0        | 0         | 0         | 0.0133801 | 0        |
| BOP1         | 3.80473   | 4.09823   | 3.7944    | 12.6962    | 14.2197  | 12.8126   | 4.91027  | 2.5593    | 5.92282   | 5.50539    | 4.62877  | 6.55692   | 14.1012   | 8.98072   | 4.84782  |
| BORA         | 0.659124  | 0.66473   | 0.50796   | 1.23599    | 0.145784 | 0.930229  | 0.560712 | 0.661641  | 0.560607  | 0.915489   | 1.18008  | 0.38843   | 0.960204  | 1.101     | 0.421    |
| BORCS5       | 2.72634   | 2.38183   | 2.30918   | 1.64852    | 2.6924   | 2.53664   | 3.0551   | 2.39085   | 3.06089   | 1.0696     | 1.20662  | 1.90426   | 0.957556  | 1.37959   | 1.25499  |
| BORCS6       | 2.80522   | 3.18091   | 2.70078   | 3.97493    | 10.9312  | 5.84797   | 2.40218  | 1.7086    | 12.1932   | 3.27802    | 5.06406  | 3.76352   | 5.1957    | 2.22447   | 1.51074  |
| BORCS7       | 3.25356   | 2.57359   | 2.93757   | 3.90546    | 1.57987  | 3.09497   | 1.63601  | 2.62372   | 3.60834   | 3.7241     | 6.30065  | 2.2503    | 3.84717   | 2.68958   | 2.86504  |
| BORCS7-ASMT  | 0.787629  | 1.0364    | 0.995605  | 0.495508   | 0.172853 | 1.12269   | 0.478047 | 0.644536  | 0.222063  | 0.337118   | 0.535672 | 0.311927  | 0.150757  | 0.456496  | 0.779695 |
| BORCS8       | 1.07757   | 1.51788   | 1.24225   | 2.35732    | 2.84095  | 2.59631   | 1.64408  | 1.20695   | 2.77408   | 2.28445    | 2.99623  | 1.57745   | 2.12393   | 1.96106   | 2.00258  |



|              |            |            |           |            |            |           |            |            |           |            |           |           |           |            |          |
|--------------|------------|------------|-----------|------------|------------|-----------|------------|------------|-----------|------------|-----------|-----------|-----------|------------|----------|
| BORCS8-MEF2B | 0.25918    | 0.333815   | 0.433225  | 0.124664   | 0.0708202  | 0.578654  | 0.350774   | 0.0536774  | 0.275473  | 1.71E-05   | 0.160939  | 0.046636  | 0.0867471 | 0.196005   | 5.72E-05 |
| BPESC1       | 0          | 0          | 0         | 0          | 0          | 0         | 0          | 0          | 0         | 0          | 0         | 0         | 0         | 0          | 0        |
| BPGM         | 2.31431    | 1.6601     | 1.62265   | 3.45444    | 1.24129    | 2.74824   | 1.27973    | 1.71551    | 1.85798   | 11.215     | 5.41255   | 3.92823   | 11.296    | 4.37717    | 5.35061  |
| BPHL         | 2.07468    | 2.69396    | 2.53157   | 2.65114    | 2.0303     | 2.93249   | 2.68859    | 1.72396    | 1.74344   | 1.4582     | 3.15006   | 1.62552   | 1.45235   | 1.24155    | 1.07262  |
| BPI          | 0          | 0          | 0.020754  | 0.0129266  | 0.0779385  | 0.0213615 | 0.0143219  | 0          | 0         | 0.110205   | 0.0424807 | 0         | 0.0242793 | 0          | 0.1261   |
| BPIFA1       | 0          | 0          | 0         | 0          | 0          | 0         | 0          | 0          | 0         | 0          | 0         | 0         | 0         | 0          | 0        |
| BPIFA2       | 0          | 0          | 0         | 0          | 0          | 0         | 0          | 0          | 0         | 0          | 0         | 0         | 0         | 0          | 0        |
| BPIFA3       | 0          | 0          | 0         | 0          | 0          | 0         | 0          | 0          | 0         | 0          | 0         | 0         | 0         | 0          | 0        |
| BPIFA4P      | 0          | 0          | 0         | 0          | 0          | 0         | 0          | 0          | 0         | 0          | 0         | 0         | 0         | 0          | 0        |
| BPIFB1       | 0.0134007  | 0          | 0         | 0          | 0          | 0.0114105 | 0          | 0          | 0         | 0          | 0         | 0         | 0         | 0          | 0        |
| BPIFB2       | 0          | 0          | 0         | 0          | 0          | 0         | 0          | 0          | 0         | 0          | 0         | 0         | 0         | 0          | 0        |
| BPIFB3       | 0          | 0          | 0         | 0          | 0          | 0         | 0          | 0          | 0         | 0          | 0         | 0         | 0         | 0.0077735  | 0        |
| BPIFB4       | 0          | 0          | 0         | 0          | 1.30634    | 0.0997084 | 0          | 0.0189215  | 0         | 0.0267221  | 0.0240346 | 0         | 0.0137367 | 0.00556374 | 0.122305 |
| BPIFB6       | 0          | 0          | 0         | 0          | 0          | 0         | 0          | 0          | 0         | 0          | 0         | 0         | 0         | 0          | 0        |
| BPIFC        | 4.72212    | 6.91567    | 7.51318   | 3.9388     | 3.97619    | 3.30424   | 7.67363    | 5.99369    | 30.4633   | 10.9879    | 9.92246   | 15.5893   | 1.69679   | 2.07091    | 1.88004  |
| BPNT1        | 1.76319    | 2.02376    | 1.61901   | 3.28206    | 3.03998    | 3.90662   | 1.7602     | 1.23061    | 3.92374   | 3.25576    | 7.29471   | 2.13351   | 3.60934   | 2.14217    | 1.97535  |
| BPTF         | 9.10331    | 9.69007    | 9.38126   | 7.41158    | 4.84441    | 8.62478   | 5.2992     | 7.17672    | 7.14915   | 6.24401    | 5.6984    | 6.37185   | 6.87627   | 6.34843    | 7.3429   |
| BPY2         | 0.00640727 | 0.00720328 | 0.0123679 | 0.00440192 | 0.00663513 | 0         | 0.00243854 | 0.00759233 | 0.0130056 | 0.00536119 | 0         | 0.0213947 | 0         | 0.00223248 | 0        |
| BPY2B        | 0.00640727 | 0.00720328 | 0.0123679 | 0.00440192 | 0.00663513 | 0         | 0.00243854 | 0.00759233 | 0.0130056 | 0.00536119 | 0         | 0.0213947 | 0         | 0.00223248 | 0        |
| BPY2C        | 0.00640727 | 0.00720328 | 0.0123679 | 0.00440192 | 0.00663513 | 0         | 0.00243854 | 0.00759233 | 0.0130056 | 0.00536119 | 0         | 0.0213947 | 0         | 0.00223248 | 0        |
| BRAF         | 3.55157    | 3.38533    | 3.64192   | 2.61889    | 1.67186    | 2.83679   | 2.80528    | 3.8701     | 3.84755   | 2.63729    | 2.86051   | 2.49402   | 2.61208   | 2.34301    | 2.51471  |
| BRAP         | 3.09071    | 2.87332    | 3.03122   | 3.56916    | 2.18225    | 4.77026   | 2.88726    | 2.69581    | 3.70128   | 2.63409    | 3.17184   | 2.40843   | 3.70705   | 2.45747    | 2.17403  |
| BRAT1        | 3.65049    | 4.23943    | 4.13802   | 5.00396    | 11.7414    | 8.39368   | 4.93958    | 2.81706    | 3.33442   | 2.27338    | 3.67269   | 3.45445   | 3.99588   | 3.62284    | 4.25209  |
| BRCA1        | 0.575275   | 0.622512   | 0.561728  | 2.07979    | 0.322282   | 1.7586    | 0.509672   | 0.474938   | 0.39051   | 1.08107    | 1.27754   | 0.661298  | 1.91261   | 1.35381    | 0.75845  |
| BRCA2        | 0.461398   | 0.261482   | 0.255588  | 0.814815   | 0.0473597  | 0.811709  | 0.194942   | 0.476888   | 0.1312    | 0.686248   | 0.940761  | 0.285057  | 0.702919  | 0.652264   | 0.703492 |
| BRCC3        | 2.59688    | 2.41116    | 2.59888   | 4.05899    | 1.01766    | 3.91836   | 1.33382    | 1.93611    | 2.44173   | 2.39745    | 2.4593    | 1.81295   | 3.52925   | 2.30609    | 1.65502  |

|         |           |            |           |            |           |           |           |           |           |           |          |            |           |            |           |
|---------|-----------|------------|-----------|------------|-----------|-----------|-----------|-----------|-----------|-----------|----------|------------|-----------|------------|-----------|
| BRD1    | 6.30325   | 8.03003    | 8.74805   | 6.07164    | 11.6296   | 7.76547   | 9.9429    | 5.89208   | 9.63981   | 4.52528   | 2.76292  | 7.05054    | 6.49982   | 5.69984    | 4.4896    |
| BRD2    | 2.46473   | 2.50905    | 2.49331   | 3.28973    | 3.69545   | 5.23875   | 2.36784   | 2.13409   | 3.22587   | 2.64835   | 2.31123  | 2.59479    | 3.97186   | 2.73403    | 2.613     |
| BRD3    | 4.3584    | 5.35372    | 5.14618   | 4.36126    | 6.60928   | 8.05655   | 4.63465   | 4.02611   | 3.55134   | 2.84434   | 3.46256  | 2.6767     | 2.90532   | 3.18137    | 3.97437   |
| BRD3OS  | 0.90206   | 0.991307   | 0.82226   | 1.23236    | 1.58653   | 2.72064   | 1.17052   | 0.650342  | 0.826875  | 1.20936   | 1.94053  | 0.621614   | 1.36588   | 0.894468   | 1.51914   |
| BRD4    | 6.0527    | 8.28704    | 8.41219   | 10.5016    | 11.5811   | 15.545    | 11.9152   | 9.3541    | 7.71651   | 6.35232   | 5.50739  | 7.93868    | 12.5643   | 7.59091    | 8.93898   |
| BRD7    | 11.3314   | 10.2004    | 9.87919   | 16.6494    | 7.21471   | 17.2345   | 6.30883   | 8.32668   | 15.958    | 11.4203   | 10.2716  | 10.5216    | 13.5303   | 9.46403    | 7.86345   |
| BRD7P3  | 0.489004  | 0.135929   | 0.256726  | 0.125983   | 0.0292151 | 0.160146  | 0.236216  | 0.267438  | 0.0343588 | 0.0472116 | 0.148622 | 0.100931   | 0.0242694 | 0.294894   | 0.567219  |
| BRD8    | 2.67816   | 2.70477    | 2.1828    | 4.78523    | 3.76793   | 5.15942   | 1.83696   | 1.83019   | 1.94737   | 2.21813   | 2.50918  | 1.94817    | 2.36353   | 2.91847    | 3.19211   |
| BRD9    | 3.4953    | 3.77321    | 4.2278    | 4.33193    | 5.57337   | 5.81149   | 3.90011   | 3.00632   | 1.95106   | 2.99941   | 2.20454  | 2.97938    | 4.33946   | 4.22445    | 3.50807   |
| BRDT    | 0         | 0          | 0         | 0.00588733 | 0         | 0         | 0         | 0         | 0         | 0         | 0        | 0          | 0         | 0          | 0         |
| BRDTP1  | 0         | 0          | 0         | 0          | 0         | 0         | 0         | 0         | 0         | 0         | 0        | 0          | 0         | 0          | 0         |
| BRE-AS1 | 0.211939  | 0.168033   | 0.138485  | 0.215638   | 0.351234  | 0.375102  | 0.340336  | 0.198362  | 0.118927  | 0.42304   | 0.759074 | 0.180725   | 0.21928   | 0.237729   | 0.957541  |
| BREA2   | 0.207872  | 0.378366   | 0.267503  | 0.166614   | 0.394651  | 0.0393333 | 0.395569  | 0.184739  | 0.0281294 | 0.144945  | 0        | 0.0826321  | 0.0596079 | 0.193143   | 0.36487   |
| BRF1    | 2.13391   | 2.49223    | 2.40641   | 2.09915    | 5.44313   | 3.30327   | 2.57141   | 1.89736   | 1.83994   | 1.47529   | 1.37733  | 2.11341    | 2.30383   | 1.84142    | 2.23344   |
| BRF2    | 2.40688   | 1.70605    | 1.8284    | 2.07816    | 2.87593   | 3.65546   | 2.08749   | 1.32661   | 1.1838    | 1.53949   | 3.14814  | 0.836253   | 1.5753    | 1.51899    | 2.14374   |
| BRI3    | 15.5324   | 10.751     | 12.352    | 22.2179    | 11.5321   | 36.6221   | 16.6689   | 10.7998   | 12.4512   | 21.5341   | 36.8708  | 10.6242    | 17.193    | 13.9636    | 14.7121   |
| BRI3BP  | 1.58638   | 1.97919    | 1.90242   | 3.93408    | 3.31      | 2.84221   | 2.22002   | 1.39248   | 2.09846   | 2.41417   | 4.20001  | 3.21653    | 5.4606    | 3.68962    | 1.05277   |
| BRICD5  | 0.384846  | 0.472936   | 0.666944  | 0.254048   | 1.49076   | 0.352769  | 0.283221  | 0.495947  | 0.136344  | 0.0963255 | 0.119592 | 0.525456   | 0.0975318 | 0.453737   | 0.210412  |
| BRINP1  | 0.108619  | 0.0418674  | 0.011981  | 0.649222   | 0.224963  | 1.05436   | 0.0744105 | 0.0836605 | 0.220476  | 0.345364  | 0.359677 | 0.300516   | 0.537282  | 0.162738   | 0.103994  |
| BRINP2  | 0.0189335 | 0.00608163 | 0         | 0.00650384 | 0         | 0.0376171 | 0.0216177 | 0         | 0         | 0.0158423 | 0        | 0.00903162 | 0.0162877 | 0.00659698 | 0.0181273 |
| BRINP3  | 0         | 0.0264862  | 0.0284227 | 0          | 0         | 0         | 0.0313824 | 0.0671745 | 0         | 0         | 0        | 0          | 0.0221671 | 0          | 0         |
| BRIP1   | 0.814567  | 0.679844   | 0.688859  | 0.941842   | 0.359091  | 0.901908  | 0.600976  | 0.568819  | 0.8659    | 0.758045  | 0.949858 | 0.58166    | 0.620842  | 1.09278    | 0.827993  |
| BRIX1   | 6.03574   | 4.45852    | 4.90295   | 8.99277    | 1.6379    | 7.49231   | 2.20027   | 3.87763   | 5.51314   | 5.40779   | 9.25582  | 4.00653    | 11.9876   | 6.89818    | 3.86408   |
| BRK1    | 27.4529   | 21.2394    | 19.8945   | 43.1158    | 16.7824   | 37.9877   | 22.4469   | 21.5645   | 59.5829   | 53.9937   | 82.0202  | 35.4846    | 48.7187   | 28.8504    | 24.6164   |
| BRMS1   | 7.08627   | 6.26208    | 6.68827   | 19.219     | 18.2373   | 17.827    | 6.74848   | 4.26523   | 10.1405   | 11.1781   | 11.8174  | 9.06909    | 17.831    | 12.0451    | 5.25027   |
| BRMS1L  | 1.639     | 1.32479    | 1.48185   | 2.09515    | 1.01559   | 2.00568   | 0.5113    | 1.39293   | 1.72342   | 1.6412    | 2.42653  | 1.03817    | 1.54865   | 1.18428    | 1.59493   |

|           |            |            |           |            |           |           |           |          |            |           |           |           |            |            |           |
|-----------|------------|------------|-----------|------------|-----------|-----------|-----------|----------|------------|-----------|-----------|-----------|------------|------------|-----------|
| BROX      | 5.63528    | 5.07167    | 5.33693   | 7.21583    | 1.56852   | 5.61481   | 3.5985    | 5.47501  | 8.67064    | 7.28408   | 7.35177   | 4.71092   | 8.96288    | 5.01889    | 4.00623   |
| BRPF1     | 3.33677    | 3.01124    | 3.23189   | 3.57919    | 4.82752   | 5.05609   | 3.82651   | 2.6754   | 3.79684    | 2.49445   | 1.72118   | 2.27949   | 4.96577    | 3.08308    | 2.77728   |
| BRPF3     | 2.80499    | 3.81748    | 3.1851    | 3.93203    | 6.20739   | 7.07034   | 3.65013   | 2.93335  | 5.04936    | 3.65558   | 3.06238   | 3.23326   | 4.94586    | 3.92207    | 3.96761   |
| BRS3      | 0          | 0.0236745  | 0         | 0          | 0         | 0         | 0         | 0        | 0          | 0         | 0         | 0         | 0          | 0          | 0         |
| BRSK1     | 0.232858   | 0.152005   | 0.192636  | 0.116113   | 0.571733  | 0.42853   | 0.291599  | 0.15354  | 0.0274446  | 0.452532  | 0.720765  | 0.123618  | 0.25686    | 0.612434   | 0.636464  |
| BRSK2     | 0.185838   | 0.296476   | 0.225483  | 0.0723488  | 0.500363  | 0.281313  | 0.363071  | 0.286273 | 0.0201182  | 0.0518325 | 0         | 0.121152  | 0.00532897 | 0.0474844  | 0.21351   |
| BRWD1     | 5.38277    | 4.95699    | 4.85833   | 3.92639    | 1.60208   | 2.75355   | 3.5846    | 5.13646  | 4.13686    | 3.8688    | 3.26555   | 3.50247   | 3.67342    | 3.72036    | 2.96737   |
| BRWD1-AS1 | 0          | 0.016137   | 0.0831211 | 0          | 0.156074  | 0.0285181 | 0.0764804 | 0        | 0          | 0         | 0         | 0         | 0          | 0          | 0         |
| BRWD1-AS2 | 0.527542   | 0.36469    | 0.151798  | 0.212732   | 0.534427  | 0.507786  | 0.419013  | 0.224226 | 0.251408   | 0.230303  | 0.207141  | 0.0656471 | 0.266375   | 0.215778   | 0.0988197 |
| BRWD3     | 2.50371    | 3.29561    | 3.41367   | 2.2278     | 1.30668   | 2.26435   | 2.46621   | 3.09808  | 2.76062    | 2.15246   | 1.81754   | 1.85878   | 2.50711    | 1.95431    | 2.09919   |
| BSCL2     | 1.83767    | 0.898664   | 1.02679   | 0.81892    | 0.966507  | 0.962503  | 1.74646   | 2.14339  | 0.746646   | 0.613327  | 4.41476   | 0.593455  | 0.366915   | 1.04243    | 1.17178   |
| BSDC1     | 6.78386    | 7.74695    | 8.30929   | 7.68645    | 10.8848   | 8.9592    | 8.59609   | 5.65504  | 10.4235    | 7.11739   | 6.9754    | 5.76022   | 7.3769     | 6.06732    | 5.38102   |
| BSG       | 30.7703    | 24.3592    | 25.5118   | 73.5836    | 47.3452   | 96.2637   | 34.1829   | 22.0644  | 49.0406    | 55.1528   | 83.9329   | 36.692    | 81.3563    | 49.0119    | 38.4626   |
| BSN       | 0.163868   | 0.113191   | 0.131964  | 0.0642604  | 0.195976  | 0.297584  | 0.170541  | 0.100525 | 0.00883064 | 0.0345818 | 0.0261927 | 0.0342417 | 0.0168414  | 0.0553278  | 0.193683  |
| BSN-DT    | 0.00889091 | 0          | 0         | 0.00916235 | 0         | 0.0227115 | 0.0101514 | 0.015803 | 0          | 0         | 0         | 0         | 0          | 0.00464678 | 0.0127685 |
| BSND      | 0          | 0.00813918 | 0.0139749 | 0          | 0.0262403 | 0         | 0         | 0        | 0.0205735  | 0         | 0         | 0         | 0          | 0.00882888 | 0         |
| BSPH1     | 0          | 0          | 0         | 0          | 0         | 0         | 0         | 0        | 0          | 0         | 0         | 0         | 0          | 0          | 0         |
| BSPRY     | 3.3789     | 4.53959    | 4.7317    | 5.72269    | 11.2427   | 4.0029    | 5.78127   | 3.92551  | 25.943     | 14.6278   | 12.3498   | 10.5749   | 16.1958    | 5.78414    | 1.65971   |
| BST1      | 0.906957   | 0.519863   | 0.866725  | 1.06356    | 0.461509  | 2.15701   | 0.714162  | 0.639264 | 0.057133   | 1.29534   | 4.07772   | 0.123077  | 0.726411   | 0.58026    | 1.19022   |
| BST2      | 3.20233    | 1.71801    | 1.8037    | 8.77683    | 9.38418   | 27.9829   | 2.72279   | 1.45326  | 1.07874    | 2.73651   | 7.99921   | 0.406268  | 2.41781    | 1.32944    | 5.28389   |
| BSX       | 0          | 0          | 0         | 0          | 0         | 0         | 0         | 0        | 0          | 0         | 0         | 0         | 0          | 0          | 0         |
| BTAF1     | 11.121     | 13.6777    | 15.2419   | 7.28568    | 3.09537   | 5.63069   | 10.1146   | 11.558   | 7.1205     | 7.82508   | 6.44046   | 7.16212   | 5.59464    | 7.75952    | 5.87468   |
| BTBD1     | 7.30171    | 4.87372    | 5.62143   | 8.89473    | 2.41482   | 11.1945   | 4.36921   | 6.85162  | 3.70955    | 8.81128   | 13.1185   | 3.7045    | 10.0709    | 7.08461    | 6.15225   |
| BTBD10    | 3.22356    | 2.9384     | 3.03367   | 5.78693    | 1.93156   | 5.26707   | 2.20652   | 2.81555  | 5.00627    | 7.7538    | 7.00973   | 3.80835   | 8.12518    | 5.27784    | 3.81046   |
| BTBD11    | 3.04096    | 2.9341     | 3.00726   | 9.16926    | 4.24706   | 6.37909   | 2.8956    | 2.85096  | 3.94477    | 6.67309   | 3.60822   | 4.62691   | 11.4538    | 4.80656    | 2.14177   |
| BTBD16    | 0.147722   | 0.521947   | 0.814705  | 0.0888016  | 0.229463  | 0.188675  | 1.22281   | 0.328207 | 0.389801   | 0.0772524 | 0.0138966 | 0.123315  | 0.055597   | 0.0128676  | 0.0176789 |

|           |           |           |           |           |           |            |           |           |           |           |           |            |            |           |          |
|-----------|-----------|-----------|-----------|-----------|-----------|------------|-----------|-----------|-----------|-----------|-----------|------------|------------|-----------|----------|
| BTBD17    | 0.0402255 | 0.0258417 | 0.0110924 | 0.0276357 | 0.041656  | 0.148423   | 0.0153094 | 0         | 0         | 0.016829  | 0         | 0.00959413 | 0.00865109 | 0.0280314 | 0.15405  |
| BTBD18    | 2.09563   | 1.69382   | 2.18591   | 0.281688  | 0.860987  | 0.484892   | 2.14998   | 1.61275   | 0.129462  | 0.324014  | 0.145714  | 0.445498   | 0.112674   | 0.7024    | 1.07953  |
| BTBD19    | 0.868601  | 0.829917  | 1.03522   | 2.32124   | 3.01863   | 2.67009    | 1.34473   | 0.719605  | 1.00407   | 1.62604   | 1.37941   | 3.72904    | 0.778884   | 2.69303   | 4.2074   |
| BTBD2     | 10.3074   | 10.8398   | 11.4669   | 19.5315   | 18.9221   | 26.646     | 13.1413   | 9.37249   | 5.99671   | 7.18961   | 15.8171   | 7.62824    | 11.1789    | 10.4231   | 8.91211  |
| BTBD3     | 4.18553   | 3.6596    | 3.84607   | 4.49706   | 3.03269   | 4.99481    | 3.68978   | 3.83067   | 4.69582   | 3.7763    | 4.57396   | 3.03314    | 4.34551    | 3.81834   | 3.56562  |
| BTBD6     | 10.4243   | 9.52886   | 10.1654   | 14.8835   | 16.4458   | 21.3126    | 10.3196   | 5.91047   | 15.5468   | 12.1918   | 15.5807   | 9.53399    | 14.0375    | 11.0912   | 7.19257  |
| BTBD7     | 3.78269   | 3.79528   | 3.76474   | 4.33382   | 2.17625   | 3.81535    | 3.6019    | 3.55922   | 4.91285   | 4.97503   | 4.61926   | 3.84566    | 6.9523     | 4.02473   | 4.10035  |
| BTBD8     | 0.303883  | 0.346773  | 0.344012  | 0.263713  | 0.173907  | 0.340463   | 0.255657  | 0.184782  | 0.0389573 | 0.180665  | 0.523596  | 0.080108   | 0.0412765  | 0.125386  | 0.160784 |
| BTBD9     | 2.46921   | 2.50657   | 2.7753    | 2.75815   | 2.96956   | 2.56042    | 3.19949   | 2.28212   | 3.59004   | 2.72761   | 1.65131   | 2.30866    | 4.3003     | 2.12853   | 2.50815  |
| BTBD9-AS1 | 0.603423  | 0.68409   | 0.704745  | 0.512108  | 0.496231  | 0.211568   | 0.810552  | 0.914817  | 0.129689  | 0.801908  | 0.0801399 | 0.634949   | 0.0229015  | 0.723508  | 0.458784 |
| BTC       | 1.2332    | 2.31727   | 3.03336   | 0.288059  | 0.549134  | 0.532027   | 2.61893   | 1.84122   | 0.15019   | 0.0309559 | 0.0464043 | 0.0235303  | 0          | 0.0214841 | 0        |
| BTD       | 1.73278   | 1.56365   | 1.58546   | 2.00254   | 1.31492   | 1.91244    | 1.92769   | 1.15351   | 1.63955   | 1.40409   | 2.42662   | 1.04801    | 1.57269    | 0.946551  | 1.89591  |
| BTF3      | 94.4637   | 78.4538   | 78.6668   | 168.124   | 71.7255   | 166.716    | 68.0599   | 81.678    | 154.818   | 141.421   | 233.562   | 116.541    | 142.047    | 97.7833   | 54.2859  |
| BTF3L4    | 5.51787   | 5.10347   | 5.26162   | 5.47566   | 1.80404   | 5.29259    | 4.49598   | 6.83081   | 5.7853    | 4.96728   | 7.86635   | 3.72345    | 5.32895    | 3.79563   | 3.4575   |
| BTF3P11   | 0         | 0         | 0         | 0         | 0         | 0          | 0         | 0         | 0         | 0         | 0         | 0          | 0          | 0         | 0        |
| BTG1      | 22.2863   | 26.6963   | 22.9319   | 45.7827   | 25.3564   | 36.9022    | 17.3547   | 21.4747   | 41.5497   | 42.3599   | 53.1053   | 20.7098    | 35.045     | 21.5907   | 13.2654  |
| BTG2      | 15.6905   | 16.6376   | 17.7826   | 13.5039   | 20.872    | 24.2055    | 14.8933   | 15.1507   | 41.1712   | 26.2397   | 32.5438   | 28.3179    | 19.5033    | 10.5697   | 12.8728  |
| BTG3      | 6.54842   | 8.14312   | 7.52673   | 13.9214   | 7.20109   | 13.7809    | 3.83049   | 7.34891   | 13.78     | 17.3025   | 22.462    | 11.2688    | 15.9573    | 11.1479   | 5.33075  |
| BTG3-AS1  | 0.860788  | 1.18904   | 1.1029    | 1.5731    | 3.5325    | 0.833132   | 0.763872  | 0.658602  | 0.532351  | 0.870442  | 0.977904  | 0.816494   | 0.280833   | 0.729476  | 0.348152 |
| BTG4      | 0         | 0.0110076 | 0         | 0         | 0         | 0          | 0         | 0         | 0         | 0         | 0.077371  | 0          | 0          | 0         | 0        |
| BTK       | 0.852442  | 0.616079  | 0.87222   | 1.23293   | 0.696914  | 1.01236    | 0.503721  | 0.657898  | 0.327846  | 0.722653  | 1.19866   | 0.235417   | 0.916651   | 0.363453  | 0.977224 |
| BTLA      | 0.129572  | 0.0450883 | 0.0714609 | 0.0741822 | 0.0111817 | 0.0735527  | 0.0328759 | 0.204717  | 0.0175338 | 0.0542088 | 0.138145  | 0.00515069 | 0.0603773  | 0.0188111 | 0.113717 |
| BTN1A1    | 0.0405876 | 0.0352003 | 0.0604385 | 0.025096  | 0.0504373 | 0.00691196 | 0.027805  | 0.0577134 | 0         | 0         | 0.0458183 | 0.0058083  | 0          | 0.0169703 | 0        |
| BTN2A1    | 3.25775   | 2.71582   | 3.0805    | 2.5442    | 3.19907   | 4.44562    | 2.41566   | 1.91256   | 1.26247   | 2.64419   | 3.23717   | 1.35177    | 2.65007    | 2.71903   | 3.7488   |
| BTN2A2    | 1.02753   | 1.7798    | 1.95467   | 1.0934    | 1.18201   | 1.31332    | 1.2818    | 1.02638   | 0.607795  | 0.932203  | 1.30881   | 0.276582   | 1.10396    | 0.608622  | 1.52767  |
| BTN2A3P   | 0.493992  | 0.606259  | 0.570589  | 0.374601  | 0.680471  | 0.642846   | 0.510814  | 0.323052  | 0.215677  | 0.327553  | 0.452437  | 0.206743   | 0.144326   | 0.526106  | 1.0173   |



|              |            |           |           |            |           |            |           |            |            |            |            |            |            |            |           |
|--------------|------------|-----------|-----------|------------|-----------|------------|-----------|------------|------------|------------|------------|------------|------------|------------|-----------|
| C10orf142    | 0.0833984  | 0.0703196 | 0.068993  | 0          | 0         | 0.0710126  | 0.190443  | 0.0185294  | 0          | 0.0261684  | 0.0470732  | 0          | 0          | 0.0217938  | 0.748566  |
| C10orf143    | 0.458535   | 0.471038  | 0.443748  | 0.356629   | 0.322534  | 0.493571   | 0.414881  | 0.315242   | 0.453077   | 0.228032   | 0.615295   | 0.278571   | 0.156295   | 0.13113    | 0.111823  |
| C10orf25     | 0.314286   | 0.136735  | 0.199993  | 0.101309   | 0.0888887 | 0.531325   | 0.119445  | 0.188917   | 0.0417565  | 0.0946714  | 0.243319   | 0.019626   | 0.0857874  | 0.193531   | 0.295439  |
| C10orf53     | 0.00446691 | 0         | 0         | 0          | 0         | 0          | 0         | 0.00396982 | 0          | 0          | 0          | 0          | 0          | 0          | 0         |
| C10orf55     | 0.300179   | 0.680914  | 0.305619  | 0.479344   | 1.70977   | 0.660635   | 0.260532  | 0.39867    | 0.184036   | 0.421145   | 0.705353   | 0.404149   | 0.68605    | 0.607734   | 0.449341  |
| C10orf62     | 0.0186337  | 0.080802  | 0.0462453 | 0          | 0.144723  | 0.0158663  | 0.170203  | 0          | 0          | 0          | 0          | 0          | 0          | 0.0194776  | 0         |
| C10orf67     | 3.30E-14   | 0.0551259 | 0.0848122 | 0.056102   | 0.018792  | 0.0257528  | 0.0690643 | 0          | 0.0442012  | 0.00759198 | 0.00682844 | 0.060594   | 0.0443249  | 0.037937   | 0.0347479 |
| C10orf71     | 0.0306472  | 0.0274232 | 0.0398413 | 0.00451184 | 0.0136016 | 0.00372796 | 0.0449898 | 0.0116729  | 0          | 0          | 0.00494242 | 0.0031327  | 0.0141239  | 0.0457645  | 0.081739  |
| C10orf71-AS1 | 0          | 0.0481324 | 0         | 0          | 0         | 0          | 0         | 0          | 0          | 0          | 0          | 0          | 0          | 0          | 0         |
| C10orf82     | 0.0646815  | 0.0124658 | 0.0321055 | 0.0666562  | 0.0401891 | 0.0660906  | 0.147703  | 0          | 0          | 0          | 0.0146035  | 0.00925627 | 0.00834644 | 0          | 0.111469  |
| C10orf88     | 0.952111   | 0.971666  | 0.719432  | 1.09707    | 0.605557  | 1.14265    | 0.582064  | 0.872808   | 0.84913    | 1.03504    | 1.47258    | 0.552519   | 1.20441    | 1.06184    | 0.62446   |
| C10orf90     | 0.140419   | 0.112631  | 0.137676  | 0.0267973  | 0.185805  | 0.230125   | 0.217853  | 0.290803   | 0.00633385 | 0.0195822  | 0.0117419  | 0.0111637  | 0          | 0.00815432 | 0.0373442 |
| C10orf91     | 0.0622125  | 0.0599499 | 0.1544    | 0.224391   | 0         | 0.238379   | 0.0710322 | 0.0552893  | 0          | 0.117125   | 0.351151   | 0.178059   | 0.160557   | 0.113802   | 0         |
| C10orf95     | 0.495313   | 0.800089  | 1.03606   | 0.362384   | 1.55048   | 0.379815   | 1.12219   | 0.425537   | 0.449856   | 0.851605   | 0.367865   | 0.605784   | 0.581682   | 0.510163   | 0.339377  |
| C10orf99     | 31.0531    | 24.0251   | 7.9542    | 137.366    | 67.3829   | 97.1734    | 14.9991   | 18.0339    | 213.06     | 154.741    | 232.796    | 222.713    | 111.952    | 72.8071    | 24.8068   |
| C11orf1      | 2.77811    | 3.27828   | 3.05113   | 3.90261    | 0.767988  | 3.18353    | 2.1236    | 3.1385     | 2.95333    | 2.06845    | 4.03977    | 2.25734    | 1.33672    | 1.82845    | 1.45388   |
| C11orf16     | 0.0240447  | 0.0579256 | 0.0497287 | 0.0123894  | 0.112049  | 0.0102369  | 0.0137267 | 0.021369   | 0.0146419  | 0.0150893  | 0          | 0.00860232 | 0          | 0.0314171  | 0.0863282 |
| C11orf21     | 0.166008   | 0.196327  | 0.237213  | 0.139971   | 0.281311  | 0.167055   | 0.163696  | 0.140828   | 0.00918997 | 0.0378832  | 0.10222    | 0.0755894  | 0.0778965  | 0.0946507  | 0.357613  |
| C11orf24     | 3.56724    | 3.59134   | 3.61598   | 7.40903    | 4.344     | 11.9154    | 4.65123   | 2.95501    | 3.40588    | 6.89553    | 15.8842    | 3.94687    | 12.4455    | 9.02282    | 13.4084   |
| C11orf40     | 0          | 0         | 0         | 0          | 0         | 0          | 0         | 0          | 0          | 0          | 0          | 0          | 0          | 0          | 0         |
| C11orf42     | 0.384705   | 0.39998   | 0.184253  | 0.166926   | 0.251613  | 0.206887   | 0.231181  | 0.16195    | 0.0246593  | 0.101651   | 0.0685712  | 0.0144877  | 0.0130637  | 0.148152   | 0.174469  |
| C11orf44     | 0.0587221  | 0         | 0.0323861 | 0.0336194  | 0.0101351 | 0.0222227  | 0.0372484 | 0.0057986  | 0          | 0.0409457  | 0.0147311  | 0.0980403  | 0.0210485  | 0.0647916  | 0.0468513 |
| C11orf45     | 0.610445   | 1.21397   | 0.742653  | 0.962125   | 1.3015    | 0.922364   | 1.10015   | 0.462731   | 0.444614   | 0.623453   | 0.641824   | 0.488177   | 0.393856   | 0.353452   | 0.326605  |
| C11orf49     | 3.27737    | 5.16952   | 4.93785   | 3.00007    | 4.66429   | 5.28506    | 6.18789   | 3.89711    | 4.74964    | 2.17162    | 4.47484    | 2.51536    | 2.08501    | 2.69854    | 2.6952    |
| C11orf52     | 0.870365   | 1.01398   | 1.30884   | 0.983272   | 0.788354  | 0.932103   | 0.764904  | 0.73919    | 0.791174   | 0.483097   | 1.05419    | 0.519771   | 0.275059   | 0.169762   | 0.0291547 |
| C11orf53     | 0.0191582  | 0         | 0.015849  | 0          | 0         | 0          | 0.0656225 | 0          | 0          | 0.0961818  | 0.0865087  | 0          | 0.049443   | 0          | 0.0550271 |

|          |           |           |           |            |           |           |           |           |           |            |            |           |           |            |            |
|----------|-----------|-----------|-----------|------------|-----------|-----------|-----------|-----------|-----------|------------|------------|-----------|-----------|------------|------------|
| C11orf54 | 1.68117   | 1.96155   | 2.26578   | 1.26591    | 1.16449   | 1.9055    | 1.88985   | 1.67219   | 1.939     | 1.39738    | 1.88946    | 1.11529   | 1.04398   | 1.08426    | 1.25249    |
| C11orf58 | 10.1177   | 9.11053   | 9.13007   | 12.8476    | 9.1601    | 14.2753   | 6.69133   | 10.2563   | 12.1453   | 12.7711    | 20.5329    | 8.25041   | 16.8451   | 10.0348    | 8.77587    |
| C11orf65 | 0.293167  | 0.310827  | 0.394339  | 0.147746   | 0.131386  | 0.199442  | 0.194287  | 0.306462  | 0.0475439 | 0.0734951  | 0.0882704  | 0.0890203 | 0.0335829 | 0.164371   | 0.21491    |
| C11orf68 | 5.00591   | 5.58965   | 5.4807    | 7.53148    | 11.7908   | 10.6246   | 5.88521   | 3.48515   | 5.11973   | 7.71847    | 15.4104    | 4.8892    | 13.197    | 6.71545    | 7.33845    |
| C11orf71 | 2.09168   | 1.96571   | 1.84174   | 1.22716    | 1.4637    | 2.27479   | 2.09264   | 2.13498   | 5.3723    | 1.22166    | 2.81712    | 1.25215   | 0.561194  | 0.676486   | 0.713801   |
| C11orf72 | 9.47768   | 10.6004   | 10.8508   | 5.15917    | 7.65842   | 4.73132   | 10.3317   | 7.38584   | 3.28943   | 6.35135    | 2.1019     | 7.13516   | 5.02225   | 7.40906    | 8.11595    |
| C11orf74 | 1.0354    | 0.812974  | 0.697933  | 1.69931    | 1.21485   | 1.87754   | 0.525415  | 0.817933  | 0.583795  | 1.78084    | 3.6784     | 0.782013  | 1.27421   | 0.972055   | 1.26667    |
| C11orf80 | 3.49235   | 5.79586   | 5.65478   | 5.08572    | 7.31038   | 2.73647   | 3.65801   | 3.54584   | 4.98035   | 4.42072    | 3.77396    | 4.96927   | 5.28968   | 3.81691    | 1.45748    |
| C11orf86 | 0         | 0         | 0         | 0          | 0         | 0         | 0         | 0         | 0         | 0          | 0.0440196  | 0         | 0         | 0          | 0          |
| C11orf87 | 0.0896564 | 0.0488323 | 0.0677205 | 0.00803422 | 0.0181653 | 0.0298727 | 0.0534088 | 0.0381074 | 0.0142424 | 0.0195701  | 0.00880095 | 0.0195244 | 0.0402406 | 0.0733435  | 0.0111963  |
| C11orf88 | 0         | 0         | 0         | 0          | 0         | 0         | 0         | 0.0258712 | 0         | 0          | 0          | 0         | 0         | 0          | 0          |
| C11orf91 | 0.691985  | 0.271666  | 0.212022  | 1.00364    | 0.47773   | 0.174583  | 0.643774  | 0.204993  | 0.37456   | 3.60272    | 0.462912   | 0.75187   | 1.48822   | 1.35288    | 1.36184    |
| C11orf94 | 0.125777  | 0.212105  | 0.156078  | 0          | 0.0976879 | 0.107098  | 0.287217  | 0.111781  | 0         | 0.0789318  | 0          | 0.449986  | 0.121726  | 0.164342   | 0.361265   |
| C11orf95 | 1.63353   | 1.37835   | 1.4577    | 2.63191    | 4.99115   | 3.94685   | 1.33493   | 1.11276   | 0.717012  | 2.07627    | 2.10615    | 1.40319   | 2.91039   | 2.81912    | 3.11405    |
| C11orf96 | 10.7699   | 1.81366   | 2.19136   | 7.61463    | 12.3169   | 74.0607   | 8.77483   | 2.09083   | 0.700396  | 5.05259    | 13.1022    | 0.822986  | 7.56708   | 7.44133    | 11.863     |
| C11orf97 | 0.0383163 | 0         | 0         | 0          | 0         | 0         | 0         | 0         | 0         | 0          | 0          | 0         | 0         | 0          | 0          |
| C11orf98 | 3.52969   | 3.90936   | 4.23839   | 10.914     | 5.68341   | 13.1456   | 5.28399   | 3.59808   | 11.6276   | 10.1467    | 16.1674    | 6.64878   | 13.0149   | 8.21618    | 4.94768    |
| C12orf10 | 6.68577   | 4.84573   | 5.29458   | 6.7721     | 7.45612   | 13.2995   | 6.78542   | 3.87653   | 5.26596   | 5.49859    | 11.4824    | 4.59304   | 7.31227   | 5.9333     | 4.18532    |
| C12orf29 | 2.81587   | 3.13242   | 3.16841   | 4.80498    | 1.35091   | 2.28753   | 2.61429   | 3.88276   | 10.0041   | 7.24963    | 9.01394    | 4.60004   | 8.8281    | 4.3661     | 2.05534    |
| C12orf4  | 1.7143    | 1.67216   | 1.5124    | 3.2553     | 0.605204  | 2.32226   | 1.08817   | 1.66203   | 2.16813   | 3.0544     | 4.11407    | 1.86996   | 3.83252   | 2.54066    | 1.97989    |
| C12orf40 | 0.0259568 | 0.0225115 | 0.012884  | 0.00534984 | 0.0241919 | 0.0176815 | 0.0237093 | 0.0276819 | 0         | 0.00651568 | 0          | 0.0148582 | 0         | 0.0379852  | 0.00745544 |
| C12orf42 | 0         | 0.0133023 | 0         | 0          | 0.0107215 | 0         | 0         | 0         | 0         | 0          | 0          | 0.0049387 | 0.017813  | 0.00360739 | 0          |
| C12orf43 | 1.9637    | 1.35984   | 1.30224   | 2.7856     | 2.11175   | 2.90411   | 1.58853   | 1.25765   | 1.37491   | 1.44686    | 1.61546    | 1.1946    | 2.53908   | 1.62466    | 1.3016     |
| C12orf45 | 4.01841   | 2.9759    | 2.7087    | 5.90488    | 2.19625   | 4.56216   | 2.76135   | 2.31468   | 2.31104   | 2.33496    | 5.75436    | 1.83698   | 2.97675   | 3.16974    | 2.7786     |
| C12orf49 | 2.92994   | 2.46417   | 2.59699   | 4.63246    | 4.00939   | 5.26062   | 3.03666   | 2.5729    | 8.32621   | 5.01806    | 6.42307    | 3.51904   | 7.72752   | 4.46172    | 3.38751    |
| C12orf50 | 0         | 0         | 0         | 0          | 0         | 0         | 0         | 0.0119718 | 0         | 0          | 0          | 0         | 0         | 0          | 0          |

|                |            |            |            |           |           |           |           |            |           |           |           |            |            |           |          |
|----------------|------------|------------|------------|-----------|-----------|-----------|-----------|------------|-----------|-----------|-----------|------------|------------|-----------|----------|
| C12orf54       | 0          | 0.137972   | 0.193825   | 0.10731   | 0         | 0.0664994 | 0         | 0          | 0.380459  | 0.490105  | 0.587753  | 0.149017   | 0.65505    | 0.517021  | 0.112159 |
| C12orf56       | 0.469796   | 0.754515   | 0.351634   | 1.30256   | 1.87651   | 0.333354  | 0.817369  | 0.666037   | 4.71349   | 4.96985   | 4.89935   | 4.70614    | 4.09199    | 5.36087   | 1.04416  |
| C12orf57       | 22.0795    | 16.1111    | 18.2833    | 17.5803   | 18.8336   | 39.0858   | 22.708    | 13.6865    | 12.668    | 19.7027   | 53.9565   | 7.88402    | 9.11277    | 10.906    | 16.4044  |
| C12orf60       | 0.12332    | 0.108932   | 0.187035   | 0.317712  | 0.0319264 | 0.122506  | 0         | 0.109597   | 0.225285  | 0.103186  | 0.278426  | 0.117652   | 0.0795654  | 0.193357  | 0.236137 |
| C12orf65       | 1.12698    | 1.45949    | 1.29341    | 2.05023   | 1.24771   | 2.26831   | 1.00553   | 0.996321   | 0.743506  | 1.21203   | 1.58069   | 0.802613   | 1.3034     | 1.24843   | 0.797035 |
| C12orf66       | 1.92027    | 1.50241    | 1.54972    | 1.48871   | 0.766234  | 1.76009   | 1.53542   | 1.63873    | 1.3231    | 0.648599  | 1.19325   | 1.00844    | 1.08361    | 0.801052  | 0.657812 |
| C12orf71       | 0.551025   | 0.507898   | 0.535124   | 0.419713  | 0.409359  | 0.142797  | 0.465018  | 0.361956   | 0.0291777 | 0.270623  | 0.0270452 | 0.325704   | 0.046372   | 0.338075  | 0.309655 |
| C12orf73       | 0.8612     | 0.889156   | 0.633285   | 0.859318  | 0.42468   | 0.907896  | 0.686743  | 0.680323   | 0.466153  | 0.772068  | 1.65118   | 0.449932   | 0.670298   | 0.72159   | 1.23679  |
| C12orf74       | 0          | 0          | 0          | 0.0906063 | 0.0303496 | 0         | 0         | 0.0694559  | 0         | 0         | 0.0220562 | 0.00699007 | 0.00630299 | 0         | 0        |
| C12orf75       | 5.52316    | 4.8325     | 3.25166    | 31.0254   | 2.44749   | 18.2201   | 3.50128   | 3.85455    | 5.28223   | 14.6723   | 28.4207   | 6.8129     | 13.8605    | 11.3518   | 5.57183  |
| C12orf76       | 0.505465   | 0.634944   | 0.567497   | 0.632516  | 0.406601  | 0.622538  | 0.587429  | 0.489323   | 0.241842  | 0.532451  | 0.906857  | 0.284172   | 0.366888   | 0.386832  | 0.440731 |
| C12orf77       | 0          | 0.00738945 | 0          | 0         | 0         | 0         | 0         | 0          | 0.0373567 | 0         | 0         | 0          | 0          | 0         | 0        |
| C12orf80       | 0.0537377  | 0.0604139  | 0.0740927  | 0.0553783 | 0.0278244 | 0         | 0.040904  | 0          | 0.152709  | 0.0224821 | 0.0808843 | 0.192254   | 0.0231142  | 0.121705  | 0        |
| C13orf42       | 0.0856833  | 0.165134   | 0.184296   | 0.0441495 | 0.332739  | 0.0291833 | 0.215227  | 0.137067   | 0.0626116 | 0.0322624 | 0.0386903 | 0.0367852  | 0          | 0.0537382 | 0.196883 |
| C14orf119      | 2.67186    | 2.55576    | 2.57715    | 8.83874   | 1.84314   | 6.14929   | 2.37771   | 2.25035    | 6.24965   | 6.24325   | 10.5301   | 3.18245    | 5.37335    | 3.84912   | 3.3515   |
| C14orf132      | 2.1473     | 2.81998    | 2.96795    | 1.23239   | 3.56424   | 2.63347   | 4.51668   | 1.25914    | 1.21252   | 1.58968   | 2.04164   | 1.19712    | 1.14597    | 1.90276   | 3.30374  |
| C14orf144      | 0.00597394 | 0.00287834 | 0.0444786  | 0.0123126 | 0.046398  | 0.0305204 | 0         | 0.00530914 | 0         | 0.0149958 | 0.0539507 | 0.00854903 | 0.0115631  | 0.0156112 | 0.154428 |
| C14orf177      | 0.0162865  | 0.00784706 | 0          | 0         | 0.0252985 | 0.0416031 | 0         | 0          | 0         | 0         | 0         | 0          | 0          | 0         | 0        |
| C14orf178      | 0.286601   | 0.3107     | 0.148185   | 0.110757  | 0.166947  | 0.335551  | 0.081808  | 0.127354   | 0.043631  | 0.134893  | 0.0808843 | 0.128169   | 0          | 0.112343  | 0.308697 |
| C14orf180      | 0.107506   | 0          | 0.00808512 | 0         | 0.0151812 | 0.0166436 | 0.0669527 | 0.00868565 | 0         | 0         | 0         | 0          | 0          | 0.0102159 | 0        |
| C14orf28       | 0.684894   | 0.713705   | 0.724712   | 0.541663  | 0.334008  | 0.840862  | 0.636503  | 1.04041    | 0.611044  | 0.579739  | 0.952965  | 0.302014   | 0.585761   | 0.374605  | 0.514672 |
| C14orf39       | 0.0167521  | 0          | 0          | 0         | 0         | 0         | 0         | 0          | 0         | 0         | 0.0283666 | 0          | 0          | 0         | 0        |
| C14orf93       | 1.80311    | 1.5405     | 1.56086    | 1.49419   | 2.05011   | 2.35839   | 1.01876   | 1.32161    | 0.577296  | 0.921569  | 1.81515   | 0.605186   | 0.905502   | 0.976389  | 1.04114  |
| C15orf32       | 0          | 0          | 0          | 0         | 0         | 0         | 0         | 0          | 0         | 0         | 0         | 0          | 0          | 0.0205707 | 0        |
| C15orf38-AP3S2 | 3.01898    | 1.26115    | 1.25307    | 2.41798   | 2.34548   | 4.43147   | 2.54295   | 1.98199    | 2.33855   | 1.91132   | 3.33072   | 1.96997    | 2.50161    | 1.53194   | 1.46936  |
| C15orf39       | 3.95215    | 4.01495    | 4.82207    | 7.01427   | 6.44762   | 11.2574   | 6.50005   | 4.19994    | 3.48262   | 4.30422   | 5.32899   | 3.54231    | 9.34965    | 6.35516   | 6.83196  |





|           |           |           |           |           |          |           |           |            |           |           |           |           |           |           |           |
|-----------|-----------|-----------|-----------|-----------|----------|-----------|-----------|------------|-----------|-----------|-----------|-----------|-----------|-----------|-----------|
| C16orf95  | 0.338873  | 0.201692  | 0.148415  | 0.924402  | 0.402531 | 0.831692  | 0.364155  | 0.159439   | 0.267047  | 0.575434  | 0.58507   | 0.427893  | 0.334389  | 0.562585  | 0.200391  |
| C16orf96  | 0.121592  | 0.130189  | 0.212356  | 0.0278454 | 0.146903 | 0.224324  | 0.115692  | 0.0960543  | 0.016454  | 0.0254351 | 0         | 0         | 0         | 0         | 0         |
| C16orf97  | 0         | 0         | 0         | 0         | 0        | 0         | 0         | 0          | 0         | 0         | 0         | 0         | 0         | 0         | 0         |
| C17orf100 | 0.786775  | 1.4591    | 1.42456   | 0.795496  | 1.6372   | 0.846891  | 1.00001   | 1.17416    | 0.325427  | 0.968851  | 1.08927   | 0.870992  | 0.488467  | 0.892232  | 0.319785  |
| C17orf102 | 0         | 0         | 0         | 0         | 0        | 0.0049302 | 0         | 0          | 0         | 0         | 0         | 0         | 0         | 0         | 0         |
| C17orf107 | 0.431612  | 1.41208   | 1.38364   | 0.977249  | 1.70118  | 1.5712    | 0.87676   | 0.553304   | 1.70339   | 1.61387   | 0.720274  | 1.28951   | 0.714597  | 1.59026   | 1.12959   |
| C17orf112 | 0         | 0         | 0         | 0         | 0        | 0         | 0         | 0          | 0         | 0         | 0         | 0         | 0         | 0         | 0         |
| C17orf113 | 0.327979  | 0.325928  | 0.288286  | 0.253494  | 0.413941 | 0.506177  | 0.327667  | 0.0910878  | 0         | 0.012864  | 0.0694215 | 0.0146674 | 0.0198385 | 0.0696379 | 0.103036  |
| C17orf47  | 0.0652836 | 0.137664  | 0.108014  | 0.217329  | 0.202816 | 0.357475  | 0.0869619 | 0.135377   | 0.0132514 | 0.0136563 | 0.027142  | 0.085639  | 0         | 0.142167  | 0.312519  |
| C17orf49  | 12.4133   | 7.65034   | 7.75688   | 22.783    | 15.1421  | 29.7449   | 9.51354   | 6.95918    | 10.3656   | 12.7082   | 31.6116   | 9.30439   | 12.5916   | 10.2711   | 10.9802   |
| C17orf50  | 0.224472  | 0.638108  | 0.965635  | 0.0231325 | 0.523024 | 0.0191135 | 0.358813  | 0.319187   | 0.0546763 | 0.0563471 | 0         | 0.176677  | 0.0144828 | 0.0703913 | 0.096711  |
| C17orf51  | 0.544061  | 0.473537  | 0.619472  | 0.512441  | 0.786047 | 1.60398   | 0.597813  | 0.366536   | 0.231555  | 0.524988  | 0.838714  | 0.383011  | 0.898322  | 0.932545  | 1.60469   |
| C17orf53  | 0.279854  | 0.253332  | 0.252561  | 0.585534  | 0.342498 | 0.902621  | 0.396989  | 0.195954   | 0.0929537 | 0.329958  | 0.478667  | 0.315534  | 0.514323  | 0.638242  | 0.377547  |
| C17orf58  | 2.21677   | 1.28169   | 1.11255   | 1.88847   | 1.05598  | 2.41606   | 1.13053   | 1.28712    | 1.38588   | 1.00162   | 2.98627   | 0.729632  | 1.86885   | 1.45209   | 1.40077   |
| C17orf64  | 0         | 0.0232306 | 0.0199433 | 0         | 0        | 0.0410542 | 0         | 0.0214246  | 0         | 0         | 0.0272142 | 0         | 0         | 0         | 0         |
| C17orf67  | 0.419135  | 0.414807  | 0.459194  | 0.326867  | 0.439906 | 0.501572  | 0.388017  | 0.19128    | 0.441478  | 0.454969  | 0.613818  | 0.194531  | 0.299659  | 0.260502  | 0.536857  |
| C17orf75  | 1.03219   | 0.911948  | 0.856391  | 1.18099   | 0.832216 | 1.19965   | 0.668816  | 0.905566   | 0.651904  | 0.762187  | 1.12301   | 0.563665  | 0.925295  | 0.670335  | 0.775974  |
| C17orf77  | 0         | 0         | 0.0138686 | 0.0691042 | 0        | 0         | 0         | 0.00744934 | 0         | 0         | 0         | 0.0119953 | 0         | 0.0306661 | 0.0240756 |
| C17orf78  | 0.168839  | 0.34864   | 0.279352  | 0.111853  | 0.168599 | 0.0821511 | 0.247854  | 0.15005    | 0.088126  | 0.0454094 | 0.0272284 | 0.163955  | 0         | 0.277335  | 0.190516  |
| C17orf80  | 1.89759   | 1.78241   | 1.69665   | 2.10829   | 0.853916 | 2.73574   | 0.97908   | 1.27309    | 0.905262  | 1.84472   | 2.91681   | 1.33536   | 1.6385    | 1.77158   | 1.94957   |
| C17orf82  | 0.0907571 | 0.014576  | 0.0250269 | 0.15588   | 0.211466 | 0.437911  | 0.0690823 | 0.0403287  | 0         | 0.246804  | 0.426889  | 0.0649391 | 0.0195187 | 0.173923  | 0.195508  |
| C17orf97  | 0.251692  | 0.636662  | 0.572597  | 0.674377  | 0.684187 | 3.85762   | 0.54601   | 0.436181   | 0.873617  | 0.280259  | 0.681909  | 0.207106  | 0.633322  | 1.01833   | 0.83136   |
| C17orf98  | 0.0408888 | 0         | 0         | 0         | 0        | 0.0348163 | 0         | 0          | 0         | 0.0513196 | 0         | 0         | 0         | 0.0213703 | 0         |
| C17orf99  | 0.0636965 | 0.16368   | 0.122953  | 0.175043  | 0.164904 | 0.0723156 | 0         | 0.0188694  | 0.0775751 | 0.133243  | 0.31159   | 0.106345  | 0.0273978 | 0.0443874 | 0         |
| C18orf12  | 0.258582  | 0.581413  | 0.392181  | 0.222063  | 0.468611 | 0.110089  | 0.246033  | 0.229806   | 0.209949  | 0         | 0         | 0.215859  | 0         | 0.202719  | 0.123785  |
| C18orf15  | 0.57538   | 0.31243   | 0.31733   | 0.10353   | 0.666776 | 0.085543  | 0.646522  | 0.470766   | 0         | 0.0229257 | 0         | 0.0914888 | 0         | 0.224346  | 0.275439  |

|          |            |           |           |           |           |           |            |            |           |           |            |           |           |            |           |
|----------|------------|-----------|-----------|-----------|-----------|-----------|------------|------------|-----------|-----------|------------|-----------|-----------|------------|-----------|
| C18orf21 | 4.25076    | 2.7011    | 2.44628   | 4.42287   | 0.956943  | 4.58117   | 1.35989    | 2.71923    | 2.22584   | 4.02069   | 6.14311    | 2.4391    | 4.4517    | 4.07836    | 2.56572   |
| C18orf25 | 4.59049    | 4.18273   | 4.35107   | 5.82603   | 2.32864   | 3.47603   | 3.37974    | 4.87375    | 5.02855   | 4.55502   | 3.987      | 3.27551   | 5.74038   | 3.53685    | 2.77932   |
| C18orf32 | 3.18873    | 3.31957   | 2.18708   | 4.31979   | 1.37659   | 5.68288   | 1.93232    | 2.55589    | 4.73975   | 5.62102   | 8.14199    | 2.916     | 4.31528   | 1.90419    | 2.76959   |
| C18orf54 | 0.12602    | 0.152776  | 0.164787  | 0.402171  | 0.0694609 | 0.304607  | 0.139245   | 0.169801   | 0.0891167 | 0.331644  | 0.541511   | 0.136711  | 0.372442  | 0.369687   | 0.496239  |
| C18orf61 | 0.00853043 | 0.0698715 | 0.0493988 | 0         | 0.0132507 | 0         | 0.00973977 | 0.0530679  | 0.0207782 | 0.0214131 | 0.00962979 | 0.024415  | 0.0165114 | 0.0133751  | 0.0612539 |
| C18orf63 | 0          | 0         | 0         | 0         | 0         | 0         | 0          | 0          | 0         | 0         | 0          | 0         | 0         | 0.00477614 | 0         |
| C18orf65 | 0          | 0.0214849 | 0.0368893 | 0.0574412 | 0.103899  | 0.0664461 | 0.0127283  | 0.00990733 | 0.0543076 | 0.0699588 | 0.0880922  | 0.0398831 | 0.050348  | 0.0349583  | 0.0320196 |
| C19orf12 | 1.40708    | 1.43553   | 1.45966   | 1.94258   | 1.53344   | 3.28244   | 1.76976    | 1.14727    | 1.65926   | 1.88936   | 2.91966    | 1.08351   | 2.39496   | 1.44979    | 1.82829   |
| C19orf18 | 0.632324   | 0.706819  | 0.418482  | 0.10426   | 0.275021  | 0.366122  | 0.231029   | 0.269739   | 0.184824  | 0.158726  | 0.11421    | 0.0361956 | 0.130551  | 0.17185    | 0.47221   |
| C19orf24 | 4.68033    | 4.83404   | 5.30514   | 12.2579   | 14.3395   | 14.3116   | 5.87528    | 3.74583    | 9.10128   | 8.47066   | 17.8647    | 6.6978    | 13.497    | 8.46014    | 6.98149   |
| C19orf25 | 1.28174    | 2.03548   | 1.55234   | 2.97988   | 5.73403   | 5.22117   | 2.00199    | 1.3487     | 1.73585   | 2.94716   | 4.12083    | 1.87092   | 2.44122   | 2.701      | 2.06163   |
| C19orf33 | 45.3502    | 34.7553   | 35.5505   | 82.3052   | 57.2798   | 41.6819   | 49.8195    | 25.5835    | 72.6516   | 70.8321   | 50.6823    | 61.1455   | 36.4137   | 52.2096    | 8.13091   |
| C19orf38 | 0.189232   | 0.0638223 | 0.0626184 | 0.721533  | 0.529096  | 1.14401   | 0.237665   | 0.117721   | 0         | 0.641264  | 1.3458     | 0.0406201 | 0.647084  | 0.0692306  | 0.516346  |
| C19orf44 | 0.459506   | 0.762804  | 0.815781  | 0.593411  | 1.3969    | 1.03698   | 0.421445   | 0.446262   | 0.208118  | 0.388439  | 0.53428    | 0.572881  | 0.343812  | 0.689941   | 0.805859  |
| C19orf47 | 2.35248    | 2.89829   | 2.45828   | 3.37062   | 5.00052   | 5.54372   | 3.33393    | 2.3291     | 3.84521   | 2.6677    | 4.00679    | 2.93832   | 5.51873   | 3.28409    | 2.03004   |
| C19orf48 | 3.78162    | 4.61219   | 4.54343   | 10.0134   | 7.84289   | 10.3971   | 5.31772    | 3.27836    | 3.4887    | 3.9962    | 8.70081    | 3.90026   | 6.0565    | 5.67613    | 2.2493    |
| C19orf53 | 9.92936    | 9.44557   | 7.94046   | 22.0392   | 9.72881   | 19.2074   | 11.7149    | 7.35366    | 18.5734   | 16.936    | 31.8164    | 11.659    | 14.2419   | 11.9226    | 8.51933   |
| C19orf54 | 1.38626    | 1.34571   | 1.17506   | 1.41451   | 1.80329   | 2.4538    | 1.58279    | 1.31089    | 0.848313  | 0.839952  | 1.23343    | 1.9545    | 0.788666  | 1.06001    | 1.55933   |
| C19orf57 | 0.260389   | 0.627297  | 0.522211  | 0.447231  | 0.894746  | 1.04812   | 0.585598   | 0.19635    | 0.691908  | 0.495174  | 0.418651   | 0.626697  | 0.519278  | 0.470131   | 0.147314  |
| C19orf66 | 3.36747    | 3.92023   | 3.55096   | 8.42552   | 6.55082   | 12.9888   | 3.17108    | 2.60277    | 3.00082   | 2.6666    | 4.63316    | 2.33702   | 2.97664   | 2.94273    | 5.91268   |
| C19orf67 | 0.0959629  | 0.107885  | 0.172006  | 0.0824105 | 0.397503  | 0.0408556 | 0.273918   | 0.227424   | 0.0389573 | 0.120443  | 0.0541651  | 0.068664  | 0.0206383 | 0.0417953  | 0.0689074 |
| C19orf70 | 8.62602    | 5.80847   | 6.05694   | 13.0523   | 10.2618   | 17.5562   | 7.25457    | 4.48747    | 7.73821   | 9.50623   | 23.8932    | 5.31407   | 7.91381   | 7.85114    | 5.89191   |
| C19orf71 | 1.0692     | 1.13002   | 0.998651  | 0.675324  | 1.33939   | 0.822307  | 1.92962    | 0.858261   | 0.252032  | 0.43289   | 0.272547   | 0.567612  | 1.40194   | 0.576838   | 1.04018   |
| C19orf73 | 0.279956   | 0.614486  | 0.488932  | 0.54495   | 1.44956   | 0.264866  | 0.355161   | 0.193513   | 0.757678  | 0.273291  | 1.05345    | 0.600949  | 0.361253  | 0.487725   | 0         |
| C19orf81 | 0.181514   | 0.451857  | 0.125134  | 0.311759  | 0.563908  | 0.180316  | 0.172706   | 0.1882     | 0.18422   | 0.151879  | 0.136605   | 0.108232  | 0.0195187 | 0.12649    | 0         |
| C19orf84 | 0          | 0         | 0         | 0.0329642 | 0         | 0         | 0          | 0          | 0         | 0         | 0          | 0         | 0         | 0.0167181  | 0.0229691 |

|               |           |           |           |           |           |            |           |            |           |           |           |            |            |            |           |
|---------------|-----------|-----------|-----------|-----------|-----------|------------|-----------|------------|-----------|-----------|-----------|------------|------------|------------|-----------|
| C1D           | 3.10015   | 2.21451   | 2.20681   | 4.03064   | 0.699945  | 2.79322    | 1.25535   | 2.69109    | 3.92931   | 4.072     | 6.57209   | 2.02479    | 4.01204    | 2.24201    | 1.88961   |
| C1GALT1       | 1.42858   | 1.33014   | 1.68525   | 2.34404   | 0.247846  | 1.93363    | 0.965956  | 1.97531    | 0.894782  | 2.56146   | 2.36668   | 1.23459    | 3.03807    | 1.87727    | 1.01782   |
| C1GALT1C1     | 1.77462   | 1.32942   | 1.47815   | 2.29226   | 0.849639  | 2.4943     | 1.36006   | 1.44751    | 1.49514   | 3.1732    | 5.2553    | 0.895811   | 2.92519    | 1.96299    | 1.50122   |
| C1GALT1C1L    | 0.316486  | 0.152488  | 0.163637  | 0.183458  | 0         | 0.202113   | 0.158092  | 0.246108   | 0.0481806 | 0.0496528 | 0.334944  | 0.0849204  | 0.0510488  | 0.0413524  | 0.227257  |
| C1QA          | 12.9573   | 2.53728   | 3.35335   | 44.5742   | 27.7959   | 54.3815    | 13.6076   | 8.83665    | 0.675105  | 14.3059   | 45.9943   | 0.942006   | 5.34235    | 5.13339    | 19.0312   |
| C1QB          | 10.0138   | 1.45981   | 1.4869    | 56.3076   | 19.9156   | 62.6161    | 9.00995   | 9.21892    | 0.771352  | 16.2852   | 56.2899   | 1.01659    | 6.46087    | 5.28734    | 21.6823   |
| C1QBP         | 18.1607   | 12.4945   | 13.2735   | 51.9892   | 18.5195   | 44.3967    | 16.7708   | 12.6681    | 20.4962   | 26.5724   | 50.5406   | 22.6866    | 46.534     | 33.024     | 13.4237   |
| C1QC          | 14.6339   | 2.4467    | 2.95202   | 46.4077   | 28.7273   | 67.8993    | 16.5909   | 12.1363    | 0.626812  | 16.7521   | 55.1753   | 1.46077    | 10.1943    | 8.90363    | 22.4204   |
| C1QL1         | 0.12343   | 0.0371689 | 0.0382911 | 0.0635989 | 0.311559  | 0.486081   | 0.052848  | 0.054847   | 0         | 0.096823  | 0.191588  | 0.0220793  | 0.00995452 | 0.0887008  | 0.288048  |
| C1QL2         | 0.0225896 | 0.02721   | 0.0467193 | 0.0116396 | 0         | 0.00961738 | 0.193441  | 0.0702652  | 0         | 0         | 0         | 0          | 0          | 0          | 0         |
| C1QL3         | 0.278496  | 0.246004  | 0.230392  | 0.296565  | 0.1442    | 0.245041   | 0.43457   | 0.363007   | 0.0904473 | 0.139817  | 0.220071  | 0.0929934  | 0.2276     | 0.203776   | 0.373292  |
| C1QL4         | 0.0224146 | 0.0323991 | 0.0185429 | 0.0577472 | 0.0348176 | 0.0286286  | 0.0511845 | 0.00996011 | 0.0136492 | 0         | 0         | 0.0160382  | 0.00723089 | 0          | 0         |
| C1QTNF1       | 5.79978   | 2.33169   | 2.1462    | 7.80852   | 8.94125   | 27.7462    | 6.13781   | 2.07837    | 0.600018  | 3.3031    | 6.91337   | 1.28513    | 5.617      | 5.89618    | 12.1535   |
| C1QTNF1-AS1   | 0.119788  | 0.103888  | 0.0594583 | 0.0987561 | 0.148858  | 0.183596   | 0.27354   | 0.106458   | 0.0583554 | 0         | 0.0540903 | 0.0514269  | 0.0154573  | 0.0876491  | 0.378468  |
| C1QTNF12      | 0.332834  | 0.459711  | 0.605756  | 0.43446   | 0.241269  | 0.869105   | 0.430688  | 0.335234   | 0.243213  | 0.0835482 | 0.576116  | 0.349289   | 0.157478   | 0.568248   | 0.286795  |
| C1QTNF2       | 0.839986  | 0.26516   | 0.287543  | 0.447739  | 0.73488   | 0.953649   | 1.68664   | 0.205934   | 0.246933  | 0.690727  | 1.35151   | 0.255611   | 0.566872   | 0.433967   | 1.30339   |
| C1QTNF3       | 0.994892  | 1.19966   | 1.54779   | 0.64311   | 0.438672  | 0.361665   | 1.24051   | 0.908159   | 0.125336  | 0.349947  | 0.686025  | 0.149338   | 0.0599995  | 0.251227   | 3.01077   |
| C1QTNF3-AMACR | 1.03254   | 0.885179  | 0.596593  | 0.207964  | 0.577862  | 0.425849   | 1.0454    | 0.43481    | 0.435459  | 0.393084  | 0.453845  | 0.0619576  | 0.250911   | 0.140363   | 0.907329  |
| C1QTNF4       | 0.556481  | 0.410067  | 0.46036   | 0.134934  | 0.610169  | 0.473836   | 0.392435  | 0.145457   | 0.0797331 | 0.0821695 | 0.388004  | 0.0468443  | 0.0211199  | 0.119758   | 0.0940208 |
| C1QTNF5       | 1.29821   | 0.607786  | 0.721621  | 2.67499   | 9.55709   | 9.38428    | 1.90797   | 0.796504   | 1.0987    | 5.8072    | 18.8485   | 0.763634   | 3.19179    | 2.96984    | 7.73305   |
| C1QTNF6       | 0.969549  | 1.36725   | 1.29767   | 3.28989   | 8.22814   | 7.84615    | 1.062     | 1.49914    | 0.873601  | 9.24035   | 26.5792   | 1.79921    | 5.30447    | 5.78412    | 21.3842   |
| C1QTNF7       | 0.841739  | 0.562258  | 0.830869  | 0.162644  | 0.0148581 | 0.12217    | 0.775409  | 0.667311   | 0.0232987 | 0.390173  | 0.431918  | 0.0855521  | 0.0740572  | 0.12248    | 0.226658  |
| C1QTNF8       | 0         | 0         | 0         | 0         | 0         | 0          | 0         | 0          | 0         | 0         | 0         | 0          | 0          | 0.00710251 | 0         |
| C1QTNF9       | 0.131619  | 0.179096  | 0.259155  | 0         | 3.83E-24  | 0.0960398  | 0.140608  | 0.313885   | 0         | 4.62E-14  | 0         | 0.00971731 | 3.72E-23   | 0          | 0.177645  |
| C1QTNF9B      | 0.271558  | 0.367441  | 0.247075  | 0.0222688 | 0.241363  | 0.0645326  | 0.459424  | 0.170484   | 0.0559107 | 0.0338744 | 7.14E-25  | 0.0911301  | 0.0663813  | 0.0336064  | 0.117623  |
| C1R           | 45.8923   | 27.7851   | 39.2749   | 84.6976   | 50.751    | 241.422    | 49.6736   | 29.5314    | 5.69782   | 34.4983   | 73.5848   | 9.67906    | 66.6854    | 32.2047    | 94.0989   |

|          |           |            |            |           |          |           |            |            |           |           |           |           |           |            |           |
|----------|-----------|------------|------------|-----------|----------|-----------|------------|------------|-----------|-----------|-----------|-----------|-----------|------------|-----------|
| C1RL     | 4.45338   | 4.21823    | 4.26451    | 7.76116   | 5.19391  | 19.4228   | 4.29049    | 3.50793    | 1.49621   | 3.88685   | 6.14516   | 2.13278   | 5.00141   | 2.70289    | 8.08082   |
| C1RL-AS1 | 1.00937   | 1.24456    | 1.51982    | 2.3582    | 1.99356  | 1.87909   | 1.3904     | 1.23975    | 0.114194  | 0.905082  | 0.420343  | 1.1215    | 0.284951  | 2.34662    | 2.86341   |
| C1S      | 53.5364   | 22.558     | 31.5804    | 59.5849   | 45.4165  | 262.432   | 44.2242    | 31.6193    | 5.26799   | 46.2993   | 87.6483   | 9.57222   | 68.1601   | 40.4887    | 136.156   |
| C1orf100 | 0.0403189 | 0.0194263  | 0          | 0         | 0        | 0         | 0          | 0          | 0         | 0         | 0         | 0.0288493 | 0         | 0.0210724  | 0         |
| C1orf105 | 0.0180523 | 0.0521872  | 0.164276   | 0.0186034 | 0        | 0         | 0.0206115  | 0.14439    | 0         | 0.0226575 | 0.0203788 | 0         | 0.0116473 | 0.00943492 | 0.0777762 |
| C1orf109 | 1.57877   | 1.54268    | 1.42814    | 1.7182    | 2.17735  | 2.83937   | 1.00238    | 1.34407    | 1.41961   | 1.40744   | 2.40686   | 1.30913   | 1.65644   | 1.71197    | 1.08068   |
| C1orf112 | 0.460215  | 0.712334   | 0.899456   | 1.22716   | 0.268077 | 0.871903  | 0.715936   | 0.531701   | 0.301263  | 0.700361  | 1.46766   | 0.391039  | 1.06152   | 0.938062   | 0.776588  |
| C1orf115 | 5.69232   | 2.26615    | 2.8538     | 1.79755   | 3.95537  | 4.36953   | 2.4628     | 2.79587    | 0.597475  | 1.06531   | 1.94272   | 0.351025  | 1.9343    | 3.19076    | 3.29903   |
| C1orf116 | 7.88262   | 10.5644    | 9.97984    | 14.3867   | 13.7474  | 11.2926   | 12.2369    | 8.22412    | 45.1899   | 21.0327   | 11.4577   | 20.132    | 29.2327   | 11.6737    | 3.84799   |
| C1orf122 | 4.77913   | 3.36125    | 2.63438    | 14.1595   | 18.5729  | 12.9136   | 3.80631    | 1.94923    | 13.2654   | 12.908    | 24.5822   | 8.76817   | 12.8982   | 8.67128    | 5.48364   |
| C1orf123 | 4.95077   | 3.31816    | 3.61883    | 7.64523   | 4.66007  | 8.39334   | 3.52657    | 2.6005     | 4.03167   | 5.9726    | 11.4278   | 3.04543   | 5.44447   | 4.39488    | 5.58184   |
| C1orf127 | 0.0167643 | 0.00807727 | 0.0277371  | 0.0431901 | 0.169264 | 0.0356864 | 0.0287113  | 0.022348   | 0         | 0         | 0.0473119 | 0         | 0.0378567 | 0.00876173 | 0.10834   |
| C1orf131 | 2.03543   | 1.8533     | 1.68385    | 3.76573   | 1.41905  | 3.47994   | 1.29924    | 1.41011    | 2.26422   | 2.63514   | 3.65469   | 1.99539   | 3.43306   | 2.60507    | 2.16359   |
| C1orf137 | 0         | 0.0288878  | 0          | 0         | 0        | 0         | 0          | 0          | 0         | 0         | 0         | 0         | 0         | 0          | 0         |
| C1orf140 | 0.0360644 | 0.00992936 | 0.00852429 | 0.0106187 | 0        | 0.0701906 | 0.0235298  | 0.00457872 | 0         | 0.0193991 | 0.0348962 | 0         | 0         | 0.0242342  | 0.118384  |
| C1orf141 | 0         | 0          | 0          | 0         | 0        | 0         | 0          | 0          | 0         | 0         | 0         | 0         | 0         | 0          | 0         |
| C1orf143 | 0         | 0          | 0.050185   | 0         | 0        | 0         | 0          | 0          | 0         | 0         | 0         | 0         | 0         | 0          | 0         |
| C1orf146 | 0         | 0.0593911  | 0.203947   | 0.0317571 | 0        | 0         | 0          | 0          | 0         | 0         | 0         | 0         | 0         | 0          | 0         |
| C1orf158 | 0         | 0          | 0          | 0         | 0        | 0         | 0          | 0          | 0         | 0         | 0         | 0         | 0         | 0          | 0         |
| C1orf159 | 1.59194   | 2.28457    | 2.29407    | 2.51373   | 4.02833  | 3.57828   | 1.8958     | 1.33111    | 2.63719   | 2.45996   | 1.7971    | 3.38048   | 3.32984   | 2.12925    | 1.42582   |
| C1orf162 | 1.9548    | 0.508817   | 0.576226   | 3.12591   | 0.558433 | 4.20905   | 0.820939   | 1.23805    | 0.136823  | 1.74845   | 5.32659   | 0.273312  | 1.8846    | 0.822029   | 1.96837   |
| C1orf167 | 0.0107333 | 0.0259783  | 0.0221721  | 0.0569805 | 0.109373 | 0.0281705 | 0.00609407 | 0.00846455 | 0.0261759 | 0.0135159 | 0.0243372 | 0.0273866 | 0.0277769 | 0.00559806 | 0.0242744 |
| C1orf174 | 3.72289   | 3.2193     | 2.88448    | 4.60958   | 3.43092  | 4.95607   | 2.37911    | 2.48145    | 2.43621   | 3.46959   | 5.41017   | 2.18672   | 4.21245   | 4.11656    | 2.57352   |
| C1orf185 | 0         | 0          | 0.0208104  | 0         | 0        | 0.0428391 | 0          | 0          | 0         | 0         | 0         | 0         | 0         | 0          | 0         |
| C1orf189 | 0.065654  | 0.0316331  | 0          | 0         | 0        | 0.111807  | 0.0749617  | 0.0291739  | 0         | 0.0412013 | 0         | 0         | 0.0211798 | 0          | 0         |
| C1orf194 | 0         | 0.030508   | 0.104764   | 0.16313   | 0.049178 | 0.377406  | 0.144591   | 0.0562726  | 0         | 0         | 0         | 0.0226532 | 0         | 0.0330932  | 0         |

|           |           |            |           |            |           |           |            |            |            |           |            |            |           |            |           |
|-----------|-----------|------------|-----------|------------|-----------|-----------|------------|------------|------------|-----------|------------|------------|-----------|------------|-----------|
| C1orf195  | 0.28969   | 0.744412   | 0.718957  | 0.232193   | 0.799981  | 0.10963   | 0.294008   | 0.286059   | 0.0392012  | 0.282793  | 0.0363361  | 0.506688   | 0.0415348 | 0.79067    | 0.600935  |
| C1orf198  | 8.90539   | 8.9163     | 9.88327   | 8.83116    | 13.1808   | 17.9313   | 13.4293    | 7.65071    | 18.9562    | 10.3197   | 17.2548    | 8.5242     | 15.5648   | 8.30756    | 14.3417   |
| C1orf21   | 6.77812   | 10.8608    | 12.5093   | 3.99344    | 5.09524   | 5.53634   | 9.74109    | 7.67993    | 8.32608    | 3.42375   | 4.36694    | 4.13344    | 3.74598   | 2.96639    | 2.69876   |
| C1orf210  | 2.21648   | 2.16533    | 2.51649   | 3.56011    | 3.25299   | 2.34286   | 3.54297    | 1.65736    | 11.2445    | 3.08887   | 5.43566    | 4.13441    | 4.64522   | 2.60446    | 0.570769  |
| C1orf216  | 1.16926   | 1.17673    | 1.25347   | 2.00351    | 2.22466   | 3.59949   | 1.50091    | 0.768596   | 0.749931   | 1.31124   | 2.28062    | 0.450497   | 1.51773   | 1.82608    | 2.35486   |
| C1orf220  | 0.332283  | 0.523567   | 0.453193  | 0.175841   | 0.34875   | 0.114703  | 0.399897   | 0.510798   | 0.0109374  | 0.123988  | 0.010138   | 0.0899622  | 0         | 0.112648   | 0.309535  |
| C1orf226  | 0.466399  | 0.749063   | 1.03334   | 0.928128   | 0.391385  | 1.29182   | 0.648817   | 0.933809   | 0.287275   | 0.686307  | 0.453885   | 0.168779   | 0.145271  | 0.156903   | 0.269463  |
| C1orf229  | 0.261886  | 0.371411   | 0.377467  | 0.204958   | 0.803414  | 0.372532  | 0.423112   | 0.186087   | 0.0381375  | 0.119494  | 0.106966   | 0.270101   | 0.0498896 | 0.12884    | 0.336492  |
| C1orf232  | 0         | 0          | 0         | 0          | 0         | 0         | 0          | 0          | 0          | 0         | 0          | 0          | 0         | 0          | 0         |
| C1orf35   | 3.24663   | 4.55442    | 4.005     | 4.50047    | 8.59121   | 7.19249   | 2.44393    | 2.34913    | 3.72659    | 3.78638   | 3.1461     | 2.95007    | 4.14307   | 3.16841    | 2.22814   |
| C1orf43   | 15.7806   | 13.6326    | 13.0618   | 23.4006    | 12.3083   | 28.0431   | 16.2579    | 10.9873    | 30.1955    | 23.8007   | 37.4917    | 16.9671    | 27.2311   | 16.6876    | 13.3402   |
| C1orf50   | 2.2573    | 2.4169     | 2.18807   | 2.96064    | 2.93968   | 3.20344   | 2.52525    | 2.18848    | 3.0546     | 2.919     | 5.07068    | 2.18617    | 2.3832    | 1.91861    | 1.76824   |
| C1orf52   | 2.17094   | 1.86502    | 1.77901   | 2.03319    | 1.39979   | 2.06942   | 1.42643    | 1.83834    | 1.62961    | 1.78223   | 2.90541    | 1.28959    | 1.82353   | 1.57706    | 1.29416   |
| C1orf53   | 0.338844  | 0.212238   | 0.168189  | 0.803134   | 0.263171  | 0.490486  | 0.116064   | 0.240909   | 0.16507    | 0.680455  | 1.68306    | 0.339433   | 0.393517  | 0.619832   | 0.583948  |
| C1orf54   | 2.48963   | 1.19954    | 1.13133   | 2.67404    | 1.0349    | 1.88103   | 1.28116    | 1.1842     | 1.5374     | 6.86563   | 18.1692    | 1.05378    | 2.37551   | 2.25417    | 4.63295   |
| C1orf56   | 1.16344   | 1.42414    | 1.3917    | 0.891119   | 2.24682   | 1.32534   | 1.43609    | 0.97808    | 1.47438    | 1.42077   | 1.01166    | 1.43995    | 1.10568   | 0.862795   | 1.37732   |
| C1orf61   | 0.0129435 | 0.031182   | 0.0107078 | 0          | 0         | 0.0220425 | 0.0147785  | 0.0115031  | 0          | 0         | 0.0292233  | 0.00926145 | 0         | 0          | 0.0371771 |
| C1orf68   | 25.3605   | 63.2567    | 76.7509   | 48.9862    | 119.883   | 18.5124   | 161.192    | 36.0839    | 367.717    | 20.3136   | 73.2841    | 34.0673    | 2.3187    | 1.9582     | 1.42755   |
| C1orf74   | 2.29984   | 1.75885    | 1.88731   | 2.38444    | 0.769762  | 1.8894    | 1.32525    | 2.11203    | 2.81617    | 8.31091   | 2.18955    | 10.737     | 7.45698   | 3.71328    | 2.16372   |
| C1orf87   | 0.0114118 | 0.0164951  | 0         | 0          | 0         | 0.0194339 | 0          | 0.0202836  | 0          | 0         | 0          | 0          | 0         | 0          | 0         |
| C1orf94   | 0         | 0          | 0         | 0          | 0         | 0         | 0          | 0.00624586 | 0          | 0         | 0.00793368 | 0          | 0         | 0          | 0         |
| C2        | 0.244046  | 0.11838    | 0.161908  | 0.369217   | 0.553392  | 1.93974   | 0.23711    | 0.207067   | 0.00835997 | 0.276135  | 0.765209   | 0.0488275  | 0.514913  | 0.213798   | 1.42124   |
| C2-AS1    | 0.0372887 | 0.00555318 | 0         | 0.00526785 | 0         | 0.0198219 | 0.00495388 | 0.00771189 | 0          | 0         | 3.10E-33   | 0.00456337 | 1.54E-31  | 0.00510144 | 0.0671334 |
| C20orf141 | 0         | 0          | 0         | 0.127028   | 0         | 0.183678  | 0          | 0          | 0          | 0.116033  | 0          | 0          | 0.119295  | 0          | 0.0885122 |
| C20orf144 | 0.0812037 | 0.215188   | 0.201532  | 0.251048   | 0.252275  | 0.553151  | 0.370863   | 0.108251   | 0          | 0.0509595 | 0          | 0.116207   | 0         | 0.0424406  | 0.174928  |
| C20orf173 | 0.0289288 | 0.0185845  | 0.0319093 | 0.0198747  | 0.0149788 | 0.0164217 | 0.03303    | 0.0257095  | 0          | 0.0121029 | 0.0108857  | 0.0275991  | 0         | 0.0100796  | 0         |

|                 |           |           |           |            |            |           |           |           |           |           |           |           |           |            |           |
|-----------------|-----------|-----------|-----------|------------|------------|-----------|-----------|-----------|-----------|-----------|-----------|-----------|-----------|------------|-----------|
| C20orf187       | 0         | 0         | 0.0393942 | 0          | 0          | 0         | 0         | 0         | 0         | 0         | 0         | 0         | 0         | 0          | 0         |
| C20orf194       | 3.31285   | 3.0229    | 3.36412   | 3.12748    | 3.20519    | 3.89614   | 2.98699   | 2.35773   | 2.4151    | 3.11112   | 2.59781   | 2.57656   | 2.3622    | 3.81827    | 3.20866   |
| C20orf197       | 0.104029  | 0.0434399 | 0.0401615 | 0.0786172  | 0.0430916  | 0.0354318 | 0.10294   | 0.147924  | 0.0084464 | 0.0087045 | 0.0391454 | 0         | 0.0492207 | 0.101491   | 0.119519  |
| C20orf202       | 0.144283  | 0.215506  | 0.143234  | 0.0743441  | 0.179298   | 0.33171   | 0.214159  | 0.0512908 | 0.193293  | 0.325963  | 0.358331  | 0.0825909 | 0.0744727 | 0.0678679  | 0.435139  |
| C20orf203       | 0.213154  | 0.262215  | 0.243869  | 0.00934728 | 0.105671   | 0.077233  | 0.212303  | 0.298257  | 0.0110467 | 0         | 0.0102393 | 0.0519207 | 0         | 0.0284434  | 0.0586179 |
| C20orf204       | 0.424882  | 0.459563  | 0.373012  | 0.16978    | 0.983248   | 0.502064  | 0.514817  | 0.454661  | 0.0422415 | 0.0870645 | 0.254502  | 0.19854   | 0.0615397 | 0.203934   | 0.249055  |
| C20orf27        | 3.20677   | 2.91205   | 2.89566   | 6.30689    | 9.50656    | 11.2461   | 4.86528   | 2.27993   | 2.44919   | 3.16528   | 8.83531   | 2.77676   | 5.33729   | 4.22695    | 5.9479    |
| C20orf78        | 0         | 0         | 0.0185339 | 0          | 0          | 0         | 0         | 0         | 0         | 0         | 0         | 0         | 0         | 0          | 0         |
| C20orf85        | 0.0305721 | 0         | 0.0252914 | 0          | 0          | 0         | 0.0698124 | 0         | 0         | 0         | 0.0345121 | 0.0218751 | 0         | 0.0479349  | 0.219527  |
| C20orf96        | 0.805976  | 0.596366  | 0.476258  | 0.415291   | 0.760119   | 1.91178   | 0.788776  | 0.62675   | 0.210341  | 0.415472  | 0.779869  | 0.164771  | 0.241434  | 0.413717   | 0.744097  |
| C21orf58        | 0.49914   | 0.74201   | 0.699956  | 0.658655   | 1.12518    | 0.715263  | 0.806203  | 0.394907  | 0.126027  | 0.343796  | 0.419164  | 0.309238  | 0.345607  | 0.569465   | 0.489541  |
| C21orf59-TCP10L | 0.287574  | 0.188093  | 0.160999  | 0.039949   | 0.00515047 | 0.0980561 | 0.12406   | 0.140077  | 0.0430833 | 0.0201268 | 0.0368045 | 0.0509166 | 0.0104149 | 0.0418794  | 0.153625  |
| C21orf62        | 0.332551  | 0.513126  | 0.475699  | 0.104949   | 0.388632   | 0.196056  | 0.4025    | 0.242647  | 0.0412273 | 0.0992331 | 0.0127324 | 0.182165  | 0         | 0.21557    | 0.290588  |
| C21orf62-AS1    | 0.0192538 | 0.398901  | 0.41413   | 0.178574   | 0.299078   | 0.049183  | 0.373717  | 0.239556  | 0.164143  | 0.048331  | 0.173881  | 0.0413298 | 0         | 0.150943   | 0         |
| C21orf91        | 3.22035   | 2.81385   | 2.53371   | 3.34938    | 0.853569   | 2.67679   | 2.70904   | 4.67906   | 2.91038   | 3.26129   | 4.34227   | 2.42618   | 2.64116   | 1.95025    | 1.70066   |
| C21orf91-OT1    | 0.0465655 | 0.246796  | 0.192611  | 0.287923   | 0          | 0.317199  | 0.106334  | 0.0827671 | 0         | 0         | 0         | 0.0333189 | 0         | 0.121686   | 0.468118  |
| C22orf15        | 0.079257  | 0.0254582 | 0.0874227 | 0.0272256  | 0          | 0         | 0.180986  | 0.023479  | 0         | 0         | 0.0298238 | 0         | 0         | 0.0552309  | 0.0758821 |
| C22orf23        | 4.05292   | 7.33393   | 6.18181   | 6.84634    | 9.89055    | 7.35304   | 4.82466   | 3.93956   | 11.162    | 4.55213   | 1.87168   | 6.10471   | 6.24763   | 5.19324    | 3.10867   |
| C22orf24        | 0.0434475 | 0.062801  | 0.0838667 | 0.0746232  | 0.067489   | 0.0863217 | 0.0661426 | 0.0643542 | 0.0705523 | 0.18177   | 0.0653958 | 0.113989  | 0.0467202 | 0.0302768  | 0.16639   |
| C22orf31        | 0.151403  | 0.145897  | 0.214717  | 0.0891573  | 0.201584   | 0.0920841 | 0.246953  | 0.0768883 | 0.105367  | 0.0271466 | 0.122082  | 0.0309523 | 0.0418648 | 0.0226085  | 0         |
| C22orf34        | 0.321516  | 0.157834  | 0.235869  | 0.218804   | 0.659617   | 0.44939   | 0.346317  | 0.188694  | 0.0221643 | 0.152277  | 0.527306  | 0.0911531 | 0.136989  | 0.221937   | 0.339769  |
| C22orf39        | 2.40987   | 2.65054   | 2.77731   | 2.43206    | 2.40091    | 4.08979   | 2.84639   | 2.14169   | 2.14555   | 1.73134   | 3.15196   | 1.58757   | 1.4208    | 1.97612    | 2.2436    |
| C22orf42        | 0         | 0         | 0         | 0          | 0.0262978  | 0         | 0         | 0         | 0         | 0         | 0         | 0.0121137 | 0         | 0.00884826 | 0         |
| C22orf46        | 0.725692  | 1.21705   | 0.938999  | 1.97508    | 1.81372    | 4.26996   | 0.62674   | 0.715216  | 1.2464    | 0.65392   | 0.687931  | 0.775549  | 1.02947   | 1.08192    | 0.721513  |
| C2CD2           | 2.29067   | 3.66288   | 4.33186   | 3.17948    | 4.97595    | 3.46209   | 3.06497   | 2.36021   | 7.98151   | 3.54886   | 4.41619   | 3.28322   | 7.49613   | 4.63175    | 3.87053   |
| C2CD2L          | 2.04484   | 3.61806   | 4.34509   | 2.14252    | 6.73518    | 4.29174   | 3.2874    | 2.3947    | 7.9293    | 2.42058   | 2.30066   | 3.58691   | 2.82841   | 2.50561    | 2.092     |





|             |            |            |            |           |           |            |           |           |            |           |           |            |            |           |           |
|-------------|------------|------------|------------|-----------|-----------|------------|-----------|-----------|------------|-----------|-----------|------------|------------|-----------|-----------|
| C2orf81     | 0.501898   | 0.304517   | 0.338315   | 0.36397   | 0.952869  | 0.91803    | 0.488154  | 0.206502  | 0.0452781  | 0.431621  | 0.671502  | 0.113057   | 0.221878   | 0.189449  | 0.640701  |
| C2orf83     | 0          | 0          | 0          | 0         | 0         | 0.0944226  | 0         | 0         | 0          | 0         | 0         | 0          | 0          | 0         | 0         |
| C2orf88     | 2.03381    | 2.29896    | 2.50878    | 1.41327   | 0.369781  | 1.03994    | 1.90262   | 3.30684   | 0.277318   | 0.928826  | 1.27356   | 0.633199   | 0.34725    | 0.757325  | 0.92158   |
| C2orf91     | 0.00621958 | 0.00299669 | 0.00514527 | 0         | 0         | 0.00529589 | 0.0142026 | 0         | 0          | 0         | 0         | 0.00890055 | 0          | 0         | 0         |
| C2orf92     | 0.236671   | 0.529433   | 0.503463   | 0.139369  | 0.236335  | 0.345467   | 0.289525  | 0.360572  | 0.102942   | 0.0636528 | 0.0954186 | 0.0967683  | 0.0436283  | 0.123695  | 0.242778  |
| C3          | 27.4407    | 7.23751    | 11.2105    | 7.48669   | 4.08386   | 35.6336    | 23.8959   | 15.9467   | 0.247146   | 1.42065   | 2.34174   | 0.109708   | 2.8339     | 0.975753  | 10.6924   |
| C3AR1       | 0.989185   | 0.331147   | 0.43573    | 3.66711   | 0.44899   | 2.42838    | 0.777392  | 0.89052   | 0.0625826  | 1.76555   | 3.44425   | 0.160861   | 1.77374    | 0.825844  | 2.2877    |
| C3P1        | 0          | 0          | 0          | 0         | 0         | 0          | 0         | 0         | 0          | 0         | 0         | 0          | 0          | 0         | 0         |
| C3orf14     | 0.627608   | 0.622228   | 0.639018   | 1.31219   | 0.0749917 | 1.21781    | 0.358291  | 0.745475  | 0.499771   | 0.704397  | 1.34886   | 0.414526   | 0.708626   | 0.62449   | 0.320664  |
| C3orf18     | 0.82683    | 0.378657   | 0.446978   | 0.253091  | 0.6994    | 1.05257    | 0.794496  | 0.312843  | 0.0299105  | 0.482916  | 0.739317  | 0.0937218  | 0.221838   | 0.350844  | 0.928783  |
| C3orf20     | 0.0347702  | 0.053609   | 0.0632816  | 0.0358317 | 0.010802  | 0.0296064  | 0.0158798 | 0.0556216 | 0.00846924 | 0.148377  | 0.0157005 | 0.024879   | 0.00897342 | 0.0363449 | 0.0499344 |
| C3orf22     | 0.0105966  | 0.00510562 | 0.0262989  | 0.0218403 | 0         | 0.0180458  | 0         | 0         | 0          | 0.0265997 | 0         | 0          | 0          | 0         | 0         |
| C3orf30     | 0.0637901  | 0.0799111  | 0.105543   | 0         | 0.0594528 | 0          | 0.116534  | 0.0113383 | 0          | 0.0320253 | 0.0720111 | 0.00912871 | 0          | 0.0066679 | 0.183221  |
| C3orf33     | 0.437231   | 0.334556   | 0.411352   | 0.34506   | 0.14842   | 0.494669   | 0.374295  | 0.284794  | 0.202151   | 0.165112  | 0.401521  | 0.135733   | 0.321278   | 0.365593  | 0.323509  |
| C3orf35     | 0.951646   | 1.05538    | 1.17412    | 0.126815  | 0.458763  | 0.300375   | 0.665049  | 0.853035  | 0.169853   | 0.144153  | 0.0926112 | 0.234803   | 0.0317585  | 0.265837  | 0.40058   |
| C3orf36     | 0.138831   | 0.100336   | 0.103365   | 0.686731  | 0.215652  | 0.0591062  | 0.0951073 | 0.172733  | 0.033816   | 2.3349    | 0.454495  | 0.278143   | 1.66605    | 1.06662   | 1.93397   |
| C3orf38     | 2.97983    | 2.62398    | 2.50279    | 3.5457    | 1.09078   | 3.43169    | 2.13837   | 3.63648   | 3.54732    | 5.00314   | 7.10259   | 2.05262    | 4.3876     | 2.95721   | 2.83078   |
| C3orf49     | 0.248088   | 0.367136   | 0.278534   | 0.0913078 | 0.0825785 | 0.0905329  | 0.202328  | 0.251977  | 0.0863266  | 0         | 0.100022  | 0.0253591  | 0.0228664  | 0.111138  | 0.356285  |
| C3orf52     | 3.06968    | 7.38068    | 10.1743    | 1.65407   | 2.27506   | 0.811475   | 9.17447   | 6.3388    | 2.93219    | 1.52348   | 0.883311  | 2.16773    | 2.0388     | 1.70921   | 0.83559   |
| C3orf56     | 0          | 0          | 0          | 0         | 0         | 0          | 0         | 0         | 0          | 0         | 0         | 0          | 0          | 0         | 0         |
| C3orf58     | 2.8277     | 2.84244    | 2.86571    | 2.93375   | 3.89444   | 4.04552    | 2.55116   | 2.95523   | 4.9297     | 3.27882   | 5.73605   | 2.86546    | 4.42061    | 2.33808   | 2.01328   |
| C3orf62     | 1.41824    | 1.43188    | 1.34926    | 0.936711  | 1.54211   | 1.02098    | 1.00102   | 1.08854   | 1.02065    | 1.10038   | 0.866003  | 1.29155    | 0.536546   | 1.21293   | 1.94419   |
| C3orf67     | 0.0596031  | 0.0779481  | 0.0680919  | 0.14332   | 0.0573141 | 0.145004   | 0.0388874 | 0.0403583 | 0.0829599  | 0.623401  | 0.567112  | 0.178714   | 0.717838   | 0.453918  | 0.150815  |
| C3orf67-AS1 | 0          | 0.00506159 | 0          | 0.0433038 | 0.0489548 | 0.0178902  | 0.0119945 | 0.0280086 | 0          | 0.158222  | 0         | 0.0225503  | 0.0813352  | 0.159224  | 0         |
| C3orf70     | 1.02649    | 0.585071   | 0.75275    | 0.373745  | 0.352097  | 1.94661    | 1.26075   | 0.710816  | 0.516625   | 0.711237  | 1.35252   | 0.2456     | 0.672734   | 0.450178  | 1.2277    |
| C3orf79     | 0          | 0.153802   | 0          | 0         | 0         | 0          | 0.0455586 | 0         | 0          | 0.0500809 | 0         | 0          | 0          | 0         | 0         |

|         |            |            |            |           |            |            |            |            |            |           |            |            |            |            |           |
|---------|------------|------------|------------|-----------|------------|------------|------------|------------|------------|-----------|------------|------------|------------|------------|-----------|
| C3orf80 | 0.25136    | 0.0678485  | 0.0891182  | 0.0185024 | 0.223113   | 0.305756   | 0.112748   | 0.0280319  | 0.131198   | 0.833775  | 2.61177    | 0.051387   | 0.242915   | 0.248668   | 0.425446  |
| C3orf84 | 0.0989019  | 0.206494   | 0.19091    | 0         | 0.102419   | 0.0280712  | 0.150564   | 0.0878958  | 0          | 0         | 0          | 0          | 0          | 0.0172302  | 0         |
| C3orf85 | 0          | 0          | 0          | 0         | 0          | 0          | 0          | 0          | 0          | 0         | 0          | 0          | 0          | 0          | 0         |
| C3orf86 | 0.0278832  | 0.0134345  | 0.0230669  | 0.201141  | 0.0433122  | 0.0949687  | 0.0636723  | 0.0743408  | 0          | 0.209978  | 0.18886    | 0          | 0.251861   | 0          | 0.240263  |
| C4A     | 0.0513311  | 0.0227214  | 0.0176642  | 0.0426183 | 0.17142    | 0.598046   | 0.0710278  | 0.0332571  | 0.0114839  | 0.0394306 | 0.0502591  | 0.0156352  | 0.0662754  | 0.0288546  | 0.444763  |
| C4B     | 0.0604242  | 0.0319381  | 0.0322917  | 0.0755634 | 0.234022   | 0.737738   | 0.109791   | 0.0332656  | 0.00745111 | 0.0376383 | 0.0627383  | 0.0098895  | 0.0886757  | 0.043162   | 0.607753  |
| C4BPA   | 0.0103179  | 0.00497132 | 0.0341428  | 0.0106329 | 0.0160273  | 0.368993   | 0          | 0.0458485  | 0          | 0.01295   | 0          | 0          | 0          | 0          | 0         |
| C4BPB   | 0.132788   | 0.0731192  | 0.0313862  | 0         | 0.0294665  | 0.145372   | 0.021659   | 0.0842935  | 0          | 0         | 0.0214144  | 0          | 0          | 0          | 0         |
| C4B_2   | 0.0604242  | 0.0319381  | 0.0322917  | 0.0755634 | 0.234022   | 0.737738   | 0.109791   | 0.0332656  | 0.00745111 | 0.0376383 | 0.0627383  | 0.0098895  | 0.0886757  | 0.043162   | 0.607753  |
| C4orf17 | 0          | 0          | 0          | 0         | 0          | 0          | 0          | 0          | 0          | 0         | 0          | 0          | 0          | 0          | 0         |
| C4orf19 | 0.727466   | 0.483736   | 0.512689   | 0.278245  | 0.2864     | 0.442543   | 0.934147   | 0.452475   | 0.150424   | 0.138916  | 0.0974693  | 0.195033   | 0.0722912  | 0.126106   | 0.0730034 |
| C4orf3  | 11.7543    | 11.9245    | 11.7331    | 19.5663   | 12.2628    | 23.9772    | 8.10095    | 15.6357    | 41.3797    | 30.5382   | 53.6252    | 22.5354    | 33.5519    | 16.6396    | 12.0046   |
| C4orf33 | 1.54763    | 1.22749    | 1.10304    | 1.86478   | 0.665725   | 2.55448    | 0.78837    | 1.13207    | 1.1454     | 2.07691   | 2.48623    | 0.928489   | 1.26736    | 0.821304   | 0.666779  |
| C4orf36 | 0.458783   | 0.77367    | 0.611477   | 0.472789  | 0.712648   | 0.672782   | 0.465621   | 0.362425   | 0.465622   | 0.38388   | 0.402818   | 0.47417    | 0.690677   | 0.333028   | 0.109812  |
| C4orf45 | 0.141634   | 0.0136483  | 0.0937359  | 0.0291917 | 0          | 0.02412    | 0.0646854  | 0.0251746  | 0          | 0.0355531 | 0          | 0.0202686  | 0.0182764  | 0.0888292  | 0.284767  |
| C4orf46 | 0.607397   | 0.352465   | 0.389679   | 0.728134  | 0.202178   | 0.955218   | 0.55905    | 0.517771   | 0.415161   | 0.995716  | 1.81214    | 0.288261   | 1.008      | 0.719126   | 0.774387  |
| C4orf47 | 0.174738   | 0.261929   | 0.240926   | 0.260105  | 0.0301587  | 0.181851   | 0.0886711  | 0.207057   | 0.16552    | 0.341155  | 0.635607   | 0.388981   | 0.125267   | 0.416039   | 0.250946  |
| C4orf48 | 0.428575   | 0.309741   | 0.496366   | 2.34079   | 3.19548    | 2.40851    | 0.4404     | 0.380882   | 0.417565   | 2.31299   | 7.83769    | 0.459985   | 1.85265    | 1.94873    | 1.47717   |
| C4orf50 | 0.00335164 | 0          | 0.00277271 | 0         | 0.00520625 | 0.00285387 | 0.00382679 | 0.00595731 | 0          | 0         | 0          | 0.00239819 | 0.00864984 | 0.00350342 | 0.0336936 |
| C4orf51 | 0          | 0.0131961  | 0          | 0         | 0.0850867  | 0          | 0          | 0          | 0          | 0         | 0.123672   | 0          | 0          | 0.0143143  | 0         |
| C4orf54 | 0          | 0.00440956 | 0.0132495  | 0         | 0.00355404 | 0.00389639 | 0.00261236 | 0.00406676 | 0.0334382  | 0         | 0.00516572 | 0.00491136 | 0          | 0.0203287  | 0         |
| C5      | 0.490832   | 0.712041   | 0.749547   | 0.484004  | 0.155102   | 0.238444   | 0.34624    | 0.557572   | 0.193669   | 0.220992  | 0.346505   | 0.308698   | 0.112143   | 0.27025    | 0.424882  |
| C5-OT1  | 0.0399537  | 0.0610242  | 5.25E-39   | 5.61E-44  | 0          | 0.0340311  | 0          | 0.0254716  | 2.23E-28   | 0.0212489 | 1.54E-43   | 0.0204147  | 0          | 0.0330001  | 1.81E-37  |
| C5AR1   | 0.869965   | 0.471558   | 0.457989   | 6.836     | 0.829241   | 5.74092    | 0.925573   | 0.623794   | 0.03612    | 8.15199   | 19.7421    | 0.629557   | 6.97157    | 3.38428    | 8.5185    |
| C5AR2   | 0.53665    | 0.336136   | 0.255274   | 0.705118  | 1.45881    | 0.87963    | 0.689321   | 0.262312   | 1.06207    | 0.538841  | 1.24191    | 0.758376   | 0.502054   | 0.687168   | 1.94601   |
| C5orf15 | 4.66717    | 5.48979    | 6.1944     | 6.34665   | 1.1505     | 7.9567     | 4.599      | 5.2208     | 3.99121    | 5.93418   | 12.6333    | 4.22517    | 7.59354    | 5.67924    | 5.95952   |

|             |           |            |           |           |            |            |            |           |           |            |           |            |           |            |           |
|-------------|-----------|------------|-----------|-----------|------------|------------|------------|-----------|-----------|------------|-----------|------------|-----------|------------|-----------|
| C5orf17     | 0         | 0.0561464  | 0.0289208 | 0.780576  | 0.235317   | 0.0198449  | 0.0399154  | 0.0621378 | 0         | 0          | 0.0394647 | 0.191776   | 0         | 0.0914969  | 0.0167353 |
| C5orf22     | 3.05627   | 1.83992    | 1.94529   | 2.64116   | 0.527493   | 2.14409    | 1.57286    | 2.88127   | 2.04448   | 1.88982    | 2.94385   | 1.43497    | 3.1418    | 1.92886    | 1.88633   |
| C5orf24     | 3.48428   | 2.96284    | 2.95694   | 4.39324   | 1.64327    | 4.6687     | 2.77039    | 3.44861   | 2.72482   | 5.32797    | 8.51216   | 2.67348    | 5.53005   | 4.69143    | 4.60304   |
| C5orf30     | 1.08234   | 0.803709   | 0.895391  | 0.590499  | 0.425258   | 0.704754   | 0.632431   | 0.786491  | 0.643578  | 0.583335   | 0.91278   | 0.52389    | 0.718862  | 0.445889   | 0.576036  |
| C5orf34     | 0.402011  | 0.528259   | 0.755845  | 0.357791  | 0.042577   | 0.645716   | 0.312957   | 0.479072  | 0.100146  | 0.206413   | 0.495077  | 0.222275   | 0.212216  | 0.329488   | 0.380519  |
| C5orf38     | 1.12893   | 1.464      | 1.22206   | 1.22528   | 3.30202    | 2.6077     | 1.4261     | 0.821851  | 0.936108  | 0.889345   | 1.35577   | 1.07417    | 0.681887  | 0.834827   | 1.03486   |
| C5orf46     | 1.83607   | 3.60031    | 3.17915   | 0.528035  | 1.19388    | 0.363579   | 6.67913    | 1.70764   | 22.4653   | 1.07184    | 4.04899   | 0.213868   | 0         | 0.0669496  | 0         |
| C5orf47     | 0.0183529 | 0.00884272 | 0         | 0         | 0          | 0          | 0          | 0         | 0.0223518 | 0.0115174  | 0.0103591 | 0          | 0.0118412 | 0.00479602 | 0         |
| C5orf49     | 0.0582215 | 0.042078   | 0.0883024 | 0.0299995 | 0.0452191  | 0.115675   | 0.0664754  | 0.0258712 | 0         | 0.036537   | 0         | 0          | 0.0187821 | 0.00507152 | 0.0278712 |
| C5orf51     | 2.89398   | 3.2521     | 3.24445   | 4.38258   | 0.897701   | 4.16208    | 2.52856    | 4.35582   | 4.03496   | 3.98661    | 5.04982   | 2.88512    | 4.5228    | 3.13802    | 3.37685   |
| C5orf52     | 0         | 0          | 0         | 0         | 0          | 0          | 0          | 0         | 0         | 0          | 0         | 0          | 0         | 0          | 0.0476849 |
| C5orf56     | 0.919972  | 1.08044    | 1.35565   | 1.33321   | 1.29506    | 1.98284    | 1.21452    | 0.587646  | 0.210079  | 0.432997   | 0.61663   | 0.226278   | 0.556464  | 0.480818   | 2.06437   |
| C5orf58     | 0.331943  | 0.0767689  | 0.120827  | 0.17788   | 0.0206249  | 0.0678348  | 0.166761   | 0.141602  | 0         | 0.233308   | 0.209844  | 0.0380022  | 0.0342668 | 0.0902137  | 0.667397  |
| C5orf60     | 0.0189697 | 0.0091399  | 0         | 0         | 0          | 0.0323049  | 0          | 0.0168587 | 0.023103  | 0          | 0         | 0.0135733  | 0         | 0.0099144  | 0         |
| C5orf63     | 0.505019  | 0.312092   | 0.224031  | 0.592091  | 0.153483   | 0.392624   | 0.271594   | 0.383773  | 0.17382   | 0.151573   | 0.169379  | 0.154525   | 0.110973  | 0.309849   | 0.315335  |
| C5orf64     | 0.0179278 | 0.0199267  | 0.0340692 | 0         | 0.00910105 | 0.0102733  | 0.0133792  | 0.010414  | 0         | 0.00735365 | 0         | 0.00419792 | 0         | 0.00612434 | 0.0168397 |
| C5orf64-AS1 | 0         | 0          | 0         | 0         | 0          | 0          | 0          | 0         | 0         | 0          | 0         | 0          | 0         | 0          | 0         |
| C5orf66     | 1.99414   | 1.75337    | 1.6636    | 1.66779   | 1.9487     | 0.754135   | 1.49771    | 1.73882   | 1.15176   | 1.75326    | 0.708412  | 2.17496    | 0.856078  | 2.17623    | 2.14233   |
| C5orf66-AS1 | 0         | 0.0132274  | 0         | 0.0282913 | 0.0426443  | 0          | 0          | 0         | 0.0334349 | 0.172283   | 0.123965  | 0.137505   | 0.106276  | 0.0717412  | 0.0394263 |
| C5orf66-AS2 | 0.0321431 | 0.0516235  | 0.0177274 | 0.0662488 | 0.183074   | 0.0273695  | 0.0367     | 0.0380882 | 0.0130489 | 0.0403429  | 0.0120952 | 0.0766642  | 0         | 0.0671976  | 0         |
| C5orf67     | 0         | 0.0475509  | 0.0612331 | 0.076278  | 0          | 0          | 0.112682   | 0         | 0         | 0          | 0         | 0.017654   | 0.0159187 | 0          | 0         |
| C6          | 0.501715  | 0.0365412  | 0.0675669 | 0.006012  | 0          | 0.178829   | 0.233133   | 0.124432  | 0         | 0          | 0.0197572 | 0          | 0         | 0          | 0         |
| C6orf10     | 0.0230646 | 0.00889031 | 0.0203527 | 0         | 0.00477698 | 0.00130928 | 0.00877815 | 0.049195  | 0         | 0          | 0         | 0          | 0         | 0.00401819 | 0.026499  |
| C6orf106    | 11.3151   | 10.62      | 10.3241   | 17.4871   | 15.1107    | 22.9323    | 12.683     | 8.57673   | 30.3346   | 22.435     | 15.5907   | 16.3015    | 34.2034   | 14.8345    | 11.4201   |
| C6orf118    | 0         | 0          | 0.0104109 | 0         | 0          | 0          | 0          | 0         | 0         | 0          | 0         | 0          | 0         | 0.00657725 | 0.0180731 |
| C6orf120    | 3.43122   | 2.76569    | 3.08942   | 4.25674   | 1.88819    | 4.48083    | 2.2557     | 3.37023   | 3.61721   | 3.92551    | 7.21727   | 2.03664    | 5.04468   | 3.04319    | 2.88396   |

|                |           |           |           |           |           |           |           |           |            |           |           |           |           |            |            |
|----------------|-----------|-----------|-----------|-----------|-----------|-----------|-----------|-----------|------------|-----------|-----------|-----------|-----------|------------|------------|
| C6orf132       | 8.66062   | 16.0413   | 15.0535   | 28.1087   | 29.4813   | 19.7089   | 21.9521   | 12.2393   | 36.2918    | 34.036    | 11.1408   | 32.0456   | 64.9805   | 19.3902    | 10.2982    |
| C6orf136       | 0.345818  | 0.34773   | 0.37039   | 0.222089  | 0.29843   | 0.540552  | 0.362417  | 0.276155  | 0.191254   | 0.176131  | 0.292318  | 0.236684  | 0.323361  | 0.227888   | 0.271112   |
| C6orf141       | 0.794159  | 0.656918  | 1.01164   | 1.07913   | 1.26635   | 0.64031   | 0.497506  | 0.549636  | 0.890163   | 2.45218   | 1.00758   | 2.30314   | 0.861536  | 4.72731    | 1.13042    |
| C6orf15        | 0.46517   | 0.345187  | 0.20786   | 0.230938  | 0.706747  | 0.462582  | 0.86064   | 0.265544  | 1.50522    | 0.251433  | 0.701436  | 0.177354  | 0.109535  | 0.0656596  | 0.00487622 |
| C6orf163       | 1.01162   | 0.709744  | 0.719427  | 0.310923  | 0.248115  | 0.302239  | 0.607914  | 1.00945   | 0.151303   | 0.200477  | 0.20035   | 0.025398  | 0.0114508 | 0.213342   | 0.484272   |
| C6orf201       | 0.863847  | 0.394058  | 0.474271  | 0.116605  | 0.108523  | 0.149241  | 0.617075  | 0.40512   | 0          | 0.0474426 | 0.145697  | 0.0927019 | 0.0147254 | 0.163797   | 0.152345   |
| C6orf203       | 1.35453   | 1.34256   | 1.35534   | 1.90105   | 1.10212   | 2.29574   | 0.765913  | 1.1694    | 0.89553    | 1.24672   | 2.69411   | 0.839974  | 0.932196  | 1.22034    | 1.40801    |
| C6orf222       | 0.0371776 | 0.176142  | 0.169158  | 0.0127709 | 0.0288748 | 0.0158281 | 0.141494  | 0.0826009 | 0.0528245  | 0.0388847 | 0.0139896 | 0.0753711 | 0         | 0.00323844 | 0          |
| C6orf223       | 0.0350586 | 0.0190032 | 0.0326283 | 0.167096  | 0.0748799 | 0.0895558 | 0.0050036 | 0.0389464 | 0.0266859  | 0.187009  | 0.18799   | 0.0752561 | 0.189439  | 0.107649   | 0.08811    |
| C6orf226       | 5.40843   | 2.78767   | 3.81524   | 2.41952   | 3.64702   | 4.17682   | 4.59548   | 2.34739   | 5.66776    | 2.57844   | 6.2001    | 1.88994   | 2.84028   | 1.29282    | 0.662318   |
| C6orf47        | 0.631769  | 0.599139  | 0.614355  | 0.882298  | 1.4046    | 1.30903   | 0.648133  | 0.4392    | 1.14519    | 0.683969  | 0.512651  | 0.565776  | 1.03067   | 0.594761   | 0.667527   |
| C6orf48        | 5.24214   | 3.16108   | 3.66437   | 3.76046   | 3.35247   | 5.41232   | 2.21224   | 2.49682   | 1.21264    | 2.81012   | 6.80476   | 1.59818   | 1.86821   | 2.08718    | 2.75938    |
| C6orf52        | 0.209439  | 0.0630694 | 0.30321   | 0.0809375 | 0         | 0.222919  | 0.20924   | 0.0232665 | 0.0637684  | 0.065717  | 0.236431  | 0.0374649 | 0.135129  | 0.0136828  | 0          |
| C6orf58        | 0.0385396 | 0         | 0.0637654 | 0.0595743 | 0         | 0         | 0         | 0.0342508 | 0          | 0         | 0         | 0         | 0         | 0          | 0          |
| C6orf62        | 10.6027   | 9.68561   | 9.09723   | 23.1018   | 4.6827    | 18.8972   | 6.7496    | 10.9844   | 17.9993    | 18.7396   | 24.0319   | 12.892    | 24.6694   | 14.5971    | 13.8873    |
| C6orf89        | 8.10115   | 6.1214    | 6.34476   | 7.37334   | 5.38315   | 11.8827   | 7.55589   | 5.72233   | 6.75537    | 6.17931   | 6.29778   | 4.76946   | 9.08199   | 5.24503    | 8.09914    |
| C6orf99        | 0.0393589 | 0.0568912 | 0.0488407 | 0.0202803 | 0.122276  | 0         | 0.0224694 | 0.0524684 | 0.0958695  | 0.0246998 | 0.066647  | 0.0704059 | 0.114274  | 0.0719974  | 0          |
| C7             | 5.24389   | 0.862783  | 1.02508   | 0.172127  | 0.307722  | 5.84764   | 2.12882   | 1.79164   | 0.00473072 | 0.0585033 | 0.0964692 | 0         | 0.0601482 | 0.0548138  | 0.574579   |
| C7orf25        | 1.47207   | 1.4084    | 1.30478   | 2.61143   | 1.32298   | 2.23831   | 0.876398  | 1.13071   | 1.7672     | 2.15114   | 4.35625   | 1.52729   | 2.76112   | 1.78054    | 1.20805    |
| C7orf26        | 4.09094   | 4.57187   | 4.36885   | 6.14305   | 9.73831   | 7.46441   | 4.75584   | 2.918     | 4.6976     | 3.57419   | 6.50139   | 3.48222   | 5.58057   | 4.39285    | 3.20461    |
| C7orf31        | 0.49377   | 0.543785  | 0.440311  | 0.350243  | 0.258985  | 1.11935   | 0.300189  | 0.421724  | 0.226485   | 0.249502  | 0.644273  | 0.174359  | 0.31444   | 0.392126   | 0.570976   |
| C7orf33        | 0         | 0.0164707 | 0.01414   | 0.0352283 | 0         | 0.0145539 | 0.0195155 | 0         | 0.0416331  | 0         | 0         | 0         | 0         | 0          | 0          |
| C7orf43        | 2.29982   | 4.29713   | 5.1684    | 4.03093   | 10.1546   | 4.58728   | 3.02903   | 2.21287   | 4.28959    | 3.37517   | 4.48715   | 4.21763   | 3.76802   | 3.61543    | 2.92573    |
| C7orf50        | 1.69152   | 0.813518  | 0.750557  | 1.89846   | 2.7565    | 3.60077   | 1.46429   | 0.951167  | 0.812794   | 1.6907    | 3.89888   | 1.13991   | 1.60331   | 1.3502     | 1.32504    |
| C7orf55-LUC7L2 | 1.85849   | 0.72896   | 0.961204  | 1.26117   | 5.89E-05  | 1.09585   | 0.131064  | 0.372139  | 0.998143   | 0.488731  | 0.477952  | 0.601231  | 0.956312  | 0.670203   | 0.282724   |
| C7orf57        | 0.0650695 | 0.0261262 | 0.026915  | 0.122936  | 0.0336918 | 0.156983  | 0.0371471 | 0.0481903 | 0.369821   | 0.449179  | 0.465217  | 0.403511  | 0.321866  | 0.187045   | 0.155747   |

|              |           |            |            |            |           |           |           |            |           |            |           |            |            |           |           |
|--------------|-----------|------------|------------|------------|-----------|-----------|-----------|------------|-----------|------------|-----------|------------|------------|-----------|-----------|
| C7orf61      | 0.138305  | 0.1777     | 0.26697    | 0.142527   | 0.0716119 | 0.431805  | 0.131594  | 0.122914   | 0.08422   | 0.115725   | 0         | 0.0824675  | 0.0743615  | 0.156616  | 0.0331039 |
| C7orf65      | 0         | 0.00383053 | 0          | 0          | 0         | 0         | 0         | 0.00706548 | 0         | 0.00997833 | 0         | 0          | 0          | 0         | 0         |
| C7orf66      | 0         | 0          | 0          | 0          | 0         | 0         | 0         | 0          | 0         | 0          | 0         | 0          | 0          | 0.0278059 | 0         |
| C7orf69      | 0         | 0          | 0          | 0          | 0         | 0         | 0.065487  | 0          | 0         | 0          | 0         | 0          | 0          | 0         | 0         |
| C7orf71      | 0.0591591 | 0.0855113  | 0.137034   | 0.012193   | 0.110273  | 0.0705225 | 0.0945644 | 0.126182   | 0         | 0.0297003  | 0.0534266 | 0.033864   | 0.00763383 | 0.0618383 | 0.016992  |
| C7orf77      | 0         | 0          | 0          | 0          | 0         | 0         | 0         | 0          | 0         | 0          | 0         | 0          | 0          | 0         | 0         |
| C8A          | 0         | 0          | 0          | 0.00997056 | 0         | 0         | 0         | 0          | 0         | 0          | 0         | 0          | 0          | 0         | 0         |
| C8B          | 0         | 0.0044372  | 0          | 0.0379619  | 0         | 0.0156833 | 0         | 0.00818449 | 0         | 0          | 0         | 0          | 0          | 0         | 0         |
| C8G          | 0.210153  | 0.126568   | 0.13039    | 0.0541421  | 0.16322   | 0.268413  | 0.0299932 | 0.0700373  | 0.159964  | 0.0329704  | 0.207582  | 0.131574   | 0.101692   | 0.109835  | 0         |
| C8orf31      | 0.13069   | 0.083958   | 0.117126   | 0.10101    | 0.152255  | 0.166921  | 0.248696  | 0.077431   | 0         | 0.0410074  | 0.196711  | 0.0389635  | 0.0421603  | 0.142301  | 0.156406  |
| C8orf33      | 6.06654   | 4.78495    | 4.62361    | 7.19953    | 4.57435   | 10.2257   | 6.41163   | 4.03965    | 3.68341   | 4.9059     | 8.31587   | 3.25241    | 7.25193    | 4.61268   | 4.49586   |
| C8orf34      | 0.128573  | 0.155478   | 0.104279   | 0.0779398  | 0.0900687 | 0.0858649 | 0.164071  | 0.0380882  | 0.303963  | 0.142387   | 0.125221  | 0.362577   | 0.123618   | 0.0421632 | 0.0579283 |
| C8orf34-AS1  | 0.173573  | 0.320582   | 0.155558   | 0.22359    | 0.0898729 | 0.270958  | 0.148635  | 0.0771286  | 0.775105  | 0.163389   | 0.538841  | 0.465735   | 0.19598    | 0         | 0.103864  |
| C8orf37      | 0.754739  | 0.492573   | 0.448414   | 0.494951   | 0.287764  | 0.397275  | 0.470039  | 0.780508   | 0.217263  | 0.43058    | 0.720333  | 0.225833   | 0.376283   | 0.279708  | 0.581365  |
| C8orf37-AS1  | 0.0527177 | 0.0762005  | 0.152641   | 0          | 0.0409444 | 0.0448884 | 0.0300957 | 0          | 0.0321021 | 0          | 0         | 0.0377209  | 0          | 0         | 0         |
| C8orf44      | 0.706875  | 0.967555   | 0.865076   | 0.590586   | 0.483571  | 0.60283   | 0.569177  | 0.736643   | 0.0897155 | 0.216004   | 0.269926  | 0.258844   | 0.0475282  | 0.416889  | 0.847984  |
| C8orf44-SGK3 | 0.818576  | 0.593413   | 0.574527   | 0.634133   | 0.148451  | 0.208763  | 0.137851  | 0.533413   | 0.0144838 | 0.423657   | 0.162518  | 0.118007   | 0.0639977  | 0.225039  | 0.270829  |
| C8orf48      | 0.256078  | 0.33159    | 0.251567   | 0.395844   | 0.0497222 | 0.613257  | 0.146191  | 0.11379    | 0.136445  | 0.682984   | 0.614295  | 0.125971   | 0.24783    | 0.225851  | 0.04597   |
| C8orf49      | 0.0117597 | 0          | 0          | 0          | 0         | 0         | 0         | 0          | 0         | 0          | 0         | 0          | 0          | 0         | 0         |
| C8orf58      | 2.7062    | 3.22456    | 3.19557    | 3.32113    | 8.05846   | 5.6699    | 3.47448   | 2.14558    | 8.99862   | 4.34083    | 5.93244   | 3.10943    | 3.41959    | 3.19262   | 2.17705   |
| C8orf59      | 3.18625   | 2.4538     | 2.09188    | 5.04677    | 0.662834  | 2.87264   | 0.832978  | 1.65673    | 3.5413    | 5.46778    | 9.35262   | 2.54349    | 4.59635    | 2.72187   | 2.67474   |
| C8orf74      | 0.0446777 | 0.129158   | 0.0184803  | 0.0920833  | 0.1388    | 0.0190212 | 0.153035  | 0.0198529  | 0.163237  | 0          | 0         | 0.015984   | 0          | 0.0116753 | 0         |
| C8orf76      | 1.80262   | 1.66631    | 1.81564    | 3.94436    | 0.762535  | 2.87137   | 1.07986   | 1.2646     | 3.03979   | 3.12187    | 5.2047    | 1.82576    | 4.29881    | 3.11669   | 3.15512   |
| C8orf82      | 3.1624    | 3.37637    | 3.38912    | 5.45627    | 10.848    | 5.94648   | 4.70489   | 1.83107    | 4.62466   | 2.94679    | 3.12372   | 2.69991    | 3.82569    | 2.53556   | 2.44284   |
| C8orf86      | 0         | 0.00495586 | 0.00850914 | 0          | 0         | 0.0175164 | 0.035232  | 0          | 0         | 0          | 0.0116114 | 0.00735977 | 0          | 0         | 0         |
| C8orf87      | 0.118077  | 0.0189637  | 0          | 0          | 0.061138  | 0         | 0.0449388 | 0          | 0         | 0          | 0         | 0          | 0          | 0         | 0         |

|             |           |           |           |           |           |            |           |           |            |           |            |           |           |            |           |
|-------------|-----------|-----------|-----------|-----------|-----------|------------|-----------|-----------|------------|-----------|------------|-----------|-----------|------------|-----------|
| C8orf88     | 1.71801   | 2.06091   | 1.96251   | 0.599507  | 0.467992  | 1.88702    | 1.04326   | 1.31832   | 0.486823   | 1.9916    | 3.38881    | 0.879803  | 0.952679  | 1.88028    | 0.60331   |
| C8orf89     | 0.0411067 | 0.0990291 | 0.0680127 | 0         | 0         | 0          | 0         | 0         | 0          | 0.0515931 | 0.0464043  | 0.0294129 | 0         | 0          | 0.118069  |
| C9          | 0.0899553 | 0.023641  | 0.0202956 | 0.0337097 | 0.0127029 | 0.0208898  | 0.0280113 | 0.167157  | 0          | 0         | 0          | 0.0058514 | 0         | 0.00854811 | 0         |
| C9orf106    | 0.521611  | 0.383594  | 0.18169   | 0.169748  | 0.639665  | 0.350641   | 0.626904  | 0.365972  | 0.0334349  | 0         | 0.123965   | 0.078574  | 0.0177127 | 0.143482   | 0.670247  |
| C9orf116    | 0.416703  | 0.169886  | 0.291691  | 0.49549   | 0.0497911 | 0.846103   | 0.292787  | 0.313357  | 0.195191   | 0.120694  | 0.904627   | 0.0917422 | 0.144768  | 0.23454    | 0.230169  |
| C9orf129    | 4.62E-18  | 2.77E-17  | 0.0337667 | 4.99E-33  | 0.0456337 | 0.0853392  | 0.0488462 | 0.0372896 | 2.05E-32   | 0.0645861 | 0.0147461  | 1.09E-31  | 1.49E-32  | 2.49E-32   | 0.0699411 |
| C9orf131    | 2.80898   | 2.69737   | 3.05704   | 0.611183  | 2.79414   | 0.904557   | 2.37377   | 2.25311   | 0.452431   | 0.907972  | 0.0588581  | 1.15184   | 0.138763  | 1.53281    | 1.41332   |
| C9orf135    | 0.0181799 | 0         | 0.0150397 | 0         | 0         | 0          | 0         | 0         | 0          | 0         | 0          | 0         | 0         | 0          | 0         |
| C9orf135-DT | 0         | 0         | 0         | 0         | 0         | 0          | 0         | 0         | 0          | 0         | 0          | 0         | 0         | 0          | 0         |
| C9orf139    | 0.0879066 | 0.0780005 | 0.0802959 | 0.0898554 | 0.339232  | 0.146427   | 0.136768  | 0.0916512 | 0          | 0.0473754 | 0.030551   | 0.0130219 | 0.0129153 | 0.0982864  | 0.261361  |
| C9orf147    | 0.213591  | 0.254487  | 0.209573  | 0.1177    | 0.491226  | 0.118508   | 0.265784  | 0.203921  | 0.0899068  | 0.0720144 | 0.083501   | 0.14288   | 0.0053428 | 0.120585   | 0.10157   |
| C9orf152    | 1.21989   | 0.633943  | 0.828968  | 0.0808156 | 0.541403  | 1.00162    | 1.23365   | 1.27773   | 0          | 0.0218727 | 0.00983645 | 0.0623474 | 0.0112438 | 0          | 0.0125137 |
| C9orf153    | 0         | 0.0169721 | 0.0291409 | 0.0242005 | 0         | 0.00999797 | 0.0134064 | 0.0208702 | 0          | 0.0147371 | 0.013255   | 0         | 0.0454544 | 0.0184103  | 0         |
| C9orf16     | 22.1044   | 16.8277   | 20.1122   | 29.235    | 38.7726   | 56.5753    | 34.5031   | 15.6925   | 38.187     | 25.4211   | 57.2712    | 24.2934   | 25.4238   | 16.9983    | 18.4595   |
| C9orf163    | 0.0548772 | 0.137337  | 0.144985  | 0.055785  | 0.58712   | 0.177922   | 0.11512   | 0.0723079 | 0.0773871  | 0.159832  | 0.0413025  | 0.256158  | 0.146406  | 0.22319    | 0.116256  |
| C9orf170    | 0.135776  | 0.0785028 | 0.0842427 | 0.0839528 | 0.0527268 | 0.127173   | 0.100766  | 0.168933  | 0.033072   | 0.0170413 | 0.0306549  | 0.0194303 | 0.0306607 | 0.0319332  | 0.146244  |
| C9orf24     | 0.22604   | 0.150798  | 0.258918  | 0.0358371 | 0.135046  | 0.0592217  | 0.119116  | 0.108169  | 0.0635289  | 0.0436467 | 0          | 0.099531  | 0         | 0.0545255  | 0.0998838 |
| C9orf3      | 5.91618   | 7.07633   | 7.10237   | 7.28203   | 9.06019   | 5.62843    | 4.5724    | 4.59177   | 3.33675    | 3.90995   | 6.25109    | 5.3951    | 2.71644   | 4.41495    | 4.74988   |
| C9orf40     | 0.537516  | 0.532355  | 0.741119  | 0.902694  | 1.36066   | 1.11032    | 0.443241  | 0.468853  | 1.21229    | 0.687131  | 1.65181    | 0.705113  | 1.05967   | 1.07169    | 0.657579  |
| C9orf41-AS1 | 0.281452  | 0.425316  | 0.308559  | 0.292417  | 0.437193  | 0.119826   | 0.268179  | 0.454784  | 0.0626677  | 0.160569  | 0.115536   | 0.228848  | 0.0582522 | 0.442478   | 0.128609  |
| C9orf43     | 0.135036  | 0.170163  | 0.171863  | 0.117749  | 0.0484055 | 0.194584   | 0.201619  | 0.212323  | 0.101205   | 0.0391116 | 0.128986   | 0.104054  | 0.167547  | 0.119436   | 0.0596703 |
| C9orf47     | 0.134036  | 0.103315  | 0.112198  | 0.0852348 | 0.0305422 | 0.0776384  | 0.118585  | 0.121826  | 0.00575687 | 0.0599555 | 0.0602464  | 0.0405869 | 0.0405671 | 0.225275   | 0.249691  |
| C9orf50     | 0         | 0.0206494 | 0.047273  | 0.014722  | 0.0443817 | 0.0851494  | 0.0326222 | 0.0126961 | 0          | 0         | 0.0483808  | 0.0204438 | 0.0276514 | 0.0821304  | 0         |
| C9orf57     | 0.0309192 | 0.0372434 | 0.0511572 | 0         | 0         | 0.0131637  | 0.0529539 | 0.0412177 | 0          | 0         | 0          | 0.0221235 | 0         | 0          | 0         |
| C9orf62     | 0         | 0         | 0         | 0         | 0         | 0          | 0         | 0         | 0          | 0         | 0          | 0         | 0         | 0          | 0         |
| C9orf64     | 1.23092   | 1.16434   | 1.20549   | 2.54631   | 1.18097   | 4.40822    | 0.847386  | 0.908934  | 0.407848   | 1.87436   | 3.32063    | 0.796564  | 2.54022   | 1.96784    | 2.61264   |

|         |           |            |           |           |           |           |           |           |            |           |           |           |           |           |           |
|---------|-----------|------------|-----------|-----------|-----------|-----------|-----------|-----------|------------|-----------|-----------|-----------|-----------|-----------|-----------|
| C9orf66 | 0.242065  | 0.170743   | 0.250515  | 0.802327  | 0.541085  | 0.44832   | 0.221738  | 0.126701  | 0.151753   | 0.491838  | 0.377918  | 0.395712  | 0.318065  | 0.250422  | 0.431289  |
| C9orf72 | 1.20737   | 1.31257    | 1.76683   | 1.70952   | 0.157603  | 1.18357   | 0.805114  | 1.41115   | 1.03179    | 2.00565   | 2.35944   | 0.635228  | 1.41724   | 0.941238  | 1.66837   |
| C9orf78 | 10.464    | 7.55384    | 7.93642   | 12.265    | 7.25263   | 15.0549   | 5.9156    | 6.79931   | 10.1549    | 8.61182   | 8.9586    | 6.28495   | 12.131    | 6.9127    | 6.08785   |
| C9orf84 | 0.115437  | 0.201878   | 0.190996  | 0.330449  | 0.0730539 | 0.174744  | 0.0439342 | 0.262177  | 0.322836   | 0.101957  | 0.0386117 | 0.431348  | 0.016551  | 0.433501  | 0.178063  |
| C9orf85 | 2.28791   | 1.86551    | 1.57241   | 2.53912   | 1.14819   | 1.90317   | 1.10519   | 1.37639   | 3.6009     | 3.09245   | 5.16552   | 1.48594   | 2.78197   | 2.14317   | 2.47693   |
| C9orf92 | 0         | 0.0249456  | 0         | 0         | 0         | 0         | 0         | 0         | 0          | 0         | 0         | 0         | 0         | 0         | 0         |
| CA1     | 0.0765819 | 0.140214   | 0.202733  | 0.0631359 | 0.0475833 | 0.0652085 | 0.122414  | 0.136119  | 0          | 0.0576709 | 0.0864514 | 0.0547964 | 0         | 0.03202   | 0         |
| CA10    | 0.0119695 | 0.00288355 | 0.019804  | 0         | 0         | 0         | 0         | 0         | 0          | 0         | 0         | 0         | 0         | 0         | 0         |
| CA11    | 1.11342   | 1.45351    | 1.49815   | 0.794103  | 3.54813   | 1.09917   | 1.18759   | 0.634523  | 3.03072    | 0.582142  | 0.681203  | 0.942561  | 0.239675  | 0.310641  | 0.493477  |
| CA12    | 15.472    | 23.2687    | 25.9768   | 35.0753   | 15.6422   | 41.1334   | 16.1735   | 20.1945   | 13.781     | 21.2604   | 20.1492   | 16.2289   | 29.0423   | 16.9968   | 8.88877   |
| CA13    | 2.17323   | 1.87725    | 2.19019   | 0.562986  | 0.456941  | 1.24728   | 1.46686   | 1.95272   | 0.935865   | 0.512371  | 0.969122  | 0.966506  | 0.464802  | 0.699692  | 0.724216  |
| CA14    | 0.470232  | 0.679695   | 0.756991  | 0.157164  | 0.0987072 | 0.35711   | 0.870642  | 0.587323  | 0.294084   | 0.0159511 | 0.0430406 | 0.154591  | 0.0245993 | 0.0797072 | 0.255524  |
| CA2     | 1.97258   | 8.03167    | 9.88307   | 71.6066   | 12.2132   | 18.4875   | 4.47273   | 5.98756   | 15.886     | 21.9511   | 36.1298   | 25.8235   | 35.9856   | 17.3451   | 7.28165   |
| CA3     | 0.396891  | 0.441732   | 0.444238  | 0.0991114 | 0.164245  | 0.123796  | 0.316907  | 0.293655  | 0.0643875  | 0.0829438 | 0         | 0.151314  | 0         | 0.0276312 | 0.0379627 |
| CA3-AS1 | 0.144584  | 0.160228   | 0.271601  | 0.244531  | 0.325445  | 0.219566  | 0.0552033 | 0.257811  | 0.176651   | 0.242732  | 0.309287  | 0.126848  | 0.11438   | 0.1095    | 0.0694353 |
| CA4     | 0.205708  | 0.123725   | 0.085937  | 0.110928  | 0.224381  | 0.606339  | 0.255673  | 0.106189  | 0.153265   | 0.0883413 | 0.234565  | 0.0463639 | 0         | 0.0400902 | 0.0669198 |
| CA5A    | 0         | 0          | 0.0529859 | 0         | 0         | 0.018179  | 0         | 0.0189738 | 0          | 0         | 0.0241011 | 0         | 0         | 0         | 0         |
| CA5B    | 1.90399   | 1.33162    | 1.48324   | 0.738288  | 0.577638  | 1.60322   | 2.12874   | 1.59435   | 0.650898   | 1.12227   | 1.6599    | 1.09389   | 1.0101    | 1.29551   | 1.9852    |
| CA5BP1  | 1.57266   | 1.1506     | 1.3202    | 2.47968   | 2.88106   | 1.61775   | 1.76834   | 0.766373  | 1.131      | 1.65036   | 1.73387   | 1.69824   | 2.52358   | 1.68859   | 1.60447   |
| CA6     | 5.61571   | 1.76063    | 1.98915   | 0.0815092 | 1.37604   | 1.38737   | 5.4004    | 3.12099   | 5.9531     | 0.059563  | 0.267864  | 0.226377  | 0         | 0         | 0.0908718 |
| CA7     | 0         | 0.00603065 | 0.0103546 | 0         | 0         | 0         | 0.014291  | 0         | 0          | 0         | 0         | 0         | 0         | 0         | 0         |
| CA8     | 0.135736  | 0.0562439  | 0.101062  | 0.106309  | 0.0168676 | 0.14794   | 0.105386  | 0.0458399 | 0.00661247 | 0.0579235 | 0.0551626 | 0.0233095 | 0.0122607 | 0.0496592 | 0.0194935 |
| CA9     | 0.0893554 | 0.279843   | 0.529768  | 0.460417  | 0.185066  | 1.42025   | 1.02023   | 0.172059  | 0.21765    | 1.23365   | 3.27831   | 0.809858  | 2.11389   | 2.13268   | 0.620241  |
| CAAP1   | 1.73826   | 1.59242    | 1.56054   | 2.12068   | 1.06552   | 2.32968   | 1.45069   | 1.73186   | 1.68981    | 1.74144   | 2.27027   | 1.28839   | 1.85578   | 1.56847   | 1.23139   |
| CAB39   | 8.15871   | 8.20136    | 9.77118   | 15.1174   | 5.06931   | 11.356    | 5.00471   | 8.21758   | 18.8401    | 16.11     | 13.8934   | 8.76048   | 26.9928   | 12.2516   | 9.61858   |
| CAB39L  | 3.24201   | 1.99729    | 2.59034   | 0.87951   | 0.740332  | 2.66616   | 3.03092   | 1.45786   | 0.992167   | 0.897282  | 1.25123   | 0.709805  | 1.43025   | 1.01376   | 1.8783    |

|             |           |           |            |           |            |           |           |            |            |            |            |            |            |            |            |
|-------------|-----------|-----------|------------|-----------|------------|-----------|-----------|------------|------------|------------|------------|------------|------------|------------|------------|
| CABCOCO1    | 0.110909  | 0.062344  | 0.0764599  | 0.0571476 | 0          | 0.566626  | 0.0844217 | 0.0492834  | 0.0900499  | 0.255204   | 0.417342   | 0.0132264  | 0.0238527  | 0.038644   | 0          |
| CABIN1      | 5.59564   | 5.3981    | 5.57872    | 6.12843   | 7.97132    | 9.44897   | 6.978     | 4.78579    | 2.04858    | 3.68979    | 2.38134    | 4.46044    | 4.79799    | 5.49006    | 5.61169    |
| CABLES1     | 1.11298   | 1.89391   | 2.54301    | 1.26985   | 1.70827    | 2.99351   | 2.0524    | 1.40519    | 0.871389   | 0.687369   | 1.10685    | 1.05867    | 0.997351   | 1.12645    | 1.2305     |
| CABLES2     | 0.684814  | 1.09003   | 1.0066     | 0.995571  | 0.987771   | 1.83263   | 1.1519    | 0.766191   | 0.7819     | 0.813467   | 0.821387   | 0.82688    | 1.2979     | 0.965089   | 0.799077   |
| CABP1       | 0.0826538 | 0.045513  | 0.0488407  | 0.0365045 | 0.275121   | 0.301622  | 0.0674081 | 0.0209874  | 0.115043   | 0.103739   | 0.306576   | 0.0168974  | 0.00761825 | 0.0431985  | 0.186531   |
| CABP2       | 0         | 0         | 0          | 0         | 0          | 0         | 0         | 0          | 0          | 0          | 0          | 0          | 0          | 0          | 0          |
| CABP4       | 0.196769  | 0.318958  | 0.388728   | 0.0935278 | 0.234344   | 0.213652  | 0.327671  | 0.346447   | 0.0130038  | 0.0335028  | 0.0241252  | 0.0534793  | 0.0206668  | 0.108818   | 0.314346   |
| CABP5       | 0         | 0         | 0          | 0         | 0          | 0         | 0         | 0          | 0          | 0          | 0          | 0          | 0          | 0          | 0          |
| CABP7       | 0.102446  | 0.054079  | 0.0310887  | 0.096011  | 0.0982477  | 0.080871  | 0.0532277 | 0.0338722  | 0.0112331  | 0.271461   | 0.0636979  | 0.133519   | 0.0909824  | 0.163474   | 0.0650771  |
| CABS1       | 0         | 0         | 0          | 0         | 0          | 0         | 0         | 0          | 0          | 0          | 0          | 0          | 0          | 0          | 0          |
| CABYR       | 0.577613  | 0.482392  | 0.485807   | 0.396832  | 0.209354   | 0.426253  | 0.483634  | 0.44489    | 0.257938   | 0.531641   | 0.456438   | 0.32375    | 0.180125   | 0.38742    | 0.428589   |
| CACFD1      | 1.14912   | 0.979553  | 0.797732   | 1.86325   | 5.36743    | 3.38014   | 1.6148    | 0.635597   | 2.53475    | 1.99697    | 2.19527    | 1.43745    | 3.25076    | 1.41115    | 2.14652    |
| CACHD1      | 4.32159   | 4.39041   | 4.03963    | 3.74661   | 4.55991    | 4.25168   | 2.65783   | 3.14577    | 0.744462   | 0.566485   | 1.05514    | 1.6173     | 1.10292    | 1.21104    | 1.73021    |
| CACNA1A     | 0.0953479 | 0.0242461 | 0.0153375  | 0.0709647 | 0.131652   | 0.180417  | 0.0665287 | 0.0353072  | 0.00322564 | 0.159562   | 0.200322   | 0.017056   | 0.138415   | 0.0650597  | 0.167361   |
| CACNA1B     | 0.0141837 | 0.0706171 | 0.015645   | 0.582233  | 0.165241   | 0.237519  | 0.0269908 | 0.0252106  | 0.0201532  | 0.103845   | 0.0426976  | 0.248646   | 0.0976132  | 0.138376   | 0.0882681  |
| CACNA1C     | 1.22899   | 0.647608  | 0.838825   | 0.573979  | 1.47893    | 2.01794   | 1.73416   | 0.708274   | 0.153172   | 0.69086    | 1.07866    | 0.546871   | 0.64284    | 1.25287    | 4.71604    |
| CACNA1C-AS1 | 0.213471  | 0.0704752 | 0.104854   | 0.0320846 | 0.162739   | 0.071271  | 0.107972  | 0.0559882  | 0          | 0.0651276  | 0          | 0.045096   | 0          | 0.13216    | 0.454659   |
| CACNA1C-AS2 | 0.190009  | 0.219718  | 0.251502   | 0.0391619 | 0.177089   | 0.226506  | 0.173557  | 0.168864   | 0          | 0          | 0.0428992  | 0.0271913  | 0          | 0.178752   | 0.109151   |
| CACNA1C-AS4 | 0.502427  | 0.287467  | 0.155866   | 0         | 0.243888   | 0.213905  | 0.286828  | 0.167443   | 0.0382437  | 0          | 0.0708972  | 0.17975    | 0.141822   | 0.475945   | 1.4431     |
| CACNA1C-IT2 | 0         | 0         | 0          | 0         | 0          | 0         | 0         | 0          | 0          | 0          | 0          | 0          | 0          | 0          | 0          |
| CACNA1C-IT3 | 0.376747  | 0.0518636 | 0.133574   | 0.0554642 | 0.418013   | 0.137484  | 0.0614511 | 0.191327   | 0          | 0.135102   | 0          | 0.192552   | 0          | 0.140646   | 0.231881   |
| CACNA1D     | 0.544056  | 0.311996  | 0.335115   | 0.0700831 | 0.110231   | 0.287018  | 0.351104  | 0.344239   | 0.23407    | 0.096489   | 0.133515   | 0.105784   | 0.0362468  | 0.0463609  | 0.110406   |
| CACNA1E     | 0.0276097 | 0.0110856 | 0.00380678 | 0.0284526 | 0.00953053 | 0.0091425 | 0.0192646 | 0.00817906 | 0          | 0.0943332  | 0.225102   | 0.00109753 | 0.0405755  | 0.00400834 | 0.0330425  |
| CACNA1F     | 0.0416651 | 0.0310248 | 0.0501357  | 0.0390337 | 0.0823712  | 0.0387025 | 0.0518965 | 0.030296   | 0.00461303 | 0.00475399 | 0.00855176 | 0          | 0.00488765 | 0.00395927 | 0.00543966 |
| CACNA1G     | 0.307939  | 0.374971  | 0.440021   | 0.363499  | 1.83072    | 0.550634  | 0.364381  | 0.355772   | 0.11933    | 0.249465   | 0.426631   | 0.204314   | 0.0957281  | 0.596951   | 1.45939    |
| CACNA1G-AS1 | 0.11305   | 0.0855949 | 0.106884   | 0.0499294 | 0.15052    | 0.0275031 | 0.0553189 | 0.10047    | 0.019669   | 0.02027    | 0.200546   | 0.0231116  | 0          | 0.0759666  | 0          |



|              |            |            |            |           |           |            |            |           |            |            |            |            |            |            |           |
|--------------|------------|------------|------------|-----------|-----------|------------|------------|-----------|------------|------------|------------|------------|------------|------------|-----------|
| CACNA1H      | 1.05828    | 0.446688   | 0.564285   | 0.483346  | 1.4401    | 2.84557    | 5.35735    | 0.446421  | 0.0871218  | 0.359136   | 0.487756   | 0.225215   | 0.385848   | 0.814004   | 1.92133   |
| CACNA1I      | 0.03008    | 0.0256414  | 0.0133992  | 0.0309983 | 0.0323478 | 0.047285   | 0.0132094  | 0.0390707 | 0          | 0.00580822 | 0.00261204 | 0.00496685 | 0.00149288 | 0.00362795 | 0         |
| CACNA1S      | 0.00375212 | 0.010847   | 0.00310401 | 0         | 0         | 0.00319488 | 0.0171362  | 0         | 0          | 0.00470929 | 0          | 0          | 0.00242085 | 0.00196102 | 0         |
| CACNA2D1     | 1.06828    | 1.06771    | 1.09313    | 0.846139  | 0.475421  | 1.12011    | 1.05172    | 1.2894    | 0.573461   | 0.882783   | 1.71425    | 0.307437   | 0.630386   | 0.573709   | 1.9061    |
| CACNA2D2     | 0.444367   | 0.354188   | 0.471227   | 0.0747293 | 0.300496  | 0.484078   | 0.558951   | 0.361389  | 0.0336574  | 0.0198205  | 0.0623949  | 0.0855655  | 0.0891525  | 0.101106   | 0.357197  |
| CACNA2D3     | 1.04886    | 0.794074   | 0.378426   | 0.512685  | 0.860823  | 0.509407   | 0.388271   | 0.386168  | 0.368139   | 0.276637   | 0.57583    | 0.815141   | 0.280352   | 1.18436    | 0.41602   |
| CACNA2D3-AS1 | 0.183162   | 0.135718   | 0.141528   | 0.0573859 | 0.0172999 | 0.0284495  | 0.0508643  | 0.049489  | 0          | 0.0139783  | 0.0125725  | 0.0884384  | 0          | 0.0649362  | 0.0639776 |
| CACNA2D4     | 0.203579   | 0.135653   | 0.204248   | 0.169621  | 0.201848  | 0.298743   | 0.173094   | 0.177075  | 0.0263762  | 0.163093   | 0.293381   | 0.0402907  | 0.0866339  | 0.104136   | 0.416776  |
| CACNB1       | 1.17095    | 1.54065    | 2.04449    | 0.336482  | 1.00563   | 1.52912    | 1.67118    | 1.25077   | 0.102842   | 0.233167   | 0.279622   | 0.257798   | 0.141654   | 0.532547   | 0.695287  |
| CACNB2       | 0.570964   | 0.577708   | 0.799831   | 0.247126  | 0.118254  | 0.466721   | 0.595409   | 0.558167  | 0.0417222  | 0.124214   | 0.22774    | 0.157969   | 0.0908677  | 0.254644   | 0.486519  |
| CACNB3       | 1.97449    | 2.50934    | 1.79323    | 2.36652   | 6.07857   | 4.01429    | 3.05489    | 1.42416   | 2.49184    | 2.29861    | 2.82658    | 2.45705    | 2.40017    | 2.68458    | 3.15412   |
| CACNB4       | 0.389656   | 0.743701   | 0.940018   | 0.108808  | 0.0820044 | 0.417409   | 0.347306   | 1.76944   | 0.220439   | 0.0283969  | 0.051082   | 0.046768   | 0.00973177 | 0.0183943  | 0.216618  |
| CACNG1       | 0.0351184  | 0.0507618  | 0.0290524  | 0.0180953 | 0.0272755 | 0          | 0.0400971  | 0         | 0          | 0.0440773  | 0          | 0          | 0          | 0.0367089  | 0.151304  |
| CACNG2       | 0          | 0.00235445 | 0          | 0         | 0         | 0          | 0.00557939 | 0         | 0          | 0          | 0          | 0          | 0          | 0          | 0         |
| CACNG3       | 0          | 0          | 0          | 0         | 0         | 0          | 0          | 0         | 0          | 0          | 0          | 0          | 0          | 0          | 0         |
| CACNG4       | 0.0877142  | 0.0357602  | 0.0669816  | 0.0208597 | 0.104808  | 0.0172356  | 0.0693341  | 0.0539675 | 0.0328695  | 0.00846849 | 0          | 0.00482783 | 0.0478862  | 0.0211584  | 0.0290697 |
| CACNG5       | 0          | 0          | 0          | 0         | 0         | 0          | 0          | 0         | 0          | 0          | 0          | 0          | 0          | 0          | 0         |
| CACNG6       | 0.012187   | 0.0234875  | 0.0201638  | 0         | 0         | 0.0207541  | 0          | 0         | 0          | 0          | 0          | 0          | 0          | 0          | 0         |
| CACNG7       | 0          | 0          | 0          | 0         | 0         | 0          | 0          | 0         | 0          | 0.0247735  | 0          | 0          | 0          | 0.00515803 | 0         |
| CACNG8       | 0.0476031  | 0.0267586  | 0.0415685  | 0.0218028 | 0.0698361 | 0.0923262  | 0.0271759  | 0.0470063 | 0.00322085 | 0.00331927 | 0.00298544 | 0.0151384  | 0          | 0.0248795  | 0.0949501 |
| CACTIN       | 2.85611    | 2.92498    | 3.08154    | 3.55365   | 6.19589   | 6.4617     | 3.09317    | 1.89546   | 2.46099    | 1.65199    | 1.50958    | 2.35543    | 4.5789     | 3.116      | 2.33339   |
| CACTIN-AS1   | 0.226947   | 0.112918   | 0.137153   | 0.187191  | 0.402116  | 0.305704   | 0.148853   | 0.129242  | 0.0232211  | 0.0287145  | 0.0354991  | 0.151669   | 0.0131844  | 0.249123   | 0.531182  |
| CACUL1       | 5.6784     | 4.91027    | 4.80059    | 8.0112    | 3.78693   | 7.26257    | 3.84206    | 5.09003   | 9.22097    | 7.03763    | 6.97717    | 5.67788    | 9.66135    | 6.01369    | 4.30917   |
| CACYBP       | 3.86765    | 3.26615    | 3.58654    | 5.70517   | 1.65919   | 5.40359    | 2.90943    | 2.97811   | 3.05239    | 5.48521    | 7.46339    | 2.80238    | 7.986      | 4.66676    | 2.99778   |
| CAD          | 3.48413    | 3.98125    | 4.07722    | 8.78023   | 7.58996   | 9.43503    | 5.80179    | 3.23518   | 1.95326    | 3.16845    | 3.4594     | 3.82682    | 6.6915     | 5.44075    | 4.47578   |
| CADM1        | 2.01724    | 2.20527    | 3.14156    | 1.2701    | 1.2763    | 2.51145    | 2.15289    | 2.8085    | 1.00709    | 0.403245   | 0.642141   | 0.497463   | 0.584495   | 0.523021   | 2.82138   |

|           |            |            |           |            |            |           |           |           |            |            |            |            |            |            |            |
|-----------|------------|------------|-----------|------------|------------|-----------|-----------|-----------|------------|------------|------------|------------|------------|------------|------------|
| CADM2     | 0.0304483  | 0.0214414  | 0.0445651 | 0.00482736 | 0.00363821 | 0.0438753 | 0.0374391 | 0.0624459 | 0          | 0          | 0.00264403 | 0.00335178 | 0.00453348 | 0.00612062 | 0          |
| CADM2-AS2 | 0          | 0          | 0         | 0          | 0          | 0         | 0         | 0         | 0          | 0          | 0          | 0          | 0          | 0          | 0          |
| CADM3     | 2.39115    | 2.42139    | 3.43203   | 0.951502   | 1.29623    | 8.90069   | 7.04726   | 1.99665   | 0.0724194  | 0.650955   | 1.17499    | 0.124088   | 0.593673   | 2.17063    | 2.16567    |
| CADM3-AS1 | 1.04598    | 0.544469   | 0.472655  | 0.106614   | 0.585675   | 0.443113  | 0.729991  | 0.681681  | 0.00855666 | 0.0245006  | 0.12658    | 0.0695523  | 0.0827633  | 0.229702   | 0.548873   |
| CADM4     | 3.60547    | 4.09951    | 4.36406   | 3.58401    | 7.05436    | 4.80877   | 4.38376   | 2.17397   | 3.75636    | 6.22052    | 2.70141    | 5.82169    | 10.0666    | 4.56919    | 1.89398    |
| CADPS     | 0.125075   | 0.0984297  | 0.124165  | 0.0558538  | 0.265522   | 0.0496999 | 0.157087  | 0.103746  | 0.00507758 | 0.0627928  | 0.127075   | 0.0268484  | 0.0188295  | 0.00871596 | 0.0957992  |
| CADPS2    | 3.12367    | 1.56857    | 0.813578  | 1.59981    | 0.965746   | 2.71752   | 1.34228   | 1.40645   | 0.532324   | 1.31472    | 1.69294    | 0.579662   | 0.914092   | 0.992542   | 2.39721    |
| CAGE1     | 0.0270284  | 0.00976701 | 0.0223598 | 0.0487437  | 0.0419844  | 0.040275  | 0.0231451 | 0.0120103 | 0.0329175  | 0.0169617  | 0.0152558  | 0.0386791  | 0          | 0.0282524  | 0          |
| CAHM      | 0.261208   | 0.289464   | 0.367353  | 0.134591   | 0.730344   | 0.533797  | 0.328063  | 0.23214   | 0.190873   | 0.131137   | 0.383333   | 0.168211   | 0.0842651  | 0.259386   | 0.225077   |
| CALB1     | 0.127812   | 0.0835751  | 0.143497  | 0.0470406  | 0          | 0.0310943 | 0.0521183 | 0.121702  | 0          | 0.0572917  | 0.0309179  | 0          | 0          | 0.00954286 | 0          |
| CALB2     | 1.02333    | 0.23515    | 0.338629  | 0.243363   | 0.635835   | 2.85536   | 0.52129   | 0.461722  | 0.153391   | 10.5319    | 3.53674    | 2.36564    | 3.85992    | 1.16019    | 1.56007    |
| CALCA     | 0.0163903  | 0          | 0         | 0.0168906  | 0.0509195  | 0.0558244 | 0.0187139 | 0.0145663 | 0          | 0          | 0          | 0          | 0          | 0          | 0          |
| CALCB     | 0.0224472  | 0          | 0         | 0.0231325  | 0.0697365  | 0         | 0         | 0.0199492 | 0          | 0.112694   | 0          | 0          | 0.10138    | 0.0469275  | 0          |
| CALCOCO1  | 12.7872    | 23.3607    | 24.3241   | 15.3071    | 28.2189    | 22.0289   | 20.7763   | 14.1122   | 33.8852    | 8.49662    | 7.30757    | 12.4224    | 7.80908    | 8.43836    | 10.0058    |
| CALCOCO2  | 12.9932    | 10.3179    | 10.2776   | 12.3654    | 6.5927     | 16.1334   | 8.68107   | 8.93412   | 12.0807    | 11.1029    | 11.0404    | 8.7895     | 12.4163    | 8.49911    | 11.3372    |
| CALCR     | 0.00580608 | 0.00839238 | 0.0288192 | 0.0119667  | 0          | 0.0543818 | 0.0066292 | 0.0103199 | 0          | 0.0291489  | 0.019663   | 0.00415441 | 0          | 0          | 0.00833827 |
| CALCRL    | 3.0757     | 1.49642    | 1.19757   | 4.78929    | 0.531499   | 6.04793   | 1.19348   | 2.20882   | 1.19062    | 6.45582    | 12.4117    | 1.52815    | 5.69377    | 4.97582    | 6.95504    |
| CALD1     | 22.9793    | 10.7885    | 12.7335   | 14.4719    | 13.6395    | 34.626    | 8.04336   | 12.006    | 11.4258    | 30.5665    | 42.8765    | 9.83472    | 19.9395    | 29.5483    | 56.6089    |
| CALHM1    | 0.022719   | 0          | 0.0438544 | 0          | 0.105871   | 0.0515864 | 0.0172932 | 0.0471117 | 0.0184461  | 0.00950488 | 0.00854896 | 0.0216747  | 0.00488605 | 0.0554116  | 0.174012   |
| CALHM2    | 4.33413    | 2.42579    | 2.79963   | 3.42631    | 7.41487    | 7.78535   | 4.35203   | 2.60657   | 1.07016    | 3.59174    | 10.1607    | 1.49537    | 4.3899     | 4.44352    | 10.641     |
| CALHM3    | 0          | 0          | 0         | 0          | 0          | 0         | 0.0159951 | 0         | 0          | 0          | 0          | 0          | 0          | 0          | 0          |
| CALHM4    | 0          | 0          | 0         | 0.0318334  | 0          | 0.0263027 | 0         | 0.0274528 | 0          | 0          | 0          | 0          | 0          | 0          | 0          |
| CALHM5    | 0.53216    | 0.225635   | 0.342409  | 0.219363   | 0.315956   | 0.894171  | 0.391566  | 0.235419  | 0.190113   | 0.946956   | 1.78888    | 0.106617   | 0.556985   | 0.731791   | 1.53529    |
| CALHM6    | 0.102222   | 0.167457   | 0.21987   | 0.969153   | 0.285815   | 1.63636   | 0.0700282 | 0.25437   | 0.0995959  | 0.564516   | 1.26935    | 0.0877711  | 1.37182    | 0.224388   | 0.205525   |
| CALM1     | 22.3413    | 16.4026    | 17.6439   | 68.4397    | 13.4885    | 42.987    | 16.1643   | 20.4885   | 34.4883    | 57.1219    | 67.5716    | 35.353     | 92.3839    | 41.5745    | 30.4594    |
| CALM2     | 17.0608    | 10.3583    | 13.5302   | 24.1387    | 3.56158    | 17.3757   | 10.6457   | 13.4761   | 7.77943    | 26.564     | 33.8895    | 9.78922    | 36.6894    | 18.6532    | 15.7045    |

|            |           |           |           |            |           |            |           |           |           |           |           |           |           |            |           |
|------------|-----------|-----------|-----------|------------|-----------|------------|-----------|-----------|-----------|-----------|-----------|-----------|-----------|------------|-----------|
| CALM3      | 16.0723   | 12.9093   | 13.2232   | 26.2845    | 33.7987   | 43.2557    | 15.5022   | 13.8527   | 13.3359   | 20.8032   | 33.8786   | 14.4083   | 31.5696   | 19.5967    | 21.9425   |
| CALML3     | 143.395   | 213.172   | 65.0494   | 264.609    | 1278.39   | 255.129    | 168.135   | 85.474    | 2593.85   | 515.462   | 879.365   | 708.797   | 472.231   | 147.152    | 116.877   |
| CALML3-AS1 | 0.863937  | 2.85907   | 2.5824    | 2.19933    | 2.88321   | 1.07576    | 2.53681   | 1.88573   | 2.90339   | 1.93217   | 1.51157   | 4.7173    | 1.82068   | 1.6085     | 0.530158  |
| CALML4     | 1.88268   | 1.8231    | 2.02232   | 0.924702   | 1.015     | 1.46869    | 1.89776   | 1.83988   | 0.348591  | 0.524585  | 0.797283  | 0.541183  | 0.603426  | 1.00558    | 1.38978   |
| CALML5     | 614.348   | 622.541   | 380.922   | 131.581    | 2853.73   | 409.484    | 771.514   | 265.853   | 8260.16   | 438.821   | 1499.48   | 983.152   | 37.6874   | 208.138    | 19.0085   |
| CALML6     | 0.12612   | 0.202555  | 0.104336  | 0.0649853  | 0.359165  | 0.196881   | 0.24      | 0.186809  | 0.0256    | 0.0263823 | 0.047458  | 0.210565  | 0.013562  | 0.0549299  | 0.12075   |
| CALN1      | 0.344288  | 0.526404  | 0.619007  | 0.435219   | 0.481318  | 0.0684032  | 0.746883  | 0.12035   | 0.402532  | 0.555991  | 0.658128  | 0.732475  | 0.102181  | 0.011996   | 0.0560367 |
| CALR       | 69.7925   | 53.8278   | 56.3346   | 198.322    | 116.538   | 226.511    | 64.1034   | 46.9471   | 139.763   | 149.642   | 186.967   | 96.1333   | 252.52    | 103.651    | 103.014   |
| CALR3      | 0         | 0         | 0.0148185 | 0          | 0         | 0          | 0         | 0         | 0.0218155 | 0         | 0.0202211 | 0         | 0.0115571 | 0          | 0         |
| CALU       | 7.68559   | 4.08867   | 5.23036   | 13.2003    | 3.12293   | 21.3037    | 6.30558   | 6.03573   | 4.52565   | 20.6137   | 31.2723   | 5.01317   | 26.7109   | 16.0327    | 28.8921   |
| CALY       | 0.0400399 | 0.0385837 | 0.0331238 | 0          | 0         | 0.0170467  | 0.0457162 | 0         | 0         | 0         | 0         | 0         | 0.0258335 | 0.0104633  | 0         |
| CAMK1      | 1.56665   | 0.904311  | 1.23189   | 1.45463    | 2.38537   | 3.23591    | 1.77104   | 0.854686  | 0.377824  | 1.22651   | 3.81728   | 0.566041  | 1.0108    | 1.41872    | 2.33902   |
| CAMK1D     | 4.38335   | 6.25006   | 6.54665   | 3.88836    | 5.70833   | 4.2536     | 7.99598   | 5.29057   | 14.2311   | 3.91358   | 3.7892    | 5.73134   | 4.65451   | 2.25259    | 3.11081   |
| CAMK1G     | 0.187393  | 0.0857744 | 0.0697612 | 0.0869013  | 0.116434  | 0.0478688  | 0.0748858 | 0.0749427 | 0.0114112 | 0.258717  | 0.296161  | 0.254761  | 0.0785883 | 0.215468   | 0.107648  |
| CAMK2A     | 0.0315178 | 0.0412184 | 0.0856708 | 0.03248    | 0.090922  | 0.0766771  | 0.128521  | 0.0320119 | 0.0767702 | 0.0847672 | 0.0711593 | 0.115981  | 0.0842454 | 0.108248   | 0.265115  |
| CAMK2B     | 0.0353021 | 0.0801857 | 0.0876132 | 0.0571683  | 0.0313351 | 0.047236   | 0.230325  | 0.071711  | 0         | 0.018989  | 0.0227724 | 0.0108255 | 0         | 0          | 0         |
| CAMK2D     | 3.75195   | 2.87719   | 3.00051   | 4.66622    | 3.58062   | 5.34788    | 2.64315   | 3.74063   | 5.55464   | 6.96665   | 8.37819   | 4.55516   | 8.11083   | 6.26259    | 5.06241   |
| CAMK2G     | 3.61525   | 3.75869   | 2.99456   | 3.09997    | 3.9778    | 5.25495    | 4.03917   | 2.61659   | 1.40094   | 2.90468   | 3.35974   | 2.31571   | 3.33093   | 2.93682    | 2.76642   |
| CAMK2N1    | 2.4216    | 1.26637   | 1.65315   | 0.862278   | 2.27836   | 2.22122    | 2.69747   | 1.95091   | 0.323697  | 2.45867   | 3.12263   | 0.324005  | 3.01049   | 1.3531     | 4.14217   |
| CAMK2N2    | 0.272271  | 0.155781  | 0.197087  | 0.315656   | 0.449364  | 0.318774   | 0.136006  | 0.0907395 | 0.227972  | 0.42716   | 0.51867   | 0.231346  | 0.592879  | 0.293495   | 0.391016  |
| CAMK4      | 0.226426  | 0.0715081 | 0.116482  | 0.135297   | 0.0413786 | 0.0567056  | 0.0543122 | 0.189392  | 0.0185386 | 0.152841  | 0.197612  | 0.0258678 | 0.106805  | 0.078562   | 0.204943  |
| CAMKK1     | 1.94153   | 2.70908   | 2.78832   | 1.21115    | 3.84423   | 2.42909    | 3.82469   | 1.35737   | 3.39868   | 1.66354   | 1.01697   | 2.74881   | 1.37292   | 1.13108    | 0.773284  |
| CAMKK2     | 4.63526   | 3.72047   | 4.5777    | 5.56147    | 5.12737   | 7.93147    | 4.95897   | 2.9861    | 2.03031   | 3.71612   | 4.16858   | 2.2402    | 5.97184   | 4.37958    | 5.92956   |
| CAMKMT     | 1.23529   | 1.24056   | 1.13273   | 1.33435    | 1.29463   | 1.40667    | 1.25748   | 1.01846   | 1.1238    | 1.3823    | 1.5961    | 1.19271   | 1.2003    | 1.12788    | 0.83358   |
| CAMKV      | 0.0208998 | 0.0637757 | 0.0633959 | 0.00717929 | 0         | 0.00593197 | 0.103405  | 0.018574  | 0         | 0         | 0.0157289 | 0.0199392 | 0         | 0.00364105 | 0         |
| CAMLG      | 4.9548    | 4.511     | 4.28683   | 4.51036    | 3.67188   | 5.30884    | 3.39434   | 4.00894   | 5.33038   | 4.75478   | 9.67184   | 2.86578   | 4.65536   | 3.15607    | 2.07542   |

|           |           |           |           |           |           |           |           |           |           |           |           |           |           |           |           |
|-----------|-----------|-----------|-----------|-----------|-----------|-----------|-----------|-----------|-----------|-----------|-----------|-----------|-----------|-----------|-----------|
| CAMP      | 0.124258  | 0.044902  | 0         | 0.512206  | 0.0482539 | 0.026451  | 0         | 0.0276075 | 0         | 0.155957  | 0.841631  | 0         | 0.140299  | 0.0649427 | 0         |
| CAMSAP1   | 5.1739    | 5.5147    | 4.71426   | 6.81015   | 6.91094   | 7.07567   | 4.97939   | 3.81111   | 8.66881   | 7.41874   | 5.00533   | 7.10033   | 12.0339   | 5.67609   | 4.11153   |
| CAMSAP2   | 6.39665   | 6.62281   | 7.71213   | 7.75398   | 3.14336   | 7.81505   | 3.78766   | 5.70425   | 17.6211   | 9.99051   | 7.47915   | 7.32272   | 13.7675   | 10.2001   | 8.10659   |
| CAMSAP3   | 4.13088   | 10.7962   | 12.9698   | 7.09506   | 17.4976   | 8.22606   | 13.0322   | 5.42078   | 15.3087   | 9.10628   | 6.37998   | 13.5449   | 15.4348   | 7.64186   | 1.80279   |
| CAMTA1    | 0.872423  | 1.04338   | 1.1726    | 0.943903  | 0.360522  | 0.915779  | 0.674322  | 0.84532   | 1.10037   | 0.814083  | 0.996555  | 0.591621  | 0.727336  | 0.706153  | 0.508902  |
| CAMTA1-DT | 0.125777  | 0.040401  | 0         | 0         | 0.130251  | 0.107098  | 0.0478695 | 0.0372602 | 0         | 0.0526212 | 0.047329  | 0.029999  | 0         | 0.175298  | 0         |
| CAMTA2    | 3.38666   | 6.15367   | 5.80153   | 6.36055   | 10.1418   | 9.99112   | 7.87841   | 4.60444   | 6.5845    | 4.68687   | 4.56547   | 6.51689   | 7.60077   | 6.32887   | 6.36127   |
| CAND1     | 7.98067   | 8.49071   | 8.65225   | 12.1871   | 3.41082   | 10.0857   | 5.77352   | 8.02046   | 12.276    | 12.2641   | 12.7208   | 8.20115   | 13.3574   | 10.327    | 8.05161   |
| CAND1.11  | 0.0908461 | 0.0656566 | 0.13152   | 0.444693  | 0.0705577 | 0.560819  | 0.103725  | 0.181657  | 0.553202  | 0.769643  | 0.256385  | 0.45502   | 0.17584   | 1.16326   | 0.424016  |
| CAND2     | 0.599743  | 0.648351  | 0.875559  | 0.233718  | 0.962923  | 1.40328   | 0.828627  | 0.465817  | 0.0797938 | 0.208743  | 0.221886  | 0.129822  | 0.240625  | 0.329257  | 0.731026  |
| CANT1     | 4.35271   | 4.86208   | 4.96096   | 11.4444   | 10.5187   | 11.8644   | 5.11365   | 3.85713   | 6.79712   | 9.81938   | 9.87      | 5.8008    | 21.5678   | 7.67085   | 7.2552    |
| CANX      | 38.5299   | 26.8283   | 27.6316   | 57.2663   | 24.1067   | 66.506    | 27.0668   | 33.0916   | 39.765    | 46.3451   | 49.937    | 28.9066   | 74.0444   | 38.2528   | 35.4986   |
| CAP1      | 21.5138   | 17.522    | 17.4674   | 68.8725   | 16.6483   | 47.233    | 18.4901   | 16.6019   | 59.4      | 87.6346   | 73.4519   | 37.5581   | 139.011   | 53.09     | 36.3184   |
| CAP2      | 1.22329   | 0.552561  | 0.354196  | 0.890322  | 1.11636   | 1.60148   | 0.803108  | 0.502809  | 1.6295    | 1.74646   | 1.54492   | 1.32935   | 1.50452   | 1.11086   | 1.41641   |
| CAPG      | 12.4205   | 19.3755   | 17.2548   | 50.6204   | 35.5233   | 32.9737   | 15.8366   | 11.0499   | 30.5084   | 56.6183   | 70.8406   | 34.8204   | 68.1877   | 26.4236   | 16.1493   |
| CAPN1     | 20.3282   | 26.4349   | 24.9677   | 64.9881   | 53.968    | 69.0664   | 29.5971   | 16.7099   | 44.5481   | 39.2295   | 24.4377   | 36.9304   | 74.7603   | 30.3212   | 22.4442   |
| CAPN10    | 1.27795   | 2.64006   | 2.43303   | 2.20997   | 5.83289   | 2.97379   | 1.71896   | 1.12795   | 1.49243   | 2.02142   | 1.2549    | 2.00417   | 2.21945   | 2.61674   | 1.91071   |
| CAPN10-DT | 0.447679  | 0.909685  | 0.799745  | 0.501463  | 0.735713  | 0.613223  | 0.629672  | 0.449754  | 0.48991   | 0.407162  | 0.351564  | 0.622083  | 0.280468  | 0.769749  | 0.260896  |
| CAPN11    | 0.0933188 | 0.282037  | 0.2316    | 0.0961677 | 0.30309   | 0.0722361 | 0.116235  | 0.105552  | 0         | 0         | 0.124499  | 0.151755  | 0.0930499 | 0.0487725 | 0.268035  |
| CAPN12    | 0.200527  | 0.563837  | 0.528667  | 0.436353  | 1.16906   | 0.634665  | 0.524303  | 0.330654  | 0.393288  | 0.64641   | 0.344475  | 1.6443    | 0.305184  | 0.792929  | 0.612957  |
| CAPN13    | 0         | 0.0873421 | 0.0785532 | 0.0444789 | 0         | 0.0882029 | 0.0492801 | 0.122746  | 0.0735917 | 0         | 0         | 0.0061766 | 0.0167084 | 0         | 0         |
| CAPN14    | 0.146297  | 0.341596  | 0.274639  | 0.0869788 | 0.218509  | 0.110196  | 0.167037  | 0.260033  | 0.198732  | 0.0706222 | 0.0254079 | 0.0724703 | 0.0254127 | 0.032349  | 0.0484848 |
| CAPN15    | 5.02473   | 5.10994   | 5.74286   | 10.6378   | 14.9434   | 12.013    | 7.9038    | 4.48724   | 14.4552   | 4.34724   | 4.05322   | 6.48207   | 9.84226   | 6.37669   | 5.61879   |
| CAPN2     | 25.9931   | 10.2923   | 10.9266   | 35.3736   | 19.3977   | 36.1826   | 14.754    | 11.2247   | 11.4572   | 41.9779   | 29.723    | 20.4517   | 65.8137   | 33.6249   | 33.5031   |
| CAPN3     | 2.99557   | 4.35123   | 3.80612   | 2.5074    | 3.40643   | 1.96953   | 2.87907   | 3.25757   | 1.10834   | 1.61019   | 0.62068   | 2.68154   | 0.505609  | 1.61847   | 2.07841   |
| CAPN5     | 1.79767   | 0.767085  | 0.837346  | 0.717117  | 1.59683   | 5.9118    | 1.80574   | 0.791783  | 0.327441  | 1.01896   | 2.01149   | 0.23387   | 0.612237  | 0.96985   | 2.37727   |

|           |            |           |           |           |           |           |           |            |           |           |           |           |           |           |           |
|-----------|------------|-----------|-----------|-----------|-----------|-----------|-----------|------------|-----------|-----------|-----------|-----------|-----------|-----------|-----------|
| CAPN6     | 0.251065   | 0.151984  | 0.0745585 | 1.7315    | 0.239994  | 0.416594  | 0.205806  | 0.188799   | 0.117603  | 0.185836  | 0.254352  | 0.0737    | 0.0332279 | 0.296081  | 0.0462258 |
| CAPN7     | 6.87192    | 6.2697    | 7.04371   | 5.11063   | 1.86001   | 5.67089   | 5.05734   | 7.01597    | 4.66534   | 4.8478    | 6.33403   | 3.33995   | 4.21153   | 3.76879   | 3.94149   |
| CAPN8     | 0.20929    | 0.111454  | 0.091126  | 0.0454062 | 0.188215  | 0.234484  | 0.088038  | 0.225157   | 0.0536614 | 0.373282  | 1.03209   | 0.0472903 | 0         | 0.0575705 | 0         |
| CAPN9     | 0.00979807 | 0.0849755 | 0.154007  | 0         | 0.0304396 | 0.0584005 | 0.0783099 | 0.00870771 | 0         | 0.0122976 | 0         | 0         | 0         | 0         | 0         |
| CAPNS1    | 31.5436    | 17.8373   | 19.4507   | 85.6213   | 21.8934   | 84.7241   | 24.4502   | 16.0725    | 19.9978   | 60.7872   | 88.2983   | 37.9369   | 97.2861   | 41.8436   | 34.222    |
| CAPNS2    | 12.8166    | 18.5918   | 17.18     | 20.7654   | 16.5373   | 15.0956   | 12.1816   | 11.3904    | 61.9917   | 23.6848   | 35.8228   | 20.1721   | 13.0303   | 9.6478    | 2.09983   |
| CAPRIN1   | 13.7893    | 13.0162   | 13.174    | 26.0598   | 8.78163   | 23.4968   | 10.2521   | 13.421     | 13.2856   | 16.147    | 19.984    | 11.6433   | 25.1832   | 16.0964   | 12.9728   |
| CAPRIN2   | 2.4884     | 2.60236   | 2.73679   | 1.46606   | 1.68547   | 1.99976   | 1.77848   | 1.73576    | 2.97773   | 2.17292   | 1.95983   | 1.78396   | 1.62728   | 2.50027   | 2.24392   |
| CAPS      | 2.38222    | 2.71106   | 2.91598   | 0.855342  | 4.93944   | 1.955     | 3.98759   | 1.59981    | 0.485733  | 0.608808  | 0.766611  | 0.794423  | 0.479876  | 1.37463   | 1.85765   |
| CAPS2     | 0.297468   | 0.269451  | 0.298585  | 0.0899213 | 0.0924143 | 0.209387  | 0.176613  | 0.289039   | 0.0627958 | 0.0746707 | 0.147754  | 0.0482452 | 0.046062  | 0.062188  | 0.108225  |
| CAPSL     | 0          | 0.0101554 | 0         | 0         | 0         | 0         | 0         | 0          | 0         | 0         | 0.0475877 | 0         | 0         | 0         | 0         |
| CAPZA1    | 17.6107    | 17.7597   | 16.9864   | 44.2262   | 5.07749   | 27.6891   | 12.7298   | 19.0288    | 33.9668   | 50.2278   | 56.8471   | 26.2776   | 64.8061   | 32.0533   | 22.0039   |
| CAPZA2    | 12.4556    | 7.17979   | 8.41885   | 16.6724   | 3.11274   | 11.4673   | 6.25831   | 9.67272    | 14.1526   | 34.2744   | 38.9888   | 11.9768   | 38.0393   | 16.136    | 13.3876   |
| CAPZA3    | 0.257622   | 0.558568  | 0.781452  | 0.0221239 | 0.066696  | 0.0365603 | 0.12256   | 0.457906   | 0.0261462 | 0.0808356 | 0         | 0         | 0         | 0         | 0         |
| CAPZB     | 18.3881    | 17.1041   | 18.4912   | 40.8336   | 28.4955   | 47.2038   | 21.5253   | 15.8193    | 28.7688   | 40.2803   | 48.5947   | 29.1981   | 60.5549   | 30.1521   | 31.5884   |
| CARD10    | 2.33864    | 2.20783   | 1.47311   | 7.81733   | 9.32152   | 11.7913   | 5.17772   | 0.770165   | 2.48676   | 3.57592   | 2.08389   | 3.72471   | 10.0069   | 7.38019   | 3.60579   |
| CARD11    | 0.221539   | 0.139011  | 0.200321  | 0.185827  | 0.664243  | 0.460626  | 0.135296  | 0.242672   | 0.0690209 | 0.232789  | 0.261721  | 0.158517  | 0.528529  | 1.57254   | 0.658512  |
| CARD14    | 2.11548    | 3.75021   | 3.8743    | 4.00081   | 8.453     | 3.07705   | 3.06092   | 3.20323    | 7.953     | 2.58418   | 1.42542   | 5.29958   | 2.41668   | 3.32924   | 0.669869  |
| CARD16    | 1.26833    | 1.02071   | 1.35087   | 3.45382   | 0.426837  | 2.50545   | 0.506778  | 0.803233   | 0.332775  | 3.36713   | 9.64674   | 0.427838  | 2.19482   | 1.83551   | 2.67562   |
| CARD17    | 0.0993264  | 0.167499  | 0.246509  | 0.102359  | 0.0771441 | 0.253725  | 0.170112  | 0.13241    | 0         | 0.311662  | 0.392445  | 0.0710707 | 0         | 0         | 0         |
| CARD18    | 1.99872    | 1.23333   | 0.754219  | 1.37316   | 1.0349    | 1.04502   | 0.760691  | 1.49583    | 7.81511   | 0.92422   | 1.66254   | 1.05378   | 0.633469  | 0.348206  | 0.25179   |
| CARD19    | 2.70862    | 2.63674   | 2.9572    | 2.54446   | 4.3076    | 5.6953    | 2.69289   | 1.80949    | 1.66062   | 3.37647   | 5.99057   | 1.31184   | 2.663     | 2.71572   | 1.79942   |
| CARD6     | 1.66639    | 1.22203   | 1.19631   | 3.3996    | 2.50951   | 3.66031   | 1.24477   | 1.30524    | 3.66682   | 4.9345    | 5.67532   | 3.52854   | 7.62078   | 3.31543   | 4.1373    |
| CARD8     | 1.10572    | 1.2018    | 1.30946   | 1.29553   | 1.30926   | 1.74678   | 1.00803   | 0.96744    | 0.382768  | 0.943128  | 1.57721   | 0.562204  | 0.862726  | 1.40816   | 2.24038   |
| CARD8-AS1 | 0.506954   | 0.289702  | 0.253584  | 1.11776   | 0.384581  | 0.853291  | 0.201915  | 0.314329   | 0.358961  | 1.25776   | 2.18268   | 0.565198  | 1.17142   | 0.745575  | 0.96509   |
| CARD9     | 0.337934   | 0.614522  | 0.946907  | 0.77514   | 1.18532   | 0.770419  | 0.211591  | 0.503776   | 0.238974  | 0.232594  | 0.529158  | 0.241801  | 0.2743    | 0.250685  | 0.610559  |

|          |           |           |            |            |           |           |           |           |            |            |           |           |            |            |          |
|----------|-----------|-----------|------------|------------|-----------|-----------|-----------|-----------|------------|------------|-----------|-----------|------------|------------|----------|
| CARF     | 1.44191   | 1.38534   | 1.43574    | 0.65845    | 0.410147  | 0.744939  | 0.899313  | 1.33773   | 0.462447   | 0.493133   | 0.681979  | 0.522093  | 0.232119   | 0.479657   | 0.706805 |
| CARHSP1  | 4.6545    | 3.77094   | 3.32253    | 20.0345    | 9.55816   | 13.8081   | 4.84642   | 3.26558   | 15.1379    | 18.841     | 22.0398   | 11.1279   | 42.1622    | 12.9802    | 6.94623  |
| CARM1    | 6.19903   | 6.26286   | 7.21184    | 14.6328    | 10.0168   | 21.7576   | 8.4311    | 5.37059   | 9.48701    | 11.881     | 14.9465   | 8.99947   | 20.5714    | 11.2724    | 8.8354   |
| CARMIL1  | 4.7982    | 3.36102   | 3.0176     | 4.58462    | 2.66094   | 4.94917   | 3.99449   | 3.41594   | 2.98412    | 3.96848    | 3.54531   | 3.34785   | 4.94601    | 3.70598    | 2.54581  |
| CARMIL2  | 0.153758  | 0.131437  | 0.139509   | 0.18912    | 0.477679  | 0.177379  | 0.0792833 | 0.110199  | 0.00604064 | 0.0747027  | 0.0671898 | 0.0354897 | 0.163206   | 0.101099   | 0.213693 |
| CARMIL3  | 1.06659   | 1.69199   | 1.21949    | 0.476992   | 2.68837   | 0.59118   | 1.28673   | 1.00602   | 2.59798    | 0.675656   | 0.357807  | 1.40036   | 0.51612    | 0.394421   | 0.281786 |
| CARMN    | 6.52988   | 2.54587   | 3.41681    | 1.14136    | 3.51248   | 5.04929   | 6.74431   | 1.90707   | 0.337216   | 1.0136     | 1.5889    | 1.5024    | 0.253081   | 3.96754    | 10.8689  |
| CARNMT1  | 1.44805   | 1.63622   | 1.63637    | 2.8561     | 0.912536  | 1.69373   | 1.1864    | 1.88228   | 2.67973    | 2.21846    | 2.7516    | 1.86207   | 2.83919    | 2.00601    | 1.39872  |
| CARNS1   | 0.460645  | 0.691123  | 0.656033   | 0.198296   | 0.878576  | 0.407128  | 1.07853   | 0.362744  | 0.482898   | 0.124414   | 0.0987363 | 0.28371   | 0.0263347  | 0.127995   | 0.242846 |
| CARS     | 4.72626   | 5.06848   | 5.38142    | 8.382      | 7.96044   | 7.68033   | 6.23002   | 4.49965   | 15.2113    | 9.13113    | 6.93661   | 6.5443    | 15.9245    | 7.89242    | 6.32609  |
| CARS-AS1 | 0.240404  | 0.33069   | 0.362152   | 0.120361   | 0.377844  | 0.201169  | 0.480795  | 0.25113   | 0.109184   | 0.156021   | 0.0921908 | 0.253425  | 0.00570678 | 0.310397   | 0.635284 |
| CARS2    | 3.6489    | 3.8568    | 3.70978    | 5.59262    | 4.31478   | 3.6299    | 3.20414   | 2.76689   | 3.01771    | 3.25333    | 4.31262   | 2.6722    | 3.92068    | 4.08661    | 2.93292  |
| CARTPT   | 0         | 0         | 0          | 0          | 0         | 0.0861465 | 0         | 0         | 0          | 0          | 0         | 0         | 0          | 0          | 0        |
| CASC1    | 0.166782  | 0.141584  | 0.236527   | 0.016369   | 0.0493468 | 0.1082    | 0.0362718 | 0.169397  | 0          | 0.00996805 | 0.0179311 | 0.0170482 | 0          | 0.0290559  | 0.182492 |
| CASC10   | 0.0930842 | 0.319552  | 0.423532   | 0.539583   | 0.957921  | 0.445837  | 0.478262  | 0.15511   | 0.18422    | 0.642566   | 1.0114    | 0.191487  | 0.495474   | 0.69326    | 0.284071 |
| CASC11   | 0.137031  | 0.0513518 | 0.0251915  | 0          | 0         | 0.0518579 | 0         | 0.040594  | 0          | 0          | 0.0515637 | 0.0326832 | 0.00982354 | 0.0238728  | 0        |
| CASC15   | 0.248479  | 0.17293   | 0.234109   | 0.376984   | 0.514631  | 0.446662  | 0.149733  | 0.208559  | 0.58002    | 0.641059   | 1.34797   | 0.232119  | 0.42306    | 0.631293   | 1.64546  |
| CASC16   | 0.0231199 | 0         | 0          | 0          | 0         | 0         | 0         | 0         | 0          | 0          | 0         | 0         | 0          | 0          | 0        |
| CASC17   | 0.056118  | 0         | 0.00928495 | 0          | 0         | 0         | 0         | 0         | 0          | 0          | 0.0253401 | 0         | 0          | 0          | 0        |
| CASC18   | 0.0427941 | 0.0288664 | 0.0283218  | 0.00882011 | 0.0398844 | 0.0291509 | 0.0488609 | 0.0304255 | 0          | 0          | 0         | 0         | 0          | 0.0134196  | 0        |
| CASC19   | 0.0716503 | 0.0690444 | 0          | 0.0738377  | 0.111298  | 0         | 0.081808  | 0         | 0          | 0          | 0         | 0         | 0          | 0          | 0        |
| CASC2    | 0.0798955 | 0.0598809 | 0.0440634  | 0.105205   | 0.0413684 | 0.109604  | 0.0253395 | 0.0710044 | 0.0702749  | 0.0779932  | 0.0851814 | 0.0254077 | 0.0343654  | 0.0556758  | 0.05737  |
| CASC20   | 0         | 0         | 0          | 0          | 0         | 0.0126078 | 0         | 0         | 0          | 0          | 0.016715  | 0         | 0          | 0.00773869 | 0        |
| CASC21   | 0.197804  | 0.152488  | 0.26182    | 0.081537   | 0.122903  | 0         | 0         | 0.140633  | 0.144542   | 0          | 0         | 0.0283068 | 0.0510488  | 0          | 0        |
| CASC22   | 0         | 0         | 0          | 0          | 0         | 0         | 0         | 0         | 0          | 0          | 0         | 0         | 0          | 0          | 0        |
| CASC23   | 0         | 0         | 0          | 0          | 0         | 0         | 0         | 0.0259856 | 0          | 0          | 0         | 0         | 0          | 0.0305637  | 0        |

|          |           |           |          |           |           |           |           |           |           |           |           |            |           |           |           |
|----------|-----------|-----------|----------|-----------|-----------|-----------|-----------|-----------|-----------|-----------|-----------|------------|-----------|-----------|-----------|
| CASC3    | 12.0089   | 11.124    | 11.9087  | 12.9746   | 11.6362   | 17.8533   | 14.9062   | 10.8349   | 9.96612   | 9.12406   | 8.78146   | 9.39294    | 16.1249   | 9.78352   | 11.0284   |
| CASC4    | 8.44995   | 5.1235    | 5.9383   | 5.94296   | 4.95259   | 9.65767   | 5.65615   | 5.78059   | 3.86891   | 9.58505   | 16.5082   | 2.95869    | 7.26927   | 5.73962   | 13.2195   |
| CASC6    | 0         | 0         | 0        | 0         | 0         | 0         | 0         | 0         | 0         | 0         | 0         | 0          | 0         | 0         | 0         |
| CASC8    | 0.131767  | 0.0750304 | 0.069368 | 0.074067  | 0.0372144 | 0.0713986 | 0.0683851 | 0.0532288 | 0         | 0.0300693 | 0         | 0.0685692  | 0.023186  | 0.0375639 | 0.0516092 |
| CASC9    | 1.14106   | 0.994338  | 1.08155  | 0.699719  | 1.99042   | 0.447646  | 0.914646  | 0.706941  | 0.300436  | 0.664252  | 0.224771  | 0.7576     | 0.159901  | 0.855402  | 0.28457   |
| CASD1    | 1.58759   | 1.1851    | 1.244    | 1.5266    | 0.581786  | 1.79924   | 0.868035  | 1.83817   | 0.551458  | 1.25589   | 2.07617   | 0.479985   | 1.54727   | 1.24462   | 1.53337   |
| CASK     | 3.28031   | 2.67938   | 2.61235  | 4.87268   | 2.2752    | 5.51746   | 2.03482   | 2.44997   | 3.97804   | 4.83707   | 4.87867   | 3.29354    | 6.85975   | 3.05774   | 3.70718   |
| CASKIN1  | 0.202217  | 0.336405  | 0.386006 | 0.123667  | 0.497226  | 0.86903   | 0.391544  | 0.393702  | 0.649154  | 0.310546  | 0.454129  | 0.524163   | 0.141305  | 0.712462  | 0.0927042 |
| CASKIN2  | 3.44724   | 3.58935   | 3.63801  | 4.55319   | 7.56646   | 8.96351   | 4.49385   | 2.22989   | 4.40494   | 3.46277   | 2.59641   | 3.5216     | 6.34827   | 5.00335   | 7.11137   |
| CASP1    | 3.00339   | 3.93699   | 2.97169  | 10.0203   | 2.22107   | 7.14429   | 1.46751   | 2.94523   | 1.64382   | 4.98056   | 8.50175   | 2.22291    | 6.23148   | 4.61626   | 3.70914   |
| CASP10   | 1.7138    | 1.46307   | 1.72887  | 2.46203   | 1.28544   | 2.12972   | 1.47063   | 1.20451   | 0.147591  | 1.42975   | 1.69102   | 0.520271   | 1.19602   | 1.14007   | 2.0089    |
| CASP12   | 0.233637  | 0.106316  | 0.139592 | 0.0267522 | 0.141135  | 0.187887  | 0.17784   | 0.0807478 | 0.031616  | 0.0325821 | 0.0732631 | 0.0185748  | 0.100494  | 0.135677  | 0.0745628 |
| CASP14   | 44.2913   | 71.3232   | 36.5678  | 85.059    | 179.288   | 43.3858   | 109.89    | 128.718   | 861.267   | 62.9534   | 150.04    | 124.923    | 3.61421   | 32.1125   | 5.77196   |
| CASP16P  | 0.0676697 | 0.105964  | 0.181939 | 0         | 0.394179  | 0.0864298 | 0.0579473 | 0.105244  | 0         | 0         | 0         | 0.0363146  | 0         | 0.0707343 | 0         |
| CASP17P  | 1.38335   | 0.576448  | 0.804176 | 0.154117  | 0.75499   | 1.14607   | 0.725699  | 0.265817  | 0.0455341 | 0.797734  | 1.56163   | 0.187264   | 0.506571  | 0.547134  | 1.82558   |
| CASP1P2  | 0.263588  | 0.614684  | 0.357616 | 0.651925  | 0.294799  | 0.439906  | 0.0601913 | 0.609064  | 0.0898858 | 0.224965  | 0.297558  | 0.165972   | 0.918355  | 0.374715  | 0         |
| CASP2    | 4.91027   | 5.062     | 4.75674  | 7.03706   | 4.94456   | 8.45251   | 5.11491   | 4.25989   | 4.27154   | 4.09523   | 5.11112   | 3.98115    | 5.38985   | 4.46047   | 4.71644   |
| CASP3    | 2.98073   | 2.37804   | 2.63961  | 6.10181   | 0.97872   | 5.79832   | 1.6417    | 2.61313   | 2.44964   | 6.11355   | 8.46229   | 1.60104    | 6.54603   | 3.93899   | 3.99068   |
| CASP4    | 10.3638   | 10.8283   | 11.0714  | 43.594    | 10.4197   | 26.9184   | 7.52844   | 8.77531   | 23.1172   | 37.8352   | 42.2651   | 23.1694    | 55.757    | 27.7226   | 16.4307   |
| CASP5    | 0.015501  | 0.0373432 | 0        | 0.830662  | 0.0963139 | 0.316774  | 0         | 0.013776  | 0         | 0.272376  | 0.27998   | 0          | 0.550065  | 0.016203  | 0.178092  |
| CASP6    | 1.96458   | 2.14823   | 1.76356  | 3.05837   | 1.21201   | 3.39309   | 1.38404   | 1.33733   | 1.35753   | 2.2559    | 4.32543   | 1.15647    | 2.51709   | 1.97345   | 1.26062   |
| CASP7    | 2.55898   | 1.64033   | 1.98079  | 5.52865   | 1.92938   | 8.50542   | 1.61466   | 2.06142   | 1.02974   | 3.70951   | 5.67618   | 1.27422    | 5.79794   | 3.49219   | 3.51383   |
| CASP8    | 3.32171   | 2.06125   | 2.5565   | 3.43104   | 1.58057   | 3.47467   | 1.39097   | 2.75998   | 0.891794  | 2.42315   | 4.2881    | 1.28153    | 2.4278    | 2.14787   | 2.55594   |
| CASP8AP2 | 2.38514   | 2.33303   | 2.25625  | 2.13704   | 0.7176    | 1.82987   | 0.972876  | 1.70003   | 1.33364   | 2.16037   | 2.46848   | 1.27324    | 2.38008   | 1.94587   | 1.95103   |
| CASP9    | 0.742483  | 0.745853  | 0.677976 | 1.32819   | 1.30566   | 1.50897   | 0.655801  | 0.435755  | 0.690992  | 0.91431   | 1.77914   | 0.77184    | 1.01684   | 0.761465  | 1.32784   |
| CASQ1    | 0.189116  | 0.119594  | 0.117337 | 0.146167  | 0.110161  | 0.0301931 | 0.148449  | 0.157566  | 0         | 0.05934   | 0.026686  | 0.00845734 | 0.0305041 | 0.012355  | 0.0678986 |

|            |           |            |            |           |           |            |           |           |           |           |           |            |           |            |           |
|------------|-----------|------------|------------|-----------|-----------|------------|-----------|-----------|-----------|-----------|-----------|------------|-----------|------------|-----------|
| CASQ2      | 1.86859   | 0.194104   | 0.255274   | 0.105998  | 0.213032  | 4.11637    | 1.58544   | 0.266617  | 0.0104391 | 0.139855  | 0.232228  | 0.0551982  | 0.132727  | 0.120956   | 1.04633   |
| CASR       | 0         | 0          | 0.00372409 | 0         | 0.0209779 | 0.00383311 | 0         | 0.0040007 | 0.0328951 | 0         | 0         | 0.00322106 | 0.0058089 | 0.00941106 | 0         |
| CASS4      | 0.284138  | 0.266959   | 0.411353   | 0.358695  | 0.264819  | 0.393152   | 0.186541  | 0.3409    | 0.0692097 | 0.820232  | 1.41133   | 0.0813234  | 1.22827   | 0.408383   | 1.19357   |
| CAST       | 34.0897   | 28.911     | 31.3433    | 37.8014   | 16.8403   | 52.6148    | 23.7034   | 31.8611   | 57.3299   | 43.394    | 31.8463   | 35.1021    | 61.4924   | 27.892     | 20.0141   |
| CASTOR1    | 2.53974   | 4.73663    | 2.77386    | 3.19073   | 7.22529   | 4.87183    | 2.10154   | 1.90206   | 6.70756   | 2.82948   | 7.02267   | 2.98111    | 1.1139    | 2.31919    | 0.922093  |
| CASTOR2    | 2.25133   | 2.50022    | 2.42058    | 3.03763   | 5.08337   | 4.76071    | 3.21758   | 1.83513   | 5.22464   | 2.03195   | 2.00594   | 2.78329    | 3.41782   | 2.81776    | 3.06178   |
| CASTOR3    | 1.76701   | 2.13866    | 1.99365    | 0.554856  | 1.50451   | 1.64701    | 2.09738   | 1.51758   | 1.01293   | 0.41606   | 0.633041  | 0.714326   | 0.322876  | 0.76058    | 1.27851   |
| CASZ1      | 6.80168   | 10.9431    | 12.4421    | 6.48517   | 14.1629   | 8.72663    | 13.7527   | 9.80291   | 16.574    | 4.85248   | 3.03587   | 8.58561    | 5.839     | 3.67222    | 1.64744   |
| CAT        | 16.2303   | 14.1953    | 14.1178    | 12.4225   | 13.5982   | 18.7892    | 25.1947   | 11.0171   | 72.0939   | 15.7232   | 30.6806   | 15.8395    | 10.7963   | 6.61049    | 9.72524   |
| CATIP      | 0.0170671 | 0          | 0          | 0         | 0.0265112 | 0.0789521  | 0.0194867 | 0         | 0         | 0.021421  | 0.0385334 | 0          | 0.0330349 | 0.0267601  | 0         |
| CATIP-AS1  | 0         | 0.0203851  | 0.105003   | 0.0872014 | 0.131441  | 0.849022   | 0         | 0.0376008 | 0         | 0.106204  | 0.143285  | 0          | 0.0545952 | 0.0442251  | 0         |
| CATIP-AS2  | 0.0586891 | 0.00942576 | 0.0323678  | 0.141122  | 0.0607762 | 0.0832883  | 0.111682  | 0.017386  | 0         | 0         | 0         | 0          | 0.0252439 | 0.0715714  | 0.0842849 |
| CATSPER1   | 0.0353464 | 0.0510913  | 0.160826   | 0.0364255 | 0.10981   | 0.090291   | 0.0403574 | 0.0785323 | 0.204478  | 0.0776359 | 0.12968   | 0.0885195  | 0.0798186 | 0.0415655  | 0.139595  |
| CATSPER2   | 0.580135  | 0.961224   | 1.16249    | 0.377276  | 0.304079  | 0.450428   | 0.730248  | 0.762603  | 0.0427778 | 0.251204  | 0.101224  | 0.43454    | 0.0973975 | 0.531013   | 0.233641  |
| CATSPER2P1 | 1.17096   | 1.81026    | 1.79058    | 0.539715  | 0.532692  | 0.681847   | 0.937953  | 1.29109   | 0.310301  | 0.418489  | 0.419897  | 0.429704   | 0.24658   | 0.732787   | 0.410949  |
| CATSPER3   | 0.253947  | 0.261025   | 0.336133   | 0.610633  | 0.236681  | 0.273895   | 0.0966495 | 0.270825  | 0.0824744 | 0.361227  | 0.133782  | 0.19382    | 0.207538  | 0.20351    | 0.194507  |
| CATSPER4   | 0.0163094 | 0.0157162  | 0.0269846  | 0.0336146 | 0         | 0          | 0         | 0.0144944 | 0         | 0         | 0         | 0          | 0         | 0          | 0         |
| CATSPERB   | 0.2619    | 0.126188   | 0.147965   | 0.25673   | 0.0396899 | 0.310031   | 0.0583472 | 0.181663  | 0.108915  | 0.128278  | 0.216331  | 0.0959837  | 0.0947919 | 0.156912   | 0.137606  |
| CATSPERD   | 0         | 0.00887439 | 0          | 0         | 0         | 0          | 0.0210298 | 0.032738  | 0         | 0         | 0         | 0          | 0         | 0          | 0         |
| CATSPERE   | 0.202882  | 0.174557   | 0.203804   | 0.141873  | 0.0787865 | 0.320824   | 0.140641  | 0.186744  | 0.0264737 | 0.0727537 | 0.155412  | 0.139983   | 0.0280497 | 0.113609   | 0.291364  |
| CATSPERG   | 0.160888  | 0.423369   | 0.476079   | 0.133915  | 0.326811  | 0.221297   | 0.339132  | 0.390455  | 0.105508  | 0.0155331 | 0.0279418 | 0.079698   | 0.0558944 | 0.0743845  | 0.0177734 |
| CATSPERZ   | 0.0816832 | 0.254406   | 0.0691085  | 0.0639606 | 0.507894  | 0.356616   | 0.470656  | 0.387023  | 0.644022  | 0.33677   | 1.02289   | 0.570035   | 0.200696  | 0.24079    | 0         |
| CAV1       | 27.0024   | 15.0977    | 18.3921    | 25.7733   | 7.45913   | 21.3542    | 15.516    | 16.0191   | 15.9266   | 28.4518   | 62.055    | 9.91862    | 33.0618   | 26.0933    | 30.6192   |
| CAV2       | 11.0605   | 7.96329    | 9.43389    | 11.1673   | 2.7076    | 11.9093    | 5.65088   | 8.36135   | 6.84604   | 11.1935   | 16.4685   | 4.94882    | 17.4513   | 10.0541    | 7.47969   |
| CAV3       | 0.0485179 | 0          | 0          | 0.0166664 | 0         | 0.0137708  | 0.0184654 | 0         | 0         | 0         | 0         | 0          | 0         | 0.0422626  | 0         |
| CAVIN1     | 63.9141   | 39.0243    | 45.1559    | 76.2937   | 84.2836   | 92.7928    | 61.1227   | 25.718    | 19.9874   | 62.0824   | 50.267    | 26.6847    | 125.601   | 58.331     | 83.539    |



|          |            |            |           |           |           |            |            |            |           |           |           |           |            |            |          |
|----------|------------|------------|-----------|-----------|-----------|------------|------------|------------|-----------|-----------|-----------|-----------|------------|------------|----------|
| CAVIN2   | 5.27662    | 1.94193    | 2.49187   | 2.11344   | 1.97997   | 2.74065    | 2.96762    | 1.90488    | 0.76318   | 1.65344   | 3.23958   | 0.968092  | 2.74285    | 1.65616    | 3.10888  |
| CAVIN3   | 10.69      | 4.32263    | 4.56023   | 12.6952   | 34.1118   | 31.6778    | 9.32611    | 3.57008    | 3.31596   | 20.3356   | 69.7607   | 5.34949   | 13.5639    | 13.6119    | 25.5763  |
| CAVIN4   | 0.0299006  | 0.0504229  | 0.0371038 | 0.0847369 | 0.0928919 | 0.0636499  | 0.0512093  | 0.0332164  | 0.0182078 | 0.178259  | 0.118139  | 0.096276  | 0.241146   | 0.121112   | 0.20397  |
| CBARP    | 0.333968   | 0.943719   | 0.918449  | 1.17202   | 2.21528   | 1.30656    | 0.958436   | 0.6658     | 2.67126   | 0.9063    | 0.866099  | 2.11191   | 1.00166    | 0.740641   | 0.414806 |
| CBFA2T2  | 3.08689    | 3.92331    | 4.38523   | 2.2714    | 3.38287   | 2.94209    | 3.68238    | 2.70704    | 1.56647   | 1.81613   | 1.77207   | 1.78626   | 1.52016    | 2.11445    | 2.09065  |
| CBFA2T3  | 0.775644   | 0.92601    | 0.839327  | 0.614081  | 1.30453   | 1.23174    | 1.23715    | 0.760875   | 0.288016  | 0.330341  | 0.591026  | 0.341104  | 0.487873   | 0.24247    | 1.0766   |
| CBFB     | 4.75715    | 4.0289     | 4.57098   | 7.22414   | 3.23577   | 6.60431    | 2.5977     | 5.19932    | 5.87462   | 6.30447   | 8.85588   | 3.07615   | 9.91322    | 5.70611    | 5.39972  |
| CBL      | 3.31351    | 3.15031    | 3.1861    | 4.81196   | 3.39934   | 4.95852    | 3.64209    | 3.30188    | 4.06058   | 6.10888   | 5.45263   | 3.95741   | 7.36152    | 5.45275    | 4.07205  |
| CBLB     | 2.29719    | 1.58197    | 1.87161   | 1.76951   | 1.1534    | 4.86045    | 1.35448    | 1.80698    | 0.402702  | 2.31167   | 3.32669   | 0.979581  | 1.60565    | 2.53919    | 5.09437  |
| CBLC     | 4.02867    | 8.98616    | 8.81147   | 13.351    | 19.2689   | 10.982     | 10.1592    | 5.92429    | 18.1432   | 15.3146   | 17.2262   | 13.822    | 24.1509    | 14.8753    | 3.85017  |
| CBLL1    | 2.50181    | 2.48509    | 2.42229   | 2.94349   | 0.726165  | 3.43794    | 2.40485    | 3.83046    | 2.43989   | 2.09551   | 2.47627   | 1.57692   | 3.41727    | 2.0835     | 1.85179  |
| CBLL2    | 0.01496    | 0.0144159  | 0.0495037 | 0         | 0         | 0.0254764  | 0          | 0.0398855  | 0         | 0         | 0         | 0.0107042 | 0          | 0.00781873 | 0        |
| CBLN1    | 0.0285247  | 0.00916243 | 0         | 0         | 0         | 0.056673   | 0.0108562  | 0.00845013 | 0         | 0         | 0         | 0         | 0.00613467 | 0          | 0        |
| CBLN2    | 0.0479814  | 0.00385303 | 0         | 0.0164821 | 0.012422  | 0.00680926 | 0          | 0.00710699 | 0         | 0         | 0.0902751 | 0         | 0.0877126  | 0.0334363  | 0.103361 |
| CBLN3    | 0.518327   | 0.410179   | 0.416563  | 0.162796  | 0.797507  | 1.87123    | 0.473467   | 0.350983   | 0.0480984 | 0.235448  | 0.289789  | 0.211939  | 0.127404   | 0.330254   | 1.04927  |
| CBLN4    | 0.00744868 | 0          | 0.0184862 | 0         | 0.0231407 | 0          | 0.00850466 | 0          | 0         | 0         | 0         | 0         | 0          | 0          | 0        |
| CBR1     | 11.6724    | 18.2025    | 17.7127   | 26.4582   | 32.3066   | 24.983     | 18.7777    | 9.91662    | 23.9159   | 16.8273   | 33.8438   | 14.6864   | 18.468     | 11.054     | 5.27831  |
| CBR3     | 9.44869    | 9.28554    | 5.44065   | 17.544    | 18.3625   | 9.35681    | 10.1941    | 5.51183    | 22.9388   | 14.3406   | 28.9214   | 11.6899   | 11.8837    | 6.65691    | 3.28777  |
| CBR3-AS1 | 1.05658    | 1.19478    | 1.07591   | 0.856791  | 0.828555  | 0.438372   | 1.43094    | 1.46       | 2.50286   | 1.32496   | 1.37602   | 1.82399   | 0.91599    | 1.0056     | 0.423915 |
| CBR4     | 2.21449    | 3.099      | 2.99679   | 3.24262   | 1.05763   | 3.46164    | 1.8416     | 2.97264    | 1.98853   | 2.24842   | 3.09687   | 1.78318   | 1.7913     | 1.99002    | 2.05057  |
| CBS      | 0.155807   | 0.116196   | 0.109751  | 0.109616  | 0.38025   | 0.445394   | 0.235731   | 0.152588   | 0.0351793 | 0.0443297 | 0.0125206 | 0.0214776 | 0.141393   | 0.193939   | 0.43304  |
| CBSL     | 0.0784499  | 0.134257   | 0.158955  | 0.0772373 | 0.255762  | 0.285825   | 0.107848   | 0.0549821  | 0.0387788 | 0.0488249 | 0.157992  | 0.0219385 | 0.105728   | 0.171963   | 0.151412 |
| CBWD1    | 7.93925    | 5.70416    | 4.85565   | 6.51856   | 4.31912   | 14.8285    | 2.65669    | 4.64999    | 10.6184   | 6.28819   | 10.0212   | 3.61906   | 9.42795    | 4.40178    | 4.12481  |
| CBWD2    | 4.70495    | 3.81051    | 4.00254   | 5.05156   | 3.07721   | 5.68863    | 2.79454    | 2.89752    | 3.65038   | 4.55653   | 7.44743   | 2.98658   | 3.83355    | 5.15337    | 2.89024  |
| CBWD3    | 1.68855    | 1.33567    | 1.55093   | 2.30171   | 1.33347   | 0.717677   | 0.56061    | 1.59002    | 1.22369   | 1.61306   | 1.26434   | 1.82108   | 1.54213    | 2.91471    | 0.539109 |
| CBWD5    | 4.36732    | 4.38858    | 4.57966   | 4.298     | 2.73842   | 2.99824    | 3.28187    | 4.31516    | 2.13902   | 2.80703   | 3.86392   | 3.75461   | 3.50524    | 4.19021    | 2.71653  |

|          |           |           |           |           |           |           |           |          |           |           |           |           |           |           |           |
|----------|-----------|-----------|-----------|-----------|-----------|-----------|-----------|----------|-----------|-----------|-----------|-----------|-----------|-----------|-----------|
| CBWD6    | 0.958205  | 1.09555   | 1.56535   | 0.952432  | 0.537003  | 0.74017   | 0.644883  | 1.06859  | 1.03634   | 0.893893  | 1.03641   | 0.801414  | 1.24323   | 0.863816  | 0.155339  |
| CBX1     | 4.68744   | 5.37951   | 5.14413   | 7.10315   | 5.33324   | 9.12388   | 3.1993    | 3.88908  | 5.7509    | 6.62133   | 7.83966   | 3.78714   | 6.43926   | 5.55063   | 5.29099   |
| CBX2     | 1.00058   | 0.857057  | 0.482854  | 1.84266   | 3.21643   | 3.34876   | 1.14243   | 0.613406 | 1.74327   | 1.12792   | 0.967422  | 2.09148   | 2.68091   | 1.80126   | 1.23073   |
| CBX3     | 10.444    | 6.99583   | 7.02449   | 22.4783   | 2.34483   | 19.0153   | 4.45965   | 8.15825  | 7.38826   | 16.6846   | 22.9194   | 6.66289   | 17.1958   | 11.9821   | 9.43026   |
| CBX3P2   | 0.712592  | 0.226291  | 0.415334  | 0.300415  | 0.125784  | 1.04805   | 0.351334  | 0.316646 | 0.138068  | 0.162614  | 0.438779  | 0.115882  | 0.344821  | 0.101572  | 0.279102  |
| CBX4     | 5.91463   | 5.77949   | 5.85425   | 4.02445   | 8.76676   | 8.39867   | 4.85786   | 4.75175  | 14.3748   | 5.82254   | 4.78329   | 10.6958   | 6.56683   | 4.90398   | 3.68875   |
| CBX5     | 9.74585   | 9.75176   | 10.7817   | 11.8223   | 4.32596   | 17.2579   | 9.46051   | 10.0446  | 4.23157   | 8.02964   | 9.72007   | 6.60186   | 10.1962   | 7.33633   | 9.79126   |
| CBX6     | 6.97108   | 4.10026   | 5.36023   | 4.50299   | 9.47563   | 16.5091   | 8.19936   | 3.84999  | 1.09268   | 4.75396   | 7.90322   | 1.48001   | 7.02131   | 5.04816   | 12.529    |
| CBX7     | 5.14034   | 5.19947   | 6.12523   | 2.43817   | 6.71568   | 7.65721   | 5.15653   | 3.33802  | 1.5962    | 0.91862   | 1.15929   | 0.958088  | 1.37641   | 1.50046   | 2.71334   |
| CBX8     | 0.703573  | 0.613071  | 0.619197  | 1.2187    | 2.95313   | 2.5238    | 0.581123  | 0.439024 | 1.27619   | 1.10852   | 1.14912   | 0.64267   | 1.21695   | 0.829321  | 0.687945  |
| CBY1     | 2.71307   | 3.71104   | 3.3742    | 5.27281   | 5.48712   | 6.21724   | 2.32847   | 2.2817   | 3.19334   | 3.56516   | 6.61878   | 2.65785   | 3.71239   | 2.95965   | 2.27503   |
| CBY3     | 0.285717  | 0.371689  | 0.260001  | 0.0883318 | 0.576962  | 0.170299  | 0.391466  | 0.304705 | 0.104391  | 0         | 0.0645077 | 0.0613314 | 0.0553029 | 0.134395  | 0         |
| CC2D1A   | 4.80663   | 6.40245   | 6.49582   | 7.0697    | 13.5204   | 11.9373   | 7.51341   | 4.31694  | 10.1282   | 6.62333   | 2.87812   | 7.75202   | 12.3351   | 5.87499   | 4.87588   |
| CC2D1B   | 2.39453   | 3.27777   | 3.5792    | 4.75389   | 5.87491   | 5.40225   | 3.05181   | 2.4118   | 2.98605   | 3.47287   | 2.2503    | 3.19827   | 4.08286   | 3.56615   | 3.35655   |
| CC2D2A   | 1.63116   | 0.980661  | 0.862789  | 1.26816   | 0.796005  | 2.14176   | 1.37209   | 0.914045 | 0.27689   | 0.978346  | 1.29956   | 0.555167  | 0.861494  | 1.1939    | 2.0316    |
| CC2D2B   | 0.341235  | 0.215256  | 0.179442  | 0.0544224 | 0.0757223 | 0.0968524 | 0.153062  | 0.180513 | 0.0494745 | 0.0713809 | 0.160505  | 0.087201  | 0.0419358 | 0.273886  | 0.250862  |
| CCAR1    | 7.58129   | 6.84127   | 6.87942   | 7.42566   | 2.83505   | 7.76397   | 3.79232   | 5.56962  | 4.85653   | 6.22567   | 6.39555   | 5.63351   | 7.70268   | 7.89952   | 5.50331   |
| CCAR2    | 9.09868   | 9.35924   | 10.2791   | 11.6239   | 15.3226   | 18.632    | 10.8853   | 8.05661  | 7.02962   | 6.94722   | 5.57701   | 6.66403   | 12.2416   | 8.3879    | 8.4712    |
| CCAT1    | 0.289806  | 0.319161  | 0.232898  | 0.110928  | 0.244377  | 0.0775549 | 0.132356  | 0.301707 | 0.0403372 | 0.0103925 | 0.0186945 | 0.0533221 | 0         | 0.0952066 | 0         |
| CCAT2    | 0.383076  | 0.178207  | 0.207629  | 0.0816767 | 0.0820757 | 0.0449909 | 0.241315  | 0.328706 | 0.0643508 | 0         | 0         | 0.0661623 | 0         | 0.0759425 | 0         |
| CCBE1    | 0.420716  | 0.586784  | 1.02582   | 0.502016  | 0.15478   | 0.458791  | 0.859591  | 0.737955 | 0.0314622 | 0.50025   | 0.679075  | 0.0237658 | 0.297636  | 0.156234  | 0.402801  |
| CCDC102A | 1.22909   | 1.3267    | 1.15867   | 1.4728    | 3.6556    | 1.84161   | 1.05522   | 0.474181 | 0.452548  | 1.01646   | 0.763655  | 0.634018  | 1.46306   | 1.08556   | 1.45041   |
| CCDC102B | 1.64911   | 0.508064  | 0.400096  | 0.629126  | 0.738934  | 1.28268   | 0.461673  | 0.655289 | 0.424861  | 2.0101    | 3.31157   | 0.73749   | 0.562692  | 2.20861   | 2.53912   |
| CCDC103  | 0.0900508 | 0.185948  | 0.0851387 | 0.357943  | 0.499571  | 0.427201  | 0.0881289 | 0.057164 | 0.0313348 | 0.193754  | 0.334013  | 0.119663  | 0.315402  | 0.15464   | 0.0554247 |
| CCDC105  | 0         | 0.0700499 | 0.0218681 | 0         | 0.0205306 | 0         | 0.0150908 | 0        | 0         | 0.0165888 | 0         | 0.0189143 | 0         | 0         | 0         |
| CCDC106  | 1.6149    | 1.41623   | 1.12451   | 1.30502   | 3.8981    | 3.31401   | 1.03467   | 0.867309 | 1.03291   | 0.962398  | 2.16402   | 0.731543  | 0.824546  | 1.05654   | 1.40153   |

|            |           |           |           |           |          |           |           |           |            |           |           |            |           |           |           |
|------------|-----------|-----------|-----------|-----------|----------|-----------|-----------|-----------|------------|-----------|-----------|------------|-----------|-----------|-----------|
| CCDC107    | 2.81788   | 1.99303   | 2.44991   | 2.9705    | 2.97472  | 5.44029   | 3.09233   | 1.61169   | 4.29127    | 3.64059   | 6.41894   | 2.119      | 3.96381   | 2.48417   | 2.1201    |
| CCDC110    | 0.0639311 | 0.130913  | 0.118999  | 0.0164707 | 0        | 0.061241  | 0.0456215 | 0.0426125 | 0.0291978  | 0.03009   | 0.117277  | 0.0285902  | 0.10312   | 0.0417665 | 0.0229533 |
| CCDC112    | 1.06987   | 0.779036  | 0.838492  | 0.862132  | 0.324879 | 0.575358  | 0.358198  | 0.857877  | 0.509438   | 1.0803    | 1.14419   | 0.333837   | 0.887499  | 0.618022  | 0.462097  |
| CCDC113    | 0.812534  | 0.931657  | 1.06283   | 0.714651  | 0.607572 | 1.91597   | 1.24442   | 0.753807  | 0.74398    | 0.347504  | 0.451468  | 0.421376   | 0.368616  | 0.303193  | 0.435493  |
| CCDC114    | 0.060288  | 0.141607  | 0.149623  | 0.0155321 | 0.163884 | 0.0577512 | 0.146274  | 0.147342  | 0.009178   | 0.0283754 | 0.0340288 | 0.00539221 | 0         | 0.0157546 | 0.0108226 |
| CCDC115    | 6.38478   | 4.3602    | 4.97936   | 5.02098   | 4.96074  | 10.2065   | 4.50206   | 4.29833   | 3.7051     | 3.53605   | 6.4699    | 2.11896    | 1.99773   | 2.25564   | 2.59054   |
| CCDC116    | 0.127253  | 0.106275  | 0.042109  | 0.0262276 | 0.197668 | 0.115578  | 0.0678035 | 0.0603156 | 0.0413279  | 0.0106477 | 0.0287305 | 0.0424913  | 0.0218941 | 0.0487725 | 0.0121834 |
| CCDC117    | 2.72973   | 2.27224   | 2.47887   | 3.42715   | 2.14214  | 4.16545   | 2.02165   | 2.53691   | 2.97891    | 3.27651   | 4.3564    | 2.03033    | 3.85196   | 3.13807   | 2.3065    |
| CCDC12     | 7.13927   | 5.56101   | 5.33189   | 8.11335   | 12.0446  | 9.55746   | 4.80024   | 5.21681   | 9.15372    | 6.34702   | 9.96218   | 5.33536    | 8.02249   | 5.78347   | 3.8733    |
| CCDC120    | 4.16698   | 6.64075   | 6.04533   | 9.30413   | 12.8742  | 9.31383   | 9.11318   | 5.17821   | 19.1488    | 6.90283   | 5.6494    | 10.337     | 14.2233   | 5.38324   | 2.64746   |
| CCDC121    | 0.4557    | 0.505779  | 0.552017  | 0.26835   | 0.189605 | 0.533531  | 0.334481  | 0.397756  | 0.227943   | 0.54131   | 0.67978   | 0.197968   | 0.231012  | 0.535879  | 0.584324  |
| CCDC122    | 1.23708   | 1.13885   | 1.32004   | 0.87535   | 0.878108 | 1.03314   | 0.693512  | 1.14529   | 0.319373   | 0.930596  | 1.10122   | 0.679399   | 0.669439  | 0.807499  | 1.10796   |
| CCDC124    | 8.48366   | 8.09269   | 7.10665   | 25.9857   | 20.8457  | 29.0222   | 10.2475   | 5.54548   | 29.5652    | 27.5715   | 35.268    | 18.3024    | 43.8435   | 18.3833   | 9.85118   |
| CCDC125    | 1.40355   | 1.45169   | 1.60493   | 1.36926   | 0.998049 | 1.30665   | 1.05411   | 1.40813   | 1.37509    | 0.908206  | 1.40135   | 0.598105   | 0.885442  | 0.877008  | 0.815231  |
| CCDC126    | 0.82353   | 0.766524  | 0.84386   | 0.704011  | 0.26166  | 0.629508  | 0.44877   | 0.840004  | 2.24528    | 1.69137   | 1.90158   | 0.749964   | 1.08683   | 1.49666   | 1.26333   |
| CCDC127    | 1.80047   | 2.13849   | 2.34225   | 2.21414   | 1.9291   | 4.66153   | 2.03566   | 1.6142    | 0.64591    | 2.82028   | 3.67758   | 1.15966    | 2.15497   | 2.36174   | 3.69051   |
| CCDC13     | 0.032711  | 0.0275812 | 0.0473565 | 0.143266  | 0.101623 | 0.174081  | 0.0186742 | 0.050874  | 0.328666   | 0.297654  | 0.203097  | 0.0526626  | 0.142459  | 0.106851  | 0.0587215 |
| CCDC13-AS1 | 0.0417745 | 0         | 0         | 0         | 0        | 0         | 0         | 0         | 0          | 0         | 0         | 0          | 0         | 0.0873326 | 0         |
| CCDC130    | 4.39044   | 4.16589   | 4.19746   | 4.54582   | 8.76612  | 6.11016   | 4.33896   | 3.23928   | 4.37602    | 3.80794   | 5.14331   | 4.13432    | 3.69454   | 4.40529   | 3.73258   |
| CCDC134    | 1.37777   | 1.56294   | 1.7169    | 1.74334   | 4.09067  | 2.70271   | 1.75231   | 1.56543   | 0.552243   | 1.46657   | 2.04752   | 0.861043   | 2.35173   | 1.16672   | 0.726341  |
| CCDC136    | 0.148523  | 0.140565  | 0.171138  | 0.0983939 | 0.313103 | 0.501345  | 0.369439  | 0.127281  | 0.045221   | 0.0932058 | 0.155688  | 0.0379543  | 0.0958262 | 0.205151  | 0.495155  |
| CCDC137    | 4.07309   | 5.09398   | 4.24145   | 8.04414   | 9.66944  | 9.3482    | 2.88307   | 3.02465   | 4.67978    | 4.4094    | 3.69328   | 5.42818    | 8.67006   | 6.17976   | 2.20735   |
| CCDC138    | 0.72964   | 0.576818  | 0.509845  | 0.649713  | 0.077026 | 0.79017   | 0.420584  | 0.522532  | 0.267449   | 0.524569  | 0.791685  | 0.349741   | 0.676432  | 0.829326  | 0.406934  |
| CCDC14     | 3.61796   | 3.4501    | 3.19759   | 2.64257   | 0.910212 | 2.8838    | 1.95801   | 2.79968   | 1.09993    | 2.0849    | 2.20899   | 1.68864    | 2.52157   | 2.64108   | 3.95285   |
| CCDC140    | 0         | 0         | 0         | 0         | 0        | 0         | 0         | 0.0121057 | 0          | 0         | 0         | 0          | 0         | 0         | 0         |
| CCDC141    | 0.231924  | 0.136312  | 0.18506   | 0.0542421 | 0.104756 | 0.0364148 | 0.225364  | 0.163722  | 0.00200324 | 0.0123867 | 0.0185683 | 0.0329542  | 0.0116737 | 0.0575979 | 0.122835  |

|               |            |            |           |           |           |            |            |            |            |            |            |            |            |            |           |
|---------------|------------|------------|-----------|-----------|-----------|------------|------------|------------|------------|------------|------------|------------|------------|------------|-----------|
| CCDC142       | 0.950121   | 1.5574     | 1.4044    | 1.11658   | 3.66836   | 1.17736    | 1.19858    | 0.942626   | 0.574079   | 0.97291    | 0.909189   | 1.1437     | 0.677935   | 1.5576     | 1.72348   |
| CCDC144A      | 1.29158    | 1.45396    | 2.01462   | 0.0655269 | 0.0361238 | 0.079042   | 0.322392   | 0.737533   | 0.0797306  | 0.260683   | 0.294624   | 0.154732   | 0.0302202  | 0.978351   | 1.27073   |
| CCDC144B      | 3.62086    | 3.98937    | 5.62266   | 0.325716  | 0.764663  | 0.469004   | 0.92754    | 2.58566    | 0.396982   | 1.24832    | 0.807837   | 1.51914    | 0.339577   | 2.97639    | 3.02665   |
| CCDC144CP     | 0.118283   | 0.0557504  | 0.0157586 | 0.118308  | 0.0688742 | 0.0146272  | 0.0249673  | 0.0386727  | 0.0446021  | 0.0536335  | 0.0859929  | 0.0416456  | 0.0716779  | 0.162791   | 0.0713    |
| CCDC144NL     | 0.0170762  | 0          | 0         | 0         | 7.01E-45  | 0          | 0          | 0          | 0          | 0          | 0          | 0          | 0          | 0.00470195 | 0         |
| CCDC144NL-AS1 | 0.00667139 | 0.00964313 | 0.0275952 | 0         | 0.010363  | 0          | 0.00761718 | 0.011858   | 0          | 0          | 0          | 0.00477356 | 0          | 0          | 0.0191619 |
| CCDC146       | 2.78439    | 2.4021     | 2.84914   | 0.779959  | 0.485362  | 0.555765   | 1.14956    | 1.57358    | 0.65961    | 0.444462   | 0.587885   | 0.814807   | 0.228479   | 0.290323   | 0.638202  |
| CCDC148       | 0.163143   | 0.0823481  | 0.102829  | 0.112083  | 0.0844727 | 0.158759   | 0.0620906  | 0.110467   | 0.0473072  | 0.0195011  | 0.0438496  | 0          | 0.0100247  | 0.0121808  | 0.0223138 |
| CCDC148-AS1   | 0          | 0          | 0         | 0         | 0         | 0          | 0          | 0          | 0          | 0          | 0          | 0          | 0          | 0          | 0         |
| CCDC149       | 1.55647    | 1.32143    | 1.41194   | 1.02876   | 1.59237   | 3.77941    | 1.28075    | 1.20201    | 0.326828   | 1.11823    | 1.80552    | 0.410915   | 0.997298   | 0.844333   | 2.75171   |
| CCDC15        | 0.897663   | 0.836372   | 0.875394  | 0.814794  | 0.12928   | 0.997196   | 0.52943    | 0.729086   | 0.231683   | 0.56706    | 0.791889   | 0.421112   | 0.744096   | 0.559261   | 0.401261  |
| CCDC150       | 0.211435   | 0.160085   | 0.134933  | 0.21789   | 0.0469188 | 0.267479   | 0.117256   | 0.0858997  | 0.0515008  | 0.272954   | 0.238684   | 0.20748    | 0.136417   | 0.25574    | 0.303647  |
| CCDC151       | 0.082104   | 0.074173   | 0.0679222 | 0.0634579 | 0.207246  | 0.174776   | 0.0820257  | 0.0456045  | 0.0624959  | 0.11593    | 0.18537    | 0.0293738  | 0.0463514  | 0.0643667  | 0.117912  |
| CCDC152       | 0.741459   | 0.566018   | 0.531721  | 0.430851  | 0.118783  | 0.903705   | 0.452406   | 1.03562    | 0.0424801  | 0.397081   | 0.548811   | 0.245633   | 0.152265   | 0.294844   | 0.72677   |
| CCDC153       | 0.301735   | 0.407065   | 0.324501  | 0.808461  | 0.749917  | 1.02769    | 0.172255   | 0.18771    | 1.17593    | 0.681674   | 0.681242   | 0.388619   | 0.292017   | 0.473099   | 0.216665  |
| CCDC154       | 0.0422511  | 0.239198   | 0.192242  | 0.0761968 | 0.754752  | 0.278816   | 0.144723   | 0.159584   | 0.0771857  | 0.0795442  | 0.0119241  | 0.0529057  | 0.0272602  | 0.121453   | 0.121356  |
| CCDC155       | 0.0194235  | 0.00467926 | 0         | 0         | 0         | 0.0248082  | 0          | 0.017262   | 0          | 0          | 0          | 0          | 0          | 0          | 0         |
| CCDC157       | 0.226572   | 0.252578   | 0.262485  | 0.216496  | 0.527599  | 0.615476   | 0.295509   | 0.134145   | 0.228096   | 0.328187   | 0.243515   | 0.266256   | 0.247446   | 0.267622   | 0.364859  |
| CCDC158       | 0.0765904  | 0.0522784  | 0.0264004 | 0.0263095 | 0.0198285 | 0.124997   | 0.0510116  | 0.0340336  | 0          | 0.00801073 | 0.00720508 | 0          | 0          | 0.0100074  | 0.0916612 |
| CCDC159       | 1.11034    | 1.66788    | 1.72904   | 2.37823   | 4.93751   | 2.35434    | 1.81463    | 1.21897    | 1.69697    | 1.47557    | 2.43315    | 2.04073    | 1.51706    | 1.33131    | 2.62639   |
| CCDC160       | 0.0700032  | 0.00674572 | 0.0347469 | 0         | 0         | 0.0476854  | 0          | 0.0995408  | 0          | 0          | 0          | 0          | 0          | 0          | 0         |
| CCDC162P      | 0.191089   | 0.0596749  | 0.0556217 | 0.040114  | 0.0384777 | 0.0361578  | 0.0767669  | 0.198128   | 0          | 0.00444142 | 0.00399474 | 0.0126601  | 0.00228315 | 0.0462369  | 0.020328  |
| CCDC163       | 0.134794   | 0.114904   | 0.102933  | 0.352615  | 0.241594  | 0.450272   | 0.189419   | 0.211942   | 0.0505119  | 0.0780831  | 0.18728    | 0.0964485  | 0.120418   | 0.341407   | 0.148908  |
| CCDC166       | 0.0350652  | 0.016895   | 0.0290084 | 0         | 0         | 0.0597152  | 0          | 0.0311631  | 0          | 0.0220052  | 0.0197921  | 0.0125451  | 0          | 0          | 0         |
| CCDC167       | 1.71707    | 1.87044    | 1.88368   | 6.77021   | 5.10246   | 4.48153    | 2.25882    | 1.36012    | 3.50047    | 5.71568    | 12.3043    | 2.7243     | 3.82928    | 3.45309    | 3.21642   |
| CCDC168       | 0.00323378 | 0.00623233 | 0.0151595 | 0.006665  | 0         | 0.00642487 | 0.00738444 | 0.00766376 | 0.00262558 | 0.00947035 | 0.00730106 | 0.00462771 | 0.0139094  | 0.0118308  | 0.0185764 |

|                |            |            |           |           |           |           |            |            |            |            |           |            |            |            |            |
|----------------|------------|------------|-----------|-----------|-----------|-----------|------------|------------|------------|------------|-----------|------------|------------|------------|------------|
| CCDC169        | 0          | 0          | 0.0124403 | 0.0154968 | 0         | 0.0468446 | 0.0171696  | 0.0267285  | 0.0183143  | 0.0653938  | 0.145485  | 0.0537995  | 0.038809   | 0.062875   | 0.10798    |
| CCDC169-SOHLH2 | 0          | 1.18E-06   | 6.02E-26  | 7.50E-26  | 0         | 0.0156436 | 0          | 3.23E-09   | 0          | 0.0329577  | 0.0160795 | 2.45E-30   | 7.68E-32   | 0          | 4.70E-06   |
| CCDC17         | 1.12115    | 0.713644   | 0.782841  | 0.381593  | 0.623119  | 0.376604  | 0.974752   | 0.594175   | 0.137796   | 0.400202   | 0.104502  | 0.471025   | 0.0862725  | 0.510702   | 0.709042   |
| CCDC170        | 0.297885   | 0.162522   | 0.224688  | 0.216691  | 0.142898  | 0.328247  | 0.215073   | 0.264736   | 0.0266758  | 0.291404   | 0.395618  | 0.0470172  | 0.096097   | 0.0801334  | 0.339724   |
| CCDC171        | 0.983503   | 1.03659    | 0.8899    | 0.506764  | 0.344798  | 0.657156  | 0.526374   | 0.801218   | 0.528195   | 0.338602   | 0.44333   | 0.410505   | 0.0881321  | 0.324833   | 0.431577   |
| CCDC172        | 0          | 0          | 0         | 0         | 0         | 0         | 0          | 0          | 0          | 0          | 0         | 0          | 0          | 0          | 0          |
| CCDC173        | 0.181389   | 0.0822549  | 0.0529615 | 0.0769696 | 0.0331481 | 0.109024  | 0.0243651  | 0.104308   | 0.0389843  | 0.0133918  | 0.04818   | 0.00763461 | 0.0137684  | 0.0669188  | 0.0153234  |
| CCDC174        | 3.54964    | 3.05513    | 3.09823   | 2.89257   | 1.97963   | 3.90794   | 1.93717    | 2.50842    | 2.69478    | 2.98319    | 3.20392   | 2.13147    | 3.3193     | 2.57031    | 2.51519    |
| CCDC175        | 0.00886707 | 0.00858379 | 0.0220064 | 0         | 0         | 0         | 0          | 0.00804237 | 0          | 0          | 0.010081  | 0          | 0          | 0          | 0          |
| CCDC177        | 0          | 0.00266826 | 0.0137441 | 0.011414  | 0.0172047 | 0.0424393 | 0.00632304 | 0.00492166 | 0.00674459 | 0.00695068 | 0         | 0.0277378  | 0.00357305 | 0          | 0.00795318 |
| CCDC178        | 0.105918   | 0.102066   | 0.065717  | 0.0341098 | 0         | 0.0901877 | 0.0755835  | 0.0411823  | 0.0161245  | 0.0249258  | 0.007473  | 0.00947338 | 0.0042711  | 0          | 0          |
| CCDC179        | 0          | 0          | 0.023932  | 0         | 0         | 0         | 0          | 0          | 0          | 0          | 0         | 0          | 0          | 0          | 0          |
| CCDC18         | 0.574953   | 0.530763   | 0.451659  | 0.453092  | 0.0450303 | 0.436083  | 0.165495   | 0.472325   | 0.241255   | 0.497254   | 0.698138  | 0.314595   | 0.52682    | 0.7222     | 0.367751   |
| CCDC18-AS1     | 2.44457    | 3.40078    | 3.48921   | 1.31873   | 1.23901   | 0.747587  | 1.88041    | 2.8865     | 0.482224   | 0.648208   | 0.291508  | 0.950918   | 0.111072   | 0.929736   | 1.58229    |
| CCDC180        | 0.260269   | 0.144281   | 0.227561  | 0.0197227 | 0.318873  | 0.100902  | 0.300656   | 0.216218   | 5.79E-05   | 0.0198685  | 0.0183195 | 0.0126388  | 0.0150583  | 0.0290719  | 0.0870125  |
| CCDC181        | 0.173428   | 0.102129   | 0.0717361 | 0.0595743 | 0.044899  | 0.04102   | 0.0880066  | 0.119878   | 0.0352027  | 0.060464   | 0.0435064 | 0.103411   | 0.0372984  | 0.0453206  | 0.0691847  |
| CCDC182        | 0          | 0.0262678  | 0.0451014 | 0         | 0.0423429 | 0         | 0          | 0.0484514  | 0          | 0          | 0         | 0          | 0          | 0          | 0          |
| CCDC183        | 0.242759   | 0.524324   | 0.494666  | 0.169497  | 1.41433   | 0.42715   | 0.515646   | 0.286505   | 0.385836   | 0.186198   | 0.121798  | 0.447446   | 0.128948   | 0.120836   | 0.116211   |
| CCDC183-AS1    | 0.378281   | 0.996881   | 0.775641  | 0.697741  | 2.32763   | 1.74929   | 0.935952   | 0.66458    | 1.18731    | 0.913042   | 0.580326  | 1.98931    | 0.658231   | 0.724198   | 0.50147    |
| CCDC184        | 0.167846   | 0.0618425  | 0.0898469 | 0.203495  | 0.260723  | 0.327873  | 0.214188   | 0.0789712  | 0.0961967  | 0.18588    | 0.267498  | 0.0706462  | 0.356732   | 0.417978   | 0.723146   |
| CCDC185        | 0.022062   | 0.0159447  | 0         | 0.0113678 | 0.0342699 | 0         | 0.0377845  | 0.0490172  | 0          | 0          | 0         | 0          | 0          | 0.0172959  | 0          |
| CCDC186        | 3.13427    | 3.58526    | 3.89773   | 2.60596   | 1.31199   | 1.88462   | 1.69053    | 2.99344    | 6.65533    | 3.59535    | 3.21363   | 3.21834    | 3.5799     | 2.28428    | 2.02772    |
| CCDC188        | 0.292487   | 0.193772   | 0.181475  | 0.0376771 | 0.624709  | 0.373574  | 0.292208   | 0.292431   | 0          | 0          | 0.288909  | 0.0784809  | 0          | 0.248408   | 0.210024   |
| CCDC189        | 0.107679   | 0.109245   | 0.0488387 | 0.0760683 | 0.187301  | 0.0654955 | 7.82E-35   | 0.0739762  | 0.123624   | 0.0438694  | 0.202306  | 0.111955   | 0.123247   | 0.155367   | 0.135327   |
| CCDC190        | 0          | 0.0143694  | 0.0370082 | 0         | 0         | 0.0380915 | 0.0170258  | 0          | 0          | 0          | 0.033667  | 0          | 0          | 0.00779354 | 0          |
| CCDC191        | 1.1117     | 1.71772    | 1.68985   | 0.807026  | 1.25048   | 0.881315  | 0.568997   | 1.01232    | 0.373496   | 0.501757   | 0.500751  | 0.528994   | 0.268532   | 0.681198   | 0.825796   |

|           |           |           |           |            |           |           |            |            |            |           |           |            |            |            |            |
|-----------|-----------|-----------|-----------|------------|-----------|-----------|------------|------------|------------|-----------|-----------|------------|------------|------------|------------|
| CCDC192   | 0.124828  | 0.144345  | 0.309799  | 0.0514554  | 0.0387801 | 0.0212578 | 0.171029   | 0.177498   | 0          | 0.0313343 | 0         | 0.035727   | 0          | 0.0521923  | 0.179268   |
| CCDC196   | 0.055278  | 0.0443896 | 0.0304866 | 0          | 0         | 0.141205  | 0.0210382  | 0.0163755  | 0          | 0         | 0         | 0          | 0          | 0          | 0          |
| CCDC197   | 0         | 0         | 0         | 0          | 0         | 0         | 0          | 0          | 0.00849989 | 0         | 0         | 0          | 0          | 0.00364764 | 0          |
| CCDC198   | 0.0725487 | 0.0794434 | 0.0491052 | 0.00679669 | 0.0102448 | 0.0168475 | 0.0150607  | 0.0703367  | 0          | 0         | 0.0372266 | 0.00943829 | 0          | 0          | 0          |
| CCDC200   | 0.387236  | 0.559729  | 0.471102  | 0.375584   | 2.26451   | 0.678848  | 0.858259   | 0.263168   | 0.0277418  | 0.114358  | 0.205714  | 0.146688   | 0.205753   | 0.67859    | 2.28991    |
| CCDC22    | 2.12569   | 2.44747   | 2.53458   | 4.06235    | 5.85976   | 4.58872   | 2.98537    | 1.74723    | 3.46395    | 2.42997   | 2.83901   | 2.61353    | 3.69592    | 2.96782    | 1.61954    |
| CCDC24    | 1.33518   | 1.84      | 1.5915    | 0.503031   | 3.07753   | 1.45472   | 2.78665    | 1.23763    | 0.577001   | 0.756805  | 0.291725  | 1.37653    | 0.296412   | 0.502732   | 0.556688   |
| CCDC25    | 5.10546   | 2.901     | 3.05067   | 4.57992    | 1.42216   | 7.8228    | 2.80937    | 3.41286    | 4.10395    | 3.79845   | 4.6581    | 2.43389    | 4.72158    | 3.53563    | 2.85796    |
| CCDC26    | 0.011423  | 0.11558   | 0.151199  | 0.117718   | 0         | 0.0680859 | 0.0391273  | 0.0203037  | 0.0417359  | 0.229393  | 0         | 0.37598    | 0          | 0.191046   | 0          |
| CCDC27    | 0         | 0         | 0         | 0          | 0         | 0.0090644 | 0          | 0          | 0          | 0         | 0         | 0          | 0          | 0          | 0          |
| CCDC28A   | 2.9857    | 1.59508   | 1.44616   | 3.07685    | 1.22554   | 4.5445    | 1.44837    | 1.53982    | 1.7145     | 2.23288   | 3.92932   | 1.22868    | 1.35743    | 1.16428    | 1.13306    |
| CCDC28B   | 1.04248   | 1.21887   | 1.34536   | 0.658907   | 2.02956   | 0.899493  | 1.34897    | 1.01294    | 0.372423   | 0.75016   | 1.86724   | 0.527118   | 0.466338   | 0.661079   | 1.39732    |
| CCDC3     | 6.86826   | 8.49955   | 12.9513   | 3.10402    | 5.76357   | 11.536    | 11.6067    | 10.2594    | 1.27209    | 3.61276   | 4.25715   | 1.78586    | 7.09548    | 4.22439    | 7.32578    |
| CCDC30    | 0.14535   | 0.179115  | 0.146283  | 0.0704058  | 0.0309937 | 0.146762  | 0.0955084  | 0.0849622  | 0.0538561  | 0.055005  | 0.0694524 | 0.0776133  | 0.0263054  | 0.0773255  | 0.125852   |
| CCDC32    | 1.59783   | 1.72739   | 1.83397   | 1.53081    | 1.25141   | 1.58652   | 1.62218    | 1.11625    | 0.723712   | 1.3806    | 2.477     | 0.861873   | 1.15537    | 1.69401    | 2.03499    |
| CCDC33    | 0         | 0         | 0         | 0          | 0         | 0         | 0.00687587 | 0.00535197 | 0          | 0         | 0         | 0          | 0          | 0          | 0.00864854 |
| CCDC34    | 0.786376  | 0.70852   | 0.57248   | 0.980564   | 0.769554  | 1.33248   | 0.18855    | 0.405342   | 0.804483   | 0.710628  | 1.22505   | 0.376991   | 0.684944   | 0.632931   | 0.293627   |
| CCDC36    | 0.497862  | 0.348913  | 0.349463  | 0.163247   | 0.562438  | 0.321154  | 0.577056   | 0.449162   | 0.0367479  | 0.208289  | 0.263981  | 0.0917572  | 0.189811   | 0.201067   | 0.60666    |
| CCDC37-DT | 0         | 0.0239028 | 0         | 0          | 0         | 0         | 0          | 0          | 0          | 0         | 0         | 0          | 0          | 0          | 0          |
| CCDC38    | 0.0473757 | 0.0570659 | 0.127376  | 0          | 0         | 0.010085  | 0.0946612  | 0.0526295  | 0          | 0         | 0         | 0          | 0.00764165 | 0.00619016 | 0          |
| CCDC39    | 0.384916  | 0.18256   | 0.288577  | 0.0681771  | 0.0467115 | 0.18436   | 0.116738   | 0.384841   | 0.0146495  | 0.05284   | 0.067894  | 0.0774611  | 0.0310432  | 0.0628668  | 0.146834   |
| CCDC40    | 0.275313  | 0.216769  | 0.313862  | 0.238738   | 0.198182  | 0.254437  | 0.341177   | 0.190966   | 0.0368012  | 0.168559  | 0.106125  | 0.297893   | 0.181963   | 0.363236   | 0.303771   |
| CCDC42    | 0         | 0         | 0.0138736 | 0.0172823  | 0.0260501 | 0.0856783 | 0          | 0.0149041  | 0          | 0         | 0         | 0          | 0          | 0          | 0.0240843  |
| CCDC43    | 2.95512   | 2.35217   | 2.31037   | 4.80784    | 1.88321   | 4.44262   | 1.61906    | 2.38577    | 2.5048     | 3.51879   | 4.63125   | 2.47851    | 5.86651    | 3.62642    | 2.33183    |
| CCDC47    | 16.2523   | 13.7533   | 13.9658   | 19.6293    | 10.5671   | 22.536    | 7.86769    | 11.6524    | 16.6031    | 15.0629   | 18.2322   | 11.2657    | 24.2035    | 13.3126    | 10.6349    |
| CCDC50    | 6.27389   | 3.29829   | 3.91726   | 2.93157    | 1.71129   | 5.32667   | 3.59053    | 4.75752    | 1.21574    | 3.08678   | 4.86666   | 1.23794    | 4.08955    | 3.20334    | 4.73528    |

|         |           |           |           |           |           |           |           |           |           |           |           |           |            |            |           |
|---------|-----------|-----------|-----------|-----------|-----------|-----------|-----------|-----------|-----------|-----------|-----------|-----------|------------|------------|-----------|
| CCDC51  | 1.69635   | 1.53087   | 1.38107   | 7.492     | 3.97343   | 5.66303   | 1.67552   | 0.93326   | 2.86939   | 4.17369   | 6.03367   | 2.80326   | 8.42576    | 4.39072    | 1.87547   |
| CCDC54  | 0.0178849 | 0.0172344 | 0.0295913 | 0.0184309 | 0.0277814 | 0         | 0         | 0         | 0         | 0         | 0.0201898 | 0         | 0          | 0          | 0         |
| CCDC57  | 1.56621   | 1.39383   | 1.45065   | 1.03487   | 2.49965   | 2.36649   | 1.72163   | 1.32914   | 0.164566  | 0.470239  | 0.464548  | 0.722939  | 0.388353   | 1.61628    | 2.45656   |
| CCDC58  | 2.1716    | 1.8983    | 2.00181   | 4.31594   | 0.289135  | 2.93213   | 1.23973   | 1.46124   | 2.19138   | 3.58219   | 5.25315   | 1.909     | 3.06241    | 2.86986    | 0.891055  |
| CCDC59  | 3.85659   | 2.33447   | 2.53687   | 2.93419   | 0.98163   | 3.60449   | 1.43069   | 2.63607   | 3.49234   | 3.07104   | 4.93472   | 2.28961   | 4.54873    | 2.94186    | 2.42031   |
| CCDC6   | 13.6769   | 14.8389   | 15.373    | 16.6734   | 5.93599   | 15.7147   | 11.1211   | 12.6668   | 29.6031   | 18.0035   | 18.8296   | 14.7375   | 23.9764    | 13.0257    | 8.91095   |
| CCDC60  | 0.0377846 | 0.0227565 | 0.0234435 | 0.0194691 | 0         | 0.0643461 | 0         | 0         | 0         | 0.0118559 | 0         | 0         | 0          | 0.00987393 | 0.0542634 |
| CCDC61  | 1.16794   | 2.44666   | 2.17396   | 2.77351   | 6.38921   | 3.41585   | 1.34801   | 1.19592   | 2.16456   | 1.46589   | 1.83438   | 1.3898    | 1.70368    | 1.66538    | 1.8414    |
| CCDC62  | 0.158317  | 0.0936157 | 0.125018  | 0.0964069 | 0.0670693 | 0.226717  | 0.0575149 | 0.121513  | 0.0613493 | 0.117416  | 0.170596  | 0.0514909 | 0.0371437  | 0.060177   | 0.0413387 |
| CCDC63  | 0.0464487 | 0.072734  | 0         | 0.0239334 | 0.180377  | 0.0197752 | 0.172359  | 0.0103199 | 0.721258  | 0.0145745 | 0.0131087 | 0.14125   | 0.00749211 | 0          | 0         |
| CCDC65  | 0.318775  | 0.301037  | 0.221519  | 0.105122  | 0.257487  | 0.380006  | 0.174704  | 0.215308  | 0         | 0.160038  | 0.0431828 | 0.319329  | 0.0575881  | 0.226584   | 0.311305  |
| CCDC66  | 1.76562   | 1.70554   | 1.4128    | 1.7835    | 0.373672  | 1.30317   | 0.509538  | 1.36399   | 0.973853  | 1.53148   | 1.22221   | 0.890055  | 1.42093    | 1.14054    | 1.78868   |
| CCDC68  | 0.357655  | 0.132557  | 0.20939   | 0.107737  | 0.0598298 | 0.238946  | 0.131931  | 0.215163  | 0.107221  | 0.428176  | 0.254672  | 0.102365  | 0.102953   | 0.224312   | 0.0474128 |
| CCDC69  | 6.11429   | 2.16518   | 2.653     | 8.56733   | 3.57482   | 20.0191   | 4.30682   | 2.66853   | 2.97695   | 4.70869   | 6.37192   | 1.29592   | 10.0072    | 5.13145    | 6.48299   |
| CCDC7   | 0.630745  | 0.676082  | 0.707988  | 0.412335  | 0.151065  | 0.29811   | 0.25063   | 0.530921  | 0.162434  | 0.209247  | 0.489326  | 0.155077  | 0.0824663  | 0.318037   | 0.538709  |
| CCDC70  | 0         | 0         | 0.0150044 | 0.0186909 | 0         | 0         | 0         | 0         | 0         | 0.022764  | 0         | 0         | 0          | 0.00947929 | 0         |
| CCDC71  | 4.09985   | 4.52919   | 4.95545   | 6.47572   | 6.52719   | 6.87318   | 4.72482   | 3.35983   | 3.7332    | 3.63888   | 5.82492   | 2.66852   | 5.62002    | 3.82492    | 4.23708   |
| CCDC71L | 1.12546   | 0.460596  | 0.516008  | 2.75631   | 1.3375    | 4.45384   | 0.549613  | 0.584461  | 0.379827  | 2.22947   | 3.33315   | 0.514224  | 3.90628    | 1.07721    | 2.7701    |
| CCDC73  | 0.121697  | 0.0469818 | 0.0355027 | 0.0878123 | 0.018066  | 0.0409647 | 0.027862  | 0.169679  | 0.0295213 | 0.0231772 | 0.0206205 | 0.0477753 | 0.0236185  | 0.0961579  | 0.0966561 |
| CCDC74A | 0.430953  | 0.441438  | 0.562313  | 0.22763   | 0.596012  | 1.07207   | 0.42827   | 0.450252  | 0.27617   | 0.591726  | 1.7557    | 0.167756  | 0.306901   | 0.590138   | 1.45265   |
| CCDC74B | 0.208316  | 0.047905  | 0.0535074 | 0.0547082 | 0.178463  | 0.210709  | 0.0236283 | 0.106011  | 0.110685  | 0.239061  | 0.542048  | 0.0159042 | 0.0139284  | 0.0768062  | 0.366993  |
| CCDC77  | 1.0361    | 1.16726   | 1.02456   | 1.67633   | 0.789618  | 1.7478    | 0.89698   | 1.11709   | 1.04683   | 1.37043   | 1.67093   | 0.978755  | 1.25823    | 1.30906    | 1.46006   |
| CCDC78  | 0.0574626 | 0.0207648 | 0.0713056 | 0.0444126 | 0.156204  | 0.244643  | 0.0820111 | 0.0766019 | 0.0174957 | 0.0180304 | 0.016217  | 0.10279   | 0          | 0.0976055  | 0.0618926 |
| CCDC8   | 1.47855   | 0.755865  | 0.740785  | 0.321905  | 3.4073    | 2.51201   | 1.01448   | 0.629243  | 0.363522  | 1.15874   | 1.62991   | 0.745027  | 0.326941   | 2.85156    | 0.937078  |
| CCDC80  | 26.2031   | 25.325    | 36.7119   | 7.2126    | 20.4085   | 38.2564   | 35.2377   | 19.8393   | 1.41168   | 8.38373   | 11.5271   | 2.02777   | 7.83052    | 6.45093    | 40.909    |
| CCDC81  | 0.149793  | 0.128307  | 0.0619598 | 0.0428795 | 0.0129267 | 0.19132   | 0.104518  | 0.0813534 | 0.0101351 | 0.104448  | 0.0751546 | 0.083363  | 0.0483229  | 0.169625   | 0.0597561 |

|         |           |            |           |            |           |           |           |           |            |           |           |            |           |            |           |
|---------|-----------|------------|-----------|------------|-----------|-----------|-----------|-----------|------------|-----------|-----------|------------|-----------|------------|-----------|
| CCDC82  | 2.24947   | 1.45699    | 1.65936   | 1.23306    | 0.831312  | 1.82278   | 0.74021   | 1.38432   | 0.413326   | 1.58914   | 2.37729   | 0.616427   | 1.55241   | 1.4713     | 2.05579   |
| CCDC83  | 0         | 0.00946175 | 0         | 0.0303559  | 0.0457562 | 0         | 0.0224217 | 0.0174524 | 0          | 0         | 0         | 0.00702566 | 0         | 0.0307906  | 0         |
| CCDC84  | 3.91816   | 3.69486    | 4.42694   | 2.13672    | 4.14434   | 1.93425   | 3.11587   | 3.06211   | 1.74535    | 3.53998   | 1.73827   | 2.63991    | 1.19021   | 2.98803    | 2.34275   |
| CCDC85A | 0.771057  | 0.510821   | 0.58628   | 0.262918   | 0.748573  | 0.555167  | 0.49197   | 0.393012  | 0.048334   | 0.0782744 | 0.0704022 | 0.0730207  | 0.131686  | 0.109637   | 0.219839  |
| CCDC85B | 7.11949   | 5.91927    | 7.27283   | 7.31749    | 21.0676   | 21.6574   | 6.34862   | 2.95493   | 10.2493    | 9.40724   | 26.2953   | 10.7798    | 22.7128   | 9.33676    | 8.65979   |
| CCDC85C | 4.65718   | 5.19989    | 4.94104   | 9.02994    | 15.5285   | 10.8267   | 5.42104   | 4.12993   | 19.6942    | 7.71687   | 7.29911   | 9.46142    | 12.4543   | 8.1443     | 3.17318   |
| CCDC86  | 3.39221   | 2.83345    | 3.12896   | 7.32163    | 5.86818   | 9.26492   | 4.06454   | 2.51754   | 4.45976    | 3.84681   | 5.32218   | 3.7328     | 10.2584   | 6.60326    | 2.73457   |
| CCDC87  | 0.0714537 | 0.0382527  | 0.111655  | 0.0818168  | 0.0616624 | 0.250128  | 0.0362593 | 0.0141116 | 0.00966917 | 0.0597878 | 0.0537749 | 0.0284039  | 0.0512239 | 0.0497931  | 0.0342055 |
| CCDC88A | 2.89757   | 1.65965    | 1.98554   | 1.87813    | 0.758096  | 2.68407   | 0.893723  | 1.75588   | 0.439323   | 3.24912   | 4.04823   | 0.922781   | 3.06818   | 2.77006    | 4.57438   |
| CCDC88B | 0.540945  | 0.657255   | 0.716013  | 0.644714   | 2.01666   | 0.668883  | 0.375951  | 0.526732  | 0.303626   | 0.513634  | 0.488528  | 0.774122   | 0.515935  | 0.66624    | 1.16868   |
| CCDC88C | 2.81042   | 3.39266    | 2.70317   | 5.03045    | 4.44658   | 4.88274   | 2.28753   | 1.75328   | 1.58808    | 1.22457   | 1.03214   | 3.16349    | 2.97923   | 2.27544    | 1.82419   |
| CCDC89  | 0.332788  | 0.137436   | 0.188781  | 0.0685896  | 0.103387  | 0.194307  | 0.0977058 | 0.135202  | 0.1158     | 0.15514   | 0.407877  | 0.0272136  | 0.073616  | 0.119266   | 0.16386   |
| CCDC9   | 4.12076   | 6.46074    | 6.42178   | 6.89779    | 16.7463   | 11.1617   | 5.26445   | 3.09801   | 10.2407    | 5.99669   | 3.72146   | 7.4669     | 10.3689   | 5.55884    | 4.91028   |
| CCDC90B | 1.79996   | 1.76979    | 1.99117   | 2.6904     | 0.715244  | 1.63066   | 0.967824  | 1.75776   | 1.79705    | 2.2263    | 3.29006   | 1.04082    | 1.99519   | 1.55057    | 2.01387   |
| CCDC91  | 3.2362    | 2.66224    | 2.54615   | 2.83325    | 1.31775   | 2.26719   | 1.27206   | 2.5543    | 3.10364    | 3.23468   | 3.79015   | 2.25662    | 3.6606    | 2.22481    | 2.02773   |
| CCDC92  | 3.3441    | 2.21159    | 2.00854   | 6.92076    | 4.61105   | 8.87776   | 2.63612   | 2.32058   | 3.28051    | 7.12949   | 8.48099   | 4.55617    | 10.6993   | 5.02307    | 4.14468   |
| CCDC92B | 0.151432  | 0.299398   | 0.28079   | 0.17758    | 0.31634   | 0.102265  | 0.310029  | 0.0881734 | 0.0254383  | 0.0131078 | 0.0235791 | 0.0971449  | 0.0235836 | 0.0354789  | 0.0374959 |
| CCDC93  | 4.05479   | 3.60639    | 4.06177   | 3.57279    | 2.82758   | 4.37121   | 3.07752   | 2.82586   | 2.50168    | 3.39978   | 2.16802   | 2.48308    | 5.04909   | 3.64141    | 2.78688   |
| CCDC96  | 0.40847   | 0.481659   | 0.49798   | 0.598178   | 0.985137  | 0.823753  | 0.208643  | 0.28659   | 0.942576   | 0.49918   | 0.364036  | 0.307654   | 0.825305  | 0.36517    | 0.308745  |
| CCDC97  | 3.62876   | 4.75711    | 4.96881   | 6.50885    | 7.71007   | 10.1422   | 5.72835   | 4.27343   | 3.78082    | 3.56731   | 4.67488   | 4.02048    | 7.60829   | 4.64327    | 4.01333   |
| CCDC9B  | 1.71607   | 4.63024    | 3.06214   | 1.67444    | 9.54235   | 3.5513    | 3.12504   | 1.70657   | 6.45513    | 3.21168   | 2.16774   | 4.4857     | 2.91516   | 3.3151     | 2.35219   |
| CCEPR   | 0.0184996 | 0.0044567  | 0.0229563 | 0.00953221 | 0.0143682 | 0.0078761 | 0         | 0         | 0.0112652  | 0         | 0.0208838 | 0          | 0.0238717 | 0.0241718  | 0         |
| CCER1   | 0         | 0          | 0         | 0          | 0         | 0         | 0         | 0         | 0          | 0         | 0         | 0          | 0         | 0.00408358 | 0         |
| CCER2   | 0.394111  | 0.443073   | 0.235471  | 4.87371    | 2.55079   | 0.261007  | 0.299989  | 0.583755  | 0.37332    | 0         | 0         | 0.0626659  | 0.748708  | 0          | 0         |
| CCHCR1  | 0.258418  | 0.301768   | 0.342261  | 0.284674   | 0.605084  | 0.739247  | 0.242728  | 0.170831  | 0.218601   | 0.14859   | 0.159513  | 0.183083   | 0.266111  | 0.208246   | 0.199272  |
| CCIN    | 0.0595549 | 0.0229556  | 0.0295608 | 0.0368239  | 0.0555056 | 0.0709944 | 0.0951971 | 0.0529275 | 0          | 0.0597981 | 0.282366  | 0.0511358  | 0.0307396 | 0.0684772  | 0.188163  |



|             |           |            |            |           |           |           |            |           |           |           |            |           |           |           |           |
|-------------|-----------|------------|------------|-----------|-----------|-----------|------------|-----------|-----------|-----------|------------|-----------|-----------|-----------|-----------|
| CCK         | 0.028206  | 0          | 0.023334   | 0.174403  | 0.109534  | 0.0840597 | 0          | 0         | 0.137407  | 0         | 0.0477616  | 0.0201822 | 0         | 0.0368543 | 0.121522  |
| CCKAR       | 0.0137592 | 0          | 0          | 0         | 0         | 0         | 0          | 0         | 0         | 0         | 0          | 0         | 0         | 0         | 0         |
| CCKBR       | 0.0871496 | 0.00933111 | 0.0320428  | 0.0199578 | 0.0150415 | 0.0247356 | 0.110561   | 0.0344228 | 0         | 0         | 0          | 0         | 0         | 0.0253045 | 0.139064  |
| CCL1        | 0         | 0.0750887  | 0          | 0         | 0         | 0         | 0.0444848  | 0         | 0         | 0         | 0.0439825  | 0.0557558 | 0         | 0         | 0         |
| CCL11       | 0         | 0          | 0          | 0.23205   | 0         | 0.703025  | 0          | 0         | 0         | 0.847856  | 1.6099     | 0.0358043 | 0.0484274 | 0.771501  | 12.1807   |
| CCL13       | 3.75293   | 0.877903   | 1.16988    | 3.81145   | 0.802625  | 5.99748   | 2.23564    | 2.3202    | 0         | 2.55995   | 6.29348    | 0.116753  | 2.47401   | 1.17971   | 1.83561   |
| CCL14       | 22.9341   | 8.7354     | 7.36103    | 16.2728   | 13.0429   | 42.3289   | 13.615     | 12.5113   | 0.610519  | 10.8008   | 37.8198    | 0.358689  | 4.72606   | 3.6898    | 11.8787   |
| CCL15       | 0.0214288 | 0          | 0          | 0         | 0         | 0         | 3.19E-13   | 0         | 0         | 0         | 0.0957712  | 0         | 8.81E-10  | 0         | 0         |
| CCL15-CCL14 | 1.30E-21  | 3.76E-22   | 4.15E-22   | 6.35E-22  | 6.32E-22  | 1.53E-21  | 0.0278441  | 9.11E-22  | 2.28E-23  | 3.94E-22  | 0.00118579 | 1.34E-23  | 0.0472347 | 7.52E-23  | 4.54E-22  |
| CCL16       | 0.0306125 | 0.0663731  | 0.0379872  | 0.0630941 | 0.0237759 | 0.104265  | 0.0174762  | 0         | 0         | 0.0384218 | 0          | 0         | 0         | 0.055998  | 0.0439634 |
| CCL17       | 0.338679  | 0.0906559  | 0.155655   | 0.0387798 | 0         | 0.0640846 | 0          | 0         | 0.0458303 | 0.566769  | 0.977056   | 0.026926  | 0.169955  | 0.255679  | 0.0540428 |
| CCL18       | 7.23035   | 0.0713872  | 0.147085   | 46.3555   | 1.79516   | 12.9944   | 0.338335   | 2.60716   | 0         | 30.9065   | 103.7      | 0.614884  | 54.6033   | 13.6443   | 10.1709   |
| CCL19       | 3.55266   | 4.77653    | 5.71008    | 13.7728   | 2.89065   | 22.2989   | 1.54526    | 1.98459   | 0         | 0.424662  | 1.79518    | 0.0242098 | 2.53229   | 0.44209   | 2.91547   |
| CCL2        | 3.09813   | 4.88122    | 6.25371    | 45.8155   | 1.82874   | 49.1991   | 3.18361    | 5.09372   | 1.47154   | 20.8811   | 61.0997    | 2.10596   | 76.9776   | 13.65     | 31.1897   |
| CCL20       | 0.494745  | 0.211889   | 0.204644   | 4.75859   | 0.0853899 | 0.257442  | 0.0941472  | 3.2488    | 0.702967  | 4.1742    | 8.43963    | 0.786673  | 0.922153  | 0.301671  | 0.118419  |
| CCL21       | 22.6259   | 11.0759    | 10.7386    | 21.478    | 25.5862   | 81.8405   | 18.0982    | 5.92899   | 1.66909   | 47.9355   | 75.5162    | 18.0767   | 108.61    | 59.3021   | 58.5257   |
| CCL22       | 1.21346   | 1.87246    | 2.90661    | 1.78994   | 0.455832  | 0.796884  | 0.824052   | 4.70842   | 1.11081   | 1.01535   | 2.02344    | 0.544794  | 2.10314   | 1.91506   | 0.387264  |
| CCL23       | 2.14425   | 0.213751   | 0.122336   | 1.56203   | 0         | 0.849939  | 0.168843   | 0.722824  | 0         | 0.278405  | 0.709482   | 0         | 0.190821  | 0.154576  | 0         |
| CCL24       | 2.18573   | 0.371689   | 0.319093   | 1.12623   | 0.399435  | 1.69691   | 1.6148     | 0.799852  | 3.28832   | 0.645487  | 1.95942    | 0.275991  | 0.539203  | 0.235192  | 0.184646  |
| CCL25       | 0         | 0.0111284  | 0.0191073  | 0         | 0         | 0.177     | 0          | 0         | 0         | 0         | 0          | 0.0165264 | 0         | 0.0120714 | 0         |
| CCL26       | 0.370618  | 0.0595232  | 0.136267   | 0.254622  | 0.319832  | 0.245448  | 0.611231   | 0.219583  | 0.250762  | 0.413479  | 0.325408   | 0         | 0.26569   | 0.0645671 | 0.177418  |
| CCL27       | 0.252103  | 23.5889    | 37.0815    | 0.363719  | 0         | 0.0429325 | 9.84423    | 16.8484   | 0.0614066 | 0.063283  | 0.0569186  | 0.180386  | 0         | 0.052704  | 0.289641  |
| CCL28       | 2.10793   | 1.2815     | 1.02256    | 0.909855  | 0.497151  | 1.91704   | 1.3861     | 1.21621   | 0.678767  | 0.526362  | 1.49503    | 0.458011  | 0.594566  | 0.749844  | 0.324914  |
| CCL3        | 0.319816  | 0.0140084  | 0.0962089  | 6.92089   | 0.808059  | 3.41637   | 0.16598    | 0.284226  | 0.106227  | 5.88321   | 7.15501    | 0.426691  | 2.19341   | 0.744577  | 1.40579   |
| CCL3L1      | 0.0183007 | 0.00220438 | 0.0037849  | 0.195074  | 0.0152902 | 0.0779128 | 0.00533242 | 0.0121981 | 0.0113759 | 0.860831  | 0.0929706  | 0.0212435 | 0.208957  | 0.0671682 | 0.109541  |
| CCL3L3      | 0.039006  | 0.00469843 | 0.00806714 | 0.317716  | 0.0315712 | 0.166067  | 0.0110105  | 0.025999  | 0.023489  | 1.41946   | 0.198143   | 0.0452795 | 0.380584  | 0.0565089 | 0.226182  |

|           |           |           |            |           |           |           |           |            |           |           |            |           |           |           |            |
|-----------|-----------|-----------|------------|-----------|-----------|-----------|-----------|------------|-----------|-----------|------------|-----------|-----------|-----------|------------|
| CCL4      | 0.277578  | 0.167177  | 0.258336   | 4.99466   | 0.215587  | 2.47402   | 0.0396162 | 0.218291   | 0.253544  | 1.89267   | 1.41546    | 0.344475  | 2.46318   | 0.453357  | 0.946763   |
| CCL4L1    | 0.0266446 | 0.0331582 | 0.0582286  | 0.345793  | 0.0145084 | 0.308003  | 2.26E-08  | 0.074997   | 4.81E-08  | 1.10569   | 0.536829   | 6.38E-08  | 0.659154  | 0.0467131 | 0.565767   |
| CCL4L2    | 0.0012151 | 0.0169816 | 4.50E-09   | 0.344126  | 0.0587101 | 0.101906  | 0.0129339 | 0.0495948  | 0.0275924 | 0.440161  | 0.00104446 | 0.065856  | 0.0175196 | 0.0216149 | 0.0653165  |
| CCL5      | 11.0016   | 9.9052    | 10.345     | 6.00588   | 22.9687   | 6.27703   | 9.05466   | 5.71626    | 2.24251   | 5.44649   | 2.30631    | 8.17077   | 3.71927   | 6.42292   | 11.9032    |
| CCL7      | 0         | 0         | 0          | 1.40464   | 0         | 0.435225  | 0         | 0.0504727  | 0         | 0.534606  | 0.801399   | 0         | 0.293139  | 0.11873   | 0.326246   |
| CCL8      | 0.277717  | 0.115967  | 0.183797   | 3.6633    | 0.172556  | 11.2088   | 0.105696  | 0.213903   | 0.0225485 | 0.999214  | 2.69616    | 0.0662379 | 3.28499   | 0.609617  | 1.03697    |
| CCM2      | 3.44168   | 3.77361   | 3.28973    | 11.5036   | 10.3787   | 13.4325   | 3.15751   | 1.97335    | 7.54733   | 13.3138   | 14.3332    | 6.91844   | 21.1769   | 8.47157   | 6.10228    |
| CCM2L     | 1.56298   | 0.54168   | 0.582231   | 0.77238   | 2.0445    | 1.83674   | 0.814009  | 0.479261   | 0.289426  | 0.573596  | 1.04214    | 0.503586  | 0.695873  | 1.07484   | 2.31027    |
| CCNA1     | 0         | 0         | 0.00831693 | 0.217568  | 0.031233  | 0.205449  | 0.0344361 | 0.00893467 | 0.0367319 | 0.227126  | 0.0567455  | 0.208612  | 1.5308    | 0.310008  | 0          |
| CCNA2     | 0.565298  | 0.548635  | 0.386468   | 3.47822   | 0.479357  | 2.64652   | 0.789734  | 0.628377   | 0.405847  | 2.36241   | 3.74343    | 0.816414  | 3.69423   | 3.36756   | 1.23802    |
| CCNB1     | 1.06798   | 0.859328  | 0.556609   | 11.0829   | 0.696753  | 8.00248   | 1.43887   | 0.749812   | 0.923479  | 4.62445   | 7.63152    | 2.67458   | 8.66829   | 9.3885    | 2.13191    |
| CCNB1IP1  | 7.82418   | 5.8862    | 6.37048    | 4.59734   | 1.55652   | 6.31155   | 6.19067   | 4.76985    | 2.54106   | 4.06588   | 9.08046    | 2.00364   | 3.30341   | 4.10359   | 3.21324    |
| CCNB2     | 1.26995   | 1.0582    | 0.791037   | 5.66601   | 0.510575  | 5.33042   | 1.04058   | 0.956016   | 1.49207   | 3.80666   | 5.24536    | 1.41114   | 3.69198   | 4.71641   | 0.922636   |
| CCNB3     | 0.0872161 | 0.116179  | 0.106105   | 0.0475829 | 0.0478153 | 0.0917371 | 0.0761498 | 0.150461   | 0.0499856 | 0.0772695 | 0.0347492  | 0.0477218 | 0.0496512 | 0.0187695 | 0.00736784 |
| CCNC      | 5.31848   | 4.35442   | 4.7824     | 8.32057   | 0.853081  | 6.87497   | 4.54335   | 5.61712    | 8.33129   | 9.57755   | 12.4754    | 4.62591   | 14.0738   | 8.20805   | 4.56619    |
| CCND1     | 15.3999   | 32.1937   | 39.8356    | 14.5633   | 17.9452   | 15.4974   | 41.2101   | 15.5948    | 18.7817   | 9.16308   | 13.3217    | 7.35891   | 14.5453   | 12.8147   | 19.125     |
| CCND2     | 7.70016   | 7.48507   | 4.69979    | 21.1945   | 15.5989   | 21.3133   | 7.33324   | 6.66035    | 20.1431   | 17.0042   | 14.9895    | 21.9879   | 39.3899   | 23.2972   | 20.7912    |
| CCND2-AS1 | 0.0418543 | 0.0739345 | 0          | 0.0295911 | 0.130015  | 0.0124388 | 0.0796383 | 0.0247952  | 0.135916  | 0.105052  | 0.141948   | 0.109798  | 0         | 0.058327  | 0.302926   |
| CCND3     | 5.52767   | 3.89091   | 3.69465    | 6.07369   | 4.60595   | 11.3275   | 4.53915   | 3.42901    | 2.85333   | 3.50106   | 6.69465    | 2.82888   | 5.27175   | 3.45533   | 3.73265    |
| CCNDBP1   | 3.08784   | 2.73492   | 3.01942    | 3.92704   | 2.53873   | 4.33532   | 3.65592   | 2.38358    | 4.76621   | 5.0626    | 6.91694    | 2.60674   | 4.90907   | 2.77039   | 2.10345    |
| CCNE1     | 0.343123  | 0.353447  | 0.401313   | 1.64606   | 0.367578  | 0.86642   | 0.243166  | 0.347      | 2.36321   | 1.72262   | 1.72301    | 1.23603   | 2.47336   | 1.19348   | 0.407808   |
| CCNE2     | 0.624353  | 0.545852  | 0.547562   | 1.09917   | 0.1055    | 0.943317  | 0.659146  | 0.884029   | 1.50187   | 1.44117   | 1.69127    | 0.632776  | 1.88328   | 0.992715  | 0.232961   |
| CCNF      | 0.577228  | 1.22683   | 0.669426   | 3.11877   | 1.9441    | 3.40374   | 1.22573   | 0.862978   | 2.47034   | 2.09219   | 1.75998    | 1.64823   | 3.85652   | 2.57137   | 0.890952   |
| CCNG1     | 3.62124   | 2.9474    | 3.33635    | 5.33613   | 1.10781   | 5.3242    | 1.94969   | 3.17352    | 2.11637   | 3.72542   | 5.87939    | 1.52011   | 3.68758   | 2.85065   | 2.56774    |
| CCNG2     | 4.62946   | 3.10646   | 2.96942    | 4.72286   | 2.59407   | 5.1695    | 1.89225   | 3.58073    | 1.08129   | 3.9373    | 4.9254     | 1.62751   | 4.32623   | 2.09474   | 2.72011    |
| CCNH      | 2.86726   | 2.54282   | 2.77166    | 2.38263   | 0.846071  | 2.17579   | 1.9379    | 2.81743    | 1.77144   | 2.19802   | 2.96661    | 1.53909   | 1.61862   | 2.35002   | 2.3227     |

|           |           |            |           |           |          |           |            |          |           |            |            |           |           |           |           |
|-----------|-----------|------------|-----------|-----------|----------|-----------|------------|----------|-----------|------------|------------|-----------|-----------|-----------|-----------|
| CCNI      | 51.5566   | 39.9827    | 44.846    | 66.6564   | 44.046   | 82.0452   | 41.9507    | 38.7263  | 47.6814   | 54.9097    | 66.2156    | 34.2959   | 94.1101   | 47.124    | 44.2655   |
| CCNI2     | 0.202069  | 0.27549    | 0.31991   | 0.122457  | 0.07209  | 0.154797  | 0.274978   | 0.225764 | 0.291516  | 0.14653    | 0.0774999  | 0.124608  | 0.0413839 | 0.238187  | 0.457037  |
| CCNJ      | 1.21364   | 1.13178    | 1.20296   | 1.08355   | 0.269315 | 1.05721   | 0.913153   | 1.30225  | 0.987655  | 1.0389     | 1.07331    | 0.716324  | 1.40008   | 1.12245   | 1.41363   |
| CCNJL     | 0.196784  | 0.344777   | 0.118396  | 0.639103  | 0.981863 | 1.10691   | 0.14298    | 0.339172 | 0.254186  | 0.54636    | 1.44058    | 0.40108   | 0.396282  | 0.529823  | 0.359682  |
| CCNK      | 6.42782   | 7.07484    | 6.60796   | 10.395    | 5.89555  | 12.8648   | 7.20484    | 8.65226  | 7.79258   | 6.97071    | 8.07635    | 7.05854   | 11.3559   | 7.17821   | 6.18012   |
| CCNL1     | 10.3145   | 8.73914    | 8.57707   | 10.2056   | 4.47294  | 8.7762    | 5.75795    | 6.68883  | 10.7064   | 10.7755    | 13.1574    | 13.5341   | 9.00916   | 11.3392   | 9.43044   |
| CCNL2     | 13.237    | 17.1996    | 16.4618   | 10.5764   | 20.3249  | 10.07     | 13.1201    | 10.4908  | 7.69999   | 7.91344    | 7.25516    | 13.7617   | 4.92759   | 13.3543   | 13.7011   |
| CCNO      | 0.437084  | 0.502185   | 0.778803  | 0.427329  | 0.800804 | 0.782514  | 0.46066    | 0.378484 | 0.17744   | 0.196928   | 0.202426   | 0.288688  | 0.216927  | 0.0820039 | 0.0160951 |
| CCNQ      | 3.21631   | 2.54526    | 2.51211   | 4.24034   | 4.18663  | 5.9669    | 3.17991    | 1.98011  | 4.59548   | 5.18696    | 9.31029    | 2.26278   | 5.55305   | 4.4701    | 2.99334   |
| CCNT1     | 3.8937    | 3.40713    | 3.48615   | 3.49709   | 1.2391   | 4.08652   | 3.01976    | 3.79455  | 2.67165   | 2.87228    | 3.93049    | 2.39772   | 3.34954   | 3.35414   | 2.98136   |
| CCNT2     | 4.16108   | 3.42153    | 3.62245   | 3.12424   | 0.597846 | 2.47668   | 2.97881    | 4.20546  | 2.36672   | 3.32202    | 3.33338    | 2.54622   | 4.14411   | 3.58448   | 2.5643    |
| CCNT2-AS1 | 0.51063   | 0.523804   | 0.395175  | 0.203698  | 0.358212 | 0.589076  | 0.300914   | 0.351333 | 0.0601828 | 0.413479   | 0.632221   | 0.188578  | 0.212552  | 0.318531  | 0.402148  |
| CCNY      | 6.77092   | 4.81951    | 4.9404    | 7.12644   | 4.01772  | 9.27069   | 5.22608    | 5.55613  | 4.69488   | 6.83257    | 10.4716    | 3.41717   | 7.81395   | 4.73496   | 6.37894   |
| CCNYL1    | 2.45573   | 1.65649    | 1.71336   | 4.36623   | 1.71887  | 3.41113   | 1.22965    | 1.82484  | 1.90968   | 4.07718    | 4.57584    | 2.55738   | 7.13189   | 3.90303   | 3.11883   |
| CCNYL2    | 0         | 0.00674776 | 0         | 0         | 0.054386 | 0         | 0.00799515 | 0        | 0         | 0.00878878 | 0.00790488 | 0         | 0         | 0.0109793 | 0         |
| CCP110    | 2.00276   | 1.41416    | 1.75205   | 1.54991   | 0.321826 | 1.61385   | 0.849843   | 1.75943  | 1.69619   | 1.66615    | 1.27336    | 1.25733   | 1.6313    | 1.38361   | 1.39403   |
| CCPG1     | 3.33007   | 2.46616    | 2.81492   | 1.97877   | 0.957914 | 3.89646   | 1.56045    | 2.36762  | 2.71049   | 3.00148    | 4.37187    | 1.25843   | 2.79919   | 2.11034   | 3.97468   |
| CCR1      | 0.752409  | 0.229181   | 0.300491  | 5.65937   | 0.711997 | 5.32416   | 0.967695   | 0.630248 | 0.11586   | 5.73123    | 10.4854    | 0.210397  | 4.82102   | 1.66337   | 5.37793   |
| CCR10     | 0.353471  | 0.12549    | 0.338587  | 0.134202  | 0.491267 | 0.506907  | 0.424823   | 0.148801 | 0.135944  | 0.0933984  | 0.546034   | 0.106492  | 0.180046  | 0.272248  | 0.748085  |
| CCR2      | 0.262447  | 0.235659   | 0.281262  | 0.811378  | 0.509588 | 0.62978   | 0.136206   | 0.302153 | 0.116229  | 0.875898   | 1.81802    | 0.0512149 | 1.98962   | 0.358503  | 1.25921   |
| CCR3      | 0.0372274 | 0.00597891 | 0.0205314 | 0.0511519 | 0        | 0         | 0.0850101  | 0        | 0.0151129 | 0.062299   | 0.0980586  | 0         | 0.0720568 | 0         | 0.213853  |
| CCR4      | 0.642475  | 0.349931   | 0.543055  | 0.93556   | 0.32543  | 0.190281  | 0.25515    | 0.521328 | 0.0680402 | 0.315537   | 0.709507   | 0.259835  | 0.802009  | 0.299287  | 0.661919  |
| CCR5      | 0.25286   | 0.118786   | 0.13074   | 0.657964  | 0.432058 | 0.732046  | 0.122701   | 0.134833 | 0.0615911 | 0.539522   | 0.549487   | 0.0949874 | 0.868744  | 0.426202  | 1.34362   |
| CCR6      | 0.414277  | 0.641157   | 0.82045   | 0.504548  | 0.175504 | 0.160342  | 0.17917    | 0.608047 | 0.0917352 | 0.189077   | 0.304693   | 0.130248  | 0.413382  | 0.393671  | 0.234376  |
| CCR7      | 0.57429   | 0.177585   | 0.333275  | 0.529991  | 0.41275  | 1.57648   | 0.185947   | 0.556088 | 0.0208782 | 0.215162   | 0.358018   | 0.177861  | 0.685755  | 0.909408  | 1.07095   |
| CCR8      | 0.0778179 | 0.11998    | 0.257506  | 0.12831   | 0        | 0.0662609 | 0.10662    | 0.138316 | 0         | 0.0781356  | 0.122985   | 0         | 0.0702908 | 0.040671  | 0         |

|               |          |          |          |           |           |            |           |           |           |           |           |           |            |           |           |
|---------------|----------|----------|----------|-----------|-----------|------------|-----------|-----------|-----------|-----------|-----------|-----------|------------|-----------|-----------|
| CCR9          | 0.113404 | 0.180731 | 0.122682 | 0         | 0.0677519 | 0.0594226  | 0.418322  | 0.0852785 | 0.0318722 | 0.0547435 | 0         | 0.0873851 | 0.00562826 | 0.0182368 | 0         |
| CCRL2         | 0.29766  | 0.107563 | 0.123123 | 0.549589  | 0.173388  | 1.0983     | 0.0566431 | 0.242491  | 0.271887  | 0.918418  | 1.12007   | 0.115366  | 0.696176   | 0.356515  | 0.9262    |
| CCS           | 3.6105   | 4.63531  | 4.52666  | 7.07168   | 14.6305   | 10.1012    | 3.89191   | 3.16885   | 5.10728   | 4.36267   | 7.69592   | 5.48773   | 4.45638    | 4.71165   | 3.83249   |
| CCSAP         | 3.05953  | 2.99398  | 3.70873  | 1.14102   | 1.24253   | 1.60465    | 2.85344   | 4.08059   | 5.30029   | 2.33691   | 2.72429   | 1.61035   | 2.18101    | 1.52582   | 1.31102   |
| CCSER1        | 0.635861 | 0.576853 | 0.639766 | 0.247941  | 0.15572   | 0.251203   | 0.562491  | 0.666921  | 0.0593015 | 0.0395441 | 0.0646674 | 0.0389394 | 0.0720717  | 0.0164667 | 0.234464  |
| CCSER2        | 6.31146  | 6.20322  | 6.91882  | 4.26425   | 1.91864   | 5.30681    | 5.08602   | 6.48585   | 12.5231   | 5.71145   | 6.17408   | 3.98214   | 5.64967    | 4.31794   | 5.27286   |
| CCT2          | 11.5917  | 10.0903  | 9.45523  | 29.2418   | 9.21572   | 24.4208    | 9.88881   | 9.67104   | 17.057    | 23.2679   | 34.8145   | 13.6131   | 39.1213    | 23.4076   | 13.0645   |
| CCT3          | 18.0808  | 16.5011  | 16.7984  | 49.6234   | 20.3739   | 40.5541    | 18.7918   | 13.0813   | 34.9176   | 39.3392   | 46.4395   | 27.1602   | 57.121     | 32.846    | 16.8974   |
| CCT4          | 16.611   | 15.8031  | 16.3825  | 39.9817   | 13.1003   | 30.8059    | 16.12     | 13.0465   | 21.2624   | 33.4122   | 44.2317   | 18.7376   | 50.2386    | 27.4604   | 15.267    |
| CCT5          | 7.94967  | 7.15442  | 7.2033   | 24.5471   | 9.70054   | 20.6194    | 7.45796   | 6.22843   | 15.6937   | 20.1429   | 24.979    | 12.5186   | 35.7695    | 20.3117   | 11.4579   |
| CCT6A         | 17.8695  | 14.6751  | 14.8189  | 32.9894   | 9.01424   | 28.3989    | 11.7737   | 14.4295   | 26.2491   | 29.276    | 44.1306   | 19.0771   | 41.0087    | 25.9835   | 13.3992   |
| CCT6B         | 0.841344 | 0.640371 | 0.665757 | 0.389535  | 0.208346  | 1.31858    | 0.612569  | 0.639351  | 0.326704  | 0.260167  | 0.578122  | 0.357712  | 0.141608   | 0.305894  | 0.595383  |
| CCT6P1        | 1.61948  | 1.62331  | 1.7361   | 0.630599  | 0.638785  | 0.817153   | 1.02417   | 1.20636   | 0.404937  | 0.701123  | 0.561911  | 0.52153   | 0.348899   | 0.9103    | 0.686197  |
| CCT6P3        | 1.82979  | 1.88779  | 1.8929   | 1.39554   | 0.762873  | 0.726847   | 0.795448  | 1.56198   | 0.799199  | 1.33809   | 1.12951   | 1.40491   | 0.517258   | 1.14861   | 1.29656   |
| CCT7          | 17.7104  | 14.8108  | 15.4145  | 50.083    | 33.3662   | 43.2723    | 19.61     | 13.6545   | 28.0888   | 36.2365   | 44.6525   | 22.5573   | 57.5013    | 32.9106   | 17.7139   |
| CCT8          | 14.5258  | 11.3289  | 11.8596  | 27.5377   | 4.61205   | 24.4216    | 8.93735   | 10.4216   | 21.1608   | 25.2076   | 28.9239   | 14.2206   | 37.5376    | 21.7716   | 10.6385   |
| CCT8L2        | 0.056364 | 0.027157 | 0.027977 | 0.0116169 | 0.0175105 | 0.00959864 | 0.0128709 | 0.0100183 | 0         | 0.0141485 | 0         | 0         | 0          | 0         | 0.0647566 |
| CCZ1          | 7.78979  | 7.54332  | 8.09215  | 12.5593   | 3.5669    | 10.6604    | 7.90617   | 6.71372   | 8.53128   | 11.8737   | 16.6482   | 7.92656   | 16.9173    | 11.2618   | 9.42811   |
| CCZ1B         | 4.4503   | 5.12039  | 5.01643  | 5.87781   | 2.25214   | 8.82545    | 0.881568  | 4.23009   | 2.59305   | 3.7083    | 5.87249   | 1.31591   | 3.80971    | 2.3171    | 1.76663   |
| CCZ1P-OR7E38P | 2.15801  | 2.94331  | 2.94042  | 3.39381   | 3.25488   | 2.65919    | 3.15204   | 2.66369   | 3.42095   | 4.66597   | 8.48469   | 3.34437   | 4.19802    | 3.80388   | 1.21927   |
| CD101         | 0.484924 | 0.671014 | 0.64256  | 0.456214  | 0.510986  | 0.437261   | 0.552942  | 0.577434  | 0.50613   | 0.696382  | 0.443574  | 0.525538  | 0.39083    | 0.816704  | 0.564743  |
| CD109         | 9.6584   | 8.45457  | 8.71823  | 13.0618   | 3.20099   | 10.1775    | 9.07925   | 8.21526   | 2.75604   | 14.9124   | 19.7812   | 8.6476    | 12.813     | 11.6125   | 14.18     |
| CD14          | 6.89421  | 2.4203   | 3.77398  | 22.6211   | 13.4162   | 59.2577    | 13.607    | 5.81951   | 1.48263   | 18.0456   | 49.4585   | 1.58626   | 19.0409    | 7.03905   | 19.0291   |
| CD151         | 21.4247  | 13.1733  | 15.0297  | 36.8753   | 37.2022   | 48.2788    | 22.1593   | 10.1046   | 17.0314   | 45.1359   | 81.0751   | 20.6217   | 54.3753    | 32.4061   | 30.3826   |
| CD160         | 0.864499 | 0.53261  | 0.574484 | 0.277491  | 0.154099  | 0.168943   | 0.307444  | 0.52899   | 0.0863002 | 0.177874  | 0.207981  | 0.172389  | 0.0914377  | 0.362941  | 0.875176  |
| CD163         | 13.1401  | 1.46636  | 1.8186   | 29.6957   | 8.28799   | 38.6686    | 5.80822   | 9.793     | 0.161445  | 10.9048   | 21.6242   | 0.379405  | 7.93979    | 3.40349   | 12.6203   |

|          |           |            |           |           |           |           |           |           |            |           |          |            |           |           |           |
|----------|-----------|------------|-----------|-----------|-----------|-----------|-----------|-----------|------------|-----------|----------|------------|-----------|-----------|-----------|
| CD163L1  | 0.777247  | 0.460911   | 0.577046  | 0.877992  | 2.5385    | 2.41395   | 0.915879  | 0.65533   | 0.175971   | 1.68215   | 3.04283  | 0.388586   | 1.19583   | 1.45303   | 2.93367   |
| CD164    | 17.661    | 13.947     | 16.0352   | 19.697    | 6.45907   | 24.6363   | 14.375    | 24.9597   | 22.4171    | 18.9077   | 32.8656  | 12.7703    | 22.3831   | 13.5029   | 17.6655   |
| CD164L2  | 2.49017   | 3.6219     | 2.52356   | 1.92465   | 6.18896   | 3.6046    | 2.20348   | 1.93643   | 12.2068    | 6.64152   | 4.11122  | 4.17606    | 1.77735   | 1.76512   | 0.447025  |
| CD177    | 0.312462  | 0.0250915  | 0.0861637 | 2.96241   | 0.533898  | 0.195109  | 0.142704  | 0.175871  | 0.0126848  | 0.470607  | 1.04644  | 0.670726   | 1.70015   | 0.24496   | 3.3356    |
| CD180    | 0.161959  | 0.065713   | 0.0352589 | 0.333806  | 0.0794456 | 0.486299  | 0.175187  | 0.174238  | 0          | 0.299563  | 0.692834 | 0.0609925  | 0.395981  | 0.200479  | 0.28156   |
| CD19     | 0.0590987 | 0.0455594  | 0.0488906 | 0.0243612 | 0.0367203 | 0.0201287 | 0.0134954 | 0.0105044 | 0          | 0.02967   | 0.026686 | 0          | 0.0533823 | 0.0185325 | 0         |
| CD1A     | 0.796937  | 3.44556    | 5.24789   | 3.67927   | 1.07286   | 0.0814298 | 1.22535   | 3.50348   | 1.04823    | 0.333413  | 0.707719 | 0.593039   | 0.46619   | 0.238801  | 0.0915602 |
| CD1B     | 0.116047  | 0.23164    | 0.370294  | 0.11959   | 0.0257515 | 0         | 0.0378567 | 0.220999  | 0          | 0.124843  | 0.205861 | 0          | 0.0106961 | 0.0346578 | 0         |
| CD1C     | 0.285717  | 0.533443   | 0.856823  | 0.37725   | 0.235778  | 0.0380131 | 0.519916  | 0.650673  | 0.23923    | 0.179302  | 0.443491 | 0.0574982  | 0.172822  | 0.177327  | 0.564197  |
| CD1D     | 0.0611764 | 0.00294757 | 0.0202438 | 0.145001  | 0.0380113 | 0.411518  | 0         | 0.038058  | 0          | 0.0691045 | 0.179558 | 0.00875468 | 0.18946   | 0.0351708 | 0.0351428 |
| CD1E     | 0.349824  | 0.932295   | 1.47413   | 0.968854  | 0.220755  | 0.0465423 | 0.187227  | 0.990976  | 0.412732   | 0.0548831 | 0.28384  | 0.117332   | 0.126959  | 0.0342813 | 0         |
| CD2      | 1.18321   | 0.760119   | 0.780738  | 1.01611   | 0.831447  | 1.27135   | 0.28949   | 0.801174  | 0.257325   | 0.424301  | 0.874564 | 0.483783   | 1.62677   | 1.06747   | 2.62978   |
| CD200    | 1.53519   | 0.716565   | 0.690574  | 1.76993   | 0.387512  | 1.42975   | 0.514895  | 0.73334   | 0.186969   | 1.19222   | 2.85952  | 0.219695   | 2.5072    | 1.77522   | 4.28546   |
| CD200R1  | 0.511715  | 0.362851   | 0.583073  | 0.288543  | 0.194968  | 0.279518  | 0.308666  | 0.549156  | 0.129346   | 0.387777  | 0.675757 | 0.0898094  | 0.348844  | 0.100923  | 0.388243  |
| CD200R1L | 0         | 0          | 0         | 0         | 0         | 0         | 3.49E-40  | 0         | 0          | 2.14E-35  | 0        | 0          | 0         | 0         | 0         |
| CD207    | 2.10167   | 13.2831    | 19.9126   | 6.22994   | 2.1508    | 0.231588  | 5.63204   | 14.1732   | 3.23713    | 0.434462  | 0.949008 | 2.53877    | 0.239291  | 0.284298  | 0         |
| CD209    | 1.2131    | 0.481197   | 0.648856  | 4.63415   | 2.38795   | 13.6999   | 2.1612    | 1.34763   | 0.0382092  | 3.16327   | 7.67953  | 0.179588   | 1.95334   | 1.22978   | 2.8986    |
| CD22     | 0.168569  | 0.027073   | 0.110399  | 0.065143  | 0.196384  | 0.0239223 | 0.0801942 | 0.0749048 | 0.0342162  | 0.114601  | 0.198222 | 0.0452307  | 0.308152  | 0.0807595 | 0.0706083 |
| CD226    | 0.500468  | 0.155014   | 0.236584  | 0.139988  | 0.122163  | 0.353089  | 0.13061   | 0.29228   | 0.00870733 | 0.42175   | 0.460043 | 0.0562725  | 0.189127  | 0.149466  | 0.472311  |
| CD24     | 15.1473   | 15.3485    | 13.8899   | 112.103   | 12.3919   | 40.8646   | 16.1755   | 25.1728   | 166.374    | 179.859   | 172.614  | 120.746    | 242.077   | 123.724   | 32.0245   |
| CD244    | 0.146649  | 0.145732   | 0.0682416 | 0.113345  | 0.370169  | 0.156087  | 0.104649  | 0.0570191 | 0.167439   | 0.149548  | 0.351791 | 0.196746   | 0.266111  | 0.172452  | 0.131629  |
| CD247    | 0.550697  | 0.305135   | 0.37585   | 0.510759  | 0.235241  | 0.574416  | 0.251507  | 0.269178  | 0.0335344  | 0.241914  | 0.559502 | 0.157615   | 0.479664  | 0.345382  | 0.276805  |
| CD248    | 14.91     | 10.4968    | 15.074    | 35.0471   | 27.3343   | 51.2063   | 35.3491   | 10.911    | 2.17067    | 14.7165   | 39.3518  | 3.94242    | 7.68187   | 8.6201    | 30.4168   |
| CD27     | 0.502263  | 0.268239   | 0.337079  | 0.291981  | 0.691542  | 0.395849  | 0.294188  | 0.285439  | 0.0275023  | 0.160456  | 0.497842 | 0.132182   | 0.627264  | 0.14614   | 0.44979   |
| CD27-AS1 | 0.825794  | 1.09547    | 1.29386   | 0.654146  | 2.19904   | 1.17106   | 0.551103  | 0.580147  | 0.163486   | 0.389606  | 0.66139  | 0.360494   | 0.21822   | 0.37889   | 1.11261   |
| CD274    | 0.51118   | 0.272683   | 0.201373  | 1.35459   | 0.226868  | 0.787618  | 0.201498  | 0.367762  | 0.0963485  | 0.481187  | 0.577058 | 0.274322   | 3.45514   | 0.830121  | 1.87025   |

|         |           |           |           |           |           |           |           |           |           |           |           |            |           |            |            |
|---------|-----------|-----------|-----------|-----------|-----------|-----------|-----------|-----------|-----------|-----------|-----------|------------|-----------|------------|------------|
| CD276   | 5.62693   | 4.59768   | 5.50769   | 19.7677   | 16.9978   | 25.336    | 9.99966   | 5.9744    | 2.80277   | 15.4348   | 26.9972   | 5.13484    | 29.2273   | 21.2947    | 20.063     |
| CD28    | 0.464188  | 0.214524  | 0.415356  | 0.410022  | 0.264873  | 0.286354  | 0.178467  | 0.357807  | 0.0461492 | 0.4102    | 0.823445  | 0.125399   | 0.351444  | 0.235178   | 0.687038   |
| CD2AP   | 5.5622    | 5.87322   | 5.93941   | 6.40222   | 3.50253   | 6.83826   | 3.6932    | 6.26649   | 13.392    | 9.56416   | 7.71355   | 7.3016     | 13.1374   | 6.81368    | 4.15378    |
| CD2BP2  | 5.42414   | 5.38887   | 5.40045   | 9.2574    | 13.53     | 11.3495   | 4.88931   | 3.6478    | 8.35219   | 8.20924   | 11.7451   | 5.23383    | 11.5757   | 7.10206    | 5.61228    |
| CD300A  | 0.498615  | 0.36329   | 0.472854  | 1.27483   | 0.642287  | 1.97427   | 0.430449  | 0.497168  | 0.118489  | 1.16971   | 3.03725   | 0.113123   | 1.82121   | 0.650686   | 1.60002    |
| CD300C  | 0.116663  | 0.0843151 | 0.12064   | 0.515151  | 0.317132  | 0.575486  | 0.183153  | 0.168481  | 0.0355206 | 0.592406  | 1.6259    | 0.0521723  | 0.638798  | 0.302025   | 0.845845   |
| CD300E  | 0.0787849 | 0.0854094 | 0.146647  | 2.92284   | 0.316149  | 4.70149   | 0.0824578 | 0.0758522 | 0.0319837 | 2.51328   | 2.60144   | 0.084559   | 4.68074   | 1.77402    | 4.66723    |
| CD300H  | 0         | 0         | 0         | 0.119043  | 0         | 0.422736  | 0         | 0         | 0         | 0.191719  | 0.517339  | 0.00022939 | 1.62623   | 0.439113   | 0.00092083 |
| CD300LB | 0.0706196 | 0.0145824 | 0.0333837 | 0.041586  | 0.17238   | 0.163215  | 0.138225  | 0.0627608 | 0         | 0.519147  | 0.740264  | 0.0216558  | 0.292908  | 0.126545   | 0.521582   |
| CD300LD | 0         | 0         | 0         | 0.109822  | 0         | 0.0151236 | 0         | 0         | 0         | 0.0222923 | 0         | 0          | 0.0343786 | 0.0556972  | 0.0255076  |
| CD300LF | 0.146048  | 0.0216518 | 0         | 0.185239  | 0.0523531 | 0.248717  | 0.102617  | 0.0399371 | 0.0136823 | 0.535817  | 1.39506   | 0.0321543  | 0.4639    | 0.240737   | 0.354951   |
| CD300LG | 0.485427  | 0.224404  | 0.396152  | 0.0608408 | 0.692898  | 0.430091  | 0.307081  | 0.227363  | 0.159782  | 0.0164665 | 0.0962679 | 0.0281624  | 0.0253942 | 0.00345776 | 0.414512   |
| CD302   | 2.83558   | 1.1455    | 1.37543   | 1.76577   | 0.0831971 | 3.22383   | 0.861299  | 4.65816   | 0.299306  | 3.09744   | 4.82751   | 1.02179    | 1.56646   | 2.08089    | 4.37204    |
| CD320   | 3.82943   | 1.35484   | 1.88242   | 4.00353   | 5.08634   | 7.40352   | 2.19672   | 1.31528   | 0.675914  | 2.6934    | 5.91011   | 1.27075    | 4.64307   | 2.16579    | 3.21471    |
| CD33    | 0.747477  | 0.519442  | 0.701608  | 0.918431  | 0.692189  | 2.01956   | 1.03398   | 0.919794  | 0.245092  | 0.685579  | 1.81743   | 0.154281   | 0.788324  | 0.360613   | 1.58956    |
| CD34    | 26.6258   | 14.6299   | 19.2133   | 9.05278   | 17.0348   | 20.477    | 31.3776   | 13.7335   | 3.13842   | 6.7063    | 15.2423   | 4.42411    | 7.08609   | 7.76682    | 23.4348    |
| CD36    | 13.0834   | 15.8745   | 2.28956   | 3.31355   | 17.9315   | 3.36967   | 6.61207   | 9.84228   | 121.682   | 10.7154   | 18.6206   | 29.5942    | 1.93973   | 3.15817    | 2.4497     |
| CD37    | 2.8859    | 1.60577   | 2.11017   | 4.20198   | 2.40047   | 5.00973   | 2.52973   | 2.8295    | 0.612238  | 2.43031   | 5.84308   | 0.746042   | 3.21941   | 1.81969    | 4.70603    |
| CD38    | 0.121934  | 0.0254582 | 0.0235369 | 0.515191  | 0.0568216 | 0.751002  | 0.0556881 | 0.0758553 | 0.0148502 | 0.0663171 | 0.146825  | 0.0145412  | 0.30944   | 0.0254912  | 0.256832   |
| CD3D    | 1.03066   | 0.662118  | 1.21436   | 1.31961   | 0.921773  | 1.38288   | 0.320939  | 0.666158  | 0.114112  | 0.352796  | 1.44555   | 0.223475   | 1.71282   | 1.07734    | 2.0184     |
| CD3E    | 1.30017   | 1.04653   | 1.08825   | 2.0492    | 2.6849    | 2.05786   | 0.94309   | 1.50893   | 0.633385  | 0.441559  | 1.22599   | 0.459681   | 1.93432   | 1.07925    | 2.10885    |
| CD3EAP  | 0.609341  | 1.15559   | 0.977413  | 2.23417   | 1.54621   | 2.26117   | 1.01812   | 0.891765  | 1.32456   | 0.857781  | 0.814983  | 1.37034    | 3.19377   | 1.77704    | 0.635992   |
| CD3G    | 0.688466  | 0.331713  | 0.496529  | 0.6731    | 0.191948  | 0.646345  | 0.201556  | 0.454966  | 0.193494  | 0.0886252 | 0.538056  | 0.0631559  | 0.603649  | 0.350596   | 0.430982   |
| CD4     | 4.01354   | 1.98542   | 2.98215   | 6.55968   | 5.7764    | 14.2115   | 4.92679   | 3.88845   | 1.36277   | 3.42272   | 7.73778   | 1.21296    | 6.33757   | 3.1412     | 6.79352    |
| CD40    | 1.9747    | 2.04227   | 2.22671   | 2.64419   | 2.03191   | 4.7016    | 1.55097   | 1.56493   | 0.643368  | 2.32059   | 4.96955   | 0.719977   | 1.72852   | 1.34103    | 2.61917    |

|          |           |           |           |           |           |           |           |           |           |           |            |           |           |           |           |
|----------|-----------|-----------|-----------|-----------|-----------|-----------|-----------|-----------|-----------|-----------|------------|-----------|-----------|-----------|-----------|
| CD40LG   | 0.151509  | 0.225082  | 0.219344  | 0.247213  | 0.137285  | 0.215014  | 0.0720785 | 0.258077  | 0.0307536 | 0.0158466 | 0.0570117  | 0.0361363 | 0.325844  | 0.125377  | 0.362644  |
| CD44     | 64.5009   | 76.8619   | 82.345    | 127.905   | 42.6195   | 99.7529   | 73.0823   | 82.3218   | 67.6147   | 86.7482   | 83.5395    | 86.2057   | 145.669   | 67.4782   | 55.3958   |
| CD46     | 16.3357   | 13.29     | 14.8741   | 17.847    | 4.78898   | 16.0123   | 11.596    | 13.2329   | 7.05264   | 14.8359   | 18.9648    | 9.36571   | 13.4926   | 12.6018   | 13.4395   |
| CD47     | 9.93929   | 9.14237   | 9.61959   | 13.7492   | 2.60238   | 12.2823   | 6.96425   | 12.3307   | 5.82056   | 15.3279   | 15.6238    | 8.77528   | 20.2826   | 11.1343   | 8.73488   |
| CD48     | 0.740674  | 0.444623  | 0.602693  | 2.74033   | 0.584692  | 1.79897   | 0.402044  | 0.863279  | 0.162666  | 0.899144  | 2.17942    | 0.338835  | 1.37097   | 0.336341  | 1.81353   |
| CD5      | 0.876681  | 0.984539  | 1.24874   | 0.366812  | 1.61777   | 0.695968  | 1.2117    | 1.10131   | 0.144501  | 0.364017  | 0.379495   | 0.29242   | 0.693214  | 0.392735  | 1.0697    |
| CD52     | 4.62861   | 3.0692    | 4.77691   | 1.70017   | 1.5661    | 3.00468   | 1.83137   | 3.82843   | 1.00464   | 4.19886   | 12.3127    | 1.01652   | 4.28734   | 2.05984   | 2.23769   |
| CD53     | 2.7294    | 1.65068   | 2.44611   | 9.99107   | 2.09777   | 5.65276   | 1.93148   | 2.62781   | 0.3982    | 9.68827   | 17.797     | 0.661158  | 10.3092   | 3.26908   | 7.63536   |
| CD55     | 6.50542   | 13.2038   | 18.8531   | 7.2203    | 2.42773   | 8.57056   | 11.1568   | 10.4115   | 14.9427   | 15.4919   | 12.8254    | 12.5355   | 27.7344   | 11.5337   | 12.1148   |
| CD58     | 2.86763   | 3.28877   | 3.20763   | 4.67557   | 0.480995  | 1.79979   | 2.35187   | 3.0989    | 4.13193   | 4.02161   | 5.12178    | 3.64134   | 4.45609   | 4.51737   | 3.36424   |
| CD59     | 25.6886   | 14.2967   | 14.8782   | 44.5912   | 17.0447   | 43.6229   | 17.6696   | 15.9735   | 20.445    | 45.8832   | 43.6847    | 18.3079   | 90.4814   | 30.2723   | 35.4298   |
| CD5L     | 0.0165841 | 0.0319618 | 0.0754573 | 0         | 0.0128804 | 0.0211817 | 0.0284027 | 0.0589541 | 0         | 0         | 0.00936067 | 0.0177995 | 0         | 0         | 0         |
| CD6      | 0.541646  | 0.450772  | 0.477184  | 0.565431  | 1.66087   | 0.664853  | 0.385517  | 0.418854  | 0.0685365 | 0.185406  | 0.301755   | 0.196298  | 0.694396  | 0.400734  | 0.808178  |
| CD63     | 39.6014   | 21.0568   | 27.6125   | 45.0592   | 35.2166   | 126.421   | 36.6602   | 25.3099   | 10.8501   | 60.238    | 137.61     | 14.0757   | 54.9437   | 34.0318   | 64.1017   |
| CD68     | 10.9404   | 2.69352   | 3.17375   | 23.7906   | 7.52167   | 37.5593   | 10.1689   | 8.24036   | 5.81715   | 35.3066   | 63.9146    | 11.3509   | 48.4097   | 11.5663   | 19.4587   |
| CD69     | 0.745659  | 0.419148  | 0.765366  | 0.896494  | 0.107247  | 0.670192  | 0.441451  | 1.11674   | 0.201806  | 1.87176   | 2.30704    | 0.28653   | 2.34311   | 0.476317  | 2.73664   |
| CD7      | 0.468994  | 0.121675  | 0.149225  | 1.28264   | 1.1488    | 2.1503    | 0.391314  | 0.320618  | 0.0219685 | 0.407517  | 0.97742    | 0.24523   | 1.95521   | 0.791916  | 1.86517   |
| CD70     | 0.0505675 | 0.105578  | 0.125499  | 0.0607965 | 0.0130915 | 0.0717626 | 0.327172  | 0.0749003 | 0.153964  | 0.0105779 | 0          | 0.0241216 | 0.0598141 | 0.0528576 | 0.0242071 |
| CD72     | 0.373757  | 0.259318  | 0.383406  | 0.801149  | 0.464459  | 2.22775   | 0.238977  | 0.279018  | 0.0364155 | 0.22517   | 0.641327   | 0.032092  | 0.183271  | 0.14846   | 0.493822  |
| CD74     | 177.295   | 100.454   | 133.154   | 171.56    | 146.469   | 375.035   | 135.904   | 175.504   | 31.909    | 112.256   | 344.262    | 29.7434   | 172.026   | 79.682    | 212.88    |
| CD79A    | 0.257554  | 0.106366  | 0.0760952 | 0         | 0.285764  | 0.281962  | 0.210048  | 0.490484  | 0.0448102 | 0.230898  | 0.477654   | 0.0263267 | 0.534126  | 0.0480746 | 0.21136   |
| CD79B    | 0.671076  | 0.209731  | 0.195057  | 0.766327  | 1.35232   | 1.74512   | 0.331335  | 0.338495  | 0.132534  | 0.478045  | 1.26943    | 0.207642  | 0.386167  | 0.189586  | 0.546993  |
| CD80     | 0.277011  | 0.145602  | 0.0972209 | 0.596888  | 0.0912746 | 0.278757  | 0.0958433 | 0.246185  | 0.0715631 | 0.294999  | 0.985515   | 0.132139  | 0.238302  | 0.653696  | 0.409879  |
| CD81     | 74.9046   | 51.2809   | 61.2735   | 93.7626   | 104.12    | 165.52    | 97.8808   | 46.5275   | 55.3472   | 73.3105   | 140.282    | 45.8298   | 94.1846   | 60.6616   | 96.2419   |
| CD81-AS1 | 0.216843  | 0.313435  | 0.489239  | 0.0609444 | 0.398074  | 0.21821   | 0.202569  | 0.0875963 | 0         | 0.0494837 | 0.0667605  | 0.112841  | 0.0254374 | 0.195755  | 0.169862  |
| CD82     | 23.0844   | 20.1816   | 19.2303   | 42.9609   | 28.882    | 47.8418   | 18.4932   | 13.0328   | 19.2407   | 30.3162   | 18.2139    | 23.3853   | 67.5234   | 18.3175   | 15.0337   |

|        |            |           |           |            |           |            |           |            |            |           |           |            |           |            |            |
|--------|------------|-----------|-----------|------------|-----------|------------|-----------|------------|------------|-----------|-----------|------------|-----------|------------|------------|
| CD83   | 0.780309   | 1.20751   | 1.91379   | 1.23931    | 0.442056  | 1.00054    | 0.712746  | 1.57459    | 0.31305    | 1.30198   | 1.54412   | 0.538626   | 1.95457   | 0.815646   | 1.50295    |
| CD84   | 1.47597    | 0.75559   | 0.978206  | 1.47494    | 0.577514  | 1.08777    | 1.05326   | 1.23222    | 0.0885163  | 1.66303   | 3.66054   | 0.202018   | 0.798983  | 0.565404   | 1.81056    |
| CD86   | 0.538579   | 0.328185  | 0.491416  | 1.68139    | 0.221453  | 1.87483    | 0.217035  | 0.570149   | 0.154336   | 1.80922   | 3.73735   | 0.170015   | 1.94184   | 0.761665   | 1.54693    |
| CD8A   | 0.327645   | 0.3218    | 0.510826  | 0.467512   | 0.518733  | 0.804765   | 0.223018  | 0.257585   | 0.130454   | 0.0948987 | 0.277403  | 0.0991855  | 0.398398  | 0.0757414  | 1.04062    |
| CD8B   | 0.396243   | 0.423594  | 0.419994  | 0.395579   | 0.538564  | 0.305765   | 0.438279  | 0.308129   | 0.0301612  | 0.0155414 | 0.0838704 | 0.0443004  | 0.183751  | 0.0906035  | 0.746884   |
| CD8B2  | 0.0666809  | 0.0137691 | 0.051223  | 0.0343583  | 0.0147969 | 0.00811114 | 0.0598197 | 0.0550276  | 0.00580071 | 0         | 0         | 0.003408   | 0.0276571 | 0.00497863 | 0.00684016 |
| CD9    | 69.6067    | 58.62     | 58.0395   | 128.366    | 37.4902   | 128.337    | 69.6292   | 38.9444    | 65.4463    | 105.517   | 124.275   | 83.6214    | 133.709   | 64.3667    | 45.6608    |
| CD93   | 11.2072    | 4.03195   | 4.63139   | 16.6424    | 10.2574   | 27.646     | 6.61684   | 5.30074    | 3.23876    | 16.2985   | 24.5193   | 3.54863    | 26.4208   | 16.3067    | 34.3027    |
| CD96   | 0.675723   | 0.449376  | 0.597878  | 0.391376   | 0.363096  | 0.301361   | 0.386646  | 0.510368   | 0.0516755  | 0.171093  | 0.23118   | 0.234899   | 0.213481  | 0.316934   | 0.786547   |
| CD99   | 9.3329     | 7.44822   | 9.15447   | 10.6429    | 13.9338   | 22.1959    | 10.7013   | 7.64997    | 4.13471    | 10.4583   | 25.0885   | 5.10642    | 12.496    | 8.0298     | 18.7161    |
| CD99L2 | 4.17133    | 2.12593   | 2.64816   | 3.04409    | 5.81711   | 9.24538    | 4.37462   | 2.47142    | 0.955829   | 3.50579   | 6.19485   | 1.08775    | 3.32927   | 3.22011    | 6.46977    |
| CD99P1 | 0.722348   | 0.860848  | 0.837185  | 0.647305   | 0.563738  | 0.751752   | 0.745067  | 0.778418   | 0.327246   | 0.792746  | 0.382115  | 0.724102   | 0.704712  | 0.753237   | 0.441013   |
| CDA    | 1.73754    | 1.62784   | 0.918348  | 11.2658    | 2.88643   | 10.5003    | 2.6176    | 1.67286    | 41.7641    | 91.6537   | 86.7403   | 45.4479    | 106.453   | 38.0146    | 14.1402    |
| CDADC1 | 0.775745   | 0.616385  | 0.658639  | 0.897604   | 0.391096  | 0.851744   | 0.44286   | 0.411231   | 0.464097   | 0.563686  | 0.691357  | 0.331092   | 0.671732  | 0.508576   | 0.664531   |
| CDAN1  | 1.50576    | 1.75748   | 1.74312   | 1.84877    | 3.62039   | 2.19191    | 1.81002   | 1.28962    | 0.883638   | 1.24121   | 0.920035  | 1.02763    | 1.12862   | 1.48565    | 1.54156    |
| CDC123 | 9.85375    | 8.11306   | 9.27595   | 17.7441    | 5.52707   | 16.0361    | 5.75545   | 7.79023    | 8.9978     | 11.2773   | 18.796    | 8.11928    | 16.1446   | 10.9107    | 8.75997    |
| CDC14A | 1.41667    | 1.1945    | 1.2528    | 0.528592   | 0.727204  | 0.734859   | 1.05975   | 1.33861    | 0.91721    | 0.541596  | 0.749072  | 0.527223   | 0.375593  | 0.495737   | 1.02311    |
| CDC14B | 2.31661    | 1.51785   | 1.29391   | 2.61045    | 1.33921   | 3.59197    | 1.38894   | 1.47555    | 3.26665    | 2.85437   | 2.49921   | 2.47512    | 3.33523   | 2.24552    | 4.45325    |
| CDC14C | 0.0324024  | 0.0157306 | 0.0473459 | 0.0331895  | 0         | 0          | 0.0650825 | 0.0215407  | 0          | 0         | 0         | 0.00581718 | 0         | 0.0127383  | 0          |
| CDC16  | 7.92448    | 8.70643   | 9.49257   | 11.615     | 3.25441   | 12.3472    | 5.98029   | 6.68924    | 6.15452    | 9.58082   | 11.5299   | 6.34339    | 11.177    | 8.00957    | 6.74199    |
| CDC20  | 1.23043    | 1.21898   | 0.972146  | 8.29179    | 1.35293   | 7.80471    | 2.33617   | 0.847769   | 2.03731    | 5.41376   | 9.33281   | 3.75902    | 14.2985   | 12.7748    | 2.52151    |
| CDC20B | 0.00775571 | 0         | 0         | 0.00799249 | 0         | 0          | 0         | 0.00689263 | 0          | 0         | 0         | 0          | 0         | 0          | 0.0334146  |
| CDC23  | 3.64567    | 3.58377   | 3.25262   | 6.41028    | 2.57512   | 5.49645    | 3.1491    | 3.49421    | 2.9749     | 3.86678   | 5.16716   | 2.61382    | 4.7564    | 3.03252    | 2.42294    |
| CDC25A | 0.231056   | 0.108317  | 0.123986  | 1.02323    | 0.310408  | 0.983705   | 0.306592  | 0.0998967  | 0.235768   | 0.564322  | 0.662657  | 0.299375   | 2.6471    | 1.19455    | 0.322857   |
| CDC25B | 4.14234    | 4.20094   | 2.86592   | 21.3766    | 9.79985   | 35.4151    | 4.784     | 3.2106     | 3.03855    | 9.38094   | 11.7383   | 8.35748    | 21.4085   | 12.2671    | 15.6483    |
| CDC25C | 0.0450254  | 0.0911145 | 0.0446978 | 0.696      | 0.027976  | 0.981562   | 0.154226  | 0.0480178  | 0.0548359  | 0.39558   | 0.853912  | 0.206188   | 0.331172  | 0.423582   | 0.258649   |



|            |           |           |           |           |           |           |           |           |          |           |          |            |         |          |          |
|------------|-----------|-----------|-----------|-----------|-----------|-----------|-----------|-----------|----------|-----------|----------|------------|---------|----------|----------|
| CDC26      | 5.55965   | 4.84478   | 4.92943   | 7.56608   | 4.83454   | 9.37734   | 3.55357   | 3.21517   | 7.74295  | 6.17664   | 14.1439  | 3.92098    | 7.20845 | 5.22751  | 4.2405   |
| CDC27      | 5.16134   | 3.55262   | 3.86422   | 5.6253    | 0.863499  | 5.53869   | 2.97517   | 4.88201   | 2.65166  | 6.18247   | 7.8835   | 3.44447    | 7.79084 | 5.78651  | 6.27584  |
| CDC34      | 7.84782   | 9.27551   | 10.7056   | 15.003    | 24.9032   | 14.6465   | 16.5859   | 5.18105   | 49.6808  | 16.6442   | 20.7378  | 12.2047    | 16.9675 | 10.4382  | 6.32526  |
| CDC37      | 25.7053   | 22.8218   | 22.6745   | 49.2834   | 48.8358   | 57.5378   | 16.7937   | 14.4995   | 31.1712  | 40.2415   | 30.003   | 27.9162    | 57.1089 | 35.5049  | 23.6493  |
| CDC37L1    | 2.17275   | 1.97635   | 2.12426   | 2.16444   | 1.25796   | 2.65176   | 1.39825   | 2.14161   | 2.73437  | 2.27252   | 3.92442  | 1.55937    | 2.21322 | 1.93736  | 1.37106  |
| CDC37L1-DT | 0.288387  | 0.173687  | 0.0596435 | 0.222893  | 0.111991  | 0.0613894 | 0.493906  | 0.128147  | 0.61464  | 0.0904888 | 0.162776 | 0.36111    | 0       | 0.150724 | 0        |
| CDC40      | 3.8031    | 2.95846   | 2.98218   | 4.08638   | 1.40922   | 4.03124   | 2.25688   | 3.35318   | 3.08052  | 3.63463   | 5.52762  | 1.9904     | 3.62053 | 2.87631  | 2.54536  |
| CDC42      | 31.6818   | 27.8718   | 27.9321   | 62.36     | 16.0432   | 42.2778   | 26.5663   | 29.0167   | 51.9121  | 56.7655   | 67.3675  | 33.5652    | 73.4581 | 34.8131  | 29.0858  |
| CDC42BPA   | 4.30207   | 2.34461   | 2.78635   | 2.97157   | 2.22757   | 3.86385   | 2.72389   | 2.36098   | 0.705578 | 3.65234   | 4.12303  | 1.67233    | 4.08612 | 3.82119  | 7.11805  |
| CDC42BPB   | 12.9616   | 13.7432   | 12.9513   | 19.8385   | 22.6929   | 21.8204   | 14.744    | 10.6475   | 16.3284  | 14.5473   | 8.92037  | 14.4046    | 24.8499 | 15.406   | 14.4631  |
| CDC42BPG   | 5.59013   | 11.2839   | 9.67163   | 9.04923   | 23.823    | 8.80965   | 9.52312   | 5.12212   | 7.49867  | 4.35204   | 1.30655  | 7.74496    | 6.56648 | 4.25145  | 1.20456  |
| CDC42EP1   | 11.5501   | 18.067    | 20.9698   | 38.4991   | 31.8587   | 44.4616   | 17.5753   | 13.5373   | 22.9839  | 16.3103   | 31.7205  | 16.3067    | 47.0537 | 22.5911  | 14.5121  |
| CDC42EP2   | 2.13927   | 1.57091   | 2.43223   | 4.00833   | 2.36344   | 6.78946   | 3.44831   | 1.72837   | 1.18427  | 3.87675   | 4.81703  | 1.26877    | 6.65767 | 4.54406  | 6.85099  |
| CDC42EP3   | 2.98215   | 1.64859   | 2.11647   | 4.41974   | 1.17027   | 6.56535   | 2.45513   | 2.42362   | 2.81953  | 3.20609   | 4.10176  | 1.34206    | 4.65575 | 3.00234  | 2.78379  |
| CDC42EP4   | 12.1947   | 9.21971   | 8.66212   | 8.46772   | 12.4506   | 20.2779   | 10.1401   | 7.88613   | 14.3791  | 6.7161    | 5.93956  | 7.15566    | 8.96099 | 5.69869  | 6.07707  |
| CDC42EP5   | 3.45457   | 1.38914   | 1.9339    | 6.5312    | 9.40084   | 9.77559   | 2.63943   | 1.45428   | 1.70822  | 5.15085   | 11.1716  | 1.41248    | 3.85444 | 3.33952  | 5.29693  |
| CDC42P3    | 0.0126051 | 0.0425202 | 0.0208557 | 0.0259799 | 0.0195801 | 0.0214662 | 0.0287843 | 0.0784168 | 0        | 0         | 0        | 0.00901932 | 0       | 0.059292 | 0        |
| CDC42SE1   | 15.1958   | 19.8305   | 18.0448   | 38.7313   | 27.557    | 29.5673   | 17.1595   | 14.7652   | 46.1159  | 35.8084   | 39.2593  | 27.9315    | 53.1942 | 33.411   | 19.432   |
| CDC42SE2   | 5.75413   | 4.00461   | 4.57166   | 5.32308   | 1.27828   | 5.65411   | 3.56318   | 6.16578   | 2.41305  | 5.13247   | 6.78863  | 2.59533    | 7.98056 | 4.11235  | 4.74548  |
| CDC45      | 0.535874  | 0.263571  | 0.147771  | 2.41602   | 0.346832  | 1.95825   | 0.344162  | 0.198433  | 0.435089 | 1.27509   | 1.27288  | 0.56716    | 2.71552 | 1.42953  | 0.75355  |
| CDC5L      | 3.63769   | 3.06158   | 3.01233   | 4.90192   | 1.58172   | 5.41976   | 2.36222   | 2.63491   | 3.26028  | 3.94698   | 4.87418  | 2.39433    | 5.41834 | 3.49402  | 4.29406  |
| CDC6       | 0.371441  | 0.284885  | 0.41389   | 2.46855   | 0.412126  | 2.14939   | 0.588546  | 0.350316  | 0.424677 | 1.38908   | 1.46331  | 0.884112   | 3.74639 | 1.71549  | 0.696733 |
| CDC7       | 0.677688  | 0.688959  | 0.683971  | 1.8088    | 0.294751  | 2.23892   | 0.680911  | 0.6625    | 0.297125 | 0.935625  | 1.51475  | 0.664319   | 1.64403 | 1.63635  | 1.18736  |
| CDC73      | 4.39169   | 3.62552   | 3.89423   | 3.86316   | 1.51932   | 4.44621   | 3.33247   | 4.6233    | 3.63058  | 4.12301   | 4.68933  | 2.60981    | 5.0133  | 3.40729  | 3.77749  |
| CDCA2      | 0.308891  | 0.254725  | 0.226051  | 1.95889   | 0.332179  | 1.55787   | 0.373029  | 0.290354  | 0.28938  | 1.37928   | 1.46856  | 0.556799   | 2.16926 | 1.49022  | 0.963991 |
| CDCA3      | 0.396006  | 0.269367  | 0.308333  | 1.65639   | 0.289475  | 1.83765   | 0.664922  | 0.300182  | 0.2837   | 1.06715   | 1.64353  | 0.53337    | 1.022   | 1.47984  | 0.451626 |

|           |            |            |            |           |            |            |            |           |            |           |            |            |           |            |           |
|-----------|------------|------------|------------|-----------|------------|------------|------------|-----------|------------|-----------|------------|------------|-----------|------------|-----------|
| CDCA4     | 5.76454    | 6.14587    | 5.79906    | 8.60458   | 8.0017     | 6.96504    | 5.94622    | 4.40195   | 9.81268    | 5.64833   | 10.9167    | 5.29928    | 11.0057   | 5.58182    | 1.82915   |
| CDCA5     | 0.404285   | 0.519441   | 0.401343   | 3.37931   | 0.683815   | 2.89164    | 0.68727    | 0.287436  | 0.306366   | 1.47715   | 3.0223     | 1.06068    | 4.36476   | 2.28201    | 1.43216   |
| CDCA7     | 1.83662    | 2.26189    | 1.96906    | 7.06994   | 1.36888    | 5.54015    | 2.27566    | 1.5444    | 0.732225   | 1.77796   | 2.29645    | 2.17454    | 3.13514   | 3.47372    | 0.934403  |
| CDCA7L    | 3.80003    | 3.66463    | 3.51181    | 6.03402   | 2.18441    | 5.55673    | 3.56543    | 3.88743   | 1.4744     | 1.96837   | 2.81006    | 1.81604    | 3.09527   | 2.10178    | 2.27785   |
| CDCA8     | 0.57718    | 0.497879   | 0.462081   | 2.79173   | 0.520583   | 3.13108    | 0.935362   | 0.289568  | 0.634914   | 1.48389   | 2.5432     | 0.825976   | 3.15934   | 2.07755    | 0.828904  |
| CDCP1     | 4.80439    | 8.34468    | 8.37676    | 16.5277   | 5.69612    | 9.88922    | 7.19314    | 6.20607   | 11.8103    | 17.6034   | 11.585     | 11.1322    | 43.1985   | 16.9747    | 6.54968   |
| CDCP2     | 0.0578783  | 0.0119514  | 0.0342007  | 0.0170415 | 0.0513743  | 0.0211211  | 0.0566431  | 0.0220446 | 0.0100699  | 0.0207552 | 0.0186678  | 0.0354973  | 0.0106694 | 0.108035   | 0.0949949 |
| CDH1      | 19.0588    | 39.7306    | 38.8663    | 64.695    | 34.4347    | 30.2453    | 32.2614    | 32.7201   | 96.1418    | 65.7863   | 38.3068    | 64.9272    | 99.2617   | 36.672     | 14.308    |
| CDH10     | 0.00673155 | 0.00324336 | 0.0167064  | 0         | 0          | 0.00573182 | 0.0153717  | 0         | 0          | 0         | 0          | 0          | 0         | 0          | 0         |
| CDH11     | 4.22114    | 1.52853    | 1.78169    | 3.47452   | 4.93828    | 10.2176    | 2.26577    | 2.46258   | 0.808306   | 7.34289   | 14.0035    | 0.959279   | 5.35704   | 5.31077    | 21.8944   |
| CDH12     | 0.388731   | 0.254811   | 0.269234   | 0.130427  | 0.0421279  | 0.107767   | 0.27869    | 0.228975  | 0.02202    | 0.0794251 | 0.15308    | 0.100262   | 0.0349964 | 0.0944966  | 0.194744  |
| CDH13     | 9.46891    | 7.44316    | 7.28963    | 11.564    | 4.99688    | 8.56316    | 8.22431    | 6.70551   | 4.6857     | 6.69336   | 9.75423    | 3.78904    | 10.6361   | 5.93198    | 9.64627   |
| CDH15     | 0.0161896  | 0.0117006  | 0.0200898  | 0.0417097 | 0.150888   | 0.0689262  | 0          | 0.014388  | 0.0788685  | 0.0914383 | 0.0548282  | 0.0695046  | 0         | 0.11846    | 0.0348755 |
| CDH16     | 0.00783448 | 0.0264234  | 0          | 0.0888102 | 0          | 0          | 0          | 0         | 0.0572491  | 1.02264   | 0.00884415 | 0.128933   | 0.085931  | 0.110555   | 0         |
| CDH17     | 0.0304194  | 0.00586261 | 0.020132   | 0         | 0          | 0.015541   | 0.00694637 | 0.0108137 | 0          | 0.0305435 | 0.0412076  | 0.00870635 | 0.0117759 | 0.0286173  | 0         |
| CDH18     | 0          | 0.0131273  | 0.00321991 | 0.0120331 | 0.00604594 | 0          | 0          | 0.0138363 | 0.0237013  | 0         | 0.00439381 | 0.00278508 | 0.0100449 | 0.0101712  | 0.0111794 |
| CDH18-AS1 | 0          | 0          | 0          | 0         | 0          | 0          | 0          | 0         | 0          | 0         | 0          | 0          | 0         | 0          | 0         |
| CDH19     | 0.56365    | 0.0750406  | 0.156453   | 0.0382144 | 0.0115203  | 0.451524   | 0.444563   | 0.26035   | 0.0316134  | 0.0279252 | 0.0544196  | 0.0371467  | 0.0167477 | 0          | 0.010651  |
| CDH2      | 0.0623942  | 0.00501041 | 0.0172056  | 0.021433  | 0.0403832  | 0.097401   | 0          | 0.0323463 | 0.00633243 | 0.123993  | 0.217175   | 0.00372039 | 0.0603846 | 0.0244575  | 0.0672045 |
| CDH20     | 0.137118   | 0.267134   | 0.438937   | 0.196596  | 0.0555628  | 0.0355338  | 0.0816816  | 0.254314  | 0.0871271  | 0.0299298 | 0.0201898  | 0.072517   | 0         | 0.0218107  | 0.0684932 |
| CDH22     | 0.0830138  | 0.199986   | 0.240362   | 0.0305529 | 0.396058   | 0.0302936  | 0.494223   | 0.142282  | 0.151652   | 0.0223266 | 0.0468561  | 0.0127283  | 0.0114772 | 0.00619809 | 0.0170312 |
| CDH23     | 0.482569   | 0.405068   | 0.46176    | 0.288643  | 1.18319    | 0.424548   | 0.589511   | 0.29091   | 0.0637033  | 0.279284  | 0.449522   | 0.351327   | 0.37558   | 0.520678   | 1.48299   |
| CDH23-AS1 | 0          | 0          | 0          | 0         | 0          | 0          | 0          | 0.0483944 | 0          | 0         | 0          | 0          | 0         | 0          | 0         |
| CDH24     | 1.08778    | 1.48446    | 0.829838   | 1.67142   | 4.61379    | 1.73044    | 1.07838    | 0.914631  | 1.05508    | 1.21812   | 1.03679    | 1.36093    | 0.865731  | 1.24598    | 3.03083   |
| CDH26     | 0.421365   | 0.255982   | 0.0985127  | 1.48677   | 0.633183   | 0.717574   | 0.146422   | 0.264575  | 3.22967    | 1.61532   | 1.24088    | 2.11048    | 1.22043   | 0.787539   | 0.29599   |
| CDH3      | 6.95084    | 9.2193     | 8.85967    | 141.717   | 30.5369    | 61.568     | 6.03738    | 8.39703   | 49.1824    | 66.3851   | 50.1247    | 51.3931    | 131.431   | 45.0171    | 18.4683   |

|          |           |           |           |           |           |           |           |           |            |           |            |           |           |           |           |
|----------|-----------|-----------|-----------|-----------|-----------|-----------|-----------|-----------|------------|-----------|------------|-----------|-----------|-----------|-----------|
| CDH4     | 0.0611531 | 0.0556552 | 0.0590219 | 0.0175056 | 0.248034  | 0.0954636 | 0.143524  | 0.0603864 | 0.0124129  | 0.0298486 | 0.00767047 | 0.0413258 | 0.0569915 | 0.0106538 | 0.0585491 |
| CDH5     | 8.9377    | 3.67383   | 4.24225   | 8.8594    | 8.35603   | 17.2897   | 5.68278   | 3.47013   | 3.00021    | 8.73581   | 16.2631    | 2.9098    | 12.0016   | 9.82418   | 23.377    |
| CDH6     | 0.675169  | 0.209449  | 0.231453  | 0.200156  | 0.36276   | 0.458737  | 0.541204  | 0.297962  | 0.225282   | 0.478843  | 0.600349   | 0.281258  | 0.499765  | 0.656198  | 1.5441    |
| CDH7     | 0         | 0         | 0         | 0         | 0         | 0         | 0         | 0         | 0          | 0         | 0          | 0         | 0         | 0         | 0         |
| CDH8     | 0.0514082 | 0.0765596 | 0.0657259 | 0.0096323 | 0.123412  | 0.111423  | 0.0800404 | 0.0332272 | 0.0512259  | 0.0234628 | 0.0158273  | 0.0735679 | 0.0482448 | 0.0830471 | 0.308738  |
| CDH9     | 0         | 0         | 0         | 0         | 0         | 0         | 0         | 0         | 0          | 0         | 0          | 0         | 0         | 0         | 0         |
| CDHR1    | 12.382    | 49.7308   | 64.2744   | 9.10932   | 12.7341   | 4.54772   | 49.404    | 28.6784   | 9.72241    | 5.90616   | 2.17268    | 8.36666   | 4.22693   | 6.15931   | 1.37066   |
| CDHR2    | 0.0740408 | 0.114666  | 0.140004  | 0.0708511 | 0.164301  | 0.0765544 | 0.108691  | 0.0611012 | 0.0837325  | 0.0862911 | 0.0238808  | 0.185424  | 0.0750684 | 0.0856862 | 0.0455709 |
| CDHR3    | 0.0856001 | 0.118369  | 0.138437  | 0.0293533 | 0.0442451 | 0.0666972 | 0.134153  | 0.0791062 | 0.0086725  | 0.017875  | 0.0321546  | 0.0152857 | 0.0183776 | 0.026052  | 0.0613594 |
| CDHR4    | 0.0837168 | 0.103081  | 0.123123  | 0.0383434 | 0.0577961 | 0.0158408 | 0.244273  | 0.0744005 | 0.0226573  | 0.0466992 | 0.0210013  | 0.186361  | 0.0360091 | 0.0534772 | 0.0667933 |
| CDHR5    | 0.457687  | 0.798989  | 0.724337  | 0.20507   | 1.34977   | 0.197681  | 1.12845   | 0.990359  | 0.00807843 | 0.116554  | 0.029952   | 0.270533  | 0.0342374 | 0.176805  | 0.438198  |
| CDIP1    | 3.7837    | 3.87784   | 4.25752   | 6.2453    | 7.272     | 9.37861   | 4.08212   | 3.16315   | 2.31382    | 3.33029   | 4.22606    | 2.36892   | 4.99625   | 3.90476   | 3.18894   |
| CDIPT    | 11.8022   | 11.0043   | 11.7225   | 15.4159   | 28.1975   | 26.5915   | 12.4495   | 8.158     | 17.2573    | 13.3957   | 24.577     | 11.251    | 15.7543   | 11.1501   | 11.5089   |
| CDIPTOSP | 0.0285717 | 0         | 0         | 0.117776  | 0.0887633 | 0.0243284 | 0         | 0         | 0.139188   | 0         | 0          | 0         | 0.0368686 | 0.0149328 | 0         |
| CDK1     | 0.557832  | 0.477071  | 0.398025  | 3.37013   | 0.0866506 | 2.07807   | 0.573223  | 0.470967  | 0.526517   | 2.94058   | 5.17948    | 0.858159  | 2.35741   | 2.56926   | 0.91127   |
| CDK10    | 3.01194   | 5.28384   | 4.20607   | 7.74649   | 13.7559   | 8.74606   | 3.70348   | 2.57381   | 3.33901    | 3.79646   | 4.15569    | 5.54436   | 4.85824   | 6.49851   | 5.58252   |
| CDK11A   | 1.44013   | 1.87633   | 1.39927   | 1.9924    | 3.64603   | 2.07762   | 1.34393   | 1.2204    | 1.56025    | 1.08516   | 0.626241   | 1.65718   | 1.37481   | 1.39876   | 3.62387   |
| CDK11B   | 5.61942   | 5.9135    | 6.05817   | 7.30195   | 9.5297    | 11.3501   | 4.11225   | 3.85629   | 6.96444    | 3.87732   | 2.95609    | 5.10297   | 6.76951   | 6.40373   | 5.74513   |
| CDK12    | 7.11643   | 7.04609   | 7.08912   | 7.84335   | 5.45117   | 9.0453    | 6.63231   | 6.56535   | 6.16935    | 5.15854   | 3.80705    | 5.9276    | 9.31273   | 6.41952   | 6.07914   |
| CDK13    | 6.43029   | 6.42181   | 6.82103   | 7.85767   | 6.25176   | 6.88509   | 5.03097   | 5.19573   | 5.82297    | 5.68449   | 4.81689    | 5.45808   | 7.29994   | 6.41455   | 5.84197   |
| CDK14    | 1.63288   | 0.742023  | 0.813293  | 0.63483   | 0.904463  | 1.30056   | 1.06467   | 1.18119   | 0.287766   | 2.33011   | 2.57683    | 0.649094  | 2.6134    | 1.60539   | 3.40543   |
| CDK15    | 0.183637  | 0.20257   | 0.27585   | 0.144422  | 0.142626  | 0.0370336 | 0.176565  | 0.219033  | 0.047084   | 0.115241  | 0.130928   | 0.0484094 | 0.0436511 | 0.0782966 | 0.166563  |
| CDK16    | 4.89824   | 4.93836   | 5.34521   | 10.4667   | 7.43711   | 12.4482   | 6.60099   | 3.69732   | 4.92526    | 7.45319   | 10.0293    | 4.91839   | 11.8802   | 8.32692   | 7.01779   |
| CDK17    | 4.92032   | 3.94404   | 3.99323   | 4.7011    | 3.87486   | 5.18889   | 3.25744   | 4.37713   | 4.13245    | 5.6701    | 8.01562    | 3.95276   | 5.46205   | 6.7728    | 6.79816   |
| CDK18    | 1.20875   | 1.31125   | 1.40346   | 2.18536   | 3.11837   | 6.55465   | 2.27598   | 1.00514   | 0.525144   | 1.59696   | 2.29018    | 1.41114   | 1.84253   | 2.13909   | 2.59881   |
| CDK19    | 2.07096   | 2.38991   | 2.2002    | 2.81474   | 1.45514   | 2.70773   | 1.49577   | 2.07015   | 5.01812    | 3.62636   | 3.61416    | 2.92512   | 3.62414   | 2.34669   | 2.35046   |

|          |           |           |           |            |                 |           |            |           |            |           |           |           |           |           |           |
|----------|-----------|-----------|-----------|------------|-----------------|-----------|------------|-----------|------------|-----------|-----------|-----------|-----------|-----------|-----------|
| CDK2     | 2.78601   | 4.04156   | 4.77598   | 8.24009    | 3.37462         | 9.36904   | 5.38585    | 2.88715   | 3.08682    | 5.8826    | 5.96087   | 3.31044   | 9.44843   | 5.83485   | 5.21441   |
| CDK20    | 0.447255  | 0.751937  | 0.653405  | 0.558975   | 0.931248        | 1.19111   | 0.40201    | 0.456682  | 0.139074   | 0.238873  | 0.870138  | 0.251933  | 0.466618  | 0.377987  | 0.669647  |
| CDK2AP1  | 6.53714   | 5.09952   | 5.47906   | 13.938     | 5.80254         | 15.1452   | 6.37314    | 6.24851   | 7.51703    | 15.5743   | 35.3599   | 7.27358   | 17.4871   | 8.99329   | 10.6678   |
| CDK2AP2  | 2.40078   | 1.7973    | 1.87932   | 9.27114    | 6.59635         | 9.23204   | 3.21274    | 1.34211   | 4.77882    | 4.45505   | 7.72259   | 3.44489   | 7.71986   | 4.81666   | 3.81856   |
| CDK3     | 0.116035  | 0.524821  | 0.0372988 | 0.495924   | 0.00028809<br>2 | 0.670399  | 0.122582   | 0.0737373 | 0.134883   | 0.17827   | 0.361986  | 0.359763  | 0.274683  | 0.489879  | 1.09858   |
| CDK4     | 9.35473   | 8.61596   | 9.0352    | 24.2605    | 14.7369         | 27.7861   | 12.4459    | 7.22787   | 7.29427    | 13.9071   | 35.0258   | 8.10641   | 16.9407   | 12.8949   | 12.3521   |
| CDK5     | 1.43553   | 1.61699   | 1.78136   | 3.35853    | 4.09815         | 5.31882   | 2.14847    | 1.0689    | 3.473      | 2.31304   | 7.77416   | 2.09596   | 2.19033   | 2.34205   | 1.9223    |
| CDK5R1   | 1.44719   | 1.59419   | 1.15748   | 5.40236    | 4.02959         | 3.72236   | 1.04901    | 1.23278   | 9.85839    | 7.3484    | 7.34148   | 4.95839   | 8.22139   | 5.67431   | 1.69028   |
| CDK5R2   | 0         | 0         | 0         | 0.00943417 | 0               | 0.0155902 | 0          | 0         | 0          | 0         | 0.0103345 | 0         | 0.0118131 | 0         | 0         |
| CDK5RAP1 | 4.6612    | 3.91582   | 3.64035   | 3.48226    | 3.9831          | 5.25493   | 3.82093    | 3.34103   | 3.10968    | 2.41376   | 3.83912   | 2.63552   | 2.91626   | 2.86772   | 1.84126   |
| CDK5RAP2 | 6.03416   | 4.67563   | 4.67731   | 6.25166    | 5.72313         | 6.89451   | 3.64962    | 3.89291   | 4.06772    | 2.78717   | 2.55141   | 3.35503   | 4.03443   | 3.71059   | 4.85846   |
| CDK5RAP3 | 8.60537   | 10.6283   | 10.1717   | 9.44189    | 23.2739         | 10.9435   | 7.66357    | 6.47312   | 5.97712    | 5.97338   | 4.90327   | 8.09648   | 4.85269   | 6.78698   | 7.93322   |
| CDK6     | 4.27147   | 3.4241    | 3.98975   | 4.62236    | 2.11213         | 4.5527    | 3.25735    | 5.0604    | 1.26411    | 3.66195   | 3.79868   | 2.24771   | 6.53605   | 5.39013   | 4.09713   |
| CDK7     | 5.59818   | 5.13043   | 5.56225   | 11.107     | 2.80152         | 8.46473   | 3.26181    | 4.37255   | 16.6232    | 10.3584   | 13.4537   | 6.67953   | 11.5898   | 7.63135   | 3.00453   |
| CDK8     | 2.21089   | 2.26407   | 2.18859   | 2.71087    | 3.50411         | 2.87168   | 1.52314    | 1.79167   | 2.53744    | 3.3769    | 3.80715   | 2.26299   | 4.00372   | 3.02782   | 2.28177   |
| CDK9     | 6.83432   | 8.33143   | 8.74407   | 11.2784    | 14.9934         | 15.5288   | 7.707      | 6.16529   | 13.785     | 9.85856   | 10.2833   | 9.17068   | 16.0976   | 9.93774   | 8.25531   |
| CDKAL1   | 4.28758   | 3.94756   | 4.27863   | 3.82789    | 2.09914         | 4.05446   | 3.86949    | 3.4206    | 2.29208    | 2.29107   | 3.27469   | 1.88325   | 2.56091   | 2.24088   | 3.12956   |
| CDKL1    | 1.80121   | 1.5048    | 1.83185   | 0.91107    | 0.654554        | 1.30857   | 1.52827    | 1.37313   | 0.654076   | 0.922947  | 1.08196   | 0.874974  | 0.948896  | 0.980255  | 1.19845   |
| CDKL2    | 0.0233815 | 0.0270374 | 0.0154743 | 0.067467   | 0               | 0.0199091 | 0.00533926 | 0.0249355 | 0.00569522 | 0.046954  | 0.0422318 | 0.0267682 | 0.0211199 | 0.0122202 | 0.0940208 |
| CDKL3    | 0.205467  | 0.206994  | 0.169977  | 0.134743   | 0.0290147       | 0.19881   | 0.0639806  | 0.232402  | 0.0113743  | 0.0703315 | 0.284662  | 0.0868737 | 0.114489  | 0.112267  | 0.107301  |
| CDKL4    | 0.0461385 | 0.0844748 | 0.122141  | 0.0285282  | 0.0286676       | 0.0628581 | 0.0526794  | 0.0328032 | 0.0224766  | 0.0579085 | 0.0833353 | 0.0132053 | 0.0297683 | 0.0385824 | 0         |
| CDKL5    | 1.15025   | 1.03769   | 1.25245   | 1.39761    | 0.612596        | 1.38612   | 1.24578    | 0.961886  | 1.75843    | 1.85067   | 1.89208   | 1.35605   | 2.32959   | 1.66381   | 1.77776   |
| CDKN1A   | 14.7267   | 21.3165   | 15.0144   | 49.3539    | 49.8281         | 56.2812   | 15.3885    | 15.8848   | 135.279    | 115.242   | 128.116   | 87.7887   | 180.031   | 71.835    | 30.7154   |
| CDKN1B   | 8.34141   | 7.73296   | 8.07727   | 7.46127    | 10.9615         | 10.8453   | 7.28179    | 7.61703   | 9.86832    | 7.07169   | 11.9647   | 4.99017   | 6.82054   | 4.13417   | 5.82493   |
| CDKN1C   | 3.18967   | 1.53683   | 1.52768   | 1.00094    | 6.91042         | 7.51483   | 2.75193    | 1.56655   | 9.81385    | 4.80102   | 7.45867   | 4.06694   | 3.6904    | 2.29378   | 4.89073   |



|           |            |            |            |           |          |           |           |           |           |            |           |            |            |            |           |
|-----------|------------|------------|------------|-----------|----------|-----------|-----------|-----------|-----------|------------|-----------|------------|------------|------------|-----------|
| CDS1      | 3.85038    | 4.9291     | 4.51005    | 5.22399   | 5.48189  | 3.72147   | 4.21573   | 4.06095   | 20.8815   | 11.7839    | 9.83309   | 9.36716    | 13.994     | 5.96516    | 1.95551   |
| CDS2      | 5.26757    | 3.95052    | 4.39672    | 3.62745   | 3.11562  | 7.63468   | 4.53485   | 3.15033   | 1.44511   | 3.30879    | 4.86755   | 1.87033    | 4.0841     | 3.45884    | 4.5917    |
| CDSN      | 11.218     | 20.6809    | 22.326     | 42.4095   | 33.6041  | 13.6401   | 51.1584   | 16.2131   | 277.589   | 83.8389    | 110.061   | 83.3663    | 151.05     | 22.6615    | 14.4275   |
| CDT1      | 0.960328   | 1.07964    | 1.16663    | 4.34538   | 1.34389  | 5.34825   | 2.31148   | 1.00066   | 0.621664  | 1.14016    | 1.95332   | 1.22571    | 3.70085    | 1.84938    | 1.10581   |
| CDV3      | 14.746     | 10.201     | 10.5258    | 29.2794   | 7.4682   | 24.0752   | 8.22529   | 9.84704   | 26.8445   | 21.7338    | 19.8889   | 14.9438    | 39.1277    | 25.8079    | 15.3093   |
| CDX1      | 0.104483   | 0.0125854  | 0.129654   | 0         | 0.202873 | 0.200174  | 0.014912  | 0.0812491 | 0         | 0.131137   | 0.280128  | 0.0186901  | 0.109545   | 0.0341297  | 0.225077  |
| CDX2      | 0.00661041 | 0          | 0          | 0         | 0        | 0.016886  | 0         | 0         | 0         | 0          | 0         | 0          | 0.004265   | 0          | 0         |
| CDX4      | 0          | 0.234751   | 0.335887   | 0         | 0.168183 | 0         | 0.0309052 | 0.0721671 | 0.0329657 | 0          | 0         | 0          | 0          | 0          | 0         |
| CDY1      | 4.84E-06   | 0.00301219 | 0.0101824  | 0         | 0        | 0         | 0         | 0         | 0         | 0          | 0         | 0          | 0          | 2.53E-06   | 0         |
| CDY1B     | 4.84E-06   | 0.00301219 | 0.0101824  | 0         | 0        | 0         | 0         | 0         | 0         | 0          | 0         | 0          | 0          | 2.53E-06   | 0         |
| CDY2A     | 0.00294533 | 0.00443188 | 0.00567056 | 0         | 0        | 0         | 0         | 0         | 0         | 0          | 0         | 0          | 0          | 0.00153936 | 0         |
| CDY2B     | 0.00294533 | 0.00443188 | 0.00567056 | 0         | 0        | 0         | 0         | 0         | 0         | 0          | 0         | 0          | 0          | 0.00153936 | 0         |
| CDYL      | 5.54467    | 5.65388    | 6.04914    | 5.78892   | 4.88156  | 7.1915    | 4.77992   | 5.33164   | 10.6276   | 7.2758     | 7.99481   | 5.74621    | 9.13847    | 6.21493    | 4.72271   |
| CDYL2     | 0.99816    | 0.649941   | 0.445904   | 1.76925   | 1.34228  | 2.16365   | 0.517734  | 0.707131  | 0.972517  | 2.2085     | 1.88336   | 1.21416    | 3.73892    | 1.94066    | 2.39187   |
| CEACAM1   | 1.18177    | 0.662776   | 0.964699   | 2.07875   | 0.577256 | 1.66399   | 0.851457  | 1.04787   | 0.249707  | 1.66342    | 0.636505  | 1.71922    | 3.81973    | 0.954386   | 0.764382  |
| CEACAM16  | 0.0136779  | 0.0131805  | 0          | 0.0422865 | 0        | 0.151405  | 0.015617  | 0.0121558 | 0         | 0.0171672  | 0         | 0.0195738  | 0.00882493 | 0          | 0.0196432 |
| CEACAM18  | 0          | 0          | 0          | 0         | 0        | 0         | 0         | 0         | 0         | 0          | 0         | 0          | 0          | 0          | 0         |
| CEACAM19  | 2.34725    | 3.92358    | 2.99787    | 7.2249    | 8.39557  | 5.14567   | 4.02002   | 2.43371   | 18.5436   | 11.0993    | 9.72741   | 9.73835    | 14.3007    | 4.56276    | 1.9516    |
| CEACAM20  | 0          | 0.006164   | 0          | 0         | 0        | 0.0326799 | 0         | 0.0227392 | 0         | 0          | 0         | 0          | 0          | 0          | 0         |
| CEACAM21  | 0.112466   | 0.0782715  | 0.0310133  | 0.180288  | 0.135877 | 0.138325  | 0.142678  | 0.111056  | 0.015219  | 0.125473   | 0.507841  | 0.0268242  | 0.282188   | 0.0718419  | 0.412762  |
| CEACAM22P | 0.130772   | 0.0674816  | 0.057683   | 0.0322118 | 0.145085 | 0.0326691 | 0.0389453 | 0.0409431 | 0         | 0.00972166 | 0.0547518 | 0.0275114  | 0          | 0.0721884  | 0.088364  |
| CEACAM3   | 0.0138581  | 0.022096   | 0          | 0.892325  | 0.129159 | 0.0590001 | 0         | 0.0381979 | 0         | 0.454876   | 0.625763  | 0.00991585 | 0.286118   | 0.0362143  | 0.119412  |
| CEACAM4   | 0.0782389  | 0.0150787  | 0.0129449  | 0.49989   | 0.145838 | 0.572926  | 0.0178661 | 0.0556257 | 0         | 0.157116   | 0.900884  | 0          | 0.272588   | 0.0817821  | 0.651693  |
| CEACAM5   | 1.40011    | 1.17509    | 0.894906   | 1.48638   | 0.407356 | 1.69148   | 1.09746   | 0.74507   | 4.13601   | 1.93372    | 2.54595   | 1.11047    | 2.28842    | 1.20613    | 0.301293  |
| CEACAM6   | 7.19828    | 2.08352    | 3.30502    | 4.93949   | 0.787813 | 3.48511   | 3.47443   | 5.219     | 0.628515  | 34.586     | 1.96871   | 5.22059    | 55.72      | 3.3436     | 1.18749   |
| CEACAM7   | 0.530583   | 0.371844   | 0.391052   | 0.417542  | 0        | 0.156071  | 0.242321  | 0.32579   | 0.0822424 | 0.0242158  | 0.0217804 | 0.13115    | 0.14938    | 0.0756288  | 0         |

|           |           |           |           |            |            |           |           |           |            |            |            |           |           |           |           |
|-----------|-----------|-----------|-----------|------------|------------|-----------|-----------|-----------|------------|------------|------------|-----------|-----------|-----------|-----------|
| CEACAM8   | 0.0905209 | 0.0775766 | 0.0581932 | 0.144982   | 0.0936582  | 0.0171133 | 0.0462375 | 0.0625156 | 0.0244773  | 0.0630632  | 0          | 0.209653  | 0         | 0.0262605 | 0.0432953 |
| CEBPA     | 13.9333   | 17.0079   | 18.4979   | 14.5763    | 28.9397    | 15.0622   | 16.5715   | 11.2024   | 56.157     | 19.5854    | 22.7792    | 23.508    | 9.46644   | 10.1417   | 3.72661   |
| CEBPA-DT  | 0.206912  | 0.857361  | 0.761714  | 0.692992   | 1.60703    | 0.986622  | 0.401616  | 0.220663  | 0.50399    | 0.311634   | 0.350366   | 0.310906  | 0.240297  | 0.178433  | 0.193148  |
| CEBPB     | 16.9285   | 19.2363   | 18.639    | 58.4762    | 64.4636    | 50.1534   | 15.329    | 11.0066   | 95.6865    | 45.3348    | 52.4752    | 24.0346   | 55.0558   | 23.9506   | 20.3293   |
| CEBPB-AS1 | 0.343069  | 0.230417  | 0.281821  | 0.0285071  | 0.253729   | 0.159909  | 0.258794  | 0.255429  | 0.102257   | 0.0575317  | 0.0527233  | 0.0130753 | 0.0770318 | 0.0528092 | 0.208359  |
| CEBPD     | 24.6785   | 11.0437   | 10.9578   | 60.9489    | 32.0985    | 76.6187   | 16.1163   | 12.9883   | 41.4786    | 27.6073    | 54.5693    | 16.6521   | 39.4361   | 23.8431   | 25.2129   |
| CEBPE     | 0.0299199 | 0         | 0.0371278 | 0.0154167  | 0.046476   | 0.0382146 | 0         | 0         | 0          | 0.0751051  | 0.0844396  | 0         | 0         | 0.0156375 | 0         |
| CEBPG     | 6.12153   | 7.3143    | 7.22175   | 8.58206    | 3.39003    | 7.51995   | 4.28537   | 6.94296   | 17.6051    | 10.1439    | 9.75322    | 8.01381   | 12.6415   | 7.50793   | 5.29544   |
| CEBPZ     | 8.41692   | 5.17482   | 4.73028   | 8.72406    | 1.8477     | 8.39889   | 2.75597   | 5.19909   | 4.57476    | 6.96707    | 8.81848    | 4.14111   | 10.4437   | 7.5002    | 5.09484   |
| CEBPZOS   | 2.43704   | 2.83835   | 2.74614   | 3.09563    | 0.962275   | 2.95589   | 2.02183   | 3.27212   | 1.89328    | 2.9047     | 5.06677    | 1.20861   | 3.32195   | 2.40728   | 1.94718   |
| CECR2     | 0.0910201 | 0.0865556 | 0.101058  | 0.0740517  | 0.21952    | 0.181519  | 0.142211  | 0.155396  | 0.571765   | 0.0420883  | 0.0459672  | 0.116544  | 0.0339991 | 0.142713  | 0.120397  |
| CECR3     | 0.0120915 | 0.0407809 | 0.0400116 | 0.0124606  | 0.0187822  | 0         | 0.124251  | 0.0429835 | 0          | 0.015176   | 0          | 0         | 0         | 0         | 0         |
| CECR7     | 1.68198   | 1.93549   | 1.78832   | 0.482472   | 1.64303    | 1.40265   | 1.1549    | 1.69513   | 0.323811   | 0.311942   | 0.495891   | 0.363945  | 0.257316  | 0.55584   | 0.614258  |
| CEL       | 0.523774  | 0.149483  | 0.149275  | 0.189917   | 0.301334   | 0.280806  | 0.376583  | 0.206883  | 0.0708775  | 0.0973911  | 0.0437982  | 0.180447  | 0.0563227 | 0.163778  | 0.0948932 |
| CELA1     | 0         | 0         | 0         | 0          | 0          | 0         | 0         | 0.0216046 | 0          | 0          | 0.0274429  | 0.0347888 | 0         | 0         | 0         |
| CELA2A    | 0.0251555 | 0         | 0         | 2.70E-17   | 0.0210926  | 0.0428391 | 0.0574434 | 7.38E-37  | 0.0306366  | 0          | 0          | 0         | 0.035044  | 0         | 0         |
| CELA2B    | 0.0250737 | 0.0120809 | 0         | 0.0516784  | 0.0179241  | 1.62E-17  | 0.0572567 | 0.111417  | 0.030537   | 0          | 0          | 0         | 0.0297797 | 0         | 0.108027  |
| CELA3A    | 0         | 0         | 0         | 0          | 0          | 0         | 0         | 0         | 0          | 0          | 0          | 0         | 0         | 0.0133358 | 0         |
| CELA3B    | 0         | 0         | 0         | 0          | 0.0347671  | 0         | 0         | 0         | 0          | 0          | 0          | 0         | 0         | 0         | 0         |
| CELF1     | 6.65927   | 6.98065   | 7.41974   | 8.63362    | 6.60556    | 9.39104   | 7.48955   | 6.61212   | 4.24349    | 6.47992    | 4.95818    | 5.00764   | 9.69227   | 8.43917   | 7.27124   |
| CELF2     | 3.1721    | 1.25225   | 1.62259   | 1.91312    | 1.00303    | 4.03261   | 2.46292   | 2.88366   | 0.368632   | 2.12489    | 2.50572    | 1.30379   | 3.84458   | 2.08501   | 4.43673   |
| CELF2-AS1 | 1.3312    | 0.632724  | 0.758977  | 0.44492    | 0.433122   | 0.444208  | 1.55073   | 1.08713   | 0          | 0.327385   | 0.121845   | 0.534177  | 0.156688  | 0.88378   | 1.02047   |
| CELF2-AS2 | 0.84434   | 0.426421  | 0.605926  | 0.272567   | 0.474055   | 0.381127  | 0.801431  | 0.515321  | 0.0495572  | 0.24259    | 0.0689027  | 0.567753  | 0.0918879 | 1.19627   | 0.71586   |
| CELF3     | 0.0790405 | 0.0799741 | 0.0719266 | 0.0488721  | 0.042972   | 0.0269208 | 0.0496352 | 0.0491712 | 0          | 0.0148806  | 0.00446134 | 0.0141389 | 0         | 0.0309825 | 0.0397292 |
| CELF4     | 0.0645499 | 0.0987918 | 0.106801  | 0.0313038  | 0.0353888  | 0.0387977 | 0.0997132 | 0.0742391 | 0.00462439 | 0.0381256  | 0.0257184  | 0.0135845 | 0.0367476 | 0.0575507 | 0.103608  |
| CELF5     | 0.0220075 | 0.0402934 | 0.0364123 | 0.00453587 | 0.00683704 | 0.0374781 | 0.0351784 | 0.0391168 | 0          | 0.00552433 | 0.0149062  | 0         | 0.0113593 | 0.0184033 | 0.0505688 |

|           |          |                 |          |          |           |          |           |          |           |          |          |          |          |           |          |
|-----------|----------|-----------------|----------|----------|-----------|----------|-----------|----------|-----------|----------|----------|----------|----------|-----------|----------|
| CELF6     | 0.692673 | 0.524003        | 0.40701  | 0.286862 | 1.00557   | 0.815802 | 0.546958  | 0.477514 | 0.0394205 | 0.11375  | 0.116926 | 0.120433 | 0.100241 | 0.233453  | 0.641485 |
| CELP      | 1.62E-26 | 0.00015765<br>1 | 0.14377  | 1.08E-22 | 2.16E-17  | 3.53E-09 | 0.0535406 | 1.05E-06 | 5.96E-22  | 4.93E-28 | 0        | 2.01E-08 | 7.46E-16 | 0.0207861 | 0.107562 |
| CELSR1    | 5.23457  | 10.3194         | 10.125   | 13.3519  | 17.7489   | 12.2589  | 9.73528   | 6.85888  | 4.14778   | 7.48043  | 3.18628  | 9.33751  | 15.0891  | 8.5834    | 4.78307  |
| CELSR2    | 7.61701  | 17.0973         | 16.1902  | 18.0297  | 33.9198   | 14.8543  | 15.0196   | 10.0262  | 32.9724   | 17.6624  | 8.27394  | 25.1016  | 26.3587  | 11.6365   | 6.69142  |
| CELSR3    | 0.224427 | 0.344905        | 0.396932 | 0.265173 | 0.546961  | 0.515631 | 0.459471  | 0.185697 | 0.212064  | 0.216116 | 0.117939 | 0.243644 | 0.200971 | 0.279082  | 0.394546 |
| CEMIP     | 0.958062 | 1.01523         | 1.02956  | 31.8395  | 4.31134   | 105.191  | 1.45367   | 1.19089  | 4.82619   | 6.85529  | 10.3196  | 3.44811  | 38.2724  | 24.8284   | 21.5618  |
| CEMIP2    | 2.4658   | 1.69577         | 1.89021  | 5.9012   | 2.2265    | 14.7632  | 1.72568   | 2.17564  | 2.07838   | 7.73928  | 8.99969  | 2.76202  | 8.90666  | 7.79904   | 14.6945  |
| CEMP1     | 1.94977  | 4.4217          | 3.40546  | 2.56919  | 13.4606   | 5.2537   | 2.96799   | 2.14294  | 1.25943   | 1.89553  | 1.7103   | 2.89567  | 1.38043  | 2.60379   | 1.93675  |
| CEND1     | 0.210903 | 0.697764        | 0.453631 | 0.159384 | 1.41962   | 0.706351 | 0.337123  | 0.337379 | 0.13699   | 0.229411 | 0.14285  | 0.46278  | 0.23586  | 0.426211  | 0.46442  |
| CENPA     | 0.259124 | 0.39796         | 0.44213  | 1.80249  | 0.427667  | 2.15125  | 0.610211  | 0.259074 | 0.256412  | 1.91071  | 2.94347  | 0.857524 | 1.83905  | 1.79444   | 0.488428 |
| CENPB     | 22.7519  | 16.7731         | 18.1546  | 29.8876  | 30.177    | 52.9009  | 16.3103   | 11.2543  | 18.0626   | 15.9042  | 18.2695  | 12.0289  | 29.0434  | 16.0351   | 15.2255  |
| CENPBD1   | 1.02501  | 1.21361         | 0.973924 | 1.23512  | 1.23488   | 2.5604   | 1.04284   | 0.692761 | 1.25114   | 1.21544  | 1.40234  | 0.938285 | 1.53047  | 1.024     | 0.684725 |
| CENPBD1P1 | 2.52822  | 2.32101         | 2.62802  | 3.71291  | 4.73319   | 4.80006  | 2.2556    | 1.80984  | 3.33233   | 2.69677  | 3.91767  | 2.5875   | 3.9106   | 3.07291   | 3.34254  |
| CENPC     | 3.98207  | 3.31322         | 3.91396  | 1.93668  | 0.775735  | 1.96949  | 2.34831   | 3.67902  | 1.08837   | 1.80203  | 2.27726  | 1.09785  | 1.4351   | 1.53341   | 2.78856  |
| CENPE     | 0.311618 | 0.267927        | 0.22668  | 0.824979 | 0.0667657 | 0.780005 | 0.073613  | 0.162345 | 0.346799  | 1.49366  | 1.31007  | 0.430566 | 1.95164  | 1.57248   | 0.72144  |
| CENPF     | 0.824932 | 0.775435        | 0.680582 | 2.85843  | 0.247901  | 3.55803  | 0.490189  | 0.517387 | 0.678908  | 2.44315  | 2.86732  | 1.28185  | 2.44947  | 3.97899   | 1.44295  |
| CENPH     | 1.7828   | 1.30854         | 0.978643 | 2.88462  | 0.750558  | 4.75271  | 1.76921   | 1.51037  | 0.466717  | 1.46385  | 3.32918  | 0.858374 | 2.0855   | 1.48038   | 1.00499  |
| CENPI     | 0.234955 | 0.302823        | 0.194371 | 0.829288 | 0.0729932 | 0.490149 | 0.268264  | 0.219249 | 0.19315   | 0.523434 | 0.682979 | 0.340436 | 0.572259 | 0.724506  | 0.388039 |
| CENPJ     | 0.866979 | 0.861023        | 0.812369 | 1.17607  | 0.329809  | 1.10356  | 0.484844  | 0.609324 | 0.290907  | 0.838319 | 0.968726 | 0.689978 | 0.973194 | 1.26227   | 1.41026  |
| CENPK     | 0.393972 | 0.35795         | 0.195553 | 1.0788   | 0.06994   | 0.431309 | 0.282747  | 0.430159 | 0.0822538 | 0.819417 | 1.47401  | 0.402711 | 1.30726  | 0.853044  | 0.75978  |
| CENPL     | 0.830393 | 0.46011         | 0.67322  | 1.00978  | 0.322472  | 1.13131  | 0.625756  | 0.487069 | 0.343851  | 1.01096  | 1.94044  | 0.463451 | 1.44121  | 1.0199    | 0.870561 |
| CENPM     | 0.341746 | 0.388594        | 0.271408 | 1.35237  | 2.22957   | 0.931176 | 1.04572   | 0.303716 | 2.98005   | 0.651968 | 2.43819  | 0.635774 | 0.6262   | 0.507257  | 0.451527 |
| CENPN     | 0.476849 | 0.410914        | 0.489461 | 1.45025  | 0.566704  | 1.71148  | 0.416907  | 0.391432 | 1.01249   | 1.4182   | 2.71137  | 0.857834 | 1.919    | 1.53343   | 0.724727 |
| CENPO     | 1.67623  | 1.3801          | 1.31118  | 2.62395  | 1.59306   | 3.55115  | 1.78811   | 1.09632  | 0.87393   | 1.52595  | 1.85392  | 1.27613  | 2.57883  | 2.27338   | 2.06758  |
| CENPP     | 1.11978  | 2.38317         | 2.18509  | 2.73808  | 2.74615   | 2.59651  | 1.58642   | 1.6279   | 1.68295   | 1.21911  | 2.92662  | 1.86841  | 0.603481 | 0.792643  | 0.826089 |



|            |          |           |            |           |           |            |           |            |           |           |            |            |           |           |            |
|------------|----------|-----------|------------|-----------|-----------|------------|-----------|------------|-----------|-----------|------------|------------|-----------|-----------|------------|
| CENPQ      | 0.830364 | 0.600123  | 0.465344   | 1.07654   | 0.208039  | 0.741256   | 0.27525   | 0.571323   | 0.685067  | 1.49605   | 3.06916    | 0.431236   | 1.33073   | 0.692975  | 0.519318   |
| CENPS      | 0.510158 | 0.305744  | 0.382269   | 0.998512  | 0.312055  | 1.49561    | 0.410454  | 0.408218   | 0.145294  | 0.715579  | 1.51191    | 0.397125   | 1.08259   | 0.633557  | 0.542631   |
| CENPS-CORT | 0.148047 | 0.0951898 | 0.00266227 | 0.0566044 | 0.014315  | 0.105887   | 0.0895435 | 0.00642828 | 0.0541155 | 0.125586  | 0.196295   | 0.00854345 | 0.0435466 | 0.0494296 | 0.00047275 |
|            |          |           |            |           |           |            |           |            |           |           |            |            |           |           | 9          |
| CENPT      | 6.53335  | 8.73509   | 8.82574    | 10.4552   | 26.4598   | 12.0169    | 11.257    | 6.46411    | 23.0052   | 17.0318   | 9.25816    | 16.9267    | 15.7405   | 11.6365   | 7.73861    |
| CENPU      | 3.50179  | 1.53644   | 1.50745    | 2.75832   | 0.483693  | 3.54737    | 1.927     | 2.33478    | 1.76303   | 3.70108   | 5.52567    | 1.95238    | 2.41058   | 1.91026   | 1.01799    |
| CENPV      | 0.795294 | 0.74721   | 0.93754    | 0.389297  | 0.617683  | 1.10042    | 0.499422  | 0.918828   | 0.121072  | 0.274498  | 0.583562   | 0.241848   | 0.487464  | 0.405264  | 0.428303   |
| CENPVL1    | 0        | 0         | 0          | 0         | 0         | 0.00304293 | 0         | 0          | 0         | 0         | 0.00403422 | 0          | 0         | 0         | 0          |
| CENPVL2    | 0        | 0         | 0          | 0         | 0         | 0.00304293 | 0         | 0          | 0         | 0         | 0.00403422 | 0          | 0         | 0         | 0          |
| CENPVL3    | 0        | 0         | 0          | 0         | 0         | 0.0311639  | 0         | 0          | 0         | 0         | 0          | 0          | 0         | 0         | 0          |
| CENPW      | 0.347319 | 0.167344  | 0.210707   | 0.847084  | 0.15286   | 0.788635   | 0.264372  | 0.113178   | 0.155099  | 0.726536  | 1.55525    | 0.314787   | 0.661061  | 0.925775  | 0.423975   |
| CENPX      | 5.36543  | 4.1815    | 4.33639    | 8.35755   | 8.60323   | 13.369     | 6.57777   | 3.03241    | 8.70264   | 9.46506   | 15.4632    | 5.85597    | 10.0981   | 7.72773   | 4.65167    |
| CEP104     | 2.35946  | 2.87486   | 2.76679    | 3.17601   | 3.56348   | 4.69002    | 2.20541   | 1.92364    | 2.23024   | 2.6717    | 2.62955    | 2.5597     | 3.73872   | 2.89533   | 2.79972    |
| CEP112     | 1.82723  | 0.932947  | 1.06941    | 1.0736    | 0.55919   | 1.98778    | 0.491986  | 0.717419   | 0.239143  | 1.24594   | 2.27822    | 0.573708   | 0.756619  | 1.3826    | 2.3813     |
| CEP120     | 2.88857  | 1.66634   | 1.91821    | 1.74151   | 0.702042  | 2.83188    | 1.39103   | 1.82494    | 0.496584  | 1.95454   | 2.64529    | 0.840099   | 1.85102   | 1.74592   | 2.30701    |
| CEP126     | 1.05901  | 0.637759  | 0.89481    | 0.185168  | 0.111643  | 0.640036   | 0.519726  | 0.734558   | 0.0510609 | 0.199209  | 0.253548   | 0.164995   | 0.154573  | 0.299056  | 0.683822   |
| CEP128     | 1.59482  | 1.36118   | 1.5606     | 0.85462   | 0.509616  | 0.958334   | 0.733566  | 1.10147    | 0.416208  | 0.606217  | 0.689276   | 0.404287   | 0.608559  | 0.745404  | 0.700194   |
| CEP131     | 0.927994 | 1.20145   | 1.21683    | 1.2751    | 2.74571   | 3.18758    | 1.18209   | 0.746179   | 0.422861  | 0.768562  | 0.776785   | 1.24219    | 1.69438   | 1.25707   | 1.79509    |
| CEP135     | 0.899895 | 0.804948  | 0.877992   | 1.10203   | 0.319687  | 0.883076   | 0.377815  | 0.717266   | 0.422662  | 0.911673  | 1.03409    | 0.649674   | 1.42418   | 1.15367   | 1.30975    |
| CEP152     | 0.648679 | 0.662673  | 0.475497   | 0.863102  | 0.389019  | 0.964852   | 0.393758  | 0.357571   | 0.255006  | 0.973899  | 0.889856   | 0.575776   | 0.863538  | 0.892626  | 0.86083    |
| CEP162     | 1.37936  | 1.18602   | 1.02002    | 0.959836  | 0.316915  | 1.30668    | 0.410185  | 0.638551   | 0.658997  | 0.990866  | 0.991352   | 0.533152   | 0.867059  | 0.785817  | 1.28028    |
| CEP164     | 2.1571   | 2.73237   | 2.41293    | 3.64213   | 5.23115   | 4.50715    | 2.69944   | 1.77624    | 1.43971   | 2.2332    | 1.26569    | 3.1538     | 3.27097   | 3.40979   | 2.99868    |
| CEP170     | 3.3515   | 2.72802   | 2.86101    | 2.51511   | 1.49497   | 4.07126    | 1.84828   | 2.82597    | 1.03537   | 4.48509   | 5.69996    | 1.47828    | 3.66488   | 3.36342   | 5.58254    |
| CEP170B    | 9.0873   | 14.1392   | 16.4864    | 17.1743   | 28.5112   | 24.4343    | 16.8982   | 9.80058    | 15.9553   | 12.6212   | 4.92206    | 19.222     | 26.0459   | 14.0369   | 9.22907    |
| CEP170P1   | 0.11445  | 0.02163   | 0.267871   | 0.0497453 | 4.07E-15  | 0.0472821  | 0.0840227 | 0.073084   | 4.88E-08  | 0.0569549 | 0.0506729  | 1.19E-11   | 0.187042  | 0.101526  | 0.195588   |
| CEP19      | 0.17867  | 0.334216  | 0.286923   | 1.45134   | 0.0979541 | 1.29763    | 0.144     | 0.0560426  | 0.1152    | 0.369352  | 0.806786   | 0.157924   | 0.461109  | 0.390002  | 0.422624   |

|          |           |           |           |           |           |          |           |           |           |           |           |           |           |            |          |
|----------|-----------|-----------|-----------|-----------|-----------|----------|-----------|-----------|-----------|-----------|-----------|-----------|-----------|------------|----------|
| CEP192   | 4.36399   | 3.72714   | 3.72302   | 3.95898   | 2.12287   | 3.19704  | 2.95514   | 3.58438   | 1.83405   | 3.35773   | 4.77245   | 2.38966   | 2.73887   | 3.28018    | 3.10028  |
| CEP250   | 1.58399   | 2.43685   | 2.22076   | 2.21943   | 4.5325    | 3.43104  | 1.93548   | 1.55097   | 0.599046  | 0.854525  | 0.655649  | 1.57084   | 1.51684   | 1.71238    | 1.64825  |
| CEP290   | 1.31298   | 1.24002   | 1.08154   | 0.908337  | 0.262106  | 1.51202  | 0.350959  | 0.862122  | 0.261903  | 1.05415   | 1.1475    | 0.586263  | 0.870584  | 0.986168   | 1.74756  |
| CEP295   | 1.72385   | 1.3469    | 1.28346   | 1.56801   | 0.321773  | 1.29086  | 0.71283   | 1.07952   | 0.625234  | 1.17051   | 1.2801    | 0.976831  | 1.14066   | 1.54862    | 1.52051  |
| CEP295NL | 0.555348  | 0.457965  | 0.406413  | 0.34118   | 0.895826  | 0.827525 | 1.573     | 0.683372  | 0.0650338 | 0.067021  | 0.132617  | 0.168116  | 0.0826864 | 0.597243   | 1.70246  |
| CEP350   | 6.9553    | 6.67831   | 7.47127   | 5.82415   | 2.86396   | 5.53572  | 4.2397    | 5.49346   | 6.44315   | 6.26011   | 5.07718   | 5.45296   | 7.16961   | 5.45002    | 4.87331  |
| CEP41    | 0.185927  | 0.215705  | 0.18417   | 0.405897  | 0.167205  | 0.554101 | 0.117316  | 0.200023  | 0.131096  | 0.297838  | 0.502628  | 0.127784  | 0.255703  | 0.311979   | 0.372416 |
| CEP44    | 1.80446   | 1.55816   | 1.62533   | 1.09262   | 0.416189  | 1.23374  | 1.24256   | 1.51569   | 1.09725   | 0.941984  | 1.50408   | 0.657848  | 0.841336  | 0.852725   | 0.818068 |
| CEP55    | 0.330864  | 0.297855  | 0.259308  | 2.87127   | 0.135249  | 2.20933  | 0.258474  | 0.263092  | 0.392351  | 1.75943   | 3.08633   | 0.778757  | 3.32567   | 3.12626    | 0.812777 |
| CEP57    | 4.80535   | 3.0692    | 3.5204    | 2.62446   | 1.16949   | 3.70707  | 1.89117   | 3.31642   | 1.89765   | 3.41003   | 5.01078   | 1.8363    | 2.80895   | 2.82971    | 2.91464  |
| CEP57L1  | 0.717614  | 0.543333  | 0.645489  | 0.431388  | 0.269829  | 0.594065 | 0.390166  | 0.617509  | 0.211557  | 0.46821   | 0.665437  | 0.252661  | 0.330715  | 0.501563   | 0.53574  |
| CEP63    | 1.58583   | 1.87517   | 1.59928   | 1.66663   | 0.832402  | 1.99325  | 0.972704  | 1.18919   | 1.03527   | 1.25455   | 1.56992   | 0.86037   | 1.3838    | 1.11719    | 1.17967  |
| CEP68    | 6.91521   | 5.34998   | 6.05869   | 4.02084   | 4.67697   | 5.40969  | 4.59347   | 5.43121   | 1.63378   | 1.90977   | 2.77248   | 1.70039   | 1.7724    | 2.50835    | 3.48261  |
| CEP70    | 1.18058   | 0.990168  | 1.08517   | 1.178     | 0.242572  | 1.13821  | 0.513502  | 0.915967  | 0.532522  | 0.893751  | 1.70645   | 0.505053  | 0.749612  | 0.976133   | 0.744566 |
| CEP72    | 0.651917  | 1.21484   | 1.01517   | 1.2646    | 1.89128   | 1.39591  | 0.996099  | 0.656051  | 0.467036  | 0.866354  | 0.303031  | 0.439025  | 0.915453  | 0.93197    | 0.647104 |
| CEP76    | 1.55214   | 1.84493   | 1.62322   | 1.10156   | 0.79609   | 1.67697  | 1.47125   | 1.49654   | 5.36785   | 1.22216   | 1.7935    | 1.78639   | 0.991989  | 0.761473   | 0.53624  |
| CEP78    | 0.763399  | 0.653897  | 0.648157  | 1.02594   | 0.454219  | 1.10808  | 0.519916  | 0.599095  | 0.380593  | 0.680787  | 0.942418  | 0.420056  | 0.949079  | 0.723306   | 0.900792 |
| CEP83    | 1.62677   | 1.34216   | 1.21524   | 1.32795   | 0.49585   | 1.39637  | 0.678085  | 1.00287   | 0.427644  | 1.03894   | 1.45699   | 1.17813   | 0.892437  | 1.68222    | 1.30041  |
| CEP83-DT | 0.0450956 | 0.0304188 | 0.0746125 | 0.0464723 | 0.0840588 | 0.115195 | 0.0205955 | 0.0240463 | 0         | 0.0226398 | 0.0814517 | 0.0258137 | 0.0349145 | 0.00471378 | 0        |
| CEP85    | 1.73516   | 2.33265   | 2.16494   | 2.46235   | 1.95299   | 3.57012  | 1.96816   | 1.43083   | 0.942292  | 1.6994    | 1.11747   | 1.8318    | 2.26105   | 1.86132    | 1.38076  |
| CEP85L   | 1.40723   | 0.569874  | 0.776107  | 0.450776  | 0.295031  | 1.00711  | 0.791866  | 0.849099  | 0.0876201 | 0.733216  | 1.09479   | 0.218267  | 0.43076   | 0.621172   | 1.30184  |
| CEP89    | 1.59428   | 1.95377   | 1.86366   | 2.52693   | 2.05924   | 2.92159  | 1.63233   | 1.26286   | 1.20298   | 1.73999   | 1.82909   | 1.10975   | 2.5995    | 1.82498    | 1.9785   |
| CEP95    | 5.57097   | 5.63775   | 5.72356   | 3.28459   | 1.88729   | 3.33781  | 2.58079   | 3.85693   | 1.82634   | 2.50945   | 3.10433   | 2.28412   | 2.61837   | 2.6791     | 2.72485  |
| CEP97    | 0.779155  | 0.789115  | 0.846159  | 0.889749  | 0.450173  | 0.991317 | 0.652613  | 0.796718  | 0.571553  | 0.977922  | 1.38897   | 0.721101  | 0.873429  | 0.88834    | 1.0196   |
| CEPT1    | 3.86936   | 3.72733   | 3.84815   | 5.07277   | 1.24366   | 3.51934  | 2.53514   | 4.00582   | 4.97511   | 4.1644    | 4.83631   | 3.56      | 4.29176   | 2.75676    | 2.86564  |
| CER1     | 0         | 0.0370147 | 0.0317769 | 0         | 0.0298333 | 0        | 0         | 0.0170686 | 0         | 0         | 0         | 0.0137423 | 0         | 0          | 0        |

|           |           |            |           |            |           |           |           |            |           |            |           |           |            |            |           |
|-----------|-----------|------------|-----------|------------|-----------|-----------|-----------|------------|-----------|------------|-----------|-----------|------------|------------|-----------|
| CERCAM    | 3.19783   | 2.58117    | 3.20456   | 3.31245    | 12.3798   | 9.08797   | 4.64868   | 2.96648    | 1.03387   | 11.4408    | 26.3392   | 1.9225    | 4.64759    | 9.09336    | 21.4119   |
| CERK      | 4.91497   | 5.6092     | 5.52185   | 6.30981    | 7.40819   | 6.55685   | 5.43341   | 3.57215    | 11.2235   | 10.2399    | 11.279    | 6.10223   | 12.3653    | 9.16216    | 5.03966   |
| CERKL     | 1.68E-29  | 3.04E-27   | 2.33E-28  | 4.12E-17   | 1.33E-28  | 0.0105996 | 0.0137887 | 0.00959587 | 1.62E-21  | 1.55E-17   | 6.56E-14  | 0         | 7.67E-22   | 0.00582456 | 1.43E-24  |
| CERNA1    | 0.192765  | 0.145303   | 0.241407  | 0.0993258  | 0.295901  | 0.12826   | 0.183781  | 0.277378   | 0.106085  | 0.224385   | 0.389536  | 0.139676  | 0.0851746  | 0.0670683  | 0.141273  |
| CERNA2    | 0.635593  | 0.564439   | 0.175269  | 5.11154    | 0.522686  | 2.38764   | 0.0569176 | 0.221514   | 1.108     | 4.08252    | 2.41982   | 2.23825   | 1.85743    | 2.19505    | 0.59063   |
| CERNA3    | 0         | 0.0200192  | 0.0687453 | 0          | 0         | 0         | 0         | 0          | 0         | 0          | 0         | 0         | 0          | 0.0217156  | 0         |
| CERS1     | 0.0400932 | 0.079059   | 0.0523809 | 0.0494477  | 0.287471  | 0.246677  | 0.0753593 | 0.0533269  | 0.0112682 | 0.00774171 | 0         | 0.0239357 | 0.00397969 | 0.0096713  | 0.0841539 |
| CERS2     | 11.0621   | 7.3197     | 8.82773   | 18.2244    | 7.37639   | 23.9278   | 11.9344   | 7.69667    | 4.70866   | 16.0307    | 24.4004   | 7.08858   | 28.5178    | 16.2846    | 17.611    |
| CERS3     | 10.4886   | 13.1326    | 11.9731   | 19.473     | 11.4236   | 11.8227   | 10.754    | 16.2945    | 45.8775   | 20.6624    | 19.5385   | 21.145    | 23.3207    | 12.0786    | 3.76377   |
| CERS3-AS1 | 0.522024  | 0.628797   | 0.611794  | 0.31381    | 0.405442  | 0.370414  | 0.447022  | 0.81188    | 0.900669  | 0.327597   | 0.0491083 | 0.622537  | 0.140336   | 0.363777   | 0         |
| CERS4     | 10.6285   | 12.5752    | 10.4478   | 12.8047    | 32.1484   | 15.6585   | 17.7809   | 6.41039    | 61.7725   | 16.8267    | 24.4712   | 15.0731   | 24.4039    | 8.21913    | 2.50737   |
| CERS5     | 3.23569   | 3.46273    | 4.10263   | 3.16692    | 2.38258   | 3.44279   | 3.05701   | 2.81781    | 1.15515   | 2.44892    | 3.9525    | 1.20997   | 3.10527    | 2.52959    | 3.10569   |
| CERS6     | 3.76389   | 3.74491    | 4.6494    | 3.60076    | 1.43251   | 3.91822   | 2.85789   | 4.22762    | 2.08654   | 3.67413    | 4.16517   | 1.8665    | 3.95324    | 2.73068    | 2.41026   |
| CERS6-AS1 | 0.0680516 | 0.16851    | 0.219807  | 0.0531343  | 4.03E-18  | 0.031625  | 0.106497  | 0.315584   | 0.0833814 | 0.208503   | 0.19042   | 0.0321256 | 0.39109    | 0.244521   | 0.26918   |
| CES1      | 3.80637   | 4.50759    | 6.81002   | 1.46678    | 4.62515   | 8.15758   | 9.45915   | 1.97249    | 0.308193  | 0.981705   | 2.10355   | 0.23045   | 2.11509    | 0.323808   | 1.49926   |
| CES1P1    | 0.0214642 | 0.0527193  | 0.0621044 | 0.0664386  | 0.0822262 | 0.0534753 | 0.220504  | 0.00954994 | 0         | 0          | 0         | 0         | 0          | 0.0115039  | 0.0627244 |
| CES1P2    | 0         | 0.00723731 | 0.0126013 | 0          | 0         | 0         | 0         | 0          | 0         | 0          | 0         | 0         | 0          | 0          | 0         |
| CES2      | 8.56225   | 8.65667    | 8.79607   | 16.1099    | 12.4791   | 17.1415   | 7.73925   | 6.15126    | 10.3476   | 22.1907    | 6.81892   | 12.4422   | 24.7693    | 10.3976    | 6.75321   |
| CES3      | 0.572861  | 0.237942   | 0.200374  | 0.105708   | 0.191396  | 0.241963  | 0.2202    | 0.37136    | 0.0860601 | 0.251971   | 0.030238  | 0.072831  | 0.0172822  | 0.19137    | 0.154778  |
| CES4A     | 1.92859   | 5.82873    | 6.99102   | 1.45266    | 8.18116   | 2.03032   | 8.70391   | 3.33445    | 9.08777   | 1.31151    | 1.42503   | 2.60435   | 0.868758   | 0.773383   | 0.684871  |
| CES5A     | 0.0279956 | 0.116902   | 0.2316    | 0.00961677 | 0.173947  | 0         | 0.0532742 | 0.124401   | 0.0340955 | 0.0351374  | 0         | 0.033386  | 0.0180626  | 0          | 0         |
| CES5AP1   | 0.0262989 | 0          | 0.0217563 | 0          | 0         | 0         | 0         | 0.0467446  | 0.0320291 | 0          | 0         | 0         | 0          | 0          | 0         |
| CETN1     | 0         | 0          | 0         | 0          | 0         | 0         | 0         | 0          | 0         | 0          | 0         | 0         | 0          | 0          | 0         |
| CETN2     | 6.49291   | 4.68741    | 4.00639   | 13.5368    | 5.82509   | 11.4222   | 3.13173   | 4.41823    | 6.15908   | 11.6994    | 17.4655   | 9.06171   | 11.9731    | 7.67173    | 5.66249   |
| CETN3     | 1.42419   | 1.84025    | 1.82084   | 3.0354     | 0.729039  | 2.21865   | 0.776089  | 1.32323    | 1.7345    | 2.78282    | 4.38471   | 1.58647   | 1.96306    | 2.01311    | 0.906446  |
| CETN4P    | 0.0367934 | 0.0531829  | 0         | 0          | 0         | 0.0939873 | 0.168038  | 0          | 0         | 0          | 0.0415352 | 0.0263267 | 0          | 0          | 0.10568   |

|            |            |            |            |            |           |            |            |            |            |            |            |            |            |            |           |
|------------|------------|------------|------------|------------|-----------|------------|------------|------------|------------|------------|------------|------------|------------|------------|-----------|
| CETP       | 0.0539151  | 0.0844256  | 0.0223012  | 0.333366   | 0.125623  | 0.401695   | 0.107727   | 0.0239576  | 0.0656625  | 0.118421   | 0.319533   | 0.0578665  | 0.130447   | 0.246561   | 0.271001  |
| CFAP100    | 0.0998502  | 0.197783   | 0.183562   | 0.0114332  | 0.189569  | 0.047234   | 0.101338   | 0.108458   | 0.0135118  | 0.0417741  | 0          | 0.00793839 | 0          | 0.0405892  | 0         |
| CFAP126    | 1.33006    | 1.12504    | 1.73606    | 0.913777   | 0.964153  | 1.00669    | 1.55237    | 1.20831    | 1.07991    | 1.2242     | 0.300294   | 0.867099   | 0.934428   | 1.035      | 0.806501  |
| CFAP157    | 0.21748    | 0.294277   | 0.317363   | 0.170716   | 0.611208  | 0.195298   | 0.357553   | 0.137882   | 0.357782   | 0.0962402  | 0.0574661  | 0.248805   | 0.158282   | 0.267288   | 0.204992  |
| CFAP161    | 0.0782741  | 0.081713   | 0.0755462  | 0.0403319  | 0.0607934 | 0.0444329  | 0.119161   | 0.0695635  | 0          | 0          | 0.0589078  | 0.0373382  | 0.0925871  | 0.102274   | 0.074941  |
| CFAP20     | 4.11011    | 3.8159     | 4.40715    | 5.39221    | 2.30821   | 7.47048    | 3.23081    | 2.93622    | 4.35107    | 4.74196    | 9.60078    | 2.98614    | 5.66062    | 3.73443    | 3.04212   |
| CFAP206    | 0.031345   | 0.0704783  | 0.0259308  | 0.0861385  | 0.0162299 | 0.0533797  | 0.0238591  | 0.0371424  | 0.0890742  | 0.0262275  | 0.082564   | 0.0373803  | 0.101118   | 0.0273038  | 0         |
| CFAP221    | 0.0438039  | 0.0281405  | 0.0362377  | 0.0376176  | 0.0113404 | 0.136761   | 0.00833564 | 0.0194646  | 0.0355655  | 0          | 0.016483   | 0.026119   | 0          | 0.0190782  | 0         |
| CFAP298    | 1.78572    | 2.02198    | 2.06945    | 2.69598    | 1.68299   | 2.88618    | 1.29731    | 1.3917     | 1.55174    | 1.53212    | 2.40158    | 1.91052    | 2.84573    | 2.15597    | 1.38171   |
| CFAP299    | 0.0489282  | 0          | 0          | 0          | 0         | 0          | 0          | 0.0217417  | 0          | 0.0921149  | 0          | 0          | 0          | 0          | 0         |
| CFAP300    | 0.184      | 0.118244   | 0.160674   | 0.136946   | 0.0317572 | 0.261122   | 0.128385   | 0.0908464  | 0.0124495  | 0.243768   | 0.438504   | 0.0365713  | 0.0989296  | 0.18699    | 0.190845  |
| CFAP36     | 4.85285    | 3.59596    | 3.66853    | 3.74213    | 3.69109   | 5.77074    | 2.1399     | 1.99282    | 3.54613    | 4.57861    | 8.2363     | 2.38274    | 3.46572    | 3.52458    | 4.3498    |
| CFAP410    | 3.1299     | 2.74877    | 2.99343    | 1.97111    | 5.24768   | 5.30193    | 3.35617    | 1.8544     | 1.61349    | 1.47573    | 3.86042    | 1.28565    | 1.19668    | 1.85653    | 2.62799   |
| CFAP43     | 0.10324    | 0.120212   | 0.0960837  | 0.017732   | 0.020046  | 0.0659309  | 0.0933189  | 0.0611676  | 0.0104779  | 0.0161972  | 0.0242803  | 0.0215458  | 0.00555085 | 0.0247307  | 0.0432443 |
| CFAP44     | 1.22065    | 1.35324    | 1.32795    | 0.797121   | 0.705943  | 0.679804   | 0.688253   | 0.921529   | 0.220715   | 0.273781   | 0.348166   | 0.415076   | 0.175823   | 0.463689   | 1.12744   |
| CFAP44-AS1 | 0.0674725  | 0.0162546  | 0.027909   | 0          | 0         | 0.028726   | 0          | 0          | 0          | 0          | 0.114252   | 0.0482783  | 0          | 0          | 0.096899  |
| CFAP45     | 0.438364   | 0.335452   | 0.447974   | 0.106293   | 0.0600821 | 0.450109   | 0.529952   | 0.33229    | 0.329748   | 0.404553   | 0.116437   | 0.212183   | 0.266193   | 0.30997    | 0.0740643 |
| CFAP46     | 0.0391402  | 0.0350227  | 0.0208154  | 0.0547405  | 0.0130282 | 0.0285663  | 0.0255366  | 0.00745384 | 0.00680977 | 0.00701786 | 0.00946809 | 0.0100021  | 0.0667403  | 0.0336069  | 0.0240901 |
| CFAP47     | 0.00652162 | 0.00418962 | 0.0089919  | 0.00224024 | 0         | 0.00925512 | 0          | 0.0135237  | 0          | 0          | 0.0122702  | 0          | 0          | 0          | 0         |
| CFAP52     | 0.0211063  | 0.030508   | 0.00873031 | 0          | 0         | 0.0359435  | 0.0120492  | 0.0281363  | 0          | 0          | 0.0238264  | 0.00755106 | 0          | 0.0110311  | 0         |
| CFAP53     | 0.100078   | 0.216986   | 0.19663    | 0.103133   | 0.155456  | 0.191734   | 0.0428497  | 0.122294   | 0.0609419  | 0.109907   | 0.14122    | 0.0537064  | 0.0161425  | 0.130763   | 0         |
| CFAP54     | 0.0567812  | 0.0227984  | 0.0293584  | 0.134096   | 0.0367503 | 0.058421   | 0.0162077  | 0.0378468  | 0.0432207  | 0.118777   | 0.125527   | 0.0812569  | 0.0595317  | 0.114996   | 0.285407  |
| CFAP57     | 0.0541675  | 0.080471   | 0.0896223  | 0.0186071  | 0.0350587 | 0.0768715  | 0.0257694  | 0.0481395  | 0.0404362  | 0.0169964  | 0.0101914  | 0.045218   | 0.00582476 | 0.0259511  | 0.0583435 |
| CFAP58     | 0.0768408  | 0.0605832  | 0.0404524  | 0.0791867  | 0.0651056 | 0.202235   | 0.0398792  | 0.0682897  | 0.0510455  | 0.0964431  | 0.189259   | 0.08997    | 0.184788   | 0.131434   | 0.110353  |
| CFAP58-DT  | 0.27729    | 0.441916   | 0.476433   | 0.417643   | 0.364461  | 0.32692    | 0.389662   | 0.417039   | 1.11703    | 0.669284   | 1.44473    | 0.48839    | 0.509194   | 0.479364   | 0.214428  |
| CFAP61     | 0.11886    | 0.0859029  | 0.20895    | 0.0153111  | 0         | 0.0674719  | 0.508915   | 0.162851   | 0.0241264  | 0          | 0.022363   | 0.00354365 | 0.00958599 | 0.00517679 | 0.0355621 |

|           |            |            |            |           |            |           |           |            |            |          |           |           |            |            |           |
|-----------|------------|------------|------------|-----------|------------|-----------|-----------|------------|------------|----------|-----------|-----------|------------|------------|-----------|
| CFAP65    | 0.00260884 | 0.00502792 | 0          | 0         | 0          | 0.0022214 | 0         | 0          | 0.00953183 | 0        | 0         | 0         | 0.00818097 | 0          |           |
| CFAP69    | 0.66428    | 0.411506   | 0.500474   | 0.757906  | 0.175047   | 1.08075   | 0.433402  | 0.442768   | 0.057787   | 0.334985 | 0.810149  | 0.203704  | 0.317616   | 0.812157   | 1.78021   |
| CFAP70    | 0.746552   | 1.01158    | 0.920292   | 0.27133   | 0.288879   | 0.411308  | 0.533733  | 0.81833    | 0.176677   | 0.212169 | 0.0228687 | 0.316959  | 0.0796574  | 0.297312   | 0.319154  |
| CFAP73    | 0.186591   | 0.401894   | 0.582171   | 0.133528  | 0.266385   | 0.0553228 | 0.269626  | 0.387726   | 0.168786   | 0.220513 | 0.0961242 | 0.294046  | 0.0502357  | 0.172281   | 5.63E-26  |
| CFAP74    | 0.00427625 | 0.00412072 | 0.0141505  | 0         | 0.00664249 | 0.0254882 | 0         | 0          | 0          | 0        | 0.0144821 | 0         | 0.0110361  | 0.00893981 | 0         |
| CFAP77    | 0.0626165  | 0.0543052  | 0.0310805  | 0         | 0.155624   | 0.0106634 | 0.0857922 | 0.0556483  | 0.015252   | 0.031436 | 0         | 0.0627253 | 0          | 0          | 0.0359701 |
| CFAP97    | 3.98674    | 2.92111    | 3.32543    | 3.93083   | 0.529837   | 3.84439   | 2.32832   | 4.20482    | 3.05084    | 2.83104  | 4.40535   | 2.17819   | 3.94234    | 3.33536    | 3.49218   |
| CFAP97D1  | 0          | 0.0230386  | 0.0197785  | 0         | 0.0371376  | 0.0610723 | 0.0272975 | 0.0212475  | 0          | 0        | 0         | 0         | 0          | 0          | 0         |
| CFAP99    | 0.0107943  | 0.0260044  | 0.00892983 | 0.0111239 | 0.0670693  | 0.0183825 | 0.0369739 | 0          | 0          | 0.013548 | 0         | 0         | 0          | 0.00564159 | 0         |
| CFB       | 0.293707   | 0.155288   | 0.172018   | 1.75042   | 0.302806   | 4.42079   | 0.210703  | 0.189414   | 0.0458998  | 0.158218 | 0.503206  | 0.0567233 | 1.64092    | 0.207162   | 1.93356   |
| CFC1      | 0          | 0          | 0          | 0         | 0          | 0         | 0         | 0          | 0          | 0        | 0         | 0         | 0          | 0          | 0         |
| CFC1B     | 0          | 0          | 0          | 0         | 0          | 0         | 0         | 0          | 0          | 0        | 0         | 0         | 0          | 0          | 0         |
| CFD       | 50.4493    | 56.4464    | 88.1234    | 11.477    | 40.6586    | 29.0689   | 129.832   | 22.5078    | 1.32928    | 3.34864  | 9.90265   | 2.83463   | 1.79964    | 3.06351    | 11.5529   |
| CFDP1     | 4.46938    | 6.31203    | 5.7781     | 8.46576   | 8.60081    | 5.33094   | 2.8304    | 4.0685     | 7.55877    | 5.79121  | 8.74259   | 5.95571   | 6.2459     | 6.74288    | 5.43112   |
| CFH       | 19.9847    | 12.229     | 18.6685    | 9.08553   | 2.73624    | 26.6917   | 18.85     | 11.2998    | 0.992134   | 9.01682  | 14.3768   | 1.3399    | 8.60412    | 6.21777    | 26.552    |
| CFHR1     | 2.31E-43   | 2.58E-39   | 8.53E-41   | 0.0428388 | 0          | 0.352794  | 2.97E-43  | 0.0538409  | 1.56E-43   | 0.132186 | 0.0492032 | 1.04E-41  | 9.90E-36   | 2.71E-40   | 0.149901  |
| CFHR2     | 0          | 0          | 0          | 0         | 0          | 0         | 0         | 0          | 0          | 0        | 0         | 0         | 0          | 0          | 0         |
| CFHR3     | 0          | 0          | 0          | 0.0436273 | 0          | 0.0720951 | 0         | 0          | 0          | 0        | 0         | 0         | 0          | 0          | 0.10133   |
| CFHR4     | 0          | 0          | 0          | 0         | 0          | 0         | 0         | 0          | 0          | 0        | 0         | 0         | 0          | 0          | 0         |
| CFHR5     | 0          | 0          | 0          | 0         | 0          | 0         | 0         | 0          | 0          | 0        | 0.0092382 | 0         | 0          | 0          | 0         |
| CFI       | 2.48962    | 0.909646   | 0.883905   | 1.79593   | 0.950695   | 3.78929   | 0.627733  | 1.03253    | 0.27794    | 3.18983  | 6.06592   | 0.794201  | 3.46692    | 2.45599    | 4.51395   |
| CFL1      | 80.7153    | 68.1992    | 67.6416    | 288.358   | 164.502    | 285.369   | 101.092   | 65.7771    | 179.967    | 249.29   | 378.749   | 180.758   | 376.122    | 189.064    | 127.472   |
| CFL1P1    | 0          | 0.063117   | 0.0632165  | 0.0337494 | 0.0169571  | 0.0929529 | 0         | 0.00970171 | 0.0531804  | 0        | 0.0246468 | 0         | 0          | 0          | 0         |
| CFL2      | 1.89017    | 0.980522   | 1.26402    | 1.49993   | 0.184145   | 1.77208   | 1.71448   | 1.14134    | 1.10689    | 2.14091  | 3.90323   | 0.805825  | 2.1841     | 1.66598    | 2.61048   |
| CFLAR     | 9.8786     | 8.86578    | 9.56432    | 8.41323   | 8.332      | 7.90779   | 7.41977   | 8.13181    | 7.09883    | 8.51682  | 4.52298   | 6.759     | 9.01505    | 7.98612    | 9.04504   |
| CFLAR-AS1 | 1.39309    | 1.32321    | 1.40239    | 1.06142   | 0.448933   | 0.256667  | 1.53025   | 1.46944    | 0.24368    | 0.48829  | 0.0985767 | 0.886859  | 0.218248   | 1.17193    | 1.55179   |

|               |           |             |           |           |           |          |           |           |           |           |           |           |           |            |           |
|---------------|-----------|-------------|-----------|-----------|-----------|----------|-----------|-----------|-----------|-----------|-----------|-----------|-----------|------------|-----------|
| CFP           | 0.664955  | 0.326668    | 0.291228  | 1.39739   | 0.526579  | 1.34334  | 0.937866  | 0.405559  | 0.0793962 | 0.834587  | 1.89871   | 0.121281  | 1.37961   | 0.381607   | 1.47925   |
| CFTR          | 2.55929   | 0.571083    | 0.530867  | 0.08947   | 0.111407  | 0.392127 | 0.728373  | 0.573652  | 0.487307  | 0.0189508 | 0.0383511 | 0.0972339 | 0.0292255 | 0.0552399  | 0.0216841 |
| CFTR-AS1      | 0.0964294 | 0           | 0         | 0         | 0         | 0        | 0         | 0.0856984 | 0         | 0         | 0         | 0         | 0         | 0          | 0         |
| CGA           | 0         | 0.0132117   | 0.0453686 | 0.0282578 | 0         | 0        | 0         | 0.0974769 | 0.0667906 | 0         | 0         | 0         | 0         | 0          | 0         |
| CGAS          | 0.693521  | 0.457908    | 0.478108  | 3.50729   | 1.37652   | 1.97935  | 0.293274  | 0.51362   | 0.782065  | 1.69252   | 3.50855   | 0.90976   | 2.56044   | 1.65123    | 1.0882    |
| CGB1          | 4.16E-33  | 0.000146919 | 2.55E-17  | 3.24E-23  | 7.68E-19  | 1.12E-44 | 1.21E-22  | 2.17E-09  | 1.41E-28  | 6.67E-11  | 0.0178388 | 3.14E-15  | 1.22E-13  | 5.94E-08   | 0         |
| CGB2          | 3.39E-33  | 0.0444074   | 2.08E-17  | 8.06E-16  | 2.10E-16  | 9.81E-45 | 0.04444   | 7.54E-05  | 1.15E-28  | 5.44E-11  | 0.014547  | 2.56E-15  | 9.94E-14  | 1.59E-05   | 0         |
| CGB3          | 4.77E-38  | 1.69E-09    | 2.93E-22  | 3.72E-28  | 0.0611291 | 0        | 1.39E-27  | 0.0553665 | 1.62E-33  | 7.66E-16  | 2.05E-07  | 0.0380628 | 1.40E-18  | 0.00253772 | 0         |
| CGB5          | 4.17E-37  | 1.48E-07    | 0.0797732 | 3.25E-27  | 3.39E-14  | 0        | 0.0266543 | 2.18E-13  | 1.42E-32  | 6.69E-15  | 1.79E-06  | 3.94E-15  | 0.0353226 | 0.0221864  | 0         |
| CGB7          | 0.262989  | 0.410726    | 0.398866  | 0.433629  | 0.916593  | 0.582223 | 0.0900818 | 0.52641   | 0.128117  | 0.297071  | 1.79E-06  | 0.167244  | 0.178271  | 0.180019   | 0         |
| CGB8          | 2.81E-37  | 9.95E-08    | 4.13E-09  | 2.19E-27  | 2.28E-14  | 0        | 0.0179358 | 1.46E-13  | 9.53E-33  | 4.50E-15  | 1.20E-06  | 2.12E-19  | 0.0237687 | 0.0149293  | 0         |
| CGGBP1        | 5.35884   | 4.57281     | 5.05822   | 7.22837   | 2.01447   | 6.52224  | 4.10974   | 5.74129   | 4.89314   | 5.36313   | 8.17381   | 3.65041   | 7.1121    | 5.48135    | 6.39964   |
| CGN           | 2.53616   | 2.81554     | 3.62193   | 1.6972    | 2.24814   | 1.86205  | 4.23219   | 2.70149   | 4.76852   | 0.79721   | 0.901413  | 1.66536   | 1.35823   | 0.535895   | 0.130313  |
| CGNL1         | 7.2215    | 4.10991     | 5.48101   | 1.64436   | 4.02645   | 6.22953  | 5.09107   | 4.06088   | 0.495428  | 0.312673  | 0.590932  | 0.532503  | 1.01322   | 0.583435   | 1.2137    |
| CGREF1        | 0.502084  | 0.379194    | 0.2018    | 0.617945  | 0.718985  | 0.884008 | 0.31731   | 0.421414  | 0.0556324 | 0.290955  | 0.537054  | 0.0245507 | 0.216862  | 0.191161   | 1.07872   |
| CGRRF1        | 1.52188   | 0.800691    | 0.897222  | 1.24386   | 0.461932  | 1.56397  | 0.818884  | 1.0105    | 1.91739   | 2.15162   | 3.13981   | 0.876163  | 2.12182   | 1.18853    | 1.78366   |
| CH17-340M24.3 | 0.50311   | 0.354286    | 0.096048  | 0.159529  | 0.601156  | 1.74652  | 0.574435  | 0.275152  | 0.188533  | 0.437161  | 1.39803   | 0.470754  | 0.249695  | 0.262947   | 0.444633  |
| CH25H         | 0.470251  | 0.186114    | 0.2223    | 4.11916   | 1.33048   | 4.01842  | 0.287634  | 0.62688   | 1.08406   | 1.3069    | 4.00037   | 0.288409  | 1.48451   | 0.649544   | 1.76071   |
| CHAC1         | 0.151559  | 0.116837    | 0.0250761 | 16.337    | 1.55379   | 0.554917 | 0.0865225 | 0.148162  | 10.0782   | 4.67947   | 12.9174   | 9.39125   | 4.23408   | 1.78226    | 0.631208  |
| CHAC2         | 0.502733  | 0.317398    | 0.258142  | 0.464486  | 0.134641  | 0.398548 | 0.197932  | 0.585445  | 1.35122   | 0.957351  | 1.54601   | 0.793862  | 1.34218   | 0.833553   | 0.672196  |
| CHAD          | 0.95576   | 1.40092     | 1.35544   | 0.126635  | 1.48463   | 0.360405 | 1.54335   | 1.04355   | 0.0665148 | 0.0514105 | 0.0154133 | 0.097696  | 0         | 0.0856323  | 0.50982   |
| CHADL         | 0.493377  | 0.755875    | 0.856972  | 0.367206  | 1.4239    | 0.414672 | 0.471661  | 0.632303  | 0.133864  | 0.115138  | 0.17534   | 0.143825  | 0.0530541 | 0.115419   | 0.104971  |
| CHAF1A        | 2.35377   | 2.73513     | 2.68599   | 4.10929   | 3.64546   | 5.00461  | 3.04315   | 2.10414   | 1.93075   | 1.564     | 1.0941    | 1.34735   | 3.72513   | 2.63042    | 1.77963   |
| CHAF1B        | 1.42169   | 0.748597    | 0.924095  | 2.18717   | 0.709834  | 3.45006  | 1.14786   | 1.00176   | 0.519437  | 1.19807   | 2.04053   | 0.871934  | 2.86318   | 1.32154    | 1.10836   |
| CHAMP1        | 3.17466   | 2.96377     | 3.17085   | 4.48418   | 1.72824   | 5.59482  | 2.85323   | 3.57202   | 2.39078   | 1.98861   | 2.82101   | 2.43828   | 3.8034    | 2.47513    | 2.41764   |

|         |            |            |           |            |           |           |           |            |            |           |            |           |          |           |           |
|---------|------------|------------|-----------|------------|-----------|-----------|-----------|------------|------------|-----------|------------|-----------|----------|-----------|-----------|
| CHAT    | 0.00848352 | 0.00408749 | 0.0210545 | 0          | 0         | 0         | 0         | 0.00753945 | 0          | 0         | 0.00957684 | 0         | 0        | 0         | 0         |
| CHCHD1  | 4.38731    | 3.75212    | 3.15312   | 10.964     | 4.60013   | 8.38206   | 3.63173   | 3.24111    | 9.15031    | 10.6689   | 19.2228    | 5.27784   | 9.1466   | 7.02231   | 3.8592    |
| CHCHD10 | 23.1751    | 7.74823    | 10.303    | 10.6513    | 12.116    | 18.9134   | 15.4659   | 9.78458    | 4.1438     | 4.51214   | 14.2042    | 2.38861   | 4.97035  | 6.66013   | 6.96073   |
| CHCHD2  | 38.2366    | 27.8541    | 30.5422   | 83.2517    | 41.0472   | 87.7817   | 41.7699   | 25.2092    | 47.7922    | 63.6271   | 123.597    | 39.8729   | 67.2722  | 49.549    | 29.6238   |
| CHCHD3  | 4.30307    | 2.62811    | 3.07275   | 4.7735     | 3.60434   | 6.17794   | 2.81737   | 2.75466    | 2.83649    | 4.81398   | 7.00788    | 2.91789   | 6.39052  | 4.26716   | 4.40167   |
| CHCHD4  | 2.64038    | 1.84222    | 1.62331   | 4.32684    | 1.61368   | 4.84049   | 1.51559   | 1.42332    | 2.19651    | 2.48094   | 3.7299     | 2.33319   | 3.87257  | 2.81275   | 1.55407   |
| CHCHD5  | 4.0859     | 3.14082    | 3.53496   | 7.81058    | 6.00767   | 11.3137   | 4.95004   | 3.04911    | 6.7995     | 6.49836   | 13.9783    | 5.28922   | 5.21204  | 4.45025   | 4.83764   |
| CHCHD6  | 2.53374    | 2.5288     | 2.39554   | 1.49206    | 3.72494   | 5.02764   | 2.71214   | 1.60842    | 1.68067    | 1.64684   | 3.6775     | 1.21404   | 1.45961  | 2.76674   | 1.4945    |
| CHCHD7  | 2.4859     | 2.22589    | 2.2203    | 2.7885     | 0.956822  | 4.97333   | 1.39404   | 1.5934     | 2.26396    | 1.988     | 3.24087    | 1.50326   | 2.42712  | 1.60393   | 1.51649   |
| CHD1    | 4.33964    | 3.56327    | 4.06829   | 4.94995    | 1.67525   | 5.17852   | 2.0398    | 3.32304    | 3.58933    | 5.87714   | 4.90291    | 3.54276   | 7.21583  | 5.15283   | 4.89659   |
| CHD1L   | 3.63545    | 3.20785    | 3.21037   | 4.92154    | 3.19971   | 6.11277   | 3.37387   | 2.5117     | 4.62169    | 4.32434   | 4.76143    | 3.5707    | 4.44987  | 3.96991   | 3.4601    |
| CHD2    | 12.0079    | 12.0609    | 12.3829   | 10.4532    | 7.97824   | 13.418    | 8.30664   | 9.6541     | 5.63949    | 7.78873   | 5.14775    | 7.46671   | 8.03903  | 8.55862   | 7.60652   |
| CHD3    | 8.04396    | 10.4777    | 9.88485   | 13.6311    | 17.5392   | 19.5529   | 8.41987   | 7.39771    | 3.98099    | 9.24439   | 7.33193    | 7.73993   | 14.8643  | 11.8074   | 15.7218   |
| CHD4    | 17.9696    | 18.1862    | 18.4698   | 22.793     | 27.013    | 35.6483   | 22.2262   | 15.1391    | 26.8098    | 14.7675   | 10.8552    | 13.6856   | 25.9634  | 16.0007   | 16.575    |
| CHD5    | 0.0191601  | 0.0103856  | 0.0138693 | 0.00493627 | 0.0223217 | 0.0305899 | 0.0437528 | 0.00851397 | 0.00291686 | 0.012024  | 0.0108147  | 0.0034274 | 0        | 0.0062587 | 0.0412746 |
| CHD6    | 6.99256    | 6.11658    | 6.1246    | 3.4663     | 5.16171   | 5.9486    | 5.12795   | 5.1324     | 2.47041    | 2.19947   | 2.18599    | 2.55374   | 2.08874  | 2.53743   | 3.33408   |
| CHD7    | 3.58139    | 3.83057    | 3.76133   | 4.15202    | 3.82155   | 3.63831   | 3.37715   | 3.705      | 4.19623    | 3.52926   | 1.77555    | 4.07126   | 4.37892  | 3.88355   | 2.89312   |
| CHD8    | 9.56605    | 9.93314    | 10.2457   | 8.93016    | 8.17778   | 11.0273   | 10.6127   | 8.34157    | 12.7937    | 6.37894   | 5.17954    | 7.42539   | 10.2067  | 7.01631   | 7.12058   |
| CHD9    | 9.11232    | 8.05903    | 7.99733   | 5.91421    | 2.46342   | 4.88036   | 4.0962    | 7.8435     | 5.2787     | 5.92729   | 5.68381    | 5.15782   | 5.01111  | 5.84937   | 5.31156   |
| CHDH    | 0.843042   | 0.40619    | 0.54244   | 0.283158   | 0.795421  | 1.80257   | 0.691615  | 0.527233   | 0.0532378  | 0.0548646 | 0.0845946  | 0.0491512 | 0.112814 | 0.0783307 | 0.376667  |
| CHEK1   | 0.66931    | 0.481455   | 0.456218  | 1.96723    | 0.446619  | 1.59334   | 0.565075  | 0.54456    | 0.275542   | 1.23642   | 1.97405    | 0.644167  | 2.01017  | 1.50517   | 1.05598   |
| CHEK2   | 0.540978   | 1.08431    | 0.769761  | 2.88781    | 0.857133  | 2.03601   | 0.877093  | 0.509623   | 0.606143   | 0.869099  | 1.4901     | 0.990937  | 1.16578  | 1.74167   | 0.994449  |
| CHEK2P2 | 0          | 0          | 0         | 0          | 0         | 0.0684236 | 0         | 0          | 0          | 0.0336191 | 0.120952   | 0         | 0        | 0         | 0         |
| CHERP   | 3.63747    | 4.55125    | 4.36655   | 7.44338    | 6.94904   | 10.3508   | 5.96779   | 3.87468    | 4.64065    | 3.05639   | 3.87453    | 4.3802    | 9.03295  | 4.85215   | 4.80091   |
| CHFR    | 4.15669    | 4.40208    | 4.59062   | 5.78923    | 8.83282   | 7.25978   | 5.12189   | 3.53562    | 7.51006    | 7.39516   | 8.2698     | 5.06012   | 8.95731  | 7.66452   | 5.15194   |
| CHGA    | 0.113114   | 0.0599499  | 0.0467878 | 0.0466268  | 0.0351409 | 0.0288944 | 0.116235  | 0.120631   | 0          | 0.0141969 | 0.0127691  | 0.0323743 | 0        | 0.0236473 | 0         |

|            |            |           |            |           |           |            |            |           |           |           |           |           |           |           |           |
|------------|------------|-----------|------------|-----------|-----------|------------|------------|-----------|-----------|-----------|-----------|-----------|-----------|-----------|-----------|
| CHGB       | 0.00873323 | 0         | 0.00722474 | 0.0269995 | 0         | 0.104107   | 0.00997132 | 0.0155227 | 0         | 0.0219222 | 0.0394349 | 0.0124977 | 0.0338078 | 0.0547724 | 0         |
| CHI3L1     | 4.4472     | 2.59798   | 3.95001    | 22.2397   | 2.77887   | 112.143    | 7.32162    | 3.87392   | 11.0625   | 17.4408   | 52.5499   | 1.84795   | 4.47872   | 3.57534   | 13.262    |
| CHI3L2     | 4.82684    | 4.0353    | 5.07459    | 62.3718   | 9.75159   | 38.5926    | 1.26297    | 9.07737   | 2.48439   | 1.09985   | 3.76234   | 0.688693  | 9.28716   | 0.442978  | 0.845866  |
| CHIA       | 0          | 0         | 0          | 0         | 0         | 0.0107273  | 0          | 0         | 0         | 0         | 0         | 0         | 0         | 0         | 0         |
| CHIAP2     | 0          | 0         | 0          | 0         | 0         | 0          | 0          | 0         | 0         | 0         | 0         | 0         | 0         | 0         | 0         |
| CHIC1      | 0.910194   | 0.704574  | 0.728064   | 0.400022  | 0.265097  | 0.618306   | 0.894046   | 1.30555   | 0.175243  | 0.634193  | 0.955722  | 0.380705  | 0.636912  | 0.459966  | 0.740082  |
| CHIC2      | 6.80204    | 6.41891   | 7.19207    | 9.35319   | 8.4715    | 8.39647    | 8.06506    | 6.09875   | 21.5436   | 8.51201   | 15.6527   | 6.85418   | 7.33605   | 5.84794   | 5.11551   |
| CHID1      | 3.44386    | 3.74513   | 3.45593    | 6.4919    | 8.18435   | 7.33619    | 4.83205    | 2.87204   | 3.98011   | 3.25703   | 5.50984   | 3.77435   | 4.41265   | 3.37799   | 3.57005   |
| CHIT1      | 1.04988    | 0.0263921 | 0.00755249 | 0.0376325 | 0         | 0.00777357 | 0.0416947  | 0.194723  | 0.0111186 | 0.1375    | 0.597746  | 0.0261293 | 0         | 0         | 0.0786659 |
| CHKA       | 2.65757    | 1.15734   | 1.25429    | 0.956792  | 1.33635   | 2.53125    | 1.19623    | 1.7411    | 0.30084   | 0.919408  | 1.21157   | 0.475391  | 1.15409   | 1.20199   | 1.68812   |
| CHKB       | 5.144      | 6.24384   | 5.51718    | 7.98005   | 13.6442   | 8.14675    | 4.78934    | 4.43533   | 5.66814   | 5.63426   | 7.89205   | 6.62821   | 2.90278   | 6.01521   | 6.55802   |
| CHKB-CPT1B | 0.293148   | 0.200617  | 0.130376   | 0.243074  | 0.212723  | 0.208654   | 0.177572   | 0.235477  | 0.0936656 | 0.170396  | 0.179262  | 0.240728  | 0.0561602 | 0.0807987 | 0.243488  |
| CHKB-DT    | 0.113558   | 0.251684  | 0.338194   | 0.585122  | 0.564462  | 0.986267   | 0.259313   | 0.222025  | 0.331921  | 0.513095  | 0.640962  | 0.520023  | 0.17584   | 0.284881  | 0         |
| CHL1       | 4.74139    | 5.15996   | 4.69866    | 4.21247   | 3.54287   | 2.54783    | 3.30036    | 3.66974   | 5.31623   | 0.804861  | 0.502511  | 1.71871   | 0.484835  | 0.118629  | 0.386101  |
| CHL1-AS1   | 0.671148   | 1.31313   | 1.54865    | 0.473793  | 0.0790091 | 0.0904554  | 0.763735   | 0.547045  | 0.470347  | 0.0638394 | 0         | 0.236564  | 0         | 0.0531673 | 0.255664  |
| CHL1-AS2   | 0.414407   | 0.337899  | 0.158228   | 0.0328507 | 1.53502   | 0.0814298  | 0.0727933  | 0.11332   | 0.0388232 | 0         | 0         | 0.159664  | 0         | 0         | 0         |
| CHM        | 1.1828     | 1.19784   | 1.12939    | 1.6323    | 0.451504  | 1.27967    | 0.881177   | 1.16209   | 1.42294   | 1.86293   | 2.21872   | 0.805422  | 1.79256   | 1.17368   | 1.5165    |
| CHML       | 1.75882    | 1.22459   | 1.13259    | 1.19822   | 0.228943  | 1.44462    | 1.18545    | 1.80178   | 1.77506   | 1.46344   | 2.01137   | 1.01944   | 1.40527   | 1.34034   | 1.34996   |
| CHMP1A     | 11.0133    | 11.4992   | 11.2466    | 22.1748   | 28.4567   | 25.0376    | 12.9826    | 8.72391   | 23.4538   | 18.2622   | 18.9764   | 15.6904   | 33.2586   | 15.6435   | 10.8265   |
| CHMP1B     | 9.85745    | 8.12349   | 8.07743    | 10.7947   | 8.20017   | 11.946     | 8.2467     | 9.70243   | 32.3214   | 15.6056   | 19.4662   | 12.9391   | 17.1715   | 10.9769   | 7.41844   |
| CHMP1B2P   | 0.11286    | 0.24717   | 0.178243   | 0.0775367 | 0.0531242 | 0.104835   | 0.0624773  | 0.249231  | 0.0624774 | 0.0386319 | 0.0463289 | 0.0244709 | 0.019859  | 0.094734  | 0.103142  |
| CHMP2A     | 20.5517    | 17.555    | 18.6464    | 36.9944   | 31.334    | 48.1426    | 21.2974    | 15.3065   | 35.8576   | 27.1964   | 49.5016   | 22.6333   | 33.7982   | 19.8948   | 12.7043   |
| CHMP2B     | 5.6801     | 4.46796   | 4.55329    | 6.90624   | 2.53067   | 6.28368    | 3.72027    | 6.57418   | 10.8001   | 8.82012   | 9.52365   | 6.48388   | 12.7672   | 5.38957   | 5.43821   |
| CHMP3      | 18.0253    | 13.3035   | 13.1758    | 20.5217   | 14.0683   | 25.2794    | 13.0304    | 13.6923   | 14.0562   | 18.2454   | 26.6788   | 11.2973   | 18.3479   | 13.19     | 13.7438   |
| CHMP4A     | 6.55378    | 7.17886   | 7.11605    | 9.40968   | 11.0817   | 9.22811    | 5.12501    | 4.70204   | 9.66543   | 8.88972   | 12.4463   | 6.44794   | 7.35577   | 5.97642   | 4.11778   |
| CHMP4B     | 19.869     | 17.3116   | 16.4022    | 30.8148   | 25.3194   | 39.7231    | 16.2202    | 14.9855   | 44.9396   | 29.4878   | 36.6901   | 22.9138   | 30.8064   | 17.3906   | 14.5901   |



|           |           |           |           |           |            |           |           |           |           |           |           |           |            |           |           |
|-----------|-----------|-----------|-----------|-----------|------------|-----------|-----------|-----------|-----------|-----------|-----------|-----------|------------|-----------|-----------|
| CHMP4C    | 5.95824   | 7.02281   | 7.19126   | 6.76061   | 4.67631    | 1.97594   | 7.10368   | 5.18371   | 36.267    | 10.5797   | 13.2681   | 9.30741   | 11.6379    | 2.62235   | 1.83746   |
| CHMP5     | 6.13796   | 6.52876   | 6.46509   | 11.1182   | 4.84532    | 9.60542   | 4.55717   | 5.71322   | 18.1914   | 14.5796   | 25.8104   | 7.59173   | 12.3567    | 7.5203    | 4.83291   |
| CHMP6     | 3.29622   | 3.85985   | 4.14207   | 6.90835   | 10.6076    | 9.36746   | 4.68454   | 2.57095   | 6.50438   | 6.24927   | 9.5302    | 5.30421   | 10.5079    | 5.29181   | 4.57399   |
| CHMP7     | 2.62573   | 3.09903   | 2.80643   | 5.29991   | 5.17475    | 6.25088   | 3.0522    | 2.2069    | 3.81758   | 3.30408   | 4.82534   | 2.50503   | 5.20491    | 3.59215   | 3.84883   |
| CHN1      | 1.08374   | 0.515424  | 0.468517  | 1.088     | 1.11866    | 1.91702   | 0.447052  | 0.602736  | 0.246944  | 4.69491   | 8.15346   | 0.660378  | 3.39236    | 3.41305   | 6.27575   |
| CHN2      | 0.364343  | 0.320664  | 0.425993  | 0.210261  | 0.22638    | 0.475691  | 0.349436  | 0.341067  | 0.0946621 | 0.28047   | 0.477105  | 0.152942  | 0.191192   | 0.17011   | 0.383711  |
| CHODL     | 0.173511  | 0.175162  | 0.252905  | 0.076632  | 0.0770064  | 0.126636  | 0.188675  | 0.132173  | 0.11069   | 0.0311106 | 0.0932725 | 0.0827678 | 0.00533087 | 0.0302281 | 0.0118659 |
| CHODL-AS1 | 0.0502018 | 0.072564  | 0         | 0         | 0          | 0.128239  | 0         | 0.0892304 | 0         | 0         | 0         | 0.107762  | 0          | 0.0262377 | 0         |
| CHORDC1   | 1.67415   | 2.0411    | 2.00133   | 3.18989   | 1.12573    | 2.35192   | 1.21447   | 1.81602   | 2.76378   | 3.67203   | 3.91199   | 3.03817   | 5.24036    | 4.28022   | 2.49396   |
| CHP1      | 20.3685   | 17.5964   | 15.6759   | 30.307    | 15.3909    | 28.7471   | 19.7934   | 18.465    | 82.1295   | 41.3657   | 42.5067   | 35.7814   | 51.6691    | 23.0745   | 14.1059   |
| CHP2      | 2.89531   | 14.6475   | 18.0364   | 1.16144   | 10.7606    | 0.364007  | 14.9203   | 6.62274   | 8.29476   | 0.463385  | 0.899371  | 1.73103   | 0.0877602  | 0.126948  | 0.320922  |
| CHPF      | 3.96407   | 3.92868   | 4.08108   | 11.0311   | 17.3976    | 15.5983   | 4.76732   | 3.64581   | 9.87741   | 15.6026   | 27.771    | 6.79899   | 15.5566    | 12.4272   | 14.1381   |
| CHPF2     | 4.49748   | 5.28453   | 5.64577   | 7.61896   | 11.0336    | 12.986    | 6.26143   | 3.89384   | 5.39964   | 6.4168    | 9.06011   | 5.73434   | 9.21436    | 8.43465   | 11.1176   |
| CHPT1     | 8.12296   | 3.23775   | 5.14377   | 2.06991   | 2.43179    | 7.40704   | 4.55295   | 4.25265   | 0.503636  | 2.02049   | 4.20144   | 0.40157   | 1.27687    | 1.92973   | 2.88458   |
| CHRAC1    | 3.44239   | 3.05026   | 2.98305   | 4.88597   | 1.52375    | 6.4501    | 4.57336   | 3.65664   | 4.11502   | 3.21477   | 6.24432   | 2.81407   | 5.87774    | 2.49221   | 3.39146   |
| CHRD      | 0.693054  | 0.736422  | 1.01871   | 0.561167  | 2.88362    | 4.19412   | 1.07392   | 0.577433  | 0.158262  | 0.893153  | 1.07576   | 0.571169  | 0.786514   | 1.38743   | 3.32364   |
| CHRD1     | 5.19178   | 2.97067   | 4.82435   | 0.625055  | 0.587772   | 12.229    | 3.43722   | 3.08093   | 0.0271081 | 0.328253  | 0.496255  | 0.059724  | 0.348253   | 0.0930652 | 2.38944   |
| CHRD2     | 0.217227  | 0.0241531 | 0.0207353 | 0.232469  | 6.9692     | 7.32748   | 0.0858541 | 0.371257  | 0.0203506 | 0.199239  | 0.782825  | 0         | 2.12387    | 0.266365  | 8.903     |
| CHRFAM7A  | 0.20633   | 0.0533332 | 0.0620466 | 0.103681  | 0.00147417 | 0.112     | 0.184718  | 0.0789011 | 0.0172687 | 0.0140507 | 0.0865744 | 0.020439  | 0.0598237  | 0.0786481 | 0.16328   |
| CHRM1     | 0.721427  | 0.774188  | 1.06477   | 0.0337932 | 0.267422   | 0.495617  | 0.823702  | 0.969002  | 0.0599057 | 0         | 0         | 0         | 0          | 0         | 0         |
| CHRM2     | 0         | 0         | 0         | 0         | 0          | 0         | 0.017776  | 0         | 0         | 0         | 0         | 0         | 0          | 0         | 0         |
| CHRM3     | 1.88815   | 1.38323   | 1.57724   | 0.667549  | 2.29418    | 0.892811  | 1.42934   | 1.2455    | 0.377628  | 0.548047  | 0.33685   | 0.765819  | 0.139979   | 0.893721  | 0.723987  |
| CHRM3-AS1 | 0         | 0.0461726 | 0.0396388 | 0         | 0          | 0         | 0         | 0.0425831 | 0         | 0         | 0         | 0         | 0          | 0         | 0         |
| CHRM3-AS2 | 0.259161  | 0.049947  | 0.128638  | 0.0267073 | 0          | 0.0220672 | 0.0591803 | 0.253353  | 0         | 0.0650547 | 0         | 0         | 0          | 0.0948141 | 0         |
| CHRM4     | 0.178317  | 0.19638   | 0.27396   | 0.118132  | 0.296773   | 0.0433814 | 0.756218  | 0.135835  | 0.0465365 | 0         | 0.0718922 | 0.0637954 | 0.0575247  | 0.0199707 | 0.0731675 |
| CHRM5     | 0.28761   | 0.194005  | 0.195633  | 0.0922105 | 0.0992796  | 0.130611  | 0.131354  | 0.272644  | 0.0389197 | 0.40109   | 0.137086  | 0.160061  | 0.0618549  | 0.230487  | 0.156039  |

|         |            |            |            |           |           |            |           |            |           |            |            |            |            |            |           |
|---------|------------|------------|------------|-----------|-----------|------------|-----------|------------|-----------|------------|------------|------------|------------|------------|-----------|
| CHRNA1  | 0.0112563  | 0          | 0          | 0.0116    | 0         | 0.0287539  | 0         | 0          | 0.013709  | 0          | 0.038121   | 0          | 0          | 0          | 0.0161655 |
| CHRNA10 | 0.0922493  | 0.28335    | 0.200327   | 0.237664  | 0.358238  | 0.206191   | 0.171157  | 0.102479   | 0.0983057 | 0.159201   | 0.117155   | 0.173268   | 0.0297594  | 0.427895   | 0.149042  |
| CHRNA2  | 0.112154   | 0.1432     | 0.199481   | 0.0231157 | 0.139372  | 0.0143247  | 0.102443  | 0.159478   | 0         | 0.00703826 | 0          | 0.00802494 | 0          | 0.0381009  | 0.0563737 |
| CHRNA3  | 0.16275    | 0.163104   | 0.188494   | 0.05367   | 0.0505614 | 0.521059   | 0.0743291 | 0.474415   | 1.49055   | 0.318658   | 0.771643   | 0.493756   | 0.0504026  | 0.360656   | 0.0280475 |
| CHRNA4  | 0.0165722  | 0.0139733  | 0.0274194  | 0         | 0.0321779 | 0          | 0.0141912 | 0.00368199 | 0         | 0.0103999  | 0.00935396 | 0          | 0.00267307 | 0          | 0         |
| CHRNA5  | 0.121368   | 0.0523217  | 0.0581289  | 0.250147  | 0.019845  | 0.271957   | 0.109401  | 0.0794774  | 0.147813  | 0.176382   | 0.259598   | 0.146261   | 0.358561   | 0.250391   | 0.165127  |
| CHRNA6  | 0.00971173 | 0          | 0.00803423 | 0.0500411 | 0.0301713 | 0.00826941 | 0         | 0.0431549  | 0         | 0.0121892  | 0.0219267  | 0.006949   | 0.0125319  | 0.0101515  | 0         |
| CHRNA7  | 0.18533    | 0.158151   | 0.102584   | 0.0908827 | 0.124925  | 0.126915   | 0.223528  | 0.105019   | 0.0298707 | 0.0837368  | 0.158531   | 0.0360441  | 0.0384746  | 0.0841803  | 0.332116  |
| CHRNA9  | 0.437237   | 0.220466   | 0.117767   | 0.146702  | 0.347487  | 0.727287   | 0.174148  | 0.189772   | 4.42103   | 0.701924   | 1.44632    | 0.334682   | 0.0131211  | 0.116917   | 0.0292059 |
| CHRNA1  | 1.02563    | 1.27335    | 1.24855    | 1.4484    | 1.29812   | 1.89216    | 0.932484  | 0.831315   | 4.3834    | 2.46726    | 2.14408    | 1.68517    | 6.95428    | 1.81161    | 1.36382   |
| CHRNA2  | 0.764959   | 0.77029    | 0.666311   | 0.771629  | 0.553257  | 0.754742   | 0.499089  | 0.597101   | 0.147878  | 0.187957   | 0.182761   | 0.25485    | 0.0940091  | 0.234804   | 0.406881  |
| CHRNA3  | 0          | 0          | 0          | 0         | 0         | 0          | 0         | 0          | 0         | 0          | 0          | 0          | 0          | 0.00489699 | 0         |
| CHRNA4  | 0.0263889  | 0.0508583  | 0.0291077  | 0.0815835 | 0.0273274 | 0.0748993  | 0.0100433 | 0.117261   | 0         | 0.0662415  | 0.109229   | 0.0314699  | 0.0283766  | 0.0459733  | 0.0252652 |
| CHRNA5  | 0.11716    | 0.203219   | 0.329539   | 0.0321965 | 0.109194  | 0.0665069  | 0.374555  | 0.18742    | 0         | 0          | 0          | 0.022355   | 0.00503941 | 0.0326576  | 0.0336514 |
| CHRNA6  | 0.243015   | 1.33299    | 1.60631    | 0.555881  | 0.535299  | 0.602431   | 0.974581  | 0.315306   | 1.60804   | 0.482452   | 0.623204   | 0.606882   | 0.238495   | 0.430292   | 0.328548  |
| CHRNA7  | 0.634926   | 0.800483   | 0.779129   | 0.130862  | 0.789007  | 0.234273   | 0.73702   | 0.611292   | 0         | 0.132816   | 0.0716752  | 0.159007   | 0.0614477  | 0.215696   | 0.288747  |
| CHST1   | 0.276072   | 0.113205   | 0.116623   | 3.48059   | 1.68797   | 2.66581    | 0.187785  | 0.114845   | 0.343378  | 0.530806   | 1.51847    | 1.20624    | 1.25442    | 0.801255   | 1.4931    |
| CHST10  | 1.00551    | 0.336005   | 0.496416   | 0.935933  | 0.667591  | 1.84355    | 0.592549  | 0.720659   | 0.207393  | 0.793854   | 1.60196    | 0.272703   | 0.978361   | 0.580621   | 1.24607   |
| CHST11  | 1.25184    | 0.537428   | 0.643939   | 2.54703   | 1.15302   | 2.55891    | 0.710076  | 0.6989     | 0.224781  | 2.70426    | 4.55204    | 0.447864   | 3.52325    | 1.73212    | 4.63857   |
| CHST12  | 2.46295    | 2.81772    | 3.45571    | 2.33688   | 6.06738   | 4.32367    | 3.95183   | 2.13101    | 2.31247   | 1.72947    | 4.60537    | 1.28874    | 2.31712    | 1.71255    | 3.03848   |
| CHST13  | 0.181616   | 0.0312519  | 0.0643909  | 0.0534744 | 0.0403017 | 0.209873   | 0.0148117 | 0.0807025  | 0.0315982 | 0.227947   | 0.790798   | 0.0185644  | 0          | 0.0813603  | 0.186302  |
| CHST14  | 2.08477    | 1.74515    | 1.86404    | 2.60414   | 4.05614   | 5.39719    | 2.68087   | 1.46912    | 0.692459  | 2.53731    | 6.0619     | 0.768456   | 2.5543     | 2.5864     | 5.1412    |
| CHST15  | 2.32353    | 1.99119    | 1.66394    | 4.4965    | 2.25922   | 5.82961    | 3.04176   | 1.98299    | 1.87933   | 5.4808     | 5.55426    | 2.33518    | 6.16592    | 4.27161    | 4.53407   |
| CHST2   | 0.676894   | 0.822083   | 0.356347   | 8.486     | 8.28994   | 6.06852    | 0.568464  | 0.561794   | 23.2802   | 14.2321    | 9.59266    | 10.3592    | 26.8606    | 9.94369    | 7.00558   |
| CHST3   | 5.23399    | 4.03938    | 3.54741    | 7.26467   | 6.08862   | 10.9905    | 3.48252   | 3.89938    | 1.24093   | 3.14505    | 2.75007    | 2.52204    | 4.7517     | 4.15791    | 2.77406   |
| CHST4   | 0.0100317  | 0.00966682 | 0          | 0.0413517 | 0         | 0.0683347  | 0.0114538 | 0          | 0         | 0          | 0.0339735  | 0          | 0          | 0          | 0.0144067 |

|             |           |           |            |           |           |            |           |           |           |          |            |           |           |           |          |
|-------------|-----------|-----------|------------|-----------|-----------|------------|-----------|-----------|-----------|----------|------------|-----------|-----------|-----------|----------|
| CHST5       | 0.0427256 | 0.116953  | 0.100146   | 0.0589691 | 0.0909841 | 0.0727606  | 0.0740011 | 0.0719242 | 0.03469   | 0.017875 | 0.0884252  | 0.0407618 | 0         | 0.0418409 | 0        |
| CHST6       | 0.03871   | 0.0199833 | 0.0388859  | 0.19376   | 0.312567  | 0.190703   | 0.0662967 | 0.0172011 | 0.0101024 | 0.298451 | 0.561841   | 0.0613314 | 0.3782    | 0.218212  | 1.25083  |
| CHST7       | 1.07577   | 0.423672  | 0.379197   | 0.838688  | 1.35136   | 1.58508    | 0.619479  | 0.448929  | 0.307604  | 0.669229 | 1.45729    | 0.321283  | 0.494909  | 0.596467  | 0.63141  |
| CHST8       | 0.0399294 | 0.0461726 | 0.0594583  | 0.0164593 | 0.198477  | 0.00679986 | 0.0638261 | 0.0141944 | 0         | 0        | 0.00901505 | 0         | 0.0257622 | 0.0125213 | 0.217906 |
| CHST9       | 0.0204896 | 0.0345528 | 0.00847524 | 0.0211152 | 0         | 0.0348933  | 0         | 0.0728379 | 0.012477  | 0        | 0          | 0         | 0         | 0         | 0        |
| CHSY1       | 6.60721   | 5.99686   | 6.63993    | 8.67496   | 6.13111   | 15.7518    | 4.37302   | 5.85838   | 2.83095   | 7.7884   | 12.5346    | 3.28642   | 10.4129   | 9.5143    | 20.5773  |
| CHSY3       | 0.636235  | 0.558811  | 0.542787   | 0.498574  | 1.82216   | 1.69296    | 0.401051  | 0.365175  | 0.16143   | 1.93812  | 3.71086    | 0.260816  | 1.34694   | 1.44094   | 4.99687  |
| CHTF18      | 0.981146  | 1.24859   | 1.64813    | 2.36952   | 2.90851   | 4.69373    | 1.56492   | 0.92521   | 0.538172  | 0.723823 | 0.963858   | 1.18435   | 1.80244   | 1.97287   | 1.9361   |
| CHTF8       | 10.6317   | 11.2775   | 11.0123    | 21.9567   | 16.5319   | 26.6505    | 13.7866   | 8.0828    | 22.6226   | 16.4171  | 23.4313    | 12.4655   | 23.7946   | 13.146    | 10.1027  |
| CHTOP       | 7.67159   | 8.39642   | 8.03475    | 11.0748   | 9.19473   | 11.9492    | 7.46604   | 6.17219   | 7.70214   | 7.89872  | 11.6602    | 6.1026    | 12.2762   | 8.21273   | 5.78491  |
| CHUK        | 2.64327   | 2.04142   | 2.50438    | 3.97055   | 1.0737    | 3.61315    | 1.92919   | 2.47995   | 2.93081   | 3.88792  | 4.7613     | 2.39509   | 6.01243   | 3.67616   | 2.72986  |
| CHURC1      | 7.49854   | 6.26851   | 6.92524    | 8.87092   | 1.30166   | 6.28715    | 3.3199    | 6.86709   | 6.1761    | 6.5729   | 8.41265    | 3.92434   | 5.3286    | 3.8448    | 5.37093  |
| CHURC1-FNTB | 2.24965   | 2.73097   | 1.86694    | 3.31576   | 4.03148   | 2.88515    | 2.36223   | 0.893929  | 7.02743   | 1.86452  | 5.51278    | 2.13922   | 2.11708   | 1.84424   | 0.19356  |
| CIAO1       | 7.55188   | 6.71224   | 6.57951    | 8.10744   | 6.58236   | 9.77976    | 6.41613   | 5.25911   | 5.098     | 5.00188  | 7.33408    | 4.67526   | 7.3105    | 6.08025   | 5.56684  |
| CIAO2A      | 1.64318   | 0.955512  | 1.14582    | 2.53677   | 1.0464    | 2.32119    | 0.934472  | 1.30366   | 1.11178   | 2.37843  | 5.70699    | 1.15322   | 2.04723   | 1.994     | 1.46471  |
| CIAO2B      | 7.28126   | 6.05137   | 5.3518     | 13.1382   | 5.76028   | 15.1426    | 5.47023   | 4.18569   | 12.3951   | 15.2879  | 23.681     | 9.62581   | 14.111    | 13.0716   | 5.32559  |
| CIAO3       | 2.42025   | 2.89779   | 2.70685    | 4.13194   | 6.71226   | 5.96136    | 2.68035   | 1.88321   | 2.75783   | 2.58137  | 2.89634    | 2.33378   | 3.31074   | 3.03477   | 1.89453  |
| CIAPIN1     | 5.14407   | 4.2824    | 4.1678     | 10.0667   | 8.03998   | 9.39237    | 4.92877   | 3.4782    | 11.1348   | 7.44144  | 9.57866    | 7.1034    | 10.3332   | 7.23409   | 4.00603  |
| CIART       | 2.2448    | 4.21102   | 5.50518    | 0.880708  | 0.283204  | 2.02784    | 7.75416   | 1.38738   | 5.73148   | 2.07376  | 1.85233    | 3.26135   | 2.55847   | 0.61937   | 0.785497 |
| CIB1        | 8.72288   | 6.80292   | 6.16231    | 23.0288   | 16.3805   | 28.0222    | 5.71712   | 4.70162   | 6.89557   | 14.7455  | 27.5635    | 8.02655   | 17.4433   | 12.9924   | 7.8771   |
| CIB2        | 1.48353   | 1.43607   | 1.11571    | 4.68374   | 4.04324   | 4.19154    | 0.846923  | 1.15064   | 12.4175   | 6.90626  | 12.3016    | 5.72249   | 5.06429   | 4.0248    | 1.7238   |
| CIB3        | 0         | 0         | 0          | 0         | 0         | 0          | 0         | 0         | 0         | 0        | 0          | 0         | 0         | 0.0170121 | 0        |
| CIB4        | 0         | 0         | 0.0247679  | 0         | 0.093012  | 0.0509858  | 0.0341837 | 0         | 0         | 0        | 0          | 0         | 0         | 0         | 0        |
| CIC         | 5.14015   | 8.06144   | 9.01932    | 8.97435   | 15.8135   | 23.5198    | 9.80675   | 5.46389   | 5.03921   | 5.25584  | 4.66775    | 5.72258   | 8.36372   | 7.30598   | 10.9551  |
| CIDEA       | 2.59922   | 2.26988   | 0.237769   | 0.347699  | 2.98929   | 1.33005    | 0.998747  | 0.921767  | 14.0319   | 1.36451  | 3.54078    | 1.4038    | 0.411188  | 0.953538  | 0.179462 |
| CIDEB       | 3.34348   | 5.15775   | 3.35895    | 6.64764   | 8.53585   | 5.94292    | 3.22184   | 2.69191   | 8.55681   | 2.75311  | 4.18543    | 3.82383   | 3.75242   | 2.41873   | 1.07547  |

|           |          |            |           |           |           |          |           |           |           |           |           |           |           |           |           |
|-----------|----------|------------|-----------|-----------|-----------|----------|-----------|-----------|-----------|-----------|-----------|-----------|-----------|-----------|-----------|
| CIDEC     | 2.13602  | 0.00810369 | 0.0417418 | 0         | 0         | 1.10273  | 0.748936  | 0.328843  | 0         | 0         | 0         | 0         | 0         | 0         | 0         |
| CIDCEP    | 1.29693  | 1.40251    | 1.23981   | 1.30683   | 2.14889   | 1.59513  | 1.77696   | 1.12699   | 0.87751   | 1.3384    | 1.8545    | 0.72177   | 1.4876    | 1.38579   | 1.20032   |
| CIITA     | 3.81371  | 2.60332    | 3.08577   | 2.80435   | 5.41948   | 4.58395  | 2.84298   | 3.12254   | 0.389553  | 1.25378   | 2.3387    | 0.950682  | 2.60981   | 2.52044   | 7.09534   |
| CILP      | 10.1834  | 5.62775    | 8.91717   | 0.389664  | 8.66545   | 1.57013  | 17.9728   | 4.83348   | 0.258642  | 0.0910154 | 0.169571  | 0.0444749 | 0.0735226 | 0.070386  | 1.94151   |
| CILP2     | 0.70548  | 0.0823222  | 0.0683933 | 0.0567983 | 1.40406   | 0.159563 | 0.176202  | 0.0783715 | 0.0134249 | 0.0276703 | 0.0373312 | 0.011831  | 0.138685  | 0.0316864 | 7.26625   |
| CINP      | 4.23146  | 3.32584    | 3.18766   | 9.4765    | 5.14084   | 7.30673  | 4.45348   | 3.40343   | 6.70812   | 9.46472   | 15.2378   | 5.73408   | 8.70893   | 6.01692   | 4.31156   |
| CIP2A     | 0.541087 | 0.423412   | 0.498278  | 1.01214   | 0.236008  | 0.827052 | 0.280978  | 0.482242  | 0.185041  | 0.930359  | 1.08423   | 0.454269  | 1.15155   | 1.08857   | 0.69356   |
| CIPC      | 5.87625  | 4.87265    | 4.62787   | 3.95482   | 3.46428   | 5.42504  | 4.4121    | 3.84105   | 9.86627   | 4.19537   | 5.51594   | 4.18176   | 3.97334   | 3.24366   | 1.98745   |
| CIR1      | 6.71187  | 5.47272    | 5.36033   | 5.91917   | 2.56636   | 7.0779   | 2.16638   | 3.95752   | 8.92886   | 6.07506   | 8.9611    | 4.4331    | 5.69623   | 3.76427   | 3.72588   |
| CIRBP     | 33.6873  | 33.3818    | 34.3489   | 20.7722   | 49.8654   | 42.7997  | 24.2933   | 27.8776   | 15.8706   | 13.7873   | 21.5057   | 15.6819   | 13.831    | 13.1686   | 19.4901   |
| CIRBP-AS1 | 0.665619 | 1.48018    | 1.22837   | 0.861821  | 1.98834   | 1.17713  | 1.94867   | 0.925239  | 0.644362  | 0.471263  | 0.693601  | 1.6242    | 0.869919  | 0.892004  | 0.784339  |
| CISD1     | 1.24059  | 1.01562    | 1.04447   | 2.98686   | 0.579825  | 2.13139  | 0.58915   | 1.405     | 1.14989   | 2.12202   | 4.37493   | 1.31187   | 2.23127   | 1.57219   | 1.38748   |
| CISD2     | 1.22409  | 0.931047   | 0.99124   | 1.40002   | 0.366143  | 1.11937  | 0.910039  | 1.11724   | 1.61653   | 2.11035   | 3.6543    | 1.20589   | 2.01726   | 1.22573   | 1.30328   |
| CISD3     | 2.55018  | 2.03856    | 2.14531   | 4.38049   | 4.39735   | 7.02495  | 4.06089   | 1.4957    | 2.12722   | 3.09707   | 6.82821   | 1.62968   | 4.00333   | 3.08858   | 3.30464   |
| CISH      | 1.62246  | 1.8437     | 1.59546   | 3.56482   | 2.6312    | 6.04735  | 1.80587   | 1.93162   | 1.60315   | 2.79199   | 3.83591   | 1.51138   | 4.99045   | 2.15993   | 2.76969   |
| CISTR     | 0        | 0          | 0.0417115 | 0         | 0         | 0        | 0         | 0         | 0         | 0         | 0         | 0         | 0         | 0         | 0         |
| CIT       | 0.975365 | 0.738854   | 0.912422  | 1.56661   | 0.668783  | 2.57077  | 1.40191   | 0.819586  | 0.385174  | 0.82057   | 1.03506   | 0.770164  | 1.25004   | 1.90848   | 0.820605  |
| CITED1    | 0.100186 | 0.0344795  | 0.0473607 | 0.0294986 | 0.066696  | 0.194988 | 0.0163414 | 0.0508785 | 0         | 0.0179635 | 0.0969411 | 0         | 0.073874  | 0.0374013 | 0.0205543 |
| CITED2    | 11.872   | 11.4195    | 13.9814   | 21.4948   | 13.4831   | 18.9057  | 24.0899   | 12.7758   | 57.0638   | 14.2286   | 26.8785   | 18.4292   | 27.3164   | 6.26776   | 5.19662   |
| CITED4    | 13.2118  | 14.6574    | 16.0609   | 41.2703   | 65.6887   | 41.3811  | 14.7983   | 9.94128   | 46.7868   | 35.2118   | 32.2371   | 23.6271   | 62.4914   | 27.0487   | 10.787    |
| CIZ1      | 8.64404  | 11.0999    | 12.0978   | 11.9655   | 12.4258   | 22.7588  | 12.7764   | 8.06221   | 9.04542   | 9.38778   | 8.80017   | 8.36916   | 17.5844   | 9.20073   | 7.68083   |
| CKAP2     | 2.65944  | 2.69937    | 1.81939   | 6.34151   | 0.723139  | 4.92993  | 0.934768  | 2.38252   | 2.48946   | 4.55348   | 4.07742   | 2.17475   | 4.71605   | 4.05516   | 2.13635   |
| CKAP2L    | 0.202924 | 0.221151   | 0.127904  | 1.36923   | 0.0600403 | 1.0285   | 0.209627  | 0.163167  | 0.229486  | 1.15217   | 1.67989   | 0.45288   | 2.17275   | 1.46966   | 0.617544  |
| CKAP4     | 12.8827  | 12.932     | 12.1709   | 35.0517   | 28.7617   | 35.1476  | 11.6541   | 9.57925   | 38.3235   | 33.1322   | 31.5728   | 21.8502   | 56.8795   | 28.3943   | 23.2195   |
| CKAP5     | 6.25626  | 6.19802    | 6.31632   | 13.0861   | 5.60067   | 11.7576  | 4.80932   | 5.4865    | 6.98124   | 9.85545   | 7.89124   | 8.01324   | 14.1586   | 9.89255   | 7.1977    |
| CKB       | 15.0353  | 15.1735    | 19.1832   | 8.01221   | 14.685    | 19.062   | 29.2222   | 8.32117   | 14.1482   | 10.157    | 12.9944   | 18.8542   | 16.6689   | 7.20983   | 2.54161   |

|            |           |            |           |           |          |           |            |            |           |            |           |            |            |           |           |
|------------|-----------|------------|-----------|-----------|----------|-----------|------------|------------|-----------|------------|-----------|------------|------------|-----------|-----------|
| CKLF       | 2.16314   | 2.07192    | 2.54412   | 5.2641    | 1.4574   | 5.97472   | 2.64835    | 1.69081    | 1.90443   | 5.92952    | 13.9562   | 1.49184    | 3.8395     | 2.32922   | 3.06912   |
| CKLF-CMTM1 | 6.75E-06  | 2.74E-08   | 2.83E-14  | 7.00E-12  | 2.63E-07 | 0.192071  | 5.08E-13   | 6.41E-15   | 2.31E-14  | 0.0563725  | 0.154312  | 7.45E-13   | 0.102295   | 3.21E-14  | 3.36E-13  |
| CKM        | 0.0279168 | 0.0874299  | 0.0923791 | 0.0143846 | 0.173458 | 0.0118854 | 0.143435   | 0.0992406  | 0         | 0.070077   | 0.0315146 | 0.0499381  | 0          | 0.0364764 | 0.0601381 |
| CKMT1A     | 6.44728   | 7.34541    | 6.57916   | 17.4182   | 8.74726  | 12.231    | 7.95272    | 5.00779    | 12.7408   | 9.50392    | 9.95331   | 14.8013    | 21.9722    | 10.841    | 1.87504   |
| CKMT1B     | 6.55673   | 6.08405    | 3.8691    | 12.6762   | 5.57608  | 9.14329   | 5.65654    | 5.36941    | 12.9516   | 10.3215    | 6.06482   | 13.4907    | 10.934     | 8.35804   | 3.17491   |
| CKMT2      | 1.53256   | 0.63002    | 0.709526  | 0.376725  | 0.764411 | 0.419022  | 0.786619   | 0.349874   | 0.0684949 | 0.0705879  | 0.14285   | 0.171027   | 0.0544293  | 0.323332  | 0.363459  |
| CKMT2-AS1  | 0.754233  | 1.3465     | 1.10342   | 1.03907   | 0.838608 | 0.97347   | 0.888353   | 0.656188   | 0.744526  | 0.418514   | 0.779736  | 0.431739   | 0.368812   | 0.70955   | 0.501681  |
| CKS1B      | 8.8665    | 6.49247    | 5.86384   | 13.5508   | 3.11248  | 14.225    | 6.89199    | 4.18476    | 5.36869   | 9.39937    | 17.0778   | 4.89258    | 8.2254     | 10.0404   | 4.10059   |
| CKS2       | 2.10391   | 1.50244    | 1.18106   | 9.56306   | 0.408513 | 5.27839   | 1.15819    | 1.33556    | 2.83687   | 12.5901    | 24.4292   | 3.92481    | 8.77484    | 8.1488    | 3.50708   |
| CLASP1     | 6.96159   | 7.32796    | 7.49653   | 6.42264   | 6.52865  | 7.78576   | 7.61914    | 6.6641     | 13.9067   | 8.22293    | 6.56338   | 7.98064    | 9.13798    | 6.3506    | 5.87765   |
| CLASP2     | 5.55506   | 4.67006    | 4.97973   | 4.11793   | 2.17831  | 4.41934   | 3.93226    | 4.30972    | 3.73898   | 4.26581    | 4.27599   | 3.53891    | 5.6543     | 4.28249   | 3.41286   |
| CLASRP     | 5.73923   | 7.48366    | 7.68218   | 7.03342   | 10.8586  | 10.8128   | 7.16685    | 5.39463    | 5.49105   | 4.58158    | 2.33473   | 6.89609    | 6.13149    | 6.51799   | 5.98492   |
| CLBA1      | 0.835898  | 1.2492     | 1.07829   | 1.59873   | 2.33279  | 2.81686   | 0.96249    | 0.824719   | 0.845483  | 1.10248    | 1.10356   | 1.02895    | 0.950661   | 1.28101   | 1.19028   |
| CLC        | 0.0365609 | 0          | 0         | 0         | 0        | 0         | 0          | 0.0974769  | 0         | 0.367102   | 0.866727  | 0          | 0          | 0         | 0         |
| CLCA1      | 0         | 0.00357393 | 0         | 0         | 0        | 0         | 0.00846923 | 0          | 0         | 0.00930991 | 0         | 0          | 0          | 0         | 0         |
| CLCA2      | 34.2519   | 36.3063    | 24.377    | 130.087   | 26.9682  | 104.12    | 17.4847    | 36.4738    | 123.025   | 140.905    | 113.508   | 100.591    | 159.502    | 91.6654   | 27.7166   |
| CLCA3P     | 0.0203485 | 0.00980423 | 0.0112225 | 0.0489294 | 0        | 0.034653  | 0.0309777  | 0.0421962  | 0.0413037 | 0.0170263  | 0.0689128 | 0.00970661 | 0.00875251 | 0.017725  | 0         |
| CLCA4      | 0.396779  | 1.9187     | 1.70091   | 0.50554   | 0.77322  | 0.0859988 | 0.733085   | 0.602667   | 0.852246  | 0.507053   | 0.342044  | 0.609109   | 0.837819   | 0.177211  | 0.0207209 |
| CLCC1      | 4.55112   | 5.16292    | 4.82665   | 3.39288   | 2.36779  | 4.69318   | 3.21224    | 4.03764    | 1.7374    | 2.86936    | 3.57022   | 2.40242    | 3.54031    | 2.72577   | 3.11718   |
| CLCF1      | 0.516115  | 0.825138   | 0.902451  | 0.773631  | 1.80383  | 3.1262    | 1.12499    | 0.89651    | 0.585713  | 2.2525     | 2.01272   | 2.10665    | 4.70731    | 2.7097    | 3.92502   |
| CLCN1      | 0.0373757 | 0.0108049  | 0         | 0.200287  | 0.104503 | 0.133665  | 0.00853488 | 0.00664329 | 0.0637272 | 0.27208    | 0.388171  | 0.032092   | 0.482293   | 0.0859504 | 0.107353  |
| CLCN2      | 0.485371  | 0.718523   | 0.727415  | 0.48569   | 0.874144 | 1.19793   | 0.65056    | 0.531382   | 0.394085  | 0.388469   | 0.547923  | 0.609026   | 0.413007   | 0.647058  | 0.737463  |
| CLCN3      | 7.63446   | 9.21073    | 9.22674   | 13.7862   | 4.93227  | 9.97549   | 7.46093    | 9.18751    | 30.0582   | 14.7563    | 14.8359   | 14.5729    | 13.0402    | 9.77393   | 5.41232   |
| CLCN4      | 1.016     | 0.34004    | 0.307434  | 0.158107  | 0.879132 | 1.07414   | 0.712373   | 0.721139   | 1.12942   | 0.282424   | 0.554226  | 0.0414719  | 0.16718    | 0.115824  | 0.523908  |
| CLCN5      | 1.54983   | 1.51549    | 1.67111   | 1.22478   | 0.701268 | 1.29557   | 1.93856    | 1.71396    | 2.16324   | 1.39607    | 1.4891    | 1.82384    | 1.62352    | 1.24459   | 1.33483   |
| CLCN6      | 2.19864   | 2.268      | 2.27667   | 1.92032   | 2.72857  | 3.56498   | 2.95355    | 2.01298    | 0.663118  | 1.23197    | 1.31016   | 1.52034    | 1.10555    | 1.48359   | 2.52375   |

|            |            |            |            |            |            |            |           |           |           |           |            |           |           |            |           |
|------------|------------|------------|------------|------------|------------|------------|-----------|-----------|-----------|-----------|------------|-----------|-----------|------------|-----------|
| CLCN7      | 5.61325    | 6.68611    | 7.36641    | 9.32325    | 19.8126    | 16.3114    | 9.44791   | 5.52399   | 12.8591   | 8.81164   | 8.27782    | 10.7482   | 12.1403   | 7.81381    | 8.65119   |
| CLCNKA     | 0.0982906  | 0.0359971  | 0.0981437  | 0.0282132  | 0.249334   | 0.0899238  | 0.141951  | 0.175999  | 0         | 0         | 0          | 0         | 0         | 0.00476955 | 0         |
| CLCNKB     | 0.00953477 | 0.017986   | 0.0320804  | 0.00799249 | 0.0290452  | 0.0490507  | 0.0653206 | 0.0227402 | 0         | 0         | 0          | 0         | 0         | 0          | 0         |
| CLDN1      | 14.5013    | 35.5484    | 48.9399    | 13.3066    | 15.5065    | 9.56186    | 42.3917   | 40.2058   | 100.756   | 31.1842   | 26.5797    | 31.1042   | 40.9672   | 15.617     | 5.64209   |
| CLDN10     | 2.77211    | 0.633422   | 1.14265    | 0.0841814  | 0.496505   | 1.55734    | 1.0543    | 1.77714   | 0         | 0         | 0.00971527 | 6.44E-42  | 0.0423306 | 0.0240019  | 0.208739  |
| CLDN10-AS1 | 0.543021   | 0.348848   | 0.492009   | 0          | 0.401666   | 0.0440358  | 0.206668  | 0.436631  | 0         | 0         | 0          | 0         | 0         | 0          | 0         |
| CLDN11     | 1.33564    | 0.897044   | 1.41298    | 0.692381   | 1.00592    | 1.94372    | 5.62859   | 0.863279  | 0.0887271 | 0.53847   | 0.804146   | 0.411235  | 0.151459  | 0.397686   | 0.883513  |
| CLDN12     | 2.09702    | 1.7925     | 2.01175    | 3.88597    | 0.686801   | 3.16243    | 1.59381   | 2.38571   | 3.34628   | 3.72599   | 4.09281    | 2.10157   | 6.88722   | 3.04702    | 2.27683   |
| CLDN14     | 0.0630846  | 0.026053   | 0.0223663  | 0.0557233  | 0.0419967  | 0.0690631  | 0.072028  | 0.040046  | 0         | 0.0565555 | 0.101735   | 0.0193452 | 0.0755892 | 0.0471011  | 0.0905975 |
| CLDN15     | 1.30979    | 1.44104    | 1.68078    | 0.97779    | 2.61128    | 2.09881    | 1.28352   | 0.907395  | 0.376813  | 0.647213  | 1.1526     | 0.760083  | 0.572252  | 1.70869    | 3.88053   |
| CLDN16     | 0.0777799  | 0.166936   | 0.233982   | 0.0801544  | 0.0329506  | 0.108374   | 0.0888066 | 0.175953  | 0.0861156 | 0.0709976 | 0.0239465  | 0.0860101 | 0.0912422 | 0.0221734  | 0.0101547 |
| CLDN17     | 0.0316594  | 0.030508   | 0.0261909  | 6.10106    | 0.786849   | 0.242618   | 0.108443  | 0.0281363 | 0.886826  | 9.5366    | 2.8949     | 2.89961   | 8.57913   | 1.22445    | 0.636537  |
| CLDN18     | 0.242135   | 0.752181   | 0.574578   | 0.28236    | 0.237549   | 0.119365   | 0.283738  | 0.271819  | 0.0155207 | 0.0719775 | 0.0287727  | 0.369306  | 0.0164447 | 0.259762   | 0.228774  |
| CLDN19     | 0          | 0.00619138 | 0.00531526 | 0.00662121 | 0.00998033 | 0.00547085 | 0         | 0.0285503 | 0.007825  | 0         | 0          | 0.0137919 | 0         | 0.0235061  | 0         |
| CLDN2      | 0.417356   | 0.638942   | 0.729514   | 0.0693705  | 0.250954   | 0.097441   | 0.622555  | 0.352964  | 0.0491896 | 0.158138  | 0.0455945  | 0.178214  | 0.0390884 | 0.0422184  | 0.0432607 |
| CLDN20     | 1.03368    | 0.949975   | 0.886809   | 0.690435   | 0.564958   | 0.440084   | 1.18023   | 1.02073   | 0.139879  | 0.168179  | 0.237702   | 0.493086  | 0.0617526 | 0.650299   | 0.742251  |
| CLDN22     | 1.78E-31   | 5.00E-30   | 8.75E-29   | 1.71E-41   | 1.45E-36   | 0          | 3.45E-32  | 1.39E-32  | 5.48E-41  | 1.60E-30  | 4.09E-33   | 1.87E-36  | 1.25E-42  | 3.44E-39   | 5.17E-41  |
| CLDN23     | 0.829925   | 0.811166   | 0.794462   | 1.19737    | 3.57282    | 3.27087    | 1.75979   | 1.00099   | 2.48357   | 1.27973   | 1.72654    | 0.415683  | 1.43045   | 0.848921   | 0.936475  |
| CLDN24     | 0.440277   | 0.255005   | 0.458487   | 0.320698   | 0.188277   | 0.226286   | 0.0617491 | 0.0365648 | 0.056322  | 0.053847  | 0.0941317  | 0.236714  | 0.119798  | 0.351081   | 0.487912  |
| CLDN25     | 0          | 0          | 0          | 0          | 0          | 0          | 0.0382956 | 0         | 0         | 0         | 0          | 0         | 0         | 0          | 0         |
| CLDN3      | 0.781123   | 0.38511    | 0.841563   | 0.074881   | 0.761874   | 0.959005   | 0.87112   | 0.758774  | 0.0221237 | 0         | 0          | 0.012998  | 0         | 0.0379767  | 0.0782645 |
| CLDN34     | 0.717614   | 0.345757   | 0.148415   | 0.221857   | 0          | 0.122208   | 0.368707  | 0.28699   | 0         | 0.135102  | 0.121515   | 0.154042  | 0.277801  | 0.0750113  | 0.0515292 |
| CLDN4      | 9.50496    | 18.1785    | 23.8927    | 12.309     | 34.084     | 12.4629    | 21.3585   | 12.3001   | 97.6722   | 37.9942   | 44.6176    | 53.2689   | 114.308   | 34.2785    | 8.98525   |
| CLDN5      | 9.02124    | 2.92017    | 3.37572    | 3.89591    | 10.2846    | 22.5926    | 4.54483   | 2.15098   | 0.548122  | 2.05864   | 6.42412    | 0.780027  | 3.40063   | 2.59265    | 5.74529   |
| CLDN6      | 0.067571   | 0.0569743  | 0.0279497  | 0          | 0.0524805  | 0.0575358  | 0.0964379 | 0.0300257 | 0         | 0.0424042 | 0          | 0.0483488 | 0         | 0.0264866  | 0         |
| CLDN7      | 2.12861    | 1.00378    | 0.992872   | 1.12014    | 1.05526    | 2.23669    | 1.48667   | 0.794932  | 0.234421  | 3.55271   | 1.06087    | 0.834455  | 10.3515   | 1.01783    | 0.975627  |

|             |           |            |           |           |           |            |           |           |            |           |            |            |            |           |           |
|-------------|-----------|------------|-----------|-----------|-----------|------------|-----------|-----------|------------|-----------|------------|------------|------------|-----------|-----------|
| CLDN8       | 1.46666   | 0.374114   | 0.615584  | 0.044454  | 0.301531  | 0.505047   | 0.554091  | 1.00634   | 0.013134   | 0.0135354 | 0.0121741  | 0          | 0          | 0.033818  | 0         |
| CLDN9       | 0         | 0.0217574  | 0.0373572 | 0         | 0.0175362 | 0.00961269 | 0.0128897 | 0.010033  | 0          | 0.0850153 | 0.0382326  | 0          | 0.0145676  | 0         | 0         |
| CLDND1      | 6.74626   | 7.87386    | 7.32833   | 12.1594   | 3.62037   | 9.14756    | 4.05403   | 6.6185    | 18.9272    | 16.0888   | 20.9458    | 10.2862    | 16.218     | 10.3683   | 8.10644   |
| CLDND2      | 0.118804  | 0.103035   | 0.0786265 | 0.0979449 | 0.184544  | 0.0809281  | 0.0271294 | 0.1267    | 0.028938   | 0         | 0.107292   | 0.034003   | 0.0153304  | 0.0993476 | 0.238865  |
| CLEC10A     | 1.71715   | 1.25954    | 1.71737   | 1.3866    | 1.59243   | 0.872912   | 1.49238   | 1.27551   | 0.171673   | 0.643342  | 2.53156    | 0.275074   | 2.14138    | 0.823785  | 1.85873   |
| CLEC11A     | 1.99027   | 2.25867    | 2.80312   | 2.05103   | 14.2059   | 6.82077    | 3.30535   | 1.72493   | 2.42392    | 6.70948   | 19.4967    | 1.9184     | 2.58945    | 4.83135   | 9.23626   |
| CLEC12A     | 0.170391  | 0.0820968  | 0.0331668 | 0.10329   | 0.124553  | 0.563273   | 0.0457756 | 0.204874  | 0.0122069  | 0.842851  | 1.45959    | 0.0286868  | 0.504408   | 0.130961  | 0.287885  |
| CLEC12A-AS1 | 0.356767  | 0.459328   | 0.48384   | 0.289305  | 1.09928   | 0.308762   | 0.474123  | 0.181922  | 0.0783528  | 0.198197  | 0.132048   | 0.338973   | 0.0905642  | 0.537988  | 0.369573  |
| CLEC12B     | 0.0528229 | 0.212209   | 0.245806  | 0.0884578 | 0.0205131 | 0.0562226  | 0.158318  | 0.199515  | 0.0241247  | 0.0331491 | 0.0223614  | 0.00472453 | 0.00852027 | 0.0129607 | 0.0379302 |
| CLEC14A     | 7.4866    | 2.58192    | 2.43862   | 5.19038   | 9.1427    | 18.6671    | 4.31298   | 2.51565   | 1.68805    | 5.69667   | 13.2556    | 2.72383    | 7.43755    | 6.2901    | 9.06956   |
| CLEC16A     | 2.99695   | 3.81126    | 4.21042   | 3.99343   | 5.45652   | 4.88411    | 4.67798   | 3.28144   | 5.86057    | 2.98294   | 2.48394    | 4.15332    | 4.00416    | 3.28966   | 3.60541   |
| CLEC17A     | 0         | 0          | 0         | 0.0107189 | 0.0323138 | 0          | 0.0118759 | 0         | 0          | 0.0261096 | 0.0587093  | 0          | 0.127507   | 0.0434897 | 0.164314  |
| CLEC18A     | 0.168423  | 0.207408   | 0.190582  | 0.0879042 | 0.253365  | 0.0914649  | 0.207856  | 0.0691166 | 0.00021838 | 0.0694745 | 0.0961196  | 0.127891   | 0.0468425  | 0.0466299 | 0.104795  |
| CLEC18B     | 2.44E-26  | 0.0377906  | 3.38E-12  | 0.0587849 | 0.0556464 | 0.16034    | 4.63E-17  | 0.0306762 | 0.130285   | 0.0333713 | 4.77E-22   | 0.0472482  | 0.0198599  | 0.0541922 | 0.0923372 |
| CLEC18C     | 0.0946803 | 0.0340832  | 1.49E-12  | 0.0435163 | 1.74E-13  | 1.41E-11   | 0.058513  | 2.56E-35  | 3.54E-24   | 1.75E-05  | 0.00185855 | 0.062127   | 0.0315697  | 5.35E-27  | 3.18E-13  |
| CLEC19A     | 0         | 0.008942   | 0.0153533 | 0.0286884 | 0         | 0          | 0         | 0.0247405 | 0          | 0         | 0          | 0          | 0          | 0         | 0         |
| CLEC1A      | 1.25873   | 0.568089   | 0.560197  | 0.829194  | 0.494997  | 1.10571    | 0.318361  | 0.601806  | 0.174644   | 0.859908  | 1.49289    | 0.302118   | 0.508863   | 0.507972  | 0.915287  |
| CLEC1B      | 0         | 0.0114955  | 0         | 0         | 0         | 0          | 0         | 0.0212037 | 0          | 0         | 0          | 0          | 0          | 0         | 0         |
| CLEC2A      | 0.303515  | 7.32106    | 10.7027   | 0.781954  | 0.383065  | 0.161525   | 14.4682   | 4.92274   | 0.300339   | 0.0714268 | 0.235559   | 0.08144    | 0.0122392  | 0.168545  | 0         |
| CLEC2B      | 6.93837   | 7.742      | 9.03731   | 10.3918   | 2.09909   | 6.19801    | 3.57852   | 5.17723   | 4.31497    | 3.69144   | 8.47352    | 1.33256    | 2.24196    | 1.31164   | 2.31578   |
| CLEC2D      | 1.26178   | 0.981025   | 1.08528   | 0.884721  | 0.303926  | 0.723429   | 0.477199  | 1.09462   | 0.103677   | 0.425391  | 0.509112   | 0.268145   | 0.34052    | 0.596483  | 1.4227    |
| CLEC2L      | 0         | 0          | 0.0887739 | 0.0184309 | 0.0833442 | 0.060915   | 0.0612612 | 0.0158946 | 0          | 0.0673421 | 0.565315   | 0          | 0          | 0         | 0.231165  |
| CLEC3A      | 0         | 0          | 0         | 0         | 0.0360032 | 0          | 0         | 0.0205985 | 0          | 0         | 0          | 0          | 0          | 0         | 0         |
| CLEC3B      | 25.9095   | 18.1634    | 25.7333   | 2.77667   | 10.3513   | 7.08761    | 54.4404   | 9.64239   | 1.40635    | 6.3408    | 15.3984    | 2.68532    | 3.94248    | 4.84075   | 8.53364   |
| CLEC4A      | 0.758789  | 0.435233   | 0.836965  | 1.06122   | 0.25257   | 0.999914   | 0.495063  | 0.867019  | 0.198026   | 2.22217   | 4.48683    | 0.25854    | 2.09814    | 0.623191  | 1.7643    |
| CLEC4C      | 0.0352253 | 0.00848605 | 0.0145704 | 0.0363007 | 0.0273586 | 0          | 0.0603287 | 0.0313054 | 0          | 0.0442114 | 0.0596475  | 0          | 0          | 0         | 0.177058  |

|           |           |            |           |           |           |           |           |            |           |           |           |            |           |            |           |
|-----------|-----------|------------|-----------|-----------|-----------|-----------|-----------|------------|-----------|-----------|-----------|------------|-----------|------------|-----------|
| CLEC4D    | 0.0119664 | 0          | 0.0197989 | 0.431611  | 0         | 0.397381  | 0         | 0.0319043  | 0         | 0.255324  | 0.553852  | 0          | 0.424637  | 0.0500334  | 0.120297  |
| CLEC4E    | 0.0643458 | 0.00516713 | 0         | 2.12193   | 0.0666342 | 0.73966   | 0.0122447 | 0.0476543  | 0         | 0.632625  | 0.956406  | 0.0230206  | 0.768039  | 0.16815    | 0.462044  |
| CLEC4F    | 0.149672  | 0.207329   | 0.340503  | 0.0964009 | 0.174369  | 0.0637219 | 0.288378  | 0.108076   | 0.0113927 | 0         | 0.0105601 | 0.0535472  | 0         | 0.0146672  | 0         |
| CLEC4G    | 0.0510508 | 0.0491942  | 0.0422329 | 0.736531  | 0.713696  | 7.54914   | 0.097147  | 0.136109   | 0         | 0.640741  | 1.44075   | 0.0487043  | 0.845403  | 0.391327   | 0.659839  |
| CLEC4GP1  | 0.0837216 | 0.0749141  | 0.0692604 | 0.110928  | 0.873184  | 0.886006  | 0.16387   | 0.127551   | 0         | 0.0150113 | 0.0675081 | 0.00855787 | 0.02315   | 0.137521   | 0.360705  |
| CLEC4M    | 0         | 0.00463838 | 0.0159281 | 0         | 0         | 0.0409859 | 0.0109917 | 0.00855558 | 0         | 0         | 0         | 0          | 0         | 0.0201257  | 0         |
| CLEC5A    | 0.294608  | 0.71604    | 1.0832    | 0.79611   | 0.142373  | 0.18396   | 0.179399  | 0.70983    | 0.358799  | 3.06492   | 3.79875   | 0.159271   | 0.98419   | 0.633007   | 0.526516  |
| CLEC6A    | 0.0286957 | 0          | 0         | 0.0443576 | 0         | 0.024434  | 0.0327638 | 0          | 0         | 0.054024  | 0.129575  | 0.0102663  | 0.111086  | 0.0149976  | 0.164842  |
| CLEC7A    | 3.03758   | 2.20719    | 2.5061    | 9.63634   | 2.90756   | 8.6052    | 0.92798   | 2.5974     | 3.91939   | 7.51161   | 10.0462   | 4.55253    | 4.85191   | 4.14912    | 4.04401   |
| CLEC9A    | 0.173206  | 0.025678   | 0.0991998 | 0.151034  | 0         | 0.0340346 | 0.0152124 | 0.118409   | 0         | 0.0167225 | 0.0752033 | 0.00953337 | 0.0945593 | 0.0348174  | 0.13394   |
| CLECL1    | 0.201361  | 0.0646791  | 0.155474  | 0.0830032 | 0         | 0.160026  | 0         | 0.071581   | 0.0326979 | 0.101091  | 0.0606163 | 0.038421   | 0         | 0.021048   | 0.0578359 |
| CLGN      | 0.0164019 | 0.0395134  | 0.0407064 | 0         | 0         | 0.041898  | 0.0187271 | 0.0291533  | 0         | 0.113223  | 0.259219  | 0          | 0.0793681 | 0.00428617 | 0.0942207 |
| CLHC1     | 0.368566  | 0.501094   | 0.428677  | 0.270762  | 0.102032  | 0.124289  | 0.17916   | 0.502678   | 0.164438  | 0.247325  | 0.197734  | 0.206275   | 0.0729873 | 0.343299   | 0.508345  |
| CLIC1     | 4.69459   | 4.80754    | 5.63993   | 11.9343   | 6.13145   | 13.0947   | 7.43032   | 3.48979    | 8.64998   | 12.8435   | 22.9158   | 5.06743    | 16.0554   | 9.21187    | 6.59481   |
| CLIC2     | 2.95516   | 1.3659     | 1.77669   | 1.62007   | 0.453701  | 4.38155   | 1.68705   | 2.12242    | 0.324334  | 2.08094   | 3.74331   | 0.442569   | 2.35561   | 1.19429    | 3.3187    |
| CLIC3     | 10.3332   | 17.1443    | 16.979    | 35.8477   | 60.4901   | 19.7545   | 22.0687   | 10.8783    | 137.6     | 69.7412   | 116.167   | 58.722     | 68.598    | 33.7129    | 10.6291   |
| CLIC4     | 15.1051   | 6.94842    | 8.28605   | 24.409    | 3.75382   | 30.7945   | 8.87355   | 11.7682    | 8.14294   | 24.8019   | 33.7736   | 7.3386     | 35.7501   | 22.0197    | 31.5948   |
| CLIC5     | 0.299107  | 0.223579   | 0.210442  | 0.126752  | 0.37343   | 0.802142  | 0.325552  | 0.146574   | 0.0204268 | 0.0491191 | 0.0473347 | 0.0320028  | 0.0486965 | 0.0525958  | 0.461672  |
| CLIC6     | 2.06169   | 0.671335   | 0.848103  | 2.66747   | 2.00598   | 6.3082    | 0.918309  | 1.19298    | 0.068981  | 0.305682  | 0.460364  | 0.190479   | 1.88201   | 0.790388   | 1.00051   |
| CLINT1    | 8.84468   | 11.3966    | 10.4258   | 11.1102   | 7.88393   | 11.8383   | 7.56096   | 9.6678     | 26.7904   | 12.9347   | 12.3581   | 11.8787    | 14.6586   | 10.5268    | 7.85665   |
| CLIP1     | 17.5229   | 21.442     | 22.3166   | 36.832    | 21.3876   | 30.0064   | 11.1272   | 16.2545    | 55.4344   | 45.1034   | 23.3823   | 43.5958    | 71.5482   | 37.1216    | 19.5445   |
| CLIP1-AS1 | 0.774879  | 1.02049    | 1.00429   | 0.958242  | 1.80548   | 0.417873  | 0.943714  | 1.14775    | 0.408943  | 2.07478   | 0.14579   | 2.56894    | 0.116655  | 2.8079     | 1.74342   |
| CLIP2     | 1.8388    | 2.95855    | 3.83733   | 3.82414   | 6.66252   | 6.79775   | 3.10647   | 1.64525    | 1.58585   | 2.29744   | 2.93989   | 0.934687   | 3.70943   | 3.78979    | 6.21346   |
| CLIP3     | 1.35873   | 0.792965   | 1.12404   | 1.05837   | 2.18985   | 6.28981   | 2.20686   | 1.47965    | 0.201992  | 1.49718   | 3.22611   | 0.424485   | 1.15651   | 1.57696    | 3.12392   |
| CLIP4     | 5.15137   | 6.65119    | 7.62187   | 4.26447   | 3.39853   | 3.57319   | 7.54022   | 6.89299    | 8.76368   | 5.1375    | 4.32729   | 6.43514    | 7.91145   | 3.46791    | 2.19558   |
| CLK1      | 9.47919   | 9.81634    | 9.50722   | 9.19029   | 5.83676   | 10.3828   | 5.20262   | 8.97194    | 13.0082   | 11.1702   | 16.0238   | 11.4311    | 9.10709   | 10.6833    | 8.03314   |



|         |            |            |           |           |           |            |          |            |           |            |           |           |           |           |           |
|---------|------------|------------|-----------|-----------|-----------|------------|----------|------------|-----------|------------|-----------|-----------|-----------|-----------|-----------|
| CLK2    | 4.47141    | 6.24314    | 6.77434   | 7.42081   | 5.84029   | 7.21677    | 4.54748  | 4.69118    | 4.2298    | 4.519      | 5.2515    | 5.67688   | 4.73512   | 6.36143   | 7.07741   |
| CLK2P1  | 0          | 0.00615379 | 0         | 0         | 0         | 0          | 0        | 0          | 0         | 0          | 0         | 0         | 0         | 0         | 0         |
| CLK3    | 3.23885    | 4.22356    | 4.04347   | 5.41842   | 6.93895   | 8.03718    | 4.00538  | 2.78123    | 8.12472   | 5.20545    | 7.30297   | 4.99616   | 7.21351   | 5.79498   | 4.05939   |
| CLK4    | 3.13867    | 3.41147    | 2.7569    | 2.49246   | 2.13659   | 2.50747    | 1.63371  | 3.0109     | 3.71012   | 2.82706    | 4.37685   | 2.64212   | 1.9774    | 2.54745   | 2.74429   |
| CLLU1   | 0.00817487 | 0          | 0         | 0.0168489 | 0         | 0.00696079 | 0        | 0.00726514 | 0.0199121 | 0          | 0         | 0         | 0.0158232 | 0         | 0.0704409 |
| CLLU1OS | 0          | 0          | 0         | 0.368808  | 0         | 0.0507887  | 0        | 0.0530093  | 0.0363217 | 0.0374316  | 0.134668  | 0.0213395 | 0         | 0         | 0         |
| CLMAT3  | 0.458263   | 0.260456   | 0.388919  | 0.169535  | 0.620904  | 0.370147   | 0.402529 | 0.261045   | 0.0143105 | 0.0589965  | 0.106106  | 0.142899  | 0.0682201 | 0.399155  | 1.77178   |
| CLMN    | 2.53031    | 0.857072   | 0.843906  | 1.6199    | 0.561089  | 1.66921    | 1.6414   | 1.21147    | 0.141481  | 1.17099    | 0.651604  | 1.08059   | 1.35967   | 0.898392  | 2.234     |
| CLMP    | 2.93694    | 1.35468    | 2.20935   | 4.64885   | 2.70075   | 7.10216    | 2.2713   | 1.74703    | 0.352917  | 5.7504     | 10.3707   | 0.930244  | 8.16068   | 7.73625   | 9.51538   |
| CLN3    | 3.69485    | 4.55602    | 4.31766   | 4.47116   | 8.86857   | 8.16955    | 6.15978  | 2.97955    | 7.26657   | 3.77473    | 8.21505   | 3.88057   | 5.36322   | 3.12825   | 3.29956   |
| CLN5    | 3.75248    | 2.71997    | 3.22056   | 3.126     | 1.39945   | 4.9265     | 2.65184  | 3.65075    | 2.90916   | 3.59974    | 6.2235    | 1.65003   | 4.61285   | 2.8295    | 3.44234   |
| CLN6    | 5.34706    | 4.88402    | 5.23471   | 9.39303   | 5.80446   | 13.193     | 6.3526   | 3.9539     | 3.08005   | 4.14586    | 7.59764   | 3.82596   | 6.79989   | 4.40231   | 5.54433   |
| CLN8    | 3.37994    | 4.2898     | 4.53736   | 2.78783   | 6.17288   | 2.80101    | 5.30396  | 3.15873    | 12.8642   | 4.1976     | 4.79948   | 5.62916   | 6.21724   | 3.88057   | 2.3366    |
| CLNK    | 0.0372674  | 0.0837947  | 0.0856395 | 0.110948  | 0.0128643 | 0.0105776  | 0.033095 | 0.0993605  | 0.0201722 | 0.00519716 | 0.0280468 | 0.0296287 | 0.0480895 | 0.0259701 | 0.101095  |
| CLNS1A  | 10.7423    | 9.76505    | 9.83081   | 19.4279   | 7.39782   | 17.3998    | 7.97411  | 8.1405     | 7.37534   | 12.4896    | 22.6044   | 8.13274   | 14.0581   | 11.9445   | 8.78438   |
| CLOCK   | 4.2707     | 3.62252    | 3.19354   | 5.3673    | 1.12614   | 3.92908    | 2.52607  | 4.45635    | 3.03956   | 4.20976    | 4.75064   | 3.30179   | 5.30532   | 4.71333   | 3.32694   |
| CLP1    | 2.382      | 1.72757    | 2.40615   | 3.82421   | 1.92793   | 4.40878    | 2.13281  | 1.72697    | 3.3896    | 3.03686    | 4.359     | 1.93762   | 3.99583   | 2.64714   | 2.7907    |
| CLPB    | 1.62179    | 1.49028    | 1.5681    | 3.60354   | 2.90187   | 4.04959    | 2.56271  | 1.56903    | 1.71681   | 1.63185    | 1.73811   | 1.8802    | 3.5674    | 2.88621   | 1.98514   |
| CLPP    | 6.65539    | 6.33583    | 5.18976   | 12.5775   | 8.93263   | 19.7574    | 7.73665  | 3.91339    | 18.9292   | 8.45414    | 18.4763   | 9.76879   | 10.4042   | 9.07956   | 5.5442    |
| CLPS    | 0          | 0          | 0         | 0         | 0         | 0          | 0        | 0          | 0         | 0          | 0         | 0         | 0         | 0         | 0         |
| CLPSL1  | 0          | 0          | 0         | 0         | 0         | 0          | 0        | 0          | 0         | 0          | 0         | 0         | 0         | 0         | 0         |
| CLPSL2  | 0          | 0          | 0         | 0.0390337 | 0         | 0          | 0        | 0          | 0         | 0          | 0         | 0         | 0         | 0         | 0         |
| CLPTM1  | 15.0461    | 14.1257    | 14.4553   | 20.9451   | 17.4746   | 34.9396    | 23.5592  | 14.5879    | 39.5263   | 21.2355    | 33.8048   | 20.9426   | 37.7489   | 17.1878   | 14.2725   |
| CLPTM1L | 8.23259    | 8.04599    | 8.91032   | 14.6128   | 13.2536   | 17.3773    | 10.2338  | 6.20941    | 12.5016   | 10.7912    | 13.2901   | 8.19597   | 17.8807   | 10.8424   | 8.31245   |
| CLPX    | 6.78794    | 6.63094    | 6.59697   | 12.1514   | 6.79151   | 9.6372     | 4.60424  | 5.88378    | 16.3649   | 10.7111    | 8.70479   | 6.92079   | 15.5962   | 6.2203    | 4.51349   |
| CLRN1   | 0.00686737 | 0.0132352  | 0.0113624 | 0.0141541 | 0.0106674 | 0          | 0        | 0.0122063  | 0         | 0          | 0         | 0         | 0         | 0         | 0         |

|            |           |            |           |            |            |           |           |           |           |           |           |            |           |           |           |
|------------|-----------|------------|-----------|------------|------------|-----------|-----------|-----------|-----------|-----------|-----------|------------|-----------|-----------|-----------|
| CLRN1-AS1  | 0         | 0.00758291 | 0         | 0          | 0          | 0         | 0         | 0.0139868 | 0         | 0         | 0         | 0.00563056 | 0         | 0         | 0         |
| CLRN2      | 0         | 0          | 0         | 0          | 0          | 0         | 0         | 0         | 0         | 0         | 0         | 0          | 0         | 0         | 0         |
| CLRN3      | 0         | 0          | 0         | 0          | 0          | 0         | 0         | 0         | 0         | 0         | 0         | 0          | 0         | 0         | 0         |
| CLSPN      | 0.225249  | 0.151939   | 0.101453  | 1.22769    | 0.0855284  | 0.632928  | 0.151451  | 0.0956426 | 0.198125  | 0.534008  | 0.41532   | 0.266828   | 1.42746   | 0.708965  | 0.409748  |
| CLSTN1     | 28.2922   | 31.6332    | 29.9079   | 45.5568    | 41.131     | 60.3215   | 32.8621   | 26.9822   | 21.2287   | 33.6537   | 20.4064   | 31.123     | 70.3341   | 31.7753   | 27.2897   |
| CLSTN2     | 5.73599   | 0.931888   | 0.949043  | 0.210064   | 1.20027    | 2.55508   | 1.99722   | 2.17388   | 0.0808273 | 0.107096  | 0.246165  | 0.0644469  | 0.0948147 | 0.156088  | 0.878224  |
| CLSTN2-AS1 | 0.344647  | 0.0996337  | 0.0356395 | 0.00887922 | 0.0133839  | 0.0366828 | 0.118052  | 0.0918881 | 0         | 0         | 0         | 0          | 0         | 0.0135096 | 0.0247478 |
| CLSTN3     | 2.99553   | 2.42963    | 3.09525   | 4.66622    | 7.02455    | 9.07993   | 3.04384   | 3.00651   | 0.521174  | 2.30082   | 3.4795    | 1.70064    | 2.20507   | 3.93816   | 7.13394   |
| CLTA       | 20.9523   | 16.789     | 17.2404   | 48.3357    | 43.7733    | 53.4742   | 19.818    | 14.81     | 40.0668   | 43.2883   | 75.7127   | 29.1398    | 58.8812   | 33.0671   | 22.561    |
| CLTB       | 25.2957   | 26.9069    | 25.3625   | 46.6745    | 63.9055    | 26.4288   | 29.1399   | 18.5742   | 105.863   | 51.5675   | 62.2651   | 45.2777    | 71.1329   | 33.1337   | 12.2607   |
| CLTC       | 21.2836   | 18.3282    | 19.2478   | 35.652     | 11.5587    | 34.0567   | 20.1557   | 19.6825   | 34.8502   | 41.5443   | 39.7484   | 24.0718    | 49.4886   | 27.7476   | 27.974    |
| CLTCL1     | 1.13742   | 1.10617    | 0.840266  | 1.37976    | 1.27784    | 2.14071   | 0.958433  | 0.846726  | 0.230024  | 0.974553  | 0.895493  | 1.02708    | 0.915294  | 1.56843   | 2.21213   |
| CLTRN      | 0.102533  | 0.0846887  | 0.205997  | 0.0905681  | 0.0455053  | 0.0498886 | 0.133792  | 0.117157  | 0         | 0.0735365 | 0.0330704 | 0.0524034  | 0.018901  | 0.0459325 | 0         |
| CLU        | 30.3385   | 9.17926    | 11.5234   | 19.0552    | 16.2819    | 124.063   | 24.6635   | 9.61441   | 0.426667  | 2.26009   | 4.61134   | 0.596602   | 6.4284    | 2.79775   | 9.71034   |
| CLUAP1     | 1.59068   | 1.51204    | 1.73524   | 1.61146    | 0.871089   | 2.30486   | 0.843449  | 1.02072   | 0.453124  | 0.73091   | 1.24784   | 0.474561   | 0.946283  | 0.81163   | 1.54876   |
| CLUH       | 10.5437   | 11.0162    | 10.7052   | 16.408     | 23.1701    | 24.4514   | 13.7735   | 8.11444   | 12.2422   | 7.01151   | 4.23091   | 13.7827    | 18.9363   | 11.9034   | 5.8978    |
| CLUHP3     | 1.64191   | 2.36701    | 1.81107   | 1.46374    | 4.35195    | 1.25382   | 1.77053   | 1.2739    | 1.31723   | 0.932249  | 0.720808  | 1.68765    | 0.554897  | 1.23271   | 1.53456   |
| CLUL1      | 0.0508415 | 0.0293955  | 0.0504716 | 0          | 0.0315898  | 0.0259745 | 0         | 0.036147  | 0         | 0.0382868 | 0.0229575 | 0.00727569 | 0         | 0         | 0.0876178 |
| CLVS1      | 0.25067   | 0.332108   | 0.144233  | 0.0922026  | 0.371374   | 0.0579027 | 0.184874  | 0.33698   | 1.32672   | 0.313602  | 0.382681  | 0.326316   | 0.0135619 | 0.0326521 | 0.0301188 |
| CLVS2      | 0.0241977 | 0.022346   | 0.0250225 | 0.00207803 | 0.00313228 | 0.020604  | 0.0207211 | 0.0286732 | 0         | 0         | 0         | 0          | 0         | 0.0010539 | 0         |
| CLYBL      | 0.715846  | 0.667069   | 0.878534  | 0.834979   | 0.574307   | 0.917649  | 0.736495  | 0.433444  | 0.335315  | 0.0987318 | 0.204245  | 0.146345   | 0.121809  | 0.291905  | 0.316321  |
| CLYBL-AS1  | 0.172548  | 0.0727444  | 0.107058  | 0.066681   | 0.134014   | 0.055096  | 0.19701   | 0.191683  | 0.0262681 | 0         | 0         | 0          | 0         | 0.0225453 | 0.0619503 |
| CLYBL-AS2  | 0.170671  | 0.115125   | 0.141191  | 0.140706   | 0          | 0         | 0.194867  | 0.303357  | 0         | 0         | 0         | 0.073272   | 0         | 0.10704   | 0.343148  |
| CMA1       | 4.33159   | 1.14488    | 1.26955   | 4.00469    | 3.19121    | 0.590126  | 3.1087    | 2.99166   | 0.994787  | 0.65239   | 1.36915   | 1.06264    | 1.50116   | 0.931424  | 2.02617   |
| CMAHP      | 2.30065   | 2.62814    | 2.95373   | 1.5548     | 1.38919    | 4.08653   | 2.33841   | 1.82014   | 0.673462  | 1.15674   | 1.91125   | 1.11862    | 0.638675  | 1.2381    | 2.83342   |
| CMAS       | 5.34766   | 5.1656     | 4.54121   | 11.1812    | 6.20503    | 10.5771   | 4.39909   | 5.62288   | 16.8235   | 13.731    | 13.8339   | 8.66704    | 16.9108   | 9.37478   | 5.90334   |

|         |           |           |            |           |           |           |           |           |           |           |           |            |           |            |           |
|---------|-----------|-----------|------------|-----------|-----------|-----------|-----------|-----------|-----------|-----------|-----------|------------|-----------|------------|-----------|
| CMBL    | 0.87647   | 0.591529  | 0.615005   | 0.604112  | 0.675443  | 1.2368    | 1.24709   | 0.544017  | 0.0905395 | 0.474135  | 1.2201    | 0.110478   | 0.335753  | 0.391869   | 0.715665  |
| CMC1    | 1.7429    | 1.40314   | 1.51485    | 3.27392   | 1.3708    | 3.56924   | 1.23429   | 1.07838   | 1.80023   | 2.13214   | 4.45805   | 2.09953    | 2.43406   | 2.29458    | 1.67924   |
| CMC2    | 1.86724   | 1.47697   | 1.41139    | 4.07341   | 1.00212   | 2.8846    | 1.16294   | 1.17886   | 2.97178   | 2.99455   | 7.19164   | 2.18947    | 3.40277   | 2.85626    | 2.06813   |
| CMC4    | 2.96549   | 2.16304   | 3.12452    | 2.9308    | 1.75837   | 5.6627    | 1.45116   | 1.36538   | 1.90033   | 2.92302   | 6.99386   | 1.40371    | 1.82167   | 2.64189    | 2.33804   |
| CMIP    | 7.19004   | 10.9676   | 11.2077    | 24.9415   | 18.1936   | 24.6301   | 12.9566   | 10.3045   | 23.4045   | 20.1643   | 20.1905   | 19.1925    | 43.6749   | 18.0125    | 16.6219   |
| CMKLR1  | 2.84444   | 0.417107  | 0.586576   | 2.29404   | 1.55605   | 5.16699   | 3.03118   | 1.29693   | 0.16568   | 1.88852   | 3.22964   | 0.244823   | 1.28199   | 1.87229    | 2.33258   |
| CMPK1   | 13.7816   | 9.42783   | 10.4898    | 17.4045   | 5.91297   | 17.4988   | 8.24806   | 13.5318   | 15.6595   | 14.9374   | 21.0987   | 9.69102    | 23.2157   | 11.7056    | 12.1464   |
| CMPK2   | 0.574394  | 0.18271   | 0.239896   | 2.52863   | 0.606371  | 7.96785   | 0.331096  | 0.287451  | 0.169793  | 0.384959  | 0.843574  | 0.111727   | 0.611663  | 0.160303   | 0.552604  |
| CMSS1   | 4.06642   | 2.24863   | 2.45441    | 7.31936   | 1.60663   | 7.08034   | 1.87347   | 2.26048   | 1.60123   | 3.97622   | 6.30977   | 1.85683    | 6.10147   | 4.00057    | 2.5125    |
| CMTM1   | 0.55891   | 0.428872  | 0.684993   | 0.490644  | 1.12542   | 1.39405   | 0.259986  | 0.331142  | 0.151265  | 0.623547  | 1.13045   | 0.0888702  | 0.394873  | 0.551766   | 0.683753  |
| CMTM2   | 0.435839  | 0.241493  | 0.162251   | 0.606345  | 0.372355  | 0.148444  | 0.622034  | 0.251769  | 0         | 0.738481  | 2.73065   | 0.0155927  | 0.210901  | 0.0683366  | 0.187776  |
| CMTM3   | 5.051     | 2.95939   | 3.46512    | 4.18954   | 5.87762   | 11.6511   | 5.16425   | 3.65212   | 1.8326    | 5.38968   | 15.2879   | 1.28446    | 4.76342   | 4.44733    | 10.4638   |
| CMTM4   | 4.49059   | 4.26546   | 4.25746    | 2.84713   | 4.5706    | 3.87467   | 4.38501   | 3.57279   | 2.17721   | 3.32801   | 3.01262   | 2.37875    | 4.75897   | 2.73295    | 3.36171   |
| CMTM5   | 0.016519  | 0.0159182 | 0.0409969  | 0.0170233 | 0.0513193 | 0.0703283 | 0.0754432 | 0.0587227 | 0.0402365 | 0.020733  | 0.130535  | 0          | 0         | 0.00863353 | 0         |
| CMTM6   | 9.52262   | 9.56056   | 11.3588    | 17.3168   | 5.66044   | 13.4301   | 8.81585   | 18.5023   | 22.1985   | 14.5407   | 23.9291   | 8.84549    | 16.7328   | 9.86403    | 9.28169   |
| CMTM7   | 1.62388   | 0.590909  | 0.789121   | 1.48621   | 1.14656   | 3.78069   | 1.2447    | 1.05967   | 0.235111  | 1.12596   | 3.23045   | 0.195009   | 0.989102  | 1.0683     | 2.46256   |
| CMTM8   | 1.22221   | 0.81683   | 1.09263    | 0.812592  | 1.62292   | 3.27314   | 0.922814  | 0.981079  | 4.29747   | 0.816481  | 1.9138    | 0.874521   | 0.903029  | 0.803624   | 1.38721   |
| CMTR1   | 4.83176   | 5.08324   | 5.97486    | 6.67372   | 7.47924   | 11.0237   | 5.58722   | 4.07462   | 3.73166   | 3.61326   | 3.31322   | 3.69014    | 4.35208   | 3.63688    | 4.72272   |
| CMTR2   | 2.15487   | 2.44355   | 1.99423    | 4.00953   | 1.25945   | 3.14611   | 1.6216    | 2.67433   | 4.49326   | 5.75749   | 6.3394    | 3.6989     | 7.5554    | 4.88034    | 2.56325   |
| CMYA5   | 0.569062  | 0.670321  | 0.723231   | 0.266393  | 0.437792  | 0.35768   | 0.606694  | 0.539238  | 0.42414   | 0.157717  | 0.0952454 | 0.199094   | 0.0613857 | 0.134166   | 0.337726  |
| CNBD1   | 0         | 0         | 0          | 0         | 0         | 0         | 0         | 0         | 0         | 0         | 0         | 0          | 0         | 0          | 0         |
| CNBD2   | 0.0614615 | 0.0619183 | 0.0785791  | 0.0460639 | 0.0781126 | 0.0381997 | 0.0701748 | 0.0993125 | 0         | 0.0420766 | 0.012615  | 0.0399949  | 0.018025  | 0.0380585  | 0.0481454 |
| CNBP    | 45.0554   | 36.1465   | 34.8741    | 47.7427   | 29.1183   | 56.7735   | 30.9371   | 32.243    | 80.3934   | 57.715    | 80.457    | 43.4289    | 73.7541   | 37.8946    | 22.0394   |
| CNDP1   | 0.157937  | 0.0304386 | 0.00871045 | 0         | 0.0490662 | 0.0537926 | 0.0841528 | 0.0748594 | 0         | 0.0528606 | 0         | 0.00753388 | 0         | 0.011006   | 0         |
| CNDP2   | 3.9628    | 4.65608   | 4.17725    | 13.198    | 10.3285   | 16.7763   | 4.07169   | 3.37618   | 8.09278   | 15.8195   | 9.73575   | 11.6416    | 21.9792   | 11.4148    | 7.45608   |
| CNEP1R1 | 2.06997   | 2.02553   | 2.40975    | 2.86987   | 0.563518  | 2.9073    | 1.47409   | 2.19046   | 3.30068   | 3.77651   | 5.02278   | 1.99263    | 3.39391   | 2.30312    | 1.82348   |

|          |           |            |            |            |           |            |            |           |            |            |            |           |            |           |            |
|----------|-----------|------------|------------|------------|-----------|------------|------------|-----------|------------|------------|------------|-----------|------------|-----------|------------|
| CNFN     | 49.6173   | 50.4315    | 43.3676    | 683.146    | 334.64    | 159.514    | 94.1355    | 70.818    | 1262.05    | 635.071    | 1157.05    | 731.941   | 799.529    | 337.256   | 78.3698    |
| CNGA1    | 0.436661  | 0.837868   | 0.823874   | 0.323679   | 0.202296  | 0.437041   | 0.314884   | 0.585507  | 0.205258   | 0.490365   | 0.25944    | 0.405628  | 0.499209   | 0.34433   | 0.154025   |
| CNGA2    | 0         | 0          | 0          | 0          | 0         | 0          | 0          | 0         | 0          | 0          | 0          | 0         | 0          | 0         | 0          |
| CNGA3    | 0.0360858 | 0.00289778 | 0          | 0.0247917  | 0.0093423 | 0.179239   | 0.0343347  | 0.0213801 | 0          | 0          | 0.033947   | 0         | 0.131934   | 0         | 0.0345492  |
| CNGA4    | 0.121104  | 0.040845   | 0.0400744  | 0.0249603  | 0.0376234 | 0.0103119  | 0.0276546  | 0.0645765 | 0.0294983  | 0.0151998  | 0          | 0.0606574 | 0          | 0.0189883 | 0.0173921  |
| CNGB1    | 0.0438177 | 0.0334274  | 0.00906227 | 11.2738    | 1.1344    | 1.36804    | 0.00833827 | 0.0421867 | 0.324637   | 1.132      | 0.527624   | 1.70089   | 2.02609    | 1.9275    | 0.555862   |
| CNGB3    | 0.117126  | 0.0436074  | 0.00880863 | 0.0164593  | 0         | 0.00453324 | 0.018236   | 0.127749  | 0          | 0.0133641  | 0          | 0.0076188 | 0          | 0.0139125 | 0.00764581 |
| CNIH1    | 7.51377   | 5.14044    | 4.96466    | 14.3969    | 1.79367   | 11.3001    | 5.45935    | 7.76164   | 17.9057    | 16.2687    | 24.6569    | 8.8674    | 18.4995    | 10.1066   | 8.058      |
| CNIH2    | 0.368413  | 0.403425   | 0.263217   | 0.44869    | 0.598285  | 0.827025   | 0.592723   | 0.53577   | 0.244738   | 0.504433   | 0.378084   | 0.215681  | 0.205285   | 0.23631   | 0.240495   |
| CNIH3    | 0.325397  | 0.191977   | 0.120862   | 0.164244   | 0.495139  | 0.520216   | 0.242631   | 0.182954  | 0.242631   | 0.416742   | 0.757156   | 0.128294  | 0.424174   | 0.190891  | 0.343331   |
| CNIH4    | 4.36367   | 4.36922    | 4.56882    | 7.10669    | 1.73996   | 4.5201     | 3.80345    | 4.12045   | 7.16502    | 7.72626    | 13.9645    | 4.62773   | 7.00083    | 4.37293   | 2.93756    |
| CNKS1    | 1.96327   | 2.94678    | 3.34561    | 7.10453    | 5.31228   | 5.82399    | 2.16929    | 2.2031    | 1.31122    | 6.23409    | 1.57285    | 3.63168   | 8.14874    | 4.41645   | 0.831559   |
| CNKS2    | 0.192618  | 0.131476   | 0.156691   | 0.00661661 | 0         | 0.051937   | 0.212594   | 0.0741792 | 0.00781957 | 0.00402926 | 0.00362403 | 0         | 0.00414254 | 0         | 0.0184416  |
| CNKS3    | 4.766     | 4.39135    | 3.94277    | 5.18152    | 7.18323   | 6.78374    | 3.63855    | 3.03983   | 6.69279    | 5.32408    | 3.22173    | 5.70055   | 6.05861    | 4.64873   | 3.95622    |
| CNMD     | 0.0320098 | 0.0462684  | 0.0662018  | 0.032987   | 0         | 0.0136279  | 0.0365477  | 0.156462  | 0          | 0.0200878  | 0.0180675  | 0.0801634 | 0          | 0.0585539 | 0.0689551  |
| CNN1     | 8.39356   | 1.6539     | 2.69923    | 0.374994   | 5.31323   | 15.4712    | 16.9927    | 1.78943   | 0.324992   | 2.98386    | 9.14668    | 0.347159  | 1.97995    | 2.79566   | 6.61941    |
| CNN2     | 14.9593   | 19.6491    | 20.2276    | 66.5082    | 26.6229   | 71.0236    | 21.4464    | 14.6264   | 45.3102    | 42.5452    | 71.6827    | 37.3761   | 86.7811    | 46.6013   | 34.4365    |
| CNN3     | 24.4476   | 9.23048    | 10.2171    | 18.3249    | 12.821    | 54.806     | 14.6673    | 13.9604   | 20.2892    | 29.5928    | 66.3452    | 9.35086   | 35.1954    | 22.5836   | 55.7816    |
| CNNM1    | 0.307447  | 0.316633   | 0.397409   | 0.138614   | 0.196998  | 0.595565   | 0.491446   | 0.331295  | 0.0374436  | 0.0482347  | 0.0347069  | 0.0522467 | 0.0719066  | 0.0702997 | 0.0993448  |
| CNNM2    | 1.64051   | 1.68557    | 1.49842    | 1.02395    | 2.86982   | 1.43653    | 2.04443    | 1.28318   | 1.48113    | 1.14966    | 1.35535    | 0.877594  | 1.31555    | 0.862812  | 1.99181    |
| CNNM3    | 2.02431   | 2.77858    | 2.88586    | 1.95997    | 3.59785   | 2.79395    | 2.38653    | 1.76556   | 1.82324    | 0.862664   | 0.951279   | 1.14528   | 0.996262   | 1.07522   | 1.30485    |
| CNNM3-DT | 0.836496  | 0.214953   | 0.184536   | 0.114938   | 0.346498  | 0.427359   | 0.0636723  | 0.247803  | 0.339586   | 0.0699925  | 0.18886    | 0         | 0.0359802  | 0.0874379 | 0          |
| CNNM4    | 3.37985   | 3.14077    | 2.74819    | 2.12659    | 4.28394   | 4.36816    | 4.89945    | 2.32243   | 42.2432    | 3.15885    | 6.6076     | 4.07432   | 1.8167     | 1.51699   | 1.59257    |
| CNOT1    | 14.1326   | 16.1638    | 16.1774    | 19.6291    | 8.7239    | 22.6407    | 14.4957    | 14.4256   | 18.9584    | 12.9309    | 12.6726    | 13.6686   | 17.917     | 12.7461   | 11.1603    |
| CNOT10   | 3.19561   | 3.08284    | 3.1356     | 3.7362     | 1.9811    | 3.73986    | 2.52787    | 2.94824   | 3.2985     | 2.65289    | 3.4295     | 2.65054   | 3.65204    | 2.79358   | 2.07856    |
| CNOT11   | 4.67824   | 5.47348    | 5.41368    | 9.52847    | 6.1105    | 8.65562    | 5.69826    | 4.93361   | 11.4287    | 8.08653    | 9.21348    | 6.22789   | 12.5835    | 6.67706   | 4.79142    |

|            |           |           |            |           |           |           |           |           |            |           |                 |            |           |           |           |
|------------|-----------|-----------|------------|-----------|-----------|-----------|-----------|-----------|------------|-----------|-----------------|------------|-----------|-----------|-----------|
| CNOT2      | 6.77512   | 7.76132   | 9.18272    | 9.33576   | 3.11513   | 7.96807   | 4.96928   | 7.70757   | 9.01342    | 9.53561   | 10.462          | 6.64256    | 9.91654   | 6.80223   | 4.80274   |
| CNOT3      | 4.09633   | 6.00985   | 5.48437    | 9.25235   | 9.71262   | 11.6516   | 6.85541   | 4.78747   | 6.59975    | 6.12732   | 6.72371         | 6.21769    | 11.6423   | 7.66709   | 7.48307   |
| CNOT4      | 3.16134   | 3.01324   | 3.07011    | 3.19588   | 1.38112   | 3.33189   | 2.84935   | 3.17217   | 2.54759    | 2.58231   | 3.07417         | 2.46793    | 3.60268   | 2.60634   | 3.15831   |
| CNOT6      | 3.56805   | 3.33447   | 2.70703    | 6.36792   | 1.4239    | 5.39217   | 2.31841   | 3.52476   | 5.58197    | 5.61045   | 4.3206          | 4.25681    | 7.75218   | 4.97986   | 3.63465   |
| CNOT6L     | 5.83493   | 5.36608   | 5.72301    | 4.7338    | 2.52143   | 5.35475   | 4.02471   | 6.76697   | 4.57383    | 4.12889   | 4.6461          | 3.32976    | 3.73216   | 3.40973   | 4.1347    |
| CNOT7      | 6.15072   | 4.42716   | 4.61766    | 7.22345   | 1.41729   | 6.65396   | 3.58489   | 6.17218   | 5.29461    | 5.37555   | 7.57956         | 3.63679    | 7.18543   | 4.94536   | 3.79229   |
| CNOT8      | 8.82747   | 5.48342   | 6.47199    | 8.14244   | 3.22853   | 8.66982   | 4.45289   | 7.15334   | 6.28557    | 7.7771    | 10.51           | 4.0605     | 9.44713   | 5.63074   | 4.8295    |
| CNOT9      | 6.64054   | 5.71707   | 5.52831    | 8.88957   | 3.35452   | 9.85314   | 6.25326   | 4.94729   | 5.55237    | 7.18264   | 11.8303         | 5.55413    | 10.4226   | 7.17965   | 5.63414   |
| CNP        | 5.5779    | 6.46962   | 6.35307    | 14.6013   | 11.375    | 17.5598   | 6.49224   | 4.6284    | 6.66871    | 6.83691   | 9.56578         | 5.50265    | 9.18029   | 5.7098    | 6.80991   |
| CNPPD1     | 8.32555   | 10.0346   | 10.959     | 14.1127   | 18.5879   | 21.8197   | 11.5192   | 6.71293   | 21.3369    | 17.3203   | 15.2118         | 12.8307    | 26.3715   | 9.79848   | 5.68219   |
| CNPY1      | 0.0103595 | 0         | 0.00857008 | 0.0106757 | 0         | 0         | 0         | 0         | 0          | 0         | 0               | 0          | 0         | 0         | 0         |
| CNPY2      | 4.53557   | 4.02977   | 3.94456    | 9.48971   | 7.4723    | 8.31809   | 4.61122   | 3.45769   | 4.3006     | 7.60342   | 17.8666         | 3.82781    | 5.10231   | 6.44286   | 5.73931   |
| CNPY3      | 2.38335   | 1.85989   | 2.1008     | 3.53878   | 5.49263   | 4.69264   | 2.72808   | 1.87269   | 0.979574   | 1.69535   | 4.37122         | 0.88489    | 2.34337   | 2.1932    | 3.16413   |
| CNPY3-GNMT | 4.65E-06  | 1.71E-09  | 3.83E-07   | 6.55E-12  | 5.90E-10  | 3.21E-08  | 1.88E-07  | 3.85E-07  | 0.00282894 | 3.44E-05  | 0.00011361<br>6 | 1.56E-06   | 9.83E-07  | 2.14E-06  | 1.62E-06  |
| CNPY4      | 1.69682   | 1.87051   | 1.64258    | 1.7063    | 5.92355   | 2.58779   | 1.17295   | 0.976061  | 3.25175    | 2.55882   | 5.79942         | 1.41412    | 1.48907   | 1.50631   | 4.16394   |
| CNR1       | 0.586835  | 0.127329  | 0.080376   | 0.0760944 | 0.0965888 | 2.34288   | 0.173054  | 0.348838  | 0.00946621 | 0.0195109 | 0.136002        | 0.0583961  | 0.0451338 | 0.0528102 | 0.167438  |
| CNR2       | 0         | 0.0251283 | 0.0323587  | 0.0537455 | 0         | 0.0444079 | 0         | 0.0231748 | 0          | 0         | 0.103031        | 0.00932928 | 0.0168245 | 0         | 0         |
| CNRIP1     | 2.68267   | 1.05623   | 1.49057    | 1.74333   | 1.67928   | 5.4379    | 2.43439   | 1.61908   | 0.304775   | 2.50014   | 7.09641         | 0.558667   | 1.97626   | 1.62181   | 4.34143   |
| CNST       | 4.01802   | 4.05222   | 4.52832    | 4.59502   | 2.50042   | 3.07065   | 4.4879    | 3.6522    | 15.1212    | 4.8133    | 7.40944         | 4.74704    | 4.50049   | 3.82169   | 3.16593   |
| CNTD1      | 0.684152  | 0.405461  | 0.387178   | 0.285656  | 0.25148   | 0.199212  | 0.410097  | 0.696227  | 0.130833   | 0.0737519 | 0.0575555       | 0.270097   | 0.177575  | 0.376792  | 0.555137  |
| CNTD2      | 0.0254739 | 0.0490949 | 0.0210738  | 0.0131258 | 0.0989245 | 0.0325361 | 0.0872559 | 0         | 0.0155122  | 0.0479586 | 0.0287569       | 0.0729091  | 0.164356  | 0.0399413 | 0.0731675 |
| CNTF       | 0.315694  | 0.238328  | 0.117725   | 1.07E-08  | 0.0452133 | 0.0614109 | 0.0679796 | 0.45801   | 0.0388873  | 0.354866  | 0.141624        | 0.385591   | 0.0296601 | 0.301102  | 0.311275  |
| CNTFR      | 1.28268   | 0.892687  | 1.58715    | 0.259849  | 0.170294  | 0.522755  | 1.86508   | 0.769702  | 0.0267036  | 0.151358  | 0.594046        | 0.0392219  | 0.0424399 | 0.200542  | 0.377865  |
| CNTFR-AS1  | 0.209439  | 0.252278  | 0.151605   | 0.0269792 | 0         | 0         | 0.298914  | 0.0697996 | 0          | 0         | 0               | 0          | 0         | 0         | 0         |
| CNTLN      | 0.836521  | 0.498241  | 0.636388   | 0.651959  | 0.205685  | 0.830405  | 0.32877   | 0.622016  | 0.158706   | 0.601462  | 0.906364        | 0.216562   | 0.419028  | 0.647015  | 1.42774   |

|           |           |            |            |           |           |           |            |            |           |           |            |           |           |            |            |
|-----------|-----------|------------|------------|-----------|-----------|-----------|------------|------------|-----------|-----------|------------|-----------|-----------|------------|------------|
| CNTN1     | 0.639696  | 1.66467    | 0.935272   | 2.13105   | 2.21854   | 2.09788   | 1.9489     | 1.42128    | 5.57307   | 8.68872   | 5.20867    | 3.69123   | 3.37948   | 3.7637     | 0.909588   |
| CNTN2     | 0.225911  | 0.0840469  | 0.175061   | 0.0589388 | 0.0666301 | 0.21671   | 0.254673   | 0.14486    | 0.0174136 | 0.0861393 | 0.00645635 | 0.069569  | 0.0147602 | 0.0388589  | 0.061602   |
| CNTN3     | 0.411682  | 0.389947   | 0.468286   | 0.255514  | 0.203472  | 0.601497  | 0.443338   | 0.320135   | 0.0284876 | 0         | 0.0316866  | 0         | 0.0573487 | 0.0195602  | 0.315769   |
| CNTN4     | 0.421985  | 0.199154   | 0.154566   | 0.115454  | 0.154644  | 0.374621  | 0.526851   | 0.143326   | 0.0431587 | 0.0495442 | 0.0535555  | 0.0656772 | 0.0050788 | 0.0734249  | 0.413948   |
| CNTN4-AS1 | 0.0264981 | 0.0115575  | 0          | 0         | 0         | 1.36E-38  | 0          | 0          | 0         | 0         | 0          | 0         | 0         | 0          | 8.13E-37   |
| CNTN4-AS2 | 0         | 0.0261753  | 0          | 0         | 0         | 0         | 0.0620281  | 0          | 0         | 0         | 0          | 0         | 0         | 0          | 0.0780196  |
| CNTN5     | 0         | 0          | 0          | 0         | 0         | 0         | 0          | 0          | 0         | 0         | 0          | 0         | 0         | 0          | 0          |
| CNTN6     | 0.0159828 | 0.030803   | 0.0528883  | 0         | 0.0413779 | 0.0317546 | 0.00608287 | 0.0142042  | 0         | 0         | 0.00601419 | 0         | 0         | 0.00835329 | 0.00765109 |
| CNTNAP1   | 0.99718   | 0.56837    | 0.638888   | 1.19379   | 1.89831   | 2.85437   | 1.60366    | 0.663715   | 0.222219  | 1.03853   | 1.74362    | 0.418997  | 1.34698   | 1.28407    | 4.36935    |
| CNTNAP2   | 0.121658  | 0.137523   | 0.0154837  | 0.376116  | 0.276196  | 0.0577713 | 0.0747949  | 0.110199   | 0.683841  | 1.01306   | 1.17264    | 1.55517   | 1.00079   | 0.602822   | 1.01134    |
| CNTNAP3   | 2.77289   | 5.58988    | 7.94251    | 2.24893   | 2.59974   | 1.41113   | 4.763      | 6.62592    | 0.497016  | 2.01851   | 1.42614    | 7.9658    | 1.32118   | 2.34126    | 1.62601    |
| CNTNAP3B  | 0.979269  | 1.97742    | 2.53934    | 1.31986   | 1.45413   | 1.67714   | 1.90834    | 0.929086   | 0.146832  | 0.302828  | 0.474414   | 2.4257    | 0.370357  | 1.42832    | 1.24482    |
| CNTNAP3P2 | 0.585227  | 1.18211    | 1.44245    | 0.541785  | 0.0600561 | 0.343924  | 0.416732   | 1.796      | 0.06098   | 0.82786   | 0.401821   | 1.11025   | 0.343569  | 0.576024   | 0.500429   |
| CNTNAP4   | 0.0129689 | 0.00156216 | 0.00536441 | 0         | 0.0352541 | 0.380979  | 0.0111056  | 0.00576285 | 0         | 0         | 0.0146403  | 0         | 0         | 0.00338906 | 0.0791563  |
| CNTNAP5   | 0.0344519 | 0          | 0.00712526 | 0         | 0.0133789 | 0         | 0          | 0.00382725 | 0         | 0         | 0          | 0         | 0         | 0          | 0          |
| CNTRL     | 1.72927   | 1.76595    | 1.83787    | 1.54404   | 0.91112   | 2.08058   | 0.704408   | 1.24243    | 0.247989  | 0.797217  | 0.936611   | 0.737185  | 1.14317   | 1.20558    | 1.54943    |
| CNTROB    | 2.2977    | 3.26187    | 3.15031    | 3.15713   | 5.79879   | 6.1704    | 2.83136    | 1.97061    | 2.83095   | 1.97635   | 1.52969    | 2.44119   | 2.5226    | 3.01479    | 2.60753    |
| COA1      | 3.2643    | 3.12174    | 2.99002    | 2.51709   | 1.82612   | 2.23527   | 2.31096    | 2.66097    | 1.49662   | 2.01031   | 2.78307    | 2.17236   | 1.5759    | 2.8514     | 2.36037    |
| COA3      | 7.7048    | 7.9352     | 7.74827    | 19.4811   | 12.5911   | 19.5597   | 10.0725    | 6.1601     | 16.5346   | 15.2784   | 34.403     | 12.1122   | 12.4924   | 14.0416    | 9.0495     |
| COA4      | 5.61559   | 6.29958    | 5.41988    | 16.192    | 7.66563   | 15.3591   | 7.09173    | 4.91506    | 9.36067   | 10.2163   | 22.0275    | 6.43303   | 12.3883   | 9.96106    | 7.61666    |
| COA5      | 4.70196   | 3.41399    | 3.72726    | 3.46879   | 1.42413   | 3.07802   | 2.84129    | 2.99144    | 2.7755    | 2.33427   | 4.27295    | 1.8087    | 1.64782   | 1.97828    | 2.59571    |
| COA6      | 0.997545  | 1.39433    | 1.04888    | 3.77556   | 2.59195   | 4.463     | 1.13701    | 1.37007    | 2.18571   | 3.27802   | 6.01953    | 1.88176   | 3.88507   | 3.06181    | 1.82331    |
| COA7      | 2.39751   | 2.49492    | 2.26414    | 5.11063   | 2.5848    | 5.06167   | 2.43741    | 1.83883    | 3.99985   | 2.51447   | 2.97837    | 2.30297   | 5.53761   | 3.82206    | 2.16964    |
| COASY     | 5.98265   | 6.57182    | 6.46176    | 12.6104   | 13.7357   | 16.3845   | 9.35229    | 4.18271    | 11.7064   | 6.94078   | 9.75747    | 8.43845   | 14.2602   | 9.56473    | 5.96619    |
| COBL      | 2.57736   | 4.37623    | 4.50965    | 2.60643   | 3.47602   | 1.68101   | 4.53709    | 2.96622    | 3.26858   | 3.35573   | 0.760996   | 3.60311   | 5.07207   | 1.32718    | 0.946282   |
| COBL1     | 4.66941   | 4.29169    | 4.37884    | 3.41896   | 1.91552   | 3.62056   | 2.83492    | 4.07813    | 5.03978   | 4.35744   | 4.51092    | 3.75176   | 5.56486   | 4.4136     | 3.30693    |

|             |           |           |           |           |           |           |            |           |            |           |            |            |            |           |           |
|-------------|-----------|-----------|-----------|-----------|-----------|-----------|------------|-----------|------------|-----------|------------|------------|------------|-----------|-----------|
| COCH        | 0.248665  | 0.159211  | 0.194097  | 0.22159   | 0.0460348 | 0.151703  | 0.595983   | 0.534058  | 0.0795348  | 0.0930959 | 0.0950086  | 0.00679343 | 0.0619973  | 0.143922  | 0.145191  |
| COG1        | 5.33387   | 4.72607   | 4.50372   | 3.9993    | 5.18282   | 7.46622   | 5.9771     | 3.80935   | 2.94448    | 3.05212   | 3.51994    | 2.52017    | 3.65931    | 3.66794   | 3.27771   |
| COG2        | 3.66692   | 3.05513   | 3.29873   | 4.75378   | 2.08894   | 5.09958   | 3.74935    | 2.8489    | 3.33276    | 2.65936   | 5.11039    | 1.75105    | 4.09109    | 2.62751   | 3.17766   |
| COG3        | 4.13413   | 3.92797   | 4.04906   | 4.2292    | 2.33091   | 4.55348   | 3.33462    | 3.78595   | 4.40324    | 5.06867   | 5.13872    | 3.19588    | 4.56141    | 3.90027   | 3.61579   |
| COG4        | 5.24038   | 5.37785   | 4.5252    | 7.23428   | 10.5223   | 7.52764   | 5.91777    | 4.38757   | 9.94782    | 7.12276   | 6.26754    | 7.30566    | 9.35475    | 5.34486   | 3.75705   |
| COG5        | 4.14177   | 3.55355   | 3.83827   | 3.31359   | 1.48992   | 3.25049   | 3.33788    | 3.93744   | 1.92981    | 3.18076   | 3.43596    | 2.25901    | 2.83688    | 2.52632   | 3.31329   |
| COG6        | 1.60233   | 1.46287   | 1.64262   | 1.50145   | 0.482401  | 2.27581   | 1.12033    | 1.28309   | 1.34792    | 2.08988   | 3.33426    | 0.895936   | 1.2619     | 1.39863   | 1.30478   |
| COG7        | 3.05737   | 3.5954    | 3.59183   | 3.15071   | 3.88011   | 5.17308   | 3.24789    | 2.34598   | 2.91741    | 2.61096   | 3.13116    | 2.43571    | 3.26394    | 2.60691   | 3.58731   |
| COG8        | 3.79886   | 4.67685   | 4.43989   | 5.31269   | 6.53537   | 6.31697   | 4.5148     | 3.3746    | 3.65668    | 3.37135   | 5.68574    | 3.35409    | 4.43873    | 3.66044   | 3.76362   |
| COIL        | 3.16426   | 2.87554   | 2.69768   | 3.49637   | 1.54282   | 3.20325   | 2.11753    | 2.72621   | 2.40857    | 2.50423   | 3.17516    | 1.93079    | 3.50469    | 2.61849   | 2.20902   |
| COL10A1     | 1.71638   | 1.12862   | 1.26861   | 0.724911  | 1.00526   | 0.610946  | 1.16458    | 1.30658   | 0.214177   | 11.4775   | 24.2595    | 0.679492   | 1.08925    | 1.13603   | 3.54588   |
| COL11A1     | 0.505673  | 0.13602   | 0.169384  | 0.310109  | 1.55169   | 0.8136    | 0.109805   | 0.242621  | 0.230472   | 2.05977   | 3.15537    | 0.0488349  | 0.156123   | 0.338871  | 15.4952   |
| COL11A2     | 0.0166236 | 0.0235431 | 0.0258375 | 0.0140163 | 0.0469494 | 0.0201598 | 0.0155293  | 0.0116399 | 0.00368103 | 0.010116  | 0.00909864 | 0.0122551  | 0.00130005 | 0.0136905 | 0.0361721 |
| COL12A1     | 8.75219   | 5.89939   | 7.44067   | 21.3694   | 14.1977   | 26.7712   | 15.4361    | 7.5954    | 4.5325     | 49.913    | 90.3579    | 8.80658    | 37.7573    | 63.3491   | 226.339   |
| COL13A1     | 0.599788  | 0.771808  | 0.786639  | 1.38695   | 4.01075   | 3.20752   | 0.801739   | 0.708556  | 0.311788   | 1.14755   | 1.0982     | 1.40264    | 2.00569    | 4.18604   | 3.44549   |
| COL14A1     | 10.405    | 5.09825   | 5.53679   | 3.50072   | 24.7759   | 6.51369   | 13.6659    | 10.8606   | 1.35207    | 11.3865   | 20.4501    | 3.54772    | 4.12606    | 6.78591   | 59.2608   |
| COL15A1     | 14.7856   | 4.28176   | 4.79522   | 24.9976   | 22.682    | 48.7707   | 9.45454    | 8.004     | 3.99756    | 30.0059   | 49.4999    | 6.30372    | 48.3837    | 26.0807   | 89.8338   |
| COL16A1     | 7.56377   | 12.9878   | 16.2278   | 10.084    | 56.4538   | 10.4988   | 15.6679    | 7.63551   | 2.59445    | 8.71823   | 11.2381    | 8.58519    | 9.17459    | 12.466    | 43.9858   |
| COL17A1     | 92.9805   | 132.991   | 153.175   | 206.266   | 158.703   | 207.865   | 147.955    | 79.5987   | 95.7669    | 113.046   | 39.7983    | 97.1054    | 210.216    | 107.714   | 43.7308   |
| COL18A1     | 17.6679   | 14.2274   | 13.3236   | 25.2358   | 60.7976   | 55.7547   | 21.4752    | 11.3524   | 12.9826    | 27.5415   | 35.5951    | 18.7212    | 40.0844    | 38.6697   | 92.2172   |
| COL18A1-AS1 | 0.21435   | 0.742303  | 0.421147  | 0.358952  | 2.44516   | 0.952505  | 1.13956    | 0.601253  | 0.106053   | 0.243809  | 0.0831785  | 0.987339   | 0.0561832  | 1.01176   | 2.90517   |
| COL18A1-AS2 | 0.125777  | 0.343408  | 0.17342   | 0.129617  | 1.36763   | 0.642587  | 0.382956   | 0.111781  | 0.0510609  | 0.0526212 | 0          | 0.449986   | 0.081151   | 0.657368  | 2.52885   |
| COL19A1     | 0.02122   | 0.0293943 | 0.039498  | 0         | 0.016481  | 0.0112928 | 0.00908561 | 0.0424318 | 0.00323045 | 0.0332916 | 0.0538981  | 0.00948967 | 0.0102683  | 0.0249536 | 0         |
| COL1A1      | 124.138   | 168.933   | 182.75    | 206.812   | 2666.14   | 588.417   | 164.108    | 237.39    | 94.2343    | 611.254   | 999.385    | 289.636    | 379.436    | 633.929   | 3954.7    |
| COL1A2      | 112.358   | 150.787   | 186.686   | 137.839   | 1329.99   | 411.954   | 145.193    | 148.881   | 69.6072    | 435.73    | 661.126    | 151.147    | 245.396    | 415.505   | 2206.04   |
| COL1A2-AS1  | 0         | 0.0598426 | 0.0684993 | 0         | 0         | 0.0352522 | 0          | 0         | 0          | 0         | 0          | 0.0296234  | 0.0801348  | 0         | 0         |

|            |            |            |           |           |            |           |           |           |           |           |            |            |            |           |           |
|------------|------------|------------|-----------|-----------|------------|-----------|-----------|-----------|-----------|-----------|------------|------------|------------|-----------|-----------|
| COL20A1    | 0          | 0.00534548 | 0         | 0         | 0          | 0         | 0         | 0         | 0         | 0.0139247 | 0          | 0          | 0          | 0         | 0         |
| COL21A1    | 1.59659    | 1.24975    | 1.59998   | 0.342562  | 1.11094    | 1.80978   | 1.23638   | 1.18616   | 0.325101  | 0.638463  | 1.05185    | 0.115322   | 0.0779897  | 0.321145  | 0.940311  |
| COL22A1    | 0.00727883 | 0.0280564  | 0.0180647 | 0.0262537 | 0.00565327 | 0.0123957 | 0.0207768 | 0.0161721 | 0.0132972 | 0.0730855 | 0.123253   | 0.0911435  | 0.253598   | 0.152169  | 0.397226  |
| COL23A1    | 0.755568   | 0.527864   | 0.725069  | 2.35926   | 2.8872     | 2.25818   | 1.23364   | 0.503615  | 0.294463  | 1.08108   | 1.04912    | 0.448722   | 3.14918    | 3.1394    | 2.17018   |
| COL24A1    | 0.257145   | 0.312036   | 0.346668  | 0.12759   | 0.290947   | 0.216252  | 0.188484  | 0.177745  | 0.131456  | 0.557828  | 1.02854    | 0.111305   | 0.454712   | 0.275427  | 0.961986  |
| COL25A1    | 0.156692   | 0.161528   | 0.25021   | 0.0225315 | 0.152831   | 0.127216  | 0.178906  | 0.165163  | 0.013314  | 0         | 0.0370226  | 0.0130369  | 0.00705327 | 0         | 0.0941984 |
| COL26A1    | 0.0228988  | 0.0882639  | 0.151548  | 0.0471957 | 0.889243   | 0.207979  | 0.10458   | 0.0407011 | 0.204513  | 0.201182  | 0.00861663 | 0.0764619  | 0.0590967  | 0.0159572 | 0         |
| COL27A1    | 2.37357    | 4.69014    | 4.16741   | 5.76238   | 16.0689    | 6.09095   | 3.86717   | 2.74674   | 1.18012   | 3.45885   | 2.12752    | 6.1022     | 4.50056    | 8.91603   | 10.3284   |
| COL28A1    | 0.237027   | 0.323576   | 0.397618  | 0.0203553 | 0.327275   | 0.235463  | 0.466085  | 0.321826  | 0.144336  | 0.0165274 | 0.00743261 | 0.127199   | 0.00849603 | 0.0240879 | 0.0283667 |
| COL2A1     | 0.0227472  | 0.0197279  | 0.0376363 | 0.0187534 | 0.0424012  | 0.019369  | 0.0259721 | 0.024259  | 0.0110814 | 0.0114201 | 0.0462219  | 0.00976576 | 0.0528351  | 0.0427993 | 0.0392015 |
| COL3A1     | 142.366    | 125.024    | 140.784   | 215.663   | 1292.32    | 383.219   | 109.546   | 155.37    | 90.8306   | 725.167   | 1116.25    | 177.998    | 322.812    | 516.855   | 2319.16   |
| COL4A1     | 14.4809    | 4.8842     | 4.57704   | 65.8757   | 47.2504    | 54.2817   | 8.32352   | 8.62554   | 19.5565   | 69.4123   | 102.163    | 28.0947    | 98.372     | 95.2691   | 168.224   |
| COL4A2     | 20.1351    | 6.79427    | 6.91112   | 59.4339   | 59.6167    | 88.5993   | 15.1724   | 9.80168   | 18.7439   | 57.4601   | 81.0327    | 28.4532    | 94.9137    | 82.7432   | 163.883   |
| COL4A2-AS1 | 0.472307   | 0.0827508  | 0.0710411 | 0.221239  | 0.466872   | 0.109681  | 0.490241  | 0.114477  | 0.0522925 | 0.161671  | 0.145412   | 0.337948   | 0.0277027  | 0.762986  | 0.863282  |
| COL4A2-AS2 | 0.608627   | 0.197941   | 0.15105   | 0.125442  | 0.354528   | 0.259119  | 0.260592  | 0.121702  | 0.018531  | 0.0572917 | 0.137413   | 0.130647   | 0.00981708 | 0.739571  | 1.72628   |
| COL4A3     | 0.251524   | 0.0771196  | 0.113497  | 0.0824736 | 0.0887962  | 0.608435  | 0.287182  | 0.190511  | 0.027848  | 0.0107621 | 0.00967974 | 0.0163611  | 0.112491   | 0.008963  | 0.238077  |
| COL4A3BP   | 4.39541    | 4.20969    | 4.40981   | 4.57667   | 2.75794    | 4.97384   | 2.76092   | 4.2285    | 6.12081   | 6.18381   | 5.45017    | 3.95566    | 7.83573    | 4.22634   | 2.99353   |
| COL4A4     | 0.642303   | 0.21566    | 0.179588  | 0.654993  | 0.271157   | 1.53974   | 0.319408  | 0.354031  | 0.0272562 | 0.10393   | 0.141479   | 0.0224188  | 0.720526   | 0.0877253 | 1.35632   |
| COL4A5     | 3.95552    | 6.48303    | 7.44712   | 5.34346   | 8.92648    | 4.33036   | 4.43103   | 4.06173   | 2.61859   | 2.74768   | 2.2908     | 2.88621    | 2.42135    | 3.72966   | 1.69959   |
| COL4A6     | 1.01761    | 1.57607    | 1.84759   | 1.09367   | 1.38246    | 1.19248   | 1.51849   | 1.21776   | 0.490825  | 0.547975  | 0.246432   | 0.425342   | 0.58505    | 0.953113  | 0.342444  |
| COL5A1     | 12.0066    | 10.761     | 12.6891   | 23.4251   | 69.0823    | 35.178    | 18.0671   | 11.0022   | 6.94369   | 37.4993   | 54.4848    | 15.8621    | 30.7749    | 45.7972   | 175.129   |
| COL5A1-AS1 | 0.0688781  | 0.199119   | 0.113962  | 0.141962  | 0.106992   | 0.234595  | 0.0786428 | 0.489705  | 0.167772  | 0.0864491 | 0          | 0.197137   | 0          | 0.971965  | 1.97835   |
| COL5A2     | 10.6064    | 6.36377    | 6.05862   | 23.5123   | 54.0327    | 27.1107   | 5.91394   | 8.80579   | 7.24367   | 58.4333   | 83.1458    | 16.1509    | 34.0845    | 43.1845   | 156.518   |
| COL5A3     | 7.23829    | 5.61327    | 4.9585    | 8.14301   | 26.0681    | 11.6755   | 8.20025   | 5.11359   | 5.00347   | 15.041    | 15.1447    | 12.7938    | 17.6211    | 18.2668   | 36.8001   |
| COL6A1     | 70.2782    | 38.7225    | 47.6623   | 67.0385   | 208.922    | 269.592   | 75.0504   | 52.142    | 29.8868   | 121.674   | 205.252    | 67.9781    | 111.439    | 171.508   | 473.876   |
| COL6A2     | 84.9422    | 44.9947    | 59.5997   | 79.0045   | 204.568    | 273.287   | 106.734   | 51.169    | 26.9644   | 129.486   | 187.326    | 60.1364    | 148.671    | 181.922   | 455.165   |



|             |            |            |            |            |            |           |           |            |            |           |            |            |           |            |           |
|-------------|------------|------------|------------|------------|------------|-----------|-----------|------------|------------|-----------|------------|------------|-----------|------------|-----------|
| COL6A3      | 36.7381    | 11.4302    | 13.3802    | 44.6615    | 90.6955    | 123.341   | 32.6311   | 32.9118    | 9.99275    | 91.8699   | 168.604    | 27.6614    | 49.7905   | 80.2252    | 325.447   |
| COL6A4P1    | 0          | 0.0148742  | 0.00851292 | 0          | 0          | 0         | 0         | 0.0457261  | 0.0125325  | 0         | 0          | 0          | 0.0132786 | 0          | 0         |
| COL6A4P2    | 0.0126299  | 0.0146047  | 0.0104484  | 0.00780929 | 0.0196186  | 0.0107542 | 0         | 0.00448977 | 0          | 0         | 0.00855456 | 0          | 0         | 0          | 0.0362763 |
| COL6A5      | 0.0451425  | 0.224753   | 0.361002   | 0.661625   | 0.128557   | 0.72392   | 0.0257711 | 0.343239   | 0.0397067  | 0.0157385 | 0.022649   | 0.0143558  | 0.0161809 | 0.00655373 | 0.0360168 |
| COL6A6      | 0.205705   | 0.264687   | 0.28429    | 0.371598   | 3.21411    | 0.416251  | 0.320525  | 1.09043    | 0.0206315  | 0.021262  | 0.0628348  | 0.0103897  | 0.0140527 | 0.0240318  | 0.392733  |
| COL7A1      | 8.0164     | 25.3563    | 22.0459    | 28.6903    | 90.6002    | 17.6213   | 21.6977   | 11.7295    | 9.72925    | 19.7521   | 12.9075    | 32.7234    | 32.3063   | 42.0502    | 57.3308   |
| COL8A1      | 1.87929    | 0.847755   | 0.953872   | 1.3657     | 2.68659    | 4.31607   | 2.2312    | 0.692019   | 0.255321   | 2.0486    | 3.1104     | 0.605376   | 4.00467   | 2.93488    | 10.1612   |
| COL8A2      | 1.65891    | 1.57889    | 2.13245    | 2.61956    | 5.48669    | 3.27274   | 3.11798   | 1.26563    | 1.38628    | 4.04887   | 3.45729    | 1.26735    | 11.0953   | 3.16398    | 8.78197   |
| COL9A1      | 0.051942   | 0.03893    | 0.0477445  | 0          | 0.116543   | 0.0147426 | 0         | 0.0153872  | 0          | 0         | 0          | 0          | 0         | 0          | 0.0248651 |
| COL9A2      | 1.68402    | 0.890163   | 1.16997    | 0.345402   | 3.06031    | 0.988433  | 0.6627    | 0.661128   | 0.109517   | 0.307809  | 0.286081   | 0.157932   | 0.152957  | 0.303351   | 0.516566  |
| COL9A3      | 0.481954   | 0.651648   | 0.668725   | 0.970073   | 3.2681     | 1.46226   | 0.571444  | 0.314282   | 0.815758   | 0.537394  | 1.24507    | 0.497381   | 0.869141  | 0.290642   | 0.545731  |
| COLCA1      | 0.213436   | 0.0706076  | 0.0526008  | 0.0801735  | 0.207407   | 0.175294  | 0.10993   | 0.0996441  | 0.00897918 | 0.0277607 | 0.0166458  | 0.026377   | 0         | 0.0443132  | 0.127058  |
| COLCA2      | 0.247934   | 0.145383   | 0.201353   | 0.239374   | 0.418959   | 0.266956  | 0.131632  | 0.133637   | 0.0790399  | 0.0325821 | 0.117221   | 0.120736   | 0         | 0.0949736  | 0.167766  |
| COLEC10     | 0.00630429 | 0.00911251 | 0.00521535 | 0          | 0.00979274 | 0.0322081 | 0.0215941 | 0.0112055  | 0.00767792 | 0.0158251 | 0.028467   | 0.00451089 | 0.0528774 | 0          | 0.0814838 |
| COLEC11     | 0.212499   | 0.00465387 | 0.0399532  | 0.0199078  | 0.19505    | 0.0822454 | 0.0551419 | 0.10301    | 0          | 0.181846  | 0.490673   | 0.0069113  | 0.0810155 | 0.0100965  | 0.180331  |
| COLEC12     | 6.71252    | 2.54751    | 3.58598    | 2.53411    | 5.13887    | 10.3435   | 4.95766   | 4.54141    | 0.548604   | 5.36636   | 11.5956    | 0.988073   | 3.0683    | 2.70549    | 9.43853   |
| COLGALT1    | 7.59157    | 6.99523    | 7.36487    | 17.1457    | 13.887     | 19.8336   | 9.86534   | 6.36392    | 6.74417    | 17.1131   | 25.6464    | 6.47727    | 20.1762   | 15.2736    | 17.1606   |
| COLGALT2    | 0.193815   | 0.112441   | 0.130887   | 0.0815231  | 0.165891   | 0.148191  | 0.302582  | 0.165216   | 0.0144517  | 0.0148933 | 0.0625122  | 0.0254718  | 0.0331761 | 0.0475471  | 0.147692  |
| COLQ        | 0.419408   | 0.397529   | 0.392467   | 0.368443   | 0.854406   | 1.14747   | 0.400363  | 0.29941    | 0.0753626  | 0.103554  | 0.302703   | 0.172187   | 0.0443606 | 0.244355   | 0.720812  |
| COMMD1      | 6.49299    | 6.56837    | 5.05943    | 11.6888    | 5.2731     | 12.3879   | 6.49065   | 4.40563    | 12.1077    | 12.1733   | 20.9858    | 8.57855    | 9.8734    | 6.78701    | 4.44957   |
| COMMD10     | 1.07912    | 1.05003    | 1.00613    | 1.22073    | 0.316685   | 0.75424   | 0.874913  | 1.18083    | 0.483745   | 1.02793   | 1.15073    | 0.787229   | 0.950243  | 1.03246    | 1.13581   |
| COMMD2      | 3.60655    | 2.59769    | 2.95326    | 4.28992    | 0.864071   | 3.49253   | 2.19153   | 3.13999    | 2.91833    | 4.01256   | 6.34159    | 2.15195    | 3.74278   | 2.69961    | 3.3096    |
| COMMD3      | 7.58931    | 8.05155    | 8.05991    | 9.21205    | 4.00707    | 7.35259   | 5.78495   | 6.65401    | 10.9786    | 8.89462   | 21.3439    | 5.68459    | 5.97692   | 5.86121    | 5.71727   |
| COMMD3-BMI1 | 0.703335   | 0.276596   | 0.288403   | 1.26139    | 3.50E-09   | 0.453857  | 0.0682863 | 1.0673     | 0.450718   | 0.363809  | 0.317574   | 0.119167   | 0.628999  | 0.319752   | 0.875812  |
| COMMD4      | 3.57179    | 2.67758    | 2.64197    | 5.95427    | 6.49468    | 8.19368   | 3.65834   | 2.10064    | 2.39252    | 3.92918   | 9.55843    | 2.20993    | 3.11107   | 3.2339     | 3.60576   |
| COMMD5      | 2.84898    | 2.83311    | 3.18555    | 4.63854    | 6.40577    | 4.82959   | 3.52023   | 1.84981    | 3.51726    | 3.9513    | 7.10781    | 2.9135     | 4.70028   | 3.40634    | 3.60574   |

|        |         |         |         |         |          |         |         |         |         |         |         |         |         |         |         |
|--------|---------|---------|---------|---------|----------|---------|---------|---------|---------|---------|---------|---------|---------|---------|---------|
| COMMD6 | 6.35408 | 3.43941 | 3.64856 | 8.98463 | 1.80099  | 5.2556  | 2.80333 | 4.556   | 5.9943  | 7.83242 | 17.6952 | 3.9772  | 4.83303 | 4.78833 | 3.06897 |
| COMMD7 | 4.98952 | 6.03342 | 5.68056 | 6.06533 | 7.07321  | 8.53824 | 6.44354 | 3.97146 | 15.1032 | 7.69112 | 15.6261 | 6.45571 | 5.76643 | 4.88632 | 5.32201 |
| COMMD8 | 2.22559 | 2.00217 | 1.99567 | 4.08987 | 0.628566 | 3.47207 | 1.65261 | 2.37904 | 4.0563  | 6.83688 | 9.43473 | 3.18495 | 4.39821 | 3.31064 | 2.27983 |
| COMMD9 | 3.41088 | 2.53949 | 2.63659 | 4.6522  | 2.80497  | 5.27644 | 3.58604 | 2.27005 | 3.20484 | 3.40931 | 7.09985 | 2.60071 | 3.91343 | 3.02492 | 2.54897 |
| COMP   | 38.9147 | 7.41711 | 8.46403 | 14.444  | 62.7791  | 85.2534 | 41.1231 | 3.84175 | 1.86218 | 5.56772 | 3.56937 | 14.2295 | 33.0241 | 17.6698 | 106.378 |
| COMT   | 8.21022 | 8.78439 | 8.13699 | 14.8018 | 18.0565  | 18.7488 | 9.90322 | 6.12623 | 9.98918 | 9.64998 | 18.4908 | 9.88794 | 13.0174 | 8.0377  | 6.26901 |
| COMTD1 | 2.73994 | 3.62003 | 3.10777 | 8.98577 | 17.3723  | 7.38058 | 2.7152  | 1.85308 | 7.68127 | 5.81803 | 10.7576 | 6.30074 | 5.16998 | 5.17867 | 2.17781 |
| COP1   | 9.35178 | 8.25994 | 9.61738 | 9.38926 | 6.54792  | 8.70487 | 7.28581 | 7.22707 | 9.45915 | 8.82128 | 10.5476 | 5.45054 | 8.35194 | 7.92787 | 6.85222 |
| COPA   | 14.6133 | 12.7581 | 13.2982 | 22.4249 | 14.3593  | 27.354  | 15.341  | 10.7922 | 22.5641 | 23.1366 | 22.3031 | 15.6636 | 30.4584 | 17.0275 | 22.5902 |
| COPB1  | 10.3346 | 9.16852 | 10.1454 | 16.4587 | 4.36242  | 14.1635 | 6.88512 | 8.54887 | 12.0351 | 20.4489 | 22.8365 | 8.65775 | 23.534  | 14.8355 | 12.7688 |
| COPB2  | 11.8028 | 10.7889 | 10.4337 | 24.3192 | 9.53177  | 25.9896 | 9.94415 | 9.34606 | 20.9326 | 25.9264 | 28.778  | 12.5673 | 30.0443 | 19.0148 | 18.5589 |
| COPE   | 17.0488 | 15.0564 | 15.3761 | 33.5141 | 35.7133  | 51.6983 | 20.4629 | 11.6926 | 30.9604 | 31.4297 | 60.9953 | 23.0663 | 34.8856 | 23.8837 | 20.1217 |
| COPG1  | 12.8138 | 10.9874 | 11.08   | 21.8789 | 17.1793  | 29.527  | 13.7621 | 9.93589 | 17.9346 | 18.9457 | 19.199  | 14.9434 | 31.4665 | 15.6251 | 23.127  |
| COPG2  | 4.5512  | 3.72331 | 3.58841 | 5.35034 | 1.78295  | 7.81878 | 2.52963 | 3.00092 | 4.77888 | 3.11575 | 4.48987 | 3.76265 | 4.09031 | 1.2835  | 2.24259 |
| COPRS  | 3.89409 | 3.3612  | 3.8169  | 7.24615 | 5.47551  | 9.28725 | 6.25831 | 2.34543 | 6.47325 | 6.16147 | 10.4378 | 4.0012  | 6.81101 | 4.79387 | 4.21418 |
| COPS2  | 6.6083  | 4.71216 | 4.73044 | 8.55162 | 1.12888  | 5.13755 | 2.99104 | 7.10954 | 10.5936 | 10.2032 | 12.8658 | 5.10733 | 10.6063 | 6.75442 | 5.64727 |
| COPS3  | 7.14923 | 5.52428 | 5.75751 | 11.5513 | 2.80663  | 9.56334 | 5.08105 | 5.77876 | 9.71211 | 9.22498 | 12.5403 | 6.35249 | 13.4063 | 7.77611 | 5.28578 |
| COPS4  | 4.4919  | 3.9051  | 3.97856 | 6.45295 | 1.21347  | 5.62288 | 2.84309 | 3.47134 | 8.02753 | 8.05833 | 12.7322 | 3.67698 | 6.60742 | 5.07812 | 3.52348 |
| COPS5  | 6.34141 | 6.65745 | 6.24899 | 12.9899 | 6.22893  | 9.99196 | 4.43653 | 4.66881 | 12.039  | 13.8895 | 21.09   | 8.14072 | 13.598  | 9.62609 | 7.96869 |
| COPS6  | 11.1411 | 9.08487 | 9.01521 | 18.4604 | 10.4189  | 23.0249 | 11.8491 | 6.92804 | 14.795  | 17.4281 | 30.1224 | 12.3644 | 22.0466 | 13.3094 | 11.5919 |
| COPS7A | 6.9881  | 6.07119 | 6.05514 | 12.6853 | 11.0109  | 15.9356 | 6.58022 | 5.45198 | 9.72127 | 10.1947 | 14.9614 | 7.0117  | 10.6952 | 7.83981 | 7.15198 |
| COPS7B | 2.96581 | 3.35379 | 3.15742 | 4.40917 | 4.88385  | 5.22317 | 2.8589  | 2.46293 | 1.35204 | 2.32904 | 3.38463 | 2.26707 | 2.91212 | 3.60832 | 2.42058 |
| COPS8  | 5.17056 | 3.95051 | 4.16207 | 7.06345 | 1.48563  | 10.3154 | 3.65137 | 4.23215 | 3.87052 | 7.69002 | 12.5062 | 3.7068  | 6.44711 | 4.96741 | 5.83745 |
| COPS9  | 7.23074 | 6.24618 | 5.09129 | 16.6875 | 8.9055   | 15.0435 | 7.29398 | 4.47122 | 16.672  | 14.7144 | 27.3144 | 13.4954 | 11.0516 | 10.6891 | 5.88105 |
| COPZ1  | 13.2099 | 11.2501 | 13.0226 | 27.2379 | 10.6068  | 21.4427 | 15.2265 | 10.8133 | 15.3906 | 20.1028 | 33.8857 | 13.0263 | 25.5245 | 14.6106 | 11.4023 |
| COPZ2  | 6.62309 | 5.6178  | 7.22906 | 6.20245 | 10.1706  | 18.5052 | 10.4373 | 6.22176 | 3.18967 | 12.6744 | 27.4618 | 5.13542 | 7.34403 | 5.85694 | 12.5857 |

|             |          |           |          |           |          |          |          |          |           |           |          |           |           |           |          |
|-------------|----------|-----------|----------|-----------|----------|----------|----------|----------|-----------|-----------|----------|-----------|-----------|-----------|----------|
| COQ10A      | 1.11548  | 0.982247  | 0.922806 | 0.845637  | 1.01574  | 1.50661  | 1.03939  | 0.809031 | 0.515305  | 0.933363  | 1.33161  | 0.65137   | 0.926514  | 0.884551  | 1.2337   |
| COQ10B      | 3.37414  | 2.61671   | 2.91788  | 2.95163   | 0.884537 | 3.73423  | 2.13488  | 3.04398  | 6.16917   | 5.39761   | 7.42611  | 2.88863   | 7.08483   | 2.92284   | 2.97821  |
| COQ2        | 3.12138  | 2.37873   | 2.35591  | 3.61396   | 1.91239  | 2.99667  | 3.19474  | 2.91771  | 6.16422   | 3.46503   | 5.08193  | 3.01648   | 3.72291   | 3.55522   | 1.66092  |
| COQ3        | 2.21368  | 1.46325   | 1.33187  | 2.28126   | 0.937804 | 2.4613   | 1.19065  | 1.18691  | 0.891245  | 1.60734   | 2.49897  | 1.13887   | 2.28993   | 2.33306   | 1.15605  |
| COQ4        | 7.74145  | 9.79395   | 8.8566   | 10.9111   | 15.274   | 14.6147  | 10.1074  | 5.79417  | 11.4812   | 5.94384   | 11.2012  | 6.62426   | 6.49166   | 6.25232   | 5.21287  |
| COQ5        | 2.14714  | 2.32768   | 2.20764  | 4.61503   | 2.64437  | 4.23111  | 2.18887  | 1.89457  | 3.10061   | 3.52259   | 7.46199  | 1.54731   | 3.41383   | 2.84554   | 2.09241  |
| COQ6        | 1.67231  | 1.43154   | 1.42077  | 1.87702   | 1.59256  | 3.00107  | 1.57278  | 1.03656  | 1.58807   | 1.29451   | 2.97057  | 1.40409   | 1.34464   | 1.92997   | 1.94039  |
| COQ7        | 2.34541  | 2.18721   | 2.10024  | 2.46899   | 1.68451  | 4.11584  | 1.90045  | 2.03958  | 1.44358   | 1.56155   | 3.38788  | 1.55189   | 2.16952   | 1.96393   | 1.78677  |
| COQ8A       | 5.20798  | 4.40459   | 5.46735  | 3.8988    | 5.72924  | 9.65756  | 4.53654  | 3.91094  | 1.0025    | 1.23181   | 2.03716  | 0.906127  | 1.45028   | 1.34855   | 3.18269  |
| COQ8B       | 2.65075  | 2.90268   | 3.11298  | 4.22166   | 8.1631   | 6.71596  | 2.96304  | 1.70504  | 2.81066   | 2.629     | 3.08653  | 2.57975   | 3.28895   | 2.73204   | 3.56722  |
| COQ9        | 5.02872  | 4.88544   | 4.81756  | 8.48644   | 7.49207  | 9.04213  | 4.56827  | 3.76281  | 6.34135   | 5.17651   | 8.05888  | 4.89235   | 6.4448    | 5.5071    | 2.87301  |
| CORIN       | 0.265362 | 1.725     | 2.404    | 0.201735  | 0.864942 | 0.559325 | 0.521526 | 1.13663  | 0.529805  | 0.163798  | 0.279917 | 0.249015  | 0.224538  | 0.263738  | 0.26864  |
| CORO1A      | 3.38589  | 2.59727   | 4.01061  | 7.16691   | 8.66535  | 10.3273  | 2.3177   | 2.96567  | 1.40633   | 5.74869   | 13.5614  | 1.27269   | 9.33158   | 2.66802   | 6.56902  |
| CORO1B      | 8.33808  | 8.31642   | 8.9682   | 18.9808   | 23.0879  | 23.2006  | 9.34659  | 5.15489  | 15.3106   | 15.2499   | 21.6371  | 10.5264   | 22.4462   | 14.2287   | 10.2782  |
| CORO1C      | 17.5386  | 14.7463   | 16.2711  | 26.0213   | 11.3572  | 28.8345  | 18.5403  | 11.9839  | 26.5747   | 31.7881   | 30.0667  | 19.2504   | 64.1493   | 24.4471   | 22.4562  |
| CORO2A      | 2.82105  | 3.46      | 3.84307  | 4.24063   | 3.20228  | 3.93163  | 2.5419   | 2.84284  | 4.45371   | 2.93546   | 2.07772  | 2.67703   | 3.42241   | 2.2305    | 1.04459  |
| CORO2B      | 0.789088 | 0.602188  | 0.889371 | 0.327454  | 0.904898 | 2.1645   | 1.85029  | 0.809526 | 0.0773976 | 0.152878  | 0.388596 | 0.0227361 | 0.143509  | 0.0636609 | 0.524784 |
| CORO6       | 0.798036 | 1.56021   | 1.05377  | 0.4112    | 4.88699  | 0.692585 | 1.90996  | 0.845618 | 0.616794  | 1.20387   | 0.571715 | 0.977317  | 0.277248  | 0.51334   | 0.727321 |
| CORO7       | 1.48959  | 1.3915    | 1.84106  | 2.48499   | 2.7789   | 4.5133   | 1.90805  | 1.08684  | 1.07119   | 2.1538    | 2.4013   | 1.21209   | 4.2235    | 1.87699   | 2.7079   |
| CORO7-PAM16 | 0.671506 | 0.309711  | 0.132671 | 0.965855  | 1.6088   | 1.61045  | 0.827308 | 0.501664 | 0.331215  | 0.296769  | 0.422605 | 0.803926  | 0.728548  | 0.539478  | 1.01908  |
| CORT        | 0.120341 | 0.0869194 | 0.199147 | 0.0664764 | 0.253133 | 0.246384 | 0.155163 | 0.127932 | 0.0477651 | 0.0694263 | 1.24E-30 | 0.126084  | 0.0499439 | 0.223968  | 0.215505 |
| COTL1       | 6.50198  | 3.36681   | 3.87445  | 17.5727   | 9.42262  | 23.7045  | 4.03897  | 4.59395  | 3.74696   | 19.5731   | 47.2877  | 3.85021   | 28.7545   | 14.309    | 19.5876  |
| COX10       | 2.50188  | 2.16314   | 1.95714  | 3.31749   | 1.81086  | 3.59312  | 2.08223  | 1.67817  | 1.85104   | 1.84524   | 2.98416  | 1.9042    | 3.54107   | 2.62655   | 1.84991  |
| COX10-AS1   | 1.66668  | 2.37468   | 2.48183  | 1.9752    | 1.86773  | 1.77395  | 2.22918  | 2.31703  | 1.75435   | 1.4643    | 1.80084  | 2.1466    | 1.40561   | 1.91015   | 1.77808  |
| COX11       | 2.91356  | 2.37047   | 2.75234  | 2.8996    | 1.09839  | 3.25438  | 2.04134  | 3.04877  | 2.24596   | 2.31373   | 3.6461   | 1.75532   | 3.25157   | 2.2538    | 1.8493   |
| COX14       | 6.41705  | 3.73922   | 3.67962  | 7.35302   | 4.57011  | 10.1588  | 5.05203  | 2.92352  | 6.03775   | 6.54211   | 16.2925  | 4.19373   | 3.97584   | 3.487     | 2.96099  |

|         |           |           |          |          |           |           |           |          |           |           |           |           |           |           |          |
|---------|-----------|-----------|----------|----------|-----------|-----------|-----------|----------|-----------|-----------|-----------|-----------|-----------|-----------|----------|
| COX15   | 2.02925   | 2.64975   | 2.75098  | 2.85898  | 1.81886   | 3.51911   | 2.08336   | 2.1332   | 1.41739   | 1.64931   | 2.35934   | 1.66009   | 2.16355   | 2.06932   | 2.08573  |
| COX16   | 5.35003   | 3.83786   | 3.46778  | 7.55629  | 3.78963   | 6.31198   | 2.46231   | 3.48052  | 4.9411    | 7.44783   | 13.5885   | 4.27211   | 5.79137   | 4.40985   | 3.23261  |
| COX17   | 6.94839   | 6.85384   | 5.70293  | 15.6178  | 7.05385   | 14.3486   | 5.24732   | 5.25131  | 20.856    | 16.3432   | 34.1548   | 10.609    | 15.0377   | 13.4681   | 8.25016  |
| COX18   | 1.36196   | 1.12318   | 1.28706  | 1.00928  | 0.87159   | 1.52454   | 1.10658   | 1.11519  | 0.646089  | 1.04996   | 2.2803    | 0.748224  | 1.01366   | 1.06373   | 0.974307 |
| COX19   | 1.817     | 2.19092   | 2.25864  | 1.37022  | 2.66072   | 1.75666   | 2.3177    | 1.78721  | 1.00848   | 1.16995   | 1.11105   | 1.09697   | 1.40434   | 1.37995   | 1.50858  |
| COX20   | 6.17091   | 6.17452   | 6.57888  | 4.70074  | 1.48396   | 4.99797   | 4.26478   | 7.36579  | 3.2913    | 4.02919   | 5.64485   | 3.33775   | 4.18134   | 5.07842   | 4.33841  |
| COX41   | 74.911    | 46.2506   | 50.7901  | 84.7084  | 73.79     | 110.007   | 51.8166   | 42.1301  | 68.4775   | 67.0703   | 138.943   | 45.0107   | 60.6019   | 50.7434   | 32.9541  |
| COX42   | 1.28573   | 0.309741  | 0.251915 | 0.906563 | 1.99718   | 2.65052   | 0.965789  | 0.390905 | 0.70052   | 0.552061  | 2.75007   | 0.653663  | 0.327451  | 0.990281  | 2.42956  |
| COX5A   | 20.8257   | 14.4567   | 11.8508  | 37.9608  | 10.4715   | 43.2815   | 19.7579   | 13.8276  | 45.3389   | 30.0668   | 65.4669   | 30.1688   | 37.3392   | 25.2607   | 15.3432  |
| COX5B   | 67.2294   | 35.6601   | 39.6939  | 73.1072  | 41.7864   | 94.901    | 57.0863   | 36.6552  | 55.5341   | 76.4423   | 175.43    | 43.9072   | 43.5535   | 46.3224   | 25.9967  |
| COX6A1  | 68.0535   | 47.2149   | 45.6213  | 93.3553  | 72.0868   | 139.079   | 69.0165   | 41.7106  | 127.87    | 104.406   | 259.612   | 77.0942   | 95.4903   | 76.8449   | 43.8115  |
| COX6A2  | 0         | 0.0253424 | 0        | 0        | 0         | 0         | 0         | 0        | 0         | 0         | 0         | 0         | 0         | 0         | 0        |
| COX6B1  | 67.3899   | 45.7452   | 47.04    | 106.297  | 64.1633   | 134.106   | 68.0634   | 41.3038  | 99.285    | 102.617   | 206.81    | 81.1007   | 80.9621   | 68.5581   | 43.9292  |
| COX6B2  | 0.250496  | 0.452879  | 0.391431 | 0.157754 | 0.499318  | 0.154046  | 0.0635574 | 0.284459 | 0.0169487 | 0.349756  | 0.0157099 | 0.179443  | 0.0448941 | 0.1091    | 0.179872 |
| COX6C   | 31.3348   | 15.7151   | 15.4453  | 36.7713  | 8.66527   | 38.8985   | 14.0871   | 16.1236  | 26.1658   | 47.0238   | 97.7229   | 21.7736   | 25.2916   | 25.6883   | 16.2032  |
| COX7A1  | 5.40612   | 1.99015   | 2.18591  | 2.91078  | 3.77419   | 5.06874   | 4.8548    | 1.67348  | 0.887736  | 3.43074   | 9.80568   | 1.04312   | 1.46966   | 2.5715    | 5.01598  |
| COX7A2  | 31.2157   | 18.4712   | 18.8156  | 45.0104  | 9.77397   | 43.3848   | 22.9195   | 17.5671  | 38.0547   | 50.6206   | 108.381   | 28.2655   | 37.7051   | 36.3666   | 17.3676  |
| COX7A2L | 5.21556   | 4.48529   | 4.65271  | 7.73297  | 3.70456   | 7.34461   | 4.5977    | 3.98806  | 4.97661   | 7.7676    | 13.9978   | 4.09867   | 7.3005    | 6.10023   | 4.08652  |
| COX7B   | 9.74394   | 5.21034   | 4.86473  | 11.6028  | 2.01515   | 7.78887   | 3.3949    | 4.40134  | 14.3811   | 15.9853   | 34.5705   | 8.44235   | 10.4107   | 9.04198   | 6.20122  |
| COX7B2  | 0         | 0         | 0        | 0        | 0         | 0         | 0         | 0        | 0         | 0         | 0         | 0         | 0         | 0         | 0        |
| COX7C   | 94.733    | 52.8767   | 52.9208  | 114.56   | 17.4004   | 79.7924   | 54.9905   | 49.3219  | 100.346   | 117.258   | 244.823   | 65.1394   | 79.9419   | 84.0449   | 48.0988  |
| COX8A   | 60.8932   | 43.3271   | 41.3121  | 90.8354  | 57.1499   | 140.546   | 68.0665   | 39.8371  | 82.6667   | 83.5313   | 190.815   | 72.2476   | 82.0512   | 67.7781   | 35.8585  |
| COX8C   | 0         | 0.013786  | 0        | 0        | 0.0677008 | 0         | 0         | 0        | 0         | 0         | 0         | 0         | 0         | 0         | 0        |
| CP      | 1.55156   | 1.0673    | 1.80247  | 0.801282 | 0.126604  | 7.04401   | 1.48825   | 1.82875  | 0.0500137 | 0.103969  | 0.103571  | 0.0300639 | 0.226944  | 0.0621824 | 0.323564 |
| CPA1    | 0         | 0         | 0        | 0        | 0         | 0.0392289 | 0         | 0        | 0         | 0.0192747 | 0.0520085 | 0.0109884 | 0         | 0         | 0        |
| CPA2    | 0.0174139 | 0.0251708 | 0.028812 | 0        | 0.0270498 | 0.0148277 | 0         | 0        | 0.127249  | 0         | 0         | 0.0498404 | 0         | 0.0182025 | 0        |



|          |           |            |           |            |           |            |            |            |           |           |           |            |           |            |           |
|----------|-----------|------------|-----------|------------|-----------|------------|------------|------------|-----------|-----------|-----------|------------|-----------|------------|-----------|
| CPN2     | 0.0382151 | 0.00368252 | 0         | 0.00787635 | 0.0237445 | 0.0130159  | 0          | 0.00679248 | 0         | 0         | 0.017256  | 0          | 0.0641061 | 0.0319566  | 0.065858  |
| CPNE1    | 7.75855   | 8.37337    | 8.23771   | 15.4653    | 15.6428   | 6.00793    | 10.3486    | 6.55242    | 5.53883   | 10.8662   | 15.0904   | 10.4644    | 14.4025   | 13.024     | 10.5011   |
| CPNE2    | 4.31218   | 3.14889    | 3.03694   | 7.02273    | 5.75058   | 11.9134    | 4.48665    | 2.4354     | 2.12841   | 5.6718    | 11.3468   | 2.17537    | 5.90466   | 5.67486    | 6.5047    |
| CPNE3    | 9.59219   | 9.18601    | 9.68693   | 15.1806    | 3.3998    | 14.034     | 9.34944    | 11.1211    | 8.79063   | 12.2243   | 14.8192   | 9.39301    | 17.9157   | 10.2405    | 7.49594   |
| CPNE4    | 0.0256234 | 0.0222223  | 0.016958  | 0.121466   | 0.0875644 | 0.00872719 | 0.00585119 | 0          | 0         | 0.038592  | 0.0289256 | 0.00366684 | 0.122337  | 0.0455325  | 0.0735969 |
| CPNE5    | 0.250559  | 0.212001   | 0.141557  | 0.932068   | 0.417682  | 0.962665   | 0.307012   | 0.217244   | 0.0967555 | 0.47555   | 0.841649  | 0.35419    | 0.753094  | 0.651571   | 1.30769   |
| CPNE6    | 0.0191661 | 0.0323208  | 0.0237833 | 0          | 0.0744289 | 0.0815984  | 0.0765913  | 0.0170332  | 0         | 0         | 0         | 0          | 0         | 0.0200341  | 0         |
| CPNE7    | 0.296147  | 0.369311   | 0.518811  | 0.430854   | 0.18942   | 0.660081   | 0.507198   | 0.25545    | 0.0424323 | 0.185848  | 0.0589965 | 0.112183   | 0.0393385 | 0.109256   | 0         |
| CPNE8    | 1.93918   | 1.20496    | 1.4438    | 2.30847    | 0.415477  | 2.67605    | 1.51932    | 1.71743    | 0.23617   | 2.13173   | 3.11001   | 0.861226   | 3.23141   | 2.04097    | 3.34188   |
| CPNE9    | 0.0106601 | 0.0770429  | 0.0881878 | 0          | 0.0165588 | 0.0363077  | 0.0486854  | 0.0852642  | 0.0259656 | 0         | 0.0240678 | 0.0152552  | 0         | 0.0222857  | 0.0765462 |
| CPO      | 0.0574269 | 0.0461153  | 0.0475076 | 0.0197267  | 0.0594692 | 0          | 0.0218561  | 0.0170121  | 0.0233132 | 0.0240256 | 0         | 0          | 0         | 0.0300138  | 0         |
| CPOX     | 1.60609   | 1.79053    | 1.79512   | 2.5179     | 2.65405   | 2.997      | 1.01443    | 1.26033    | 0.74912   | 2.70204   | 3.7033    | 1.50985    | 2.2654    | 2.37982    | 2.23293   |
| CPPED1   | 2.34708   | 1.81154    | 1.63624   | 2.77593    | 1.55665   | 3.06672    | 1.42379    | 1.49328    | 1.62424   | 2.64319   | 5.42668   | 1.67131    | 3.40058   | 2.08713    | 2.54833   |
| CPQ      | 6.54275   | 4.65136    | 5.70732   | 4.52763    | 4.26078   | 10.7883    | 5.58578    | 5.0654     | 1.54739   | 6.00611   | 14.0212   | 1.21498    | 1.76975   | 3.5995     | 11.2209   |
| CPS1     | 0.829486  | 0.866227   | 0.540274  | 1.67867    | 1.08442   | 0.885269   | 0.548536   | 0.673801   | 0.571392  | 0.928031  | 1.07197   | 0.921163   | 0.973495  | 0.749354   | 1.00798   |
| CPS1-IT1 | 0.0100404 | 0.0290256  | 0.0415305 | 0.0206938  | 0.0467885 | 0.0256477  | 0.0229275  | 0.0178461  | 0.0244561 | 0.0126017 | 0.0113343 | 0.0359208  | 0         | 0.00524754 | 0         |
| CPSF1    | 8.05938   | 5.12872    | 5.44034   | 6.88847    | 15.6228   | 10.8747    | 8.47872    | 6.68654    | 4.4091    | 4.072     | 2.90672   | 6.70633    | 6.67179   | 6.8337     | 7.69154   |
| CPSF2    | 3.69327   | 4.42871    | 4.31364   | 7.621      | 2.95332   | 6.50547    | 3.54815    | 3.97756    | 5.62111   | 6.72548   | 7.0853    | 4.46904    | 8.99856   | 6.10133    | 4.50055   |
| CPSF3    | 3.178     | 3.0408     | 2.94179   | 5.94258    | 1.91092   | 6.43225    | 2.31174    | 2.84143    | 3.01208   | 4.22999   | 5.02693   | 3.19085    | 6.2918    | 3.91466    | 3.28498   |
| CPSF4    | 3.76879   | 3.70784    | 3.88326   | 4.62806    | 5.29334   | 6.89856    | 2.43498    | 2.41677    | 3.7929    | 3.51226   | 5.1971    | 3.06806    | 4.67392   | 4.02791    | 3.12755   |
| CPSF4L   | 0.0357698 | 0.0344689  | 0.0591826 | 0          | 0         | 0.152288   | 0          | 0          | 0         | 0.0897895 | 0         | 0          | 0         | 0          | 0         |
| CPSF6    | 5.61807   | 5.2945     | 5.769     | 5.84985    | 2.43153   | 7.9034     | 5.12609    | 7.18512    | 3.17596   | 3.40686   | 4.8391    | 3.05488    | 4.77445   | 4.64628    | 4.10575   |
| CPSF7    | 9.77453   | 11.1652    | 11.71     | 14.0174    | 11.3373   | 15.5579    | 12.5352    | 10.5597    | 10.9916   | 8.2352    | 10.5835   | 9.34559    | 14.452    | 10.6251    | 9.68762   |
| CPT1A    | 9.14262   | 2.49821    | 3.0795    | 4.00547    | 4.84581   | 8.73351    | 4.29017    | 4.29668    | 3.04696   | 4.90457   | 5.77956   | 2.92671    | 8.05407   | 5.06296    | 8.61748   |
| CPT1B    | 0.899923  | 2.70519    | 1.86452   | 1.77044    | 4.20049   | 3.01032    | 1.42296    | 1.0408     | 0.885632  | 0.9379    | 0.385372  | 1.70368    | 0.521387  | 0.836461   | 1.06592   |
| CPT1C    | 0.161685  | 0.283282   | 0.291835  | 0.446848   | 0.936116  | 0.581981   | 0.34404    | 0.195944   | 0.966672  | 0.581123  | 0.978985  | 0.446985   | 0.516851  | 0.568481   | 0.770484  |

|         |           |            |            |           |           |            |            |            |            |            |            |            |            |           |           |
|---------|-----------|------------|------------|-----------|-----------|------------|------------|------------|------------|------------|------------|------------|------------|-----------|-----------|
| CPT2    | 2.51328   | 2.02542    | 2.06678    | 4.40916   | 2.83503   | 5.00608    | 2.28883    | 2.15382    | 4.12673    | 3.33279    | 5.08325    | 2.36029    | 3.40717    | 2.75611   | 2.39551   |
| CPTP    | 4.6856    | 4.79993    | 4.70564    | 9.77692   | 17.1795   | 10.3337    | 6.73553    | 3.51703    | 19.8957    | 9.85449    | 11.937     | 9.74842    | 21.2708    | 8.15748   | 3.47064   |
| CPVL    | 2.95373   | 3.1842     | 4.27963    | 3.69012   | 1.84552   | 6.96199    | 3.0145     | 4.12821    | 0.884255   | 3.90398    | 11.8661    | 0.619873   | 3.91791    | 1.42732   | 6.04298   |
| CPXCR1  | 0         | 0          | 0          | 0         | 0         | 0          | 0          | 0          | 0          | 0          | 0          | 0          | 0          | 0         | 0         |
| CPXM1   | 3.11466   | 2.01177    | 2.68836    | 4.5811    | 18.3788   | 39.0272    | 2.10291    | 7.61862    | 0.716384   | 11.7155    | 29.0977    | 0.648579   | 5.76747    | 8.27543   | 40.0076   |
| CPXM2   | 4.13269   | 1.62888    | 1.72228    | 5.28354   | 7.47171   | 8.5883     | 3.17883    | 1.33104    | 2.49008    | 1.75498    | 2.5396     | 2.41455    | 7.63028    | 4.70636   | 12.2093   |
| CPZ     | 0.783583  | 2.98963    | 4.54519    | 0.394363  | 2.75988   | 6.58677    | 1.26918    | 1.27131    | 0.0221934  | 0.537482   | 1.39885    | 0.215143   | 0.417384   | 0.542872  | 3.07501   |
| CR1     | 0.19248   | 0.0581813  | 0.0557159  | 1.1694    | 0.404227  | 2.7836     | 0.141024   | 0.157375   | 0.00848454 | 0.74624    | 1.43638    | 0.00830798 | 0.357451   | 0.101984  | 0.940098  |
| CR1L    | 0.0417762 | 0.0121401  | 0.0208444  | 0.108299  | 4.55E-40  | 0.0345913  | 0          | 0.0221972  | 0          | 1.09E-42   | 0.0152573  | 0          | 0.0279999  | 7.79E-18  | 0.0200746 |
| CR2     | 0.0332994 | 0.00534805 | 0.00459126 | 0         | 0.0086209 | 0.00472566 | 0.00633669 | 0.00493228 | 0          | 0.00696569 | 0          | 0          | 0.0286461  | 0.0116025 | 0         |
| CRABP1  | 0.239824  | 0.823301   | 0.917598   | 3.86166   | 2.79398   | 2.29733    | 1.50603    | 0.239778   | 0.0730198  | 0.0752511  | 0.169207   | 0.171601   | 0.909059   | 0.517039  | 0.861045  |
| CRABP2  | 44.4172   | 60.9739    | 37.2545    | 86.0954   | 220.516   | 48.6724    | 47.3087    | 44.7389    | 246.872    | 92.6303    | 200.514    | 147.518    | 72.8373    | 40.7351   | 60.0195   |
| CRACR2A | 2.03201   | 0.850922   | 1.07743    | 0.365403  | 2.13958   | 1.69539    | 2.25001    | 1.92708    | 0.0249136  | 0.196841   | 0.246323   | 0.0731856  | 0.334359   | 0.281541  | 0.979268  |
| CRACR2B | 2.74429   | 1.36489    | 2.17611    | 0.195488  | 4.22353   | 1.71216    | 1.63165    | 1.78702    | 0.0770099  | 0.190472   | 0.513947   | 0.0723911  | 0.155029   | 0.125582  | 0.581182  |
| CRADD   | 1.10205   | 0.933128   | 0.992137   | 1.47807   | 1.19579   | 1.47657    | 1.101      | 0.820976   | 0.91781    | 1.17978    | 2.90894    | 0.898711   | 0.873112   | 0.965614  | 1.17537   |
| CRAMP1  | 2.9287    | 4.19404    | 4.19191    | 3.68327   | 7.07926   | 4.87706    | 4.16351    | 2.89764    | 2.54931    | 2.08208    | 1.37898    | 3.21132    | 3.11946    | 3.14173   | 3.71218   |
| CRAT    | 2.96631   | 4.45389    | 1.97408    | 2.6407    | 13.1273   | 7.40848    | 3.58804    | 2.30342    | 19.0644    | 2.77384    | 5.24669    | 4.50234    | 4.09768    | 3.40381   | 5.3988    |
| CRAT37  | 0         | 0          | 0          | 0         | 0         | 0.0276511  | 0.0247184  | 0.00962003 | 0          | 0          | 0          | 0          | 0          | 0.0169723 | 0         |
| CRB1    | 0.058013  | 0.0199654  | 0.0239962  | 0         | 0         | 0.0246987  | 0.0141937  | 0.0257786  | 0          | 0.00520088 | 0.00467782 | 0          | 0          | 0         | 0         |
| CRB2    | 0.101012  | 0.141022   | 0.120808   | 0.0771083 | 0.174341  | 0.0573405  | 0.187949   | 0.136319   | 0.0182254  | 0.0140868  | 0.00844669 | 0.0535385  | 0.00761753 | 0.0508382 | 0.166558  |
| CRB3    | 2.41259   | 4.13305    | 5.33464    | 3.95959   | 9.25333   | 3.58867    | 4.8631     | 2.475      | 11.5899    | 4.76638    | 4.84181    | 4.73128    | 6.46658    | 2.5452    | 0.834117  |
| CRBN    | 6.64548   | 5.4742     | 5.74883    | 4.72202   | 1.59558   | 4.22107    | 3.93657    | 6.05675    | 4.81909    | 4.47307    | 7.29018    | 2.63955    | 3.4347     | 2.73562   | 3.9509    |
| CRCP    | 5.66103   | 5.91292    | 6.17661    | 6.20101   | 6.93651   | 8.16427    | 5.60483    | 5.11554    | 4.55135    | 4.73017    | 6.62303    | 3.79573    | 7.64721    | 4.99469   | 4.20713   |
| CRCT1   | 32.034    | 38.4738    | 40.798     | 432.964   | 182.177   | 64.3635    | 97.9779    | 29.9784    | 876.431    | 580.186    | 718.549    | 313.82     | 1016.95    | 185.541   | 42.5138   |
| CREB1   | 2.64417   | 2.86545    | 3.15905    | 2.60227   | 0.82146   | 2.86875    | 2.10325    | 3.42692    | 2.03416    | 3.33528    | 3.49239    | 2.17262    | 3.4106     | 2.88829   | 2.58853   |
| CREB3   | 4.24603   | 2.94166    | 3.26775    | 6.14612   | 7.01703   | 9.84835    | 5.16149    | 2.77265    | 3.3583     | 4.36481    | 10.1839    | 2.47232    | 6.93242    | 4.3153    | 5.04063   |

|         |           |            |           |           |           |           |           |            |           |           |           |          |            |            |           |
|---------|-----------|------------|-----------|-----------|-----------|-----------|-----------|------------|-----------|-----------|-----------|----------|------------|------------|-----------|
| CREB3L1 | 1.40908   | 1.65409    | 2.32431   | 1.63691   | 9.03372   | 7.54791   | 3.12018   | 2.10989    | 0.52003   | 3.56923   | 12.1662   | 0.788255 | 1.86234    | 3.07076    | 13.221    |
| CREB3L2 | 7.13984   | 3.7924     | 3.64763   | 6.4496    | 5.89447   | 10.0154   | 7.56355   | 4.739      | 4.57778   | 6.75282   | 8.29021   | 5.60211  | 7.58676    | 6.45914    | 10.5548   |
| CREB3L3 | 0         | 0          | 0.0146261 | 0         | 0         | 0.0451627 | 0         | 0          | 0         | 0         | 0         | 0        | 0.011407   | 0.00462016 | 0         |
| CREB3L4 | 1.87614   | 1.77358    | 1.66013   | 1.34605   | 2.10272   | 3.5388    | 1.32866   | 1.40354    | 0.795387  | 0.953824  | 1.67558   | 0.467302 | 0.574594   | 0.558544   | 0.90381   |
| CREB5   | 1.06607   | 0.997377   | 1.31861   | 1.12528   | 0.273317  | 0.839444  | 1.33538   | 1.19119    | 0.482156  | 0.88011   | 1.44883   | 0.58321  | 0.732898   | 1.29421    | 2.56407   |
| CREBBP  | 8.07372   | 9.91986    | 10.4682   | 8.52354   | 8.58202   | 13.6817   | 10.9419   | 8.34918    | 6.10112   | 5.3359    | 5.48351   | 6.10502  | 9.67301    | 6.64468    | 8.70026   |
| CREBL2  | 5.76604   | 5.337      | 6.07557   | 5.22902   | 3.77122   | 7.79351   | 4.76089   | 5.40487    | 4.53129   | 5.52295   | 9.68834   | 2.5102   | 4.76579    | 3.15633    | 4.35829   |
| CREBRF  | 3.01542   | 2.00971    | 2.35611   | 1.28132   | 1.00283   | 2.35495   | 1.99598   | 2.90416    | 1.18424   | 1.56722   | 2.15339   | 0.825028 | 1.44844    | 1.02891    | 1.88102   |
| CREBZF  | 3.64181   | 4.58092    | 4.97658   | 3.11697   | 5.88948   | 3.58222   | 3.01041   | 3.53517    | 2.09113   | 2.3736    | 2.87985   | 2.21448  | 1.46854    | 3.96166    | 3.77776   |
| CREG1   | 25.9888   | 20.3465    | 21.7078   | 45.6734   | 19.5634   | 39.0033   | 20.8391   | 24.6304    | 129.668   | 40.4792   | 88.6465   | 34.2393  | 28.6985    | 20.3624    | 16.4787   |
| CREG2   | 0.0132701 | 0.00319687 | 0.010978  | 0.0615385 | 0.0412261 | 0.0112993 | 0         | 0.00589668 | 0.177776  | 0.599592  | 0.277135  | 0.379804 | 0.552236   | 0.235808   | 0.133403  |
| CRELD1  | 1.32132   | 1.67067    | 1.81518   | 2.88836   | 3.89345   | 2.4411    | 1.6915    | 1.31661    | 1.97982   | 1.10559   | 1.18424   | 1.55854  | 2.21652    | 1.50671    | 2.5071    |
| CRELD2  | 3.52848   | 3.44539    | 3.09658   | 8.25406   | 10.0033   | 10.567    | 3.72234   | 2.01503    | 4.52605   | 7.51008   | 9.61728   | 5.33742  | 10.1105    | 5.32205    | 4.33517   |
| CREM    | 0.566083  | 0.381847   | 0.387562  | 0.97764   | 0.333536  | 1.44271   | 0.383344  | 0.350427   | 0.413656  | 1.35729   | 2.43716   | 0.326832 | 1.07555    | 1.03041    | 1.05966   |
| CRH     | 0         | 0          | 0         | 0         | 0         | 0         | 0         | 0          | 0         | 0         | 0         | 0        | 0          | 0          | 0         |
| CRHBP   | 0.113323  | 0.0910012  | 0.0729156 | 0.0129758 | 0.117353  | 0.139379  | 0.057506  | 0.145473   | 0.0306699 | 0.0158035 | 0.0426425 | 0.018019 | 0.00812393 | 0.00658083 | 0.0723315 |
| CRHR1   | 0.0952378 | 0.0632255  | 0.0571493 | 3.50E-06  | 0.0602202 | 0.0443688 | 0.128817  | 0.00360687 | 0         | 0         | 0         | 0        | 0          | 9.22E-07   | 0.053488  |
| CRHR2   | 0.0709119 | 0.152196   | 0.106661  | 0.0332167 | 0.200274  | 0.120761  | 0.0809649 | 0.0687497  | 0.102065  | 0.0728195 | 0.0727733 | 0.156831 | 0.0540705  | 0.13477    | 0.296257  |
| CRIM1   | 14.1391   | 8.7242     | 10.6493   | 10.2055   | 10.2767   | 17.3389   | 10.5395   | 8.52982    | 3.53639   | 9.49421   | 9.81049   | 4.80169  | 20.4218    | 10.0822    | 12.4037   |
| CRIP1   | 51.1762   | 47.2621    | 69.1323   | 24.4483   | 36.7012   | 11.8318   | 129.688   | 33.0028    | 6.60417   | 76.6279   | 112.701   | 92.9132  | 104.023    | 65.4122    | 64.8039   |
| CRIP2   | 10.8234   | 7.18369    | 9.78331   | 10.8328   | 11.5858   | 13.0315   | 18.0813   | 5.77813    | 3.59836   | 20.4389   | 28.7241   | 15.9781  | 25.5367    | 16.1367    | 18.9688   |
| CRIP3   | 0.0484164 | 0.186622   | 0.280374  | 0         | 0.225622  | 0.0618389 | 0.0276402 | 0.0215142  | 0.0294829 | 0.0303838 | 0.0273281 | 0        | 0          | 0          | 0         |
| CRIPAK  | 3.53162   | 2.38423    | 2.31401   | 1.59427   | 3.1232    | 2.29748   | 2.44435   | 3.5969     | 0.767603  | 0.876049  | 0.67034   | 1.75546  | 1.03175    | 1.42925    | 1.97488   |
| CRIPT   | 2.50844   | 2.14921    | 1.86764   | 1.74208   | 0.615529  | 1.9997    | 2.3369    | 2.95946    | 1.51864   | 1.40079   | 1.72365   | 1.14454  | 1.13056    | 1.22172    | 1.79077   |
| CRISP1  | 0.0117657 | 0          | 0         | 0         | 0         | 0         | 0         | 0          | 0         | 0         | 0         | 0        | 0          | 0          | 0         |
| CRISP2  | 0.0327573 | 0.00789149 | 0.0270992 | 0         | 0         | 0.0418387 | 0.0374013 | 0.058224   | 0         | 0         | 0         | 0        | 0          | 0          | 0         |



|          |           |            |           |           |           |          |           |            |           |          |           |            |           |           |           |
|----------|-----------|------------|-----------|-----------|-----------|----------|-----------|------------|-----------|----------|-----------|------------|-----------|-----------|-----------|
| CRISP3   | 0.123594  | 0.133987   | 0.204492  | 0.180437  | 0.0479962 | 1.57859  | 0.811418  | 0.137301   | 0.865514  | 0.168051 | 0.313926  | 0.309523   | 0.0531617 | 0.0538299 | 0.0739572 |
| CRISPLD1 | 1.75655   | 0.589541   | 0.638882  | 0.327704  | 0.933031  | 1.0315   | 0.875997  | 1.00483    | 0.1168    | 0.614514 | 1.53278   | 0.115573   | 0.319152  | 0.403626  | 1.16708   |
| CRISPLD2 | 12.2952   | 4.24255    | 5.86591   | 19.3749   | 10.5364   | 44.7626  | 7.64678   | 14.2436    | 1.43723   | 20.6158  | 20.6318   | 6.3979     | 15.114    | 20.2058   | 44.1799   |
| CRK      | 10.2762   | 9.36327    | 9.95559   | 14.6204   | 6.97802   | 14.3535  | 7.25123   | 7.34056    | 12.4104   | 15.1674  | 17.0524   | 7.78937    | 21.923    | 14.2446   | 11.6456   |
| CRKL     | 7.82306   | 10.0053    | 10.574    | 13.7502   | 10.248    | 13.8593  | 9.52757   | 7.55485    | 17.8746   | 13.7515  | 12.5156   | 9.78651    | 18.7331   | 11.8752   | 7.7707    |
| CRLF1    | 6.3374    | 1.86051    | 2.15441   | 3.04069   | 12.375    | 19.3783  | 9.53549   | 2.47404    | 1.51552   | 6.73038  | 5.19906   | 3.45142    | 14.402    | 4.67999   | 8.34593   |
| CRLF2    | 0.0481745 | 0.0324957  | 0.0637654 | 0.0595743 | 0.0598654 | 0.016408 | 0.0110008 | 0.0171254  | 0         | 0.120928 | 0.130519  | 0.00689404 | 0.0808131 | 0.181282  | 0.0138369 |
| CRLF3    | 2.81715   | 3.30049    | 3.34159   | 4.21519   | 1.63444   | 4.10852  | 2.62154   | 3.21762    | 7.15948   | 5.34714  | 5.33956   | 3.17049    | 7.5644    | 4.43775   | 3.26698   |
| CRLS1    | 1.69013   | 1.45045    | 1.56819   | 2.50937   | 1.74758   | 2.02527  | 1.3432    | 1.27834    | 1.47028   | 1.94076  | 4.21608   | 0.955706   | 2.24061   | 1.93314   | 1.63046   |
| CRMP1    | 0.63067   | 0.751156   | 0.826428  | 0.618727  | 0.91695   | 0.927947 | 0.933221  | 0.520132   | 0.153617  | 1.6781   | 0.558167  | 0.444041   | 0.628262  | 0.833267  | 1.01441   |
| CRNDE    | 3.04771   | 2.24584    | 1.84714   | 3.42628   | 1.99999   | 2.99754  | 1.45146   | 1.89744    | 2.26279   | 2.65922  | 4.70997   | 1.36441    | 1.66142   | 1.62694   | 0.748988  |
| CRNKL1   | 2.97875   | 2.67836    | 2.91543   | 3.95602   | 1.45817   | 4.11717  | 1.99393   | 2.38628    | 2.6889    | 3.37004  | 4.16776   | 1.9325     | 4.14486   | 2.53535   | 2.75652   |
| CRNN     | 0.677476  | 0.285616   | 0.350285  | 0.0498684 | 0.432217  | 0.195721 | 0.48345   | 0.387054   | 0.810355  | 0.015184 | 0.163883  | 0.0865628  | 0.0312217 | 0.0316141 | 0         |
| CROCC    | 1.6191    | 2.27936    | 2.20275   | 1.34997   | 6.40796   | 1.68117  | 1.69517   | 1.18829    | 0.404166  | 0.727158 | 0.495804  | 0.729733   | 0.827798  | 1.77153   | 1.818     |
| CROCC2   | 0.0106758 | 0.00859066 | 0.0184376 | 0.0551223 | 0.0484677 | 0.105704 | 0         | 0.00792281 | 0         | 0.050351 | 0         | 0.060599   | 0.0287592 | 0.0256262 | 0.0576131 |
| CROCCP2  | 4.13608   | 3.64918    | 4.03521   | 2.18903   | 13.8243   | 5.63313  | 3.0584    | 3.29163    | 0.718614  | 1.89257  | 1.07588   | 1.23844    | 0.685254  | 3.78565   | 2.41034   |
| CROCCP3  | 1.03806   | 1.18151    | 1.24131   | 0.35413   | 1.28081   | 0.436434 | 0.882902  | 0.942896   | 0.155901  | 0.43506  | 0.177036  | 0.371758   | 0.147625  | 0.58916   | 1.13634   |
| CROT     | 3.91835   | 3.69964    | 3.30224   | 3.30483   | 2.45567   | 3.88927  | 1.57293   | 4.0543     | 2.7161    | 1.58026  | 2.43474   | 3.06628    | 1.92338   | 1.55215   | 1.62979   |
| CRP      | 0.114854  | 0.00553383 | 0         | 0.0473441 | 0.0178408 | 0.107576 | 0.0131136 | 0.0102073  | 0         | 0        | 0.0388967 | 0          | 0.0296412 | 0.0360166 | 0         |
| CRSP8P   | 0         | 0.0614441  | 0         | 0         | 0         | 0        | 6.29E-42  | 0.0328456  | 0         | 0        | 0         | 0          | 0         | 0         | 0         |
| CRTAC1   | 2.85898   | 0.64009    | 0.652669  | 3.37106   | 1.47192   | 2.83969  | 1.88742   | 0.794153   | 0.202245  | 0.389127 | 0.23859   | 0.270788   | 1.7176    | 0.763223  | 1.93966   |
| CRTAM    | 0.132296  | 0.042495   | 0.0510743 | 0.0363561 | 0.0274003 | 0.105139 | 0.0201402 | 0.0235148  | 0.0322244 | 0.121767 | 0.0497821 | 0.00631077 | 0.0967379 | 0.0276576 | 0.126663  |
| CRTAP    | 15.4148   | 11.2664    | 13.0343   | 10.4743   | 9.38861   | 24.5592  | 15.4428   | 9.91736    | 3.86488   | 9.08398  | 19.7189   | 3.65996    | 9.7345    | 8.00734   | 12.443    |
| CRTC1    | 1.39348   | 1.51346    | 1.5553    | 1.0881    | 2.49875   | 3.78792  | 2.05965   | 1.26489    | 0.858629  | 0.618992 | 1.12842   | 0.729448   | 0.77307   | 0.961828  | 2.59064   |
| CRTC2    | 5.51354   | 5.8793     | 5.87664   | 6.59916   | 7.00727   | 11.4204  | 6.60106   | 5.33775    | 5.65186   | 5.02193  | 6.95578   | 4.66856    | 6.41765   | 5.45159   | 5.34909   |
| CRTC3    | 5.46955   | 4.16215    | 5.11183   | 4.2149    | 4.31995   | 10.3465  | 5.88769   | 4.54749    | 2.51207   | 3.32452  | 4.98532   | 2.80669    | 4.61799   | 3.7684    | 5.89912   |

|           |           |           |           |            |          |            |           |           |           |           |           |           |           |           |           |
|-----------|-----------|-----------|-----------|------------|----------|------------|-----------|-----------|-----------|-----------|-----------|-----------|-----------|-----------|-----------|
| CRTC3-AS1 | 0.141548  | 0.1023    | 0         | 0.0364673  | 0        | 0.0903945  | 0.242422  | 0.0316664 | 0.0430973 | 0.0444142 | 0         | 0.0253203 | 0.0456629 | 0.22297   | 0         |
| CRX       | 0.336051  | 0.407897  | 0.27746   | 0.242415   | 0.464655 | 0.181064   | 0.335783  | 0.285872  | 0.0955626 | 0.171749  | 0.0175546 | 0.2754    | 0.0367613 | 0.319431  | 0.278887  |
| CRY1      | 3.59722   | 3.09402   | 4.06277   | 3.08437    | 2.61925  | 3.03307    | 2.96006   | 2.57876   | 3.15741   | 3.68598   | 4.46531   | 3.06657   | 4.91833   | 4.52023   | 6.18515   |
| CRY2      | 6.77127   | 11.12     | 16.4853   | 2.48979    | 4.18913  | 7.03339    | 15.0693   | 6.31438   | 7.28509   | 4.08306   | 2.81711   | 5.61844   | 4.2115    | 2.89648   | 6.85577   |
| CRYAA     | 0         | 0.0338412 | 0.0189536 | 0          | 0        | 0.00719456 | 0         | 0.0203614 | 0         | 0         | 0         | 0         | 0.014782  | 0         | 0         |
| CRYAA2    | 0         | 9.70E-17  | 0.0253562 | 0          | 0        | 0.0387778  | 0         | 0.0272395 | 0         | 0         | 0         | 0         | 0.0197755 | 0         | 0         |
| CRYAB     | 17.2482   | 8.91289   | 13.2673   | 14.4406    | 12.5483  | 17.0863    | 25.087    | 10.9541   | 16.8002   | 16.0431   | 15.6172   | 23.7882   | 27.5711   | 15.3424   | 7.12615   |
| CRYBA1    | 0.087885  | 0.155263  | 0.290819  | 0.0905681  | 0        | 0.0997772  | 0.133792  | 0.0781049 | 0         | 0.183841  | 0.0330704 | 0.0419227 | 0         | 0.0153108 | 0         |
| CRYBA2    | 0.0261503 | 0         | 0         | 0          | 0        | 0.0890667  | 0         | 0         | 0         | 0.262571  | 0         | 0.0374225 | 0.523034  | 0.0410019 | 0.187776  |
| CRYBA4    | 0         | 0         | 0         | 0          | 0        | 0          | 0.032582  | 0         | 0         | 0         | 0         | 0         | 0         | 0         | 0         |
| CRYBB1    | 0.175897  | 0.0363214 | 0.0415756 | 0.129477   | 0.117098 | 0.299548   | 0.143453  | 0.178655  | 0.0306033 | 0.0946153 | 0.397132  | 0         | 0.113488  | 0         | 0.108262  |
| CRYBB2    | 0.207568  | 0.276415  | 0.455287  | 1.14613    | 0.297092 | 1.20245    | 0.356349  | 0.114393  | 0.281107  | 0.819306  | 0.0731626 | 0.166164  | 0.15373   | 0.560526  | 0.0603412 |
| CRYBB2P1  | 3.05526   | 2.60073   | 2.23032   | 1.62598    | 3.03435  | 2.90722    | 2.86439   | 2.57275   | 1.04011   | 1.78962   | 1.98184   | 2.96045   | 2.2795    | 2.0117    | 1.98432   |
| CRYBB3    | 0.26817   | 0.103367  | 0.0665547 | 0.0276357  | 0.291592 | 0          | 0.0918563 | 0.119163  | 0.13064   | 0.100974  | 0.0908191 | 0.11513   | 0.0692087 | 0.252283  | 0.15405   |
| CRYBG1    | 16.1007   | 29.8061   | 22.1639   | 45.7038    | 41.9359  | 23.7376    | 20.8848   | 17.8624   | 93.0328   | 24.4792   | 20.3269   | 39.0713   | 30.901    | 19.3366   | 8.08213   |
| CRYBG2    | 2.98278   | 8.09779   | 7.76773   | 13.1639    | 15.8259  | 8.48354    | 6.63496   | 4.72134   | 10.135    | 11.3474   | 3.87028   | 13.8253   | 16.9844   | 10.2784   | 2.465     |
| CRYBG3    | 6.50244   | 7.22042   | 8.20578   | 8.87704    | 3.57393  | 6.70286    | 4.52153   | 6.35315   | 10.4141   | 7.7901    | 9.26321   | 5.98901   | 6.94827   | 7.22959   | 7.52894   |
| CRYGA     | 0         | 0         | 0         | 0          | 0        | 0          | 0         | 0         | 0         | 0         | 0         | 0         | 0         | 0         | 0         |
| CRYGB     | 0         | 0         | 0         | 0          | 0        | 0          | 0         | 0         | 0         | 0         | 0         | 0         | 0         | 0         | 0         |
| CRYGC     | 0         | 0         | 0         | 0          | 0        | 0          | 0         | 0         | 0         | 0         | 0         | 0.0263267 | 0         | 0         | 0         |
| CRYGD     | 0         | 0         | 0         | 0          | 0        | 0          | 0         | 0         | 0         | 0         | 0         | 0         | 0         | 0         | 0         |
| CRYGN     | 0         | 0         | 0         | 0.00902027 | 0        | 0.0670779  | 0         | 0         | 0         | 0         | 0.0296433 | 0         | 0.0169423 | 0         | 0         |
| CRYGS     | 0.579206  | 0.76441   | 1.02082   | 0.389275   | 0.938824 | 0.643286   | 0.345036  | 0.402848  | 0.214689  | 0.252857  | 0.540138  | 0.288304  | 0.0162479 | 0.71073   | 1.04881   |
| CRYL1     | 4.07046   | 2.01321   | 1.93879   | 5.4182     | 3.73622  | 8.37603    | 4.01377   | 2.1102    | 4.22503   | 6.52151   | 8.33719   | 1.89756   | 9.77877   | 2.90906   | 2.81213   |
| CRYM      | 0.460189  | 0.421995  | 0.417543  | 0.168278   | 0.345887 | 0.619368   | 0.457632  | 0.633256  | 0.0542379 | 0.186318  | 0.351917  | 0.0637311 | 0.0670445 | 0.0698269 | 0.469018  |
| CRYM-AS1  | 0.793533  | 0.871844  | 0.889139  | 0.351947   | 0.63972  | 0.427648   | 0.607843  | 0.919473  | 0.0978668 | 0.340393  | 0.181428  | 0.754663  | 0.103693  | 0.524981  | 0.360637  |

|                |           |           |           |           |           |            |           |            |            |          |          |           |           |           |          |
|----------------|-----------|-----------|-----------|-----------|-----------|------------|-----------|------------|------------|----------|----------|-----------|-----------|-----------|----------|
| CRYZ           | 1.89635   | 2.60176   | 2.43265   | 5.15024   | 2.10843   | 4.4646     | 3.57529   | 2.09904    | 3.32043    | 3.64268  | 4.29202  | 1.85281   | 4.94307   | 2.18108   | 3.25516  |
| CRYZL1         | 3.91131   | 3.45606   | 3.82911   | 2.74758   | 1.17728   | 2.45461    | 2.07065   | 2.82654    | 1.54939    | 2.53099  | 3.52925  | 1.25891   | 2.03456   | 2.39789   | 2.7211   |
| CRYZL2P        | 1.60692   | 1.2896    | 1.51785   | 0.984082  | 0.548883  | 2.02958    | 1.03448   | 1.26233    | 0.614823   | 1.00393  | 1.44054  | 0.756933  | 0.616787  | 0.80469   | 1.49104  |
| CRYZL2P-SEC16B | 0.130871  | 0.118666  | 0.083506  | 0.0563089 | 0.0795053 | 0.217053   | 0.228319  | 0.22845    | 0.00334242 | 0.106742 | 0.273081 | 0.0174357 | 0.104733  | 0.0473718 | 0.548909 |
| CS             | 23.3841   | 21.9079   | 23.6039   | 32.8493   | 16.6096   | 36.4786    | 29.2031   | 21.4039    | 36.075     | 27.1729  | 27.0035  | 24.8169   | 48.9798   | 21.9639   | 18.2822  |
| CSAD           | 4.92533   | 5.88124   | 3.77724   | 2.90829   | 12.2127   | 3.34728    | 3.63265   | 2.71878    | 2.74777    | 1.75664  | 1.4332   | 4.62418   | 0.478646  | 2.9939    | 3.14131  |
| CSAG1          | 0         | 0         | 0         | 0         | 0         | 0          | 0         | 0          | 0          | 0        | 0        | 0         | 0         | 0         | 0        |
| CSAG3          | 0         | 0.0514805 | 0.0441957 | 0.0110109 | 0         | 0.00909788 | 0         | 0.00949567 | 0          | 0        | 0        | 0         | 0         | 0         | 0        |
| CSAG4          | 0         | 0         | 0         | 0         | 0         | 0          | 0         | 0          | 0          | 0        | 0        | 0         | 0         | 0         | 0        |
| CSDC2          | 0.493962  | 0.237999  | 0.26486   | 0.150827  | 0.397856  | 0.841205   | 0.626656  | 0.219496   | 0.0445623  | 0.045924 | 0.103263 | 0.0785429 | 0.0118038 | 0.10996   | 0.302149 |
| CSDE1          | 58.8623   | 49.2159   | 49.794    | 71.4841   | 29.4821   | 78.4933    | 37.5134   | 51.2181    | 99.8407    | 73.2706  | 71.5794  | 50.5058   | 91.0021   | 51.4221   | 42.0374  |
| CSE1L          | 8.03312   | 8.16929   | 8.49449   | 18.5146   | 2.11911   | 11.58      | 6.8355    | 8.16755    | 10.347     | 12.1615  | 14.4582  | 8.26238   | 17.2899   | 12.4772   | 6.31491  |
| CSE1L-AS1      | 0.0814896 | 0         | 0         | 0.0419887 | 0         | 0.0346937  | 0         | 0.0362106  | 0          | 0        | 0        | 0         | 0         | 0         | 0        |
| CSF1           | 3.41848   | 2.49558   | 2.92151   | 2.54752   | 5.01754   | 9.1976     | 5.00523   | 2.37689    | 0.613604   | 1.9207   | 2.76406  | 0.828814  | 2.65519   | 1.75713   | 3.94237  |
| CSF1R          | 4.33322   | 4.39464   | 6.01489   | 9.88438   | 9.2099    | 16.7024    | 8.31998   | 6.44721    | 1.08052    | 5.73743  | 12.1468  | 1.43996   | 8.08376   | 3.83392   | 11.1799  |
| CSF2           | 0         | 0.0142047 | 0.0487785 | 0.0303816 | 0         | 0          | 0.0336611 | 0.0262008  | 0          | 0.222015 | 1.13156  | 0.0843795 | 0.741834  | 0.215717  | 0.59275  |
| CSF2RA         | 0.417945  | 0.329959  | 0.549872  | 1.01708   | 0.289408  | 0.535955   | 0.385206  | 0.550439   | 0.0613264  | 0.821606 | 1.61438  | 0.180151  | 0.737492  | 0.460558  | 1.31615  |
| CSF2RB         | 2.24936   | 1.67743   | 1.84502   | 6.80151   | 3.55337   | 8.42568    | 2.17019   | 1.86747    | 0.476934   | 5.24475  | 7.06783  | 0.88504   | 9.71829   | 3.05509   | 7.70897  |
| CSF3           | 0.0654498 | 0.0378417 | 0.0541447 | 6.15125   | 0.345665  | 0.60188    | 0.0597828 | 0          | 0          | 1.90579  | 5.76301  | 0.084296  | 6.72264   | 1.46406   | 3.271    |
| CSF3R          | 0.198937  | 0.108631  | 0.126174  | 6.79949   | 0.772546  | 2.16258    | 0.16657   | 0.247519   | 0.0484567  | 3.9201   | 8.35421  | 0.085407  | 4.03032   | 0.73821   | 3.72361  |
| CSGALNACT1     | 3.55905   | 1.37684   | 1.44912   | 2.96781   | 2.28286   | 6.91734    | 1.26272   | 1.73486    | 0.800009   | 4.59273  | 8.42086  | 0.953312  | 5.5551    | 8.19294   | 12.5195  |
| CSGALNACT2     | 3.66283   | 2.82883   | 3.22502   | 4.20555   | 2.10389   | 6.35309    | 2.15829   | 3.59017    | 2.68947    | 5.72067  | 6.12922  | 2.45232   | 7.72414   | 4.66277   | 9.55656  |
| CSH1           | 0         | 0         | 0         | 0         | 0         | 0          | 0         | 0          | 0          | 0        | 0        | 0         | 0         | 0         | 0        |
| CSH2           | 0         | 0         | 0         | 0         | 0         | 0          | 0         | 0          | 0          | 0        | 0        | 0         | 0         | 0         | 0        |
| CSHL1          | 0         | 0         | 0         | 0         | 0         | 0          | 0.028753  | 0          | 0          | 0        | 0        | 0         | 0         | 0         | 0        |
| CSK            | 6.20477   | 7.56888   | 6.80903   | 13.0187   | 17.8647   | 16.4969    | 8.61516   | 5.3157     | 24.0583    | 10.639   | 14.2191  | 10.6488   | 16.7245   | 9.75583   | 6.81415  |

|             |            |            |            |            |           |            |            |            |            |            |            |            |            |           |           |
|-------------|------------|------------|------------|------------|-----------|------------|------------|------------|------------|------------|------------|------------|------------|-----------|-----------|
| CSKMT       | 0.485636   | 0.70196    | 0.900479   | 1.10447    | 1.14455   | 0.884061   | 0.650084   | 0.788773   | 0.285527   | 0.504433   | 1.11535    | 0.754882   | 0.864358   | 1.15529   | 1.05818   |
| CSMD1       | 0.0339459  | 0.0140191  | 0.0173844  | 0.00999494 | 0.0652845 | 0.0192697  | 0.0239933  | 0.024422   | 0.00196868 | 0.00811536 | 0.0419703  | 0.00578315 | 0.00312882 | 0.0135174 | 0.0580365 |
| CSMD2       | 0.0498773  | 0.175431   | 0.279206   | 0.1542     | 0.449364  | 0.799852   | 0.222098   | 0.118205   | 0.012149   | 0.269185   | 0.454195   | 0.0761356  | 0.30357    | 0.527445  | 1.61885   |
| CSMD2-AS1   | 0          | 0.00817498 | 0.0561453  | 0          | 0.105423  | 0          | 0          | 0          | 0          | 0.0212954  | 0          | 0          | 0          | 0         | 0.0243668 |
| CSMD3       | 0.00346609 | 0          | 0          | 0.00178595 | 0         | 0.00885398 | 0.00395746 | 0          | 0.00211065 | 0.0217515  | 0.00391278 | 0.00868027 | 0.059262   | 0.049817  | 0.0348442 |
| CSN1S1      | 0          | 0          | 0          | 0          | 0         | 0          | 0          | 0.020966   | 0          | 0          | 0          | 0          | 0          | 0         | 0         |
| CSN1S2AP    | 0          | 0          | 0          | 0          | 0         | 0          | 0          | 0          | 0          | 0          | 0          | 0          | 0          | 0         | 0         |
| CSN1S2BP    | 0          | 0          | 0          | 0          | 0         | 0          | 0          | 0          | 0          | 0          | 0          | 0          | 0          | 0         | 0         |
| CSN2        | 0          | 0          | 0          | 0          | 0         | 0          | 0          | 0          | 0          | 0          | 0          | 0          | 0          | 0         | 0         |
| CSN3        | 0          | 0.0138003  | 0          | 0          | 0         | 0.0243886  | 0          | 0          | 0          | 0          | 0          | 0          | 0          | 0         | 0         |
| CSNK1A1     | 54.7463    | 55.5543    | 52.0602    | 120.558    | 61.081    | 76.6733    | 48.4616    | 48.8784    | 162.252    | 111.7      | 124.877    | 91.3047    | 153.297    | 86.6347   | 44.7474   |
| CSNK1A1L    | 0.00962289 | 0.0139094  | 0.00796073 | 0.0396667  | 0.0149477 | 0.0245813  | 0          | 0.00855202 | 0          | 0.0241554  | 0.0869044  | 0.00688544 | 0.0310432  | 0         | 0.110557  |
| CSNK1A1P1   | 0.191718   | 0.356294   | 0.385177   | 0.0846731  | 0.0638151 | 0.0699621  | 0.297074   | 0.194723   | 0.0667116  | 0          | 0.0309179  | 0.156776   | 0.0530122  | 0.1503    | 0         |
| CSNK1D      | 6.07444    | 8.21632    | 7.80639    | 12.9584    | 13.1804   | 20.011     | 8.5925     | 5.42139    | 9.26326    | 10.0493    | 7.92591    | 9.2863     | 16.6949    | 10.2595   | 10.0393   |
| CSNK1E      | 11.2281    | 11.6348    | 14.1398    | 22.5509    | 20.4194   | 25.9638    | 14.673     | 8.7514     | 32.0822    | 22.8584    | 23.1303    | 16.3641    | 29.8359    | 21.3718   | 14.9652   |
| CSNK1G1     | 2.62139    | 3.1138     | 3.21249    | 4.60593    | 2.18558   | 4.0767     | 2.73485    | 2.69935    | 2.60096    | 3.86124    | 2.89619    | 2.6807     | 3.85993    | 3.32663   | 3.01092   |
| CSNK1G2     | 8.60692    | 9.41126    | 9.21018    | 16.8606    | 16.2539   | 22.4       | 7.40672    | 5.82183    | 8.94874    | 11.2727    | 9.52722    | 9.84787    | 15.9961    | 12.2039   | 8.744     |
| CSNK1G2-AS1 | 0.105757   | 0.23779    | 0.218723   | 0.199806   | 0.684485  | 0.360201   | 0.503122   | 0.297627   | 0          | 0.110613   | 0          | 0.504477   | 0.0796058  | 0.294789  | 0.734085  |
| CSNK1G3     | 3.41619    | 2.52246    | 2.62285    | 3.87593    | 1.36516   | 3.32726    | 1.93676    | 2.73367    | 3.39516    | 4.30545    | 5.85667    | 2.09952    | 5.10934    | 3.15849   | 4.01713   |
| CSNK2A1     | 7.56758    | 7.40495    | 7.61282    | 11.4013    | 5.33094   | 11.3692    | 7.33943    | 7.51916    | 13.8545    | 9.10406    | 9.76736    | 7.51192    | 14.6574    | 8.22358   | 7.63218   |
| CSNK2A2     | 13.0171    | 17.5402    | 17.6633    | 11.0086    | 15.1387   | 13.5573    | 28.0668    | 13.571     | 68.8523    | 11.5677    | 18.5408    | 13.3447    | 13.6006    | 8.54848   | 5.965     |
| CSNK2A3     | 0.335517   | 0.226689   | 0.15639    | 0.0784494  | 0.15176   | 0.06243    | 0.404999   | 0.31982    | 0.114972   | 0.260887   | 0.0647742  | 0.296354   | 0.146004   | 0.341202  | 0.401404  |
| CSNK2B      | 4.55271    | 4.93434    | 4.92353    | 6.39495    | 5.08502   | 9.08877    | 7.84558    | 4.40164    | 17.4977    | 5.57852    | 9.29953    | 6.73434    | 7.59693    | 4.29332   | 3.3383    |
| CSPG4       | 2.66885    | 3.40573    | 4.09932    | 5.49778    | 9.12389   | 6.51796    | 6.28247    | 2.13864    | 1.95157    | 6.52066    | 3.64309    | 5.52315    | 9.39135    | 8.17946   | 10.1233   |
| CSPG4P1Y    | 0.0582215  | 0.035065   | 0.0481649  | 0.0299995  | 0.0226095 | 0.086756   | 0.0498566  | 0.064678   | 0          | 0.0182685  | 0.0492936  | 0.0104148  | 0.0657374  | 0         | 0.18813   |
| CSPG5       | 0.0893554  | 0.124853   | 0.118274   | 0.147333   | 0.16656   | 0.174995   | 0.122428   | 0.0794117  | 0.206767   | 0.17944    | 0.100871   | 0.127872   | 0.299789   | 0.0747217 | 0.0128326 |

|          |           |            |           |           |           |           |          |            |           |           |            |           |           |           |           |
|----------|-----------|------------|-----------|-----------|-----------|-----------|----------|------------|-----------|-----------|------------|-----------|-----------|-----------|-----------|
| CSPP1    | 1.9939    | 2.08738    | 2.1162    | 1.57548   | 0.729151  | 1.62811   | 1.17025  | 1.50028    | 0.833925  | 1.19993   | 1.3758     | 1.46059   | 1.17254   | 1.93565   | 1.45958   |
| CSRNP1   | 4.25694   | 3.82944    | 5.03771   | 5.53995   | 3.97549   | 6.51023   | 5.69006  | 3.49175    | 10.0557   | 7.58658   | 10.1992    | 8.88017   | 13.6413   | 7.25265   | 5.15307   |
| CSRNP2   | 3.08606   | 2.90535    | 3.05558   | 2.69719   | 4.36269   | 4.30181   | 2.56249  | 2.33948    | 4.22519   | 4.0734    | 4.65409    | 2.67289   | 4.19252   | 3.64777   | 4.22276   |
| CSRNP3   | 0.778485  | 0.507522   | 0.454785  | 0.279302  | 0.244836  | 0.381355  | 0.364317 | 0.655975   | 0.11705   | 0.255728  | 0.388412   | 0.145789  | 0.095494  | 0.120554  | 0.869553  |
| CSRP1    | 34.735    | 17.5083    | 21.9303   | 23.7367   | 23.9607   | 76.7001   | 43.7078  | 15.0187    | 25.9537   | 27.0474   | 52.2847    | 14.0089   | 35.8259   | 26.9913   | 26.8148   |
| CSRP2    | 19.6829   | 18.9792    | 6.36804   | 53.7457   | 21.3436   | 44.4507   | 7.35749  | 6.12795    | 42.3245   | 52.9956   | 125.418    | 88.9325   | 72.574    | 59.7962   | 27.5469   |
| CSRP3    | 0         | 0.0228497  | 0.0523103 | 0.0325814 | 0.0245554 | 0         | 0        | 0.0561957  | 0.0192525 | 0.0595223 | 0.0178454  | 0.0339333 | 0.0101993 | 0.033048  | 0.0681073 |
| CST1     | 0         | 0          | 0         | 0.125524  | 0         | 0         | 0        | 0          | 0         | 0         | 0.00590868 | 0         | 0         | 0         | 0         |
| CST11    | 0         | 0          | 0         | 0         | 0         | 0         | 0        | 0          | 0         | 0         | 0          | 0         | 0.0270014 | 0         | 0         |
| CST13P   | 0         | 0          | 0         | 0         | 0         | 0         | 0        | 0          | 0         | 0         | 0          | 0         | 0         | 0         | 0         |
| CST2     | 0         | 0          | 0         | 0         | 0         | 0         | 0        | 0.0296363  | 0         | 0         | 0          | 0         | 0         | 0         | 0         |
| CST3     | 38.1132   | 36.9738    | 29.3221   | 113.433   | 176.702   | 180.527   | 67.6877  | 31.1147    | 134.875   | 68.6137   | 135.359    | 125.961   | 92.4068   | 45.6522   | 44.1475   |
| CST4     | 0         | 0          | 0         | 0         | 0         | 0.0267745 | 0        | 0          | 0         | 0         | 0.0293954  | 0         | 0.0202877 | 0         | 0         |
| CST5     | 0         | 0          | 0         | 0         | 0         | 0         | 0        | 0          | 0         | 0         | 0          | 0         | 0         | 0         | 0         |
| CST6     | 11.4765   | 34.3309    | 46.182    | 28.2357   | 43.7411   | 11.0664   | 47.9884  | 31.949     | 134.912   | 45.5974   | 69.1106    | 41.4395   | 26.4064   | 14.4392   | 3.65654   |
| CST7     | 0.84609   | 0.647459   | 0.926398  | 3.61591   | 1.58486   | 1.16541   | 0.653496 | 1.2606     | 0.121229  | 1.15563   | 2.92157    | 0.551982  | 3.03452   | 0.715329  | 1.71542   |
| CST8     | 0         | 0          | 0         | 0         | 0         | 0         | 0        | 0          | 0         | 0         | 0          | 0         | 0         | 0         | 0         |
| CST9     | 0         | 0.00660194 | 0         | 0         | 0         | 0         | 0        | 0          | 0         | 0         | 0          | 0         | 0         | 0         | 0         |
| CST9L    | 0         | 0          | 0.0199849 | 0         | 0         | 0         | 0        | 0          | 0         | 0         | 0          | 0         | 0         | 0.0126259 | 0.0693869 |
| CSTA     | 131.778   | 115.875    | 55.5615   | 397.657   | 64.552    | 166.512   | 41.1856  | 80.6539    | 2051.79   | 1376.48   | 2003.71    | 987.741   | 969.302   | 497.337   | 112.328   |
| CSTB     | 22.6999   | 25.5398    | 24.543    | 188.995   | 31.2069   | 105.197   | 19.3401  | 25.622     | 100.029   | 481.653   | 578.488    | 313.573   | 516.735   | 261.612   | 90.4099   |
| CSTF1    | 3.59024   | 3.20384    | 2.83611   | 4.85895   | 2.1385    | 4.48977   | 2.45542  | 2.96679    | 3.35334   | 3.4784    | 5.83052    | 2.82645   | 4.71409   | 3.35309   | 2.51986   |
| CSTF2    | 1.97351   | 1.64203    | 1.59666   | 3.80769   | 2.6604    | 5.04124   | 1.76689  | 1.51437    | 2.53057   | 2.26963   | 3.04244    | 2.04038   | 3.85914   | 2.87166   | 1.61063   |
| CSTF2T   | 3.08011   | 2.44989    | 2.68783   | 4.65966   | 3.14883   | 7.74815   | 2.32737  | 2.23692    | 1.20698   | 2.27569   | 3.10202    | 1.32959   | 3.85465   | 2.88704   | 3.75223   |
| CSTF3    | 2.6919    | 2.80783    | 2.7325    | 4.79841   | 1.06231   | 4.50989   | 1.7112   | 2.70269    | 1.85187   | 2.53852   | 2.81707    | 1.91571   | 2.79296   | 3.23208   | 2.31954   |
| CSTF3-DT | 0.0112345 | 0          | 0         | 0.0231549 | 0         | 0         | 0        | 0.00998428 | 0         | 0         | 0.0126823  | 0         | 0         | 0         | 0         |

|         |            |   |          |   |            |   |            |            |   |   |   |            |            |   |   |
|---------|------------|---|----------|---|------------|---|------------|------------|---|---|---|------------|------------|---|---|
| CSTL1   | 0          | 0 | 0.026013 | 0 | 0          | 0 | 0          | 0.0558903  | 0 | 0 | 0 | 0.0224993  | 0          | 0 | 0 |
| CT45A1  | 8.70E-08   | 0 | 0        | 0 | 0          | 0 | 0          | 0          | 0 | 0 | 0 | 0          | 0          | 0 | 0 |
| CT45A10 | 2.23E-10   | 0 | 0        | 0 | 0          | 0 | 0          | 0          | 0 | 0 | 0 | 0          | 0          | 0 | 0 |
| CT45A2  | 2.21E-07   | 0 | 0        | 0 | 0          | 0 | 0          | 0          | 0 | 0 | 0 | 0          | 0          | 0 | 0 |
| CT45A3  | 2.32E-07   | 0 | 0        | 0 | 0          | 0 | 0          | 0          | 0 | 0 | 0 | 0          | 0          | 0 | 0 |
| CT45A5  | 4.73E-13   | 0 | 0        | 0 | 0          | 0 | 0          | 0          | 0 | 0 | 0 | 0          | 0          | 0 | 0 |
| CT45A6  | 2.32E-07   | 0 | 0        | 0 | 0          | 0 | 0          | 0          | 0 | 0 | 0 | 0          | 0          | 0 | 0 |
| CT45A7  | 0.00705543 | 0 | 0        | 0 | 0          | 0 | 0          | 0          | 0 | 0 | 0 | 0          | 0          | 0 | 0 |
| CT45A8  | 2.21E-07   | 0 | 0        | 0 | 0          | 0 | 0          | 0          | 0 | 0 | 0 | 0          | 0          | 0 | 0 |
| CT45A9  | 1.97E-11   | 0 | 0        | 0 | 0          | 0 | 0          | 0          | 0 | 0 | 0 | 0          | 0          | 0 | 0 |
| CT47A1  | 0          | 0 | 0        | 0 | 0.00076599 | 0 | 0.00020383 | 0.00015749 | 0 | 0 | 0 | 0.00012680 | 0.00034644 | 0 | 0 |
|         |            |   |          | 8 |            |   | 1          | 4          |   |   |   | 2          | 5          |   |   |
| CT47A10 | 0          | 0 | 0        | 0 | 0.00085110 | 0 | 0.00020383 | 0.00015749 | 0 | 0 | 0 | 0.00012680 | 0.00034644 | 0 | 0 |
|         |            |   |          | 9 |            |   | 1          | 4          |   |   |   | 2          | 5          |   |   |
| CT47A11 | 0          | 0 | 0        | 0 | 0.00085110 | 0 | 0.00020383 | 0.00015749 | 0 | 0 | 0 | 0.00012680 | 0.00034644 | 0 | 0 |
|         |            |   |          | 9 |            |   | 1          | 4          |   |   |   | 2          | 5          |   |   |
| CT47A12 | 0          | 0 | 0        | 0 | 0.00085110 | 0 | 0.00020383 | 0.00015749 | 0 | 0 | 0 | 0.00012680 | 0.00034644 | 0 | 0 |
|         |            |   |          | 9 |            |   | 1          | 4          |   |   |   | 2          | 5          |   |   |
| CT47A2  | 0          | 0 | 0        | 0 | 0.00085110 | 0 | 0.00020383 | 0.00015749 | 0 | 0 | 0 | 0.00012680 | 0.00034644 | 0 | 0 |
|         |            |   |          | 9 |            |   | 1          | 4          |   |   |   | 2          | 5          |   |   |
| CT47A3  | 0          | 0 | 0        | 0 | 0.00085110 | 0 | 0.00020383 | 0.00015749 | 0 | 0 | 0 | 0.00012680 | 0.00034644 | 0 | 0 |
|         |            |   |          | 9 |            |   | 1          | 4          |   |   |   | 2          | 5          |   |   |
| CT47A4  | 0          | 0 | 0        | 0 | 0.00085110 | 0 | 0.00020383 | 0.00015749 | 0 | 0 | 0 | 0.00012680 | 0.00034644 | 0 | 0 |
|         |            |   |          | 9 |            |   | 1          | 4          |   |   |   | 2          | 5          |   |   |
| CT47A5  | 0          | 0 | 0        | 0 | 0.00085110 | 0 | 0.00020383 | 0.00015749 | 0 | 0 | 0 | 0.00012680 | 0.00034644 | 0 | 0 |
|         |            |   |          | 9 |            |   | 1          | 4          |   |   |   | 2          | 5          |   |   |

|              |            |           |            |           |                 |           |                 |                 |           |           |                 |                 |                 |            |                 |
|--------------|------------|-----------|------------|-----------|-----------------|-----------|-----------------|-----------------|-----------|-----------|-----------------|-----------------|-----------------|------------|-----------------|
| CT47A6       | 0          | 0         | 0          | 0         | 0.00068088<br>7 | 0         | 0.00018344<br>8 | 0.00015749<br>4 | 0         | 0         | 0               | 0.00011412<br>2 | 0.0003118       | 0          | 0               |
| CT47A7       | 0          | 0         | 0          | 0         | 1.34E-12        | 0         | 0               | 0               | 0         | 0         | 0               | 0.00012680<br>2 | 5.41E-13        | 0          | 0               |
| CT47A8       | 0          | 0         | 0          | 0         | 0.00085110<br>9 | 0         | 0.00020383<br>1 | 0.00015749<br>4 | 0         | 0         | 0               | 0.00012680<br>2 | 0.00034644<br>5 | 0          | 0               |
| CT47A9       | 0          | 0         | 0          | 0         | 0.00085110<br>9 | 0         | 0.00020383<br>1 | 0.00015749<br>4 | 0         | 0         | 0               | 0.00012680<br>2 | 0.00034644<br>5 | 0          | 0               |
| CT47B1       | 0          | 0.0167805 | 0          | 0         | 0               | 0.0296554 | 5.16E-05        | 0               | 0         | 0         | 0               | 0               | 0               | 0          | 0               |
| CT55         | 0.0642565  | 0.0103199 | 0.0177192  | 0.0110364 | 0               | 0.0364757 | 0.146732        | 0.0571058       | 0         | 0.0134414 | 0               | 0.0153257       | 0               | 0.00559721 | 0.0307602       |
| CT62         | 0.0126396  | 0.0608994 | 0.0209127  | 0.0521018 | 0.0392672       | 0.0645746 | 0.0432944       | 0.044932        | 0         | 0         | 0.0142685       | 0               | 0               | 0          | 0.018152        |
| CT83         | 0.0403189  | 0         | 0.0333546  | 0.290849  | 0               | 0         | 0               | 0.0358321       | 0         | 0.0506044 | 0               | 0               | 0.0780407       | 0.0210724  | 0.057903        |
| CTAG1A       | 0          | 0.0149073 | 0          | 0         | 0               | 0         | 3.89E-31        | 0               | 0         | 0         | 0               | 0               | 0               | 0          | 0               |
| CTAG1B       | 0          | 0.0149073 | 0          | 0         | 0               | 0         | 3.89E-31        | 0               | 0         | 0         | 0               | 0               | 0               | 0          | 0               |
| CTAG2        | 0          | 1.63E-09  | 0          | 0         | 0.14481         | 0         | 0.585426        | 0               | 0         | 0         | 0               | 0               | 0               | 0          | 0               |
| CTAGE1       | 0          | 0         | 0          | 0         | 0               | 0         | 0               | 0               | 0         | 0         | 0               | 0               | 0               | 0          | 0               |
| CTAGE10P     | 0          | 0.0112557 | 0.00644198 | 0         | 0               | 0         | 0               | 0               | 0         | 0         | 0               | 0               | 0               | 0.0122095  | 0.0894653       |
| CTAGE11P     | 0.105636   | 0.0339756 | 0.0655961  | 0         | 0               | 0.030069  | 0.0100753       | 0.0312934       | 0         | 0         | 0               | 0               | 0               | 0          | 0.0126422       |
| CTAGE15      | 0.00593567 | 0.428638  | 0.662696   | 0.708178  | 0.182918        | 0.423578  | 0.00250358      | 0.0902197       | 0.415315  | 0.433846  | 0.00083320<br>4 | 0.858647        | 0.192058        | 0.57364    | 0.00037021<br>2 |
| CTAGE4       | 0.843371   | 1.12012   | 1.58472    | 1.896     | 0.661787        | 0.14207   | 0.37526         | 0.794423        | 0.614575  | 0.584029  | 0.224346        | 0.781625        | 0.518712        | 0.267298   | 0.236516        |
| CTAGE6       | 0.526898   | 0.407382  | 0.393531   | 0.116614  | 0.0855527       | 0.181127  | 0.294494        | 0.478139        | 0.183729  | 0.122998  | 0.142023        | 0.00127349      | 0.223893        | 0.380217   | 0.242125        |
| CTAGE7P      | 0.2536     | 0.260143  | 0.203028   | 0.0758736 | 0.203318        | 0.125383  | 0.168127        | 0.298081        | 0.0797049 | 0.0410702 | 0.0369397       | 0.122923        | 0.0105562       | 0.11544    | 0.234969        |
| CTAGE8       | 2.12483    | 3.6027    | 4.42295    | 4.74583   | 2.42455         | 1.76616   | 3.16292         | 2.75786         | 3.49507   | 3.50427   | 1.17147         | 3.85837         | 5.79014         | 3.44808    | 0.931649        |
| CTAGE9       | 0.159035   | 0.201471  | 0.52244    | 0.532929  | 1.76E-16        | 0.101131  | 0.226763        | 0.229569        | 0.254198  | 0.385171  | 0.150539        | 0.121354        | 1.57E-08        | 0.209893   | 6.34E-15        |
| CTB-178M22.2 | 0.178711   | 0.430528  | 0.147842   | 0.322292  | 0.0693999       | 0.114127  | 0.0510116       | 0.238235        | 0.21765   | 0.616826  | 0.403484        | 0.319681        | 0.144129        | 0.490361   | 0.256651        |

|               |            |            |           |          |           |           |           |            |          |           |           |           |            |           |           |
|---------------|------------|------------|-----------|----------|-----------|-----------|-----------|------------|----------|-----------|-----------|-----------|------------|-----------|-----------|
| CTBP1         | 13.4741    | 14.288     | 14.7541   | 22.1718  | 28.3278   | 34.3648   | 14.9419   | 8.93964    | 14.7828  | 16.1702   | 19.6924   | 13.5243   | 25.3569    | 16.0762   | 15.7921   |
| CTBP1-AS      | 0.835966   | 1.30367    | 1.323     | 0.470591 | 2.71425   | 0.821115  | 1.70641   | 1.07854    | 0.099509 | 0.521176  | 0.238273  | 0.993427  | 0.0975253  | 0.952083  | 1.44719   |
| CTBP1-DT      | 1.80879    | 2.08552    | 2.21514   | 1.88843  | 2.17167   | 4.76845   | 1.64135   | 1.46711    | 1.1255   | 1.49696   | 2.18457   | 1.27163   | 2.1302     | 1.53568   | 2.37078   |
| CTBP2         | 2.50845    | 2.12748    | 2.27984   | 4.82657  | 3.25597   | 4.97988   | 2.03623   | 1.78039    | 1.69909  | 3.88153   | 3.79373   | 2.31365   | 5.08587    | 4.1827    | 3.82945   |
| CTBS          | 2.58223    | 2.17188    | 2.56838   | 3.57628  | 0.660787  | 3.92722   | 1.32929   | 2.85201    | 1.54517  | 1.94833   | 3.55531   | 1.51657   | 2.59537    | 1.80985   | 2.06856   |
| CTC-338M12.4  | 1.6671     | 1.79819    | 1.60337   | 0.897955 | 1.91092   | 1.68779   | 2.16806   | 0.983961   | 0.611058 | 0.721605  | 0.497251  | 0.743187  | 0.429393   | 0.97183   | 0.917509  |
| CTC1          | 1.54984    | 2.801      | 2.87803   | 2.06554  | 3.44354   | 2.31638   | 2.77753   | 1.90334    | 1.68843  | 1.15728   | 1.02982   | 1.93016   | 1.74674    | 1.67642   | 2.13654   |
| CTCF          | 6.24613    | 6.36673    | 6.38505   | 8.2156   | 5.41613   | 9.62935   | 4.81815   | 6.07948    | 7.43131  | 5.61519   | 4.64644   | 5.24169   | 9.2705     | 5.4911    | 4.87477   |
| CTCFL         | 0.00582288 | 0.00140278 | 0         | 0        | 0         | 0         | 0         | 0.00517489 | 0        | 0         | 0         | 0         | 0          | 0         | 0         |
| CTD-2194D22.4 | 0.0141721  | 0.020485   | 0.0117242 | 0        | 0         | 0         | 0         | 0          | 0        | 0.0177875 | 0         | 0         | 0          | 0         | 0         |
| CTD-2201I18.1 | 0.309588   | 0.148615   | 0.127363  | 0.131953 | 0.20187   | 0.029262  | 0.204859  | 0.130341   | 0        | 0.0641684 | 0.0384766 | 0.146328  | 0.00549771 | 0.0578948 | 0.0749765 |
| CTD-2270F17.1 | 0.269271   | 0.148632   | 0.0630307 | 0        | 0         | 0.0324379 | 0.0652444 | 0.0846404  | 0        | 0         | 0.0215026 | 0         | 0          | 0.0201344 | 0.10942   |
| CTD-2297D10.2 | 0          | 0          | 0         | 0        | 0.0226952 | 0.0124407 | 0         | 0          | 0        | 0         | 0         | 0         | 0          | 0         | 0         |
| CTD-2350J17.1 | 0.360671   | 0.0289628  | 0.198915  | 0.061947 | 0.0933744 | 0.204738  | 0.274535  | 0.106845   | 0        | 0         | 0.0678588 | 0.0430116 | 0          | 0.0628341 | 0         |
| CTD-3080P12.3 | 0.0770579  | 0.0123759  | 0.0424985 | 0        | 0.0997479 | 0.0109356 | 0         | 0.0228275  | 0        | 0         | 0         | 0.0275685 | 0          | 0         | 0.0922207 |
| CTDNEP1       | 16.659     | 16.4345    | 16.5299   | 34.8432  | 33.4881   | 40.0547   | 24.1959   | 14.5136    | 32.9749  | 27.69     | 42.0881   | 23.0859   | 43.1806    | 22.4871   | 21.032    |
| CTDP1         | 4.8443     | 4.63908    | 5.488     | 5.29646  | 8.69478   | 6.71573   | 4.45787   | 3.91433    | 7.8664   | 3.75848   | 2.94517   | 4.53976   | 6.86519    | 4.08748   | 3.78139   |
| CTDSP1        | 18.0898    | 17.315     | 19.6547   | 23.97    | 31.9018   | 39.0213   | 23.2779   | 14.2938    | 8.50634  | 13.7817   | 27.319    | 8.14864   | 15.5498    | 13.8488   | 19.4278   |
| CTDSP2        | 22.5253    | 24.7203    | 26.144    | 33.5034  | 32.032    | 47.2591   | 28.6979   | 18.5969    | 24.48    | 21.8083   | 26.7345   | 14.5473   | 26.2169    | 18.2903   | 29.2771   |
| CTDSPL        | 8.10394    | 9.1683     | 9.26989   | 7.67679  | 5.85035   | 10.7753   | 9.72144   | 7.54372    | 6.5166   | 5.80938   | 7.38907   | 4.60913   | 7.89658    | 4.25722   | 3.93166   |
| CTDSPL2       | 4.99992    | 3.11139    | 3.27604   | 3.22953  | 0.73757   | 3.42449   | 2.65107   | 4.88238    | 1.34162  | 3.30756   | 4.49721   | 1.55606   | 3.4802     | 2.38239   | 3.17771   |
| CTF1          | 0.347702   | 0.41547    | 0.598299  | 0.329652 | 1.03699   | 0.959247  | 0.238197  | 0.34609    | 0.406524 | 0.244385  | 1.06763   | 0.149274  | 0.206389   | 0.254414  | 0.439423  |
| CTGF          | 33.3268    | 12.7831    | 19.0067   | 12.3676  | 8.66892   | 13.9363   | 28.2623   | 12.4038    | 18.3333  | 51.3373   | 121.552   | 12.6157   | 76.5453    | 26.9788   | 79.6935   |
| CTH           | 0.389322   | 0.203213   | 0.277342  | 0.278617 | 0.0839933 | 0.884008  | 0.271648  | 0.259498   | 2.56832  | 0.502213  | 1.01328   | 0.363689  | 0.509355   | 0.214781  | 0.543585  |
| CTHRC1        | 9.7032     | 5.57167    | 8.21793   | 8.27207  | 5.56554   | 28.0598   | 6.9352    | 6.57343    | 0.74912  | 24.8398   | 67.8754   | 1.32036   | 13.0367    | 6.63044   | 22.1944   |
| CTIF          | 3.77892    | 2.65255    | 3.19201   | 2.75061  | 6.21604   | 5.99851   | 5.07769   | 2.03273    | 3.25552  | 3.22522   | 2.30812   | 3.1992    | 5.41784    | 3.3534    | 5.90121   |



|          |           |           |           |            |           |           |           |           |           |            |            |           |            |            |           |
|----------|-----------|-----------|-----------|------------|-----------|-----------|-----------|-----------|-----------|------------|------------|-----------|------------|------------|-----------|
| CTLA4    | 0.243367  | 0.0837557 | 0.105459  | 0.298568   | 0.0720063 | 0.167753  | 0.0396955 | 0.267781  | 0.028228  | 0.130907   | 0.379391   | 0.0829217 | 0.493489   | 0.357355   | 0.549224  |
| CTNNA1   | 24.012    | 22.5142   | 24.1908   | 40.3012    | 24.2923   | 51.1879   | 26.546    | 19.396    | 31.8861   | 39.747     | 24.0798    | 25.5741   | 69.4126    | 28.4567    | 27.6795   |
| CTNNA2   | 0.0146044 | 0         | 0         | 0.0250837  | 0.0151237 | 0.0207257 | 0         | 0         | 0         | 0          | 0.0054955  | 0         | 0          | 0          | 0         |
| CTNNA3   | 0.0708138 | 0.0152638 | 0.0369992 | 0.00384082 | 0.0115788 | 0.0460161 | 0.0702143 | 0.0215298 | 0         | 0.00935564 | 0.0231405  | 0         | 0.00961867 | 0.00973957 | 0.0401437 |
| CTNNAL1  | 3.04231   | 3.25408   | 3.33607   | 3.32828    | 0.997817  | 5.16577   | 2.2003    | 1.93466   | 2.43391   | 3.53848    | 5.07605    | 1.2193    | 3.98909    | 3.34795    | 3.19038   |
| CTNNB1   | 40.2966   | 32.4494   | 32.9226   | 58.2761    | 29.4518   | 75.9653   | 32.724    | 29.2778   | 34.3389   | 62.7444    | 95.6748    | 28.5099   | 70.573     | 51.2464    | 45.5931   |
| CTNNBIP1 | 39.6947   | 45.8085   | 51.5594   | 33.4919    | 51.5272   | 54.2343   | 57.0389   | 35.8611   | 87.0099   | 49.8001    | 71.3152    | 43.171    | 51.8422    | 23.9126    | 11.7075   |
| CTNNBL1  | 5.45986   | 4.98212   | 5.1067    | 8.5661     | 6.94056   | 11.1195   | 4.41461   | 3.15892   | 5.03462   | 5.55208    | 5.87416    | 3.6276    | 8.00147    | 5.15387    | 5.21668   |
| CTNND1   | 40.0519   | 57.5379   | 57.6897   | 55.9734    | 41.3635   | 51.7761   | 47.9622   | 44.5248   | 61.5551   | 56.3231    | 34.4972    | 55.2617   | 78.5094    | 45.1218    | 32.0931   |
| CTNND2   | 0.0695451 | 0.0353694 | 0.0191775 | 0.00796313 | 0.0120031 | 0.148042  | 0.136752  | 0.0446376 | 0         | 0          | 0.00436154 | 0         | 0.00747835 | 0.00605788 | 0.0166459 |
| CTNS     | 2.06032   | 2.21318   | 2.34682   | 3.13929    | 3.75517   | 4.15971   | 3.42557   | 1.85732   | 4.1536    | 3.73924    | 4.63689    | 3.43313   | 6.54259    | 3.51848    | 2.74918   |
| CTPS1    | 3.69675   | 3.00828   | 3.14116   | 7.70878    | 3.02173   | 7.00125   | 3.70179   | 2.54867   | 8.93925   | 6.08287    | 5.53152    | 6.88308   | 13.4178    | 9.47508    | 5.06896   |
| CTPS2    | 1.71047   | 1.94033   | 2.14586   | 1.24938    | 1.073     | 1.78054   | 1.39497   | 1.45748   | 0.377716  | 0.849291   | 1.27313    | 0.497625  | 0.870138   | 1.0536     | 1.35645   |
| CTR9     | 4.79676   | 4.82122   | 4.71764   | 7.16318    | 2.96319   | 8.63147   | 2.72975   | 3.90062   | 7.49691   | 6.55101    | 4.58536    | 6.09722   | 11.4701    | 5.65588    | 4.32985   |
| CTRB1    | 0.0368683 | 0.0764618 | 0.0656419 | 0.0272532  | 0.205424  | 0.0675634 | 0.0210475 | 0.0940234 | 0         | 0.0231367  | 0          | 0.0378454 | 0.0341298  | 0.193529   | 0.113953  |
| CTRB2    | 0.01576   | 8.16E-11  | 0         | 3.38E-06   | 1.20E-12  | 0         | 0.0089971 | 6.20E-36  | 0         | 0.00989018 | 0          | 4.69E-06  | 0          | 1.01E-32   | 0         |
| CTRC     | 0.0257431 | 0.136438  | 0.042593  | 0          | 0         | 0.131519  | 0.0587853 | 0.0457567 | 0.0313522 | 0.0323102  | 0          | 0.0184199 | 0          | 0.0269089  | 0         |
| CTRL     | 0.729329  | 0.745851  | 0.949724  | 0.525871   | 1.00366   | 0.662777  | 1.07994   | 0.701247  | 0.241138  | 0.323831   | 0.486264   | 0.663444  | 0.520775   | 0.823054   | 1.20911   |
| CTSA     | 10.1703   | 11.3653   | 11.7059   | 18.5642    | 17.6709   | 28.2554   | 20.9155   | 11.4147   | 66.2365   | 20.1448    | 42.9978    | 19.5957   | 22.4097    | 12.3547    | 17.2933   |
| CTSB     | 54.614    | 28.1052   | 25.4933   | 219.666    | 67.2978   | 204.944   | 35.0537   | 37.1035   | 89.631    | 149.514    | 275.1      | 48.2362   | 214.44     | 89.1502    | 99.6428   |
| CTSC     | 5.98646   | 3.75873   | 2.7093    | 17.4275    | 5.14367   | 13.9637   | 3.05092   | 4.11406   | 13.9287   | 11.1412    | 20.2638    | 10.8236   | 14.052     | 9.10134    | 5.62133   |
| CTSD     | 97.9574   | 71.0796   | 72.7676   | 97.8473    | 179.627   | 202.379   | 109.89    | 68.7557   | 235.562   | 99.2767    | 189.734    | 100.16    | 111.872    | 63.355     | 70.2769   |
| CTSE     | 0.0103874 | 0.0150144 | 0.0257795 | 0.021409   | 0         | 0.0530682 | 0.0474398 | 0.0276943 | 0         | 0.0260744  | 0.0234521  | 0.0371622 | 0.0201056  | 0.0271445  | 0         |
| CTSF     | 7.10149   | 7.61834   | 9.43969   | 3.93151    | 10.1207   | 8.24834   | 7.83273   | 4.87128   | 3.00889   | 2.46625    | 5.72065    | 1.38133   | 2.98784    | 3.20707    | 4.93429   |
| CTSG     | 11.7969   | 5.49086   | 8.1638    | 8.41446    | 11.9052   | 0.938381  | 7.92148   | 7.01169   | 3.75198   | 4.24387    | 11.1119    | 3.67391   | 5.97918    | 4.52929    | 8.81267   |
| CTSH     | 12.7192   | 9.0568    | 11.5857   | 11.64      | 11.0423   | 14.9829   | 12.8724   | 9.37724   | 11.8799   | 8.05524    | 20.5477    | 1.21649   | 10.1465    | 4.57613    | 11.7045   |

|           |           |           |           |           |           |           |           |           |            |           |          |            |           |            |           |
|-----------|-----------|-----------|-----------|-----------|-----------|-----------|-----------|-----------|------------|-----------|----------|------------|-----------|------------|-----------|
| CTSK      | 42.1817   | 26.1825   | 38.6613   | 41.3612   | 39.8817   | 128.252   | 41.2419   | 48.3737   | 5.02981    | 81.5239   | 207.071  | 5.75465    | 28.4529   | 23.7234    | 85.5882   |
| CTSL      | 10.6939   | 3.96845   | 5.50686   | 55.0598   | 14.3042   | 68.8103   | 5.14913   | 5.6759    | 2.3351     | 53.1107   | 102.275  | 11.1878    | 67.4551   | 33.4845    | 27.2055   |
| CTSL3P    | 0         | 0         | 0         | 0         | 0         | 0         | 0         | 0         | 0          | 0         | 0        | 0          | 0         | 0          | 0         |
| CTSLP2    | 0.0628318 | 0.0302733 | 0.0173263 | 0.0215833 | 0         | 0         | 0         | 0.0372265 | 0          | 0         | 0        | 0          | 0         | 0.0109462  | 0         |
| CTSLP8    | 0         | 0         | 0         | 0         | 0         | 0         | 0         | 0         | 0          | 0         | 0        | 0          | 0         | 0          | 0         |
| CTSO      | 4.30036   | 2.06818   | 2.85911   | 4.1877    | 1.78949   | 7.22934   | 2.85592   | 3.58338   | 1.53757    | 3.7138    | 8.30177  | 1.04449    | 3.22258   | 2.34241    | 7.9323    |
| CTSS      | 3.68531   | 2.12044   | 2.67116   | 8.96035   | 2.13577   | 10.2151   | 2.76013   | 3.70586   | 0.720596   | 13.1621   | 32.964   | 0.846721   | 11.2342   | 3.13065    | 11.3459   |
| CTSV      | 1.05472   | 2.81946   | 4.32077   | 4.76574   | 1.32328   | 4.80133   | 2.16533   | 2.07749   | 4.31678    | 19.2517   | 10.2178  | 5.03971    | 3.46137   | 2.17052    | 1.17973   |
| CTSW      | 0.285717  | 0.774352  | 0.886369  | 0.496866  | 0.859895  | 0.790673  | 0.468944  | 0.412622  | 0.173985   | 0.156889  | 0.725712 | 0.153328   | 0.0921715 | 0.074664   | 0.359035  |
| CTSZ      | 22.8499   | 8.14743   | 10.7853   | 29.2237   | 19.0291   | 42.854    | 13.3353   | 10.0233   | 3.138      | 32.1065   | 68.571   | 5.05616    | 40.1665   | 24.9249    | 35.4521   |
| CTTN      | 24.3143   | 25.2108   | 25.4072   | 49.8148   | 45.2628   | 68.3697   | 26.6177   | 17.496    | 45.4698    | 49.3296   | 32.0977  | 42.0463    | 77.689    | 39.5858    | 33.4595   |
| CTTNBP2   | 1.46671   | 0.862935  | 0.548758  | 0.520286  | 0.732722  | 0.3891    | 1.19918   | 0.828599  | 0.556532   | 0.323771  | 0.544977 | 0.408713   | 0.164059  | 0.23883    | 0.428685  |
| CTTNBP2NL | 6.66049   | 7.41992   | 7.0222    | 8.56564   | 3.8691    | 7.515     | 6.54777   | 7.70066   | 14.3842    | 8.80269   | 8.6923   | 6.59011    | 10.6775   | 8.13478    | 6.00508   |
| CTU1      | 0.889695  | 1.06373   | 0.999531  | 2.12801   | 4.12895   | 1.7583    | 0.765004  | 0.458794  | 1.92631    | 1.11666   | 1.57473  | 0.927393   | 1.22601   | 1.39498    | 0.599422  |
| CTU2      | 1.54997   | 1.4822    | 1.63462   | 3.10923   | 5.23799   | 4.92649   | 2.02638   | 1.18821   | 1.51303    | 1.60382   | 4.34092  | 1.40535    | 3.08407   | 2.19526    | 2.24294   |
| CTXN1     | 0.403125  | 1.11242   | 0.924687  | 1.73726   | 8.65284   | 1.18579   | 2.25953   | 0.569966  | 4.46328    | 2.8058    | 3.55788  | 3.46136    | 4.00782   | 2.07818    | 1.28945   |
| CTXN2     | 0.042937  | 0.0165502 | 0         | 0.0176991 | 0.0133392 | 0.0219362 | 0.0294145 | 0.0381588 | 0          | 0         | 0        | 0          | 0         | 0.00448815 | 0.061663  |
| CTXN3     | 0.04977   | 0         | 0.0514666 | 0.0769342 | 0         | 0.0211893 | 0         | 0         | 0          | 0         | 0        | 0.00890294 | 0.0160557 | 0          | 0         |
| CTXND1    | 0.136665  | 0.142937  | 0.170967  | 0.0309155 | 0.0362443 | 0.0965007 | 0.20171   | 0.216252  | 0.00405958 | 0.0167345 | 0        | 0.0262357  | 0         | 0.0156791  | 0.0143611 |
| CTXND2    | 0.069708  | 0.0335864 | 0         | 0         | 0         | 0.118711  | 0         | 0         | 0          | 0         | 0        | 0          | 0         | 0          | 0         |
| CUBN      | 0.552734  | 0.357891  | 0.441216  | 0.213853  | 0.310296  | 0.264222  | 0.569091  | 0.39815   | 0.0401538  | 0.279929  | 0.3087   | 0.0902008  | 0.180187  | 0.343618   | 0.73809   |
| CUEDC1    | 2.66791   | 1.80073   | 2.11671   | 2.97452   | 4.6265    | 5.75275   | 2.93455   | 1.44612   | 0.490185   | 2.05674   | 2.84298  | 1.38235    | 2.68587   | 2.5904     | 4.98751   |
| CUEDC2    | 5.28265   | 4.10225   | 4.32216   | 8.65445   | 12.2035   | 14.5324   | 4.70594   | 3.09546   | 4.38338    | 5.07592   | 12.757   | 3.44758    | 5.50578   | 4.58135    | 6.03034   |
| CUL1      | 9.87312   | 7.75578   | 8.13194   | 14.0912   | 4.23458   | 14.5231   | 7.22975   | 7.03106   | 17.0484    | 13.0073   | 11.2188  | 9.74269    | 20.4783   | 11.6056    | 9.57008   |
| CUL2      | 3.29036   | 2.87863   | 2.90506   | 4.03027   | 0.85184   | 3.42836   | 1.6642    | 2.766     | 3.56203    | 4.0633    | 5.01225  | 2.06177    | 5.07762   | 3.39916    | 2.37649   |
| CUL3      | 5.41568   | 5.2929    | 5.70752   | 6.36272   | 2.24714   | 6.0937    | 3.29966   | 4.79818   | 12.6384    | 6.227     | 6.58896  | 4.81224    | 8.22578   | 5.35535    | 4.40467   |

|         |          |            |           |            |           |           |           |           |           |            |            |            |          |            |            |
|---------|----------|------------|-----------|------------|-----------|-----------|-----------|-----------|-----------|------------|------------|------------|----------|------------|------------|
| CUL4A   | 6.48917  | 6.42146    | 6.59208   | 6.9923     | 4.84343   | 8.30887   | 5.62435   | 5.23914   | 5.46262   | 5.42987    | 5.18277    | 5.1215     | 7.25996  | 5.8869     | 5.38436    |
| CUL4B   | 5.25447  | 4.69018    | 4.97099   | 5.71602    | 1.69988   | 6.88608   | 3.16203   | 5.53346   | 5.37438   | 5.04776    | 6.55145    | 3.70599    | 5.36052  | 4.25561    | 4.41977    |
| CUL5    | 4.32179  | 3.74849    | 3.8888    | 4.2209     | 1.64717   | 3.65822   | 3.07052   | 4.40758   | 3.78116   | 4.26259    | 4.94458    | 2.89158    | 4.64576  | 3.75761    | 3.33881    |
| CUL7    | 1.86104  | 2.68603    | 2.53176   | 3.7249     | 5.58893   | 6.06752   | 2.54514   | 1.8377    | 1.87367   | 2.02954    | 2.43703    | 2.31702    | 1.83844  | 2.44245    | 4.15157    |
| CUL9    | 3.18064  | 4.74381    | 4.88802   | 3.22864    | 7.09176   | 5.3633    | 5.1175    | 3.11783   | 1.9586    | 1.38675    | 1.01531    | 2.84266    | 1.27778  | 2.03746    | 2.934      |
| CUTA    | 5.80023  | 6.13803    | 5.92412   | 9.24944    | 11.4234   | 13.3784   | 9.71887   | 4.79455   | 7.35791   | 6.86804    | 15.8411    | 5.73849    | 6.13954  | 6.19409    | 5.5856     |
| CUTALP  | 2.71381  | 1.37636    | 1.15654   | 0.909916   | 1.43205   | 2.18179   | 1.58633   | 2.181     | 0.590386  | 0.798559   | 1.03584    | 0.569841   | 0.653458 | 0.549696   | 1.42965    |
| CUTC    | 4.92066  | 2.69383    | 3.17536   | 4.22956    | 1.79219   | 3.56994   | 3.13967   | 2.8934    | 2.12243   | 3.18497    | 4.42504    | 2.42748    | 3.16006  | 2.25608    | 2.06512    |
| CUX1    | 3.3244   | 4.59847    | 4.91567   | 8.00856    | 7.95924   | 7.7739    | 4.64501   | 3.77521   | 7.05407   | 6.93235    | 5.25966    | 9.24067    | 11.7826  | 6.06448    | 6.02806    |
| CUX2    | 0.142023 | 0.068429   | 0.117492  | 0.00348474 | 0.0315159 | 0.0547069 | 0.077218  | 0.102177  | 0.0041183 | 0.00424414 | 0.00763461 | 0.00483912 | 0        | 0.00176732 | 0.00971255 |
| CUZD1   | 0.131126 | 0.00890666 | 3.44E-06  | 0.10266    | 0.0234537 | 0.0425205 | 0.0347686 | 0.07133   | 0.0494198 | 0.0381974  | 0.111603   | 0.00722328 | 0.019655 | 0.0689051  | 0.058333   |
| CWC15   | 6.1072   | 4.80101    | 5.17992   | 8.99662    | 4.07424   | 10.0719   | 2.73048   | 3.40508   | 8.70623   | 8.66565    | 16.9963    | 4.94947    | 8.00504  | 6.30316    | 5.52094    |
| CWC22   | 3.64191  | 3.30201    | 3.54418   | 4.16768    | 1.20598   | 4.14673   | 1.39413   | 2.785     | 3.22343   | 3.46366    | 4.62118    | 2.31297    | 5.52826  | 3.74044    | 3.15233    |
| CWC25   | 4.13518  | 4.48641    | 4.79253   | 4.32495    | 5.57382   | 4.65716   | 3.20286   | 3.5857    | 4.07595   | 3.41198    | 2.49253    | 3.93836    | 3.28052  | 4.03175    | 3.64555    |
| CWC27   | 1.69414  | 1.44787    | 1.28262   | 1.70547    | 0.541199  | 1.98024   | 0.795604  | 1.26951   | 1.88824   | 1.72729    | 2.15337    | 1.10937    | 2.20295  | 1.51365    | 1.24464    |
| CWF19L1 | 4.01399  | 3.06528    | 3.4849    | 4.49237    | 1.91747   | 3.98383   | 2.98637   | 2.83083   | 2.75444   | 2.8386     | 5.10624    | 2.89065    | 3.71485  | 3.75816    | 3.34718    |
| CWF19L2 | 5.25112  | 3.91413    | 3.78357   | 2.82937    | 1.30465   | 3.51571   | 1.85347   | 3.27426   | 1.65039   | 2.42722    | 2.56555    | 1.5504     | 1.9991   | 2.32763    | 3.12193    |
| CWH43   | 6.87028  | 11.5134    | 7.84426   | 16.5049    | 19.2122   | 8.54138   | 8.05662   | 8.26173   | 46.8507   | 27.6801    | 23.8267    | 23.7314    | 29.973   | 14.4506    | 4.01787    |
| CX3CL1  | 6.45304  | 3.20987    | 3.82219   | 1.89591    | 4.91446   | 13.2029   | 3.03148   | 3.0842    | 0.712916  | 0.384843   | 0.527075   | 0.329095   | 1.47924  | 0.4407     | 2.53201    |
| CX3CR1  | 0.246809 | 0.362847   | 0.544473  | 0.515209   | 0.324398  | 0.652016  | 0.289024  | 0.545545  | 0.131024  | 0.198571   | 0.550088   | 0.0724505  | 0.992184 | 0.162068   | 0.508952   |
| CXADR   | 12.1536  | 21.276     | 19.6757   | 32.5096    | 5.31723   | 26.4676   | 10.1721   | 19.9537   | 19.6002   | 10.5557    | 15.695     | 12.143     | 8.12788  | 7.60517    | 1.93896    |
| CXADRP2 | 0        | 0          | 2.25E-11  | 0          | 0         | 0.0161139 | 0         | 0.0168275 | 0         | 0          | 0.0213572  | 0          | 0.225023 | 0.0738859  | 0.221926   |
| CXADRP3 | 0        | 0          | 0.0118917 | 0          | 0         | 0         | 0         | 0         | 0         | 0          | 0          | 0          | 0        | 5.30E-13   | 0.0532767  |
| CXCL1   | 0.601875 | 0.046773   | 0.128494  | 23.8896    | 1.53809   | 5.22407   | 0.133007  | 0.431368  | 0.0472913 | 14.8646    | 40.7443    | 0.263951   | 18.5771  | 2.0396     | 8.44853    |
| CXCL10  | 0.36161  | 0.843637   | 0.377873  | 2.3928     | 0.206944  | 4.68342   | 0.173842  | 1.11633   | 0.208611  | 0.310534   | 0.623062   | 0.013618   | 7.9939   | 0.547086   | 1.28463    |
| CXCL11  | 0.130098 | 0.125367   | 0.0597925 | 0.208554   | 0.0449084 | 1.32933   | 0         | 0.141314  | 0         | 0.108858   | 0.146865   | 0.0103432  | 0.457    | 0.0528851  | 0.228357   |

|           |            |            |           |           |           |            |           |            |            |           |            |            |           |            |           |
|-----------|------------|------------|-----------|-----------|-----------|------------|-----------|------------|------------|-----------|------------|------------|-----------|------------|-----------|
| CXCL12    | 20.9165    | 11.8758    | 17.4625   | 9.60292   | 17.7504   | 23.2705    | 16.6587   | 14.8484    | 0.468872   | 6.49574   | 17.1619    | 0.795105   | 6.0913    | 3.1508     | 58.9847   |
| CXCL13    | 0.0577133  | 0.0834215  | 0.0636594 | 7.13703   | 0.119532  | 0.68799    | 0         | 0.0341939  | 0          | 5.04639   | 15.1585    | 0          | 2.13488   | 0.231254   | 2.98381   |
| CXCL14    | 167.89     | 177.495    | 182.402   | 138.226   | 203.031   | 153.853    | 193.124   | 136.833    | 152.614    | 149.843   | 230.854    | 132.09     | 61.7781   | 113.188    | 45.8032   |
| CXCL16    | 4.22972    | 4.74435    | 6.01785   | 18.6665   | 6.82465   | 22.5198    | 5.24739   | 5.29174    | 9.83327    | 12.0444   | 19.2082    | 6.4735     | 22.3103   | 7.07508    | 8.9802    |
| CXCL17    | 0.345051   | 0.225626   | 0.0611679 | 2.59069   | 0.535983  | 0.81846    | 0.225124  | 0.197134   | 0.63035    | 0.433074  | 0.333874   | 1.00521    | 0.27033   | 0.528135   | 0.106186  |
| CXCL2     | 0.904176   | 0.148305   | 0.286467  | 3.09271   | 0.448244  | 6.04449    | 0.461267  | 0.530005   | 0          | 3.42865   | 8.25248    | 0.50931    | 6.41707   | 1.5685     | 3.75739   |
| CXCL3     | 0.20072    | 0.0580261  | 0.09963   | 2.0478    | 0.124715  | 1.84584    | 0.0687528 | 0.0891917  | 0          | 3.45137   | 6.95626    | 0.186707   | 3.4448    | 0.692374   | 1.41247   |
| CXCL5     | 0.0372075  | 0.00896357 | 0         | 8.55058   | 0.245633  | 0.56235    | 0         | 0.0165335  | 0.0113286  | 24.7739   | 35.2612    | 0.173049   | 9.17032   | 1.97866    | 1.29579   |
| CXCL6     | 0.01395    | 0          | 0         | 1.63885   | 0.0650075 | 0.320713   | 0         | 0.0123976  | 0          | 1.80339   | 6.92904    | 0          | 2.30412   | 0.160399   | 0.280475  |
| CXCL8     | 0.228544   | 0.0289778  | 0.0696564 | 7.10281   | 0         | 0.389204   | 0.137339  | 0.245871   | 0.336938   | 99.7035   | 113.028    | 3.23615    | 29.0794   | 17.2381    | 21.3169   |
| CXCL9     | 0.461494   | 0.609416   | 0.24745   | 0.942358  | 0.424805  | 4.22064    | 0.400068  | 2.23297    | 0.0416331  | 1.08336   | 2.5759     | 0.0489202  | 2.20007   | 0.848655   | 7.67087   |
| CXCR1     | 0.0651655  | 0.0542364  | 0.0704123 | 3.72854   | 0.202466  | 0.389551   | 0.140058  | 0.0165468  | 0.207447   | 4.69057   | 8.82343    | 0.419622   | 4.95008   | 1.06944    | 2.36073   |
| CXCR2     | 0.472307   | 0.50788    | 0.383283  | 4.78898   | 0.917056  | 0.642498   | 0.591602  | 0.419747   | 2.35555    | 4.7577    | 10.0184    | 0.771672   | 3.50875   | 1.12398    | 2.5823    |
| CXCR2P1   | 0          | 0.0313221  | 0.0268898 | 0.0446621 | 0.0504904 | 0.0369026  | 0         | 0.0288871  | 0.0131955  | 0         | 0.0611555  | 0          | 0.0559243 | 0.00566272 | 0.0155601 |
| CXCR3     | 0.235395   | 0.17311    | 0.256231  | 0.242581  | 0.769789  | 0.369224   | 0.198038  | 0.132126   | 0.0301773  | 0.0777487 | 0.293703   | 0.168431   | 0.351712  | 0.110077   | 0.658322  |
| CXCR4     | 4.73201    | 0.723261   | 0.814181  | 2.91972   | 0.463262  | 4.33398    | 0.90804   | 2.84483    | 0.290574   | 4.20482   | 7.44046    | 0.519262   | 4.17553   | 1.45479    | 2.7697    |
| CXCR5     | 0.67656    | 0.648308   | 0.560233  | 0.178111  | 0.659512  | 0.184992   | 0.789818  | 0.679449   | 0.00915546 | 0.11311   | 0.050759   | 0.144996   | 0.145333  | 0.137266   | 0.55776   |
| CXCR6     | 1.41015    | 1.05626    | 0.90189   | 1.02579   | 0.809914  | 0.312794   | 1.16358   | 1.23216    | 0.404095   | 0.862632  | 0.548464   | 0.83942    | 0.718683  | 1.13338    | 1.17425   |
| CXXC1     | 4.97816    | 6.61666    | 6.08063   | 7.88815   | 15.8049   | 11.2348    | 5.43445   | 3.55739    | 9.50298    | 8.2949    | 4.03424    | 8.02294    | 10.1188   | 8.31517    | 4.20216   |
| CXXC1P1   | 0.0121998  | 0          | 0         | 0         | 0         | 0          | 0         | 0          | 0          | 0         | 0.0137721  | 0          | 0         | 0          | 0.0175205 |
| CXXC4     | 0.10233    | 0.0591652  | 0.0711102 | 0.0126545 | 0.0381491 | 0.146383   | 0.0841231 | 0.138233   | 0          | 0.0154122 | 0.00462073 | 0.0351457  | 0.0184865 | 0.0128358  | 0.0117568 |
| CXXC4-AS1 | 0.00779752 | 0.0450836  | 0.0322533 | 0         | 0         | 0.00663949 | 0         | 0.00692979 | 0          | 0         | 0          | 0.00557934 | 0         | 0          | 0         |
| CXXC5     | 3.21956    | 2.50329    | 3.51471   | 2.60875   | 5.53065   | 4.95068    | 3.53906   | 2.89495    | 4.59766    | 4.29443   | 6.72742    | 2.05977    | 4.64736   | 2.39536    | 3.3998    |
| CXXC5-AS1 | 0.240656   | 0.173927   | 0.398175  | 0.289336  | 0.436125  | 0.239068   | 0.549546  | 0.213875   | 0.0488486  | 0.302048  | 0.0905567  | 0.229594   | 0.0776349 | 0.188666   | 0.345612  |
| CXorf21   | 0.216178   | 0.185169   | 0.278192  | 0.569321  | 0.205211  | 0.32724    | 0.123412  | 0.234815   | 0.0585068  | 0.618019  | 0.827018   | 0.0171868  | 0.984087  | 0.194584   | 0.672661  |
| CXorf36   | 2.11572    | 1.12927    | 1.01881   | 2.11522   | 2.54522   | 4.03023    | 1.94695   | 1.01965    | 0.380309   | 1.46644   | 2.51909    | 0.647717   | 1.72046   | 2.10701    | 4.39389   |

|          |           |            |           |           |            |           |            |           |          |           |           |           |            |           |           |
|----------|-----------|------------|-----------|-----------|------------|-----------|------------|-----------|----------|-----------|-----------|-----------|------------|-----------|-----------|
| CXorf38  | 2.15687   | 1.7295     | 1.87549   | 1.8063    | 1.05157    | 2.50682   | 1.44403    | 1.67432   | 0.901173 | 1.3239    | 1.83057   | 0.837362  | 2.00445    | 1.24796   | 1.92937   |
| CXorf40A | 0.787112  | 0.85109    | 0.928133  | 0.569355  | 0.840345   | 1.04568   | 0.675385   | 0.638633  | 0.286343 | 0.425354  | 0.715519  | 0.474137  | 0.705843   | 0.67327   | 0.7159    |
| CXorf40B | 5.24877   | 5.19028    | 4.61489   | 5.62274   | 7.46845    | 7.46013   | 3.65768    | 2.88497   | 4.02931  | 5.50321   | 10.6355   | 4.65681   | 6.77672    | 4.30033   | 5.26293   |
| CXorf49  | 0         | 0.0045181  | 0         | 0         | 0.00485537 | 0.0079846 | 0.00356888 | 0         | 0        | 0.0313851 | 0.0458716 | 0.0111828 | 0.00403344 | 0.0114356 | 0.0179559 |
| CXorf49B | 0         | 0.0045181  | 0         | 0         | 0.00485537 | 0.0079846 | 0.00356888 | 0         | 0        | 0.0313851 | 0.0458716 | 0.0111828 | 0.00403344 | 0.0114356 | 0.0179559 |
| CXorf51A | 0         | 0          | 0         | 0         | 0          | 0         | 0          | 0         | 0        | 0         | 0         | 0         | 0          | 0         | 0         |
| CXorf51B | 0         | 0          | 0         | 0         | 0          | 0         | 0          | 0         | 0        | 0         | 0         | 0         | 0          | 0         | 0         |
| CXorf56  | 3.39582   | 2.46021    | 2.54172   | 3.56813   | 2.7335     | 4.26842   | 2.42193    | 2.50227   | 3.13945  | 2.38774   | 6.0777    | 1.58584   | 3.15452    | 2.37635   | 2.29499   |
| CXorf57  | 0.54538   | 0.391301   | 0.397231  | 0.323778  | 0.101291   | 0.615812  | 0.318117   | 0.405662  | 0.202151 | 0.193448  | 0.254297  | 0.0975584 | 0.164464   | 0.0712598 | 0.0681073 |
| CXorf58  | 0.01496   | 0.00720793 | 0.0247519 | 0.0308333 | 0          | 0         | 0          | 0         | 0        | 0         | 0         | 0         | 0.0193042  | 0         | 0.0214844 |
| CXorf65  | 0.314871  | 0.139067   | 0.325605  | 0.0270403 | 0.122276   | 0.0446848 | 0.0898775  | 0.209874  | 0        | 0.032933  | 0.0592418 | 0.0375498 | 0          | 0.068569  | 0         |
| CXorf66  | 0         | 0          | 0         | 0         | 0          | 0         | 0          | 0         | 0        | 0         | 0         | 0         | 0          | 0         | 0         |
| CXorf67  | 0.0240697 | 0.0115972  | 0.0199122 | 0         | 0.0373886  | 0.0307426 | 0.0687051  | 0.0106956 | 0        | 0         | 0         | 0         | 0          | 0         | 0         |
| CYB561   | 7.89516   | 8.99179    | 10.0947   | 9.64613   | 15.2214    | 15.3149   | 9.93475    | 5.85116   | 10.8767  | 10.352    | 10.2062   | 8.25553   | 16.7829    | 6.8934    | 6.46799   |
| CYB561A3 | 4.19006   | 6.08394    | 6.84378   | 6.12649   | 7.81389    | 8.75685   | 8.31712    | 4.05444   | 5.02226  | 4.65973   | 9.19817   | 3.38981   | 5.30973    | 3.97558   | 3.62634   |
| CYB561D1 | 2.43682   | 3.73202    | 4.56642   | 2.66844   | 4.9215     | 4.48229   | 4.10423    | 2.60037   | 9.15463  | 2.38256   | 3.68301   | 2.08719   | 2.49008    | 2.12968   | 1.47588   |
| CYB561D2 | 1.33424   | 1.33062    | 1.6848    | 1.88825   | 2.27504    | 2.17222   | 1.71772    | 1.02405   | 1.6075   | 1.28623   | 3.61212   | 1.02758   | 2.04255    | 1.51666   | 1.19959   |
| CYB5A    | 8.61822   | 10.0511    | 11.6606   | 16.1303   | 8.21577    | 17.0312   | 9.50285    | 10.5462   | 14.7795  | 13.0408   | 24.7316   | 12.3908   | 8.7131     | 5.33216   | 4.89677   |
| CYB5B    | 4.38994   | 3.58507    | 3.81482   | 7.49543   | 2.65047    | 9.14954   | 3.86557    | 3.81984   | 3.15     | 5.66571   | 9.24089   | 3.50044   | 7.99195    | 5.74017   | 4.62951   |
| CYB5D1   | 2.41831   | 2.69868    | 2.50441   | 2.64164   | 2.03323    | 3.14717   | 1.96605    | 2.20722   | 0.868172 | 1.55801   | 1.24176   | 1.88295   | 1.84765    | 2.11378   | 1.25465   |
| CYB5D2   | 3.39862   | 2.82944    | 2.70639   | 3.20456   | 2.6935     | 5.71887   | 3.14131    | 2.11635   | 3.22403  | 2.98884   | 6.08119   | 1.63775   | 2.55824    | 3.19004   | 1.95899   |
| CYB5R1   | 9.97278   | 24.5071    | 29.7613   | 24.0528   | 21.727     | 21.2172   | 20.0713    | 9.95207   | 70.404   | 28.269    | 32.9472   | 24.9753   | 34.2077    | 20.5985   | 8.05117   |
| CYB5R2   | 4.10658   | 3.60511    | 3.52201   | 5.35569   | 3.02729    | 8.47509   | 5.35103    | 3.5465    | 6.96515  | 7.97878   | 9.99193   | 5.90997   | 14.5725    | 8.74883   | 2.3657    |
| CYB5R3   | 39.6791   | 34.7668    | 37.8292   | 36.0329   | 48.4827    | 53.5659   | 45.7976    | 26.5693   | 20.0931  | 31.0507   | 51.2864   | 29.652    | 28.5303    | 29.3945   | 44.7443   |
| CYB5R4   | 3.04866   | 1.94033    | 1.89155   | 4.23497   | 0.639949   | 3.10455   | 1.71691    | 2.30665   | 3.83836  | 6.01104   | 8.42949   | 2.48355   | 6.05378    | 3.29439   | 2.17434   |
| CYB5RL   | 0.502987  | 0.735208   | 0.649874  | 0.384389  | 1.05345    | 0.928756  | 1.09051    | 0.49724   | 0.392327 | 0.262451  | 0.56781   | 0.323506  | 0.142207   | 0.342634  | 0.543794  |

|            |           |           |           |          |           |           |            |           |            |           |           |           |            |           |           |
|------------|-----------|-----------|-----------|----------|-----------|-----------|------------|-----------|------------|-----------|-----------|-----------|------------|-----------|-----------|
| CYBA       | 11.0754   | 6.21538   | 8.1031    | 31.1727  | 28.8886   | 60.6171   | 11.2932    | 6.96966   | 2.92382    | 24.2258   | 82.0626   | 5.70305   | 25.4233    | 16.2613   | 27.0304   |
| CYBB       | 3.77857   | 1.59332   | 2.19921   | 10.9803  | 2.38939   | 11.6374   | 4.73037    | 3.71055   | 0.359011   | 8.17323   | 15.9791   | 0.594423  | 9.32977    | 1.98325   | 10.1833   |
| CYBC1      | 3.02779   | 3.56332   | 3.69729   | 10.2863  | 11.3417   | 16.2891   | 4.48257    | 2.60072   | 3.1582     | 5.03661   | 7.2939    | 3.86647   | 8.92168    | 5.42505   | 6.58485   |
| CYBRD1     | 33.3048   | 23.8014   | 35.9606   | 11.524   | 6.13306   | 33.3986   | 36.5987    | 30.5925   | 4.57166    | 12.8473   | 25.1108   | 1.84329   | 9.3688     | 9.56212   | 26.6299   |
| CYC1       | 18.9233   | 14.6386   | 16.3063   | 27.5604  | 25.4616   | 36.2501   | 20.1071    | 11.4672   | 24.5768    | 18.7604   | 37.6217   | 13.0302   | 30.0572    | 18.7413   | 10.8274   |
| CYCS       | 4.82251   | 3.90213   | 3.30156   | 7.92833  | 1.9539    | 6.39787   | 3.38292    | 4.20786   | 11.7567    | 12.2629   | 13.2232   | 12.3613   | 12.1142    | 8.15545   | 4.27307   |
| CYCSP52    | 0.223965  | 0.719398  | 0.926398  | 0.461605 | 0.46386   | 0.254271  | 0.767148   | 0.729819  | 0.545528   | 0.0936997 | 0.0842762 | 0.320506  | 0.048167   | 0.39018   | 0.107214  |
| CYFIP1     | 8.18862   | 8.42338   | 9.45479   | 16.2728  | 9.51291   | 16.8529   | 5.39905    | 6.94199   | 12.38      | 14.3774   | 11.9049   | 10.1      | 21.9405    | 10.1148   | 9.65212   |
| CYFIP2     | 0.899782  | 0.498966  | 0.589872  | 0.682317 | 1.87763   | 1.11598   | 0.899409   | 0.772494  | 5.88028    | 0.933286  | 1.13073   | 2.0602    | 0.690069   | 0.628202  | 1.23856   |
| CYGB       | 3.97587   | 1.50204   | 1.52478   | 5.40634  | 5.55917   | 14.4694   | 5.91606    | 2.07006   | 0.676663   | 3.87468   | 9.70672   | 0.894276  | 3.84542    | 2.02699   | 6.42938   |
| CYHR1      | 1.87934   | 3.11003   | 3.12042   | 3.18222  | 8.37611   | 3.84507   | 2.71443    | 1.62889   | 3.10568    | 2.69215   | 3.11858   | 2.11448   | 2.35224    | 1.85338   | 1.70712   |
| CYLC1      | 0         | 0         | 0         | 0        | 0         | 0         | 0          | 0         | 0          | 0         | 0         | 0         | 0          | 0         | 0         |
| CYLC2      | 0         | 0         | 0         | 0        | 0         | 0         | 0          | 0         | 0          | 0         | 0         | 0         | 0          | 0         | 0         |
| CYLD       | 4.48928   | 5.13642   | 6.2014    | 4.05212  | 2.59667   | 4.80952   | 3.2021     | 5.67633   | 4.01419    | 4.12696   | 3.66737   | 2.76648   | 5.14677    | 2.46174   | 3.81624   |
| CYMP       | 0         | 0         | 0         | 0        | 0         | 0         | 0          | 0.0165734 | 0          | 0         | 0         | 0         | 0          | 0         | 0         |
| CYMP-AS1   | 0         | 0         | 0         | 0        | 0         | 0         | 0          | 0         | 0          | 0         | 0         | 0         | 0          | 0         | 0         |
| CYP11A1    | 0.142976  | 0.0551104 | 0.110395  | 0.10805  | 0.162867  | 0.795382  | 0.0326491  | 0.127065  | 0.0116086  | 0.0239266 | 0.0538007 | 0.0136404 | 0.0614983  | 0.0398536 | 0.0821327 |
| CYP11B1    | 0         | 0         | 0.005416  | 0        | 0.0101695 | 0.0111491 | 0.00747496 | 0         | 0          | 0         | 0         | 0         | 0          | 0         | 0         |
| CYP11B2    | 0         | 0         | 0         | 0        | 0         | 0         | 0          | 0         | 0          | 0         | 0         | 0         | 0          | 0         | 0         |
| CYP17A1    | 0.0742558 | 0.137147  | 0.0921444 | 0        | 0.0768966 | 0.0316139 | 0.0423914  | 0.0549936 | 0          | 0.0621324 | 0.0139709 | 0         | 0.00798491 | 0.0129364 | 0         |
| CYP19A1    | 0.499009  | 0.123055  | 0.146273  | 0.465654 | 0.207516  | 24.4874   | 0.331982   | 0.502842  | 0.00478534 | 0.172605  | 0.319362  | 0.0140573 | 0.0912638  | 0.104732  | 0.253928  |
| CYP1A1     | 0.767126  | 0.0290707 | 0.0285223 | 0.648424 | 0.0133889 | 0.388983  | 1.09239    | 0.367689  | 0.0104974  | 0.0108182 | 0.0583813 | 0.0061674 | 0          | 0.0270292 | 0         |
| CYP1A2     | 0         | 0         | 0         | 0        | 0         | 0         | 0          | 0         | 0          | 0         | 0         | 0         | 0          | 0         | 0         |
| CYP1B1     | 3.30551   | 0.383014  | 0.274941  | 1.94388  | 1.10924   | 8.71531   | 2.887      | 1.13755   | 0.00546975 | 1.49378   | 3.00143   | 0.208881  | 1.10981    | 0.387302  | 2.86376   |
| CYP1B1-AS1 | 0.369655  | 0.0445264 | 0.0982944 | 0.02721  | 0.0410144 | 0.134896  | 0.452207   | 0.234656  | 0          | 0         | 0.0596135 | 0         | 0.0340714  | 0.0344996 | 0.189597  |
| CYP20A1    | 2.23754   | 2.24198   | 2.31468   | 1.84511  | 2.2963    | 1.87462   | 1.98729    | 2.15581   | 1.17451    | 1.27941   | 2.16301   | 1.13889   | 1.69335    | 1.58725   | 2.58772   |

|          |            |            |           |            |           |           |           |            |           |            |           |            |            |            |           |
|----------|------------|------------|-----------|------------|-----------|-----------|-----------|------------|-----------|------------|-----------|------------|------------|------------|-----------|
| CYP21A1P | 0.0235583  | 0.016069   | 0.028907  | 0.0129855  | 0.028551  | 0.0745016 | 0.0391177 | 0.0262549  | 0         | 0          | 1.52E-37  | 0.00180642 | 1.01E-06   | 0.00649888 | 0.0334632 |
| CYP21A2  | 0.00302538 | 0.00755567 | 0.0224913 | 0.00374602 | 0.0222759 | 0.0419405 | 0.0226974 | 0.00908304 | 0         | 0.00172047 | 2.91E-33  | 0.00333775 | 0.00530277 | 0.00238729 | 0.0405937 |
| CYP24A1  | 0.0566884  | 0.119496   | 0.0879313 | 2.28565    | 2.02531   | 0.337886  | 0.153722  | 0.27709    | 1.79504   | 0.613667   | 1.23189   | 1.3639     | 1.12011    | 0.862912   | 0.376529  |
| CYP26A1  | 0.140035   | 0.0494786  | 0.0540617 | 0.14431    | 0.10151   | 0.58029   | 0.0106591 | 0.0165935  | 0.0909581 | 0.0234344  | 0.0843102 | 0.0133598  | 0.74689    | 0          | 0         |
| CYP26B1  | 3.98753    | 5.69511    | 6.86656   | 6.35497    | 10.4392   | 8.63744   | 8.39819   | 2.59579    | 18.6586   | 4.7115     | 4.89713   | 7.86186    | 10.92      | 6.19642    | 4.80745   |
| CYP26C1  | 0.0147502  | 0.0142137  | 0.0366072 | 0          | 0.0458243 | 0.0376788 | 0         | 0          | 0         | 0          | 0         | 0.0105542  | 0          | 0.0231273  | 0.0423663 |
| CYP27A1  | 4.81432    | 2.10564    | 2.22099   | 3.57796    | 6.23976   | 4.90716   | 3.21513   | 1.77601    | 0.688354  | 2.40685    | 6.4602    | 0.447748   | 2.2466     | 1.36622    | 3.31929   |
| CYP27B1  | 0.241946   | 0.264531   | 0.169362  | 2.06179    | 0.477009  | 1.14892   | 0.286871  | 0.289452   | 0.271996  | 1.17963    | 1.20806   | 0.87891    | 4.60502    | 2.79652    | 1.30968   |
| CYP27C1  | 0.459403   | 0.761626   | 0.788707  | 1.39992    | 1.6344    | 0.929568  | 0.580933  | 0.825339   | 1.65444   | 2.96359    | 1.24912   | 3.02206    | 3.07878    | 2.7186     | 1.958     |
| CYP2A13  | 0.0262989  | 0          | 0         | 0          | 0         | 0         | 0         | 0          | 0         | 0          | 0         | 0          | 0          | 0          | 0         |
| CYP2A6   | 0.499466   | 0.215077   | 0.227013  | 0.0540807  | 0.200246  | 0.115836  | 0.353447  | 0.336561   | 0         | 0          | 0.0740522 | 0.0513876  | 0.0507884  | 0.102853   | 0.25404   |
| CYP2A7   | 0.120513   | 0.0874897  | 0.134411  | 0.0104101  | 0.0811885 | 0.074238  | 0.316082  | 0.153827   | 0         | 0          | 1.91E-17  | 0.0182575  | 9.92E-12   | 0.0316776  | 0.0800367 |
| CYP2B6   | 0          | 0          | 0         | 0          | 0         | 0         | 0         | 0          | 0         | 0          | 0         | 0          | 0          | 0          | 0         |
| CYP2B7P  | 0.0874823  | 0.0651414  | 0.08553   | 0          | 0.0494146 | 0.0677182 | 0.0272412 | 0.0706791  | 0         | 0          | 0         | 0          | 0.025656   | 0.00415655 | 0.0456857 |
| CYP2C18  | 0.236432   | 0.648448   | 1.11338   | 0.0749692  | 0.409637  | 0.108402  | 0.571049  | 1.0991     | 0.310097  | 0.10272    | 0.0615928 | 0.208213   | 0.0352026  | 0.104559   | 0.0914163 |
| CYP2C19  | 5.73E-20   | 0.129542   | 0.134274  | 0.0104841  | 0.0316175 | 0.0190626 | 0.019171  | 0.290881   | 0         | 0          | 0         | 0.0440518  | 0          | 0.00726027 | 0         |
| CYP2C8   | 0.0914745  | 0.0275461  | 0.0472964 | 0.106051   | 0.106569  | 0.0389447 | 0         | 0.101619   | 0.0278514 | 0.0143512  | 0.0903554 | 0.130905   | 0          | 0.101593   | 0.0656845 |
| CYP2C9   | 0.0124358  | 0.0836567  | 0.205756  | 0.0023361  | 0.0263338 | 0.0211779 | 0.0283976 | 0.315201   | 0.0151454 | 0.0156082  | 0.028077  | 0          | 0.00802352 | 0.0228652  | 0         |
| CYP2D6   | 0.706862   | 1.11251    | 0.870019  | 0.396212   | 1.7496    | 0.672657  | 1.04195   | 0.766856   | 0.0365383 | 0.179877   | 0.0857292 | 0.647024   | 0.0801318  | 0.275513   | 0.260401  |
| CYP2D7   | 0.815542   | 1.25402    | 1.57092   | 0.480184   | 1.6074    | 0.89027   | 1.56733   | 1.06009    | 0.202175  | 0.341723   | 0.0946217 | 0.718563   | 0.0891049  | 0.521958   | 0.829373  |
| CYP2E1   | 1.45772    | 0.86289    | 1.44712   | 1.05871    | 0.646955  | 0.508313  | 1.93385   | 2.2332     | 0.659412  | 0.575014   | 0.485839  | 0.208608   | 0.313505   | 0.166885   | 0.63801   |
| CYP2F1   | 0.112649   | 0.0723678  | 0.0724818 | 0.103189   | 0.0777699 | 0.031973  | 0.171492  | 0.100113   | 0         | 0.031419   | 0         | 0.0268677  | 0.0161512  | 0.0523335  | 0.215704  |
| CYP2G1P  | 0.0737333  | 0.0444073  | 0.0686221 | 0          | 0.0572667 | 0.0470872 | 0.073663  | 0.0901011  | 0         | 0.0115679  | 0         | 0          | 0.00594655 | 0.0626214  | 0.145599  |
| CYP2J2   | 1.10366    | 2.13246    | 2.08691   | 0.615099   | 2.02925   | 0.594537  | 2.85456   | 1.46125    | 1.92019   | 0.240291   | 0.394109  | 0.701058   | 0.108991   | 0.123604   | 0.0161734 |
| CYP2R1   | 3.30411    | 3.053      | 3.04104   | 2.25525    | 0.955385  | 2.46021   | 1.78011   | 2.84743    | 7.2119    | 2.80057    | 2.19597   | 2.85543    | 1.67037    | 2.16793    | 1.43791   |
| CYP2S1   | 0.573284   | 0.92214    | 0.744225  | 1.71782    | 1.13711   | 1.22412   | 0.604207  | 0.658415   | 0.397435  | 3.57551    | 1.41381   | 1.62818    | 6.07742    | 1.5396     | 1.03864   |

|                 |           |            |            |           |            |            |           |           |           |           |            |            |           |            |           |
|-----------------|-----------|------------|------------|-----------|------------|------------|-----------|-----------|-----------|-----------|------------|------------|-----------|------------|-----------|
| CYP2T1P         | 1.10806   | 1.19363    | 1.30419    | 0.482748  | 1.41334    | 1.08157    | 2.38628   | 1.52116   | 0.318172  | 0.316588  | 0.274578   | 0.644588   | 0.133683  | 1.04053    | 2.13468   |
| CYP2U1          | 1.05196   | 0.537132   | 0.57614    | 0.547055  | 0.353114   | 1.55078    | 1.17885   | 0.740123  | 0.22539   | 0.69072   | 1.38452    | 0.13242    | 0.51218   | 0.354117   | 1.10508   |
| CYP2W1          | 0.0904025 | 0.648692   | 0.84759    | 0.0414055 | 2.38725    | 0.0769766  | 1.49094   | 0.169611  | 0.0489334 | 0.0378215 | 0.0680355  | 0.344989   | 0.0583273 | 0.173244   | 0         |
| CYP39A1         | 0.814362  | 2.44547    | 2.1621     | 1.89313   | 0.882549   | 0.572474   | 1.70826   | 1.54005   | 1.89134   | 1.41431   | 1.63552    | 1.84973    | 0.98975   | 0.564195   | 0.421574  |
| CYP3A4          | 0.133483  | 0.269968   | 0.263491   | 0.0795118 | 0.0772546  | 0.0141893  | 0.124039  | 0.141801  | 0.183035  | 0.0104036 | 0.0467866  | 0.0239102  | 0         | 0.00437936 | 0.0238083 |
| CYP3A43         | 0.0114456 | 0.0330881  | 0.0284059  | 0.011795  | 0          | 0.0292374  | 0.0653412 | 0.0406877 | 0         | 0         | 0          | 0          | 0         | 0          | 0         |
| CYP3A5          | 2.52887   | 4.52068    | 4.56741    | 0.793948  | 1.66498    | 0.761043   | 2.69848   | 3.38528   | 3.5736    | 0.567766  | 0.472216   | 1.79142    | 0.113406  | 0.338386   | 0.421785  |
| CYP3A7          | 0.0948777 | 0.0411514  | 0.0551745  | 0.0175382 | 0          | 0.0378598  | 1.51E-24  | 0.204515  | 0.0135378 | 0         | 0          | 0.0238609  | 0         | 6.62E-22   | 0.0884366 |
| CYP3A7-CYP3A51P | 0.0661407 | 0.0508554  | 4.03E-19   | 0.0154881 | 0.0158926  | 0          | 0.0350451 | 0.0208906 | 0         | 0.0128412 | 0          | 2.68E-28   | 0         | 0.0427783  | 0.0508409 |
| CYP46A1         | 0.111425  | 0.0858983  | 0.0921789  | 0.0574135 | 0.207699   | 0.275144   | 0.139944  | 0.0693179 | 0         | 0.0419551 | 0.213835   | 0.0637823  | 0.0862693 | 0.0349415  | 0.192025  |
| CYP4A11         | 0.384199  | 0.246658   | 0.251803   | 0.0274659 | 0.124201   | 0.0529528  | 0.268623  | 0.210664  | 0.0216396 | 0.0111504 | 0.010029   | 0.031784   | 0         | 0.0232161  | 0.076552  |
| CYP4A22         | 0.34627   | 0.136288   | 0.230016   | 0.0389954 | 0.0235115  | 0.0708849  | 0.263703  | 0.177013  | 0         | 0.028496  | 0.00854337 | 0.0541513  | 0         | 0.0158215  | 0         |
| CYP4B1          | 1.984     | 2.08753    | 2.03167    | 0.232086  | 2.36551    | 0.0913161  | 2.4122    | 1.80133   | 0.91427   | 0         | 0.0726384  | 0.115103   | 0         | 0.00560499 | 0         |
| CYP4F11         | 0.0068168 | 0.262755   | 0.327082   | 0.105374  | 0.751808   | 1.3118     | 0.241279  | 0.0908731 | 0.481522  | 0.983917  | 0.80801    | 0.941377   | 2.40141   | 0.630609   | 0.127267  |
| CYP4F12         | 4.35657   | 9.91201    | 9.88       | 2.06291   | 5.28575    | 2.83114    | 9.33156   | 4.83217   | 5.53936   | 0.669991  | 1.26781    | 3.73205    | 0.165032  | 0.552176   | 0.223599  |
| CYP4F2          | 0         | 0.0294965  | 0.0167555  | 0.0100641 | 0.0336976  | 0.0423087  | 0.0464104 | 0.0357908 | 0         | 0.0125118 | 0.023257   | 0          | 0         | 0.0212358  | 0         |
| CYP4F22         | 7.5399    | 10.2745    | 10.4937    | 13.9587   | 20.627     | 17.6516    | 17.3999   | 10.8317   | 77.7725   | 24.1371   | 36.6199    | 30.2818    | 30.0982   | 14.4136    | 4.10199   |
| CYP4F24P        | 0.311638  | 0.0594262  | 0.0628031  | 0         | 0.0294331  | 0.00817762 | 0.0759636 | 0.0506848 | 0.0116083 | 0         | 0.0213075  | 0          | 0         | 0          | 0         |
| CYP4F29P        | 0.148451  | 0.129877   | 0.425739   | 0.0323597 | 0.0332411  | 0.0715856  | 0.0619796 | 0.0860065 | 0.0220372 | 0.204396  | 0.102133   | 0.0776832  | 0         | 0.00945705 | 1.39E-20  |
| CYP4F3          | 0.413664  | 1.12694    | 0.738778   | 0.616487  | 0.97239    | 0.445535   | 1.12826   | 0.694646  | 1.56537   | 1.29764   | 1.38307    | 1.15224    | 0.652938  | 0.520329   | 0.371296  |
| CYP4F30P        | 0         | 0.00495806 | 0.016491   | 0         | 0.0309647  | 0          | 0         | 0         | 0         | 0         | 0          | 0          | 0         | 0.00520924 | 4.53E-07  |
| CYP4F35P        | 0.977857  | 0.349342   | 0.3166     | 0.0414631 | 1.42268    | 0.248323   | 0.101065  | 0.169144  | 0.068602  | 0.0100998 | 0.0726721  | 0.0575781  | 0         | 0.00841138 | 0.19646   |
| CYP4F62P        | 0         | 0.004623   | 0.00049871 | 0         | 0.00093642 | 0          | 0         | 0         | 0         | 0.0120427 | 0          | 0          | 0         | 0.00015753 | 0.0551179 |
|                 |           |            | 7          |           | 9          |            |           |           |           |           |            |            |           | 7          |           |
| CYP4F8          | 0.0485943 | 0.00585337 | 0          | 0.112675  | 0.0377419  | 0.0103444  | 0.0277417 | 0         | 0.0295912 | 0         | 0.0411427  | 0.00869264 | 0         | 0          | 0         |
| CYP4V2          | 2.21212   | 1.33566    | 1.41559    | 1.64086   | 0.937058   | 2.61825    | 1.73576   | 1.49841   | 0.233544  | 0.790392  | 1.78281    | 0.225862   | 0.726908  | 0.759176   | 1.65334   |





|           |           |            |            |           |           |           |           |            |            |           |           |            |            |           |           |
|-----------|-----------|------------|------------|-----------|-----------|-----------|-----------|------------|------------|-----------|-----------|------------|------------|-----------|-----------|
| D2HGDH    | 2.62147   | 6.2898     | 5.77581    | 2.82884   | 12.5589   | 4.55448   | 3.58769   | 3.20829    | 1.37596    | 1.52878   | 1.40492   | 3.33464    | 1.19591    | 2.19122   | 2.80139   |
| DAAM1     | 9.95867   | 12.6017    | 15.0874    | 11.3734   | 5.13817   | 10.0856   | 9.06495   | 13.6053    | 22.7631    | 18.381    | 12.2249   | 15.143     | 20.4288    | 11.2323   | 5.92271   |
| DAAM2     | 3.72413   | 1.72028    | 2.18037    | 1.27771   | 3.09082   | 6.92955   | 4.56009   | 2.04452    | 0.575404   | 1.62032   | 1.86188   | 1.14206    | 1.55208    | 3.63587   | 7.45727   |
| DAB1      | 0.0357192 | 0.0143417  | 0.00738736 | 0.190183  | 0.0508605 | 0.0735015 | 0.0679717 | 0.00264535 | 0          | 0.0336234 | 0.0201613 | 0.00212984 | 0.113309   | 0.0871192 | 0.0299234 |
| DAB1-AS1  | 0         | 0.0290887  | 0.0166483  | 0         | 0         | 0         | 0         | 0          | 0          | 0         | 0         | 0          | 0          | 0         | 0         |
| DAB2      | 9.67257   | 4.44952    | 6.5247     | 8.07599   | 4.85989   | 20.5844   | 10.8084   | 8.65448    | 1.2497     | 8.92057   | 19.0109   | 1.96512    | 7.21104    | 5.77047   | 18.0304   |
| DAB2IP    | 8.31055   | 7.45269    | 7.10164    | 8.99548   | 18.7549   | 16.3592   | 9.77962   | 5.81988    | 9.9822     | 6.49998   | 4.94419   | 7.48481    | 11.2513    | 8.70481   | 10.2518   |
| DACH1     | 0.459942  | 0.470915   | 0.559769   | 0.396506  | 0.68697   | 0.429292  | 0.504949  | 0.514879   | 0.118495   | 0.432956  | 0.883669  | 0.139235   | 0.393767   | 0.450723  | 1.16864   |
| DACH2     | 0.0369108 | 0.0133381  | 0          | 0         | 0.0143338 | 0.0157145 | 0.0316076 | 0.0082008  | 0          | 0         | 0         | 0          | 0          | 0         | 0         |
| DACT1     | 1.15584   | 0.217698   | 0.478096   | 0.530592  | 0.865065  | 1.95047   | 0.557873  | 0.340848   | 0.0319928  | 0.975922  | 1.73776   | 0.1015     | 1.50843    | 0.540937  | 3.31986   |
| DACT2     | 0.827516  | 0.921521   | 0.965666   | 0.513927  | 0.834245  | 0.979933  | 1.49546   | 0.472427   | 0.00667432 | 0.11693   | 0.0618651 | 0.0666614  | 0.0530373  | 0.0143211 | 0.24398   |
| DACT3     | 1.43795   | 0.304074   | 0.462613   | 0.26344   | 1.78691   | 3.55756   | 1.58708   | 0.37628    | 0.26269    | 1.03273   | 2.41687   | 0.108605   | 0.788596   | 0.647156  | 1.65207   |
| DACT3-AS1 | 0.0277828 | 0.0535447  | 0.0229839  | 0.0143155 | 0.0863125 | 0.118283  | 0.0158607 | 0.11111    | 0          | 0         | 0.0470449 | 0.029819   | 0.00896265 | 0.0508217 | 0.119699  |
| DAD1      | 25.8658   | 16.494     | 19.3653    | 41.8822   | 14.4931   | 41.1366   | 21.6093   | 16.2888    | 26.285     | 44.383    | 96.8934   | 20.5033    | 42.1175    | 27.8701   | 21.6012   |
| DAG1      | 10.1376   | 8.76265    | 9.31586    | 9.99492   | 9.40577   | 13.8687   | 13.8191   | 8.02362    | 11.269     | 8.98763   | 9.95795   | 7.98979    | 15.0943    | 7.1513    | 7.8591    |
| DAGLA     | 0.490353  | 0.238196   | 0.40898    | 0.302365  | 0.717984  | 0.773456  | 0.770967  | 0.332197   | 0.0244752  | 0.232052  | 0.362982  | 0.0834013  | 0.290441   | 0.291991  | 0.813881  |
| DAGLB     | 3.67425   | 3.95067    | 4.26336    | 4.27817   | 5.99152   | 5.54611   | 5.13041   | 3.1947     | 5.76302    | 4.22227   | 3.7707    | 4.31344    | 3.2378     | 3.83234   | 3.67771   |
| DALRD3    | 3.26865   | 3.5637     | 3.37246    | 5.09818   | 5.84977   | 6.67284   | 3.61009   | 2.11237    | 3.19044    | 3.74516   | 6.81428   | 3.11101    | 3.52435    | 2.51658   | 2.30274   |
| DANCR     | 5.92514   | 4.67266    | 3.02468    | 5.54486   | 2.15494   | 5.11142   | 5.98055   | 2.81148    | 5.54239    | 4.13329   | 5.98621   | 4.14683    | 4.64265    | 5.48875   | 2.10404   |
| DAND5     | 0         | 0.0257521  | 0.011054   | 0.01377   | 0.0622676 | 0.0341328 | 0         | 0          | 0          | 0.0335415 | 0         | 0.0191218  | 0.00862112 | 0.0349179 | 0         |
| DANT1     | 1.11167   | 1.07124    | 0.856952   | 0.31244   | 0.313966  | 0.387236  | 0.663485  | 1.10023    | 0.0307703  | 0.0634212 | 0         | 0.216936   | 0.0163011  | 0.290505  | 0.326558  |
| DANT2     | 1.57932   | 1.10726    | 0.963141   | 0.479913  | 0.204435  | 0.206887  | 0.751338  | 1.58351    | 0.0123297  | 0.190597  | 0.0342856 | 0.470851   | 0          | 0.497368  | 0.494329  |
| DAO       | 0         | 0          | 0          | 0.0298867 | 0         | 0         | 0         | 0          | 0          | 0         | 0         | 0          | 0          | 0         | 0         |
| DAOA      | 0         | 0.00997377 | 0          | 0         | 0.0321549 | 0         | 0         | 0          | 0          | 0         | 0         | 0          | 0          | 0         | 0         |
| DAOA-AS1  | 0         | 0          | 0          | 0         | 0         | 0         | 0         | 0          | 0          | 0         | 0         | 0          | 0          | 0         | 0         |
| DAP       | 10.5143   | 7.40361    | 7.49641    | 12.149    | 10.1308   | 25.8563   | 12.0611   | 7.7019     | 6.87186    | 10.8027   | 22.8463   | 6.06659    | 12.9233    | 10.2209   | 16.6465   |

|           |            |           |            |            |            |            |            |           |            |           |           |           |            |            |          |
|-----------|------------|-----------|------------|------------|------------|------------|------------|-----------|------------|-----------|-----------|-----------|------------|------------|----------|
| DAP3      | 11.347     | 8.87724   | 10.4839    | 15.1358    | 8.44814    | 16.826     | 9.43966    | 8.59997   | 10.2089    | 11.9096   | 13.6815   | 7.78302   | 14.9452    | 9.34588    | 8.20041  |
| DAPK1     | 2.61119    | 1.27233   | 1.88556    | 1.33786    | 1.87909    | 3.83128    | 2.46765    | 1.31436   | 0.260521   | 0.768412  | 1.40724   | 0.282369  | 0.944688   | 1.09101    | 2.42055  |
| DAPK1-IT1 | 0.0669842  | 0.145233  | 0.193949   | 0.0690292  | 0.0520248  | 0.171109   | 0.229441   | 0.208355  | 0          | 0.0840721 | 0.113425  | 0         | 0          | 0.0175044  | 0.384791 |
| DAPK2     | 2.31224    | 3.55775   | 4.23559    | 1.99988    | 0.844479   | 2.19737    | 1.81503    | 2.28122   | 1.52536    | 0.820534  | 0.924457  | 1.77265   | 1.08336    | 0.870393   | 0.780753 |
| DAPK3     | 4.87908    | 6.08701   | 7.28526    | 10.3864    | 13.726     | 14.0245    | 5.71948    | 2.93823   | 19.1077    | 14.0708   | 8.99129   | 8.036     | 22.0809    | 12.97      | 9.56804  |
| DAPL1     | 54.0005    | 33.0002   | 20.3091    | 19.3256    | 22.3772    | 75.8119    | 24.7208    | 31.3249   | 84.6607    | 18.2947   | 54.7531   | 42.8473   | 1.48493    | 8.42012    | 1.22417  |
| DAPP1     | 2.16073    | 2.76629   | 3.17283    | 3.1333     | 1.05486    | 2.16839    | 1.67408    | 2.98331   | 5.5356     | 4.8428    | 4.00726   | 3.38479   | 7.37889    | 3.4121     | 1.85077  |
| DARS      | 9.04895    | 8.97353   | 9.55646    | 14.5987    | 4.12671    | 14.5747    | 6.52015    | 8.87282   | 12.142     | 10.8378   | 12.9866   | 7.55783   | 12.5093    | 8.94242    | 5.90507  |
| DARS-AS1  | 0.672703   | 0.893194  | 0.819535   | 1.04912    | 0.753449   | 0.438853   | 0.364593   | 0.552276  | 1.17649    | 0.672698  | 1.29201   | 0.777087  | 0.492559   | 0.805655   | 0.240872 |
| DARS2     | 1.97006    | 1.84845   | 2.14444    | 3.83246    | 2.02939    | 2.99004    | 1.90998    | 1.8184    | 1.59954    | 2.49866   | 3.08232   | 1.77564   | 3.93364    | 3.04196    | 3.2462   |
| DAW1      | 0.0209914  | 0.0657409 | 0.0347312  | 0.0324484  | 0          | 0          | 0.0239673  | 0.0373109 | 0.102261   | 0.0395196 | 0         | 0.0375498 | 0          | 0.010971   | 0        |
| DAXX      | 0.989145   | 1.21575   | 1.20474    | 2.1481     | 2.25937    | 2.66384    | 1.07683    | 0.809872  | 2.44812    | 1.54129   | 1.29839   | 1.3826    | 2.39979    | 1.86996    | 1.25535  |
| DAZ1      | 2.79E-09   | 2.20E-07  | 5.81E-08   | 1.52E-09   | 1.30E-08   | 2.52E-11   | 4.02E-08   | 7.53E-09  | 0          | 0         | 0         | 0         | 0          | 7.70E-10   | 0        |
| DAZ2      | 0.147225   | 0.0389363 | 0.0109236  | 0.0040188  | 3.73E-05   | 0.0485513  | 0.00011511 | 0.13008   | 0          | 0         | 0         | 0         | 0          | 0.00203818 | 0        |
| DAZ3      | 0.111134   | 6.27E-05  | 0.00037446 | 0.00013974 | 0.00119869 | 2.32E-06   | 0.00123429 | 0.22581   | 0          | 0         | 0         | 0         | 0          | 7.09E-05   | 0        |
| DAZ4      | 0.150878   | 0.0137515 | 0.0306353  | 0.00104338 | 0.00894991 | 1.73E-05   | 0.0207346  | 0.0723818 | 0          | 0         | 0         | 0         | 0          | 0.00052916 | 0        |
| DAZAP1    | 12.586     | 12.2449   | 12.3741    | 29.3514    | 21.4628    | 30.595     | 14.1973    | 11.0149   | 14.5046    | 21.5223   | 20.5199   | 18.2059   | 40.1461    | 23.0884    | 15.147   |
| DAZAP2    | 26.3481    | 18.2922   | 20.5492    | 32.1887    | 8.20096    | 46.4685    | 21.8564    | 24.494    | 20.9773    | 23.7374   | 39.137    | 13.9493   | 36.0273    | 17.8451    | 21.3924  |
| DAZL      | 0          | 0         | 0.00563271 | 0          | 0          | 0.00579759 | 0          | 0         | 0.00829233 | 0.128186  | 0.307451  | 0         | 0.00439299 | 0.00355857 | 0.244457 |
| DBET      | 0.00688167 | 0.0132628 | 0          | 0.028367   | 0.203103   | 0.0410176  | 0          | 0.0122317 | 0          | 0         | 0         | 0.0196961 | 0          | 0.00359666 | 0        |
| DBF4      | 0.712487   | 0.59215   | 0.563537   | 1.25749    | 0.138018   | 1.07104    | 0.312226   | 0.710681  | 0.62763    | 0.780632  | 1.21032   | 0.699338  | 1.27211    | 1.08975    | 0.748605 |
| DBF4B     | 0.242195   | 0.430036  | 0.371038   | 0.494555   | 0.613086   | 0.763799   | 0.522335   | 0.28699   | 0.131096   | 0.202653  | 0.177209  | 0.381895  | 0.399338   | 0.564929   | 0.772938 |
| DBH       | 0.0251555  | 0.038156  | 0.0208104  | 0.0518469  | 0.117225   | 0.0856783  | 0.0861652  | 0.0298081 | 0          | 0.0105242 | 0         | 0.029999  | 0          | 0          | 0.108379 |
| DBH-AS1   | 0.0518205  | 0.047717  | 0.0600174  | 0.0106805  | 0.257585   | 0.114724   | 0.142001   | 0.0644753 | 0.0126223  | 0.026016  | 0.0818985 | 0.0519106 | 0.00668687 | 0.0108335  | 0.089305 |





|           |           |            |           |            |            |           |           |           |          |           |           |          |            |            |           |
|-----------|-----------|------------|-----------|------------|------------|-----------|-----------|-----------|----------|-----------|-----------|----------|------------|------------|-----------|
| DCN       | 104.397   | 90.7946    | 128.216   | 94.1332    | 52.0669    | 145.679   | 112.986   | 91.2815   | 24.4353  | 77.1771   | 193.345   | 16.0783  | 35.6784    | 32.358     | 120.042   |
| DCP1A     | 3.78787   | 3.03993    | 3.3103    | 3.20772    | 1.51097    | 4.06981   | 3.1228    | 3.24094   | 2.10451  | 2.55663   | 3.19518   | 1.99521  | 4.03383    | 2.65358    | 2.98563   |
| DCP1B     | 1.02894   | 1.11743    | 1.00885   | 0.869605   | 0.668074   | 1.88669   | 0.926176  | 0.94347   | 0.702818 | 0.662797  | 1.46269   | 0.557047 | 0.446091   | 0.793851   | 1.04768   |
| DCP2      | 1.95167   | 2.36071    | 2.30728   | 3.69037    | 1.19149    | 2.47918   | 1.34218   | 2.74285   | 1.97061  | 2.7714    | 3.4764    | 1.58644  | 2.69117    | 2.4433     | 2.4313    |
| DCPS      | 1.8455    | 1.75126    | 1.81279   | 1.8894     | 1.79246    | 3.99188   | 2.2127    | 1.57937   | 0.817756 | 0.893208  | 1.69299   | 0.822795 | 1.5876     | 1.1978     | 1.31075   |
| DCST1     | 0.28099   | 0.520627   | 0.32758   | 0.0874622  | 0.382467   | 0.122763  | 0.30388   | 0.335253  | 0.112943 | 0.015032  | 3.87E-27  | 0.181983 | 0.00723049 | 0.0419406  | 0.0993609 |
| DCST1-AS1 | 1.01363   | 1.73013    | 1.75817   | 0.881804   | 1.78252    | 1.49865   | 1.5533    | 0.940877  | 0.921069 | 0.679364  | 0.713381  | 0.794475 | 0.397593   | 0.449082   | 0.527384  |
| DCST2     | 0.602733  | 1.10631    | 1.1872    | 0.13803    | 1.12945    | 0.309561  | 0.797417  | 0.960786  | 0.151473 | 0.144094  | 0.0432007 | 0.273823 | 0.0185181  | 0.100005   | 0.370972  |
| DCSTAMP   | 0.0116707 | 0          | 0         | 0.0481081  | 0          | 0.0496874 | 0         | 0.010372  | 0        | 0.0585918 | 0.105398  | 0        | 0.0301196  | 0.00609963 | 0         |
| DCT       | 3.08308   | 7.75059    | 9.38864   | 3.74538    | 2.11022    | 7.00062   | 10.1071   | 9.32929   | 2.43879  | 0.132862  | 0.149375  | 0.561766 | 0.150826   | 0.0230524  | 0.126687  |
| DCTD      | 7.31463   | 5.41164    | 6.28928   | 12.8598    | 5.46377    | 17.3302   | 6.36183   | 5.47757   | 5.64688  | 9.2007    | 16.9297   | 6.75533  | 12.0329    | 8.99119    | 8.6793    |
| DCTN1     | 12.0675   | 11.8083    | 10.5026   | 18.4389    | 23.9475    | 24.2735   | 12.5405   | 8.11861   | 18.6638  | 16.986    | 10.273    | 16.3244  | 25.6734    | 13.6413    | 11.1271   |
| DCTN1-AS1 | 0         | 0          | 0         | 0          | 0          | 0         | 0         | 0         | 0        | 0         | 0         | 0        | 0          | 0          | 0         |
| DCTN2     | 11.247    | 11.7929    | 11.4524   | 21.4086    | 16.0396    | 24.8302   | 15.1553   | 8.25671   | 30.8677  | 24.0592   | 33.0081   | 18.6691  | 31.0282    | 15.9469    | 13.3551   |
| DCTN3     | 12.6534   | 11.5699    | 12.3941   | 17.1359    | 17.2073    | 26.5552   | 16.5419   | 10.2211   | 23.0585  | 16.7669   | 28.701    | 13.4293  | 15.3414    | 12.7101    | 8.27531   |
| DCTN4     | 7.49072   | 6.86686    | 6.86273   | 10.5229    | 3.50074    | 10.1292   | 6.95376   | 7.51072   | 9.96601  | 8.80907   | 10.0069   | 7.00318  | 12.6568    | 7.49352    | 6.6273    |
| DCTN5     | 4.68876   | 4.60487    | 4.6931    | 7.51342    | 3.8545     | 6.97346   | 4.43152   | 3.84476   | 7.62689  | 6.51728   | 6.22132   | 4.27004  | 9.95605    | 6.70305    | 4.53705   |
| DCTN6     | 8.40631   | 5.37728    | 6.07013   | 10.8869    | 1.75595    | 10.693    | 4.22408   | 5.66249   | 14.4933  | 13.8012   | 25.824    | 8.69152  | 13.3007    | 9.36708    | 5.6673    |
| DCTPP1    | 4.72412   | 3.51694    | 3.92222   | 10.4221    | 4.02672    | 11.2979   | 4.26443   | 2.36444   | 2.24322  | 5.30848   | 12.572    | 2.96533  | 8.12056    | 6.06116    | 3.67388   |
| DCUN1D1   | 2.62507   | 2.23825    | 2.47226   | 3.05871    | 0.406409   | 2.2253    | 1.78572   | 3.47229   | 2.98817  | 2.91893   | 3.38999   | 1.84295  | 3.25419    | 2.41119    | 2.2127    |
| DCUN1D2   | 3.32361   | 2.17355    | 2.22217   | 1.19519    | 1.75879    | 2.02509   | 1.77682   | 1.99293   | 1.14455  | 1.38386   | 1.38003   | 1.48702  | 0.985921   | 1.67233    | 2.10676   |
| DCUN1D3   | 3.60573   | 2.67136    | 3.04844   | 7.2023     | 2.68916    | 3.42029   | 3.60014   | 2.45028   | 11.277   | 8.13749   | 7.4085    | 6.2071   | 14.9099    | 4.91826    | 4.14913   |
| DCUN1D4   | 1.82604   | 2.14382    | 2.30057   | 2.12019    | 0.359339   | 2.15836   | 1.38807   | 1.90279   | 1.14493  | 2.92816   | 3.61714   | 1.28546  | 2.18484    | 1.78527    | 2.3821    |
| DCUN1D5   | 1.63724   | 1.27884    | 1.24256   | 1.41035    | 0.943892   | 1.35263   | 1.04996   | 1.82201   | 0.90695  | 1.40539   | 2.0823    | 0.936672 | 1.76715    | 1.50029    | 1.02545   |
| DCX       | 0.0358362 | 0.00805768 | 0.0158113 | 0.00738606 | 0.00371107 | 0.0122056 | 0.0436444 | 0.0297251 | 0        | 0         | 0         | 0        | 0          | 0          | 0.0308792 |
| DCXR      | 12.7301   | 9.96701    | 6.76677   | 15.2475    | 25.9319    | 21.7028   | 10.4548   | 7.76558   | 19.0057  | 7.7435    | 16.8918   | 11.2061  | 6.48427    | 8.47712    | 4.32995   |

|         |           |           |            |           |           |          |          |            |           |           |            |            |           |            |           |
|---------|-----------|-----------|------------|-----------|-----------|----------|----------|------------|-----------|-----------|------------|------------|-----------|------------|-----------|
| DDA1    | 3.32642   | 3.84817   | 3.85071    | 4.41074   | 5.93421   | 6.6315   | 4.97759  | 2.93102    | 8.73153   | 4.59535   | 6.31193    | 4.47191    | 6.61071   | 4.14163    | 3.45651   |
| DDAH1   | 0.919725  | 0.869415  | 1.19504    | 1.02507   | 0.411513  | 1.66415  | 0.856069 | 0.804048   | 0.706163  | 1.24845   | 2.52229    | 0.525754   | 1.37708   | 1.1756     | 3.1011    |
| DDAH2   | 1.45734   | 1.20024   | 1.27518    | 1.32691   | 3.04525   | 1.7943   | 1.47188  | 0.758339   | 4.17368   | 1.2322    | 2.07671    | 1.01541    | 2.18639   | 0.986255   | 0.913595  |
| DDB1    | 18.5739   | 19.7927   | 20.4993    | 29.4123   | 19.7654   | 37.2858  | 23.4637  | 15.9923    | 22.7892   | 20.6182   | 21.8253    | 15.8904    | 30.3743   | 17.9379    | 17.4346   |
| DDB2    | 8.37807   | 9.60602   | 10.3187    | 7.58848   | 7.33376   | 13.9264  | 8.03583  | 8.22483    | 2.3488    | 5.07693   | 10.1506    | 3.45885    | 5.69639   | 5.31474    | 5.34156   |
| DDC     | 0         | 0         | 0.00769826 | 0         | 0         | 0        | 0        | 0.00827005 | 0         | 0         | 0          | 0          | 0         | 0.00486352 | 0         |
| DDC-AS1 | 0         | 0         | 0          | 0         | 0         | 0        | 0        | 0          | 0         | 0         | 0          | 0          | 0         | 0          | 0         |
| DDHD1   | 2.61165   | 1.46018   | 1.54557    | 1.128     | 0.827977  | 1.98092  | 1.53676  | 2.10873    | 2.8572    | 1.14783   | 1.75485    | 1.36487    | 0.740725  | 1.18886    | 1.55404   |
| DDHD2   | 4.60655   | 3.73461   | 4.20205    | 2.84262   | 1.26706   | 5.2008   | 3.27994  | 3.54758    | 1.64132   | 3.15545   | 3.98135    | 1.76225    | 3.90267   | 3.41058    | 4.1425    |
| DDI1    | 0.362855  | 0.0980748 | 0.175715   | 0.0547218 | 0.123726  | 0.286359 | 0.293038 | 0.196631   | 0         | 0.0111078 | 0.00999068 | 0.012665   | 0.0171301 | 0.10176    | 0.660914  |
| DDI2    | 6.05559   | 6.32677   | 6.01117    | 8.61581   | 8.45783   | 8.60122  | 5.29513  | 4.33185    | 8.13072   | 5.35712   | 5.75184    | 7.4152     | 7.33912   | 5.34345    | 3.11392   |
| DDIAS   | 0.25332   | 0.14396   | 0.295539   | 1.03752   | 0.0504479 | 0.774302 | 0.163157 | 0.24822    | 0.189855  | 0.489142  | 0.909226   | 0.274209   | 1.29495   | 0.614453   | 0.531707  |
| DDIT3   | 2.96656   | 2.37591   | 2.74669    | 2.10557   | 3.3874    | 5.65419  | 1.83936  | 1.519      | 1.45953   | 3.35346   | 6.12112    | 1.22298    | 2.07879   | 1.6634     | 1.7775    |
| DDIT4   | 26.0806   | 13.4331   | 9.80813    | 70.7306   | 32.3727   | 70.5653  | 8.03749  | 14.97      | 23.5605   | 46.7673   | 90.4463    | 46.9895    | 44.0441   | 37.3863    | 13.7012   |
| DDIT4L  | 0.641398  | 0.232835  | 0.218059   | 0.126763  | 0.0818887 | 1.14465  | 0.441403 | 0.171787   | 0         | 0.0771938 | 0.366989   | 0.0125736  | 0.14739   | 0.123986   | 0.656147  |
| DDN     | 0.0556323 | 0.0387176 | 0.0664776  | 0.121032  | 0.0489374 | 0.137027 | 0.129138 | 0.0494414  | 0.0225846 | 0.0775826 | 0.055824   | 0.0690568  | 0.165994  | 0.118597   | 0.124281  |
| DDN-AS1 | 0.224975  | 0.293969  | 0.247926   | 0.211657  | 0.432795  | 0.125481 | 0.254566 | 0.235541   | 0.207729  | 0.244606  | 0.18844    | 0.147889   | 0.242942  | 0.216247   | 0.080157  |
| DDO     | 0.243754  | 0.0652468 | 0.123231   | 0.0558211 | 0.210352  | 0.368983 | 0.108232 | 0.0962791  | 0         | 0.0849822 | 0.214019   | 0.00968957 | 0.0698972 | 0.0424654  | 0.0972392 |
| DDOST   | 24.696    | 17.0379   | 18.4977    | 34.7626   | 21.7501   | 54.9264  | 24.3804  | 16.5912    | 25.1016   | 29.1508   | 53.2301    | 17.4073    | 34.4605   | 24.2217    | 26.9917   |
| DDR1    | 3.55612   | 5.7902    | 5.23587    | 6.43016   | 9.61796   | 6.88786  | 3.63905  | 2.96459    | 4.99021   | 3.07512   | 2.02421    | 4.61822    | 5.75915   | 3.04515    | 1.38693   |
| DDR2    | 6.69383   | 2.81881   | 4.3831     | 5.66747   | 2.37772   | 11.408   | 5.80855  | 4.30011    | 0.409784  | 5.1985    | 7.56465    | 0.803644   | 8.1623    | 4.03589    | 14.3601   |
| DDRKG1  | 7.95433   | 8.10497   | 8.585      | 13.6438   | 21.4113   | 17.6128  | 7.97932  | 5.08729    | 14.3281   | 8.6171    | 10.9815    | 8.6064     | 6.54823   | 8.22278    | 6.2791    |
| DDT     | 11.0583   | 9.59925   | 9.17427    | 20.8789   | 18.3038   | 18.0507  | 12.9113  | 6.83732    | 17.6189   | 12.6549   | 29.9962    | 12.1219    | 12.8199   | 12.8071    | 3.66248   |
| DDTL    | 1.13994   | 1.44988   | 1.17741    | 0.832297  | 1.20666   | 1.09358  | 1.45009  | 1.06488    | 0.242204  | 0.479836  | 0.797039   | 0.463321   | 0.239803  | 1.00952    | 0.921448  |
| DDX1    | 16.5573   | 13.3475   | 12.482     | 22.0485   | 6.72817   | 25.1268  | 9.27394  | 11.0379    | 23.4246   | 23.8225   | 26.3448    | 14.5054    | 33.094    | 16.7864    | 13.0714   |
| DDX10   | 3.2474    | 3.00289   | 3.19093    | 4.1576    | 2.41203   | 4.14164  | 1.96723  | 2.08575    | 2.03793   | 2.1269    | 2.92152    | 2.36926    | 3.30292   | 3.67981    | 2.34202   |

|            |           |            |           |           |           |           |           |           |            |           |           |           |            |           |           |
|------------|-----------|------------|-----------|-----------|-----------|-----------|-----------|-----------|------------|-----------|-----------|-----------|------------|-----------|-----------|
| DDX11      | 0.782215  | 2.04298    | 1.1989    | 3.53552   | 5.71934   | 3.57792   | 2.64301   | 1.0031    | 0.629743   | 1.24176   | 1.32121   | 2.45452   | 2.21029    | 3.21401   | 2.27093   |
| DDX11-AS1  | 0.182318  | 0.164707   | 0.179107  | 0.164399  | 0.123902  | 0.310484  | 0.286227  | 0.162029  | 0.0416331  | 0.0429053 | 0.0643171 | 0.0733802 | 0.117631   | 0.101243  | 0.0163645 |
| DDX11L1    | 0.261625  | 0.286088   | 0.247234  | 1.63E-13  | 0.0144165 | 0.0280807 | 0.24162   | 0.025995  | 0.284589   | 0.0176439 | 2.57E-08  | 0.127958  | 1.10E-20   | 0.0763937 | 0.332682  |
| DDX11L10   | 3.23E-05  | 0.155288   | 0.134099  | 2.25E-12  | 0.288448  | 0.0018703 | 0.152626  | 0.0503247 | 1.43E-19   | 7.91E-05  | 0.121441  | 1.01E-06  | 3.65E-29   | 1.33E-07  | 1.78E-20  |
| DDX11L16   | 0.0583569 | 0.115184   | 0.0848036 | 8.63E-10  | 0.0265999 | 0.0413936 | 0.0710011 | 0.117088  | 8.10E-19   | 1.77E-15  | 3.54E-26  | 5.40E-12  | 0.0300596  | 0.0159019 | 0.0137075 |
| DDX11L2    | 0.960258  | 1.08012    | 1.07946   | 0.242009  | 0.609183  | 0.985137  | 1.36983   | 0.948087  | 0.346252   | 0.273163  | 0.0321138 | 0.317246  | 0.573285   | 0.715414  | 0.396027  |
| DDX11L5    | 0.109363  | 0.0553146  | 1.23E-08  | 0.0618621 | 0.0729755 | 0.122497  | 0.282356  | 0.169875  | 2.86E-15   | 0.04291   | 2.46E-26  | 0.166064  | 0.0106008  | 0.146286  | 1.80E-36  |
| DDX11L9    | 0.477901  | 0.29688    | 0.520476  | 0.0759532 | 0.229502  | 0.173599  | 0.180172  | 0.501702  | 5.99E-05   | 0.043949  | 0.0545599 | 0.0672385 | 0.00337875 | 0.0293062 | 0.428326  |
| DDX12P     | 1.08742   | 1.723      | 1.6749    | 1.77142   | 1.92277   | 1.31336   | 1.61189   | 0.964668  | 0.218891   | 0.457653  | 0.312645  | 0.951242  | 0.330989   | 1.19104   | 0.574085  |
| DDX17      | 51.0943   | 72.7162    | 72.6222   | 59.725    | 51.87     | 47.4184   | 57.7916   | 52.7142   | 56.6168    | 40.7176   | 41.8033   | 45.2367   | 39.8918    | 54.0843   | 48.696    |
| DDX18      | 8.84538   | 6.53048    | 7.21073   | 11.8076   | 2.32977   | 13.0745   | 5.20058   | 7.61521   | 5.71948    | 7.32923   | 9.35387   | 5.18995   | 11.2078    | 7.96733   | 7.14162   |
| DDX19A     | 5.83717   | 5.04633    | 4.99011   | 8.69183   | 6.76114   | 10.1718   | 5.72743   | 3.88372   | 4.57717    | 4.21888   | 5.43886   | 4.20042   | 7.5283     | 5.52796   | 5.35783   |
| DDX19B     | 3.96686   | 3.62775    | 3.60529   | 3.63132   | 3.26075   | 6.23393   | 4.5414    | 3.15685   | 5.8118     | 3.0595    | 4.21432   | 2.77328   | 4.09366    | 2.15405   | 2.68421   |
| DDX20      | 2.2154    | 1.63607    | 1.69637   | 3.05764   | 1.30072   | 3.54259   | 1.4153    | 1.86925   | 1.30088    | 1.54751   | 2.41904   | 1.14171   | 2.89702    | 2.32262   | 1.94115   |
| DDX21      | 10.6382   | 9.2072     | 10.227    | 23.0606   | 4.21708   | 20.4082   | 7.47833   | 10.0319   | 17.104     | 13.3807   | 11.4994   | 13.6339   | 35.841     | 21.3608   | 10.8494   |
| DDX23      | 7.67893   | 8.12323    | 8.64393   | 13.9871   | 13.1604   | 18.2161   | 7.40066   | 6.12559   | 8.43757    | 7.36175   | 5.66175   | 7.71964   | 16.1658    | 9.76309   | 8.18955   |
| DDX24      | 15.2534   | 12.9322    | 14.4566   | 16.164    | 14.1577   | 28.2154   | 14.1083   | 12.342    | 13.2993    | 11.9912   | 11.9019   | 9.48743   | 18.8116    | 12.6659   | 13.856    |
| DDX25      | 0.0106112 | 0.352772   | 0.737381  | 0.0874813 | 0.0164829 | 0.117459  | 0.121155  | 0.216898  | 0          | 0         | 0         | 0.0911113 | 0          | 0         | 0         |
| DDX27      | 5.15492   | 6.10735    | 5.37697   | 8.60577   | 8.70359   | 12.5673   | 4.89999   | 4.26402   | 6.64201    | 4.7717    | 3.62649   | 5.10804   | 9.43143    | 6.73763   | 4.42276   |
| DDX28      | 1.83447   | 1.698      | 1.87833   | 3.98887   | 3.32036   | 4.0843    | 2.08748   | 1.51749   | 3.1481     | 1.92018   | 3.9533    | 2.19085   | 3.5568     | 2.27326   | 1.65475   |
| DDX31      | 1.95435   | 2.1116     | 2.34697   | 2.08853   | 1.64194   | 2.45162   | 2.18434   | 1.70245   | 1.55147    | 1.01824   | 1.36263   | 1.53814   | 1.5308     | 1.64342   | 1.23205   |
| DDX39A     | 5.36497   | 4.79331    | 4.52531   | 14.8983   | 8.19359   | 14.1269   | 6.48589   | 3.79298   | 7.41246    | 11.2604   | 15.1663   | 8.17225   | 19.0136    | 12.2763   | 7.48898   |
| DDX39B     | 3.83616   | 3.69775    | 3.59805   | 5.49124   | 3.76702   | 6.74578   | 3.98054   | 3.01835   | 2.25454    | 3.25875   | 4.72852   | 3.01912   | 3.61818    | 4.40507   | 3.5946    |
| DDX39B-AS1 | 0.0250941 | 0.00302268 | 0         | 0         | 0         | 0.0213673 | 0         | 0         | 0.00764045 | 0         | 0         | 0         | 0.0080953  | 0         | 0         |
| DDX3X      | 20.377    | 21.7104    | 20.1133   | 30.0833   | 13.2289   | 29.0193   | 20.3569   | 21.7354   | 60.6461    | 31.3377   | 30.1725   | 28.7162   | 55.037     | 28.023    | 18.1635   |
| DDX3Y      | 6.66298   | 5.24072    | 6.10258   | 6.05597   | 2.08459   | 7.21643   | 0.317185  | 6.1266    | 2.84198    | 6.25461   | 5.4905    | 3.46481   | 9.24859    | 6.41747   | 6.32198   |



|        |            |            |          |            |           |           |           |            |          |          |           |          |           |          |           |
|--------|------------|------------|----------|------------|-----------|-----------|-----------|------------|----------|----------|-----------|----------|-----------|----------|-----------|
| DDX4   | 0.00781332 | 0          | 0        | 0.00805185 | 0         | 0         | 0.017842  | 0.00694383 | 0        | 0        | 0         | 0        | 0         | 0        | 0         |
| DDX41  | 7.11767    | 7.55025    | 6.47501  | 11.7813    | 13.089    | 15.8742   | 6.48792   | 5.41015    | 13.9538  | 12.8862  | 11.0088   | 11.4363  | 12.8125   | 10.6969  | 6.18404   |
| DDX42  | 15.3535    | 13.4745    | 14.5587  | 15.3999    | 10.8896   | 21.3415   | 9.73675   | 10.4968    | 10.3439  | 11.92    | 8.91711   | 8.5832   | 16.1076   | 11.0853  | 11.2364   |
| DDX43  | 0.309032   | 0.612129   | 0.447393 | 0.398083   | 0.18668   | 0.358158  | 0.196024  | 0.221239   | 0.846824 | 0.463285 | 1.0175    | 0.7125   | 0.210463  | 0.264703 | 0.0493121 |
| DDX46  | 6.99309    | 5.66973    | 5.63473  | 6.33026    | 3.33625   | 7.93824   | 3.54518   | 4.91783    | 5.53977  | 4.50769  | 4.40712   | 4.03587  | 6.98474   | 5.96404  | 4.91926   |
| DDX47  | 7.00537    | 6.23511    | 5.70048  | 12.2725    | 5.18364   | 10.444    | 4.78453   | 5.35413    | 7.50793  | 7.03394  | 10.1943   | 5.11272  | 9.95992   | 8.62739  | 6.51191   |
| DDX49  | 6.25217    | 5.75147    | 5.57889  | 9.82047    | 11.9634   | 13.5021   | 6.57721   | 4.05526    | 7.87543  | 6.05933  | 10.8857   | 5.45666  | 9.13311   | 5.73158  | 3.98256   |
| DDX5   | 48.8683    | 41.8662    | 44.812   | 63.3709    | 31.5475   | 59.5703   | 37.6309   | 37.7357    | 70.0783  | 53.6287  | 63.3754   | 43.8461  | 59.8232   | 56.0247  | 55.2032   |
| DDX50  | 6.09124    | 5.56655    | 5.40119  | 7.89348    | 2.74789   | 7.40722   | 3.32122   | 4.1816     | 5.48609  | 7.21023  | 9.61439   | 3.64073  | 8.33073   | 6.19076  | 5.48701   |
| DDX51  | 2.70828    | 2.45613    | 2.63419  | 2.60894    | 3.8274    | 3.97295   | 2.41097   | 1.85299    | 1.39823  | 0.837477 | 0.653556  | 1.46743  | 1.73154   | 2.22577  | 1.70515   |
| DDX52  | 2.68047    | 2.47337    | 2.18514  | 3.19829    | 1.45232   | 2.59721   | 1.70883   | 2.33477    | 6.20433  | 3.68997  | 3.18645   | 3.33734  | 3.2799    | 2.75912  | 1.89411   |
| DDX53  | 0          | 0          | 0        | 0          | 0         | 0         | 0         | 0.00966069 | 0        | 0        | 0         | 0        | 0.014027  | 0        | 0         |
| DDX54  | 5.45584    | 4.76323    | 5.22218  | 8.59871    | 10.8872   | 12.6384   | 5.30499   | 3.6218     | 4.72827  | 4.25993  | 2.84113   | 4.7026   | 9.22604   | 6.02     | 4.3774    |
| DDX55  | 3.0633     | 3.14245    | 3.01456  | 3.79859    | 2.94129   | 3.83371   | 2.36374   | 2.52047    | 1.93712  | 1.86957  | 2.47006   | 2.75188  | 3.21441   | 3.38236  | 2.38093   |
| DDX56  | 4.93967    | 5.5481     | 5.9196   | 9.80723    | 8.99977   | 9.98325   | 6.39439   | 4.01037    | 7.01696  | 5.69407  | 6.9135    | 7.02281  | 8.71878   | 8.43588  | 5.54326   |
| DDX58  | 2.57902    | 4.02325    | 3.6069   | 9.84874    | 2.26761   | 8.84616   | 1.57233   | 2.80664    | 5.5589   | 2.37579  | 3.49916   | 1.91499  | 2.99829   | 2.16937  | 2.82327   |
| DDX59  | 3.65256    | 3.33234    | 3.48215  | 3.15113    | 1.52799   | 3.39579   | 2.65546   | 2.82593    | 2.82321  | 2.72764  | 3.85644   | 1.7678   | 3.35535   | 2.4231   | 3.1539    |
| DDX6   | 15.27      | 15.909     | 14.8343  | 21.0986    | 8.6459    | 21.8013   | 12.6854   | 16.1322    | 28.9796  | 22.3234  | 24.3644   | 17.8561  | 27.8201   | 16.0121  | 14.2624   |
| DDX60  | 1.94351    | 2.82944    | 3.35749  | 9.14241    | 1.03591   | 5.37023   | 1.70562   | 2.68906    | 1.73114  | 1.08573  | 1.68205   | 0.550801 | 1.47277   | 0.78672  | 2.28216   |
| DDX60L | 1.6556     | 0.936821   | 1.00598  | 3.85532    | 0.553217  | 3.21282   | 0.710697  | 1.53694    | 1.02379  | 1.92895  | 2.15148   | 0.876988 | 1.50705   | 1.16713  | 2.16568   |
| DEAF1  | 4.11827    | 5.10924    | 4.80827  | 4.92887    | 10.6294   | 8.15805   | 4.84961   | 3.16008    | 10.025   | 5.80571  | 6.47454   | 5.71767  | 7.21066   | 4.13581  | 3.25646   |
| 1-Dec  | 0.0369993  | 0.00891341 | 0        | 0.0190644  | 0.0287363 | 0.0157522 | 0.0211223 | 0          | 0        | 0.023219 | 0.0208838 | 0        | 0.0835511 | 0        | 0         |
| DECR1  | 4.45133    | 3.40372    | 3.48152  | 4.02565    | 2.03967   | 6.7476    | 2.47373   | 3.85095    | 4.06194  | 3.601    | 6.95198   | 2.07639  | 2.53312   | 2.85831  | 2.71548   |
| DECR2  | 2.73389    | 1.66239    | 2.05606  | 4.89647    | 3.02036   | 6.47323   | 2.05316   | 1.45519    | 1.47783  | 2.69734  | 6.13944   | 2.79304  | 2.60339   | 3.91979  | 1.78464   |
| DEDD   | 5.65177    | 5.73672    | 5.7736   | 8.17962    | 6.42205   | 9.19244   | 6.15157   | 4.38691    | 10.3366  | 7.13977  | 8.01441   | 6.46263  | 9.39883   | 5.75125  | 5.89464   |
| DEDD2  | 3.67495    | 3.87786    | 3.80231  | 6.34319    | 7.57984   | 7.87032   | 4.36932   | 3.03206    | 13.5626  | 8.25917  | 15.4398   | 7.07725  | 9.02697   | 4.83083  | 2.83512   |

|          |          |            |           |           |          |            |            |          |         |           |           |           |           |           |           |
|----------|----------|------------|-----------|-----------|----------|------------|------------|----------|---------|-----------|-----------|-----------|-----------|-----------|-----------|
| DEF6     | 5.33218  | 6.09013    | 5.75368   | 6.17015   | 9.50398  | 6.40273    | 3.57921    | 3.9684   | 2.52885 | 3.22603   | 2.12783   | 2.53152   | 4.0256    | 3.05023   | 1.67919   |
| DEF8     | 2.94498  | 3.92388    | 4.42344   | 4.83208   | 9.32805  | 7.76563    | 4.44575    | 2.39306  | 5.44342 | 5.37575   | 6.61808   | 4.20657   | 5.64007   | 5.0475    | 3.93008   |
| DEFA1    | 0        | 0.00278752 | 0         | 0.0358318 | 0        | 0.00329671 | 0.00877411 | 0        | 0       | 0.0363141 | 0.0130621 | 0         | 0.0337273 | 0.0200817 | 0         |
| DEFA10P  | 0        | 0          | 0         | 0         | 0        | 0          | 0          | 0        | 0       | 0         | 0         | 0         | 0         | 0         | 0         |
| DEFA11P  | 0        | 0          | 0         | 0         | 0        | 0          | 0          | 0        | 0       | 0         | 0         | 0         | 0         | 0         | 0         |
| DEFA1B   | 0        | 0.00266016 | 0         | 0.0338386 | 0        | 0.00311333 | 0.00841685 | 0        | 0       | 0.0345091 | 0.0124653 | 0         | 0.0318512 | 0.0192641 | 0         |
| DEFA3    | 0        | 0.00565732 | 0         | 0.0733851 | 0        | 0.0200722  | 0          | 0        | 0       | 0.133268  | 0.0265098 | 0         | 0.06845   | 3.24E-13  | 0         |
| DEFA4    | 0        | 0          | 0         | 0         | 0        | 0          | 0          | 0        | 0       | 0         | 0         | 0         | 0         | 0         | 0         |
| DEFA5    | 0        | 0          | 0         | 0         | 0        | 0          | 0          | 0        | 0       | 0         | 0         | 0         | 0         | 0         | 0         |
| DEFA6    | 0        | 0          | 0         | 0         | 0        | 0          | 0          | 0        | 0       | 0         | 0         | 0         | 0         | 0         | 0         |
| DEFA8P   | 0        | 0.0391252  | 0         | 0         | 0        | 0          | 0          | 0        | 0       | 0         | 0.0916689 | 0         | 0         | 0         | 0         |
| DEFA9P   | 0        | 0          | 0         | 0         | 0        | 0          | 0          | 0        | 0       | 0         | 0         | 0         | 0         | 0         | 0         |
| DEFB1    | 37.5887  | 24.6375    | 18.4839   | 65.9856   | 16.2276  | 9.53379    | 17.8062    | 14.615   | 73.0513 | 82.8119   | 74.4834   | 36.5167   | 18.7373   | 28.0575   | 5.81457   |
| DEFB103A | 0.248607 | 0.185119   | 0.215014  | 30.1031   | 1.15852  | 0.221308   | 0.129023   | 0.461968 | 12.2762 | 70.3763   | 52.9656   | 20.2789   | 128.932   | 17.3283   | 6.18313   |
| DEFB103B | 0.248607 | 0.185119   | 0.215014  | 30.1031   | 1.15852  | 0.221308   | 0.129023   | 0.461968 | 12.2762 | 70.3763   | 52.9656   | 20.2789   | 128.932   | 17.3283   | 6.18313   |
| DEFB104A | 0        | 0          | 0         | 0         | 0        | 0          | 0          | 0        | 0       | 0         | 0         | 0.0147326 | 0         | 0         | 0         |
| DEFB104B | 0        | 0          | 0         | 0         | 0        | 0          | 0          | 0        | 0       | 0         | 0         | 0.0147326 | 0         | 0         | 0         |
| DEFB105A | 0        | 0          | 0         | 0         | 0        | 0          | 0          | 0        | 0       | 0         | 0         | 0         | 0.0338333 | 0.0182713 | 0         |
| DEFB105B | 0        | 0          | 0         | 0         | 0        | 0          | 0          | 0        | 0       | 0         | 0         | 0         | 0.0338333 | 0.0182713 | 0         |
| DEFB106A | 0        | 0          | 0         | 0         | 0        | 0          | 0          | 0        | 0       | 0         | 0         | 0.0136629 | 0         | 0         | 0         |
| DEFB106B | 0        | 0          | 0         | 0         | 0        | 0          | 0          | 0        | 0       | 0         | 0         | 0.0136629 | 0         | 0         | 0         |
| DEFB107A | 0        | 0          | 0         | 0         | 0        | 0          | 0          | 0        | 0       | 0         | 0         | 0         | 0         | 0         | 0         |
| DEFB107B | 0        | 0          | 0         | 0         | 0        | 0          | 0          | 0        | 0       | 0         | 0         | 0         | 0         | 0         | 0         |
| DEFB108B | 0        | 0.0502283  | 0         | 0         | 0.161933 | 0          | 0          | 0        | 0       | 0.261684  | 0         | 0         | 0         | 0         | 0         |
| DEFB109A | 0.12245  | 0.117997   | 0.101299  | 0         | 0        | 0          | 0.279619   | 0.108823 | 0       | 0.153687  | 0         | 0         | 0         | 0         | 0.351707  |
| DEFB109B | 0.131495 | 0.232306   | 0.0725211 | 0.0903393 | 0        | 0.037322   | 0.250227   | 0.155815 | 0       | 0         | 0         | 0.0313626 | 0         | 0         | 0.0629476 |



|             |           |           |           |            |            |           |          |           |           |            |          |           |            |           |           |
|-------------|-----------|-----------|-----------|------------|------------|-----------|----------|-----------|-----------|------------|----------|-----------|------------|-----------|-----------|
| DEFB4A      | 23.5851   | 0.382985  | 0.116031  | 718.54     | 53.2692    | 5.7421    | 0.174993 | 1.56103   | 77.8097   | 126.146    | 7.60928  | 39.1538   | 674.916    | 3.13073   | 22.2283   |
| DEFB4B      | 9.66274   | 0.470667  | 1.3671    | 799.116    | 42.7861    | 5.56573   | 0.623047 | 2.89341   | 38.5389   | 61.0274    | 3.52656  | 20.6929   | 582.851    | 4.29368   | 13.5747   |
| DEFT1P      | 0         | 0         | 0         | 0          | 0          | 0         | 0        | 0         | 0         | 0          | 0        | 0         | 0          | 0         | 0         |
| DEFT1P2     | 0         | 0         | 0         | 0          | 0          | 0         | 0        | 0         | 0         | 0          | 0        | 0         | 0          | 0         | 0         |
| DEGS1       | 48.9888   | 92.5429   | 102.539   | 33.9292    | 29.6372    | 36.7417   | 79.856   | 76.4627   | 127.318   | 29.0942    | 57.9285  | 33.9984   | 16.7486    | 17.3651   | 13.0287   |
| DEGS2       | 6.63819   | 12.4522   | 12.0733   | 8.23278    | 32.3159    | 11.3888   | 22.2488  | 8.84188   | 68.9294   | 11.1639    | 37.0221  | 17.632    | 8.71463    | 9.18575   | 1.82149   |
| DEK         | 11.8739   | 8.87464   | 9.59618   | 15.3016    | 5.14633    | 17.0771   | 4.46382  | 9.00508   | 6.6071    | 13.294     | 18.0081  | 6.06781   | 20.2568    | 11.5647   | 8.97192   |
| DELE1       | 4.98057   | 4.77701   | 4.6377    | 4.11764    | 4.64045    | 6.78463   | 5.3189   | 3.11125   | 2.0295    | 2.88829    | 4.24712  | 2.70534   | 2.56292    | 4.17901   | 5.79191   |
| DENND1A     | 1.93084   | 1.46732   | 1.59444   | 2.83014    | 2.73754    | 4.27234   | 2.95865  | 1.69799   | 1.1573    | 1.16306    | 1.44931  | 1.13081   | 2.13028    | 1.75763   | 2.52612   |
| DENND1B     | 1.22786   | 0.862921  | 0.767082  | 1.53368    | 0.50313    | 0.858036  | 0.652624 | 1.19469   | 1.61399   | 2.49496    | 2.23688  | 1.28604   | 2.96939    | 1.39521   | 1.04282   |
| DENND1C     | 1.23966   | 1.48333   | 1.7862    | 1.18444    | 3.31564    | 1.99926   | 1.39665  | 1.17467   | 2.78958   | 1.14374    | 0.63947  | 1.21597   | 1.61554    | 0.815239  | 1.21438   |
| DENND2A     | 1.06537   | 0.422206  | 0.602829  | 0.294674   | 0.852521   | 1.17419   | 1.44284  | 0.598421  | 0.0505522 | 0.642528   | 0.54667  | 0.333301  | 0.717129   | 1.44145   | 1.43066   |
| DENND2C     | 6.03444   | 7.6874    | 7.82541   | 10.7785    | 3.72712    | 5.19499   | 7.51046  | 6.08287   | 21.7353   | 11.6534    | 7.23468  | 12.0767   | 13.7508    | 10.3381   | 3.20288   |
| DENND2D     | 2.30188   | 4.10867   | 4.04658   | 5.75515    | 6.41985    | 4.19289   | 4.16632  | 2.3828    | 15.9204   | 4.07921    | 5.35945  | 6.03137   | 5.37108    | 4.07059   | 2.31029   |
| DENND3      | 2.04417   | 1.00242   | 1.25265   | 0.964345   | 1.50533    | 2.1016    | 1.46262  | 1.28918   | 0.188101  | 1.41016    | 1.16577  | 0.264362  | 0.81869    | 1.04622   | 3.42714   |
| DENND4A     | 3.67954   | 3.0508    | 3.59072   | 2.79998    | 0.711905   | 2.66535   | 2.4691   | 3.51879   | 1.08762   | 2.22527    | 2.71694  | 1.55694   | 2.12856    | 2.71643   | 3.29091   |
| DENND4B     | 2.58366   | 2.87981   | 3.07985   | 3.56402    | 6.71835    | 7.15417   | 3.69323  | 2.52394   | 1.49154   | 2.06821    | 2.57674  | 2.38727   | 2.68551    | 3.59592   | 6.22889   |
| DENND4C     | 7.9605    | 9.96077   | 10.5995   | 7.06543    | 2.53206    | 6.27865   | 6.82535  | 8.92926   | 4.45669   | 5.11825    | 5.54846  | 3.90491   | 4.6599     | 4.62661   | 4.54357   |
| DENND5A     | 5.67933   | 3.70428   | 4.61409   | 6.11984    | 4.27795    | 13.7077   | 5.02585  | 3.4348    | 2.41833   | 6.45422    | 8.32884  | 1.7851    | 5.6621     | 6.50735   | 13.534    |
| DENND5B     | 0.776644  | 0.486001  | 0.748271  | 0.366016   | 0.194936   | 0.816547  | 0.619101 | 0.477681  | 0.126884  | 0.526018   | 0.732396 | 0.106737  | 0.357483   | 0.481398  | 1.06095   |
| DENND5B-AS1 | 0         | 0.111283  | 0.191268  | 0.0977761  | 0.422969   | 0.119465  | 0.107978 | 0.2433    | 0         | 0.0620421  | 2.49E-27 | 2.80E-45  | 0.062828   | 0.156601  | 0.368513  |
| DENND6A     | 4.28498   | 2.74847   | 2.78819   | 4.47959    | 2.3092     | 3.96405   | 2.48803  | 3.76769   | 2.6927    | 3.79995    | 4.36923  | 2.59832   | 4.93024    | 3.72026   | 3.84871   |
| DENND6A-DT  | 0.0233454 | 0.0112482 | 0.0257506 | 0.00801936 | 0          | 0.0198783 | 0.008885 | 0.0207474 | 0         | 0.00976695 | 0        | 0.0111362 | 0.00502077 | 0.0040671 | 0.0111756 |
| DENND6B     | 0.542235  | 0.900503  | 0.66809   | 1.03435    | 1.82792    | 1.63071   | 0.619106 | 0.625436  | 0.63228   | 0.897761   | 1.17214  | 0.718183  | 0.937888   | 0.78386   | 1.92194   |
| DENR        | 5.80702   | 6.33729   | 5.77462   | 13.4318    | 3.27531    | 11.7498   | 4.77612  | 6.50577   | 9.50566   | 10.1376    | 10.8841  | 7.11169   | 16.5171    | 10.1137   | 5.44578   |
| DEPDC1      | 0.16172   | 0.129182  | 0.105621  | 0.723644   | 0.00661073 | 0.405861  | 0.121478 | 0.215586  | 0.0932956 | 0.790537   | 0.984875 | 0.167483  | 0.788052   | 1.17664   | 0.348376  |

|            |           |           |           |            |           |           |           |           |           |           |           |           |           |            |           |
|------------|-----------|-----------|-----------|------------|-----------|-----------|-----------|-----------|-----------|-----------|-----------|-----------|-----------|------------|-----------|
| DEPDC1-AS1 | 0         | 0         | 0         | 0          | 0         | 0         | 0         | 0         | 0         | 0         | 0.0209508 | 0.0132794 | 0.0119742 | 0          | 0         |
| DEPDC1B    | 0.286515  | 0.293908  | 0.137628  | 1.27629    | 0.100497  | 1.12538   | 0.358792  | 0.172492  | 0.292662  | 0.696012  | 1.53373   | 0.495991  | 1.07337   | 1.40567    | 0.292013  |
| DEPDC4     | 0.0791847 | 0.0839353 | 0.0655072 | 0.0979226  | 0.0656006 | 0.0674247 | 0.0542463 | 0.0656813 | 0.0064292 | 0.019877  | 0.0238372 | 0.0377725 | 0.0442776 | 0.0303493  | 0.0833941 |
| DEPDC5     | 1.73758   | 1.83469   | 1.79528   | 1.63823    | 2.02716   | 2.06819   | 2.00502   | 1.48507   | 0.999556  | 0.890895  | 0.959887  | 1.38877   | 1.00658   | 1.54189    | 1.49192   |
| DEPDC7     | 0.996898  | 0.991632  | 0.806968  | 2.01048    | 0.149858  | 1.47864   | 0.257019  | 0.514429  | 1.35771   | 1.23776   | 1.70621   | 0.728647  | 0.926753  | 1.42861    | 0.692745  |
| DEPP1      | 14.8745   | 5.6024    | 6.55224   | 10.8018    | 10.4008   | 88.5048   | 11.8523   | 5.99057   | 0.547294  | 4.18783   | 10.0064   | 1.63183   | 5.1029    | 3.29986    | 24.9918   |
| DEPTOR     | 3.63475   | 1.93318   | 1.89567   | 3.04906    | 2.25023   | 3.67057   | 2.1051    | 3.13665   | 0.609477  | 0.396695  | 0.891998  | 0.709871  | 0.362532  | 0.243196   | 0.83217   |
| DERA       | 5.81142   | 4.95724   | 3.61897   | 10.1798    | 1.99275   | 11.5352   | 4.10129   | 4.61746   | 8.15568   | 11.0455   | 14.4822   | 5.96654   | 11.7535   | 7.29494    | 4.99282   |
| DERL1      | 5.99396   | 5.55236   | 5.95832   | 9.53979    | 3.91305   | 10.5681   | 5.30818   | 5.29053   | 11.0164   | 7.97724   | 11.4213   | 5.26586   | 11.5841   | 7.64621    | 7.67667   |
| DERL2      | 2.84846   | 2.19336   | 2.55534   | 2.96775    | 0.876808  | 3.93851   | 1.83202   | 2.52683   | 2.73072   | 2.86009   | 5.45758   | 1.64548   | 3.83412   | 2.42295    | 2.31183   |
| DERL3      | 0.59304   | 0.466935  | 0.478639  | 0.253402   | 1.20205   | 0.166269  | 0.611055  | 0.700585  | 0.0792721 | 0.172466  | 0.32657   | 0.232868  | 0.181981  | 0.234352   | 0.311591  |
| DES        | 15.1439   | 0.496026  | 0.476936  | 0.445588   | 11.7059   | 62.4842   | 39.6242   | 0.576406  | 0.0752286 | 2.41627   | 6.19438   | 0.191524  | 0.597803  | 1.20525    | 6.12093   |
| DESI1      | 3.85514   | 5.66584   | 5.59127   | 7.00904    | 6.06417   | 8.27403   | 6.9407    | 3.65924   | 11.6858   | 6.61479   | 11.1485   | 6.70846   | 8.48915   | 7.36765    | 4.3626    |
| DESI2      | 4.14158   | 2.95098   | 3.30468   | 4.63482    | 1.19362   | 5.57114   | 3.45782   | 4.03215   | 5.45682   | 6.50299   | 10.9707   | 3.42027   | 8.25338   | 5.77308    | 5.5502    |
| DET1       | 0.923491  | 0.985463  | 1.10751   | 0.613165   | 0.558396  | 0.907722  | 1.07564   | 0.974951  | 0.173613  | 0.350056  | 0.678679  | 0.235043  | 0.227936  | 0.37252    | 0.765486  |
| DEUP1      | 0         | 0         | 0         | 0.00894583 | 0         | 0.0591328 | 0         | 0         | 0         | 0         | 0         | 0         | 0.0168025 | 0.00907395 | 0         |
| DEXI       | 4.50218   | 4.68759   | 5.31892   | 8.05579    | 12.3407   | 10.8573   | 4.85877   | 3.87784   | 5.5207    | 5.07015   | 8.92901   | 4.40189   | 7.7494    | 5.54414    | 5.15927   |
| DFFA       | 2.23666   | 2.92153   | 2.65896   | 5.44049    | 4.2754    | 5.39216   | 2.40643   | 2.15956   | 3.55539   | 3.39866   | 4.29652   | 3.22308   | 5.35575   | 4.20091    | 3.03663   |
| DFFB       | 0.433566  | 0.336211  | 0.376563  | 0.448981   | 0.575752  | 0.697656  | 0.4232    | 0.36408   | 0.0475172 | 0.326461  | 0.565235  | 0.195419  | 0.444723  | 0.574361   | 0.532305  |
| DGAT1      | 2.26322   | 2.88325   | 3.09103   | 3.84723    | 6.22808   | 4.60933   | 3.36666   | 1.97065   | 2.70454   | 2.64767   | 3.89745   | 2.89956   | 3.8556    | 3.69657    | 3.30738   |
| DGAT2      | 13.7405   | 22.0069   | 24.9975   | 11.303     | 29.7812   | 7.44403   | 36.1785   | 15.1031   | 77.2279   | 8.51049   | 20.0257   | 15.6352   | 6.80876   | 3.43052    | 1.62525   |
| DGAT2L6    | 0.148786  | 0.0847217 | 0.234984  | 0.125451   | 0.0420212 | 0.0230345 | 0.247097  | 0.156271  | 0         | 0         | 0.0305384 | 0         | 0.0174539 | 0.0141386  | 0.174826  |
| DGCR10     | 0.124828  | 0.144345  | 0.103266  | 0.0771831  | 0         | 0         | 0.0855145 | 0.133124  | 0.0304052 | 0.125337  | 0         | 0         | 0.0322153 | 0          | 0         |
| DGCR11     | 1.12893   | 1.98436   | 1.60843   | 0.937179   | 1.9647    | 0.827759  | 2.17216   | 1.29128   | 1.03118   | 1.36444   | 0.719812  | 1.63052   | 0.930707  | 1.51878    | 1.30604   |
| DGCR2      | 11.5717   | 16.3535   | 17.4276   | 17.1761    | 28.138    | 19.1977   | 17.5236   | 10.9522   | 20.863    | 10.7212   | 9.17768   | 13.3445   | 19.3484   | 9.86318    | 8.54581   |
| DGCR5      | 0.0940297 | 0.336955  | 0.408387  | 0.466333   | 0.328636  | 0.45537   | 0.30866   | 0.177577  | 0.100203  | 0.0885127 | 0.152587  | 0.180817  | 0.140294  | 0.104431   | 0.0759591 |

|           |           |           |            |            |           |           |           |           |           |          |           |           |           |           |           |
|-----------|-----------|-----------|------------|------------|-----------|-----------|-----------|-----------|-----------|----------|-----------|-----------|-----------|-----------|-----------|
| DGCR6     | 4.14118   | 3.39843   | 3.81182    | 2.31362    | 9.30509   | 6.05615   | 4.18742   | 3.15826   | 2.3743    | 2.67085  | 3.62284   | 0.904693  | 0.813851  | 1.05329   | 0.638318  |
| DGCR6L    | 8.36287   | 7.42161   | 6.92663    | 9.50912    | 16.476    | 17.0165   | 9.00232   | 4.86025   | 8.42408   | 7.74201  | 25.238    | 5.27503   | 5.5682    | 5.78721   | 5.42609   |
| DGCR8     | 4.53134   | 5.88111   | 6.11641    | 5.99405    | 8.64519   | 7.26777   | 5.78752   | 4.47302   | 3.72898   | 4.04861  | 2.79174   | 4.59417   | 6.74576   | 5.82308   | 4.99284   |
| DGCR9     | 0.0670813 | 0.115431  | 0.190266   | 0.0296268  | 0.0446573 | 0.0734385 | 0.229774  | 0.187365  | 0.0350132 | 0.144332 | 0.0108181 | 0.0754262 | 0.0618293 | 0.0450767 | 0.0963372 |
| DGKA      | 5.77751   | 12.0541   | 12.3667    | 11.6016    | 14.2874   | 10.0301   | 8.73012   | 6.93607   | 9.53723   | 14.6685  | 8.065     | 13.0255   | 18.118    | 12.0128   | 5.09213   |
| DGKB      | 0.0845433 | 0.0144541 | 0.0248175  | 0.00281046 | 0.0169452 | 0.0116109 | 0.0217968 | 0.0315083 | 0         | 0        | 0         | 0         | 0         | 0         | 0.0783322 |
| DGKD      | 1.60992   | 1.12779   | 1.5174     | 1.1744     | 1.75896   | 3.02198   | 1.7225    | 1.3118    | 0.281989  | 0.685647 | 0.763716  | 0.54879   | 1.06439   | 1.47106   | 2.55625   |
| DGKE      | 1.62967   | 0.723473  | 0.791159   | 0.503519   | 0.444274  | 0.56571   | 0.636108  | 1.13853   | 0.431783  | 0.37393  | 0.649105  | 0.326158  | 0.247966  | 0.546543  | 0.654629  |
| DGKG      | 0.773827  | 0.251765  | 0.277185   | 0.102765   | 0.297408  | 0.451723  | 0.801554  | 0.397031  | 0.0680108 | 0.160204 | 0.265669  | 0.148413  | 0.118384  | 0.141761  | 0.532744  |
| DGKH      | 2.73075   | 2.74488   | 2.83616    | 2.22815    | 0.915455  | 1.86748   | 1.61048   | 2.38893   | 1.22895   | 1.79025  | 1.61435   | 1.60993   | 2.12953   | 2.68095   | 2.78618   |
| DGKI      | 0.265212  | 0.148548  | 0.153581   | 0.140071   | 0.128739  | 0.197596  | 0.162761  | 0.120795  | 0.0565247 | 0.303742 | 0.520192  | 0.0545578 | 0.181808  | 0.252966  | 0.53799   |
| DGKK      | 0         | 0         | 0.00258444 | 0          | 0         | 0.0106404 | 0         | 0         | 0         | 0        | 0         | 0         | 0         | 0         | 0         |
| DGKQ      | 1.55018   | 2.81709   | 3.00606    | 2.86113    | 7.30132   | 3.62882   | 2.46427   | 1.45741   | 1.85152   | 3.18434  | 1.85124   | 2.814     | 3.5022    | 2.8005    | 2.82756   |
| DGKZ      | 4.14534   | 4.42449   | 4.46058    | 7.35152    | 11.499    | 12.1048   | 4.75251   | 3.61194   | 3.81112   | 5.84583  | 4.46752   | 4.93947   | 10.2604   | 6.41043   | 5.42595   |
| DGLUCY    | 3.47806   | 4.42087   | 4.61701    | 2.66418    | 4.33324   | 4.13805   | 4.21703   | 3.20157   | 1.13522   | 1.2008   | 2.44969   | 1.32126   | 1.03846   | 1.54008   | 2.9361    |
| DGUOK     | 6.84884   | 5.87449   | 6.50638    | 9.15205    | 4.91013   | 16.8382   | 6.0367    | 5.36764   | 5.79753   | 8.1473   | 12.553    | 6.44877   | 9.14115   | 7.08033   | 6.51216   |
| DGUOK-AS1 | 0.891676  | 1.58179   | 0.938837   | 1.54542    | 1.511     | 0.448648  | 0.601597  | 0.900509  | 3.40597   | 2.49264  | 2.28771   | 2.78408   | 1.88282   | 1.20744   | 0.523865  |
| DHCR24    | 23.4994   | 53.7475   | 47.3904    | 88.1923    | 75.8656   | 59.6973   | 70.5914   | 25.4096   | 117.103   | 39.8971  | 38.8105   | 43.9912   | 51.9755   | 29.6463   | 7.39792   |
| DHCR7     | 11.8278   | 11.4224   | 11.401     | 17.3437    | 17.0638   | 13.4724   | 12.9989   | 9.40013   | 44.3236   | 18.1477  | 15.2636   | 16.8327   | 18.63     | 8.8368    | 2.50676   |
| DHDDS     | 4.71701   | 5.65682   | 5.77622    | 6.46948    | 6.82294   | 9.78541   | 6.3793    | 4.85496   | 7.25034   | 5.6603   | 5.63678   | 5.65328   | 6.35415   | 5.07862   | 5.60385   |
| DHDH      | 0.107045  | 0         | 0.0531329  | 0.0882501  | 0.0665109 | 0.0546883 | 0.12222   | 0.0380529 | 0         | 0        | 0.048336  | 0.0153187 | 0.0138129 | 0         | 0         |
| DHFR      | 1.63805   | 2.07014   | 1.29783    | 5.68652    | 1.14685   | 6.77383   | 2.17441   | 1.54109   | 1.53469   | 3.74554  | 5.83908   | 2.05418   | 5.18501   | 3.12018   | 2.81877   |
| DHFR2     | 0.851081  | 1.01346   | 1.01638    | 1.39786    | 0.492536  | 1.64256   | 0.95388   | 0.820135  | 0.331755  | 0.446553 | 0.759946  | 0.373911  | 0.950499  | 0.770257  | 1.20555   |
| DHFRP3    | 0         | 0         | 0          | 0          | 0         | 0         | 0         | 0         | 0         | 0        | 0         | 0         | 0         | 0         | 0         |
| DHH       | 0.221535  | 0.101995  | 0.0733078  | 0.136979   | 0.367062  | 0.259896  | 0.134902  | 0.100629  | 0.0119913 | 0.148293 | 0.144494  | 0.0669283 | 0.200107  | 0.285601  | 0.919108  |
| DHODH     | 1.20149   | 0.996991  | 1.04129    | 1.60176    | 1.19979   | 2.12731   | 1.36094   | 1.11016   | 0.301947  | 0.562507 | 0.979576  | 0.539019  | 1.1751    | 1.03662   | 0.643638  |

|           |           |          |            |           |           |           |           |           |          |           |          |           |           |           |           |
|-----------|-----------|----------|------------|-----------|-----------|-----------|-----------|-----------|----------|-----------|----------|-----------|-----------|-----------|-----------|
| DHPS      | 5.5815    | 8.19347  | 8.56746    | 9.13447   | 11.1241   | 7.80865   | 7.87474   | 5.1097    | 6.82141  | 5.76673   | 8.96601  | 5.96359   | 6.26687   | 6.38715   | 5.39619   |
| DHRS1     | 11.2964   | 11.0797  | 9.94455    | 12.4017   | 12.5875   | 27.0859   | 14.2459   | 7.5355    | 21.4211  | 17.6135   | 10.0716  | 26.7927   | 28.8515   | 13.3647   | 6.95554   |
| DHRS11    | 1.89721   | 2.2399   | 2.2045     | 2.58196   | 3.37445   | 3.56385   | 2.67878   | 2.2524    | 6.45553  | 2.99921   | 3.35153  | 2.52848   | 2.31732   | 2.23291   | 0.97754   |
| DHRS12    | 2.59828   | 2.32724  | 2.56285    | 1.99104   | 2.0827    | 1.85785   | 2.34859   | 1.74666   | 0.77082  | 1.44242   | 1.7392   | 1.71613   | 0.940288  | 1.29704   | 1.6385    |
| DHRS13    | 1.74687   | 1.83426  | 1.92353    | 4.58121   | 3.20005   | 4.01096   | 0.962873  | 1.30622   | 0.689602 | 1.3155    | 2.3256   | 0.862024  | 2.2386    | 1.73783   | 0.795873  |
| DHRS2     | 0.0179334 | 0        | 0.00741789 | 0.0277213 | 0.0278568 | 0.0687152 | 0.0614273 | 0.0159377 | 0        | 0.0450165 | 0.111345 | 0.0128318 | 0.0347116 | 0.084355  | 0.0257546 |
| DHRS3     | 8.85197   | 7.78881  | 8.05799    | 10.4844   | 17.6883   | 16.9105   | 10.6017   | 6.82697   | 12.6941  | 5.38511   | 11.3015  | 5.59736   | 6.3404    | 3.92994   | 2.95642   |
| DHRS4     | 6.48714   | 6.0398   | 4.8962     | 12.5097   | 18.4674   | 16.6543   | 4.87271   | 3.88692   | 22.2062  | 8.7661    | 20.5024  | 4.83321   | 7.31905   | 4.94183   | 2.49679   |
| DHRS4-AS1 | 1.98694   | 2.16755  | 1.55275    | 2.2437    | 1.10726   | 1.35176   | 1.19327   | 1.51631   | 2.14365  | 1.56461   | 3.40877  | 1.30833   | 1.29491   | 0.915577  | 1.4533    |
| DHRS4L1   | 0.355315  | 0.718436 | 0.359843   | 0.220683  | 0.612246  | 0.191043  | 0.382885  | 0.454278  | 0.182482 | 0.329425  | 0.460141 | 0.40282   | 0.117692  | 0.227935  | 0.403263  |
| DHRS4L2   | 3.67375   | 3.41127  | 2.13879    | 5.5818    | 7.5964    | 6.97248   | 3.19728   | 1.76339   | 9.21269  | 3.70948   | 7.79898  | 2.6742    | 3.48326   | 3.14201   | 2.2598    |
| DHRS7     | 5.58304   | 4.41317  | 4.85952    | 14.3569   | 7.36424   | 16.1121   | 5.27054   | 4.12092   | 15.4098  | 17.8117   | 20.5978  | 9.8717    | 27.4561   | 9.28644   | 6.01718   |
| DHRS7B    | 2.5432    | 2.03204  | 2.38443    | 2.91569   | 2.71593   | 5.58515   | 2.94003   | 1.64805   | 3.78131  | 2.60677   | 5.57439  | 2.14575   | 2.46811   | 1.77224   | 2.67839   |
| DHRS7C    | 0         | 0        | 0          | 0         | 0         | 0         | 0         | 0         | 0        | 0         | 0        | 0         | 0         | 0.0120234 | 0         |
| DHRS9     | 0.293591  | 0.229257 | 0.276379   | 8.28368   | 0.471774  | 0.310331  | 0.497039  | 0.170947  | 0.73978  | 3.49427   | 2.82285  | 2.10072   | 3.50758   | 1.70375   | 0.130852  |
| DHRSX     | 0.843348  | 0.771517 | 0.865411   | 1.22066   | 1.02852   | 1.81885   | 1.11786   | 0.777819  | 0.763291 | 0.955416  | 2.04376  | 0.804186  | 1.10932   | 0.998155  | 0.983247  |
| DHTKD1    | 2.35556   | 2.35111  | 2.33769    | 3.8995    | 1.95822   | 3.9548    | 2.54262   | 2.13285   | 2.16646  | 2.03779   | 3.09982  | 1.73308   | 3.57195   | 2.58048   | 2.00042   |
| DHX15     | 17.9464   | 16.0326  | 17.5517    | 23.7942   | 9.76529   | 19.9413   | 12.8132   | 14.2984   | 15.668   | 17.1777   | 18.2749  | 13.3739   | 27.3873   | 19.8744   | 13.3056   |
| DHX16     | 0.456236  | 0.550952 | 0.546916   | 0.615409  | 0.856526  | 0.795516  | 0.409765  | 0.348648  | 0.430006 | 0.373847  | 0.322305 | 0.415859  | 0.725119  | 0.527392  | 0.431939  |
| DHX29     | 5.02188   | 4.27125  | 3.90871    | 5.40359   | 1.96299   | 4.19575   | 2.99342   | 4.58874   | 6.27114  | 6.12539   | 5.41359  | 3.95094   | 8.21136   | 5.01518   | 3.78548   |
| DHX30     | 4.4697    | 4.47458  | 4.67621    | 6.1136    | 7.14633   | 8.79207   | 5.05701   | 3.58709   | 4.69028  | 3.31495   | 3.54729  | 3.7829    | 6.63862   | 4.94348   | 5.04443   |
| DHX32     | 5.96307   | 6.43649  | 6.39886    | 10.5922   | 4.06915   | 6.94673   | 5.61605   | 4.89708   | 22.3557  | 12.7145   | 10.9347  | 10.347    | 14.4463   | 8.35732   | 5.05122   |
| DHX33     | 2.47578   | 2.00267  | 2.17423    | 2.96317   | 1.69571   | 3.87948   | 2.07892   | 1.78292   | 1.40978  | 1.59763   | 2.03685  | 1.63885   | 2.87843   | 2.75588   | 2.46699   |
| DHX34     | 1.32866   | 2.46376  | 2.6012     | 2.88028   | 4.95      | 3.43909   | 2.26647   | 1.61831   | 1.88248  | 1.25569   | 1.26684  | 2.56801   | 2.0731    | 2.94643   | 1.53562   |
| DHX35     | 2.34755   | 1.5248   | 1.39209    | 1.61281   | 1.53822   | 2.21708   | 1.68411   | 1.50164   | 0.708436 | 0.773541  | 1.3055   | 0.802703  | 1.56377   | 1.2595    | 1.98901   |
| DHX36     | 6.97296   | 5.81153  | 6.26161    | 6.46606   | 1.55305   | 7.19814   | 3.68808   | 5.92373   | 5.50287  | 5.35731   | 5.33947  | 3.54026   | 7.43905   | 5.50352   | 5.0347    |

|            |           |           |           |           |           |           |           |           |           |           |           |           |           |           |           |
|------------|-----------|-----------|-----------|-----------|-----------|-----------|-----------|-----------|-----------|-----------|-----------|-----------|-----------|-----------|-----------|
| DHX37      | 2.43076   | 2.20759   | 2.14551   | 4.45968   | 4.94488   | 5.62905   | 3.26308   | 1.77611   | 1.80844   | 1.53181   | 1.40071   | 2.03036   | 4.3309    | 3.34349   | 2.29317   |
| DHX38      | 6.43786   | 7.13753   | 7.47941   | 8.83516   | 11.6387   | 15.1534   | 7.61158   | 5.47208   | 6.48637   | 5.22375   | 3.2613    | 6.36502   | 10.6172   | 7.26983   | 7.29051   |
| DHX40      | 6.47862   | 5.37191   | 5.72089   | 6.19922   | 2.12681   | 7.23154   | 4.20393   | 5.14474   | 6.91995   | 5.51121   | 6.64317   | 3.2185    | 5.46521   | 4.03242   | 5.46057   |
| DHX57      | 2.86027   | 2.35857   | 2.16609   | 3.12847   | 1.85677   | 3.30386   | 2.00929   | 2.04033   | 3.91095   | 2.30399   | 2.09369   | 2.70164   | 2.46977   | 2.06261   | 2.26844   |
| DHX58      | 1.51221   | 1.35069   | 1.68996   | 3.54509   | 2.36273   | 4.76649   | 1.29242   | 1.02956   | 0.581591  | 0.577164  | 0.978338  | 0.430281  | 0.559157  | 0.605472  | 1.42242   |
| DHX8       | 4.65434   | 4.19988   | 4.16173   | 5.0749    | 4.71161   | 7.93448   | 5.69977   | 3.86768   | 5.21403   | 3.98865   | 3.25708   | 3.5881    | 6.59943   | 3.94386   | 4.24981   |
| DHX9       | 14.273    | 10.2747   | 11.2585   | 22.1049   | 5.94666   | 20.6337   | 8.97393   | 10.3475   | 9.30057   | 13.8618   | 15.3744   | 8.53289   | 22.6113   | 14.78     | 12.1476   |
| DIABLO     | 2.56272   | 2.18195   | 2.1781    | 3.41227   | 2.04613   | 3.43767   | 1.79215   | 1.82886   | 2.43156   | 3.07022   | 4.37822   | 2.06417   | 3.0252    | 2.5481    | 1.89849   |
| DIAPH1     | 13.7798   | 13.2156   | 14.8235   | 28.2088   | 14.6739   | 31.1331   | 18.9445   | 12.3131   | 18.9095   | 28.7291   | 13.6505   | 19.5102   | 56.8847   | 23.8206   | 14.7952   |
| DIAPH2     | 5.02756   | 3.79015   | 3.0279    | 3.88813   | 1.40208   | 3.94658   | 2.80317   | 3.34906   | 3.831     | 2.12981   | 2.80718   | 2.44129   | 2.43136   | 2.5333    | 3.99898   |
| DIAPH2-AS1 | 0.45007   | 0.399461  | 0.391926  | 0.341755  | 0.367954  | 0.383228  | 0.243414  | 0.273674  | 0.0288492 | 0.237846  | 0.240666  | 0.203392  | 0.0916998 | 0.173324  | 0.510282  |
| DIAPH3     | 0.288275  | 0.251747  | 0.234755  | 1.36469   | 0.125941  | 0.855282  | 0.308571  | 0.288219  | 0.252343  | 0.740589  | 0.747463  | 0.464103  | 0.892186  | 0.922822  | 0.491624  |
| DIAPH3-AS1 | 0         | 0.0227565 | 0         | 0.121682  | 0         | 0.0201082 | 0         | 0         | 0.0575217 | 0.0296397 | 0         | 0         | 0         | 0.0246848 | 0         |
| DIAPH3-AS2 | 0         | 0         | 0         | 0         | 0         | 0         | 0         | 0         | 0         | 0         | 0         | 0.0902424 | 0         | 0         | 0         |
| DICER1     | 8.5577    | 7.76525   | 7.79111   | 11.1612   | 3.6144    | 7.37887   | 5.28624   | 7.77061   | 9.14854   | 8.65551   | 6.52652   | 9.17351   | 12.1321   | 8.05751   | 8.12282   |
| DICER1-AS1 | 0.806981  | 0.638768  | 0.524536  | 0.386108  | 1.25352   | 0.858917  | 0.658132  | 0.512269  | 0.0702008 | 0.289384  | 0.292815  | 0.144354  | 0.130165  | 0.30126   | 0.496683  |
| DIDO1      | 4.62933   | 5.46155   | 5.6871    | 4.59346   | 7.65215   | 6.27348   | 4.94656   | 3.95366   | 4.08572   | 3.73548   | 2.34637   | 4.09515   | 4.38723   | 4.3044    | 3.56602   |
| DIMT1      | 2.55939   | 2.40095   | 2.42406   | 4.59472   | 1.15195   | 4.10446   | 2.17877   | 2.59607   | 2.84169   | 2.588     | 5.49262   | 2.12251   | 4.59216   | 3.58753   | 2.51968   |
| DINOL      | 0.170348  | 0.0351756 | 0         | 0         | 0         | 0.103607  | 0.0635328 | 0.0948276 | 0         | 0.122174  | 0.137359  | 0.104476  | 0.109908  | 0.0127188 | 0         |
| DIO1       | 0.23628   | 0.119835  | 0.174892  | 0.0384464 | 0.0965856 | 0.137656  | 0.198783  | 0.187883  | 0.0151454 | 0.109258  | 0.028077  | 0.0533889 | 0         | 0.116991  | 0.178594  |
| DIO2       | 2.46008   | 1.69983   | 1.33328   | 10.5256   | 1.22629   | 9.02612   | 2.58443   | 2.47451   | 14.2622   | 2.4586    | 3.00637   | 2.26417   | 5.79726   | 1.80106   | 2.09814   |
| DIO2-AS1   | 0.0435292 | 0.0769012 | 0.0360105 | 0         | 0         | 0.0123549 | 0.0331335 | 0.0902654 | 0         | 0.0182112 | 0         | 0         | 0         | 0.0151669 | 0         |
| DIO3       | 1.11201   | 0.238716  | 0.191273  | 0.170192  | 0.307842  | 0.928113  | 0.175992  | 0.479454  | 0.107272  | 0         | 0.0124289 | 0         | 0.0213108 | 0.0115086 | 0.0158118 |
| DIO3OS     | 1.7824    | 0.813588  | 1.03217   | 0.696056  | 2.06923   | 1.42184   | 0.963988  | 1.33394   | 0.0685504 | 0.0235484 | 0.0423601 | 0.0805487 | 0.0181578 | 0.088253  | 0.56584   |
| DIP2A      | 3.6355    | 4.56238   | 4.53344   | 3.85189   | 6.42506   | 4.9145    | 4.71131   | 3.46945   | 2.51628   | 3.30714   | 1.8659    | 3.50529   | 4.5393    | 4.47221   | 3.92286   |
| DIP2A-IT1  | 0.541992  | 0.235026  | 0.0448374 | 0.111708  | 0.08419   | 0.13845   | 0.247531  | 0.192671  | 0         | 0.0680255 | 0         | 0.0775619 | 0.104907  | 0.169961  | 0.0778369 |





|               |            |            |           |           |           |            |            |            |            |           |            |           |            |            |            |
|---------------|------------|------------|-----------|-----------|-----------|------------|------------|------------|------------|-----------|------------|-----------|------------|------------|------------|
| DKFZp451B082  | 0.00938676 | 0.00904537 | 0.0155308 | 0         | 0         | 0.00399635 | 0.00535875 | 0.00417108 | 0          | 0         | 0.00529824 | 0         | 0          | 0.00245296 | 0.00674029 |
| DKFZp779M0652 | 0          | 0.0343626  | 0         | 0.62472   | 0.498524  | 0.212545   | 0          | 0          | 0.738299   | 0.62659   | 0.563573   | 0.535823  | 0.276088   | 0.074549   | 0.0512116  |
| DKK1          | 0.741842   | 0.298836   | 0.593583  | 0.112794  | 0.0944539 | 7.02085    | 0.902553   | 0.821408   | 0.0740558  | 0.0305275 | 0.192201   | 0.0261053 | 0.0156929  | 0          | 0.069861   |
| DKK2          | 0.311798   | 0.564125   | 0.784352  | 0.452467  | 0.13838   | 0.579748   | 0.690206   | 0.780405   | 0.178243   | 0.079865  | 0.186766   | 0.0455306 | 0.262753   | 0.0033257  | 0.0731072  |
| DKK3          | 11.0982    | 5.98728    | 6.0746    | 5.89948   | 8.34703   | 30.2361    | 7.94812    | 4.47035    | 2.87247    | 11.0745   | 18.8016    | 3.27148   | 13.8138    | 11.2019    | 28.2377    |
| DKK4          | 0.0282922  | 0.0408949  | 0.0468107 | 0.495652  | 0         | 0.144543   | 0.0323032  | 0.0502876  | 0.0689135  | 0.248568  | 1.88437    | 0.384633  | 1.33254    | 0.221801   | 0.0812625  |
| DKKL1         | 0.0426207  | 0.0410706  | 0.0528883 | 0.0219609 | 0.0662047 | 0.0544365  | 0          | 0.0378777  | 0          | 0.0267467 | 0.0721702  | 0         | 0.0274987  | 0.0334132  | 0.153022   |
| DLAT          | 3.28029    | 2.53493    | 2.71317   | 5.27332   | 1.55509   | 5.78481    | 2.95467    | 3.20866    | 3.57967    | 3.44874   | 5.50434    | 2.75864   | 5.60648    | 3.85167    | 2.92426    |
| DLC1          | 3.25394    | 1.98284    | 2.51426   | 2.52087   | 3.22803   | 4.63375    | 3.68022    | 2.05132    | 1.36664    | 3.28517   | 4.99204    | 1.60766   | 4.16755    | 3.41998    | 9.51489    |
| DLD           | 6.04684    | 5.31152    | 5.53222   | 8.23152   | 1.41289   | 7.36312    | 3.88351    | 6.47821    | 5.39063    | 7.96717   | 9.19785    | 4.10204   | 9.56742    | 5.80512    | 3.80843    |
| DLEC1         | 0.242659   | 0.263558   | 0.285806  | 0.10596   | 0.261936  | 0.238139   | 0.347499   | 0.204689   | 0.025045   | 0.139376  | 0.0650007  | 0.0794572 | 0.0583791  | 0.137572   | 0.070879   |
| DLEU1         | 1.10372    | 1.36464    | 1.39618   | 0.824475  | 0.662198  | 0.75582    | 1.02015    | 1.3909     | 0.547639   | 0.674316  | 0.88338    | 0.818991  | 0.59908    | 0.998045   | 1.43412    |
| DLEU1-AS1     | 0.0316594  | 0.045762   | 0         | 0.0652519 | 0.0983561 | 0          | 0          | 0.112545   | 0.115673   | 0         | 0.0357396  | 0.0226532 | 0          | 0          | 0          |
| DLEU2         | 0.267115   | 0.55959    | 0.372855  | 0.598271  | 0.646213  | 0.282168   | 0.321114   | 0.54764    | 0.0637026  | 0.440555  | 0.849657   | 0.411139  | 0.280927   | 0.599131   | 1.51057    |
| DLEU2L        | 0.335204   | 0.370119   | 0.473729  | 0.331044  | 0.195258  | 0.285422   | 0.398672   | 0.633041   | 0.10206    | 0.213133  | 0.583372   | 0.139911  | 0.054068   | 0.306587   | 0.461337   |
| DLEU7         | 0.0452139  | 0.0684663  | 0.0641213 | 0.0732195 | 0.0501663 | 0.0769981  | 0.0442489  | 0.0975857  | 0.015733   | 0.0486412 | 0.080207   | 0.013865  | 0.0708457  | 0.0101275  | 0.00927612 |
| DLEU7-AS1     | 0          | 0.0308541  | 0.0423809 | 0.0395953 | 0         | 0.0218107  | 0.0292463  | 0.0682931  | 0          | 0         | 0          | 0         | 0          | 0          | 0.0551793  |
| DLG1          | 7.81984    | 8.4536     | 9.21856   | 7.13184   | 2.67122   | 5.66728    | 6.57798    | 7.75152    | 10.4219    | 10.0253   | 7.05045    | 8.09943   | 13.0916    | 9.6886     | 7.99344    |
| DLG1-AS1      | 0.0136251  | 0.0527284  | 0.0913284 | 0.199234  | 0.121211  | 0.0581452  | 0.0936546  | 0.024255   | 0.102336   | 0.154409  | 0.123327   | 0.0489182 | 0.167977   | 0.0641668  | 0.137012   |
| DLG2          | 0.457208   | 1.64616    | 2.21613   | 0.319108  | 0.548793  | 0.309676   | 0.90168    | 1.49787    | 0.394842   | 0.11216   | 0.152493   | 0.346476  | 0.0268171  | 0.0586531  | 0.379043   |
| DLG3          | 2.27949    | 2.21302    | 2.21888   | 2.06775   | 2.86237   | 2.7313     | 2.43122    | 1.90148    | 5.05783    | 2.44555   | 2.18806    | 1.84101   | 3.31352    | 1.42679    | 1.18106    |
| DLG3-AS1      | 0.239081   | 0.276463   | 0.237342  | 0         | 0.371376  | 0.16286    | 0.054595   | 0.127485   | 0.11647    | 0         | 0.161936   | 0         | 0          | 0.199927   | 0.343351   |
| DLG4          | 0.66861    | 0.757341   | 0.659242  | 1.104     | 1.85055   | 1.51627    | 0.805141   | 0.765998   | 0.273273   | 1.04021   | 1.43638    | 0.567222  | 0.720582   | 1.35903    | 3.4442     |
| DLG5          | 6.68701    | 13.3468    | 17.0567   | 10.3989   | 14.1461   | 17.4875    | 9.48988    | 11.9627    | 8.04981    | 7.02579   | 4.04862    | 7.72067   | 16.3473    | 10.0966    | 7.55473    |
| DLG5-AS1      | 0.238034   | 0.258974   | 0.336667  | 0.181998  | 0.238548  | 0.516514   | 0.157807   | 0.225193   | 0.102867   | 0.192747  | 0.121353   | 0.230756  | 0.0842204  | 0.341116   | 0.341847   |
| DLGAP1        | 0.105975   | 0.0540639  | 0.0618847 | 0.0449689 | 0.0629413 | 0.0557342  | 0.0676169  | 0.0692512  | 0.00759209 | 0.0156482 | 0.0774092  | 0.0066907 | 0.00603304 | 0.0293226  | 0.080573   |

|            |            |            |            |           |           |            |           |            |            |            |            |           |           |            |           |
|------------|------------|------------|------------|-----------|-----------|------------|-----------|------------|------------|------------|------------|-----------|-----------|------------|-----------|
| DLGAP1-AS1 | 0.699186   | 0.707445   | 0.867624   | 1.39303   | 1.12228   | 1.56775    | 0.585426  | 0.47639    | 0.141922   | 0.35102    | 0.710364   | 0.13341   | 0.375926  | 0.682127   | 2.07518   |
| DLGAP1-AS2 | 0.325958   | 0.241618   | 0.146573   | 0.413427  | 0.116844  | 0.341599   | 0.17177   | 0.245118   | 0.030537   | 0.377641   | 0.481187   | 0.0717637 | 0.226484  | 0.196569   | 0.648163  |
| DLGAP1-AS3 | 0          | 0.00886381 | 0          | 0         | 0.0285764 | 0          | 0         | 0          | 0          | 0.0230898  | 0          | 0         | 0         | 0.0192298  | 0         |
| DLGAP1-AS4 | 0          | 0          | 0          | 0         | 0         | 0          | 0         | 0          | 0          | 0          | 0          | 0         | 0         | 0          | 0         |
| DLGAP1-AS5 | 0.0718728  | 0.0311665  | 0.0416208  | 0         | 0.0223287 | 0.0611988  | 0.0574434 | 0.0766495  | 0          | 0.00902078 | 0          | 0         | 0         | 0.00375639 | 0         |
| DLGAP2     | 0.058792   | 0.0505837  | 0.0503739  | 0.0173105 | 0.0880627 | 0.0303939  | 0.0383582 | 0.0709099  | 0.00511443 | 0.0764254  | 0.00948126 | 0.0886417 | 0.0311587 | 0.00877922 | 0.0784018 |
| DLGAP2-AS1 | 0          | 0          | 0          | 0         | 0         | 0          | 0         | 0          | 0          | 0          | 0          | 0         | 0         | 0          | 0         |
| DLGAP3     | 0.108033   | 0.0433766  | 0.0695119  | 0.154626  | 0.0745833 | 0.342402   | 0.150759  | 0.0586732  | 0.182739   | 2.16195    | 0.271013   | 0.747238  | 0.298171  | 0.210167   | 1.29291   |
| DLGAP4     | 5.99638    | 9.13251    | 10.0224    | 7.52289   | 12.524    | 13.9926    | 16.2308   | 6.96553    | 19.6433    | 12.9373    | 12.333     | 11.0443   | 22.746    | 9.43561    | 11.3872   |
| DLGAP4-AS1 | 0.536873   | 0.683637   | 0.586898   | 0.158075  | 1.01265   | 0.163264   | 0.48163   | 0.306725   | 0.140111   | 0.842288   | 0.108225   | 0.562501  | 0.0618549 | 0.861822   | 1.40435   |
| DLGAP5     | 0.270152   | 0.231402   | 0.204865   | 2.42826   | 0.13988   | 2.23002    | 0.17993   | 0.213412   | 0.356433   | 2.35464    | 2.80402    | 0.633599  | 2.32402   | 2.87485    | 0.58196   |
| DLK1       | 0.0148226  | 0.00238059 | 0.0122623  | 0         | 0.184197  | 0.00841418 | 0         | 0.00439104 | 0          | 0          | 0          | 0         | 0         | 0.00258232 | 0.0141914 |
| DLK2       | 1.31518    | 2.62803    | 2.0242     | 1.3133    | 4.4976    | 2.02269    | 1.52491   | 1.28661    | 2.30948    | 0.959699   | 0.702054   | 1.07965   | 0.86828   | 0.660728   | 0.556379  |
| DLL1       | 5.02715    | 4.11665    | 3.45314    | 7.11164   | 10.5893   | 8.41821    | 2.99365   | 2.84591    | 2.96332    | 2.10612    | 2.15477    | 2.83162   | 5.34567   | 4.67379    | 4.32775   |
| DLL3       | 0.00971173 | 0          | 0.00803423 | 0.0100082 | 0.0150857 | 0.00826941 | 0         | 0.00863098 | 0          | 0.0365677  | 0.0109633  | 0.020847  | 0.156649  | 0.0710608  | 0         |
| DLL4       | 1.31279    | 0.991171   | 0.828521   | 2.24549   | 2.06024   | 5.73894    | 1.12032   | 0.408947   | 1.04666    | 1.32495    | 2.29936    | 0.813448  | 3.09114   | 2.7834     | 3.78039   |
| DLST       | 10.2742    | 9.41133    | 10.9713    | 18.1361   | 7.48955   | 17.3942    | 9.86834   | 7.44161    | 7.80893    | 12.3148    | 13.5523    | 8.65907   | 19.5538   | 12.3351    | 9.00197   |
| DLSTP1     | 1.17472    | 1.22999    | 1.17303    | 0.556572  | 0.573734  | 0.524957   | 1.01105   | 1.01597    | 0.103132   | 0.26186    | 0.296258   | 0.34247   | 0.0744823 | 0.583685   | 0.917619  |
| DLX1       | 0.291474   | 0.210655   | 0.20094    | 0.0901118 | 0.543312  | 0.190276   | 0.454821  | 0.0518076  | 0.828293   | 0.560939   | 0.285166   | 0.236365  | 0.288355  | 0.279285   | 0.181391  |
| DLX2       | 0.160716   | 0.382337   | 0.257601   | 0.134568  | 0.998588  | 0.128294   | 0.5505    | 0.107123   | 1.3579     | 0.353001   | 0.204106   | 0.359364  | 0.136097  | 0.446234   | 0.187531  |
| DLX2-DT    | 0          | 0.0352127  | 0          | 0         | 0.0378412 | 0          | 0         | 0          | 0          | 0          | 0.082502   | 0         | 0         | 0          | 0         |
| DLX3       | 5.71016    | 9.16652    | 8.12325    | 4.50044   | 11.4534   | 7.64914    | 15.3751   | 5.89679    | 31.9986    | 7.41243    | 12.3098    | 10.8063   | 6.11159   | 4.63927    | 1.46894   |
| DLX4       | 0.709174   | 0.644981   | 0.388365   | 0.432319  | 0.744739  | 0.459268   | 1.49398   | 0.239674   | 0.815036   | 0.300874   | 0.270615   | 0.435964  | 0.225556  | 0.193153   | 0.100412  |
| DLX5       | 9.14996    | 8.87982    | 6.02332    | 8.29041   | 7.42209   | 11.6243    | 7.64514   | 5.40189    | 26.3449    | 11.0558    | 13.9801    | 13.2453   | 10.5907   | 4.74819    | 2.10061   |
| DLX6       | 1.34538    | 0.814743   | 0.827088   | 0.712308  | 0.977817  | 0.935378   | 0.718732  | 0.570409   | 1.84898    | 0.263359   | 0.376209   | 0.521071  | 0.238908  | 0.116117   | 0.0886303 |
| DLX6-AS1   | 0.511706   | 0.678006   | 0.548391   | 0.335572  | 0.307103  | 0.19805    | 0.451465  | 0.237716   | 0.863982   | 0.189754   | 0.301954   | 0.382782  | 0.232606  | 0.188423   | 0.0334034 |

|         |           |            |            |            |           |           |           |            |           |            |           |           |           |            |            |
|---------|-----------|------------|------------|------------|-----------|-----------|-----------|------------|-----------|------------|-----------|-----------|-----------|------------|------------|
| DM1-AS  | 0.0666254 | 0.249196   | 0.160703   | 0.401418   | 1.72592   | 1.00321   | 0.331879  | 0.0871849  | 0.164571  | 0.0412915  | 0.184799  | 0.3554    | 0.26831   | 0.296162   | 0.623572   |
| DMAC1   | 3.83407   | 2.57734    | 2.29289    | 5.76008    | 3.38683   | 6.81249   | 3.12235   | 2.6274     | 4.27565   | 5.03248    | 12.4422   | 2.04927   | 2.32471   | 3.70835    | 1.75138    |
| DMAC2   | 4.88058   | 3.88277    | 4.02817    | 9.27548    | 7.73992   | 9.44227   | 5.97424   | 3.21779    | 5.97164   | 5.3991     | 9.64815   | 4.46675   | 9.97405   | 5.98553    | 4.14028    |
| DMAP1   | 4.69151   | 4.41354    | 4.27144    | 5.05082    | 9.60816   | 6.27113   | 4.42894   | 2.85338    | 3.38356   | 2.94416    | 3.81677   | 3.40379   | 3.16223   | 3.27388    | 2.18313    |
| DMBT1   | 0.0421549 | 0.00290155 | 0.0124548  | 0          | 0.0327406 | 0.0128194 | 0.0171897 | 0.0267598  | 0         | 0          | 0.0101974 | 0         | 0         | 0.00786857 | 0.00432427 |
| DMBT1P1 | 0.0803793 | 0.199598   | 0.0511503  | 0.00637178 | 0.0864393 | 0         | 0.0352979 | 0.0659395  | 0         | 0          | 0         | 0         | 0         | 0          | 0          |
| DMBX1   | 0         | 0          | 0          | 0.0165392  | 0         | 0.0136657 | 0         | 0          | 0         | 0          | 0.0362353 | 0         | 0.0207098 | 0.00419403 | 0          |
| DMC1    | 0.256574  | 0.147071   | 0.18365    | 0.333627   | 0.114945  | 0.46469   | 0.168978  | 0.156189   | 0.0901219 | 0.301846   | 0.302815  | 0.105896  | 0.214846  | 0.164368   | 0.106558   |
| DMD     | 2.0052    | 1.14076    | 1.57475    | 0.437273   | 0.585879  | 1.60579   | 1.47697   | 1.42721    | 0.129193  | 0.545508   | 0.563826  | 0.296232  | 0.43917   | 0.481264   | 1.18067    |
| DMGDH   | 0.32051   | 0.255603   | 0.26972    | 0.0797264  | 0.137342  | 0.451714  | 0.201902  | 0.22591    | 0.0403806 | 0.0693575  | 0.187146  | 0.0474483 | 0.0926997 | 0.0490985  | 0.277763   |
| DMKN    | 157.945   | 277.641    | 294.014    | 197.828    | 590.35    | 187.884   | 310.29    | 159.615    | 1470.13   | 338.08     | 313.1     | 338.542   | 258.513   | 117.268    | 32.9858    |
| DMP1    | 0.0172324 | 0          | 0          | 0.0355169  | 0.0401517 | 0         | 0         | 0          | 0         | 0          | 0         | 0         | 0         | 0.0360255  | 0.0618696  |
| DMPK    | 3.62854   | 3.66177    | 2.94998    | 3.08798    | 9.16871   | 7.47731   | 4.51335   | 2.21446    | 1.90747   | 2.55552    | 1.7053    | 3.68435   | 3.33651   | 4.81576    | 6.85635    |
| DMRT1   | 0         | 0          | 0          | 0          | 0         | 0.0712551 | 0         | 0          | 0         | 0          | 0         | 0         | 0         | 0          | 0          |
| DMRT2   | 0.118278  | 0.0607873  | 0.104371   | 0.0568815  | 0.244969  | 0.161139  | 0.0810276 | 0.0350385  | 0         | 0.00989673 | 0.0890141 | 0         | 0         | 0.0247269  | 0.0339724  |
| DMRT3   | 0.0636965 | 0.0460349  | 0.0790413  | 0.0109402  | 0.181395  | 0.244065  | 0.133332  | 0.132086   | 0.103434  | 0.199864   | 0.383495  | 0.083557  | 0.0684944 | 0.260776   | 0.9605     |
| DMRTA1  | 0.462459  | 0.42142    | 0.523966   | 0.663064   | 0.171781  | 0.761874  | 0.172181  | 0.40206    | 0.404051  | 0.832796   | 1.55483   | 0.589868  | 1.07675   | 0.998331   | 0.231008   |
| DMRTA2  | 0         | 0          | 0.00621004 | 0          | 0         | 0.0255673 | 0         | 0          | 0         | 0          | 0         | 0         | 0         | 0          | 0          |
| DMRTB1  | 0         | 0          | 0          | 0          | 0         | 0         | 0         | 0          | 0         | 0          | 0         | 0         | 0         | 0          | 0          |
| DMRTC1  | 0.0157794 | 0.00253424 | 0.0217563  | 0          | 0         | 0.0179146 | 0         | 0.00934892 | 0         | 0          | 0         | 0         | 0         | 0          | 0          |
| DMRTC1B | 0.0157794 | 0.00253424 | 0.0217563  | 0          | 0         | 0.0179146 | 0         | 0.00934892 | 0         | 0          | 0         | 0         | 0         | 0          | 0          |
| DMRTC2  | 0         | 0          | 0          | 0          | 0         | 0         | 0         | 0          | 0         | 0          | 0         | 0         | 0         | 0          | 0          |
| DMTF1   | 6.36448   | 6.73675    | 6.07101    | 4.73403    | 2.83256   | 3.8778    | 3.35632   | 5.46786    | 2.12711   | 3.70509    | 3.48013   | 3.24475   | 3.12429   | 5.08499    | 5.76553    |
| DMTN    | 1.36304   | 3.13191    | 3.93239    | 2.8152     | 2.82896   | 2.7211    | 4.33535   | 2.29038    | 2.15525   | 2.31455    | 3.18084   | 2.04893   | 4.43409   | 1.39783    | 1.62028    |
| DMWD    | 3.35113   | 4.37195    | 4.33495    | 6.3373     | 10.9217   | 8.9237    | 5.7433    | 3.32638    | 3.80864   | 4.44309    | 4.00414   | 5.11101   | 6.52701   | 5.72967    | 9.57504    |
| DMXL1   | 4.13677   | 4.59827    | 4.64665    | 3.83916    | 1.82481   | 3.22567   | 3.66909   | 4.18883    | 4.90254   | 4.24517    | 3.71889   | 3.86217   | 3.88359   | 3.05962    | 3.12141    |



|            |           |            |           |           |           |           |           |           |           |           |           |           |           |           |           |
|------------|-----------|------------|-----------|-----------|-----------|-----------|-----------|-----------|-----------|-----------|-----------|-----------|-----------|-----------|-----------|
| DNAJA2     | 9.59738   | 8.9959     | 9.51625   | 11.9404   | 6.4633    | 13.3507   | 7.30821   | 8.18521   | 22.7205   | 11.6645   | 16.4228   | 10.4366   | 16.6464   | 10.1074   | 6.69525   |
| DNAJA3     | 3.846     | 4.43687    | 4.90075   | 8.86808   | 6.13036   | 8.74717   | 4.06596   | 3.24673   | 3.92884   | 4.52213   | 5.1173    | 4.4666    | 7.64438   | 6.80542   | 3.16479   |
| DNAJA4     | 4.25525   | 6.90123    | 8.70981   | 5.94828   | 4.87213   | 3.65836   | 4.20809   | 4.64175   | 9.57906   | 4.72915   | 2.27786   | 5.49528   | 5.50861   | 4.2507    | 2.45429   |
| DNAJB1     | 16.656    | 21.2481    | 17.4363   | 58.5538   | 35.5619   | 38.7765   | 15.8784   | 13.9878   | 79.5998   | 53.6368   | 51.4091   | 44.8351   | 68.0482   | 36.9481   | 15.5271   |
| DNAJB11    | 7.19884   | 5.64458    | 6.09126   | 13.582    | 4.95337   | 16.1867   | 5.40668   | 4.98683   | 9.70079   | 11.5604   | 15.0636   | 7.2466    | 19.5853   | 10.572    | 10.3974   |
| DNAJB12    | 5.19126   | 5.26075    | 5.10254   | 5.90225   | 6.2746    | 8.44285   | 6.33327   | 4.75036   | 6.81367   | 4.35037   | 5.6206    | 4.51208   | 7.28438   | 4.40268   | 5.14554   |
| DNAJB13    | 0.0370289 | 0.0297351  | 0.0510548 | 0.0127198 | 0         | 0.0105099 | 0         | 0.0219388 | 0         | 0         | 0.041801  | 0         | 0         | 0.0129019 | 0.0177261 |
| DNAJB14    | 2.86955   | 2.18322    | 2.57978   | 2.14999   | 0.545804  | 2.49326   | 1.93071   | 3.67247   | 2.42495   | 3.08247   | 3.58642   | 1.85159   | 3.02512   | 2.17886   | 2.70179   |
| DNAJB2     | 6.8059    | 11.7644    | 12.2899   | 10.0206   | 27.6089   | 15.0142   | 9.41962   | 6.91727   | 18.4176   | 14.714    | 9.91516   | 13.2582   | 17.0819   | 12.0143   | 5.28591   |
| DNAJB3     | 0.0292679 | 0.26808    | 0.412414  | 0.0188385 | 0         | 0         | 0.510894  | 0.29783   | 0         | 0         | 0         | 0.0261603 | 0         | 0         | 0         |
| DNAJB4     | 2.22863   | 2.19545    | 2.59349   | 1.91283   | 1.01252   | 3.7953    | 1.39633   | 2.2289    | 1.05847   | 4.81519   | 6.04087   | 1.43474   | 2.77568   | 3.02714   | 3.63746   |
| DNAJB5     | 1.73438   | 1.58176    | 1.39636   | 1.77934   | 1.2388    | 3.52059   | 1.57359   | 1.13538   | 3.03639   | 4.07183   | 4.3528    | 1.92797   | 3.95652   | 3.75939   | 2.80213   |
| DNAJB5-DT  | 0.092944  | 0.0746364  | 0.0768898 | 0.0957815 | 0.192499  | 0.105521  | 0         | 0.110134  | 0.188659  | 0.0388847 | 0.0699481 | 0.266016  | 0         | 0.080961  | 0         |
| DNAJB6     | 14.7879   | 16.0227    | 17.0408   | 49.6875   | 31.2783   | 28.2414   | 14.0703   | 16.9321   | 78.3174   | 69.9067   | 50.0486   | 45.4833   | 97.2345   | 40.5441   | 16.2652   |
| DNAJB7     | 0.361549  | 0.451152   | 0.441979  | 0.19639   | 0.0319046 | 0.115559  | 0.419647  | 0.488563  | 0.0623999 | 0.137639  | 0.0120349 | 0.106225  | 0.0608215 | 0.254649  | 0.10189   |
| DNAJB8     | 0.0374029 | 0.00450532 | 0.0154712 | 0         | 0         | 0         | 0.131308  | 0.0332406 | 0         | 0         | 0         | 0.0066907 | 0         | 0         | 0         |
| DNAJB8-AS1 | 0.0257431 | 0.0248068  | 0.0319448 | 0         | 0         | 0.0328799 | 0.171963  | 0.102952  | 0         | 0         | 0         | 0         | 0         | 0         | 0         |
| DNAJB9     | 1.89667   | 1.30047    | 1.68221   | 2.52779   | 0.354109  | 1.90227   | 1.32224   | 2.27719   | 2.20998   | 3.57078   | 4.22045   | 1.38322   | 3.09461   | 1.36778   | 2.8941    |
| DNAJC1     | 3.59708   | 3.50358    | 3.60753   | 4.95013   | 5.53593   | 4.75922   | 3.17189   | 2.9017    | 10.2444   | 6.32058   | 10.0329   | 3.52413   | 7.3195    | 4.64502   | 5.70629   |
| DNAJC10    | 6.19872   | 2.96873    | 3.26404   | 5.17308   | 1.22787   | 6.4978    | 2.74614   | 4.22704   | 1.48107   | 4.99878   | 7.23402   | 2.18746   | 5.69074   | 4.03427   | 6.19516   |
| DNAJC11    | 4.98471   | 4.56703    | 4.8694    | 8.78489   | 8.5591    | 10.1082   | 5.25777   | 4.35647   | 4.99005   | 4.38936   | 3.63023   | 4.86044   | 8.81018   | 6.11272   | 4.70335   |
| DNAJC12    | 0         | 0.0510829  | 0.0125298 | 0.0780418 | 0.0941077 | 0.103173  | 0.0691727 | 0.026921  | 0.75629   | 0.722371  | 1.57301   | 0.108374  | 0.0586326 | 0.316638  | 0.913564  |
| DNAJC13    | 4.89554   | 5.23614    | 5.73525   | 7.45476   | 2.40417   | 7.85812   | 3.49611   | 3.97781   | 2.88113   | 5.22087   | 5.3411    | 3.42676   | 6.33859   | 4.45454   | 7.03503   |
| DNAJC14    | 4.9932    | 4.24358    | 4.3076    | 6.51323   | 5.67845   | 8.08942   | 4.68435   | 3.66625   | 4.35437   | 3.69821   | 4.13406   | 3.00029   | 6.4933    | 4.54409   | 5.44783   |
| DNAJC15    | 2.88454   | 2.02849    | 2.13112   | 4.1668    | 0.647499  | 5.24594   | 1.89423   | 2.05973   | 2.71094   | 4.69815   | 9.69358   | 1.40779   | 4.41068   | 3.58161   | 3.48407   |
| DNAJC16    | 2.49103   | 2.65537    | 2.48932   | 3.39249   | 1.7635    | 3.19099   | 2.13103   | 2.40319   | 2.5729    | 2.30106   | 2.7125    | 2.38968   | 2.98446   | 2.57501   | 2.25305   |

|               |           |           |            |            |           |            |           |           |           |            |            |            |            |            |           |
|---------------|-----------|-----------|------------|------------|-----------|------------|-----------|-----------|-----------|------------|------------|------------|------------|------------|-----------|
| DNAJC17       | 3.38004   | 3.28605   | 3.7426     | 5.47355    | 5.36765   | 6.11699    | 3.53012   | 2.12141   | 3.62703   | 3.30986    | 4.49114    | 2.62433    | 2.88386    | 2.93478    | 3.1242    |
| DNAJC18       | 1.93237   | 0.548573  | 0.709234   | 0.556272   | 0.465042  | 0.996501   | 1.06172   | 0.733694  | 0.480625  | 0.575017   | 0.829547   | 0.259655   | 0.465338   | 0.623507   | 1.46573   |
| DNAJC19       | 3.93714   | 2.86927   | 2.65002    | 3.941      | 1.24945   | 4.24159    | 2.70685   | 2.38283   | 3.2826    | 3.50688    | 7.93327    | 2.29207    | 2.85889    | 2.49287    | 1.80368   |
| DNAJC2        | 4.11445   | 3.09402   | 2.69266    | 3.71912    | 1.43216   | 5.29669    | 0.896841  | 1.50482   | 3.43622   | 3.49167    | 4.98318    | 2.08112    | 3.99489    | 4.03697    | 2.89074   |
| DNAJC21       | 3.95633   | 4.0289    | 4.06349    | 4.36898    | 1.92297   | 4.18415    | 1.6473    | 2.86711   | 2.31787   | 3.66128    | 2.72172    | 2.18642    | 4.35591    | 3.30284    | 2.82588   |
| DNAJC22       | 0.0472093 | 0.0606564 | 0.0433943  | 0.0540562  | 0.0325922 | 0.187591   | 0.0598912 | 0.0652644 | 0.0255536 | 0.0329181  | 0.0769794  | 0.00750656 | 0.0236905  | 0.0246736  | 0.0979312 |
| DNAJC24       | 1.67326   | 1.51111   | 1.61294    | 1.66851    | 0.967772  | 2.08468    | 1.26779   | 1.93605   | 1.44183   | 1.87409    | 2.61549    | 0.895659   | 1.65634    | 1.50351    | 1.87144   |
| DNAJC25       | 1.55454   | 0.854625  | 1.16826    | 1.84959    | 0.711114  | 2.22909    | 0.900373  | 1.22533   | 1.24792   | 1.66619    | 2.40822    | 0.937612   | 1.38265    | 1.43023    | 1.05392   |
| DNAJC25-GNG10 | 0.0570871 | 0.67834   | 0.00571471 | 0.231556   | 1.65566   | 1.92192    | 0.419506  | 0.163307  | 0.308039  | 0.135867   | 2.0351     | 0.170308   | 0.43025    | 0.411321   | 1.49547   |
| DNAJC27       | 0.635136  | 0.848811  | 0.870602   | 0.515976   | 0.439283  | 0.738186   | 0.719884  | 0.922905  | 0.525093  | 0.477133   | 0.638487   | 0.335037   | 0.329026   | 0.462791   | 0.759003  |
| DNAJC27-AS1   | 0.0495144 | 0.109741  | 0.17204    | 0.0204104  | 0.0538391 | 0.0674574  | 0.0339204 | 0.0660065 | 0.0120606 | 0.00621457 | 0.00558956 | 0.0106287  | 0.00319465 | 0.0207027  | 0.0142218 |
| DNAJC28       | 0.193868  | 0.321093  | 0.230549   | 0.1873     | 0.112929  | 0.175394   | 0.110676  | 0.0538419 | 0.486977  | 0.410611   | 0.437707   | 0.130048   | 0.312707   | 0.189983   | 0.0522037 |
| DNAJC3        | 6.93339   | 4.37162   | 5.18447    | 7.53315    | 2.28902   | 8.4837     | 4.91521   | 6.1839    | 6.4528    | 9.0606     | 10.64      | 4.87514    | 12.5041    | 6.71087    | 8.10251   |
| DNAJC3-DT     | 0.270865  | 0.322429  | 0.276803   | 0.172407   | 0.395998  | 0.481627   | 0.309265  | 0.382324  | 0.611255  | 0.18998    | 0.395707   | 0.108306   | 0.118221   | 0.195694   | 0.183057  |
| DNAJC30       | 1.80834   | 2.33663   | 2.52353    | 3.13414    | 3.29132   | 4.35492    | 2.72165   | 1.7532    | 2.14674   | 1.66212    | 4.04153    | 1.69908    | 2.8579     | 1.83295    | 2.12482   |
| DNAJC4        | 5.95345   | 7.28027   | 5.89628    | 5.92784    | 10.7587   | 11.6094    | 7.25702   | 4.85872   | 5.92308   | 4.54648    | 9.57937    | 5.50781    | 3.58147    | 4.21592    | 4.88911   |
| DNAJC5        | 9.39189   | 9.4569    | 9.78077    | 20.9974    | 18.6775   | 24.5906    | 9.91461   | 7.57345   | 28.4146   | 22.8622    | 14.5559    | 15.7492    | 41.2098    | 17.0956    | 10.3985   |
| DNAJC5B       | 0.0185392 | 0         | 0          | 0.00636838 | 0         | 0.00526195 | 0         | 0         | 0         | 0          | 0.0558091  | 0          | 0.00797425 | 0.00645958 | 0         |
| DNAJC5G       | 0         | 0         | 0.00944993 | 0          | 0.0177439 | 0.00972656 | 0.0782547 | 0         | 0         | 0          | 0          | 0          | 0          | 0          | 0         |
| DNAJC6        | 0.252669  | 0.153498  | 0.160556   | 0.124531   | 0.0796342 | 0.311804   | 0.192327  | 0.175736  | 0.0981146 | 0.0965166  | 0.082676   | 0.0602639  | 0.177197   | 0.147367   | 0.315535  |
| DNAJC7        | 10.454    | 9.7285    | 8.69142    | 18.709     | 11.4781   | 20.3495    | 6.94192   | 8.39763   | 23.8464   | 19.7345    | 18.8251    | 13.5165    | 21.5626    | 12.1485    | 7.71897   |
| DNAJC8        | 12.28     | 9.85482   | 9.6162     | 21.1185    | 9.57829   | 22.7446    | 7.74444   | 8.88465   | 12.4151   | 15.6102    | 26.9698    | 9.49072    | 21.6189    | 13.419     | 10.8904   |
| DNAJC9        | 5.33756   | 5.04419   | 4.83507    | 8.93067    | 3.77853   | 8.88218    | 3.95045   | 3.50812   | 4.24223   | 6.88754    | 9.85796    | 4.00102    | 8.79021    | 5.62644    | 4.5172    |
| DNAJC9-AS1    | 0.248514  | 0.325442  | 0.291428   | 0.200389   | 0.181855  | 0.262765   | 0.108179  | 0.186532  | 0.0868762 | 0.214998   | 0.145076   | 0.1431     | 0.132069   | 0.116218   | 0.0801734 |
| DNAL1         | 0.80143   | 0.603747  | 0.655401   | 0.685274   | 0.252541  | 0.902901   | 0.582914  | 0.846989  | 0.430842  | 0.651289   | 1.04868    | 0.389749   | 0.670001   | 0.83008    | 1.01609   |
| DNAL4         | 2.53686   | 2.79704   | 2.98707    | 4.81162    | 5.89885   | 6.44056    | 2.68327   | 1.96409   | 2.8432    | 2.44174    | 5.85059    | 2.03792    | 2.82167    | 2.41586    | 2.19042   |

|           |           |           |           |            |          |           |           |           |            |           |           |            |            |            |           |
|-----------|-----------|-----------|-----------|------------|----------|-----------|-----------|-----------|------------|-----------|-----------|------------|------------|------------|-----------|
| DNALI1    | 0.475542  | 0.386115  | 0.356976  | 0.317631   | 0.328303 | 0.374924  | 0.361972  | 0.438275  | 0.107251   | 0.30948   | 0.566652  | 0.132325   | 0.306817   | 0.524694   | 0.531174  |
| DNASE1    | 0.306283  | 0.734261  | 0.655078  | 0.546585   | 1.52012  | 0.686975  | 0.571468  | 0.537759  | 0.327528   | 0.478177  | 0.252992  | 0.630735   | 0.163874   | 0.648116   | 0.472046  |
| DNASE1L1  | 1.84749   | 1.23335   | 1.22036   | 2.58208    | 2.95718  | 2.82052   | 1.35841   | 1.09322   | 1.85252    | 3.46943   | 4.03605   | 2.03589    | 6.00291    | 3.14299    | 1.8495    |
| DNASE1L2  | 1.74533   | 3.32166   | 4.21607   | 0.701459   | 12.0644  | 3.77476   | 8.11055   | 2.15604   | 22.4252    | 0.722887  | 1.75353   | 2.62254    | 0.0675646  | 0.191559   | 0.150391  |
| DNASE1L3  | 1.76369   | 1.51301   | 1.47684   | 2.48248    | 0.63479  | 3.33317   | 1.08054   | 0.726366  | 2.93382    | 0.944834  | 1.79674   | 0.923391   | 0.81875    | 1.57377    | 2.16222   |
| DNASE2    | 5.52068   | 4.12597   | 4.56709   | 5.57045    | 6.78522  | 11.2564   | 6.13226   | 3.43135   | 3.76183    | 4.20949   | 8.54807   | 2.62247    | 5.06401    | 3.80095    | 4.6511    |
| DNASE2B   | 0.0688269 | 0         | 0         | 0          | 0        | 0         | 0         | 0         | 0          | 0.0215962 | 0.0388485 | 0.0246237  | 0          | 0          | 0         |
| DND1      | 0.95823   | 1.61708   | 1.09138   | 1.50536    | 2.53378  | 2.07905   | 1.41119   | 0.967786  | 0.834433   | 0.906832  | 1.30599   | 1.45297    | 1.24203    | 1.61548    | 1.34897   |
| DNER      | 3.99628   | 1.30523   | 1.43943   | 0.670587   | 2.74673  | 5.02286   | 2.12393   | 1.84178   | 3.92807    | 0.932129  | 1.40529   | 1.33103    | 1.07699    | 0.425119   | 0.304734  |
| DNHD1     | 1.43463   | 1.42086   | 1.43591   | 0.614492   | 1.43521  | 1.11349   | 1.62622   | 0.937874  | 0.15459    | 0.322332  | 0.246594  | 0.578737   | 0.171411   | 0.909483   | 1.02592   |
| DNLZ      | 7.03549   | 1.6057    | 2.27194   | 5.2787     | 5.84772  | 5.75415   | 3.17088   | 3.37309   | 3.57018    | 5.0348    | 14.491    | 1.58971    | 8.62058    | 4.09637    | 2.26007   |
| DNM1      | 2.77831   | 3.00368   | 4.21532   | 1.26142    | 4.5633   | 3.37401   | 8.41801   | 3.07124   | 0.471494   | 1.472     | 3.00782   | 0.928797   | 1.30768    | 3.02016    | 9.77053   |
| DNM1L     | 6.50437   | 4.7583    | 5.21218   | 10.2696    | 2.04696  | 8.11276   | 2.98646   | 4.7329    | 4.42105    | 8.57547   | 7.86462   | 4.70318    | 11.2998    | 7.59415    | 6.55587   |
| DNM1P35   | 0.0129762 | 0.137547  | 0.230799  | 0.00668617 | 0.161252 | 0.082868  | 0.155566  | 0.0807252 | 0.00790178 | 0.0162865 | 0.0146485 | 0.0464241  | 0          | 0.0339096  | 0.0372709 |
| DNM1P41   | 1.90501   | 2.29126   | 1.59057   | 1.17695    | 3.14419  | 0.908388  | 1.59478   | 1.83538   | 0.714733   | 1.25563   | 0.364362  | 3.35039    | 0.704759   | 1.58107    | 0.825134  |
| DNM1P46   | 0.199353  | 0.148443  | 0.179911  | 0.0809305  | 0.15014  | 0.344636  | 0.137948  | 0.0697935 | 0.029429   | 0.0606566 | 0.0272781 | 0.0475474  | 0.00389762 | 0.0284156  | 0.0173513 |
| DNM1P50   | 0.19818   | 0.0795719 | 0.118407  | 0.0113461  | 0        | 0.084374  | 0.0502835 | 0.0489239 | 0.013409   | 0         | 0.0372868 | 0.00787796 | 0          | 0.00575431 | 0         |
| DNM2      | 16.7807   | 19.9957   | 23.4065   | 21.6997    | 26.8509  | 31.7474   | 24.9164   | 16.4705   | 38.1867    | 20.0465   | 17.4058   | 19.01      | 29.126     | 18.3677    | 13.8623   |
| DNM3      | 0.748421  | 0.517615  | 0.532329  | 0.256141   | 0.407538 | 0.289241  | 0.466677  | 0.773126  | 0.131174   | 0.22877   | 0.20888   | 0.247009   | 0.178184   | 0.233829   | 0.539396  |
| DNM3-IT1  | 0.236758  | 0.0855551 | 0.0979313 | 0.0609964  | 0        | 0.050399  | 0         | 0.105205  | 0          | 0         | 0         | 0          | 0.0763774  | 0.030935   | 0         |
| DNM3OS    | 1.03543   | 0.919297  | 1.07794   | 0.527526   | 0.521507 | 1.10455   | 0.813608  | 1.20195   | 0.116894   | 1.01849   | 1.62526   | 0.516118   | 0.34341    | 1.07168    | 4.04333   |
| DNMBP     | 3.72664   | 5.72535   | 6.75296   | 3.45727    | 4.94236  | 4.02295   | 6.35883   | 4.63634   | 2.7911     | 2.61591   | 1.67626   | 3.84102    | 2.38215    | 3.15841    | 2.95178   |
| DNMBP-AS1 | 0.154976  | 0.16476   | 0.232171  | 0.0970352  | 0.181465 | 0.0604838 | 0.16224   | 0.2295    | 0.0728669  | 0.2224    | 0.0363967 | 0.246837   | 0.0318516  | 0.273955   | 0.291151  |
| DNMT1     | 3.44584   | 4.05271   | 4.16394   | 10.3958    | 6.60201  | 12.6051   | 5.07019   | 3.15644   | 3.65532    | 4.38335   | 3.74655   | 5.29471    | 12.7686    | 7.23696    | 6.62661   |
| DNMT3A    | 2.05446   | 2.08605   | 1.90103   | 2.28184    | 3.52814  | 4.31506   | 1.84182   | 1.54519   | 0.829398   | 1.69516   | 1.48602   | 1.2359     | 2.22394    | 2.38411    | 2.8084    |
| DNMT3B    | 0.82975   | 1.20659   | 0.847697  | 1.65351    | 2.5079   | 0.978916  | 0.99304   | 1.04837   | 4.77269    | 1.63114   | 2.36429   | 2.60016    | 0.728851   | 1.41594    | 0.775275  |



|           |           |           |           |           |          |           |           |           |           |           |          |            |           |           |          |
|-----------|-----------|-----------|-----------|-----------|----------|-----------|-----------|-----------|-----------|-----------|----------|------------|-----------|-----------|----------|
| DNMT3L    | 0.0135657 | 0.0130723 | 0         | 0         | 0        | 0         | 0         | 0         | 0         | 0         | 0        | 0.00970661 | 0         | 0.01418   | 0.019482 |
| DNPEP     | 4.96981   | 4.8272    | 5.20802   | 6.20461   | 5.59502  | 10.9053   | 5.07736   | 3.41229   | 5.29366   | 3.27458   | 5.43736  | 3.35949    | 4.18786   | 3.45587   | 3.15526  |
| DNPB1     | 5.28487   | 5.09266   | 4.99658   | 11.3113   | 14.6142  | 13.2528   | 5.70254   | 3.6645    | 9.33625   | 7.17971   | 19.3401  | 7.27203    | 7.23168   | 7.1329    | 4.25359  |
| DNTT      | 0         | 0         | 0         | 0         | 0        | 0         | 0         | 0         | 0         | 0         | 0        | 0          | 0         | 0         | 0        |
| DNTTIP1   | 4.32362   | 4.30468   | 4.79381   | 6.98848   | 4.62601  | 9.97521   | 4.34255   | 2.69452   | 4.9598    | 5.42659   | 10.511   | 2.63154    | 6.56304   | 4.00373   | 2.88564  |
| DNTTIP2   | 8.57874   | 6.35367   | 6.40061   | 8.86693   | 2.35083  | 9.75889   | 2.74724   | 4.56387   | 13.1712   | 10.4364   | 13.2356  | 7.21511    | 16.6872   | 9.10945   | 6.17839  |
| DOC2A     | 0.0380026 | 0.101342  | 0.0903403 | 0.0882673 | 0.175621 | 0.0989475 | 0.0613089 | 0.0619038 | 0.0187056 | 0.0188316 | 9.04E-14 | 0.0176962  | 3.92E-20  | 0.0340895 | 0.141352 |
| DOC2B     | 2.43498   | 0.944797  | 0.873494  | 3.95272   | 2.37653  | 4.75219   | 1.13175   | 1.70439   | 0.104974  | 0.513865  | 0.681115 | 0.539648   | 1.96032   | 1.45282   | 2.01151  |
| DOC2GP    | 0.10665   | 0.205542  | 0.264685  | 0         | 0.579825 | 0.0454055 | 0.12177   | 0.142172  | 0.0649439 | 0         | 0        | 0.0381555  | 0.034405  | 0         | 0        |
| DOCK1     | 15.4276   | 15.121    | 16.0636   | 12.9749   | 12.5717  | 20.7854   | 15.0839   | 15.1053   | 15.0045   | 14.8194   | 14.8419  | 11.5963    | 14.6898   | 11.9614   | 12.81    |
| DOCK10    | 2.11112   | 1.75243   | 1.96297   | 1.70289   | 0.890622 | 1.59231   | 1.11121   | 2.02776   | 0.555046  | 2.22898   | 2.92091  | 0.879415   | 1.6201    | 1.51213   | 4.01994  |
| DOCK11    | 4.4243    | 1.28171   | 1.47961   | 3.1294    | 0.644464 | 4.42628   | 2.01026   | 2.64299   | 0.768545  | 3.68009   | 4.35689  | 1.06272    | 3.8083    | 3.61336   | 4.72659  |
| DOCK2     | 1.52397   | 0.903713  | 1.21694   | 2.13945   | 1.46851  | 2.50512   | 1.32983   | 1.44511   | 0.271724  | 1.40489   | 2.13446  | 0.319284   | 1.91282   | 0.942748  | 3.09555  |
| DOCK3     | 0.518108  | 0.747624  | 0.903154  | 0.39772   | 0.804801 | 0.371387  | 0.742467  | 0.657788  | 1.39077   | 0.36827   | 0.182029 | 0.849252   | 0.170551  | 0.279075  | 0.277128 |
| DOCK4     | 2.76731   | 1.65334   | 1.70782   | 2.81758   | 2.09342  | 3.86433   | 1.95897   | 1.75844   | 0.647093  | 3.03911   | 4.17669  | 1.14053    | 2.94603   | 3.71559   | 5.64331  |
| DOCK4-AS1 | 0.700467  | 0.466277  | 0.24399   | 0.655365  | 0.1718   | 0.384546  | 0.652444  | 0.696236  | 0.078574  | 0.38174   | 0.39537  | 0.29017    | 0.0832517 | 0.563593  | 1.33687  |
| DOCK5     | 3.04748   | 2.31141   | 2.62719   | 2.78212   | 1.64433  | 2.89843   | 3.209     | 2.36643   | 0.926549  | 3.17833   | 2.05383  | 1.70307    | 4.68976   | 3.68309   | 3.52436  |
| DOCK6     | 4.92875   | 6.82282   | 6.08769   | 9.24544   | 16.868   | 12.1715   | 10.1732   | 5.58861   | 17.6865   | 8.882     | 6.34363  | 14.1997    | 13.1213   | 11.676    | 10.8901  |
| DOCK7     | 3.32473   | 3.41992   | 4.12447   | 3.57831   | 1.23606  | 4.35365   | 2.88755   | 3.26079   | 2.61135   | 3.5664    | 4.17461  | 2.71439    | 3.23727   | 2.95055   | 3.43253  |
| DOCK8     | 1.92995   | 1.81758   | 1.68763   | 4.00812   | 4.01915  | 4.19489   | 2.12527   | 1.63564   | 2.2496    | 3.68777   | 3.03447  | 2.2052     | 4.97316   | 1.70083   | 4.37032  |
| DOCK9     | 17.6156   | 15.0913   | 15.9981   | 13.0819   | 9.76137  | 14.5685   | 14.3235   | 12.9971   | 24.7676   | 10.6448   | 8.29835  | 11.0876    | 12.2205   | 8.96008   | 8.48772  |
| DOCK9-AS1 | 0.767499  | 0.398238  | 0.195363  | 0         | 0.183414 | 0.251352  | 0.134816  | 0.367279  | 0         | 0         | 0        | 0.211218   | 0         | 0.030856  | 0.847866 |
| DOCK9-DT  | 1.66611   | 1.83989   | 1.98196   | 1.71697   | 4.04263  | 2.34028   | 2.20778   | 1.30777   | 3.33251   | 1.35847   | 2.23777  | 1.33137    | 1.34174   | 0.578401  | 0.174652 |
| DOHH      | 1.65147   | 1.44526   | 1.57068   | 3.18381   | 5.54944  | 4.83085   | 1.25706   | 0.858648  | 2.49019   | 1.84716   | 1.34433  | 2.2508     | 4.61725   | 2.75967   | 1.61341  |
| DOK1      | 0.735112  | 0.383357  | 0.6296    | 1.11405   | 2.40467  | 1.78944   | 0.671462  | 0.64562   | 0.23172   | 1.4111    | 2.87031  | 0.253714   | 1.1941    | 1.26109   | 2.13627  |
| DOK2      | 1.20645   | 0.49378   | 0.880009  | 2.31277   | 2.31735  | 4.44048   | 1.43673   | 0.611033  | 0.17379   | 1.51422   | 3.0021   | 0.0928222  | 2.36029   | 1.07124   | 2.17974  |

|         |           |            |           |           |           |           |           |           |           |           |           |            |           |           |           |
|---------|-----------|------------|-----------|-----------|-----------|-----------|-----------|-----------|-----------|-----------|-----------|------------|-----------|-----------|-----------|
| DOK3    | 0.484055  | 0.469602   | 0.389621  | 2.28519   | 1.76799   | 2.71807   | 0.537741  | 0.401121  | 0.374427  | 2.07713   | 2.34082   | 0.819081   | 1.55311   | 1.28545   | 1.7567    |
| DOK4    | 5.37654   | 8.2962     | 8.69699   | 7.09606   | 17.1113   | 6.79672   | 10.5626   | 5.04514   | 18.912    | 9.92428   | 6.4848    | 8.61286    | 14.157    | 7.85306   | 3.99009   |
| DOK5    | 0.161045  | 0.0593364  | 0.0705322 | 0.136674  | 0.323734  | 0.483979  | 0.22714   | 0.117866  | 0.0115373 | 0.356695  | 0.791361  | 0.0271133  | 0.262819  | 0.103973  | 0.585003  |
| DOK6    | 0.374618  | 0.186764   | 0.256106  | 0.112599  | 0.173765  | 0.28354   | 0.237626  | 0.252009  | 0.0443569 | 0.130607  | 0.349477  | 0.0297832  | 0.0839241 | 0.0938168 | 0.616457  |
| DOK7    | 0.132452  | 0.275576   | 0.503044  | 0.0372262 | 0.121576  | 0.0974022 | 0.591171  | 0.214023  | 0.0366619 | 0.0453386 | 0         | 0.107697   | 0.0116533 | 0.0346127 | 0.129694  |
| DOLK    | 1.97409   | 2.13502    | 1.89371   | 3.65751   | 3.39266   | 4.56886   | 2.81744   | 1.66109   | 2.95412   | 2.47769   | 5.68979   | 2.15634    | 4.634     | 2.49704   | 2.21676   |
| DOLPP1  | 2.15902   | 2.48533    | 2.18203   | 3.91282   | 4.13019   | 4.41029   | 2.34368   | 1.81479   | 4.14495   | 3.27044   | 4.85052   | 2.49609    | 6.36801   | 3.05725   | 1.77179   |
| DONSON  | 1.53247   | 1.68012    | 2.06487   | 2.15611   | 1.58222   | 2.35972   | 1.12108   | 1.2396    | 1.46404   | 1.8543    | 2.82803   | 1.34603    | 2.73532   | 2.10066   | 1.85818   |
| DOP1A   | 6.09564   | 6.13115    | 7.09837   | 3.49097   | 1.50732   | 3.17885   | 3.86357   | 6.31121   | 4.55353   | 3.65066   | 3.09413   | 2.9712     | 2.46432   | 3.15367   | 2.88404   |
| DOP1B   | 2.58261   | 3.23954    | 3.18402   | 2.88044   | 5.2129    | 2.17894   | 4.33716   | 2.97982   | 6.61777   | 4.05271   | 2.51227   | 3.67685    | 4.8027    | 2.28768   | 1.74214   |
| DOT1L   | 2.44833   | 4.18918    | 4.26326   | 6.12578   | 8.9972    | 7.06777   | 4.85056   | 3.45828   | 5.76903   | 3.47678   | 2.7264    | 6.35995    | 7.0302    | 5.47847   | 4.58255   |
| DPAGT1  | 1.38296   | 2.13435    | 2.18985   | 7.41542   | 3.80974   | 6.29267   | 2.82497   | 1.91081   | 3.73703   | 3.11895   | 6.01304   | 3.77265    | 6.22506   | 4.87889   | 3.5688    |
| DPCD    | 1.14743   | 0.922976   | 0.909012  | 1.71356   | 1.17817   | 2.34319   | 1.15466   | 0.829618  | 1.23164   | 1.72085   | 2.60159   | 0.93234    | 1.42416   | 1.28579   | 0.991505  |
| DPEP1   | 0.101006  | 0.0486663  | 0.0313348 | 0         | 0.294183  | 0         | 0.0432471 | 0.0785452 | 0         | 0         | 0.0427588 | 0.00903408 | 0         | 0         | 0.253851  |
| DPEP2   | 0.453407  | 0.106905   | 0.111729  | 0.328069  | 0.389611  | 0.427141  | 0.286379  | 0.162895  | 0.0352467 | 0.58118   | 1.17614   | 0.0759292  | 0.398347  | 0.267222  | 0.665004  |
| DPEP2NB | 0         | 0          | 0.0161566 | 0         | 0.0303368 | 0.0332591 | 0         | 0.0347133 | 0         | 0         | 0         | 0          | 0         | 0.0204145 | 0         |
| DPEP3   | 0.0133159 | 0.00641581 | 0.0330476 | 0         | 0.0620526 | 0.0113383 | 0.045611  | 0         | 0         | 0.0668513 | 0.015032  | 0          | 0.0257741 | 0.013919  | 0.0956166 |
| DPF1    | 0.0552121 | 0.106408   | 0.068513  | 0.0379317 | 0.300172  | 0.141037  | 0.115572  | 0.0736018 | 0.616386  | 0.612122  | 0.446681  | 0.190944   | 1.03899   | 0.509793  | 0.343596  |
| DPF2    | 3.1362    | 3.33478    | 3.29529   | 5.23179   | 5.04896   | 8.47164   | 3.54654   | 2.46683   | 4.20002   | 3.61202   | 5.14102   | 2.90178    | 5.31449   | 3.73043   | 3.44272   |
| DPF3    | 0.0973761 | 0.17203    | 0.172621  | 0.12902   | 0.108042  | 0.217157  | 0.190596  | 0.0906607 | 0.0338838 | 0.0640184 | 0.0837528 | 0.129397   | 0.0837687 | 0.0872451 | 0.206437  |
| DPH1    | 4.23182   | 5.46459    | 5.76853   | 5.56354   | 8.79879   | 7.66759   | 6.37494   | 3.94368   | 4.13249   | 3.10511   | 3.5897    | 3.54297    | 3.19758   | 3.46526   | 3.67482   |
| DPH2    | 3.18356   | 2.91894    | 2.91052   | 5.98672   | 5.13179   | 7.41624   | 3.2038    | 2.37934   | 3.44875   | 2.50943   | 4.84345   | 3.26032    | 5.72469   | 4.52519   | 2.5756    |
| DPH3    | 1.44609   | 1.06158    | 1.16334   | 2.40549   | 0.486397  | 1.55127   | 0.851549  | 1.10301   | 2.11479   | 3.89435   | 4.53742   | 1.16507    | 4.29768   | 2.41615   | 1.83147   |
| DPH3P1  | 0.668957  | 0.686497   | 0.98907   | 0.660044  | 0.751704  | 1.16345   | 0.877549  | 0.872796  | 0.849383  | 0.786017  | 0.56236   | 0.712892   | 0.46834   | 0.736446  | 0.36793   |
| DPH5    | 2.71518   | 2.36959    | 2.19321   | 3.55038   | 1.63134   | 3.22799   | 1.55005   | 1.73009   | 1.591     | 2.31475   | 3.93258   | 1.45709    | 1.47087   | 2.43652   | 1.94967   |
| DPH6    | 1.55315   | 1.45539    | 1.45493   | 1.23573   | 0.36366   | 0.972415  | 1.16701   | 1.5833    | 0.563295  | 0.723844  | 1.18606   | 0.559745   | 0.556304  | 0.668495  | 0.656034  |

|           |           |            |            |            |           |           |           |           |           |           |            |           |            |            |            |
|-----------|-----------|------------|------------|------------|-----------|-----------|-----------|-----------|-----------|-----------|------------|-----------|------------|------------|------------|
| DPH6-DT   | 0.0313379 | 0.0301982  | 0.0259249  | 0.17762    | 0.243393  | 0         | 0         | 0         | 0.0381661 | 0.0589985 | 0          | 0         | 0          | 0.0327571  | 0.0225026  |
| DPH7      | 1.56096   | 1.93487    | 2.09335    | 1.77359    | 3.5438    | 2.02967   | 1.71624   | 1.27658   | 0.893664  | 1.03261   | 1.39062    | 1.50512   | 0.834963   | 1.6944     | 1.45617    |
| DPM1      | 7.65155   | 5.80235    | 5.6595     | 13.0707    | 2.22487   | 8.07177   | 4.4327    | 5.82863   | 10.0072   | 11.2355   | 18.0838    | 7.59198   | 14.105     | 8.87468    | 5.1695     |
| DPM2      | 4.08671   | 4.23379    | 4.28484    | 9.13257    | 7.72      | 9.62357   | 5.34975   | 3.97783   | 5.23239   | 5.58016   | 11.4912    | 5.62337   | 7.57213    | 5.64095    | 5.67555    |
| DPM3      | 6.13481   | 5.15744    | 5.28516    | 8.89453    | 12.4869   | 9.47476   | 7.29438   | 5.03851   | 5.66804   | 5.57573   | 13.5165    | 3.96579   | 4.80438    | 4.46673    | 3.52414    |
| DPP10     | 0         | 0.00307817 | 0.00264259 | 0.0197512  | 0         | 0.0951981 | 0.0145888 | 0         | 0         | 0         | 0          | 0         | 0.00206098 | 0.00500852 | 0.00458749 |
| DPP10-AS1 | 0.0317028 | 0          | 0          | 0.0326707  | 0         | 0.431912  | 0.180986  | 0         | 0         | 0         | 0          | 0         | 0          | 0          | 0          |
| DPP10-AS3 | 0         | 0          | 0          | 0          | 0         | 0         | 0         | 0         | 0         | 0         | 0          | 0         | 0          | 0          | 0          |
| DPP3      | 2.85584   | 2.4851     | 2.37054    | 6.97716    | 5.04539   | 11.1634   | 2.72327   | 1.72642   | 2.78818   | 5.03052   | 4.54968    | 4.66198   | 8.45164    | 4.93874    | 3.74085    |
| DPP4      | 3.21629   | 2.49032    | 1.49728    | 5.14906    | 1.72372   | 8.66054   | 3.07602   | 4.22427   | 1.84291   | 2.18969   | 4.7562     | 0.43734   | 4.51016    | 0.691618   | 4.05654    |
| DPP6      | 0.0126175 | 0.289458   | 0.506196   | 0.0338022  | 0.0358149 | 0.0142016 | 0.257714  | 0.557476  | 0.01003   | 0.0134883 | 0.00569745 | 0.0169843 | 1.78E-29   | 0.00945241 | 0.00362407 |
| DPP7      | 10.4909   | 11.661     | 12.6453    | 15.8555    | 29.9687   | 19.121    | 16.5048   | 9.13268   | 15.13     | 11.5505   | 24.6553    | 10.7119   | 14.0361    | 9.79913    | 12.2093    |
| DPP8      | 5.2837    | 3.93974    | 4.21541    | 3.71787    | 1.08245   | 3.90317   | 3.36049   | 4.40043   | 2.632     | 3.5649    | 3.87019    | 2.29532   | 4.14508    | 2.89519    | 3.98194    |
| DPP9      | 4.41247   | 5.14656    | 5.43336    | 11.2327    | 9.57411   | 9.51584   | 6.96601   | 4.1389    | 5.41613   | 6.78077   | 4.89229    | 5.89613   | 14.429     | 7.05378    | 6.33874    |
| DPP9-AS1  | 0.573261  | 1.05899    | 0.882104   | 0.562124   | 1.32354   | 0.741409  | 1.0978    | 0.883998  | 0.253972  | 0.524334  | 0.362286   | 0.663425  | 0.241854   | 0.947026   | 0.993822   |
| DPPA2     | 0         | 0          | 0          | 0          | 0         | 0         | 0         | 0         | 0         | 0         | 0          | 0         | 0          | 0          | 0          |
| DPPA2P3   | 0         | 0.00973858 | 0          | 0          | 0         | 0.0516315 | 0.0923109 | 0.017963  | 0         | 0         | 0          | 0.0433873 | 0          | 0.0105638  | 0          |
| DPPA3     | 0.0430168 | 0          | 0.0355866  | 0.022165   | 0         | 0.0549424 | 0.122788  | 0.0191149 | 0         | 0         | 0.121402   | 0         | 0          | 0.0112412  | 0          |
| DPPA4     | 0         | 0          | 0.00679644 | 0.00846631 | 0         | 0         | 0         | 0         | 0         | 0         | 0.0278228  | 0         | 0          | 0          | 0.0707909  |
| DPPA5     | 0.0350652 | 0.0337899  | 0.0290084  | 0          | 0         | 0         | 0         | 0         | 0         | 0         | 0          | 0         | 0          | 0          | 0          |
| DPRX      | 0         | 0.0516235  | 0          | 0          | 0         | 0.0304105 | 0         | 0         | 0         | 0         | 0          | 0         | 0          | 0          | 0          |
| DPRXP4    | 1.53127   | 2.86732    | 1.52589    | 1.18351    | 0.702765  | 0.622295  | 2.42385   | 2.2578    | 1.14438   | 1.74718   | 0.314293   | 2.46524   | 0.718522   | 1.74613    | 1.89922    |
| DPT       | 16.3662   | 5.6076     | 7.8222     | 4.22336    | 6.11635   | 2.66852   | 12.4015   | 3.57077   | 0.636134  | 3.39553   | 5.86617    | 2.89407   | 6.2907     | 5.5718     | 27.8701    |
| DPY19L1   | 1.25403   | 0.795843   | 0.959161   | 2.35599    | 0.458139  | 2.69236   | 0.915442  | 1.35331   | 0.585149  | 2.571     | 4.02759    | 0.894319  | 3.4522     | 2.08031    | 3.50976    |
| DPY19L1P1 | 0.781603  | 0.505154   | 0.357404   | 0.372039   | 0.101857  | 0.31309   | 0.269782  | 0.388728  | 0.0465186 | 0.217365  | 0.388311   | 0.132711  | 0.0599479  | 0.324946   | 0.65347    |
| DPY19L1P2 | 0.0396965 | 0.0956319  | 0.0328397  | 0.0613626  | 0.0924935 | 0.101403  | 0.0453242 | 0.0881973 | 0.0483459 | 0         | 0.0448124  | 0.0710097 | 0.012806   | 0.14523    | 0.0285046  |

|           |           |            |           |           |           |           |           |           |            |            |           |            |           |           |            |
|-----------|-----------|------------|-----------|-----------|-----------|-----------|-----------|-----------|------------|------------|-----------|------------|-----------|-----------|------------|
| DPY19L2   | 0.883773  | 0.32539    | 0.341773  | 0.0883972 | 0.43944   | 0.231788  | 0.324688  | 0.531251  | 0.0903163  | 0.272473   | 0.465495  | 0.244902   | 0.0041099 | 0.290604  | 1.57944    |
| DPY19L2P1 | 3.41E-43  | 0.0046006  | 0         | 0         | 0         | 0.047157  | 7.67E-37  | 2.02E-43  | 0          | 0.0122931  | 1.94E-35  | 0          | 4.47E-43  | 0.015812  | 1.39E-37   |
| DPY19L2P2 | 0.745828  | 0.898987   | 0.839597  | 0.45964   | 0.837572  | 0.538617  | 0.786124  | 0.717968  | 0.183421   | 0.322905   | 0.317967  | 0.611147   | 0.112987  | 0.785228  | 0.591151   |
| DPY19L2P3 | 0.132549  | 0.10711    | 0.0445014 | 0.0525725 | 5.27E-17  | 0.0930456 | 0.0772946 | 0.100802  | 0.0727291  | 0.0336964  | 0.0927726 | 3.59E-15   | 1.49E-25  | 0.0544366 | 1.82E-17   |
| DPY19L2P4 | 0.177847  | 0.027628   | 0.123949  | 0.0618721 | 0.071257  | 0.132249  | 0.028287  | 0.0980825 | 0          | 0.0169184  | 0.0409316 | 0.0164118  | 0.0147986 | 0.0119877 | 0.0693432  |
| DPY19L3   | 2.05292   | 1.47739    | 1.46322   | 2.27745   | 0.807388  | 2.69369   | 1.27231   | 2.09697   | 1.22962    | 1.821      | 3.15331   | 1.37527    | 1.79017   | 1.82733   | 3.52287    |
| DPY19L4   | 1.84135   | 1.76186    | 1.86726   | 2.19214   | 0.876527  | 1.90812   | 1.30556   | 2.32928   | 1.05346    | 2.12004    | 3.82623   | 0.911116   | 1.80839   | 1.7269    | 2.31672    |
| DPY30     | 3.78166   | 3.51818    | 3.22937   | 6.17791   | 2.03026   | 5.68328   | 2.56679   | 3.80997   | 9.74188    | 6.43055    | 13.5153   | 4.52643    | 5.09344   | 4.36277   | 3.3787     |
| DPYD      | 3.60529   | 2.58289    | 2.8054    | 5.78404   | 2.1188    | 5.43174   | 2.32434   | 3.21549   | 0.797991   | 2.24989    | 3.44713   | 1.16752    | 2.28656   | 1.76588   | 4.09536    |
| DPYD-AS1  | 0.178986  | 0.107389   | 0.0749766 | 0.178984  | 0         | 0.0373805 | 0         | 0.0389779 | 0          | 0          | 0         | 0.0324989  | 0         | 0.0702929 | 0          |
| DPYD-AS2  | 0.226615  | 0.0818899  | 0.140604  | 0.291917  | 0.0440014 | 0.16884   | 0.0323427 | 0.377618  | 0          | 0.0711063  | 0.0319775 | 0.0608059  | 0.109658  | 0.0592194 | 0.040681   |
| DPYS      | 0.109011  | 0.0262616  | 0.0270545 | 0.0561695 | 0.253998  | 0.491954  | 0.0373396 | 0.135632  | 0          | 0.041046   | 0.073836  | 0          | 0.0211    | 0         | 0.250486   |
| DPYSL2    | 21.9183   | 9.56218    | 12.956    | 16.0757   | 12.7679   | 33.8752   | 21.5451   | 14.2326   | 3.57367    | 10.5881    | 19.5553   | 5.95418    | 18.7297   | 13.4422   | 26.2235    |
| DPYSL3    | 10.7513   | 5.08704    | 6.9725    | 8.15599   | 8.28951   | 15.9216   | 14.355    | 5.616     | 0.605873   | 12.6838    | 15.5898   | 4.80989    | 25.3546   | 16.0708   | 32.451     |
| DPYSL4    | 0.085116  | 0.184546   | 0.232366  | 0.973632  | 1.58658   | 4.47897   | 0.320703  | 0.166417  | 0.103662   | 0.779854   | 1.0089    | 0.152257   | 0.483265  | 2.5757    | 0.378936   |
| DPYSL5    | 0.0129677 | 0.00208268 | 0.0143037 | 0         | 0         | 0         | 0         | 0         | 0.00526441 | 0.00542527 | 0         | 0.00930853 | 0         | 0         | 0.00620776 |
| DQX1      | 0.149367  | 0.673105   | 0.363431  | 0.633816  | 1.36481   | 0.231923  | 0.591881  | 0.390426  | 0.738348   | 0.396996   | 0.456256  | 0.729271   | 0.334463  | 0.422472  | 0.189273   |
| DR1       | 7.48109   | 8.39777    | 8.54627   | 10.4007   | 8.11321   | 10.9218   | 6.80368   | 9.40545   | 10.7365    | 11.7528    | 17.0615   | 7.13379    | 15.1087   | 9.04528   | 6.7861     |
| DRAIC     | 0.0407209 | 0.0850198  | 0.0561453 | 0.013988  | 0.0210845 | 0.0924622 | 0.139481  | 0.108568  | 0.0165312  | 0          | 0         | 0.0097123  | 0.0788188 | 0.0141884 | 0          |
| DRAM1     | 1.92695   | 0.824577   | 1.26989   | 5.95062   | 0.933481  | 11.7802   | 1.49907   | 1.08556   | 0.636424   | 3.33675    | 6.8282    | 0.705752   | 5.87072   | 2.23954   | 5.95684    |
| DRAM2     | 4.32204   | 3.0744     | 3.12133   | 4.43346   | 0.933567  | 3.74212   | 2.59317   | 3.60029   | 2.80335    | 4.8488     | 6.6821    | 2.55133    | 4.74326   | 3.17332   | 2.98315    |
| DRAP1     | 14.4846   | 16.2212    | 15.7165   | 30.4705   | 31.3348   | 47.0983   | 19.8246   | 11.1331   | 52.473     | 71.1288    | 79.1827   | 39.9405    | 136.08    | 51.3309   | 20.3717    |
| DRAXIN    | 0         | 0.0188675  | 0         | 1.00887   | 0.243311  | 0.0333435 | 0.0596142 | 0.0348014 | 0.0158971  | 0.0491487  | 0.0589411 | 0.0093398  | 0.370557  | 0.0341105 | 0.0562375  |
| DRC1      | 0.0185515 | 0.0178768  | 0         | 0.124266  | 0.0432254 | 0.0631856 | 0.0211816 | 0.0247306 | 0          | 0          | 0.0628271 | 0.0265483  | 0.0299234 | 0.0339355 | 0.119891   |
| DRC3      | 0.56381   | 0.517433   | 0.518248  | 0.193674  | 0.556058  | 0.350532  | 0.378069  | 0.302231  | 0.0544966  | 0.19095    | 0.0909244 | 0.23693    | 0.167448  | 0.318058  | 0.514097   |
| DRC7      | 0         | 0          | 0         | 0         | 0.0236352 | 0.012956  | 0         | 0         | 0          | 0          | 0         | 0          | 0.0245427 | 0.0278333 | 0          |

|           |           |            |           |            |            |            |           |            |            |           |            |            |            |            |           |
|-----------|-----------|------------|-----------|------------|------------|------------|-----------|------------|------------|-----------|------------|------------|------------|------------|-----------|
| DRD1      | 0.176491  | 0.0438895  | 0.0423887 | 0.0410694  | 0.0707486  | 0.0484773  | 0.0130007 | 0.0252984  | 0.00693374 | 0         | 0.0321348  | 0          | 0.0257128  | 0.00892662 | 0.163524  |
| DRD2      | 0.0600227 | 0.0495769  | 0.106404  | 0.0441823  | 0.0399583  | 0.0438073  | 0.107693  | 0.0914455  | 0          | 0.0322863 | 0.0290392  | 0.0736249  | 0.016597   | 0.053778   | 0.0615716 |
| DRD3      | 0         | 0          | 0         | 0          | 0          | 0          | 0         | 0.00978944 | 0          | 0.0138253 | 0          | 0          | 0          | 0          | 0         |
| DRD4      | 0.16992   | 0.392975   | 0.632563  | 0.157596   | 0.765437   | 0.217026   | 0.504423  | 0.513435   | 0          | 0.06398   | 0.0575454  | 0.060791   | 0.0219263  | 0.0976882  | 0.219623  |
| DRD5      | 0.0681824 | 0.0328513  | 0.0080579 | 0.0100377  | 0.0302602  | 0.0248813  | 0.0222424 | 0          | 0          | 0.0244503 | 0          | 0.0209084  | 0.100551   | 0.0356351  | 0         |
| DRD5P2    | 0         | 0          | 0         | 0          | 0          | 0          | 0         | 0          | 0          | 0         | 0          | 0          | 0          | 0          | 0         |
| DRG1      | 10.151    | 9.35119    | 8.72774   | 17.0072    | 9.44595    | 18.4285    | 9.91355   | 7.74477    | 13.0431    | 12.1797   | 16.7925    | 8.27974    | 15.0965    | 11.0278    | 6.5785    |
| DRG2      | 4.40379   | 3.95327    | 4.0362    | 7.87022    | 5.47249    | 9.40392    | 5.84846   | 3.47085    | 5.40568    | 5.13448   | 6.64588    | 4.45291    | 6.87898    | 5.46334    | 3.69477   |
| DRGX      | 0.0727007 | 0.186818   | 0.240573  | 0          | 0.0376431  | 0.0619037  | 0         | 0.0430735  | 0          | 0.0912468 | 0          | 0          | 0.0156354  | 0          | 0         |
| DRICH1    | 0.124616  | 0.188704   | 0.412366  | 0.0550375  | 0.359492   | 0.0606339  | 0.284566  | 0.174034   | 0.0216813  | 0.0223438 | 0.0602899  | 0.0127381  | 0.011486   | 0.186086   | 0.255664  |
| DROSHA    | 4.10487   | 4.48302    | 4.04366   | 5.7878     | 2.96252    | 7.06583    | 4.16284   | 3.68549    | 2.54835    | 2.92742   | 2.86112    | 3.49746    | 4.05819    | 4.30397    | 4.09939   |
| DRP2      | 0.0325134 | 0.00626618 | 0.0134487 | 0.0268048  | 0.00505046 | 0.0636749  | 0.0519719 | 0.0173371  | 0.00791954 | 0.0367269 | 0.0734072  | 0.0139585  | 0.00209775 | 0.00509788 | 0.0186774 |
| DSC1      | 136.961   | 168.909    | 132.822   | 20.6479    | 104.344    | 33.9862    | 188.369   | 138.406    | 936.318    | 103.329   | 150.981    | 254.772    | 36.0513    | 25.2607    | 12.7365   |
| DSC2      | 16.2583   | 10.1977    | 5.03249   | 234.884    | 24.6047    | 92.8553    | 4.98905   | 12.4565    | 82.8081    | 504.16    | 273.986    | 278.612    | 957.348    | 266.318    | 96.085    |
| DSC3      | 76.8819   | 120.27     | 109.288   | 172.14     | 50.6714    | 133.574    | 78.45     | 97.6483    | 183.05     | 133.118   | 99.5635    | 155.963    | 165.278    | 86.4629    | 31.7822   |
| DSCAM     | 0         | 0          | 0         | 0.00836632 | 0.0042036  | 0.00691277 | 0         | 0.00721502 | 0          | 0.56382   | 0.0427688  | 0.108434   | 0.797921   | 0.114563   | 0.155455  |
| DSCAM-AS1 | 0         | 0          | 0         | 0.013482   | 0          | 0          | 0         | 0          | 0          | 0.0820998 | 0          | 0.0374437  | 0          | 0          | 0         |
| DSCAM-IT1 | 0         | 0          | 0         | 0          | 0          | 0          | 0         | 0          | 0          | 0.322743  | 0          | 0.0229993  | 0.103693   | 0.0167994  | 0.0923232 |
| DSCAML1   | 0.053665  | 0.0500972  | 0.0749174 | 0.0103694  | 0.0312601  | 0.0542629  | 0.157012  | 0.0298081  | 0.00408487 | 0.0042097 | 0.00378632 | 0.00239992 | 0.0151482  | 0          | 0.0240843 |
| DSCAS     | 1.20375   | 3.0606     | 2.70143   | 0.5277     | 8.15436    | 0.63529    | 5.58812   | 1.86437    | 13.257     | 1.84177   | 3.21324    | 4.77382    | 0.980211   | 0.727133   | 0.0649685 |
| DSCC1     | 0.560982  | 0.329262   | 0.396581  | 0.935484   | 0.269341   | 0.512408   | 0.279496  | 0.498554   | 0.124221   | 0.537669  | 1.51987    | 0.306522   | 1.38854    | 0.639695   | 0.571273  |
| DSCR10    | 0         | 0          | 0         | 0          | 0          | 0          | 0.0307256 | 0          | 0          | 0         | 0          | 0          | 0          | 0.0140646  | 0         |
| DSCR4     | 0         | 0          | 0         | 0          | 0          | 0          | 0         | 0          | 0          | 0         | 0          | 0          | 0          | 0          | 0         |
| DSCR8     | 0         | 0          | 0         | 0          | 0          | 0          | 0         | 0          | 0          | 0         | 0          | 0          | 0          | 0          | 0         |
| DSCR9     | 0.183005  | 0.196697   | 0.209623  | 0.0725352  | 0.240536   | 0.155826   | 0.128584  | 0.150129   | 0.0171445  | 0.0706737 | 0.0158915  | 0.0805814  | 0.0363304  | 0.132433   | 0.464985  |
| DSE       | 2.97812   | 2.9115     | 3.55172   | 7.19253    | 2.38117    | 3.74036    | 2.78719   | 2.26034    | 2.03517    | 5.08253   | 6.78496    | 1.68478    | 7.12023    | 3.91307    | 4.49447   |

|                        |           |           |            |           |           |           |           |           |           |            |           |          |           |           |           |
|------------------------|-----------|-----------|------------|-----------|-----------|-----------|-----------|-----------|-----------|------------|-----------|----------|-----------|-----------|-----------|
| DSEL                   | 1.57337   | 0.79443   | 0.984121   | 0.904542  | 0.753912  | 2.52237   | 1.12745   | 1.24102   | 0.595236  | 2.79797    | 5.48072   | 0.378318 | 1.55576   | 1.34888   | 3.87119   |
| DSG1                   | 186.944   | 251.139   | 198.394    | 145.79    | 164.357   | 128.571   | 219.149   | 206.548   | 1066.68   | 517.135    | 381.219   | 537.782  | 577.613   | 226.835   | 83.3151   |
| DSG1-AS1               | 1.6616    | 3.12066   | 2.61363    | 1.16242   | 1.91981   | 1.45089   | 2.63511   | 1.22403   | 4.46611   | 2.87764    | 1.82842   | 6.71476  | 4.14156   | 2.02725   | 1.30093   |
| DSG2                   | 4.60847   | 2.04031   | 2.4649     | 5.18479   | 0.776752  | 4.00231   | 1.57099   | 2.99615   | 0.437024  | 2.97447    | 2.24343   | 0.948029 | 4.88991   | 2.65205   | 2.33859   |
| DSG2-AS1               | 0.0968216 | 0.011845  | 0.0712748  | 0.0253007 | 0.0215166 | 0         | 0.0275267 | 0.0108028 | 0         | 0          | 0.0134689 | 0        | 0         | 0.0315253 | 0.0509192 |
| DSG3                   | 31.9893   | 23.6046   | 18.55      | 240.398   | 28.7995   | 88.3322   | 10.8379   | 24.8004   | 71.8856   | 356.355    | 175.721   | 154.788  | 505.643   | 170.698   | 64.1012   |
| DSG4                   | 0.0246622 | 0.106944  | 0.0897703  | 0.23382   | 0.0689562 | 0.0209996 | 0.0506854 | 0.149041  | 0.0600717 | 0.235248   | 0.0668175 | 0.112938 | 0.0859246 | 0.121162  | 0.0991707 |
| DSN1                   | 1.96766   | 1.58156   | 1.65061    | 2.78577   | 1.11404   | 2.63843   | 1.41726   | 1.31561   | 1.51174   | 2.18111    | 3.36302   | 1.26976  | 2.42041   | 2.10964   | 1.9411    |
| DSP                    | 376.38    | 518.421   | 427.238    | 528.462   | 466.268   | 475.479   | 439.81    | 323.795   | 1084.49   | 715.065    | 298.757   | 915.073  | 1066.79   | 417.72    | 193.985   |
| DSPP                   | 0.0106872 | 0.0102985 | 0.00884117 | 0         | 0         | 0.01365   | 0.0122023 | 0.0142468 | 0         | 0.00670674 | 0         | 0        | 0         | 0         | 0.0767406 |
| DST                    | 20.0454   | 31.0326   | 35.628     | 28.7474   | 8.38344   | 23.4963   | 10.6794   | 13.7639   | 28.5095   | 20.0261    | 13.3978   | 13.6982  | 27.2933   | 31.1666   | 15.7867   |
| DSTN                   | 59.7285   | 42.0823   | 41.3392    | 83.1694   | 19.1483   | 76.5806   | 46.279    | 44.3412   | 111.786   | 128.635    | 122.865   | 82.4058  | 169.562   | 73.4284   | 51.4534   |
| DSTNP2                 | 0.712094  | 0.524738  | 0.433158   | 0.777     | 0.780796  | 1.12351   | 0.550002  | 0.483944  | 0.38261   | 0.893751   | 0.851151  | 0.734311 | 0.621594  | 1.09462   | 0.842188  |
| DSTYK                  | 4.08785   | 4.13661   | 4.41298    | 2.80441   | 2.83631   | 3.49318   | 4.09608   | 3.4613    | 2.82247   | 2.65898    | 2.65913   | 2.39106  | 2.73185   | 2.3231    | 2.57183   |
| DTD1                   | 4.78145   | 2.83325   | 2.82367    | 4.79991   | 3.65144   | 6.19065   | 3.4401    | 3.20156   | 4.6267    | 5.59929    | 6.57247   | 4.44188  | 6.29201   | 4.2753    | 3.28183   |
| DTD2                   | 1.9789    | 1.99358   | 1.75918    | 3.13248   | 0.85997   | 2.67332   | 1.50853   | 1.74978   | 2.62926   | 3.58751    | 4.84113   | 2.33563  | 4.95869   | 2.89499   | 2.2943    |
| DTHD1                  | 0.061225  | 0.0648981 | 0.0253248  | 0.0315471 | 0         | 0.0260661 | 0.0209714 | 0.0870587 | 0.0298261 | 0.084528   | 0.0276462 | 0.473128 | 0.019751  | 0.0415985 | 0.0967195 |
| DTL                    | 0.44806   | 0.332313  | 0.287371   | 1.85214   | 0.218964  | 1.70183   | 0.839222  | 0.46531   | 0.251384  | 0.897252   | 1.31282   | 0.511518 | 2.08531   | 0.902496  | 0.55671   |
| DTNA                   | 0.653588  | 0.191232  | 0.287299   | 0.195616  | 0.177585  | 1.19018   | 0.44824   | 0.35273   | 0.0210164 | 0.276147   | 0.379867  | 0.165147 | 0.237984  | 0.204054  | 0.489453  |
| DTNB                   | 1.87001   | 1.53462   | 1.40232    | 1.5909    | 1.58822   | 1.93881   | 1.48229   | 1.47958   | 1.44594   | 0.51078    | 0.774542  | 0.837479 | 0.49042   | 0.885942  | 0.792147  |
| DTNBP1                 | 2.21573   | 1.77348   | 1.72826    | 2.23677   | 2.05103   | 3.61932   | 1.57986   | 1.35831   | 1.1565    | 1.74804    | 2.42982   | 1.10655  | 1.62213   | 1.31874   | 1.54557   |
| DTWD1                  | 2.59202   | 1.90171   | 2.12342    | 1.92531   | 0.470607  | 2.77316   | 1.2107    | 2.38585   | 0.942938  | 1.80619    | 3.6291    | 0.782812 | 1.30856   | 0.958849  | 2.16338   |
| DTWD2                  | 1.06634   | 1.15888   | 1.19236    | 0.718062  | 0.359661  | 0.901321  | 1.15062   | 1.4406    | 0.822974  | 0.897146   | 1.62265   | 0.824321 | 1.22478   | 0.792635  | 0.381447  |
| DTX1                   | 0.971332  | 0.579916  | 0.885075   | 0.594789  | 1.18081   | 1.19267   | 1.28584   | 0.588004  | 1.74017   | 1.13961    | 0.707172  | 1.05259  | 0.567662  | 1.00429   | 0.454877  |
| DTX2                   | 4.961     | 9.1889    | 9.3017     | 7.72556   | 12.9007   | 7.25977   | 9.1445    | 7.38021   | 4.09823   | 4.00833    | 5.2575    | 4.18515  | 5.79821   | 4.31549   | 3.15366   |
| DTX2P1-UPK3BP1-PMS2P11 | 4.27834   | 8.33634   | 6.46195    | 3.36692   | 7.29147   | 2.01963   | 5.3691    | 5.83543   | 0.999975  | 1.41178    | 1.50269   | 2.70617  | 1.00616   | 2.0902    | 1.84454   |



|         |           |           |           |           |            |           |           |           |            |           |           |            |           |           |           |
|---------|-----------|-----------|-----------|-----------|------------|-----------|-----------|-----------|------------|-----------|-----------|------------|-----------|-----------|-----------|
| DUSP22  | 6.56326   | 6.23228   | 6.63131   | 8.99552   | 7.90779    | 10.03     | 6.55135   | 5.6979    | 6.84334    | 8.0221    | 7.26002   | 7.47893    | 9.13802   | 6.5706    | 5.52833   |
| DUSP23  | 7.39212   | 5.86301   | 5.198     | 14.2102   | 15.369     | 25.2741   | 8.27778   | 5.0282    | 12.0153    | 8.5642    | 21.9532   | 7.93392    | 8.51149   | 8.61843   | 5.22635   |
| DUSP26  | 0.011328  | 0         | 0         | 0.0116738 | 0.0175963  | 0.0482281 | 0         | 0.0100674 | 0          | 0         | 0         | 0          | 0.0146175 | 0         | 0         |
| DUSP27  | 0.0449489 | 0.0270713 | 0.0697216 | 0.0463211 | 0.00872764 | 0.119604  | 0.0384909 | 0         | 0.0136857  | 0         | 0.0190281 | 0          | 0         | 0         | 0.0403452 |
| DUSP28  | 0.928625  | 1.15831   | 1.17802   | 0.579998  | 2.56093    | 0.946178  | 1.11266   | 0.877253  | 0.673592   | 0.794325  | 1.03671   | 0.702501   | 0.284231  | 0.674272  | 0.769403  |
| DUSP3   | 7.89402   | 6.22187   | 7.32938   | 10.5188   | 5.66884    | 18.2288   | 8.51311   | 6.23715   | 11.2278    | 12.2192   | 17.8291   | 7.89809    | 16.4713   | 10.8631   | 9.47421   |
| DUSP4   | 1.5889    | 0.675936  | 0.688522  | 0.961648  | 1.55236    | 2.4213    | 1.17704   | 0.924575  | 0.906118   | 1.27409   | 1.54811   | 0.503033   | 2.29844   | 2.89825   | 2.14151   |
| DUSP5   | 1.96826   | 2.50537   | 2.58253   | 4.38689   | 1.59268    | 4.36525   | 2.40408   | 1.81431   | 16.5345    | 6.94      | 9.15637   | 6.9893     | 15.3334   | 8.17216   | 3.73383   |
| DUSP5P1 | 0.140431  | 0.0867201 | 0.131664  | 0.0578873 | 0.0436276  | 0.119575  | 0.0869973 | 0.0832023 | 0          | 0.0822526 | 0.0422745 | 0.00669882 | 0         | 0.0782885 | 0         |
| DUSP6   | 4.15825   | 3.05782   | 3.49641   | 14.5558   | 4.58498    | 17.4998   | 3.88384   | 3.47133   | 7.28928    | 10.0702   | 21.0082   | 5.82386    | 18.1999   | 15.52     | 9.09474   |
| DUSP7   | 9.32021   | 16.8657   | 21.6624   | 29.2569   | 17.9023    | 27.6238   | 13.2733   | 13.207    | 22.6322    | 26.1719   | 23.6529   | 23.1925    | 60.1197   | 32.089    | 9.88969   |
| DUSP8   | 0.470829  | 1.45335   | 2.19149   | 0.831776  | 0.62688    | 0.740132  | 1.26419   | 0.634548  | 3.69255    | 1.00005   | 1.17399   | 0.977353   | 1.87941   | 1.80095   | 1.0254    |
| DUSP9   | 0.160036  | 0.038554  | 0.0882623 | 0.284033  | 0.082864   | 0.567787  | 0         | 0.0711135 | 0.0433125  | 0.145067  | 0.100367  | 0.0954253  | 0.820302  | 0.339215  | 0         |
| DUT     | 6.10434   | 6.02509   | 5.94061   | 10.23     | 6.90445    | 10.3534   | 4.37581   | 3.20409   | 4.89611    | 7.16562   | 17.0269   | 4.3183     | 7.20138   | 6.44266   | 5.24858   |
| DUX4    | 0         | 0         | 0         | 0         | 0          | 0         | 0         | 0         | 0          | 0         | 0         | 0          | 0         | 0         | 0         |
| DUXA    | 0.06937   | 0.0637719 | 0.097497  | 0.0429709 | 0.185504   | 0.0648402 | 0.0715649 | 0.0495781 | 0          | 0.0435882 | 0.0546561 | 0.0198821  | 0.0313785 | 0.0507039 | 0.0299568 |
| DUXAP10 | 0.0162556 | 0.0105801 | 2.86E-07  | 0.0767249 | 0.0510287  | 0.16582   | 0.08271   | 0.035172  | 0.00702953 | 0.120633  | 0.370261  | 0.0355699  | 0.211359  | 0.253365  | 0.382101  |
| DUXAP8  | 0.480642  | 0.266126  | 0.241895  | 0.523918  | 0.259798   | 0.593405  | 0.189894  | 0.0770512 | 0.110043   | 0.809531  | 1.38559   | 0.215424   | 0.950708  | 1.21238   | 0.948934  |
| DUXAP9  | 0.523731  | 0.345434  | 0.423148  | 0.397256  | 0.222434   | 0.926177  | 0.31071   | 0.257514  | 0.019492   | 0.343852  | 0.7275    | 0.280807   | 0.825388  | 1.41274   | 1.72038   |
| DUXB    | 0.37361   | 0.210013  | 0.394931  | 0         | 0.161207   | 0.0353471 | 0.284384  | 0.14757   | 0          | 0.026051  | 0.0468621 | 0.133664   | 0.0267835 | 0.130177  | 0.0596168 |
| DVL1    | 7.74006   | 10.8271   | 11.951    | 12.6684   | 24.6456    | 16.0986   | 9.25145   | 5.61685   | 14.793     | 17.124    | 9.12078   | 14.5662    | 26.0397   | 17.2339   | 7.66912   |
| DVL2    | 4.9954    | 6.38872   | 6.48765   | 6.66618   | 8.52243    | 10.7547   | 6.57971   | 4.67136   | 8.14916    | 4.18946   | 6.20224   | 4.82619    | 4.99541   | 4.50375   | 4.1876    |
| DVL3    | 7.96885   | 10.6484   | 10.8512   | 10.8553   | 11.235     | 17.7362   | 11.6199   | 8.41476   | 11.0749    | 9.39348   | 9.5997    | 9.37563    | 13.1383   | 9.91158   | 11.9695   |
| DWORF   | 0.145554  | 0         | 0         | 0         | 0          | 0         | 0         | 0         | 0          | 0         | 0         | 0          | 0         | 0         | 0         |
| DXO     | 0.312463  | 0.430124  | 0.387969  | 0.446964  | 0.77691    | 0.650769  | 0.374464  | 0.283302  | 0.26469    | 0.314206  | 0.495217  | 0.321601   | 0.43551   | 0.429532  | 0.426608  |
| DYDC1   | 0         | 0.0145951 | 0         | 0         | 0          | 0         | 0         | 0         | 0          | 0         | 0         | 0.0650241  | 0         | 0.0158319 | 0         |



|         |           |           |          |           |           |           |           |           |           |           |          |            |            |           |           |
|---------|-----------|-----------|----------|-----------|-----------|-----------|-----------|-----------|-----------|-----------|----------|------------|------------|-----------|-----------|
| DYDC2   | 0.084498  | 0         | 0        | 0.0774023 | 0.0145838 | 0.111921  | 0.0428787 | 0.0166877 | 0.0114343 | 0         | 0        | 0.00671784 | 0.0181725  | 0.0147208 | 0         |
| DYM     | 5.77112   | 4.43209   | 4.99015  | 4.49176   | 2.8927    | 6.1857    | 4.86364   | 4.44136   | 3.88955   | 4.03101   | 6.17464  | 2.80979    | 4.34165    | 3.79675   | 4.03745   |
| DYNAP   | 0.0433594 | 0.0052228 | 0        | 0.569709  | 0.016838  | 0         | 0.0123766 | 0         | 0.224429  | 0.0408153 | 0.2325   | 0.0232686  | 0          | 0         | 0.0311348 |
| DYNC1H1 | 26.7614   | 29.5275   | 31.3512  | 32.3965   | 35.3876   | 40.8961   | 35.4936   | 22.8022   | 36.9656   | 32.5228   | 17.6612  | 32.2702    | 46.2708    | 25.9186   | 29.1896   |
| DYNC1I1 | 0.566629  | 0.253275  | 0.372746 | 0.0844233 | 0.222694  | 0.796379  | 0.522244  | 0.430767  | 0.0997722 | 0.128526  | 0.223494 | 0.0586176  | 0.0704745  | 0.0713603 | 0.539233  |
| DYNC1I2 | 7.65157   | 7.6264    | 7.74027  | 13.309    | 6.25839   | 12.8235   | 6.722     | 7.17449   | 14.3522   | 16.0662   | 15.9273  | 9.58471    | 18.4806    | 11.0337   | 9.22359   |
| DYNC1L1 | 7.24015   | 9.43481   | 9.97009  | 8.74049   | 4.99685   | 9.99191   | 6.92155   | 7.61824   | 19.4121   | 12.0328   | 14.321   | 9.09023    | 12.3829    | 8.58625   | 5.19237   |
| DYNC1L2 | 11.7663   | 12.6281   | 12.6272  | 15.7553   | 8.39741   | 16.0772   | 10.5536   | 10.9097   | 11.9202   | 12.4852   | 10.068   | 10.2997    | 18.7156    | 12.6993   | 13.7406   |
| DYNC2H1 | 3.01894   | 1.99504   | 2.01115  | 1.73923   | 0.679671  | 2.04988   | 1.38302   | 2.4863    | 0.905297  | 1.74506   | 2.00248  | 0.809906   | 0.712853   | 1.59109   | 2.16416   |
| DYNC2L1 | 1.7507    | 1.15428   | 1.27044  | 1.41642   | 0.608297  | 1.49724   | 0.710134  | 1.37845   | 1.10349   | 1.58052   | 2.53108  | 1.0384     | 0.827341   | 1.48486   | 1.31225   |
| DYNLL1  | 50.4494   | 69.8818   | 61.4045  | 131.126   | 48.005    | 108.939   | 80.6162   | 49.8922   | 416.504   | 294.341   | 449.166  | 233.295    | 262.349    | 149.885   | 65.7303   |
| DYNLL2  | 13.3354   | 10.7111   | 10.7426  | 12.3949   | 14.1246   | 26.7494   | 11.4411   | 8.59462   | 6.44455   | 6.92774   | 6.69448  | 4.89603    | 10.9094    | 5.7299    | 6.66037   |
| DYNLRB1 | 9.99148   | 10.1868   | 10.4755  | 13.6585   | 9.71121   | 17.7897   | 13.3677   | 8.2937    | 23.6171   | 14.7373   | 20.0562  | 11.0288    | 14.9978    | 8.16863   | 8.16217   |
| DYNLRB2 | 0.146785  | 0.133588  | 0.256354 | 0.100844  | 0         | 0.0833235 | 0.186216  | 0.0289889 | 0.158904  | 0.0818799 | 0.202524 | 0.105028   | 0.0315682  | 0.017048  | 0         |
| DYNLT1  | 11.8713   | 9.63406   | 7.53919  | 25.6414   | 8.05597   | 26.113    | 7.4617    | 7.40646   | 15.6992   | 25.3596   | 53.6392  | 13.5779    | 26.9818    | 15.2919   | 10.7631   |
| DYNLT3  | 4.04168   | 2.82792   | 1.74522  | 7.87811   | 1.03824   | 4.99764   | 2.44446   | 4.47364   | 12.363    | 14.6939   | 18.5449  | 8.27226    | 12.8699    | 5.92224   | 5.81936   |
| DYRK1A  | 7.61536   | 6.49703   | 6.79174  | 6.16934   | 5.65937   | 6.74946   | 5.49097   | 5.73676   | 6.20862   | 5.25781   | 4.89671  | 4.35504    | 7.42813    | 4.94481   | 5.733     |
| DYRK1B  | 2.27829   | 3.39293   | 2.89045  | 3.76768   | 7.27373   | 6.08815   | 3.72197   | 2.4329    | 3.16951   | 2.76906   | 4.64569  | 2.74488    | 2.59128    | 1.99554   | 3.03912   |
| DYRK2   | 3.61104   | 3.27689   | 3.06812  | 3.29144   | 3.27448   | 3.63469   | 2.90454   | 3.21922   | 2.67717   | 5.08877   | 5.18787  | 3.31783    | 5.25123    | 4.15363   | 4.44663   |
| DYRK3   | 0.706267  | 0.734831  | 0.618145 | 3.61806   | 0.906281  | 3.18119   | 0.677838  | 0.500318  | 0.585902  | 4.41935   | 4.87617  | 3.63267    | 6.22766    | 5.14637   | 4.20415   |
| DYRK4   | 1.2185    | 0.762404  | 0.805024 | 1.77891   | 0.998953  | 2.31285   | 0.869528  | 0.759535  | 0.906887  | 1.62493   | 4.01198  | 1.15644    | 1.15196    | 1.12774   | 1.11801   |
| DYSF    | 1.5009    | 0.766055  | 0.849685 | 7.00941   | 4.34176   | 7.53251   | 2.17477   | 0.689544  | 0.724198  | 5.49168   | 4.23581  | 2.61202    | 14.2322    | 6.72762   | 9.77731   |
| DYTN    | 0         | 0         | 0        | 0         | 0         | 0         | 0         | 0         | 0         | 0         | 0        | 0          | 0.00728024 | 0         | 0         |
| DZANK1  | 0.701874  | 0.431776  | 0.383637 | 0.322903  | 0.379642  | 0.490916  | 0.386378  | 0.350869  | 0.129747  | 0.228096  | 0.16271  | 0.300429   | 0.121298   | 0.239095  | 0.206996  |
| DZIP1   | 0.834037  | 0.474916  | 0.402779 | 0.622829  | 0.99055   | 2.01435   | 0.376502  | 0.469661  | 0.150504  | 0.953883  | 1.45401  | 0.291797   | 0.696993   | 1.11925   | 1.36451   |
| DZIP1L  | 1.51564   | 2.99803   | 3.86437  | 1.45819   | 1.64618   | 1.40145   | 1.8657    | 1.69423   | 0.16584   | 0.787663  | 0.855482 | 1.63519    | 0.48512    | 0.987078  | 2.26167   |

|          |          |           |           |          |          |          |          |          |          |           |          |           |          |           |          |
|----------|----------|-----------|-----------|----------|----------|----------|----------|----------|----------|-----------|----------|-----------|----------|-----------|----------|
| DZIP3    | 0.970003 | 0.913562  | 1.02948   | 0.688548 | 0.337307 | 1.18762  | 0.51803  | 0.983475 | 0.274634 | 0.604807  | 0.702403 | 0.292824  | 0.210374 | 0.445589  | 1.04351  |
| E2F1     | 0.96858  | 0.764028  | 0.865096  | 1.7048   | 1.43797  | 2.00709  | 1.03739  | 0.639881 | 1.95212  | 1.0005    | 1.81912  | 1.0549    | 1.6425   | 1.12444   | 0.726276 |
| E2F2     | 1.21665  | 1.8724    | 0.763168  | 1.93809  | 4.48586  | 1.63932  | 2.04553  | 0.819853 | 1.02039  | 0.632062  | 1.09674  | 0.631384  | 1.12139  | 0.801247  | 0.486417 |
| E2F3     | 0.999594 | 0.799098  | 0.778727  | 2.57758  | 1.05139  | 3.4084   | 0.931469 | 0.852504 | 1.30474  | 1.69342   | 2.53007  | 1.24445   | 3.14079  | 2.26541   | 1.77673  |
| E2F4     | 8.0119   | 6.632     | 6.6736    | 16.3881  | 15.0644  | 19.584   | 6.12785  | 5.60223  | 8.92545  | 9.59931   | 15.128   | 9.75432   | 16.9369  | 12.9077   | 9.16374  |
| E2F5     | 0.398906 | 0.309109  | 0.316006  | 0.391359 | 0.158232 | 0.428972 | 0.137759 | 0.272921 | 0.125132 | 0.0958468 | 0.21317  | 0.0726323 | 0.205453 | 0.244802  | 0.424695 |
| E2F6     | 2.11306  | 1.33485   | 1.42065   | 1.43789  | 0.979485 | 2.15338  | 1.30205  | 1.46656  | 1.74016  | 1.43972   | 2.28694  | 1.15196   | 2.22895  | 1.62326   | 1.98455  |
| E2F7     | 0.177372 | 0.172864  | 0.106716  | 0.826697 | 0.175331 | 0.748286 | 0.382022 | 0.161216 | 0.137467 | 0.511015  | 0.591592 | 0.377859  | 1.26664  | 0.924918  | 0.521037 |
| E2F8     | 0.163226 | 0.463441  | 0.409918  | 1.32164  | 0.298822 | 1.18137  | 0.492538 | 0.233134 | 0.127794 | 0.841409  | 0.592269 | 0.750807  | 1.37282  | 0.630675  | 0.452081 |
| E4F1     | 3.4134   | 4.18941   | 4.02266   | 3.95845  | 8.39405  | 4.75738  | 2.83079  | 2.33529  | 5.06088  | 3.24326   | 2.61158  | 3.598     | 3.32318  | 3.19385   | 2.60775  |
| EAF1     | 5.07414  | 4.30573   | 4.26595   | 7.00396  | 3.96498  | 9.22511  | 5.22828  | 3.84955  | 17.2078  | 10.1548   | 7.21249  | 8.84795   | 17.9028  | 8.07719   | 6.82056  |
| EAF2     | 0.5859   | 0.369156  | 0.354202  | 0.90568  | 0.17502  | 0.882645 | 0.283022 | 0.340457 | 0.274446 | 0.848498  | 1.22106  | 0.370855  | 0.683343 | 0.282662  | 0.2589   |
| EAPP     | 8.77305  | 6.93196   | 7.81165   | 9.69555  | 3.04021  | 12.2066  | 5.42985  | 7.96463  | 7.98733  | 8.98554   | 13.4116  | 5.24548   | 6.86773  | 4.63006   | 6.5585   |
| EARS2    | 3.56599  | 3.2072    | 3.29765   | 3.71477  | 4.22527  | 4.76879  | 3.57916  | 2.65325  | 2.88185  | 1.94988   | 2.52145  | 2.17179   | 2.29007  | 2.59768   | 1.98497  |
| EBAG9    | 2.49525  | 1.70385   | 1.96855   | 2.52034  | 0.551879 | 2.39202  | 0.830172 | 1.79903  | 1.69054  | 1.50368   | 2.76087  | 1.22969   | 1.97775  | 1.58481   | 1.29338  |
| EBF1     | 5.6386   | 2.20015   | 2.80996   | 1.05088  | 2.14891  | 4.89377  | 4.61445  | 2.97203  | 0.388106 | 2.21158   | 4.68933  | 0.673324  | 1.24573  | 1.787     | 6.92402  |
| EBF2     | 1.45832  | 0.199119  | 0.282939  | 0.137067 | 0.383694 | 1.13657  | 1.12269  | 0.493927 | 0.075208 | 0.453113  | 0.6703   | 0.132557  | 0.153241 | 0.471707  | 2.06022  |
| EBF3     | 1.87264  | 0.834026  | 0.807134  | 0.816248 | 0.977765 | 1.4382   | 1.78476  | 0.950996 | 0.15971  | 0.78345   | 1.84751  | 0.315276  | 0.639643 | 0.890993  | 2.56881  |
| EBF4     | 0.675768 | 0.624376  | 0.631389  | 0.884836 | 1.77832  | 1.01542  | 0.925884 | 0.416863 | 0.145237 | 0.738396  | 0.87953  | 0.284429  | 0.748898 | 1.10111   | 2.29492  |
| EBI3     | 0.18319  | 0.0686497 | 0.0673547 | 1.02782  | 0.189705 | 0.467953 | 0.1162   | 0.235162 | 0        | 0.153282  | 0.344665 | 0         | 0.157591 | 0.0531907 | 0.584632 |
| EBLN1    | 0        | 0         | 0         | 0        | 0        | 0        | 0        | 0        | 0        | 0         | 0        | 0         | 0        | 0         | 0        |
| EBLN2    | 1.7963   | 1.66388   | 1.56666   | 1.24844  | 0.821942 | 0.675838 | 0.890339 | 1.63353  | 0.407013 | 1.0661    | 0.675934 | 1.15578   | 0.251558 | 1.7976    | 1.23986  |
| EBLN3P   | 6.18382  | 5.99715   | 6.19222   | 4.68815  | 2.62121  | 5.8555   | 4.35467  | 5.18069  | 6.8934   | 5.20521   | 6.50304  | 4.81833   | 4.93517  | 5.05664   | 4.43658  |
| EBNA1BP2 | 6.94852  | 5.86731   | 5.09538   | 21.0463  | 12.8515  | 20.1259  | 4.74731  | 4.20872  | 11.5805  | 13.0907   | 15.4813  | 8.5822    | 21.0336  | 12.9573   | 6.39628  |
| EBP      | 8.70115  | 7.17036   | 7.34713   | 21.376   | 12.9255  | 21.6136  | 9.47792  | 5.61743  | 12.9844  | 16.8206   | 19.6224  | 10.1332   | 21.3071  | 13.7682   | 3.01626  |
| EBPL     | 5.99043  | 5.40699   | 5.31913   | 12.3054  | 6.85484  | 10.3036  | 4.99297  | 5.46578  | 10.3842  | 8.22035   | 19.0927  | 4.91497   | 6.3386   | 7.31581   | 3.18312  |

|         |            |            |          |          |          |           |           |           |            |          |           |           |           |            |           |
|---------|------------|------------|----------|----------|----------|-----------|-----------|-----------|------------|----------|-----------|-----------|-----------|------------|-----------|
| ECD     | 6.44953    | 5.54191    | 5.69615  | 7.59591  | 3.124    | 7.28848   | 4.46809   | 5.40603   | 5.83985    | 6.19236  | 7.5827    | 4.1257    | 6.85857   | 5.44202    | 4.23992   |
| ECE1    | 11.2951    | 5.58025    | 6.57094  | 13.0617  | 12.7643  | 29.0792   | 9.79218   | 6.42442   | 2.19609    | 9.44276  | 11.658    | 3.50705   | 19.3097   | 11.967     | 21.7252   |
| ECE2    | 0.00028199 | 0.00012866 | 0        | 6.87E-05 | 0        | 0         | 0         | 0.0038197 | 0          | 0        | 0         | 0         | 0         | 0          | 0         |
|         | 5          | 7          |          |          |          |           |           |           |            |          |           |           |           |            |           |
| ECEL1   | 0.0159828  | 0.0808578  | 0.198331 | 0.255296 | 2.42061  | 0.176919  | 0.0364972 | 0.0284083 | 0.00973261 | 0.02006  | 0.0360851 | 0         | 0.010312  | 0.00417665 | 1.20505   |
| ECEL1P2 | 0          | 0          | 0        | 0        | 0        | 0         | 0         | 0         | 0          | 0        | 0         | 0         | 0         | 0          | 0         |
| ECH1    | 16.2533    | 14.5939    | 13.4004  | 26.2478  | 41.6987  | 35.0433   | 14.7079   | 12.6044   | 42.3119    | 21.6874  | 35.5375   | 26.8256   | 20.4056   | 17.0085    | 11.8156   |
| ECHDC1  | 6.0205     | 4.60762    | 3.62733  | 8.0097   | 2.1801   | 8.20057   | 2.43132   | 4.73977   | 11.8117    | 7.77505  | 11.6806   | 5.02117   | 6.98812   | 5.18023    | 5.22663   |
| ECHDC2  | 4.35789    | 6.78692    | 6.23619  | 5.71575  | 13.8976  | 5.48169   | 3.93281   | 3.26657   | 6.88895    | 3.56352  | 4.08718   | 7.01592   | 2.42118   | 4.33668    | 2.43385   |
| ECHDC3  | 3.62397    | 4.36858    | 4.51437  | 6.71941  | 3.8253   | 5.44477   | 2.87565   | 2.15127   | 4.46471    | 3.77575  | 5.10192   | 2.61307   | 3.72843   | 2.08418    | 0.602836  |
| ECHS1   | 10.9882    | 10.7396    | 10.5452  | 25.4108  | 18.1234  | 32.873    | 14.0371   | 8.80585   | 15.2487    | 14.7967  | 27.3837   | 12.1486   | 19.6956   | 14.0887    | 8.30283   |
| ECI1    | 8.16946    | 5.73979    | 6.64903  | 9.82573  | 13.7503  | 12.5623   | 6.1346    | 4.16831   | 7.07993    | 7.54501  | 11.8323   | 4.3959    | 8.39649   | 5.67376    | 3.16236   |
| ECI2    | 5.12711    | 3.68318    | 4.29649  | 4.26048  | 1.98231  | 9.68088   | 3.56721   | 2.64868   | 1.98894    | 4.81941  | 8.88387   | 2.29312   | 5.19218   | 5.24001    | 4.94293   |
| ECM1    | 12.3963    | 14.5745    | 13.3701  | 28.2538  | 32.1301  | 30.3936   | 52.5629   | 15.0455   | 153.221    | 94.9001  | 71.1133   | 46.0764   | 91.3355   | 21.9144    | 36.9757   |
| ECM2    | 2.79405    | 2.18832    | 3.51141  | 0.698395 | 1.08965  | 1.43758   | 2.57249   | 2.38274   | 0.275123   | 2.99198  | 5.82508   | 0.986847  | 1.02409   | 2.20909    | 7.11171   |
| ECPAS   | 11.7226    | 10.2458    | 10.4682  | 13.5326  | 7.70736  | 14.5083   | 9.57683   | 9.07444   | 13.2935    | 11.5292  | 9.22952   | 10.3698   | 14.4751   | 10.7385    | 9.82238   |
| ECRP    | 0.420783   | 0.405479   | 0.348101 | 0.197104 | 0.475361 | 0.393299  | 0.043676  | 0.237972  | 0.0465878  | 0.20018  | 0.13457   | 0.0821131 | 0.0740419 | 0.0799707  | 0.109872  |
| ECSCR   | 7.11377    | 2.0655     | 2.33859  | 7.2029   | 2.46095  | 10.0249   | 2.90841   | 2.62272   | 0.718828   | 7.25199  | 18.6561   | 1.42256   | 7.43583   | 5.76366    | 6.24575   |
| ECSIT   | 4.60571    | 3.84972    | 4.31538  | 5.96566  | 8.26097  | 7.0742    | 4.25632   | 2.61194   | 3.23848    | 2.84241  | 5.47217   | 2.79481   | 4.41633   | 4.12273    | 3.56299   |
| ECT2    | 0.807097   | 0.775484   | 0.718153 | 3.22057  | 0.298847 | 2.14161   | 0.675065  | 0.629707  | 1.10868    | 3.38056  | 3.26306   | 1.98432   | 6.41527   | 3.60512    | 2.23732   |
| ECT2L   | 0.382018   | 0.333301   | 0.418529 | 0.16492  | 0.120285 | 0.0791229 | 0.31829   | 0.59184   | 0.0188617  | 0.110149 | 0.0641048 | 0.155141  | 0.026646  | 0.145697   | 0.118622  |
| EDA     | 0.901301   | 0.778466   | 0.931163 | 0.449427 | 0.806469 | 1.15647   | 1.30887   | 0.549995  | 0.151753   | 0.317994 | 0.248503  | 0.145624  | 0.458244  | 0.199712   | 0.495085  |
| EDA2R   | 0.389012   | 0.178214   | 0.121341 | 0.230018 | 0.178309 | 0.71678   | 0.211159  | 0.300381  | 0          | 0.488251 | 1.32464   | 0.0593202 | 0.0534894 | 0.319971   | 0.302232  |
| EDAR    | 1.85079    | 0.76737    | 0.654239 | 0.311278 | 1.17726  | 0.374105  | 0.583159  | 0.600336  | 0.214034   | 0.386005 | 0.21699   | 0.176833  | 0.30473   | 0.129165   | 0.0157743 |
| EDARADD | 0.836126   | 1.21597    | 0.964575 | 1.82607  | 2.02564  | 1.68517   | 0.937144  | 0.74308   | 0.476456   | 0.645059 | 1.09975   | 0.691578  | 1.06408   | 0.625427   | 0.473703  |
| EDC3    | 3.33777    | 4.09976    | 4.06675  | 5.25894  | 5.07893  | 5.65512   | 4.40078   | 3.03697   | 4.29319    | 3.19182  | 3.40908   | 3.61084   | 4.981     | 4.11493    | 3.65217   |

|                |            |            |           |            |           |           |           |            |           |           |           |            |            |           |          |
|----------------|------------|------------|-----------|------------|-----------|-----------|-----------|------------|-----------|-----------|-----------|------------|------------|-----------|----------|
| EDC4           | 3.67518    | 4.91594    | 5.98125   | 5.33406    | 7.52459   | 8.1552    | 5.27271   | 4.32642    | 3.24565   | 3.58634   | 3.11162   | 3.62099    | 5.86284    | 4.66375   | 4.40066  |
| EDDM13         | 0.602236   | 1.58901    | 1.23367   | 1.24124    | 2.71735   | 0.561633  | 1.21151   | 0.892028   | 1.15257   | 1.07981   | 0.938839  | 1.33379    | 0.555085   | 1.18408   | 0.411851 |
| EDDM3A         | 0.0263288  | 0          | 0         | 0.0542653  | 0         | 0.0224187 | 0         | 0          | 0         | 0         | 0.029722  | 0          | 0          | 0         | 0        |
| EDDM3B         | 0          | 0          | 0         | 0          | 0         | 0         | 0.0294911 | 0          | 0         | 0         | 0         | 0          | 0          | 0         | 0        |
| EDEM1          | 5.85253    | 6.80675    | 7.81629   | 13.8687    | 5.91849   | 11.536    | 6.98284   | 5.90655    | 11.9284   | 10.1591   | 12.9418   | 7.23955    | 12.8399    | 8.3114    | 7.5353   |
| EDEM2          | 2.12974    | 2.1961     | 2.07498   | 5.00432    | 4.16839   | 5.11503   | 1.8668    | 1.7456     | 2.13886   | 3.78209   | 5.85767   | 2.62856    | 4.81859    | 3.08291   | 2.96153  |
| EDEM3          | 2.73266    | 3.04272    | 3.15519   | 5.04475    | 2.168     | 4.2477    | 2.00378   | 2.81234    | 5.03211   | 5.35928   | 6.18129   | 3.72021    | 4.31078    | 4.49762   | 4.68356  |
| EDF1           | 29.8529    | 29.4985    | 29.9116   | 58.7762    | 41.1273   | 62.5754   | 29.4738   | 23.0744    | 62.695    | 57.4772   | 89.2067   | 39.5557    | 56.0183    | 33.1595   | 21.421   |
| EDIL3          | 1.46832    | 1.21111    | 1.11012   | 0.661375   | 1.39719   | 2.11136   | 3.36962   | 1.2185     | 2.42184   | 5.80328   | 12.2286   | 1.38807    | 1.32065    | 2.08876   | 15.0262  |
| EDN1           | 5.75268    | 3.00008    | 3.74706   | 1.99882    | 3.09848   | 2.05506   | 2.94438   | 3.27123    | 1.58376   | 4.28789   | 5.57345   | 1.31687    | 4.57908    | 2.93174   | 3.56104  |
| EDN2           | 0.332462   | 0.863221   | 0.763989  | 0.247442   | 2.41      | 0.26736   | 0.274152  | 0.443197   | 0.427396  | 0.556365  | 0.959121  | 0.502203   | 0.0476673  | 0.656424  | 0.29178  |
| EDN3           | 0.155729   | 0.0750326  | 0.17893   | 0.0980731  | 0.107511  | 0.0736673 | 0.187684  | 0.161465   | 0.0105367 | 0.0108587 | 0         | 0          | 0.00558197 | 0         | 0        |
| EDNRA          | 2.22359    | 1.33491    | 1.14417   | 2.91017    | 1.57502   | 5.83914   | 1.47759   | 1.51767    | 1.3432    | 4.56019   | 10.2112   | 1.51784    | 4.24939    | 4.26965   | 8.52632  |
| EDNRB          | 2.78816    | 1.23308    | 1.56801   | 2.06177    | 1.23742   | 7.69141   | 1.3591    | 2.7993     | 0.88655   | 2.03989   | 3.57645   | 0.57       | 2.16224    | 2.0291    | 4.04359  |
| EDNRB-AS1      | 0.12376    | 0.0458687  | 0.0236268 | 0.049053   | 0.0295756 | 0.10538   | 0.0434784 | 0.076145   | 0         | 0.0477942 | 0.0967218 | 0.00681179 | 0.0368534  | 0.0398044 | 0.136719 |
| EDRF1          | 2.98899    | 2.1617     | 2.11547   | 2.05627    | 1.13296   | 2.29216   | 1.7198    | 2.42224    | 1.2214    | 1.70439   | 1.55434   | 1.41457    | 1.57275    | 2.06136   | 2.01223  |
| EDRF1-AS1      | 0.336443   | 0.300287   | 0.209241  | 0.435459   | 0         | 0.0353788 | 0.194315  | 0.332331   | 1.39E-32  | 0.0521488 | 0.0964779 | 0.297298   | 0          | 0.109634  | 0.358022 |
| EEA1           | 4.89292    | 4.66899    | 4.72479   | 4.40754    | 1.52277   | 5.23245   | 1.63767   | 3.41551    | 9.03715   | 8.1192    | 6.50937   | 5.06116    | 9.12176    | 5.54676   | 4.50599  |
| EED            | 2.16624    | 2.12708    | 1.8223    | 3.17429    | 1.03645   | 2.28814   | 1.17927   | 1.71397    | 1.14657   | 2.17967   | 2.39382   | 1.40612    | 2.44734    | 2.336     | 1.35203  |
| EEF1A1         | 1278.24    | 975.925    | 1043.19   | 1661.38    | 984.405   | 1447.43   | 917.978   | 960.763    | 1383.88   | 1256.97   | 1899.02   | 854.704    | 1226.93    | 879.674   | 679.897  |
| EEF1A2         | 0.726463   | 1.05562    | 1.71709   | 2.64995    | 0.94933   | 3.50525   | 2.30403   | 0.799339   | 9.05816   | 5.5865    | 11.312    | 4.21619    | 2.19476    | 6.49677   | 0.977053 |
| EEF1AKMT1      | 1.36582    | 1.24303    | 1.31822   | 2.52832    | 1.13937   | 2.60593   | 0.750846  | 1.01152    | 0.924119  | 1.14283   | 2.59829   | 0.579129   | 1.17496    | 1.62596   | 0.835449 |
| EEF1AKMT2      | 3.03516    | 2.57134    | 2.73583   | 2.14385    | 0.736663  | 2.30442   | 1.66774   | 2.87723    | 1.38618   | 1.46028   | 2.09148   | 1.24875    | 1.36262    | 1.63918   | 1.51652  |
| EEF1AKMT3      | 2.11873    | 1.48807    | 1.86737   | 1.62917    | 1.62024   | 3.26815   | 1.84224   | 1.68017    | 0.694717  | 1.18642   | 2.1986    | 0.571418   | 1.33545    | 1.2777    | 1.5916   |
| EEF1AKMT4      | 1.23688    | 1.15777    | 1.08298   | 2.47894    | 2.94129   | 3.48338   | 1.7616    | 0.664441   | 2.79009   | 2.02448   | 3.85287   | 2.29156    | 2.76012    | 2.28472   | 1.24217  |
| EEF1AKMT4-ECE2 | 0.00696717 | 0.00694654 | 0         | 0.00745876 | 1.18E-43  | 0         | 1.02E-43  | 0.00231263 | 0         | 0         | 0         | 0          | 0          | 0         | 0        |

|                |           |           |           |           |            |           |           |           |           |            |           |           |            |            |           |
|----------------|-----------|-----------|-----------|-----------|------------|-----------|-----------|-----------|-----------|------------|-----------|-----------|------------|------------|-----------|
| EEF1B2         | 134.851   | 107.288   | 96.7783   | 211.714   | 72.9668    | 152.794   | 87.0543   | 87.8997   | 285.303   | 189.574    | 349.238   | 146.56    | 150.654    | 124.725    | 57.6393   |
| EEF1D          | 31.8607   | 25.3637   | 26.6513   | 51.0393   | 58.2528    | 54.6658   | 23.3816   | 18.0486   | 34.0117   | 39.7754    | 62.1776   | 27.8218   | 42.6245    | 32.1582    | 21.9348   |
| EEF1DP3        | 1.28796   | 0.775699  | 1.63154   | 0.663641  | 0.0625203  | 0.685426  | 1.79224   | 1.21617   | 0.833314  | 0.656713   | 0.272615  | 0.345589  | 0.207746   | 0.315537   | 0.173407  |
| EEF1E1         | 1.78154   | 0.991228  | 1.21776   | 3.49563   | 2.97E-08   | 1.98316   | 1.27955   | 1.09633   | 1.73895   | 2.86074    | 5.49552   | 1.07317   | 3.11138    | 2.89123    | 2.11494   |
| EEF1E1-BLOC1S5 | 0.448015  | 0.631689  | 0.639289  | 0.808047  | 0.286356   | 1.56928   | 0.785338  | 0.619856  | 0.781465  | 1.14768    | 2.6618    | 0.755618  | 1.13403    | 1.17705    | 0.713552  |
| EEF1G          | 396.201   | 405.223   | 433.514   | 544.012   | 511.212    | 520.902   | 451.905   | 351.95    | 628.349   | 375.4      | 659.12    | 386.607   | 436.255    | 331.205    | 186.668   |
| EEF2           | 341.437   | 307.848   | 324.444   | 505.765   | 478.586    | 601.651   | 322.736   | 230.432   | 501.406   | 346.438    | 277.727   | 313.639   | 524.612    | 302.5      | 231.17    |
| EEF2K          | 15.3184   | 24.6573   | 26.9877   | 7.05963   | 12.589     | 11.0042   | 27.8963   | 19.6186   | 4.80281   | 3.53093    | 3.91602   | 6.99141   | 4.42595    | 3.7713     | 4.77111   |
| EEF2KMT        | 1.15513   | 1.28089   | 1.28696   | 2.87082   | 2.11109    | 2.82047   | 1.43264   | 1.09805   | 1.53728   | 1.04701    | 2.89567   | 1.83176   | 3.01331    | 1.55023    | 1.79174   |
| EEFSEC         | 3.70082   | 2.96524   | 3.28309   | 4.4224    | 5.46493    | 7.07848   | 3.97936   | 2.61983   | 2.66345   | 2.82153    | 4.61035   | 2.77378   | 4.77495    | 2.99906    | 2.7002    |
| EEPD1          | 1.6492    | 1.96511   | 1.87493   | 1.35862   | 3.93469    | 2.32083   | 2.04085   | 1.29892   | 3.63821   | 1.01636    | 1.96207   | 2.15517   | 0.876091   | 0.696779   | 1.38278   |
| EFCAB1         | 0.111051  | 0.26111   | 0.121267  | 0.0549319 | 0.1035     | 0.215594  | 0.116651  | 0.098693  | 0.0486892 | 0.0390266  | 0.115334  | 0.0508544 | 0.126103   | 0.13001    | 0.076552  |
| EFCAB10        | 0.285783  | 0.169789  | 0.316714  | 0.0755606 | 0.0368299  | 0.127941  | 0.154477  | 0.203606  | 0.0455068 | 0.0821274  | 0.075546  | 0.128317  | 0.0567942  | 0.244714   | 0.158388  |
| EFCAB11        | 0.585834  | 0.434117  | 0.412092  | 0.52358   | 0.378497   | 0.609192  | 0.414355  | 0.442314  | 0.359897  | 0.396922   | 0.690596  | 0.28589   | 0.347873   | 0.276567   | 0.448743  |
| EFCAB12        | 0.096698  | 0.0672975 | 0.0533303 | 0.0221445 | 0.0166895  | 0.0274457 | 0.061337  | 0.0286457 | 0         | 0.0539404  | 0.0121289 | 0.0230633 | 0.00693212 | 0.0449232  | 0.185161  |
| EFCAB13        | 0.950545  | 0.797323  | 0.90044   | 0.456791  | 0.0918046  | 0.465496  | 0.466736  | 0.906043  | 0.149955  | 0.333801   | 0.489264  | 0.193822  | 0.14935    | 0.463333   | 0.813403  |
| EFCAB14        | 13.9292   | 12.0459   | 12.4494   | 16.8233   | 12.0932    | 20.7345   | 12.9669   | 12.5859   | 21.0647   | 12.5314    | 19.1537   | 10.5754   | 17.3708    | 10.747     | 11.8895   |
| EFCAB14-AS1    | 0.476358  | 0.229516  | 0.328397  | 0.122725  | 0.0616624  | 0.135204  | 0.181297  | 0.246953  | 0.145038  | 0.14947    | 0.0896248 | 0.0568078 | 0.179284   | 0.0829885  | 0.171028  |
| EFCAB2         | 0.591172  | 0.413874  | 0.48059   | 0.445165  | 0.215957   | 0.790608  | 0.548359  | 0.554383  | 0.143834  | 0.273596   | 0.465228  | 0.163428  | 0.0640711  | 0.264696   | 0.527674  |
| EFCAB3         | 0.224306  | 0.254291  | 0.174646  | 0.326334  | 0          | 0.0674094 | 0.0903899 | 0.117261  | 0.385664  | 0.0828019  | 0.193633  | 0.0472049 | 0.0681039  | 0.131024   | 0.303182  |
| EFCAB5         | 0.0693671 | 0.0527718 | 0.0513448 | 0.0112871 | 0.00567111 | 0.0435217 | 0.0166739 | 0.0389354 | 0         | 0          | 0         | 0         | 0.025911   | 0.00572436 | 0.0471884 |
| EFCAB6         | 0.385013  | 0.404944  | 0.29132   | 0.169352  | 0.175042   | 0.263866  | 0.337738  | 0.396414  | 0.10293   | 0.0883959  | 0.095407  | 0.0403152 | 0.0575581  | 0.0883426  | 0.114631  |
| EFCAB6-AS1     | 0.0115889 | 0.0558371 | 0.0191743 | 0.0119427 | 0.0180016  | 0.0197356 | 0         | 0.0308978 | 0         | 0          | 0.0130824 | 0         | 0          | 0.0121137  | 0.0499294 |
| EFCAB7         | 1.27181   | 1.23484   | 1.03619   | 0.963118  | 0.239461   | 0.968072  | 0.605045  | 1.19022   | 0.293356  | 0.773939   | 1.4901    | 0.39296   | 0.435148   | 0.609311   | 0.691847  |
| EFCAB8         | 0.0467418 | 0.0619326 | 0.0193341 | 0.0120422 | 0.0544547  | 0.02985   | 0.0933945 | 0.0623104 | 0         | 0.00733323 | 0.0263829 | 0.0292644 | 0.0113091  | 0.0213757  | 0.0167818 |
| EFCAB9         | 0.0328737 | 0.0475171 | 0.0271954 | 0         | 0          | 0.0839745 | 0         | 0         | 0.0400364 | 0.0412598  | 0         | 0.047044  | 0          | 0          | 0         |

|         |           |           |           |           |           |           |           |          |            |           |           |            |           |            |           |
|---------|-----------|-----------|-----------|-----------|-----------|-----------|-----------|----------|------------|-----------|-----------|------------|-----------|------------|-----------|
| EFCC1   | 0.526891  | 0.407832  | 0.490912  | 0.29247   | 1.21105   | 0.629772  | 0.284762  | 0.305725 | 0.136867   | 0.291441  | 0.203879  | 0.270467   | 0.277439  | 0.575337   | 0.419932  |
| EFEMP1  | 11.1227   | 4.48691   | 5.74241   | 15.8331   | 4.25255   | 23.4255   | 12.6825   | 6.86032  | 3.43438    | 9.022     | 9.93015   | 5.85522    | 15.7766   | 6.84139    | 14.0937   |
| EFEMP2  | 5.48363   | 3.24598   | 4.5457    | 4.33629   | 8.69177   | 15.8562   | 5.80101   | 3.63017  | 0.94043    | 5.28128   | 16.6127   | 2.16202    | 4.28168   | 4.5797     | 13.6932   |
| EFHB    | 0.0219991 | 0.116594  | 0.121328  | 0.0680121 | 0.0113907 | 0.0686838 | 0.0334905 | 0.013034 | 0.00893081 | 0.0552223 | 0.0413904 | 0.00524698 | 0.0567748 | 0.00766513 | 0.168499  |
| EFHC1   | 1.50798   | 1.90682   | 1.66696   | 0.824505  | 0.736474  | 1.09337   | 1.30823   | 1.48061  | 0.505248   | 0.727309  | 1.12248   | 0.647867   | 0.3845    | 0.973972   | 1.3618    |
| EFHC2   | 0.298896  | 0.809213  | 1.09504   | 0.469365  | 0.143708  | 0.266625  | 0.650037  | 0.512293 | 0.130008   | 0.169708  | 0.144607  | 0.183315   | 0.339776  | 0.204568   | 0.398591  |
| EFHD1   | 3.94894   | 0.816153  | 1.14733   | 0.403675  | 1.57874   | 3.84023   | 3.05822   | 2.29574  | 0.554429   | 0.597946  | 1.08757   | 0.242408   | 0.53962   | 0.636318   | 2.67593   |
| EFHD2   | 6.01777   | 5.75742   | 6.22884   | 19.7284   | 12.528    | 26.1986   | 5.84408   | 5.3906   | 3.83343    | 10.795    | 15.0878   | 4.38118    | 19.4934   | 10.8705    | 10.03     |
| EFL1    | 2.56265   | 2.61664   | 2.33996   | 5.90447   | 2.48683   | 4.59537   | 2.12503   | 2.06128  | 10.4378    | 6.86483   | 6.35416   | 5.71077    | 8.90854   | 4.79561    | 2.82724   |
| EFL1P1  | 4.78E-42  | 4.20E-45  | 2.80E-45  | 0.024215  | 6.51E-39  | 1.39E-40  | 2.38E-43  | 1.16E-40 | 3.09E-40   | 0.0284584 | 2.11E-33  | 0.016677   | 0.01566   | 0          | 0         |
| EFNA1   | 10.4041   | 12.5747   | 11.6633   | 17.8643   | 16.1151   | 19.5424   | 9.70226   | 9.12797  | 12.725     | 14.8573   | 15.999    | 16.3373    | 10.5362   | 7.9632     | 4.22352   |
| EFNA2   | 0         | 0.0104115 | 0         | 0.044537  | 0.0839149 | 0.0183996 | 0         | 0        | 0.0131586  | 0.0542426 | 0.134165  | 0.0231925  | 0         | 0          | 0         |
| EFNA3   | 18.8703   | 22.7707   | 23.5291   | 13.5576   | 29.2717   | 21.796    | 25.3563   | 15.5354  | 50.6139    | 19.169    | 22.7829   | 23.817     | 14.6134   | 7.26277    | 1.75321   |
| EFNA4   | 5.68353   | 7.04242   | 5.91113   | 5.07904   | 11.2545   | 7.90217   | 6.2572    | 4.54173  | 8.3592     | 4.11023   | 5.77523   | 5.04124    | 3.33798   | 2.51023    | 1.40137   |
| EFNA5   | 5.41812   | 4.79469   | 4.55761   | 4.25582   | 4.72359   | 5.54797   | 6.31501   | 4.73421  | 6.82055    | 4.49179   | 3.20755   | 5.8416     | 4.99312   | 3.53912    | 2.23029   |
| EFNB1   | 10.7514   | 11.1741   | 11.8496   | 17.59     | 23.0917   | 23.3336   | 11.1806   | 7.02881  | 20.1616    | 19.5129   | 12.4822   | 14.2421    | 34.2893   | 20.8531    | 11.0987   |
| EFNB2   | 6.86853   | 6.75852   | 7.44089   | 5.39293   | 6.2196    | 8.31003   | 5.22216   | 4.43045  | 4.57446    | 7.42891   | 4.94285   | 5.83941    | 17.0829   | 8.4396     | 8.18976   |
| EFNB3   | 0.654246  | 1.62809   | 1.79025   | 0.903899  | 1.13912   | 1.55493   | 0.993259  | 0.964806 | 0.280193   | 0.767004  | 1.39596   | 0.200627   | 0.51025   | 0.559876   | 1.15641   |
| EFR3A   | 5.00011   | 4.88789   | 5.24153   | 7.70827   | 3.1151    | 6.68705   | 5.10575   | 5.3976   | 7.91307    | 7.03159   | 7.47908   | 4.94758    | 7.48336   | 5.74544    | 6.48488   |
| EFR3B   | 0.434952  | 0.244494  | 0.242381  | 0.859108  | 1.26212   | 1.39398   | 0.489717  | 0.238909 | 2.60079    | 3.66972   | 0.917227  | 2.11586    | 3.22724   | 0.809844   | 1.24929   |
| EFS     | 8.48572   | 16.4717   | 16.5008   | 10.5106   | 23.7818   | 13.5792   | 14.2876   | 10.2443  | 13.8219    | 8.74197   | 9.24438   | 9.77101    | 12.9266   | 8.33893    | 5.67787   |
| EFTUD2  | 6.86436   | 6.19609   | 6.44729   | 13.4278   | 8.77223   | 16.4692   | 8.04525   | 5.66208  | 6.18258    | 7.10615   | 7.91599   | 6.47688    | 14.4374   | 9.01742    | 6.67823   |
| EGF     | 0.133986  | 0.101725  | 0.134355  | 0.0502097 | 0.0819893 | 0.0933442 | 0.115895  | 0.133509 | 0.0395588  | 0.0509595 | 0.0275007 | 0.0319569  | 0.0183373 | 0.0509287  | 0.0699712 |
| EGFEM1P | 0.0783081 | 0.046437  | 0.0249161 | 0.0434532 | 0.683053  | 0.0102582 | 0.0481437 | 0.058887 | 0.0366809  | 0.0756036 | 0.1088    | 0.202576   | 0.0233188 | 0.113337   | 0.207619  |
| EGFL6   | 0.0666124 | 0.114625  | 0.0236171 | 0.31381   | 1.40426   | 1.57194   | 0.0325954 | 0.211427 | 0.614243   | 1.56462   | 3.54502   | 0.40854    | 0.804302  | 0.363066   | 4.04521   |
| EGFL7   | 6.7925    | 2.69978   | 3.07045   | 6.94413   | 16.0086   | 16.1392   | 4.48456   | 2.65801  | 1.33852    | 3.99126   | 10.0984   | 2.72661    | 4.90556   | 8.92216    | 13.869    |

|            |           |           |           |           |           |           |           |           |           |           |           |           |           |           |          |
|------------|-----------|-----------|-----------|-----------|-----------|-----------|-----------|-----------|-----------|-----------|-----------|-----------|-----------|-----------|----------|
| EGFL8      | 0.228521  | 0.292935  | 0.316701  | 0.0488863 | 0.293547  | 0.339995  | 0.235907  | 0.0946581 | 0.254638  | 0.223256  | 0.241916  | 0.24945   | 0.100874  | 0.212732  | 0.422692 |
| EGFLAM     | 0.843956  | 0.463846  | 0.421013  | 0.808535  | 1.52176   | 2.21364   | 0.832862  | 0.625659  | 1.21378   | 1.22426   | 1.96768   | 1.28968   | 1.31341   | 1.46069   | 3.76398  |
| EGFLAM-AS2 | 0.0731989 | 0.0529025 | 0.0302776 | 0         | 0.151604  | 0.0623279 | 0.0278587 | 0.108422  | 0.029716  | 0.030624  | 0         | 0.0872929 | 0         | 0.0382569 | 0.245287 |
| EGFLAM-AS4 | 0.0588133 | 0.0779272 | 0.109473  | 0.0151522 | 0.114197  | 0         | 0.117515  | 0.104537  | 0         | 0         | 0         | 0.178851  | 0         | 0.253592  | 0.274506 |
| EGFR       | 24.1926   | 28.4477   | 31.7054   | 21.9489   | 17.511    | 26.5564   | 29.6126   | 23.7446   | 14.2498   | 15.6892   | 9.80601   | 18.3924   | 29.7937   | 13.7949   | 9.80609  |
| EGFR-AS1   | 2.55143   | 3.49126   | 3.64497   | 1.16603   | 2.00872   | 0.820978  | 3.93286   | 2.77144   | 0.423156  | 0.934616  | 0.143276  | 2.01173   | 0.165559  | 1.63668   | 0.685142 |
| EGLN1      | 7.93392   | 7.56524   | 9.20185   | 7.72247   | 5.75936   | 9.65447   | 4.41207   | 7.88855   | 6.34246   | 6.10243   | 8.66559   | 3.84062   | 7.53427   | 4.42953   | 3.84955  |
| EGLN2      | 5.12122   | 4.38019   | 5.02547   | 8.2547    | 14.5076   | 13.7804   | 4.87344   | 3.51453   | 5.07736   | 9.36162   | 9.60828   | 4.30614   | 12.1794   | 8.86371   | 8.2789   |
| EGLN3      | 7.35437   | 18.1632   | 27.1284   | 12.1702   | 6.66949   | 25.4111   | 14.2799   | 22.1694   | 40.6516   | 18.1838   | 33.5359   | 11.1269   | 13.7302   | 15.1398   | 2.07575  |
| EGOT       | 0.300765  | 0.251691  | 0.510723  | 0.130504  | 0.172123  | 0.10783   | 0.596437  | 0.22509   | 0         | 0.139075  | 0.125088  | 0.283165  | 0         | 0.322659  | 0.727471 |
| EGR1       | 16.0068   | 16.0433   | 18.938    | 15.4612   | 12.3002   | 33.3042   | 28.0755   | 19.4002   | 37.5149   | 18.3951   | 36.181    | 50.349    | 45.5524   | 22.9993   | 19.3843  |
| EGR2       | 0.41719   | 0.645343  | 1.05355   | 0.256447  | 0.318335  | 0.79148   | 0.768819  | 0.878123  | 1.09641   | 0.569547  | 1.37982   | 0.63368   | 0.538338  | 0.263945  | 0.473003 |
| EGR3       | 2.74901   | 7.8259    | 9.94277   | 2.75349   | 5.69087   | 2.10885   | 13.8689   | 6.45711   | 19.994    | 2.05082   | 4.34463   | 6.65459   | 1.28299   | 1.54417   | 1.15117  |
| EGR4       | 0         | 0.0140969 | 0.0322723 | 0.100504  | 0.0454477 | 0.0249128 | 0         | 0.0173347 | 0.0593882 | 0.0244812 | 0         | 0.181435  | 0.0566313 | 0.188595  | 0.014006 |
| EHBP1      | 5.61576   | 4.87467   | 4.91044   | 5.70436   | 1.82255   | 7.2652    | 2.47381   | 3.81717   | 2.11191   | 4.8954    | 3.45851   | 2.5579    | 5.83205   | 5.37227   | 3.43314  |
| EHBP1L1    | 7.01214   | 9.19595   | 7.15242   | 14.5998   | 32.8289   | 17.3726   | 6.44673   | 5.00604   | 9.45869   | 14.403    | 4.92282   | 19.6642   | 30.4907   | 18.7769   | 13.8971  |
| EHD1       | 5.01756   | 5.7948    | 6.42077   | 9.20316   | 12.2569   | 10.2107   | 8.84824   | 4.25557   | 15.0407   | 9.69693   | 8.03197   | 6.61288   | 23.8027   | 7.85808   | 10.2518  |
| EHD2       | 14.2384   | 11.0698   | 12.3987   | 23.5501   | 33.2209   | 41.166    | 24.1089   | 10.0313   | 9.42143   | 21.542    | 33.7723   | 15.1087   | 37.6128   | 25.099    | 39.0694  |
| EHD3       | 1.09613   | 1.40168   | 0.921497  | 1.75239   | 3.31329   | 2.13406   | 1.16358   | 1.31115   | 1.41433   | 2.20864   | 2.99649   | 0.771588  | 1.97255   | 1.53285   | 3.72696  |
| EHD4       | 7.73568   | 4.93359   | 5.39358   | 18.3674   | 8.97176   | 19.3586   | 8.26606   | 4.49317   | 16.5139   | 14.9602   | 15.0812   | 7.27518   | 25.1925   | 11.6817   | 10.6499  |
| EHD4-AS1   | 0.433686  | 0.379921  | 0.521855  | 0.203148  | 0.336832  | 0.25178   | 0.540184  | 0.47302   | 0.144049  | 0.494837  | 0.0222535 | 0.43726   | 0.089031  | 0.875744  | 1.52876  |
| EHF        | 18.866    | 14.1214   | 15.6186   | 36.6104   | 5.5336    | 13.6288   | 6.82744   | 26.6358   | 21.068    | 22.6906   | 19.315    | 18.9021   | 44.6738   | 16.3671   | 3.89594  |
| EHHADH     | 0.972789  | 1.08054   | 0.881863  | 1.96896   | 0.705772  | 1.75088   | 0.811408  | 0.900771  | 0.659769  | 1.29406   | 1.37434   | 0.808591  | 1.59728   | 0.858532  | 0.711072 |
| EHHADH-AS1 | 0         | 0         | 0         | 0         | 0         | 0         | 0         | 0         | 0         | 0         | 0         | 0         | 0         | 0         | 0        |
| EHMT1      | 3.58772   | 4.14039   | 3.92859   | 4.99723   | 6.21404   | 5.82078   | 3.92044   | 3.10494   | 3.20592   | 2.58105   | 2.16863   | 3.637     | 4.19516   | 3.61715   | 3.47953  |
| EHMT2      | 0.521374  | 0.628004  | 0.59891   | 0.831147  | 1.36088   | 1.3657    | 0.626711  | 0.398131  | 0.233693  | 0.32623   | 0.352103  | 0.421741  | 0.524805  | 0.49065   | 0.58188  |

|            |          |          |          |          |           |          |          |          |           |           |           |           |           |           |           |
|------------|----------|----------|----------|----------|-----------|----------|----------|----------|-----------|-----------|-----------|-----------|-----------|-----------|-----------|
| EIF24      | 18.2285  | 14.8952  | 14.6735  | 29.9643  | 14.603    | 30.013   | 17.7062  | 14.0082  | 27.1772   | 26.1911   | 35.4133   | 19.7567   | 30.4387   | 19.1257   | 11.7628   |
| EIFD1      | 14.5986  | 8.83095  | 10.438   | 11.0066  | 10.8999   | 22.9951  | 8.63108  | 12.8757  | 5.52659   | 13.7108   | 34.6093   | 3.7142    | 10.6615   | 9.8338    | 17.1983   |
| EIFD2      | 2.56037  | 1.80237  | 2.09061  | 3.06686  | 3.56392   | 4.02048  | 1.57557  | 1.47756  | 4.7381    | 4.21514   | 4.6358    | 2.11752   | 6.3932    | 2.40695   | 2.17278   |
| EIFD2B     | 0.468062 | 0.141994 | 0.415896 | 0.232243 | 0.29621   | 0.885663 | 0.296899 | 0.415974 | 0.0211128 | 0.21758   | 0.469674  | 0.0868287 | 0.268436  | 0.181207  | 0.746884  |
| EIFD3      | 1.2255   | 0.946256 | 1.0918   | 1.57054  | 1.87922   | 1.21741  | 0.950761 | 1.39631  | 0.880203  | 1.08458   | 1.06418   | 1.43898   | 0.598082  | 1.26457   | 1.4892    |
| EIF1       | 125.681  | 99.1031  | 105.633  | 195.077  | 78.5134   | 194.667  | 132.439  | 97.5488  | 252.268   | 181.269   | 276.979   | 160.687   | 282.87    | 141.215   | 96.9519   |
| EIF1AD     | 4.58114  | 4.40689  | 4.84367  | 4.98192  | 4.24016   | 6.18464  | 6.01654  | 4.23307  | 7.38125   | 4.72695   | 5.84142   | 4.89708   | 8.45875   | 4.97057   | 3.80655   |
| EIF1AX     | 7.1346   | 6.23089  | 6.81826  | 10.6841  | 2.96128   | 8.3387   | 7.67494  | 9.63628  | 10.502    | 9.7413    | 10.6012   | 6.88763   | 14.6218   | 7.88628   | 4.50802   |
| EIF1AX-AS1 | 0.551025 | 0.324491 | 0.405197 | 0.315471 | 0.285311  | 0        | 0.908761 | 0.272058 | 0.447391  | 0.307375  | 0.0691154 | 0.70093   | 0.118506  | 0.639977  | 0.615488  |
| EIF1AY     | 2.81871  | 2.6606   | 2.26365  | 4.68838  | 1.5875    | 4.11244  | 0.150564 | 2.78336  | 8.89334   | 5.56526   | 9.35986   | 3.32606   | 5.58347   | 3.29958   | 2.46195   |
| EIF1B      | 7.38657  | 6.12626  | 6.77284  | 7.94201  | 1.49196   | 11.294   | 4.83047  | 5.9955   | 6.79575   | 7.49135   | 12.8563   | 5.43255   | 7.70196   | 6.68125   | 5.02486   |
| EIF1B-AS1  | 0.4164   | 0.179509 | 0.290084 | 0.124217 | 0.0851069 | 0.214601 | 0.300273 | 0.311631 | 0.0133455 | 0.0412598 | 0.197921  | 0.0705659 | 0.0494898 | 0.0687248 | 0.0157369 |
| EIF2A      | 10.4516  | 7.31152  | 7.39318  | 10.2503  | 1.92907   | 8.02466  | 5.03565  | 7.66389  | 8.45293   | 8.66026   | 10.842    | 5.2776    | 10.5362   | 7.34586   | 6.37558   |
| EIF2AK1    | 8.50163  | 8.67027  | 8.77046  | 11.5146  | 4.99622   | 13.6662  | 8.34363  | 8.04043  | 11.1085   | 7.84159   | 9.41869   | 7.37615   | 10.7988   | 7.1051    | 7.00573   |
| EIF2AK2    | 4.77244  | 3.03338  | 3.20341  | 10.1052  | 1.24105   | 10.3995  | 2.42651  | 4.02358  | 0.849785  | 2.98157   | 3.45137   | 1.32628   | 4.6359    | 3.19577   | 6.27247   |
| EIF2AK3    | 2.70096  | 2.28455  | 2.94045  | 2.11738  | 1.40258   | 3.37198  | 1.65643  | 2.49346  | 1.91286   | 2.44612   | 2.43255   | 1.46647   | 2.06382   | 2.18837   | 3.45222   |
| EIF2AK4    | 4.35344  | 3.48383  | 3.31432  | 5.65857  | 4.9305    | 8.3325   | 3.74825  | 3.35237  | 2.79615   | 5.57423   | 6.35437   | 2.84868   | 5.8119    | 4.98991   | 6.52235   |
| EIF2B1     | 10.2349  | 8.15729  | 7.95514  | 12.9578  | 7.57431   | 17.4509  | 8.08263  | 7.85309  | 11.5456   | 9.72372   | 14.3481   | 8.41257   | 15.6025   | 8.8744    | 8.26465   |
| EIF2B2     | 3.84466  | 3.90744  | 3.95087  | 10.3384  | 6.27535   | 10.3965  | 4.20109  | 3.00306  | 13.5532   | 12.3275   | 12.6983   | 7.85527   | 24.011    | 9.05794   | 4.85281   |
| EIF2B3     | 3.18004  | 2.7313   | 2.98269  | 5.10751  | 2.24682   | 5.25253  | 3.52158  | 2.26848  | 2.35744   | 3.85779   | 5.49886   | 2.83854   | 4.17897   | 3.46858   | 2.73406   |
| EIF2B4     | 3.5373   | 4.97857  | 5.28025  | 6.38211  | 7.69596   | 8.68433  | 5.09623  | 3.09407  | 11.2797   | 6.9326    | 7.72181   | 5.7567    | 8.20741   | 5.74453   | 3.2371    |
| EIF2B5     | 5.74983  | 6.26023  | 6.08456  | 7.43962  | 6.93429   | 9.9006   | 5.98141  | 4.45703  | 6.5747    | 4.90129   | 4.96729   | 4.23986   | 7.064     | 5.3299    | 4.26636   |
| EIF2D      | 6.93078  | 6.84985  | 7.23091  | 10.8842  | 8.60587   | 9.3314   | 8.27879  | 5.39446  | 6.89519   | 6.20552   | 10.5898   | 4.69856   | 6.60076   | 6.41401   | 5.73751   |
| EIF2S1     | 6.54562  | 6.28079  | 6.44008  | 13.9318  | 3.63376   | 12.6658  | 5.60836  | 6.84435  | 12.5262   | 11.7861   | 13.1789   | 8.26184   | 18.3914   | 10.8207   | 7.21384   |
| EIF2S2     | 10.3972  | 9.85254  | 9.78704  | 21.9809  | 7.61911   | 20.8311  | 6.60601  | 7.27545  | 21.9384   | 25.3289   | 32.6078   | 14.4153   | 42.7357   | 20.9102   | 13.2572   |
| EIF2S3     | 22.3349  | 20.1774  | 21.0518  | 38.3108  | 9.00544   | 26.178   | 16.5179  | 19.6357  | 23.3619   | 28.0745   | 27.709    | 21.4437   | 45.989    | 28.1986   | 19.2512   |



|          |         |            |         |          |          |         |          |         |         |          |         |            |          |            |          |
|----------|---------|------------|---------|----------|----------|---------|----------|---------|---------|----------|---------|------------|----------|------------|----------|
| EIF2S3B  | 0       | 0.00424141 | 0       | 0        | 0        | 0       | 0        | 0       | 0       | 0        | 0       | 0.00629877 | 0        | 0          | 0        |
| EIF3A    | 20.1899 | 22.2632    | 21.1729 | 31.738   | 23.0643  | 34.591  | 11.1921  | 15.3951 | 27.1586 | 19.7376  | 16.039  | 19.5936    | 42.7856  | 23.8026    | 16.1832  |
| EIF3B    | 21.4677 | 20.0271    | 20.6035 | 41.3336  | 36.4113  | 46.0998 | 24.0728  | 15.2567 | 37.5837 | 27.3082  | 19.6252 | 24.6917    | 53.1793  | 27.5163    | 15.3423  |
| EIF3C    | 11.9845 | 7.78864    | 7.08397 | 19.3398  | 14.5777  | 17.2819 | 8.34732  | 8.94102 | 14.0597 | 6.79381  | 5.39778 | 6.95928    | 12.8515  | 8.15411    | 5.21336  |
| EIF3CL   | 16.8929 | 11.5332    | 10.1804 | 29.5209  | 18.946   | 28.1443 | 12.6684  | 13.9332 | 20.2221 | 8.95361  | 7.59889 | 10.3185    | 18.2954  | 11.8854    | 7.10972  |
| EIF3D    | 29.358  | 26.5382    | 25.6286 | 54.6613  | 38.7022  | 58.7642 | 30.8651  | 22.1732 | 57.7418 | 35.1714  | 45.3772 | 29.3553    | 52.0095  | 30.1981    | 20.2291  |
| EIF3E    | 59.2542 | 45.9928    | 48.1305 | 89.3094  | 9.7263   | 40.4574 | 30.1212  | 46.0453 | 71.6229 | 73.2529  | 104.762 | 41.3328    | 61.1926  | 49.024     | 30.1067  |
| EIF3F    | 49.5633 | 44.9132    | 46.7292 | 67.8489  | 41.383   | 92.7922 | 65.0194  | 43.1151 | 93.4812 | 47.0019  | 95.1496 | 46.6221    | 49.4044  | 40.7901    | 33.4479  |
| EIF3G    | 29.6441 | 28.0702    | 28.0239 | 47.9568  | 41.8171  | 58.1017 | 36.9399  | 21.3621 | 39.5688 | 29.2771  | 49.6973 | 26.2753    | 42.7453  | 30.3932    | 20.0443  |
| EIF3H    | 43.0915 | 32.8661    | 34.1467 | 61.56    | 17.3684  | 56.3051 | 27.0457  | 33.9567 | 59.1567 | 46.4751  | 59.3615 | 35.5217    | 48.9997  | 39.1043    | 25.4942  |
| EIF3I    | 18.7882 | 14.5495    | 14.8642 | 41.9426  | 18.3628  | 37.0738 | 19.5295  | 10.9114 | 32.1763 | 37.4823  | 48.7361 | 23.2657    | 53.3589  | 31.5144    | 18.562   |
| EIF3IP1  | 0       | 0          | 0       | 0        | 0        | 0       | 0.026772 | 0       | 0       | 0        | 0       | 0          | 0        | 0          | 0        |
| EIF3J    | 7.45852 | 7.73546    | 7.76541 | 14.6006  | 3.54151  | 9.84957 | 3.40887  | 8.28444 | 18.4358 | 10.7707  | 11.147  | 8.9788     | 15.1423  | 9.84542    | 5.81483  |
| EIF3J-DT | 1.60039 | 1.62651    | 1.65494 | 0.889044 | 1.94215  | 1.43723 | 1.17059  | 1.00005 | 1.14204 | 0.533547 | 0.94566 | 0.626236   | 0.363009 | 0.790688   | 0.736191 |
| EIF3K    | 55.3301 | 33.8139    | 36.405  | 68.5841  | 44.564   | 78.5142 | 48.3806  | 34.7784 | 50.3432 | 47.5882  | 96.718  | 39.6648    | 50.2299  | 41.5834    | 31.2265  |
| EIF3L    | 71.9064 | 56.7535    | 62.1498 | 71.398   | 26.2696  | 78.4782 | 57.7404  | 49.811  | 73.7487 | 52.7607  | 85.9394 | 44.5385    | 54.7984  | 43.288     | 30.947   |
| EIF3M    | 19.1306 | 15.1961    | 15.7229 | 32.8782  | 10.3035  | 25.0523 | 12.7165  | 15.1714 | 22.0532 | 23.1999  | 36.1475 | 16.1586    | 30.346   | 22.5377    | 13.0487  |
| EIF4A1   | 69.2561 | 57.1056    | 57.4291 | 222.994  | 74.6616  | 179.351 | 65.5225  | 51.4487 | 198.923 | 173.83   | 216.303 | 126.835    | 254.201  | 146.957    | 71.0775  |
| EIF4A2   | 30.4166 | 37.0863    | 37.8859 | 44.229   | 25.1644  | 20.0188 | 16.9729  | 25.7803 | 21.3853 | 24.3594  | 30.3278 | 23.7177    | 21.3785  | 27.9414    | 22.4565  |
| EIF4A3   | 10.5839 | 12.9898    | 12.6091 | 32.941   | 14.8441  | 36.5595 | 11.6576  | 10.8413 | 29.6811 | 25.8809  | 27.9939 | 23.4736    | 38.9742  | 21.1986    | 11.8071  |
| EIF4B    | 65.2887 | 58.7186    | 63.1792 | 89.8671  | 51.6749  | 88.286  | 50.5797  | 55.9327 | 70.1617 | 54.7153  | 52.2546 | 51.652     | 68.8065  | 54.6       | 39.0678  |
| EIF4E    | 1.53636 | 1.26017    | 1.40553 | 2.78007  | 0.481462 | 2.17002 | 0.983036 | 1.55923 | 3.73755 | 3.20102  | 3.19441 | 2.40121    | 3.85648  | 2.52094    | 1.67885  |
| EIF4E1B  | 0       | 0          | 0       | 0        | 0        | 0       | 0        | 0       | 0       | 0        | 0       | 0          | 0        | 0.00612744 | 0        |
| EIF4E2   | 4.96843 | 4.67374    | 4.58177 | 8.58343  | 4.56882  | 9.33559 | 5.19394  | 3.96634 | 7.06607 | 8.06484  | 9.63932 | 5.3403     | 10.897   | 6.39062    | 5.49048  |
| EIF4E3   | 2.04751 | 1.73051    | 2.36341 | 1.74041  | 0.848717 | 2.44826 | 1.69224  | 1.98906 | 1.477   | 2.28236  | 1.78958 | 1.2967     | 2.5781   | 0.875268   | 1.59021  |
| EIF4EBP1 | 4.01434 | 3.79045    | 2.13967 | 29.6523  | 10.5881  | 26.9094 | 5.10638  | 2.39437 | 11.7796 | 38.2445  | 56.2963 | 23.7115    | 57.3457  | 27.6551    | 13.7743  |

|           |            |            |           |            |           |           |            |           |            |           |           |           |           |            |           |
|-----------|------------|------------|-----------|------------|-----------|-----------|------------|-----------|------------|-----------|-----------|-----------|-----------|------------|-----------|
| EIF4EBP2  | 16.9109    | 14.106     | 15.1237   | 17.1992    | 9.80952   | 18.9864   | 16.9716    | 16.9189   | 24.2484    | 14.3402   | 17.7547   | 13.3404   | 22.704    | 11.4531    | 12.0835   |
| EIF4EBP3  | 1.71532    | 1.8285     | 2.92307   | 2.3813     | 2.11372   | 4.06019   | 2.84546    | 2.11336   | 0.567684   | 0.512927  | 3.38897   | 0.8843    | 0.638534  | 0.54714    | 0.937249  |
| EIF4ENIF1 | 4.53306    | 4.88328    | 4.84198   | 4.00058    | 4.86123   | 6.04655   | 4.84837    | 3.39167   | 5.51348    | 2.8035    | 2.52829   | 3.23924   | 4.14236   | 3.47726    | 3.51661   |
| EIF4G1    | 24.4436    | 36.6432    | 36.513    | 63.3441    | 59.3929   | 68.9073   | 45.3344    | 26.6326   | 76.2554    | 46.5782   | 26.0088   | 54.1799   | 94.0234   | 40.3402    | 36.9868   |
| EIF4G2    | 66.8008    | 67.0295    | 65.2971   | 128.832    | 53.6311   | 124.81    | 66.3026    | 65.2934   | 155.781    | 136.503   | 154.282   | 100.92    | 202.993   | 106.288    | 79.529    |
| EIF4G3    | 4.721      | 5.10333    | 5.20831   | 7.74944    | 4.90288   | 9.55869   | 5.09       | 4.33951   | 7.13775    | 8.68488   | 5.72158   | 7.69705   | 10.5218   | 8.08781    | 8.36839   |
| EIF4H     | 57.0042    | 54.4611    | 53.6556   | 96.3443    | 78.5802   | 111.645   | 65.1127    | 42.9045   | 257.786    | 98.0166   | 119.702   | 75.2607   | 129.909   | 69.9882    | 38.7442   |
| EIF5      | 17.3212    | 11.382     | 10.8478   | 24.3009    | 8.24609   | 20.0966   | 9.82956    | 12.1586   | 27.5472    | 19.7526   | 23.7465   | 12.9809   | 38.396    | 16.5344    | 11.8708   |
| EIF5A     | 62.9362    | 47.5706    | 43.7782   | 166.143    | 94.9557   | 166.39    | 64.7521    | 39.4281   | 128.607    | 135.48    | 178.324   | 100.561   | 185.672   | 100.14     | 50.5491   |
| EIF5A2    | 0.509925   | 0.265828   | 0.30774   | 0.409195   | 0.0779104 | 0.612142  | 0.391325   | 0.442035  | 0.208707   | 0.456399  | 1.14185   | 0.242246  | 0.698452  | 0.316752   | 0.798345  |
| EIF5AL1   | 0.0120828  | 0.00290991 | 0         | 0.0373547  | 0.0187511 | 0.0256998 | 0.0275788  | 0.0268242 | 0.0147338  | 0.0151632 | 0.0545505 | 0.0302722 | 0.031172  | 0.0284115  | 0         |
| EIF5B     | 8.4582     | 7.29612    | 6.36963   | 11.0313    | 3.47401   | 15.6331   | 3.19473    | 5.0828    | 12.341     | 7.846     | 5.82238   | 8.13169   | 16.95     | 9.53125    | 6.11951   |
| EIF6      | 23.1273    | 24.5328    | 22.5993   | 56.6447    | 45.983    | 50.5867   | 31.7482    | 18.1735   | 87.6834    | 65.1926   | 98.7954   | 47.8294   | 74.4349   | 41.4074    | 16.8332   |
| EIPR1     | 2.59719    | 2.29123    | 2.11832   | 5.25243    | 3.16307   | 5.0563    | 2.56165    | 2.02642   | 2.80668    | 4.08615   | 7.21278   | 2.66104   | 4.72811   | 3.14817    | 1.89122   |
| ELAC1     | 1.3577     | 1.14353    | 1.08889   | 1.28166    | 0.482971  | 2.27682   | 0.62717    | 0.994762  | 0.65636    | 0.949585  | 2.14106   | 0.474611  | 0.595131  | 0.931678   | 1.44376   |
| ELAC2     | 5.38426    | 4.98317    | 4.88202   | 8.92159    | 7.25785   | 11.5522   | 5.84884    | 3.73072   | 5.4978     | 6.0018    | 5.43252   | 6.15105   | 11.3677   | 7.02721    | 5.27728   |
| ELANE     | 0.0690151  | 0.188431   | 0.247408  | 0.118537   | 0.357347  | 1.41037   | 1.94371    | 0.16356   | 0          | 0         | 0.207758  | 0.115225  | 0.0445282 | 0.0480937  | 0.0660762 |
| ELAVL1    | 3.32743    | 3.55062    | 3.54278   | 6.31081    | 3.37654   | 6.46674   | 3.96491    | 3.34759   | 3.66162    | 3.53856   | 4.96809   | 2.97677   | 7.01729   | 4.21688    | 4.09282   |
| ELAVL2    | 0.0860032  | 0.0611699  | 0.0440439 | 0.0844084  | 0.0190847 | 0.198769  | 0.0374079  | 0.0655136 | 0.00498772 | 0.0308408 | 0.073971  | 0.0703287 | 0.0845544 | 0.207622   | 0.0294075 |
| ELAVL3    | 0.00988597 | 0.00952642 | 0.0122676 | 0.00509389 | 0.0383908 | 0.0252533 | 0.00564374 | 0.0175717 | 0.915041   | 0.0620395 | 0.18414   | 0.106105  | 0.0350811 | 0.031001   | 0.0354938 |
| ELAVL4    | 0.0140218  | 0.0270238  | 0.0231997 | 0.0361248  | 0         | 0.0358182 | 0          | 0.0218075 | 0          | 0         | 0.0237434 | 0.0050165 | 0         | 0.00549632 | 0         |
| ELDR      | 0          | 0          | 0         | 0          | 0         | 0         | 0          | 0         | 0          | 0         | 0.111173  | 0         | 0         | 0          | 0         |
| ELF1      | 11.7541    | 11.7974    | 12.6223   | 15.1428    | 4.34583   | 14.3302   | 8.61483    | 11.7994   | 12.6415    | 11.8392   | 12.6401   | 9.04818   | 15.6712   | 9.9185     | 7.80463   |
| ELF2      | 6.37502    | 5.12967    | 5.58618   | 5.11895    | 2.7563    | 4.93226   | 3.6517     | 4.88427   | 3.74408    | 4.86709   | 6.22852   | 3.1066    | 4.49237   | 4.34943    | 4.98815   |
| ELF3      | 1.9672     | 0.793286   | 1.03187   | 8.25589    | 2.51323   | 3.10127   | 1.20442    | 1.60893   | 2.57812    | 3.23837   | 2.81613   | 3.65665   | 11.5286   | 3.11795    | 0.542509  |
| ELF3-AS1  | 0.668391   | 0.469643   | 0.622058  | 0.573997   | 0.432601  | 0.355704  | 0.349776   | 0.396007  | 0.474848   | 0.279633  | 0.282949  | 0.27898   | 0.485148  | 0.50944    | 0.199978  |

|           |           |           |           |            |            |           |           |           |           |           |           |           |            |           |           |
|-----------|-----------|-----------|-----------|------------|------------|-----------|-----------|-----------|-----------|-----------|-----------|-----------|------------|-----------|-----------|
| ELF4      | 3.19625   | 3.12177   | 3.76907   | 5.93446    | 5.11636    | 7.74493   | 4.18132   | 2.77316   | 2.74466   | 4.48758   | 5.22883   | 2.37615   | 7.87483    | 4.80484   | 5.19707   |
| ELF5      | 0.404442  | 0.376742  | 0.907091  | 0.0277859  | 0.33506    | 0.451516  | 0.697798  | 0.862642  | 0.0766211 | 0         | 0.0202917 | 0.0321543 | 0.00579875 | 0.0187892 | 0         |
| ELFN1     | 0.160802  | 0.134094  | 0.0972116 | 0.535373   | 1.16244    | 1.10063   | 0.261274  | 0.23085   | 0.173241  | 0.915963  | 1.529     | 0.37615   | 1.13724    | 1.1378    | 2.33596   |
| ELFN1-AS1 | 0         | 0.0442487 | 0         | 0          | 0.178319   | 0.0586488 | 0         | 0.0204044 | 0         | 0         | 0         | 0.0657122 | 0.0148133  | 0.0239991 | 0.0329726 |
| ELFN2     | 0.0157973 | 0.102754  | 0.132865  | 0.00271326 | 0.00817956 | 0.0067256 | 0.129264  | 0.021059  | 0         | 0         | 0.0029722 | 0.0169551 | 0          | 0.0151367 | 0.0189058 |
| ELK1      | 4.01315   | 3.09529   | 3.70051   | 6.09722    | 4.44745    | 9.10336   | 5.12542   | 3.51722   | 5.641     | 4.09125   | 8.64887   | 2.96232   | 5.94609    | 3.97935   | 4.56743   |
| ELK2AP    | 1.19806   | 0.0281583 | 0.145042  | 0.0903393  | 2.40569    | 0.149288  | 0.333636  | 2.59692   | 0         | 0.550131  | 1.61636   | 0         | 4.26084    | 0.0305444 | 0.671441  |
| ELK3      | 9.45991   | 4.62536   | 4.54573   | 14.1787    | 4.10035    | 15.3988   | 5.10519   | 6.3723    | 7.14482   | 15.6864   | 23.5048   | 7.51653   | 24.8552    | 13.2475   | 18.9005   |
| ELK4      | 7.14776   | 6.92471   | 7.1835    | 6.63934    | 2.52163    | 7.79949   | 4.98502   | 7.60067   | 4.20392   | 4.41087   | 5.37864   | 3.69709   | 6.63958    | 4.96604   | 6.52551   |
| ELL       | 2.72981   | 3.392     | 3.64179   | 4.86823    | 5.45442    | 7.13468   | 4.05513   | 3.01849   | 5.24237   | 4.01045   | 3.34112   | 3.93529   | 6.74841    | 4.03987   | 3.92035   |
| ELL2      | 9.86814   | 11.2208   | 7.72979   | 22.7135    | 5.49405    | 18.9401   | 8.28645   | 11.0152   | 45.593    | 37.2191   | 41.4311   | 25.6335   | 46.9761    | 32.3055   | 11.066    |
| ELL3      | 1.70728   | 5.21771   | 5.20899   | 3.7586     | 2.69489    | 2.65755   | 3.888     | 2.68654   | 2.33435   | 1.89705   | 1.79281   | 1.75472   | 1.61826    | 1.58924   | 0.956502  |
| ELMO1     | 2.71887   | 1.66772   | 2.09569   | 1.80652    | 1.37219    | 3.60288   | 2.79429   | 1.92144   | 0.477225  | 1.3762    | 2.6114    | 0.676348  | 2.34191    | 2.05515   | 4.58093   |
| ELMO1-AS1 | 0.0438315 | 0.0422374 | 0.145042  | 0.0903393  | 0          | 0         | 0.100091  | 0.0779076 | 0         | 0.110026  | 0         | 0.0627253 | 0          | 0.0916331 | 0         |
| ELMO2     | 3.63638   | 4.23054   | 4.30145   | 4.75278    | 5.20079    | 6.27281   | 4.15823   | 2.99523   | 3.81433   | 3.91003   | 4.20515   | 3.26824   | 4.70669    | 3.5113    | 3.73362   |
| ELMO3     | 3.14163   | 5.72626   | 4.92358   | 8.39293    | 12.7511    | 7.45251   | 5.3963    | 3.09497   | 6.22732   | 8.42962   | 5.43937   | 8.26655   | 7.37673    | 5.33996   | 1.82588   |
| ELMOD1    | 2.1759    | 5.33462   | 6.50843   | 1.16693    | 2.44873    | 1.6637    | 6.00814   | 2.81514   | 27.546    | 1.52341   | 2.43127   | 2.88613   | 0.243531   | 0.208878  | 0.499555  |
| ELMOD2    | 1.86866   | 1.71724   | 1.7934    | 2.5045     | 0.448447   | 2.34648   | 1.33648   | 2.35112   | 2.00093   | 2.99758   | 4.30785   | 1.61125   | 3.03445    | 1.76948   | 2.29164   |
| ELMOD3    | 2.1532    | 2.77274   | 2.80008   | 2.43445    | 3.52513    | 2.41379   | 2.12241   | 1.43863   | 1.55644   | 1.44846   | 1.80991   | 1.87319   | 1.36925    | 2.23048   | 2.33589   |
| ELMSAN1   | 11.6317   | 12.62     | 15.0993   | 10.7305    | 12.1121    | 14.1788   | 14.1578   | 10.7283   | 8.63299   | 5.83963   | 4.14806   | 10.302    | 14.1179    | 8.96958   | 7.93376   |
| ELN       | 36.593    | 8.30651   | 10.6763   | 2.03965    | 28.3168    | 6.45041   | 17.8672   | 9.11894   | 1.23343   | 2.47687   | 3.03133   | 4.17817   | 8.12494    | 11.6147   | 43.6832   |
| ELOA      | 6.35753   | 7.3811    | 7.01243   | 9.31979    | 7.7022     | 10.3482   | 6.18789   | 5.88776   | 16.7985   | 7.4869    | 6.17129   | 8.48986   | 11.0419    | 7.81848   | 5.72449   |
| ELOA-AS1  | 0.173532  | 0.473246  | 0.256733  | 0.118973   | 0.396217   | 0.314227  | 0.230655  | 5.13E-08  | 0.103997  | 0.15892   | 0.0574386 | 0.164571  | 0.0233788  | 0.154794  | 0.172872  |
| ELOA2     | 0.149724  | 0.140662  | 0.0694759 | 0.0552481  | 0.228598   | 0.0650464 | 0.0966519 | 0.110022  | 0         | 0.0476804 | 0         | 0.0278069 | 0          | 0.060447  | 0.135492  |
| ELOA3     | 0.520857  | 0.690146  | 0.421706  | 0.0805661  | 1.39954    | 0.757282  | 0.592571  | 0.130821  | 4.15E-06  | 1.78E-05  | 0.102509  | 0.16411   | 1.32E-05   | 0.381609  | 0.177756  |

|            |                 |           |                 |           |           |                 |           |          |            |           |                 |            |           |            |           |
|------------|-----------------|-----------|-----------------|-----------|-----------|-----------------|-----------|----------|------------|-----------|-----------------|------------|-----------|------------|-----------|
| ELOA3B     | 0.179057        | 0.193002  | 0.0969426       | 0.124663  | 0.163272  | 0.203108        | 0.0516557 | 0.281466 | 0.00343138 | 0.0147303 | 0.00034974<br>6 | 0.031961   | 0.010907  | 0.0469385  | 0.342711  |
| ELOA3C     | 0.119371        | 0.14142   | 0.0646289       | 0.125272  | 0.108891  | 0.135405        | 0.0344738 | 0.187644 | 0.00343138 | 0.0196403 | 0.00023316<br>9 | 0.0213073  | 0.010907  | 0.0343348  | 0.308517  |
| ELOA3D     | 0.00012890<br>3 | 0.160362  | 0.00011909<br>2 | 0.0714661 | 0.0159485 | 0.00015009<br>3 | 0.280391  | 5.18E-06 | 4.15E-06   | 3.56E-05  | 0.00127079      | 5.57E-05   | 1.32E-05  | 0.169577   | 0.247597  |
| ELOB       | 23.6105         | 14.8337   | 14.5236         | 35.2442   | 40.4156   | 55.3955         | 23.9685   | 13.8572  | 32.3137    | 30.7195   | 70.065          | 21.5607    | 26.3642   | 22.0653    | 15.7789   |
| ELOC       | 3.3771          | 2.814     | 3.04029         | 6.60211   | 1.21888   | 6.30086         | 2.16609   | 2.50696  | 10.6331    | 7.11835   | 13.0068         | 4.71908    | 7.64536   | 5.53906    | 2.63894   |
| ELOF1      | 5.75965         | 5.23158   | 4.63523         | 12.929    | 14.0823   | 15.7796         | 6.05962   | 4.03619  | 15.4492    | 10.4175   | 15.754          | 8.29221    | 16.1778   | 8.49413    | 6.07252   |
| ELOVL1     | 15.2775         | 18.493    | 20.2712         | 46.3913   | 28.0187   | 38.607          | 33.3775   | 13.4852  | 142.958    | 91.256    | 126.657         | 60.7647    | 127.908   | 51.8229    | 24.4341   |
| ELOVL2     | 0.187508        | 0.0739181 | 0.0423054       | 0.0585553 | 0         | 0.116117        | 0.149215  | 0.106045 | 0.00692012 | 0.0356579 | 0.0641434       | 0.00406567 | 0.0696547 | 0.0148485  | 0.236645  |
| ELOVL2-AS1 | 0.0110574       | 0         | 0               | 0.0113949 | 0         | 0               | 0         | 0        | 0          | 0.0138781 | 0               | 0          | 0         | 0          | 0         |
| ELOVL3     | 0.081547        | 0.110014  | 0.094446        | 0.403376  | 0.73469   | 0.444392        | 0.148972  | 0.13045  | 1.33082    | 0.34799   | 1.04944         | 0.186717   | 0.0736592 | 0.0852401  | 0.0702671 |
| ELOVL4     | 7.72948         | 10.5749   | 10.0295         | 10.9739   | 12.0183   | 5.95688         | 12.6939   | 12.4145  | 69.3772    | 20.8549   | 26.5781         | 23.1724    | 24.9546   | 8.62896    | 2.55246   |
| ELOVL5     | 3.84936         | 2.31201   | 2.68038         | 5.57298   | 1.40156   | 8.25162         | 2.65578   | 3.21271  | 2.24058    | 5.22841   | 9.47138         | 2.15482    | 6.66826   | 5.0802     | 8.32176   |
| ELOVL6     | 2.43575         | 3.07367   | 2.9294          | 2.3484    | 1.1658    | 2.11467         | 2.69537   | 2.80742  | 8.12659    | 2.38918   | 2.94222         | 1.97718    | 2.42113   | 1.89707    | 0.44093   |
| ELOVL7     | 5.67627         | 6.37702   | 7.54861         | 7.01157   | 2.08314   | 3.44434         | 8.71219   | 9.54925  | 38.9119    | 6.64345   | 9.10818         | 9.42342    | 6.33581   | 3.556      | 0.998348  |
| ELP1       | 2.99827         | 3.5942    | 3.72839         | 3.95868   | 3.10687   | 3.52849         | 3.05206   | 2.42267  | 2.44974    | 3.09878   | 2.68471         | 2.64584    | 4.24701   | 3.56287    | 3.27422   |
| ELP2       | 5.00402         | 4.98324   | 5.0942          | 5.08146   | 2.48543   | 5.83613         | 3.76795   | 3.91732  | 3.43831    | 3.60613   | 4.67199         | 2.63653    | 3.70253   | 4.04257    | 4.36374   |
| ELP3       | 3.26135         | 2.995     | 2.68072         | 5.50101   | 2.17578   | 6.46785         | 2.70526   | 2.96036  | 1.89262    | 2.79886   | 3.63445         | 2.13912    | 4.17693   | 3.08855    | 2.69213   |
| ELP4       | 1.77573         | 1.82011   | 1.86397         | 2.84849   | 0.85872   | 2.38213         | 1.57798   | 1.80143  | 1.8668     | 1.70308   | 2.70428         | 1.56425    | 1.97253   | 1.81236    | 1.1187    |
| ELP5       | 2.60983         | 2.6271    | 2.38174         | 4.44329   | 4.58892   | 6.53411         | 2.63674   | 1.87757  | 3.30732    | 3.68186   | 6.13277         | 2.67758    | 3.82784   | 3.40116    | 2.92289   |
| ELP6       | 1.61716         | 1.94466   | 1.52895         | 4.34139   | 4.3063    | 4.44341         | 1.87745   | 1.0628   | 2.10192    | 3.44537   | 6.3358          | 1.98364    | 3.61238   | 2.65634    | 2.20535   |
| ELSPBP1    | 0               | 0         | 0               | 0         | 0         | 0.0558244       | 0         | 0        | 0          | 0         | 0               | 0          | 0         | 0          | 0         |
| EMB        | 3.93249         | 5.16165   | 7.40301         | 2.60377   | 2.55387   | 2.32896         | 5.27331   | 9.45818  | 7.11673    | 2.07873   | 4.35426         | 1.54829    | 1.79763   | 1.62719    | 2.34718   |
| EMBP1      | 0.0755346       | 0.0457623 | 0.0580903       | 0.0201071 | 0.0499861 | 0.0453568       | 0.100385  | 0.104411 | 5.61E-45   | 0.0249032 | 0.0422061       | 0.00436497 | 0.0290872 | 0.00948789 | 0.0918691 |

|          |           |           |           |          |           |          |           |           |           |          |          |          |           |           |           |
|----------|-----------|-----------|-----------|----------|-----------|----------|-----------|-----------|-----------|----------|----------|----------|-----------|-----------|-----------|
| EMC1     | 4.36204   | 3.79472   | 4.18473   | 5.72345  | 4.66395   | 7.20562  | 4.30471   | 3.80189   | 3.10301   | 4.053    | 3.63796  | 3.52196  | 6.85224   | 4.45952   | 4.78592   |
| EMC10    | 10.1322   | 9.38478   | 9.28194   | 17.1504  | 28.094    | 23.0382  | 10.3491   | 6.56736   | 14.634    | 14.438   | 23.9378  | 11.0983  | 17.5316   | 11.0007   | 10.2817   |
| EMC2     | 3.01542   | 2.79803   | 2.81706   | 3.36151  | 0.739108  | 2.85071  | 1.13236   | 2.58815   | 4.08436   | 4.49698  | 5.96677  | 2.24786  | 2.8961    | 2.12129   | 1.86064   |
| EMC3     | 4.62883   | 3.59111   | 3.59807   | 5.56673  | 3.03936   | 7.01812  | 3.63932   | 3.31469   | 5.99604   | 5.57414  | 7.97958  | 3.74056  | 6.38656   | 3.33239   | 2.66494   |
| EMC3-AS1 | 0.855536  | 0.860129  | 0.958223  | 0.720755 | 0.582212  | 0.737328 | 0.947876  | 0.760193  | 0.207069  | 0.289169 | 0.295898 | 0.344496 | 0.336442  | 0.697226  | 0.459412  |
| EMC4     | 17.5929   | 13.4192   | 12.5643   | 20.0657  | 14.3315   | 27.5353  | 13.5516   | 10.4151   | 26.3742   | 23.5825  | 35.6814  | 13.9186  | 27.4494   | 15.751    | 13.813    |
| EMC6     | 4.04543   | 3.76115   | 3.83677   | 9.389    | 3.84244   | 9.14473  | 5.11105   | 2.77367   | 9.65267   | 9.72593  | 16.3856  | 4.83608  | 10.8091   | 7.28006   | 3.91511   |
| EMC7     | 13.077    | 9.07515   | 9.56369   | 15.4014  | 6.75967   | 20.5481  | 8.40649   | 9.60994   | 18.2818   | 14.289   | 24.2152  | 9.67149  | 18.4201   | 11.9233   | 11.9941   |
| EMC8     | 3.34826   | 2.58459   | 2.44806   | 5.71028  | 3.49785   | 6.29427  | 3.12296   | 2.29461   | 3.71884   | 3.49214  | 8.2782   | 2.48013  | 5.67457   | 4.55358   | 3.36936   |
| EMC9     | 1.90976   | 2.3647    | 1.78375   | 3.74567  | 4.88041   | 3.09491  | 1.2661    | 1.51474   | 3.87646   | 2.4485   | 5.0304   | 2.11585  | 1.13943   | 1.76014   | 1.32709   |
| EMCN     | 2.46508   | 1.45012   | 1.69782   | 1.76642  | 0.534295  | 2.59689  | 1.13236   | 1.62014   | 0.740073  | 2.82771  | 5.50731  | 0.541454 | 1.12812   | 2.07635   | 4.56103   |
| EMD      | 11.2172   | 9.51013   | 11.4244   | 17.8471  | 9.47726   | 26.2109  | 13.5968   | 9.55419   | 18.7553   | 15.966   | 27.7255  | 13.208   | 19.6823   | 13.7216   | 10.7726   |
| EME1     | 0.317686  | 0.162427  | 0.258189  | 0.359222 | 0.0931434 | 0.631208 | 0.210442  | 0.229363  | 0.0262217 | 0.226477 | 0.287393 | 0.119166 | 0.237018  | 0.283792  | 0.291064  |
| EME2     | 0.852639  | 1.3596    | 1.32675   | 2.05023  | 7.00062   | 3.24976  | 1.57617   | 0.956214  | 1.08787   | 0.99371  | 0.779185 | 2.29508  | 1.87302   | 2.54644   | 1.48689   |
| EMG1     | 3.69625   | 3.94707   | 3.79417   | 8.10013  | 3.53867   | 7.07825  | 3.78961   | 2.74861   | 4.79561   | 4.8664   | 9.40111  | 3.17372  | 7.72874   | 5.14102   | 3.53163   |
| EMID1    | 1.12866   | 0.876425  | 0.888383  | 2.45046  | 5.66813   | 6.19547  | 1.23862   | 0.827769  | 0.160146  | 0.632651 | 1.15042  | 0.462599 | 0.756486  | 0.922057  | 1.24322   |
| EMILIN1  | 3.48441   | 1.53988   | 2.4638    | 6.62354  | 14.5461   | 30.6716  | 4.13967   | 1.95633   | 0.530452  | 5.8212   | 9.70741  | 1.05708  | 7.81526   | 5.29412   | 20.3712   |
| EMILIN2  | 3.14039   | 1.47137   | 1.99622   | 5.37791  | 2.89638   | 10.3765  | 4.76541   | 2.23684   | 0.442927  | 4.1154   | 6.86865  | 0.908726 | 4.12682   | 3.85888   | 6.3256    |
| EMILIN3  | 0.727066  | 0.703325  | 0.648594  | 0.409586 | 1.17426   | 0.854727 | 0.704748  | 0.60038   | 0.551116  | 0.436999 | 0.362567 | 1.00936  | 0.0604347 | 0.678164  | 0.268013  |
| EML1     | 2.5447    | 2.48915   | 2.14751   | 3.26613  | 3.37223   | 5.781    | 3.54269   | 2.28429   | 10.9498   | 14.4018  | 8.7393   | 10.39    | 15.6093   | 7.62937   | 9.62524   |
| EML2     | 3.28138   | 5.23876   | 5.45649   | 8.09348  | 8.63965   | 6.78656  | 4.47502   | 2.91944   | 5.36356   | 4.18494  | 2.00537  | 4.37819  | 5.24866   | 4.17979   | 2.59169   |
| EML2-AS1 | 0.0540161 | 0.0681243 | 0.0951082 | 0.307607 | 0.367169  | 0.189605 | 0.0493143 | 0.0954857 | 0.0592888 | 0.215762 | 0.43664  | 0.184507 | 0.166371  | 0.0956346 | 0.0308601 |
| EML3     | 6.04506   | 5.96904   | 6.62283   | 8.87945  | 23.227    | 17.9824  | 8.6053    | 4.58953   | 8.3051    | 7.95265  | 7.38543  | 8.86927  | 9.79877   | 8.32006   | 9.03853   |
| EML4     | 8.48976   | 9.01318   | 9.96344   | 8.53444  | 4.13731   | 10.294   | 6.96126   | 10.23     | 5.60068   | 5.92332  | 6.50205  | 4.27605  | 6.43611   | 6.08581   | 6.29348   |
| EML5     | 0.351777  | 0.468045  | 0.413828  | 0.708404 | 0.340893  | 0.197857 | 0.239515  | 0.395807  | 0.448077  | 0.785818 | 0.575631 | 0.921382 | 0.674647  | 1.08288   | 0.264185  |
| EML6     | 0.975592  | 1.31076   | 1.13869   | 0.82617  | 1.19037   | 0.612362 | 0.733626  | 0.97704   | 1.30662   | 1.50192  | 0.745306 | 2.06044  | 0.629447  | 1.33402   | 0.863502  |

|          |            |           |           |           |           |           |            |           |           |            |           |           |           |            |           |
|----------|------------|-----------|-----------|-----------|-----------|-----------|------------|-----------|-----------|------------|-----------|-----------|-----------|------------|-----------|
| EMP1     | 47.3013    | 43.1393   | 50.6156   | 85.2852   | 18.372    | 71.3534   | 55.628     | 33.5067   | 31.1711   | 92.8797    | 58.4752   | 39.9931   | 165.304   | 45.7552    | 62.4663   |
| EMP2     | 17.9109    | 29.5135   | 27.4609   | 23.3465   | 22.8517   | 17.5295   | 28.4093    | 20.1456   | 25.3157   | 10.7554    | 16.3316   | 12.3235   | 14.3362   | 8.77886    | 7.23998   |
| EMP3     | 10.4196    | 6.83673   | 9.52946   | 10.1172   | 7.31996   | 25.9478   | 20.4159    | 6.65425   | 1.27537   | 14.9835    | 49.03     | 2.54761   | 12.6515   | 10.0979    | 22.2201   |
| EMSY     | 1.77843    | 1.94936   | 2.05586   | 1.83273   | 0.743955  | 2.35274   | 1.26957    | 1.54182   | 1.05645   | 1.41661    | 1.66735   | 1.27491   | 1.3095    | 1.58765    | 2.0875    |
| EMX1     | 0.0528863  | 0.1376    | 0.113753  | 0.0218004 | 0.147871  | 0.0630448 | 0.217382   | 0.0658013 | 0.0515277 | 0.0796533  | 0.0477616 | 0.0605465 | 0.17061   | 0.105035   | 0.151903  |
| EMX2     | 1.19871    | 1.22608   | 1.06438   | 0.947065  | 1.01896   | 1.70795   | 1.615      | 0.863154  | 1.26524   | 1.003      | 0.532255  | 0.504798  | 1.85316   | 0.217186   | 0.470542  |
| EMX2OS   | 0.940603   | 1.76341   | 1.42329   | 1.24539   | 1.80284   | 1.44975   | 2.25325    | 0.911232  | 2.50861   | 1.64008    | 0.709003  | 1.19849   | 2.46703   | 0.401372   | 1.02594   |
| EN1      | 7.11012    | 5.61298   | 3.27711   | 3.83268   | 10.644    | 6.13401   | 5.63807    | 2.88863   | 9.38252   | 3.6088     | 6.183     | 4.62346   | 2.36932   | 2.27864    | 0.819127  |
| EN2      | 0.0204504  | 0.0164222 | 0.0620328 | 0.0913239 | 0.0317666 | 0.0406309 | 0.0155664  | 0.0181746 | 0.0166042 | 0.00855579 | 0         | 0.0292656 | 0.105556  | 0.00712552 | 0         |
| ENAH     | 6.09584    | 5.2517    | 4.85177   | 13.1119   | 10.771    | 12.3884   | 4.56561    | 5.4674    | 13.9475   | 19.1681    | 12.4553   | 16.1491   | 24.3487   | 15.7451    | 12.6374   |
| ENAM     | 0.00407879 | 0         | 0         | 0         | 0         | 0.0138921 | 0.00465703 | 0         | 0         | 0.0051193  | 0         | 0         | 0         | 0.00426351 | 0         |
| ENC1     | 3.25922    | 1.62056   | 1.43449   | 2.18328   | 1.57137   | 2.6892    | 1.58814    | 1.94653   | 5.98654   | 5.36469    | 4.72696   | 3.97435   | 6.40957   | 3.14583    | 3.33637   |
| ENDOD1   | 14.0939    | 11.9443   | 10.0399   | 19.6163   | 14.7075   | 14.7764   | 11.413     | 10.4832   | 39.5848   | 33.6023    | 27.7122   | 22.3286   | 41.2795   | 24.5494    | 9.47586   |
| ENDOG    | 2.40557    | 2.16871   | 1.64853   | 2.83239   | 6.85302   | 3.91645   | 2.23698    | 0.997175  | 4.05164   | 4.02942    | 6.60242   | 2.47873   | 3.47318   | 3.25447    | 2.07318   |
| ENDOU    | 4.90342    | 5.89509   | 4.92847   | 4.24811   | 6.9881    | 1.89928   | 6.01767    | 4.9516    | 10.2129   | 6.47327    | 9.83836   | 6.99684   | 2.4107    | 5.46979    | 1.48678   |
| ENDOV    | 0.906061   | 1.32108   | 1.28846   | 0.915414  | 2.52049   | 2.06742   | 1.44696    | 0.884176  | 0.735654  | 0.735835   | 0.976034  | 0.652548  | 0.943744  | 0.832576   | 0.765423  |
| ENG      | 13.5508    | 6.39232   | 6.87919   | 25.2774   | 21.1434   | 48.6682   | 13.7132    | 7.85844   | 5.33934   | 20.2125    | 47.9259   | 10.8559   | 42.9887   | 27.6092    | 43.538    |
| ENGASE   | 2.42039    | 2.82365   | 2.70952   | 3.59283   | 8.55932   | 4.62613   | 3.39267    | 2.03205   | 0.78398   | 0.924279   | 0.802255  | 2.64568   | 1.04662   | 2.46541    | 3.89754   |
| ENHO     | 0.901677   | 0.599944  | 0.852493  | 0.0663718 | 0.233436  | 0.164521  | 0.882434   | 0.248032  | 0         | 0          | 0.121176  | 0.0153613 | 0         | 0.0112204  | 0.0308315 |
| ENKD1    | 2.09186    | 1.71057   | 1.93771   | 1.91282   | 3.56975   | 3.78817   | 1.11011    | 1.19138   | 0.879119  | 1.7565     | 1.92907   | 0.72731   | 1.76786   | 1.82473    | 1.52324   |
| ENKUR    | 0.0619129  | 0.0387798 | 0.040975  | 0.236071  | 0.0192344 | 0.0685335 | 0.0424141  | 0.0550231 | 0.0075403 | 0.893632   | 0.17473   | 0.177201  | 1.63379   | 0.304169   | 0.0355659 |
| ENO1     | 82.0096    | 57.3324   | 55.1983   | 262.037   | 84.543    | 310.282   | 68.4016    | 50.0702   | 109.487   | 213.937    | 271.048   | 129.895   | 342.073   | 185.313    | 81.0646   |
| ENO1-AS1 | 0.155671   | 0.250015  | 0.300491  | 0.160423  | 0.403017  | 0.839493  | 0.0592466  | 0.230579  | 0.252786  | 0.455893   | 0.351466  | 0.222773  | 0.535669  | 0.162721   | 0         |
| ENO2     | 2.00579    | 1.78558   | 2.59962   | 1.16147   | 3.38275   | 6.66084   | 2.51917    | 1.89293   | 0.372241  | 4.23176    | 7.87111   | 1.96827   | 5.52162   | 5.20664    | 3.7859    |
| ENO3     | 0.272806   | 0.357815  | 0.300913  | 0.296753  | 0.847524  | 0.309721  | 0.484526   | 0.39061   | 0.110749  | 0.133155   | 0.119764  | 0.227733  | 0.058671  | 0.34853    | 0.348252  |
| ENO4     | 0.239693   | 0.293572  | 0.415409  | 0.133191  | 0.0896658 | 0.135251  | 0.0662726  | 0.330738  | 0.0491896 | 0.101247   | 0.118546  | 0.104039  | 0.0156354 | 0.0464402  | 0.0365206 |

|            |           |           |           |            |            |            |           |           |           |           |            |            |           |           |           |
|------------|-----------|-----------|-----------|------------|------------|------------|-----------|-----------|-----------|-----------|------------|------------|-----------|-----------|-----------|
| ENOPH1     | 4.78493   | 4.39715   | 4.42157   | 5.86714    | 4.7418     | 6.36778    | 3.52159   | 3.7831    | 6.26491   | 5.93932   | 7.071      | 3.86966    | 7.61245   | 4.7422    | 3.00356   |
| ENOSF1     | 4.01559   | 5.02179   | 5.27439   | 3.30852    | 3.75931    | 3.48647    | 4.08579   | 4.04729   | 2.14561   | 2.11154   | 1.94386    | 3.36587    | 1.4714    | 3.83979   | 3.09745   |
| ENOX1      | 0.0964517 | 0.0361448 | 0.066493  | 0.13805    | 0.174793   | 0.246382   | 0.165188  | 0.109529  | 0.0261039 | 0.215212  | 0.520214   | 0.0498433  | 0.169404  | 0.176435  | 0.323206  |
| ENOX1-AS2  | 0.0648265 | 0         | 0         | 0          | 0          | 0          | 0         | 0.0288062 | 0         | 0         | 0          | 0.0231925  | 0         | 0.0677623 | 0         |
| ENOX2      | 1.97517   | 1.57652   | 1.18061   | 3.316      | 1.38233    | 3.03098    | 1.04085   | 1.25383   | 1.57945   | 2.21342   | 2.87903    | 1.79378    | 2.98285   | 2.44465   | 1.99496   |
| ENPEP      | 0.189963  | 0.104921  | 0.122654  | 0.501343   | 0.46061    | 0.54443    | 0.232764  | 0.341764  | 0.42885   | 3.16347   | 6.19797    | 0.480705   | 0.750326  | 1.94449   | 4.53132   |
| ENPP1      | 0.702812  | 0.176805  | 0.23411   | 0.573646   | 0.135256   | 0.75996    | 0.97288   | 0.309537  | 0.0681727 | 1.10068   | 1.93432    | 0.106807   | 0.634029  | 1.19948   | 2.03205   |
| ENPP2      | 4.14631   | 1.97108   | 2.15273   | 4.76103    | 1.82517    | 13.9126    | 3.25909   | 2.48211   | 0.442039  | 2.9958    | 6.54182    | 0.510606   | 3.11973   | 1.21856   | 5.4952    |
| ENPP3      | 0.35803   | 0.393309  | 0.509443  | 0.154963   | 0.0444915  | 0.0853602  | 0.122636  | 0.241822  | 0.0784872 | 0.143797  | 0.129335   | 0.0461124  | 0.0600598 | 0.0673639 | 0.154253  |
| ENPP4      | 1.27583   | 0.419342  | 0.580912  | 0.682873   | 0.0844959  | 1.69691    | 0.818692  | 0.672403  | 0.042158  | 0.341363  | 0.502416   | 0.0247684  | 0.424343  | 0.167994  | 0.830909  |
| ENPP5      | 0.477422  | 0.19265   | 0.32584   | 0.110699   | 0.01854    | 0.711409   | 0.279367  | 0.31822   | 0.0145362 | 0.0599214 | 0.175159   | 0.0170804  | 0.0346534 | 0.0810946 | 0.128557  |
| ENPP6      | 0.0587984 | 0.011332  | 0.0291853 | 0.018178   | 0.0365337  | 0.0851123  | 0.0268536 | 0.0156765 | 0         | 0.0073798 | 0.0464633  | 0.00420718 | 0         | 0.0307306 | 0.0591094 |
| ENPP7      | 0         | 0.0119964 | 0         | 0          | 0          | 0.0106003  | 0         | 0         | 0         | 0         | 0          | 0          | 0         | 0         | 0         |
| ENPP7P13   | 0.0085116 | 0.0205051 | 0         | 0.00438573 | 0.00661073 | 0.00724752 | 0         | 0         | 0         | 0         | 0.00480427 | 0          | 0         | 0.0066728 | 0.0183356 |
| ENSA       | 15.7003   | 19.1945   | 19.8382   | 24.3099    | 21.0927    | 20.4571    | 14.6304   | 14.3699   | 25.8668   | 18.0588   | 27.513     | 17.2668    | 18.5268   | 14.6431   | 8.02644   |
| ENTHD1     | 0.367214  | 0.246878  | 0.332045  | 0.0264018  | 0.0397961  | 0.130889   | 0.282766  | 0.47814   | 0         | 0         | 0.0192809  | 0.0305525  | 0.0165296 | 0         | 0.036793  |
| ENTPD1     | 4.5297    | 2.25604   | 2.67405   | 2.52588    | 1.5554     | 2.56063    | 3.00562   | 3.30852   | 0.599837  | 2.79169   | 4.55446    | 1.85175    | 2.63031   | 4.16796   | 6.0537    |
| ENTPD1-AS1 | 0.273841  | 0.352053  | 0.411071  | 0.0793924  | 0.141226   | 0.0764241  | 0.27696   | 0.389867  | 0.058204  | 0.0363863 | 0.0753807  | 0.105992   | 0.0425493 | 0.226777  | 0.370296  |
| ENTPD2     | 1.26736   | 1.06197   | 1.63193   | 1.30605    | 0.992882   | 1.45449    | 1.06954   | 2.13511   | 0.456339  | 1.32786   | 1.53022    | 1.3563     | 1.47185   | 1.1462    | 0.332363  |
| ENTPD3     | 4.33847   | 2.61398   | 0.913746  | 3.43995    | 1.35138    | 4.54566    | 1.7554    | 0.986781  | 4.2777    | 5.25434   | 4.94783    | 4.69804    | 5.14575   | 2.99198   | 2.0219    |
| ENTPD3-AS1 | 0.490059  | 0.363245  | 0.261043  | 0.140752   | 0.266594   | 0.15829    | 0.390693  | 0.342962  | 0.0554405 | 0.144418  | 0.0902728  | 0.38379    | 0.0440419 | 0.196696  | 0.260805  |
| ENTPD4     | 4.92196   | 4.64709   | 5.24829   | 4.11915    | 3.67635    | 4.57315    | 4.04295   | 3.50715   | 2.83034   | 4.1273    | 3.40352    | 3.15203    | 2.78249   | 5.27787   | 6.2307    |
| ENTPD5     | 1.5362    | 1.45234   | 1.42615   | 1.95744    | 0.944303   | 1.90244    | 1.35006   | 1.32274   | 1.26462   | 1.49514   | 1.3623     | 1.20175    | 1.54031   | 1.61036   | 1.30855   |
| ENTPD6     | 1.99707   | 2.14312   | 2.49398   | 4.13084    | 4.1634     | 6.63918    | 2.34565   | 1.54979   | 0.704059  | 2.00282   | 2.29219    | 1.34349    | 2.90066   | 2.85159   | 3.08074   |
| ENTPD7     | 1.87775   | 2.36984   | 2.30319   | 7.75945    | 2.26756    | 4.47992    | 1.90527   | 2.3067    | 3.75027   | 4.69262   | 5.53467    | 4.58927    | 8.09084   | 5.28671   | 4.46594   |
| ENTPD8     | 0.0833233 | 0.155567  | 0.224025  | 0.0644003  | 0.145609   | 0.0709487  | 0.261624  | 0.148102  | 0.0126848 | 0.0261448 | 0.0235154  | 0.186313   | 0.0134399 | 0.0108871 | 0.0448736 |

|              |           |           |           |           |           |           |           |           |            |           |           |            |          |           |           |
|--------------|-----------|-----------|-----------|-----------|-----------|-----------|-----------|-----------|------------|-----------|-----------|------------|----------|-----------|-----------|
| ENTR1        | 2.73358   | 3.70751   | 3.65368   | 6.50624   | 5.74219   | 7.87739   | 2.57687   | 2.08356   | 3.00931    | 3.49198   | 5.31519   | 4.34348    | 9.11343  | 5.77064   | 3.21326   |
| ENY2         | 4.26932   | 2.93005   | 3.1652    | 3.55019   | 0.7731    | 4.7146    | 2.43286   | 3.37955   | 1.78054    | 3.71872   | 8.57682   | 1.76946    | 3.13586  | 2.64998   | 3.22759   |
| EOGT         | 2.93629   | 1.97155   | 1.81362   | 3.65463   | 1.08633   | 4.96658   | 2.10101   | 2.06735   | 1.34102    | 3.08148   | 5.1064    | 1.80642    | 4.70743  | 3.98173   | 6.24695   |
| EOMES        | 0.120142  | 0.0365596 | 0.0627723 | 0.143358  | 0.0982217 | 0.393044  | 0.021659  | 0.0505761 | 0.00770099 | 0.0476179 | 0.0785196 | 0.0588178  | 0.171348 | 0.0594864 | 0.326915  |
| EP300        | 10.4261   | 13.1055   | 13.3719   | 12.5309   | 9.5607    | 16.0294   | 13.777    | 11.4681   | 11.0575    | 10.4636   | 8.23034   | 9.93993    | 14.8796  | 9.50973   | 11.6427   |
| EP300-AS1    | 1.36296   | 1.18277   | 1.56202   | 0.800047  | 1.60035   | 0.743629  | 1.3004    | 1.12325   | 2.69827    | 1.27557   | 0.920559  | 2.20512    | 0.548349 | 0.923324  | 0.35323   |
| EP400        | 5.61055   | 6.54085   | 7.08496   | 6.44986   | 7.3346    | 9.40263   | 8.12864   | 5.93467   | 3.40049    | 3.26386   | 2.68532   | 5.02955    | 5.93052  | 4.35331   | 6.18476   |
| EP400P1      | 0.571433  | 0.594123  | 0.709095  | 0.495898  | 1.35481   | 0.921918  | 0.755462  | 0.815221  | 0.146514   | 0.415225  | 0.373466  | 0.570274   | 0.320175 | 0.723062  | 0.863843  |
| EPAS1        | 23.6269   | 16.3483   | 17.0776   | 48.0547   | 32.3932   | 97.1835   | 25.6414   | 14.074    | 25.5395    | 37.5428   | 50.0261   | 23.0377    | 70.7424  | 32.5944   | 68.7309   |
| EPB41        | 4.27481   | 7.07463   | 7.12181   | 4.64161   | 5.04186   | 4.57168   | 5.79534   | 5.07381   | 9.38183    | 4.3259    | 3.69254   | 5.31475    | 4.70639  | 4.15039   | 1.96423   |
| EPB41L1      | 2.60341   | 2.37339   | 2.38611   | 1.8392    | 3.08091   | 5.19487   | 2.65178   | 2.47506   | 0.734261   | 0.911478  | 1.68989   | 0.531884   | 0.939316 | 0.71972   | 3.24689   |
| EPB41L2      | 7.07239   | 3.30991   | 3.99072   | 2.82511   | 2.88423   | 6.59873   | 3.18793   | 3.27985   | 0.751916   | 2.79886   | 3.90609   | 1.29891    | 3.17185  | 2.92336   | 10.8517   |
| EPB41L3      | 2.59472   | 1.52616   | 1.55244   | 8.47558   | 2.52321   | 8.14222   | 2.63068   | 2.05523   | 5.57572    | 14.2551   | 9.51122   | 5.12319    | 17.0134  | 5.98746   | 4.948     |
| EPB41L4A     | 3.08096   | 2.74449   | 2.60066   | 2.71662   | 1.31702   | 2.80134   | 2.10997   | 2.53911   | 1.68343    | 1.71614   | 1.42895   | 1.76874    | 2.34226  | 1.82245   | 2.16088   |
| EPB41L4A-AS1 | 10.0209   | 6.2384    | 7.85706   | 5.89249   | 5.20871   | 14.2596   | 6.94902   | 5.8051    | 2.7147     | 3.33285   | 8.33657   | 2.48253    | 3.13893  | 3.11      | 2.36607   |
| EPB41L4A-DT  | 1.07604   | 0.717855  | 0.821698  | 0.648272  | 1.82574   | 0.98671   | 0.58594   | 0.294243  | 0.302421   | 0.664879  | 0.878329  | 0.497495   | 0.875827 | 0.562383  | 0.689452  |
| EPB41L4B     | 3.47557   | 1.63357   | 2.12971   | 1.74244   | 0.633806  | 1.30474   | 1.71266   | 2.10267   | 2.34523    | 5.57801   | 2.57147   | 2.75573    | 7.62889  | 2.424     | 0.881074  |
| EPB41L5      | 1.77702   | 1.55515   | 1.73018   | 1.44779   | 0.494571  | 1.28436   | 1.27462   | 1.6111    | 1.42019    | 1.66589   | 1.3119    | 1.01664    | 2.36237  | 1.40613   | 0.69159   |
| EPB42        | 0.0637801 | 0.0658504 | 0.0226129 | 0.0187792 | 0.0424596 | 0.0387913 | 0.0624189 | 0.0728774 | 0.0110967  | 0.0114358 | 0         | 0.00651948 | 0        | 0.0142861 | 0.0130852 |
| EPC1         | 5.25493   | 3.75419   | 4.02821   | 3.7922    | 2.43222   | 3.87316   | 3.56493   | 3.96404   | 2.95945    | 3.44644   | 4.40585   | 2.59978    | 3.46539  | 3.118     | 3.70332   |
| EPC2         | 4.81167   | 3.9476    | 4.14882   | 4.18563   | 1.25393   | 5.28236   | 3.00454   | 3.95422   | 3.62287    | 3.90111   | 4.36264   | 2.59239    | 4.58083  | 2.96326   | 3.94345   |
| EPCAM        | 2.24964   | 0.752898  | 1.40416   | 0.63858   | 0.79515   | 2.64964   | 1.16893   | 2.14296   | 0.0492182  | 1.92744   | 2.08336   | 0.867493   | 3.65038  | 1.67564   | 0.61907   |
| EPDR1        | 1.43214   | 0.461379  | 0.567847  | 0.698633  | 0.723985  | 3.51402   | 1.61582   | 0.497057  | 0.0722444  | 1.4784    | 4.15179   | 0.127334   | 0.503011 | 0.469473  | 2.85996   |
| EPG5         | 4.12591   | 4.06286   | 4.13      | 5.48495   | 3.29515   | 4.00861   | 4.68584   | 3.74134   | 8.07493    | 3.42711   | 3.56221   | 3.47034    | 4.40021  | 2.75601   | 3.14865   |
| EPGN         | 1.16795   | 0.331475  | 0.191919  | 7.99655   | 0.745575  | 3.60334   | 0.858574  | 0.710944  | 47.5138    | 38.4254   | 24.7256   | 45.8141    | 88.8685  | 32.9464   | 10.8796   |
| EPHA1        | 3.64728   | 6.68112   | 5.4539    | 10.1767   | 11.9724   | 7.38902   | 5.31937   | 4.01812   | 12.7141    | 7.43663   | 4.74658   | 8.34129    | 10.5406  | 6.69339   | 2.45097   |



|           |           |           |            |           |           |           |           |           |           |            |            |            |            |            |            |
|-----------|-----------|-----------|------------|-----------|-----------|-----------|-----------|-----------|-----------|------------|------------|------------|------------|------------|------------|
| EPHA1-AS1 | 0.433702  | 0.424597  | 0.469479   | 0.251999  | 0.121837  | 0.239646  | 0.33188   | 0.323932  | 0.106764  | 0.173726   | 0.0885438  | 0.303722   | 0.116096   | 0.417172   | 0.25179    |
| EPHA10    | 0.0348733 | 0.0336189 | 0.0432694  | 0.0215411 | 0.140701  | 0.0533958 | 0.0517103 | 0.0340575 | 0.0848581 | 0.00874512 | 0.0117984  | 0.0249277  | 0.00224775 | 0.0637916  | 0.0200129  |
| EPHA2     | 6.04994   | 6.38666   | 6.84931    | 14.3896   | 12.4911   | 9.66015   | 5.60164   | 6.4448    | 21.3906   | 15.5438    | 6.82307    | 21.2624    | 50.9731    | 16.6868    | 7.28768    |
| EPHA3     | 0.960538  | 0.180443  | 0.197939   | 0.164381  | 0.258549  | 0.575767  | 0.684949  | 0.348238  | 0.240722  | 0.409111   | 0.645898   | 0.171202   | 0.120815   | 0.161298   | 0.722096   |
| EPHA4     | 4.16347   | 4.80081   | 5.06195    | 3.65572   | 3.87609   | 3.92526   | 3.60776   | 5.51486   | 4.15597   | 2.07634    | 2.23476    | 3.37777    | 1.47598    | 1.79073    | 2.11734    |
| EPHA5     | 0.0234076 | 0.0473592 | 0.0484109  | 0.02171   | 0.0181787 | 0.0398625 | 0.0587972 | 0.0462052 | 0.0142539 | 0.00587578 | 0.00613468 | 0.00837437 | 0.00453073 | 0.00122338 | 0.00336162 |
| EPHA5-AS1 | 0         | 0.0190219 | 4.70E-08   | 2.34E-15  | 1.09E-05  | 0.0167426 | 4.78E-12  | 0.0487333 | 0         | 0          | 0.015058   | 0.0140692  | 0          | 0          | 0          |
| EPHA6     | 0.0908164 | 0.0607732 | 0.0500865  | 0.0103988 | 0.0235115 | 0.0601448 | 0.0403244 | 0.0448389 | 0         | 0.00633244 | 0.0227823  | 0.00361009 | 0.0162762  | 0.00791077 | 0.00724577 |
| EPHA7     | 0.067986  | 0.0804028 | 0.120155   | 0.0605077 | 0.0720039 | 0.121041  | 0.0917377 | 0.043942  | 0.018818  | 0.0853294  | 0.125587   | 0.00442235 | 0.0378827  | 0.0193813  | 0.128703   |
| EPHA8     | 0.0213576 | 0.0123485 | 0.00706739 | 0.0572249 | 0.0132703 | 0.145485  | 0.0146312 | 0.0531463 | 0         | 0          | 0.0626861  | 0.00305638 | 0.00551192 | 0.00892991 | 0          |
| EPHB1     | 0.722756  | 0.980305  | 1.44974    | 0.300989  | 0.361414  | 0.484747  | 0.893046  | 0.888697  | 0.0723481 | 0.161544   | 0.335302   | 0.0673005  | 0.242741   | 0.287189   | 0.554532   |
| EPHB2     | 0.652006  | 0.17273   | 0.114468   | 0.321912  | 0.843447  | 1.04251   | 0.435652  | 0.296245  | 0.643425  | 0.397326   | 0.665033   | 0.247515   | 0.499124   | 0.315566   | 1.5596     |
| EPHB3     | 6.59741   | 11.4625   | 10.4892    | 12.7951   | 29.049    | 12.8743   | 12.9427   | 7.65681   | 20.0505   | 13.6631    | 8.55583    | 16.7321    | 22.9178    | 8.77932    | 4.32388    |
| EPHB4     | 12.4359   | 10.3844   | 9.51778    | 19.6947   | 26.1088   | 29.7923   | 9.84447   | 7.61536   | 8.00029   | 10.5947    | 10.5379    | 10.687     | 21.1502    | 16.0348    | 17.9129    |
| EPHB6     | 13.2505   | 28.7429   | 21.9237    | 4.66534   | 58.7282   | 7.81633   | 25.5837   | 16.6407   | 50.8941   | 3.57808    | 3.92626    | 16.6777    | 2.10421    | 2.34819    | 2.15353    |
| EPHX1     | 15.0583   | 7.4479    | 9.73018    | 6.60313   | 10.7256   | 17.2727   | 18.2615   | 8.2167    | 5.70124   | 7.41777    | 12.1436    | 6.441      | 6.56294    | 6.448      | 15.4345    |
| EPHX2     | 4.90327   | 7.14622   | 6.27804    | 3.98366   | 14.3006   | 7.05948   | 7.45677   | 5.00852   | 8.61056   | 1.65982    | 1.96373    | 3.18815    | 0.623525   | 1.28133    | 1.00805    |
| EPHX3     | 8.65772   | 12.1461   | 14.4925    | 14.8045   | 22.3341   | 9.69021   | 15.2025   | 11.568    | 72.1262   | 15.138     | 23.2542    | 25.9586    | 15.6717    | 10.604     | 3.15556    |
| EPHX4     | 0.288687  | 0.0772743 | 0.0796073  | 0.0826389 | 0.0498256 | 0.641845  | 0.0549355 | 0.0855202 | 0         | 0.100648   | 0.307786   | 0          | 0.144868   | 0.134116   | 0.0690984  |
| EPM2A     | 1.18177   | 0.787107  | 0.623009   | 0.692504  | 0.593903  | 0.986534  | 0.648198  | 0.679581  | 0.945401  | 0.843415   | 0.634339   | 0.766834   | 0.683984   | 0.475345   | 0.623961   |
| EPM2AIP1  | 3.20126   | 3.04436   | 3.47189    | 2.70268   | 1.32894   | 3.60266   | 2.55395   | 3.61641   | 1.92855   | 2.21786    | 2.91846    | 1.52038    | 2.35448    | 2.29099    | 2.35456    |
| EPN1      | 11.2985   | 12.8046   | 11.6998    | 29.156    | 38.3613   | 44.7544   | 17.9616   | 9.82678   | 35.5268   | 46.7611    | 39.0961    | 37.625     | 98.0767    | 30.3357    | 20.1681    |
| EPN2      | 6.62737   | 13.6417   | 14.2076    | 9.4597    | 14.619    | 8.69154   | 13.6244   | 9.23098   | 9.87598   | 8.41535    | 7.61259    | 7.66355    | 8.70713    | 6.9561     | 4.88869    |
| EPN2-AS1  | 2.43099   | 4.77886   | 4.39222    | 1.32275   | 1.9334    | 0.927341  | 4.61865   | 3.16292   | 0.544764  | 1.3425     | 0.0439086  | 2.26823    | 0.0376431  | 1.56531    | 0.92168    |
| EPN2-IT1  | 1.73713   | 3.15891   | 3.52315    | 0.837334  | 2.61132   | 0.691857  | 3.71087   | 2.56473   | 0.375353  | 0.668149   | 0.34792    | 1.50358    | 0.271158   | 1.43507    | 0.88523    |
| EPN3      | 3.7894    | 5.997     | 5.3239     | 32.5647   | 16.3131   | 5.60018   | 7.69774   | 4.09572   | 57.8211   | 10.2297    | 13.8977    | 14.7715    | 32.4529    | 3.56368    | 1.63346    |

|             |            |            |           |           |           |           |           |           |           |           |           |           |           |            |           |
|-------------|------------|------------|-----------|-----------|-----------|-----------|-----------|-----------|-----------|-----------|-----------|-----------|-----------|------------|-----------|
| EPO         | 0.0174008  | 0.117376   | 0.0575806 | 0.035864  | 0.378412  | 0.0296331 | 0.33775   | 0.0463931 | 0.275499  | 0.174718  | 0.53037   | 0.0373522 | 0.0336807 | 0.0636609  | 0         |
| EPOP        | 0.587715   | 0.628499   | 1.03169   | 1.9056    | 0.723659  | 2.92935   | 0.818333  | 0.770728  | 1.36171   | 0.63869   | 0.792911  | 0.830794  | 1.95607   | 1.32231    | 1.01901   |
| EPOR        | 0.318206   | 0.273484   | 0.362848  | 0.5229    | 0.774824  | 0.783553  | 0.363318  | 0.183435  | 0.251377  | 0.47494   | 0.941726  | 0.116919  | 0.271891  | 0.566348   | 0.444633  |
| EPPIN       | 0          | 0          | 0         | 0         | 0         | 0         | 0         | 0.0102838 | 0         | 0         | 0         | 0         | 0         | 0          | 0         |
| EPPIN-WFDC6 | 0          | 0.00598855 | 0         | 0         | 0         | 0         | 0         | 0         | 0         | 0         | 0         | 0         | 0         | 0          | 0         |
| EPPK1       | 8.7054     | 32.5351    | 45.7632   | 39.683    | 141.276   | 18.0441   | 60.1227   | 22.0815   | 61.8388   | 37.276    | 5.34788   | 122.679   | 138.457   | 47.5252    | 28.1192   |
| EPRS        | 10.254     | 8.96056    | 9.32273   | 17.4532   | 6.86009   | 17.2619   | 7.60315   | 7.68979   | 15.4951   | 15.6732   | 15.9515   | 11.6065   | 26.8415   | 13.4631    | 10.3785   |
| EPS15       | 11.6751    | 8.58227    | 9.90617   | 7.85557   | 3.97978   | 10.3075   | 11.3059   | 9.92569   | 8.39441   | 8.27499   | 8.04292   | 5.42423   | 11.6396   | 7.35039    | 9.28652   |
| EPS15L1     | 3.62509    | 4.80919    | 4.78639   | 4.91157   | 5.51239   | 5.62267   | 7.10352   | 3.63686   | 5.92487   | 5.72819   | 3.70688   | 5.97513   | 9.43371   | 4.57339    | 3.96101   |
| EPS8        | 9.10528    | 3.17147    | 3.43326   | 2.96805   | 2.51873   | 13.0343   | 4.29179   | 4.16693   | 1.2843    | 5.72114   | 10.2275   | 1.19267   | 3.25924   | 5.05217    | 13.0112   |
| EPS8L1      | 6.431      | 14.31      | 16.7797   | 29.4128   | 45.504    | 14.3742   | 17.6608   | 7.52761   | 62.6547   | 41.8645   | 27.0908   | 34.1785   | 56.2285   | 31.8323    | 5.83306   |
| EPS8L2      | 9.09954    | 17.2567    | 16.1832   | 27.2133   | 36.7389   | 23.6836   | 16.127    | 8.60422   | 34.826    | 25.5513   | 13.5244   | 25.7275   | 35.0405   | 17.3212    | 6.47585   |
| EPS8L3      | 0.00997116 | 0.019217   | 0.0247465 | 0         | 0         | 0         | 0.0227695 | 0         | 0         | 0         | 0         | 0         | 0         | 0.0104227  | 0         |
| EPST11      | 0.999393   | 0.581266   | 0.454722  | 5.4511    | 0.820554  | 8.83191   | 0.326021  | 0.932585  | 0.286899  | 1.19162   | 2.6996    | 0.260498  | 1.98967   | 0.731256   | 2.18363   |
| EPX         | 0.0595374  | 0.0942541  | 0.0844347 | 0.01753   | 0.0396352 | 0.0796641 | 0.116534  | 0.0680296 | 0.0207171 | 0.0213502 | 0         | 0.0060858 | 0.0493885 | 0.00889053 | 0.0610738 |
| EPYC        | 0.0300754  | 0          | 0         | 0         | 0         | 0.0128044 | 0         | 0         | 0         | 0         | 0.0169757 | 0         | 0         | 0          | 0         |
| EQTN        | 0.0446777  | 0.053816   | 0.0369605 | 0.138125  | 0         | 0.0190212 | 0.0510116 | 0.0992646 | 0.0272062 | 0         | 0         | 0         | 0.0288258 | 0.046701   | 0.0320814 |
| ERAL1       | 4.91761    | 4.6627     | 4.6307    | 9.96031   | 6.99747   | 11.6416   | 5.64247   | 4.03584   | 6.21089   | 5.51678   | 8.73137   | 5.05647   | 9.01711   | 5.93352    | 4.70819   |
| ERAP1       | 4.88004    | 6.99613    | 8.83844   | 3.39709   | 2.93502   | 6.94528   | 4.3854    | 6.76456   | 2.35211   | 2.77368   | 3.45      | 1.83238   | 4.60127   | 2.68472    | 2.46604   |
| ERAP2       | 2.18718    | 1.17111    | 0.738459  | 2.77563   | 1.35657   | 3.524     | 1.40746   | 2.59972   | 0.597691  | 0.470454  | 0.357706  | 1.67835   | 0.251813  | 2.87393    | 3.50178   |
| ERAS        | 0          | 0.0539984  | 0         | 0         | 0         | 0         | 0         | 0         | 0         | 0         | 0         | 0         | 0         | 0.0146435  | 0         |
| ERBB2       | 13.9451    | 19.7166    | 19.6504   | 22.4897   | 48.0449   | 25.4779   | 22.3241   | 14.0795   | 43.8136   | 14.0839   | 10.3589   | 22.599    | 17.6241   | 11.1001    | 7.38347   |
| ERBB3       | 8.31103    | 15.8212    | 17.0063   | 10.9793   | 14.9126   | 11.1847   | 17.6559   | 11.3748   | 24.8223   | 11.388    | 7.11673   | 10.7383   | 13.4489   | 4.9023     | 1.6476    |
| ERBB4       | 0.108698   | 0.0822997  | 0.118827  | 0.0060009 | 0.0361813 | 0.133875  | 0.0886488 | 0.105227  | 0         | 0         | 0.0021912 | 0         | 0         | 0.00608684 | 0.0167255 |
| ERBIN       | 10.3382    | 9.8843     | 11.7971   | 10.1491   | 2.18617   | 9.95183   | 7.46456   | 11.4173   | 10.3744   | 9.93569   | 10.896    | 5.47751   | 10.076    | 7.08462    | 9.77756   |
| ERC1        | 7.57581    | 7.62011    | 7.33541   | 10.9594   | 9.27576   | 8.36938   | 8.11975   | 6.20457   | 8.83104   | 10.8787   | 5.87238   | 10.2115   | 17.5163   | 10.2744    | 8.90412   |

|          |           |           |            |           |           |           |           |           |           |           |           |            |           |           |           |
|----------|-----------|-----------|------------|-----------|-----------|-----------|-----------|-----------|-----------|-----------|-----------|------------|-----------|-----------|-----------|
| ERC2     | 0.018321  | 0.0247165 | 0.00606256 | 0.0528648 | 0.022767  | 0.0280801 | 0.0167346 | 0.0162822 | 0.031238  | 0.0137968 | 0.0206821 | 0.00786549 | 0.0118206 | 0.0172356 | 0.0631469 |
| ERC2-IT1 | 0.020526  | 0.0148346 | 0.0254708  | 0         | 0.0318839 | 0         | 0.0351539 | 0.0273627 | 0.0249983 | 0         | 0         | 0.0146869  | 0         | 0         | 0         |
| ERCC1    | 9.17771   | 9.51861   | 9.33775    | 12.8498   | 12.8365   | 16.9152   | 10.8986   | 7.79397   | 13.4877   | 8.92759   | 12.8934   | 10.1558    | 11.9498   | 8.77994   | 7.74587   |
| ERCC2    | 1.40491   | 2.01569   | 2.05757    | 2.34566   | 3.78838   | 4.66218   | 2.39755   | 1.52209   | 1.443     | 1.90184   | 2.22386   | 1.90498    | 2.57751   | 2.44912   | 1.6475    |
| ERCC3    | 5.98383   | 5.48453   | 5.50384    | 7.00673   | 5.90195   | 7.38081   | 5.73439   | 3.9987    | 5.30176   | 5.00045   | 5.59151   | 4.42469    | 7.2252    | 5.31416   | 4.89325   |
| ERCC4    | 0.818102  | 1.11655   | 1.20067    | 1.26285   | 0.489176  | 1.22416   | 0.715218  | 0.909587  | 0.608653  | 0.747546  | 1.00082   | 0.754373   | 1.28536   | 1.10266   | 0.904524  |
| ERCC5    | 7.42472   | 6.96023   | 7.42565    | 4.637     | 5.2868    | 8.87679   | 4.73667   | 5.19747   | 7.48441   | 3.79134   | 3.63258   | 4.46338    | 4.67377   | 3.23034   | 4.84846   |
| ERCC6    | 2.1359    | 2.75532   | 2.73299    | 2.31052   | 1.7365    | 2.12535   | 2.02511   | 2.18581   | 3.04749   | 1.98575   | 1.42636   | 1.95877    | 2.11681   | 1.84093   | 1.35729   |
| ERCC6L   | 0.667894  | 0.334572  | 0.350812   | 0.737447  | 0.181146  | 0.541621  | 0.375237  | 0.654809  | 0.148481  | 0.479015  | 0.454775  | 0.299633   | 1.0944    | 0.82004   | 0.350177  |
| ERCC6L2  | 2.45744   | 1.95854   | 1.91221    | 1.50151   | 0.727764  | 1.88949   | 1.55736   | 1.86564   | 0.921045  | 1.38966   | 1.82604   | 0.802235   | 1.39816   | 1.31398   | 1.68963   |
| ERCC8    | 1.55194   | 1.3993    | 1.13372    | 1.69285   | 0.507518  | 1.32919   | 1.1295    | 1.23406   | 0.806883  | 1.3783    | 2.17201   | 0.71433    | 1.00716   | 1.10046   | 0.873269  |
| EREG     | 3.0554    | 3.47435   | 3.34261    | 3.13837   | 1.94194   | 1.08153   | 5.20715   | 4.01309   | 56.1155   | 19.1679   | 15.3491   | 30.99      | 31.3445   | 13.1593   | 7.26058   |
| ERF      | 6.15431   | 7.74309   | 7.99679    | 9.52156   | 14.4523   | 18.4508   | 6.79683   | 5.18305   | 6.6417    | 6.55147   | 10.112    | 4.84736    | 9.47457   | 9.35893   | 9.53245   |
| ERFE     | 0.159497  | 0.146012  | 0.145142   | 0.164367  | 0.210591  | 0.129019  | 0.145687  | 0.170097  | 0.0388499 | 0.880816  | 2.01659   | 0.370905   | 0.514534  | 0.904459  | 0.767345  |
| ERG      | 2.27094   | 0.895362  | 1.07139    | 2.452     | 0.748551  | 3.16722   | 1.0626    | 1.07067   | 0.502529  | 1.96191   | 2.64519   | 0.909436   | 2.87794   | 2.51231   | 3.36083   |
| ERG28    | 5.68057   | 7.39999   | 7.80741    | 16.6792   | 5.92928   | 17.8506   | 10.4495   | 6.65109   | 9.35251   | 10.2041   | 15.353    | 8.76362    | 9.31782   | 6.57402   | 3.94951   |
| ERGIC1   | 14.4644   | 9.47959   | 11.203     | 18.8214   | 10.077    | 20.0752   | 15.129    | 9.91253   | 11.1936   | 14.3256   | 20.5641   | 8.12181    | 21.8891   | 12.9442   | 16.3465   |
| ERGIC2   | 5.99089   | 4.88823   | 5.00995    | 8.0125    | 1.11266   | 5.96614   | 3.79185   | 6.65525   | 8.67616   | 9.41532   | 12.0557   | 5.0601     | 10.5707   | 6.14648   | 5.76072   |
| ERGIC3   | 30.5299   | 24.0232   | 24.6674    | 41.3438   | 38.2124   | 57.617    | 34.2386   | 20.4923   | 34.8506   | 27.7924   | 50.1282   | 25.1297    | 32.5202   | 25.0317   | 20.9736   |
| ERH      | 18.6936   | 10.747    | 11.6164    | 29.8045   | 5.52028   | 25.881    | 9.83065   | 10.9899   | 16.6791   | 22.8096   | 39.5635   | 11.8666    | 22.1646   | 16.2633   | 10.6224   |
| ERI1     | 0.829031  | 0.822005  | 0.985433   | 1.97847   | 0.56933   | 2.03227   | 0.657611  | 1.01209   | 1.25942   | 1.84555   | 2.59581   | 1.05214    | 2.94468   | 1.68298   | 1.22193   |
| ERI2     | 0.964334  | 1.0845    | 0.930177   | 1.71983   | 0.281988  | 0.941361  | 0.641782  | 1.06265   | 1.33382   | 1.01795   | 1.75464   | 0.880327   | 1.89531   | 1.16793   | 0.751913  |
| ERI3     | 6.83083   | 6.72217   | 6.50186    | 11.7414   | 10.5902   | 16.6518   | 9.03384   | 5.42609   | 5.58894   | 5.67698   | 14.2612   | 4.43474    | 5.77702   | 6.94719   | 6.51471   |
| ERI3-IT1 | 0.537249  | 0.866168  | 0.68377    | 0.191648  | 1.05922   | 0.475055  | 0.896528  | 0.550918  | 0.0503315 | 0.129674  | 0.0699793 | 0.561839   | 0.173315  | 0.388786  | 0.860584  |
| ERICH1   | 2.06883   | 2.21916   | 1.99935    | 1.86468   | 3.00722   | 2.47807   | 1.34359   | 1.81611   | 1.37923   | 1.03229   | 0.857046  | 1.27659    | 1.48991   | 1.2532    | 1.79902   |
| ERICH2   | 0.0944614 | 0.025285  | 0.0520968  | 0.0432646 | 0.114124  | 0.187676  | 0.0838857 | 0.0746217 | 0.0127826 | 0.0395196 | 0.0236967 | 0          | 0.0270871 | 0.010971  | 0.0753659 |

|               |            |            |            |            |           |           |            |           |           |           |           |            |            |            |            |
|---------------|------------|------------|------------|------------|-----------|-----------|------------|-----------|-----------|-----------|-----------|------------|------------|------------|------------|
| ERICH3        | 0.00646544 | 0.00467272 | 0.00534867 | 0.00333141 | 1.67E-10  | 0         | 0          | 0         | 0         | 0         | 0         | 0          | 0          | 0          | 0.00928519 |
| ERICH3-AS1    | 1.76E-10   | 0          | 0          | 0          | 0.0142458 | 0         | 0          | 0         | 0         | 0         | 0         | 0          | 0          | 0          | 0          |
| ERICH4        | 0.169635   | 0.0350283  | 0.100239   | 0          | 0.0376431 | 0.0206346 | 0.0830073  | 0.107684  | 0         | 0         | 0.0520193 | 0          | 0.0633276  | 0.0348025  |            |
| ERICH5        | 0.074655   | 0.17985    | 0.0864638  | 0.107708   | 0.139158  | 0.139849  | 0.0852387  | 0.0663472 | 0.236396  | 0.0187399 | 0.0842762 | 0.0213671  | 0.00963341 | 0.00780359 | 0          |
| ERICH6        | 0.10694    | 0.0420811  | 0.0831612  | 0.0230208  | 0         | 0.133149  | 0.0892702  | 0.0794116 | 0.0272062 | 0         | 0.0126089 | 0.00799202 | 0          | 0.0233505  | 0          |
| ERICH6-AS1    | 0.216711   | 0.157214   | 0.193146   | 0.210526   | 0.0453331 | 0.347899  | 0.199929   | 0.181555  | 0.106629  | 0.183146  | 0.131781  | 0.0417641  | 0.0941474  | 0.167782   | 0          |
| ERICH6B       | 0          | 0.0138174  | 0          | 0          | 0         | 0         | 0          | 0         | 0         | 0         | 0         | 0          | 0          | 0          | 0          |
| ERLEC1        | 6.65968    | 4.13726    | 4.66405    | 6.46579    | 2.99344   | 8.99816   | 3.52046    | 5.26538   | 9.0277    | 8.48234   | 14.8944   | 4.04048    | 6.87597    | 5.2514     | 8.39276    |
| ERLIN1        | 3.48016    | 4.41244    | 4.32387    | 7.96313    | 3.1234    | 7.65521   | 3.72335    | 3.33344   | 5.08613   | 4.93416   | 6.83881   | 4.30702    | 6.49077    | 4.95143    | 3.56335    |
| ERLIN2        | 2.73826    | 2.70851    | 2.98484    | 3.73149    | 1.96159   | 4.37516   | 2.60414    | 2.48219   | 1.78514   | 2.04995   | 3.14931   | 1.39225    | 3.14331    | 1.91433    | 2.10503    |
| ERLNC1        | 0.143873   | 0.0297087  | 0.0850158  | 0          | 0         | 0.105005  | 0.0469343  | 0.0913305 | 0         | 0         | 0         | 0.0441194  | 0          | 0.0214841  | 0.20662    |
| ERMAP         | 3.07472    | 2.83866    | 2.79526    | 2.58257    | 2.10559   | 3.91305   | 2.29511    | 2.13316   | 1.61866   | 1.80921   | 2.18709   | 1.61337    | 1.31826    | 1.24066    | 1.75678    |
| ERMARD        | 3.74955    | 3.79886    | 3.92907    | 4.00355    | 1.90909   | 3.84897   | 2.33083    | 2.63806   | 2.52427   | 2.91515   | 3.69192   | 2.35499    | 1.80767    | 2.31895    | 2.33342    |
| ERMN          | 0.255847   | 0.0723548  | 0.110429   | 0.0802437  | 0.0345582 | 0.123133  | 0.0444528  | 0.197718  | 0         | 0.139615  | 0.0376721 | 0          | 0.021531   | 0.0145345  | 0.159752   |
| ERMP1         | 3.74813    | 4.40724    | 4.82493    | 5.51028    | 3.39905   | 5.03258   | 4.2597     | 3.93946   | 5.32999   | 5.2862    | 5.31708   | 5.36377    | 5.92407    | 4.43421    | 2.6385     |
| ERN1          | 2.32515    | 2.38186    | 2.35044    | 2.71945    | 2.48224   | 3.30056   | 2.39031    | 2.86117   | 2.33541   | 1.68916   | 1.17173   | 2.01827    | 2.23608    | 1.68262    | 2.3244     |
| ERN2          | 0.115076   | 0.0616059  | 0.13751    | 0.00658828 | 0         | 0.0435492 | 0.138689   | 0.124997  | 0         | 0         | 0.0216511 | 0          | 0.0123744  | 0.0133653  | 0          |
| ERO1A         | 4.33722    | 3.70813    | 4.28622    | 38.5695    | 2.99131   | 10.7861   | 2.67979    | 6.26133   | 8.73386   | 29.4421   | 26.7939   | 15.1024    | 59.6621    | 21.6237    | 7.57345    |
| ERO1B         | 1.07152    | 0.785445   | 0.928109   | 0.703124   | 0.305859  | 0.939681  | 0.580345   | 1.42028   | 0.284422  | 0.59772   | 0.909796  | 0.350586   | 0.61748    | 0.536092   | 1.164      |
| ERP27         | 0.462333   | 0.445518   | 0.469897   | 0.231417   | 0.205189  | 0.764845  | 0.180986   | 0.48132   | 0         | 1.52529   | 2.41573   | 0.500943   | 1.34659    | 0.283058   | 0.113823   |
| ERP29         | 16.7912    | 15.2714    | 16.1411    | 22.0025    | 25.7652   | 25.168    | 19.7819    | 11.9465   | 21.388    | 12.6884   | 19.3635   | 11.4746    | 17.0521    | 9.99199    | 9.93474    |
| ERP44         | 4.16803    | 3.74822    | 3.81809    | 6.84499    | 1.35992   | 6.05279   | 3.29213    | 4.20317   | 6.04392   | 7.51852   | 8.44356   | 5.00801    | 12.1628    | 5.54546    | 5.15901    |
| ERRF1         | 11.124     | 7.15582    | 8.43163    | 10.9682    | 1.8842    | 12.9736   | 7.92128    | 8.91329   | 47.4084   | 15.837    | 29.407    | 15.8027    | 13.0993    | 20.5806    | 9.81476    |
| ERV3-1        | 2.82148    | 2.73025    | 2.72425    | 4.54346    | 1.33648   | 3.0589    | 2.15377    | 3.08601   | 5.17658   | 3.59269   | 3.48034   | 4.43593    | 3.52367    | 2.47396    | 3.26472    |
| ERV3-1-ZNF117 | 0.534055   | 0.207736   | 0.0700254  | 0.0257206  | 1.19E-05  | 0.0817474 | 0.00070368 | 0.22967   | 0.184036  | 0.212727  | 0.418709  | 0.00703342 | 0.0847977  | 0.266834   | 0.0317712  |

|            |           |           |           |           |           |           |           |            |           |           |            |           |            |            |           |
|------------|-----------|-----------|-----------|-----------|-----------|-----------|-----------|------------|-----------|-----------|------------|-----------|------------|------------|-----------|
| ERVRD-1    | 0.700456  | 1.06309   | 0.967709  | 0.36092   | 0.990125  | 0.256464  | 0.999697  | 0.703432   | 0.238861  | 0.316492  | 0.126516   | 0.556326  | 0.117502   | 0.940848   | 0.6941    |
| ERVH48-1   | 0.363187  | 0.539549  | 0.408951  | 0.135155  | 0.235064  | 0.214756  | 0.472268  | 0.672437   | 0.11058   | 0.253242  | 0.0455547  | 0.288744  | 0.0585815  | 0.337453   | 0.478117  |
| ERVK13-1   | 2.57729   | 4.45262   | 5.31954   | 1.15992   | 2.92358   | 1.41933   | 3.26917   | 2.91546    | 0.54679   | 1.04211   | 0.729226   | 1.64856   | 0.385197   | 2.17626    | 1.62795   |
| ERVK3-1    | 5.22969   | 5.10898   | 4.7271    | 7.81554   | 5.38834   | 10.2549   | 3.53244   | 3.49785    | 8.32084   | 6.4582    | 12.6951    | 5.33496   | 7.63892    | 4.72447    | 3.77531   |
| ERVMER34-1 | 0.372149  | 0.56407   | 0.0962089 | 1.61394   | 0.674423  | 1.05627   | 0.300977  | 0.20671    | 0.764836  | 0.486548  | 1.19031    | 0.771111  | 2.28604    | 1.37367    | 0.322899  |
| ERVV-1     | 0.259455  | 0.209431  | 0.294459  | 0.192085  | 0.495302  | 0.151122  | 0.205802  | 0.276108   | 0.159381  | 0.105775  | 0.0419689  | 0.23979   | 0.0899505  | 0.26138    | 0.361924  |
| ERVV-2     | 0         | 0         | 0.0154275 | 0         | 0         | 0         | 0         | 0.00828671 | 0         | 0         | 0          | 0         | 0          | 0          | 0         |
| ESAM       | 7.87532   | 2.70265   | 2.86825   | 10.3106   | 10.252    | 17.7449   | 6.29143   | 2.8612     | 3.46854   | 7.86396   | 17.5708    | 4.16423   | 12.575     | 11.2284    | 15.809    |
| ESCO1      | 3.4105    | 2.2802    | 2.4682    | 2.09923   | 0.255695  | 2.11996   | 0.886869  | 2.39095    | 1.97343   | 2.35009   | 2.17762    | 1.49068   | 2.34315    | 2.28791    | 1.8912    |
| ESCO2      | 0.0689192 | 0.136146  | 0.108328  | 0.823869  | 0.0321166 | 0.346234  | 0.0786897 | 0.140874   | 0.0755422 | 0.605504  | 1.12034    | 0.128215  | 0.871539   | 0.601537   | 0.326623  |
| ESD        | 14.8333   | 12.1703   | 11.7251   | 23.7896   | 6.24285   | 27.757    | 12.3918   | 10.4909    | 9.55285   | 18.8854   | 35.6816    | 10.308    | 16.0968    | 14.9673    | 10.6234   |
| ESF1       | 3.49663   | 3.13709   | 2.97481   | 3.20139   | 1.0246    | 4.0644    | 0.931277  | 2.16202    | 3.68841   | 3.07116   | 3.07455    | 1.84727   | 4.37932    | 3.14715    | 2.45478   |
| ESM1       | 0         | 0.0320268 | 0.0183299 | 0.194085  | 0.0516264 | 0.0565993 | 0         | 0.029537   | 0.202386  | 0.347617  | 0.762883   | 0.023781  | 0.0500347  | 0.358988   | 0.159102  |
| ESPL1      | 0.510174  | 0.683553  | 0.549246  | 1.18474   | 0.868468  | 1.60671   | 1.14505   | 0.490666   | 0.876678  | 0.675407  | 0.694264   | 0.902608  | 1.22872    | 1.08299    | 0.436594  |
| ESPN       | 2.15635   | 7.50642   | 6.7614    | 2.70849   | 10.1097   | 2.13747   | 4.88668   | 4.87542    | 2.58628   | 1.06941   | 1.05805    | 2.54184   | 0.541282   | 0.863235   | 0.31062   |
| ESPNL      | 0.0479947 | 0.0647488 | 0.0119114 | 0.02473   | 0.208747  | 0.608917  | 0.131517  | 0.0725113  | 0         | 0.0180715 | 0.043344   | 0.0068683 | 0.0557387  | 0.030101   | 0.10339   |
| ESPNP      | 0.0229708 | 0         | 0.019003  | 0         | 0         | 0         | 0         | 0.0306218  | 0         | 0         | 0          | 0         | 0          | 0          | 0         |
| ESR1       | 0.243993  | 0.184598  | 0.268575  | 0.278456  | 0.256847  | 0.38289   | 0.331537  | 0.195336   | 0.127704  | 0.108828  | 0.175279   | 0.0908989 | 0.074158   | 0.16757    | 0.411219  |
| ESR2       | 0.325394  | 0.51544   | 0.523627  | 0.211302  | 0.283882  | 0.284659  | 0.356256  | 0.392179   | 0.0380007 | 0.156647  | 0.0553509  | 0.11163   | 0.0258833  | 0.160746   | 0.172839  |
| ESRG       | 0.941159  | 1.25424   | 1.12262   | 0.540543  | 1.18805   | 0.491405  | 0.906042  | 1.07492    | 0.404192  | 2.49926   | 0.341348   | 2.2698    | 3.01681    | 3.65411    | 1.82134   |
| ESRP1      | 12.2527   | 19.6063   | 19.3014   | 24.846    | 9.00142   | 18.4584   | 16.2669   | 17.055     | 50.8179   | 27.0628   | 19.1787    | 25.696    | 37.459     | 18.4837    | 6.01678   |
| ESRP2      | 5.93636   | 13.5242   | 12.3282   | 17.7517   | 20.9197   | 15.4134   | 12.0522   | 8.12303    | 22.9214   | 15.153    | 10.5689    | 19.4583   | 28.0162    | 15.7125    | 3.90305   |
| ESRRA      | 6.95578   | 5.10701   | 4.37271   | 8.00387   | 15.0551   | 11.3693   | 4.69695   | 2.90341    | 8.43023   | 6.38612   | 5.14       | 5.29552   | 10.7528    | 7.77242    | 3.72415   |
| ESRRB      | 0.115178  | 0.0332966 | 0.0254088 | 0.0237388 | 0.0357822 | 0.0457671 | 0.0438354 | 0.0477682  | 0         | 0         | 0          | 0.0109884 | 0.00495414 | 0          | 0.0441093 |
| ESRRG      | 0.863652  | 0.210107  | 0.3139    | 0.0291809 | 0.101166  | 0.274867  | 0.252181  | 0.520922   | 0         | 0         | 0.00639315 | 0         | 0.00182696 | 0.00295988 | 0         |
| ESS2       | 1.15924   | 1.25973   | 1.26257   | 1.90367   | 2.78525   | 2.32567   | 1.19979   | 0.807882   | 2.12281   | 1.36599   | 1.77466    | 1.41427   | 1.87253    | 1.42313    | 1.2037    |

|          |           |           |            |           |           |           |           |           |           |           |           |           |           |            |          |
|----------|-----------|-----------|------------|-----------|-----------|-----------|-----------|-----------|-----------|-----------|-----------|-----------|-----------|------------|----------|
| ESX1     | 0         | 0         | 0          | 0         | 0.02429   | 0         | 0         | 0         | 0         | 0         | 0         | 0         | 0         | 0.00817268 | 0.022457 |
| ESYT1    | 9.49102   | 8.23839   | 9.1499     | 22.9081   | 14.9782   | 21.0611   | 11.6027   | 6.40068   | 10.0037   | 17.7394   | 13.4997   | 11.4799   | 35.5716   | 16.1092    | 14.3917  |
| ESYT2    | 17.1407   | 11.1525   | 13.2222    | 11.2462   | 6.58394   | 16.8049   | 14.4474   | 11.6735   | 11.209    | 15.9058   | 19.5208   | 9.14287   | 21.0002   | 11.123     | 16.6935  |
| ESYT3    | 2.32587   | 2.60043   | 3.01259    | 4.22137   | 3.02231   | 2.41524   | 4.57496   | 2.91173   | 15.9882   | 3.14375   | 4.24981   | 4.77929   | 3.06861   | 2.54808    | 0.792233 |
| ETAA1    | 2.03727   | 1.72881   | 1.83116    | 1.83067   | 0.700806  | 1.65667   | 0.973897  | 1.99223   | 1.65697   | 2.17653   | 2.37144   | 0.948273  | 1.88296   | 1.70952    | 1.64005  |
| ETDA     | 0         | 0         | 0          | 0         | 0         | 0         | 0         | 0         | 0         | 0         | 0         | 0         | 0         | 0          | 0        |
| ETDB     | 0.102102  | 0.131184  | 0.112621   | 0.140292  | 0.0528664 | 0.0289794 | 0         | 0.060493  | 0.124348  | 0.0854321 | 0         | 0.0730565 | 0.109792  | 0.0177876  | 0.146631 |
| ETDC     | 0.642863  | 0.309741  | 0.319093   | 0.132498  | 0.599153  | 0         | 0.1468    | 0         | 0         | 0         | 0         | 0.183994  | 0         | 0.134395   | 0        |
| ETF1     | 16.6628   | 15.3973   | 15.4861    | 24.6766   | 7.51191   | 23.4303   | 10.5102   | 15.0349   | 34.8559   | 24.2785   | 26.0404   | 18.1245   | 37.8703   | 20.3991    | 11.4581  |
| ETFA     | 7.89667   | 9.34712   | 8.51228    | 15.606    | 6.7438    | 12.7056   | 10.4798   | 8.38499   | 17.5067   | 15.2743   | 26.8398   | 9.82066   | 18.1519   | 13.1853    | 9.47507  |
| ETFB     | 8.93799   | 6.5751    | 5.92854    | 10.9051   | 18.8423   | 21.9892   | 6.23243   | 4.24117   | 20.0796   | 8.27336   | 14.1799   | 7.20617   | 7.28056   | 6.30641    | 3.62162  |
| ETFBKMT  | 0.456835  | 0.501101  | 0.643278   | 0.621031  | 0.588835  | 0.786254  | 0.543795  | 0.354167  | 0.556373  | 0.402582  | 1.05336   | 0.389471  | 0.263391  | 0.416563   | 0.446688 |
| ETFDH    | 5.04243   | 4.19429   | 4.37964    | 3.44825   | 3.47475   | 5.83324   | 2.85205   | 3.4873    | 15.2337   | 4.85479   | 5.52396   | 4.74845   | 4.12488   | 3.02512    | 2.79759  |
| ETFRF1   | 1.86535   | 2.75557   | 2.15182    | 2.30379   | 0.538445  | 2.83356   | 1.85516   | 3.65198   | 7.03743   | 2.53727   | 5.04599   | 2.54344   | 2.45041   | 1.15698    | 1.78949  |
| ETHE1    | 6.36137   | 4.51745   | 5.30185    | 27.5431   | 9.54958   | 14.532    | 4.52596   | 4.11353   | 7.86306   | 21.3608   | 20.1769   | 12.5003   | 25.836    | 12.6539    | 5.04511  |
| ETNK1    | 2.69569   | 2.87238   | 2.9638     | 2.58539   | 1.18584   | 2.60553   | 2.52812   | 3.5443    | 2.20671   | 3.71735   | 4.53067   | 2.75387   | 2.47705   | 3.32602    | 3.28451  |
| ETNK2    | 1.54854   | 0.926492  | 1.15436    | 0.517325  | 0.819429  | 3.33263   | 1.0589    | 0.967888  | 0.300509  | 0.662099  | 1.11418   | 0.328754  | 0.43917   | 0.493606   | 0.855347 |
| ETNPPL   | 0         | 0         | 0.00691425 | 0         | 0         | 0         | 0         | 0         | 0         | 0         | 0         | 0         | 0         | 0          | 0        |
| ETS1     | 8.10341   | 4.96957   | 5.88443    | 11.0313   | 7.14265   | 17.5233   | 5.6395    | 6.28856   | 3.5132    | 12.909    | 14.255    | 4.48388   | 23.645    | 15.4333    | 25.7115  |
| ETS1-AS1 | 0.0335164 | 0.0726691 | 0.0831813  | 0.0690792 | 0.0520625 | 0.0428081 | 0.0765358 | 0.0893597 | 0.0408192 | 0.231366  | 0.0756716 | 0.0359728 | 0.0432492 | 0.262757   | 0.192535 |
| ETS2     | 23.0236   | 17.3538   | 21.0104    | 46.8883   | 23.0076   | 48.4992   | 18.6301   | 26.1846   | 50.0053   | 33.1613   | 28.4476   | 34.5145   | 45.2376   | 26.7505    | 18.7836  |
| ETV1     | 0.490858  | 0.201465  | 0.220583   | 0.396556  | 0.169438  | 0.882358  | 0.366712  | 0.363528  | 0.0627331 | 0.912707  | 1.79233   | 0.134418  | 0.643173  | 0.636608   | 0.739746 |
| ETV2     | 0.201244  | 0.223759  | 0.166483   | 0.0319058 | 0.38474   | 0.158175  | 0.282799  | 0.123818  | 0.0565598 | 0.136006  | 0.332031  | 0.177225  | 0.239707  | 0.12136    | 0        |
| ETV3     | 8.99895   | 10.3796   | 10.577     | 8.18599   | 8.19273   | 9.29586   | 11.1743   | 9.36512   | 8.39056   | 4.77804   | 4.48572   | 5.58681   | 7.47181   | 5.30906    | 4.88739  |
| ETV3L    | 0.0126961 | 0         | 0          | 0.0391183 | 0.0197673 | 0.0111434 | 9.81E-45  | 0.0222035 | 0         | 0.0330867 | 0.014563  | 0.0649833 | 0.0412505 | 0.0259374  | 0        |
| ETV4     | 1.23217   | 0.844075  | 1.10949    | 2.816     | 1.73171   | 4.41083   | 1.37814   | 1.30363   | 0.683969  | 1.75691   | 1.72215   | 1.06758   | 4.05066   | 2.69423    | 1.21582  |

|         |           |           |           |           |           |            |           |           |          |            |          |            |            |            |           |
|---------|-----------|-----------|-----------|-----------|-----------|------------|-----------|-----------|----------|------------|----------|------------|------------|------------|-----------|
| ETV5    | 2.45422   | 2.95757   | 2.38969   | 3.47685   | 1.25322   | 6.8457     | 2.58958   | 2.05075   | 0.776445 | 1.64991    | 3.6367   | 0.601502   | 1.88922    | 1.60704    | 2.48746   |
| ETV6    | 9.60487   | 6.55648   | 7.44301   | 7.12535   | 4.85897   | 14.9789    | 8.98628   | 7.44191   | 4.91292  | 5.51007    | 8.53519  | 3.47644    | 6.14206    | 4.57276    | 7.9338    |
| ETV7    | 0.464099  | 1.35657   | 2.28655   | 0.563292  | 1.66609   | 0.913291   | 2.02537   | 0.907395  | 0.314011 | 0.142387   | 0.349273 | 0.214004   | 0.425862   | 0.0215607  | 0.592448  |
| EVA1A   | 0.440401  | 0.217497  | 0.127516  | 0.975767  | 0.598582  | 1.03124    | 0.276559  | 0.166341  | 0.147499 | 1.4786     | 4.32525  | 0.275729   | 1.1792     | 0.78834    | 2.07134   |
| EVA1B   | 5.05615   | 4.12888   | 4.0444    | 5.65111   | 16.5164   | 12.7258    | 4.5844    | 3.13883   | 6.76907  | 12.1321    | 19.9774  | 9.35046    | 9.81057    | 10.5995    | 7.47483   |
| EVA1C   | 5.33721   | 3.45348   | 4.63272   | 5.69625   | 2.80105   | 7.38395    | 4.0143    | 3.17292   | 2.40582  | 1.29653    | 1.606    | 1.73764    | 3.00507    | 1.68599    | 2.55064   |
| EVADR   | 0.859697  | 2.41902   | 3.10084   | 6.80404   | 1.86957   | 1.31764    | 1.60978   | 0.916833  | 10.3864  | 0.776886   | 1.35869  | 0.713558   | 0.155308   | 0.305534   | 0         |
| EVC     | 3.59602   | 3.8402    | 3.91477   | 3.53035   | 6.88654   | 7.55578    | 5.14911   | 2.63696   | 0.744734 | 2.59464    | 2.33762  | 1.83221    | 3.03298    | 3.58453    | 6.82594   |
| EVC2    | 1.22707   | 1.10202   | 1.39206   | 1.03209   | 1.54868   | 2.49304    | 1.1538    | 0.769782  | 0.263725 | 0.611513   | 0.662052 | 0.513247   | 0.628707   | 1.16476    | 1.56787   |
| EVI2A   | 1.28402   | 0.848342  | 1.17672   | 1.70354   | 0.0955459 | 0.752887   | 0.640847  | 1.50328   | 0.149824 | 2.28708    | 4.76508  | 0.253068   | 1.13104    | 0.723322   | 3.04759   |
| EVI2B   | 2.95813   | 1.75504   | 2.33202   | 3.01258   | 0.648706  | 1.8175     | 1.07285   | 3.21659   | 0.22605  | 2.50429    | 4.60963  | 0.730443   | 1.27238    | 1.06101    | 2.56561   |
| EVI5    | 3.12815   | 2.67235   | 2.74375   | 2.59836   | 1.40009   | 2.50306    | 2.16921   | 2.91879   | 2.41068  | 3.867      | 3.95695  | 2.62819    | 4.50787    | 2.72485    | 3.33762   |
| EVI5L   | 2.59953   | 3.37476   | 3.35023   | 4.58264   | 7.8796    | 6.14333    | 3.60014   | 2.24073   | 5.77491  | 4.11609    | 2.22808  | 4.42625    | 6.2274     | 3.17645    | 2.05675   |
| EVL     | 6.18424   | 8.82857   | 9.15833   | 11.7822   | 12.156    | 40.8828    | 8.54287   | 6.42893   | 6.40425  | 6.08489    | 7.61681  | 6.35064    | 4.58729    | 6.99298    | 10.0875   |
| EVPL    | 14.8647   | 34.2689   | 34.3582   | 29.2395   | 73.8482   | 32.1974    | 30.274    | 20.3135   | 30.7594  | 22.7875    | 10.3871  | 46.1957    | 60.742     | 26.2317    | 10.035    |
| EVPLL   | 0.318199  | 1.25214   | 0.930695  | 0.435947  | 3.75578   | 0.179297   | 0.441183  | 0.313966  | 1.08354  | 1.72425    | 0.343671 | 2.02559    | 0.747165   | 1.27256    | 0.401915  |
| EVX1    | 0.0146661 | 0.0105995 | 0.0121328 | 0         | 0.0569537 | 0.0187319  | 0         | 0.013034  | 0        | 0.00920371 | 0        | 0          | 0.00473124 | 0.00383256 | 0.126374  |
| EVX1-AS | 0         | 0         | 0         | 0         | 0         | 0          | 0         | 0         | 0        | 0          | 0        | 0          | 0          | 0          | 0         |
| EVX2    | 0         | 0         | 0         | 0         | 0         | 0.0243735  | 0         | 0         | 0        | 0          | 0        | 0          | 0          | 0          | 0         |
| EWSAT1  | 0.0183239 | 0.0441436 | 0.0303176 | 0         | 0.0142317 | 0.00780127 | 0.052304  | 0.0325695 | 0        | 0          | 0        | 0.00655561 | 0          | 0          | 0         |
| EWSR1   | 21.8257   | 19.0299   | 19.6772   | 33.3679   | 21.4331   | 36.7626    | 17.4998   | 16.248    | 17.721   | 21.1654    | 17.426   | 18.1972    | 35.2557    | 25.3586    | 19.613    |
| EXD1    | 0.0142463 | 0.0274563 | 0.0353565 | 0.0220218 | 0.0663881 | 0          | 0.0406648 | 0.0253218 | 0        | 0          | 0        | 0.025484   | 0          | 0.0148914  | 0.0204594 |
| EXD2    | 1.9       | 1.83915   | 1.94436   | 2.5812    | 2.03197   | 2.6988     | 1.86574   | 1.45224   | 1.11781  | 1.88945    | 1.77205  | 1.55284    | 2.41853    | 1.67894    | 2.02645   |
| EXD3    | 0.827874  | 1.32961   | 1.33106   | 1.03631   | 2.78991   | 1.75235    | 1.28168   | 0.943583  | 0.694957 | 0.792509   | 0.686405 | 1.03078    | 0.929464   | 0.789585   | 1.15535   |
| EXO1    | 0.27408   | 0.154602  | 0.171436  | 1.13668   | 0.114223  | 1.08719    | 0.358731  | 0.166347  | 0.17097  | 0.427901   | 0.603712 | 0.416139   | 1.03082    | 0.719724   | 0.528018  |
| EXO5    | 1.22257   | 0.976589  | 1.12673   | 1.41462   | 0.999513  | 1.78979    | 0.746925  | 0.819655  | 0.365708 | 1.27871    | 2.02177  | 0.437391   | 1.41845    | 0.947243   | 1.47854   |

|           |           |          |          |           |          |          |           |           |          |           |          |          |          |            |           |
|-----------|-----------|----------|----------|-----------|----------|----------|-----------|-----------|----------|-----------|----------|----------|----------|------------|-----------|
| EXOC1     | 7.11353   | 6.43138  | 6.60631  | 7.21076   | 2.74988  | 7.12435  | 4.46303   | 6.13817   | 9.18273  | 6.38188   | 7.0529   | 5.45048  | 7.27827  | 5.16975    | 4.7971    |
| EXOC1L    | 0         | 0        | 0        | 0         | 0        | 0        | 0         | 0         | 0        | 0         | 0        | 0        | 0        | 0          | 0         |
| EXOC2     | 3.58429   | 3.59099  | 3.59702  | 5.13419   | 2.34957  | 4.56514  | 3.92139   | 3.28303   | 4.59627  | 4.68031   | 4.76755  | 3.53619  | 5.3176   | 4.37277    | 4.18679   |
| EXOC3     | 9.62758   | 12.164   | 12.3178  | 11.8471   | 18.4952  | 15.0756  | 12.0448   | 8.44449   | 18.5829  | 9.88562   | 8.41847  | 12.7823  | 12.8883  | 9.66507    | 7.30429   |
| EXOC3-AS1 | 1.06545   | 0.664833 | 0.910317 | 1.11598   | 1.65502  | 2.34985  | 1.13673   | 0.574341  | 0.935976 | 0.657666  | 1.67598  | 0.249954 | 0.484578 | 0.693784   | 0.100336  |
| EXOC3L1   | 0.194635  | 0.370647 | 0.276027 | 0.754552  | 0.964595 | 0.583999 | 0.338633  | 0.181212  | 0.225756 | 0.465309  | 0.439438 | 0.285165 | 0.568089 | 0.760514   | 0.891804  |
| EXOC3L2   | 0.63664   | 0.431712 | 0.156051 | 1.4215    | 1.9229   | 3.00158  | 0.578824  | 0.345762  | 0.631772 | 0.769454  | 1.05141  | 1.02917  | 2.11464  | 2.90836    | 2.86141   |
| EXOC3L4   | 0.0448683 | 0.103767 | 0.200438 | 0.0369904 | 0.125453 | 0.366765 | 0.0922124 | 0.0239251 | 0        | 0.0112629 | 0        | 0        | 0        | 0.00938005 | 0.0257746 |
| EXOC4     | 10.2372   | 9.57762  | 9.0286   | 11.2635   | 7.951    | 10.6173  | 10.0952   | 9.20689   | 10.9045  | 8.27619   | 7.52802  | 8.36923  | 8.38175  | 7.40764    | 7.47337   |
| EXOC5     | 2.85787   | 2.65698  | 2.87487  | 4.02957   | 1.07708  | 3.29938  | 1.99942   | 3.39531   | 4.17933  | 5.17732   | 5.23065  | 2.89513  | 6.76325  | 3.83858    | 3.14361   |
| EXOC6     | 1.44966   | 1.51841  | 1.36043  | 1.36992   | 0.35602  | 1.21973  | 0.79815   | 1.68044   | 2.06559  | 1.7188    | 2.34154  | 1.27097  | 1.35676  | 1.0721     | 1.2261    |
| EXOC6B    | 8.2466    | 12.9393  | 14.952   | 12.5319   | 6.62154  | 7.09108  | 10.9642   | 9.09215   | 17.5758  | 13.0788   | 8.3338   | 11.4493  | 13.6692  | 8.52261    | 5.92708   |
| EXOC7     | 7.46194   | 8.14627  | 8.14978  | 13.0767   | 14.7038  | 20.3229  | 9.17141   | 5.84002   | 9.64044  | 8.8613    | 7.6977   | 7.34567  | 13.8281  | 8.66054    | 8.11055   |
| EXOC8     | 3.83467   | 3.28318  | 3.4255   | 3.34877   | 3.5236   | 2.98541  | 3.20151   | 3.33594   | 5.90901  | 3.14082   | 2.53533  | 3.06585  | 5.87166  | 2.93568    | 2.51438   |
| EXOG      | 1.01014   | 0.481266 | 0.606906 | 0.761838  | 0.482127 | 1.0187   | 0.863403  | 0.75229   | 0.158076 | 0.658708  | 1.26137  | 0.34726  | 0.833791 | 1.0146     | 1.72625   |
| EXOSC1    | 3.90111   | 3.29356  | 2.73301  | 6.28384   | 3.57581  | 5.53624  | 3.10989   | 2.35817   | 6.86984  | 7.98405   | 11.8825  | 6.01021  | 5.64619  | 3.89409    | 4.21448   |
| EXOSC10   | 10.6433   | 8.7885   | 9.49203  | 12.8142   | 6.02105  | 14.9354  | 8.77705   | 7.2588    | 8.18107  | 7.90055   | 9.40322  | 6.48509  | 13.0932  | 8.7546     | 8.13949   |
| EXOSC2    | 3.53045   | 3.64993  | 3.36828  | 4.77174   | 3.36206  | 4.74334  | 3.60557   | 3.06661   | 1.72852  | 2.3714    | 3.2344   | 2.24686  | 4.09206  | 3.77842    | 2.21661   |
| EXOSC3    | 3.01701   | 3.5493   | 3.68143  | 5.75189   | 2.88999  | 5.51255  | 2.41131   | 3.32925   | 2.49552  | 3.51845   | 5.35001  | 2.62649  | 5.19896  | 5.35465    | 2.74412   |
| EXOSC4    | 2.76682   | 3.70028  | 2.58839  | 8.20746   | 10.4032  | 9.07137  | 3.51336   | 2.11421   | 8.91233  | 5.38747   | 9.69129  | 5.34714  | 10.7442  | 5.40584    | 3.52788   |
| EXOSC5    | 3.09972   | 3.48108  | 3.20057  | 7.63763   | 7.74735  | 7.18386  | 3.59238   | 2.1334    | 3.37773  | 2.92517   | 6.10387  | 2.8016   | 2.99237  | 3.435      | 1.30535   |
| EXOSC6    | 7.46023   | 7.79891  | 9.91064  | 9.18911   | 13.7241  | 10.8963  | 7.6785    | 5.45647   | 8.28989  | 4.59625   | 6.93097  | 5.53281  | 6.8774   | 7.15062    | 6.21715   |
| EXOSC7    | 6.01416   | 8.04753  | 8.42656  | 8.06495   | 10.5955  | 9.93081  | 6.74506   | 5.34487   | 3.59738  | 4.73923   | 7.94081  | 4.43402  | 5.19665  | 5.40322    | 3.2799    |
| EXOSC8    | 3.67622   | 2.7162   | 3.01951  | 6.43911   | 1.35032  | 5.72698  | 1.88397   | 2.96888   | 3.00817  | 5.04558   | 7.66529  | 2.72558  | 5.34983  | 3.9531     | 3.57679   |
| EXOSC9    | 4.09642   | 2.64514  | 3.06454  | 5.96273   | 1.70089  | 5.55098  | 2.01465   | 2.48261   | 1.77844  | 4.00906   | 6.18724  | 1.85035  | 4.99477  | 3.74542    | 2.75443   |
| EXPH5     | 13.3713   | 21.7247  | 25.2473  | 9.13724   | 5.68276  | 4.95344  | 17.0731   | 17.2254   | 24.4234  | 11.7619   | 11.019   | 17.4889  | 11.6323  | 6.21259    | 3.19111   |



|           |            |            |            |            |           |            |           |           |            |           |            |            |           |            |           |
|-----------|------------|------------|------------|------------|-----------|------------|-----------|-----------|------------|-----------|------------|------------|-----------|------------|-----------|
| EXT1      | 10.6872    | 11.6348    | 13.2932    | 20.0129    | 10.0482   | 15.1648    | 11.1887   | 9.38172   | 5.35552    | 10.9692   | 10.6662    | 8.92232    | 15.1937   | 12.7933    | 11.8101   |
| EXT2      | 7.5101     | 6.79686    | 6.73976    | 14.2959    | 8.46465   | 13.4445    | 7.62122   | 5.38751   | 10.1707    | 10.7756   | 12.7034    | 6.87402    | 14.102    | 8.0416     | 10.6042   |
| EXTL1     | 0.190264   | 0.213902   | 0.31957    | 0.0178248  | 0.465709  | 0.427111   | 0.441058  | 0.169091  | 0.0351092  | 0.0144728 | 0.00650863 | 0.00825086 | 0         | 0.00301335 | 0         |
| EXTL2     | 1.09126    | 0.664676   | 0.539391   | 1.03971    | 0.245205  | 1.0227     | 0.783629  | 0.841736  | 0.250762   | 1.49886   | 3.09138    | 0.4518     | 0.779357  | 0.975679   | 2.14873   |
| EXTL3     | 4.90603    | 4.90695    | 5.15181    | 10.785     | 9.40692   | 9.73789    | 5.17646   | 3.46796   | 6.50847    | 8.97527   | 6.93527    | 6.03345    | 12.9556   | 7.36221    | 5.37865   |
| EXTL3-AS1 | 0.178023   | 0.228732   | 0.368184   | 0.0917292  | 0.368709  | 0.151585   | 0.101631  | 0.0527375 | 0.0361354  | 0.111719  | 0.0334944  | 0.382142   | 0.134003  | 0.0465214  | 0.127832  |
| EYA1      | 0.0730526  | 0.00703957 | 0.00402895 | 0.0200754  | 0.113476  | 0.331751   | 0.0333636 | 0.064923  | 0          | 0.275065  | 0.42883    | 0          | 0.0408487 | 0.0152722  | 0.426645  |
| EYA2      | 1.68734    | 1.74564    | 0.829028   | 0.679652   | 3.12659   | 1.99832    | 1.08552   | 1.33971   | 7.08292    | 0.204253  | 0.338415   | 0.594474   | 0.326045  | 0.41184    | 0.393621  |
| EYA3      | 2.78543    | 3.13737    | 3.39387    | 4.93115    | 2.69346   | 4.79694    | 2.78015   | 2.62628   | 3.72485    | 3.70901   | 3.6275     | 3.59805    | 5.37002   | 4.03377    | 3.07303   |
| EYA4      | 0.501725   | 0.159241   | 0.13506    | 0.0861737  | 0.0680387 | 0.437384   | 0.227323  | 0.173402  | 0.0145487  | 0.114948  | 0.220261   | 0.0199443  | 0.159286  | 0.0707587  | 1.05222   |
| EYS       | 0.209394   | 0.187366   | 0.162227   | 0.0804919  | 0.0154886 | 0.0297161  | 0.121437  | 0.270277  | 0.00607187 | 0.0166864 | 0.0469008  | 0.0214039  | 0.0396722 | 0.0590621  | 0.0739858 |
| EZH1      | 5.79931    | 6.48023    | 6.63498    | 4.04867    | 5.55838   | 4.92127    | 6.19881   | 4.57938   | 3.20987    | 2.81859   | 1.96123    | 3.02654    | 2.0667    | 3.13673    | 3.83468   |
| EZH2      | 2.97292    | 2.65176    | 2.05581    | 4.05349    | 1.85903   | 4.28392    | 1.76682   | 2.61499   | 6.78646    | 3.70262   | 2.85696    | 3.8126     | 3.77228   | 3.04382    | 1.67495   |
| EZR       | 26.5538    | 44.2051    | 53.6448    | 57.1088    | 37.6597   | 52.3718    | 39.3963   | 28.8023   | 65.241     | 77.509    | 34.8938    | 56.0242    | 130.895   | 51.2971    | 20.7359   |
| EZR-AS1   | 0.66123    | 0.477886   | 0.765823   | 0.272567   | 0.924407  | 0.112606   | 0.754971  | 0.352588  | 0.161061   | 1.57683   | 0.149289   | 1.27744    | 0.127987  | 0.898528   | 0.189922  |
| F10       | 5.96659    | 5.36481    | 8.12691    | 0.621083   | 3.79151   | 4.37483    | 10.666    | 4.29832   | 0.422051   | 0.77534   | 2.16013    | 0.398893   | 0.330521  | 0.519731   | 2.03399   |
| F10-AS1   | 0.0508639  | 0.024507   | 0.126234   | 0          | 0         | 0.0866198  | 0         | 0.0452036 | 0          | 0         | 0          | 0          | 0         | 0.0531673  | 0         |
| F11       | 0.00952131 | 0          | 8.28E-24   | 0          | 0         | 0          | 0         | 2.67E-23  | 0          | 0         | 0.0133978  | 0          | 0         | 0          | 0         |
| F11-AS1   | 0.00317592 | 0          | 0.00664315 | 0.00827536 | 0         | 0          | 0.0275059 | 0.0214097 | 0          | 0         | 0          | 0          | 0         | 0          | 0         |
| F11R      | 15.6573    | 20.1619    | 18.6706    | 31.7103    | 20.2909   | 23.0267    | 14.8925   | 14.8629   | 24.3782    | 28.0681   | 19.3167    | 20.2616    | 47.4611   | 18.6418    | 9.12882   |
| F12       | 1.04939    | 1.20151    | 0.886801   | 2.25588    | 3.488     | 3.34358    | 1.77792   | 0.561573  | 2.22627    | 2.13851   | 5.37543    | 2.70474    | 3.35619   | 2.36486    | 0.858862  |
| F13A1     | 14.0787    | 4.35       | 6.09109    | 9.18052    | 13.4193   | 45.5029    | 19.4606   | 15.9621   | 0.780705   | 15.3619   | 31.6578    | 2.33196    | 10.9659   | 4.60903    | 13.0089   |
| F13B      | 0          | 0          | 0          | 0          | 0         | 0          | 0         | 0         | 0          | 0         | 0          | 0          | 0         | 0          | 0         |
| F2        | 0          | 0.0218748  | 0.0563381  | 0.0233934  | 0         | 0.00966454 | 0.0129593 | 0.0403484 | 0.0138233  | 0         | 0          | 0.00812137 | 0         | 0.0296605  | 0.048901  |
| F2R       | 5.35356    | 5.89976    | 8.48542    | 5.83285    | 3.88475   | 9.25353    | 5.45729   | 6.08674   | 2.51838    | 6.34631   | 13.5865    | 3.81856    | 6.90156   | 8.08727    | 8.80426   |
| F2RL1     | 2.81148    | 7.30878    | 8.82378    | 16.6718    | 4.60159   | 7.89863    | 4.99644   | 5.39247   | 15.8242    | 11.9318   | 16.7297    | 9.45038    | 15.0804   | 9.07375    | 4.14029   |

|         |           |            |            |           |           |           |           |           |            |            |           |            |           |            |           |
|---------|-----------|------------|------------|-----------|-----------|-----------|-----------|-----------|------------|------------|-----------|------------|-----------|------------|-----------|
| F2RL2   | 0.830153  | 0.439003   | 0.351756   | 0.459047  | 1.24758   | 1.61487   | 0.577953  | 1.16364   | 0.698682   | 1.41465    | 3.30667   | 1.46808    | 0.931875  | 2.0706     | 2.91751   |
| F2RL3   | 0.246984  | 0.141514   | 0.242978   | 1.19007   | 0.611768  | 1.19361   | 0.442051  | 0.130513  | 0.26828    | 0.569712   | 0.467202  | 0.320013   | 0.900127  | 1.08152    | 1.13121   |
| F3      | 5.93811   | 4.87868    | 7.05662    | 2.70089   | 2.10317   | 3.29396   | 7.15531   | 5.7414    | 8.63354    | 26.7402    | 14.0727   | 12.6842    | 17.5218   | 37.2933    | 7.95836   |
| F5      | 2.79613   | 0.349863   | 0.542308   | 0.254631  | 0.493474  | 0.457281  | 0.73408   | 1.07107   | 0.00307066 | 0.180376   | 0.273239  | 0.0432975  | 0.510794  | 0.126503   | 0.231738  |
| F7      | 0.0578938 | 0.0383544  | 0.0718408  | 0.0596613 | 0.134894  | 0.338909  | 0.0991519 | 0.0450198 | 0.00881352 | 0.0363313  | 0.0408468 | 0.0103561  | 0.0280146 | 0.0264756  | 0.155893  |
| F8      | 1.17928   | 0.460371   | 0.565796   | 0.479376  | 0.222632  | 3.29932   | 0.493799  | 0.739666  | 0.128618   | 0.36924    | 0.638663  | 0.118745   | 0.402334  | 0.216837   | 0.386385  |
| F8A1    | 2.01698   | 1.5265     | 1.59734    | 3.0174    | 1.96926   | 3.53519   | 2.10108   | 1.4743    | 0.745214   | 1.27429    | 2.72718   | 0.794571   | 2.3044    | 1.23182    | 1.36044   |
| F8A2    | 5.14E-15  | 2.24E-21   | 3.83E-23   | 1.20E-17  | 0.184139  | 9.39E-20  | 5.29E-24  | 8.24E-31  | 1.53E-21   | 1.39E-17   | 8.68E-20  | 9.58E-23   | 4.41E-21  | 1.75E-23   | 1.91E-15  |
| F8A3    | 5.14E-15  | 2.24E-21   | 3.83E-23   | 1.20E-17  | 0.184139  | 9.39E-20  | 5.29E-24  | 8.24E-31  | 1.53E-21   | 1.39E-17   | 8.68E-20  | 9.58E-23   | 4.41E-21  | 1.75E-23   | 1.91E-15  |
| F9      | 0         | 0          | 0          | 0         | 0         | 0         | 0         | 0         | 0          | 0          | 0         | 0          | 0         | 0          | 0         |
| FA2H    | 1.31592   | 0.679975   | 0.575866   | 0.216189  | 0.47399   | 0.787591  | 0.783901  | 0.923721  | 4.77309    | 0.287238   | 0.710462  | 0.327505   | 0.0246094 | 0.11961    | 0         |
| FAAH    | 1.66807   | 2.38449    | 2.2207     | 2.36788   | 4.56443   | 2.4268    | 1.564     | 1.51189   | 0.699596   | 1.08146    | 1.05999   | 1.32792    | 0.841026  | 1.42606    | 1.15812   |
| FAAH2   | 1.86186   | 3.82999    | 4.46917    | 2.35613   | 3.26674   | 1.90571   | 2.25799   | 2.82066   | 4.92279    | 0.908094   | 1.58997   | 2.18124    | 0.435692  | 0.640324   | 0.346356  |
| FAAHP1  | 0.018266  | 0.0352034  | 0.0755547  | 0.0188237 | 0.170241  | 0.202193  | 0.0208556 | 0.0162333 | 0.0667379  | 0          | 0         | 0.0522793  | 0         | 0.0286399  | 0.0262323 |
| FAAP100 | 2.77789   | 3.49382    | 3.47197    | 5.34741   | 10.7596   | 9.33335   | 4.32507   | 2.44738   | 3.0756     | 2.71677    | 3.78072   | 3.84624    | 4.36432   | 4.78292    | 4.40389   |
| FAAP20  | 1.28354   | 1.1812     | 1.14095    | 2.28586   | 3.62124   | 3.27481   | 1.47648   | 0.86689   | 1.18148    | 1.34346    | 3.30547   | 1.26427    | 0.970013  | 1.39709    | 1.47847   |
| FAAP24  | 0.43285   | 0.340638   | 0.226787   | 0.966474  | 0.71719   | 1.62169   | 0.280055  | 0.243631  | 0.0878605  | 0.488944   | 0.879541  | 0.299392   | 1.03331   | 0.399667   | 0.476581  |
| FABP1   | 0         | 0          | 0          | 0         | 0         | 0         | 0         | 0         | 0          | 0          | 0         | 0          | 0         | 0          | 0         |
| FABP12  | 0.0370289 | 0.0356822  | 0          | 0.114478  | 0         | 0.0315296 | 0         | 0         | 0.045097   | 0          | 0.083602  | 0.0794855  | 0         | 0.0193529  | 0         |
| FABP2   | 0.0308711 | 0.00495806 | 0.00851292 | 0.0424181 | 0.0159845 | 0         | 0         | 0.0365809 | 0          | 0          | 0         | 0.0147261  | 0         | 0.026891   | 0.0443348 |
| FABP3   | 1.27614   | 0.789355   | 1.12705    | 0.515379  | 0.508967  | 1.3803    | 1.63427   | 1.01152   | 0.189024   | 0.584401   | 1.53795   | 0.259127   | 0.211404  | 0.414602   | 0.742989  |
| FABP4   | 21.127    | 3.32657    | 5.25475    | 0.796884  | 7.12119   | 14.5796   | 3.37395   | 5.47324   | 0.739957   | 5.13       | 14.0916   | 0.0592821  | 1.49674   | 0.245376   | 10.1533   |
| FABP5   | 320.14    | 307.688    | 51.2818    | 890.526   | 484.551   | 571.905   | 136.205   | 166.933   | 3221.99    | 1674.83    | 2758.7    | 1552.04    | 1101.62   | 908.177    | 229.699   |
| FABP5P3 | 0.0270679 | 0          | 0.0447849  | 0         | 0         | 0         | 0.0927157 | 0         | 0          | 0.101919   | 0         | 0          | 0.0174641 | 0          | 0         |
| FABP6   | 0.133466  | 0.10289    | 0.0441651  | 0.247574  | 0.248783  | 0.522766  | 0         | 0.094891  | 0.0975281  | 0.134011   | 0.241067  | 0.0572992  | 0         | 0.0697553  | 0         |
| FABP7   | 0.177033  | 0.333435   | 0.39942    | 0.0221137 | 0.0833314 | 0.137038  | 0.208256  | 1.4446    | 0.0588017  | 0.00673317 | 0.024224  | 0.00767708 | 0         | 0.00560759 | 0         |

|          |          |           |          |           |          |           |          |          |           |          |           |           |           |          |          |
|----------|----------|-----------|----------|-----------|----------|-----------|----------|----------|-----------|----------|-----------|-----------|-----------|----------|----------|
| FABP9    | 0        | 0.0279466 | 0        | 0.418414  | 0        | 0         | 0        | 0.824767 | 0.0706407 | 0        | 0         | 0         | 0         | 0        | 0        |
| FADD     | 3.42212  | 3.1412    | 3.37863  | 7.55516   | 6.13056  | 7.7952    | 2.95184  | 2.05343  | 2.72274   | 5.34538  | 8.57225   | 3.10993   | 7.30875   | 4.47791  | 2.92365  |
| FADS1    | 1.18857  | 0.701352  | 0.977638 | 3.75188   | 1.28535  | 7.38055   | 1.40973  | 0.952818 | 0.369857  | 3.00719  | 6.37594   | 0.713927  | 4.55683   | 3.85244  | 6.90332  |
| FADS2    | 2.04274  | 0.798934  | 0.87129  | 4.95736   | 3.08877  | 11.0172   | 1.86718  | 0.828891 | 0.439028  | 3.9544   | 6.88615   | 0.685425  | 4.3614    | 4.70455  | 10.6037  |
| FADS3    | 3.08488  | 1.08833   | 1.5483   | 3.36528   | 4.27059  | 11.2213   | 2.57903  | 1.23887  | 0.628793  | 3.14283  | 6.11978   | 1.62547   | 4.43873   | 5.58568  | 6.61761  |
| FADS6    | 1.6191   | 2.59386   | 1.44827  | 2.03352   | 9.76144  | 1.97319   | 1.72155  | 1.06121  | 9.4404    | 2.76879  | 4.71792   | 3.49002   | 1.27315   | 0.936124 | 0.188925 |
| FAF1     | 11.3162  | 10.1405   | 10.7105  | 10.9045   | 7.5155   | 10.3069   | 10.1277  | 8.7908   | 10.6828   | 8.56901  | 8.93106   | 6.43659   | 8.95444   | 7.26296  | 5.18554  |
| FAF2     | 6.65843  | 5.97666   | 6.05534  | 8.47281   | 4.06866  | 9.99485   | 6.54308  | 5.81724  | 10.0257   | 8.47282  | 8.4713    | 5.9196    | 13.7941   | 6.58224  | 6.11725  |
| FAH      | 2.04772  | 1.37134   | 0.926914 | 5.60074   | 3.84098  | 6.46997   | 2.17627  | 0.97287  | 1.91355   | 2.37612  | 5.20477   | 1.92595   | 3.04951   | 2.41642  | 1.75707  |
| FAHD1    | 2.05328  | 2.61651   | 1.99811  | 5.56682   | 4.44058  | 4.0405    | 2.09337  | 1.97208  | 6.10621   | 4.72669  | 7.7673    | 2.52425   | 4.02478   | 2.54049  | 1.88953  |
| FAHD2A   | 2.50204  | 2.57108   | 2.53803  | 3.22305   | 3.97728  | 3.33828   | 3.69897  | 1.848    | 2.14285   | 2.53427  | 4.66137   | 1.61871   | 1.88925   | 2.28861  | 2.82262  |
| FAHD2B   | 1.84904  | 1.62036   | 2.04818  | 1.09402   | 1.34566  | 2.74565   | 1.85721  | 1.21504  | 0.755051  | 0.147478 | 0.460295  | 0.323207  | 0.320441  | 0.552495 | 0.48955  |
| FAHD2CP  | 1.26673  | 0.705575  | 1.43816  | 0.22394   | 0.81388  | 1.1102    | 1.42766  | 0.579369 | 0.0992452 | 0.471732 | 0.337303  | 0.09718   | 0.330493  | 0.201542 | 0.585147 |
| FAIM     | 1.85871  | 1.17163   | 1.02896  | 2.67876   | 1.042    | 2.02296   | 0.861652 | 1.13023  | 1.56587   | 2.50828  | 3.54967   | 1.54995   | 2.5788    | 1.67264  | 1.144    |
| FAIM2    | 1.24887  | 1.57482   | 0.633612 | 0.140765  | 5.00894  | 0.942931  | 0.902337 | 0.784726 | 13.2373   | 0.783728 | 3.04542   | 2.23748   | 0.412324  | 0.300859 | 0.420359 |
| FALEC    | 0.204444 | 0.413718  | 0.405913 | 0.210685  | 0.635144 | 0.104449  | 0.233427 | 0.690432 | 2.09151   | 1.12903  | 0.0923167 | 0.643654  | 0         | 0.406035 | 0.293607 |
| FAM102A  | 10.2638  | 12.3647   | 13.3922  | 11.0009   | 24.6823  | 19.4879   | 12.6938  | 12.5749  | 20.4821   | 11.8102  | 13.3939   | 15.7505   | 18.5409   | 9.45383  | 8.86098  |
| FAM102B  | 2.30564  | 1.36982   | 1.77831  | 1.76862   | 0.841506 | 2.36915   | 2.08819  | 1.84492  | 0.712558  | 2.75238  | 4.26131   | 1.06675   | 3.08702   | 2.50972  | 4.5311   |
| FAM104A  | 5.7442   | 5.67576   | 5.80965  | 5.48552   | 4.62916  | 6.67825   | 4.4074   | 5.20705  | 7.44913   | 5.20416  | 6.66905   | 4.55251   | 6.32775   | 5.14839  | 3.75518  |
| FAM104B  | 1.33146  | 1.1753    | 1.1267   | 1.84344   | 0.394699 | 1.35874   | 0.963193 | 1.11103  | 2.06719   | 1.35221  | 2.91432   | 1.04724   | 1.35088   | 0.993357 | 0.919583 |
| FAM106A  | 0.152507 | 0.486581  | 0.285914 | 0.0289993 | 1.38374  | 0.1483    | 0.350361 | 0.1973   | 0.0741402 | 0.283078 | 0.0881421 | 0.523526  | 0.0327307 | 0.501254 | 0.650839 |
| FAM106B  | 0.180293 | 0.173862  | 0.275924 | 0.0415494 | 0.220645 | 0.0933435 | 0.146308 | 0.111683 | 3.83E-17  | 0.122314 | 0.0262195 | 0.187268  | 1.12E-28  | 0.332927 | 0.491813 |
| FAM106CP | 0.793245 | 0.843696  | 0.939676 | 0.143925  | 9.48E-27 | 0.0306237 | 0.292269 | 0.490855 | 1.29E-20  | 0.189214 | 0.0415874 | 0.0182122 | 3.95E-08  | 0.517195 | 0.267397 |
| FAM107A  | 4.13229  | 1.00935   | 1.26197  | 1.33515   | 0.827723 | 2.68233   | 1.68803  | 2.36319  | 0.0954367 | 0.524549 | 0.931793  | 0.373803  | 1.12915   | 0.494197 | 1.51552  |
| FAM107B  | 3.45898  | 2.54928   | 3.35933  | 3.74831   | 1.98025  | 3.62087   | 3.02308  | 2.78882  | 3.70777   | 3.51898  | 4.68972   | 1.96469   | 7.63848   | 2.93536  | 6.73433  |
| FAM110A  | 5.91372  | 8.78403   | 8.25285  | 9.19193   | 31.1951  | 10.5532   | 12.1613  | 5.033    | 20.9305   | 6.49283  | 9.60197   | 6.14064   | 9.81628   | 5.24804  | 2.28353  |

|            |           |           |           |           |           |           |           |          |           |           |           |           |           |            |          |
|------------|-----------|-----------|-----------|-----------|-----------|-----------|-----------|----------|-----------|-----------|-----------|-----------|-----------|------------|----------|
| FAM110B    | 0.699378  | 0.334418  | 0.302437  | 1.03195   | 0.930003  | 3.02718   | 0.520252  | 0.475579 | 0.051622  | 0.99084   | 2.37451   | 0.189554  | 0.964002  | 0.872277   | 3.81214  |
| FAM110C    | 4.8587    | 6.11979   | 5.38182   | 15.9419   | 11.1304   | 11.208    | 1.74693   | 4.89409  | 11.2942   | 7.95253   | 10.9565   | 10.1246   | 9.47978   | 7.78292    | 2.24763  |
| FAM110D    | 1.95896   | 0.790205  | 0.954766  | 2.08136   | 2.97217   | 4.0343    | 0.901606  | 0.607312 | 0.277418  | 1.10546   | 2.24571   | 0.282511  | 1.3129    | 1.15083    | 2.57342  |
| FAM111A    | 2.38269   | 3.51353   | 3.41632   | 3.19316   | 1.40245   | 2.19258   | 1.75672   | 2.49736  | 1.76974   | 1.79699   | 2.76213   | 1.38378   | 2.15429   | 2.04664    | 3.15332  |
| FAM111A-DT | 0.752201  | 0.729808  | 0.784235  | 0.615884  | 0.368135  | 0.956347  | 0.705895  | 0.760068 | 0.451773  | 0.28452   | 0.604867  | 0.213813  | 0.265927  | 0.263884   | 0.651113 |
| FAM111B    | 0.331451  | 0.325659  | 0.387105  | 1.8351    | 0.0706667 | 1.13997   | 0.111306  | 0.32922  | 0.348264  | 1.24801   | 1.40863   | 0.604529  | 3.81994   | 1.61003    | 0.821342 |
| FAM114A1   | 3.91447   | 3.18614   | 3.68263   | 4.2444    | 3.63653   | 6.80657   | 3.63009   | 2.83797  | 3.46548   | 7.44836   | 9.73471   | 3.25316   | 7.98111   | 4.69479    | 8.57263  |
| FAM114A2   | 1.58035   | 1.44961   | 1.49795   | 2.79186   | 1.23815   | 3.43277   | 1.0679    | 1.41267  | 2.14913   | 2.67742   | 3.74487   | 1.37473   | 2.83295   | 1.85177    | 2.58718  |
| FAM117A    | 3.37197   | 3.2021    | 4.21673   | 2.28293   | 3.19751   | 4.10646   | 4.35363   | 2.07331  | 0.53721   | 1.34101   | 3.16473   | 0.820609  | 1.18898   | 1.09121    | 2.78729  |
| FAM117B    | 2.78615   | 2.31783   | 2.45413   | 1.92102   | 0.977657  | 1.75453   | 2.2245    | 2.24095  | 1.23523   | 0.835231  | 1.02276   | 0.892083  | 0.843194  | 0.743795   | 0.788737 |
| FAM118A    | 2.53586   | 3.31488   | 4.23611   | 1.4941    | 5.46576   | 3.1857    | 1.69878   | 2.48046  | 0.42986   | 1.10408   | 1.9677    | 0.644972  | 1.24373   | 1.75388    | 2.23031  |
| FAM118B    | 1.71389   | 1.4864    | 1.50018   | 2.09666   | 1.15078   | 2.56093   | 1.64124   | 1.32663  | 2.46439   | 2.05396   | 3.90699   | 1.59028   | 2.36141   | 2.06891    | 2.46136  |
| FAM120A    | 9.82109   | 9.07519   | 9.16344   | 17.1357   | 11.0927   | 17.7859   | 9.51587   | 8.71538  | 7.8347    | 12.3494   | 12.1564   | 8.91683   | 19.3453   | 13.278     | 12.3149  |
| FAM120AOS  | 3.58791   | 3.8163    | 4.4705    | 3.33809   | 3.54135   | 5.12668   | 2.9574    | 3.00298  | 2.79662   | 3.43041   | 6.44448   | 2.11512   | 3.84355   | 2.94929    | 3.03012  |
| FAM120B    | 6.04374   | 5.63988   | 5.69527   | 5.64221   | 4.11983   | 6.42561   | 4.9713    | 5.19782  | 3.70994   | 3.49705   | 4.12653   | 3.03117   | 4.39465   | 4.20303    | 5.26722  |
| FAM120C    | 2.00422   | 1.19288   | 1.39719   | 1.35339   | 1.08175   | 2.56566   | 1.57461   | 1.39131  | 0.497531  | 0.609087  | 1.1328    | 0.790602  | 0.610289  | 0.803888   | 1.04344  |
| FAM122A    | 2.99294   | 2.33721   | 2.55011   | 1.96387   | 1.60537   | 3.73366   | 2.46915   | 2.93596  | 2.99027   | 2.19689   | 3.2775    | 1.38067   | 2.8792    | 1.71099    | 2.8226   |
| FAM122B    | 2.25028   | 2.22342   | 2.16574   | 2.93955   | 1.01418   | 3.54611   | 2.05544   | 2.80545  | 2.123     | 1.63096   | 2.08948   | 1.66456   | 2.20439   | 2.25611    | 2.05736  |
| FAM122C    | 0.236241  | 0.250569  | 0.241746  | 0.155019  | 0.120097  | 0.303563  | 0.201073  | 0.206134 | 0.0993925 | 0.172513  | 0.174559  | 0.096653  | 0.0803678 | 0.175207   | 0.314598 |
| FAM124A    | 0.421382  | 0.181843  | 0.269784  | 0.539976  | 0.216287  | 0.936003  | 0.405815  | 0.267027 | 0.0937141 | 0.280535  | 0.690781  | 0.110117  | 0.328613  | 0.543879   | 0.873533 |
| FAM124B    | 0.660211  | 0.382579  | 0.450223  | 0.707948  | 1.31656   | 0.904015  | 0.346344  | 0.491593 | 0.673673  | 0.358327  | 0.946727  | 0.293653  | 0.598652  | 0.489605   | 1.15315  |
| FAM126A    | 3.45694   | 2.39378   | 2.75289   | 3.62907   | 1.22117   | 4.91201   | 2.64773   | 2.54902  | 2.35645   | 6.56002   | 6.84032   | 3.20811   | 7.88162   | 6.68652    | 8.34123  |
| FAM126B    | 2.6042    | 2.4244    | 2.83492   | 2.16098   | 0.884031  | 1.63344   | 2.10113   | 3.30881  | 3.38437   | 3.27239   | 3.08933   | 2.69179   | 3.46372   | 2.41026    | 2.0304   |
| FAM129A    | 7.88371   | 4.82412   | 5.61263   | 4.78429   | 5.14296   | 7.98816   | 6.86288   | 5.81701  | 11.4538   | 4.42227   | 4.0225    | 3.3694    | 5.89429   | 2.69369    | 6.33346  |
| FAM129B    | 29.9784   | 29.9191   | 29.8709   | 100.058   | 87.4437   | 108.865   | 34.053    | 18.0048  | 49.0707   | 69.7314   | 37.9017   | 53.6068   | 188.612   | 69.1895    | 39.3989  |
| FAM129C    | 0.0332635 | 0.0240403 | 0.0206384 | 0.0257092 | 0.103339  | 0.0354042 | 0.0189896 | 0        | 0         | 0.0104373 | 0.0469379 | 0.0178507 | 0.0375575 | 0.00434623 | 0.131369 |

|            |            |           |           |            |            |            |           |           |            |           |            |            |            |           |           |
|------------|------------|-----------|-----------|------------|------------|------------|-----------|-----------|------------|-----------|------------|------------|------------|-----------|-----------|
| FAM131A    | 2.68146    | 4.182     | 5.42628   | 2.55076    | 5.26742    | 3.60399    | 3.98479   | 2.53703   | 8.75212    | 4.60816   | 5.36484    | 3.55394    | 3.84873    | 2.84602   | 1.80104   |
| FAM131B    | 0.0468905  | 0.0602468 | 0.0732721 | 0.0590602  | 0.194232   | 0.173015   | 0.107076  | 0.0370421 | 0.0824884  | 0.111166  | 0.0999855  | 0.0372793  | 0.151267   | 0.059906  | 0.269363  |
| FAM131C    | 0.12245    | 0.445765  | 0.562774  | 0.112167   | 0.380414   | 0.347549   | 0.341756  | 0.32647   | 1.09362    | 0.290298  | 0.798667   | 0.301789   | 0.412577   | 0.241769  | 0         |
| FAM133A    | 0.0541992  | 0         | 0.0112093 | 0          | 0          | 0.0115375  | 0         | 0         | 0          | 0         | 0.015296   | 0.00484762 | 0          | 0         | 0.0389184 |
| FAM133B    | 3.02267    | 2.30674   | 2.27528   | 2.73219    | 0.67819    | 2.32096    | 0.815275  | 2.13845   | 1.36654    | 1.2652    | 1.95326    | 1.86741    | 1.71819    | 3.07457   | 1.83618   |
| FAM133CP   | 0.482479   | 0.284893  | 0.329463  | 0.482655   | 0.0142712  | 0.312918   | 0.266838  | 0.510707  | 0.0113184  | 0.197564  | 0.176953   | 0.153232   | 0.0711319  | 0.846553  | 2.131     |
| FAM133DP   | 1.72653    | 1.87056   | 1.82466   | 1.58472    | 0.596279   | 1.52791    | 1.25686   | 2.67127   | 1.39885    | 2.82671   | 3.39045    | 1.70406    | 1.38942    | 1.59205   | 2.6453    |
| FAM135A    | 3.85661    | 4.74031   | 5.25738   | 5.52348    | 1.7929     | 3.1073     | 3.78782   | 5.53732   | 8.81722    | 4.84044   | 3.17549    | 4.54477    | 3.48489    | 4.09809   | 2.38217   |
| FAM135B    | 0.00655054 | 0.0063123 | 0.0270953 | 0.00337526 | 0          | 0.0167331  | 0.321606  | 0.0291079 | 0          | 0         | 0          | 0          | 0.00211319 | 0.0051354 | 0.0094074 |
| FAM136A    | 3.88663    | 3.52233   | 3.54239   | 6.11196    | 1.7772     | 5.58735    | 2.9392    | 2.86347   | 4.7232     | 5.16319   | 6.22987    | 3.98488    | 7.8648     | 5.32892   | 2.58545   |
| FAM138A    | 0.0204806  | 1.53E-15  | 1.01E-13  | 0          | 0.0159067  | 0.00871947 | 0.0311787 | 4.04E-18  | 0.00415717 | 0.0031387 | 0.00282304 | 0.0097696  | 0          | 1.07E-06  | 0         |
| FAM138B    | 0.0204806  | 0.0443856 | 0.0847145 | 0          | 0.0159067  | 1.04E-26   | 0.0311787 | 0.0364029 | 0          | 0.0031387 | 0.00282304 | 0          | 0          | 0.0374633 | 0         |
| FAM138C    | 0.0204806  | 1.53E-15  | 1.34E-22  | 0          | 1.87E-11   | 0.00871947 | 0.0311787 | 4.04E-18  | 0.00415717 | 0.0031387 | 0.00282304 | 0.0097696  | 0          | 1.07E-06  | 0         |
| FAM138D    | 2.55E-26   | 0.0148742 | 1.60E-22  | 0          | 2.23E-11   | 0          | 2.84E-17  | 4.82E-18  | 0          | 0.0037476 | 0.00337069 | 0          | 0          | 0         | 0         |
| FAM138E    | 1.46E-17   | 1.08E-22  | 4.08E-07  | 0          | 0.0159067  | 0.00871947 | 2.13E-32  | 4.04E-18  | 0.00415717 | 0.0031387 | 0.00282304 | 0.0097696  | 0          | 0.0374597 | 0         |
| FAM138F    | 0.0204806  | 1.53E-15  | 1.01E-13  | 0          | 0.0159067  | 0.00871947 | 0.0311787 | 4.04E-18  | 0.00415717 | 0.0031387 | 0.00282304 | 0.0097696  | 0          | 1.07E-06  | 0         |
| FAM13A     | 3.88211    | 2.81384   | 3.05939   | 1.5325     | 1.62588    | 3.9256     | 2.32324   | 2.74737   | 0.722959   | 1.63051   | 1.96614    | 0.946754   | 0.757464   | 1.18577   | 2.02623   |
| FAM13A-AS1 | 2.58522    | 2.5334    | 3.17539   | 0.811606   | 0.341744   | 0.456485   | 1.71969   | 2.88163   | 0.537603   | 2.15503   | 0.466268   | 0.967982   | 0.21414    | 1.03444   | 0.858086  |
| FAM13B     | 4.37404    | 3.74118   | 3.92568   | 4.20448    | 1.57655    | 5.192      | 2.51466   | 3.69399   | 1.50025    | 3.3898    | 4.19856    | 1.76641    | 2.91935    | 3.4104    | 4.37381   |
| FAM13C     | 1.45971    | 1.36163   | 1.09905   | 0.519953   | 1.54069    | 1.97035    | 1.12828   | 1.08715   | 0.428926   | 1.25564   | 2.19913    | 0.496201   | 0.312847   | 0.688865  | 2.87768   |
| FAM149A    | 0.98984    | 0.363029  | 0.439987  | 0.12941    | 0.436026   | 1.71083    | 0.860277  | 0.551446  | 0.071971   | 0.120527  | 0.483653   | 0.0158565  | 0.0571916  | 0.077214  | 0.424339  |
| FAM149B1   | 1.90368    | 1.94868   | 1.95446   | 2.62642    | 1.43475    | 2.24121    | 1.50874   | 1.69381   | 2.38877    | 2.33959   | 2.80364    | 1.19815    | 1.90885    | 1.66458   | 2.30305   |
| FAM151A    | 0.0330386  | 0.0575795 | 0.0559608 | 0.0746533  | 0.0303568  | 0.155261   | 0.108831  | 0.014201  | 9.16E-18   | 0.0622868 | 2.11E-30   | 0.0388975  | 0.10116    | 0.145723  | 0.151021  |
| FAM151B    | 0.285046   | 0.333539  | 0.348101  | 0.335713   | 0.189761   | 0.288944   | 0.201473  | 0.325704  | 0.297561   | 0.851815  | 0.658887   | 0.446766   | 0.33279    | 0.297955  | 0.487336  |
| FAM153A    | 0.0920386  | 0.132444  | 0.218718  | 9.15E-20   | 0.00029283 | 0.0293383  | 0.112679  | 0.251953  | 0          | 0         | 0          | 0          | 0          | 0.0210794 | 0         |

|             |           |            |           |           |           |            |            |           |           |            |           |           |           |           |           |
|-------------|-----------|------------|-----------|-----------|-----------|------------|------------|-----------|-----------|------------|-----------|-----------|-----------|-----------|-----------|
| FAM153B     | 1.05E-05  | 0.141136   | 0.253067  | 0.0265882 | 0.0391405 | 0.0922379  | 0.250258   | 0.435828  | 0         | 0          | 0         | 0         | 0         | 1.23E-06  | 0         |
| FAM153C     | 0.234739  | 0.267871   | 0.403192  | 0.0465509 | 0.0233892 | 0.00679566 | 0.554791   | 0.600132  | 0         | 0.00944922 | 0         | 0.0107739 | 0         | 0.0354132 | 0         |
| FAM155A     | 0.119943  | 0.054901   | 0.0347289 | 0.135966  | 0.149051  | 0.0765976  | 0.0273895  | 0.0373085 | 0.0292155 | 0.210758   | 0.352043  | 0.0686581 | 0.263115  | 0.592398  | 0.585662  |
| FAM155A-IT1 | 0.0256149 | 0.0308541  | 0         | 0.0527938 | 0.0198944 | 0.0327161  | 0.0584925  | 0.0910575 | 0         | 0.0160747  | 0         | 0.0366563 | 0.0247899 | 0.575661  | 1.03001   |
| FAM155B     | 0.0575841 | 0.0166469  | 0.0142913 | 0.284842  | 0.089448  | 0.225548   | 0.0131495  | 0.025588  | 0.0841572 | 1.33707    | 0.169014  | 0.222496  | 4.78902   | 0.306979  | 0.206745  |
| FAM156A     | 0.893748  | 0.725857   | 0.819003  | 0.571202  | 1.57017   | 0.784976   | 0.269513   | 0.421987  | 0.306049  | 0.290019   | 0.532343  | 0.353311  | 0.222087  | 0.460761  | 0.54425   |
| FAM156B     | 2.62522   | 3.89805    | 3.77534   | 1.75695   | 4.76506   | 2.57163    | 3.59088    | 2.57546   | 1.19431   | 1.39472    | 0.899276  | 2.34393   | 0.925039  | 2.21812   | 2.50933   |
| FAM157A     | 0.126618  | 0.0979506  | 0.0718604 | 0.207154  | 0.159647  | 0.107412   | 0.201554   | 0.151747  | 0.0954526 | 0.0345086  | 0.0737785 | 0.3007    | 0.0775223 | 0.11042   | 0.112393  |
| FAM157B     | 1.87753   | 1.68733    | 1.56297   | 2.20295   | 1.97447   | 1.48927    | 2.39117    | 2.56682   | 0.827732  | 0.910722   | 0.337612  | 2.68555   | 0.474123  | 1.44337   | 1.85084   |
| FAM157C     | 0.373058  | 0.152388   | 0.198256  | 1.24032   | 1.39772   | 0.727256   | 0.596757   | 0.297386  | 0.300121  | 0.198081   | 0.203526  | 0.307987  | 0.303763  | 0.252241  | 0.892763  |
| FAM160A1    | 7.25329   | 10.8289    | 11.731    | 7.96298   | 8.45715   | 6.31685    | 9.6883     | 8.98041   | 16.3013   | 8.2937     | 5.09676   | 11.1675   | 10.1299   | 6.00516   | 1.94316   |
| FAM160A2    | 4.77179   | 5.59133    | 6.04747   | 4.44621   | 10.0477   | 5.82939    | 5.62227    | 4.12296   | 4.00346   | 3.67661    | 3.32929   | 4.41961   | 4.04078   | 4.56874   | 3.79761   |
| FAM160B1    | 3.92744   | 2.45474    | 2.59178   | 3.16262   | 1.16399   | 4.26442    | 2.82039    | 3.36321   | 1.95822   | 2.50485    | 4.15731   | 1.53847   | 3.50581   | 2.43645   | 3.21764   |
| FAM160B2    | 4.38252   | 5.90153    | 6.1076    | 9.17738   | 13.5279   | 11.0612    | 6.088      | 4.509     | 5.67956   | 6.62178    | 4.95365   | 6.68976   | 9.43616   | 7.03009   | 8.1255    |
| FAM161A     | 0.462539  | 0.355735   | 0.368202  | 0.346004  | 0.195578  | 0.398303   | 0.34228    | 0.23445   | 0.119386  | 0.308529   | 0.365488  | 0.163797  | 0.154733  | 0.291953  | 0.344418  |
| FAM161B     | 0.7916    | 0.735587   | 0.778209  | 0.677325  | 0.839747  | 1.51682    | 0.690727   | 0.629154  | 0.305684  | 0.535987   | 0.58848   | 0.359188  | 0.511654  | 0.514634  | 0.731608  |
| FAM162A     | 16.8464   | 19.0679    | 14.3706   | 21.3166   | 15.5722   | 40.141     | 13.685     | 12.3209   | 138.708   | 80.8322    | 160.682   | 54.6186   | 43.548    | 37.196    | 12.771    |
| FAM162B     | 0.58081   | 0.312133   | 0.332645  | 0.207188  | 0.451099  | 1.2554     | 0.48461    | 0.238235  | 0.326475  | 0.700939   | 1.23567   | 0.0639362 | 0.115303  | 0.280206  | 0.705791  |
| FAM163A     | 0         | 0.00241828 | 0         | 0         | 0         | 0          | 0.00573064 | 0         | 0         | 0          | 0.0169978 | 0         | 0.0032383 | 0         | 0         |
| FAM163B     | 0.0204625 | 0.0197183  | 0         | 0.0210872 | 0         | 0.034847   | 0          | 0         | 0         | 0          | 0         | 0         | 0         | 0.0106946 | 0         |
| FAM166A     | 0.176495  | 0.425683   | 0.58993   | 0.503961  | 0.161805  | 0.413849   | 0.658583   | 0.237706  | 1.18614   | 0.695745   | 0.751723  | 0.780681  | 1.85181   | 0.590668  | 0.283373  |
| FAM166B     | 0.208872  | 0.543444   | 0.57022   | 0.129149  | 0.227116  | 0.213422   | 0.357725   | 0.297005  | 0         | 0.0262156  | 0.0471582 | 0.0896722 | 0         | 0.251081  | 0.0299967 |
| FAM167A     | 3.60179   | 5.25795    | 5.36993   | 2.32494   | 3.07408   | 2.39284    | 5.64245    | 3.63815   | 4.60694   | 2.85998    | 4.03406   | 1.6426    | 5.84795   | 4.06929   | 3.62165   |
| FAM167A-AS1 | 0.170448  | 0.155124   | 0.172341  | 0.0585505 | 0.147091  | 0.0322521  | 0.0864942  | 0.201973  | 0         | 0.02377    | 0.0855176 | 0.0406534 | 0.0366574 | 0.0494909 | 0.32638   |
| FAM167B     | 0.169457  | 0.151631   | 0.140187  | 1.89599   | 0.902489  | 0.783293   | 0.221121   | 0.0645427 | 0.117932  | 0.364606   | 1.50304   | 0.329111  | 0.687237  | 0.759136  | 0.591023  |
| FAM168A     | 4.91062   | 3.70322    | 4.04931   | 3.73499   | 4.45368   | 6.8196     | 5.1871     | 3.86291   | 1.85589   | 3.53096    | 4.49911   | 2.44823   | 4.19033   | 3.95066   | 6.52895   |

|             |           |            |            |           |           |           |           |            |           |           |           |            |           |            |           |
|-------------|-----------|------------|------------|-----------|-----------|-----------|-----------|------------|-----------|-----------|-----------|------------|-----------|------------|-----------|
| FAM168B     | 10.3373   | 8.42894    | 9.41727    | 11.4914   | 9.30474   | 17.7403   | 8.91855   | 8.04036    | 8.99894   | 10.3145   | 10.1256   | 7.13623    | 20.4646   | 10.3848    | 8.98648   |
| FAM169A     | 0.28682   | 0.13281    | 0.199698   | 0.134353  | 0.0854274 | 0.263254  | 0.0765543 | 0.291317   | 0.081658  | 0.350639  | 0.412089  | 0.155978   | 0.523207  | 0.467533   | 0.197931  |
| FAM169B     | 0         | 0          | 0          | 0         | 0.0109003 | 0.0179254 | 0         | 0          | 0         | 0         | 0         | 0          | 0         | 0          | 0         |
| FAM170A     | 0         | 0.0162192  | 0          | 0.0693806 | 0         | 0.0143316 | 0         | 0.0149583  | 0         | 0.0633751 | 0         | 0          | 0         | 0          | 0         |
| FAM170B     | 0         | 0.00790268 | 0          | 0.0169026 | 0         | 0         | 0         | 0          | 0         | 0         | 0         | 0          | 0         | 0.00857234 | 0         |
| FAM170B-AS1 | 0.0231431 | 0.00557534 | 0.00957278 | 0         | 0         | 0.009853  | 0         | 0          | 0         | 0.0145235 | 0.0130628 | 0.0165595  | 0         | 0.00604778 | 0.0664727 |
| FAM171A1    | 3.03496   | 1.56956    | 1.56557    | 3.508     | 4.26839   | 5.11358   | 2.1875    | 1.72872    | 1.18451   | 1.53691   | 3.07555   | 1.16545    | 2.13203   | 1.80056    | 3.84532   |
| FAM171A2    | 0.114222  | 0.402169   | 0.348894   | 0.398399  | 0.846184  | 0.351626  | 0.310988  | 0.124936   | 0.331722  | 0.485218  | 0.406663  | 0.125736   | 0.527204  | 0.404104   | 0.378546  |
| FAM171B     | 0.79422   | 0.818657   | 1.06634    | 0.872137  | 0.788758  | 1.82925   | 1.04804   | 1.05876    | 0.935557  | 2.15707   | 3.15271   | 0.549653   | 1.30207   | 1.02072    | 2.68322   |
| FAM172A     | 3.78035   | 2.79947    | 2.80288    | 2.76392   | 1.54612   | 3.24398   | 2.42406   | 3.44682    | 2.05421   | 2.36314   | 2.94466   | 1.61736    | 2.14169   | 1.88096    | 2.85888   |
| FAM172BP    | 0         | 0          | 0.00834229 | 0         | 0         | 0         | 0.0115137 | 0          | 0         | 0         | 0.0341511 | 0          | 0.0260249 | 0          | 0.0579283 |
| FAM173A     | 1.69469   | 1.69684    | 1.46768    | 5.53944   | 10.4886   | 5.65928   | 2.4489    | 1.17664    | 5.67582   | 4.08784   | 9.53552   | 2.61465    | 4.52737   | 2.96161    | 2.77603   |
| FAM173B     | 0.834897  | 1.03762    | 1.00698    | 1.39913   | 0.848429  | 1.19592   | 0.614719  | 0.804398   | 0.893274  | 1.07726   | 1.9995    | 1.01612    | 1.08741   | 0.909411   | 1.26625   |
| FAM174A     | 6.02915   | 6.0979     | 6.8811     | 6.98766   | 14.5123   | 9.04586   | 4.50475   | 5.02427    | 17.9514   | 8.23174   | 17.2178   | 7.01486    | 8.4742    | 6.27541    | 5.61706   |
| FAM174B     | 1.57573   | 1.46329    | 1.73322    | 1.99578   | 2.05111   | 2.25618   | 1.40714   | 1.43168    | 0.686147  | 0.629773  | 1.96762   | 0.592085   | 1.69253   | 0.814346   | 1.27686   |
| FAM177A1    | 3.99656   | 3.97041    | 4.38688    | 4.87037   | 2.71777   | 5.11839   | 2.64896   | 3.4386     | 6.92486   | 6.65888   | 8.01861   | 3.92671    | 9.40193   | 4.37477    | 3.24525   |
| FAM177B     | 0.0215987 | 0.0208132  | 0.053604   | 0         | 0.0335503 | 0         | 0         | 0.0383903  | 0         | 0.0135543 | 0.0121911 | 0.0154545  | 0         | 0.00564422 | 0         |
| FAM178B     | 0.038482  | 0.103831   | 0.038202   | 0.0951763 | 0.466251  | 0.196601  | 0.263625  | 0.0410395  | 0.731121  | 0.173876  | 0.330154  | 0.170716   | 0.158901  | 0.100562   | 0         |
| FAM180A     | 1.83757   | 0.903941   | 1.09494    | 0.662121  | 0.958112  | 1.59749   | 1.71661   | 1.43893    | 0.1252    | 0.580616  | 1.46512   | 0.229865   | 0.795919  | 0.839504   | 1.67935   |
| FAM180B     | 1.20416   | 1.62134    | 2.40172    | 0.067996  | 0.768692  | 0.154502  | 3.1641    | 1.21676    | 0         | 0.0207034 | 0         | 0.0236058  | 0         | 0.0258637  | 0.189516  |
| FAM181A     | 0.0109217 | 0          | 0          | 0         | 0.0169651 | 0         | 0.01247   | 0.00970628 | 0.0266028 | 0         | 0         | 0.00781476 | 0         | 0.0171244  | 0         |
| FAM181A-AS1 | 0         | 0.00464999 | 0          | 0         | 0         | 0         | 0.0110192 | 0          | 0         | 0         | 0         | 0          | 0         | 0          | 0         |
| FAM181B     | 0.29846   | 0.113844   | 0.0617267  | 1.37126   | 0.753367  | 1.24949   | 0.127789  | 0.132623   | 5.40692   | 0.764803  | 2.54097   | 1.33472    | 0.657929  | 0.662949   | 0.321469  |
| FAM182A     | 0.0926849 | 1.57597    | 1.43571    | 0.327799  | 1.08023   | 0.487675  | 1.29894   | 0.224322   | 0.344433  | 0.258227  | 0.417857  | 0.399774   | 0.218528  | 0.10529    | 0.0303881 |
| FAM182B     | 0.719904  | 0.849436   | 1.00864    | 0.18774   | 0.61796   | 0.298075  | 0.633066  | 0.627849   | 0.188142  | 0.114339  | 0.155572  | 0.1868     | 0.180041  | 0.165929   | 0.0975251 |
| FAM183A     | 0.134292  | 1.38035    | 0.851737   | 0.276784  | 0.556273  | 0.228696  | 0.357772  | 0.278478   | 0.218071  | 0.561836  | 0.202132  | 0.16015    | 0.144408  | 0.210561   | 0         |

|             |           |            |           |           |           |           |           |           |            |           |            |           |           |           |           |
|-------------|-----------|------------|-----------|-----------|-----------|-----------|-----------|-----------|------------|-----------|------------|-----------|-----------|-----------|-----------|
| FAM183BP    | 0.463704  | 0.0947841  | 0.0813716 | 0         | 0.0873082 | 0.0358944 | 0.192524  | 0.262246  | 0          | 0.0176363 | 0          | 0.0100543 | 0.0181321 | 0.007344  | 0         |
| FAM184A     | 0.52838   | 0.332296   | 0.326685  | 0.103171  | 0.146872  | 0.317304  | 0.15876   | 0.326235  | 0.0406426  | 0.027923  | 0.138131   | 0.0955125 | 0.0574161 | 0.0552309 | 0.175727  |
| FAM184B     | 0.55418   | 0.507904   | 0.513273  | 0.15519   | 0.411703  | 0.282101  | 0.440171  | 0.347969  | 0.146724   | 0.128526  | 0.0612001  | 0.137924  | 0.0544104 | 0.317973  | 0.198968  |
| FAM185A     | 1.91634   | 1.94742    | 2.15119   | 1.1185    | 1.64203   | 0.746075  | 1.33604   | 1.58753   | 0.516346   | 1.20615   | 0.938072   | 1.41164   | 0.612735  | 1.06361   | 0.828067  |
| FAM185BP    | 1.62688   | 1.81829    | 1.82024   | 0.597786  | 0.745704  | 0.420122  | 1.03534   | 2.31689   | 0.186767   | 0.21758   | 0.278493   | 0.481852  | 0.0817355 | 0.512258  | 0.411744  |
| FAM186A     | 0.0636848 | 0.078245   | 0.108003  | 0.036096  | 0.148387  | 0.0813401 | 0.021814  | 0.0481081 | 0          | 0         | 0.00359461 | 0.0136705 | 0         | 0.014978  | 0.0411567 |
| FAM186B     | 0.556257  | 0.628673   | 0.687422  | 0.283081  | 0.57604   | 0.461951  | 0.556707  | 0.488252  | 0.0334548  | 0.0861926 | 0.0852765  | 0.250603  | 0.106339  | 0.380454  | 0.433946  |
| FAM187A     | 0.0148258 | 0.0285732  | 0.0367948 | 0.076392  | 0.276355  | 0.214607  | 0         | 0.0131759 | 0.0180561  | 0.0744315 | 0.0167365  | 0.0530412 | 0.0765242 | 0.0232458 | 0.12775   |
| FAM187B     | 0         | 0.00945774 | 0.0649553 | 0         | 0.0914737 | 0.0334283 | 0         | 0         | 0          | 0         | 0          | 0         | 0         | 0         | 0.0281903 |
| FAM189A1    | 0.0835844 | 0.0497481  | 0.0569445 | 0.0152005 | 0.14511   | 0.167461  | 0.0673652 | 0.0611741 | 0.00598803 | 0.06171   | 0.044403   | 0         | 0         | 0.0154182 | 0.0988547 |
| FAM189A2    | 3.23812   | 2.9024     | 3.32881   | 0.744277  | 2.28073   | 1.78408   | 2.85444   | 2.34877   | 0.444629   | 0.498061  | 0.313579   | 1.15848   | 0.645199  | 0.489464  | 0.421723  |
| FAM189B     | 2.04395   | 2.6995     | 2.68625   | 6.13235   | 6.78898   | 9.5105    | 3.07025   | 1.73276   | 2.9395     | 2.85647   | 5.67841    | 3.61477   | 6.15419   | 4.06845   | 2.53983   |
| FAM192A     | 5.24839   | 5.17125    | 5.26553   | 4.95747   | 4.5156    | 7.89908   | 4.29637   | 4.15287   | 4.45099    | 4.21659   | 5.59714    | 3.79055   | 3.81151   | 3.97445   | 3.96293   |
| FAM193A     | 3.13405   | 4.11243    | 4.24763   | 4.1322    | 4.08795   | 5.958     | 4.01991   | 3.13294   | 2.20894    | 2.79533   | 2.19303    | 2.62739   | 3.56232   | 3.83127   | 4.76265   |
| FAM193B     | 6.74027   | 9.75219    | 9.87545   | 6.58185   | 18.8599   | 9.93138   | 6.4909    | 6.22911   | 5.86875    | 5.88561   | 4.70925    | 9.08651   | 3.25679   | 6.77758   | 7.0133    |
| FAM197Y2    | 0         | 0          | 0         | 0         | 0         | 0         | 0         | 0         | 0          | 0         | 0          | 0         | 0         | 0         | 0         |
| FAM197Y3    | 0         | 0          | 0         | 0         | 0         | 0         | 0         | 0         | 0          | 0         | 0          | 0         | 0         | 0         | 0         |
| FAM197Y4    | 0         | 0          | 0         | 0         | 0         | 0         | 0         | 0         | 0          | 0         | 0          | 0         | 0         | 0         | 0         |
| FAM197Y5    | 0         | 0          | 0         | 0         | 0         | 0         | 0         | 0         | 0          | 0         | 0          | 0         | 0         | 0         | 0         |
| FAM197Y6    | 0         | 0          | 0         | 0         | 0         | 0         | 0         | 0         | 0          | 0         | 0          | 0         | 0         | 0         | 0         |
| FAM197Y7    | 0         | 0          | 0         | 0         | 0         | 0         | 0         | 0         | 0          | 0         | 0          | 0         | 0         | 0         | 0         |
| FAM197Y8    | 0         | 0          | 0         | 0         | 0         | 0         | 0         | 0         | 0          | 0         | 0          | 0         | 0         | 0         | 0         |
| FAM197Y9    | 0         | 0          | 0         | 0         | 0         | 0         | 0         | 0         | 0          | 0         | 0          | 0         | 0         | 0         | 0         |
| FAM198A     | 1.41568   | 0.691842   | 0.641346  | 1.26438   | 1.45556   | 2.49697   | 0.908252  | 0.437354  | 0.188835   | 0.177683  | 0.312016   | 0.12059   | 0.356658  | 0.225493  | 0.638974  |
| FAM198B     | 4.39556   | 1.96026    | 2.1067    | 4.32034   | 3.32753   | 7.03108   | 2.5733    | 3.75036   | 1.00932    | 10.119    | 21.8675    | 1.11581   | 5.43738   | 4.3603    | 9.1361    |
| FAM198B-AS1 | 0.441695  | 0.410871   | 0.470418  | 0.201127  | 0.439196  | 0.823973  | 0.303139  | 0.495338  | 0.172989   | 0.106881  | 0.403721   | 0.554984  | 0.0763681 | 0.219319  | 0.111987  |



|          |           |            |           |           |           |           |           |           |            |            |           |           |            |            |           |
|----------|-----------|------------|-----------|-----------|-----------|-----------|-----------|-----------|------------|------------|-----------|-----------|------------|------------|-----------|
| FAM199X  | 2.83161   | 2.5027     | 2.72033   | 2.53525   | 1.25805   | 2.70922   | 2.1484    | 3.46627   | 2.51412    | 3.27117    | 3.25152   | 1.99341   | 3.92301    | 2.51587    | 2.10761   |
| FAM19A1  | 0.0208308 | 0.0150549  | 0.0172327 | 0         | 0         | 0.0354744 | 0         | 0         | 0          | 0          | 0.0117577 | 0         | 0          | 0          | 0         |
| FAM19A2  | 0.27418   | 0.14828    | 0.152757  | 0.0461307 | 0.208602  | 0.214403  | 0.121387  | 0.183995  | 0.0136294  | 0.00702295 | 0.0189499 | 0.0600561 | 0.0072204  | 0.0292446  | 0.0482152 |
| FAM19A3  | 0.102132  | 0.00984173 | 0.0675925 | 0         | 0.158646  | 0.0173928 | 0.0699664 | 0.145226  | 0.074631   | 0.0512743  | 0.0230588 | 0.073078  | 0          | 0.0106757  | 0.0586696 |
| FAM19A4  | 0         | 0          | 0         | 0         | 0         | 0         | 0         | 0         | 0          | 0          | 0         | 0         | 0          | 0          | 0         |
| FAM19A5  | 0.513221  | 0.710922   | 1.03489   | 0.537153  | 1.14599   | 0.928627  | 1.65722   | 0.406221  | 0.146495   | 0.875635   | 1.19493   | 0.344272  | 1.23138    | 0.913664   | 1.17467   |
| FAM200A  | 0.492999  | 0.775348   | 0.677174  | 1.13113   | 0.491267  | 1.22767   | 0.382341  | 0.793606  | 1.00825    | 1.05073    | 1.95312   | 0.705508  | 0.642163   | 0.802158   | 0.480912  |
| FAM200B  | 1.11889   | 0.867133   | 0.829568  | 1.03339   | 0.295136  | 1.17292   | 0.566444  | 1.08349   | 0.835606   | 0.94063    | 1.43587   | 0.524918  | 0.721901   | 0.893721   | 0.598785  |
| FAM201A  | 0.0938051 | 0.25181    | 0.354753  | 0.0690492 | 0.228975  | 0.0570527 | 0.275409  | 0.202461  | 0          | 0.0672771  | 0         | 0.0383543 | 0.00864608 | 0          | 0.0769805 |
| FAM201B  | 0.0715617 | 0.0413754  | 0.0710411 | 0         | 0.289016  | 0.0121868 | 0.0980482 | 0.0254392 | 0          | 0.0179635  | 0         | 0.0204817 | 0          | 0          | 0         |
| FAM204A  | 4.74409   | 3.17266    | 3.28782   | 3.64728   | 2.4304    | 6.32647   | 2.7513    | 3.36844   | 3.95373    | 5.2717     | 7.93403   | 2.99339   | 5.75454    | 3.96191    | 2.992     |
| FAM205A  | 0.0906219 | 0.209293   | 0.341553  | 0.294828  | 0.239667  | 0.456088  | 0.166002  | 0.138069  | 0.00015207 | 0.0507423  | 0.0364713 | 0.0413764 | 0.055586   | 0.067152   | 0.039982  |
| FAM205BP | 0.0648239 | 0.0679022  | 0.110328  | 0.0889717 | 0.0665381 | 0.088482  | 0.0474116 | 0.0441142 | 0.0136873  | 0.0165458  | 5.30E-34  | 0.0250169 | 4.02E-16   | 0.114717   | 0.096671  |
| FAM205C  | 0.0337117 | 0.0487284  | 0.0278887 | 0         | 0.0261829 | 0.028705  | 0.0577363 | 0         | 0          | 0.0211558  | 0         | 0.0120608 | 0          | 0.00880959 | 0.193657  |
| FAM206A  | 3.02761   | 3.55351    | 3.29612   | 5.40391   | 0.790091  | 4.76409   | 1.64545   | 2.52925   | 4.08552    | 3.90636    | 4.53883   | 3.33616   | 5.95396    | 3.82931    | 1.73921   |
| FAM207A  | 3.1398    | 2.82526    | 2.85549   | 7.82129   | 9.3668    | 8.72869   | 3.41873   | 1.84795   | 4.78624    | 3.49712    | 7.44098   | 3.48151   | 6.56032    | 4.42309    | 2.09035   |
| FAM208A  | 4.98887   | 5.07716    | 5.03953   | 5.75244   | 2.69148   | 5.91765   | 3.27304   | 4.87831   | 3.04388    | 4.8133     | 5.82241   | 3.08472   | 4.95086    | 4.72693    | 4.83469   |
| FAM208B  | 4.41274   | 4.09182    | 3.94218   | 5.80087   | 2.62961   | 4.45598   | 3.43342   | 4.20405   | 3.35227    | 3.7469     | 3.59854   | 3.5871    | 5.45265    | 5.54623    | 4.88732   |
| FAM209A  | 0.594584  | 0.163784   | 0.161127  | 0.0792995 | 0.212089  | 0.110476  | 0.338786  | 0.45724   | 0          | 0.0856841  | 2.03E-43  | 0.111792  | 0.0609153  | 0.124881   | 0.0490212 |
| FAM209B  | 0.074319  | 0.177917   | 0.209302  | 0.232487  | 0.103899  | 0.318912  | 0.164473  | 0.0998176 | 0          | 0          | 0.264277  | 0.0819087 | 0.177672   | 0.0873957  | 0         |
| FAM20A   | 3.00298   | 2.4983     | 1.76798   | 13.5392   | 6.59274   | 20.4995   | 2.09152   | 2.10391   | 1.40196    | 3.12831    | 7.41844   | 3.78532   | 7.28175    | 5.23943    | 8.18686   |
| FAM20B   | 4.44343   | 3.7732     | 3.69799   | 4.91285   | 3.30308   | 5.58759   | 4.06826   | 3.89813   | 5.16559    | 4.496      | 4.53421   | 3.23666   | 6.86225    | 4.1925     | 3.79813   |
| FAM20C   | 3.9543    | 2.60316    | 2.7341    | 16.3172   | 10.1252   | 20.8756   | 4.27726   | 2.13814   | 2.3319     | 6.51988    | 8.26058   | 2.38266   | 14.9533    | 7.63587    | 16.7138   |
| FAM210A  | 1.08747   | 0.824092   | 0.807923  | 1.93669   | 0.377204  | 1.58223   | 0.699175  | 0.966454  | 1.96734    | 1.84855    | 2.43736   | 1.51845   | 2.55788    | 2.18513    | 0.947661  |
| FAM210B  | 13.9026   | 13.1249    | 9.94837   | 14.4922   | 9.90883   | 21.3693   | 8.05004   | 12.8912   | 30.0721    | 12.1532    | 18.9159   | 12.8632   | 8.35451    | 8.11556    | 7.3749    |

|             |            |            |           |            |           |           |            |            |           |           |           |            |           |            |           |
|-------------|------------|------------|-----------|------------|-----------|-----------|------------|------------|-----------|-----------|-----------|------------|-----------|------------|-----------|
| FAM213B     | 0.604301   | 0.731666   | 0.307169  | 1.4382     | 1.61286   | 2.96096   | 0.949176   | 0.568692   | 0.512031  | 1.5989    | 1.89272   | 0.513114   | 2.39612   | 2.30382    | 1.68548   |
| FAM214A     | 5.6488     | 4.44487    | 3.9684    | 8.26985    | 1.71776   | 3.5968    | 2.91199    | 5.17508    | 12.1395   | 5.48923   | 8.23804   | 5.32142    | 4.16203   | 3.46775    | 3.12619   |
| FAM214B     | 3.74413    | 4.27485    | 3.25773   | 5.42747    | 6.79423   | 7.46043   | 3.31091    | 2.4664     | 15.0451   | 15.3227   | 10.9924   | 9.59686    | 17.2093   | 7.45123    | 4.71112   |
| FAM215A     | 0.148353   | 0.0571829  | 0.270002  | 0.275188   | 0.0921773 | 0.0757923 | 0.203261   | 0.0791062  | 0.0722709 | 0.111719  | 0         | 0          | 0         | 0.170579   | 0.213054  |
| FAM216A     | 0.678709   | 0.46792    | 0.56394   | 0.674249   | 0.330893  | 0.816159  | 0.486437   | 0.523642   | 0.239644  | 0.878119  | 1.11147   | 0.304842   | 0.863239  | 0.497155   | 0.752021  |
| FAM216B     | 0.00699397 | 0.0067396  | 0         | 0.158565   | 0         | 0.0297764 | 0.00798549 | 0.00621566 | 0         | 0.0438908 | 0.205278  | 0          | 0.0135374 | 0.0913839  | 0.160708  |
| FAM217A     | 0.0203904  | 0.103156   | 0.109644  | 0          | 0         | 0.0347242 | 0.0465621  | 0.0453031  | 0         | 0         | 0         | 0          | 0         | 0.00532844 | 0         |
| FAM217B     | 1.58652    | 1.08283    | 1.09252   | 1.86295    | 0.634879  | 1.77915   | 1.18528    | 1.46976    | 1.82562   | 1.29671   | 1.77757   | 1.04141    | 1.95083   | 0.997279   | 0.956106  |
| FAM218A     | 0.328496   | 0.301232   | 0.201625  | 0.076441   | 0.0658409 | 0.207527  | 0.21778    | 0.442618   | 0.0903386 | 0.0265997 | 0.0358868 | 0.0303287  | 0.0273476 | 0.0664592  | 0.0913086 |
| FAM219A     | 3.40321    | 4.26142    | 4.72729   | 3.48094    | 5.94715   | 7.28224   | 4.45839    | 3.35175    | 6.56503   | 5.64205   | 4.60155   | 3.92067    | 5.63682   | 4.98429    | 5.70809   |
| FAM219B     | 6.91366    | 8.49171    | 7.79112   | 8.41499    | 11.3735   | 10.3195   | 7.00805    | 6.14425    | 16.1275   | 8.29303   | 10.5624   | 7.52747    | 7.79292   | 7.66422    | 4.54423   |
| FAM21EP     | 0.330992   | 0.295525   | 0.174286  | 0.341063   | 0.507841  | 0.357799  | 0.344803   | 0.247383   | 0.257073  | 0.177525  | 0.325561  | 0.238723   | 0.112452  | 0.160244   | 0.19219   |
| FAM220A     | 2.39375    | 2.96646    | 2.81044   | 2.83308    | 3.491     | 5.12677   | 1.9812     | 2.45251    | 10.7319   | 4.63124   | 9.38115   | 2.67016    | 4.12074   | 3.10857    | 1.96656   |
| FAM221A     | 0.730997   | 0.899247   | 0.849198  | 0.288503   | 0.193275  | 0.715137  | 0.72808    | 0.649649   | 0.303071  | 0.175687  | 0.421381  | 0.289346   | 0.0903132 | 0.219476   | 0.245699  |
| FAM221B     | 0.0295098  | 0.00355457 | 0.0305157 | 0.00760267 | 0.0114597 | 0         | 0.0421167  | 0.0786775  | 0.0089849 | 0         | 0         | 0.00527876 | 0         | 0          | 0.0211899 |
| FAM222A     | 0.36852    | 0.752848   | 1.1402    | 0.349389   | 0.457951  | 0.74682   | 0.74896    | 0.524016   | 0.987395  | 0.7678    | 0.341131  | 0.353339   | 0.361406  | 0.211865   | 0.497487  |
| FAM222A-AS1 | 0          | 0.0385392  | 0.110285  | 0          | 0.0414161 | 0.0227028 | 0.0913271  | 0.0473908  | 0         | 0         | 0         | 0.0381555  | 0.0172025 | 0.013935   | 0         |
| FAM222B     | 1.74159    | 2.16006    | 1.93157   | 2.54915    | 2.31882   | 4.17994   | 2.69321    | 2.26214    | 3.08254   | 2.70232   | 2.679     | 2.49915    | 4.21066   | 2.17306    | 2.28813   |
| FAM223A     | 0.0407448  | 0.125641   | 0.195501  | 0.0671819  | 0.0253163 | 0.0555099 | 0.120955   | 0.123116   | 0.0396981 | 0         | 0         | 0.029154   | 0.015773  | 0.021295   | 0.0117029 |
| FAM223B     | 0.0407448  | 0.125641   | 0.195501  | 0.0671819  | 0.0253163 | 0.0555099 | 0.120955   | 0.123116   | 0.0396981 | 0         | 0         | 0.029154   | 0.015773  | 0.021295   | 0.0117029 |
| FAM224A     | 0.126257   | 0.108258   | 1.72E-21  | 0.0440998  | 0.177261  | 0.024292  | 0          | 4.52E-05   | 0.121608  | 0         | 0         | 0.00011635 | 0         | 0.0223657  | 0.0409711 |
| FAM224B     | 0.200031   | 0.206091   | 0.207203  | 0.0335725  | 0.134946  | 0.0184931 | 0          | 0.15577    | 0.092578  | 0         | 0         | 0.143256   | 0         | 0.0170267  | 0.0311907 |
| FAM225A     | 0.303449   | 0.0180864  | 0.0541142 | 0.195173   | 0.177882  | 0.647339  | 0.188357   | 0.209477   | 0.0123498 | 0.400111  | 0.739013  | 0.0421512  | 0.30878   | 0.523731   | 0.558561  |
| FAM225B     | 0.15117    | 0.106761   | 0.107503  | 0.0555342  | 0.398071  | 0.184655  | 0.0939445  | 0.0244712  | 0.0119315 | 0.265553  | 0.647424  | 0.00065980 | 0.272656  | 0.130782   | 0.775629  |

|         |           |            |                 |           |           |            |                 |           |            |           |            |            |            |           |           |
|---------|-----------|------------|-----------------|-----------|-----------|------------|-----------------|-----------|------------|-----------|------------|------------|------------|-----------|-----------|
| FAM226A | 0.0400597 | 0.0137867  | 0.0473431       | 0.011795  | 0.017779  | 0.0389832  | 0.0588071       | 0.0305158 | 0.00696974 | 0         | 0          | 0.0204741  | 0          | 0.011964  | 0.024656  |
| FAM226B | 0.0400597 | 0.0137867  | 0.0473431       | 0.011795  | 0.017779  | 0.0389832  | 0.0588071       | 0.0305158 | 0.00696974 | 0         | 0          | 0.0204741  | 0          | 0.011964  | 0.024656  |
| FAM227A | 0.098272  | 0.416455   | 0.639294        | 0.0598426 | 0.135304  | 0.0817755  | 0.178506        | 0.119094  | 0.0190407  | 0.0224257 | 0.0529471  | 0.0894934  | 0.00432304 | 0.123734  | 0.269432  |
| FAM227B | 0.184211  | 0.171891   | 0.0842304       | 0.169263  | 0.0158157 | 0.147733   | 0.187183        | 0.158955  | 0.0868013  | 0.166691  | 0.208363   | 0.10292    | 0.133008   | 0.0489156 | 0.146224  |
| FAM228A | 0.164046  | 0.145919   | 0.156589        | 0.0520165 | 0.25482   | 0.257876   | 0.144078        | 0.168219  | 0.076842   | 0.063352  | 0.256413   | 0.0451458  | 0.0244249  | 0.112118  | 0.163101  |
| FAM228B | 1.65511   | 1.0587     | 1.00331         | 1.02927   | 0.243798  | 1.59154    | 0.48873         | 0.862268  | 0.382296   | 0.877496  | 1.28856    | 0.326697   | 0.810109   | 0.387774  | 0.327855  |
| FAM229A | 1.45679   | 1.34       | 1.53384         | 0.921229  | 3.24005   | 0.902135   | 0.907261        | 1.14755   | 0.362905   | 0.290885  | 0.560636   | 1.08975    | 0.299063   | 0.986334  | 1.14116   |
| FAM229B | 1.04841   | 0.496792   | 0.508924        | 0.464312  | 0.403772  | 1.44604    | 0.554003        | 0.408118  | 0.0844197  | 0.750369  | 1.9269     | 0.204591   | 0.178891   | 0.262652  | 1.19457   |
| FAM230A | 0         | 0          | 0               | 0         | 0         | 0.00379137 | 0               | 0         | 0          | 0         | 0          | 0          | 0          | 0         | 0         |
| FAM230B | 0.0563781 | 0.0741602  | 0.0461672       | 0.0288377 | 0.0108428 | 0.0415238  | 0.0478595       | 0.0681805 | 0.0424227  | 0.0620154 | 0.00794583 | 0.0551174  | 0          | 0.0953178 | 0.0500526 |
| FAM230C | 0         | 0          | 0               | 0         | 0         | 0          | 0               | 0         | 0          | 0         | 0          | 0          | 0          | 0         | 0         |
| FAM234A | 5.39871   | 4.82034    | 4.82369         | 7.16307   | 10.702    | 13.0976    | 6.76484         | 4.28323   | 8.01355    | 4.41719   | 6.89798    | 5.245      | 5.8499     | 4.4979    | 6.02502   |
| FAM234B | 1.14954   | 1.82728    | 2.29617         | 1.19476   | 1.44224   | 1.48077    | 1.9351          | 1.82057   | 0.873509   | 0.616576  | 1.13686    | 0.706528   | 0.735337   | 0.759985  | 0.536184  |
| FAM236A | 0.0124425 | 0          | 0               | 0         | 0         | 0.0105946  | 0               | 0         | 0          | 0         | 0          | 0          | 0          | 0         | 0         |
| FAM236B | 0.0124425 | 0          | 0               | 0         | 0         | 0.0105946  | 0               | 0         | 0          | 0         | 0          | 0          | 0          | 0         | 0         |
| FAM236C | 0         | 0          | 0.0206756       | 0         | 0         | 0          | 0               | 0         | 0          | 0         | 0          | 0          | 0          | 0         | 0         |
| FAM236D | 0         | 0          | 0.0206756       | 0         | 0         | 0          | 0               | 0         | 0          | 0         | 0          | 0          | 0          | 0         | 0         |
| FAM237A | 0.0207375 | 0.00999164 | 0               | 0.0213706 | 0         | 0          | 0               | 0         | 0          | 0         | 0          | 0.0296765  | 0.0401392  | 0         | 0         |
| FAM238A | 0.145455  | 0.0617766  | 0.0530348       | 0.0220218 | 0         | 0.121408   | 0.0243989       | 0.0759653 | 0          | 0         | 0          | 0.0152904  | 0.0137874  | 0.0335057 | 0         |
| FAM238B | 0.034856  | 0.0328821  | 0.0376387       | 0.0117216 | 0.0117789 | 0.0591686  | 0.0822503       | 0.057282  | 0.00923514 | 0.028552  | 0.00856016 | 0.0352676  | 0          | 0.0356685 | 0.0326701 |
| FAM238C | 0.824711  | 0.924089   | 0.63466         | 0.823535  | 1.83718   | 0.811104   | 1.2555          | 0.687481  | 0.093433   | 0.866593  | 0.202077   | 1.13904    | 0.255738   | 1.10263   | 0.615148  |
| FAM239A | 0.0203498 | 0.0417617  | 0.00023097<br>9 | 3.89E-07  | 0.0648384 | 0.0614057  | 0.00034404<br>6 | 3.60E-06  | 0.00393801 | 0.0116165 | 0.0891141  | 0.00454242 | 2.81E-05   | 1.55E-06  | 3.05E-07  |
| FAM239B | 0.0253564 | 0.612974   | 1.00599         | 0.0625737 | 1.93E-05  | 0.6285     | 0.58421         | 0.0185003 | 0.0133182  | 0.32445   | 0.595352   | 0.764208   | 0.484656   | 0.0190404 | 0.505771  |
| FAM240A | 0         | 0.0122132  | 0               | 0         | 0         | 0.0539595  | 0               | 0         | 0.0154357  | 0         | 0          | 0          | 0.00817732 | 0         | 0         |
| FAM241A | 3.08178   | 1.88163    | 2.17723         | 2.38846   | 0.791251  | 2.66024    | 1.37645         | 3.07835   | 2.96745    | 3.55894   | 4.07314    | 2.17472    | 5.54327    | 2.56021   | 1.85324   |

|              |            |            |           |            |            |           |            |            |            |           |            |            |           |            |           |
|--------------|------------|------------|-----------|------------|------------|-----------|------------|------------|------------|-----------|------------|------------|-----------|------------|-----------|
| FAM241B      | 0.451677   | 0.352345   | 0.338072  | 0.465466   | 0.16705    | 1.22705   | 0.466595   | 0.248494   | 0.0261948  | 0.269953  | 0.291364   | 0.107729   | 0.166525  | 0.191101   | 0         |
| FAM242B      | 0.0643757  | 0.0465258  | 0.026628  | 0          | 0          | 0         | 0.036751   | 0.0286059  | 0          | 0         | 0.0363361  | 0.0230313  | 0         | 0          | 0         |
| FAM242F      | 0.0678682  | 0.228899   | 0.505308  | 0.0699401  | 0          | 0         | 0.0774897  | 0.301578   | 0          | 0         | 0          | 0.194246   | 0         | 0.0354709  | 0         |
| FAM243A      | 0.276946   | 0.278477   | 0.318761  | 0.124087   | 0.130928   | 0.399862  | 0.384949   | 0.363839   | 0.0439942  | 0.0906771 | 0.0815576  | 0.103389   | 0.0466133 | 0.144744   | 0.380437  |
| FAM243B      | 0.276946   | 0.278477   | 0.318761  | 0.124087   | 0.130928   | 0.399862  | 0.384949   | 0.363839   | 0.0439942  | 0.0906771 | 0.0815576  | 0.103389   | 0.0466133 | 0.144744   | 0.380437  |
| FAM24A       | 0          | 0          | 0         | 0          | 0          | 0         | 0          | 0          | 0          | 0.0974728 | 0          | 0          | 0         | 0          | 0         |
| FAM24B       | 0.719185   | 0.8093     | 0.490353  | 0.339022   | 0.414648   | 0.637894  | 0.205366   | 0.346213   | 0.0730198  | 0.150502  | 0.602612   | 0.25739    | 0.309467  | 0.501351   | 0.215261  |
| FAM24B-CUZD1 | 0.00085641 |            |           |            |            |           | 0.00069440 |            | 0.00079400 |           |            |            |           |            |           |
|              | 2          | 0.10266    | 0.118444  | 0.00196531 | 0.00834216 |           | 1.37E-05   |            | 4.38E-05   | 3.38E-05  | 0.0643203  | 4.05E-05   | 5.85E-07  | 8.49E-05   | 1.74E-06  |
|              |            |            |           |            |            | 8         |            | 9          |            |           |            |            |           |            |           |
| FAM25A       | 15.747     | 30.5489    | 29.6445   | 157.116    | 71.0256    | 26.6914   | 30.9577    | 17.9804    | 758.089    | 376.572   | 530.157    | 269.592    | 336.321   | 137.923    | 31.6401   |
| FAM25BP      | 1.72419    | 2.84711    | 1.07722   | 0.777789   | 7.79674    | 0.252339  | 1.32222    | 0.820627   | 24.137     | 12.6514   | 4.03653    | 6.41305    | 4.65307   | 1.20841    | 0.374895  |
| FAM25C       | 3.54348    | 4.22521    | 4.87439   | 2.57097    | 9.7709     | 1.88865   | 4.99017    | 3.42038    | 51.0241    | 129.057   | 53.7151    | 23.4659    | 92.1871   | 4.82598    | 3.85394   |
| FAM25E       | 0          | 0          | 0         | 0          | 0          | 0         | 0          | 0          | 0          | 0         | 0          | 0          | 0         | 0          | 0         |
| FAM25G       | 1.69E-10   | 1.29E-08   | 2.63E-15  | 1.14E-09   | 0.00279235 | 1.53E-13  | 8.91E-08   | 6.99E-12   | 4.73E-10   | 2.27E-08  | 9.29E-09   | 6.87E-08   | 2.57E-09  | 7.13E-12   | 6.93E-14  |
| FAM27B       | 0.822321   | 1.7274     | 2.27677   | 0.915971   | 1.46572    | 0.336376  | 2.63112    | 1.49164    | 0.521152   | 0.0619778 | 0.222978   | 1.03519    | 0.297294  | 1.56143    | 0.283667  |
| FAM27C       | 0.00068946 |            |           |            |            |           |            | 0.00046440 |            |           |            |            |           |            |           |
|              | 1          | 0.00151001 | 0.119833  | 1.64E-05   | 0.73316    | 1.49E-16  | 3.05E-06   |            | 6.14E-05   | 0.0619778 | 0.148652   | 0.00124483 | 6.68E-05  | 0.00428852 | 2.22E-10  |
|              |            |            |           |            |            |           |            | 2          |            |           |            |            |           |            |           |
| FAM27E2      | 0.0887918  | 0.123344   | 0.212248  | 0.0251398  | 0.0685942  | 0.0562675 | 0.244744   | 0.126127   | 1.22E-20   | 0.0164246 | 0.0304542  | 0.0310245  | 0         | 0.0725437  | 0.0768007 |
| FAM27E3      | 0.375169   | 0.679112   | 0.873921  | 0.225861   | 0.960181   | 0.155616  | 1.52967    | 0.672236   | 0.112219   | 2.71E-14  | 0.101884   | 0.333754   | 0         | 0.430313   | 0.12851   |
| FAM27E5      | 0.0380017  | 0          | 0         | 0          | 0          | 0         | 0          | 0          | 0          | 0         | 0          | 0          | 0         | 0          | 0         |
| FAM30A       | 0.0433345  | 0.0197193  | 0.0298745 | 0.00744292 | 0.123408   | 0         | 0.0109951  | 0.0492099  | 0          | 0         | 0.00271774 | 0.00861306 | 0.037279  | 0.00880776 | 0.0656913 |
| FAM30C       | 0          | 0          | 0         | 0          | 0          | 0         | 0          | 0          | 0          | 0         | 0          | 0          | 0.0282906 | 0.00458339 | 0.0377829 |
| FAM32A       | 12.2947    | 10.075     | 10.9905   | 17.1257    | 11.3562    | 20.0942   | 9.89104    | 7.7408     | 24.4327    | 15.7074   | 26.5516    | 10.7209    | 22.3469   | 10.7562    | 9.12193   |
| FAM3A        | 5.06179    | 6.00197    | 6.32576   | 8.18831    | 14.2384    | 12.6143   | 5.65643    | 3.11599    | 12.7375    | 7.76485   | 10.6042    | 7.13238    | 8.87106   | 7.75516    | 4.10728   |
| FAM3B        | 0.501656   | 0.136966   | 0.193669  | 0.0516971  | 0.0779245  | 0.213577  | 0.171832   | 0.371525   | 0.0203653  | 0         | 0          | 0          | 0.0215777 | 0.0262187  | 0         |
| FAM3C        | 6.48223    | 5.42621    | 5.83709   | 8.22829    | 2.55972    | 9.8763    | 4.34508    | 6.99075    | 10.0567    | 7.61026   | 11.2334    | 5.06161    | 9.58628   | 6.00502    | 7.24352   |

|              |            |            |            |            |           |           |           |            |           |            |           |           |            |            |           |
|--------------|------------|------------|------------|------------|-----------|-----------|-----------|------------|-----------|------------|-----------|-----------|------------|------------|-----------|
| FAM3D        | 0.46003    | 0.15345    | 0.131736   | 1.40399    | 0.247357  | 0.60263   | 0.161615  | 0.298765   | 0.0646459 | 0.177657   | 0.279632  | 0.0379804 | 0.0456629  | 0.0184948  | 0.0508201 |
| FAM3D-AS1    | 3.67E-38   | 0          | 1.59E-39   | 5.94E-40   | 2.99E-39  | 2.36E-32  | 0         | 0          | 4.83E-16  | 0          | 6.39E-14  | 0.0201699 | 0          | 0          | 0         |
| FAM41AY1     | 0.00566399 | 0.00409349 | 0.00234282 | 0.00291845 | 0         | 0         | 0         | 0.00755052 | 0         | 0          | 0         | 0         | 0          | 0          | 0         |
| FAM41AY2     | 0.00566399 | 0.00409349 | 0.00234282 | 0.00291845 | 0         | 0         | 0         | 0.00755052 | 0         | 0          | 0         | 0         | 0          | 0          | 0         |
| FAM41C       | 0.800375   | 1.05383    | 0.941707   | 0.606675   | 0.105361  | 0.334979  | 0.499481  | 1.2803     | 0.231301  | 0.289447   | 0.260337  | 0.924265  | 0.17505    | 0.638102   | 0.428605  |
| FAM43A       | 5.20995    | 3.63771    | 3.60387    | 30.4926    | 15.4884   | 11.7296   | 4.88991   | 3.66882    | 36.2604   | 14.7128    | 23.2348   | 16.2067   | 14.5377    | 13.2609    | 5.71729   |
| FAM43B       | 0.170301   | 0.0604607  | 0.0370751  | 0.184737   | 0.348075  | 0.190802  | 0.296784  | 0.0398288  | 0.251073  | 0.776234   | 0.151775  | 0.513074  | 1.46889    | 0.210806   | 0.077234  |
| FAM45A       | 1.15361    | 1.33646    | 1.41873    | 0.972057   | 0.757952  | 1.20331   | 0.939611  | 1.07602    | 1.80125   | 1.22566    | 1.49139   | 0.991889  | 2.18568    | 1.14427    | 1.05687   |
| FAM45BP      | 2.08073    | 1.72695    | 1.8549     | 2.68059    | 0.821224  | 2.53879   | 1.07473   | 1.98283    | 3.18336   | 3.16915    | 3.32101   | 1.66018   | 2.8064     | 1.6502     | 1.27692   |
| FAM47A       | 0          | 0          | 0          | 0          | 0.0139392 | 0         | 0         | 0          | 0         | 0          | 0         | 0         | 0          | 0          | 0         |
| FAM47B       | 0          | 0          | 0          | 0          | 0         | 0         | 0         | 0          | 0         | 0          | 0         | 0         | 0          | 0          | 0         |
| FAM47C       | 0          | 0.00674164 | 0          | 0          | 0         | 0.0119141 | 0         | 0          | 0         | 0          | 0         | 0         | 0          | 0          | 0         |
| FAM47E       | 0.140405   | 0.115051   | 0.140775   | 0.0401857  | 0.0736013 | 0.12812   | 0.10859   | 0.22042    | 0.0134602 | 0.0693575  | 0.0124764 | 0.118621  | 0.0782424  | 0.0173289  | 0.0707568 |
| FAM47E-STBD1 | 0.596047   | 0.0392632  | 0.0782316  | 0.0461753  | 0.0379423 | 0.656355  | 0.0772393 | 0.0531479  | 9.80E-09  | 6.97E-05   | 0.0786367 | 2.41E-06  | 0.0012664  | 0.110715   | 0.110752  |
| FAM49A       | 2.13257    | 0.856649   | 0.745614   | 1.90837    | 0.512576  | 3.47654   | 1.33835   | 0.936682   | 0.995704  | 2.16353    | 3.08014   | 0.919775  | 1.95108    | 1.03478    | 2.68777   |
| FAM49B       | 2.05863    | 1.94949    | 1.88356    | 5.65077    | 0.935754  | 5.05271   | 1.16983   | 1.99817    | 2.72093   | 4.96519    | 7.22885   | 2.27061   | 7.81934    | 4.23927    | 2.60904   |
| FAM50A       | 5.80288    | 5.21245    | 5.5086     | 8.80247    | 13.4809   | 10.5672   | 4.96427   | 3.04255    | 9.52724   | 8.05665    | 9.5459    | 5.70763   | 11.2541    | 6.87086    | 5.21162   |
| FAM50B       | 1.41406    | 1.24121    | 1.3783     | 2.26521    | 2.80547   | 2.47964   | 1.13497   | 0.982965   | 0.71615   | 0.843467   | 1.32762   | 0.581034  | 1.15624    | 0.775638   | 0.562987  |
| FAM53A       | 0.174817   | 0.291563   | 0.467236   | 0.180154   | 0.6371    | 0.70992   | 0.191923  | 0.173289   | 0.163775  | 0.118145   | 0.258068  | 0.182818  | 0.121467   | 0.200304   | 0.154498  |
| FAM53B       | 9.96683    | 7.24405    | 7.40473    | 9.92625    | 13.4402   | 12.1257   | 7.49907   | 5.96604    | 4.57648   | 4.24065    | 4.36489   | 4.33027   | 7.88471    | 5.0911     | 4.86965   |
| FAM53B-AS1   | 0.784068   | 0.794026   | 0.575437   | 0.298795   | 0.974342  | 0.348282  | 0.939983  | 0.802943   | 0.0967431 | 0.278824   | 0         | 0.523619  | 0.0168625  | 0.437107   | 0.37534   |
| FAM53C       | 3.36931    | 3.23964    | 3.21396    | 5.29425    | 4.8751    | 7.70335   | 3.23009   | 2.47929    | 4.87506   | 4.17952    | 5.89375   | 2.99422   | 5.77693    | 4.20466    | 3.80891   |
| FAM57A       | 7.13427    | 17.3295    | 21.3768    | 10.2992    | 12.3467   | 10.2775   | 12.3289   | 11.6948    | 12.4692   | 7.33197    | 10.719    | 10.7265   | 8.51652    | 7.17008    | 4.76476   |
| FAM57B       | 0          | 0.0212962  | 0.014615   | 0.0158346  | 0.0137315 | 0.0752712 | 0.0302796 | 0.0157125  | 0.0107661 | 0.0221901  | 0.0199585 | 0         | 0.00570351 | 0.00924031 | 0.0281969 |
| FAM66A       | 0.192442   | 0.161414   | 0.439364   | 0.099143   | 1.12741   | 0.203684  | 0.122898  | 0.227248   | 1.46E-35  | 0.00645325 | 0         | 0.0429114 | 0.0385336  | 0.0182966  | 7.50E-17  |
| FAM66B       | 0.619943   | 1.132      | 1.11755    | 0.241983   | 0.45541   | 0.880041  | 0.486988  | 0.601191   | 0.299312  | 0.127126   | 0.151611  | 0.169206  | 0.322343   | 0.105251   | 0.292643  |

|         |                 |            |           |                 |           |           |           |           |           |            |            |            |            |            |                 |
|---------|-----------------|------------|-----------|-----------------|-----------|-----------|-----------|-----------|-----------|------------|------------|------------|------------|------------|-----------------|
| FAM66C  | 0.722322        | 0.61309    | 0.575109  | 0.211769        | 0.396255  | 0.476661  | 0.428803  | 0.468897  | 0.0604101 | 0.0355749  | 0.22398    | 0.0464113  | 0.0432188  | 0.0518487  | 0.4552          |
| FAM66D  | 0.507914        | 0.236372   | 0.322843  | 0.473812        | 1.02743   | 0.112032  | 0         | 0.174414  | 0.10086   | 0.0371828  | 0.0487873  | 0.0435795  | 0.0521507  | 0.0977981  | 0.167807        |
| FAM66E  | 2.30E-08        | 1.47E-09   | 0.0123341 | 0.00011374<br>5 | 0.0337928 | 0.0282119 | 1.64E-08  | 3.24E-05  | 1.87E-11  | 6.05E-06   | 7.16E-18   | 2.00E-08   | 4.63E-24   | 0.0321918  | 0.120213        |
| FAM69A  | 1.61307         | 1.60118    | 1.71748   | 1.67001         | 0.429209  | 1.46253   | 1.57742   | 1.6393    | 4.00183   | 2.50259    | 2.57969    | 1.89694    | 2.44286    | 1.79541    | 2.78846         |
| FAM69B  | 2.75311         | 2.41357    | 2.69896   | 1.38376         | 2.94443   | 3.95133   | 2.39509   | 1.78746   | 0.375259  | 1.60605    | 3.23842    | 1.54416    | 0.992528   | 1.5045     | 2.22527         |
| FAM69C  | 0.249337        | 0.262112   | 0.225021  | 0.105116        | 0.211258  | 0.405315  | 0.427028  | 0.251807  | 0.0276059 | 0          | 0.0639707  | 0          | 0          | 0.00592339 | 0.0162764       |
| FAM71A  | 0.079393        | 0.023908   | 0.0246298 | 0.0409084       | 0         | 0.0253508 | 0.158635  | 0.0705579 | 0         | 0.161925   | 0.0112031  | 0.0497068  | 0.0512239  | 0.0570546  | 0.0570092       |
| FAM71B  | 0               | 0          | 0         | 0               | 0         | 0         | 0         | 0         | 0         | 0          | 0          | 0          | 0          | 0          | 0               |
| FAM71C  | 0.0867709       | 0.0537526  | 0.123057  | 0.0127743       | 0.0385101 | 0.0633294 | 0.183991  | 0.0110164 | 0         | 0          | 0          | 0.0266087  | 0          | 0          | 0.124614        |
| FAM71D  | 0.103433        | 0.0560648  | 0.0748709 | 0               | 0.0401666 | 0.0110089 | 0.029524  | 0.080432  | 0         | 0          | 0          | 0          | 0          | 0.0270292  | 0               |
| FAM71E1 | 0.163515        | 0.272368   | 0.241572  | 0.131545        | 0.595673  | 0.449866  | 0.518669  | 0.129251  | 0.508764  | 0.250404   | 0.392952   | 0.26188    | 0.0588495  | 0.218915   | 0.157037        |
| FAM71E2 | 0.08725         | 0.0315288  | 0.0300747 | 0               | 0.0225882 | 0.018573  | 0.0083016 | 0.0323085 | 0         | 0          | 0          | 0.0104049  | 0          | 0.0570008  | 0               |
| FAM71F1 | 0.00953959      | 0.00459632 | 0.0236755 | 0               | 0.0296366 | 0.0162457 | 0.021784  | 0.016956  | 0         | 0          | 0.010769   | 0          | 0          | 0.0349007  | 0               |
| FAM71F2 | 0.388759        | 0.422403   | 0.295355  | 0.282074        | 0.24648   | 0.172267  | 0.353286  | 0.345496  | 0.0386502 | 0.348523   | 0.0447817  | 0.198691   | 0.0409511  | 0.366972   | 0.415882        |
| FAM72A  | 0.0652307       | 0.154124   | 0.141513  | 0.137188        | 0.209017  | 0.126606  | 0.229163  | 0.128028  | 0.27789   | 0.104623   | 0.00160869 | 0.0784976  | 0.145642   | 0.126502   | 0.00041890<br>4 |
| FAM72B  | 0.266876        | 0.207247   | 0.0741999 | 0.431128        | 0.238365  | 0.230618  | 0.0918976 | 0.135743  | 0.055788  | 0.0839865  | 0.556494   | 0.119731   | 0.454579   | 0.270038   | 0.242637        |
| FAM72C  | 0.162593        | 0.123331   | 0.189726  | 0.274426        | 0.157326  | 0.327676  | 0.134078  | 0.178953  | 0.113952  | 0.20074    | 0.178893   | 0.134094   | 0.196955   | 0.231721   | 0.136508        |
| FAM72D  | 0.294474        | 0.46864    | 0.585088  | 0.300974        | 0.654917  | 0.261777  | 0.696988  | 0.352149  | 0.298118  | 0.146631   | 0.166013   | 0.269684   | 0.185816   | 0.189715   | 0.216535        |
| FAM74A1 | 0.00050128<br>5 | 8.96E-12   | 0         | 0               | 0         | 0         | 0.0134501 | 0         | 0         | 0.00932476 | 0          | 0          | 0          | 0.00388285 | 0.032009        |
| FAM74A3 | 0.0729139       | 0.00733551 | 0.0379492 | 0               | 2.91E-17  | 0.0139301 | 0.113667  | 0.0363483 | 0.0149685 | 8.94E-27   | 0          | 0.0087942  | 0.00208283 | 0.0128468  | 0               |
| FAM74A4 | 6.03E-18        | 2.82E-21   | 0         | 0               | 5.14E-17  | 0.0270543 | 0.0342426 | 0.0176925 | 0         | 1.76E-26   | 0.0134391  | 0          | 0.00410718 | 5.02E-07   | 6.05E-26        |
| FAM74A6 | 9.11E-09        | 0.0270585  | 0         | 0               | 0         | 9.01E-14  | 0.0135556 | 1.89E-18  | 0         | 1.69E-07   | 0          | 0          | 0          | 7.05E-08   | 5.82E-07        |
| FAM74A7 | 0.0122256       | 0.0367523  | 0.0138675 | 0.0251977       | 0.0759623 | 0.0104099 | 0.0521571 | 0.0108651 | 0         | 0.0153444  | 0.0138012  | 0.00874774 | 0.00159823 | 0.0191689  | 0               |

|            |           |           |           |           |           |           |           |           |           |           |            |           |           |           |           |
|------------|-----------|-----------|-----------|-----------|-----------|-----------|-----------|-----------|-----------|-----------|------------|-----------|-----------|-----------|-----------|
| FAM76A     | 3.01081   | 2.69822   | 3.34866   | 2.14432   | 1.10165   | 2.59785   | 2.70427   | 2.42601   | 2.43639   | 2.30931   | 2.4245     | 1.82398   | 2.29654   | 1.74842   | 1.49895   |
| FAM76B     | 2.36583   | 1.58569   | 1.74887   | 1.26128   | 0.2547    | 1.93969   | 0.969505  | 1.82673   | 0.734595  | 1.38178   | 1.75184    | 0.678805  | 1.08437   | 1.26403   | 1.55585   |
| FAM78A     | 0.823178  | 0.393787  | 0.428051  | 1.03009   | 1.03208   | 2.09276   | 0.557213  | 0.480747  | 0.121737  | 0.678942  | 1.30761    | 0.231395  | 0.849776  | 0.666854  | 2.09416   |
| FAM78B     | 0.182333  | 0.202856  | 0.159066  | 0.259643  | 0.293526  | 0.259698  | 0.272529  | 0.135526  | 0.0403748 | 0.212203  | 0.123499   | 0.128092  | 0.162558  | 0.174997  | 0.471336  |
| FAM81A     | 0.186853  | 0.112536  | 0.209784  | 0.0894016 | 0.0829277 | 0.232972  | 0.144768  | 0.130475  | 0.0812735 | 0.0670056 | 0.105467   | 0.0381995 | 0.0430559 | 0.0383654 | 0.0479186 |
| FAM81B     | 0.0148068 | 0.0214024 | 0         | 0         | 0         | 0.0756468 | 0.0338119 | 0.0526363 | 0         | 0         | 0.016715   | 0.0211893 | 0         | 0         | 0.276438  |
| FAM83A     | 1.4351    | 0.944911  | 0.553599  | 18.6838   | 4.57853   | 6.92985   | 0.362154  | 2.13136   | 11.1761   | 19.6436   | 10.2123    | 10.6077   | 47.4213   | 14.9433   | 6.5552    |
| FAM83A-AS1 | 0.199746  | 0.13481   | 0.1488    | 1.58316   | 0.37253   | 0.170173  | 0.0456373 | 0.515078  | 0.28307   | 1.47713   | 0.728148   | 1.52161   | 3.51848   | 3.05379   | 0.458481  |
| FAM83B     | 14.1549   | 20.4209   | 19.4828   | 29.8005   | 5.16438   | 16.0671   | 12.154    | 17.5602   | 37.8502   | 30.3402   | 21.0294    | 28.8385   | 41.9089   | 22.9998   | 8.97445   |
| FAM83C     | 11.016    | 18.001    | 14.8036   | 14.2374   | 34.2005   | 14.2162   | 9.83179   | 9.32234   | 48.3678   | 18.0373   | 9.12664    | 18.6621   | 35.8155   | 18.2656   | 7.54799   |
| FAM83C-AS1 | 0.188666  | 0.363609  | 0.364182  | 0.129617  | 0.0976879 | 0.0535489 | 0.215413  | 0.279451  | 1.30205   | 0.315727  | 0.283974   | 0.674978  | 0.730359  | 0.361552  | 0         |
| FAM83D     | 0.276307  | 0.716141  | 0.740915  | 3.74092   | 1.258     | 2.30404   | 0.728863  | 0.609662  | 1.19519   | 1.67417   | 3.42032    | 1.00216   | 3.94656   | 2.33546   | 1.32726   |
| FAM83E     | 0.874626  | 0.493491  | 0.476021  | 0.142315  | 0.375401  | 0.617344  | 0.328493  | 0.429557  | 0.0700786 | 0.0866641 | 0.0129914  | 0.279971  | 0.0594004 | 0.276676  | 0.0826364 |
| FAM83F     | 6.91721   | 11.2207   | 10.6128   | 11.8039   | 22.6527   | 11.4087   | 9.96482   | 6.87242   | 5.75689   | 9.13063   | 5.82812    | 7.44417   | 10.0146   | 7.23048   | 2.82453   |
| FAM83G     | 13.3837   | 21.8922   | 17.2106   | 24.8415   | 55.8686   | 23.5993   | 24.6265   | 12.1796   | 75.5135   | 37.571    | 13.6464    | 53.3131   | 65.5969   | 30.0058   | 11.7061   |
| FAM83H     | 8.57165   | 17.9004   | 17.6063   | 35.572    | 43.6438   | 30.5924   | 21.4007   | 10.3297   | 34.2941   | 22.2795   | 10.7873    | 28.2017   | 65.0121   | 21.6151   | 8.37292   |
| FAM83H-AS1 | 2.3253    | 7.97699   | 7.13499   | 7.55484   | 7.30279   | 4.47831   | 5.5416    | 4.15561   | 5.29317   | 4.49978   | 3.77996    | 6.43139   | 5.38461   | 4.71979   | 1.25076   |
| FAM84A     | 6.81683   | 8.18133   | 4.74345   | 13.9837   | 21.6524   | 14.0586   | 6.25945   | 5.31693   | 24.4902   | 15.6171   | 16.0831    | 15.9374   | 17.1541   | 7.53616   | 3.19942   |
| FAM84B     | 5.46029   | 3.09167   | 3.48895   | 2.85691   | 3.39007   | 4.40181   | 3.3481    | 3.27253   | 2.67335   | 2.69687   | 2.17832    | 2.14644   | 4.99623   | 2.3253    | 1.60343   |
| FAM85A     | 0.250316  | 0.299095  | 0.334487  | 0.212008  | 0.592724  | 0.240028  | 0.0979888 | 0.17634   | 0.0355916 | 0.063065  | 0.0282745  | 0.0363105 | 0.0403998 | 0.0418121 | 0.323731  |
| FAM85B     | 0.0532636 | 0.128316  | 0.198285  | 0.0548897 | 0.289579  | 0.0226766 | 0.182444  | 0.0710044 | 0.0648691 | 0         | 0.030064   | 0         | 0.0171827 | 0.013919  | 0.0382467 |
| FAM86B1    | 0.742948  | 0.671369  | 0.482082  | 1.49137   | 1.21421   | 1.02237   | 0.905646  | 0.652294  | 0.99276   | 0.607509  | 0.453499   | 0.296078  | 0.270941  | 0.183744  | 0.67924   |
| FAM86B2    | 0.0506248 | 0.0599305 | 0.0862276 | 0.110376  | 0.195494  | 0.0514625 | 0.183823  | 0.0368379 | 0.239936  | 0.0206027 | 0.00682769 | 0.0261174 | 0.0579843 | 0.0317037 | 0.0944245 |
| FAM86B3P   | 0.45343   | 0.458786  | 0.472637  | 0.479247  | 0.323993  | 0.386089  | 0.569482  | 0.298198  | 0.0773117 | 0.317701  | 0.194509   | 0.284619  | 0.169679  | 0.682509  | 0.338615  |
| FAM86C1    | 1.08284   | 1.2857    | 1.47126   | 1.88586   | 0.800824  | 2.15968   | 1.56691   | 1.07012   | 3.30117   | 0.827964  | 1.64958    | 1.24364   | 2.16528   | 1.55711   | 0.952832  |
| FAM86C2P   | 0.83187   | 0.779442  | 0.647365  | 0.729972  | 0.524031  | 1.55475   | 1.08176   | 0.39577   | 0.440782  | 0.405658  | 0.8073     | 0.593124  | 0.473897  | 0.386443  | 0.36348   |

|           |           |            |            |            |           |           |           |           |           |            |            |           |            |            |           |
|-----------|-----------|------------|------------|------------|-----------|-----------|-----------|-----------|-----------|------------|------------|-----------|------------|------------|-----------|
| FAM86DP   | 0.726243  | 1.38412    | 1.62342    | 1.42048    | 1.46357   | 1.67681   | 1.64193   | 0.519755  | 1.05745   | 0.837523   | 1.08336    | 1.18893   | 1.43365    | 1.21456    | 1.35908   |
| FAM86EP   | 0.466193  | 0.720781   | 0.857199   | 0.490507   | 0.501346  | 0.536621  | 0.707742  | 0.470376  | 0.360134  | 0.226661   | 0.317318   | 0.282466  | 0.48318    | 0.372852   | 0.476215  |
| FAM86FP   | 0.714536  | 0.609066   | 0.738861   | 0.430352   | 0.643263  | 0.738551  | 0.422636  | 0.594292  | 0.750895  | 0.299006   | 0.698653   | 0.366324  | 0.120413   | 0.226234   | 0.164985  |
| FAM86HP   | 0.89407   | 0.635261   | 0.792037   | 0.457453   | 0.477747  | 0.7337    | 0.515589  | 0.715216  | 0.139446  | 0.129856   | 0.133396   | 0.222085  | 0.183408   | 0.202272   | 0.507877  |
| FAM86JP   | 0.444487  | 0.361062   | 0.467293   | 0.722885   | 0.50398   | 0.801769  | 0.464148  | 0.353874  | 0.270508  | 0.353808   | 0.621729   | 0.194722  | 0.596125   | 0.315399   | 0.410082  |
| FAM87A    | 0.118647  | 0.0992489  | 0.0751976  | 0.234624   | 0.052234  | 0.0907232 | 0.0667617 | 0.0527079 | 0.0178331 | 0.0999432  | 0.113475   | 0.0767874 | 0.0931278  | 0.0506147  | 0.111112  |
| FAM87B    | 1.38604   | 1.68798    | 1.18417    | 0.521667   | 0.890761  | 1.00887   | 0.963183  | 1.055     | 0.180669  | 0.540778   | 0.773686   | 0.965896  | 0.138037   | 0.710598   | 0.830638  |
| FAM89A    | 8.91425   | 7.89777    | 7.29781    | 14.6154    | 18.0706   | 11.2869   | 7.69083   | 5.50575   | 49.4472   | 24.2769    | 21.5563    | 14.0059   | 31.7774    | 9.14031    | 5.76866   |
| FAM89B    | 7.49213   | 8.96342    | 8.32529    | 15.916     | 26.3579   | 20.1384   | 8.33677   | 4.8245    | 29.79     | 27.5326    | 41.3933    | 17.3545   | 34.1445    | 17.3136    | 13.176    |
| FAM8A1    | 3.87262   | 3.98792    | 4.3012     | 3.53848    | 2.69713   | 5.19541   | 4.43277   | 4.29124   | 9.05267   | 4.1137     | 7.20175    | 3.62947   | 5.14194    | 3.56367    | 4.18169   |
| FAM90A1   | 0.510624  | 0.193219   | 0.194643   | 0.0496639  | 0.312607  | 0.198602  | 0.273062  | 0.196788  | 0.0112026 | 0.0115449  | 0.114222   | 0.059235  | 0.0785113  | 0.10179    | 0.0625958 |
| FAM90A10P | 1.66E-39  | 0.0228812  | 3.67E-33   | 0          | 5.60E-20  | 1.95E-39  | 1.51E-21  | 0.0403772 | 4.14E-17  | 0          | 0          | 0         | 0          | 6.02E-24   | 0         |
| FAM90A25P | 0.332887  | 0.458943   | 0.209431   | 0.115142   | 0.928097  | 0.127067  | 0.0737793 | 0.150435  | 3.48E-21  | 0.0153201  | 0.00156351 | 1.73E-09  | 3.43E-28   | 0.024019   | 0.450543  |
| FAM90A26  | 0         | 0          | 0          | 0          | 0         | 0         | 0         | 0         | 0         | 0          | 0          | 0         | 0          | 0          | 0         |
| FAM90A27P | 0         | 0          | 0          | 0          | 0         | 0         | 0         | 0         | 0         | 0          | 0          | 0         | 0          | 0          | 0         |
| FAM90A2P  | 0.0999224 | 0.167396   | 0.235825   | 0.157909   | 0.0800856 | 0.0442842 | 1.89E-32  | 0.171752  | 0.035678  | 0          | 0.0992112  | 0.0209614 | 0.0523722  | 0.00661784 | 0.0235512 |
| FAM90A7P  | 0.13683   | 0.221506   | 0.202203   | 0.034769   | 0.276953  | 0.11564   | 0.162686  | 0.0851647 | 0.0458552 | 0.00787606 | 0.00628016 | 0.0179604 | 0          | 0.0381412  | 0.0540721 |
| FAM91A1   | 5.31993   | 4.3386     | 4.48895    | 5.9044     | 1.62399   | 5.879     | 3.9274    | 5.41294   | 7.27763   | 6.92819    | 9.17301    | 4.20474   | 8.04808    | 6.51913    | 5.82768   |
| FAM92A    | 0.97034   | 0.559281   | 0.622681   | 1.03734    | 0.239473  | 1.25865   | 0.528066  | 1.04772   | 0.265069  | 0.899179   | 2.16007    | 0.376352  | 0.982969   | 0.995324   | 1.69308   |
| FAM92A1P2 | 0         | 0          | 0.0077986  | 0          | 0         | 0         | 0         | 0         | 0         | 0          | 0          | 0         | 0          | 0          | 0         |
| FAM92B    | 0.012155  | 0.00585645 | 0.0100554  | 0.012526   | 0         | 0.0620988 | 0         | 0         | 0         | 0.0152557  | 0          | 0         | 0.0156846  | 0          | 0.0523682 |
| FAM95A    | 0.0772078 | 0.018714   | 0.00798397 | 0.00994562 | 0.0449739 | 0         | 0         | 0.017154  | 0.0117538 | 0.0484519  | 0.0217895  | 0.0897719 | 0.0435873  | 0.010088   | 0         |
| FAM95B1   | 0.11624   | 0.186041   | 0.167508   | 0.0695549  | 0.180561  | 0.0670489 | 0.214063  | 0.163288  | 0         | 0.00941248 | 0          | 0.075124  | 0.00241928 | 0.0137182  | 0.0592352 |
| FAM95C    | 0.156196  | 0.915635   | 1.35677    | 0.116252   | 0.741359  | 0.184721  | 0.713358  | 0.601528  | 0.126819  | 0.0980211  | 0.0391835  | 0.291824  | 0.0615859  | 0.136058   | 0.0373862 |
| FAM98A    | 3.71868   | 4.88759    | 3.41667    | 8.7836     | 4.28119   | 9.38014   | 3.1938    | 3.75818   | 15.7713   | 7.71352    | 6.64981    | 6.68738   | 9.95259    | 6.60472    | 4.52525   |
| FAM98B    | 3.11703   | 2.27435    | 2.6179     | 3.15784    | 0.450593  | 2.95949   | 1.3489    | 2.52642   | 1.04701   | 1.76744    | 2.2327     | 0.98119   | 2.3752     | 2.31823    | 1.81785   |



|           |           |           |           |           |           |            |            |           |           |          |            |           |           |           |           |
|-----------|-----------|-----------|-----------|-----------|-----------|------------|------------|-----------|-----------|----------|------------|-----------|-----------|-----------|-----------|
| FAM98C    | 3.9933    | 4.25037   | 5.30069   | 3.29218   | 9.02255   | 7.07871    | 3.64755    | 2.54877   | 5.50449   | 3.09834  | 6.70045    | 2.97421   | 4.08721   | 2.97883   | 1.72047   |
| FAM99A    | 0         | 0         | 0         | 0         | 0         | 0          | 0          | 0         | 0         | 0        | 0          | 0         | 0         | 0         | 0         |
| FAM99B    | 0         | 0         | 0         | 0         | 0         | 0          | 0          | 0         | 0         | 0        | 0          | 0         | 0         | 0         | 0         |
| FAM9A     | 0         | 0         | 0         | 0         | 0         | 0          | 0          | 0         | 0         | 0        | 0          | 0         | 0         | 0         | 0         |
| FAM9B     | 0         | 0         | 0         | 0         | 0         | 0          | 0          | 0         | 0         | 0        | 0          | 0.0157484 | 0         | 0         | 0         |
| FAM9C     | 0         | 0         | 0         | 0         | 0         | 0.015702   | 0          | 0         | 0         | 0        | 0          | 0         | 0         | 0         | 0         |
| FAN1      | 3.51643   | 3.7623    | 3.93172   | 2.7894    | 2.30395   | 2.52633    | 2.93991    | 3.3827    | 1.13542   | 1.2389   | 1.11572    | 1.49951   | 1.08309   | 1.96976   | 1.76263   |
| FANCA     | 0.571748  | 0.816882  | 0.602939  | 1.76375   | 0.707635  | 1.49813    | 0.978569   | 0.590991  | 0.189934  | 0.675674 | 0.558857   | 0.983985  | 0.888696  | 1.59807   | 1.2105    |
| FANCB     | 0.230279  | 0.247793  | 0.342906  | 0.427157  | 0.0476937 | 0.215688   | 0.219104   | 0.272871  | 0.0654393 | 0.308292 | 0.424596   | 0.236172  | 0.450677  | 0.304897  | 0.0551183 |
| FANCC     | 5.47058   | 5.68038   | 6.00472   | 2.38986   | 4.83386   | 1.96789    | 5.38619    | 5.09434   | 0.598667  | 1.16426  | 1.0427     | 2.65213   | 1.20979   | 2.67065   | 3.46141   |
| FANCD2    | 1.17428   | 0.792358  | 0.837286  | 1.46952   | 0.397551  | 1.92926    | 0.898131   | 0.822839  | 0.352951  | 1.02507  | 1.10842    | 0.657102  | 1.13853   | 1.32952   | 0.724291  |
| FANCD2OS  | 0         | 0.0523424 | 0.0904481 | 0.0691169 | 0         | 0          | 0          | 0.0763886 | 0.0261705 | 0        | 0.0514053  | 0         | 0.099057  | 0.0349892 | 0         |
| FANCE     | 2.2826    | 2.98079   | 2.46532   | 3.97649   | 6.79587   | 4.34998    | 1.98568    | 1.58584   | 7.07123   | 3.47881  | 4.72408    | 2.17768   | 2.67662   | 2.50433   | 0.676434  |
| FANCF     | 1.24493   | 1.43217   | 1.3944    | 1.78025   | 1.71652   | 2.1975     | 1.23775    | 1.18098   | 0.689947  | 0.833925 | 1.67381    | 0.785687  | 1.23642   | 0.979635  | 0.793494  |
| FANCG     | 1.46898   | 1.66561   | 1.72463   | 2.92794   | 2.97868   | 2.73382    | 2.01871    | 1.11007   | 1.13557   | 1.44627  | 1.90654    | 1.47909   | 1.71962   | 2.10558   | 1.6296    |
| FANCI     | 2.0024    | 1.45609   | 1.47206   | 4.27042   | 0.512539  | 3.99698    | 1.31862    | 1.36846   | 0.894038  | 2.42293  | 2.50236    | 1.44755   | 5.22503   | 3.35132   | 1.76732   |
| FANCL     | 2.41169   | 2.05607   | 2.16674   | 2.4825    | 0.384489  | 2.32176    | 1.32821    | 1.55235   | 1.2076    | 1.45037  | 2.17384    | 1.06188   | 1.09618   | 1.62755   | 1.41326   |
| FANCM     | 1.10683   | 0.854508  | 0.832648  | 0.753741  | 0.24633   | 0.774351   | 0.606004   | 1.00379   | 0.362618  | 0.64991  | 0.938929   | 0.43998   | 0.588835  | 0.646134  | 0.613508  |
| FANK1     | 0.468167  | 0.729343  | 0.426031  | 1.12574   | 1.09084   | 0.757412   | 0.374176   | 0.443806  | 1.48245   | 1.07726  | 0.880836   | 1.40694   | 0.875971  | 0.815615  | 0.874051  |
| FANK1-AS1 | 0         | 0.0250015 | 0         | 0.106949  | 0         | 0.0441839  | 0          | 0.0461157 | 0         | 0        | 0          | 0.111387  | 0         | 0.0271201 | 0         |
| FAP       | 1.86499   | 0.446692  | 0.556549  | 6.84169   | 1.55686   | 5.10806    | 0.714989   | 1.85019   | 0.451155  | 14.0482  | 24.6785    | 0.891007  | 8.84007   | 4.31022   | 12.4925   |
| FAR1      | 4.07142   | 2.49014   | 2.42813   | 4.81061   | 0.667871  | 4.6099     | 2.40947    | 3.47797   | 1.41062   | 5.40741  | 6.33949    | 2.38896   | 7.13329   | 4.89097   | 4.77595   |
| FAR2      | 2.04363   | 0.957224  | 1.22789   | 1.02413   | 0.282931  | 1.36774    | 1.22913    | 1.83428   | 0.407087  | 1.33612  | 2.10959    | 0.566138  | 1.10428   | 1.117     | 1.95168   |
| FAR2P1    | 0         | 0         | 0         | 0         | 0         | 0.00870984 | 0          | 5.89E-44  | 0         | 2.62E-16 | 0          | 0         | 0         | 0         | 0.0561685 |
| FAR2P2    | 0.0729553 | 0.0546793 | 0.0603538 | 0.0334145 | 0.0881415 | 0.0483159  | 0.00925534 | 0.0576326 | 0.0394895 | 0.010174 | 0.00915083 | 0.0290008 | 0.0104601 | 0.0211831 | 0.108881  |
| FARP1     | 4.36457   | 2.30281   | 2.54649   | 2.70567   | 5.05693   | 6.69714    | 4.71199    | 2.6954    | 0.748861  | 3.45629  | 6.06824    | 1.87594   | 4.48559   | 4.85589   | 9.91399   |

|           |           |           |           |           |           |           |           |           |           |           |           |           |            |           |           |
|-----------|-----------|-----------|-----------|-----------|-----------|-----------|-----------|-----------|-----------|-----------|-----------|-----------|------------|-----------|-----------|
| FARP2     | 3.76176   | 4.84516   | 4.73491   | 3.74036   | 4.10185   | 4.23102   | 5.0206    | 4.26082   | 5.37934   | 3.73054   | 2.68597   | 5.14501   | 3.73363    | 3.1776    | 3.22106   |
| FARS2     | 2.55495   | 2.51312   | 2.38552   | 4.27172   | 4.06754   | 3.07822   | 2.65087   | 1.84666   | 2.2595    | 3.06037   | 4.9666    | 2.31362   | 3.50892    | 2.55431   | 2.49691   |
| FARSA     | 5.69521   | 7.35957   | 7.39785   | 12.9866   | 16.8784   | 18.2703   | 6.93041   | 4.96154   | 12.0622   | 8.24537   | 9.74247   | 8.98126   | 17.5426    | 11.9193   | 7.06698   |
| FARSA-AS1 | 0         | 0         | 0         | 0         | 0         | 0         | 0         | 0         | 0         | 0         | 0         | 0.137423  | 0          | 0.0501891 | 0         |
| FARSB     | 7.18677   | 5.20029   | 6.7968    | 12.7535   | 1.37026   | 12.3347   | 4.52249   | 6.62527   | 3.5706    | 7.2617    | 7.72249   | 5.41467   | 10.306     | 8.46138   | 5.46486   |
| FAS       | 2.08019   | 2.64195   | 3.66508   | 3.16446   | 0.928356  | 2.68283   | 1.20528   | 2.05897   | 1.61643   | 2.38276   | 4.09082   | 1.15535   | 2.0548     | 1.58125   | 3.4909    |
| FAS-AS1   | 0.367669  | 0.439319  | 0.57279   | 0.288207  | 0.0828303 | 0.163203  | 0.57816   | 0.644316  | 0.123031  | 0.0792313 | 0.19277   | 0.2098    | 0.0728248  | 0.140284  | 0.554236  |
| FASLG     | 0.122063  | 0.0940985 | 0.131272  | 0.0503156 | 0.227526  | 0.145508  | 0.12543   | 0.0650874 | 0         | 0.0306402 | 0.192911  | 0.0436695 | 0.212636   | 0.0893133 | 0.298005  |
| FASN      | 10.4852   | 21.5077   | 20.5807   | 35.5516   | 52.9377   | 37.5831   | 32.9972   | 13.715    | 35.4836   | 16.3161   | 7.59552   | 31.1141   | 30.9034    | 15.3647   | 8.21674   |
| FASTK     | 7.60717   | 7.18748   | 7.34715   | 10.4908   | 21.2698   | 15.3351   | 7.04735   | 4.8918    | 9.06882   | 9.0665    | 15.3598   | 7.24862   | 9.16173    | 8.21029   | 8.52667   |
| FASTKD1   | 1.43676   | 1.31437   | 0.967183  | 1.97415   | 0.663699  | 1.15941   | 0.686198  | 1.26435   | 0.857749  | 1.54398   | 1.81803   | 1.17922   | 1.70251    | 1.77912   | 1.74644   |
| FASTKD2   | 2.95328   | 2.35112   | 2.48729   | 2.93354   | 0.719708  | 2.35292   | 1.71263   | 2.58909   | 2.32614   | 2.1713    | 2.43082   | 1.60515   | 2.86034    | 2.54352   | 1.72812   |
| FASTKD3   | 1.17615   | 0.845673  | 0.80085   | 1.40785   | 0.393501  | 1.03229   | 0.743756  | 1.06939   | 0.672136  | 1.19231   | 1.73626   | 0.543782  | 1.0332     | 0.969348  | 0.987475  |
| FASTKD5   | 3.25765   | 2.81309   | 2.96245   | 4.6233    | 2.4234    | 3.06981   | 2.83345   | 2.73708   | 6.46803   | 3.30747   | 3.94211   | 3.01923   | 4.75647    | 3.42208   | 2.61201   |
| FAT1      | 15.2019   | 13.1295   | 16.1734   | 18.1101   | 11.7095   | 17.8374   | 13.7972   | 11.9695   | 14.6655   | 27.4808   | 15.5154   | 19.691    | 56.3583    | 34.8432   | 26.6854   |
| FAT2      | 19.2026   | 33.6837   | 27.5158   | 31.246    | 34.6433   | 30.9323   | 22.9828   | 21.9302   | 10.7383   | 18.2862   | 11.0139   | 25.9556   | 19.0684    | 18.7175   | 7.02637   |
| FAT3      | 0.307408  | 0.0977667 | 0.0512639 | 0.0200343 | 0.13023   | 0.236923  | 0.235842  | 0.0485926 | 0.128742  | 0.0442254 | 0.0960148 | 0.0539028 | 0.00705549 | 0.016511  | 0.247785  |
| FAT4      | 3.55709   | 1.99408   | 2.49475   | 3.10775   | 2.969     | 7.20678   | 2.91031   | 2.32016   | 0.21162   | 2.62425   | 3.81605   | 1.17856   | 4.6762     | 8.50889   | 13.9539   |
| FATE1     | 0         | 0         | 0         | 0         | 0.0336288 | 0.0553022 | 0.0494368 | 0         | 0.0263664 | 0.027172  | 0         | 0.0309812 | 0          | 0.0226297 | 0         |
| FAU       | 184.541   | 117.48    | 129.923   | 233.767   | 166.617   | 270.949   | 166.816   | 97.258    | 211.172   | 210.502   | 443.045   | 134.578   | 175.754    | 133.619   | 86.7613   |
| FAXC      | 0.0958622 | 0.0628155 | 0.0570989 | 0.108668  | 0.041694  | 0.161618  | 0.048159  | 0.0443011 | 0.0537047 | 0.0192507 | 0.0562726 | 0.0438989 | 0.127411   | 0.0871771 | 0.0440545 |
| FAXDC2    | 6.85352   | 4.50592   | 5.3284    | 1.16531   | 2.44487   | 5.52341   | 5.50463   | 4.40007   | 0.567621  | 0.911012  | 1.67328   | 0.530297  | 0.527468   | 1.4216    | 2.18357   |
| FBF1      | 0.944715  | 1.73254   | 1.89451   | 1.21822   | 2.10517   | 1.50354   | 0.937461  | 1.08135   | 0.373479  | 0.285565  | 0.307097  | 0.665352  | 0.41486    | 0.641099  | 1.01577   |
| FBH1      | 5.32363   | 7.23796   | 7.69083   | 9.62859   | 9.25827   | 10.5351   | 6.49598   | 4.44582   | 7.22102   | 7.00543   | 7.42679   | 6.70762   | 7.79002    | 7.25416   | 7.41595   |
| FBL       | 32.8969   | 31.3176   | 34.3798   | 51.1589   | 40.2384   | 72.7346   | 24.0424   | 21.1855   | 21.2179   | 23.8359   | 39.0875   | 17.128    | 35.157     | 28.5102   | 15.3486   |
| FBLIM1    | 4.52979   | 4.47953   | 3.8262    | 16.8764   | 17.0734   | 23.2711   | 5.98727   | 2.84067   | 21.3836   | 31.5325   | 25.3318   | 17.5773   | 51.4842    | 27.9453   | 14.3806   |

|            |           |            |            |          |           |            |           |           |           |           |          |           |           |          |          |
|------------|-----------|------------|------------|----------|-----------|------------|-----------|-----------|-----------|-----------|----------|-----------|-----------|----------|----------|
| FBLL1      | 0.014722  | 0.148959   | 0.0730747  | 0.1062   | 0.160079  | 0.188034   | 0.20171   | 0         | 0.681332  | 0         | 0        | 0.0632041 | 0.0379943 | 0.19236  | 0.126856 |
| FBLN1      | 18.5305   | 19.3378    | 28.6175    | 12.5018  | 19.436    | 62.9911    | 40.7045   | 11.2809   | 2.00207   | 10.7827   | 25.8994  | 1.75243   | 12.6014   | 8.69372  | 58.0571  |
| FBLN2      | 28.5815   | 16.2831    | 23.6723    | 10.0613  | 31.6024   | 27.5298    | 42.8745   | 17.4071   | 1.65549   | 8.77946   | 13.5471  | 3.01727   | 11.747    | 9.74152  | 27.2081  |
| FBLN5      | 13.369    | 7.20792    | 11.1979    | 4.42028  | 5.06538   | 14.7065    | 14.1202   | 8.84259   | 0.952724  | 2.87932   | 6.48924  | 1.42136   | 4.88274   | 3.08706  | 10.982   |
| FBLN7      | 2.08378   | 1.52297    | 2.06529    | 0.757294 | 4.72234   | 1.7486     | 3.01135   | 1.95031   | 0.269719  | 1.41507   | 3.36372  | 0.511406  | 1.10413   | 1.20482  | 2.93474  |
| FBN1       | 18.8548   | 9.55554    | 13.7711    | 16.6957  | 16.7158   | 30.9399    | 33.8462   | 11.7813   | 1.7497    | 16.8345   | 27.6715  | 4.39934   | 15.0007   | 13.6811  | 56.813   |
| FBN2       | 0.0431612 | 0.0405517  | 0.0553443  | 0.409206 | 0.268177  | 2.46049    | 0.0689921 | 0.0920595 | 0.0919897 | 2.81422   | 2.16333  | 1.30326   | 6.47731   | 7.56029  | 2.02381  |
| FBN3       | 0.0121998 | 0.00470245 | 0.00807404 | 0        | 0.0113703 | 0.0020776  | 0.0195011 | 0.034695  | 0         | 0.0122496 | 0        | 0         | 0         | 0        | 0        |
| FBP1       | 0.863354  | 0.204884   | 0.330464   | 0.318703 | 0.380308  | 1.63485    | 0.500231  | 0.435172  | 0.109855  | 0.889521  | 2.32745  | 0.101422  | 0.257731  | 0.154899 | 0.296092 |
| FBP2       | 0.034286  | 0          | 0          | 0        | 0         | 0          | 0         | 0         | 0         | 0         | 0        | 0         | 0         | 0        | 0        |
| FBRS       | 8.19133   | 12.0817    | 12.4204    | 15.0889  | 25.2467   | 20.7661    | 14.3184   | 9.53781   | 21.1324   | 11.4406   | 10.042   | 14.032    | 21.558    | 12.5873  | 11.2298  |
| FBRS1      | 3.46102   | 3.82806    | 4.36638    | 4.88321  | 8.72836   | 7.43688    | 5.18368   | 3.05325   | 4.20894   | 2.91938   | 2.48214  | 3.72561   | 5.38884   | 3.82791  | 3.88135  |
| FBXL12     | 2.38004   | 2.27163    | 1.99706    | 3.13011  | 4.6653    | 5.02782    | 2.27748   | 1.41012   | 2.94003   | 2.74537   | 4.31163  | 2.5788    | 3.65616   | 2.94986  | 3.15762  |
| FBXL13     | 0.386735  | 0.346518   | 0.297483   | 0.370574 | 0.137009  | 0.22531    | 0.209161  | 0.422085  | 0.0908947 | 0.272501  | 0.245095 | 0.354395  | 0.0787957 | 0.18794  | 0.107183 |
| FBXL14     | 2.6421    | 2.0759     | 2.2855     | 1.60428  | 2.21383   | 3.1552     | 1.89011   | 1.59786   | 1.05479   | 1.15582   | 2.45044  | 0.87857   | 1.46418   | 1.2319   | 2.06251  |
| FBXL15     | 1.86163   | 1.98748    | 2.13179    | 1.99925  | 6.95545   | 3.28712    | 2.0025    | 1.21908   | 2.2434    | 2.0168    | 4.77827  | 1.64052   | 2.06719   | 1.82304  | 1.2242   |
| FBXL16     | 1.43705   | 3.42105    | 3.40438    | 2.30216  | 6.94023   | 1.99674    | 3.52022   | 2.6007    | 5.43347   | 1.36093   | 3.76067  | 2.35562   | 1.2559    | 0.81593  | 0.431519 |
| FBXL17     | 3.32459   | 2.93992    | 3.04488    | 2.41248  | 2.1846    | 3.49024    | 2.66272   | 2.74894   | 2.52045   | 2.13942   | 2.81855  | 1.78651   | 2.70208   | 1.67477  | 1.57873  |
| FBXL18     | 1.33407   | 1.70453    | 1.70285    | 2.11614  | 4.04789   | 2.78827    | 2.42397   | 1.52052   | 2.40239   | 1.42626   | 1.33435  | 2.09464   | 2.47545   | 1.88991  | 1.89379  |
| FBXL19     | 2.69092   | 4.99427    | 4.29009    | 6.28068  | 15.0406   | 9.41293    | 3.11988   | 1.99552   | 6.12764   | 4.39881   | 2.51466  | 6.83037   | 7.692     | 7.25557  | 3.92421  |
| FBXL19-AS1 | 0.169868  | 0.200379   | 0.19383    | 0.670034 | 0.427641  | 0.408983   | 0.220701  | 0.161376  | 0.14981   | 0.360238  | 0.198372 | 0.326914  | 0.710497  | 0.887804 | 0.639322 |
| FBXL2      | 0.770965  | 0.747455   | 0.633907   | 0.784813 | 0.598787  | 0.640455   | 0.735342  | 0.806327  | 0.223287  | 1.25085   | 0.647435 | 0.575192  | 0.609646  | 1.05895  | 1.07345  |
| FBXL20     | 3.70398   | 3.97784    | 3.97871    | 2.53832  | 3.37019   | 2.68574    | 4.06579   | 3.843     | 6.54132   | 3.25913   | 3.30722  | 3.7471    | 2.60212   | 2.1523   | 2.80902  |
| FBXL21     | 0         | 0          | 0          | 0        | 0         | 0.00820742 | 0         | 0         | 0         | 0.0120978 | 0        | 0         | 0         | 0        | 0        |
| FBXL22     | 0.563721  | 0.469811   | 0.315101   | 0.235513 | 0.875654  | 0.285406   | 0.730617  | 0.365586  | 0.185554  | 0.191224  | 0.292387 | 0.119917  | 0.02949   | 0.175183 | 0.54701  |
| FBXL3      | 8.8164    | 7.00648    | 7.43381    | 6.31016  | 3.67696   | 8.85077    | 5.47242   | 8.45538   | 8.34689   | 7.59525   | 9.7465   | 4.41866   | 9.43702   | 5.73594  | 6.09661  |

|          |           |           |           |          |           |          |           |           |           |           |           |           |           |           |          |
|----------|-----------|-----------|-----------|----------|-----------|----------|-----------|-----------|-----------|-----------|-----------|-----------|-----------|-----------|----------|
| FBXL4    | 2.30414   | 2.45502   | 2.55439   | 2.13441  | 0.888202  | 1.65178  | 2.04563   | 2.5032    | 1.3154    | 1.6214    | 2.1612    | 1.3941    | 1.19422   | 1.72003   | 1.35038  |
| FBXL5    | 12.41     | 8.7303    | 8.72165   | 15.9039  | 3.78828   | 11.1941  | 7.76625   | 10.5265   | 14.8819   | 15.3924   | 17.1353   | 7.82541   | 14.8785   | 11.9798   | 9.57683  |
| FBXL6    | 2.01      | 2.40525   | 2.18168   | 4.87484  | 6.96984   | 6.0668   | 2.48558   | 1.24936   | 1.95842   | 3.55215   | 3.96459   | 3.53034   | 4.51174   | 4.01332   | 2.93222  |
| FBXL7    | 1.52602   | 0.976517  | 1.1283    | 1.08608  | 2.25932   | 2.5135   | 1.8077    | 1.12734   | 0.185852  | 1.13722   | 2.71323   | 0.35487   | 1.12919   | 1.25865   | 5.1844   |
| FBXL8    | 1.99057   | 3.10309   | 3.0503    | 1.76289  | 7.31264   | 3.67779  | 3.78364   | 1.93624   | 0.955131  | 0.952099  | 1.83426   | 1.70219   | 0.814816  | 0.868416  | 1.64353  |
| FBXO10   | 1.22418   | 1.06754   | 0.941585  | 2.17904  | 3.66956   | 2.84714  | 1.09739   | 1.18236   | 5.64329   | 1.63806   | 2.17571   | 2.34909   | 2.27159   | 1.27169   | 2.1867   |
| FBXO11   | 7.63634   | 7.192     | 8.04301   | 9.26631  | 2.22679   | 7.21944  | 4.5218    | 7.80763   | 6.71868   | 8.56916   | 6.93915   | 4.989     | 11.4338   | 7.92099   | 7.62617  |
| FBXO15   | 0.0250195 | 0.0964383 | 0.010349  | 0.038675 | 0.0582959 | 0.159778 | 0.0285665 | 0.0111176 | 0.030471  | 0         | 0.0564878 | 0.0179021 | 0         | 0         | 0        |
| FBXO16   | 0.137552  | 0.0662744 | 0.0284481 | 0.106313 | 0.0801244 | 0.380651 | 0.039263  | 0.0305611 | 0.0418806 | 0.151061  | 0.232918  | 0         | 0.0332803 | 0.134795  | 0        |
| FBXO17   | 1.70587   | 1.81279   | 2.05411   | 2.86156  | 2.88536   | 3.69589  | 2.0451    | 1.2381    | 0.530933  | 1.64147   | 2.64252   | 0.67133   | 1.27183   | 1.52557   | 1.63324  |
| FBXO2    | 1.52456   | 2.2799    | 2.6681    | 2.69785  | 6.68523   | 3.6766   | 2.24182   | 0.993716  | 2.49809   | 3.40293   | 3.16859   | 2.17253   | 6.50381   | 1.91803   | 0.581394 |
| FBXO21   | 6.51157   | 5.13142   | 5.53603   | 5.6117   | 4.65392   | 7.73243  | 5.60565   | 5.29621   | 4.97394   | 3.80841   | 4.82023   | 3.23913   | 5.47462   | 3.75183   | 3.00721  |
| FBXO22   | 2.50268   | 2.7721    | 2.84067   | 3.06161  | 1.9145    | 2.49763  | 2.41503   | 2.9273    | 1.67147   | 2.81012   | 4.04035   | 1.87931   | 1.95849   | 2.97327   | 1.84732  |
| FBXO24   | 0.0256389 | 0.116456  | 0.159769  | 0.048181 | 0.213403  | 0.192237 | 0.113075  | 0.107859  | 0.102493  | 0.0352084 | 0.0249488 | 0.0602163 | 0.0603304 | 0.0529689 | 0.107431 |
| FBXO25   | 5.03441   | 3.70472   | 3.37588   | 3.94725  | 2.60672   | 4.93255  | 3.78879   | 4.01626   | 4.23767   | 4.34336   | 6.42168   | 3.35804   | 5.71337   | 2.63616   | 3.21335  |
| FBXO27   | 2.44179   | 7.40234   | 6.33588   | 9.59036  | 14.6691   | 6.27085  | 5.51338   | 2.97185   | 15.6533   | 14.1542   | 12.8082   | 10.0968   | 11.8638   | 5.3857    | 1.21115  |
| FBXO28   | 4.27957   | 6.10426   | 5.91479   | 5.29848  | 3.5217    | 5.14435  | 5.55048   | 6.84822   | 16.0035   | 5.89354   | 7.76439   | 5.36484   | 7.07272   | 4.48003   | 3.26206  |
| FBXO3    | 5.82512   | 5.86079   | 5.85403   | 7.01057  | 1.96929   | 5.50328  | 4.62633   | 5.2137    | 10.1622   | 10.1191   | 8.37181   | 5.95856   | 12.248    | 5.5346    | 4.08165  |
| FBXO3-DT | 0         | 0.0288878 | 0         | 0        | 0         | 0        | 0         | 0         | 0.0730198 | 0         | 0         | 0         | 0         | 0         | 0        |
| FBXO30   | 2.92503   | 2.49229   | 2.47628   | 4.09128  | 1.37042   | 4.00645  | 1.79877   | 2.42219   | 4.28505   | 4.29736   | 4.23868   | 2.90082   | 6.64763   | 4.45995   | 3.22785  |
| FBXO31   | 4.92261   | 3.36876   | 3.96899   | 2.86259  | 5.95718   | 6.38579  | 3.95471   | 2.98731   | 2.70919   | 1.86924   | 1.99354   | 1.83844   | 2.30809   | 2.4718    | 3.23821  |
| FBXO32   | 4.66457   | 2.96506   | 3.46469   | 1.67901  | 2.5153    | 12.2955  | 2.9673    | 3.60364   | 1.36343   | 1.06218   | 1.65118   | 0.438662  | 1.42525   | 1.2416    | 2.12452  |
| FBXO33   | 1.7709    | 1.15643   | 1.18986   | 1.36177  | 0.572505  | 1.38543  | 1.30349   | 1.56184   | 1.58746   | 1.76008   | 2.19193   | 1.3411    | 2.11405   | 1.32255   | 1.82674  |
| FBXO34   | 4.93255   | 4.12333   | 4.22439   | 4.96367  | 3.14079   | 4.3919   | 4.29371   | 3.43364   | 6.2504    | 4.58252   | 5.11027   | 3.10087   | 4.93151   | 3.82654   | 4.05975  |
| FBXO36   | 1.54561   | 1.02198   | 1.19702   | 0.813343 | 0.472511  | 1.53308  | 1.1452    | 1.27132   | 0.931177  | 1.19696   | 1.48494   | 0.541198  | 0.896437  | 0.674602  | 0.873709 |
| FBXO38   | 4.69769   | 4.18406   | 4.22809   | 4.60388  | 2.60842   | 5.06012  | 3.26717   | 3.80296   | 8.09772   | 5.83039   | 5.55108   | 4.93338   | 4.2797    | 4.99794   | 3.63616  |

|           |           |           |           |           |            |           |           |            |            |            |            |           |           |            |           |
|-----------|-----------|-----------|-----------|-----------|------------|-----------|-----------|------------|------------|------------|------------|-----------|-----------|------------|-----------|
| FBXO39    | 0.0277661 | 0.113714  | 0.0918803 | 0.128762  | 0.129391   | 0.28371   | 0.0317024 | 0.0740286  | 0.016908   | 0.0696986  | 0.109706   | 0.0298011 | 0         | 0.12335    | 0.159503  |
| FBXO4     | 2.7638    | 1.77065   | 2.01841   | 2.11788   | 0.487499   | 2.51712   | 1.54891   | 2.03337    | 0.961715   | 2.05844    | 3.90855    | 0.941703  | 1.13654   | 1.23813    | 1.25036   |
| FBXO40    | 0.0444903 | 0.0214361 | 0.0234217 | 0.0333444 | 0.00628262 | 0.0068878 | 0.0277078 | 0.0647006  | 0.00492584 | 0.00507636 | 0.00913164 | 0.002894  | 0         | 0.0147971  | 0.0464682 |
| FBXO41    | 0.370797  | 0.535966  | 0.660478  | 0.395887  | 1.05855    | 0.918741  | 0.800958  | 0.700629   | 1.07405    | 0.440232   | 0.433667   | 0.360924  | 0.368553  | 0.425999   | 0.753191  |
| FBXO42    | 4.68574   | 5.4949    | 6.01867   | 4.32412   | 5.27308    | 4.79224   | 6.3709    | 3.9335     | 9.69192    | 4.56332    | 5.21424    | 4.85263   | 3.75808   | 3.40879    | 2.99436   |
| FBXO43    | 0.0829252 | 0.0732502 | 0.0514512 | 0.035607  | 0.0107343  | 0.082378  | 0.0315605 | 0.0614142  | 0.0168323  | 0.0693865  | 0.0858112  | 0.0049446 | 0.0178343 | 0.0433404  | 0         |
| FBXO44    | 2.06493   | 3.36552   | 3.16581   | 1.89621   | 6.57464    | 2.75732   | 2.28752   | 1.9257     | 1.10058    | 1.54427    | 1.61838    | 1.4526    | 0.992165  | 1.40526    | 1.4845    |
| FBXO45    | 3.11238   | 3.58356   | 3.57904   | 7.47978   | 3.60558    | 5.78153   | 3.65502   | 3.98222    | 35.6385    | 10.5132    | 14.9472    | 10.4601   | 11.6318   | 6.4497     | 1.96531   |
| FBXO46    | 2.06755   | 3.44512   | 2.88635   | 10.5647   | 8.53568    | 7.94308   | 3.02109   | 1.77732    | 8.37855    | 5.91597    | 5.11955    | 7.43654   | 8.54383   | 6.94658    | 3.20786   |
| FBXO47    | 0         | 0         | 0         | 0         | 0.0156165  | 0.0256812 | 0         | 0.00893467 | 0          | 0          | 0.0113491  | 0         | 0         | 0          | 0         |
| FBXO48    | 0.325371  | 0.522562  | 0.434813  | 0.292316  | 0.311024   | 0.497268  | 0.219089  | 0.326235   | 0.843334   | 0.481672   | 0.857041   | 0.388019  | 0.344497  | 0.335746   | 0.515199  |
| FBXO5     | 0.685858  | 0.5716    | 0.483048  | 1.25122   | 0.33113    | 1.53102   | 0.391545  | 0.461268   | 0.4628     | 1.48899    | 2.04025    | 0.90855   | 2.16472   | 1.37086    | 1.02491   |
| FBXO6     | 1.74981   | 1.84613   | 1.91325   | 4.84646   | 2.01983    | 5.32433   | 1.86226   | 1.37       | 2.09762    | 1.98065    | 3.2976     | 1.58012   | 4.72961   | 1.47804    | 1.53344   |
| FBXO7     | 12.0164   | 11.3002   | 10.9416   | 13.3724   | 7.05005    | 18.5652   | 12.0192   | 9.46198    | 10.8482    | 13.7393    | 21.3969    | 8.5981    | 19.1053   | 10.3245    | 11.3277   |
| FBXO8     | 3.48676   | 3.59121   | 3.81553   | 3.82294   | 2.04988    | 3.41219   | 3.91667   | 3.08285    | 5.29991    | 4.4145     | 7.14346    | 2.6536    | 3.64599   | 2.38368    | 3.03097   |
| FBXO9     | 4.88694   | 4.61057   | 4.10045   | 7.70239   | 4.77686    | 7.80016   | 3.72862   | 3.38939    | 9.01817    | 3.93552    | 6.25607    | 4.15813   | 4.60658   | 3.96707    | 2.82195   |
| FBXW10    | 0.104073  | 0.1111705 | 0.0726832 | 0.137044  | 0.103237   | 0.0784119 | 0.0436181 | 0.0903356  | 0.05782    | 0.254203   | 0.101338   | 0.217052  | 4.89E-17  | 0.266607   | 0.0640247 |
| FBXW11    | 5.62858   | 5.36132   | 6.09695   | 10.773    | 3.85999    | 8.49335   | 4.85409   | 5.06428    | 9.57148    | 7.96004    | 9.09155    | 5.83054   | 12.0631   | 6.50946    | 5.58238   |
| FBXW12    | 0.0553    | 0.0266444 | 0.022874  | 0.0284941 | 0          | 0         | 0.0157849 | 0.0368595  | 0          | 0          | 0          | 0         | 0         | 0.00722555 | 0.0397089 |
| FBXW2     | 6.47733   | 5.9488    | 5.61278   | 4.96672   | 4.28134    | 6.63034   | 5.32737   | 5.76547    | 5.58128    | 4.26249    | 4.81785    | 4.23992   | 4.41809   | 4.55065    | 4.76149   |
| FBXW4     | 9.57148   | 11.5097   | 11.4215   | 9.79008   | 17.1029    | 17.8902   | 8.91282   | 5.60438    | 8.68681    | 4.99484    | 6.27799    | 5.95793   | 8.93404   | 5.91447    | 5.46611   |
| FBXW4P1   | 0.735852  | 1.05365   | 1.04602   | 0.576748  | 1.41672    | 0.91779   | 1.31351   | 0.72765    | 0.416536   | 0.611377   | 0.163797   | 1.30518   | 0.260788  | 1.25668    | 1.54795   |
| FBXW5     | 10.2296   | 11.83     | 12.9353   | 19.4605   | 27.4603    | 29.8654   | 11.0248   | 7.05175    | 23.0577    | 20.1254    | 26.5537    | 14.8548   | 29.0919   | 17.1574    | 11.2976   |
| FBXW7     | 5.0021    | 7.63462   | 8.45188   | 4.6548    | 5.31977    | 3.59529   | 3.81019   | 5.72747    | 7.90204    | 6.44466    | 5.78959    | 5.66396   | 4.69335   | 4.08944    | 3.43208   |
| FBXW7-AS1 | 0.214176  | 0.370457  | 0.846881  | 0.147131  | 0.105483   | 0.253045  | 0.258657  | 1.41872    | 0.1745     | 0.806635   | 0          | 0.654587  | 0.0890905 | 0.430404   | 0.436228  |
| FBXW8     | 2.11746   | 2.16907   | 2.21358   | 2.51445   | 2.96563    | 4.46334   | 2.31453   | 2.04552    | 1.24961    | 1.32985    | 2.06822    | 1.5426    | 1.42027   | 1.66282    | 3.05459   |

|         |                 |           |            |           |           |          |           |           |            |           |           |            |           |           |          |
|---------|-----------------|-----------|------------|-----------|-----------|----------|-----------|-----------|------------|-----------|-----------|------------|-----------|-----------|----------|
| FBXW9   | 1.83865         | 1.8103    | 1.43289    | 3.55616   | 3.33207   | 4.90098  | 2.60133   | 1.27882   | 1.97965    | 2.19064   | 3.36911   | 1.83994    | 2.65626   | 2.15868   | 1.35854  |
| FCAMR   | 0               | 0         | 0.00687947 | 0         | 0         | 0        | 0         | 0         | 0          | 0.0104373 | 0.0281627 | 0          | 0         | 0         | 0        |
| FCAR    | 0.0176799       | 0         | 0.0146261  | 1.09318   | 0.0411946 | 0.511844 | 0.0100932 | 0.0157125 | 0          | 1.76412   | 2.33514   | 0.0126505  | 0.850596  | 0.29569   | 1.05371  |
| FCER1A  | 3.35723         | 4.91013   | 7.55962    | 5.85492   | 0.555438  | 0.997986 | 2.58569   | 5.80837   | 2.37098    | 1.77024   | 5.83061   | 1.94734    | 1.07663   | 1.25628   | 1.54057  |
| FCER1G  | 6.77453         | 3.0188    | 4.30856    | 42.6548   | 3.28469   | 34.8106  | 8.18205   | 6.33385   | 0.810754   | 19.9052   | 42.8796   | 1.26087    | 18.191    | 6.7948    | 16.1964  |
| FCER2   | 0.0268793       | 0.0323771 | 0.0111182  | 0.0138499 | 0.0208764 | 0.114437 | 0.383624  | 0.0477761 | 0          | 0.101209  | 0.0151717 | 0.00961642 | 0.0173424 | 0         | 0.057903 |
| FCF1    | 4.10451         | 3.60677   | 3.23141    | 7.56915   | 2.36354   | 6.31805  | 2.77752   | 3.54758   | 4.4612     | 6.23612   | 8.70504   | 3.34683    | 6.89629   | 4.76659   | 4.57269  |
| FCF1P2  | 1.37205         | 1.17082   | 1.23079    | 1.20951   | 0.308136  | 0.731937 | 0.6606    | 1.3369    | 1.71127    | 0.954398  | 1.10101   | 0.674207   | 1.16255   | 1.33051   | 0.99709  |
| FCGBP   | 2.36796         | 15.9001   | 24.8939    | 9.65333   | 8.34354   | 0.619194 | 8.45277   | 19.575    | 3.11435    | 0.228618  | 0.376183  | 2.9704     | 0.494689  | 0.126195  | 0.172367 |
| FCGR1A  | 0.127307        | 0.108422  | 0.0970486  | 2.03135   | 0.611239  | 2.77703  | 0.0501507 | 0.179369  | 0.156998   | 2.20304   | 6.03973   | 0.119466   | 0.738422  | 0.242177  | 2.30659  |
| FCGR1B  | 0.136914        | 0.0937605 | 0.0598166  | 0.65707   | 0.0657136 | 0.484824 | 0.0632309 | 0.0900889 | 0.0184506  | 0.408304  | 0.521987  | 0.0709537  | 0.206182  | 0.0232314 | 0.361664 |
| FCGR1CP | 0.00078417<br>2 | 0.0476194 | 1.39E-34   | 1.29636   | 0.39729   | 1.54574  | 1.95E-22  | 0.0839321 | 5.44E-35   | 0.426589  | 1.53796   | 6.10E-11   | 0.198493  | 0.162343  | 1.53722  |
| FCGR2A  | 3.55203         | 0.728756  | 0.775274   | 15.8451   | 3.28566   | 16.3879  | 1.34805   | 3.48934   | 0.259331   | 15.0328   | 42.6489   | 0.653833   | 15.5844   | 6.0167    | 15.869   |
| FCGR2B  | 1.68947         | 1.09447   | 1.3668     | 3.16988   | 3.76973   | 5.36557  | 3.22886   | 2.03881   | 0.371469   | 2.44693   | 6.18431   | 0.411893   | 3.88414   | 1.01034   | 1.98889  |
| FCGR2C  | 2.29233         | 0.520531  | 0.456845   | 0.498561  | 0.944775  | 2.2778   | 1.61454   | 2.32049   | 0.0699042  | 1.27095   | 2.59595   | 0.108766   | 0.652333  | 1.22139   | 2.39036  |
| FCGR3A  | 0.983538        | 0.152404  | 0.0884739  | 9.63732   | 1.18911   | 18.012   | 0.238562  | 1.25389   | 0.201344   | 8.38652   | 17.3017   | 0.200691   | 4.46525   | 1.3991    | 6.95579  |
| FCGR3B  | 0.466041        | 0.130694  | 0.00844602 | 2.91546   | 0.361876  | 0.744677 | 0.417055  | 2.32066   | 0.236434   | 9.64339   | 17.7657   | 0.0657793  | 3.27956   | 0.387989  | 1.84621  |
| FCGRT   | 19.6952         | 12.3292   | 16.4116    | 14.8251   | 29.875    | 36.1025  | 19.557    | 12.3739   | 2.96479    | 12.3183   | 41.0832   | 3.31821    | 7.82473   | 6.77027   | 20.2643  |
| FCHO1   | 0.995026        | 1.93444   | 2.64215    | 0.487604  | 2.93992   | 1.26199  | 3.77371   | 1.29862   | 7.6354     | 0.576397  | 1.06042   | 1.01567    | 0.273854  | 0.22911   | 0.549609 |
| FCHO2   | 4.58126         | 3.62437   | 3.90905    | 5.43453   | 0.902157  | 4.69604  | 2.98141   | 4.31499   | 5.66435    | 6.33888   | 6.48284   | 4.88039    | 7.38959   | 4.74984   | 4.11032  |
| FCHSD1  | 3.8218          | 4.93625   | 4.9913     | 50.7056   | 21.318    | 8.41695  | 4.57658   | 3.23716   | 44.1039    | 17.0731   | 14.6987   | 27.2827    | 22.1877   | 20.2201   | 5.96158  |
| FCHSD2  | 4.76262         | 3.65812   | 4.58811    | 5.46575   | 3.2026    | 7.19335  | 3.84884   | 4.13643   | 2.07783    | 3.37695   | 4.53853   | 2.30505    | 5.05486   | 3.7041    | 6.0921   |
| FCMR    | 0.378845        | 0.24217   | 0.201286   | 1.57185   | 0.348243  | 1.66727  | 0.0770878 | 0.303252  | 0.24546    | 0.78671   | 1.57899   | 0.43018    | 1.6737    | 0.929444  | 0.732536 |
| FCN1    | 0.0885068       | 0.113323  | 0.184596   | 0.466116  | 0.41687   | 0.758941 | 0.0413144 | 0.0884341 | 0.00734479 | 0.669877  | 1.50116   | 0.025891   | 0.947463  | 0.225364  | 1.10427  |
| FCN2    | 0.145563        | 0         | 0.0181131  | 0         | 0.0340106 | 0.175461 | 0.0499981 | 0.038917  | 0          | 0         | 0         | 0          | 0         | 0         | 0        |

|         |            |            |            |            |           |           |            |            |            |            |            |            |            |           |           |
|---------|------------|------------|------------|------------|-----------|-----------|------------|------------|------------|------------|------------|------------|------------|-----------|-----------|
| FCN3    | 0.109165   | 0.21039    | 0.19868    | 0.944984   | 0.440886  | 1.17121   | 0.0997132  | 0.0388068  | 0.212722   | 0.822082   | 1.08446    | 0.21871    | 0.309905   | 0.330916  | 0.18813   |
| FCRL1   | 0.00732375 | 0.0141148  | 0.00605872 | 0          | 0         | 0         | 0          | 0.026035   | 0          | 0.00919206 | 0.0248028  | 0          | 0.00472525 | 0         | 0.0420713 |
| FCRL2   | 0          | 0          | 0          | 0          | 0         | 0         | 0          | 0          | 0          | 0.0224387  | 0.050455   | 0          | 0.0634413  | 0         | 0         |
| FCRL3   | 0.0277162  | 0.00333853 | 0.0057322  | 0.0071406  | 0.0107632 | 0.0295    | 0.00791137 | 0.00615797 | 0          | 0          | 0.00782204 | 0          | 0.1111765  | 0.0181071 | 0.049755  |
| FCRL4   | 0          | 0          | 0          | 0.00689494 | 0         | 0         | 0          | 0.00594612 | 0          | 0          | 0          | 0          | 0          | 0         | 0         |
| FCRL5   | 0.0601118  | 0.0103439  | 0.0248644  | 0.00442478 | 0.0800352 | 0.0292482 | 0.024512   | 0.06487    | 0          | 0.0215561  | 0.0242353  | 0.00614452 | 0.0775677  | 0         | 0.0308315 |
| FCRL6   | 0.282784   | 0.0980998  | 0.084218   | 0.10491    | 0.0702818 | 0.423785  | 0.167894   | 0.0703682  | 0          | 0.0851815  | 0.102153   | 0          | 0.0364902  | 0.0118236 | 0.129956  |
| FCRLA   | 0.117527   | 0.103815   | 0.0972267  | 0.504647   | 0.212987  | 0.858958  | 0.123006   | 0.165377   | 0.107351   | 0.0614619  | 0.0773929  | 0.0700782  | 0.0695089  | 0         | 0.0140653 |
| FCRLB   | 0.217252   | 0.0991661  | 0.0851334  | 0.223884   | 0.515082  | 0.369974  | 0.169719   | 0.213399   | 0.236737   | 0.358781   | 0.697028   | 0.245447   | 0.376245   | 0.233067  | 0.0164211 |
| FDCSP   | 0.778262   | 0.0394714  | 0          | 0.25327    | 0         | 4.2551    | 0.0467681  | 0          | 0          | 0.205642   | 0.0924801  | 0          | 0.13214    | 0.0856323 | 0         |
| FDFT1   | 8.66746    | 9.34351    | 8.95963    | 21.9524    | 9.57934   | 17.2713   | 10.9081    | 8.07324    | 16.139     | 16.5926    | 15.5433    | 10.033     | 16.2048    | 11.8997   | 4.34868   |
| FDPS    | 14.4955    | 13.9341    | 13.1291    | 43.2661    | 23.2277   | 39.9928   | 14.5946    | 10.3851    | 34.7049    | 43.7288    | 37.1841    | 24.2616    | 40.5214    | 26.2246   | 10.6952   |
| FDPS2   | 1.28421    | 2.95065    | 2.69983    | 1.20647    | 3.49796   | 0.623275  | 2.87046    | 2.71068    | 0.181076   | 0.609966   | 0.144243   | 0.9327     | 0.124143   | 1.39581   | 1.3565    |
| FDX1    | 2.20061    | 2.08876    | 1.96614    | 3.12199    | 1.93704   | 3.59767   | 1.92631    | 1.71451    | 2.25128    | 1.68481    | 3.79256    | 1.39614    | 2.28118    | 1.93606   | 1.27467   |
| FDX2    | 1.39515    | 1.80572    | 1.71993    | 4.31322    | 6.20399   | 4.70522   | 1.5617     | 0.972464   | 2.09893    | 2.91842    | 4.78661    | 1.62463    | 3.26522    | 2.58782   | 1.7286    |
| FDXACB1 | 0.384963   | 0.654639   | 0.639088   | 0.670119   | 0.386928  | 0.772526  | 0.48263    | 0.389081   | 0.772209   | 0.369481   | 0.869151   | 0.43208    | 0.545454   | 0.455272  | 0.37941   |
| FDXR    | 1.77226    | 3.05679    | 2.207      | 5.26538    | 13.179    | 5.49841   | 2.64778    | 1.35721    | 6.45229    | 4.04646    | 3.6182     | 3.60194    | 3.22964    | 4.11889   | 1.90889   |
| FECH    | 1.87931    | 1.1261     | 1.16272    | 1.80888    | 1.09161   | 2.71844   | 1.32883    | 1.36213    | 1.05725    | 1.16139    | 1.83073    | 1.21955    | 1.93471    | 1.09189   | 1.49331   |
| FEM1A   | 7.73041    | 7.78575    | 8.57167    | 9.43064    | 11.2037   | 10.6425   | 9.77495    | 6.33508    | 12.3404    | 6.26428    | 6.31392    | 6.31534    | 11.8514    | 6.6362    | 4.17616   |
| FEM1B   | 8.47149    | 7.90505    | 8.4276     | 9.07838    | 4.8861    | 8.26479   | 7.01968    | 8.97559    | 14.1799    | 10.5469    | 13.0041    | 6.52195    | 13.3132    | 9.28652   | 6.67807   |
| FEM1C   | 3.82201    | 3.05574    | 2.9214     | 3.71304    | 1.15027   | 3.87815   | 2.40466    | 4.36615    | 4.71781    | 5.2967     | 5.77523    | 4.28729    | 8.45869    | 4.84197   | 3.87653   |
| FEN1    | 2.05806    | 1.53601    | 1.41046    | 7.46469    | 2.13125   | 8.2724    | 1.50895    | 1.16556    | 1.42525    | 2.98826    | 4.21381    | 1.89127    | 8.33159    | 3.00017   | 2.98461   |
| FENDRR  | 0          | 0.00600791 | 0          | 0.00856666 | 0.0129128 | 0.0176958 | 0          | 0.0036939  | 0.00506207 | 0.0156503  | 0.0234605  | 0.0148702  | 0.0294988  | 0.0238957 | 0.0716301 |
| FER     | 2.10751    | 2.44167    | 2.82299    | 2.60765    | 0.560365  | 2.05612   | 1.72442    | 2.07547    | 1.43997    | 2.57367    | 2.4376     | 1.80562    | 4.15056    | 3.07528   | 2.30533   |
| FER1L4  | 0.162032   | 0.137061   | 0.145453   | 0.0213165  | 0.326664  | 0.173194  | 0.137768   | 0.171576   | 0.0461853  | 0.0389427  | 0.038918   | 0.106071   | 0.0355889  | 0.255857  | 0.193091  |
| FER1L5  | 0.039365   | 0.0275879  | 0.0266445  | 0.00368789 | 0.0333532 | 0.0700848 | 0.0286018  | 0.0222628  | 0.00435838 | 0.0134747  | 0.0121195  | 0.0281667  | 0.00230892 | 0.0168332 | 0.0256969 |

|            |            |            |           |            |           |           |           |            |            |            |           |            |            |           |          |
|------------|------------|------------|-----------|------------|-----------|-----------|-----------|------------|------------|------------|-----------|------------|------------|-----------|----------|
| FER1L6     | 0.0191233  | 0.0331701  | 0.0126561 | 0.0236486  | 0.0475282 | 0.0814163 | 0.0436688 | 0.0271924  | 0.847758   | 0.187214   | 0.120892  | 0.448367   | 0.229492   | 0.415576  | 0.137318 |
| FER1L6-AS1 | 0.009997   | 0          | 0         | 0          | 0         | 0.0170246 | 0         | 0          | 0          | 0          | 0         | 0.0786843  | 0          | 0.0992725 | 0        |
| FER1L6-AS2 | 0          | 2.43E-23   | 0.0109528 | 0          | 1.21E-20  | 0         | 0         | 0.0235327  | 0.0161245  | 0.0166172  | 0         | 0.0867969  | 0          | 0.0145411 | 0        |
| FERD3L     | 0          | 0.104538   | 0.149575  | 0.22359    | 0.0561705 | 0.277116  | 0.082575  | 0.0642738  | 0          | 0          | 0         | 0.0258742  | 0          | 0.0188993 | 0        |
| FERMT1     | 5.3331     | 6.63499    | 5.41919   | 9.87598    | 4.35494   | 9.21985   | 5.69929   | 5.16686    | 3.72088    | 4.40976    | 3.55544   | 5.58091    | 11.3141    | 7.59877   | 4.92964  |
| FERMT2     | 4.82233    | 1.88924    | 2.34242   | 2.59912    | 1.99543   | 8.88811   | 3.25596   | 2.12789    | 1.60546    | 7.7577     | 13.7196   | 1.28972    | 4.82975    | 5.73677   | 11.4264  |
| FERMT3     | 1.84092    | 1.39821    | 1.41791   | 4.12136    | 4.24008   | 7.0578    | 1.90518   | 1.43457    | 0.364469   | 3.18696    | 5.83529   | 0.609949   | 3.40527    | 1.78211   | 4.46712  |
| FES        | 1.32788    | 0.623897   | 0.962055  | 1.93788    | 2.71604   | 4.2839    | 1.19595   | 0.894244   | 0.391746   | 1.90471    | 3.05389   | 0.519328   | 1.51659    | 1.17249   | 3.24546  |
| FETUB      | 1.0784     | 1.65448    | 0.551712  | 0.116981   | 2.68903   | 0.773258  | 0.72905   | 1.05928    | 37.0675    | 0.926082   | 3.21965   | 5.16787    | 0.16479    | 0.734188  | 0.142645 |
| FEV        | 0.0123167  | 0          | 0         | 0          | 0         | 0         | 0         | 0          | 0          | 0          | 0         | 0          | 0          | 0         | 0        |
| FEZ1       | 1.28276    | 0.537116   | 0.795889  | 1.32192    | 1.51814   | 2.54858   | 1.69127   | 0.71929    | 0.492853   | 1.99332    | 3.64604   | 0.546337   | 4.93622    | 2.15893   | 2.4453   |
| FEZ2       | 5.14413    | 3.1608     | 3.96275   | 7.25062    | 3.53992   | 8.05376   | 3.15775   | 4.47336    | 3.17965    | 7.44219    | 11.0147   | 3.17417    | 8.41529    | 5.88015   | 6.18016  |
| FEZF1      | 0          | 0.00509121 | 0         | 0          | 0         | 0.0141381 | 0         | 0          | 0          | 0          | 0         | 0          | 0          | 0         | 0        |
| FEZF1-AS1  | 0          | 3.48E-07   | 0         | 0.00898967 | 0         | 0.0106127 | 0         | 0          | 0          | 0          | 0         | 0          | 0          | 0         | 0        |
| FEZF2      | 0          | 0          | 0         | 0          | 0         | 0         | 0.0126673 | 0.00985984 | 0          | 0          | 0         | 0          | 0          | 0         | 0        |
| FFAR1      | 0.0250737  | 0          | 0         | 0          | 0.0389482 | 0         | 0         | 0          | 0          | 0.0314701  | 0         | 0          | 0          | 0         | 0        |
| FFAR2      | 0.20291    | 0.260707   | 0.335723  | 2.6719     | 0.525316  | 0.153578  | 0.167322  | 0.290531   | 0.631534   | 1.21677    | 2.36696   | 0.250046   | 2.32014    | 0.200316  | 1.3437   |
| FFAR3      | 0.0257431  | 0.0124034  | 0.0106483 | 0.185703   | 0.0599819 | 0.0438398 | 0         | 0          | 0          | 0.0969307  | 0.159834  | 0.00920994 | 0.340491   | 0.0874541 | 0.129396 |
| FFAR4      | 0.120372   | 0.177043   | 0.293499  | 0.130575   | 0.049205  | 0.0431558 | 0.101269  | 0.292778   | 0.0154315  | 0.00795152 | 0.0286073 | 0.0271987  | 0.00817508 | 0.0099334 | 0        |
| FGA        | 0          | 0          | 0         | 0          | 0         | 0.0049813 | 0         | 0          | 0.00712478 | 0          | 0         | 0          | 0.00377446 | 0         | 0        |
| FGB        | 0.00637901 | 0          | 0         | 0          | 0         | 0         | 0         | 0          | 0          | 0          | 0         | 0          | 0          | 0         | 0        |
| FGD1       | 1.41545    | 1.68193    | 1.84863   | 3.22626    | 4.18132   | 4.46388   | 2.57377   | 1.02189    | 1.41345    | 2.81315    | 2.48159   | 2.80435    | 5.04011    | 3.1393    | 2.7464   |
| FGD2       | 2.2345     | 1.41352    | 1.55931   | 2.89798    | 3.34109   | 4.91194   | 2.79426   | 2.13444    | 4.04503    | 2.23218    | 3.56063   | 1.4357     | 3.21193    | 1.3466    | 2.09569  |
| FGD3       | 1.74599    | 1.30522    | 1.17775   | 2.42846    | 3.67559   | 3.23076   | 1.13088   | 1.36222    | 2.38333    | 6.44627    | 2.80195   | 3.73019    | 4.49959    | 3.30299   | 2.17803  |
| FGD4       | 4.16011    | 3.02893    | 3.3329    | 2.53883    | 0.995699  | 2.36077   | 2.43077   | 3.33338    | 2.39217    | 3.15995    | 2.47018   | 2.25644    | 3.06774    | 2.31819   | 2.28476  |
| FGD5       | 6.38523    | 2.58297    | 2.91874   | 2.84318    | 6.06569   | 8.79551   | 5.386     | 2.64376    | 0.578338   | 2.22641    | 2.14871   | 1.18222    | 4.66919    | 4.46738   | 7.66507  |





|          |           |            |            |           |           |           |           |            |            |           |           |           |           |           |           |
|----------|-----------|------------|------------|-----------|-----------|-----------|-----------|------------|------------|-----------|-----------|-----------|-----------|-----------|-----------|
| FGF4     | 0         | 0          | 0          | 0         | 0         | 0         | 0         | 0          | 0          | 0         | 0         | 0         | 0         | 0         | 0         |
| FGF5     | 0.901396  | 0.638384   | 0.640631   | 0.373284  | 0.131848  | 0.144523  | 0.426609  | 0.674332   | 0.0825153  | 0.503956  | 0.492089  | 0.237313  | 0.132155  | 0.399035  | 0.538839  |
| FGF6     | 0         | 0          | 0.0257333  | 0         | 0         | 0         | 0         | 0          | 0          | 0         | 0         | 0         | 0         | 0         | 0.0446725 |
| FGF7     | 3.55677   | 1.30492    | 1.53383    | 1.85618   | 0.359377  | 12.8722   | 0.875783  | 1.73566    | 0.0840627  | 6.23427   | 10.9152   | 0.0673149 | 3.61934   | 3.50121   | 17.8954   |
| FGF7P3   | 0.611584  | 0.574981   | 0.780855   | 0.255845  | 0.0658005 | 0.430847  | 0.388402  | 0.686674   | 0.0867645  | 0.137289  | 0.154674  | 0.231987  | 0.252798  | 0.327517  | 0.242961  |
| FGF7P6   | 1.02067   | 1.36178    | 1.42038    | 0.203734  | 0.644295  | 0.272701  | 0.43053   | 1.21175    | 0.49082    | 0.450469  | 0.593218  | 0.40196   | 0.212022  | 0.183578  | 0.375553  |
| FGF8     | 0.0208496 | 0.0100457  | 0          | 0         | 0.0323866 | 0.0177532 | 0         | 0.0185294  | 0          | 0         | 0         | 0         | 0         | 0         | 0         |
| FGF9     | 0.0153265 | 0.0123076  | 0.00422639 | 0.0105296 | 0.0079358 | 0         | 0.139995  | 0.00908063 | 0          | 0.102594  | 0.0115345 | 0.0365551 | 0.0527392 | 0.0320412 | 0         |
| FGFBP1   | 6.47596   | 10.075     | 12.1528    | 62.1002   | 6.85628   | 33.6511   | 11.7526   | 9.57197    | 36.9859    | 100.424   | 43.6132   | 62.1529   | 157.267   | 76.1718   | 12.5799   |
| FGFBP2   | 2.01588   | 2.62817    | 3.85854    | 0.0611006 | 0.0613991 | 0.286082  | 3.99406   | 0.860643   | 0          | 0.0248052 | 0         | 0         | 0.0127513 | 0.0206585 | 0         |
| FGFBP3   | 0.559621  | 0.360962   | 0.365886   | 0.213939  | 0.77114   | 0.507253  | 0.144281  | 0.336911   | 0.1539     | 0.124616  | 0.183409  | 0.071043  | 0.0640599 | 0.0235873 | 0.103702  |
| FGFR1    | 7.47198   | 3.63552    | 5.29136    | 3.14816   | 8.09326   | 12.6684   | 10.1411   | 4.14745    | 0.679711   | 5.13838   | 7.80077   | 2.00721   | 5.71166   | 7.62228   | 15.1445   |
| FGFR1OP  | 1.47432   | 1.4595     | 1.28115    | 2.16408   | 0.808279  | 1.29228   | 0.763863  | 1.23317    | 1.13165    | 1.41502   | 2.2727    | 1.38291   | 2.46199   | 1.96521   | 1.62801   |
| FGFR1OP2 | 3.35971   | 3.20919    | 3.30851    | 3.80321   | 1.02777   | 3.62445   | 1.94738   | 2.8225     | 3.48291    | 4.90881   | 7.353     | 2.84583   | 5.62075   | 3.83846   | 3.39965   |
| FGFR2    | 8.99924   | 13.9208    | 13.6539    | 9.88981   | 9.31558   | 11.2024   | 9.91316   | 9.19263    | 5.13837    | 2.62025   | 2.79682   | 2.62      | 2.69863   | 3.48473   | 0.920906  |
| FGFR3    | 16.4572   | 42.1821    | 52.4421    | 26.1813   | 31.9493   | 50.4822   | 33.1405   | 33.5298    | 11.9189    | 12.0348   | 6.1181    | 16.5264   | 14.6766   | 17.6408   | 4.24342   |
| FGFR4    | 0.454493  | 0.128608   | 0.220818   | 0.617056  | 0.313771  | 0.700275  | 0.115317  | 0.179518   | 0.0615023  | 0.271636  | 0.138446  | 0.13421   | 0.246691  | 0.305406  | 0.0932441 |
| FGFRL1   | 1.09388   | 1.05409    | 1.31304    | 1.36305   | 2.45436   | 3.51263   | 2.00813   | 0.826008   | 0.862025   | 1.31909   | 1.16221   | 0.736658  | 2.23262   | 1.27047   | 2.07407   |
| FGG      | 0         | 0          | 0          | 0         | 0         | 0.0869383 | 0         | 0          | 0.0138165  | 0         | 0         | 0         | 0         | 0         | 0         |
| FGGY     | 0.973635  | 1.23759    | 1.1658     | 1.40602   | 1.47259   | 1.47809   | 0.841063  | 1.0873     | 1.08436    | 0.836114  | 1.49682   | 0.989993  | 0.686044  | 0.820208  | 0.91991   |
| FGL1     | 0         | 0          | 0          | 0.06131   | 0         | 0.0379936 | 0         | 0          | 0          | 0.0186677 | 0.0503707 | 0         | 0         | 0.0077735 | 0         |
| FGL2     | 6.37681   | 3.67335    | 5.38301    | 2.97282   | 0.825449  | 4.58021   | 4.09237   | 5.50333    | 0.574543   | 2.74952   | 5.35      | 0.90014   | 5.12886   | 1.84494   | 7.74061   |
| FGR      | 0.893006  | 0.410158   | 0.469491   | 2.98443   | 0.803767  | 2.52276   | 0.323987  | 0.645288   | 0.233779   | 3.06915   | 3.53303   | 0.406074  | 2.12697   | 0.876743  | 2.07353   |
| FH       | 9.13574   | 6.51004    | 6.87066    | 12.6465   | 5.56471   | 14.0275   | 6.63784   | 5.88276    | 13.6324    | 12.5709   | 14.4132   | 9.39287   | 17.2671   | 10.7286   | 7.44124   |
| FHAD1    | 0.0210925 | 0.00868095 | 0.0311886  | 0.0636699 | 0.0961079 | 0.132691  | 0.0822857 | 0.0344481  | 0.00548572 | 0.0791469 | 0.122523  | 0.0386753 | 0.0900905 | 0.0707955 | 0.689654  |
| FHDC1    | 3.28217   | 4.44306    | 4.85435    | 4.44235   | 6.39651   | 3.2965    | 4.404     | 3.14227    | 10.7436    | 4.97563   | 2.67304   | 5.57349   | 3.59469   | 3.95159   | 1.49769   |

|         |            |           |            |           |            |           |            |           |            |           |           |           |           |           |           |
|---------|------------|-----------|------------|-----------|------------|-----------|------------|-----------|------------|-----------|-----------|-----------|-----------|-----------|-----------|
| FHIT    | 0.34334    | 0.355823  | 0.342986   | 0.267035  | 0.362259   | 0.281317  | 0.29586    | 0.414519  | 0.153847   | 0.11383   | 0.175512  | 0.108929  | 0.0543354 | 0.106651  | 0.158158  |
| FHL1    | 20.4527    | 5.98639   | 9.21869    | 1.60842   | 3.6149     | 9.87928   | 14.1797    | 5.45389   | 0.51098    | 3.20169   | 7.76127   | 0.908629  | 4.73545   | 4.50553   | 12.2276   |
| FHL2    | 4.57766    | 3.43705   | 3.99093    | 15.5581   | 7.16175    | 14.4717   | 4.68237    | 2.35183   | 10.0592    | 12.5945   | 17.0707   | 7.76224   | 22.3024   | 11.752    | 6.14919   |
| FHL3    | 4.32972    | 4.82502   | 4.78351    | 8.75111   | 5.27196    | 13.4028   | 4.52891    | 3.95961   | 2.92573    | 5.67965   | 12.6923   | 2.68829   | 7.84881   | 9.32171   | 6.63923   |
| FHL5    | 3.83235    | 0.743721  | 0.876257   | 0.197467  | 0.363791   | 2.8009    | 1.28231    | 1.13056   | 0.0713068  | 1.5766    | 2.69788   | 0.121873  | 0.769255  | 0.973653  | 2.88181   |
| FHOD1   | 2.14243    | 2.31408   | 2.07913    | 3.57865   | 6.18964    | 5.7033    | 2.47976    | 2.06618   | 1.96411    | 5.3041    | 3.51487   | 6.13192   | 6.96833   | 5.34946   | 6.77066   |
| FHOD3   | 1.18984    | 1.18543   | 1.39753    | 0.484915  | 1.62904    | 1.67955   | 2.0902     | 0.692925  | 0.312905   | 0.639777  | 1.11285   | 0.332945  | 0.914545  | 0.916876  | 3.46418   |
| FIBCD1  | 0.00696451 | 0.0201336 | 0.00576153 | 0         | 0.075728   | 0.118604  | 0.254459   | 0.0123789 | 1.67095    | 0.1486    | 0.393103  | 0.0896992 | 0.0314542 | 0.0873589 | 0.0500095 |
| FIBIN   | 3.64282    | 1.30988   | 1.5737     | 0.547628  | 1.94999    | 4.5773    | 2.36541    | 2.05334   | 0.403322   | 0.947287  | 1.99963   | 0.484936  | 0.809943  | 0.921759  | 2.64342   |
| FIBP    | 6.8631     | 5.36001   | 5.45319    | 10.2799   | 11.4542    | 19.6926   | 8.14585    | 5.84403   | 11.6436    | 8.39357   | 20.7383   | 8.11984   | 9.30919   | 8.4502    | 6.9911    |
| FICD    | 1.24757    | 0.979314  | 1.10165    | 1.24232   | 1.08871    | 1.64714   | 1.44044    | 0.859579  | 0.785305   | 0.985237  | 1.21846   | 0.661978  | 1.02198   | 0.820535  | 1.18773   |
| FIG4    | 2.29567    | 2.33787   | 2.70073    | 2.66532   | 1.55143    | 3.71273   | 2.57006    | 1.81498   | 3.51299    | 1.89904   | 3.02064   | 1.39196   | 1.83702   | 1.85037   | 1.57351   |
| FIGLA   | 0          | 0.0154441 | 0.0265174  | 0         | 0          | 0         | 0.109795   | 0         | 0          | 0         | 0         | 0         | 0         | 0         | 0         |
| FIGN    | 0.620794   | 0.260363  | 0.263435   | 0.228717  | 0.254817   | 0.282101  | 0.378273   | 0.394486  | 0.156696   | 0.165521  | 0.326797  | 0.306103  | 0.166024  | 0.206776  | 0.244826  |
| FIGNL1  | 1.09476    | 1.06109   | 0.789599   | 1.61669   | 0.429263   | 1.53492   | 0.927159   | 1.08628   | 0.541085   | 0.837763  | 0.837498  | 0.69359   | 1.58136   | 1.14545   | 0.598359  |
| FIGNL2  | 0.256378   | 0.168662  | 0.187622   | 0.137183  | 0.444195   | 0.398822  | 0.197026   | 0.140214  | 0.0360277  | 0.0556928 | 0.166972  | 0.0564447 | 0.171776  | 0.11338   | 0.4744    |
| FILIP1  | 0.681248   | 0.273335  | 0.338948   | 0.267327  | 0.19206    | 0.992937  | 0.406906   | 0.28225   | 0.0738153  | 0.629867  | 1.09473   | 0.107552  | 0.312838  | 0.274957  | 0.863462  |
| FILIP1L | 6.89021    | 5.09428   | 5.81979    | 2.57473   | 2.12931    | 6.84027   | 2.97668    | 3.00192   | 19.6426    | 8.50501   | 11.9941   | 6.89169   | 7.19547   | 11.1948   | 10.534    |
| FILNC1  | 0          | 0         | 0.0134638  | 0.0167719 | 0          | 0         | 0          | 0         | 0          | 0         | 0.0551173 | 0         | 0         | 0         | 0         |
| FIP1L1  | 6.69614    | 6.68589   | 6.71829    | 7.62036   | 6.19166    | 10.6658   | 5.07214    | 5.76058   | 6.28363    | 5.4821    | 6.80211   | 5.04445   | 8.92299   | 6.0989    | 5.28305   |
| FIRRE   | 0.0284732  | 0.0274377 | 0.0188441  | 0.0645535 | 0.00884576 | 0.0727338 | 0.00650197 | 0.0303656 | 0.00693544 | 0.0500316 | 0.070714  | 0.024448  | 0.0220449 | 0.0297627 | 0.0327129 |
| FIS1    | 28.2477    | 20.4454   | 18.4202    | 39.4373   | 40.7164    | 44.9052   | 25.2798    | 14.5003   | 44.6241    | 38.0086   | 81.7      | 21.8477   | 21.3773   | 19.7064   | 16.6856   |
| FITM1   | 0.184591   | 0.433576  | 0.209971   | 0.237783  | 0.501783   | 0.294706  | 0.131725   | 0.287085  | 0.112405   | 0.02896   | 0.0260475 | 0.11557   | 0.133984  | 0.120594  | 0.0662739 |
| FITM2   | 2.13628    | 2.40883   | 2.05365    | 1.25363   | 2.61169    | 2.62326   | 2.94729    | 1.67002   | 4.75181    | 1.6013    | 2.72421   | 1.84702   | 1.61123   | 1.42666   | 1.38485   |
| FIZ1    | 0.939643   | 1.42108   | 1.54748    | 2.52841   | 3.98684    | 3.82267   | 1.75829    | 1.05158   | 1.96028    | 0.928191  | 1.68933   | 1.13924   | 1.99277   | 1.64154   | 1.9367    |
| FJX1    | 2.46331    | 2.67251   | 3.07099    | 6.85221   | 6.16768    | 7.28249   | 2.35033    | 1.49263   | 3.04199    | 2.60525   | 4.30728   | 2.13233   | 8.35224   | 4.22692   | 1.74407   |

|               |          |          |          |          |          |          |          |          |          |          |           |           |           |           |            |
|---------------|----------|----------|----------|----------|----------|----------|----------|----------|----------|----------|-----------|-----------|-----------|-----------|------------|
| FKBP10        | 6.14098  | 3.17541  | 4.17045  | 9.15765  | 15.8361  | 21.8659  | 5.7284   | 4.03077  | 2.29748  | 14.2968  | 32.1881   | 3.77944   | 12.6011   | 12.6242   | 34.5852    |
| FKBP11        | 2.12909  | 2.62712  | 1.68974  | 4.70927  | 4.14074  | 6.64727  | 1.89731  | 1.93831  | 1.07514  | 3.19364  | 8.44149   | 1.94453   | 2.30063   | 3.64586   | 6.21473    |
| FKBP14        | 1.71795  | 1.60374  | 1.85422  | 2.13001  | 0.986812 | 2.3923   | 1.18507  | 1.47905  | 0.90447  | 4.3068   | 8.15121   | 1.23884   | 2.38713   | 2.66089   | 4.47176    |
| FKBP15        | 5.24135  | 5.51619  | 5.48404  | 8.01953  | 7.89289  | 8.85316  | 5.89908  | 4.62487  | 9.17203  | 7.4225   | 7.11586   | 5.9692    | 9.90401   | 6.63359   | 6.46177    |
| FKBP1A        | 29.4571  | 20.5696  | 20.0154  | 77.1522  | 23.0382  | 80.655   | 25.4543  | 23.5954  | 40.1405  | 67.4961  | 110.526   | 43.6372   | 87.7425   | 49.2937   | 50.4125    |
| FKBP1A-SDCBP2 | 0.240055 | 0.116055 | 0.299782 | 0.266194 | 0.231947 | 0.114675 | 0.523707 | 0.104422 | 0.061014 | 0.93953  | 1.18803   | 0.379847  | 0.243616  | 0.3981    | 0.00436248 |
| FKBP1AP1      | 1.5917   | 1.92066  | 1.82949  | 0.566119 | 1.24717  | 0.539726 | 1.80127  | 2.95433  | 0.480339 | 0.689488 | 0.190814  | 1.35056   | 0.199939  | 1.86992   | 1.23397    |
| FKBP1B        | 0.615295 | 0.478159 | 0.689634 | 0.715897 | 1.32574  | 2.39987  | 0.702525 | 0.388068 | 1.32951  | 1.84346  | 3.38333   | 0.880521  | 2.65084   | 1.26557   | 0.798128   |
| FKBP2         | 7.0048   | 6.24914  | 5.67199  | 11.5295  | 20.0316  | 12.8142  | 5.05871  | 5.74132  | 13.8065  | 9.16451  | 16.5975   | 8.00523   | 8.41606   | 6.71404   | 4.86992    |
| FKBP3         | 6.40858  | 5.54636  | 5.72803  | 12.6773  | 2.88234  | 8.92403  | 3.09947  | 5.16099  | 8.2025   | 10.9977  | 17.708    | 5.70423   | 9.58871   | 8.34208   | 5.69977    |
| FKBP4         | 8.92642  | 9.38314  | 9.59027  | 19.0745  | 15.3363  | 12.9319  | 8.91382  | 7.12446  | 17.374   | 11.2661  | 7.58418   | 11.4292   | 24.8743   | 10.9573   | 5.13515    |
| FKBP5         | 17.2506  | 6.0485   | 6.01493  | 7.02175  | 1.28197  | 10.0944  | 3.34653  | 13.7729  | 2.49289  | 1.68083  | 2.16566   | 2.1377    | 1.98236   | 1.76633   | 1.2853     |
| FKBP6         | 0.240038 | 0.140982 | 0.182615 | 0.073936 | 0.164645 | 0.124763 | 0.179755 | 0.080462 | 2.93E-29 | 1.09E-30 | 0.0956564 | 0.0458602 | 5.98E-10  | 0.0316704 | 0.0409378  |
| FKBP7         | 0.996171 | 0.729556 | 0.698839 | 0.813055 | 0.173309 | 1.8661   | 0.673339 | 0.991551 | 0.359114 | 1.92046  | 4.46224   | 0.205283  | 0.853538  | 0.916331  | 3.14738    |
| FKBP8         | 34.2955  | 29.8869  | 28.8944  | 50.0373  | 97.4574  | 87.6448  | 33.8437  | 18.3215  | 68.4644  | 53.2234  | 64.3923   | 47.9256   | 65.8075   | 33.1659   | 25.2561    |
| FKBP9         | 23.3378  | 22.1502  | 24.9485  | 22.5917  | 27.6985  | 49.9938  | 29.6705  | 16.6846  | 15.9669  | 22.0819  | 30.2942   | 14.082    | 20.3393   | 18.4259   | 35.3678    |
| FKBP9P1       | 0.536388 | 0.435236 | 0.513051 | 0.353257 | 0.471043 | 1.21414  | 0.585086 | 0.429674 | 0.117316 | 0.599862 | 0.527758  | 0.355423  | 0.108639  | 0.40949   | 0.780026   |
| FKBPL         | 0.357305 | 0.358829 | 0.281343 | 0.829589 | 0.969611 | 0.758769 | 0.594736 | 0.313717 | 3.20339  | 0.778042 | 0.860163  | 0.840911  | 0.644377  | 0.258741  | 0.23493    |
| FKRP          | 0.906003 | 0.950086 | 0.826666 | 1.66824  | 2.80433  | 1.88325  | 0.859503 | 0.680851 | 0.924917 | 1.32107  | 1.31606   | 1.16784   | 1.63329   | 1.69213   | 1.94214    |
| FKSG29        | 1.56063  | 1.70561  | 1.70043  | 1.37292  | 0.413888 | 0.583401 | 2.21649  | 2.57095  | 0.23179  | 1.09881  | 0.300788  | 1.3618    | 0.245588  | 1.27322   | 1.20263    |
| FKTN          | 1.77325  | 1.52558  | 1.53737  | 1.37712  | 0.401051 | 1.21034  | 1.29253  | 1.85076  | 0.787829 | 1.12527  | 1.66868   | 0.801886  | 1.00863   | 1.26635   | 1.28349    |
| FLAD1         | 2.90388  | 3.54377  | 3.24552  | 5.89437  | 5.13722  | 5.46971  | 3.70069  | 2.5286   | 5.05484  | 3.32254  | 6.08441   | 3.66765   | 3.90327   | 3.74826   | 2.17995    |
| FLCN          | 2.53064  | 3.01551  | 3.13405  | 3.48931  | 7.2758   | 6.04467  | 2.97557  | 2.00311  | 2.49994  | 2.91733  | 3.47583   | 3.2507    | 3.99264   | 3.57607   | 3.28751    |
| FLG           | 282.716  | 470.218  | 435.348  | 52.6972  | 467.973  | 134.379  | 1030.62  | 271.495  | 3504.26  | 154.158  | 271.833   | 469.347   | 10.3004   | 27.3671   | 12.4535    |
| FLG-AS1       | 0.107469 | 0.102313 | 0.103169 | 0.19247  | 0.122029 | 0.229429 | 0.121656 | 0.130629 | 0.519694 | 0.199416 | 0.221041  | 0.162157  | 0.0640169 | 0.466579  | 0.230902   |
| FLG2          | 110.573  | 258.435  | 324.885  | 23.1306  | 119.012  | 30.9243  | 428.832  | 117.703  | 1108.72  | 67.1849  | 114.068   | 67.8009   | 2.8924    | 6.5795    | 1.20601    |



|          |           |           |            |           |           |            |           |           |           |           |           |           |           |           |          |
|----------|-----------|-----------|------------|-----------|-----------|------------|-----------|-----------|-----------|-----------|-----------|-----------|-----------|-----------|----------|
| FLJ40288 | 0         | 0         | 0          | 0         | 0         | 0          | 0         | 0         | 0         | 0         | 0         | 0         | 0         | 0         | 0        |
| FLJ42102 | 0.139663  | 0.0876788 | 0.106266   | 0.0330938 | 0.0831387 | 0.0273441  | 0.109998  | 0.0761059 | 0.0130368 | 0.0134352 | 0         | 0.0612746 | 0.0207194 | 0.111108  | 0.015373 |
| FLJ42351 | 0.0450254 | 0.0650818 | 0          | 0.0464    | 0         | 0.115016   | 0.0514085 | 0         | 0         | 0         | 0.0508281 | 0.0322169 | 0         | 0.0235322 | 0        |
| FLJ42393 | 1.63411   | 1.35816   | 1.51238    | 0.715698  | 0.856688  | 0.513087   | 1.22441   | 1.29796   | 0.124385  | 0.512743  | 0.126823  | 0.686933  | 0.164737  | 1.81487   | 1.20273  |
| FLJ42627 | 1.44257   | 2.32049   | 2.68197    | 1.17857   | 1.90048   | 1.72898    | 2.22593   | 1.63463   | 0.816368  | 0.982795  | 0.557504  | 1.52089   | 1.43708   | 1.48959   | 1.67164  |
| FLJ42969 | 0.0118804 | 0.0915867 | 0.00982832 | 0.134674  | 0.16609   | 0.121392   | 0.040694  | 0         | 0.217035  | 0.477157  | 0.429168  | 0.246522  | 0.643875  | 0.223532  | 0        |
| FLJ43315 | 0         | 0         | 0          | 0         | 0         | 0          | 0         | 0         | 0         | 0         | 0         | 0         | 0         | 0         | 0        |
| FLJ44635 | 0.285591  | 0.127773  | 0.194071   | 0.0735774 | 0.17428   | 0.277916   | 0.232913  | 0.154098  | 0.0248441 | 0.102413  | 0.426024  | 0.0802795 | 0.164519  | 0.309186  | 0.380848 |
| FLJ45513 | 0.760167  | 1.20505   | 1.06219    | 0.334952  | 0.616271  | 0.382741   | 1.77363   | 1.03991   | 0.0939521 | 0.318133  | 0.0995262 | 0.307533  | 0.0355519 | 0.472303  | 0.522285 |
| FLJ46284 | 0         | 0         | 0          | 0.0141709 | 0         | 0.00585443 | 0         | 0.0122208 | 0         | 0         | 0         | 0         | 0         | 0.0143738 | 0        |
| FLJ46875 | 0.483798  | 0.512421  | 0.583096   | 0.262178  | 0.576586  | 0.500729   | 0.476194  | 0.637526  | 0.0355559 | 0.193681  | 0.174202  | 0.193975  | 0.137236  | 0.272472  | 0.4612   |
| FLJ46906 | 1.17912   | 1.23649   | 1.22409    | 1.50102   | 3.55541   | 1.41741    | 1.45187   | 1.10954   | 2.33707   | 1.85714   | 1.82697   | 2.84538   | 0.790594  | 1.29293   | 0.398438 |
| FLNA     | 75.1259   | 51.9991   | 63.4694    | 123.665   | 102.332   | 188.584    | 102.395   | 35.8284   | 48.7129   | 98.1087   | 69.1977   | 82.1388   | 235.863   | 99.7395   | 151.309  |
| FLNB     | 27.7051   | 35.5957   | 38.3958    | 64.2907   | 39.8676   | 53.7623    | 35.4739   | 23.9405   | 43.8635   | 57.9074   | 28.9837   | 53.7289   | 130.495   | 50.6997   | 31.2851  |
| FLNB-AS1 | 1.50323   | 2.57805   | 2.85552    | 1.72373   | 2.53245   | 0.565389   | 1.96194   | 1.25908   | 0.509474  | 2.54963   | 0.365171  | 3.1127    | 0.233665  | 6.85849   | 1.54103  |
| FLNC     | 3.20885   | 1.31664   | 1.95689    | 1.09617   | 4.45727   | 5.25315    | 7.86226   | 0.931821  | 1.33248   | 1.8786    | 2.01847   | 0.77379   | 2.72396   | 2.74126   | 8.33637  |
| FLNC-AS1 | 0.124202  | 0.0199475 | 0.0342497  | 0         | 0         | 0.0352522  | 0         | 0         | 0         | 0         | 0         | 0.0296234 | 0         | 0.0432757 | 0        |
| FLOT1    | 1.50986   | 1.09355   | 1.08923    | 3.45156   | 2.74633   | 5.06376    | 1.15669   | 0.80222   | 1.53632   | 2.93629   | 3.74433   | 1.36728   | 3.5059    | 2.27827   | 2.49241  |
| FLOT2    | 9.82295   | 8.98987   | 10.1543    | 37.6374   | 20.9898   | 55.8109    | 7.86224   | 8.1794    | 5.70641   | 14.7649   | 14.6401   | 12.6803   | 28.125    | 13.6437   | 10.0095  |
| FLRT1    | 0.242336  | 0.937522  | 0.518882   | 0.367256  | 2.94502   | 0.449105   | 0.675451  | 0.633434  | 0.112847  | 0.16997   | 0.104599  | 0.555892  | 0.0137959 | 0.279386  | 0.2559   |
| FLRT2    | 1.73967   | 2.74939   | 3.27367    | 1.3925    | 2.97656   | 1.71382    | 1.80352   | 2.19672   | 1.79762   | 2.50255   | 3.66733   | 1.9219    | 2.08386   | 2.4853    | 7.41753  |
| FLRT3    | 1.28253   | 2.47454   | 1.55106    | 4.9667    | 1.00057   | 2.19391    | 0.879924  | 1.73271   | 7.55775   | 10.9503   | 11.9981   | 7.60485   | 14.197    | 7.83629   | 2.59349  |
| FLT1     | 1.37779   | 0.862531  | 0.907064   | 4.24765   | 0.99975   | 5.44087    | 0.690852  | 1.41799   | 0.849558  | 2.3847    | 2.66912   | 1.21887   | 4.77797   | 3.49468   | 3.95736  |
| FLT3     | 0.355241  | 0.162743  | 0.29388    | 0.114027  | 0.0271383 | 0.0545461  | 0.0731414 | 0.393341  | 0.0425551 | 0.0730924 | 0.0525931 | 0         | 0.123993  | 0.0486988 | 0.200723 |
| FLT3LG   | 2.05458   | 1.19538   | 1.82797    | 1.57799   | 3.19147   | 3.82898    | 2.41224   | 1.10245   | 0.330485  | 1.02175   | 1.5973    | 0.540887  | 1.00045   | 0.891466  | 1.28046  |
| FLT4     | 1.15552   | 0.816795  | 0.940948   | 1.56782   | 2.95404   | 3.44521    | 1.43928   | 0.585899  | 0.25146   | 1.38665   | 1.55797   | 0.93048   | 3.12473   | 2.90605   | 2.99123  |

|           |           |           |           |           |           |           |           |           |           |            |            |           |           |            |           |
|-----------|-----------|-----------|-----------|-----------|-----------|-----------|-----------|-----------|-----------|------------|------------|-----------|-----------|------------|-----------|
| FLVCR1    | 1.05213   | 0.903094  | 0.822044  | 1.12843   | 0.568988  | 0.866016  | 0.654037  | 0.827692  | 0.431873  | 0.493978   | 0.690642   | 0.407086  | 0.633576  | 0.600807   | 0.548436  |
| FLVCR1-DT | 0         | 0.177559  | 0.406488  | 0.151908  | 0.305301  | 0.209193  | 0.58907   | 0         | 0.0897632 | 0.154177   | 0.665621   | 0.0527372 | 0.190214  | 0.179764   | 0.141131  |
| FLVCR2    | 2.0923    | 1.19592   | 1.13779   | 2.07662   | 2.10148   | 3.28841   | 1.79685   | 1.74248   | 4.16111   | 1.40431    | 2.97329    | 1.34489   | 1.40047   | 1.01704    | 1.48367   |
| FLYWCH1   | 4.77497   | 4.91638   | 5.31987   | 5.03384   | 12.2626   | 7.35672   | 5.11766   | 3.85743   | 3.1862    | 2.85876    | 1.99814    | 2.99116   | 3.29915   | 3.65258    | 2.72591   |
| FLYWCH2   | 3.96609   | 3.75669   | 3.50474   | 8.45302   | 7.94591   | 9.24863   | 3.422     | 2.68361   | 6.28483   | 5.43038    | 11.7782    | 3.41831   | 6.32458   | 3.58037    | 2.78318   |
| FMC1      | 0.852951  | 0.871531  | 0.582183  | 1.2957    | 1.48767   | 1.67337   | 0.881352  | 0.628547  | 0.747778  | 0.695094   | 3.1912     | 0.384927  | 0.24857   | 1.06044    | 0.691845  |
| FMN1      | 2.09935   | 2.82242   | 2.66793   | 1.84641   | 2.45104   | 2.31449   | 2.77108   | 2.4566    | 2.73757   | 1.0964     | 0.91609    | 1.38914   | 1.56519   | 1.01759    | 0.692261  |
| FMN2      | 0.0179654 | 0.0190432 | 0.0178347 | 0         | 0.0223252 | 0.272292  | 0.0451271 | 0.0510917 | 0         | 0.00450969 | 0.00811229 | 0         | 0.0162277 | 0          | 0.0206405 |
| FMNL1     | 2.12091   | 1.55113   | 2.14608   | 4.76871   | 3.90258   | 5.85558   | 3.21544   | 2.07701   | 0.313095  | 2.93329    | 3.13956    | 0.522579  | 3.99211   | 2.27498    | 5.88202   |
| FMNL2     | 4.49162   | 3.20019   | 3.19379   | 12.7312   | 2.93397   | 10.134    | 2.37934   | 3.55645   | 1.70378   | 6.15847    | 4.70027    | 3.10397   | 13.0543   | 9.27508    | 4.29837   |
| FMNL3     | 2.82946   | 1.79689   | 1.81058   | 2.92124   | 3.88984   | 5.27848   | 2.48525   | 1.91263   | 0.759775  | 3.08517    | 3.72152    | 1.68448   | 4.03091   | 4.49808    | 9.84582   |
| FMO1      | 1.28955   | 0.668756  | 0.374605  | 1.35936   | 0.657513  | 4.03172   | 0.561973  | 0.901091  | 0.131877  | 0.778373   | 1.65577    | 0.0352179 | 0.177835  | 0.0308692  | 4.17045   |
| FMO2      | 1.33081   | 0.538192  | 0.332088  | 1.91103   | 1.02344   | 3.51468   | 0.383606  | 0.77943   | 14.8576   | 1.8346     | 1.42351    | 1.07087   | 0.484212  | 0.136828   | 0.256917  |
| FMO3      | 1.97563   | 0.846122  | 0.423728  | 0.667875  | 0.470879  | 4.34349   | 0.369984  | 1.04046   | 0.865683  | 2.65017    | 5.10948    | 1.00225   | 0.95094   | 1.19645    | 1.66632   |
| FMO4      | 0.834074  | 0.861841  | 0.681692  | 0.994164  | 0.718046  | 2.00226   | 0.562212  | 0.714463  | 0.318205  | 0.66847    | 1.04366    | 0.409852  | 0.188025  | 0.399159   | 0.793747  |
| FMO5      | 3.32281   | 1.58342   | 1.53719   | 0.390484  | 1.70917   | 1.01136   | 1.5475    | 2.09821   | 3.43446   | 0.512162   | 0.765014   | 0.886369  | 0.0705216 | 0.258973   | 0.565102  |
| FMO6P     | 0.457416  | 0.246627  | 0.324348  | 0.10101   | 0.287593  | 0.111281  | 0.0621741 | 0.377476  | 0.0265277 | 0.0136691  | 0.0245888  | 0.0311708 | 0.0281069 | 0.0113841  | 0.187688  |
| FMO9P     | 0         | 0.0327479 | 0.0140569 | 0         | 0         | 0.0289369 | 0         | 0.015101  | 0.0413886 | 0.0213267  | 0.0191818  | 0.0121582 | 0.0109631 | 0.00888074 | 0         |
| FMOD      | 11.8806   | 3.9645    | 5.34925   | 15.0627   | 8.80793   | 34.1172   | 15.1147   | 6.37174   | 2.08558   | 8.90039    | 22.235     | 4.53515   | 18.4844   | 14.4947    | 34.4089   |
| FMR1      | 4.95286   | 3.75647   | 4.08435   | 4.55794   | 1.31213   | 6.00876   | 2.73766   | 4.7514    | 3.87863   | 3.93791    | 3.5004     | 2.56781   | 5.36882   | 3.52914    | 3.01395   |
| FMR1-AS1  | 0.0484773 | 0.0420428 | 0.0882284 | 0.0399658 | 0.0150604 | 0.0165111 | 0.0664197 | 0.0430826 | 0         | 0.0121688  | 0.0437798  | 0.0277494 | 0         | 0          | 0.0139239 |
| FMR1NB    | 0         | 0.0109213 | 0         | 0         | 0         | 0         | 0         | 0         | 0         | 0.0284495  | 0          | 0         | 0         | 0          | 0.0976582 |
| FN1       | 34.0809   | 8.34235   | 10.6618   | 57.7295   | 29.9614   | 110.216   | 35.9294   | 12.1441   | 8.87923   | 124.101    | 233.518    | 17.4493   | 96.4503   | 78.9158    | 273.195   |
| FN3K      | 1.58271   | 1.45511   | 1.42957   | 1.39802   | 4.44033   | 3.39664   | 2.45247   | 1.59317   | 0.511393  | 0.34459    | 1.49498    | 0.658681  | 0.646037  | 0.523325   | 0.603032  |
| FN3KRP    | 3.8256    | 4.8221    | 3.82128   | 8.89783   | 7.00956   | 6.76704   | 5.00354   | 3.46303   | 6.3468    | 5.78262    | 7.04621    | 5.20344   | 7.10671   | 3.94314    | 4.60954   |
| FNBP1     | 6.52031   | 6.74587   | 8.1151    | 6.35378   | 6.18122   | 11.1564   | 8.12707   | 5.8187    | 6.31613   | 6.97376    | 5.60643    | 4.71235   | 11.9987   | 5.89459    | 9.48583   |

|           |            |           |           |           |           |            |           |           |           |           |           |           |            |            |           |
|-----------|------------|-----------|-----------|-----------|-----------|------------|-----------|-----------|-----------|-----------|-----------|-----------|------------|------------|-----------|
| FNBP1L    | 4.03125    | 2.82353   | 3.11284   | 2.79694   | 1.15986   | 3.81835    | 1.76735   | 3.53791   | 1.10351   | 3.25903   | 2.60451   | 1.40772   | 4.56318    | 2.30641    | 3.5122    |
| FNBP4     | 10.037     | 10.7504   | 10.544    | 7.55777   | 6.23819   | 8.00885    | 7.49465   | 9.02856   | 5.96364   | 5.26988   | 3.8332    | 7.11835   | 5.02131    | 9.07873    | 8.2733    |
| FNDC1     | 1.62153    | 0.376171  | 0.312712  | 6.98996   | 11.3812   | 13.4522    | 5.20332   | 1.59806   | 0.124772  | 6.93472   | 17.1844   | 0.952972  | 8.10296    | 5.78098    | 40.253    |
| FNDC10    | 3.12327    | 3.16143   | 3.04276   | 6.16456   | 9.75454   | 9.76305    | 5.07206   | 2.61256   | 11.0892   | 2.55846   | 7.01554   | 4.01082   | 3.34518    | 1.94487    | 1.35236   |
| FNDC11    | 0.109769   | 0.141036  | 0.0756742 | 0.207388  | 0.142092  | 0.21809    | 0.0417771 | 0.0812949 | 0.0668434 | 0.11481   | 0.413053  | 0.170176  | 0.153449   | 0.210358   | 0.0262738 |
| FNDC3A    | 5.76588    | 3.78845   | 4.40988   | 4.94509   | 1.7226    | 7.53948    | 3.64077   | 4.48564   | 1.57358   | 4.7436    | 5.8733    | 2.14565   | 4.71871    | 4.61864    | 9.52084   |
| FNDC3B    | 6.23567    | 4.82393   | 6.0559    | 8.90715   | 3.59744   | 10.5664    | 5.78083   | 5.49534   | 1.9533    | 8.43734   | 12.578    | 3.65547   | 10.7442    | 9.31631    | 20.1808   |
| FNDC4     | 1.06644    | 0.447095  | 0.51559   | 2.01244   | 2.15136   | 5.14172    | 0.442772  | 0.553886  | 0.421688  | 2.22502   | 5.72231   | 0.297298  | 2.54671    | 2.17156    | 3.06307   |
| FNDC5     | 0.231793   | 0.240813  | 0.299618  | 0.0671819 | 0.371306  | 0.191201   | 0.289465  | 0.148061  | 0.0264654 | 0.0545482 | 0.0572392 | 0.0829269 | 0.00467348 | 0.155217   | 0.405702  |
| FNDC7     | 0.00756309 | 0.010932  | 0.0125134 | 0         | 0         | 0.00643987 | 0.0431764 | 0.0134429 | 0         | 0         | 0         | 0.0108232 | 0          | 0.0158112  | 0         |
| FNDC8     | 0.466863   | 0.329379  | 0.496571  | 0.378019  | 0.2849    | 0.809252   | 0.475936  | 0.251909  | 0.12184   | 0.0418543 | 0.207047  | 0.0715827 | 0.0645466  | 0.313718   | 0.215509  |
| FNDC9     | 0.108857   | 0.0734287 | 0.0900544 | 0.0112181 | 0.0676372 | 0.0185381  | 0.0497159 | 0.116092  | 0.0795455 | 0.0273254 | 0         | 0.0934683 | 0          | 0.0398255  | 0.203233  |
| FNIP1     | 4.91716    | 3.32812   | 3.85703   | 3.26108   | 1.65812   | 4.67363    | 3.39294   | 3.95076   | 2.21425   | 5.05219   | 6.20779   | 2.37761   | 5.28527    | 3.46254    | 4.5446    |
| FNIP2     | 5.47694    | 4.37351   | 4.21262   | 5.09614   | 4.73718   | 4.32259    | 5.46045   | 3.78332   | 8.9407    | 6.31267   | 5.06342   | 5.53711   | 6.61319    | 4.62798    | 4.5369    |
| FNTA      | 11.1278    | 11.8153   | 10.8096   | 17.8133   | 4.09333   | 15.9972    | 7.3582    | 9.5254    | 18.0587   | 16.0057   | 20.0683   | 9.52538   | 16.1913    | 12.1454    | 7.51002   |
| FNTB      | 2.49409    | 2.13565   | 2.90767   | 3.53828   | 1.88573   | 3.86271    | 2.68871   | 2.89833   | 5.16677   | 2.16493   | 1.68589   | 1.93418   | 2.00797    | 1.80939    | 2.4413    |
| FOCAD     | 3.35605    | 2.75657   | 2.21432   | 4.33487   | 2.83064   | 3.15826    | 3.02125   | 2.24368   | 3.44923   | 2.75412   | 2.8457    | 2.70287   | 2.50823    | 2.55959    | 3.02595   |
| FOCAD-AS1 | 0          | 0.0790828 | 0.0452614 | 0.169146  | 0.169972  | 0          | 0.124936  | 0.0486232 | 0.0666327 | 0.137338  | 0.123525  | 0.0391477 | 0          | 0.0285947  | 0.0785729 |
| FOLH1     | 0.310269   | 0.3406    | 0.218439  | 0.281539  | 0.171381  | 0.780728   | 0.101977  | 0.327014  | 0.461857  | 0.336298  | 0.533781  | 0.233073  | 0.447445   | 0.0650687  | 0.134289  |
| FOLH1B    | 0.022791   | 0.0194781 | 0.0168928 | 1.28E-12  | 1.43E-28  | 0.0646802  | 0.026772  | 0.0308719 | 0.0973587 | 3.49E-14  | 3.62E-17  | 2.41E-20  | 1.60E-11   | 0.00798469 | 0.0370731 |
| FOLR1     | 0.759092   | 0.0802849 | 0.183797  | 0.0190797 | 0.201315  | 0.504474   | 0.52848   | 0.378444  | 0.045097  | 0         | 0         | 0         | 0.0597271  | 0.0580587  | 0         |
| FOLR2     | 4.29711    | 1.17324   | 1.92979   | 5.06092   | 8.58201   | 15.8729    | 7.89681   | 3.58251   | 0.323973  | 4.72558   | 13.1899   | 0.541733  | 2.35       | 1.9678     | 6.08305   |
| FOLR3     | 0.0467536  | 0.0225266 | 0.0966948 | 0.096362  | 0         | 0.0597152  | 0.213527  | 0.0415507 | 0.256233  | 0.176042  | 0.290285  | 0.10036   | 0.497726   | 0.354315   | 0.100716  |
| FOPNL     | 4.25409    | 4.06702   | 4.23425   | 6.13558   | 1.31267   | 5.95266    | 3.24544   | 4.67678   | 6.45582   | 4.88133   | 7.16554   | 3.24318   | 6.93921    | 3.87459    | 2.86853   |
| FOS       | 49.6964    | 55.4123   | 70.1767   | 46.0967   | 45.7277   | 37.1748    | 62.7539   | 52.5913   | 121.363   | 117.116   | 156.294   | 211.812   | 118.243    | 92.5888    | 45.2803   |
| FOSB      | 7.58161    | 12.0426   | 16.7317   | 6.60036   | 9.06342   | 1.79525    | 22.9951   | 9.35242   | 16.4741   | 25.2852   | 5.715     | 81.9405   | 18.6168    | 12.589     | 16.5654   |



|           |           |            |           |            |           |           |            |           |            |           |           |            |            |            |           |
|-----------|-----------|------------|-----------|------------|-----------|-----------|------------|-----------|------------|-----------|-----------|------------|------------|------------|-----------|
| FOSL1     | 0.330049  | 0.776031   | 0.961101  | 6.92497    | 1.02536   | 7.30687   | 0.452207   | 0.797831  | 7.87844    | 9.77622   | 11.8035   | 23.7383    | 49.4555    | 20.617     | 6.25669   |
| FOSL2     | 32.3574   | 41.8814    | 36.876    | 53.914     | 92.3004   | 74.2172   | 42.3472    | 29.1637   | 67.9252    | 33.1226   | 37.2868   | 43.0148    | 45.2667    | 32.3771    | 37.775    |
| FOXA1     | 1.23932   | 0.491553   | 0.481471  | 0.00705609 | 0.170173  | 1.28847   | 0.422158   | 0.894509  | 0.0250168  | 0.0171875 | 0.0231884 | 0          | 0.0485945  | 0.00715714 | 0.039333  |
| FOXA2     | 0         | 0          | 0         | 0          | 0         | 0         | 0          | 0         | 0          | 0         | 0         | 0          | 0.0857491  | 0.00463077 | 0         |
| FOXA3     | 0         | 0.00560617 | 0         | 0.0239815  | 0         | 0         | 0          | 0.0103407 | 0          | 0.0146038 | 0         | 0          | 0.0150144  | 0          | 0         |
| FOXB1     | 0         | 0          | 0.0131224 | 0          | 0         | 0         | 0          | 0         | 0          | 0         | 0         | 0          | 0          | 0.00829032 | 0         |
| FOXB2     | 0         | 0          | 0         | 0          | 0         | 0         | 0          | 0.0158334 | 0          | 0         | 0         | 0          | 0          | 0          | 0         |
| FOXC1     | 8.15822   | 2.12647    | 2.15989   | 1.67187    | 1.70713   | 4.35711   | 2.68887    | 3.10581   | 1.57216    | 2.14568   | 1.92332   | 0.92783    | 2.64495    | 3.00262    | 2.4969    |
| FOXC2     | 0.877136  | 0.106431   | 0.205009  | 0.212816   | 0.577411  | 0.562694  | 0.644488   | 0.15906   | 0          | 0.224634  | 0.279751  | 0.0729492  | 0.168771   | 0.323796   | 0.177946  |
| FOXC2-AS1 | 0.0935179 | 0.03339    | 0         | 0          | 8.72E-37  | 1.79E-25  | 8.05E-16   | 1.54E-21  | 0          | 0         | 2.12E-13  | 0.0308719  | 0          | 0.0379171  | 1.35E-13  |
| FOXCUT    | 2.18493   | 0.865736   | 0.784849  | 0.577723   | 0.468902  | 0.697666  | 0.95192    | 0.75372   | 0.192573   | 0.108249  | 0.0324542 | 0.0925685  | 0.14839    | 0.142743   | 0.0412874 |
| FOXD1     | 1.43879   | 0.0245826  | 0.042208  | 0.210314   | 0.713277  | 1.12953   | 0.267968   | 0.217647  | 0.521956   | 0.84528   | 0.990654  | 0.219041   | 0.638617   | 0.421318   | 0.498252  |
| FOXD2     | 0.321775  | 0.0620144  | 0.0860015 | 0.0714212  | 0.261448  | 0.400443  | 0.209131   | 0.114387  | 0.00602901 | 0.0434927 | 0.100591  | 0.0247949  | 0.124565   | 0.0983169  | 0.135078  |
| FOXD2-AS1 | 0.369255  | 0.115643   | 0.114553  | 0.152211   | 0.487543  | 0.974689  | 0.263502   | 0.18049   | 0.0449711  | 0.150622  | 0.198     | 0.0594476  | 0.125077   | 0.299133   | 0.384465  |
| FOXD3     | 0.25286   | 0.0793235  | 0.0740641 | 0          | 0.0521506 | 0.171522  | 0.355062   | 0.029837  | 0          | 0.0140459 | 0.0631664 | 0          | 0          | 0          | 0         |
| FOXD3-AS1 | 0.157506  | 0.0206643  | 0.0620099 | 0.0386228  | 0.145543  | 0.143607  | 0.1971     | 0.0999236 | 0.0912895  | 0.0235198 | 0.063463  | 0.0536339  | 0          | 0.019588   | 0         |
| FOXD4     | 0.0595209 | 0.0843001  | 0.0622626 | 0.0629012  | 0.398258  | 0.0432802 | 0.0796484  | 0.0887885 | 0.020381   | 0.0398449 | 0.0821596 | 0.0281929  | 0.0365417  | 0.0240486  | 0.0759862 |
| FOXD4L1   | 0.0449313 | 0.0366851  | 0.0286401 | 0.057331   | 0.128477  | 0.132579  | 0.0185046  | 0.0131157 | 0.027272   | 0.0843161 | 0.0126394 | 0.026293   | 0.0310574  | 0.0825285  | 0.0852443 |
| FOXD4L3   | 0.0407206 | 1.30E-07   | 8.87E-07  | 2.27E-09   | 6.24E-10  | 0.0390398 | 2.56E-09   | 0.0709156 | 1.07E-24   | 0.0654772 | 6.18E-17  | 3.04E-19   | 0.00743863 | 0.0414387  | 7.63E-19  |
| FOXD4L4   | 0.0450324 | 0.0462744  | 0.0714814 | 0.0181398  | 0.0538898 | 3.82E-35  | 0.00766133 | 5.67E-16  | 0.0337957  | 3.48E-13  | 0.0104419 | 1.77E-05   | 0.00596794 | 0.0384369  | 4.20E-17  |
| FOXD4L5   | 0.193261  | 0.241884   | 0.394092  | 0.158991   | 0.0956165 | 0.103814  | 0.122439   | 0.202999  | 0          | 0.0373714 | 1.13E-25  | 0.0618557  | 0.0144083  | 0.136153   | 0.197561  |
| FOXD4L6   | 0.115748  | 0.08119    | 0.10861   | 0.0405608  | 0.22908   | 0.025437  | 0.124401   | 0.0521394 | 0.0146729  | 2.22E-06  | 0.0491099 | 0.0387624  | 0.0287329  | 1.21E-05   | 0.0636469 |
| FOX1      | 1.18357   | 1.0342     | 0.813175  | 1.28861    | 2.84602   | 1.24123   | 0.503896   | 1.21231   | 3.45296    | 1.16658   | 0.732212  | 1.67461    | 0.957774   | 0.859726   | 1.07555   |
| FOX3      | 0.023365  | 0.0112576  | 0         | 0          | 0.018147  | 0.019895  | 0.0666936  | 0.0415298 | 0          | 0         | 0         | 0.00835915 | 0.015075   | 0          | 0.0503327 |
| FOX1      | 0.289062  | 0.108808   | 0.0971477 | 0.148944   | 0.463045  | 0.669173  | 0.43318    | 0.0561957 | 0.187024   | 0.306115  | 0.632236  | 0.213295   | 1.07238    | 0.920623   | 2.78915   |
| FOX2      | 0.415461  | 0.154681   | 0.179661  | 0.379492   | 1.40805   | 1.02912   | 0.388112   | 0.226571  | 0.195494   | 0.628105  | 1.39635   | 0.351323   | 2.315      | 2.63526    | 2.23745   |

|           |            |            |           |            |           |            |            |            |           |           |           |            |            |            |           |
|-----------|------------|------------|-----------|------------|-----------|------------|------------|------------|-----------|-----------|-----------|------------|------------|------------|-----------|
| FOXG1     | 0          | 0          | 0         | 0          | 0         | 0          | 0          | 0          | 0         | 0         | 0         | 0          | 0          | 0          | 0         |
| FOXG1-AS1 | 0          | 0          | 0         | 0          | 0         | 0          | 0          | 0          | 0         | 0         | 0         | 0          | 0.0164992  | 0          | 0         |
| FOXH1     | 0.0281051  | 0.282857   | 0.265832  | 0.0751713  | 0.503199  | 0.200288   | 0.111379   | 0.263537   | 0.129295  | 0.0547049 | 0.0308783 | 0.429234   | 0.0349776  | 0.110816   | 0.116502  |
| FOXI1     | 1.15917    | 0.514796   | 0.633738  | 0          | 0.970752  | 1.43332    | 1.08182    | 1.10184    | 0         | 0         | 0         | 0          | 0          | 0          | 0.057903  |
| FOXI2     | 0.101952   | 0.143857   | 0.156635  | 0.0450275  | 0.0791832 | 0.0496061  | 0.174608   | 0.0388312  | 0         | 0.00914   | 0.0246623 | 0.00521066 | 0.00469848 | 0.00761206 | 0.0836661 |
| FOXI3     | 0          | 0          | 0         | 0.00889246 | 0         | 0.0073475  | 0.00985234 | 0.0460126  | 0         | 0.0324909 | 0         | 0          | 0.0222696  | 0          | 0         |
| FOXJ1     | 0.23669    | 0.291438   | 0.246572  | 0.523968   | 0.108937  | 0.171681   | 0.190173   | 0.179188   | 0.0213528 | 0         | 0         | 0.0250901  | 0.0226239  | 0.0183266  | 0.0503581 |
| FOXJ2     | 4.2723     | 5.28854    | 5.86381   | 4.33312    | 4.2756    | 7.71777    | 6.88315    | 4.41217    | 6.29318   | 3.59775   | 4.52742   | 3.64598    | 6.22112    | 3.48834    | 4.57742   |
| FOXJ3     | 6.72097    | 5.71046    | 6.3951    | 5.11421    | 2.56335   | 6.56197    | 5.64333    | 6.52484    | 4.62444   | 3.94129   | 5.37167   | 3.74864    | 6.32372    | 4.34371    | 4.95266   |
| FOXK1     | 8.74051    | 10.8428    | 11.9785   | 11.2443    | 15.9257   | 15.1007    | 10.6428    | 7.75424    | 4.53843   | 4.99541   | 3.47259   | 7.48189    | 8.32472    | 6.83245    | 9.29775   |
| FOXK2     | 4.17384    | 6.10723    | 6.20357   | 10.3158    | 6.80451   | 10.7892    | 5.73976    | 4.29567    | 8.44712   | 6.39783   | 7.30842   | 6.38525    | 10.4766    | 7.71891    | 4.7688    |
| FOXL1     | 0.602155   | 0.0734057  | 0.132038  | 0.119622   | 0.315541  | 0.654808   | 0.281635   | 0.128951   | 0.0441781 | 0.418858  | 0.810795  | 0.0415285  | 0.40255    | 0.364005   | 0.448013  |
| FOXL2     | 0.00793385 | 0.0152906  | 0.0393807 | 0          | 0.012324  | 0.0135111  | 0.00905862 | 0.00705095 | 0         | 0.0199156 | 0         | 0.0227075  | 0.0460699  | 0.0456124  | 0.034182  |
| FOXL2NB   | 0.00567928 | 0.0273636  | 0.0234915 | 0          | 0         | 0.00483583 | 0.0259377  | 0          | 0         | 0.0213842 | 0         | 0          | 0.0219854  | 0.00890471 | 0         |
| FOXM1     | 0.999006   | 1.10398    | 0.971676  | 5.5985     | 1.20263   | 5.41646    | 2.05349    | 0.981196   | 0.913697  | 2.57911   | 3.88336   | 2.06182    | 4.51342    | 4.34589    | 2.38413   |
| FOXN1     | 3.87863    | 8.86018    | 8.46891   | 5.34118    | 9.5038    | 4.85891    | 9.61139    | 7.45071    | 8.38149   | 5.40658   | 5.69591   | 11.101     | 8.97457    | 4.18883    | 1.82387   |
| FOXN2     | 1.88093    | 1.50635    | 1.71024   | 2.59757    | 0.519858  | 1.95509    | 1.19955    | 2.274      | 1.86253   | 2.51495   | 3.43846   | 1.51863    | 4.12722    | 2.64362    | 1.813     |
| FOXN3     | 15.1099    | 16.3057    | 18.9208   | 8.54719    | 9.8449    | 13.4547    | 15.9255    | 17.2607    | 16.8236   | 8.6832    | 11.1772   | 10.5021    | 8.77424    | 8.25108    | 9.85342   |
| FOXN3-AS1 | 0.644653   | 0.53838    | 0.60441   | 2.45804    | 1.66895   | 0.841668   | 0.490696   | 0.381943   | 1.3347    | 1.29457   | 1.57676   | 0.784153   | 1.06755    | 1.01077    | 0.678923  |
| FOXN3-AS2 | 1.248      | 1.23798    | 2.45962   | 0.321525   | 0.342101  | 0.0937637  | 1.38302    | 1.04388    | 0.0447036 | 0.0921393 | 0.0207182 | 0.774789   | 0.0592061  | 0.335722   | 1.31786   |
| FOXN4     | 0.0345213  | 0.00997972 | 0.0171351 | 0          | 0.0107247 | 0.0117578  | 0.0315322  | 0          | 0         | 0         | 0         | 0          | 0          | 0          | 0         |
| FOXO1     | 10.1236    | 6.0942     | 7.17708   | 4.54713    | 3.76533   | 6.39123    | 8.16021    | 8.32311    | 7.30429   | 4.98627   | 6.09203   | 4.12111    | 5.61048    | 4.42886    | 6.26729   |
| FOXO3     | 13.6127    | 9.14445    | 10.2816   | 9.03339    | 8.93863   | 13.0765    | 9.64343    | 9.88313    | 12.7441   | 7.2099    | 9.11361   | 7.46874    | 8.87562    | 7.6346     | 12.8798   |
| FOXO3B    | 0.700905   | 0.609678   | 0.511932  | 0.349313   | 0.597819  | 0.729305   | 0.507616   | 0.557429   | 0.370736  | 0.207919  | 0.323486  | 0.321493   | 0.246221   | 0.344607   | 0.404494  |
| FOXO4     | 2.4332     | 3.91008    | 3.39109   | 3.12011    | 5.8305    | 4.23785    | 2.86496    | 1.88598    | 5.71623   | 1.83929   | 1.65431   | 2.36918    | 2.30133    | 1.51015    | 1.28061   |
| FOXO6     | 0.271132   | 0.769816   | 0.744995  | 0.159663   | 0.782157  | 0.230865   | 0.751812   | 0.413073   | 0.0471726 | 0.0607676 | 0.0327937 | 0.0970011  | 0.0374856  | 0.101218   | 0.139064  |

|             |           |           |           |           |           |           |           |           |            |           |           |           |            |            |          |
|-------------|-----------|-----------|-----------|-----------|-----------|-----------|-----------|-----------|------------|-----------|-----------|-----------|------------|------------|----------|
| FOXP1       | 6.74426   | 4.75791   | 4.06186   | 6.48228   | 3.33036   | 7.41853   | 4.05393   | 4.96294   | 6.04045    | 4.66055   | 6.53219   | 4.35251   | 7.02648    | 5.03488    | 8.14801  |
| FOXP1-AS1   | 0.845111  | 0.501154  | 0.537797  | 0.167483  | 0.252452  | 0.110708  | 0.185562  | 0.491081  | 0.0395866  | 0.0407962 | 0.0733866 | 0.209319  | 0          | 0.407716   | 0        |
| FOXP2       | 0.872891  | 1.13098   | 1.24409   | 0.923123  | 0.319932  | 0.91028   | 0.668158  | 0.909404  | 0.549458   | 0.791928  | 0.900502  | 1.13921   | 0.533655   | 0.715927   | 0.403775 |
| FOXP3       | 0.427496  | 0.355773  | 0.40188   | 0.640795  | 0.799876  | 0.37228   | 0.354982  | 0.457634  | 0.603471   | 0.28047   | 0.701948  | 0.437971  | 0.595516   | 0.426544   | 0.390688 |
| FOXP4       | 2.02292   | 1.9456    | 2.03395   | 2.44551   | 3.10606   | 5.60479   | 3.23805   | 1.86696   | 2.20785    | 1.67963   | 1.29113   | 1.99303   | 4.22173    | 2.63507    | 2.87724  |
| FOXP4-AS1   | 0         | 0.068409  | 0.046983  | 0.0292633 | 0.0882188 | 0.0725374 | 0.194532  | 0.100945  | 0          | 0         | 0.032056  | 0.0812735 | 0          | 0.0890471  | 0.163123 |
| FOXQ1       | 2.19555   | 3.76978   | 5.56451   | 1.22385   | 3.78249   | 1.29164   | 5.64031   | 3.68071   | 2.24853    | 1.24004   | 0.980133  | 1.94229   | 1.9703     | 2.72789    | 1.70553  |
| FOXR1       | 0         | 0.029013  | 0.06642   | 0         | 0         | 0         | 0         | 0.0178383 | 0          | 0         | 0         | 0         | 0          | 0          | 0        |
| FOXR2       | 0         | 0         | 0         | 0         | 0         | 0         | 0         | 0         | 0          | 0         | 0         | 0         | 0          | 0          | 0        |
| FOXRED1     | 2.00327   | 1.86437   | 1.89275   | 3.41174   | 3.14452   | 5.88936   | 2.22708   | 1.18065   | 1.63079    | 2.26288   | 3.65402   | 1.54656   | 3.12921    | 2.353      | 2.22585  |
| FOXRED2     | 2.13255   | 3.37292   | 1.9682    | 2.74356   | 4.85186   | 4.96147   | 3.22218   | 2.6785    | 6.81283    | 0.980074  | 2.44347   | 2.62376   | 1.09012    | 0.94989    | 1.68542  |
| FOXS1       | 0.632132  | 0.0592221 | 0.0871573 | 0.217143  | 0.654613  | 0.822329  | 0.661602  | 0.109236  | 0.149696   | 0.815429  | 1.72453   | 0.452307  | 0.634431   | 1.44082    | 3.32868  |
| FPGS        | 4.29591   | 2.57628   | 3.4102    | 8.54329   | 6.10513   | 15.659    | 3.55868   | 2.36382   | 1.38034    | 4.78378   | 7.57359   | 2.17785   | 8.11459    | 5.5844     | 5.3031   |
| FPGT        | 1.1052    | 1.58029   | 1.60054   | 1.98063   | 0.439356  | 1.37633   | 0.863621  | 1.49131   | 1.23216    | 1.57192   | 2.017     | 0.818044  | 1.43568    | 1.27364    | 1.45161  |
| FPGT-TNNI3K | 0.55313   | 0.701853  | 0.832483  | 0.104469  | 0.0525447 | 0.607746  | 0.391869  | 0.359176  | 0.0277357  | 0.148175  | 0.147568  | 0.085708  | 0.0205596  | 0.0837066  | 0.291716 |
| FPR1        | 0.253206  | 0.105732  | 0.195505  | 13.6208   | 0.603086  | 5.40441   | 0.173462  | 0.405051  | 0.0616753  | 12.3307   | 32.7761   | 0.157019  | 12.7318    | 2.45264    | 9.47878  |
| FPR2        | 0.0113335 | 0         | 0.0187518 | 2.68628   | 0.123234  | 0.443916  | 0         | 0.0503615 | 0          | 2.68848   | 6.56335   | 0.0324377 | 3.73659    | 0.580493   | 1.83923  |
| FPR3        | 1.54404   | 0.862296  | 1.21202   | 5.73186   | 0.8449    | 5.25892   | 1.43238   | 1.67628   | 0.587646   | 7.11308   | 16.6083   | 0.389192  | 7.40929    | 3.69561    | 7.35786  |
| FRA10AC1    | 1.79746   | 1.804     | 1.84715   | 1.40367   | 0.58933   | 1.36104   | 0.894765  | 1.93461   | 0.439335   | 0.632303  | 0.842536  | 0.458378  | 0.626003   | 0.893921   | 0.250099 |
| FRAS1       | 0.307734  | 0.288455  | 0.330954  | 0.236406  | 1.13203   | 2.46189   | 1.01256   | 0.668806  | 0.512775   | 0.126405  | 0.145274  | 0.415363  | 0.251796   | 0.216397   | 0.707114 |
| FRAT1       | 0.969023  | 0.62252   | 0.881086  | 0.980613  | 1.51879   | 1.10015   | 0.867177  | 0.5974    | 1.80745    | 0.701246  | 0.758835  | 0.418516  | 0.692798   | 0.511016   | 0.777312 |
| FRAT2       | 5.07993   | 3.94446   | 3.51653   | 4.60768   | 8.02131   | 4.43273   | 4.9133    | 3.59117   | 4.116      | 3.05618   | 4.64456   | 3.25181   | 2.95927    | 2.23809    | 1.71834  |
| FREM1       | 0.923458  | 0.73502   | 0.949322  | 0.135284  | 0.597687  | 0.410502  | 1.11123   | 0.697992  | 0.113018   | 0.0227262 | 0.0408812 | 0.0939315 | 0.0262858  | 0.0425859  | 0.305547 |
| FREM2       | 0.246294  | 0.611279  | 0.354196  | 0.0900151 | 1.05209   | 0.0755954 | 0.881236  | 0.189616  | 0.381924   | 0.0413364 | 0.0856737 | 0.0573772 | 0.00369553 | 0.00598716 | 0.022621 |
| FREM2-AS1   | 0         | 0.0557534 | 0         | 0         | 0         | 0         | 0         | 0         | 0          | 0         | 0.0870854 | 0         | 0          | 0          | 0.110788 |
| FREM3       | 0.150257  | 0.0639779 | 0.0664877 | 0.0324092 | 0.0488513 | 0.26481   | 0.0478768 | 0.0776371 | 0.00425572 | 0.0350861 | 0.0394468 | 0.0050006 | 0.00225453 | 0.0401785  | 0.12044  |

|           |            |            |            |           |                 |            |            |            |            |            |           |            |           |            |            |
|-----------|------------|------------|------------|-----------|-----------------|------------|------------|------------|------------|------------|-----------|------------|-----------|------------|------------|
| FRG1      | 11.0883    | 6.66909    | 5.99208    | 10.9453   | 3.01138         | 12.425     | 4.33953    | 6.55163    | 7.90439    | 9.8799     | 14.143    | 5.72521    | 12.0288   | 6.22139    | 6.42974    |
| FRG1-DT   | 0.0593868  | 0.117315   | 0.108084   | 0.0489599 | 0.0737986       | 0.126418   | 0.067806   | 0.026389   | 0          | 0          | 0.0201121 | 0.00424929 | 0.0114948 | 0.00620763 | 0.0341148  |
| FRG1BP    | 2.46244    | 1.90787    | 2.05257    | 1.69116   | 1.23813         | 1.90203    | 1.44854    | 1.98719    | 1.15348    | 0.960008   | 1.41889   | 0.707737   | 1.3461    | 0.927284   | 1.53732    |
| FRG1CP    | 0          | 0          | 0          | 0         | 0               | 0          | 0          | 0          | 0          | 0          | 0         | 0          | 0         | 0          | 0          |
| FRG1DP    | 3.68E-05   | 9.34E-12   | 5.80E-05   | 5.89E-09  | 1.75E-14        | 6.48E-08   | 6.32E-08   | 3.84E-08   | 3.04E-06   | 3.81E-18   | 2.25E-06  | 1.86E-16   | 7.08E-14  | 5.90E-10   | 0.00207638 |
| FRG1EP    | 0          | 0          | 0          | 0         | 0               | 0          | 0          | 0          | 0          | 0          | 0         | 0          | 0         | 0          | 0          |
| FRG1FP    | 0          | 0          | 0          | 0         | 0               | 0          | 0          | 0          | 0          | 0          | 0         | 0          | 0         | 0          | 0          |
| FRG1HP    | 2.13236    | 1.60526    | 1.72156    | 0.895946  | 1.23099         | 1.33263    | 1.59003    | 1.76232    | 0.485781   | 0.870094   | 1.25036   | 0.52523    | 0.559996  | 0.978059   | 1.64294    |
| FRG1JP    | 0.570896   | 0.423981   | 0.354964   | 0.111726  | 0.0555823       | 0.266072   | 0.203883   | 0.502004   | 0.0873701  | 4.18E-39   | 0.0663732 | 0.116731   | 0.0226923 | 0.0299511  | 0.289594   |
| FRG2      | 0.00554989 | 0          | 0          | 0         | 0               | 0          | 0          | 0.00493228 | 0          | 0          | 0         | 0          | 0         | 4.60E-21   | 0          |
| FRG2B     | 0          | 0          | 0          | 0         | 0               | 0          | 0          | 0          | 0          | 0          | 0         | 0          | 0         | 0.0138956  | 0          |
| FRG2C     | 0.00167395 | 0.0398647  | 0.0172949  | 0.0269265 | 0.0642608       | 0.00106901 | 0.00262798 | 0.0512671  | 0.00152901 | 0.00446458 | 0.185536  | 0.0603622  | 0.0087752 | 0.22521    | 0          |
| FRG2DP    | 0.012716   | 0          | 0          | 0.0393125 | 0               | 0.0433099  | 0.0725934  | 0.0452036  | 0          | 0          | 0         | 0          | 0         | 0          | 0          |
| FRG2EP    | 0.042827   | 0.00045538 | 1.11E-07   | 4.16E-06  | 0.00073405<br>9 | 0.02735    | 0.0672355  | 0.00477122 | 0.0391189  | 0.114224   | 0.167165  | 0.067272   | 0.224508  | 0.0773288  | 0          |
| FRG2KP    | 0          | 0          | 0          | 0         | 0               | 0.0422422  | 0          | 0          | 0          | 0          | 0.0560035 | 0          | 0.0160041 | 0          | 0          |
| FRGCA     | 0          | 0.0396351  | 0.068053   | 0.0282578 | 0               | 0.070045   | 0          | 0.0487384  | 0          | 0          | 0         | 0          | 0         | 0          | 0          |
| FRK       | 2.67254    | 1.30333    | 1.17602    | 1.79144   | 1.29967         | 1.86062    | 1.12225    | 1.37888    | 0.583697   | 0.958375   | 1.60477   | 0.773047   | 0.854293  | 0.8109     | 1.10827    |
| FRMD1     | 0.00559958 | 0          | 0.00926473 | 0         | 0               | 0          | 0.00639342 | 0.00995288 | 0          | 0          | 0         | 0          | 0         | 0          | 0          |
| FRMD3     | 0.986853   | 0.475481   | 0.543204   | 0.973452  | 0.739621        | 1.60866    | 0.833011   | 0.726879   | 0.238505   | 0.481946   | 0.693562  | 0.398394   | 0.624324  | 0.644215   | 2.1948     |
| FRMD4A    | 3.19541    | 3.4103     | 3.7889     | 4.10205   | 3.33504         | 4.6985     | 3.63701    | 2.56345    | 0.953066   | 1.99901    | 2.41522   | 1.76058    | 1.89499   | 2.52479    | 6.32886    |
| FRMD4B    | 6.49629    | 5.41575    | 5.87802    | 6.37897   | 4.0718          | 5.62249    | 6.93741    | 6.11838    | 12.1279    | 6.84377    | 6.08311   | 6.34805    | 9.73162   | 6.08874    | 4.25556    |
| FRMD5     | 0.351742   | 0.215695   | 0.238079   | 0.0947393 | 0.0434618       | 0.136138   | 0.360534   | 0.312599   | 0.0730198  | 0.105351   | 0.067683  | 0.131561   | 0.0438411 | 0.1525     | 0.229612   |
| FRMD6     | 11.8957    | 12.8803    | 14.1343    | 13.3159   | 8.74214         | 14.5742    | 13.2168    | 14.4791    | 18.8869    | 16.3275    | 18.7236   | 8.9885     | 16.9653   | 10.7278    | 11.6076    |
| FRMD6-AS1 | 3.39214    | 3.98034    | 3.29117    | 1.70634   | 5.38817         | 1.10061    | 2.2344     | 1.96821    | 0.3086     | 1.57992    | 0.408676  | 2.92073    | 0.383764  | 2.7116     | 1.11934    |
| FRMD6-AS2 | 0.22714    | 0.376958   | 0.354934   | 0.260083  | 0.039203        | 0.128938   | 0.259341   | 0.471014   | 0.307368   | 0.285084   | 0.0569806 | 0.397283   | 0.113983  | 0.395711   | 0          |



|           |           |            |           |           |           |           |           |           |           |           |            |           |           |           |           |
|-----------|-----------|------------|-----------|-----------|-----------|-----------|-----------|-----------|-----------|-----------|------------|-----------|-----------|-----------|-----------|
| FSHR      | 0         | 0          | 0         | 0         | 0         | 0         | 0         | 0         | 0         | 0.0209423 | 0          | 0         | 0         | 0         |           |
| FSIP1     | 0.123408  | 0.0317118  | 0.0272244 | 0.110219  | 0.0511186 | 0.10508   | 0.0751482 | 0.0950512 | 0.120237  | 0.10326   | 0.11145    | 0.0294338 | 0.0690057 | 0.0902975 | 0.22449   |
| FSIP2     | 0.438131  | 0.389076   | 0.513876  | 0.0845829 | 0.0282065 | 0.131607  | 0.263247  | 1.07322   | 0.0298304 | 0.0503049 | 0.096973   | 0.0270853 | 0.0136481 | 0.0974347 | 0.176447  |
| FSIP2-AS1 | 0.275414  | 0.426857   | 0.784694  | 0.0888564 | 0.191594  | 0.0934616 | 0.057373  | 0.334975  | 0         | 0.0330078 | 0.351594   | 0.0188176 | 0         | 0.0763166 | 0.250971  |
| FST       | 1.87527   | 0.807866   | 0.994692  | 1.80748   | 0.822478  | 2.50787   | 1.10835   | 0.813685  | 0.14778   | 1.24606   | 2.78939    | 0.276254  | 6.27736   | 2.923     | 2.31292   |
| FSTL1     | 51.6078   | 18.8952    | 27.4021   | 44.5689   | 28.0666   | 59.7236   | 49.9441   | 30.0962   | 6.26103   | 70.8321   | 154.019    | 12.9285   | 72.0031   | 55.1104   | 137.991   |
| FSTL3     | 3.2627    | 2.38467    | 3.06512   | 3.16285   | 4.33795   | 13.6082   | 4.05147   | 1.5481    | 2.82867   | 5.41376   | 4.36988    | 3.84475   | 13.5581   | 7.04732   | 5.83721   |
| FSTL4     | 0.614912  | 1.03178    | 1.23439   | 0.132941  | 0.534361  | 0.205042  | 1.64475   | 0.611449  | 0.712234  | 0.151117  | 0.0388341  | 0.372296  | 0.0527135 | 0.0943913 | 0.0679301 |
| FSTL5     | 0         | 0.00691872 | 0         | 0         | 0         | 0         | 0         | 0         | 0.0058295 | 0         | 0.00540344 | 0         | 0         | 0         | 0         |
| FTCD      | 0.0767779 | 0.0264234  | 0.0453686 | 0.0226062 | 0         | 0.112072  | 0.0876625 | 0.0682338 | 0         | 0         | 0          | 0.0271428 | 0.0353834 | 0.0171975 | 0.0472555 |
| FTCD-AS1  | 0.0313167 | 0.0754443  | 0.0259074 | 0         | 0.0486457 | 0.0266658 | 0.0715128 | 0         | 0         | 0         | 0          | 0.101765  | 0         | 0         | 0         |
| FTCDNL1   | 0.462472  | 0.479357   | 0.37616   | 0.608755  | 0.350134  | 0.539392  | 0.399355  | 0.63896   | 0.108861  | 0.0536551 | 0.157938   | 0.197435  | 0.017552  | 0.0446856 | 0.117206  |
| FTH1      | 178.496   | 106.08     | 126.728   | 1124.56   | 207.007   | 1055.5    | 190.599   | 118.249   | 39.1938   | 457.399   | 1265.66    | 67.8546   | 642.382   | 236.104   | 340.663   |
| FTH1P18   | 0         | 0          | 0         | 0         | 0         | 0         | 0         | 0         | 0.0617429 | 0         | 0.0572303  | 0         | 0         | 0.0132482 | 0         |
| FTH1P3    | 0.363884  | 0.584417   | 0.421443  | 0.42503   | 0.414583  | 0.0619758 | 0.332377  | 0.474306  | 0.118179  | 0.213161  | 0.0821649  | 0.381875  | 0.125229  | 1.07781   | 1.32388   |
| FTHL17    | 0         | 0          | 0.0470986 | 0         | 0         | 0         | 0.0325018 | 0         | 0         | 0         | 0          | 0         | 0         | 0         | 0         |
| FTL       | 356.738   | 124.245    | 160.924   | 602.702   | 337.121   | 1323.94   | 326.371   | 222.56    | 84.3627   | 668.746   | 2123.94    | 105.992   | 311.15    | 252.091   | 550.937   |
| FTLP10    | 0         | 0          | 0         | 0         | 0         | 0         | 0         | 0         | 0         | 0         | 0          | 0         | 0         | 0         | 0         |
| FTMT      | 0.0794384 | 0.0127582  | 0.0219057 | 0         | 0         | 0.0450938 | 0         | 0         | 0         | 0         | 0          | 0         | 0         | 0         | 0         |
| FTO       | 6.6937    | 5.34978    | 5.70962   | 6.42835   | 4.88712   | 7.43358   | 6.27369   | 5.45562   | 3.84377   | 4.31569   | 5.88959    | 3.73305   | 4.94531   | 3.85061   | 6.0339    |
| FTO-IT1   | 0.691631  | 1.16633    | 1.29838   | 0.685333  | 0.165283  | 0.203855  | 0.668193  | 0.921997  | 0.0647946 | 0.434034  | 0.0600589  | 0.571016  | 0.120141  | 0.514409  | 1.83373   |
| FTSJ1     | 4.86669   | 4.71508    | 4.08706   | 10.4104   | 5.66153   | 10.7006   | 4.55834   | 3.3234    | 8.09518   | 7.57572   | 10.8331    | 5.35901   | 11.7985   | 6.81028   | 4.87125   |
| FTSJ3     | 4.24625   | 5.46725    | 5.25037   | 7.27751   | 5.88883   | 11.9155   | 4.48443   | 3.1438    | 4.87844   | 3.74615   | 2.4518     | 4.18291   | 8.5756    | 5.95772   | 4.16505   |
| FTX       | 2.42676   | 3.3563     | 3.39666   | 2.09544   | 2.97315   | 1.5641    | 3.47684   | 1.80709   | 0.957067  | 1.6644    | 1.67444    | 2.00309   | 0.893625  | 2.22813   | 2.69446   |
| FUBP1     | 9.08176   | 9.35663    | 10.0585   | 14.1306   | 4.0867    | 13.0614   | 7.28058   | 8.41465   | 3.5843    | 7.994     | 9.2874     | 3.97236   | 13.9296   | 10.8293   | 9.07219   |
| FUBP3     | 7.72657   | 6.37535    | 6.31919   | 8.74812   | 3.74636   | 10.911    | 5.96779   | 5.44648   | 7.47272   | 6.32095   | 6.68657    | 5.70166   | 10.7743   | 7.15313   | 6.66411   |

|          |           |           |           |           |            |           |           |           |            |           |           |           |           |           |          |
|----------|-----------|-----------|-----------|-----------|------------|-----------|-----------|-----------|------------|-----------|-----------|-----------|-----------|-----------|----------|
| FUCA1    | 5.66278   | 3.06551   | 3.6808    | 3.78529   | 3.31133    | 8.88958   | 4.45601   | 4.5274    | 1.43791    | 3.80066   | 9.57652   | 1.07946   | 2.44043   | 1.21698   | 3.46964  |
| FUCA2    | 4.78665   | 3.16403   | 3.2836    | 6.3368    | 2.96284    | 13.9597   | 5.04005   | 3.50328   | 3.92696    | 10.4651   | 19.7685   | 3.97089   | 9.00712   | 5.99557   | 7.12207  |
| FUK      | 1.48087   | 1.89793   | 2.29335   | 1.54439   | 4.37978    | 3.09687   | 1.88018   | 1.15288   | 1.45726    | 1.66535   | 1.92582   | 1.31815   | 1.11597   | 1.3529    | 1.15693  |
| FUNDC1   | 2.27474   | 2.43981   | 2.24183   | 3.20033   | 1.29048    | 3.03169   | 1.28732   | 2.12708   | 3.13174    | 3.67431   | 5.78336   | 1.37288   | 2.32272   | 2.00559   | 1.33514  |
| FUNDC2   | 4.33347   | 2.39642   | 2.63542   | 5.9463    | 3.06853    | 6.07003   | 2.85279   | 2.53279   | 3.24268    | 5.74274   | 11.4233   | 2.81019   | 5.56163   | 4.16244   | 4.31714  |
| FUNDC2P2 | 0         | 0         | 0         | 0         | 0          | 0         | 0         | 0         | 0          | 0         | 0         | 0         | 0         | 0         | 0        |
| FUOM     | 0.901986  | 0.960674  | 1.57092   | 2.93533   | 1.62232    | 2.48599   | 1.43638   | 0.569565  | 0.86725    | 2.47271   | 5.49309   | 1.22285   | 1.97559   | 2.55557   | 1.43172  |
| FURIN    | 15.5084   | 11.5346   | 12.2046   | 34.9942   | 30.4045    | 42.0666   | 16.0806   | 11.0959   | 54.4812    | 32.9635   | 23.3013   | 27.9866   | 64.1263   | 25.5042   | 19.3023  |
| FUS      | 11.4018   | 11.9368   | 11.9457   | 16.2835   | 7.47918    | 17.5888   | 8.79076   | 7.67016   | 6.12827    | 8.80653   | 8.01264   | 7.49862   | 17.744    | 10.0847   | 10.3754  |
| FUT1     | 1.07171   | 0.879988  | 0.687929  | 2.10201   | 3.46916    | 1.74606   | 1.1261    | 0.651944  | 4.32809    | 2.98039   | 2.50277   | 3.1869    | 4.05994   | 2.35199   | 1.11594  |
| FUT10    | 3.53638   | 2.92678   | 2.96333   | 2.43404   | 1.87499    | 2.03894   | 2.39879   | 2.77753   | 0.659545   | 1.15467   | 1.76037   | 1.16715   | 1.39341   | 1.66071   | 1.59295  |
| FUT11    | 3.91209   | 3.26783   | 4.05423   | 4.84222   | 4.92091    | 6.7075    | 4.13899   | 3.52399   | 3.59926    | 7.55195   | 12.2889   | 3.30885   | 8.33357   | 6.36169   | 8.35109  |
| FUT2     | 1.60865   | 1.5343    | 1.64343   | 7.06609   | 1.7689     | 3.96057   | 0.68764   | 0.915945  | 5.00004    | 6.65729   | 6.98972   | 3.41077   | 15.3187   | 4.73168   | 1.42764  |
| FUT3     | 0.826553  | 0.319459  | 0.165203  | 2.40099   | 1.10387    | 1.43018   | 0.42412   | 0.488499  | 7.29047    | 2.80161   | 2.66178   | 2.79685   | 4.42514   | 1.72612   | 0.84695  |
| FUT4     | 1.20536   | 0.51911   | 0.661611  | 0.753179  | 0.703197   | 1.32858   | 0.589821  | 0.516911  | 0.14447    | 0.653171  | 1.14472   | 0.249159  | 0.888938  | 0.702789  | 1.48377  |
| FUT5     | 0.142638  | 0.0670429 | 0.0706646 | 0         | 0.0217173  | 0.0570735 | 0.186559  | 0.153771  | 0          | 2.59E-43  | 0         | 1.35E-20  | 0         | 0         | 0        |
| FUT6     | 0.0239448 | 0.0492151 | 0.0202254 | 0.0323806 | 0.0260039  | 0.0205467 | 0.0285831 | 0.0434181 | 0.00961953 | 0.0202875 | 0.017658  | 0.0293273 | 0.0258768 | 0.024638  | 0        |
| FUT7     | 0.0911638 | 0.149262  | 0.0555174 | 0.391499  | 0.387191   | 0.274711  | 0.0465648 | 0.0511208 | 0.0350277  | 0.165783  | 0.168169  | 0.0960367 | 0.245565  | 0.0751589 | 0.178986 |
| FUT8     | 1.69019   | 1.40271   | 1.58532   | 1.52484   | 1.12298    | 2.90371   | 1.21576   | 1.62369   | 0.493785   | 2.04551   | 4.31744   | 0.471788  | 2.44956   | 1.62569   | 3.60537  |
| FUT8-AS1 | 0.220509  | 0.132859  | 0.208722  | 0.0435456 | 0.185956   | 0.207449  | 0.104367  | 0.100442  | 0          | 0.0581231 | 0.0403359 | 0.016355  | 0.17661   | 0.0686023 | 0.16413  |
| FUT9     | 0.03255   | 0.0357226 | 0.0403915 | 0.0093177 | 0.00280897 | 0.0138579 | 0.0185823 | 0.0385703 | 0          | 0         | 0         | 0         | 0         | 0         | 0        |
| FUZ      | 1.49443   | 1.54118   | 1.34687   | 2.63854   | 4.7729     | 2.21083   | 1.36683   | 1.23915   | 2.05297    | 1.28464   | 2.40097   | 1.01006   | 1.60665   | 1.01026   | 1.10018  |
| FXN      | 0.683713  | 0.428872  | 0.544772  | 0.661381  | 0.350675   | 0.889735  | 0.574434  | 0.599029  | 0.231738   | 0.303584  | 0.655326  | 0.288452  | 0.395351  | 0.477013  | 0.491043 |
| FXR1     | 3.51213   | 3.35311   | 3.52225   | 4.26718   | 1.50511    | 4.43707   | 1.70841   | 2.99431   | 1.83812    | 3.96796   | 4.13772   | 2.22676   | 4.07949   | 3.65077   | 2.96586  |
| FXR2     | 3.66477   | 4.05785   | 4.28804   | 5.61308   | 6.88414    | 9.69137   | 3.56507   | 2.6992    | 5.74659    | 5.60128   | 4.27701   | 3.93059   | 8.58815   | 5.37761   | 4.08361  |
| FXYD1    | 5.23499   | 2.74301   | 3.48265   | 0.741787  | 3.62541    | 4.959     | 6.7243    | 2.44252   | 0.239086   | 1.4236    | 4.11214   | 0.4214    | 0.408126  | 1.06021   | 4.88678  |

|             |           |           |           |            |          |            |           |           |           |           |           |            |           |           |            |
|-------------|-----------|-----------|-----------|------------|----------|------------|-----------|-----------|-----------|-----------|-----------|------------|-----------|-----------|------------|
| FXVD2       | 0.110418  | 0.183344  | 0.400655  | 0.285197   | 0.161207 | 0.235647   | 0.0371168 | 0.0922315 | 0         | 0.0868368 | 0.117155  | 0.173268   | 0         | 0.126561  | 0.0818887  |
| FXVD3       | 21.2626   | 22.0904   | 16.6844   | 45.2068    | 29.334   | 50.5454    | 24.4925   | 12.3883   | 53.7305   | 39.7489   | 60.6535   | 39.1203    | 28.3229   | 23.2237   | 5.90139    |
| FXVD4       | 0         | 0         | 0         | 0          | 0        | 0          | 0.0342724 | 0.0266765 | 0         | 0         | 0         | 0          | 0         | 0.0627526 | 0          |
| FXVD5       | 6.40128   | 3.34712   | 4.18362   | 9.20249    | 4.89934  | 17.0203    | 7.58228   | 4.51802   | 2.0422    | 11.7089   | 19.6958   | 3.7804     | 21.432    | 9.90457   | 12.7288    |
| FXVD6       | 1.91551   | 2.20522   | 3.4695    | 0.720323   | 3.25728  | 3.4406     | 2.88317   | 1.31898   | 0.198244  | 0.793172  | 2.77794   | 0.226091   | 1.08112   | 0.525459  | 3.19851    |
| FXVD6-FXVD2 | 0.0704734 | 7.77E-12  | 3.24E-09  | 1.51E-09   | 1.16E-07 | 6.52E-09   | 0.0928589 | 3.24E-18  | 0         | 1.61E-18  | 1.02E-08  | 2.74E-16   | 2.71E-40  | 1.87E-11  | 0.0471717  |
| FXVD7       | 0.227211  | 0.109474  | 0.0537042 | 0          | 0        | 0.469849   | 0.370603  | 0.115386  | 0         | 0.081478  | 0.183209  | 0          | 0.0628266 | 0.0169643 | 0.139844   |
| FYB1        | 1.12673   | 0.656406  | 0.839966  | 3.20085    | 0.751991 | 3.28313    | 0.440237  | 1.16888   | 0.140876  | 1.5486    | 3.29835   | 0.183926   | 2.54575   | 0.691881  | 3.05169    |
| FYB2        | 0.0200662 | 0         | 0         | 0.00689294 | 0        | 0.00569538 | 0.038185  | 0         | 0         | 0         | 0.0226523 | 0.00957195 | 0         | 0         | 0.00960588 |
| FYCO1       | 5.3986    | 6.83205   | 7.13407   | 7.32735    | 10.7831  | 9.31859    | 8.97448   | 5.0417    | 11.5085   | 5.29924   | 4.33996   | 7.02582    | 7.48517   | 4.686     | 3.99944    |
| FYN         | 7.2426    | 3.63638   | 4.98886   | 5.40244    | 5.11044  | 14.8556    | 5.88339   | 4.46797   | 2.45788   | 4.51141   | 7.16503   | 1.84564    | 5.45882   | 4.32516   | 12.7509    |
| FYTTD1      | 8.13611   | 6.87899   | 7.13442   | 9.22834    | 2.78853  | 7.87533    | 5.7535    | 7.22592   | 13.693    | 11.529    | 11.1935   | 7.48169    | 14.4683   | 8.50437   | 6.49046    |
| FZD1        | 11.9227   | 6.46739   | 8.48127   | 4.60544    | 11.9004  | 13.4544    | 10.4056   | 7.75423   | 5.2354    | 6.64406   | 11.0448   | 3.17485    | 6.86519   | 4.73813   | 10.2001    |
| FZD10       | 2.53149   | 2.55834   | 1.57505   | 1.36616    | 4.43614  | 1.18884    | 1.47337   | 1.16562   | 6.50107   | 2.43385   | 3.57416   | 2.56314    | 0.79163   | 1.31201   | 0.87091    |
| FZD10-DT    | 0.289445  | 0.306204  | 0.275888  | 0.350157   | 1.3977   | 0.337542   | 0.308926  | 0.218091  | 0.375502  | 0.323796  | 0.383574  | 0.499756   | 0.16645   | 0.460408  | 0.451826   |
| FZD2        | 0.260579  | 0.157669  | 0.160424  | 0.387189   | 1.11076  | 1.02684    | 0.207573  | 0.145411  | 0.059043  | 0.661713  | 1.84706   | 0.0650411  | 0.477004  | 0.288216  | 0.704934   |
| FZD3        | 0.715089  | 0.347776  | 0.374941  | 0.479172   | 0.242494 | 0.667492   | 0.343069  | 0.620593  | 0.259634  | 0.393978  | 0.583642  | 0.245023   | 0.504693  | 0.439536  | 0.395355   |
| FZD4        | 7.58587   | 2.25446   | 2.33535   | 2.04715    | 2.46054  | 8.29191    | 3.5212    | 3.06445   | 0.622772  | 2.36501   | 4.30815   | 0.627801   | 1.56799   | 1.58624   | 4.16206    |
| FZD5        | 1.01894   | 0.640433  | 0.708771  | 2.57608    | 1.34727  | 3.14323    | 0.579685  | 0.930619  | 1.18514   | 1.96478   | 1.35325   | 2.0712     | 7.086     | 2.25548   | 1.37725    |
| FZD6        | 7.51134   | 8.7835    | 7.88897   | 10.0922    | 4.34266  | 8.10262    | 4.2689    | 8.04291   | 8.58286   | 8.74203   | 15.5691   | 5.90721    | 7.969     | 6.82732   | 4.1746     |
| FZD7        | 6.34015   | 3.07505   | 4.23579   | 1.54208    | 4.63017  | 7.0872     | 4.91976   | 3.37542   | 1.40526   | 1.50854   | 2.72721   | 0.898709   | 2.77232   | 2.69802   | 7.59491    |
| FZD8        | 2.17919   | 0.983471  | 1.20787   | 0.928232   | 1.433    | 2.87611    | 1.27724   | 0.742397  | 0.557343  | 0.392033  | 0.62321   | 0.332645   | 0.712376  | 0.489745  | 0.865856   |
| FZD9        | 0.0889357 | 0.0904623 | 0.130798  | 0.152751   | 0.353045 | 0.143041   | 0.124109  | 0.0878207 | 0.264767  | 0.0992209 | 0.401589  | 0.0282826  | 0.0573809 | 0.149774  | 0.0283829  |
| FZR1        | 4.09985   | 5.32607   | 5.46785   | 6.35722    | 9.46341  | 9.47767    | 5.59252   | 3.462     | 9.3251    | 8.30365   | 4.23173   | 7.05512    | 11.372    | 7.41946   | 4.32879    |
| GOS2        | 6.92129   | 0.486322  | 0.33798   | 24.444     | 3.99435  | 29.8966    | 2.00306   | 0.576662  | 0.0878057 | 14.1464   | 33.342    | 0.189153   | 9.59789   | 2.47438   | 8.24869    |
| G2E3        | 1.31232   | 1.1339    | 1.21434   | 1.44282    | 0.235448 | 0.696265   | 0.797002  | 1.59166   | 0.602381  | 0.941195  | 1.33735   | 0.587945   | 0.903316  | 1.32172   | 1.30608    |



|            |            |            |            |            |           |            |           |            |           |            |            |            |            |            |         |
|------------|------------|------------|------------|------------|-----------|------------|-----------|------------|-----------|------------|------------|------------|------------|------------|---------|
| G2E3-AS1   | 0          | 0          | 0.0880256  | 0.0548266  | 0         | 0          | 0.0607448 | 0          | 0         | 0          | 0          | 0          | 0          | 0          | 0       |
| G3BP1      | 19.5181    | 16.657     | 18.3693    | 43.1881    | 20.1112   | 31.0644    | 17.3086   | 19.6094    | 18.6711   | 19.3131    | 26.3376    | 18.3006    | 36.0268    | 22.825     | 18.8869 |
| G3BP2      | 8.00925    | 7.03198    | 7.39571    | 11.4348    | 3.82321   | 13.9518    | 5.75397   | 7.93141    | 5.66689   | 7.70364    | 10.5111    | 4.71568    | 11.2539    | 7.94136    | 8.31814 |
| G6PC       | 0          | 0          | 0.00460119 | 0          | 0         | 0          | 0.0127008 | 0          | 0.0338688 | 0          | 0.0125574  | 0.0159187  | 0.00358851 | 0.00290689 | 0       |
| G6PC2      | 0.0676038  | 0.0108575  | 0.00621407 | 0          | 0         | 0          | 0.0428822 | 0.0801076  | 0         | 0          | 0.00847959 | 0.00537471 | 0          | 0          | 0       |
| G6PC3      | 4.81568    | 2.17411    | 2.5618     | 4.58497    | 4.86914   | 12.9472    | 4.48818   | 2.75208    | 1.41621   | 3.64871    | 10.0593    | 1.63695    | 3.9307     | 3.21712    | 4.81029 |
| G6PD       | 6.10092    | 5.36922    | 4.17929    | 11.6166    | 12.9788   | 16.3526    | 7.54375   | 4.37522    | 28.0617   | 13.4319    | 13.0144    | 15.6771    | 13.8454    | 9.92161    | 8.39171 |
| GAA        | 5.36551    | 4.08509    | 4.24129    | 6.84639    | 9.39292   | 16.4204    | 7.8579    | 4.27354    | 3.13712   | 5.04921    | 7.43234    | 3.77161    | 7.13537    | 5.17447    | 10.4767 |
| GAB1       | 4.02298    | 5.45691    | 4.60607    | 6.85651    | 5.31281   | 4.53165    | 4.9908    | 5.1692     | 10.5364   | 7.31876    | 6.27543    | 7.36282    | 9.99732    | 5.51564    | 3.11354 |
| GAB2       | 4.91732    | 4.15022    | 4.09867    | 2.99076    | 5.56877   | 7.84312    | 6.29667   | 3.34438    | 8.75036   | 4.9048     | 3.04997    | 4.06288    | 5.62222    | 3.17906    | 4.07193 |
| GAB3       | 1.32396    | 0.573424   | 0.834306   | 0.531961   | 0.527136  | 0.793613   | 0.638498  | 0.675394   | 0.0756739 | 0.575899   | 0.647475   | 0.249658   | 0.604425   | 0.502108   | 1.24928 |
| GAB4       | 0.017606   | 0.00424141 | 0.0291298  | 0.00907173 | 0         | 0.00749563 | 0         | 0          | 0         | 0          | 0          | 0          | 0          | 0          | 0       |
| GABARAP    | 64.6347    | 54.3923    | 56.5148    | 94.1698    | 68.718    | 115.213    | 87.8531   | 48.183     | 174.511   | 113.748    | 239.256    | 78.9217    | 95.443     | 51.9581    | 65.3561 |
| GABARAPL1  | 9.15507    | 5.04997    | 6.50105    | 5.06146    | 4.33343   | 17.6652    | 5.78727   | 5.78792    | 4.46232   | 5.69596    | 8.07277    | 1.79933    | 5.41244    | 4.35359    | 8.3514  |
| GABARAPL2  | 16.8607    | 16.6259    | 19.1647    | 32.3945    | 17.1135   | 25.842     | 19.6466   | 15.3333    | 86.4134   | 37.9465    | 62.3678    | 26.3101    | 40.8463    | 19.9903    | 17.1157 |
| GABARAPL3  | 0.024555   | 0.0414083  | 0.0203136  | 0          | 0.0190712 | 0          | 0.014018  | 0.0872896  | 0.0149526 | 0          | 0.0277195  | 0.0175697  | 0          | 0.0128335  | 0       |
| GABBR1     | 0.305252   | 0.436511   | 0.405229   | 0.28298    | 0.925019  | 0.48207    | 0.558534  | 0.367505   | 0.084997  | 0.295528   | 0.168614   | 0.285153   | 0.121619   | 0.496687   | 1.036   |
| GABBR2     | 0.00399845 | 0.00192652 | 0.00661561 | 0.0164821  | 0         | 0.0136185  | 0         | 0.00355349 | 0         | 0          | 0.00451376 | 0.008583   | 0.00257978 | 0.035526   | 0       |
| GABPA      | 3.27351    | 2.67869    | 2.52581    | 3.83156    | 1.1644    | 3.63146    | 2.14635   | 3.216      | 3.77448   | 4.13738    | 5.61408    | 2.21305    | 4.86077    | 2.86658    | 3.42596 |
| GABPB1     | 1.57708    | 1.1218     | 1.2862     | 2.36699    | 0.801182  | 2.07373    | 1.06833   | 1.16631    | 1.75445   | 2.16026    | 3.71551    | 1.12791    | 3.60971    | 2.02784    | 2.23729 |
| GABPB1-AS1 | 1.57821    | 3.12293    | 3.52445    | 1.57401    | 5.05407   | 1.91873    | 2.07463   | 1.70317    | 0.952136  | 0.924082   | 1.61434    | 0.77948    | 0.614585   | 1.7542     | 1.27704 |
| GABPB1-IT1 | 1.44225    | 1.29297    | 1.3516     | 1.10059    | 0.956873  | 1.68767    | 0.874684  | 1.33774    | 1.09055   | 0.680489   | 0.912035   | 0.640148   | 0.454206   | 0.976811   | 1.28688 |
| GABPB2     | 2.15269    | 3.51197    | 3.07455    | 2.55555    | 2.2157    | 2.32327    | 2.13663   | 2.5993     | 2.12767   | 1.5357     | 1.44773    | 1.78376    | 1.51977    | 1.81929    | 1.55047 |
| GABRA1     | 0          | 0          | 0          | 0          | 0         | 0          | 0         | 0          | 0         | 0          | 0          | 0          | 0          | 0          | 0       |
| GABRA2     | 0.0366419  | 0.00117698 | 0.00202085 | 0          | 0         | 0.0187201  | 0.0167346 | 0.00868382 | 0         | 0.00306596 | 0          | 0          | 0          | 0          | 0       |
| GABRA3     | 0.0498594  | 0.0600575  | 0.0412472  | 0.0599451  | 0.0258163 | 0.0141515  | 0.0664158 | 0.0221554  | 0.0101205 | 0.0625786  | 0          | 0.0178379  | 0.096507   | 0.0608036  | 0       |

|            |            |            |            |           |            |            |            |            |            |            |           |            |            |            |           |
|------------|------------|------------|------------|-----------|------------|------------|------------|------------|------------|------------|-----------|------------|------------|------------|-----------|
| GABRA4     | 0.0405917  | 0.0102445  | 0.00639625 | 0.0717101 | 0.00900756 | 0.0296257  | 0.059588   | 0.00687133 | 0.0329574  | 0.0315384  | 0.0283666 | 0.00829841 | 0.00124712 | 0.0080819  | 0         |
| GABRA5     | 0          | 0.0070641  | 0.012129   | 0         | 0          | 0.043694   | 0          | 0          | 0          | 0          | 0         | 0          | 0.0189189  | 0          | 0         |
| GABRA6     | 0          | 0          | 0          | 0         | 0          | 0          | 0          | 0          | 0          | 0          | 0         | 0          | 0          | 0          | 0         |
| GABRB1     | 0.0314017  | 0.0100865  | 0          | 0.0215736 | 0          | 0          | 0.0119511  | 0          | 0          | 0.0131375  | 0         | 0.00748958 | 0          | 0.0109413  | 0.0601291 |
| GABRB2     | 0.0468546  | 0.0165552  | 0.025841   | 0.016095  | 0.00970418 | 0.00531948 | 0.0927283  | 0.0333124  | 0          | 0          | 0.0035262 | 0.0044701  | 0.00604607 | 0.00163255 | 0.0897188 |
| GABRB3     | 0.042994   | 0.0517879  | 0.027946   | 0.123425  | 0.0429329  | 0.0261492  | 0.0315573  | 0.065502   | 0.0748026  | 0.0231265  | 0.031201  | 0.105474   | 0.0475534  | 0          | 0.0176414 |
| GABRD      | 0.0601118  | 0.0695107  | 0.0497287  | 0.173452  | 0.261448   | 0.337817   | 0.109814   | 0.0320534  | 0.0146419  | 0.0603572  | 0.0271435 | 0.0430116  | 0.0155135  | 0.175936   | 0.172656  |
| GABRE      | 4.60365    | 8.50451    | 6.41425    | 8.05075   | 9.21539    | 3.10094    | 4.5018     | 4.57421    | 2.2713     | 3.92576    | 1.44221   | 5.02773    | 1.12746    | 5.79451    | 3.03682   |
| GABRG1     | 0.00341948 | 0.00164756 | 0          | 0         | 0          | 0          | 0          | 0          | 0          | 0          | 0         | 0          | 0          | 0          | 0         |
| GABRG2     | 0          | 0          | 0          | 0         | 0          | 0          | 0          | 0          | 0          | 0          | 0         | 0          | 0          | 0          | 0         |
| GABRG3     | 0.12706    | 0.0262369  | 0.0525564  | 0         | 0.0422931  | 0.0772784  | 0.0621741  | 0.0806573  | 0.0110532  | 0          | 0         | 0.00649391 | 0          | 0          | 0         |
| GABRG3-AS1 | 0          | 0          | 0.0225242  | 0         | 0          | 0          | 0          | 0          | 0          | 0          | 0         | 0          | 0          | 0          | 0         |
| GABRP      | 16.0374    | 2.24091    | 2.86982    | 0.872107  | 1.06468    | 3.26349    | 3.29001    | 4.05883    | 0.0340715  | 0.0790034  | 0.157906  | 0.0200175  | 0.148912   | 0.208355   | 0.421858  |
| GABRQ      | 0.277717   | 0.111507   | 0.0765823  | 0.476992  | 0.62911    | 0.266031   | 0.317088   | 0.0822705  | 0.817383   | 0.595462   | 0.182879  | 0.521623   | 0.70926    | 0.169338   | 0.149564  |
| GABRR1     | 0.0131944  | 0.0190718  | 0.00545769 | 0         | 0          | 0.0168523  | 0.0753249  | 0.0293153  | 0          | 0          | 0         | 0          | 0          | 0          | 0         |
| GABRR2     | 0.127079   | 0.0565187  | 0.0525644  | 0.0705162 | 0.0911066  | 0.0416178  | 0.0725474  | 0.130312   | 0.00595262 | 0.0368071  | 0.0275878 | 0.0454642  | 0.0283814  | 0.183924   | 0.0912508 |
| GABRR3     | 0          | 0          | 0          | 0         | 0          | 0          | 0          | 0          | 0          | 0          | 0         | 0          | 0          | 0          | 0         |
| GACAT1     | 0          | 0          | 0          | 0         | 0          | 0          | 0          | 0          | 0          | 0          | 0         | 0          | 0          | 0          | 0         |
| GACAT2     | 0.480968   | 0.16358    | 0.163837   | 0.0874679 | 1.18659    | 0.337267   | 0.129213   | 0.176007   | 0.0344568  | 0.177548   | 0.0958152 | 0.182195   | 0.073016   | 0.162654   | 0.487575  |
| GACAT3     | 0          | 0          | 0          | 0         | 0          | 0          | 0          | 0          | 0          | 0          | 0         | 0          | 0          | 0          | 0         |
| GAD1       | 0.0126155  | 0.0151958  | 0.0208728  | 0.0065003 | 0.0195962  | 0.0375966  | 0.00720196 | 0          | 0          | 0.00791685 | 0.0213619 | 0          | 0.0122091  | 0.0131868  | 0         |
| GAD2       | 0          | 0          | 0          | 0         | 0          | 0          | 0          | 0          | 0          | 0          | 0         | 0          | 0          | 0          | 0         |
| GADD45A    | 7.59694    | 3.70072    | 2.67761    | 9.19417   | 14.9007    | 19.7204    | 3.67638    | 5.09719    | 8.78246    | 9.9349     | 18.6099   | 6.61179    | 8.3639     | 6.04779    | 4.96136   |
| GADD45B    | 7.28796    | 5.73347    | 4.94304    | 15.8535   | 13.9352    | 26.6712    | 5.32323    | 5.04094    | 17.5058    | 13.9003    | 22.1165   | 24.3274    | 8.32922    | 9.8172     | 7.95255   |
| GADD45G    | 1.58633    | 2.02073    | 1.16851    | 0.358304  | 6.91979    | 2.53495    | 0.843583   | 1.44842    | 4.57851    | 2.01828    | 2.94373   | 1.52378    | 0.518757   | 1.07895    | 0.43691   |
| GADD45GIP1 | 7.64358    | 6.98561    | 7.50265    | 21.3177   | 16.6318    | 21.8238    | 9.76614    | 4.90604    | 9.30902    | 17.3216    | 38.0756   | 9.02849    | 20.5287    | 14.4735    | 5.79349   |

|         |            |           |            |           |         |           |           |          |            |           |         |            |           |            |            |
|---------|------------|-----------|------------|-----------|---------|-----------|-----------|----------|------------|-----------|---------|------------|-----------|------------|------------|
| GADL1   | 0          | 0         | 0.00523818 | 0.0195756 | 0       | 0.0377406 | 0         | 0        | 0.00771153 | 0.0158943 | 0       | 0.00453064 | 0.0163412 | 0.00992796 | 0.00909339 |
| GAGE1   | 5.89E-44   | 0         | 0          | 0         | 0       | 0         | 0         | 0        | 0          | 0         | 0       | 0          | 0         | 0          | 0          |
| GAGE10  | 1.44E-07   | 0.0397529 | 0.0341276  | 0         | 0       | 0.161627  | 0         | 0        | 0          | 0         | 0       | 0          | 0         | 3.62E-37   | 0          |
| GAGE12B | 0.00171878 | 0         | 0          | 0         | 0       | 0         | 0         | 0        | 0          | 0         | 0       | 0          | 0         | 0.00387914 | 0          |
| GAGE12C | 3.69E-08   | 0         | 0          | 0         | 0       | 2.44E-07  | 0         | 0        | 0          | 0         | 0       | 0          | 0         | 8.32E-08   | 0          |
| GAGE12D | 5.93E-09   | 0         | 0          | 0         | 0       | 3.92E-08  | 0         | 0        | 0          | 0         | 0       | 0          | 0         | 1.34E-08   | 0          |
| GAGE12E | 3.69E-08   | 0         | 0          | 0         | 0       | 2.44E-07  | 0         | 0        | 0          | 0         | 0       | 0          | 0         | 8.32E-08   | 0          |
| GAGE12F | 2.37E-09   | 0         | 0          | 0         | 0       | 1.31E-08  | 0         | 0        | 0          | 0         | 0       | 0          | 0         | 5.35E-09   | 0          |
| GAGE12G | 0.00630486 | 0         | 0          | 0         | 0       | 0.0138925 | 0         | 0        | 0          | 0         | 0       | 0          | 0         | 5.44E-05   | 0          |
| GAGE12H | 0          | 0         | 0          | 0         | 0       | 2.44E-07  | 0         | 0        | 0          | 0         | 0       | 0          | 0         | 1.10E-17   | 0          |
| GAGE12I | 3.74E-05   | 0         | 0          | 0         | 0       | 2.10E-44  | 0         | 0        | 0          | 0         | 0       | 0          | 0         | 0.0479584  | 0          |
| GAGE12J | 5.97E-08   | 0         | 0          | 0         | 0       | 1.32E-07  | 0         | 0        | 0          | 0         | 0       | 0          | 0         | 1.50E-37   | 0          |
| GAGE13  | 0          | 0         | 0          | 0         | 0       | 1.63E-06  | 0         | 0        | 0          | 0         | 0       | 0          | 0         | 0          | 0          |
| GAGE2A  | 8.09E-07   | 0         | 0          | 0         | 0       | 1.78E-06  | 0         | 0        | 0          | 0         | 0       | 0          | 0         | 1.37E-06   | 0          |
| GAGE2B  | 1.87E-05   | 0         | 0          | 0         | 0       | 0         | 0         | 0        | 0          | 0         | 0       | 0          | 0         | 4.22E-05   | 0          |
| GAGE2C  | 1.17E-06   | 0         | 0          | 0         | 0       | 0         | 0         | 0        | 0          | 0         | 0       | 0          | 0         | 0.0022524  | 0          |
| GAGE2D  | 1.44E-07   | 0         | 0          | 0         | 0       | 4.06E-11  | 0         | 0        | 0          | 0         | 0       | 0          | 0         | 0.00018509 | 0          |
|         |            |           |            |           |         |           |           |          |            |           |         |            |           | 6          |            |
| GAGE2E  | 5.97E-08   | 0         | 0          | 0         | 0       | 0         | 0         | 0        | 0          | 0         | 0       | 0          | 0         | 1.35E-07   | 0          |
| GAGE4   | 3.62E-06   | 0         | 0          | 0         | 0       | 0         | 0         | 0        | 0          | 0         | 0       | 0          | 0         | 0.0139115  | 0          |
| GAGE5   | 5.30E-06   | 0         | 0          | 0         | 0       | 0         | 0         | 0        | 0          | 0         | 0       | 0          | 0         | 0.0203768  | 0          |
| GAGE6   | 3.98E-06   | 0         | 0          | 0         | 0       | 4.20E-45  | 0         | 0        | 0          | 0         | 0       | 0          | 0         | 8.98E-06   | 0          |
| GAGE7   | 4.82E-06   | 0         | 0          | 0         | 0       | 0         | 0         | 0        | 0          | 0         | 0       | 0          | 0         | 0.0185173  | 0          |
| GAGE8   | 6.42E-06   | 0         | 0          | 0         | 0       | 4.20E-45  | 0         | 0        | 0          | 0         | 0       | 0          | 0         | 4.83E-06   | 0          |
| GAK     | 5.91198    | 7.31404   | 7.70561    | 10.1768   | 14.9594 | 14.5372   | 9.37671   | 5.98393  | 9.75961    | 7.15124   | 5.0213  | 8.73773    | 12.7525   | 8.24576    | 8.19008    |
| GAL     | 0.282922   | 0.0817898 | 0.140432   | 0.699743  | 0       | 5.87807   | 0.0323032 | 0.100575 | 0.0689135  | 0.532645  | 1.75661 | 0.182195   | 2.0627    | 0.576684   | 0.203156   |

|         |           |           |           |            |           |           |            |           |            |            |            |            |           |           |           |
|---------|-----------|-----------|-----------|------------|-----------|-----------|------------|-----------|------------|------------|------------|------------|-----------|-----------|-----------|
| GAL3ST1 | 0.0190556 | 0.0596784 | 0.0551745 | 0.00981869 | 0.0739999 | 0.0324512 | 0.0326356  | 0.0592727 | 0.0116038  | 0.0119584  | 0          | 0          | 0         | 0.0149389 | 0.0273663 |
| GAL3ST2 | 0         | 0.0692589 | 0.0660647 | 0.0164593  | 0         | 0.0815984 | 0.018236   | 0.0425831 | 0          | 0          | 0.144241   | 0          | 0.0103049 | 0.0250426 | 0         |
| GAL3ST3 | 0.0139416 | 0.0201518 | 0.0461339 | 0          | 0.0108281 | 0.0178066 | 0.00795903 | 0.0123901 | 0.0254689  | 0          | 0          | 0.00997559 | 0         | 0         | 0         |
| GAL3ST4 | 1.55806   | 4.72806   | 4.62056   | 2.29106    | 4.61395   | 1.6913    | 4.78545    | 2.51832   | 2.21934    | 1.63532    | 4.50513    | 1.07571    | 0.858283  | 1.01908   | 2.31608   |
| GALC    | 2.69427   | 2.08773   | 2.57359   | 3.49788    | 0.957838  | 5.07082   | 2.24535    | 2.666     | 1.15016    | 3.13059    | 5.51863    | 1.20837    | 2.37633   | 1.78849   | 2.49712   |
| GALE    | 1.81856   | 1.2603    | 1.32927   | 6.39243    | 2.2444    | 5.67421   | 1.33684    | 0.841302  | 2.80643    | 4.6744     | 5.06202    | 1.75577    | 6.18003   | 3.76926   | 1.91404   |
| GALK1   | 2.07454   | 2.87574   | 3.23547   | 4.94165    | 7.55434   | 12.3651   | 3.7277     | 2.07036   | 6.06788    | 9.15586    | 20.0405    | 6.08357    | 6.99961   | 6.79876   | 4.00497   |
| GALK2   | 1.92952   | 2.10223   | 1.84647   | 2.41527    | 1.71975   | 1.98099   | 1.65546    | 1.59654   | 1.36998    | 1.76077    | 2.70594    | 1.24915    | 1.59957   | 1.91167   | 2.15114   |
| GALM    | 1.05106   | 0.815295  | 0.765039  | 1.03041    | 1.16203   | 1.90529   | 1.07513    | 0.688384  | 0.170642   | 1.18153    | 1.71505    | 0.483242   | 0.6136    | 0.902135  | 1.44529   |
| GALNS   | 1.74234   | 2.80415   | 2.17341   | 4.24912    | 4.12345   | 5.4683    | 2.4997     | 1.71059   | 2.67747    | 2.96537    | 4.87088    | 3.3354     | 4.69079   | 3.66158   | 5.51536   |
| GALNT1  | 8.88819   | 8.53297   | 8.88438   | 16.9706    | 6.26628   | 13.8322   | 6.45797    | 8.98159   | 33.2749    | 27.223     | 31.122     | 15.0278    | 29.136    | 14.7838   | 11.6474   |
| GALNT10 | 5.82948   | 2.54659   | 2.86782   | 4.63375    | 4.61815   | 7.65738   | 3.31465    | 3.61962   | 1.67552    | 4.30216    | 4.29504    | 3.10612    | 5.79468   | 5.2343    | 6.43518   |
| GALNT11 | 6.68329   | 6.05443   | 6.26796   | 6.87874    | 7.38356   | 10.5347   | 6.17778    | 4.25436   | 7.72901    | 5.44761    | 7.06892    | 4.48061    | 5.53558   | 3.9335    | 6.81431   |
| GALNT12 | 1.37081   | 0.811329  | 0.812024  | 0.523208   | 1.0121    | 1.71482   | 1.24632    | 0.721935  | 0.752304   | 0.573504   | 0.792843   | 0.393552   | 0.289354  | 0.256506  | 0.583307  |
| GALNT13 | 0.296858  | 0.024792  | 0.0458419 | 0.0774999  | 0.0491865 | 0.306695  | 0.207885   | 0.0949762 | 0.00482053 | 0.00496783 | 0.00446821 | 0.0934604  | 0.0791662 | 0.0620604 | 0.233058  |
| GALNT14 | 0.467331  | 0.952883  | 0.818043  | 1.80774    | 0.526034  | 1.33219   | 0.564516   | 0.710266  | 0.6104     | 0.331528   | 0.657537   | 0.227771   | 0.891449  | 0.626548  | 0.223716  |
| GALNT15 | 4.36579   | 0.590455  | 0.840391  | 1.0718     | 0.237949  | 8.3274    | 2.38419    | 2.20687   | 0.0343667  | 1.39138    | 1.70196    | 0.392282   | 2.37984   | 2.10688   | 6.62874   |
| GALNT16 | 2.29873   | 1.91753   | 2.72367   | 0.237998   | 1.72696   | 2.02136   | 5.12658    | 1.16943   | 0.0327055  | 0.337049   | 0.885203   | 0.203679   | 0.353456  | 0.491234  | 2.09801   |
| GALNT17 | 0.914407  | 0.171159  | 0.266666  | 0.0406758  | 0.408745  | 1.24913   | 0.578353   | 0.467712  | 0.048071   | 0.0495399  | 0.0445576  | 0.00941414 | 0.0297108 | 0.0103146 | 0.0850276 |
| GALNT18 | 5.29118   | 3.10358   | 3.46372   | 6.1734     | 4.70267   | 8.61905   | 4.30767    | 2.51064   | 4.40435    | 7.22995    | 7.38584    | 4.35882    | 8.73338   | 5.91556   | 5.16717   |
| GALNT2  | 4.87665   | 3.93242   | 3.72907   | 12.6299    | 8.44528   | 16.3863   | 4.60868    | 2.89589   | 5.05137    | 10.4671    | 7.95922    | 6.39665    | 17.6993   | 7.83447   | 9.99768   |
| GALNT3  | 1.65763   | 2.92163   | 2.37342   | 4.62099    | 1.27643   | 2.75655   | 1.20513    | 2.16568   | 7.36778    | 7.82408    | 4.17434    | 4.50101    | 13.3367   | 5.9978    | 2.23814   |
| GALNT4  | 0.955146  | 0.683938  | 0.630343  | 1.48731    | 0.503634  | 1.50467   | 0.733641   | 0.769775  | 0.549447   | 1.53373    | 1.23247    | 0.689051   | 2.20768   | 1.41178   | 0.667289  |
| GALNT5  | 0.378025  | 0.211789  | 0.238183  | 0.237816   | 0.235564  | 0.56891   | 0.100376   | 0.285173  | 0.0829776  | 1.15304    | 1.84095    | 0.267342   | 0.266588  | 0.465215  | 3.25423   |
| GALNT6  | 2.29382   | 4.86979   | 2.26612   | 13.7346    | 13.3298   | 7.55542   | 4.22667    | 2.42079   | 18.3207    | 15.0376    | 5.85514    | 14.4089    | 32.3907   | 16.048    | 5.47076   |
| GALNT7  | 2.13322   | 1.29966   | 1.29356   | 2.1319     | 1.15184   | 3.10666   | 1.00616    | 1.85285   | 3.66472    | 3.84415    | 4.63431    | 2.65674    | 3.62981   | 2.62019   | 2.19929   |

|         |           |           |           |           |           |           |           |           |           |            |            |            |           |            |           |
|---------|-----------|-----------|-----------|-----------|-----------|-----------|-----------|-----------|-----------|------------|------------|------------|-----------|------------|-----------|
| GALNT8  | 0.0867187 | 0.078342  | 0.0896748 | 0.0111708 | 0.101028  | 0.0276899 | 0.0742594 | 0.0578013 | 0         | 0          | 0.0122368  | 0          | 0         | 0.045323   | 0.0311348 |
| GALNT9  | 0.0079257 | 0.0190936 | 0         | 0         | 0         | 0         | 0         | 0         | 0         | 0.00994757 | 0.00894713 | 0.00567105 | 0         | 0.0207116  | 0.0227646 |
| GALNTL5 | 0         | 0         | 0         | 0         | 0         | 0         | 0         | 0         | 0         | 0          | 0          | 0          | 0         | 0          | 0         |
| GALNTL6 | 0.0568625 | 0.0547945 | 0.0470407 | 0.0167424 | 0.151418  | 0.0484177 | 0.0370993 | 0.0216577 | 0.0395727 | 0.020391   | 0          | 0.0142341  | 0.0104821 | 0.00424555 | 0.0233319 |
| GALP    | 0         | 0         | 0         | 0         | 0         | 0         | 0         | 0         | 0         | 0          | 0          | 0          | 0         | 0          | 0         |
| GALR1   | 0.199437  | 0         | 0         | 0         | 0         | 0.148591  | 0.0569278 | 0.0295406 | 0         | 0          | 0.0187617  | 0.00594595 | 0         | 0.00868623 | 0         |
| GALR2   | 0.170546  | 0.11504   | 0.183414  | 0.0351505 | 0.344391  | 0.0290435 | 0.175251  | 0.151567  | 0.37387   | 0.0642157  | 0.115515   | 0.061015   | 0.0990317 | 0.0980481  | 0.048985  |
| GALR3   | 0.0400053 | 0.0289127 | 0.0165476 | 0.0824532 | 0.124284  | 0.0681279 | 0         | 0.0711067 | 0.024361  | 0.0502107  | 0          | 0.0715621  | 0         | 0.0627255  | 0         |
| GALT    | 2.99789   | 6.5714    | 7.65823   | 5.16033   | 6.67811   | 5.59623   | 5.56691   | 5.69454   | 1.76536   | 1.88133    | 4.77886    | 3.28832    | 2.63565   | 3.29722    | 2.79138   |
| GAMT    | 1.45482   | 4.16596   | 3.32038   | 2.43493   | 12.1006   | 3.05738   | 3.12187   | 2.05401   | 5.22747   | 1.9166     | 5.27637    | 2.87927    | 0.485965  | 0.830458   | 1.00761   |
| GAN     | 12.2031   | 24.6669   | 28.6004   | 5.72096   | 11.0996   | 5.14334   | 37.5542   | 21.7264   | 17.7091   | 6.17502    | 5.03654    | 6.81839    | 7.24244   | 4.61303    | 2.28207   |
| GANAB   | 16.7929   | 16.0189   | 16.8001   | 36.8163   | 25.6069   | 44.5184   | 20.2588   | 14.5611   | 14.1995   | 23.0231    | 30.9572    | 15.2942    | 35.4417   | 21.4442    | 25.5965   |
| GANC    | 3.38345   | 3.59039   | 3.40812   | 3.16913   | 2.13312   | 2.71767   | 2.9599    | 3.32953   | 1.74336   | 3.86404    | 2.61333    | 3.39618    | 3.06458   | 2.86907    | 2.8279    |
| GAP43   | 0.472981  | 0.0529975 | 0.0363984 | 0.0680121 | 0.102517  | 0.280979  | 0.213502  | 0.136857  | 0         | 0.0276111  | 0.496685   | 0          | 0.156131  | 0.0517396  | 0.268545  |
| GAPDH   | 324.408   | 175.502   | 171.914   | 680.061   | 221.518   | 1072.53   | 299.859   | 183.173   | 393.438   | 790.356    | 1241.56    | 477.789    | 1123.4    | 635.26     | 271.088   |
| GAPDHS  | 0.248183  | 0.724943  | 0.705768  | 0.271745  | 0.674649  | 0.396233  | 0.513603  | 0.372202  | 0.340041  | 0.116811   | 0.157594   | 0.266372   | 0.0600474 | 0.162139   | 0.155935  |
| GAPLINC | 0.138581  | 0.0222568 | 0         | 0.190416  | 0.0717548 | 0.236     | 0.105485  | 0.246319  | 0.112517  | 0.405845   | 2.5552     | 0.0661057  | 0.0894118 | 0.0724286  | 0.46438   |
| GAPT    | 0.0820675 | 0.0922633 | 0.120697  | 0.244322  | 0.0566574 | 0.131995  | 0.0208227 | 0.137766  | 0.0666327 | 0.228896   | 0.483808   | 0.0456723  | 0.205915  | 0.0714868  | 0.170241  |
| GAPVD1  | 4.43653   | 4.61491   | 4.93774   | 4.36381   | 2.3682    | 4.77883   | 4.59545   | 4.24428   | 8.62933   | 4.2121     | 3.88529    | 4.51485    | 5.48877   | 4.07472    | 3.4019    |
| GAR1    | 2.88603   | 2.35863   | 2.9013    | 4.55533   | 0.99307   | 4.44823   | 1.5016    | 2.12656   | 3.73732   | 1.87991    | 3.09301    | 1.85591    | 3.06413   | 2.86398    | 1.86249   |
| GAREM1  | 4.26224   | 3.18658   | 2.53569   | 3.92463   | 3.77014   | 2.75554   | 2.99273   | 3.25307   | 6.83312   | 3.11642    | 3.69033    | 3.90633    | 2.35107   | 3.29676    | 1.70504   |
| GAREM2  | 0.432544  | 0.352976  | 0.396515  | 0.385513  | 0.381343  | 1.02528   | 0.382634  | 0.235494  | 0.099663  | 0.347252   | 1.20532    | 0.189602   | 0.409813  | 0.334008   | 0.69394   |
| GARNL3  | 1.6182    | 1.42802   | 1.62051   | 0.947898  | 1.04073   | 1.26184   | 1.99022   | 1.25142   | 0.518627  | 0.783896   | 0.647372   | 1.01567    | 0.692371  | 1.13359    | 1.15789   |
| GARS    | 10.7056   | 10.8695   | 10.341    | 22.9893   | 11.6949   | 23.1754   | 13.0223   | 9.72945   | 49.3227   | 34.644     | 29.5691    | 25.3558    | 66.9089   | 26.584     | 18.6478   |
| GARS-DT | 2.55883   | 1.99335   | 1.94868   | 0.998097  | 1.86664   | 1.1454    | 1.86354   | 2.53442   | 0.77181   | 0.855424   | 0.735648   | 0.74862    | 0.401164  | 1.10926    | 2.72176   |
| GART    | 4.17693   | 3.91671   | 3.7625    | 11.6906   | 4.45001   | 10.7231   | 4.16623   | 3.56344   | 5.23986   | 6.1217     | 7.12303    | 5.05725    | 11.3226   | 7.60656    | 3.67874   |

|           |            |            |            |            |           |            |           |            |           |           |           |            |           |            |           |
|-----------|------------|------------|------------|------------|-----------|------------|-----------|------------|-----------|-----------|-----------|------------|-----------|------------|-----------|
| GAS1      | 10.6877    | 9.52618    | 12.7344    | 12.4055    | 11.4661   | 17.7619    | 11.6703   | 6.08737    | 2.21259   | 7.68285   | 12.7487   | 2.61743    | 17.6985   | 9.05457    | 14.8083   |
| GAS1RR    | 0.179322   | 0.449788   | 0.575938   | 0.152185   | 0.0573482 | 0.220053   | 0.1927    | 0.328107   | 0.0385401 | 0.0264785 | 0.119078  | 0.0377381  | 0.0238201 | 0.0275651  | 0.0909825 |
| GAS2      | 0.188859   | 0.0568719  | 0.0781186  | 0.0162187  | 0.0244469 | 0.134009   | 0.0269541 | 0.153855   | 0         | 0.0296296 | 0.035533  | 0.00563056 | 0.0203084 | 0.0329019  | 0.0452041 |
| GAS2L1    | 9.65792    | 10.5836    | 11.7578    | 12.221     | 23.0683   | 13.0736    | 12.5862   | 6.8825     | 10.9745   | 10.3627   | 8.75252   | 16.2446    | 20.5375   | 12.288     | 7.23816   |
| GAS2L1P2  | 0          | 0          | 0          | 0          | 0.0317853 | 0          | 0.0116817 | 0          | 0         | 0         | 0         | 0          | 0         | 0          | 0         |
| GAS2L2    | 0.0307141  | 0.0961903  | 0.127044   | 0          | 0.0477096 | 0.00653816 | 0.113972  | 0.0750643  | 0.065461  | 0.0192747 | 0         | 0.0274709  | 0.0148624 | 0          | 0.0220546 |
| GAS2L3    | 0.333846   | 0.556928   | 0.724603   | 0.813852   | 0.139403  | 0.678569   | 0.372977  | 0.832658   | 0.336636  | 0.752417  | 1.09414   | 0.315932   | 0.961173  | 0.636015   | 0.551619  |
| GAS5      | 40.1328    | 57.0789    | 74.3298    | 41.7508    | 21.6964   | 31.1589    | 20.1133   | 23.1568    | 16.8451   | 31.3365   | 59.6282   | 19.3648    | 15.0021   | 22.6544    | 17.322    |
| GAS5-AS1  | 2.40101    | 2.13695    | 2.45527    | 0.8935     | 0.1554    | 0.82345    | 1.63722   | 3.20072    | 0.852879  | 0.795232  | 0.564675  | 1.36007    | 0.451826  | 2.24831    | 1.62829   |
| GAS6      | 28.5293    | 21.5176    | 26.3955    | 25.5238    | 54.0439   | 45.5135    | 25.7146   | 17.3139    | 10.5515   | 16.2479   | 20.6428   | 8.38645    | 22.8659   | 15.2345    | 27.9249   |
| GAS6-AS1  | 0.15557    | 0.774614   | 0.578953   | 0.241075   | 1.52744   | 0.4646     | 0.444365  | 0.575253   | 0.0315863 | 0.0325846 | 0         | 0.484086   | 0.0668315 | 0.326334   | 0.635436  |
| GAS6-DT   | 0.513232   | 0.341162   | 0.237516   | 0.343866   | 0.149505  | 1.18928    | 0.358462  | 0.211819   | 0.159651  | 0.344776  | 0.729332  | 0.17054    | 0.246044  | 0.317649   | 0.36011   |
| GAS7      | 7.68386    | 7.9875     | 9.91983    | 7.53377    | 10.7451   | 12.7596    | 17.3709   | 8.43227    | 19.9194   | 6.40431   | 6.76696   | 7.62898    | 9.38542   | 4.80764    | 6.05862   |
| GAS8      | 1.27366    | 1.64936    | 1.44639    | 1.64982    | 2.29234   | 2.87627    | 1.27043   | 1.06355    | 0.900124  | 1.57817   | 0.914502  | 1.48153    | 1.84944   | 1.31974    | 1.48117   |
| GAS8-AS1  | 0.605351   | 0.549681   | 0.84749    | 0.40789    | 1.55514   | 0.416324   | 0.957006  | 0.413835   | 0.0567115 | 0.175333  | 0.0262833 | 0.416486   | 0.0450657 | 0.486743   | 0.802487  |
| GASAL1    | 0.27105    | 0.294536   | 0.243315   | 0.861747   | 0.949566  | 1.17362    | 0.210707  | 0.338266   | 0.927113  | 1.18707   | 1.24997   | 1.27095    | 1.65206   | 0.901215   | 0.563188  |
| GAST      | 0          | 0.0237248  | 0.0814705  | 0.101488   | 0         | 0          | 0.112442  | 0.0437609  | 0.119939  | 0.30901   | 0.389105  | 0.0352329  | 0.349467  | 0.0514705  | 0         |
| GATA1     | 0.14083    | 0.128169   | 0.258899   | 0.032251   | 0.0243064 | 0.0532955  | 0.107197  | 0.0556257  | 0.0762289 | 0.0196396 | 0.158979  | 0.0335892  | 0.0807669 | 0.0654257  | 0.0449443 |
| GATA2     | 3.7014     | 2.02633    | 2.71618    | 1.61574    | 3.90626   | 2.34546    | 3.65751   | 1.84693    | 0.636498  | 0.926044  | 1.93652   | 0.822694   | 1.98351   | 1.43001    | 2.88742   |
| GATA2-AS1 | 0.392588   | 0.222257   | 0.259821   | 0.262973   | 0.472614  | 0.350998   | 0.168092  | 0.183172   | 0.107579  | 0.271006  | 0.354546  | 0.119386   | 0.322952  | 0.297516   | 0.606091  |
| GATA3     | 2.67615    | 18.4149    | 24.3404    | 2.25289    | 14.2158   | 2.72161    | 25.4422   | 22.3295    | 5.40762   | 1.81661   | 3.59119   | 4.16413    | 0.783068  | 0.724946   | 0.346437  |
| GATA3-AS1 | 0.00976088 | 0.150494   | 0.113048   | 0.0201177  | 0.545833  | 0.0249338  | 0.100302  | 0.13012    | 0.0237753 | 0         | 0.0550941 | 0.0139683  | 0.0251907 | 0.0204059  | 0         |
| GATA4     | 0.0059601  | 0          | 0          | 0          | 0         | 0.00507494 | 0         | 0          | 0         | 0         | 0         | 0          | 0         | 0          | 0         |
| GATA5     | 0          | 0.00429698 | 0.00737787 | 0.00919059 | 0         | 0          | 0.0101827 | 0.00792586 | 0         | 0         | 0         | 0          | 0         | 0          | 0         |
| GATA6     | 0.625157   | 0.0915442  | 0.0709846  | 0.132638   | 0.209449  | 1.39341    | 0.496849  | 0.21243    | 0.0298577 | 0.18462   | 0.345943  | 0.0263127  | 0.102814  | 0.128131   | 0.580932  |
| GATA6-AS1 | 0.0517742  | 0.0062364  | 0.0107078  | 0          | 0.0201058 | 0.08817    | 0.0443355 | 0.0345094  | 0         | 0         | 0.0292233 | 0          | 0         | 0.00676486 | 0.0185886 |

|         |           |           |            |           |          |           |           |            |           |           |           |           |           |            |           |
|---------|-----------|-----------|------------|-----------|----------|-----------|-----------|------------|-----------|-----------|-----------|-----------|-----------|------------|-----------|
| GATAD1  | 3.4989    | 3.44441   | 3.75665    | 3.14398   | 2.33822  | 3.3565    | 2.27624   | 2.46526    | 1.24466   | 2.12939   | 3.31898   | 1.63902   | 1.88718   | 2.39703    | 2.89923   |
| GATAD2A | 9.10304   | 10.4      | 10.2766    | 14.5222   | 15.4555  | 19.3594   | 11.8166   | 8.6544     | 18.1162   | 12.1423   | 8.7747    | 11.8095   | 23.2154   | 11.0891    | 8.4152    |
| GATAD2B | 6.33452   | 6.91262   | 7.50498    | 5.40996   | 5.56778  | 9.41545   | 8.52188   | 6.79104    | 4.56626   | 4.05685   | 4.2182    | 3.99915   | 5.1328    | 4.08822    | 5.48473   |
| GATB    | 2.54956   | 3.84508   | 3.14663    | 5.51113   | 9.88483  | 7.00697   | 2.56785   | 2.53296    | 4.48093   | 5.58042   | 9.0088    | 4.51622   | 5.37626   | 3.27169    | 2.76846   |
| GATC    | 4.34473   | 4.25364   | 4.28253    | 4.90219   | 3.70164  | 5.25484   | 4.23585   | 3.84116    | 3.69855   | 3.79312   | 5.56869   | 2.84436   | 3.54156   | 4.3126     | 3.52804   |
| GATD1   | 3.20684   | 4.94382   | 4.64692    | 5.31281   | 12.5697  | 6.85557   | 4.20199   | 3.52219    | 3.76838   | 4.51659   | 4.80199   | 4.4282    | 4.83614   | 6.22497    | 4.02268   |
| GATD3A  | 1.56508   | 2.60901   | 1.52628    | 2.85745   | 5.55274  | 3.39398   | 1.76475   | 1.17517    | 2.1969    | 1.40481   | 2.19549   | 1.47579   | 1.56521   | 1.75949    | 1.64861   |
| GATD3B  | 4.90232   | 4.10526   | 5.68804    | 7.98343   | 12.1404  | 12.3214   | 4.78277   | 4.49183    | 5.77429   | 4.62925   | 10.1148   | 3.77688   | 4.6906    | 4.85995    | 5.65812   |
| GATM    | 3.40255   | 15.8376   | 20.1276    | 4.25989   | 3.58181  | 3.75326   | 9.12638   | 8.86564    | 6.42141   | 1.69411   | 4.12676   | 4.19019   | 0.839118  | 0.683408   | 0.918745  |
| GAU1    | 0.0741171 | 0.0803491 | 0.0153287  | 0         | 0.115129 | 0.0315549 | 0.0634683 | 0.0494018  | 0         | 0.0465123 | 0.0418345 | 0         | 0         | 0.0096842  | 0.0266104 |
| GBA     | 6.38513   | 6.54553   | 6.63812    | 23.2678   | 12.9822  | 18.9138   | 10.3749   | 6.19635    | 60.8629   | 11.9403   | 24.2628   | 14.1167   | 13.2013   | 5.77013    | 6.6341    |
| GBA2    | 5.01063   | 5.45642   | 5.94157    | 21.1303   | 12.9027  | 8.9195    | 7.84633   | 4.01271    | 27.7188   | 9.26624   | 9.3892    | 12.7776   | 13.5122   | 9.23385    | 6.67606   |
| GBA3    | 0         | 0         | 0.00861249 | 0.0429142 | 0        | 0         | 0.0118866 | 0.0185044  | 0         | 0.0130665 | 0.0235048 | 0         | 0         | 0          | 0         |
| GBAP1   | 0.50377   | 0.395591  | 0.43676    | 3.24948   | 1.21507  | 1.37199   | 0.58857   | 0.518233   | 6.34981   | 0.555288  | 1.23393   | 2.01312   | 0.276717  | 0.82009    | 0.797643  |
| GBAT2   | 0.0527177 | 0.0508003 | 0.0872235  | 0.108654  | 0        | 0.0448884 | 0.180574  | 0.140553   | 0.0642042 | 0.396996  | 0.535605  | 0.0377209 | 0.0340132 | 0.0551051  | 0.227128  |
| GBE1    | 5.80257   | 5.19933   | 5.43045    | 9.63526   | 2.72606  | 14.7143   | 5.43998   | 4.49315    | 9.76811   | 8.68877   | 10.5211   | 5.74425   | 12.8551   | 9.703      | 6.14535   |
| GBF1    | 6.72376   | 8.3403    | 8.79685    | 9.47693   | 9.89713  | 13.4667   | 10.7091   | 7.18585    | 9.99189   | 7.82105   | 6.33267   | 8.61658   | 12.3449   | 7.08065    | 10.2186   |
| GBGT1   | 0.685637  | 0.763596  | 1.00424    | 1.41314   | 1.34438  | 2.07683   | 0.975339  | 0.649293   | 0.27378   | 1.70698   | 1.8779    | 0.394082  | 1.23283   | 1.42162    | 2.63114   |
| GBP1    | 2.26606   | 5.69894   | 6.8106     | 12.9866   | 2.82634  | 17.4275   | 2.01489   | 2.51404    | 29.5621   | 6.38927   | 11.1864   | 2.46895   | 18.5736   | 7.40384    | 8.59786   |
| GBP1P1  | 0.306781  | 0.22764   | 0.109095   | 0.56451   | 0.326488 | 1.11242   | 0.214133  | 0.169839   | 0.161124  | 0.143824  | 0.318745  | 0.110813  | 0.243415  | 0.0887981  | 0.161603  |
| GBP2    | 5.91458   | 8.58159   | 10.0871    | 12.3577   | 5.79432  | 21.9093   | 5.09679   | 7.46149    | 12.0123   | 4.92785   | 7.68215   | 6.29196   | 6.54801   | 3.77035    | 8.38148   |
| GBP3    | 2.42347   | 2.32871   | 2.50465    | 2.75215   | 1.97288  | 4.68244   | 1.19485   | 1.94633    | 1.62207   | 0.654869  | 0.488257  | 1.56703   | 3.80048   | 1.29531    | 2.16909   |
| GBP4    | 1.81536   | 1.3113    | 1.33143    | 1.27584   | 0.993985 | 3.88417   | 1.42391   | 1.60579    | 0.212466  | 0.668292  | 1.08825   | 0.426943  | 2.08394   | 0.69537    | 1.66338   |
| GBP5    | 0.515568  | 0.17066   | 0.203224   | 1.50127   | 0.399337 | 3.88084   | 0.156548  | 0.441714   | 0.0765347 | 0.587965  | 1.05122   | 0.0899305 | 2.89714   | 0.376214   | 2.3711    |
| GBP6    | 1.37898   | 2.65075   | 0.413044   | 2.48442   | 1.16704  | 4.1947    | 0.602643  | 1.14945    | 9.43387   | 4.99531   | 7.07488   | 3.87874   | 4.20928   | 4.20501    | 1.15409   |
| GBP7    | 0         | 0.0136316 | 0.0312071  | 0         | 0        | 0         | 0.0215354 | 0.00838126 | 0         | 0         | 0.0106461 | 0         | 0         | 0.00492892 | 0         |

|          |            |            |            |            |           |           |           |           |            |           |           |            |           |            |           |
|----------|------------|------------|------------|------------|-----------|-----------|-----------|-----------|------------|-----------|-----------|------------|-----------|------------|-----------|
| GBX1     | 0          | 0.0102112  | 0.0525977  | 0          | 0         | 0         | 0.120989  | 0.0376696 | 0          | 0         | 0         | 0.0151644  | 0         | 0          | 0.152181  |
| GBX2     | 0          | 0.0247793  | 0.0212728  | 0          | 0         | 0         | 0.01468   | 0         | 0          | 0         | 0         | 0          | 0.0497726 | 0.00671976 | 0         |
| GC       | 0          | 0          | 0          | 0          | 0         | 0         | 0         | 0         | 0          | 0         | 0         | 0          | 0         | 0          | 0         |
| GCA      | 0.786515   | 0.619207   | 0.859041   | 1.63694    | 0.255525  | 1.4576    | 0.598678  | 0.927417  | 0.194081   | 1.49686   | 3.06406   | 0.128739   | 1.06798   | 0.346586   | 0.944969  |
| GCAT     | 1.56816    | 1.14637    | 1.03651    | 2.04611    | 2.02337   | 3.42432   | 1.34286   | 0.966565  | 2.40271    | 1.69837   | 3.15507   | 1.14468    | 1.46054   | 1.47584    | 0.908097  |
| GCC1     | 2.9965     | 2.7256     | 2.78936    | 3.5151     | 4.5763    | 4.48774   | 2.86494   | 2.14039   | 3.2333     | 2.53071   | 2.56704   | 2.35648    | 4.24609   | 2.86582    | 2.37288   |
| GCC2     | 2.78146    | 2.37098    | 2.54272    | 2.02071    | 0.591941  | 2.51318   | 0.910038  | 1.81378   | 1.63172    | 2.46028   | 2.53305   | 1.40719    | 2.28442   | 1.80554    | 3.38532   |
| GCC2-AS1 | 0.0833984  | 0.140639   | 0.10349    | 0.0429722  | 0.129546  | 0         | 0.190443  | 0         | 0          | 0         | 0.0470732 | 0.0298369  | 0.0538082 | 0.0871753  | 0.179656  |
| GCDH     | 1.34308    | 1.58399    | 1.5008     | 2.6029     | 4.26594   | 2.94438   | 1.85391   | 1.06      | 1.30613    | 1.44669   | 2.50055   | 1.30525    | 1.97237   | 2.18443    | 1.55458   |
| GCFC2    | 1.76849    | 1.78223    | 1.79238    | 1.99422    | 0.812614  | 1.46248   | 1.25803   | 1.92551   | 1.17276    | 1.45264   | 2.13228   | 0.990453   | 1.70256   | 1.25335    | 1.27653   |
| GCG      | 0          | 0.0172344  | 0          | 0.0184309  | 0         | 0         | 0         | 0         | 0          | 0         | 0         | 0          | 0         | 0          | 0         |
| GCGR     | 0.101455   | 0.363904   | 0.354375   | 0.0929356  | 0.3327    | 0.0959864 | 0.167322  | 0.270495  | 0.054916   | 0         | 0.0254512 | 0.129056   | 0         | 0          | 0         |
| GCH1     | 1.44001    | 1.55919    | 1.85892    | 2.47873    | 1.21674   | 3.4157    | 1.00276   | 2.18685   | 4.90478    | 2.48265   | 2.43839   | 1.29645    | 4.82921   | 1.21162    | 1.84078   |
| GCHFR    | 2.92128    | 2.78376    | 3.22225    | 1.57213    | 2.67224   | 3.95226   | 3.59485   | 2.45196   | 0.237186   | 0.896258  | 1.75881   | 0.580627   | 0.272248  | 0.695538   | 1.2586    |
| GCK      | 0          | 0.015352   | 0.0043932  | 0.0218904  | 0.041245  | 0.0768706 | 0.0424433 | 0         | 0.00646756 | 0.0199956 | 0.0719384 | 0.0113994  | 0.0308366 | 0.0194284  | 0         |
| GCKR     | 0          | 0          | 0.00875026 | 0.0872014  | 0.0492904 | 0.144102  | 0         | 0.0188004 | 0          | 0.0132756 | 0.0835829 | 0          | 0.0477708 | 0.154788   | 0.106332  |
| GCLC     | 2.98699    | 3.52768    | 3.80201    | 5.1053     | 3.87596   | 4.82309   | 3.08465   | 3.73907   | 2.80969    | 3.29939   | 3.86538   | 3.11467    | 3.70556   | 2.59873    | 2.14485   |
| GCLM     | 0.994466   | 0.67125    | 0.906097   | 1.44042    | 0.434237  | 1.97841   | 0.518015  | 1.02634   | 0.435343   | 1.44947   | 2.05383   | 0.609913   | 2.09635   | 1.31255    | 1.22415   |
| GCM1     | 0.00837303 | 0.00806851 | 0.00692676 | 0.00862865 | 0         | 0.0285181 | 0         | 0         | 0.0101974  | 0         | 0.0283563 | 0.00599113 | 0         | 0          | 0         |
| GCM2     | 0.127213   | 0.108442   | 0.194289   | 0          | 0.030401  | 0.0333294 | 0.111729  | 0.165237  | 0          | 0         | 0         | 0.00700189 | 0.0126273 | 0.0102288  | 0.0140534 |
| GCN1     | 6.94185    | 8.49679    | 8.28728    | 13.3583    | 16.8424   | 15.9503   | 11.1573   | 6.64627   | 8.09996    | 6.33684   | 4.62051   | 8.72677    | 12.4943   | 9.461      | 9.25234   |
| GCNA     | 0.364113   | 0.273679   | 0.289172   | 0.292679   | 0.226238  | 0.303837  | 0.149664  | 0.291234  | 0.354759   | 0.60324   | 0.345273  | 0.270954   | 0.338291  | 0.483366   | 0.491538  |
| GCNT1    | 0.602773   | 0.396638   | 0.404625   | 0.535985   | 0.615294  | 1.29633   | 0.625304  | 0.599978  | 0.159407   | 0.453925  | 0.773776  | 0.133087   | 0.633362  | 0.507657   | 1.21687   |
| GCNT2    | 0.887313   | 0.732894   | 0.852021   | 0.391887   | 0.310119  | 0.536971  | 0.524644  | 0.932203  | 0.135081   | 0.238644  | 0.253994  | 0.0884321  | 0.224907  | 0.152375   | 0.377737  |
| GCNT3    | 0.302047   | 0.0100366  | 0          | 0.0536669  | 0.0323575 | 0.115292  | 0.011892  | 0.0462818 | 0.0126848  | 0         | 0         | 0.014905   | 0.0134399 | 0          | 0.0149579 |
| GCNT4    | 1.03053    | 0.882708   | 0.668646   | 2.00598    | 0.868388  | 0.906155  | 0.515252  | 1.40669   | 5.36479    | 2.2825    | 2.19741   | 2.0868     | 1.35151   | 1.38346    | 0.657762  |



|            |           |            |           |            |           |            |           |           |           |           |            |            |            |            |           |
|------------|-----------|------------|-----------|------------|-----------|------------|-----------|-----------|-----------|-----------|------------|------------|------------|------------|-----------|
| GCNT7      | 0.531021  | 0.475416   | 0.433456  | 0.346651   | 0.209007  | 0.15276    | 0.460883  | 0.603566  | 0.0409675 | 0.22517   | 0.101262   | 0.344989   | 0.108516   | 0.404358   | 0.289852  |
| GCOM1      | 2.49596   | 2.40414    | 1.99529   | 4.40842    | 1.12082   | 1.60931    | 1.94783   | 2.1483    | 9.02431   | 3.50012   | 5.18579    | 3.58281    | 4.04422    | 2.15518    | 1.44063   |
| GCSAM      | 1.50963   | 3.37657    | 4.40544   | 0.54236    | 0.828272  | 0.530683   | 3.92168   | 3.58178   | 0.480725  | 0.573637  | 0.390868   | 0.891893   | 0.402113   | 0.723852   | 0.248626  |
| GCSAML     | 0.350256  | 0.319887   | 0.449772  | 0.0969714  | 0.0406022 | 0.00445132 | 0.143252  | 0.14867   | 0.0827678 | 0.144349  | 0.159339   | 0.0523679  | 0.337289   | 0.0628412  | 0.0525535 |
| GCSAML-AS1 | 0         | 0          | 0.0100081 | 0.0124671  | 0         | 0          | 0         | 0         | 0         | 0         | 0          | 0          | 0.0390271  | 0.0126457  | 0.0521218 |
| GCSH       | 3.98759   | 1.73278    | 2.11622   | 4.82265    | 0.958332  | 5.77856    | 2.25068   | 2.80832   | 1.81429   | 2.98401   | 6.37004    | 1.432      | 2.68927    | 2.57169    | 2.52838   |
| GCSHP3     | 1.89773   | 2.23013    | 2.8144    | 1.38328    | 1.22227   | 1.35971    | 1.3212    | 2.44755   | 1.83207   | 0.958548  | 1.69817    | 1.73874    | 1.314      | 1.24584    | 1.22974   |
| GDA        | 1.01602   | 0.452725   | 0.309666  | 3.20408    | 0.296659  | 0.881387   | 1.35631   | 0.597442  | 3.68428   | 0.417079  | 0.89687    | 2.07984    | 0.174972   | 0.135748   | 0.148107  |
| GDAP1      | 1.42133   | 0.719492   | 0.565585  | 1.0321     | 0.381942  | 1.94557    | 0.49301   | 0.826116  | 0.861856  | 1.25702   | 1.23215    | 0.87539    | 1.18402    | 0.959119   | 1.19716   |
| GDAP1L1    | 0.469275  | 0.614248   | 0.530563  | 0.11284    | 0.80184   | 0.113215   | 0.759053  | 0.430954  | 0.0666777 | 0.0490823 | 0.00882921 | 0.25743    | 0.0201849  | 0.151246   | 0.0449292 |
| GDAP2      | 2.51813   | 2.29503    | 2.50846   | 2.00896    | 0.643086  | 1.69285    | 2.28035   | 2.96769   | 2.0473    | 1.91286   | 1.84631    | 1.74969    | 2.02535    | 1.94024    | 1.86861   |
| GDE1       | 9.67263   | 7.00188    | 7.03378   | 9.16131    | 7.71714   | 13.951     | 10.0173   | 8.61005   | 30.4235   | 11.1967   | 18.0676    | 8.1134     | 11.5513    | 7.43729    | 6.82314   |
| GDF1       | 0.0406177 | 0.0626164  | 0.0577562 | 0.0113566  | 0.238308  | 0.18471    | 0.0546161 | 0.0342683 | 0.0164893 | 0         | 0          | 0.00372471 | 0.00582363 | 0.0141524  | 0.0583321 |
| GDF10      | 2.13481   | 0.36945    | 0.490173  | 0.0448976  | 0.947455  | 0.489682   | 4.62619   | 0.317497  | 0.0424482 | 0.032809  | 0.108201   | 0.024939   | 0.0730848  | 0.00455405 | 0.625684  |
| GDF11      | 0.931732  | 1.06944    | 1.09612   | 0.732617   | 1.30335   | 1.80214    | 1.11437   | 1.00236   | 0.137211  | 0.77061   | 1.25633    | 0.319601   | 0.616796   | 0.935303   | 1.78228   |
| GDF15      | 0.215053  | 0.0637637  | 0.0957962 | 0.187524   | 0.539623  | 3.01436    | 0.283317  | 0.249928  | 0.020147  | 0.664404  | 1.9795     | 0.0236733  | 0.320195   | 0.0605211  | 0.237572  |
| GDF2       | 0         | 0          | 0         | 0          | 0         | 0          | 0         | 0         | 0         | 0         | 0          | 0.00505942 | 0          | 0          | 0         |
| GDF3       | 0.073704  | 0.00887793 | 0.0304866 | 0.0949426  | 0         | 0.094137   | 0.0420764 | 0.0163755 | 0.112204  | 0         | 0.0416013  | 0          | 0.0713302  | 0.0288907  | 0.0529241 |
| GDF5       | 0.0714016 | 0.0645045  | 0.0295342 | 0.00919768 | 0.0138639 | 0.113995   | 0.0815203 | 0.015864  | 0         | 0.011202  | 1.11E-08   | 0          | 6.34E-09   | 0.0046647  | 0         |
| GDF5OS     | 0.0133313 | 2.04E-09   | 3.88E-11  | 0          | 0         | 3.56E-39   | 5.66E-06  | 0         | 0         | 0         | 0.0300986  | 0          | 0.0172025  | 0          | 0         |
| GDF6       | 0.112649  | 0.00904598 | 0         | 0.0838412  | 0.272195  | 0.149207   | 0.0714548 | 0.0556182 | 0.114328  | 0.0785476 | 0.0847776  | 0.0223898  | 0.161512   | 0.242042   | 0.0359506 |
| GDF7       | 0.441725  | 0.533219   | 0.730852  | 0.181105   | 0.889045  | 0.236593   | 0.648059  | 0.498097  | 0.529294  | 0.205668  | 0.179622   | 0.276982   | 0.104193   | 0.192387   | 0.235332  |
| GDF9       | 0.120022  | 0.119058   | 0.0876094 | 0.0509296  | 0.109668  | 0.132255   | 0.112854  | 0.106665  | 0.060189  | 0.0443058 | 0.0478199  | 0.0606204  | 0.0683272  | 0.0295194  | 0.0608353 |
| GDI1       | 11.287    | 14.0316    | 13.5045   | 19.6968    | 28.2551   | 26.3144    | 12.557    | 9.93977   | 28.2311   | 20.629    | 20.7341    | 18.4951    | 33.4144    | 17.5803    | 16.8258   |
| GDI2       | 33.7947   | 28.9579    | 30.0117   | 63.9168    | 14.7254   | 61.4397    | 27.7931   | 29.6569   | 44.7334   | 59.2137   | 77.9529    | 30.3446    | 69.7479    | 41.1603    | 35.5781   |
| GDNF       | 0.1882    | 0.0426718  | 0.0274751 | 0.102677   | 0.0601875 | 0.240375   | 0.11376   | 0.0983861 | 0.0269654 | 0.333473  | 0.41866    | 0.237639   | 1.04997    | 0.665386   | 0.270279  |

|            |           |           |            |           |           |            |           |            |           |           |           |            |            |            |           |
|------------|-----------|-----------|------------|-----------|-----------|------------|-----------|------------|-----------|-----------|-----------|------------|------------|------------|-----------|
| GDNF-AS1   | 0.0834987 | 0.0670516 | 0.0575633  | 0.0573652 | 0.021617  | 0.035549   | 0.0317787 | 0.123678   | 0         | 0         | 0.125679  | 0.0298728  | 0.134682   | 0.116373   | 0.299787  |
| GDPD1      | 0.467538  | 0.446749  | 0.49889    | 0.28298   | 0.510201  | 0.310744   | 0.440846  | 0.306811   | 0.223667  | 0.327625  | 0.339444  | 0.26143    | 0.111972   | 0.268251   | 0.251929  |
| GDPD2      | 1.02478   | 2.67453   | 3.44605    | 2.04369   | 3.46374   | 1.64015    | 4.0844    | 1.6697     | 2.7735    | 2.53669   | 1.4782    | 2.10473    | 1.34686    | 1.87955    | 0.476946  |
| GDPD3      | 4.23477   | 3.02455   | 2.35183    | 9.01347   | 8.7733    | 5.61154    | 4.26953   | 2.40628    | 36.6433   | 18.3805   | 32.985    | 13.8987    | 8.80999    | 9.50041    | 3.77978   |
| GDPD4      | 0         | 0         | 0.00737218 | 0         | 0.0138426 | 0.00758799 | 0         | 0          | 0         | 0         | 0         | 0          | 0.0172489  | 0.0139725  | 0         |
| GDPD5      | 0.825421  | 0.438546  | 0.69392    | 0.593136  | 1.14355   | 1.64122    | 1.36017   | 0.551166   | 0.0706407 | 0.352796  | 0.700108  | 0.20432    | 0.512407   | 0.608626   | 1.29434   |
| GDPGP1     | 0.488051  | 0.417202  | 0.221411   | 0.632744  | 1.54068   | 1.2199     | 0.251657  | 0.461722   | 0.191739  | 0.375436  | 0.693129  | 0.428068   | 0.548515   | 0.386729   | 0.474805  |
| GEM        | 1.99308   | 1.93081   | 2.1838     | 2.49094   | 3.52411   | 10.1012    | 1.88829   | 1.79013    | 0.697217  | 3.93857   | 5.46927   | 1.0544     | 3.84409    | 4.72631    | 8.96753   |
| GEMIN2     | 1.58374   | 1.42768   | 1.28201    | 2.03573   | 0.925843  | 2.55207    | 1.18607   | 0.908063   | 1.30662   | 1.81677   | 4.30621   | 0.828583   | 1.3844     | 1.44185    | 1.44293   |
| GEMIN4     | 3.7118    | 6.63198   | 7.65618    | 5.99905   | 6.89962   | 7.99618    | 5.70719   | 4.20589    | 4.67124   | 2.6011    | 2.66773   | 3.90416    | 6.86119    | 4.01892    | 2.73638   |
| GEMIN5     | 2.47105   | 2.28421   | 2.53315    | 3.79987   | 2.52123   | 4.86085    | 2.43507   | 1.96389    | 1.54906   | 1.63402   | 2.25287   | 1.74971    | 3.81308    | 3.11117    | 2.13417   |
| GEMIN6     | 1.47152   | 1.85307   | 1.41102    | 5.06631   | 1.92214   | 3.38875    | 1.18373   | 1.2186     | 2.28092   | 4.11358   | 8.72113   | 1.77081    | 3.15035    | 3.23364    | 1.39285   |
| GEMIN7     | 1.54103   | 1.72862   | 1.47757    | 3.30179   | 2.27808   | 2.49996    | 2.16367   | 1.4138     | 2.65422   | 2.23439   | 3.99668   | 1.62794    | 3.04519    | 2.30133    | 1.31805   |
| GEMIN7-AS1 | 0.221243  | 0.165561  | 0.355629   | 0.189637  | 0.261779  | 0.466577   | 0.277562  | 0.335447   | 0.198147  | 0.0562535 | 0.121689  | 0.1648     | 1.05E-26   | 0.221111   | 0.499963  |
| GEMIN8     | 2.44344   | 2.11494   | 2.10301    | 2.65643   | 2.5941    | 2.21163    | 2.34593   | 1.8247     | 2.32503   | 1.69742   | 2.13011   | 1.86151    | 1.39553    | 2.10737    | 2.041     |
| GEMIN8P4   | 0.326342  | 0.117927  | 0.191231   | 0.308279  | 0.147852  | 0.451548   | 0.310505  | 0.145013   | 0.132482  | 0.153597  | 0.13815   | 0.301612   | 0.377242   | 0.120814   | 0.0390556 |
| GEN1       | 1.25089   | 0.962091  | 0.851883   | 1.69382   | 0.189692  | 1.17191    | 0.523807  | 1.19381    | 0.582846  | 1.29659   | 1.18482   | 0.71084    | 0.939092   | 1.45761    | 0.924283  |
| GET4       | 5.24265   | 6.02393   | 6.03342    | 7.84706   | 14.6861   | 9.52268    | 4.39134   | 4.9252     | 10.0702   | 7.58169   | 10.3852   | 7.23287    | 9.91161    | 6.64445    | 3.15172   |
| GFAP       | 0.068844  | 0.0193492 | 0          | 0         | 0.0623808 | 0.615508   | 0.0720535 | 0.0152957  | 0         | 0.014401  | 0.0259054 | 0.00410498 | 0.00740296 | 0.0269857  | 0.0164781 |
| GFER       | 1.46025   | 1.50435   | 1.53387    | 2.06914   | 2.67119   | 3.86922    | 1.20657   | 0.990388   | 0.971111  | 1.57955   | 2.62449   | 0.728644   | 1.74793    | 1.41592    | 1.11754   |
| GFI1       | 0.120286  | 0.0857744 | 0.119411   | 0.0595    | 0.149477  | 0.0655501  | 0.120858  | 0.17104    | 0.0234392 | 0.0724663 | 0.0923359 | 0.0585262  | 0.127277   | 0.0653815  | 0.110557  |
| GFI1B      | 0.028166  | 0.0361888 | 0.0310679  | 0.0290259 | 0.0145838 | 0          | 0.0107197 | 0.00834386 | 0         | 0.0117837 | 0.0211973 | 0.00671784 | 0.0363451  | 0.00490692 | 0         |
| GFM1       | 5.40209   | 4.33704   | 4.47903    | 7.6318    | 2.35562   | 8.75365    | 4.20001   | 4.43286    | 4.97698   | 5.99283   | 7.74832   | 3.55592    | 9.12792    | 5.46848    | 4.29448   |
| GFM2       | 2.43098   | 2.35043   | 2.12561    | 3.13499   | 1.02449   | 2.967      | 1.41841   | 1.92804    | 2.80454   | 2.54894   | 3.61203   | 2.03517    | 2.58442    | 2.58291    | 2.01317   |
| GFOD1      | 4.00164   | 2.42792   | 2.29242    | 2.72606   | 6.52981   | 3.20083    | 2.68701   | 1.95977    | 7.38962   | 3.69216   | 1.95701   | 5.43095    | 6.14312    | 4.89412    | 2.76056   |
| GFOD2      | 2.54995   | 3.05597   | 2.8061     | 8.25428   | 7.42598   | 5.40933    | 2.86105   | 2.99643    | 22.8141   | 6.04292   | 7.43984   | 5.90369    | 9.11114    | 6.07975    | 3.61816   |

|        |           |           |            |           |           |           |           |           |            |           |           |           |           |            |          |
|--------|-----------|-----------|------------|-----------|-----------|-----------|-----------|-----------|------------|-----------|-----------|-----------|-----------|------------|----------|
| GFPT1  | 2.82938   | 2.16402   | 2.45725    | 3.70228   | 1.89185   | 5.29616   | 2.36416   | 2.65867   | 1.6614     | 4.1386    | 4.41579   | 2.02071   | 6.14225   | 3.19797    | 4.98376  |
| GFPT2  | 1.1897    | 0.937334  | 1.40512    | 4.41059   | 0.883329  | 2.4529    | 2.32374   | 0.844516  | 1.24844    | 3.23996   | 6.42793   | 0.835201  | 3.99243   | 2.55364    | 8.75772  |
| GFRA1  | 4.21853   | 2.53208   | 3.92919    | 0.459241  | 0.19368   | 0.983038  | 3.53269   | 3.83939   | 0.134981   | 0.0637566 | 0.0078197 | 0.0413037 | 0.0342643 | 0.00241356 | 0.238753 |
| GFRA2  | 0.736686  | 0.190867  | 0.252974   | 0.444046  | 0.550572  | 2.08303   | 1.04744   | 0.59294   | 0.00846415 | 0.331466  | 0.800245  | 0.104429  | 0.654666  | 0.443141   | 0.55893  |
| GFRA3  | 0.57528   | 0.0230982 | 0.00991484 | 0.0617545 | 0.0186169 | 0.367383  | 0.643152  | 0.159769  | 0.0145964  | 0.0150424 | 0.270592  | 0.0171512 | 0         | 0.0125278  | 0.017212 |
| GFRA4  | 0         | 0         | 0          | 0         | 0         | 0         | 0         | 0         | 0          | 0         | 0         | 0         | 0         | 0          | 0        |
| GFRAL  | 0         | 0         | 0          | 0         | 0         | 0         | 0         | 0         | 0          | 0         | 0         | 0         | 0         | 0          | 0        |
| GFY    | 0         | 0         | 0          | 0         | 0         | 0         | 0         | 0         | 0          | 0         | 0         | 0         | 0         | 0          | 0        |
| GGA1   | 3.72222   | 6.01537   | 5.2083     | 7.0701    | 12.1878   | 8.00101   | 6.85859   | 3.308     | 12.1321    | 6.52316   | 5.26483   | 8.02153   | 9.74388   | 6.02649    | 5.39067  |
| GGA2   | 7.02079   | 5.97764   | 7.7249     | 3.4858    | 4.6584    | 7.2285    | 7.17557   | 5.46128   | 2.01023    | 2.86433   | 3.62601   | 1.92958   | 2.85486   | 2.6447     | 4.15663  |
| GGA3   | 4.028     | 5.39748   | 5.28784    | 5.64439   | 7.20694   | 7.87767   | 5.85728   | 3.69728   | 4.20101    | 3.34732   | 2.61256   | 4.35671   | 5.15149   | 4.20753    | 4.93007  |
| GGACT  | 0.722408  | 0.717782  | 0.866413   | 1.09341   | 0.688409  | 1.47842   | 0.617014  | 0.548892  | 0.557112   | 0.563848  | 1.33946   | 0.38999   | 1.45232   | 0.529047   | 0.386357 |
| GGCT   | 8.4474    | 12.2186   | 10.4536    | 19.4431   | 10.248    | 12.7361   | 12.1558   | 8.20531   | 49.0378    | 11.2595   | 17.3777   | 10.4402   | 10.2698   | 7.75357    | 4.48666  |
| GGCX   | 2.22516   | 2.43752   | 2.68959    | 3.12729   | 2.49909   | 2.10752   | 2.56762   | 2.07745   | 1.75611    | 2.69888   | 2.5483    | 3.24469   | 2.61672   | 3.25102    | 2.99915  |
| GGH    | 10.796    | 11.4646   | 5.7488     | 10.7419   | 6.81877   | 6.90767   | 13.9381   | 7.8576    | 97.7618    | 40.8448   | 67.8531   | 35.4053   | 15.9126   | 12.5658    | 5.43543  |
| GGN    | 0.290094  | 0.455552  | 0.533303   | 0.409673  | 0.751027  | 0.494022  | 0.478429  | 0.324651  | 0.235535   | 0.431523  | 0.254707  | 0.376701  | 0.610026  | 0.449232   | 0.401182 |
| GGNBP1 | 0.0463324 | 0.0223237 | 0          | 0         | 0         | 0         | 0         | 0         | 0          | 0         | 0         | 0         | 0         | 0.0121077  | 0        |
| GGNBP2 | 11.3071   | 8.56779   | 8.74168    | 10.9398   | 5.21863   | 12.5301   | 5.22907   | 7.41013   | 9.30274    | 10.3936   | 9.37584   | 6.46663   | 12.6592   | 8.12465    | 6.98606  |
| GGPS1  | 3.00699   | 3.05039   | 3.00624    | 3.31869   | 1.15846   | 4.18875   | 1.85762   | 2.57017   | 5.39219    | 4.56536   | 5.1301    | 2.40663   | 4.29615   | 2.57279    | 3.48539  |
| GGT1   | 0.421843  | 0.322139  | 0.319316   | 0.27441   | 0.70412   | 0.592937  | 0.469439  | 0.401522  | 0.246245   | 0.424957  | 0.763753  | 0.775496  | 0.34025   | 0.435089   | 0.442908 |
| GGT2   | 0.0143301 | 0.0172678 | 0.00741214 | 0.0184666 | 0.0278352 | 0         | 0.0690054 | 0.0275209 | 0          | 0         | 0         | 8.33E-24  | 0         | 0          | 0        |
| GGT3P  | 0.11419   | 0.200118  | 0.260952   | 0.0415017 | 0.193265  | 0.148678  | 0.522486  | 0.205759  | 0          | 0.0351104 | 3.15E-39  | 0.0177934 | 0         | 0.0207247  | 0        |
| GGT5   | 6.79984   | 1.65021   | 1.9106     | 5.96846   | 9.135     | 26.2188   | 4.0091    | 2.89112   | 1.03424    | 2.90503   | 6.59796   | 1.61141   | 6.32646   | 3.00611    | 11.2201  |
| GGT6   | 5.66626   | 10.6483   | 12.2724    | 4.66604   | 15.8753   | 5.89774   | 11.5201   | 6.16334   | 16.2149    | 7.12265   | 6.475     | 10.7888   | 9.29102   | 4.26049    | 0.93606  |
| GGT7   | 1.72696   | 1.87535   | 2.43671    | 1.09311   | 3.45874   | 2.04525   | 2.3121    | 1.17641   | 0.50179    | 0.704168  | 1.08857   | 0.508074  | 0.661749  | 1.40199    | 1.76253  |
| GGT8P  | 0.158386  | 0.129549  | 0.138736   | 0.124763  | 0.420438  | 0.0555322 | 0.447498  | 0.180964  | 0.0453875  | 0.924906  | 0.0778469 | 1.40747   | 0.40876   | 0.832449   | 0.495338 |

|               |            |           |           |            |           |            |          |           |           |           |           |            |           |           |          |
|---------------|------------|-----------|-----------|------------|-----------|------------|----------|-----------|-----------|-----------|-----------|------------|-----------|-----------|----------|
| GGTA1P        | 4.47035    | 2.28731   | 2.04001   | 1.73946    | 2.29419   | 6.3329     | 2.13801  | 3.0705    | 0.915431  | 1.8537    | 5.47821   | 0.434038   | 1.32727   | 0.944212  | 3.40886  |
| GGTLC1        | 5.51E-24   | 2.21E-09  | 2.67E-12  | 1.81E-36   | 0         | 0          | 0        | 0         | 0         | 0         | 0         | 0          | 0         | 0         | 0        |
| GGTLC2        | 0.0640997  | 0.0283322 | 0.0316131 | 0.102803   | 0.101626  | 0.102628   | 0.131612 | 0.0322639 | 4.20E-10  | 2.72E-21  | 1.78E-08  | 0.0244385  | 0.0181058 | 0.0799206 | 0.283487 |
| GGTLC3        | 0.00957805 | 0         | 0         | 0          | 0         | 0          | 0.116139 | 0.0328013 | 0         | 0         | 0         | 0.0171069  | 0         | 0         | 0        |
| GH1           | 0.0273559  | 0         | 0.0226307 | 0          | 0.0424931 | 0.0232931  | 0        | 0         | 0         | 0         | 0         | 0          | 0         | 0         | 0        |
| GH2           | 0          | 0         | 0         | 0          | 0         | 0          | 0        | 0         | 0         | 0         | 0         | 0          | 0         | 0         | 0        |
| GHDC          | 1.84414    | 1.324     | 1.73707   | 2.49316    | 4.92085   | 5.698      | 2.24109  | 1.12777   | 1.03403   | 1.91354   | 3.46281   | 0.849205   | 2.09104   | 1.60797   | 2.72709  |
| GHET1         | 0.0121934  | 0.0528746 | 0.0504362 | 0.113091   | 0         | 0.16612    | 0        | 0.0216729 | 0.0891011 | 0.0765198 | 0.178943  | 0.113421   | 0.0786711 | 0.0382368 | 0        |
| GHITM         | 19.7789    | 14.6748   | 14.8927   | 27.3749    | 10.5983   | 27.3019    | 13.39    | 14.7811   | 25.4925   | 37.2901   | 37.7536   | 18.5001    | 42.4723   | 19.8942   | 12.0514  |
| GHR           | 1.31482    | 0.914853  | 0.807212  | 0.815305   | 0.298455  | 1.04577    | 0.572097 | 1.02118   | 0.307413  | 0.288436  | 0.514602  | 0.177914   | 0.371897  | 0.261877  | 0.74123  |
| GHRH          | 0.0490319  | 0         | 0         | 0          | 0         | 0          | 0.055983 | 0         | 0         | 0         | 0         | 0          | 0         | 0         | 0        |
| GHRHR         | 0.072007   | 0         | 0         | 0          | 0         | 0          | 0        | 0.0255975 | 0         | 0         | 0         | 0          | 0         | 0         | 0        |
| GHRL          | 0.692156   | 0.870235  | 0.996097  | 0.441659   | 1.4646    | 0.496299   | 0.730951 | 0.624646  | 0.0626347 | 0.301227  | 0.232228  | 0.367988   | 0.0663635 | 0.582379  | 0.713966 |
| GHRLOS        | 1.11243    | 1.46051   | 1.40577   | 0.793125   | 3.45179   | 0.710708   | 1.22102  | 1.3776    | 0.369648  | 0.435363  | 0.244737  | 0.868694   | 0.251777  | 0.912124  | 0.996312 |
| GHSR          | 0.00749209 | 0.0036098 | 0         | 0.00772081 | 0         | 0.00637941 | 0        | 0         | 0         | 0         | 0         | 0.00536079 | 0         | 0         | 0        |
| GID4          | 2.3843     | 3.43584   | 3.30252   | 3.69691    | 4.45117   | 4.69368    | 3.61519  | 2.44945   | 9.38411   | 4.88004   | 6.30299   | 4.06552    | 3.97287   | 3.00103   | 1.85344  |
| GID8          | 8.36956    | 8.34223   | 8.54998   | 12.2561    | 11.0844   | 13.6077    | 9.6695   | 7.71692   | 21.335    | 14.0609   | 16.0047   | 10.8177    | 16.9623   | 8.8087    | 5.17277  |
| GIF           | 0.0305923  | 0.0147398 | 0         | 0.0157631  | 0         | 0          | 0        | 0.0135939 | 0         | 0.0383964 | 0.0172674 | 0          | 0         | 0         | 0        |
| GIGYF1        | 6.41386    | 7.45256   | 9.01726   | 5.93775    | 17.3333   | 11.1007    | 8.18088  | 6.37719   | 3.92294   | 3.28673   | 2.10813   | 5.1471     | 3.41115   | 4.75229   | 6.66661  |
| GIGYF2        | 5.60663    | 6.07864   | 6.11089   | 5.87945    | 4.8383    | 7.38942    | 4.54227  | 5.32255   | 5.04254   | 3.9157    | 3.35898   | 4.28887    | 5.45048   | 4.74476   | 3.9968   |
| GIMAP1        | 1.36996    | 0.661847  | 0.758393  | 0.745583   | 1.70509   | 2.5912     | 0.668115 | 0.680395  | 0.180332  | 0.622661  | 0.979285  | 0.137763   | 0.690331  | 0.571293  | 1.44187  |
| GIMAP1-GIMAP5 | 2.47312    | 0.995893  | 1.35036   | 2.31177    | 5.74228   | 5.18898    | 1.53209  | 1.12665   | 0.206366  | 1.33585   | 3.50647   | 0.556008   | 2.31832   | 1.28135   | 2.73515  |
| GIMAP2        | 1.54073    | 1.09032   | 1.03561   | 1.43891    | 1.04706   | 2.17285    | 0.971201 | 1.21238   | 0.332286  | 1.7122    | 5.05482   | 0.298576   | 1.68785   | 0.805253  | 2.00524  |
| GIMAP4        | 5.02758    | 2.1668    | 2.35623   | 4.49186    | 3.20623   | 8.26733    | 1.80373  | 2.9719    | 0.603877  | 3.18401   | 6.14415   | 0.660069   | 3.93567   | 2.39861   | 5.71327  |
| GIMAP5        | 4.3632     | 1.3299    | 1.39263   | 2.89308    | 1.57493   | 8.52188    | 2.40998  | 2.52034   | 0.34815   | 1.95466   | 3.83986   | 0.267963   | 1.23016   | 0.301579  | 3.40463  |
| GIMAP6        | 6.2886     | 2.02947   | 2.21701   | 3.49938    | 5.01747   | 7.88844    | 3.41106  | 2.49209   | 0.648443  | 3.24476   | 4.5279    | 0.62225    | 3.90854   | 2.35913   | 5.44593  |

|            |                 |            |           |           |          |          |           |           |                 |           |           |            |          |          |           |
|------------|-----------------|------------|-----------|-----------|----------|----------|-----------|-----------|-----------------|-----------|-----------|------------|----------|----------|-----------|
| GIMAP7     | 6.06352         | 1.93254    | 2.25883   | 3.12432   | 3.74409  | 8.51415  | 1.67703   | 3.09602   | 0.275206        | 3.56882   | 9.3321    | 0.673697   | 3.31682  | 1.5058   | 4.38103   |
| GIMAP8     | 3.17823         | 1.59257    | 1.55926   | 3.15564   | 3.17678  | 7.50212  | 1.98795   | 1.73894   | 0.343317        | 1.64416   | 2.50212   | 0.593246   | 3.09905  | 1.66975  | 3.52447   |
| GIMD1      | 0.0707739       | 0          | 0         | 0         | 0        | 0        | 0         | 0         | 0               | 0         | 0         | 0          | 0        | 0        | 0         |
| GIN1       | 0.521681        | 0.534126   | 0.404598  | 0.638409  | 0.141811 | 0.488625 | 0.275483  | 0.567942  | 0.42886         | 0.70387   | 1.17782   | 0.307953   | 0.774147 | 0.579388 | 0.533804  |
| GINM1      | 11.347          | 9.17173    | 9.74947   | 10.1471   | 5.46128  | 14.1197  | 8.02849   | 10.571    | 14.513          | 11.1486   | 14.4538   | 7.10811    | 12.4726  | 7.90534  | 10.2871   |
| GINS1      | 0.501489        | 0.525699   | 0.465324  | 2.15101   | 0.442127 | 1.82922  | 0.719599  | 0.578182  | 0.338393        | 1.00367   | 1.87432   | 0.737054   | 2.68028  | 1.48051  | 0.603413  |
| GINS2      | 0.823736        | 0.755978   | 0.941053  | 4.87097   | 0.7921   | 3.9913   | 1.81385   | 0.610056  | 0.453836        | 2.14159   | 3.6753    | 0.996375   | 4.06195  | 2.06035  | 1.18299   |
| GINS3      | 1.81002         | 1.71154    | 0.840771  | 2.83283   | 2.07486  | 2.40659  | 1.07199   | 1.50537   | 2.45195         | 1.50641   | 2.88463   | 1.80762    | 2.64163  | 1.52775  | 1.12595   |
| GINS4      | 0.424784        | 0.328046   | 0.338948  | 1.37845   | 0.27142  | 1.14404  | 0.534773  | 0.294512  | 0.132086        | 0.786482  | 0.96408   | 0.331965   | 0.98353  | 0.719692 | 0.899917  |
| GIP        | 0               | 0          | 0         | 0         | 0        | 0        | 0         | 0         | 0               | 0.0408536 | 0         | 0          | 0        | 0        | 0         |
| GIPC1      | 21.0381         | 24.7367    | 23.0022   | 65.7756   | 62.3664  | 47.9484  | 22.622    | 14.9553   | 73.8101         | 64.8113   | 53.151    | 49.329     | 108.076  | 44.311   | 16.9598   |
| GIPC2      | 0.686669        | 1.27852    | 1.27092   | 0.803581  | 0.569474 | 0.564869 | 0.823881  | 0.930895  | 1.23317         | 0.591602  | 0.827717  | 0.341433   | 0.998704 | 0.407545 | 0.484714  |
| GIPC3      | 0.300211        | 0.173059   | 0.172962  | 0.375671  | 0.582914 | 0.839913 | 0.618212  | 0.133401  | 0.13058         | 0.450809  | 1.12563   | 0.24166    | 0.428895 | 0.406268 | 1.11635   |
| GIPR       | 0.351825        | 0.539057   | 0.622857  | 0.623613  | 0.797898 | 0.461345 | 0.666826  | 0.400221  | 1.17404         | 2.81725   | 0.730786  | 2.30594    | 1.1259   | 2.23598  | 0.707371  |
| GIT1       | 7.04755         | 7.78767    | 8.91073   | 8.20787   | 11.4923  | 14.6903  | 8.53157   | 5.92966   | 4.85754         | 5.09864   | 5.30155   | 4.43492    | 8.85564  | 6.51106  | 4.87054   |
| GIT2       | 4.81815         | 4.28695    | 4.53151   | 4.93927   | 3.01722  | 7.17109  | 3.83481   | 4.13786   | 2.26029         | 3.98479   | 5.52452   | 3.00402    | 4.78737  | 4.26791  | 6.81601   |
| GJA1       | 65.2811         | 106.577    | 81.1255   | 94.8038   | 85.3636  | 87.9464  | 83.4828   | 91.3828   | 360.748         | 150.853   | 182.879   | 177.571    | 105.729  | 76.3826  | 45.5492   |
| GJA10      | 0               | 0          | 0         | 0         | 0        | 0        | 0         | 0         | 0               | 0         | 0         | 0          | 0        | 0        | 0         |
| GJA3       | 0.0933725       | 0.0471306  | 0.0110349 | 0.361982  | 0.193386 | 0.321808 | 0.0609199 | 0.0474181 | 0.270755        | 0.318093  | 0.37645   | 0.279968   | 0.352855 | 0.262594 | 0.121324  |
| GJA4       | 3.23889         | 1.21681    | 1.10955   | 3.14662   | 7.8902   | 7.92128  | 1.8083    | 1.03979   | 1.09476         | 2.23851   | 5.12204   | 1.30679    | 5.35777  | 3.13948  | 9.40535   |
| GJA5       | 1.3176          | 0.232092   | 0.128926  | 1.83234   | 1.23242  | 2.5213   | 0.331614  | 0.264414  | 0.612544        | 1.17361   | 2.32708   | 0.567695   | 5.10064  | 1.67346  | 5.97177   |
| GJA8       | 0               | 0          | 0         | 0         | 0        | 0        | 0         | 0         | 0               | 0         | 0         | 0          | 0        | 0        | 0         |
| GJA9       | 0.00092412<br>6 | 0.00109319 | 0.0293808 | 0.0491959 | 3.68E-05 | 2.98E-05 | 0.0042837 | 5.03E-05  | 0.00020714<br>2 | 0.0171703 | 0.0102775 | 0.00325246 | 3.90E-10 | 0.196306 | 0.0934604 |
| GJA9-MYCBP | 0.856549        | 0.740734   | 1.15005   | 0.965449  | 0.544819 | 0.497285 | 0.569394  | 0.886772  | 0.888775        | 0.930067  | 0.416444  | 0.744004   | 0.391512 | 0.750664 | 0.366929  |
| GJB1       | 0.0534173       | 0.109383   | 0.0883811 | 0.0825721 | 0.103719 | 0.238792 | 0.0609902 | 0.154287  | 0.0162641       | 0         | 0         | 0.00955538 | 0        | 0        | 0         |

|        |           |           |           |           |           |           |           |           |           |           |           |           |           |           |           |
|--------|-----------|-----------|-----------|-----------|-----------|-----------|-----------|-----------|-----------|-----------|-----------|-----------|-----------|-----------|-----------|
| GJB2   | 70.7391   | 46.4962   | 14.5644   | 918.864   | 125.776   | 487.048   | 26.22     | 55.1498   | 805.889   | 753.775   | 1129.05   | 554.089   | 1220.05   | 597.683   | 165.17    |
| GJB3   | 8.98365   | 15.4128   | 19.4548   | 16.8935   | 13.4044   | 15.0477   | 23.1096   | 10.8261   | 31.5531   | 20.8962   | 15.451    | 12.9546   | 44.4905   | 15.7622   | 5.28503   |
| GJB4   | 0.603023  | 3.90274   | 5.75715   | 0.487069  | 1.18987   | 0.249794  | 5.10802   | 3.02721   | 1.39936   | 0.879589  | 0.275975  | 0.180755  | 2.03998   | 0.268317  | 0.0819206 |
| GJB5   | 5.03852   | 10.9285   | 11.7841   | 14.0457   | 14.0348   | 10.6601   | 16.4979   | 7.51363   | 20.7804   | 21.2653   | 16.1767   | 11.7811   | 43.8146   | 13.1846   | 3.92459   |
| GJB6   | 27.8491   | 25.7642   | 8.54218   | 207.349   | 64.1298   | 112.631   | 10.3673   | 17.9351   | 209.475   | 208.625   | 245.643   | 132.43    | 369.014   | 175.342   | 32.9446   |
| GJB7   | 0.162407  | 0.190735  | 0.134355  | 0.0523017 | 0.126137  | 0.0691439 | 0.162253  | 0.162376  | 0.0865348 | 0.0636994 | 0.057293  | 0.101681  | 0.0458432 | 0.0848812 | 0.1311196 |
| GJC1   | 1.19001   | 0.624712  | 0.58039   | 0.719942  | 0.892061  | 0.909931  | 0.517123  | 0.660332  | 0.710228  | 1.54932   | 3.02425   | 0.640187  | 1.32358   | 2.76318   | 4.15772   |
| GJC2   | 0.767871  | 0.318457  | 0.442254  | 0.250416  | 0.860605  | 0.595898  | 0.554893  | 0.112297  | 0.15389   | 0.365984  | 0.263341  | 0.827626  | 0.413901  | 0.609604  | 0.809621  |
| GJC3   | 0.933188  | 0.539549  | 0.634754  | 0.235077  | 0.12885   | 0.582704  | 0.757677  | 0.847769  | 0.707166  | 0.0520554 | 0.21069   | 0.178059  | 0         | 0.0433533 | 0.238253  |
| GJD2   | 0         | 0.010174  | 0         | 0.0435211 | 0.0328003 | 0         | 0         | 0         | 0         | 0         | 0         | 0         | 0         | 0         | 0         |
| GJD3   | 1.24277   | 1.10927   | 0.966517  | 1.5581    | 2.41974   | 4.64244   | 0.948151  | 0.615858  | 1.12296   | 0.769121  | 1.14433   | 0.663854  | 1.28219   | 0.655513  | 0.56751   |
| GJD4   | 0.0439425 | 0.0352869 | 0.0121174 | 0         | 0.113763  | 0.0623608 | 0         | 0         | 0.017839  | 0.0367682 | 0.0330704 | 0.0209614 | 0         | 0         | 0.0210357 |
| GJE1   | 0         | 0         | 0         | 0         | 0         | 0         | 0         | 0         | 0         | 0         | 0         | 0         | 0         | 0         | 0         |
| GK     | 1.00116   | 1.3643    | 1.43895   | 2.29793   | 0.581219  | 1.40788   | 1.06541   | 1.35551   | 2.48172   | 3.63008   | 5.20571   | 1.48337   | 4.04532   | 2.91225   | 2.89737   |
| GK2    | 0.0124025 | 0         | 0         | 0         | 0         | 0         | 0.0141608 | 0.0220446 | 0         | 0         | 0         | 0         | 0         | 0         | 0         |
| GK3P   | 0.974663  | 0.674436  | 0.634754  | 1.30361   | 0.306019  | 0.379641  | 0.905154  | 0.749662  | 0.265187  | 0.741789  | 0.280921  | 0.853199  | 0.113728  | 0.910419  | 1.23594   |
| GK5    | 3.76927   | 3.17487   | 2.8627    | 1.77342   | 1.59006   | 2.15541   | 3.04789   | 3.04873   | 3.77353   | 2.2796    | 2.3781    | 2.48712   | 1.89931   | 2.12036   | 1.88705   |
| GKAP1  | 0.469533  | 0.398876  | 0.531537  | 0.540953  | 0.37505   | 0.77321   | 0.28614   | 0.340414  | 0.180581  | 0.155082  | 0.446354  | 0.114935  | 0.143498  | 0.200194  | 0.408135  |
| GKN1   | 0         | 0.0135984 | 0         | 0         | 0         | 0.0240317 | 0         | 0         | 0         | 0         | 0.0318605 | 0         | 0         | 0         | 0         |
| GKN2   | 0.0289288 | 0         | 0.0478639 | 0.029812  | 0         | 0         | 0         | 0         | 0         | 0.0363086 | 0         | 0         | 0         | 0         | 0         |
| GLA    | 2.30125   | 2.0996    | 2.53834   | 3.6834    | 2.30703   | 4.50264   | 2.59022   | 1.8711    | 4.63135   | 3.62574   | 7.90401   | 2.44071   | 4.09624   | 2.82344   | 2.34389   |
| GLB1   | 4.37254   | 3.77122   | 3.90373   | 7.16976   | 3.32723   | 9.07139   | 5.28664   | 3.59253   | 3.34423   | 4.77042   | 10.4447   | 3.07682   | 7.23724   | 4.47378   | 6.78839   |
| GLB1L  | 0.777128  | 0.621311  | 0.47334   | 0.695246  | 0.862249  | 1.80335   | 0.770294  | 0.690647  | 0.416024  | 0.996813  | 2.04377   | 0.433846  | 0.854031  | 0.830175  | 1.2019    |
| GLB1L2 | 1.51842   | 1.6015    | 2.03311   | 1.22196   | 2.5461    | 3.9732    | 2.95328   | 1.4128    | 9.29481   | 0.558391  | 1.46943   | 0.989176  | 0.31236   | 0.310536  | 0.126414  |
| GLB1L3 | 0.597443  | 0.650962  | 0.962245  | 0.659026  | 0.95914   | 1.21741   | 0.694534  | 0.553884  | 5.16583   | 0.299438  | 0.92778   | 0.363009  | 0.121726  | 0.205427  | 0         |
| GLCCI1 | 1.57892   | 1.64713   | 2.15303   | 0.791171  | 1.38006   | 0.916845  | 2.13355   | 1.73793   | 1.6642    | 0.569666  | 0.888478  | 0.72899   | 0.439262  | 0.51986   | 0.790516  |

|           |           |            |           |           |           |            |           |            |            |           |            |            |            |            |           |
|-----------|-----------|------------|-----------|-----------|-----------|------------|-----------|------------|------------|-----------|------------|------------|------------|------------|-----------|
| GLCE      | 2.38568   | 2.54524    | 2.55079   | 2.39225   | 0.599319  | 2.2586     | 1.57854   | 1.90875    | 2.12234    | 3.27272   | 3.64048    | 2.30977    | 3.38547    | 2.12572    | 2.35028   |
| GLDC      | 0.133669  | 0.0673315  | 0.0402112 | 2.75501   | 0.132131  | 2.82475    | 0.0416235 | 0.0431979  | 0.140595   | 0.831219  | 1.2689     | 0.643424   | 2.18351    | 0.870093   | 0.183241  |
| GLDN      | 2.0191    | 1.20084    | 1.64424   | 1.33762   | 2.12124   | 3.89897    | 2.18184   | 1.72232    | 0.878228   | 0.458189  | 0.936147   | 0.27411    | 0.398375   | 0.138975   | 0.265373  |
| GLE1      | 4.51554   | 4.39248    | 4.70349   | 6.59062   | 4.60467   | 7.46036    | 4.15759   | 3.87285    | 4.67491    | 4.33929   | 4.77102    | 3.29684    | 6.4544     | 4.42466    | 2.88847   |
| GLG1      | 11.2064   | 9.68801    | 11.0434   | 11.2118   | 10.3149   | 17.368     | 11.6748   | 9.60615    | 7.08979    | 9.38069   | 10.2478    | 7.01819    | 13.6688    | 8.87745    | 14.2903   |
| GLI1      | 0.191899  | 0.12328    | 0.148169  | 0.0263677 | 0.198724  | 0.1634     | 0.576975  | 0.108011   | 0.038952   | 0.160569  | 0.259956   | 0.0320388  | 0.0784145  | 0.120354   | 0.817589  |
| GLI2      | 0.506009  | 0.360762   | 0.398807  | 0.186738  | 1.20025   | 0.521107   | 0.956401  | 0.467929   | 0.0791146  | 0.201685  | 0.277891   | 0.144336   | 0.161031   | 0.169756   | 0.873995  |
| GLI3      | 5.16732   | 6.36541    | 6.61727   | 6.27743   | 5.61514   | 9.15007    | 7.13518   | 6.16978    | 3.50347    | 3.45847   | 4.30656    | 4.56424    | 3.60479    | 3.84042    | 5.60818   |
| GLI4      | 2.24021   | 2.87277    | 2.63733   | 2.05998   | 3.9081    | 3.3308     | 2.28234   | 1.74587    | 1.25922    | 1.16793   | 1.90641    | 1.63992    | 0.68933    | 1.45003    | 0.890922  |
| GLIDR     | 1.60134   | 1.96957    | 2.00979   | 1.22232   | 1.40064   | 1.5934     | 1.5515    | 1.55921    | 0.849244   | 0.561049  | 0.901221   | 0.672116   | 0.535396   | 0.914331   | 1.00239   |
| GLIPR1    | 1.8826    | 1.17797    | 1.63616   | 2.70696   | 0.307438  | 3.25684    | 1.2421    | 1.99218    | 2.36121    | 7.76054   | 13.9646    | 1.47953    | 9.91064    | 9.1551     | 7.31488   |
| GLIPR1L1  | 0.201829  | 0.162074   | 0.204071  | 0.11555   | 0.0348344 | 0.11457    | 0.0768139 | 0.279018   | 0          | 0.0562925 | 0.0506311  | 0.016046   | 0          | 0.023441   | 0.128823  |
| GLIPR1L2  | 0.21036   | 0.231654   | 0.231507  | 0.106402  | 0.102741  | 0.0749021  | 0.222307  | 0.260866   | 0.048332   | 0.0499731 | 0.037333   | 0.0636497  | 0.0298721  | 0.0656804  | 0.113986  |
| GLIPR2    | 2.43355   | 1.0709     | 1.35556   | 2.86729   | 2.26808   | 4.31694    | 2.96378   | 1.41299    | 0.493965   | 4.38808   | 9.45938    | 1.00994    | 4.75742    | 2.94653    | 4.99768   |
| GLIS1     | 0.846497  | 0.372217   | 0.41473   | 0.558975  | 1.53192   | 1.3016     | 0.797599  | 0.503965   | 0.100091   | 0.711732  | 1.17825    | 0.605691   | 0.477223   | 1.43463    | 3.03329   |
| GLIS2     | 2.8793    | 1.59438    | 1.82931   | 1.22743   | 4.45644   | 4.56384    | 3.52398   | 1.5924     | 0.252277   | 1.24143   | 2.37347    | 0.863359   | 1.60712    | 2.05699    | 5.32498   |
| GLIS2-AS1 | 0.451257  | 0.124242   | 0.106661  | 0.0664334 | 0         | 0.0548914  | 0         | 0.0572914  | 0          | 0.161821  | 0          | 0          | 0          | 0          | 0         |
| GLIS3     | 1.11738   | 0.225301   | 0.251429  | 1.38456   | 0.92106   | 2.67261    | 0.404848  | 0.434117   | 0.0471756  | 1.59233   | 3.10769    | 0.590573   | 2.68181    | 3.45156    | 9.88556   |
| GLIS3-AS1 | 4.43E-40  | 0.0162904  | 0         | 0.0683719 | 0         | 0.124563   | 0         | 0.0299685  | 0          | 0.128137  | 0.182863   | 0          | 0          | 0.275993   | 0.313072  |
| GLMN      | 1.13893   | 1.14141    | 1.44157   | 1.73707   | 0.300756  | 1.69712    | 0.897272  | 1.78145    | 1.44257    | 1.94409   | 1.50428    | 1.06756    | 1.39618    | 1.5298     | 1.14495   |
| GLMP      | 3.78841   | 5.1145     | 4.49937   | 6.62273   | 9.28345   | 16.1076    | 6.49537   | 4.36687    | 5.32953    | 7.54811   | 19.393     | 5.59137    | 9.18814    | 6.11641    | 6.89505   |
| GLO1      | 12.2615   | 13.4996    | 15.9921   | 33.3498   | 6.43079   | 22.2102    | 12.2692   | 15.1995    | 36.5476    | 51.9749   | 46.735     | 18.9228    | 69.8714    | 19.6095    | 14.4414   |
| GLOD4     | 8.781     | 8.89869    | 9.95319   | 12.6324   | 6.61449   | 15.6725    | 7.96891   | 8.1957     | 8.83774    | 7.30521   | 10.638     | 7.04927    | 10.3636    | 6.73586    | 6.36864   |
| GLOD5     | 0.0628034 | 0.0302596  | 0         | 0         | 0         | 0.0267381  | 0.10756   | 0.0558144  | 0          | 0         | 0          | 0          | 0          | 0          | 0         |
| GLP1R     | 0.117759  | 0.16187    | 0.232085  | 0.0107077 | 0.1076    | 0.0796262  | 0.229361  | 0.141591   | 0.0253089  | 0.0347763 | 0.0195493  | 0.0569991  | 0.0223463  | 0.0868883  | 0.0447661 |
| GLP2R     | 0.025304  | 0.00731512 | 0.0251199 | 0         | 0         | 0.00861841 | 0.0173348 | 0.00449762 | 0.00616349 | 0         | 0.00571302 | 0.00724228 | 0.00979561 | 0.00528999 | 0.0145359 |

|          |            |            |           |            |           |            |           |           |            |            |           |            |           |           |           |
|----------|------------|------------|-----------|------------|-----------|------------|-----------|-----------|------------|------------|-----------|------------|-----------|-----------|-----------|
| GLRA1    | 0.0762539  | 0.0734806  | 0.115651  | 0.0785818  | 0.0592243 | 0.0541076  | 0.0580428 | 0.0677681 | 0          | 0.0957064  | 0.0286937 | 0.0454681  | 0         | 0.0464959 | 0.0182517 |
| GLRA2    | 0.0124425  | 0.00299749 | 0.0102933 | 0.00641118 | 0         | 0          | 0         | 0.0110579 | 0          | 0          | 0         | 0          | 0         | 0         | 0         |
| GLRA3    | 0.00629914 | 0          | 0.0052111 | 0          | 0         | 0.0214546  | 0         | 0.0167945 | 0.0153433  | 0.00790607 | 0         | 0          | 0         | 0         | 0         |
| GLRA4    | 0.0428972  | 0.103343   | 0.133079  | 0.0331551  | 0         | 0.0547896  | 0.0612233 | 0.10484   | 0.039183   | 0          | 0.0484256 | 0.00767353 | 0.0276771 | 0.016815  | 0.0462044 |
| GLRB     | 0.115211   | 0.128368   | 0.208492  | 0.0371027  | 0.0559259 | 0.165545   | 0.156209  | 0.159985  | 0.00876964 | 0.144602   | 0.211346  | 0.0257615  | 0.0371668 | 0.037634  | 0.09307   |
| GLRX     | 4.34107    | 4.45219    | 4.4573    | 5.89766    | 6.41795   | 12.6341    | 6.5821    | 4.32938   | 72.5699    | 8.40927    | 22.2651   | 8.68923    | 3.05299   | 2.37826   | 3.58824   |
| GLRX2    | 1.23521    | 1.28121    | 1.29151   | 1.90938    | 0.666219  | 1.53383    | 1.56703   | 1.32645   | 2.94601    | 1.91636    | 3.44726   | 1.76765    | 1.88169   | 1.47944   | 1.08406   |
| GLRX3    | 8.22135    | 8.46363    | 7.29999   | 24.4847    | 6.95996   | 15.4008    | 6.58645   | 7.37949   | 23.4464    | 23.2686    | 31.4777   | 17.3245    | 33.8501   | 18.8129   | 8.69773   |
| GLRX5    | 6.02787    | 5.23729    | 5.46082   | 8.35041    | 4.75843   | 12.3184    | 5.43824   | 5.02335   | 7.94301    | 5.18429    | 11.4676   | 4.85047    | 8.42861   | 6.1046    | 3.74654   |
| GLS      | 7.2029     | 4.25189    | 5.65888   | 5.07842    | 3.35416   | 4.05774    | 4.2387    | 6.86786   | 3.58505    | 6.65184    | 6.67779   | 3.98       | 8.07872   | 6.37441   | 8.2485    |
| GLS2     | 0.595374   | 0.749935   | 0.851383  | 0.31554    | 0.462411  | 0.499711   | 0.631223  | 0.544237  | 0.186454   | 0.117426   | 0.163225  | 0.249518   | 0.120727  | 0.288942  | 0.305369  |
| GLT1D1   | 0.0982238  | 0.0982919  | 0.0875083 | 0.700771   | 0.422517  | 0.553286   | 0.0431342 | 0.255165  | 0.0736158  | 0.54054    | 0.793237  | 0.113532   | 0.555737  | 0.118468  | 0.292975  |
| GLT6D1   | 0          | 0.00730713 | 0.0752774 | 0          | 0         | 0          | 0.0346317 | 0         | 0          | 0          | 0         | 0          | 0         | 0         | 0         |
| GLT8D1   | 3.77737    | 3.17106    | 3.40026   | 3.66166    | 1.92735   | 5.92676    | 2.49629   | 3.07758   | 1.80743    | 4.92576    | 8.77222   | 1.96314    | 3.66736   | 3.38214   | 6.04297   |
| GLT8D2   | 1.88338    | 1.07512    | 1.13468   | 1.82485    | 2.22596   | 2.64955    | 1.53098   | 1.28263   | 0.56097    | 4.97175    | 11.9131   | 0.725072   | 1.7897    | 2.31104   | 9.09916   |
| GLTP     | 53.0345    | 68.2056    | 60.8416   | 87.4215    | 100.951   | 66.3865    | 66.8899   | 66.1633   | 403.272    | 125.496    | 168.785   | 123.886    | 126.926   | 65.3448   | 23.9257   |
| GLTPD2   | 1.19314    | 0.748245   | 0.955711  | 1.42473    | 2.0887    | 1.85449    | 0.67033   | 0.437609  | 1.75295    | 1.49751    | 1.15449   | 0.948579   | 2.19944   | 0.910632  | 0.897545  |
| GLUD1    | 22.1004    | 19.326     | 22.4991   | 19.8771    | 14.46     | 27.2068    | 19.0039   | 14.6534   | 13.7671    | 23.4574    | 28.6677   | 12.9791    | 30.4607   | 18.3144   | 15.7749   |
| GLUD1P2  | 0.241159   | 0.116096   | 0         | 0          | 0.148586  | 0.205335   | 0.220137  | 0.253921  | 0          | 0          | 0.163075  | 0          | 0.184658  | 0.0757983 | 0         |
| GLUD1P3  | 1.73056    | 1.38139    | 1.60259   | 0.692064   | 1.08329   | 1.09967    | 2.35928   | 1.1707    | 0.660601   | 0.583532   | 0.408213  | 0.59141    | 0.266639  | 1.39045   | 1.37248   |
| GLUD2    | 0.151421   | 0.0310528  | 0.0625229 | 0.0444668  | 0.0938965 | 0.194325   | 0.049642  | 0.095855  | 0.0130544  | 0.107054   | 0.253602  | 0.0312703  | 0.139225  | 0.168757  | 0.0472848 |
| GLUL     | 24.5442    | 10.3152    | 13.0778   | 49.9059    | 8.88528   | 59.0422    | 11.6981   | 20.8164   | 3.42401    | 14.9222    | 31.8692   | 3.44887    | 17.7624   | 8.90255   | 21.0108   |
| GLYAT    | 0.0280409  | 0.00900701 | 0         | 0          | 0         | 0.00795881 | 0.010672  | 0.0249204 | 0          | 0          | 0         | 0.013376   | 0         | 0         | 0         |
| GLYATL1  | 0.0612858  | 0.0442927  | 0.0823874 | 0.0236838  | 0.0356993 | 0.0847991  | 0.0699741 | 0.136164  | 0.0279897  | 0.009615   | 0.008648  | 0.0219258  | 0.0543693 | 0.0400383 | 0.0330053 |
| GLYATL1B | 0.0763797  | 0.0245339  | 0         | 0          | 0         | 0.0216788  | 0.0290693 | 0.158386  | 0          | 0          | 0         | 0          | 0         | 0         | 0         |
| GLYATL2  | 0.621403   | 0.113287   | 0.0833624 | 0.0346148  | 0.365231  | 0.64352    | 0.249283  | 0.373143  | 0.040908   | 0.0843161  | 0.0758363 | 0          | 0.065015  | 0.0351105 | 0.31355   |



|            |           |          |          |          |          |           |            |          |           |          |           |          |          |          |          |
|------------|-----------|----------|----------|----------|----------|-----------|------------|----------|-----------|----------|-----------|----------|----------|----------|----------|
| GLYATL3    | 0         | 0        | 0        | 0        | 0        | 0         | 0          | 0        | 0         | 0        | 0         | 0        | 0        | 0        |          |
| GLYCAM1    | 0         | 0        | 0        | 0        | 0        | 0.0504635 | 0          | 0.10534  | 0         | 0        | 0         | 0        | 0        | 0        |          |
| GLYCTK     | 1.16933   | 1.23538  | 1.08827  | 1.31173  | 2.24209  | 1.48832   | 1.55762    | 1.05003  | 0.645303  | 0.909627 | 0.797519  | 0.963064 | 0.746589 | 1.5024   | 2.37902  |
| GLYCTK-AS1 | 0.421147  | 0.338192 | 0.28204  | 0.413338 | 0.373821 | 0.307373  | 0.50375    | 0.374281 | 0.122121  | 0.251706 | 0.0679176 | 0.430489 | 0.129391 | 0.387813 | 0.547219 |
| GLYR1      | 7.03697   | 8.3319   | 8.29918  | 13.3037  | 11.3743  | 15.3871   | 8.06016    | 6.35836  | 11.6179   | 7.67979  | 7.58994   | 8.2597   | 11.905   | 8.90635  | 6.93831  |
| GM2A       | 26.4372   | 26.1069  | 22.6281  | 119.414  | 33.6595  | 61.4561   | 20.0759    | 25.0019  | 108.881   | 46.352   | 72.9903   | 47.8068  | 52.0333  | 20.9008  | 13.2025  |
| GMCL1      | 1.736     | 1.79952  | 1.79405  | 1.67049  | 1.01229  | 2.20562   | 1.33183    | 1.87377  | 2.20096   | 1.71147  | 2.8005    | 1.1246   | 2.13059  | 1.50551  | 1.17971  |
| GMCL2      | 0         | 0        | 0        | 0        | 0        | 0         | 0          | 0        | 0         | 0        | 0         | 0        | 0        | 0        | 0        |
| GMDS       | 3.23477   | 1.79931  | 1.71875  | 6.03016  | 3.63577  | 5.85581   | 2.19199    | 1.77629  | 1.15305   | 2.096    | 2.64225   | 1.99466  | 2.68942  | 2.89331  | 2.07727  |
| GMDS-DT    | 0.918144  | 0.617922 | 0.663102 | 0.315391 | 0.724416 | 0.707331  | 0.499194   | 0.919585 | 0.0532474 | 0.256081 | 0.411298  | 0.166846 | 0.084626 | 0.198038 | 0.523242 |
| GMEB1      | 2.21637   | 2.39239  | 2.35944  | 3.13391  | 2.32189  | 2.64795   | 2.39327    | 1.98499  | 4.64529   | 2.60927  | 2.27896   | 1.90551  | 5.45388  | 2.97226  | 2.09732  |
| GMEB2      | 2.25983   | 1.89959  | 2.18182  | 3.32927  | 3.40139  | 3.19631   | 2.30925    | 1.74472  | 2.22017   | 1.96309  | 1.7413    | 1.51277  | 4.27318  | 2.23533  | 2.05258  |
| GMFB       | 2.76595   | 2.2815   | 2.4692   | 5.6603   | 0.505467 | 3.6259    | 1.81925    | 4.41269  | 2.71265   | 5.39392  | 7.1695    | 2.18786  | 6.9573   | 3.95855  | 3.99642  |
| GMFG       | 4.21421   | 1.60746  | 2.23704  | 8.5048   | 4.20043  | 8.58213   | 1.56379    | 2.49683  | 1.66804   | 10.0496  | 26.6014   | 1.1559   | 6.07241  | 3.1019   | 5.39649  |
| GMIP       | 1.64047   | 2.19802  | 2.23301  | 3.63032  | 4.38579  | 5.5484    | 2.47003    | 1.69025  | 2.40385   | 2.62497  | 2.45688   | 2.28681  | 5.47344  | 2.44575  | 3.88585  |
| GML        | 0.0640195 | 0        | 0        | 0.032987 | 0        | 0.0272559 | 0          | 0        | 0         | 0        | 0         | 0        | 0        | 0        | 0        |
| GMNC       | 0         | 0        | 0        | 0        | 0        | 0         | 0.00729139 | 0        | 0         | 0        | 0         | 0        | 0        | 0        | 0        |
| GMNN       | 1.33026   | 1.68451  | 1.90468  | 4.23563  | 1.13914  | 3.47069   | 1.09045    | 1.28832  | 0.893133  | 2.93252  | 6.2763    | 1.29352  | 4.90757  | 2.90579  | 1.56752  |
| GMPPA      | 3.17892   | 2.49712  | 2.39447  | 5.94011  | 6.8209   | 7.73079   | 3.40362    | 2.36346  | 4.21805   | 5.35608  | 9.96992   | 3.37208  | 5.1635   | 4.34433  | 5.45354  |
| GMPPB      | 2.46786   | 3.04529  | 3.07373  | 5.2277   | 7.6456   | 6.58423   | 3.94481    | 1.98609  | 6.56216   | 4.8182   | 7.76964   | 4.32625  | 7.82852  | 4.32804  | 3.60324  |
| GMPR       | 2.55108   | 1.25859  | 1.57967  | 1.02325  | 1.54237  | 6.10041   | 2.05811    | 1.39833  | 0.427901  | 0.191729 | 0.620807  | 0.284189 | 0.453374 | 0.255484 | 0.658145 |
| GMPR2      | 4.38546   | 4.19248  | 4.07337  | 7.52629  | 6.11068  | 7.31304   | 4.21395    | 2.97131  | 4.43144   | 6.59413  | 6.20544   | 4.34958  | 4.81852  | 4.44791  | 5.03845  |
| GMPS       | 9.93191   | 8.27674  | 9.43246  | 13.1969  | 3.48367  | 11.5299   | 8.75779    | 7.98084  | 8.75637   | 8.25519  | 8.85037   | 6.12215  | 13.6794  | 9.61834  | 7.29413  |
| GNA11      | 8.24663   | 8.71878  | 9.41805  | 10.8229  | 15.6719  | 18.8122   | 9.68986    | 6.04872  | 6.20152   | 7.33005  | 6.00038   | 7.4228   | 11.0088  | 9.31753  | 9.64616  |
| GNA12      | 4.04598   | 2.41455  | 2.6869   | 7.38841  | 5.75828  | 10.094    | 4.08069    | 2.24208  | 1.99086   | 4.73347  | 7.18283   | 2.45291  | 8.39044  | 5.63518  | 7.16603  |
| GNA13      | 4.46961   | 4.11123  | 4.85635  | 6.58585  | 2.47487  | 5.87867   | 3.59756    | 5.65433  | 4.44947   | 6.63425  | 8.07136   | 2.85643  | 8.4465   | 5.11723  | 5.18533  |

|           |           |           |           |           |          |            |           |           |           |           |           |           |           |           |           |
|-----------|-----------|-----------|-----------|-----------|----------|------------|-----------|-----------|-----------|-----------|-----------|-----------|-----------|-----------|-----------|
| GNA14     | 0.910485  | 0.358111  | 0.399667  | 0.574458  | 0.793739 | 1.91443    | 0.360665  | 0.363298  | 0.18104   | 0.443108  | 0.860016  | 0.226022  | 0.575452  | 0.529272  | 1.1608    |
| GNA14-AS1 | 0.0987612 | 0.0158616 | 0.13617   | 0.0339254 | 0.102274 | 0.0280313  | 0.0375875 | 0.0585138 | 0         | 0         | 0         | 0.0471109 | 0         | 0.0860282 | 0         |
| GNA15     | 5.82873   | 7.92923   | 8.55993   | 36.9119   | 20.0019  | 18.1833    | 7.68899   | 7.14808   | 34.3391   | 29.5232   | 24.5078   | 21.9227   | 62.6601   | 23.5762   | 7.48693   |
| GNAI1     | 5.72212   | 8.70973   | 9.03572   | 7.14962   | 7.26695  | 5.45759    | 5.64669   | 8.02678   | 18.4336   | 9.61831   | 13.2929   | 9.24516   | 10.4763   | 7.32865   | 3.60151   |
| GNAI2     | 22.5563   | 15.1307   | 17.0643   | 39.3549   | 34.9054  | 68.3085    | 21.7378   | 15.5588   | 21.2129   | 48.7934   | 74.0135   | 21.026    | 53.8019   | 32.0988   | 40.8167   |
| GNAI3     | 8.37786   | 9.15713   | 9.67798   | 19.0867   | 4.14798  | 14.5047    | 7.19233   | 10.2534   | 24.1889   | 22.0062   | 24.0111   | 12.8955   | 29.3839   | 13.7443   | 8.65325   |
| GNAL      | 3.50854   | 3.11978   | 3.30793   | 3.44457   | 3.27783  | 5.98253    | 2.26356   | 3.26944   | 2.4369    | 4.39515   | 2.37772   | 4.59625   | 4.88261   | 3.23846   | 1.8358    |
| GNAO1     | 0.35052   | 0.246292  | 0.268226  | 0.340149  | 0.571702 | 1.13913    | 0.760402  | 0.220655  | 0.103166  | 0.219969  | 0.217631  | 0.183924  | 0.810383  | 0.265635  | 1.02356   |
| GNAQ      | 6.6441    | 3.10278   | 3.65224   | 5.68134   | 1.60958  | 8.13964    | 3.48682   | 5.06489   | 1.97739   | 5.2159    | 6.30178   | 2.63416   | 7.07629   | 4.39544   | 6.1673    |
| GNAS      | 19.5285   | 13.6723   | 14.5444   | 26.513    | 24.9307  | 38.3052    | 15.936    | 13.506    | 22.2145   | 30.142    | 40.5291   | 18.5972   | 39.9868   | 21.2556   | 24.4415   |
| GNAS-AS1  | 0.0200026 | 0.067463  | 0.115833  | 0.18552   | 0.124284 | 0.119224   | 0.13703   | 0         | 0         | 0         | 0.0225805 | 0.0429373 | 0.103245  | 0.083634  | 0         |
| GNAT1     | 0.0257216 | 0.0185896 | 0.0478772 | 0.0198802 | 0.029966 | 0.00547541 | 0.0146841 | 0.0400037 | 0.0626521 | 0.0403541 | 0         | 0.0414102 | 0         | 0.0134433 | 0.0646442 |
| GNAT2     | 0.423865  | 0.481971  | 0.350651  | 0.454278  | 0.553064 | 0.288733   | 0.425881  | 0.241086  | 0.908548  | 1.06399   | 0.267955  | 0.800678  | 1.4002    | 0.806371  | 0.681771  |
| GNAT3     | 0         | 0         | 0.0161702 | 0         | 0        | 0          | 0.0223176 | 0.0173713 | 0         | 0         | 0.0220656 | 0         | 0         | 0         | 0.112285  |
| GNAZ      | 0.644402  | 0.273759  | 0.252217  | 0.214218  | 0.355186 | 0.6018     | 0.656644  | 0.246319  | 0.0928269 | 0.0869668 | 0.148619  | 0.069411  | 0.232471  | 0.0651857 | 0.129363  |
| GNB1      | 33.5989   | 28.2156   | 30.7973   | 52.5685   | 27.1925  | 61.6902    | 28.8237   | 25.2555   | 36.2593   | 53.8182   | 60.9576   | 26.7204   | 82.0096   | 39.3917   | 42.9338   |
| GNB1L     | 0.944614  | 1.29198   | 1.48728   | 1.52298   | 3.62095  | 1.60865    | 1.37426   | 0.893656  | 1.89265   | 0.956119  | 1.71992   | 1.23188   | 1.94634   | 1.38554   | 1.24718   |
| GNB2      | 42.1276   | 39.4763   | 40.5923   | 89.1063   | 84.6015  | 117.265    | 59.9621   | 28.7378   | 107.187   | 73.7519   | 111.74    | 54.3159   | 110.732   | 53.0199   | 39.8277   |
| GNB3      | 0.32106   | 0.309383  | 0.542273  | 0.0965012 | 0.893534 | 0.418104   | 0.534589  | 0.463663  | 0.0162923 | 0.117531  | 0.317132  | 0.0765756 | 0.129466  | 0.348879  | 1.11428   |
| GNB4      | 5.78201   | 6.64006   | 9.03964   | 6.35568   | 2.38775  | 6.93969    | 6.59444   | 10.5584   | 2.59143   | 5.65755   | 9.69347   | 2.22572   | 5.82358   | 4.26581   | 8.852     |
| GNB5      | 2.21906   | 1.41948   | 1.08868   | 3.69406   | 4.0939   | 4.25821    | 1.7027    | 1.43186   | 5.09473   | 4.54487   | 4.9483    | 4.66141   | 6.39188   | 4.07387   | 2.88327   |
| GNE       | 2.01782   | 1.31753   | 1.67987   | 1.4024    | 1.16628  | 2.9132     | 1.45636   | 1.71365   | 1.70413   | 1.47242   | 1.91186   | 0.888261  | 2.39459   | 1.72697   | 2.27294   |
| GNG10     | 4.38838   | 1.72139   | 2.58787   | 9.44672   | 1.07106  | 8.65695    | 1.76467   | 3.88082   | 1.83408   | 11.74     | 26.1095   | 2.81962   | 9.18227   | 5.43293   | 8.0532    |
| GNG11     | 9.41248   | 3.91559   | 5.03725   | 9.64983   | 9.75978  | 12.497     | 4.68098   | 5.56231   | 2.92492   | 14.8279   | 41.5436   | 2.89878   | 11.2067   | 10.2952   | 15.9911   |
| GNG12     | 16.7077   | 18.7682   | 21.6077   | 23.5034   | 9.50708  | 21.1631    | 17.638    | 22.9421   | 28.7738   | 27.7029   | 33.2777   | 17.9717   | 32.2207   | 15.9665   | 16.6069   |
| GNG12-AS1 | 0.444399  | 0.672694  | 0.924177  | 0.159507  | 0.111991 | 0.201708   | 0.294783  | 0.304399  | 0.0501747 | 0.07785   | 0.116269  | 0.193432  | 0.0799002 | 0.151468  | 0.505239  |

|         |          |            |           |           |           |           |           |          |           |           |          |           |           |           |           |
|---------|----------|------------|-----------|-----------|-----------|-----------|-----------|----------|-----------|-----------|----------|-----------|-----------|-----------|-----------|
| GNG13   | 0        | 0          | 0         | 0.0242374 | 0.0365337 | 0         | 0         | 0        | 0         | 0         | 0        | 0.0168287 | 0.0606983 | 0.0122922 | 0         |
| GNG14   | 0.109423 | 0.316331   | 0.678921  | 0.056382  | 0.424931  | 0.139759  | 0.562212  | 0.291739 | 0         | 0.137338  | 0        | 0.313181  | 0.0352997 | 0.142974  | 0.314292  |
| GNG2    | 1.96531  | 1.03874    | 1.23663   | 1.43      | 0.638315  | 2.83978   | 1.74755   | 1.86834  | 0.290125  | 2.23495   | 3.92622  | 0.426132  | 1.73678   | 0.831066  | 3.69482   |
| GNG3    | 0.827407 | 0.609711   | 0.754146  | 0.344306  | 0.474179  | 0.352263  | 0.61128   | 0.627193 | 0.237103  | 0.458153  | 0        | 0.340944  | 0.0314023 | 0.572346  | 0.654306  |
| GNG4    | 0.017427 | 0.00839659 | 0.0144168 | 0.125713  | 0.0473728 | 0.0296777 | 0.0049744 | 0.046463 | 0.143263  | 0.694458  | 0.570515 | 0.392789  | 0.202389  | 0.475898  | 0.125137  |
| GNG5    | 11.026   | 9.47669    | 10.1666   | 34.0877   | 6.33347   | 28.8011   | 12.1957   | 12.7591  | 17.8696   | 25.4431   | 45.4443  | 16.4773   | 31.0492   | 18.8337   | 13.5667   |
| GNG7    | 0.714023 | 0.575129   | 0.789089  | 0.320166  | 1.33772   | 0.719367  | 0.833918  | 0.65394  | 0.238974  | 0.143661  | 0.190743 | 0.1131    | 0.130117  | 0.113948  | 0.524455  |
| GNG8    | 0        | 0          | 0         | 0         | 0.168775  | 0         | 0         | 0        | 0         | 0         | 0        | 0         | 0         | 0         | 0         |
| GNGT1   | 0        | 0.0309741  | 0.0265911 | 0         | 0         | 0         | 0         | 0        | 0         | 0         | 0        | 0         | 0         | 0         | 0         |
| GNGT2   | 0.175031 | 0.121814   | 0.177111  | 0.400833  | 0.429374  | 0.529909  | 0.0666151 | 0.13838  | 0.0473708 | 0.17104   | 0.263452 | 0.0974087 | 0.451718  | 0.152465  | 0.0837891 |
| GNL1    | 0.461719 | 0.469958   | 0.509674  | 0.369797  | 0.664433  | 0.829502  | 0.46802   | 0.327947 | 0.373237  | 0.324445  | 0.302343 | 0.288511  | 0.427139  | 0.349476  | 0.347213  |
| GNL2    | 7.97477  | 5.97751    | 5.7378    | 11.0006   | 3.82115   | 14.3144   | 3.59958   | 4.29345  | 9.43128   | 9.99821   | 10.2055  | 6.90091   | 17.2351   | 9.36162   | 6.96354   |
| GNL3    | 11.8367  | 9.97234    | 10.347    | 17.1708   | 7.39486   | 20.7476   | 6.44852   | 9.33671  | 11.4509   | 14.6524   | 22.4127  | 10.6603   | 20.495    | 15.7707   | 9.83568   |
| GNL3L   | 4.22489  | 3.90444    | 3.69879   | 5.48382   | 5.15913   | 5.3666    | 4.57001   | 4.26156  | 3.19521   | 3.14904   | 3.01417  | 3.57205   | 6.45377   | 5.43465   | 4.52426   |
| GPLY    | 0.383234 | 0.133357   | 0.387491  | 1.16286   | 0.595294  | 1.17837   | 0.340327  | 0.39735  | 0         | 0.320665  | 0.769108 | 0.137107  | 0.755517  | 1.10162   | 1.52881   |
| GNMT    | 0.430162 | 0.248714   | 0.373658  | 0.110825  | 0.10023   | 0.109885  | 0.294691  | 0.286723 | 0.0227098 | 0.0539436 | 0.048407 | 0.0769472 | 0.0971385 | 0.0674446 | 0.648663  |
| GNPAT   | 4.9395   | 5.29246    | 4.88639   | 8.13378   | 3.15225   | 7.63247   | 5.44255   | 3.26933  | 6.34175   | 7.20751   | 9.47547  | 4.53534   | 7.41017   | 5.47457   | 5.13429   |
| GNPDA1  | 3.8387   | 3.58259    | 3.58406   | 7.99485   | 4.9299    | 12.1479   | 3.84223   | 2.88323  | 4.06158   | 5.61464   | 8.48486  | 3.27296   | 5.73349   | 3.25427   | 3.51608   |
| GNPDA2  | 2.9014   | 2.28925    | 2.20693   | 2.2174    | 0.771312  | 2.87674   | 2.02321   | 2.86406  | 2.53753   | 2.8717    | 3.58307  | 2.25716   | 2.13581   | 1.45534   | 1.94356   |
| GNPNAT1 | 2.62186  | 1.72029    | 1.74006   | 4.57805   | 1.15316   | 3.65725   | 1.7625    | 2.4191   | 2.26748   | 6.91417   | 7.20317  | 3.03956   | 14.5973   | 5.27795   | 4.07839   |
| GNPTAB  | 8.6324   | 6.01107    | 6.48841   | 6.22716   | 2.7776    | 6.50683   | 4.8577    | 6.9813   | 4.78605   | 5.61333   | 6.50588  | 3.55014   | 6.46602   | 4.93061   | 5.68501   |
| GNPTG   | 9.38839  | 8.81923    | 8.28028   | 14.5469   | 21.6738   | 15.5277   | 9.16955   | 5.88569  | 11.7188   | 9.53117   | 19.3637  | 8.65331   | 9.99331   | 7.87483   | 10.0772   |
| GNRH1   | 1.87297  | 1.26547    | 1.2734    | 0.74322   | 0.63538   | 0.47661   | 0.798865  | 1.34885  | 0.249082  | 0.675509  | 0.522512 | 0.731698  | 0.20835   | 1.0239    | 0.680186  |
| GNRH2   | 0.109423 | 0.131805   | 0         | 0.056382  | 0.254959  | 0.139759  | 0         | 0.194493 | 0         | 0         | 0        | 0         | 0.141199  | 0.0571895 | 0.157146  |
| GNRHR   | 0.111017 | 0.118441   | 0.101681  | 0.155265  | 0.0492707 | 0.104658  | 0.0679047 | 0.155041 | 0.333186  | 0.378202  | 0.210366 | 0.303558  | 0.115116  | 0.120189  | 0.347339  |
| GNRHR2  | 1.11897  | 0.874769   | 1.05709   | 0.724015  | 0.473179  | 0.559814  | 0.871747  | 1.19105  | 0.118194  | 0.294399  | 0.340117 | 0.431146  | 0.232558  | 0.638971  | 0.747036  |

|            |            |            |            |            |            |            |            |            |            |            |            |           |            |            |            |
|------------|------------|------------|------------|------------|------------|------------|------------|------------|------------|------------|------------|-----------|------------|------------|------------|
| GNS        | 11.7611    | 7.79112    | 8.7626     | 17.2221    | 7.68336    | 35.9688    | 12.8667    | 9.33324    | 8.79427    | 15.7356    | 28.352     | 7.80827   | 16.9322    | 10.553     | 18.6728    |
| GOLGA1     | 3.07183    | 3.37581    | 3.19616    | 3.40499    | 3.14426    | 4.39571    | 2.60343    | 2.62467    | 3.48712    | 2.33232    | 2.76668    | 2.45577   | 2.6701     | 2.51227    | 2.60063    |
| GOLGA2     | 9.42563    | 11.2632    | 11.2042    | 10.9395    | 14.7847    | 16.2135    | 11.0658    | 8.07738    | 18.4067    | 10.596     | 6.31676    | 12.2019   | 17.848     | 9.09723    | 9.01906    |
| GOLGA2P10  | 2.81371    | 2.71632    | 2.45229    | 2.291      | 8.24904    | 0.665101   | 2.44853    | 2.07213    | 1.05368    | 2.15715    | 0.895518   | 7.51414   | 2.84291    | 1.90558    | 0.851118   |
| GOLGA2P11  | 0.0237934  | 0.00382134 | 0          | 0          | 0.197117   | 0          | 0          | 0.00704853 | 0          | 0          | 0          | 0         | 0          | 0          | 0          |
| GOLGA2P2Y  | 0.00544799 | 0.00525977 | 0.00904637 | 0.0113268  | 0.0253878  | 0.0139167  | 0          | 0.00484172 | 0          | 0          | 0          | 0         | 0          | 0.00284736 | 0          |
| GOLGA2P3Y  | 0.00544799 | 0.00525977 | 0.00904637 | 0.0113268  | 0.0253878  | 0.0139167  | 0          | 0.00484172 | 0          | 0          | 0          | 0         | 0          | 0.00284736 | 0          |
| GOLGA2P5   | 0.593147   | 0.70577    | 0.721105   | 0.281709   | 0.632936   | 0.412829   | 0.553567   | 0.490469   | 0.106788   | 0.135945   | 0.0873377  | 0.276791  | 0.183028   | 0.307309   | 0.118516   |
| GOLGA2P6   | 0.0481478  | 0.0309311  | 0.0464698  | 0.0413481  | 0          | 0.00683287 | 0.0366491  | 0.0213949  | 0          | 0.0100717  | 0          | 0.0344511 | 0          | 0.00419403 | 0          |
| GOLGA2P7   | 3.98692    | 7.3974     | 5.61837    | 4.58092    | 14.8584    | 3.68284    | 3.22177    | 4.11924    | 3.52114    | 3.16689    | 2.49804    | 6.00687   | 4.37881    | 4.52782    | 1.65813    |
| GOLGA2P9   | 0          | 0          | 0          | 0          | 0          | 0          | 0          | 0          | 0          | 0          | 0          | 0         | 0          | 0          | 0          |
| GOLGA3     | 6.67296    | 8.47272    | 9.0316     | 9.55127    | 15.8144    | 12.1985    | 9.306      | 6.15787    | 8.57973    | 7.92983    | 5.49709    | 8.36273   | 13.5605    | 9.57349    | 12.1698    |
| GOLGA4     | 17.5002    | 18.2898    | 17.4029    | 9.62765    | 6.57169    | 12.183     | 4.31031    | 8.49893    | 31.3057    | 16.5926    | 13.0851    | 13.8063   | 17.9954    | 13.3903    | 9.5369     |
| GOLGA5     | 7.26974    | 5.35924    | 5.78174    | 7.75694    | 2.78676    | 10.2083    | 4.08784    | 4.89408    | 10.5922    | 9.47671    | 11.5879    | 4.94496   | 10.3974    | 5.76853    | 6.85563    |
| GOLGA6A    | 0.0570852  | 0.0260824  | 0.0323327  | 0.0336779  | 0.0226451  | 0.0763866  | 0.0492588  | 0.0359735  | 0          | 0.00460231 | 0          | 0         | 0          | 0.00409278 | 3.39E-08   |
| GOLGA6B    | 0.0660097  | 0.0719488  | 0.102177   | 6.95E-08   | 0.0226166  | 4.26E-14   | 1.43E-10   | 0.0471652  | 0          | 0.0044597  | 0          | 0         | 0          | 2.71E-18   | 3.29E-08   |
| GOLGA6C    | 0.0832231  | 0.0274109  | 0.0295351  | 9.38E-17   | 3.92E-29   | 2.18E-21   | 0.0409283  | 0.100018   | 0          | 1.67E-14   | 0          | 0         | 0          | 0.0110329  | 0.0341248  |
| GOLGA6D    | 0.0361365  | 0.0121617  | 0.0236317  | 0.0243072  | 1.75E-19   | 0.0317948  | 0.0509835  | 1.13E-09   | 0          | 7.45E-05   | 0.00757484 | 0         | 0          | 6.63E-05   | 0.0335081  |
| GOLGA6L1   | 0.00494086 | 0.0114653  | 8.95E-06   | 0.00671781 | 0.00383743 | 0.00661973 | 0.00968217 | 0.00322984 | 0.00147538 | 0.00304093 | 0          | 0.0173307 | 0.00557869 | 0.00451901 | 0.00521928 |
| GOLGA6L10  | 0.0493995  | 0.157172   | 0.183376   | 0.0205771  | 0.106727   | 0.0684996  | 0.202049   | 0.0731051  | 0.0519702  | 0.135602   | 0.127026   | 0.624544  | 0.0157456  | 0.0373745  | 1.15E-07   |
| GOLGA6L17P | 0.280727   | 0.360659   | 0.095846   | 0.130683   | 0.448487   | 0.0231768  | 0.0718529  | 0.156529   | 0.0604126  | 3.59E-14   | 5.04E-35   | 0.297985  | 0.0774324  | 0.140168   | 0.065559   |
| GOLGA6L2   | 0          | 0          | 0          | 0          | 0          | 0          | 0          | 0          | 0          | 0          | 0          | 0         | 0          | 0          | 0          |
| GOLGA6L22  | 0.00977168 | 0.0104544  | 0.0201325  | 0.00608318 | 0.0075894  | 0.00709765 | 0.0191487  | 0.00638775 | 0.0029179  | 0.00601413 | 0          | 4.90E-09  | 0.0110331  | 0.00893737 | 0.0103223  |
| GOLGA6L3   | 0.474236   | 0.759159   | 0.989247   | 0.152476   | 1.32412    | 0.550218   | 0.167865   | 0.320926   | 0.192725   | 1.60E-09   | 0.022912   | 1.27296   | 0.127435   | 0.746846   | 0.0842363  |
| GOLGA6L4   | 0.740894   | 0.994379   | 0.428266   | 0.49021    | 0.733386   | 0.345465   | 0.553293   | 0.824294   | 0.348154   | 0.435071   | 0.477581   | 0.702234  | 0.19934    | 0.873024   | 0.146008   |
| GOLGA6L5P  | 1.36783    | 1.00959    | 1.13525    | 0.50998    | 0.384729   | 0.495383   | 0.156472   | 1.11602    | 0.503932   | 0.657957   | 0.0638109  | 0.852582  | 0.310764   | 0.621631   | 1.66157    |

|          |            |            |                 |           |           |           |            |            |            |            |           |            |            |            |            |
|----------|------------|------------|-----------------|-----------|-----------|-----------|------------|------------|------------|------------|-----------|------------|------------|------------|------------|
| GOLGA6L6 | 2.00E-10   | 3.89E-08   | 0.014654        | 8.52E-13  | 2.38E-19  | 2.41E-34  | 0.00088859 | 0.00029642 | 0.00013540 | 0.00027908 | 0         | 2.27E-10   | 1.96E-11   | 1.49E-07   | 0.00047900 |
|          |            |            |                 |           |           |           | 5          | 4          | 5          | 6          |           |            |            |            | 8          |
| GOLGA6L9 | 1.73425    | 0.99344    | 0.721855        | 0.70781   | 0.362459  | 0.287984  | 0.612476   | 1.203      | 0.358893   | 1.01271    | 0.396378  | 1.48093    | 0.494793   | 1.13445    | 0.303392   |
| GOLGA7   | 7.62003    | 7.9564     | 7.86726         | 9.7273    | 3.15536   | 11.1008   | 6.88871    | 7.43668    | 18.3883    | 10.6675    | 14.1238   | 7.66506    | 10.0872    | 6.42282    | 6.44408    |
| GOLGA7B  | 1.32168    | 3.10241    | 3.18741         | 5.47279   | 4.15057   | 4.15385   | 1.73756    | 1.53624    | 2.21621    | 10.7932    | 3.24139   | 3.91609    | 15.4767    | 6.18948    | 2.23742    |
| GOLGA8A  | 17.4745    | 21.4583    | 19.2983         | 8.57293   | 19.3123   | 9.07784   | 7.64021    | 16.4144    | 4.93779    | 3.89874    | 1.50167   | 17.8366    | 1.7039     | 13.597     | 9.94432    |
| GOLGA8B  | 7.93237    | 7.41332    | 8.67632         | 3.4191    | 10.1442   | 4.45424   | 5.99926    | 6.50873    | 1.21469    | 2.12819    | 0.730363  | 6.24277    | 0.603577   | 3.46488    | 2.91353    |
| GOLGA8CP | 0          | 0          | 0               | 0         | 0         | 0         | 0          | 0          | 0          | 0          | 0         | 0          | 0          | 0          | 0          |
| GOLGA8DP | 0          | 0.00316213 | 0               | 0         | 0         | 0         | 0          | 0          | 0          | 0          | 0         | 0          | 0          | 0          | 0          |
| GOLGA8EP | 0          | 0.0091266  | 0               | 0         | 0         | 0         | 0          | 0          | 0          | 0          | 0         | 0          | 0          | 0          | 0          |
| GOLGA8F  | 0          | 0.00125122 | 0               | 0         | 0         | 0         | 0.00248479 | 0          | 0          | 0          | 0         | 0          | 0          | 0          | 2.90E-24   |
| GOLGA8G  | 0          | 1.12E-05   | 0               | 0         | 0         | 0         | 2.22E-05   | 0          | 0          | 0          | 0         | 0          | 0          | 0          | 2.59E-26   |
| GOLGA8H  | 0.445551   | 0.477325   | 0.340383        | 0.163303  | 0.0816293 | 0.166961  | 0.404467   | 0.367481   | 0.0189387  | 0.0237953  | 0.10309   | 0.0831834  | 0.0666649  | 0.127647   | 0.245988   |
| GOLGA8IP | 0.466246   | 0.447655   | 0.505716        | 0.208454  | 0.395022  | 0.30718   | 0.564159   | 0.331984   | 0.121604   | 0.11246    | 0.123818  | 0.0601469  | 0.0219893  | 0.120714   | 0.312714   |
| GOLGA8J  | 1.41E-05   | 0.0314984  | 0.00070769<br>1 | 2.25E-10  | 0.0116085 | 0.0145818 | 3.85E-12   | 0.0140673  | 0.0214453  | 0.0361255  | 9.77E-12  | 0.00857589 | 1.90E-11   | 0.0234058  | 1.58E-14   |
| GOLGA8K  | 0.184915   | 0.198194   | 0.213054        | 0.0254325 | 4.13E-10  | 0.2548    | 0.224465   | 0.191532   | 0.00153568 | 0.0770768  | 0.0730669 | 0.0365552  | 0.00756621 | 0.00118435 | 0.297516   |
| GOLGA8M  | 0.34772    | 0.17143    | 0.106942        | 0.0491235 | 0.0729972 | 0.13447   | 0.266796   | 0.188666   | 5.95E-17   | 2.39E-05   | 0.0248253 | 0.0153223  | 2.46E-14   | 0.0348024  | 0.0982681  |
| GOLGA8N  | 1.85964    | 1.33314    | 1.23334         | 0.756445  | 0.911726  | 0.705093  | 1.11343    | 1.39994    | 0.208739   | 0.160869   | 0.310485  | 0.376049   | 0.251521   | 0.438954   | 1.17279    |
| GOLGA8O  | 0.951818   | 0.899941   | 0.859878        | 0.222486  | 0.485106  | 0.568999  | 0.273173   | 0.778986   | 0.198646   | 0.300579   | 0.383805  | 0.533102   | 0.20604    | 0.521064   | 0.650379   |
| GOLGA8Q  | 0          | 0          | 0               | 0         | 0         | 0         | 0          | 0          | 0          | 0          | 0         | 0          | 0          | 0          | 0          |
| GOLGA8R  | 1.23226    | 1.0763     | 1.01141         | 0.211469  | 0.252318  | 0.430595  | 0.982348   | 0.701395   | 0.0467575  | 0.268974   | 0.314086  | 0.355533   | 0.0701133  | 0.0826558  | 0.525502   |
| GOLGA8S  | 0.0304762  | 0.0330074  | 0.0153835       | 0.0228335 | 0.0217159 | 0.0262784 | 0.0135414  | 0.0292372  | 0.00629726 | 0          | 4.79E-35  | 0.00442873 | 0.00804261 | 4.16E-30   | 0.0290259  |
| GOLGA8T  | 0.00822381 | 0.108779   | 0.0671757       | 0.0407366 | 0.27413   | 0.0799536 | 0.0858416  | 8.02E-09   | 0.0591577  | 1.17E-18   | 1.64E-27  | 0.0836432  | 0.0332257  | 0.118743   | 6.59E-10   |
| GOLGB1   | 13.6099    | 11.0492    | 10.5788         | 8.03382   | 4.65932   | 10.4964   | 4.35897    | 6.3473     | 9.54975    | 9.27625    | 7.2874    | 7.40384    | 10.824     | 7.19915    | 9.65755    |
| GOLIM4   | 5.73361    | 3.28049    | 3.54416         | 4.6685    | 4.45314   | 8.15206   | 2.31447    | 3.10866    | 1.88252    | 4.47755    | 5.49438   | 2.43398    | 6.2461     | 6.42935    | 8.11905    |

|         |           |           |            |            |           |           |            |           |          |            |           |            |                 |            |           |
|---------|-----------|-----------|------------|------------|-----------|-----------|------------|-----------|----------|------------|-----------|------------|-----------------|------------|-----------|
| GOLM1   | 4.51796   | 2.35453   | 2.79879    | 3.31102    | 3.47043   | 9.89824   | 2.24316    | 3.14534   | 1.07974  | 4.55778    | 5.6847    | 1.20783    | 5.65609         | 2.94698    | 8.60703   |
| GOLPH3  | 11.805    | 10.0631   | 11.0895    | 15.053     | 10.9083   | 16.2744   | 9.87443    | 10.6758   | 17.7055  | 13.1775    | 19.9847   | 8.84286    | 21.4658         | 12.3939    | 15.2023   |
| GOLPH3L | 2.32817   | 4.01931   | 4.75771    | 5.98684    | 2.09732   | 5.72972   | 2.25825    | 2.69824   | 1.90215  | 3.20606    | 3.92173   | 2.73641    | 1.41737         | 2.33062    | 2.13819   |
| GOLT1A  | 0.0786287 | 0.0631409 | 0.173459   | 0          | 0.0407125 | 0.0446342 | 0          | 0.0465858 | 0        | 0          | 0         | 0          | 0               | 0          | 0         |
| GOLT1B  | 2.4685    | 1.5063    | 1.92509    | 3.19258    | 0.505398  | 2.58973   | 1.21137    | 3.55785   | 1.7573   | 3.92382    | 5.91659   | 1.52841    | 5.24346         | 2.66162    | 3.53492   |
| GON4L   | 4.8882    | 4.89676   | 5.03262    | 4.76495    | 6.05795   | 6.24221   | 4.61939    | 4.14087   | 2.91824  | 3.00008    | 2.84209   | 3.57608    | 3.53797         | 4.1603     | 4.95508   |
| GON7    | 0.74782   | 0.976632  | 0.846573   | 2.59587    | 0.641949  | 2.46325   | 0.786428   | 1.01439   | 1.36614  | 2.24768    | 4.35427   | 0.915277   | 1.98075         | 1.4708     | 0.734817  |
| GOPC    | 3.90057   | 3.87978   | 4.13313    | 4.05915    | 2.08998   | 5.00267   | 2.60246    | 4.12787   | 3.55576  | 4.58861    | 5.92296   | 2.55194    | 3.69505         | 4.10989    | 4.19981   |
| GORAB   | 1.29311   | 0.751142  | 0.719833   | 1.02124    | 0.732124  | 1.16281   | 0.310465   | 0.730338  | 0.419473 | 0.84183    | 1.1187    | 0.479922   | 0.807017        | 0.944276   | 1.11077   |
| GORASP1 | 4.91228   | 4.40099   | 4.55033    | 6.14786    | 6.72929   | 6.66195   | 4.35229    | 3.32824   | 4.03874  | 4.5772     | 5.5395    | 3.76079    | 6.89289         | 4.84829    | 5.22009   |
| GORASP2 | 9.12978   | 8.30933   | 8.96012    | 14.3681    | 4.99876   | 16.9118   | 9.55806    | 9.10278   | 17.3083  | 12.5618    | 17.9956   | 10.6355    | 20.6578         | 10.7472    | 10.1695   |
| GOSR1   | 11.4415   | 11.3748   | 11.9187    | 9.49079    | 12.9557   | 10.8018   | 10.3288    | 8.80597   | 6.61088  | 7.17133    | 6.08718   | 7.88595    | 7.22438         | 10.1406    | 7.79373   |
| GOSR2   | 4.22742   | 4.25688   | 4.32447    | 4.01711    | 3.70652   | 5.5753    | 4.5977     | 3.79957   | 3.34729  | 4.06581    | 4.48496   | 3.23694    | 5.31018         | 4.61132    | 5.04783   |
| GOT1    | 4.35224   | 2.68937   | 2.54734    | 7.92744    | 5.84786   | 7.81014   | 3.77663    | 2.93961   | 9.07718  | 6.59598    | 5.41674   | 4.77243    | 9.20337         | 5.53883    | 2.50015   |
| GOT1L1  | 0         | 0         | 0          | 0          | 0         | 0         | 0          | 0         | 0        | 0          | 0         | 0          | 0               | 0          | 0         |
| GOT2    | 10.5751   | 8.51034   | 9.16068    | 22.7644    | 11.3601   | 22.2909   | 11.7417    | 7.42671   | 14.5164  | 15.1251    | 17.6154   | 12.988     | 31.216          | 17.9418    | 9.7738    |
| GP1BA   | 1.91712   | 2.49266   | 2.54971    | 0.557719   | 1.32512   | 1.21844   | 2.52405    | 2.42116   | 0.357487 | 0.472027   | 0.28994   | 0.498819   | 0.13612         | 0.690354   | 0.803574  |
| GP1BB   | 0.0361946 | 0.0342139 | 0.00395907 | 0.00315148 | 0.283414  | 0.010139  | 0.00410575 | 1.31E-05  | 0.117494 | 0.00796535 | 0.562476  | 0.00254699 | 0.00081848<br>7 | 0.00332918 | 1.82E-05  |
| GP2     | 0.0067023 | 0         | 0          | 0          | 0         | 0         | 0          | 0         | 0        | 0          | 0         | 0          | 0               | 0          | 0         |
| GP5     | 0.0463789 | 0.0414998 | 0.0657735  | 0.0136556  | 0.0514589 | 0.0846236 | 0.0378242  | 0.0117765 | 0        | 0.0249472  | 0.0299177 | 0.00948152 | 0.0213739       | 0.00692561 | 0.0285454 |
| GP6     | 0.255329  | 0.442878  | 0.371759   | 0.231549   | 0.491802  | 0.347855  | 0.186577   | 0.235992  | 0.223893 | 0.384557   | 0.103765  | 0.153464   | 0.0527159       | 0.117433   | 0.117339  |
| GP9     | 0.0776612 | 0         | 0          | 0          | 0         | 0.0220425 | 0          | 0         | 0        | 0          | 0.116893  | 0          | 0               | 0          | 0         |
| GPA33   | 0.016519  | 0.0238772 | 0.0204985  | 0.0425581  | 0         | 0.0140657 | 0.0282912  | 0         | 0        | 0          | 0         | 0          | 0.00532897      | 0          | 0         |
| GPAA1   | 10.4351   | 9.27874   | 10.9019    | 16.7997    | 25.027    | 23.9103   | 11.7099    | 6.88572   | 15.4905  | 11.9869    | 28.0089   | 12.0411    | 17.0628         | 11.9493    | 11.0466   |
| GPALPP1 | 2.38043   | 2.52999   | 2.56132    | 2.39698    | 1.14796   | 2.87476   | 1.8297     | 2.59947   | 1.62956  | 2.04061    | 3.41609   | 1.17447    | 1.58101         | 1.88244    | 1.9886    |



|         |           |           |            |            |            |            |           |           |           |            |            |           |            |            |           |
|---------|-----------|-----------|------------|------------|------------|------------|-----------|-----------|-----------|------------|------------|-----------|------------|------------|-----------|
| GPCPD1  | 6.38034   | 6.32396   | 5.28178    | 6.96833    | 3.00948    | 4.80106    | 3.38347   | 5.76828   | 5.42131   | 6.85335    | 8.73885    | 7.27416   | 4.60618    | 4.76821    | 6.30754   |
| GPD1    | 2.2595    | 0.126589  | 0.167671   | 0.046415   | 0.139925   | 1.44455    | 0.839945  | 0.313551  | 0.0182845 | 0.0282649  | 0.101689   | 0.0537122 | 0.00484326 | 0.0156932  | 0.0107805 |
| GPD1L   | 5.04794   | 3.87336   | 2.85157    | 2.13719    | 2.42493    | 2.50813    | 2.45245   | 3.53933   | 1.56818   | 1.11554    | 1.24775    | 0.986556  | 1.24248    | 1.09879    | 1.45644   |
| GPD2    | 3.52314   | 3.17402   | 3.99085    | 4.79313    | 1.36087    | 6.06716    | 2.5544    | 4.29399   | 1.60276   | 2.87402    | 3.38299    | 1.25643   | 5.28378    | 2.76889    | 2.94293   |
| GPER1   | 0.697035  | 0.74314   | 0.76067    | 0.336233   | 1.29007    | 0.978671   | 1.29538   | 0.553566  | 0.0903096 | 0.446732   | 0.636189   | 0.504053  | 0.468861   | 0.437936   | 1.07558   |
| GPHA2   | 0.0309813 | 0.0447818 | 0.17941    | 0.0319272  | 0.0962494  | 0.0527604  | 0.070747  | 0.110134  | 0         | 0.0388847  | 0          | 0.0443359 | 0.019989   | 0.0647688  | 0         |
| GPHB5   | 0         | 0         | 0          | 0          | 0          | 0          | 0         | 0         | 0         | 0          | 0          | 0         | 0          | 0          | 0         |
| GPHN    | 2.93726   | 2.78116   | 2.75033    | 2.6056     | 1.94704    | 2.78046    | 2.75788   | 2.72036   | 1.70345   | 1.26937    | 1.89474    | 1.42422   | 1.60703    | 1.6195     | 1.54516   |
| GPI     | 20.1292   | 14.9866   | 16.6374    | 33.0665    | 17.7511    | 44.419     | 22.5921   | 16.6897   | 14.9875   | 23.4135    | 23.9114    | 18.2895   | 43.31      | 23.9232    | 18.9741   |
| GPIHBP1 | 1.80599   | 0.601286  | 0.595938   | 0.386863   | 3.94006    | 0.768888   | 0.915166  | 0.937761  | 0.172994  | 0.241951   | 0.251979   | 0.101636  | 0.0720077  | 0.127266   | 1.16568   |
| GPKOW   | 3.69812   | 3.60832   | 4.17781    | 5.61408    | 8.46226    | 9.29997    | 4.37373   | 2.48555   | 6.21504   | 4.39197    | 5.17724    | 3.28154   | 6.95277    | 3.3391     | 4.41628   |
| GPLD1   | 0.809093  | 1.85174   | 2.21872    | 0.301937   | 1.32942    | 0.423962   | 1.95452   | 1.91469   | 2.3443    | 0.397091   | 0.48723    | 0.25642   | 0.0128646  | 0.135719   | 0.0683875 |
| GPM6A   | 0.0733702 | 0.0782769 | 0.108387   | 0.00540072 | 0.00814066 | 0.0178496  | 0.0718043 | 0.0326027 | 0         | 0          | 0.00591613 | 0         | 0          | 0          | 0         |
| GPM6B   | 1.23273   | 0.931846  | 1.06304    | 1.24792    | 0.466872   | 1.62826    | 0.974799  | 1.49815   | 0.641909  | 2.85384    | 5.97456    | 0.688809  | 1.2394     | 2.21967    | 3.328     |
| GPN1    | 5.24216   | 4.21902   | 4.25888    | 7.29177    | 2.39174    | 7.78636    | 3.93207   | 3.39485   | 4.00811   | 7.1843     | 9.79217    | 3.74249   | 9.11521    | 6.13684    | 4.50691   |
| GPN2    | 3.43314   | 4.29781   | 3.7784     | 4.92786    | 9.11823    | 5.23318    | 3.91985   | 2.81953   | 4.77849   | 4.52055    | 6.47085    | 3.66282   | 6.38803    | 5.26277    | 4.4682    |
| GPN3    | 1.94688   | 1.09467   | 1.45652    | 2.677      | 0.774415   | 2.37953    | 0.853837  | 1.43736   | 1.24739   | 2.23975    | 4.13643    | 1.07956   | 2.02364    | 1.66268    | 1.42413   |
| GPNMB   | 49.9646   | 75.2381   | 94.0903    | 39.1638    | 57.3419    | 67.9219    | 72.117    | 77.5559   | 43.5134   | 67.4023    | 105.196    | 62.1791   | 40.0087    | 45.4508    | 57.606    |
| GPR1    | 2.21118   | 1.90757   | 1.0773     | 2.60293    | 1.54766    | 1.35442    | 2.18537   | 0.95537   | 16.0196   | 3.1153     | 5.33759    | 3.70212   | 1.82136    | 1.00949    | 0.67778   |
| GPR1-AS | 0.0312069 | 0.0270647 | 0.00516331 | 0.0257277  | 0.0387801  | 0.00531446 | 0.035631  | 0.0221873 | 0.0076013 | 0.00783358 | 0          | 0.0178635 | 0          | 0.00652404 | 0         |
| GPR101  | 0.0303118 | 0.0584187 | 0.012538   | 0          | 0.0235423  | 0          | 0.034609  | 0         | 0         | 0          | 0          | 0         | 0          | 0          | 0         |
| GPR107  | 6.8256    | 7.06271   | 7.63664    | 8.71257    | 6.31838    | 12.1933    | 8.14168   | 6.51973   | 8.74852   | 8.39956    | 6.64643    | 6.15241   | 11.8726    | 6.39223    | 7.0927    |
| GPR108  | 7.34304   | 5.65705   | 6.2349     | 8.82515    | 9.29955    | 13.7998    | 6.62535   | 4.19271   | 9.56816   | 7.84232    | 12.2371    | 6.53648   | 9.56917    | 5.76671    | 4.85537   |
| GPR119  | 0         | 0         | 0          | 0          | 0          | 0          | 0         | 0.0172402 | 0         | 0          | 0          | 0         | 0          | 0.0101388  | 0         |
| GPR12   | 1.26027   | 0.273707  | 0.418612   | 0.0295168  | 0.103814   | 0.438995   | 0.877529  | 0.470917  | 0         | 0          | 0.0107779  | 0.0136629 | 0.0246399  | 0.0149698  | 0.0137114 |
| GPR132  | 0.609972  | 1.17845   | 1.18732    | 0.59778    | 1.75566    | 0.916558   | 0.600856  | 1.21174   | 0.356872  | 0.720544   | 0.661579   | 1.14676   | 0.532451   | 1.17518    | 0.712821  |



|            |            |            |           |           |           |            |           |           |           |            |           |           |           |            |           |
|------------|------------|------------|-----------|-----------|-----------|------------|-----------|-----------|-----------|------------|-----------|-----------|-----------|------------|-----------|
| GPR135     | 0.839253   | 0.465633   | 0.578575  | 0.327604  | 1.24439   | 0.89868    | 0.740452  | 0.406832  | 0.0464598 | 0.255357   | 0.416287  | 0.291156  | 0.123064  | 1.16304    | 0.693946  |
| GPR137     | 1.59667    | 2.38694    | 2.29519   | 2.68274   | 7.80448   | 7.31496    | 2.9426    | 1.68119   | 3.63573   | 2.14563    | 5.01548   | 2.24767   | 2.82736   | 2.16501    | 3.14044   |
| GPR137B    | 4.90741    | 5.11118    | 5.04423   | 7.19459   | 5.95045   | 8.63706    | 6.28896   | 5.56998   | 15.8182   | 5.30583    | 12.679    | 6.23616   | 5.86449   | 5.22443    | 6.23385   |
| GPR137C    | 0.0786605  | 0.0433141  | 0.0325368 | 0.040531  | 0.0523658 | 0.0382734  | 0.0513212 | 0.0299601 | 0.0478998 | 0.126935   | 0.177596  | 0.0361824 | 0.072502  | 0.120398   | 0.0806903 |
| GPR139     | 0          | 0          | 0         | 0         | 0         | 0          | 0         | 0         | 0         | 0          | 0         | 0         | 0         | 0          | 0         |
| GPR141     | 0.211567   | 0.223693   | 0.320875  | 0.393657  | 0.209962  | 0.120098   | 0.14762   | 0.32904   | 0.0715735 | 0.118017   | 0.152587  | 0.0714858 | 0.257837  | 0.16279    | 0.413555  |
| GPR142     | 0.0311272  | 0.0224963  | 0.0386259 | 0         | 0.0967025 | 0.238539   | 0         | 0.0968213 | 0         | 0.0195339  | 0.0351387 | 0.0556808 | 0.0803324 | 0.0244026  | 0.201161  |
| GPR143     | 0.423016   | 0.710067   | 0.609588  | 0.7453    | 0.826661  | 1.13867    | 1.21525   | 0.485085  | 0.415472  | 0.171267   | 0.600766  | 0.156221  | 0.114453  | 0.149768   | 0.0979845 |
| GPR146     | 1.586      | 1.13115    | 1.22573   | 1.27958   | 2.38257   | 4.6644     | 1.62023   | 1.21477   | 0.292277  | 0.772663   | 1.53126   | 0.597276  | 1.54165   | 0.818005   | 1.73824   |
| GPR148     | 0          | 0          | 0         | 0         | 0         | 0          | 0         | 0         | 0         | 0          | 0         | 0         | 0         | 0          | 0         |
| GPR149     | 0.00916375 | 0.0419447  | 0.0795995 | 0         | 0         | 0.00390141 | 0.0680087 | 0.0773678 | 0.0111604 | 0          | 0         | 0         | 0         | 0.00239469 | 0         |
| GPR15      | 0.674069   | 0.260623   | 0.447487  | 0.454523  | 0.219754  | 0.0141719  | 0.114019  | 0.391975  | 0.0608104 | 0.0104448  | 0.0751546 | 0.095272  | 0.311414  | 0.0173974  | 0         |
| GPR150     | 0.24656    | 0.0269992  | 0.0741717 | 0.0461977 | 0.156679  | 0.620286   | 0.115165  | 0.119521  | 0.0682461 | 0.0703315  | 0.189774  | 0.0481147 | 0         | 0.0527168  | 0.0482852 |
| GPR151     | 0.036735   | 0.106197   | 0.167144  | 0.0567847 | 0.0855932 | 0.0312794  | 0.167771  | 0.065294  | 0.0894782 | 0.0230531  | 0.0829385 | 0.0131424 | 0         | 0.105596   | 0.0263781 |
| GPR152     | 0.0346999  | 0.0234094  | 0.0267958 | 0         | 0.0251569 | 0.0413702  | 0.0784725 | 0.0863581 | 0         | 0          | 0         | 0         | 0         | 0.0169287  | 0.0930339 |
| GPR153     | 2.64767    | 3.49107    | 3.90228   | 8.06282   | 10.8587   | 8.33716    | 4.27885   | 2.12629   | 6.79438   | 9.09406    | 7.10422   | 9.89836   | 21.9112   | 11.7518    | 5.91122   |
| GPR155     | 2.7075     | 3.50562    | 3.51717   | 3.09457   | 0.832616  | 2.83699    | 2.20808   | 2.96104   | 1.40576   | 2.03737    | 2.03875   | 1.83922   | 1.71345   | 1.73087    | 1.28589   |
| GPR156     | 0.154545   | 0.0638245  | 0.0502269 | 0.0625675 | 0.0342944 | 0.216188   | 0.214266  | 0.0882941 | 0.0201662 | 0.0277099  | 0.118385  | 0.0315945 | 0.0356112 | 0.0519247  | 0.261579  |
| GPR157     | 5.29902    | 7.41767    | 6.42613   | 5.70901   | 18.5826   | 6.76806    | 6.60027   | 4.95906   | 19.5808   | 8.96852    | 12.553    | 10.0965   | 12.0179   | 4.8676     | 1.78721   |
| GPR158     | 0.0208433  | 0.0639382  | 0.0229908 | 0.0143198 | 0.0377731 | 0.0118319  | 0.031731  | 0.0216111 | 0.0803853 | 0.00872018 | 0.0156864 | 0.0323136 | 0.0179307 | 0.00181561 | 0         |
| GPR158-AS1 | 0          | 0.00824924 | 0         | 0         | 6.51E-23  | 0          | 5.53E-11  | 0         | 3.46E-29  | 0          | 0         | 1.13E-12  | 0         | 0          | 0         |
| GPR160     | 0.655317   | 0.315742   | 0.504081  | 0.568694  | 0.196443  | 1.06704    | 0.1969    | 0.766305  | 0.336043  | 0.86578    | 1.49252   | 0.394861  | 0.571161  | 0.306445   | 0.0495326 |
| GPR161     | 0.821903   | 0.849633   | 0.81466   | 0.944019  | 1.98026   | 1.87418    | 0.88903   | 0.497512  | 0.892519  | 1.38607    | 1.76086   | 0.686413  | 1.44474   | 1.81401    | 2.36802   |
| GPR162     | 0.229959   | 0.2083     | 0.273943  | 0.236979  | 1.01446   | 0.305459   | 0.273062  | 0.163495  | 0.0224051 | 0.288622   | 0.623028  | 0.11847   | 0.462909  | 0.552858   | 1.09643   |
| GPR17      | 1.55264    | 0.668024   | 0.869417  | 0.302823  | 1.36803   | 1.60917    | 2.66693   | 1.38561   | 0.0325344 | 0.156467   | 0.0804175 | 0.356803  | 0.0919232 | 0.651587   | 2.72659   |
| GPR171     | 0.193396   | 0.105605   | 0.0533303 | 0.411887  | 0         | 0.186631   | 0.0736044 | 0.320832  | 0.0471069 | 0.0647285  | 0.203765  | 0.0369013 | 0.166371  | 0.107816   | 0.259225  |



|            |            |            |           |           |            |            |            |            |            |            |           |            |            |            |            |
|------------|------------|------------|-----------|-----------|------------|------------|------------|------------|------------|------------|-----------|------------|------------|------------|------------|
| GPR45      | 0.053665   | 0.0258566  | 0.0221978 | 0.0276517 | 0.125041   | 0          | 0.0153183  | 0          | 0          | 0.0168388  | 0         | 0.00959969 | 0.0346244  | 0.0140238  | 0          |
| GPR50      | 0          | 0.00552014 | 0         | 0         | 0          | 0          | 0          | 0.020364   | 0          | 0.0143797  | 0         | 0.0573843  | 0.0295679  | 0.00598791 | 0.18099    |
| GPR50-AS1  | 0          | 0          | 0         | 0         | 0          | 0          | 0          | 0          | 0          | 0          | 0         | 0          | 0          | 0          | 0          |
| GPR52      | 0.974775   | 1.30293    | 1.2096    | 0.82631   | 0.634971   | 0.401617   | 1.00526    | 1.36931    | 0.26807    | 0.730119   | 0.319471  | 0.753726   | 0.172446   | 1.07644    | 1.06121    |
| GPR55      | 0.205555   | 0.151472   | 0.235068  | 0.155757  | 0.197213   | 0.0411829  | 0.075931   | 0.145069   | 0.00736302 | 0.00758801 | 0.0818985 | 0.0475847  | 0.105318   | 0.0347574  | 0.00868243 |
| GPR6       | 0          | 0          | 0         | 0         | 0          | 0          | 0          | 0          | 0          | 0          | 0         | 0          | 0          | 0.00621241 | 0          |
| GPR61      | 0.0655843  | 0.0473993  | 0.020346  | 0.0337932 | 0.0254688  | 0.0279221  | 0.0655218  | 0.080143   | 0.00998428 | 0          | 0         | 0.0293296  | 0          | 0.012854   | 0          |
| GPR62      | 0.0633767  | 0.152679   | 0.148551  | 0.0653115 | 0.147669   | 0.0629585  | 0.180904   | 0.0844859  | 0.0128643  | 0.0397721  | 0.0476963 | 0.0377898  | 0.0681505  | 0.0607263  | 0.0606779  |
| GPR63      | 0.140653   | 0.106232   | 0.119502  | 0.0470097 | 0.0531443  | 0.0841584  | 0.160593   | 0.0777029  | 0.0231485  | 0.0667964  | 0.0557873 | 0.0326402  | 0.0392425  | 0.0615904  | 0.0818898  |
| GPR65      | 0.245818   | 0.104834   | 0.139718  | 0.41687   | 0.151598   | 0.248395   | 0.151929   | 0.206682   | 0.018699   | 0.603806   | 1.20171   | 0.0805636  | 0.478794   | 0.183707   | 0.492445   |
| GPR68      | 2.49828    | 2.62124    | 2.87804   | 15.9931   | 5.07047    | 9.56355    | 1.75724    | 2.20754    | 1.76978    | 7.30443    | 4.12934   | 5.44466    | 14.5758    | 6.86163    | 5.33549    |
| GPR75      | 1.77437    | 1.16023    | 1.06912   | 0.444983  | 0.915771   | 0.728083   | 1.32865    | 1.28607    | 0.551465   | 0.322893   | 0.435629  | 0.745395   | 0.587653   | 1.26198    | 0.881997   |
| GPR75-ASB3 | 1.57778    | 1.70531    | 0.833013  | 1.13064   | 0.785309   | 1.16548    | 0.748343   | 0.597073   | 1.72911    | 0.416167   | 1.24387   | 0.513113   | 0.904969   | 1.40663    | 2.1227     |
| GPR78      | 0.00514519 | 0          | 0         | 0.0424181 | 0.0479535  | 0.0131432  | 0.00587461 | 0.00914523 | 0.00626626 | 1.11719    | 0.0464662 | 0.353426   | 0.248974   | 0.916982   | 0.236452   |
| GPR82      | 0.552835   | 0.59932    | 0.617414  | 0.40592   | 0.193217   | 0.305976   | 0.418176   | 0.749253   | 0.0757452  | 0.520398   | 0.210628  | 0.736746   | 0.084713   | 0.465909   | 0.496213   |
| GPR83      | 0.0647962  | 0.0313379  | 0.0179292 | 0         | 0.00838758 | 0.00919552 | 0.0123304  | 0.0483496  | 0          | 0.0203315  | 0         | 0.00390298 | 0.0104515  | 0.0114304  | 0.0155093  |
| GPR84      | 0.0613467  | 0.192126   | 0.139563  | 1.80176   | 0.238232   | 2.06332    | 0.0175109  | 0.14993    | 0.11207    | 0.904708   | 1.07342   | 0.0987642  | 1.24679    | 0.296578   | 0.682788   |
| GPR85      | 0.0435511  | 0.0272787  | 0.0216171 | 0.0807852 | 0.0405899  | 0.233624   | 0.0298351  | 0.0580569  | 0.0159121  | 0.213178   | 0.314648  | 0.00623239 | 0.202312   | 0.0682851  | 0.118835   |
| GPR87      | 6.88654    | 7.12058    | 7.04567   | 14.1308   | 4.5676     | 7.6411     | 4.57506    | 6.06603    | 26.9424    | 12.6781    | 16.5973   | 10.3456    | 14.2732    | 9.18913    | 2.40685    |
| GPR88      | 0.0267164  | 0.00965426 | 0         | 0         | 0          | 0.102369   | 0.00762597 | 0.0118716  | 0          | 0.00838295 | 0.052779  | 0          | 0.00430932 | 0.00698157 | 0.0479601  |
| GPR89A     | 4.58662    | 2.96156    | 2.723     | 3.44545   | 0.950126   | 4.35973    | 2.86602    | 3.78313    | 3.381      | 3.12476    | 3.53192   | 2.2687     | 3.61208    | 3.16864    | 2.38664    |
| GPR89B     | 2.69209    | 2.57326    | 2.55327   | 2.10411   | 1.00149    | 1.46964    | 2.00743    | 2.38305    | 1.98804    | 2.22971    | 2.62514   | 1.81928    | 1.31079    | 1.4943     | 0.805827   |
| GPRASP1    | 1.82698    | 1.60302    | 2.13506   | 0.467717  | 1.42793    | 1.67683    | 1.21646    | 0.940019   | 0.14053    | 0.255856   | 0.312622  | 0.302732   | 0.198528   | 0.574926   | 1.08818    |
| GPRASP2    | 0.907492   | 0.994229   | 1.1524    | 0.160723  | 0.923533   | 0.535823   | 0.898183   | 0.663627   | 0.567809   | 0.170184   | 0.35437   | 0.349068   | 0.0626391  | 0.139255   | 0.657436   |
| GPRC5A     | 1.89883    | 0.789774   | 0.899546  | 6.82372   | 1.36133    | 1.61683    | 1.81595    | 0.865398   | 1.28476    | 35.8096    | 15.7468   | 12.3151    | 79.8944    | 8.25315    | 6.91064    |
| GPRC5B     | 3.4587     | 1.90547    | 1.68144   | 1.90995   | 3.99199    | 6.45913    | 3.83103    | 2.04513    | 0.436336   | 1.06364    | 2.03001   | 0.586655   | 1.61364    | 1.68525    | 3.9282     |

|            |          |          |          |          |          |          |          |          |           |          |          |           |           |          |          |
|------------|----------|----------|----------|----------|----------|----------|----------|----------|-----------|----------|----------|-----------|-----------|----------|----------|
| GPRC5C     | 5.58132  | 4.25593  | 5.20723  | 2.19487  | 4.51949  | 6.37978  | 4.79842  | 2.37448  | 0.509519  | 1.53946  | 2.43653  | 0.97969   | 1.60115   | 1.60015  | 2.47156  |
| GPRC5D     | 0.802649 | 0.633805 | 0.313559 | 0.896083 | 0.796561 | 0.417661 | 0.585503 | 0.673698 | 0.0271538 | 0.895473 | 0.176184 | 0.366925  | 0.445939  | 0.501069 | 0.192118 |
| GPRC5D-AS1 | 1.22564  | 0.710185 | 0.457267 | 0.437531 | 0.64706  | 0.354694 | 0.411589 | 0.882791 | 0.351223  | 0.402172 | 0.180863 | 0.533067  | 0.263593  | 0.460544 | 0.31062  |
| GPRC6A     | 0        | 0        | 0        | 0        | 0        | 0        | 0        | 0        | 0         | 0        | 0        | 0         | 0         | 0        | 0        |
| GPRIN1     | 0.599475 | 0.498177 | 0.141044 | 3.5423   | 2.21265  | 2.56628  | 0.200943 | 0.464335 | 3.34236   | 4.85266  | 1.98053  | 3.52597   | 6.96201   | 3.60165  | 1.80873  |
| GPRIN2     | 3.46575  | 5.49451  | 4.75447  | 1.18937  | 7.03557  | 1.49123  | 7.68433  | 4.51426  | 4.12283   | 1.10326  | 0.980942 | 1.46438   | 0.950283  | 0.606707 | 0.163821 |
| GPRIN3     | 0.998299 | 0.452908 | 0.542538 | 0.818515 | 0.645183 | 1.35572  | 0.503354 | 0.968155 | 0.106495  | 0.996887 | 1.89608  | 0.161632  | 1.14715   | 0.75026  | 2.8883   |
| GPS1       | 5.97141  | 6.09138  | 5.90976  | 9.54621  | 11.5389  | 13.2392  | 7.66854  | 4.60997  | 9.2192    | 7.6885   | 11.0929  | 7.27724   | 9.88713   | 7.54835  | 6.00579  |
| GPS2       | 9.82129  | 9.79178  | 9.91201  | 12.9245  | 10.5331  | 19.8082  | 11.5105  | 8.78168  | 21.3646   | 15.8666  | 20.2321  | 12.6951   | 20.4425   | 13.7996  | 8.61789  |
| GPSM1      | 1.60307  | 1.83557  | 2.48057  | 9.43425  | 5.46776  | 4.27586  | 3.20858  | 1.28735  | 7.339     | 6.06029  | 5.26544  | 9.11423   | 7.04684   | 7.16451  | 4.14673  |
| GPSM2      | 8.92021  | 9.31988  | 8.35118  | 11.3883  | 3.44821  | 10.5659  | 4.6295   | 6.96525  | 5.9217    | 7.47463  | 7.85118  | 6.12799   | 8.43052   | 6.44561  | 3.19189  |
| GPSM3      | 0.226276 | 0.175649 | 0.225818 | 0.766175 | 0.596966 | 1.00158  | 0.241952 | 0.276108 | 0.048117  | 0.545461 | 1.40693  | 0.0809534 | 0.486643  | 0.233708 | 0.642187 |
| GPT        | 0.50311  | 2.18165  | 3.02512  | 0.379368 | 1.79174  | 0.825437 | 1.7233   | 1.58129  | 0.627676  | 0.107809 | 0.069262 | 0.456571  | 0.0395858 | 0.179574 | 0.405321 |
| GPT2       | 3.21565  | 7.49063  | 6.28415  | 16.4201  | 12.9171  | 16.7939  | 4.68292  | 4.0076   | 12.3569   | 7.89681  | 5.85412  | 6.46474   | 7.87291   | 4.92695  | 2.151    |
| GPX1       | 24.1304  | 13.3262  | 18.0208  | 66.2282  | 35.8739  | 83.3046  | 17.8502  | 15.3609  | 8.2389    | 34.2262  | 95.1155  | 11.3948   | 35.7323   | 25.6127  | 23.0331  |
| GPX2       | 2.60051  | 2.84697  | 3.06788  | 18.823   | 3.37023  | 8.11035  | 2.98676  | 2.66668  | 6.20308   | 4.32613  | 5.21123  | 5.0427    | 6.14543   | 3.20886  | 1.30382  |
| GPX3       | 24.087   | 8.68576  | 7.03976  | 80.653   | 24.6927  | 66.3966  | 17.5675  | 14.0027  | 127.535   | 158.528  | 189.655  | 76.905    | 140.775   | 72.8737  | 20.6126  |
| GPX4       | 32.4294  | 23.7873  | 26.4324  | 29.2719  | 35.4877  | 69.761   | 32.8653  | 21.3301  | 36.462    | 27.8051  | 71.5803  | 19.6522   | 17.4435   | 16.6307  | 21.6286  |
| GPX5       | 0        | 0        | 0        | 0        | 0        | 0        | 0        | 0        | 0         | 0        | 0        | 0         | 0         | 0        | 0        |
| GPX6       | 0        | 0        | 0        | 0        | 0        | 0        | 0        | 0        | 0         | 0        | 0        | 0         | 0         | 0        | 0        |
| GPX7       | 1.93957  | 1.13412  | 1.33972  | 3.47362  | 0.906773 | 3.46338  | 0.946017 | 1.57311  | 1.03202   | 3.54519  | 12.1806  | 1.18571   | 1.78598   | 3.23795  | 11.3041  |
| GPX8       | 1.44797  | 1.06856  | 1.05634  | 2.97805  | 0.892086 | 4.53633  | 0.92777  | 1.17824  | 0.401802  | 5.65907  | 12.6144  | 0.660105  | 2.50702   | 2.57365  | 8.26526  |
| GRAMD1A    | 2.63479  | 2.049    | 2.19881  | 8.20916  | 6.77337  | 14.9831  | 3.65046  | 1.95132  | 0.844443  | 4.38025  | 9.87978  | 1.66477   | 6.3574    | 4.69893  | 13.6419  |
| GRAMD1B    | 0.28667  | 0.151403 | 0.14366  | 0.244291 | 0.779269 | 0.690037 | 0.254924 | 0.23762  | 0.0604265 | 0.913337 | 0.619223 | 0.777088  | 0.810968  | 0.473968 | 0.930271 |
| GRAMD1C    | 2.05265  | 2.58933  | 1.95934  | 2.39426  | 1.54168  | 1.04196  | 1.46156  | 2.30033  | 8.88699   | 2.10916  | 3.17022  | 2.84465   | 0.480262  | 0.601242 | 0.315843 |
| GRAMD2A    | 0.604588 | 0.914545 | 0.942157 | 1.39823  | 1.33226  | 1.98736  | 0.706352 | 0.631024 | 0.291103  | 0.458821 | 0.484102 | 0.749502  | 0.430899  | 0.389469 | 0.141345 |

|           |           |            |            |            |           |            |           |           |           |            |           |            |           |            |           |
|-----------|-----------|------------|------------|------------|-----------|------------|-----------|-----------|-----------|------------|-----------|------------|-----------|------------|-----------|
| GRAMD2B   | 3.72164   | 3.49888    | 4.02058    | 2.37852    | 2.3707    | 3.71217    | 5.56333   | 4.2525    | 14.527    | 5.09497    | 8.48734   | 3.91611    | 5.35127   | 2.84409    | 3.18889   |
| GRAMD4    | 4.6183    | 8.13577    | 8.64322    | 12.6737    | 13.3388   | 11.2443    | 7.20333   | 5.23123   | 5.40486   | 4.12091    | 3.65991   | 5.95625    | 6.24873   | 6.27677    | 3.61973   |
| GRAP      | 0.907398  | 0.695849   | 0.616887   | 1.34453    | 3.01386   | 2.17375    | 0.706666  | 0.36917   | 1.33856   | 1.85263    | 2.89616   | 1.06752    | 2.42313   | 1.75623    | 1.85546   |
| GRAP2     | 0.433968  | 0.357658   | 0.581027   | 0.258915   | 0.549925  | 0.218794   | 0.358579  | 0.482093  | 0.125177  | 0.129002   | 0.264286  | 0.126658   | 0.316835  | 0.289482   | 0.467424  |
| GRAPL     | 0.409334  | 0.216568   | 0.201527   | 0.281441   | 0.440112  | 0.297246   | 0.506716  | 0.267065  | 0.0554803 | 0.223406   | 0.180027  | 0.153834   | 0.139517  | 0.120224   | 0.632703  |
| GRASP     | 2.81415   | 1.50389    | 1.83843    | 2.61754    | 4.73206   | 6.68903    | 2.37708   | 1.00774   | 0.951508  | 2.68483    | 4.40175   | 1.22842    | 2.9599    | 3.15712    | 4.87552   |
| GRASP-AS1 | 1.05116   | 0.920936   | 0.848473   | 0.400627   | 1.71025   | 0.750805   | 1.59719   | 0.886451  | 0.0690518 | 0.140887   | 0.0718687 | 0.800403   | 0.145538  | 0.959046   | 1.33354   |
| GRB10     | 3.02142   | 1.57648    | 1.39207    | 3.06744    | 3.24698   | 7.32331    | 1.9042    | 1.80453   | 0.783314  | 3.41674    | 3.95958   | 1.89969    | 3.77092   | 4.96798    | 4.67748   |
| GRB14     | 0.374261  | 0.191365   | 0.28434    | 0.0393558  | 0.059322  | 0.14308    | 0.22674   | 0.278308  | 0.0558131 | 0.0862779  | 0.0776009 | 0.0163955  | 0         | 0.0678629  | 0.0219382 |
| GRB2      | 9.35806   | 8.08286    | 8.95848    | 18.7246    | 15.4723   | 23.2069    | 8.58942   | 7.47004   | 14.9035   | 16.2201    | 20.599    | 9.54296    | 23.5378   | 10.8619    | 12.4334   |
| GRB7      | 2.05033   | 3.96387    | 3.44182    | 6.34757    | 8.85128   | 7.35429    | 3.71633   | 2.95342   | 15.1697   | 7.21614    | 5.22704   | 6.32056    | 5.32452   | 2.33517    | 0.895626  |
| GREB1     | 0.661239  | 0.421955   | 0.450372   | 0.396717   | 0.628746  | 0.923423   | 0.630832  | 0.45327   | 0.0984699 | 0.201434   | 0.382907  | 0.307085   | 0.358586  | 0.43065    | 0.918764  |
| GREB1L    | 0.575229  | 0.304631   | 0.356903   | 0.145642   | 0.046217  | 0.160452   | 0.418979  | 0.478163  | 0.0724722 | 0.0684628  | 0.0783713 | 0.0922533  | 0.0143975 | 0.171054   | 0.138871  |
| GREM1     | 0.206934  | 0.0916199  | 0.0694015  | 5.11224    | 1.63326   | 22.2773    | 0.376756  | 0.382723  | 0.401873  | 17.0571    | 34.8274   | 1.07649    | 16.8117   | 10.4208    | 11.4857   |
| GREM2     | 0.149381  | 0.117291   | 0.22885    | 0.0114031  | 0.0601588 | 0.376878   | 0.454824  | 0.0885052 | 0.0336907 | 0.0277761  | 0.0249827 | 0.0118763  | 0.0214178 | 0          | 0.0397279 |
| GRHL1     | 10.2394   | 18.5711    | 20.2077    | 22.3015    | 13.5021   | 12.9551    | 14.9088   | 17.2414   | 49.7334   | 31.4238    | 21.9006   | 28.1121    | 38.0688   | 24.369     | 5.55015   |
| GRHL2     | 6.29548   | 11.7633    | 11.3318    | 9.5218     | 9.86732   | 9.35366    | 8.88619   | 6.5512    | 12.0418   | 4.95276    | 4.8646    | 6.39526    | 6.50055   | 5.41905    | 1.36338   |
| GRHL3     | 6.25583   | 9.76905    | 7.37959    | 13.1794    | 16.1783   | 13.5963    | 9.29709   | 7.66329   | 28.4821   | 16.6881    | 17.9107   | 21.892     | 17.7984   | 13.7073    | 3.92387   |
| GRHPR     | 16.7904   | 15.1144    | 16.0916    | 23.2123    | 22.8503   | 27.9235    | 16.7958   | 10.875    | 15.93     | 17.875     | 35.3701   | 14.1862    | 23.0082   | 15.592     | 12.2719   |
| GRIA1     | 0.0794673 | 0.0591732  | 0.0537881  | 0.026057   | 0.0224437 | 0.190693   | 0.0412424 | 0.0770443 | 0         | 0.00906724 | 0         | 0.00258459 | 0.0186443 | 0.0151029  | 0.0259375 |
| GRIA2     | 0.43376   | 0.214692   | 0.316428   | 0.00406365 | 0.24501   | 0.0637952  | 0.23412   | 0.459083  | 0         | 0          | 0         | 0          | 0         | 0          | 0         |
| GRIA3     | 0.242505  | 0.257054   | 0.304269   | 0.374863   | 0.401807  | 0.485251   | 0.27227   | 0.29095   | 0.118137  | 0.862378   | 1.56042   | 0.323901   | 0.344218  | 1.28645    | 1.61364   |
| GRIA4     | 0.103141  | 0.0716192  | 0.0777969  | 0.0343879  | 0.0801069 | 0.00774912 | 0.107372  | 0.148279  | 0.0258618 | 0          | 0         | 0.0021706  | 0         | 0.00475642 | 0.0609921 |
| GRID1     | 0.344238  | 0.221145   | 0.343697   | 0.265041   | 0.903492  | 0.926509   | 0.650548  | 0.158239  | 0.120472  | 0.43702    | 0.513668  | 0.12174    | 0.508023  | 0.467362   | 1.68767   |
| GRID1-AS1 | 0.03303   | 0.00530479 | 0          | 0.0113461  | 0.0342047 | 0.0374995  | 0.0502835 | 0.0195696 | 0         | 0.0138187  | 0.0124289 | 0.00787796 | 0         | 0.0345259  | 0.189741  |
| GRID2     | 0.0260083 | 0.00417707 | 0.00717197 | 0.00446705 | 0.0134666 | 0.0184548  | 0.0296954 | 0.0154093 | 0.0052792 | 0          | 0         | 0          | 0         | 0.00226551 | 0.0186756 |

|           |           |           |            |            |            |           |           |           |            |            |            |            |            |            |           |
|-----------|-----------|-----------|------------|------------|------------|-----------|-----------|-----------|------------|------------|------------|------------|------------|------------|-----------|
| GRID2IP   | 0.129905  | 0.233509  | 0.289333   | 0.0720842  | 0.465663   | 0.0808321 | 0.15973   | 0.177613  | 0.182549   | 0.0313546  | 0.067683   | 0.0893754  | 0.0548014  | 0.0757279  | 0.0358769 |
| GRIFIN    | 0.363232  | 0.450027  | 0.386345   | 0.0534744  | 0.24181    | 0.0883677 | 0.533219  | 0.461157  | 0          | 0          | 0          | 0.111387   | 0          | 0          | 0         |
| GRIK1     | 0.193093  | 0.214826  | 0.264297   | 0.347324   | 0.17451    | 0.0657664 | 0.252535  | 0.35881   | 0.0470331  | 0.198287   | 0.13475    | 0.178356   | 0.033977   | 0.172479   | 0.347893  |
| GRIK1-AS1 | 0.0423478 | 0.0102019 | 0.0175165  | 0          | 0.0328903  | 0         | 0.0241757 | 0         | 0          | 0          | 0          | 0.0151505  | 0.0409838  | 0.0221328  | 0.152042  |
| GRIK1-AS2 | 0.194117  | 0.207841  | 0.249802   | 0.133362   | 0.10051    | 0.0734613 | 0.147758  | 0.172515  | 0.0525361  | 0.135354   | 0.170437   | 0.185194   | 0.0974114  | 0.326907   | 0.0929255 |
| GRIK2     | 0.21647   | 0.197008  | 0.194997   | 0.0545303  | 0.112084   | 0.307202  | 0.269128  | 0.205206  | 0.0820201  | 0.0120752  | 0.0380128  | 0.05163    | 0.018622   | 0.0578254  | 0.0414504 |
| GRIK3     | 0.0527177 | 0.0241906 | 0.008307   | 0.0646751  | 0.0233968  | 0.0790891 | 0.192039  | 0.020079  | 0.00611468 | 0.0189046  | 0.00283389 | 0.0143699  | 0.105279   | 0.0288646  | 0.205496  |
| GRIK4     | 0.0146893 | 0.0389265 | 0.0273421  | 0.0151378  | 0.057044   | 0.0656658 | 0.0922449 | 0.0228457 | 0.00894498 | 0.00921831 | 0.0290193  | 0.0341595  | 0          | 0.00959661 | 0.163492  |
| GRIK5     | 0.215234  | 0.124444  | 0.1558     | 0.088722   | 0.259108   | 0.430682  | 0.239604  | 0.124333  | 0.0131065  | 0.0270141  | 0.0364459  | 0.0308012  | 0.0104151  | 0.0281227  | 0.0309103 |
| GRIN1     | 0.104131  | 0.112886  | 0.202439   | 0.0482894  | 0.841105   | 0.0930992 | 0.208063  | 0.198967  | 0.380458   | 0.0653474  | 0.129306   | 0.115488   | 0.0503885  | 0.0435386  | 0.0672952 |
| GRIN2A    | 0.380292  | 0.737452  | 0.363802   | 0.0935405  | 0.561554   | 0.138587  | 0.459222  | 0.139083  | 0.34117    | 0.0157138  | 0.0106001  | 0.0447916  | 0.0201945  | 0.0171766  | 0.197782  |
| GRIN2B    | 0.0327913 | 0.0161668 | 0.018926   | 0.00707283 | 0.00355369 | 0.0240254 | 0.0278624 | 0.0210095 | 0.00278624 | 0.0191426  | 0.0025826  | 0.00654783 | 0.00393615 | 0.0235152  | 0.043807  |
| GRIN2C    | 0.141432  | 0.156732  | 0.273007   | 0.0340084  | 0.512618   | 0.0561996 | 0.328349  | 0.234628  | 0.0516746  | 0.0532537  | 0.010644   | 0.0539726  | 0.0577926  | 0.0418873  | 0.541639  |
| GRIN2D    | 0.136323  | 0.140122  | 0.1842     | 0.131119   | 0.367044   | 0.472046  | 0.399499  | 0.0969218 | 0.132821   | 0.285165   | 0.379599   | 0.1138     | 0.214023   | 0.21612    | 0.495967  |
| GRIN3A    | 0.428851  | 0.266893  | 0.238981   | 0.150383   | 0.171164   | 0.248512  | 0.282228  | 0.365247  | 0.1342     | 0.138301   | 0.161373   | 0.125725   | 0.0826234  | 0.147868   | 0.23951   |
| GRIN3B    | 0.176341  | 0.197116  | 0.215905   | 0.167187   | 0.547838   | 0.402409  | 0.273824  | 0.369854  | 0.0944962  | 0.602008   | 0.581277   | 0.65612    | 0.27761    | 1.42669    | 0.192469  |
| GRINA     | 14.4292   | 16.3062   | 18.4648    | 30.4549    | 17.6641    | 64.7947   | 27.7528   | 16.0422   | 11.5577    | 14.42      | 33.5727    | 9.31463    | 23.6951    | 12.3908    | 20.0124   |
| GRIP1     | 1.78375   | 3.1204    | 2.79238    | 1.59312    | 1.45644    | 1.44875   | 1.61364   | 1.45518   | 2.23925    | 1.21124    | 0.836434   | 1.21087    | 0.867575   | 1.16892    | 0.407244  |
| GRIP2     | 0.162157  | 0.396798  | 0.471223   | 0.0897866  | 0.437723   | 0.19416   | 0.497059  | 0.340821  | 0.117445   | 0.328796   | 0.142544   | 0.151072   | 0.208504   | 0.228013   | 0.689818  |
| GRIPAP1   | 3.91182   | 5.07751   | 4.77535    | 5.375      | 8.31509    | 7.75254   | 3.76988   | 3.19188   | 5.71142    | 3.59856    | 2.32419    | 3.95027    | 4.57055    | 3.85783    | 3.54813   |
| GRK1      | 0         | 0         | 0.00912563 | 0          | 0          | 0         | 0         | 0         | 0          | 0          | 0          | 0          | 0          | 0          | 0.0475258 |
| GRK2      | 10.2939   | 12.898    | 14.6922    | 18.8438    | 24.8998    | 29.61     | 13.0297   | 10.1005   | 19.8547    | 15.3169    | 14.5201    | 13.0552    | 22.3247    | 13.8553    | 11.3241   |
| GRK3      | 1.75978   | 1.69797   | 1.39643    | 1.15729    | 0.761394   | 1.48763   | 1.11431   | 1.64669   | 0.620059   | 1.10623    | 1.23199    | 1.14111    | 1.42968    | 1.01087    | 1.77074   |
| GRK4      | 0.4266    | 0.355028  | 0.4251     | 0.659436   | 0.632536   | 0.709978  | 0.254609  | 0.327428  | 0.413279   | 0.328557   | 0.295514   | 0.33993    | 0.250218   | 0.329372   | 0.167087  |
| GRK5      | 5.01222   | 2.26239   | 2.64954    | 3.74806    | 4.0615     | 8.99789   | 4.20429   | 1.71263   | 1.74094    | 3.5315     | 3.51338    | 2.13629    | 6.36848    | 5.07371    | 9.31605   |
| GRK6      | 3.35353   | 4.42252   | 4.74431    | 7.71173    | 7.67915    | 9.19529   | 5.24864   | 2.83968   | 6.0942     | 4.39816    | 5.3255     | 3.71522    | 7.26414    | 5.17535    | 4.0585    |

|            |           |            |            |            |            |            |            |            |            |            |            |            |            |            |            |
|------------|-----------|------------|------------|------------|------------|------------|------------|------------|------------|------------|------------|------------|------------|------------|------------|
| GRK6P1     | 0.0754337 | 0.109035   | 0.14977    | 0.17102    | 0.210914   | 0.0770769  | 0.0602894  | 0.0670392  | 0.0918697  | 0.0568062  | 0.0510931  | 0.0593723  | 0.0778711  | 0.181355   | 0.314164   |
| GRK7       | 0.172314  | 0.140501   | 0.109654   | 0.0136596  | 0.0205894  | 0.0677182  | 0.105938   | 0.0588992  | 0          | 0.0332725  | 0          | 0.00948423 | 0.017104   | 0.0831311  | 0.0761428  |
| GRM1       | 0.0101519 | 0.00489136 | 0.0111979  | 0          | 0.00525649 | 0.0172885  | 0.00772744 | 0.0090222  | 0          | 0          | 0.0152804  | 0.00484266 | 0.00654998 | 0.00353723 | 0.00485983 |
| GRM2       | 0.496156  | 0.257928   | 0.243033   | 0.127826   | 0.152112   | 0.544764   | 0.544133   | 0.411932   | 0.103361   | 0.1311     | 0.132655   | 0.102767   | 0.12215    | 0.160364   | 0.131258   |
| GRM3       | 0.0217051 | 0.0366025  | 0.035912   | 0.00559193 | 0.0252866  | 0.023102   | 0.0371733  | 0.0337569  | 0          | 0.0136211  | 0          | 0.0155306  | 0.010503   | 0          | 0          |
| GRM4       | 0         | 0.00664205 | 0.00912345 | 0.0170476  | 0.0856544  | 0.201896   | 0          | 0.0171519  | 0.00671566 | 0.0346044  | 0.074698   | 0.0414283  | 0.0302407  | 0.0821358  | 0.0950289  |
| GRM5       | 5.40E-13  | 0.00458607 | 0          | 0.0206763  | 0          | 0.0171293  | 0.0262501  | 0.022968   | 4.38E-13   | 0.00626007 | 0.00833841 | 0.00528542 | 0.00476579 | 0.0255339  | 0.0288904  |
| GRM5-AS1   | 0.0144014 | 0.0131559  | 0          | 9.14E-05   | 0.0149136  | 1.63E-34   | 3.17E-37   | 3.05E-05   | 0.0116929  | 0.0196686  | 0.0185863  | 0.0255199  | 0.0137199  | 1.11E-18   | 0          |
| GRM6       | 0.0192122 | 0.0240675  | 0.0317874  | 0.031678   | 0.0477492  | 0.00981538 | 0.00877436 | 0.0102445  | 0          | 0          | 0          | 0.0109975  | 0.00495825 | 0.0542222  | 0.0441459  |
| GRM7       | 0.109191  | 0.0420879  | 0.0496818  | 0.0225049  | 0.059364   | 0.0418386  | 0.0124671  | 0.019408   | 0          | 0          | 0          | 0          | 0          | 0          | 0.0313624  |
| GRM7-AS1   | 0         | 0.103727   | 0.0890491  | 0          | 0          | 0          | 0          | 0.0478317  | 0          | 0          | 0          | 0          | 0          | 0          | 0          |
| GRM7-AS2   | 0.136136  | 0          | 0          | 0          | 0          | 0          | 0          | 0.0403287  | 0          | 0          | 0          | 0          | 0          | 0          | 0          |
| GRM7-AS3   | 0         | 0          | 0          | 0          | 0          | 0          | 0.0331128  | 0          | 0          | 0          | 0          | 0          | 0          | 0          | 0          |
| GRM8       | 0.0294366 | 0.0028366  | 0.00974081 | 0.0303353  | 0.00914504 | 0.0300779  | 0.0201659  | 0.00523216 | 0.0215103  | 0.00738919 | 0.0132921  | 0          | 0.0189923  | 0.00307697 | 0.0760944  |
| GRN        | 38.8085   | 45.8195    | 38.6094    | 98.1228    | 138.571    | 145.241    | 56.2721    | 36.664     | 114.569    | 76.9013    | 110.616    | 90.943     | 102.6      | 50.8519    | 52.2913    |
| GRP        | 0         | 0.0262061  | 0          | 0.0280254  | 0.211217   | 0.0694689  | 0.0310505  | 0.0483375  | 0.132482   | 0          | 0          | 0          | 0.0175462  | 0.0142134  | 0.156223   |
| GRPEL1     | 3.58019   | 2.64126    | 2.69502    | 7.40453    | 2.92833    | 6.3997     | 3.06817    | 2.75558    | 9.01256    | 6.10203    | 8.25118    | 4.2715     | 12.4458    | 5.80795    | 2.88547    |
| GRPEL2     | 2.43061   | 1.84322    | 1.48227    | 3.99556    | 1.60261    | 3.22065    | 1.5167     | 2.13442    | 4.94811    | 8.30389    | 8.77643    | 4.34286    | 17.9067    | 7.10189    | 3.54231    |
| GRPEL2-AS1 | 0.511909  | 0.123447   | 0.152121   | 0.373675   | 4.40E-08   | 0.0540048  | 0.354441   | 8.77E-43   | 0.305692   | 0.54094    | 3.27E-28   | 0.100303   | 0.0422301  | 0.746767   | 0.703834   |
| GRPR       | 0.069058  | 0.0207957  | 0.0428472  | 0.0177916  | 0.0268177  | 0.0808527  | 0.0788482  | 0.0460297  | 0.0105131  | 0.0433374  | 0.0194895  | 0.0185298  | 0.0668338  | 0.0270695  | 0          |
| GRSF1      | 4.28927   | 4.13163    | 4.57049    | 5.80807    | 2.63578    | 6.31245    | 3.20592    | 4.14105    | 4.15768    | 4.89328    | 6.35474    | 2.81374    | 6.37971    | 5.16961    | 3.29751    |
| GRTP1      | 2.4606    | 3.65747    | 3.96119    | 3.15461    | 4.29888    | 2.29418    | 2.59333    | 2.62943    | 1.41555    | 1.19666    | 1.37014    | 1.75273    | 1.4069     | 1.938      | 0.664727   |
| GRTP1-AS1  | 0.322446  | 0.756143   | 0.618307   | 0.189064   | 1.12563    | 0.227627   | 0.577815   | 0.465214   | 0          | 0.117188   | 0          | 0.242087   | 0          | 0.40625    | 0.19138    |
| GRWD1      | 4.08019   | 4.62644    | 4.85655    | 10.1574    | 10.29      | 11.6824    | 5.73452    | 3.45864    | 5.27907    | 3.70182    | 4.98897    | 4.67926    | 12.2932    | 6.97859    | 4.73645    |
| GRXCR1     | 0         | 0          | 0          | 0          | 0          | 0          | 0          | 0          | 0          | 0          | 0          | 0          | 0          | 0          | 0          |
| GRXCR2     | 0         | 0.0149273  | 0          | 0          | 0.0481247  | 0.0791406  | 0.0353735  | 0.0275336  | 0.0377318  | 0          | 0          | 0          | 0          | 0          | 0          |

|              |           |            |           |           |           |            |           |           |           |           |           |            |           |            |           |
|--------------|-----------|------------|-----------|-----------|-----------|------------|-----------|-----------|-----------|-----------|-----------|------------|-----------|------------|-----------|
| GS1-124K5.11 | 1.9924    | 2.87634    | 2.90014   | 2.3344    | 3.44316   | 2.22045    | 2.43318   | 1.94043   | 1.85744   | 3.1849    | 2.65435   | 2.27675    | 2.54167   | 3.20867    | 2.39925   |
| GS1-124K5.4  | 0.43339   | 0.278419   | 0.167315  | 0.238198  | 0.179521  | 0.393628   | 0.296899  | 0.205419  | 0.387069  | 0.145053  | 0.815407  | 0.103367   | 0.0745657 | 0.120805   | 0.165974  |
| GS1-24F4.2   | 0.020925  | 0.191558   | 0.0173106 | 0.0431276 | 0.130015  | 0.0178174  | 0         | 0.0371928 | 0         | 0         | 0.0472434 | 0.0299448  | 0         | 0.0109363  | 0         |
| GS1-279B7.1  | 0.0347493 | 0.0502283  | 0.0287471 | 0.0358102 | 0         | 0.0295886  | 0         | 0.0617646 | 0         | 0         | 0         | 0          | 0         | 0.0181615  | 0         |
| GS1-594A7.3  | 0         | 0          | 0         | 0         | 0         | 0          | 0         | 0         | 0         | 0         | 0         | 0          | 0         | 0          | 0         |
| GS1-600G8.3  | 0         | 0          | 0         | 0         | 0         | 0          | 0         | 0         | 0         | 0         | 0         | 0          | 0         | 0          | 0.0295566 |
| GSAP         | 1.41746   | 1.7393     | 2.00551   | 1.91807   | 0.555597  | 1.48895    | 1.02852   | 1.50107   | 0.871222  | 1.82063   | 1.73473   | 0.881529   | 1.75215   | 0.948537   | 1.14149   |
| GSC          | 0.350357  | 0.0750256  | 0.128818  | 0.0401171 | 0.241878  | 0.563502   | 0.266684  | 0.155684  | 0.0237053 | 0         | 0.505374  | 0.0139272  | 0.113024  | 0.203458   | 1.22994   |
| GSC-DT       | 0         | 0          | 0         | 0         | 0         | 0.0973792  | 0.0118706 | 0         | 0         | 0         | 0         | 0          | 0         | 0.00543377 | 0.0597239 |
| GSC2         | 0         | 0          | 0         | 0         | 0         | 0          | 0.0427573 | 0         | 0         | 0         | 0         | 0          | 0         | 0.0195721  | 0         |
| GSDMA        | 8.42732   | 14.0208    | 14.9166   | 49.9364   | 26.3804   | 20.1613    | 22.834    | 11.7285   | 190.956   | 39.6778   | 53.6879   | 42.623     | 42.4907   | 14.7841    | 3.97792   |
| GSDMB        | 0.89553   | 1.92934    | 2.03204   | 0.659193  | 1.41094   | 0.718958   | 1.0517    | 1.40983   | 0.218131  | 0.337195  | 0.259956  | 0.796393   | 0.115558  | 1.01632    | 0.955384  |
| GSDMC        | 6.24197   | 14.9182    | 14.7084   | 33.5599   | 15.8155   | 17.1865    | 8.37311   | 10.7006   | 16.9799   | 22.7324   | 15.5368   | 21.2149    | 17.6551   | 20.1221    | 5.719     |
| GSDMD        | 2.01159   | 2.31011    | 2.31847   | 4.58878   | 7.64489   | 7.49988    | 1.8062    | 1.15422   | 0.868165  | 3.23561   | 5.66607   | 0.978196   | 5.46243   | 3.2459     | 6.31072   |
| GSDME        | 0.794301  | 0.526222   | 0.552563  | 4.18576   | 1.54228   | 5.31849    | 0.989353  | 0.737995  | 1.22021   | 4.0217    | 4.7279    | 1.51774    | 5.4276    | 3.71737    | 2.08699   |
| GSE1         | 5.64731   | 7.00336    | 7.18836   | 4.84317   | 9.47325   | 7.13216    | 7.73949   | 6.2088    | 8.47899   | 5.47936   | 4.58522   | 5.96332    | 6.05276   | 4.79606    | 3.46538   |
| GSEC         | 0.153877  | 0.177936   | 0.356433  | 0.951446  | 0.669266  | 0.628915   | 0.281106  | 0.218804  | 0.0374809 | 0.502141  | 1.59811   | 0.198185   | 0.496402  | 0.53079    | 0.662959  |
| GSG1         | 0.172147  | 0.259581   | 0.284273  | 0.112615  | 0.0363245 | 0.0935614  | 0.240712  | 0.166587  | 0.0192261 | 0.0197104 | 0.0884576 | 0.050369   | 0         | 0.126541   | 0.10075   |
| GSG1L        | 0.0136833 | 0.00219761 | 0.0264129 | 0         | 0         | 0.00388372 | 0.0156232 | 0.0162141 | 0         | 0.0114493 | 0         | 0.00326359 | 0         | 0          | 0         |
| GSG1L2       | 0         | 0          | 0         | 0         | 0         | 0          | 0         | 0         | 0         | 0         | 0         | 0          | 0         | 0          | 0         |
| GSK3A        | 7.98695   | 9.49778    | 9.84955   | 18.2894   | 12.159    | 20.4024    | 11.1929   | 7.91934   | 21.4723   | 13.8236   | 18.9318   | 12.3721    | 25.4025   | 12.4231    | 8.06885   |
| GSK3B        | 7.20506   | 8.1793     | 8.80614   | 7.94422   | 6.09085   | 8.68734    | 6.90104   | 8.04724   | 7.40086   | 8.08407   | 8.62904   | 5.25763    | 10.3603   | 6.90087    | 6.28024   |
| GSKIP        | 2.2176    | 2.34582    | 2.36561   | 3.47091   | 1.43745   | 2.63362    | 1.64674   | 2.63023   | 7.67588   | 6.33045   | 8.47954   | 3.50159    | 8.31038   | 3.0544     | 2.35863   |
| GSN          | 101.974   | 45.9379    | 63.7673   | 38.3892   | 54.077    | 57.204     | 114.68    | 37.1857   | 47.4527   | 28.5498   | 30.4268   | 20.8654    | 30.9037   | 15.8102    | 38.5568   |
| GSN-AS1      | 1.5871    | 1.91053    | 2.00945   | 1.03638   | 3.25787   | 1.10781    | 2.27005   | 1.60638   | 0.202987  | 0.801655  | 0.137329  | 1.09121    | 0.0940618 | 1.41963    | 3.34244   |
| GSPT1        | 6.74582   | 7.34948    | 7.29961   | 13.5788   | 4.94798   | 10.9176    | 4.98638   | 5.90779   | 11.624    | 10.8246   | 10.3406   | 9.12758    | 18.5012   | 11.681     | 6.47712   |



|           |           |           |            |           |           |           |           |           |           |           |          |           |           |            |           |
|-----------|-----------|-----------|------------|-----------|-----------|-----------|-----------|-----------|-----------|-----------|----------|-----------|-----------|------------|-----------|
| GSPT2     | 0.918891  | 0.591621  | 0.484357   | 1.12293   | 0.631573  | 1.7795    | 0.492084  | 0.520333  | 0.316915  | 0.530724  | 0.917977 | 0.38984   | 0.650576  | 0.743754   | 1.0744    |
| GSR       | 4.95508   | 3.28928   | 4.2072     | 3.49894   | 3.16668   | 5.86859   | 3.13112   | 4.06838   | 0.989589  | 2.83184   | 6.42902  | 1.02264   | 3.88509   | 2.9689     | 4.81354   |
| GSS       | 3.76548   | 4.33784   | 4.20473    | 9.30981   | 5.56028   | 10.0675   | 3.74202   | 2.96773   | 3.15166   | 5.95138   | 7.09331  | 5.36084   | 6.63352   | 5.12251    | 3.92782   |
| GSTA1     | 0.0510508 | 0         | 0.0140776  | 0         | 0         | 0.0869383 | 0.0777176 | 0.0302465 | 0         | 0         | 0        | 0         | 0         | 0          | 0.0292998 |
| GSTA2     | 0         | 0         | 0          | 0         | 0         | 0         | 0         | 8.90E-17  | 0         | 0         | 0        | 0         | 0         | 0          | 0.198074  |
| GSTA3     | 0.557664  | 1.09919   | 1.97118    | 0.0261222 | 0.196874  | 0.237422  | 0.665664  | 1.8022    | 0.0308715 | 0         | 0        | 0.126962  | 0         | 0.0264963  | 0         |
| GSTA4     | 11.4076   | 13.745    | 11.6215    | 30.9102   | 10.5622   | 10.5804   | 9.41884   | 12.5001   | 31.1282   | 12.7365   | 20.1836  | 18.9428   | 9.76523   | 8.40647    | 4.51082   |
| GSTA5     | 0         | 0         | 0          | 0         | 0         | 0         | 0         | 0         | 0         | 0         | 0        | 0         | 0         | 0          | 0         |
| GSTA7P    | 0         | 0         | 0          | 0         | 0         | 0         | 0         | 0         | 0         | 0         | 0        | 0         | 0         | 0          | 0         |
| GSTCD     | 1.30196   | 1.40568   | 1.45075    | 2.09197   | 0.808959  | 1.95476   | 1.08002   | 1.53018   | 0.789586  | 1.24058   | 2.16563  | 1.05327   | 1.61489   | 1.61367    | 1.27451   |
| GSTK1     | 27.7304   | 18.7997   | 17.9432    | 32.895    | 29.9675   | 49.3778   | 19.7641   | 15.1489   | 23.9095   | 23.1712   | 40.8076  | 17.9777   | 17.7085   | 15.44      | 18.4888   |
| GSTM1     | 1.02E-13  | 4.76081   | 7.65296    | 0.149032  | 5.1637    | 15.3396   | 6.66937   | 0.511985  | 2.28E-16  | 2.85746   | 10.3746  | 14.1176   | 7.83E-11  | 7.82E-17   | 1.28916   |
| GSTM2     | 4.49062   | 7.02418   | 6.8057     | 1.55577   | 4.03567   | 2.91772   | 5.17673   | 4.18917   | 1.53258   | 0.494155  | 1.84466  | 1.71961   | 0.230713  | 1.09303    | 1.63257   |
| GSTM2P1   | 0.0203724 | 0         | 0          | 0.0419887 | 0         | 0.0173468 | 0.0232606 | 0         | 0         | 0.0255695 | 0        | 0         | 0         | 0          | 0         |
| GSTM3     | 2.759     | 2.50467   | 3.39583    | 3.30556   | 0.740411  | 4.29742   | 4.18095   | 1.54992   | 0.77857   | 2.31559   | 4.41227  | 2.84885   | 2.75334   | 2.99529    | 1.0711    |
| GSTM4     | 2.99426   | 2.30458   | 2.39217    | 3.67763   | 2.52974   | 10.6964   | 4.99473   | 2.64239   | 1.06262   | 2.0739    | 5.57383  | 2.03004   | 0.754141  | 1.71924    | 2.83449   |
| GSTM5     | 1.68649   | 1.72348   | 2.51776    | 0.461076  | 1.08413   | 0.680671  | 3.9755    | 1.05061   | 0.0538579 | 0.355688  | 1.63009  | 0.0967982 | 0         | 0.201554   | 0.60175   |
| GSTO1     | 8.0206    | 4.92844   | 4.85215    | 27.6909   | 6.75074   | 31.4399   | 7.08002   | 4.55313   | 13.0601   | 27.5615   | 51.7129  | 11.3008   | 30.0005   | 11.9294    | 12.0514   |
| GSTO2     | 2.86561   | 3.93182   | 3.85077    | 3.79255   | 2.23694   | 2.98501   | 3.81994   | 2.52086   | 4.0746    | 2.97589   | 5.69804  | 3.06001   | 1.92396   | 2.47081    | 1.10718   |
| GSTP1     | 146.758   | 94.1406   | 74.8036    | 343.429   | 213.706   | 293.06    | 124.535   | 81.2614   | 287.299   | 490.887   | 611.198  | 336.202   | 471.286   | 306.72     | 124.862   |
| GSTT1     | 0         | 5.68663   | 6.21196    | 10.1192   | 10.4079   | 0.393464  | 8.55152   | 0.838447  | 4.5491    | 5.17141   | 11.4327  | 0.0826596 | 0.0124224 | 4.1761     | 4.03702   |
| GSTT1-AS1 | 0         | 0.575233  | 1.06364    | 0.283924  | 0.427966  | 0         | 1.15343   | 0         | 0         | 0.230531  | 0        | 0         | 0         | 0.191993   | 0         |
| GSTT2     | 0.22943   | 0.144425  | 0.0418578  | 0.0732882 | 0.211386  | 0.436196  | 0.307484  | 0.285181  | 0.060885  | 0.0594262 | 0.240801 | 0.134052  | 0.0461914 | 0.00817025 | 0.0125492 |
| GSTT2B    | 1.06407   | 0.170425  | 0.183622   | 0.5032    | 0.499746  | 5.01855   | 1.03354   | 0.844508  | 0.95124   | 0.490862  | 1.82882  | 0.122109  | 0.721684  | 0.806857   | 1.27783   |
| GSTT4     | 0         | 0         | 0          | 0         | 0         | 0         | 0         | 0         | 0         | 0         | 0        | 0         | 0         | 0          | 0         |
| GSTTP2    | 0         | 0.0430944 | 0.00924907 | 0         | 0.0173667 | 0         | 0.0382956 | 0         | 0         | 0         | 0        | 0         | 0         | 0.0292164  | 0         |

|           |          |           |           |          |          |           |           |          |           |          |          |          |           |          |          |
|-----------|----------|-----------|-----------|----------|----------|-----------|-----------|----------|-----------|----------|----------|----------|-----------|----------|----------|
| GSTZ1     | 3.16241  | 2.28555   | 1.8551    | 4.85879  | 4.44341  | 8.27407   | 3.29889   | 2.06954  | 4.98939   | 3.35573  | 4.98172  | 3.27075  | 2.10529   | 1.94581  | 1.42441  |
| GSX1      | 0        | 0         | 0         | 0        | 0        | 0         | 0         | 0        | 0         | 0        | 0        | 0        | 0         | 0        | 0        |
| GSX2      | 0        | 0.0184005 | 0.0631867 | 0        | 0        | 0.0162591 | 0.0436039 | 0.01697  | 0.0465109 | 0        | 0        | 0        | 0.0492798 | 0        | 0        |
| GTDC1     | 1.50947  | 0.877161  | 0.883058  | 1.45433  | 0.712066 | 1.65332   | 0.785093  | 1.0505   | 0.941116  | 1.50824  | 2.13278  | 1.11052  | 1.16826   | 1.22359  | 1.7963   |
| GTF2A1    | 2.62219  | 2.64542   | 2.66803   | 3.1949   | 0.886677 | 3.71215   | 2.18333   | 3.77935  | 3.71491   | 3.59558  | 4.13211  | 2.19534  | 4.86377   | 2.87704  | 2.67961  |
| GTF2A1L   | 4.28E-24 | 4.55E-16  | 4.60E-09  | 1.77E-26 | 0        | 1.57E-34  | 3.66E-21  | 9.22E-13 | 0         | 2.23E-22 | 7.91E-10 | 6.44E-17 | 1.49E-20  | 2.81E-16 | 1.85E-18 |
| GTF2A2    | 2.91829  | 2.20133   | 2.30538   | 5.18896  | 0.520194 | 4.92903   | 2.14396   | 3.02934  | 4.93796   | 5.56921  | 10.6797  | 3.42314  | 7.19199   | 3.66307  | 2.97152  |
| GTF2B     | 4.92405  | 4.46705   | 4.48088   | 6.84316  | 1.5516   | 6.31311   | 3.26083   | 3.63841  | 8.32718   | 6.97479  | 13.7219  | 4.35882  | 8.01505   | 5.09558  | 3.96008  |
| GTF2E1    | 1.5829   | 1.45425   | 1.41245   | 2.34328  | 1.16379  | 2.87709   | 1.11467   | 1.2681   | 1.5891    | 1.87485  | 2.81671  | 1.1776   | 1.90524   | 1.7298   | 1.56703  |
| GTF2E2    | 3.20287  | 3.25835   | 3.29312   | 5.52624  | 2.99932  | 3.87264   | 2.53896   | 2.06571  | 6.12974   | 5.94949  | 7.23127  | 3.35249  | 7.11458   | 4.84493  | 3.32495  |
| GTF2F1    | 7.79298  | 6.73149   | 6.67205   | 14.7622  | 12.077   | 16.253    | 6.41178   | 5.03104  | 8.49657   | 8.71066  | 5.92973  | 6.53031  | 17.1385   | 9.35024  | 6.98341  |
| GTF2F2    | 8.21873  | 7.72796   | 8.81513   | 10.5214  | 4.08232  | 7.89325   | 6.63782   | 5.95937  | 23.1227   | 12.0546  | 19.1672  | 8.50197  | 9.21804   | 7.92497  | 4.0945   |
| GTF2H1    | 3.95704  | 4.13671   | 3.74739   | 5.842    | 2.15797  | 7.20961   | 2.9243    | 3.50499  | 6.67151   | 5.8507   | 8.74813  | 4.34835  | 5.47994   | 4.95864  | 3.3      |
| GTF2H2    | 1.00691  | 0.432577  | 0.589288  | 0.334083 | 0.245796 | 0.150913  | 0.449041  | 0.660274 | 0.136426  | 0.467874 | 0.750098 | 0.189286 | 0.54898   | 0.393988 | 0.488539 |
| GTF2H2B   | 4.02541  | 2.04992   | 2.71688   | 1.4579   | 0.930779 | 2.13513   | 1.7908    | 3.03958  | 0.324293  | 1.04619  | 2.22469  | 1.05837  | 1.55611   | 1.91321  | 2.4933   |
| GTF2H2C   | 0.18288  | 0.290931  | 0.0391679 | 2.03438  | 0.110861 | 1.02868   | 0.403157  | 0.297012 | 0.204717  | 0.648434 | 0.622235 | 0.573243 | 0.423244  | 0.193536 | 0.255784 |
| GTF2H2C_2 | 2.28782  | 1.20449   | 1.54471   | 2.97431  | 0.499035 | 3.27899   | 0.696626  | 2.30993  | 0.322824  | 1.82637  | 3.00287  | 1.14436  | 2.32644   | 3.1328   | 1.77767  |
| GTF2H3    | 3.57611  | 2.78686   | 3.12648   | 6.66561  | 2.3145   | 6.18226   | 2.289     | 3.0999   | 2.55708   | 3.68081  | 5.84905  | 2.37948  | 5.34867   | 3.98938  | 2.4706   |
| GTF2H4    | 0.341661 | 0.360642  | 0.366324  | 0.73893  | 0.607532 | 0.815342  | 0.377266  | 0.255697 | 0.246378  | 0.383681 | 0.730787 | 0.332926 | 0.551095  | 0.559197 | 0.377686 |
| GTF2H5    | 0.964551 | 0.637522  | 0.716104  | 1.15011  | 0.168076 | 1.15035   | 0.603594  | 0.662142 | 0.862211  | 0.939    | 1.60537  | 0.570711 | 0.58642   | 0.71255  | 0.577174 |
| GTF2I     | 24.5277  | 34.4469   | 32.2699   | 34.8807  | 31.8001  | 29.7349   | 26.4041   | 23.3623  | 44.2303   | 22.1086  | 22.3112  | 30.3531  | 25.0684   | 22.3572  | 18.8132  |
| GTF2IP1   | 1.69686  | 2.33524   | 2.07606   | 2.88542  | 2.53494  | 2.30604   | 1.42734   | 1.58596  | 5.99825   | 2.27289  | 2.7262   | 1.52998  | 2.44711   | 1.21715  | 2.37775  |
| GTF2IP12  | 0.295758 | 0.760003  | 0.550511  | 0.406383 | 0.306276 | 0.398737  | 0.675373  | 0.52569  | 0.45025   | 0.40214  | 0.69557  | 0.599598 | 0.0636071 | 0.450847 | 0.530932 |
| GTF2IP20  | 2.88458  | 3.22252   | 3.3454    | 2.74255  | 3.37806  | 3.12359   | 3.36345   | 3.64401  | 1.42439   | 1.30813  | 1.01158  | 3.19958  | 0.573654  | 2.22485  | 2.05001  |
| GTF2IP23  | 0.449816 | 1.32204   | 1.48848   | 0.370839 | 0.943272 | 1.12989   | 1.43804   | 0.959422 | 0.246522  | 0.197598 | 0.177725 | 0.498876 | 0         | 0.599489 | 0.90439  |
| GTF2IP4   | 1.56521  | 1.6817    | 1.74159   | 2.52135  | 1.34811  | 1.61239   | 1.31777   | 1.26414  | 5.70598   | 2.27756  | 2.52065  | 1.40314  | 2.43554   | 0.917982 | 2.20386  |

|            |           |            |           |           |           |           |           |           |           |           |           |           |           |           |           |
|------------|-----------|------------|-----------|-----------|-----------|-----------|-----------|-----------|-----------|-----------|-----------|-----------|-----------|-----------|-----------|
| GTF2IP7    | 0.154287  | 0.118941   | 0.127637  | 0.0317994 | 0         | 0.183923  | 0.035232  | 0.0822705 | 0.112743  | 0.0387292 | 0         | 0.132476  | 0.0398181 | 0.0645097 | 0         |
| GTF2IRD1   | 3.70525   | 5.58634    | 5.28416   | 5.10243   | 10.6044   | 6.96328   | 5.43606   | 3.52605   | 9.9436    | 7.88522   | 5.35985   | 7.68155   | 6.31295   | 5.27837   | 3.72955   |
| GTF2IRD1P1 | 0.0163674 | 0.0678078  | 0.0289913 | 0.032449  | 0.0593668 | 0.0507232 | 0.0650805 | 0.0153941 | 3.96E-22  | 0.0189298 | 0.0911101 | 0.0407079 | 0.0372488 | 0.0239945 | 0.0499374 |
| GTF2IRD2   | 2.05328   | 2.04979    | 2.04027   | 1.19349   | 1.78974   | 3.18157   | 1.74892   | 1.41777   | 1.07276   | 0.815347  | 1.37526   | 0.613488  | 0.69096   | 0.865961  | 1.39095   |
| GTF2IRD2B  | 2.01276   | 1.86843    | 1.73463   | 0.816206  | 1.29935   | 2.13797   | 1.26915   | 1.29681   | 0.60251   | 0.485867  | 0.798862  | 0.439142  | 0.322149  | 0.791209  | 1.39824   |
| GTF3A      | 12.7419   | 8.80776    | 8.50914   | 19.0083   | 7.75826   | 18.6112   | 10.1631   | 7.14886   | 14.7754   | 15.5993   | 35.2994   | 9.50636   | 11.5392   | 11.7424   | 9.91882   |
| GTF3C1     | 8.39819   | 13.9654    | 13.6606   | 11.4197   | 23.2885   | 14.9595   | 14.9988   | 9.60213   | 19.2821   | 10.7286   | 6.77129   | 14.4065   | 15.8919   | 8.89404   | 9.63376   |
| GTF3C2     | 7.28836   | 7.30763    | 7.38958   | 9.3055    | 8.94401   | 10.832    | 8.81227   | 6.064     | 10.3012   | 6.0425    | 8.17169   | 7.26145   | 10.7056   | 6.80006   | 5.66588   |
| GTF3C2-AS1 | 0.513448  | 0.398225   | 0.355748  | 0.23505   | 0.224149  | 0.0744822 | 0.521819  | 0.301892  | 0.035261  | 0.247911  | 0         | 0.203692  | 0.0379295 | 0.253399  | 0.200053  |
| GTF3C3     | 3.40014   | 2.97106    | 2.96382   | 3.95924   | 1.15628   | 3.05466   | 2.3962    | 2.99188   | 2.55595   | 3.15845   | 3.48053   | 2.26108   | 3.40217   | 2.83125   | 2.21392   |
| GTF3C4     | 3.82197   | 4.48385    | 5.09967   | 4.02913   | 2.47025   | 4.12016   | 4.13962   | 3.65117   | 4.02705   | 2.88365   | 2.76376   | 2.7962    | 3.98812   | 3.07206   | 2.79705   |
| GTF3C5     | 5.7834    | 5.95681    | 6.18054   | 8.54914   | 9.71996   | 11.4878   | 6.27853   | 4.64266   | 6.20058   | 6.64      | 7.02105   | 4.97937   | 10.038    | 5.78264   | 5.18764   |
| GTF3C6     | 6.52878   | 4.47201    | 4.37325   | 18.678    | 4.42742   | 17.1131   | 3.36558   | 4.69808   | 13.0841   | 15.6853   | 17.7104   | 9.79624   | 19.1284   | 10.9115   | 5.56271   |
| GTPBP1     | 5.94282   | 7.20254    | 7.58312   | 8.0428    | 9.72272   | 10.6632   | 8.12039   | 5.82348   | 9.72284   | 6.69339   | 4.4207    | 8.07467   | 9.35196   | 5.87164   | 6.63805   |
| GTPBP10    | 1.39312   | 1.15913    | 1.13219   | 1.13841   | 0.347957  | 1.06342   | 0.708014  | 1.57352   | 0.69511   | 0.962837  | 1.62463   | 0.656495  | 0.995844  | 0.861219  | 1.07967   |
| GTPBP2     | 4.17933   | 5.48004    | 5.33432   | 13.6976   | 11.9058   | 13.1544   | 5.16379   | 3.2168    | 21.2505   | 14.5468   | 11.1545   | 8.89114   | 18.6539   | 9.52919   | 7.2882    |
| GTPBP3     | 1.96459   | 2.53335    | 2.34683   | 2.05817   | 5.47025   | 4.37988   | 2.68056   | 1.80392   | 1.74733   | 1.46309   | 1.43558   | 2.8756    | 2.43515   | 2.19416   | 2.61068   |
| GTPBP4     | 5.09386   | 4.63393    | 4.27485   | 10.9346   | 4.99889   | 10.7886   | 3.32793   | 4.50249   | 9.02567   | 6.2433    | 6.41463   | 6.61195   | 18.0285   | 10.1926   | 6.07418   |
| GTPBP6     | 4.03884   | 4.03731    | 4.36371   | 5.66653   | 9.14602   | 6.19852   | 4.32251   | 2.64663   | 3.41357   | 3.01707   | 3.94411   | 2.64617   | 4.50842   | 3.62664   | 3.22859   |
| GTPBP8     | 1.70546   | 1.26544    | 1.14281   | 2.70658   | 0.476849  | 1.75713   | 1.49937   | 1.94006   | 1.45394   | 2.0549    | 2.57983   | 1.14708   | 3.04798   | 1.55986   | 0.783761  |
| GTSCR1     | 0         | 0          | 0         | 0         | 0         | 0         | 0         | 0         | 0         | 0         | 0         | 0         | 0         | 0         | 0         |
| GTSE1      | 0.171044  | 0.279483   | 0.246087  | 1.65537   | 0.427416  | 1.72238   | 0.280203  | 0.171837  | 0.298884  | 1.19473   | 1.79656   | 0.542759  | 1.31469   | 1.75681   | 0.897125  |
| GTSE1-DT   | 0.152458  | 0.190987   | 0.21441   | 0.0628448 | 0.260501  | 0.16876   | 0.208885  | 0.189688  | 0.0185676 | 0.03827   | 0.0688422 | 0.0654525 | 0.0491824 | 0.20717   | 0.175159  |
| GTSF1      | 0.0570026 | 0.0411971  | 0.0471566 | 0.146857  | 0         | 0.0728054 | 0         | 0.0253296 | 0         | 0.143088  | 0.257395  | 0         | 0.0183889 | 0.312816  | 0.0409315 |
| GTSF1L     | 0.0274858 | 0          | 0         | 0         | 0         | 0         | 0         | 0         | 0         | 0.068995  | 0         | 0.0196668 | 0         | 0         | 0         |
| GUCA1A     | 0         | 0.00956729 | 0.0328538 | 0         | 0.0154222 | 0.0169078 | 0         | 0.017647  | 0         | 0.0498445 | 0.0896632 | 0         | 0         | 0.015567  | 0         |

|         |           |            |            |           |           |            |           |           |            |            |           |           |           |           |           |
|---------|-----------|------------|------------|-----------|-----------|------------|-----------|-----------|------------|------------|-----------|-----------|-----------|-----------|-----------|
| GUCA1B  | 0.825809  | 0.6042     | 0.691602   | 0.157596  | 0.443426  | 0.813287   | 0.337575  | 0.534577  | 0.0869161  | 0.181031   | 0.218673  | 0.372041  | 0.322316  | 0.261094  | 0.309088  |
| GUCA1C  | 0         | 0          | 0          | 0         | 0         | 0          | 0         | 0         | 0          | 0          | 0         | 0         | 0         | 0         | 0         |
| GUCA2A  | 0         | 0          | 0          | 0         | 0         | 0          | 0         | 0         | 0          | 0          | 0         | 0         | 0         | 0         | 0         |
| GUCA2B  | 0.0387656 | 0          | 0.0320696  | 0         | 0.180649  | 0          | 0.309829  | 0         | 0.188848   | 0          | 0         | 0         | 0         | 0         | 0         |
| GUCD1   | 6.27423   | 5.03144    | 5.33437    | 10.126    | 8.28109   | 14.9028    | 6.42428   | 4.3561    | 9.86317    | 8.09794    | 11.422    | 4.62769   | 10.7235   | 6.52746   | 5.35422   |
| GUCY1A1 | 2.59581   | 0.844227   | 0.881192   | 1.57506   | 1.55726   | 2.84864    | 1.38482   | 1.25888   | 0.768551   | 5.41224    | 9.266     | 0.65969   | 2.55843   | 2.01864   | 6.82277   |
| GUCY1A2 | 0.697759  | 0.348565   | 0.396627   | 0.258803  | 0.461029  | 0.707131   | 0.840671  | 0.53895   | 0.384058   | 2.01657    | 3.29565   | 0.414523  | 0.654572  | 1.08062   | 3.22345   |
| GUCY1B1 | 1.39078   | 0.587805   | 0.620691   | 1.11893   | 0.596942  | 2.65931    | 0.793972  | 0.612584  | 0.482885   | 3.36098    | 6.8654    | 0.493205  | 1.37747   | 1.46333   | 5.15979   |
| GUCY1B2 | 0.130189  | 0.605133   | 0.943974   | 0.386707  | 0.0118958 | 0.00652085 | 0         | 0.0952835 | 0.00932681 | 0.00961182 | 0         | 0.15891   | 0         | 0.0040025 | 0         |
| GUCY2C  | 0.505727  | 0.675886   | 0.78196    | 0.744524  | 0.130928  | 0.179425   | 0.556801  | 0.513655  | 0.601254   | 0.838763   | 0.0611682 | 0.594487  | 0.341831  | 0.0881051 | 0.276681  |
| GUCY2D  | 0.0511025 | 0.0400107  | 0.058129   | 0.0197485 | 0.0396899 | 0.0924654  | 0.0218802 | 0.0113539 | 0.0311186  | 0.0400868  | 0.0432663 | 0.013712  | 0.0329711 | 0.0534168 | 0.0458685 |
| GUCY2EP | 0.0165367 | 0.00796761 | 0.00684014 | 0         | 0         | 0          | 0         | 0.0073482 | 0          | 0          | 0         | 0         | 0         | 0         | 0         |
| GUCY2F  | 0         | 0          | 0          | 0         | 0         | 0          | 0         | 0         | 0          | 0          | 0         | 0         | 0         | 0         | 0         |
| GUCY2GP | 0         | 0          | 0          | 0         | 0         | 0          | 0         | 0         | 0          | 0          | 0         | 0         | 0         | 0         | 0         |
| GUF1    | 3.9109    | 3.46599    | 3.46129    | 4.34552   | 1.07754   | 5.56252    | 2.75653   | 4.45139   | 3.49244    | 3.38664    | 3.70581   | 2.86479   | 5.30385   | 3.5513    | 2.19641   |
| GUK1    | 38.2041   | 31.6833    | 34.2823    | 67.4309   | 50.3565   | 67.54      | 37.0967   | 24.1185   | 51.9003    | 73.0246    | 130.671   | 44.3866   | 75.9069   | 50.9904   | 26.2256   |
| GULP1   | 0.877254  | 0.927243   | 1.04777    | 0.299462  | 0.221435  | 0.630256   | 0.651053  | 0.838102  | 0.347229   | 0.40601    | 0.946984  | 0.102001  | 0.314837  | 0.255036  | 1.2441    |
| GUSB    | 5.20442   | 4.27306    | 4.44703    | 5.91311   | 5.78565   | 12.4632    | 5.41354   | 3.40855   | 3.80059    | 3.99252    | 8.40929   | 3.4502    | 4.65685   | 4.93502   | 7.73441   |
| GUSBP1  | 1.93055   | 1.73922    | 1.87979    | 1.34532   | 4.06234   | 1.63212    | 2.69765   | 1.71779   | 0.404433   | 0.798004   | 1.24114   | 1.0842    | 0.439336  | 0.872868  | 1.46865   |
| GUSBP10 | 0         | 0          | 0          | 0         | 0         | 0          | 0         | 0         | 0          | 0          | 0         | 0         | 0         | 0         | 0         |
| GUSBP11 | 3.0216    | 3.78653    | 3.74953    | 2.20393   | 5.80547   | 3.62484    | 4.69536   | 2.62514   | 0.924119   | 0.960861   | 0.978946  | 1.91966   | 0.419628  | 2.68264   | 4.07671   |
| GUSBP2  | 1.02701   | 1.97138    | 1.87587    | 0.890178  | 0.7071    | 1.15155    | 1.01226   | 1.30228   | 0.300622   | 0.60795    | 1.25482   | 0.173696  | 0.3926    | 0.69728   | 1.41131   |
| GUSBP3  | 5.98911   | 5.74914    | 6.02916    | 3.09854   | 8.03245   | 2.66859    | 6.62717   | 5.57501   | 0.440851   | 1.76395    | 2.06942   | 2.75364   | 0.423747  | 3.14609   | 7.50828   |
| GUSBP4  | 2.04751   | 1.70717    | 1.7903     | 1.01605   | 0.335039  | 0.750089   | 1.02203   | 1.86944   | 0.124348   | 0.407599   | 0.407297  | 0.523492  | 0.102326  | 0.501212  | 0.858584  |
| GUSBP5  | 0.709767  | 0.414857   | 0.298397   | 0.299769  | 0.325332  | 0.584542   | 0.518117  | 0.45499   | 0.467635   | 0.146038   | 0.722428  | 0.0416276 | 0.195187  | 0.188518  | 0.0668403 |
| GUSBP9  | 2.76394   | 8.02116    | 7.58983    | 5.83583   | 2.4865    | 4.71323    | 6.09267   | 1.08039   | 0.195699   | 2.63554    | 5.48514   | 1.85308   | 0.462284  | 3.85419   | 7.72116   |

|          |           |           |            |           |           |           |            |            |            |           |           |           |            |            |           |
|----------|-----------|-----------|------------|-----------|-----------|-----------|------------|------------|------------|-----------|-----------|-----------|------------|------------|-----------|
| GVINP1   | 0.431862  | 0.241268  | 0.219182   | 0.464159  | 0.370398  | 0.663259  | 0.145203   | 0.322583   | 0.0645349  | 0.226124  | 0.337973  | 0.0758304 | 0.309405   | 0.191092   | 1.03875   |
| GVQW2    | 0.0426679 | 0.0781205 | 0.0776553  | 0.087941  | 0.106045  | 0.0944609 | 0.0292301  | 0.0379196  | 0.0311788  | 0.0321315 | 0.1156    | 0.024424  | 0.0110116  | 0.0356801  | 0.0245106 |
| GVQW3    | 0.222644  | 0.198988  | 0.220743   | 0.0700583 | 0.161041  | 0.179448  | 0.246445   | 0.234118   | 0.00620966 | 0.046929  | 0.0498837 | 0.0571561 | 0.0109655  | 0.0710616  | 0.141566  |
| GXYLT1   | 1.68443   | 1.32831   | 1.14035    | 1.37594   | 0.801751  | 1.36584   | 1.02689    | 1.96943    | 2.20576    | 1.45855   | 1.76543   | 1.19419   | 1.09276    | 1.10004    | 1.34934   |
| GXYLT1P3 | 0.0454478 | 0.14355   | 0.0626628  | 0.0416314 | 0.0235321 | 0.0128994 | 0.0749535  | 0.0807805  | 0          | 0         | 0.0228022 | 0.0180662 | 0.00651616 | 0.00263923 | 0.0290084 |
| GXYLT2   | 3.04277   | 1.31439   | 1.8228     | 1.22028   | 2.86383   | 2.79509   | 1.52315    | 1.51859    | 0.273824   | 2.99123   | 7.51277   | 0.332476  | 1.24754    | 0.971406   | 10.1603   |
| GYG1     | 4.89873   | 2.66358   | 2.91633    | 10.4269   | 1.88458   | 11.0029   | 4.1949     | 3.28553    | 3.84729    | 7.74294   | 11.8611   | 3.42327   | 8.04936    | 5.45554    | 4.65178   |
| GYG2     | 0.477176  | 0.223342  | 0.203016   | 0.224797  | 0.222366  | 0.882271  | 0.428076   | 0.278678   | 0.083021   | 0.102669  | 0.438634  | 0.0926745 | 0.448613   | 0.242268   | 0.107688  |
| GYG2P1   | 0.140431  | 0.0676619 | 0          | 0.0578873 | 0.0436276 | 0.0239151 | 0          | 0.0499214  | 0          | 0.0352511 | 0.0317059 | 0.0401929 | 0.0181211  | 0          | 0         |
| GYPA     | 0         | 0         | 0.00710411 | 0         | 0         | 0         | 0.00980482 | 0.0228953  | 0          | 0         | 0         | 0         | 0          | 0.00448815 | 0         |
| GYPB     | 0         | 0         | 0          | 0         | 0         | 0         | 0          | 0          | 0          | 0         | 0         | 0         | 0          | 0          | 0         |
| GYPC     | 4.85924   | 1.87732   | 2.28784    | 4.34993   | 3.73926   | 16.7508   | 5.31803    | 2.36821    | 0.381808   | 4.30013   | 11.9064   | 0.47267   | 4.00202    | 2.22367    | 5.56351   |
| GYPE     | 0.442224  | 0.118372  | 0.162595   | 0.113931  | 0.0954065 | 0.30333   | 0.266484   | 0.229257   | 0.0149605  | 0.0616707 | 0.0970697 | 0.0263686 | 0.126809   | 0.102722   | 0.564524  |
| GYS1     | 4.58639   | 6.38906   | 5.23352    | 13.9683   | 11.0789   | 18.8939   | 6.16413    | 4.84346    | 12.1296    | 11.7536   | 12.4779   | 12.4952   | 18.1141    | 11.6741    | 6.5683    |
| GYS2     | 0.0221677 | 0.014241  | 0          | 0         | 0         | 0         | 0          | 0.00656693 | 0          | 0         | 0.0333661 | 0         | 0.00476749 | 0.00386193 | 0.0106119 |
| GZF1     | 1.58934   | 1.43973   | 1.4609     | 1.61392   | 1.14056   | 2.19615   | 1.07182    | 1.40421    | 1.3923     | 1.65066   | 1.79941   | 1.21037   | 1.58313    | 1.75362    | 1.29475   |
| GZMA     | 0.387439  | 0.348459  | 0.512828   | 0.905007  | 0.521584  | 1.09967   | 0.117964   | 0.619783   | 0.188743   | 0.453858  | 1.37043   | 0.203297  | 0.649932   | 0.56698    | 1.70633   |
| GZMB     | 0.235673  | 0.147616  | 0.266783   | 0.794847  | 0.402689  | 2.22451   | 0.080725   | 0.293225   | 0.0287023  | 0.384531  | 1.23027   | 0.118041  | 1.08911    | 0.72672    | 0.711369  |
| GZMH     | 0.309845  | 0.229674  | 0.124543   | 0.301433  | 0.481297  | 0.388583  | 0.163279   | 0.0847276  | 0.0870823  | 0.179487  | 0.558493  | 0.0852702 | 0.697748   | 0.0622841  | 1.40277   |
| GZMK     | 0.487222  | 0.298774  | 0.421386   | 0.319516  | 0.275209  | 0.471436  | 0.0505722  | 0.393639   | 0          | 0.222369  | 0.150004  | 0.0950783 | 0.628706   | 0.0462988  | 1.43123   |
| GZMM     | 0.4181    | 0.0829487 | 0.223806   | 0.177415  | 0.458438  | 0.54448   | 0.505454   | 0.327858   | 0.149764   | 0         | 0.194346  | 0.0175977 | 0.333228   | 0.0771237  | 0.847686  |
| H19      | 10.7587   | 4.68082   | 6.61379    | 6.01667   | 15.9313   | 21.4633   | 6.708      | 6.24733    | 2.50159    | 89.8691   | 12.4954   | 18.7122   | 59.1681    | 28.408     | 44.0769   |
| H1F0     | 36.2243   | 33.5286   | 35.6288    | 56.1028   | 45.1602   | 54.9231   | 43.798     | 38.6283    | 155.638    | 78.7757   | 68.7564   | 50.6876   | 146.049    | 40.8654    | 24.4066   |
| H1FNT    | 0.0890117 | 0.0686195 | 0.0441821  | 0.0183458 | 0.110613  | 0.0303169 | 0.101631   | 0.063285   | 0          | 0         | 0.0200966 | 0         | 0          | 0.00930428 | 0         |
| H1FOO    | 0.0365898 | 0         | 0          | 0         | 0.0284183 | 0.0155779 | 0.0626656  | 0.048777   | 0          | 0         | 0         | 0         | 0          | 0          | 0.157643  |
| H1FX     | 31.8658   | 25.8604   | 27.937     | 55.2639   | 48.3059   | 44.6818   | 34.6124    | 18.4522    | 30.0934    | 32.9982   | 37.6368   | 18.6802   | 53.7128    | 20.796     | 20.6873   |

|          |           |                 |           |           |           |            |            |           |            |            |           |           |            |           |                 |
|----------|-----------|-----------------|-----------|-----------|-----------|------------|------------|-----------|------------|------------|-----------|-----------|------------|-----------|-----------------|
| H1FX-AS1 | 0.691291  | 0.524752        | 0.54634   | 0.370179  | 1.30885   | 0.78177    | 0.626045   | 0.310421  | 0.0257193  | 0.159357   | 0.321656  | 0.15332   | 0.0953237  | 0.67107   | 1.00027         |
| H2AFB1   | 2.44E-09  | 0.00010003<br>5 | 2.36E-14  | 0.0153684 | 0.0926607 | 0.00103655 | 0.00851364 | 6.33E-15  | 0.00908124 | 0.00935873 | 0         | 0.0426829 | 0          | 0.0272798 | 0.117794        |
| H2AFB2   | 0.103897  | 0.0874294       | 0.0859509 | 1.49E-05  | 8.96E-05  | 0.0645458  | 8.23E-06   | 0.0230837 | 8.78E-06   | 9.05E-06   | 0         | 4.13E-05  | 0          | 2.64E-05  | 0.00011384<br>9 |
| H2AFB3   | 2.44E-09  | 0.00010003<br>5 | 2.36E-14  | 0.0153684 | 0.0926607 | 0.00103655 | 0.00851364 | 6.33E-15  | 0.00908124 | 0.00935873 | 0         | 0.0426829 | 0          | 0.0272798 | 0.117794        |
| H2AFJ    | 5.37084   | 4.91706         | 5.53952   | 8.78666   | 8.41137   | 8.96912    | 5.79351    | 4.5432    | 29.7617    | 9.34697    | 17.1488   | 6.15959   | 6.68599    | 4.17589   | 2.03932         |
| H2AFV    | 11.0402   | 6.78901         | 7.55403   | 8.94359   | 3.37023   | 12.2911    | 7.52163    | 7.48987   | 5.24286    | 8.16325    | 12.1464   | 4.79112   | 11.129     | 7.57772   | 8.34441         |
| H2AFX    | 3.45766   | 4.14388         | 3.41327   | 20.9751   | 10.2454   | 22.4275    | 6.0047     | 2.38858   | 8.81133    | 10.9952    | 25.978    | 6.8504    | 25.5331    | 14.7531   | 5.38291         |
| H2AFY    | 21.4651   | 21.0796         | 19.0923   | 45.6407   | 40.0191   | 41.1448    | 19.1588    | 18.5131   | 62.8473    | 44.8879    | 48.0176   | 39.2081   | 64.4337    | 30.2264   | 20.7153         |
| H2AFY2   | 2.87828   | 2.64566         | 2.34597   | 6.56712   | 5.70831   | 6.90931    | 2.32832    | 2.55797   | 2.19897    | 2.8527     | 5.47931   | 2.45466   | 4.13896    | 3.64144   | 3.30991         |
| H2AFZ    | 21.579    | 13.7293         | 13.2826   | 45.9363   | 15.1085   | 40.723     | 17.6346    | 12.5317   | 25.5665    | 50.3337    | 114.517   | 17.8185   | 51.4807    | 41.1403   | 19.8997         |
| H2BFM    | 0.0245941 | 0               | 0         | 0         | 0.0191016 | 0.0104708  | 0          | 0         | 0          | 0          | 0         | 0         | 0          | 0         | 0.0176601       |
| H2BFS    | 0         | 0.0242406       | 0.0416208 | 0         | 0.156301  | 0          | 0          | 0         | 0          | 0.0631455  | 0.0567948 | 0.143995  | 0          | 0         | 0               |
| H2BFWT   | 0         | 0               | 0         | 0.0266774 | 0         | 0          | 0          | 0         | 0          | 0          | 0         | 0         | 0          | 0         | 0               |
| H2BFXP   | 0.0413691 | 0.0199323       | 0.0537797 | 0.0182709 | 0.0183601 | 0.0956113  | 0.0269908  | 0.0682786 | 0.00719756 | 0.0222525  | 0.0600436 | 0.0338294 | 0.00762604 | 0.0710414 | 0.025462        |
| H3.Y     | 0         | 0               | 0         | 0         | 0         | 0          | 0          | 0         | 0          | 0          | 0         | 0         | 0          | 0         | 0               |
| H3F3A    | 25.5488   | 23.5337         | 20.0261   | 47.6914   | 18.3056   | 41.541     | 22.0993    | 26.6724   | 69.339     | 44.2791    | 92.3028   | 32.5297   | 38.3433    | 24.518    | 18.68           |
| H3F3AP4  | 63.9988   | 57.8135         | 50.053    | 121.222   | 47.3756   | 102.05     | 57.1805    | 68.9801   | 179.296    | 114.539    | 236.416   | 84.1136   | 99.1475    | 63.4053   | 48.3282         |
| H3F3B    | 104.374   | 83.1565         | 100.091   | 131.102   | 67.2366   | 122.1      | 74.5432    | 110.609   | 102.94     | 138.533    | 187.783   | 110.163   | 158.623    | 96.5954   | 52.6716         |
| H3F3C    | 0         | 0               | 0.0368461 | 0.0230919 | 0         | 0.0572046  | 0          | 0.019687  | 0          | 0.056255   | 0.0756126 | 0.0318033 | 0.0286952  | 0         | 0               |
| H6PD     | 11.8281   | 13.7409         | 16.8275   | 8.09935   | 9.31034   | 26.1273    | 14.9353    | 11.9797   | 4.31437    | 4.46801    | 7.10915   | 2.72901   | 5.88754    | 5.17024   | 11.6379         |
| HAAO     | 1.53206   | 1.48502         | 1.49109   | 0.872999  | 2.60379   | 1.87238    | 1.04955    | 1.29749   | 0.504883   | 0.497688   | 2.11609   | 0.257936  | 0.0581456  | 0.339128  | 1.19071         |
| HABP2    | 0         | 3.83E-25        | 0         | 0.142051  | 0.0450773 | 0.0617743  | 0          | 0         | 0.0353425  | 0.0364225  | 0.0245696 | 0.0467195 | 0.0608505  | 0.0341254 | 0.104189        |
| HABP4    | 2.16233   | 1.41842         | 1.52302   | 1.52136   | 2.34715   | 3.9486     | 1.49719    | 1.02645   | 0.888403   | 1.55861    | 2.31356   | 0.87613   | 2.02265    | 2.19672   | 3.65413         |

|           |            |            |           |           |           |            |            |            |           |            |           |            |            |           |          |
|-----------|------------|------------|-----------|-----------|-----------|------------|------------|------------|-----------|------------|-----------|------------|------------|-----------|----------|
| HACD1     | 0.389554   | 0.28154    | 0.234376  | 0.967122  | 0.495092  | 0.859405   | 0.566084   | 0.330467   | 0.388172  | 1.48902    | 2.87842   | 0.937568   | 1.34809    | 0.9347    | 0.737455 |
| HACD2     | 5.42886    | 5.29081    | 4.71996   | 7.35077   | 1.87228   | 3.97906    | 3.77323    | 5.57981    | 8.51291   | 6.00153    | 7.17693   | 5.62704    | 8.89846    | 5.72115   | 3.36975  |
| HACD3     | 6.0094     | 5.83255    | 5.76515   | 8.19272   | 2.30846   | 8.09617    | 4.54677    | 5.26372    | 2.09986   | 6.2114     | 11.996    | 2.84422    | 7.41934    | 5.16173   | 4.13382  |
| HACD4     | 1.86824    | 1.72443    | 1.53251   | 1.97935   | 0.538014  | 1.43438    | 1.48597    | 1.76295    | 1.20796   | 1.65323    | 2.7429    | 0.841118   | 0.968364   | 0.946252  | 2.7584   |
| HACE1     | 2.32974    | 1.75138    | 1.87314   | 1.68736   | 1.13363   | 1.77262    | 1.24455    | 1.65888    | 1.35601   | 2.06681    | 2.2075    | 1.13476    | 1.21941    | 1.35944   | 1.82743  |
| HACL1     | 3.287      | 2.76873    | 2.9796    | 2.95988   | 1.7911    | 3.27238    | 3.19997    | 2.24822    | 1.93466   | 2.15748    | 3.11592   | 1.571      | 2.08334    | 1.51242   | 1.83004  |
| HADH      | 4.73589    | 3.77377    | 4.169     | 6.2049    | 2.92372   | 6.29008    | 4.39053    | 3.36349    | 4.05469   | 2.90849    | 5.72321   | 2.89627    | 2.91193    | 4.61718   | 1.94739  |
| HADHA     | 26.6637    | 21.9048    | 21.6168   | 34.1527   | 22.5851   | 38.6723    | 22.9089    | 19.6466    | 36.2228   | 39.2425    | 36.2593   | 24.3567    | 46.6637    | 24.5974   | 17.8712  |
| HADHB     | 15.9483    | 11.072     | 10.5128   | 22.4842   | 7.26579   | 26.3964    | 10.5416    | 11.3932    | 17.7106   | 17.5611    | 25.5506   | 12.8627    | 21.7429    | 13.422    | 13.1423  |
| HAGH      | 4.20408    | 4.62232    | 3.72876   | 5.49719   | 10.3415   | 6.63124    | 4.24924    | 2.90323    | 10.7606   | 4.84403    | 7.14215   | 6.59814    | 6.97235    | 4.60339   | 3.22664  |
| HAGHL     | 0.344562   | 0.394285   | 0.391938  | 0.281106  | 2.05169   | 0.684575   | 0.590114   | 0.165868   | 0.419637  | 0.882939   | 1.88001   | 0.349269   | 0.463144   | 0.862897  | 0.391744 |
| HAGLR     | 0.645511   | 0.265606   | 0.345113  | 0.351708  | 0.408864  | 0.931396   | 0.44796    | 0.322197   | 0.0967747 | 0.504893   | 0.786747  | 0.177677   | 0.684193   | 0.584014  | 0.762445 |
| HAGLROS   | 0.206327   | 0.0828431  | 0.0853443 | 0.283502  | 0.213665  | 0.556336   | 0.157052   | 0.122244   | 0         | 0.388443   | 0.737573  | 0.172238   | 0.133121   | 0.34148   | 0.493854 |
| HAL       | 6.80752    | 3.76157    | 2.57363   | 21.5156   | 16.454    | 2.60363    | 12.7223    | 9.0144     | 105.4     | 8.29919    | 18.7477   | 11.2655    | 0.28238    | 1.30445   | 0.390716 |
| HAMP      | 0.19713    | 0.170964   | 0.0978479 | 0.203148  | 0         | 0.0671414  | 0.225077   | 0.105116   | 0         | 0          | 0         | 0          | 0.228937   | 0.0206057 | 0        |
| HAND1     | 0          | 0          | 0.0110159 | 0         | 0         | 0          | 0          | 0          | 0         | 0          | 0         | 0          | 0          | 0         | 0        |
| HAND2     | 1.07506    | 0.809931   | 1.42185   | 0.141003  | 0.303625  | 1.5455     | 1.64961    | 0.277941   | 0         | 0.159464   | 0.297885  | 0.00699302 | 0.170253   | 0.188993  | 0.505282 |
| HAND2-AS1 | 0.143865   | 0.192545   | 0.323033  | 0.0263568 | 0.0248302 | 0.264824   | 0.223281   | 0.153426   | 0.0116807 | 0.00802512 | 0.0433081 | 0.0205878  | 0.0247522  | 0.0551394 | 0.165286 |
| HAO1      | 0          | 0          | 0         | 0         | 0         | 0          | 0          | 0          | 0         | 0          | 0         | 0          | 0          | 0         | 0        |
| HAO2      | 0.0272111  | 0.0327768  | 0.0337664 | 0.126188  | 0.25361   | 0.104265   | 0.0155344  | 0.0846404  | 0         | 0.0341527  | 0         | 0          | 0.0614477  | 0         | 0.195393 |
| HAO2-IT1  | 0          | 0          | 0         | 0         | 0         | 0          | 0          | 0          | 0         | 0          | 0         | 0          | 0          | 0         | 0        |
| HAP1      | 0.0292358  | 0.140863   | 0.0773949 | 0.210898  | 0.790191  | 0.0248939  | 0.100141   | 0.114322   | 0.199393  | 0.623797   | 0.0528057 | 0.732164   | 0.0829962  | 0.201695  | 0.159548 |
| HAPLN1    | 0.00494721 | 0.00715092 | 0         | 0         | 0.0153695 | 0.00842497 | 0.0225943  | 0.00439667 | 0.0964023 | 0.0434648  | 0.1111696 | 0.00353986 | 0.00319192 | 0.0284419 | 0.078153 |
| HAPLN2    | 0.0392034  | 0.0314813  | 0.0648636 | 0         | 0.0405976 | 0.0778893  | 0.164124   | 0.0580678  | 0         | 0.0164014  | 0         | 0          | 0          | 0.0136596 | 0.037534 |
| HAPLN3    | 2.38847    | 1.48185    | 1.29021   | 3.97868   | 4.23529   | 9.16587    | 1.23279    | 1.26003    | 0.504738  | 3.76432    | 5.47878   | 1.09252    | 5.62932    | 3.99578   | 6.9073   |
| HAPLN4    | 0.0269262  | 0.00324336 | 0.0167064 | 0.0346853 | 0.0731949 | 0.0687819  | 0.00768586 | 0.0299122  | 0         | 0.0337951  | 0.0303963 | 0.0096332  | 0.0130295  | 0.0422184 | 0.125676 |

|          |           |           |           |           |           |           |           |           |           |           |          |           |            |           |           |
|----------|-----------|-----------|-----------|-----------|-----------|-----------|-----------|-----------|-----------|-----------|----------|-----------|------------|-----------|-----------|
| HAR1A    | 0.0579611 | 0.0598426 | 0.0479495 | 0.0682636 | 0.12862   | 0.151429  | 0.0661781 | 0.0294349 | 0.0100843 | 0.0311774 | 0.121515 | 0.0118494 | 0.016027   | 0.0335517 | 0.107022  |
| HAR1B    | 0         | 0.0124449 | 0.0641034 | 0.106471  | 0         | 0.165436  | 0         | 0.0459099 | 0         | 0         | 0.204106 | 0         | 0          | 0.12483   | 0.111282  |
| HARBI1   | 1.17084   | 0.857181  | 0.717015  | 1.41029   | 0.684971  | 1.70906   | 0.850707  | 0.702704  | 1.83336   | 1.10691   | 1.40756  | 0.957446  | 1.55008    | 1.16028   | 1.4631    |
| HARS     | 9.08588   | 7.91999   | 8.52092   | 14.9698   | 13.7048   | 16.1496   | 9.83603   | 6.72474   | 21.6331   | 14.6792   | 11.8576  | 11.6753   | 19.2475    | 11.8179   | 7.80659   |
| HARS2    | 3.93482   | 3.72      | 3.72158   | 4.69394   | 4.75716   | 6.19892   | 3.0091    | 2.62111   | 2.73702   | 3.95389   | 4.73435  | 2.86504   | 3.66572    | 3.46649   | 2.71432   |
| HAS1     | 0.0986677 | 0.195441  | 0.199527  | 0.135573  | 0.187324  | 0.130689  | 0.287898  | 0.107174  | 0.0133518 | 1.85757   | 5.53205  | 0.235331  | 1.35808    | 1.20325   | 0.661263  |
| HAS2     | 1.35078   | 0.713182  | 1.05083   | 1.88217   | 0.28856   | 2.09107   | 0.94579   | 0.950564  | 0.086063  | 4.65141   | 8.48465  | 0.376891  | 2.79358    | 1.31329   | 1.84113   |
| HAS2-AS1 | 0.160383  | 0.129379  | 0.0690361 | 0.0890818 | 0.0897854 | 0.0644371 | 0.228519  | 0.113683  | 0.0246486 | 0.121416  | 0.278728 | 0.0685074 | 0.0736639  | 0.0973898 | 0.197368  |
| HAS3     | 1.35192   | 3.6253    | 4.19258   | 14.1525   | 5.36405   | 10.4105   | 1.00212   | 1.69496   | 14.2186   | 7.54144   | 6.12468  | 6.17813   | 33.7067    | 20.8955   | 2.98615   |
| HASPIN   | 0.26487   | 0.199404  | 0.178035  | 0.904169  | 0.308576  | 0.838703  | 0.311871  | 0.242751  | 0.171372  | 0.529826  | 0.616699 | 0.396811  | 1.37248    | 0.856553  | 0.261516  |
| HAT1     | 6.47171   | 6.26304   | 6.63786   | 12.3104   | 1.16243   | 8.20099   | 3.5443    | 5.35741   | 7.30799   | 10.5404   | 16.9583  | 3.97624   | 11.9365    | 7.36599   | 5.51287   |
| HAUS1    | 2.36397   | 1.69414   | 2.25145   | 4.91323   | 0.833156  | 4.78695   | 1.15676   | 1.44768   | 2.05646   | 5.16113   | 9.7999   | 1.66305   | 4.16551    | 2.86556   | 2.36791   |
| HAUS2    | 2.43385   | 1.91139   | 1.9558    | 3.36446   | 0.866044  | 2.61103   | 1.21194   | 1.62464   | 1.802     | 3.29696   | 4.12732  | 1.36557   | 5.254      | 2.34515   | 2.00942   |
| HAUS3    | 2.20214   | 2.25819   | 2.52391   | 2.35153   | 1.19462   | 2.12127   | 1.14854   | 2.17355   | 1.34268   | 1.72668   | 2.60337  | 1.10694   | 2.05591    | 1.74939   | 1.43319   |
| HAUS4    | 4.54948   | 6.09267   | 6.35846   | 7.76056   | 6.82551   | 8.95069   | 4.71051   | 4.45756   | 3.69958   | 4.55742   | 8.62877  | 3.32605   | 3.7375     | 4.54876   | 2.49577   |
| HAUS5    | 1.20844   | 1.46726   | 1.63064   | 1.9704    | 2.13576   | 2.86741   | 1.49628   | 1.08351   | 0.693357  | 0.660617  | 0.624493 | 0.849302  | 1.33759    | 1.10036   | 1.43466   |
| HAUS6    | 2.03978   | 1.44879   | 1.58519   | 2.40931   | 0.598682  | 2.04336   | 1.06277   | 1.87419   | 0.650948  | 1.72045   | 1.99483  | 0.86635   | 2.25912    | 1.7312    | 1.39942   |
| HAUS7    | 1.98512   | 2.82612   | 3.09465   | 1.96348   | 3.13006   | 3.28716   | 1.95902   | 1.71988   | 0.71679   | 1.0517    | 1.68916  | 0.835111  | 0.952544   | 1.43374   | 2.67896   |
| HAUS8    | 1.01728   | 0.627992  | 0.618023  | 1.45784   | 0.543188  | 1.7324    | 0.54445   | 0.536792  | 0.44524   | 1.05734   | 1.75845  | 0.568663  | 1.57933    | 0.855662  | 0.525025  |
| HAVCR1   | 0.0605205 | 0.0291597 | 0.0200267 | 0.0124736 | 0.0188019 | 0.0515324 | 0.0142615 | 0.0107571 | 0         | 0.0151919 | 0.177632 | 0         | 0.00780951 | 0.0126523 | 0.0521491 |
| HAVCR1P1 | 0.885153  | 0.613065  | 0.793282  | 0.152029  | 0.372382  | 0.125616  | 0.504647  | 0.917758  | 0         | 0.18516   | 0.187355 | 0.30348   | 0          | 0.36624   | 0.820978  |
| HAVCR2   | 1.0381    | 0.656192  | 0.520003  | 2.16904   | 0.665725  | 2.74911   | 0.663318  | 0.973365  | 0.255179  | 1.68544   | 4.83808  | 0.25214   | 1.76355    | 1.08512   | 2.35253   |
| HAX1     | 9.5988    | 9.55227   | 10.4091   | 21.0784   | 11.4647   | 24.2022   | 13.0215   | 6.28018   | 17.7385   | 16.6053   | 34.3469  | 9.90201   | 21.5553    | 15.0913   | 8.93633   |
| HBA1     | 2.00839   | 1.54743   | 2.67794   | 0.44738   | 1.45584   | 1.91722   | 4.19737   | 0.68843   | 1.09692   | 14.3439   | 36.3399  | 2.44651   | 7.39738    | 3.53545   | 1.32861   |
| HBA2     | 9.90643   | 1.02743   | 1.70959   | 0.515004  | 5.68172   | 6.36796   | 4.6858    | 3.11911   | 4.98264   | 21.338    | 73.9589  | 4.91035   | 16.177     | 7.08924   | 3.90742   |
| HBB      | 7.92318   | 0.745746  | 1.03654   | 0.265839  | 2.80495   | 3.42031   | 3.28196   | 2.19432   | 3.9047    | 38.575    | 120.186  | 2.87418   | 20.9473    | 4.60325   | 2.43451   |



|           |            |            |           |            |           |            |           |            |            |            |            |            |            |            |            |
|-----------|------------|------------|-----------|------------|-----------|------------|-----------|------------|------------|------------|------------|------------|------------|------------|------------|
| HBBP1     | 0          | 0          | 0         | 0          | 0         | 0          | 0         | 0          | 0          | 0          | 0          | 0          | 0          | 0          | 0          |
| HBD       | 0.0299006  | 0.0288131  | 0         | 0          | 0         | 0          | 0         | 0          | 0.0750566  | 0.0337635  | 0          | 0          | 0          | 0          | 0          |
| HBE1      | 0          | 0          | 0.0234627 | 0          | 0.0440553 | 0.0241495  | 0         | 0.0252054  | 0          | 0          | 0          | 0          | 0          | 0          | 0          |
| HBEGF     | 0.98147    | 0.926858   | 0.876896  | 2.92304    | 1.84472   | 5.24825    | 1.05337   | 1.21243    | 7.70981    | 11.3207    | 14.4256    | 22.8237    | 38.9759    | 10.9773    | 6.65291    |
| HBG1      | 0          | 0.00914619 | 0         | 0          | 0         | 0          | 0         | 0          | 0.0231189  | 0.14915    | 0.436814   | 0          | 0          | 0          | 0          |
| HBG2      | 0.0396965  | 0.00996449 | 0         | 0          | 0         | 0          | 0         | 0          | 0.0251873  | 0.149534   | 0.548309   | 0          | 0.025612   | 0          | 0          |
| HBM       | 0          | 0          | 0         | 0          | 0         | 0          | 0         | 0          | 0          | 0          | 0.0512267  | 0          | 0.058556   | 0          | 0          |
| HBP1      | 12.7703    | 11.8923    | 12.8379   | 13.1577    | 6.89146   | 13.6067    | 10.71     | 11.8983    | 30.7659    | 16.7439    | 21.0098    | 8.79825    | 15.0966    | 7.97876    | 10.2141    |
| HBQ1      | 0          | 0.0170761  | 0         | 0          | 0         | 0.0301776  | 0         | 0.0314971  | 0          | 0          | 0          | 0.0253591  | 0          | 0.0555692  | 0          |
| HBS1L     | 2.62       | 2.05767    | 2.20584   | 3.04976    | 1.08098   | 2.82971    | 1.61979   | 2.25249    | 2.75672    | 2.42415    | 2.49182    | 1.74016    | 3.12566    | 2.27287    | 1.98127    |
| HBZ       | 0.196461   | 0.0567946  | 0.162526  | 0.0404917  | 0         | 0.267654   | 0.134587  | 0          | 0.0478534  | 0          | 0          | 0.0281146  | 0          | 0          | 0          |
| HCAR1     | 0.0544177  | 0.0824034  | 0.218659  | 0.0160226  | 0.0241513 | 0.0529553  | 0.0621323 | 0.0829061  | 0.0094678  | 0.0390284  | 0.0438791  | 0.0166874  | 0.00501571 | 0          | 0.0446575  |
| HCAR2     | 1.17891    | 4.26181    | 5.56939   | 9.00511    | 6.13816   | 3.14708    | 3.56403   | 2.82847    | 3.85368    | 10.5411    | 9.18079    | 4.18566    | 20.0519    | 2.17736    | 2.59168    |
| HCAR3     | 0.182035   | 0.969238   | 1.14047   | 4.28889    | 0.881656  | 0.730485   | 1.10637   | 1.62673    | 0.681398   | 5.62193    | 7.02152    | 1.17815    | 5.18401    | 1.19017    | 3.07909    |
| HCCAT5    | 0.042937   | 0          | 0.0355205 | 0.0221239  | 0         | 0          | 0.0490241 | 0          | 0          | 0.0538904  | 0          | 0          | 0          | 0.0448815  | 0.0924945  |
| HCCS      | 2.47541    | 2.4185     | 2.13721   | 5.00074    | 2.10568   | 4.57519    | 2.5123    | 2.40072    | 5.43138    | 4.84525    | 6.27638    | 3.929      | 6.55319    | 3.9018     | 2.49696    |
| HCFC1     | 5.80636    | 6.55727    | 6.81433   | 12.2786    | 10.4827   | 15.0707    | 10.2986   | 5.90959    | 5.88734    | 5.10544    | 4.87724    | 6.64069    | 15.7239    | 7.60244    | 9.86519    |
| HCFC1-AS1 | 0.14722    | 0.326292   | 0.219224  | 0.212401   | 0.320158  | 0.225641   | 0.369801  | 0.130837   | 0.0358596  | 0.0369554  | 0.0997161  | 0.252816   | 0.0379943  | 0.292387   | 0.338283   |
| HCFC1R1   | 7.85777    | 7.00321    | 6.84163   | 8.61244    | 16.8723   | 11.5537    | 13.7251   | 5.64967    | 6.29376    | 8.12649    | 22.1235    | 8.09316    | 4.10095    | 6.06566    | 13.2247    |
| HCFC2     | 2.16701    | 2.0182     | 2.06979   | 1.63433    | 0.802352  | 2.3606     | 1.47901   | 1.85413    | 2.50648    | 2.80593    | 3.13416    | 1.68915    | 1.88502    | 2.33264    | 2.27178    |
| HCG11     | 1.30828    | 0.933369   | 1.13781   | 0.880547   | 0.958732  | 1.19733    | 0.652347  | 0.92256    | 0.592348   | 0.664691   | 0.988119   | 0.318153   | 0.730659   | 0.680668   | 1.16883    |
| HCG14     | 0          | 0.00906559 | 0         | 0          | 0         | 0          | 0.0107415 | 0.00836082 | 0          | 0          | 0.0212403  | 0          | 0          | 0.0049169  | 0          |
| HCG15     | 0.0234271  | 0.0211641  | 0.033916  | 0.0181067  | 0.0090976 | 0.0448827  | 0.0234048 | 0.00780752 | 0.00713289 | 0.0220526  | 0.00661157 | 0.00838136 | 0.015115   | 0.0260186  | 0          |
| HCG17     | 0.0323485  | 0.015586   | 0.015292  | 0.00952459 | 0         | 0.00786981 | 0.0158291 | 0.0082139  | 0.0112562  | 0.0464008  | 0.0260839  | 0.0264528  | 0.0387606  | 0.0120762  | 0          |
| HCG18     | 0.34869    | 0.389568   | 0.369021  | 0.282377   | 0.301611  | 0.336772   | 0.2742    | 0.293369   | 0.132694   | 0.240934   | 0.253033   | 0.271969   | 0.283865   | 0.38844    | 0.434432   |
| HCG20     | 0.00653389 | 0.00629626 | 0.0162159 | 0.00336668 | 0         | 0          | 0.0149204 | 0.00290339 | 0.0119363  | 0.00820071 | 0.00737595 | 0.00233759 | 0.00632345 | 0.00170745 | 0.00469175 |

|            |            |            |            |            |            |            |            |            |            |            |            |            |            |            |            |
|------------|------------|------------|------------|------------|------------|------------|------------|------------|------------|------------|------------|------------|------------|------------|------------|
| HCG2040054 | 0          | 0.128464   | 0          | 0.054953   | 0.0828322  | 0          | 0          | 0          | 0          | 0          | 0          | 0.0381555  | 0          | 0          | 0          |
| HCG21      | 0          | 0          | 0          | 0.0707344  | 0.00892925 | 1.23E-17   | 0          | 0          | 0          | 0          | 0          | 0.00411313 | 0          | 0          | 0.0495326  |
| HCG22      | 0.00672959 | 0          | 0.00111344 | 0.0180311  | 0.00418135 | 0.00458412 | 0          | 0          | 0.0295052  | 0.00506779 | 0.0167131  | 0.00770432 | 0.0364719  | 0.00422061 | 0.0309265  |
| HCG23      | 0          | 0.0158551  | 0.011667   | 0.0193781  | 0          | 0.00800569 | 0.00536746 | 0.00835573 | 0          | 0          | 0          | 0          | 0          | 0.0098278  | 0.0337562  |
| HCG24      | 0          | 0          | 0          | 0          | 0          | 0          | 0          | 0          | 0          | 0          | 0          | 0          | 0          | 0          | 0          |
| HCG25      | 0.00969114 | 0.0469567  | 0.0159869  | 0.0100984  | 0.0687366  | 0.0126231  | 0.0387334  | 0.0131198  | 0.00585068 | 0.00609339 | 0.00553577 | 0.0139567  | 0          | 0.0104365  | 0.00697036 |
| HCG26      | 0.300729   | 0.618957   | 0.711198   | 0.134743   | 0.294499   | 0.311733   | 0.238861   | 0.377654   | 0.0875825  | 0.0205134  | 0.0147602  | 0.0561338  | 0.0358531  | 0.0632113  | 0.164304   |
| HCG27      | 0.0381269  | 0.0378209  | 0.0630826  | 0.00693369 | 0.031354   | 0.0381936  | 0.0665785  | 0.0298977  | 0          | 0          | 0.00759539 | 0.00802378 | 0.00289404 | 0.021099   | 0.0483133  |
| HCG4       | 0.0415346  | 0.0154566  | 0.00918057 | 0.0619351  | 0.0618589  | 0.146045   | 0.0649437  | 0.0227476  | 0.0062752  | 0.121131   | 0.111682   | 0.102188   | 0.426655   | 0.0878532  | 0.00204217 |
| HCG4B      | 0.031932   | 0.0400019  | 0.0496629  | 0.0250092  | 0.0476174  | 0.109846   | 0.0160419  | 0.0283785  | 0.00933351 | 0.0192374  | 0.0173027  | 0.00182786 | 0.0206024  | 0.0193593  | 0.0330181  |
| HCG9       | 0.0101952  | 0.0294732  | 0.0210854  | 0.00525321 | 0.0475099  | 0.0217026  | 0.0291013  | 0.00453031 | 0          | 0          | 0.0172636  | 0.00364746 | 0          | 0.00266422 | 0          |
| HCK        | 1.31783    | 1.04522    | 1.66046    | 10.2481    | 2.56667    | 5.8436     | 1.23844    | 1.37838    | 0.56791    | 5.25467    | 9.85283    | 1.19681    | 9.11086    | 3.02521    | 6.81321    |
| HCLS1      | 5.04198    | 2.01894    | 2.92162    | 8.51937    | 6.50895    | 14.9777    | 1.7374     | 3.01752    | 0.926613   | 6.91256    | 9.16578    | 0.820661   | 7.28266    | 3.7747     | 8.15415    |
| HCN1       | 0.0430836  | 0.0161454  | 0.00396019 | 0.0665983  | 0.0706416  | 0.099865   | 0.0409928  | 0.0723238  | 0.00874515 | 0          | 0          | 0.0325401  | 0          | 0          | 0          |
| HCN2       | 0.475356   | 0.268297   | 0.264038   | 0.44788    | 0.506326   | 0.387413   | 0.217098   | 0.277615   | 1.19921    | 0.375019   | 0.467624   | 0.403297   | 0.302316   | 0.358466   | 0.409603   |
| HCN3       | 0.843947   | 1.53238    | 1.09666    | 0.836207   | 2.42365    | 1.28725    | 1.18764    | 0.700241   | 1.12545    | 1.25784    | 0.715952   | 1.19728    | 0.960475   | 0.775881   | 0.451142   |
| HCN4       | 0.0128074  | 0.00771353 | 0.0105952  | 0.00659922 | 0.0397888  | 0.114506   | 0.00365578 | 0.00284555 | 0          | 0.0160747  | 0.007229   | 0.00687305 | 0          | 0.0552233  | 0.0919655  |
| HCP5       | 1.55969    | 2.40794    | 3.07602    | 2.80228    | 1.67454    | 2.91       | 2.16199    | 1.8074     | 0.670421   | 0.818853   | 1.42409    | 0.319118   | 0.718554   | 0.36629    | 1.48229    |
| HCP5B      | 0.0153458  | 0.0110908  | 0.00888661 | 0.00158143 | 0.00238374 | 0.00653339 | 0.0105128  | 0.00681905 | 0          | 0          | 0.00173235 | 0.00439214 | 0          | 0.00320816 | 0.015427   |
| HCRT       | 0          | 0          | 0          | 0.0826675  | 0          | 0          | 0          | 0          | 0          | 0          | 0          | 0          | 0          | 0          | 0          |
| HCRT1      | 0.312275   | 0.317635   | 0.220064   | 0.0357565  | 0.179656   | 0.0984808  | 0.330135   | 0.390589   | 0.0281715  | 0.11613    | 0.0261126  | 0.041378   | 0          | 0.108806   | 0.0664395  |
| HCRT2      | 0          | 0.0107012  | 0.00918693 | 0.0228883  | 0          | 0.00945586 | 0          | 0.0098693  | 0          | 0          | 0.0250726  | 0          | 0          | 0          | 0          |
| HCST       | 2.87576    | 1.23163    | 1.66155    | 3.90437    | 4.67977    | 7.38489    | 1.7199     | 1.9878     | 0.389151   | 3.4948     | 7.26571    | 0.457263   | 2.415      | 0.930428   | 2.35998    |
| HDAC1      | 9.64017    | 9.20957    | 8.88149    | 23.2679    | 8.26951    | 21.7039    | 7.56957    | 7.2985     | 17.4829    | 19.184     | 21.7401    | 12.7265    | 24.2365    | 16.4514    | 9.93435    |
| HDAC10     | 1.67629    | 3.49851    | 3.41733    | 3.93087    | 10.0036    | 4.19462    | 3.58374    | 2.72866    | 1.37491    | 1.72822    | 1.50614    | 2.64976    | 1.99752    | 2.36457    | 3.46365    |
| HDAC11     | 1.40444    | 2.94684    | 2.75471    | 2.87906    | 5.01997    | 4.22407    | 1.78459    | 1.09381    | 1.72884    | 2.02807    | 1.99458    | 1.14539    | 1.74894    | 1.33782    | 1.01932    |

|            |          |          |           |           |           |          |          |           |            |           |           |           |            |           |           |
|------------|----------|----------|-----------|-----------|-----------|----------|----------|-----------|------------|-----------|-----------|-----------|------------|-----------|-----------|
| HDAC11-AS1 | 0        | 0.043814 | 0.0752281 | 0         | 0.070627  | 0.116145 | 0.155741 | 0         | 0.0553745  | 0.0570666 | 0.0513274 | 0.0325333 | 0          | 0.0237634 | 0.130595  |
| HDAC2      | 2.90248  | 2.77603  | 2.71339   | 5.02183   | 1.66023   | 4.70967  | 1.89152  | 2.30936   | 4.75114    | 4.72444   | 6.48139   | 2.77467   | 5.54696    | 4.07439   | 2.86842   |
| HDAC2-AS2  | 0.126843 | 0.200012 | 0.171709  | 0.178248  | 0.28659   | 0.235647 | 0.105327 | 0.153719  | 0.0983057  | 0.10131   | 0.195259  | 0.0990103 | 0.00743985 | 0.186827  | 0.165602  |
| HDAC3      | 7.18474  | 7.90083  | 7.84507   | 11.0701   | 8.73895   | 17.0684  | 8.44289  | 5.43498   | 12.2673    | 10.9741   | 14.9579   | 9.28789   | 14.9317    | 10.3878   | 5.99863   |
| HDAC4      | 2.23283  | 3.38396  | 4.06758   | 4.53025   | 5.47888   | 4.99017  | 4.00658  | 2.46096   | 3.06161    | 4.04508   | 2.73306   | 3.55505   | 6.33303    | 3.28801   | 4.16935   |
| HDAC5      | 4.679    | 10.4241  | 10.128    | 4.7144    | 18.3696   | 9.80675  | 9.17176  | 4.35136   | 10.8785    | 4.30769   | 4.24228   | 3.45366   | 4.45963    | 4.49582   | 5.51547   |
| HDAC6      | 2.89094  | 3.04567  | 2.86348   | 3.97493   | 5.00296   | 5.56753  | 3.37167  | 2.20022   | 2.06052    | 1.87509   | 2.00191   | 2.84875   | 2.82161    | 2.73794   | 3.76166   |
| HDAC7      | 9.84153  | 9.89061  | 10.3539   | 15.116    | 22.258    | 24.7232  | 13.3009  | 7.95724   | 5.45889    | 8.65124   | 8.65594   | 7.56948   | 15.1572    | 12.3123   | 16.9158   |
| HDAC8      | 1.66172  | 1.58901  | 1.64857   | 2.02738   | 1.2461    | 1.57756  | 1.25032  | 1.33534   | 1.42673    | 1.38243   | 1.56682   | 1.34389   | 1.52399    | 1.68373   | 1.55438   |
| HDAC9      | 0.300054 | 0.294611 | 0.407895  | 0.195557  | 0.188954  | 0.349402 | 0.394443 | 0.324319  | 0.0375308  | 0.181174  | 0.27464   | 0.119534  | 0.217661   | 0.42384   | 0.736049  |
| HDC        | 1.72566  | 2.03851  | 2.92038   | 1.00201   | 2.16348   | 0.171551 | 1.36021  | 0.94197   | 0.213366   | 0.61568   | 1.06797   | 0.65185   | 0.406922   | 0.636367  | 1.86184   |
| HDDC2      | 5.45975  | 3.30723  | 3.02298   | 7.26563   | 2.84922   | 9.70048  | 3.20687  | 3.03102   | 6.21306    | 6.5468    | 12.715    | 3.9066    | 6.29631    | 4.48622   | 2.84001   |
| HDDC3      | 2.12833  | 2.20027  | 2.25644   | 3.32191   | 4.33316   | 4.08197  | 2.19413  | 1.94658   | 2.16425    | 2.15258   | 5.01519   | 1.9073    | 1.83981    | 1.38235   | 0.919935  |
| HDGF       | 23.5761  | 22.4775  | 22.895    | 56.7724   | 46.2723   | 52.0286  | 29.8511  | 16.4396   | 47.9664    | 35.946    | 32.5318   | 29.6073   | 62.6765    | 35.5365   | 18.125    |
| HDGFL1     | 0.010453 | 0        | 0         | 0         | 0.0162372 | 0        | 0.011935 | 0.0092898 | 0          | 0         | 0         | 0         | 0          | 0         | 0         |
| HDGFL2     | 3.10319  | 3.73986  | 3.84748   | 5.62709   | 8.70379   | 9.24489  | 3.15349  | 2.38404   | 1.42088    | 2.29108   | 2.48176   | 2.28289   | 4.54201    | 3.26448   | 3.74991   |
| HDGFL3     | 3.71772  | 1.40643  | 1.48665   | 3.46867   | 2.0382    | 4.98722  | 1.08562  | 1.98578   | 2.21177    | 5.7163    | 9.37045   | 1.62601   | 7.061      | 3.98548   | 5.29815   |
| HDHD2      | 3.17831  | 3.77143  | 3.9908    | 4.22933   | 1.86936   | 5.41259  | 2.54845  | 3.59248   | 3.93346    | 2.80141   | 3.21635   | 2.21529   | 2.36918    | 3.02657   | 2.62937   |
| HDHD3      | 3.66085  | 4.49032  | 4.13675   | 6.58123   | 12.9876   | 5.39849  | 4.81276  | 2.4324    | 14.0788    | 3.08732   | 7.01376   | 5.74293   | 2.85373    | 3.89302   | 1.50924   |
| HDHD5      | 5.33028  | 3.77818  | 3.5236    | 6.60936   | 8.31803   | 10.2828  | 3.65438  | 3.13984   | 3.46323    | 4.18708   | 8.76879   | 2.65128   | 5.56764    | 4.24631   | 3.21756   |
| HDHD5-AS1  | 0.184849 | 0.587815 | 0.275256  | 0.190492  | 0.574268  | 0.157396 | 0.928638 | 0.197134  | 0.045025   | 0         | 0.0417342 | 0.0264528 | 0.0954107  | 0.057966  | 0.106186  |
| HDLBP      | 29.9508  | 28.6439  | 25.9646   | 43.892    | 41.6224   | 52.862   | 33.583   | 20.8697   | 68.7403    | 54.9518   | 34.4327   | 48.5383   | 78.6859    | 46.0512   | 47.7857   |
| HDX        | 0.219192 | 0.168976 | 0.187376  | 0.203296  | 0.0283734 | 0.298623 | 0.200213 | 0.211033  | 0.022246   | 0.178821  | 0.292805  | 0.0496654 | 0.0942812  | 0.183295  | 0.377745  |
| HEATR1     | 4.97855  | 4.60605  | 4.80342   | 7.50089   | 2.16454   | 6.83445  | 4.19995  | 5.30282   | 2.65457    | 3.42998   | 3.95433   | 3.42935   | 6.40919    | 4.93227   | 3.90954   |
| HEATR3     | 1.11467  | 1.31625  | 1.14888   | 2.29269   | 2.24239   | 2.06939  | 0.985814 | 0.958143  | 1.98624    | 2.37949   | 3.15095   | 1.49382   | 2.60262    | 2.29687   | 1.31213   |
| HEATR4     | 0.338901 | 0.128746 | 0.129398  | 0.0738793 | 0.161979  | 0.271922 | 0.23068  | 0.249059  | 0.00793738 | 0.0654394 | 0.0220718 | 0.0559599 | 0          | 0.0715311 | 0.0374389 |

|            |            |           |           |           |           |            |           |           |           |           |          |           |           |           |          |
|------------|------------|-----------|-----------|-----------|-----------|------------|-----------|-----------|-----------|-----------|----------|-----------|-----------|-----------|----------|
| HEATR5A    | 2.90063    | 2.6032    | 2.64615   | 4.46705   | 1.99845   | 3.34422    | 2.49989   | 2.17923   | 5.54153   | 3.68873   | 4.40368  | 3.77513   | 4.09134   | 3.44376   | 4.00463  |
| HEATR5B    | 5.1361     | 6.0293    | 6.05263   | 4.79165   | 3.09087   | 4.57606    | 4.8778    | 4.64011   | 4.87159   | 4.0471    | 3.45193  | 4.04738   | 4.28158   | 4.20963   | 3.67827  |
| HEATR6     | 2.4584     | 2.04878   | 1.67858   | 3.0365    | 1.81801   | 3.38032    | 2.6659    | 2.16391   | 1.7334    | 1.90447   | 2.32375  | 1.87267   | 2.86872   | 2.51133   | 1.95955  |
| HEATR9     | 0.01144    | 0.0551195 | 0.0283918 | 0.0235784 | 0.0533107 | 0.019482   | 0.0261236 | 0.0508344 | 0.0139326 | 0         | 0        | 0.0245568 | 0         | 0.0179371 | 0        |
| HEBP1      | 7.37589    | 7.55071   | 7.7343    | 11.9051   | 8.77897   | 13.7355    | 8.94653   | 5.34622   | 5.92645   | 9.522     | 16.2636  | 5.55181   | 10.1853   | 6.20799   | 9.13449  |
| HEBP2      | 20.0148    | 19.9711   | 19.8587   | 39.4912   | 27.1228   | 20.5758    | 17.3486   | 11.6739   | 64.6527   | 37.1602   | 53.9635  | 20.488    | 37.9067   | 14.9817   | 6.53267  |
| HECA       | 9.82787    | 9.5974    | 10.4464   | 10.8365   | 9.07523   | 11.7549    | 8.0151    | 9.5831    | 19.8418   | 10.9087   | 10.388   | 9.01476   | 15.0407   | 8.82906   | 6.8353   |
| HECTD1     | 17.1663    | 17.1191   | 18.5176   | 22.6333   | 13.3032   | 20.5563    | 14.823    | 15.1887   | 43.7573   | 20.5895   | 19.7942  | 21.9692   | 25.3012   | 18.372    | 12.7303  |
| HECTD2     | 0.993295   | 0.642044  | 0.688627  | 0.774923  | 0.304239  | 0.753455   | 0.519135  | 1.03817   | 0.430218  | 1.16767   | 1.22001  | 0.590605  | 0.789803  | 0.886556  | 1.48175  |
| HECTD2-AS1 | 0.981809   | 0.745581  | 0.599369  | 0.326387  | 0.948805  | 0.404522   | 0.645747  | 0.55037   | 0.275519  | 0.312332  | 0.536303 | 1.52159   | 0.218941  | 1.14689   | 0.519826 |
| HECTD3     | 4.72047    | 6.60496   | 6.23761   | 7.85564   | 11.8509   | 9.98336    | 6.32923   | 4.41059   | 8.3982    | 5.46031   | 4.49349  | 6.62744   | 9.09982   | 5.7744    | 4.98362  |
| HECTD4     | 5.7955     | 7.30604   | 7.98289   | 3.86379   | 6.04272   | 4.31364    | 7.4962    | 5.22244   | 3.76538   | 3.48375   | 1.9125   | 4.76098   | 3.97504   | 4.43348   | 4.70472  |
| HECW1      | 0.0778316  | 0.0878012 | 0.0693548 | 0.024411  | 0.131412  | 0.0403398  | 0.0309098 | 0.045111  | 0.0412131 | 0.0849449 | 0.080222 | 0.0477966 | 0.0676831 | 0.123803  | 0.155514 |
| HECW1-IT1  | 0.0125846  | 0         | 0         | 0         | 0         | 0          | 0         | 0         | 0         | 0         | 0        | 0         | 0         | 0.0131545 | 0        |
| HECW2      | 2.29245    | 1.68179   | 1.28425   | 1.79473   | 1.26764   | 2.37836    | 1.98423   | 1.35656   | 1.62861   | 1.35248   | 1.77967  | 1.45583   | 1.35221   | 1.68959   | 2.05097  |
| HEG1       | 7.50708    | 3.30282   | 3.15956   | 5.26952   | 6.0622    | 11.7771    | 6.76184   | 4.13554   | 2.53351   | 6.12282   | 8.3804   | 4.19051   | 10.0687   | 7.29618   | 20.5168  |
| HEIH       | 5.26275    | 4.14686   | 4.96518   | 4.92251   | 7.1601    | 10.2137    | 4.77326   | 3.61408   | 3.13169   | 3.57898   | 7.94958  | 2.18778   | 3.90751   | 2.70389   | 3.08459  |
| HELB       | 0.625996   | 0.597196  | 0.512689  | 1.31602   | 0.865425  | 0.922136   | 0.271602  | 0.589712  | 0.365948  | 0.636408  | 0.508803 | 0.394166  | 0.76739   | 0.775398  | 0.970929 |
| HELLS      | 1.34874    | 0.996428  | 1.33321   | 2.80122   | 0.408269  | 2.61491    | 1.21617   | 1.34618   | 0.336947  | 1.81435   | 2.05351  | 0.841336  | 2.87389   | 2.21596   | 1.45024  |
| HELQ       | 1.67506    | 1.34584   | 1.41195   | 1.39962   | 0.794651  | 1.5458     | 1.12684   | 1.40819   | 1.08067   | 1.11369   | 1.67118  | 0.82603   | 1.15961   | 1.11207   | 1.15729  |
| HELT       | 0.0272592  | 0.157607  | 0.293159  | 0         | 0.0423429 | 0          | 0.0311237 | 0         | 0         | 0         | 0        | 0         | 0         | 0         | 0        |
| HELZ       | 3.69709    | 2.78158   | 2.96447   | 3.54619   | 1.20575   | 3.94587    | 2.2348    | 3.3749    | 1.21226   | 2.36421   | 2.96499  | 1.65545   | 2.83659   | 3.12051   | 3.76233  |
| HELZ2      | 1.67935    | 2.1511    | 2.39676   | 14.758    | 7.71589   | 14.7492    | 2.02701   | 1.72394   | 3.21954   | 3.56456   | 2.4013   | 3.59664   | 9.05546   | 4.53787   | 4.53803  |
| HEMGN      | 0.00943459 | 0.0136372 | 0         | 0         | 0         | 0.00803343 | 0         | 0.025154  | 0         | 0.0118414 | 0        | 0         | 0.0426101 | 0         | 0        |
| HEMK1      | 0.950111   | 1.69413   | 1.56271   | 1.59589   | 2.70185   | 1.46513    | 1.38376   | 1.107     | 0.496563  | 0.873237  | 0.954321 | 1.04651   | 0.685407  | 1.25902   | 1.33762  |
| HENMT1     | 1.05453    | 0.743014  | 0.844243  | 1.49571   | 0.722153  | 1.75722    | 0.56965   | 0.634865  | 0.676676  | 1.13854   | 2.73929  | 0.705867  | 0.797434  | 1.0134    | 0.765364 |

|          |           |            |            |           |           |           |           |            |           |           |           |            |            |            |           |
|----------|-----------|------------|------------|-----------|-----------|-----------|-----------|------------|-----------|-----------|-----------|------------|------------|------------|-----------|
| HEPACAM  | 0.05466   | 0.00314547 | 0.0162021  | 3.01E-22  | 0.0202816 | 0.0744641 | 0.0670844 | 0.00971544 | 0         | 0         | 0         | 0.00467122 | 0.0141065  | 0.00571354 | 8.39E-22  |
| HEPACAM2 | 0.0463417 | 0.0133969  | 0.00766743 | 0.0668591 | 0.0143969 | 0         | 0.0423292 | 0.0494216  | 0         | 0         | 0         | 0.0198952  | 0          | 0.00968808 | 0         |
| HEPH     | 1.90475   | 1.22366    | 0.946251   | 1.29362   | 2.14566   | 5.53009   | 1.46093   | 1.02084    | 3.39407   | 3.22405   | 5.79962   | 0.991835   | 1.58856    | 2.33552    | 5.32477   |
| HEPHL1   | 0.976123  | 0.282936   | 0.32172    | 62.7319   | 2.57341   | 3.0862    | 0.199812  | 1.10252    | 6.0956    | 29.8328   | 13.9474   | 20.3021    | 89.4251    | 18.3476    | 5.09352   |
| HEPN1    | 0.139819  | 0          | 2.58E-07   | 0.0167014 | 0         | 0.0221393 | 1.07E-06  | 0.00468768 | 0         | 0         | 0         | 0          | 0.0381756  | 0.0535785  | 0.0465495 |
| HERC1    | 8.25548   | 8.2656     | 9.22822    | 5.4347    | 6.15987   | 6.5691    | 8.5721    | 6.81437    | 4.11183   | 4.84147   | 3.4864    | 4.86639    | 5.35489    | 5.57143    | 7.42935   |
| HERC2    | 6.83761   | 6.7347     | 6.58102    | 6.26005   | 9.83671   | 8.18106   | 7.48382   | 5.11736    | 3.42454   | 3.37189   | 2.45346   | 5.51579    | 4.75688    | 4.82506    | 6.10228   |
| HERC2P10 | 0.290195  | 0.0699102  | 0.150044   | 0.0752074 | 0.50712   | 0.0617743 | 0.207085  | 0.161188   | 0         | 0         | 0         | 0.0259553  | 0          | 0.0758343  | 0         |
| HERC2P11 | 0.0505307 | 0.0973858  | 0.0752446  | 0.218708  | 0.298268  | 0.215131  | 0.0576943 | 0.053889   | 0.0123081 | 0.0761054 | 0.0456343 | 0.0506185  | 0.00652043 | 0.0633829  | 0         |
| HERC2P2  | 4.21685   | 5.69706    | 4.26843    | 5.06106   | 9.3083    | 4.49589   | 5.87794   | 2.74835    | 2.92329   | 3.03377   | 2.58495   | 7.1399     | 2.05392    | 6.14629    | 6.48242   |
| HERC2P3  | 7.75887   | 6.63019    | 7.43544    | 2.20754   | 2.02901   | 2.66539   | 3.02187   | 4.60474    | 0.474795  | 0.539548  | 0.234738  | 1.69642    | 0.1596     | 1.14059    | 3.72407   |
| HERC2P4  | 0.239411  | 0.352916   | 0.144155   | 0.0482214 | 0.251222  | 0.0387597 | 0.0655768 | 0.25281    | 0.245158  | 0         | 0         | 0.244617   | 0.0151854  | 0.662906   | 0.161367  |
| HERC2P7  | 1.23325   | 1.66881    | 1.67144    | 1.00049   | 1.89528   | 0.904868  | 0.838857  | 1.18928    | 0.239674  | 1.05386   | 0.473934  | 0.459985   | 0.126971   | 0.905111   | 0.998598  |
| HERC2P9  | 7.69921   | 5.78878    | 5.08707    | 1.90486   | 4.42885   | 2.46646   | 3.32383   | 4.39471    | 0.801952  | 0.929519  | 1.62145   | 3.05355    | 0.621584   | 3.0122     | 3.91627   |
| HERC3    | 6.00997   | 6.7031     | 7.96101    | 3.49527   | 3.11939   | 4.20215   | 5.6555    | 6.08666    | 5.18333   | 8.98787   | 4.1978    | 4.21717    | 8.80947    | 4.32918    | 3.95313   |
| HERC4    | 3.54243   | 3.7236     | 4.01698    | 7.99929   | 2.43385   | 4.61152   | 3.0594    | 3.12802    | 5.11169   | 5.93283   | 4.65689   | 5.14522    | 7.43528    | 6.16353    | 4.59277   |
| HERC5    | 1.21702   | 0.621243   | 0.57687    | 2.6846    | 0.562025  | 5.41663   | 0.383065  | 0.561254   | 0.344509  | 0.429346  | 0.824316  | 0.178869   | 0.602704   | 0.319752   | 0.821934  |
| HERC6    | 2.10661   | 2.56616    | 1.25536    | 9.19274   | 2.78239   | 13.5143   | 0.808551  | 1.52313    | 3.39185   | 0.784244  | 1.26295   | 0.400254   | 0.82549    | 0.656252   | 1.00846   |
| HERPUD1  | 15.9064   | 11.1679    | 12.4715    | 14.1089   | 10.3434   | 26.3596   | 17.6527   | 11.9532    | 19.5188   | 18.8307   | 26.71     | 11.6828    | 16.5552    | 10.8308    | 14.0243   |
| HERPUD2  | 5.8295    | 5.94319    | 6.1779     | 6.61396   | 4.69439   | 7.09687   | 5.35744   | 5.04649    | 6.78973   | 7.41644   | 8.63672   | 5.10441    | 10.1341    | 5.96881    | 4.70563   |
| HES1     | 11.9596   | 13.1351    | 12.4099    | 10.7903   | 15.8216   | 19.5711   | 9.11546   | 11.8676    | 13.0414   | 11.75     | 12.6962   | 17.4662    | 15.9027    | 10.5226    | 6.50623   |
| HES2     | 5.01976   | 8.5567     | 3.46058    | 12.5854   | 17.9661   | 7.75288   | 2.73544   | 3.83349    | 8.77327   | 14.9803   | 6.00399   | 12.6839    | 14.1116    | 5.00859    | 2.68387   |
| HES3     | 0         | 0          | 0          | 0         | 0         | 0.0282726 | 0.0758221 | 0          | 0         | 0         | 0         | 0.0712746  | 0.0856917  | 0.0173538  | 0.0476849 |
| HES4     | 3.38245   | 2.44457    | 2.96388    | 2.36202   | 8.05399   | 3.65698   | 2.89648   | 1.08771    | 1.97841   | 9.04924   | 6.65701   | 2.21324    | 8.16938    | 5.10572    | 5.4009    |
| HES5     | 0.567058  | 2.02351    | 1.56859    | 0.730462  | 8.97353   | 0.814797  | 2.36723   | 0.519702   | 9.90598   | 6.3832    | 4.58099   | 6.39049    | 4.48182    | 2.07458    | 0.99251   |
| HES6     | 0.366087  | 0.29909    | 0.131675   | 0.738123  | 1.16204   | 1.17911   | 0.16356   | 0.0707277  | 0.523392  | 0.499431  | 0.772628  | 0.535279   | 1.16045    | 0.499129   | 0.365737  |

|           |           |            |            |           |           |           |           |            |           |            |            |            |           |           |           |
|-----------|-----------|------------|------------|-----------|-----------|-----------|-----------|------------|-----------|------------|------------|------------|-----------|-----------|-----------|
| HES7      | 0.0412777 | 0.0331471  | 0.0455305  | 0         | 0.106864  | 0.0702949 | 0.172808  | 0.0122281  | 0.0167572 | 0.0345385  | 0.0310649  | 0.00984511 | 0.0355096 | 0.0431471 | 0.0988001 |
| HESX1     | 0.138109  | 0.304196   | 0.212184   | 0.121993  | 0.183883  | 0.184796  | 0.0450537 | 0.245479   | 0.0480573 | 0.123815   | 0.289542   | 0.112938   | 0.0254591 | 0.134051  | 0.0850034 |
| HEXA      | 7.56284   | 4.5921     | 4.8052     | 8.43466   | 7.73197   | 17.2355   | 7.54568   | 5.39479    | 1.88341   | 6.68185    | 15.6857    | 2.39984    | 5.02311   | 5.21919   | 9.76746   |
| HEXA-AS1  | 0.0867363 | 0.11766    | 0.0647211  | 0.126427  | 0.0676752 | 0.148185  | 0.0595138 | 0.0616384  | 0.105327  | 0.0765352  | 0.0391823  | 0.0252088  | 0.106543  | 0.0545243 | 0.0125176 |
| HEXB      | 10.7248   | 6.97096    | 8.20829    | 18.141    | 5.95399   | 25.0286   | 8.77988   | 8.79327    | 12.5534   | 20.3115    | 34.5585    | 7.252      | 22.5622   | 12.0321   | 16.8569   |
| HEXDC     | 1.73995   | 2.15163    | 2.24726    | 2.54943   | 6.03796   | 3.08223   | 1.32395   | 1.03927    | 0.951245  | 0.622058   | 1.45057    | 1.10255    | 1.28809   | 1.14715   | 1.36058   |
| HEXIM1    | 6.5052    | 7.1588     | 7.76626    | 6.60412   | 8.79759   | 10.3616   | 7.00774   | 5.54488    | 12.8234   | 6.13111    | 5.07225    | 5.65133    | 6.16618   | 4.87867   | 5.31365   |
| HEXIM2    | 1.48171   | 2.22039    | 2.27117    | 1.14755   | 3.54387   | 1.63859   | 2.22666   | 1.58568    | 0.553533  | 0.674913   | 0.924186   | 0.682185   | 0.54397   | 0.848728  | 1.62808   |
| HEY1      | 0.772033  | 0.618521   | 0.668387   | 0.536569  | 1.2829    | 1.91862   | 0.52274   | 0.646228   | 0.491991  | 0.642232   | 1.28703    | 0.783652   | 1.04835   | 0.999363  | 2.46243   |
| HEY2      | 1.85352   | 0.479913   | 0.40842    | 0.374881  | 1.00905   | 2.27888   | 1.02848   | 0.469545   | 0.305907  | 0.869668   | 2.34661    | 0.340857   | 0.704118  | 1.014     | 2.03996   |
| HEYL      | 1.6595    | 0.712841   | 0.61895    | 0.979723  | 1.64279   | 3.50148   | 1.44516   | 0.634926   | 0.431622  | 1.39092    | 2.81324    | 0.945911   | 1.21588   | 3.61044   | 4.4272    |
| HFE       | 0.807007  | 0.958307   | 0.713352   | 1.25885   | 1.49949   | 1.84988   | 1.19667   | 0.885139   | 0.380544  | 1.30642    | 1.85772    | 0.2981     | 0.685437  | 0.842086  | 1.16633   |
| HFM1      | 0.0563205 | 0.0248748  | 0.050475   | 0.0193467 | 0         | 0.0999088 | 0         | 0.0542241  | 0         | 0.017672   | 0.0688771  | 0.00335824 | 0.0181689 | 0.0245296 | 0.161767  |
| HGC6.3    | 0         | 0.0219501  | 0.0753762  | 0.023474  | 0.212298  | 0.058187  | 0         | 0          | 0         | 0.0285895  | 0.0257142  | 0          | 0.0293933 | 0.0119051 | 0.0327129 |
| HGD       | 0.103626  | 0.0887616  | 0.0952516  | 0.0474619 | 0.0357703 | 0.107844  | 0.0657313 | 0.102326   | 0         | 0.0578048  | 0.0389935  | 0.0164771  | 0.0148575 | 0.0782301 | 0.231497  |
| HGF       | 0.533164  | 0.125456   | 0.158991   | 0.552636  | 0.173342  | 1.57046   | 0.18758   | 0.278239   | 0.0302016 | 1.61458    | 2.69095    | 0.117553   | 0.563992  | 0.91535   | 2.59534   |
| HGFAC     | 0         | 0.020901   | 0.026915   | 0         | 0.0336918 | 0.0092343 | 0.0247647 | 0.00963806 | 0         | 0          | 0          | 0.0310393  | 0         | 0         | 0.046724  |
| HGH1      | 0.644641  | 0.914169   | 0.756444   | 2.02123   | 2.82651   | 2.46813   | 0.76213   | 0.613535   | 0.907598  | 1.03288    | 1.4348     | 1.12534    | 1.72266   | 1.62723   | 0.794468  |
| HGS       | 9.77272   | 12.295     | 11.7373    | 20.7039   | 26.0547   | 27.9942   | 11.7983   | 8.10386    | 18.8536   | 18.1788    | 11.6915    | 19.9026    | 29.7781   | 17.3701   | 13.8447   |
| HGSNAT    | 8.62681   | 9.72463    | 10.4738    | 9.01617   | 7.1071    | 13.2156   | 9.92472   | 7.5969     | 6.30606   | 8.81664    | 12.1831    | 7.05348    | 9.38816   | 7.50243   | 12.4331   |
| HHAT      | 1.49536   | 1.62391    | 1.45452    | 1.02935   | 2.52243   | 1.21857   | 1.14713   | 1.27704    | 0.875021  | 0.42522    | 0.507742   | 0.706348   | 0.316575  | 0.454881  | 0.889211  |
| HHATL     | 0.0115773 | 0.00557813 | 0.00957757 | 0         | 0         | 0         | 0         | 0.010289   | 0         | 0          | 0          | 0          | 0         | 0         | 0         |
| HHATL-AS1 | 0         | 0.0112406  | 0          | 0.0240419 | 0         | 0.0198649 | 0         | 0          | 0         | 0          | 0          | 0          | 0         | 0.0121931 | 0         |
| HHEX      | 2.10511   | 0.950882   | 1.14286    | 1.58636   | 1.41017   | 2.95758   | 1.0816    | 1.22774    | 0.336497  | 1.83298    | 5.55485    | 0.593091   | 2.73339   | 1.69847   | 2.05956   |
| HHIP      | 0.04557   | 0.0125465  | 0.0269277  | 0         | 0.0303368 | 0.0110864 | 0.0297316 | 0.0289277  | 0         | 0.00817072 | 0.00734898 | 0          | 0         | 0.0170121 | 0.0467459 |
| HHIP-AS1  | 0.0613332 | 0.0689529  | 0.0338261  | 0.0210685 | 0.0635144 | 0.0696325 | 0.0233427 | 0          | 0.024899  | 0          | 0.0461583  | 0          | 0         | 0         | 0.234886  |

|           |           |           |           |            |           |           |           |           |            |           |           |           |            |            |          |
|-----------|-----------|-----------|-----------|------------|-----------|-----------|-----------|-----------|------------|-----------|-----------|-----------|------------|------------|----------|
| HHIPL1    | 0.165625  | 0.198906  | 0.253584  | 0.292961   | 0.698862  | 0.780916  | 0.355631  | 0.118634  | 0.0391384  | 0.322675  | 0.418591  | 0.0760583 | 0.338127   | 0.295865   | 0.972736 |
| HHIPL2    | 0.0359643 | 0.0389884 | 0.0446284 | 0.0277967  | 0.0279325 | 0.191395  | 0.0821258 | 0.0399526 | 0.0109501  | 0.0338542 | 0.0405993 | 0.0321668 | 0          | 0.0563896  | 0.154948 |
| HHLA1     | 0         | 0         | 0         | 0.00580989 | 0         | 0         | 0         | 0         | 0          | 0         | 0         | 0         | 0          | 0          | 0        |
| HHLA2     | 0.0494827 | 0.0956624 | 0.168495  | 0.0225784  | 0.022175  | 0.0361062 | 0.0993205 | 0.155963  | 2.32E-13   | 0.0383408 | 1.14E-39  | 0.121089  | 0.00747098 | 0.0285244  | 0        |
| HHLA3     | 0.827407  | 1.07872   | 1.14753   | 1.78057    | 1.09624   | 2.79738   | 1.05585   | 1.27601   | 1.57081    | 0.916306  | 1.42853   | 1.11441   | 1.3503     | 0.674096   | 1.46785  |
| HIBADH    | 4.37842   | 3.10857   | 3.1526    | 3.37809    | 2.28506   | 6.26292   | 2.67149   | 3.22205   | 1.70694    | 2.92214   | 5.16498   | 1.06087   | 3.16123    | 2.51234    | 4.22524  |
| HIBCH     | 5.00099   | 7.68872   | 7.12902   | 9.54482    | 3.31867   | 8.28286   | 2.65739   | 5.59009   | 6.99193    | 5.67755   | 7.80133   | 6.28563   | 4.30471    | 5.53941    | 2.69113  |
| HIC1      | 3.05772   | 1.56403   | 2.43965   | 2.62839    | 6.76434   | 7.1013    | 3.65667   | 1.29433   | 2.24143    | 2.8465    | 4.4415    | 1.10431   | 3.50619    | 2.61679    | 5.44227  |
| HIC2      | 0.906407  | 0.592062  | 0.776289  | 0.379934   | 0.787413  | 0.791604  | 0.61171   | 0.67792   | 0.223959   | 0.387554  | 0.304347  | 0.236355  | 0.825714   | 0.495982   | 0.754454 |
| HID1      | 2.71457   | 1.8818    | 2.5493    | 0.456725   | 3.00114   | 2.09325   | 2.60128   | 1.82167   | 0.91928    | 0.756158  | 0.82864   | 0.460811  | 1.00528    | 0.821572   | 0.934834 |
| HID1-AS1  | 0.139416  | 0.0671727 | 0.138402  | 0.0287344  | 0.0433122 | 0.379875  | 0.0955084 | 0.0743408 | 0          | 0.104989  | 0.18886   | 0.0598535 | 0.0899505  | 0.014573   | 0.160175 |
| HIF1A     | 16.727    | 12.5719   | 10.3688   | 81.9532    | 10.6985   | 51.8818   | 8.56526   | 13.1627   | 36.9463    | 61.5801   | 61.5373   | 29.6423   | 87.2188    | 57.2723    | 53.0202  |
| HIF1A-AS1 | 0         | 0.0362129 | 0         | 0.0773826  | 2.11E-34  | 0.130422  | 0         | 0         | 0          | 0         | 0.264367  | 0         | 0.0242297  | 0.0396004  | 0        |
| HIF1A-AS2 | 0.105955  | 0.102204  | 0.110042  | 0.668741   | 0.0180962 | 0.195293  | 0.107697  | 0.334188  | 0.0810346  | 0.585546  | 0.325037  | 0.379747  | 0.323748   | 0.869188   | 0.660675 |
| HIF1AN    | 5.09937   | 7.0579    | 7.7945    | 6.25914    | 6.70406   | 7.6834    | 8.99914   | 5.08239   | 7.90274    | 3.89561   | 3.69281   | 3.85477   | 4.84332    | 4.53934    | 3.67369  |
| HIF3A     | 2.4323    | 0.547593  | 0.703662  | 0.0783299  | 0.258627  | 0.604063  | 1.54147   | 1.41856   | 0.00881628 | 0.0227142 | 0.0653753 | 0.0129492 | 0.00467056 | 0.00756683 | 0.233912 |
| HIGD1A    | 10.2875   | 8.04811   | 7.67701   | 33.0858    | 3.96559   | 13.5201   | 6.19298   | 12.8524   | 36.0091    | 40.6567   | 50.0794   | 19.2536   | 40.1883    | 18.3435    | 7.00631  |
| HIGD1B    | 0.658802  | 0.386439  | 0.299586  | 0.203357   | 0.204291  | 0.254438  | 0.496322  | 0.475491  | 0.379092   | 0.458224  | 1.06962   | 0.282254  | 0.147696   | 0.677784   | 0.448019 |
| HIGD1C    | 0.0320098 | 0.0308456 | 0.0794422 | 0          | 0         | 0         | 0.0365477 | 0.0568952 | 0          | 0         | 0         | 0         | 0          | 0.0167297  | 0.04597  |
| HIGD2A    | 17.3613   | 13.2674   | 14.3591   | 25.9402    | 12.5901   | 35.1134   | 20.6097   | 12.679    | 9.82387    | 15.062    | 34.7306   | 11.9568   | 14.99      | 14.5514    | 15.1608  |
| HIGD2B    | 0         | 0         | 0.0171402 | 0          | 0         | 0.0176419 | 0         | 0         | 0          | 0         | 0         | 0         | 0          | 0          | 0        |
| HIKESHI   | 3.56163   | 3.37417   | 3.46858   | 7.04645    | 1.86749   | 6.66678   | 3.39737   | 2.03005   | 7.39415    | 8.3557    | 13.5718   | 3.52695   | 5.45881    | 4.24131    | 3.53946  |
| HILPDA    | 4.11396   | 3.64846   | 3.93216   | 12.9552    | 4.42999   | 7.60611   | 3.05036   | 2.94239   | 15.7696    | 10.2446   | 23.1095   | 6.12187   | 8.50222    | 11.4103    | 2.80108  |
| HILS1     | 0.154434  | 0.0637789 | 0.109508  | 0.0227355  | 0.17135   | 0.0939276 | 0.100759  | 0.0392138 | 0          | 0.0553802 | 0.174337  | 0.0473579 | 0          | 0.19602    | 0.348522 |
| HINFP     | 1.97162   | 2.08462   | 1.75404   | 2.20919    | 2.89246   | 2.69143   | 2.00994   | 1.7383    | 2.67754    | 2.40584   | 2.59666   | 1.61788   | 1.39323    | 1.82374    | 1.22473  |
| HINT1     | 29.453    | 20.1764   | 19.2959   | 54.1338    | 13.1634   | 41.5643   | 19.7096   | 18.5563   | 35.7102    | 61.3493   | 110.454   | 30.9558   | 49.9975    | 38.8762    | 18.1483  |

|           |           |          |           |            |           |           |           |           |           |           |           |           |           |            |           |
|-----------|-----------|----------|-----------|------------|-----------|-----------|-----------|-----------|-----------|-----------|-----------|-----------|-----------|------------|-----------|
| HINT2     | 8.80288   | 5.16488  | 5.43241   | 7.46214    | 9.97975   | 12.4825   | 6.64652   | 4.25863   | 7.13287   | 7.08353   | 16.629    | 4.72402   | 6.02309   | 4.24829    | 3.10954   |
| HINT3     | 3.38345   | 3.32309  | 3.69993   | 3.7973     | 2.71294   | 4.0765    | 2.23654   | 3.70692   | 7.60737   | 4.195     | 5.49728   | 2.75419   | 4.12292   | 2.29812    | 1.741     |
| HIP1      | 2.93604   | 2.64347  | 2.71942   | 3.88296    | 3.22378   | 5.98778   | 3.73024   | 1.98513   | 0.985098  | 2.47477   | 2.74253   | 1.31816   | 3.71433   | 3.07503    | 5.9238    |
| HIP1R     | 6.46275   | 7.67619  | 8.14657   | 10.5772    | 18.6278   | 9.11553   | 8.82881   | 6.34143   | 26.967    | 9.378     | 5.87635   | 13.8487   | 15.1029   | 7.76408    | 3.5205    |
| HIPK1     | 8.697     | 9.91092  | 11.5457   | 9.06914    | 5.48417   | 9.49845   | 10.3184   | 9.4903    | 14.6064   | 8.57868   | 8.52725   | 9.20487   | 10.9945   | 7.7522     | 7.93964   |
| HIPK1-AS1 | 0.0811681 | 0.124778 | 0.117509  | 0.0731903  | 0.0945616 | 0.0518352 | 0.115844  | 0.0721354 | 0.271949  | 0.0382029 | 0.0343607 | 0.0653377 | 0.0393305 | 0.00530275 | 0.0582838 |
| HIPK2     | 4.57237   | 4.461    | 3.32111   | 6.11546    | 7.37637   | 12.0843   | 4.47429   | 4.51474   | 7.49963   | 7.2499    | 5.00205   | 8.73937   | 11.7119   | 6.35893    | 5.93994   |
| HIPK3     | 16.2626   | 12.1221  | 12.8618   | 16.8179    | 8.34813   | 21.9667   | 11.8293   | 14.8636   | 18.9578   | 20.8487   | 21.9515   | 14.2555   | 28.1775   | 14.621     | 16.2591   |
| HIPK4     | 0.121022  | 0.165959 | 0.0847149 | 0.00959356 | 0.173528  | 0.103048  | 0.212582  | 0.157194  | 0.0340132 | 0.0116842 | 0.0630546 | 0.0399665 | 0.0420444 | 0.0389238  | 0.280758  |
| HIRA      | 3.41408   | 4.06793  | 4.23178   | 4.48703    | 5.63469   | 6.98279   | 3.8915    | 2.85989   | 4.42486   | 3.50329   | 2.539     | 3.883     | 5.34314   | 4.44278    | 3.2963    |
| HIRIP3    | 1.53376   | 1.86942  | 1.65199   | 1.73708    | 3.33779   | 2.92874   | 1.31773   | 1.1269    | 1.00795   | 0.628968  | 1.14      | 1.07571   | 0.935686  | 1.0913     | 1.0032    |
| HIST1H1A  | 2.16318   | 1.29925  | 0.857996  | 13.7723    | 1.56501   | 17.7632   | 3.07885   | 1.21141   | 1.84055   | 11.1204   | 30.006    | 3.54089   | 13.8229   | 7.4339     | 3.02149   |
| HIST1H1B  | 16.9032   | 15.4698  | 12.7718   | 100.621    | 20.2043   | 76.2298   | 33.9498   | 12.4187   | 25.0816   | 72.3231   | 173.983   | 33.2657   | 88.2676   | 48.8263    | 23.3496   |
| HIST1H1C  | 104.144   | 79.8522  | 79.747    | 206.468    | 101.414   | 163.921   | 123.24    | 83.1977   | 64.4188   | 105.593   | 203.58    | 76.4405   | 118.414   | 68.2276    | 67.517    |
| HIST1H1D  | 24.394    | 24.8702  | 25.7985   | 70.6893    | 24.6138   | 48.9226   | 29.2126   | 24.8823   | 10.157    | 31.4021   | 71.4168   | 17.4759   | 34.5718   | 20.7664    | 13.517    |
| HIST1H1E  | 114.389   | 109.646  | 117.946   | 161.387    | 141.14    | 132.771   | 159.587   | 103.86    | 97.6982   | 79.6292   | 150.33    | 78.5784   | 84.4169   | 62.8507    | 46.7426   |
| HIST1H1T  | 0.0319215 | 0.061521 | 0         | 0.131584   | 0.19834   | 0.0815421 | 0.0728938 | 0.0283691 | 0.11663   | 0.200323  | 0.0360353 | 0.114203  | 0.0411911 | 0.0500506  | 0.0916865 |
| HIST1H2AA | 0         | 0        | 0         | 0          | 0         | 0         | 0         | 0         | 0         | 0         | 0         | 0         | 0         | 0          | 0         |
| HIST1H2AB | 2.66849   | 2.17403  | 1.32454   | 23.6496    | 3.61752   | 18.4253   | 4.81947   | 2.0697    | 3.66354   | 20.9479   | 77.7744   | 8.22766   | 16.5283   | 12.9831    | 6.6194    |
| HIST1H2AC | 51.9235   | 63.9224  | 67.7108   | 93.6074    | 51.9485   | 106.651   | 87.4508   | 37.9333   | 88.5318   | 87.1939   | 221.781   | 55.9868   | 69.0253   | 55.7371    | 41.6367   |
| HIST1H2AD | 6.56201   | 5.88067  | 5.55192   | 21.4724    | 2.48409   | 19.001    | 8.84196   | 6.65434   | 4.94287   | 19.2765   | 42.9724   | 8.03437   | 14.5889   | 11.1832    | 3.75534   |
| HIST1H2AE | 26.0975   | 21.3326  | 21.8952   | 65.9669    | 9.94338   | 57.0915   | 39.0738   | 22.391    | 27.436    | 49.3385   | 128.59    | 32.796    | 52.0759   | 39.332     | 15.3217   |
| HIST1H2AG | 13.7557   | 13.4122  | 12.4946   | 67.2386    | 11.1168   | 54.6466   | 31.6239   | 12.5553   | 16.2435   | 42.9288   | 132.779   | 25.7703   | 46.7143   | 36.0924    | 18.8873   |
| HIST1H2AH | 5.72562   | 5.28556  | 3.82115   | 26.5271    | 4.33483   | 31.1363   | 13.4043   | 4.14773   | 6.68017   | 22.5249   | 70.5555   | 12.8413   | 26.9765   | 21.3496    | 8.8446    |
| HIST1H2AI | 12.3338   | 8.87175  | 8.58063   | 51.804     | 11.8755   | 47.9463   | 27.0876   | 8.57681   | 11.7003   | 43.6981   | 121.977   | 20.245    | 46.8203   | 31.3577    | 12.6543   |
| HIST1H2AJ | 8.2794    | 6.75269  | 4.09098   | 40.2716    | 3.36317   | 31.8206   | 16.7465   | 4.70498   | 8.49486   | 30.0686   | 93.7486   | 17.224    | 28.687    | 27.8039    | 10.9351   |



|             |         |         |         |         |         |         |         |         |         |         |         |         |         |         |         |
|-------------|---------|---------|---------|---------|---------|---------|---------|---------|---------|---------|---------|---------|---------|---------|---------|
| HIST1H2AK   | 4.77954 | 2.64223 | 3.16318 | 11.51   | 2.73526 | 13.5372 | 5.16991 | 3.62169 | 3.43129 | 8.20891 | 24.3082 | 3.38389 | 5.42089 | 6.15296 | 2.89012 |
| HIST1H2AL   | 4.53013 | 3.17913 | 3.50323 | 30.4463 | 4.2833  | 29.6009 | 12.4249 | 3.63215 | 4.97746 | 22.7431 | 71.095  | 12.5429 | 25.3205 | 18.0147 | 10.1831 |
| HIST1H2AM   | 11.2626 | 8.15121 | 7.46952 | 41.7245 | 6.86503 | 32.2903 | 17.417  | 10.5161 | 10.7071 | 23.7385 | 62.2294 | 13.2272 | 22.5356 | 19.8695 | 11.1243 |
| HIST1H2APS1 | 0       | 0       | 0       | 0       | 0       | 0       | 0       | 0       | 0       | 0       | 0       | 0       | 0       | 0       | 0       |
| HIST1H2BA   | 0       | 0       | 0       | 0       | 0       | 0       | 0       | 0       | 0       | 0       | 0       | 0       | 0       | 0       | 0       |
| HIST1H2BB   | 4.29569 | 3.13047 | 1.86569 | 23.8496 | 1.58477 | 16.9627 | 5.14992 | 3.48361 | 6.4088  | 21.4988 | 52.0694 | 7.68421 | 15.6247 | 12.6849 | 5.55224 |
| HIST1H2BC   | 46.973  | 42.897  | 42.4    | 102.423 | 28.3982 | 92.4113 | 64.1294 | 42.7788 | 85.0074 | 86.2786 | 188.307 | 67.9392 | 70.0225 | 60.1465 | 35.5887 |
| HIST1H2BD   | 18.7079 | 16.6678 | 17.3888 | 41.19   | 6.13766 | 36.9632 | 25.4725 | 15.4556 | 35.5838 | 33.3988 | 73.8246 | 27.9069 | 32.6904 | 28.3779 | 11.6578 |
| HIST1H2BE   | 8.61879 | 6.56224 | 6.07377 | 34.9794 | 2.56189 | 31.5749 | 14.7002 | 7.94336 | 7.25699 | 21.5014 | 48.5877 | 15.189  | 21.5438 | 16.7948 | 8.78662 |
| HIST1H2BF   | 4.73625 | 5.24509 | 4.21336 | 30.6819 | 3.51131 | 17.4146 | 11.1841 | 6.36161 | 6.48925 | 15.1092 | 42.5777 | 10.9755 | 19.7724 | 13.7552 | 5.41057 |
| HIST1H2BG   | 17.5137 | 16.2991 | 16.1271 | 53.2856 | 8.42052 | 33.5535 | 21.0083 | 14.5456 | 21.7106 | 51.0284 | 122.92  | 30.8066 | 43.2147 | 32.0642 | 14.6719 |
| HIST1H2BH   | 10.1285 | 11.7541 | 10.271  | 56.6217 | 5.24435 | 44.1414 | 18.3414 | 9.04975 | 14.4576 | 30.7555 | 72.7214 | 18.079  | 31.2338 | 26.4395 | 9.14977 |
| HIST1H2BI   | 9.16189 | 9.13488 | 9.55088 | 36.8192 | 4.52449 | 28.3189 | 17.0516 | 10.778  | 10.9647 | 29.4457 | 75.8062 | 13.869  | 23.7815 | 17.0777 | 9.9633  |
| HIST1H2BJ   | 11.7399 | 8.57744 | 8.47818 | 42.4433 | 3.58744 | 40.8459 | 21.0403 | 7.78234 | 10.8406 | 27.356  | 71.6418 | 14.7693 | 23.3445 | 23.6631 | 10.7794 |
| HIST1H2BK   | 24.0039 | 23.4202 | 22.7502 | 60.976  | 18.8459 | 72.2917 | 43.0173 | 21.7038 | 40.8008 | 55.3757 | 82.7851 | 38.944  | 65.0131 | 32.5773 | 24.693  |
| HIST1H2BL   | 4.24034 | 3.83997 | 3.88828 | 20.3936 | 3.65047 | 15.1819 | 11.1996 | 3.81386 | 4.85316 | 14.4914 | 35.9299 | 8.33457 | 12.5256 | 11.4814 | 7.33694 |
| HIST1H2BM   | 4.51445 | 3.62522 | 2.79027 | 31.3895 | 2.2569  | 21.0757 | 10.0719 | 3.04364 | 5.81408 | 16.7378 | 37.8411 | 11.2872 | 24.239  | 16.3263 | 7.97374 |
| HIST1H2BN   | 9.22629 | 7.69868 | 7.93112 | 31.3922 | 4.96403 | 31.2048 | 14.4773 | 6.82533 | 7.34459 | 12.8091 | 35.3772 | 10.9167 | 12.9489 | 13.4425 | 13.5462 |
| HIST1H2BO   | 3.71676 | 3.04997 | 2.47499 | 25.4851 | 2.30937 | 19.6638 | 7.52546 | 3.34719 | 4.34554 | 12.0249 | 29.0101 | 10.9215 | 13.1924 | 11.6812 | 4.98189 |
| HIST1H3A    | 7.20445 | 6.32426 | 5.47016 | 40.1222 | 4.29244 | 38.5717 | 10.3104 | 5.52563 | 6.6708  | 27.994  | 72.9178 | 11.4398 | 22.8911 | 17.1246 | 7.51184 |
| HIST1H3B    | 24.0747 | 17.9781 | 16.0222 | 105.201 | 16.5275 | 107.214 | 49.6569 | 15.8615 | 26.215  | 94.6486 | 250.463 | 45.9596 | 69.5024 | 53.0719 | 28.096  |
| HIST1H3C    | 7.71435 | 6.38917 | 4.46313 | 58.5588 | 6.57893 | 46.2812 | 17.9038 | 6.45259 | 7.36879 | 34.6158 | 120.212 | 15.874  | 31.2299 | 24.5601 | 12.9615 |
| HIST1H3D    | 9.18167 | 7.62793 | 7.15325 | 33.9186 | 10.9978 | 21.2518 | 13.9248 | 7.34712 | 7.515   | 30.6095 | 99.0882 | 16.0481 | 24.2495 | 19.6796 | 9.25189 |
| HIST1H3E    | 5.1095  | 5.06849 | 4.72423 | 16.3643 | 3.8906  | 15.1421 | 7.43532 | 3.24986 | 4.69761 | 10.3739 | 31.6109 | 5.48398 | 7.59517 | 16.7558 | 2.94955 |
| HIST1H3F    | 9.53533 | 7.77676 | 7.3542  | 59.2145 | 9.95159 | 52.5634 | 22.2846 | 5.34052 | 13.1251 | 44.6923 | 118.406 | 18.6205 | 36.4002 | 23.4384 | 9.62856 |
| HIST1H3G    | 7.78043 | 4.67994 | 4.18169 | 48.3631 | 9.00653 | 44.0959 | 17.5971 | 4.88866 | 7.00114 | 28.1761 | 94.3208 | 15.4602 | 24.5239 | 21.886  | 10.889  |

|            |          |          |          |          |         |         |         |          |          |          |         |           |         |         |         |
|------------|----------|----------|----------|----------|---------|---------|---------|----------|----------|----------|---------|-----------|---------|---------|---------|
| HIST1H3H   | 11.0089  | 9.59477  | 8.86444  | 48.3042  | 12.2364 | 33.4127 | 19.0499 | 8.00093  | 11.5007  | 26.222   | 79.4815 | 18.8351   | 30.053  | 23.603  | 9.34553 |
| HIST1H3I   | 8.87878  | 10.1221  | 9.47244  | 56.049   | 10.8526 | 42.5518 | 21.6045 | 8.79621  | 11.1088  | 33.6749  | 99.9017 | 18.4688   | 29.8949 | 24.0897 | 16.1653 |
| HIST1H3J   | 3.72806  | 2.58938  | 3.00401  | 22.5523  | 2.10581 | 13.687  | 7.8498  | 2.71079  | 3.71484  | 19.081   | 43.7249 | 6.99794   | 15.5878 | 13.209  | 8.06572 |
| HIST1H4A   | 3.91939  | 3.74687  | 3.96293  | 17.0537  | 4.34869 | 11.813  | 7.67148 | 2.87504  | 3.86416  | 10.0727  | 37.222  | 4.18438   | 7.9877  | 6.89317 | 5.18201 |
| HIST1H4B   | 24.1803  | 29.7976  | 27.7262  | 81.9036  | 45.4148 | 70.765  | 40.1911 | 17.3413  | 42.0811  | 75.5871  | 195.759 | 37.3864   | 51.4456 | 47.332  | 24.2988 |
| HIST1H4C   | 55.306   | 33.452   | 33.6275  | 77.7252  | 16.4076 | 44.9196 | 63.1466 | 31.9062  | 24.9334  | 86.1725  | 229.303 | 33.0765   | 55.2476 | 45.4049 | 20.1975 |
| HIST1H4D   | 23.7106  | 24.2155  | 25.2492  | 64.4004  | 21.256  | 41.6672 | 41.976  | 20.0632  | 17.5872  | 50.1791  | 127.14  | 25.4032   | 35.641  | 28.7723 | 14.7616 |
| HIST1H4E   | 83.5483  | 77.1378  | 79.2738  | 111.593  | 106.608 | 92.5712 | 101.14  | 74.469   | 83.7345  | 127.745  | 362.987 | 60.0885   | 61.0737 | 63.9108 | 43.3748 |
| HIST1H4F   | 25.0297  | 34.4823  | 33.8689  | 69.6693  | 13.5786 | 57.7257 | 44.1597 | 18.835   | 30.56    | 48.0695  | 148.873 | 23.8042   | 39.4394 | 30.3375 | 20.4115 |
| HIST1H4G   | 0        | 0        | 0        | 0        | 0       | 0       | 0       | 0        | 0        | 0        | 0       | 0         | 0       | 0       | 0       |
| HIST1H4H   | 39.665   | 31.842   | 29.5374  | 58.6037  | 28.1634 | 56.1147 | 47.2664 | 31.5114  | 31.4262  | 51.5699  | 116.797 | 28.7798   | 33.0974 | 30.6917 | 26.127  |
| HIST1H4I   | 5.31665  | 3.64657  | 3.88086  | 22.5604  | 7.67563 | 9.58671 | 6.85595 | 3.94676  | 2.97092  | 10.5197  | 42.2247 | 3.58043   | 4.96381 | 8.56497 | 10.0607 |
| HIST1H4J   | 25.8975  | 25.6795  | 18.5605  | 88.6323  | 26.2611 | 61.8451 | 29.8701 | 24.2782  | 38.9183  | 54.7071  | 171.203 | 30.9065   | 48.7708 | 33.5364 | 35.5567 |
| HIST1H4K   | 41.1623  | 40.5444  | 41.7995  | 149.092  | 34.3183 | 93.8955 | 71.7757 | 33.9758  | 68.6678  | 104.742  | 363.629 | 45.1669   | 56.024  | 66.1486 | 27.4291 |
| HIST1H4L   | 3.24257  | 4.28872  | 2.78768  | 18.87    | 1.2839  | 12.5599 | 7.11415 | 3.44677  | 5.49775  | 20.9074  | 56.6294 | 8.27974   | 20.1825 | 18.6418 | 3.37842 |
| HIST2H2AA3 | 22.7296  | 19.4572  | 20.9178  | 51.144   | 16.2538 | 64.6039 | 27.0457 | 18.7347  | 17.7222  | 36.7009  | 69.2251 | 28.7105   | 49.9493 | 31.9184 | 17.4293 |
| HIST2H2AA4 | 22.7296  | 19.4572  | 20.9178  | 51.144   | 16.2538 | 64.6039 | 27.0457 | 18.7347  | 17.7222  | 36.7009  | 69.2251 | 28.7105   | 49.9493 | 31.9184 | 17.4293 |
| HIST2H2AB  | 15.4459  | 10.4538  | 10.9831  | 19.0051  | 10.0305 | 19.882  | 18.4024 | 11.202   | 7.36098  | 17.3763  | 49.1605 | 7.94707   | 11.1988 | 10.5296 | 9.71866 |
| HIST2H2AC  | 93.7455  | 71.9267  | 82.2022  | 85.3254  | 33.6656 | 114.462 | 92.4984 | 70.2386  | 58.0453  | 62.2923  | 177.154 | 38.3349   | 55.7163 | 46.263  | 38.0178 |
| HIST2H2BA  | 0.575816 | 0.571476 | 0.511766 | 0.901268 | 1.17592 | 1.0237  | 1.18018 | 0.420929 | 0.590463 | 0.862421 | 2.53259 | 0.0689468 | 0.27878 | 0.47291 | 0.80679 |
| HIST2H2BC  | 1.43153  | 2.55108  | 2.33563  | 2.25742  | 1.97659 | 1.62524 | 3.35975 | 2.01435  | 1.8943   | 1.34754  | 1.61671 | 2.93063   | 1.87289 | 2.03671 | 1.19925 |
| HIST2H2BE  | 12.2631  | 14.2684  | 14.0601  | 23.4666  | 8.35658 | 24.3211 | 16.8056 | 14.7223  | 27.1995  | 19.4547  | 21.3104 | 28.734    | 17.5997 | 13.1117 | 7.14265 |
| HIST2H2BF  | 16.0995  | 13.0098  | 14.8878  | 32.8159  | 7.72911 | 28.3794 | 21.3267 | 15.5795  | 14.3136  | 18.0166  | 47.0553 | 12.5013   | 19.3847 | 16.6086 | 10.6769 |
| HIST2H3A   | 5.10807  | 3.56545  | 3.73583  | 31.4775  | 4.89808 | 28.7252 | 10.0037 | 2.73267  | 6.51067  | 16.6138  | 43.9796 | 9.52126   | 16.9441 | 12.557  | 5.92739 |
| HIST2H3C   | 5.10807  | 3.56545  | 3.73583  | 31.4775  | 4.89808 | 28.7252 | 10.0037 | 2.73267  | 6.51067  | 16.6138  | 43.9796 | 9.52126   | 16.9441 | 12.557  | 5.92739 |
| HIST2H3D   | 6.75483  | 5.11276  | 6.88238  | 18.2856  | 6.18957 | 24.6999 | 14.2371 | 3.17533  | 3.85762  | 14.495   | 41.5648 | 6.73809   | 12.6346 | 13.1185 | 5.40547 |

|            |           |            |           |           |           |           |           |           |           |           |           |           |           |           |           |
|------------|-----------|------------|-----------|-----------|-----------|-----------|-----------|-----------|-----------|-----------|-----------|-----------|-----------|-----------|-----------|
| HIST2H3PS2 | 0.413442  | 0.605389   | 0.521059  | 0.622453  | 0.501733  | 0.629822  | 0.438863  | 0.522443  | 0.334372  | 0.210808  | 0.430261  | 0.693348  | 0.264667  | 0.415284  | 0.658697  |
| HIST2H4A   | 10.0959   | 9.42598    | 10.721    | 41.6915   | 8.60147   | 40.9547   | 18.2165   | 7.89464   | 7.56243   | 22.6104   | 63.3513   | 10.036    | 24.6035   | 18.5633   | 10.5332   |
| HIST2H4B   | 10.0959   | 9.42598    | 10.721    | 41.6915   | 8.60147   | 40.9547   | 18.2165   | 7.89464   | 7.56243   | 22.6104   | 63.3513   | 10.036    | 24.6035   | 18.5633   | 10.5332   |
| HIST3H2A   | 2.28631   | 2.38301    | 2.77919   | 3.65437   | 3.18904   | 4.80731   | 3.40955   | 2.65389   | 6.13719   | 3.22093   | 6.42606   | 2.80443   | 3.22117   | 2.04844   | 0.402053  |
| HIST3H2BB  | 4.09612   | 4.44053    | 4.02396   | 7.17598   | 2.94274   | 4.62132   | 11.2828   | 5.36942   | 7.60763   | 4.1771    | 6.58921   | 6.0083    | 3.30349   | 1.92673   | 1.32357   |
| HIST3H3    | 0.0962289 | 0.162276   | 0.159215  | 0.0495833 | 0.149477  | 0.0819376 | 0.164807  | 0.213801  | 0         | 0.0603886 | 0         | 0         | 0         | 0.100587  | 0         |
| HIST4H4    | 34.7146   | 31.1515    | 35.1312   | 66.1073   | 24.5187   | 47.4475   | 48.1019   | 24.162    | 54.5242   | 52.1716   | 125.428   | 25.4019   | 40.4825   | 36.5216   | 23.1525   |
| HIVEP1     | 4.19882   | 4.73973    | 5.43903   | 4.00449   | 2.05389   | 4.01937   | 3.737     | 3.71765   | 2.21381   | 4.15377   | 3.61531   | 2.6946    | 4.64073   | 3.86557   | 7.07873   |
| HIVEP2     | 4.60767   | 5.53864    | 6.10358   | 7.37267   | 4.00749   | 7.80215   | 6.86415   | 4.46929   | 6.47539   | 6.30883   | 5.38686   | 7.19155   | 8.60067   | 5.81145   | 9.1875    |
| HIVEP3     | 1.89539   | 4.93425    | 5.54226   | 5.50834   | 3.3797    | 4.27068   | 3.38279   | 4.3831    | 0.609042  | 0.905463  | 1.06798   | 1.65419   | 1.68942   | 1.19799   | 3.1529    |
| HJURP      | 0.2032    | 0.321688   | 0.246149  | 1.99682   | 0.180366  | 1.7364    | 0.455729  | 0.174138  | 0.212121  | 1.26608   | 1.9498    | 0.451764  | 2.00401   | 1.42993   | 0.448154  |
| HJV        | 0.0731383 | 0.00503416 | 0.0172872 | 0.0107673 | 0.0162299 | 0         | 0.0119296 | 0.046428  | 0         | 0         | 0         | 0         | 0         | 0         | 0         |
| HK1        | 17.5212   | 18.1869    | 19.8492   | 18.7488   | 21.3633   | 31.6485   | 20.6848   | 15.1994   | 32.6274   | 19.0472   | 11.4462   | 17.9209   | 34.1585   | 16.6473   | 13.0501   |
| HK2        | 4.71475   | 5.29315    | 5.11772   | 25.4097   | 10.4051   | 22.6843   | 5.29374   | 5.9241    | 68.8249   | 52.8643   | 53.5478   | 52.0294   | 82.1406   | 57.0076   | 9.36222   |
| HK3        | 0.188584  | 0.0981318  | 0.031202  | 1.69466   | 0.64446   | 2.20312   | 0.198094  | 0.147486  | 0         | 1.01304   | 1.1496    | 0.0431798 | 0.467226  | 0.208952  | 1.14832   |
| HKDC1      | 0.156838  | 0.0211588  | 0.0207596 | 0.0581855 | 0.0487248 | 0.122862  | 0.0143258 | 0.0501785 | 0         | 0.125983  | 0.0141641 | 0.0673332 | 0.161906  | 0.0393458 | 0.0630671 |
| HKR1       | 2.96054   | 2.89299    | 2.83498   | 1.81082   | 2.27674   | 2.68041   | 2.40089   | 2.15002   | 0.978738  | 1.22814   | 1.60289   | 1.26326   | 1.29223   | 1.82152   | 1.81789   |
| HLA-A      | 11.1517   | 11.1116    | 13.8177   | 20.6253   | 22.5064   | 48.6377   | 12.5404   | 10.8029   | 6.1989    | 12.2434   | 27.5431   | 3.57297   | 19.5726   | 5.13746   | 22.5592   |
| HLA-B      | 28.1443   | 22.5017    | 28.9987   | 36.693    | 24.8843   | 67.8566   | 20.6399   | 22.9553   | 10.829    | 19.1606   | 45.439    | 5.83505   | 26.1966   | 12.1988   | 33.0264   |
| HLA-C      | 5.76526   | 9.10285    | 12.8218   | 19.8688   | 10.1071   | 37.4833   | 5.30112   | 4.38135   | 2.92632   | 4.94934   | 11.0336   | 3.91351   | 14.3068   | 3.10971   | 16.8477   |
| HLA-DMA    | 1.70287   | 0.674221   | 0.90227   | 1.13721   | 1.13477   | 2.04573   | 1.08962   | 1.25047   | 0.197365  | 1.20423   | 3.72559   | 0.196939  | 1.34265   | 0.826806  | 1.61065   |
| HLA-DMB    | 0.962913  | 0.490885   | 0.693804  | 0.755436  | 0.588645  | 1.51815   | 0.598181  | 0.70853   | 0.181582  | 1.14878   | 3.05765   | 0.149652  | 1.04079   | 0.474039  | 1.27878   |
| HLA-DOA    | 0.266667  | 0.213073   | 0.338366  | 0.205372  | 0.259444  | 0.429885  | 0.173364  | 0.22181   | 0.0647228 | 0.312063  | 0.776687  | 0.0590755 | 0.253486  | 0.222201  | 0.357072  |
| HLA-DOB    | 0.0815292 | 0.105655   | 0.146522  | 0.141962  | 0.091707  | 0.14363   | 0.070618  | 0.122426  | 0.037663  | 0.098799  | 0.09521   | 0.0663827 | 0.0652993 | 0.0749361 | 0.0524869 |
| HLA-DPA1   | 3.26593   | 1.61669    | 2.15148   | 4.40987   | 1.13944   | 2.22696   | 2.33989   | 2.65681   | 1.16672   | 3.45206   | 9.97011   | 0.523704  | 1.46284   | 0.934224  | 3.91013   |
| HLA-DPB1   | 0.907795  | 0.553958   | 0.640586  | 1.4062    | 1.09639   | 1.36364   | 0.699142  | 0.874003  | 0.355493  | 1.0292    | 2.65542   | 0.200176  | 0.904803  | 0.51511   | 1.64603   |

|              |            |            |            |            |            |           |            |           |            |           |            |           |            |           |            |
|--------------|------------|------------|------------|------------|------------|-----------|------------|-----------|------------|-----------|------------|-----------|------------|-----------|------------|
| HLA-DPB2     | 0          | 0          | 0.00322914 | 0          | 0.00606327 | 0         | 0          | 0         | 0          | 0         | 0.00881283 | 0         | 0          | 0         | 0          |
| HLA-DQA1     | 20.039     | 2.24259    | 2.19299    | 3.74356    | 5.49171    | 36.8766   | 9.42055    | 20.1531   | 0.596079   | 8.79852   | 23.9259    | 4.11082   | 3.78513    | 8.65021   | 3.98961    |
| HLA-DQA2     | 0.22058    | 0.764692   | 1.25166    | 1.20351    | 0.333346   | 0.0671386 | 0.0552164  | 0.464476  | 0.203085   | 0.393798  | 0.91821    | 0.0524867 | 1.27717    | 0.164394  | 0.915864   |
| HLA-DQB1     | 6.53152    | 0.492262   | 0.571527   | 0.598656   | 1.06246    | 6.88985   | 3.80977    | 4.97015   | 0.171299   | 1.42943   | 4.56025    | 2.70401   | 0.646989   | 0.900503  | 0.497872   |
| HLA-DQB1-AS1 | 0.341521   | 0.0249854  | 0.0217478  | 0.0167164  | 0.0108706  | 0.123998  | 0.469506   | 0.393355  | 0.00832679 | 0.0754257 | 0.0372146  | 0.126932  | 0.00589843 | 0.015444  | 6.22E-09   |
| HLA-DQB2     | 0.398856   | 1.97883    | 2.92066    | 1.48378    | 0.484715   | 0.0379576 | 0.680421   | 1.99337   | 1.25441    | 0.239437  | 0.733657   | 0.364295  | 0.53685    | 0.153279  | 0.279665   |
| HLA-DRA      | 16.0489    | 8.45626    | 11.665     | 17.9643    | 9.14763    | 21.8199   | 8.07923    | 12.8456   | 3.20577    | 22.5366   | 59.6246    | 2.68667   | 25.1483    | 10.2303   | 23.7191    |
| HLA-DRB1     | 3.84566    | 1.27723    | 1.48126    | 2.14025    | 3.51549    | 5.33581   | 4.67676    | 2.81125   | 0.393242   | 2.57238   | 5.40277    | 2.54881   | 3.08938    | 2.7423    | 2.72991    |
| HLA-DRB3     | 0          | 0          | 0          | 0          | 0          | 0         | 0          | 0         | 0          | 0         | 0          | 0         | 0          | 0         | 0          |
| HLA-DRB4     | 0          | 0          | 0          | 0          | 0          | 0         | 0          | 0         | 0          | 0         | 0          | 0         | 0          | 0         | 0          |
| HLA-DRB5     | 0.165646   | 4.6815     | 2.87033    | 5.62985    | 1.86418    | 0.305075  | 17.1273    | 0.0746446 | 0.754042   | 5.65626   | 7.27474    | 9.33821   | 0.886067   | 2.19753   | 5.99815    |
| HLA-DRB6     | 0.0442788  | 0.384016   | 0.598299   | 1.20161    | 0.550242   | 0.0377028 | 0.556117   | 0.537801  | 0.125829   | 0.46312   | 0.94972    | 0.0211218 | 0.457095   | 0.964737  | 1.82291    |
| HLA-E        | 18.3726    | 16.1791    | 19.3326    | 19.288     | 18.8214    | 41.2898   | 16.2849    | 13.1205   | 12.2044    | 14.312    | 18.8417    | 6.66193   | 19.227     | 8.5919    | 13.536     |
| HLA-F        | 1.50953    | 1.70276    | 2.10128    | 2.04875    | 1.78043    | 3.1832    | 0.859871   | 1.10085   | 0.388533   | 0.865283  | 2.1026     | 0.212323  | 1.12852    | 0.418592  | 2.03818    |
| HLA-F-AS1    | 0.0911415  | 0.115646   | 0.175576   | 0.0656944  | 0.0750051  | 0.127713  | 0.0816595  | 0.083342  | 0.00734228 | 0.0449076 | 0.0668637  | 0.0216545 | 0.00926169 | 0.0431659 | 0.123462   |
| HLA-G        | 0.00211731 | 0.00101863 | 0          | 0.00438474 | 0.00991527 | 0.0577122 | 0.00241259 | 0         | 0.00775352 | 0.333005  | 0.706218   | 0.295699  | 0.0889482  | 0.12831   | 0.0151812  |
| HLA-H        | 0.17161    | 0.158493   | 0.140875   | 0.0403985  | 0.145755   | 0.376667  | 0.152162   | 0.0867369 | 0.00977525 | 0.0883834 | 0.167809   | 0.0406703 | 0.0253233  | 0.0448502 | 0.182977   |
| HLA-J        | 0.014901   | 0.0358975  | 0.0354405  | 0.00191948 | 0.0318262  | 0.01586   | 0.0212668  | 0.0215194 | 0.00680538 | 0.0140267 | 0.0105133  | 0.0173258 | 0.00600876 | 0.0330985 | 0.00802487 |
| HLA-L        | 0.052577   | 0.046645   | 0.0593747  | 0.0232209  | 0.047965   | 0.0234502 | 0.036209   | 0.0452427 | 0.0101639  | 0.0157118 | 0.00659476 | 0.028663  | 0.0145382  | 0.0414366 | 0.0874925  |
| HLA-V        | 0.00632295 | 0.00266321 | 0.002241   | 0.00405083 | 0.0281311  | 0.0161691 | 1.40E-24   | 1.55E-31  | 0.00379752 | 0.0458578 | 0.0138788  | 0.0122653 | 0.0291774  | 0.0139585 | 0          |
| HLCS         | 1.04592    | 0.801181   | 0.979719   | 1.10642    | 0.835491   | 1.67492   | 0.91791    | 0.869415  | 0.501651   | 0.717556  | 0.947629   | 0.494224  | 0.880046   | 1.25871   | 1.67443    |
| HLF          | 4.46193    | 6.56651    | 9.65523    | 0.854706   | 0.81759    | 2.84182   | 6.5058     | 4.90098   | 1.62684    | 0.545505  | 0.30609    | 1.27534   | 0.470799   | 0.289677  | 0.841789   |
| HLTF         | 1.82865    | 1.36805    | 1.31794    | 2.14487    | 0.538838   | 2.21346   | 1.24687    | 1.19128   | 0.432903   | 1.60715   | 2.79918    | 0.72011   | 1.58325    | 1.43025   | 2.77379    |
| HLTF-AS1     | 2.34E-40   | 1.20E-41   | 1.52E-41   | 0          | 4.82E-10   | 5.76E-41  | 0          | 0         | 0.0679172  | 0         | 1.73E-35   | 0         | 0          | 0         | 0          |
| HLX          | 0.954883   | 0.603333   | 0.909919   | 1.96827    | 2.13044    | 4.66065   | 0.833298   | 0.859789  | 0.222714   | 1.69589   | 3.32442    | 0.596083  | 1.63214    | 1.53451   | 2.55007    |
| HLX-AS1      | 0.575891   | 0.0543396  | 0.127011   | 2.05E-36   | 1.19E-34   | 0.11314   | 0.336132   | 0.21089   | 1.74E-10   | 2.00E-34  | 0.145264   | 9.21E-43  | 8.13E-19   | 1.74E-27  | 0.0720032  |

|          |           |            |           |           |           |           |           |           |           |           |           |            |           |            |           |
|----------|-----------|------------|-----------|-----------|-----------|-----------|-----------|-----------|-----------|-----------|-----------|------------|-----------|------------|-----------|
| HM13     | 6.12905   | 5.20617    | 4.86184   | 15.1818   | 10.2109   | 15.4699   | 7.84617   | 5.22296   | 17.4739   | 13.1289   | 21.4675   | 10.532     | 19.2537   | 11.5061    | 11.8981   |
| HM13-AS1 | 0.494022  | 0.732392   | 0.911694  | 0.391619  | 0.472238  | 0.453012  | 1.2149    | 1.1145    | 0.323973  | 0.286176  | 0.214496  | 0.761355   | 0.0245185 | 0.774593   | 1.20066   |
| HMBBOX1  | 4.2146    | 4.72625    | 5.27304   | 3.68333   | 2.71431   | 3.89724   | 4.72141   | 4.06764   | 2.29741   | 2.64799   | 2.51057   | 2.81674    | 2.44379   | 2.99924    | 3.98522   |
| HMBS     | 2.25686   | 1.51575    | 1.49362   | 4.20045   | 2.95327   | 5.0779    | 2.04583   | 1.17911   | 1.69913   | 3.67378   | 8.27623   | 2.17269    | 4.8537    | 3.89602    | 1.3161    |
| HMCES    | 7.36145   | 6.22953    | 6.73907   | 10.2561   | 6.50103   | 15.0288   | 7.25312   | 4.40576   | 8.14619   | 7.78545   | 8.53511   | 5.4188     | 11.251    | 6.46439    | 4.34684   |
| HMCN1    | 4.47815   | 2.39888    | 2.30752   | 1.55051   | 5.02364   | 2.04072   | 4.59939   | 2.82223   | 1.26752   | 5.63011   | 9.41337   | 2.12313    | 1.64305   | 4.01946    | 14.7111   |
| HMCN2    | 2.15277   | 0.599876   | 0.824804  | 0.119273  | 1.8415    | 2.8073    | 7.20586   | 0.805248  | 0.0140958 | 0.0352788 | 0.0354638 | 0.128955   | 0.106678  | 0.0812305  | 1.18014   |
| HMG20A   | 3.70425   | 2.98451    | 2.95329   | 3.54055   | 2.83352   | 4.90271   | 2.63857   | 2.75993   | 2.23522   | 2.68979   | 4.39007   | 2.30616    | 2.6535    | 2.59693    | 3.82508   |
| HMG20B   | 11.0309   | 11.4604    | 9.9233    | 15.4932   | 25.237    | 26.8469   | 13.3621   | 7.24541   | 21.3705   | 13.1481   | 26.0432   | 11.9283    | 11.623    | 15.6769    | 10.4073   |
| HMGA1    | 15.7855   | 22.8868    | 26.6523   | 40.6539   | 24.5354   | 44.3531   | 34.5163   | 23.0784   | 52.9658   | 35.4609   | 46.2421   | 29.5728    | 62.4454   | 32.3503    | 9.14      |
| HMGA1P7  | 0.0105724 | 0          | 0         | 0         | 0.0492679 | 0         | 0         | 0         | 0         | 0         | 0         | 0          | 0         | 0          | 0         |
| HMGA2    | 0.0343879 | 0.0110457  | 0.0126436 | 0.082688  | 0.0118703 | 0.120377  | 0.0218128 | 0.0441438 | 0.0604942 | 0.513129  | 0.603861  | 0.177706   | 0.655746  | 1.07037    | 0.433494  |
| HMGB1    | 17.9256   | 12.2779    | 13.2707   | 23.1865   | 8.38307   | 26.6013   | 9.02848   | 15.9645   | 9.5995    | 20.1872   | 32.652    | 9.26958    | 22.4889   | 16.8157    | 11.1422   |
| HMGB2    | 9.31043   | 5.76756    | 5.84906   | 16.3615   | 3.63189   | 17.2146   | 4.396     | 6.81854   | 3.00101   | 11.6329   | 25.8727   | 3.97708    | 9.41252   | 7.08325    | 3.9208    |
| HMGB3    | 1.37735   | 1.02535    | 0.860694  | 3.79522   | 1.01007   | 3.55866   | 0.944919  | 1.12426   | 1.1735    | 2.89357   | 4.1374    | 1.23932    | 4.34415   | 3.15135    | 2.08841   |
| HMGB3P1  | 0         | 0.0125571  | 0         | 0         | 0         | 0         | 0         | 0.0463235 | 0         | 0         | 0         | 0          | 0         | 0          | 0         |
| HMGB4    | 0         | 0.00475914 | 0.0163428 | 0.0101791 | 0         | 0         | 0.0338335 | 0         | 0         | 0.0123973 | 0.0334515 | 0.00706764 | 0         | 0.0206497  | 0.212781  |
| HMGCL    | 2.90728   | 3.28694    | 2.92899   | 4.5682    | 4.53836   | 6.56865   | 3.23727   | 2.17444   | 3.08499   | 3.90182   | 7.71749   | 2.00814    | 3.5101    | 3.05399    | 2.72836   |
| HMGCLL1  | 0.109967  | 0.0264919  | 0.0165404 | 0         | 0.0155288 | 0.0255369 | 0.045657  | 0.0444225 | 0         | 0         | 0         | 0          | 0.0354751 | 0.00261243 | 0.014357  |
| HMGCR    | 13.3662   | 15.543     | 13.9356   | 30.7818   | 9.75946   | 18.8187   | 14.6519   | 12.8182   | 70.5505   | 29.8442   | 25.0577   | 25.6343    | 34.3403   | 16.6318    | 5.32852   |
| HMGCS1   | 6.40402   | 7.06575    | 8.28662   | 23.4265   | 2.50881   | 10.3638   | 6.65883   | 7.71737   | 8.83444   | 11.9808   | 8.87523   | 5.58801    | 16.4388   | 10.2873    | 2.29057   |
| HMGCS2   | 3.05946   | 0.682787   | 1.00153   | 0.154742  | 0.626851  | 1.0788    | 1.25369   | 2.47712   | 0.0228594 | 0         | 0.0211887 | 0          | 0         | 0.00490493 | 0         |
| HMGN1    | 27.154    | 23.3788    | 24.5633   | 59.7154   | 17.9746   | 57.5161   | 17.9537   | 24.1953   | 32.1411   | 36.2641   | 63.9717   | 27.7219    | 41.1311   | 31.5561    | 24.8253   |
| HMGN2    | 39.8451   | 29.0631    | 29.0343   | 86.8832   | 25.1954   | 88.5416   | 26.6119   | 29.718    | 20.6704   | 35.7444   | 63.2773   | 23.1109    | 28.0657   | 28.3745    | 28.1217   |
| HMGN2P46 | 0.0720593 | 0.063652   | 0.119266  | 0.247531  | 0.0932775 | 0.0511313 | 0         | 0.0640633 | 0.0146267 | 0.0753682 | 0         | 0.0171932  | 0.0154974 | 0.0188348  | 0.0862913 |
| HMGN3    | 6.68301   | 5.76985    | 4.67181   | 7.00621   | 4.51433   | 7.80981   | 2.54512   | 5.6509    | 6.6518    | 7.685     | 15.2455   | 7.06152    | 4.15167   | 6.39939    | 4.90488   |

|            |            |            |           |            |           |           |           |            |           |            |           |            |           |            |           |
|------------|------------|------------|-----------|------------|-----------|-----------|-----------|------------|-----------|------------|-----------|------------|-----------|------------|-----------|
| HMGN3-AS1  | 0.630258   | 0.601152   | 0.67996   | 0.630813   | 0.425242  | 0.51629   | 0.551007  | 0.502484   | 0.283276  | 0.48601    | 0.673795  | 0.382544   | 0.365576  | 0.52645    | 0.444893  |
| HMGN4      | 5.67993    | 5.13906    | 6.04136   | 9.91309    | 4.43884   | 10.7542   | 4.18917   | 6.20791    | 4.01015   | 7.66024    | 14.2841   | 2.9871     | 8.75573   | 5.51922    | 7.61666   |
| HMGN5      | 0.892629   | 0.929727   | 0.531321  | 0.258311   | 0.642553  | 1.00106   | 0.0249806 | 0.135441   | 0.479446  | 0.382556   | 0.221195  | 0.389451   | 0.210702  | 0.512042   | 0.297032  |
| HMGXB3     | 4.49675    | 4.12469    | 4.54248   | 6.22937    | 6.83032   | 10.1349   | 5.0101    | 4.00886    | 2.99799   | 4.65328    | 5.28979   | 3.63161    | 6.39535   | 5.84107    | 5.81928   |
| HMGXB4     | 2.97794    | 2.84078    | 3.1076    | 3.97213    | 1.6575    | 4.64953   | 2.61691   | 2.82557    | 4.00474   | 3.13634    | 3.59527   | 2.57488    | 5.20209   | 3.42869    | 3.36977   |
| HMHB1      | 0          | 0          | 0         | 0          | 0.0936176 | 0         | 0.0688125 | 0          | 0         | 0          | 0         | 0          | 0         | 0          | 0         |
| HMMR       | 0.228264   | 0.187878   | 0.188836  | 1.08511    | 0.0915028 | 0.808015  | 0.0756652 | 0.137423   | 0.134516  | 0.950074   | 1.12216   | 0.310634   | 1.10694   | 0.985194   | 0.190345  |
| HMMR-AS1   | 0          | 0.00917007 | 0         | 0          | 5.54E-29  | 0.0174866 | 0.0208227 | 1.05E-34   | 0         | 0.0503081  | 1.45E-38  | 0.0135894  | 0         | 0          | 0         |
| HMOX1      | 7.77257    | 7.13924    | 7.34515   | 53.7891    | 23.2878   | 30.6497   | 19.9592   | 8.77034    | 130.203   | 35.8245    | 108.068   | 36.4204    | 17.6458   | 22.5023    | 26.4428   |
| HMOX2      | 3.72162    | 3.39628    | 3.87396   | 14.0286    | 5.62783   | 9.46468   | 3.32059   | 3.05096    | 10.5759   | 18.2817    | 17.8069   | 8.35911    | 37.327    | 11.1639    | 6.40659   |
| HMSD       | 0.185144   | 0.142729   | 0.367595  | 0.0763187  | 0         | 0.220707  | 0.169114  | 0.164541   | 0.090194  | 0.139425   | 0.250806  | 0.0264952  | 0.238908  | 0.0774116  | 0         |
| HMX1       | 0          | 0          | 0         | 0.0111187  | 0.0167595 | 0         | 0.0615944 | 0          | 0         | 0          | 0         | 0          | 0.0139224 | 0.00563896 | 0         |
| HMX2       | 0          | 0          | 0         | 0.0292992  | 0.0883272 | 0         | 0         | 0          | 0         | 0          | 0         | 0.0203433  | 0         | 0          | 0         |
| HMX3       | 0          | 0          | 0         | 0          | 0         | 0.0366965 | 0         | 0          | 0         | 0          | 0         | 0          | 0         | 0          | 0         |
| HNFI1A     | 0.107736   | 0.126528   | 0.100268  | 0.0624516  | 0.219649  | 0.143337  | 0.192202  | 0.0777943  | 0         | 0.0507074  | 0.0684116 | 0.09636    | 0.0521331 | 0.147807   | 0.0967016 |
| HNFI1A-AS1 | 0.0287018  | 0.0869839  | 0.0483942 | 0.010053   | 0.0439297 | 0         | 0.06458   | 0.0425756  | 0.0114809 | 0          | 0         | 0.0431266  | 0.030411  | 0.0151747  | 0         |
| HNFI1B     | 0          | 0          | 0         | 0.00849042 | 0         | 0         | 0.0188138 | 0          | 0.0702383 | 0.0103407  | 0         | 0          | 0         | 0.00430601 | 0         |
| HNFI4A     | 0.00423091 | 0.00203851 | 0.0105003 | 0.00872014 | 0.0131441 | 0.0180128 | 0.0193228 | 0.00376008 | 0         | 0          | 0         | 0.00302733 | 0         | 0.00442251 | 0.0182283 |
| HNFI4A-AS1 | 0          | 0          | 0         | 0          | 0         | 0         | 0         | 0          | 0         | 0          | 0         | 0          | 0         | 0          | 0         |
| HNFI4G     | 0.0253984  | 0          | 0         | 0.00523476 | 0         | 0.0951563 | 0         | 0.0045144  | 0         | 0.00637553 | 0         | 0          | 0         | 0          | 0.0145901 |
| HNMT       | 1.42913    | 0.739286   | 0.998979  | 0.959007   | 0.35278   | 2.81582   | 1.1321    | 1.02887    | 0.161909  | 1.84237    | 4.15834   | 0.2497     | 0.825572  | 0.599278   | 3.56388   |
| HNRNPA0    | 14.7267    | 14.4391    | 15.9062   | 24.2837    | 27.0558   | 34.2248   | 13.35     | 11.7985    | 14.8955   | 13.7745    | 21.6261   | 10.4369    | 24.4686   | 15.3406    | 13.1287   |
| HNRNPA1    | 116.601    | 79.5784    | 86.4443   | 146.281    | 80.3531   | 142.693   | 45.466    | 76.0241    | 54.8536   | 74.0275    | 85.7097   | 55.7931    | 113.249   | 83.3482    | 52.2885   |
| HNRNPA1L2  | 2.68674    | 1.80831    | 1.61892   | 1.43344    | 1.55971   | 2.18398   | 1.45216   | 1.78148    | 0.628345  | 0.840027   | 1.03178   | 0.952524   | 0.613251  | 1.23354    | 1.63624   |
| HNRNPA1P10 | 42.3454    | 30.0968    | 33.4585   | 95.2795    | 32.8244   | 77.324    | 23.7424   | 45.042     | 31.2447   | 44.1857    | 47.2013   | 36.0017    | 74.4078   | 37.5686    | 34.0437   |
| HNRNPA1P33 | 3.71484    | 7.36631    | 5.86377   | 4.91793    | 4.90819   | 2.03604   | 3.70521   | 7.05826    | 4.73227   | 5.78794    | 2.2173    | 10.0518    | 6.58431   | 8.07859    | 0.981147  |

|               |          |           |          |          |           |           |          |         |            |          |          |            |           |          |           |
|---------------|----------|-----------|----------|----------|-----------|-----------|----------|---------|------------|----------|----------|------------|-----------|----------|-----------|
| HNRNPA2B1     | 28.9242  | 28.1313   | 29.3397  | 54.1571  | 24.1122   | 51.8901   | 14.247   | 27.6906 | 19.1864    | 29.7384  | 32.6827  | 26.6335    | 41.2862   | 41.657   | 29.4205   |
| HNRNPA3       | 19.5702  | 17.8502   | 18.3608  | 27.9013  | 9.65863   | 24.2444   | 9.5236   | 18.507  | 12.1959    | 15.5033  | 16.1339  | 12.8199    | 20.1769   | 18.7763  | 13.838    |
| HNRNPA3P1     | 0        | 0.0074228 | 0        | 0        | 0.0119591 | 0.0131111 | 0        | 0       | 0.00937646 | 0.019326 | 0        | 0.00551081 | 0         | 0        | 0         |
| HNRNPAB       | 22.5058  | 26.2374   | 25.8191  | 58.0603  | 35.0385   | 60.9628   | 23.223   | 20.4657 | 48.5954    | 31.3182  | 40.9867  | 25.9422    | 61.4951   | 35.7346  | 22.0722   |
| HNRNPC        | 26.0547  | 20.7989   | 21.9486  | 59.4348  | 19.8266   | 40.9152   | 18.605   | 25.3952 | 25.1162    | 34.5503  | 49.3739  | 21.5718    | 49.5019   | 38.2318  | 22.1948   |
| HNRNPCL1      | 0        | 0         | 0        | 0        | 0         | 0         | 0        | 0       | 0          | 0        | 0        | 0          | 0         | 0        | 0         |
| HNRNPCL2      | 0        | 0         | 0        | 0        | 0         | 0         | 0        | 0       | 0          | 0        | 0        | 0          | 0         | 0        | 0         |
| HNRNPCL3      | 0        | 0         | 0        | 0        | 0         | 0         | 0        | 0       | 0          | 0        | 0        | 0          | 0         | 0        | 0         |
| HNRNPCL4      | 0        | 0         | 0        | 0        | 0         | 0         | 0        | 0       | 0          | 0        | 0        | 0          | 0         | 0        | 0         |
| HNRNPD        | 23.6967  | 21.9313   | 23.6417  | 30.0948  | 8.93552   | 34.8986   | 12.5622  | 21.169  | 12.638     | 16.3832  | 18.0112  | 12.7002    | 24.4516   | 20.8679  | 16.6256   |
| HNRNPDL       | 21.2239  | 15.1325   | 16.7103  | 17.731   | 6.96965   | 12.4084   | 9.10044  | 15.3298 | 8.76449    | 11.7831  | 14.2107  | 10.7433    | 16.2682   | 13.4173  | 11.9714   |
| HNRNPF        | 14.9823  | 19.3924   | 22.3678  | 40.5634  | 15.5897   | 37.0614   | 16.2199  | 14.6704 | 23.375     | 20.3475  | 26.8385  | 15.9547    | 39.4299   | 22.4605  | 16.2778   |
| HNRNPH1       | 22.8689  | 25.9373   | 25.1547  | 30.3056  | 17.9056   | 23.3167   | 13.0349  | 18.7255 | 14.5461    | 24.3784  | 22.0489  | 21.7589    | 28.9639   | 27.8878  | 19.2937   |
| HNRNPH2       | 4.23119  | 4.14435   | 4.27353  | 10.38    | 5.81657   | 9.7334    | 3.10668  | 3.97484 | 10.8485    | 7.26527  | 9.65396  | 5.16785    | 12.1863   | 4.99077  | 3.88282   |
| HNRNPH3       | 7.50022  | 7.87945   | 8.51785  | 10.87    | 4.31871   | 8.8583    | 4.05493  | 7.23636 | 5.0167     | 5.42861  | 6.44749  | 4.07425    | 8.1811    | 8.19945  | 5.56209   |
| HNRNPK        | 45.7322  | 45.1353   | 46.3807  | 82.9517  | 24.9361   | 93.3817   | 39.5909  | 38.6614 | 54.9125    | 59.1908  | 66.5883  | 41.3438    | 95.7119   | 55.1327  | 39.884    |
| HNRNPKP3      | 0        | 0         | 0        | 0        | 0         | 0         | 0        | 0       | 0          | 0        | 0        | 0          | 0         | 0        | 0         |
| HNRNPL        | 34.1722  | 31.6349   | 32.6411  | 63.4086  | 36.9153   | 68.16     | 30.9642  | 24.3592 | 46.7124    | 40.6314  | 51.7695  | 37.0142    | 69.3577   | 37.8518  | 30.943    |
| HNRNPLL       | 3.94234  | 3.24415   | 3.49478  | 4.36127  | 2.64141   | 5.28528   | 2.82959  | 2.50065 | 3.15752    | 4.83316  | 7.44607  | 1.62594    | 4.70826   | 4.05712  | 4.17234   |
| HNRNPM        | 20.7461  | 20.5547   | 20.0968  | 40.5146  | 26.5255   | 43.4408   | 12.39    | 14.6299 | 19.5247    | 19.9447  | 20.7636  | 16.076     | 44.2071   | 25.8427  | 18.2447   |
| HNRNPR        | 7.86099  | 6.88648   | 7.65829  | 10.6836  | 2.97131   | 10.3581   | 4.62086  | 8.29255 | 4.422      | 6.50224  | 7.26119  | 4.1927     | 10.9648   | 7.58763  | 6.85499   |
| HNRNPU        | 20.5476  | 22.2597   | 23.5599  | 35.5212  | 17.1187   | 41.5121   | 13.876   | 19.4692 | 15.9747    | 19.8066  | 16.7608  | 16.4461    | 33.6695   | 23.6144  | 18.8559   |
| HNRNPUL1      | 25.2173  | 22.9752   | 24.7864  | 29.9862  | 30.6049   | 51.2616   | 28.4704  | 23.3837 | 24.7373    | 21.6052  | 21.1198  | 19.5487    | 36.9236   | 19.9513  | 21.8832   |
| HNRNPUL2      | 9.07083  | 11.5264   | 11.941   | 12.966   | 8.34125   | 17.1749   | 6.54724  | 7.08802 | 7.12962    | 7.09346  | 5.26359  | 6.85663    | 12.8077   | 9.46658  | 7.41516   |
| HNRNPUL2-BSC2 | 8.48326  | 6.56972   | 6.373    | 10.8189  | 19.2044   | 16.4864   | 8.41294  | 5.28006 | 9.83919    | 7.6648   | 6.24832  | 6.70442    | 11.0383   | 6.47255  | 5.72462   |
| HOGA1         | 0.205292 | 0.283577  | 0.169944 | 0.242272 | 0.131155  | 0.587528  | 0.351326 | 0.12445 | 0.0908481  | 0.128733 | 0.252625 | 0.109412   | 0.0601603 | 0.161155 | 0.0937367 |

|              |           |            |           |           |           |            |           |            |           |           |           |           |           |            |           |
|--------------|-----------|------------|-----------|-----------|-----------|------------|-----------|------------|-----------|-----------|-----------|-----------|-----------|------------|-----------|
| HOMER1       | 1.94827   | 1.68605    | 1.50518   | 3.15265   | 2.20931   | 2.36728    | 1.02951   | 1.75053    | 4.824     | 4.04177   | 4.83496   | 4.14757   | 4.6056    | 4.69007    | 1.84989   |
| HOMER2       | 11.8273   | 8.50859    | 9.03446   | 15.7918   | 22.5227   | 11.7425    | 12.6548   | 10.6143    | 52.5929   | 45.0006   | 25.2341   | 27.5664   | 60.6545   | 18.1985    | 8.89309   |
| HOMER3       | 2.77821   | 3.13178    | 3.0789    | 8.5171    | 12.0781   | 11.5156    | 3.22195   | 1.56839    | 7.87363   | 9.35338   | 8.54091   | 6.52625   | 14.7347   | 8.48838    | 5.06888   |
| HOMER3-AS1   | 0.292381  | 0.346765   | 0.18606   | 0.254952  | 1.50225   | 0.28726    | 0.385189  | 0.259844   | 0.191739  | 0.395196  | 0.152336  | 0.514969  | 0.188642  | 0.717036   | 0.161498  |
| HOMEZ        | 0.983626  | 2.02685    | 2.21599   | 3.28322   | 1.75854   | 3.18162    | 1.62457   | 1.39646    | 1.65      | 1.70818   | 1.98334   | 1.08891   | 2.59839   | 1.42263    | 1.08389   |
| HOOK1        | 5.04192   | 5.95325    | 3.87684   | 7.28884   | 2.33237   | 3.29387    | 2.41818   | 3.64858    | 15.0144   | 9.88398   | 8.38589   | 8.84661   | 12.803    | 6.53206    | 2.12231   |
| HOOK2        | 3.03254   | 8.47206    | 9.00067   | 5.07147   | 12.8096   | 6.33458    | 5.1937    | 2.90784    | 7.21377   | 4.00647   | 2.25221   | 7.96257   | 4.98868   | 3.74915    | 2.01201   |
| HOOK3        | 4.68394   | 4.69747    | 5.42784   | 3.72589   | 2.55303   | 4.04932    | 4.2337    | 5.14293    | 7.28321   | 5.18058   | 6.1008    | 4.67578   | 5.72836   | 4.50794    | 5.82397   |
| HOPX         | 41.2573   | 62.0555    | 75.3102   | 65.5605   | 29.1799   | 31.3568    | 77.9022   | 47.5024    | 222.725   | 121.218   | 126.779   | 60.5778   | 47.3154   | 26.9025    | 6.87165   |
| HORMAD1      | 0.0853537 | 3.07259    | 5.26551   | 0.0628282 | 0.113643  | 0.0622951  | 1.43397   | 0.195056   | 0.668258  | 1.20901   | 0.633182  | 0.0348988 | 1.85664   | 0.0254912  | 0.0525337 |
| HORMAD2      | 0.0297087 | 0.00954273 | 0.0163847 | 0         | 0         | 0          | 0.0113068 | 0.00880086 | 0         | 0         | 0         | 0         | 0         | 0          | 0         |
| HORMAD2-AS1  | 0.0623224 | 0.131583   | 0.0863726 | 0.283132  | 0.126849  | 0.0526555  | 0.188116  | 0.154942   | 0.0253294 | 0.0264535 | 0.093926  | 0.0904172 | 0         | 0.163471   | 0.0293746 |
| HOTAIR       | 1.31912   | 3.06978    | 1.92273   | 1.85877   | 2.21633   | 3.46899    | 1.3422    | 1.33183    | 0.284151  | 0.765874  | 1.41822   | 0.333886  | 0.318437  | 0.464312   | 0.154648  |
| HOTAIRM1     | 1.83992   | 1.98661    | 1.79719   | 1.2336    | 1.37736   | 0.717268   | 1.84765   | 1.61546    | 1.48488   | 1.86412   | 2.37733   | 0.697909  | 1.31583   | 1.33237    | 0.827725  |
| HOTS         | 0.125854  | 0.2838     | 0.242351  | 0.0235636 | 0.0657886 | 0.153066   | 1.11955   | 0.723965   | 0.0181695 | 0.314752  | 0.0867373 | 0.142266  | 0.205887  | 0.132248   | 0.119056  |
| HOTTIP       | 0.19844   | 0.0358543  | 0.0246245 | 0.0357872 | 0.107886  | 0.177417   | 0.0509788 | 0.0617249  | 0         | 0.0124531 | 0.0336021 | 0.0106492 | 0.067217  | 0.0233355  | 0.0997447 |
| HOXA-AS2     | 0.0950295 | 0.144364   | 0.132962  | 0.0343066 | 0.205816  | 0.119047   | 0.310975  | 0.223807   | 0         | 0.0946142 | 0.0351835 | 0.115715  | 5.08E-34  | 0.0598124  | 6.77E-28  |
| HOXA-AS3     | 0.13849   | 0.249106   | 0.231264  | 0.0781878 | 0.136931  | 0.0837274  | 0.252926  | 0.165217   | 0.115575  | 0.0224776 | 0.0711614 | 0.0968413 | 0.0530318 | 0.041135   | 4.16E-26  |
| HOXA1        | 0.527011  | 0.678585   | 0.518667  | 0.767831  | 0.437544  | 0.812379   | 0.726219  | 0.565266   | 0.475847  | 0.786901  | 0.902652  | 0.565636  | 0.697638  | 0.508137   | 0.247935  |
| HOXA10       | 1.1252    | 0.891131   | 0.866407  | 0.81834   | 1.33744   | 1.43774    | 1.21655   | 0.95791    | 0.291855  | 0.506774  | 1.27338   | 0.26085   | 0.686113  | 0.632601   | 1.52002   |
| HOXA10-AS    | 1.31233   | 1.65733    | 1.63144   | 1.84153   | 2.98592   | 1.68843    | 1.18457   | 1.32096    | 0.752574  | 0.835561  | 1.1447    | 1.09169   | 1.2547    | 1.09716    | 1.1481    |
| HOXA10-HOXA9 | 0.136349  | 0.0926399  | 0.0354358 | 1.27E-06  | 1.28E-06  | 0.00015600 | 0.0372628 | 0.00062759 | 0.0449247 | 5.16E-06  | 0.202939  | 0.0400008 | 1.51E-06  | 0.00027342 | 0.0147086 |
|              |           |            |           |           |           | 8          |           | 2          |           |           |           |           |           | 2          |           |
| HOXA11       | 0.488508  | 0.222761   | 0.310313  | 0.305649  | 0.460713  | 0.727926   | 0.458162  | 0.224825   | 0.0212481 | 0.602179  | 0.846892  | 0.0374507 | 0.287041  | 0.319144   | 0.964643  |
| HOXA11-AS    | 0.567744  | 0.20876    | 0.234839  | 0.184761  | 0.626615  | 0.712418   | 0.358234  | 0.172614   | 0.018196  | 0.468801  | 0.758975  | 0.160356  | 0.125315  | 0.17179    | 0.472046  |
| HOXA13       | 1.33482   | 0.425801   | 0.563553  | 0.227681  | 0.772177  | 0.799528   | 0.693708  | 0.539961   | 0.0560573 | 0.184865  | 0.665091  | 0.0856297 | 0.130668  | 0.235753   | 1.17662   |



|          |           |           |            |           |           |           |           |           |           |            |            |            |            |           |           |
|----------|-----------|-----------|------------|-----------|-----------|-----------|-----------|-----------|-----------|------------|------------|------------|------------|-----------|-----------|
| HOXA2    | 0.286359  | 0.451546  | 0.441489   | 0.093896  | 0.242626  | 0.243831  | 0.297233  | 0.42801   | 0.0792622 | 0.0980211  | 0.088163   | 0.121076   | 0.109175   | 0.0952407 | 0.168238  |
| HOXA3    | 0.565927  | 0.808393  | 0.79865    | 0.432257  | 0.734289  | 0.572585  | 0.706971  | 0.769215  | 0.170281  | 0.217267   | 0.511088   | 0.309656   | 0.412385   | 0.254021  | 0.296412  |
| HOXA4    | 0.531657  | 0.86748   | 0.595217   | 0.641682  | 0.603313  | 0.954155  | 0.621857  | 0.614126  | 0.260978  | 0.362857   | 0.734612   | 0.408973   | 0.578952   | 0.243715  | 0.211574  |
| HOXA5    | 1.28495   | 1.12382   | 1.22476    | 0.921167  | 1.01968   | 0.915729  | 0.797344  | 1.17919   | 0.459271  | 0.525895   | 0.772574   | 0.399746   | 0.243306   | 0.299287  | 0.120349  |
| HOXA6    | 1.21198   | 1.47378   | 1.16974    | 0.654228  | 1.21026   | 0.638848  | 1.02138   | 0.94888   | 0.492019  | 0.253527   | 0.29318    | 0.516193   | 0.0744727  | 0.180981  | 0         |
| HOXA7    | 1.89576   | 2.14651   | 2.22957    | 2.4422    | 2.26799   | 3.84625   | 1.94219   | 2.28151   | 1.6493    | 1.04907    | 2.69226    | 1.56658    | 1.49093    | 1.38559   | 0.643284  |
| HOXA9    | 3.71037   | 4.32702   | 4.49497    | 3.84933   | 3.67006   | 3.59235   | 3.79272   | 4.57889   | 2.50255   | 2.07579    | 2.96442    | 2.6901     | 2.51162    | 2.29891   | 1.40909   |
| HOXB-AS1 | 0.247885  | 0.0594468 | 0.157779   | 0.129154  | 0.384214  | 0.0494504 | 0.0331543 | 0.0861144 | 0         | 0          | 0.0423002  | 0.0415545  | 0          | 0.0455291 | 0.172048  |
| HOXB-AS3 | 0.0503041 | 0.0647769 | 0.0677959  | 7.90E-29  | 0.282269  | 0.219285  | 0.205853  | 0.0873978 | 0         | 0.0406502  | 0          | 0.0234553  | 0.0169893  | 0.0687196 | 0.310882  |
| HOXB1    | 0         | 0         | 0          | 0         | 0         | 0         | 0.0260592 | 0         | 0.0277965 | 0          | 0          | 0.0489925  | 0          | 0         | 0         |
| HOXB13   | 0.205818  | 0.121203  | 0.107205   | 0.133545  | 0.0355229 | 0.824329  | 0.261107  | 0.0203237 | 0.046419  | 0.00956749 | 0.00860528 | 0.0272719  | 0.0541006  | 0.199202  | 0.93053   |
| HOXB2    | 0.43339   | 0.515075  | 0.764866   | 0.655045  | 1.54837   | 0.664247  | 0.428854  | 0.539226  | 0.228722  | 0.235711   | 1.27203    | 0.258419   | 0.307583   | 0.528521  | 1.34854   |
| HOXB3    | 0.592237  | 0.322353  | 0.346341   | 0.224462  | 0.848288  | 0.452785  | 0.376166  | 0.347569  | 0.0633543 | 0.101563   | 0.193851   | 0.111665   | 0.212565   | 0.335317  | 0.936946  |
| HOXB4    | 0.387046  | 0.241333  | 0.244852   | 0.328474  | 0.866458  | 0.562198  | 0.246953  | 0.283273  | 0.0415922 | 0.100014   | 0.346971   | 0.0977441  | 0.220341   | 0.279632  | 0.850118  |
| HOXB5    | 0.101672  | 0.0979741 | 0.210275   | 0.104776  | 0.513277  | 0.119037  | 0.232171  | 0.158126  | 0.0154781 | 0.0159511  | 0.0430406  | 0.0909361  | 0.00819977 | 0.185983  | 0.346782  |
| HOXB6    | 0.358066  | 0.211553  | 0.308431   | 0.184991  | 0.813213  | 0.532479  | 0.28379   | 0.19635   | 0.100903  | 0.139064   | 0.155881   | 0.0988035  | 0.048051   | 0.16583   | 0.570979  |
| HOXB7    | 0.813226  | 0.408151  | 0.350395   | 0.750756  | 1.47376   | 2.16391   | 0.502946  | 0.406534  | 0.226971  | 0.489077   | 1.4918     | 0.375801   | 0.776103   | 0.522429  | 1.24089   |
| HOXB8    | 0.0507801 | 0.0305833 | 0.0315067  | 0.065413  | 0.0985989 | 0.118906  | 0.0724739 | 0.0225646 | 0.0309223 | 0.0478007  | 0.0573245  | 0.00908364 | 0.0327631  | 0.01327   | 0.0729267 |
| HOXB9    | 0.0600005 | 0.033039  | 0.00709095 | 0.0529991 | 0.0665725 | 0.0729852 | 0.0489333 | 0.0228529 | 0.0104391 | 0.0322743  | 0.0774093  | 0.0245326  | 0.0608332  | 0.0313589 | 0         |
| HOXC-AS1 | 1.35142   | 1.66853   | 1.64205    | 0.261127  | 0.656006  | 0.898997  | 1.7841    | 0.825707  | 0.360035  | 0.318032   | 1.09651    | 0.271962   | 0.0544955  | 0.176578  | 1.15236   |
| HOXC-AS2 | 0.229594  | 0.553109  | 0.455847   | 0.473206  | 0.855932  | 0.351893  | 0.629143  | 0.489705  | 0.0559239 | 0          | 0.207346   | 0.197137   | 0.0296265  | 0.143995  | 0.197835  |
| HOXC-AS3 | 0.251555  | 0.121203  | 0.26013    | 0.129617  | 0.195376  | 0.48194   | 0.287217  | 0.279451  | 0.153183  | 0.157864   | 0.0709935  | 0.134996   | 0.0405755  | 0         | 0.0903162 |
| HOXC10   | 2.83529   | 4.2121    | 4.26109    | 4.21233   | 4.31243   | 6.81009   | 4.27586   | 4.05263   | 1.82725   | 3.06928    | 5.62788    | 2.06254    | 2.89641    | 2.35861   | 1.34031   |
| HOXC11   | 1.98823   | 2.79725   | 2.33093    | 2.73972   | 3.86493   | 2.80547   | 2.01066   | 1.75688   | 1.79879   | 1.49726    | 2.56511    | 1.43076    | 1.38542    | 0.777869  | 0.375275  |
| HOXC12   | 1.11943   | 0.961467  | 1.32871    | 0.852667  | 1.77667   | 0.994625  | 1.08363   | 0.540684  | 0.355655  | 0.0916306  | 0.412076   | 0.156714   | 0.40823    | 0.178063  | 0.174744  |
| HOXC13   | 1.16348   | 1.44065   | 1.31183    | 1.689     | 2.33082   | 1.67095   | 1.44547   | 1.18775   | 3.15259   | 1.91645    | 1.91868    | 1.24359    | 2.09541    | 0.897524  | 0.0971012 |

|           |           |            |            |           |           |            |            |           |           |           |            |            |           |           |           |
|-----------|-----------|------------|------------|-----------|-----------|------------|------------|-----------|-----------|-----------|------------|------------|-----------|-----------|-----------|
| HOXC13-AS | 0.732178  | 1.37356    | 1.83337    | 1.58067   | 2.44218   | 1.5372     | 1.34994    | 0.929547  | 3.68345   | 0.844121  | 0.501663   | 1.02396    | 0.888308  | 0.414155  | 0.188843  |
| HOXC4     | 1.27345   | 1.23128    | 1.26087    | 0.682957  | 1.26311   | 1.13384    | 1.33164    | 1.21558   | 0.172557  | 0.259326  | 0.868702   | 0.410172   | 0.257619  | 0.311175  | 0.981808  |
| HOXC5     | 0.606538  | 0.841561   | 0.741763   | 0.350927  | 1.2652    | 0.738146   | 1.20814    | 0.745759  | 0.103674  | 0.355611  | 0.311417   | 0.350612   | 0.206753  | 0.352129  | 0.910062  |
| HOXC6     | 1.8967    | 2.53325    | 1.83634    | 2.11306   | 4.53406   | 4.19363    | 2.58268    | 2.06671   | 0.46018   | 1.11874   | 2.86483    | 1.09835    | 0.960906  | 1.16604   | 1.83872   |
| HOXC8     | 0.960922  | 1.18427    | 1.30538    | 1.04238   | 1.06842   | 1.5503     | 1.28193    | 1.52819   | 0.184783  | 0.736329  | 0.536671   | 0.535577   | 1.10292   | 0.72954   | 0.828003  |
| HOXC9     | 1.51232   | 1.91365    | 1.88296    | 1.58997   | 1.89831   | 3.56399    | 1.88369    | 1.42548   | 0.744175  | 0.920298  | 1.4313     | 0.699542   | 0.719485  | 0.894194  | 1.51373   |
| HOXD-AS2  | 0.767298  | 0.214133   | 0.226956   | 1.23E-12  | 2.79133   | 0.283078   | 0.366641   | 0.245253  | 0.0668861 | 0.506222  | 0.535146   | 0.118068   | 0.129466  | 0.328075  | 0.337122  |
| HOXD1     | 0.468982  | 0.107272   | 0.126021   | 0.0879028 | 0.309436  | 0.546252   | 0.187309   | 0.0833119 | 0         | 0.220609  | 0.511517   | 0.0167691  | 0.101859  | 0.122487  | 0.472867  |
| HOXD10    | 0.41052   | 0.241062   | 0.254708   | 0.727122  | 0.717389  | 0.764645   | 0.351539   | 0.239423  | 0.203112  | 0.305926  | 0.304123   | 0.431427   | 0.902197  | 0.918566  | 0.221084  |
| HOXD11    | 0.158189  | 0.0304871  | 0.0392595  | 0.17932   | 0.245722  | 0.390618   | 0.072246   | 0.210878  | 0.0192656 | 0.0198543 | 0.0178576  | 0.0905508  | 0.35722   | 0.0330706 | 0.11359   |
| HOXD12    | 0         | 0          | 0          | 0         | 0         | 0.0242386  | 0          | 0.0252984 | 0         | 0         | 0          | 0          | 0         | 0         | 0.0817622 |
| HOXD13    | 0.1094    | 0.00479187 | 0          | 0.0307472 | 0.0617948 | 0.313331   | 0          | 0.0265161 | 0.0363373 | 0.0873779 | 0.101045   | 0.00711623 | 0.121918  | 0.0103958 | 0.371356  |
| HOXD3     | 0.593928  | 0.291014   | 0.22485    | 0.269721  | 0.860028  | 0.360005   | 0.206886   | 0.286283  | 0.0735597 | 0.101077  | 0.20455    | 0.22329    | 0.0974235 | 0.452466  | 0.477077  |
| HOXD4     | 0.964294  | 0.610878   | 0.84205    | 0.588879  | 1.19276   | 0.836289   | 0.428166   | 0.603063  | 0.0652445 | 0.268953  | 0.322539   | 0.332212   | 0.299557  | 1.03596   | 0.718069  |
| HOXD8     | 0.82748   | 0.394451   | 0.400535   | 0.662236  | 0.861467  | 1.10186    | 0.613109   | 0.344228  | 0.418121  | 0.90599   | 2.02724    | 0.352731   | 0.755392  | 0.924765  | 0.960808  |
| HOXD9     | 1.49785   | 0.893237   | 0.843014   | 1.22727   | 3.01324   | 1.95492    | 1.10742    | 0.752873  | 0.538293  | 0.693428  | 1.01176    | 0.843347   | 1.18821   | 1.82236   | 1.26951   |
| HP        | 0.561305  | 0.107595   | 0.0526174  | 0.353205  | 0.198614  | 1.51836    | 0.11933    | 0.191248  | 0.101741  | 0.0665188 | 0.234553   | 0.0884364  | 1.21908   | 0.0799691 | 0.367252  |
| HP09053   | 0.410049  | 0.364945   | 0.43141    | 0.18131   | 0.177171  | 0.236998   | 0.391516   | 0.389681  | 0.0866462 | 0.232897  | 0.249476   | 0.183338   | 0.0902753 | 0.361793  | 0.309669  |
| HP1BP3    | 17.3529   | 15.4193    | 15.1075    | 24.3605   | 14.0643   | 23.0632    | 14.9204    | 15.7942   | 15.5916   | 17.7867   | 17.5903    | 14.4563    | 27.2321   | 19.4035   | 18.9195   |
| HPAT5     | 0         | 0          | 0          | 0         | 0         | 0          | 0          | 0         | 0         | 0         | 0          | 0          | 0         | 0         | 0         |
| HPCA      | 0.0329204 | 0.158616   | 0.0953193  | 0.0678509 | 0.15341   | 0.042047   | 0.0751749  | 0.0292569 | 0.0400934 | 0.0206593 | 0.0557446  | 0.0353332  | 0.0212401 | 0.154851  | 0         |
| HPCAL1    | 2.48323   | 1.53424    | 2.02635    | 6.04945   | 3.03075   | 6.91148    | 2.29522    | 1.59887   | 5.01992   | 3.986     | 6.70304    | 3.03389    | 6.66481   | 5.33267   | 3.77244   |
| HPCAL4    | 0.0185776 | 0          | 0.00384218 | 0.0287171 | 0.0144287 | 0.00395465 | 0.00530283 | 0.0206378 | 0         | 0.0174876 | 0.00524295 | 0.0132928  | 0.0239724 | 0.0218463 | 0.0533596 |
| HPD       | 0.0834198 | 0.0114837  | 0          | 0.0245619 | 0.12958   | 0.578395   | 0.0408198  | 0.0105909 | 0         | 0         | 0.0807177  | 0          | 0.0307555 | 0         | 0.034229  |
| HPDL      | 0.47519   | 0.433156   | 0.55248    | 1.0191    | 0.95758   | 1.00608    | 0.79184    | 0.547861  | 0.985402  | 0.370743  | 0.304461   | 0.35839    | 0.67947   | 0.476573  | 0.202886  |
| HPF1      | 3.42578   | 3.18198    | 3.14894    | 5.17787   | 1.24166   | 5.25061    | 1.8688     | 3.16295   | 2.61922   | 4.22804   | 7.32635    | 1.75672    | 3.27861   | 2.40718   | 3.71722   |

|         |           |           |            |            |            |           |           |            |           |           |           |           |           |            |            |
|---------|-----------|-----------|------------|------------|------------|-----------|-----------|------------|-----------|-----------|-----------|-----------|-----------|------------|------------|
| HPGD    | 6.13985   | 5.11517   | 4.45045    | 1.90154    | 3.00754    | 2.16866   | 5.38569   | 5.24296    | 50.9342   | 9.72029   | 24.7544   | 5.09056   | 0.695866  | 0.706311   | 1.75419    |
| HPGDS   | 1.16074   | 1.43612   | 2.09831    | 0.826983   | 0.267114   | 0.0732112 | 1.99612   | 1.20986    | 0.139619  | 0.5036    | 1.27797   | 0.205071  | 0.221896  | 0.269623   | 0.782032   |
| HPN     | 0.0587139 | 0         | 0.00809538 | 0.0100844  | 0.030401   | 0.199976  | 0         | 0.0173933  | 0         | 0         | 0.0552339 | 0         | 0.0126273 | 0.00511441 | 0.168641   |
| HPN-AS1 | 0         | 0.0072454 | 0.00414675 | 0          | 0.00778626 | 0.0384133 | 0.0114464 | 0.00445476 | 0         | 0         | 0         | 0         | 0         | 0          | 0.00719869 |
| HPR     | 0.351816  | 0.278569  | 0.123637   | 0.260302   | 0          | 0.149632  | 0.116182  | 0.224153   | 0.0402401 | 0.0393844 | 0         | 0.0835561 | 0.1777    | 0.140498   | 0.107041   |
| HPRT1   | 3.77812   | 2.56111   | 2.76021    | 6.82621    | 0.889202   | 7.64565   | 2.68908   | 4.1862     | 1.81264   | 5.46041   | 9.04704   | 3.01932   | 7.35509   | 5.76142    | 4.41585    |
| HPS1    | 4.95845   | 3.76634   | 3.97009    | 6.96227    | 7.93273    | 12.638    | 6.52753   | 3.55658    | 4.68645   | 4.60888   | 5.8705    | 3.5479    | 5.23143   | 4.5538     | 4.76834    |
| HPS3    | 2.17008   | 1.40732   | 1.55027    | 2.33461    | 1.04975    | 2.89427   | 1.42883   | 1.76194    | 0.667024  | 1.21892   | 2.60847   | 0.844214  | 1.61094   | 1.30974    | 2.17381    |
| HPS4    | 3.6557    | 4.35192   | 4.58518    | 3.4701     | 4.79219    | 4.45305   | 3.99686   | 3.55735    | 3.81226   | 2.28368   | 2.27575   | 3.4531    | 2.25684   | 2.19229    | 2.15187    |
| HPS5    | 2.43288   | 2.30098   | 2.46381    | 3.74358    | 1.82693    | 2.79438   | 1.93307   | 2.18742    | 2.16013   | 2.23209   | 2.78388   | 1.96813   | 2.65897   | 2.11176    | 2.11132    |
| HPS6    | 3.35193   | 3.32601   | 3.41066    | 6.01595    | 8.46258    | 7.17588   | 3.58979   | 1.94746    | 5.84388   | 4.16354   | 4.54656   | 3.1173    | 8.14765   | 4.30497    | 2.62458    |
| HPSE    | 1.31405   | 0.876463  | 0.523258   | 3.67345    | 2.54386    | 2.34217   | 1.13086   | 1.56871    | 16.2009   | 4.30164   | 5.74542   | 4.11531   | 4.65034   | 2.95984    | 1.66886    |
| HPSE2   | 1.29358   | 0.524857  | 0.797191   | 0.178103   | 0.211513   | 0.664448  | 0.890966  | 0.577141   | 0.0510263 | 0.0525855 | 0.0295606 | 0.0262313 | 0.0608219 | 0.0273717  | 0.0676911  |
| HPX     | 0.442042  | 0.460317  | 0.365689   | 0.0881685  | 0.177199   | 0.315685  | 0.358181  | 0.278797   | 0.0694655 | 0.0715882 | 0.0804856 | 0.071421  | 0.0736009 | 0.104336   | 0          |
| HPYR1   | 0         | 0         | 0.0194965  | 0.0242867  | 0          | 0         | 0         | 0          | 0         | 0         | 0         | 0         | 0         | 0          | 0          |
| HR      | 9.63337   | 13.6601   | 14.0299    | 13.3044    | 37.8993    | 25.6488   | 20.202    | 11.7417    | 22.4724   | 16.4242   | 4.6606    | 14.7522   | 16.7944   | 11.6203    | 6.35685    |
| HRAS    | 14.0782   | 15.0011   | 13.4218    | 28.2725    | 36.0929    | 35.0324   | 12.3565   | 8.91097    | 25.5945   | 24.1708   | 25.6243   | 19.2333   | 34.2679   | 19.3084    | 7.67809    |
| HRASLS  | 0.718458  | 1.6469    | 1.06264    | 0.471158   | 0.405823   | 1.66843   | 1.93892   | 0.754597   | 1.98864   | 0         | 0.196618  | 0.311561  | 0.112375  | 0.0113787  | 0.0625331  |
| HRASLS2 | 0.12476   | 0.0150279 | 0          | 0.0964269  | 0.096898   | 0.026558  | 0.0356118 | 0          | 0.113958  | 0.391468  | 0.0352097 | 0.178539  | 0.140866  | 0.0652052  | 0          |
| HRASLS5 | 0.319676  | 0.0501476 | 0.166055   | 0.00766129 | 0.0461923  | 0.27853   | 0.144301  | 0.0858911  | 0         | 0         | 0         | 0         | 0         | 0          | 0.0320299  |
| HRAT17  | 0         | 0         | 0          | 0          | 0          | 0         | 0         | 0          | 0         | 0         | 0         | 0         | 0         | 0          | 0          |
| HRAT5   | 0.0834485 | 0.187632  | 0.115057   | 0.0859961  | 0.129624   | 0.189481  | 0.254077  | 0.123603   | 0.033877  | 0.0349121 | 0.125604  | 0.0796128 | 0.0358937 | 0.261683   | 0.119843   |
| HRAT92  | 0.158424  | 0.184466  | 0.20751    | 0.05442    | 0.389637   | 0.213585  | 0.195957  | 0.129061   | 0         | 0.0662793 | 0.0670652 | 0.11808   | 0.0127768 | 0.0620993  | 0.104278   |
| HRC     | 0.29123   | 0.177737  | 0.289111   | 0.0400161  | 0.376984   | 0.338904  | 0.144091  | 0.232939   | 0.0236457 | 0.0487364 | 0.17534   | 0.0902991 | 0.0125267 | 0.0811783  | 0.334594   |
| HRCT1   | 2.11942   | 0.48124   | 0.846435   | 0.225943   | 0.681142   | 2.94553   | 1.55762   | 0.671154   | 0.148345  | 0.21403   | 0.330008  | 0.034862  | 0.581553  | 0.17825    | 0.384842   |
| HRG     | 0.0689123 | 0.0276692 | 0          | 0          | 0          | 0         | 0         | 0.0306218  | 0.0139879 | 0         | 0         | 0.0082181 | 0         | 0          | 0          |

|            |           |            |            |           |            |            |            |           |            |           |           |            |            |            |           |
|------------|-----------|------------|------------|-----------|------------|------------|------------|-----------|------------|-----------|-----------|------------|------------|------------|-----------|
| HRH1       | 0.859819  | 1.25671    | 1.41466    | 2.6978    | 1.44752    | 2.58494    | 1.33272    | 0.798287  | 0.614257   | 3.87051   | 3.39991   | 2.21688    | 4.7107     | 2.94481    | 2.5524    |
| HRH2       | 0.471198  | 0.296886   | 0.247378   | 3.71658   | 0.760084   | 6.07229    | 1.03461    | 0.46708   | 0.0551794  | 0.761998  | 1.86173   | 0.142642   | 1.99948    | 0.951922   | 3.16227   |
| HRH3       | 0.0431773 | 0.0374463  | 0.0214316  | 0.0088991 | 0.120725   | 0.176472   | 0.0591582  | 0.0613959 | 0.0210341  | 0.151738  | 0.0487418 | 0.0617891  | 0.0167147  | 0.0135398  | 0.0124016 |
| HRH4       | 0.0315472 | 0.0577598  | 0.0469766  | 0.0845269 | 0.0490038  | 0.00537241 | 0.0360196  | 0.0280366 | 0.0076842  | 0.015838  | 0.0356129 | 0.00902916 | 0.113983   | 0.0329759  | 0.0634281 |
| HRK        | 0.041631  | 0.00547049 | 0.00626184 | 0.0624028 | 0.123456   | 0.103122   | 0.00864235 | 0.0235443 | 0          | 0.0190004 | 0.115354  | 0.0243721  | 0.0170928  | 0.00989008 | 0         |
| HRNR       | 23.0445   | 94.7773    | 1.2125     | 7.73527   | 324.901    | 19.6978    | 17.6535    | 51.1585   | 2679.25    | 186.284   | 387.021   | 242.344    | 12.4282    | 16.6804    | 8.71626   |
| HS1BP3     | 2.60034   | 3.6148     | 3.74466    | 3.80124   | 8.87135    | 7.18371    | 4.58544    | 2.05419   | 3.38978    | 3.67468   | 5.10988   | 3.07346    | 4.54229    | 2.70804    | 3.51312   |
| HS1BP3-IT1 | 0.347146  | 0.223014   | 0.191456   | 0         | 0          | 0.131373   | 0.52848    | 0.102838  | 0          | 0         | 0         | 0          | 0.0995452  | 0.100796   | 0         |
| HS2ST1     | 2.54844   | 2.03214    | 1.92641    | 2.19948   | 1.12326    | 3.90322    | 1.28392    | 2.76028   | 1.82343    | 2.55885   | 4.14628   | 1.14651    | 2.27316    | 1.85305    | 2.21423   |
| HS3ST1     | 0.459328  | 0.226986   | 0.282555   | 1.10448   | 0.731789   | 1.77504    | 0.34963    | 0.177939  | 0.803255   | 1.72951   | 3.28398   | 1.65173    | 8.25237    | 1.65583    | 2.01279   |
| HS3ST2     | 0.889205  | 0.182798   | 0.196164   | 0.0610901 | 0.147333   | 1.17105    | 0.284274   | 0.347711  | 0.0288787  | 0.297612  | 1.55255   | 0.02545    | 0.0382474  | 0.049572   | 0.32351   |
| HS3ST3A1   | 0.115346  | 0.0829462  | 0.10748    | 0.223259  | 0.819974   | 0.30387    | 0.0876632  | 0.134988  | 0.016356   | 1.67516   | 1.7036    | 2.82119    | 2.3485     | 2.05307    | 0.876373  |
| HS3ST3B1   | 0.527456  | 0.569438   | 0.625519   | 1.82711   | 0.407583   | 0.884036   | 0.388206   | 0.65299   | 0.0812338  | 1.33852   | 2.00389   | 0.652043   | 2.45703    | 0.829378   | 1.93436   |
| HS3ST4     | 0.433526  | 0.275024   | 0.478191   | 0.290395  | 0.707086   | 0.86133    | 0.173245   | 0.089899  | 0.0615983  | 0         | 0.0163132 | 0.00516999 | 0.0139854  | 0          | 0.083013  |
| HS3ST5     | 0         | 0.0162546  | 0.0139545  | 0         | 0          | 0.00718149 | 0          | 0.014991  | 0          | 0         | 0         | 0          | 0.00544161 | 0.013224   | 0         |
| HS3ST6     | 4.2479    | 9.34533    | 10.6419    | 1.63127   | 19.9821    | 4.67484    | 17.5016    | 5.43128   | 38.801     | 2.43944   | 6.65016   | 5.00368    | 0.762749   | 1.8955     | 0.0287761 |
| HS6ST1     | 9.93184   | 10.4227    | 6.97127    | 12.6671   | 22.6956    | 16.44      | 6.01092    | 5.48019   | 8.03062    | 6.40914   | 6.06204   | 9.13034    | 16.6471    | 6.41506    | 4.1209    |
| HS6ST2     | 0.111484  | 0.0122079  | 0.0209608  | 0.067888  | 0.047229   | 0.224373   | 0.0347151  | 0.0360282 | 0.00617159 | 0.0826822 | 0.0457642 | 0.0145036  | 0.434843   | 0.206581   | 0.0218325 |
| HS6ST2-AS1 | 0         | 0          | 0          | 0         | 0          | 0          | 0          | 0         | 0          | 0         | 0         | 0          | 0          | 0          | 0         |
| HS6ST3     | 0.103794  | 0.0185749  | 0.0392528  | 0         | 0.00921301 | 0.154032   | 0.152368   | 0.0263552 | 0          | 0         | 0         | 0          | 0.0038267  | 0          | 0         |
| HSBP1      | 8.79645   | 6.32937    | 6.42036    | 17.5305   | 3.1991     | 15.2179    | 6.00485    | 6.49395   | 10.5856    | 31.2959   | 29.5801   | 12.7797    | 23.5876    | 14.8017    | 9.27409   |
| HSBP1L1    | 3.3326    | 5.33746    | 4.67152    | 6.86868   | 3.30732    | 5.99063    | 3.73459    | 3.23597   | 12.8902    | 7.20363   | 10.3806   | 6.75626    | 9.53643    | 4.72534    | 2.43733   |
| HSCB       | 1.65579   | 1.10957    | 0.708512   | 1.7848    | 1.71468    | 3.1925     | 1.23862    | 0.761137  | 1.41392    | 1.48101   | 3.22273   | 1.26647    | 1.12971    | 1.62136    | 1.58529   |
| HSD11B1    | 0.931042  | 1.95101    | 2.62854    | 2.04077   | 0.596857   | 6.43025    | 1.77172    | 1.12951   | 1.65586    | 0.85323   | 1.61825   | 0.158616   | 2.05956    | 0.33985    | 1.33709   |
| HSD11B1L   | 0.578031  | 0.898569   | 0.622547   | 0.730548  | 1.86353    | 1.4487     | 0.83431    | 0.726942  | 1.32826    | 0.807619  | 1.73596   | 1.0613     | 0.816252   | 0.798012   | 0.532533  |
| HSD11B2    | 11.6207   | 5.50424    | 5.48324    | 1.12785   | 2.82703    | 2.18839    | 5.29322    | 9.54066   | 1.54257    | 0.463022  | 1.24937   | 2.09413    | 0.920343   | 1.09259    | 1.05961   |

|             |           |           |           |           |           |           |            |           |           |           |            |            |            |            |           |
|-------------|-----------|-----------|-----------|-----------|-----------|-----------|------------|-----------|-----------|-----------|------------|------------|------------|------------|-----------|
| HSD17B1     | 0.600078  | 0.617106  | 0.836387  | 2.08534   | 2.15726   | 2.27224   | 1.40461    | 0.694955  | 2.36784   | 2.37676   | 4.90132    | 1.58609    | 2.48598    | 1.85368    | 0.816904  |
| HSD17B10    | 18.6249   | 15.2844   | 15.8255   | 34.9943   | 29.8644   | 43.4633   | 21.7868    | 12.1099   | 27.6294   | 21.2951   | 40.0703    | 19.878     | 23.0569    | 19.004     | 10.8717   |
| HSD17B11    | 6.15676   | 2.35777   | 2.73943   | 2.81847   | 0.933497  | 5.05443   | 3.20673    | 3.59688   | 0.463039  | 5.403     | 10.7438    | 0.693269   | 3.68745    | 2.57039    | 5.30161   |
| HSD17B12    | 10.6031   | 7.60174   | 7.08649   | 13.5038   | 2.6132    | 12.9696   | 6.45804    | 10.8697   | 13.013    | 12.4862   | 14.2587    | 8.8816     | 19.162     | 9.62893    | 6.80398   |
| HSD17B13    | 0.212757  | 0.13461   | 0.20202   | 0.0603213 | 0.0960776 | 0.0822801 | 0.222724   | 0.198338  | 0.0235174 | 0.0728421 | 0.0218391  | 0.0631752  | 0.0311468  | 0.108457   | 0.0417136 |
| HSD17B14    | 0.972869  | 0.387614  | 0.557187  | 0.751927  | 2.49929   | 2.30992   | 1.51666    | 0.565319  | 0.159498  | 1.22105   | 3.67491    | 0.200802   | 0.820825   | 0.567133   | 2.01514   |
| HSD17B2     | 0.451887  | 0.124415  | 0.0534046 | 1.86273   | 1.20332   | 1.75897   | 0.0737071  | 0.344228  | 0.471726  | 0.324094  | 0.364374   | 0.10393    | 0.364444   | 0.134958   | 0         |
| HSD17B3     | 0.204083  | 0.157329  | 0.287015  | 0.0841255 | 0.0634024 | 0.225907  | 0.163111   | 0.0362745 | 0.0497101 | 0.128073  | 0.0691154  | 0.0146027  | 0          | 0.117329   | 0.410325  |
| HSD17B3-AS1 | 0.049293  | 0.0237501 | 0.0203893 | 0         | 0.0382845 | 0.0629585 | 0.0281406  | 0.0219037 | 0         | 0         | 0          | 0          | 0          | 0          | 0         |
| HSD17B4     | 13.2888   | 11.9439   | 12.9484   | 19.3035   | 9.51957   | 15.9168   | 8.76       | 11.6561   | 17.2107   | 11.5674   | 13.534     | 11.0865    | 11.3995    | 8.74834    | 8.04327   |
| HSD17B6     | 0.357587  | 0.0344582 | 0.0709971 | 0.088441  | 0.111091  | 0.816009  | 0.375619   | 0.0635588 | 0.13936   | 0.0897618 | 0.322937   | 0.0204691  | 0.0830569  | 0.0672807  | 0.390291  |
| HSD17B7     | 1.56184   | 1.5124    | 1.31806   | 4.06181   | 1.78401   | 2.4354    | 1.50883    | 0.976474  | 1.00436   | 1.24918   | 1.78015    | 0.995661   | 1.24218    | 1.50835    | 0.989944  |
| HSD17B7P2   | 0.676725  | 1.08067   | 0.787023  | 1.29596   | 0.903331  | 1.08091   | 0.851196   | 0.674781  | 0.47633   | 0.38943   | 0.407016   | 0.719101   | 0.0266493  | 0.732939   | 0.306175  |
| HSD17B8     | 0.848966  | 0.913347  | 0.769671  | 0.974757  | 0.969483  | 0.854917  | 0.969322   | 0.62702   | 0.656248  | 0.651974  | 1.15093    | 0.654612   | 0.262619   | 0.476124   | 0.217122  |
| HSD3B1      | 0.0275513 | 0.0796477 | 0.068377  | 0         | 0         | 0         | 0          | 0.110184  | 0.0167772 | 0         | 0          | 0          | 0          | 0          | 0         |
| HSD3B2      | 0.0247519 | 0.0238517 | 0.0409531 | 0         | 0         | 0         | 0          | 0         | 0         | 0         | 0.0139709  | 0.00885533 | 0          | 0          | 0         |
| HSD3B7      | 3.67875   | 3.89196   | 4.65357   | 10.7012   | 7.89127   | 12.9689   | 5.62262    | 2.75907   | 4.55142   | 10.1383   | 14.9635    | 6.87307    | 15.8551    | 6.46992    | 6.58295   |
| HSD3BP4     | 0.066526  | 0.112827  | 0.182716  | 0.0274228 | 0.177741  | 0.013595  | 0.0668423  | 0.413859  | 0.0162042 | 0.0500982 | 0.00901194 | 0.0228485  | 0.0188858  | 0.0931819  | 0.175793  |
| HSD52       | 0.0221889 | 0         | 0.0367125 | 0         | 0.0689341 | 0.0944679 | 0          | 0         | 0         | 0.0278494 | 0          | 0.0158768  | 0          | 0          | 0         |
| HSDL1       | 1.98117   | 2.14623   | 1.99912   | 2.08067   | 0.989875  | 2.3155    | 1.29671    | 1.69901   | 1.67515   | 2.01143   | 2.51427    | 1.48981    | 1.88073    | 1.83346    | 1.35918   |
| HSDL2       | 5.87328   | 7.09762   | 6.18125   | 7.57272   | 5.15843   | 6.12861   | 5.70309    | 7.20134   | 32.5222   | 10.0497   | 13.7329    | 8.08577    | 7.47261    | 4.66538    | 2.9955    |
| HSF1        | 8.68385   | 10.9807   | 10.4948   | 19.1538   | 21.9554   | 21.1252   | 13.1198    | 7.33322   | 14.3708   | 10.4145   | 13.5601    | 13.7535    | 20.9607    | 13.1456    | 11.3037   |
| HSF2        | 2.08568   | 2.30744   | 2.67441   | 1.67815   | 0.623035  | 1.69396   | 1.70359    | 1.96765   | 1.72924   | 2.13447   | 2.17336    | 1.83101    | 1.88394    | 1.68961    | 1.20964   |
| HSF2BP      | 0.304674  | 0.293593  | 0.26213   | 0.364212  | 1.1737    | 0.581114  | 0.333952   | 0.368246  | 1.06865   | 1.4837    | 1.03182    | 1.32546    | 0.87279    | 0.579619   | 0.367543  |
| HSF4        | 2.04616   | 4.39986   | 3.84114   | 1.67445   | 8.83951   | 3.42163   | 3.58349    | 2.72195   | 1.02078   | 0.583468  | 0.516281   | 2.16724    | 0.226679   | 0.957286   | 1.70028   |
| HSF5        | 0.0731841 | 0.013562  | 0.0232858 | 0.0116028 | 0.0174892 | 0.0143804 | 0.00642763 | 0.0200123 | 0         | 0         | 0.0127101  | 0.00402809 | 0.00363215 | 0.00882674 | 0.0565931 |

|           |          |            |           |           |           |            |           |            |          |           |            |           |           |           |           |
|-----------|----------|------------|-----------|-----------|-----------|------------|-----------|------------|----------|-----------|------------|-----------|-----------|-----------|-----------|
| HSFX1     | 0.128718 | 0.235666   | 0.194335  | 0.0762727 | 0.515377  | 0.219205   | 0.146966  | 0.151572   | 0.137169 | 0.0726997 | 0.0399595  | 0.0921012 | 0.058134  | 0.0531714 | 0.16637   |
| HSFX2     | 0.107654 | 0.197107   | 0.162533  | 0.0637905 | 0.14608   | 0.18333    | 0.122916  | 0.126768   | 0.114721 | 0.0608024 | 0.03342    | 0.0770293 | 0.0486202 | 0.150461  | 0.139144  |
| HSFX3     | 2.08E-06 | 0.0980772  | 0.142098  | 0.103301  | 2.53E-10  | 0.0662942  | 4.24E-05  | 0.0598954  | 1.18E-05 | 0.183687  | 2.91E-05   | 0.335792  | 0.0488481 | 4.18E-06  | 1.26E-06  |
| HSFX4     | 0.348367 | 0.076127   | 0.223518  | 0.243767  | 0.464663  | 0.220016   | 0.346322  | 0.0929538  | 0.162172 | 0.198097  | 0.210098   | 0.0115773 | 0.12072   | 0.138479  | 0.587215  |
| HSFY1     | 0        | 0.00153981 | 0         | 0         | 0         | 0.00544246 | 0         | 0.00568043 | 0        | 0         | 0.00284841 | 0         | 0         | 0         | 0         |
| HSFY1P1   | 0        | 0          | 0         | 0         | 0         | 0          | 0.0382679 | 0          | 0        | 0         | 0          | 0         | 0         | 0         | 0         |
| HSFY2     | 0        | 0.00088546 | 0         | 0         | 0         | 0.00312968 | 0         | 0.00326652 | 0        | 0         | 0.00282867 | 0         | 0         | 0         | 0         |
|           |          | 7          |           |           |           |            |           |            |          |           |            |           |           |           |           |
| HSH2D     | 0.376545 | 0.177936   | 0.143771  | 0.335805  | 0.303701  | 0.585754   | 0.19016   | 0.15445    | 0.141105 | 0.254479  | 0.449596   | 0.0932636 | 0.36909   | 0.234645  | 0.478371  |
| HSP90AA1  | 38.2855  | 36.8607    | 42.9063   | 94.9163   | 24.3356   | 71.082     | 17.8366   | 25.1825    | 48.8819  | 85.8457   | 71.2799    | 40.1349   | 162.924   | 71.416    | 40.2106   |
| HSP90AB1  | 92.9275  | 83.7571    | 89.1985   | 172.26    | 75.0034   | 170.993    | 76.1433   | 72.3273    | 82.8123  | 86.9694   | 72.6526    | 68.5665   | 200.504   | 96.9569   | 69.4578   |
| HSP90AB4P | 0.701305 | 0.522855   | 0.482456  | 0.532527  | 0.642154  | 0.251432   | 0.463579  | 0.433002   | 0.116878 | 0.463268  | 0.250006   | 0.797601  | 0.0571551 | 0.802513  | 0.667907  |
| HSP90B1   | 37.9734  | 25.1767    | 27.8688   | 90.3068   | 21.5795   | 85.9848    | 15.8895   | 23.744     | 34.6756  | 73.5104   | 89.7874    | 33.4198   | 117.086   | 59.5861   | 61.0959   |
| HSP90B2P  | 0.55503  | 0.413288   | 0.292192  | 0.233989  | 0.365762  | 0.171855   | 0.297654  | 0.396106   | 0.143386 | 0.295535  | 0.0949332  | 0.216621  | 0.0596837 | 0.232945  | 0.193235  |
| HSPA12A   | 1.38861  | 0.928736   | 0.946902  | 0.934655  | 1.13336   | 1.18896    | 2.02639   | 0.798964   | 0.641221 | 0.834527  | 0.759213   | 0.643461  | 0.657077  | 0.946031  | 1.59422   |
| HSPA12B   | 3.9111   | 1.08744    | 1.48396   | 1.23491   | 4.08825   | 5.28958    | 2.6189    | 1.60725    | 0.295466 | 1.13493   | 1.42745    | 0.704882  | 1.71706   | 2.06715   | 5.05724   |
| HSPA13    | 1.67796  | 1.04066    | 1.23442   | 2.28564   | 0.39683   | 2.67954    | 1.57775   | 1.73891    | 1.71122  | 4.49622   | 6.25285    | 0.889043  | 4.25552   | 2.56113   | 3.24359   |
| HSPA14    | 2.21433  | 2.13482    | 2.20558   | 2.71314   | 1.11586   | 2.67056    | 1.46283   | 1.98765    | 2.81451  | 2.43065   | 3.8833     | 1.87056   | 3.22766   | 2.43785   | 1.85592   |
| HSPA1A    | 6.08857  | 10.5446    | 10.7404   | 17.1349   | 19.7563   | 12.4867    | 7.15833   | 5.68683    | 13.3096  | 9.40489   | 3.96866    | 7.64033   | 19.9742   | 4.65815   | 4.67787   |
| HSPA1B    | 6.06969  | 10.3783    | 10.2783   | 13.9347   | 21.8346   | 10.0338    | 7.84033   | 5.86779    | 19.7067  | 9.06066   | 3.7881     | 17.6353   | 11.54     | 4.24829   | 2.98998   |
| HSPA1L    | 0.062031 | 0.0545007  | 0.0467919 | 0.0526439 | 0.0963556 | 0.111851   | 0.0499941 | 0.0405353  | 0.064437 | 0.0251885 | 0.0700253  | 0.0443849 | 0.0306051 | 0.0247919 | 0.0104805 |
| HSPA2     | 12.4366  | 13.3977    | 14.112    | 26.2096   | 19.0197   | 31.0215    | 11.8999   | 8.48256    | 86.6538  | 11.9901   | 13.8789    | 18.5031   | 15.9348   | 8.66216   | 8.3541    |
| HSPA4     | 11.2878  | 10.1855    | 10.0224   | 23.2225   | 7.23231   | 20.0378    | 7.37686   | 8.09337    | 21.3994  | 17.0677   | 13.8385    | 13.1351   | 28.699    | 17.6806   | 10.1231   |
| HSPA4L    | 4.42107  | 5.15036    | 5.44752   | 6.96768   | 1.65237   | 3.82191    | 2.87938   | 4.32564    | 14.9205  | 9.11792   | 5.06695    | 9.37121   | 11.1383   | 9.41331   | 2.60823   |
| HSPA5     | 21.983   | 17.2204    | 17.5155   | 60.9036   | 25.8526   | 62.3196    | 21.7183   | 16.6976    | 45.9561  | 42.3339   | 48.5726    | 34.1576   | 85.8634   | 35.7901   | 29.0253   |
| HSPA6     | 0.887104 | 0.926286   | 0.62739   | 8.85699   | 4.91904   | 2.42172    | 1.38066   | 0.784605   | 2.41006  | 4.21475   | 2.87393    | 3.44142   | 4.47611   | 1.85628   | 2.7092    |



|           |            |            |            |           |           |            |           |           |           |           |            |            |           |            |            |
|-----------|------------|------------|------------|-----------|-----------|------------|-----------|-----------|-----------|-----------|------------|------------|-----------|------------|------------|
| HTR1A     | 0.0103087  | 0          | 0          | 0         | 0         | 0          | 0         | 0         | 0         | 0         | 0          | 0          | 0         | 0          | 0          |
| HTR1B     | 0.204096   | 0.0245842  | 0.108542   | 0.0150234 | 0.113226  | 0.254471   | 0.141483  | 0.0647799 | 0.0443868 | 0.292756  | 0.814626   | 0.0469402  | 0.188117  | 0.259055   | 0.366385   |
| HTR1D     | 0          | 0.00393322 | 0          | 0.0588879 | 0.0126805 | 0.00695097 | 0         | 0         | 0         | 0.0307375 | 0.00921539 | 0.00584108 | 0.0684702 | 0.00853303 | 0          |
| HTR1E     | 0          | 0          | 0          | 0         | 0         | 0          | 0         | 0         | 0         | 0         | 0          | 0          | 0         | 0          | 0          |
| HTR1F     | 0.153306   | 0.0650013  | 0.116679   | 0.0252778 | 0.0476274 | 0.219304   | 0.0980222 | 0.0926469 | 0.0224051 | 0.0538761 | 0.103838   | 0.0307144  | 0.0514343 | 0.118584   | 0.220167   |
| HTR2A     | 0.161602   | 0.016392   | 0.0211087  | 0.043825  | 0.0990881 | 0.423668   | 0.0631224 | 0.071809  | 0         | 0.266877  | 0.643299   | 0.0669438  | 0.189322  | 0.0866827  | 0.421409   |
| HTR2A-AS1 | 0          | 0          | 0          | 0         | 0         | 0          | 0         | 0         | 0         | 0         | 0          | 0          | 0         | 0          | 0          |
| HTR2B     | 0.952644   | 0.793269   | 0.6853     | 0.490864  | 0.466454  | 0.432033   | 0.75666   | 0.984668  | 0.277443  | 0.571841  | 0.876699   | 0.570505   | 0.140299  | 0.892962   | 1.29376    |
| HTR2C     | 0.00477965 | 0.00690872 | 0.0197703  | 0.0246278 | 0         | 0          | 0         | 0.0084955 | 0         | 0         | 0          | 0          | 0         | 0.0124903  | 0.00686418 |
| HTR3A     | 1.55567    | 0.347013   | 0.0317769  | 0.118753  | 0.119333  | 0.400661   | 1.12932   | 0.256028  | 4.52608   | 0.0964213 | 0.184289   | 0.171779   | 0.0185873 | 0.150567   | 0          |
| HTR3B     | 0.0296452  | 0.00476118 | 0          | 0.0203669 | 0         | 0          | 0.0112827 | 0         | 0.144418  | 0         | 0.0111553  | 0          | 0         | 0.0103293  | 0          |
| HTR3C     | 0.0136216  | 0.0196892  | 0          | 0         | 0         | 0          | 0.0155527 | 0         | 0         | 0         | 0          | 0          | 0         | 0.00711923 | 0          |
| HTR3D     | 0          | 0          | 0          | 0         | 0         | 0          | 0         | 0         | 0         | 0         | 0          | 0          | 0         | 0          | 0          |
| HTR3E     | 0.00917283 | 0.0309373  | 0.0227652  | 0         | 0.0427457 | 0          | 0.0104732 | 0.0244561 | 0         | 0         | 0          | 0          | 0         | 0          | 0          |
| HTR3E-AS1 | 0          | 0.0216518  | 0          | 0         | 0         | 0          | 0         | 0         | 0         | 0         | 0          | 0          | 0         | 0          | 0          |
| HTR4      | 0.0110022  | 0.00265051 | 0.00455088 | 0.0226761 | 0.0170902 | 0.0046841  | 0.0125619 | 0         | 0         | 0         | 0.0124201  | 0          | 0         | 0          | 0          |
| HTR5A     | 0          | 0          | 0          | 0         | 0         | 0          | 0         | 0         | 0         | 0         | 0          | 0          | 0         | 0          | 0          |
| HTR5A-AS1 | 0          | 0          | 0          | 0         | 0         | 0          | 0         | 0         | 0         | 0         | 0          | 0          | 0         | 0          | 0          |
| HTR6      | 0.136618   | 0.207347   | 0.175181   | 0.0422366 | 0.116718  | 0.110512   | 0.288574  | 0.115344  | 0.0249578 | 0         | 0.0154224  | 0.0439892  | 0         | 0.0856829  | 0.17658    |
| HTR7      | 0.538693   | 0.319446   | 0.0628473  | 0.982168  | 1.95247   | 0.564541   | 0.110396  | 0.282337  | 0.689711  | 3.89199   | 1.99587    | 2.27316    | 4.32668   | 2.65301    | 1.20012    |
| HTR7P1    | 0.95968    | 0.581796   | 0.702309   | 0.445584  | 0.524207  | 1.06859    | 0.794706  | 0.69824   | 0.244031  | 0.582394  | 0.922641   | 0.222604   | 0.510314  | 0.424406   | 0.461931   |
| HTRA1     | 21.5711    | 9.85152    | 12.1647    | 18.7647   | 62.9619   | 40.9643    | 21.3635   | 17.5504   | 6.71403   | 43.173    | 92.0435    | 8.15476    | 21.0454   | 23.7461    | 91.3059    |
| HTRA2     | 1.88709    | 2.0594     | 2.06008    | 3.5763    | 4.11766   | 4.36438    | 1.86673   | 0.944479  | 2.60013   | 3.09064   | 4.92705    | 2.06429    | 2.866     | 2.53872    | 1.95877    |
| HTRA3     | 5.24859    | 1.81339    | 2.62105    | 2.0239    | 3.60342   | 4.74295    | 3.04711   | 2.67586   | 0.0833401 | 3.54712   | 7.41588    | 0.798106   | 11.0774   | 10.6542    | 13.3358    |
| HTRA4     | 0.263238   | 0.0422774  | 0.099811   | 0.124334  | 0.0511125 | 0.532342   | 0.125232  | 0.0487384 | 0         | 0.0412989 | 0.123818   | 0          | 0.0707667 | 0.0630575  | 0.488307   |
| HTT       | 6.16404    | 7.52288    | 8.31607    | 6.95045   | 8.16893   | 8.52148    | 9.49303   | 6.32826   | 5.8463    | 5.49897   | 3.92418    | 6.38415    | 6.63204   | 5.3014     | 5.49047    |



|        |           |           |           |           |           |            |           |           |           |           |           |           |            |           |           |
|--------|-----------|-----------|-----------|-----------|-----------|------------|-----------|-----------|-----------|-----------|-----------|-----------|------------|-----------|-----------|
| HTT-AS | 0.28147   | 0.135616  | 0.0517448 | 0         | 0.19432   | 0.0532595  | 0.0714162 | 0.222353  | 0.0380887 | 0.0785052 | 0         | 0.0895107 | 0          | 0.0163454 | 0         |
| HULC   | 0.381741  | 0.321875  | 0.118426  | 0         | 0.074122  | 0          | 0.163447  | 0.424075  | 0         | 0         | 0         | 0         | 0          | 0.0249393 | 0.0685285 |
| HUNK   | 0.407393  | 0.558666  | 0.865893  | 0.203456  | 0.496522  | 0.485646   | 1.2237    | 0.27015   | 0.465626  | 0.491654  | 0.484659  | 0.390162  | 0.68947    | 0.548682  | 1.50767   |
| HUS1   | 2.98037   | 2.62177   | 2.61501   | 3.73062   | 1.48473   | 3.55669    | 2.74122   | 2.85607   | 3.72141   | 3.01332   | 4.42649   | 3.31191   | 4.05464    | 3.61097   | 2.99398   |
| HUS1B  | 0.406018  | 0.282571  | 0.48517   | 0.232452  | 0.77084   | 0.384133   | 0.231789  | 0.240557  | 0.0824141 | 0.198176  | 0.178245  | 0.355076  | 0.0291068  | 0.589453  | 0.226759  |
| HUWE1  | 15.7767   | 19.7385   | 20.0495   | 23.725    | 21.5266   | 27.382     | 25.0186   | 16.086    | 17.9619   | 18.3964   | 8.98384   | 19.6397   | 28.6116    | 15.3063   | 16.5381   |
| HVCN1  | 1.08443   | 0.442585  | 0.686032  | 0.999211  | 0.535076  | 1.37964    | 0.772035  | 0.668958  | 0.233068  | 0.848669  | 1.81468   | 0.219089  | 1.11947    | 0.406742  | 1.33752   |
| HYAL1  | 4.36972   | 5.62444   | 5.42567   | 2.95897   | 6.75113   | 2.14428    | 4.96232   | 3.21412   | 6.52569   | 4.83458   | 1.71809   | 5.92771   | 3.95819    | 3.55897   | 1.90405   |
| HYAL2  | 9.57193   | 4.05733   | 4.3163    | 13.8175   | 9.51984   | 23.0708    | 6.99748   | 3.38391   | 9.78853   | 11.0988   | 25.2809   | 6.93128   | 19.028     | 14.7276   | 17.7544   |
| HYAL3  | 0.312295  | 0.339587  | 0.281553  | 0.864363  | 0.673812  | 1.26775    | 0.332831  | 0.273312  | 1.26151   | 1.21333   | 2.19389   | 1.212     | 2.24658    | 1.27321   | 0.319771  |
| HYAL4  | 0.923414  | 0.431011  | 0.0795742 | 0.0793004 | 0.71719   | 0.163807   | 0.208668  | 0.239357  | 6.64225   | 0.531199  | 1.36817   | 0.633197  | 0.00620606 | 0.0251363 | 0.0414418 |
| HYAL6P | 0         | 0         | 0         | 0         | 0         | 0          | 0         | 0         | 0         | 0         | 0         | 0         | 0          | 0         | 0         |
| HYDIN  | 0.0795987 | 0.0997148 | 0.0904335 | 0.050311  | 0.110456  | 0.106636   | 0.172072  | 0.058479  | 0.020681  | 0.04529   | 0.0359428 | 0.0182256 | 0.0136951  | 0.0288439 | 0.344465  |
| HYDIN2 | 0         | 0         | 0         | 0         | 0         | 0          | 0         | 0         | 0         | 0         | 0         | 0         | 0          | 0         | 0         |
| HYI    | 3.42203   | 2.23151   | 3.47441   | 2.19213   | 4.17957   | 3.91595    | 2.43814   | 1.84744   | 1.10206   | 2.38648   | 6.00092   | 0.660383  | 2.85049    | 2.46931   | 3.14753   |
| HYKK   | 0.529416  | 0.380018  | 0.370934  | 0.256088  | 0.209787  | 0.404792   | 0.370084  | 0.283261  | 0.190799  | 0.142387  | 0.146362  | 0.0927702 | 0.111535   | 0.115761  | 0.232748  |
| HYLS1  | 0.634182  | 0.482694  | 0.486623  | 0.994522  | 0.385475  | 1.25217    | 0.472231  | 0.465589  | 0.570877  | 1.07282   | 1.8676    | 0.473503  | 0.735321   | 0.840638  | 0.620377  |
| HYMAI  | 0.61603   | 0.98523   | 1.29143   | 0.343524  | 0.445079  | 0.318739   | 1.01585   | 0.955689  | 0.118557  | 0.175119  | 0.275693  | 0.346362  | 0.074724   | 0.482042  | 0.853778  |
| HYOU1  | 6.28047   | 5.35089   | 5.37704   | 19.6997   | 14.2928   | 20.1568    | 6.63018   | 4.47855   | 8.11628   | 11.5362   | 7.50621   | 8.45983   | 31.7613    | 11.0174   | 10.0648   |
| HYPK   | 3.6046    | 3.08975   | 3.24331   | 5.73286   | 4.40416   | 8.15942    | 2.1999    | 3.66018   | 3.18904   | 3.15344   | 6.19934   | 2.69674   | 3.3274     | 3.19263   | 2.24401   |
| HYPM   | 0         | 0         | 0         | 0         | 0         | 0.0786667  | 0         | 0.0410531 | 0         | 0.0579779 | 0         | 0         | 0          | 0         | 0         |
| IAH1   | 4.25692   | 3.51105   | 4.06974   | 6.7872    | 3.01652   | 9.02449    | 4.45485   | 3.56977   | 2.97476   | 7.88209   | 16.8831   | 3.45557   | 8.73929    | 5.73801   | 5.65453   |
| IAPP   | 0.022801  | 0.0329577 | 0.0188626 | 0         | 0.0708358 | 0.00970739 | 0.0650837 | 0.0101318 | 0         | 0.0143088 | 0.0128698 | 0.0244721 | 0          | 0.0119168 | 0.0491178 |
| IARS   | 13.8091   | 11.567    | 11.3914   | 19.5718   | 8.35583   | 20.9099    | 12.1323   | 10.1508   | 12.7078   | 13.1267   | 12.156    | 11.4278   | 24.8198    | 16.1887   | 11.3657   |
| IARS2  | 11.5291   | 10.67     | 11.5985   | 16.0072   | 5.94594   | 20.1613    | 9.93971   | 8.81469   | 13.4058   | 13.2917   | 11.712    | 9.61653   | 20.0184    | 12.3819   | 9.3088    |
| IBA57  | 1.75518   | 1.69134   | 1.8235    | 1.37926   | 2.58961   | 1.72442    | 1.68564   | 1.35379   | 0.511166  | 0.769919  | 0.63616   | 0.903054  | 1.57744    | 1.2502    | 1.37414   |

|          |           |           |           |           |           |           |           |           |           |           |           |           |           |            |           |
|----------|-----------|-----------|-----------|-----------|-----------|-----------|-----------|-----------|-----------|-----------|-----------|-----------|-----------|------------|-----------|
| IBA57-DT | 0.144418  | 0.173957  | 0.358419  | 0.0372068 | 0.224332  | 0.0307426 | 0.164892  | 0.224607  | 0.0439713 | 0.226575  | 0.203788  | 0.387507  | 0.0698835 | 0.207568   | 0         |
| IBSP     | 0.0145462 | 0.0070086 | 0         | 0.0299806 | 0         | 0.0495437 | 0         | 0         | 0         | 0         | 0.0164209 | 0         | 0         | 0.00760249 | 0         |
| IBTK     | 4.72811   | 3.5461    | 3.92409   | 5.27057   | 1.1884    | 5.35809   | 2.90008   | 4.10334   | 2.45519   | 4.90198   | 5.67423   | 2.9752    | 5.49383   | 4.78219    | 5.56504   |
| ICA1     | 2.41937   | 1.39383   | 1.42      | 1.32667   | 0.89643   | 1.83326   | 0.90389   | 1.38082   | 0.95514   | 0.520021  | 0.793457  | 0.57704   | 0.544189  | 0.668969   | 2.24196   |
| ICA1L    | 1.12362   | 0.474729  | 0.554858  | 0.191691  | 0.230306  | 0.389421  | 0.629761  | 0.816002  | 0.0409035 | 0.149285  | 0.2304    | 0.13388   | 0.0552721 | 0.169076   | 0.352412  |
| ICAM1    | 3.60051   | 2.10235   | 2.66599   | 10.6831   | 3.4886    | 14.1937   | 3.02826   | 2.68659   | 0.434159  | 5.736     | 10.7207   | 1.61207   | 16.7304   | 4.69886    | 15.0106   |
| ICAM2    | 3.36136   | 0.832687  | 1.63494   | 3.64356   | 4.18461   | 7.90765   | 2.21354   | 1.08003   | 0.613462  | 2.81131   | 6.66935   | 0.588205  | 3.41925   | 2.07231    | 5.44646   |
| ICAM3    | 1.10334   | 0.671045  | 0.965133  | 1.94786   | 2.06507   | 2.07918   | 0.80542   | 1.06093   | 0.671873  | 2.34963   | 4.88007   | 0.465917  | 1.75634   | 0.907521   | 2.58462   |
| ICAM4    | 0.0517356 | 0.149562  | 0.0998651 | 0.0177717 | 0.107151  | 0.0734203 | 0.17721   | 0.0766305 | 0.0210027 | 0.043289  | 0.0973384 | 0.123394  | 0.0667591 | 0.126183   | 0.0990651 |
| ICAM5    | 0.115638  | 0.204293  | 0.248727  | 0.143002  | 0.167651  | 0.13785   | 0.0968234 | 0.109621  | 0.197168  | 0.193517  | 0.130541  | 0.171001  | 0.089531  | 0.0967001  | 0.210357  |
| ICE1     | 5.6722    | 4.44877   | 4.71653   | 5.1372    | 2.37007   | 4.71575   | 3.53738   | 4.14561   | 2.34762   | 3.95064   | 3.47114   | 3.07521   | 5.69805   | 4.83184    | 5.25225   |
| ICE2     | 1.98598   | 1.86034   | 1.88684   | 1.81813   | 0.575216  | 2.02443   | 1.31958   | 1.84463   | 1.14903   | 1.50386   | 2.14076   | 1.07505   | 1.28896   | 1.49161    | 1.48365   |
| ICK      | 3.63953   | 2.48469   | 2.5965    | 3.02422   | 1.5848    | 3.55078   | 2.55004   | 2.8751    | 1.69439   | 2.18854   | 3.33374   | 1.54833   | 2.15672   | 1.9332     | 2.5468    |
| ICMT     | 6.97821   | 6.68161   | 6.24283   | 12.753    | 8.474     | 10.9838   | 8.16353   | 5.20035   | 17.1682   | 13.4762   | 19.4071   | 9.68678   | 18.7736   | 7.72601    | 9.50859   |
| ICOS     | 0.166371  | 0.0548463 | 0.0869265 | 0.135355  | 0.0408049 | 0.0745592 | 0.0999772 | 0.108947  | 0         | 0.087921  | 0.345969  | 0.0626541 | 0.355922  | 0.0869526  | 0.0880266 |
| ICOSLG   | 1.44701   | 1.54478   | 1.29402   | 0.779605  | 3.54339   | 1.44639   | 1.12968   | 0.78496   | 1.25293   | 1.0871    | 1.28075   | 0.562792  | 1.204     | 0.736374   | 2.26726   |
| ID1      | 19.7805   | 18.2556   | 16.0843   | 28.4568   | 57.4259   | 55.2621   | 15.8072   | 16.7948   | 47.9981   | 51.8467   | 73.2849   | 54.1674   | 58.8559   | 53.0456    | 32.1305   |
| ID2      | 10.2651   | 11.5349   | 12.2397   | 8.00815   | 5.98274   | 9.78077   | 10.9454   | 10.5703   | 7.87297   | 8.41168   | 12.7372   | 6.33728   | 10.4106   | 6.73947    | 8.62586   |
| ID2-AS1  | 0.279541  | 0.538748  | 0.499026  | 0.197104  | 0.251393  | 0.463523  | 0.251977  | 0.339961  | 0.268776  | 0.332387  | 0.348785  | 0.178964  | 0.0949255 | 0.161479   | 0.169034  |
| ID3      | 12.4961   | 9.27873   | 8.37522   | 17.2279   | 36.9356   | 34.068    | 12.4122   | 7.07167   | 11.5563   | 16.8327   | 41.0546   | 9.40909   | 16.4623   | 19.6224    | 21.2723   |
| ID4      | 8.8727    | 9.68348   | 13.8455   | 1.13833   | 5.67618   | 6.35005   | 10.1442   | 11.1859   | 9.34431   | 2.8927    | 6.55837   | 1.3116    | 2.59264   | 2.83665    | 4.26173   |
| IDE      | 15.3205   | 17.9783   | 17.816    | 8.39184   | 8.82694   | 9.63058   | 15.7077   | 22.7095   | 111.024   | 14.2086   | 24.0987   | 21.6763   | 6.9406    | 5.4262     | 3.5143    |
| IDH1     | 6.22477   | 4.58693   | 4.15129   | 15.6251   | 3.42557   | 13.9307   | 3.73415   | 4.28952   | 3.72969   | 10.9148   | 15.8485   | 4.54924   | 8.90219   | 7.12414    | 6.02338   |
| IDH1-AS1 | 0.141404  | 0.0908405 | 0.116979  | 0.194294  | 0.146432  | 0.200672  | 0         | 0         | 0         | 0.236635  | 0.372463  | 0.067452  | 0.030411  | 0.0739037  | 0.338456  |
| IDH2     | 26.9708   | 29.4026   | 20.4863   | 70.7425   | 58.7635   | 75.9067   | 20.2024   | 23.6486   | 66.9425   | 42.7563   | 62.0338   | 34.9211   | 36.3074   | 29.4379    | 15.0244   |
| IDH2-DT  | 0.233297  | 0.407274  | 0.116716  | 0.0481817 | 0.951047  | 0.119316  | 0.106548  | 0.207335  | 0.0569463 | 0.0585623 | 0.211692  | 0.0670263 | 0.0603072 | 0.0977016  | 0         |

|          |           |          |           |          |           |           |          |           |           |          |           |           |           |           |           |
|----------|-----------|----------|-----------|----------|-----------|-----------|----------|-----------|-----------|----------|-----------|-----------|-----------|-----------|-----------|
| IDH3A    | 7.22515   | 5.76572  | 5.23719   | 13.039   | 4.92362   | 13.7461   | 4.18421  | 6.30534   | 16.298    | 10.6487  | 12.6364   | 9.5815    | 16.5062   | 9.30428   | 5.43754   |
| IDH3B    | 10.047    | 6.97213  | 6.9263    | 11.2938  | 10.1714   | 16.2161   | 9.64502  | 5.53061   | 9.07056   | 10.5868  | 16.406    | 6.90278   | 11.9648   | 8.41203   | 6.85543   |
| IDH3G    | 7.38751   | 7.25471  | 8.36719   | 10.7967  | 8.13707   | 14.159    | 10.3211  | 6.36248   | 8.57188   | 9.32267  | 14.7688   | 7.38112   | 10.5727   | 7.28688   | 7.83167   |
| IDI1     | 2.94893   | 3.08899  | 3.06869   | 7.24405  | 1.92101   | 4.64751   | 2.46598  | 3.35373   | 14.2242   | 12.1003  | 9.65774   | 6.79652   | 11.6513   | 5.50705   | 2.37124   |
| IDI2     | 0.544943  | 0.68102  | 0.859367  | 0.579129 | 0.264527  | 1.08753   | 0.349987 | 0.575106  | 0.49776   | 0.555717 | 0.615173  | 0.657992  | 1.42835   | 1.06804   | 0.807064  |
| IDI2-AS1 | 0.820498  | 0.65149  | 0.520709  | 0.66658  | 0.233013  | 0.254984  | 0.568566 | 0.491568  | 0.681707  | 0.403429 | 0.402123  | 2.22224   | 0.255588  | 0.533139  | 0.294314  |
| IDNK     | 1.53096   | 0.995816 | 1.4565    | 0.696818 | 0.594528  | 1.72726   | 0.903135 | 1.00911   | 0.916733  | 0.800631 | 0.806524  | 0.56598   | 0.419802  | 0.906835  | 0.86114   |
| IDO1     | 1.32263   | 1.01289  | 1.25355   | 1.39419  | 1.41646   | 0.705141  | 0.924471 | 0.815715  | 0.252051  | 0.744813 | 0.769614  | 0.718144  | 1.16965   | 0.906192  | 2.18662   |
| IDO2     | 0.0403541 | 0.048608 | 0.0584215 | 0.062379 | 0.0313419 | 0         | 0.046075 | 0.0627608 | 0         | 0        | 0.0227774 | 0.0216558 | 0         | 0         | 0         |
| IDS      | 8.31686   | 8.81637  | 10.4423   | 7.99696  | 6.11757   | 10.7007   | 10.2015  | 8.14255   | 12.948    | 18.7914  | 15.1312   | 11.1195   | 24.5492   | 7.92562   | 9.82549   |
| IDUA     | 1.68599   | 1.69061  | 1.57643   | 1.9841   | 4.91653   | 4.45487   | 2.19433  | 1.49145   | 0.492947  | 0.628616 | 1.72326   | 1.27759   | 0.815887  | 1.20522   | 3.78519   |
| IER2     | 16.492    | 16.9113  | 17.7606   | 34.4572  | 54.732    | 44.8249   | 18.8171  | 12.1838   | 76.0158   | 50.0442  | 38.4734   | 63.4699   | 78.6436   | 35.7074   | 18.2426   |
| IER3     | 1.47651   | 1.15853  | 1.31497   | 3.97814  | 1.20314   | 5.01483   | 1.50233  | 0.982069  | 8.06436   | 9.51052  | 11.9852   | 11.4028   | 28.4154   | 11.1606   | 5.68014   |
| IER3-AS1 | 0.0425673 | 3.29E-20 | 1.25E-18  | 2.56E-17 | 2.88E-26  | 0.0208915 | 3.46E-21 | 0.0283844 | 0.0842369 | 2.67E-14 | 0.0367345 | 0.032689  | 0.0227747 | 0.0849636 | 0.0337024 |
| IER3IP1  | 6.17045   | 5.08601  | 5.83023   | 8.38858  | 1.9839    | 8.7655    | 4.86665  | 8.95731   | 9.20156   | 9.07716  | 18.2567   | 5.74737   | 8.73668   | 5.05859   | 5.34787   |
| IER5     | 8.67617   | 9.2224   | 5.50169   | 20.2447  | 32.2345   | 19.2348   | 8.31532  | 4.95309   | 29.2327   | 29.1709  | 16.8891   | 15.7888   | 37.0298   | 14.8328   | 7.87625   |
| IER5L    | 1.53718   | 1.62528  | 1.69555   | 4.5851   | 6.1684    | 10.3402   | 1.58934  | 1.42683   | 4.80508   | 5.59501  | 10.402    | 2.66418   | 6.07189   | 4.17766   | 3.54439   |
| IFFO1    | 2.24413   | 1.18348  | 1.37718   | 1.42122  | 3.79012   | 3.77304   | 1.92869  | 1.25465   | 0.168955  | 1.21882  | 2.16485   | 0.566385  | 0.758172  | 1.78703   | 4.21899   |
| IFFO2    | 27.8669   | 66.8295  | 88.8964   | 23.5594  | 43.7736   | 33.6944   | 66.6328  | 36.99     | 242.266   | 50.8707  | 26.6316   | 86.2795   | 108.919   | 54.0476   | 21.719    |
| IFI16    | 14.3093   | 12.8217  | 12.3562   | 56.413   | 7.46689   | 63.5386   | 5.20209  | 13.59     | 6.76216   | 22.7518  | 27.1394   | 12.2476   | 36.6895   | 20.3015   | 26.2628   |
| IFI27    | 25.7145   | 25.0925  | 34.7377   | 264.098  | 37.2221   | 172.688   | 10.034   | 15.5952   | 77.6738   | 23.5141  | 40.3848   | 11.7878   | 14.9683   | 7.70926   | 29.868    |
| IFI27L1  | 2.07154   | 1.48156  | 1.68695   | 2.03472  | 2.31281   | 3.08681   | 1.3674   | 1.15064   | 0.82783   | 2.35625  | 3.32508   | 0.741123  | 1.87953   | 1.4041    | 1.53399   |
| IFI27L2  | 8.37511   | 6.75726  | 9.14231   | 10.0607  | 15.0109   | 16.1193   | 8.0347   | 7.09076   | 8.26859   | 26.9321  | 55.1044   | 8.22655   | 13.5249   | 12.7949   | 6.12061   |
| IFI30    | 9.83805   | 8.79688  | 10.7089   | 45.6112  | 15.0721   | 57.0477   | 16.2451  | 7.68285   | 29.392    | 35.9978  | 96.9291   | 5.99234   | 46.2188   | 13.4604   | 30.3912   |
| IFI35    | 2.27728   | 1.909    | 2.09835   | 9.1964   | 5.63683   | 18.2714   | 2.49442  | 1.25051   | 0.834295  | 2.02166  | 7.87948   | 0.940578  | 3.51196   | 2.26429   | 5.74324   |
| IFI44    | 3.74787   | 2.29592  | 1.80493   | 15.7664  | 1.45543   | 17.7685   | 1.26847  | 2.91444   | 1.22263   | 2.53677  | 6.0592    | 0.823663  | 1.39904   | 1.15429   | 3.80613   |



|          |           |            |           |           |           |           |           |           |           |           |           |           |           |            |           |
|----------|-----------|------------|-----------|-----------|-----------|-----------|-----------|-----------|-----------|-----------|-----------|-----------|-----------|------------|-----------|
| IFNA7    | 0         | 0          | 0         | 0         | 0         | 0         | 0         | 0         | 0         | 0         | 0         | 0         | 0         | 0          | 0         |
| IFNA8    | 0.0222744 | 0.0107321  | 0         | 0         | 0         | 0         | 0         | 0         | 0         | 0         | 0         | 0         | 0         | 0          | 0         |
| IFNAR1   | 3.35335   | 3.28994    | 3.7135    | 5.79215   | 1.68714   | 5.29352   | 2.29378   | 3.63156   | 1.65118   | 3.96094   | 5.5861    | 1.62225   | 4.33448   | 3.1936     | 4.4286    |
| IFNAR2   | 2.40723   | 1.45949    | 1.7251    | 3.67207   | 1.52298   | 4.2552    | 1.65411   | 1.5281    | 0.463374  | 2.59889   | 4.59243   | 1.34026   | 3.47921   | 2.3021     | 5.87389   |
| IFNB1    | 0.0269419 | 0.012981   | 0         | 0         | 0         | 0.114703  | 0         | 0.0478874 | 0         | 0.0338148 | 0         | 0.0192776 | 0         | 0          | 0         |
| IFNE     | 0.0157008 | 0.453894   | 0         | 1.03553   | 0.902387  | 0.294119  | 0.0358534 | 0.544191  | 0.51629   | 1.97062   | 0.762145  | 1.29195   | 0.405204  | 2.26484    | 0.699     |
| IFNG     | 0.0573795 | 0.0368617  | 0.0316456 | 0.0197104 | 0         | 0         | 0         | 0.0679921 | 0.0232939 | 0         | 0.0863657 | 0         | 0.0246806 | 0          | 0.0549361 |
| IFNG-AS1 | 0.133354  | 0.0233644  | 0.0100291 | 0.0124932 | 0         | 0.0206454 | 0         | 0.0861922 | 0         | 0.0608631 | 0.0136855 | 0.0173488 | 0         | 0          | 0.0348207 |
| IFNGR1   | 13.4693   | 11.8667    | 13.1992   | 41.5484   | 4.64364   | 23.0159   | 7.6223    | 12.9256   | 18.8583   | 22.6285   | 28.0787   | 11.813    | 30.6062   | 15.023     | 11.9993   |
| IFNGR2   | 11.084    | 9.72118    | 9.90058   | 42.5396   | 9.2477    | 30.7792   | 8.71129   | 7.34939   | 13.3998   | 19.1906   | 30.8852   | 11.929    | 23.944    | 15.1538    | 15.3635   |
| IFNK     | 0.913541  | 0.860754   | 0.722157  | 0.31381   | 0.567618  | 0.311147  | 0.347684  | 0.829921  | 0.0741727 | 0.356716  | 0.114586  | 0.610086  | 0.0785883 | 0.753321   | 0.93295   |
| IFNL1    | 0         | 0          | 0.0223663 | 0.083585  | 0         | 0.0460421 | 0         | 0         | 0         | 0         | 0.0305206 | 0         | 0         | 0.0141303  | 0         |
| IFNL2    | 0         | 0          | 0         | 0         | 0.048977  | 0         | 0         | 0         | 0         | 0         | 0         | 0         | 0         | 0          | 0         |
| IFNL3    | 0         | 0.0167428  | 0.0287471 | 0.0358102 | 0.0539777 | 0.0295886 | 0.0793513 | 0         | 0         | 0         | 0         | 0         | 0         | 0          | 0         |
| IFNL4    | 0.0141375 | 0.0272466  | 0         | 0         | 0.0439208 | 0.0120379 | 0.0484251 | 0.0628211 | 0         | 0.070976  | 0         | 0         | 0         | 0.00738886 | 0         |
| IFNLR1   | 1.17212   | 2.06682    | 2.17387   | 2.73851   | 2.50381   | 2.13746   | 1.90177   | 1.12752   | 2.60051   | 3.15994   | 1.85848   | 2.05309   | 3.81429   | 1.49813    | 0.757474  |
| IFNW1    | 0         | 0.00878006 | 0.0301505 | 0         | 0         | 0         | 0.0208063 | 0.016195  | 0         | 0         | 0         | 0         | 0         | 0          | 0         |
| IFRD1    | 2.12527   | 2.34979    | 2.00801   | 3.79242   | 2.78002   | 2.98591   | 1.92209   | 1.8639    | 10.5441   | 5.3138    | 5.53068   | 3.15342   | 4.25799   | 3.25044    | 2.04816   |
| IFRD2    | 3.50449   | 3.62638    | 3.93627   | 13.696    | 11.2837   | 13.4016   | 4.71539   | 2.21008   | 8.84576   | 9.30701   | 12.8731   | 8.90053   | 18.3802   | 11.8945    | 5.60218   |
| IFT122   | 2.75611   | 2.73255    | 2.26252   | 2.02133   | 3.20804   | 4.14213   | 3.39553   | 2.41923   | 1.32602   | 1.161     | 1.37135   | 1.20771   | 0.973669  | 1.67594    | 1.63742   |
| IFT140   | 1.37945   | 1.74415    | 1.68269   | 1.57549   | 3.9716    | 2.79804   | 1.91107   | 1.24936   | 0.652742  | 0.567926  | 0.699262  | 1.10648   | 0.980713  | 1.24905    | 1.78548   |
| IFT172   | 1.93882   | 2.19261    | 2.17826   | 1.71881   | 2.03188   | 3.2585    | 2.29585   | 1.62524   | 0.391825  | 0.770405  | 0.979651  | 0.848116  | 0.767483  | 1.38722    | 2.219     |
| IFT20    | 2.48466   | 2.00095    | 1.96424   | 3.88684   | 2.30085   | 4.42056   | 1.69753   | 1.75838   | 3.41212   | 5.28921   | 11.4011   | 2.72022   | 2.84335   | 2.97898    | 5.03799   |
| IFT22    | 1.90204   | 1.536      | 1.58856   | 2.38215   | 1.4702    | 3.92106   | 1.46511   | 1.48176   | 0.809104  | 1.70192   | 4.28408   | 1.00282   | 1.4738    | 1.25094    | 1.22855   |
| IFT27    | 2.22435   | 2.57687    | 2.8008    | 2.7979    | 7.29147   | 6.4619    | 3.67881   | 1.32272   | 2.15127   | 2.48387   | 5.3359    | 1.46285   | 1.82558   | 2.17122    | 2.60723   |
| IFT43    | 1.59607   | 1.4419     | 1.53701   | 3.5466    | 2.49862   | 3.05783   | 1.5376    | 1.1525    | 2.05014   | 3.27091   | 5.46162   | 1.90934   | 2.59054   | 2.37871    | 2.31007   |

|             |            |            |            |           |            |            |            |           |           |            |           |            |            |            |           |
|-------------|------------|------------|------------|-----------|------------|------------|------------|-----------|-----------|------------|-----------|------------|------------|------------|-----------|
| IFT46       | 2.45625    | 3.60987    | 2.85907    | 4.90985   | 3.01014    | 4.59282    | 2.80447    | 1.8648    | 3.78815   | 3.20678    | 6.81354   | 2.79081    | 2.99432    | 2.52878    | 2.39302   |
| IFT52       | 3.87206    | 2.30572    | 2.71865    | 2.92621   | 1.92778    | 6.2897     | 2.79997    | 2.8147    | 2.1765    | 3.77573    | 5.95141   | 1.98913    | 2.58792    | 2.75536    | 3.807     |
| IFT57       | 4.11127    | 3.16452    | 3.07238    | 3.04542   | 5.15163    | 6.0047     | 2.39243    | 2.14473   | 3.5639    | 4.53433    | 10        | 2.20758    | 4.30285    | 3.60639    | 3.20638   |
| IFT74       | 1.33362    | 1.20319    | 1.05558    | 0.89656   | 0.256947   | 0.772241   | 0.464542   | 1.04777   | 0.646735  | 0.654561   | 0.861284  | 0.358415   | 0.509669   | 0.589628   | 0.579646  |
| IFT74-AS1   | 0          | 0          | 0          | 0         | 0          | 0          | 0.0633669  | 0.0493228 | 0         | 0.139314   | 0         | 0          | 0          | 0          | 0         |
| IFT80       | 1.17115    | 1.10286    | 1.20079    | 0.774257  | 0.392687   | 1.27442    | 0.584413   | 1.15726   | 0.522276  | 1.2478     | 1.40455   | 0.557973   | 0.724833   | 0.664229   | 1.1699    |
| IFT81       | 1.22186    | 1.11652    | 1.25977    | 1.14751   | 0.44878    | 1.80916    | 0.50855    | 0.700743  | 0.329871  | 1.1785     | 1.62393   | 0.521117   | 0.95144    | 1.15451    | 2.24745   |
| IFT88       | 1.47053    | 1.17421    | 1.25577    | 1.24656   | 0.267109   | 0.959298   | 0.595775   | 1.19095   | 0.577722  | 0.967486   | 1.21826   | 0.5855     | 1.27397    | 0.740672   | 0.664216  |
| IGBP1       | 9.39664    | 9.20938    | 8.81157    | 15.4735   | 8.22932    | 14.7795    | 7.78393    | 7.39691   | 13.94     | 11.3388    | 15.4078   | 7.63132    | 11.1359    | 8.05157    | 6.78742   |
| IGBP1P1     | 0.563483   | 0.349065   | 0.332966   | 0.124433  | 0.437642   | 0.0342713  | 0.137864   | 0.143079  | 0         | 0.202065   | 0         | 0.0287991  | 0          | 0.105179   | 0         |
| IGDCC3      | 0.00516701 | 0.00248955 | 0          | 0         | 0.0401308  | 0.0175986  | 0.00589953 | 0.0229601 | 0         | 0          | 0.0233317 | 0.00369714 | 0.00333373 | 0.00270051 | 0.0296819 |
| IGDCC4      | 0.438951   | 0.605249   | 0.782355   | 0.448674  | 3.17084    | 1.47681    | 0.66009    | 0.618456  | 0.0738868 | 0.801757   | 1.48656   | 0.14555    | 0.589443   | 0.941906   | 5.7965    |
| IGF1        | 4.52733    | 0.740511   | 0.847632   | 2.42915   | 0.970148   | 15.5055    | 1.19616    | 2.40439   | 0.0946415 | 0.8778     | 2.04365   | 0.284195   | 1.42057    | 0.812285   | 6.54721   |
| IGF1R       | 8.54427    | 8.46496    | 9.31826    | 8.7007    | 9.10353    | 10.0092    | 8.70339    | 7.12115   | 4.84028   | 6.85455    | 3.6784    | 6.44784    | 10.9839    | 6.82612    | 6.52755   |
| IGF2        | 5.11963    | 2.83996    | 3.35732    | 3.91476   | 11.9246    | 13.2715    | 6.17924    | 2.16865   | 0.842734  | 4.17348    | 10.0212   | 1.38756    | 13.729     | 4.81188    | 42.1636   |
| IGF2-AS     | 0.0223821  | 0.00720071 | 0          | 0.0230654 | 0.0677482  | 0.0667031  | 0.062451   | 0         | 0         | 0          | 0         | 0          | 0.0649836  | 0.0116978  | 0.0964304 |
| IGF2BP1     | 0.0105568  | 0.0025432  | 0.00218332 | 0         | 0.00819915 | 0.00898894 | 0.00602668 | 0         | 0         | 0.00993736 | 0.0119173 | 0.00188841 | 0          | 0.00689678 | 0         |
| IGF2BP2     | 1.01257    | 0.865096   | 1.58467    | 0.71538   | 1.14317    | 1.9466     | 1.40642    | 1.76731   | 0.743735  | 8.42449    | 4.27177   | 2.95037    | 8.58735    | 5.66314    | 2.8409    |
| IGF2BP2-AS1 | 0.0604652  | 0.0873992  | 0.0875369  | 0.0467333 | 0.0234808  | 0.038614   | 0.155334   | 0.120907  | 0         | 0.284588   | 0.0170644 | 0.3353     | 0.0292589  | 0.474026   | 0         |
| IGF2BP3     | 0.211454   | 0.136736   | 0.151912   | 0.0860168 | 0.0086437  | 0.146883   | 0.127069   | 0.182977  | 0.264304  | 0.244444   | 0.559072  | 0.0517608  | 0.104117   | 1.30873    | 0.11188   |
| IGF2R       | 9.38775    | 9.58631    | 10.1045    | 11.6174   | 10.7986    | 13.7136    | 11.0272    | 6.93692   | 8.90411   | 13.123     | 8.72032   | 10.1053    | 14.4479    | 10.4607    | 12.1092   |
| IGFALS      | 0.346636   | 0.388063   | 0.548221   | 0.0630386 | 0.760158   | 0.208345   | 0.675151   | 0.317122  | 0.0372497 | 0.012796   | 0.0115091 | 0.182373   | 0.0328894  | 0.106569   | 0.0439247 |
| IGFBP1      | 0.0290925  | 0          | 0          | 0         | 0          | 0          | 0          | 0         | 0         | 0.018257   | 0.0985253 | 0          | 0.0656961  | 0.0380125  | 0         |
| IGFBP2      | 4.99549    | 1.61757    | 1.03077    | 26.1443   | 26.4509    | 24.2837    | 2.89794    | 2.19415   | 6.77243   | 39.4438    | 24.9279   | 33.582     | 54.9705    | 48.3473    | 23.8586   |
| IGFBP3      | 8.47961    | 2.94557    | 3.86405    | 8.97415   | 4.46801    | 26.4089    | 6.72899    | 2.70482   | 1.7462    | 17.1677    | 16.6028   | 7.40165    | 29.9317    | 17.8463    | 14.0727   |
| IGFBP4      | 84.9648    | 35.5066    | 43.1631    | 110.224   | 219.762    | 711.637    | 49.3264    | 49.6897   | 8.52124   | 90.0636    | 230.422   | 17.7518    | 126.025    | 117.889    | 247.073   |

|             |           |           |            |           |           |           |           |           |            |           |            |            |            |            |           |
|-------------|-----------|-----------|------------|-----------|-----------|-----------|-----------|-----------|------------|-----------|------------|------------|------------|------------|-----------|
| IGFBP5      | 47.7402   | 27.7292   | 26.2803    | 12.0643   | 31.8408   | 214.517   | 50.7007   | 30.1146   | 3.37469    | 17.7522   | 29.886     | 2.31711    | 90.6772    | 51.5947    | 96.4222   |
| IGFBP6      | 10.4695   | 6.44107   | 8.60163    | 1.23445   | 4.87509   | 3.67193   | 15.4277   | 3.36406   | 0.729442   | 34.4594   | 32.8058    | 14.6224    | 47.1139    | 25.6311    | 18.0288   |
| IGFBP7      | 65.3863   | 22.6993   | 25.4982    | 76.6354   | 119.45    | 192.401   | 39.9473   | 22.879    | 26.88      | 101.807   | 310.041    | 18.9235    | 68.2191    | 80.9352    | 160.713   |
| IGFBP7-AS1  | 0.333233  | 0.11239   | 0.124053   | 0.103022  | 0.310576  | 0.0993103 | 0.114142  | 0.05923   | 0.0811681  | 0.0627363 | 0.112854   | 0.131141   | 0.0215     | 0.226411   | 0.334996  |
| IGFBPL1     | 0.0455188 | 0.0187986 | 0.00537948 | 0.0201036 | 0.0101009 | 0.65336   | 0.0816701 | 0         | 0.00791954 | 0.0652923 | 0.124792   | 0.00930569 | 0.0629325  | 0.0237901  | 0.028016  |
| IGFL1       | 2.76874   | 0.696011  | 0.672211   | 0.49622   | 17.437    | 6.25262   | 0.962122  | 4.09213   | 106.951    | 23.9476   | 78.1391    | 30.5134    | 5.78631    | 10.9316    | 26.0618   |
| IGFL2       | 2.64146   | 4.68212   | 5.07207    | 0.649308  | 14.2667   | 1.50632   | 5.22945   | 4.93192   | 26.4443    | 36.0121   | 51.4035    | 19.0564    | 16.9644    | 14.73      | 7.65653   |
| IGFL2-AS1   | 1.25288   | 1.13949   | 0.687097   | 0.130563  | 1.53068   | 0.0599331 | 1.51086   | 0.625536  | 1.25155    | 0.441711  | 0.31783    | 0.775596   | 0.0363304  | 0.16922    | 0.141517  |
| IGFL3       | 3.1813    | 3.65513   | 3.96215    | 0.360266  | 5.6476    | 0.952556  | 5.02934   | 1.98841   | 24.4389    | 2.15      | 4.38058    | 4.85278    | 0.609      | 0.456781   | 0.351442  |
| IGFL4       | 0.727007  | 0.486504  | 0.93556    | 0.665957  | 0.501908  | 0.343909  | 0.0461152 | 0.394841  | 0.245948   | 0.101385  | 0.41035    | 0.231197   | 0          | 0.189983   | 0         |
| IGFLR1      | 1.04878   | 0.970209  | 1.70054    | 1.77251   | 1.47706   | 2.61953   | 0.957969  | 1.10605   | 0.187337   | 0.87755   | 3.22032    | 0.520298   | 1.79542    | 0.869712   | 1.64675   |
| IGFN1       | 0.076425  | 0.0103859 | 0.00810566 | 0.39581   | 0.210033  | 0.17687   | 0.0380362 | 0.0174154 | 0.00477318 | 0.216438  | 0.110608   | 0.569276   | 0.398265   | 0.436301   | 0.208255  |
| IGHMBP2     | 1.97249   | 1.98253   | 2.11599    | 2.56953   | 3.90949   | 3.5734    | 2.28553   | 1.60213   | 3.23629    | 2.29202   | 1.26201    | 2.63008    | 2.80207    | 2.38608    | 2.30318   |
| IGHV1OR15-1 | 0.0415495 | 0.0200192 | 0.0343726  | 0.235499  | 0         | 0.0707576 | 0.0474398 | 0.0553886 | 0          | 0.104298  | 0.0234521  | 0.0297298  | 0          | 0.0108578  | 0.0298351 |
| IGHV1OR15-3 | 0.0176127 | 0.0339442 | 0          | 0.0363007 | 0.0273586 | 0.0599878 | 0         | 0         | 0          | 0         | 0          | 0          | 0.0340908  | 0          | 0         |
| IGIP        | 2.6843    | 3.21975   | 3.66106    | 1.85248   | 1.75301   | 1.83264   | 2.36537   | 2.7796    | 1.17808    | 2.06394   | 2.48425    | 1.42466    | 1.1494     | 1.54618    | 3.02149   |
| IGLL1       | 0         | 0         | 0          | 0         | 0         | 0         | 0.02936   | 0         | 0          | 0         | 0          | 0.0367988  | 0          | 0          | 0         |
| IGLL3P      | 0.034286  | 0.0495586 | 0          | 0         | 0         | 0         | 0         | 0.0304705 | 0          | 0         | 0          | 0.0981302  | 0          | 0          | 0         |
| IGLL5       | 13.1465   | 2.23435   | 3.65539    | 0.879144  | 16.0038   | 0.968537  | 3.99607   | 14.8329   | 0.239764   | 0.796182  | 2.96321    | 0.219123   | 8.24212    | 0.0914599  | 4.90064   |
| IGLON5      | 0.333794  | 0.382411  | 0.343638   | 0.359273  | 0.829596  | 0.372646  | 0.609784  | 0.263687  | 1.08406    | 0.614454  | 0.234461   | 1.1995     | 0.296721   | 0.577641   | 0.351538  |
| IGSF1       | 0.0737431 | 0.0414523 | 0.0474487  | 0.0886602 | 0.0254552 | 0.467447  | 0.0654869 | 0.0254865 | 0.00997898 | 0         | 0.00462482 | 0.014657   | 0.00792978 | 0.0214119  | 0.0294179 |
| IGSF10      | 0.890794  | 1.4445    | 2.28255    | 0.742348  | 0.24547   | 0.564355  | 1.28392   | 0.765178  | 0.0416995  | 0.0561964 | 0.171596   | 0.034786   | 0.0322868  | 0.0344133  | 0.121038  |
| IGSF11      | 0.16861   | 0.359023  | 0.310469   | 0.0336304 | 0.0168974 | 0.250088  | 0.248404  | 0.188516  | 0.0264965  | 0.0955715 | 0.0306999  | 0.0194588  | 0.0105277  | 0.00284267 | 0.062489  |
| IGSF11-AS1  | 0.0144554 | 0.0208945 | 0.0119585  | 0         | 0         | 0         | 0.0825234 | 0.0256935 | 0          | 0.018143  | 0          | 0          | 0          | 0          | 0.0622792 |
| IGSF21      | 0.357146  | 0.166342  | 0.157577   | 1.22683   | 0.70271   | 3.21338   | 0.285444  | 0.317401  | 0.0724939  | 0.8218    | 1.62613    | 0.068146   | 0.437815   | 0.43554    | 0.76936   |
| IGSF22      | 0.174898  | 0.199019  | 0.225227   | 0.288412  | 0.553036  | 0.128998  | 0.30511   | 0.159063  | 1.2698     | 0.144667  | 0.1409     | 0.449197   | 0.0668147  | 0.180161   | 0.124536  |

|           |           |           |           |           |           |            |           |           |           |           |           |            |           |            |          |
|-----------|-----------|-----------|-----------|-----------|-----------|------------|-----------|-----------|-----------|-----------|-----------|------------|-----------|------------|----------|
| IGSF23    | 0         | 0.0225494 | 0.0193585 | 0         | 0.036349  | 0          | 0         | 0.0207964 | 0.0284991 | 0.02937   | 0.0528324 | 0.0334873  | 0.0452936 | 0.0122301  | 0        |
| IGSF3     | 8.86324   | 13.717    | 12.5035   | 13.6711   | 17.0008   | 9.63373    | 11.8797   | 7.36581   | 16.5953   | 11.1677   | 7.10635   | 14.6018    | 21.5774   | 10.6924    | 5.82442  |
| IGSF5     | 0.100817  | 0.0323834 | 0.0926697 | 0         | 0.0174004 | 0.0476912  | 0.0127899 | 0.0398211 | 0.0136426 | 0         | 0.0379365 | 0          | 0         | 0.00585458 | 0        |
| IGSF6     | 1.10838   | 0.769012  | 1.0453    | 2.55858   | 0.860851  | 1.56667    | 0.809931  | 0.985039  | 0.269977  | 4.31252   | 8.70854   | 0.586878   | 3.50411   | 1.41347    | 2.67419  |
| IGSF8     | 5.55166   | 8.72696   | 9.96025   | 11.0244   | 20.0069   | 13.4003    | 13.5484   | 4.71076   | 13.4638   | 20.9886   | 10.4525   | 18.5005    | 27.7342   | 12.6858    | 7.44597  |
| IGSF9     | 1.92287   | 4.00086   | 4.38397   | 2.79543   | 6.88936   | 2.41696    | 3.30626   | 2.04455   | 1.52637   | 2.89464   | 1.08534   | 2.41186    | 5.90034   | 3.73874    | 1.12596  |
| IGSF9B    | 0.70042   | 1.02414   | 1.50493   | 0.200501  | 1.04266   | 0.92359    | 1.76049   | 1.17579   | 0.0888576 | 0.268614  | 0.0439271 | 0.50465    | 0.150636  | 0.251673   | 0.565814 |
| IHH       | 0.0111694 | 0.0161448 | 0.0277204 | 0         | 0         | 0          | 0.0127529 | 0         | 0         | 0.0140188 | 0         | 0.015984   | 0         | 0.0175129  | 0        |
| IK        | 13.539    | 11.3697   | 12.3481   | 17.9334   | 9.71649   | 24.3499    | 7.44241   | 9.72577   | 17.0425   | 15.2815   | 14.6763   | 11.4847    | 19.639    | 11.7955    | 10.4948  |
| IKBIP     | 0.564633  | 0.450084  | 0.505243  | 1.5186    | 0.60761   | 1.37495    | 0.419019  | 0.3964    | 0.247544  | 2.49439   | 6.30992   | 0.351981   | 2.97251   | 2.03314    | 3.05687  |
| IKBKB     | 5.54392   | 7.8618    | 8.18493   | 8.05433   | 9.49598   | 9.20583    | 6.0585    | 5.23154   | 5.31135   | 4.0584    | 3.24465   | 5.45393    | 5.5455    | 6.26871    | 5.06443  |
| IKBKE     | 1.91194   | 2.56459   | 1.90684   | 3.65913   | 4.2427    | 4.45851    | 1.39194   | 1.76429   | 1.0385    | 2.42475   | 2.15833   | 2.10687    | 1.94706   | 1.90104    | 1.53075  |
| IKBKG     | 3.29884   | 3.35548   | 3.10278   | 5.83284   | 8.72576   | 8.23078    | 3.01711   | 2.52266   | 3.01124   | 3.66964   | 3.05207   | 4.0987     | 5.85169   | 3.87593    | 3.66029  |
| IKZF1     | 1.06853   | 0.597957  | 0.78037   | 1.19865   | 0.778026  | 1.28419    | 0.587765  | 1.04853   | 0.12539   | 0.562288  | 0.879544  | 0.205077   | 1.22083   | 0.474108   | 1.61047  |
| IKZF2     | 0.39782   | 1.15236   | 1.705     | 0.735961  | 0.145181  | 0.577487   | 0.807194  | 1.85507   | 0.265599  | 0.237621  | 0.557304  | 0.28808    | 0.282957  | 0.519795   | 0.519694 |
| IKZF3     | 0.577049  | 0.335513  | 0.467527  | 0.523308  | 0.500308  | 0.34625    | 0.197312  | 0.604946  | 0.0901219 | 0.101583  | 0.21928   | 0.136534   | 0.471468  | 0.196689   | 0.8867   |
| IKZF4     | 0.775494  | 0.686647  | 0.611314  | 0.686198  | 0.876656  | 1.56957    | 0.755633  | 0.801055  | 0.311526  | 0.361812  | 0.563764  | 0.485164   | 0.565835  | 0.564461   | 0.915457 |
| IKZF5     | 2.5554    | 2.2793    | 2.39669   | 1.587     | 0.792391  | 1.89316    | 1.92314   | 2.8142    | 1.81692   | 1.44359   | 2.04267   | 1.36016    | 1.41587   | 1.26011    | 1.38917  |
| IL10      | 0.070991  | 0.0410454 | 0.046983  | 0.424318  | 0.132328  | 0.580299   | 0.113477  | 0.100945  | 0.0345836 | 0.641527  | 2.06761   | 0.0203184  | 0.430548  | 0.0964677  | 0.53015  |
| IL10RA    | 3.00671   | 1.15129   | 1.35996   | 4.64774   | 4.32871   | 7.91995    | 2.33051   | 2.17787   | 0.446564  | 2.4698    | 4.9533    | 0.826442   | 3.98625   | 1.70559    | 6.29272  |
| IL10RB    | 3.92995   | 4.93564   | 5.0085    | 8.42823   | 6.34289   | 10.3605    | 3.48996   | 4.00654   | 6.81285   | 6.04342   | 10.1785   | 3.31865    | 9.47989   | 5.04547    | 6.94896  |
| IL10RB-DT | 0.592146  | 0.499284  | 0.326577  | 0.966188  | 0.996458  | 0.462188   | 0.788776  | 0.306979  | 0.240389  | 0.185801  | 0.835574  | 0.211848   | 0.604912  | 0.851074   | 1.20473  |
| IL11      | 0.0389286 | 0.0984711 | 0.0486847 | 1.52445   | 0.256996  | 0.0580076  | 0.211125  | 0.0778421 | 0.248906  | 1.53907   | 2.14234   | 0.515307   | 7.80504   | 6.79556    | 2.87917  |
| IL11RA    | 4.80879   | 6.62686   | 8.81706   | 1.41215   | 7.98212   | 4.38631    | 4.23014   | 4.87128   | 0.370864  | 0.668843  | 1.93364   | 0.889709   | 0.442059  | 1.05438    | 4.86519  |
| IL12A     | 0.0320763 | 0.0231823 | 0.0398037 | 0.0330556 | 0         | 0.0546251  | 0.0366237 | 0.0427601 | 0         | 0         | 0.0181051 | 0.0114757  | 0.0620864 | 0.0586757  | 0.138197 |
| IL12A-AS1 | 0         | 0         | 0.0157967 | 0         | 0         | 0.00812954 | 0         | 0         | 0         | 0.0239661 | 0.0215558 | 0.00683147 | 0         | 0.0149698  | 0        |



|         |           |            |           |           |           |           |           |            |            |           |            |            |            |            |           |
|---------|-----------|------------|-----------|-----------|-----------|-----------|-----------|------------|------------|-----------|------------|------------|------------|------------|-----------|
| IL12B   | 0         | 0.00950207 | 0         | 0         | 0         | 0.0251888 | 0         | 0.00876337 | 0.0120092  | 0         | 0.0111315  | 0.00705559 | 0          | 0.0103073  | 0         |
| IL12RB1 | 0.128004  | 0.0986785  | 0.0900096 | 0.197867  | 0.437434  | 0.283383  | 0.14615   | 0.136511   | 0.0467682  | 0.160658  | 0.24565    | 0.0320565  | 0.359255   | 0.153871   | 0.358467  |
| IL12RB2 | 0.674389  | 0.866482   | 0.666761  | 2.4522    | 0.885741  | 2.11019   | 0.782516  | 0.594468   | 1.01498    | 1.54146   | 1.60306    | 1.13378    | 1.01172    | 1.22647    | 0.826775  |
| IL13    | 0.0147596 | 0.0142228  | 0.0122102 | 0         | 0         | 0.0125676 | 0.016852  | 0.0262342  | 0          | 0         | 0          | 0          | 0.0476141  | 0          | 0         |
| IL13RA1 | 8.71186   | 6.68874    | 8.02909   | 38.8702   | 5.29456   | 32.0973   | 5.06581   | 9.33912    | 16.9564    | 30.8596   | 26.6408    | 16.7744    | 52.9508    | 22.2195    | 14.3117   |
| IL13RA2 | 0.421396  | 0.0243642  | 0.0557773 | 0.312668  | 0         | 0.11482   | 0.0577363 | 0.0599202  | 0          | 0.169246  | 0.380563   | 0.0482432  | 1.00053    | 0.43167    | 0.338899  |
| IL15    | 0.493982  | 0.287989   | 0.205558  | 0.667223  | 0.346214  | 0.87629   | 0.272606  | 0.270723   | 0.0100269  | 0.175666  | 0.743525   | 0.100146   | 0.265595   | 0.305509   | 0.768539  |
| IL15RA  | 1.23101   | 1.40436    | 1.69511   | 2.23436   | 1.70247   | 4.05074   | 1.2151    | 1.36929    | 0.183777   | 0.697764  | 0.995177   | 0.420522   | 1.68072    | 0.933941   | 1.9846    |
| IL16    | 2.63573   | 2.22424    | 3.20113   | 1.32658   | 1.96792   | 2.0967    | 3.0647    | 1.95052    | 0.88478    | 0.828631  | 1.44455    | 0.8919     | 0.784499   | 0.829998   | 1.95853   |
| IL17A   | 0         | 0          | 0         | 0.0382409 | 0         | 0         | 0         | 0          | 0          | 0         | 0.0279269  | 0.0088506  | 0.2474     | 0.129295   | 0         |
| IL17B   | 0.380835  | 0.0423443  | 0.218114  | 0.0905681 | 0.409547  | 0.34922   | 0.468273  | 0.130175   | 0.107034   | 0.0367682 | 0.363774   | 0.0628841  | 0.056703   | 0.122487   | 0.210357  |
| IL17C   | 0.0664394 | 0.0106705  | 0.0366422 | 0.0228226 | 0.0344011 | 0.0377148 | 0.0252861 | 0.0590458  | 0.296691   | 0.0277961 | 0.0750018  | 0.0316928  | 0.0571551  | 0          | 0.0954153 |
| IL17D   | 1.05704   | 0.539259   | 0.802447  | 0.217863  | 0.405659  | 0.624747  | 1.73225   | 0.497336   | 0.0151454  | 0.249732  | 0.308847   | 0.124574   | 0.320941   | 0.110491   | 0.446485  |
| IL17F   | 0         | 0          | 0         | 0.0295168 | 0         | 0         | 0         | 0          | 0          | 0         | 0          | 0.0204944  | 0.351119   | 0.134728   | 0.0822682 |
| IL17RA  | 2.41431   | 2.22161    | 2.28645   | 4.22801   | 3.51224   | 7.08986   | 2.92541   | 1.90434    | 2.10541    | 2.81763   | 2.38859    | 1.61016    | 5.91175    | 3.02251    | 3.89967   |
| IL17RB  | 0.408407  | 0.442747   | 0.300323  | 0.444257  | 0.511042  | 0.676186  | 0.362682  | 0.302465   | 0.303963   | 0.299012  | 0.53788    | 0.227287   | 0.263502   | 0.415044   | 0.602816  |
| IL17RC  | 4.95748   | 7.05657    | 7.28434   | 5.81842   | 16.257    | 8.69763   | 6.55744   | 4.66498    | 12.026     | 9.40442   | 8.96153    | 5.70917    | 9.86217    | 6.04143    | 3.28059   |
| IL17RD  | 1.29203   | 1.92224    | 2.04817   | 1.09851   | 1.11411   | 1.28741   | 1.92215   | 0.947307   | 1.65839    | 0.898025  | 0.945329   | 0.828507   | 1.37495    | 0.547367   | 0.843053  |
| IL17RE  | 3.4924    | 5.97313    | 6.24242   | 4.61684   | 10.4816   | 3.77435   | 5.2415    | 3.57423    | 2.98312    | 4.63125   | 2.44398    | 4.43809    | 5.91869    | 3.00635    | 1.61132   |
| IL17REL | 0         | 0.0981627  | 0.147476  | 0.0131222 | 0.168125  | 0.0108424 | 0.0945012 | 0.0226329  | 0.00775396 | 0.0479454 | 0.00718724 | 0.109334   | 0.00410778 | 0.00665506 | 0.100578  |
| IL18    | 7.42514   | 12.6672    | 15.6736   | 9.64793   | 5.20275   | 7.92023   | 10.6664   | 12.3729    | 20.0764    | 14.3335   | 11.867     | 8.66235    | 6.32681    | 2.72071    | 3.12949   |
| IL18BP  | 1.90468   | 1.96212    | 2.36023   | 1.40437   | 2.95863   | 3.83398   | 2.48407   | 1.94061    | 0.329997   | 0.740176  | 1.05258    | 1.08344    | 0.925523   | 1.55776    | 2.38057   |
| IL18R1  | 0.765626  | 1.03469    | 0.937195  | 1.85383   | 0.609144  | 1.00703   | 0.69649   | 0.774467   | 1.0689     | 0.664064  | 0.772948   | 0.694803   | 0.915664   | 0.403403   | 0.64363   |
| IL18RAP | 0.0866456 | 0.0960185  | 0.143359  | 1.27686   | 0.0942134 | 0.368888  | 0.108822  | 0.0847038  | 0          | 0.152249  | 0.117375   | 0.0433981  | 0.111807   | 0.140383   | 0.199095  |
| IL19    | 0.0235074 | 0          | 0         | 0.0242251 | 0         | 0.0200163 | 0         | 0          | 0          | 0.0295042 | 0.106148   | 0.00841009 | 0.280587   | 0.055287   | 0.185678  |
| IL1A    | 0.0710394 | 0.152124   | 0.0783584 | 0.300967  | 0.147132  | 0.107536  | 0.144196  | 0.154327   | 2.1245     | 4.50762   | 3.55529    | 2.95947    | 8.58628    | 2.66499    | 1.54166   |

|           |           |            |           |            |           |           |            |           |            |            |            |            |           |            |           |
|-----------|-----------|------------|-----------|------------|-----------|-----------|------------|-----------|------------|------------|------------|------------|-----------|------------|-----------|
| IL1B      | 0.401682  | 0.253086   | 0.217273  | 6.78233    | 0.287977  | 0.881377  | 0.0881976  | 0.411902  | 4.3652     | 26.9721    | 29.4567    | 1.75765    | 29.116    | 4.47326    | 14.9985   |
| IL1F10    | 0.73704   | 0.923304   | 1.24656   | 0.421967   | 0.865018  | 1.08781   | 1.14074    | 0.771468  | 2.53331    | 2.61073    | 5.54684    | 1.55868    | 1.59568   | 2.08869    | 0.352827  |
| IL1R1     | 10.3081   | 6.98574    | 8.30999   | 15.4875    | 7.24103   | 36.0061   | 7.78654    | 9.70847   | 4.02377    | 12.2483    | 17.3995    | 4.0711     | 16.0614   | 10.4836    | 20.8165   |
| IL1R2     | 4.1001    | 5.97894    | 8.73324   | 25.5059    | 1.26954   | 3.12002   | 2.65951    | 3.13538   | 4.84415    | 5.41958    | 8.56502    | 2.63158    | 18.6054   | 3.33892    | 2.19098   |
| IL1RAP    | 1.43663   | 2.03683    | 2.14226   | 6.67674    | 1.02203   | 3.74348   | 1.35313    | 2.19051   | 2.24466    | 3.8512     | 3.75462    | 2.64617    | 5.61593   | 4.12022    | 1.50549   |
| IL1RAPL1  | 0.0431935 | 0.066596   | 0.0857584 | 0.00890242 | 0         | 0.0441344 | 0.0493169  | 0.0383867 | 0          | 0.0108424  | 0.019504   | 0.00618121 | 0         | 0.0135449  | 0.0248125 |
| IL1RAPL2  | 0.0620249 | 0.0560335  | 0.0705532 | 0.00798981 | 0.144519  | 0.0264067 | 0.0265568  | 0.0137806 | 0.0188848  | 0          | 0.0350092  | 0.0221902  | 0         | 0.00405212 | 0         |
| IL1RL1    | 1.91124   | 0.809377   | 0.980057  | 1.54037    | 0.452869  | 2.52582   | 0.702737   | 1.5546    | 0.501604   | 4.11802    | 1.46797    | 1.9172     | 18.0225   | 2.61936    | 1.22285   |
| IL1RL2    | 1.13685   | 2.31621    | 2.16311   | 2.51885    | 2.8507    | 1.26533   | 1.38147    | 1.50829   | 3.18448    | 3.42448    | 1.74171    | 3.00394    | 3.77223   | 2.38516    | 0.711374  |
| IL1RN     | 6.21018   | 13.9898    | 14.715    | 47.5977    | 11.0927   | 13.8958   | 13.681     | 9.07191   | 35.7488    | 140.4      | 52.2004    | 55.8456    | 131.172   | 46.9809    | 14.3453   |
| IL2       | 0.0290013 | 0.0139733  | 0.0239919 | 0.0298867  | 0         | 0         | 0.0331128  | 0         | 0          | 0.0363996  | 0          | 0          | 0         | 0          | 0         |
| IL20      | 0.0187545 | 0.0542172  | 0.0310301 | 1.2176     | 0.26219   | 0.255507  | 0          | 0.0500023 | 0.433977   | 0.282466   | 0.57163    | 0.40258    | 2.11755   | 0.450888   | 0.0269338 |
| IL20RA    | 1.88237   | 4.46937    | 3.61724   | 2.48712    | 6.07705   | 2.75844   | 2.91728    | 2.51721   | 23.0111    | 1.98485    | 3.76363    | 3.54666    | 0.822353  | 0.903621   | 0.516934  |
| IL20RB    | 16.4467   | 40.4008    | 37.4583   | 26.146     | 50.6381   | 21.3337   | 21.7229    | 23.6337   | 58.4377    | 19.2226    | 16.4849    | 19.0685    | 19.0917   | 13.142     | 5.31197   |
| IL21      | 0         | 0          | 0         | 0          | 0         | 0         | 0          | 0         | 0          | 0          | 0          | 0          | 0.0211199 | 0          | 0         |
| IL21-AS1  | 0         | 0.0089253  | 0         | 0.0190898  | 0         | 0.0315464 | 0          | 0         | 0          | 0.00774998 | 0.00697055 | 0          | 0         | 0.00968162 | 0.0266033 |
| IL21R     | 0.127585  | 0.109736   | 0.165198  | 0.646101   | 0.661313  | 0.275837  | 0.0860667  | 0.194811  | 0.0663972  | 0.162189   | 0.307722   | 0.065015   | 0.650737  | 0.243618   | 0.750329  |
| IL21R-AS1 | 0.0523888 | 0.0676935  | 0.0882299 | 8.43E-09   | 0.0452715 | 0.0957127 | 0.0142341  | 0.0452497 | 2.37E-09   | 0.095083   | 5.38E-07   | 1.16E-06   | 6.35E-15  | 0.0805196  | 1.76E-08  |
| IL22      | 0         | 0          | 0.0328679 | 0.0204717  | 0         | 0         | 0          | 0.0176546 | 0          | 0          | 0          | 0          | 0.0512679 | 0.0311474  | 0.0285291 |
| IL22RA1   | 1.9377    | 5.35699    | 7.20706   | 5.12903    | 5.0489    | 3.98511   | 6.11088    | 4.45099   | 10.6481    | 4.84442    | 5.53031    | 3.81841    | 4.63278   | 1.9642     | 0.886452  |
| IL22RA2   | 0         | 0.0346414  | 0.0660876 | 0.222278   | 0.0124091 | 0.0136044 | 0.00912116 | 0.0141993 | 0.00972925 | 0          | 0.0180363  | 0.00571608 | 0.0154627 | 0          | 0         |
| IL23A     | 0.310943  | 0.214024   | 0.128617  | 0.251771   | 0.276001  | 0.321499  | 0.202871   | 0.177647  | 0.0540991  | 0.0278761  | 0.200581   | 0.095352   | 0.315258  | 0.0928643  | 0.223277  |
| IL23R     | 0.032897  | 0.0317006  | 0.0680368 | 0.025426   | 0.0383253 | 0         | 0          | 0.0365452 | 0.0300486  | 0.0206446  | 0.0464208  | 0.00588467 | 0.0477562 | 0.0386852  | 0         |
| IL24      | 0.0643122 | 4.06E-31   | 0.0151507 | 11.6739    | 0.438061  | 0.428045  | 0          | 0.0365233 | 0.0161459  | 4.7474     | 11.334     | 0.768633   | 25.5042   | 13.2931    | 10.2112   |
| IL25      | 0         | 0.00815704 | 0         | 0          | 0         | 0         | 0          | 0.0601832 | 0          | 0          | 0          | 0          | 0         | 0          | 0         |
| IL26      | 0.0663125 | 0.0106501  | 0.0182861 | 0          | 0         | 0         | 0          | 0.0392887 | 0          | 0          | 0          | 0          | 0.028523  | 0.150184   | 0.0952331 |

|          |           |           |           |           |           |           |           |           |            |           |           |            |           |            |           |
|----------|-----------|-----------|-----------|-----------|-----------|-----------|-----------|-----------|------------|-----------|-----------|------------|-----------|------------|-----------|
| IL27     | 0.0443353 | 0.0213614 | 0.0733547 | 0.114222  | 0         | 0.320883  | 0         | 0.0394016 | 0          | 0.0834681 | 0.0250245 | 0.0317231  | 0.0858148 | 0.0811006  | 0.0318356 |
| IL27RA   | 0.704997  | 0.805163  | 1.38966   | 1.39922   | 1.4331    | 1.57114   | 0.417378  | 0.734834  | 0.159001   | 0.568048  | 1.04149   | 0.230425   | 1.78013   | 0.868843   | 1.34995   |
| IL2RA    | 0.259064  | 0.0658777 | 0.107158  | 0.452371  | 0.100604  | 0.839466  | 0.131463  | 0.191862  | 0.00876419 | 0.379344  | 0.674262  | 0.0257454  | 0.756804  | 0.31969    | 0.599412  |
| IL2RB    | 0.693425  | 1.0258    | 1.31312   | 1.31753   | 0.900412  | 2.70773   | 1.71954   | 0.905129  | 0.105564   | 0.509953  | 1.27203   | 0.251958   | 1.44704   | 0.617236   | 1.68049   |
| IL2RG    | 1.31255   | 1.76637   | 2.1467    | 4.85076   | 2.08571   | 2.505     | 1.20579   | 2.26592   | 0.257235   | 2.17757   | 3.74683   | 0.885187   | 4.77934   | 1.49026    | 5.11328   |
| IL3      | 0         | 0         | 0         | 0         | 0         | 0         | 0         | 0         | 0          | 0         | 0         | 0          | 0         | 0          | 0         |
| IL31     | 0         | 0.0246696 | 0         | 0         | 0         | 0         | 0.0584601 | 0         | 0          | 0         | 0         | 0          | 0         | 0          | 0         |
| IL31RA   | 0.0420783 | 0.162192  | 0.269778  | 0.0162611 | 0.0245108 | 0.0850941 | 0.240218  | 0.130885  | 0.0256233  | 0.204649  | 0.0771893 | 0.0451622  | 0.376688  | 0.0989637  | 0.188843  |
| IL32     | 3.94821   | 1.93238   | 2.82729   | 10.2281   | 10.0115   | 6.01943   | 2.85087   | 2.41319   | 0.81725    | 3.2122    | 10.2353   | 1.06079    | 10.1895   | 4.95893    | 11.273    |
| IL33     | 5.57605   | 5.26549   | 5.90162   | 11.8713   | 1.51391   | 14.1691   | 2.25293   | 4.83483   | 3.53172    | 6.1162    | 13.3649   | 1.21181    | 3.57189   | 1.41122    | 4.94472   |
| IL34     | 1.0986    | 8.89959   | 13.8623   | 1.58002   | 8.28874   | 2.90912   | 6.78175   | 6.26577   | 9.7775     | 0.439416  | 1.56726   | 0.665143   | 0.778914  | 0.498461   | 1.71643   |
| IL36A    | 0.104248  | 0         | 0         | 30.564    | 1.82175   | 0.0665743 | 0         | 0.0231617 | 3.26928    | 0.228973  | 0.764939  | 1.21212    | 1.41247   | 0.12259    | 0.0374283 |
| IL36B    | 0.71819   | 0.793494  | 1.17803   | 0.497664  | 0.365454  | 0.210872  | 1.32898   | 0.528221  | 4.88611    | 0.730447  | 0.936553  | 0.815126   | 0.495329  | 0.375357   | 0.124481  |
| IL36G    | 16.9756   | 5.16132   | 3.08035   | 51.9881   | 16.8179   | 6.11341   | 6.80223   | 8.06076   | 87.9532    | 21.5456   | 24.8109   | 57.6435    | 74.0803   | 14.6503    | 2.90681   |
| IL36RN   | 7.2379    | 14.3037   | 10.8613   | 78.9458   | 48.7839   | 12.4455   | 18.8769   | 8.96575   | 162.775    | 84.3818   | 71.0922   | 60.586     | 167.701   | 42.9452    | 9.58766   |
| IL37     | 3.94923   | 9.31445   | 12.7256   | 0.882264  | 9.05163   | 2.1164    | 18.7932   | 6.35683   | 71.8098    | 2.66899   | 11.2858   | 3.99166    | 0.10691   | 0.0288677  | 0.079323  |
| IL3RA    | 1.18422   | 0.792284  | 0.884502  | 1.49235   | 0.967053  | 1.82079   | 1.0276    | 0.902089  | 0.280208   | 1.37591   | 2.42158   | 0.39704    | 2.48864   | 0.983205   | 2.33238   |
| IL4      | 3.62E-21  | 1.01E-06  | 0.026628  | 0         | 0         | 0         | 0         | 0.0286059 | 0          | 0         | 0.145344  | 0          | 0         | 0          | 0.111444  |
| IL4I1    | 0.129922  | 0.20107   | 0.237848  | 1.79191   | 0.636605  | 3.08526   | 0.234629  | 0.2       | 0.0795557  | 0.571451  | 0.942041  | 0.146865   | 1.73573   | 0.429696   | 0.99872   |
| IL4R     | 5.35471   | 5.10894   | 7.58902   | 40.951    | 12.3396   | 25.5541   | 5.56293   | 5.11447   | 5.01652    | 20.0592   | 11.5583   | 11.6165    | 41.0632   | 18.9935    | 17.4505   |
| IL5      | 0.0850847 | 0.0273301 | 0.0469254 | 0         | 0         | 0         | 0.194294  | 0.0252054 | 0          | 0         | 0         | 0          | 0         | 0.014823   | 0.0407308 |
| IL5RA    | 0.0513801 | 0.0636575 | 0.103227  | 0.0226923 | 0.0342047 | 0.0156248 | 0.0460932 | 0.0391391 | 0.013409   | 0.0276374 | 0.0372868 | 0.00787796 | 0.0260466 | 0.019181   | 0         |
| IL6      | 0.291964  | 0.0656474 | 0.064409  | 27.38     | 1.02798   | 13.9053   | 0.133342  | 0.172982  | 0.0237053  | 6.71818   | 19.0942   | 0.974906   | 49.2038   | 5.97148    | 17.8342   |
| IL6R     | 2.19974   | 2.83992   | 2.75591   | 5.75445   | 2.72699   | 5.86832   | 3.26025   | 1.91735   | 2.94523    | 3.71219   | 2.86924   | 3.26145    | 5.28136   | 3.72358    | 3.04265   |
| IL6R-AS1 | 0.105136  | 0.012664  | 0.021744  | 0.0270864 | 0.0204141 | 0.100712  | 0.0300102 | 0.0817566 | 0          | 0.0494837 | 0.044507  | 0          | 0.0339166 | 0.00686858 | 0         |
| IL6ST    | 14.8846   | 7.88543   | 10.1981   | 9.98005   | 2.2977    | 16.5726   | 7.42767   | 12.0304   | 3.71592    | 10.8539   | 13.2436   | 4.01793    | 16.9521   | 7.8785     | 14.5805   |

|         |           |            |            |           |            |           |           |           |            |            |            |            |           |            |           |
|---------|-----------|------------|------------|-----------|------------|-----------|-----------|-----------|------------|------------|------------|------------|-----------|------------|-----------|
| IL7     | 1.00331   | 1.65971    | 2.35169    | 1.41305   | 0.346331   | 1.08212   | 0.649144  | 1.27805   | 0.162923   | 0.47572    | 0.578891   | 0.191439   | 0.640139  | 0.180618   | 1.1367    |
| IL7R    | 2.54643   | 1.07023    | 1.58512    | 5.867     | 0.660544   | 3.25023   | 0.451253  | 2.12968   | 0.231529   | 6.32935    | 11.9899    | 0.289952   | 9.41851   | 2.80292    | 4.37548   |
| IL9     | 0.0391591 | 0          | 0.0323952  | 0         | 0          | 0         | 0         | 0         | 0          | 0          | 0          | 0          | 0         | 0          | 0         |
| IL9R    | 0.0457172 | 0.115031   | 0.113461   | 0.0680519 | 0.0867956  | 0.0216264 | 0.0753977 | 0.045144  | 0.00618649 | 0.00637553 | 0.0802807  | 0.0327119  | 0.0491608 | 0.0637168  | 0.175082  |
| ILD1R1  | 0.40869   | 0.351354   | 0.271803   | 0.0412908 | 0.211612   | 0.388934  | 0.402582  | 0.377453  | 0.00975957 | 0.0402312  | 0.0542776  | 0.137613   | 0.0155109 | 0.0167529  | 0         |
| ILD2R2  | 0.0142384 | 0.0109764  | 0.00942319 | 0.0117384 | 0.030964   | 0.0242476 | 0.0260111 | 0.0101231 | 0.0104044  | 0          | 0.00964401 | 0.00203759 | 0.0165357 | 0.00446496 | 0.0163585 |
| ILF2    | 18.7475   | 14.4969    | 14.4946    | 37.4641   | 13.6554    | 37.014    | 16.0538   | 13.3915   | 25.9531    | 29.2448    | 42.7252    | 17.5934    | 39.8668   | 25.4535    | 16.7228   |
| ILF3    | 13.1462   | 14.6657    | 15.8662    | 19.433    | 16.3703    | 24.8032   | 14.4619   | 10.7615   | 9.78372    | 11         | 7.83103    | 12.2496    | 17.9153   | 15.4229    | 12.9556   |
| ILF3-DT | 4.11995   | 2.88332    | 3.77961    | 2.65654   | 3.45012    | 5.81087   | 3.57401   | 2.63871   | 3.48992    | 1.86328    | 2.61126    | 1.11165    | 1.72261   | 1.34128    | 1.83453   |
| ILK     | 8.74483   | 9.16649    | 10.2734    | 15.045    | 14.3731    | 20.3638   | 14.6383   | 5.90872   | 12.5456    | 17.6193    | 31.5277    | 8.62062    | 22.7119   | 14.2257    | 19.0356   |
| ILKAP   | 5.22844   | 4.86828    | 5.20101    | 8.0325    | 7.44892    | 5.89951   | 3.97367   | 3.67737   | 4.59018    | 4.93173    | 6.19194    | 4.79685    | 6.87089   | 5.31434    | 3.24763   |
| ILVBL   | 5.78824   | 6.55838    | 7.05536    | 9.85292   | 15.8694    | 16.8993   | 7.357     | 4.7647    | 8.2465     | 11.4393    | 9.86295    | 9.03631    | 11.4407   | 7.7887     | 5.77465   |
| IMMP1L  | 1.58597   | 1.37925    | 1.36355    | 1.57577   | 0.278929   | 1.29002   | 0.725133  | 1.34578   | 0.754981   | 1.09978    | 1.93874    | 0.469636   | 1.2298    | 0.997083   | 0.788702  |
| IMMP2L  | 1.00595   | 1.19974    | 1.31507    | 0.831888  | 0.96456    | 0.930576  | 0.964224  | 0.778115  | 0.29494    | 0.233809   | 0.532747   | 0.426539   | 0.316504  | 0.402428   | 0.633158  |
| IMMT    | 8.52158   | 6.68826    | 6.63488    | 12.4693   | 5.92963    | 14.7416   | 6.15474   | 5.87354   | 7.9457     | 8.16913    | 11.3783    | 6.28498    | 12.9866   | 7.71438    | 6.62291   |
| IMP3    | 12.795    | 12.0057    | 13.3509    | 20.2693   | 16.8575    | 20.3422   | 13.8411   | 9.4123    | 20.4738    | 13.8084    | 25.9569    | 13.4721    | 20.1139   | 14.8974    | 7.08184   |
| IMP4    | 4.54525   | 3.27547    | 3.4194     | 6.44085   | 5.62022    | 8.07611   | 3.36767   | 3.16028   | 3.06921    | 3.21847    | 5.9638     | 3.22249    | 6.47043   | 4.87496    | 3.27235   |
| IMPA1   | 1.21602   | 0.849397   | 0.867592   | 2.28086   | 0.479722   | 1.44631   | 0.558305  | 1.10357   | 0.689557   | 2.02691    | 2.94158    | 0.805646   | 2.91413   | 1.73515    | 1.5708    |
| IMPA1P1 | 0.0247784 | 0.00596931 | 0.00512462 | 0.0319186 | 0.00962236 | 0.0105493 | 0         | 0.0110105 | 0.0150887  | 0          | 0          | 0.0487565  | 0         | 0.022663   | 0         |
| IMPA2   | 46.9185   | 37.2536    | 31.9882    | 65.8851   | 69.2553    | 58.0026   | 38.7162   | 35.8629   | 94.6979    | 55.4858    | 75.6742    | 60.1399    | 49.7305   | 38.8994    | 16.0235   |
| IMPACT  | 4.63723   | 3.29061    | 3.24527    | 4.57572   | 1.11923    | 4.64596   | 2.65084   | 3.76544   | 3.51758    | 3.88014    | 5.92311    | 2.80251    | 3.83426   | 3.06413    | 3.20159   |
| IMPAD1  | 7.85519   | 5.38101    | 5.60067    | 7.68926   | 3.32642    | 9.4905    | 5.43099   | 8.00231   | 8.79095    | 9.30465    | 12.5389    | 6.27971    | 12.2759   | 7.56182    | 6.70703   |
| IMPDH1  | 5.99097   | 5.45099    | 4.99114    | 15.8879   | 18.9802    | 20.8512   | 7.37167   | 2.63206   | 9.76966    | 17.6298    | 14.9206    | 12.9811    | 27.3729   | 14.1167    | 9.70963   |
| IMPDH2  | 33.955    | 31.731     | 34.2265    | 69.2639   | 36.5444    | 67.0657   | 37.2374   | 24.8003   | 29.0524    | 28.085     | 38.4391    | 27.7036    | 40.548    | 34.2481    | 21.2469   |
| IMPG1   | 0.0715295 | 0.0845935  | 0.0914511  | 0.0201036 | 0          | 0.0276848 | 0.0742455 | 0.0693485 | 0.00791954 | 0.0897769  | 0.0293629  | 0.0372228  | 0.0041955 | 0.0815661  | 0.0560321 |
| IMPG2   | 0.130235  | 0.106807   | 0.112324   | 0.0885222 | 0.0473468  | 0.12505   | 0.0126552 | 0.0591023 | 0.0337472  | 0.0834681  | 0.0750736  | 0.0594809  | 0.0965417 | 0.0912381  | 0.254685  |

|           |            |            |           |           |           |           |           |            |            |           |           |           |           |            |           |
|-----------|------------|------------|-----------|-----------|-----------|-----------|-----------|------------|------------|-----------|-----------|-----------|-----------|------------|-----------|
| INA       | 0.236373   | 0.262288   | 0.225172  | 0.457652  | 0.678706  | 1.22591   | 0.228992  | 0.4456     | 2.84386    | 0.881027  | 1.36652   | 1.82457   | 0.771776  | 1.21667    | 0.133727  |
| INAFM1    | 6.62644    | 7.00491    | 7.36368   | 7.72056   | 24.9645   | 19.6849   | 6.04138   | 2.90056    | 10.9009    | 6.42385   | 10.6065   | 6.75826   | 8.16781   | 5.71179    | 5.71695   |
| INAFM2    | 2.236      | 1.59715    | 1.38913   | 2.63601   | 2.63537   | 4.66721   | 1.40067   | 1.30674    | 4.67288    | 4.37888   | 4.27242   | 1.55012   | 4.59742   | 2.57372    | 2.4365    |
| INAVA     | 7.00381    | 12.9995    | 13.4601   | 11.5028   | 17.3632   | 11.0198   | 12.8582   | 8.63195    | 17.0406    | 11.5713   | 8.04876   | 12.4612   | 14.5993   | 9.35404    | 2.8652    |
| INCA1     | 0.193728   | 0.466706   | 0.320531  | 0.491427  | 0.833335  | 0.87554   | 0.442385  | 0.185413   | 0.308536   | 0.261852  | 0.50468   | 0.319887  | 0.192296  | 0.342695   | 0.428028  |
| INCENP    | 2.57889    | 3.06603    | 2.73377   | 5.34975   | 3.67642   | 7.0107    | 3.43525   | 1.74621    | 2.06667    | 2.22091   | 1.8022    | 3.81437   | 7.16334   | 3.79555    | 1.82776   |
| INE1      | 0.964294   | 2.4558     | 1.80439   | 1.04105   | 2.13983   | 1.66172   | 2.30686   | 1.81599    | 0.335543   | 1.29674   | 0.259183  | 2.03708   | 0.459211  | 1.96793    | 2.20916   |
| INE2      | 0.00013212 | 0.00025546 |           |           |           |           |           |            | 0.00058780 |           |           |           |           |            |           |
|           | 1          | 9          | 0.0456486 | 0.0154792 | 0.563594  | 3.67E-05  | 1.58E-08  | 2.94E-09   |            | 2.50E-06  | 3.79E-10  | 0.0145704 | 9.21E-14  | 3.19E-05   | 1.37E-12  |
| INF2      | 5.38989    | 5.70254    | 5.80658   | 9.15187   | 14.9954   | 13.1495   | 9.34249   | 4.70153    | 5.3041     | 7.01005   | 5.6342    | 6.83599   | 7.40285   | 7.31507    | 8.99987   |
| ING1      | 0.899185   | 0.781947   | 0.830049  | 1.09049   | 0.911291  | 1.91878   | 0.594712  | 0.77963    | 1.05504    | 1.09416   | 1.57831   | 0.702238  | 1.32302   | 0.991488   | 1.22048   |
| ING2      | 1.58456    | 1.09361    | 1.30377   | 1.61528   | 0.359225  | 1.49509   | 0.801912  | 0.745976   | 2.11758    | 3.03154   | 2.53327   | 1.42184   | 3.45387   | 1.89357    | 1.32847   |
| ING3      | 1.69843    | 1.10954    | 1.03165   | 1.56895   | 0.522897  | 1.60254   | 0.847315  | 1.13547    | 1.0063     | 1.58438   | 2.19369   | 0.788286  | 1.82637   | 1.16757    | 1.69203   |
| ING4      | 5.68986    | 6.9538     | 6.33337   | 4.6118    | 8.54041   | 7.2945    | 5.54757   | 4.4459     | 7.12426    | 5.31591   | 8.57021   | 3.1678    | 3.10391   | 3.28284    | 3.81025   |
| ING5      | 1.73274    | 2.03677    | 2.1028    | 1.59579   | 3.96384   | 1.90573   | 1.93006   | 1.52       | 1.11578    | 0.859283  | 1.00051   | 1.03497   | 1.02961   | 1.40915    | 1.19416   |
| INGX      | 0.131358   | 0.135449   | 0.0920204 | 0.0310138 | 0.178391  | 0.0919701 | 1.10E-12  | 0.096293   | 0.131559   | 0         | 0.0725196 | 0.0660811 | 0         | 0.184456   | 0.0864404 |
| INHHA     | 0.274935   | 0.412988   | 0.240825  | 0.216663  | 0.829016  | 0.358041  | 0.221585  | 0.201221   | 0.118179   | 0.0811933 | 0.0182569 | 0.196723  | 0         | 0.118335   | 0.0696779 |
| INHBA     | 2.04181    | 0.577393   | 0.811413  | 3.25651   | 0.681753  | 1.33561   | 0.793068  | 0.678352   | 0.762276   | 5.89177   | 9.16809   | 1.16878   | 8.19967   | 5.17612    | 6.63192   |
| INHBA-AS1 | 0.00511562 | 0.00739435 | 0.004232  | 0.0105436 | 0         | 0.0130676 | 0         | 0.00454633 | 0          | 0         | 0.0115498 | 0         | 0         | 0.00534729 | 0         |
| INHBB     | 6.13778    | 1.7848     | 2.48504   | 2.05382   | 3.01726   | 11.1596   | 2.15184   | 2.38726    | 0.131914   | 0.797544  | 0.74994   | 0.816348  | 2.89318   | 2.29457    | 2.11551   |
| INHBC     | 0.0350546  | 0.0236458  | 0.0231997 | 0.0144499 | 0         | 0.101485  | 0.0320194 | 0.0311536  | 0.00853851 | 0         | 0.0237434 | 0.020066  | 0         | 0.00732843 | 0         |
| INHBE     | 0.0187849  | 0.0181017  | 0.0233103 | 0.0871129 | 0.0291795 | 0.0159951 | 0.021448  | 0.00834725 | 0.0228779  | 0.023577  | 0.0424117 | 0.0403234 | 0         | 0.058907   | 0         |
| INIP      | 1.87905    | 1.90021    | 1.91456   | 2.20991   | 1.07188   | 3.39885   | 1.44847   | 1.81618    | 1.93938    | 2.04527   | 3.25972   | 1.29133   | 2.6884    | 2.43854    | 1.64657   |
| INKA1     | 4.1613     | 5.32874    | 5.4123    | 6.12292   | 13.5501   | 7.54134   | 5.81836   | 3.40157    | 6.9109     | 6.22833   | 8.08889   | 4.95192   | 5.64249   | 3.74497    | 2.10923   |
| INKA2     | 1.54617    | 1.95786    | 2.25035   | 1.71111   | 1.98932   | 3.75903   | 1.63058   | 1.54672    | 0.728511   | 1.37659   | 1.19085   | 0.703035  | 1.42757   | 2.62085    | 3.02268   |
| INKA2-AS1 | 0.0760213  | 0.177629   | 0.194917  | 1.28E-06  | 0.138606  | 0.375444  | 0.0705336 | 0.0978138  | 0.026453   | 0.209559  | 0.334894  | 0.0695937 | 0.0560555 | 0.122638   | 0.343125  |

|             |            |            |            |            |            |            |            |            |            |            |            |            |            |            |            |
|-------------|------------|------------|------------|------------|------------|------------|------------|------------|------------|------------|------------|------------|------------|------------|------------|
| INMT        | 3.30937    | 1.82787    | 1.79882    | 0.826442   | 3.74086    | 2.79048    | 2.90847    | 1.10272    | 0.448044   | 0.809089   | 0.725509   | 1.09663    | 0.220418   | 0.861253   | 1.67918    |
| INMT-MINDY4 | 0.00025886 | 0.0237146  | 0.0382331  | 0.058639   | 0.00023473 | 0.00526789 | 0.135903   | 0.089575   | 3.60E-05   | 0.00027641 | 0.0198265  | 5.08E-05   | 0.00927481 | 0.00049362 | 0.00935077 |
|             |            |            |            |            | 2          |            |            |            |            | 6          |            |            |            | 3          |            |
| INO80       | 4.94932    | 5.12864    | 5.23757    | 5.25406    | 3.98242    | 5.47138    | 4.67115    | 3.98487    | 4.33591    | 3.25888    | 2.83262    | 3.88227    | 4.73711    | 4.26682    | 4.14149    |
| INO80B      | 2.94213    | 6.78686    | 6.57942    | 4.87394    | 11.7728    | 8.62109    | 4.76261    | 4.59981    | 6.35136    | 4.20865    | 6.0822     | 6.00479    | 4.58992    | 3.28765    | 2.52596    |
| INO80B-WBP1 | 3.25126    | 2.13072    | 2.24504    | 2.86448    | 2.59011    | 1.73599    | 1.45394    | 0.693458   | 1.65408    | 1.01787    | 0.760348   | 1.44175    | 0.464498   | 1.18244    | 0.939026   |
| INO80C      | 2.7426     | 2.26272    | 2.03577    | 5.0332     | 3.82252    | 5.05445    | 3.08852    | 1.61937    | 6.52022    | 5.6585     | 8.05821    | 4.39526    | 8.58087    | 4.23148    | 1.67261    |
| INO80D      | 4.8362     | 4.41263    | 4.61303    | 3.63244    | 1.80051    | 3.36937    | 4.68065    | 5.53766    | 2.93301    | 3.46031    | 2.80181    | 3.36203    | 4.13328    | 3.28658    | 3.40922    |
| INO80E      | 5.0956     | 6.16291    | 4.9696     | 7.27239    | 10.6824    | 10.6271    | 5.72488    | 4.02333    | 4.31531    | 5.46452    | 10.289     | 6.12798    | 7.23546    | 6.1461     | 6.13375    |
| INPP1       | 3.39175    | 5.57791    | 6.25791    | 6.329      | 5.08573    | 6.09492    | 3.70156    | 2.9097     | 12.0535    | 3.8004     | 6.12376    | 4.12645    | 4.55616    | 4.04863    | 2.4278     |
| INPP4A      | 2.11821    | 1.75974    | 1.8426     | 2.0175     | 2.30322    | 3.38318    | 2.17666    | 1.62294    | 0.7192     | 1.80058    | 1.68833    | 1.29977    | 1.80979    | 2.13362    | 3.21716    |
| INPP4B      | 1.53872    | 0.923246   | 1.0966     | 1.2562     | 0.507006   | 1.35747    | 0.854349   | 0.994536   | 0.494864   | 1.68323    | 1.66434    | 0.781662   | 1.43545    | 1.17323    | 2.10139    |
| INPP5A      | 3.20299    | 3.03809    | 3.47061    | 2.80887    | 2.08769    | 5.24063    | 4.75418    | 2.92469    | 1.92748    | 3.05841    | 4.01989    | 1.62674    | 3.38753    | 2.51432    | 3.72499    |
| INPP5B      | 2.31862    | 2.66912    | 3.06581    | 2.4933     | 2.40109    | 4.07118    | 2.65282    | 1.93262    | 2.05794    | 2.00033    | 2.37357    | 1.70026    | 2.21452    | 2.0749     | 3.27468    |
| INPP5D      | 1.67154    | 1.55062    | 1.652      | 2.32892    | 3.3235     | 4.55071    | 1.58788    | 1.4578     | 0.803442   | 1.48255    | 1.86181    | 0.701672   | 1.78019    | 1.51661    | 3.36077    |
| INPP5E      | 1.85253    | 2.72369    | 2.86789    | 3.03208    | 5.17337    | 4.41906    | 2.31735    | 1.35584    | 1.83314    | 1.79513    | 2.24505    | 2.26609    | 2.6014     | 2.67327    | 2.64091    |
| INPP5F      | 2.87355    | 3.00084    | 3.19447    | 3.0498     | 1.38112    | 3.20022    | 2.0794     | 2.92787    | 1.91461    | 2.66856    | 2.86082    | 1.61047    | 3.03457    | 2.33918    | 2.34406    |
| INPP5J      | 0.92701    | 1.29031    | 0.958609   | 0.318437   | 3.04993    | 0.350816   | 1.7273     | 0.915387   | 2.32855    | 0.468629   | 0.319757   | 1.7642     | 0.215981   | 0.373465   | 0.147923   |
| INPP5K      | 5.72399    | 4.89417    | 4.67852    | 4.97925    | 8.62483    | 7.59131    | 6.22198    | 4.37339    | 12.6466    | 5.71118    | 6.99623    | 4.89121    | 5.87178    | 3.93856    | 3.40051    |
| INPPL1      | 4.34392    | 4.44372    | 4.8605     | 5.0026     | 8.76046    | 12.0242    | 5.44172    | 3.09714    | 2.42104    | 4.10907    | 4.39398    | 2.40226    | 4.41145    | 5.47187    | 10.0449    |
| INS         | 0          | 0          | 0          | 0          | 0          | 0          | 0          | 0          | 0          | 0          | 0          | 0          | 0          | 0          | 0          |
| INS-IGF2    | 0.00342517 | 0.00755459 | 0.00076812 | 0.00092705 | 0.00390906 | 0.00481272 | 0.00400006 | 0.00030109 | 0.00024617 | 0.00312363 | 0.00207377 | 0.00015866 | 0.00378457 | 0.00245288 | 0.036298   |
|             |            |            | 8          | 3          |            |            |            | 4          | 8          |            |            | 7          |            |            |            |
| INSC        | 0.085874   | 0.0137918  | 0          | 0.00737464 | 0.044464   | 0.0365603  | 0.0408534  | 0.0127196  | 0.00871541 | 0.0628721  | 0.0403921  | 0.0102409  | 0.00923425 | 0.029921   | 0.0205543  |
| INSIG1      | 4.08621    | 2.9497     | 3.42852    | 7.19307    | 3.52376    | 7.26204    | 4.94775    | 4.07734    | 4.64891    | 5.53014    | 9.02048    | 2.85615    | 10.6816    | 3.56066    | 3.39359    |
| INSIG2      | 2.86057    | 2.68019    | 3.22887    | 2.30331    | 0.94569    | 3.20978    | 1.92348    | 2.69047    | 5.24099    | 4.86732    | 6.38316    | 1.9573     | 2.89488    | 2.23169    | 2.07203    |

|            |            |            |           |           |           |            |           |            |           |           |           |           |           |           |           |
|------------|------------|------------|-----------|-----------|-----------|------------|-----------|------------|-----------|-----------|-----------|-----------|-----------|-----------|-----------|
| INSL3      | 0.128573   | 0.0495586  | 0         | 0.105998  | 0.079887  | 0.350329   | 0         | 0.0457058  | 0         | 0.0322743 | 0         | 0         | 0.149318  | 0.0403186 | 0.332363  |
| INSL4      | 0          | 0          | 0         | 0         | 0         | 0          | 0         | 0          | 0         | 0         | 0         | 0         | 0         | 0         | 0         |
| INSL5      | 0          | 0.0155302  | 0         | 0         | 0         | 0          | 0         | 0          | 0         | 0         | 0         | 0         | 0         | 0         | 0         |
| INSL6      | 0          | 0.0629982  | 0         | 0         | 0         | 0          | 0         | 0          | 0         | 0         | 0         | 0         | 0.0210901 | 0         | 0         |
| INSM1      | 0.00818354 | 0.00788591 | 0         | 0.0590336 | 0.0254237 | 0.00696818 | 0.196218  | 0.0290914  | 0         | 0         | 0         | 0         | 0.137279  | 0.0256625 | 0.0235052 |
| INSM2      | 0.0614485  | 0.0592137  | 0.101669  | 0.0237467 | 0.035794  | 0.0130807  | 0.0789299 | 0.0341315  | 0.028064  | 0.0192811 | 0.0173419 | 0         | 0         | 0         | 0.022062  |
| INSR       | 4.71712    | 5.05538    | 5.50171   | 6.03819   | 5.98706   | 10.3045    | 4.73097   | 3.82306    | 4.28761   | 3.64289   | 3.05046   | 3.43006   | 8.62154   | 5.56      | 5.42876   |
| INSRR      | 0.0165583  | 0.0106374  | 0         | 0         | 0.120031  | 0.00469974 | 0.0378116 | 0.00981045 | 0.0134441 | 0.0277099 | 0.0186923 | 0.0157973 | 0         | 0.0519247 | 0.182312  |
| INSYN1     | 0.325413   | 0.423703   | 0.34612   | 0.299417  | 0.758217  | 0.814761   | 1.05714   | 0.241      | 0.589756  | 0.233387  | 0.472308  | 0.163543  | 0.159966  | 0.30168   | 0.244794  |
| INSYN1-AS1 | 0          | 0          | 0         | 0         | 0         | 0          | 0         | 0          | 0         | 0         | 0         | 0         | 0         | 0         | 0         |
| INSYN2     | 1.24459    | 1.28029    | 1.50749   | 0.703528  | 1.26438   | 0.549997   | 1.47499   | 1.59613    | 0.0831435 | 0.60638   | 0.237128  | 0.743993  | 0.121975  | 0.982576  | 1.3198    |
| INSYN2B    | 0.782539   | 0.294912   | 0.407011  | 0.355308  | 0.252739  | 0.781775   | 0.389238  | 0.550857   | 0.0802068 | 0.165316  | 0.297379  | 0.0859296 | 0.299935  | 0.263211  | 0.617548  |
| INTS1      | 6.46771    | 6.95039    | 6.55298   | 10.8989   | 20.2787   | 16.1598    | 9.3094    | 6.22278    | 8.70142   | 5.73941   | 4.30432   | 7.97818   | 11.035    | 7.77523   | 8.23045   |
| INTS10     | 8.20204    | 6.52669    | 7.06739   | 9.7494    | 4.17946   | 13.4293    | 6.26446   | 7.0689     | 6.23662   | 6.13154   | 9.72798   | 5.46509   | 8.43991   | 6.23406   | 7.55895   |
| INTS11     | 6.25014    | 7.50296    | 7.63924   | 11.5483   | 13.387    | 12.1505    | 7.84981   | 5.57803    | 9.18788   | 7.4247    | 7.90032   | 7.22465   | 10.7742   | 7.83071   | 5.94183   |
| INTS12     | 3.55336    | 3.11863    | 2.89587   | 5.00951   | 1.68255   | 5.09522    | 2.18692   | 2.31268    | 4.40803   | 4.75825   | 7.20247   | 2.61814   | 5.99998   | 3.53478   | 2.67485   |
| INTS13     | 2.21632    | 2.51415    | 2.48326   | 4.79236   | 1.15965   | 5.64164    | 1.27858   | 2.07335    | 5.01015   | 4.48002   | 6.13636   | 3.22732   | 4.57587   | 4.48707   | 2.51283   |
| INTS14     | 4.52711    | 4.23827    | 4.01171   | 6.32561   | 3.16573   | 8.71099    | 3.66055   | 3.44345    | 4.34605   | 4.35753   | 6.48366   | 2.7724    | 5.65463   | 4.31533   | 3.20448   |
| INTS2      | 1.89176    | 1.62802    | 1.67656   | 2.29307   | 1.05904   | 2.56771    | 1.61247   | 1.62131    | 0.939826  | 1.52334   | 1.84377   | 1.24102   | 1.88277   | 1.73858   | 1.64084   |
| INTS3      | 3.77094    | 6.56046    | 6.69278   | 8.17752   | 9.84045   | 8.59021    | 5.51194   | 3.92099    | 4.56029   | 3.65654   | 3.24886   | 4.93468   | 5.75301   | 5.14785   | 6.86945   |
| INTS4      | 4.11841    | 3.7211     | 3.72033   | 4.66201   | 3.25067   | 4.35595    | 3.74324   | 3.03693    | 2.19657   | 2.78209   | 3.56413   | 2.28375   | 3.66832   | 2.86114   | 3.13151   |
| INTS4P1    | 0.0361328  | 0.0609327  | 0.0448374 | 0.0186179 | 0.0561267 | 0.0102555  | 0.0481311 | 0.0481677  | 0.0146686 | 0.0604671 | 0.0271929 | 0.021545  | 0.0077709 | 0.088128  | 0.0605398 |
| INTS4P2    | 0.0402964  | 0.241624   | 0.228545  | 0.0870255 | 0.371385  | 0.128562   | 0.258566  | 0.0569904  | 0.0413288 | 0.0228728 | 0.169395  | 0.12091   | 0.180665  | 0.129848  | 0.137359  |
| INTS5      | 2.63486    | 3.30277    | 3.47942   | 6.05496   | 5.89851   | 7.75043    | 4.08627   | 2.28529    | 5.23386   | 3.04175   | 4.45368   | 3.52865   | 6.27726   | 3.72625   | 2.86328   |
| INTS6      | 2.09456    | 2.78197    | 2.5633    | 3.36278   | 1.77617   | 3.02655    | 1.63763   | 2.30831    | 4.03821   | 4.48337   | 5.25602   | 3.45439   | 3.42839   | 4.34303   | 2.03472   |
| INTS6-AS1  | 0.79398    | 1.13349    | 0.827127  | 0.757611  | 0.822217  | 0.525827   | 0.872965  | 0.705624   | 0.680466  | 0.442901  | 0.298768  | 0.652279  | 0.417407  | 0.338123  | 0.168927  |

|              |           |            |           |           |           |           |            |           |           |           |          |           |           |           |          |
|--------------|-----------|------------|-----------|-----------|-----------|-----------|------------|-----------|-----------|-----------|----------|-----------|-----------|-----------|----------|
| INTS6L       | 1.96801   | 2.27909    | 2.57979   | 1.53461   | 1.11576   | 1.85971   | 1.81361    | 1.67115   | 1.32998   | 1.88369   | 1.79313  | 1.44577   | 1.25091   | 1.40398   | 2.57471  |
| INTS6L-AS1   | 0         | 0          | 0         | 0.0599236 | 0         | 0         | 0          | 0         | 0         | 0         | 0        | 0         | 0         | 0         | 0        |
| INTS7        | 1.95939   | 2.33455    | 1.88482   | 3.56882   | 1.59652   | 3.30661   | 1.90188    | 1.58385   | 2.43564   | 2.31943   | 2.50911  | 2.14103   | 3.38424   | 2.91342   | 2.16679  |
| INTS8        | 3.82225   | 4.18279    | 4.3688    | 5.55151   | 2.71409   | 3.92407   | 2.98132    | 3.50299   | 3.01193   | 4.09046   | 4.96796  | 3.03412   | 4.91662   | 4.24104   | 3.91684  |
| INTS9        | 2.25746   | 2.19101    | 2.03548   | 3.42263   | 2.7498    | 4.50127   | 2.33644    | 1.67428   | 1.88893   | 1.94665   | 2.66756  | 1.8012    | 3.00207   | 2.38517   | 2.22742  |
| INTU         | 1.39212   | 1.8522     | 1.78302   | 1.48559   | 1.28429   | 1.01689   | 1.41197    | 1.2372    | 0.662685  | 0.789366  | 1.02907  | 0.859576  | 0.647424  | 1.02674   | 0.913365 |
| INVS         | 2.10183   | 1.84669    | 2.07593   | 2.21319   | 1.5862    | 2.1757    | 1.76195    | 1.50982   | 0.959226  | 2.04029   | 1.86095  | 1.53668   | 2.0563    | 2.36456   | 2.2162   |
| IP6K1        | 5.56212   | 5.63239    | 5.77858   | 6.75897   | 8.78391   | 10.0917   | 5.99607    | 4.38705   | 6.48044   | 5.9979    | 7.46144  | 4.5834    | 9.06467   | 5.57415   | 5.65813  |
| IP6K2        | 7.01574   | 8.85039    | 8.31823   | 9.12219   | 11.1733   | 8.84207   | 8.97188    | 6.18435   | 13.9424   | 7.78822   | 10.5074  | 8.20496   | 5.26187   | 6.29435   | 3.89197  |
| IP6K3        | 0.0409902 | 0.00789988 | 0.03391   | 0         | 0.0382031 | 0.0209416 | 0.00936025 | 0.0291429 | 0         | 0         | 0        | 0         | 0         | 0.0085693 | 0        |
| IPCCE1       | 0.59913   | 0.303103   | 0.289124  | 0.270979  | 0.17579   | 0.527157  | 0.235623   | 0.446672  | 0.0567523 | 0.19217   | 0.28181  | 0.0976468 | 0.167507  | 0.140909  | 0.372851 |
| IPMK         | 1.21508   | 1.33452    | 1.79187   | 1.43105   | 0.55099   | 1.67403   | 1.4692     | 1.90149   | 0.703147  | 1.82342   | 2.42385  | 1.40943   | 1.84791   | 1.70399   | 1.57159  |
| IPO11        | 2.56258   | 2.25276    | 2.09513   | 4.5073    | 0.738522  | 3.01837   | 1.92776    | 2.4461    | 1.66491   | 2.50917   | 3.68275  | 1.73548   | 3.35503   | 2.82499   | 2.2425   |
| IPO11-LRRC70 | 3.44E-09  | 2.03E-06   | 3.81E-05  | 0.091157  | 0.289373  | 0.30235   | 4.29E-10   | 2.33E-12  | 0.0361434 | 0.444765  | 1.23356  | 0.0787855 | 0.207493  | 0.0953534 | 0.574146 |
| IPO13        | 2.55166   | 3.38369    | 3.05226   | 6.83447   | 7.67725   | 8.1721    | 3.3924     | 1.88464   | 7.32812   | 6.75862   | 5.79993  | 7.46348   | 9.01765   | 6.11837   | 3.67275  |
| IPO4         | 3.98288   | 3.82571    | 4.19935   | 8.33405   | 7.83536   | 11.7367   | 5.62786    | 3.5624    | 5.0921    | 4.37307   | 4.07042  | 5.52598   | 9.45387   | 6.83298   | 3.66335  |
| IPO5         | 10.0369   | 7.11919    | 7.44195   | 16.3355   | 4.10882   | 15.3229   | 7.95097    | 7.88163   | 6.25982   | 11.5955   | 13.9813  | 6.52502   | 14.8671   | 11.487    | 10.3829  |
| IPO5P1       | 1.23906   | 1.42267    | 1.36903   | 0.65792   | 1.13524   | 1.1516    | 1.38114    | 0.940661  | 1.23792   | 0.495537  | 0.76338  | 0.568012  | 0.363132  | 0.678318  | 0.796225 |
| IPO7         | 9.09351   | 8.50167    | 9.45219   | 20.5217   | 3.57053   | 11.7593   | 6.73402    | 8.01513   | 10.2919   | 13.9324   | 11.8013  | 9.55004   | 24.8188   | 17.5886   | 9.81739  |
| IPO8         | 4.20151   | 4.31522    | 4.16224   | 6.62252   | 2.4956    | 6.65632   | 3.56188    | 3.7918    | 5.46868   | 4.8394    | 4.52718  | 3.23913   | 6.07507   | 4.21119   | 4.73722  |
| IPO9         | 3.96921   | 3.06157    | 3.2443    | 3.96003   | 2.33292   | 4.97504   | 3.66788    | 3.10144   | 2.06518   | 2.52129   | 2.91327  | 2.20523   | 3.77076   | 3.01285   | 3.63846  |
| IPO9-AS1     | 0.304207  | 0.351971   | 0.19342   | 0.126446  | 0.305623  | 0.207882  | 0.199634   | 0.111241  | 0.118604  | 0.0718631 | 0        | 0.112674  | 0.0193646 | 0.149776  | 0.168367 |
| IPP          | 1.93057   | 2.18753    | 2.08624   | 1.96899   | 1.25295   | 2.22708   | 1.72776    | 1.99292   | 1.77838   | 1.78075   | 1.9046   | 1.37143   | 2.42986   | 1.58601   | 1.12029  |
| IPPK         | 8.45114   | 9.05742    | 8.86913   | 12.1241   | 9.43227   | 7.6803    | 8.97319    | 7.01774   | 20.601    | 11.2568   | 8.34319  | 13.9989   | 15.2583   | 10.1235   | 5.01552  |
| IPW          | 0.451946  | 0.293006   | 0.321215  | 0.198958  | 0.0879148 | 0.268655  | 0.24896    | 0.425645  | 0.0313313 | 0.173134  | 0.274836 | 0.0883565 | 0.116188  | 0.199277  | 0.246399 |
| IQCA1        | 0.135736  | 0.0392399  | 0.0393017 | 0.461605  | 0.263557  | 0.433417  | 0.0542428  | 0.0723787 | 0.0743902 | 0.178881  | 0.490334 | 0.0874107 | 0.415988  | 0.485951  | 0.282655 |



|                 |          |            |           |           |           |           |           |            |           |          |           |           |           |           |          |
|-----------------|----------|------------|-----------|-----------|-----------|-----------|-----------|------------|-----------|----------|-----------|-----------|-----------|-----------|----------|
| IQCA1L          | 0        | 0.0171285  | 0.0220571 | 0         | 0.0138054 | 0         | 0.0304424 | 0.0157969  | 0.021648  | 0        | 0         | 0         | 0         | 0         | 0        |
| IQCB1           | 3.40548  | 2.63734    | 2.88364   | 1.73635   | 0.927809  | 3.25649   | 1.71003   | 2.50361    | 1.25945   | 1.92452  | 2.6971    | 1.63936   | 1.16187   | 1.70997   | 2.02286  |
| IQCC            | 1.68552  | 1.56585    | 1.94545   | 1.08171   | 1.36397   | 1.4266    | 1.87837   | 1.32752    | 0.467097  | 0.734724 | 0.432959  | 0.823279  | 0.65119   | 1.00225   | 1.02912  |
| IQCD            | 0.179618 | 0.133142   | 0.0914415 | 0.0854314 | 0.107311  | 0.200001  | 0.189306  | 0.208746   | 0.0504817 | 0.260122 | 0.155974  | 0.0296588 | 0.222862  | 0.252743  | 0.297639 |
| IQCE            | 1.17883  | 1.54144    | 1.61296   | 1.80734   | 2.61449   | 2.83077   | 1.555     | 0.959155   | 0.723711  | 1.04819  | 0.877502  | 1.06872   | 2.29001   | 1.53944   | 2.0297   |
| IQCF1           | 0        | 0.0458247  | 0         | 0         | 0         | 0         | 0         | 0          | 0         | 0        | 0         | 0         | 0         | 0         | 0        |
| IQCF2           | 0        | 0          | 0.032616  | 0         | 0         | 0.0335707 | 0         | 0          | 0         | 0        | 0         | 0         | 0         | 0         | 0        |
| IQCF3           | 0        | 0          | 0         | 0         | 0         | 0         | 0         | 0          | 0         | 0        | 0         | 0         | 0         | 0         | 0        |
| IQCF4           | 0        | 0          | 0         | 0         | 0         | 0         | 0         | 0          | 0         | 0        | 0         | 0         | 0         | 0         | 0        |
| IQCF5           | 0        | 0.065336   | 0         | 0         | 0         | 0         | 0         | 0          | 0         | 0        | 0         | 0         | 0         | 0         | 0        |
| IQCF5-AS1       | 0        | 0.00557534 | 0         | 0         | 0         | 0         | 0         | 0          | 0         | 0        | 0         | 0         | 0         | 0         | 0        |
| IQCF6           | 0        | 0          | 0         | 0         | 0         | 0         | 0         | 0          | 0         | 0        | 0         | 0         | 0         | 0         | 0        |
| IQCG            | 1.07409  | 0.934497   | 0.850204  | 0.836129  | 0.27607   | 1.0988    | 0.45878   | 0.803476   | 0.461134  | 0.785576 | 1.27357   | 0.425736  | 0.707951  | 0.767331  | 0.821199 |
| IQCH            | 0.293347 | 0.243421   | 0.202844  | 0.177837  | 0.10473   | 0.304692  | 0.162526  | 0.286872   | 0.0945493 | 0.165478 | 0.0830263 | 0.150839  | 0.151338  | 0.0952828 | 0.144165 |
| IQCH-AS1        | 0.523703 | 0.696465   | 0.71342   | 0.395349  | 0.406186  | 0.520295  | 0.360502  | 0.652548   | 0.151853  | 0.129249 | 0.308878  | 0.164572  | 0.144343  | 0.241444  | 0.345356 |
| IQCI            | 0        | 0.00848605 | 0.0145704 | 0         | 0         | 0         | 0.0100548 | 0          | 0.0321754 | 0        | 0         | 0         | 0         | 1.90434   | 0        |
| IQCI-SCHIP1     | 0.838936 | 0.615599   | 0.846959  | 1.28004   | 2.06794   | 1.63156   | 0.431199  | 0.304357   | 1.35168   | 2.3121   | 4.62038   | 0.717646  | 2.43666   | 0.875004  | 2.91395  |
| IQCI-SCHIP1-AS1 | 0.155062 | 0.317523   | 0.256557  | 0.239694  | 0.301082  | 0.330084  | 0.398352  | 0.20671    | 0.0944242 | 0.145964 | 0.218808  | 0.277378  | 0         | 0.810423  | 0.835084 |
| IQCK            | 1.70504  | 1.04106    | 1.05888   | 1.20327   | 1.11292   | 2.54942   | 1.18336   | 1.20807    | 1.01998   | 0.909119 | 1.94473   | 0.815431  | 1.17306   | 1.0182    | 1.54632  |
| IQCM            | 0        | 0          | 0         | 0         | 0         | 0         | 0         | 0.00931926 | 0         | 0        | 0         | 0         | 0         | 0         | 0        |
| IQCN            | 1.08865  | 2.02786    | 2.53809   | 0.214716  | 0.792937  | 0.864882  | 2.81309   | 1.74984    | 0.279129  | 0.353035 | 0.105843  | 0.689513  | 0.0537719 | 0.582591  | 0.628371 |
| IQGAP1          | 30.2079  | 31.0162    | 34.47     | 57.9237   | 17.8948   | 52.911    | 27.4795   | 28.5294    | 37.5404   | 64.9708  | 43.9751   | 39.265    | 103.323   | 37.8117   | 37.8461  |
| IQGAP2          | 2.68086  | 0.84135    | 1.22822   | 1.15344   | 0.938012  | 2.66262   | 1.33503   | 2.14325    | 0.0655807 | 1.40962  | 2.36636   | 0.255947  | 1.22095   | 0.84832   | 2.60721  |
| IQGAP3          | 0.401524 | 0.473517   | 0.449218  | 2.39993   | 0.677165  | 2.34766   | 0.781542  | 0.271879   | 0.54024   | 1.0415   | 1.06626   | 0.965878  | 1.2879    | 2.22645   | 0.999507 |
| IQSEC1          | 6.13808  | 4.86834    | 5.23563   | 4.83935   | 9.618     | 9.21237   | 6.91981   | 3.9218     | 6.70253   | 5.98364  | 7.01316   | 5.25326   | 7.03241   | 4.63922   | 8.87082  |
| IQSEC2          | 1.35198  | 1.73654    | 1.72301   | 1.47541   | 3.30235   | 2.93313   | 2.01394   | 1.27533    | 1.14086   | 1.18406  | 1.51872   | 1.21695   | 1.56025   | 1.20313   | 1.6029   |

|          |           |           |           |           |           |           |           |           |           |           |           |            |           |           |           |
|----------|-----------|-----------|-----------|-----------|-----------|-----------|-----------|-----------|-----------|-----------|-----------|------------|-----------|-----------|-----------|
| IQSEC3   | 0.0344298 | 0.0754035 | 0.134646  | 0.0451575 | 0.373252  | 0.319816  | 0.0643267 | 0.0389433 | 0.0114359 | 0.0864258 | 0.173134  | 0.0492708  | 0.018175  | 0.0245379 | 0.301168  |
| IQUB     | 0.0713663 | 0.0114513 | 0.0688159 | 0.0122489 | 0.0116246 | 0.0507395 | 0.0293939 | 0.0211739 | 0.0149773 | 0.0260044 | 0.0274941 | 0.0233008  | 0         | 0.0035072 | 0.0170662 |
| IRAIN    | 0.811924  | 0.510337  | 0.48025   | 0.238168  | 1.1391    | 0.212337  | 0.661913  | 0.360305  | 0.0310003 | 0.243035  | 0.0602598 | 0.231922   | 0.0607059 | 0.171947  | 0.329464  |
| IRAK1    | 11.3738   | 8.23742   | 7.83303   | 21.8927   | 26.0027   | 39.3042   | 13.2899   | 6.31254   | 23.5603   | 19.0177   | 16.0296   | 14.5702    | 32.4665   | 18.3242   | 10.4149   |
| IRAK1BP1 | 0.745034  | 0.669429  | 0.566371  | 0.636358  | 0.323209  | 0.731545  | 0.636076  | 0.66809   | 0.220711  | 0.446487  | 0.750127  | 0.288158   | 0.38542   | 0.270116  | 0.462687  |
| IRAK2    | 0.733853  | 0.970742  | 1.30801   | 2.90815   | 1.70989   | 3.47085   | 0.868358  | 1.35774   | 2.62438   | 2.67108   | 2.32713   | 1.41775    | 1.683     | 1.21339   | 1.80122   |
| IRAK3    | 3.62857   | 0.654115  | 0.90032   | 3.29595   | 0.388127  | 3.10152   | 1.25209   | 2.54874   | 0.189347  | 2.21266   | 3.27506   | 0.472792   | 2.27489   | 1.60335   | 3.41295   |
| IRAK4    | 2.46569   | 2.40732   | 2.5956    | 2.52182   | 1.46321   | 2.9733    | 1.64683   | 2.37435   | 1.96802   | 2.50605   | 3.11892   | 1.87803    | 1.96235   | 1.94393   | 2.44738   |
| IREB2    | 5.38491   | 4.48897   | 4.7419    | 6.53062   | 1.47442   | 5.8773    | 3.7002    | 4.81566   | 4.4033    | 4.5417    | 4.90335   | 3.35411    | 7.43041   | 4.5371    | 4.13798   |
| IRF1     | 2.63441   | 4.0414    | 4.80706   | 5.39459   | 3.73699   | 8.49897   | 2.53813   | 2.88998   | 0.875056  | 2.04609   | 3.91917   | 1.52948    | 9.08844   | 1.89193   | 4.86221   |
| IRF2     | 4.11027   | 5.05829   | 5.52759   | 7.62644   | 3.39677   | 10.6547   | 3.96475   | 4.59757   | 2.15769   | 3.97711   | 7.15426   | 1.75301    | 4.48737   | 3.21702   | 6.07734   |
| IRF2BP1  | 4.02566   | 4.3098    | 4.60718   | 4.9206    | 9.59018   | 8.70016   | 4.76126   | 2.56694   | 5.25458   | 2.94547   | 3.61724   | 3.39715    | 4.20466   | 2.98144   | 3.2666    |
| IRF2BP2  | 20.9293   | 23.9036   | 26.8229   | 24.6066   | 22.9352   | 27.7686   | 22.446    | 17.6346   | 30.501    | 21.1295   | 21.1781   | 18.8997    | 24.8906   | 17.281    | 14.1841   |
| IRF2BPL  | 8.91873   | 7.89694   | 9.48758   | 13.8267   | 18.5497   | 23.2661   | 9.05802   | 6.19453   | 6.04801   | 6.6381    | 8.7232    | 5.88764    | 10.467    | 8.43518   | 9.1306    |
| IRF3     | 5.29709   | 7.48955   | 7.76676   | 8.71145   | 17.3113   | 9.99971   | 5.07039   | 4.163     | 5.18812   | 5.57524   | 6.29668   | 5.75357    | 7.94385   | 7.33208   | 7.56673   |
| IRF4     | 0.461929  | 0.647274  | 0.834397  | 0.44546   | 0.539797  | 0.757783  | 0.958056  | 0.907672  | 0.103225  | 0.106379  | 0.277474  | 0.124325   | 0.910506  | 0.307871  | 0.517321  |
| IRF5     | 0.887841  | 1.40374   | 1.55058   | 3.53101   | 2.61523   | 2.71595   | 1.41919   | 1.04621   | 1.24949   | 3.16965   | 3.37799   | 1.59054    | 3.03812   | 1.58799   | 1.50173   |
| IRF6     | 17.4976   | 27.1269   | 29.9422   | 34.9947   | 18.2736   | 23.1491   | 19.1221   | 18.596    | 40.948    | 40.2971   | 17.925    | 40.6088    | 51.6199   | 24.674    | 8.41057   |
| IRF7     | 1.62186   | 2.74889   | 2.4265    | 12.719    | 8.48701   | 16.8361   | 2.78423   | 2.19783   | 7.97097   | 5.16838   | 7.0508    | 4.16457    | 11.0727   | 3.70921   | 2.92387   |
| IRF8     | 1.85744   | 0.73616   | 0.935592  | 1.82152   | 1.33791   | 2.53181   | 0.932107  | 1.30461   | 0.17331   | 1.51345   | 2.90004   | 0.187567   | 2.52246   | 0.688939  | 2.52768   |
| IRF9     | 5.75128   | 8.61885   | 6.49215   | 24.0912   | 16.6463   | 31.4732   | 4.77143   | 6.50858   | 10.6326   | 9.55536   | 15.2892   | 6.54287    | 16.1509   | 6.53795   | 8.27938   |
| IRGC     | 0         | 0.0347157 | 0.0119213 | 0         | 0         | 0         | 0.0329066 | 0.0256135 | 0         | 0.0180865 | 0         | 0          | 0         | 0         | 0         |
| IRGM     | 0.078562  | 0.0441611 | 0.02708   | 0.0202401 | 0         | 0.0390218 | 0.0298998 | 0.0756376 | 0.0159466 | 0         | 0.0221717 | 0.00468443 | 0.0211199 | 0.02053   | 0         |
| IRGQ     | 1.98772   | 2.70853   | 2.84209   | 3.28926   | 4.74275   | 4.27197   | 2.44136   | 1.78987   | 2.38881   | 2.79764   | 2.07667   | 2.61204    | 5.50289   | 3.93072   | 3.05704   |
| IRS1     | 1.43055   | 1.02112   | 1.1703    | 1.30223   | 1.64602   | 3.27531   | 1.88743   | 0.932323  | 0.635596  | 1.55608   | 1.9648    | 0.90607    | 3.47143   | 4.57184   | 3.63332   |
| IRS2     | 4.83828   | 2.83149   | 3.39521   | 3.27174   | 4.3665    | 6.5865    | 5.83004   | 3.13305   | 5.91665   | 2.26631   | 2.47518   | 4.0038     | 3.79589   | 2.70154   | 3.47182   |

|          |            |            |           |            |           |            |            |           |            |           |           |            |           |           |           |
|----------|------------|------------|-----------|------------|-----------|------------|------------|-----------|------------|-----------|-----------|------------|-----------|-----------|-----------|
| IRS4     | 0.0238527  | 0.060336   | 0.123329  | 0.0184356  | 0.0185257 | 0.0101551  | 0.0476599  | 0.0264978 | 0.0145249  | 0         | 0         | 0          | 0.0115422 | 0         | 0         |
| IRX1     | 1.71891    | 0.870209   | 1.04074   | 0.231051   | 0.851325  | 1.72878    | 2.51725    | 0.996279  | 0.197208   | 0.297035  | 0.815547  | 0.258463   | 0.908122  | 1.26294   | 0.447206  |
| IRX2     | 3.94423    | 4.34063    | 3.67004   | 4.2987     | 7.14986   | 3.49384    | 3.18091    | 3.66677   | 3.12559    | 2.82202   | 2.02544   | 3.67266    | 3.31166   | 4.34838   | 1.71781   |
| IRX3     | 7.65496    | 10.7775    | 11.8845   | 4.77148    | 10.5718   | 8.70636    | 5.06933    | 7.16961   | 7.85158    | 2.58534   | 3.90711   | 7.23985    | 3.86928   | 2.37282   | 1.67164   |
| IRX4     | 4.92929    | 4.86416    | 4.13061   | 6.76054    | 6.28401   | 5.48506    | 3.34982    | 1.6114    | 2.21934    | 2.16136   | 1.14171   | 3.67698    | 3.3861    | 3.83822   | 1.40011   |
| IRX5     | 5.36026    | 6.18234    | 6.83672   | 4.13203    | 7.74545   | 3.94022    | 4.57769    | 4.0144    | 5.67362    | 3.81154   | 3.65958   | 3.81409    | 3.75775   | 2.03685   | 1.4171    |
| IRX6     | 1.35142    | 0.708587   | 0.739846  | 0.542734   | 0.524805  | 0.761503   | 0.907651   | 1.02441   | 0.0847142  | 0.0623592 | 0.291656  | 0.056881   | 0.121814  | 0.275253  | 0.299684  |
| ISCA1    | 6.02274    | 4.28872    | 4.29389   | 6.87373    | 1.79566   | 8.32731    | 4.05203    | 5.03403   | 10.4464    | 9.05358   | 13.637    | 5.69904    | 10.0913   | 6.56737   | 7.25489   |
| ISCA2    | 2.53127    | 2.142      | 2.30521   | 4.64717    | 2.87461   | 4.81783    | 2.04009    | 2.34411   | 2.38334    | 3.2037    | 5.93109   | 2.14603    | 3.04674   | 2.43468   | 1.31357   |
| ISCU     | 5.62754    | 3.65898    | 3.74354   | 5.90456    | 3.66785   | 9.4328     | 3.82257    | 3.68899   | 3.39785    | 4.56073   | 9.65591   | 2.24461    | 4.14014   | 3.40353   | 5.26739   |
| ISG15    | 2.11053    | 1.35       | 1.29443   | 25.1246    | 11.7004   | 60.6053    | 1.74498    | 1.09953   | 8.5975     | 5.48055   | 20.0872   | 1.11959    | 4.31989   | 1.6736    | 5.95746   |
| ISG20    | 0.381348   | 0.249771   | 0.345054  | 1.13599    | 0.740456  | 1.96857    | 0.346968   | 0.323024  | 0.377357   | 2.39315   | 1.73543   | 0.831384   | 2.15673   | 1.43565   | 2.08797   |
| ISG20L2  | 4.88826    | 5.51669    | 5.55993   | 9.75935    | 6.74135   | 9.66237    | 5.8725     | 4.57715   | 7.2257     | 5.83736   | 6.63774   | 5.59582    | 11.9329   | 7.93299   | 5.72767   |
| ISL1     | 0.00851787 | 0.00820808 | 0         | 0.00877791 | 0.0264624 | 0.0145057  | 0          | 0.0302799 | 0.0207476  | 0.0106908 | 0         | 0          | 0         | 0         | 0         |
| ISL2     | 0.0246203  | 0.00593121 | 0         | 0.0126859  | 0.0191219 | 0.0209638  | 0.0140553  | 0         | 0          | 0         | 0         | 0.00880823 | 0.0158849 | 0.0128676 | 0         |
| ISLR     | 10.8292    | 5.6759     | 8.52525   | 5.39988    | 12.6462   | 14.9304    | 20.6296    | 6.52817   | 0.732708   | 8.51308   | 25.1397   | 1.26366    | 14.2556   | 10.3661   | 24.1644   |
| ISLR2    | 0.249297   | 0.122339   | 0.137491  | 0.0428179  | 0.415929  | 0.0589647  | 0.305723   | 0.0902629 | 0.0393576  | 0.0869147 | 0.072962  | 0.191592   | 0.0744653 | 0.139945  | 0.384542  |
| ISM1     | 3.45539    | 2.98126    | 3.6932    | 0.846513   | 3.53666   | 4.55397    | 3.27241    | 3.08673   | 1.23965    | 0.930129  | 0.503966  | 1.25218    | 2.42526   | 1.24596   | 4.07761   |
| ISM1-AS1 | 0.486756   | 0.511694   | 0.549108  | 0.0684023  | 0.37805   | 0.188394   | 0.78312    | 0.668546  | 0.0269461  | 0         | 0         | 0.158312   | 0.0142751 | 0.358473  | 0.413071  |
| ISM2     | 0.0154803  | 0.00372932 | 0.0128064 | 0          | 0         | 0.0856783  | 0          | 0         | 0.00942663 | 0         | 0         | 0          | 0.0249695 | 0         | 0.0111158 |
| ISOC1    | 4.09179    | 5.38566    | 6.56278   | 4.7945     | 2.03835   | 5.82038    | 3.15998    | 4.58001   | 3.55953    | 2.76994   | 4.95579   | 2.95339    | 5.0337    | 2.97401   | 1.33631   |
| ISOC2    | 5.66203    | 4.83607    | 4.42199   | 11.7513    | 9.65613   | 14.4129    | 7.05242    | 3.3429    | 6.19651    | 7.90155   | 21.3655   | 5.31206    | 10.8316   | 7.09803   | 6.82355   |
| ISPD     | 0.381249   | 0.528869   | 0.700111  | 0.310856   | 0.409992  | 0.288955   | 0.373112   | 0.595731  | 0.229608   | 0.34179   | 0.510783  | 0.203846   | 0.300041  | 0.36567   | 0.397103  |
| ISPD-AS1 | 0.00992412 | 0.0669423  | 0.106729  | 0.0409084  | 0         | 0.033801   | 0.0339931  | 0.105837  | 0          | 0.0373674 | 0.0112031 | 0.0355049  | 0.012806  | 0.0311207 | 0.0285046 |
| IST1     | 9.07952    | 9.79907    | 10.616    | 12.298     | 12.0648   | 14.2332    | 9.55836    | 7.29469   | 10.6666    | 9.7894    | 10.5326   | 7.35798    | 13.5048   | 8.3976    | 9.26917   |
| ISX      | 0.0299102  | 0.0324252  | 0.0185579 | 0.00770584 | 0.104537  | 0.00636704 | 0.00853764 | 0.0132909 | 0.00910683 | 0.0656958 | 0.0253237 | 0.0374528  | 0         | 0.132875  | 0.0536936 |

|            |           |           |            |            |           |            |           |           |           |           |            |            |           |            |           |
|------------|-----------|-----------|------------|------------|-----------|------------|-----------|-----------|-----------|-----------|------------|------------|-----------|------------|-----------|
| ISX-AS1    | 0.193504  | 0.399038  | 0.550675   | 0.00797645 | 0.0480925 | 0.00659064 | 0.0795371 | 0.605335  | 0.0565598 | 0.0971468 | 0.00873767 | 0.0498446  | 0.0249695 | 0.12136    | 0.211201  |
| ISY1       | 2.75675   | 2.21136   | 2.2967     | 2.80879    | 3.19276   | 4.42006    | 1.92612   | 1.85455   | 2.16272   | 2.25796   | 2.67784    | 1.50184    | 2.37642   | 1.96493    | 1.97755   |
| ISY1-RAB43 | 2.29654   | 2.6367    | 2.26124    | 4.55826    | 4.05451   | 6.06549    | 2.26365   | 1.56043   | 2.18124   | 2.80705   | 2.97783    | 1.57493    | 4.52266   | 2.58399    | 3.0843    |
| ISYNA1     | 2.18108   | 1.31777   | 1.60455    | 0.705188   | 3.09357   | 2.86907    | 2.40343   | 0.8944    | 0.392181  | 0.839185  | 2.43363    | 0.459445   | 0.471204  | 1.10589    | 3.76933   |
| ITCH       | 7.02471   | 5.72742   | 6.75689    | 6.32655    | 1.87922   | 6.30885    | 5.48709   | 5.96986   | 7.4686    | 6.72805   | 7.76026    | 4.1871     | 8.56252   | 6.01735    | 6.49372   |
| ITFG1      | 6.0795    | 4.73358   | 5.24964    | 5.283      | 1.73307   | 6.87575    | 3.50569   | 5.11841   | 5.03302   | 5.55204   | 8.33857    | 3.32176    | 4.51583   | 4.45834    | 5.19224   |
| ITFG1-AS1  | 0.0816668 | 0.0262484 | 0          | 0.0290198  | 0.12817   | 0.023227   | 0.061605  | 0.0730589 | 0.0335932 | 0.241482  | 0.0933368  | 0.0597717  | 0.0175287 | 0.0435166  | 0         |
| ITFG2      | 3.07874   | 3.64598   | 3.40215    | 2.55165    | 4.519     | 2.46334    | 3.30782   | 3.18783   | 0.819999  | 1.29426   | 1.43502    | 1.4714     | 1.34428   | 1.72814    | 2.40199   |
| ITFG2-AS1  | 0.126391  | 0.119263  | 0.0759381  | 0.0324012  | 0.230722  | 0.132209   | 0.104192  | 0.1415    | 2.39E-34  | 0.111476  | 0.163887   | 0.0864915  | 0         | 0.145118   | 0.0426132 |
| ITGA1      | 3.5282    | 1.1664    | 1.54167    | 2.53482    | 1.025     | 5.3135     | 2.70506   | 1.32706   | 1.53387   | 6.08426   | 9.19214    | 1.6228     | 4.39885   | 5.07168    | 11.3848   |
| ITGA10     | 0.81697   | 0.241256  | 0.261621   | 0.181056   | 0.450303  | 0.878899   | 0.371109  | 0.320088  | 0.0855893 | 0.479613  | 0.471044   | 0.27971    | 0.297559  | 0.466009   | 1.26789   |
| ITGA11     | 1.66331   | 1.43363   | 1.70854    | 0.442805   | 3.49516   | 2.10475    | 7.07418   | 1.05528   | 0.540192  | 1.20038   | 1.87766    | 0.644659   | 0.959879  | 2.48721    | 13.1844   |
| ITGA2      | 5.69062   | 9.25297   | 7.35323    | 9.82927    | 4.08576   | 7.32432    | 5.22794   | 6.20149   | 4.56459   | 3.89985   | 4.35319    | 3.45006    | 6.79199   | 4.65622    | 2.63455   |
| ITGA2B     | 0.0539622 | 0.0552496 | 0.0111603  | 0.0486584  | 0.0628665 | 0.0574352  | 0.0616123 | 0.0659411 | 0.03286   | 0.101592  | 0.167521   | 0.0627436  | 0.121857  | 0.169218   | 0.261551  |
| ITGA3      | 9.63413   | 12.1517   | 11.59      | 35.0047    | 19.5132   | 43.2514    | 11.2833   | 6.53997   | 10.3338   | 22.9375   | 12.3701    | 13.3134    | 59.5581   | 29.6756    | 13.2219   |
| ITGA4      | 0.552751  | 0.291064  | 0.44728    | 0.70036    | 0.389426  | 1.04994    | 0.304466  | 0.573021  | 0.117716  | 1.23967   | 2.37661    | 0.142642   | 1.25308   | 0.89575    | 2.12987   |
| ITGA5      | 9.70374   | 3.68891   | 4.38771    | 14.3603    | 8.21332   | 35.3224    | 11.1167   | 4.48616   | 2.55992   | 20.0458   | 36.2378    | 3.99376    | 33.6018   | 22.5234    | 31.4611   |
| ITGA6      | 21.4605   | 13.6515   | 12.665     | 48.9403    | 12.0737   | 44.1979    | 14.8227   | 13.3584   | 16.9615   | 49.5749   | 24.4571    | 25.1931    | 109.309   | 53.3381    | 27.6408   |
| ITGA7      | 4.64118   | 1.67273   | 2.19958    | 2.459      | 10.9891   | 9.41764    | 4.27526   | 1.44948   | 0.555665  | 2.55386   | 3.8185     | 1.12573    | 2.61552   | 4.90623    | 16.0194   |
| ITGA8      | 1.53844   | 0.307384  | 0.313366   | 0.45542    | 0.500656  | 1.16849    | 1.60479   | 0.248052  | 0.441096  | 0.433723  | 0.491379   | 0.261528   | 0.263691  | 0.371637   | 1.18821   |
| ITGA9      | 5.56087   | 2.15865   | 2.52246    | 3.03387    | 4.24639   | 4.95386    | 4.99535   | 2.13359   | 0.526435  | 2.66862   | 2.88819    | 1.9853     | 4.80892   | 4.81136    | 9.35349   |
| ITGA9-AS1  | 0.688466  | 0.395505  | 0.284774   | 0.109151   | 0.246791  | 0.157828   | 0.634901  | 0.164729  | 0         | 0.0664689 | 0.089676   | 0.0757871  | 0         | 0.0830359  | 0.152111  |
| ITGAD      | 0         | 0.014241  | 0.00489031 | 0.00609185 | 0.0275472 | 0.0151004  | 0.0134988 | 0         | 0         | 0.0519357 | 0.0467125  | 0.00422975 | 0         | 0.00617909 | 0.0254685 |
| ITGAE      | 0.863144  | 0.65847   | 0.545458   | 1.00068    | 0.418988  | 0.622671   | 0.526974  | 0.367564  | 0.657008  | 0.827547  | 1.88787    | 0.31309    | 0.626508  | 0.64848    | 0.602576  |
| ITGAL      | 0.719749  | 0.496632  | 0.779202   | 1.04849    | 1.68393   | 1.05926    | 0.507276  | 0.560684  | 0.0649314 | 0.423798  | 0.531641   | 0.212994   | 0.931624  | 0.436545   | 2.25872   |
| ITGAM      | 1.05839   | 0.451197  | 0.597164   | 1.84464    | 1.6895    | 2.24263    | 1.58711   | 0.918934  | 0.421745  | 2.77919   | 2.98421    | 0.198923   | 1.82202   | 0.86925    | 2.71775   |

|           |            |           |           |            |           |           |           |            |            |           |            |            |           |           |           |
|-----------|------------|-----------|-----------|------------|-----------|-----------|-----------|------------|------------|-----------|------------|------------|-----------|-----------|-----------|
| ITGAV     | 8.48065    | 10.7017   | 12.6581   | 20.2736    | 9.18917   | 12.4242   | 9.40399   | 11.3422    | 9.75368    | 25.1677   | 33.9551    | 11.383     | 25.875    | 16.5124   | 29.7292   |
| ITGAX     | 0.467487   | 0.270291  | 0.386738  | 3.28103    | 1.15423   | 1.61737   | 0.196649  | 0.393597   | 0.131849   | 5.2004    | 5.8884     | 0.415483   | 3.60361   | 2.50247   | 5.51233   |
| ITGB1     | 28.6123    | 19.8918   | 23.7131   | 66.6723    | 14.3813   | 69.9188   | 19.6677   | 23.6318    | 21.8404    | 85.1907   | 107.576    | 18.0628    | 100.3     | 74.0069   | 102.055   |
| ITGB1BP1  | 5.88734    | 3.85939   | 4.48628   | 6.42598    | 3.18146   | 7.65365   | 3.99531   | 3.33091    | 4.38285    | 9.36664   | 14.481     | 4.41428    | 10.8497   | 6.49198   | 5.56123   |
| ITGB1BP2  | 0.285717   | 0.15487   | 0.280683  | 0.0552074  | 0.249647  | 0.197668  | 0.285444  | 0.285661   | 0.0652445  | 0.24654   | 0.403173   | 0.153328   | 0.0460857 | 0.345321  | 0.076936  |
| ITGB2     | 4.39372    | 2.13771   | 2.66106   | 11.8797    | 7.97131   | 17.2388   | 3.60816   | 4.00343    | 0.595224   | 6.36745   | 10.4097    | 0.817689   | 10.582    | 2.45173   | 11.2095   |
| ITGB2-AS1 | 0.37378    | 0.357043  | 0.403285  | 0.399116   | 0.465313  | 0.2071    | 0.179991  | 0.354116   | 0.0353056  | 0.11079   | 0.436336   | 0.0829702  | 0.0562117 | 0.163214  | 0.596728  |
| ITGB3     | 2.49211    | 1.20302   | 1.86605   | 2.86059    | 1.45442   | 4.31245   | 3.28275   | 1.39107    | 0.143981   | 3.84008   | 5.47175    | 0.646273   | 3.3714    | 3.86544   | 5.29717   |
| ITGB3BP   | 1.69082    | 1.38201   | 1.02409   | 1.55575    | 0.211052  | 1.34973   | 0.603287  | 1.52949    | 0.772209   | 1.78109   | 3.16984    | 0.691328   | 1.0422    | 0.994157  | 0.758821  |
| ITGB4     | 23.9539    | 27.1991   | 29.2407   | 85.9451    | 43.7353   | 79.1692   | 31.9352   | 19.1813    | 18.2258    | 28.2537   | 12.6911    | 24.0297    | 104.463   | 39.6089   | 24.2635   |
| ITGB5     | 16.4676    | 18.2318   | 21.0642   | 15.1963    | 31.2238   | 27.5239   | 19.5475   | 11.7938    | 17.0789    | 22.571    | 21.1909    | 11.6931    | 23.3873   | 12.977    | 25.8042   |
| ITGB6     | 1.85164    | 1.40603   | 0.915001  | 7.69371    | 1.8638    | 1.93402   | 0.479206  | 1.1541     | 3.09097    | 7.42437   | 8.67888    | 5.31377    | 8.04087   | 8.66568   | 4.38943   |
| ITGB7     | 1.21083    | 1.48183   | 1.82975   | 0.665493   | 1.27897   | 1.574     | 2.01844   | 1.4563     | 0.412904   | 0.851043  | 0.473852   | 0.554486   | 0.463525  | 0.548457  | 1.4375    |
| ITGB8     | 5.97232    | 3.50762   | 3.5074    | 4.74965    | 1.88798   | 4.35262   | 2.2757    | 3.89934    | 2.78741    | 2.95202   | 2.66332    | 1.4603     | 2.67078   | 1.99824   | 1.02528   |
| ITGBL1    | 3.23362    | 1.62575   | 2.37785   | 0.32599    | 1.58938   | 1.80234   | 2.6754    | 1.92279    | 0.456602   | 0.499964  | 1.14625    | 0.645501   | 0.229293  | 0.512317  | 5.50763   |
| ITIH1     | 0.106617   | 0.0136986 | 0.0294004 | 0          | 0.0331227 | 0.32682   | 0.016231  | 0.00631684 | 0          | 0         | 0.0320954  | 0          | 0         | 0.0111446 | 0.0816618 |
| ITIH2     | 0.181429   | 0.0454559 | 0.0660399 | 0.0149574  | 0.0112729 | 0.0308968 | 0.0911458 | 0.103193   | 0.00883839 | 0         | 0.00819242 | 0.00519268 | 0         | 0.0189645 | 0.0416887 |
| ITIH3     | 0.853481   | 0.0697606 | 0.100866  | 0.125648   | 0.414297  | 2.33591   | 0.730858  | 0.0812682  | 0.0185615  | 0.0956434 | 0.206459   | 0.0817886  | 0.117999  | 0.274809  | 0.503415  |
| ITIH4     | 1.63401    | 1.20163   | 0.949174  | 0.601666   | 1.79582   | 3.07246   | 1.81807   | 0.914673   | 0.206048   | 0.203496  | 0.230778   | 0.423206   | 0.0272893 | 0.420011  | 0.951635  |
| ITIH4-AS1 | 0.0705721  | 0.147229  | 0.30245   | 0.131504   | 0.273032  | 0.106307  | 0.0746949 | 0.0520699  | 0          | 0.0735365 | 0          | 0.0459975  | 0         | 0         | 3.01E-24  |
| ITIH5     | 3.62139    | 2.2216    | 3.18891   | 1.85683    | 1.39942   | 3.03323   | 4.97784   | 1.91107    | 0.485649   | 1.15298   | 0.880302   | 1.43508    | 1.95724   | 1.4882    | 1.20474   |
| ITIH6     | 0.00931685 | 0.013467  | 0.0154151 | 0.00960128 | 0.0144723 | 0.047599  | 0.0372319 | 0.0207001  | 0          | 0.0116936 | 0.00525878 | 0          | 0         | 0.0292164 | 0         |
| ITK       | 0.906427   | 0.357557  | 0.513063  | 0.524407   | 0.44463   | 0.284351  | 0.260245  | 0.706629   | 0.0322786  | 0.232854  | 0.359033   | 0.109992   | 0.359101  | 0.249336  | 1.26368   |
| ITLN1     | 0          | 0         | 0         | 0          | 0         | 0.0166717 | 0         | 0          | 0          | 0         | 0          | 0          | 0         | 0         | 0         |
| ITLN2     | 0.0201244  | 0.038785  | 0.0166483 | 0.0829551  | 0         | 0.0411268 | 0.0459548 | 0.0357698  | 0.245092   | 0.176807  | 0.136308   | 0.172794   | 0.103873  | 0.0525894 | 0         |
| ITM2A     | 7.62178    | 6.01307   | 6.21132   | 3.73218    | 1.76413   | 5.65178   | 6.52676   | 5.36057    | 3.53474    | 3.81697   | 10.2423    | 1.76069    | 1.79116   | 2.54574   | 5.56355   |

|           |            |            |           |           |           |            |           |            |            |            |            |            |            |            |           |
|-----------|------------|------------|-----------|-----------|-----------|------------|-----------|------------|------------|------------|------------|------------|------------|------------|-----------|
| ITM2B     | 110.332    | 106.178    | 118.902   | 166.683   | 64.0486   | 143.658    | 106.49    | 136.879    | 228.399    | 154.028    | 207.131    | 126.869    | 166.36     | 85.3388    | 76.2192   |
| ITM2C     | 4.23831    | 2.51711    | 3.42216   | 3.98016   | 8.43076   | 13.4574    | 4.68832   | 3.19759    | 1.58444    | 6.86306    | 16.3502    | 1.46905    | 5.58056    | 5.25891    | 10.7868   |
| ITPA      | 4.39708    | 3.751      | 3.47941   | 7.42085   | 7.85306   | 9.93896    | 4.69302   | 3.02048    | 5.80788    | 6.42524    | 12.865     | 4.35456    | 9.03863    | 6.10609    | 3.49295   |
| ITPK1     | 4.24033    | 2.17606    | 2.11521   | 5.13929   | 4.66057   | 9.35589    | 3.29656   | 2.08331    | 2.22664    | 3.05576    | 3.82127    | 1.72589    | 5.08917    | 3.15988    | 2.95708   |
| ITPK1-AS1 | 0.237263   | 0.259595   | 0.204459  | 0.132441  | 0.46069   | 0.235698   | 0.203175  | 0.232824   | 0.0301     | 0.0930593  | 0.00558001 | 0.187452   | 0          | 0.209257   | 0.262654  |
| ITPKA     | 0.0625826  | 0.0542759  | 0.0621273 | 0.0386959 | 0.15554   | 0.234468   | 0.014291  | 0.0556182  | 0.0304874  | 0.0942571  | 0.0847776  | 0.0268677  | 0.0484536  | 0.170084   | 0.107852  |
| ITPKB     | 4.93508    | 5.05599    | 5.22604   | 5.73985   | 12.794    | 7.76152    | 5.8234    | 3.75838    | 8.13276    | 6.53815    | 4.56202    | 5.61119    | 8.45456    | 6.37756    | 7.99355   |
| ITPKB-IT1 | 0.343624   | 0.347683   | 0.28427   | 0.0531171 | 0.800649  | 0.190184   | 0.353105  | 0.259576   | 0.0209247  | 0.25877    | 0.0969771  | 0.356514   | 0          | 0.305308   | 0.444138  |
| ITPKC     | 5.57211    | 7.35253    | 7.88447   | 20.8199   | 17.6825   | 12.8948    | 6.2996    | 4.89734    | 20.3919    | 14.399     | 7.84926    | 19.8909    | 24.8437    | 9.69432    | 3.8293    |
| ITPR1     | 3.81646    | 1.54814    | 2.16655   | 1.10609   | 2.61494   | 5.33533    | 3.14497   | 1.80333    | 0.836599   | 1.63357    | 2.07639    | 0.782542   | 1.44478    | 1.60966    | 4.2219    |
| ITPR1-DT  | 0.048484   | 0.101228   | 0.0133698 | 0.0832737 | 0.0753125 | 0.151373   | 0.0553575 | 0.0574514  | 0          | 0.0608525  | 0.0364883  | 0          | 0.0208544  | 0.0844663  | 0.0464195 |
| ITPR2     | 13.8807    | 13.6355    | 12.2819   | 10.5061   | 7.21383   | 8.61502    | 9.66619   | 11.3079    | 12.3468    | 7.41004    | 5.6682     | 10.8308    | 6.96571    | 6.53947    | 5.46763   |
| ITPR3     | 10.5811    | 12.5866    | 15.1409   | 15.3223   | 14.8      | 19.3743    | 18.2782   | 11.9703    | 9.94034    | 21.9162    | 5.25637    | 16.8235    | 35.6967    | 17.9284    | 11.8246   |
| ITPRID1   | 0.754578   | 0.241103   | 0.313215  | 0.051841  | 0.0863668 | 0.250242   | 0.598553  | 0.45413    | 0.00322453 | 0.00332306 | 0.00298886 | 0.00189446 | 0          | 0.0055351  | 0.0228141 |
| ITPRID2   | 16.7305    | 19.6948    | 23.6498   | 12.2855   | 14.849    | 17.588     | 19.3418   | 16.2734    | 58.9119    | 24.8641    | 16.1277    | 19.4515    | 24.163     | 15.0988    | 11.0858   |
| ITPRIP    | 7.01205    | 6.71071    | 6.30724   | 7.75079   | 8.20044   | 9.31397    | 6.75582   | 6.48939    | 14.5186    | 11.5946    | 8.04319    | 17.1454    | 15.709     | 8.13465    | 7.41506   |
| ITPRIPL1  | 0.416242   | 0.276316   | 0.283128  | 0.362224  | 0.646567  | 0.535575   | 0.158417  | 0.246614   | 0.0901219  | 0.290237   | 0.647397   | 0.13237    | 0.423724   | 0.415755   | 0.345382  |
| ITPRIPL2  | 7.20834    | 10.4829    | 9.57647   | 7.82794   | 13.6994   | 12.5265    | 6.73054   | 6.69727    | 1.99155    | 5.88559    | 8.08312    | 2.84346    | 9.72799    | 7.14221    | 11.1074   |
| ITSN1     | 2.3644     | 1.90575    | 2.1245    | 2.17846   | 2.00953   | 4.02184    | 1.75049   | 1.50685    | 0.868231   | 1.85862    | 1.70897    | 1.03201    | 2.3584     | 1.8385     | 3.2849    |
| ITSN2     | 5.64334    | 5.61483    | 6.32974   | 8.72115   | 3.52723   | 5.04476    | 3.84029   | 5.49894    | 12.7353    | 7.50841    | 6.04542    | 6.85364    | 11.8499    | 6.3882     | 4.24766   |
| IVD       | 1.47104    | 0.821065   | 0.824994  | 1.09069   | 1.81022   | 2.27739    | 0.903049  | 0.838732   | 1.04702    | 0.872798   | 1.71238    | 0.453834   | 0.766679   | 1.14226    | 2.37598   |
| IVL       | 13.0925    | 15.4753    | 12.245    | 94.6783   | 49.2902   | 94.4021    | 10.1621   | 15.3994    | 169.965    | 146.705    | 86.8225    | 171.517    | 257.669    | 175.872    | 34.7646   |
| IVNS1ABP  | 20.7113    | 16.3554    | 14.2508   | 23.054    | 11.2721   | 19.1895    | 10.8794   | 15.3534    | 14.3447    | 16.7624    | 17.4358    | 14.5512    | 13.9712    | 16.9949    | 9.60583   |
| IWS1      | 4.76747    | 5.11444    | 5.62241   | 8.64945   | 6.81836   | 7.08102    | 2.67763   | 3.31139    | 7.57254    | 5.78033    | 5.41671    | 4.91264    | 9.52647    | 6.53161    | 6.32598   |
| IYD       | 0.00611038 | 0.00736018 | 0.0101099 | 0         | 0         | 0.00520291 | 0         | 0.00543039 | 0          | 0          | 0          | 0          | 0.00394238 | 0.00159677 | 0         |
| IZUMO1    | 0.0137103  | 0.0924819  | 0.0567108 | 0.226062  | 0.511125  | 0.0583709  | 0.0469621 | 0.0731076  | 0.217069   | 0.808771   | 0          | 0.245253   | 0.123842   | 0.315287   | 0.433175  |

|             |           |            |           |           |           |           |           |           |           |           |           |            |           |            |           |
|-------------|-----------|------------|-----------|-----------|-----------|-----------|-----------|-----------|-----------|-----------|-----------|------------|-----------|------------|-----------|
| IZUMO1R     | 0         | 0          | 0         | 0         | 0         | 0         | 0         | 0         | 0         | 0         | 0         | 0          | 0         | 0          | 0         |
| IZUMO2      | 0         | 0          | 0.0405626 | 0         | 0         | 0         | 0         | 0         | 0         | 0         | 0         | 0          | 0         | 0          | 0         |
| IZUMO3      | 0         | 0          | 0         | 0         | 0         | 0.0401344 | 0         | 0         | 0         | 0         | 0         | 0          | 0         | 0          | 0         |
| IZUMO4      | 0.364817  | 0.549295   | 0.641329  | 0.399451  | 0.743776  | 1.16489   | 0.572737  | 0.263428  | 1.77722   | 0.85853   | 1.54437   | 0.929941   | 0.1324    | 0.78651    | 0.0654903 |
| JADE1       | 3.00017   | 1.65926    | 1.86527   | 1.11174   | 1.82253   | 1.89081   | 1.87908   | 1.98982   | 1.38419   | 0.96856   | 1.04005   | 0.672371   | 1.61901   | 0.8478     | 1.13841   |
| JADE2       | 3.96607   | 2.59768    | 3.14723   | 2.68962   | 3.31098   | 8.39761   | 3.85773   | 2.77402   | 0.369701  | 1.20511   | 1.65008   | 0.637447   | 2.53758   | 1.59861    | 2.6157    |
| JADE3       | 1.30605   | 1.08226    | 1.16475   | 1.44615   | 0.899267  | 2.10981   | 0.9677    | 1.06193   | 1.41577   | 1.39509   | 1.22341   | 1.09027    | 1.71819   | 1.50802    | 1.09746   |
| JAG1        | 31.0366   | 26.3787    | 21.5307   | 36.0996   | 29.7034   | 42.5305   | 24.1731   | 18.265    | 20.5081   | 40.0153   | 29.3363   | 30.189     | 49.4332   | 31.7071    | 28.0942   |
| JAG2        | 6.0921    | 8.44492    | 7.94692   | 7.07523   | 16.6838   | 10.4253   | 8.11967   | 4.74095   | 3.98512   | 3.63897   | 2.48049   | 4.91817    | 7.5335    | 6.19181    | 7.98022   |
| JAGN1       | 3.94802   | 4.0478     | 4.49773   | 7.46582   | 3.6548    | 7.01765   | 5.20587   | 3.11881   | 6.84806   | 4.43796   | 7.57813   | 4.5845     | 7.39298   | 4.9049     | 3.22627   |
| JAK1        | 17.6148   | 17.3456    | 18.3901   | 21.8356   | 18.3359   | 29.5269   | 16.8512   | 16.6321   | 30.2473   | 20.5401   | 20.8076   | 15.5882    | 27.1649   | 15.8378    | 21.4822   |
| JAK2        | 4.2777    | 4.3862     | 5.38605   | 3.64129   | 2.1154    | 3.66331   | 3.28724   | 4.9829    | 2.27119   | 2.88467   | 3.80873   | 1.93131    | 2.69662   | 2.11604    | 3.55328   |
| JAK3        | 0.570697  | 0.527369   | 0.511186  | 3.0591    | 2.61978   | 5.7225    | 0.583719  | 0.738072  | 0.4357    | 1.27221   | 3.03373   | 0.433083   | 3.07484   | 1.80076    | 5.54143   |
| JAKMIP1     | 0.0202123 | 0.0324619  | 0.016721  | 0.0833173 | 0.104655  | 0.0458946 | 0.0153851 | 0.0119753 | 0         | 0         | 0.0228171 | 0.00482081 | 0.0478165 | 0.0246489  | 0.0967579 |
| JAKMIP2     | 0.0324552 | 0.058941   | 0.0722864 | 0.033446  | 4.01E-35  | 0.0510188 | 0.0443995 | 0.0399371 | 0.0152026 | 0.101635  | 0.137601  | 0.00451231 | 0.0142997 | 0.0247335  | 0.0236873 |
| JAKMIP2-AS1 | 0         | 4.02E-38   | 8.62E-16  | 1.15E-09  | 0.0748941 | 5.48E-08  | 0.0333586 | 1.36E-16  | 0         | 0.0236682 | 0.0296045 | 0.00408818 | 0.0320601 | 0.00657928 | 0.214536  |
| JAKMIP3     | 0.189246  | 0.109418   | 0.0768555 | 0.0354588 | 0.165689  | 0.187509  | 0.212146  | 0.143723  | 0.0167622 | 0.0518232 | 0.0349585 | 0.0541642  | 0.0155401 | 0.102505   | 0.33602   |
| JAM2        | 3.03784   | 1.89108    | 2.09085   | 1.81298   | 1.71663   | 3.46859   | 2.25764   | 1.88059   | 0.506979  | 1.62339   | 3.49648   | 0.773011   | 1.86407   | 1.46597    | 5.90713   |
| JAM3        | 3.8235    | 2.33776    | 3.21527   | 2.61382   | 2.90103   | 7.22058   | 4.21431   | 2.55694   | 0.82221   | 3.06466   | 6.84477   | 1.30472    | 3.3055    | 3.35696    | 7.27607   |
| JAML        | 1.49738   | 0.853881   | 1.10546   | 1.81655   | 1.56045   | 1.5413    | 0.811548  | 1.24652   | 0.219299  | 1.49874   | 4.2045    | 0.454334   | 3.10619   | 0.876705   | 2.28653   |
| JARID2      | 4.69056   | 6.12418    | 5.46263   | 5.37155   | 8.98874   | 7.01943   | 6.62832   | 5.02012   | 12.4061   | 6.86035   | 4.13332   | 7.40342    | 7.09423   | 6.56298    | 3.87143   |
| JARID2-AS1  | 0.940047  | 1.53133    | 1.11096   | 0.64583   | 2.92043   | 0.609857  | 0.766653  | 0.477392  | 0.381624  | 0.955121  | 0.101066  | 2.75457    | 0.0577632 | 1.52072    | 0.83573   |
| JAZF1       | 3.10359   | 1.4849     | 1.90319   | 1.752     | 0.797871  | 3.02459   | 2.668     | 2.73892   | 0.616753  | 1.91588   | 2.94005   | 0.973173   | 1.58233   | 1.55779    | 3.17922   |
| JAZF1-AS1   | 0         | 0.00933892 | 0         | 0         | 0         | 0.0330084 | 0.0442613 | 0.0172258 | 0         | 0         | 0         | 0          | 0         | 0          | 0         |
| JCAD        | 4.45198   | 1.60705    | 1.80565   | 2.90153   | 3.6895    | 6.516     | 2.918     | 1.95047   | 1.1313    | 3.41302   | 4.26785   | 1.29315    | 3.84279   | 2.82109    | 7.76915   |
| JCHAIN      | 5.96233   | 4.52675    | 6.78044   | 0.236972  | 2.3728    | 0.419574  | 0.618873  | 8.90436   | 0.120024  | 0.597843  | 1.8542    | 0.129279   | 6.52802   | 0.0429225  | 1.69838   |

|               |          |            |          |           |           |          |          |          |           |           |           |           |           |           |           |
|---------------|----------|------------|----------|-----------|-----------|----------|----------|----------|-----------|-----------|-----------|-----------|-----------|-----------|-----------|
| JDP2          | 2.46376  | 2.65592    | 3.43133  | 2.44969   | 4.2308    | 3.32892  | 3.09126  | 2.12221  | 0.962821  | 2.01167   | 4.93295   | 1.67378   | 1.96691   | 2.11687   | 2.83061   |
| JHY           | 0.539876 | 0.676845   | 0.665378 | 0.959434  | 0.607567  | 0.539441 | 0.616413 | 0.528756 | 1.11374   | 1.96366   | 1.6791    | 1.28108   | 2.69419   | 1.14305   | 0.830711  |
| JKAMP         | 3.37179  | 2.44246    | 2.60901  | 4.41363   | 0.822524  | 3.52746  | 2.30276  | 2.74036  | 2.59854   | 5.56115   | 8.26308   | 2.45718   | 5.8682    | 3.5367    | 2.52739   |
| JMJD1C        | 7.3879   | 6.5591     | 7.38903  | 7.48081   | 1.7299    | 5.20621  | 4.82223  | 6.2818   | 11.9685   | 10.4814   | 9.37445   | 8.52252   | 10.5787   | 9.8829    | 9.50471   |
| JMJD1C-AS1    | 1.28467  | 1.3264     | 1.28617  | 0.910219  | 4.57473   | 0.475909 | 1.22396  | 0.844387 | 0.271778  | 0.909789  | 0.477687  | 0.962697  | 0.25392   | 2.26027   | 1.25087   |
| JMJD4         | 2.07243  | 2.84182    | 2.73737  | 3.81744   | 7.05575   | 5.0846   | 2.51549  | 1.61904  | 2.15043   | 2.17423   | 4.32776   | 2.11965   | 2.78413   | 2.40687   | 2.00429   |
| JMJD6         | 1.13021  | 1.03055    | 1.0791   | 1.55296   | 1.11377   | 1.66602  | 1.0083   | 0.871235 | 1.38634   | 1.70834   | 1.76976   | 1.25218   | 2.86458   | 2.19979   | 1.49514   |
| JMJD7         | 4.30726  | 10.0124    | 10.0415  | 5.49271   | 15.8294   | 6.0543   | 7.08015  | 5.90531  | 8.45328   | 5.88497   | 8.2293    | 6.318     | 6.07155   | 5.92204   | 3.25854   |
| JMJD7-PLA2G4B | 1.84027  | 3.10649    | 3.24642  | 1.43365   | 4.49985   | 3.98856  | 3.00045  | 1.95139  | 2.3924    | 1.63314   | 2.68955   | 2.48365   | 2.03554   | 2.35374   | 0.4908    |
| JMJD8         | 8.28201  | 8.49285    | 9.67784  | 11.1862   | 18.428    | 15.5912  | 11.9613  | 5.83945  | 16.4358   | 8.83978   | 17.2376   | 9.48186   | 15.247    | 8.03304   | 8.53735   |
| JMY           | 4.53025  | 4.15295    | 3.52543  | 7.01458   | 4.92238   | 4.21578  | 3.64998  | 4.85296  | 26.6203   | 6.37957   | 7.71549   | 8.4185    | 4.57326   | 3.97488   | 2.37741   |
| JOSD1         | 5.43086  | 5.98541    | 6.95369  | 9.29946   | 4.86763   | 11.1193  | 5.53496  | 4.06223  | 6.19097   | 7.57773   | 9.80781   | 4.49706   | 9.64182   | 6.89897   | 6.79278   |
| JOSD2         | 3.02349  | 3.06349    | 2.92425  | 9.48482   | 13.5716   | 9.65424  | 3.42674  | 1.83745  | 8.71832   | 8.28716   | 18.0194   | 5.86978   | 6.61244   | 5.03112   | 3.19273   |
| JPH1          | 0.36202  | 0.187066   | 0.117191 | 0.162205  | 0.179298  | 0.518226 | 0.179714 | 0.172524 | 1.59107   | 0.289745  | 0.242836  | 0.326609  | 0.494228  | 0.422289  | 0.331535  |
| JPH2          | 1.05957  | 1.19559    | 1.82722  | 0.124447  | 0.605103  | 1.64521  | 1.72127  | 0.36697  | 0.260934  | 0.288465  | 0.334211  | 0.320542  | 0.241281  | 0.806235  | 0.827971  |
| JPH3          | 0.099369 | 0.143633   | 0.1603   | 0.0716819 | 0.239249  | 0.126917 | 0.272295 | 0.203115 | 0.0242041 | 0.0561233 | 0.0280438 | 0.110207  | 0.0128225 | 0.0830954 | 0.156977  |
| JPH4          | 0.173415 | 0.202555   | 0.265186 | 0.0595698 | 0.359165  | 0.264    | 0.432    | 0.186808 | 0.2752    | 0.0725513 | 0.0830515 | 0.0639217 | 0.0440765 | 0.0604229 | 0.218859  |
| JPT1          | 2.06366  | 2.7262     | 2.36526  | 12.1183   | 3.97491   | 9.58448  | 2.7932   | 2.18081  | 7.31146   | 9.21132   | 14.1725   | 6.47023   | 13.3439   | 9.18521   | 4.44014   |
| JPT2          | 5.78733  | 7.64471    | 7.03858  | 18.2547   | 7.71106   | 12.2848  | 6.69389  | 6.25461  | 9.74214   | 12.6267   | 13.1373   | 8.72711   | 25.0025   | 10.4535   | 5.94699   |
| JPX           | 1.58378  | 1.42217    | 1.46106  | 0.367772  | 0.455903  | 0.620811 | 0.893271 | 1.06744  | 0.421941  | 0.706354  | 0.672696  | 0.742395  | 0.187953  | 0.710781  | 1.40164   |
| JRK           | 2.07671  | 2.733      | 2.813    | 1.53649   | 4.13178   | 2.78739  | 2.70407  | 1.83885  | 0.747335  | 1.01841   | 0.615427  | 1.13033   | 1.20737   | 1.69897   | 1.76979   |
| JRKL          | 1.43266  | 1.53673    | 1.30319  | 1.87723   | 1.02712   | 2.21348  | 0.740168 | 1.1004   | 0.821094  | 1.61101   | 1.65389   | 0.751438  | 1.43881   | 1.32814   | 1.6013    |
| JRKL-AS1      | 0        | 0          | 0        | 0.0368049 | 0         | 0        | 0        | 0        | 0         | 0         | 0         | 0         | 0         | 0         | 0         |
| JSRP1         | 0        | 0.00973858 | 0.033442 | 0         | 0.0941899 | 0        | 0.115389 | 0        | 0         | 0.0253685 | 0.0456343 | 0         | 0.091286  | 0         | 0.0870821 |
| JTB           | 12.7184  | 11.2003    | 11.3487  | 20.2888   | 20.2128   | 22.4603  | 14.1689  | 8.20614  | 18.8203   | 18.8417   | 38.3087   | 11.1519   | 22.0467   | 15.3      | 14.1899   |
| JUN           | 20.6985  | 11.2144    | 13.3495  | 26.8783   | 28.4845   | 25.2211  | 15.5141  | 10.7387  | 48.025    | 44.8859   | 27.2184   | 59.8045   | 48.799    | 28.0313   | 15.773    |



|            |          |            |          |          |          |           |          |           |          |          |          |           |           |            |          |
|------------|----------|------------|----------|----------|----------|-----------|----------|-----------|----------|----------|----------|-----------|-----------|------------|----------|
| JUNB       | 34.396   | 39.8563    | 43.6363  | 113.89   | 102.997  | 122.707   | 42.9244  | 32.7428   | 198.432  | 132.167  | 198.863  | 174.029   | 199.778   | 100.881    | 58.1087  |
| JUND       | 21.575   | 26.6185    | 37.2183  | 22.0272  | 45.1974  | 30.5177   | 31.6469  | 18.2101   | 48.5459  | 34.5071  | 48.2319  | 26.6571   | 39.0752   | 26.0335    | 23.2468  |
| JUP        | 135.116  | 196.5      | 171.94   | 307.409  | 445.413  | 310.569   | 294.381  | 150.176   | 735.876  | 551.486  | 393.552  | 604.912   | 883.484   | 290.456    | 129.037  |
| KAAG1      | 4.47E-30 | 0.00806851 | 0        | 0        | 0        | 0         | 0        | 0         | 0        | 5.29E-08 | 0        | 0.133052  | 3.17E-22  | 0.00875222 | 0        |
| KALRN      | 1.17592  | 0.681392   | 0.69828  | 0.560007 | 0.676328 | 1.29427   | 0.634441 | 0.815461  | 0.396007 | 0.965761 | 0.789438 | 0.541013  | 1.28316   | 0.987061   | 1.2154   |
| KANK1      | 7.58804  | 7.63323    | 7.63964  | 8.98555  | 10.4434  | 6.86208   | 9.0864   | 5.92231   | 25.5557  | 16.1106  | 8.88698  | 14.5633   | 11.7096   | 14.6775    | 4.68303  |
| KANK2      | 10.6759  | 4.22833    | 5.97718  | 3.81287  | 12.4582  | 20.22     | 12.8828  | 4.23154   | 2.10674  | 6.26662  | 7.10583  | 2.20355   | 6.37797   | 5.43603    | 13.8956  |
| KANK3      | 2.90638  | 1.22029    | 1.27088  | 1.74572  | 4.35982  | 4.23534   | 2.07637  | 0.92248   | 0.536002 | 1.37574  | 1.32175  | 0.915019  | 1.90197   | 2.66476    | 3.51802  |
| KANK4      | 0.118271 | 0.103793   | 0.13628  | 0        | 0.118103 | 0.0539496 | 0.22667  | 0.0863397 | 0.051443 | 0.583165 | 0.319477 | 0.0664918 | 0.106286  | 0.172195   | 0.127389 |
| KANSL1     | 4.26225  | 4.34904    | 4.18887  | 3.89229  | 3.7306   | 5.09763   | 4.17335  | 3.57326   | 3.06078  | 4.20396  | 4.81388  | 4.02945   | 3.16172   | 3.33492    | 3.31566  |
| KANSL1-AS1 | 0.332515 | 0.395187   | 0.660192 | 0.548266 | 0.482077 | 0.58514   | 0.430276 | 0.25611   | 0.350971 | 0.695568 | 1.97694  | 0.396539  | 0.0858148 | 0.312816   | 0.127342 |
| KANSL1L    | 2.53007  | 2.41787    | 2.65953  | 1.78617  | 0.697306 | 1.84371   | 1.54822  | 2.66365   | 1.02043  | 1.268    | 1.84061  | 1.00873   | 0.920393  | 1.20467    | 2.05643  |
| KANSL2     | 5.19894  | 3.80413    | 4.02811  | 4.85788  | 3.70641  | 4.76545   | 4.49629  | 3.83596   | 3.3785   | 4.28521  | 5.64997  | 3.41461   | 4.7624    | 3.68545    | 4.06748  |
| KANSL3     | 5.32565  | 4.70314    | 4.6502   | 4.08683  | 5.12059  | 7.04153   | 4.88566  | 3.64466   | 3.63322  | 3.35552  | 3.0301   | 3.20949   | 3.273     | 3.86812    | 4.60637  |
| KANTR      | 2.80731  | 3.42738    | 3.1399   | 0.847706 | 2.06244  | 0.825002  | 2.0234   | 2.26184   | 0.487466 | 0.533543 | 0.405096 | 0.908559  | 0.213718  | 0.770401   | 1.05846  |
| KARS       | 16.8426  | 12.5639    | 12.5107  | 32.7342  | 12.1141  | 34.6038   | 14.9529  | 11.7329   | 18.5463  | 23.6827  | 26.996   | 13.7882   | 34.2536   | 20.1261    | 14.2918  |
| KAT14      | 3.06312  | 3.07001    | 3.5671   | 2.90198  | 2.43779  | 3.61092   | 2.80844  | 2.18961   | 1.9847   | 1.37639  | 1.64435  | 1.57604   | 1.75246   | 1.61297    | 1.67221  |
| KAT2A      | 5.60728  | 7.78612    | 7.81326  | 7.62543  | 13.7697  | 8.13696   | 7.59944  | 5.34679   | 2.01067  | 2.34279  | 3.30768  | 4.56024   | 3.50263   | 4.91674    | 4.2827   |
| KAT2B      | 4.03468  | 4.30401    | 4.0085   | 4.32595  | 3.59193  | 4.35869   | 3.7193   | 3.22755   | 14.233   | 9.89907  | 8.12364  | 6.18577   | 13.0405   | 4.94955    | 3.24509  |
| KAT5       | 6.27366  | 6.86919    | 7.68666  | 7.85838  | 8.55799  | 11.4996   | 8.33165  | 4.65939   | 11.369   | 7.00802  | 7.86681  | 5.73699   | 8.4762    | 5.83406    | 5.78471  |
| KAT6A      | 8.09177  | 9.73539    | 10.9964  | 7.12905  | 5.03273  | 7.34609   | 8.08202  | 8.45815   | 7.68461  | 4.76804  | 4.16231  | 5.09322   | 6.85883   | 4.99349    | 5.90738  |
| KAT6B      | 4.50663  | 3.66184    | 3.28664  | 2.84264  | 2.45329  | 4.3381    | 2.94429  | 3.28879   | 3.05769  | 1.87631  | 2.00422  | 2.38681   | 2.02393   | 2.20737    | 2.77262  |
| KAT7       | 11.4065  | 10.5086    | 11.0221  | 9.30169  | 6.41879  | 13.1444   | 12.7553  | 10.2614   | 10.3127  | 5.22619  | 7.54539  | 6.43579   | 6.13896   | 5.1753     | 6.99181  |
| KAT8       | 5.4081   | 5.35208    | 6.00724  | 6.75063  | 8.47948  | 8.65853   | 6.4067   | 4.21958   | 4.79296  | 3.04331  | 5.86144  | 3.55171   | 4.09539   | 3.62271    | 4.44851  |
| KATNA1     | 3.43766  | 3.02069    | 2.84387  | 4.19108  | 1.79203  | 4.59409   | 2.20865  | 2.22661   | 4.3428   | 3.89048  | 4.60422  | 2.6265    | 4.40585   | 3.43501    | 2.94541  |
| KATNAL1    | 1.60544  | 1.12248    | 1.21829  | 1.08534  | 0.520323 | 1.34645   | 1.03711  | 1.2015    | 0.407955 | 1.36731  | 1.64541  | 0.71688   | 1.39797   | 1.1624     | 1.76388  |

|             |           |            |            |            |            |           |           |           |            |           |            |            |            |            |           |
|-------------|-----------|------------|------------|------------|------------|-----------|-----------|-----------|------------|-----------|------------|------------|------------|------------|-----------|
| KATNAL2     | 0.994545  | 1.03744    | 1.05724    | 0.44071    | 0.556154   | 0.804499  | 0.772167  | 1.04738   | 0.187743   | 0.280857  | 0.308747   | 0.231278   | 0.0834178  | 0.486006   | 0.642731  |
| KATNB1      | 6.40239   | 5.66805    | 5.32545    | 6.11112    | 10.5701    | 10.2775   | 7.85929   | 3.99537   | 12.6335    | 4.08369   | 5.2034     | 5.82648    | 5.24249    | 3.97243    | 2.37402   |
| KATNBL1     | 2.71128   | 2.78767    | 2.781      | 4.96141    | 0.419844   | 1.91306   | 1.9384    | 3.41543   | 6.64523    | 11.693    | 10.6409    | 4.39974    | 11.831     | 6.26409    | 3.63458   |
| KATNBL1P6   | 0         | 0          | 0          | 0          | 0          | 0         | 0         | 3.56E-36  | 0          | 0         | 0          | 0          | 0          | 0          | 0.0518888 |
| KAZALD1     | 0.342814  | 0.441462   | 0.438291   | 0.160582   | 1.80085    | 0.965929  | 0.604912  | 0.25481   | 2.59615    | 0.907472  | 1.30171    | 0.584243   | 0.430299   | 0.325763   | 0.680302  |
| KAZN        | 2.30644   | 2.59962    | 2.69405    | 3.63159    | 4.14089    | 4.29099   | 3.18774   | 2.47789   | 3.735      | 2.37513   | 2.04118    | 2.43514    | 5.37855    | 2.18801    | 2.22754   |
| KAZN-AS1    | 0.538211  | 0.250376   | 0.245653   | 0.439888   | 1.26845    | 0.34766   | 0.233091  | 0.461823  | 0.090411   | 0.209641  | 0.104754   | 0.411663   | 0.203561   | 0.387989   | 0.373143  |
| KBTBD11     | 0.840688  | 0.351934   | 0.470302   | 0.482886   | 0.877722   | 1.04735   | 0.448464  | 0.45318   | 0.474167   | 0.640009  | 1.03071    | 0.532506   | 0.511286   | 0.56003    | 0.75211   |
| KBTBD11-OT1 | 0.0296326 | 0.0142774  | 0.0245142  | 0.0305372  | 0.0460296  | 0.100927  | 0         | 0         | 0          | 0         | 0.066903   | 0.0212029  | 0          | 0.0154873  | 0         |
| KBTBD12     | 0.224387  | 0.167789   | 0.156592   | 0.0543581  | 0.130051   | 0.149944  | 0.180734  | 0.125237  | 0.00548363 | 0.0220554 | 0.00495931 | 0.0540887  | 0.00850329 | 0.0757695  | 0.0821237 |
| KBTBD13     | 0.155621  | 0.0464165  | 0.061305   | 0          | 0.0115111  | 0.119889  | 0.0592276 | 0.0197576 | 0.0180504  | 0         | 0.0501933  | 0.0106048  | 0.00478123 | 0.0154922  | 0.0638546 |
| KBTBD2      | 4.87813   | 4.23786    | 4.32968    | 6.31275    | 2.15114    | 6.69792   | 3.17658   | 3.9583    | 3.36556    | 5.50404   | 6.90815    | 2.80306    | 7.28075    | 5.55223    | 5.60807   |
| KBTBD3      | 0.344602  | 0.358424   | 0.217203   | 0.219838   | 0.127449   | 0.288767  | 0.156133  | 0.272226  | 0.193189   | 0.26088   | 0.524859   | 0.215261   | 0.158811   | 0.168669   | 0.204241  |
| KBTBD4      | 2.64049   | 2.27662    | 2.59636    | 1.87772    | 1.48783    | 3.36057   | 2.68485   | 1.92613   | 2.12403    | 1.80103   | 2.92694    | 1.46503    | 1.75362    | 1.73145    | 2.0447    |
| KBTBD6      | 1.09267   | 0.963269   | 1.13662    | 1.16679    | 0.918424   | 1.32565   | 0.867727  | 0.904192  | 0.477974   | 0.978771  | 1.47506    | 1.16732    | 1.08129    | 1.25609    | 0.945452  |
| KBTBD7      | 1.12119   | 1.14387    | 1.20341    | 1.00012    | 0.911295   | 1.37417   | 1.05295   | 1.3947    | 0.535967   | 0.579814  | 1.23082    | 0.838127   | 0.922154   | 0.650026   | 0.743516  |
| KBTBD8      | 0.197719  | 0.181002   | 0.106319   | 0.315821   | 0.0921379  | 0.210444  | 0.124162  | 0.267968  | 0.4214     | 0.434277  | 0.580321   | 0.254652   | 0.794108   | 0.576102   | 0.262654  |
| KC6         | 0.0516586 | 0.00622247 | 0          | 0.0133089  | 0          | 0.0109967 | 0.0147455 | 0.160685  | 0.0314572  | 0         | 0.0291581  | 0.00924078 | 0.0666597  | 0.00674976 | 0         |
| KCCAT198    | 0.463704  | 0.22342    | 0.244115   | 0.217209   | 0.130962   | 0.179472  | 0.385049  | 0.149855  | 0.05134    | 0.211635  | 0.0475877  | 0.392119   | 0          | 0.5508     | 0.544858  |
| KCCAT333    | 0.0503475 | 0.0404303  | 0.041651   | 0.0172948  | 0          | 0.0285801 | 0         | 0.0596595 | 0          | 0         | 0.0757814  | 0.0120083  | 0          | 0.0263138  | 0.0723053 |
| KCMF1       | 3.38275   | 2.91131    | 2.85168    | 3.9944     | 1.73725    | 3.83788   | 2.26351   | 3.06349   | 6.39243    | 5.68786   | 6.09817    | 3.16149    | 6.86589    | 3.8162     | 2.00219   |
| KCNA1       | 0.0347885 | 0.013968   | 0.0263812  | 0.00597509 | 0.0540386  | 0.029622  | 0.0695107 | 0.0128821 | 0          | 0         | 0.00327266 | 0.00829737 | 0.0112227  | 0.00606066 | 0.566221  |
| KCNA10      | 0         | 0          | 0.00977313 | 0          | 0          | 0         | 0.0134885 | 0         | 0          | 0.0296548 | 0          | 0          | 0          | 0          | 0         |
| KCNA2       | 0.114895  | 0.0711745  | 0.108627   | 0.0507438  | 0.0382438  | 0.0698794 | 0.168664  | 0.0218804 | 0          | 0.0412013 | 0.0741152  | 0.0117443  | 0          | 0          | 0.0117859 |
| KCNA3       | 0.266631  | 0.122291   | 0.212092   | 0.1823     | 0.254874   | 0.227033  | 0.0790349 | 0.275693  | 0.0405908  | 0.1448    | 0.133132   | 0.0550331  | 0.26466    | 0.147393   | 0.460235  |
| KCNA4       | 0         | 0.0373557  | 0.0412324  | 0          | 0.00860233 | 0         | 0.0379382 | 0.02953   | 0.00674459 | 0         | 0          | 0          | 0          | 0          | 0         |

|            |           |            |           |           |           |            |           |           |            |            |            |            |             |            |           |
|------------|-----------|------------|-----------|-----------|-----------|------------|-----------|-----------|------------|------------|------------|------------|-------------|------------|-----------|
| KCNA5      | 0.171327  | 0.0202519  | 0         | 0.0332398 | 0.0512441 | 0.598896   | 0.151285  | 0.0586917 | 0          | 0.0303626  | 0.126305   | 0          | 0.0218686   | 0.0168579  | 0.602192  |
| KCNA6      | 0.37844   | 0.646858   | 0.976814  | 0.099739  | 0.0896559 | 0.20364    | 1.22249   | 0.250507  | 0.00471489 | 0.0242948  | 0.018027   | 0.00277007 | 0.0144789   | 0.00607004 | 0.111196  |
| KCNA7      | 0.154708  | 0.310848   | 0.38938   | 0.217641  | 0.46955   | 0.135269   | 0.246996  | 0.23522   | 0.0645139  | 0.22035    | 0.0299253  | 0.15908    | 0.112706    | 0.213537   | 0.243373  |
| KCNAB1     | 1.59337   | 0.450977   | 0.662676  | 0.237778  | 0.175824  | 0.863714   | 1.41167   | 1.42379   | 0.159061   | 0.355164   | 0.584829   | 0.161981   | 0.26684     | 0.307167   | 1.05036   |
| KCNAB1-AS1 | 0         | 0          | 0         | 0         | 0         | 0          | 0         | 0         | 0          | 0          | 0          | 0          | 0           | 0          | 0         |
| KCNAB1-AS2 | 0.559219  | 0          | 0.0355866 | 0         | 0.06682   | 0.0366283  | 0.196461  | 0.0382298 | 0          | 0          | 0          | 0          | 0           | 0          | 0         |
| KCNAB2     | 1.12942   | 1.19679    | 1.22033   | 1.30068   | 1.75438   | 3.52003    | 1.58323   | 1.15019   | 0.353378   | 0.978905   | 1.57897    | 0.374076   | 1.10326     | 0.668548   | 1.95101   |
| KCNAB3     | 0.263631  | 0.390138   | 0.280407  | 0.281382  | 0.292507  | 0.793692   | 0.279505  | 0.401646  | 0.0917352  | 0.236346   | 0.372008   | 0.161687   | 0.200467    | 0.393672   | 0.419173  |
| KCNB1      | 0.212931  | 0.0997697  | 0.129285  | 0.106696  | 0.0971025 | 0.206259   | 0.25427   | 0.130208  | 0          | 0.0269702  | 0.0617471  | 0.00139778 | 0.0415927   | 0.0112308  | 0.216021  |
| KCNB2      | 0.0387656 | 0.0155649  | 0.0160348 | 0         | 0.0501803 | 0          | 0.199176  | 0.0114839 | 0          | 0          | 0          | 0.0184919  | 0.00833712  | 0          | 0.111345  |
| KCNC1      | 0.0470275 | 0.0626442  | 0.027462  | 0.0114031 | 0.507052  | 0.103641   | 0.0410605 | 0.051628  | 0.0235835  | 0.0694404  | 0.056211   | 0.0692782  | 0.0321267   | 0.0346992  | 0.115211  |
| KCNC2      | 0.0076166 | 0.00550469 | 0.0031505 | 0.0117737 | 0         | 0.00972816 | 0.0347856 | 0         | 0          | 0          | 0          | 0          | 0           | 0          | 0         |
| KCNC3      | 0.583004  | 1.21249    | 0.732611  | 0.448701  | 1.38134   | 0.612671   | 0.914223  | 0.695206  | 0.858332   | 0.324184   | 0.416544   | 1.0112     | 0.361867    | 0.464769   | 1.01214   |
| KCNC4      | 1.64302   | 2.73178    | 2.21359   | 2.77357   | 5.6391    | 2.48713    | 3.22184   | 1.91909   | 0.730527   | 0.77249    | 0.535819   | 0.918105   | 0.98603     | 1.36849    | 1.42324   |
| KCND1      | 0.264772  | 0.177182   | 0.202813  | 0.161692  | 0.601691  | 0.501      | 0.391881  | 0.326816  | 0.0418007  | 0.160004   | 0.531369   | 0.129809   | 0.0569432   | 0.271638   | 0.450662  |
| KCND2      | 0.42962   | 0.146362   | 0.233351  | 0.0313045 | 0.235931  | 0.421242   | 0.232876  | 0.246827  | 0          | 0.250545   | 0.553571   | 0.00931528 | 0.131595    | 0.154228   | 0.947295  |
| KCND3      | 2.80156   | 3.99572    | 4.90547   | 3.0288    | 3.23049   | 6.31497    | 3.14968   | 3.42158   | 2.03045    | 1.18647    | 1.29997    | 1.45118    | 2.67252     | 1.12736    | 1.01202   |
| KCND3-AS1  | 0.154976  | 0.348459   | 0.427356  | 0         | 0.0802436 | 0.175946   | 0.294911  | 0.321369  | 0          | 0.194511   | 0          | 0.0739262  | 0           | 0.0809971  | 0.148377  |
| KCND3-IT1  | 0.307753  | 0.415185   | 0.203676  | 0.12686   | 0         | 0.262048   | 0.21083   | 0.164103  | 0          | 0.154505   | 0.069483   | 0.0880823  | 0           | 0.193014   | 0.0883945 |
| KCNE1      | 0.106315  | 0.0674001  | 0.0740641 | 0.0518969 | 0.0608344 | 0.171498   | 0.121387  | 0.0596739 | 0.0545177  | 0.113864   | 0.067951   | 0.0120112  | 0.115361    | 0.0438669  | 0.13661   |
| KCNE1B     | 1.28E-10  | 5.01E-15   | 6.36E-11  | 1.62E-07  | 1.02E-05  | 3.10E-05   | 5.64E-11  | 9.91E-10  | 5.66E-22   | 0.00709403 | 0.00196658 | 3.23E-25   | 0.000211989 | 1.81E-25   | 0         |
| KCNE2      | 0.0576415 | 0.0555451  | 0.0476851 | 0.0297006 | 0.0447686 | 0.0736214  | 0         | 0.0512269 | 0.0702008  | 0          | 0.06507    | 0.020622   | 0           | 0          | 0.0413902 |
| KCNE3      | 0.43723   | 0.315996   | 0.380417  | 0.706942  | 0.608911  | 1.29662    | 0.370108  | 0.361776  | 0.036724   | 0.766384   | 1.97431    | 0.0701215  | 0.627427    | 0.374293   | 0.931051  |
| KCNE4      | 1.54433   | 0.315883   | 0.397736  | 0.795737  | 0.961812  | 5.74991    | 0.682017  | 0.7445    | 0.141948   | 1.77372    | 3.77452    | 0.151157   | 0.864793    | 1.61807    | 3.65108   |
| KCNE5      | 0.0472629 | 0.0759066  | 0.0521322 | 0.064941  | 0.0244719 | 0.362193   | 0.0359755 | 0.0140011 | 0          | 0.0593198  | 0.0355693  | 0.0225452  | 0.0813167   | 0.065871   | 0.0905006 |

|            |           |            |            |           |           |            |            |            |            |            |            |            |            |            |            |
|------------|-----------|------------|------------|-----------|-----------|------------|------------|------------|------------|------------|------------|------------|------------|------------|------------|
| KCNF1      | 0.0505528 | 0.00487142 | 0.00836416 | 0.0312576 | 0.0785259 | 0.068872   | 0.0115439  | 0          | 0          | 0.0380693  | 0.0228271  | 0.0289375  | 0.0978491  | 0.0158526  | 0          |
| KCNG1      | 0.26062   | 0.386758   | 0.068993   | 0.429722  | 0.323866  | 1.41138    | 0.154735   | 0.0833822  | 1.18075    | 0.719631   | 0.364817   | 0.537064   | 0.564986   | 0.294217   | 0.359312   |
| KCNG2      | 0.181708  | 0.159182   | 0.136656   | 0.153209  | 0.564512  | 0.436036   | 0.150886   | 0.205529   | 0.0402365  | 0.145131   | 0.0932392  | 0.141837   | 0.127895   | 0.172671   | 0.640529   |
| KCNG3      | 0.344967  | 0.174958   | 0.280374   | 0.13721   | 0.244424  | 0.252509   | 0.276401   | 0.145221   | 0.30957    | 0.144323   | 0.150304   | 0.129912   | 0.117143   | 0.139175   | 0.017383   |
| KCNG4      | 0         | 0          | 0          | 0         | 0         | 0          | 0.00956351 | 0          | 0          | 0          | 0          | 0          | 0          | 0          | 0          |
| KCNH1      | 0.268375  | 0.383795   | 0.264533   | 0.297164  | 0.37253   | 0.488639   | 0.198848   | 0.284181   | 0.0660655  | 0.0860012  | 0.141812   | 0.165472   | 0.0994715  | 0.204428   | 1.43917    |
| KCNH1-IT1  | 0         | 0.0357776  | 0          | 0.0510152 | 0.0768966 | 0.0421519  | 0          | 0          | 0          | 0.0310662  | 0.0279418  | 0          | 0.0159698  | 0.0517458  | 0.319922   |
| KCNH2      | 0.0720044 | 0.0183668  | 0.0175197  | 0.0218243 | 0.138165  | 0.1659     | 0.285325   | 0.018821   | 0.0206337  | 0.0478445  | 0.081284   | 0.0060613  | 0.021862   | 0.0309916  | 0.0608279  |
| KCNH3      | 0.101636  | 0.0950587  | 0.0890261  | 0.0123222 | 0.213596  | 0.0967228  | 0.191132   | 0.0903254  | 0.0582498  | 0.0750372  | 0.0134981  | 0.0684453  | 0.011572   | 0.0499946  | 0.188892   |
| KCNH4      | 0.0294966 | 0.0255815  | 0.00976068 | 0.0243177 | 0.0458184 | 0.075348   | 0.0471496  | 0          | 0          | 0.0592341  | 0.0133192  | 0.0253267  | 0.0304497  | 0.00308324 | 0.0508331  |
| KCNH5      | 0         | 0          | 0          | 0.0784129 | 0         | 0.0149514  | 0          | 0.0260086  | 0          | 0          | 0.0198222  | 0.0167521  | 0.0453165  | 0          | 0          |
| KCNH6      | 0         | 0.00822523 | 0          | 0.0293209 | 0         | 0.00969068 | 0          | 0.0101144  | 0          | 0.0142842  | 0.00642381 | 0.00407167 | 0.0073429  | 0.00594815 | 0          |
| KCNH7      | 0.0320615 | 0.0102985  | 0.0132618  | 0.0165201 | 0         | 0.0318499  | 0.00610113 | 0.0189957  | 0.0130158  | 0.0335337  | 0.0723869  | 0          | 0          | 0.00558558 | 0.176503   |
| KCNH8      | 0.0639942 | 0.0660715  | 0.12857    | 0.0706585 | 0         | 0.0544902  | 0.0782856  | 0.0853091  | 0.00556698 | 0.00573709 | 0.0154803  | 0.00981205 | 0.00589839 | 0.00238901 | 0.0328228  |
| KCNIP1     | 0.142393  | 0.0605357  | 0.0692927  | 0.0604224 | 0.0130109 | 0.0071321  | 0.0573811  | 0.0669955  | 0.0102011  | 0.0946153  | 0.104011   | 0.0479464  | 0.027021   | 0.0437769  | 0.0721745  |
| KCNIP2     | 0.53665   | 0.537333   | 0.485576   | 0.198747  | 0.768478  | 0.449811   | 0.526565   | 0.432218   | 0.0816975  | 0.042097   | 0.0851922  | 0.203994   | 0.0432805  | 0.525894   | 0.698445   |
| KCNIP2-AS1 | 0.143153  | 0.195424   | 0.138164   | 0.122936  | 0.667098  | 0.203155   | 0.136206   | 0.0212037  | 0.0290574  | 0.0598905  | 0.0269336  | 0.256074   | 0.0769679  | 0.124697   | 0.411171   |
| KCNIP3     | 1.41912   | 0.654184   | 0.520363   | 1.37548   | 2.71674   | 2.67798    | 1.13859    | 0.654456   | 0.439087   | 0.616176   | 0.952542   | 0.691579   | 0.282105   | 1.58761    | 1.16773    |
| KCNIP4     | 0.0119889 | 0.0208265  | 0.00844097 | 4.11E-30  | 0         | 7.84E-38   | 0.0427352  | 0.0903141  | 0          | 6.29E-31   | 0.0104187  | 3.06E-40   | 1.46E-40   | 0.00957682 | 3.22E-12   |
| KCNIP4-IT1 | 0.0164502 | 0          | 0.00194411 | 0         | 0         | 0          | 0.00268318 | 0.00417701 | 0          | 0          | 0          | 0          | 0.00909735 | 0.0147387  | 0.00337493 |
| KCNJ1      | 0.0955009 | 0.122703   | 0.144843   | 0.0492082 | 0.0494486 | 0.0474354  | 0.19082    | 0.0495094  | 0          | 0.0199772  | 0.0628884  | 0.00569445 | 0.0205389  | 0.0249565  | 0.16001    |
| KCNJ10     | 0.0567018 | 0.0672487  | 0.0938154  | 0.053938  | 0.0609767 | 0.0742782  | 0.0448202  | 0.0426392  | 0          | 0.0109487  | 0          | 0.00936269 | 0.00281413 | 0.034194   | 0.0375835  |
| KCNJ11     | 0.149143  | 0.0781078  | 0.0751017  | 0.0200473 | 0.23167   | 0.104907   | 0.11846    | 0.04034    | 0.11846    | 0.073248   | 0.0146403  | 0.176313   | 0.0669399  | 0.0338906  | 0.03725    |
| KCNJ12     | 0.38928   | 0.706115   | 0.923336   | 0.589947  | 1.33979   | 1.20838    | 1.06319    | 0.569815   | 0.16733    | 0.258663   | 0.094783   | 0.393926   | 0.969844   | 0.352971   | 0.436604   |
| KCNJ13     | 1.80194   | 1.60045    | 1.53843    | 0.674053  | 0.468166  | 0.46412    | 1.09825    | 1.98325    | 0.179626   | 0.474859   | 0.282322   | 0.96356    | 0.148945   | 0.965232   | 0.709116   |
| KCNJ14     | 0.754929  | 0.719651   | 0.6984     | 0.326248  | 0.592638  | 0.725756   | 0.704392   | 0.627633   | 0.355904   | 0.0713183  | 0.1008     | 0.226524   | 0.251394   | 0.275767   | 0.384707   |

|             |           |                 |            |                 |           |           |           |            |           |           |            |            |           |            |           |
|-------------|-----------|-----------------|------------|-----------------|-----------|-----------|-----------|------------|-----------|-----------|------------|------------|-----------|------------|-----------|
| KCNJ15      | 1.0694    | 1.0002          | 0.275813   | 9.36742         | 2.29629   | 9.06296   | 0.703874  | 0.955983   | 1.08789   | 4.16083   | 6.24203    | 3.64139    | 6.22593   | 4.0965     | 2.77346   |
| KCNJ16      | 0.0154116 | 0.00990071      | 0.0297489  | 0.0105881       | 0         | 0.0131228 | 0         | 0.00913102 | 0         | 0         | 0          | 0          | 0.0232014 | 0          | 0.022133  |
| KCNJ18      | 0.568871  | 0.912206        | 1.19135    | 0.69042         | 6.37996   | 0.0833369 | 0.343421  | 0.487575   | 4.23106   | 0.137792  | 0.238027   | 1.35298    | 0.0428143 | 0.0240983  | 0.0952178 |
| KCNJ2       | 1.73594   | 1.24633         | 1.31879    | 2.91367         | 0.52729   | 2.08183   | 1.07442   | 1.48548    | 0.293055  | 0.593234  | 1.40669    | 0.415063   | 1.51647   | 0.669231   | 1.01819   |
| KCNJ2-AS1   | 0.274836  | 0.342465        | 0.431206   | 0.527386        | 0.25026   | 0.766614  | 0.227233  | 0.277941   | 0.0807942 | 0.130842  | 0.374446   | 0.142403   | 0.116177  | 0.113922   | 0.258596  |
| KCNJ3       | 0         | 0               | 0          | 0.00488221      | 0         | 0         | 0         | 0          | 0         | 0         | 0.00534813 | 0          | 0         | 0          | 0.0476263 |
| KCNJ4       | 0.109062  | 0.0315288       | 0.0812017  | 0.0112392       | 0.0169412 | 0.111438  | 0.0871668 | 0.0581554  | 0         | 0         | 0          | 0.00780371 | 0         | 0          | 0.0939765 |
| KCNJ5       | 0.397501  | 0.160714        | 0.179861   | 0.0887463       | 0.256954  | 0.376259  | 0.44547   | 0.213456   | 0.0592806 | 0.28719   | 0.350821   | 0.0321491  | 0.0700569 | 0.0588776  | 0.20971   |
| KCNJ6       | 0         | 0.00799332      | 0.00686221 | 0               | 0.038655  | 0.0988832 | 0         | 0.00737191 | 0         | 0.0208222 | 0.0842762  | 0          | 0         | 0.039018   | 0.345467  |
| KCNJ8       | 1.05592   | 0.672121        | 0.841475   | 1.28782         | 1.09849   | 5.93077   | 1.6038    | 0.473511   | 0.460125  | 2.10344   | 5.40228    | 0.346577   | 1.57506   | 1.87838    | 4.18758   |
| KCNJ9       | 0.351463  | 0.854063        | 0.903868   | 0.212591        | 0.35605   | 0.253725  | 1.44813   | 0.597541   | 0.186105  | 0.508249  | 0.0776265  | 0.677905   | 0.024648  | 0.594995   | 0.197509  |
| KCNK1       | 1.40293   | 2.03302         | 2.27691    | 4.90015         | 3.44353   | 2.44387   | 1.69965   | 1.49427    | 5.71278   | 4.34158   | 4.86002    | 3.41764    | 7.31733   | 4.03559    | 1.89175   |
| KCNK10      | 0.0962171 | 0.169074        | 0.0234111  | 0.239138        | 0.465959  | 0.0506024 | 0.0484666 | 0.0578449  | 0.220577  | 0.429771  | 0.351408   | 0.25716    | 0.768681  | 0.49252    | 0.158501  |
| KCNK12      | 0.0487564 | 0.172272        | 0.242009   | 0.720177        | 0.858337  | 0.0553539 | 0.129893  | 0.259984   | 0.455245  | 1.38707   | 1.19253    | 0.767504   | 1.43655   | 0.535127   | 0.350102  |
| KCNK13      | 0.0917647 | 0.0663204       | 0.0455485  | 0.179676        | 0.0997796 | 0.218782  | 0.0733418 | 0.0733975  | 0.0223518 | 0.299453  | 0.404004   | 0.03283    | 0.201301  | 0.148677   | 0.131786  |
| KCNK15      | 0.1303    | 0.237951        | 0.248223   | 0.111113        | 0.440377  | 0.721773  | 0.453268  | 0.232498   | 0.984839  | 0.0807756 | 0.196045   | 0.104641   | 0.0471778 | 0.0525479  | 0.275657  |
| KCNK15-AS1  | 0.0387587 | 0.0389266       | 0.110363   | 1.01E-28        | 0.262623  | 9.44E-34  | 0.173952  | 0.0468038  | 5.61E-09  | 0.0379448 | 9.06E-24   | 2.29E-35   | 0         | 0          | 7.72E-41  |
| KCNK16      | 0         | 0               | 0          | 0               | 0         | 0         | 0.0289419 | 0          | 0         | 0         | 0          | 0          | 0         | 0          | 0.0182017 |
| KCNK17      | 0         | 0               | 0          | 0               | 0.0418744 | 0         | 0.0615585 | 0          | 0         | 0.0169172 | 0.0912951  | 0          | 0.0173929 | 0.00704459 | 0         |
| KCNK18      | 0         | 0.0965426       | 0.0331525  | 0               | 0         | 0         | 0.0915116 | 0.0890373  | 0         | 0         | 0          | 0          | 0.0129279 | 0          | 0         |
| KCNK2       | 0.315697  | 0.0702036       | 0.140628   | 0.056308        | 0.301777  | 0.273982  | 0.242613  | 0.199633   | 0         | 0.327654  | 0.534575   | 0          | 0.0235023 | 0.00951907 | 1.01139   |
| KCNK3       | 0.651589  | 0.0896987       | 0.0625672  | 0.275787        | 0.469924  | 4.31967   | 0.245774  | 0.134429   | 0.0495976 | 0.54034   | 0.748698   | 0.0541159  | 0.0975933 | 0.419605   | 0.960829  |
| KCNK4       | 0         | 0.0444604       | 0.0239306  | 0.0477636       | 6.47E-14  | 0.0816542 | 1.07E-11  | 0.0309736  | 0.0282954 | 0         | 4.09E-31   | 0.0439873  | 0         | 0.0210984  | 0         |
| KCNK4-TEX40 | 0.0116355 | 0.00033790<br>8 | 0.0337977  | 0.00013383<br>2 | 0.216888  | 0.0669261 | 0.0265701 | 1.95E-06   | 3.78E-06  | 0.0146038 | 0.0656753  | 0.0308863  | 1.12E-29  | 0.0518445  | 0         |
| KCNK5       | 8.50964   | 2.80904         | 3.43638    | 1.97328         | 5.70169   | 5.89149   | 5.35046   | 3.79492    | 1.18465   | 0.691045  | 0.255524   | 1.15124    | 1.35779   | 0.962402   | 0.333857  |

|            |            |           |           |            |            |            |           |            |           |           |            |            |           |            |            |
|------------|------------|-----------|-----------|------------|------------|------------|-----------|------------|-----------|-----------|------------|------------|-----------|------------|------------|
| KCNK6      | 4.04459    | 7.26159   | 7.16787   | 11.7945    | 16.8981    | 10.4208    | 5.90185   | 5.45371    | 20.3085   | 17.3297   | 11.2965    | 14.7694    | 24.5151   | 12.9247    | 5.90868    |
| KCNK7      | 2.93175    | 6.66331   | 8.28047   | 1.51063    | 9.36102    | 1.14731    | 10.3972   | 3.35556    | 7.64601   | 0.613274  | 2.30668    | 1.85407    | 0.859795  | 1.31558    | 0.722992   |
| KCNK9      | 0.0156831  | 0         | 0         | 0.107746   | 0.00812043 | 0.0400619  | 0.0238753 | 0.00464595 | 0.0127335 | 0.0131226 | 0.0354086  | 0.0149623  | 0.148407  | 0.0273223  | 0.0450459  |
| KCNMA1     | 0.619486   | 0.200348  | 0.157957  | 0.285676   | 0.162576   | 0.576861   | 0.720228  | 0.290357   | 0.0740685 | 0.241421  | 0.26504    | 0.0981647  | 0.183419  | 0.138231   | 0.576857   |
| KCNMA1-AS1 | 0          | 0.055476  | 0.0238129 | 0          | 0          | 0          | 0.098597  | 0.0511632  | 0         | 0         | 0          | 0          | 0         | 0          | 0          |
| KCNMA1-AS2 | 0.0520069  | 0.0501154 | 0         | 0          | 0          | 0          | 0         | 0          | 0         | 0         | 0          | 0          | 0         | 0          | 0          |
| KCNMA1-AS3 | 0.075018   | 0.0271086 | 0.0310301 | 0          | 0          | 0          | 0.0642398 | 0.0500023  | 0         | 0.0235388 | 0          | 0.0268387  | 0         | 0          | 0.161603   |
| KCNMB1     | 1.70185    | 0.612536  | 0.833482  | 0.870311   | 1.77214    | 4.20109    | 1.91159   | 0.908557   | 0.216535  | 1.09716   | 2.44196    | 0.381652   | 1.08021   | 0.874857   | 2.85126    |
| KCNMB2     | 0.00760534 | 0.0256506 | 0.0314584 | 0.00783752 | 0          | 0          | 0         | 0.0608309  | 0.0463122 | 0         | 0          | 0          | 0.0147208 | 0.00397488 | 0.0218445  |
| KCNMB2-AS1 | 0.0105339  | 0.0461215 | 0.0177591 | 0          | 0.0344823  | 0.00917028 | 0.0121582 | 0.0189105  | 0         | 0         | 0.0121053  | 0          | 0         | 0.0169717  | 0          |
| KCNMB3     | 0.440201   | 0.238135  | 0.256996  | 0.203417   | 0.26957    | 0.383306   | 0.17024   | 0.302074   | 0.0564519 | 0.0863271 | 0.188141   | 0.0735421  | 0.0521909 | 0.288206   | 0.487221   |
| KCNMB4     | 0.470208   | 0.410628  | 0.656419  | 0.222091   | 0.235857   | 1.18027    | 0.542461  | 0.274235   | 0.119304  | 0.215162  | 0.984203   | 0.0771023  | 0.135887  | 0.0870369  | 0.295434   |
| KCNN1      | 0.0435511  | 0.0335737 | 0.0216171 | 0.0179523  | 0.01353    | 0.0148333  | 0.0397802 | 0.0309637  | 0         | 0         | 0.00983275 | 0.00623239 | 0.0337187 | 0.0182094  | 0          |
| KCNN2      | 0.122572   | 0.0922763 | 0.12675   | 0.10263    | 0.130897   | 0.189167   | 0.104961  | 0.0544657  | 0.0186598 | 0.048075  | 0.121072   | 0.0328887  | 0.0593119 | 0.0640613  | 0.176028   |
| KCNN3      | 0.337536   | 0.165158  | 0.146127  | 0.196449   | 0.209181   | 0.33506    | 0.42133   | 0.198946   | 0.0575086 | 0.375351  | 0.209273   | 0.35414    | 0.406216  | 0.668165   | 1.0147     |
| KCNN4      | 3.90539    | 2.22516   | 3.36757   | 1.16054    | 5.7294     | 3.6157     | 2.90192   | 2.55259    | 0.0251657 | 1.06332   | 1.06135    | 0.273527   | 1.3132    | 0.84237    | 1.39474    |
| KCNQ1      | 0.646711   | 0.420663  | 0.523249  | 0.924876   | 0.913702   | 1.98337    | 0.630643  | 0.516096   | 0.233072  | 0.414128  | 0.841801   | 0.21558    | 0.439581  | 0.430091   | 0.604818   |
| KCNQ1-AS1  | 0.02133    | 0.0102771 | 0         | 0          | 0.0662657  | 0.0726489  | 0         | 0.0189563  | 0         | 0         | 0          | 0          | 0.027524  | 0          | 0.0612652  |
| KCNQ1DN    | 0.0423091  | 0         | 0         | 0          | 0.0328603  | 0          | 0         | 0          | 0         | 0         | 0          | 0.0151366  | 0         | 0          | 0.0303806  |
| KCNQ1OT1   | 2.7488     | 2.64174   | 2.79726   | 1.32642    | 1.63477    | 1.12954    | 2.3057    | 2.61266    | 0.562625  | 1.31371   | 0.535541   | 2.71853    | 0.288891  | 2.29907    | 3.34674    |
| KCNQ2      | 0.00246386 | 0         | 0         | 0          | 0          | 0.00419589 | 0         | 0          | 0         | 0         | 0          | 0          | 0         | 0          | 0.00353842 |
| KCNQ3      | 0.106405   | 0.0887322 | 0.0626336 | 0.128632   | 0.0985344  | 0.228248   | 0.0957899 | 0.0709228  | 0.0797471 | 0.0667745 | 0.0877784  | 0.0395319  | 0.0633709 | 0.077001   | 0.167504   |
| KCNQ4      | 0.276655   | 0.187704  | 0.182161  | 0.209462   | 0.306958   | 0.668245   | 0.535055  | 0.200709   | 0.137524  | 0.0354317 | 0.0637366  | 0.032319   | 0.0910696 | 0.0472137  | 0.162168   |
| KCNQ5      | 0.142923   | 0.0739012 | 0.043257  | 0.129324   | 0.0162445  | 0.237457   | 0.0278608 | 0.034078   | 0.0382092 | 0.0131256 | 0.00787035 | 0          | 0.114704  | 0.129355   | 0.0150187  |
| KCNQ5-AS1  | 0.0420401  | 0.0101278 | 0.104335  | 0.0649852  | 0          | 0          | 0         | 0          | 0         | 0         | 0          | 0          | 0.027124  | 0.0439439  | 0          |
| KCNQ5-IT1  | 0.0411067  | 0.0396116 | 0.0340063 | 0.0423616  | 0          | 0          | 0.0469343 | 0.0365322  | 0         | 0.0515931 | 0          | 0          | 0         | 0.0859365  | 0.413241   |

|            |           |            |           |            |           |           |           |            |            |            |           |           |            |            |            |
|------------|-----------|------------|-----------|------------|-----------|-----------|-----------|------------|------------|------------|-----------|-----------|------------|------------|------------|
| KCNRG      | 0.844749  | 0.799255   | 1.00839   | 0.651895   | 0.42701   | 0.798566  | 0.52534   | 1.02411    | 0.73719    | 0.343198   | 0.268293  | 0.433044  | 0.301499   | 0.968491   | 0.673108   |
| KCNS1      | 0.209495  | 0.229585   | 0.397591  | 0.266689   | 0.663598  | 0.0874423 | 0.276715  | 0.244592   | 2.84657    | 0.386673   | 0.584279  | 0.787707  | 0.307434   | 0.502372   | 0.0412947  |
| KCNS2      | 0.211986  | 0.151446   | 0.157228  | 0.135595   | 0.23845   | 0.280092  | 0.158577  | 0.110439   | 0.0534156  | 0.0733971  | 0.0495116 | 0.0993778 | 0.0282977  | 0.129896   | 0.220456   |
| KCNS3      | 2.3134    | 1.19768    | 1.41847   | 2.31858    | 1.63469   | 1.45227   | 1.1912    | 1.34645    | 0.784468   | 1.30944    | 1.54644   | 0.577732  | 3.03787    | 1.40349    | 1.51134    |
| KCNT1      | 0.0430346 | 0.0345579  | 0.039557  | 0.0344932  | 0.185688  | 0.0447864 | 0.0163785 | 0.0339961  | 0          | 0.0240057  | 0         | 0.027371  | 0.00308508 | 0.00999634 | 0.130473   |
| KCNT2      | 0.40576   | 0.20261    | 0.247177  | 0.129245   | 0.103138  | 0.505685  | 0.366415  | 0.249145   | 0.0179698  | 0.106484   | 0.158236  | 0.0659845 | 0.0380791  | 0.177366   | 0.858192   |
| KCNU1      | 0         | 0.0029313  | 0         | 0          | 0         | 0         | 0         | 0          | 0          | 0          | 0         | 0         | 0          | 0          | 0          |
| KCNV1      | 0         | 0          | 0         | 0          | 0         | 0         | 0.0151449 | 0          | 0          | 0          | 0         | 0         | 0          | 0          | 0          |
| KCNV2      | 0.438883  | 0.515757   | 0.363075  | 0.220625   | 0.631854  | 0.300785  | 0.464436  | 0.237831   | 0.0130368  | 0.134352   | 0.084588  | 0.359989  | 0.0345323  | 0.414002   | 0.15373    |
| KCP        | 0.0514385 | 0.121854   | 0.145391  | 0.176696   | 0.419484  | 0.306595  | 0.176193  | 0.0380952  | 0.0104411  | 0.726307   | 0.101618  | 0.312848  | 0.492287   | 0.394299   | 0.357049   |
| KCTD1      | 5.45514   | 5.86305    | 4.84815   | 8.47928    | 7.38861   | 8.00961   | 5.68055   | 4.40736    | 9.60518    | 5.16018    | 4.74957   | 5.39136   | 7.98526    | 4.9302     | 2.24383    |
| KCTD10     | 9.27503   | 7.23836    | 6.9194    | 15.1959    | 9.42945   | 24.7521   | 9.44205   | 7.9516     | 16.0713    | 19.0648    | 18.2131   | 11.6634   | 29.853     | 15.1868    | 13.4317    |
| KCTD11     | 4.96192   | 7.24169    | 8.5231    | 14.9732    | 13.1442   | 13.7395   | 8.06118   | 5.63511    | 29.8824    | 20.3568    | 20.0453   | 22.3154   | 26.4715    | 19.1002    | 6.96278    |
| KCTD12     | 15.963    | 6.29673    | 7.83995   | 7.35334    | 7.90224   | 14.6823   | 10.9899   | 9.63581    | 1.43707    | 6.68773    | 11.4103   | 1.86649   | 7.62509    | 4.10361    | 9.62932    |
| KCTD13     | 2.28056   | 3.07963    | 3.07953   | 2.22371    | 6.59253   | 4.05788   | 2.8841    | 2.36305    | 1.83088    | 1.37341    | 1.92796   | 2.01231   | 1.31304    | 2.28228    | 2.04147    |
| KCTD14     | 0.0561707 | 0.0622288  | 0.0179513 | 9.27E-17   | 1.59E-22  | 0.136969  | 0.0478529 | 4.69E-09   | 2.82E-30   | 0.0867855  | 9.15E-27  | 4.96E-27  | 0.0311199  | 0.0487471  | 4.51E-14   |
| KCTD15     | 7.17465   | 10.3413    | 10.3957   | 11.3977    | 18.8711   | 14.1604   | 7.9615    | 6.35128    | 10.5838    | 7.89779    | 6.94992   | 9.07555   | 13.5665    | 9.2999     | 6.97476    |
| KCTD16     | 0         | 0.00645418 | 0.0147757 | 0.0046015  | 0.0208079 | 0.079843  | 0.0611784 | 0.00793657 | 0.00543809 | 0          | 0.0151219 | 0         | 0          | 0.0023337  | 0.00641257 |
| KCTD17     | 0.917335  | 1.84371    | 2.77535   | 2.25531    | 1.99491   | 3.78275   | 2.30424   | 1.21123    | 0.782047   | 1.79282    | 3.37296   | 0.722015  | 2.17297    | 1.59585    | 2.5219     |
| KCTD18     | 3.27943   | 2.86743    | 2.55188   | 3.98162    | 3.08551   | 5.30619   | 2.19681   | 2.22222    | 3.90861    | 2.58108    | 4.33522   | 2.41341   | 3.3623     | 2.11703    | 2.46112    |
| KCTD19     | 0.0543264 | 0.0822652  | 0.0898853 | 0.00799785 | 0.0723323 | 0.0132166 | 0.053167  | 0.117253   | 0          | 0.00974075 | 0.0175222 | 0.0111063 | 0          | 0.020281   | 0.0445826  |
| KCTD2      | 4.54901   | 5.23561    | 4.38889   | 5.26211    | 9.10654   | 9.96445   | 6.7002    | 3.45658    | 12.4931    | 5.17422    | 4.75014   | 4.07678   | 5.31608    | 3.63467    | 3.29097    |
| KCTD20     | 9.21766   | 8.93585    | 10.2561   | 10.6919    | 4.93272   | 12.492    | 9.43815   | 7.22201    | 11.3015    | 11.5228    | 12.1491   | 5.97074   | 14.3228    | 8.74173    | 10.1027    |
| KCTD21     | 0.880524  | 1.09559    | 0.998746  | 2.64815    | 2.32577   | 3.54655   | 0.988207  | 0.547429   | 5.34973    | 4.02643    | 3.73226   | 2.72831   | 4.60657    | 3.14527    | 1.53056    |
| KCTD21-AS1 | 0.293919  | 0.22893    | 0.0847211 | 0.326195   | 0.0407391 | 0.248022  | 0.169782  | 0.144055   | 0.0842724  | 0.029885   | 0.041274  | 0.0659966 | 1.65E-19   | 0.174919   | 0.0787381  |
| KCTD3      | 7.93629   | 5.04683    | 4.74599   | 7.25552    | 3.74656   | 9.41297   | 4.53073   | 4.43508    | 6.03576    | 6.74635    | 6.65138   | 4.05151   | 6.87293    | 4.98828    | 6.22664    |

|           |          |           |           |            |           |            |           |           |           |           |           |            |           |           |           |
|-----------|----------|-----------|-----------|------------|-----------|------------|-----------|-----------|-----------|-----------|-----------|------------|-----------|-----------|-----------|
| KCTD4     | 1.27784  | 1.16295   | 0.903519  | 1.15928    | 1.25542   | 0.316189   | 1.01007   | 1.388     | 12.7294   | 1.63123   | 2.83572   | 1.45354    | 0.0493263 | 0.485193  | 0.392123  |
| KCTD5     | 3.83894  | 4.53042   | 4.64644   | 10.5814    | 8.5412    | 10.3802    | 4.92673   | 3.59586   | 12.5062   | 8.54551   | 10.9117   | 6.69686    | 16.3651   | 7.13653   | 4.38605   |
| KCTD6     | 1.18931  | 0.894627  | 1.23487   | 1.08805    | 0.584386  | 1.55003    | 0.983798  | 0.959895  | 1.12329   | 0.990062  | 2.00018   | 0.547062   | 1.0962    | 0.932381  | 1.15029   |
| KCTD7     | 1.23253  | 1.39742   | 1.49723   | 0.802698   | 1.92877   | 1.70101    | 1.48049   | 1.05058   | 0.401775  | 1.27666   | 1.59309   | 0.754044   | 0.668103  | 1.29073   | 2.00037   |
| KCTD8     | 0.044626 | 0.0043003 | 0.0221507 | 0.00919768 | 0.0277278 | 0.00759969 | 0.234382  | 0.0237959 | 0         | 0         | 0         | 0.00638622 | 0         | 0         | 0         |
| KCTD9     | 6.90685  | 4.77699   | 5.16778   | 7.11771    | 1.7018    | 6.75022    | 3.94689   | 5.21296   | 8.51122   | 12.7086   | 8.31165   | 5.23905    | 18.3212   | 7.69977   | 4.46604   |
| KDELC1    | 0.83315  | 0.49063   | 0.595639  | 1.22958    | 0.782893  | 2.11073    | 0.52848   | 0.63074   | 0.476024  | 2.02683   | 5.80571   | 0.66238    | 1.64581   | 1.69876   | 2.28961   |
| KDELC2    | 4.36203  | 3.53582   | 4.25002   | 5.84204    | 1.66779   | 6.60976    | 3.35279   | 2.86257   | 3.3475    | 7.16238   | 11.2479   | 2.9078     | 5.85712   | 3.70924   | 7.65574   |
| KDELR1    | 21.6715  | 21.621    | 21.9983   | 43.3183    | 27.5218   | 63.4338    | 36.8273   | 21.4791   | 28.7287   | 35.3339   | 72.2188   | 29.8964    | 56.6007   | 29.2562   | 39.7897   |
| KDELR2    | 15.658   | 11.6305   | 12.4246   | 24.9251    | 10.2066   | 26.5205    | 16.2149   | 13.2468   | 18.7839   | 28.7428   | 57.8332   | 14.0061    | 32.3127   | 20.96     | 30.2966   |
| KDELR3    | 3.10039  | 2.45832   | 2.79711   | 2.2642     | 1.57372   | 4.21974    | 2.98245   | 2.27806   | 0.698695  | 6.60297   | 17.4033   | 1.11794    | 2.24449   | 4.17219   | 11.3943   |
| KDF1      | 2.63135  | 3.80966   | 3.53604   | 4.98685    | 4.70549   | 4.1423     | 3.48802   | 2.28149   | 4.4084    | 3.36706   | 3.73844   | 3.1227     | 5.25055   | 2.87798   | 0.645187  |
| KDM1A     | 9.48687  | 8.49245   | 8.59557   | 14.8671    | 9.04192   | 17.1588    | 7.39874   | 7.08183   | 8.52336   | 10.9588   | 11.9969   | 8.80693    | 17.6462   | 11.1976   | 8.52979   |
| KDM1B     | 2.67365  | 3.60652   | 4.13102   | 5.99492    | 2.27676   | 4.73821    | 3.39895   | 3.33288   | 6.31548   | 5.65203   | 4.1308    | 4.85321    | 10.3273   | 4.29779   | 3.3171    |
| KDM2A     | 9.62395  | 12.9105   | 13.5152   | 14.2719    | 18.2819   | 17.118     | 12.4651   | 9.40356   | 13.5225   | 12.4066   | 8.51324   | 12.8124    | 16.4673   | 12.7072   | 11.037    |
| KDM2B     | 3.57657  | 4.82633   | 5.65442   | 5.16344    | 5.98731   | 5.57982    | 4.83321   | 4.4958    | 7.55401   | 3.09882   | 2.69624   | 4.49286    | 5.41811   | 3.79542   | 3.72507   |
| KDM3A     | 13.3409  | 12.4751   | 13.8867   | 9.29154    | 7.02467   | 10.4217    | 10.2247   | 13.27     | 16.5289   | 10.5839   | 9.37088   | 8.28314    | 6.89823   | 8.27326   | 4.36572   |
| KDM3B     | 10.3911  | 11.0967   | 12.0303   | 9.57764    | 9.64554   | 14.7947    | 11.1933   | 8.67626   | 7.31428   | 5.75993   | 4.14145   | 5.67538    | 8.23845   | 6.37001   | 7.59562   |
| KDM4A     | 5.54838  | 8.22233   | 7.7145    | 7.58931    | 9.47163   | 8.25517    | 6.26851   | 5.06322   | 4.66301   | 5.64318   | 4.06732   | 5.16726    | 5.98066   | 5.59846   | 5.27035   |
| KDM4A-AS1 | 1.18179  | 1.3023    | 1.31498   | 0.446853   | 0.860186  | 0.456077   | 1.27793   | 0.767928  | 0.16322   | 0.504918  | 0.100889  | 0.792521   | 0.0478583 | 0.893344  | 0.768514  |
| KDM4B     | 3.85373  | 6.11168   | 6.27365   | 5.04404    | 10.702    | 7.23808    | 6.65905   | 4.55182   | 8.28013   | 5.07012   | 3.76754   | 5.02725    | 6.89159   | 4.15131   | 4.41925   |
| KDM4C     | 3.96873  | 4.17271   | 4.2554    | 3.63309    | 2.76816   | 3.36666    | 3.50893   | 3.73332   | 2.50732   | 2.88266   | 2.60282   | 2.99727    | 1.98092   | 3.17668   | 2.40973   |
| KDM4D     | 0.249185 | 0.180092  | 0.199701  | 0.232718   | 0.229823  | 0.4774     | 0.248947  | 0.193773  | 0.0663861 | 0.127056  | 0.246136  | 0.0557183  | 0.115555  | 0.0813968 | 0.268396  |
| KDM4E     | 0.118733 | 0.219295  | 0.147337  | 0.0509824  | 0.322759  | 0.0168499  | 0.0564856 | 0.175867  | 0.0723018 | 0.0496741 | 0.0111696 | 0.120355   | 0         | 0.0413701 | 0.0852578 |
| KDM5A     | 7.38736  | 8.5975    | 9.58515   | 7.28957    | 6.64509   | 7.90879    | 6.13048   | 6.84638   | 5.76926   | 5.87013   | 4.8771    | 4.57235    | 6.72591   | 5.48743   | 5.68968   |
| KDM5B     | 4.93034  | 7.78193   | 7.35482   | 9.44049    | 6.95117   | 8.50074    | 5.55336   | 6.52272   | 12.6381   | 11.0394   | 7.60577   | 8.55863    | 12.2258   | 9.11337   | 6.15747   |



|          |           |            |            |            |           |            |            |            |           |           |           |            |            |            |           |
|----------|-----------|------------|------------|------------|-----------|------------|------------|------------|-----------|-----------|-----------|------------|------------|------------|-----------|
| KDM5C    | 6.73024   | 9.07497    | 9.33907    | 11.8626    | 17.2001   | 13.8379    | 12.7298    | 6.42414    | 13.8105   | 9.0288    | 4.33635   | 9.88791    | 14.2725    | 9.12058    | 8.28859   |
| KDM5D    | 5.5939    | 6.2238     | 6.34984    | 4.74345    | 7.65873   | 5.31404    | 0.553952   | 4.2528     | 3.01503   | 3.41421   | 2.30782   | 4.4121     | 2.78518    | 4.59895    | 6.05059   |
| KDM6A    | 4.97147   | 5.13047    | 5.0765     | 4.47283    | 4.07906   | 3.57296    | 5.85422    | 4.09964    | 3.96212   | 4.1761    | 4.20473   | 3.37322    | 3.96169    | 3.50038    | 3.12779   |
| KDM6B    | 2.76818   | 7.40895    | 7.71241    | 7.09985    | 11.0608   | 10.1894    | 7.92507    | 5.55518    | 7.6718    | 5.80505   | 4.82379   | 8.13035    | 11.9187    | 5.83221    | 7.81221   |
| KDM7A    | 5.26506   | 5.13432    | 6.82548    | 5.92991    | 1.71559   | 4.62054    | 3.9587     | 6.72291    | 7.51166   | 6.78858   | 5.36574   | 5.05012    | 10.9052    | 7.57653    | 4.42886   |
| KDM7A-DT | 2.32403   | 1.78973    | 1.86629    | 6.50352    | 2.64332   | 5.93664    | 2.00956    | 2.25552    | 5.5187    | 9.37312   | 4.14936   | 4.23728    | 21.8079    | 6.60682    | 1.7875    |
| KDM8     | 0.571647  | 0.592588   | 0.444246   | 0.794391   | 1.38576   | 0.789126   | 0.62302    | 0.254016   | 0.179325  | 0.445705  | 0.537766  | 0.365647   | 0.463824   | 0.547741   | 0.746325  |
| KDR      | 5.25311   | 2.25766    | 2.16303    | 6.3866     | 4.99824   | 10.2196    | 3.32508    | 2.76092    | 1.64775   | 5.87611   | 8.4831    | 2.83893    | 10.0219    | 7.20592    | 12.3133   |
| KDSR     | 6.44387   | 6.94451    | 8.47646    | 10.5962    | 3.89338   | 9.96987    | 6.80766    | 7.23846    | 5.84209   | 7.05982   | 7.74676   | 5.11627    | 11.7817    | 6.47465    | 5.27982   |
| KEAP1    | 6.4948    | 9.07408    | 9.27861    | 14.2072    | 15.2529   | 18.9691    | 8.29607    | 5.09433    | 15.0373   | 9.61418   | 9.57582   | 9.11653    | 14.7493    | 9.35042    | 6.06646   |
| KEL      | 0.109037  | 0.0831813  | 0.0300676  | 0.00936379 | 0         | 0.0541586  | 0.103746   | 0.0807523  | 0.0110662 | 0.0228087 | 0.051287  | 0.0130031  | 0          | 0.0189958  | 0.0913445 |
| KERA     | 0.356751  | 0.00881476 | 0.0151348  | 0.00942671 | 0         | 0          | 0.0104443  | 0.0243885  | 0         | 0.011481  | 0.0103263 | 0          | 0          | 0          | 0.157643  |
| KHDC1    | 0.458353  | 0.796477   | 0.57188    | 0.503319   | 0.618606  | 0.441466   | 0.454698   | 0.540902   | 0.15557   | 0.480971  | 0.271435  | 0.413987   | 0.155135   | 0.604778   | 0.334522  |
| KHDC1L   | 0.0365032 | 0.0175878  | 0          | 0.0752353  | 0.0567021 | 0.217574   | 0.0416782  | 0          | 0.0444568 | 0.549784  | 0.576907  | 0.208952   | 0.588793   | 0.400642   | 0.104847  |
| KHDC3L   | 0         | 0.0327319  | 0.0374669  | 0          | 0         | 0.0578454  | 0.0517103  | 0          | 0         | 0         | 0.0255632 | 0          | 0          | 0          | 0         |
| KHDC4    | 4.81889   | 6.9729     | 6.69967    | 4.81456    | 4.66186   | 5.98688    | 5.1223     | 4.26201    | 5.05872   | 5.32009   | 4.48816   | 5.76704    | 2.16591    | 6.35907    | 4.03235   |
| KHDRBS1  | 13.2618   | 11.7633    | 13.8755    | 21.0433    | 11.5624   | 24.9186    | 10.9209    | 11.4939    | 11.6792   | 15.0491   | 17.3239   | 9.50703    | 23.4526    | 13.593     | 11.8568   |
| KHDRBS2  | 0.0277661 | 0.00668907 | 0.00574252 | 0          | 0         | 0.00591062 | 0.00792561 | 0.00616905 | 0         | 0         | 0.0156722 | 0          | 0.00895728 | 0.00725589 | 0         |
| KHDRBS3  | 1.36412   | 0.521271   | 0.62262    | 1.04221    | 1.44308   | 3.78499    | 1.18156    | 0.459845   | 0.630167  | 1.50548   | 2.44264   | 0.891923   | 2.40517    | 1.11245    | 2.4657    |
| KHK      | 0.448952  | 0.455869   | 0.409658   | 0.374995   | 0.93101   | 0.486609   | 0.61761    | 0.320372   | 0.0406175 | 0.170578  | 0.405084  | 0.0779269  | 0.256567   | 0.234133   | 0.162056  |
| KHNYN    | 7.82651   | 9.61809    | 10.5656    | 10.8117    | 14.4865   | 12.3302    | 7.01814    | 6.0595     | 8.88739   | 7.91369   | 4.93595   | 9.0507     | 11.4364    | 9.48952    | 7.56837   |
| KHSRP    | 12.9744   | 13.9023    | 13.7082    | 28.2086    | 17.9856   | 34.8705    | 16.6349    | 12.7772    | 17.7613   | 13.2543   | 14.767    | 14.6029    | 27.4239    | 16.7738    | 12.3741   |
| KIAA0040 | 2.94195   | 1.37646    | 1.64731    | 3.21697    | 1.52084   | 6.34312    | 2.42476    | 1.61413    | 1.04263   | 3.12848   | 5.86801   | 1.05252    | 4.48593    | 3.48059    | 4.74804   |
| KIAA0087 | 0.0482147 | 0.00774352 | 0.00886369 | 0          | 0.0424747 | 0          | 0.0214282  | 0.0428492  | 0         | 0         | 0         | 0.00766642 | 0          | 0.0027999  | 0         |
| KIAA0100 | 13.5774   | 14.0207    | 13.1358    | 19.1708    | 18.7864   | 22.4466    | 18.236     | 10.9514    | 17.7089   | 16.4243   | 12.2945   | 15.8361    | 23.4995    | 15.5631    | 14.9184   |
| KIAA0232 | 4.53028   | 3.81208    | 4.30338    | 2.83814    | 1.67461   | 3.42858    | 2.8721     | 3.74603    | 4.89675   | 5.52696   | 4.55875   | 2.95065    | 5.49217    | 3.7994     | 3.28682   |

|           |           |            |            |            |           |            |           |           |            |           |           |           |           |            |            |
|-----------|-----------|------------|------------|------------|-----------|------------|-----------|-----------|------------|-----------|-----------|-----------|-----------|------------|------------|
| KIAA0319  | 0.122621  | 0.306286   | 0.501864   | 0.0399045  | 0.18546   | 0.1154     | 0.106845  | 0.240892  | 0.322256   | 0.133651  | 0.138424  | 0.226273  | 0         | 0.109622   | 0.00463418 |
| KIAA0319L | 6.11248   | 7.45624    | 6.01783    | 6.67114    | 10.2478   | 9.1773     | 6.28297   | 4.79869   | 10.0627    | 6.09854   | 5.23924   | 7.73495   | 5.96713   | 6.04785    | 4.65817    |
| KIAA0355  | 3.87507   | 3.9744     | 4.39749    | 4.14325    | 4.80335   | 4.94198    | 4.30186   | 3.7793    | 6.3347     | 5.06789   | 4.42529   | 3.96456   | 5.46731   | 4.75642    | 5.75407    |
| KIAA0391  | 4.75837   | 4.6078     | 4.39758    | 5.66552    | 2.48949   | 4.63114    | 4.08619   | 4.60659   | 3.68567    | 4.73623   | 5.7772    | 4.00097   | 6.48184   | 4.37787    | 3.48742    |
| KIAA0408  | 0.017454  | 0.00693188 | 0.0307444  | 0.0196818  | 6.09E-34  | 0.0234252  | 0.0160898 | 0.0537105 | 0.00606712 | 2.84E-06  | 1.13E-08  | 8.68E-08  | 0.0213151 | 0.00791659 | 1.90E-08   |
| KIAA0513  | 2.12515   | 2.7201     | 2.09326    | 2.38633    | 9.24457   | 3.70356    | 2.31306   | 2.01264   | 11.8036    | 2.87942   | 2.31118   | 3.68819   | 2.21943   | 1.97735    | 1.7148     |
| KIAA0556  | 2.81015   | 3.53354    | 3.41927    | 3.15699    | 4.68334   | 4.31849    | 4.2505    | 2.46132   | 3.45008    | 2.49746   | 1.43923   | 3.22851   | 3.19637   | 2.3705     | 3.27295    |
| KIAA0586  | 1.46171   | 1.20052    | 1.2162     | 1.45641    | 0.340254  | 1.56565    | 0.85611   | 1.18486   | 0.543807   | 0.822132  | 0.820289  | 0.79723   | 0.778661  | 0.878438   | 1.07077    |
| KIAA0753  | 1.62935   | 1.78719    | 1.73194    | 1.71661    | 1.32909   | 2.2748     | 1.41864   | 1.35095   | 0.620804   | 1.54232   | 1.41289   | 1.12676   | 1.19513   | 1.74357    | 1.78437    |
| KIAA0754  | 5.86618   | 4.81241    | 5.61556    | 3.32165    | 3.66287   | 3.70946    | 5.92252   | 4.52081   | 1.17928    | 4.00174   | 2.2049    | 5.04133   | 2.52037   | 5.80428    | 5.75766    |
| KIAA0825  | 1.00516   | 0.558592   | 0.500745   | 0.512684   | 0.204851  | 0.54341    | 0.38215   | 0.787796  | 0.135566   | 0.325381  | 0.49363   | 0.306306  | 0.102348  | 0.261267   | 0.785592   |
| KIAA0895  | 0.318956  | 0.68251    | 0.861435   | 0.430201   | 0.18215   | 0.279574   | 0.423084  | 0.371001  | 0.502703   | 1.05968   | 0.301816  | 0.429593  | 1.01078   | 0.593257   | 0.316601   |
| KIAA0895L | 1.90176   | 2.73252    | 2.1824     | 1.76663    | 5.67119   | 2.32944    | 1.93718   | 1.61423   | 1.13769    | 1.61064   | 1.0045    | 2.58151   | 1.03977   | 2.58713    | 3.89522    |
| KIAA0930  | 7.57016   | 9.62486    | 10.3054    | 14.093     | 19.154    | 17.3651    | 11.3772   | 7.13474   | 14.227     | 10.2437   | 9.73872   | 7.82179   | 15.7242   | 10.1536    | 9.43682    |
| KIAA1024  | 0.15447   | 0.142236   | 0.130628   | 0.113199   | 0.0799818 | 0.298133   | 0.137176  | 0.0762668 | 0.133779   | 0.206801  | 0.244128  | 0.0712288 | 0.0575832 | 0.1812     | 0.478185   |
| KIAA1024L | 0         | 0          | 0          | 0          | 0         | 0          | 0         | 0         | 0          | 0         | 0         | 0         | 0         | 0          | 0          |
| KIAA1107  | 0.421365  | 0.382911   | 0.352995   | 0.280325   | 0.0745661 | 0.372411   | 0.140067  | 0.194347  | 0.0714547  | 0.187443  | 0.319119  | 0.0572464 | 0.147976  | 0.103143   | 0.405975   |
| KIAA1109  | 9.32111   | 8.17955    | 8.28146    | 5.90153    | 2.93133   | 6.46028    | 6.65901   | 7.33039   | 5.22452    | 6.13016   | 4.85442   | 4.95136   | 5.65059   | 5.30574    | 6.43174    |
| KIAA1143  | 5.28252   | 4.49813    | 5.12901    | 4.14018    | 1.72274   | 5.08578    | 4.13954   | 5.16168   | 3.02142    | 3.85167   | 7.94438   | 2.10979   | 3.86516   | 3.21845    | 3.75475    |
| KIAA1147  | 5.33534   | 6.59168    | 6.01185    | 3.99781    | 4.87304   | 3.62195    | 4.49816   | 4.98686   | 4.18767    | 2.95804   | 3.73121   | 3.88567   | 3.50782   | 3.43504    | 5.48017    |
| KIAA1191  | 11.2689   | 10.4087    | 11.2368    | 15.3967    | 7.67134   | 18.209     | 10.8495   | 8.4669    | 19.0824    | 15.5291   | 18.5464   | 11.375    | 19.3273   | 13.224     | 9.50093    |
| KIAA1210  | 0.0177477 | 0.00712594 | 0.00244703 | 0.00304826 | 0         | 0.00503732 | 0.0067546 | 0.0157727 | 0.00720492 | 0.0297003 | 0.0333916 | 0         | 0         | 0          | 0          |
| KIAA1211  | 0.0561004 | 0.06201    | 0.11739    | 0.115626   | 0.328069  | 0.157356   | 0.124339  | 0.0938491 | 0.0844002  | 0.339633  | 0.23842   | 0.110979  | 0.266145  | 0.334599   | 0.767758   |
| KIAA1211L | 1.93806   | 2.95123    | 3.02845    | 1.28217    | 4.48784   | 2.29199    | 1.63912   | 1.13231   | 0.830489   | 1.16368   | 1.09391   | 1.63926   | 1.19254   | 1.13797    | 1.28856    |
| KIAA1217  | 7.93416   | 7.86057    | 7.41216    | 12.4017    | 5.70654   | 12.3802    | 4.99335   | 7.4701    | 5.92179    | 9.67808   | 6.76006   | 8.05457   | 17.9428   | 11.7026    | 12.2048    |
| KIAA1257  | 0.251826  | 0.408504   | 0.420768   | 0.125128   | 0.529603  | 0.213918   | 0.387737  | 0.362803  | 1.26969    | 0.175268  | 0.200346  | 0.338764  | 0.111669  | 0.209504   | 0.193345   |

|              |            |           |            |           |           |          |           |           |           |           |          |            |           |            |           |
|--------------|------------|-----------|------------|-----------|-----------|----------|-----------|-----------|-----------|-----------|----------|------------|-----------|------------|-----------|
| KIAA1324     | 2.39343    | 0.96811   | 1.25433    | 0.15616   | 0.864473  | 2.17107  | 1.53117   | 1.85713   | 0.0688714 | 0.129884  | 0.130953 | 0.106216   | 0.127233  | 0.167186   | 0.266079  |
| KIAA1324L    | 1.79231    | 0.923898  | 1.15526    | 0.419983  | 0.610606  | 1.49631  | 1.11888   | 0.910799  | 0.117882  | 0.263612  | 0.438052 | 0.23178    | 0.532907  | 0.249848   | 1.39535   |
| KIAA1328     | 1.57473    | 1.47728   | 1.56274    | 0.842799  | 0.632697  | 1.00769  | 1.56361   | 1.22562   | 0.484343  | 0.740664  | 0.760308 | 0.518631   | 0.399367  | 0.489455   | 0.838278  |
| KIAA1522     | 13.1236    | 21.4084   | 23.5886    | 23.2627   | 24.3617   | 25.3683  | 24.3643   | 15.0825   | 17.4917   | 13.1866   | 10.3924  | 14.3526    | 31.3138   | 12.497     | 8.81606   |
| KIAA1549     | 0.70029    | 0.35087   | 0.494585   | 0.25719   | 0.303771  | 0.545539 | 0.791061  | 0.47339   | 0.0680484 | 0.100516  | 0.153482 | 0.11594    | 0.258356  | 0.270607   | 0.46808   |
| KIAA1549L    | 0.221074   | 0.350258  | 0.4185     | 0.326341  | 0.306279  | 0.529111 | 0.375212  | 0.323913  | 0.0654916 | 0.882406  | 1.38722  | 0.115432   | 0.735024  | 0.443435   | 1.36149   |
| KIAA1551     | 8.44098    | 7.30734   | 8.19646    | 5.95857   | 1.05563   | 6.34627  | 2.76451   | 5.86468   | 3.60461   | 7.01936   | 6.8039   | 3.23377    | 5.32388   | 5.13751    | 6.89046   |
| KIAA1586     | 1.10169    | 0.835673  | 0.917559   | 0.958893  | 0.254384  | 0.804974 | 0.492953  | 1.21064   | 0.380764  | 1.12114   | 1.96635  | 0.612525   | 1.43122   | 0.972624   | 1.12249   |
| KIAA1614     | 1.1307     | 0.955389  | 0.774117   | 0.706017  | 2.75134   | 1.74532  | 1.23376   | 0.856365  | 0.203506  | 0.601212  | 0.408704 | 0.4105     | 0.445617  | 0.82966    | 2.26375   |
| KIAA1614-AS1 | 1.10281    | 1.40154   | 0.938767   | 0.92236   | 1.46478   | 0.707674 | 1.45989   | 1.20735   | 0.253048  | 0.641921  | 0.252596 | 0.537497   | 0.494976  | 0.968982   | 1.17062   |
| KIAA1656     | 0.190105   | 0.290229  | 0.294609   | 0.182829  | 0.493329  | 0.348422 | 0.286885  | 0.199641  | 0.0482731 | 0.165107  | 0.115858 | 0.189385   | 0.0306941 | 0.262429   | 0.23246   |
| KIAA1671     | 10.782     | 8.91608   | 9.45967    | 8.83167   | 8.92391   | 11.4773  | 10.3112   | 8.44538   | 4.85876   | 8.43672   | 4.42149  | 12.1111    | 14.6572   | 9.15178    | 7.38585   |
| KIAA1755     | 0.288747   | 0.14434   | 0.140337   | 0.208293  | 0.420491  | 0.792911 | 0.366771  | 0.157176  | 0.0351661 | 0.0770115 | 0.228171 | 0.00774773 | 0.0698617 | 0.00377279 | 0.502795  |
| KIAA1841     | 0.721266   | 1.0526    | 1.00712    | 0.975294  | 0.433903  | 0.589299 | 0.690232  | 0.615065  | 0.639775  | 0.988986  | 1.13426  | 0.650328   | 0.976443  | 1.05463    | 1.16755   |
| KIAA1958     | 0.802608   | 0.706982  | 0.869255   | 0.865724  | 0.796679  | 0.890141 | 1.029     | 0.80205   | 1.67521   | 0.864906  | 0.668433 | 1.13204    | 0.97757   | 0.665852   | 0.391711  |
| KIAA2012     | 0.00558337 | 0.0053803 | 0.00461895 | 0.0172615 | 0.0086729 | 0        | 0.0127498 | 0.0148861 | 0         | 0         | 0        | 0.00399505 | 0         | 0.00875433 | 0.0400921 |
| KIAA2013     | 8.37019    | 7.63128   | 8.86406    | 8.92142   | 14.8101   | 13.4515  | 8.77991   | 5.8213    | 10.164    | 8.01542   | 11.4109  | 5.40837    | 9.62129   | 7.80235    | 6.64021   |
| KIAA2026     | 6.62102    | 7.40334   | 7.74699    | 4.76396   | 3.89732   | 4.8335   | 3.71198   | 5.37602   | 4.69108   | 4.64089   | 4.23943  | 3.81806    | 4.12469   | 4.18073    | 4.58591   |
| KIDINS220    | 5.74149    | 5.05026   | 5.03979    | 4.19777   | 2.74545   | 6.15055  | 4.25473   | 4.59663   | 3.1628    | 4.84719   | 4.21078  | 3.68017    | 5.51043   | 4.43451    | 5.0714    |
| KIF11        | 0.938848   | 0.617042  | 0.723897   | 2.93071   | 0.269017  | 2.7902   | 0.738914  | 0.96398   | 0.971344  | 2.15078   | 2.74736  | 1.24897    | 3.44919   | 2.55107    | 1.35485   |
| KIF12        | 0.277301   | 0.122474  | 0.219844   | 0.226232  | 0.30511   | 0.265633 | 0.23746   | 0.246442  | 0.0281434 | 0.0725085 | 0.156519 | 0.0330693  | 0.216187  | 0.114736   | 0.0663731 |
| KIF13A       | 7.86936    | 8.34181   | 7.92257    | 7.18713   | 7.02152   | 8.31286  | 7.61723   | 5.58683   | 12.0262   | 13.2536   | 7.16554  | 10.0107    | 24.4375   | 10.8759    | 8.66574   |
| KIF13B       | 6.2887     | 7.26333   | 9.6383     | 7.69956   | 8.47262   | 8.04561  | 8.96173   | 7.98679   | 15.0317   | 20.1797   | 6.13353  | 14.8631    | 25.8487   | 9.10962    | 6.61997   |
| KIF14        | 0.149474   | 0.160893  | 0.121025   | 0.868507  | 0.044461  | 0.609296 | 0.127091  | 0.0650069 | 0.170423  | 0.658615  | 0.804196 | 0.307205   | 0.83718   | 1.14357    | 0.506972  |
| KIF15        | 0.444967   | 0.258192  | 0.233531   | 0.991062  | 0.185803  | 1.12443  | 0.142035  | 0.233868  | 0.116542  | 0.588505  | 0.912803 | 0.349197   | 0.941532  | 0.742688   | 0.350435  |
| KIF16B       | 3.83864    | 4.8184    | 4.40172    | 4.37588   | 3.37275   | 4.64098  | 2.51718   | 3.14804   | 3.68678   | 4.1296    | 2.10393  | 4.13062    | 4.55891   | 3.784      | 2.10721   |

|            |           |           |           |           |           |           |           |           |            |            |            |           |          |            |           |
|------------|-----------|-----------|-----------|-----------|-----------|-----------|-----------|-----------|------------|------------|------------|-----------|----------|------------|-----------|
| KIF17      | 0.248486  | 0.0870721 | 0.130814  | 0.168774  | 0.192992  | 0.557808  | 0.135408  | 0.180682  | 0.0962906  | 0.240994   | 0.274134   | 0.177798  | 0.579344 | 0.371899   | 0.527175  |
| KIF18A     | 0.280684  | 0.186757  | 0.215616  | 0.792002  | 0.103809  | 0.665782  | 0.0686734 | 0.190056  | 0.113947   | 0.880718   | 1.06373    | 0.325164  | 0.711448 | 0.96052    | 0.614244  |
| KIF18B     | 0.386891  | 0.489887  | 0.304235  | 1.80561   | 0.751864  | 2.14555   | 0.650429  | 0.273065  | 0.227707   | 0.954911   | 0.88324    | 0.840603  | 1.7491   | 1.88306    | 1.09519   |
| KIF19      | 0.18423   | 0.0459127 | 0.0472989 | 0.353521  | 0.108548  | 1.0494    | 0.0797869 | 0.0790411 | 0.00773693 | 0.135547   | 0.136258   | 0.0227278 | 0.102469 | 0.0730449  | 0.237207  |
| KIF1A      | 0.0471547 | 0.124361  | 0.17657   | 0.0869583 | 0.0192757 | 0.183852  | 0.5639    | 0.0838144 | 0.00906776 | 0.00934485 | 0.00560335 | 0         | 0        | 0          | 0         |
| KIF1B      | 6.33486   | 6.27459   | 6.82106   | 6.38449   | 4.93133   | 6.56947   | 7.40451   | 5.34224   | 13.1654    | 8.78697    | 5.14813    | 7.39572   | 11.1205  | 6.39515    | 5.07799   |
| KIF1BP     | 3.14636   | 3.1108    | 3.11445   | 4.46067   | 2.76858   | 5.71435   | 2.20113   | 2.46488   | 3.95374    | 3.36693    | 5.29698    | 2.23829   | 4.56461  | 3.49797    | 3.89172   |
| KIF1C      | 10.0875   | 11.9362   | 11.1904   | 19.9317   | 37.1024   | 25.3751   | 16.2008   | 7.28007   | 33.3478    | 26.9483    | 10.9888    | 21.6179   | 60.7116  | 20.7983    | 13.7227   |
| KIF20A     | 0.313375  | 0.31804   | 0.281309  | 2.87212   | 0.403923  | 2.92382   | 0.418703  | 0.278501  | 0.211128   | 1.82432    | 3.40213    | 0.83012   | 2.18105  | 2.81568    | 0.823488  |
| KIF20B     | 0.88984   | 0.592974  | 0.47196   | 1.53451   | 0.122617  | 1.13959   | 0.421964  | 0.778062  | 0.607411   | 1.42758    | 1.65665    | 0.48523   | 1.73626  | 1.44396    | 0.700798  |
| KIF21A     | 2.61713   | 1.97625   | 2.19102   | 2.10807   | 1.11512   | 1.72996   | 1.90192   | 1.9976    | 3.0049     | 2.91737    | 1.78997    | 3.79761   | 3.874    | 2.96696    | 1.53144   |
| KIF21B     | 0.430732  | 0.222116  | 0.26773   | 0.463075  | 0.47016   | 0.937718  | 0.481162  | 0.2752    | 0.0425337  | 0.467556   | 0.265461   | 0.0766334 | 0.56933  | 0.401563   | 0.932891  |
| KIF22      | 5.26283   | 5.74331   | 5.42842   | 7.23458   | 7.74474   | 9.60483   | 5.21279   | 4.21027   | 4.09466    | 3.57242    | 5.28334    | 4.25094   | 5.47848  | 4.73736    | 2.94915   |
| KIF23      | 0.67757   | 0.532311  | 0.392425  | 2.22766   | 0.205548  | 2.20128   | 0.366054  | 0.458532  | 0.750796   | 2.7324     | 2.72343    | 1.28213   | 3.86373  | 3.14799    | 1.33004   |
| KIF24      | 0.479381  | 0.40574   | 0.351417  | 0.889229  | 0.303586  | 0.722757  | 0.513659  | 0.36049   | 0.314371   | 0.51881    | 0.455069   | 0.520512  | 0.625726 | 0.767041   | 0.730818  |
| KIF25      | 0.0766326 | 0.0147691 | 0.0253584 | 0         | 0         | 0.0522013 | 0.0349987 | 0         | 0.018666   | 0          | 0.0173017  | 0         | 0        | 0.00801031 | 0.0220108 |
| KIF25-AS1  | 0.0329438 | 0         | 0.0136267 | 0         | 0         | 0.0841538 | 0.0376142 | 0.0146389 | 0          | 0          | 0          | 0.0117861 | 0        | 0          | 0         |
| KIF26A     | 1.21247   | 0.759111  | 1.11354   | 0.656508  | 3.0964    | 1.66234   | 1.11452   | 0.426146  | 0.208566   | 0.683507   | 0.564502   | 0.558763  | 1.21319  | 1.27096    | 2.92669   |
| KIF26B     | 1.20883   | 0.776027  | 0.829599  | 0.864993  | 1.88037   | 1.78025   | 0.880605  | 0.8776    | 0.207354   | 1.78645    | 2.53126    | 0.670029  | 0.729398 | 1.58213    | 3.53074   |
| KIF26B-AS1 | 0.224146  | 0.067498  | 0.0695359 | 0.0577472 | 0.261132  | 0.0715714 | 0.0959709 | 0.0996011 | 0.034123   | 0.105497   | 0          | 0.280669  | 0        | 0.366089   | 0.442615  |
| KIF27      | 1.04939   | 1.13128   | 1.18159   | 0.484923  | 0.269453  | 0.767255  | 0.649441  | 0.931796  | 0.389732   | 0.576335   | 0.578002   | 0.690042  | 0.32922  | 0.579395   | 0.514097  |
| KIF2A      | 3.85011   | 3.06364   | 3.17192   | 4.59064   | 1.31803   | 5.77085   | 2.45833   | 3.94481   | 4.30795    | 4.78566    | 5.5855     | 3.05083   | 5.08446  | 5.71517    | 3.38151   |
| KIF2B      | 0         | 0         | 0         | 0         | 0         | 0         | 0         | 0         | 0          | 0          | 0          | 0         | 0        | 0          | 0         |
| KIF2C      | 0.543629  | 0.363979  | 0.315394  | 2.8084    | 0.614141  | 2.75331   | 0.604576  | 0.313722  | 0.283748   | 1.78996    | 2.5504     | 0.687031  | 2.519    | 1.88555    | 0.993643  |
| KIF3A      | 1.32361   | 1.34048   | 1.39059   | 1.05589   | 0.719323  | 1.60516   | 0.857625  | 0.949475  | 1.51431    | 1.15785    | 1.16901    | 1.32278   | 1.50094  | 1.29016    | 1.16775   |
| KIF3B      | 5.48195   | 3.71203   | 3.50464   | 5.93021   | 4.15182   | 8.69411   | 3.63962   | 3.27036   | 3.82233    | 4.28125    | 3.90624    | 3.09356   | 5.75971  | 4.92291    | 5.88283   |



|             |            |            |            |           |           |           |           |           |           |           |            |           |           |            |           |
|-------------|------------|------------|------------|-----------|-----------|-----------|-----------|-----------|-----------|-----------|------------|-----------|-----------|------------|-----------|
| KIR3DL1     | 0          | 0          | 0          | 0         | 0         | 0.0103661 | 0         | 0.0108194 | 0         | 0         | 0          | 0         | 0         | 0          | 0         |
| KIR3DL2     | 0.0368324  | 0.011831   | 0          | 0         | 0.0190712 | 0.0418165 | 0.014018  | 0.0327336 | 0         | 0.0154095 | 0          | 0         | 0         | 0.00641675 | 0.0705281 |
| KIR3DL3     | 0          | 0          | 0          | 0         | 0         | 0         | 0         | 0         | 0         | 0         | 0          | 0         | 0         | 0          | 0         |
| KIR3DS1     | 0          | 0          | 0          | 0         | 0         | 0         | 0         | 0         | 0         | 0         | 0          | 0         | 0         | 0          | 0         |
| KIR3DX1     | 0.00630429 | 0          | 0          | 0         | 0         | 0.010736  | 0         | 0.0112055 | 0         | 0         | 0          | 0         | 0         | 0          | 0.0543226 |
| KIRREL1     | 5.12276    | 4.10513    | 3.76301    | 5.91982   | 7.47491   | 13.9323   | 4.87254   | 3.42181   | 1.85983   | 5.30788   | 7.7607     | 2.06887   | 8.9518    | 7.00225    | 12.266    |
| KIRREL1-IT1 | 0.944614   | 0.792806   | 0.491558   | 0.37682   | 0.733656  | 0.428109  | 0.695826  | 0.446828  | 0.0742216 | 0.152979  | 0.171992   | 0.392456  | 0.10813   | 1.02721    | 0.831456  |
| KIRREL2     | 0          | 0.00745117 | 0.00639678 | 0.0239054 | 0.0120111 | 0.0395042 | 0.0088286 | 0         | 0         | 0         | 0.00872891 | 0         | 0.0249445 | 0.00808257 | 0         |
| KIRREL3     | 0.0761643  | 0.0733942  | 0.130517   | 0.0504575 | 0.261971  | 0.0926469 | 0.242251  | 0.0628536 | 0         | 0.0204844 | 0.0368485  | 0.0272488 | 0         | 0.0540235  | 0.203137  |
| KIRREL3-AS2 | 0          | 0          | 0          | 0         | 0         | 0         | 0.10698   | 0         | 0         | 0         | 0          | 0         | 0         | 0          | 0         |
| KIRREL3-AS3 | 0          | 0          | 0          | 0         | 0         | 0         | 0         | 0         | 0         | 0         | 0          | 0         | 0         | 0          | 0         |
| KISS1       | 0          | 0          | 0          | 0         | 0         | 0.0275994 | 0         | 0         | 0         | 0         | 0          | 0         | 0         | 0          | 0         |
| KISS1R      | 0          | 0.00686195 | 0.0117819  | 0         | 0.0221226 | 0.121268  | 0.0162609 | 0.012657  | 0.052035  | 0.10725   | 0.434087   | 0.0713331 | 0.119454  | 0.0669908  | 0.0204531 |
| KIT         | 6.95271    | 5.88558    | 7.89735    | 3.66313   | 1.93081   | 5.65367   | 6.21298   | 6.85445   | 1.46483   | 1.53203   | 2.1805     | 1.05576   | 2.67712   | 1.02355    | 2.18965   |
| KITLG       | 2.95082    | 2.22482    | 2.73658    | 3.08035   | 0.614233  | 2.98685   | 2.3788    | 2.55063   | 0.781929  | 3.29266   | 5.58697    | 1.14392   | 1.85446   | 1.87556    | 3.99346   |
| KIZ         | 3.69259    | 3.01812    | 3.93974    | 2.72416   | 1.42199   | 4.8871    | 1.98473   | 2.55952   | 1.69114   | 2.98215   | 2.92607    | 1.50875   | 1.59272   | 2.03206    | 2.95434   |
| KIZ-AS1     | 0.0996686  | 0.163274   | 0.0824529  | 0.143796  | 0         | 0.0848665 | 0.0910387 | 0.212585  | 0         | 0         | 0          | 0.0570524 | 0         | 0.0937641  | 0.114509  |
| KL          | 0.40683    | 0.204927   | 0.244769   | 0.352551  | 0.330336  | 1.01561   | 0.496176  | 0.17667   | 0.112607  | 0.38296   | 0.741078   | 0.178628  | 0.372847  | 0.396259   | 0.637373  |
| KLB         | 0.388319   | 0.359522   | 0.403131   | 0.219703  | 0.165583  | 0.126424  | 0.30862   | 0.368789  | 0.366288  | 0.0955648 | 0.120335   | 0.212476  | 0.0687761 | 0.302439   | 0.229631  |
| KLC1        | 14.0339    | 14.9394    | 15.1928    | 17.0075   | 17.9406   | 18.6823   | 15.17     | 9.84096   | 13.9054   | 18.9936   | 13.5262    | 14.1053   | 28.081    | 19.7142    | 16.8707   |
| KLC2        | 2.64775    | 2.97441    | 2.95178    | 4.54521   | 6.43325   | 6.61285   | 3.5162    | 1.86235   | 5.15601   | 4.44279   | 3.00497    | 4.83765   | 8.88414   | 5.59085    | 3.69067   |
| KLC3        | 8.69614    | 16.5317    | 16.845     | 12.4778   | 26.3223   | 11.3064   | 16.1532   | 7.19903   | 38.2376   | 22.232    | 11.8901    | 20.5372   | 40.8634   | 17.4162    | 3.17628   |
| KLC4        | 1.46439    | 1.69128    | 1.51431    | 1.41293   | 3.20019   | 2.98892   | 1.18842   | 1.09728   | 0.935441  | 0.765815  | 1.14259    | 0.868037  | 0.930921  | 1.00546    | 1.18554   |
| KLF1        | 0.0429902  | 0.00690444 | 0.0118548  | 0.0147675 | 0         | 0.0244037 | 0.0163616 | 0         | 0.0174524 | 0         | 0.0161769  | 0         | 0.157177  | 0.0299581  | 0.0205798 |
| KLF10       | 12.0286    | 15.8914    | 17.084     | 23.4378   | 11.3929   | 25.0189   | 9.78588   | 16.5732   | 29.1495   | 25.7252   | 21.8228    | 28.5252   | 25.9177   | 19.567     | 16.3684   |
| KLF11       | 7.07326    | 5.67407    | 7.60738    | 6.11784   | 3.9581    | 7.48612   | 5.89862   | 6.1617    | 4.39581   | 2.90064   | 5.52189    | 3.70816   | 5.32477   | 3.29419    | 5.9572    |

|          |           |            |           |           |           |           |           |            |           |           |           |           |            |            |           |
|----------|-----------|------------|-----------|-----------|-----------|-----------|-----------|------------|-----------|-----------|-----------|-----------|------------|------------|-----------|
| KLF12    | 1.63777   | 0.774793   | 1.01967   | 0.496274  | 0.392149  | 0.603337  | 1.1336    | 0.901212   | 0.175692  | 0.854712  | 1.22617   | 0.236802  | 0.59541    | 0.644195   | 1.68787   |
| KLF13    | 16.0126   | 15.496     | 17.5405   | 15.3527   | 19.1432   | 20.7714   | 17.5072   | 12.8616    | 14.4313   | 11.2663   | 9.28577   | 10.3389   | 20.6793    | 13.1945    | 15.547    |
| KLF14    | 0.0782388 | 0.00753933 | 0.0129449 | 0.0483764 | 0.0243064 | 0.0399716 | 0.0357322 | 0.0556257  | 0.0190572 | 0.0392791 | 0         | 0         | 0          | 0          | 0         |
| KLF15    | 1.02654   | 0.313544   | 0.432197  | 0.0944538 | 0.213559  | 0.850675  | 0.387203  | 0.537609   | 0.0446505 | 0.0460149 | 0.0724275 | 0.0262328 | 0.0236543  | 0.0191613  | 0.0394887 |
| KLF16    | 3.47907   | 5.25283    | 6.30006   | 7.80667   | 12.5641   | 10.3615   | 4.75943   | 3.07766    | 11.4812   | 5.59407   | 5.53823   | 6.86011   | 11.5958    | 6.92971    | 4.05237   |
| KLF17    | 0         | 0          | 0         | 0.0304982 | 0         | 0.0188996 | 0         | 0          | 0         | 0.0185722 | 0.0584653 | 0         | 0.0286415  | 0          | 0.0425017 |
| KLF18    | 0         | 0          | 0         | 0         | 0         | 0         | 0         | 0          | 0         | 0         | 0         | 0         | 0          | 0          | 0         |
| KLF2     | 8.4811    | 4.50093    | 5.37335   | 4.36574   | 9.8195    | 11.0754   | 11.554    | 3.75026    | 4.84708   | 5.49368   | 7.63126   | 4.40481   | 9.03274    | 5.85967    | 12.8097   |
| KLF3     | 14.0046   | 17.8255    | 17.2312   | 12.4783   | 9.39974   | 15.5668   | 17.7606   | 18.4791    | 38.0331   | 14.8872   | 17.074    | 20.6695   | 19.4108    | 12.4202    | 10.4086   |
| KLF3-AS1 | 0.588196  | 0.795097   | 0.820264  | 0.324207  | 1.09038   | 0.253045  | 0.523886  | 0.27076    | 0.335964  | 0.639986  | 0.346567  | 0.77186   | 0.199768   | 0.507303   | 0.456944  |
| KLF4     | 64.6827   | 81.6995    | 106.251   | 28.3496   | 63.1061   | 26.0953   | 95.3823   | 62.2693    | 146.497   | 42.2158   | 57.5291   | 80.9485   | 74.4838    | 43.7268    | 22.7617   |
| KLF5     | 28.8414   | 46.8714    | 50.4637   | 43.1352   | 30.9629   | 26.9274   | 48.8861   | 46.2756    | 48.9175   | 28.3737   | 25.5186   | 35.7091   | 49.3072    | 26.9749    | 6.86181   |
| KLF6     | 24.5526   | 25.9414    | 33.7227   | 30.0254   | 17.9207   | 30.3291   | 25.9752   | 24.9581    | 29.618    | 44.293    | 39.3593   | 39.0484   | 68.9617    | 36.1654    | 28.403    |
| KLF7     | 4.49831   | 2.6659     | 3.04646   | 5.09225   | 2.19824   | 5.76302   | 2.88342   | 2.52696    | 2.26628   | 5.31217   | 4.66611   | 2.60324   | 7.343      | 6.61997    | 4.69354   |
| KLF8     | 2.63382   | 4.72408    | 3.66825   | 2.00701   | 3.14221   | 1.87835   | 3.50546   | 3.18939    | 2.9847    | 2.60119   | 1.44702   | 3.32708   | 1.48292    | 2.19498    | 1.49678   |
| KLF9     | 13.7134   | 4.83239    | 5.39296   | 4.28175   | 2.28479   | 11.026    | 6.74806   | 9.2886     | 2.05656   | 4.1384    | 7.65509   | 1.99998   | 5.30411    | 5.32084    | 12.2275   |
| KLHDC1   | 0.911618  | 1.30941    | 1.54388   | 0.48745   | 0.333976  | 0.915366  | 0.667719  | 1.04711    | 0.429436  | 0.518117  | 0.553385  | 0.449216  | 0.255244   | 0.296658   | 0.876916  |
| KLHDC10  | 4.4575    | 4.0962     | 4.54997   | 4.26388   | 2.44016   | 5.12087   | 4.30139   | 4.30968    | 5.16167   | 4.80506   | 5.52704   | 3.32836   | 6.09053    | 4.00367    | 3.09752   |
| KLHDC2   | 10.9564   | 9.28605    | 9.96502   | 9.42891   | 7.14604   | 11.4133   | 6.467     | 7.15197    | 11.6426   | 8.89421   | 14.278    | 4.62125   | 7.75526    | 5.42492    | 7.39812   |
| KLHDC3   | 9.84649   | 9.64313    | 10.431    | 14.2933   | 15.0812   | 20.7409   | 10.0252   | 6.87622    | 18.7068   | 11.8116   | 24.5595   | 8.89077   | 13.0605    | 9.44146    | 10.8154   |
| KLHDC4   | 2.70726   | 2.52623    | 2.82553   | 3.59039   | 5.39415   | 4.48393   | 3.15627   | 2.16234    | 2.15635   | 1.9355    | 1.57321   | 2.52561   | 3.24283    | 3.28359    | 2.28028   |
| KLHDC7A  | 0.0137293 | 0.02646    | 0.0189298 | 0.0282969 | 0.0142176 | 0.0311742 | 0.0209009 | 0.00813432 | 0.206223  | 0.0402073 | 0.067161  | 0         | 0.00590539 | 0.00239185 | 0         |
| KLHDC7B  | 0.10561   | 0.0832658  | 0.055598  | 0.390815  | 0.178963  | 1.18947   | 0.0876963 | 0.157851   | 0.140314  | 0.325354  | 0.384758  | 0.144264  | 0.229196   | 0.130465   | 0.0827289 |
| KLHDC8A  | 0.044094  | 0.00303502 | 0.0208444 | 0.0259658 | 0.0293542 | 0.0643637 | 0.0934981 | 0.0391871  | 0.0153433 | 0.0632486 | 0.120886  | 0.022536  | 0.00812835 | 0.0329221  | 0         |
| KLHDC8B  | 4.99004   | 7.38697    | 6.57797   | 7.95387   | 13.6371   | 10.6919   | 3.88705   | 3.73015    | 7.02866   | 5.70695   | 8.13382   | 3.98762   | 4.49082    | 3.69875    | 3.03062   |
| KLHDC9   | 0.304514  | 0.285288   | 0.167944  | 0.191773  | 0.341622  | 0.345719  | 0.251105  | 0.150348   | 0.0618106 | 0.148632  | 0.286465  | 0.0242098 | 0.185556   | 0.0795761  | 0.145773  |

|        |           |           |           |           |           |           |           |            |            |           |            |           |            |            |            |
|--------|-----------|-----------|-----------|-----------|-----------|-----------|-----------|------------|------------|-----------|------------|-----------|------------|------------|------------|
| KLHL1  | 0         | 0         | 0         | 0         | 0         | 0         | 0         | 0          | 0          | 0         | 0          | 0         | 0          | 0          | 0          |
| KLHL10 | 0.100404  | 0.111265  | 0.107979  | 0.0310407 | 0.20275   | 0.0683939 | 0.0458551 | 0.0446152  | 0.012228   | 0.0378051 | 0.0113343  | 0.0215525 | 0.00647799 | 0.0419803  | 0.0865154  |
| KLHL11 | 2.18967   | 2.0092    | 2.13188   | 1.96359   | 1.69338   | 2.38313   | 1.87596   | 2.40127    | 2.85318    | 2.22684   | 2.53886    | 1.5623    | 3.06334    | 1.90845    | 1.81232    |
| KLHL12 | 3.44169   | 4.08571   | 4.29247   | 5.19873   | 2.82551   | 6.94746   | 3.19001   | 2.80283    | 2.70939    | 3.2685    | 4.03296    | 2.06935   | 2.91289    | 3.40263    | 2.62169    |
| KLHL13 | 0.45626   | 0.329749  | 0.277065  | 0.215086  | 0.407142  | 0.756333  | 0.415646  | 0.310585   | 0.0945826  | 0.316787  | 0.904095   | 0.107664  | 0.197295   | 0.380523   | 0.934075   |
| KLHL14 | 0.0597731 | 0.0471266 | 0.0314672 | 0.0167994 | 0.0506445 | 0.259107  | 0.0310214 | 0.0193169  | 0.0264716  | 0.0341006 | 0.0674764  | 0.0311049 | 0.052589   | 0.0568     | 0.00780379 |
| KLHL15 | 1.30539   | 0.923893  | 1.05551   | 1.02223   | 0.412419  | 1.18688   | 0.989426  | 1.31415    | 0.592814   | 0.833085  | 1.49028    | 0.498684  | 1.22052    | 0.903891   | 0.656677   |
| KLHL17 | 0.496438  | 0.995907  | 1.03792   | 1.0883    | 2.64992   | 1.4987    | 1.12333   | 0.585584   | 0.472692   | 0.657067  | 0.580796   | 1.05273   | 0.861897   | 1.44354    | 0.933314   |
| KLHL18 | 3.77556   | 4.82504   | 4.41166   | 6.12136   | 8.5499    | 6.03773   | 4.8923    | 3.20743    | 20.2953    | 8.51862   | 6.45678    | 8.13958   | 9.7818     | 5.68947    | 3.03108    |
| KLHL2  | 2.51143   | 1.87591   | 1.41604   | 4.82921   | 2.09222   | 3.91252   | 1.3216    | 1.74566    | 3.14408    | 4.96587   | 3.67454    | 2.33911   | 6.40898    | 3.32547    | 2.9821     |
| KLHL20 | 3.68124   | 2.8778    | 3.00117   | 2.97431   | 1.90954   | 4.65913   | 2.708     | 2.82627    | 2.85599    | 3.05227   | 3.54476    | 1.87872   | 3.55621    | 2.8074     | 3.55007    |
| KLHL21 | 8.81834   | 9.10812   | 9.64202   | 12.0206   | 14.6095   | 14.4785   | 9.77607   | 6.85174    | 29.7212    | 15.9674   | 16.1344    | 18.3093   | 17.7175    | 12.0248    | 4.63623    |
| KLHL22 | 1.82242   | 2.28042   | 2.51028   | 1.96923   | 3.51795   | 3.6007    | 2.35351   | 1.57245    | 1.28214    | 1.8876    | 2.49671    | 1.76609   | 1.85506    | 1.85409    | 2.79511    |
| KLHL23 | 0.310034  | 0.147061  | 0.223057  | 0.387577  | 0.176361  | 0.386589  | 0.04851   | 0.265766   | 0.0245065  | 0.0419493 | 0.403109   | 0.125907  | 0.231367   | 0.223671   | 0.436009   |
| KLHL24 | 4.1283    | 2.70182   | 2.99442   | 2.12717   | 1.23291   | 3.59681   | 2.22211   | 3.33256    | 1.32578    | 2.37174   | 3.24561    | 1.07959   | 1.90095    | 1.48851    | 3.62783    |
| KLHL25 | 1.33288   | 2.55063   | 2.02846   | 1.41892   | 5.82062   | 2.61783   | 2.71347   | 1.5198     | 3.40739    | 2.00432   | 1.83114    | 2.3123    | 2.22293    | 1.53454    | 0.984179   |
| KLHL26 | 1.18881   | 1.20161   | 1.22399   | 1.13189   | 1.62584   | 2.61316   | 1.84422   | 0.809613   | 0.700313   | 0.664948  | 0.787707   | 0.790528  | 1.22556    | 0.769903   | 0.807248   |
| KLHL28 | 1.79069   | 1.53839   | 1.87492   | 1.30961   | 0.643928  | 1.27015   | 1.32294   | 2.09572    | 1.58909    | 1.94044   | 2.02915    | 1.04001   | 2.32824    | 1.4065     | 1.23459    |
| KLHL29 | 1.74802   | 1.87307   | 2.17289   | 1.50115   | 1.53442   | 1.8644    | 3.01454   | 1.43617    | 0.609839   | 1.07983   | 0.323744   | 1.28007   | 1.58305    | 1.15151    | 1.79126    |
| KLHL3  | 1.66043   | 1.18941   | 1.16454   | 1.09632   | 1.46992   | 1.56396   | 0.828789  | 1.00031    | 0.12169    | 0.435242  | 0.713272   | 0.222896  | 0.583998   | 0.58673    | 1.06356    |
| KLHL30 | 0.251214  | 0.148272  | 0.228604  | 0.110025  | 0.507288  | 0.475939  | 0.279657  | 0.0669773  | 0.06119    | 0.12612   | 0.0921664  | 0.0494313 | 0.210706   | 0.282285   | 0.28862    |
| KLHL31 | 0.241787  | 0.417446  | 0.396713  | 0.116279  | 0.194049  | 0.219604  | 0.225453  | 0.419016   | 0.127603   | 0.0505779 | 0.036393   | 0.0980362 | 0.00779999 | 0.058972   | 0.0231491  |
| KLHL32 | 0.0173278 | 0.028386  | 0.0229357 | 0.0142855 | 0         | 0.0147544 | 0.0395687 | 0.0461986  | 0          | 0         | 0.00391219 | 0         | 0          | 0.00905628 | 0.014931   |
| KLHL33 | 0.0248449 | 0.0119707 | 0.0205535 | 0         | 0.0385928 | 0.105776  | 0.0709178 | 0.0110401  | 0          | 0         | 0.0140234  | 0         | 0.0400746  | 0.0259701  | 0.0178402  |
| KLHL34 | 0.0304614 | 0.0513687 | 0.0566996 | 0.0627827 | 0.0118293 | 0.0907812 | 0.139119  | 0.00676789 | 0.00927464 | 0         | 0          | 0         | 0.0147402  | 0.00796023 | 0.0109366  |
| KLHL35 | 0.394077  | 0.345222  | 0.227218  | 0.147675  | 0.537939  | 0.884635  | 0.313597  | 0.212256   | 0.174524   | 0.179857  | 0.498786   | 0.290517  | 0.100162   | 0.337028   | 0          |



|           |           |            |           |           |           |            |           |           |            |           |           |           |           |           |           |
|-----------|-----------|------------|-----------|-----------|-----------|------------|-----------|-----------|------------|-----------|-----------|-----------|-----------|-----------|-----------|
| KLHL36    | 4.24037   | 5.07166    | 5.62788   | 4.36667   | 5.51204   | 5.70407    | 5.268     | 3.9617    | 3.99351    | 3.17404   | 2.89285   | 3.59717   | 4.56321   | 3.50278   | 3.71982   |
| KLHL38    | 0.0504756 | 0.0851197  | 0.0521962 | 0.0520165 | 0.0980075 | 0.161172   | 0.0432235 | 0.0112146 | 0          | 0.047514  | 0.128206  | 0         | 0         | 0.0395711 | 0         |
| KLHL4     | 0.209493  | 0.110459   | 0.140608  | 0.109981  | 0.0306995 | 0.0538507  | 0.176009  | 0.0491796 | 0.00962789 | 0.203403  | 0.223105  | 0.0791913 | 0.170868  | 0.200388  | 0.351948  |
| KLHL40    | 0         | 0.00460962 | 0         | 0         | 0         | 0.00814634 | 0.0109235 | 0.0170051 | 0          | 0         | 0         | 0         | 0         | 0         | 0.0686985 |
| KLHL41    | 0.338129  | 0.271526   | 0.357425  | 0.183905  | 0.058359  | 0.383883   | 0.150136  | 0.116861  | 0.0343169  | 0.0589426 | 0.127235  | 0.0537645 | 0.0242399 | 0.0687248 | 0.539551  |
| KLHL42    | 2.59729   | 2.43043    | 2.69026   | 2.57335   | 2.2173    | 3.31429    | 2.17307   | 2.30507   | 3.15885    | 3.50233   | 4.92708   | 2.33712   | 4.01859   | 4.13407   | 3.83279   |
| KLHL5     | 2.6233    | 1.29048    | 1.49874   | 2.7004    | 0.774456  | 3.3296     | 0.916764  | 1.77494   | 0.65663    | 3.19064   | 4.41424   | 0.939559  | 3.47861   | 3.18299   | 4.27108   |
| KLHL6     | 0.259829  | 0.144585   | 0.166509  | 0.577006  | 0.352443  | 0.645026   | 0.162956  | 0.273194  | 0.0534832  | 0.583327  | 0.784925  | 0.128307  | 0.613894  | 0.562318  | 1.09842   |
| KLHL6-AS1 | 0.592881  | 0.453686   | 0.334184  | 0.129057  | 0.0834034 | 0.122714   | 0.330376  | 0.353377  | 0.0942344  | 0.213241  | 0.170698  | 0.331325  | 0.078219  | 0.756073  | 0.521816  |
| KLHL7     | 2.53878   | 2.21488    | 2.35753   | 2.47062   | 1.68635   | 2.98022    | 1.71081   | 1.87938   | 2.5135     | 3.32837   | 4.11702   | 1.65473   | 3.04255   | 2.28141   | 2.54165   |
| KLHL7-DT  | 0.0631831 | 0.0913277  | 0.0298683 | 0.0186034 | 0.0140207 | 0.0999134  | 0.0927519 | 0.0802169 | 0          | 0         | 0.0101894 | 0.0387507 | 0         | 0.0518921 | 0         |
| KLHL8     | 1.50623   | 1.2305     | 1.44556   | 1.73555   | 0.442149  | 1.56194    | 0.902767  | 1.60564   | 0.881102   | 1.16604   | 1.27192   | 0.67607   | 1.50747   | 1.1798    | 1.03331   |
| KLHL9     | 3.09672   | 2.98409    | 3.1433    | 4.15567   | 1.21037   | 4.21343    | 2.21958   | 2.86276   | 1.54087    | 3.83629   | 5.66312   | 1.52317   | 3.78348   | 2.67857   | 3.55898   |
| KLK1      | 0.951084  | 3.37321    | 4.32742   | 0.49006   | 1.31321   | 0.134973   | 10.6782   | 2.25399   | 1.67312    | 0.165793  | 1.04383   | 1.39886   | 0.272727  | 0.372809  | 0.113823  |
| KLK10     | 3.67642   | 3.52575    | 3.36766   | 63.7341   | 12.1326   | 15.64      | 4.51124   | 5.88359   | 44.8004    | 105.294   | 88.4291   | 43.9519   | 100.374   | 37.5813   | 10.6608   |
| KLK11     | 13.4913   | 16.9834    | 15.5082   | 26.208    | 16.0449   | 17.0647    | 33.1635   | 18.5337   | 122.073    | 54.8427   | 53.9684   | 47.5781   | 47.3321   | 21.0275   | 6.59537   |
| KLK12     | 0.0430969 | 0.0934414  | 0.160438  | 5.596     | 0.6025    | 0.0366965  | 0.196827  | 0.134053  | 7.4007     | 42.8943   | 10.4599   | 11.2555   | 14.6121   | 0.382914  | 0.216624  |
| KLK13     | 1.02609   | 1.68991    | 1.62826   | 28.5883   | 3.34714   | 3.20888    | 2.36442   | 1.89013   | 14.019     | 17.5147   | 11.4464   | 6.46764   | 12.4523   | 2.80816   | 0.656421  |
| KLK14     | 2.09789   | 1.35127    | 0.712478  | 2.36675   | 0.754658  | 3.00855    | 3.35343   | 1.72705   | 1.72126    | 2.13417   | 1.44588   | 2.13314   | 0.54142   | 0.242373  | 0.412283  |
| KLK15     | 0         | 0.0170369  | 0.0146261 | 0.0182197 | 0.0274631 | 0          | 0.0403728 | 0.0157125 | 0          | 0         | 0         | 0         | 0         | 0         | 0         |
| KLK2      | 0         | 0.0150787  | 0         | 0         | 0.0243064 | 0.0133239  | 0         | 0         | 0          | 0         | 0         | 0.0111964 | 0         | 0         | 0         |
| KLK3      | 0         | 0          | 0         | 0         | 0         | 0          | 0         | 0         | 0          | 0         | 0         | 0         | 0         | 0         | 0         |
| KLK4      | 0         | 0.0246152  | 0         | 0.0175494 | 0.0264527 | 0.0145004  | 0.0194437 | 0.0151344 | 0.35258    | 0.106869  | 0.192242  | 0.207146  | 0.0439493 | 0.0979038 | 0.0733694 |
| KLK5      | 17.3239   | 26.9742    | 26.6178   | 44.8294   | 57.7083   | 22.1145    | 92.7296   | 21.5677   | 516.501    | 156.309   | 165.928   | 83.9125   | 187.674   | 35.66     | 14.2047   |
| KLK6      | 0.0733923 | 0.0942975  | 0.0607153 | 69.2173   | 7.60025   | 1.09362    | 0.195526  | 0.195675  | 2.56233    | 10.6239   | 4.63964   | 1.00652   | 8.85492   | 1.84757   | 1.07157   |
| KLK7      | 15.9672   | 29.4195    | 29.9342   | 20.4874   | 29.3319   | 22.3181    | 57.5993   | 24.3054   | 299.827    | 112.044   | 92.9468   | 57.3322   | 60.172    | 21.4665   | 4.85703   |

|             |            |           |           |           |           |           |            |           |           |           |           |            |           |           |           |
|-------------|------------|-----------|-----------|-----------|-----------|-----------|------------|-----------|-----------|-----------|-----------|------------|-----------|-----------|-----------|
| KLK8        | 14.031     | 20.2324   | 13.6587   | 42.0486   | 54.832    | 18.2468   | 28.0352    | 12.3084   | 258.064   | 77.1208   | 113.925   | 56.3714    | 53.6142   | 27.4047   | 7.84586   |
| KLK9        | 2.55893    | 3.34986   | 3.00897   | 85.7457   | 14.7997   | 8.78411   | 8.15873    | 3.33258   | 119.054   | 17.3716   | 47.8727   | 28.5472    | 20.7467   | 11.7928   | 2.08016   |
| KLKB1       | 0.0567463  | 0.0956944 | 0.078241  | 0.0682252 | 0.0293822 | 0.153009  | 0.021597   | 0.0504314 | 0         | 0.0830929 | 0.106766  | 0.00676725 | 0.0122042 | 0.0197721 | 0.0135825 |
| KLKP1       | 0          | 0         | 0         | 0         | 0         | 0         | 0          | 0         | 0         | 0.0258195 | 0         | 0          | 0         | 0         | 0         |
| KLLN        | 0.162331   | 0.132963  | 0.0805752 | 0.301117  | 0.243752  | 0.368595  | 0.117531   | 0.0769422 | 0.125211  | 0.224117  | 0.384829  | 0.143255   | 0.212962  | 0.147059  | 0.170961  |
| KLRA1P      | 0.545036   | 0.858521  | 1.05786   | 0.486065  | 0.048844  | 0.303444  | 0.454761   | 0.968765  | 0.114887  | 0.157864  | 0.236645  | 0.284991   | 0.0541006 | 0.372508  | 0.662318  |
| KLRB1       | 1.65754    | 0.452054  | 0.569192  | 0.0966875 | 0.19432   | 0.479335  | 0.17854    | 0.972793  | 0.152355  | 0.314021  | 0.882622  | 0.201399   | 0.807123  | 0.735541  | 1.21268   |
| KLRC1       | 0.0763377  | 0.0306506 | 0.031576  | 0.0343012 | 0.0395263 | 0.0358982 | 0          | 0.0565355 | 0         | 0         | 0.0861758 | 0.00910361 | 0.0246264 | 0         | 0         |
| KLRC2       | 0.0572376  | 0.0827338 | 0.0315673 | 0.027209  | 0         | 0.0923785 | 0.021784   | 0.016956  | 0         | 0         | 0.0646141 | 0          | 0         | 0         | 0         |
| KLRC3       | 0.18191    | 0.0584315 | 0.050163  | 0         | 0         | 0.0172105 | 0          | 0.107778  | 0         | 0.0253685 | 0.0684514 | 0.0144624  | 0         | 0.0105638 | 0.290274  |
| KLRC4       | 0.396812   | 0.0503005 | 0.234084  | 1.13E-21  | 0         | 2.54E-28  | 0.113896   | 0.0930022 | 0         | 3.67E-22  | 9.60E-26  | 0          | 0         | 0         | 0.307006  |
| KLRC4-KLRK1 | 0.00837994 | 0.119225  | 0.196672  | 0.132793  | 7.88E-06  | 0.0550866 | 1.09E-05   | 0.140201  | 2.75E-06  | 0.0809781 | 0.0730317 | 3.63E-06   | 3.64E-06  | 5.01E-06  | 0.035943  |
| KLRD1       | 0.149302   | 0.0770866 | 0.0804099 | 0.0355695 | 0.059981  | 0.175288  | 0.0719757  | 0.169964  | 0.0116904 | 0.0492772 | 0.113778  | 0.0549579  | 0.0340625 | 0.0691042 | 0.261921  |
| KLRF1       | 0.261082   | 0.152749  | 0.0771376 | 0.115308  | 0.0869037 | 0         | 0.0638775  | 0.298322  | 0         | 0         | 0         | 0.0133437  | 0.0240641 | 0.0292399 | 0         |
| KLRF2       | 0          | 0.167794  | 0.445246  | 0         | 0         | 0         | 0.144591   | 0.365772  | 0.0385576 | 0         | 0         | 0          | 0         | 0         | 0         |
| KLRG1       | 0.164135   | 0.184527  | 0.190098  | 0.12404   | 0.118981  | 0.0931726 | 0.124936   | 0.175044  | 0.0399796 | 0.0961363 | 0.123525  | 0.00782954 | 0.105899  | 0.114379  | 0.282863  |
| KLRG2       | 1.43457    | 2.0736    | 1.24786   | 1.31531   | 4.211     | 0.790396  | 1.86678    | 0.909325  | 0.886421  | 0.860551  | 1.19078   | 0.603809   | 0.394733  | 0.501685  | 0.272677  |
| KLRK1       | 0.559038   | 0.414001  | 0.598264  | 0.0924446 | 0.203604  | 0.378957  | 0.282685   | 0.382253  | 0.0709485 | 0.0652975 | 0.255787  | 0.0937874  | 0.0939652 | 0.129399  | 0.445992  |
| KMO         | 0.0575893  | 0.0870111 | 0.0535722 | 0.273445  | 0.0310679 | 0.128414  | 0.00679297 | 0.113654  | 0.0373173 | 0.105482  | 0.235126  | 0.0045888  | 0.0844664 | 0.0670499 | 0.204325  |
| KMT2A       | 7.75851    | 9.02002   | 10.0145   | 5.18988   | 4.91553   | 7.83863   | 7.29459    | 6.93598   | 2.45946   | 3.69166   | 3.23542   | 3.89585    | 4.08441   | 4.59353   | 6.54957   |
| KMT2B       | 3.96964    | 6.98184   | 6.66964   | 5.90398   | 13.8772   | 10.3683   | 8.05103    | 5.39745   | 4.90113   | 3.79931   | 1.93066   | 6.31023    | 6.21526   | 5.38453   | 6.44638   |
| KMT2C       | 13.1823    | 14.6277   | 16.2014   | 8.65895   | 7.08205   | 9.85977   | 13.3027    | 12.7584   | 8.45469   | 8.57695   | 5.38719   | 9.03878    | 8.65338   | 8.4908    | 9.20494   |
| KMT2D       | 5.62142    | 10.1142   | 9.54618   | 9.01657   | 16.9543   | 14.2902   | 13.9026    | 8.86978   | 5.53689   | 5.1744    | 3.0406    | 8.9452     | 8.56506   | 6.57608   | 9.72109   |
| KMT2E       | 12.383     | 13.9415   | 15.1702   | 8.77123   | 5.70951   | 9.99539   | 8.66296    | 11.2619   | 9.35976   | 8.85398   | 8.38252   | 7.55702    | 8.91573   | 8.38004   | 9.65641   |
| KMT2E-AS1   | 2.90574    | 2.72262   | 3.06329   | 2.27234   | 3.8146    | 1.81733   | 2.69378    | 2.92517   | 1.64416   | 2.12204   | 1.1684    | 2.47472    | 0.476987  | 2.43255   | 1.73568   |
| KMT5A       | 8.31669    | 10.2762   | 9.15061   | 12.7156   | 12.6368   | 14.1629   | 8.65838    | 6.5849    | 18.2503   | 10.1157   | 12.6659   | 11.5663    | 17.5612   | 10.0013   | 4.81008   |

|            |           |           |           |            |           |            |           |           |           |           |           |           |           |            |           |
|------------|-----------|-----------|-----------|------------|-----------|------------|-----------|-----------|-----------|-----------|-----------|-----------|-----------|------------|-----------|
| KMT5B      | 3.49212   | 4.0571    | 3.83635   | 3.64064    | 1.89564   | 3.7435     | 1.97573   | 3.12854   | 4.31778   | 3.7585    | 3.49354   | 2.67782   | 4.8918    | 3.36078    | 2.44914   |
| KMT5C      | 0.84193   | 1.70954   | 1.99001   | 1.09487    | 3.25395   | 2.03119    | 1.36183   | 0.979835  | 1.17186   | 1.44668   | 0.871231  | 1.52757   | 0.717812  | 1.05293    | 0.748502  |
| KNCN       | 0         | 0         | 0         | 0          | 0         | 0          | 0         | 0         | 0         | 0         | 0         | 0         | 0         | 0.00415798 | 0         |
| KNDC1      | 0.025024  | 0.101479  | 0.0431284 | 1.44628    | 0.741787  | 0.497178   | 0.0333336 | 0.0277991 | 0.025397  | 0.141335  | 0.0211868 | 0.0775899 | 0.0403634 | 0.0588539  | 0.0329429 |
| KNG1       | 0         | 0         | 0         | 0.00561431 | 0.0169252 | 0.00463889 | 0         | 0         | 0         | 0         | 0         | 0         | 0         | 0.0113894  | 0         |
| KNL1       | 0.313191  | 0.264076  | 0.236672  | 1.1948     | 0.0748453 | 0.774393   | 0.206303  | 0.289044  | 0.253065  | 1.14902   | 1.28164   | 0.476205  | 1.40867   | 1.52198    | 0.696298  |
| KNOP1      | 2.75725   | 2.96021   | 2.84316   | 4.34538    | 3.86226   | 4.74977    | 2.59797   | 2.29385   | 2.82156   | 2.07573   | 2.73677   | 2.41177   | 3.89108   | 3.51369    | 2.19406   |
| KNSTRN     | 1.13837   | 0.970816  | 0.659218  | 2.67473    | 0.760361  | 2.22941    | 1.10479   | 0.839701  | 7.07064   | 2.50034   | 4.79334   | 1.44173   | 3.31247   | 2.86176    | 0.850118  |
| KNTC1      | 2.17505   | 2.03045   | 2.06267   | 2.8599     | 0.49443   | 1.89437    | 1.68462   | 1.85639   | 0.702622  | 1.74781   | 2.13721   | 1.26687   | 1.67073   | 2.24929    | 1.72848   |
| KPNA1      | 4.99028   | 4.80725   | 4.93656   | 6.53379    | 1.99433   | 5.76665    | 4.22437   | 5.30618   | 6.17016   | 5.89057   | 5.15287   | 4.48222   | 8.01331   | 5.47694    | 4.683     |
| KPNA2      | 2.80441   | 2.43058   | 2.22814   | 17.4902    | 2.67461   | 14.012     | 3.17761   | 2.36161   | 10.1777   | 12.3183   | 16.443    | 8.84835   | 23.7264   | 16.7155    | 8.41576   |
| KPNA3      | 5.0176    | 4.4189    | 4.8784    | 6.77       | 1.30973   | 6.23686    | 3.83898   | 5.19937   | 8.17724   | 7.53765   | 6.58688   | 4.52665   | 11.5509   | 6.2127     | 4.68756   |
| KPNA4      | 6.25411   | 6.04031   | 6.51474   | 7.53648    | 2.30561   | 7.46024    | 4.25738   | 5.97952   | 8.8596    | 8.64842   | 7.17647   | 5.65873   | 13.8744   | 7.26865    | 4.97379   |
| KPNA5      | 2.27355   | 1.76199   | 1.8631    | 1.45883    | 0.516415  | 1.36974    | 1.40814   | 2.17304   | 1.3061    | 1.07681   | 2.10651   | 0.590862  | 0.788796  | 0.846354   | 1.33993   |
| KPNA6      | 7.90794   | 8.61409   | 9.15985   | 13.1639    | 8.16509   | 12.5902    | 10.3445   | 7.29855   | 19.4952   | 13.0577   | 11.7197   | 11.5256   | 17.891    | 10.9536    | 8.33614   |
| KPNA7      | 0.0406494 | 0.026114  | 0.0560467 | 0.0418904  | 0.0210475 | 0.0230749  | 0.0309414 | 0.0361258 | 0.0165021 | 0.323121  | 0.0458881 | 0.0484762 | 0.358433  | 0.0566537  | 0.350266  |
| KPNB1      | 17.2025   | 16.0761   | 16.9006   | 30.4574    | 18.2286   | 36.3786    | 15.025    | 12.9555   | 24.2305   | 24.6904   | 21.0622   | 17.1984   | 45.0753   | 22.959     | 16.7036   |
| KPRP       | 42.4335   | 86.1647   | 99.5144   | 89.9629    | 133.823   | 70.4277    | 268.042   | 71.2081   | 1142.82   | 87.6588   | 235.824   | 193.023   | 69.6461   | 34.7286    | 12.1326   |
| KPTN       | 0.961587  | 0.864005  | 0.601994  | 3.0264     | 2.44236   | 1.52691    | 0.593464  | 0.554321  | 1.32936   | 1.48415   | 2.039     | 1.25521   | 2.27205   | 1.61637    | 0.615834  |
| KRAS       | 3.95549   | 3.40734   | 3.75644   | 4.60613    | 0.84852   | 4.50669    | 2.63081   | 4.40924   | 6.3828    | 7.01811   | 7.65623   | 3.784     | 7.99398   | 4.78857    | 3.88229   |
| KRBA1      | 1.13296   | 1.85706   | 1.34702   | 3.40289    | 7.37554   | 3.14132    | 1.35208   | 0.81461   | 2.70415   | 3.70857   | 1.45249   | 3.84962   | 3.38673   | 2.92793    | 1.95412   |
| KRBA2      | 1.23296   | 1.96281   | 1.64715   | 0.832761   | 1.38465   | 1.57478    | 1.65507   | 1.24383   | 1.26825   | 0.585539  | 1.0439    | 0.405344  | 0.424626  | 0.76196    | 1.16052   |
| KRBOX1     | 1.00476   | 0.532521  | 0.304777  | 0.690292   | 0.572273  | 0.627398   | 1.45313   | 1.10131   | 0.938161  | 0.588505  | 2.26851   | 0.239645  | 0.280916  | 0.542638   | 0.0480989 |
| KRBOX1-AS1 | 0.0108044 | 0.0416458 | 0.0446909 | 0.0668056  | 0.016783  | 0.0643987  | 0.0616806 | 0.0480103 | 0.0263171 | 0.0271213 | 0         | 0.0309234 | 0.0278838 | 0          | 0         |
| KRBOX4     | 1.63661   | 1.31952   | 1.15378   | 1.14126    | 0.805424  | 1.4576     | 0.810474  | 1.04886   | 0.244025  | 1.05784   | 2.25465   | 0.431219  | 0.77948   | 1.17914    | 0.822075  |
| KRCC1      | 2.64745   | 3.58872   | 3.74109   | 3.74648    | 0.728035  | 4.9939     | 1.40292   | 2.31906   | 4.44306   | 6.70926   | 9.30911   | 2.38376   | 4.68304   | 3.48898    | 2.54685   |

|          |            |            |            |            |           |            |            |           |           |           |           |           |           |           |           |
|----------|------------|------------|------------|------------|-----------|------------|------------|-----------|-----------|-----------|-----------|-----------|-----------|-----------|-----------|
| KREMEN1  | 8.99461    | 12.7222    | 12.1122    | 12.3536    | 17.086    | 11.2403    | 13.1939    | 9.13383   | 21.1574   | 9.30257   | 7.87182   | 12.2244   | 12.8491   | 8.68086   | 4.95057   |
| KREMEN2  | 0.225018   | 1.44195    | 1.3589     | 0.579717   | 1.04859   | 1.89683    | 0.552373   | 0.819905  | 0.219237  | 0.155331  | 0.342923  | 0.225408  | 0.326655  | 0.352812  | 0.387784  |
| KRI1     | 3.05944    | 5.13613    | 4.12699    | 7.39923    | 8.75529   | 7.51613    | 2.95789    | 2.97316   | 2.44916   | 1.77985   | 1.61389   | 3.96859   | 5.43914   | 4.64416   | 2.85723   |
| KRIT1    | 3.59101    | 4.07378    | 4.28433    | 3.75236    | 1.67271   | 3.68323    | 2.10996    | 3.50363   | 2.08947   | 2.59429   | 2.88453   | 2.3703    | 2.64368   | 3.45552   | 2.72601   |
| KRR1     | 5.02003    | 3.96023    | 3.97574    | 4.57916    | 1.05574   | 5.06759    | 2.32476    | 4.7211    | 3.5322    | 5.54769   | 6.03649   | 2.76693   | 5.20337   | 3.85088   | 3.76342   |
| KRT1     | 3589.2     | 5073.7     | 2702.95    | 321.215    | 7405.98   | 392.633    | 2001.88    | 2150.92   | 21699.8   | 410.935   | 604.226   | 2827.25   | 199.011   | 50.7214   | 120.185   |
| KRT10    | 3501.15    | 3540.72    | 3158.76    | 343.456    | 8101.78   | 237.025    | 3801.57    | 2661.46   | 8966.3    | 177.512   | 250.843   | 1602.47   | 85.5507   | 132.95    | 54.0168   |
| KRT12    | 0.139416   | 0.391841   | 0.31717    | 0.0239454  | 0.0541403 | 0.0197851  | 0.10612    | 0.216827  | 0         | 0         | 0.0131153 | 0.016626  | 0         | 0         | 0.0667396 |
| KRT13    | 0.0404835  | 0.0650185  | 0.0781452  | 0.0556259  | 0         | 0          | 0.0154076  | 0.0959422 | 0.493043  | 0.101622  | 0.16757   | 0.173802  | 0.0348263 | 0.0423169 | 0.155038  |
| KRT14    | 1298.56    | 1403.4     | 1248.25    | 7868.88    | 4232.49   | 12029.4    | 1520.96    | 915.059   | 3706.96   | 14760.5   | 9786.8    | 10815.4   | 21460.2   | 6729      | 2500.78   |
| KRT15    | 15.8605    | 81.8787    | 98.0274    | 8.41216    | 34.3275   | 10.8919    | 24.9735    | 81.5886   | 3.09429   | 8.0984    | 12.793    | 2.89791   | 1.25784   | 1.41334   | 0.704466  |
| KRT16    | 266.639    | 149.704    | 17.2012    | 2976.37    | 3221.15   | 7213.55    | 74.213     | 194.185   | 6161.03   | 9956.69   | 7457.32   | 8600.47   | 13489.5   | 3590.36   | 1479.9    |
| KRT16P1  | 0.0452918  | 0.153207   | 0.0632911  | 1.86344    | 0.863484  | 0.301876   | 0          | 0.0906562 | 0.639746  | 1.1955    | 0.544547  | 2.87567   | 3.24291   | 1.43321   | 1.87202   |
| KRT16P2  | 0.169525   | 0.107042   | 0.086925   | 4.67398    | 1.3604    | 0.48142    | 0.0340465  | 0.039784  | 0.321502  | 2.03469   | 0.674031  | 0.842953  | 2.26534   | 1.67985   | 4.71059   |
| KRT16P3  | 0.0506846  | 0.0621039  | 3.28E-19   | 1.36249    | 1.65428   | 1.49965    | 0.0144164  | 0.0448902 | 1.13107   | 2.71888   | 1.51784   | 3.66236   | 3.52306   | 1.70371   | 2.16951   |
| KRT17    | 30.9799    | 17.732     | 21.6756    | 2889.85    | 639.867   | 1757.11    | 32.0143    | 62.6437   | 3021.59   | 8823.76   | 5601.8    | 5941.83   | 13950.2   | 4270.83   | 1447.45   |
| KRT17P1  | 0.00340505 | 0.0216384  | 0          | 0.00350901 | 0.0384295 | 0.0170246  | 0.00388778 | 0         | 0.0365257 | 1.04E-07  | 0.0112854 | 0.0389825 | 0         | 0.0468144 | 0         |
| KRT17P2  | 0.00668142 | 0.00736039 | 0          | 0.00688539 | 0.0397467 | 0          | 0.00762862 | 0         | 5.54E-11  | 0.114458  | 0.0343156 | 0.0764917 | 0         | 0.0531701 | 0         |
| KRT17P5  | 0.01468    | 0.0176826  | 0.00607217 | 0.0151282  | 0         | 0.00624992 | 0.0167612  | 0         | 0.0178786 | 0.0736997 | 0.0414298 | 0.0787796 | 0.0236787 | 0.0575431 | 0         |
| KRT18    | 10.0624    | 3.12787    | 4.41218    | 1.6992     | 8.19354   | 10.848     | 6.4012     | 5.85186   | 0.844651  | 4.02862   | 3.84651   | 3.95469   | 8.98816   | 13.6128   | 2.29513   |
| KRT18P55 | 0          | 0          | 0          | 0          | 0         | 0          | 0          | 0         | 0         | 0.0297917 | 0         | 0         | 0         | 0         | 0.0511328 |
| KRT19    | 27.5325    | 7.35293    | 11.909     | 0.437756   | 16.6916   | 41.9841    | 12.5923    | 17.2119   | 0.134126  | 0.493659  | 0.568334  | 0.0675437 | 0.609046  | 0.42758   | 0.655237  |
| KRT19P2  | 0.160995   | 0.135747   | 0.233076   | 0          | 0.0625203 | 0          | 0.183819   | 0.0715395 | 0         | 0         | 0         | 0         | 0         | 0         | 0         |
| KRT2     | 581.836    | 612.215    | 563.866    | 140.302    | 1936.38   | 31.8202    | 2817.96    | 147.407   | 770.435   | 4.53632   | 6.47188   | 150.812   | 1.03916   | 1.65851   | 0.853626  |
| KRT20    | 0.128216   | 0.135908   | 0.413671   | 0.0660653  | 0.0398329 | 0          | 0.0585573  | 0.250686  | 0.0312306 | 0         | 0         | 0         | 0         | 0         | 0.0552405 |
| KRT222   | 0.160067   | 0.115684   | 0.0551745  | 0.0962231  | 0.02072   | 0.102221   | 0.0609199  | 0.142254  | 0.0162453 | 0         | 0.060232  | 0         | 0.0344248 | 0.0209145 | 0.191564  |

|         |           |            |           |           |           |           |           |           |           |           |           |            |           |            |           |
|---------|-----------|------------|-----------|-----------|-----------|-----------|-----------|-----------|-----------|-----------|-----------|------------|-----------|------------|-----------|
| KRT23   | 11.4667   | 16.9101    | 18.3649   | 19.8226   | 18.8038   | 13.002    | 22.3648   | 13.9348   | 130.505   | 12.5257   | 32.3454   | 24.8936    | 2.44148   | 7.72671    | 1.36888   |
| KRT24   | 0.0123036 | 0          | 0         | 0         | 0.133782  | 0         | 0         | 0.0218688 | 0.37461   | 0.262519  | 0.0972245 | 0.475392   | 0         | 0.0900255  | 0.0176695 |
| KRT25   | 0         | 0.00667705 | 0.0114644 | 0.885434  | 0.0645793 | 0         | 0.0949365 | 2.29076   | 0.0337553 | 0.0173934 | 0         | 0.0594951  | 0.0357647 | 0.00724286 | 0         |
| KRT26   | 0         | 0          | 0         | 0.0689294 | 0         | 0         | 0.015274  | 0.0356664 | 0         | 0         | 0         | 0          | 0         | 0          | 0         |
| KRT27   | 0.0861404 | 0.0138346  | 0.0356307 | 0.784137  | 0.0669029 | 0.0488983 | 0.163921  | 1.03348   | 0.139879  | 0.0360383 | 0.0648278 | 0.801265   | 0.138943  | 0.0150069  | 0         |
| KRT28   | 0         | 0          | 0         | 0.0704775 | 0.0212465 | 0         | 0         | 0.158025  | 0         | 0         | 0         | 0          | 0         | 0          | 0         |
| KRT3    | 0.0671105 | 0.159295   | 0.0165762 | 0         | 0.77812   | 0.0597152 | 0.137267  | 0.0445187 | 2.54965   | 0.85506   | 0.226196  | 2.73032    | 0.297091  | 0.277517   | 0.100716  |
| KRT31   | 0.187519  | 1.74753    | 2.7727    | 1.49527   | 0.202848  | 0.072085  | 2.5673    | 2.13922   | 0.0663449 | 0.364225  | 0.425872  | 0.190785   | 0.571059  | 0.128918   | 3.53E-11  |
| KRT32   | 0.0115427 | 0.189089   | 0.305565  | 0.0356852 | 0         | 0.0294853 | 0.14497   | 0.297487  | 0         | 0         | 0         | 0          | 0         | 0          | 0         |
| KRT33A  | 0.0539885 | 0.00867082 | 0.0148877 | 0.211797  | 0.101726  | 0         | 0.0205474 | 0.0639739 | 0.0219173 | 0.0775979 | 0.101577  | 0.0386302  | 1.84E-37  | 0          | 1.67E-06  |
| KRT33B  | 0.015501  | 0.0071655  | 0.0120167 | 1.29978   | 0.0574647 | 0.0142915 | 0.0169834 | 0.0781458 | 0.109543  | 0.100579  | 0.130059  | 0.225086   | 0.241584  | 0.180643   | 0.0620454 |
| KRT34   | 0.121592  | 0.0716039  | 0.10059   | 1.33658   | 0.772124  | 0.149549  | 0.107979  | 0.33619   | 0.493619  | 1.32263   | 1.00659   | 0.800234   | 0.967558  | 0.529578   | 0.407451  |
| KRT35   | 0.0138498 | 0.0400383  | 0.0572877 | 0.156999  | 0.0215136 | 0         | 0.110693  | 0.209246  | 0         | 0         | 0         | 0          | 0         | 0          | 0         |
| KRT36   | 0         | 0.0135653  | 0.104811  | 0         | 0.0218669 | 0.0719197 | 0.112511  | 0.137618  | 0         | 0         | 0.031783  | 0          | 0.0272478 | 0          | 0         |
| KRT37   | 0.0134709 | 0.077886   | 0.178306  | 0.727504  | 0.104625  | 0.216311  | 0.138426  | 0.0897596 | 4.67377   | 2.50202   | 6.63025   | 0.374565   | 0.425877  | 2.2313     | 0.483649  |
| KRT38   | 0         | 0.0314436  | 0.0404911 | 0.307635  | 0         | 0.0357147 | 0.0279422 | 0.0906399 | 0.07073   | 0.0206448 | 0         | 0.0183278  | 0         | 0.0131144  | 0         |
| KRT39   | 0.136457  | 0.230114   | 0.372526  | 0.112498  | 0         | 0         | 0.171382  | 0.448704  | 0.0166189 | 0         | 0         | 0.00976384 | 0         | 0          | 0         |
| KRT4    | 0.043117  | 0.0207744  | 0.0445868 | 0.033325  | 0.0669756 | 0.0734271 | 0.0492296 | 0.0095797 | 0.157535  | 0         | 0         | 0.0154257  | 0         | 0.00563371 | 0         |
| KRT40   | 0         | 0.0632907  | 0.138306  | 0         | 0         | 0.0101682 | 0.0272693 | 0.0955153 | 0         | 0         | 0         | 0          | 0         | 0          | 0         |
| KRT42P  | 0.113129  | 0.0817612  | 0.113643  | 0.308113  | 0.0753125 | 0.798148  | 0.0922625 | 0.114903  | 0.521592  | 1.88643   | 2.16193   | 1.7288     | 1.59536   | 1.18675    | 0.243702  |
| KRT5    | 1186.45   | 1195.86    | 996.858   | 4683.95   | 2591.39   | 5779.95   | 1229.91   | 788.86    | 2000.53   | 4068.57   | 2021.09   | 3343.25    | 7546.43   | 2869.88    | 963.215   |
| KRT6A   | 462.895   | 108.035    | 80.0551   | 4794.46   | 1852.13   | 5537.22   | 67.1618   | 226.155   | 2968.55   | 10010.5   | 4548.15   | 7697.34    | 14480.5   | 4452.29    | 1675.69   |
| KRT6B   | 83.615    | 15.0402    | 4.41443   | 2352.77   | 801.468   | 3058.64   | 39.2694   | 91.4404   | 3568.16   | 8493.99   | 4072.8    | 6323.11    | 15269.7   | 3602.93    | 1404.84   |
| KRT6C   | 58.6192   | 9.20337    | 2.46092   | 1238.76   | 543.75    | 2238.19   | 24.8742   | 71.7581   | 1744.42   | 6258.42   | 2553.58   | 4515.77    | 8157.25   | 2116.3     | 1079.35   |
| KRT7    | 20.7777   | 3.1523     | 5.61738   | 0.132094  | 13.5956   | 15.3305   | 7.09503   | 9.94643   | 0.0331206 | 0.392526  | 0.168849  | 0.0291883  | 0.193008  | 0.269304   | 1.69892   |
| KRT7-AS | 0.78991   | 0.222252   | 0.311504  | 0.0220973 | 0.282024  | 0.126606  | 0.59136   | 0.810572  | 0         | 0         | 0         | 0          | 0         | 0.0149984  | 0         |

|           |            |            |           |           |           |            |           |           |           |           |            |            |            |            |           |
|-----------|------------|------------|-----------|-----------|-----------|------------|-----------|-----------|-----------|-----------|------------|------------|------------|------------|-----------|
| KRT71     | 0.0204354  | 0.0147691  | 0.0338111 | 0.673896  | 0.0476148 | 0.00870022 | 0.221658  | 1.90693   | 0.049776  | 0.0128242 | 0          | 0.0219331  | 0          | 0          | 0         |
| KRT72     | 0.114854   | 0.890946   | 1.38722   | 0.0828522 | 1.48078   | 0.107576   | 1.48184   | 0.22456   | 0.251782  | 0.100907  | 0.0518623  | 0.320506   | 0          | 0.00600276 | 0.0494834 |
| KRT73     | 0.760591   | 2.46429    | 3.0485    | 0.0889717 | 5.26729   | 0.189813   | 8.5401    | 0.708872  | 0.554633  | 0.0254351 | 0          | 0.753902   | 0.00653756 | 0.0264789  | 0         |
| KRT73-AS1 | 0.0786236  | 0.539488   | 0.755788  | 0.028055  | 1.27773   | 0.0310494  | 2.16336   | 0.104139  | 0.289079  | 1.05E-28  | 0.00686072 | 0.152273   | 0.0156846  | 1.49E-33   | 0         |
| KRT74     | 0          | 0.175979   | 0.151077  | 0.205305  | 0.0644712 | 0.0212045  | 0.123752  | 0.634439  | 0.0909866 | 0.0208371 | 0.0187415  | 0.00593955 | 0.0910474  | 0.0563997  | 0.0119212 |
| KRT75     | 0.119799   | 0.0104948  | 0.0540581 | 4.78114   | 0.592104  | 14.0492    | 0.435219  | 2.89398   | 25.944    | 20.49     | 11.8764    | 11.7514    | 29.442     | 39.5255    | 12.622    |
| KRT76     | 0.0119095  | 0.00881825 | 0         | 0         | 0         | 0.023376   | 0.282107  | 0         | 0.0338733 | 0         | 0          | 0.0597722  | 0.0120384  | 0          | 0         |
| KRT77     | 20.7825    | 14.3433    | 16.7234   | 2.49035   | 3.48176   | 8.52893    | 9.73305   | 7.30823   | 2.4398    | 0.149454  | 0.166053   | 1.18282    | 0.768282   | 0.823699   | 0.261545  |
| KRT78     | 10.5307    | 12.5326    | 10.5038   | 13.4423   | 31.4942   | 10.8903    | 19.1889   | 10.1261   | 107.125   | 10.6725   | 13.0977    | 24.0054    | 8.34142    | 9.27515    | 1.29535   |
| KRT79     | 0.201634   | 0.242875   | 0.240941  | 0.531017  | 0.330607  | 0.0858442  | 0.166269  | 0.746646  | 9.63168   | 0.0702974 | 0.11381    | 0.18435    | 0.0216822  | 0.0468367  | 0         |
| KRT8      | 8.62984    | 1.78912    | 2.63096   | 0.512121  | 5.14466   | 5.27226    | 3.95654   | 5.09663   | 0.049776  | 0.245009  | 0.403707   | 0.251606   | 0.362583   | 0.712683   | 0.572292  |
| KRT80     | 25.5093    | 48.1188    | 60.4415   | 90.076    | 90.6758   | 34.0033    | 54.8867   | 43.0624   | 276.038   | 75.169    | 74.2306    | 101.51     | 79.693     | 39.8769    | 11.6505   |
| KRT81     | 0.106154   | 0.0661639  | 0.0228145 | 1.03032   | 0.175929  | 0.0584643  | 0.0668087 | 0.233313  | 0.0442706 | 0.0152078 | 0.0136783  | 0.0346795  | 5.40E-14   | 0.0443293  | 0.13921   |
| KRT82     | 0.00863225 | 0          | 0         | 0.0355831 | 0.0268177 | 0          | 0         | 0.0460297 | 0         | 0.151681  | 0.146171   | 0.0247064  | 0.395433   | 0.0360927  | 0.049588  |
| KRT83     | 0.012343   | 0.00594703 | 0         | 0.590456  | 0.0958644 | 0          | 0         | 0.230357  | 0         | 0         | 0          | 0          | 0          | 0          | 0         |
| KRT84     | 0.0446562  | 0          | 0         | 0.0575243 | 0.0693664 | 0.228145   | 0         | 0         | 0.0407896 | 0.238204  | 0.0504112  | 0.119823   | 0.100842   | 0.093357   | 0.0320659 |
| KRT85     | 0.0421242  | 0          | 0.0278785 | 0.772703  | 0.143954  | 0.0502155  | 0.0384769 | 0.426776  | 0.0102605 | 0         | 0          | 0.0180846  | 0          | 0          | 0         |
| KRT86     | 0.0333615  | 0.0578961  | 0.142497  | 2.21903   | 0.346417  | 0.0467731  | 0.0137692 | 0.396647  | 0         | 0.012927  | 0.0813882  | 0.00736959 | 0.0398712  | 2.76E-24   | 0         |
| KRT87P    | 0          | 0          | 0.0142771 | 0         | 0         | 0          | 0         | 0         | 0         | 0         | 0          | 0          | 0          | 0          | 0         |
| KRT8P41   | 0.0886222  | 0.0121999  | 0.0314205 | 0.0130468 | 0.0196658 | 0.0107801  | 0.0578205 | 0.0225029 | 0         | 0         | 0          | 0.00905879 | 0.0326735  | 0.0198505  | 0.090909  |
| KRT9      | 275.128    | 2051.61    | 3.09474   | 107.547   | 2357.82   | 32.8261    | 11.0591   | 34.5669   | 6826.76   | 56.0761   | 95.1548    | 509.567    | 54.5737    | 0.84019    | 23.3192   |
| KRTAP1-1  | 0          | 0          | 0         | 1.94352   | 0.278676  | 0          | 0         | 0.045554  | 0         | 0         | 0          | 0          | 0          | 0          | 0         |
| KRTAP1-3  | 0          | 0          | 0         | 2.29442   | 0.111068  | 0          | 0         | 0.211819  | 0         | 0         | 0          | 0          | 0          | 0          | 0         |
| KRTAP1-4  | 0          | 0          | 0         | 0         | 0         | 0          | 0         | 0         | 0         | 0         | 0          | 0          | 0          | 0          | 0         |
| KRTAP1-5  | 0          | 0.00948187 | 0         | 2.00775   | 0.030569  | 0          | 0.0449388 | 0.262342  | 0.0239674 | 0.0246998 | 0.111078   | 0          | 0.0380913  | 0.0411414  | 0         |
| KRTAP10-1 | 0          | 0.0110294  | 0         | 0.0471802 | 0         | 0          | 0         | 0.0203438 | 0         | 0         | 0          | 0          | 0          | 0          | 0         |

|            |           |            |           |           |           |           |           |           |   |   |           |           |   |           |           |
|------------|-----------|------------|-----------|-----------|-----------|-----------|-----------|-----------|---|---|-----------|-----------|---|-----------|-----------|
| KRTAP10-10 | 0.0631174 | 0          | 0         | 0.0216814 | 0         | 0         | 0         | 0.0934892 | 0 | 0 | 0         | 0         | 0 | 0         | 0         |
| KRTAP10-11 | 0         | 0          | 0         | 0         | 0         | 0         | 0.0641359 | 0.0332809 | 0 | 0 | 0         | 0         | 0 | 0         | 0         |
| KRTAP10-12 | 0         | 0.0127728  | 0         | 0.0273191 | 0.0411789 | 0.0451455 | 0         | 0.0706791 | 0 | 0 | 0         | 0         | 0 | 0         | 0         |
| KRTAP10-2  | 0         | 0.00970468 | 0         | 0.0622705 | 0         | 0         | 0.0689921 | 0.0537014 | 0 | 0 | 0         | 0         | 0 | 0.0315811 | 0         |
| KRTAP10-3  | 0         | 0          | 0         | 0.0323165 | 0         | 0         | 0.0358049 | 0.139347  | 0 | 0 | 0         | 0         | 0 | 0         | 0         |
| KRTAP10-4  | 0         | 6.44E-09   | 0.0116528 | 0         | 0         | 0         | 0         | 0.0280643 | 0 | 0 | 0         | 0         | 0 | 0         | 0         |
| KRTAP10-5  | 0         | 0          | 0         | 0.0207388 | 0.0625203 | 0         | 0         | 0.0357698 | 0 | 0 | 0         | 0         | 0 | 0         | 0         |
| KRTAP10-6  | 0         | 0.00900694 | 0         | 0         | 1.07E-09  | 0         | 0         | 0         | 0 | 0 | 0         | 0         | 0 | 0         | 0         |
| KRTAP10-7  | 0         | 4.55E-08   | 0.0121174 | 0.0150947 | 5.40E-15  | 0         | 0         | 0.087974  | 0 | 0 | 0         | 0         | 0 | 0         | 0         |
| KRTAP10-8  | 0         | 0.0127291  | 0.0218557 | 0.0272256 | 0         | 0.0674863 | 0         | 0.023479  | 0 | 0 | 0         | 0         | 0 | 0.0138077 | 0.037941  |
| KRTAP10-9  | 0         | 0.00887793 | 0.0304866 | 0.0189885 | 0.0286219 | 0         | 0.0420764 | 0         | 0 | 0 | 0         | 0         | 0 | 0         | 0         |
| KRTAP11-1  | 0.050808  | 0.01224    | 0.10508   | 0.863926  | 0.0789224 | 0.0216312 | 0.0870164 | 0.112885  | 0 | 0 | 0         | 0.0181772 | 0 | 0         | 0         |
| KRTAP12-1  | 0         | 0          | 0.065121  | 0         | 0.061138  | 0         | 0         | 0.0699579 | 0 | 0 | 0.0444313 | 0.0281624 | 0 | 0         | 0         |
| KRTAP12-2  | 0         | 0.0452666  | 0.0259074 | 0.0322728 | 0         | 0         | 0.0357564 | 0.0278317 | 0 | 0 | 0         | 0         | 0 | 0         | 0         |
| KRTAP12-3  | 0         | 0          | 0.0466965 | 0.116339  | 0         | 0         | 0.0644488 | 0         | 0 | 0 | 0         | 0         | 0 | 0.0295014 | 0.0810643 |
| KRTAP12-4  | 0.0517742 | 0          | 0.0428312 | 0         | 0.0804232 | 0         | 0         | 0.0460126 | 0 | 0 | 0         | 0         | 0 | 0.0541189 | 0         |
| KRTAP13-1  | 0         | 0          | 0         | 0.127709  | 0         | 0         | 0         | 0         | 0 | 0 | 0         | 0         | 0 | 0         | 0         |
| KRTAP13-2  | 0         | 0          | 0         | 0.0842742 | 0         | 0         | 0         | 0         | 0 | 0 | 0         | 0         | 0 | 0         | 0         |
| KRTAP13-3  | 0         | 0          | 0         | 0         | 0         | 0         | 0         | 0         | 0 | 0 | 0         | 0         | 0 | 0         | 0         |
| KRTAP13-4  | 0         | 0          | 0         | 0         | 0         | 0         | 0         | 0         | 0 | 0 | 0         | 0         | 0 | 0         | 0         |
| KRTAP15-1  | 0         | 0          | 0         | 0         | 0.121655  | 0         | 0         | 0         | 0 | 0 | 0         | 0         | 0 | 0         | 0         |
| KRTAP16-1  | 0         | 0          | 0         | 0.0613889 | 0         | 0         | 0         | 0.198529  | 0 | 0 | 0         | 0         | 0 | 0         | 0         |
| KRTAP17-1  | 0         | 0          | 0         | 0.0612313 | 0         | 0         | 0.0339204 | 0.0792078 | 0 | 0 | 0         | 0         | 0 | 0         | 0         |
| KRTAP19-1  | 0         | 0          | 0         | 0.59624   | 0         | 0         | 0         | 0.120986  | 0 | 0 | 0         | 0         | 0 | 0         | 0         |
| KRTAP19-2  | 0         | 0          | 0         | 0         | 0         | 0         | 0         | 0         | 0 | 0 | 0         | 0         | 0 | 0         | 0         |
| KRTAP19-3  | 0         | 0          | 0         | 0.675899  | 0         | 0         | 0         | 0.0832697 | 0 | 0 | 0         | 0         | 0 | 0         | 0         |

|           |           |           |           |           |           |           |           |           |   |   |   |           |   |   |   |
|-----------|-----------|-----------|-----------|-----------|-----------|-----------|-----------|-----------|---|---|---|-----------|---|---|---|
| KRTAP19-4 | 0         | 0         | 0         | 0         | 0         | 0         | 0         | 0         | 0 | 0 | 0 | 0         | 0 | 0 | 0 |
| KRTAP19-5 | 0         | 0         | 0         | 0.93122   | 0         | 0         | 0         | 0.0446152 | 0 | 0 | 0 | 0         | 0 | 0 | 0 |
| KRTAP19-6 | 0         | 0         | 0         | 0         | 0         | 0         | 0         | 0         | 0 | 0 | 0 | 0         | 0 | 0 | 0 |
| KRTAP19-7 | 0         | 0         | 0         | 0.217308  | 0         | 0         | 0         | 0         | 0 | 0 | 0 | 0         | 0 | 0 | 0 |
| KRTAP19-8 | 0         | 0.035065  | 0.0602062 | 0         | 0         | 0         | 0         | 0         | 0 | 0 | 0 | 0         | 0 | 0 | 0 |
| KRTAP2-1  | 0         | 0         | 0         | 0.545306  | 0.17349   | 0         | 0         | 0.175386  | 0 | 0 | 0 | 0         | 0 | 0 | 0 |
| KRTAP2-2  | 0.0324587 | 0.0469173 | 0         | 1.16605   | 0.0640081 | 0         | 0         | 0.171276  | 0 | 0 | 0 | 0         | 0 | 0 | 0 |
| KRTAP2-3  | 0         | 0.0130876 | 0.0224713 | 0.159561  | 1.80E-39  | 0         | 0         | 1.07E-39  | 0 | 0 | 0 | 0         | 0 | 0 | 0 |
| KRTAP2-4  | 0         | 0         | 0         | 0.523371  | 4.19E-37  | 0         | 0         | 0.0395979 | 0 | 0 | 0 | 0         | 0 | 0 | 0 |
| KRTAP20-1 | 0         | 0         | 0         | 0         | 0         | 0         | 0         | 0         | 0 | 0 | 0 | 0         | 0 | 0 | 0 |
| KRTAP20-2 | 0         | 0         | 0         | 0.124217  | 0         | 0         | 0         | 0         | 0 | 0 | 0 | 0         | 0 | 0 | 0 |
| KRTAP20-3 | 0         | 0         | 0         | 0         | 0         | 0         | 0         | 0         | 0 | 0 | 0 | 0         | 0 | 0 | 0 |
| KRTAP20-4 | 0         | 0         | 0         | 0         | 0         | 0         | 0         | 0         | 0 | 0 | 0 | 0         | 0 | 0 | 0 |
| KRTAP21-1 | 0         | 0         | 0         | 0         | 0         | 0         | 0         | 0         | 0 | 0 | 0 | 0         | 0 | 0 | 0 |
| KRTAP21-2 | 0         | 0.0253424 | 0         | 0.0542036 | 0         | 0         | 0         | 0         | 0 | 0 | 0 | 0         | 0 | 0 | 0 |
| KRTAP21-3 | 0.0914745 | 0         | 0         | 0         | 0         | 0         | 0         | 0         | 0 | 0 | 0 | 0         | 0 | 0 | 0 |
| KRTAP22-1 | 0         | 0         | 0         | 0         | 0         | 0         | 0         | 0         | 0 | 0 | 0 | 0         | 0 | 0 | 0 |
| KRTAP22-2 | 0         | 0         | 0         | 0         | 0         | 0         | 0         | 0         | 0 | 0 | 0 | 0         | 0 | 0 | 0 |
| KRTAP23-1 | 0         | 0         | 0         | 0         | 0         | 0         | 0         | 0         | 0 | 0 | 0 | 0         | 0 | 0 | 0 |
| KRTAP24-1 | 0         | 0         | 0         | 0         | 0         | 0         | 0         | 0.0623261 | 0 | 0 | 0 | 0         | 0 | 0 | 0 |
| KRTAP25-1 | 0         | 0         | 0         | 0         | 0         | 0         | 0         | 0         | 0 | 0 | 0 | 0         | 0 | 0 | 0 |
| KRTAP26-1 | 0         | 0         | 0         | 0.0205955 | 0         | 0         | 0.0456373 | 0.124329  | 0 | 0 | 0 | 0         | 0 | 0 | 0 |
| KRTAP27-1 | 0         | 0         | 0         | 0         | 0         | 0         | 0         | 0         | 0 | 0 | 0 | 0         | 0 | 0 | 0 |
| KRTAP29-1 | 0         | 0         | 0         | 0         | 0         | 0         | 0         | 0         | 0 | 0 | 0 | 0         | 0 | 0 | 0 |
| KRTAP3-1  | 0         | 0.0188038 | 0.16143   | 4.94688   | 0.0606225 | 0.0664621 | 0         | 0.658996  | 0 | 0 | 0 | 0         | 0 | 0 | 0 |
| KRTAP3-2  | 0         | 0.0321345 | 0.110349  | 1.60187   | 0         | 0         | 0         | 0.326     | 0 | 0 | 0 | 0.0238609 | 0 | 0 | 0 |





|          |           |           |           |            |           |           |           |           |            |            |            |           |           |            |           |
|----------|-----------|-----------|-----------|------------|-----------|-----------|-----------|-----------|------------|------------|------------|-----------|-----------|------------|-----------|
| KRTAP6-2 | 0         | 0         | 0         | 0          | 0         | 0         | 0         | 0         | 0          | 0          | 0          | 0         | 0         | 0          | 0         |
| KRTAP6-3 | 0         | 0         | 0         | 0          | 0         | 0         | 0         | 0         | 0          | 0          | 0          | 0         | 0         | 0          | 0         |
| KRTAP7-1 | 0.0333955 | 0.0321809 | 0.0276271 | 0.447395   | 0         | 0         | 0         | 0         | 0          | 0          | 0          | 0         | 0         | 0          | 0         |
| KRTAP8-1 | 0         | 0         | 0         | 0.815004   | 0         | 0         | 0         | 0.147968  | 0          | 0          | 0          | 0         | 0         | 0          | 0         |
| KRTAP9-1 | 0         | 0         | 0         | 0          | 0         | 0         | 0         | 0         | 0          | 0          | 0          | 0         | 0         | 0          | 0         |
| KRTAP9-2 | 0         | 0         | 0         | 0.907853   | 0.16334   | 0         | 0         | 0.286497  | 0          | 0          | 0          | 0         | 0         | 0          | 0         |
| KRTAP9-3 | 0         | 0         | 0         | 1.65889    | 0.181195  | 0         | 0         | 0.0232608 | 0          | 0          | 0          | 0         | 0         | 0          | 0         |
| KRTAP9-4 | 0         | 0         | 0         | 1.13452    | 0         | 0         | 0         | 0.167563  | 0          | 0          | 0          | 0         | 0         | 0          | 0         |
| KRTAP9-6 | 0         | 0         | 0         | 0.049378   | 0         | 0         | 0         | 0         | 0          | 0          | 0          | 0         | 0         | 0          | 0         |
| KRTAP9-7 | 0         | 0         | 0         | 0.0935278  | 0         | 0         | 0         | 0.0403287 | 0          | 0          | 0          | 0         | 0         | 0          | 0         |
| KRTAP9-8 | 0         | 0         | 0         | 1.66111    | 0.125062  | 0         | 0.026772  | 0.10421   | 0          | 0          | 0          | 0         | 0         | 0          | 0         |
| KRTAP9-9 | 0         | 0         | 0         | 1.1313     | 0         | 0         | 0         | 0.0597317 | 0          | 0          | 0          | 0         | 0         | 0          | 0         |
| KRTCAP2  | 20.0545   | 14.29     | 13.1604   | 29.2997    | 16.2987   | 45.6805   | 19.3711   | 13.8371   | 16.0251    | 15.1872    | 37.7317    | 14.6523   | 16.2148   | 16.1201    | 20.598    |
| KRTCAP3  | 1.36518   | 1.64963   | 1.90022   | 2.99236    | 1.9523    | 3.78252   | 1.38553   | 1.03994   | 0.395866   | 0.734332   | 1.19865    | 0.620205  | 1.85948   | 1.32508    | 0.373442  |
| KRTDAP   | 395.287   | 425.085   | 379.502   | 679.478    | 743.337   | 400.451   | 534.322   | 515.865   | 2853.46    | 1018.06    | 2000.28    | 1437.56   | 540.997   | 537.361    | 147.168   |
| KSR1     | 2.36017   | 2.65173   | 2.77528   | 2.40567    | 4.95492   | 3.41816   | 2.37116   | 2.57839   | 0.690363   | 0.782604   | 0.977311   | 1.55971   | 1.14041   | 2.01997    | 2.33121   |
| KSR2     | 0.0326572 | 0.0177016 | 0.0180109 | 0.00140226 | 0.0465005 | 0.0312831 | 0.0295188 | 0.0302323 | 0.00994319 | 0.00512351 | 0.00307216 | 0.0155781 | 0.0158027 | 0.00782286 | 0         |
| KTI12    | 2.13794   | 1.4134    | 1.15575   | 2.44594    | 2.83204   | 4.08588   | 1.50674   | 1.2863    | 1.87793    | 1.72044    | 3.68162    | 1.55245   | 3.87326   | 2.28601    | 1.8813    |
| KTN1     | 16.4492   | 19.6148   | 18.2842   | 30.6755    | 9.16107   | 24.8157   | 4.71685   | 10.0179   | 25.8219    | 36.5027    | 20.2606    | 24.5713   | 60.6854   | 30.1839    | 17.278    |
| KTN1-AS1 | 0.520413  | 0.538359  | 0.63312   | 0.930639   | 0.570621  | 0.97748   | 0.367     | 0.380882  | 0.111848   | 0.326586   | 0.812106   | 0.470937  | 0.622157  | 0.375987   | 0.285762  |
| KU-MEL-3 | 0.116688  | 0.0749625 | 0.0965323 | 0.060125   | 0.211466  | 0         | 0.0666151 | 0.0345674 | 0.0236854  | 0          | 0.0658629  | 0.0139155 | 0.0125477 | 0.0203287  | 0.0279297 |
| KXD1     | 9.8717    | 7.79929   | 7.07216   | 15.0399    | 14.3621   | 22.9764   | 9.64706   | 6.99069   | 11.555     | 13.4969    | 26.8319    | 8.21365   | 15.4273   | 11.1291    | 9.37643   |
| KY       | 2.0669    | 1.85743   | 2.52598   | 0.148455   | 0.671311  | 0.117329  | 1.48031   | 1.51405   | 0.0610244  | 0.0746808  | 0.00707053 | 0.0963541 | 0.193971  | 0.0245512  | 0.0584672 |
| KYAT1    | 0.377737  | 0.681857  | 0.699804  | 0.422165   | 1.03302   | 0.484722  | 0.516331  | 0.434993  | 0.129589   | 0.273775   | 0.342336   | 0.274088  | 0.274607  | 0.444895   | 0.313262  |
| KYAT3    | 4.27187   | 3.43635   | 3.59082   | 4.92305    | 0.784661  | 6.17743   | 2.80304   | 3.85237   | 4.88861    | 3.96069    | 4.8771     | 2.38951   | 4.17496   | 3.13555    | 1.83861   |
| KYNU     | 1.09165   | 0.514902  | 0.361237  | 3.09074    | 0.589038  | 2.35807   | 0.328004  | 0.755712  | 2.36513    | 6.70646    | 12.2327    | 2.53243   | 4.47803   | 4.0719     | 5.24784   |

|             |           |          |           |           |           |           |           |           |           |           |           |           |           |           |           |
|-------------|-----------|----------|-----------|-----------|-----------|-----------|-----------|-----------|-----------|-----------|-----------|-----------|-----------|-----------|-----------|
| L1CAM       | 1.34214   | 1.08911  | 1.43172   | 0.62331   | 1.15899   | 1.41724   | 2.42464   | 1.04368   | 0.392513  | 3.13629   | 1.00177   | 1.10249   | 2.96244   | 1.61059   | 1.14761   |
| L1TD1       | 0.223071  | 0.242307 | 0.239838  | 0.160967  | 0.323293  | 0.799212  | 0.153715  | 0.171685  | 0.0178252 | 0.136798  | 0.120157  | 0.191703  | 0.0412044 | 0.278461  | 0.177764  |
| L2HGDH      | 13.0448   | 12.6789  | 12.6853   | 7.15925   | 4.1756    | 3.89074   | 9.59139   | 13.4752   | 2.80743   | 4.79156   | 2.61105   | 7.33849   | 1.84008   | 8.7657    | 7.30201   |
| L3HYPDH     | 2.07938   | 1.99356  | 2.12728   | 1.77754   | 1.65198   | 1.73903   | 1.26864   | 1.69751   | 0.277088  | 1.37465   | 3.31498   | 1.09412   | 0.880749  | 2.28969   | 1.67929   |
| L3MBTL1     | 0.921828  | 1.27928  | 1.29427   | 0.682373  | 0.947887  | 1.08342   | 1.06734   | 0.703858  | 0.118593  | 0.659972  | 0.249164  | 0.278701  | 0.234553  | 0.62768   | 0.400887  |
| L3MBTL2     | 2.87538   | 3.53051  | 3.66158   | 5.67722   | 7.23924   | 5.08161   | 3.94921   | 2.99709   | 4.30718   | 2.73171   | 2.8834    | 3.39527   | 4.72898   | 3.26714   | 2.99733   |
| L3MBTL3     | 0.821412  | 0.643721 | 0.712279  | 0.99947   | 0.5073    | 1.94238   | 0.463281  | 0.668436  | 0.331454  | 0.975062  | 1.03341   | 0.463821  | 1.08868   | 1.05516   | 1.51365   |
| L3MBTL4     | 1.95059   | 2.73883  | 3.04626   | 1.59882   | 0.719983  | 1.59512   | 2.27856   | 1.78501   | 1.29364   | 0.161596  | 0.399697  | 0.55275   | 0.357199  | 0.235519  | 0.665651  |
| L3MBTL4-AS1 | 0.508514  | 0.57169  | 0.71048   | 0.19797   | 0.0351066 | 0.0481104 | 0.206437  | 0.713038  | 0.0688126 | 0.0141831 | 0.0637833 | 0.0646854 | 0         | 0.0354362 | 0.0649147 |
| LACC1       | 0.827928  | 0.886033 | 0.816247  | 1.90209   | 0.493984  | 1.18444   | 0.555542  | 0.832771  | 1.43158   | 1.79867   | 1.75005   | 0.742525  | 2.25063   | 1.07482   | 1.41829   |
| LACRT       | 0.546686  | 0.109751 | 0.0376881 | 0         | 0         | 0.232748  | 0         | 0.283412  | 0         | 0         | 0         | 0         | 0         | 0         | 0         |
| LACTB       | 2.04795   | 1.79726  | 1.77993   | 2.97727   | 1.15507   | 3.30595   | 1.34312   | 2.03672   | 3.60023   | 3.90147   | 5.80722   | 2.13263   | 5.32856   | 2.92115   | 2.44217   |
| LACTB2      | 2.16352   | 1.68055  | 1.60953   | 1.92949   | 0.598493  | 3.30597   | 1.24542   | 1.42192   | 1.97826   | 1.45702   | 3.54172   | 1.54981   | 2.03834   | 1.18884   | 0.621642  |
| LACTB2-AS1  | 0.185759  | 0.101882 | 0.074428  | 0.04724   | 0.0304351 | 0.0342761 | 0.0981836 | 0.141926  | 0         | 0.0164219 | 0.0525153 | 0.0474902 | 0         | 0.0402431 | 0.097993  |
| LACTBL1     | 0         | 0        | 0         | 0         | 0         | 0         | 0         | 0         | 0         | 0         | 0         | 0         | 0         | 0         | 0         |
| LAD1        | 39.2185   | 54.2569  | 38.0349   | 119.777   | 152.04    | 88.6805   | 55.8822   | 35.3105   | 205.887   | 162.065   | 81.4965   | 140.537   | 225.181   | 87.7919   | 30.5788   |
| LAG3        | 0.151034  | 0.162334 | 0.163391  | 0.215508  | 0.451169  | 1.00904   | 0.265301  | 0.0826009 | 0.0424482 | 0.0437453 | 0.236075  | 0.0581909 | 0.47224   | 0.285387  | 0.8843    |
| LAGE3       | 2.68255   | 2.63198  | 3.14722   | 5.10165   | 9.2051    | 9.07431   | 3.20206   | 1.86387   | 4.69266   | 3.70356   | 8.50666   | 3.38518   | 4.45279   | 3.59426   | 2.69673   |
| LAIR1       | 1.58498   | 1.21571  | 1.25811   | 3.75687   | 2.70366   | 7.79254   | 1.2881    | 1.37524   | 0.186539  | 2.19344   | 4.76807   | 0.800155  | 2.50029   | 1.401     | 3.33967   |
| LAIR2       | 0.0659346 | 0        | 0         | 0.0339738 | 0         | 6.48445   | 0         | 0         | 0         | 0.331019  | 0.483808  | 0         | 0.063811  | 0.0172302 | 0.236726  |
| LALBA       | 0         | 0        | 0         | 0         | 0         | 0         | 0.0362967 | 0         | 0         | 0         | 0         | 0         | 0         | 0         | 0         |
| LAMA1       | 0.431371  | 0.204377 | 0.34893   | 1.10888   | 1.26568   | 2.62615   | 0.136813  | 0.319472  | 0.0875602 | 0.691808  | 1.03609   | 0.0977415 | 1.63899   | 1.50523   | 2.62601   |
| LAMA2       | 14.0954   | 3.39059  | 4.15236   | 4.30633   | 6.3278    | 13.5092   | 8.76797   | 9.68787   | 1.2156    | 3.48553   | 5.00836   | 1.71541   | 2.54818   | 2.96655   | 8.55617   |
| LAMA3       | 9.84315   | 8.99918  | 8.36154   | 7.72759   | 6.22109   | 7.2066    | 5.87491   | 6.1618    | 5.25937   | 8.00316   | 4.32088   | 6.23589   | 15.7132   | 9.77192   | 7.7182    |
| LAMA4       | 8.28829   | 3.95808  | 5.2677    | 6.88662   | 6.27105   | 15.9952   | 6.28564   | 3.56607   | 2.24233   | 14.4754   | 22.8803   | 3.93688   | 10.1009   | 13.1889   | 30.0396   |
| LAMA5       | 9.74434   | 14.2796  | 14.057    | 13.8596   | 30.8101   | 20.7936   | 19.4326   | 10.1892   | 3.80458   | 8.8327    | 5.31837   | 10.4791   | 15.3041   | 11.5122   | 18.0585   |

|             |           |            |            |           |           |           |           |           |           |           |           |           |           |           |          |
|-------------|-----------|------------|------------|-----------|-----------|-----------|-----------|-----------|-----------|-----------|-----------|-----------|-----------|-----------|----------|
| LAMA5-AS1   | 0.336219  | 0.518184   | 0.513133   | 0.409198  | 1.57151   | 0.599773  | 0.94251   | 0.351092  | 0.0344291 | 0.141216  | 0         | 0.947232  | 0.0903866 | 0.443653  | 0.608815 |
| LAMB1       | 14.5129   | 8.7359     | 8.66561    | 28.9573   | 20.6372   | 47.765    | 8.66486   | 9.46758   | 6.72097   | 24.8533   | 36.0333   | 11.4211   | 28.0705   | 27.5595   | 41.355   |
| LAMB2       | 14.6636   | 14.3761    | 14.257     | 9.23514   | 39.731    | 29.291    | 24.4859   | 11.8207   | 5.65848   | 9.53727   | 13.4182   | 7.79789   | 13.5949   | 14.9987   | 40.7386  |
| LAMB2P1     | 0.824931  | 0.831061   | 1.22839    | 0.216393  | 0.326175  | 0.549163  | 0.993254  | 0.7198    | 0.0913339 | 0.169425  | 0.135454  | 0.118052  | 0.125802  | 0.164619  | 0.280021 |
| LAMB3       | 10.529    | 13.9335    | 8.97023    | 14.4846   | 23.609    | 22.8809   | 12.1098   | 4.84104   | 11.1424   | 23.4968   | 5.30651   | 12.6691   | 48.1943   | 16.1752   | 10.8249  |
| LAMB4       | 5.42715   | 12.2927    | 17.1304    | 3.44561   | 1.827     | 2.20507   | 9.77491   | 10.0961   | 1.99777   | 2.14205   | 0.441271  | 2.95927   | 0.835423  | 0.162344  | 0.235577 |
| LAMC1       | 21.5501   | 9.13227    | 11.5276    | 16.6485   | 14.222    | 36.3845   | 15.5483   | 13.4502   | 5.65928   | 24.6396   | 36.2924   | 7.71824   | 23.275    | 22.2639   | 39.9055  |
| LAMC1-AS1   | 0.546295  | 0.358927   | 0.287594   | 0         | 0.0771441 | 0.211438  | 0.283519  | 0.573775  | 0.120968  | 0.0623324 | 0         | 0.0355353 | 0.0640849 | 0.259562  | 0        |
| LAMC2       | 2.90756   | 6.46621    | 9.10026    | 8.61867   | 2.13937   | 5.67868   | 4.19338   | 3.18493   | 4.49465   | 12.9045   | 4.97771   | 6.02741   | 37.8574   | 17.6412   | 12.0978  |
| LAMC3       | 2.03802   | 2.37167    | 3.75502    | 1.92815   | 2.60569   | 2.35903   | 5.01787   | 1.52453   | 0.374391  | 0.538259  | 0.402724  | 1.14868   | 4.10636   | 4.43121   | 2.39816  |
| LAMP1       | 41.3477   | 48.523     | 46.183     | 55.3799   | 62.3166   | 71.6088   | 58.8402   | 37.3537   | 119.345   | 63.32     | 73.7997   | 71.5317   | 78.0097   | 41.9773   | 36.6908  |
| LAMP2       | 7.84663   | 8.14558    | 8.63275    | 14.1275   | 2.65369   | 9.45823   | 5.85165   | 9.56096   | 11.742    | 14.7738   | 16.6692   | 11.5217   | 19.5256   | 9.30986   | 7.23289  |
| LAMP3       | 0.602648  | 1.22821    | 1.61027    | 5.48922   | 0.47344   | 2.46546   | 0.39545   | 1.37897   | 0.531486  | 0.625973  | 1.94711   | 0.396515  | 3.03462   | 1.19109   | 0.567037 |
| LAMP5       | 0.396673  | 0.152899   | 0.0281277  | 0.175193  | 0.187399  | 0.221958  | 0.0776415 | 0.0805783 | 1.75298   | 0.611664  | 1.04912   | 0.72985   | 0.12431   | 0.379097  | 0.618502 |
| LAMP5-AS1   | 0.0120037 | 0.00578355 | 0.00993027 | 0         | 0.02527   | 0.010221  | 0.0411162 | 0         | 0         | 0         | 0         | 0         | 0         | 0         | 0        |
| LAMTOR1     | 15.2128   | 13.9785    | 14.5175    | 28.5426   | 24.9113   | 37.0887   | 16.6747   | 11.6183   | 19.914    | 22.7399   | 50.6779   | 13.006    | 24.671    | 17.6971   | 12.3473  |
| LAMTOR2     | 7.57842   | 7.17178    | 6.4662     | 20.3474   | 10.6105   | 17.2174   | 6.4411    | 5.13436   | 17.0521   | 17.5732   | 32.4554   | 10.9667   | 12.3225   | 11.3141   | 6.10065  |
| LAMTOR3     | 3.03348   | 2.89188    | 2.79577    | 3.82817   | 0.705544  | 3.09402   | 1.8151    | 2.93618   | 5.35394   | 4.98138   | 7.13576   | 2.5497    | 3.88299   | 2.91647   | 2.15104  |
| LAMTOR4     | 15.1026   | 19.6058    | 23.091     | 16.3198   | 38.6561   | 27.6978   | 22.6541   | 12.0363   | 20.1432   | 16.0391   | 38.9293   | 9.53754   | 10.1583   | 11.3765   | 8.91277  |
| LAMTOR5     | 9.4428    | 7.56089    | 6.3668     | 16.3966   | 5.51107   | 17.1498   | 7.10456   | 6.35462   | 17.9152   | 22.847    | 39.1268   | 9.54904   | 16.9215   | 12.9229   | 7.87795  |
| LAMTOR5-AS1 | 0.0434204 | 0.167365   | 0.0359204  | 0.0447459 | 0         | 0.0739437 | 0.148728  | 0.0385884 | 0.211524  | 0         | 0.0980324 | 0.0621369 | 0.0560292 | 0.0226934 | 0.249428 |
| LANCL1      | 9.81968   | 10.5338    | 9.89672    | 11.1125   | 4.45269   | 11.5415   | 9.1308    | 11.5463   | 14.9671   | 9.12989   | 13.0345   | 8.51304   | 8.6354    | 5.9166    | 4.61417  |
| LANCL1-AS1  | 0.170719  | 0.282751   | 0.361903   | 0.318874  | 0.0828703 | 0.118109  | 0.182738  | 0.502574  | 0.0259895 | 0.133918  | 0.060225  | 0.167961  | 0         | 0.144991  | 0.153233 |
| LANCL2      | 2.96133   | 2.05185    | 2.39265    | 2.29565   | 1.43698   | 3.53558   | 2.19745   | 2.15457   | 2.02667   | 2.12197   | 2.92885   | 1.48362   | 3.14552   | 1.6811    | 2.04625  |
| LANCL3      | 0.180588  | 0.314575   | 0.281552   | 0.28631   | 0.258937  | 0.42582   | 0.301354  | 0.31481   | 0.355281  | 0.278962  | 0.368519  | 0.193823  | 0.264398  | 0.264999  | 0.249372 |
| LAP3        | 10.9874   | 6.34526    | 6.82858    | 21.3056   | 7.92593   | 43.4658   | 6.20335   | 7.24764   | 10.026    | 10.526    | 16.1606   | 5.50405   | 15.2802   | 6.88296   | 15.2571  |



|          |           |           |           |           |           |           |          |           |           |            |           |           |           |           |           |
|----------|-----------|-----------|-----------|-----------|-----------|-----------|----------|-----------|-----------|------------|-----------|-----------|-----------|-----------|-----------|
| LBP      | 0.0977531 | 0         | 0         | 3.80284   | 0.208786  | 8.62528   | 0        | 0.0325781 | 0         | 0.521433   | 1.17248   | 0         | 1.26928   | 0         | 0.29832   |
| LBR      | 3.62904   | 3.37638   | 3.21902   | 5.45062   | 2.29829   | 6.78036   | 2.90644  | 3.12165   | 2.7384    | 4.66445    | 6.8323    | 2.72172   | 6.66725   | 4.59408   | 3.85652   |
| LBX1     | 0         | 0         | 0         | 0         | 0         | 0         | 0        | 0         | 0         | 0          | 0         | 0         | 0         | 0         | 0         |
| LBX1-AS1 | 0         | 0         | 0         | 0         | 0         | 0         | 0        | 0         | 0         | 0          | 0         | 0         | 0         | 0         | 0         |
| LBX2     | 0.234582  | 0.257362  | 0.239609  | 0.072793  | 0.703395  | 0.201646  | 0.40943  | 0.183875  | 0.0707996 | 0.00278088 | 0.160269  | 0.242815  | 0.0941854 | 0.20725   | 0.495428  |
| LBX2-AS1 | 0.477193  | 0.289796  | 0.286445  | 0.471383  | 0.583902  | 1.25766   | 0.876169 | 0.291079  | 0.214099  | 0.467938   | 1.20123   | 0.176745  | 0.43724   | 0.412064  | 0.85997   |
| LCA10    | 0.0336871 | 0.0243465 | 0.0557367 | 0.0173578 | 0.0261639 | 0.0143421 | 0.115389 | 0.0149692 | 0         | 0.0845616  | 0         | 0.0361561 | 0         | 0.0176064 | 0.0725684 |
| LCA5     | 0.505135  | 0.356802  | 0.454398  | 0.283021  | 0.198067  | 0.739133  | 0.207181 | 0.300735  | 0.19113   | 0.406251   | 0.84151   | 0.322838  | 0.373374  | 0.363969  | 0.676137  |
| LCA5L    | 0.241214  | 0.300001  | 0.353759  | 0.1989    | 0         | 0.0750229 | 0.290619 | 0.329564  | 0.0715371 | 0.144101   | 0.15472   | 0.101169  | 0.0252653 | 0.136209  | 0.154604  |
| LCAL1    | 0.208496  | 0.226745  | 0.221763  | 0.05525   | 0.16656   | 0.0659403 | 0.197245 | 0.095294  | 0.24667   | 0.15701    | 0.0941464 | 0.187546  | 0.103773  | 0.333134  | 0.0427752 |
| LCAT     | 2.05703   | 3.61068   | 3.47049   | 2.6828    | 4.71279   | 5.06854   | 3.18493  | 2.56424   | 0.840838  | 1.77917    | 1.6759    | 2.09814   | 1.29783   | 3.57085   | 2.84921   |
| LCE1A    | 18.1442   | 50.7222   | 59.9486   | 28.1616   | 157.336   | 39.948    | 133.811  | 33.0727   | 474.781   | 33.7409    | 129.959   | 38.8154   | 2.22185   | 6.6187    | 1.11674   |
| LCE1B    | 18.4291   | 37.4493   | 38.9803   | 13.0032   | 88.9273   | 13.8236   | 97.321   | 20.387    | 402.534   | 18.9481    | 73.7206   | 23.8579   | 1.5076    | 2.43186   | 1.16721   |
| LCE1C    | 40.5917   | 83.7479   | 95.1785   | 29.9236   | 239.494   | 58.4653   | 251.538  | 51.0201   | 841.389   | 48.6482    | 179.309   | 63.4263   | 2.83596   | 6.45678   | 1.53031   |
| LCE1D    | 7.48113   | 9.30952   | 11.4873   | 6.48931   | 34.9071   | 16.4002   | 30.9807  | 7.17475   | 158.28    | 5.44748    | 20.2968   | 5.71338   | 0.277801  | 0         | 0.618351  |
| LCE1E    | 9.04915   | 9.97792   | 10.8151   | 8.23306   | 30.292    | 18.789    | 35.1641  | 11.252    | 239.597   | 7.81871    | 29.6475   | 10.1778   | 0.785217  | 0.574514  | 0.648377  |
| LCE1F    | 17.9184   | 30.021    | 29.0385   | 40.4406   | 150.349   | 37.9621   | 96.5173  | 23.4911   | 594.726   | 46.2905    | 170.647   | 54.469    | 3.22107   | 8.8593    | 3.55707   |
| LCE2A    | 20.2111   | 34.8835   | 39.8111   | 44.5165   | 121.875   | 30.5909   | 71.4162  | 31.6505   | 340.513   | 32.2362    | 134.776   | 43.077    | 3.35461   | 2.65612   | 1.68427   |
| LCE2B    | 53.4065   | 105.596   | 142.87    | 32.8256   | 205.577   | 57.2074   | 261.483  | 66.3619   | 507.42    | 48.3116    | 170.161   | 53.0513   | 3.06344   | 5.05603   | 1.91761   |
| LCE2C    | 29.9733   | 53.7462   | 72.3384   | 65.1288   | 122.577   | 43.0644   | 120.655  | 38.2692   | 449.324   | 44.955     | 151.785   | 42.0703   | 3.81845   | 4.90753   | 2.67615   |
| LCE2D    | 10.13     | 23.4766   | 30.3944   | 18.8176   | 56.284    | 7.17691   | 72.4213  | 11.2958   | 132.431   | 13.5454    | 43.3326   | 15.7789   | 2.76514   | 2.19919   | 1.51074   |
| LCE3A    | 2.91431   | 0.289092  | 0.141819  | 74.6404   | 8.92072   | 3.13836   | 0.5872   | 4.11352   | 162.015   | 16.1372    | 27.7706   | 52.9903   | 35.2832   | 9.36287   | 1.60027   |
| LCE3B    | 0         | 0         | 0         | 2.9812    | 0.249647  | 0         | 0        | 0         | 1.1744    | 0          | 0.362856  | 0         | 0         | 0         | 0         |
| LCE3C    | 0         | 0.104948  | 0.0450484 | 84.0628   | 10.1503   | 2.17925   | 0.248696 | 0.725916  | 49.872    | 13.8742    | 37.1291   | 17.1829   | 1.12428   | 3.41522   | 1.72047   |
| LCE3D    | 71.8079   | 58.1271   | 26.8046   | 1011.7    | 386.006   | 217.484   | 65.2684  | 69.2318   | 2674.92   | 755.698    | 1535.21   | 884.189   | 1128.11   | 211.021   | 72.0361   |
| LCE3E    | 14.5669   | 10.5623   | 6.12424   | 251.424   | 113.898   | 41.6743   | 17.5005  | 21.0453   | 690.114   | 163.562    | 347.845   | 221.123   | 268.764   | 39.115    | 15.1839   |

|           |           |           |           |           |           |           |           |           |           |            |           |           |           |            |            |
|-----------|-----------|-----------|-----------|-----------|-----------|-----------|-----------|-----------|-----------|------------|-----------|-----------|-----------|------------|------------|
| LCE4A     | 0.417529  | 0.718471  | 0.246721  | 0.245872  | 0.555915  | 0.0507887 | 1.22585   | 0.318056  | 2.46988   | 0.299453   | 0.606007  | 0.170716  | 0         | 0          | 0          |
| LCE5A     | 2.99532   | 14.0915   | 20.1508   | 0.81537   | 12.9487   | 1.44366   | 9.13063   | 8.48822   | 5.74725   | 0.212798   | 0.478491  | 0.121315  | 0.127622  | 0.0443061  | 0          |
| LCE6A     | 9.44467   | 22.4924   | 25.5274   | 16.4198   | 44.5165   | 8.90147   | 47.5796   | 14.1603   | 320.008   | 15.2021    | 47.49     | 21.0991   | 1.79088   | 0.715937   | 1.08717    |
| LCK       | 0.60058   | 0.429064  | 0.531107  | 0.875018  | 1.64063   | 1.03159   | 0.200988  | 0.331291  | 0.390942  | 0.272924   | 0.537709  | 0.200047  | 0.815068  | 0.454599   | 1.0707     |
| LCLAT1    | 2.49077   | 2.22525   | 1.68336   | 3.26724   | 1.20661   | 3.37899   | 1.74489   | 2.19858   | 4.21087   | 3.88915    | 4.79431   | 3.57348   | 5.31132   | 2.62565    | 2.00679    |
| LCMT1     | 7.60176   | 7.3497    | 6.28867   | 8.94797   | 12.1492   | 12.6723   | 8.31296   | 5.50972   | 30.4079   | 14.3115    | 21.7394   | 16.1485   | 13.4604   | 8.23727    | 5.82243    |
| LCMT1-AS1 | 0.201946  | 0.233522  | 0.200477  | 0.208112  | 0.0627385 | 0.481473  | 0.184461  | 0.143578  | 0.245948  | 0.101385   | 0.136783  | 0.115598  | 0.104236  | 0.401075   | 0          |
| LCMT1-AS2 | 1.2872    | 1.20617   | 0.910644  | 0.420821  | 1.54442   | 0.461092  | 1.58118   | 1.06507   | 0.389215  | 0.523669   | 0.190405  | 1.24498   | 0.108824  | 0.825858   | 0.624695   |
| LCMT2     | 1.38224   | 1.4224    | 1.36886   | 2.69008   | 1.69      | 2.92417   | 1.35057   | 1.27825   | 1.87582   | 1.39717    | 2.48668   | 1.35099   | 2.61975   | 1.85651    | 1.33175    |
| LCN1      | 0         | 0         | 0         | 0.0302276 | 0         | 0.0499518 | 0         | 0         | 0         | 0          | 0.0331123 | 0         | 0         | 0.061321   | 0          |
| LCN10     | 0.883498  | 0.0497551 | 0.0284763 | 0.16554   | 0.249523  | 0.605737  | 0.0393019 | 0.265125  | 0         | 0.0576042  | 0.0777163 | 0.0820995 | 0.0148059 | 0.143923   | 0.95573    |
| LCN12     | 0         | 0.0485516 | 0         | 0.0692296 | 0         | 0.0286009 | 0         | 0.0298514 | 0         | 0          | 0.0758363 | 0         | 0         | 0          | 0          |
| LCN15     | 0.0303715 | 0.0292669 | 0         | 0         | 0         | 0.0258609 | 0.0346771 | 0         | 0         | 0          | 0         | 0         | 0         | 0          | 0          |
| LCN2      | 8.21647   | 0.884136  | 1.13287   | 54.0779   | 4.59468   | 11.124    | 1.1883    | 4.77071   | 19.78     | 5.80938    | 7.0802    | 10.9351   | 21.0459   | 1.67477    | 1.14066    |
| LCN6      | 0.746867  | 0         | 0.107711  | 0.134175  | 0.202246  | 0.859193  | 0.0371645 | 0.404988  | 0.0396422 | 0.0817072  | 0.110235  | 0.0931616 | 0.0840044 | 0.136096   | 0.747935   |
| LCN8      | 0         | 0         | 0.0189373 | 0         | 0         | 0         | 0         | 0         | 0         | 0          | 0         | 0         | 0         | 0          | 0          |
| LCN9      | 0         | 0         | 0         | 0         | 0         | 0         | 0         | 0         | 0         | 0          | 0         | 0         | 0         | 0          | 0          |
| LCNL1     | 0.189077  | 0.279374  | 0.208557  | 0.0649499 | 1.29229   | 0.493723  | 0.0719607 | 0.369679  | 0         | 0          | 0.0426889 | 0.0450966 | 0.0325311 | 0.026352   | 0.271539   |
| LCOR      | 2.00592   | 1.74701   | 1.73036   | 1.80389   | 0.802678  | 1.57954   | 1.3275    | 2.16461   | 1.32408   | 1.80359    | 1.42721   | 1.36885   | 2.35714   | 1.52636    | 1.78439    |
| LCORL     | 0.678239  | 0.773554  | 0.8895    | 0.710507  | 0.184417  | 0.69814   | 0.536327  | 0.988099  | 0.510772  | 1.17067    | 0.982811  | 0.930794  | 1.00467   | 0.635121   | 0.555211   |
| LCP1      | 8.3718    | 7.62306   | 11.1186   | 21.5779   | 6.09902   | 13.9814   | 5.61248   | 12.232    | 2.32029   | 16.3858    | 25.2709   | 1.99675   | 20.2347   | 5.98715    | 17.6004    |
| LCP2      | 1.30338   | 0.848562  | 1.10498   | 3.36347   | 0.970468  | 3.82472   | 0.940859  | 1.49339   | 0.367325  | 4.32628    | 5.49629   | 0.377665  | 3.6869    | 1.74242    | 4.69501    |
| LCT       | 0.0258005 | 0.0106552 | 0.021344  | 0.0113949 | 0.0057253 | 0.031384  | 0.0168332 | 0.0196537 | 0.0134666 | 0.00462604 | 0.0249648 | 0.0131864 | 0         | 0.0192635  | 0.00529325 |
| LCTL      | 0.0247943 | 0.0369879 | 0.0269466 | 0.0894037 | 0.0259969 | 0.0144841 | 0.0470796 | 0.0147234 | 0.0310634 | 0.0647512  | 0.0839214 | 0.0413485 | 0.0215499 | 0.00457008 | 0.351147   |
| LDAH      | 1.58705   | 1.31926   | 1.10131   | 2.13274   | 0.830777  | 1.36125   | 0.955804  | 1.6481    | 1.63549   | 1.37172    | 2.38222   | 1.39763   | 1.31276   | 1.56778    | 1.89517    |
| LDB1      | 14.1037   | 29.2185   | 31.0831   | 15.663    | 26.9262   | 27.4132   | 20.3326   | 15.1698   | 13.9543   | 11.8087    | 14.3513   | 13.9133   | 13.709    | 12.4747    | 10.2422    |

|             |           |            |           |            |           |           |           |            |           |           |           |            |            |           |           |
|-------------|-----------|------------|-----------|------------|-----------|-----------|-----------|------------|-----------|-----------|-----------|------------|------------|-----------|-----------|
| LDB2        | 4.41018   | 2.35281    | 2.91758   | 1.73477    | 1.78287   | 4.13431   | 2.87511   | 2.70155    | 0.652328  | 3.15176   | 6.8318    | 1.21446    | 2.03758    | 3.10842   | 5.93397   |
| LDB3        | 1.60415   | 0.287274   | 0.246623  | 0.153609   | 0.562308  | 0.667847  | 1.46282   | 0.693893   | 0.0216114 | 0.115813  | 0.204326  | 0.226007   | 0.0366368  | 0.13355   | 1.21814   |
| LDHA        | 96.9723   | 75.0141    | 77.6755   | 288.995    | 63.7317   | 266.727   | 73.0503   | 78.2742    | 141.641   | 311.598   | 309.483   | 179.253    | 467.613    | 272.211   | 129.718   |
| LDHAL6A     | 0.259833  | 0.176995   | 0.200128  | 0.120033   | 0.111341  | 0.0610329 | 0.11253   | 0.183142   | 0.0327359 | 0.0224908 | 0.0809156 | 0.00641095 | 0.0289039  | 0.0842897 | 0.24448   |
| LDHAL6B     | 0.509644  | 0.717774   | 0.821605  | 0.538669   | 0.345079  | 0.100143  | 0.626656  | 0.650359   | 0.302387  | 0.705261  | 0.30979   | 1.12204    | 0.0843127  | 2.28115   | 0.225204  |
| LDHB        | 16.7749   | 5.27897    | 5.54369   | 18.2114    | 10.8139   | 29.7622   | 6.01523   | 7.58905    | 5.74643   | 39.7102   | 75.5012   | 10.9672    | 37.5294    | 35.915    | 25.2751   |
| LDHC        | 0.0360484 | 0.156318   | 0         | 0          | 0         | 0.506463  | 0.144056  | 0.080092   | 0         | 0.0904888 | 0         | 0          | 0          | 0         | 0.10354   |
| LDHD        | 0.569641  | 1.09785    | 1.0349    | 1.28917    | 2.48105   | 0.60868   | 0.981972  | 0.426838   | 0.734568  | 0.546732  | 1.34915   | 0.75125    | 0.410768   | 0.402797  | 0.368936  |
| LDLR        | 4.87229   | 10.6803    | 12.3887   | 33.8336    | 12.1596   | 25.7883   | 9.16655   | 6.12667    | 28.9453   | 19.3695   | 11.5415   | 21.3824    | 55.8522    | 22.528    | 10.1685   |
| LDLRAD1     | 0         | 0.00938609 | 0         | 0          | 0         | 0.0331751 | 0.0222424 | 0.0086564  | 0.106764  | 0.0244503 | 0         | 0.00696947 | 0.0125688  | 0         | 0         |
| LDLRAD2     | 0.247494  | 0.280896   | 0.28499   | 0.336596   | 0.846285  | 0.454286  | 0.491735  | 0.259332   | 0.0106291 | 0.127883  | 0.0745338 | 0.174461   | 0.0386267  | 0.262194  | 0.970999  |
| LDLRAD3     | 4.40242   | 5.27645    | 5.14085   | 4.50712    | 4.51719   | 6.02333   | 5.59967   | 4.18941    | 4.04758   | 2.78809   | 4.91117   | 3.78582    | 5.4128     | 3.9263    | 2.85878   |
| LDLRAD4     | 1.89265   | 0.95024    | 1.09463   | 0.65158    | 1.62607   | 1.28712   | 1.5753    | 1.39549    | 0.379922  | 0.706859  | 1.0541    | 0.585739   | 1.03606    | 0.765957  | 2.16183   |
| LDLRAD4-AS1 | 1.12189   | 0.432436   | 0.618739  | 0.099098   | 0.365135  | 0.12737   | 0.792964  | 0.740662   | 0.0130128 | 0.0268208 | 0.0723701 | 0.129968   | 0.0137874  | 0.139607  | 0.383614  |
| LDLRAP1     | 4.34474   | 5.80899    | 4.99024   | 8.95477    | 11.5013   | 11.5282   | 6.00504   | 3.49685    | 5.32982   | 5.40362   | 6.84518   | 5.48973    | 10.2716    | 6.6845    | 4.74481   |
| LDOC1       | 4.17489   | 4.56958    | 4.43124   | 4.18869    | 7.41497   | 9.34996   | 6.99723   | 4.64837    | 6.63869   | 1.52254   | 3.41465   | 3.1676     | 3.18152    | 2.12434   | 3.5974    |
| LEAP2       | 0.556481  | 0.914765   | 0.56868   | 0.371069   | 0.254237  | 0.222982  | 0.261624  | 0.901833   | 0.358799  | 0.0410847 | 0.0739056 | 0.0702665  | 0.0633597  | 0.393491  | 0.564125  |
| LECT2       | 0         | 0          | 0         | 0          | 0         | 0         | 0         | 0          | 0         | 0         | 0         | 0          | 0          | 0         | 0         |
| LEF1        | 0.812506  | 0.91348    | 0.782379  | 1.70026    | 1.30629   | 1.59802   | 0.556901  | 0.7955     | 0.900484  | 1.05541   | 2.09525   | 0.83038    | 1.0801     | 1.35563   | 1.69886   |
| LEF1-AS1    | 0.0241472 | 0.105606   | 0.0800311 | 0.0565256  | 0.0723323 | 0.0817645 | 0.0265835 | 0.0759396  | 0.0300185 | 0.0293716 | 0.143748  | 0.0333189  | 0.0180106  | 0.069058  | 0.0167185 |
| LEFTY1      | 0.0381742 | 0.0548619  | 0.117746  | 0.0293353  | 0.0442179 | 0.0121193 | 0.0487527 | 0.0252984  | 0         | 0         | 6.78E-11  | 0.0101842  | 0          | 0.0148777 | 0.286168  |
| LEFTY2      | 0.0737628 | 0          | 1.51E-43  | 0          | 0.0469719 | 0         | 0.0345261 | 0.00895802 | 0         | 0.0253022 | 0.045515  | 0          | 0          | 0         | 0.231612  |
| LEKR1       | 0.119499  | 0.0877358  | 0.0941508 | 0.0820984  | 0.0795531 | 0.125979  | 0.136441  | 0.131487   | 0.0970246 | 0.0285684 | 0.102781  | 0.0570033  | 0.0440574  | 0.0327148 | 0.0653776 |
| LELP1       | 0         | 0.0206112  | 0.0353892 | 0          | 0         | 0         | 0         | 0.0380178  | 0         | 0         | 0         | 0.030609   | 0          | 0.0447156 | 0         |
| LEMD1       | 0.240823  | 0.243667   | 0.0398451 | 0.0744524  | 0         | 0.922758  | 0.0549927 | 0.128414   | 0.263965  | 1.29971   | 0.434974  | 0.499713   | 1.13426    | 0.251729  | 0.276681  |
| LEMD1-AS1   | 0.0665989 | 0.0131619  | 0.0279215 | 0.00857795 | 0.0258534 | 0.0141719 | 0.0665113 | 0.0147915  | 0.0202701 | 0.0835582 | 0         | 0.083363   | 0.00536921 | 0.0277286 | 0.107561  |



|           |          |            |           |           |           |           |           |            |            |           |           |            |           |            |          |
|-----------|----------|------------|-----------|-----------|-----------|-----------|-----------|------------|------------|-----------|-----------|------------|-----------|------------|----------|
| LEMD2     | 5.1156   | 5.30983    | 6.04307   | 8.16474   | 13.9493   | 9.30776   | 4.91412   | 3.76544    | 6.38442    | 6.63557   | 6.18678   | 3.86814    | 8.27788   | 7.30491    | 6.18105  |
| LEMD3     | 4.03724  | 3.83225    | 3.7429    | 5.14966   | 3.11688   | 4.74375   | 3.25482   | 3.72946    | 4.22376    | 5.38797   | 4.63927   | 3.57556    | 7.31962   | 4.53764    | 4.12855  |
| LENEP     | 0.320936 | 0.25772    | 0.1475    | 0.0367482 | 0.387741  | 0.121455  | 0.16286   | 0.285221   | 0.217147   | 0         | 0         | 0.0510307  | 0         | 0.0931862  | 0        |
| LENG1     | 2.27924  | 2.0998     | 2.5486    | 3.92331   | 5.21341   | 4.0521    | 2.03041   | 1.58041    | 2.86737    | 2.48345   | 3.61913   | 1.86384    | 4.20158   | 2.27774    | 1.69059  |
| LENG8     | 16.477   | 25.4672    | 23.8172   | 16.0866   | 39.7416   | 21.6986   | 25.7091   | 19.0427    | 6.87535    | 12.584    | 4.88199   | 18.8678    | 7.72575   | 18.0567    | 25.4937  |
| LENG8-AS1 | 1.6086   | 2.52515    | 1.95319   | 1.1497    | 2.53901   | 1.21506   | 1.62928   | 1.52182    | 0.473974   | 0.716404  | 0.205022  | 1.37377    | 0.0669587 | 1.17972    | 1.63946  |
| LENG9     | 1.00121  | 1.41029    | 1.63856   | 2.97931   | 3.37597   | 2.94349   | 1.00307   | 0.763702   | 0.946228   | 1.5034    | 1.77066   | 1.88968    | 3.23773   | 1.80574    | 1.55627  |
| LEO1      | 3.66483  | 4.12659    | 3.89443   | 7.05263   | 2.84636   | 5.948     | 1.7223    | 3.11303    | 5.90591    | 5.19693   | 5.19998   | 4.58539    | 6.50573   | 5.6351     | 3.06775  |
| LEP       | 0.202595 | 0.0195226  | 0.0223467 | 0.0347966 | 0         | 0.120755  | 0.100237  | 0.00600164 | 0.00822458 | 0.0169518 | 0.0457408 | 0.00483206 | 0.0174284 | 0.0317654  | 0        |
| LEPR      | 1.14935  | 0.983946   | 1.33418   | 0.978445  | 0.451646  | 1.654     | 3.48699   | 1.23869    | 0.311325   | 0.74125   | 0.701699  | 0.405586   | 1.85382   | 0.956397   | 1.18835  |
| LEPROT    | 9.49031  | 6.96747    | 7.53758   | 11.4145   | 3.46631   | 16.0043   | 6.73167   | 7.4688     | 8.73841    | 14.0667   | 21.7888   | 7.19699    | 16.6745   | 9.08669    | 12.1205  |
| LEPROTL1  | 3.16958  | 3.32005    | 3.68676   | 5.22918   | 1.65638   | 4.58993   | 2.79606   | 4.49651    | 7.57706    | 4.79038   | 7.43008   | 4.68844    | 4.69257   | 3.40152    | 3.6542   |
| LETM1     | 5.33027  | 6.40827    | 6.41457   | 10.497    | 10.9519   | 11.509    | 6.78741   | 5.27558    | 8.17394    | 6.4401    | 3.78348   | 7.92502    | 13.9148   | 8.95099    | 5.06273  |
| LETM2     | 0.32796  | 0.168551   | 0.248702  | 0.129556  | 0.0424529 | 0.186169  | 0.193468  | 0.335183   | 0.0332849  | 0.363601  | 0.382567  | 0.230753   | 0.35619   | 0.562784   | 0.635839 |
| LETMD1    | 3.60014  | 3.78703    | 3.94144   | 2.63351   | 2.45833   | 2.84616   | 3.2412    | 2.77619    | 1.00451    | 1.82443   | 2.52648   | 1.6554     | 1.2587    | 2.25681    | 2.129    |
| LEUTX     | 0        | 0          | 0         | 0         | 0         | 0         | 0         | 0          | 0          | 0         | 0         | 0          | 0         | 0          | 0        |
| LEXM      | 0.323408 | 0.311645   | 0.321055  | 0.186637  | 0.622931  | 0.143196  | 0.546499  | 0.264424   | 0.835013   | 0.519564  | 0.262863  | 0.370251   | 0.559211  | 0.304249   | 0.185782 |
| LFNG      | 5.77295  | 6.28393    | 7.62186   | 2.14684   | 8.92179   | 4.96555   | 9.97503   | 5.57379    | 3.44839    | 2.0899    | 3.36196   | 2.19918    | 2.64086   | 2.60698    | 3.82402  |
| LGALS1    | 73.079   | 26.4579    | 34.2767   | 98.091    | 92.5143   | 95.3163   | 81.4029   | 33.1736    | 18.2853    | 233.781   | 748.466   | 33.4751    | 125.582   | 118.333    | 237.181  |
| LGALS12   | 0.120641 | 0.00484391 | 0.0166339 | 0.0103604 | 0.0468495 | 0.179768  | 0.0918297 | 0.0178693  | 0.012244   | 0.0126181 | 0.0113491 | 0          | 0.0389186 | 0.00525437 | 0        |
| LGALS13   | 0        | 0          | 0         | 0         | 0         | 0         | 0         | 0          | 0          | 0         | 0         | 0          | 0         | 0          | 0        |
| LGALS14   | 0        | 0          | 0         | 0         | 0         | 0.0545873 | 0         | 0          | 0          | 0         | 0         | 0          | 0         | 0          | 0        |
| LGALS16   | 0        | 0          | 0         | 0         | 0         | 0         | 0         | 0          | 0          | 0         | 0         | 0          | 0         | 0          | 0        |
| LGALS17A  | 0        | 0.00986785 | 0         | 0         | 0         | 0.0348779 | 0         | 0          | 0          | 0         | 0         | 0          | 0         | 0          | 0        |
| LGALS2    | 1.00813  | 1.45719    | 2.17563   | 1.67128   | 2.58725   | 2.31396   | 1.40127   | 1.44129    | 0.266909   | 0.880209  | 1.53389   | 0.564527   | 2.03615   | 1.35159    | 3.39917  |
| LGALS3    | 56.8841  | 54.411     | 60.224    | 40.215    | 30.8533   | 58.1262   | 71.7306   | 36.9839    | 76.9676    | 55.6217   | 85.0296   | 36.6589    | 48.1795   | 26.5048    | 28.1417  |

|            |           |           |           |            |           |            |           |            |           |            |           |            |            |            |           |
|------------|-----------|-----------|-----------|------------|-----------|------------|-----------|------------|-----------|------------|-----------|------------|------------|------------|-----------|
| LGALS3BP   | 11.3258   | 10.1491   | 10.7757   | 33.4527    | 24.21     | 50.6252    | 9.33024   | 8.97331    | 6.87181   | 9.34385    | 28.2411   | 7.73752    | 7.38       | 9.44097    | 23.8978   |
| LGALS4     | 0.379988  | 0.427196  | 0.284414  | 0.279706   | 0.393501  | 0.123259   | 0.0826395 | 0.369863   | 0.0220372 | 0.0454213  | 0.0204266 | 0.064736   | 0.0583729  | 0.709279   | 0.103945  |
| LGALS7     | 182.119   | 78.8133   | 2.5499    | 85.9755    | 11.7721   | 71.4372    | 16.2697   | 103.833    | 731.121   | 1078.91    | 1720.29   | 18.3341    | 117.003    | 1.91486    | 4.63333   |
| LGALS7B    | 171.731   | 554.625   | 582.486   | 494.705    | 1254.17   | 455.009    | 965.077   | 244.482    | 1615.8    | 58.9306    | 129.077   | 900.438    | 304.867    | 656.731    | 127.719   |
| LGALS8     | 4.64906   | 5.21271   | 4.98651   | 5.72692    | 1.41495   | 7.06111    | 3.49057   | 5.06455    | 8.74209   | 5.70812    | 7.62643   | 4.9127     | 5.74261    | 4.13503    | 3.51317   |
| LGALS8-AS1 | 0.0326002 | 0.111552  | 0.242188  | 0.133781   | 0.56518   | 0.172109   | 0.209507  | 0.117148   | 0.081984  | 0.210334   | 0.341374  | 0.0829806  | 0.0739424  | 0.0518786  | 0.253889  |
| LGALS9     | 3.72598   | 1.59698   | 2.37644   | 8.17348    | 4.05549   | 26.3077    | 2.95098   | 2.72836    | 1.16641   | 3.06277    | 9.86377   | 0.866216   | 4.66405    | 2.50963    | 6.83945   |
| LGALS9B    | 0.216709  | 0.315663  | 0.0724299 | 0.603028   | 1.30626   | 0.525811   | 0.026088  | 0.335017   | 0.42701   | 3.7297     | 0.510996  | 2.68874    | 2.1197     | 1.25354    | 0.620938  |
| LGALS9C    | 0.179876  | 0.954679  | 0.115184  | 0.444401   | 4.72282   | 0.37679    | 0.0887379 | 0.415819   | 1.2653    | 6.88398    | 0.983137  | 8.98683    | 4.70403    | 3.6813     | 1.87117   |
| LGALS9D    | 0.179876  | 0.954679  | 0.115184  | 0.444401   | 4.72282   | 0.37679    | 0.0887379 | 0.415819   | 1.2653    | 6.88398    | 0.983137  | 8.98683    | 4.70403    | 3.6813     | 1.87117   |
| LGALS9E    | 0.179876  | 0.954679  | 0.115184  | 0.444401   | 4.72282   | 0.37679    | 0.0887379 | 0.415819   | 1.2653    | 6.88398    | 0.983137  | 8.98683    | 4.70403    | 3.6813     | 1.87117   |
| LGALS9F    | 0.179876  | 0.954679  | 0.115184  | 0.444401   | 4.72282   | 0.37679    | 0.0887379 | 0.415819   | 1.2653    | 6.88398    | 0.983137  | 8.98683    | 4.70403    | 3.6813     | 1.87117   |
| LGALS9G    | 0.179876  | 0.954679  | 0.115184  | 0.444401   | 4.72282   | 0.37679    | 0.0887379 | 0.415819   | 1.2653    | 6.88398    | 0.983137  | 8.98683    | 4.70403    | 3.6813     | 1.87117   |
| LGALS9H    | 0.179876  | 0.954679  | 0.115184  | 0.444401   | 4.72282   | 0.37679    | 0.0887379 | 0.415819   | 1.2653    | 6.88398    | 0.983137  | 8.98683    | 4.70403    | 3.6813     | 1.87117   |
| LGALS9I    | 0.179876  | 0.954679  | 0.115184  | 0.444401   | 4.72282   | 0.37679    | 0.0887379 | 0.415819   | 1.2653    | 6.88398    | 0.983137  | 8.98683    | 4.70403    | 3.6813     | 1.87117   |
| LGALS9J    | 0.179876  | 0.954679  | 0.115184  | 0.444401   | 4.72282   | 0.37679    | 0.0887379 | 0.415819   | 1.2653    | 6.88398    | 0.983137  | 8.98683    | 4.70403    | 3.6813     | 1.87117   |
| LGALS9K    | 0.179876  | 0.954679  | 0.115184  | 0.444401   | 4.72282   | 0.37679    | 0.0887379 | 0.415819   | 1.2653    | 6.88398    | 0.983137  | 8.98683    | 4.70403    | 3.6813     | 1.87117   |
| LGALS9L    | 0.179876  | 0.954679  | 0.115184  | 0.444401   | 4.72282   | 0.37679    | 0.0887379 | 0.415819   | 1.2653    | 6.88398    | 0.983137  | 8.98683    | 4.70403    | 3.6813     | 1.87117   |
| LGALS9M    | 0.179876  | 0.954679  | 0.115184  | 0.444401   | 4.72282   | 0.37679    | 0.0887379 | 0.415819   | 1.2653    | 6.88398    | 0.983137  | 8.98683    | 4.70403    | 3.6813     | 1.87117   |
| LGALS9N    | 0.179876  | 0.954679  | 0.115184  | 0.444401   | 4.72282   | 0.37679    | 0.0887379 | 0.415819   | 1.2653    | 6.88398    | 0.983137  | 8.98683    | 4.70403    | 3.6813     | 1.87117   |
| LGALS9O    | 0.179876  | 0.954679  | 0.115184  | 0.444401   | 4.72282   | 0.37679    | 0.0887379 | 0.415819   | 1.2653    | 6.88398    | 0.983137  | 8.98683    | 4.70403    | 3.6813     | 1.87117   |
| LGALS9P    | 0.179876  | 0.954679  | 0.115184  | 0.444401   | 4.72282   | 0.37679    | 0.0887379 | 0.415819   | 1.2653    | 6.88398    | 0.983137  | 8.98683    | 4.70403    | 3.6813     | 1.87117   |
| LGALS9Q    | 0.179876  | 0.954679  | 0.115184  | 0.444401   | 4.72282   | 0.37679    | 0.0887379 | 0.415819   | 1.2653    | 6.88398    | 0.983137  | 8.98683    | 4.70403    | 3.6813     | 1.87117   |
| LGALS9R    | 0.179876  | 0.954679  | 0.115184  | 0.444401   | 4.72282   | 0.37679    | 0.0887379 | 0.415819   | 1.2653    | 6.88398    | 0.983137  | 8.98683    | 4.70403    | 3.6813     | 1.87117   |
| LGALS9S    | 0.179876  | 0.954679  | 0.115184  | 0.444401   | 4.72282   | 0.37679    | 0.0887379 | 0.415819   | 1.2653    | 6.88398    | 0.983137  | 8.98683    | 4.70403    | 3.6813     | 1.87117   |
| LGALS9T    | 0.179876  | 0.954679  | 0.115184  | 0.444401   | 4.72282   | 0.37679    | 0.0887379 | 0.415819   | 1.2653    | 6.88398    | 0.983137  | 8.98683    | 4.70403    | 3.6813     | 1.87117   |
| LGALS9U    | 0.179876  | 0.954679  | 0.115184  | 0.444401   | 4.72282   | 0.37679    | 0.0887379 | 0.415819   | 1.2653    | 6.88398    | 0.983137  | 8.98683    | 4.70403    | 3.6813     | 1.87117   |
| LGALS9V    | 0.179876  | 0.954679  | 0.115184  | 0.444401   | 4.72282   | 0.37679    | 0.0887379 | 0.415819   | 1.2653    | 6.88398    | 0.983137  | 8.98683    | 4.70403    | 3.6813     | 1.87117   |
| LGALS9W    | 0.179876  | 0.954679  | 0.115184  | 0.444401   | 4.72282   | 0.37679    | 0.0887379 | 0.415819   | 1.2653    | 6.88398    | 0.983137  | 8.98683    | 4.70403    | 3.6813     | 1.87117   |
| LGALS9X    | 0.179876  | 0.954679  | 0.115184  | 0.444401   | 4.72282   | 0.37679    | 0.0887379 | 0.415819   | 1.2653    | 6.88398    | 0.983137  | 8.98683    | 4.70403    | 3.6813     | 1.87117   |
| LGALS9Y    | 0.179876  | 0.954679  | 0.115184  | 0.444401   | 4.72282   | 0.37679    | 0.0887379 | 0.415819   | 1.2653    | 6.88398    | 0.983137  | 8.98683    | 4.70403    | 3.6813     | 1.87117   |
| LGALS9Z    | 0.179876  | 0.954679  | 0.115184  | 0.444401   | 4.72282   | 0.37679    | 0.0887379 | 0.415819   | 1.2653    | 6.88398    | 0.983137  | 8.98683    | 4.70403    | 3.6813     | 1.87117   |
| LGI1       | 0.103781  | 0.050003  | 0.0546347 | 0.00972262 | 0         | 0.00803343 | 0.0538605 | 0.025154   | 0         | 0          | 0         | 0.0067507  | 0          | 0          | 0         |
| LGI2       | 0.226356  | 0.105544  | 0.193298  | 0.361186   | 0.158791  | 0.481847   | 0.400174  | 0.220634   | 0.0266783 | 0.348251   | 0.597605  | 0.0339601  | 0.701951   | 0.156466   | 0.812689  |
| LGI3       | 0.148807  | 0.563338  | 0.879312  | 0.124141   | 0.0770496 | 0.899019   | 1.63431   | 0.522692   | 0.12082   | 0.0444686  | 0.0799927 | 0.096335   | 0.00457189 | 0.0111104  | 0.0508823 |
| LGI4       | 5.28892   | 1.66797   | 1.93577   | 0.693686   | 4.43141   | 5.95001    | 2.60763   | 1.66649    | 0.23423   | 0.854912   | 1.26648   | 0.407106   | 0.615264   | 1.13082    | 2.83107   |
| LGMN       | 15.5562   | 7.24405   | 8.40638   | 21.843     | 18.7596   | 39.0937    | 21.6131   | 11.21      | 20.501    | 23.6517    | 56.384    | 9.39511    | 18.5083    | 11.4894    | 24.5717   |
| LGR4       | 7.14841   | 7.16726   | 5.75275   | 5.23466    | 4.20951   | 4.81831    | 5.22925   | 5.59863    | 3.83886   | 5.38766    | 6.91189   | 3.27394    | 5.28537    | 3.27397    | 3.53634   |
| LGR5       | 0.737853  | 0.175476  | 0.344331  | 0.0389938  | 0.0146941 | 0.519533   | 0.658845  | 0.184953   | 0.0172812 | 0.00593642 | 0.0320363 | 0.00676864 | 0.0122066  | 0.0148321  | 0.285291  |
| LGR6       | 1.28431   | 2.05858   | 0.804744  | 0.28174    | 2.153     | 1.64036    | 1.98906   | 0.870168   | 0.704641  | 0.159598   | 0.229676  | 0.200169   | 0.0697363  | 0.29242    | 0.429151  |
| LGSN       | 0         | 0         | 0         | 0          | 0         | 0          | 0         | 0.00365062 | 0         | 0          | 0         | 0          | 0          | 0          | 0         |
| LHB        | 0.309754  | 0.469053  | 0.329465  | 0.136805   | 0.0687364 | 0.226073   | 0.202095  | 0.275284   | 0.107784  | 0.166617   | 0.0499534 | 0.221637   | 0          | 0.161891   | 0.0635494 |
| LHCGR      | 0.0598592 | 0.0468667 | 0.0557097 | 0.0231325  | 0         | 0.00637116 | 0.0768884 | 0.0332487  | 0         | 0.0187824  | 0         | 0          | 0          | 0.0351956  | 0.0107457 |
| LHFPL1     | 0.144234  | 0.0442236 | 0.0433894 | 0.0135125  | 0.0407356 | 0.0781541  | 0.0449133 | 0.0233061  | 0         | 0          | 0.0296041 | 0          | 0          | 0          | 0         |
| LHFPL2     | 3.6561    | 1.41013   | 1.97338   | 5.86194    | 2.8004    | 5.55049    | 2.68692   | 3.06985    | 0.541924  | 10.0469    | 15.3647   | 3.57776    | 8.06819    | 5.48796    | 10.073    |
| LHFPL3     | 0.0291474 | 0.0105328 | 0.0180846 | 0.0525652  | 0.022638  | 0.0124093  | 0.0499194 | 0.0518076  | 0         | 0.00914575 | 0         | 0          | 0          | 0.00380843 | 0         |
| LHFPL3-AS1 | 0         | 0.0125641 | 0.0323587 | 0.0134364  | 0.0607591 | 0.0222039  | 0.0148868 | 0.0231748  | 0         | 0          | 0         | 0.0186586  | 0          | 0          | 0         |
| LHFPL3-AS2 | 0.113694  | 0.0121732 | 0.0836051 | 0.0650917  | 0         | 0.096809   | 0.115389  | 0.0336806  | 0         | 0.0475659  | 0         | 0.00903901 | 0          | 0.0132048  | 0         |

|          |            |            |            |            |           |            |            |           |            |           |           |            |            |            |           |
|----------|------------|------------|------------|------------|-----------|------------|------------|-----------|------------|-----------|-----------|------------|------------|------------|-----------|
| LHFPL4   | 0.203924   | 0.379306   | 0.372711   | 0.146616   | 0.346232  | 0.383621   | 0.368203   | 0.252881  | 0.0519817  | 0.0654746 | 0         | 0.0780467  | 0.0520164  | 0.0917082  | 0.0681073 |
| LHFPL5   | 0.0107793  | 0          | 0          | 0          | 0         | 0          | 0          | 0.0191594 | 0.0131279  | 0         | 0         | 0.00771284 | 0.0278189  | 0          | 0         |
| LHFPL6   | 10.8208    | 6.74828    | 9.20903    | 5.31587    | 14.343    | 19.5599    | 12.012     | 5.35635   | 2.6122     | 6.54161   | 15.5446   | 2.99268    | 5.97825    | 5.82919    | 22.2551   |
| LHPP     | 2.83107    | 3.03785    | 2.55683    | 4.01316    | 7.60466   | 4.40018    | 3.303      | 2.15345   | 4.14052    | 2.21886   | 4.99624   | 3.42334    | 1.81862    | 2.19684    | 1.77545   |
| LHX1     | 0          | 0          | 0.0111603  | 0          | 0.0104777 | 0.00574352 | 0.00770154 | 0         | 0          | 0         | 0         | 0          | 0          | 0          | 0         |
| LHX1-DT  | 0          | 0          | 0          | 0          | 0         | 0          | 0          | 0         | 0          | 0         | 0         | 0          | 0          | 0          | 0         |
| LHX2     | 0.10537    | 0.0461535  | 0.0396224  | 0.236916   | 0.446388  | 0.579109   | 0.0109371  | 0.11067   | 0.0349987  | 0.228432  | 0.42173   | 0.082249   | 0.222493   | 0.325419   | 0.729109  |
| LHX3     | 0          | 0.00713872 | 0          | 0.0152686  | 0.0115074 | 0          | 0          | 0.0131675 | 0.0180446  | 0         | 0         | 0.0106015  | 0.0095594  | 0          | 0         |
| LHX4     | 0.302115   | 0.530582   | 0.472493   | 0.372295   | 0.805188  | 0.352833   | 0.737029   | 0.532844  | 0.0600013  | 0.465519  | 0.172786  | 0.46175    | 0.155965   | 0.441834   | 0.247636  |
| LHX4-AS1 | 0.840284   | 1.18176    | 0.90524    | 0.75102    | 1.41949   | 0.74431    | 0.831308   | 0.660461  | 0.148513   | 0.370452  | 0.231787  | 0.502364   | 0.0358179  | 0.898463   | 1.13832   |
| LHX5     | 0          | 0          | 0          | 0          | 0         | 0.0378234  | 0          | 0         | 0          | 0.0418142 | 0.087754  | 0.007946   | 0.0143299  | 0.0290201  | 0.0797417 |
| LHX5-AS1 | 0          | 0          | 0          | 0          | 0         | 0          | 0          | 0         | 0          | 0         | 0         | 0          | 0          | 0          | 0         |
| LHX6     | 1.80722    | 0.425129   | 0.492491   | 1.20508    | 0.693553  | 1.77418    | 0.837508   | 0.599928  | 0.0712085  | 0.547048  | 1.6201    | 0.224393   | 0.984248   | 0.983423   | 2.19845   |
| LHX8     | 0          | 0.00911748 | 0          | 0          | 0         | 0.0241693  | 0          | 0         | 0          | 0         | 0.010681  | 0          | 0          | 0.00989008 | 0         |
| LHX9     | 0.00900508 | 0.00433878 | 0          | 0.00927999 | 0         | 0.0306708  | 0.0102817  | 0         | 0.0109672  | 0         | 0         | 0          | 0.0348602  | 0          | 0.0646622 |
| LIAS     | 1.8557     | 2.64815    | 2.12185    | 2.92334    | 0.991447  | 2.07326    | 1.03915    | 1.71222   | 1.71302    | 2.06206   | 2.49514   | 1.52232    | 1.30405    | 1.37141    | 1.25612   |
| LIF      | 0.513124   | 1.60375    | 1.95612    | 3.89983    | 0.606852  | 0.600763   | 0.638392   | 0.966587  | 0.213043   | 0.292738  | 0.441022  | 0.250332   | 4.10819    | 0.719211   | 2.16049   |
| LIF-AS1  | 0          | 0          | 0          | 0          | 0         | 0          | 0.032703   | 0         | 0          | 0         | 0         | 0          | 0.0554398  | 0          | 0.123402  |
| LIFR     | 9.70842    | 2.59786    | 2.98319    | 0.975828   | 0.811695  | 3.71393    | 3.17903    | 5.81982   | 0.215879   | 0.519367  | 0.844498  | 0.178689   | 0.620127   | 0.348565   | 1.1121    |
| LIFR-AS1 | 0.637291   | 0.253891   | 0.287153   | 0.065632   | 0.123846  | 0.414199   | 0.308595   | 0.31661   | 0.0153821  | 0.0363775 | 0.0592046 | 0.0142631  | 0.00321528 | 0.016146   | 0.0572547 |
| LIG1     | 2.60788    | 3.29086    | 3.26284    | 3.82905    | 4.18211   | 5.68887    | 2.71103    | 2.41037   | 1.16155    | 1.41525   | 1.09348   | 1.571      | 2.10885    | 1.9627     | 2.06167   |
| LIG3     | 3.7741     | 4.9549     | 5.46876    | 5.1796     | 4.97759   | 5.24991    | 6.17239    | 3.89205   | 4.2712     | 2.94938   | 2.23743   | 3.26519    | 3.97419    | 3.71548    | 2.78674   |
| LIG4     | 0.822468   | 1.1196     | 0.959123   | 1.35306    | 0.43099   | 1.53564    | 0.543075   | 0.788183  | 1.74991    | 2.96626   | 1.82337   | 1.37198    | 4.93568    | 2.03275    | 1.14559   |
| LILRA1   | 0.0630422  | 0.0172256  | 0.00985868 | 0.38685    | 0.0894309 | 0.251465   | 0.0272132  | 0.0270845 | 0.00725686 | 0.314102  | 0.813903  | 0.00504743 | 0.553599   | 0.0373704  | 0.650337  |
| LILRA2   | 0.295613   | 0.0262781  | 0.0902383  | 0.712553   | 0.0568073 | 0.21132    | 0.217951   | 0.113098  | 0.0221411  | 0.559282  | 1.41009   | 0.0130082  | 0.589184   | 0.137774   | 0.339413  |
| LILRA3   | 0          | 0          | 0.0238129  | 2.66973    | 0.290634  | 0.789681   | 0          | 0         | 0          | 0.96733   | 1.29978   | 0.0617891  | 4.39225    | 1.04557    | 1.05414   |





|            |            |            |            |            |           |            |            |            |            |            |           |            |           |            |           |
|------------|------------|------------|------------|------------|-----------|------------|------------|------------|------------|------------|-----------|------------|-----------|------------|-----------|
| LINC00160  | 0          | 0          | 0          | 0.0343654  | 0         | 0          | 0          | 0          | 0          | 0          | 0         | 0          | 0         | 0          | 0         |
| LINC00161  | 0.133006   | 0.153802   | 0.176051   | 0          | 0         | 0.0679517  | 0.12149    | 0.0236409  | 0          | 0          | 0         | 0          | 0.013903  | 0.114608   |           |
| LINC00163  | 0.0107392  | 0.0362203  | 0.0799583  | 0          | 0.116772  | 0.146309   | 0.0735703  | 0.0381766  | 0          | 0          | 0         | 0.0230526  | 0         | 0.0392896  | 0.0616916 |
| LINC00167  | 0.0889185  | 0.109373   | 0.133745   | 0.0583119  | 0.0627823 | 0.0550639  | 0.110754   | 0.150863   | 0.0295344  | 0.0405825  | 0.0912526 | 0.0578396  | 0.0260772 | 0.0253487  | 0.0812625 |
| LINC00173  | 0.854584   | 2.01424    | 1.88207    | 0.35703    | 0.878996  | 0.255667   | 0.580167   | 1.38554    | 0.0562587  | 0.0289889  | 0.0391102 | 0.157001   | 0         | 0.229357   | 0.248775  |
| LINC00174  | 1.01486    | 1.95338    | 2.00371    | 0.657697   | 1.64144   | 1.24276    | 1.32       | 1.34359    | 0.280327   | 0.249499   | 0.295271  | 0.812253   | 0.19576   | 0.645243   | 0.706197  |
| LINC00184  | 0.0305855  | 0.0392975  | 0.0253025  | 0.0525321  | 0.0316733 | 0.104173   | 0.023281   | 0.0453031  | 0.0372497  | 0.089572   | 0.0115091 | 0.116719   | 0.0197336 | 0.0745982  | 0.0292831 |
| LINC00189  | 0.0468009  | 0.112747   | 0.077434   | 0.289378   | 0.181745  | 0.0797007  | 0.0534358  | 0.207964   | 0.113996   | 0.14685    | 0.0792486 | 0          | 0.120783  | 0.0978408  | 1.41145   |
| LINC00200  | 0          | 0          | 0          | 0.00979852 | 0         | 0          | 0          | 0.0253504  | 0          | 0          | 0         | 0          | 0         | 0          | 0         |
| LINC00207  | 0          | 0          | 0          | 0          | 0         | 0          | 0          | 0          | 0          | 0          | 0         | 0          | 0         | 0          | 0         |
| LINC00208  | 0          | 0          | 0          | 0          | 0         | 0          | 0          | 0          | 0          | 0          | 0         | 0          | 0         | 0          | 0         |
| LINC00210  | 0          | 0          | 0          | 0          | 0         | 0          | 0          | 0          | 0          | 0          | 0         | 0          | 0         | 0          | 0         |
| LINC00211  | 0.0186037  | 0.00448178 | 0.0153903  | 0.00958585 | 0         | 0.0237613  | 0.0106206  | 0.0413336  | 0          | 0.0466992  | 0.0210013 | 0          | 0         | 0.00486156 | 0         |
| LINC00216  | 1.88037    | 1.63278    | 1.4872     | 0.936948   | 0.0962924 | 0.475055   | 0.566228   | 1.89149    | 0.17616    | 0.622434   | 0.489855  | 0.650551   | 0.0799917 | 1.38235    | 1.30571   |
| LINC00221  | 0          | 0          | 0          | 0          | 0         | 0          | 0          | 0          | 0          | 0          | 0         | 0          | 0         | 0          | 0         |
| LINC00222  | 0.105616   | 0.0763309  | 0.0655296  | 0.0680251  | 0.0410144 | 0.0112413  | 0.0150736  | 0.0703969  | 0          | 0          | 0         | 0.0850173  | 0         | 0.0413996  | 0.151678  |
| LINC00226  | 0          | 0          | 0          | 0          | 0         | 0          | 0          | 0          | 0          | 0          | 0         | 0          | 0         | 0          | 0         |
| LINC00229  | 0          | 0          | 0.0463573  | 0          | 0         | 0          | 0.0319903  | 0          | 0          | 0          | 0         | 0          | 0         | 0          | 0         |
| LINC00235  | 0.288772   | 0.337899   | 0.853189   | 0.382614   | 1.9865    | 0.772784   | 1.13044    | 0.293299   | 0.502418   | 0.103554   | 0.232849  | 0.501802   | 0.319396  | 0.452775   | 0.473959  |
| LINC00237  | 0          | 0          | 0          | 0          | 0         | 0          | 0          | 0          | 0          | 0          | 0         | 0          | 0         | 0          | 0         |
| LINC00239  | 0.108145   | 0.173687   | 0.0894653  | 0.222893   | 0.111991  | 0.0306947  | 0.0823177  | 0          | 0.131709   | 0.0904888  | 0.0406941 | 0.0515871  | 0.0697747 | 0.0565214  | 0         |
| LINC00240  | 0.0236879  | 0.182611   | 0.235155   | 0.024411   | 0.0367954 | 0.141189   | 0.0540921  | 0.0631554  | 0          | 0.0891921  | 0.0534813 | 0          | 0         | 0.0866622  | 0         |
| LINC00242  | 0.0765692  | 0.0675617  | 0.0357629  | 0.0887702  | 0.162266  | 0.15815    | 0.0764962  | 0.0451358  | 0.153059   | 0.184539   | 0.151265  | 0.0547873  | 0.160557  | 0.0991028  | 0.360972  |
| LINC00243  | 0.00611334 | 0.0186548  | 0.00674318 | 0.00629997 | 0.0158269 | 0.00347028 | 0.00930668 | 0.00905504 | 0.00248179 | 0.00767286 | 0.0138024 | 0.00437425 | 0.0157772 | 0.0138454  | 0.0292651 |
| LINC00244  | 0.0378773  | 0.109499   | 0.125339   | 0          | 0         | 0          | 0.216236   | 0.134649   | 0          | 0.0475399  | 0         | 0.0271022  | 0         | 0.0197963  | 0.217587  |
| LINC002481 | 0.165217   | 0.0612338  | 0.0946239  | 0.013097   | 0.0987072 | 0.0649292  | 0.0725535  | 0.180715   | 0.0309562  | 0.0159511  | 0         | 0.0272808  | 0.0327991 | 0.112919   | 0.346782  |

|             |           |            |           |            |           |            |            |            |           |           |            |            |           |            |           |
|-------------|-----------|------------|-----------|------------|-----------|------------|------------|------------|-----------|-----------|------------|------------|-----------|------------|-----------|
| LINC00251   | 0         | 0          | 0         | 0          | 0         | 0          | 0          | 0          | 0         | 0         | 0          | 0          | 0         | 0          | 0         |
| LINC00254   | 0         | 0          | 0.173525  | 0          | 0         | 0          | 0          | 0          | 0         | 0         | 0          | 0          | 0         | 0          | 0         |
| LINC00260   | 1.08908   | 2.26512    | 2.29747   | 0.617283   | 1.32518   | 0.664595   | 2.81856    | 1.51636    | 0.287383  | 1.07075   | 0.0614721  | 1.67543    | 0.128823  | 1.58428    | 1.92901   |
| LINC00261   | 0         | 0          | 0         | 0          | 0         | 0          | 0          | 0          | 0         | 0         | 0          | 0          | 0         | 0          | 0         |
| LINC00265   | 1.08015   | 1.23979    | 1.29371   | 0.577772   | 1.58762   | 1.41455    | 1.44626    | 1.3484     | 0.364183  | 0.368382  | 0.417242   | 0.799644   | 0.437848  | 0.699823   | 1.38571   |
| LINC00266-1 | 0.383676  | 0.565823   | 0.648191  | 0.958695   | 2.11084   | 0.514686   | 0.50652    | 0.252471   | 0.390321  | 0.231426  | 0.595234   | 0.281965   | 0.0939188 | 1.06448    | 0.470509  |
| LINC00266-3 | 0         | 0.0378417  | 0.0433158 | 0          | 0         | 0.111459   | 0          | 0          | 0         | 0         | 0.0886616  | 0.0749297  | 0         | 0          | 0.0375977 |
| LINC00269   | 0         | 0          | 0         | 0          | 0         | 0          | 0          | 0          | 0         | 0.066836  | 0          | 0.0152411  | 0.027486  | 0.0834945  | 0         |
| LINC00271   | 0.206196  | 0.156119   | 0.292423  | 0.0910676  | 0.0305042 | 0.108688   | 0.201795   | 0.139619   | 0         | 0.0246474 | 0.0332528  | 0.00702566 | 0.0126702 | 0.0615812  | 0.0846067 |
| LINC00272   | 0         | 0.120875   | 0         | 0          | 0.0487116 | 0          | 0.107415   | 0.0557388  | 0         | 0         | 0          | 0          | 0         | 0.0163897  | 0         |
| LINC00276   | 0         | 0.00636636 | 0         | 0.00680833 | 0         | 0          | 0.00754324 | 0          | 0         | 0         | 0.00745807 | 0          | 0         | 0.0103588  | 0         |
| LINC00278   | 1.26632   | 1.36754    | 1.3727    | 1.84497    | 2.71314   | 1.85906    | 0.548422   | 1.47466    | 1.54223   | 0.274027  | 1.28163    | 1.18728    | 0.0563463 | 0.433615   | 0.501681  |
| LINC00279   | 0         | 0          | 0         | 0          | 0         | 0          | 0          | 0          | 0         | 0         | 0          | 0          | 0         | 0          | 0         |
| LINC00280   | 0         | 0          | 0         | 0          | 0         | 0          | 0          | 0          | 0         | 0         | 0          | 0          | 0         | 0          | 0         |
| LINC00284   | 0.0270785 | 0.0130468  | 0         | 0          | 0.0280415 | 0.00768565 | 0.0309173  | 0.00802169 | 0         | 0.0113287 | 0.0101894  | 0.00645845 | 0.0116473 | 0.0141524  | 0         |
| LINC00290   | 0         | 0          | 0         | 0          | 0         | 0          | 0          | 0          | 0         | 0         | 0          | 0          | 0         | 0          | 0         |
| LINC00293   | 0         | 0          | 0         | 0          | 0         | 0          | 0          | 0          | 0.0131157 | 0         | 0          | 0.00770566 | 0         | 0          | 0         |
| LINC00294   | 2.01082   | 2.89945    | 2.47298   | 2.28306    | 1.76162   | 2.28627    | 1.90403    | 1.69493    | 2.30302   | 2.29925   | 1.74767    | 1.54597    | 2.0834    | 2.15823    | 2.68265   |
| LINC00297   | 0         | 0          | 0         | 0          | 0         | 0          | 0          | 0          | 0         | 0         | 0          | 0          | 0         | 0          | 0         |
| LINC00298   | 0         | 0          | 0         | 0          | 0         | 0.00910208 | 0          | 0.0190001  | 0         | 0         | 0          | 0          | 0         | 0          | 0         |
| LINC00299   | 0.054631  | 0.0197415  | 0.033896  | 0.0211121  | 0.0636456 | 0.0174441  | 0.023391   | 0.00606893 | 0.0083168 | 0.0342837 | 0.0231268  | 0.019545   | 0         | 0.00713813 | 0.0392285 |
| LINC00301   | 0         | 0          | 0         | 0          | 0         | 0          | 0          | 0          | 0         | 0         | 0          | 0          | 0         | 0          | 0         |
| LINC00302   | 5.73456   | 10.302     | 13.4866   | 9.58205    | 17.7519   | 7.95216    | 27.7335    | 7.28057    | 121.223   | 12.9554   | 45.5464    | 17.7904    | 1.50639   | 2.24785    | 0.882381  |
| LINC00303   | 0.0305721 | 0.0147301  | 0.037937  | 0          | 0         | 0.0130159  | 0          | 0.013585   | 0         | 0         | 0          | 0          | 0         | 0          | 0         |
| LINC00304   | 0.0515895 | 0.0198853  | 0.0426785 | 0.0318987  | 0.112191  | 0.0263567  | 0.0706839  | 0.0183394  | 0         | 0         | 0          | 0.00738273 | 0         | 0.0161778  | 0.0296356 |
| LINC00305   | 0.0266318 | 0.0256632  | 0         | 0.0274449  | 0         | 0          | 0.091222   | 0.0236681  | 0         | 0.0334257 | 0.030064   | 0          | 0.0515481 | 0          | 0         |

|           |           |           |            |           |           |           |           |           |           |           |           |           |           |           |           |
|-----------|-----------|-----------|------------|-----------|-----------|-----------|-----------|-----------|-----------|-----------|-----------|-----------|-----------|-----------|-----------|
| LINC00307 | 0.0545827 | 0         | 0          | 0         | 0         | 0         | 0         | 0         | 0         | 0         | 0         | 0         | 0         | 0         | 0         |
| LINC00308 | 0         | 0         | 0          | 0         | 0         | 0         | 0         | 0         | 0         | 0         | 0         | 0         | 0         | 0         | 0         |
| LINC00309 | 0.0280013 | 0.0168643 | 0.00579116 | 0         | 0         | 0         | 0.0159855 | 0.0124426 | 0.0085256 | 0         | 0.015805  | 0.0100178 | 0         | 0         | 0.0201067 |
| LINC00310 | 0.281764  | 0.0925623 | 0.254285   | 0.25077   | 0.278521  | 0.218107  | 0.131608  | 0.0682931 | 0.0935882 | 0.112523  | 0.303618  | 0.137461  | 0.0578431 | 0.234281  | 0.0735724 |
| LINC00311 | 0.116753  | 0.112507  | 0.0321955  | 0.0267372 | 0.46347   | 0.11046   | 0.222175  | 0.161405  | 0         | 0.0488457 | 0.073222  | 0.111387  | 0         | 0.189841  | 0.335344  |
| LINC00312 | 1.73954   | 0.432586  | 0.663165   | 0.470879  | 0.136973  | 0.525584  | 0.99765   | 1.21824   | 0.0292888 | 0.452757  | 0.352927  | 0.149133  | 0.268948  | 0.645209  | 1.51964   |
| LINC00313 | 0         | 0.107017  | 0.0710909  | 0.288337  | 0.255187  | 1.16E-22  | 0         | 0.106568  | 0.243399  | 0.250837  | 0         | 0.342553  | 0.0257738 | 0.201555  | 0.286847  |
| LINC00314 | 0.158786  | 0.133885  | 0.0985192  | 0.0409084 | 0         | 0.101403  | 0.0453242 | 0.352789  | 0         | 0         | 0         | 0         | 0         | 0         | 0.513083  |
| LINC00316 | 0         | 0         | 0          | 0         | 0         | 0.0433099 | 0         | 0         | 0         | 0         | 0         | 0         | 0         | 0         | 0         |
| LINC00317 | 0         | 0         | 0          | 0         | 0         | 0         | 0         | 0         | 0         | 0         | 0         | 0         | 0         | 0         | 0         |
| LINC00319 | 0.119664  | 0.526592  | 0.514772   | 0.238414  | 1.66053   | 0.421156  | 0.428103  | 0.304863  | 0.456644  | 0.540687  | 0.180115  | 1.22726   | 0.257356  | 0.346064  | 0.263508  |
| LINC00320 | 0         | 0         | 0          | 0         | 0         | 0         | 0         | 0         | 0         | 0         | 0         | 0         | 0         | 0         | 0         |
| LINC00322 | 0         | 0.012294  | 0.0211087  | 0         | 0         | 0         | 0         | 0         | 0         | 0         | 0         | 0         | 0         | 0.0266716 | 0         |
| LINC00323 | 0.0343879 | 0.0386601 | 0.0853443  | 0.0118126 | 0.0890271 | 0.0976028 | 0.0261753 | 0.010187  | 0         | 0.0287736 | 0.0517595 | 0.0328073 | 0         | 0.0119817 | 0.0329236 |
| LINC00324 | 0.552604  | 0.889285  | 0.694872   | 0.318906  | 0.412025  | 1.054     | 0.757134  | 0.520575  | 0.309584  | 0.291301  | 1.0605    | 0.158161  | 0.221053  | 0.404341  | 0.492038  |
| LINC00326 | 0         | 0         | 0          | 0         | 0         | 0         | 0         | 0         | 0         | 0         | 0         | 0         | 0         | 0         | 0         |
| LINC00327 | 0.110891  | 0.133573  | 0.14678    | 0.0228554 | 0.0172253 | 0.0472113 | 0.10129   | 0.108406  | 0.0270107 | 0.111344  | 0.137701  | 0.0317383 | 0.0500826 | 0.0231827 | 0.0159254 |
| LINC00330 | 0.0457733 | 0.071427  | 0.00955271 | 0.0468788 | 0.0885013 | 0         | 0.0649238 | 0.0303208 | 0.0138504 | 0.100025  | 0         | 0.146472  | 0.0293499 | 0.0237995 | 0.0328242 |
| LINC00331 | 0         | 0         | 0          | 0         | 0         | 0         | 0         | 0         | 0         | 0         | 0         | 0         | 0         | 0         | 0         |
| LINC00332 | 0         | 0         | 0.0229014  | 0         | 0         | 0         | 0.0316076 | 0.0738072 | 0         | 0         | 0.0312507 | 0         | 0         | 0         | 0.119269  |
| LINC00333 | 0         | 0.0549294 | 0          | 0         | 0         | 0         | 0         | 0         | 0         | 0         | 0         | 0         | 0         | 0         | 0         |
| LINC00334 | 0.0426994 | 0.0205732 | 0          | 0         | 0         | 0         | 0         | 0.0379476 | 0         | 0         | 0         | 0         | 0         | 0         | 0         |
| LINC00336 | 0         | 0         | 0          | 0         | 0         | 0.0187053 | 0.012541  | 0         | 0         | 0.0137859 | 0         | 0         | 0         | 0.017222  | 0.063097  |
| LINC00337 | 0         | 0.0203976 | 0          | 0.0145424 | 0.109601  | 0.108143  | 0.0161122 | 0         | 0.0343727 | 0.0531346 | 0.0318605 | 0.0706807 | 0.0182095 | 0.022126  | 0.0405321 |
| LINC00339 | 1.13381   | 1.28538   | 1.36557    | 1.20279   | 1.6576    | 1.87406   | 1.2184    | 1.06691   | 0.893493  | 1.40212   | 4.53622   | 0.429497  | 0.882136  | 0.732009  | 1.26911   |
| LINC00342 | 5.26536   | 5.39839   | 6.0191     | 1.66117   | 2.49115   | 1.18542   | 4.69643   | 3.60093   | 0.190555  | 0.966851  | 0.830835  | 1.12279   | 0.153823  | 2.13584   | 4.48242   |







|           |           |            |           |            |           |           |            |            |            |           |           |           |           |           |           |
|-----------|-----------|------------|-----------|------------|-----------|-----------|------------|------------|------------|-----------|-----------|-----------|-----------|-----------|-----------|
| LINC00434 | 0         | 0          | 0.0199433 | 0          | 0         | 0         | 0          | 0          | 0          | 0         | 0         | 0         | 0         | 0         | 0         |
| LINC00437 | 0         | 0          | 0         | 0          | 0.0304783 | 0         | 0          | 0          | 0          | 0         | 0         | 0         | 0         | 0         | 0         |
| LINC00440 | 0         | 0          | 0         | 0          | 0         | 0         | 0          | 0          | 0          | 0         | 0         | 0         | 0         | 0         | 0         |
| LINC00442 | 0         | 0.0469392  | 0.0268647 | 0          | 0         | 0         | 0          | 0.0192401  | 0          | 0         | 0         | 0         | 0         | 0         | 0         |
| LINC00443 | 0         | 0.00911748 | 0         | 0          | 0         | 0         | 0          | 0          | 0          | 0         | 0         | 0         | 0         | 0         | 0         |
| LINC00445 | 0         | 0.0147691  | 0.0253584 | 0          | 0         | 0         | 0          | 0          | 0          | 0         | 0         | 0         | 0         | 0         | 0         |
| LINC00446 | 0         | 0          | 0         | 0          | 0         | 0         | 0          | 0          | 0          | 0         | 0         | 0         | 0         | 0         | 0         |
| LINC00448 | 0         | 0          | 0         | 0          | 0         | 0         | 0          | 0          | 0          | 0         | 0         | 0         | 0         | 0         | 0         |
| LINC00449 | 0.156548  | 0.0879986  | 0.0431693 | 0.0268879  | 0.0810578 | 0.0222165 | 0.148951   | 0.0463757  | 0          | 0.130989  | 0.0589078 | 0.0186691 | 0.218842  | 0.054546  | 0         |
| LINC00452 | 0         | 0          | 0         | 0          | 0         | 0.0122626 | 0.0164431  | 0          | 0          | 0         | 0         | 0         | 0.0278751 | 0.0075268 | 0.0206822 |
| LINC00454 | 0         | 0.012094   | 0         | 0          | 0         | 0         | 0          | 0          | 0          | 0         | 0         | 0         | 0         | 0         | 0         |
| LINC00456 | 0.0297087 | 0.0858845  | 0.0491542 | 0          | 0         | 0.0252965 | 0.0678408  | 0.0528052  | 0.144727   | 0         | 0         | 0         | 0         | 0.015527  | 0.0426654 |
| LINC00457 | 0         | 0.0285915  | 0         | 0          | 0         | 0         | 0.0677538  | 0          | 0          | 0         | 0         | 0         | 0         | 0         | 0         |
| LINC00458 | 0.145914  | 0.130193   | 0.0657471 | 0          | 0.123452  | 0.0812061 | 0.10889    | 0.0565044  | 0          | 0.0199498 | 0         | 0         | 0         | 0.083074  | 0         |
| LINC00459 | 0         | 0          | 0         | 0          | 0         | 0         | 0          | 0          | 0          | 0         | 0         | 0         | 0         | 0         | 0         |
| LINC00460 | 0         | 0          | 0         | 0          | 0         | 0         | 0          | 0          | 0          | 0.190264  | 0.114086  | 0         | 0.0815053 | 0.171662  | 0         |
| LINC00461 | 0         | 0.00578055 | 0.0297754 | 0.00309093 | 0         | 0         | 0.00684914 | 0.0213246  | 0.00365288 | 0         | 0         | 0         | 0         | 0         | 0         |
| LINC00462 | 0.0452455 | 0.0653999  | 0.131006  | 0.116567   | 0.105423  | 0.0385259 | 0.206639   | 0.0402104  | 0.13776    | 0.482695  | 0.408612  | 0.11331   | 0.729803  | 0.224649  | 0.0974673 |
| LINC00463 | 0         | 0          | 0         | 0          | 0         | 0         | 0          | 0          | 0          | 0         | 0         | 0         | 0         | 0         | 0         |
| LINC00466 | 0.012716  | 0          | 0         | 0          | 0         | 0.0108275 | 0          | 0          | 0          | 0         | 0         | 0         | 0         | 0         | 0         |
| LINC00467 | 1.55712   | 0.838507   | 0.808256  | 0.975379   | 0.189705  | 1.76782   | 0.732063   | 0.814022   | 1.30145    | 1.60946   | 2.65392   | 0.480618  | 0.630365  | 0.68616   | 0.613864  |
| LINC00469 | 0         | 0          | 0         | 0          | 0         | 0         | 0          | 0          | 0          | 0         | 0         | 0         | 0         | 0         | 0         |
| LINC00470 | 0         | 0.0995152  | 0.0170866 | 0          | 0         | 0.0087934 | 0.0117912  | 0.00917787 | 0.0125773  | 0         | 0         | 0         | 0         | 0.026987  | 0         |
| LINC00471 | 0.180523  | 0.173957   | 0.104539  | 0.260448   | 0.112166  | 0.199827  | 0.123669   | 0          | 0          | 0.0679725 | 0.0815152 | 0.0258338 | 0         | 0.0566095 | 0.103702  |
| LINC00472 | 1.1903    | 0.465097   | 0.646457  | 0.219398   | 0.289367  | 0.519121  | 0.662947   | 0.743926   | 0.0530359  | 0.124495  | 0.303151  | 0.162721  | 0.0905335 | 0.370479  | 0.667089  |
| LINC00473 | 0.199004  | 0.100953   | 0.0840508 | 0.166849   | 0.281084  | 0.90826   | 0.0372198  | 0.194673   | 0.011599   | 0.411589  | 0.746109  | 0.170365  | 0.0614477 | 1.19878   | 2.27047   |

|           |            |           |            |           |           |            |           |            |           |           |            |            |            |            |           |
|-----------|------------|-----------|------------|-----------|-----------|------------|-----------|------------|-----------|-----------|------------|------------|------------|------------|-----------|
| LINC00474 | 0          | 0         | 0          | 0         | 0         | 0          | 0         | 0          | 0         | 0         | 0          | 0          | 0          | 0          | 0         |
| LINC00475 | 0.266145   | 0.0892054 | 0.0382911  | 0.0119248 | 0.0718983 | 0.059118   | 0.145332  | 0.0205676  | 0         | 0.0726173 | 0.156754   | 0.0248392  | 0.00746589 | 0.102812   | 0.099709  |
| LINC00476 | 0.800033   | 0.50254   | 0.474999   | 0.226709  | 0.740695  | 0.612901   | 0.357932  | 0.55101    | 0.0865501 | 0.265217  | 0.546421   | 0.160575   | 0.309706   | 0.257866   | 0.378462  |
| LINC00477 | 0          | 0.0195626 | 0          | 0         | 0         | 0          | 0.0772631 | 0          | 0         | 0.0509595 | 0          | 0          | 0          | 0          | 0         |
| LINC00479 | 0.0910696  | 0.0822726 | 0.047087   | 0.0117312 | 0.0176828 | 0.0193861  | 0.0129975 | 0.0910519  | 0         | 0.0428631 | 0.0385523  | 0.130325   | 0          | 0.0297481  | 0.0163484 |
| LINC00482 | 0.116884   | 0.142669  | 0.0644632  | 0.248935  | 0.229978  | 0.345021   | 0.115661  | 0.0692512  | 0.0949011 | 0.293403  | 0.131948   | 0.211872   | 0.281542   | 0.423549   | 0.380483  |
| LINC00484 | 0.356831   | 0.24561   | 0.210854   | 0.105064  | 0.158366  | 0.390648   | 0         | 0          | 0.248332  | 0         | 0.115091   | 0.145898   | 0          | 0.159853   | 0.219623  |
| LINC00485 | 0.0220258  | 0.0638336 | 0.0425638  | 8.94E-22  | 1.54E-15  | 0.0630141  | 0.0686157 | 0.0973626  | 2.91E-36  | 0.0242318 | 0          | 0.019438   | 9.19E-43   | 0.0234142  | 0.0937614 |
| LINC00486 | 0.0215736  | 0         | 0.0044618  | 0         | 0         | 0          | 0.03079   | 0.0191728  | 0         | 0         | 0.00608847 | 0          | 0          | 0          | 0.0154912 |
| LINC00487 | 0          | 0         | 0.00898431 | 0.0111917 | 0         | 0.166451   | 0         | 0          | 0         | 0.0136306 | 0.0245196  | 0.031083   | 0          | 0          | 0.0155966 |
| LINC00488 | 0          | 0         | 0          | 0         | 0         | 0          | 0         | 0          | 0.011167  | 0         | 0          | 0          | 0          | 0          | 0         |
| LINC00489 | 0          | 0         | 0          | 0         | 0         | 0          | 0         | 0          | 0         | 0         | 0          | 0          | 0          | 0          | 0         |
| LINC00491 | 0.183978   | 0.10933   | 0.0610363  | 0.0302095 | 0.246568  | 0.0123656  | 0.0638517 | 0.147256   | 0.0203628 | 0.0170011 | 0.128146   | 0.00960896 | 0          | 0.0599125  | 0.115849  |
| LINC00492 | 0          | 0         | 0          | 0         | 0         | 0          | 0         | 0          | 0         | 0         | 0          | 0          | 0          | 0          | 0         |
| LINC00494 | 0.00644294 | 0         | 0          | 0         | 0         | 0.00548608 | 0         | 0.0171779  | 0         | 0.0161731 | 0.0145466  | 0          | 0          | 0.00673473 | 0.0277586 |
| LINC00499 | 0          | 0         | 0          | 0         | 0         | 0          | 0         | 0          | 0         | 0         | 0          | 0          | 0          | 0          | 0         |
| LINC00501 | 0          | 0.0818085 | 0.0385661  | 0.0231342 | 0.0697305 | 0.00955763 | 0.0256474 | 0.0400918  | 0         | 0.0422398 | 0          | 0.104488   | 0.0072379  | 0.0117327  | 0.162964  |
| LINC00502 | 0          | 0         | 0          | 0         | 0         | 0          | 0.0489333 | 0          | 0         | 0         | 0          | 0          | 0          | 0          | 0         |
| LINC00504 | 37.1014    | 36.0226   | 35.5495    | 17.3465   | 8.17965   | 7.98309    | 19.8883   | 42.4512    | 9.29655   | 13.2198   | 5.67764    | 19.7532    | 3.66544    | 25.4853    | 26.0501   |
| LINC00506 | 23.955     | 22.2943   | 22.1624    | 11.6199   | 6.9111    | 6.57686    | 16.4848   | 21.884     | 3.77282   | 9.49044   | 4.23918    | 13.4233    | 2.39545    | 17.0106    | 17.3875   |
| LINC00507 | 0.39147    | 0.38693   | 0.491802   | 0.16292   | 0.172555  | 0.0954403  | 0.268851  | 0.345338   | 0.0666882 | 0.0863233 | 0.0490852  | 0.285876   | 0.0518918  | 0.303442   | 0.140501  |
| LINC00508 | 0          | 0         | 0          | 0         | 0         | 0          | 0         | 0          | 0         | 0.0203552 | 0          | 0          | 0          | 0          | 0         |
| LINC00511 | 0.0613061  | 0.0344612 | 0.0845279  | 0.0315889 | 0.0634864 | 0.0435011  | 0.0583311 | 0.0908063  | 0.0622199 | 0.0384727 | 0.046138   | 0.0584882  | 0.0395544  | 0.0534021  | 0         |
| LINC00513 | 2.95703    | 1.77799   | 2.32496    | 1.30959   | 0.949027  | 1.14449    | 2.28803   | 1.41172    | 0.119052  | 0.705469  | 0.524168   | 1.13661    | 0.646466   | 1.99251    | 3.61494   |
| LINC00514 | 0          | 0.0138475 | 0          | 0.0074044 | 0         | 0.0489438  | 0         | 0.00638548 | 0         | 0         | 0          | 0.0205644  | 0.0231788  | 0.00375522 | 0         |
| LINC00515 | 0.668577   | 0.446027  | 0.340366   | 0.264995  | 0.239661  | 0.481702   | 0.64592   | 0.502764   | 0.0626347 | 0.0645487 | 0          | 0.110396   | 0.0995452  | 0.188153   | 0.147717  |



|           |            |            |           |            |           |           |            |           |           |            |           |            |           |            |            |
|-----------|------------|------------|-----------|------------|-----------|-----------|------------|-----------|-----------|------------|-----------|------------|-----------|------------|------------|
| LINC00557 | 0          | 0.00871828 | 0         | 0          | 0         | 0         | 0          | 0.016081  | 0         | 0.0227106  | 0         | 0          | 0         | 0          | 0          |
| LINC00558 | 0          | 0          | 0         | 0          | 0         | 0         | 0          | 0         | 0         | 0          | 0         | 0          | 0         | 0          | 0          |
| LINC00559 | 0          | 0.00577008 | 0         | 0.00617066 | 0         | 0         | 0.00683674 | 0         | 0         | 0          | 0         | 0          | 0         | 0          | 0          |
| LINC00560 | 0          | 0          | 0         | 0          | 0         | 0         | 0          | 0         | 0         | 0          | 0         | 0          | 0         | 0          | 0          |
| LINC00561 | 0          | 0          | 0         | 0          | 0         | 0         | 0.0193228  | 0         | 0         | 0          | 0         | 0.00605465 | 0         | 0          | 0          |
| LINC00562 | 0.766378   | 0.465878   | 0.532402  | 0.299327   | 0.319902  | 0.214937  | 0.462108   | 0.65866   | 0.125771  | 0.235198   | 0.116349  | 0.498248   | 0.0967241 | 0.338914   | 0.526844   |
| LINC00563 | 0.0165308  | 0.0159295  | 0.0136754 | 0.0340708  | 0.025678  | 0.0422272 | 0.0188743  | 0         | 0         | 0          | 0         | 0          | 0         | 0.0172794  | 0.0712207  |
| LINC00564 | 0          | 0          | 0         | 0          | 0         | 0         | 0          | 0         | 0         | 0          | 0         | 0          | 0         | 0          | 0          |
| LINC00565 | 0.0373576  | 0.035999   | 0.0618097 | 0.173242   | 0.246625  | 0.318095  | 0.0959709  | 0.0249003 | 0         | 0.0703315  | 0.137059  | 0.0066826  | 0.45193   | 0.268465   | 0.41579    |
| LINC00566 | 0          | 0          | 0         | 0          | 0         | 0         | 0          | 0         | 0         | 0          | 0         | 0          | 0         | 0          | 0          |
| LINC00567 | 0.00678881 | 0.0065419  | 0         | 0          | 0.0210907 | 0.121392  | 0.00775124 | 0         | 0         | 0.00852065 | 0.0383186 | 0          | 0         | 0          | 0.00974959 |
| LINC00570 | 0          | 0.0167679  | 0         | 0          | 0.0270294 | 0.0148165 | 0.0397353  | 0.0463931 | 0         | 0.0436796  | 0         | 0.0124507  | 0         | 0.00909441 | 0          |
| LINC00571 | 0.399784   | 0.535061   | 0.293982  | 0.183106   | 0.276001  | 0.226941  | 0.304307   | 0.197386  | 0.108198  | 0.390266   | 0.10029   | 0.254272   | 0.286598  | 0.232161   | 0          |
| LINC00572 | 0          | 0.038785   | 0.0332966 | 0          | 0         | 0         | 0          | 0         | 0         | 0          | 0         | 0          | 0         | 0          | 0          |
| LINC00574 | 0.0450956  | 0.0362827  | 0.033451  | 0          | 0.0152105 | 0.0276039 | 0.0102977  | 0.0135756 | 0.0425018 | 0.0864626  | 0         | 0          | 4.86E-15  | 0.0103164  | 0.100236   |
| LINC00575 | 0          | 0          | 0         | 0          | 0         | 0         | 0.0290373  | 0         | 0         | 0          | 0         | 0          | 0         | 0          | 0          |
| LINC00578 | 0.0757547  | 0.109499   | 0.188009  | 0.0195168  | 0.235346  | 0.0483781 | 0.0864942  | 0.0504933 | 0.0691955 | 0.0475399  | 0.128276  | 0.0813067  | 0.171068  | 0.0197963  | 0.217587   |
| LINC00581 | 0          | 0          | 0         | 0          | 0         | 0.0399311 | 0          | 0.0208385 | 0.0285569 | 0          | 0         | 0          | 0         | 0          | 0          |
| LINC00582 | 0.155062   | 0.168101   | 0.384835  | 0.0798981  | 0.0602163 | 0         | 0.177045   | 0.275613  | 0.0472121 | 0          | 0         | 0.110951   | 0.0250114 | 0.0607818  | 0.0556723  |
| LINC00583 | 0          | 0          | 0         | 0          | 0         | 0         | 0          | 0         | 0         | 0          | 0         | 0          | 0         | 0          | 0          |
| LINC00587 | 0          | 0          | 0         | 0          | 0         | 0         | 0          | 0         | 0         | 0          | 0         | 0          | 0         | 0          | 0          |
| LINC00588 | 0          | 0          | 0         | 0          | 0         | 0         | 0          | 0         | 0         | 0          | 0         | 0          | 0         | 0          | 0          |
| LINC00589 | 0          | 0          | 0         | 0          | 0         | 0.0704793 | 0          | 0.0147122 | 0         | 0          | 0         | 0          | 0         | 0.00865205 | 0.0713226  |
| LINC00592 | 0.53677    | 0.606772   | 0.580686  | 0.297854   | 0.577239  | 0.158211  | 0.141431   | 0.440342  | 3.44463   | 1.76199    | 3.75221   | 1.09313    | 0.466202  | 0.453179   | 0          |
| LINC00593 | 0          | 0          | 0         | 0          | 0.0270294 | 0         | 0          | 0         | 0         | 0          | 0         | 0          | 0         | 0          | 0          |
| LINC00595 | 0          | 0          | 0         | 0          | 0         | 0.0450938 | 0.0604668  | 0         | 0         | 0          | 0         | 0.0378935  | 0.0341688 | 0.0691966  | 0          |

|           |            |            |           |           |           |           |            |            |            |            |           |           |            |            |            |
|-----------|------------|------------|-----------|-----------|-----------|-----------|------------|------------|------------|------------|-----------|-----------|------------|------------|------------|
| LINC00597 | 0.664764   | 0.633138   | 0.677832  | 0.286769  | 0.0480283 | 0.368583  | 0.388328   | 0.590787   | 0.169453   | 0.271648   | 0.157068  | 0.30973   | 0.0698213  | 1.0423     | 1.73175    |
| LINC00598 | 0.110058   | 0.0593911  | 0.0509869 | 0.0408306 | 0.0478684 | 0.0674735 | 0.0955023  | 0.0899858  | 0.0107231  | 0.0497284  | 0.0248484 | 0.0283499 | 0.00284036 | 0.0322119  | 0.0569007  |
| LINC00599 | 0.00792028 | 0          | 0         | 0         | 0.147635  | 0         | 0.00904312 | 0          | 0          | 0          | 0         | 0         | 0          | 0          | 0          |
| LINC00601 | 0.0198143  | 0.00954681 | 0         | 0.0612575 | 0         | 0.0506147 | 0          | 0.070437   | 0          | 0.174082   | 0.0671035 | 0         | 0          | 0.0828464  | 0          |
| LINC00602 | 0.0123808  | 0          | 0.0123503 | 5.95E-34  | 1.12E-14  | 9.25E-26  | 0.020182   | 0          | 0          | 0.0501798  | 0.121491  | 2.57E-29  | 1.70E-15   | 0.00682845 | 0          |
| LINC00603 | 0          | 0          | 0         | 0         | 0         | 0.315577  | 0          | 0          | 0          | 0          | 0         | 0         | 0          | 0          | 0          |
| LINC00605 | 0          | 0.0286282  | 0.0122886 | 0.0459235 | 0         | 0.0126483 | 0.0339204  | 0.0396039  | 0          | 0          | 0         | 0         | 0.00958394 | 0.00776352 | 0.0213327  |
| LINC00606 | 0          | 0          | 0         | 0.0152931 | 0         | 0         | 0          | 0          | 0          | 0.0186258  | 0         | 0.0159277 | 0          | 0.0116341  | 0          |
| LINC00607 | 0.0501746  | 0.0120875  | 0.0259425 | 0.0129266 | 0         | 0.0213615 | 0.0143219  | 0.00557388 | 0          | 0.00787179 | 0.0141602 | 0.026926  | 0.0080931  | 0.0131117  | 0.00900714 |
| LINC00608 | 0          | 0          | 0         | 0         | 0         | 0         | 0          | 0          | 0          | 0          | 0         | 0         | 0          | 0          | 0          |
| LINC00609 | 0          | 0          | 0         | 0         | 0         | 0         | 0          | 0          | 0          | 0          | 0         | 0         | 0          | 0          | 0          |
| LINC00612 | 0.544542   | 0.36328    | 0.285884  | 0.0755417 | 0.585597  | 0.32992   | 0.31087    | 0.279198   | 0.038261   | 0.0525736  | 0.0118215 | 0.0749297 | 0.0945905  | 0.0547311  | 0.105273   |
| LINC00613 | 0          | 0          | 0         | 0         | 0         | 0         | 0          | 0          | 0          | 0          | 0         | 0         | 0          | 0          | 0          |
| LINC00615 | 0          | 0          | 0         | 0         | 0         | 0         | 0          | 0          | 0          | 0          | 0         | 0         | 0          | 0          | 0          |
| LINC00616 | 0          | 0          | 0         | 0         | 0         | 0         | 0          | 0          | 0.0699048  | 0          | 0         | 0         | 0          | 0.0299989  | 0          |
| LINC00618 | 0.192325   | 0.154441   | 0.10607   | 0         | 0         | 0.0545873 | 0.21959    | 0.170922   | 0          | 0.0804623  | 0         | 0         | 0          | 0.0335057  | 0.552405   |
| LINC00619 | 0.020645   | 0          | 0         | 0         | 0         | 0.0351579 | 0          | 0.0183476  | 0          | 0.0259116  | 0.0466113 | 0.0443162 | 0          | 0          | 0.0889465  |
| LINC00620 | 0          | 0          | 0         | 0         | 0         | 0         | 0          | 0          | 0          | 0          | 0         | 0         | 0          | 0          | 0          |
| LINC00621 | 0          | 0.0286404  | 0.0983505 | 0.0816767 | 0         | 0.0337432 | 0          | 0.0176093  | 0          | 0          | 0         | 0.0141776 | 0.0639203  | 0          | 0          |
| LINC00622 | 0.174665   | 0.182338   | 0.325113  | 0.059999  | 0.113048  | 0         | 0.182807   | 0.595038   | 0          | 0.219222   | 0.312193  | 0.104148  | 0.140866   | 0.182575   | 0.668908   |
| LINC00623 | 0.116051   | 0.1293     | 0.118802  | 0.0759857 | 0.0743209 | 0.121289  | 0.087634   | 0.174714   | 0.00655513 | 0.0417512  | 0.115838  | 0.0111901 | 0.187684   | 0.0550825  | 0.107536   |
| LINC00624 | 0          | 0.0495879  | 0.170284  | 0         | 0         | 0         | 0.0156679  | 0.0243909  | 0          | 0.00861159 | 0         | 0         | 0          | 0          | 0          |
| LINC00626 | 0          | 0.0233522  | 0         | 0         | 0         | 0.0412691 | 0          | 0          | 0          | 0          | 0.0547133 | 0         | 0          | 0          | 0          |
| LINC00628 | 0.0179403  | 0.00864393 | 0.0148415 | 0.0554642 | 0.0278676 | 0         | 0.0204837  | 0.0318878  | 0          | 0.022517   | 0.0607573 | 0.0128368 | 0.011575   | 0.0468821  | 0          |
| LINC00629 | 0          | 0          | 0         | 0         | 0         | 0         | 0          | 0          | 0          | 0          | 0         | 0         | 0          | 0.0544437  | 0          |
| LINC00630 | 0.761416   | 0.382187   | 0.41787   | 0.24896   | 0.193555  | 0.410571  | 0.356438   | 0.473439   | 0.126993   | 0.140198   | 0.253199  | 0.226313  | 0.107153   | 0.295663   | 0.409418   |

|           |           |           |            |            |           |            |            |            |            |           |           |           |            |            |           |
|-----------|-----------|-----------|------------|------------|-----------|------------|------------|------------|------------|-----------|-----------|-----------|------------|------------|-----------|
| LINC00632 | 0.260885  | 0.113534  | 0.187975   | 0.0260177  | 0.117652  | 0.100321   | 0.15374    | 0.26177    | 0.0204986  | 0.0633751 | 0.228005  | 0.0782811 | 0          | 0.13635    | 0.120859  |
| LINC00634 | 0.0153672 | 0.0148083 | 0          | 0.0158364  | 0         | 0.02617    | 0.0175458  | 0          | 0.0561467  | 0         | 0.0173477 | 0.0109957 | 0.0793189  | 0.00803159 | 0         |
| LINC00635 | 0         | 0         | 0          | 0          | 0         | 0          | 0          | 0          | 0          | 0         | 0         | 0         | 0          | 0          | 0         |
| LINC00636 | 0.194926  | 0.0256141 | 0.117278   | 0.0730462  | 0.0550523 | 0.0452665  | 0.121397   | 0          | 0          | 0.155688  | 0.0600129 | 0.0380386 | 0.388729   | 0.0648308  | 0.152694  |
| LINC00637 | 0.0112563 | 0.0596583 | 0.121057   | 0          | 0.06994   | 0.00958463 | 0.115669   | 0.0600222  | 0          | 0         | 0         | 0         | 0          | 0          | 0         |
| LINC00638 | 0.0827194 | 0.283417  | 0.266122   | 0.227319   | 0.699566  | 0.320868   | 0.146917   | 0.0490094  | 0.0111937  | 0.0576785 | 0.0415022 | 0.0591879 | 0.01779    | 0.163324   | 0.0659975 |
| LINC00639 | 0.182737  | 0.256367  | 0.262329   | 0.0221547  | 0.776422  | 0.388995   | 0.17796    | 0.0812005  | 0.0130913  | 0.0337284 | 0.0546053 | 0         | 0.0173383  | 0.039326   | 0.50171   |
| LINC00640 | 0.995769  | 1.52205   | 0.880582   | 0.530777   | 0.960066  | 0.555511   | 0.431252   | 0.732378   | 0.710914   | 0.34477   | 1.70553   | 0.368534  | 0.0664619  | 0.179459   | 0.0986242 |
| LINC00641 | 4.24391   | 3.31691   | 3.77215    | 2.23681    | 0.79887   | 1.23098    | 2.85277    | 3.85801    | 0.660871   | 1.67217   | 0.813712  | 1.9993    | 1.50755    | 3.01806    | 2.35533   |
| LINC00642 | 0         | 0         | 0          | 0          | 0.050704  | 0          | 0          | 0          | 0          | 0         | 0         | 0         | 0          | 0          | 0         |
| LINC00643 | 0         | 0         | 0.00599543 | 0          | 0         | 0          | 0          | 0.00315042 | 0          | 0         | 0         | 0         | 0          | 0          | 0         |
| LINC00644 | 0         | 0         | 0.065121   | 0          | 0         | 0          | 0          | 0          | 0          | 0         | 0         | 0         | 0          | 0          | 0         |
| LINC00645 | 0.0130937 | 0.0157718 | 0          | 0          | 0         | 0.00557454 | 0          | 0.0232731  | 0          | 0         | 0         | 0         | 0          | 0          | 0         |
| LINC00648 | 0.0561335 | 0.13523   | 0.0331697  | 0          | 0         | 0.0136563  | 0.100715   | 0.0142534  | 0.00976633 | 0         | 0         | 0         | 0          | 0          | 0         |
| LINC00649 | 1.82032   | 2.36336   | 1.8879     | 1.32859    | 4.00674   | 0.768757   | 2.60512    | 1.64033    | 0.945905   | 1.17897   | 0.752382  | 1.83936   | 0.50597    | 1.92552    | 1.32694   |
| LINC00652 | 0.0593829 | 0.0528565 | 0.0133937  | 0.0322323  | 0         | 0          | 0.0218973  | 0.0272424  | 0.0341909  | 0         | 0.0436071 | 0.0405805 | 0          | 0.0423903  | 9.92E-34  |
| LINC00654 | 0.31244   | 0.102541  | 0.141577   | 0.222334   | 0.384504  | 0.585061   | 0.235136   | 0.240303   | 0.0184945  | 0.125652  | 0.26964   | 0.100638  | 0.306418   | 0.272386   | 0.528284  |
| LINC00656 | 0.0121104 | 0         | 0.0400744  | 0.0249603  | 0.0564351 | 0          | 0.0138273  | 0.0215255  | 0          | 0.106399  | 0.0273424 | 0.0346614 | 0.0156272  | 0.0443061  | 0.0173921 |
| LINC00658 | 0         | 0         | 0          | 0          | 0         | 0          | 0.016122   | 0          | 0          | 0         | 0         | 0         | 0          | 0          | 0         |
| LINC00659 | 0.0327805 | 0         | 0          | 0.0337813  | 0         | 0.0558244  | 0.0374277  | 0          | 1.11784    | 0         | 0.111015  | 0.375286  | 0.0422997  | 0          | 0         |
| LINC00661 | 0         | 0         | 0.00572877 | 0          | 0         | 0.00589647 | 0.00790664 | 0          | 0          | 0         | 0         | 0         | 0          | 0          | 0         |
| LINC00662 | 0.803789  | 0.870147  | 0.864831   | 0.409762   | 0.333025  | 0.910097   | 0.871531   | 0.962697   | 0.432936   | 0.644112  | 1.07263   | 0.6562    | 0.458655   | 0.859144   | 0.340304  |
| LINC00663 | 0.753319  | 0.805486  | 1.10321    | 0.426736   | 0.881871  | 0.868155   | 0.575819   | 0.579484   | 0.0925245  | 0.251968  | 0.286802  | 0.191071  | 0.100828   | 0.28008    | 0.584594  |
| LINC00664 | 0.0307753 | 0.0385529 | 0.0356433  | 0.00634297 | 0.114731  | 0.136265   | 0.0421659  | 0.049231   | 0.0374809  | 0.0154505 | 0.0069483 | 0.07487   | 0.00794244 | 0.0868565  | 0.0795551 |
| LINC00665 | 1.13346   | 1.19533   | 1.19829    | 0.729517   | 3.14661   | 0.880974   | 1.24348    | 0.842062   | 0.451372   | 0.642711  | 1.25403   | 0.997465  | 0.569164   | 0.893354   | 0.25025   |
| LINC00667 | 4.97544   | 4.57859   | 5.07403    | 2.26082    | 2.19654   | 4.13246    | 3.95994    | 3.80633    | 1.82849    | 1.97931   | 3.38313   | 1.48648   | 3.41287    | 1.74271    | 2.36507   |



|                  |           |            |            |            |            |           |           |           |           |           |           |            |            |            |           |
|------------------|-----------|------------|------------|------------|------------|-----------|-----------|-----------|-----------|-----------|-----------|------------|------------|------------|-----------|
| LINC00668        | 0.013217  | 0.165573   | 0.0328022  | 0          | 0          | 0.112541  | 0.0150908 | 0.0587311 | 0         | 0         | 0         | 0          | 0          | 0          | 0         |
| LINC00670        | 0.150551  | 0.0282092  | 0.0415155  | 0.00861929 | 0          | 0.135314  | 0.0763975 | 0.0520323 | 0         | 0.0314929 | 0.0377674 | 0.0119693  | 0.00539638 | 0.135512   | 0.120117  |
| LINC00671        | 0.0376514 | 0.036282   | 0.0415305  | 0.0258672  | 0.0779808  | 0.0534328 | 0.100308  | 0.0111538 | 0         | 0.0157521 | 0.0141679 | 0.0359208  | 0          | 0.0196783  | 0.0720962 |
| LINC00672        | 0.457596  | 0.570823   | 0.591169   | 0.129196   | 0.204478   | 0.112087  | 0.39364   | 0.512519  | 0.0381712 | 0.141615  | 0.0778391 | 0.107646   | 0.044488   | 0.190017   | 0.315079  |
| LINC00673        | 2.69003   | 3.35287    | 3.26875    | 4.57178    | 4.46624    | 4.9866    | 4.7229    | 2.11633   | 2.85723   | 5.28025   | 3.92283   | 4.99814    | 4.80273    | 5.25493    | 3.03991   |
| LINC00674        | 4.79692   | 3.41732    | 3.88624    | 2.16358    | 2.5694     | 3.88461   | 3.30979   | 3.6806    | 1.34469   | 2.05272   | 2.37378   | 1.67326    | 1.99971    | 2.3158     | 3.80972   |
| LINC00676        | 0.0454677 | 0.021907   | 0.0376141  | 0          | 0          | 0         | 0.103827  | 0         | 0         | 0         | 0         | 0          | 0          | 0          | 0         |
| LINC00677        | 0         | 0          | 0          | 0          | 0.14855    | 0.0814298 | 0.32757   | 0         | 0         | 0.0600143 | 0         | 0          | 0          | 0.0499817  | 0.274681  |
| LINC00678        | 0.24555   | 0.359325   | 0.318429   | 0.0247917  | 0.496818   | 0.18436   | 0.22521   | 0.14966   | 0.175794  | 0.0301943 | 0         | 0.485011   | 0.0155216  | 0.0632949  | 0.0358843 |
| LINC00680        | 1.31034   | 1.25932    | 0.842216   | 3.06137    | 1.91548    | 1.33694   | 1.41984   | 0.996145  | 0.341316  | 0.764499  | 1.257     | 0.689344   | 1.04794    | 1.05902    | 1.37031   |
| LINC00680-GUSBP4 | 1.08304   | 0.693264   | 0.990689   | 0.0986885  | 0.911301   | 0.680732  | 0.898689  | 0.702843  | 1.75E-07  | 0.223778  | 0.239448  | 0.115774   | 0.00019029 | 0.303437   | 0.0166889 |
| LINC00681        | 0.136941  | 0.307908   | 0.264337   | 0          | 0          | 0.155471  | 0.208473  | 0.162269  | 0         | 0         | 0         | 0          | 0          | 0          | 0         |
| LINC00682        | 0         | 0          | 0          | 0          | 0          | 0         | 0.0185562 | 0         | 0         | 0         | 0         | 0          | 0          | 0          | 0         |
| LINC00683        | 0.0625206 | 0.0200823  | 0.00862024 | 0.0214764  | 0.0647441  | 0.0460413 | 0.0118973 | 0.0320362 | 0         | 5.64E-21  | 0.011763  | 0          | 0          | 0.00942006 | 0         |
| LINC00685        | 0.172709  | 0.574177   | 0.642948   | 0.177982   | 0.670693   | 0.264708  | 0.354949  | 0.337677  | 0.168272  | 0.130061  | 0.0779869 | 0.358377   | 0.0668587  | 0.306902   | 0.173623  |
| LINC00687        | 0         | 0          | 0          | 0          | 0          | 0         | 0         | 0         | 0         | 0         | 0         | 0          | 0          | 0          | 0         |
| LINC00689        | 0.0173011 | 0.00277864 | 0.0286253  | 0.0118862  | 0.00895817 | 0.0196422 | 0         | 0         | 0         | 0         | 0         | 0.00825291 | 0          | 0          | 0         |
| LINC00690        | 0         | 0          | 0          | 0          | 0          | 0         | 0         | 0         | 0         | 0         | 0         | 0          | 0          | 0          | 0         |
| LINC00691        | 0.289159  | 0.36323    | 0.281929   | 0.0851391  | 0.144374   | 0.0263802 | 0.377317  | 0.293692  | 0.0125773 | 0.0518463 | 0         | 0.184733   | 0.019989   | 0.0701662  | 0.0296621 |
| LINC00692        | 0         | 0          | 0          | 0          | 0          | 0         | 0         | 0         | 0         | 0         | 0         | 0          | 0          | 0          | 0         |
| LINC00693        | 0.0139922 | 0.0539331  | 0.0578766  | 0          | 0.0217347  | 0.0476566 | 0.0319516 | 0.0124351 | 0         | 0         | 0         | 0.0100118  | 0          | 0.0219388  | 0.0200945 |
| LINC00696        | 0.114987  | 0.520783   | 0.887837   | 0.782083   | 0.523936   | 0.359003  | 0.533906  | 0.865216  | 0.168049  | 0.500311  | 0.112499  | 1.23414    | 0.153324   | 1.02566    | 0.286236  |
| LINC00698        | 0         | 0          | 0          | 0.012997   | 0          | 0.0214779 | 0.0144    | 0         | 0         | 0.0316588 | 0         | 0          | 0          | 0.0131832  | 0         |
| LINC00700        | 0         | 0          | 0          | 0          | 0          | 0         | 0         | 0         | 0         | 0         | 0         | 0          | 0          | 0.00576804 | 0         |
| LINC00701        | 0         | 0          | 0          | 0          | 0          | 0         | 0         | 0         | 0         | 0         | 0         | 0          | 0          | 0          | 0         |
| LINC00702        | 0.491534  | 0.0789428  | 0.0677719  | 0          | 0.0636268  | 0.0697558 | 0.420913  | 0.25482   | 0         | 0.0514105 | 0         | 0          | 0.13214    | 0.0642243  | 0.882381  |

|           |            |            |           |           |           |           |            |            |            |           |           |           |           |           |           |
|-----------|------------|------------|-----------|-----------|-----------|-----------|------------|------------|------------|-----------|-----------|-----------|-----------|-----------|-----------|
| LINC00703 | 0          | 0          | 0         | 0         | 0         | 0         | 0          | 0          | 0          | 0         | 0         | 0         | 0         | 0         | 0         |
| LINC00705 | 0          | 0          | 0         | 0.0707703 | 0.035558  | 0         | 0          | 0          | 0          | 0.0287309 | 0.0516827 | 0.0163793 | 0         | 0.0598198 | 0         |
| LINC00706 | 0.0329204  | 0.0158616  | 0         | 0.0339254 | 0         | 0         | 0          | 0          | 0          | 0         | 0         | 0.0235554 | 0         | 0         | 0         |
| LINC00707 | 0.0226154  | 0.00726428 | 0.018709  | 0.504959  | 0.0819687 | 0.0770267 | 0.00860716 | 0.0334977  | 0.027543   | 3.95492   | 0.0255299 | 1.1597    | 8.51646   | 1.02832   | 1.12592   |
| LINC00708 | 0          | 0.0243731  | 0         | 0         | 0         | 0         | 0          | 0          | 0          | 0         | 0         | 0         | 0         | 0         | 0         |
| LINC00709 | 0          | 0          | 0         | 0         | 0         | 0         | 0          | 0          | 0          | 0         | 0         | 0         | 0         | 0         | 0         |
| LINC00710 | 0.124873   | 0.0701931  | 0.137738  | 0.0214475 | 0.226299  | 0.0531637 | 0.118813   | 0.147968   | 0          | 0         | 0         | 0.0297832 | 0.0134279 | 0.0652639 | 0.0298888 |
| LINC00824 | 0.07817    | 0.131326   | 0.132576  | 0.0250656 | 0.135809  | 0.028503  | 0.0608561  | 0.028374   | 0.0402931  | 0.0706316 | 0.0141037 | 0.108772  | 0         | 0.0776235 | 0.0851803 |
| LINC00836 | 0          | 0          | 0         | 0         | 0         | 0         | 0          | 0          | 0          | 0         | 0         | 0         | 0         | 0         | 0         |
| LINC00837 | 0          | 0          | 0         | 0         | 0         | 0         | 0          | 0          | 0          | 0         | 0         | 0         | 0         | 0         | 0         |
| LINC00838 | 0          | 0          | 0         | 0         | 0         | 0         | 0          | 0          | 0          | 0         | 0         | 0         | 0         | 0         | 0         |
| LINC00839 | 0.461657   | 0.120888   | 0.124537  | 0.248218  | 0.452093  | 0.333276  | 0.160423   | 0.187303   | 0.0733364  | 0.289713  | 0.498494  | 0.107716  | 0.148929  | 0.456338  | 0.576519  |
| LINC00840 | 0.316546   | 0.0621365  | 0.0872898 | 0.0241637 | 0.109268  | 0.379346  | 0.107088   | 0.114612   | 0.0285569  | 0.0882885 | 0.0794092 | 0         | 0.0907707 | 0.140931  | 0.117859  |
| LINC00841 | 0.219206   | 0.0121865  | 0.0278988 | 0.0260651 | 0.0523849 | 0.215366  | 0.0192524  | 0.0524493  | 0.010268   | 0.042327  | 0         | 0         | 0.043517  | 0.0088128 | 0.254267  |
| LINC00842 | 0.474606   | 1.57357    | 2.08292   | 0.373038  | 1.337     | 0.40412   | 1.71751    | 1.3869     | 0.450657   | 1.41347   | 0.817277  | 0.644651  | 0.840788  | 0.428831  | 0.0346573 |
| LINC00844 | 0.140474   | 0.0169206  | 0.11621   | 0         | 0         | 0.0598058 | 0          | 0.0624207  | 0          | 0         | 0.0792887 | 0         | 0         | 0         | 0         |
| LINC00845 | 0          | 0          | 0         | 0         | 0         | 0         | 0          | 0          | 0          | 0         | 0         | 0         | 0         | 0         | 0         |
| LINC00847 | 1.24917    | 1.36999    | 1.33524   | 1.34423   | 1.49144   | 2.27178   | 1.32288    | 1.55523    | 0.514474   | 1.12796   | 2.45156   | 0.501283  | 0.547098  | 0.539129  | 0.709984  |
| LINC00850 | 0          | 0          | 0         | 0         | 0         | 0         | 0          | 0          | 0          | 0         | 0         | 0         | 0         | 0         | 0         |
| LINC00851 | 0          | 0          | 0         | 0         | 0         | 0         | 0.0363967  | 0          | 0          | 0         | 0         | 0         | 0         | 0         | 0         |
| LINC00852 | 2.71861    | 2.77927    | 2.40761   | 1.63427   | 3.97931   | 2.28518   | 2.78566    | 3.74801    | 0.36081    | 0.853034  | 0.550841  | 1.28436   | 0.70836   | 1.5757    | 2.00219   |
| LINC00853 | 0.0350122  | 0.084347   | 0.0579291 | 0.180405  | 0.217544  | 0.149062  | 0.0399758  | 0.03111159 | 0.127923   | 0.0439439 | 0.118573  | 0.125261  | 0         | 0.146391  | 0.100564  |
| LINC00856 | 0.024664   | 0.0118835  | 0.0136025 | 0.0423616 | 0.0510823 | 0.0910046 | 0.0844817  | 0.0292257  | 0          | 0.0206372 | 0         | 0.0235303 | 0.0159131 | 0.025781  | 0.165296  |
| LINC00857 | 0.0535471  | 0.0103199  | 0.0620171 | 0.0110364 | 0.0166354 | 0.164141  | 0.0489107  | 0.00951764 | 0.0521715  | 0.134414  | 0.217613  | 0.0153257 | 0.0898256 | 0.0727637 | 0.107661  |
| LINC00858 | 0.00861939 | 0          | 0         | 0         | 0.0133889 | 0         | 0.00984134 | 0          | 0          | 0         | 0         | 0         | 0         | 0         | 0         |
| LINC00861 | 0.080623   | 0.0347564  | 0.0491452 | 0.0349829 | 0.059322  | 0.028905  | 0.0145346  | 0.0980488  | 0.00516788 | 0         | 0.0143705 | 0.0273259 | 0.0109511 | 0.0288307 | 0.219382  |



|           |           |            |           |            |           |            |            |           |           |            |           |           |            |            |           |
|-----------|-----------|------------|-----------|------------|-----------|------------|------------|-----------|-----------|------------|-----------|-----------|------------|------------|-----------|
| LINC00896 | 0.230801  | 0.278009   | 0.329797  | 0.183791   | 0.423698  | 0.27692    | 0.467151   | 0.40091   | 1.35434   | 0.0526689  | 0.153959  | 0.367821  | 0          | 0.142559   | 0.090398  |
| LINC00898 | 0.03871   | 0.218484   | 0.24704   | 0.0284941  | 0.03436   | 0.122427   | 0.151535   | 0.147438  | 0         | 0.00694072 | 0.0249707 | 0.027698  | 0.0214076  | 0.00289022 | 0         |
| LINC00899 | 0.373739  | 0.907291   | 1.02268   | 0.592536   | 1.42903   | 1.52997    | 0.492372   | 0.472672  | 0.0700264 | 0.451039   | 0.210952  | 0.349703  | 0.0834696  | 0.308024   | 0.247724  |
| LINC00900 | 0.237312  | 1.07381    | 0.725534  | 1.16962    | 0.929581  | 1.10698    | 0.683277   | 0.531842  | 0.753963  | 0.323751   | 0.780391  | 0.302692  | 0.512593   | 0.269629   | 0.148178  |
| LINC00901 | 0.063755  | 0.0230386  | 0         | 0          | 0         | 0          | 0.0181983  | 0.0566601 | 0         | 0          | 0         | 0         | 0          | 0          | 0         |
| LINC00903 | 0         | 0          | 0         | 0          | 0         | 0          | 0          | 0         | 0         | 0          | 0         | 0         | 0          | 0          | 0         |
| LINC00904 | 0         | 0          | 0         | 0          | 0         | 0          | 0          | 0         | 0         | 0          | 0         | 0         | 0          | 0          | 0         |
| LINC00905 | 0         | 0          | 0         | 0          | 0         | 0.0217146  | 0          | 0.022664  | 0         | 0.0160038  | 0         | 0.0182474 | 0          | 0          | 0         |
| LINC00906 | 0.0470387 | 0.0809428  | 0.0632241 | 1.39E-27   | 0.0303633 | 0.034331   | 0.0690522  | 0.115834  | 0.0409199 | 0          | 0         | 0         | 0          | 0          | 0         |
| LINC00907 | 0.0316039 | 0.0152272  | 0.01494   | 0.00930534 | 0         | 0.00384432 | 0.00515489 | 0.0160496 | 0         | 0          | 0         | 0.0129219 | 0.00873885 | 0.00235965 | 0.0259355 |
| LINC00908 | 0.113497  | 0.104398   | 0.136571  | 0.0637974  | 0.1763    | 0.114212   | 0.141368   | 0.146715  | 0         | 0.0518001  | 0.104829  | 0.0221482 | 0.119827   | 0.0215703  | 0.0740891 |
| LINC00909 | 0.945974  | 1.01107    | 1.01404   | 0.899337   | 0.827845  | 1.06642    | 0.555254   | 0.793339  | 0.503025  | 0.777594   | 1.3687    | 0.533869  | 0.704897   | 0.522261   | 0.832344  |
| LINC00910 | 0.26831   | 0.35234    | 0.330771  | 0.140961   | 0.196131  | 0.367332   | 0.354402   | 0.280531  | 0.115331  | 0.112252   | 0.255377  | 0.101638  | 0.0712815  | 0.093487   | 0.0906652 |
| LINC00911 | 0.0391591 | 0          | 0.0323952 | 0          | 0         | 0          | 0          | 0         | 0         | 0.0982975  | 0.132617  | 0         | 0          | 0          | 0         |
| LINC00917 | 0         | 0          | 0         | 0          | 0.0137315 | 0          | 0          | 0         | 0         | 0          | 0         | 0         | 0          | 0          | 0         |
| LINC00919 | 0         | 0          | 0         | 0          | 0         | 0          | 0          | 0         | 0         | 0          | 0         | 0         | 0          | 0          | 0         |
| LINC00920 | 0.558275  | 0.427932   | 0.293901  | 0.392263   | 0.19709   | 0.713046   | 0.376658   | 0.360835  | 0.0618106 | 0.541445   | 1.00263   | 0.236045  | 0.130981   | 0.225466   | 0.32799   |
| LINC00921 | 1.25098   | 1.83561    | 1.93582   | 0.625051   | 2.35539   | 1.20659    | 1.42832    | 1.09492   | 0.242383  | 0.380631   | 1.00565   | 0.691673  | 0.256812   | 0.718612   | 1.42908   |
| LINC00922 | 0.0262989 | 0.00633561 | 0         | 0.0542036  | 0         | 0.123163   | 0          | 0         | 0         | 0.115527   | 0.0445323 | 0         | 0.0254519  | 0          | 0.0755372 |
| LINC00923 | 0.926258  | 0.918801   | 1.18897   | 0.537767   | 1.54186   | 0.22874    | 1.10925    | 0.852143  | 0.212746  | 0.368372   | 0.077173  | 0.457186  | 0.0492148  | 0.820483   | 0.810642  |
| LINC00924 | 0.37124   | 0.0625018  | 0.0427993 | 0.0444292  | 0.0535755 | 0.359759   | 0.088605   | 0.130272  | 0.0105014 | 0.216445   | 0.37962   | 0.0185333 | 0.0500693  | 0.193918   | 0.445793  |
| LINC00926 | 0.561099  | 0.474214   | 0.350038  | 0.199063   | 0.614393  | 0.242801   | 0.315071   | 0.384212  | 0.100823  | 0.0577244  | 0.186908  | 0.230358  | 0.0415431  | 0.490361   | 0.70013   |
| LINC00927 | 0         | 0          | 0         | 0          | 0         | 0          | 0          | 0         | 0         | 0          | 0         | 0         | 0          | 0          | 0         |
| LINC00928 | 0.0193828 | 0          | 0         | 0          | 0         | 0          | 0          | 0         | 0         | 0          | 0         | 0.0208034 | 0          | 0.0202606  | 0         |
| LINC00929 | 0.0155845 | 0          | 0         | 0          | 0         | 0          | 0          | 0         | 0         | 0          | 0         | 0         | 0          | 0          | 0         |
| LINC00930 | 0.0262691 | 0.0316421  | 0.0869265 | 0.027071   | 0.0408049 | 0.0447355  | 0.0299932  | 0.0350186 | 0.0159964 | 0          | 0         | 0         | 0          | 0.020594   | 0         |







|           |           |            |           |            |           |           |           |           |           |            |            |           |           |           |            |
|-----------|-----------|------------|-----------|------------|-----------|-----------|-----------|-----------|-----------|------------|------------|-----------|-----------|-----------|------------|
| LINC01053 | 0         | 0          | 0         | 0          | 0         | 0         | 0         | 0         | 0         | 0          | 0.0147021  | 0         | 0         | 0         | 0          |
| LINC01054 | 0         | 0          | 0         | 0          | 0         | 0         | 0         | 0         | 0         | 0          | 0          | 0         | 0         | 0         | 0          |
| LINC01055 | 0         | 0.0157942  | 0.0542367 | 0          | 0         | 0         | 0         | 0         | 0         | 0          | 0          | 0         | 0         | 0         | 0          |
| LINC01056 | 0         | 0          | 0         | 0          | 0         | 0         | 0         | 0         | 0         | 0          | 0          | 0         | 0         | 0         | 0          |
| LINC01058 | 0.389322  | 0.187581   | 0.214717  | 0.178315   | 0.201584  | 0         | 0.296344  | 0.153777  | 0         | 0.108587   | 0.146499   | 0.0309523 | 0.0558197 | 0         | 0          |
| LINC01060 | 0.0479152 | 0.0692589  | 0         | 0.049378   | 0         | 0.122398  | 0.109416  | 0.0425831 | 0.0583554 | 0.661524   | 0.757264   | 0.0685692 | 0         | 0.601022  | 0.89456    |
| LINC01061 | 0.645334  | 1.73817    | 1.91787   | 1.18627    | 1.6027    | 2.3369    | 0.857493  | 1.07377   | 0.423183  | 0.361236   | 0.386094   | 0.854608  | 0.433504  | 0.416876  | 0.866367   |
| LINC01063 | 0         | 0.0326043  | 0.167944  | 0.0697356  | 0.210229  | 0         | 0         | 0         | 0         | 0.0849325  | 0.534735   | 0.0484195 | 0         | 0         | 0          |
| LINC01065 | 0         | 0          | 0         | 0          | 0         | 0         | 0         | 0         | 0         | 0          | 0          | 0         | 0         | 0         | 0          |
| LINC01068 | 0.0363884 | 0.262988   | 0.39134   | 0.224996   | 0         | 0.0619686 | 0.0415471 | 0.032339  | 0.0886341 | 0.274027   | 0          | 0.104148  | 0.0704329 | 0         | 0          |
| LINC01069 | 0.0177002 | 0          | 0         | 0          | 0         | 0         | 0         | 0.0157305 | 0         | 0          | 0          | 0         | 0         | 0         | 0          |
| LINC01070 | 0         | 0          | 0         | 0          | 0         | 0         | 0         | 0         | 0         | 0          | 0          | 0         | 0         | 0         | 0          |
| LINC01072 | 0         | 0          | 0         | 0          | 0         | 0         | 0         | 0         | 0         | 0          | 0          | 0         | 0         | 0         | 0          |
| LINC01074 | 0         | 0          | 0         | 0          | 0         | 0         | 0         | 0         | 0         | 0          | 0          | 0         | 0         | 0         | 0          |
| LINC01075 | 0         | 0          | 0         | 0          | 0         | 0         | 0         | 0         | 0         | 0          | 0          | 0         | 0         | 0         | 0          |
| LINC01078 | 0         | 0          | 0         | 0          | 0         | 0         | 0         | 0         | 0         | 0          | 0          | 0         | 0         | 0         | 0          |
| LINC01080 | 0.0372075 | 0.0537814  | 0.0615613 | 0.0383434  | 0         | 0         | 0         | 0         | 0         | 0          | 0          | 0.0266229 | 0         | 0         | 0          |
| LINC01081 | 0         | 0          | 0         | 0          | 0         | 0         | 0         | 0         | 0         | 0          | 0          | 0         | 0         | 0         | 0          |
| LINC01082 | 0         | 0          | 0         | 0          | 0         | 0         | 0         | 0         | 0         | 0          | 0          | 0         | 0         | 0         | 0          |
| LINC01085 | 0.0116648 | 0.0168609  | 0         | 0          | 0         | 0.0198649 | 0         | 0         | 0         | 0.0146406  | 0.0658408  | 0         | 0.0075261 | 0.0243862 | 0.0502566  |
| LINC01087 | 0         | 0.00634282 | 0.0326716 | 0.00678316 | 0         | 0         | 0.0225461 | 0.0233989 | 0         | 0.00826135 | 0.0074305  | 0         | 0         | 0         | 0.00945289 |
| LINC01088 | 1.23613   | 0.0441174  | 0.132561  | 0.11795    | 0         | 0.194916  | 0.365911  | 0.366189  | 0.027879  | 0.114923   | 0.155048   | 0.0655172 | 0.0147693 | 0.0239279 | 0.164374   |
| LINC01089 | 3.34906   | 3.78443    | 3.35451   | 1.96554    | 5.57551   | 2.3018    | 3.32658   | 3.16322   | 0.914524  | 1.24406    | 1.23762    | 1.54741   | 0.271311  | 1.86811   | 2.82542    |
| LINC01090 | 0         | 0.0674436  | 0.0771999 | 0          | 0         | 0         | 0.0532742 | 0         | 0         | 0          | 0          | 0         | 0         | 0         | 0          |
| LINC01091 | 0.459482  | 0.348357   | 0.570174  | 0.0765972  | 0.0524805 | 0.0747965 | 0.578627  | 0.39634   | 0.0329175 | 0.0932893  | 0.00762792 | 0.21757   | 0.0523157 | 0.226019  | 0.126153   |
| LINC01093 | 0         | 0          | 0         | 0.0623926  | 0         | 0.0128882 | 0         | 0         | 0         | 0.113984   | 0.0341735  | 0.0216605 | 0.156251  | 0         | 0          |



|           |           |                 |           |            |           |            |            |            |           |           |           |            |           |            |           |
|-----------|-----------|-----------------|-----------|------------|-----------|------------|------------|------------|-----------|-----------|-----------|------------|-----------|------------|-----------|
| LINC01094 | 0.286183  | 0.642608        | 0.410964  | 1.12403    | 0.595518  | 0.409201   | 0.51171    | 0.527867   | 2.92641   | 1.4842    | 2.45041   | 1.14363    | 1.56077   | 1.01596    | 0.821991  |
| LINC01095 | 0         | 0               | 0         | 0          | 0         | 0          | 0          | 0          | 0         | 0         | 0         | 0          | 0         | 0          | 0         |
| LINC01096 | 0         | 0               | 0.0218932 | 0          | 0         | 0          | 0          | 0          | 0         | 0         | 0         | 0          | 0         | 0          | 0         |
| LINC01097 | 0         | 0               | 0         | 0          | 0         | 0          | 0          | 0          | 0         | 0         | 0         | 0          | 0         | 0          | 0         |
| LINC01098 | 0         | 0.021568        | 0         | 0          | 0         | 0          | 0          | 0.0198913  | 0         | 0         | 0         | 0          | 0         | 0.0116978  | 0         |
| LINC01099 | 0         | 0               | 0         | 0          | 0         | 0          | 0.0149204  | 0.0232271  | 0         | 0         | 0.0442557 | 0          | 0         | 0.0136596  | 0         |
| LINC01100 | 0         | 0               | 0.0309799 | 0          | 0         | 0          | 0          | 0          | 0         | 0         | 0         | 0          | 0         | 0          | 0         |
| LINC01101 | 0         | 0               | 0         | 0          | 0         | 0.029339   | 0          | 0          | 0         | 0         | 0         | 0          | 0         | 0          | 0         |
| LINC01102 | 0         | 0.0222273       | 0         | 0          | 0         | 0          | 0.0175575  | 0          | 0         | 0         | 0         | 0          | 0         | 0          | 0         |
| LINC01103 | 0         | 0               | 0         | 0          | 0         | 0          | 0          | 0.0140971  | 0         | 0         | 0         | 0          | 0         | 0          | 0         |
| LINC01104 | 0         | 0               | 0         | 0          | 0         | 0          | 0          | 0          | 0         | 0         | 0         | 0          | 0         | 0          | 0         |
| LINC01105 | 0         | 0.00093955<br>8 | 0         | 0.00200957 | 0         | 0          | 0.00222649 | 0          | 0         | 0         | 0         | 0          | 0         | 0.00101918 | 0         |
| LINC01106 | 1.29963   | 1.57337         | 1.17054   | 1.64927    | 2.69903   | 1.83355    | 0.692089   | 1.49178    | 0.56987   | 0.491473  | 0.181643  | 0.914085   | 0.918842  | 1.56756    | 0.910387  |
| LINC01107 | 0.076506  | 0.0460772       | 0.0474683 | 0.0197104  | 0.14855   | 0.0325719  | 0.141947   | 0.0509941  | 0         | 0         | 0.0107957 | 0.00684276 | 0.0123403 | 0.159941   | 0.219744  |
| LINC01108 | 0.0625995 | 0.0512744       | 0.0310721 | 0.0387064  | 0.0486194 | 0.0266513  | 0.0786215  | 0.0445066  | 0.0152478 | 0.0785688 | 0.0282668 | 0.080625   | 0.0323111 | 0.17013    | 0.0719207 |
| LINC01111 | 0         | 0               | 0         | 0          | 0         | 0          | 0          | 0          | 0         | 0         | 0         | 0          | 0         | 0          | 0         |
| LINC01114 | 0         | 0.0137267       | 0         | 0          | 0         | 0          | 0          | 0          | 0         | 0         | 0         | 0          | 0         | 0          | 0         |
| LINC01115 | 0.045647  | 0.0879738       | 0         | 0.0627208  | 0.0709056 | 0          | 0.104237   | 0.0270449  | 0.018531  | 0.0381945 | 0.120236  | 0.348391   | 0         | 0          | 0.0655549 |
| LINC01116 | 0.721853  | 0.189709        | 0.27144   | 0.428301   | 0.101935  | 1.24792    | 0.299705   | 0.311041   | 0.0799215 | 0.631455  | 1.65446   | 0.0782584  | 0.183472  | 0.445867   | 0.659701  |
| LINC01117 | 0.423348  | 0.152982        | 0.291853  | 0          | 0.712407  | 0.0600793  | 0.362524   | 0.0627062  | 0.0429659 | 0.354231  | 0.318605  | 0          | 0         | 0.129069   | 0         |
| LINC01118 | 0.1997    | 0.0320729       | 0.128494  | 0          | 0.0344671 | 0.226723   | 0.0506692  | 0.0788787  | 0         | 0.0835482 | 0.0751456 | 0.0158768  | 0         | 0.0579845  | 0.0955983 |
| LINC01119 | 0.286897  | 0.138232        | 0.0791139 | 0.0394208  | 0.02971   | 0.179146   | 0.10919    | 0.118986   | 0.0232939 | 0.0960228 | 0.172731  | 0.0136855  | 0.0370209 | 0.089967   | 0.274681  |
| LINC01120 | 0         | 0               | 0         | 0          | 0         | 0          | 0          | 0          | 0         | 0         | 0         | 0          | 0         | 0          | 0         |
| LINC01121 | 0.0421549 | 0.0101554       | 0         | 0          | 0         | 0.107683   | 0          | 0.0374638  | 0         | 0.0793631 | 0.0475877 | 0          | 0         | 0          | 0.0605398 |
| LINC01122 | 0.0161613 | 0               | 0         | 0          | 0         | 0.00458706 | 0          | 0.00478762 | 0         | 0         | 0         | 0          | 0         | 0          | 0         |

|           |            |            |            |            |           |            |            |           |            |           |           |            |            |            |            |
|-----------|------------|------------|------------|------------|-----------|------------|------------|-----------|------------|-----------|-----------|------------|------------|------------|------------|
| LINC01123 | 0.489173   | 0.662172   | 0.599013   | 0.748622   | 0.857709  | 1.20879    | 0.544793   | 0.358264  | 0.407834   | 0.444501  | 0.38812   | 0.698783   | 0.627653   | 0.869807   | 0.588794   |
| LINC01124 | 0.0108704  | 0.0785628  | 0.0449637  | 0.20164    | 0.0168855 | 0.212888   | 0.148937   | 0.0386428 | 0          | 0         | 0.0122713 | 0          | 0.0210406  | 0.00568134 | 0          |
| LINC01126 | 0.984811   | 0.976108   | 1.00092    | 0.347957   | 0.895997  | 0.395318   | 1.23687    | 0.587646  | 0.239878   | 0.423785  | 0.1747    | 0.231531   | 0.199696   | 0.294117   | 0.464703   |
| LINC01127 | 0          | 0.212714   | 0.15378    | 0.98176    | 0.0360935 | 0.316562   | 0.0530602  | 0.165202  | 0.0565977  | 0.174981  | 0.0524611 | 0.016626   | 0.674629   | 0.255027   | 0.433808   |
| LINC01128 | 0.877295   | 0.903214   | 1.00155    | 0.91441    | 1.04347   | 1.53243    | 0.895777   | 0.79526   | 0.940233   | 1.51951   | 1.18987   | 1.04741    | 1.47963    | 1.42532    | 1.26711    |
| LINC01132 | 0.0366091  | 0.0470369  | 0.050476   | 0.144619   | 0.0663443 | 0.280549   | 0.0557321  | 0.010845  | 0.0817406  | 0.0153161 | 0.0895421 | 0.021829   | 0.0787333  | 0.0542116  | 0.0613378  |
| LINC01133 | 1.26087    | 2.77297    | 3.33113    | 1.78138    | 0.600206  | 0.57144    | 2.13621    | 1.55432   | 1.26315    | 1.17413   | 1.37745   | 0.582055   | 2.34867    | 0.658985   | 0.292059   |
| LINC01134 | 0.0118561  | 0.0228497  | 0          | 0.0244361  | 0.239415  | 0.0807623  | 0.0270738  | 0         | 0.0288787  | 0.119045  | 0         | 0.0424167  | 0.0229484  | 0.099144   | 0          |
| LINC01135 | 0.0824329  | 0.0397175  | 0.11934    | 0          | 0.0640234 | 0          | 0.117649   | 0         | 0          | 0.0775964 | 0.0465283 | 0.058983   | 0          | 0.0538538  | 0          |
| LINC01136 | 0.0337732  | 0.296972   | 0.27241    | 0.0174021  | 0.0918074 | 0.0359467  | 0.106043   | 0.0900443 | 0.0411319  | 0.052986  | 0.123908  | 0.0422898  | 0.0108951  | 0.00882566 | 0          |
| LINC01137 | 1.54071    | 1.36746    | 1.27458    | 2.40669    | 4.03074   | 2.92759    | 1.01844    | 1.41249   | 5.13543    | 1.48593   | 3.02083   | 2.04237    | 1.71606    | 1.60201    | 1.83999    |
| LINC01138 | 1.46409    | 1.95391    | 1.6634     | 1.54503    | 0.83232   | 1.28826    | 1.04712    | 1.4056    | 0.249863   | 0.454236  | 0.933433  | 0.386908   | 0.289818   | 0.635572   | 1.31377    |
| LINC01139 | 1.57209    | 0.888558   | 0.700295   | 0.529645   | 0.516578  | 1.01683    | 0.914743   | 1.12846   | 0.11046    | 0.22767   | 0.904414  | 0.0648967  | 0.0585177  | 0.395022   | 1.93209    |
| LINC01140 | 0.443716   | 0.168149   | 0.193848   | 0.364783   | 0.123909  | 0.556115   | 0.244772   | 0.212677  | 0.0364312  | 0.412989  | 1.16502   | 0.0214039  | 0.804167   | 0.257962   | 0.472555   |
| LINC01141 | 0          | 0          | 0          | 0.00630441 | 0         | 0.0312546  | 0          | 0         | 0          | 0.0153565 | 0.0276242 | 0          | 0          | 0.0063947  | 0.175714   |
| LINC01142 | 0.0939138  | 0.0193925  | 0.0221978  | 0.0138258  | 0.0416802 | 0.125661   | 0.0306365  | 0         | 0          | 0.0673551 | 0.0908717 | 0          | 0          | 0.0631073  | 0.192674   |
| LINC01143 | 0.0356047  | 0.0171549  | 0          | 0.0366917  | 0         | 0.0303169  | 0          | 0         | 0          | 0         | 0         | 0          | 0          | 0          | 0.102266   |
| LINC01144 | 0.378951   | 0.306481   | 0.582204   | 0.167366   | 0.609664  | 0.495531   | 0.5872     | 0.372863  | 0.23076    | 0.0849325 | 0.152781  | 0.125891   | 0.0960524  | 0.0919546  | 0          |
| LINC01145 | 0.402445   | 0.607598   | 0.479779   | 0.362848   | 0.628898  | 0.558758   | 0.477816   | 0.360603  | 0.148541   | 0.154162  | 0.180864  | 0.172926   | 0.149739   | 0.219851   | 0.434071   |
| LINC01146 | 0          | 0          | 0.0230392  | 0          | 0         | 0.0237136  | 0          | 0         | 0          | 0         | 0         | 0          | 0          | 0          | 0          |
| LINC01148 | 0          | 0          | 0          | 0          | 0         | 0          | 0          | 0         | 0          | 0         | 0         | 0          | 0          | 0          | 0          |
| LINC01149 | 0.00810899 | 0.00390703 | 0.00670833 | 0          | 0         | 0.00460313 | 0.00617239 | 0         | 0          | 0         | 0         | 0.00386813 | 0          | 0.00282541 | 0.00388184 |
| LINC01150 | 0.134664   | 0.0648834  | 0.127319   | 0.0198251  | 0.149415  | 0.0491422  | 0.0878603  | 0.0170969 | 0          | 0.0965816 | 0.130302  | 0.0412954  | 0          | 0.060327   | 0.414418   |
| LINC01151 | 0.0405307  | 0          | 0          | 0          | 0         | 0          | 0.0462767  | 0         | 0          | 0         | 0         | 0          | 0          | 0          | 0          |
| LINC01152 | 3.71918    | 1.41487    | 2.27415    | 0.053325   | 0.542553  | 0.374513   | 2.24508    | 3.81689   | 0.00787748 | 0.0162364 | 0.0146035 | 0.00462814 | 0.00834644 | 0.0405665  | 0.111469   |
| LINC01159 | 0.00582802 | 0.0393124  | 0.0578561  | 0.0240238  | 0         | 0.0148874  | 0.0133085  | 0.0466151 | 0          | 0         | 0         | 0          | 0          | 0          | 0          |





|           |           |            |            |           |            |            |           |            |            |           |           |            |           |            |           |
|-----------|-----------|------------|------------|-----------|------------|------------|-----------|------------|------------|-----------|-----------|------------|-----------|------------|-----------|
| LINC01232 | 0.16558   | 0.0981898  | 0.105369   | 0.0918806 | 0.158279   | 0.271134   | 0.130884  | 0.0792368  | 0.0620487  | 0.079931  | 0.0718922 | 0.0911363  | 0.0657426 | 0.0732258  | 0.329254  |
| LINC01233 | 0         | 0          | 0          | 0         | 0          | 0          | 0         | 0          | 0          | 0         | 0         | 0          | 0         | 0          | 0         |
| LINC01234 | 0         | 0.0200732  | 0          | 0         | 0          | 0          | 0.011892  | 0.00925635 | 0          | 0         | 0         | 0          | 0         | 0          | 0         |
| LINC01235 | 0.169     | 0.0478981  | 0.0908845  | 0.174159  | 0.0927939  | 0.727971   | 0.124856  | 0.185533   | 0.0121072  | 0.811018  | 1.67213   | 0.0426791  | 0.820991  | 0.644266   | 0.84233   |
| LINC01237 | 0.0803578 | 0.193588   | 0.398866   | 0         | 0.0624117  | 0.136847   | 0.45875   | 0.214246   | 0          | 0         | 0         | 0.0574982  | 0         | 0.0209993  | 0.115404  |
| LINC01238 | 0.25596   | 0.49844    | 0.59113    | 0.0879247 | 0.198797   | 0.32692    | 0.56014   | 0.587646   | 0          | 0.040157  | 0         | 0.0534177  | 0         | 0.033444   | 0.597335  |
| LINC01239 | 0.13805   | 0.0855186  | 0.0897321  | 0.0203235 | 0          | 0.319058   | 0.0788104 | 0.0613436  | 0          | 0         | 0.022263  | 0.00705559 | 0         | 0.0257681  | 0         |
| LINC01241 | 0         | 0          | 0          | 0         | 0          | 0          | 0         | 0          | 0          | 0         | 0         | 0.0401604  | 0         | 0          | 0         |
| LINC01242 | 0         | 0          | 0          | 0         | 0          | 0          | 0         | 0          | 0          | 0         | 0         | 0          | 0         | 0          | 0         |
| LINC01243 | 0         | 0          | 0          | 0         | 0          | 0          | 0         | 0          | 0          | 0         | 0         | 0          | 0         | 0          | 0         |
| LINC01246 | 0         | 0          | 0          | 0         | 0          | 0          | 0         | 0          | 0          | 0         | 0         | 0          | 0         | 0          | 0         |
| LINC01247 | 0         | 0.00529849 | 0          | 0         | 0.00854102 | 0          | 0         | 0.00488658 | 0          | 0         | 0         | 0          | 0         | 0.00287374 | 0         |
| LINC01248 | 0         | 0          | 0          | 0         | 0          | 0          | 0         | 0          | 0          | 0         | 0.037216  | 0          | 0         | 0          | 0         |
| LINC01249 | 0         | 0          | 0          | 0         | 0          | 0          | 0         | 0          | 0          | 0         | 0         | 0          | 0         | 0          | 0         |
| LINC01250 | 0         | 0          | 0.0163358  | 0         | 0          | 0          | 0         | 0          | 0          | 0         | 0.0222915 | 0.00706462 | 0         | 0          | 0         |
| LINC01251 | 0.0476194 | 0.0229438  | 0.0787883  | 0.0490732 | 0          | 0.0810947  | 0         | 0          | 0.289976   | 0         | 0         | 0.068146   | 0.337962  | 0.024888   | 0         |
| LINC01252 | 0.134181  | 0.353611   | 0.404923   | 0.051974  | 0.117899   | 0.276547   | 0.230337  | 0.123799   | 0.00767792 | 0.0320034 | 0.0427006 | 0.0681534  | 0.0040675 | 0.0672076  | 0.253505  |
| LINC01254 | 0         | 0.0526251  | 0.0401585  | 0         | 0          | 0.020667   | 0.11085   | 0.0539266  | 0.0295602  | 0.0152317 | 0.0273997 | 0.0260506  | 0.01566   | 0          | 0         |
| LINC01255 | 0         | 0          | 0          | 0         | 0          | 0          | 0         | 0          | 0          | 0         | 0         | 0          | 0         | 0          | 0         |
| LINC01256 | 0         | 0          | 0          | 0         | 0          | 0          | 0         | 0          | 0          | 0         | 0         | 0          | 0         | 0          | 0         |
| LINC01257 | 0         | 0.00450897 | 0.00774184 | 0         | 0.04361    | 0.0876531  | 0.010685  | 0.00831687 | 0.0455894  | 0.152693  | 0.0845148 | 0.147314   | 0.0664171 | 0.210315   | 0.0134397 |
| LINC01258 | 0         | 0          | 0          | 0         | 0          | 0.00957067 | 0         | 0          | 0          | 0.0141073 | 0         | 0          | 0         | 0          | 0         |
| LINC01259 | 0         | 0          | 0          | 0         | 0          | 0          | 0         | 0          | 0          | 0         | 0         | 0          | 0         | 0          | 0         |
| LINC01260 | 0.0200026 | 0.0771006  | 0.082738   | 0         | 0.093213   | 0.0851599  | 0.13703   | 0.0355534  | 0.024361   | 0         | 0.0225805 | 0.0572497  | 0         | 0          | 0.229811  |
| LINC01262 | 0         | 0          | 0          | 0         | 0          | 0          | 0         | 0          | 0          | 0.033083  | 0.0297558 | 0          | 0.0680263 | 0          | 0         |
| LINC01264 | 0         | 0          | 0          | 0         | 0          | 0          | 0         | 0          | 0.0563713  | 0         | 0         | 0.0331189  | 0         | 0          | 0         |

|           |           |            |            |           |           |            |           |           |           |            |            |           |           |            |           |
|-----------|-----------|------------|------------|-----------|-----------|------------|-----------|-----------|-----------|------------|------------|-----------|-----------|------------|-----------|
| LINC01265 | 0         | 0.0836301  | 0.0957278  | 0.059624  | 0         | 0.172428   | 0.03303   | 0.179967  | 0         | 0.0726173  | 0.0653141  | 0         | 0         | 0.136075   | 0         |
| LINC01266 | 0.204327  | 0.104239   | 0.0894885  | 0.0247724 | 0         | 0.0562882  | 0.0960623 | 0.0801128 | 0         | 0.00754269 | 0.0135682  | 0         | 0         | 0.00314089 | 0         |
| LINC01267 | 0         | 0.00976416 | 0.00838247 | 0.0208841 | 0         | 0          | 0         | 0         | 0         | 0          | 0          | 0.0145004 | 0         | 0          | 0         |
| LINC01268 | 0.176729  | 0.129753   | 0.187975   | 0.147434  | 0.0392173 | 0.0429949  | 0.115305  | 0.134624  | 0.0409973 | 0.0528126  | 0.00950023 | 0.0421514 | 0.0325784 | 0.0483823  | 0.0483438 |
| LINC01269 | 0.0768872 | 0.0740909  | 0          | 2.85244   | 0.179149  | 0.0327342  | 0.0438937 | 0.068331  | 0.56184   | 1.15802    | 0.390582   | 0.605163  | 4.83671   | 0.562585   | 0         |
| LINC01270 | 1.28E-08  | 0.00889782 | 0.00840455 | 0.156678  | 0.050275  | 0.204126   | 0.0579975 | 2.35E-11  | 1.81E-17  | 0.160769   | 0.206436   | 0.0615216 | 0.0242348 | 0.0362285  | 0.031241  |
| LINC01271 | 0.0822864 | 0.0455059  | 0          | 0.0957682 | 0.0769185 | 0.231245   | 7.49E-07  | 0.054847  | 0.0751617 | 0.0825156  | 1.69E-16   | 0.0628288 | 0.101554  | 0.0869642  | 0.189946  |
| LINC01273 | 0         | 0          | 0.0814705  | 0         | 0.0509917 | 0          | 0.0374808 | 0         | 0         | 0.0412013  | 0          | 0         | 0         | 0.102941   | 0         |
| LINC01276 | 0         | 0          | 0          | 0         | 0         | 0          | 0.0323823 | 0         | 0         | 0          | 0          | 0         | 0         | 0          | 0         |
| LINC01277 | 0.048671  | 0.0351756  | 0.0402641  | 0.0250784 | 0.0378014 | 0.0621641  | 0.0138927 | 0.0432547 | 0         | 0          | 0.0137359  | 0         | 0         | 0.0190782  | 0         |
| LINC01278 | 2.22174   | 2.43709    | 2.42612    | 1.7248    | 1.96714   | 1.94853    | 2.74809   | 2.73796   | 1.28075   | 0.994566   | 2.10677    | 1.69039   | 1.81093   | 1.60629    | 2.65891   |
| LINC01279 | 9.09447   | 7.69086    | 11.7847    | 1.68182   | 2.34058   | 5.07117    | 11.8489   | 6.96581   | 0.245045  | 1.59938    | 2.50354    | 0.39991   | 1.63569   | 1.31098    | 10.4153   |
| LINC01280 | 0.042937  | 0          | 0          | 0         | 0         | 0          | 0         | 0         | 0         | 0.0538904  | 0          | 0.0102409 | 0         | 0          | 0         |
| LINC01281 | 0.013053  | 0.0188675  | 0.0107984  | 0.0134515 | 0         | 0          | 0         | 0.0116005 | 0         | 0          | 0          | 0         | 0         | 0.0272884  | 0         |
| LINC01282 | 0         | 0          | 0          | 0         | 0         | 0          | 0         | 0         | 0         | 0          | 0.0296882  | 0.0188176 | 0         | 0          | 0         |
| LINC01284 | 0         | 0          | 0          | 0         | 0         | 0          | 0         | 0         | 0         | 0          | 0          | 0         | 0         | 0          | 0         |
| LINC01285 | 0         | 0.0133381  | 0.0229014  | 0         | 0.0430014 | 0.0471436  | 0.0316076 | 0.0246024 | 0         | 0          | 0.0312507  | 0         | 0         | 0          | 0         |
| LINC01287 | 0.0459188 | 0.0331865  | 0.0379872  | 0         | 0.0356638 | 0          | 0         | 0.0204044 | 0.0559239 | 0          | 0          | 0         | 0         | 0          | 0         |
| LINC01288 | 0         | 0          | 0          | 0         | 0         | 0          | 0         | 0         | 0         | 0          | 0          | 0         | 0         | 0          | 0         |
| LINC01289 | 0         | 0          | 0          | 0         | 0         | 0          | 0         | 0         | 0         | 0          | 0          | 0         | 0         | 0          | 0         |
| LINC01290 | 1.86262   | 3.18591    | 4.96937    | 0.479871  | 0.94032   | 0.475799   | 3.82802   | 2.68993   | 0.226846  | 0.116889   | 0.105133   | 1.09952   | 0.0600876 | 0.657103   | 0.534992  |
| LINC01291 | 0.0936966 | 0          | 0          | 0.096557  | 0.145543  | 0.199453   | 0.0534899 | 0         | 0.114112  | 0.117599   | 0          | 0.167606  | 0.332489  | 0.171395   | 0         |
| LINC01297 | 0         | 0          | 0          | 0         | 0         | 0          | 0         | 0         | 0         | 0          | 0          | 0         | 0         | 0          | 0         |
| LINC01298 | 0.0445916 | 0.451183   | 0.0737787  | 0.045953  | 0.554129  | 0.0379692  | 0.15274   | 0.0396293 | 0.108615  | 0.279835   | 0          | 0.382878  | 0         | 0.163139   | 0         |
| LINC01299 | 0         | 0.00884974 | 0          | 0         | 0         | 0.00781984 | 0         | 0         | 0         | 0          | 0          | 0         | 0         | 0          | 0         |
| LINC01300 | 0         | 0.0700419  | 0.192418   | 0         | 0         | 0          | 0.132784  | 0.0775161 | 0         | 0          | 0          | 0         | 0         | 0          | 0         |



|           |           |            |           |            |           |           |           |           |            |           |            |            |            |            |           |
|-----------|-----------|------------|-----------|------------|-----------|-----------|-----------|-----------|------------|-----------|------------|------------|------------|------------|-----------|
| LINC01343 | 0.14192   | 0.161179   | 0.10902   | 0.219379   | 0.283436  | 0.0776846 | 0.196762  | 0.0360361 | 0.172842   | 0.267186  | 0.434855   | 0.609284   | 0.392425   | 0.143049   | 0.189256  |
| LINC01344 | 0.0810615 | 0          | 0.0670598 | 0          | 0         | 0         | 0.0925534 | 0         | 0          | 0         | 0          | 0          | 0          | 0          | 0         |
| LINC01345 | 0         | 0          | 0         | 0          | 0         | 0         | 0         | 0         | 0          | 0         | 0          | 0          | 0          | 0          | 0         |
| LINC01346 | 0         | 0          | 0         | 0          | 0         | 0         | 0         | 0         | 0          | 0         | 0          | 0          | 0          | 0          | 0         |
| LINC01347 | 3.52372   | 3.82615    | 3.58989   | 3.19403    | 2.90526   | 3.39375   | 5.21951   | 3.40221   | 1.5796     | 2.0492    | 1.01228    | 3.59592    | 1.01879    | 2.27095    | 3.93497   |
| LINC01349 | 0         | 0          | 0         | 0          | 0         | 0         | 0         | 0         | 0          | 0         | 0          | 0          | 0          | 0          | 0         |
| LINC01350 | 0         | 0          | 0         | 0          | 0         | 0         | 0         | 0         | 0          | 0         | 0          | 0          | 0          | 0          | 0         |
| LINC01351 | 0         | 0          | 0.0134544 | 0          | 0         | 0         | 0         | 0         | 0          | 0         | 0          | 0          | 0          | 0          | 0         |
| LINC01352 | 0.240823  | 0.0232064  | 0.0398451 | 0.0248175  | 0         | 0.164046  | 0.0549927 | 0.107012  | 0          | 0         | 0.0815576  | 0          | 0.0155378  | 0.0125864  | 0.172926  |
| LINC01353 | 0.10263   | 0.0494487  | 0.0212257 | 0.185085   | 0         | 0.131082  | 0         | 0         | 0.0624959  | 0.0966083 | 0.202749   | 0.0367172  | 0          | 0.0134097  | 0         |
| LINC01354 | 0.0566438 | 0.046786   | 0.053554  | 0.00833902 | 0.0251393 | 0.0551217 | 0.0831524 | 0.0359574 | 0.00985512 | 0.0101563 | 0.00913483 | 0.0636903  | 0.0208836  | 0.0126877  | 0.0464844 |
| LINC01355 | 1.21285   | 1.47363    | 1.47777   | 0.597768   | 0.266214  | 0.729644  | 0.82034   | 1.6344    | 0.168584   | 0.63703   | 0.468788   | 0.556542   | 0.0935628  | 1.23677    | 1.0697    |
| LINC01356 | 0         | 0.0672464  | 0.125958  | 0.0392263  | 0.0394179 | 0.0864298 | 0.0579473 | 0.0233262 | 0          | 0.0477745 | 0          | 0          | 0.00818628 | 0.0331567  | 0.054665  |
| LINC01358 | 0         | 0          | 0         | 0          | 0         | 0         | 0.0561019 | 0         | 0          | 0         | 0.0554684  | 0.0351581  | 0          | 0.0256806  | 0.211696  |
| LINC01359 | 0.428972  | 0.372034   | 0.408107  | 0.0442068  | 0.0333171 | 0.109579  | 0.0489787 | 0.362173  | 0.026122   | 0         | 0          | 0.122776   | 0          | 0.0336299  | 0.123212  |
| LINC01360 | 0         | 0          | 0         | 0          | 0         | 0         | 0         | 0         | 0          | 0         | 0          | 0          | 0          | 0          | 0         |
| LINC01361 | 0.0146013 | 0.0140703  | 0.0362377 | 0          | 0         | 0         | 0.0333426 | 0.0259528 | 0          | 0.0183261 | 0          | 0.0313428  | 0          | 0          | 0         |
| LINC01362 | 0.0405544 | 0.0195397  | 0.0447326 | 0.0278617  | 0         | 0         | 0.0308691 | 0.0120138 | 0.0164636  | 0         | 0.0152603  | 0.00967259 | 0          | 0          | 0         |
| LINC01363 | 0         | 0.00601439 | 0         | 0          | 0         | 0         | 0         | 0         | 0.0456078  | 0.0470015 | 0.0140915  | 0.0267953  | 0          | 0.00652404 | 0         |
| LINC01364 | 0.31345   | 0.0880979  | 0.108045  | 0.134591   | 0.0811493 | 0.0667246 | 0.298239  | 0.185712  | 0.159061   | 0.098353  | 0          | 0.0373803  | 0.16853    | 0.0273038  | 0.112538  |
| LINC01365 | 0         | 0          | 0         | 0          | 0         | 0         | 0         | 0         | 0          | 0         | 0          | 0          | 0          | 0          | 0         |
| LINC01366 | 0.04129   | 0.0198942  | 0         | 0          | 0.0641376 | 0.017579  | 0.0235718 | 0         | 0          | 0.168425  | 0.0466113  | 0          | 0.00666003 | 0.016185   | 0.0741221 |
| LINC01370 | 0.082851  | 0          | 0         | 0          | 0         | 0         | 0.0630644 | 0.0245437 | 0          | 0.0346622 | 0          | 0          | 0          | 0          | 0         |
| LINC01372 | 0.566769  | 0.750964   | 0.507944  | 0.19469    | 0.660291  | 0.241298  | 0.797101  | 0.755545  | 0.115043   | 0.296397  | 0.266588   | 0.337948   | 0          | 0.444327   | 0.746122  |
| LINC01374 | 0.0401093 | 0.0193253  | 0         | 0.0413338  | 0         | 0.0341525 | 0.0457955 | 0.0712916 | 0          | 0         | 0          | 0          | 0.0776349  | 0          | 0         |
| LINC01375 | 0.074655  | 0.0479599  | 0.0102933 | 0.0128224  | 0         | 0         | 0.0568258 | 0.0221157 | 0          | 0.0468499 | 0.014046   | 0          | 0          | 0.00650299 | 0.035738  |



|           |            |            |            |           |           |           |            |            |           |           |           |           |           |            |           |
|-----------|------------|------------|------------|-----------|-----------|-----------|------------|------------|-----------|-----------|-----------|-----------|-----------|------------|-----------|
| LINC01376 | 0.653088   | 0.383322   | 0.461694   | 0.440526  | 0.0922246 | 0.232549  | 0.244039   | 0.65428    | 0.0867695 | 0.0447105 | 0.0536185 | 0.101957  | 0.0536288 | 0.229623   | 0.0682121 |
| LINC01377 | 0          | 0          | 0          | 0         | 0         | 0         | 0          | 0          | 0         | 0         | 0         | 0         | 0         | 0          | 0         |
| LINC01378 | 0          | 0          | 0.0446284  | 0         | 0         | 0         | 0          | 0          | 0         | 0         | 0         | 0         | 0         | 0          | 0         |
| LINC01381 | 0          | 0          | 0          | 0         | 0         | 0         | 0          | 0          | 0         | 0         | 0         | 0         | 0         | 0          | 0         |
| LINC01386 | 0          | 0          | 0          | 0         | 0         | 0         | 0          | 0          | 0         | 0         | 0         | 0         | 0         | 0          | 0         |
| LINC01387 | 0          | 0          | 0          | 0         | 0         | 0         | 0          | 0          | 0         | 0         | 0         | 0         | 0         | 0          | 0         |
| LINC01389 | 0.618223   | 0.375574   | 0.333546   | 0.249299  | 0.0835056 | 0.068662  | 0.491038   | 0.501649   | 0.0982078 | 0.101209  | 0.151717  | 0.192328  | 0.0520271 | 0.196676   | 0.19301   |
| LINC01391 | 0.00654128 | 0.00630338 | 0.00541141 | 0         | 0         | 0         | 0.00746862 | 0.00581335 | 0         | 0         | 0         | 0         | 0.0042204 | 0          | 0         |
| LINC01392 | 0          | 0          | 0.0349372  | 0         | 0         | 0         | 0          | 0          | 0         | 0         | 0         | 0         | 0         | 0          | 0         |
| LINC01393 | 0.0389942  | 0.018788   | 0          | 0         | 0         | 0.0166015 | 0.0222612  | 0          | 0         | 0         | 0         | 0         | 0         | 0          | 0         |
| LINC01395 | 0.260567   | 0.148371   | 0.0587888  | 0.122055  | 0.257568  | 0.282379  | 0.027046   | 0.168414   | 0.403888  | 0         | 0         | 0.322037  | 0         | 0.0123803  | 0         |
| LINC01396 | 0          | 0          | 0          | 0         | 0         | 0         | 0          | 0          | 0         | 0         | 0         | 0         | 0         | 0          | 0         |
| LINC01397 | 0.399707   | 0.327395   | 0.264533   | 0.370719  | 1.0555    | 1.56559   | 0.319461   | 0.106568   | 0.0486799 | 0.100335  | 0.315854  | 0.0858004 | 0.0773667 | 0.125343   | 1.09066   |
| LINC01398 | 0.0204987  | 0          | 0          | 0         | 0.0318416 | 0         | 0          | 0.0364351  | 0         | 0         | 0         | 0         | 0         | 0.0214271  | 0.0588775 |
| LINC01399 | 0.0357146  | 0.0344157  | 0          | 0         | 0         | 0         | 0          | 0          | 0         | 0         | 0         | 0         | 0         | 0          | 0         |
| LINC01402 | 0.08295    | 0.0399666  | 0.0686221  | 0         | 0         | 0.141262  | 0.0947096  | 0          | 0         | 0         | 0         | 0.0593529 | 0         | 0          | 0         |
| LINC01405 | 0          | 0          | 0          | 0         | 0         | 0         | 0.0736044  | 0          | 0         | 0.0809106 | 0         | 0         | 0         | 0          | 0         |
| LINC01410 | 0.281546   | 0.271306   | 0.22626    | 0.447646  | 0.237412  | 0.0890435 | 0.413305   | 0.3503     | 0.0293906 | 0.141347  | 0.118051  | 0.132384  | 0.0311403 | 0.227028   | 0.300363  |
| LINC01411 | 0          | 0.0103343  | 0          | 0.0221034 | 0         | 0.0182632 | 0          | 0          | 0         | 0.0538404 | 0         | 0.0153471 | 0.0138385 | 0          | 0         |
| LINC01412 | 0.164135   | 0.0263609  | 0.0905228  | 0         | 0         | 0         | 0          | 0          | 0         | 0         | 0.123525  | 0.0391477 | 0         | 0.0571895  | 0.157146  |
| LINC01413 | 0          | 0          | 0          | 0         | 0         | 0         | 0          | 0          | 0         | 0         | 0         | 0         | 0.0151438 | 0          | 0         |
| LINC01415 | 0.120371   | 0.0887005  | 0.0761488  | 0.072968  | 0.0439947 | 0.19293   | 0.0889288  | 0.147878   | 0.0215585 | 0.0799823 | 0.187839  | 0.0151991 | 0.0456839 | 0.062911   | 0.162699  |
| LINC01416 | 0.0100186  | 0.0289628  | 0          | 0         | 0         | 0         | 0.011439   | 0          | 0         | 0         | 0         | 0         | 0         | 0.00523618 | 0         |
| LINC01419 | 0.60983    | 0.626962   | 0.64323    | 0.439913  | 1.11305   | 0.16876   | 0.905169   | 0.758753   | 0.0185676 | 0.34443   | 0.206527  | 0.490893  | 0.0393459 | 0.677288   | 0.240843  |
| LINC01422 | 0.615507   | 0.316331   | 0.441298   | 0.0422865 | 0.191219  | 0         | 0.609064   | 0.328207   | 0         | 0         | 0         | 0.0293608 | 0         | 0.10723    | 0         |
| LINC01423 | 0          | 0          | 0          | 0         | 0         | 0         | 0          | 0          | 0         | 0         | 0.210351  | 0         | 0.0240447 | 0          | 0.107041  |

|           |            |            |            |           |           |            |           |            |            |           |            |            |           |            |           |
|-----------|------------|------------|------------|-----------|-----------|------------|-----------|------------|------------|-----------|------------|------------|-----------|------------|-----------|
| LINC01424 | 0.254133   | 0.399988   | 0.224253   | 0.0698377 | 0.263171  | 0.100982   | 0.154752  | 0.165625   | 0.0206337  | 0.0212642 | 0.0191256  | 0.0484904  | 0         | 0.106257   | 0.389298  |
| LINC01425 | 0          | 0          | 0          | 0         | 0         | 0          | 0         | 0          | 0          | 0         | 0          | 0          | 0         | 0          | 0         |
| LINC01426 | 0.0664182  | 0.0675583  | 0.0976814  | 0.106471  | 0.0343901 | 0.163379   | 0.0505561 | 0.111495   | 0.00898777 | 0.138936  | 0.274919   | 0          | 0.0904668 | 0.146566   | 0.0953849 |
| LINC01427 | 0          | 0          | 0          | 0         | 0         | 0          | 0         | 0          | 0          | 0         | 0          | 0          | 0         | 0          | 0         |
| LINC01428 | 0          | 0          | 0          | 0         | 0         | 0          | 0         | 0          | 0          | 0         | 0          | 0          | 0         | 0          | 0         |
| LINC01429 | 0.089509   | 0.0479187  | 0.0493654  | 0         | 0         | 0.00846842 | 0.102198  | 0.0353547  | 0          | 0.0124826 | 0          | 0.0284649  | 0         | 0.0363855  | 0.44277   |
| LINC01430 | 0          | 0.0777954  | 0.0445246  | 0         | 0         | 0          | 0.122902  | 0          | 0          | 0         | 0          | 0          | 0         | 0          | 0         |
| LINC01431 | 0.181942   | 0.192858   | 0.301031   | 0.112498  | 0.0565238 | 0.154921   | 0.207736  | 0.32339    | 0          | 0         | 0.246468   | 0.0520738  | 0.0469553 | 0.133127   | 0.679359  |
| LINC01432 | 0          | 0          | 0          | 0         | 0         | 0          | 0         | 0          | 0          | 0         | 0          | 0          | 0         | 0          | 0         |
| LINC01433 | 0          | 0.0326999  | 0          | 0.0349701 | 0         | 0          | 0.116235  | 0          | 0.247967   | 0.127772  | 0.0383074  | 0.169965   | 0.0656823 | 0.159619   | 0.146201  |
| LINC01435 | 0          | 0          | 0          | 0         | 0         | 0          | 0         | 0          | 0          | 0         | 0.0362856  | 0          | 0         | 0          | 0         |
| LINC01436 | 0.303914   | 0.183038   | 0.26399    | 0.250554  | 0.0708125 | 2.52309    | 0.329649  | 0.148551   | 0          | 0.0762887 | 0.154386   | 0.0217459  | 0.441188  | 0.428865   | 0.414636  |
| LINC01440 | 0          | 0          | 0          | 0         | 0         | 0          | 0         | 0          | 0          | 0         | 0          | 0          | 0         | 0          | 0         |
| LINC01441 | 0.512446   | 0.468168   | 0.380992   | 0.303485  | 0.536159  | 0.101392   | 0.322207  | 0.318352   | 0.0399841  | 0.138568  | 0.100388   | 0.476133   | 0.0531847 | 0.312304   | 0.381475  |
| LINC01443 | 0.111324   | 0.178792   | 0.0613968  | 0.012747  | 0.422705  | 0.252776   | 0.0564917 | 0.0659571  | 0.632708   | 0         | 0          | 0.0531036  | 0.0159613 | 0.0517181  | 0         |
| LINC01444 | 0.090995   | 0.0438428  | 0          | 0         | 0.0942311 | 0          | 0         | 0.0269562  | 0.0369405  | 0         | 0          | 0.0434062  | 0         | 0          | 0         |
| LINC01445 | 0          | 0          | 0          | 0         | 0         | 0          | 0         | 0          | 0          | 0         | 0          | 0          | 0         | 0          | 0         |
| LINC01446 | 0          | 0.00640108 | 0          | 0         | 0         | 0          | 0         | 0          | 0          | 0         | 0          | 0.014259   | 0         | 0          | 0         |
| LINC01447 | 0.251464   | 0.207585   | 0.208029   | 0.0950183 | 0.292219  | 0.128684   | 0.229691  | 0.163885   | 0.0102085  | 0.0631226 | 0.0283871  | 0.113955   | 0         | 0.170854   | 0.180567  |
| LINC01448 | 0.378142   | 0.384189   | 0.280667   | 0.225415  | 0.311066  | 0.0337141  | 0.275127  | 0.141092   | 0.0723633  | 0.149326  | 0.223644   | 0.371308   | 0.0765732 | 0.302148   | 0.205819  |
| LINC01449 | 0.209698   | 0.0551104  | 0.110395   | 0         | 0.0296122 | 0          | 0         | 0.0677681  | 0          | 0.0239266 | 0          | 0          | 0         | 0.0099634  | 0         |
| LINC01450 | 0.0569325  | 0.00685773 | 0.0353239  | 0.0146676 | 0.0110545 | 0.0302983  | 0         | 0.0632461  | 0.00866717 | 0.026796  | 0.00803371 | 0.00509209 | 0         | 0.0371942  | 0.0408811 |
| LINC01451 | 0.163267   | 0.498375   | 0.483985   | 0.231345  | 0.750262  | 0.446021   | 0.341756  | 0.489705   | 0.0662801  | 0.0426909 | 0.0691154  | 0.3602     | 0.0702259 | 0.202659   | 0.478713  |
| LINC01455 | 0.0412532  | 0          | 0          | 0         | 0         | 0          | 0         | 0          | 0          | 0         | 0          | 0          | 0         | 0          | 0         |
| LINC01456 | 0          | 0          | 0          | 0         | 0         | 0          | 0         | 0          | 0          | 0         | 0          | 0          | 0         | 0          | 0         |
| LINC01460 | 0.00809198 | 0          | 0.00669425 | 0.025017  | 0         | 0          | 0.0277175 | 0.00719147 | 0.0197102  | 0         | 0          | 0.0463202  | 0         | 0.00845844 | 0.0116211 |





|           |           |            |            |           |           |           |           |            |            |            |            |            |            |            |           |
|-----------|-----------|------------|------------|-----------|-----------|-----------|-----------|------------|------------|------------|------------|------------|------------|------------|-----------|
| LINC01521 | 0.426333  | 0.296633   | 0.300442   | 0.244083  | 0.437589  | 1.13387   | 0.252401  | 0.210494   | 0.0582325  | 0.171758   | 0.362443   | 0.166478   | 0.101877   | 0.173865   | 0.46865   |
| LINC01522 | 0.0250195 | 0          | 0          | 0.0257833 | 0.0388639 | 0.0639114 | 0         | 0.0222353  | 0          | 0.188412   | 0.0847317  | 0.0179021  | 0          | 0.0130763  | 0.503037  |
| LINC01523 | 0         | 0          | 0          | 0         | 0         | 0         | 0         | 0          | 0          | 0          | 0          | 0          | 0          | 0          | 0         |
| LINC01524 | 0.0105556 | 0.0610299  | 0.0960553  | 0.103339  | 0.0327928 | 0.40895   | 0.018078  | 0.0140713  | 0          | 0          | 0.00595795 | 0.00755278 | 0.0442675  | 0.0386176  | 0.16675   |
| LINC01525 | 0         | 0          | 0          | 0         | 0         | 0         | 0         | 0          | 0          | 0          | 0          | 0          | 0          | 0          | 0         |
| LINC01526 | 0.0416992 | 0.0401826  | 0.068993   | 0         | 0         | 0         | 0         | 0.0741175  | 0          | 0          | 0          | 0          | 0          | 0          | 0         |
| LINC01529 | 0.0211256 | 0.0101786  | 0.0174766  | 0         | 0         | 0.0359763 | 0         | 0.0187746  | 0.0257286  | 0          | 0          | 0          | 0          | 0.00552057 | 0         |
| LINC01530 | 1.09428   | 1.22276    | 1.14647    | 0.515846  | 2.01938   | 0.412272  | 1.07774   | 1.01503    | 0.150123   | 0.699602   | 0.337898   | 0.932042   | 0.201899   | 0.915338   | 0.996357  |
| LINC01531 | 0.0209629 | 0          | 0          | 0.0144019 | 0.0108542 | 0         | 0.0159565 | 0.00621003 | 0          | 0          | 0          | 0.00499984 | 0.0180335  | 0          | 0         |
| LINC01532 | 0         | 0          | 0          | 0         | 0         | 0         | 0         | 0          | 0          | 0          | 0          | 0          | 0          | 0          | 0         |
| LINC01533 | 0         | 0.00878698 | 0          | 0         | 0         | 0         | 0         | 0          | 0          | 0          | 0          | 0          | 0          | 0          | 0         |
| LINC01534 | 0.762669  | 0.975684   | 0.979035   | 0.243916  | 0.32681   | 0.403077  | 0.840763  | 0.60768    | 0.224204   | 0.0990236  | 0.207817   | 0.131723   | 0.0678717  | 0.508564   | 0.566529  |
| LINC01535 | 0.178883  | 0.184255   | 0.258974   | 0.0691292 | 0.225768  | 0.0380792 | 0.114887  | 0.198721   | 0.0136162  | 0.0280646  | 0.100969   | 0.0159995  | 0.00721342 | 0.134968   | 0.240843  |
| LINC01537 | 0.520175  | 0.205059   | 0.219075   | 0.13645   | 0.0734556 | 0.330178  | 0.302359  | 0.33621    | 0.0230369  | 0.308631   | 0.192179   | 0.128578   | 0.372227   | 0.207607   | 0.244485  |
| LINC01538 | 0         | 0          | 0.00795412 | 0         | 0         | 0         | 0.0329339 | 0.0170898  | 0          | 0          | 0          | 0          | 0          | 0          | 0         |
| LINC01539 | 0         | 0          | 0.008004   | 0         | 0         | 0         | 0         | 0.0085985  | 0          | 0          | 0          | 0          | 0          | 0          | 0         |
| LINC01541 | 0         | 0          | 0          | 0         | 0         | 0         | 0         | 0          | 0          | 0          | 0          | 0          | 0          | 0          | 0         |
| LINC01543 | 0.0601118 | 0.10137    | 0.0994575  | 0         | 0         | 0         | 0.0686337 | 0.0534224  | 0.0366047  | 0          | 0          | 0          | 0          | 0.0314171  | 0         |
| LINC01544 | 0.0503579 | 0.0277294  | 0.00595137 | 0         | 0.0558737 | 0.0367535 | 0.057497  | 0.0191802  | 0.00876147 | 0.00902919 | 0          | 0.00514749 | 0          | 0.0150396  | 0.0103315 |
| LINC01545 | 0.0445059 | 0.128662   | 0.110455   | 0         | 0.069133  | 0         | 0.152446  | 0.118659   | 0.487828   | 0.0558594  | 0          | 0.0318451  | 0.0574299  | 0          | 0         |
| LINC01546 | 0         | 0.0992642  | 0.0284059  | 0         | 0         | 0         | 0         | 0.0305158  | 0          | 0.0430963  | 0          | 0.0245689  | 0          | 0          | 0         |
| LINC01547 | 0.667282  | 0.44908    | 0.543261   | 0.53484   | 0.542939  | 1.26263   | 0.362801  | 0.621263   | 0.154795   | 0.172815   | 0.286963   | 0.136417   | 0.464695   | 0.254644   | 0.547592  |
| LINC01548 | 0         | 0          | 0          | 0         | 0         | 0         | 0         | 0          | 0          | 0          | 0          | 0          | 0          | 0          | 0         |
| LINC01549 | 0.12911   | 0.0311037  | 0.106809   | 0.033263  | 0         | 0.13742   | 0         | 0          | 0.0393105  | 0          | 0.0364374  | 0.0692865  | 0          | 0.0337394  | 0         |
| LINC01550 | 0.496433  | 1.20405    | 1.12416    | 0.38586   | 0.431311  | 0.297327  | 0.60524   | 0.70665    | 0.532868   | 0.17425    | 0.498671   | 0.421437   | 0.39087    | 0.178102   | 0.132921  |
| LINC01551 | 13.4517   | 12.2652    | 12.4341    | 7.6634    | 21.1542   | 2.56154   | 10.3776   | 5.47402    | 2.99401    | 8.01935    | 0.414852   | 11.3399    | 2.9502     | 7.35016    | 8.53683   |

|           |            |            |            |            |           |           |            |            |           |           |            |            |           |            |           |
|-----------|------------|------------|------------|------------|-----------|-----------|------------|------------|-----------|-----------|------------|------------|-----------|------------|-----------|
| LINC01553 | 0          | 0          | 0          | 0          | 0         | 0         | 0          | 0          | 0         | 0         | 0          | 0          | 0         | 0          | 0         |
| LINC01554 | 1.4875     | 0.813657   | 0.782855   | 0.473008   | 1.13287   | 1.37819   | 1.00676    | 1.4896     | 2.51552   | 0.269386  | 0.286346   | 0.67098    | 0.101312  | 0.191299   | 0.156121  |
| LINC01555 | 0          | 0          | 0          | 0          | 0         | 0         | 0          | 0.00713163 | 0         | 0         | 0          | 0.0689021  | 0         | 0.00838805 | 0         |
| LINC01556 | 0          | 0.00246152 | 0          | 0          | 0.0317432 | 0.0130503 | 0          | 0.00454031 | 0         | 0         | 0          | 0.00731103 | 0         | 0.00534021 | 0         |
| LINC01558 | 0.126235   | 0.107149   | 0.10443    | 0.0814325  | 0.165283  | 0.119741  | 0.128116   | 0.0872566  | 0         | 0.0176085 | 0.0316674  | 0.0100384  | 0.0542974 | 0.157504   | 0.222278  |
| LINC01559 | 0          | 0.00348241 | 0.00597925 | 0          | 0         | 0         | 0.00825234 | 0.00642337 | 0         | 0.399146  | 0          | 0.0827456  | 0.0559592 | 0.230428   | 0.0726591 |
| LINC01560 | 0.569979   | 0.60475    | 0.533935   | 0.54342    | 0.758605  | 0.663895  | 0.55102    | 0.488997   | 0.38561   | 0.539709  | 0.900954   | 0.261088   | 0.418079  | 0.4925     | 0.441651  |
| LINC01561 | 0.0425619  | 0.041014   | 0.0352102  | 0          | 0.0330567 | 0         | 0.0485958  | 0.0472819  | 0         | 0.0267098 | 0.0240236  | 0.0228407  | 0         | 0.0111224  | 0.152811  |
| LINC01562 | 0.00978151 | 0.0282773  | 0          | 0.0100801  | 0         | 0         | 0.0111682  | 0.017386   | 0.0357383 | 0.0122768 | 0          | 0.0209968  | 0.012622  | 0.00511224 | 0.028095  |
| LINC01563 | 0          | 0.0383624  | 0          | 0.0547009  | 0         | 0.0677959 | 0.0303027  | 0.0471734  | 0         | 0         | 0.0299606  | 0          | 0.0684944 | 0.0138711  | 0         |
| LINC01564 | 0          | 0.0197008  | 0.0338261  | 0.0842742  | 0         | 0         | 0          | 0.0363385  | 0.0497979 | 0.153959  | 0          | 0          | 0         | 0.0427405  | 0         |
| LINC01565 | 0.0429052  | 0.00826895 | 0.00709884 | 0          | 0         | 0.0146133 | 0.0685828  | 0.00762611 | 0         | 0.0107701 | 0          | 0          | 0         | 0          | 0         |
| LINC01566 | 0          | 0.0198764  | 0.0170638  | 0          | 0         | 0         | 0          | 0.0427728  | 0.0251209 | 0         | 0          | 0.00983926 | 0         | 0          | 0         |
| LINC01567 | 0          | 0.0076716  | 0          | 0.00820419 | 0         | 0         | 0          | 0          | 0         | 0         | 0.00898714 | 0          | 0         | 0          | 0         |
| LINC01568 | 0          | 0          | 0          | 0          | 0.0270701 | 0         | 0.0198976  | 0.046463   | 0         | 0         | 0          | 0          | 0         | 0          | 0         |
| LINC01569 | 0.21009    | 0.410226   | 0.539698   | 0.193714   | 0.137407  | 0.310701  | 0.189374   | 0.31446    | 0.0403999 | 0.0416344 | 0.099859   | 0.0712065  | 0.0356708 | 0.0577906  | 0.269956  |
| LINC01570 | 0          | 0.113493   | 0.0243582  | 0          | 0         | 0         | 0          | 0          | 0         | 0         | 0          | 0          | 0         | 0          | 0         |
| LINC01571 | 0          | 0          | 0          | 0          | 0         | 0         | 0          | 0          | 0         | 0         | 0          | 0          | 0         | 0          | 0         |
| LINC01572 | 0.321431   | 0.290382   | 0.387786   | 0.248433   | 0.249647  | 0.285098  | 0.229375   | 0.309466   | 0.0652445 | 0.235334  | 0.347737   | 0.134162   | 0.0604875 | 0.27999    | 0.173106  |
| LINC01574 | 0.0379394  | 0          | 0          | 0          | 0         | 0         | 0          | 0          | 0         | 0         | 0          | 0          | 0         | 0          | 0         |
| LINC01578 | 10.7356    | 6.27392    | 7.47004    | 8.59055    | 5.24663   | 7.17551   | 4.49272    | 7.843      | 6.27425   | 8.73548   | 10.5658    | 3.55601    | 5.89934   | 4.78475    | 4.80171   |
| LINC01579 | 0          | 0          | 0          | 0          | 0         | 0         | 0          | 0          | 0         | 0         | 0          | 0          | 0         | 0          | 0         |
| LINC01580 | 0          | 0          | 0          | 0          | 0         | 0         | 0          | 0          | 0         | 0         | 0          | 0          | 0         | 0.0106475  | 0         |
| LINC01581 | 0          | 0.00351424 | 0          | 0          | 0         | 0         | 0.00832776 | 0.00648207 | 0         | 0         | 0          | 0          | 0         | 0          | 0.0209495 |
| LINC01582 | 0          | 0          | 0          | 0          | 0         | 0         | 0          | 0          | 0         | 0         | 0          | 0          | 0         | 0          | 0         |
| LINC01583 | 0          | 0.00868771 | 0          | 0.00929084 | 0         | 0         | 0          | 0          | 0         | 0.022631  | 0.0712424  | 0.0129018  | 0.0116336 | 0.131935   | 0         |

|           |           |            |            |           |           |           |            |            |           |            |           |           |            |            |           |
|-----------|-----------|------------|------------|-----------|-----------|-----------|------------|------------|-----------|------------|-----------|-----------|------------|------------|-----------|
| LINC01584 | 0         | 0          | 0.0224713  | 0         | 0         | 0         | 0          | 0          | 0         | 0          | 0         | 0         | 0          | 0          | 0         |
| LINC01585 | 0.0902615 | 0.130468   | 0.104539   | 0.0372068 | 0.140207  | 0.169084  | 0.164892   | 0.192521   | 0         | 0          | 0.0407576 | 0.0258338 | 0          | 0.0660444  | 0         |
| LINC01586 | 0         | 0.00535575 | 0.00919576 | 0         | 0         | 0         | 0.0126916  | 0.00987878 | 0         | 0          | 0         | 0         | 0          | 0.0522863  | 0.0319273 |
| LINC01587 | 0.0879128 | 0.148252   | 0.127273   | 0.0905967 | 0.238978  | 0.130999  | 0.276034   | 0.136727   | 0         | 0.11034    | 0         | 0.07863   | 0.0425407  | 0.103381   | 0.0315635 |
| LINC01588 | 0.183467  | 0.257251   | 0.258218   | 0.14487   | 0.244275  | 0.144047  | 0.261166   | 0.196931   | 0.258264  | 0.206968   | 0.131798  | 0.247207  | 0.133745   | 0.159398   | 0.143717  |
| LINC01589 | 0.36287   | 0.543935   | 0.466965   | 0         | 0.0626292 | 0.171655  | 0.506383   | 0.537481   | 0.0982078 | 0          | 0.227575  | 0.144246  | 0.156081   | 0.210724   | 0.231612  |
| LINC01590 | 0.713008  | 0.708547   | 0.479254   | 0.183694  | 0.276887  | 0.3668    | 0.474886   | 0.488448   | 0.0361818 | 0.130506   | 0.0838435 | 0.180687  | 0.00958394 | 0.279487   | 0.213327  |
| LINC01591 | 0         | 0          | 0          | 0         | 0         | 0         | 0          | 0          | 0         | 0          | 0         | 0         | 0          | 0          | 0         |
| LINC01592 | 0.0586643 | 0          | 0.00808854 | 0         | 0         | 0         | 0.0334905  | 0.0173786  | 0         | 0.0122716  | 0.0220749 | 0.0139919 | 0          | 0.0306605  | 0.0561662 |
| LINC01593 | 0         | 0          | 0          | 0         | 0         | 0.0507887 | 0          | 0          | 0         | 0          | 0         | 0         | 0          | 0          | 0         |
| LINC01594 | 0.0378773 | 0          | 0          | 0         | 0         | 0         | 0          | 0          | 0         | 0          | 0         | 0         | 0          | 0          | 0         |
| LINC01596 | 0         | 0.0377349  | 0.0323952  | 0         | 0         | 0.066687  | 0          | 0.0348014  | 0         | 0          | 0         | 0         | 0          | 0          | 0         |
| LINC01597 | 0.0347911 | 0.00670516 | 0          | 0         | 0         | 0         | 0.00794467 | 0          | 0         | 0.00873329 | 0.0157099 | 0         | 0.0224471  | 0          | 0.0299787 |
| LINC01599 | 0.118439  | 0.284381   | 0.15677    | 0.24411   | 0.367954  | 0.221869  | 0.0811381  | 0.126311   | 0.115397  | 0.35058    | 0.267407  | 0.203392  | 0.198683   | 0.259987   | 0.476263  |
| LINC01600 | 0.247214  | 0.0503934  | 0.0471953  | 0.0489926 | 0.0590783 | 0.0161923 | 0.0759934  | 0.126752   | 0         | 0          | 0.0107336 | 0.0204102 | 0          | 0.059633   | 0.122895  |
| LINC01601 | 0         | 0          | 0          | 0         | 0         | 0         | 0          | 0          | 0         | 0          | 0         | 0         | 0          | 0          | 0         |
| LINC01602 | 0         | 0          | 0          | 0         | 0         | 0         | 0          | 0          | 0         | 0          | 0         | 0         | 0          | 0          | 0         |
| LINC01603 | 0.0790945 | 0.0457307  | 0.0785191  | 0.097811  | 0.0245722 | 0.0673479 | 0.036123   | 0.028117   | 0         | 0          | 0.0178576 | 0.0905508 | 0          | 0.0248029  | 0         |
| LINC01605 | 0.212614  | 0.27659    | 0.114328   | 0.766868  | 2.34487   | 1.32158   | 0.182067   | 0.36846    | 1.1005    | 3.29563    | 2.43615   | 1.76472   | 3.03848    | 2.59469    | 1.23663   |
| LINC01606 | 0         | 0          | 0          | 0         | 0         | 0         | 0          | 0          | 0         | 0          | 0         | 0         | 0          | 0          | 0         |
| LINC01607 | 0.0372674 | 0          | 0          | 0         | 0         | 0.126931  | 0          | 0.0331202  | 0         | 0          | 0.0420702 | 0         | 0          | 0.0194776  | 0.267603  |
| LINC01608 | 0.0307753 | 0          | 0          | 0         | 0         | 0         | 0          | 0          | 0         | 0          | 0         | 0         | 0          | 0          | 0         |
| LINC01609 | 0         | 0          | 0          | 0         | 0         | 0         | 0          | 0          | 0         | 0          | 0         | 0         | 0          | 0          | 0         |
| LINC01611 | 0         | 0          | 0          | 0         | 0         | 0         | 0.0462767  | 0          | 0         | 0          | 0         | 0         | 0          | 0          | 0         |
| LINC01612 | 0.0183821 | 0          | 0.0608278  | 0         | 0         | 0.0156521 | 0          | 0.0163365  | 0.0223873 | 0.0692142  | 0         | 0         | 0          | 0.00960728 | 0         |
| LINC01613 | 0.0834585 | 0.0120635  | 0.0345214  | 0         | 0.012964  | 0         | 0          | 0.0370855  | 0         | 0          | 0         | 0         | 0          | 0.0130857  | 0.0239714 |













|           |            |            |            |            |          |            |            |            |          |           |           |            |           |            |           |
|-----------|------------|------------|------------|------------|----------|------------|------------|------------|----------|-----------|-----------|------------|-----------|------------|-----------|
| LINC01767 | 0.127393   | 0.02046    | 0.316165   | 0.0437607  | 0        | 0.108473   | 0.0484844  | 0          | 0        | 0         | 0         | 0.0303844  | 0         | 0.110969   | 0.487873  |
| LINC01770 | 0.116297   | 0.579013   | 0.336731   | 0.359541   | 0.752704 | 0.577647   | 0.243437   | 0.32729    | 0.141636 | 0.194619  | 0.262569  | 0.37446    | 0.225102  | 0.202606   | 0.194853  |
| LINC01771 | 0          | 0.0196661  | 0          | 0          | 0        | 0          | 0          | 0          | 0        | 0         | 0         | 0.0292054  | 0         | 0          | 0.117236  |
| LINC01772 | 1.30592    | 1.45704    | 1.84182    | 0.452298   | 0.848358 | 0.666371   | 1.1836     | 1.32401    | 0.433122 | 0.375715  | 0.0694373 | 0.353014   | 0.284963  | 0.649613   | 1.18189   |
| LINC01774 | 0          | 0.0187406  | 0          | 0          | 0        | 0          | 0          | 0          | 0        | 0         | 0         | 0          | 0         | 0          | 0         |
| LINC01775 | 0          | 0.0302186  | 0.051885   | 0.129266   | 0.194846 | 0.160211   | 0.0716097  | 0          | 0        | 0.0787179 | 0         | 0.0448766  | 0.0809311 | 0.098338   | 0         |
| LINC01776 | 0          | 0          | 0          | 0          | 0        | 0          | 0          | 0          | 0        | 0         | 0         | 0          | 0         | 0.0160206  | 0         |
| LINC01777 | 0          | 0.0161292  | 0          | 0          | 0        | 0.00950145 | 0          | 0          | 0        | 0         | 0         | 0          | 0         | 0          | 0         |
| LINC01778 | 0.0226893  | 0          | 0          | 0          | 0        | 0          | 0          | 0          | 0        | 0         | 0         | 0          | 0         | 0          | 0         |
| LINC01780 | 0          | 0.0570367  | 0          | 0          | 0        | 0          | 0          | 0          | 0        | 0         | 0         | 0          | 0         | 0          | 0         |
| LINC01781 | 0.0655611  | 0          | 0          | 0          | 0        | 0.0558244  | 0          | 0          | 0        | 0         | 0         | 0          | 0         | 0          | 0         |
| LINC01782 | 0.00796937 | 0.00383976 | 0.00659283 | 0.0164253  | 0        | 0.0610723  | 0.00909917 | 0.00708251 | 0        | 0         | 0         | 0          | 0         | 0.00833028 | 0         |
| LINC01783 | 0.01704    | 0.0168489  | 0.0648049  | 0.00755324 | 1.85E-06 | 0.0826709  | 0.0203435  | 0.0637051  | 0.209507 | 0.0684522 | 0.0472113 | 0          | 0.150533  | 0.218962   | 0.214983  |
| LINC01784 | 0          | 0          | 0          | 0          | 0        | 0          | 0          | 0          | 0        | 0         | 0         | 0          | 0         | 0          | 0         |
| LINC01785 | 0          | 0          | 0.0344345  | 0          | 0        | 0          | 0          | 0.0369921  | 0        | 0         | 0         | 0          | 0         | 0          | 0         |
| LINC01787 | 0.0116063  | 0          | 0          | 0          | 0        | 0          | 0          | 0          | 0        | 0         | 0         | 0          | 0         | 0          | 0         |
| LINC01788 | 0          | 0          | 0          | 0          | 0        | 0          | 0          | 0          | 0        | 0         | 0.0751456 | 0          | 0         | 0          | 0.0318661 |
| LINC01790 | 0          | 0          | 0          | 0          | 0        | 0          | 0          | 0.00721165 | 0        | 0         | 0         | 0.00580627 | 0         | 0          | 0         |
| LINC01791 | 0          | 0          | 0.0280316  | 0          | 0        | 0          | 0          | 0          | 0        | 0         | 0         | 0.0242452  | 0         | 0.0177095  | 0         |
| LINC01792 | 0.0225786  | 0.0326361  | 0.0186786  | 0.104705   | 0.140289 | 0.0576761  | 0.0128897  | 0.020066   | 0.30248  | 0.0708461 | 0.0254884 | 0.0565445  | 0.123825  | 0.0767036  | 0.11349   |
| LINC01793 | 0          | 0.021907   | 0.00940352 | 0          | 0        | 0          | 0          | 0          | 0        | 0         | 0         | 0          | 0         | 0          | 0         |
| LINC01795 | 0          | 0          | 0.0235493  | 0          | 0        | 0          | 0          | 0          | 0        | 0.0357281 | 0         | 0          | 0         | 0          | 0.327049  |
| LINC01796 | 0          | 0          | 0          | 0          | 0        | 0          | 0          | 0          | 0        | 0         | 0         | 0          | 0         | 0          | 0         |
| LINC01797 | 0.0269105  | 0.0129659  | 0          | 0          | 0        | 0          | 0          | 0          | 0        | 0         | 0         | 0.0192552  | 0         | 0          | 0         |
| LINC01798 | 0          | 0.0291521  | 0          | 0          | 0        | 0.0257595  | 0.0345412  | 0.0268858  | 0        | 0.0379698 | 0         | 0          | 0.0195187 | 0.0158112  | 0         |
| LINC01799 | 0          | 0          | 0          | 0          | 0        | 0          | 0.0420095  | 0          | 0        | 0         | 0         | 0          | 0         | 0          | 0         |





|           |            |            |           |           |           |           |           |           |           |           |           |           |           |            |          |
|-----------|------------|------------|-----------|-----------|-----------|-----------|-----------|-----------|-----------|-----------|-----------|-----------|-----------|------------|----------|
| LINC01873 | 63.7123    | 60.7071    | 58.267    | 35.0869   | 61.4316   | 26.1223   | 54.3761   | 54.5591   | 16.4181   | 29.3924   | 15.5265   | 41.102    | 8.25488   | 48.6236    | 49.3843  |
| LINC01874 | 0          | 0.063117   | 0         | 0         | 0         | 0         | 0         | 0         | 0         | 0         | 0         | 0         | 0         | 0          | 0        |
| LINC01875 | 0          | 0          | 0         | 0         | 0         | 0         | 0         | 0         | 0         | 0         | 0         | 0         | 0         | 0          | 0        |
| LINC01876 | 0.397031   | 1.07989    | 1.38797   | 0.488342  | 0.298416  | 0.185391  | 0.848141  | 1.16098   | 0.109186  | 0.176821  | 0.202412  | 0.329907  | 0.082633  | 0.227587   | 0.386255 |
| LINC01877 | 0          | 0          | 0         | 0         | 0         | 0         | 0         | 0         | 0         | 0         | 0         | 0         | 0         | 0          | 0        |
| LINC01878 | 0.0206082  | 0          | 0.0681944 | 0         | 0         | 0.0175476 | 0.0235298 | 0.0183149 | 0         | 0         | 0         | 0         | 0         | 0.0215415  | 0        |
| LINC01879 | 0          | 0          | 0         | 0         | 0         | 0         | 0         | 0         | 0         | 0         | 0         | 0         | 0.0191679 | 0          | 0        |
| LINC01880 | 0          | 0          | 0         | 0         | 0         | 0         | 0         | 0         | 0         | 0         | 0         | 0         | 0         | 0          | 0        |
| LINC01881 | 1.89046    | 1.43457    | 1.42493   | 1.32393   | 0.60802   | 1.30074   | 1.51169   | 1.92254   | 0.687012  | 1.12267   | 0.95019   | 1.07216   | 0.789367  | 0.706347   | 0.715781 |
| LINC01882 | 0          | 0          | 0         | 0         | 0         | 0         | 0         | 0.0358321 | 0         | 0         | 0         | 0         | 0         | 0          | 0        |
| LINC01883 | 0.0609028  | 0.0586878  | 0.100766  | 0         | 0.094603  | 0         | 0.0695368 | 0.216501  | 0         | 0         | 0         | 0         | 0         | 0          | 0.174928 |
| LINC01884 | 0          | 0          | 0         | 0         | 0         | 0         | 0         | 0         | 0         | 0         | 0         | 0         | 0         | 0          | 0        |
| LINC01886 | 0          | 0.037906   | 0.0650841 | 0.297275  | 0.0203678 | 0.089319  | 0.0299422 | 0.011653  | 0.0638768 | 0.1152    | 0.0296041 | 0.2627    | 0.109979  | 0.0548241  | 0        |
| LINC01887 | 0          | 0          | 0         | 0.0106329 | 0         | 0         | 0         | 0         | 0         | 0         | 0         | 0         | 0         | 0          | 0        |
| LINC01891 | 0.0430168  | 0          | 0         | 0         | 0         | 0         | 0         | 0.0764595 | 0         | 0         | 0         | 0         | 0         | 0          | 0        |
| LINC01892 | 0          | 0          | 0         | 0         | 0         | 0         | 0         | 0         | 0         | 0         | 0         | 0         | 0         | 0          | 0        |
| LINC01893 | 0          | 0.0371071  | 0         | 0         | 0         | 0         | 0         | 0.0342223 | 0         | 0         | 0         | 0         | 0         | 0          | 0        |
| LINC01894 | 0.0927577  | 0.022346   | 0.0383679 | 0.0159316 | 0.120071  | 0.0658183 | 0.105908  | 0.0412177 | 0         | 0.0194034 | 0.0872599 | 0.0221235 | 0         | 0          | 0.288626 |
| LINC01895 | 0          | 0          | 0         | 0         | 0         | 0         | 0         | 0         | 0         | 0         | 0         | 0         | 0         | 0          | 0        |
| LINC01898 | 0          | 0          | 0         | 0         | 0         | 0         | 0         | 0         | 0         | 0         | 0         | 0         | 0         | 0          | 0        |
| LINC01899 | 0          | 0          | 0         | 0         | 0         | 0         | 0         | 0         | 0         | 0         | 0         | 0         | 0         | 0          | 0        |
| LINC01902 | 0.00500823 | 0          | 0         | 0         | 0         | 0         | 0         | 0         | 0         | 0         | 0         | 0         | 0         | 0          | 0        |
| LINC01903 | 0          | 0.00519361 | 0         | 0         | 0         | 0         | 0         | 0         | 0         | 0         | 0         | 0         | 0         | 0.00563371 | 0        |
| LINC01904 | 0          | 0          | 0         | 0         | 0         | 0         | 0         | 0         | 0         | 0         | 0         | 0         | 0         | 0          | 0        |
| LINC01905 | 0          | 0          | 0         | 0         | 0         | 0         | 0.0459548 | 0         | 0         | 0         | 0         | 0         | 0         | 0          | 0        |
| LINC01907 | 0          | 0.0299175  | 0.0366914 | 0.0274238 | 0.0413367 | 0.0151062 | 0         | 0.0157667 | 0         | 0         | 0.0100137 | 0         | 0         | 0.00927219 | 0        |



|           |            |            |           |           |           |           |           |           |           |           |           |            |            |            |           |
|-----------|------------|------------|-----------|-----------|-----------|-----------|-----------|-----------|-----------|-----------|-----------|------------|------------|------------|-----------|
| LINC01909 | 0.283964   | 0.369409   | 0.375864  | 0.234106  | 0.132328  | 0.0725374 | 0.194532  | 0.075709  | 0.0345836 | 0.463325  | 0.192336  | 0.0812735  | 0.109927   | 0.341347   | 0.448589  |
| LINC01910 | 0.0526577  | 0.0295998  | 0.0290414 | 0         | 0.0272652 | 0         | 0.0300614 | 0.0155993 | 0         | 0.0550757 | 0         | 0.0251187  | 0.00566241 | 0.0321081  | 0         |
| LINC01913 | 0.0127862  | 0          | 0         | 0.0131766 | 0.0397228 | 0.228633  | 0.0145989 | 0.0454533 | 0         | 0         | 0         | 0          | 0          | 0.0200479  | 0.0183626 |
| LINC01914 | 0.257718   | 0.0124172  | 0.0213202 | 0         | 0.0400325 | 0.482775  | 0.0882761 | 0.114519  | 0         | 0         | 0.116372  | 0          | 0          | 0          | 0.296092  |
| LINC01915 | 0.0697981  | 0.0960851  | 0.0494931 | 0         | 0         | 0.135845  | 0.0341542 | 0.0265846 | 0         | 0         | 0.0675372 | 0.00713463 | 0          | 0.00521136 | 0         |
| LINC01917 | 0          | 0.0215056  | 0.0184625 | 0         | 0         | 0.0190029 | 0.0254812 | 0.0198338 | 0         | 0         | 0         | 0          | 0          | 0          | 0         |
| LINC01918 | 0.052124   | 0          | 0         | 0         | 0         | 0         | 0         | 0         | 0.0634812 | 0         | 0         | 0.0372961  | 0          | 0          | 0         |
| LINC01919 | 0          | 0          | 0         | 0         | 0         | 0         | 0         | 0.0362106 | 0         | 0         | 0         | 0          | 0          | 0.021295   | 0         |
| LINC01920 | 0          | 0          | 0         | 0         | 0         | 0         | 0.0209051 | 0.0162719 | 0         | 0.0574504 | 0         | 0.0262017  | 0.0295328  | 0.0622003  | 0         |
| LINC01921 | 0.471105   | 0.425598   | 0.292299  | 0         | 0.0914737 | 0.100285  | 0.268946  | 0.20934   | 0         | 0         | 0         | 0          | 0          | 0          | 0         |
| LINC01922 | 0          | 0.00654767 | 0         | 0         | 0         | 0         | 0         | 0         | 0         | 0         | 0         | 0          | 0          | 0          | 0         |
| LINC01923 | 0          | 0          | 0         | 0         | 0         | 0         | 0         | 0         | 0         | 0         | 0         | 0          | 0          | 0          | 0         |
| LINC01924 | 0          | 0.0195283  | 0.0447065 | 0         | 0         | 0         | 0         | 0         | 0         | 0         | 0         | 0          | 0          | 0          | 0         |
| LINC01925 | 0          | 0.0223013  | 0         | 0         | 0         | 0.039412  | 0         | 0.0822705 | 0         | 0.0580938 | 0         | 0.0331189  | 0.0298636  | 0.0483823  | 0.199418  |
| LINC01926 | 0          | 0          | 0         | 0         | 0         | 0         | 0         | 0         | 0         | 0         | 0         | 0          | 0          | 0          | 0         |
| LINC01927 | 0          | 0          | 0         | 0         | 9.89E-14  | 0.0170527 | 0         | 0.0118655 | 0         | 0.0309999 | 0         | 0          | 0          | 0.00348899 | 0         |
| LINC01928 | 0          | 0          | 0         | 0         | 0         | 0         | 0         | 0         | 0         | 0         | 0         | 0          | 0          | 0          | 0         |
| LINC01929 | 0.00754583 | 0.00363569 | 0         | 0.0155524 | 0         | 0.038551  | 0         | 0         | 0.0183799 | 0.776605  | 1.28626   | 0.0161977  | 0.0146056  | 0.035494   | 0.0650206 |
| LINC01930 | 0.0267859  | 0          | 0         | 0         | 0         | 0         | 0         | 0         | 0         | 0         | 0         | 0          | 0          | 0          | 0         |
| LINC01931 | 0.0126327  | 0.0182598  | 0         | 0.0260367 | 0         | 0.0430262 | 0.0144236 | 0.0336806 | 0         | 0         | 0.0713036 | 0.018078   | 0          | 0          | 0.199563  |
| LINC01932 | 0.0807785  | 0          | 0         | 0.0416223 | 0         | 0         | 0         | 0         | 0         | 0.101385  | 0         | 0.144498   | 0.0781768  | 0.0422184  | 0         |
| LINC01933 | 0.0574269  | 0          | 0.0475076 | 0         | 0         | 0         | 0         | 0         | 0         | 0         | 0         | 0          | 0          | 0          | 0         |
| LINC01934 | 0.0393366  | 0.018953   | 0.0433894 | 0.027025  | 0         | 0         | 0         | 0.011653  | 0         | 0         | 0         | 0          | 0          | 0.00685301 | 0.0376616 |
| LINC01935 | 0          | 0          | 0         | 0         | 0         | 0         | 0         | 0         | 0         | 0         | 0         | 0          | 0          | 0          | 0         |
| LINC01936 | 0.0668874  | 0.0161137  | 0.055334  | 0.103394  | 1.19484   | 0.711922  | 0.114555  | 0.059444  | 0         | 0.0419753 | 0.0377538 | 0          | 0          | 0.0174791  | 0         |
| LINC01939 | 0.0333473  | 0.0160673  | 0         | 0         | 0         | 0         | 0.0380749 | 0         | 0         | 0         | 0         | 0.0238609  | 0          | 0          | 0.047891  |



|           |            |            |            |           |           |           |           |            |           |            |           |            |            |            |           |
|-----------|------------|------------|------------|-----------|-----------|-----------|-----------|------------|-----------|------------|-----------|------------|------------|------------|-----------|
| LINC01977 | 0.0647177  | 0.031182   | 0.0321234  | 0.0133387 | 0.0402116 | 0.0110213 | 0.0443355 | 0.0345094  | 0.0315276 | 0.0649819  | 0         | 0.157445   | 0.0167022  | 0.0135297  | 0         |
| LINC01978 | 0.0150867  | 0.0218071  | 0.0124808  | 0         | 0.0468698 | 0         | 0         | 0.0134078  | 0         | 0          | 0         | 0.0539748  | 0          | 0          | 0         |
| LINC01979 | 0.00878128 | 0.0105774  | 0.00726449 | 0         | 0.0136404 | 0.0224314 | 0.0250654 | 0.00390203 | 0.0053473 | 0.0055107  | 0         | 0.0157081  | 0.00283282 | 0.0114737  | 0         |
| LINC01980 | 0          | 0          | 0          | 0         | 0         | 0         | 0         | 0          | 0         | 0          | 0         | 0          | 0          | 0          | 0         |
| LINC01981 | 0          | 0          | 0          | 0         | 0         | 0         | 0         | 0          | 0         | 0          | 0         | 0          | 0          | 0          | 0         |
| LINC01982 | 0          | 0          | 0          | 0         | 0         | 0         | 0         | 0          | 0         | 0          | 0         | 0          | 0          | 0          | 0         |
| LINC01983 | 0          | 0.0573299  | 0          | 0.06131   | 0         | 0         | 0         | 0.158619   | 0         | 0          | 0         | 0          | 0          | 0          | 0         |
| LINC01985 | 0.16184    | 0.0194942  | 0.133885   | 0.0416951 | 0         | 0         | 0         | 0.0359574  | 0         | 0.101563   | 0.0913483 | 0          | 0          | 0          | 0         |
| LINC01986 | 0          | 0          | 0          | 0         | 0         | 0         | 0         | 0          | 0         | 0          | 0         | 0          | 0          | 0          | 0         |
| LINC01987 | 0.020292   | 0          | 0          | 0         | 0         | 0.0172784 | 0         | 0          | 0         | 0          | 0         | 0.00725974 | 0          | 0.00530275 | 0         |
| LINC01988 | 0.0267241  | 0.0257521  | 0.0442161  | 0.0550799 | 0.0415117 | 0.0227552 | 0.0305127 | 0          | 0         | 0          | 0         | 0.0382436  | 0          | 0          | 0         |
| LINC01989 | 0          | 0.0103535  | 0          | 0         | 0         | 0         | 0         | 0          | 0         | 0          | 0         | 0          | 0.0415927  | 0.0336924  | 0         |
| LINC01990 | 0.0155636  | 0.0374939  | 0.0128753  | 0         | 0         | 0         | 0.01777   | 0.0138316  | 0         | 0          | 0         | 0          | 0          | 0          | 0         |
| LINC01991 | 0          | 0.00805394 | 0          | 0         | 0         | 0         | 0         | 0.0371391  | 0         | 0.0209801  | 0.0377402 | 0.00598031 | 0          | 0.00436821 | 0         |
| LINC01992 | 0          | 0.00495806 | 0.00851292 | 0         | 0         | 0         | 0         | 0          | 0         | 0          | 0         | 0          | 0          | 0          | 0         |
| LINC01993 | 0.0552683  | 0.0723185  | 0.0327816  | 0.0652345 | 0.036981  | 0.0201493 | 0.036125  | 0.0912754  | 0         | 0.00990011 | 0.0178734 | 0.0395746  | 0          | 0.0454024  | 0.0680946 |
| LINC01994 | 0          | 0.0370454  | 0.0530054  | 0         | 0         | 0         | 0.0438937 | 0.0113885  | 0         | 0          | 0         | 0          | 0          | 0          | 0         |
| LINC01995 | 0          | 0.0562219  | 0          | 0         | 0         | 0         | 0         | 0          | 0         | 0          | 0.0439086 | 0.027831   | 0          | 0          | 0         |
| LINC01996 | 0.0728915  | 0          | 0          | 0         | 0.0566128 | 0         | 0         | 0          | 0         | 0          | 0         | 0          | 0          | 0          | 0         |
| LINC01999 | 0.0359364  | 0          | 0          | 0         | 0         | 0         | 0         | 0          | 0         | 0          | 0         | 0          | 0          | 0          | 0         |
| LINC02000 | 0          | 0          | 0          | 0         | 0         | 0         | 0         | 0          | 0         | 0          | 0         | 0          | 0          | 0          | 0         |
| LINC02001 | 3.19795    | 2.16256    | 2.57595    | 2.6885    | 2.57091   | 3.51125   | 2.37015   | 1.69527    | 3.17729   | 1.72521    | 3.0084    | 0.883172   | 1.10405    | 1.58342    | 2.65891   |
| LINC02003 | 0.247708   | 0.2046     | 0.136615   | 0.0121558 | 0.109936  | 0.0200877 | 0.552183  | 0.157245   | 0.0143658 | 0.0444142  | 0.0133158 | 0.151922   | 0          | 0.104804   | 0.321861  |
| LINC02004 | 0          | 0.0758549  | 0.130242   | 0         | 0.122276  | 0         | 0.0898775 | 0          | 0.0958695 | 0          | 0         | 0          | 0.203153   | 0.0411414  | 0         |
| LINC02005 | 0.0994972  | 0.0287636  | 0.0164622  | 0         | 0         | 0.101665  | 0         | 0.0353699  | 0         | 0          | 0.11232   | 0          | 0.0513561  | 0.0520016  | 0         |
| LINC02006 | 0.0976088  | 0.0235147  | 0.0242247  | 0.100589  | 0         | 0.0498676 | 0.0222893 | 0.0954213  | 0.035663  | 0.26952    | 0.0440753 | 0.104763   | 0.037786   | 0.0969278  | 0         |





|           |            |            |            |           |            |            |            |            |           |           |            |            |           |           |            |
|-----------|------------|------------|------------|-----------|------------|------------|------------|------------|-----------|-----------|------------|------------|-----------|-----------|------------|
| LINC02076 | 0.0615834  | 0.166162   | 0.152838   | 0.114234  | 0.172189   | 0.146825   | 0.0562512  | 0.142299   | 0.0300007 | 0.0772935 | 0.097328   | 0.14982    | 0         | 0.141619  | 0.31839    |
| LINC02077 | 0          | 0          | 0          | 0         | 0          | 0          | 0          | 0          | 0         | 0         | 0          | 0          | 0         | 0         | 0          |
| LINC02078 | 0.0110415  | 0.00265999 | 0          | 0.0113786 | 0.00857566 | 0.032906   | 0.00630343 | 0.0049064  | 0         | 0         | 0          | 0          | 0         | 0         | 0          |
| LINC02079 | 0          | 0.0379275  | 0          | 0         | 0          | 0          | 0          | 0          | 0         | 0         | 0          | 0          | 0         | 0         | 0          |
| LINC02080 | 0.142534   | 0.198796   | 0.174102   | 0.0309233 | 0.104946   | 0.0319384  | 0.0770878  | 0.0533358  | 0.027409  | 0.0753242 | 0          | 0.0549942  | 0         | 0.0432433 | 0.0861883  |
| LINC02081 | 0.00959894 | 0.0231246  | 0.00794092 | 0         | 0.0447314  | 0.00817337 | 0.0219195  | 0          | 0         | 0         | 0.032508   | 0.0137366  | 0         | 0.0200673 | 0.0137853  |
| LINC02082 | 0          | 0          | 0          | 0         | 0          | 0          | 0          | 0          | 0         | 0         | 0          | 0          | 0         | 0.0163013 | 0          |
| LINC02085 | 0.0451352  | 0.103297   | 0.130686   | 0.0581414 | 0          | 0.019216   | 0.0257669  | 0.0802247  | 0.0137424 | 0.0283246 | 0.025476   | 0          | 0         | 0         | 0.0162049  |
| LINC02087 | 0.0974444  | 0.0815793  | 0.0622476  | 0.0251048 | 0.0378412  | 0          | 0.111259   | 0.0649504  | 0.0296691 | 0         | 0          | 0.0175849  | 0         | 0.04615   | 0          |
| LINC02088 | 0          | 0          | 0          | 0         | 0          | 0          | 0          | 0          | 0         | 0         | 0          | 0          | 0         | 0         | 0          |
| LINC02089 | 0          | 0          | 0          | 0         | 0          | 0          | 0          | 0          | 0         | 0         | 0          | 0          | 0         | 0         | 0          |
| LINC02090 | 0          | 0          | 0          | 0         | 0          | 0          | 0          | 0          | 0         | 0         | 0          | 0          | 0         | 0         | 0          |
| LINC02091 | 0.0877739  | 0.0563877  | 0          | 0.0603024 | 0.181791   | 0.124564   | 0.0668116  | 0.13001    | 0         | 0         | 0.0330286  | 0          | 0.0188771 | 0.0152915 | 0          |
| LINC02092 | 0          | 0          | 0          | 0         | 0          | 0          | 0          | 0.00831351 | 0         | 0         | 0          | 0          | 0         | 0         | 0          |
| LINC02093 | 0          | 0          | 0          | 0         | 0          | 0          | 0          | 0          | 0         | 0         | 0          | 0          | 0         | 0         | 0          |
| LINC02097 | 0.0897452  | 0.070266   | 0.120646   | 0.0115606 | 0.052277   | 0          | 0.115277   | 0.149546   | 0.0409874 | 0.0281599 | 0          | 0          | 0         | 0         | 0          |
| LINC02098 | 0          | 0          | 0          | 0         | 0          | 0          | 0          | 0          | 0         | 0         | 0          | 0          | 0         | 0         | 0          |
| LINC02099 | 0.0334196  | 0.0523317  | 0.0660456  | 0.0129149 | 0.0259561  | 0.0177852  | 0.028618   | 0.0446717  | 0         | 0.0211028 | 0.00943163 | 0.00901872 | 0.0080858 | 0.0283831 | 0.00599934 |
| LINC02101 | 0          | 0          | 0          | 0         | 0          | 0          | 0          | 0          | 0         | 0.0247208 | 0          | 0          | 0         | 0         | 0          |
| LINC02102 | 0.0343981  | 0.0828677  | 0.0796783  | 0.0425379 | 0.0106864  | 0.0468633  | 0.0942592  | 0.0366842  | 0.0502716 | 0.0259039 | 0          | 0.0246128  | 0         | 0.0611251 | 0.0494     |
| LINC02103 | 0          | 0          | 0          | 0         | 0          | 0          | 0          | 0          | 0         | 0         | 0          | 0          | 0         | 0         | 0          |
| LINC02104 | 0.0386361  | 0.0558465  | 0          | 0         | 0          | 0.197389   | 0          | 0.0343366  | 0         | 0.0969847 | 0.523385   | 0          | 0.0249278 | 0.0403859 | 0          |
| LINC02105 | 0          | 0          | 0          | 0         | 0.0195164  | 0.0534908  | 0          | 0          | 0         | 0         | 0          | 0          | 0         | 0         | 0          |
| LINC02106 | 0          | 0          | 0          | 0         | 0          | 0          | 0          | 0          | 0         | 0         | 0          | 0          | 0         | 0         | 0          |
| LINC02107 | 0          | 0          | 0          | 0         | 0          | 0          | 0          | 0          | 0         | 0         | 0          | 0          | 0         | 0         | 0          |
| LINC02108 | 6.59987    | 6.95334    | 6.79376    | 3.81835   | 12.245     | 3.13602    | 7.55614    | 4.00206    | 2.10475   | 3.21222   | 2.02461    | 4.42383    | 0.816205  | 5.74113   | 3.69198    |

|           |           |            |            |           |           |            |           |            |           |           |            |           |           |           |           |
|-----------|-----------|------------|------------|-----------|-----------|------------|-----------|------------|-----------|-----------|------------|-----------|-----------|-----------|-----------|
| LINC02109 | 0         | 0.00542084 | 0          | 0         | 0.0174765 | 0.00957997 | 0.0256918 | 0.00999884 | 0.0411069 | 0         | 0          | 0.0161006 | 0         | 0.0058802 | 0.0161577 |
| LINC02110 | 0         | 0          | 0          | 0         | 0         | 0          | 0         | 0          | 0         | 0         | 0          | 0         | 0         | 0         | 0         |
| LINC02111 | 0         | 0          | 0.00828095 | 0         | 0         | 0          | 0         | 0          | 0         | 0         | 0          | 0         | 0         | 0         | 0         |
| LINC02112 | 0         | 0          | 0          | 0         | 0         | 0          | 0         | 0          | 0         | 0         | 0          | 0         | 0         | 0         | 0         |
| LINC02113 | 0.0224037 | 0.0863557  | 0.0387278  | 0.0230877 | 0.148471  | 0          | 0.0511597 | 0.0425635  | 0         | 0.028119  | 0.025291   | 0         | 0         | 0.0141287 | 0         |
| LINC02114 | 0         | 0          | 0          | 0         | 0         | 0          | 0         | 0          | 0         | 0         | 0          | 0         | 0         | 0         | 0         |
| LINC02115 | 0         | 0.0258117  | 0.0886369  | 0         | 0         | 0          | 0.0611666 | 0          | 0         | 0         | 0          | 0         | 0.0691286 | 0         | 0         |
| LINC02116 | 0         | 0          | 0          | 0         | 0         | 0          | 0.107197  | 0          | 0         | 0         | 0          | 0         | 0         | 0         | 0         |
| LINC02118 | 0         | 0          | 0          | 0         | 0         | 0          | 0         | 0          | 0         | 0         | 0          | 0         | 0         | 0         | 0         |
| LINC02119 | 0         | 0          | 0          | 0         | 0         | 0          | 0         | 0          | 0         | 0         | 0          | 0         | 0         | 0         | 0         |
| LINC02120 | 0.172881  | 0.510888   | 0.791375   | 0.0712637 | 0         | 0          | 0.223709  | 0.389228   | 0         | 0.85347   | 0.0130108  | 0.115454  | 0.0817976 | 0.216853  | 0.0496559 |
| LINC02121 | 0         | 0          | 0          | 0         | 0         | 0          | 0         | 0          | 0         | 0         | 0          | 0         | 0         | 0         | 0         |
| LINC02123 | 0         | 0          | 0          | 0         | 0         | 0          | 0         | 0          | 0         | 0         | 0          | 0         | 0         | 0         | 0         |
| LINC02124 | 0         | 0.0461726  | 0.0792777  | 0         | 0         | 0          | 0.164124  | 0          | 0         | 0         | 0          | 0         | 0         | 0         | 0         |
| LINC02125 | 0.0105291 | 0          | 0          | 0         | 0.0163554 | 0          | 0.0841528 | 0.0467871  | 0         | 0         | 0          | 0         | 0         | 0.022012  | 0.0756059 |
| LINC02126 | 0         | 0.0148676  | 0          | 0         | 0         | 0          | 0         | 0          | 0         | 0.0387292 | 0.0696683  | 0         | 0         | 0         | 0         |
| LINC02127 | 0         | 0          | 0          | 0         | 0         | 0          | 0         | 0          | 0         | 0         | 0          | 0         | 0         | 0         | 0         |
| LINC02130 | 0         | 0.150685   | 0          | 0         | 0         | 0          | 0         | 0          | 0.0544124 | 0.0560751 | 0          | 0         | 0         | 0.0233505 | 0         |
| LINC02133 | 0.0440988 | 0.00849899 | 0.0145927  | 0         | 0         | 0.0225297  | 0         | 0          | 0         | 0         | 0          | 0         | 0         | 0.0138288 | 0         |
| LINC02134 | 0         | 0          | 0          | 0         | 0         | 0          | 0         | 0          | 0         | 0         | 0          | 0         | 0         | 0         | 0         |
| LINC02135 | 0         | 0          | 0          | 0         | 0         | 0          | 0         | 0          | 0         | 0         | 0          | 0         | 0         | 0         | 0         |
| LINC02136 | 0         | 0          | 0          | 0         | 0         | 0          | 0         | 0          | 0         | 0         | 0          | 0         | 0         | 0         | 0         |
| LINC02138 | 0         | 0          | 0          | 0         | 0         | 0          | 0         | 0          | 0         | 0         | 0          | 0         | 0         | 0         | 0         |
| LINC02139 | 0.034628  | 0.00556143 | 0.0190978  | 0         | 0.0537893 | 0.00982843 | 0.013179  | 0.0205163  | 0         | 0         | 0          | 0         | 0         | 0         | 0         |
| LINC02140 | 0.0952389 | 0.126191   | 0.147728   | 0         | 0.0554771 | 0          | 0.163111  | 0.148121   | 0         | 0         | 0          | 0.0170365 | 0         | 0.006222  | 0         |
| LINC02141 | 0         | 0          | 0          | 0         | 0         | 0          | 0         | 0.00624776 | 0         | 0         | 0.00396805 | 0         | 0         | 0         | 0         |





|                 |            |            |                 |            |                 |            |                 |            |           |           |            |            |           |            |            |
|-----------------|------------|------------|-----------------|------------|-----------------|------------|-----------------|------------|-----------|-----------|------------|------------|-----------|------------|------------|
| LINC02181       | 0.0340089  | 0.013655   | 0               | 0.00584119 | 0               | 0          | 0.00647171      | 0.0100748  | 0         | 0         | 0          | 0.00811142 | 0         | 0          | 0.00814018 |
| LINC02182       | 0.185888   | 0.0223909  | 0.0384449       | 0.0478907  | 0.144374        | 0.0395703  | 0.10612         | 0.0826009  | 0         | 0         | 0.0524611  | 0.033252   | 0         | 0          | 0          |
| LINC02185       | 0.241703   | 0.0727851  | 0.249942        | 0.0311352  | 0.046931        | 0.0514517  | 0.0689921       | 0.134253   | 0         | 0.0379202 | 0.0341066  | 0          | 0.0194932 | 0.0157906  | 0.347116   |
| LINC02186       | 0.0261503  | 0          | 0               | 0          | 0               | 0          | 0               | 0          | 0         | 0         | 0          | 0          | 0         | 0          | 0          |
| LINC02188       | 0.246203   | 0.0677853  | 0.0872898       | 0.108737   | 0.218536        | 0.748708   | 0.281106        | 0.156289   | 0         | 0         | 0          | 0          | 0.0226927 | 0          | 0          |
| LINC02189       | 0.0898759  | 0.0433036  | 0.0371759       | 0          | 0               | 0          | 0.102617        | 0.0798742  | 0         | 0         | 0          | 0          | 0         | 0          | 0          |
| LINC02190       | 0          | 0          | 0               | 0          | 0               | 0          | 0               | 0          | 0         | 0         | 0          | 0          | 0         | 0          | 0          |
| LINC02192       | 0.0349329  | 0.0504936  | 0               | 0          | 0               | 0          | 0               | 0.0310455  | 0         | 0.0219222 | 0          | 0          | 0         | 0.0456437  | 0          |
| LINC02197       | 0.0152207  | 0.0220007  | 0.0440707       | 0          | 0.0118215       | 0          | 0.0260677       | 0.0473441  | 0         | 0         | 0.00859113 | 0          | 0         | 0.00795499 | 0.0218588  |
| LINC02198       | 0.00953566 | 0.0413498  | 0.0315543       | 0.0196536  | 0               | 0.00811949 | 0               | 0          | 0         | 0         | 0.0107646  | 0.00682302 | 0         | 0.00996751 | 0.136944   |
| LINC02199       | 0          | 0          | 0               | 0          | 0               | 0          | 0               | 0          | 0         | 0         | 0          | 0          | 0         | 0          | 0          |
| LINC02200       | 0          | 0          | 0               | 0          | 0               | 0          | 0               | 0          | 0         | 0         | 0          | 0          | 0         | 0          | 0          |
| LINC02201       | 0.0280182  | 0          | 0               | 0.0144368  | 0.021761        | 0          | 0               | 0          | 0         | 0         | 0.189774   | 0          | 0         | 0          | 0.120713   |
| LINC02202       | 0.396091   | 0.246133   | 0.194107        | 0.0916331  | 0.326468        | 0.619469   | 0.258425        | 0.244254   | 0.0295344 | 0.223815  | 0.410637   | 0.0983273  | 0.0417234 | 0.143643   | 0.360587   |
| LINC02203       | 0          | 0          | 0               | 0          | 0               | 0          | 0               | 0          | 0         | 0         | 0          | 0          | 0         | 0          | 0.0214913  |
| LINC02204       | 0.0794054  | 0.0278245  | 0.029859        | 0.0223171  | 0.0336393       | 0.0184398  | 0.0247261       | 0.0449075  | 0         | 0.0271805 | 0.0244469  | 0.00516515 | 0         | 0.0528191  | 0.0518346  |
| LINC02205       | 0          | 0          | 0               | 0          | 0               | 0          | 0               | 0          | 0         | 0         | 0          | 0          | 0.187428  | 0          | 0          |
| LINC02206       | 0          | 0.0934414  | 0.106958        | 0          | 0.0502083       | 0.0550447  | 0.14762         | 0.114903   | 0         | 0         | 0          | 0          | 0         | 0.0168933  | 0.092839   |
| LINC02207       | 0          | 0          | 0.0492174       | 0.18393    | 0               | 0.151974   | 0               | 0.0528731  | 0         | 0         | 0.268644   | 0          | 0.038385  | 0.031094   | 0.0854405  |
| LINC02208       | 0.00724806 | 0.00349223 | 0.00599611      | 0          | 0               | 0.00617163 | 0.0165512       | 0.00644147 | 0         | 0         | 0          | 0          | 0         | 0          | 0          |
| LINC02209       | 0          | 0          | 0.0269656       | 0          | 0.0126582       | 0          | 0               | 0          | 0         | 0         | 0          | 0          | 0         | 0          | 0          |
| LINC02210       | 0.6448     | 1.04082    | 1.02321         | 0.595182   | 0.700348        | 0.58971    | 0.936835        | 0.690915   | 1.49152   | 1.10121   | 1.42608    | 0.994004   | 0.673535  | 0.81084    | 0.285571   |
| LINC02210-CRHR1 | 0.0148917  | 0.00631663 | 0.00035863<br>4 | 0.0197972  | 0.00051517<br>6 | 6.39E-06   | 0.00011306<br>8 | 0.0821692  | 0         | 0         | 0          | 0          | 5.61E-45  | 0.00243896 | 0.0149989  |
| LINC02211       | 0          | 0          | 0               | 0          | 0               | 0          | 0               | 0          | 0         | 0         | 0          | 0          | 0         | 0          | 0          |
| LINC02212       | 0          | 0          | 0               | 0          | 0               | 0          | 0               | 0          | 0         | 0         | 0          | 0          | 0         | 0.0113573  | 0          |



|           |           |            |           |           |           |            |           |            |            |           |           |           |            |            |            |
|-----------|-----------|------------|-----------|-----------|-----------|------------|-----------|------------|------------|-----------|-----------|-----------|------------|------------|------------|
| LINC02241 | 0         | 0          | 0         | 0         | 0         | 0          | 0         | 0          | 0          | 0         | 0         | 0         | 0          | 0          | 0          |
| LINC02242 | 0.0361046 | 0          | 0         | 0         | 0         | 0          | 0.0412231 | 0          | 0          | 0         | 0         | 0         | 0          | 0          | 0          |
| LINC02243 | 0.192859  | 0.127768   | 0.159546  | 0         | 0         | 0          | 0         | 0.107123   | 0.0880801  | 0.0605144 | 0.0272142 | 0.103497  | 0.124431   | 0.0251991  | 0.0346212  |
| LINC02245 | 0.0229215 | 0.0184065  | 0.0316038 | 0         | 0.0118683 | 0          | 0.026171  | 0.0339512  | 0          | 0         | 0         | 0.010934  | 0          | 0          | 0.0109727  |
| LINC02246 | 0.0721054 | 0.0654743  | 0.0780047 | 0.197198  | 0.0215393 | 0.0850109  | 0.0728282 | 0.0887279  | 0.138479   | 0.27846   | 0.22854   | 0.140889  | 0.187877   | 0.124652   | 0.139398   |
| LINC02247 | 0.0622962 | 0.405206   | 0.360751  | 0.0641981 | 0.338686  | 0          | 0.426767  | 0.138409   | 0.569024   | 0         | 0.105487  | 0.0222873 | 0          | 0          | 0          |
| LINC02249 | 0         | 0.044498   | 0.0404484 | 0         | 0         | 0.00462582 | 0.0186084 | 0.0337966  | 0.00661635 | 0         | 0         | 0         | 0          | 0.00283934 | 0.00780196 |
| LINC02251 | 0         | 0          | 0         | 0.0106234 | 0         | 0          | 0         | 0.0274846  | 0          | 0.0129385 | 0         | 0         | 0          | 0.00538778 | 0          |
| LINC02252 | 0         | 0.0228967  | 0         | 0         | 0         | 0.0404641  | 0         | 0.0844666  | 0          | 0         | 0         | 0         | 0          | 0          | 0          |
| LINC02254 | 0.0402255 | 0.0193812  | 0.0110924 | 0         | 0         | 0.0570858  | 0.0459281 | 0.0238327  | 0          | 0         | 0.0605461 | 0         | 0.00865109 | 0          | 0.0192563  |
| LINC02255 | 0         | 0          | 0.0174368 | 0.0108605 | 0.0163703 | 0.0269208  | 0         | 0.00936595 | 0          | 0.0132272 | 0         | 0.0527852 | 0          | 0.005508   | 0          |
| LINC02256 | 6.48906   | 5.78317    | 5.08893   | 1.27559   | 4.31157   | 2.37941    | 5.76017   | 3.66684    | 0.79943    | 1.20048   | 2.07481   | 2.44232   | 1.10113    | 1.63692    | 2.66645    |
| LINC02257 | 0.038253  | 0          | 0         | 0         | 0.0594201 | 0          | 0         | 0.0339961  | 0          | 0.528126  | 0.259097  | 0         | 0.123403   | 0.179934   | 0.219744   |
| LINC02258 | 0         | 0          | 0         | 0         | 0         | 0          | 0         | 0          | 0          | 0         | 0         | 0         | 0          | 0          | 0          |
| LINC02259 | 0.07347   | 0.159295   | 0.121559  | 0         | 0         | 0.0312794  | 0.0838857 | 0.163235   | 0          | 0.0922124 | 0         | 0.157709  | 0          | 0.0383986  | 0          |
| LINC02260 | 0         | 0          | 0         | 0         | 0         | 0          | 0         | 0          | 0          | 0         | 0         | 0         | 0          | 0          | 0          |
| LINC02261 | 0.336866  | 0.359397   | 0.288514  | 0.256581  | 0.284158  | 0.141715   | 0.350595  | 0.287009   | 0.0303213  | 0.187831  | 0.0841479 | 0.261432  | 0.0268962  | 0.268839   | 0.443958   |
| LINC02262 | 0         | 0          | 0         | 0         | 0         | 0          | 0         | 0          | 0          | 0         | 0         | 0         | 0          | 0          | 0          |
| LINC02263 | 0         | 0          | 0         | 0         | 0         | 0          | 0         | 0          | 0          | 0         | 0         | 0         | 0          | 0          | 0          |
| LINC02264 | 0         | 0          | 0         | 0         | 0         | 0          | 0.045875  | 0          | 0          | 0         | 0         | 0         | 0          | 0          | 0          |
| LINC02265 | 0         | 0.00850547 | 0         | 0         | 0.0274212 | 0.0300626  | 0         | 0          | 0          | 0.0221563 | 0.019928  | 0         | 0.0341688  | 0          | 0.0507038  |
| LINC02266 | 0         | 0          | 0         | 0         | 0         | 0          | 0         | 0          | 0          | 0         | 0         | 0         | 0          | 0          | 0          |
| LINC02267 | 0         | 0          | 0         | 0         | 0         | 0          | 0         | 0          | 0          | 0         | 0         | 0         | 0          | 0          | 0          |
| LINC02268 | 0.087135  | 0.00839659 | 0.086501  | 0         | 0         | 0.0148389  | 0         | 0          | 0          | 0         | 0         | 0         | 0          | 0          | 0          |
| LINC02269 | 0         | 0.022346   | 0         | 0         | 0         | 0          | 0         | 0          | 0          | 0         | 0         | 0         | 0          | 0          | 0          |
| LINC02270 | 0         | 0          | 0         | 0         | 0         | 0          | 0         | 0.0321369  | 0          | 0         | 0         | 0         | 0          | 0          | 0          |



|           |           |            |            |           |           |            |           |            |           |            |          |           |           |            |           |
|-----------|-----------|------------|------------|-----------|-----------|------------|-----------|------------|-----------|------------|----------|-----------|-----------|------------|-----------|
| LINC02312 | 0.0531849 | 0.00366076 | 0          | 0         | 0         | 0          | 0.01735   | 0.0270093  | 0         | 0          | 0        | 0         | 0         | 0.0109115  |           |
| LINC02313 | 0.0500932 | 0.0241357  | 0.124322   | 0.0516225 | 0         | 0          | 0         | 0          | 0         | 0          | 0        | 0.035843  | 0         | 0          | 0         |
| LINC02314 | 0         | 0          | 0          | 0         | 0         | 0          | 0         | 0          | 0         | 0          | 0        | 0         | 0         | 0          | 0         |
| LINC02315 | 0.708581  | 1.3171     | 1.16382    | 0.334142  | 1.14008   | 0.529215   | 1.5179    | 0.497782   | 0.082034  | 0.691022   | 0.284657 | 1.10429   | 0.143748  | 0.893799   | 1.08202   |
| LINC02317 | 0         | 0          | 0          | 0         | 0         | 0          | 0.0205474 | 0          | 0         | 0          | 0        | 0         | 0         | 0.00940557 | 0         |
| LINC02318 | 0         | 0.00566599 | 0          | 0         | 0         | 0          | 0         | 0.010451   | 0         | 0          | 0        | 0         | 0         | 0          | 0         |
| LINC02322 | 0         | 0          | 0          | 0         | 0         | 0.0521323  | 0         | 0          | 0         | 0          | 0        | 0         | 0         | 0          | 0         |
| LINC02323 | 0.043312  | 0.0695613  | 0.131379   | 0.461221  | 0.313966  | 0.528608   | 0.181325  | 0.0384921  | 0.193414  | 1.90264    | 1.01047  | 0.413212  | 6.23167   | 0.656466   | 0.331741  |
| LINC02324 | 0         | 0.00773278 | 0.0265542  | 0         | 0         | 0          | 0         | 0          | 0         | 0          | 0        | 0         | 0         | 0          | 0         |
| LINC02325 | 0.0294441 | 0.0070933  | 0.0121791  | 0         | 0.0228684 | 0          | 0.0168092 | 0.0130837  | 0         | 0          | 0        | 0.021068  | 0.0569915 | 0.0307775  | 0.0422854 |
| LINC02328 | 0.219514  | 0.0151093  | 0.0778275  | 0.161583  | 0.0487116 | 0          | 0.0358049 | 0.0557388  | 0         | 0          | 0.106202 | 0         | 0.101164  | 0.0655586  | 0.31525   |
| LINC02329 | 0         | 0          | 0          | 0         | 0         | 0          | 0         | 0          | 0         | 0          | 0        | 0         | 0         | 0          | 0         |
| LINC02330 | 0         | 0          | 0          | 0         | 0         | 0          | 0         | 0          | 0         | 0          | 0        | 0         | 0         | 0          | 0         |
| LINC02332 | 0.0599561 | 0          | 0          | 0.185359  | 0         | 0          | 0         | 0          | 0         | 0          | 0        | 0         | 0         | 0          | 0         |
| LINC02333 | 0         | 0          | 0          | 0         | 0         | 0          | 0         | 0          | 0         | 0          | 0        | 0         | 0         | 0          | 0         |
| LINC02337 | 0         | 0          | 0          | 0         | 0         | 0          | 0         | 0          | 0         | 0          | 0        | 0         | 0         | 0          | 0         |
| LINC02338 | 0.0254901 | 0.0493808  | 0.0625899  | 0.0173263 | 0.0135903 | 0.00715801 | 0.0479913 | 0.0448259  | 0.0204763 | 0.010551   | 0        | 0.0300753 | 0         | 0.0136926  | 0.0362183 |
| LINC02339 | 0         | 0          | 0          | 0         | 0         | 0          | 0         | 0          | 0         | 0          | 0        | 0         | 0         | 0          | 0         |
| LINC02341 | 0         | 0          | 0          | 0         | 0         | 0.0239151  | 0         | 0          | 0         | 0.0352511  | 0        | 0         | 0         | 0          | 0         |
| LINC02343 | 0.0515244 | 0.0372379  | 0.0497287  | 0         | 0         | 0.0438724  | 0.0490241 | 0.0305271  | 0         | 0          | 0        | 0         | 0         | 0          | 0.0369978 |
| LINC02344 | 0.248316  | 0.119642   | 0.16434    | 0.0511794 | 0.308576  | 0.0422876  | 0.226815  | 0.353092   | 0         | 0.0623324  | 0        | 0         | 0         | 0.363386   | 0.499258  |
| LINC02345 | 0.0571433 | 0          | 0          | 0.0588879 | 0         | 0          | 0         | 0.0507842  | 0         | 0          | 0        | 0         | 0.0368686 | 0          | 0         |
| LINC02346 | 0.0117657 | 0          | 0          | 0         | 0         | 0          | 0         | 0          | 0         | 0          | 0        | 0         | 0         | 0          | 0         |
| LINC02347 | 0         | 0          | 0.00780496 | 0         | 0         | 0          | 0         | 0          | 0         | 0          | 0        | 0         | 0         | 0          | 0         |
| LINC02348 | 0.0238588 | 0.0143694  | 0.0197377  | 0.0122936 | 0         | 0.0304732  | 0.0408618 | 0.00530093 | 0         | 0.00748632 | 0        | 0.0256074 | 0         | 0.0124697  | 0.0171321 |
| LINC02349 | 0.0517163 | 0          | 0          | 0         | 0         | 0.154125   | 0         | 0.0229806  | 0         | 0          | 0        | 0         | 0         | 0          | 0         |





|           |           |            |            |           |           |            |           |           |            |           |            |           |           |            |           |
|-----------|-----------|------------|------------|-----------|-----------|------------|-----------|-----------|------------|-----------|------------|-----------|-----------|------------|-----------|
| LINC02420 | 0         | 0          | 0.0258375  | 0.0321857 | 0.0485144 | 0          | 0         | 0         | 0          | 0         | 0          | 0         | 0         | 0.0163233  | 0         |
| LINC02421 | 0.132879  | 0.188512   | 0.152676   | 0.0304301 | 0.0688022 | 0.0440006  | 0.0590009 | 0.0787277 | 0.00899063 | 0.0370614 | 0.00833353 | 0.0739498 | 0.0428663 | 0.0272033  | 0.0636102 |
| LINC02422 | 0         | 0.0115911  | 0          | 0         | 0.0373692 | 0.0819376  | 0         | 0.0641402 | 0          | 0         | 0          | 0.0344272 | 0         | 0.0125734  | 0         |
| LINC02423 | 0         | 0          | 0          | 0         | 0         | 0          | 0         | 0         | 0          | 0         | 0          | 0         | 0         | 0          | 0         |
| LINC02424 | 0         | 0          | 0          | 0         | 0         | 0          | 0         | 0         | 0          | 0         | 0          | 0         | 0         | 0          | 0         |
| LINC02425 | 0         | 0          | 0          | 0         | 0         | 0          | 0         | 0         | 0          | 0         | 0          | 0         | 0         | 0          | 0         |
| LINC02426 | 0.0337362 | 0          | 0          | 0         | 0         | 0          | 0         | 0.0449729 | 0          | 0         | 0          | 0         | 0         | 0          | 0         |
| LINC02427 | 0.148898  | 0.0819903  | 0.0351941  | 0         | 0         | 0.0543364  | 0.0728603 | 0.0378081 | 0          | 0         | 0.048025   | 0.0456603 | 0.0274481 | 0          | 0.0305481 |
| LINC02428 | 0.0554989 | 0          | 0          | 0         | 0.172418  | 0          | 0         | 0         | 0.0675914  | 0         | 0.0626514  | 0.0794219 | 0         | 0          | 0         |
| LINC02429 | 0         | 0          | 0.051123   | 0         | 0         | 0          | 0         | 0         | 0          | 0         | 0          | 0         | 0         | 0          | 0         |
| LINC02431 | 0.0129653 | 0          | 0          | 0         | 0         | 0          | 0         | 0         | 0          | 0         | 0          | 0         | 0         | 0          | 0         |
| LINC02432 | 0.0451572 | 0.0326361  | 0.0373572  | 0.0232679 | 0.0350723 | 0.135186   | 0.0257795 | 0.0802639 | 0          | 0.0283384 | 0.127442   | 0.0161556 | 0.0291352 | 0.0118006  | 0.0324257 |
| LINC02433 | 0.0831288 | 0.0240316  | 0          | 0         | 0         | 0.0141566  | 0.0189827 | 0.0147756 | 0          | 0         | 0          | 0         | 0         | 0          | 0         |
| LINC02436 | 0         | 0.00510095 | 0.0262748  | 0         | 0         | 0          | 0.0241757 | 0         | 0          | 0         | 0          | 0         | 0         | 0          | 0         |
| LINC02439 | 0         | 0          | 0          | 0         | 0         | 0          | 0         | 0         | 0          | 0         | 0          | 0         | 0         | 0          | 0         |
| LINC02441 | 0         | 0          | 0          | 0         | 0         | 0          | 0         | 0         | 0          | 0         | 0          | 0         | 0         | 0          | 0         |
| LINC02443 | 0.229822  | 0.199317   | 0          | 0.0236838 | 0.142797  | 0          | 0.0524806 | 0.163397  | 0.0839691  | 0.144225  | 0          | 0         | 0         | 0          | 0         |
| LINC02444 | 16.4841   | 15.803     | 15.8032    | 8.25351   | 3.62704   | 2.99067    | 11.8263   | 17.9029   | 2.32373    | 4.90481   | 2.35027    | 6.11537   | 0.577701  | 9.57005    | 8.89567   |
| LINC02446 | 0.0638052 | 0.0219588  | 0.0452436  | 0.103326  | 0.0566351 | 0.0620906  | 0         | 0.105309  | 0          | 0.0228806 | 0.0205795  | 0.0195661 | 0         | 0.00952782 | 0.0654516 |
| LINC02447 | 0.0648871 | 0.0781589  | 0.0894653  | 0.066868  | 0.050396  | 0.0368337  | 0.123477  | 0.0961104 | 0.0263417  | 0.0135733 | 0.0488329  | 0         | 0         | 0.0282607  | 0.108717  |
| LINC02449 | 1.73735   | 1.33467    | 1.25238    | 0.543648  | 1.37897   | 0.961543   | 1.11984   | 1.29297   | 0.267351   | 0.172727  | 0.133798   | 0.388493  | 0.288349  | 0.347643   | 0.670082  |
| LINC02450 | 0         | 0          | 0          | 0         | 0         | 0          | 0         | 0         | 0          | 0.02896   | 0.052095   | 0         | 0         | 0          | 0         |
| LINC02451 | 0         | 0          | 0          | 0         | 0         | 0          | 0         | 0         | 0          | 0         | 0          | 0         | 0         | 0          | 0         |
| LINC02453 | 0.0380434 | 0.0610996  | 0.104907   | 0         | 0         | 0.0107978  | 0.0289578 | 0.0563496 | 0          | 0         | 0.0143154  | 0         | 0         | 0.0265108  | 0.0910585 |
| LINC02454 | 0         | 0          | 0          | 0.234202  | 0         | 0.0645041  | 0.0864942 | 0         | 0          | 0.19016   | 0.513106   | 0.0813067 | 0.122191  | 0.118778   | 0         |
| LINC02458 | 0.018448  | 0          | 0.00763075 | 0.0190112 | 0         | 0.00785413 | 0.0105317 | 0         | 0          | 0.0115771 | 0          | 0         | 0.0238051 | 0          | 0         |









|           |           |           |            |            |           |            |           |            |            |            |            |            |            |            |           |
|-----------|-----------|-----------|------------|------------|-----------|------------|-----------|------------|------------|------------|------------|------------|------------|------------|-----------|
| LINC02565 | 0         | 0         | 0          | 0          | 0         | 0          | 0         | 0          | 0          | 0          | 0          | 0          | 0          | 0          | 0         |
| LINC02567 | 0         | 0         | 0          | 0          | 0         | 0          | 0         | 0          | 0          | 0          | 0          | 0          | 0          | 0          | 0         |
| LINC02568 | 0.384436  | 0.166704  | 0.222623   | 0.0396173  | 0.0597162 | 0.392811   | 0.131681  | 0.18791    | 0.02341    | 0.0482507  | 0          | 0          | 0          | 0          | 0         |
| LINC02569 | 0.0142976 | 0.0149257 | 0.00394266 | 0.00245568 | 0         | 0.00405807 | 0.0272076 | 0.00423551 | 0          | 0.00299083 | 0.00807011 | 0.00341011 | 0.00461237 | 0.00622713 | 0         |
| LINC02570 | 0.0048457 | 0.0326862 | 0.0160348  | 0.0249682  | 0         | 0.0247563  | 0.016598  | 0.00430645 | 0.00590151 | 0.0608185  | 0.0437615  | 0.0173361  | 0.0125057  | 0.00506515 | 0         |
| LINC02571 | 0         | 0         | 0          | 0          | 0         | 0          | 0         | 0          | 0          | 0          | 0          | 0          | 0          | 0          | 0         |
| LINC02572 | 0.0320319 | 0.0385837 | 0.0529981  | 0          | 0.124392  | 0.0818242  | 0.0182865 | 0          | 0          | 0          | 0          | 0          | 0          | 0.0167413  | 0         |
| LINC02573 | 0         | 0         | 0          | 0          | 0         | 0          | 0         | 0          | 0          | 0          | 0          | 0          | 0          | 0          | 0         |
| LINC02574 | 0         | 0         | 0          | 0.0540807  | 0         | 0.178739   | 0.0599183 | 0          | 0          | 0.065866   | 0          | 0          | 0          | 0          | 0         |
| LINC02575 | 0.0164252 | 0.0474834 | 0.0135881  | 0.0169266  | 0.153084  | 0.0139858  | 0.0750149 | 0.0291946  | 0          | 0          | 0          | 0.0235053  | 0.0211949  | 0.0429225  | 0.212297  |
| LINC02578 | 0         | 0         | 0          | 0          | 0         | 0          | 0         | 0          | 0          | 0          | 0          | 0          | 0          | 0          | 0         |
| LINC02579 | 0.0653389 | 0.10074   | 0.140538   | 0          | 0.0608964 | 0.0222541  | 0.0298408 | 0.0348407  | 0.0318302  | 0          | 0.0147519  | 0.0654525  | 0          | 0          | 0         |
| LINC02580 | 1.83571   | 1.01083   | 1.00338    | 0.371594   | 0.712873  | 0.725717   | 1.87139   | 1.10704    | 0.159692   | 0.0822859  | 0.555077   | 0.140732   | 0.148049   | 0.376916   | 0         |
| LINC02582 | 0.0393589 | 0.0568912 | 0.0162802  | 0.0202803  | 0.030569  | 0          | 0.0224694 | 0.0699579  | 0.167772   | 0.0246998  | 0          | 0.0422436  | 0          | 0.102853   | 0.197835  |
| LINC02583 | 0.0312322 | 0         | 0          | 0          | 0         | 0          | 0         | 0.0277566  | 0          | 0          | 0          | 0          | 0          | 0          | 0         |
| LINC02584 | 0.0575698 | 0.097083  | 0          | 0          | 0.0447129 | 0.14706    | 0         | 0.0255816  | 0          | 0.036128   | 0          | 0.0411927  | 0.0185719  | 0.120354   | 0         |
| LINC02585 | 0         | 0         | 0          | 0          | 0         | 0.19706    | 0         | 0          | 0.422785   | 0          | 0          | 0          | 0          | 0          | 0         |
| LINC02586 | 0.0613874 | 0.0690139 | 0.16928    | 0.0421743  | 0.190712  | 0.156812   | 0.21027   | 0.0181853  | 0.049842   | 0          | 0          | 0          | 0          | 0.203197   | 0         |
| LINC02587 | 0.11031   | 0.0265745 | 0.073005   | 0.10231    | 0.017135  | 0.0563565  | 0.100759  | 0.0686241  | 0          | 0.193831   | 0.311316   | 0.015786   | 0          | 0.0115306  | 0.0633677 |
| LINC02588 | 0         | 0         | 0          | 0          | 0         | 0.0262513  | 0         | 0          | 0          | 0          | 0          | 0          | 0          | 0          | 0         |
| LINC02589 | 0.502564  | 0.181607  | 0.249454   | 0          | 0.0780655 | 0.171171   | 0.114762  | 0.111659   | 0.0306033  | 0.0315384  | 0.0850997  | 0.0539396  | 0          | 0.118198   | 0.108262  |
| LINC02592 | 0         | 0         | 0          | 0          | 0         | 0.00293527 | 0         | 1.18E-16   | 0          | 0          | 0          | 0          | 0          | 0          | 0         |
| LINC02593 | 0.0614689 | 0.26655   | 0.279683   | 0.0158364  | 0.0477412 | 0.431805   | 0.0701832 | 0.0409713  | 0.224587   | 0.0964373  | 0.0867385  | 0.109957   | 0          | 0.096379   | 0.154485  |
| LINC02595 | 0.925722  | 3.47901   | 3.01224    | 1.27198    | 4.3139    | 0.420395   | 1.97299   | 1.53572    | 1.9542     | 1.47171    | 1.95071    | 2.29625    | 0.796362   | 2.03206    | 0.531782  |
| LINC02601 | 0         | 0.0267402 | 0          | 0          | 0.0431045 | 0          | 0.190101  | 0          | 0          | 0          | 0          | 0          | 0          | 0          | 0         |
| LINC02603 | 3.24243   | 2.9096    | 3.0088     | 2.758      | 1.54563   | 1.18324    | 2.11549   | 3.21703    | 0.940218   | 1.42112    | 1.06517    | 1.7922     | 0.45382    | 3.29065    | 2.4145    |

|            |           |           |           |           |           |            |           |            |            |           |            |           |           |           |            |
|------------|-----------|-----------|-----------|-----------|-----------|------------|-----------|------------|------------|-----------|------------|-----------|-----------|-----------|------------|
| LINC2194   | 0         | 0         | 0         | 0         | 0         | 0          | 0         | 0          | 0          | 0         | 0          | 0         | 0         | 0         | 0          |
| LINCMD1    | 0.0632324 | 0         | 0         | 0         | 0         | 0          | 0         | 0          | 0          | 0         | 0          | 0         | 0         | 0         | 0          |
| LINCR-0001 | 0         | 0.12276   | 0.140518  | 0.0875214 | 0.197885  | 0.0723156  | 0.0969688 | 0.188694   | 0.0517168  | 0.106594  | 0.0958738  | 0.121537  | 0         | 0.0887748 | 0.0609841  |
| LINCR-0002 | 0         | 0         | 0         | 0         | 0         | 0          | 0         | 0          | 0          | 0         | 0          | 0         | 0         | 0         | 0          |
| LINCR-0003 | 0         | 0         | 0         | 0         | 0         | 0          | 0.0807456 | 0          | 0          | 0         | 0          | 0         | 0         | 0         | 0          |
| LINGO1     | 0.589221  | 0.238568  | 0.274444  | 0.224515  | 0.746057  | 0.948621   | 0.446619  | 0.316831   | 0.180909   | 0.553097  | 1.67687    | 0.205488  | 0.281129  | 0.527919  | 1.65684    |
| LINGO1-AS1 | 0.0269262 | 0.0518938 | 0.0222752 | 0.0138741 | 0         | 0          | 0.0307434 | 0.0478595  | 0          | 0         | 0          | 0         | 0         | 0.0140728 | 0          |
| LINGO1-AS2 | 0         | 0         | 0         | 0         | 0         | 0          | 0         | 0          | 0          | 0         | 0          | 0         | 0         | 0         | 0          |
| LINGO2     | 0.0153509 | 0.0118341 | 0.0165092 | 0.0142376 | 0.0143072 | 0.00261422 | 0.0157745 | 0.00682131 | 0.00747828 | 0         | 0.00173293 | 0.0010984 | 0         | 0         | 0.00440917 |
| LINGO3     | 0.478072  | 0.355984  | 0.440438  | 0.291122  | 0.455693  | 0.268298   | 1.05448   | 0.579369   | 0.0132327  | 0.190919  | 0.33117    | 0.155488  | 0.140204  | 0.187396  | 0.390098   |
| LINGO4     | 0.121486  | 0.150515  | 0.122038  | 0.0268274 | 0.0134792 | 0.184721   | 0.297233  | 0.115678   | 0.0845463  | 0         | 0.00979588 | 0.0124181 | 0         | 0.0362822 | 0.0124621  |
| LINP1      | 0.0557664 | 0.0806073 | 0         | 0.25861   | 0.173249  | 0.189937   | 0.0318361 | 0.0495605  | 0.0339586  | 0.349963  | 0.47215    | 0.139658  | 1.61911   | 0.306032  | 0          |
| LINS1      | 1.60872   | 2.16288   | 2.35833   | 2.77321   | 1.14839   | 1.61153    | 1.14799   | 2.36531    | 1.49824    | 2.23438   | 1.89616    | 2.12018   | 1.94613   | 2.17615   | 1.60533    |
| LIPA       | 11.3271   | 5.45353   | 4.58591   | 11.5961   | 4.37619   | 19.1486    | 5.73323   | 7.66586    | 3.97606    | 11.471    | 24.2267    | 3.88345   | 7.46324   | 6.96804   | 11.3882    |
| LIPC       | 0.158712  | 0.208554  | 0.393893  | 0.0594753 | 0.20171   | 0.171998   | 0.34595   | 0.0512908  | 0.0527163  | 0.108654  | 0.325756   | 0.0206477 | 0.148945  | 0.0980314 | 0.269372   |
| LIPC-AS1   | 0.0312744 | 0.0200913 | 0.0431206 | 0         | 0.0809666 | 0          | 0.0357081 | 0.00926469 | 0          | 0.0130842 | 0          | 0.0149184 | 0.0269041 | 0         | 0.0299427  |
| LIPE       | 1.40813   | 0.742793  | 0.507134  | 1.58872   | 2.06474   | 1.70548    | 1.22661   | 0.587954   | 1.81843    | 0.906526  | 0.582397   | 1.51133   | 0.982921  | 1.23398   | 0.566578   |
| LIPE-AS1   | 0.27702   | 0.270759  | 0.235718  | 0.889058  | 0.676198  | 0.242618   | 0.334366  | 0.267295   | 0.713316   | 0.715245  | 0.223372   | 1.02506   | 0.372784  | 0.500535  | 0.193235   |
| LIPF       | 0.0303317 | 0.0146143 | 0         | 0.0156288 | 0         | 0.0129135  | 0.0173158 | 0.0134781  | 0          | 0         | 0          | 0.0325547 | 0         | 0         | 0          |
| LIPG       | 0.183234  | 0.235427  | 0.137804  | 6.10552   | 0.664128  | 4.17947    | 0.139474  | 0.399707   | 4.8013     | 17.0323   | 5.74166    | 8.27982   | 23.8895   | 10.8185   | 4.37783    |
| LIPH       | 1.00093   | 0.878893  | 1.26915   | 0.144601  | 0.261554  | 0.430123   | 0.683563  | 1.08907    | 0.421531   | 0.246558  | 0.0739205  | 0.0937076 | 0.229348  | 0.0293344 | 0.0403028  |
| LIPJ       | 0.0398331 | 0.0191922 | 0         | 0.0136831 | 0         | 0          | 0.0454802 | 0          | 0          | 0         | 0          | 0         | 0         | 0         | 0.0381369  |
| LIPJ       | 0.0311901 | 0.0676254 | 0.0129013 | 0         | 0         | 0          | 0         | 0.0415787  | 0          | 0         | 0          | 0.033476  | 0.0201237 | 0.0163013 | 0          |
| LIPK       | 0.771435  | 3.88415   | 5.29694   | 2.54396   | 0.868771  | 0.755397   | 1.84968   | 2.86233    | 3.89901    | 2.15431   | 3.37456    | 2.75991   | 0.43551   | 0.695495  | 0.249273   |
| LIPM       | 2.504     | 4.74952   | 4.82837   | 2.0843    | 4.24389   | 0.61086    | 5.75744   | 3.59964    | 22.2524    | 1.15045   | 2.24964    | 3.7083    | 0.15927   | 0.297961  | 0.122583   |
| LIPN       | 1.04405   | 2.85055   | 3.32688   | 2.0323    | 1.71186   | 0.839604   | 3.75278   | 3.14442    | 19.2378    | 2.86344   | 5.54378    | 5.65817   | 0.785883  | 1.35406   | 0.277664   |

|                 |            |           |           |           |           |           |           |           |           |           |           |            |           |           |           |
|-----------------|------------|-----------|-----------|-----------|-----------|-----------|-----------|-----------|-----------|-----------|-----------|------------|-----------|-----------|-----------|
| LIPT1           | 1.14626    | 0.861567  | 0.824995  | 0.77963   | 0.284887  | 0.800343  | 0.549682  | 0.886272  | 0.418806  | 0.374056  | 1.04813   | 0.303467   | 0.443738  | 0.407379  | 0.46093   |
| LIPT2           | 0.838347   | 0.333536  | 0.458674  | 0.405837  | 0.230372  | 0.599017  | 0.572405  | 0.643266  | 0.207646  | 0.316952  | 0.395819  | 0.22121    | 0.339258  | 0.179461  | 0.029991  |
| LITAF           | 10.9467    | 10.5257   | 12.6087   | 23.6785   | 6.94163   | 27.1812   | 11.1529   | 10.7125   | 21.9816   | 18.7522   | 35.455    | 7.93444    | 24.5147   | 12.9843   | 17.504    |
| LIVAR           | 0.400686   | 0.319542  | 0.388626  | 0.156624  | 0.0643865 | 0.117648  | 0.205082  | 0.392934  | 0.168272  | 0.24278   | 0.0779869 | 0.07909    | 0.213948  | 0.332177  | 0.198426  |
| LIX1            | 0.00583389 | 0.0112434 | 0.0193048 | 0.006012  | 0         | 0.0397399 | 0.0199828 | 0.0259234 | 0         | 0.0512549 | 0.0197572 | 0.00834861 | 0         | 0.0304905 | 0.0167564 |
| LIX1L           | 4.34258    | 2.39004   | 2.60983   | 3.66963   | 3.96609   | 8.49473   | 3.7939    | 2.75055   | 0.803893  | 3.7483    | 8.22198   | 1.30535    | 4.2009    | 3.34391   | 7.79462   |
| LIX1L-AS1       | 0.113077   | 0.273707  | 0.218272  | 0.116529  | 0.180398  | 0.0962834 | 0.216638  | 0.200986  | 0.0918099 | 0.0951947 | 0.0854388 | 0.162556   | 0.121869  | 0.158032  | 0.162393  |
| LKAAEAR1        | 0.0266625  | 0.0128464 | 0         | 0         | 0.0828322 | 0.0227028 | 0.0608848 | 0         | 0         | 0         | 0.0601973 | 0          | 0         | 0.0836099 | 0         |
| LL22NC01-81G9.3 | 0          | 0         | 0         | 0         | 0         | 0         | 0         | 0         | 0         | 0         | 0.0263363 | 0          | 0         | 0         | 0         |
| LL22NC03-63E9.3 | 0          | 0         | 0         | 0         | 0         | 0         | 0         | 0         | 0         | 0         | 0         | 0          | 0         | 0         | 0         |
| LLCFC1          | 0.0602684  | 0.0435573 | 0.0249291 | 0.0931624 | 0.0936176 | 0.0256589 | 0.0344062 | 0         | 0         | 0.0378215 | 0         | 0          | 0         | 0         | 0         |
| LLGL1           | 2.78629    | 3.48138   | 3.9093    | 6.03867   | 7.01919   | 9.43313   | 4.44796   | 2.54174   | 3.18438   | 5.42567   | 5.16451   | 3.02568    | 7.21844   | 5.06561   | 4.19861   |
| LLGL2           | 5.32462    | 7.45342   | 7.7671    | 8.49695   | 15.883    | 7.09917   | 8.04513   | 4.34412   | 14.2876   | 12.1542   | 4.81699   | 9.98684    | 13.0315   | 7.30103   | 1.9691    |
| LLPH            | 4.33576    | 3.5367    | 3.0677    | 8.07398   | 1.68373   | 9.19722   | 2.32323   | 3.66736   | 5.51206   | 7.08869   | 13.5029   | 4.2045     | 11.9626   | 7.45413   | 4.91581   |
| LLPH-DT         | 1.16409    | 1.39796   | 1.35217   | 0.957046  | 3.70553   | 0.885663  | 1.35725   | 0.561235  | 0.361934  | 0.522063  | 0.503222  | 1.04349    | 0.0239675 | 1.22629   | 0.906931  |
| LMAN1           | 8.45961    | 6.42421   | 6.53104   | 14.3226   | 4.64052   | 15.1444   | 5.07817   | 7.88837   | 13.6439   | 16.8669   | 23.4342   | 11.791     | 17.2855   | 10.917    | 15.6418   |
| LMAN1L          | 0.0933188  | 0.0064232 | 0.0110286 | 0.0274765 | 0.0828322 | 0.0227028 | 0.0456636 | 0.0236954 | 0.0487079 | 0         | 0         | 0.0286166  | 0         | 0.013935  | 0.0191454 |
| LMAN2           | 15.5003    | 13.4758   | 13.4186   | 30.515    | 33.2412   | 40.606    | 17.6977   | 11.2718   | 18.4776   | 20.1996   | 37.1919   | 15.05      | 27.6385   | 18.7376   | 15.2394   |
| LMAN2L          | 1.63171    | 2.1489    | 1.9573    | 3.03608   | 2.70358   | 3.32679   | 2.09073   | 1.20038   | 3.51079   | 1.96832   | 3.06999   | 1.63454    | 2.46815   | 1.74825   | 2.43447   |
| LMBR1           | 3.5847     | 3.45489   | 4.13371   | 3.55962   | 1.98318   | 3.51358   | 3.36329   | 4.33002   | 4.05086   | 5.42198   | 6.2358    | 3.09147    | 6.1561    | 4.12883   | 3.64111   |
| LMBR1L          | 2.4023     | 3.45968   | 3.52337   | 3.63638   | 6.79342   | 6.25646   | 2.44146   | 2.27573   | 5.02625   | 5.03627   | 4.34102   | 3.19856    | 3.66198   | 3.37572   | 3.69012   |
| LMBRD1          | 6.35675    | 6.24928   | 7.71489   | 6.04083   | 1.22688   | 7.56801   | 5.61728   | 7.49297   | 7.50999   | 6.19874   | 8.91615   | 4.3782     | 6.15815   | 4.05838   | 5.01551   |
| LMBRD2          | 2.46659    | 2.60768   | 2.7562    | 2.19561   | 1.51038   | 2.35595   | 1.99996   | 3.37393   | 3.5613    | 2.49461   | 3.35751   | 1.98489    | 2.42174   | 1.84217   | 1.7763    |
| LMCD1           | 5.79491    | 1.90256   | 2.35759   | 3.84281   | 3.72123   | 10.4238   | 4.48346   | 2.76709   | 0.687019  | 3.32858   | 7.94772   | 1.35244    | 3.5545    | 4.20034   | 9.70052   |
| LMCD1-AS1       | 0.301819   | 0.155808  | 0.214017  | 0.0555417 | 0.133951  | 0.165211  | 0.172304  | 0.277811  | 0         | 0.0405872 | 0         | 0.0154257  | 0.0208642 | 0.0394359 | 0.0619215 |
| LMF1            | 1.33586    | 1.59098   | 1.99391   | 0.903296  | 2.59441   | 2.10862   | 2.391     | 1.32617   | 0.691037  | 0.7458    | 1.66519   | 0.971032   | 0.631285  | 0.718692  | 1.71956   |

|            |           |            |           |            |           |           |           |           |           |            |           |            |            |            |           |
|------------|-----------|------------|-----------|------------|-----------|-----------|-----------|-----------|-----------|------------|-----------|------------|------------|------------|-----------|
| LMF1-AS1   | 0.282041  | 0.641081   | 0.590178  | 0.222977   | 1.17229   | 0.516605  | 0.613332  | 0.598787  | 0.114498  | 0.196662   | 0.227097  | 0.496111   | 0.0202191  | 0.427609   | 0.495057  |
| LMF2       | 6.92211   | 7.48534    | 7.96529   | 11.7818    | 15.5088   | 23.1406   | 9.02258   | 5.2884    | 3.38058   | 9.10162    | 17.587    | 7.36115    | 11.8816    | 10.6632    | 12.9931   |
| LMLN       | 0.756986  | 1.09967    | 1.13471   | 0.893442   | 0.376878  | 1.07646   | 0.694396  | 0.925029  | 0.453082  | 0.771445   | 0.744985  | 0.898109   | 0.822353   | 0.777739   | 1.00815   |
| LMLN-AS1   | 0         | 0.0708576  | 0         | 1.84E-43   | 5.91E-25  | 0.0792995 | 9.81E-45  | 0.084401  | 0         | 0          | 0         | 0          | 0          | 0          | 6.46E-39  |
| LMLN2      | 0         | 0          | 0         | 0          | 0.0139845 | 0         | 0         | 0.0238235 | 0         | 0.0225511  | 0         | 0.00652443 | 0.00577135 | 0.00936287 | 0.0260612 |
| LMNA       | 48.3389   | 56.5498    | 66.0267   | 82.5123    | 115.94    | 109.107   | 76.5217   | 35.8581   | 65.0813   | 87.1419    | 50.449    | 87.0748    | 150.22     | 83.3848    | 83.639    |
| LMNB1      | 1.456     | 1.29733    | 1.485     | 7.38579    | 1.35287   | 6.92909   | 1.47264   | 1.3176    | 1.00403   | 3.56306    | 4.73579   | 1.43189    | 6.30555    | 4.3087     | 2.88347   |
| LMNB1-DT   | 0         | 0          | 0         | 0          | 0         | 0.0646805 | 0         | 0         | 0         | 0          | 0         | 0          | 0.0653469  | 0          | 0         |
| LMNB2      | 3.10966   | 3.09501    | 2.96418   | 16.0024    | 7.6481    | 15.2335   | 3.29446   | 2.13028   | 2.98001   | 5.44786    | 4.38802   | 5.70168    | 17.0217    | 11.6893    | 5.15292   |
| LMNTD1     | 0         | 0.0141938  | 0         | 0          | 0         | 0.0200672 | 0         | 0         | 0.0287023 | 0.0147897  | 0         | 0.00421575 | 0          | 0.0153966  | 0         |
| LMNTD2     | 0.33093   | 1.13208    | 1.16808   | 0.500182   | 2.51884   | 1.52163   | 0.881639  | 0.539189  | 0.85981   | 0.456887   | 0.572821  | 1.03398    | 0.576489   | 0.50158    | 0.475258  |
| LMO1       | 0.142069  | 0.554453   | 0.470118  | 0.409938   | 0.198614  | 0.616947  | 0.616398  | 0.27777   | 0.242234  | 0.106987   | 0.192454  | 0.071158   | 0.0183324  | 0.111377   | 0.122417  |
| LMO2       | 5.28766   | 1.89691    | 2.62301   | 3.33657    | 3.05032   | 6.04394   | 2.11086   | 1.7537    | 1.44661   | 2.44062    | 5.19055   | 0.986989   | 3.04075    | 2.52325    | 3.82437   |
| LMO3       | 0.448857  | 0.0237893  | 0.085405  | 0.0786352  | 0.0348615 | 0.240783  | 0.158872  | 0.271256  | 0.0163997 | 0.0394353  | 0.0810725 | 0.0706572  | 0.01448    | 0.16656    | 0.122477  |
| LMO4       | 7.95409   | 5.41651    | 3.65841   | 4.42492    | 4.82115   | 7.59662   | 3.65615   | 4.13939   | 10.4536   | 4.72294    | 8.94534   | 2.79973    | 7.54047    | 3.53962    | 4.79548   |
| LMO7       | 3.91886   | 3.58703    | 4.23581   | 4.79644    | 3.4271    | 3.43769   | 2.78936   | 4.30424   | 10.0334   | 4.26741    | 2.47069   | 3.8132     | 4.54662    | 2.42992    | 1.91337   |
| LMO7-AS1   | 0.741514  | 0.263254   | 0.452003  | 0.0402185  | 0         | 0.864007  | 0.267359  | 0.416208  | 0.142592  | 0.195932   | 0.484624  | 0.167549   | 0.1259     | 0.367151   | 0.224191  |
| LMO7DN     | 0         | 0.0190936  | 0.0327835 | 0.0408383  | 0.0307784 | 0.0168716 | 0.0904931 | 0.0176093 | 0         | 0          | 0         | 0          | 0          | 0.0103558  | 0         |
| LMO7DN-IT1 | 0         | 0          | 0         | 0          | 0         | 0         | 0         | 0         | 0         | 0          | 0         | 0          | 0          | 0          | 0         |
| LMOD1      | 10.1451   | 2.45107    | 3.23838   | 0.553104   | 4.13229   | 19.3036   | 7.32038   | 2.31237   | 0.717607  | 1.94769    | 2.81211   | 0.617797   | 1.0765     | 1.98493    | 5.08557   |
| LMOD2      | 0.187673  | 0.0380732  | 0.0735425 | 0.122149   | 0.0306864 | 0.0336423 | 0.0789449 | 0.0702266 | 0.0481189 | 0.0991785  | 0.0334515 | 0.0989469  | 0.0254917  | 0.0309746  | 0         |
| LMOD3      | 0.039988  | 0.00963341 | 0.0827022 | 0.0412088  | 0         | 0         | 0.0342427 | 0.0266535 | 0         | 0          | 0         | 0          | 0          | 0.0156746  | 0.0430709 |
| LMTK2      | 5.2806    | 5.47249    | 5.42583   | 4.23933    | 5.8234    | 6.15964   | 5.77517   | 5.07005   | 10.7449   | 6.06592    | 3.54865   | 7.11437    | 9.58338    | 4.607      | 3.19545   |
| LMTK3      | 0.404957  | 0.959873   | 1.10129   | 1.27594    | 2.97889   | 0.812496  | 1.12137   | 0.500539  | 3.43534   | 0.963946   | 1.13498   | 1.77185    | 1.01808    | 1.07284    | 0.695209  |
| LMX1A      | 0.0311314 | 0.0269992  | 0.0412065 | 0.00641635 | 0.0580293 | 0.0265079 | 0.127961  | 0.0442671 | 0         | 0.00781461 | 0         | 0          | 0          | 0          | 0.0447086 |
| LMX1B      | 0.797899  | 0.751666   | 0.614104  | 0.38863    | 0.72145   | 0.723342  | 0.960873  | 0.585631  | 0.0676842 | 0.12954    | 0.0537749 | 0.613524   | 0.522484   | 0.709551   | 0.421868  |

|              |           |           |            |           |           |            |           |           |            |                 |           |            |            |           |           |
|--------------|-----------|-----------|------------|-----------|-----------|------------|-----------|-----------|------------|-----------------|-----------|------------|------------|-----------|-----------|
| LNCAROD      | 0.078852  | 0.018996  | 0.016308   | 0.101574  | 0.0612422 | 0.453204   | 0.0450153 | 0.0350385 | 0          | 0.0494837       | 0         | 0          | 0.0254374  | 0.0206057 | 0.141552  |
| LNCNEF       | 0         | 0         | 0          | 0         | 0         | 0          | 0         | 0         | 0          | 0               | 0         | 0          | 0          | 0         | 0         |
| LNCOC1       | 0.0946138 | 0.0774829 | 0.119585   | 0.0883638 | 0.0803178 | 0.264697   | 0.157314  | 0.102753  | 0.0113803  | 0.0391854       | 0.0351013 | 0.0250182  | 0.0461106  | 0.0392366 | 0.029904  |
| LNCPRESS1    | 0         | 0         | 0          | 0         | 0         | 0          | 0         | 0         | 0          | 0               | 0         | 0          | 0          | 0         | 0         |
| LNCPRESS2    | 0         | 0         | 0          | 0         | 0         | 0          | 0         | 0         | 0          | 0               | 0         | 0          | 0          | 0         | 0         |
| LNCURLR      | 0.195851  | 0.125819  | 0.108014   | 0.168192  | 0         | 0.0833822  | 0.186347  | 0.0580187 | 0          | 0.0819377       | 0.331637  | 0.140137   | 0.147422   | 0.409441  | 0.281267  |
| LNCTAM34A    | 0.18873   | 0.306899  | 0.457233   | 0.437607  | 0.4031    | 0.823595   | 0.269358  | 0.251592  | 0.287315   | 0.059219        | 0.219481  | 0.101281   | 0.0608839  | 0.246597  | 0.508201  |
| LNP1         | 0.28225   | 0.212551  | 0.26771    | 0.151146  | 0.460985  | 0.856761   | 0.262214  | 0.278663  | 0.0764345  | 0.302784        | 0.377794  | 0.194869   | 0.176673   | 0.137156  | 0.288749  |
| LNPEP        | 9.24767   | 10.8693   | 12.1381    | 9.27622   | 4.77572   | 10.1183    | 9.46732   | 11.5857   | 9.19939    | 10.1346         | 9.59486   | 7.74274    | 10.9552    | 7.12364   | 7.68699   |
| LNPK         | 3.11638   | 3.17995   | 3.14841    | 3.04978   | 1.3321    | 4.17364    | 2.85421   | 4.13442   | 4.66577    | 4.89973         | 5.51115   | 3.69776    | 5.78257    | 2.77566   | 3.06686   |
| LNK1         | 3.82966   | 3.4804    | 4.17325    | 5.70892   | 2.83081   | 3.01354    | 5.66926   | 2.59369   | 16.1072    | 2.40331         | 2.86971   | 2.20636    | 2.68815    | 0.628072  | 0.597401  |
| LNK1-AS1     | 0.2511    | 0.161312  | 0.138485   | 0.345021  | 0.0650075 | 0.0356347  | 0.334481  | 0.0743856 | 0.101937   | 0.105052        | 0         | 0.269503   | 0          | 0.0218726 | 0.0601019 |
| LNK1-AS2     | 0.283095  | 0.0795665 | 0.0878237  | 0         | 0.0366454 | 0.0502192  | 0.148147  | 0.115313  | 0          | 0               | 0         | 0.0761049  | 0          | 0.0508201 |           |
| LNK2         | 2.44452   | 3.25983   | 3.2082     | 3.51488   | 1.79596   | 3.2469     | 2.27795   | 2.81459   | 7.11681    | 5.54769         | 3.9754    | 4.16819    | 7.20109    | 3.89678   | 1.86107   |
| LOC100049716 | 0.742399  | 1.25433   | 1.38392    | 1.62194   | 1.10707   | 3.25343    | 2.19258   | 1.10843   | 2.89331    | 0.807549        | 1.3521    | 1.28198    | 0.453446   | 0.946745  | 0.511766  |
| LOC100101148 | 0.727686  | 0.341915  | 0.318048   | 0.283936  | 2.276     | 0.652076   | 0.0443721 | 0.652017  | 0.00100877 | 0.00042351<br>6 | 4.14E-12  | 0.0185441  | 0.0275472  | 0.270794  | 0.24432   |
| LOC100101478 | 0.0413691 | 0.0199323 | 0.0537797  | 0.0182709 | 0.0183601 | 0.0956113  | 0.0269908 | 0.0682786 | 0.00719756 | 0.0222525       | 0.0600436 | 0.0338294  | 0.00762604 | 0.0710414 | 0.025462  |
| LOC100126447 | 0         | 0         | 0          | 0         | 0         | 0          | 0         | 0         | 0          | 0               | 0         | 0          | 0          | 0         | 0.101952  |
| LOC100126584 | 0.544166  | 0.416415  | 0.105923   | 0.263896  | 0.149167  | 0.109024   | 0.0730954 | 0.312924  | 0.155937   | 0.120527        | 0.14454   | 0.29775    | 0.0826101  | 0.301134  | 0         |
| LOC100126784 | 0.930932  | 0.317989  | 0.301257   | 0.630451  | 1.49465   | 1.2026     | 0.817198  | 0.327053  | 0.698215   | 0.645641        | 0.339395  | 0.476464   | 0.0946395  | 0.513091  | 0.313079  |
| LOC100128006 | 0.0467302 | 0.040281  | 0.0244469  | 0.0274745 | 0.0627792 | 0.0257745  | 0.0773057 | 0.0137301 | 0          | 0               | 0.0256824 | 4.85E-16   | 7.33E-33   | 0.0118674 | 0.0910995 |
| LOC100128059 | 0         | 0.0051103 | 0          | 0.0437206 | 0         | 0.00903117 | 0.01211   | 0         | 0          | 0.186369        | 0.0119732 | 0.00758913 | 0.0684316  | 0.0443467 | 0.0913923 |
| LOC100128076 | 0         | 0.0332525 | 0.00951569 | 0         | 0.0178674 | 0.00979424 | 0         | 0.0204449 | 0          | 0               | 0         | 0.00823035 | 0          | 0         | 0         |
| LOC100128079 | 0.220643  | 0.176092  | 0.357117   | 0.076759  | 0.0760898 | 0.126469   | 0.324878  | 0.188611  | 0.0906799  | 0.185135        | 0.0545397 | 0.108721   | 0.0616748  | 0.31793   | 0.284505  |
| LOC100128108 | 0.46344   | 0.383496  | 0.438565   | 0.276897  | 0.250828  | 0.347371   | 0.562212  | 0.171077  | 0.0511889  | 0.145416        | 0.320657  | 0.165802   | 0.0373762  | 0.0851792 | 0.995547  |



|              |            |            |            |           |            |            |           |            |            |            |            |            |            |            |           |
|--------------|------------|------------|------------|-----------|------------|------------|-----------|------------|------------|------------|------------|------------|------------|------------|-----------|
| LOC100128164 | 0.00660098 | 0.00954137 | 0.0109216  | 0         | 0.0102536  | 0.00562065 | 0         | 0.0029332  | 0.00401963 | 0.00414246 | 0.00745169 | 0          | 0          | 0          | 0         |
| LOC100128239 | 0.201331   | 0.441371   | 0.591272   | 0.0518695 | 0.265827   | 0.154288   | 0.356304  | 0.125249   | 0.01226    | 0.101077   | 0.0113639  | 0.0288116  | 0.0259796  | 0.142053   | 0.289137  |
| LOC100128242 | 0.140403   | 0.0338241  | 0.0580755  | 0.0964594 | 0.181745   | 0.239102   | 0.0534358 | 0.124778   | 0          | 0.35244    | 0.396243   | 0.100462   | 0.0603914  | 0.293522   | 0.739332  |
| LOC100128253 | 0.190871   | 0.137947   | 0.207246   | 0.0245872 | 0.074122   | 0.0711041  | 0.272412  | 0.159028   | 0          | 0.0299453  | 0          | 0.0170716  | 0          | 0.0124697  | 0.23985   |
| LOC100128276 | 0.147722   | 0          | 0          | 0         | 0          | 0          | 0         | 0          | 0          | 0          | 0.0555864  | 0          | 0          | 0          | 0         |
| LOC100128288 | 0.347852   | 0.869428   | 0.899275   | 0.44809   | 0.253282   | 0.425776   | 0.620573  | 0.647267   | 0.35745    | 0.245582   | 0.136606   | 0.225563   | 0.0771487  | 0.323836   | 0.530782  |
| LOC100128310 | 0          | 0.0111507  | 0.00957278 | 0         | 0.0359492  | 0.009853   | 0.013212  | 0          | 0          | 0.0145235  | 0.0261256  | 0.00827974 | 0.0223977  | 0.0120956  | 0         |
| LOC100128317 | 0.0144946  | 0.00465581 | 0.00399699 | 0         | 0          | 0          | 0.011033  | 0.00858773 | 0.00588427 | 0.00606407 | 0          | 0          | 0          | 0          | 0         |
| LOC100128325 | 0          | 0.110185   | 0.189185   | 0.0942671 | 0.284183   | 0.155779   | 0.156664  | 0.0406475  | 0          | 0          | 0.0516317  | 0          | 0          | 0.0956172  | 0         |
| LOC100128340 | 0.15028    | 0.742172   | 0.435126   | 0.387169  | 0.758667   | 0.319903   | 0.600545  | 0.233723   | 0.411803   | 0.0943081  | 0.0424117  | 0.564527   | 0.0484798  | 0.255264   | 0.377686  |
| LOC100128361 | 3.97509    | 4.53473    | 4.65162    | 1.69806   | 5.0323     | 1.78353    | 4.76184   | 3.2928     | 1.36053    | 2.81589    | 0.914292   | 5.42213    | 0.420444   | 3.01173    | 1.484     |
| LOC100128386 | 0.112159   | 0.103295   | 0.204716   | 0.0879252 | 0.048012   | 0.0606821  | 0.13004   | 0.0782664  | 0.0325438  | 5.61E-45   | 0.0773281  | 0.018244   | 0.00826064 | 0.0676877  | 0.0183392 |
| LOC100128398 | 0.69539    | 0.74863    | 0.852569   | 0.211764  | 0.499381   | 0.388981   | 0.647958  | 0.601175   | 0.252586   | 0.381112   | 0.110177   | 0.255347   | 0.031485   | 0.810452   | 0.280328  |
| LOC100128494 | 0.977863   | 1.19839    | 1.29585    | 0.494901  | 1.45982    | 0.546513   | 1.29377   | 1.17318    | 0.277947   | 0.369243   | 0.198614   | 0.990681   | 0.135264   | 0.793572   | 1.62556   |
| LOC100128531 | 2.52124    | 2.50976    | 2.36122    | 1.39715   | 2.58627    | 2.4911     | 2.28121   | 2.02928    | 0.173807   | 0.656765   | 0.295356   | 1.71892    | 0.184153   | 1.01936    | 0.888124  |
| LOC100128568 | 0.217306   | 1.01211    | 1.6479     | 0.0373233 | 0          | 0          | 0.496225  | 0.514995   | 0.132327   | 0.0909136  | 0          | 0.466464   | 0          | 0.530009   | 0.572144  |
| LOC100128573 | 0.264492   | 0.530985   | 0.692887   | 0.317994  | 0.821695   | 0.0750705  | 0.402651  | 0.430941   | 0.107374   | 0.165982   | 0          | 0.157709   | 0.142207   | 0.230392   | 0.253229  |
| LOC100128593 | 0.0432951  | 0.00825365 | 0.0212571  | 0.0441332 | 0.0665232  | 0.0364656  | 0.0391177 | 0.015224   | 0          | 0          | 0.038676   | 0          | 0          | 0.0134296  | 0.0123006 |
| LOC100128653 | 0.638626   | 1.11139    | 1.30108    | 0.736705  | 2.25052    | 0.900892   | 1.861     | 0.931811   | 0.48756    | 0.765652   | 0.247483   | 2.30523    | 0.510436   | 1.52938    | 1.91643   |
| LOC100128770 | 0.79711    | 1.53373    | 0.915921   | 1.83351   | 4.44999    | 0.822294   | 1.3459    | 0.836904   | 1.11601    | 0.985138   | 0.052259   | 2.33661    | 0.175008   | 1.54179    | 0.559651  |
| LOC100128882 | 0.0630601  | 0.212683   | 0.234755   | 0         | 0.783633   | 0.187932   | 0.18      | 0.140106   | 0          | 0.0395734  | 0.071187   | 0.112803   | 0          | 0          | 0         |
| LOC100128885 | 0.0105942  | 0.00510445 | 0.00438214 | 0.0218353 | 0.00822823 | 0.0135312  | 0         | 0.0282458  | 0.0129026  | 0.0132968  | 0.0538179  | 0.00379022 | 0          | 0.00830549 | 0         |
| LOC100128966 | 0          | 0          | 0          | 0         | 0          | 0          | 0         | 0          | 0          | 0          | 0          | 0          | 0          | 0          | 0.18096   |
| LOC100128988 | 0.0223389  | 0.026908   | 0.0369605  | 0.0345313 | 0.0520499  | 0.0475531  | 0.0127529 | 0.00992646 | 0.0272062  | 0.0420563  | 0.0378267  | 0.015984   | 0.0144129  | 0.00583763 | 0.0320814 |
| LOC100128993 | 0.0228912  | 0.0220587  | 0          | 0.0707703 | 0          | 0.0194916  | 0.052273  | 0.0610315  | 0          | 0.114923   | 0          | 0          | 0          | 0.0239279  | 0         |
| LOC100129027 | 0.0129074  | 0.0590805  | 0.0320338  | 0.0598567 | 0.0300746  | 0.153867   | 0.0294746 | 0.0114711  | 0.00785991 | 0.0648007  | 0.00728545 | 0.115445   | 0.00416391 | 0.128174   | 0.194636  |

|              |           |            |            |            |           |            |           |            |            |           |            |            |           |            |           |
|--------------|-----------|------------|------------|------------|-----------|------------|-----------|------------|------------|-----------|------------|------------|-----------|------------|-----------|
| LOC100129034 | 4.04427   | 3.12534    | 3.50034    | 4.65386    | 4.53431   | 7.12069    | 4.35247   | 3.90605    | 0.550735   | 2.51991   | 4.15409    | 1.58803    | 2.85602   | 3.29424    | 7.37948   |
| LOC100129046 | 0.91822   | 0.719904   | 0.838344   | 0.10962    | 0.764141  | 0.12861    | 0.920952  | 0.72255    | 0.0180446  | 0.204556  | 0.0334515  | 0.171774   | 0.0860346 | 0.445292   | 0.260531  |
| LOC100129055 | 0.0750585 | 0.00803652 | 0.0068993  | 0          | 0         | 0.0284051  | 0.0190443 | 0.0222353  | 0          | 0         | 0          | 0          | 0         | 0.00435876 | 0         |
| LOC100129083 | 1.34E-16  | 0.0241345  | 0.0892885  | 0.0192355  | 0.0556197 | 0          | 0.0202845 | 2.34E-43   | 1.09E-39   | 0.0395707 | 5.73E-35   | 2.52E-44   | 6.40E-31  | 0.00799134 | 0         |
| LOC100129129 | 0.0415868 | 0.0601115  | 0.0172018  | 0          | 0         | 0          | 0         | 0          | 0.050648   | 0.0260979 | 0.539883   | 0.119026   | 0         | 0.0326026  | 0         |
| LOC100129138 | 0         | 0          | 0          | 0          | 0.0594692 | 0.0162994  | 0         | 0          | 0          | 0         | 0          | 0          | 0         | 0          | 0         |
| LOC100129148 | 0.662614  | 0.993432   | 0.921511   | 0.0649762  | 0.709334  | 0.2878     | 0.450433  | 0.433573   | 0.160127   | 0.08853   | 0.461448   | 0.18774    | 8.84E-34  | 0.301396   | 4.85E-29  |
| LOC100129175 | 0         | 0.0111898  | 0          | 0          | 0         | 0          | 0         | 0          | 0          | 0         | 0          | 0          | 0         | 0          | 0         |
| LOC100129203 | 1.00365   | 0.563223   | 0.351653   | 0.559735   | 2.0359    | 0.502704   | 0.57971   | 0.535178   | 0.258848   | 0.163018  | 0.533176   | 0.380192   | 0.0914191 | 0.364101   | 0.186531  |
| LOC100129291 | 0         | 0.0368414  | 0.0632563  | 0          | 0.0197958 | 0.0217026  | 0.0145507 | 0.0113258  | 0          | 0.015995  | 0          | 0.027356   | 0.0164447 | 0.00666056 | 0.0366039 |
| LOC100129297 | 0         | 0          | 0          | 0          | 0         | 0          | 0         | 0          | 0          | 0         | 0          | 0          | 0         | 0          | 0         |
| LOC100129307 | 0.586136  | 0.280305   | 0.347614   | 0.284883   | 0.808986  | 0.245694   | 0.38597   | 0.128253   | 0.0197102  | 0.129881  | 0.0435766  | 0.215352   | 0.0417672 | 0.40042    | 1.22562   |
| LOC100129316 | 0.0176362 | 0.0148704  | 0.00729494 | 0.00454364 | 0.0684876 | 0.00375424 | 0.0100682 | 0.00783678 | 0.00536971 | 0.0055338 | 0.00995451 | 0.00630957 | 0         | 0.0576089  | 0.101311  |
| LOC100129434 | 92.3291   | 86.6217    | 87.8468    | 44.7861    | 19.1435   | 23.4195    | 57.9181   | 91.7908    | 16.2817    | 36.0003   | 15.7467    | 52.0545    | 9.07319   | 64.7306    | 64.9453   |
| LOC100129484 | 0.874974  | 1.42914    | 1.23777    | 0.712332   | 3.32988   | 1.35595    | 1.93809   | 0.808708   | 0.788558   | 0.395345  | 0.5235     | 0.732498   | 0.50243   | 0.571624   | 0.628286  |
| LOC100129534 | 0.175014  | 0.352179   | 0.476936   | 0.169748   | 0.671648  | 0.587323   | 0.552459  | 0.274479   | 0          | 0.0129212 | 0.0464869  | 0.0662968  | 0.0332112 | 0.0753283  | 0.0739243 |
| LOC100129540 | 0         | 0.00830965 | 0.0371333  | 0.0251048  | 0.0287692 | 0.0207432  | 0         | 0.0545008  | 0          | 0.0152878 | 0.0137503  | 0          | 0         | 0.0190983  | 0.0524784 |
| LOC100129603 | 0.0414008 | 0          | 0.102749   | 0          | 0         | 0.176261   | 0         | 0          | 0          | 0         | 0          | 0          | 0         | 0.0216379  | 0.17837   |
| LOC100129617 | 0.746939  | 1.54983    | 1.43517    | 1.52707    | 1.16025   | 0.861689   | 1.62313   | 1.14562    | 0.762964   | 2.1925    | 0.1904     | 2.44815    | 0.334236  | 1.71265    | 1.78206   |
| LOC100129620 | 0         | 0          | 0          | 0          | 0.014131  | 0          | 0         | 0          | 0          | 0         | 0          | 0          | 0         | 0.0237727  | 0         |
| LOC100129636 | 0         | 0          | 0          | 0          | 0         | 0          | 0         | 0          | 0          | 0         | 0          | 0          | 0         | 0.00475361 | 0         |
| LOC100129697 | 0.162771  | 0.121203   | 0.159138   | 0.0457473  | 0.459708  | 0.188996   | 0.152056  | 0.0920546  | 0          | 0.0371444 | 0.0835218  | 0.0952911  | 0.0381887 | 0.116006   | 0.297512  |
| LOC100129724 | 0.123101  | 0.0790828  | 0          | 0.084573   | 0         | 0          | 0         | 0.328207   | 0.0999491  | 0.0515016 | 0          | 0.0587215  | 0.0529496 | 0          | 0.0589297 |
| LOC100129878 | 0.105515  | 0.118624   | 0.145483   | 0.108737   | 0.054634  | 0          | 0.20079   | 0.218804   | 0.0856706  | 0.0441442 | 0          | 0.251664   | 0         | 0.055147   | 0.252556  |
| LOC100129917 | 2.28708   | 3.53542    | 3.4462     | 1.48709    | 6.40741   | 2.08652    | 3.83925   | 2.40762    | 0.878728   | 1.1277    | 0.322728   | 2.12351    | 0.193235  | 2.00644    | 2.69801   |
| LOC100129931 | 0.297309  | 0.269099   | 0.224097   | 0.168923   | 0.285746  | 0.168331   | 0.446919  | 0.213556   | 0.0310512  | 0.275318  | 0.0620016  | 0.142741   | 0.0253386 | 0.166138   | 0.144498  |

|              |           |           |            |           |           |            |            |           |           |           |           |           |            |            |           |
|--------------|-----------|-----------|------------|-----------|-----------|------------|------------|-----------|-----------|-----------|-----------|-----------|------------|------------|-----------|
| LOC100129935 | 0         | 0         | 0          | 0         | 0         | 0          | 0          | 0         | 0         | 0         | 0         | 0         | 0          | 0          | 0         |
| LOC100129940 | 0.13556   | 0.0290288 | 0.0342664  | 0.108654  | 0.0467936 | 0.327044   | 0.0515926  | 0.153939  | 0.0183441 | 0.26939   | 0.246548  | 0.158967  | 0.106899   | 0.87381    | 0.529965  |
| LOC100130027 | 0.615736  | 1.46722   | 1.48349    | 0.629805  | 2.3383    | 1.35659    | 1.13871    | 0.809116  | 0.602986  | 0.331638  | 0.31281   | 0.499751  | 0.292525   | 0.410487   | 0.73713   |
| LOC100130075 | 0.349989  | 0.189709  | 0.325728   | 0         | 0.0679568 | 0.0745029  | 0.0749262  | 0.213841  | 0         | 0.0549091 | 0         | 0.0313033 | 0          | 0.0457299  | 0         |
| LOC100130111 | 0         | 0         | 0.00742076 | 0         | 0         | 0          | 0.0204837  | 0         | 0.0218493 | 0.0337755 | 0.0810097 | 0.0128368 | 0.0636626  | 0.0328174  | 0.0128823 |
| LOC100130172 | 0.116762  | 0.0518908 | 0.0550177  | 0.01691   | 4.01E-43  | 0.00724532 | 0.0402093  | 0.0433779 | 0         | 0.0204166 | 0.0286773 | 0.0120108 | 0          | 0.0218392  | 0.0705922 |
| LOC100130207 | 0.671385  | 0.518525  | 0.383891   | 0.183145  | 0.32207   | 0.142919   | 0.236734   | 0.544024  | 0.0841721 | 0.0619601 | 0.111457  | 0.0635816 | 0.0254809  | 0.0412818  | 0.141793  |
| LOC100130238 | 0         | 0         | 0          | 0         | 0         | 0.0050828  | 0          | 0         | 0         | 0         | 0         | 0         | 0          | 0.00311983 | 0.0085727 |
| LOC100130264 | 0.517452  | 0.567195  | 0.395968   | 0.639899  | 0.562647  | 0.242332   | 0.192013   | 0.459868  | 0.204815  | 0.357201  | 0.116828  | 0.888602  | 0.125197   | 0.304249   | 0.20436   |
| LOC100130268 | 0         | 0         | 0          | 0         | 0         | 0          | 0          | 0         | 0         | 0         | 0         | 0         | 0          | 0          | 0         |
| LOC100130283 | 0.466795  | 0.792043  | 0.875606   | 0.779779  | 1.27063   | 0.974875   | 1.13048    | 0.716905  | 0.534833  | 1.11293   | 0.562005  | 1.67563   | 0.583099   | 2.08018    | 1.7384    |
| LOC100130298 | 0.135339  | 0.0869448 | 0          | 0.139471  | 0         | 0.23048    | 0          | 0         | 0         | 0.0566217 | 0.0509271 | 0         | 0.0582136  | 0          | 0.194365  |
| LOC100130331 | 0         | 0         | 0          | 0.0228956 | 0         | 0          | 0          | 0         | 0         | 0         | 0         | 0.0158971 | 0          | 0          | 0         |
| LOC100130357 | 0.352436  | 0.333914  | 0.523556   | 0.105032  | 0.186324  | 0.192926   | 0.537184   | 0.457836  | 0.0492756 | 0.284375  | 0.118753  | 0.094659  | 0.052209   | 0.170693   | 0.209745  |
| LOC100130370 | 0.0982025 | 0.378524  | 0.52806    | 0.0337335 | 0.0762712 | 0.292663   | 0.205561   | 0.261823  | 0.0996663 | 0         | 0         | 0.0585554 | 0.0316799  | 0.0513249  | 0.117526  |
| LOC100130373 | 0.300872  | 0.382706  | 0.398244   | 0.136425  | 0.205637  | 0.174208   | 0.357267   | 0.427824  | 0         | 0         | 0.0135859 | 0.0516676 | 0          | 0.0754794  | 0.172836  |
| LOC100130449 | 0.343952  | 0.68656   | 0.792651   | 0.278498  | 0.954065  | 0.481144   | 0.673223   | 0.43668   | 0.0299211 | 0.0308354 | 0.0277342 | 0.773479  | 0.126809   | 0.42373    | 0.670372  |
| LOC100130451 | 0.0370734 | 0.0669844 | 0.0920091  | 0.0191026 | 0.0431908 | 0.0157837  | 0.0529115  | 0.0576585 | 0         | 0.0116327 | 0.0313884 | 0.0331587 | 0          | 0.0387523  | 0.0399315 |
| LOC100130452 | 0.0914745 | 0         | 0          | 0         | 0         | 0          | 0          | 0         | 0         | 0         | 0         | 0         | 0          | 0.0239043  | 0         |
| LOC100130476 | 1.3669    | 1.95307   | 2.59303    | 0.886466  | 1.3362    | 0.993327   | 1.7894     | 1.4766    | 6.08488   | 1.73039   | 2.60724   | 3.19554   | 1.02637    | 1.97692    | 0.998444  |
| LOC100130520 | 0         | 0         | 0          | 0.174921  | 0         | 1.88E-12   | 0          | 0         | 0         | 1.13E-05  | 9.32E-08  | 0.0608486 | 8.84E-09   | 2.17E-18   | 0.244257  |
| LOC100130548 | 0.350652  | 0.665239  | 0.525778   | 0.338773  | 1.36171   | 0.38255    | 0.863284   | 0.496661  | 0.0934183 | 0.0962729 | 0.0247402 | 0.376352  | 0.0636297  | 0.314989   | 0.975688  |
| LOC100130587 | 0         | 0         | 0          | 0         | 0         | 0          | 0          | 0         | 0         | 0         | 0         | 0         | 0          | 0          | 0         |
| LOC100130673 | 0         | 0         | 0          | 0         | 0         | 0          | 0.016546   | 0         | 0         | 0         | 0         | 0         | 0          | 0          | 0         |
| LOC100130691 | 0.408982  | 1.62998   | 1.71376    | 0.476442  | 0.448846  | 0.61321    | 1.1268     | 0.84151   | 0.969118  | 0.541212  | 0.67748   | 0.795211  | 0.243796   | 0.341538   | 0.223448  |
| LOC100130698 | 0         | 0         | 0.00552064 | 0         | 0         | 0.00568224 | 0.00761937 | 0         | 0         | 0         | 0         | 0         | 0.00430559 | 0          | 0         |

|              |          |            |           |           |           |           |           |           |           |           |           |            |            |           |          |
|--------------|----------|------------|-----------|-----------|-----------|-----------|-----------|-----------|-----------|-----------|-----------|------------|------------|-----------|----------|
| LOC100130744 | 5.1394   | 5.32206    | 5.39294   | 2.18438   | 5.57642   | 2.39108   | 5.54855   | 3.88486   | 1.72674   | 1.9648    | 1.24365   | 2.2711     | 1.31407    | 2.30546   | 2.43373  |
| LOC100130849 | 0        | 0          | 0         | 0         | 0         | 0         | 0         | 0         | 0         | 0         | 0         | 0          | 0          | 0         | 0        |
| LOC100130872 | 0.185851 | 0.187132   | 0.314517  | 0.0287287 | 0.251911  | 0.0883783 | 0.38502   | 0.23196   | 0.0169759 | 0.0416453 | 0.136371  | 0.056517   | 0.00899324 | 0.127475  | 0.587191 |
| LOC100130880 | 0.481311 | 0.077301   | 0.0663624 | 0.289336  | 0.0623036 | 0.0341525 | 0.183182  | 0.285166  | 0.195394  | 0.151024  | 0         | 0.487887   | 0.0258783  | 0.565997  | 0.518418 |
| LOC100130899 | 4.57846  | 9.14429    | 9.07678   | 5.5327    | 5.83348   | 6.40468   | 8.49476   | 6.74285   | 2.44284   | 3.24264   | 1.51979   | 4.02482    | 3.78042    | 3.67197   | 0.939322 |
| LOC100130950 | 0.243156 | 0.493268   | 0.343052  | 0.0875926 | 0.430331  | 0.351062  | 0.478703  | 0.410893  | 0.0778609 | 0.0142533 | 0.3596    | 0.0947863  | 0.0322393  | 0.213584  | 0.382555 |
| LOC100130964 | 0        | 0          | 0         | 0         | 0         | 0         | 0         | 0         | 0         | 0         | 0         | 0          | 0          | 0         | 0        |
| LOC100130987 | 0.980176 | 1.67916    | 1.32893   | 0.785633  | 3.34116   | 0.579588  | 1.6787    | 0.677522  | 0.862149  | 0.854321  | 0.768401  | 2.37677    | 0.597271   | 1.15264   | 0.899336 |
| LOC100130992 | 0.310861 | 0.151499   | 0.156664  | 0.121512  | 0.466223  | 0.38335   | 0.179505  | 0.09844   | 0.0217582 | 0.0672694 | 0.153277  | 0.0255666  | 0.0484124  | 0.0597589 | 0.246309 |
| LOC100131047 | 0        | 0          | 0         | 0         | 0         | 0         | 0         | 0         | 0         | 0         | 0         | 0          | 0          | 0         | 0        |
| LOC100131107 | 0.647353 | 0.412463   | 0.677138  | 0.323706  | 0.796973  | 0.386676  | 0.531257  | 0.445097  | 0.0559239 | 0.243051  | 0.138231  | 0.347606   | 0.0493776  | 0.763649  | 0.675066 |
| LOC100131257 | 0.143051 | 0.197949   | 0.225346  | 0.105746  | 0.039341  | 0.0525068 | 0.170198  | 0.190047  | 0.0214574 | 0.0491434 | 0.0189821 | 0.15115    | 0.00358527 | 0.0982428 | 0.110169 |
| LOC100131289 | 0        | 0.282807   | 0.254349  | 0.230431  | 1.21567   | 0.0951981 | 0.127652  | 0.173881  | 0.0340406 | 0.0350808 | 0.094658  | 0.0399987  | 0.0180335  | 0.0730409 | 0.120422 |
| LOC100131315 | 0        | 0          | 0         | 0.0407685 | 0.307258  | 2.0885    | 0         | 0         | 0         | 0.198611  | 0.53591   | 0.141534   | 0.357342   | 0.227438  | 0.568143 |
| LOC100131472 | 0        | 0.0191922  | 0         | 0         | 0         | 0         | 0.0454802 | 0         | 0         | 0         | 0         | 0          | 0          | 0         | 0        |
| LOC100131496 | 0.39034  | 0.485027   | 0.441886  | 0.338742  | 0.590377  | 0.524794  | 0.609875  | 0.639029  | 0.150123  | 0.141818  | 0.0463837 | 0.448348   | 0.0596476  | 0.327488  | 0.177024 |
| LOC100131604 | 0.126327 | 0.0973858  | 0.0418025 | 0.130183  | 0.117737  | 0.666906  | 0.20193   | 0.0449075 | 0.0615407 | 0.0951318 | 0.19965   | 0.0542341  | 0.0163011  | 0.0528191 | 0.181421 |
| LOC100131626 | 0.293643 | 0.333022   | 0.246333  | 0.484171  | 0.271776  | 0.112158  | 0.197228  | 0.385372  | 0.211843  | 0.106016  | 0.143423  | 0.242806   | 0.106899   | 0.368652  | 0.189225 |
| LOC100131635 | 0        | 0          | 0         | 0         | 0         | 0         | 0         | 0         | 0         | 0         | 0         | 0          | 0          | 0         | 0        |
| LOC100132057 | 0.19091  | 0.292855   | 0.36058   | 0.153112  | 0.135809  | 0.194511  | 0.0928169 | 0.309991  | 0.0759209 | 0.0782408 | 0.035186  | 0.110056   | 0.0100551  | 0.117591  | 0.296298 |
| LOC100132062 | 0.368174 | 0.432682   | 0.627405  | 0.715161  | 2.19863   | 1.26024   | 0.858211  | 0.935541  | 0.824621  | 0.42914   | 0.469214  | 1.05016    | 0.502614   | 0.681772  | 0.752256 |
| LOC100132077 | 1.79835  | 1.9083     | 2.18731   | 0.95972   | 1.13069   | 1.52216   | 1.90663   | 1.66482   | 0.391105  | 0.752371  | 0.676704  | 0.79657    | 0.455827   | 1.07417   | 1.3067   |
| LOC100132078 | 0        | 0.00862055 | 0         | 0         | 0         | 0         | 0         | 0         | 0         | 0         | 0         | 0.00640103 | 0          | 0         | 0        |
| LOC100132111 | 1.11824  | 1.33486    | 1.44467   | 0.372311  | 3.09899   | 0.933758  | 1.66791   | 1.0661    | 0.789858  | 0.182801  | 0.378064  | 0.775584   | 0.396289   | 1.35756   | 0.378545 |
| LOC100132215 | 0.632566 | 0.615835   | 0.541769  | 0.388042  | 0.320306  | 0.401927  | 0.607779  | 0.774978  | 0.510824  | 0.725501  | 0.694297  | 0.408852   | 0.408731   | 0.486732  | 0.522681 |
| LOC100132249 | 0.474266 | 0.519585   | 0.513787  | 0.482926  | 0.79809   | 0.177878  | 0.631752  | 0.607144  | 0.151277  | 0.127554  | 0.146594  | 0.185835   | 0.0874269  | 0.0295086 | 0.235144 |

|              |            |           |            |           |           |           |            |            |           |           |           |            |            |            |           |
|--------------|------------|-----------|------------|-----------|-----------|-----------|------------|------------|-----------|-----------|-----------|------------|------------|------------|-----------|
| LOC100132287 | 0.368174   | 0.432682  | 0.627405   | 0.715161  | 2.19863   | 1.26024   | 0.858211   | 0.935541   | 0.824621  | 0.42914   | 0.469214  | 1.05016    | 0.502614   | 0.681772   | 0.752256  |
| LOC100132356 | 1.73735    | 1.493     | 1.59815    | 1.06889   | 2.49731   | 1.35789   | 1.93924    | 1.6938     | 0.189483  | 0.846184  | 0.556176  | 0.62156    | 0.234224   | 1.17906    | 1.56406   |
| LOC100132686 | 0.624515   | 1.00809   | 1.02885    | 0.095439  | 1.72E-25  | 0.409223  | 0.979957   | 0.893787   | 1.26E-10  | 0.119432  | 0.0823707 | 0.198822   | 0.0395719  | 0.26989    | 0.768792  |
| LOC100132741 | 0.130506   | 0.0890796 | 0.0809728  | 0.0336225 | 0.0337868 | 0.231509  | 0.198677   | 0.0579914  | 0         | 0.0409496 | 0.171879  | 0.0155634  | 0.0561345  | 0.011368   | 0.0937115 |
| LOC100132781 | 0.779373   | 0.427669  | 0.689527   | 0.178481  | 0.117701  | 0.0829532 | 0.321339   | 0.808082   | 0         | 0.149446  | 0.0855376 | 0.123925   | 0.020952   | 0.203667   | 0.248728  |
| LOC100132813 | 0.0322492  | 0.0253837 | 0.00661381 | 0.0081801 | 0.0350723 | 0.0203865 | 0.00859317 | 0.00776632 | 0         | 0         | 0         | 0          | 0          | 0.00786704 | 0         |
| LOC100132831 | 0          | 0         | 0          | 0         | 0         | 0         | 0          | 0          | 0         | 0.264063  | 0         | 0.00836337 | 0.422313   | 0.0427621  | 0.016786  |
| LOC100133050 | 0.273934   | 0.181904  | 0.393681   | 0.0701198 | 0.40901   | 0.322638  | 0.234407   | 0.266466   | 0         | 0.0427643 | 0.266307  | 0.0732741  | 0          | 0.12262    | 0.292187  |
| LOC100133077 | 0          | 0.0103824 | 0.0297107  | 0         | 0         | 0         | 0.0164022  | 0.012767   | 0         | 0         | 0         | 0.0256975  | 0.00463432 | 0.0187703  | 0         |
| LOC100133091 | 2.62382    | 2.80437   | 2.92742    | 1.72713   | 8.33837   | 1.25209   | 2.72739    | 2.23573    | 0.905148  | 1.34398   | 1.19399   | 2.0638     | 0.498605   | 3.24416    | 2.35985   |
| LOC100133286 | 0.141988   | 0.278686  | 0.158343   | 0.0482572 | 0.435974  | 0.0204021 | 0.299828   | 0.0986247  | 0.224138  | 0.028178  | 0.0273329 | 0.119537   | 0.0453084  | 0.10992    | 2.67E-40  |
| LOC100133315 | 0.817907   | 1.13746   | 0.845788   | 0.689627  | 0.895119  | 0.633125  | 0.955084   | 0.726888   | 0.113195  | 0.186647  | 0.314767  | 0.186211   | 0.191894   | 0.514912   | 0.266959  |
| LOC100133331 | 1.36734    | 1.39905   | 1.13255    | 0.799897  | 1.57571   | 1.16139   | 1.36823    | 1.59212    | 0.617388  | 0.478943  | 0.31527   | 1.70419    | 0.162197   | 0.51161    | 1.02546   |
| LOC100133920 | 0.231915   | 0.472218  | 0.241619   | 0.0944642 | 0.243783  | 0.0844643 | 0.186887   | 0.0830123  | 0.0156695 | 0.131591  | 0.0128759 | 0.151587   | 1.33E-06   | 0.528535   | 0.409214  |
| LOC100134040 | 0.0951084  | 0.282343  | 0.314722   | 0.0326707 | 0.196982  | 0         | 0.0723945  | 0.309923   | 0.0386105 | 0         | 0.0357885 | 0.158789   | 0          | 0.0497078  | 0.0455292 |
| LOC100134317 | 1.97E-31   | 0.260813  | 0.0396387  | 9.64E-33  | 0.128968  | 0.137591  | 0.140911   | 0.12753    | 4.50E-23  | 0         | 3.08E-21  | 0.0296952  | 7.25E-19   | 0.0751469  | 0.111345  |
| LOC100134368 | 0.162046   | 0.0922717 | 0.0609343  | 0.0910869 | 0.526308  | 0.125436  | 0.100919   | 0.0916444  | 0.0179412 | 0.0924472 | 0.0332599 | 0.0210814  | 0.0285139  | 0.138587   | 0.0211562 |
| LOC100134391 | 0          | 0         | 0          | 0         | 0         | 0         | 0.0231789  | 0          | 0         | 0         | 0         | 0          | 0          | 0          | 0         |
| LOC100134868 | 0.894528   | 0.850944  | 0.999339   | 0.370311  | 0.736322  | 0.449195  | 0.750731   | 0.747419   | 0.0838027 | 0.297474  | 0.284818  | 0.317294   | 0.419293   | 0.371618   | 0.285479  |
| LOC100144595 | 0.00979807 | 0         | 0          | 0         | 0         | 0         | 0.0111871  | 0          | 0         | 0         | 0         | 0.0140216  | 0          | 0.0051209  | 0.0281425 |
| LOC100147773 | 0.086234   | 0.0882913 | 0.205099   | 0.0888666 | 0.100463  | 0.165211  | 0.209226   | 0.0766376  | 0         | 0.0405872 | 0.0243369 | 0.0154257  | 0.0765019  | 0.0281685  | 0.170284  |
| LOC100190986 | 55.8019    | 64.937    | 75.3065    | 18.9855   | 30.0217   | 13.6289   | 46.7852    | 65.7029    | 4.72851   | 12.075    | 3.35164   | 32.0159    | 1.79894    | 33.019     | 35.7509   |
| LOC100192426 | 0.11271    | 0.072407  | 0          | 0.0387169 | 0         | 0         | 0.171584   | 0.100167   | 0         | 0         | 0         | 0.0537645  | 0          | 0.0196357  | 0         |
| LOC100233156 | 0          | 0         | 0          | 0         | 0         | 0         | 0          | 0          | 0         | 0         | 0         | 0          | 0          | 0          | 0         |
| LOC100240728 | 0          | 0         | 0          | 0         | 0         | 0         | 0          | 0          | 0         | 0         | 0         | 0          | 0          | 0          | 0         |
| LOC100240734 | 0.565614   | 0.545043  | 1.0918     | 0         | 0.0732162 | 0.0401344 | 1.13015    | 0.502671   | 0         | 0         | 0         | 0.370986   | 0          | 0.0739037  | 0         |

|              |           |           |           |           |           |           |           |           |            |           |            |           |            |           |           |
|--------------|-----------|-----------|-----------|-----------|-----------|-----------|-----------|-----------|------------|-----------|------------|-----------|------------|-----------|-----------|
| LOC100240735 | 0.255724  | 0.258745  | 0.465417  | 0         | 0.119168  | 0.0870984 | 0.291978  | 0.27272   | 0          | 0.032096  | 0.0288681  | 0.073191  | 0.0329984  | 0.0534611 | 0.220351  |
| LOC100268168 | 0.162245  | 0.156344  | 0.268441  | 0.13137   | 0.0900079 | 0.049339  | 0.264637  | 0.14419   | 0.0846839  | 0.378177  | 0.091577   | 0.19072   | 0.119634   | 0.314957  | 0.133145  |
| LOC100270746 | 0.147565  | 0.296245  | 0.264498  | 0.430864  | 0.916875  | 0.293182  | 0.393131  | 0.174858  | 0.0599057  | 0.0926044 | 0.222109   | 0.175977  | 0.111076   | 0.12854   | 0         |
| LOC100270804 | 0.773163  | 0.494634  | 0.462659  | 0.219561  | 0.320815  | 0.302869  | 0.386589  | 0.37339   | 0.123219   | 0.0720052 | 0.103586   | 0.152634  | 0.0740296  | 0.142096  | 0.280128  |
| LOC100272217 | 0.107893  | 0.129961  | 0.196365  | 0.0889495 | 0.0837976 | 0.257235  | 0.11087   | 0.0767091 | 0.354784   | 0.176042  | 0.389753   | 0.0926404 | 0.0974568  | 0.101501  | 0         |
| LOC100286906 | 0.0178573 | 0         | 0         | 0         | 0         | 0         | 0         | 0         | 0          | 0         | 0          | 0         | 0          | 0         | 0         |
| LOC100286922 | 0.0539019 | 0.21179   | 0.236608  | 0.0231549 | 0         | 0.0382641 | 0.526493  | 0.372766  | 0          | 0         | 0          | 0.0482315 | 0          | 0         | 0         |
| LOC100286925 | 0.773723  | 0.832768  | 0.91366   | 0.430823  | 0.949856  | 1.47702   | 0.983152  | 0.737529  | 0.265974   | 0.383742  | 0.197228   | 0.531296  | 0.466996   | 0.626139  | 1.07532   |
| LOC100287010 | 0         | 0         | 0         | 0         | 0         | 0         | 0         | 0         | 0          | 0         | 0          | 0         | 0          | 0         | 0         |
| LOC100287015 | 0.182607  | 0.250057  | 0.29418   | 0.683398  | 0.373226  | 0.85109   | 0.274335  | 0.136662  | 0.53843    | 0.615196  | 1.1392     | 0.165045  | 0.502273   | 0.346592  | 0.276049  |
| LOC100287036 | 0.914175  | 1.09729   | 0.915484  | 0.512361  | 1.1709    | 0.464313  | 1.17196   | 0.698415  | 0.0976633  | 0.42272   | 0.0724203  | 1.2279    | 0          | 0.846606  | 1.08254   |
| LOC100287042 | 0.604087  | 0.403295  | 0.472093  | 0.214897  | 0.635252  | 0.932286  | 0.448964  | 0.43326   | 0.132537   | 0.281691  | 0.325067   | 0.188807  | 0.18432    | 0.159688  | 0.0857295 |
| LOC100287049 | 1.21585   | 1.38044   | 1.10989   | 0.82091   | 0.195376  | 0.428391  | 1.34035   | 0.819724  | 0.204244   | 0.684076  | 0.378632   | 1.04997   | 0.216403   | 0.96414   | 1.26443   |
| LOC100287072 | 0         | 0         | 0.0089587 | 0.0111849 | 0         | 0         | 0         | 0.0196071 | 0          | 0         | 0          | 0         | 0.00706389 | 0         | 0         |
| LOC100287175 | 0         | 0.0473489 | 0.0406488 | 0         | 0         | 0         | 0.0561019 | 0         | 0          | 0         | 0          | 0         | 0          | 0         | 0         |
| LOC100287329 | 0.0493455 | 0.0988557 | 0.068753  | 0.0374699 | 0.10489   | 0.0420171 | 0.0948903 | 0.0877084 | 0.0126521  | 0.019558  | 0.00586368 | 0.0297331 | 0.00837828 | 0.0475081 | 0.0559472 |
| LOC100287467 | 0.724691  | 0.914172  | 1.03982   | 1.27298   | 1.1684    | 1.05361   | 0.554993  | 0.65395   | 0.405097   | 0.994362  | 0.699789   | 0.617135  | 1.11528    | 0.679654  | 0.67116   |
| LOC100287497 | 1.32784   | 1.2521    | 1.26888   | 0.510321  | 0.449279  | 0.496288  | 1.13081   | 1.4527    | 0.240173   | 0.511525  | 0.366085   | 0.639677  | 0.13289    | 0.627567  | 0.96921   |
| LOC100287704 | 0         | 0         | 0         | 0         | 0         | 0         | 0         | 0         | 0          | 0         | 0          | 0         | 0          | 0         | 0         |
| LOC100287792 | 0.0111916 | 0         | 0         | 0         | 0         | 0         | 0         | 0         | 0          | 0         | 0          | 0         | 0          | 0         | 0         |
| LOC100287808 | 0.127674  | 0.188647  | 0.147869  | 0.140343  | 0.423087  | 0.456594  | 0.204084  | 0.173981  | 0.103662   | 0.0961464 | 0.297865   | 0.255792  | 0.109833   | 0.160147  | 0.183356  |
| LOC100287834 | 0         | 0         | 0         | 0         | 0         | 0         | 0         | 0         | 0          | 0         | 0          | 0         | 0          | 0         | 0         |
| LOC100287837 | 0.647044  | 0.19524   | 0.383508  | 0.302414  | 2.78828   | 1.03978   | 0.39445   | 0.221542  | 0.0877168  | 0.136065  | 0.56561    | 0.124738  | 0.104409   | 0.284708  | 0.706025  |
| LOC100287846 | 0.0819016 | 0.0676482 | 0.0532359 | 0.0482297 | 0.072698  | 0.104607  | 0.0935126 | 0.0519909 | 0.00712478 | 0         | 0.0198121  | 0.0209296 | 0.0113234  | 0.0550355 | 0.151227  |
| LOC100287896 | 0.497848  | 0.600212  | 0.652136  | 0.537001  | 0.302606  | 0.97987   | 0.295893  | 0.406857  | 0.416458   | 0.553712  | 0.814428   | 0.270192  | 0.315039   | 0.282912  | 0.213111  |
| LOC100287944 | 0.0842836 | 9.95E-44  | 0.0720679 | 0         | 5.55E-16  | 0         | 0.0623534 | 0         | 0          | 0         | 3.77E-29   | 4.65E-43  | 1.47E-43   | 0.0254094 | 0         |

|              |           |           |            |            |           |            |           |            |           |           |           |           |            |            |            |
|--------------|-----------|-----------|------------|------------|-----------|------------|-----------|------------|-----------|-----------|-----------|-----------|------------|------------|------------|
| LOC100288069 | 12.1593   | 10.6059   | 9.37769    | 11.1391    | 14.2499   | 10.3069    | 16.1471   | 13.1616    | 6.51599   | 4.93519   | 3.72044   | 13.6263   | 3.16567    | 7.67577    | 10.3766    |
| LOC100288123 | 0.906912  | 0.84156   | 0.764155   | 0.276918   | 2.00877   | 0.743623   | 1.34229   | 0.880616   | 0.163632  | 0.21079   | 0.132714  | 0.721022  | 0.173373   | 0.781209   | 1.06125    |
| LOC100288162 | 1.02629   | 1.5463    | 1.6467     | 0.638154   | 3.48487   | 1.62683    | 2.26799   | 1.08312    | 0.196285  | 0.197539  | 0.25542   | 0.986177  | 0.175432   | 0.820958   | 1.49541    |
| LOC100288175 | 0.0712825 | 0.34345   | 0.216223   | 0.661128   | 0.369088  | 0.404641   | 0.0271294 | 0.337866   | 1.59159   | 1.55076   | 1.07292   | 1.51313   | 2.2229     | 1.24184    | 0.204741   |
| LOC100288203 | 0.770528  | 0.777446  | 0.667432   | 0.36433    | 0.450596  | 0.710126   | 0.403657  | 0.563938   | 0.132482  | 0.170663  | 0.583298  | 0.389177  | 0.198856   | 0.454827   | 0.481686   |
| LOC100288208 | 0         | 0         | 0          | 0          | 0         | 0          | 0         | 0          | 0         | 0         | 0         | 0         | 0          | 0          | 0          |
| LOC100288254 | 0.115587  | 0.0371277 | 0.0212492  | 0          | 0.0398992 | 0.0109356  | 0.0733185 | 0.0570689  | 0.0469239 | 0         | 0         | 0.0091895 | 0          | 0.0469861  | 0.0922207  |
| LOC100288570 | 2.75E-06  | 0.0413417 | 0.00100336 | 0.00020854 | 1.07E-39  | 0.00011258 | 3.64E-15  | 0.00039109 | 0         | 8.93E-08  | 1.34E-20  | 2.11E-11  | 0.00011079 | 0.0915261  | 0.00024005 |
|              |           |           | 7          |            | 8         |            | 3         |            |           |           |           | 5         |            |            | 3          |
| LOC100288637 | 0.366634  | 0.331512  | 0.386011   | 0.546655   | 0.3853    | 0.283065   | 0.348686  | 0.287354   | 0.182305  | 0.3588    | 0.271054  | 0.209785  | 0.172415   | 0.60842    | 0.236244   |
| LOC100288728 | 0         | 0         | 0          | 0          | 0         | 0          | 0         | 0          | 0         | 0         | 0         | 0         | 0          | 0          | 0          |
| LOC100288748 | 0.222631  | 0.214534  | 0.254339   | 0.142027   | 0.115274  | 0.126378   | 0.0847311 | 0.160169   | 0.296963  | 0.199589  | 0.0837743 | 0.12137   | 0.136801   | 0.083112   | 0          |
| LOC100288798 | 0.740782  | 0.66461   | 0.866411   | 0.210592   | 0.952295  | 0.369759   | 0.758304  | 0.703748   | 0.21777   | 0.54503   | 1.0381    | 0.219331  | 0.082405   | 0.213608   | 0.550271   |
| LOC100288846 | 0.355269  | 0.428084  | 0.273904   | 0.359119   | 0.666567  | 0.450839   | 0.329865  | 0.27071    | 0.369126  | 0.398384  | 0.679078  | 0.250332  | 0.428642   | 0.255847   | 3.74E-16   |
| LOC100288866 | 0.101283  | 0.0200865 | 0          | 0          | 0.0319745 | 0.068599   | 0.0687582 | 0.122271   | 0         | 0.0237894 | 0         | 0.0144035 | 0          | 0.00990628 | 0.0903518  |
| LOC100288911 | 1.09897   | 0.747531  | 0.935887   | 0.433023   | 1.05437   | 0.990805   | 0.7381    | 0.574514   | 0.354289  | 0.811366  | 2.22579   | 0.161894  | 0.542215   | 0.219612   | 0.649873   |
| LOC100288966 | 0         | 0         | 0          | 0          | 0         | 0          | 0         | 0          | 0         | 0         | 0         | 0         | 0          | 0          | 0          |
| LOC100289230 | 0.623979  | 0.42733   | 0.556949   | 0.327494   | 0.260534  | 0.544626   | 0.564443  | 0.539912   | 0.143174  | 0.218702  | 0.269595  | 0.150824  | 0.0810183  | 0.290562   | 0.764323   |
| LOC100289333 | 0.433159  | 0.149073  | 0.204765   | 0.0637689  | 0         | 0.15807    | 0.0706524 | 0.109987   | 0         | 0         | 0         | 0         | 0          | 0.0970233  | 0.0888672  |
| LOC100289361 | 0.297182  | 0.143187  | 0.307312   | 0.229691   | 0.750143  | 0.695878   | 0.254485  | 0.231097   | 0.271451  | 0.559491  | 0.838704  | 0.106321  | 0.311578   | 0.0970752  | 0.0533489  |
| LOC100289473 | 0.247851  | 0.358255  | 0.17941    | 0.319272   | 0.0481247 | 0.0527604  | 0.530602  | 0.440538   | 0.528245  | 0.233308  | 0.0699481 | 0.266016  | 0.059967   | 0.0161922  | 0          |
| LOC100289495 | 0.148049  | 0.156931  | 0.132275   | 0.10985    | 0.0275966 | 0.176487   | 0.108184  | 0.126311   | 0.0432737 | 0.0817595 | 0.0869071 | 0.0635599 | 0.0229249  | 0.0557114  | 0.00850469 |
| LOC100289511 | 1.9967    | 1.9613    | 2.28165    | 1.37194    | 2.03095   | 0.867958   | 2.13931   | 1.38703    | 1.04513   | 0.86652   | 0.858575  | 1.45858   | 0.725383   | 0.885057   | 1.35353    |
| LOC100289561 | 2.04948   | 2.24177   | 2.29156    | 2.24021    | 5.64843   | 2.3347     | 2.86515   | 1.93395    | 0.816827  | 0.990522  | 1.23345   | 1.30654   | 2.0085     | 2.40419    | 3.00412    |
| LOC100289580 | 0.37242   | 0.714989  | 0.494157   | 0.697939   | 2.21386   | 1.23433    | 1.49337   | 0.794352   | 0.340045  | 0.574789  | 0.119412  | 1.81187   | 0.293625   | 1.17375    | 1.17856    |
| LOC100289656 | 0         | 0         | 0          | 1.64E-43   | 0.230263  | 0          | 0         | 0          | 3.92E-40  | 0         | 0         | 0         | 0          | 0          | 0          |

|              |           |            |            |           |           |            |           |           |           |           |            |            |            |           |           |
|--------------|-----------|------------|------------|-----------|-----------|------------|-----------|-----------|-----------|-----------|------------|------------|------------|-----------|-----------|
| LOC100291105 | 0.241388  | 0.163318   | 0.16345    | 0.0474948 | 0.171991  | 0.2220219  | 0.24321   | 0.147486  | 0.0189244 | 0.172402  | 0.052512   | 0.161924   | 0.0589631  | 0.176611  | 0.255917  |
| LOC100294145 | 0.128573  | 0.100855   | 0.0856102  | 0.154311  | 0.0657606 | 0.174898   | 0.107414  | 0.10033   | 0.0725647 | 0.177115  | 0.29648    | 0.0549739  | 0.115327   | 0.0717047 | 0.119345  |
| LOC100294362 | 1.16295   | 1.22816    | 1.26368    | 0.73791   | 1.16249   | 1.31865    | 1.65073   | 0.986995  | 0.175261  | 0.515323  | 0.171132   | 0.63337    | 0.211997   | 0.778904  | 2.04888   |
| LOC100303749 | 0.692185  | 0.928015   | 1.19504    | 0.527234  | 0.140244  | 0.256255   | 0.996483  | 1.3373    | 0.183262  | 0.339951  | 0.169868   | 0.710615   | 0.0388343  | 0.975195  | 0.821184  |
| LOC100310756 | 0.222989  | 0.314644   | 0.250355   | 0.410351  | 0.494827  | 0.8273     | 0.254601  | 0.0990869 | 0.0581947 | 0.39982   | 0.611336   | 0.125364   | 0.513826   | 0.27471   | 0.228743  |
| LOC100335030 | 0.534634  | 0.723382   | 0.808226   | 0.233967  | 0.227526  | 0.218263   | 0.284309  | 0.631348  | 0.053517  | 0.183841  | 0.0330704  | 0.298699   | 0.0519777  | 0.566501  | 0.536409  |
| LOC100379224 | 0.348715  | 0.196078   | 0.246783   | 0.134437  | 0.107508  | 0.32779    | 0.0722456 | 0.207638  | 0.0886611 | 0.224529  | 0.309047   | 0.186197   | 0.147571   | 0.25801   | 0.632421  |
| LOC100419170 | 0.0305116 | 0.0110257  | 0.00631034 | 0.267266  | 0.0236975 | 0.0649506  | 0.0522557 | 0.0406743 | 0.250828  | 0.0574428 | 0.111942   | 0.00545797 | 0.0393719  | 0.139534  | 0.0985917 |
| LOC100419583 | 2.29853   | 4.32129    | 4.58599    | 9.38192   | 5.14559   | 10.0065    | 2.52147   | 3.71499   | 6.22993   | 5.28897   | 8.03865    | 3.22482    | 5.51036    | 3.10928   | 3.20389   |
| LOC100420587 | 0         | 0.0107012  | 0          | 0         | 0         | 0          | 0         | 0         | 0         | 0         | 0.00835752 | 0          | 0          | 0         | 0.0106322 |
| LOC100421746 | 0         | 0          | 0          | 0         | 0         | 0          | 0         | 0         | 0         | 0         | 0          | 0          | 0          | 0         | 0         |
| LOC100422212 | 0         | 0          | 0          | 0         | 0         | 0          | 0         | 0         | 0         | 0         | 0          | 0          | 0          | 0         | 0         |
| LOC100422556 | 1.06814   | 0.661688   | 0.757407   | 0.0524167 | 0.237027  | 0.21655    | 0.754971  | 0.813664  | 0         | 0.638394  | 0.114838   | 0.618706   | 0.0984513  | 0.824094  | 1.31484   |
| LOC100422781 | 0.033944  | 0.0163548  | 0.0280809  | 0.0279843 | 0.0105454 | 0.0289029  | 0.0465075 | 0         | 0         | 0         | 0.00485757 | 0          | 0.00354813 | 0         | 0         |
| LOC100499194 | 0.469656  | 0.394247   | 0.529066   | 0.195657  | 0.465655  | 0.212716   | 0.34228   | 0.435153  | 0.182549  | 0.849618  | 0.157927   | 0.440659   | 0.0633572  | 0.684162  | 0.444873  |
| LOC100499489 | 0.498892  | 0.240374   | 0.244574   | 0.257061  | 0.60274   | 1.07773    | 0.611813  | 0.26274   | 0.135021  | 0.243507  | 0.615334   | 0.138822   | 0.214588   | 0.140029  | 0.942028  |
| LOC100500773 | 0         | 0          | 0          | 0         | 0         | 0          | 0         | 0         | 0         | 0         | 0          | 0          | 0          | 0.0177354 | 0         |
| LOC100505501 | 0.0347076 | 0.0267563  | 0.0401976  | 0.0143069 | 0.0431304 | 0.0709274  | 0.0396281 | 0.0308453 | 0         | 0.052274  | 0.0470167  | 0.0099337  | 0.0313505  | 0.0108838 | 0.0797513 |
| LOC100505549 | 0.620254  | 0.762786   | 0.927138   | 0.771753  | 0.819991  | 0.799294   | 0.695714  | 0.58836   | 0.259215  | 0.724481  | 0.39952    | 0.531133   | 0.219087   | 0.713415  | 1.55604   |
| LOC100505555 | 0.177477  | 0.102614   | 0.117457   | 0.438949  | 0.33082   | 0.392911   | 0.202638  | 0.126182  | 0.432295  | 0.356404  | 0.52091    | 0.12699    | 0.160311   | 0.12986   | 0.050976  |
| LOC100505585 | 0.285276  | 0.0687253  | 0.1475     | 0         | 0.0553916 | 0.0303636  | 0.24429   | 0.380295  | 0         | 0         | 0          | 0          | 0.0230074  | 0.0372745 | 0         |
| LOC100505588 | 0         | 0.00519603 | 0          | 0         | 0         | 0.00918267 | 0         | 0         | 0         | 0         | 0          | 0          | 0          | 0         | 0.0619503 |
| LOC100505622 | 0         | 0          | 0.0279497  | 0         | 0.0524805 | 0.0287679  | 0.0385752 | 0         | 0         | 0.0424042 | 0.114419   | 0          | 0          | 0.0706311 | 0         |
| LOC100505635 | 0.626428  | 0.0838397  | 0.0575806  | 0.0717281 | 0.324353  | 0.38523    | 0.119206  | 0.185572  | 0.127153  | 0.218398  | 0.0785733  | 0.423325   | 0.0673614  | 0.200077  | 0.699713  |
| LOC100505658 | 0.700738  | 0.913842   | 1.03573    | 0.491049  | 0.217698  | 0.143201   | 0.56539   | 0.929985  | 0.170684  | 0.469066  | 0.263682   | 0.782179   | 0.235099   | 1.16219   | 0.644063  |
| LOC100505715 | 0.0739395 | 0.239198   | 0.209719   | 0.108853  | 0.475822  | 0.143905   | 0.229145  | 0.159584  | 0.0771857 | 0.185603  | 0.155013   | 0.143601   | 0.0885957  | 0.253946  | 0.182034  |



|              |            |            |           |           |            |            |            |           |           |            |            |            |            |           |            |
|--------------|------------|------------|-----------|-----------|------------|------------|------------|-----------|-----------|------------|------------|------------|------------|-----------|------------|
| LOC100505716 | 1.5904     | 1.19962    | 1.06163   | 0.587762  | 0.528163   | 0.401592   | 1.39008    | 1.46215   | 0.0667906 | 0.289092   | 0.173345   | 0.69848    | 0.0566134  | 0.38981   | 1.19714    |
| LOC100505736 | 0.871968   | 0.939108   | 0.712867  | 0.359435  | 0.446177   | 0.227108   | 0.702766   | 0.884335  | 0.0499745 | 0.257508   | 0.266352   | 0.616576   | 0.0595683  | 0.509344  | 0.97234    |
| LOC100505774 | 0.22076    | 0.124093   | 0.0608762 | 0.0379167 | 0.0571529  | 0.125316   | 0.294067   | 0.0980967 | 0         | 0          | 0          | 0          | 0          | 0         | 0.05284    |
| LOC100505782 | 0          | 0.160033   | 0.265911  | 0.022083  | 0          | 0.00912315 | 0.171267   | 0.199963  | 0.0130489 | 0.0268953  | 0          | 0.0229993  | 0          | 0.0167994 | 0          |
| LOC100505795 | 0.389058   | 0.352186   | 0.292596  | 0.145795  | 0.256387   | 0.100387   | 0.457675   | 0.35624   | 0.0717922 | 0.118378   | 0.0798542  | 0.278381   | 0          | 0.27728   | 0.253971   |
| LOC100505797 | 0          | 0          | 0         | 0         | 0          | 0          | 0          | 0         | 0         | 0          | 0          | 0          | 0          | 0         | 0          |
| LOC100505824 | 0          | 0          | 0         | 0         | 0          | 0          | 0          | 0         | 0         | 0          | 0          | 0          | 0          | 0         | 0          |
| LOC100505841 | 0          | 0.025285   | 0         | 0.0540807 | 0          | 0          | 0          | 0         | 0         | 0          | 0          | 0          | 0          | 0         | 0          |
| LOC100505851 | 0.0772723  | 0.00930774 | 0.0958876 | 0         | 0          | 0          | 0.0661703  | 0.0686732 | 0         | 0          | 0.0218077  | 0.0414678  | 0.137103   | 0.0201929 | 0          |
| LOC100505874 | 0          | 0          | 0         | 0         | 0          | 0          | 0          | 0         | 0         | 0          | 0          | 0          | 0          | 0         | 0          |
| LOC100505912 | 0          | 0.138596   | 0.0432668 | 0         | 0.081241   | 0.0445333  | 0          | 0.116201  | 0         | 0          | 0          | 0.0561338  | 0.0506162  | 0.0820039 | 0.112666   |
| LOC100505915 | 18.0833    | 17.8161    | 21.0984   | 5.82916   | 6.94606    | 8.07043    | 19.6095    | 17.6621   | 1.45376   | 3.58894    | 1.71958    | 8.12039    | 0.672447   | 8.01705   | 11.8847    |
| LOC100505918 | 0.00948097 | 0.0548169  | 0.0313733 | 0         | 0.0147272  | 0.0242188  | 0.0216501  | 0.0674072 | 0         | 0          | 0          | 0.0407033  | 0.00611707 | 0.0148655 | 0          |
| LOC100505921 | 0.0593412  | 0.0857744  | 0.0654549 | 0         | 0.0307258  | 0.0336855  | 0.112923   | 0.0703166 | 0.0240903 | 0.0496528  | 0.0669888  | 0.0283068  | 0          | 0.0206762 | 0          |
| LOC100505938 | 0.194117   | 0.0311762  | 0.0892151 | 0.22227   | 0.167517   | 0.220384   | 0.0985051  | 0.0191683 | 0.13134   | 0.108283   | 0.0730446  | 0          | 0          | 0.0112727 | 0          |
| LOC100505942 | 0.146079   | 0.0904924  | 0.241693  | 0.086022  | 0.226911   | 0.284307   | 0.0714806  | 0.0927305 | 0.0254154 | 0.026192   | 0.0942313  | 0.0149319  | 0.0538567  | 0.0327202 | 0          |
| LOC100505978 | 0.026817   | 0          | 0         | 0         | 0          | 0          | 0          | 0         | 0         | 0          | 0.030273   | 0          | 0          | 0         | 0          |
| LOC100506016 | 0          | 0          | 0         | 0         | 0          | 0          | 0          | 0         | 0         | 0          | 0          | 0          | 0          | 0         | 0          |
| LOC100506022 | 0.123404   | 0.132637   | 0.0942358 | 0.0489122 | 0.206435   | 0.250569   | 0.260121   | 0.101235  | 0.011561  | 0.0833997  | 0.203604   | 0.0543379  | 0.0857444  | 0.0644965 | 0.218122   |
| LOC100506023 | 0.350091   | 0.232182   | 0.173772  | 0.0806446 | 0.319889   | 0.133267   | 0.178699   | 0.245245  | 0.0551774 | 0.0775411  | 0.130186   | 0.0913585  | 0.0265737  | 0.116241  | 0.301665   |
| LOC100506071 | 0.138772   | 0.370007   | 0.41162   | 0.32835   | 0.055246   | 0.052579   | 0.153944   | 0.248988  | 0.188526  | 0.279209   | 0.0893621  | 0.147527   | 0.0766777  | 0.379013  | 0.309799   |
| LOC100506076 | 0.00106888 | 0.533814   | 0.516319  | 0.0016581 | 0.00062063 | 0.00028350 | 0.00063783 | 0.273298  | 8.80E-33  | 0.00034493 | 0.00012529 | 0.00040013 | 5.73E-05   | 0.0593499 | 0.00528372 |
|              |            |            |           |           | 3          | 7          | 4          |           |           | 7          |            | 3          |            |           |            |
| LOC100506082 | 0.103317   | 0.0497798  | 0         | 0.106471  | 0          | 0.13196    | 0          | 0         | 0.0629144 | 0          | 0.0583161  | 0          | 0          | 0         | 0          |
| LOC100506083 | 0.215704   | 0.370582   | 0.396473  | 0.393532  | 0.331488   | 0.734985   | 0.54312    | 0.298219  | 0.0612739 | 0.153566   | 0.0558602  | 0.0485381  | 0          | 0.101547  | 0.138404   |
| LOC100506098 | 0.163941   | 0.250133   | 0.158228  | 0.168946  | 0.169772   | 0.139594   | 0.311971   | 0.339961  | 0.465878  | 0.102882   | 0.215914   | 0.215058   | 0.158661   | 0         | 0          |

|              |           |           |           |           |           |           |           |           |           |           |           |            |            |           |           |
|--------------|-----------|-----------|-----------|-----------|-----------|-----------|-----------|-----------|-----------|-----------|-----------|------------|------------|-----------|-----------|
| LOC100506100 | 0.72322   | 0.716276  | 0.465344  | 1.57341   | 0.249647  | 0.992143  | 0.504625  | 0.642738  | 0.440401  | 1.71457   | 3.12963   | 0.574982   | 0.72585    | 0.902968  | 0.519318  |
| LOC100506123 | 0.78912   | 0.373205  | 0.561787  | 0.367598  | 0.458193  | 0.209304  | 0.470891  | 0.0761621 | 2.16E-36  | 0.254656  | 0.0924962 | 0.293498   | 0.0422921  | 0.165003  | 0.651624  |
| LOC100506124 | 1.37756   | 2.05407   | 2.24325   | 0.552904  | 0.473015  | 1.00012   | 0.761594  | 1.41757   | 0.0883009 | 0.0727993 | 0.0818472 | 0.300893   | 0.037423   | 0.591137  | 1.12454   |
| LOC100506125 | 0         | 0.0201276 | 0.0345588 | 0         | 0         | 0         | 0         | 0         | 0         | 0         | 0         | 0          | 0          | 0         | 0         |
| LOC100506142 | 1.15868   | 0.602342  | 0.870253  | 0.65987   | 0.331547  | 0.363484  | 0.939984  | 0.853597  | 0.0928381 | 0.516645  | 0.240948  | 0.447258   | 0.118038   | 1.70517   | 2.25517   |
| LOC100506175 | 0.0725487 | 0.0174775 | 0         | 0.149527  | 0.281733  | 0.21621   | 0.0414169 | 0.193426  | 0         | 0         | 0.0409493 | 0          | 0          | 0.322296  | 0.57304   |
| LOC100506178 | 0.142624  | 0.0870431 | 0.0157318 | 0.235164  | 0.0443087 | 0.445288  | 0.151987  | 0.0507008 | 0         | 0.226742  | 0.246873  | 0.0204102  | 0.214713   | 0.417431  | 0.887577  |
| LOC100506188 | 0.079257  | 0.0305498 | 0.0393402 | 0         | 0         | 0.0539891 | 0.199085  | 0.0281748 | 0         | 0.0596854 | 0.143154  | 0.0113421  | 0.0306817  | 0.0497078 | 0.0455292 |
| LOC100506207 | 0.41154   | 0.373244  | 0.260348  | 0.207894  | 0.225622  | 0.213001  | 0.257975  | 0.301199  | 0.0982763 | 0.0911514 | 0.127531  | 0.155895   | 0.0780951  | 0.164479  | 0.0811208 |
| LOC100506258 | 0.349873  | 0.617278  | 0.642726  | 0.185579  | 0.143861  | 0.188386  | 0.475843  | 0.352091  | 0.112793  | 0.0904083 | 0.104549  | 0.0662673  | 0.00331965 | 0.0779839 | 0.0886697 |
| LOC100506271 | 0         | 0         | 0         | 0         | 0         | 0         | 0         | 0         | 0         | 0         | 0         | 0          | 0          | 0         | 0         |
| LOC100506274 | 0         | 0.0241618 | 0.0207428 | 0         | 0         | 0.0426999 | 0.0286284 | 0         | 0         | 0         | 0         | 0          | 0          | 0         | 0         |
| LOC100506281 | 0.188155  | 0.220164  | 0.222364  | 0.110799  | 0.542786  | 0.228873  | 0.12276   | 0.262769  | 0         | 0.0674725 | 0.0303433 | 0.13463    | 0.0520271  | 0.393352  | 0.617632  |
| LOC100506282 | 0.271601  | 0.413173  | 0.730946  | 0.282061  | 0.144977  | 0.159872  | 0.245853  | 0.43716   | 0.192191  | 0.398343  | 0.664836  | 0.315401   | 0.139082   | 0.261867  | 0.350676  |
| LOC100506302 | 0.434454  | 0.475011  | 0.428529  | 0.378838  | 0.285517  | 0.739864  | 0.457889  | 0.504909  | 0.468065  | 0.293615  | 0.697941  | 0.394558   | 0.463586   | 0.567662  | 0.0959895 |
| LOC100506321 | 1.11856   | 0.756717  | 0.495645  | 0.483028  | 0.563386  | 0.353408  | 0.903494  | 0.716423  | 0.0316926 | 0.425676  | 0.204975  | 0.541124   | 0.218941   | 0.710574  | 0.753832  |
| LOC100506358 | 0.024568  | 0         | 0         | 0         | 0         | 0         | 0.0280509 | 0.043668  | 0         | 0.0308354 | 0         | 0          | 0          | 0.0256806 | 0.246979  |
| LOC100506368 | 0.172281  | 0.0645614 | 0.126687  | 0.0591801 | 0.0297346 | 0.0977966 | 0.0655682 | 0.0680484 | 0         | 0.0720767 | 0.0432186 | 0.0273937  | 0.111155   | 0.0100046 | 0.219926  |
| LOC100506384 | 0.0341343 | 0.0493393 | 0.0282383 | 0         | 0.159067  | 0         | 0         | 0         | 0         | 0         | 0         | 0          | 0          | 0         | 0.0490212 |
| LOC100506388 | 0.500636  | 0.559178  | 0.112953  | 0.398666  | 0.212089  | 0.503792  | 0.311787  | 0.384252  | 0         | 0.0571227 | 0.0770667 | 0.146544   | 0.102775   | 0         | 0         |
| LOC100506403 | 0.0506412 | 0         | 0.083788  | 0         | 0.0786633 | 0         | 0.0578205 | 0.0450057 | 0         | 0         | 0         | 0          | 0          | 0         | 0.290909  |
| LOC100506406 | 0         | 0         | 0         | 0         | 0         | 0         | 0         | 0         | 0         | 0         | 0         | 0          | 0          | 0         | 0         |
| LOC100506422 | 0         | 0         | 0         | 0         | 0         | 0         | 0         | 0         | 0         | 0         | 0         | 0          | 0          | 0         | 0         |
| LOC100506444 | 0.0143212 | 0         | 0         | 0.103309  | 0         | 0.0121943 | 0.032703  | 0         | 0         | 0.0359491 | 0         | 0.0204944  | 0          | 0.0149698 | 0         |
| LOC100506472 | 0.330981  | 0.712883  | 0.703292  | 0.133753  | 0.624776  | 0.308725  | 0.457246  | 0.495586  | 0.041963  | 0.0814551 | 0.0366316 | 0.214785   | 0.0206422  | 0.253889  | 0.462187  |
| LOC100506474 | 0.0952389 | 0.0172078 | 0.0492427 | 0         | 0.0184924 | 0         | 0.0951481 | 0.0846404 | 0         | 0.0298836 | 0.0134391 | 0.00851825 | 0.0153619  | 0.018666  | 0         |

|              |           |           |           |           |           |           |           |           |           |            |           |           |            |            |           |
|--------------|-----------|-----------|-----------|-----------|-----------|-----------|-----------|-----------|-----------|------------|-----------|-----------|------------|------------|-----------|
| LOC100506476 | 0.305752  | 0.929223  | 1.30361   | 0.702884  | 0.98641   | 0.200264  | 0.161122  | 0.522551  | 0.458303  | 0.177115   | 0.292055  | 0.0504862 | 0.0606983  | 0.0122922  | 0.303991  |
| LOC100506497 | 0.155993  | 0.276587  | 0.170343  | 0.180045  | 0.0193848 | 0.10626   | 0.0569943 | 0.127543  | 0.0835918 | 0.0156629  | 0.0352192 | 0.0446467 | 0          | 0.0130446  | 0.08961   |
| LOC100506544 | 0.475954  | 0.83696   | 0.88186   | 0.440433  | 0.357824  | 0.374994  | 0.684115  | 0.691018  | 0.1712    | 0.17159    | 0.111922  | 0.281698  | 0.137827   | 0.515936   | 0.865982  |
| LOC100506548 | 4.52721   | 4.53787   | 5.07752   | 2.74147   | 1.95497   | 4.99253   | 2.93524   | 3.81137   | 1.52551   | 1.99136    | 2.16142   | 2.1681    | 2.00501    | 3.77519    | 1.79887   |
| LOC100506551 | 0.655724  | 0.789384  | 0.703231  | 0.370626  | 0.590652  | 0.164186  | 0.698569  | 0.768066  | 0.0924574 | 0.185634   | 0.147243  | 0.467222  | 0.0434138  | 0.523972   | 0.685886  |
| LOC100506585 | 0.0968779 | 0.316368  | 0.249338  | 0.266228  | 0.92799   | 0.224557  | 0.399432  | 0.210459  | 0.032774  | 0.452591   | 0.0911359 | 0.793314  | 0.118065   | 0.168775   | 0.656998  |
| LOC100506606 | 1.33376   | 0.825416  | 0.691322  | 0.456415  | 0.224113  | 0.657452  | 0.443545  | 1.05073   | 0.106495  | 0.159689   | 0.177078  | 0.329113  | 0.13098    | 0.338996   | 0.3087    |
| LOC100506639 | 1.80899   | 2.03853   | 1.48972   | 0.889579  | 1.13793   | 0.852907  | 2.11665   | 1.76711   | 0.218493  | 0.694274   | 0.904059  | 0.673932  | 0.393624   | 1.18093    | 2.42617   |
| LOC100506675 | 0         | 0         | 0         | 0         | 0         | 0         | 0         | 0         | 0         | 0          | 0         | 0         | 0          | 0          | 0         |
| LOC100506679 | 0.0765174 | 0.0804735 | 0.0820273 | 0.0595908 | 0.0414522 | 0.0443528 | 0.117626  | 0.0767348 | 0.0440785 | 0.0877067  | 0.104078  | 0.0468289 | 9.42E-43   | 0.0475019  | 0.0530103 |
| LOC100506682 | 0.0241829 | 0.0233034 | 0         | 0         | 0         | 0         | 0.0552225 | 0.0214918 | 0         | 0          | 0         | 0         | 0          | 0          | 0         |
| LOC100506688 | 0.019741  | 0.0158525 | 0.0108874 | 0.0135625 | 0         | 0.0672369 | 0.0150264 | 0.0350883 | 0         | 0.0166859  | 0.0519987 | 0         | 0          | 0.0171959  | 0.0661514 |
| LOC100506691 | 0.114146  | 0.0412479 | 0.165251  | 0.147038  | 0.0886539 | 0.194387  | 0.228074  | 0.0507216 | 0.0347542 | 0.143265   | 0.386569  | 0         | 0.0184116  | 0.223716   | 0.450801  |
| LOC100506725 | 0.0394596 | 0.114073  | 0.0326438 | 0.0406643 | 0.0919416 | 0.0671987 | 0.112634  | 0.087671  | 0.0240287 | 0.0247629  | 0.133635  | 0.0141172 | 0          | 0.0618699  | 0         |
| LOC100506730 | 1.23615   | 1.54049   | 1.93762   | 0.574689  | 0.909557  | 1.03674   | 1.29467   | 1.47856   | 0.362225  | 0.326632   | 0.577072  | 0.724893  | 0.515716   | 0.680072   | 1.14792   |
| LOC100506747 | 0         | 0.0238135 | 0         | 0         | 0.0191934 | 0         | 0.0282157 | 0.0219622 | 0.0300968 | 0.0155082  | 0.0697427 | 0.0353646 | 0.0159442  | 0.0322893  | 0.03549   |
| LOC100506790 | 0         | 0.0287389 | 0         | 0         | 0         | 0         | 0         | 0         | 0         | 0          | 0         | 0         | 0          | 0          | 0         |
| LOC100506801 | 0.395608  | 0.385552  | 0.401655  | 0.120452  | 0.586583  | 0.176083  | 0.595412  | 0.391536  | 0         | 0.203125   | 0.101498  | 0.160834  | 0.017403   | 0.418223   | 0.671441  |
| LOC100506804 | 0.249809  | 0.300905  | 0.265706  | 0.0183883 | 0         | 0.182322  | 0.224105  | 0.174436  | 0         | 0.0447909  | 0.221574  | 0.127675  | 0.0805879  | 0.102584   | 0.0512511 |
| LOC100506844 | 0.860829  | 0.526427  | 0.575189  | 0.887109  | 0.411435  | 1.6915    | 0.378026  | 0.47079   | 0.0806456 | 0.664879   | 2.42942   | 0.165832  | 0.277701   | 0.173041   | 0.285291  |
| LOC100506858 | 0         | 0         | 0         | 0         | 0         | 0         | 0         | 0         | 0         | 0          | 0         | 0         | 0          | 0          | 0         |
| LOC100506869 | 0         | 0         | 0         | 0         | 0         | 0.14009   | 0         | 0         | 0         | 0          | 0         | 0         | 0          | 0          | 0         |
| LOC100506885 | 0.0931042 | 0.157007  | 0.214562  | 0.02056   | 0.0206604 | 0.0339759 | 0.356876  | 0.230499  | 0.0485959 | 0.00834681 | 0.0225221 | 0.0333093 | 0.00858148 | 0.00347574 | 0.0191013 |
| LOC100506937 | 0         | 0         | 0         | 0         | 0         | 0         | 0         | 0         | 0         | 0          | 0         | 0         | 0          | 0          | 0         |
| LOC100506985 | 1.33197   | 1.32937   | 1.27899   | 1.81384   | 0.0738934 | 0.911377  | 0.869031  | 2.05042   | 0.52142   | 1.58221    | 0.859219  | 0.748835  | 2.63953    | 0.969635   | 0.546538  |
| LOC100506990 | 3.29581   | 6.37603   | 6.84856   | 1.80722   | 4.30663   | 1.9341    | 4.94536   | 4.28472   | 0.94924   | 1.46737    | 0.597049  | 1.7886    | 0.689656   | 1.0824     | 1.87089   |

|              |           |            |            |            |           |           |           |           |            |           |           |            |            |           |           |
|--------------|-----------|------------|------------|------------|-----------|-----------|-----------|-----------|------------|-----------|-----------|------------|------------|-----------|-----------|
| LOC100507002 | 0.363677  | 0.366379   | 0.300859   | 0.170354   | 0.154068  | 0.19706   | 1.01921   | 0.176294  | 0.161061   | 0.37346   | 0.373223  | 0.141938   | 0.170649   | 0.172794  | 0.379844  |
| LOC100507006 | 0.445059  | 0.314506   | 0.490912   | 0.183458   | 0.230443  | 0.252641  | 0.508154  | 0.448269  | 0          | 0.409636  | 0.468921  | 0.169841   | 0.268006   | 0.139564  | 0.0852214 |
| LOC100507053 | 0.62834   | 0.559267   | 0.372991   | 0.444863   | 0.199199  | 0.820913  | 0.312159  | 0.375119  | 0.210297   | 0.252844  | 0.405653  | 0.326041   | 0.0928401  | 0.298316  | 0.365083  |
| LOC100507065 | 0.0461201 | 0.00888854 | 0.00763075 | 0.00950561 | 0.0143281 | 0.0314165 | 0.0105317 | 0         | 0          | 0.0115771 | 0.0416511 | 0          | 0.0297564  | 0.0192835 | 0.0397406 |
| LOC100507071 | 0.763945  | 0.84442    | 1.00375    | 0.277859   | 0.349021  | 0.612225  | 0.718322  | 0.798742  | 0          | 0.225607  | 0.304376  | 0.385852   | 0.115975   | 0.751569  | 1.16166   |
| LOC100507144 | 0.10453   | 0.161166   | 0.190245   | 0.0215443  | 0.0649488 | 0.106808  | 0.0238699 | 0.185796  | 0          | 0.0262393 | 0.0708011 | 0.0299177  | 0.0944196  | 0.0874115 | 0         |
| LOC100507156 | 0.259891  | 0.130015   | 0.12256    | 0.130972   | 0.189496  | 0.0995743 | 0.278705  | 0.156797  | 0.0257756  | 0.153116  | 0.131441  | 0.170365   | 0.0375944  | 0.648581  | 0.540581  |
| LOC100507205 | 0         | 0          | 0          | 0          | 0         | 0         | 0         | 0         | 0          | 0.121281  | 0         | 0          | 0          | 0         | 0         |
| LOC100507250 | 0.0669261 | 0.103187   | 0.143952   | 0.0275877  | 0         | 0.034192  | 0.0305656 | 0.071374  | 0          | 0.0503995 | 0         | 0.00957748 | 0.00863608 | 0.0559656 | 0         |
| LOC100507283 | 0.0955009 | 0.0536828  | 0.0921726  | 0.0328055  | 0.123622  | 0.162636  | 0.0999532 | 0.0565822 | 0.00969245 | 0.0399545 | 0.0898405 | 0.0398612  | 0.0410778  | 0.0540724 | 0.114293  |
| LOC100507291 | 0.42998   | 0.548394   | 1.19267    | 0.390977   | 0.275021  | 0.452269  | 0.606452  | 0.472044  | 0.585275   | 0.190472  | 0.685262  | 0.271467   | 0.244783   | 0.185069  | 0         |
| LOC100507334 | 8.54E-12  | 1.84E-11   | 7.28E-08   | 0.068216   | 0         | 0.0497598 | 0.100173  | 7.36E-21  | 0          | 0.076698  | 0.11276   | 1.00E-11   | 2.82E-09   | 1.33E-07  | 4.80E-12  |
| LOC100507346 | 0.417093  | 0.32628    | 0.326549   | 0.0845302  | 0.193581  | 0.0642029 | 0.597967  | 0.185324  | 0.0405642  | 0.0405866 | 0.0322056 | 0.0597779  | 0          | 0.062548  | 0.0169833 |
| LOC100507351 | 0.426852  | 0.126562   | 0.131289   | 0.0733139  | 0.238018  | 0.312202  | 0.318662  | 0.131314  | 0.0333242  | 0.054948  | 0.0185332 | 0.0783139  | 0.0953318  | 0.111546  | 0.510845  |
| LOC100507373 | 0.66656   | 1.08744    | 1.04948    | 0.734842   | 1.5757    | 1.22271   | 1.69596   | 1.02805   | 0.366939   | 0.25582   | 0.181782  | 0.861421   | 0.319642   | 0.814673  | 1.18941   |
| LOC100507377 | 0         | 0          | 0          | 0          | 0         | 0         | 0         | 0         | 0          | 0         | 0         | 0          | 0          | 0         | 0         |
| LOC100507384 | 0         | 0          | 0          | 0          | 0         | 0         | 0         | 0         | 0          | 0         | 0         | 0          | 0          | 0         | 0         |
| LOC100507387 | 0.143597  | 0.438186   | 0.752359   | 0.049327   | 0         | 0.081514  | 0.546515  | 0.765702  | 0          | 0         | 0         | 0          | 0          | 0.0250167 | 0         |
| LOC100507388 | 0.599938  | 0.407311   | 0.458711   | 0.0281024  | 0.0423596 | 0.1161    | 0.30098   | 0.290823  | 0          | 0.0456354 | 0.0205229 | 0.0260165  | 0          | 0.0665114 | 0.456902  |
| LOC100507389 | 0         | 0          | 0          | 0          | 0         | 0         | 0         | 0         | 0          | 0         | 0         | 0          | 0          | 0         | 0         |
| LOC100507412 | 0         | 0          | 0          | 0          | 0         | 0         | 0         | 0         | 0          | 0         | 0         | 0          | 0          | 0         | 0         |
| LOC100507437 | 0.160919  | 0.0634362  | 0.0242043  | 0.075378   | 0.318134  | 0.386148  | 0.0668116 | 0.0780061 | 0.0178165  | 0.0550826 | 0.148629  | 0.0209349  | 0.113263   | 0.0841032 | 0.168073  |
| LOC100507443 | 0         | 0          | 0          | 0          | 0         | 0         | 0         | 0         | 0          | 0         | 0         | 0          | 0          | 0         | 0         |
| LOC100507464 | 0         | 0          | 0          | 0          | 0         | 0         | 0         | 0         | 0          | 0         | 0         | 0          | 0          | 0         | 0         |
| LOC100507468 | 0.0103087 | 0.0198676  | 0.0426405  | 0          | 0         | 0.0175555 | 0         | 0         | 0          | 0         | 0         | 0          | 0          | 0         | 0         |
| LOC100507472 | 0.146475  | 0.233437   | 0.158459   | 0.150947   | 0.490057  | 0.153503  | 0.257293  | 0.190255  | 0.192112   | 0.127275  | 0.0890357 | 0.395041   | 0.036348   | 0.24144   | 0.404532  |



|              |           |           |           |           |           |           |           |           |           |           |           |            |           |           |           |
|--------------|-----------|-----------|-----------|-----------|-----------|-----------|-----------|-----------|-----------|-----------|-----------|------------|-----------|-----------|-----------|
| LOC100996325 | 0.0222102 | 0.0856098 | 0.0183739 | 0         | 0.0345001 | 0         | 0.0253589 | 0.0197386 | 0         | 0         | 0         | 0          | 0         | 0         | 0         |
| LOC100996335 | 0         | 0         | 0         | 0         | 0         | 0         | 0         | 0         | 0         | 0         | 0         | 0          | 0         | 0         | 0         |
| LOC100996349 | 0         | 0         | 0         | 0         | 0         | 0         | 0         | 0         | 0         | 0         | 0         | 0          | 0         | 0         | 0         |
| LOC100996351 | 0.102205  | 0.157426  | 0.184594  | 0.304303  | 0.459302  | 0.13814   | 0.199174  | 0.290392  | 0.147936  | 0.280395  | 0.0343977 | 0.471518   | 0.189307  | 0.530073  | 0.103855  |
| LOC100996385 | 0.074655  | 0.014388  | 0.0494079 | 0         | 0.023193  | 0         | 0         | 0.092886  | 0         | 0         | 0         | 0          | 0         | 0.0156072 | 0.0643284 |
| LOC100996419 | 0.522024  | 0.396333  | 0.405682  | 0.195622  | 0.319439  | 0.444496  | 0.307046  | 0.267112  | 0.0963282 | 0.13898   | 0.250006  | 0.0905508  | 0.0510314 | 0.165353  | 0.0908718 |
| LOC100996437 | 1.28877   | 1.5854    | 1.61059   | 1.18683   | 2.38525   | 0.793844  | 2.44203   | 1.31594   | 0.467534  | 1.1013    | 0         | 2.41329    | 0.176917  | 2.32166   | 0.826971  |
| LOC100996447 | 0.536241  | 0.367156  | 0.455291  | 0.523528  | 0.0219202 | 0.384507  | 0.225571  | 0.163036  | 0.137491  | 0.265673  | 0.414187  | 0.141361   | 0.127466  | 0.258137  | 0.303991  |
| LOC100996455 | 0.0294691 | 0         | 0.0081263 | 0.0202458 | 0.0152586 | 0.158919  | 0.0224312 | 0         | 0         | 0.0246578 | 0.0332669 | 0.00702864 | 0.0570399 | 0.0359376 | 0.0282142 |
| LOC100996583 | 0.0663125 | 0.0159752 | 0.219433  | 0.0341685 | 0.154509  | 0.169393  | 0.0757134 | 0.0294665 | 0         | 0         | 0         | 0.0237242  | 0.0427845 | 0.0866445 | 0.380932  |
| LOC100996635 | 0.125173  | 0.0402068 | 0.0345172 | 0         | 0.0216041 | 0.213166  | 0.0635192 | 0.0865224 | 0         | 0.0174561 | 0.0157005 | 0          | 0         | 0         | 0         |
| LOC100996654 | 0         | 0         | 0         | 0         | 0         | 0.062758  | 0         | 0.032751  | 0         | 0         | 0         | 0          | 0         | 0         | 0         |
| LOC100996664 | 0.235527  | 0.207225  | 0.296502  | 0.0316587 | 0.174974  | 0.0959142 | 0.187072  | 0.391331  | 0.0124715 | 0.0514105 | 0.04624   | 0.0293088  | 0.013214  | 0.0321121 | 0.0735317 |
| LOC100996671 | 0         | 0.0346294 | 0.0198194 | 0.024689  | 0         | 0.0407992 | 0         | 0.0212915 | 0         | 0         | 0         | 0          | 0         | 0         | 0.240843  |
| LOC100996693 | 0         | 0.0410454 | 0         | 0         | 0.132328  | 0.459404  | 0.129688  | 0.0252363 | 0.0691672 | 0.106921  | 0.0961679 | 0          | 0         | 0.0148412 | 0         |
| LOC100996724 | 1.23588   | 1.20584   | 1.61956   | 0.412667  | 0.652498  | 0.450427  | 1.11678   | 0.66851   | 0.1204    | 0.267736  | 0.165922  | 0.103236   | 0.0682136 | 0.633598  | 1.13471   |
| LOC100996740 | 2.22452   | 2.0274    | 1.68508   | 1.51908   | 5.16236   | 2.32775   | 1.68306   | 1.04803   | 0.391694  | 0.857784  | 1.75482   | 0.594492   | 0.786793  | 0.742403  | 1.1932    |
| LOC100996842 | 1.02512   | 1.29791   | 1.45556   | 1.16254   | 3.0626    | 1.53076   | 1.11404   | 0.831262  | 1.63224   | 1.33827   | 1.46544   | 1.53508    | 1.10259   | 1.03548   | 1.0709    |
| LOC101059915 | 0         | 0.0121799 | 0.0104563 | 0         | 0         | 0.0322873 | 0.0144315 | 0.011233  | 0         | 0.015864  | 0.0713425 | 0          | 0         | 0.03303   | 0         |
| LOC101059948 | 0.141116  | 0.022664  | 0.116741  | 0         | 0         | 0         | 0.0537073 | 0.0836082 | 0         | 0.0590384 | 0.0531009 | 0.13463    | 0.121397  | 0         | 0         |
| LOC101060391 | 0.0924489 | 0.356346  | 0.433388  | 0.698656  | 0.335079  | 0.655992  | 0.0351851 | 0.219096  | 0         | 0.309421  | 0.347878  | 0.0220499  | 0.0795301 | 0.531496  | 0.398305  |
| LOC101060524 | 0         | 0         | 0         | 0         | 0         | 0         | 0         | 0         | 0         | 0         | 0         | 0          | 0         | 0         | 0         |
| LOC101060553 | 0.335407  | 0.156126  | 0.103464  | 0.117168  | 0.0706444 | 0.135536  | 0.194724  | 0.207141  | 0.0484646 | 0.0570806 | 0.064175  | 0.0569473  | 0.091696  | 0.216894  | 0.285746  |
| LOC101241902 | 0.500145  | 1.10265   | 1.2538    | 0.421702  | 0.188339  | 0.141955  | 0.622962  | 1.22571   | 0.129207  | 0.190222  | 0.1882    | 0.173511   | 0.136899  | 0.150502  | 0.174126  |
| LOC101409256 | 0.0713924 | 0.131859  | 0.0689043 | 0.073572  | 0.0184829 | 0.0101316 | 0.0135856 | 0.105746  | 0.0579653 | 0         | 0         | 0.0595971  | 0         | 0.0808444 | 0.119617  |
| LOC101448202 | 0.347815  | 0.27071   | 0.55334   | 0.248146  | 0.540276  | 0.182252  | 0.733151  | 0.499329  | 0.0325845 | 0.235062  | 0.211421  | 0.172295   | 0.0690487 | 0.755099  | 1.69063   |

|              |           |            |           |           |           |           |           |           |           |           |           |           |            |           |           |
|--------------|-----------|------------|-----------|-----------|-----------|-----------|-----------|-----------|-----------|-----------|-----------|-----------|------------|-----------|-----------|
| LOC101559451 | 0         | 0.0472486  | 0         | 0.101058  | 0         | 0         | 0         | 0.0435755 | 0.238861  | 0.12308   | 0.166053  | 0.0350836 | 0          | 0.0256262 | 0         |
| LOC101593348 | 0.257528  | 0.144691   | 0.195446  | 0.152631  | 0.142482  | 0.0594746 | 0.125889  | 0.114995  | 0.060303  | 0.0991663 | 0.0555628 | 0.0424415 | 0.0190537  | 0.0823178 | 0.0282742 |
| LOC101926889 | 1.18738   | 1.14332    | 0.980836  | 0.467335  | 0.635826  | 0.545543  | 1.07073   | 1.01138   | 0.347932  | 0.303189  | 0.191667  | 0.541297  | 0.15098    | 0.786413  | 0.718112  |
| LOC101926892 | 0.0195548 | 0.042398   | 0.0323541 | 0         | 0.106314  | 0.0166506 | 0.022327  | 0.026068  | 0.0238155 | 0.0122716 | 0         | 0         | 0.0378499  | 0.0919815 | 0.0842493 |
| LOC101926898 | 73.4043   | 68.7956    | 70.4512   | 35.9255   | 18.264    | 19.4443   | 46.9514   | 66.6567   | 14.193    | 23.09     | 12.259    | 39.0347   | 6.23293    | 48.8287   | 45.4762   |
| LOC101926905 | 0         | 0          | 0         | 0         | 0         | 0         | 0         | 0         | 0         | 0         | 0         | 0         | 0          | 0         | 0         |
| LOC101926908 | 0.0403189 | 0.00647542 | 0         | 0         | 0         | 0         | 0.0767247 | 0.011944  | 0         | 0         | 0         | 0         | 0          | 0         | 0         |
| LOC101926913 | 0         | 0          | 0.0325605 | 0         | 0         | 0         | 0         | 0         | 0         | 0         | 0         | 0         | 0.0253942  | 0         | 0         |
| LOC101926915 | 0.887312  | 0.240473   | 0.271497  | 0.125703  | 0.0787567 | 0.0724485 | 0.472849  | 0.475946  | 0.0148034 | 0.0610229 | 0.0205822 | 0.109203  | 0.00784232 | 0.142936  | 0.410218  |
| LOC101926933 | 0.249745  | 0.340938   | 0.241041  | 0.25737   | 0         | 0.106327  | 0.190101  | 0.0739842 | 0.0506936 | 0.208971  | 0         | 0.119133  | 0          | 0.0652639 | 0.597776  |
| LOC101926934 | 0.0320428 | 0.0916996  | 0.0629788 | 0.0392263 | 0.380762  | 0         | 0.191097  | 0.0676566 | 0         | 0         | 0         | 0         | 0          | 0.019894  | 0         |
| LOC101926935 | 0.865179  | 1.4179     | 1.3033    | 0.285759  | 1.0124    | 0.301756  | 1.09483   | 1.04442   | 0.135169  | 0.0893278 | 0.0835552 | 0.400675  | 0.0594229  | 0.320592  | 0.338607  |
| LOC101926942 | 0         | 0          | 0         | 0         | 0         | 0         | 0         | 0         | 0         | 0         | 0         | 0         | 0          | 0         | 0         |
| LOC101926943 | 0.794254  | 1.19108    | 1.19791   | 0.813356  | 0.528288  | 0.411203  | 1.08714   | 1.20197   | 0.378987  | 0.394226  | 0.128632  | 0.99041   | 0.0178801  | 1.04556   | 0.733946  |
| LOC101926944 | 0.0876631 | 0.0422374  | 0.181303  | 0.0451697 | 0         | 0.149288  | 0.0500454 | 0.0779076 | 0         | 0         | 0         | 0         | 0          | 0.0458166 | 0         |
| LOC101926948 | 0         | 0.0821629  | 0.161226  | 0         | 0.0378412 | 0.124459  | 0.0278147 | 0         | 0.148345  | 0         | 0.0550013 | 0.017431  | 0          | 0.0254644 | 0         |
| LOC101926960 | 0.0568905 | 0          | 0         | 0         | 0         | 0.125948  | 0         | 0.0101119 | 0         | 0         | 0         | 0         | 0.00734109 | 0         | 0         |
| LOC101926962 | 0.0936424 | 0.0322274  | 0.0221336 | 0         | 0         | 0.0227815 | 0.030548  | 0.0713328 | 0         | 0.0335802 | 0         | 0.0191439 | 0          | 0.0769082 | 0.153694  |
| LOC101926963 | 0.0529994 | 0.178751   | 0.0876896 | 0.273087  | 0.192095  | 0.406154  | 0.282394  | 0.109903  | 0         | 0.509984  | 0.917388  | 0.126408  | 0.193771   | 0.276998  | 0.583539  |
| LOC101926964 | 0.0592399 | 0.042814   | 0.0735111 | 0         | 0.0153367 | 0.058849  | 0.0450921 | 0.0263237 | 0         | 0         | 0.0222915 | 0.0211939 | 0.00637021 | 0.139326  | 0.042538  |
| LOC101926968 | 0         | 0          | 0         | 0         | 0         | 0         | 0         | 0         | 0         | 0         | 0         | 0         | 0          | 0         | 0         |
| LOC101927000 | 0.0404599 | 0.155953   | 0.0669425 | 0         | 0.125696  | 0.137804  | 0.0461958 | 0.0719147 | 0         | 0         | 0         | 0         | 0          | 0.0422922 | 0.0581055 |
| LOC101927018 | 0.509011  | 0.572249   | 0.533381  | 0.454611  | 0.474402  | 0.375628  | 0.813642  | 1.20631   | 0.0826558 | 0.298135  | 0.0383074 | 0.169965  | 0.0875764  | 0.798095  | 1.55948   |
| LOC101927020 | 0         | 0          | 0         | 0         | 0         | 0         | 0         | 0         | 0         | 0         | 0         | 0         | 0          | 0         | 0         |
| LOC101927021 | 0.428717  | 0.390993   | 0.379998  | 0.528588  | 0.285405  | 1.0104    | 0.839134  | 0.285756  | 0.0932373 | 0.374737  | 1.0025    | 0.410837  | 0.493939   | 0.212063  | 0.373813  |
| LOC101927023 | 0.7161    | 0.282296   | 0.188494  | 0.301894  | 0.101123  | 0.0554318 | 0.111494  | 0.231422  | 0.0396422 | 0.285975  | 0.14698   | 0.232904  | 0.126007   | 0.204145  | 0.560951  |

|              |           |            |            |            |           |            |           |            |           |           |           |            |            |            |           |
|--------------|-----------|------------|------------|------------|-----------|------------|-----------|------------|-----------|-----------|-----------|------------|------------|------------|-----------|
| LOC101927027 | 1.10641   | 0.863966   | 1.1678     | 1.24241    | 0.426696  | 1.58532    | 0.932201  | 1.17994    | 0.315962  | 1.01516   | 1.73999   | 0.485919   | 0.787697   | 1.02092    | 1.9944    |
| LOC101927040 | 0.0109268 | 0.00526472 | 0.00903945 | 0.0225209  | 0.101839  | 0.0186081  | 0.0249518 | 0.00971087 | 0         | 0         | 0         | 0.00781845 | 0.00704994 | 0.00571084 | 0.0156923 |
| LOC101927043 | 0.0336749 | 0.0202813  | 0.0139291  | 0.00867573 | 0.0523087 | 0          | 0.0288367 | 0.052373   | 0         | 0         | 0         | 0          | 0.0162951  | 0.00439999 | 0.0120903 |
| LOC101927045 | 0.404675  | 0.500621   | 0.570024   | 0.710077   | 0.42473   | 0.670526   | 0.287217  | 0.534603   | 0.386287  | 0.521636  | 0.580295  | 0.344337   | 0.366944   | 0.497313   | 0.376972  |
| LOC101927048 | 0         | 0          | 0          | 0          | 0         | 0          | 0         | 0          | 0         | 0         | 0         | 0          | 0          | 0          | 0         |
| LOC101927050 | 0         | 0          | 0          | 0          | 0         | 0.0342118  | 0         | 0          | 0         | 0         | 0         | 0.0287491  | 0          | 0          | 0         |
| LOC101927051 | 0.185795  | 0.556671   | 0.482663   | 0.224118   | 0.634761  | 0.411572   | 0.272781  | 0.339232   | 0.167315  | 0.286105  | 0.0858143 | 0.649655   | 0.129787   | 0.559186   | 0.626211  |
| LOC101927053 | 0         | 0.00986785 | 0.00847149 | 0          | 0         | 0.0174389  | 0.011692  | 0          | 0         | 0         | 0         | 0          | 0          | 0          | 0         |
| LOC101927055 | 0         | 0.00586873 | 0          | 0.0124139  | 1.01E-32  | 0.0100746  | 0         | 0          | 0         | 0         | 0.0139562 | 0          | 0          | 0          | 0.0190535 |
| LOC101927056 | 0.55241   | 0.78447    | 0.913984   | 0.269656   | 0.180649  | 0.247563   | 0.564331  | 0.465097   | 0.318682  | 0.693331  | 0.0984634 | 0.228837   | 0          | 0.850945   | 0.584559  |
| LOC101927066 | 0.219118  | 0.110602   | 0.189902   | 0.0537637  | 0.0324158 | 0.0533075  | 0.119134  | 0.222553   | 0         | 0.039288  | 0.0706735 | 0.0223978  | 0          | 0.0818005  | 0.194803  |
| LOC101927069 | 0.302047  | 0.0953478  | 0.155095   | 0.128801   | 0.0808937 | 0.434561   | 0.142704  | 0.222152   | 0.253696  | 0.562114  | 0.188123  | 0.335363   | 0.134399   | 0.326613   | 0.373946  |
| LOC101927070 | 0.098388  | 0.0210688  | 0.0271312  | 0.0675945  | 0.101887  | 0.158244   | 0.0249636 | 0.0582927  | 0         | 0.109766  | 0.246817  | 0          | 0.00705327 | 0.0114271  | 0.0156997 |
| LOC101927078 | 0.0113837 | 0          | 0.0188348  | 0.0117312  | 0         | 0          | 0         | 0.0101169  | 0         | 0.0142877 | 0.0257015 | 0          | 0          | 0          | 0.0163484 |
| LOC101927079 | 0         | 0          | 0          | 0          | 0         | 0          | 0         | 0          | 0         | 0         | 0         | 0          | 0          | 0          | 0.0925803 |
| LOC101927082 | 0         | 0          | 0          | 0          | 0         | 0          | 0         | 0          | 0         | 0         | 0         | 0          | 0          | 0          | 0         |
| LOC101927100 | 0.613588  | 0.401555   | 0.407412   | 0.114938   | 0.512304  | 0.371356   | 0.519584  | 0.40967    | 7.29E-19  | 0.287121  | 0.672066  | 0.0534298  | 0.0238967  | 0.232579   | 0.62404   |
| LOC101927120 | 0         | 0.00384373 | 0.00659964 | 0          | 0         | 0.00679283 | 0         | 0          | 0         | 0         | 0         | 0          | 0          | 0          | 0         |
| LOC101927124 | 0.248029  | 0.165468   | 0.268322   | 0.0983083  | 0         | 0.0324914  | 0.196056  | 0.25434    | 0.116182  | 0.143678  | 0.0861521 | 0.109213   | 0          | 0.189461   | 0.0274001 |
| LOC101927131 | 0.0203098 | 0.0293568  | 0.0840086  | 0.0209299  | 0.0630964 | 0.0172936  | 0.0927564 | 0.0541491  | 0.0123675 | 0.165691  | 0.0114636 | 0.0290645  | 0.0196557  | 0.026537   | 0.189589  |
| LOC101927136 | 0         | 0.00631587 | 0          | 0          | 0         | 0          | 0         | 0          | 0         | 0         | 0         | 0          | 0          | 0          | 0         |
| LOC101927138 | 0         | 0.0281228  | 0.0241432  | 0          | 0.0679997 | 0          | 0         | 0          | 0         | 0         | 0         | 0          | 0          | 0          | 0         |
| LOC101927139 | 0.101505  | 0.0733597  | 0.0839718  | 0          | 0         | 0          | 0         | 0.0451044  | 0         | 0         | 0         | 0          | 0          | 0          | 0         |
| LOC101927141 | 0         | 0          | 0          | 0          | 0         | 0          | 0         | 0          | 0         | 0         | 0         | 0          | 0          | 0          | 0         |
| LOC101927142 | 0.510288  | 0.130164   | 0.0744964  | 0.247467   | 0.233133  | 0.153354   | 0.205634  | 0.373472   | 0         | 0.0753487 | 0         | 0.128867   | 0          | 0.345139   | 0         |
| LOC101927143 | 0.146661  | 1.13061    | 2.13537    | 0.12091    | 0.956822  | 0.0249759  | 0.401886  | 0.338883   | 0.0357232 | 0         | 0.0331123 | 0.167903   | 0          | 0.0766513  | 0         |





|              |            |           |           |            |           |            |            |           |           |           |           |            |            |            |           |
|--------------|------------|-----------|-----------|------------|-----------|------------|------------|-----------|-----------|-----------|-----------|------------|------------|------------|-----------|
| LOC101927354 | 0.0912341  | 0.043958  | 0         | 0.0626796  | 0         | 0.0517898  | 0.0694454  | 0.0810813 | 0.0370376 | 0         | 0.0686613 | 0.0217601  | 0.0196213  | 0.0158943  | 0         |
| LOC101927356 | 0.165869   | 0.058887  | 0.0722202 | 0.0539787  | 0.0271212 | 0.0223003  | 0.0996755  | 0.0931013 | 0         | 0.0547848 | 0.07884   | 0.0437255  | 0.00563251 | 0.0410638  | 0.0501491 |
| LOC101927357 | 0.0267963  | 0         | 0.0147785 | 0          | 0         | 0.00760556 | 0          | 0.0158762 | 0         | 0         | 0.0100832 | 0          | 0          | 0          | 0.0384828 |
| LOC101927358 | 0          | 0         | 0         | 0          | 0         | 0          | 0          | 0         | 0         | 0         | 0         | 0          | 0          | 0          | 0         |
| LOC101927359 | 0          | 0         | 0         | 0          | 0         | 0.020949   | 0.0280907  | 0         | 0         | 0         | 0         | 0          | 0          | 0          | 0.0117776 |
| LOC101927365 | 1.7925     | 1.83542   | 1.85769   | 0.546132   | 0.640678  | 0.860442   | 1.30812    | 2.06376   | 0.418599  | 0.667553  | 0.79061   | 0.557448   | 0.354815   | 0.9606     | 2.244     |
| LOC101927374 | 14.9409    | 12.8962   | 13.635    | 6.38586    | 3.01534   | 3.34471    | 7.58691    | 13.4184   | 1.90942   | 5.40175   | 1.52743   | 6.43021    | 1.00299    | 8.72849    | 8.01599   |
| LOC101927377 | 0.70402    | 0.561234  | 0.508289  | 0.34297    | 0.437434  | 0.66486    | 0.438451   | 0.568795  | 0.124715  | 0.30525   | 0.1734    | 0.283929   | 0.0495524  | 0.314431   | 0.349276  |
| LOC101927378 | 0          | 0         | 0         | 0          | 0         | 0          | 0          | 0         | 0         | 0         | 0         | 0          | 0          | 0          | 0         |
| LOC101927391 | 0.470348   | 0.383868  | 0.285873  | 0.108812   | 0.0447314 | 0.130774   | 0.175356   | 0.605683  | 0.339023  | 0.0843336 | 0.0758521 | 0.233522   | 0.0867046  | 0.0802692  | 0.0137853 |
| LOC101927394 | 0.10351    | 0.0249363 | 0.0784947 | 0          | 0         | 0.0220343  | 0.00984867 | 0.0229977 | 0         | 0.0108263 | 0         | 0          | 0          | 0          | 0         |
| LOC101927402 | 0.27061    | 0.544212  | 0.63267   | 0.278872   | 0.109657  | 0.370677   | 0.161204   | 0.271865  | 0.229268  | 0.413479  | 0.491433  | 0.286234   | 0.379557   | 0.147582   | 0.0337939 |
| LOC101927410 | 0          | 0.0125078 | 0.0107378 | 0.00668805 | 0.0100811 | 0.00552608 | 0          | 0.0057677 | 0         | 0         | 0         | 0.00928742 | 0          | 0          | 0         |
| LOC101927415 | 0.219839   | 0.44776   | 0.438132  | 0.123573   | 0.155221  | 0.144647   | 0.296642   | 0.426272  | 0.0243399 | 0.100335  | 0.045122  | 0.128701   | 0.058025   | 0.224572   | 0.473575  |
| LOC101927417 | 0.00979599 | 0.0250819 | 0.0530937 | 0.0251629  | 0.0145999 | 0.116533   | 0.042455   | 0.0224348 | 0         | 0.0280015 | 0.116726  | 0.00532117 | 0.0191925  | 0.0657919  | 0.35657   |
| LOC101927418 | 0.223604   | 0         | 0.138736  | 0.0576077  | 0         | 0.190396   | 0.0638261  | 0.0496802 | 0         | 0         | 0.315527  | 0.0399987  | 0          | 0          | 0         |
| LOC101927419 | 0          | 0         | 0         | 0          | 0         | 0          | 0          | 0         | 0         | 0         | 0         | 0          | 0          | 0          | 0         |
| LOC101927420 | 0.0944614  | 0.0568912 | 0.175827  | 0.0730089  | 0.0366828 | 0.120649   | 0.188743   | 0.0419747 | 0.0575217 | 0.0592794 | 0.243581  | 0          | 0          | 0.0617121  | 0.339146  |
| LOC101927421 | 0          | 0         | 0         | 0          | 0         | 0          | 0          | 0         | 0         | 0         | 0         | 0          | 0          | 0          | 0         |
| LOC101927429 | 0          | 0         | 0         | 0          | 0         | 4.31E-17   | 0          | 0         | 0         | 0         | 0         | 3.62E-17   | 0          | 0          | 0         |
| LOC101927434 | 0          | 0         | 0         | 0          | 0         | 0          | 0          | 0         | 0         | 0         | 0         | 0          | 0          | 0          | 0         |
| LOC101927437 | 0.0426207  | 0.0205353 | 0         | 0.0439219  | 0         | 0          | 0          | 0         | 0         | 0         | 0         | 0.0609925  | 0          | 0.0222754  | 0         |
| LOC101927446 | 0          | 0.0167302 | 0         | 0          | 0         | 0          | 0.00991147 | 0         | 0         | 0         | 0.0101203 | 0          | 0          | 0          | 0         |
| LOC101927447 | 0          | 0         | 0         | 0          | 0         | 0.0100541  | 0          | 0.0209874 | 0         | 0         | 0         | 0          | 0          | 0.00617121 | 0         |
| LOC101927450 | 0.0095514  | 0         | 0         | 0          | 0         | 0          | 0          | 0         | 0         | 0         | 0         | 0.00683428 | 0          | 0          | 0         |
| LOC101927468 | 0.312078   | 0.110794  | 0.149469  | 0.0507798  | 0.204112  | 0.181816   | 0.243798   | 0.189765  | 0         | 0.144307  | 0.352297  | 0.0587632  | 0.0529872  | 0.034338   | 0.566127  |

|              |           |            |           |           |           |           |           |           |           |           |           |            |            |           |           |
|--------------|-----------|------------|-----------|-----------|-----------|-----------|-----------|-----------|-----------|-----------|-----------|------------|------------|-----------|-----------|
| LOC101927472 | 0.793476  | 1.2425     | 0.929927  | 0.783629  | 1.64339   | 0.337817  | 0.79272   | 0.734558  | 1.08716   | 1.70132   | 0.186612  | 5.06247    | 0.447953   | 1.29595   | 1.4719    |
| LOC101927476 | 0.0231353 | 0.0222939  | 0.0574176 | 0.0556305 | 0.0120398 | 0.118197  | 0.0352202 | 0.0342679 | 0.0281762 | 0.0774326 | 0.0348226 | 0.0463425  | 0.0447804  | 0.0728017 | 0.0221502 |
| LOC101927478 | 0         | 0.0233767  | 0         | 0         | 0         | 0         | 0.0553962 | 0         | 0.0590894 | 0         | 0.0547707 | 0          | 0          | 0         | 0         |
| LOC101927480 | 0         | 0          | 0         | 0         | 0         | 0         | 0         | 0         | 0         | 0         | 0         | 0          | 0          | 0         | 0         |
| LOC101927482 | 0.246366  | 0.237406   | 0.165597  | 0.222152  | 0.0717548 | 0.0524445 | 0.228551  | 0.246319  | 0.0187529 | 0.231911  | 0.382411  | 0.176282   | 0.0794772  | 0.217286  | 0.06634   |
| LOC101927488 | 0         | 0          | 0         | 0         | 0         | 0         | 0         | 0         | 0         | 0         | 0         | 0          | 0          | 0.0183266 | 0         |
| LOC101927495 | 0.0296073 | 0.0332856  | 0.0163288 | 0         | 0.0153301 | 0.0588239 | 0.0450729 | 0.0789376 | 0         | 0.0123867 | 0.033423  | 0          | 0          | 0         | 0         |
| LOC101927497 | 0.108272  | 0.0130417  | 0         | 0.0557885 | 0         | 0.11524   | 0.154526  | 0.0240557 | 0         | 0.135892  | 0         | 0.0581034  | 0          | 0.0141469 | 0         |
| LOC101927502 | 0.0159828 | 0.0539052  | 0.0132221 | 0.0164707 | 0.0248268 | 0.0136091 | 0.12774   | 0.0426125 | 0         | 0         | 0         | 0          | 0          | 0         | 0         |
| LOC101927503 | 0         | 0          | 0.0158097 | 0.0196941 | 0         | 0.032545  | 0.0436399 | 0.050952  | 0         | 0         | 0         | 0          | 0          | 0         | 0         |
| LOC101927513 | 0         | 0.0158503  | 0         | 0         | 0         | 0         | 0.0187804 | 0         | 0         | 0         | 0         | 0          | 0          | 0         | 0         |
| LOC101927516 | 1.65243   | 1.81301    | 2.15453   | 0.85144   | 1.38105   | 0.46646   | 1.27147   | 2.5061    | 0.240622  | 0.698839  | 0.081104  | 1.27232    | 0.127473   | 1.04199   | 0.502995  |
| LOC101927523 | 0         | 0.0110076  | 0         | 0.0235435 | 0         | 0.0389062 | 0         | 0         | 0         | 0         | 0         | 0          | 0          | 0.0119403 | 0         |
| LOC101927539 | 0.21444   | 0.262275   | 0.327508  | 0         | 0.256231  | 0.0421369 | 0.207173  | 0.278535  | 0.0200895 | 0.0414069 | 0.0558638 | 0.177044   | 0          | 0.146561  | 0.0710685 |
| LOC101927543 | 0.527845  | 0.327795   | 0.368744  | 0.0483519 | 0.273308  | 0.109866  | 0.482141  | 0.562925  | 0.0285713 | 0.0588888 | 0.0264831 | 0.0755374  | 0.0227042  | 0.392355  | 0.555904  |
| LOC101927549 | 0         | 0          | 0         | 0         | 0         | 0         | 0         | 0         | 0         | 0         | 0         | 0          | 0          | 0         | 0         |
| LOC101927550 | 1.20864   | 1.23952    | 1.64838   | 0.907104  | 1.46165   | 0.546734  | 1.30815   | 1.05722   | 0.189431  | 0.724187  | 0.180452  | 0.694377   | 0.321097   | 0.85597   | 0.850616  |
| LOC101927551 | 0         | 0.0136567  | 0         | 0         | 0.0440284 | 0.0362021 | 0.0161813 | 0.012595  | 0         | 0         | 0         | 0.0101405  | 0          | 0.0444418 | 0.0610588 |
| LOC101927557 | 0.328853  | 0.198058   | 0.102019  | 0         | 0         | 0.0350018 | 0.281606  | 0.109597  | 0         | 0         | 0         | 0.0882387  | 0          | 0.0429683 | 0         |
| LOC101927560 | 0.139486  | 0.352834   | 0.336562  | 0.203638  | 0.325005  | 0.0890779 | 0.265434  | 0.196276  | 0.028313  | 0.0145891 | 0.118097  | 0.099806   | 0.00749964 | 0.0668264 | 0.0166933 |
| LOC101927571 | 0.133389  | 0.128538   | 0.386222  | 0         | 0         | 0.170369  | 0.1523    | 0.177818  | 0         | 0         | 0         | 0.0477218  | 0.258186   | 0         | 0         |
| LOC101927572 | 0.26939   | 0.306791   | 0.364677  | 0.075713  | 0.190207  | 0.271088  | 0.363505  | 0.174117  | 0.0894782 | 0.0922124 | 0.0829385 | 0.070093   | 0.0632033  | 0.166394  | 0.140683  |
| LOC101927575 | 0         | 0.00555036 | 0.0095299 | 0         | 0         | 0         | 0         | 0.0102377 | 0         | 0.0144584 | 0         | 0          | 0          | 0         | 0         |
| LOC101927583 | 0.0651802 | 0.0240147  | 0.0467773 | 1.08E-34  | 0.267602  | 0.151674  | 0.0974882 | 0.0199856 | 0         | 0.0329712 | 0.0628335 | 0.00854759 | 0          | 0.0475505 | 0.0921462 |
| LOC101927588 | 0.0393924 | 0.0189799  | 0.0162941 | 0.0202975 | 0         | 0.0335421 | 0         | 0         | 0.0239878 | 0.0247208 | 0.0889383 | 0.0140932  | 0          | 0.0514705 | 0         |
| LOC101927596 | 0.203455  | 0.024507   | 0.0420782 | 0         | 0.0790091 | 0         | 0         | 0.135611  | 0         | 0.0638394 | 0         | 0          | 0          | 0.0531673 | 0.0730469 |

|              |            |            |            |           |           |            |           |           |           |           |           |            |           |            |           |
|--------------|------------|------------|------------|-----------|-----------|------------|-----------|-----------|-----------|-----------|-----------|------------|-----------|------------|-----------|
| LOC101927604 | 0          | 0          | 0.0964512  | 0         | 0         | 0.124093   | 0.0332796 | 0.0259038 | 0         | 0         | 0         | 0          | 0.0752231 | 0.0304674  | 0         |
| LOC101927620 | 0.150559   | 0.0414523  | 0.0533798  | 0.0886602 | 0         | 0.0549424  | 0.122788  | 0.0382298 | 0         | 0.0809858 | 0.0242803 | 0.0307797  | 0.0138771 | 0.0337237  | 0.0308888 |
| LOC101927623 | 0.00947709 | 0.0136986  | 0.00784012 | 0         | 0         | 0.00806962 | 0         | 0.0168449 | 0         | 0         | 0.0106985 | 0          | 0         | 0.0148594  | 0         |
| LOC101927630 | 0.0523598  | 0.0252278  | 0.216579   | 0.161875  | 0         | 0          | 0         | 0         | 0         | 0.131434  | 0.118215  | 0.0374649  | 0.236476  | 0.273655   | 0.451172  |
| LOC101927635 | 0.0356596  | 0.0859066  | 0.0295001  | 0         | 0         | 0          | 0.122145  | 0.0316912 | 0.217147  | 0         | 0         | 0.0510307  | 0         | 0.111823   | 0.102423  |
| LOC101927636 | 0.0889433  | 0.119992   | 0.161876   | 0.0183317 | 0         | 0.0151468  | 0.0812421 | 0.189709  | 0         | 0.0223266 | 0.0200812 | 0.0127283  | 0.0229543 | 0.0185943  | 0.153281  |
| LOC101927640 | 0.172709   | 0.041607   | 0.0714387  | 0.0444955 | 0         | 0          | 0.0492985 | 0         | 0         | 0         | 0         | 0          | 0.139289  | 0.0451327  | 0         |
| LOC101927657 | 0          | 0          | 0          | 0         | 0         | 0          | 0         | 0         | 0         | 0         | 0.0183983 | 0          | 0         | 0          | 0         |
| LOC101927661 | 0          | 0          | 0          | 0         | 0         | 0          | 0.0497627 | 0         | 0         | 0         | 0         | 0          | 0         | 0          | 0         |
| LOC101927666 | 0          | 0          | 0.0125278  | 0         | 0         | 0          | 0         | 0         | 0         | 0         | 0         | 0          | 0         | 0          | 0         |
| LOC101927668 | 0.029293   | 0.0283561  | 0.0245269  | 0         | 0         | 0          | 0         | 0         | 0.107418  | 0         | 0         | 0          | 0         | 0          | 0         |
| LOC101927690 | 0.0103967  | 0          | 0.00860088 | 0.0214282 | 0.0161497 | 0.00885265 | 0         | 0         | 0         | 0.0521957 | 0.117366  | 0          | 0         | 0.0217351  | 0.14931   |
| LOC101927691 | 0.0192138  | 0.0324013  | 0.00794751 | 0         | 0         | 0          | 0.0219377 | 0         | 0         | 0.036173  | 0         | 0          | 0         | 0.00502099 | 0         |
| LOC101927692 | 0.107054   | 0.0281346  | 0.0241534  | 0.0200585 | 0         | 0.124302   | 0.0222237 | 0.0518947 | 0         | 0         | 0         | 0.00696361 | 0         | 0.0508645  | 0.209649  |
| LOC101927699 | 1.22458    | 1.67738    | 1.14188    | 0.410825  | 1.78522   | 3.26474    | 2.25891   | 1.33574   | 0.3905    | 0.173242  | 0.360325  | 0.274345   | 0.0494757 | 0.171041   | 0.39281   |
| LOC101927708 | 1.32132    | 2.14139    | 1.9543     | 0.453885  | 1.61709   | 0.136374   | 1.14291   | 1.63687   | 0.0975281 | 0.201017  | 0.0904001 | 0.458394   | 0         | 0.355752   | 1.38006   |
| LOC101927709 | 0          | 0.00955499 | 0.0164058  | 0         | 0.0308048 | 0          | 0.0226427 | 0.0176244 | 0.0241522 | 0.0248902 | 0         | 0.0425693  | 0         | 0.0103647  | 0         |
| LOC101927727 | 1.12893    | 1.07427    | 0.817189   | 0.581697  | 0.964489  | 0.480634   | 0.547814  | 1.02838   | 0.240609  | 0.673038  | 0.541629  | 1.02992    | 0.0728379 | 1.48982    | 1.98607   |
| LOC101927730 | 0.222446   | 0.0352385  | 0.0296179  | 0         | 0.112958  | 0.0951663  | 0.0410406 | 0         | 0         | 0.0934477 | 0.042413  | 0.0514206  | 0         | 0.0190703  | 0.362167  |
| LOC101927746 | 0.337547   | 0.376094   | 0.174527   | 1.41315   | 0.229393  | 0.664651   | 0.1927    | 0.243737  | 0.282627  | 0.52957   | 0.428679  | 0.483047   | 2.3684    | 0.826953   | 0.272677  |
| LOC101927751 | 0.417435   | 0.422106   | 0.436931   | 0.941885  | 0.507372  | 0.47606    | 0.498898  | 0.432508  | 0.0855055 | 0.807909  | 0.266709  | 0.808502   | 0.790697  | 1.12708    | 0.53576   |
| LOC101927752 | 2.83417    | 1.32653    | 1.37998    | 1.86925   | 2.54084   | 4.0405     | 2.18197   | 2.13017   | 3.6884    | 2.64248   | 5.88695   | 1.69187    | 2.16297   | 1.39662    | 1.37225   |
| LOC101927759 | 0.298388   | 0.234652   | 0.265911   | 0.231871  | 0.349506  | 0.109478   | 0.2569    | 0.142831  | 0.156587  | 0.201715  | 0.253999  | 0.206993   | 0.186647  | 0.224159   | 0.646262  |
| LOC101927762 | 0          | 0.0273972  | 0.0470407  | 0         | 0         | 0          | 0         | 0.0505347 | 0         | 0         | 0         | 0.0406867  | 0         | 0          | 0         |
| LOC101927765 | 0.783489   | 0.529123   | 0.775166   | 0.37265   | 0.327662  | 0.744438   | 0.244097  | 0.642792  | 0.258744  | 0.378215  | 0.986515  | 0.107809   | 0.155539  | 0.314989   | 0.0432765 |
| LOC101927769 | 0          | 0          | 0          | 0         | 0         | 0          | 0         | 0.0182986 | 0         | 0         | 0         | 0          | 0         | 0          | 0         |

|              |           |            |           |            |           |           |           |           |            |           |           |           |            |           |           |
|--------------|-----------|------------|-----------|------------|-----------|-----------|-----------|-----------|------------|-----------|-----------|-----------|------------|-----------|-----------|
| LOC101927770 | 0.487347  | 0.778886   | 0.629335  | 0.489976   | 0.498524  | 0.344121  | 0.597152  | 0.834536  | 0.130288   | 0.343132  | 0.322042  | 0.31469   | 0.299096   | 0.782764  | 0.870598  |
| LOC101927787 | 0.117991  | 0.105578   | 0.083666  | 0.0521113  | 0.0785488 | 0.215288  | 0.365663  | 0.0449402 | 0.205285   | 0.169246  | 0.0761125 | 0.711587  | 0.163129   | 0.0792863 | 0.0242071 |
| LOC101927793 | 0.133553  | 0.580313   | 0.497798  | 0.100295   | 0.770365  | 0.122247  | 0.350724  | 0.13783   | 0.284828   | 0.102787  | 0.0787255 | 0.25815   | 0.0465217  | 0.08711   | 0.250641  |
| LOC101927795 | 0.131944  | 0.0686132  | 0.087323  | 0.277209   | 0.0914379 | 0.04559   | 0.18078   | 0.0469045 | 0.129785   | 0.10021   | 0.0301977 | 0.172157  | 0.0343412  | 0.159588  | 0.265284  |
| LOC101927798 | 0         | 0          | 0.0183915 | 0          | 0         | 0         | 0         | 0         | 0          | 0         | 0         | 0         | 0          | 0         | 0         |
| LOC101927809 | 0.352432  | 0.283012   | 0.592092  | 0.413181   | 0.191909  | 0.782157  | 0.228416  | 0.313212  | 0.243558   | 0.448434  | 1.32867   | 0.308214  | 0.0256751  | 0.376454  | 1.19999   |
| LOC101927811 | 0.407359  | 0.184661   | 0.296684  | 0.13277    | 0.0414345 | 0.246176  | 0.235558  | 0.226266  | 0.124029   | 0         | 0.7831    | 0.145738  | 0.280816   | 0.146371  | 0.0821064 |
| LOC101927814 | 0.0694465 | 0.0334604  | 0.0143628 | 0.0715666  | 0.0269686 | 0.0295664 | 0.0198229 | 0.0617183 | 0.042289   | 0.108953  | 0.0391982 | 0.0248454 | 0.0112016  | 0         | 0         |
| LOC101927815 | 0.0553662 | 0.0622446  | 0.0534366 | 0.0190188  | 0         | 0.031429  | 0.0526794 | 0.0574056 | 0          | 0.0115817 | 0.0104169 | 0.0132053 | 0.00595366 | 0         | 0         |
| LOC101927817 | 0.964294  | 1.07654    | 1.47872   | 0.448392   | 0.949877  | 0.31041   | 1.16813   | 1.05555   | 0.128898   | 0.649423  | 0.199128  | 1.18642   | 0.0682856  | 1.31527   | 0.962638  |
| LOC101927822 | 0         | 0          | 0         | 0.0409787  | 0         | 0         | 0         | 0         | 0          | 0         | 0         | 0         | 0          | 0         | 0         |
| LOC101927827 | 0.768139  | 1.06906    | 1.03795   | 0.177595   | 0.100385  | 0.134512  | 0.270553  | 1.17289   | 0.0787064  | 0.171235  | 0.048636  | 0.235523  | 0.0231644  | 0.284428  | 0.0721857 |
| LOC101927829 | 0.0113391 | 0.0218534  | 0.018761  | 0.0116852  | 0         | 0.0193101 | 0         | 0.0302317 | 0          | 0         | 0         | 0.0162268 | 0          | 0.0059263 | 0         |
| LOC101927830 | 0.108781  | 0.117927   | 0.064681  | 0.0385349  | 0.0264021 | 0.0549962 | 0.0582197 | 0.0966751 | 0.00414008 | 0.0255995 | 0.0422124 | 0.0121618 | 0          | 0.0870568 | 0.0244098 |
| LOC101927839 | 0.617581  | 0.626442   | 0.833585  | 0.267973   | 0.807846  | 0.0830309 | 0.668022  | 0.69329   | 0.11876    | 0.32637   | 0         | 1.02334   | 0.0209716  | 1.01929   | 0.560163  |
| LOC101927844 | 0.0200895 | 0.00967941 | 0.0498582 | 0          | 0.0624117 | 0         | 0         | 0         | 0          | 0         | 0.0226785 | 0.0143745 | 0          | 0         | 0.144255  |
| LOC101927845 | 0         | 0          | 0         | 0          | 0         | 0         | 0         | 0         | 0          | 0         | 0         | 0.015801  | 0          | 0         | 0         |
| LOC101927847 | 0         | 0          | 0         | 0          | 0.0677008 | 0         | 0         | 0         | 0.106161   | 0         | 0         | 0         | 0          | 0         | 0         |
| LOC101927851 | 0         | 0.0376712  | 0.0431206 | 0.0805729  | 0         | 0.0221914 | 0.0595135 | 0         | 0          | 0.0327105 | 0.147104  | 0         | 0.0840753  | 0.0136211 | 0         |
| LOC101927854 | 1.36771   | 0.832399   | 0.83371   | 0.259638   | 0.111817  | 0.337117  | 0.780802  | 0.7357    | 0.394511   | 0.180696  | 0.325047  | 0.695343  | 0.0928882  | 0.0940557 | 0.103379  |
| LOC101927855 | 0.261799  | 0.277505   | 0.0433158 | 0.0539583  | 0.162666  | 0.0445837 | 0.179348  | 0.232665  | 0          | 0.065717  | 0         | 0.149859  | 0          | 0         | 0         |
| LOC101927859 | 0         | 0          | 0         | 0          | 0         | 0         | 0         | 0         | 0          | 0         | 0         | 0         | 0          | 0         | 0         |
| LOC101927865 | 0.15403   | 0.0927677  | 0.127425  | 0.0396832  | 0.119631  | 0.557408  | 0.307767  | 0.136889  | 0          | 0.048331  | 0         | 0.0551064 | 0.0496898  | 0.14088   | 0         |
| LOC101927870 | 0.0169857 | 0.0327359  | 0.0421554 | 0.00875214 | 0.0131923 | 0.0144631 | 0.0872719 | 0.120764  | 0          | 0         | 0         | 0.0121537 | 0.0219182  | 0         | 0         |
| LOC101927877 | 0         | 0          | 0         | 0.0131839  | 0         | 0         | 0.014607  | 0         | 0          | 0         | 0         | 0         | 0          | 0         | 0         |
| LOC101927880 | 0.0948132 | 0.249177   | 0.349398  | 0.151003   | 0.107111  | 0.645858  | 0.137779  | 0.122563  | 0.0629847  | 0.216364  | 0.360018  | 0.0185022 | 0.155713   | 0.0855925 | 0.0990282 |

|              |           |           |            |           |           |           |           |           |           |           |           |           |            |           |          |
|--------------|-----------|-----------|------------|-----------|-----------|-----------|-----------|-----------|-----------|-----------|-----------|-----------|------------|-----------|----------|
| LOC101927881 | 0.670653  | 0.744862  | 0.781986   | 0.471529  | 0.871502  | 0.202941  | 0.778129  | 0.501541  | 0.206677  | 0.258712  | 0.33383   | 0.415085  | 0.0547453  | 0.474868  | 0.467898 |
| LOC101927884 | 0.11718   | 0.178787  | 0.129253   | 0.301894  | 0.182021  | 0.0665182 | 0.133792  | 0.10414   | 0.0237853 | 0.0980486 | 0.264563  | 0.0419227 | 0          | 0.357253  | 0.392666 |
| LOC101927895 | 0.557983  | 0.603027  | 0.425887   | 0.230594  | 0.823849  | 0.308574  | 0.569176  | 0.544735  | 0.437614  | 0.129015  | 0.113194  | 0.0736466 | 0.121886   | 0.26329   | 0.5804   |
| LOC101927907 | 0         | 0         | 0          | 0         | 0         | 0         | 0.0265035 | 0         | 0         | 0         | 0         | 0         | 0          | 0         | 0        |
| LOC101927908 | 0         | 0         | 0          | 0         | 0         | 0         | 0         | 0         | 0         | 0         | 0         | 0         | 0          | 0         | 0        |
| LOC101927911 | 0.137526  | 0.0569135 | 0.0977198  | 0.0282716 | 0.156414  | 0.100782  | 0.0625702 | 0.202771  | 0         | 0.14905   | 0.0102574 | 0.110527  | 0          | 0.14298   | 0        |
| LOC101927914 | 0.0114315 | 0.156974  | 0.151311   | 0.0412317 | 0.23972   | 0.0632695 | 0.241464  | 0.106673  | 0.104417  | 0.136303  | 0.0258095 | 0.35172   | 0.00368777 | 0.0896189 | 0.205213 |
| LOC101927915 | 0         | 0         | 0          | 0         | 0         | 0         | 0         | 0         | 0         | 0         | 0         | 0         | 0          | 0         | 0        |
| LOC101927919 | 0.0281033 | 0.0541624 | 0          | 0         | 0         | 0         | 0         | 0.0124879 | 0.0342266 | 0.0352725 | 0         | 0         | 0.0181321  | 0.044064  | 0        |
| LOC101927932 | 0.0677688 | 0.0979562 | 0.168189   | 0.0349189 | 0         | 0.0288521 | 0.0773762 | 0.120455  | 0.0412674 | 0.0425284 | 0.0382513 | 0         | 0.021862   | 0         | 0        |
| LOC101927948 | 0         | 0         | 0          | 0         | 0         | 0         | 0.0718694 | 0         | 0         | 0         | 0         | 0         | 0          | 0         | 0        |
| LOC101927950 | 0.518128  | 0.527022  | 0.523884   | 0.118655  | 0.760119  | 0.19608   | 0.591582  | 0.434887  | 0.140227  | 0.144512  | 0.0649891 | 0.391331  | 0          | 0.541593  | 0.248032 |
| LOC101927954 | 0.307184  | 0.294934  | 0.279848   | 0.227157  | 0.542168  | 0.294481  | 0.305129  | 0.331087  | 0.135255  | 0.728739  | 0.0442061 | 0.638717  | 0.0586161  | 0.752716  | 0.552438 |
| LOC101927960 | 0         | 0         | 0.0171248  | 0         | 0         | 0         | 0         | 0         | 0         | 0         | 0         | 0         | 0          | 0         | 0        |
| LOC101927964 | 0         | 0.014627  | 0.00837148 | 0.031285  | 0         | 0.0516992 | 0.011554  | 0.0359731 | 0         | 0         | 0.0456941 | 0         | 0          | 0         | 0        |
| LOC101927967 | 0         | 0         | 0          | 0         | 0         | 0         | 0         | 0         | 0         | 0         | 0         | 0         | 0          | 0         | 0        |
| LOC101927969 | 0.795579  | 0.177358  | 0.216112   | 0.0611842 | 0.202894  | 0.202217  | 0.528751  | 0.232164  | 0.0433848 | 0.0447105 | 0         | 0.0849639 | 0          | 0.124121  | 0.699174 |
| LOC101927972 | 0.844637  | 0.813918  | 0.73368    | 1.74085   | 0.721607  | 0.863037  | 0.91616   | 1.0509    | 2.77742   | 1.16612   | 3.14652   | 1.54112   | 0.24523    | 0.949105  | 0.485202 |
| LOC101927974 | 0.152508  | 0.146961  | 0.142342   | 0.353618  | 0.41457   | 0.228006  | 0.174128  | 0.135536  | 0.395255  | 0.191417  | 0.645609  | 0.136404  | 0.430488   | 0.219195  | 0.10951  |
| LOC101927987 | 0.069187  | 0         | 0          | 0         | 0         | 0         | 0         | 0         | 0         | 0         | 0         | 0         | 0          | 0         | 0        |
| LOC101927989 | 0.251345  | 0.409883  | 0.495833   | 0.697356  | 1.02111   | 0.312794  | 0.154526  | 0.58421   | 0.37675   | 0.315463  | 0.371041  | 0.456527  | 0.237012   | 0.434511  | 0.832991 |
| LOC101928000 | 0.583438  | 0.603823  | 0.0840978  | 0.701555  | 0.180929  | 0.786584  | 0.327809  | 0.339228  | 0.236854  | 0.945675  | 0.727883  | 0.254191  | 0.277676   | 0.533628  | 0.418946 |
| LOC101928008 | 0.316486  | 0.514647  | 0.39273    | 0.122306  | 0.122903  | 0.168427  | 0.271015  | 0.562533  | 0.0963611 | 0.148959  | 0.178637  | 0.0849204 | 0          | 0.310143  | 0.568143 |
| LOC101928009 | 0.0410702 | 0.0742059 | 0.118917   | 0.063486  | 0.0637962 | 0.026228  | 0.0351695 | 0.0821245 | 0.0750283 | 0.0386605 | 0         | 0.0881605 | 0.00662457 | 0.0268313 | 0        |
| LOC101928012 | 0.0197466 | 0.0190285 | 0          | 0         | 0         | 0         | 0         | 0         | 0         | 0         | 0         | 0         | 0          | 0         | 0        |
| LOC101928020 | 1.72597   | 2.05369   | 2.48321    | 0.897066  | 0.48958   | 0.587857  | 1.04531   | 1.73398   | 0.164508  | 0.207209  | 0.220255  | 0.536948  | 0.426069   | 0.737343  | 1.05615  |

|              |            |           |           |           |           |           |           |           |           |           |           |           |           |           |           |
|--------------|------------|-----------|-----------|-----------|-----------|-----------|-----------|-----------|-----------|-----------|-----------|-----------|-----------|-----------|-----------|
| LOC101928021 | 0.136136   | 0.131184  | 0.0225242 | 0         | 0.296052  | 0.115918  | 0.124348  | 0.120986  | 0.0994787 | 0.0683457 | 0.0614721 | 0.0194817 | 0.0351336 | 0.0711504 | 0         |
| LOC101928030 | 0          | 0.138518  | 0.237833  | 0         | 0.223287  | 0         | 0         | 0         | 0         | 0         | 0         | 0.0514269 | 0         | 0.0375639 | 0         |
| LOC101928034 | 0.915732   | 0.826273  | 0.812653  | 0.960847  | 0.750018  | 1.43188   | 0.513272  | 0.429109  | 0.182497  | 1.56728   | 0.357113  | 1.10794   | 0.300784  | 1.23566   | 0.502132  |
| LOC101928035 | 0          | 0         | 0         | 0         | 0         | 0         | 0.027354  | 0         | 0         | 0         | 0         | 0         | 0         | 0         | 0         |
| LOC101928042 | 0.657707   | 1.06951   | 0.782146  | 0.381254  | 0.127706  | 0.245012  | 1.36109   | 0.913305  | 0.100127  | 0.0515931 | 0.32483   | 0.294129  | 0.159131  | 0.343746  | 0.118069  |
| LOC101928048 | 0          | 0.0292669 | 0.100502  | 0         | 0         | 0         | 0         | 0.0539832 | 0         | 0         | 0         | 0         | 0         | 0         | 0.0872345 |
| LOC101928052 | 0          | 0         | 0         | 0         | 0         | 0         | 0         | 0         | 0         | 0         | 0         | 0         | 0         | 0         | 0         |
| LOC101928053 | 0.0297341  | 0.138488  | 0.163988  | 0         | 0.0153958 | 0.084394  | 0.0113165 | 0.0792756 | 0.0120709 | 0.0124398 | 0         | 0.0212756 | 0         | 0.0155403 | 0         |
| LOC101928058 | 0.114075   | 0.0137408 | 0.0235928 | 0         | 0.0221498 | 0.133559  | 0.146529  | 0.0126726 | 0         | 0.0357941 | 0.0321942 | 0.030609  | 0         | 0.0074526 | 0.102392  |
| LOC101928063 | 0.0672257  | 0.0460628 | 0.0638341 | 0.0391316 | 8.17E-37  | 0.0124138 | 0.015801  | 0.015259  | 3.98E-21  | 0.0395054 | 0.200719  | 1.71E-26  | 1.13E-25  | 0.0255789 | 0.114842  |
| LOC101928068 | 0.598149   | 0.283726  | 0.443588  | 0.103608  | 0.237975  | 0.0693012 | 0.25841   | 0.465331  | 0.0478965 | 0.0486568 | 0.0918774 | 0.0616613 | 0.0185334 | 0.110096  | 0.247519  |
| LOC101928069 | 0.464897   | 0.317729  | 0.238245  | 0.262189  | 0.271793  | 0.397824  | 0.263536  | 0.21062   | 0.0674151 | 0.359552  | 0.261744  | 0.196529  | 0.0180649 | 0.237166  | 0.088355  |
| LOC101928075 | 0.00786911 | 0.0113744 | 0.0195296 | 0.0892028 | 0.0244469 | 0.0134009 | 0         | 0.0139868 | 0.0191674 | 0.108642  | 0.0532995 | 0.0450445 | 0.147236  | 0.0616911 | 0         |
| LOC101928087 | 0.0461017  | 0         | 0         | 0         | 0         | 0         | 0.0526374 | 0.163885  | 0         | 0         | 0         | 0         | 0         | 0         | 0         |
| LOC101928093 | 0.0905204  | 0.130842  | 0.124808  | 0         | 0.0937396 | 0.0513846 | 0.137804  | 0.080447  | 0.146992  | 0.227225  | 0.17031   | 0.12954   | 0         | 0.0473099 | 0         |
| LOC101928098 | 0.190043   | 0.193305  | 0.209623  | 0.0435211 | 0         | 0.0359599 | 0.144657  | 0.168895  | 0.0514336 | 0.0265027 | 0         | 0.090654  | 0         | 0.0772527 | 0         |
| LOC101928100 | 0.196266   | 0.315213  | 0.250313  | 0.75004   | 0.101623  | 0.53617   | 0.177405  | 0.203496  | 0.229071  | 0.297654  | 0.618522  | 0.140434  | 0.247984  | 0.222251  | 0.187909  |
| LOC101928103 | 0.630235   | 0.766609  | 0.68377   | 0.59624   | 0.0802436 | 0.140757  | 0.412875  | 1.44157   | 0.402652  | 0.518695  | 0.198275  | 1.1976    | 0.173315  | 0.642577  | 0.163214  |
| LOC101928105 | 0.0987612  | 0.111031  | 0.0817023 | 0.135702  | 0         | 0.0840939 | 0.15035   | 0.146285  | 0.0400934 | 0.0413185 | 0         | 0.117777  | 0.12744   | 0.309702  | 0.189112  |
| LOC101928107 | 0          | 0         | 0         | 0         | 0         | 0         | 0         | 0         | 0         | 0         | 0         | 0         | 0         | 0         | 0         |
| LOC101928111 | 0.216628   | 0.330519  | 0.388288  | 0.297655  | 0.560829  | 0.491882  | 0.371008  | 0.320868  | 1.18723   | 0.135945  | 0.570606  | 0.335839  | 0.0232945 | 0.320787  | 0.103702  |
| LOC101928118 | 0.479089   | 0.299434  | 0.397732  | 0.149575  | 0.188977  | 0.153317  | 0.348983  | 0.31877   | 0.0812276 | 0.0469825 | 0.160121  | 0.134558  | 0         | 0.284765  | 0.255354  |
| LOC101928119 | 0.807044   | 1.11978   | 0.962467  | 0.447669  | 1.43392   | 0.50925   | 1.06638   | 1.00377   | 0.0793589 | 0.408919  | 0.135611  | 1.04905   | 0.0560555 | 1.05574   | 0.857813  |
| LOC101928120 | 0.683471   | 1.00707   | 0.788961  | 0.82482   | 2.0829    | 1.09203   | 1.21385   | 0.602251  | 0.734302  | 1.06292   | 0.978341  | 0.515649  | 0.57618   | 0.81921   | 0.885126  |
| LOC101928123 | 0.766611   | 0.867666  | 0.460392  | 0.895234  | 3.42884   | 0.798524  | 0.871524  | 0.3392    | 0.500196  | 1.50314   | 1.07622   | 1.52018   | 1.55886   | 1.08508   | 1.05265   |
| LOC101928126 | 0          | 0.285158  | 0.287015  | 0.273408  | 0.221908  | 0.260661  | 0.116508  | 0.126961  | 0.0248551 | 0.0768437 | 0.138231  | 0.102219  | 0.105339  | 0.149328  | 0.205163  |

|              |           |           |           |           |           |           |            |            |           |           |           |           |            |            |            |
|--------------|-----------|-----------|-----------|-----------|-----------|-----------|------------|------------|-----------|-----------|-----------|-----------|------------|------------|------------|
| LOC101928128 | 0         | 0.0307181 | 0         | 0         | 0         | 0         | 0          | 0          | 0         | 0         | 0         | 0         | 0          | 0          | 0          |
| LOC101928131 | 0         | 0         | 0         | 0         | 0         | 0         | 0          | 0          | 0         | 0         | 0         | 0         | 0          | 0          | 0          |
| LOC101928132 | 0         | 0         | 0         | 0         | 0         | 0         | 0          | 0          | 0         | 0         | 0         | 0         | 0          | 0          | 0          |
| LOC101928134 | 0.165308  | 0.0398238 | 0.0341885 | 0         | 0         | 0         | 0.188743   | 0          | 0         | 0.155608  | 0         | 0         | 0          | 0          | 0.0593506  |
| LOC101928135 | 0         | 0.0429698 | 0         | 0         | 0         | 0         | 0          | 0          | 0         | 0         | 0         | 0         | 0          | 0          | 0          |
| LOC101928140 | 0.484538  | 0.337899  | 0.369198  | 0.223385  | 0.0792268 | 0.0760011 | 0.189263   | 0.419285   | 0.232939  | 0.208049  | 0.244703  | 0.200721  | 0.0822688  | 0.219919   | 0.0915602  |
| LOC101928143 | 0         | 0         | 0         | 0.0723811 | 0         | 0         | 0          | 0.0312103  | 0         | 0.176309  | 0.792887  | 0.0251282 | 0.0226582  | 0.0183544  | 0.0504345  |
| LOC101928150 | 0.0201178 | 0.0391014 | 0.0277411 | 0         | 0.0522339 | 0.0397772 | 0.0306636  | 0.0178753  | 0         | 0.0167804 | 0         | 0.023938  | 0          | 0.0139848  | 0.00987304 |
| LOC101928160 | 0.0718728 | 0.112546  | 0.0594583 | 0.0555503 | 0         | 0.0305994 | 0.205155   | 0.0958119  | 0         | 0.0225519 | 0         | 0.0642837 | 0.023186   | 0.00939097 | 0          |
| LOC101928161 | 0.305087  | 0.0839976 | 0.180278  | 0.0449145 | 0.135402  | 0.0371111 | 0.199051   | 0.0774675  | 0         | 0.0547023 | 0.393606  | 0.124742  | 0.140601   | 0.478356   | 0          |
| LOC101928163 | 0.0190949 | 0.211605  | 0.0789834 | 0.0393558 | 0.385593  | 0.0325182 | 0.283426   | 0.0509099  | 0.0232555 | 0         | 0.0646674 | 0.109303  | 0          | 0.0498992  | 0.164536   |
| LOC101928166 | 0         | 0         | 0         | 0         | 0         | 0         | 0          | 0          | 0         | 0         | 0         | 0         | 0          | 0          | 0          |
| LOC101928168 | 0.0452013 | 0.0217787 | 0         | 0         | 0         | 0         | 0          | 0.0401711  | 0         | 0         | 0         | 0         | 0          | 0          | 0.129829   |
| LOC101928174 | 0         | 0         | 0.0140415 | 0         | 0         | 0         | 0.00968976 | 0.00754221 | 0         | 0         | 0.0383214 | 0         | 0.00547553 | 0          | 0          |
| LOC101928177 | 0         | 0.0289628 | 0         | 0         | 0         | 0.0511844 | 0          | 0          | 0         | 0         | 0         | 0         | 0          | 0          | 0          |
| LOC101928185 | 0.324625  | 0.417091  | 0.38045   | 0.418169  | 0.189095  | 0.195793  | 0.355203   | 0.276479   | 0.0164732 | 0.0848828 | 0.167961  | 0.348417  | 0.0698154  | 0.678653   | 0.349652   |
| LOC101928191 | 0.224472  | 0.0757078 | 0.129989  | 0.0231325 | 0         | 0         | 0.102518   | 0.199492   | 0.0273382 | 0         | 0         | 0.0160616 | 0          | 0          | 0.161185   |
| LOC101928195 | 5.92E-39  | 0.157034  | 0.0613586 | 2.06E-09  | 0.0382087 | 0.0312614 | 0.0146557  | 5.32E-09   | 2.13E-34  | 0.014276  | 0         | 0.0500801 | 0          | 0.0552516  | 0          |
| LOC101928201 | 0         | 0         | 0         | 0         | 0         | 0         | 0          | 0          | 0         | 0         | 0         | 0         | 0          | 0          | 0          |
| LOC101928211 | 0         | 0.0197707 | 0         | 0         | 0         | 0         | 0          | 0          | 0         | 0         | 0         | 0         | 0          | 0          | 0          |
| LOC101928222 | 0.0201244 | 0.0678737 | 0.0499449 | 0.0207388 | 0.0312601 | 0.051407  | 0.0919095  | 0.0357698  | 0.0490185 | 0         | 0.0454359 | 0         | 0.0779049  | 0.0631073  | 0          |
| LOC101928226 | 0         | 0         | 0         | 0         | 0         | 0         | 0          | 0          | 0         | 0         | 0         | 0         | 0          | 0          | 0          |
| LOC101928231 | 0.0974034 | 0.0281583 | 0.0644632 | 0.381433  | 0.121041  | 0.149288  | 0.0222424  | 0.12119    | 0.498231  | 0.195602  | 0.461817  | 0.209084  | 0.138257   | 0.0509073  | 0.0279767  |
| LOC101928251 | 0.0406375 | 0.0734241 | 0.0504273 | 0.0628172 | 0.126248  | 0.060554  | 0          | 0.00902881 | 0         | 0.0892574 | 0.0114687 | 0.130847  | 0          | 0.0159292  | 0.0437704  |
| LOC101928253 | 0         | 0         | 0         | 0         | 0         | 0         | 0          | 0          | 0         | 0         | 0         | 0         | 0          | 0          | 0          |
| LOC101928254 | 0.0241325 | 0.0408985 | 0.0499102 | 0         | 0.0562291 | 0.0102742 | 0.0140087  | 0          | 0         | 0         | 0.0136213 | 0.0259012 | 0          | 0.0126127  | 0.0173286  |



|              |           |            |            |            |           |           |            |           |            |           |           |            |            |            |           |
|--------------|-----------|------------|------------|------------|-----------|-----------|------------|-----------|------------|-----------|-----------|------------|------------|------------|-----------|
| LOC101928266 | 0.146888  | 0.133682   | 0.209278   | 0.0588671  | 0.09507   | 0.0903308 | 0.312131   | 0.130542  | 0.00993852 | 0.051211  | 0.0138182 | 0.0642293  | 0.0184278  | 0.571511   | 0.8438    |
| LOC101928269 | 0.313901  | 0.109994   | 0.0236074  | 0          | 0.0443269 | 0.0242984 | 0.065164   | 0.101443  | 0          | 0         | 0         | 0.0612558  | 0.0552347  | 0          | 0         |
| LOC101928272 | 0         | 0          | 0          | 0          | 0         | 0         | 0          | 0         | 0          | 0         | 0         | 0          | 0          | 0          | 0         |
| LOC101928273 | 0         | 0          | 0          | 0          | 0         | 0         | 0          | 0         | 0          | 0         | 0         | 0          | 0          | 0          | 0         |
| LOC101928279 | 0.368582  | 0.247689   | 0.224676   | 0.00999564 | 0.210934  | 0.0743311 | 0.321163   | 0.172403  | 0          | 0         | 0.0437982 | 0.0485819  | 0.00625808 | 0.0304164  | 0.0975081 |
| LOC101928283 | 0         | 0          | 0          | 0          | 0         | 0.0137228 | 0          | 0         | 0          | 0         | 0         | 0          | 0          | 0          | 0         |
| LOC101928295 | 0         | 0.00683462 | 0.00586747 | 0.0073091  | 0.0220344 | 0.0120785 | 0.00809806 | 0         | 0.00863795 | 0         | 0         | 0.00507492 | 0.00915218 | 0.00741377 | 0.0407433 |
| LOC101928298 | 0         | 0          | 0          | 0          | 0         | 0         | 0          | 0         | 0          | 0         | 0         | 0          | 0          | 0          | 0         |
| LOC101928303 | 0.0214685 | 0.0206877  | 0          | 0.0884957  | 0.033348  | 0.0365603 | 0.024512   | 0         | 0.0522925  | 0.0538904 | 0.0727058 | 0.0460839  | 0.0969596  | 0.0112204  | 0         |
| LOC101928304 | 0.171176  | 0.362892   | 0.226575   | 0.105841   | 0.159538  | 0.145754  | 0.390887   | 0.0304255 | 0.333558   | 0.171875  | 0.425121  | 0.122481   | 0.0883537  | 0.107357   | 0         |
| LOC101928306 | 0         | 0          | 0          | 0          | 0         | 0         | 0          | 0         | 0          | 0         | 0         | 0          | 0          | 0          | 0         |
| LOC101928307 | 0.303373  | 0.0835257  | 0.215119   | 0.0893243  | 0.0673205 | 0.221416  | 0.0989662  | 0.231097  | 0          | 0         | 0         | 0          | 0.0279621  | 0.0906035  | 0         |
| LOC101928314 | 0         | 0          | 0          | 0.0183317  | 0         | 0         | 0          | 0         | 0          | 0         | 0         | 0          | 0          | 0          | 0         |
| LOC101928322 | 0         | 0          | 0          | 0          | 0         | 0         | 0          | 0         | 0          | 0         | 0         | 0          | 0          | 0          | 0         |
| LOC101928323 | 0.368814  | 0.155488   | 0.419524   | 0.237546   | 0.78773   | 0.588825  | 0.157912   | 0.368742  | 0.112293   | 0.289312  | 0.364302  | 0.065974   | 0.0594892  | 0.0722843  | 0.0662079 |
| LOC101928324 | 0.443353  | 0.811735   | 0.78245    | 0.335052   | 0.550945  | 0.251673  | 0.742436   | 0.472819  | 0.143988   | 0.148388  | 0.0667321 | 0.634463   | 0.1907     | 0.6797     | 0.594264  |
| LOC101928333 | 0         | 0          | 0          | 0          | 0         | 0         | 0          | 0         | 0          | 0         | 0         | 0.00866081 | 0.015619   | 0          | 0         |
| LOC101928335 | 0.210391  | 0.234751   | 0.229014   | 0.148347   | 0.0172006 | 0.122573  | 0.214932   | 0.285388  | 0.0809157  | 0.111184  | 0.0250006 | 0.17431    | 0.0142888  | 0.272006   | 0.12722   |
| LOC101928336 | 0.502649  | 0.656393   | 0.556199   | 0.298088   | 0.606446  | 0.311611  | 0.500229   | 0.429793  | 0.0961084  | 0.190873  | 0.0718477 | 0.244777   | 0.0461966  | 0.393239   | 0.253122  |
| LOC101928358 | 0         | 0.0292925  | 0.0670598  | 0          | 0         | 0         | 0.0462767  | 0.0540305 | 0          | 0         | 0         | 0          | 0          | 0          | 0         |
| LOC101928370 | 0.419742  | 0.110312   | 0.157836   | 0.255601   | 0.0296366 | 0.536107  | 0.304976   | 0.152604  | 0.0697089  | 0.215517  | 0.667679  | 0.0682583  | 0.356984   | 0.269234   | 0.191801  |
| LOC101928371 | 0.0259005 | 0.0690351  | 0.0847019  | 0.0262644  | 0.0295786 | 6.41E-18  | 0.0761625  | 0.0716438 | 1.07E-14   | 3.46E-14  | 5.66E-21  | 1.22E-14   | 1.64E-18   | 0.163362   | 1.11E-14  |
| LOC101928372 | 0.142849  | 0.127425   | 0.210494   | 0.123824   | 0.387808  | 0.0616713 | 0.128085   | 0.08799   | 0.026391   | 0.0137021 | 0.0122556 | 0.134646   | 0.0349862  | 0.155189   | 0.0804943 |
| LOC101928381 | 0.114524  | 0.231754   | 0.227382   | 0.0660915  | 0.106737  | 0.101416  | 0.0993776  | 0.0814236 | 0.0390537  | 0.0919934 | 0.0103427 | 0.0819451  | 0          | 0.246604   | 0.309206  |
| LOC101928386 | 0.24222   | 0.116705   | 0.145732   | 0.0907691  | 0.376252  | 0.112499  | 0.125709   | 0.215265  | 0.107272   | 0.11055   | 0.0248579 | 0.0157559  | 0.0568288  | 0.115086   | 0.126494  |
| LOC101928389 | 0.268066  | 0.473581   | 0.308005   | 0.27625    | 0.185066  | 0.164851  | 0.357081   | 0.330882  | 0          | 0.0934585 | 0.117683  | 0.10656    | 0          | 0.513711   | 0.641628  |

|              |            |            |           |            |           |            |            |           |            |           |           |           |           |            |           |
|--------------|------------|------------|-----------|------------|-----------|------------|------------|-----------|------------|-----------|-----------|-----------|-----------|------------|-----------|
| LOC101928398 | 0          | 0          | 0         | 0          | 0         | 0.0561425  | 0          | 0         | 0.026767   | 0         | 0         | 0         | 0         | 0          |           |
| LOC101928401 | 0          | 0          | 0         | 0          | 0         | 0          | 0          | 0         | 0          | 0         | 0         | 0         | 0         | 0          |           |
| LOC101928402 | 0.425946   | 0.136818   | 0.234915  | 0.146316   | 0.992461  | 0.120896   | 0.16211    | 0.315454  | 0          | 0         | 0         | 0         | 0.222618  | 0          |           |
| LOC101928403 | 0.121806   | 0.192831   | 0.388669  | 0.17932    | 0.0270294 | 0.207432   | 0.25828    | 0.216501  | 0.0211922  | 0.218398  | 0.255363  | 0.0124507 | 0.168404  | 0.100039   | 0.0499795 |
| LOC101928404 | 0.00878961 | 0.0465847  | 0.094528  | 0.00905795 | 0.0409599 | 0.00748424 | 0.0100357  | 0.015623  | 0          | 0         | 0.0198448 | 0.0125784 | 0         | 0.0321569  | 0.063115  |
| LOC101928414 | 0.0688781  | 0.0829663  | 0.0854713 | 0          | 0         | 0.117298   | 0.0786428  | 0.153033  | 0.0838858  | 0         | 0         | 0         | 0         | 0.0359987  | 0         |
| LOC101928416 | 0          | 0          | 0         | 0          | 0         | 0          | 0          | 0         | 0          | 0         | 0         | 0         | 0         | 0          | 0         |
| LOC101928417 | 0.44953    | 0.634834   | 0.487295  | 0.399357   | 0.240785  | 0.0263979  | 0.283177   | 0.537265  | 0.113271   | 0.097277  | 0.13999   | 0.277285  | 0.0900107 | 0.356467   | 0.289399  |
| LOC101928418 | 0.0607429  | 0.0195112  | 0.0837514 | 0.0208658  | 0         | 0.137925   | 0.0924724  | 0.0359888 | 0          | 0.0254129 | 0.0228571 | 0.0579509 | 0         | 0.0740761  | 0.174469  |
| LOC101928424 | 0.0320541  | 0.18533    | 0.265174  | 0.132131   | 0.248955  | 0.0818809  | 0          | 0.113948  | 0.0780765  | 0         | 0.0723701 | 0         | 0         | 0          | 0         |
| LOC101928429 | 0.719888   | 1.02771    | 0.639656  | 1.67607    | 1.65664   | 1.04433    | 0.51752    | 0.947816  | 0.0974158  | 0.769676  | 1.02335   | 0.686798  | 0.27524   | 1.56072    | 1.45505   |
| LOC101928433 | 0.205847   | 0.467563   | 0.632509  | 0.262638   | 0.106584  | 0.404804   | 0.195858   | 0.187295  | 0.710311   | 0.824287  | 0.6252    | 0.480442  | 0.619786  | 0.489253   | 0.436394  |
| LOC101928436 | 0          | 0          | 0         | 0          | 0.0214878 | 0          | 0          | 0         | 0          | 0         | 0         | 0         | 0         | 0.00722987 | 0         |
| LOC101928437 | 0.0189026  | 0          | 0         | 0          | 0         | 0.0107302  | 0.00719412 | 0         | 0          | 0         | 0         | 0         | 0         | 0          | 0         |
| LOC101928438 | 0.164879   | 0.0649975  | 0.0743999 | 0.0772331  | 0         | 0.0893407  | 0.136912   | 0.093247  | 0.0182549  | 0         | 0         | 0.0321751 | 0         | 0.0235018  | 0.0430523 |
| LOC101928441 | 0          | 0.00679505 | 0         | 0          | 0         | 0          | 0          | 0         | 0.0171759  | 0         | 0         | 0         | 0         | 0.00737085 | 0         |
| LOC101928443 | 0.0116005  | 0.0503038  | 0.0671774 | 0          | 0.0180196 | 0.0197554  | 0.0132451  | 0.0515479 | 0          | 0         | 0         | 0         | 0         | 0.0606294  | 0.116619  |
| LOC101928445 | 0.506181   | 0.544489   | 0.5843    | 0.181965   | 0.932557  | 0.310725   | 0.725786   | 0.564929  | 0.100356   | 0.206845  | 0.0398662 | 0.395878  | 0.007595  | 0.442971   | 0.15215   |
| LOC101928446 | 0.515946   | 0.367362   | 0.341462  | 0.177232   | 0.187003  | 0.0878643  | 0.307636   | 0.438151  | 0.00698183 | 0.143903  | 0.0582439 | 0.151771  | 0.0110962 | 0.311602   | 0.246988  |
| LOC101928453 | 0          | 0          | 0         | 0          | 0.0337868 | 0          | 0.0993383  | 0.0193305 | 0          | 0         | 0         | 0         | 0         | 0.011368   | 0         |
| LOC101928461 | 0.577058   | 0.42437    | 0.402007  | 0.970259   | 1.32097   | 0.362053   | 0.277417   | 0.485849  | 0.147956   | 0.266835  | 0         | 0.369437  | 0.333124  | 0.539697   | 0.567024  |
| LOC101928475 | 0          | 0          | 0         | 0          | 0         | 0          | 0          | 0         | 0          | 0         | 0         | 0         | 0         | 0          | 0         |
| LOC101928489 | 0.246327   | 0.457782   | 0.397855  | 0.398903   | 0.346191  | 0.59927    | 0.57589    | 0.125094  | 0.142857   | 0.647777  | 1.04608   | 0.285363  | 0.385971  | 0.386224   | 0.454831  |
| LOC101928491 | 0.0667588  | 0.107218   | 0.0184092 | 0.137594   | 0.103699  | 0          | 0.0508154  | 0.138436  | 0          | 0.139649  | 0.100483  | 0.159226  | 0         | 0.127934   | 0.031958  |
| LOC101928495 | 0.0362176  | 0.0354126  | 0.0299618 | 0          | 0         | 0          | 0.0827652  | 0         | 0          | 0         | 0         | 0.0518293 | 0         | 0          | 0         |
| LOC101928504 | 0.0903143  | 0.0870297  | 0.13075   | 0.139607   | 0.0876809 | 0.173028   | 0.103118   | 0.10033   | 0.0824945  | 0.0566769 | 0.114698  | 0.0242334 | 0.0874055 | 0.0413019  | 0.0162129 |

|              |            |            |           |           |           |           |            |           |           |           |           |            |           |            |            |
|--------------|------------|------------|-----------|-----------|-----------|-----------|------------|-----------|-----------|-----------|-----------|------------|-----------|------------|------------|
| LOC101928505 | 0          | 0          | 0         | 0         | 0         | 0         | 0          | 0.0123752 | 0         | 0         | 0         | 0          | 0         | 0          | 0          |
| LOC101928510 | 0.570881   | 0.585175   | 0.421341  | 0.288387  | 0.278204  | 0.157267  | 0.543177   | 0.586936  | 0.14996   | 0.19669   | 0.126363  | 0.480565   | 0.0433329 | 0.415374   | 0.385815   |
| LOC101928516 | 0.0345935  | 0.0166677  | 0.0858545 | 0         | 0         | 0         | 0          | 0.0614876 | 0         | 0         | 0         | 0          | 0.0223195 | 0.0542402  | 0          |
| LOC101928517 | 3.52E-28   | 1.47E-30   | 0         | 0.053481  | 0         | 0.0300142 | 2.34E-15   | 8.89E-22  | 0         | 0.0213874 | 0.0250754 | 0          | 0.0222582 | 7.82E-40   | 0.0282098  |
| LOC101928519 | 0.0108551  | 0.00523015 | 0.0179602 | 0         | 0.0337234 | 0.0647008 | 0          | 0         | 0         | 0         | 0         | 0.00776711 | 0         | 0          | 0          |
| LOC101928523 | 0          | 0          | 0         | 0         | 0         | 0         | 0          | 0         | 0         | 0         | 0         | 0          | 0         | 0          | 0          |
| LOC101928525 | 0.134792   | 0.211082   | 0.0735002 | 0         | 0.431286  | 0.149259  | 0.0735569  | 0.163382  | 0         | 0.0273414 | 0.0507154 | 0.125328   | 0         | 0.185364   | 0.158157   |
| LOC101928530 | 0.0852414  | 0.123212   | 0.0705177 | 0.0439219 | 0.132409  | 0.108873  | 0.194652   | 0.151511  | 0.103814  | 0         | 0.14434   | 0.121985   | 0.0274987 | 0.0445509  | 0          |
| LOC101928535 | 0          | 0.00341626 | 0         | 0         | 0         | 0         | 0.00809558 | 0         | 0         | 0         | 0         | 0          | 0         | 0          | 0          |
| LOC101928540 | 0.0820676  | 0          | 0         | 0         | 0         | 0.0232931 | 0          | 0         | 0         | 0.0343344 | 0         | 0          | 0         | 0          | 0          |
| LOC101928551 | 0          | 0          | 0         | 0         | 0         | 0         | 0          | 0         | 0         | 0         | 0         | 0          | 0         | 0          | 0          |
| LOC101928557 | 0.226893   | 0.0273301  | 0.0469254 | 0.11691   | 0         | 0         | 0.194294   | 0.201643  | 0.0690824 | 0         | 0         | 0.0811739  | 0         | 0.326106   | 0.896078   |
| LOC101928565 | 0          | 0.036028   | 0.0618597 | 0         | 0         | 0         | 0          | 0         | 0         | 0         | 0         | 0          | 0         | 0          | 0          |
| LOC101928583 | 0.0437487  | 0.0308074  | 0.030624  | 0         | 0         | 0.0458479 | 0.0691627  | 0.0508433 | 0         | 0         | 0         | 0          | 0         | 0.00175884 | 0.00483297 |
| LOC101928590 | 0          | 0          | 0         | 0         | 0         | 0         | 0          | 0         | 0         | 0         | 0         | 0          | 0         | 0          | 0          |
| LOC101928591 | 0          | 0          | 0         | 0         | 0         | 0         | 0          | 0         | 0         | 0         | 0         | 0          | 0         | 0          | 0          |
| LOC101928595 | 0.40315    | 0.444441   | 0.320941  | 0.215624  | 0.33708   | 0.674421  | 0.553116   | 0.416448  | 0.391386  | 0.429392  | 0.60914   | 0.694636   | 0.130655  | 0.394743   | 0.32381    |
| LOC101928596 | 0.0408167  | 0          | 0         | 0         | 0         | 0         | 0          | 0         | 0         | 0         | 0         | 0          | 0         | 0          | 0          |
| LOC101928597 | 0          | 0.00484812 | 0         | 0         | 0         | 0         | 0          | 0         | 0         | 0         | 0         | 0.00719977 | 0         | 0          | 0          |
| LOC101928605 | 1.23954    | 1.52134    | 1.87594   | 1.39495   | 1.0219    | 1.65981   | 1.63749    | 0.765188  | 0.735502  | 0.292859  | 0.382652  | 0.78161    | 1.235     | 0.620693   | 1.75338    |
| LOC101928617 | 0.0792872  | 0.207987   | 0.0947439 | 0.19973   | 0.0410535 | 0.120021  | 0.0502931  | 0.0626345 | 0.13948   | 0.221141  | 0.248626  | 0.0882499  | 0.0909435 | 0.101295   | 0.0253037  |
| LOC101928618 | 0.013362   | 0.0772564  | 0.022108  | 0.01377   | 0.0415117 | 0         | 0.0305127  | 0.0475003 | 0         | 0.0167707 | 0         | 0.0286827  | 0         | 0.0139672  | 0          |
| LOC101928622 | 0.00962689 | 0          | 0         | 0         | 0         | 0         | 0          | 0         | 0         | 0         | 0         | 0          | 0         | 0          | 0          |
| LOC101928626 | 0.174008   | 0          | 0.167944  | 0.119547  | 0.135147  | 0         | 0.165564   | 0.154644  | 0         | 0.0363996 | 0.0327389 | 0.0622537  | 0         | 0.0454721  | 0.0832991  |
| LOC101928627 | 0          | 0          | 0         | 0         | 0         | 0         | 0          | 0         | 0         | 0         | 0         | 0          | 0         | 0          | 0          |
| LOC101928650 | 0.10951    | 0.15829    | 0.120792  | 0.112853  | 0.283511  | 0.808133  | 0.125035   | 0.032441  | 0         | 0.503968  | 0.741737  | 0.0783571  | 0.0942068 | 0.171704   | 1.20573    |

|              |           |            |           |           |           |           |           |           |           |           |            |           |           |            |          |
|--------------|-----------|------------|-----------|-----------|-----------|-----------|-----------|-----------|-----------|-----------|------------|-----------|-----------|------------|----------|
| LOC101928651 | 0.0138747 | 0.0133701  | 0.0114782 | 0         | 0         | 0         | 0.0316834 | 0.0123307 | 0         | 0.0174142 | 0          | 0.0198555 | 0         | 0.00725154 | 0        |
| LOC101928659 | 0.115427  | 0.139036   | 0.190978  | 0         | 0.358595  | 0.245711  | 0.13179   | 0.102582  | 0.0702884 | 0.217309  | 0.325756   | 0         | 0.148945  | 0.211145   | 0        |
| LOC101928661 | 0         | 0          | 0.0174845 | 0         | 0         | 0         | 0.0120657 | 0         | 0         | 0         | 0          | 0.0151228 | 0         | 0.0165693  | 0        |
| LOC101928663 | 0.0196294 | 0.0283732  | 0         | 0         | 0         | 0.0668567 | 0.0672366 | 0.0697799 | 0         | 0.0246369 | 0.0443183  | 0         | 0.0126648 | 0          | 0.112761 |
| LOC101928673 | 1.05601   | 0.894996   | 0.47364   | 0.393341  | 1.24508   | 0.433337  | 0.871599  | 0.554048  | 0.185942  | 0.271466  | 0.229802   | 0.273108  | 0.0820878 | 0.425573   | 0.895317 |
| LOC101928674 | 0.0348016 | 0.00838397 | 0.0287903 | 0.0717281 | 0         | 0.340781  | 0         | 0         | 0         | 0.0436796 | 0.137503   | 0.0871551 | 0.14595   | 0.109133   | 0.324867 |
| LOC101928682 | 0.098621  | 0.015839   | 0.0271954 | 0         | 0         | 0.0279915 | 0         | 0.0584307 | 0         | 0         | 0          | 0         | 0         | 0.0343624  | 0.188843 |
| LOC101928696 | 0.0690837 | 0.0665712  | 0.0285755 | 0         | 0.0536554 | 0.0588239 | 0.0394388 | 0.0306979 | 0         | 0         | 0          | 0.0247156 | 0         | 0          | 0        |
| LOC101928697 | 0         | 0          | 0         | 0         | 0         | 0         | 0         | 0         | 0         | 0         | 0          | 0         | 0         | 0          | 0        |
| LOC101928700 | 0         | 0          | 0         | 0         | 0         | 0         | 0         | 0         | 0         | 0         | 0          | 0         | 0         | 0          | 0        |
| LOC101928708 | 0.0318555 | 0.0690682  | 0.0395297 | 0.016414  | 0         | 0         | 0.0545574 | 0         | 0         | 0         | 0          | 0.0227935 | 0         | 0.0582718  | 0        |
| LOC101928718 | 2.20E-15  | 0.00827507 | 0.0574625 | 0.0430955 | 0.127111  | 0.0740643 | 0.088924  | 0.0138671 | 1.36E-09  | 0.0275653 | 0.0253379  | 0.0122335 | 2.88E-09  | 0.0541769  | 1.37E-09 |
| LOC101928725 | 0.116047  | 0.103839   | 0.137146  | 0.170842  | 0.0257515 | 0.169393  | 0.0946418 | 0.147333  | 0.0807611 | 0.0416145 | 0.0561439  | 0.142345  | 0.406452  | 0.147296   | 0        |
| LOC101928728 | 0.489524  | 0.301098   | 0.37912   | 0.418602  | 0.25886   | 0.807042  | 0.368651  | 0.425792  | 0.126848  | 0.169941  | 0.141092   | 0.111788  | 0.208319  | 0.152419   | 0.119663 |
| LOC101928730 | 0         | 0          | 0         | 0         | 0         | 0         | 0         | 0         | 0         | 0         | 0          | 0         | 0         | 0          | 0        |
| LOC101928731 | 1.04494   | 0.972609   | 1.06091   | 0.538421  | 0.571793  | 0.272992  | 1.01683   | 0.875891  | 0.0433848 | 0.178842  | 0.134046   | 0.492791  | 0.0153225 | 0.695076   | 0.716227 |
| LOC101928737 | 0         | 0.0613799  | 0.0351295 | 0         | 0.131923  | 0         | 0         | 0         | 0         | 0         | 0          | 0         | 0         | 0          | 0        |
| LOC101928739 | 0         | 0          | 0         | 0         | 0         | 0         | 0         | 0         | 0         | 0         | 0          | 0         | 0         | 0          | 0        |
| LOC101928748 | 0         | 0.00731672 | 0         | 0         | 0         | 0.0129304 | 0         | 0         | 0         | 0         | 0.0171428  | 0         | 0.0293933 | 0          | 0        |
| LOC101928775 | 0         | 0          | 0         | 0         | 0         | 0         | 0         | 0         | 0         | 0         | 0          | 0         | 0         | 0          | 0        |
| LOC101928782 | 0         | 0          | 0         | 0         | 0         | 0         | 0         | 0         | 0         | 0         | 0          | 0         | 0         | 0          | 0        |
| LOC101928786 | 0.0152709 | 0.00367888 | 0         | 0.0236057 | 0.0355815 | 0.0455104 | 0.0174358 | 0         | 0         | 0.0287498 | 0.00861947 | 0.0928773 | 0         | 0.0359156  | 0        |
| LOC101928791 | 0         | 0          | 0         | 0         | 0         | 0         | 0         | 0         | 0         | 0         | 0          | 0         | 0         | 0          | 0        |
| LOC101928796 | 0.216898  | 0.0731534  | 0.10766   | 0.022352  | 0.134767  | 0.66487   | 0.396236  | 0.0578284 | 0.0792473 | 0.027223  | 0.416247   | 0         | 0.111953  | 0.124697   | 0.155747 |
| LOC101928797 | 0.0178298 | 0          | 0         | 0         | 0         | 0         | 0         | 0.0158456 | 0         | 0         | 0          | 0         | 0         | 0          | 0        |
| LOC101928804 | 0         | 0          | 0         | 0         | 0         | 0         | 0.0338335 | 0         | 0         | 0         | 0          | 0         | 0         | 0          | 0        |

|              |           |           |           |           |           |           |           |           |            |           |           |           |            |            |           |
|--------------|-----------|-----------|-----------|-----------|-----------|-----------|-----------|-----------|------------|-----------|-----------|-----------|------------|------------|-----------|
| LOC101928807 | 0.198653  | 0         | 0         | 0         | 0         | 0         | 0.113408  | 0         | 0          | 0         | 0         | 0         | 0          | 0          | 0         |
| LOC101928809 | 0.0412287 | 0.0331077 | 0         | 0         | 0         | 0.0351057 | 0.0470736 | 0.0122135 | 0          | 0         | 0         | 0         | 0          | 0.0359132  | 0         |
| LOC101928812 | 0.0228912 | 0.0661761 | 0.0568118 | 0.0471802 | 0.035558  | 0.11695   | 0         | 0         | 0          | 0         | 0.0982758 | 0         | 0.0957117  | 0          | 0         |
| LOC101928823 | 0.0353599 | 0         | 0.0146261 | 0         | 0.0274631 | 0.0150542 | 0         | 0         | 0          | 0         | 0         | 0         | 0          | 0.0277209  | 0         |
| LOC101928834 | 0.115964  | 0.0239456 | 0.0822286 | 0.051216  | 0.0257331 | 0.0282119 | 0.0189148 | 0.0588908 | 0.100879   | 0.0207923 | 0.317921  | 0.0118536 | 0.0320654  | 0.00865825 | 0.166539  |
| LOC101928837 | 0.332515  | 0.192253  | 0.220064  | 0.137067  | 0.413209  | 1.0759    | 0.227793  | 0.236409  | 0          | 0.166936  | 0.0750736 | 0         | 0.0429074  | 0.173787   | 0         |
| LOC101928841 | 0.0344501 | 0.0165986 | 0.018347  | 0.0938261 | 0.0726245 | 0.0796202 | 0.019667  | 0.037177  | 0.00599632 | 0.0370614 | 0.0194449 | 0.0299321 | 0.088908   | 0.0913992  | 0.0742119 |
| LOC101928844 | 0.0194807 | 0.0281583 | 0.0322316 | 0.100377  | 0.0605205 | 0.0165875 | 0.0444848 | 0.0692512 | 0.0711758  | 0         | 0         | 0.0975726 | 0.0502753  | 0.111996   | 0.111907  |
| LOC101928847 | 0.0119726 | 0         | 0         | 0         | 0         | 0         | 0.0273399 | 0         | 0          | 0         | 0.0405467 | 0         | 0          | 0.00625741 | 0.0687767 |
| LOC101928855 | 0.382828  | 0.44547   | 0.537797  | 0.133986  | 0.807846  | 0.227566  | 0.602045  | 0.29529   | 0.00879701 | 0.154119  | 0.0244622 | 0.852782  | 0.00932071 | 0.422816   | 0.425309  |
| LOC101928858 | 0.0445916 | 0.0143233 | 0.0368893 | 0         | 0.0230887 | 0         | 0.203653  | 0.0924684 | 0          | 0.0186557 | 0         | 0.021271  | 0          | 0.147602   | 0         |
| LOC101928861 | 0.381297  | 0.43133   | 0.548584  | 0.187927  | 0.0515031 | 0.14116   | 0.586779  | 0.63353   | 0.0605708  | 0.0624217 | 0.0187146 | 0.332138  | 0.0106961  | 0.285927   | 0.380932  |
| LOC101928865 | 1.00131   | 0.64553   | 0.700021  | 0.101735  | 0.0876274 | 0.192137  | 0.434764  | 0.513877  | 0.0343518  | 0.0708029 | 0.159205  | 0.171548  | 0.0727936  | 0.147417   | 0.222791  |
| LOC101928881 | 0         | 0.10405   | 0.0595507 | 0         | 0         | 0         | 0         | 0.0639739 | 0          | 0         | 0         | 0         | 0          | 0          | 0         |
| LOC101928882 | 0.853868  | 0.426932  | 0.666396  | 0.0249038 | 0.150153  | 0.377247  | 0.607025  | 0.730211  | 0          | 0.0101103 | 0.0454675 | 0         | 0.0155918  | 0.0252605  | 0.23137   |
| LOC101928887 | 0         | 0         | 0         | 0         | 0         | 0         | 0         | 0         | 0          | 0         | 0         | 0         | 0.00580551 | 0          | 0         |
| LOC101928894 | 0         | 0         | 0         | 0         | 0         | 0         | 0         | 0         | 0          | 0         | 0         | 0         | 0          | 0          | 0         |
| LOC101928896 | 0.0322776 | 0.0933111 | 0.0534046 | 0         | 0         | 0         | 0.0368535 | 0.143428  | 0.0393105  | 0         | 0.0364374 | 0.0230955 | 0          | 0.0506091  | 0         |
| LOC101928902 | 0         | 0         | 0         | 0         | 0         | 0         | 0         | 0         | 0          | 0         | 0         | 0         | 0          | 0          | 0         |
| LOC101928907 | 0.0640018 | 0.0555067 | 0.0211787 | 0.0527646 | 0.0795335 | 0.032698  | 0.0292301 | 0.102383  | 0.0467682  | 0.128526  | 0         | 0.073272  | 0.0165175  | 0.254221   | 0.238978  |
| LOC101928909 | 0.186337  | 0.287296  | 0.200396  | 0.211228  | 0.31839   | 0.142797  | 0.106377  | 0.115921  | 0.0226937  | 0.210485  | 0         | 0.159995  | 0.0240447  | 0.146082   | 0.508447  |
| LOC101928911 | 0         | 0         | 0         | 0         | 0         | 0         | 0         | 0         | 0          | 0         | 0         | 0         | 0          | 0          | 0         |
| LOC101928924 | 0         | 0         | 0         | 0         | 0         | 0         | 0         | 0         | 0          | 0         | 0         | 0         | 0          | 0          | 0         |
| LOC101928932 | 0.104562  | 0.0167932 | 0         | 0.0718361 | 0         | 0.38581   | 0.0397952 | 0.092926  | 0          | 0         | 0.157383  | 0         | 0          | 0.0728649  | 0.0500547 |
| LOC101928936 | 3.0743    | 2.48068   | 2.43476   | 1.2757    | 3.37478   | 1.03187   | 2.03399   | 1.96718   | 0.497076   | 0.988927  | 0.527676  | 1.66992   | 0.228416   | 1.78963    | 2.26262   |
| LOC101928937 | 0         | 0.0214849 | 0.0184447 | 0         | 0         | 0         | 0         | 0.0198147 | 0          | 0         | 0         | 0         | 0          | 0          | 0         |



|              |            |            |           |            |            |           |            |            |           |            |            |            |           |            |            |
|--------------|------------|------------|-----------|------------|------------|-----------|------------|------------|-----------|------------|------------|------------|-----------|------------|------------|
| LOC101929122 | 0.0845666  | 0          | 0.0466396 | 0.377643   | 0.74438    | 0.336034  | 0.0321851  | 0.0501038  | 0         | 0.10614    | 0.700078   | 0          | 0.127311  | 0.147327   | 0.769172   |
| LOC101929124 | 0.0344904  | 0.0265888  | 0.0171197 | 0          | 0.0107151  | 0         | 0.03938    | 0.0306522  | 0         | 0          | 0          | 0          | 0         | 0          | 0          |
| LOC101929128 | 0.0324587  | 0.0781955  | 0.134261  | 0          | 0          | 0         | 0          | 0.144233   | 0         | 0          | 0          | 0          | 0.104711  | 0.0169643  | 0.139844   |
| LOC101929130 | 0.304977   | 0.197807   | 0.213483  | 0.350551   | 0.109323   | 0.449453  | 0.214285   | 0.218915   | 0.0285713 | 0.294444   | 0.463455   | 0.184647   | 0.408675  | 0.931843   | 1.53295    |
| LOC101929134 | 0.190217   | 0          | 0         | 0          | 0          | 0         | 0          | 0          | 0         | 0          | 0          | 0          | 0         | 0.0331385  | 0          |
| LOC101929140 | 0.156616   | 0.116092   | 0.119597  | 0.124152   | 0.0935688  | 0.051291  | 0.0687766  | 0.171308   | 0.0293448 | 0.0151207  | 0.0680001  | 0.112063   | 0         | 0.170005   | 0.0519048  |
| LOC101929147 | 1.09487    | 1.20738    | 1.29012   | 0.503936   | 1.00062    | 0.806937  | 1.02874    | 1.19781    | 0.316092  | 0.447085   | 0.451072   | 0.533601   | 0.34512   | 0.739496   | 0.863685   |
| LOC101929148 | 0          | 0          | 0         | 0          | 0          | 0         | 0          | 0          | 0         | 0          | 0          | 0          | 0         | 0          | 0          |
| LOC101929154 | 0.0492405  | 0          | 0         | 0          | 0          | 0         | 0          | 0          | 0         | 0          | 0          | 0          | 0         | 0          | 0          |
| LOC101929161 | 0          | 0          | 0         | 0          | 0          | 0         | 0          | 0          | 0         | 0          | 0          | 0          | 0         | 0          | 0          |
| LOC101929162 | 0.775703   | 0.687638   | 0.581916  | 0.43076    | 0.349481   | 0.295787  | 0.572798   | 0.660793   | 0.150872  | 0.481765   | 0.094502   | 0.741702   | 0.215529  | 0.807822   | 0.640556   |
| LOC101929163 | 0.00684879 | 0.00471408 | 0.0032376 | 0.00201654 | 0.00455937 | 0         | 0.00223421 | 0.00608664 | 0         | 0.00122799 | 0.00331347 | 0.00210021 | 0         | 0          | 0.00562042 |
| LOC101929165 | 0.702521   | 0.696313   | 0.805342  | 0.475751   | 0.26502    | 0.170911  | 0.607316   | 0.695696   | 0.0611137 | 0.239328   | 0.0906353  | 0.459586   | 0.0388511 | 0.382904   | 0.648584   |
| LOC101929172 | 0          | 0          | 0         | 0          | 0          | 0         | 0          | 0          | 0         | 0          | 0          | 0          | 0         | 0          | 0          |
| LOC101929188 | 0.290364   | 0.611422   | 0.658351  | 0.321393   | 0.50115    | 0.439539  | 0.736728   | 0.563889   | 0.261948  | 0.499412   | 0.376345   | 0.900306   | 0.534269  | 1.26464    | 0.416999   |
| LOC101929208 | 0          | 0          | 0         | 0          | 0          | 0         | 0          | 0          | 0         | 0          | 0          | 0          | 0         | 0.0236704  | 0          |
| LOC101929210 | 0          | 0          | 0         | 0          | 0          | 0         | 0          | 0          | 0         | 0          | 0          | 0          | 0         | 0          | 0          |
| LOC101929217 | 0          | 0          | 0         | 0          | 0          | 0         | 0          | 0          | 0         | 0          | 0          | 0.094356   | 0         | 0          | 0          |
| LOC101929224 | 0.126423   | 0.0303007  | 0         | 0          | 0.0976879  | 0.107098  | 0.0359022  | 0.0558903  | 0.191478  | 0.118398   | 0.10649    | 0.0674978  | 0.081151  | 0          | 0.0451581  |
| LOC101929227 | 0.00733071 | 0.0264904  | 0.0181934 | 0.00377725 | 0          | 0         | 0.0669597  | 0.0162873  | 0         | 0          | 0          | 0.00262266 | 0         | 0          | 0          |
| LOC101929229 | 0          | 0          | 0         | 0          | 0          | 0         | 0          | 0          | 0         | 0          | 0          | 0          | 0         | 0          | 0          |
| LOC101929231 | 0.618223   | 0.543935   | 0.62262   | 0.332398   | 0.668045   | 0.527612  | 0.738189   | 0.358902   | 0.392831  | 0.438571   | 0.45515    | 0.617012   | 0.243107  | 0.772655   | 0.231612   |
| LOC101929234 | 0.320494   | 0.438875   | 0.237226  | 0.121682   | 0.419232   | 0.186719  | 0.115557   | 0.31481    | 0.0821739 | 0.0635136  | 0.171378   | 0.120696   | 0.0870658 | 0.17632    | 0.193798   |
| LOC101929237 | 0.0416349  | 0.00859728 | 0.0147614 | 0.00612942 | 0.00923905 | 0.0455806 | 0.0543284  | 0.0264297  | 0         | 0          | 0          | 0          | 0         | 0          | 0          |
| LOC101929243 | 0.534791   | 0.520719   | 0.526552  | 0.676008   | 0.667313   | 0.695318  | 0.372819   | 0.222974   | 1.0374    | 0.686413   | 0.642662   | 0.494334   | 0.0798491 | 0.490808   | 0.113265   |
| LOC101929259 | 0.0586421  | 0.0632842  | 0.0543291 | 0.027071   | 0.0612074  | 0.0223678 | 0.0299932  | 0.0350186  | 0         | 0.0164852  | 0          | 0.0817112  | 0         | 0.00686468 | 0          |

|              |            |            |            |           |           |           |           |           |           |           |           |           |            |            |           |
|--------------|------------|------------|------------|-----------|-----------|-----------|-----------|-----------|-----------|-----------|-----------|-----------|------------|------------|-----------|
| LOC101929268 | 0.00975677 | 0.0376077  | 0.0242145  | 0.0100546 | 0.0303113 | 0.0581543 | 0.0334199 | 0.026013  | 0         | 0.0367372 | 0.0440567 | 0.0209437 | 0          | 0.0203972  | 0         |
| LOC101929269 | 0.0365032  | 0.0879391  | 0.0905942  | 0.0376176 | 0         | 0.031082  | 0.416782  | 0.129764  | 0         | 0         | 0         | 0.0783571 | 0          | 0.0763127  | 0         |
| LOC101929279 | 0          | 0          | 0.00937589 | 0         | 0         | 0         | 0.0129402 | 0.0201446 | 0         | 0         | 0         | 0         | 0          | 0.00592339 | 0         |
| LOC101929282 | 0          | 0          | 0          | 0         | 0         | 0.0631603 | 0         | 0         | 0         | 0         | 0         | 0         | 0          | 0          | 0         |
| LOC101929294 | 0.0521828  | 0.0125712  | 0.0431693  | 0.0268879 | 0         | 0.0888659 | 0         | 0.0231878 | 0         | 0         | 0         | 0         | 0          | 0          | 0         |
| LOC101929295 | 0.468629   | 0.38211    | 0.397623   | 0.33434   | 0.97059   | 0.296716  | 0.397869  | 0.277652  | 0.0878057 | 0.708829  | 0.122082  | 0.412697  | 0.0620219  | 1.35023    | 0.690267  |
| LOC101929297 | 0          | 0          | 0          | 0         | 0         | 0         | 0         | 0         | 0         | 0         | 0         | 0         | 0          | 0          | 0         |
| LOC101929315 | 0          | 0          | 0          | 0         | 0         | 0         | 0         | 0         | 0         | 0         | 0         | 0         | 0          | 0          | 0         |
| LOC101929319 | 0          | 0          | 0.0101947  | 0.0126995 | 0         | 0.0314792 | 0         | 0         | 0         | 0         | 0.0278228 | 0         | 0          | 0.0128813  | 0         |
| LOC101929331 | 0.413269   | 0.289628   | 0.124322   | 0.387169  | 1.2839    | 0.639805  | 0.300273  | 0.367279  | 0.183024  | 0.141462  | 1.14512   | 0.0537645 | 0.484798   | 0.117814   | 0.431641  |
| LOC101929340 | 0.671255   | 0.198463   | 0.391241   | 0.20438   | 0.355463  | 0.350733  | 0.435465  | 0.216929  | 0.0371597 | 0.229771  | 0.172219  | 0.163739  | 0.226388   | 0.430561   | 1.00783   |
| LOC101929341 | 0.0290742  | 0.0420252  | 0          | 0         | 0         | 0         | 0         | 0         | 0         | 0         | 0         | 0         | 0          | 0          | 0.0835084 |
| LOC101929352 | 0.34839    | 0.0599499  | 0.0411733  | 0         | 0.115965  | 0.0635678 | 0.227303  | 0.132694  | 0         | 0         | 0         | 0         | 0          | 0.039018   | 0.285904  |
| LOC101929353 | 0          | 0          | 0          | 0         | 0         | 0         | 0         | 0         | 0         | 0         | 0         | 0         | 0          | 0          | 0         |
| LOC101929372 | 0.0377743  | 0.0606674  | 0.0312496  | 0.0259517 | 0.0586765 | 0.0428858 | 0.0862589 | 0.0111902 | 0         | 0         | 0         | 0.0630665 | 0.0162479  | 0.0592275  | 0.0180829 |
| LOC101929380 | 0          | 0.00758034 | 0          | 0         | 0         | 0         | 0         | 0.0139821 | 0         | 0         | 0         | 0         | 0          | 0          | 0         |
| LOC101929384 | 0          | 0          | 0          | 0         | 0         | 0         | 0         | 0         | 0         | 0         | 0         | 0         | 0          | 0          | 0         |
| LOC101929411 | 0          | 0          | 0          | 0         | 0         | 0         | 0         | 0         | 0         | 0         | 0         | 0         | 0          | 0          | 0         |
| LOC101929413 | 0.0461477  | 0.0111173  | 0.0190883  | 0         | 0         | 0         | 0         | 0.0512652 | 0         | 0.01448   | 0         | 0.0165099 | 0          | 0          | 0         |
| LOC101929415 | 0.237148   | 0.262731   | 0.233638   | 0.158165  | 0.0697823 | 0.0628539 | 0.229438  | 0.240985  | 0.0113251 | 0.0599839 | 0.0816953 | 0.260465  | 0.0299021  | 0.159276   | 0.330191  |
| LOC101929420 | 0.0206358  | 0.00497132 | 0.0170714  | 0         | 0         | 0         | 0         | 0         | 0         | 0         | 0         | 0         | 0          | 0          | 0         |
| LOC101929427 | 0.0413269  | 0.0199119  | 0.0341885  | 0         | 0         | 0         | 0         | 0.0734558 | 0         | 0.311217  | 0.0933058 | 0.0295705 | 0.346631   | 0.129595   | 0.0593506 |
| LOC101929431 | 0.19108    | 0.269015   | 0.26381    | 0.139678  | 0.34014   | 0.0656265 | 0.356549  | 0.185383  | 0.0639513 | 0.0902677 | 0.0161602 | 0.234496  | 0.00923615 | 0.141078   | 0.14391   |
| LOC101929439 | 0.0899814  | 0.259201   | 0.224153   | 0.0405261 | 0.137444  | 0.0837128 | 0.192623  | 0.100023  | 0         | 0         | 0         | 0.0140692 | 0          | 0.0051383  | 0.0705955 |
| LOC101929445 | 0.0135024  | 0.0130113  | 0          | 0         | 0         | 0         | 0.0616662 | 0         | 0         | 0         | 0.0152425 | 0         | 0          | 0          | 0         |
| LOC101929452 | 0.261997   | 0.168312   | 0.28899    | 0.0449992 | 0         | 0.260268  | 0.299139  | 0.11642   | 0         | 0.219222  | 0.0492936 | 0.124977  | 0          | 0.182575   | 0.438971  |



|              |           |            |           |           |            |           |            |            |            |            |            |            |           |            |           |
|--------------|-----------|------------|-----------|-----------|------------|-----------|------------|------------|------------|------------|------------|------------|-----------|------------|-----------|
| LOC101929457 | 0.0184701 | 0.0177984  | 0.020373  | 0         | 0.0765079  | 0.0262118 | 0.00702953 | 0.0164147  | 0.00749817 | 0.0231819  | 0.00695015 | 0.0176211  | 0         | 0.00643553 | 0.0353672 |
| LOC101929460 | 0.0481645 | 0          | 0.0199225 | 0.0248175 | 0.448897   | 0.0205057 | 0.082489   | 0.0642069  | 0.263965   | 0.0906771  | 0.217487   | 0.0172315  | 0.0776888 | 0.0755186  | 0.138341  |
| LOC101929464 | 0.141692  | 0.136539   | 0         | 0.0486726 | 0          | 0         | 0          | 0.0839495  | 0.0575217  | 0          | 0          | 0.0675897  | 0         | 0.0493697  | 0.0678293 |
| LOC101929470 | 0.0123958 | 0          | 0         | 0         | 0          | 0         | 0          | 0.0220328  | 0          | 0.0155581  | 0          | 0          | 0         | 0.0259144  | 0         |
| LOC101929473 | 0         | 0          | 0         | 0         | 0          | 0         | 0          | 0          | 0          | 0          | 0          | 0          | 0         | 0          | 0         |
| LOC101929488 | 0         | 0          | 0.0104563 | 0         | 0          | 0         | 0          | 0          | 0          | 0          | 0          | 0          | 0         | 0          | 0         |
| LOC101929497 | 0         | 0          | 0         | 0         | 0          | 0         | 0          | 0          | 0          | 0          | 0          | 0          | 0         | 0          | 0         |
| LOC101929512 | 0.36287   | 0.330246   | 0.50032   | 0.166199  | 0          | 0.068662  | 0.184139   | 0.214993   | 0.196416   | 0.101209   | 0.09103    | 0.144246   | 0.0520271 | 0.105362   | 0.057903  |
| LOC101929516 | 0.159005  | 0.209646   | 0.421195  | 0.0411987 | 1.02E-34   | 0.0366955 | 0.307741   | 0.142161   | 0.0455857  | 0.0979808  | 0.133156   | 0.0853335  | 0.127132  | 0.40786    | 0.476454  |
| LOC101929523 | 0.0454231 | 0.656566   | 0.544869  | 0.491503  | 1.51699    | 2.30129   | 0.881664   | 0.504603   | 0.193621   | 0.370569   | 0.666601   | 0.568775   | 0.967122  | 0.973343   | 2.57671   |
| LOC101929524 | 0.152075  | 0.153205   | 0.148681  | 0.0854824 | 0.150325   | 0.188349  | 0.0315699  | 0.184298   | 0.0505119  | 0.121463   | 0.0156067  | 0.0197843  | 0.0178396 | 0.0505788  | 0         |
| LOC101929526 | 0.724074  | 0.421277   | 0.440777  | 0.267498  | 0.572979   | 0.151227  | 0.405563   | 0.497799   | 0.0998311  | 0.480114   | 0.200492   | 0.488768   | 0.017629  | 0.528378   | 0.412021  |
| LOC101929528 | 0         | 0          | 0         | 0         | 0          | 0         | 0          | 0          | 0          | 0          | 0          | 0          | 0         | 0          | 0         |
| LOC101929529 | 0.198369  | 0.159295   | 0.109403  | 0         | 0          | 0         | 0          | 0.293823   | 0          | 0          | 0          | 0          | 0         | 0.172794   | 0         |
| LOC101929532 | 0.0495672 | 0.0201548  | 0.017925  | 0.109037  | 0.0538059  | 0.126495  | 0.014816   | 0.0251247  | 0.00824232 | 0.225383   | 0.279012   | 0.0547446  | 0.0562096 | 0.212746   | 0.438742  |
| LOC101929536 | 0         | 0.0653178  | 0.0320428 | 0         | 0.0902489  | 0.0494711 | 0.0221121  | 0.0172114  | 0          | 0          | 0          | 0          | 0.0124952 | 0.0202436  | 0         |
| LOC101929538 | 0.0120788 | 0          | 0.0399699 | 0         | 0          | 0         | 0          | 0          | 0          | 0          | 0.0136355  | 7.56E-31   | 0         | 0          | 0         |
| LOC101929541 | 0         | 0.0244532  | 0.0629788 | 0         | 0.0394179  | 0.0432149 | 0.0289737  | 0          | 0.0927159  | 0.0636994  | 0.057293   | 0.0363146  | 0         | 0.0132627  | 0         |
| LOC101929550 | 0         | 0.00413677 | 0         | 0.0132719 | 0.00666836 | 0         | 0          | 0.00381518 | 0          | 0          | 0          | 0          | 0         | 0.00673098 | 0         |
| LOC101929551 | 0         | 0          | 0         | 0         | 0          | 0         | 0          | 0          | 0          | 0          | 0          | 0          | 0         | 0          | 0         |
| LOC101929552 | 0         | 0.0995596  | 0.0427356 | 0         | 0.120365   | 0         | 0.0589821  | 0.0229549  | 0.0314572  | 0          | 0.0583161  | 0.0369631  | 0.0833247 | 0          | 0         |
| LOC101929555 | 0.0206358 | 0.0695985  | 0.0682856 | 0         | 0.0480818  | 0         | 0.0235613  | 0.119206   | 0.0376981  | 0          | 0          | 0.00738273 | 0         | 0          | 0         |
| LOC101929563 | 0.0576534 | 0.00925944 | 0.0119237 | 0.0198045 | 0          | 0.0122728 | 0.0219423  | 0.042698   | 0          | 0.00603008 | 0          | 0.00687543 | 0.0216987 | 0.0150661  | 0.0068998 |
| LOC101929570 | 0         | 0          | 0         | 0         | 0          | 0         | 0          | 0          | 0          | 0          | 0          | 0          | 0         | 0          | 0         |
| LOC101929572 | 0         | 0          | 0         | 0         | 0          | 0         | 0          | 0          | 0          | 0          | 0          | 0          | 0         | 7.07E-10   | 0         |
| LOC101929574 | 0.193504  | 0.130526   | 0.032016  | 0.0797645 | 0.300578   | 0.395438  | 0.176749   | 0.068788   | 0          | 0.0971468  | 0.131065   | 0.166149   | 0.0249695 | 0.222494   | 0.277896  |

|              |           |           |           |            |           |            |           |            |            |            |           |            |           |            |           |
|--------------|-----------|-----------|-----------|------------|-----------|------------|-----------|------------|------------|------------|-----------|------------|-----------|------------|-----------|
| LOC101929577 | 0.0525083 | 0.0537611 | 0.0108597 | 0.0135278  | 0.0305863 | 0.0223551  | 0.0374702 | 0.0291657  | 0          | 0.0164758  | 0.0148188 | 0.00939278 | 0.0127043 | 0.0377343  | 0.0282782 |
| LOC101929579 | 0         | 0.118624  | 0.0814705 | 0          | 0.0764876 | 0.0838553  | 0.224885  | 0          | 0.119939   | 0          | 0.0555864 | 0.0352329  | 0         | 0          | 0         |
| LOC101929583 | 4.07E-32  | 1.56E-08  | 2.56E-12  | 0.0141457  | 4.93E-07  | 0.00848342 | 3.73E-28  | 0.0365972  | 1.47E-27   | 1.41E-41   | 0         | 0.00285869 | 0         | 1.46E-13   | 8.54E-40  |
| LOC101929586 | 0.101061  | 0.0265598 | 0.0684042 | 0.0473394  | 0.0998984 | 0.148636   | 0.0209797 | 0.04899    | 0.0111892  | 0.0230623  | 0.0103714 | 0.00657383 | 0         | 0.0528191  | 0.211108  |
| LOC101929592 | 0.101505  | 0.0489065 | 0         | 0          | 0         | 0          | 0.0579473 | 0.135313   | 0          | 0          | 0         | 0          | 0         | 0          | 0.21866   |
| LOC101929595 | 0.354066  | 0.308652  | 0.365543  | 0.243716   | 0.168515  | 0.0599948  | 0.287104  | 0.377002   | 0.100305   | 0.244248   | 0.127465  | 0.507798   | 0.185222  | 0.592508   | 0.279406  |
| LOC101929596 | 0.0204444 | 0.206859  | 0.202957  | 0.0421371  | 0         | 0.0870407  | 0.186742  | 0.0363385  | 0          | 0.0256598  | 0         | 0.0731425  | 0.0131906 | 0.0427405  | 0         |
| LOC101929613 | 0         | 0.0253424 | 0         | 0          | 0         | 0          | 0         | 0          | 0          | 0          | 0         | 0          | 0         | 0          | 0         |
| LOC101929621 | 0.0789865 | 0.0190285 | 0.163358  | 0          | 0         | 0          | 0.135276  | 0.0350983  | 0          | 0.0495681  | 0         | 0.056517   | 0         | 0          | 0         |
| LOC101929622 | 0         | 0         | 0         | 0          | 0.037253  | 0          | 0.0273824 | 0          | 0          | 0          | 0         | 0          | 0         | 0          | 0.103325  |
| LOC101929626 | 0         | 0         | 0.0534792 | 0          | 0         | 0.0550447  | 0.07381   | 0          | 0          | 0          | 0         | 0          | 0         | 0          | 0         |
| LOC101929633 | 0.0735868 | 0.124093  | 0.0304381 | 0          | 0         | 0.0626582  | 0         | 0.0653978  | 0          | 0.0461795  | 0         | 0          | 0         | 0.0961492  | 0         |
| LOC101929645 | 0.0096329 | 0         | 0         | 0          | 0         | 0          | 0         | 0.00856092 | 0          | 0          | 0         | 0          | 0         | 0          | 0         |
| LOC101929646 | 0         | 0         | 0         | 0          | 0         | 0          | 0         | 0          | 0          | 0          | 0         | 0          | 0         | 0          | 0         |
| LOC101929653 | 0.0320319 | 0.0591616 | 0.0750806 | 0.00550163 | 0.0580494 | 0.0318205  | 0.158483  | 0.0237227  | 0.00650188 | 0.00670056 | 0         | 0.0114598  | 0         | 0.00279021 | 0         |
| LOC101929657 | 0.101238  | 0.0943043 | 0.0781679 | 0.0904184  | 0.0629032 | 0.0517218  | 0.0462362 | 0.125961   | 0          | 0          | 0         | 0.0144877  | 0.0217728 | 0.0176372  | 0.0872345 |
| LOC101929662 | 0         | 0         | 0         | 0          | 0         | 0          | 0         | 0          | 0          | 0          | 0         | 0          | 0         | 0          | 0         |
| LOC101929679 | 0.326287  | 0.449171  | 0.424172  | 0.120089   | 0.253418  | 0.158759   | 0.319323  | 0.227839   | 0.113537   | 0.204762   | 0.0789294 | 0.100057   | 0         | 0.14617    | 0.167353  |
| LOC101929680 | 0.0442478 | 0.0395497 | 0.0231857 | 0.0507165  | 0.0342869 | 0.0284436  | 0.0746424 | 0.0208659  | 0          | 4.95E-37   | 0.0260104 | 0.0081263  | 7.77E-40  | 0.0124254  | 0         |
| LOC101929698 | 0.0392034 | 0.0377985 | 0.0973466 | 0.0269335  | 0.142092  | 0.011127   | 0.0298408 | 0.0580678  | 0.0159151  | 0.0164014  | 0.0147519 | 0.0654525  | 0         | 0.0205302  | 0.093835  |
| LOC101929705 | 0         | 0.0145697 | 0.0166773 | 0.0727122  | 0.0313146 | 0.0858276  | 0.0115087 | 0.0537481  | 0.0245519  | 0.101209   | 0.0682725 | 0.0216369  | 0.0520271 | 0.0316086  | 0.0868546 |
| LOC101929709 | 1.67682   | 2.1382    | 2.48737   | 1.04277    | 1.48198   | 1.157      | 1.58445   | 1.31037    | 0.686596   | 1.21558    | 1.46865   | 0.80677    | 0.419694  | 1.22391    | 2.80257   |
| LOC101929710 | 0         | 0.212169  | 0.121431  | 0.050422   | 0.380012  | 0.124985   | 0.167594  | 0.13045    | 0.0595891  | 0.6141     | 0.220935  | 0.175047   | 0.126273  | 0.12786    | 0.351336  |
| LOC101929715 | 0.0262393 | 0.025285  | 0.065121  | 0.0540807  | 0.0815174 | 0.111712   | 0.0299592 | 0.0233193  | 0.0319565  | 0          | 0.0888627 | 0.0187749  | 0.0507884 | 0.0137138  | 0.0376829 |
| LOC101929718 | 0.8438    | 1.18131   | 0.710684  | 0.642966   | 0.849329  | 0.534813   | 0.927772  | 1.10478    | 0.367648   | 0.448686   | 0.244536  | 0.70971    | 0.0732037 | 0.610422   | 0.59482   |
| LOC101929719 | 0.396965  | 0.612044  | 0.886673  | 0.204542   | 0.184987  | 0          | 0.725187  | 0.776137   | 0          | 0.298939   | 0         | 0.198827   | 0.025612  | 0.0829885  | 0.456073  |



|              |           |           |           |           |           |           |           |           |           |           |           |            |           |           |           |
|--------------|-----------|-----------|-----------|-----------|-----------|-----------|-----------|-----------|-----------|-----------|-----------|------------|-----------|-----------|-----------|
| LOC102467226 | 0         | 0         | 0         | 0         | 0         | 0         | 0         | 0         | 0         | 0         | 0         | 0          | 0         | 0         | 0         |
| LOC102503427 | 0.104405  | 0.0335359 | 0         | 0         | 0         | 0.0888993 | 0         | 0         | 0         | 0         | 0         | 0          | 0.0449076 | 0         | 0         |
| LOC102546229 | 0         | 0         | 0         | 0         | 0         | 0         | 0         | 0         | 0         | 0         | 0         | 0          | 0.0211798 | 0         | 0         |
| LOC102546294 | 0.0771435 | 0.207084  | 0.164105  | 0.102213  | 0.188305  | 0.0563029 | 0.0754971 | 0.146912  | 0.147639  | 0.096823  | 0.149289  | 0.17348    | 0.0142207 | 0.0806371 | 0.094961  |
| LOC102546299 | 0         | 0         | 0         | 0         | 0         | 0         | 0         | 0         | 0         | 0         | 0.0448894 | 0          | 0         | 0         | 0         |
| LOC102606465 | 0.296706  | 0.395235  | 0.447596  | 0.827361  | 0.379554  | 0.683617  | 0.239131  | 0.217154  | 0.233817  | 0.547642  | 1.02453   | 0.549485   | 0.394127  | 0.556433  | 0.651693  |
| LOC102606466 | 0         | 0         | 0         | 0         | 0         | 0         | 0.0318745 | 0         | 0         | 0         | 0         | 0.0399505  | 0         | 0         | 0         |
| LOC102723313 | 0.794611  | 0.546367  | 0.431391  | 0.460614  | 0.835728  | 0.472211  | 0.529236  | 0.588487  | 0.362905  | 0.290885  | 0.149503  | 0.728475   | 0.160212  | 0.523449  | 0.404162  |
| LOC102723322 | 0         | 0         | 0         | 0.0489725 | 0         | 0         | 0         | 0.0422333 | 0         | 0         | 0         | 0          | 0         | 0         | 0         |
| LOC102723330 | 0         | 0         | 0         | 0         | 0         | 0         | 0         | 0         | 0         | 0         | 0         | 0          | 0         | 0         | 0         |
| LOC102723335 | 2.39E-30  | 0.293913  | 0.277259  | 0.114164  | 0.515557  | 0.16038   | 0         | 0.289646  | 0.211498  | 0.0703974 | 0         | 0.351365   | 0.0328171 | 0.339396  | 0         |
| LOC102723345 | 0.211352  | 0.178207  | 0         | 0.762316  | 0         | 0.0899818 | 0.0603287 | 0.0939161 | 0         | 0.265269  | 0         | 0.37807    | 0         | 0         | 0         |
| LOC102723360 | 0         | 0         | 0         | 0         | 0         | 0         | 0         | 0         | 0         | 0         | 0         | 0          | 0         | 0         | 0         |
| LOC102723373 | 0.0396285 | 0.381872  | 0.163917  | 0.163353  | 0.861795  | 0.236202  | 0.0904931 | 0.105656  | 0.434368  | 0.0994757 | 0.178943  | 0.283553   | 0.0511362 | 0.248539  | 0         |
| LOC102723376 | 0         | 0         | 0         | 0         | 0         | 0         | 0         | 0         | 0         | 0         | 0         | 0          | 0         | 0         | 0         |
| LOC102723385 | 9.65E-18  | 0         | 0         | 0.152491  | 0.0459708 | 0.0251995 | 0.0337903 | 0.0683594 | 7.63E-41  | 0         | 0.176287  | 0          | 0.0196394 | 0.11014   | 0.103133  |
| LOC102723427 | 0         | 0         | 0         | 0         | 0         | 0         | 0         | 0         | 0         | 0         | 0         | 0          | 0         | 0         | 0         |
| LOC102723439 | 0.223821  | 0.668609  | 0.740641  | 0.230654  | 0.208602  | 0.228696  | 0.511102  | 0.915     | 0.0545177 | 0.337101  | 0.151599  | 0.480449   | 0.144408  | 0.514705  | 0.192861  |
| LOC102723493 | 0.0758789 | 0.0121865 | 0.0209241 | 0.0260651 | 0         | 0.0107683 | 0.086636  | 0.0112391 | 0         | 0         | 0         | 0.00904889 | 0         | 0.0066096 | 0         |
| LOC102723517 | 2.06776   | 0.99628   | 1.38164   | 0         | 1.11183   | 0.237014  | 1.45287   | 1.30756   | 0         | 0         | 0         | 0          | 0         | 0         | 0.0571071 |
| LOC102723544 | 0         | 0         | 0         | 0         | 0         | 0         | 0         | 0         | 0         | 0         | 0         | 0          | 0         | 0         | 0         |
| LOC102723566 | 1.03609   | 0.884457  | 0.903708  | 0.63831   | 2.39661   | 1.04523   | 1.06725   | 0.710609  | 0.0548625 | 0.254425  | 0.190698  | 0.628535   | 0.130789  | 1.41262   | 2.08637   |
| LOC102723582 | 1.08075   | 1.09532   | 1.51068   | 0.652887  | 1.33145   | 0.47599   | 1.36162   | 0.728643  | 0.18155   | 0.654842  | 0.336562  | 0.879972   | 0         | 1.07127   | 0.588728  |
| LOC102723604 | 0.0437487 | 0.126473  | 0.144768  | 0.0901686 | 0         | 0.0372514 | 0.149852  | 0.233281  | 0.053281  | 0.0549091 | 0         | 0.156517   | 0         | 0.0457299 | 0         |
| LOC102723649 | 0         | 0.0643308 | 0         | 0         | 0         | 0         | 0         | 0.118659  | 0.271016  | 0.167578  | 0         | 0.159226   | 0         | 0         | 0         |
| LOC102723661 | 0         | 0         | 0         | 0         | 0         | 0         | 0         | 0         | 0         | 0.0357281 | 0         | 0          | 0         | 0         | 0         |

|              |           |           |           |           |           |           |           |           |            |            |           |            |           |            |           |
|--------------|-----------|-----------|-----------|-----------|-----------|-----------|-----------|-----------|------------|------------|-----------|------------|-----------|------------|-----------|
| LOC102723665 | 0.19072   | 0.140375  | 0.0733547 | 0.183473  | 0.275472  | 0.21572   | 0.101241  | 0.101318  | 0.107991   | 0.0953921  | 0.257395  | 0.0727699  | 0.155856  | 0.125789   | 0.0181918 |
| LOC102723672 | 0         | 0.0988535 | 0         | 0.0422865 | 0.0637396 | 0.104819  | 0         | 0         | 0          | 0          | 0         | 0          | 0         | 0.0643381  | 0         |
| LOC102723692 | 0.201975  | 0.307938  | 0.425231  | 0.0413813 | 0.184215  | 0.0341514 | 0.458908  | 0.215627  | 0          | 0.203879   | 0.0496417 | 0.171182   | 0.106753  | 0.248392   | 0.415308  |
| LOC102723701 | 0.0776612 | 0.0694913 | 0.073425  | 0.0914653 | 0.0172335 | 0.255063  | 0.101338  | 0.157757  | 0.0135118  | 0.0835482  | 0.150291  | 0.00793839 | 0.126595  | 0          | 0.0159331 |
| LOC102723703 | 0.326666  | 0.290571  | 0.478119  | 0.207163  | 0.156131  | 0.449323  | 0.200834  | 0.379641  | 0.214223   | 0.315384   | 0.226933  | 0.449497   | 0.259401  | 0.262662   | 0.613483  |
| LOC102723704 | 0.153672  | 0.0666375 | 0.0635643 | 0.0950183 | 0.0238706 | 0.07851   | 0.0526374 | 0.0819427 | 0.0748622  | 0.0771498  | 0.0346954 | 0.186926   | 0         | 0.0321263  | 0         |
| LOC102723709 | 0.0788968 | 0.51952   | 0.500395  | 0         | 0.204257  | 0.0223932 | 0.420382  | 0.0934892 | 0          | 0          | 0         | 0.0752703  | 0         | 0.10996    | 0         |
| LOC102723727 | 0         | 0         | 0         | 0         | 0         | 0         | 0         | 0         | 0          | 0          | 0         | 0          | 0         | 0          | 0         |
| LOC102723729 | 0.141438  | 0.0272633 | 1.54E-44  | 0         | 0         | 0.385875  | 0.0817374 | 0         | 0          | 2.45E-38   | 0.144395  | 0.0809754  | 0         | 0.0727163  | 0         |
| LOC102723753 | 0.137546  | 0.21741   | 0.168422  | 0.0299265 | 0.1557    | 0.0924894 | 0.0620281 | 0.0690633 | 0.278917   | 0.00658361 | 0         | 0.170259   | 0.0111129 | 0.455307   | 0.0975246 |
| LOC102723769 | 2.34785   | 1.84229   | 1.19313   | 0.794986  | 1.43276   | 0.742545  | 3.42746   | 1.52022   | 0.224668   | 0.884036   | 0.397564  | 1.35596    | 0.151482  | 1.27968    | 1.25238   |
| LOC102723809 | 0.330026  | 0.814933  | 0.784934  | 0.255076  | 0.0640805 | 0.210759  | 0.235508  | 0.549936  | 0.100484   | 0          | 0.232849  | 0.118071   | 0         | 0.366532   | 0.177734  |
| LOC102723824 | 0.158514  | 0.175661  | 0.118021  | 0.0163353 | 0.0246227 | 0.0809836 | 0.12669   | 0.112699  | 0.0193052  | 0.0596854  | 0.178943  | 0          | 0.081818  | 0.190547   | 0.182117  |
| LOC102723831 | 0.0261503 | 0         | 0         | 0         | 0         | 0         | 0         | 0         | 0          | 0          | 0         | 0          | 0         | 0          | 0         |
| LOC102723833 | 0.0502018 | 0         | 0         | 0         | 0         | 0         | 0         | 0         | 0          | 0          | 0         | 0          | 0         | 0          | 0         |
| LOC102723838 | 0         | 0         | 0         | 0         | 0         | 0         | 0         | 0         | 0          | 0          | 0         | 0          | 0         | 0          | 0         |
| LOC102723883 | 0         | 0         | 0.0389137 | 0         | 0         | 0.0400529 | 0.0537073 | 0         | 0.171864   | 0          | 0         | 0          | 0         | 0          | 0         |
| LOC102723885 | 0.282232  | 0.0971313 | 0.166773  | 0.0830996 | 0.250517  | 0.102993  | 0.322244  | 0.286657  | 0.196416   | 0          | 0.136545  | 0.0576985  | 0         | 0.126435   | 0         |
| LOC102723886 | 0.134748  | 0.016231  | 0.111473  | 0.138862  | 0.209311  | 0.114737  | 0.230777  | 0.0898149 | 0.0410271  | 0.126842   | 0.380286  | 0.0723121  | 0         | 0.0352127  | 0         |
| LOC102723968 | 0.0151064 | 0.014557  | 0         | 0         | 0.0234655 | 0         | 0.0517441 | 0.0134253 | 0          | 0          | 0         | 0          | 0         | 0          | 0         |
| LOC102723996 | 0.913681  | 0.304773  | 0.754957  | 0.897918  | 1.7394    | 1.71942   | 1.9948    | 1.3028    | 1.27077    | 0.386691   | 0.578815  | 0.738696   | 0.840809  | 0.945159   | 0.623712  |
| LOC102724009 | 0.318118  | 0.459822  | 0.625027  | 0.368808  | 0.864756  | 0.507887  | 0.726433  | 0.494754  | 0          | 0.39927    | 0.0448894 | 0.569054   | 0.12828   | 0.97679    | 0.7995    |
| LOC102724020 | 0         | 0.0215736 | 0         | 0         | 0         | 0         | 0         | 0         | 0          | 0          | 0         | 0          | 0         | 0.00441075 | 0         |
| LOC102724034 | 0.194324  | 0.122163  | 0.116683  | 0.0985811 | 0.143777  | 0.0933783 | 1.23E-14  | 3.98E-11  | 0.00053196 | 0.220162   | 0.0868282 | 0.0257566  | 1.73E-07  | 0.0516292  | 0.573212  |
| LOC102724050 | 0.134329  | 0.101706  | 0.0317505 | 0.13843   | 0.0596172 | 0.1634    | 0.175283  | 0.136435  | 0          | 0.0240853  | 0.021663  | 0.0274618  | 0.0123812 | 0.0902654  | 0.551183  |
| LOC102724058 | 1.86E-09  | 0         | 0         | 0.0322292 | 0         | 1.85E-20  | 0.0357081 | 0         | 0          | 0          | 0         | 0          | 0         | 0          | 0         |

|              |           |            |           |           |           |           |           |           |           |           |           |            |           |           |           |
|--------------|-----------|------------|-----------|-----------|-----------|-----------|-----------|-----------|-----------|-----------|-----------|------------|-----------|-----------|-----------|
| LOC102724064 | 0.319324  | 0.976891   | 0.951218  | 0.972465  | 1.44463   | 1.85219   | 0.538468  | 0.571181  | 0.224946  | 0.776955  | 0.47323   | 0.619988   | 0.864182  | 0.476062  | 0.461616  |
| LOC102724084 | 0         | 0.0197357  | 0.033886  | 0         | 0.19088   | 0.0348779 | 0         | 0         | 0         | 0         | 0.0924801 | 0.0879264  | 0         | 0         | 0.294127  |
| LOC102724094 | 0.170588  | 0.0547945  | 0.141122  | 0.0585985 | 0.353309  | 0.145253  | 0.129848  | 0.202139  | 0         | 0.142737  | 0.89867   | 0.0406867  | 0.623686  | 0.118875  | 0.163324  |
| LOC102724096 | 0.143924  | 0.013869   | 0.0714387 | 0.0296637 | 0         | 0         | 0         | 0.0255816 | 0         | 0.252896  | 0         | 0.0411927  | 0.0371437 | 0.0451327 | 0.165355  |
| LOC102724152 | 0         | 0          | 0.0419859 | 0         | 0         | 0         | 0         | 0         | 0         | 0         | 0         | 0          | 0         | 0         | 0         |
| LOC102724153 | 0.215076  | 0.237389   | 0.28733   | 0.363357  | 1.32306   | 0.276269  | 0.21505   | 0.197957  | 1.00603   | 0.0469238 | 0.104802  | 0.23182    | 0.0766317 | 0.034174  | 0.0249498 |
| LOC102724156 | 0         | 0          | 0.030584  | 0.0380984 | 0         | 0         | 0         | 0         | 0         | 0         | 0.0834684 | 0          | 0.0238527 | 0         | 0         |
| LOC102724163 | 0.0852414 | 0.143747   | 0.0352589 | 0.0878438 | 0         | 0.108873  | 0.145989  | 0         | 0.103814  | 0.16048   | 0.0481135 | 0.0609925  | 0.0549973 | 0.0222754 | 0.122417  |
| LOC102724219 | 0         | 0          | 0         | 0         | 0         | 0         | 0         | 0         | 0         | 0         | 0         | 0          | 0         | 0         | 0         |
| LOC102724238 | 0.0135986 | 0.0262062  | 1.19E-10  | 3.45E-11  | 7.69E-11  | 0.0115793 | 8.94E-11  | 0.0241696 | 3.78E-11  | 2.66E-11  | 3.62E-11  | 0.00971302 | 1.17E-11  | 0.0213231 | 1.27E-11  |
| LOC102724264 | 0         | 0          | 0         | 0         | 0         | 0         | 0         | 0         | 0         | 0         | 0         | 0          | 0         | 0         | 0         |
| LOC102724265 | 0.0289892 | 0.00465581 | 0         | 0         | 0         | 0         | 0.011033  | 0         | 0         | 0         | 0         | 0          | 0         | 0         | 0         |
| LOC102724297 | 0.0243355 | 0.0469008  | 0.020132  | 0.225706  | 0.0378014 | 0.0828854 | 0         | 0         | 0.0296379 | 0.122174  | 0.988982  | 0.0174127  | 0.219816  | 0.127188  | 0.244642  |
| LOC102724301 | 0         | 0.127924   | 0.109822  | 0.136805  | 0.137473  | 0.489824  | 0.0505239 | 0.0786525 | 0.107784  | 0.111078  | 0.29972   | 0.189975   | 0.199852  | 0.277527  | 0.0635494 |
| LOC102724323 | 0.199509  | 0.168221   | 0.165048  | 0.2056    | 0.0774766 | 0.12741   | 0.0569482 | 0.0443268 | 0         | 0.125202  | 0.11261   | 0.107066   | 0.128722  | 0.182476  | 0.28652   |
| LOC102724357 | 0         | 0          | 0         | 0         | 0         | 0         | 0         | 0         | 0         | 0         | 0         | 0          | 0         | 0         | 0.153517  |
| LOC102724404 | 0.104248  | 0.0502283  | 0.064681  | 0.0268576 | 0.161933  | 0.0221914 | 0.446351  | 0.0231617 | 0.0317406 | 0.065421  | 0.0588415 | 0.167832   | 0         | 0.0272423 | 0.0374283 |
| LOC102724421 | 0         | 0          | 0         | 0         | 0         | 0         | 0         | 0         | 0         | 0         | 0         | 0          | 0         | 0         | 0         |
| LOC102724434 | 0.0571151 | 0.0990682  | 0.0283498 | 0.0235435 | 0         | 0.0486328 | 0.0521698 | 0.0101518 | 0.0278239 | 0.0716854 | 0.193428  | 0.00817348 | 0.0221102 | 0.214926  | 0.311693  |
| LOC102724450 | 0.36735   | 0.0294991  | 0         | 0         | 0.190207  | 0.208529  | 0.139809  | 0         | 0         | 0         | 0.138231  | 0          | 0         | 0         | 0         |
| LOC102724452 | 0         | 0          | 0         | 0         | 0         | 0         | 0         | 0         | 0         | 0         | 0         | 0          | 0         | 0         | 0         |
| LOC102724467 | 0         | 0          | 0         | 0         | 0         | 0.0256923 | 0         | 0         | 0         | 0         | 0         | 0          | 0         | 0.01577   | 0         |
| LOC102724484 | 0.231787  | 0.146041   | 0.265501  | 0.0551223 | 0.193871  | 0.182182  | 0.305362  | 0.380295  | 0         | 0.0671346 | 0.201276  | 0.114819   | 0         | 0.214328  | 0.512116  |
| LOC102724511 | 0         | 0          | 0         | 0         | 0         | 0         | 0         | 0         | 0         | 0         | 0         | 0.0312443  | 0         | 0         | 0         |
| LOC102724532 | 2.11594   | 1.12569    | 0.80229   | 1.31741   | 0.75322   | 3.04035   | 1.81193   | 1.01859   | 4.13389   | 2.37908   | 6.31991   | 1.95559    | 1.67805   | 0.944606  | 0.316537  |
| LOC102724552 | 0.466863  | 0.417749   | 0.220698  | 0.412385  | 0.2072    | 0.0851845 | 0.266524  | 0.326     | 0.0406133 | 0.0837087 | 0.112935  | 0.143165   | 0         | 0.122001  | 0.47891   |







|              |           |           |           |           |           |            |            |           |           |           |           |           |            |            |           |
|--------------|-----------|-----------|-----------|-----------|-----------|------------|------------|-----------|-----------|-----------|-----------|-----------|------------|------------|-----------|
| LOC105369147 | 0.732113  | 0.655187  | 0.562106  | 0.37464   | 0.492375  | 0.939537   | 0.576789   | 0.55167   | 0.388648  | 0.352777  | 0.605662  | 0.206824  | 0.204838   | 0.369041   | 0.415114  |
| LOC105369187 | 0         | 0         | 0         | 0         | 0         | 0          | 0          | 0         | 0         | 0         | 0         | 0         | 0          | 0          | 0         |
| LOC105369192 | 0.0219158 | 0.0527968 | 0.0362605 | 0.0451697 | 0.11915   | 0.018661   | 0.0125114  | 0.0389538 | 0.253564  | 0.0137533 | 0.0742205 | 0.0705659 | 0          | 0.00572707 | 0         |
| LOC105369306 | 0.1387    | 0.157522  | 0.172113  | 0.0918862 | 0.107724  | 0.0337432  | 0.113116   | 0.0616324 | 0.0965261 | 0.0994757 | 0.0111839 | 0.155954  | 0.0511362  | 0.0155337  | 0         |
| LOC105369332 | 0.536644  | 0.529167  | 0.583068  | 0.0918567 | 0.435205  | 0.158099   | 0.364838   | 0.378276  | 0.512202  | 3.85E-40  | 0.265893  | 0.192012  | 0.17705    | 0.544779   | 0.365268  |
| LOC105369340 | 1.6053    | 2.04644   | 0.885344  | 5.68668   | 3.32478   | 4.95498    | 1.22192    | 0.832216  | 11.9341   | 8.14321   | 14.9127   | 7.39433   | 5.20023    | 3.84541    | 1.34482   |
| LOC105369391 | 0.1422    | 0.0513856 | 0.0294095 | 0         | 0.0552214 | 0.363244   | 0.162359   | 0.0315939 | 0         | 0         | 0.200658  | 0         | 0.0458734  | 0.16722    | 0.612652  |
| LOC105369423 | 0         | 0.0328444 | 0.0845901 | 0         | 0.0529443 | 0          | 0          | 0.030291  | 0         | 0         | 0         | 0         | 0          | 0          | 0         |
| LOC105369431 | 0         | 0         | 0         | 0         | 0         | 0          | 0          | 0         | 0         | 0         | 0         | 0         | 0          | 0          | 0         |
| LOC105369438 | 0.067431  | 0.0708194 | 0.041833  | 1.57E-05  | 0.10075   | 0.00175674 | 0.00962272 | 0.0449402 | 1.24E-23  | 1.77E-11  | 0.0190307 | 0.0060304 | 0.00512556 | 0.0466597  | 0.0363106 |
| LOC105369443 | 0         | 0         | 0         | 0         | 0         | 0          | 0          | 0         | 0         | 0         | 0         | 0         | 0          | 0          | 0         |
| LOC105369473 | 0         | 0         | 0         | 0         | 0         | 0          | 0          | 0         | 0         | 0         | 0         | 0         | 0          | 0          | 0         |
| LOC105369486 | 0.0345419 | 0.0083214 | 0         | 0         | 0         | 0          | 0          | 0.015349  | 0         | 0         | 0         | 0         | 0          | 0          | 0         |
| LOC105369507 | 0.174995  | 0.33726   | 0.217152  | 0.180337  | 0.0679568 | 0.1111754  | 0.149852   | 0.194401  | 0         | 0.0549091 | 0         | 0.0313033 | 0.0564529  | 0.0457299  | 0.251315  |
| LOC105369509 | 0.228235  | 0.219934  | 0.15105   | 0.0470406 | 0.0709056 | 0.0777357  | 0.0521183  | 0.243404  | 0.055593  | 0         | 0.0515298 | 0.097985  | 0          | 0.0238571  | 0.13111   |
| LOC105369532 | 0         | 0         | 0         | 0         | 0         | 0          | 0          | 0         | 0         | 0         | 0         | 0         | 0          | 0          | 0         |
| LOC105369595 | 0.042937  | 0.26894   | 0.213123  | 0.0442478 | 0         | 0.0731206  | 0.343169   | 0.228953  | 0         | 0         | 0         | 0.307226  | 0          | 0.134645   | 0         |
| LOC105369632 | 0         | 0         | 0         | 0.11836   | 0         | 0          | 0          | 0.153109  | 0.0699395 | 0         | 0.129656  | 0.205453  | 0.0370516  | 0.0300138  | 0         |
| LOC105369691 | 0         | 0.0147107 | 0.050516  | 0.0314638 | 0         | 0.0519947  | 0          | 0.0542681 | 0         | 0.0383205 | 0         | 0         | 0          | 0          | 0         |
| LOC105369747 | 0.0273882 | 0         | 0         | 0         | 0         | 0.0466414  | 0          | 0.0973615 | 0.0333558 | 0         | 0.0309179 | 0         | 0          | 0.0286286  | 0         |
| LOC105369781 | 0.0604257 | 0.232912  | 0         | 0.186811  | 0.187724  | 0.0514517  | 0          | 0.161104  | 0         | 0         | 0.0682131 | 0         | 0          | 0.0315811  | 0         |
| LOC105369879 | 0         | 0         | 0         | 0         | 0         | 0          | 0          | 0         | 0         | 0         | 0         | 0         | 0          | 0          | 0         |
| LOC105369911 | 0.170483  | 0.164283  | 0.141035  | 0.175688  | 0.397228  | 0.072582   | 0.389304   | 0.0378777 | 0         | 0         | 0         | 0.0304963 | 0.0274987  | 0.111377   | 0.183626  |
| LOC105369921 | 0         | 0.0136316 | 0.0234053 | 0         | 0         | 0.0240905  | 0          | 0         | 0         | 0.0355097 | 0         | 0         | 0          | 0.0443603  | 0         |
| LOC105369945 | 0         | 0         | 0         | 0         | 0         | 0          | 0          | 0         | 0         | 0         | 0.0708011 | 0         | 0          | 0          | 0         |
| LOC105369971 | 0         | 0.026114  | 0.17935   | 0         | 0.50514   | 0.0461499  | 0.0618829  | 0.0481677 | 0         | 0         | 0         | 0         | 0          | 0          | 0.0778369 |

|              |           |            |            |            |            |            |           |            |           |           |           |           |           |            |           |
|--------------|-----------|------------|------------|------------|------------|------------|-----------|------------|-----------|-----------|-----------|-----------|-----------|------------|-----------|
| LOC105369980 | 0         | 0          | 0          | 0          | 0          | 0          | 0         | 0          | 0         | 0         | 0         | 0         | 0         | 0          | 0         |
| LOC105370024 | 0.0401789 | 0.0193588  | 0          | 0          | 0          | 0          | 0.045875  | 0          | 0         | 0         | 0         | 0         | 0.0259232 | 0          | 0         |
| LOC105370068 | 0         | 0          | 0          | 0          | 0          | 0          | 0         | 0          | 0         | 0         | 0         | 0         | 0         | 0          | 0         |
| LOC105370203 | 0.248088  | 0.119533   | 0.0879582  | 0.328708   | 0.165157   | 0.211244   | 0.0404655 | 0.0944914  | 0.25898   | 0.133447  | 0.360077  | 0.0507181 | 0.0914657 | 0.0555692  | 0.508979  |
| LOC105370306 | 0         | 0          | 0          | 0          | 0          | 0          | 0         | 0          | 0         | 0         | 0         | 0         | 0         | 0          | 0         |
| LOC105370333 | 0.573984  | 0.564171   | 0.322891   | 1.08837    | 1.14124    | 1.42712    | 0.471857  | 0.632536   | 1.03459   | 0.432246  | 1.45142   | 0.476413  | 0.444398  | 0.515982   | 0.956204  |
| LOC105370361 | 0.0362516 | 0          | 0.00599798 | 0          | 0.0225245  | 0.00617356 | 0         | 0          | 0         | 0.0181998 | 0         | 0.0051878 | 0         | 0.0416827  | 0.0416496 |
| LOC105370401 | 0.0209392 | 0.0100888  | 0          | 0.00539461 | 0.00813145 | 0.00445736 | 0         | 0.00465225 | 0         | 0         | 0.0354566 | 0         | 0         | 0.00273594 | 0.0150357 |
| LOC105370457 | 0         | 0          | 0          | 0          | 0          | 0          | 0         | 0          | 0         | 0         | 0         | 0         | 0         | 0          | 0         |
| LOC105370473 | 0         | 0          | 0          | 0          | 0          | 0          | 0         | 0          | 0         | 0         | 0         | 0         | 0         | 0          | 0         |
| LOC105370489 | 0.288088  | 0.208208   | 0.119163   | 0.0494805  | 0.0745833  | 0.163535   | 0.164465  | 0.213357   | 0.0584764 | 0.120527  | 0.0542025 | 0         | 0         | 0.326229   | 0.27582   |
| LOC105370526 | 0.824987  | 1.06695    | 0.466965   | 2.64001    | 0.269787   | 1.03521    | 0.24788   | 0.810356   | 0.687454  | 2.72485   | 1.07836   | 2.60975   | 0.560292  | 3.74441    | 3.492     |
| LOC105370586 | 0         | 0          | 0          | 0          | 0          | 0          | 0         | 0          | 0         | 0         | 0         | 0         | 0         | 0          | 0         |
| LOC105370619 | 0         | 0          | 0          | 0          | 0          | 0          | 0         | 0          | 0         | 0         | 0         | 0.0539396 | 0         | 0          | 0         |
| LOC105370622 | 0.0355318 | 0.097012   | 0.10778    | 0.146466   | 0.110386   | 0.0605097  | 0.0405691 | 0.115785   | 0         | 0.0743268 | 0.040111  | 0.169493  | 0.0152833 | 0.123803   | 0.187103  |
| LOC105370697 | 0.0459644 | 0.00553658 | 0.038025   | 0.0118419  | 0.0356993  | 0.0489226  | 0.0131202 | 0.0612739  | 0         | 0.0144225 | 0         | 0.0411109 | 0.0889679 | 0.0360345  | 0.0825133 |
| LOC105370757 | 0         | 0.024188   | 0          | 0          | 0          | 0          | 0         | 0          | 0         | 0         | 0         | 0.0359208 | 0         | 0.0262377  | 0         |
| LOC105370792 | 0.932504  | 0.684486   | 0.636482   | 1.5725     | 1.0774     | 1.6799     | 0.886919  | 0.675962   | 1.60498   | 1.39286   | 1.60947   | 1.05323   | 2.46128   | 1.52252    | 1.53841   |
| LOC105370802 | 0         | 0          | 0          | 0          | 0          | 0          | 0         | 0          | 0         | 0         | 0         | 0         | 0         | 0          | 0.20297   |
| LOC105370829 | 0         | 0          | 0          | 0          | 0          | 0          | 0         | 0          | 0         | 0         | 0         | 0         | 0         | 0          | 0         |
| LOC105370941 | 0.239028  | 0.222109   | 0.169492   | 0.123163   | 0.0795629  | 0.145378   | 0.116963  | 0.189668   | 0.0207935 | 0.0107145 | 0.0674583 | 0.0366495 | 0         | 0.182928   | 0.0980785 |
| LOC105370943 | 0.154287  | 0.111507   | 0.159546   | 0          | 0.179746   | 0.262747   | 0.26424   | 0.342794   | 0         | 0         | 0         | 0.220793  | 0.174204  | 0.0403186  | 0         |
| LOC105370954 | 0         | 0          | 0          | 0          | 0          | 0          | 0         | 0          | 0         | 0         | 0         | 0         | 0         | 0          | 0         |
| LOC105371038 | 0.0447641 | 0.258816   | 0.259224   | 0.322915   | 0.903944   | 0.686089   | 0.153331  | 0.119348   | 0.0545177 | 0.168551  | 0         | 0.384359  | 0.17329   | 0.233957   | 0.321435  |
| LOC105371046 | 0.190871  | 0.20692    | 0          | 0.0491744  | 0.518854   | 0.0812619  | 0.108965  | 0.16963    | 0         | 0         | 0         | 0.0682865 | 0.21551   | 0.074818   | 0         |
| LOC105371049 | 0.159107  | 0.572805   | 0.514029   | 0.248425   | 1.14788    | 0.523326   | 0.929893  | 0.674473   | 0.116513  | 0.158718  | 0.134699  | 0.25879   | 0.0526122 | 0.362598   | 0.581655  |

|              |           |           |           |           |           |           |           |           |           |           |           |           |            |           |           |
|--------------|-----------|-----------|-----------|-----------|-----------|-----------|-----------|-----------|-----------|-----------|-----------|-----------|------------|-----------|-----------|
| LOC105371083 | 0         | 0         | 0.026777  | 0         | 0         | 0.0275608 | 0.0369566 | 0         | 0         | 0         | 0.0231601 | 0         | 0.0338338  | 0         |           |
| LOC105371184 | 0.0323227 | 0.0155736 | 0.0534792 | 0.0999284 | 0         | 0.0550447 | 0         | 0.0574514 | 0         | 0         | 0.0693833 | 0         | 0.067573   | 0         |           |
| LOC105371267 | 1.14181   | 0.460743  | 0.513618  | 0.1765    | 0.886812  | 0.303824  | 0.627397  | 0.405898  | 1.12117   | 0.0985248 | 0.177232  | 0.102124  | 0.0828776  | 0.115622  | 0.112735  |
| LOC105371328 | 0.274917  | 0.0722506 | 0.0413511 | 0.0257555 | 0.155288  | 0.0638423 | 0.114142  | 0.17769   | 0.030438  | 0.0313682 | 0         | 0         | 0          | 0.313475  | 0.215354  |
| LOC105371335 | 0         | 0         | 0         | 0         | 0         | 0         | 0         | 0         | 0         | 0         | 0         | 0         | 0          | 0         | 0         |
| LOC105371414 | 1.86495   | 3.94094   | 3.28001   | 1.4225    | 3.39875   | 2.53827   | 5.54971   | 3.68025   | 0.304033  | 1.16114   | 0.215503  | 2.43769   | 0.445301   | 2.15663   | 3.79603   |
| LOC105371430 | 5.69E-18  | 6.91E-21  | 1.89E-12  | 1.79E-14  | 7.42E-21  | 1.92E-21  | 0         | 3.45E-17  | 4.56E-25  | 0.0940571 | 1.86E-36  | 0         | 5.43E-32   | 0.0365789 | 1.16E-15  |
| LOC105371433 | 0.078186  | 0.0565068 | 0.0323405 | 0.0402865 | 0         | 0.0332872 | 0.0892702 | 0         | 0         | 0.147197  | 0         | 0.0559442 | 0.10089    | 0.0204317 | 0         |
| LOC105371458 | 0         | 0         | 0.0365373 | 0         | 0.0343026 | 0         | 0         | 0         | 0         | 0         | 0         | 0         | 0          | 0         | 0         |
| LOC105371485 | 0.205555  | 0.734057  | 0.870253  | 0.0373818 | 0.657377  | 0.0514786 | 0.717893  | 0.526548  | 0.014726  | 0.182112  | 0         | 0.103821  | 0.00780135 | 0.101112  | 0.295203  |
| LOC105371506 | 0.116297  | 0.0280168 | 0.0962089 | 0         | 0         | 0         | 0         | 0         | 0         | 0         | 0         | 0         | 0          | 0         | 0         |
| LOC105371592 | 0.31345   | 0.453075  | 0.345744  | 0.215346  | 0.568045  | 0.57828   | 0.119296  | 0.324996  | 0.0636245 | 0.196706  | 0.117949  | 0.149521  | 0.033706   | 0.300341  | 0.450154  |
| LOC105371703 | 0         | 0         | 0         | 0         | 0         | 0         | 0         | 0         | 0         | 0         | 0         | 0         | 0          | 0         | 0         |
| LOC105371730 | 0.0298182 | 0.100883  | 0.174239  | 0.0458619 | 0.101678  | 0.195623  | 0.0516574 | 0.0528488 | 0.171195  | 0.0744294 | 0.0674298 | 0.0322474 | 0          | 0.0613146 | 0         |
| LOC105371789 | 0.193396  | 0.155302  | 0.0533303 | 0.132867  | 0.100137  | 0         | 0.294418  | 0.0572914 | 0.0785115 | 0.0809106 | 0.0727733 | 0.0922533 | 0          | 0.168462  | 0.0925803 |
| LOC105371795 | 0.0799051 | 0.196873  | 0.0896494 | 0.0470248 | 0.15333   | 0.254093  | 0.134124  | 0.138233  | 0.1783    | 0.216172  | 0.107832  | 0.135269  | 0.0554223  | 0.150456  | 0.0923721 |
| LOC105371814 | 0         | 0         | 0.0778275 | 0         | 0         | 0         | 0         | 0         | 0         | 0.039359  | 0.0354006 | 0.0448766 | 0          | 0         | 0.225178  |
| LOC105371824 | 0.152508  | 0.128591  | 0.126165  | 0.667946  | 0.236897  | 0.194788  | 0.0870642 | 0.203304  | 0.557212  | 0.717798  | 0         | 0.300089  | 0.0245993  | 0.139488  | 0.273776  |
| LOC105371849 | 0.379488  | 0.213045  | 0.0832498 | 0.108525  | 0.261294  | 0.0849397 | 0.272562  | 0.209873  | 0.584344  | 0.133549  | 0.157928  | 0.125014  | 0          | 0.225923  | 0.0477534 |
| LOC105371855 | 0         | 0.0196864 | 0.0252358 | 3.71E-07  | 0         | 0.0259745 | 0         | 0.0271102 | 0         | 9.38E-18  | 0.0229575 | 0.0363785 | 0.0131211  | 0.0323041 | 0         |
| LOC105371880 | 0.385419  | 0.185701  | 0.10381   | 0.1755    | 0.250614  | 0.160273  | 0.194445  | 0.254905  | 0.0327486 | 0.0674986 | 0.0303551 | 0.115442  | 0.00578303 | 0.131168  | 0.102979  |
| LOC105371899 | 0         | 0         | 0         | 0         | 0         | 0         | 0         | 0         | 0         | 0         | 0         | 0         | 0          | 0         | 0         |
| LOC105371907 | 0.0998981 | 0.256706  | 0.247928  | 0.720635  | 0.258627  | 0.368602  | 0.380201  | 0.266343  | 0.324439  | 1.12844   | 0.0751816 | 1.1675    | 0.558599   | 1.65335   | 0.573865  |
| LOC105371925 | 0.149692  | 0.288132  | 0.257434  | 0.193756  | 0.876952  | 0.313512  | 0.262585  | 0.158124  | 0.0752314 | 0.155898  | 0.0301521 | 0.402165  | 0.146007   | 0.245641  | 0.261703  |
| LOC105371998 | 0.0426145 | 0.0929748 | 0.0539506 | 0.0422307 | 0.281262  | 0.10518   | 0.0935308 | 0.153096  | 0         | 0.0538387 | 0         | 0.164031  | 0.0137465  | 0.132621  | 0.124664  |
| LOC105372028 | 0         | 0         | 0         | 0         | 0         | 0         | 0.055983  | 0         | 0         | 0         | 0         | 0         | 0          | 0         | 0         |

|              |           |            |           |            |           |           |           |            |           |           |           |            |            |           |           |
|--------------|-----------|------------|-----------|------------|-----------|-----------|-----------|------------|-----------|-----------|-----------|------------|------------|-----------|-----------|
| LOC105372038 | 0         | 0          | 0         | 0          | 0         | 0         | 0         | 0          | 0         | 0         | 0         | 0          | 0          | 0         | 0         |
| LOC105372068 | 0         | 0          | 0         | 0          | 0         | 0         | 0         | 0          | 0         | 0         | 0         | 0          | 0          | 0         | 0         |
| LOC105372069 | 0.335893  | 0.258942   | 0.500174  | 0.138459   | 0         | 0.257408  | 0.230107  | 0.567177   | 0         | 0.0421581 | 0.0758363 | 0.0480681  | 0          | 0.122887  | 0.241193  |
| LOC105372071 | 0         | 0.0586878  | 0         | 0          | 0         | 0         | 0         | 0          | 0         | 0         | 0         | 0          | 0          | 0         | 0         |
| LOC105372179 | 0         | 0          | 0.110349  | 0          | 0         | 0         | 0         | 0          | 0         | 0         | 0         | 0          | 0          | 0.0348575 | 0         |
| LOC105372273 | 0.366059  | 0.744685   | 0.706603  | 0.544894   | 3.41169   | 1.10825   | 1.16098   | 0.650645   | 0.396283  | 0.357343  | 0.229575  | 1.36783    | 0.262421   | 1.78564   | 2.27806   |
| LOC105372383 | 0.0381584 | 0.0275779  | 0.0473509 | 0.00983083 | 0.0296366 | 0.0162457 | 0.032676  | 0.008478   | 0         | 0         | 0.010769  | 0.00682583 | 0          | 0         | 0.0685003 |
| LOC105372397 | 0.044938  | 0.0216518  | 0.0371759 | 0.0463099  | 0.0698042 | 0.0382641 | 0         | 0          | 0         | 0         | 0         | 0          | 0          | 0         | 0.0645366 |
| LOC105372440 | 0         | 0.0559398  | 0.032016  | 0          | 0.0601156 | 0         | 0.0441873 | 0.137576   | 0         | 0         | 0.0436883 | 0          | 0          | 0         | 0         |
| LOC105372441 | 0         | 0          | 0.0413511 | 0          | 0         | 0         | 0         | 0          | 0         | 0         | 0         | 0          | 0          | 0         | 0         |
| LOC105372480 | 0.296284  | 0.30137    | 0.217873  | 0.542807   | 0.613641  | 1.03716   | 0.3007    | 0.175542   | 0.721681  | 0.495822  | 1.22638   | 0.51822    | 0.849603   | 0.378524  | 0.66189   |
| LOC105372483 | 0.0943331 | 0.439361   | 0.416208  | 0.097213   | 0.879191  | 0.321294  | 0.287217  | 0.195616   | 0         | 0         | 0.141987  | 0.134996   | 0.0405755  | 0.164342  | 0.406423  |
| LOC105372493 | 0         | 0.110403   | 0.18956   | 0          | 0         | 0         | 0         | 0.10182    | 0         | 0         | 0         | 0          | 0.147839   | 0         | 0         |
| LOC105372582 | 0.0383692 | 0.107315   | 0.115161  | 0.0789009  | 0.0198669 | 0.0762321 | 0.0438088 | 0.0738593  | 0.0508613 | 0.0262077 | 0.0785733 | 0.00498029 | 0.0288816  | 0.0472909 | 0.101022  |
| LOC105372633 | 0.0123627 | 0          | 0.0102273 | 0          | 0         | 0.0210534 | 0.0141154 | 0.010987   | 0         | 0.0155165 | 0         | 0          | 0          | 0         | 0         |
| LOC105372653 | 0.0403893 | 0.0973008  | 0         | 0.166489   | 0         | 0.0343909 | 0         | 0          | 0.0983792 | 0         | 0.0911889 | 0          | 0          | 0.0211092 | 0         |
| LOC105372672 | 0.0607429 | 0          | 0         | 0          | 0         | 0         | 0         | 0          | 0         | 0         | 0         | 0          | 0          | 0         | 0         |
| LOC105372695 | 0         | 0          | 0         | 0          | 0         | 0         | 0         | 0          | 0         | 0         | 0         | 0          | 0          | 0         | 0         |
| LOC105372795 | 0.225566  | 0.206494   | 0.167944  | 0.139471   | 0.175191  | 0.17286   | 0.128772  | 0.140325   | 0.109886  | 0.0566217 | 0.127318  | 0.177538   | 0.072767   | 0.0589453 | 0.194365  |
| LOC105372833 | 0         | 0          | 0         | 0          | 0         | 0         | 0         | 0          | 0         | 0         | 0.149574  | 0          | 0          | 0         | 0         |
| LOC105372977 | 0         | 0          | 0         | 0          | 0         | 0         | 0         | 0          | 0         | 0         | 0         | 0          | 0          | 0         | 0         |
| LOC105372990 | 0.019182  | 0.00462108 | 0.0317374 | 0.0593027  | 0         | 0.0163332 | 0.0438027 | 0.00852367 | 0         | 0         | 0.010827  | 0.00686261 | 0.00618806 | 0.0551394 | 0.137739  |
| LOC105373021 | 0.0416242 | 0.240662   | 0.103303  | 0.214475   | 0.129313  | 0.0708849 | 0         | 0          | 0.0506936 | 0.0522426 | 0.0469885 | 0.119133   | 0          | 0.0435092 | 0         |
| LOC105373031 | 0.0660287 | 0.0636273  | 0         | 0          | 0         | 0         | 0         | 0          | 0         | 0         | 0         | 0          | 0          | 0         | 0.0948255 |
| LOC105373044 | 0         | 0          | 0         | 0          | 0         | 0         | 0         | 0          | 0         | 0         | 0         | 0          | 0          | 0         | 0         |
| LOC105373051 | 0         | 0          | 0         | 0          | 0         | 0         | 0         | 0.0387337  | 0         | 0         | 0         | 0          | 0          | 0.0227789 | 0         |

|              |           |           |           |           |           |           |           |           |           |           |           |           |           |            |           |
|--------------|-----------|-----------|-----------|-----------|-----------|-----------|-----------|-----------|-----------|-----------|-----------|-----------|-----------|------------|-----------|
| LOC105373064 | 0.415612  | 0.526969  | 0.81432   | 0.202879  | 1.08731   | 0.372514  | 0.524484  | 0.505442  | 0.053281  | 0.109818  | 0.0493868 | 0.140865  | 0.0705661 | 0.525894   | 0.314143  |
| LOC105373100 | 0.427741  | 0.184398  | 0.186241  | 0.1044    | 0.052455  | 0.0287539 | 0.42412   | 0.280104  | 0.013709  | 0.0988951 | 0.012707  | 0.120813  | 0         | 0.0764798  | 0.484966  |
| LOC105373156 | 0.0235313 | 0.0115243 | 0.0146001 | 0.0184743 | 0.49781   | 0.0361225 | 0.0229884 | 0.0242065 | 0.0226728 | 0.077113  | 0.0511002 | 0.0180791 | 0.0116274 | 0.00981239 | 0.0530282 |
| LOC105373159 | 0.198434  | 0.27863   | 0.239202  | 0.163593  | 0.220169  | 0.217239  | 0.258932  | 0.236815  | 0.200241  | 0.0853902 | 0.172805  | 0.154155  | 0.113397  | 0.157047   | 0.170986  |
| LOC105373338 | 0.249386  | 0.192253  | 0.268203  | 0.2056    | 0.0387383 | 0.0637048 | 0.170845  | 0.443268  | 0.0607449 | 0.0626011 | 0.0563052 | 0.071377  | 0         | 0.156408   | 0         |
| LOC105373352 | 0.0102312 | 0         | 0         | 0         | 0         | 0         | 0         | 0.0181853 | 0         | 0         | 0         | 0         | 0         | 0          | 0         |
| LOC105373378 | 0         | 0         | 0.035063  | 0         | 0         | 0         | 0         | 0         | 0         | 0         | 0         | 0         | 0         | 0          | 0         |
| LOC105373383 | 0.75194   | 0.221403  | 0.345588  | 0.0860996 | 0.454231  | 0.391274  | 0.524664  | 0.111377  | 0.559643  | 0.209725  | 0.51874   | 0.239126  | 0.0269527 | 0.0436663  | 0         |
| LOC105373394 | 0         | 0         | 0         | 0         | 0         | 0         | 0         | 0         | 0         | 0         | 0         | 0         | 0         | 0          | 0         |
| LOC105373496 | 0         | 0.0253424 | 0         | 0         | 0         | 0         | 0         | 0.140234  | 0         | 0         | 0.0593764 | 0         | 0         | 0          | 0         |
| LOC105373553 | 0.251555  | 0.26934   | 0.277472  | 0.115215  | 0.173667  | 0.047599  | 0.478695  | 0.173881  | 0.272325  | 0         | 0.220869  | 0.0799975 | 0.25247   | 0          | 0.080281  |
| LOC105373562 | 0.0615814 | 0.134945  | 0.0442161 | 0.11016   | 0         | 0         | 0         | 0         | 0         | 0.134166  | 0.181009  | 0.0764872 | 0         | 0.139672   | 0         |
| LOC105373609 | 0         | 0         | 0         | 0         | 0         | 0         | 0         | 0         | 0         | 0         | 0         | 0         | 0         | 0          | 0         |
| LOC105373656 | 0.480716  | 0.132352  | 0.340871  | 0.141541  | 0.106674  | 0.175424  | 0.156819  | 0.305158  | 0         | 0.0861926 | 0.387621  | 0         | 0.0886159 | 0.0717838  | 0.197248  |
| LOC105373764 | 0         | 0.0132274 | 0         | 0         | 0         | 0         | 0         | 0.0487962 | 0         | 0         | 0         | 0         | 0         | 0          | 0         |
| LOC105373782 | 0         | 0         | 0         | 0         | 0         | 0         | 0         | 0         | 0         | 0         | 0         | 0         | 0         | 0          | 0         |
| LOC105373805 | 0.257893  | 0.0379109 | 0.0991998 | 0         | 0         | 0         | 0         | 0.053284  | 0         | 0.0866067 | 0.0941084 | 0         | 0.0386834 | 0          | 0.0861045 |
| LOC105373876 | 0.0543264 | 0.471155  | 0.179771  | 0         | 0         | 0.138775  | 0.496225  | 0.193123  | 0         | 0         | 0         | 0         | 0         | 0          | 0         |
| LOC105373878 | 0.203724  | 0.235578  | 0.101121  | 0.0419887 | 0.126582  | 0         | 0.0465211 | 0.108632  | 0         | 0         | 0         | 0         | 0         | 0.0851801  | 0.702176  |
| LOC105374042 | 0.021895  | 0.0421974 | 0.0724525 | 0.0225635 | 0.102032  | 0.0186433 | 0.024999  | 0.038917  | 0         | 0.054961  | 0.0494335 | 0.0156665 | 0         | 0.0457732  | 0.31444   |
| LOC105374060 | 0         | 0         | 0         | 0         | 0         | 0         | 0         | 0         | 0         | 0.0488183 | 0         | 0         | 0.0752863 | 0.101643   | 0         |
| LOC105374194 | 0         | 0         | 0         | 0         | 0         | 0         | 0         | 0         | 0         | 0         | 0         | 0         | 0         | 0          | 0         |
| LOC105374205 | 0         | 0.0208424 | 0         | 0.0891573 | 0         | 0         | 0         | 0.0768883 | 0         | 0.0542933 | 0         | 0         | 0.111639  | 0.0452171  | 0.186372  |
| LOC105374297 | 0.401905  | 0.580932  | 0.609555  | 0.241602  | 1.19657   | 0.59888   | 0.497123  | 0.23812   | 0.163159  | 0.0840721 | 0         | 0.455326  | 0.0216089 | 0.385098   | 0.384791  |
| LOC105374312 | 0.124091  | 0         | 0         | 0         | 0         | 0         | 0         | 0.0551411 | 0         | 0         | 0         | 0         | 0         | 0.0972834  | 0         |
| LOC105374313 | 0.0313167 | 0         | 0         | 0         | 0         | 0         | 0.0715128 | 0         | 0         | 0         | 0         | 0.0448159 | 0         | 0          | 0         |





|              |            |           |           |           |           |           |           |            |           |           |           |           |           |           |           |
|--------------|------------|-----------|-----------|-----------|-----------|-----------|-----------|------------|-----------|-----------|-----------|-----------|-----------|-----------|-----------|
| LOC105376671 | 0.0294067  | 0.0850115 | 0.0973091 | 0         | 0         | 0.0625985 | 0.0167878 | 0.0914697  | 0         | 0.0184542 | 0         | 0.0736444 | 0         | 0.0230538 | 0.0422317 |
| LOC105376731 | 0.225002   | 0         | 0.0531821 | 0.0331244 | 0         | 0.0547389 | 0.1468    | 0.0285661  | 0         | 0.0806859 | 0         | 0         | 0         | 0         | 0         |
| LOC105376736 | 0.0381269  | 0.0551104 | 0.0630826 | 0.117873  | 0         | 0.325472  | 0         | 0          | 0.282397  | 0         | 0.735612  | 0.0818425 | 0.0491986 | 0.0597804 | 0         |
| LOC105376772 | 0.274917   | 0.0722506 | 0.0413511 | 0.0257555 | 0.155288  | 0.0638423 | 0.114142  | 0.17769    | 0.030438  | 0.0313682 | 0         | 0         | 0         | 1.72E-05  | 0.215354  |
| LOC105376805 | 1.4694     | 1.11507   | 1.06364   | 1.40069   | 1.36949   | 0.656867  | 0.167771  | 0.750881   | 0.402652  | 1.15266   | 2.28081   | 0.473128  | 0.521427  | 0.940766  | 1.16063   |
| LOC105376975 | 0          | 0         | 0         | 0         | 0         | 0         | 0         | 0          | 0         | 0         | 0         | 0         | 0         | 0         | 0         |
| LOC105376997 | 0.0415495  | 0.0200192 | 0.0343726 | 0         | 0         | 0.0353788 | 0         | 0          | 0         | 0         | 0         | 0         | 0         | 0         | 0         |
| LOC105377102 | 0.916253   | 0.894809  | 1.14113   | 0.44408   | 0.798387  | 0.154121  | 1.00124   | 0.466535   | 0.46164   | 0.452143  | 0.328343  | 0.370919  | 0.358914  | 0.242486  | 0.687493  |
| LOC105377143 | 0          | 0         | 0         | 0         | 0         | 0         | 0         | 0          | 0         | 0         | 0         | 0         | 0         | 0         | 0         |
| LOC105377146 | 0          | 0         | 0         | 0         | 0         | 0         | 0         | 0          | 0         | 0         | 0         | 0         | 0         | 0         | 0         |
| LOC105377162 | 0          | 0.0753424 | 0.0323405 | 0.0402865 | 0         | 0.0665743 | 0         | 0.0347426  | 0         | 0         | 0         | 0         | 0         | 0         | 0         |
| LOC105377213 | 0          | 0         | 0         | 0         | 0         | 0         | 0         | 0          | 0         | 0         | 0         | 0         | 0         | 0         | 0         |
| LOC105377245 | 0          | 0         | 0         | 0         | 0         | 0         | 0         | 0.0298948  | 0         | 0         | 0         | 0         | 0         | 0         | 0         |
| LOC105377267 | 0.00778179 | 0         | 0         | 0         | 0         | 0         | 6.84E-13  | 0.00691581 | 0         | 0         | 0.026354  | 0         | 0         | 0         | 0         |
| LOC105377342 | 0.0127721  | 0.0861531 | 0.200754  | 0.13162   | 0.0198395 | 0.0217506 | 0.0583311 | 0.181613   | 0.03111   | 0.0801515 | 0         | 0.0548327 | 0.0247215 | 0.0600773 | 0         |
| LOC105377348 | 0.334836   | 0.582519  | 0.606759  | 0.527736  | 0.030595  | 0.441793  | 0.7691    | 0.455113   | 0.961008  | 0.494415  | 0.647715  | 0.380516  | 0.470192  | 0.425424  | 0.0848588 |
| LOC105377372 | 0          | 0         | 0         | 0         | 0         | 0         | 0         | 0          | 0         | 0         | 0         | 0         | 0         | 0         | 0         |
| LOC105377448 | 0          | 0         | 0         | 0         | 0         | 0         | 0         | 0          | 0         | 0         | 0         | 0         | 0         | 0         | 0         |
| LOC105377458 | 0.082703   | 0.0996189 | 0.0684177 | 0.0142046 | 0.0214111 | 0.117368  | 0         | 0.208249   | 0         | 0         | 0.0155602 | 0.0295881 | 0         | 0.0288161 | 0.138567  |
| LOC105377480 | 0          | 0         | 0         | 0         | 0         | 0         | 0         | 0          | 0         | 0         | 0         | 0         | 0         | 0         | 0         |
| LOC105377590 | 0.145249   | 0.0699833 | 0.0400535 | 0.0498945 | 0.150415  | 0.247356  | 0.386962  | 0.0430285  | 0.176897  | 0.24307   | 0.874498  | 0         | 0.187428  | 0.126523  | 0         |
| LOC105377621 | 0.151064   | 0.14557   | 0.0499884 | 0.155676  | 0.281586  | 0.257259  | 0.206976  | 0.107403   | 0.147183  | 0.151681  | 0.784451  | 0.172945  | 0.136452  | 0.0631622 | 0.130168  |
| LOC105377623 | 0.234064   | 0.18326   | 0.266247  | 0.0603024 | 0.454477  | 0.89686   | 0.0668116 | 0.0780061  | 0.24943   | 0.183609  | 0.165143  | 0.0628046 | 0.0566313 | 0.137623  | 0.798345  |
| LOC105377651 | 0          | 0         | 0         | 0         | 0         | 0         | 0         | 0          | 0         | 0         | 0         | 0         | 0         | 0         | 0         |
| LOC105377716 | 0          | 0.034759  | 0         | 0         | 0         | 0.0614277 | 0         | 0.0256454  | 0         | 0         | 0.0162878 | 0.0206477 | 0         | 0.0226226 | 0         |
| LOC105377763 | 0.149209   | 0.438875  | 0.252491  | 0.13392   | 0.298561  | 0.0599569 | 0.169509  | 0.178943   | 0.0572572 | 1.90E-35  | 0.121741  | 0.0901394 | 2.66E-26  | 0.115596  | 0.109075  |





|              |            |           |           |            |           |           |           |                 |            |            |           |            |            |            |           |
|--------------|------------|-----------|-----------|------------|-----------|-----------|-----------|-----------------|------------|------------|-----------|------------|------------|------------|-----------|
| LOC105378586 | 0.0841025  | 0.248116  | 0         | 0.0434459  | 0.136072  | 0.0701306 | 0.0932253 | 0.203134        | 0.0548542  | 0          | 0.138795  | 0.0298043  | 0          | 0.107955   | 0         |
| LOC105378591 | 0          | 0.0412988 | 0         | 0          | 0         | 0         | 0         | 0.0761764       | 0          | 0          | 0         | 0          | 0          | 0          | 0         |
| LOC105378614 | 0          | 0         | 0         | 0          | 0         | 0         | 0         | 0               | 0          | 0          | 0         | 0          | 0          | 0          | 0         |
| LOC105378663 | 0.119253   | 0.208592  | 0.284098  | 0.205742   | 0.483963  | 0.222639  | 0.324299  | 0.05546         | 1.78E-10   | 0.64254    | 0.233274  | 0.255658   | 0.241819   | 0.0780211  | 0.31944   |
| LOC105378683 | 0.375546   | 0.429742  | 0.388348  | 0.0967529  | 0.291677  | 0.319773  | 0.107197  | 0.375474        | 0.114343   | 0.0589187  | 0         | 0.100768   | 0          | 0.0981385  | 0         |
| LOC105378696 | 0          | 0         | 0         | 0          | 0         | 0         | 0         | 0               | 0          | 0          | 0         | 0          | 0          | 0          | 0         |
| LOC105378828 | 0.227311   | 0.369635  | 0.658165  | 0.322094   | 0.595842  | 0.677431  | 0.405525  | 0.366152        | 0.346048   | 0.267467   | 0.22453   | 0.223639   | 0.265821   | 0.215329   | 0.265238  |
| LOC105378853 | 0.0474729  | 0.0829153 | 0.0883642 | 0.0917292  | 0.0645241 | 0.151585  | 0.0406523 | 0.0369162       | 0.00722709 | 0.0670313  | 0.200966  | 0.00849204 | 0.034458   | 0.0465214  | 0.11931   |
| LOC105378933 | 0.269497   | 0.129848  | 0.195079  | 0          | 0.0523277 | 0.229473  | 0.423092  | 0.0299383       | 0          | 0          | 0         | 0.0482081  | 0          | 0.0352127  | 0.048379  |
| LOC105379030 | 0.0515435  | 0         | 0         | 0          | 0         | 0         | 0         | 0.0458076       | 0          | 0          | 0         | 0          | 0          | 0          | 0         |
| LOC105379143 | 0.00880299 | 0.0678626 | 0.0218474 | 0.00907173 | 0         | 0.0449738 | 0.010051  | 0.0469402       | 0          | 0          | 0.019875  | 0          | 0          | 0          | 0         |
| LOC105379152 | 0.1185     | 0.122739  | 0.112609  | 0.0562131  | 0.220886  | 0.340274  | 0.128586  | 0.0315939       | 0.0432959  | 0.0446189  | 0.0133772 | 0.016958   | 0          | 0.0123867  | 0.271734  |
| LOC105379176 | 0.0957908  | 0.0461529 | 0.031698  | 0          | 0         | 0.0978775 | 0.0218742 | 0.0170262       | 0          | 0.0240455  | 4.40E-24  | 0          | 0.0123607  | 0.0300387  | 0.208804  |
| LOC105379183 | 0.0802185  | 0.231903  | 0.298631  | 0.248003   | 0.249214  | 0.170763  | 0.183182  | 0.285166        | 0.0488486  | 0          | 0         | 0.0286993  | 0          | 0.335406   | 0.172806  |
| LOC105379192 | 0          | 0.0324148 | 0         | 0          | 0.209007  | 0         | 0         | 0               | 0          | 0          | 0         | 0          | 0          | 0          | 0         |
| LOC105379194 | 0.559349   | 0.47163   | 0.539855  | 0.576425   | 1.4119    | 0.357208  | 0.345933  | 0.269264        | 0.141922   | 0.412008   | 0.394647  | 0.283495   | 0.315778   | 0.621223   | 0.468589  |
| LOC105379252 | 0.0774935  | 0.124027  | 0.111672  | 0.0463699  | 0.120374  | 0.0446993 | 0.142709  | 0.108859        | 0          | 0.00627499 | 0         | 0.0500827  | 0.00161285 | 0.00914549 | 0.0394901 |
| LOC105379393 | 0.0798036  | 0.124964  | 0.0990288 | 0.04112    | 0.247925  | 0.0339759 | 0.0683379 | 0.0709228       | 0.024298   | 0.0500809  | 0.0450442 | 0.0142754  | 0          | 0          | 0         |
| LOC105379450 | 0          | 0         | 0         | 0          | 0         | 0         | 0         | 0               | 0          | 0          | 0         | 0          | 0          | 0          | 0         |
| LOC105379477 | 0          | 0         | 0         | 0          | 0         | 0         | 0         | 0               | 0          | 0          | 0         | 0          | 0          | 0          | 0         |
| LOC105379511 | 0          | 0.196105  | 0.0802016 | 0.164462   | 0         | 0         | 0         | 0.00027967<br>3 | 0.332617   | 0.270189   | 0.36574   | 0.163994   | 0          | 0.0349918  | 0         |
| LOC105379514 | 0.160716   | 0.0309741 | 0.0531821 | 0          | 0.0499294 | 0         | 0.0367    | 0.0571323       | 0          | 0.0403429  | 0.0362856 | 0          | 0          | 0          | 0         |
| LOC105379550 | 0          | 0         | 0         | 0          | 0         | 0         | 0         | 0.013373        | 0          | 0          | 0         | 0          | 0          | 0          | 0         |
| LOC105379807 | 0          | 0.0425068 | 0.0178264 | 3.00E-37   | 4.90E-44  | 1.45E-33  | 0         | 0.0202022       | 0          | 0          | 1.50E-18  | 0          | 0          | 0.0132174  | 0         |
| LOC105447645 | 0.251583   | 0.481208  | 0.48954   | 0.268218   | 0.686281  | 0.643448  | 0.523579  | 0.300351        | 0.102244   | 0.675885   | 0.388406  | 0.497516   | 0.0715705  | 0.383816   | 0.258602  |







|           |           |            |            |           |           |            |           |            |           |            |            |            |            |            |           |
|-----------|-----------|------------|------------|-----------|-----------|------------|-----------|------------|-----------|------------|------------|------------|------------|------------|-----------|
| LOC283665 | 0.0855231 | 0.00912601 | 0.0081813  | 0.0188088 | 0         | 0.0166278  | 0.0455168 | 0.0405513  | 0         | 0          | 0          | 0          | 0          | 0          | 0         |
| LOC283683 | 0.0490924 | 0.141402   | 0.0863044  | 0.0330181 | 0.124433  | 0.136446   | 0.0229226 | 0.0570233  | 0         | 0.100544   | 0.0448282  | 0.0458982  | 0.0413397  | 0.10224    | 0.207173  |
| LOC283710 | 0.0446777 | 0.0322896  | 0.0554408  | 0.0230208 | 0.1041    | 0.0190212  | 0.0510116 | 0.0397058  | 0.108825  | 0          | 0.0504356  | 0.015984   | 0.0720646  | 0          | 0.288733  |
| LOC283731 | 0.0180382 | 0.0173822  | 0.0223837  | 0         | 0.112078  | 0.00767966 | 0.0514887 | 0.0240463  | 0.0109843 | 0.0113199  | 0.0407258  | 0.0258137  | 0.0174573  | 0.0377103  | 0.0518104 |
| LOC283788 | 0         | 0          | 0          | 0         | 0         | 0          | 0         | 0          | 0         | 0          | 0          | 0          | 0          | 0          | 0         |
| LOC283856 | 0.0604934 | 0.0291466  | 0.035746   | 0.0623402 | 0.0402716 | 0.176603   | 0.0986706 | 0.0230406  | 0         | 0          | 0.00975565 | 0          | 0.00557572 | 0.00451664 | 0.0620544 |
| LOC283922 | 3.97021   | 3.83377    | 3.72053    | 1.85888   | 7.06588   | 2.79727    | 4.48094   | 3.74533    | 0.703658  | 1.07637    | 1.24648    | 1.75121    | 0.781297   | 3.16061    | 3.78423   |
| LOC284009 | 0.642863  | 0.48397    | 0.498582   | 0.0414055 | 0.561705  | 0.239483   | 0.82575   | 0.642738   | 0.0489334 | 0.0504287  | 0.272142   | 0.172495   | 0          | 0.230992   | 0.346212  |
| LOC284191 | 0         | 0.0101324  | 0          | 0         | 0         | 0          | 0         | 0          | 0         | 0          | 0          | 0          | 0          | 0          | 0         |
| LOC284240 | 0.0939501 | 0.0641277  | 0.0518148  | 0         | 0.109453  | 0.20666    | 0.134087  | 0.0417475  | 0.0572104 | 0.00982642 | 0.0441908  | 0.0280099  | 0.00505135 | 0.0368268  | 0.0787058 |
| LOC284241 | 0         | 0.0702563  | 0.0172327  | 0.0214668 | 0         | 0.0532115  | 0         | 0.0185127  | 0.0507392 | 0.0261448  | 0.0470308  | 0          | 0          | 0.0217742  | 0.0299157 |
| LOC284344 | 0.0672372 | 0.0647918  | 0.0222493  | 0.021108  | 0.0208885 | 0          | 0.0307077 | 0.0125564  | 0.0491324 | 0.0337558  | 0          | 0.012613   | 0          | 0.0562258  | 0         |
| LOC284379 | 0.0188923 | 0          | 0.015629   | 0         | 0         | 0.0321731  | 0.0215706 | 0          | 0         | 0          | 0.021327   | 0          | 0.0121892  | 0          | 0.108527  |
| LOC284395 | 0         | 0          | 0          | 0         | 0         | 0          | 0         | 0          | 0         | 0          | 0          | 0          | 0          | 0          | 0         |
| LOC284412 | 1.42176   | 1.59856    | 1.63982    | 0.681707  | 6.23985   | 4.76535    | 2.92892   | 1.8716     | 0.252516  | 0.483289   | 0.434684   | 0.811933   | 0.388583   | 0.87874    | 1.13435   |
| LOC284454 | 2.89614   | 7.73759    | 10.0692    | 3.81808   | 7.25468   | 3.71015    | 8.84772   | 4.41728    | 1.92247   | 7.66288    | 2.73921    | 19.4718    | 3.24897    | 18.4979    | 9.21775   |
| LOC284577 | 0         | 0          | 0          | 0         | 0.013044  | 0.0143004  | 0.0191756 | 0.00746285 | 0         | 0.021079   | 0          | 0          | 0          | 0          | 0         |
| LOC284578 | 1.4788    | 0.382638   | 0.663832   | 0.0462329 | 0.0413885 | 0.144339   | 0.47299   | 0.466069   | 0         | 0.00804401 | 0          | 0          | 0.0124052  | 0.0200979  | 0.128859  |
| LOC284581 | 1.01708   | 0.313801   | 0.0369036  | 0.0459707 | 0.0415757 | 0          | 0.814926  | 0.848394   | 0.0325971 | 0.951807   | 0.0100716  | 0.938413   | 0          | 0.0373032  | 1.25565   |
| LOC284632 | 0.0125369 | 0.0120809  | 0          | 0.0387588 | 0         | 0.02135    | 0         | 0          | 0         | 0.0157351  | 0.0283051  | 0.0358818  | 0          | 0.0786278  | 0         |
| LOC284788 | 0         | 0          | 0          | 0         | 0         | 0          | 0         | 0          | 0         | 0          | 0          | 0          | 0          | 0          | 0         |
| LOC284798 | 0         | 0.00332261 | 0          | 0         | 0         | 0.0176156  | 0         | 0          | 0         | 0          | 0          | 0          | 0          | 0          | 0         |
| LOC284865 | 0.0519368 | 0.0500479  | 0.0343726  | 0.0321134 | 0         | 0.0530682  | 0.01186   | 0.0184629  | 0.0506026 | 0.0391116  | 0.0469042  | 0.00743244 | 0.00670188 | 0.0162867  | 0         |
| LOC284898 | 0         | 0.018717   | 0.00803423 | 0         | 0         | 0          | 0.0332656 | 0.017262   | 0         | 0          | 0          | 0          | 0          | 0          | 0         |
| LOC284930 | 2.32068   | 3.77833    | 3.55485    | 1.2089    | 1.4855    | 0.662295   | 3.17379   | 3.02565    | 0.232939  | 0.928221   | 0.5038     | 1.36855    | 0.287941   | 1.01963    | 0.457801  |
| LOC284933 | 0.0328737 | 0.0475171  | 0.0815862  | 0         | 0.0255321 | 0.055983   | 0.412875  | 0.0292154  | 0         | 0.0825196  | 0          | 0.0588049  | 0.010605   | 0.154631   | 0.141632  |

|           |            |            |            |            |           |           |           |           |            |            |            |            |            |            |           |
|-----------|------------|------------|------------|------------|-----------|-----------|-----------|-----------|------------|------------|------------|------------|------------|------------|-----------|
| LOC284950 | 0.134033   | 0.0143509  | 0.0739211  | 0.0153472  | 0.0462666 | 0.0380425 | 0.0340077 | 0.0529411 | 0          | 0.00934585 | 0          | 0.015984   | 0.0240215  | 0.0116753  | 0.203182  |
| LOC285000 | 0          | 0          | 0          | 0          | 0         | 0         | 0         | 0         | 0.0199051  | 0          | 0          | 0          | 0          | 0          | 0         |
| LOC285074 | 6.27157    | 5.61921    | 4.88228    | 3.31668    | 10.079    | 3.11211   | 5.93914   | 3.10322   | 11.9191    | 3.69598    | 6.16786    | 3.23194    | 2.11251    | 2.56002    | 2.34953   |
| LOC285095 | 0.0620457  | 0.209262   | 0.153986   | 0.12788    | 0.0481892 | 0.0264156 | 0.247946  | 0.137853  | 0          | 0.0389369  | 0.0350209  | 0.110988   | 0          | 0.0162139  | 0         |
| LOC285097 | 0.178283   | 0.134653   | 0.259101   | 0.00496556 | 0.0374236 | 0.0861599 | 0.236567  | 0.154161  | 0          | 0          | 0.0108789  | 0.0275819  | 0          | 0          | 0.0691991 |
| LOC285191 | 0          | 0          | 0          | 0          | 0         | 0         | 0         | 0         | 0          | 0          | 0          | 0          | 0          | 0          | 0         |
| LOC285593 | 0.145506   | 0.0848662  | 0.0696893  | 0.015784   | 0.0356874 | 0.0652085 | 0.122414  | 0.122507  | 0.00932681 | 0.00961182 | 0          | 0.0109593  | 0.0345872  | 0.0040025  | 0.0659888 |
| LOC285626 | 0.0439425  | 0.0282296  | 0.0242349  | 0.0603787  | 0         | 0.0124722 | 0.0334481 | 0.026035  | 0.053517   | 0.0735365  | 0.0496056  | 0.104807   | 0.0850544  | 0.237318   | 0.063107  |
| LOC285638 | 0.50477    | 0.649911   | 0.505308   | 0.454611   | 0.283324  | 0.0975187 | 0.653819  | 0.527761  | 0.0878218  | 0.585623   | 0.129287   | 0.185141   | 0.0848396  | 0.36136    | 0.383777  |
| LOC285762 | 0.0466997  | 0.0642876  | 0.0662285  | 0.0343753  | 0.113993  | 0.0681672 | 0.0533202 | 0.0415028 | 0          | 0.00837328 | 0.00753117 | 0.0620563  | 0          | 0.104603   | 0.0670667 |
| LOC285766 | 0.0112893  | 0          | 0          | 0          | 0         | 0         | 0         | 0         | 0          | 0          | 0          | 0.00807779 | 0.0291352  | 0.0236011  | 0         |
| LOC285804 | 0          | 0          | 0          | 0          | 0         | 0         | 0         | 0         | 0          | 0.014873   | 0          | 0          | 0          | 0          | 0         |
| LOC285819 | 0.0952941  | 0.039419   | 0.0593353  | 0.0328507  | 0.0183134 | 8.06E-40  | 0.0537796 | 0.0476035 | 0.0123728  | 4.91E-37   | 6.21E-37   | 0.00761941 | 0.0210809  | 0.0219583  | 0.0343351 |
| LOC285847 | 0.0935343  | 0.0450662  | 0.0663241  | 0.01377    | 0.0622676 | 0.0341328 | 0.0152563 | 0.0593753 | 0.0162735  | 0.0335415  | 0.0150841  | 0.0860481  | 0.068969   | 0.0139672  | 0         |
| LOC285889 | 0.0343114  | 0.0247976  | 0.00709621 | 0          | 0         | 0.0146079 | 0.0391757 | 0.0457397 | 0.0208937  | 0          | 0          | 0          | 0.0166032  | 0.00448316 | 0         |
| LOC286059 | 0          | 0.0253809  | 0.00726311 | 0.0180953  | 0         | 0.0299029 | 0         | 0.0156052 | 0          | 0          | 0          | 0.00628205 | 0          | 0.0412975  | 0         |
| LOC286083 | 0.0538927  | 0.0890273  | 0.057322   | 0.023802   | 0.227224  | 0         | 0.0791137 | 0.0821063 | 0.00937646 | 0.396182   | 0.00869116 | 0.391125   | 0.00496732 | 0.0563333  | 0.09951   |
| LOC286177 | 0          | 0          | 0          | 0          | 0         | 0         | 0         | 0         | 0          | 0          | 0          | 0          | 0          | 0          | 0         |
| LOC286178 | 0.00941157 | 0          | 0.00778591 | 0.0096989  | 0         | 0.0400691 | 0.0107458 | 0.0250927 | 0          | 0.023625   | 0.0743714  | 0          | 0          | 0          | 0         |
| LOC286297 | 0.0476232  | 0.179699   | 0.243717   | 0.0182344  | 0.32444   | 0.155523  | 0.119114  | 0.0944699 | 0.0699856  | 0.0710074  | 6.20E-08   | 0.131445   | 0.00864056 | 0.347158   | 0.307862  |
| LOC286359 | 0.011474   | 0          | 0          | 0          | 0         | 0         | 0         | 0         | 0          | 0          | 0          | 0          | 0          | 0          | 0         |
| LOC286437 | 0.988422   | 1.1016     | 0.900288   | 0.771665   | 0.744417  | 0.884135  | 0.715052  | 0.922792  | 0.583654   | 0.814516   | 0.619892   | 0.621516   | 0.605516   | 0.808806   | 0.759934  |
| LOC338694 | 0.0702724  | 0.135433   | 0.213159   | 0          | 0         | 0         | 0.0802348 | 0.145722  | 0          | 0          | 0          | 0          | 0          | 0.024485   | 0         |
| LOC338963 | 0.0509759  | 0.00818699 | 0          | 0          | 0         | 0.0144684 | 0         | 0         | 0          | 0          | 0.0383636  | 0          | 0          | 0          | 0         |
| LOC339059 | 0.292402   | 0.589624   | 0.573381   | 0.558016   | 2.40558   | 0.903691  | 1.12521   | 0.442728  | 0.448438   | 0.407771   | 0.0733522  | 1.28632    | 0.0698726  | 0.752789   | 1.05759   |
| LOC339166 | 0.012709   | 0          | 0.0105138  | 0.013097   | 0.0592243 | 0         | 0         | 0.0112947 | 0          | 0          | 0          | 0          | 0          | 0.0132845  | 0         |

|           |            |           |            |           |            |           |           |            |            |           |           |            |            |            |           |
|-----------|------------|-----------|------------|-----------|------------|-----------|-----------|------------|------------|-----------|-----------|------------|------------|------------|-----------|
| LOC339192 | 0.219365   | 0.132117  | 0.226843   | 0.25432   | 0.724094   | 0.256832  | 0.125232  | 0.146215   | 0          | 0.0344158 | 0.154773  | 0.0196202  | 0.0353834  | 0.157644   | 0.433175  |
| LOC339260 | 0.0137103  | 0.0132117 | 0.0113422  | 0         | 0.0212969  | 0         | 0.0469621 | 0          | 0          | 0         | 0.0154773 | 0          | 0          | 0          | 0         |
| LOC339298 | 0          | 0         | 0          | 0         | 0          | 0         | 0         | 0          | 0          | 0         | 0         | 0          | 0          | 0          | 0         |
| LOC339529 | 0.0128644  | 0         | 0.0106423  | 0         | 0          | 0         | 0.0293763 | 0          | 0          | 0         | 0         | 0.0276145  | 0          | 0          | 0         |
| LOC339539 | 0.0195713  | 0         | 0.00809538 | 0         | 0          | 0         | 0.0223459 | 0          | 0          | 0         | 0         | 0.0280076  | 0          | 0          | 0         |
| LOC339593 | 0.0101772  | 0.0490355 | 0.0589353  | 0         | 0.0316175  | 0         | 0         | 0.00904469 | 0          | 0.0127735 | 0.0229777 | 0.00728209 | 0          | 0          | 0         |
| LOC339666 | 0.237822   | 0.286466  | 0.405783   | 0.0765883 | 0          | 0.0379692 | 0.118798  | 0.369874   | 0          | 0.0932784 | 0.0503384 | 0.0957195  | 0.0191802  | 0.170907   | 0.490967  |
| LOC339685 | 0.00530561 | 0         | 0          | 0.0109352 | 0.00824144 | 0.0180706 | 0.0121155 | 0.0235759  | 0          | 0.0332954 | 0         | 0          | 0.092425   | 0.0249565  | 0.015239  |
| LOC339803 | 0.606408   | 0.423002  | 0.336938   | 0.690211  | 0.337419   | 1.58758   | 0.413359  | 0.466532   | 0.165344   | 0.590708  | 1.77781   | 0.291426   | 0.426289   | 0.477768   | 0.922871  |
| LOC339862 | 0.0198568  | 0         | 0          | 0.020463  | 0          | 0         | 0         | 0.017647   | 0          | 0.0373834 | 0.0560395 | 0          | 0.00640574 | 0.005189   | 0         |
| LOC339874 | 0.245705   | 0.10711   | 0.077434   | 0.084402  | 0.072698   | 0.0597755 | 0.106872  | 0.145575   | 0          | 0.132165  | 0.0528324 | 0.0418591  | 0          | 0.0489204  | 0.100818  |
| LOC339902 | 0          | 0         | 0          | 0         | 0          | 0         | 0         | 0          | 0          | 0         | 0         | 0          | 0          | 0          | 0         |
| LOC339975 | 0.0570963  | 0.09175   | 0.0708512  | 0.107872  | 0          | 0.0081028 | 0.0217303 | 0.0169142  | 0          | 0         | 0         | 0          | 0          | 0.0447616  | 0.0409988 |
| LOC340090 | 0.0784843  | 0.179621  | 0.202899   | 0.0202201 | 0.304783   | 0.0334142 | 0.134416  | 0.0784691  | 0.227014   | 0.0123132 | 0         | 0.0561576  | 0          | 0.0102548  | 0         |
| LOC340357 | 0.111354   | 0.214608  | 0.291713   | 0         | 0          | 0.0632109 | 0.296661  | 0.379355   | 0.0226028  | 0         | 0         | 0          | 0          | 0          | 0         |
| LOC340512 | 0.599666   | 0.523989  | 0.47927    | 0.366594  | 0.110516   | 0.199051  | 0.499004  | 0.514868   | 0.0371352  | 0.165837  | 0.103263  | 0.225447   | 0.0459036  | 0.233731   | 0.321124  |
| LOC341056 | 0.0113114  | 0         | 0          | 0         | 0          | 0         | 0         | 0          | 0          | 0         | 0.0127691 | 0          | 0          | 0          | 0         |
| LOC343052 | 0.0350652  | 0.0506849 | 0.0870253  | 0         | 0.163405   | 0.0298576 | 0.0400363 | 0          | 0          | 0         | 0         | 0          | 0          | 0.0916331  | 0         |
| LOC344967 | 0.0573913  | 0.0967821 | 0.118695   | 0.0443576 | 0.178297   | 0.012217  | 0.0163819 | 0.0255023  | 0.0349481  | 0.018008  | 0.0647877 | 0.0307988  | 0.0555429  | 0.0449928  | 0.0206053 |
| LOC349160 | 0          | 0         | 0          | 0         | 0          | 0         | 0         | 0          | 0          | 0         | 0         | 0          | 0          | 0          | 0         |
| LOC374443 | 1.68078    | 1.20326   | 1.34542    | 1.83728   | 1.06759    | 1.21098   | 1.32858   | 1.30627    | 0.198899   | 0.725959  | 1.5133    | 0.423603   | 0.667342   | 0.985142   | 1.83723   |
| LOC375196 | 4.01E-22   | 0.043512  | 0.0462604  | 0.0902539 | 0.149502   | 0.25197   | 0.17688   | 0.0231301  | 0          | 0.168688  | 0.19546   | 0.0156665  | 0.0565063  | 0.10738    | 0.103425  |
| LOC387810 | 0          | 0.0107997 | 0.0185429  | 0         | 0          | 0         | 0         | 0          | 0          | 0         | 0         | 0          | 0          | 0.00585742 | 0         |
| LOC388242 | 0.250534   | 0.0433805 | 0.0518148  | 0.0363069 | 0.0608071  | 0.109996  | 0.089391  | 0.0489668  | 0          | 0.0540453 | 0.203278  | 0.0252089  | 0.0126284  | 0.0429646  | 0.196765  |
| LOC388282 | 0.0538628  | 0.112458  | 0.14853    | 0.185024  | 0.139446   | 0.0458635 | 0.204996  | 0.0957376  | 0.240529   | 0.292948  | 0.304022  | 0.308322   | 0.567616   | 0.0844532  | 0.257846  |
| LOC388436 | 0.0322158  | 0.0314269 | 0.0199884  | 0.0601834 | 0.0882628  | 0.0279982 | 0.0666692 | 0.0438143  | 0.00853359 | 0.0126357 | 0         | 0.0222796  | 0.0112329  | 0.0488771  | 0.123197  |



|           |           |            |            |           |           |            |           |           |           |           |           |            |           |            |           |
|-----------|-----------|------------|------------|-----------|-----------|------------|-----------|-----------|-----------|-----------|-----------|------------|-----------|------------|-----------|
| LOC388780 | 0.0277162 | 0.0400623  | 0.0687865  | 0.11425   | 0         | 0.1652     | 0.126582  | 0         | 0.0337553 | 0.243507  | 0.250305  | 0          | 0.0894118 | 0          | 0         |
| LOC388813 | 0         | 0          | 0          | 0.0143413 | 0         | 0          | 0         | 0         | 0         | 0.0174666 | 0.0314199 | 0          | 0.0448941 | 0.0145467  | 0.0599573 |
| LOC389199 | 0.288529  | 0.112451   | 0.163775   | 0         | 1.06149   | 0.169978   | 0.1835    | 0.0952205 | 0         | 0.0904285 | 0.161269  | 0.103283   | 0.0460857 | 0.253496   | 0.6971    |
| LOC389247 | 0.148163  | 0.0713872  | 0.122571   | 0.0916117 | 0.0920593 | 0.0756953  | 0.0338335 | 0.0790049 | 0         | 0.148768  | 0.066903  | 0          | 0.0382376 | 0.139386   | 0.127668  |
| LOC389602 | 0         | 0          | 0          | 0         | 0         | 0.00400854 | 0         | 0         | 0.0114669 | 0.0413605 | 0.0372008 | 0.00673697 | 0         | 0.00738135 | 0.0202826 |
| LOC389641 | 0.223207  | 0.492441   | 0.417898   | 0.544788  | 0.510952  | 0.660201   | 0.482875  | 0.208808  | 0.343378  | 0.221169  | 0.556993  | 0.46232    | 0.576048  | 0.374533   | 0.253069  |
| LOC389705 | 0.0250737 | 0.0483236  | 0.0414855  | 0         | 0.0389482 | 0.0426999  | 0         | 0.0668503 | 0         | 0.0314701 | 0         | 0          | 0         | 0.0393139  | 0         |
| LOC389765 | 1.31774   | 1.14003    | 1.20418    | 0.590395  | 0.346596  | 0.827459   | 0.753916  | 1.10468   | 0.207936  | 0.509058  | 0.450533  | 0.343539   | 0.211618  | 0.458283   | 0.724238  |
| LOC389831 | 0         | 0          | 0          | 0         | 0         | 0          | 0         | 0         | 0         | 0         | 0         | 0          | 0         | 0          | 0         |
| LOC389834 | 0         | 0          | 0          | 0         | 0         | 0          | 0         | 0         | 0         | 0         | 0         | 0          | 0         | 0          | 0         |
| LOC389895 | 0         | 0          | 0          | 0.0191563 | 0.0866245 | 0.0158281  | 0         | 0         | 0         | 0         | 0         | 0          | 0         | 0          | 0         |
| LOC389906 | 2.26133   | 5.46016    | 6.34978    | 3.70195   | 5.19868   | 5.38037    | 6.34412   | 1.96374   | 2.28192   | 3.77886   | 6.57881   | 6.12081    | 5.38578   | 2.61362    | 3.67437   |
| LOC390705 | 0         | 0          | 0          | 0         | 0.0413209 | 0          | 0         | 0         | 0         | 0         | 0         | 0          | 0         | 0          | 0         |
| LOC390877 | 0         | 0.0216098  | 0          | 0         | 0.0696689 | 0          | 0         | 0.0797194 | 0         | 0         | 0         | 0          | 0         | 0          | 0         |
| LOC391322 | 0.0245419 | 1.99837    | 2.43634    | 0.910483  | 2.43981   | 0.0835886  | 1.76534   | 0.174487  | 0.179336  | 0.184816  | 0.498686  | 0          | 0         | 0.923522   | 0.493435  |
| LOC392196 | 0.739292  | 0.52656    | 0.398866   | 0.314682  | 0.4244    | 0.177901   | 0.1101    | 0.55704   | 0         | 0.0806859 | 0.0362856 | 0.0919971  | 0         | 0.0419985  | 0.115404  |
| LOC392232 | 0.0179509 | 0.00869158 | 0.00729077 | 0         | 0         | 0.00755334 | 0         | 0         | 0         | 3.52E-27  | 0         | 0          | 0         | 0.0598791  | 0.0396225 |
| LOC392364 | 0         | 0.0219934  | 0          | 0         | 0.0709056 | 0          | 0         | 0         | 0         | 0.0286459 | 0         | 0          | 0         | 0          | 0.163887  |
| LOC392452 | 0         | 0.083214   | 0.0285755  | 0         | 0         | 0          | 0         | 0.0306979 | 0         | 0         | 0         | 0          | 0         | 0          | 0         |
| LOC399715 | 0.483772  | 0.319557   | 0.561586   | 0.450296  | 0.181806  | 0.0597957  | 0.579083  | 0.499281  | 0.0760233 | 0.244832  | 0.0616586 | 0.0949127  | 0.0453088 | 0.326246   | 0.560289  |
| LOC399716 | 0.410784  | 0.322421   | 0.38916    | 0.416497  | 0.144085  | 0.039491   | 0.416066  | 0.6006    | 0.0645534 | 0.133052  | 0.0598354 | 0.12326    | 0.0598468 | 0.155826   | 0.275939  |
| LOC399815 | 0.0328737 | 0.0633561  | 0.0271954  | 0.0225848 | 0.0170214 | 0.0653135  | 0.0500454 | 0.0194769 | 0.0133455 | 0.0137533 | 0.0247402 | 0          | 0.0212099 | 0.0229083  | 0         |
| LOC399886 | 0.0623802 | 0.240446   | 0.16956    | 0.569378  | 0.512175  | 0.675331   | 0.0508741 | 0.0791976 | 0.0108532 | 0.223696  | 0.0301798 | 0.554745   | 0.0862444 | 0.386574   | 0.012798  |
| LOC399975 | 3.3208    | 2.56064    | 2.18503    | 1.46665   | 0.487952  | 0.938901   | 1.17115   | 2.27326   | 2.77172   | 2.37364   | 1.65004   | 2.46787    | 2.21702   | 2.29849    | 1.27974   |
| LOC400464 | 2.33E-09  | 0.150557   | 0.230208   | 0.116614  | 0.285602  | 0.421555   | 2.30E-26  | 0.123852  | 0.381994  | 4.03E-33  | 0.290494  | 1.43E-21   | 0.053615  | 0.0949686  | 0.362025  |
| LOC400541 | 0         | 0.0781133  | 0.0335299  | 0.0417681 | 0.125916  | 0.0690228  | 0.185107  | 0.144081  | 0         | 0         | 0.0457542 | 0.0290008  | 0         | 0.105916   | 0.116415  |

|           |            |            |            |            |           |           |           |           |           |            |           |            |            |            |           |
|-----------|------------|------------|------------|------------|-----------|-----------|-----------|-----------|-----------|------------|-----------|------------|------------|------------|-----------|
| LOC400553 | 0          | 0.053868   | 0.0924906  | 0          | 0.0868337 | 0.0951981 | 0.255304  | 0.0993605 | 0         | 0          | 0         | 0.0799975  | 0          | 0.116865   | 0         |
| LOC400622 | 0          | 0          | 0          | 0          | 0         | 0         | 0         | 0         | 0         | 0          | 0         | 0          | 0          | 0          | 0         |
| LOC400627 | 0.170903   | 0.470412   | 0.390901   | 0.13012    | 0.666592  | 0.139907  | 0.526016  | 0.464288  | 0.0271973 | 0.0849911  | 0.0172241 | 0.403999   | 0.167151   | 0.311068   | 0.72301   |
| LOC400655 | 0          | 0          | 0          | 0          | 0.0270905 | 0.0519751 | 0         | 0         | 0         | 0          | 0         | 0          | 0          | 0.00455749 | 0         |
| LOC400682 | 0          | 0.0063791  | 0.00547642 | 0          | 0         | 0         | 0         | 0         | 0         | 0          | 0         | 0.00947338 | 0          | 0          | 0         |
| LOC400684 | 0.0730065  | 0.26968    | 0.30198    | 0.225706   | 0.52922   | 0.186492  | 0.111142  | 0.194646  | 0.0889137 | 0.122174   | 0.16483   | 0.174127   | 0.157011   | 0.165344   | 0.244642  |
| LOC400706 | 0.451957   | 0.487367   | 0.183978   | 0.110894   | 0.289733  | 0.32375   | 0.163819  | 0.248648  | 0.104844  | 0.036016   | 0.145772  | 0.133461   | 0          | 0.116231   | 0.0721185 |
| LOC400710 | 0.0734311  | 0.0825539  | 0.0911211  | 0.0504486  | 0.28516   | 0.156314  | 0.0698678 | 0.0652595 | 0.313008  | 0.0307212  | 0         | 0.201411   | 0.0947548  | 0.0383783  | 0.0175761 |
| LOC400743 | 0          | 0.0566983  | 0          | 0          | 0         | 0         | 0.134359  | 0         | 0         | 0          | 0         | 0.0280669  | 0          | 0.020501   | 0.0563328 |
| LOC400794 | 0          | 0          | 0          | 0          | 0         | 0         | 0         | 0         | 0         | 0          | 0         | 0          | 0.00828163 | 0.0134172  | 0         |
| LOC400800 | 0          | 0          | 0          | 0          | 0         | 0         | 0         | 0         | 0         | 0          | 0         | 0          | 0          | 0.00526811 | 0         |
| LOC400867 | 0.0181609  | 0.00583347 | 0.00500799 | 0.0187153  | 0.0282102 | 0.0773189 | 0.0207355 | 0.0322798 | 0.191689  | 0.00759794 | 0.0273352 | 0.00866308 | 0          | 0.0158195  | 0         |
| LOC400940 | 0          | 0          | 0          | 0          | 0         | 0         | 0         | 0         | 0         | 0          | 0         | 0          | 0          | 0          | 0         |
| LOC401021 | 0.558873   | 0.373426   | 0.427332   | 0.401283   | 0.670765  | 0.431691  | 0.509781  | 0.504656  | 0.0372728 | 0.210806   | 0.0853569 | 0.242087   | 3.20E-26   | 0.54427    | 1.00624   |
| LOC401127 | 0.126311   | 0.155528   | 0.267039   | 0.0723153  | 0.348809  | 0.0956022 | 0.160242  | 0.0623639 | 0.0170926 | 0.0528446  | 0.0316866 | 0.0702949  | 0.162991   | 0.080686   | 0.0806218 |
| LOC401176 | 0          | 0          | 0          | 0          | 0         | 0         | 0         | 0         | 0         | 0          | 0         | 0          | 0          | 0          | 0         |
| LOC401261 | 2.18442    | 2.22282    | 2.12108    | 0.660557   | 1.67693   | 0.840234  | 1.99335   | 1.8214    | 0.308152  | 0.52928    | 0.09521   | 0.597445   | 0.195898   | 0.991801   | 1.61095   |
| LOC401312 | 0.0625005  | 0.0129059  | 0.0147728  | 0.0828111  | 0         | 0.0304105 | 0.0203889 | 0.0476102 | 0         | 0.0112064  | 0         | 0          | 0.00576072 | 0.0326655  | 0         |
| LOC401324 | 0          | 0          | 0          | 0          | 0         | 0         | 0         | 0         | 0         | 0          | 0         | 0.00912619 | 0          | 0          | 0         |
| LOC401357 | 0          | 0          | 0          | 0          | 0         | 0         | 0         | 0         | 0         | 0          | 0         | 0          | 0          | 0          | 0         |
| LOC401442 | 0.0126672  | 0.0366196  | 0.0209585  | 0.0652698  | 0.098383  | 0.010786  | 0         | 0.0225152 | 0.154273  | 0.0158987  | 0         | 0.0181275  | 0.00817284 | 0.0331023  | 0         |
| LOC401463 | 0.0483503  | 0.00775429 | 0.0332851  | 0.104732   | 0.224999  | 0.10963   | 0         | 0.0429088 | 0.0196006 | 0.011197   | 0.0726721 | 0.00575781 | 0.048392   | 0.0316059  | 0.266197  |
| LOC401478 | 0.00516932 | 0          | 0          | 0          | 0         | 0.0176064 | 0         | 0         | 0         | 0          | 0         | 0          | 0          | 0          | 0         |
| LOC401554 | 0.0355173  | 0.0650285  | 0.0411353  | 0.00732032 | 0.0551706 | 0.036291  | 0.0648839 | 0.0820685 | 0         | 0.0178311  | 0.0160378 | 0.00508271 | 0.00916622 | 0.025988   | 0.0102015 |
| LOC401557 | 0          | 0          | 0          | 0          | 0         | 0         | 0         | 0         | 0         | 0          | 0         | 0.00444073 | 0          | 0          | 0         |
| LOC403312 | 0.145464   | 0.150279   | 0.12023    | 0.0506257  | 0.162756  | 0.0542364 | 0.116008  | 0.0432259 | 0.0168402 | 0.0530786  | 0         | 0.175064   | 0.0176105  | 0.13248    | 0.146437  |

|           |            |            |            |            |           |            |           |            |           |            |            |           |            |            |            |
|-----------|------------|------------|------------|------------|-----------|------------|-----------|------------|-----------|------------|------------|-----------|------------|------------|------------|
| LOC403323 | 0.0774966  | 0.249591   | 0.176963   | 0.166011   | 0.426861  | 0.134604   | 0.625955  | 0.0360659  | 0.669229  | 4.83E-25   | 0.0189071  | 0.229591  | 0.074856   | 0.860276   | 7.36E-16   |
| LOC407835 | 0          | 0          | 0          | 0          | 0.0632388 | 0          | 0.0155696 | 0.0359899  | 0         | 0.0684197  | 0.0463066  | 0         | 0.0263682  | 0          | 0          |
| LOC414300 | 0.0209629  | 0.0606015  | 0.017342   | 0.0432058  | 0         | 0.0356993  | 0         | 0.0372602  | 0.0510609 | 0          | 0.0709935  | 0.029999  | 0.0135252  | 0.0219123  | 0.0903162  |
| LOC439933 | 0          | 0          | 0.0107559  | 0          | 0         | 0.0110708  | 0.0296899 | 0.0115548  | 0         | 0          | 0          | 0.0186061 | 0          | 0          | 0          |
| LOC440028 | 0.310443   | 0.357053   | 0.331381   | 0.196081   | 0.280002  | 0.588366   | 0.45736   | 0.364895   | 0.085374  | 0.351931   | 0.260013   | 0.114648  | 0.239064   | 0.245994   | 0.359545   |
| LOC440040 | 0          | 0          | 0          | 0          | 0         | 0          | 0         | 0          | 0         | 0          | 0          | 0         | 0          | 2.58E-36   | 0          |
| LOC440084 | 0.0641971  | 0.0927934  | 0.0265542  | 0.0330785  | 0         | 0.0273315  | 0.0366491 | 0.057053   | 0         | 0          | 0          | 0.0229674 | 0          | 0.0503283  | 0.0460976  |
| LOC440173 | 2.20086    | 2.37735    | 2.14924    | 1.46582    | 3.84916   | 1.05507    | 2.49759   | 1.8049     | 0.536817  | 0.854478   | 0.651826   | 1.31436   | 0.254813   | 1.51486    | 1.03633    |
| LOC440300 | 3.82323    | 4.40246    | 4.30618    | 1.93964    | 7.84493   | 1.60586    | 3.24815   | 4.05225    | 0.769772  | 2.59148    | 0.485883   | 6.39575   | 0.871333   | 3.23702    | 2.99563    |
| LOC440311 | 0.0543903  | 0          | 0          | 0.0140127  | 0         | 0          | 0.0465758 | 0          | 0         | 0          | 0          | 0         | 0          | 0          | 0          |
| LOC440346 | 0.416651   | 0.419747   | 0.438687   | 0.117101   | 0.588366  | 0.129008   | 0.432471  | 0.336622   | 0.184521  | 0.19016    | 0          | 0.189716  | 0          | 0.0791854  | 0.32638    |
| LOC440434 | 7.47937    | 11.3929    | 11.9334    | 12.5746    | 13.9615   | 8.2825     | 10.5011   | 9.23572    | 9.89192   | 14.3559    | 5.2749     | 18.2575   | 12.0237    | 16.4135    | 7.83478    |
| LOC440570 | 0.021907   | 0.0296656  | 0.0140424  | 0.0116572  | 0.0419961 | 0.00964659 | 0.0967735 | 0.0168654  | 0.0357171 | 0.0189839  | 0.00613587 | 0.016121  | 0.00411154 | 0.195501   | 1.05E-12   |
| LOC440700 | 0.076506   | 0.0276463  | 0.0632911  | 0          | 0         | 0.016286   | 0.065514  | 0.0849902  | 0.0232939 | 0.0480114  | 0          | 0         | 0          | 0          | 0          |
| LOC440895 | 0.00038522 | 0.106853   | 0.00279363 | 0.00057274 | 1.50E-37  | 0.0970844  | 0.0820248 | 0.0547396  | 0         | 1.25E-05   | 1.34E-20   | 0.0390448 | 0.0155075  | 0.0915585  | 0.00032404 |
|           | 7          |            |            | 7          |           |            |           |            |           |            |            |           |            |            | 6          |
| LOC440896 | 0.00452278 | 0.00871657 | 0.00748312 | 0          | 0         | 0.00770217 | 0.0154919 | 0.00803894 | 0         | 0.00567655 | 0          | 0.0097085 | 0.00291807 | 0.0165466  | 0.0129906  |
| LOC440910 | 0          | 0          | 0          | 0          | 0         | 0          | 0         | 0          | 0         | 0          | 0          | 0         | 0          | 0          | 0.133786   |
| LOC440934 | 0.029388   | 0.0530985  | 0.0303898  | 0.0567847  | 0.0342373 | 0.0563029  | 0.0209714 | 0.0293823  | 0.0313174 | 0.0138319  | 0.0248815  | 0.0131424 | 0.0474025  | 0.00383986 | 0.0422049  |
| LOC440982 | 0.0350122  | 0.0168694  | 0          | 0          | 0         | 0.0596248  | 0.0399758 | 0          | 0         | 0          | 0          | 0         | 0          | 0          | 0          |
| LOC441052 | 0.0157436  | 0.0227565  | 0          | 0.0324484  | 0.0733656 | 0.0402163  | 0         | 0.0139916  | 0         | 0.0197598  | 0          | 0.0174727 | 0          | 0          | 0          |
| LOC441081 | 12.1679    | 9.98138    | 10.6927    | 5.67442    | 19.8672   | 7.01768    | 11.4997   | 9.72072    | 0.357185  | 2.96677    | 2.24816    | 3.83982   | 0.923528   | 6.19737    | 15.8828    |
| LOC441086 | 0.0502018  | 0.024188   | 0.0165476  | 0          | 0.0841103 | 0.056995   | 0.0191063 | 0.0148717  | 0         | 0.0420057  | 0          | 0.0176994 | 0.035603   | 0.0686309  | 0          |
| LOC441087 | 0          | 0          | 0          | 0          | 0         | 0          | 0         | 0.017386   | 0         | 0          | 0          | 0         | 0          | 0          | 0          |
| LOC441155 | 0.480337   | 0.412296   | 0.415987   | 0.426188   | 0.0935269 | 0.454283   | 0.367361  | 0.411343   | 0.286654  | 0.377594   | 0.332381   | 0.246257  | 0.62032    | 0.351414   | 0.244114   |
| LOC441179 | 0.0425424  | 0.0505075  | 0.147815   | 0.0470522  | 0.402013  | 0.0579588  | 0.116576  | 0.0756162  | 0.0207247 | 0.0854321  | 0.201705   | 0.0487043 | 0.104303   | 0.166823   | 0.207301   |

|           |            |            |            |            |                 |                 |            |            |            |            |                 |            |           |           |           |
|-----------|------------|------------|------------|------------|-----------------|-----------------|------------|------------|------------|------------|-----------------|------------|-----------|-----------|-----------|
| LOC441204 | 0.116737   | 0.0562455  | 0.092549   | 0.0501252  | 0.105777        | 0.0807623       | 0.162434   | 0.131844   | 0.00592384 | 0.0244194  | 0.0741269       | 0.0469846  | 0.0345207 | 0.0266926 | 0.125736  |
| LOC441242 | 0.44418    | 0.508905   | 0.504568   | 0.188562   | 0.40002         | 0.261956        | 0.275614   | 0.446497   | 0.115549   | 0.144597   | 0.183206        | 0.270641   | 0.0437241 | 0.188265  | 0.233579  |
| LOC441454 | 2.2456     | 2.44653    | 3.21651    | 0.88076    | 1.04125         | 0.342465        | 2.0282     | 2.97866    | 0.224505   | 0.336532   | 0.151343        | 0.587555   | 0.0216254 | 0.656892  | 1.10708   |
| LOC441455 | 0.126465   | 0.101554   | 0.116245   | 0.0289612  | 0.130962        | 0.0239296       | 0.208568   | 0.112391   | 0.0171133  | 0.0176363  | 0.0475877       | 0.030163   | 0         | 0.022032  | 0.0201799 |
| LOC441601 | 0          | 0.263661   | 0.452703   | 0          | 0               | 0               | 0          | 0.060791   | 0          | 0          | 0               | 0          | 0         | 0         | 0         |
| LOC441666 | 0.177195   | 0.185817   | 0.132217   | 0.0859316  | 0.0377787       | 0.139046        | 0.0595045  | 0.11116    | 0.0169258  | 0.126462   | 0.12551         | 0.0646369  | 0.0156917 | 0.161613  | 0.194598  |
| LOC442028 | 0          | 0.0133942  | 0.00574942 | 0.0214861  | 0.0647732       | 0               | 0          | 0.0247058  | 0          | 0          | 0               | 0.0248641  | 0         | 0.0145292 | 0.0199618 |
| LOC442132 | 0.0181088  | 0          | 0          | 0          | 0               | 0.0308388       | 0          | 0          | 0          | 0          | 0               | 0          | 0         | 0         | 0         |
| LOC442497 | 0.0720967  | 0.0248124  | 0.0255615  | 0          | 0.111991        | 0.00876992      | 0.0117597  | 0          | 0.0250873  | 0          | 0               | 0          | 0         | 0         | 0         |
| LOC494127 | 0          | 0          | 0.0142877  | 0          | 0               | 0               | 0.0197194  | 0          | 0          | 0          | 0               | 0          | 0         | 0         | 0         |
| LOC494141 | 0.00857527 | 0.0124836  | 0.00712748 | 0.0444706  | 0.0262131       | 0.0218099       | 0.00976202 | 0.00767712 | 0.0103076  | 0.0322481  | 0.0947533       | 0.024687   | 0.0278961 | 0.017868  | 0         |
| LOC497256 | 0          | 0          | 0          | 0          | 0               | 0               | 0          | 0          | 0          | 0          | 0               | 0          | 0         | 0         | 0         |
| LOC51145  | 0          | 0          | 0          | 0.068435   | 0               | 0.0565452       | 0.037911   | 0          | 0          | 0          | 0               | 0          | 0         | 0         | 0         |
| LOC541472 | 0.135736   | 0.0408749  | 0.0280727  | 0.0874252  | 0.0527114       | 0.0722361       | 0.309959   | 0.0452367  | 0          | 0.0425908  | 0.0766147       | 0.0121404  | 0.0218941 | 0.0532063 | 0.341136  |
| LOC541473 | 0.837256   | 1.75487    | 2.30689    | 0.429686   | 0.841942        | 1.94835         | 2.29104    | 1.43207    | 0.388664   | 0.372398   | 0.301809        | 0.870586   | 0.241528  | 0.798893  | 0.47408   |
| LOC550113 | 0.00397833 | 0.0570439  | 0.00329115 | 0.0757026  | 0.00068663<br>6 | 0.00037638<br>9 | 0.0752233  | 0.183751   | 0.0021534  | 0.00277401 | 0.00049900<br>5 | 0.00347918 | 0         | 1.06E-05  | 0         |
| LOC554206 | 0.490981   | 0.333337   | 0.406174   | 0.34498    | 0.415998        | 0.380058        | 0.662511   | 0.238005   | 0.0815399  | 0.224084   | 0.176354        | 0.0159686  | 0.0719951 | 0.17496   | 0.0320505 |
| LOC554249 | 0.834674   | 1.24608    | 1.77895    | 0.514104   | 1.14702         | 0.457094        | 1.33374    | 0.717492   | 0.563136   | 0.397167   | 0.540344        | 0.469644   | 0.173863  | 0.425736  | 0.189035  |
| LOC574538 | 0.0398057  | 0.038358   | 0.0197581  | 0.00820419 | 0.126506        | 0.0271152       | 0.0181796  | 0.0070752  | 0.00969578 | 0          | 0               | 0          | 0         | 0         | 0.102899  |
| LOC606724 | 0.936211   | 0.48582    | 0.856277   | 0.482903   | 1.07214         | 0.603673        | 0.496377   | 0.455269   | 0.16172    | 0.163791   | 0.265866        | 0.368868   | 0.0258896 | 0.546753  | 0.638847  |
| LOC613038 | 0.250534   | 0.0433805  | 0.0518148  | 0.0363069  | 0.0608071       | 0.109996        | 0.089391   | 0.0489668  | 0          | 0.0540453  | 0.203278        | 0.0252089  | 0.0126284 | 0.0429646 | 0.196765  |
| LOC613206 | 0.385718   | 0.557534   | 0.159546   | 0.529991   | 0.399435        | 0.383172        | 0.2936     | 0.228529   | 0          | 0.0806859  | 0               | 0.183994   | 0         | 0.638377  | 2.49273   |
| LOC613266 | 0.0480745  | 0.0648564  | 0.127266   | 0.00990843 | 0.0149353       | 0               | 0.010978   | 0.145264   | 0          | 0          | 0               | 0.00687971 | 0         | 0.0100503 | 0         |
| LOC641367 | 1.13396    | 0.596027   | 0.65382    | 0.274438   | 0.133442        | 0.219443        | 0.902378   | 0.748191   | 0.0315479  | 0.129699   | 0.223047        | 0.196698   | 0.0221704 | 0.282859  | 0.382452  |
| LOC641746 | 0.0202654  | 0.00976416 | 0          | 0          | 0.0944374       | 0.0172557       | 0.0231383  | 0.0180102  | 0          | 0          | 0               | 0.0145004  | 0         | 0.0105916 | 0         |

|           |            |           |            |           |           |            |            |            |           |           |           |            |            |            |           |
|-----------|------------|-----------|------------|-----------|-----------|------------|------------|------------|-----------|-----------|-----------|------------|------------|------------|-----------|
| LOC642131 | 0.0176127  | 0.0339442 | 0          | 0.0363007 | 0.0273586 | 0.0599878  | 0          | 0          | 0         | 0         | 0         | 0          | 0.0340908  | 0          | 0         |
| LOC642361 | 1.29163    | 1.22427   | 1.45016    | 0.826182  | 3.41942   | 2.84856    | 1.34914    | 0.761136   | 1.17992   | 1.1887    | 2.64774   | 0.716124   | 1.17346    | 0.954244   | 0.943615  |
| LOC642366 | 0          | 0         | 0          | 0         | 0.0161014 | 0.00294207 | 0.00394506 | 0.00307071 | 0         | 0         | 0         | 0          | 0          | 0          | 0         |
| LOC642423 | 1.35091    | 0.662372  | 1.29552    | 0.547664  | 5.49075   | 0.710854   | 1.07074    | 0.0848894  | 0.327901  | 0.638229  | 1.41E-05  | 1.43049    | 1.18374    | 1.03144    | 0.925529  |
| LOC642484 | 0.0180946  | 0.0697462 | 0.0972996  | 0.0279706 | 0.0140536 | 0.00770368 | 0.0619796  | 0.0402025  | 0.0220372 | 0         | 0.0306399 | 0.0194208  | 0.0116746  | 0.0189141  | 0         |
| LOC642648 | 2.11909    | 3.27961   | 2.67209    | 1.05219   | 2.01491   | 0.891254   | 2.25088    | 3.30999    | 0.164234  | 0.781784  | 0.275464  | 1.56681    | 0.0994347  | 0.879312   | 1.35564   |
| LOC642846 | 1.34664    | 1.72883   | 1.26463    | 1.88475   | 2.1078    | 2.44125    | 1.56139    | 1.03535    | 0.248932  | 0.4859    | 0.609471  | 1.73866    | 0.40989    | 1.13941    | 0.675957  |
| LOC642852 | 0.500652   | 0.840386  | 0.89248    | 0.48265   | 1.34966   | 0.981862   | 0.619572   | 0.413362   | 0.125881  | 0.372968  | 0.470371  | 0.25885    | 0.262583   | 0.720839   | 1.03907   |
| LOC642929 | 0          | 0         | 0.0388742  | 0         | 0         | 0          | 0          | 0.0208808  | 0         | 0         | 0         | 0.151305   | 0          | 0          | 0         |
| LOC642943 | 0          | 0.0305709 | 0.0113668  | 0         | 0         | 0.00389986 | 0          | 0.00814075 | 0.005578  | 0.0114969 | 0         | 0.0131086  | 0          | 0          | 0         |
| LOC643072 | 0.6711     | 0.586633  | 0.622815   | 0.609948  | 0.814952  | 1.06833    | 0.620914   | 0.577108   | 0.405357  | 0.498008  | 1.26976   | 0.272324   | 0.22861    | 0.343128   | 0.583634  |
| LOC643201 | 0          | 0         | 0          | 0         | 0         | 0          | 0.00615657 | 0.00479208 | 0         | 0.0135354 | 0         | 0          | 0          | 0.016909   | 0         |
| LOC643327 | 2.048      | 2.19022   | 1.6334     | 1.30256   | 8.33736   | 1.19088    | 2.90285    | 1.05683    | 0.597169  | 1.80071   | 2.74E-12  | 2.0274     | 2.10E-14   | 2.81673    | 0.548762  |
| LOC643339 | 0.12012    | 0.0578755 | 0.132495   | 0.0825245 | 0.0621958 | 0.10228    | 0.137149   | 0.213505   | 0         | 0.0502542 | 0         | 0.0286496  | 0          | 0.146486   | 0         |
| LOC643387 | 0          | 0         | 0          | 0         | 0         | 0          | 0          | 0          | 0         | 0         | 0         | 0.00669788 | 0          | 0          | 0         |
| LOC643406 | 3.87724    | 3.41851   | 3.45951    | 1.65513   | 1.01273   | 0.879935   | 2.6355     | 4.07308    | 0.542872  | 1.23152   | 0.433895  | 2.0192     | 0.29665    | 2.70999    | 2.57434   |
| LOC643441 | 0          | 0         | 0          | 0         | 0         | 0          | 0.0121713  | 0          | 0         | 0         | 0         | 0.00762758 | 0.00687783 | 0          | 0         |
| LOC643542 | 0.0160211  | 0         | 0.00640106 | 0         | 2.45E-43  | 0.00680103 | 0          | 0          | 0         | 0         | 0         | 0          | 0          | 0          | 0         |
| LOC643711 | 0.00532024 | 0         | 0.00440128 | 0         | 0         | 0          | 0          | 0          | 0         | 0         | 0         | 0          | 0          | 0          | 0         |
| LOC643802 | 0          | 0         | 0          | 0.05568   | 0         | 0.0153354  | 0          | 0          | 0.0219343 | 0.203441  | 0.3253    | 0          | 0.104581   | 0.00941289 | 0.0258649 |
| LOC644090 | 0.460558   | 0.242077  | 0.216481   | 0.172589  | 0.243888  | 0.133691   | 0.394388   | 0.288375   | 0.0127479 | 0.0656873 | 0.059081  | 0.0449375  | 0.108054   | 0.0328238  | 0.255549  |
| LOC644135 | 0.132667   | 0.0710234 | 0.0243893  | 0.0151908 | 0.0457951 | 0.062758   | 0.100983   | 0.0917028  | 0         | 0         | 0.116484  | 0.0421897  | 0.0380427  | 0.231126   | 0.635089  |
| LOC644189 | 0          | 0.0258716 | 0.0333159  | 0.0138339 | 0         | 0.0228608  | 0.0153271  | 0.0119302  | 0         | 0.11794   | 0.0151541 | 0.00960526 | 0.0173222  | 0.00701599 | 0.0385572 |
| LOC644285 | 1.06083    | 1.03295   | 0.97674    | 0.548897  | 0.627421  | 0.438415   | 0.978103   | 0.994062   | 0.102709  | 0.59052   | 0.315672  | 0.606609   | 0.040093   | 1.3571     | 0.68844   |
| LOC644554 | 0.0874974  | 0.17917   | 0.126672   | 0.135253  | 0.271827  | 0.167631   | 0.174828   | 0.116641   | 0         | 0.0274545 | 0.0740802 | 0.046955   | 0          | 0.0457299  | 0.0314143 |
| LOC644634 | 1.24735    | 1.25897   | 0.802302   | 1.15219   | 1.68161   | 1.10199    | 0.906013   | 0.941399   | 0.243545  | 0.285455  | 0.418711  | 0.435254   | 0.399374   | 0.463953   | 0.98731   |

|           |            |           |            |           |           |           |            |            |            |           |           |           |           |            |           |
|-----------|------------|-----------|------------|-----------|-----------|-----------|------------|------------|------------|-----------|-----------|-----------|-----------|------------|-----------|
| LOC644656 | 0.607429   | 0.634115  | 0.519258   | 0.563376  | 0.691935  | 0.603421  | 0.670425   | 0.341894   | 0.665802   | 0.381193  | 0.754283  | 0.31873   | 0.470292  | 0.539697   | 0.726954  |
| LOC644669 | 0          | 0         | 0          | 0         | 0.0171431 | 0         | 0          | 0.00980812 | 0          | 0         | 0         | 0         | 0         | 0          | 0         |
| LOC644762 | 0          | 0         | 0          | 0         | 0         | 0         | 0          | 0          | 0          | 0         | 0.0323738 | 0         | 0         | 0          | 0         |
| LOC644794 | 0.871318   | 2.04787   | 2.32067    | 1.13882   | 1.50201   | 2.20765   | 1.55292    | 0.934892   | 0.401173   | 0.30674   | 0.347862  | 1.10244   | 0.219383  | 0.971866   | 1.61756   |
| LOC644936 | 0          | 0         | 0          | 0         | 0         | 0         | 0          | 0          | 0          | 0         | 0         | 0         | 0         | 0          | 0         |
| LOC645177 | 0          | 0.0276463 | 0          | 0         | 0         | 0         | 0.032757   | 0.00849902 | 0.0815287  | 0         | 0         | 0         | 0.0123403 | 0.00499817 | 0         |
| LOC645188 | 0          | 0         | 0          | 0         | 0         | 0         | 0          | 0          | 0          | 0         | 0         | 0         | 0         | 0          | 0         |
| LOC645485 | 0.0745588  | 0.0359236 | 0.0863524  | 0.030734  | 0.0463262 | 0.17776   | 0.0851288  | 0.0927663  | 0.199769   | 0.0748632 | 0.0168335 | 0.0426791 | 0         | 0          | 0.0642455 |
| LOC645513 | 4.41438    | 3.27569   | 3.25746    | 2.03569   | 2.94695   | 1.69793   | 4.03529    | 2.90855    | 1.13755    | 1.92994   | 2.4387    | 2.2063    | 0.472513  | 2.18529    | 1.69267   |
| LOC645752 | 0.0473191  | 0.011021  | 0.00688448 | 0         | 0         | 0.0640051 | 0.00926731 | 0.0263941  | 0.00904255 | 0         | 0.0167633 | 0         | 0         | 0          | 0         |
| LOC645967 | 0.297365   | 0.520479  | 0.408397   | 0.232945  | 1.00014   | 0.389099  | 0.473501   | 0.308672   | 0.10018    | 0.0980025 | 0.572774  | 0.233114  | 0.368182  | 0.318409   | 0.231106  |
| LOC646029 | 0.125437   | 0.151093  | 0.145278   | 0.0517064 | 0.0194846 | 0.0640846 | 0.128898   | 0.390172   | 0          | 0.0314872 | 0         | 0.0628273 | 0         | 0.104894   | 0.180143  |
| LOC646030 | 0.0281889  | 0.0950727 | 0.163239   | 0         | 0         | 0         | 0.0965554  | 0.100208   | 0          | 0         | 0         | 0         | 0         | 0.0294655  | 0.0809655 |
| LOC646214 | 7.25081    | 6.74767   | 6.72737    | 3.24724   | 2.13984   | 1.81942   | 4.66222    | 6.61096    | 1.21536    | 2.68706   | 0.830435  | 3.99082   | 0.56788   | 4.78056    | 5.40078   |
| LOC646383 | 0.0239081  | 0.0691158 | 0.0791139  | 0         | 0         | 0         | 0.054595   | 0          | 0          | 0         | 0         | 0.0513207 | 0         | 0.0124954  | 0         |
| LOC646471 | 1.75777    | 1.75094   | 1.77977    | 0.975846  | 2.80324   | 1.01369   | 1.32025    | 1.31511    | 0.50333    | 0.556759  | 0.253201  | 1.32679   | 0.203867  | 1.06895    | 0.53903   |
| LOC646522 | 0          | 0         | 0          | 0         | 0         | 0         | 0          | 0          | 0          | 0         | 0         | 0         | 0         | 0          | 0         |
| LOC646548 | 0.00777395 | 0         | 0          | 0         | 0         | 0         | 0          | 0.00690884 | 0          | 0         | 0         | 0         | 0.0150471 | 0.00406301 | 0         |
| LOC646626 | 5.06E-20   | 0.0363125 | 3.17E-25   | 0.436118  | 0.264969  | 0.271862  | 0.033372   | 0.0952941  | 0.202431   | 0.0747967 | 0.14874   | 0.16358   | 0.171569  | 0.190001   | 0.317065  |
| LOC646730 | 0          | 0         | 0          | 0         | 0         | 0         | 0          | 0          | 0          | 0         | 0         | 0         | 0.0152833 | 0          | 0         |
| LOC646736 | 0          | 0         | 0          | 0         | 0         | 0         | 0          | 0          | 0          | 0         | 0         | 0         | 0         | 0.0129364  | 0         |
| LOC646762 | 1.29921    | 1.10184   | 1.11964    | 0.731597  | 1.0566    | 1.81074   | 1.08829    | 1.05162    | 0.2642     | 0.41544   | 0.45444   | 0.430683  | 0.359801  | 0.609663   | 1.08144   |
| LOC646813 | 0          | 0         | 0          | 0         | 0         | 0         | 0          | 0          | 0          | 0         | 0         | 0         | 0         | 0          | 0         |
| LOC646903 | 0.212105   | 0.085163  | 0.175469   | 0.0607169 | 0.0732162 | 0.0903025 | 0.0941792  | 0.104723   | 0.0143511  | 0.103528  | 0.226138  | 0.101178  | 0.159658  | 0.172442   | 0.0846139 |
| LOC646938 | 0.240572   | 0.255005  | 0.278626   | 0.0991667 | 0.373692  | 0.245813  | 0.439484   | 0.342081   | 0.058598   | 0.0603886 | 0         | 0.309845  | 0         | 0.15088    | 1.38197   |
| LOC647070 | 0.468668   | 0.216043  | 0.223358   | 0.173281  | 0.0870439 | 0.251891  | 0.157043   | 0.466314   | 0.0310209  | 0.134269  | 0.132267  | 0.102103  | 0.0493363 | 0.143773   | 0.26383   |

|           |           |            |           |           |          |            |           |           |           |           |            |           |           |            |           |
|-----------|-----------|------------|-----------|-----------|----------|------------|-----------|-----------|-----------|-----------|------------|-----------|-----------|------------|-----------|
| LOC648987 | 0.633844  | 0.630044   | 0.640125  | 0.510121  | 1.1073   | 0.949848   | 0.723121  | 0.463018  | 0.200924  | 0.832047  | 0.717921   | 0.544232  | 0.493144  | 0.723359   | 1.08982   |
| LOC649133 | 0.11963   | 0.707397   | 1.12462   | 0.13449   | 0.10136  | 0.055562   | 0.807124  | 1.50778   | 0.0529805 | 0.0136499 | 0          | 0.194543  | 0.0140336 | 0.0738921  | 0.0780929 |
| LOC649352 | 0.0885012 | 0.298488   | 0.11343   | 0         | 0.274946 | 0          | 0.151572  | 0.0438093 | 0.0538922 | 0         | 0.0499534  | 0.0316625 | 0         | 0          | 0         |
| LOC650226 | 0.0832983 | 0.00668907 | 0         | 0         | 0        | 0.047285   | 0         | 0         | 0         | 0         | 0          | 0.0198674 | 0         | 0.0145118  | 0.219316  |
| LOC651337 | 0.799015  | 1.22542    | 1.2756    | 0.4063    | 1.96559  | 0.554925   | 1.22073   | 0.973024  | 0.112437  | 0.252909  | 0.0359662  | 0.777832  | 0.0749757 | 0.792665   | 1.03392   |
| LOC652276 | 2.16116   | 3.42369    | 4.16387   | 2.26046   | 3.17652  | 2.6038     | 3.12313   | 3.11009   | 2.15128   | 1.80225   | 0.878858   | 2.03138   | 1.71418   | 2.77565    | 2.14272   |
| LOC653080 | 0.22337   | 0.205888   | 0.212907  | 0.0650534 | 0.211199 | 0.0868288  | 0.171872  | 0.146727  | 0.0118278 | 0.030473  | 0.109633   | 0.083388  | 0.0125319 | 0.0761366  | 0.0488154 |
| LOC653160 | 0.919835  | 0.67365    | 0.902997  | 0.328611  | 0.59058  | 0.543038   | 0.630143  | 0.58858   | 0.0448102 | 0.230898  | 0.263056   | 0.23694   | 0.118695  | 0.423056   | 0.810213  |
| LOC653653 | 0.264569  | 0.170849   | 0.206     | 0.152779  | 0.108309 | 0.0905504  | 0.164173  | 0.232017  | 0.197946  | 0.185407  | 0.18793    | 0.0480234 | 0.0729138 | 0.108224   | 0.0300161 |
| LOC653712 | 0.225527  | 0.263464   | 0.155072  | 0.209055  | 0.396628 | 0.0964759  | 0.185402  | 0.269438  | 0         | 0.166752  | 0.0264762  | 0.130533  | 1.27E-39  | 0.194921   | 0.838595  |
| LOC654780 | 0.55656   | 0.948415   | 0.891485  | 0.598914  | 0.781603 | 0.251294   | 0.390043  | 0.553097  | 0.443495  | 0.34547   | 0.296559   | 0.483884  | 0.134626  | 0.160437   | 0.0260575 |
| LOC654841 | 0.0647487 | 0.0490238  | 0.137738  | 0.133451  | 0.129313 | 0.149646   | 0.0528057 | 0.0986456 | 0.0112652 | 0.023219  | 0.0313257  | 0.0860404 | 0.0596794 | 0.0145031  | 0.119555  |
| LOC692247 | 0.369796  | 1.29176    | 1.32566   | 0.254057  | 1.53179  | 0.734711   | 0.492591  | 0.848996  | 0.300246  | 0.850908  | 0.417453   | 1.67579   | 0.23859   | 0.579814   | 1.32768   |
| LOC727751 | 0.779935  | 0.808404   | 0.725673  | 0.549052  | 1.45233  | 0.108128   | 0.378812  | 0.876031  | 0.734894  | 0.770153  | 0.080893   | 2.02068   | 1.35918   | 0.869494   | 0.808723  |
| LOC727896 | 0.25535   | 0.301123   | 0.373513  | 0.462216  | 0.364521 | 0.143794   | 0.32562   | 0.250098  | 0.0757973 | 0.311382  | 0.0931606  | 0.361083  | 0.0308337 | 0.373361   | 0.613984  |
| LOC728024 | 0.620873  | 0.629681   | 0.552152  | 0.319914  | 0.216997 | 0.303983   | 0.443058  | 0.455219  | 0.0756154 | 0.272741  | 0.175222   | 0.133275  | 0.13019   | 0.283934   | 0.378952  |
| LOC728095 | 0.958745  | 0.205306   | 0.50673   | 0.0548897 | 0.124105 | 0.13606    | 0.729776  | 0.402358  | 0.0648691 | 0.0334257 | 0.030064   | 0.0952789 | 0         | 0.278379   | 1.18565   |
| LOC728158 | 0.023369  | 0.00769845 | 0.0128883 | 0         | 0.0242   | 0.00685333 | 0.0294559 | 0.0144127 | 0         | 0.0293304 | 0.00879354 | 0.0390159 | 0.0100517 | 0.00814242 | 0         |
| LOC728196 | 0         | 0          | 0         | 0         | 0        | 0          | 0         | 0.0360203 | 0         | 0         | 0          | 0         | 0         | 0          | 0         |
| LOC728327 | 0         | 0          | 0         | 0         | 0        | 0          | 0         | 0         | 0         | 0         | 0          | 0         | 0         | 0          | 0         |
| LOC728392 | 2.26315   | 4.04053    | 4.38565   | 1.5495    | 8.28299  | 3.29973    | 1.87605   | 1.44648   | 1.30262   | 1.7899    | 1.90736    | 2.61757   | 0.950113  | 2.20361    | 2.56007   |
| LOC728485 | 0.0613874 | 0.0650702  | 0.111725  | 0.0253046 | 0.247925 | 0.0209082  | 0.126162  | 0.0654672 | 0         | 0         | 0.0138597  | 0.0790638 | 0         | 0.0449172  | 0         |
| LOC728554 | 5.05592   | 3.18354    | 2.14082   | 10.0288   | 1.30095  | 5.83488    | 3.70955   | 3.16771   | 2.87166   | 4.23627   | 4.13797    | 4.4223    | 12.3944   | 2.9744     | 2.00225   |
| LOC728613 | 0.644973  | 1.07258    | 1.43389   | 0.456026  | 0.701784 | 1.03866    | 0.884461  | 0.61922   | 0.192324  | 0.409264  | 0.470548   | 0.242689  | 0.146546  | 0.532077   | 0.716906  |
| LOC728660 | 0         | 0          | 0         | 0         | 0        | 0          | 0         | 0         | 0         | 0         | 0          | 0         | 0         | 0          | 0         |
| LOC728673 | 0.757784  | 0.806395   | 0.973988  | 0.449742  | 0.571899 | 0.719642   | 0.939717  | 0.854774  | 0.51112   | 0.100581  | 0.400492   | 0.596781  | 0.157119  | 0.815329   | 0.606229  |

|           |           |            |           |            |           |           |            |            |           |           |            |           |           |            |           |
|-----------|-----------|------------|-----------|------------|-----------|-----------|------------|------------|-----------|-----------|------------|-----------|-----------|------------|-----------|
| LOC728715 | 2.8685    | 1.68272    | 1.93585   | 0.932116   | 0.396045  | 2.06636   | 0.96214    | 1.03921    | 0.115511  | 1.12147   | 0.731593   | 0.128587  | 0.455064  | 0.582743   | 1.27157   |
| LOC728730 | 0.64465   | 0.549338   | 0.471914  | 0.198983   | 0.84267   | 0.696796  | 0.556405   | 0.400403   | 0.459122  | 0.334668  | 0.435946   | 0.15815   | 0.160174  | 0.091594   | 0.0792285 |
| LOC728739 | 0         | 0.0358543  | 0.0615613 | 0          | 0         | 0.0316817 | 0          | 0          | 0         | 0         | 0          | 0         | 0         | 0          | 0         |
| LOC728743 | 0.515206  | 0.632169   | 0.693309  | 0.467223   | 1.49388   | 1.42721   | 0.635305   | 0.549447   | 0.21752   | 0.344873  | 0.682415   | 0.339152  | 0.301383  | 0.348255   | 0.838554  |
| LOC728752 | 4.12121   | 5.04031    | 5.70202   | 2.20067    | 7.59732   | 3.17162   | 4.02998    | 3.24622    | 0.908382  | 2.45391   | 0.812321   | 3.60836   | 0.985459  | 4.01769    | 4.18311   |
| LOC728755 | 0         | 0          | 0         | 0          | 0         | 0         | 0          | 0          | 0         | 0.0430963 | 0          | 0         | 0         | 0          | 0         |
| LOC728975 | 0.359625  | 0.302224   | 0.465616  | 0.658101   | 0.978437  | 0.66423   | 0.512403   | 0.29735    | 0.171417  | 0.481909  | 0.699006   | 0.312054  | 0.968742  | 0.455817   | 0.459403  |
| LOC728989 | 0.219356  | 0.257334   | 0.198117  | 0.092485   | 0.205829  | 0.0371212 | 0.229291   | 0.154457   | 0         | 0.0856079 | 0.0535783  | 0.054882  | 0         | 0.126411   | 0.617776  |
| LOC729080 | 0.129774  | 0.0416848  | 0         | 0.0445787  | 0.0335973 | 0         | 0.0246953  | 0.153777   | 0         | 0         | 0          | 0         | 0         | 0          | 0         |
| LOC729159 | 0.279709  | 0.280876   | 0.277426  | 0.162803   | 1.04489   | 0.247628  | 0.27205    | 0.149818   | 0.0400934 | 0.0406871 | 0.0695545  | 0.185807  | 0.0424802 | 0.270706   | 0.371247  |
| LOC729218 | 2.30498   | 2.8781     | 3.05457   | 1.83375    | 2.32554   | 3.2902    | 3.98838    | 2.78502    | 0.965039  | 0.920191  | 1.11128    | 1.93984   | 0.693421  | 1.63729    | 2.83258   |
| LOC729224 | 0         | 0.00401392 | 0.0137837 | 0.00858516 | 0         | 0.0141872 | 0.0285356  | 0          | 0         | 0.010456  | 0          | 0         | 0         | 0.00435406 | 0.0358924 |
| LOC729291 | 0.338646  | 0.307758   | 0.285107  | 0.122622   | 0.106631  | 0.271332  | 0.176044   | 0.298738   | 0.0279476 | 0.178181  | 0.210864   | 0.108164  | 0.0821494 | 0.160578   | 0.278571  |
| LOC729296 | 0.0183821 | 0          | 0.015207  | 0          | 0         | 0         | 0.0209881  | 0          | 0         | 0         | 0.0622533  | 0.0263058 | 0.01186   | 0.0576437  | 0.131995  |
| LOC729305 | 0.0138747 | 0          | 0.0229563 | 0          | 0         | 0         | 0.00792086 | 0.00616535 | 0         | 0         | 0.00783142 | 0         | 0         | 0.00362577 | 0         |
| LOC729558 | 0.853987  | 1.24027    | 1.27166   | 0.653758   | 1.45919   | 0.311639  | 1.11435    | 1.17096    | 0.193154  | 0.581857  | 0.179037   | 0.890388  | 0.0708413 | 0.695001   | 0.595696  |
| LOC729603 | 2.18036   | 1.77768    | 1.8926    | 0.84109    | 1.18369   | 0.879006  | 2.08623    | 1.43972    | 0.352966  | 1.10262   | 0.392681   | 1.84449   | 0.276096  | 1.81693    | 1.39583   |
| LOC729609 | 0.073704  | 0.266338   | 0.213406  | 0.189885   | 0.0572439 | 0         | 0.294535   | 0.196506   | 0.0448816 | 0         | 0          | 0.0263686 | 0.0475534 | 0.0963023  | 0.211696  |
| LOC729652 | 0.0070904 | 0.0239138  | 0.0410597 | 0.0876823  | 0.176221  | 0.0603738 | 0          | 0.0567122  | 0.0086353 | 0.0177983 | 0          | 0.0355136 | 0.0137241 | 0.0518805  | 0.0916443 |
| LOC729681 | 0.025502  | 0          | 0         | 0          | 0         | 0.0108573 | 0          | 0          | 0         | 0         | 0.0431828  | 0         | 0         | 0          | 0.018312  |
| LOC729683 | 0.315408  | 0.232701   | 0.334314  | 0.436768   | 1.05643   | 0.84766   | 0.202569   | 0.341626   | 0.0600205 | 0.519578  | 0.767746   | 0.239788  | 0.337046  | 0.422418   | 0.821     |
| LOC729732 | 3.25871   | 5.86365    | 6.44293   | 0.971403   | 3.35644   | 0.779412  | 3.97525    | 5.32341    | 0.447661  | 0.709828  | 0.263128   | 1.65477   | 0.299985  | 1.15765    | 1.05906   |
| LOC729737 | 4.5348    | 3.41798    | 1.73044   | 6.35162    | 12.2376   | 6.2151    | 6.19128    | 5.63151    | 3.48305   | 1.9817    | 1.31035    | 9.08909   | 2.17125   | 2.48386    | 3.55686   |
| LOC729815 | 0         | 0          | 0         | 0          | 0         | 0.0201287 | 0          | 0          | 0         | 0         | 0          | 0         | 0         | 0          | 0         |
| LOC729867 | 0.733303  | 0.707808   | 0.813318  | 0.302532   | 0.980674  | 0.462055  | 0.821007   | 0.573495   | 0.196478  | 0.533815  | 0.0662246  | 0.661394  | 0.397424  | 0.605954   | 0.359844  |
| LOC729870 | 0.205899  | 0.257934   | 0.323635  | 0.254622   | 0.831564  | 0.210384  | 0.399651   | 0.274479   | 1.50457   | 0.542691  | 0.395138   | 0.427246  | 0.239121  | 0.161418   | 0.206988  |



|           |           |            |           |           |           |           |           |           |            |           |           |           |           |           |           |
|-----------|-----------|------------|-----------|-----------|-----------|-----------|-----------|-----------|------------|-----------|-----------|-----------|-----------|-----------|-----------|
| LOC729930 | 0         | 0.0100911  | 0         | 0.0215833 | 0         | 0         | 0         | 0         | 0          | 0         | 0         | 0.0299719 | 0         | 0         | 0         |
| LOC729966 | 0         | 0.016231   | 0.139342  | 0         | 0         | 0         | 0.0384629 | 0.0299383 | 0          | 0         | 0         | 0         | 0         | 0         | 0         |
| LOC729968 | 0         | 0          | 0         | 0.0337813 | 0         | 0.279122  | 0         | 0.0145663 | 0          | 0         | 0         | 0         | 0         | 0         | 0         |
| LOC729970 | 1.04533   | 0.386526   | 0.301663  | 0.275573  | 0.415379  | 2.98074   | 0.943714  | 0.302465  | 0.207247   | 0.488183  | 0.548858  | 0.191338  | 0.360747  | 0.533628  | 1.29175   |
| LOC730098 | 0.964876  | 1.03085    | 1.56172   | 0.446729  | 0.651646  | 1.23832   | 1.1815    | 1.15576   | 0.119214   | 0.210612  | 0.394647  | 0.190109  | 0.189467  | 0.204638  | 0.50206   |
| LOC730100 | 0         | 0.00283084 | 0         | 0         | 0         | 0         | 0.0067083 | 0         | 0          | 0         | 0         | 0         | 0         | 0         | 0         |
| LOC730101 | 0.256873  | 0.14734    | 0.161908  | 0.151266  | 0.370512  | 0.666588  | 0.146645  | 0.173933  | 0.0297945  | 0.161201  | 0.17951   | 0.0525142 | 0.153895  | 0.185397  | 0.298635  |
| LOC730183 | 1.18682   | 1.05957    | 1.32835   | 1.00722   | 4.60887   | 2.28863   | 1.43479   | 0.930661  | 1.23286    | 0.963849  | 1.26097   | 1.47362   | 1.12608   | 1.09462   | 0.551433  |
| LOC730202 | 0.136336  | 0.0656888  | 0.197377  | 0.280997  | 0.582387  | 0.290221  | 0.466992  | 0.0605821 | 0.0415105  | 0.470568  | 0.384766  | 0.146328  | 0.109954  | 0.106883  | 0.0978979 |
| LOC730234 | 0.471433  | 0.227143   | 0.319093  | 0.264995  | 0.199718  | 0.510896  | 0.342533  | 0.228529  | 0.156587   | 0.0537906 | 0         | 0.0306657 | 0         | 0.0671976 | 0.123098  |
| LOC730338 | 0         | 0.0400897  | 0.0393335 | 0.0122494 | 0         | 0.0101212 | 0.0271433 | 0.0211275 | 0          | 0         | 0         | 0.0170102 | 0         | 0         | 0         |
| LOC730668 | 0.111211  | 0.0696582  | 0.124202  | 0.0515729 | 0.198662  | 0.132573  | 0.11428   | 0.08401   | 0.0270885  | 0.0767698 | 0.0627718 | 0.103447  | 0.0143506 | 0.0581238 | 0.18367   |
| LOC731157 | 0.0487222 | 0.0939004  | 0.0806129 | 0.0502097 | 0         | 0.124459  | 0.166888  | 0         | 0.118676   | 0         | 0         | 0.034862  | 0         | 0.101857  | 0         |
| LOC79999  | 0.0322158 | 0.0314269  | 0.0199884 | 0.0601834 | 0.0882628 | 0.0279982 | 0.0666692 | 0.0438143 | 0.00853359 | 0.0126357 | 0         | 0.0222796 | 0.0112329 | 0.0488771 | 0.123197  |
| LOC90246  | 0.243877  | 0.0972443  | 0.0556557 | 0.0606639 | 0.0783775 | 0.0572849 | 0.134424  | 0.149474  | 0.0204837  | 0.063329  | 0.0379733 | 0.0421208 | 0.0922385 | 0.0527423 | 0.446855  |
| LOC90768  | 0.0305721 | 0.00841719 | 0         | 0.0675116 | 0.176388  | 0.200816  | 0.0448794 | 0.0232885 | 0.0531905  | 0.701643  | 0.650799  | 0.381252  | 1.35538   | 0.374349  | 0.57077   |
| LOC91370  | 0.413269  | 0.272489   | 0.378154  | 0.486726  | 0.137561  | 0.125676  | 0.0374333 | 0.301033  | 0          | 0.111149  | 0         | 0.0211218 | 0.0380913 | 0.0617121 | 0         |
| LOC91450  | 0.582655  | 0.875884   | 0.424172  | 0.264195  | 1.91874   | 0.873176  | 1.11763   | 0.579953  | 0.283843   | 0.380272  | 0.0789294 | 0.433581  | 0         | 0.401968  | 1.07106   |
| LOC91548  | 0         | 0          | 0         | 0         | 0         | 0         | 0.0185562 | 0         | 0          | 0         | 0         | 0         | 0         | 0         | 0         |
| LOC93429  | 0.665681  | 1.33754    | 1.66381   | 0.423279  | 1.58405   | 0.494459  | 0.857082  | 1.23355   | 0.569233   | 1.19103   | 0.447685  | 2.34103   | 0.0913818 | 0.318304  | 0.42715   |
| LOC93463  | 0.186721  | 0.164936   | 0.171632  | 0.0320703 | 0.0483404 | 0.0529969 | 0.130284  | 0.165942  | 0.0126336  | 0.0130197 | 0.0468411 | 0.0148449 | 0         | 0.0813239 | 0.0744876 |
| LOC93622  | 2.81657   | 2.48684    | 2.90397   | 1.51562   | 2.24143   | 3.91048   | 1.69506   | 1.86194   | 0.929382   | 1.20158   | 2.77232   | 0.645303  | 1.64715   | 0.98621   | 1.13577   |
| LOH12CR2  | 0.0755289 | 0.160335   | 0.166517  | 0.093307  | 0.149677  | 0.230822  | 0.0689796 | 0.107188  | 0.0932056  | 0.0756539 | 0.271788  | 0.0432921 | 0.0582514 | 0.0479374 | 0.172881  |
| LONP1     | 4.83565   | 5.58848    | 5.35267   | 9.82622   | 14.0706   | 15.2638   | 5.70006   | 3.78909   | 7.1584     | 6.74455   | 4.67462   | 7.29532   | 13.7805   | 8.40063   | 6.22078   |
| LONP2     | 9.55685   | 10.3074    | 11.3483   | 8.83289   | 5.04077   | 7.73644   | 9.07901   | 8.13849   | 5.85481    | 6.12227   | 7.54324   | 5.32446   | 6.81073   | 6.08968   | 5.70701   |
| LONRF1    | 9.36818   | 14.7147    | 20.1393   | 2.81218   | 3.08281   | 3.60213   | 9.98075   | 9.82848   | 9.20702    | 2.8924    | 3.29425   | 3.38663   | 2.15659   | 2.10179   | 2.19388   |

|           |           |            |            |           |           |            |            |           |            |           |            |            |            |            |           |
|-----------|-----------|------------|------------|-----------|-----------|------------|------------|-----------|------------|-----------|------------|------------|------------|------------|-----------|
| LONRF2    | 0.429191  | 0.181142   | 0.308267   | 0.0428579 | 0.100778  | 0.123233   | 0.38937    | 0.620932  | 0.00607798 | 0         | 0.00187792 | 0.00714181 | 0.00429321 | 0.00434717 | 0.0883945 |
| LONRF3    | 0.481073  | 0.295254   | 0.345861   | 0.182959  | 0.36474   | 0.580305   | 0.568891   | 0.300294  | 0.0278997  | 0.208453  | 0.303862   | 0.0819573  | 0.125632   | 0.221498   | 0.39479   |
| LOR       | 75.5492   | 158.514    | 159.848    | 17.077    | 159.182   | 72.9074    | 310.294    | 60.3808   | 2000.19    | 87.8261   | 261.788    | 204.413    | 4.31309    | 16.7015    | 3.6779    |
| LOX       | 5.8233    | 4.55491    | 6.59735    | 1.96738   | 2.08946   | 7.89306    | 4.95569    | 4.50709   | 3.26119    | 5.91419   | 13.7558    | 2.01165    | 2.45001    | 2.7597     | 9.01694   |
| LOXHD1    | 0.0676439 | 0.0935245  | 0.0535268  | 0.121233  | 0.338066  | 0.122709   | 0.191405   | 0.0627301 | 0.218493   | 0.0369131 | 0.0431609  | 0.0610274  | 0.0151804  | 0.052262   | 0.11404   |
| LOXL1     | 5.24369   | 1.67314    | 2.03621    | 3.61541   | 8.18052   | 14.2325    | 5.28158    | 2.40862   | 1.27768    | 6.00671   | 17.8237    | 1.28442    | 4.02448    | 4.36406    | 13.3508   |
| LOXL1-AS1 | 0.597377  | 0.386728   | 0.45465    | 0.436068  | 0.203516  | 0.873871   | 0.439346   | 0.681332  | 0.151098   | 0.16343   | 0.664621   | 0.135883   | 0.421438   | 0.299077   | 0.327407  |
| LOXL2     | 1.92483   | 1.09165    | 1.09044    | 6.3848    | 6.53825   | 9.68179    | 1.79534    | 1.66082   | 1.70149    | 13.3337   | 21.1816    | 4.02034    | 14.8769    | 13.7701    | 22.2959   |
| LOXL3     | 0.449975  | 0.289322   | 0.187671   | 0.837001  | 1.32149   | 1.37702    | 0.527177   | 0.306179  | 0.123042   | 1.26906   | 2.2539     | 0.411424   | 1.56061    | 2.07027    | 2.70782   |
| LOXL4     | 1.07583   | 0.695202   | 0.874298   | 0.736944  | 0.884721  | 1.19087    | 1.8642     | 0.849251  | 0.215805   | 0.460684  | 0.435784   | 0.335084   | 0.41239    | 0.443207   | 1.10879   |
| LPA       | 0         | 0.00343679 | 0.00885139 | 0         | 0         | 0.00303683 | 0.00814424 | 0         | 0          | 0         | 0          | 0          | 0          | 0          | 0         |
| LPAL2     | 0.371792  | 0.329783   | 0.340705   | 0.208057  | 0.189548  | 0.236429   | 0.354123   | 0.456038  | 0.0337957  | 0.193941  | 0.156628   | 0.123255   | 0.0487753  | 0.477084   | 0.45958   |
| LPAR1     | 5.01375   | 2.20255    | 3.02468    | 4.0673    | 1.30026   | 7.92156    | 4.47663    | 3.21852   | 0.274673   | 4.40928   | 9.94888    | 0.751011   | 6.77477    | 3.90117    | 9.54244   |
| LPAR2     | 1.66413   | 2.53594    | 2.48658    | 2.12705   | 3.86744   | 2.93283    | 2.16518    | 1.59359   | 3.03223    | 2.02389   | 3.20381    | 2.94452    | 3.92854    | 1.92828    | 1.11158   |
| LPAR3     | 1.82885   | 2.33251    | 2.4363     | 4.89187   | 2.98706   | 1.56869    | 2.27237    | 1.75679   | 3.79957    | 11.1732   | 5.23727    | 5.32097    | 8.16432    | 6.90171    | 1.7381    |
| LPAR4     | 0.0735478 | 0.0236243  | 0.0135209  | 0.134743  | 0.0126939 | 0.118292   | 0.055983   | 0.0581006 | 0          | 0.102567  | 0.239854   | 0.00584727 | 0.0421802  | 0.115318   | 0.17604   |
| LPAR5     | 2.26675   | 3.40631    | 2.95053    | 4.92509   | 3.96425   | 3.4688     | 3.14012    | 2.78931   | 2.70273    | 3.10365   | 3.14939    | 3.17578    | 5.37438    | 2.77121    | 1.42279   |
| LPAR6     | 5.38754   | 5.06592    | 3.859      | 8.25562   | 1.56979   | 4.58744    | 2.63629    | 5.24602   | 7.61286    | 6.42596   | 9.51204    | 3.97467    | 5.24638    | 3.82311    | 3.17178   |
| LPCAT1    | 2.10657   | 2.25488    | 2.3944     | 11.3896   | 5.51112   | 13.7336    | 2.55845    | 2.43223   | 1.8762     | 5.25129   | 6.13287    | 3.89143    | 8.71585    | 6.70959    | 7.22384   |
| LPCAT2    | 3.99033   | 2.8601     | 3.30819    | 2.92144   | 1.56127   | 2.86373    | 2.25595    | 3.28288   | 5.73338    | 4.08641   | 5.68771    | 3.15331    | 4.10707    | 2.51879    | 2.83138   |
| LPCAT3    | 5.94445   | 5.45155    | 5.30941    | 12.6776   | 5.79068   | 16.6433    | 6.43057    | 6.96631   | 7.97591    | 6.18369   | 9.34927    | 6.72616    | 10.6934    | 6.62439    | 4.58682   |
| LPCAT4    | 3.02024   | 2.93377    | 3.50199    | 3.81243   | 6.74518   | 4.93683    | 3.36532    | 1.8541    | 1.59541    | 4.12564   | 4.01195    | 2.48218    | 5.29029    | 4.26641    | 3.44905   |
| LPGAT1    | 2.85137   | 2.46538    | 2.31418    | 3.64521   | 1.11148   | 4.42132    | 2.18583    | 2.57727   | 1.59163    | 3.755     | 5.48367    | 1.63064    | 4.67588    | 3.60847    | 4.51374   |
| LPIN1     | 2.35141   | 1.54744    | 1.83362    | 3.68871   | 1.51447   | 4.04749    | 1.76031    | 1.66699   | 0.747783   | 0.986579  | 1.30628    | 0.69038    | 1.27116    | 1.24306    | 2.03488   |
| LPIN2     | 1.9097    | 1.42673    | 1.76118    | 5.55559   | 2.07188   | 4.37841    | 1.8241     | 1.29765   | 2.94571    | 3.11966   | 4.66814    | 1.79977    | 2.73753    | 2.28358    | 3.77237   |
| LPIN3     | 4.09943   | 8.15847    | 6.88111    | 6.97465   | 23.4044   | 9.57312    | 6.68309    | 4.87431   | 15.7016    | 6.51147   | 4.1573     | 14.3187    | 3.88947    | 9.03725    | 3.72478   |

|         |            |            |            |            |            |           |            |            |            |            |           |           |            |           |          |
|---------|------------|------------|------------|------------|------------|-----------|------------|------------|------------|------------|-----------|-----------|------------|-----------|----------|
| LPL     | 1.98263    | 0.21724    | 0.23504    | 0.986572   | 0.719559   | 5.80083   | 0.888557   | 0.806896   | 0.218143   | 1.17831    | 2.60071   | 0.251906  | 0.729254   | 0.842526  | 1.75628  |
| LPO     | 0          | 0.00374309 | 0.00642684 | 0.0080059  | 0          | 0         | 0          | 0          | 0          | 0          | 0         | 0         | 0          | 0         | 0        |
| LPP     | 13.3053    | 5.78238    | 6.33834    | 8.94458    | 2.86122    | 12.0466   | 8.72887    | 9.3715     | 1.83485    | 8.23676    | 10.7508   | 4.22689   | 7.78658    | 7.92808   | 13.9784  |
| LPP-AS1 | 0.374029   | 0.315373   | 0.502813   | 0.240905   | 0          | 0.199051  | 0.106764   | 0.290855   | 0.0569407  | 0.645487   | 0.052779  | 0.234174  | 0          | 0.390968  | 1.00716  |
| LPP-AS2 | 0.730495   | 0.459782   | 0.422268   | 0.817926   | 0.645316   | 1.5825    | 0.537921   | 0.532275   | 0.1662     | 0.522249   | 0.887853  | 0.243079  | 0.463635   | 0.385984  | 0.680175 |
| LPXN    | 1.7387     | 1.15513    | 1.51878    | 1.80291    | 0.939409   | 1.82991   | 1.63994    | 1.61239    | 0.302506   | 2.38556    | 5.41287   | 0.548634  | 2.45262    | 1.24173   | 2.91574  |
| LRAT    | 0.00928135 | 0.0044719  | 0.0191955  | 0.00478235 | 0.00720857 | 0.0592721 | 0.0423886  | 0.0123727  | 0.0508664  | 0.86203    | 0.796289  | 0.438309  | 0.90423    | 0.943491  | 0.393211 |
| LRBA    | 12.2732    | 13.0665    | 13.95      | 10.2222    | 5.86173    | 8.99844   | 10.0985    | 11.7096    | 12.3403    | 9.07123    | 6.34905   | 9.99262   | 8.34312    | 7.79316   | 5.3641   |
| LRCH1   | 3.56221    | 3.9142     | 4.93915    | 2.79751    | 2.94907    | 3.28678   | 4.01166    | 3.41523    | 6.28442    | 2.55535    | 2.89963   | 2.16982   | 2.39256    | 2.24641   | 2.84166  |
| LRCH2   | 0.422919   | 0.101884   | 0.198259   | 0.179175   | 0.0656939  | 0.36011   | 0.139497   | 0.225513   | 0.0515067  | 0.224118   | 0.249321  | 0.0504349 | 0.230419   | 0.11543   | 0.337425 |
| LRCH3   | 2.61137    | 2.40389    | 2.65442    | 2.35788    | 1.63928    | 3.03993   | 1.89969    | 2.20503    | 0.817649   | 1.83745    | 2.70204   | 1.24192   | 2.02094    | 2.40575   | 2.93764  |
| LRCH4   | 3.89771    | 4.60016    | 4.5852     | 4.64317    | 10.6203    | 9.21976   | 5.70775    | 3.83895    | 3.92823    | 4.09313    | 3.68955   | 4.58505   | 4.81265    | 3.82003   | 5.8235   |
| LRCOL1  | 0.0529589  | 0.0255164  | 0.0219057  | 0          | 0.0411318  | 0.0676407 | 0.0302334  | 0          | 0          | 0          | 0         | 0.0378935 | 0          | 0         | 0        |
| LRFN1   | 0.421186   | 0.370265   | 0.476805   | 0.533037   | 0.918241   | 0.918607  | 0.776184   | 0.499086   | 0.125989   | 0.30605    | 0.417076  | 0.195626  | 0.333724   | 0.351436  | 0.392639 |
| LRFN2   | 0.00718505 | 0.0173093  | 0.0178319  | 0.0222132  | 0.100448   | 0.0367079 | 0.00820366 | 0.00638548 | 0.0612541  | 0.00901798 | 0.0324441 | 0.0051411 | 0.00463576 | 0         | 0        |
| LRFN3   | 1.24227    | 1.7247     | 1.89552    | 3.24316    | 4.95998    | 5.24188   | 2.50056    | 1.07132    | 1.84916    | 2.02116    | 3.37607   | 2.0938    | 4.41126    | 2.16422   | 2.90735  |
| LRFN4   | 2.0286     | 1.75935    | 2.43339    | 2.18636    | 4.73984    | 3.69936   | 3.04001    | 1.32961    | 0.638243   | 2.2915     | 2.80531   | 2.15915   | 3.84476    | 3.71968   | 4.58849  |
| LRFN5   | 0.719715   | 0.598966   | 0.777112   | 0.207095   | 0.326679   | 0.298455  | 0.864435   | 0.444413   | 0.00569177 | 0.111448   | 0.168825  | 0.043472  | 0.0572908  | 0.0244256 | 0.335585 |
| LRG1    | 0.702093   | 0.870755   | 1.29071    | 4.34116    | 0.504904   | 3.55372   | 0.178139   | 1.72167    | 0.0316693  | 1.90926    | 4.28578   | 0.0372123 | 1.12408    | 0.135905  | 1.40041  |
| LRGUK   | 0.49858    | 0.333445   | 0.375524   | 0.276072   | 0.0924737  | 0.500571  | 0.212411   | 0.416643   | 0.135944   | 0.0840586  | 0.226814  | 0.149088  | 0.0432109  | 0.124456  | 0.13893  |
| LRIF1   | 1.00622    | 1.07996    | 1.41224    | 1.29438    | 0.398836   | 2.59989   | 0.816093   | 1.23961    | 1.1494     | 1.76807    | 2.31096   | 1.00797   | 2.27895    | 1.61033   | 1.52479  |
| LRIG1   | 6.93591    | 6.56836    | 8.44719    | 4.10468    | 5.63923    | 10.0621   | 6.44461    | 6.33444    | 1.23704    | 1.85674    | 3.15892   | 1.2623    | 3.74856    | 3.22629   | 5.0194   |
| LRIG2   | 5.31774    | 4.36385    | 4.6464     | 2.87343    | 2.66062    | 3.47655   | 4.4684     | 4.60203    | 1.82527    | 2.23101    | 2.71485   | 2.33      | 1.66731    | 2.54244   | 2.93178  |
| LRIG3   | 12.9273    | 13.6252    | 15.6222    | 8.80745    | 8.02008    | 8.85363   | 12.1237    | 11.4983    | 4.4292     | 4.88267    | 9.00105   | 6.60418   | 5.0021     | 4.76336   | 4.92214  |
| LRIT1   | 0          | 0          | 0          | 0          | 0          | 0         | 0          | 0.0178771  | 0          | 0          | 0         | 0         | 0          | 0         | 0        |
| LRIT2   | 0.276639   | 0.943547   | 1.12621    | 0.157547   | 0.180933   | 0.0495904 | 0.315858   | 0.368781   | 0.0886619  | 0.0365485  | 0         | 0.0937623 | 0.004697   | 0.0608774 | 0        |

|          |            |            |            |            |           |            |            |            |           |           |           |            |            |            |           |
|----------|------------|------------|------------|------------|-----------|------------|------------|------------|-----------|-----------|-----------|------------|------------|------------|-----------|
| LRIT3    | 0.122689   | 0.155562   | 0.0908132  | 0.00665446 | 0.0601827 | 0.03299    | 0.117964   | 0.172162   | 0.0235929 | 0.0162092 | 0         | 0.0924078  | 0.0166649  | 0.0674976  | 0         |
| LRMDA    | 1.04536    | 0.440711   | 0.612562   | 0.523673   | 0.699137  | 1.23626    | 0.679663   | 0.45161    | 0.159141  | 0.89291   | 1.58983   | 0.4571     | 0.402802   | 0.386997   | 1.50126   |
| LRMP     | 0.774393   | 0.322588   | 0.413742   | 0.590213   | 0.187953  | 0.700597   | 0.211834   | 0.537669   | 0.216132  | 0.708708  | 1.12006   | 0.121209   | 0.484021   | 0.164422   | 0.845679  |
| LRP1     | 27.2234    | 24.5975    | 28.5832    | 24.6342    | 61.6263   | 86.1762    | 52.688     | 22.2997    | 19.9483   | 23.5369   | 29.9826   | 26.3005    | 34.785     | 22.9934    | 81.657    |
| LRP1-AS  | 0.23977    | 0.3708     | 0.285542   | 0.385163   | 0.61556   | 0.748013   | 0.48575    | 0.378898   | 0.0976847 | 0.269439  | 0.180754  | 0.39971    | 0.0341789  | 0.292396   | 1.10681   |
| LRP10    | 12.7748    | 16.3702    | 17.9188    | 30.1433    | 38.1836   | 36.9694    | 23.2471    | 12.0738    | 68.208    | 28.1934   | 34.0887   | 27.4284    | 49.3104    | 19.018     | 15.6492   |
| LRP11    | 4.04685    | 5.50817    | 5.24274    | 11.8876    | 9.08308   | 6.14383    | 4.07779    | 4.21244    | 13.6801   | 13.597    | 9.76281   | 8.5248     | 16.7782    | 7.69574    | 5.8701    |
| LRP12    | 1.57857    | 1.70123    | 1.65199    | 1.85669    | 1.23903   | 2.11831    | 1.54124    | 1.46735    | 2.5543    | 3.60549   | 5.31453   | 1.58052    | 3.49092    | 2.77536    | 3.46863   |
| LRP1B    | 0.467593   | 0.149746   | 0.209627   | 0.0894486  | 0.147876  | 0.0834445  | 0.148656   | 0.20529    | 0.0255753 | 0.0140569 | 0.0300276 | 0.0330568  | 0.0289043  | 0.0358528  | 0.066348  |
| LRP2     | 0          | 0.00141731 | 0.00608375 | 0.0015157  | 0         | 0.00751421 | 0.00335863 | 0.00130713 | 0         | 0         | 0         | 0          | 0.00094895 | 0.00076870 | 0         |
|          |            |            |            |            |           |            |            |            |           |           |           |            | 3          | 5          |           |
| LRP2BP   | 0.695458   | 0.566397   | 0.731228   | 0.198824   | 0.139392  | 0.202485   | 0.548152   | 0.761616   | 0.0874312 | 0.467409  | 0.141822  | 0.391674   | 0.182377   | 0.485417   | 0.567041  |
| LRP3     | 3.1961     | 2.36697    | 2.46438    | 3.2956     | 6.78543   | 8.28074    | 3.67235    | 1.90758    | 1.05182   | 2.58422   | 4.93123   | 1.27162    | 2.98393    | 2.81292    | 3.64899   |
| LRP4     | 7.88202    | 12.7277    | 16.7149    | 2.25592    | 5.14172   | 2.31067    | 13.5023    | 13.2645    | 4.32442   | 1.7753    | 1.43587   | 2.22318    | 1.84725    | 1.55186    | 0.932793  |
| LRP4-AS1 | 2.49557    | 3.50786    | 5.15256    | 0.35329    | 0.404116  | 0.208918   | 4.46331    | 5.23826    | 0.526368  | 0.267425  | 0.234849  | 0.381628   | 0.0408833  | 0.0979829  | 0.11019   |
| LRP5     | 5.23132    | 4.57229    | 4.76042    | 7.01271    | 10.799    | 12.605     | 6.85163    | 3.33509    | 2.39049   | 2.09455   | 2.00102   | 3.22653    | 4.56067    | 4.06502    | 3.51423   |
| LRP5L    | 0.833566   | 0.850664   | 0.924235   | 0.703915   | 0.836236  | 0.690055   | 0.991395   | 0.766527   | 0.232648  | 0.305145  | 0.19604   | 0.994065   | 0.149392   | 0.810809   | 0.515421  |
| LRP6     | 5.48566    | 3.84407    | 4.43179    | 2.67518    | 2.6526    | 4.11592    | 3.96766    | 3.9124     | 1.91203   | 2.054     | 2.58847   | 1.55527    | 2.25095    | 2.71829    | 4.05772   |
| LRP8     | 0.720646   | 0.329088   | 0.312293   | 1.97417    | 0.457569  | 1.58403    | 0.622567   | 0.554209   | 0.239955  | 0.750123  | 0.793122  | 0.676323   | 1.94118    | 1.84998    | 0.700485  |
| LRPAP1   | 2.42612    | 2.11801    | 2.41489    | 3.64996    | 4.88702   | 5.3045     | 2.55775    | 1.8698     | 2.09622   | 2.34483   | 2.50197   | 2.16758    | 3.57844    | 2.42859    | 2.38799   |
| LRPPRC   | 10.388     | 7.64156    | 8.36805    | 11.9915    | 3.20984   | 11.0811    | 5.85248    | 7.94552    | 6.02974   | 8.50913   | 10.3966   | 5.80169    | 11.7825    | 9.22107    | 6.0909    |
| LRR1     | 0.803811   | 0.70465    | 0.720383   | 1.80626    | 0.745689  | 1.80615    | 0.917765   | 0.763968   | 1.00614   | 1.68144   | 3.08769   | 0.639054   | 2.13208    | 1.62791    | 1.09024   |
| LRRC1    | 6.0332     | 5.04235    | 6.05072    | 5.05491    | 3.18794   | 4.61666    | 2.83352    | 4.93493    | 5.11419   | 4.16522   | 3.8449    | 3.36918    | 6.43757    | 3.16463    | 1.33782   |
| LRRC10   | 0.00890803 | 0.0600883  | 0.0515854  | 0          | 0         | 0          | 0          | 0.0158334  | 0         | 0         | 0         | 0.00637393 | 0          | 0.00465572 | 0.0383792 |
| LRRC10B  | 0.177301   | 0.0301505  | 0.025884   | 0.107479   | 0.145805  | 1.13671    | 0.0952645  | 0.0278066  | 0.012702  | 0.157081  | 0.388529  | 0.00746258 | 0.0605615  | 0.0490582  | 0.539211  |
| LRRC14   | 2.12917    | 3.06113    | 2.86256    | 1.96914    | 6.59081   | 3.73418    | 2.75149    | 1.94925    | 2.31126   | 1.62503   | 1.91295   | 2.17722    | 2.0389     | 2.16184    | 2.11015   |

|            |            |           |           |            |           |            |           |           |           |            |           |            |            |            |           |
|------------|------------|-----------|-----------|------------|-----------|------------|-----------|-----------|-----------|------------|-----------|------------|------------|------------|-----------|
| LRRC14B    | 0.036246   | 0.0392937 | 0.0599704 | 0          | 0.0281513 | 0.100305   | 0.0620767 | 0.0322124 | 0.0331076 | 0          | 0         | 0.0129675  | 0.0116929  | 0.0284156  | 0.0780807 |
| LRRC15     | 2.81301    | 1.37977   | 1.73084   | 3.48509    | 7.51059   | 2.97913    | 2.90486   | 2.84624   | 0.635838  | 3.95119    | 8.71732   | 1.72007    | 8.48161    | 4.16835    | 32.7151   |
| LRRC17     | 0.82581    | 0.442097  | 0.649431  | 0.178609   | 0.110856  | 0.798657   | 0.512183  | 0.299001  | 0.124166  | 3.04545    | 4.99492   | 0.153193   | 0.105246   | 0.229123   | 1.74234   |
| LRRC18     | 0.185831   | 0.185959  | 0.141907  | 0.0883864  | 0.133227  | 0.085202   | 0.0979271 | 0.0762234 | 0         | 0.0179413  | 0.0645476 | 0.0204564  | 0          | 0.022413   | 0.287405  |
| LRRC19     | 0.378448   | 0.145255  | 0.20695   | 0.145424   | 0.0199275 | 0.0546175  | 0.109856  | 0.313531  | 0.015624  | 0.0402535  | 0.0506872 | 0.0642552  | 0.0331082  | 0.0737535  | 0.202661  |
| LRRC2      | 0.594914   | 0.57762   | 0.95821   | 0.0603787  | 0.161019  | 0.579476   | 0.663816  | 0.484651  | 0.0109779 | 0          | 0.0254388 | 0.0128993  | 0.00872353 | 0.00942206 | 0.0647251 |
| LRRC2-AS1  | 0.0365609  | 0         | 0.0604915 | 0          | 0         | 0          | 0.0834881 | 0.0649846 | 0         | 0          | 0         | 0          | 0          | 0          | 0         |
| LRRC20     | 1.03426    | 0.790543  | 0.533435  | 2.38825    | 2.64785   | 1.14159    | 1.02051   | 0.487949  | 8.67735   | 3.79814    | 3.72607   | 3.00127    | 6.1416     | 1.52154    | 0.733492  |
| LRRC23     | 0.745721   | 0.619482  | 0.776459  | 0.622739   | 1.45794   | 1.53269    | 0.86612   | 0.51419   | 0.657665  | 0.484115   | 0.986968  | 0.423187   | 0.572385   | 0.611498   | 0.627798  |
| LRRC24     | 0.183758   | 0.127366  | 0.275873  | 0.0719     | 1.09035   | 0.13662    | 0.270858  | 0.127742  | 0.149584  | 0.114642   | 0.0459489 | 0.0424545  | 1.71E-13   | 0.0599631  | 1.18E-16  |
| LRRC25     | 0.780103   | 0.14849   | 0.215119  | 3.19582    | 0.822806  | 3.58366    | 0.692764  | 0.385161  | 0.0821055 | 1.7769     | 4.79459   | 0.0482382  | 2.13134    | 0.749996   | 2.32364   |
| LRRC26     | 2.22716    | 1.20371   | 1.05741   | 0.0997891  | 6.25726   | 1.08837    | 1.26039   | 1.2048    | 0.259449  | 0.024307   | 0.0655873 | 0.0138573  | 0          | 0.0101218  | 0         |
| LRRC27     | 0.208914   | 0.290553  | 0.254151  | 0.179798   | 0.362648  | 0.477065   | 0.176201  | 0.194364  | 0.101753  | 0.13313    | 0.282962  | 0.0932122  | 0.101469   | 0.161883   | 0.39878   |
| LRRC28     | 1.18249    | 1.30935   | 1.36103   | 1.23751    | 0.741572  | 1.61663    | 1.6059    | 1.0509    | 1.57432   | 1.37814    | 1.58777   | 1.13252    | 1.08754    | 0.998047   | 0.833282  |
| LRRC29     | 0.542536   | 0.716989  | 0.57706   | 0.239614   | 1.37247   | 0.989921   | 1.11501   | 0.551041  | 0.0566356 | 0.291831   | 0.857438  | 0.332742   | 0.430051   | 0.332162   | 0.645582  |
| LRRC3      | 0.212937   | 0.588978  | 0.466488  | 0.910259   | 1.12092   | 1.67546    | 0.648331  | 0.413525  | 0.321765  | 0.544413   | 0.485209  | 0.423227   | 1.11689    | 0.82437    | 0.724868  |
| LRRC3-DT   | 0          | 0         | 0         | 0          | 0         | 0.0251352  | 0         | 0         | 0         | 0          | 0         | 0.0211218  | 0          | 0          | 0         |
| LRRC30     | 0          | 0         | 0         | 0          | 0         | 0          | 0         | 0         | 0         | 0          | 0         | 0          | 0          | 0          | 0         |
| LRRC31     | 0.00908997 | 0         | 0         | 0.00936747 | 0         | 0          | 0         | 0         | 0         | 0          | 0.0307843 | 0.00650411 | 0          | 0          | 0         |
| LRRC32     | 5.91331    | 1.67786   | 2.16604   | 5.08539    | 8.66793   | 27.094     | 11.322    | 3.07635   | 0.767086  | 4.27275    | 8.57338   | 1.41906    | 6.4551     | 5.89266    | 12.2373   |
| LRRC34     | 0.326094   | 0.189464  | 0.214227  | 0.20756    | 0.0297962 | 0.195998   | 0.0876054 | 0.221615  | 0.116807  | 0.144452   | 0.433081  | 0.0205878  | 0.136137   | 0.165418   | 0.275477  |
| LRRC36     | 0.273236   | 0.122872  | 0.120555  | 0          | 0         | 0.0387761  | 0.103991  | 0.080943  | 0.0221847 | 0.0457252  | 0.0308449 | 0          | 0          | 0.00476016 | 0.0392401 |
| LRRC37A    | 0.694386   | 0.719957  | 0.898176  | 0.331551   | 0.232187  | 0.256402   | 0.816418  | 0.719275  | 0.238589  | 0.331423   | 0.257843  | 0.582495   | 0.150057   | 0.344531   | 0.467104  |
| LRRC37A11P | 0.0517163  | 0.1059    | 0.203221  | 0          | 0.0200833 | 0.00550447 | 0.059048  | 0.0919223 | 0.0236192 | 0.00811366 | 0         | 0.00462555 | 0          | 0.00337865 | 0.0278517 |
| LRRC37A2   | 1.88891    | 2.23014   | 2.26685   | 0.671146   | 1.5743    | 0.658833   | 2.18576   | 1.91638   | 1.51399   | 1.34479    | 1.27666   | 1.89281    | 0.398766   | 0.925816   | 0.942647  |
| LRRC37A3   | 2.29666    | 2.2167    | 2.47465   | 0.95536    | 1.72449   | 1.48063    | 1.95366   | 2.09379   | 0.336274  | 0.946434   | 0.66127   | 1.65633    | 0.380597   | 0.808353   | 1.56328   |

|           |           |           |            |           |           |            |            |           |           |           |           |            |            |            |           |
|-----------|-----------|-----------|------------|-----------|-----------|------------|------------|-----------|-----------|-----------|-----------|------------|------------|------------|-----------|
| LRRC37A4P | 2.53507   | 3.83203   | 4.17649    | 1.47782   | 1.79037   | 2.12917    | 2.00374    | 2.72673   | 0.441406  | 1.14681   | 0.519591  | 3.5454     | 0.761723   | 1.03803    | 1.06564   |
| LRRC37A5P | 0         | 0         | 0          | 0         | 0         | 0          | 0          | 0         | 0         | 0         | 0         | 0          | 0          | 0          | 0         |
| LRRC37A6P | 0.121919  | 0.0915689 | 0.0949269  | 0.0628204 | 0.0557006 | 0.0702259  | 0.0941667  | 0.165714  | 0.0305701 | 0.0135018 | 0         | 0.0230919  | 0.0254493  | 0.0918319  | 0.0102995 |
| LRRC37A8P | 0.0276339 | 0.019865  | 0.0225345  | 0.0175262 | 0.0376149 | 0.00579248 | 0.00786387 | 0.0151909 | 0.0083448 | 0.0128742 | 0.0115702 | 0.024637   | 0.00438912 | 0.0178418  | 0.0390786 |
| LRRC37B   | 2.20459   | 2.29159   | 2.42288    | 1.51796   | 1.83084   | 1.64957    | 2.16694    | 1.863     | 3.31245   | 1.37494   | 1.69194   | 1.53904    | 1.03169    | 1.23666    | 1.30719   |
| LRRC38    | 0.024259  | 0.0409092 | 0.0702405  | 0.0374993 | 0         | 0.0103281  | 0.0415471  | 0.0431187 | 0         | 0.060895  | 0.0958487 | 0          | 0.0313035  | 0.183843   | 0.0174195 |
| LRRC39    | 0.474823  | 0.387754  | 0.433083   | 0.155236  | 0         | 0.117997   | 0.22375    | 0.419105  | 0.11433   | 0.242874  | 0.0994632 | 0.111474   | 0.0257463  | 0.162951   | 0.167558  |
| LRRC3B    | 0.048671  | 0.0117252 | 0          | 0         | 0.0126005 | 0.00690712 | 0.00926183 | 0         | 0         | 0         | 0         | 0          | 0          | 0          | 0         |
| LRRC3C    | 0.0527177 | 0.0254002 | 0.0436118  | 0         | 0         | 0.0224442  | 0.120383   | 0         | 0         | 0         | 0         | 0          | 0          | 0.0137763  | 0         |
| LRRC4     | 0.948946  | 0.98061   | 0.748882   | 1.07442   | 1.32858   | 1.5735     | 1.35435    | 1.07083   | 0.197687  | 2.81301   | 1.26858   | 3.04655    | 1.11978    | 3.75886    | 2.25042   |
| LRRC40    | 2.27108   | 1.62054   | 1.72278    | 2.4457    | 0.42724   | 1.92042    | 1.28307    | 2.32564   | 0.899643  | 3.32387   | 4.17833   | 1.2033     | 2.7227     | 1.98786    | 1.94114   |
| LRRC41    | 7.96818   | 9.64148   | 10.8912    | 14.7321   | 11.5237   | 17.5937    | 9.88659    | 7.01866   | 13.2897   | 10.7497   | 17.228    | 9.54922    | 17.4846    | 11.7427    | 9.04191   |
| LRRC42    | 3.37826   | 3.58594   | 3.89764    | 5.85568   | 2.7746    | 6.77807    | 3.42861    | 2.5767    | 5.45427   | 5.68592   | 7.52499   | 3.11186    | 8.41791    | 5.03306    | 3.43889   |
| LRRC43    | 0.0997068 | 0.026689  | 0.0916494  | 0.045667  | 0.0688351 | 0.113199   | 0.0505964  | 0.0689197 | 0.0539696 | 0         | 0.112557  | 0.015854   | 0.0142956  | 0          | 0         |
| LRRC45    | 1.0282    | 1.20548   | 1.21919    | 2.32227   | 4.75152   | 3.26853    | 1.00765    | 0.791941  | 1.02266   | 1.44105   | 0.851187  | 1.3304     | 1.95147    | 1.49123    | 0.984416  |
| LRRC46    | 0.21674   | 0.266874  | 0.239071   | 0.0868611 | 0.448897  | 0.123034   | 0.109985   | 0.246127  | 0.0879885 | 0.0151129 | 0.149522  | 0.0775418  | 0.0388444  | 0.100692   | 0.172926  |
| LRRC47    | 7.73474   | 7.42396   | 8.00383    | 9.97035   | 14.7028   | 11.2       | 6.49623    | 5.072     | 7.50411   | 4.7278    | 5.28827   | 6.47871    | 8.88689    | 6.3721     | 4.56874   |
| LRRC49    | 0.765876  | 0.357107  | 0.558274   | 0.381899  | 0.172694  | 0.583764   | 0.465434   | 0.417171  | 0.30841   | 0.434114  | 0.620544  | 0.154679   | 0.21519    | 0.322807   | 0.549948  |
| LRRC4B    | 0.482147  | 0.310932  | 0.337502   | 0.16817   | 1.302     | 0.688447   | 0.592845   | 0.296648  | 0.126474  | 0.0837892 | 0.133978  | 0.159226   | 0.0717874  | 0.201593   | 0.490023  |
| LRRC4C    | 0.0992465 | 0.0418412 | 0.0359204  | 0.0127846 | 0.154164  | 0.158451   | 0.127481   | 0.0275631 | 0         | 0         | 0         | 0.00443835 | 0.0400208  | 0.00648382 | 0.258337  |
| LRRC52    | 0         | 0         | 0          | 0         | 0         | 0          | 0.0235508  | 0         | 0         | 0         | 0         | 0          | 0          | 0          | 0         |
| LRRC53    | 0.0191979 | 0.030062  | 0.0158818  | 0         | 0         | 0.00408669 | 0.00547988 | 0         | 0         | 0         | 0         | 0.00343415 | 0          | 0.00501683 | 0         |
| LRRC55    | 0.154087  | 0.0412453 | 0.00708177 | 0.295528  | 0.0797836 | 0.0656016  | 0.039096   | 0.0950972 | 0.0573408 | 0.0376047 | 0.0966363 | 0.0490016  | 0.0303772  | 0.0671106  | 0.233583  |
| LRRC56    | 0.225257  | 1.10542   | 1.26993    | 0.601828  | 2.72146   | 1.59126    | 0.742996   | 0.467109  | 0.721406  | 0.345547  | 0.169525  | 0.865582   | 0.441386   | 0.379349   | 0.491237  |
| LRRC57    | 2.69284   | 3.43986   | 3.44065    | 4.44402   | 3.21533   | 3.83512    | 2.69164    | 2.27394   | 4.52838   | 3.69251   | 4.28395   | 2.20107    | 5.23694    | 3.04518    | 3.05527   |
| LRRC58    | 5.38274   | 4.02616   | 4.37421    | 4.17839   | 2.04245   | 5.2039     | 3.49992    | 5.52881   | 3.7135    | 4.74375   | 6.5451    | 2.71842    | 4.99476    | 3.73163    | 3.65886   |

|             |            |            |            |            |            |            |            |            |           |            |            |            |            |            |            |
|-------------|------------|------------|------------|------------|------------|------------|------------|------------|-----------|------------|------------|------------|------------|------------|------------|
| LRRC59      | 8.61165    | 5.18214    | 5.38082    | 23.7232    | 9.40845    | 23.5566    | 6.33861    | 5.33241    | 12.8195   | 20.5834    | 22.0665    | 11.2937    | 40.2961    | 22.2939    | 15.3855    |
| LRRC6       | 0.281995   | 0.302193   | 0.285575   | 0.420875   | 0.219018   | 0.306354   | 0.13323    | 0.285181   | 0.0532922 | 0.176966   | 0.23052    | 0.111324   | 0.0815601  | 0.23378    | 0.293262   |
| LRRC61      | 0.667817   | 0.865699   | 0.743198   | 1.68774    | 3.93947    | 1.05604    | 0.816956   | 0.73481    | 1.6557    | 1.27723    | 1.90266    | 1.53023    | 1.11309    | 0.793629   | 0.399613   |
| LRRC63      | 0.0328426  | 0.0105494  | 0          | 0.0112817  | 0.0510158  | 0.0466083  | 0          | 0          | 0         | 0.0412208  | 0.0370752  | 0          | 0.0282531  | 0          | 0.031444   |
| LRRC66      | 0.109326   | 0.0921815  | 0.101748   | 0.0704151  | 0.0106139  | 0.0639994  | 0.0468095  | 0.0667977  | 0.0166434 | 0.051456   | 0.092562   | 0.00488913 | 0.0308599  | 0.0714235  | 0.186445   |
| LRRC69      | 0.265349   | 0.227905   | 0.257692   | 0.0832239  | 0.0716833  | 0.144696   | 0.10538    | 0.225567   | 0.0281013 | 0.0724001  | 0.0781424  | 0.148589   | 0.00744356 | 0.20501    | 0          |
| LRRC7       | 0.0291327  | 0.0154403  | 0.0265107  | 0.00300221 | 0.00905064 | 0.00496123 | 0.0665256  | 0.00517815 | 0         | 0.00365646 | 0.00328872 | 0          | 0          | 0          | 0.00836766 |
| LRRC70      | 0.905553   | 0.525554   | 0.638466   | 0.588159   | 0.066941   | 0.266965   | 0.505216   | 0.914523   | 0.10026   | 0.82594    | 1.44135    | 0.315138   | 0.642379   | 0.632513   | 0.901475   |
| LRRC71      | 0.0234836  | 0.0396016  | 0.077709   | 0.0121002  | 0.018239   | 0.0499899  | 0.0268128  | 0.0313054  | 0         | 0          | 0.02651    | 0.0168031  | 0          | 0.0368206  | 0.286666   |
| LRRC72      | 0          | 0          | 0          | 0          | 0          | 0          | 0          | 0          | 0         | 0          | 0          | 0          | 0          | 0          | 0          |
| LRRC73      | 0.18182    | 0.150177   | 0.118182   | 0.0535344  | 0.302602   | 0.121642   | 0.118626   | 0.0230837  | 0.0474506 | 0.114101   | 0.190591   | 0.0743411  | 0.0502753  | 0.156116   | 0.0932557  |
| LRRC74A     | 0.0266933  | 0.00643061 | 0.0110413  | 0.0275082  | 0.0207319  | 0.0113645  | 0          | 0          | 0         | 0          | 0          | 0.0190997  | 0          | 0          | 0.0383349  |
| LRRC74B     | 0.0046739  | 0.00868228 | 0.0149037  | 0.00581461 | 0.0286934  | 0.0300709  | 0.0257133  | 0.0200198  | 0         | 0.00643055 | 0          | 0.0128923  | 0.00290558 | 0.00485998 | 0.00647241 |
| LRRC75A     | 1.47774    | 1.53871    | 1.7794     | 1.26904    | 1.40277    | 0.922736   | 2.42774    | 1.37166    | 1.12983   | 0.947967   | 0.296566   | 1.48031    | 0.439638   | 2.05956    | 1.10827    |
| LRRC75A-AS1 | 46.683     | 33.2643    | 34.6327    | 60.866     | 23.8752    | 66.8119    | 33.1592    | 29.1732    | 41.9466   | 46.9359    | 89.3952    | 30.8268    | 32.6573    | 32.2919    | 16.7706    |
| LRRC75B     | 1.62375    | 1.44779    | 1.49768    | 1.78872    | 2.34829    | 3.19428    | 1.34251    | 1.11131    | 0.795562  | 1.85057    | 1.87515    | 1.00158    | 0.987424   | 1.08275    | 1.12575    |
| LRRC77P     | 0.00864192 | 0.00416381 | 0.0214476  | 0          | 0          | 0.0367924  | 0.0197341  | 0.00768022 | 0         | 0          | 0.00975565 | 0          | 0          | 0.00903329 | 0.0248218  |
| LRRC8A      | 6.65324    | 6.39015    | 7.10013    | 11.8547    | 10.7198    | 14.1737    | 7.40229    | 4.82878    | 15.9631   | 19.5435    | 11.9273    | 10.964     | 37.0692    | 19.1849    | 10.1064    |
| LRRC8B      | 1.92356    | 3.05844    | 4.18251    | 2.86692    | 0.664487   | 1.86523    | 1.93075    | 3.31184    | 4.98256   | 2.39625    | 2.84883    | 2.44871    | 4.0492     | 2.35126    | 1.56266    |
| LRRC8C      | 2.16113    | 1.80094    | 2.72559    | 1.14168    | 0.613535   | 1.75268    | 1.48124    | 2.52565    | 0.457572  | 3.00666    | 4.03829    | 0.781216   | 2.23345    | 2.11131    | 3.14516    |
| LRRC8C-DT   | 0.322653   | 0.353317   | 0.558109   | 0.12091    | 0.182252   | 0.174831   | 0.167452   | 0.312815   | 0.0357232 | 0.110445   | 0.165562   | 0.0419758  | 0.189249   | 0.229954   | 0.336997   |
| LRRC8D      | 2.4331     | 1.67866    | 1.64429    | 3.23135    | 1.06463    | 3.67664    | 2.05419    | 1.78672    | 1.2799    | 2.01436    | 2.86273    | 1.71234    | 4.15673    | 3.01494    | 1.6569     |
| LRRC8E      | 2.9848     | 3.75162    | 2.67885    | 3.54083    | 4.00288    | 3.64654    | 2.48364    | 2.09246    | 8.78304   | 4.83209    | 2.67884    | 4.099      | 4.86027    | 2.74532    | 1.53535    |
| LRRC9       | 0.014126   | 0.00680611 | 0.011686   | 0.00485241 | 0.0219425  | 0          | 0.00537619 | 0.0209233  | 0         | 0          | 0.010631   | 0.00336917 | 0          | 0.00246095 | 0          |
| LRRC1       | 1.22381    | 0.91343    | 0.922025   | 0.579912   | 0.135785   | 0.911798   | 0.380515   | 0.772013   | 0.186307  | 0.610287   | 0.84495    | 0.355739   | 0.430047   | 0.408325   | 0.839539   |
| LRRD1       | 0.0173943  | 0.00838082 | 0.00719488 | 0.0448132  | 0          | 0          | 0          | 0.0695635  | 0         | 0.0109158  | 0.00981797 | 0          | 0          | 0          | 0.0499607  |

|           |           |            |            |            |           |            |           |            |            |           |           |            |            |            |           |
|-----------|-----------|------------|------------|------------|-----------|------------|-----------|------------|------------|-----------|-----------|------------|------------|------------|-----------|
| LRRFIP1   | 11.5729   | 8.68281    | 9.28611    | 12.3729    | 6.18714   | 13.8955    | 4.91851   | 7.03892    | 9.06151    | 16.7703   | 10.3484   | 10.6209    | 24.6703    | 13.7334    | 11.5994   |
| LRRFIP2   | 5.64685   | 4.67448    | 5.55358    | 4.64298    | 3.21932   | 6.69655    | 3.56663   | 4.67142    | 5.79201    | 6.88002   | 5.97897   | 4.74612    | 11.9054    | 5.79003    | 5.71555   |
| LRRIQ1    | 0.0467622 | 0.0307238  | 0.0633027  | 0.00438089 | 0         | 0.0361977  | 0.0145613 | 0.0188902  | 0          | 0.0266779 | 0.0143969 | 0.00608357 | 0.00822839 | 0.00444363 | 0.0488411 |
| LRRIQ3    | 0.0161726 | 0.0194806  | 0.0133792  | 0.0666655  | 0.0251217 | 0.0757394  | 0         | 0          | 0.0295447  | 0.0304475 | 0.0547707 | 0.0347159  | 0          | 0.00845253 | 0         |
| LRRIQ4    | 0         | 0          | 0.0309632  | 0          | 0.0193796 | 0.0106232  | 0         | 0          | 0          | 0         | 0.0140839 | 0          | 0          | 0          | 0         |
| LRRK1     | 2.18655   | 2.86665    | 3.06204    | 3.17751    | 4.23903   | 4.71337    | 3.40922   | 2.3485     | 1.00624    | 1.73203   | 1.29528   | 1.72442    | 2.89832    | 2.14868    | 3.11432   |
| LRRK2     | 1.94448   | 2.28357    | 1.63144    | 1.78148    | 1.01331   | 2.13211    | 1.20317   | 1.65228    | 1.78758    | 1.79811   | 1.92317   | 1.26386    | 0.8612     | 0.759251   | 1.86648   |
| LRRN1     | 1.18645   | 0.618092   | 0.717728   | 0.213966   | 0.414665  | 0.612459   | 0.821251  | 0.602991   | 0.0993406  | 0.125643  | 0.221829  | 0.0424466  | 0.0598037  | 0.00968886 | 0.266232  |
| LRRN2     | 0.236864  | 0.0973418  | 0.109502   | 0.136406   | 0.865723  | 0.177959   | 0.270444  | 0.179549   | 0.0339382  | 0.0786942 | 0.110102  | 0.0149544  | 0.11237    | 0.218463   | 0.540266  |
| LRRN3     | 0.788614  | 0.801818   | 0.847603   | 0.499133   | 0.144684  | 0.327817   | 0.55301   | 0.87193    | 0.166376   | 0.140286  | 0.182255  | 0.231042   | 0.388618   | 0.350502   | 1.42684   |
| LRRN4     | 0.313273  | 0.218863   | 0.343389   | 0.145277   | 0.340635  | 0.10003    | 0.214611  | 0.160086   | 0.00953829 | 0.0982975 | 0.0353646 | 0.0448311  | 0.0202122  | 0.0818651  | 0.0337425 |
| LRRN4CL   | 2.09605   | 1.41088    | 2.21151    | 0.64583    | 1.66882   | 4.70263    | 5.37388   | 1.70352    | 0.207167   | 0.732325  | 3.02188   | 0.19218    | 0.583408   | 0.652057   | 1.44842   |
| LRRTM1    | 0         | 0          | 0          | 0          | 0         | 0.0712695  | 0.0358372 | 0          | 0          | 0         | 0         | 0          | 0.0202511  | 0.0109363  | 0.0150255 |
| LRRTM2    | 1.47678   | 1.09059    | 1.16222    | 0.898385   | 0.586682  | 0.420171   | 0.858626  | 1.61806    | 0.19412    | 0.96756   | 0.311841  | 1.0013     | 0.104223   | 1.53077    | 1.15158   |
| LRRTM3    | 0.033698  | 0.0162362  | 0.0185849  | 0.00771706 | 0.0639768 | 0.0478224  | 0.0513004 | 0.0166378  | 0          | 0         | 0         | 0          | 0          | 0.00391379 | 0.0752805 |
| LRRTM4    | 0         | 0.0251967  | 0.0117988  | 0.00489926 | 0.0221544 | 0.0202403  | 0.0705653 | 0.0126752  | 0          | 0         | 0         | 0          | 0          | 0          | 0         |
| LRSAM1    | 2.58264   | 5.1778     | 5.1721     | 4.31367    | 9.91985   | 4.81514    | 5.79795   | 3.47563    | 9.37891    | 3.18253   | 2.3248    | 5.38543    | 3.03828    | 3.10628    | 2.62037   |
| LRTM1     | 0.283964  | 0.167222   | 0.0261017  | 0.0325148  | 0.294063  | 0.09403    | 0.198135  | 0.0280404  | 0.0192131  | 0.0396004 | 0.0356178 | 0.11288    | 0          | 0.107186   | 0.022656  |
| LRTM2     | 0         | 0.00279536 | 0.00479959 | 0.0119577  | 0         | 0          | 0.0198726 | 0.00515608 | 0          | 0         | 0         | 0.00415128 | 0          | 0          | 0         |
| LRTOMT    | 0.902014  | 0.934717   | 0.876955   | 0.541774   | 0.799711  | 0.629848   | 1.21721   | 0.927517   | 0.369478   | 0.427726  | 0.439765  | 0.355058   | 0.31323    | 0.611105   | 0.554822  |
| LRWD1     | 1.10688   | 1.48252    | 1.52055    | 3.0139     | 4.3852    | 6.00087    | 1.31019   | 1.02883    | 1.53358    | 2.30693   | 1.79979   | 2.22344    | 4.56668    | 3.20568    | 3.01883   |
| LSAMP     | 0.455734  | 0.533764   | 0.643735   | 0.252311   | 0.256053  | 0.598591   | 0.614447  | 0.741098   | 0.224375   | 0.191679  | 0.413216  | 0.196001   | 0.0625611  | 0.268593   | 0.553533  |
| LSAMP-AS1 | 0         | 0          | 0.104811   | 0.0435211  | 0         | 0.0359599  | 0.144657  | 0.150129   | 0          | 0         | 0         | 0          | 0          | 0          | 0.0606503 |
| LSG1      | 7.00382   | 5.60968    | 5.86909    | 7.46468    | 3.81431   | 9.52199    | 5.31883   | 5.24555    | 5.45248    | 4.35053   | 4.60051   | 4.13987    | 5.8983     | 5.16737    | 3.55439   |
| LSINCT5   | 0.148633  | 0.0926766  | 0.0433976  | 0          | 0         | 0.00744466 | 0.0698783 | 0.132093   | 0          | 0         | 0         | 0.0125119  | 0          | 0          | 0         |
| LSM1      | 5.54685   | 4.72535    | 3.92476    | 7.72389    | 5.79027   | 8.11324    | 2.95876   | 2.70066    | 7.21026    | 8.52579   | 17.1245   | 5.20226    | 9.14427    | 5.7092     | 5.69684   |



|        |           |            |           |            |            |           |           |           |           |            |           |           |           |           |          |
|--------|-----------|------------|-----------|------------|------------|-----------|-----------|-----------|-----------|------------|-----------|-----------|-----------|-----------|----------|
| LSM10  | 4.59366   | 3.77704    | 3.4904    | 7.43531    | 5.11897    | 9.20464   | 4.95984   | 3.30591   | 4.34795   | 7.92758    | 16.7971   | 4.18006   | 5.99204   | 5.81944   | 4.94781  |
| LSM11  | 0.748704  | 0.652032   | 0.741287  | 0.681003   | 0.540908   | 0.84403   | 0.445838  | 0.47483   | 0.363755  | 0.599997   | 1.00788   | 0.455235  | 0.800565  | 0.662126  | 0.711775 |
| LSM12  | 7.19261   | 6.28011    | 5.74213   | 15.3236    | 4.34168    | 16.2392   | 6.97832   | 6.23487   | 10.6774   | 12.6174    | 21.4874   | 8.2864    | 16.8974   | 10.6396   | 8.65697  |
| LSM14A | 12.3875   | 11.399     | 11.7604   | 14.0113    | 5.82315    | 14.4244   | 7.62177   | 11.4398   | 13.0019   | 11.0734    | 12.2316   | 9.01724   | 17.857    | 10.0593   | 9.94795  |
| LSM14B | 5.63855   | 6.75317    | 7.12977   | 7.87018    | 9.42383    | 10.2632   | 5.67392   | 4.78114   | 9.76827   | 6.53947    | 4.82428   | 5.9752    | 7.83429   | 5.32503   | 4.33072  |
| LSM2   | 0.933612  | 0.743378   | 0.681698  | 1.90164    | 0.84426    | 2.53043   | 1.106     | 0.642738  | 0.651259  | 1.10576    | 2.58782   | 0.853064  | 1.17362   | 0.946112  | 0.642066 |
| LSM3   | 12.787    | 8.45526    | 8.15408   | 21.619     | 2.58627    | 16.1618   | 5.8551    | 8.25664   | 10.6659   | 18.264     | 40.4477   | 10.436    | 14.4806   | 11.9389   | 7.84282  |
| LSM4   | 6.37861   | 5.1201     | 4.90966   | 12.4148    | 11.287     | 16.4558   | 6.92091   | 4.58686   | 6.37843   | 8.30816    | 18.4954   | 5.91606   | 9.07357   | 7.91345   | 4.71683  |
| LSM5   | 1.65156   | 1.1885     | 1.34283   | 2.41782    | 0.297282   | 1.3761    | 0.954987  | 1.46777   | 1.32943   | 1.87715    | 3.13668   | 1.32374   | 1.55034   | 1.4485    | 1.12993  |
| LSM6   | 3.46999   | 3.14543    | 3.28418   | 7.33367    | 0.776538   | 5.35843   | 2.51817   | 3.26678   | 1.71907   | 3.0634     | 7.90076   | 2.08308   | 5.2745    | 3.71935   | 1.98489  |
| LSM7   | 9.61327   | 7.97702    | 8.54187   | 28.2526    | 13.5501    | 24.8599   | 8.63861   | 6.72403   | 8.34728   | 16.1434    | 45.6194   | 9.33063   | 15.2764   | 13.654    | 7.22251  |
| LSM8   | 1.48618   | 0.979692   | 1.11173   | 0.939125   | 0.203865   | 0.812164  | 0.751353  | 1.32737   | 0.344441  | 0.654251   | 1.04127   | 0.317434  | 0.454394  | 0.526524  | 0.570752 |
| LSMEM1 | 0.256291  | 0.284015   | 0.201421  | 0.290527   | 0.179149   | 0.218228  | 0.11705   | 0.0911079 | 0.14046   | 0.466423   | 0.231456  | 0.293413  | 0.15709   | 0.221015  | 0.276049 |
| LSMEM2 | 0.412667  | 0.471098   | 0.504858  | 0.125726   | 0.313524   | 0.391906  | 0.559731  | 0.363154  | 0.096443  | 0.102043   | 0.154089  | 0.315188  | 0.199281  | 0.526634  | 0.478641 |
| LSP1   | 7.75118   | 7.67715    | 11.299    | 4.72788    | 7.41877    | 5.8088    | 17.1293   | 5.55516   | 1.10504   | 5.27471    | 6.76575   | 5.50222   | 11.1137   | 2.3293    | 10.9179  |
| LSP1P3 | 0.052124  | 0          | 0         | 0          | 0          | 0         | 0         | 0         | 0         | 0          | 0         | 0         | 0         | 0         | 0        |
| LSP1P4 | 2.55746   | 2.24192    | 2.10982   | 1.56709    | 2.80667    | 3.4864    | 0.927704  | 2.27299   | 5.69348   | 5.91398    | 3.00352   | 4.70212   | 3.90119   | 6.07497   | 2.72608  |
| LSP1P5 | 2.07325   | 1.57173    | 1.66217   | 0.499994   | 1.5528     | 1.38929   | 1.22917   | 1.71717   | 0.426097  | 2.64361    | 2.44413   | 1.34672   | 0.781107  | 3.73485   | 3.38677  |
| LSR    | 6.63405   | 7.91512    | 8.98444   | 13.6941    | 15.56      | 15.1904   | 9.0709    | 5.87778   | 12.4596   | 9.12973    | 8.72763   | 9.70456   | 16.905    | 7.70974   | 3.48704  |
| LSS    | 7.77427   | 11.5317    | 11.6778   | 12.9157    | 15.0254    | 18.8707   | 11.4212   | 5.65758   | 6.32194   | 8.76397    | 4.82938   | 9.58971   | 11.0814   | 7.48421   | 6.75047  |
| LST1   | 0.145615  | 0.118492   | 0.224864  | 0.566895   | 0.185979   | 0.388499  | 0.140396  | 0.209932  | 0.0630551 | 0.393953   | 0.916881  | 0.0486226 | 0.342395  | 0.126841  | 0.381066 |
| LTA    | 0.0102995 | 0.00694746 | 0.0136328 | 0.00849117 | 0.00639949 | 0.0315717 | 0.0141116 | 0.010984  | 0         | 0.00258539 | 0.0209284 | 0         | 0.0279099 | 0.0010766 | 0        |
| LTA4H  | 7.70817   | 7.11652    | 7.75908   | 21.5286    | 5.23391    | 14.9349   | 6.30296   | 6.58787   | 9.15166   | 10.6478    | 16.2672   | 7.91982   | 14.4852   | 9.31174   | 8.6571   |
| LTB    | 0.0906809 | 0.0889433  | 0.10181   | 0.236961   | 0.281717   | 0.237156  | 0.0887455 | 0.0690768 | 0.015777  | 0.146332   | 0.340006  | 0.0324423 | 0.240296  | 0.0304674 | 0.139531 |
| LTB4R  | 16.3976   | 25.0192    | 22.6423   | 31.6145    | 33.715     | 32.9742   | 15.4577   | 18.0716   | 19.7353   | 18.2034    | 6.79003   | 29.6605   | 26.7358   | 20.0517   | 7.17715  |
| LTB4R2 | 17.0708   | 26.7959    | 23.5123   | 40.4187    | 72.2756    | 49.232    | 20.2237   | 16.7523   | 28.1968   | 24.2973    | 19.7305   | 38.7603   | 43.0725   | 24.5895   | 9.54351  |

|             |           |            |           |            |           |           |            |           |           |            |            |            |           |           |           |
|-------------|-----------|------------|-----------|------------|-----------|-----------|------------|-----------|-----------|------------|------------|------------|-----------|-----------|-----------|
| LTBP1       | 6.21964   | 2.605      | 2.52741   | 18.2214    | 7.96797   | 21.0997   | 4.85357    | 2.75725   | 1.68723   | 21.2496    | 26.4841    | 7.51012    | 33.2047   | 23.7494   | 25.8691   |
| LTBP2       | 9.42875   | 4.08145    | 3.17377   | 11.4982    | 13.6081   | 11.5048   | 13.2892    | 5.51099   | 2.29663   | 7.17174    | 10.1583    | 4.75644    | 12.4199   | 9.66345   | 17.9781   |
| LTBP3       | 8.05633   | 5.9726     | 7.50221   | 5.07646    | 18.567    | 14.1969   | 11.597     | 5.06115   | 3.46867   | 3.02383    | 5.68896    | 2.2527     | 4.18978   | 3.04177   | 13.2706   |
| LTBP4       | 12.2897   | 12.5365    | 14.5326   | 9.16572    | 22.1138   | 13.2181   | 29.2086    | 7.12273   | 4.54924   | 3.81886    | 4.00087    | 5.48529    | 5.80993   | 7.14925   | 12.334    |
| LTBR        | 11.9102   | 11.602     | 12.5309   | 26.7937    | 19.5522   | 37.8423   | 11.8511    | 10.6836   | 9.11652   | 24.6696    | 27.2359    | 13.1347    | 42.371    | 20.3517   | 16.4251   |
| LTC4S       | 2.15123   | 1.08665    | 1.83706   | 0.643617   | 2.10197   | 1.38858   | 1.30733    | 0.863408  | 0.253544  | 0.391937   | 1.52759    | 0.446882   | 0.156705  | 0.435223  | 1.39523   |
| LTF         | 9.83539   | 1.06321    | 1.65753   | 4.95269    | 3.20693   | 128.222   | 0.8115     | 5.49229   | 0.0164876 | 0.17841    | 0.320935   | 0.0678071  | 1.86047   | 0.194576  | 0.738801  |
| LTK         | 0.0592083 | 0.106978   | 0.0795946 | 0.0610159  | 0.436862  | 0.0441132 | 0.101403   | 0.0986614 | 0.0270409 | 0.0371563  | 0.0417743  | 0.0529564  | 0.0143253 | 0.0889665 | 0.201948  |
| LTN1        | 3.85673   | 3.53961    | 3.73584   | 4.15578    | 0.959075  | 3.25599   | 2.88453    | 4.4401    | 3.77798   | 4.60088    | 5.37064    | 2.88332    | 5.4345    | 4.06103   | 3.46539   |
| LTO1        | 2.53685   | 2.92998    | 3.2427    | 2.18016    | 4.16822   | 3.20505   | 3.03243    | 2.37663   | 2.31999   | 1.9196     | 1.73688    | 2.55568    | 2.15084   | 2.6996    | 1.8545    |
| LTV1        | 5.77172   | 4.72152    | 5.51936   | 6.43483    | 2.58652   | 6.48569   | 2.31226    | 3.22962   | 4.30252   | 3.92563    | 6.0329     | 3.63874    | 7.68012   | 5.50392   | 3.84553   |
| LUADT1      | 0         | 0          | 0.0422639 | 0          | 0         | 0         | 0.0583311  | 0         | 0         | 0          | 0          | 0.0731103  | 0         | 0         | 0         |
| LUARIS      | 0.0238097 | 0.0158664  | 0.021179  | 0.00817887 | 0.0246565 | 0.0270316 | 0.0543703  | 0.0493736 | 0.135322  | 0.0697285  | 0.15231    | 0.00715647 | 0.0460857 | 0.045628  | 0.125377  |
| LUC7L       | 4.49479   | 5.24241    | 5.27676   | 4.03239    | 5.20823   | 4.5952    | 3.10577    | 3.51627   | 3.33055   | 2.76594    | 3.27596    | 4.85022    | 2.33221   | 5.55362   | 5.89104   |
| LUC7L2      | 13.5216   | 11.5946    | 12.5001   | 10.3203    | 11.8353   | 14.5713   | 6.73396    | 10.543    | 8.57048   | 7.00541    | 8.32982    | 7.06912    | 9.30597   | 9.03108   | 8.42139   |
| LUC7L3      | 9.05015   | 9.30069    | 8.72984   | 5.27806    | 3.55917   | 4.99365   | 3.25796    | 5.5129    | 3.49517   | 4.0806     | 4.79464    | 3.49537    | 3.14542   | 5.53918   | 5.34425   |
| LUCAT1      | 0.0458732 | 0.0110512  | 0.0758992 | 1.0873     | 0.142514  | 0.429665  | 0.0261883  | 0.101921  | 1.56432   | 1.12272    | 1.42409    | 0.525176   | 0.725131  | 0.994977  | 1.35054   |
| LUM         | 34.4302   | 12.5946    | 17.5079   | 31.0631    | 10.1765   | 43.64     | 26.0119    | 26.3024   | 10.7095   | 164.384    | 353.165    | 11.4492    | 40.6954   | 69.5152   | 226.057   |
| LUNAR1      | 0         | 0          | 0         | 0          | 0         | 0         | 0.05505    | 0         | 0         | 0          | 0          | 0          | 0         | 0         | 0         |
| LURAP1      | 0.980041  | 0.765022   | 0.790454  | 0.654701   | 0.953872  | 0.737742  | 0.721789   | 0.495894  | 0.120413  | 0.467084   | 0.759111   | 0.227694   | 0.368232  | 0.439344  | 0.533802  |
| LURAP1L     | 2.34012   | 1.86535    | 2.30601   | 3.04104    | 1.88432   | 3.06945   | 2.11195    | 2.01089   | 3.81397   | 9.57792    | 4.81721    | 2.27154    | 4.73487   | 2.1853    | 1.47031   |
| LURAP1L-AS1 | 0.0735478 | 0.118122   | 0.060844  | 0.0252644  | 0         | 0.062625  | 0.111966   | 0.370391  | 0         | 0.12308    | 0.0276754  | 0.0175418  | 0         | 0.0384393 | 0         |
| LUZP1       | 6.46268   | 4.89142    | 5.07345   | 8.66364    | 4.94314   | 8.54691   | 5.32712    | 4.82989   | 6.24357   | 7.04699    | 6.11356    | 4.31595    | 10.9574   | 8.07529   | 7.88322   |
| LUZP2       | 0.187871  | 0.00842037 | 0.0108432 | 0.0225124  | 0.0067867 | 0.0818448 | 0.00997696 | 0.108721  | 0.0106421 | 0.00548365 | 0.00493215 | 0.0031262  | 0         | 0         | 0         |
| LUZP4       | 0         | 0          | 0         | 0          | 0         | 0         | 0          | 0         | 0         | 0          | 0          | 0          | 0         | 0         | 0.0191123 |
| LUZP6       | 6.78084   | 6.68495    | 6.37857   | 15.3051    | 7.78867   | 12.4811   | 6.00731    | 7.57782   | 15.1596   | 20.024     | 22.0326    | 14.2785    | 26.0095   | 12.7791   | 9.92641   |

|               |            |            |           |            |            |            |           |            |           |           |            |            |            |            |            |
|---------------|------------|------------|-----------|------------|------------|------------|-----------|------------|-----------|-----------|------------|------------|------------|------------|------------|
| LVRN          | 0.626029   | 0.205109   | 0.32731   | 0.165156   | 0.101134   | 1.20257    | 0.514642  | 0.258152   | 0         | 0.125717  | 0.033922   | 0.00716705 | 0.0517006  | 0.0523504  | 0.294891   |
| LXN           | 2.1567     | 1.97835    | 2.04151   | 2.92777    | 0.676463   | 4.69695    | 0.947096  | 1.41909    | 1.38908   | 4.65896   | 8.82559    | 1.009      | 2.114      | 2.64455    | 4.91398    |
| LY6D          | 61.9264    | 137.284    | 121.176   | 454.718    | 189.607    | 425.768    | 128.627   | 64.3443    | 128.698   | 430.959   | 487.982    | 247.752    | 399.341    | 167.815    | 70.907     |
| LY6E          | 23.1234    | 15.9012    | 16.5407   | 48.6521    | 44.9366    | 199.439    | 28.446    | 15.4782    | 8.3167    | 15.5361   | 46.5413    | 10.5468    | 21.3946    | 18.6371    | 26.4534    |
| LY6E-DT       | 0.131869   | 0.111189   | 0.0818186 | 0.0339738  | 0.256048   | 0.505282   | 0.075282  | 0.234389   | 0         | 0         | 0.111648   | 0          | 0.0212703  | 0.189532   | 0          |
| LY6G5B        | 1.01662    | 0.907613   | 0.932896  | 0.325742   | 0.703324   | 0.465553   | 1.01443   | 1.09709    | 0.265313  | 0.257337  | 0.0916181  | 0.492077   | 0.124018   | 0.526865   | 0.70546    |
| LY6G5C        | 0.0136618  | 0.0263298  | 0.0376733 | 0.0563154  | 0.0424429  | 0.0465313  | 0.0623943 | 0.0364244  | 0         | 0.0171469 | 0.0514081  | 0.0456184  | 0.0323199  | 0.0714024  | 0.0327001  |
| LY6G6C        | 4.7472     | 8.45296    | 8.46913   | 4.91919    | 16.9574    | 4.94008    | 16.1663   | 7.6941     | 85.6309   | 10.2491   | 27.9769    | 21.4384    | 6.04341    | 3.68143    | 1.44974    |
| LY6G6D        | 0.020631   | 8.57E-05   | 0.0445152 | 0.0297362  | 0.019272   | 0          | 0.0242025 | 0.0220523  | 0.0300486 | 0.0309669 | 0.0254384  | 0          | 0.0106125  | 0.00867034 | 0          |
| LY6G6E        | 0.00417443 | 0.0160904  | 0.0103602 | 0          | 0.00648433 | 0.00355447 | 0.0142987 | 0.00370989 | 0         | 0         | 0          | 0.00896075 | 0.00807997 | 0          | 0          |
| LY6G6F        | 1.03E-08   | 4.13E-09   | 8.61E-08  | 0.00332074 | 2.82E-08   | 0          | 6.17E-07  | 3.23E-08   | 0         | 0         | 5.81E-05   | 2.02E-08   | 0          | 2.74E-08   | 0          |
| LY6G6F-LY6G6D | 0.00404173 | 0.0300028  | 0.016718  | 0.00416514 | 0.00627819 | 0.00230749 | 0.0415309 | 0.00718389 | 2.35E-26  | 2.42E-26  | 0.00380579 | 0.00581713 | 8.30E-27   | 0.00422475 | 0.00778369 |
| LY6H          | 0          | 0.00963758 | 0         | 0.350426   | 0.031071   | 0.119224   | 0.0456767 | 0.0355534  | 0         | 0.627634  | 1.76128    | 0.128812   | 0.412979   | 0.63771    | 0.574526   |
| LY6K          | 0.375617   | 0.47579    | 0.288575  | 1.27889    | 0.758676   | 0.379125   | 0.677283  | 0.216537   | 0.62946   | 1.44466   | 1.68693    | 0.358881   | 2.91041    | 0.337228   | 0.184879   |
| LY75          | 2.56713    | 1.56001    | 2.10308   | 1.13008    | 0.398118   | 1.64214    | 1.24824   | 2.05597    | 0.487072  | 0.454427  | 0.540129   | 0.212123   | 1.03454    | 0.227204   | 1.12022    |
| LY75-CD302    | 3.34146    | 2.35787    | 3.12954   | 1.63124    | 0.903041   | 1.96983    | 2.68399   | 2.83901    | 0.461355  | 0.310303  | 0.566764   | 0.266812   | 0.554867   | 0.517092   | 1.85584    |
| LY86          | 0.658221   | 0.279084   | 0.304935  | 1.2481     | 0.204489   | 1.36754    | 0.330676  | 0.725365   | 0.192393  | 0.892226  | 2.49665    | 0.131873   | 0.951285   | 0.192648   | 0.907477   |
| LY86-AS1      | 0          | 0          | 0         | 0          | 0          | 0.019482   | 0         | 0          | 0         | 0         | 0          | 0          | 0          | 0.00597903 | 0          |
| LY9           | 0.246203   | 0.179539   | 0.214686  | 0.0960018  | 0.289412   | 0.192641   | 0.0531823 | 0.1301     | 0.105352  | 0.0751645 | 0.195304   | 0.0714181  | 0.133089   | 0.0765102  | 0.0668932  |
| LY96          | 1.42998    | 0.743378   | 0.62262   | 3.21872    | 0.350723   | 1.08944    | 0.558556  | 1.10363    | 0.137491  | 4.53416   | 7.34916    | 0.26926    | 2.20942    | 1.31773    | 3.13449    |
| LYAR          | 1.81797    | 1.71709    | 1.49202   | 3.7618     | 1.12061    | 4.34908    | 0.840164  | 1.25662    | 2.07351   | 1.73847   | 2.60605    | 1.68279    | 7.02835    | 4.91665    | 2.59012    |
| LYG1          | 0.116884   | 0.360426   | 0.232067  | 0.144543   | 0.108937   | 0.15924    | 0.133454  | 0.103877   | 0         | 0.117361  | 0.052779   | 0.133814   | 0.0603304  | 0.281008   | 0.0671441  |
| LYG2          | 0.159975   | 0.17985    | 0.0882284 | 0          | 0          | 0          | 0.0913271 | 0.284345   | 0         | 0.0669284 | 0.0902959  | 0.0381555  | 0          | 0.11148    | 0.268035   |
| LYL1          | 1.1002     | 0.53633    | 0.87804   | 1.42724    | 3.15661    | 2.89859    | 0.945825  | 0.58666    | 0.315276  | 1.2509    | 2.61548    | 0.435288   | 1.20256    | 1.51533    | 2.63958    |
| LYN           | 2.77183    | 1.20142    | 1.40898   | 10.7719    | 1.82426    | 8.48809    | 1.62687   | 2.47326    | 0.779545  | 5.44193   | 8.25615    | 1.18282    | 9.26503    | 3.51697    | 5.87508    |
| LYNX1         | 3.23537    | 3.75914    | 3.25094   | 3.89503    | 16.8756    | 3.02172    | 3.56909   | 1.96516    | 7.93677   | 3.69081   | 1.66868    | 5.61313    | 7.82336    | 3.09868    | 1.38621    |

|              |           |           |           |           |           |           |           |           |            |           |           |           |           |            |          |
|--------------|-----------|-----------|-----------|-----------|-----------|-----------|-----------|-----------|------------|-----------|-----------|-----------|-----------|------------|----------|
| LYNX1-SLURP2 | 0.267759  | 0.0280369 | 0.0122634 | 0.185803  | 0.43927   | 1.58765   | 0.888312  | 0.0598871 | 0.00299845 | 0.63929   | 0.0867149 | 1.34176   | 0.359791  | 0.0709255  | 0.253887 |
| LYPD1        | 0.141615  | 0.0514374 | 0.084782  | 0.327784  | 0.11726   | 0.216228  | 0.0173076 | 0.0804821 | 0.0320456  | 0.158223  | 0.510559  | 0.0439263 | 0.194452  | 0.138862   | 0.361721 |
| LYPD2        | 2.18184   | 4.39269   | 6.38185   | 0.521961  | 7.80714   | 0.530801  | 1.77939   | 5.19384   | 2.89448    | 0.146702  | 0.131948  | 0.306657  | 0.0502753 | 0.0610887  | 0.111907 |
| LYPD3        | 85.5452   | 124.573   | 117.948   | 189.091   | 232.995   | 122.764   | 157.274   | 99.6071   | 726.3      | 448.593   | 345.621   | 473.362   | 563.591   | 190.622    | 86.5002  |
| LYPD4        | 0         | 0         | 0         | 0.0111603 | 0         | 0         | 0         | 0         | 0          | 0.0135924 | 0         | 0         | 0         | 0          | 0        |
| LYPD5        | 5.14197   | 8.6414    | 10.4881   | 79.1835   | 15.6551   | 9.05784   | 13.2635   | 7.75028   | 72.6565    | 86.0297   | 86.6079   | 52.9322   | 132.353   | 40.2646    | 10.9763  |
| LYPD6        | 0.161163  | 0.0983579 | 0.115549  | 0.315559  | 0.100137  | 0.141803  | 0.11654   | 0.0429686 | 0          | 0.134851  | 0.315351  | 0.0153756 | 0.242624  | 0.0870387  | 0.293171 |
| LYPD6B       | 2.68567   | 5.50414   | 6.80351   | 0.913727  | 2.45516   | 0.733094  | 5.32586   | 3.8029    | 1.67455    | 2.25795   | 1.4071    | 1.5355    | 2.3463    | 1.17531    | 0.479814 |
| LYPD8        | 0.0532024 | 0.0256337 | 0         | 0         | 0         | 0         | 0.0607448 | 0.0472819 | 0          | 0         | 0         | 0         | 0         | 0          | 0        |
| LYPLA1       | 8.02131   | 7.64555   | 7.60329   | 14.5662   | 3.14394   | 8.74404   | 10.6738   | 9.1927    | 42.7837    | 16.1164   | 25.0117   | 11.188    | 17.8486   | 9.27758    | 5.83721  |
| LYPLA2       | 6.72631   | 7.84118   | 7.38      | 19.767    | 17.3769   | 23.4798   | 9.77883   | 5.87646   | 12.8779    | 12.9137   | 21.2673   | 10.0642   | 21.8552   | 13.0564    | 8.1249   |
| LYPLA2P2     | 0.0144554 | 0.215909  | 0.0837095 | 0.0297934 | 0.157179  | 0.0246171 | 0.0660187 | 0.0770804 | 0.0704201  | 0.036286  | 0         | 0.051716  | 0         | 0          | 0        |
| LYPLAL1      | 2.01056   | 2.26555   | 1.9852    | 2.51752   | 0.453352  | 2.18137   | 1.36995   | 2.17108   | 2.29066    | 1.61447   | 2.17205   | 1.07509   | 0.899673  | 1.02821    | 1.1798   |
| LYPLAL1-DT   | 0.0568975 | 0.0822422 | 0.058837  | 0.0146586 | 0.0441907 | 0.0242237 | 0.0162409 | 0.0126414 | 0.0173237  | 0         | 0.0321151 | 0         | 0         | 0.00743428 | 0.020428 |
| LYRM1        | 1.73674   | 1.99467   | 2.29713   | 3.14248   | 1.19203   | 1.65936   | 2.00601   | 1.72294   | 3.98436    | 2.52196   | 4.78742   | 1.81345   | 4.10429   | 1.56736    | 1.56611  |
| LYRM2        | 1.89447   | 1.64222   | 1.49277   | 2.7341    | 0.75412   | 2.75109   | 1.03788   | 1.45293   | 1.82363    | 2.58915   | 3.31367   | 1.10874   | 2.25022   | 1.95553    | 1.38056  |
| LYRM4        | 2.42847   | 1.151     | 1.22287   | 2.3258    | 1.38384   | 2.79828   | 1.56721   | 1.32543   | 0.779586   | 1.8056    | 4.02277   | 1.47794   | 1.85211   | 1.48996    | 1.47844  |
| LYRM4-AS1    | 0.476322  | 0.399129  | 0.291252  | 0.341471  | 0.184973  | 0.436442  | 0.478824  | 0.404911  | 0.239609   | 0.162455  | 0.292233  | 0.414913  | 0.220469  | 0.414009   | 0.394077 |
| LYRM7        | 1.5677    | 1.42091   | 1.70752   | 1.23085   | 0.679046  | 1.11353   | 1.06701   | 1.57565   | 0.956517   | 1.171     | 1.71048   | 0.726357  | 1.32657   | 1.10616    | 0.98276  |
| LYRM9        | 2.96906   | 1.76182   | 1.82277   | 0.628044  | 1.35932   | 3.35308   | 2.30162   | 1.77762   | 0.456756   | 0.529552  | 1.44652   | 0.313076  | 0.383125  | 0.441027   | 0.920115 |
| LYSMD1       | 1.01505   | 1.64948   | 1.38172   | 1.8258    | 2.42241   | 1.86217   | 1.33806   | 1.0169    | 1.8206     | 1.60986   | 1.91671   | 1.25451   | 1.53009   | 1.39379    | 1.11318  |
| LYSMD2       | 0.822401  | 0.619482  | 0.747424  | 1.92181   | 0.539777  | 1.82463   | 0.648036  | 0.535294  | 0.310352   | 0.944969  | 2.52364   | 0.422689  | 1.13595   | 1.01704    | 0.948184 |
| LYSMD3       | 1.73844   | 1.33755   | 1.48311   | 2.16663   | 0.13502   | 1.94285   | 1.08549   | 2.16298   | 1.97829    | 2.96604   | 4.07216   | 1.33719   | 3.80652   | 2.54972    | 2.62926  |
| LYSMD4       | 3.55867   | 5.19638   | 5.12138   | 3.45064   | 6.04797   | 4.27009   | 3.91202   | 2.99656   | 3.46156    | 2.77568   | 1.81086   | 2.20644   | 2.44174   | 2.07969    | 0.972935 |
| LYST         | 5.72025   | 6.59594   | 6.90135   | 4.10351   | 3.17748   | 3.65894   | 4.16256   | 6.04404   | 9.40408    | 6.41396   | 5.42256   | 4.66831   | 4.68021   | 6.00075    | 5.53173  |
| LYVE1        | 5.66542   | 2.61372   | 3.63      | 3.30078   | 2.44454   | 8.68641   | 17.1016   | 4.31097   | 0.146565   | 4.5197    | 8.45425   | 0.801478  | 7.74661   | 5.55912    | 6.06231  |

|             |           |           |           |           |           |           |           |          |            |           |           |            |            |           |            |
|-------------|-----------|-----------|-----------|-----------|-----------|-----------|-----------|----------|------------|-----------|-----------|------------|------------|-----------|------------|
| LYZ         | 12.6683   | 5.7128    | 6.61279   | 21.4721   | 10.0851   | 31.6188   | 5.72296   | 10.9152  | 1.71568    | 29.1721   | 73.7756   | 4.04938    | 37.6671    | 11.9556   | 59.1797    |
| LYZL1       | 0         | 0         | 0         | 0         | 0         | 0         | 0         | 0        | 0          | 0         | 0         | 0          | 0          | 0         | 0          |
| LYZL2       | 0         | 0         | 0         | 0         | 0         | 0         | 0         | 0        | 0          | 0         | 0         | 0          | 0          | 0         | 0          |
| LYZL4       | 0         | 0         | 0         | 0         | 0         | 0         | 0         | 0        | 0          | 0         | 0         | 0          | 0          | 0         | 0          |
| LYZL6       | 0         | 0         | 0         | 0         | 0         | 0         | 0         | 0        | 0          | 0         | 0         | 0          | 0          | 0         | 0          |
| LZIC        | 2.7863    | 3.04494   | 2.78131   | 4.56521   | 2.94912   | 3.24443   | 2.75982   | 3.03867  | 3.47369    | 3.55778   | 4.47996   | 2.63832    | 4.66724    | 2.70577   | 2.97902    |
| LZTFL1      | 1.53808   | 1.32405   | 1.50145   | 1.76468   | 0.246882  | 1.70692   | 1.09466   | 1.41705  | 0.643137   | 1.13897   | 2.12986   | 0.69701    | 1.14784    | 0.916412  | 1.06763    |
| LZTR1       | 2.81578   | 4.33623   | 4.37486   | 4.991     | 9.65587   | 6.01912   | 4.13353   | 2.74076  | 3.67099    | 4.46306   | 3.16656   | 4.52843    | 4.86537    | 5.99593   | 5.87702    |
| LZTS1       | 0.879879  | 1.02422   | 0.764599  | 1.45917   | 1.56201   | 3.4816    | 0.953964  | 0.70968  | 0.355697   | 0.58929   | 1.13934   | 0.359759   | 1.72455    | 0.919729  | 4.21028    |
| LZTS1-AS1   | 0.233506  | 0.212513  | 0.0214636 | 0         | 0.120905  | 0.0662758 | 0.17774   | 0.207521 | 0          | 0.0325638 | 0.0585776 | 0.0371289  | 0          | 0.12204   | 0.409865   |
| LZTS2       | 5.57083   | 6.21963   | 6.28088   | 5.91911   | 12.0402   | 18.1897   | 6.56543   | 3.99319  | 4.06357    | 5.00806   | 3.52323   | 4.0881     | 6.19866    | 5.29531   | 5.59127    |
| LZTS3       | 0.970643  | 0.837456  | 1.08776   | 0.348933  | 2.02493   | 1.02831   | 1.06315   | 0.571741 | 1.20275    | 0.800366  | 0.382233  | 0.698559   | 1.37994    | 0.625277  | 0.648356   |
| M1AP        | 0.0662413 | 0.0718112 | 0.0684993 | 0.0426647 | 0.102896  | 0.105757  | 0.0472701 | 0.125098 | 0          | 0.0207849 | 0.130862  | 0.0473974  | 0.00534232 | 0.0389482 | 0.142696   |
| M6PR        | 10.4419   | 10.1313   | 11.2205   | 21.2664   | 8.65471   | 23.491    | 11.3018   | 9.00417  | 10.1976    | 13.8676   | 22.9469   | 9.6501     | 17.8344    | 11.1689   | 10.7189    |
| MAATS1      | 0.180724  | 0.166688  | 0.209311  | 0.0691755 | 0.0641663 | 0.162678  | 0.141494  | 0.105546 | 0.00628863 | 0.032404  | 0         | 0.00369466 | 0.0033315  | 0.0134935 | 0.177972   |
| MAB21L1     | 0.69262   | 0.287685  | 0.388575  | 0.0984503 | 0.556488  | 0.494853  | 0.345412  | 0.290083 | 0.0581747  | 0.0699444 | 0.206704  | 0.0113928  | 0.0667744  | 0.0707343 | 0.423029   |
| MAB21L2     | 1.04474   | 1.38125   | 1.40359   | 0.861307  | 2.12917   | 0.320249  | 1.4505    | 1.20331  | 0.285012   | 0.618912  | 0.311356  | 1.22596    | 0.118635   | 0.947901  | 0.504127   |
| MAB21L3     | 5.8488    | 7.90221   | 8.11642   | 5.56466   | 3.60647   | 3.04932   | 4.81248   | 11.7434  | 2.28655    | 3.53528   | 2.77507   | 5.28471    | 2.02401    | 5.7619    | 5.59951    |
| MAB21L4     | 5.89973   | 14.8592   | 13.7525   | 8.32205   | 27.1585   | 4.31321   | 11.0077   | 6.97051  | 25.2004    | 4.78178   | 4.44649   | 5.79676    | 4.15604    | 2.52159   | 0.876916   |
| MACC1       | 1.41964   | 1.85495   | 1.82503   | 1.49198   | 0.811505  | 0.686597  | 1.65308   | 1.5896   | 3.13027    | 0.988159  | 0.754053  | 1.12215    | 0.962216   | 1.20031   | 0.375683   |
| MACC1-AS1   | 0.0362176 | 0.0174502 | 0         | 0         | 0         | 0         | 0         | 0        | 0.0882179  | 0         | 0         | 0.0259147  | 0.0701022  | 0.113573  | 0.104026   |
| MACF1       | 41.0253   | 39.7413   | 42.6454   | 53.0842   | 33.3173   | 44.7805   | 40.8691   | 35.1658  | 43.6496    | 54.1561   | 23.185    | 53.9435    | 71.5677    | 49.529    | 33.4938    |
| MACO1       | 4.3935    | 3.71779   | 3.55281   | 9.69109   | 2.63043   | 5.41578   | 2.95004   | 3.24261  | 14.8974    | 8.57458   | 8.88159   | 7.17843    | 10.3811    | 5.63876   | 4.62151    |
| MACROD1     | 3.59021   | 4.25801   | 5.39183   | 2.39065   | 8.83714   | 3.59004   | 4.09919   | 2.40528  | 3.31859    | 1.54824   | 3.03448   | 1.52816    | 0.86716    | 1.46263   | 1.24273    |
| MACROD2     | 0.606797  | 0.683616  | 0.775123  | 0.17932   | 0.256433  | 0.455894  | 0.499239  | 0.650298 | 0.146715   | 0.0279997 | 0.0503675 | 0.0702349  | 0.0115148  | 0.023319  | 0.00640762 |
| MACROD2-AS1 | 0.363232  | 0.462528  | 0.429273  | 0.106949  | 0.161207  | 0.0220919 | 0.222175  | 0.403513 | 0.0157991  | 0.0162819 | 0         | 0.0278466  | 0          | 0.0135601 | 0          |

|                |            |            |           |            |            |            |            |            |           |           |           |           |            |            |          |
|----------------|------------|------------|-----------|------------|------------|------------|------------|------------|-----------|-----------|-----------|-----------|------------|------------|----------|
| MACROD2-IT1    | 0.139206   | 0.150911   | 0.143952  | 0          | 0          | 0          | 0          | 0.0618575  | 0         | 0         | 0         | 0         | 0          | 0          | 0        |
| MAD1L1         | 1.86392    | 2.60738    | 2.98074   | 3.29895    | 6.27496    | 4.16541    | 2.94303    | 1.44712    | 1.61181   | 1.27841   | 1.65045   | 1.92367   | 3.20989    | 2.42636    | 2.14942  |
| MAD2L1         | 1.01533    | 0.512496   | 0.786621  | 3.35489    | 0.0500685  | 3.25231    | 1.10407    | 0.716143   | 0.353302  | 2.488     | 6.60418   | 0.703432  | 3.4002     | 2.89755    | 0.972094 |
| MAD2L1BP       | 2.59986    | 2.25204    | 2.15079   | 5.40238    | 2.86887    | 5.56464    | 2.72513    | 1.27522    | 2.61266   | 4.81442   | 9.52644   | 1.75862   | 5.55474    | 3.35619    | 2.46875  |
| MAD2L2         | 2.99744    | 2.15793    | 2.59503   | 6.51912    | 3.3567     | 12.8355    | 3.32289    | 2.02888    | 1.54936   | 4.02457   | 8.77412   | 2.31932   | 5.97048    | 3.31535    | 3.05334  |
| MADCAM1        | 0.0150573  | 0.123332   | 0.0498258 | 0          | 0.537951   | 0.217958   | 0.0515758  | 0.0535267  | 0.0366762 | 0.0377969 | 0.084989  | 0.150834  | 0.00971489 | 0.0314784  | 0        |
| MADD           | 5.03867    | 5.76489    | 5.7538    | 4.44855    | 8.2136     | 6.67521    | 6.88209    | 4.7217     | 6.43096   | 3.40662   | 2.98253   | 4.38258   | 4.45487    | 3.79355    | 4.97613  |
| MAEA           | 6.8088     | 7.60259    | 7.7176    | 13.2411    | 17.3442    | 16.0252    | 7.57899    | 4.98058    | 17.1466   | 12.4273   | 11.8429   | 11.9442   | 22.0596    | 10.9928    | 7.81527  |
| MAEL           | 0          | 0.0110897  | 0         | 0          | 0          | 0          | 0          | 0          | 0         | 0         | 0         | 0         | 0          | 0          | 0        |
| MAF            | 10.9019    | 21.0958    | 20.8301   | 23.2043    | 35.9901    | 23.9529    | 15.8167    | 14.3625    | 22.5505   | 16.7451   | 17.7724   | 16.5039   | 16.0155    | 10.0096    | 11.8101  |
| MAF1           | 10.8479    | 9.97593    | 10.1714   | 17.9376    | 23.7568    | 22.3927    | 9.63173    | 7.18418    | 19.3568   | 13.9425   | 25.0217   | 7.678     | 17.6153    | 12.3136    | 9.5496   |
| MAFA           | 0.0487633  | 0.0939796  | 0.0726128 | 0.100504   | 0.212089   | 0.0498255  | 0.0222705  | 0.0346694  | 0.0475105 | 0         | 0.0440381 | 0.0348914 | 0.0125847  | 0.0152915  | 0        |
| MAFA-AS1       | 0          | 0          | 0.0918252 | 0          | 0          | 0.0472566  | 0.0633669  | 0          | 0         | 0         | 0         | 0         | 0          | 0.0290062  | 0        |
| MAFB           | 31.976     | 30.5732    | 20.1556   | 53.8074    | 91.0542    | 58.334     | 59.6       | 18.155     | 120.634   | 93.3473   | 69.3526   | 77.7461   | 170.217    | 56.9237    | 31.287   |
| MAFF           | 3.6224     | 3.07633    | 3.29183   | 5.95769    | 4.71744    | 9.62721    | 3.66593    | 2.44698    | 18.7496   | 7.08377   | 6.93928   | 8.38439   | 12.5061    | 6.47805    | 5.20222  |
| MAFG           | 2.57683    | 2.65927    | 2.57266   | 2.67819    | 5.20695    | 4.78585    | 2.87174    | 2.0826     | 5.34319   | 3.60462   | 3.86862   | 3.57727   | 5.84878    | 3.83312    | 3.96633  |
| MAFG-DT        | 0.170978   | 0.40013    | 0.343509  | 0.402737   | 1.55558    | 0.571942   | 0.404378   | 0.173658   | 0.431337  | 0.33722   | 0.579038  | 0.305848  | 0.559449   | 0.363825   | 0.543708 |
| MAFIP          | 0          | 0          | 0         | 0          | 0          | 0          | 0          | 0          | 0         | 0         | 0         | 0         | 0          | 0          | 0        |
| MAFK           | 3.75116    | 4.47017    | 4.87618   | 4.32812    | 9.40633    | 8.46152    | 4.2756     | 2.60553    | 6.4012    | 4.23436   | 2.29688   | 4.41562   | 7.64034    | 7.5        | 7.86158  |
| MAFTRR         | 0.0337855  | 0.651134   | 0.503095  | 0.139268   | 0.419844   | 0.143839   | 0.732928   | 0.330283   | 0.164588  | 0.339234  | 0.381396  | 0.145046  | 0.0217982  | 0.0529733  | 0.145561 |
| MAG            | 0.00914023 | 0          | 0         | 0          | 0.0141979  | 0          | 0.0521801  | 0.00812307 | 0         | 0         | 0         | 0.0130802 | 0          | 0          | 0        |
| MAGEA1         | 0          | 0          | 0         | 0          | 0          | 0          | 0          | 0          | 0         | 0         | 0         | 0         | 0          | 0          | 0        |
| MAGEA10        | 0.0590599  | 0.0243908  | 0.0558383 | 0.0173894  | 0.0131058  | 0.00718411 | 0.0577995  | 0.0224947  | 0         | 0         | 0         | 0         | 0          | 0.00881923 | 0        |
| MAGEA10-MAGEA5 | 0.00022432 | 0.00028822 | 3.09E-05  | 0.00026970 | 0.00017422 | 3.18E-05   | 0.00012806 | 9.97E-05   | 0         | 0         | 0         | 5.35E-05  | 0          | 1.95E-05   | 0        |
|                | 6          | 4          |           | 3          | 8          |            | 4          |            |           |           |           |           |            |            |          |
| MAGEA11        | 0          | 0          | 0         | 0.0114496  | 0          | 0          | 0          | 0          | 0.0135313 | 0         | 0         | 0         | 0          | 0          | 0        |

|            |            |            |            |           |           |           |           |            |           |          |         |            |         |            |           |
|------------|------------|------------|------------|-----------|-----------|-----------|-----------|------------|-----------|----------|---------|------------|---------|------------|-----------|
| MAGEA12    | 0          | 0          | 0          | 0         | 0         | 0         | 0         | 0          | 0         | 0        | 0       | 0          | 0       | 0          | 0         |
| MAGEA2     | 0          | 0          | 0          | 0         | 0         | 0         | 0         | 0          | 0         | 0        | 0       | 0          | 0       | 0          | 0         |
| MAGEA2B    | 0          | 0          | 0          | 0         | 0         | 0         | 0         | 0          | 0         | 0        | 0       | 0          | 0       | 0          | 0         |
| MAGEA3     | 0          | 0          | 0          | 0         | 0         | 0         | 0         | 0          | 0         | 0        | 0       | 0          | 0       | 0          | 0         |
| MAGEA4     | 0          | 0          | 0          | 0         | 0         | 0         | 0         | 0          | 0         | 0        | 0       | 0          | 0       | 0          | 0         |
| MAGEA4-AS1 | 0          | 0          | 0          | 0         | 0         | 0         | 0         | 0          | 0         | 0        | 0       | 0          | 0       | 0          | 0         |
| MAGEA5     | 0.083196   | 0.106894   | 0.0114709  | 0.100025  | 0.0646161 | 0.0118067 | 0.0474952 | 0.0369688  | 0         | 0        | 0       | 0.019843   | 0       | 0.00724698 | 0         |
| MAGEA6     | 0          | 0          | 0          | 0         | 0         | 0         | 0.0147951 | 0          | 0         | 0        | 0       | 0          | 0       | 0          | 0         |
| MAGEA8     | 0          | 0.0235943  | 0.0486134  | 0.0201859 | 0.0456401 | 0.0083394 | 0.0223648 | 0.0435201  | 0.0119279 | 0        | 0       | 0.00700782 | 0       | 0.0307124  | 0         |
| MAGEA8-AS1 | 0          | 0.0187092  | 0          | 0.0400161 | 0.0603174 | 0         | 0         | 0          | 0         | 0        | 0       | 0          | 0       | 0          | 0         |
| MAGEA9     | 0          | 0          | 0.00579793 | 0         | 0         | 0         | 0         | 0          | 0         | 0        | 0       | 0          | 0       | 0          | 0         |
| MAGEA9B    | 0          | 0          | 0.00477877 | 0         | 0         | 0         | 0         | 0          | 0         | 0        | 0       | 0          | 0       | 0          | 0         |
| MAGEB1     | 0          | 0          | 0          | 0         | 0         | 0         | 0         | 0          | 0         | 0        | 0       | 0          | 0       | 0          | 0         |
| MAGEB10    | 0.01185    | 0.0457317  | 0.0392126  | 0.0244235 | 0         | 0.0201802 | 0.0405968 | 0.0105324  | 0         | 0        | 0       | 0.0169589  | 0       | 0.00619333 | 0.0170181 |
| MAGEB16    | 0          | 0          | 0          | 0         | 0         | 0         | 0         | 0          | 0         | 0        | 0       | 0          | 0       | 0          | 0         |
| MAGEB17    | 0          | 0          | 0          | 0         | 0         | 0.0144578 | 0.0193866 | 0          | 0         | 0.042622 | 0       | 0.0121493  | 0       | 0.0709938  | 0.0243847 |
| MAGEB18    | 0          | 0          | 0          | 0         | 0         | 0         | 0         | 0          | 0         | 0        | 0       | 0          | 0       | 0          | 0         |
| MAGEB2     | 0          | 0          | 0.0118769  | 0         | 0         | 0         | 0         | 0          | 0         | 0        | 0       | 0          | 0       | 0          | 0         |
| MAGEB3     | 0          | 0          | 0          | 0         | 0         | 0         | 0         | 0          | 0         | 0        | 0       | 0          | 0       | 0          | 0         |
| MAGEB4     | 0          | 0          | 0          | 0         | 0         | 0         | 0         | 0          | 0         | 0        | 0       | 0          | 0       | 0          | 0         |
| MAGEB5     | 0          | 0          | 0          | 0         | 0         | 0         | 0         | 0          | 0         | 0        | 0       | 0          | 0       | 0          | 0         |
| MAGEB6     | 0          | 0          | 0          | 0         | 0         | 0         | 0         | 0          | 0         | 0        | 0       | 0          | 0       | 0          | 0         |
| MAGEC1     | 0          | 0          | 0          | 0         | 0         | 0         | 0         | 0          | 0         | 0        | 0       | 0          | 0       | 0.0055985  | 0         |
| MAGEC2     | 0          | 0          | 0          | 0         | 0         | 0         | 0         | 0          | 0         | 0        | 0       | 0          | 0       | 0          | 0         |
| MAGEC3     | 0.00860017 | 0.00414369 | 0          | 0         | 0.013359  | 0.0219688 | 0         | 0.00764311 | 0         | 0        | 0       | 0          | 0       | 0.00449482 | 0         |
| MAGED1     | 9.56565    | 6.90961    | 6.48925    | 12.3463   | 13.6488   | 31.0809   | 10.566    | 6.40358    | 9.59128   | 18.9083  | 37.5305 | 10.6012    | 13.9921 | 12.2743    | 28.5491   |

|           |           |           |           |           |           |           |           |           |           |           |           |           |            |           |           |
|-----------|-----------|-----------|-----------|-----------|-----------|-----------|-----------|-----------|-----------|-----------|-----------|-----------|------------|-----------|-----------|
| MAGED2    | 13.1587   | 9.38991   | 9.79478   | 13.0749   | 16.709    | 26.4917   | 11.9268   | 7.87712   | 10.5997   | 17.4375   | 35.3126   | 6.18705   | 12.8839    | 10.9238   | 19.4656   |
| MAGED4    | 0.0640622 | 0.107002  | 0.0865613 | 0.310291  | 0.630249  | 0.27457   | 0.112155  | 0.068323  | 0.0884302 | 0.613771  | 1.18126   | 0.145789  | 0.360976   | 0.656273  | 1.42298   |
| MAGED4B   | 0.0653011 | 0.109073  | 0.0882354 | 0.316278  | 0.64241   | 0.279858  | 0.114323  | 0.0696377 | 0.0901265 | 0.625609  | 1.20398   | 0.150413  | 0.367946   | 0.668902  | 1.45045   |
| MAGEE1    | 0.43147   | 0.590525  | 0.688019  | 0.489751  | 0.573088  | 1.11282   | 0.606874  | 0.4557    | 0.10662   | 0.19621   | 0.169418  | 0.143178  | 0.371176   | 0.189555  | 0.502901  |
| MAGEE2    | 0.0615234 | 0.0296429 | 0.0763447 | 0.0422678 | 0.0955671 | 0.0436553 | 0.081953  | 0.0364513 | 0         | 0.0643485 | 0.0694522 | 0         | 0          | 0.0214365 | 0.0147259 |
| MAGEF1    | 4.3204    | 3.87158   | 4.75793   | 4.99111   | 7.2454    | 9.12662   | 4.85435   | 3.33826   | 3.68659   | 3.45385   | 7.87496   | 2.2053    | 5.91234    | 3.12816   | 2.80592   |
| MAGEH1    | 2.58014   | 1.59726   | 1.75932   | 2.41719   | 1.67601   | 4.04772   | 2.78523   | 1.80662   | 0.647508  | 4.51405   | 11.5624   | 0.660141  | 2.01781    | 2.31287   | 4.4914    |
| MAGEL2    | 0.0215384 | 0.0311326 | 0.0400908 | 0.05549   | 0.259289  | 0.247586  | 0.0307399 | 0.0622101 | 0.0196735 | 0.162198  | 0.401184  | 0.0346755 | 0.00694825 | 0.0337708 | 0.371183  |
| MAGI1     | 3.90765   | 4.40057   | 4.8366    | 2.73145   | 3.50162   | 4.28171   | 3.78719   | 3.54462   | 3.38178   | 2.14493   | 1.59295   | 2.33907   | 2.68569    | 2.64654   | 2.28028   |
| MAGI1-AS1 | 0.665705  | 0.924506  | 0.80988   | 0.807093  | 0.243311  | 0.133374  | 0.625949  | 0.835233  | 0.0953829 | 0.638934  | 0.221029  | 0.756524  | 0.0505306  | 0.961915  | 0.618612  |
| MAGI1-IT1 | 1.05441   | 2.26661   | 2.30373   | 0.993733  | 0.489961  | 0.299273  | 1.64635   | 2.09841   | 0.120733  | 0.769155  | 0.193297  | 1.24454   | 0.0465164  | 1.59673   | 0.970688  |
| MAGI2     | 0.648858  | 0.348585  | 0.345065  | 0.314619  | 0.296289  | 0.732625  | 0.44549   | 0.343267  | 0.131096  | 0.252398  | 0.413909  | 0.0580801 | 0.173619   | 0.12654   | 0.883923  |
| MAGI2-AS2 | 0         | 0         | 0         | 0         | 0         | 0         | 0.0555126 | 0         | 0         | 0         | 0         | 0         | 0          | 0         | 0         |
| MAGI2-AS3 | 0.96      | 0.461124  | 0.588271  | 0.379832  | 0.317841  | 1.13734   | 0.479788  | 0.85332   | 0.0605622 | 0.475015  | 0.968343  | 0.138534  | 0.437947   | 0.447052  | 1.39625   |
| MAGI3     | 2.56717   | 1.47626   | 1.41318   | 1.64811   | 1.55326   | 2.24051   | 1.44909   | 1.38997   | 0.92508   | 2.16817   | 1.12882   | 1.60068   | 2.49794    | 2.03351   | 1.91934   |
| MAGIX     | 0.288361  | 0.551778  | 0.449842  | 0.263203  | 0.921445  | 0.385842  | 0.291614  | 0.292882  | 0.37126   | 0.382604  | 0.334825  | 0.394975  | 0.393361   | 0.292808  | 0.319466  |
| MAGOH     | 8.05109   | 5.41309   | 6.60978   | 13.6914   | 2.33004   | 11.5212   | 4.29914   | 4.38014   | 7.30739   | 7.99174   | 18.0046   | 4.18368   | 7.34738    | 6.75176   | 5.93506   |
| MAGOH2P   | 1.33796   | 1.23703   | 1.25643   | 0.409915  | 0.505535  | 0.123163  | 0.743175  | 0.996244  | 0         | 0.453858  | 0.0408213 | 0.206993  | 0.0233309  | 0.321289  | 0.155795  |
| MAGOHB    | 1.44555   | 1.64812   | 1.79379   | 1.65192   | 0.511336  | 1.55381   | 1.25829   | 2.01606   | 0.74081   | 1.44606   | 2.55278   | 0.901196  | 0.918808   | 1.35019   | 1.42853   |
| MAGT1     | 8.0405    | 6.49185   | 6.73737   | 10.2136   | 5.72182   | 8.248     | 6.87379   | 8.25058   | 7.52131   | 12.6417   | 17.6596   | 6.28033   | 16.2723    | 8.2061    | 8.04252   |
| MAIP1     | 2.68037   | 1.90395   | 1.86065   | 3.2515    | 1.16029   | 3.62355   | 2.51824   | 2.05043   | 3.13381   | 2.30214   | 4.1763    | 1.72592   | 2.76522    | 2.08698   | 1.34177   |
| MAJIN     | 0.0338184 | 0.0760397 | 0.0932565 | 0.0116169 | 0         | 0.0383946 | 0         | 0.0200366 | 0.013729  | 0         | 0         | 0.024198  | 0          | 0.0235666 | 0.0161892 |
| MAK       | 0.231641  | 0.466726  | 0.544403  | 0.135632  | 0.245331  | 0.116551  | 0.300546  | 0.416405  | 0.0320583 | 0.0660758 | 0.0237722 | 0.214716  | 0.129074   | 0.181599  | 0.38559   |
| MAK16     | 2.63116   | 1.97606   | 2.33759   | 4.21506   | 0.836527  | 3.76678   | 1.44623   | 2.66869   | 2.38094   | 2.14247   | 3.58229   | 1.77208   | 5.56903    | 3.64134   | 2.69951   |
| MAL       | 2.84963   | 2.59889   | 1.61651   | 12.166    | 3.09852   | 2.92904   | 3.23037   | 1.84512   | 3.37137   | 11.2406   | 3.21687   | 2.76719   | 12.8043    | 0.936156  | 0.321548  |
| MAL2      | 24.6208   | 30.5091   | 31.6897   | 43.5282   | 13.9002   | 27.5562   | 23.9119   | 39.1215   | 81.6374   | 59.1654   | 69.0443   | 47.2935   | 61.5069    | 31.5583   | 11.2478   |



|            |           |           |           |           |           |           |           |           |          |            |           |           |          |            |          |
|------------|-----------|-----------|-----------|-----------|-----------|-----------|-----------|-----------|----------|------------|-----------|-----------|----------|------------|----------|
| MAL2-AS1   | 0.928239  | 1.65251   | 1.82215   | 0.891725  | 0.635403  | 0.522457  | 1.18558   | 1.41219   | 0.479022 | 1.3625     | 0.230886  | 2.15014   | 0.26392  | 1.75143    | 0.36151  |
| MALAT1     | 463.411   | 527.268   | 505.877   | 471.555   | 125.788   | 350.174   | 205.762   | 584.431   | 324.996  | 593.07     | 265.682   | 667.348   | 300.61   | 786.264    | 469.978  |
| MALINC1    | 0.464631  | 0.397984  | 0.280655  | 0.152005  | 0.423875  | 0.345389  | 0.176834  | 0.222849  | 0.125749 | 0.157361   | 0.233116  | 0.174144  | 0.14751  | 0.142618   | 0.285972 |
| MALL       | 9.89574   | 9.20759   | 10.8181   | 31.3555   | 8.90003   | 34.7      | 14.0981   | 9.64957   | 34.2304  | 74.8168    | 75.604    | 41.7209   | 113.82   | 45.403     | 21.2101  |
| MALRD1     | 0.0639125 | 0.0486221 | 0.0139139 | 0.0693302 | 0.0522517 | 0.0830631 | 0.0460883 | 0.0448422 | 0.016387 | 0.00422193 | 0.0265813 | 0         | 0        | 0.00527423 | 0.111111 |
| MALSU1     | 6.008     | 4.59319   | 4.28556   | 8.33946   | 4.28533   | 10.5447   | 4.16484   | 3.1873    | 8.66102  | 6.04022    | 11.7306   | 3.99182   | 7.17912  | 5.27078    | 4.75434  |
| MALT1      | 3.59149   | 3.25123   | 3.31041   | 3.86461   | 1.71093   | 3.02995   | 2.21986   | 2.9568    | 6.83569  | 4.55795    | 5.31965   | 3.29705   | 7.06753  | 4.45667    | 3.0476   |
| MAMDC2     | 5.9785    | 1.41592   | 1.91334   | 0.415291  | 0.900527  | 1.18985   | 7.28267   | 3.98019   | 0.235836 | 0.46638    | 0.732605  | 0.269625  | 0.580792 | 0.583329   | 0.924484 |
| MAMDC2-AS1 | 0.647883  | 0.246538  | 0.258736  | 0.107017  | 0.0974512 | 0.0757923 | 0.563264  | 0.623173  | 0        | 0.0186198  | 0.0334944 | 0.0955354 | 0        | 0.122053   | 0.149137 |
| MAMDC4     | 0.480566  | 0.767751  | 0.753268  | 0.651628  | 2.37697   | 0.597641  | 1.01797   | 0.882272  | 0.115515 | 0.134917   | 0.0999341 | 0.44792   | 0.122392 | 0.541987   | 1.02615  |
| MAML1      | 6.08602   | 6.45309   | 6.6506    | 7.66371   | 6.88455   | 8.95602   | 7.4013    | 5.7861    | 4.64425  | 4.94351    | 6.18104   | 3.78759   | 7.51416  | 5.68743    | 6.78316  |
| MAML2      | 5.87445   | 5.48047   | 5.89633   | 3.914     | 3.34164   | 4.71381   | 5.25433   | 4.8505    | 2.50504  | 3.02683    | 3.53804   | 2.75021   | 4.92826  | 3.53971    | 5.0385   |
| MAML3      | 3.31726   | 4.11552   | 3.49118   | 2.1013    | 4.23364   | 3.47821   | 3.28176   | 4.03599   | 3.13402  | 1.6637     | 1.3246    | 2.12679   | 1.78684  | 1.32196    | 1.55886  |
| MAMLD1     | 0.866674  | 0.559828  | 0.653943  | 0.480918  | 0.43642   | 1.31373   | 1.14178   | 0.622106  | 0.139188 | 0.418371   | 0.585945  | 0.211253  | 0.525377 | 0.614734   | 0.902716 |
| MAMSTR     | 0.21288   | 0.205137  | 0.25997   | 0.229825  | 0.881802  | 0.379792  | 0.497692  | 0.108108  | 0.111113 | 0.254463   | 0.480629  | 0.210348  | 0.176591 | 0.211924   | 0.407629 |
| MAN1A1     | 8.58599   | 3.96606   | 4.89017   | 8.83863   | 7.45156   | 11.1368   | 5.72949   | 9.04615   | 0.779352 | 9.7189     | 14.5518   | 6.74304   | 14.6407  | 11.0874    | 16.7207  |
| MAN1A2     | 5.97031   | 4.51868   | 4.99701   | 5.50012   | 2.7914    | 6.81107   | 4.0728    | 5.4424    | 5.21385  | 5.66398    | 7.02259   | 3.72058   | 6.91486  | 4.65658    | 5.95082  |
| MAN1B1     | 6.92695   | 7.70551   | 7.81662   | 8.61052   | 12.198    | 15.0444   | 7.59003   | 5.3476    | 5.73434  | 8.56377    | 8.58544   | 6.50957   | 8.90759  | 6.565      | 9.52396  |
| MAN1B1-DT  | 1.0632    | 0.673091  | 0.623867  | 0.420425  | 0.768144  | 1.81059   | 0.875153  | 0.813036  | 0.496862 | 0.574111   | 1.15835   | 0.601519  | 0.303102 | 0.400601   | 0.31958  |
| MAN1C1     | 1.67053   | 1.8981    | 1.97601   | 2.43583   | 4.42298   | 5.49016   | 2.17495   | 1.42259   | 0.40083  | 0.907521   | 2.01529   | 0.385353  | 0.904081 | 0.557736   | 2.33464  |
| MAN2A1     | 3.86151   | 3.82452   | 4.66663   | 8.29405   | 3.61311   | 7.21316   | 4.63924   | 4.40033   | 5.01985  | 12.3308    | 11.9758   | 5.33981   | 12.9231  | 8.36352    | 9.15705  |
| MAN2A2     | 3.13101   | 2.97822   | 3.65783   | 1.52331   | 3.57731   | 3.83931   | 3.86663   | 2.35428   | 0.705133 | 1.49801    | 1.21956   | 1.82142   | 1.39197  | 2.17063    | 2.86144  |
| MAN2B1     | 8.0973    | 8.2142    | 9.0799    | 11.6733   | 18.1751   | 23.0919   | 11.4089   | 8.01266   | 11.6187  | 10.505     | 16.1992   | 7.0265    | 12.8009  | 8.79017    | 13.711   |
| MAN2B2     | 4.92604   | 4.01431   | 4.27642   | 5.69182   | 5.58217   | 13.2286   | 5.71278   | 3.88652   | 3.19159  | 3.83038    | 4.29393   | 2.65837   | 4.13777  | 3.61484    | 6.69337  |
| MAN2C1     | 7.62638   | 8.68431   | 8.92926   | 7.20782   | 16.6368   | 13.2359   | 8.49344   | 6.66041   | 5.24463  | 4.47209    | 3.38724   | 6.33655   | 4.75016  | 7.3438     | 9.20681  |
| MANBA      | 2.13187   | 1.79502   | 1.79255   | 2.58593   | 1.72634   | 3.98167   | 2.09093   | 1.83872   | 1.9409   | 2.4564     | 4.24512   | 2.02055   | 1.5739   | 1.74986    | 2.67015  |

|           |           |           |           |           |           |           |           |           |           |           |           |            |            |           |           |
|-----------|-----------|-----------|-----------|-----------|-----------|-----------|-----------|-----------|-----------|-----------|-----------|------------|------------|-----------|-----------|
| MANBAL    | 8.48285   | 8.66614   | 8.48811   | 14.2553   | 8.28334   | 18.642    | 9.5649    | 6.3658    | 11.4243   | 11.6409   | 18.5363   | 6.91345    | 17.3163    | 9.19815   | 8.01211   |
| MANCR     | 0.0498057 | 0.0399952 | 0.0274685 | 1.60822   | 0.103154  | 0.11309   | 0         | 0.0147544 | 0.121315  | 0.833484  | 0.468537  | 1.46113    | 0.374901   | 0.0780919 | 0.0715273 |
| MANEA     | 1.1381    | 1.00008   | 0.978846  | 1.53968   | 0.171335  | 1.6009    | 0.915909  | 1.38127   | 0.775471  | 1.51653   | 2.1677    | 0.979362   | 2.0735     | 1.12675   | 1.08724   |
| MANEA-DT  | 0.4119    | 0.383074  | 0.427922  | 0.167816  | 0.163676  | 0.179442  | 0.251553  | 0.723612  | 0.0699974 | 0.120227  | 0.291967  | 0.137082   | 0.117427   | 0.100129  | 0.275135  |
| MANEAL    | 1.16079   | 1.56153   | 1.22435   | 1.63561   | 2.77341   | 1.58099   | 1.34757   | 1.08974   | 2.3273    | 0.484336  | 0.94665   | 0.986946   | 0.264768   | 0.429431  | 0.350322  |
| MANF      | 10.2618   | 8.45274   | 7.0777    | 23.7258   | 8.21268   | 19.8492   | 7.24396   | 6.55686   | 32.0491   | 21.295    | 37.2487   | 15.6481    | 18.498     | 14.2811   | 7.10975   |
| MANSC1    | 4.89212   | 4.12174   | 4.4903    | 4.36263   | 3.04238   | 6.31939   | 4.70319   | 3.97304   | 15.7241   | 4.22201   | 6.91068   | 4.49336    | 4.24434    | 2.41451   | 2.30825   |
| MANSC4    | 0.155228  | 0.0407952 | 0.0583706 | 0.0290849 | 0         | 0.0360476 | 0.0483366 | 0.0250825 | 0         | 0         | 0.0159303 | 0.0100972  | 0.00910474 | 0.0295014 | 0         |
| MAOA      | 4.10683   | 3.12291   | 2.41522   | 3.13142   | 1.01144   | 4.04408   | 1.5452    | 3.44939   | 1.39943   | 0.972146  | 1.2347    | 1.15411    | 0.895139   | 0.880808  | 0.513397  |
| MAOB      | 4.54835   | 2.45788   | 3.36431   | 9.60417   | 1.64854   | 25.9254   | 3.30936   | 3.70138   | 0.369292  | 0.52609   | 0.885956  | 0.497741   | 2.07146    | 1.03943   | 1.20394   |
| MAP10     | 0.335161  | 0.134912  | 0.12284   | 0.249207  | 0.0856717 | 0.400984  | 0.159852  | 0.245077  | 0.0258347 | 0.186369  | 0.330462  | 0.0849982  | 0.213507   | 0.137475  | 0.152321  |
| MAP1A     | 3.55874   | 2.12595   | 2.83597   | 0.63831   | 3.20131   | 5.45247   | 6.40091   | 2.08779   | 0.172817  | 1.50394   | 2.15107   | 0.378732   | 1.27883    | 1.18896   | 6.09414   |
| MAP1B     | 10.6557   | 4.743     | 6.32246   | 3.3671    | 5.11923   | 13.9241   | 7.3168    | 4.74077   | 1.69361   | 5.52933   | 7.95736   | 1.48714    | 4.21131    | 5.37887   | 11.1301   |
| MAP1LC3A  | 6.33749   | 7.40447   | 7.72189   | 6.11367   | 16.4806   | 8.741     | 11.351    | 5.83019   | 46.878    | 6.81065   | 13.7372   | 11.4889    | 6.47957    | 5.20647   | 4.71066   |
| MAP1LC3B  | 14.5732   | 10.4992   | 11.4888   | 19.011    | 4.85502   | 21.2561   | 12.6007   | 12.6167   | 41.8267   | 24.4221   | 36.5565   | 15.2811    | 28.6706    | 12.1746   | 13.4683   |
| MAP1LC3B2 | 0.179407  | 0.161899  | 0.119646  | 0.272214  | 2.38E-28  | 0.122808  | 0.227605  | 0.216838  | 0.0938582 | 0.0464195 | 0.0810661 | 0.0542373  | 0.0704158  | 0.0759356 | 0.158422  |
| MAP1LC3C  | 1.02487   | 0.546341  | 0.606888  | 0.421676  | 0.69786   | 0.286835  | 0.697123  | 0.414242  | 0.0743239 | 0.324124  | 0.115989  | 0.66033    | 0.0755225  | 0.405778  | 0.479566  |
| MAP1S     | 1.71334   | 1.52689   | 2.09413   | 3.41183   | 3.82204   | 6.8173    | 2.18423   | 1.32805   | 2.52596   | 2.40104   | 4.95897   | 1.02776    | 3.49087    | 2.84125   | 3.62612   |
| MAP2      | 1.72449   | 1.95897   | 2.52882   | 1.69443   | 1.44979   | 1.30827   | 2.53713   | 2.27238   | 10.2638   | 8.05042   | 4.31541   | 4.95863    | 4.74642    | 2.18251   | 1.36344   |
| MAP2K1    | 5.03522   | 4.78286   | 5.3395    | 10.5257   | 6.33735   | 12.8486   | 4.92854   | 3.79144   | 5.7507    | 9.98835   | 11.1936   | 4.91114    | 16.0625    | 8.31125   | 6.25307   |
| MAP2K2    | 15.6379   | 15.719    | 16.0633   | 28.6938   | 41.8189   | 43.3691   | 22.8863   | 10.6455   | 41.4734   | 29.1464   | 41.3659   | 24.3089    | 45.5963    | 24.2819   | 17.1264   |
| MAP2K3    | 8.02926   | 7.71933   | 8.41974   | 15.9762   | 13.4936   | 17.5612   | 10.6479   | 6.30442   | 32.0315   | 12.3441   | 17.9503   | 13.0409    | 23.1471    | 11.1082   | 10.4537   |
| MAP2K4    | 5.06717   | 5.33503   | 5.47719   | 6.65056   | 2.03275   | 5.32722   | 3.75245   | 4.88036   | 12.8373   | 9.14975   | 8.69494   | 6.64851    | 11.4159    | 6.90832   | 4.27359   |
| MAP2K4P1  | 0.0364601 | 0.0219767 | 0.0301624 | 0         | 0         | 0.0155227 | 0.0104072 | 0.0486041 | 0         | 0.0228806 | 0.0411589 | 0.00652205 | 0.011786   | 0.0381113 | 0.039271  |
| MAP2K5    | 4.0057    | 4.63638   | 4.80316   | 3.93319   | 4.60026   | 5.72556   | 4.3886    | 3.68793   | 2.11584   | 1.92064   | 3.59723   | 2.6472     | 2.21277    | 2.87922   | 3.29648   |
| MAP2K6    | 0.983142  | 0.615238  | 0.567531  | 0.682891  | 0.300765  | 0.5344    | 0.44977   | 0.804014  | 0.0650516 | 0.406426  | 0.702839  | 0.10749    | 0.24985    | 0.246012  | 0.426691  |

|             |           |           |           |            |           |            |            |            |            |           |           |            |            |           |           |
|-------------|-----------|-----------|-----------|------------|-----------|------------|------------|------------|------------|-----------|-----------|------------|------------|-----------|-----------|
| MAP2K7      | 4.68606   | 6.01244   | 6.14968   | 7.88933    | 11.5168   | 11.3367    | 7.11643    | 4.56479    | 7.64651    | 4.8739    | 4.09641   | 5.98212    | 8.66173    | 5.65207   | 4.68644   |
| MAP3K1      | 8.1714    | 11.4684   | 13.5607   | 8.99241    | 6.10241   | 6.99719    | 8.92878    | 10.7534    | 6.70586    | 6.21854   | 6.31662   | 4.90104    | 9.92205    | 5.1355    | 3.32762   |
| MAP3K10     | 1.20565   | 1.76542   | 1.6939    | 2.59597    | 6.04733   | 4.04902    | 1.42271    | 0.90986    | 3.02692    | 1.91054   | 1.44466   | 2.13018    | 2.27714    | 3.02037   | 2.33119   |
| MAP3K11     | 7.75969   | 6.86267   | 7.16418   | 12.0149    | 21.3099   | 18.25      | 7.32151    | 4.90445    | 8.26715    | 9.64165   | 7.47282   | 8.62501    | 19.6834    | 10.1795   | 11.2648   |
| MAP3K12     | 2.61962   | 1.75688   | 1.72756   | 1.14898    | 4.64234   | 3.61118    | 2.41792    | 1.69278    | 0.773877   | 1.24555   | 1.84371   | 1.00639    | 0.937729   | 2.09425   | 3.92133   |
| MAP3K13     | 1.71592   | 1.70435   | 1.78513   | 1.36829    | 0.621519  | 1.40176    | 1.30233    | 1.8947     | 0.780645   | 1.06684   | 1.15729   | 0.796211   | 0.896472   | 1.12258   | 0.763298  |
| MAP3K14     | 2.38674   | 3.89935   | 3.72047   | 3.20608    | 4.8569    | 4.61034    | 2.86195    | 3.07519    | 1.78342    | 1.53705   | 1.59425   | 1.81964    | 1.32473    | 1.8112    | 2.28261   |
| MAP3K14-AS1 | 0.609401  | 0.949138  | 0.84414   | 0.438143   | 0.572369  | 0.567166   | 0.7767     | 0.843865   | 0.10356    | 0.320174  | 0.143987  | 0.304216   | 0.0731502  | 0.281465  | 0.529176  |
| MAP3K15     | 0.0211081 | 0         | 0.0216906 | 0.00531811 | 0         | 0.00871597 | 0.00599794 | 0.00463276 | 0          | 0         | 0.0233699 | 0.00726456 | 0          | 0         | 0         |
| MAP3K19     | 0.0383401 | 0.0323275 | 0.0753294 | 0.0148165  | 0.0148889 | 0.0408076  | 0.0601913  | 0.0596286  | 0.00583674 | 0.0060151 | 0.0324609 | 0.0137167  | 0.00309211 | 0.0150287 | 0.0137653 |
| MAP3K2      | 5.99548   | 5.60816   | 6.53098   | 4.06123    | 1.15421   | 4.68448    | 4.00857    | 6.33112    | 3.58349    | 5.41389   | 5.79234   | 3.40787    | 5.27626    | 4.12718   | 4.54668   |
| MAP3K20     | 3.36383   | 2.95513   | 3.46905   | 7.19642    | 1.82289   | 5.20328    | 3.22703    | 3.19807    | 2.90491    | 6.8354    | 5.70295   | 3.46542    | 11.0484    | 6.01151   | 5.52872   |
| MAP3K20-AS1 | 0.411803  | 0.507414  | 0.775703  | 1.07574    | 0.228513  | 0.0858234  | 0.26134    | 0.544626   | 0.066659   | 0.872293  | 0.361476  | 0.62661    | 0.65806    | 0.884535  | 0.513106  |
| MAP3K21     | 0.824688  | 0.669923  | 0.72179   | 0.829337   | 0.686926  | 0.807373   | 0.623186   | 0.757698   | 0.412425   | 0.530035  | 0.449744  | 0.496014   | 0.778848   | 0.839131  | 0.303241  |
| MAP3K3      | 5.63468   | 4.62028   | 4.8883    | 4.94574    | 6.10107   | 10.3097    | 4.93149    | 3.90303    | 3.82787    | 5.19381   | 5.00761   | 3.62097    | 5.59345    | 4.71987   | 6.37992   |
| MAP3K4      | 5.44283   | 5.21189   | 5.15684   | 5.55905    | 4.174     | 5.65137    | 3.98938    | 3.63589    | 4.4814     | 5.11463   | 4.38614   | 4.35059    | 5.61511    | 5.26971   | 4.61809   |
| MAP3K5      | 3.41243   | 3.88932   | 3.63379   | 11.647     | 5.94424   | 8.31863    | 1.95319    | 4.10561    | 3.57       | 4.69112   | 4.77251   | 4.84831    | 6.1969     | 6.00704   | 4.20972   |
| MAP3K6      | 9.01664   | 14.9      | 17.0142   | 15.3695    | 21.1991   | 20.2273    | 13.9716    | 10.2885    | 11.0136    | 12.2788   | 6.47729   | 9.06428    | 13.5167    | 9.82278   | 6.76496   |
| MAP3K7      | 4.36704   | 3.73123   | 4.17595   | 4.56035    | 2.33075   | 5.88089    | 2.99168    | 3.94073    | 4.13483    | 4.08693   | 5.24331   | 3.05422    | 5.99652    | 4.04976   | 3.67936   |
| MAP3K7CL    | 0.703835  | 0.402924  | 0.256739  | 0.824926   | 0.892868  | 0.512965   | 0.340515   | 0.641957   | 0.450389   | 0.711386  | 1.40728   | 0.375576   | 0.380991   | 0.355589  | 0.770946  |
| MAP3K8      | 3.5303    | 2.38203   | 3.27562   | 5.14057    | 2.74764   | 8.86674    | 3.46461    | 3.17032    | 9.50037    | 5.89853   | 10.5354   | 4.17825    | 4.3501     | 3.69404   | 6.97253   |
| MAP3K9      | 1.58983   | 2.23184   | 2.2436    | 5.76811    | 4.71656   | 2.30252    | 3.84177    | 1.66755    | 17.0404    | 7.74195   | 4.73505   | 7.62002    | 13.052     | 5.94137   | 1.44593   |
| MAP4        | 21.9297   | 21.5927   | 20.8499   | 57.5594    | 37.0073   | 46.5508    | 28.9373    | 19.076     | 54.5995    | 53.885    | 30.4298   | 49.9728    | 74.4811    | 32.7645   | 33.9341   |
| MAP4K1      | 0.732479  | 0.531362  | 0.517448  | 0.534326   | 1.2145    | 0.84094    | 0.498034   | 0.533939   | 0.18042    | 0.165274  | 0.36234   | 0.182555   | 0.610652   | 0.309701  | 1.30014   |
| MAP4K2      | 1.78735   | 1.60357   | 1.50411   | 1.62755    | 2.80031   | 1.86958    | 1.58333    | 1.02701    | 1.20099    | 1.56644   | 2.25251   | 1.35055    | 1.63037    | 1.64281   | 1.91407   |
| MAP4K3      | 5.13583   | 5.09218   | 5.46014   | 3.03451    | 2.7444    | 4.21045    | 4.29495    | 5.29986    | 4.09669    | 3.16306   | 3.79127   | 2.21705    | 3.18353    | 3.26098   | 3.2383    |

|            |           |            |           |           |           |           |          |           |           |           |            |            |           |           |           |
|------------|-----------|------------|-----------|-----------|-----------|-----------|----------|-----------|-----------|-----------|------------|------------|-----------|-----------|-----------|
| MAP4K4     | 8.43502   | 6.87042    | 7.30587   | 16.2689   | 8.73325   | 20.0041   | 6.54154  | 6.98946   | 8.01022   | 17.3013   | 12.109     | 8.63377    | 29.2482   | 12.7916   | 15.5749   |
| MAP4K5     | 8.34929   | 7.64822    | 8.49141   | 5.51202   | 3.04777   | 6.64717   | 5.03456  | 8.12966   | 10.0349   | 8.48822   | 9.24261    | 6.60512    | 8.0266    | 6.87825   | 6.53483   |
| MAP6       | 1.09181   | 0.265018   | 0.311338  | 0.183262  | 0.372597  | 0.869797  | 0.524136 | 0.316086  | 0.0503675 | 0.15572   | 0.331472   | 0.0266325  | 0.181444  | 0.164271  | 0.326662  |
| MAP6D1     | 1.02834   | 0.855337   | 1.0119    | 0.65815   | 0.790276  | 0.912486  | 0.926941 | 1.2987    | 1.87201   | 1.11405   | 1.50302    | 0.782276   | 1.20823   | 0.729807  | 0.419729  |
| MAP7       | 5.60197   | 6.45876    | 5.5256    | 8.19802   | 11.5564   | 6.61543   | 4.85262  | 5.79708   | 22.3458   | 10.0907   | 4.86456    | 11.756     | 14.3786   | 7.96653   | 2.54217   |
| MAP7D1     | 13.8364   | 16.5001    | 16.749    | 29.2064   | 43.4903   | 32.2985   | 20.4153  | 10.3502   | 76.9783   | 43.8078   | 18.9633    | 41.0887    | 82.9722   | 38.2209   | 27.6051   |
| MAP7D2     | 0.244526  | 0.133525   | 0.130364  | 0.0167994 | 0.126611  | 0.277615  | 0.359848 | 0.12556   | 0.132358  | 0.0682012 | 0.0736106  | 0.069986   | 0.0385653 | 0.0880401 | 0.0234114 |
| MAP7D3     | 1.56152   | 0.68071    | 0.688554  | 1.04725   | 0.519477  | 1.50147   | 0.606426 | 0.632639  | 0.344989  | 1.07993   | 1.31907    | 0.469081   | 1.54892   | 1.23072   | 2.14531   |
| MAP9       | 0.362045  | 0.13492    | 0.117522  | 0.266767  | 0.0294223 | 0.623625  | 0.118946 | 0.216029  | 0.111497  | 0.669612  | 0.965768   | 0.110683   | 0.256637  | 0.351433  | 0.698185  |
| MAPK1      | 11.0082   | 11.833     | 12.5959   | 17.3378   | 6.48622   | 14.1249   | 13.8032  | 11.8771   | 16.7167   | 17.7959   | 19.6933    | 11.7061    | 25.4057   | 12.5711   | 11.1954   |
| MAPK10     | 0.194638  | 0.108905   | 0.101286  | 0.0291164 | 0.0585173 | 0.192462  | 0.100362 | 0.125548  | 0.04588   | 0.126085  | 0.166563   | 0.0516641  | 0.0445604 | 0.0721928 | 0.148779  |
| MAPK11     | 2.40855   | 1.83475    | 1.81138   | 4.15969   | 5.76725   | 9.00593   | 1.09783  | 1.35369   | 0.962323  | 3.03493   | 3.60019    | 2.05035    | 2.88685   | 3.14952   | 4.58008   |
| MAPK12     | 0.631726  | 0.43315    | 0.351756  | 1.0266    | 2.77403   | 1.81027   | 0.48548  | 0.45346   | 0.221934  | 1.32655   | 2.96227    | 0.512865   | 0.940585  | 1.61909   | 2.2681    |
| MAPK13     | 5.97902   | 10.8065    | 11.1135   | 15.4648   | 16.6999   | 12.7584   | 11.0207  | 8.29001   | 30.8155   | 24.0296   | 18.006     | 19.1857    | 34.1606   | 12.4366   | 5.18856   |
| MAPK14     | 10.1806   | 8.78659    | 8.58638   | 14.54     | 9.40286   | 11.7445   | 7.32445  | 8.43175   | 20.1248   | 14.594    | 17.0947    | 11.5682    | 15.5993   | 10.0744   | 7.99073   |
| MAPK15     | 0.355481  | 0.785508   | 0.902519  | 0.176851  | 0.837798  | 0.365313  | 0.797758 | 0.533799  | 0.0597153 | 0.18462   | 0.0138377  | 0.727985   | 0.0474527 | 0.217823  | 0.299268  |
| MAPK1IP1L  | 6.08519   | 5.20388    | 5.70904   | 9.68492   | 1.93944   | 9.57732   | 4.99152  | 6.75625   | 7.57688   | 7.57492   | 8.03275    | 6.2434     | 15.1649   | 7.24164   | 7.1518    |
| MAPK3      | 14.5946   | 13.7293    | 12.965    | 26.4657   | 25.1998   | 38.6689   | 21.6394  | 9.21446   | 57.8159   | 46.6127   | 55.4532    | 30.0956    | 65.6258   | 23.7398   | 13.8241   |
| MAPK4      | 0.229671  | 0.176584   | 0.238511  | 0.0906445 | 0.197356  | 1.01942   | 0.27339  | 0.156342  | 0.0178541 | 0.0122664 | 0.00551639 | 0.00699302 | 0.0126113 | 0.0102159 | 0         |
| MAPK6      | 14.1707   | 12.4888    | 11.7638   | 26.0962   | 5.52213   | 13.2368   | 7.8928   | 14.5896   | 41.2277   | 29.1775   | 27.1583    | 26.7264    | 45.5941   | 25.3935   | 10.6356   |
| MAPK6-DT   | 0.133775  | 0.0902367  | 0.132802  | 0.165431  | 0.124679  | 0.113908  | 0.030548 | 0.118888  | 0.260676  | 0.134321  | 0.30203    | 0.248871   | 0.0345243 | 0.0978832 | 0.230541  |
| MAPK7      | 3.5853    | 4.23941    | 4.19268   | 4.64177   | 9.77293   | 8.00339   | 5.2108   | 3.37445   | 12.9057   | 6.92793   | 8.66318    | 8.68533    | 5.56339   | 6.55184   | 3.93338   |
| MAPK8      | 2.86575   | 1.94496    | 1.94674   | 2.66409   | 0.639251  | 2.6281    | 1.93502  | 2.4205    | 2.4741    | 2.53092   | 3.45892    | 1.51782    | 2.52243   | 1.8595    | 2.32643   |
| MAPK8IP1   | 1.00333   | 0.674713   | 1.13472   | 0.617165  | 0.964626  | 1.38291   | 1.34387  | 0.61458   | 0.237445  | 0.696087  | 1.18045    | 0.403007   | 0.978369  | 0.762342  | 1.67997   |
| MAPK8IP1P2 | 0.0135246 | 0.00339602 | 0.0275089 | 0.0208006 | 0.0102361 | 0.0621835 | 0        | 0.0189253 | 0         | 0.0843176 | 0.135286   | 3.53E-38   | 0         | 0         | 0         |
| MAPK8IP2   | 0.266882  | 0.310914   | 0.362481  | 0.820984  | 0.519747  | 1.4381    | 0.532118 | 0.226562  | 0.960543  | 0.554941  | 0.220337   | 0.561483   | 0.585963  | 0.447599  | 0.154455  |

|             |            |            |            |           |           |            |            |           |            |            |            |           |           |            |           |
|-------------|------------|------------|------------|-----------|-----------|------------|------------|-----------|------------|------------|------------|-----------|-----------|------------|-----------|
| MAPK8IP3    | 4.71345    | 6.20811    | 6.11866    | 3.69764   | 11.9388   | 8.57896    | 6.83418    | 4.3664    | 2.5375     | 3.47479    | 1.77209    | 5.20768   | 7.41319   | 6.12665    | 5.87896   |
| MAPK9       | 2.7116     | 1.96403    | 2.0988     | 2.36476   | 0.902188  | 3.34956    | 1.60293    | 2.07735   | 1.48414    | 2.00354    | 2.53814    | 1.28499   | 2.34495   | 1.95726    | 1.75009   |
| MAPKAP1     | 8.23267    | 7.10553    | 7.13744    | 12.6646   | 8.28848   | 15.0826    | 7.39528    | 5.67826   | 10.0188    | 12.3632    | 13.5618    | 7.64041   | 19.8594   | 10.4439    | 8.68955   |
| MAPKAP2     | 12.7986    | 11.0047    | 13.2934    | 28.3044   | 18.6441   | 29.5171    | 12.0887    | 9.20483   | 30.5733    | 22.6376    | 29.1856    | 13.5929   | 32.1652   | 18.7876    | 20.4885   |
| MAPKAP3     | 7.28133    | 9.24787    | 9.3088     | 13.2675   | 9.58873   | 16.525     | 10.3667    | 7.97133   | 19.1391    | 12.7316    | 12.4869    | 8.42412   | 15.7366   | 9.34501    | 6.01903   |
| MAPKAP5     | 4.85095    | 4.34628    | 4.70392    | 4.95531   | 4.98726   | 7.33021    | 4.516      | 3.793     | 3.19188    | 3.7026     | 5.55858    | 3.21794   | 4.75423   | 4.26363    | 4.39565   |
| MAPKAP5-AS1 | 2.17671    | 1.5304     | 1.34676    | 1.26724   | 1.38633   | 1.59793    | 1.54183    | 1.14888   | 0.596222   | 1.0448     | 2.15956    | 0.726103  | 0.87187   | 0.953657   | 1.27947   |
| MAPKBP1     | 4.08911    | 8.42475    | 8.33053    | 8.90176   | 12.788    | 9.12197    | 9.08514    | 5.07522   | 7.07175    | 5.96966    | 3.02335    | 8.38027   | 9.22075   | 7.3275     | 4.58888   |
| MAPRE1      | 15.9522    | 14.1817    | 15.1748    | 27.132    | 12.7186   | 22.4632    | 12.6327    | 14.0437   | 34.3966    | 33.1996    | 28.277     | 24.0469   | 48.6948   | 25.4685    | 18.1831   |
| MAPRE2      | 7.39347    | 4.47624    | 5.31995    | 3.56768   | 2.71829   | 5.1728     | 7.66733    | 4.49705   | 5.84504    | 5.90462    | 6.6813     | 4.72015   | 4.40001   | 3.09575    | 5.76188   |
| MAPRE3      | 1.98757    | 4.41449    | 5.00497    | 3.31715   | 4.41269   | 5.26702    | 4.67152    | 3.30013   | 6.86044    | 3.88185    | 3.61184    | 3.97512   | 2.98385   | 2.58431    | 1.64302   |
| MAPT        | 0.499307   | 0.759367   | 0.914639   | 0.0980096 | 0.741301  | 0.25596    | 0.868709   | 1.04144   | 0.21511    | 0.0383683  | 0.0325923  | 0.120304  | 0.0405427 | 0.109177   | 0.0853652 |
| MAPT-AS1    | 0          | 0          | 0          | 0         | 0         | 0          | 0          | 0         | 0          | 0          | 0          | 0         | 0         | 0          | 0         |
| MAPT-IT1    | 0.0500848  | 0.0965266  | 0.0924291  | 0.0039703 | 0.173552  | 0.00328051 | 0.101174   | 0.13011   | 0.00938426 | 0.00483551 | 0          | 0.0110268 | 0         | 0.00402716 | 0         |
| 1-Mar       | 0.907975   | 0.382792   | 0.375571   | 0.40405   | 0.320545  | 1.21241    | 0.388761   | 0.449315  | 0.0376981  | 0.2331     | 0.407667   | 0.0959755 | 0.332853  | 0.150992   | 0.0740891 |
| 2-Mar       | 1.81697    | 0.755385   | 0.773038   | 0.599182  | 1.33862   | 1.57365    | 1.20917    | 0.765865  | 0.12645    | 0.28669    | 0.820454   | 0.445746  | 0.736875  | 0.775982   | 1.13323   |
| 1-Mar       | 1.67932    | 1.02695    | 1.23229    | 1.47266   | 0.11287   | 1.50897    | 1.05548    | 2.68711   | 0.275317   | 1.05892    | 1.75447    | 0.447709  | 0.734479  | 0.829157   | 1.64066   |
| 10-Mar      | 0.0108704  | 0.00780849 | 0.00449637 | 0.0280054 | 0.0168855 | 0.02314    | 0.0124115  | 4.51E-18  | 0.00661945 | 0.0204652  | 0          | 2.91E-20  | 0.0175338 | 0.0225021  | 0.0702506 |
| 11-Mar      | 0          | 0          | 0.012064   | 0         | 0         | 0          | 0          | 0         | 0          | 0          | 0          | 0         | 0         | 0          | 0         |
| 2-Mar       | 6.63032    | 4.86281    | 5.17196    | 8.73958   | 12.7379   | 15.9581    | 7.33022    | 3.96154   | 12.838     | 9.62364    | 17.9446    | 5.91768   | 9.02597   | 5.33349    | 6.56272   |
| 3-Mar       | 1.03691    | 1.52538    | 1.74299    | 1.36413   | 1.83344   | 1.49345    | 2.50637    | 1.21563   | 9.75346    | 1.80678    | 3.55523    | 2.68361   | 1.41987   | 1.21648    | 0.871306  |
| 4-Mar       | 0.00520069 | 0.00250577 | 0          | 0         | 0         | 0.00885663 | 0.00593797 | 0.0138658 | 0.00633385 | 0.0130548  | 0.00587093 | 0.0223274 | 0.0100664 | 0.0326173  | 0         |
| 5-Mar       | 2.55835    | 2.63856    | 2.46269    | 4.25842   | 2.51809   | 4.07572    | 2.30183    | 2.7399    | 5.89414    | 3.46994    | 4.91103    | 2.6151    | 5.00895   | 3.08397    | 2.28574   |
| 6-Mar       | 8.83772    | 8.35605    | 9.75956    | 6.42662   | 4.27071   | 8.9216     | 8.39547    | 8.97595   | 7.06314    | 6.42832    | 7.40078    | 5.41177   | 7.01572   | 5.80901    | 6.54986   |
| 7-Mar       | 10.6193    | 11.1534    | 11.2279    | 17.3469   | 2.9864    | 8.73944    | 6.56474    | 12.314    | 24.4348    | 20.3629    | 20.39      | 10.919    | 23.7399   | 13.031     | 8.87175   |
| 8-Mar       | 3.1542     | 2.67722    | 2.61545    | 2.79315   | 3.51515   | 5.02483    | 3.70187    | 2.2393    | 2.8677     | 2.12212    | 2.72021    | 1.92625   | 4.21922   | 2.20251    | 2.88645   |

|           |           |            |           |           |           |            |           |           |            |           |           |            |            |           |            |
|-----------|-----------|------------|-----------|-----------|-----------|------------|-----------|-----------|------------|-----------|-----------|------------|------------|-----------|------------|
| 9-Mar     | 1.40331   | 1.75572    | 2.2128    | 1.96549   | 4.38375   | 2.05972    | 1.75275   | 0.978426  | 2.46447    | 2.77332   | 2.56442   | 1.79741    | 2.10095    | 2.00175   | 1.89286    |
| MARCKS    | 9.36154   | 8.55731    | 9.46157   | 30.8704   | 28.34     | 25.9786    | 5.86313   | 9.03656   | 17.1576    | 26.0707   | 26.0285   | 8.88764    | 30.6546    | 13.6188   | 17.7611    |
| MARCKSL1  | 6.40064   | 5.14699    | 5.50341   | 19.2386   | 17.0311   | 34.3659    | 4.80435   | 5.97804   | 4.51114    | 24.212    | 43.5211   | 7.95112    | 31.5652    | 15.0537   | 17.1713    |
| MARCO     | 1.34949   | 0.3646     | 0.396475  | 15.1416   | 1.80236   | 4.56406    | 2.6928    | 0.30263   | 0.0921601  | 0.854786  | 0.455597  | 0.0541454  | 0.781172   | 0.316396  | 0.470924   |
| MARCOL    | 0.0325043 | 0.0313221  | 0.0268898 | 0         | 0         | 0.0415155  | 0         | 0.0144436 | 0          | 0         | 0         | 0.0697731  | 0          | 0.0169882 | 0.0466803  |
| MARF1     | 7.63502   | 8.37387    | 8.25704   | 7.36713   | 5.14485   | 10.649     | 7.02217   | 7.29921   | 6.42646    | 5.39558   | 4.90341   | 4.70141    | 6.88033    | 5.20399   | 5.84412    |
| MARK1     | 1.29043   | 1.2435     | 1.32364   | 1.87049   | 1.07311   | 2.08936    | 1.04178   | 1.10628   | 0.746113   | 1.7505    | 1.32799   | 1.18682    | 2.67224    | 1.98754   | 1.67539    |
| MARK2     | 6.68505   | 9.64569    | 9.75949   | 14.2435   | 16.5965   | 13.2641    | 9.67369   | 6.89023   | 12.6859    | 7.98095   | 6.95135   | 9.68486    | 16.2929    | 8.34237   | 5.35863    |
| MARK2P9   | 0.0489282 | 0.129659   | 0.182146  | 0.050422  | 0.190006  | 0.0416617  | 0.167594  | 0.13045   | 0.178767   | 0.12282   | 0.0552339 | 0.455123   | 0          | 0.0767161 | 0.175668   |
| MARK3     | 8.13614   | 8.68053    | 7.90227   | 13.3638   | 10.6829   | 13.2862    | 5.67405   | 6.4849    | 12.5839    | 22.1353   | 14.6689   | 13.4164    | 27.145     | 19.8116   | 11.9671    |
| MARK4     | 3.70781   | 6.34854    | 6.42327   | 5.62691   | 10.2439   | 9.80246    | 6.9096    | 4.11514   | 12.5093    | 5.77843   | 5.7703    | 6.50958    | 8.7203     | 6.25429   | 4.49448    |
| MARS      | 6.16883   | 7.08441    | 7.18533   | 12.9352   | 12.7148   | 16.4205    | 9.64498   | 4.93905   | 14.5424    | 13.3825   | 12.3144   | 11.7365    | 27.3433    | 14.1952   | 10.4783    |
| MARS2     | 1.34195   | 1.40151    | 1.65593   | 1.95463   | 1.31592   | 2.04273    | 1.56644   | 1.09934   | 1.3513     | 0.81862   | 1.38795   | 0.976295   | 2.33143    | 1.93169   | 0.732126   |
| MARVELD1  | 10.5384   | 7.09275    | 7.70673   | 9.71813   | 12.7382   | 32.1615    | 13.4283   | 6.5763    | 3.50905    | 9.16185   | 19.2734   | 3.36612    | 9.0135     | 8.76994   | 16.6233    |
| MARVELD2  | 2.20716   | 3.24196    | 3.03137   | 4.38348   | 2.71283   | 3.81349    | 3.13173   | 2.08533   | 5.16736    | 3.21399   | 2.81818   | 2.89024    | 6.44974    | 2.93988   | 0.76936    |
| MARVELD3  | 0.51598   | 0.505065   | 0.37743   | 1.03548   | 1.00398   | 1.17931    | 0.279061  | 0.463387  | 0.363814   | 0.736227  | 0.607002  | 0.559625   | 1.83625    | 1.11276   | 0.397807   |
| MAS1      | 0.0408167 | 0.00983305 | 0.0337664 | 0         | 0.0317012 | 0.0173774  | 0.0932063 | 0         | 0          | 0.0256146 | 0         | 0          | 0.0131674  | 0         | 0          |
| MAS1L     | 0.0183675 | 0.0287617  | 0.0493834 | 0.0118302 | 0.0178319 | 0.00390992 | 0.0131071 | 0.0224448 | 0.00279619 | 0         | 0         | 0.00657122 | 0.00444398 | 0.0131995 | 0.00989177 |
| MASCRNA   | 0         | 0          | 0         | 0         | 0         | 0          | 0         | 0         | 0          | 0         | 0         | 0          | 0          | 0         | 0          |
| MASP1     | 1.5052    | 0.962878   | 1.57087   | 6.30971   | 0.96042   | 5.95679    | 2.25531   | 1.29654   | 0.0817874  | 1.58982   | 1.85864   | 0.980906   | 4.88867    | 8.71158   | 6.53823    |
| MASP2     | 2.23365   | 2.19939    | 2.23646   | 0.548056  | 0.867406  | 0.513216   | 1.67996   | 2.28442   | 0.172719   | 0.611865  | 0.15009   | 0.469322   | 0.268783   | 0.699514  | 0.865596   |
| MAST1     | 0.150432  | 0.385053   | 0.443346  | 0.116269  | 0.313998  | 0.128091   | 0.450866  | 0.246494  | 0.435123   | 0.123905  | 0.222888  | 0.178276   | 0.112223   | 0.0614238 | 0.0337562  |
| MAST2     | 3.02248   | 2.70838    | 3.18996   | 3.6417    | 4.51538   | 5.41551    | 3.83485   | 2.16632   | 1.59525    | 2.50556   | 2.13892   | 2.37064    | 3.99505    | 4.47905   | 5.82945    |
| MAST3     | 1.53947   | 3.25078    | 3.24887   | 2.36351   | 5.7648    | 3.02964    | 5.27314   | 1.86375   | 7.08348    | 1.47379   | 1.93293   | 2.19182    | 2.15374    | 1.54761   | 2.70155    |
| MAST4     | 8.51545   | 10.7658    | 10.4997   | 12.6544   | 12.8236   | 10.5112    | 7.01476   | 9.02261   | 24.8817    | 17.2948   | 7.95647   | 19.0548    | 17.323     | 13.2045   | 8.34616    |
| MAST4-AS1 | 0.591814  | 0.585298   | 0.695734  | 0.930872  | 0.822524  | 0.291744   | 0.391203  | 0.968865  | 1.44153    | 1.68105   | 0.632922  | 1.89442    | 0.401932   | 2.40935   | 1.74457    |

|           |           |           |           |           |           |           |            |            |           |           |            |           |            |            |            |
|-----------|-----------|-----------|-----------|-----------|-----------|-----------|------------|------------|-----------|-----------|------------|-----------|------------|------------|------------|
| MASTL     | 1.83164   | 1.78411   | 1.88793   | 2.64769   | 0.915069  | 2.63029   | 1.20392    | 1.6806     | 1.62784   | 1.70864   | 2.15711    | 1.42039   | 1.94832    | 1.60412    | 0.867345   |
| MAT1A     | 0.163171  | 0.468433  | 0.568068  | 0.105095  | 0.12673   | 0.289454  | 2.81007    | 0.374616   | 0.207004  | 0.0426658 | 0.0690748  | 0.0972942 | 0.057025   | 0.0461934  | 0          |
| MAT2A     | 17.9009   | 30.3741   | 31.9846   | 41.246    | 15.6967   | 37.1897   | 18.593     | 17.8394    | 26.7295   | 26.1992   | 30.6126    | 24.6564   | 35.4767    | 40.8278    | 21.0867    |
| MAT2B     | 5.51202   | 4.95238   | 5.27552   | 8.31647   | 2.24414   | 9.07333   | 3.66678    | 5.22577    | 3.53021   | 5.54376   | 8.98548    | 2.21233   | 6.67914    | 4.08794    | 4.70462    |
| MATK      | 0.326597  | 0.152988  | 0.30771   | 0.308521  | 0.944176  | 0.40169   | 0.279674   | 0.177377   | 0.0662931 | 0.318821  | 0.737375   | 0.103862  | 0.269252   | 0.161211   | 0.456006   |
| MATN1     | 0.0130486 | 0.0271565 | 0.0175075 | 0.0138706 | 0.0298023 | 0.0462168 | 0.00725626 | 0.00580913 | 0.0393462 | 0         | 0.00769004 | 0.0245033 | 0.00779727 | 0.00664701 | 0.00918174 |
| MATN1-AS1 | 0.3143    | 0.553032  | 0.714435  | 0.230032  | 0.821129  | 0.471189  | 0.553592   | 0.420565   | 0.187722  | 0.127523  | 0.113075   | 0.269255  | 0.116541   | 0.247194   | 0.307103   |
| MATN2     | 8.48572   | 7.02476   | 7.57549   | 3.94631   | 9.71578   | 6.82868   | 7.6357     | 5.11479    | 4.02845   | 3.20422   | 4.73016    | 2.24764   | 3.72398    | 2.32628    | 4.08081    |
| MATN3     | 0.349431  | 0.185629  | 0.155655  | 0.129266  | 0.222682  | 0.411972  | 0.0818397  | 0.191104   | 0.196416  | 0.348608  | 0.677668   | 0.102575  | 0.156081   | 0.163897   | 0.270214   |
| MATN4     | 0.0296452 | 0.285671  | 0.547717  | 0.0305503 | 0.0153498 | 0.0252425 | 0.575416   | 0.201988   | 0         | 0.0124026 | 0.0223105  | 0.0494946 | 0          | 0.0103293  | 0          |
| MATR3     | 13.8667   | 11.9196   | 12.387    | 17.1399   | 7.04939   | 17.478    | 8.07978    | 11.2835    | 9.1866    | 13.7334   | 16.8314    | 7.30057   | 14.5273    | 11.3346    | 12.7815    |
| MAU2      | 4.8928    | 6.19227   | 6.02417   | 6.09386   | 9.00766   | 9.82255   | 5.85324    | 4.70432    | 5.54652   | 4.59675   | 4.76969    | 4.99889   | 6.08286    | 4.31183    | 5.63641    |
| MAVS      | 5.567     | 8.98962   | 8.69132   | 8.28604   | 8.93343   | 13.0276   | 8.44214    | 6.64027    | 4.76592   | 4.57748   | 4.27361    | 5.23438   | 6.13362    | 6.44943    | 6.03311    |
| MAX       | 7.4736    | 8.43467   | 8.83093   | 9.39908   | 9.50487   | 13.1327   | 8.59973    | 6.85916    | 9.27142   | 6.66522   | 11.8369    | 6.22555   | 9.09023    | 5.60937    | 5.81882    |
| MAZ       | 14.0993   | 12.6277   | 14.4546   | 35.2695   | 31.702    | 39.0131   | 15.8394    | 9.1659     | 9.08326   | 18.9144   | 30.3355    | 13.4687   | 29.1024    | 23.5436    | 18.8893    |
| MB        | 0.989825  | 0.204391  | 0.311944  | 0.0161912 | 0.463703  | 1.11039   | 0.197328   | 0.558523   | 0         | 0.0788782 | 0.33699    | 0.05621   | 0          | 0.0410576  | 0.0451274  |
| MB21D2    | 1.38845   | 1.32139   | 1.50117   | 0.8925    | 0.89686   | 1.0886    | 1.28706    | 1.19117    | 1.67423   | 1.39756   | 3.11149    | 0.786907  | 1.11756    | 1.32559    | 1.61888    |
| MBD1      | 5.48075   | 6.82279   | 7.36339   | 11.0783   | 13.6618   | 10.3806   | 6.0274     | 4.45248    | 17.1407   | 15.1806   | 5.99729    | 11.3215   | 21.5052    | 13.0144    | 6.23612    |
| MBD2      | 8.06357   | 8.75001   | 8.28471   | 12.2925   | 6.125     | 11.3439   | 6.50356    | 6.36347    | 12.8093   | 12.0205   | 11.9104    | 8.41994   | 18.764     | 8.78013    | 5.85234    |
| MBD3      | 7.22352   | 7.9157    | 8.53476   | 15.8903   | 30.1948   | 23.9245   | 7.35935    | 4.18926    | 10.9968   | 9.84501   | 8.87581    | 8.59448   | 14.6571    | 11.6887    | 9.5094     |
| MBD3L1    | 0         | 0         | 0         | 0         | 0         | 0         | 0          | 0          | 0         | 0         | 0          | 0         | 0          | 0          | 0          |
| MBD3L2    | 0         | 0         | 0         | 0         | 0         | 0         | 0          | 0          | 0         | 0         | 0          | 0         | 0          | 6.01E-06   | 0          |
| MBD3L2B   | 0         | 0         | 0         | 0         | 0         | 0         | 0          | 0          | 0         | 0         | 0          | 0         | 0          | 0.0185935  | 0          |
| MBD3L3    | 0         | 0         | 0.0247679 | 0         | 0         | 0         | 0          | 0          | 0         | 0         | 0.0112659  | 0         | 0          | 6.41E-06   | 0          |
| MBD3L4    | 0         | 0         | 0         | 0         | 0         | 0         | 0          | 0          | 0         | 0         | 0.0112659  | 0         | 0          | 6.41E-06   | 0          |
| MBD3L5    | 0         | 0         | 0         | 0         | 0         | 0         | 0          | 0          | 0         | 0         | 0.0112659  | 0         | 0          | 6.41E-06   | 0          |

|           |           |            |           |            |           |           |           |           |           |           |           |          |           |           |           |
|-----------|-----------|------------|-----------|------------|-----------|-----------|-----------|-----------|-----------|-----------|-----------|----------|-----------|-----------|-----------|
| MBD4      | 3.57304   | 3.47684    | 3.36802   | 4.96566    | 2.64812   | 5.62745   | 1.98202   | 2.95404   | 4.55066   | 3.82017   | 5.27258   | 2.79054  | 5.03251   | 3.8203    | 3.32029   |
| MBD5      | 2.04271   | 1.49207    | 1.6485    | 1.12588    | 0.746949  | 1.68366   | 1.4802    | 1.63078   | 0.754303  | 0.975312  | 1.18555   | 0.861555 | 1.04989   | 1.04147   | 1.85629   |
| MBD6      | 5.23089   | 9.2564     | 7.51982   | 9.35593    | 12.266    | 15.1285   | 9.68455   | 8.36086   | 6.59476   | 5.52241   | 8.02025   | 9.32917  | 7.67817   | 7.5488    | 8.65747   |
| MBIP      | 3.52482   | 3.59286    | 4.11258   | 3.96529    | 0.6326    | 3.91012   | 2.03632   | 3.20745   | 2.87329   | 3.71899   | 5.96071   | 2.63263  | 3.59703   | 2.78903   | 2.27895   |
| MBL1P     | 0.49316   | 0.331087   | 0.400196  | 0.0837415  | 0.937046  | 0.688037  | 0.28915   | 0.174466  | 0         | 0.0815924 | 0.0917332 | 0.101846 | 0.0314574 | 0.361375  | 0.534375  |
| MBL2      | 0         | 0          | 0         | 0          | 0         | 0         | 0         | 0         | 0         | 0         | 0         | 0        | 0         | 0         | 0         |
| MBLAC1    | 0.539285  | 0.63103    | 0.560855  | 0.396964   | 1.72326   | 0.86591   | 0.686109  | 0.438192  | 1.53876   | 0.232066  | 1.11321   | 0.518173 | 0.586535  | 0.394596  | 0.376177  |
| MBLAC2    | 1.18419   | 1.1802     | 1.23462   | 0.991875   | 0.848333  | 1.16486   | 1.00016   | 1.45127   | 0.796837  | 0.760106  | 1.21472   | 0.878271 | 0.847762  | 0.734778  | 0.885267  |
| MBNL1     | 15.594    | 15.7291    | 19.9109   | 13.8642    | 5.60646   | 17.2876   | 15.2385   | 16.6511   | 10.925    | 18.2147   | 21.002    | 11.2924  | 23.7019   | 14.5672   | 17.4216   |
| MBNL1-AS1 | 1.35181   | 0.712004   | 0.945313  | 0.481257   | 0.421852  | 1.67412   | 1.07748   | 0.690397  | 0.673834  | 0.79103   | 1.06163   | 0.517486 | 0.842018  | 0.905156  | 1.12624   |
| MBNL2     | 9.44304   | 9.8577     | 10.1285   | 11.8519    | 3.13559   | 8.64403   | 6.75808   | 9.72134   | 11.191    | 13.9069   | 14.4227   | 12.4572  | 13.2734   | 11.2502   | 9.90431   |
| MBNL3     | 2.15542   | 1.89438    | 1.95127   | 2.57364    | 0.506924  | 1.92352   | 1.80502   | 2.72836   | 1.68975   | 1.82478   | 1.86627   | 1.8373   | 2.23795   | 1.0826    | 0.906473  |
| MBOAT1    | 2.52445   | 1.69584    | 2.0481    | 1.25511    | 1.44655   | 1.68755   | 2.09771   | 1.39521   | 0.270966  | 0.837642  | 0.800131  | 0.746416 | 1.21854   | 1.25581   | 1.17885   |
| MBOAT2    | 4.28571   | 4.00462    | 3.65418   | 4.75811    | 2.86262   | 2.94375   | 4.67152   | 5.53804   | 24.0756   | 17.6753   | 13.7562   | 13.084   | 17.0289   | 9.72882   | 4.28381   |
| MBOAT4    | 0.0556658 | 0.0804619  | 0.138152  | 0.0860478  | 0.237788  | 0.0947974 | 0.0953361 | 0.173149  | 0.0847433 | 0.139733  | 0.188519  | 0.199152 | 0.0448941 | 0.0654601 | 0.0799431 |
| MBOAT7    | 3.13919   | 5.10064    | 5.25589   | 9.6587     | 12.3128   | 10.2708   | 6.04784   | 3.39576   | 9.58072   | 6.19683   | 13.3545   | 6.79746  | 10.8132   | 6.64104   | 5.25069   |
| MBP       | 3.31717   | 4.01909    | 4.11768   | 4.37242    | 3.88146   | 6.4287    | 3.88701   | 3.99727   | 2.80631   | 4.70644   | 4.64581   | 2.79831  | 6.46615   | 3.27982   | 2.35544   |
| MBTD1     | 3.48737   | 3.98623    | 3.92374   | 2.27772    | 1.6298    | 2.37263   | 2.45485   | 3.85977   | 2.96939   | 1.93214   | 2.59703   | 2.07686  | 1.25957   | 1.81141   | 1.6118    |
| MBTPS1    | 10.5887   | 10.2469    | 10.7792   | 12.8668    | 10.9407   | 17.5105   | 11.01     | 8.41018   | 9.65261   | 8.56154   | 10.331    | 7.48201  | 12.9034   | 10.7976   | 12.8392   |
| MBTPS2    | 2.1174    | 1.6954     | 1.76012   | 2.20312    | 0.921569  | 2.40391   | 1.6234    | 1.9454    | 1.25823   | 2.33659   | 2.96764   | 1.19667  | 2.44518   | 1.75887   | 1.98316   |
| MC1R      | 0.67958   | 0.928323   | 1.07497   | 0.892724   | 2.26205   | 1.86314   | 1.15962   | 0.776512  | 0.136426  | 0.599872  | 0.944198  | 0.635875 | 0.44328   | 0.827448  | 0.675666  |
| MC2R      | 0         | 0          | 0         | 0.00639399 | 0         | 0         | 0         | 0         | 0         | 0         | 0         | 0        | 0         | 0         | 0         |
| MC3R      | 0         | 0          | 0         | 0          | 0.0331634 | 0         | 0         | 0         | 0         | 0         | 0         | 0        | 0         | 0.0111583 | 0.0919825 |
| MC4R      | 0         | 0.00775429 | 0         | 0          | 0         | 0         | 0         | 0.0143029 | 0         | 0         | 0         | 0        | 0         | 0         | 0         |
| MC5R      | 0         | 0.0338155  | 0.0290304 | 0.180816   | 0.0545097 | 0.149401  | 0.0400667 | 0         | 0         | 0         | 0         | 0.087882 | 0         | 0         | 0         |
| MCAM      | 19.3438   | 4.53122    | 4.74617   | 26.1472    | 20.5532   | 74.6427   | 15.1708   | 4.78388   | 19.5066   | 36.082    | 37.8477   | 19.2929  | 33.722    | 31.4441   | 43.0117   |



|            |           |           |           |            |           |            |           |            |           |           |            |            |           |           |            |
|------------|-----------|-----------|-----------|------------|-----------|------------|-----------|------------|-----------|-----------|------------|------------|-----------|-----------|------------|
| MCAT       | 1.62543   | 1.76876   | 1.66483   | 2.27898    | 3.55541   | 3.1541     | 1.96949   | 1.01217    | 2.86839   | 1.87355   | 3.24542    | 1.45578    | 2.15451   | 1.83197   | 1.30214    |
| MCC        | 6.68359   | 7.94998   | 8.10586   | 8.8412     | 9.13659   | 6.02299    | 7.80491   | 7.20941    | 7.50735   | 3.62383   | 3.41445    | 3.96739    | 5.44499   | 4.27383   | 4.9428     |
| MCCC1      | 4.14776   | 3.91486   | 3.70177   | 2.97593    | 3.12095   | 2.63867    | 3.46824   | 3.32302    | 4.74461   | 1.69255   | 1.99133    | 2.7388     | 1.72256   | 1.98983   | 1.5552     |
| MCCC2      | 5.51504   | 5.69675   | 5.24468   | 8.55766    | 3.34456   | 8.18052    | 5.11084   | 5.09155    | 5.51292   | 4.39338   | 6.46039    | 4.84261    | 6.89725   | 5.40616   | 4.78292    |
| MCCD1      | 0.0326418 | 0.0393183 | 0.0708845 | 0.00840959 | 0.088732  | 0.00694852 | 0.0978321 | 0.0326355  | 0         | 0         | 0.00460607 | 0.00583902 | 0         | 0.0106625 | 0.0234389  |
| MCEE       | 3.16554   | 4.08858   | 3.34497   | 5.31818    | 2.06604   | 4.0318     | 2.49054   | 2.97876    | 8.42329   | 5.70922   | 12.5523    | 5.50079    | 2.90054   | 2.08544   | 2.8652     |
| MCEMP1     | 0.0176935 | 0         | 0.0146373 | 2.07863    | 0.164904  | 0.10546    | 0         | 0          | 0.0215486 | 1.53229   | 2.43679    | 0          | 1.33564   | 0.0924738 | 0.15246    |
| MCF2       | 0.0272849 | 0.0184048 | 0.0045144 | 0.0337415  | 0         | 0.00929309 | 0.0186918 | 0.00484971 | 0         | 0.0136981 | 0          | 0          | 0.0176041 | 0.0941178 | 0.00783691 |
| MCF2L      | 2.45377   | 2.903     | 3.70073   | 1.48802    | 3.51507   | 4.06861    | 3.52928   | 2.90578    | 0.509944  | 0.629859  | 0.601268   | 0.819492   | 0.760791  | 0.934887  | 3.20115    |
| MCF2L-AS1  | 0.22041   | 0.212394  | 0.381254  | 0.041298   | 0.373498  | 0.392414   | 0.297413  | 0.160267   | 0.0244031 | 0         | 0          | 0          | 0         | 0         | 0          |
| MCF2L2     | 0.217274  | 0.13791   | 0.237153  | 0.166514   | 0.136351  | 0.172963   | 0.168675  | 0.184629   | 0.0449801 | 0.151538  | 0.182405   | 0.0693787  | 0.154888  | 0.306456  | 0.212161   |
| MCFD2      | 7.8556    | 5.74915   | 6.10417   | 9.95118    | 3.3299    | 12.4077    | 5.7092    | 6.05257    | 9.62448   | 11.4404   | 14.723     | 6.40189    | 16.5029   | 8.19873   | 8.84134    |
| MCHR1      | 0.0668598 | 0.0874382 | 0.126426  | 0.511836   | 0.237386  | 1.78924    | 0.130866  | 0.0594194  | 0.0116325 | 0.17982   | 0.398947   | 0.0136686  | 0.351263  | 0.199679  | 0.192038   |
| MCHR2      | 0         | 0         | 0         | 0          | 0         | 0          | 0         | 0          | 0         | 0         | 0          | 0          | 0         | 0         | 0          |
| MCHR2-AS1  | 0         | 0         | 0         | 0          | 0         | 0          | 0         | 0          | 0         | 0         | 0          | 0          | 0         | 0         | 0          |
| MCIDAS     | 0         | 0.0158993 | 0.0272988 | 0.0566768  | 0.0341722 | 0.00936597 | 0         | 0          | 0         | 0.0138056 | 0          | 0          | 0         | 0         | 0.0473902  |
| MCL1       | 40.4336   | 30.4      | 34.1111   | 59.2736    | 34.3739   | 47.6307    | 25.6614   | 36.3032    | 63.3499   | 65.5494   | 67.6828    | 54.775     | 86.7008   | 68.4067   | 41.3225    |
| MCM10      | 0.152592  | 0.102929  | 0.092572  | 1.3209     | 0.205424  | 0.848874   | 0.185839  | 0.103968   | 0.086725  | 0.638394  | 0.66606    | 0.400339   | 2.25125   | 1.03411   | 0.562461   |
| MCM2       | 2.29054   | 1.76515   | 1.45803   | 7.06103    | 2.35833   | 9.83605    | 2.75092   | 1.38447    | 1.29432   | 3.16483   | 2.83909    | 1.85149    | 6.63107   | 3.41204   | 1.83909    |
| MCM3       | 5.38901   | 4.03901   | 4.08216   | 13.1069    | 6.19697   | 16.8311    | 5.30457   | 3.47494    | 2.66218   | 5.86735   | 7.07702    | 3.60305    | 11.5618   | 7.14863   | 6.6203     |
| MCM3AP     | 7.15031   | 7.54334   | 7.83374   | 8.77496    | 12.022    | 11.4603    | 8.25923   | 6.10406    | 7.32429   | 5.26805   | 4.47102    | 6.71135    | 10.0331   | 8.71856   | 8.0207     |
| MCM3AP-AS1 | 0.965112  | 0.987405  | 1.07632   | 0.577854   | 0.631021  | 0.451233   | 0.83627   | 1.04759    | 0.170256  | 0.546959  | 0.244148   | 0.568686   | 0.117535  | 0.787167  | 0.771373   |
| MCM4       | 7.05863   | 6.88465   | 6.4353    | 14.9197    | 5.55118   | 15.163     | 7.75587   | 6.08108    | 7.77355   | 8.23343   | 9.7761     | 6.74341    | 14.4598   | 7.99794   | 3.70796    |
| MCM5       | 4.74496   | 3.57382   | 3.94041   | 11.3534    | 4.94195   | 14.6673    | 6.63194   | 3.26368    | 3.13297   | 5.08834   | 6.03373    | 3.40816    | 10.6915   | 5.82925   | 4.71262    |
| MCM6       | 3.85616   | 2.12885   | 2.17896   | 7.06608    | 1.21508   | 8.61715    | 2.8608    | 2.30279    | 1.15362   | 4.7555    | 6.96775    | 1.78407    | 7.43632   | 4.31186   | 4.79193    |
| MCM7       | 5.73063   | 6.56315   | 6.27225   | 12.6729    | 8.92119   | 15.1419    | 6.57523   | 3.9401     | 4.69589   | 5.5036    | 5.79026    | 4.61017    | 12.4745   | 6.43519   | 5.60214    |

|           |           |            |            |           |            |           |            |            |            |            |           |            |           |           |          |
|-----------|-----------|------------|------------|-----------|------------|-----------|------------|------------|------------|------------|-----------|------------|-----------|-----------|----------|
| MCM8      | 1.19848   | 1.08947    | 1.34312    | 1.78872   | 0.550242   | 1.60363   | 0.99764    | 0.865729   | 0.496125   | 0.859551   | 0.959716  | 0.705467   | 1.48556   | 1.4996    | 1.41594  |
| MCM8-AS1  | 0.143237  | 0.078873   | 0.118496   | 0.0210872 | 0.127141   | 0.121965  | 0.116817   | 0.0727414  | 0          | 0.0256825  | 0.0230996 | 0.0732072  | 0.0528091 | 0.0962512 | 0.117547 |
| MCM9      | 2.28908   | 1.81944    | 1.875      | 1.89338   | 1.29246    | 1.58046   | 1.84413    | 1.85701    | 1.23802    | 1.06794    | 1.04128   | 1.31193    | 1.72467   | 1.44627   | 1.19493  |
| MCMBP     | 6.86682   | 6.14579    | 7.07745    | 9.73924   | 3.0624     | 9.0772    | 5.43054    | 6.39995    | 7.71095    | 7.42966    | 10.5293   | 4.56716    | 10.8236   | 6.95698   | 6.20962  |
| MCMD2     | 0.161572  | 0.159661   | 0.305117   | 0.14067   | 0.0449044  | 0.12323   | 0.208787   | 0.154852   | 0.0453018  | 0.0521101  | 0.098333  | 0.0474207  | 0.0666483 | 0.0955904 | 0.101064 |
| MCOLN1    | 3.9491    | 4.50173    | 3.68675    | 4.54711   | 8.89305    | 7.33574   | 5.59211    | 2.97044    | 9.59225    | 4.3335     | 8.36817   | 5.30408    | 6.76841   | 3.86851   | 3.15254  |
| MCOLN2    | 0.572702  | 0.615552   | 0.996151   | 0.310226  | 0.193888   | 0.543916  | 0.217964   | 0.841758   | 0.0983636  | 0.0368616  | 0.314966  | 0.120834   | 0.108957  | 0.314669  | 0.411237 |
| MCOLN3    | 0.600907  | 0.849017   | 1.06812    | 0.426782  | 0.138751   | 0.414863  | 1.01987    | 0.94539    | 0.33625    | 0.254797   | 0.41251   | 0.313758   | 0.110024  | 0.174006  | 0.151604 |
| MCPH1     | 1.47074   | 1.04699    | 1.18132    | 1.29584   | 0.740331   | 0.968555  | 0.935057   | 1.05212    | 0.74139    | 0.932382   | 1.20173   | 0.801589   | 1.22661   | 1.16965   | 1.09428  |
| MCPH1-AS1 | 0.156231  | 0.263329   | 0.2017     | 0.183565  | 0.129342   | 0.0882324 | 0.23442    | 0.214218   | 0.00687888 | 0.0643236  | 0.0468352 | 0.221246   | 0.018542  | 0.230468  | 0.197003 |
| MCRIP1    | 5.70026   | 3.60964    | 3.83989    | 11.5807   | 18.392     | 21.9247   | 7.34517    | 3.35798    | 4.16537    | 9.52557    | 28.0561   | 4.06703    | 9.5833    | 8.51196   | 10.4083  |
| MCRIP2    | 1.92405   | 0.865817   | 0.900968   | 2.50655   | 2.93232    | 3.27661   | 1.13986    | 0.725916   | 0.397915   | 1.27579    | 3.58587   | 0.831221   | 2.21342   | 1.72658   | 0.729896 |
| MCRS1     | 5.04623   | 5.53341    | 5.61413    | 10.5799   | 12.3795    | 11.7841   | 6.10599    | 3.67021    | 9.26809    | 8.02244    | 12.7812   | 6.25856    | 10.2762   | 7.74243   | 6.3474   |
| MCTP1     | 3.34289   | 1.86672    | 2.48183    | 2.54837   | 1.18499    | 2.86102   | 1.53161    | 2.22434    | 0.250539   | 4.06655    | 6.91364   | 0.509051   | 2.93383   | 2.21306   | 5.08396  |
| MCTP2     | 2.01782   | 2.00664    | 1.75163    | 2.52581   | 1.16181    | 2.16028   | 1.34546    | 1.52308    | 3.22093    | 1.54318    | 2.27787   | 1.64979    | 1.34702   | 2.18372   | 3.48901  |
| MCTS1     | 1.41014   | 1.48339    | 1.49043    | 1.62323   | 0.37445    | 1.12752   | 1.03896    | 1.49351    | 1.16285    | 1.23045    | 1.94855   | 0.849367   | 1.12864   | 1.4122    | 1.36455  |
| MCU       | 2.504     | 2.95829    | 3.86572    | 3.6752    | 2.12159    | 3.7043    | 4.09355    | 2.20849    | 8.61742    | 5.55541    | 7.80201   | 2.95445    | 5.54032   | 3.42379   | 3.40536  |
| MCUB      | 4.7594    | 4.13993    | 3.74195    | 15.0324   | 3.35789    | 7.91952   | 3.50522    | 3.2934     | 3.56192    | 10.9439    | 15.9953   | 6.26504    | 18.2955   | 9.5986    | 5.42634  |
| MCUR1     | 3.65483   | 4.73053    | 4.5493     | 3.90591   | 3.14087    | 3.5983    | 4.38065    | 4.22555    | 11.1125    | 3.92354    | 5.80198   | 4.32526    | 3.8155    | 2.80557   | 1.63418  |
| MDC1      | 0.280336  | 0.328018   | 0.327951   | 0.338662  | 0.280867   | 0.612469  | 0.352719   | 0.276605   | 0.0989825  | 0.156043   | 0.159119  | 0.168      | 0.299173  | 0.228393  | 0.299411 |
| MDC1-AS1  | 7.66E-09  | 0.00387147 | 0.00754627 | 5.57E-20  | 0.00290022 | 2.13E-19  | 0.00979818 | 0.00797381 | 2.13E-09   | 0.00170602 | 5.16E-17  | 6.15E-15   | 2.06E-15  | 2.64E-15  | 3.01E-17 |
| MDFI      | 2.819     | 2.26738    | 1.3353     | 20.8977   | 15.8205    | 21.7092   | 1.6223     | 1.63652    | 9.4829     | 14.609     | 14.0252   | 11.9234    | 36.0031   | 21.8387   | 7.52553  |
| MDFIC     | 2.62084   | 1.55572    | 1.7692     | 2.69221   | 2.35145    | 5.07735   | 2.01567    | 2.34782    | 3.23785    | 4.5473     | 6.49945   | 2.31035    | 4.16109   | 2.89294   | 5.85355  |
| MDFIC2    | 0         | 0.00354665 | 0          | 0         | 0          | 0         | 0          | 0.00654186 | 0          | 0          | 0         | 0          | 0         | 0         | 0        |
| MDGA1     | 0.511865  | 0.335509   | 0.404105   | 0.564978  | 3.53962    | 0.716823  | 0.667497   | 0.309426   | 0.145564   | 0.945728   | 1.43138   | 0.193352   | 1.05614   | 1.07281   | 4.1718   |
| MDGA2     | 0.0443708 | 0.0498832  | 0.0611777  | 0.034294  | 0.0229744  | 0.0535233 | 0.0295523  | 0.0460052  | 0.00900643 | 0          | 0         | 0.00264571 | 0         | 0         | 0        |

|        |           |           |           |           |          |           |           |           |           |           |           |           |           |           |           |
|--------|-----------|-----------|-----------|-----------|----------|-----------|-----------|-----------|-----------|-----------|-----------|-----------|-----------|-----------|-----------|
| MDH1   | 12.4135   | 8.86785   | 9.25249   | 21.8919   | 8.55294  | 16.7631   | 8.8267    | 9.03839   | 14.2789   | 20.6553   | 39.579    | 10.0765   | 15.9628   | 14.522    | 9.33729   |
| MDH1B  | 0.27702   | 0.141341  | 0.157146  | 0.0652519 | 0.147534 | 0.121309  | 0.0632585 | 0.175852  | 0.0963941 | 0.0496698 | 0.151893  | 0.0622962 | 0.0204696 | 0.0537765 | 0.0227335 |
| MDH2   | 16.9461   | 14.3818   | 15.1693   | 28.6018   | 21.3325  | 37.3253   | 20.8584   | 13.8022   | 26.7297   | 18.8857   | 31.1591   | 20.375    | 28.0368   | 14.8203   | 11.6388   |
| MDK    | 4.44159   | 1.60337   | 2.0249    | 5.0165    | 24.1153  | 33.5337   | 1.82126   | 4.44838   | 1.50725   | 7.38683   | 23.5488   | 0.865854  | 1.25097   | 1.35114   | 12.5401   |
| MDM1   | 0.812565  | 0.534898  | 0.533896  | 0.578924  | 0.311653 | 0.820015  | 0.416156  | 0.52006   | 0.272856  | 0.306375  | 0.551126  | 0.270369  | 0.343036  | 0.449149  | 0.648303  |
| MDM2   | 6.76088   | 5.61283   | 5.30582   | 7.00181   | 3.24517  | 6.94736   | 4.49664   | 6.54691   | 7.33604   | 7.51462   | 9.29684   | 5.71069   | 8.11026   | 5.99568   | 6.99467   |
| MDM4   | 8.18723   | 7.8971    | 8.28953   | 4.46602   | 4.45932  | 3.69011   | 6.98811   | 8.28852   | 3.004     | 2.57695   | 2.84667   | 3.5971    | 2.68051   | 4.75556   | 5.07928   |
| MDN1   | 5.52907   | 7.1982    | 7.55597   | 5.83909   | 5.45846  | 5.85033   | 7.0513    | 4.93275   | 3.0251    | 2.21626   | 2.04939   | 4.54336   | 3.59033   | 4.75978   | 3.73405   |
| MDP1   | 2.68696   | 1.99138   | 2.22947   | 1.82724   | 0.883458 | 3.00787   | 2.59975   | 1.52074   | 1.87195   | 2.11863   | 6.45958   | 0.682209  | 1.66627   | 1.48218   | 0.201482  |
| MDS2   | 0         | 0.0216728 | 0         | 0         | 0.104808 | 0         | 0         | 0         | 0         | 0         | 0         | 0         | 0         | 0         | 0         |
| ME1    | 2.54001   | 2.68225   | 3.04304   | 8.2731    | 2.6576   | 5.41257   | 3.08793   | 4.18136   | 17.607    | 17.4348   | 18.155    | 13.2636   | 16.8126   | 7.13628   | 3.70448   |
| ME2    | 1.49213   | 1.86246   | 2.38181   | 3.47269   | 0.847785 | 3.41935   | 1.60076   | 1.45068   | 1.15865   | 3.65129   | 5.39811   | 1.3077    | 3.25645   | 2.37357   | 1.97749   |
| ME3    | 1.44732   | 0.717752  | 0.788484  | 0.647533  | 1.76565  | 1.85758   | 1.12854   | 0.828226  | 0.283748  | 0.708893  | 1.46648   | 0.292999  | 0.501066  | 0.977829  | 2.50438   |
| MEA1   | 5.63283   | 5.47211   | 6.3195    | 9.94472   | 7.24365  | 12.8634   | 6.51404   | 4.48024   | 14.8498   | 10.8581   | 22.5965   | 6.54041   | 10.5924   | 7.12724   | 5.07842   |
| MEAF6  | 3.54719   | 3.33734   | 3.27382   | 3.82841   | 1.95493  | 3.95309   | 2.85262   | 3.50872   | 4.89914   | 4.07768   | 4.95674   | 3.13847   | 4.68551   | 2.82841   | 2.55716   |
| MEAT6  | 0.0216088 | 0.0208229 | 0         | 0         | 0.033566 | 0.0367993 | 0         | 0.0192041 | 0         | 0         | 0         | 0         | 0         | 0         | 0         |
| MECOM  | 1.40364   | 0.676295  | 0.600227  | 0.995772  | 0.642513 | 2.19115   | 0.630985  | 0.620704  | 0.313816  | 1         | 1.63429   | 0.373595  | 1.23593   | 1.0118    | 2.94092   |
| MECP2  | 4.16214   | 3.82758   | 4.23229   | 2.75866   | 4.40342  | 6.30044   | 4.58975   | 3.58832   | 1.86027   | 2.17105   | 2.26645   | 1.94406   | 3.00674   | 2.6378    | 4.60117   |
| MECR   | 1.97985   | 1.80223   | 1.77826   | 2.4775    | 2.32851  | 4.05198   | 2.34126   | 1.41391   | 1.67925   | 1.16259   | 2.33877   | 1.24968   | 1.80659   | 1.65931   | 1.11702   |
| MED1   | 4.8797    | 4.61874   | 4.7488    | 5.0433    | 2.44867  | 5.94227   | 4.8418    | 4.44269   | 3.64947   | 3.515     | 3.5655    | 3.0485    | 6.4818    | 4.22929   | 4.91937   |
| MED10  | 6.19099   | 4.91367   | 4.99126   | 11.8088   | 8.60262  | 12.3067   | 5.11515   | 4.74176   | 7.15608   | 10.7937   | 17.2307   | 5.5413    | 16.3698   | 8.58927   | 6.56321   |
| MED11  | 3.07779   | 3.87401   | 3.29619   | 6.5648    | 5.29972  | 6.88695   | 3.26895   | 2.43843   | 6.88659   | 5.36021   | 11.4468   | 3.51675   | 5.4801    | 3.84064   | 3.42643   |
| MED12  | 2.8028    | 4.32171   | 4.37636   | 4.14091   | 4.92115  | 7.21055   | 5.25143   | 3.09887   | 2.85132   | 2.15903   | 2.3955    | 2.78249   | 3.62956   | 2.85337   | 4.27795   |
| MED12L | 0.114788  | 0.0776462 | 0.0612662 | 0.0833676 | 0.110189 | 0.123354  | 0.0633921 | 0.086874  | 0.0431964 | 0.06121   | 0.0732866 | 0.0420988 | 0.0514889 | 0.0683562 | 0.0955067 |
| MED13  | 8.26427   | 8.19172   | 8.50528   | 8.33197   | 3.23594  | 7.3495    | 6.21147   | 7.6905    | 9.06842   | 8.84869   | 7.92631   | 6.41966   | 10.7283   | 7.90922   | 7.83508   |
| MED13L | 18.5332   | 19.6534   | 21.5321   | 15.414    | 11.7492  | 20.1746   | 19.7095   | 17.8788   | 14.9494   | 11.1412   | 9.0122    | 10.5858   | 17.3647   | 11.2508   | 12.5673   |

|          |          |          |           |          |          |          |          |           |          |          |           |          |           |          |          |
|----------|----------|----------|-----------|----------|----------|----------|----------|-----------|----------|----------|-----------|----------|-----------|----------|----------|
| MED14    | 5.3774   | 5.36039  | 5.33518   | 6.21404  | 2.30992  | 6.8336   | 5.03507  | 5.32352   | 4.1229   | 7.55517  | 5.81958   | 5.90248  | 9.51812   | 6.98312  | 4.93475  |
| MED14OS  | 0.881238 | 1.04186  | 1.18602   | 1.0708   | 2.11243  | 1.52608  | 1.03365  | 0.46047   | 0.717112 | 1.40177  | 1.4566    | 1.34826  | 1.81364   | 0.905011 | 0.703137 |
| MED15    | 5.22821  | 6.96289  | 7.15016   | 9.76651  | 9.52013  | 15.9953  | 7.56353  | 5.51657   | 5.59442  | 9.14873  | 8.87685   | 7.9099   | 15.9145   | 8.49744  | 7.76005  |
| MED15P9  | 0        | 0        | 0.0208671 | 0        | 0        | 0        | 0        | 0         | 0        | 0        | 0         | 0        | 0         | 0        | 0        |
| MED16    | 3.26092  | 4.91942  | 4.44591   | 8.88242  | 13.2781  | 9.81931  | 5.21431  | 3.52407   | 6.79578  | 6.58622  | 7.34448   | 5.48773  | 12.8585   | 6.76343  | 6.59271  |
| MED17    | 2.01848  | 2.72629  | 2.64983   | 3.86013  | 2.89896  | 3.96712  | 1.5868   | 1.75269   | 3.16756  | 2.67461  | 4.08656   | 2.01725  | 3.89413   | 3.1683   | 2.28102  |
| MED18    | 1.89454  | 1.92109  | 1.62876   | 5.32119  | 5.59721  | 4.6181   | 2.09243  | 2.09088   | 8.52056  | 5.05097  | 8.73648   | 2.98585  | 5.44063   | 3.7989   | 2.47183  |
| MED19    | 2.67794  | 3.10345  | 2.94995   | 4.15407  | 3.59054  | 3.9604   | 3.99096  | 2.8935    | 3.26143  | 3.44954  | 5.21876   | 2.47081  | 3.4374    | 2.91708  | 1.98366  |
| MED20    | 2.21573  | 2.33     | 1.77726   | 4.02847  | 2.98376  | 3.40747  | 1.59679  | 1.50495   | 2.01106  | 2.78097  | 3.89934   | 1.66981  | 3.40816   | 2.69035  | 1.58499  |
| MED21    | 3.95509  | 4.64519  | 3.7449    | 6.98942  | 0.875918 | 2.55411  | 2.92407  | 5.11583   | 6.08542  | 5.1508   | 5.45499   | 3.21102  | 5.25514   | 4.74414  | 2.08079  |
| MED22    | 2.28179  | 2.95642  | 3.19336   | 3.72821  | 7.52038  | 5.6576   | 3.10474  | 1.76519   | 1.87904  | 2.73775  | 2.10874   | 1.97953  | 4.17249   | 3.36451  | 3.10715  |
| MED23    | 4.71067  | 4.5273   | 4.66476   | 4.5257   | 1.66682  | 5.02702  | 3.737    | 3.91764   | 3.39579  | 3.18236  | 3.69016   | 2.95558  | 3.24781   | 3.44721  | 3.53425  |
| MED24    | 4.47429  | 4.40021  | 4.47221   | 9.08115  | 8.78448  | 10.8839  | 6.41631  | 4.40355   | 4.97948  | 4.20807  | 4.45473   | 4.6324   | 8.90947   | 5.41204  | 4.78943  |
| MED25    | 3.18056  | 5.13512  | 4.87832   | 8.34685  | 10.6175  | 11.0095  | 5.98853  | 3.23042   | 6.58026  | 5.02091  | 7.7719    | 7.18072  | 10.3751   | 5.85419  | 4.96488  |
| MED26    | 2.15149  | 2.1748   | 2.44731   | 2.51679  | 2.98071  | 3.10691  | 2.65568  | 1.80871   | 2.98322  | 2.19859  | 2.23184   | 1.90351  | 3.78922   | 2.29071  | 1.78499  |
| MED27    | 3.03599  | 2.94104  | 3.01179   | 3.97714  | 3.25721  | 5.29074  | 3.42234  | 2.94767   | 3.94818  | 3.97194  | 6.14295   | 3.02839  | 4.55671   | 3.67776  | 2.95598  |
| MED28    | 5.74226  | 6.0318   | 6.28589   | 7.62111  | 4.67009  | 9.63075  | 6.24727  | 5.88505   | 4.29731  | 4.07676  | 8.30476   | 3.51387  | 5.10824   | 5.66885  | 4.58145  |
| MED29    | 5.05087  | 4.92812  | 4.65435   | 5.71974  | 5.02758  | 10.3132  | 4.82145  | 3.75845   | 6.85974  | 6.34731  | 10.4189   | 5.90274  | 6.84393   | 5.88432  | 4.64817  |
| MED30    | 0.921436 | 0.801885 | 0.963187  | 1.03054  | 0.510389 | 1.35631  | 0.864488 | 0.863332  | 0.417565 | 0.815824 | 1.99168   | 0.413987 | 1.10145   | 0.839971 | 0.902716 |
| MED31    | 1.1384   | 1.25438  | 1.20295   | 2.00506  | 0.829381 | 1.50533  | 0.820193 | 1.13213   | 1.29274  | 2.01363  | 2.8686    | 1.09578  | 1.42891   | 1.30208  | 0.530788 |
| MED4     | 5.3607   | 3.86292  | 4.56211   | 6.47455  | 1.23171  | 6.0617   | 3.08946  | 5.31083   | 6.34698  | 5.45693  | 8.09906   | 3.8046   | 7.76562   | 4.88825  | 4.06839  |
| MED4-AS1 | 0.734034 | 0.44511  | 0.212639  | 0.356793 | 0.108491 | 0.126907 | 0.078062 | 0.0933281 | 1.81E-17 | 0.232269 | 0.0970038 | 0.412493 | 0.0439231 | 0.349996 | 0.369835 |
| MED6     | 4.60553  | 3.73849  | 4.27137   | 4.84519  | 1.55327  | 3.96247  | 3.53491  | 4.25537   | 4.77763  | 3.8134   | 4.68895   | 2.74501  | 4.56575   | 3.33168  | 3.06542  |
| MED7     | 1.67885  | 1.86727  | 1.71337   | 2.87812  | 0.755542 | 2.23112  | 0.859899 | 1.43625   | 1.79624  | 2.42222  | 3.38305   | 0.987955 | 2.21699   | 1.64828  | 1.14919  |
| MED8     | 5.4753   | 5.51551  | 5.08057   | 11.8898  | 9.2065   | 10.5835  | 5.59416  | 4.56501   | 19.6751  | 16.2097  | 19.6387   | 10.8485  | 20.8467   | 9.76495  | 7.73349  |
| MED9     | 3.18712  | 2.20805  | 2.11101   | 3.68155  | 2.29738  | 4.7447   | 2.74705  | 2.37888   | 3.64054  | 1.76478  | 3.32743   | 1.50541  | 2.74847   | 1.85081  | 1.54066  |

|           |            |           |           |            |            |            |           |           |            |           |           |           |            |           |           |
|-----------|------------|-----------|-----------|------------|------------|------------|-----------|-----------|------------|-----------|-----------|-----------|------------|-----------|-----------|
| MEDAG     | 2.50797    | 0.900452  | 1.40187   | 11.0566    | 1.62448    | 20.209     | 4.74305   | 1.72114   | 0.235863   | 4.50896   | 11.0952   | 0.436505  | 11.0208    | 4.43842   | 9.67887   |
| MEF2A     | 8.57364    | 9.34097   | 10.5914   | 7.29252    | 3.07291    | 12.1521    | 8.76842   | 9.86896   | 4.85792    | 7.55687   | 8.74234   | 5.34596   | 6.18023    | 5.41354   | 8.20335   |
| MEF2B     | 1.13195    | 0.961412  | 1.00945   | 1.00984    | 2.85363    | 2.30657    | 1.09067   | 1.10749   | 0.678223   | 0.580517  | 0.774311  | 0.570069  | 0.914269   | 0.574235  | 1.21394   |
| MEF2C     | 2.66026    | 0.96691   | 1.13616   | 1.09486    | 0.990421   | 3.73135    | 1.75289   | 1.70928   | 0.399747   | 2.16099   | 4.199     | 0.341985  | 1.65702    | 1.42354   | 4.56081   |
| MEF2C-AS1 | 0.0559153  | 0.0371827 | 0.0283743 | 0.0220911  | 0.0133194  | 0.0109518  | 0.0391611 | 0.0228614 | 1.27E-16   | 0.0107621 | 0.0198672 | 0         | 0.00276617 | 0.0224075 | 0.0431001 |
| MEF2C-AS2 | 2.69E-12   | 8.02E-27  | 5.41E-30  | 4.38E-13   | 0.819      | 5.58E-14   | 8.97E-10  | 7.70E-30  | 1.53E-25   | 2.00E-23  | 2.47E-13  | 6.81E-10  | 8.70E-06   | 3.74E-13  | 2.65E-22  |
| MEF2D     | 7.24429    | 6.1325    | 6.99546   | 4.97958    | 7.5888     | 13.4725    | 9.4243    | 6.30609   | 6.50215    | 4.96949   | 6.94763   | 4.2837    | 7.10319    | 6.21021   | 9.11769   |
| MEFV      | 0.0579853  | 0.0182101 | 0.0260555 | 2.0513     | 0.20548    | 2.09718    | 0.0721166 | 0.0448129 | 0.0505347  | 0.909198  | 1.1662    | 0.157752  | 1.13391    | 0.645272  | 1.25744   |
| MEG3      | 1.01841    | 0.836802  | 1.11608   | 0.268582   | 4.83427    | 1.40424    | 1.27781   | 0.99461   | 0.0693505  | 0.263888  | 0.551341  | 0.504604  | 0.107392   | 2.21605   | 5.77791   |
| MEG8      | 0.551748   | 0.195112  | 0.297317  | 0.130411   | 0.448185   | 0.2974     | 0.190724  | 0.350891  | 0.00616484 | 0.304954  | 0.719997  | 0.105036  | 0.163296   | 0.902141  | 1.81739   |
| MEG9      | 0.0701305  | 0.10137   | 0.123286  | 0.00903393 | 0.653621   | 0.179146   | 0.0600545 | 0.0779076 | 0          | 0.110026  | 0.138545  | 0.0689978 | 0.0339359  | 0.16494   | 0.906446  |
| MEGF10    | 0.273343   | 0.126213  | 0.146042  | 0.0440138  | 0.203452   | 0.375791   | 0.253577  | 0.204968  | 0.0208063  | 0.196553  | 0.28607   | 0.103904  | 0.292096   | 0.930083  | 1.10815   |
| MEGF11    | 0.876571   | 0.86166   | 1.06832   | 0.38311    | 0.35864    | 0.173269   | 0.737227  | 1.11289   | 0.214466   | 0.289781  | 0.172286  | 0.333205  | 0.0934183  | 0.451999  | 0.606954  |
| MEGF6     | 3.96969    | 8.95472   | 10.7863   | 3.15793    | 18.3781    | 8.28876    | 8.5037    | 4.0809    | 1.60271    | 1.56968   | 1.91754   | 2.43528   | 2.40065    | 2.23896   | 9.08314   |
| MEGF8     | 2.01649    | 2.2217    | 2.29054   | 3.05836    | 6.84102    | 6.29292    | 3.01224   | 1.70554   | 1.4412     | 1.59449   | 1.61662   | 1.92478   | 2.58735    | 2.25621   | 3.87216   |
| MEGF9     | 6.51061    | 8.84872   | 9.13191   | 6.22547    | 5.43579    | 5.83882    | 7.19532   | 7.81636   | 20.4561    | 8.26972   | 10.0632   | 6.69845   | 7.02587    | 3.952     | 4.02476   |
| MEI1      | 0.0866565  | 0.0584534 | 0.105143  | 0.196464   | 0.125634   | 0.0737868  | 0.0923454 | 0.118087  | 0.0140717  | 0.152268  | 0.260865  | 0.0289357 | 0.137912   | 0.0392517 | 0.273789  |
| MEI4      | 0.0519971  | 0.008351  | 0.0143386 | 0          | 0.00673079 | 0.0332061  | 0         | 0.0269563 | 0.00527722 | 0.0217539 | 0.0440237 | 0         | 0.0223655  | 0         | 0         |
| MEIG1     | 0.058442   | 0.0375444 | 0.0161158 | 0.0602262  | 0.0302602  | 0          | 0.0222424 | 0.103877  | 0.118626   | 0         | 0.0879651 | 0.0418168 | 0          | 0.0407258 | 0         |
| MEIKIN    | 0.0296706  | 0         | 0.0122728 | 0.0458646  | 0          | 0          | 0         | 0         | 0.0180677  | 0.204818  | 0.083736  | 0.0318451 | 0.028715   | 0.054275  | 0.0213054 |
| MEIOB     | 0.0898673  | 0.0547019 | 0.107409  | 0          | 0.0394317  | 0.0569327  | 0.0280509 | 0.0779753 | 0.165708   | 0.0170267 | 0.030364  | 0.0565644 | 0.0266957  | 0.0217457 | 0         |
| MEIOC     | 0.103847   | 0.0619482 | 0.061364  | 0.0458646  | 0.0153629  | 0.0505282  | 0.0395231 | 0.158212  | 0.0240903  | 0.062066  | 0.0390768 | 0.0672286 | 0.0382866  | 0.0439369 | 0.0710178 |
| MEIS1     | 2.46636    | 4.2205    | 2.73852   | 3.13396    | 3.45817    | 2.54611    | 2.3093    | 2.08198   | 2.65819    | 3.17772   | 3.48232   | 3.22756   | 1.38475    | 1.64646   | 1.5986    |
| MEIS1-AS2 | 1.02344    | 1.03394   | 1.22903   | 0.510334   | 4.00005    | 0.421669   | 0.829283  | 0.410766  | 0.36187    | 0.580109  | 0.521767  | 0.921283  | 0.170405   | 0.500387  | 0.426715  |
| MEIS1-AS3 | 0.00564602 | 0.0625678 | 0.065391  | 0.00581839 | 0.0438511  | 0.00480752 | 0.0128929 | 0         | 0.0481336  | 0         | 0         | 0         | 0.0254995  | 0         | 0.040542  |
| MEIS2     | 1.51252    | 1.81054   | 2.12584   | 1.48318    | 1.52837    | 1.81819    | 1.11146   | 1.68839   | 0.452551   | 0.729128  | 1.00438   | 0.958667  | 0.796903   | 0.86436   | 1.36042   |

|           |            |           |           |           |           |            |           |           |           |            |            |           |            |            |           |
|-----------|------------|-----------|-----------|-----------|-----------|------------|-----------|-----------|-----------|------------|------------|-----------|------------|------------|-----------|
| MEIS3     | 0.481493   | 0.453895  | 0.718717  | 1.41307   | 3.12177   | 4.04637    | 1.06365   | 0.401077  | 0.293202  | 1.97062    | 5.54181    | 0.292094  | 1.57354    | 1.76701    | 5.32142   |
| MEIS3P1   | 1.79163    | 0.59761   | 1.1128    | 1.40292   | 0.767821  | 3.95484    | 0.842807  | 0.894468  | 0.305936  | 1.21029    | 2.82662    | 0.266714  | 1.83219    | 0.924074   | 3.68905   |
| MELK      | 0.399171   | 0.397475  | 0.337561  | 4.13186   | 0.192905  | 2.74933    | 0.506401  | 0.40205   | 1.19916   | 2.9392     | 3.23441    | 1.33923   | 4.20655    | 3.20354    | 1.28665   |
| MELTF     | 1.62593    | 1.02908   | 1.54406   | 0.510602  | 6.83713   | 2.33883    | 1.79602   | 1.0303    | 0.0292929 | 0.283767   | 0.255228   | 0.134238  | 0.220361   | 0.291641   | 0.43523   |
| MELTF-AS1 | 0.730065   | 0.609711  | 0.644225  | 0.32602   | 1.58766   | 0.745969   | 0.388997  | 0.281156  | 0.0889137 | 0.152718   | 0.137359   | 0.226365  | 0.125609   | 0.394282   | 0.209693  |
| MEMO1     | 5.35985    | 5.80538   | 6.30286   | 10.8021   | 5.08353   | 8.72641    | 5.20805   | 4.8483    | 9.24591   | 13.8539    | 16.0889    | 8.6098    | 16.7602    | 9.74914    | 4.32736   |
| MEN1      | 2.22163    | 3.20209   | 2.84612   | 5.0237    | 6.85259   | 6.87493    | 2.59456   | 1.83338   | 4.06629   | 3.38587    | 2.92355    | 4.15575   | 4.48037    | 3.61604    | 2.37012   |
| MEOX1     | 2.52416    | 1.75988   | 2.12091   | 2.80523   | 2.5678    | 2.91628    | 2.67857   | 0.976479  | 0.53044   | 2.75809    | 5.08431    | 0.637448  | 3.4743     | 3.51278    | 5.81422   |
| MEOX2     | 3.84579    | 1.36385   | 1.8976    | 0.724239  | 1.66782   | 1.87003    | 2.51869   | 1.58746   | 0.106989  | 2.05815    | 3.49297    | 0.230478  | 0.749423   | 1.18354    | 3.70072   |
| MEP1A     | 0.00790135 | 0         | 0.0130731 | 0.0244277 | 0         | 0.0134558  | 0         | 0         | 0         | 0.009917   | 0.00891964 | 0.0226145 | 0.00509791 | 0.00825918 | 0         |
| MEP1B     | 0.2103     | 0.159226  | 0.132553  | 0.0309601 | 0         | 0.00852705 | 0.28585   | 0.160198  | 0.0121963 | 0.012569   | 0.0339147  | 0.0501585 | 0          | 0.0523391  | 0.0575272 |
| MEPCE     | 5.5784     | 6.0297    | 6.35787   | 7.1204    | 10.6497   | 16.2261    | 6.82746   | 3.63797   | 8.05653   | 3.87852    | 3.83578    | 5.79582   | 5.8864     | 5.3626     | 4.68767   |
| MEPE      | 0          | 0         | 0         | 0         | 0         | 0          | 0         | 0         | 0         | 0.0126236  | 0.0227081  | 0         | 0.0389355  | 0          | 0         |
| MERTK     | 2.24665    | 0.716522  | 0.844813  | 2.75592   | 0.822885  | 2.74993    | 1.34088   | 1.10042   | 0.349794  | 1.35381    | 3.01893    | 0.470388  | 1.02126    | 0.91067    | 2.29153   |
| MESD      | 2.91162    | 2.71365   | 2.70009   | 4.17058   | 2.94532   | 5.32244    | 2.37456   | 2.97724   | 3.67837   | 3.01005    | 3.98904    | 2.17987   | 4.07886    | 3.81119    | 3.52491   |
| MESP1     | 0.617414   | 0.086365  | 0.0823819 | 0.164197  | 0.34031   | 0.678348   | 0.1137    | 0.177002  | 0         | 0.149984   | 0.382216   | 0.0142508 | 0          | 0.0728649  | 0.171616  |
| MESP2     | 0.172388   | 0.145353  | 0.0475371 | 0.207259  | 0.379352  | 0.45259    | 0.0820111 | 0.0893689 | 0.139966  | 0.270455   | 0.567596   | 0.051395  | 0.305865   | 0.172687   | 0.144416  |
| MEST      | 1.09252    | 0.452255  | 0.681042  | 0.840444  | 0.250975  | 1.44126    | 0.922379  | 0.95727   | 0.393549  | 0.724241   | 1.26807    | 0.649607  | 0.794244   | 0.571001   | 0.81765   |
| MESTIT1   | 0.128493   | 0.0515916 | 0.0708658 | 0.0514951 | 0.0443543 | 0.018235   | 0.0489031 | 0.0888176 | 0         | 0.00895956 | 0.00805849 | 0.0051078 | 0          | 0          | 0         |
| MET       | 2.19927    | 3.17894   | 4.20421   | 4.85707   | 0.793615  | 2.9991     | 2.24449   | 1.65684   | 2.24579   | 3.03209    | 1.94415    | 1.78426   | 6.01642    | 3.54554    | 2.02625   |
| METAP1    | 7.71992    | 7.25398   | 6.98087   | 12.0453   | 4.06212   | 10.3937    | 4.94138   | 6.08861   | 12.8209   | 10.6435    | 10.4408    | 8.33952   | 12.2958    | 9.03893    | 5.96334   |
| METAP1D   | 1.28572    | 0.929224  | 0.762277  | 0.699294  | 0.843252  | 0.894069   | 0.905266  | 0.723675  | 0.313174  | 0.331709   | 0.556379   | 0.444653  | 0.400946   | 0.627178   | 0.451358  |
| METAP2    | 8.52013    | 7.72344   | 7.35981   | 12.4623   | 4.08326   | 13.2552    | 4.1099    | 7.17876   | 12.854    | 11.5475    | 11.8548    | 8.75232   | 15.916     | 11.481     | 6.49741   |
| METRN     | 0.800479   | 0.713343  | 0.978668  | 0.98552   | 3.40015   | 1.8759     | 1.63381   | 0.786946  | 0.802346  | 1.35143    | 3.16674    | 0.795787  | 0.827258   | 1.58831    | 1.38358   |
| METRNL    | 16.9435    | 22.59     | 23.8989   | 29.0703   | 57.8672   | 38.6225    | 31.6517   | 15.9544   | 111.961   | 55.8055    | 80.3812    | 49.6124   | 77.5112    | 34.3259    | 25.2122   |
| METTL1    | 1.66446    | 1.68924   | 2.02149   | 4.74438   | 2.83302   | 5.24689    | 2.24412   | 1.36908   | 1.98399   | 2.04462    | 4.03778    | 1.96382   | 2.50196    | 2.88739    | 2.31409   |

|           |           |           |           |           |          |           |           |           |            |           |          |           |          |           |           |
|-----------|-----------|-----------|-----------|-----------|----------|-----------|-----------|-----------|------------|-----------|----------|-----------|----------|-----------|-----------|
| METTL11B  | 0         | 0         | 0         | 0         | 0        | 0         | 0         | 0         | 0          | 0.0619337 | 0.167115 | 0.017654  | 0        | 0         | 0         |
| METTL13   | 2.57446   | 2.79176   | 2.54563   | 5.48114   | 5.04363  | 6.32764   | 2.31898   | 1.92576   | 3.01131    | 2.27635   | 2.53819  | 2.38647   | 4.42646  | 3.11706   | 2.39005   |
| METTL14   | 2.85325   | 2.74948   | 2.92866   | 2.94717   | 0.923352 | 3.2281    | 1.87019   | 2.88205   | 2.43729    | 2.42058   | 3.58631  | 1.58317   | 3.06817  | 2.24376   | 1.75477   |
| METTL15   | 1.91286   | 1.94431   | 1.83391   | 1.76603   | 0.724518 | 1.8519    | 1.26256   | 1.60685   | 1.20632    | 1.77597   | 2.09431  | 1.50746   | 1.27475  | 1.78037   | 1.33216   |
| METTL16   | 4.01473   | 3.35703   | 3.69067   | 3.50717   | 2.99941  | 4.30223   | 3.81685   | 3.78247   | 2.93958    | 1.87823   | 2.00722  | 2.28833   | 3.6752   | 2.7122    | 2.54198   |
| METTL17   | 7.10136   | 7.87846   | 7.34418   | 7.4421    | 5.35355  | 9.59987   | 5.38414   | 5.25022   | 3.02632    | 4.67425   | 6.61061  | 5.18373   | 4.9506   | 5.70545   | 4.05648   |
| METTL18   | 1.20962   | 0.709206  | 1.07302   | 1.23153   | 0.407484 | 1.50153   | 0.432635  | 0.777114  | 0.940704   | 1.48161   | 2.50069  | 0.49011   | 1.48565  | 0.837854  | 1.19299   |
| METTL21A  | 0.609384  | 0.737289  | 0.554538  | 0.809407  | 0.557433 | 0.703374  | 0.688044  | 0.643866  | 0.305111   | 0.671359  | 1.27647  | 0.387583  | 0.747026 | 0.824537  | 0.952944  |
| METTL21C  | 0.189009  | 0.0708301 | 0.104241  | 0         | 0        | 0.0357641 | 0         | 0.186639  | 0.0255768  | 0.0790751 | 0        | 0         | 0        | 0.0658561 | 0.06032   |
| METTL21EP | 0.13013   | 0.106105  | 0.0414048 | 0.0206311 | 0        | 0.0511402 | 0.12572   | 0.0800643 | 0.012191   | 0         | 0        | 0.0143248 | 0        | 0.0156949 | 0         |
| METTL22   | 2.50234   | 2.50193   | 2.27353   | 3.04082   | 3.10061  | 4.06437   | 2.87361   | 2.14674   | 2.25485    | 2.3419    | 3.59227  | 2.15273   | 2.07179  | 2.6837    | 2.94973   |
| METTL23   | 4.07683   | 3.69996   | 3.72154   | 4.88944   | 3.33014  | 5.11728   | 3.27039   | 2.65489   | 3.25301    | 2.97747   | 8.05392  | 2.84164   | 4.2063   | 3.10425   | 3.33121   |
| METTL24   | 0.564639  | 0.365032  | 0.437545  | 0.41247   | 0.210943 | 0.70596   | 0.285621  | 0.355709  | 0.00870464 | 0.125589  | 0.266259 | 0.097168  | 0.133731 | 0.0896522 | 0.492694  |
| METTL25   | 1.69905   | 1.21499   | 1.29763   | 1.96011   | 0.80441  | 0.847724  | 0.959217  | 0.985856  | 1.01634    | 1.17133   | 2.59623  | 0.802101  | 1.17971  | 1.01786   | 1.38131   |
| METTL26   | 6.12047   | 4.93026   | 4.39082   | 9.60882   | 11.7726  | 10.2195   | 6.44221   | 3.93079   | 6.98817    | 5.67135   | 14.7361  | 5.33735   | 5.01325  | 4.98568   | 5.39061   |
| METTL27   | 0.522585  | 0.335719  | 0.226453  | 0.0512894 | 1.15965  | 1.05946   | 0.39778   | 0.442314  | 0.151536   | 0.249866  | 0.337105 | 0.160253  | 0.385336 | 0.351162  | 0.679022  |
| METTL2A   | 2.31729   | 2.67548   | 2.66157   | 3.22751   | 1.78429  | 3.13893   | 2.56405   | 1.96208   | 2.71624    | 2.50517   | 3.66546  | 1.92186   | 4.10342  | 2.6433    | 2.0573    |
| METTL2B   | 3.09536   | 3.2583    | 3.8854    | 5.08372   | 3.01454  | 3.39349   | 3.96685   | 2.91921   | 4.0592     | 4.53606   | 6.7838   | 3.28343   | 6.61563  | 3.96077   | 3.21513   |
| METTL3    | 6.21263   | 7.85276   | 7.19649   | 8.01029   | 7.37438  | 6.88545   | 5.88638   | 4.34208   | 3.04677    | 4.30365   | 8.60227  | 4.65989   | 5.53729  | 5.72573   | 4.69187   |
| METTL4    | 0.947818  | 0.904271  | 0.581585  | 1.05438   | 0.351009 | 0.844466  | 0.530343  | 0.898125  | 0.634502   | 1.05568   | 1.82107  | 0.628783  | 0.919313 | 1.07275   | 0.58594   |
| METTL5    | 4.08715   | 3.65738   | 3.88494   | 8.51853   | 2.10024  | 8.74485   | 2.5472    | 2.92393   | 6.50437    | 7.9621    | 12.2293  | 3.95767   | 6.69735  | 6.0089    | 2.91263   |
| METTL6    | 1.21837   | 1.48211   | 1.07279   | 1.97659   | 1.32104  | 1.96187   | 0.991674  | 1.03454   | 1.21939    | 1.58218   | 2.63503  | 0.97104   | 1.70448  | 1.41856   | 1.15206   |
| METTL7A   | 13.2646   | 7.87784   | 6.31973   | 6.85236   | 16.7551  | 18.5841   | 8.6599    | 10.1746   | 18.3248    | 3.69298   | 8.26155  | 5.76895   | 3.07445  | 2.7331    | 6.11784   |
| METTL7B   | 0.0768872 | 0.0148182 | 0.0254426 | 0.364479  | 0.143319 | 0.0785621 | 0.0526724 | 0.0409986 | 0          | 0.0386005 | 0.22567  | 0         | 0.20835  | 0.0241108 | 0.0883358 |
| METTL8    | 3.68464   | 3.69031   | 3.19842   | 2.97898   | 1.64867  | 2.54498   | 3.04653   | 3.3081    | 2.12407    | 1.80879   | 2.15333  | 2.61205   | 2.12341  | 1.88547   | 1.23661   |
| METTL9    | 9.4348    | 7.73789   | 7.61009   | 15.4567   | 9.20275  | 14.2713   | 7.50102   | 8.28625   | 27.163     | 16.9701   | 29.9011  | 11.1837   | 17.6172  | 9.84024   | 6.44602   |

|         |           |            |           |            |           |           |           |          |          |           |           |           |           |            |            |
|---------|-----------|------------|-----------|------------|-----------|-----------|-----------|----------|----------|-----------|-----------|-----------|-----------|------------|------------|
| MEX3A   | 0.306105  | 0.336851   | 0.246979  | 0.514067   | 0.55767   | 0.978221  | 0.181223  | 0.238455 | 0.16569  | 0.30356   | 0.639916  | 0.216322  | 0.336477  | 0.600433   | 0.45046    |
| MEX3B   | 0.517932  | 0.499095   | 0.488131  | 0.351325   | 1.2628    | 1.36211   | 0.591358  | 0.471948 | 0.343338 | 0.748801  | 1.87986   | 0.17357   | 0.562585  | 0.911451   | 0.875632   |
| MEX3C   | 4.19056   | 3.86047    | 4.31723   | 5.79254    | 4.01846   | 6.3181    | 3.51512   | 3.80367  | 4.43675  | 5.51204   | 7.29777   | 2.96247   | 7.20273   | 4.86509    | 4.58986    |
| MEX3D   | 5.43251   | 5.3563     | 5.67649   | 9.86614    | 14.2788   | 11.7475   | 5.85962   | 3.07432  | 9.80069  | 7.75603   | 8.29603   | 4.56693   | 11.0705   | 5.89083    | 5.64436    |
| MFAP1   | 3.65712   | 4.21056    | 4.5567    | 7.76875    | 4.11246   | 9.57121   | 2.03656   | 2.62205  | 6.50333  | 5.77277   | 4.74896   | 4.17398   | 7.28856   | 5.20643    | 3.93101    |
| MFAP1   | 3.65712   | 4.21056    | 4.5567    | 7.76875    | 4.11246   | 9.57121   | 2.03656   | 2.62205  | 6.50333  | 5.77277   | 4.74896   | 4.17398   | 7.28856   | 5.20643    | 3.93101    |
| MFAP2   | 4.04116   | 2.98238    | 3.34313   | 6.17572    | 17.4847   | 18.3968   | 6.1446    | 5.22075  | 1.99268  | 21.3027   | 51.5163   | 3.80839   | 9.45      | 12.8064    | 30.6884    |
| MFAP3   | 3.26841   | 2.73241    | 2.66448   | 5.74159    | 1.31128   | 5.19011   | 2.54553   | 3.13941  | 4.60795  | 6.27014   | 9.00656   | 3.27101   | 8.79828   | 4.87127    | 5.69486    |
| MFAP3L  | 3.37104   | 3.91443    | 4.0425    | 1.52253    | 2.00869   | 2.14537   | 3.40637   | 4.45293  | 18.9915  | 2.14542   | 3.56517   | 2.95994   | 0.621132  | 0.582857   | 0.396975   |
| MFAP4   | 32.573    | 22.4543    | 31.9553   | 7.49174    | 30.9993   | 53.6107   | 61.7943   | 22.0032  | 2.14544  | 9.02073   | 29.0767   | 4.13778   | 5.60787   | 6.4362     | 36.1339    |
| MFAP5   | 11.8514   | 6.50014    | 9.12747   | 0.575572   | 1.27552   | 2.78889   | 18.5372   | 6.78431  | 0.159559 | 3.40418   | 6.7946    | 0.95889   | 0.924846  | 1.66609    | 12.5831    |
| MFF     | 5.54585   | 5.15431    | 5.26481   | 9.83757    | 2.99707   | 9.4014    | 4.68273   | 5.09029  | 7.86147  | 7.54382   | 11.2896   | 4.92231   | 7.4105    | 6.37249    | 5.44026    |
| MFGE8   | 17.5729   | 11.3587    | 12.3487   | 12.7252    | 22.442    | 36.6536   | 17.306    | 8.239    | 18.4012  | 34.5334   | 35.6378   | 34.4568   | 48.5488   | 28.9813    | 30.6205    |
| MFHAS1  | 4.41722   | 3.91282    | 3.63602   | 5.49607    | 10.6992   | 5.03244   | 3.46453   | 3.93348  | 4.89159  | 4.98579   | 3.15198   | 4.75199   | 7.28546   | 5.18809    | 3.51021    |
| MFN1    | 6.48243   | 7.89403    | 7.66259   | 9.92545    | 4.0728    | 7.52788   | 5.86698   | 7.27741  | 15.8138  | 13.1881   | 11.9584   | 11.2141   | 15.1911   | 11.4242    | 7.53092    |
| MFN2    | 14.8845   | 16.7497    | 17.7003   | 22.4425    | 21.7376   | 30.8141   | 15.6556   | 11.8118  | 15.8254  | 14.092    | 9.78087   | 12.1303   | 21.9374   | 14.085     | 9.2595     |
| MFNG    | 2.04777   | 0.657765   | 0.959071  | 2.27777    | 3.71945   | 5.09255   | 1.80613   | 0.828097 | 0.329888 | 1.56386   | 4.59889   | 0.806267  | 2.1461    | 1.88568    | 2.17841    |
| MFRP    | 0.0225653 | 0.00869787 | 0.0149341 | 0.00465087 | 0.0140209 | 0.0192147 | 0.0309175 | 2.30E-23 | 3.18E-23 | 0.0169932 | 0.0152847 | 2.21E-23  | 9.23E-23  | 0.00707623 | 0.00648132 |
| MFSD1   | 9.2815    | 8.49535    | 8.8643    | 17.4028    | 6.82543   | 13.2141   | 7.82308   | 8.46362  | 21.2472  | 19.4423   | 24.1188   | 14.4347   | 18.7875   | 5.99913    | 11.2169    |
| MFSD10  | 4.06415   | 3.56822    | 4.04392   | 8.37647    | 13.6432   | 8.47833   | 4.11184   | 2.50824  | 2.77731  | 7.73639   | 12.1835   | 6.2037    | 17.5106   | 11.1222    | 7.9281     |
| MFSD11  | 3.28148   | 3.42897    | 3.49473   | 2.69732    | 2.62263   | 3.22785   | 3.88279   | 2.89649  | 4.82642  | 4.43655   | 4.96615   | 3.50771   | 4.40797   | 3.06316    | 2.94682    |
| MFSD12  | 3.17608   | 3.88574    | 4.39405   | 8.76907    | 9.69868   | 15.2015   | 6.21305   | 3.02493  | 9.22794  | 10.0541   | 13.3261   | 7.50796   | 15.6453   | 11.5911    | 7.75258    |
| MFSD13A | 0.930948  | 1.62106    | 2.48609   | 0.757397   | 1.97885   | 1.00129   | 1.81816   | 1.03056  | 0.517168 | 0.799456  | 1.27217   | 0.496667  | 0.574299  | 0.836532   | 0.621569   |
| MFSD13B | 0.195182  | 0.188084   | 0.322937  | 0          | 0.0433122 | 0.0474843 | 0.127345  | 0.223022 | 0        | 0.0699925 | 0         | 0.0598535 | 0.0179901 | 0.0582919  | 0.120131   |
| MFSD14A | 7.97764   | 6.59653    | 7.52899   | 9.88532    | 3.0128    | 9.91652   | 7.18468   | 8.01802  | 7.77056  | 7.55638   | 12.7111   | 5.31887   | 11.3078   | 7.43073    | 6.61702    |
| MFSD14B | 10.1745   | 8.57875    | 9.15334   | 16.3871    | 8.04165   | 12.7225   | 9.61769   | 8.40195  | 20.328   | 15.4623   | 19.9905   | 9.1928    | 19.6826   | 10.1737    | 9.18128    |



|           |            |            |            |            |           |            |           |            |            |            |           |            |            |            |           |
|-----------|------------|------------|------------|------------|-----------|------------|-----------|------------|------------|------------|-----------|------------|------------|------------|-----------|
| MFSD14C   | 2.7746     | 3.0714     | 3.26296    | 1.81614    | 3.38828   | 1.01126    | 2.07196   | 2.36268    | 1.85192    | 2.48605    | 1.48907   | 1.35104    | 0.932264   | 2.05417    | 1.54737   |
| MFSD2A    | 8.5754     | 15.6452    | 20.0451    | 5.77648    | 2.8103    | 9.11834    | 16.0359   | 7.36085    | 8.8263     | 4.43644    | 6.10346   | 6.51006    | 10.3706    | 8.37345    | 2.23778   |
| MFSD2B    | 0.170888   | 0.0666531  | 0.14137    | 0.150947   | 0.214886  | 0.110864   | 0.0836202 | 0.108479   | 0.366691   | 0.0919206  | 0.101048  | 0.122275   | 0.0525027  | 0.0595422  | 0.128551  |
| MFSD3     | 1.96593    | 2.99487    | 2.37974    | 3.44113    | 15.3363   | 3.88951    | 2.97084   | 1.90132    | 3.8203     | 2.48559    | 4.21012   | 3.88904    | 2.86325    | 2.85579    | 0.934188  |
| MFSD4A    | 3.48314    | 1.80049    | 2.35009    | 0.350043   | 0.90438   | 2.1574     | 2.50383   | 1.92783    | 0.11721    | 0.0852649  | 0.198115  | 0.251147   | 0.11323    | 0.248539   | 1.05693   |
| MFSD4B    | 2.06991    | 3.33076    | 3.61281    | 2.60179    | 3.18646   | 2.13023    | 3.02421   | 2.80647    | 2.99466    | 2.55097    | 3.24737   | 3.46335    | 2.66394    | 3.11135    | 1.99509   |
| MFSD5     | 6.23485    | 7.94038    | 7.27457    | 8.12568    | 15.3465   | 9.61289    | 12.5322   | 5.71733    | 27.7403    | 8.27105    | 14.7251   | 9.56515    | 13.2676    | 5.99874    | 3.95956   |
| MFSD6     | 10.7441    | 11.5435    | 12.3247    | 8.31777    | 6.89456   | 7.32865    | 11.5512   | 10.093     | 30.1892    | 11.9046    | 8.13124   | 13.5735    | 18.7542    | 7.17615    | 5.14793   |
| MFSD6L    | 0.144644   | 0.104538   | 0.136754   | 0.0425885  | 0.160487  | 0.0615813  | 0.259521  | 0.211185   | 0.0251657  | 0.0389021  | 0.0933058 | 0.110889   | 0.133319   | 0.0701975  | 0.044513  |
| MFSD8     | 1.63796    | 2.18304    | 2.31398    | 1.45944    | 0.414918  | 1.3904     | 1.30049   | 1.9215     | 1.60815    | 1.61934    | 1.93439   | 1.3451     | 1.22588    | 1.45663    | 1.38967   |
| MFSD9     | 1.08098    | 0.850627   | 0.880456   | 1.22151    | 1.05027   | 2.01858    | 1.15798   | 0.693624   | 2.23147    | 1.43532    | 1.48414   | 1.17962    | 2.30506    | 1.11903    | 1.11487   |
| MGA       | 4.32042    | 4.66775    | 4.68861    | 4.43834    | 2.63601   | 4.05681    | 3.34194   | 3.76096    | 2.86487    | 2.97896    | 3.54935   | 2.90016    | 3.1359     | 4.01493    | 3.54108   |
| MGAM      | 0.0321233  | 0.0361142  | 0.0265747  | 0.70254    | 0.0277214 | 0.0547051  | 0.0244516 | 0.0222044  | 0.0173878  | 0.676447   | 0.922697  | 0.025539   | 0.241659   | 0.16789    | 0.363939  |
| MGAM2     | 0.0293992  | 0.0325795  | 0.0608027  | 0.0818012  | 0.0182668 | 0.127668   | 0.0738475 | 0.0156765  | 0.00358049 | 0.0036899  | 0.0232316 | 0          | 0.0077045  | 0          | 0         |
| MGARP     | 0.0691353  | 0.0166552  | 0.0428952  | 0.106869   | 0         | 0.103019   | 0.0592024 | 0.0614417  | 0          | 0.130158   | 0.0780452 | 0.0247341  | 0.0334543  | 0.00903329 | 0.0248218 |
| MGAT1     | 9.00411    | 5.78934    | 6.40503    | 10.4536    | 16.3077   | 21.8739    | 8.45249   | 5.26132    | 7.04296    | 9.80832    | 15.0575   | 5.00252    | 13.7562    | 9.50952    | 11.7048   |
| MGAT2     | 3.57689    | 3.08073    | 3.72883    | 5.67428    | 6.78936   | 6.5929     | 2.63168   | 2.70087    | 2.36007    | 6.20367    | 12.8653   | 2.02183    | 7.24833    | 4.42597    | 4.40127   |
| MGAT3     | 1.51058    | 0.729965   | 0.966651   | 0.631838   | 1.63562   | 2.29632    | 0.847149  | 0.529096   | 0.17315    | 0.167289   | 0.300929  | 0.146235   | 0.450046   | 0.445834   | 1.21231   |
| MGAT3-AS1 | 0.139416   | 0.111955   | 0          | 0.0478907  | 0.288748  | 0          | 0.10612   | 0.206502   | 0.0565977  | 0          | 0         | 0.033252   | 0          | 0.0485766  | 0.0667396 |
| MGAT4A    | 2.2214     | 1.1163     | 1.39111    | 1.54075    | 0.423973  | 1.87417    | 1.05048   | 1.50449    | 0.279632   | 1.2646     | 1.942     | 0.531753   | 1.24899    | 0.92559    | 1.94422   |
| MGAT4B    | 6.7236     | 7.57252    | 7.67754    | 13.7826    | 17.9479   | 16.4241    | 8.69823   | 4.74251    | 11.2603    | 12.1466    | 16.8423   | 9.04827    | 17.9937    | 11.0179    | 7.78129   |
| MGAT4C    | 0.00955732 | 0.00230243 | 0.00395324 | 0.00246227 | 0         | 0.00406897 | 0.0163684 | 0.00637031 | 0          | 0.00899656 | 0         | 0.00683852 | 0.00770792 | 0.00249754 | 0         |
| MGAT4D    | 0          | 0          | 0          | 0          | 0         | 0          | 0         | 0          | 0          | 0          | 0         | 0          | 0          | 0          | 0         |
| MGAT4EP   | 0.00824476 | 0.043697   | 0.0477445  | 0          | 0.012807  | 0.00702031 | 0.0094136 | 0.00732726 | 0.0301236  | 0.0517401  | 0         | 0.0235974  | 0.0159584  | 0          | 0         |
| MGAT5     | 3.95804    | 3.35273    | 3.3637     | 4.84605    | 3.72953   | 6.2977     | 4.08769   | 2.98477    | 3.94149    | 3.84082    | 4.38474   | 2.20996    | 6.31736    | 4.25164    | 6.10455   |
| MGAT5B    | 0.109264   | 0.0501379  | 0.0645646  | 0.0268093  | 0.088903  | 0.349994   | 0.0297032 | 0.0739842  | 0          | 0.0914246  | 0.211448  | 0.0148916  | 0.0402836  | 0.0734218  | 0.246583  |

|           |           |            |            |           |           |           |           |           |           |           |           |           |            |           |           |
|-----------|-----------|------------|------------|-----------|-----------|-----------|-----------|-----------|-----------|-----------|-----------|-----------|------------|-----------|-----------|
| MGC12916  | 0.380718  | 0.344637   | 0.22906    | 1.08191   | 0.286733  | 0.903765  | 0.15807   | 0.399869  | 0.0562027 | 0.550241  | 0.377688  | 0.354964  | 0.766687   | 0.633118  | 1.37518   |
| MGC15885  | 0.19994   | 0.0674339  | 0.0909724  | 0.0309066 | 0.0310576 | 0.0170246 | 0.102728  | 0.0977295 | 0         | 0         | 0.0564268 | 0.0214594 | 0.00645001 | 0.0470238 | 0.129213  |
| MGC16025  | 0.315538  | 0.660548   | 0.477064   | 0.336383  | 1.18309   | 0.45397   | 0.509348  | 0.319103  | 0.106011  | 1.39294   | 0.0736971 | 1.39358   | 0.0702011  | 1.06341   | 1.2657    |
| MGC16275  | 0.633291  | 1.07693    | 0.893716   | 0.547053  | 0.679924  | 0.594749  | 0.840038  | 0.75318   | 0.362954  | 0.222089  | 0.431046  | 0.473128  | 0.252368   | 0.535418  | 0.227371  |
| MGC27345  | 3.01505   | 2.63702    | 2.33415    | 1.49803   | 1.4285    | 1.41571   | 2.39834   | 2.54486   | 0.454031  | 0.83142   | 0.703243  | 1.15513   | 0.949888   | 1.92539   | 1.77038   |
| MGC27382  | 0.0388632 | 0.00936245 | 0          | 0.0400497 | 0         | 0         | 0.0221864 | 0.0172692 | 0         | 0         | 0         | 0.0139038 | 0          | 0.0101558 | 0         |
| MGC2889   | 0.25316   | 0.477741   | 0.270516   | 0.130444  | 0.0327704 | 0.0628724 | 0.590144  | 0.18749   | 0.0256934 | 0         | 0         | 0.0150952 | 0          | 0.011026  | 0.0454462 |
| MGC32805  | 0.694328  | 0.366058   | 0.312519   | 0.485701  | 0.530149  | 0.352518  | 0.207577  | 0.380169  | 0.14672   | 0.104238  | 0.0758066 | 0.476783  | 0.0419432  | 0.161388  | 0.295674  |
| MGC34796  | 0.0367934 | 0.100457   | 0.0608762  | 0.0252778 | 0.019051  | 0.0208861 | 0.084019  | 0.0544982 | 0.059747  | 0.0307863 | 0         | 0.0438778 | 0          | 0.0128199 | 0.0352267 |
| MGC4859   | 0.0074224 | 0          | 0.00614033 | 0         | 0         | 0         | 0.0169493 | 0         | 0         | 0         | 0         | 0         | 0          | 0         | 0         |
| MGC70870  | 0         | 0          | 0          | 0         | 0         | 0         | 0         | 0         | 0         | 0         | 0         | 0         | 0          | 0         | 0         |
| MGLL      | 8.48909   | 4.8485     | 5.22726    | 9.25927   | 10.9588   | 21.2749   | 10.3851   | 4.69603   | 8.24636   | 8.48038   | 10.8217   | 6.01223   | 12.7587    | 6.86886   | 8.13463   |
| MGME1     | 4.12202   | 7.35498    | 7.28213    | 5.28007   | 4.62268   | 6.00282   | 4.00264   | 4.25389   | 4.117     | 3.68678   | 5.74046   | 3.39734   | 3.50461    | 3.82044   | 2.62793   |
| MGMT      | 4.95923   | 3.42973    | 3.4049     | 5.33661   | 5.97406   | 9.65192   | 4.29486   | 3.02818   | 2.95826   | 2.37118   | 6.55045   | 3.00533   | 3.13437    | 2.14229   | 3.87596   |
| MGP       | 36.4697   | 14.3867    | 20.1456    | 8.46397   | 4.18446   | 19.38     | 29.8689   | 10.8318   | 2.15803   | 11.9914   | 24.8007   | 1.97035   | 7.49295    | 3.99847   | 17.5895   |
| MGRN1     | 2.93267   | 3.4429     | 3.78711    | 4.44852   | 6.66093   | 7.57957   | 4.56123   | 2.83198   | 4.25116   | 3.24089   | 4.84882   | 3.74644   | 5.6972     | 4.23375   | 5.40843   |
| MGST1     | 4.32581   | 1.82371    | 0.943452   | 10.8408   | 1.28281   | 8.70612   | 0.774535  | 2.32413   | 13.6498   | 13.1538   | 14.4058   | 10.7137   | 16.1812    | 11.3042   | 3.88275   |
| MGST2     | 9.9234    | 9.45386    | 8.82649    | 14.2489   | 4.41953   | 10.6063   | 8.71555   | 9.26624   | 8.49372   | 5.70487   | 13.0237   | 6.36809   | 4.10793    | 4.59703   | 3.8618    |
| MGST3     | 11.9679   | 7.63212    | 8.86649    | 15.5855   | 3.59965   | 17.564    | 11.7846   | 6.13777   | 4.0106    | 13.9877   | 35.3505   | 3.81806   | 6.99374    | 8.47805   | 9.89646   |
| MHENCN    | 2.33473   | 2.67166    | 2.82476    | 2.34586   | 2.62932   | 2.1868    | 1.79936   | 1.47838   | 1.49281   | 1.24539   | 1.21898   | 1.31557   | 0.753179   | 1.327     | 1.08972   |
| MHRT      | 0         | 0          | 0          | 0         | 0         | 0         | 0         | 0         | 0         | 0         | 0         | 0         | 0          | 0         | 0         |
| MIA       | 3.61111   | 0.713957   | 1.12373    | 0.712699  | 1.84941   | 4.20842   | 1.09841   | 0.780338  | 0.0841362 | 9.31E-21  | 0.264484  | 0.0508366 | 0.141209   | 0.390225  | 0.272593  |
| MIA-RAB4B | 1.18072   | 0.0480684  | 0.0461492  | 0.0791772 | 2.29769   | 0.432412  | 0.481303  | 0.226723  | 1.55E-06  | 0.17349   | 0.319291  | 0.250316  | 0.0354203  | 0.106265  | 0.969001  |
| MIA2      | 1.65745   | 1.34749    | 1.33977    | 2.06916   | 0.884628  | 1.76052   | 0.615884  | 1.2693    | 1.94734   | 2.06702   | 2.40902   | 1.61447   | 1.60818    | 1.56161   | 1.86207   |
| MIA3      | 5.29795   | 3.87077    | 4.0325     | 3.23606   | 2.31876   | 6.68567   | 2.7177    | 4.14875   | 2.93856   | 2.99087   | 4.10867   | 2.20612   | 3.40769    | 3.14338   | 4.59158   |
| MIAT      | 0.860373  | 0.675842   | 0.70158    | 0.653768  | 1.36992   | 0.25707   | 0.663439  | 0.875782  | 0.0956584 | 0.251044  | 0.0855802 | 0.625021  | 0.16054    | 0.727669  | 1.33516   |

|             |           |           |           |           |           |           |           |           |            |            |           |            |            |           |           |
|-------------|-----------|-----------|-----------|-----------|-----------|-----------|-----------|-----------|------------|------------|-----------|------------|------------|-----------|-----------|
| MIATNB      | 2.22171   | 2.79011   | 2.46872   | 0.905903  | 1.83791   | 0.681549  | 2.45633   | 1.96193   | 0.426364   | 0.552617   | 0.646875  | 0.814098   | 0.386414   | 0.88056   | 1.32338   |
| MIB1        | 4.64941   | 4.13882   | 4.43668   | 4.72903   | 2.94597   | 5.96927   | 3.43316   | 4.49319   | 3.15236    | 6.69472    | 6.42286   | 3.1208     | 6.43033    | 5.03065   | 5.62103   |
| MIB2        | 3.21785   | 5.4162    | 5.87554   | 7.43155   | 16.7744   | 9.79886   | 5.10628   | 2.90823   | 6.07404    | 4.93622    | 5.43857   | 6.09221    | 5.47381    | 5.27339   | 3.84668   |
| MICA        | 0.555472  | 0.320575  | 0.310491  | 0.40742   | 0.401295  | 0.522624  | 0.495426  | 0.377342  | 0.148035   | 0.374356   | 0.392379  | 0.253638   | 0.357346   | 0.299331  | 0.476635  |
| MICA-AS1    | 0.13038   | 0.068811  | 0.0426368 | 0.0268649 | 0.0206347 | 0.0315975 | 0.0871554 | 0.115507  | 0.0175636  | 0.0463997  | 0.0288925 | 0.0477444  | 0.041408   | 0.0299463 | 0.0645454 |
| MICAL1      | 2.68935   | 2.91539   | 3.34541   | 4.89844   | 11.5392   | 7.2531    | 4.64661   | 2.4886    | 6.104      | 7.30591    | 4.33991   | 5.60716    | 6.52566    | 5.17059   | 8.28409   |
| MICAL2      | 4.66525   | 6.46741   | 8.46426   | 5.38879   | 4.98918   | 5.77915   | 9.48508   | 4.84097   | 11.4661    | 9.49617    | 8.82669   | 7.83463    | 10.9803    | 8.97519   | 13.1327   |
| MICAL3      | 1.96769   | 2.8851    | 2.94252   | 3.39243   | 4.60348   | 3.55014   | 3.04157   | 1.85562   | 0.803237   | 1.62641    | 0.912407  | 2.2702     | 3.28131    | 2.85394   | 2.42059   |
| MICALCL     | 2.50672   | 4.32509   | 5.85021   | 2.42525   | 3.00668   | 1.27936   | 5.18589   | 3.856     | 11.0493    | 4.20935    | 1.62258   | 5.3507     | 4.23619    | 2.06734   | 1.18347   |
| MICALL1     | 10.6113   | 16.7322   | 16.1385   | 34.5461   | 43.179    | 33.0377   | 17.424    | 10.5561   | 62.0272    | 20.9047    | 16.0648   | 27.3719    | 40.4703    | 22.1918   | 10.0264   |
| MICALL2     | 1.96406   | 2.54749   | 2.73067   | 3.23997   | 5.92772   | 5.80561   | 3.22306   | 2.05079   | 2.38291    | 3.5055     | 2.46166   | 4.36563    | 2.82832    | 3.80158   | 6.72449   |
| MICB        | 0.0386786 | 0.021324  | 0.0325183 | 0.109953  | 0.0613256 | 0.228695  | 0.0608043 | 0.0353564 | 0.00274106 | 0.0617966  | 0.141622  | 0.0173961  | 0.105489   | 0.0955959 | 0.0686686 |
| MICB-DT     | 0.0566782 | 0.076303  | 0.0717114 | 0.034358  | 0.0233049 | 0.0241304 | 0.03997   | 0.0637044 | 0.00406045 | 0.00418453 | 0.035755  | 0.00238558 | 0.00215109 | 0.0270088 | 0.0359105 |
| MICU1       | 4.73026   | 5.14773   | 5.50276   | 5.79813   | 5.25986   | 8.90659   | 6.57158   | 3.93588   | 11.4484    | 6.69398    | 8.61776   | 4.45122    | 7.02116    | 4.37261   | 5.22179   |
| MICU2       | 4.54959   | 4.12454   | 4.21935   | 6.04568   | 1.525     | 5.46426   | 2.44692   | 4.21354   | 7.42188    | 6.74706    | 6.83888   | 4.38616    | 8.85247    | 3.87334   | 3.64517   |
| MICU3       | 0.670894  | 0.216388  | 0.330254  | 0.114277  | 0.473695  | 0.37769   | 0.493788  | 0.571597  | 0.0945373  | 0.438418   | 0.532026  | 0.0674439  | 0.196753   | 0.376719  | 0.621091  |
| MID1        | 1.39174   | 0.854445  | 0.991377  | 1.05666   | 0.699538  | 1.74832   | 1.19105   | 1.29113   | 0.529875   | 1.37954    | 1.26377   | 1.33808    | 1.43473    | 1.63163   | 1.26061   |
| MID1IP1     | 2.86227   | 2.41996   | 2.67453   | 6.78393   | 5.06969   | 6.38635   | 2.76923   | 1.57986   | 5.43896    | 6.13259    | 5.01164   | 3.84467    | 9.91111    | 4.37244   | 2.97835   |
| MID1IP1-AS1 | 0.104035  | 0.0640843 | 0.152287  | 0.375077  | 0.387631  | 0.53826   | 0.286356  | 0.219139  | 0.161986   | 0.137851   | 0.424576  | 0.111607   | 0.429074   | 0.269063  | 0         |
| MID2        | 3.72429   | 3.50991   | 3.88388   | 2.53595   | 2.01158   | 3.19807   | 4.27028   | 3.62909   | 10.7754    | 4.24728    | 4.99035   | 3.77184    | 3.952      | 2.6332    | 1.67426   |
| MIDN        | 8.34687   | 12.8293   | 13.891    | 26.1132   | 25.2772   | 38.4093   | 13.9539   | 11.0457   | 27.3162    | 18.9077    | 21.3661   | 37.1573    | 42.0121    | 22.45     | 21.1791   |
| MIEF1       | 4.35125   | 3.26347   | 3.40371   | 4.8187    | 3.51896   | 6.45372   | 3.62467   | 3.16084   | 3.26614    | 3.09263    | 3.27757   | 2.32073    | 6.73378    | 3.99725   | 3.60454   |
| MIEF2       | 1.78495   | 2.47043   | 2.81573   | 2.00174   | 3.96867   | 2.80877   | 2.42761   | 1.23639   | 2.99439    | 1.99869    | 1.58038   | 1.21457    | 2.5065     | 1.0152    | 1.10578   |
| MIEN1       | 5.19825   | 4.67538   | 4.70899   | 9.31273   | 8.70615   | 10.3785   | 6.23586   | 3.05055   | 18.597     | 7.88271    | 16.0755   | 6.45368    | 10.0688    | 5.60863   | 4.64134   |
| MIER1       | 3.5364    | 2.6915    | 3.08577   | 3.17155   | 0.874663  | 2.89197   | 1.8607    | 3.5718    | 2.27502    | 3.66451    | 3.51794   | 1.94417    | 3.92519    | 3.03945   | 3.20041   |
| MIER2       | 2.69947   | 3.64419   | 4.00339   | 5.07185   | 8.74439   | 7.31619   | 4.21917   | 2.85254   | 4.59069    | 3.5224     | 4.45956   | 3.26242    | 5.74544    | 4.29711   | 4.23137   |

|             |            |            |           |            |           |           |          |          |           |          |           |           |           |            |          |
|-------------|------------|------------|-----------|------------|-----------|-----------|----------|----------|-----------|----------|-----------|-----------|-----------|------------|----------|
| MIER3       | 2.0741     | 1.89619    | 1.96148   | 2.04608    | 0.901827  | 1.82267   | 1.45731  | 2.36713  | 3.11975   | 2.52533  | 2.96177   | 1.30015   | 2.84223   | 2.14949    | 1.83302  |
| MIF         | 84.9798    | 56.0937    | 62.9126   | 222.168    | 95.2284   | 260.478   | 96.634   | 67.1902  | 126.99    | 143.811  | 354.463   | 119.405   | 164.199   | 154.749    | 55.5136  |
| MIF-AS1     | 0.612599   | 2.59374    | 2.37162   | 1.06483    | 3.96744   | 1.96733   | 1.80074  | 0.425109 | 0.647965  | 0.668827 | 1.19622   | 0.860216  | 0.593127  | 0.991729   | 0.424283 |
| MIF4GD      | 4.40248    | 3.57369    | 4.16505   | 3.34713    | 4.57242   | 6.15838   | 4.65034  | 2.97457  | 3.49488   | 4.12749  | 7.57965   | 2.86944   | 3.95727   | 2.53954    | 2.27595  |
| MIG7        | 0.34499    | 0.159295   | 0.21405   | 0          | 0.0446573 | 0.0122398 | 0.180537 | 0.217174 | 0.0175066 | 0        | 0.0324542 | 0.0308562 | 0.0649208 | 0.0225383  | 0.16515  |
| MIGA1       | 2.15838    | 1.69605    | 1.92921   | 1.71205    | 0.671601  | 1.6784    | 1.4071   | 1.9787   | 0.883133  | 1.73478  | 2.34815   | 1.16437   | 1.64298   | 1.35226    | 1.74542  |
| MIGA2       | 1.76114    | 2.45536    | 2.34816   | 1.98384    | 6.46083   | 3.32222   | 2.20333  | 1.31956  | 5.48197   | 1.56375  | 1.19498   | 2.42979   | 1.35688   | 2.07101    | 2.1727   |
| MIIIP       | 1.58056    | 2.16698    | 2.38124   | 3.48275    | 9.06214   | 5.70063   | 2.90502  | 1.35899  | 2.05015   | 2.80631  | 5.49784   | 2.28026   | 4.55166   | 2.67298    | 2.34371  |
| MILR1       | 0.220061   | 0.194386   | 0.212391  | 0.415761   | 0.455774  | 1.03058   | 0.251258 | 0.358548 | 0.268009  | 1.15083  | 1.53193   | 0.209946  | 0.331291  | 0.498391   | 0.737415 |
| MIMT1       | 0          | 0          | 0         | 0          | 0.0278676 | 0.015276  | 0        | 0        | 0         | 0        | 0         | 0         | 0         | 0          | 0        |
| MINCR       | 0.826537   | 1.25371    | 0.785069  | 0.504753   | 0.475518  | 0.755918  | 1.32819  | 0.952205 | 0.223696  | 0.192109 | 0.276462  | 0.394273  | 0.0592531 | 0.255991   | 0.351707 |
| MINDY1      | 2.69822    | 4.08626    | 3.82012   | 2.86146    | 5.73837   | 5.48933   | 4.63144  | 2.90757  | 8.18223   | 4.85631  | 4.90622   | 4.35365   | 3.85172   | 3.17059    | 2.59198  |
| MINDY2      | 1.92879    | 2.31973    | 2.44457   | 2.39284    | 1.78228   | 1.68235   | 1.8352   | 2.03501  | 2.58095   | 3.32709  | 2.74125   | 2.05955   | 3.89454   | 2.68045    | 2.59243  |
| MINDY3      | 4.35804    | 3.80844    | 3.92504   | 4.38153    | 2.79188   | 4.59941   | 3.6078   | 4.03624  | 5.00161   | 3.5778   | 4.8106    | 2.68963   | 4.03376   | 3.25747    | 4.20485  |
| MINDY4      | 1.71024    | 1.04187    | 1.02916   | 1.39284    | 1.26249   | 1.90498   | 1.50703  | 0.761626 | 0.412482  | 0.786174 | 1.11767   | 0.830036  | 1.01756   | 1.53075    | 1.72881  |
| MINDY4B     | 0          | 0.013615   | 0         | 0          | 0         | 0         | 0        | 0        | 0         | 0        | 0         | 0         | 0         | 0          | 0        |
| MINK1       | 15.7325    | 27.6208    | 26.4248   | 52.2688    | 53.0675   | 55.5812   | 26.4655  | 20.19    | 40.7315   | 36.0812  | 13.4165   | 49.3777   | 57.6429   | 33.6861    | 17.9232  |
| MINOS1      | 3.16542    | 2.36809    | 2.30226   | 5.09479    | 2.03394   | 5.15763   | 1.78527  | 1.82294  | 3.53074   | 4.84622  | 7.47638   | 3.04147   | 3.77058   | 3.20869    | 2.45127  |
| MINOS1-NBL1 | 2.98532    | 3.38494    | 4.19042   | 5.70297    | 9.46583   | 6.83585   | 3.19075  | 2.92102  | 2.88014   | 4.76022  | 4.72937   | 2.61344   | 5.84271   | 4.66185    | 5.95387  |
| MINOS1P1    | 2.56919    | 1.4923     | 1.71378   | 0.575571   | 0.69406   | 0.795503  | 1.60005  | 1.79594  | 0.222616  | 0.790219 | 0.1261    | 0.61762   | 0.0458633 | 0.918181   | 1.02086  |
| MINPP1      | 1.19814    | 1.77236    | 1.76791   | 1.37913    | 1.58903   | 1.68841   | 1.576    | 1.44465  | 6.18665   | 1.70606  | 2.72884   | 1.13806   | 1.41497   | 1.15719    | 1.54962  |
| MIOS        | 6.48395    | 6.46289    | 6.72371   | 7.53598    | 2.53148   | 5.18298   | 4.66773  | 6.42467  | 8.87216   | 6.77441  | 6.38399   | 5.53145   | 8.71283   | 5.60189    | 2.74052  |
| MIOX        | 0          | 0.00775969 | 0.0266466 | 0          | 0.0250168 | 0.0274266 | 0        | 0        | 0         | 0        | 0         | 0         | 0         | 0          | 0        |
| MIP         | 0.00887387 | 0.00427557 | 0.0220233 | 0.00914478 | 0         | 0.0680038 | 0        | 0        | 0.0540369 | 0        | 0.0100175 | 0         | 0.0286269 | 0.00463787 | 0.025488 |
| MIPPEP      | 4.40185    | 5.596      | 6.0692    | 5.01735    | 3.72959   | 6.11706   | 5.10204  | 5.14825  | 5.92954   | 2.9896   | 3.65694   | 3.29281   | 3.49166   | 2.72885    | 2.14825  |
| MIPPEP3     | 0.332515   | 0.277699   | 0.559329  | 0.9252     | 0.585379  | 0.528514  | 0.379655 | 0.354614 | 0.283476  | 0.20867  | 0.27527   | 0.475847  | 0.69367   | 0.243302   | 0.445698 |

















|            |          |          |          |          |           |          |           |          |           |           |          |          |          |          |          |
|------------|----------|----------|----------|----------|-----------|----------|-----------|----------|-----------|-----------|----------|----------|----------|----------|----------|
| MIR1470    | 0        | 0        | 0        | 0        | 0         | 0        | 0         | 0        | 0         | 0         | 0        | 0        | 0        | 0        | 0        |
| MIR1471    | 0        | 0        | 0        | 0        | 0         | 0        | 0         | 0        | 0         | 0         | 0        | 0        | 0        | 0        | 0        |
| MIR147A    | 0        | 0        | 0        | 0        | 0         | 0        | 0         | 0        | 0         | 0         | 0        | 0        | 0        | 0        | 0        |
| MIR147B    | 0        | 0        | 0        | 0        | 0         | 0        | 0         | 0        | 0         | 0         | 0        | 0        | 0        | 0        | 0        |
| MIR148A    | 0        | 0        | 0        | 0        | 0         | 0        | 0         | 0        | 0         | 0         | 0        | 0        | 0        | 0        | 0        |
| MIR148B    | 0        | 0        | 0        | 0        | 0         | 0        | 0         | 0        | 0         | 0         | 0        | 0        | 0        | 0        | 0        |
| MIR149     | 0        | 0        | 0        | 0        | 0         | 0        | 0         | 0        | 0         | 0         | 0        | 0        | 0        | 0        | 0        |
| MIR150     | 0        | 0        | 0        | 0        | 0         | 0        | 0         | 0        | 0         | 0         | 0        | 0        | 0        | 0        | 0        |
| MIR151B    | 0        | 0        | 0        | 0        | 0         | 0        | 0         | 0        | 0         | 0         | 0        | 0        | 0        | 0        | 0        |
| MIR152     | 0        | 0        | 0        | 0        | 0         | 0        | 0         | 0        | 0         | 0         | 0        | 0        | 0        | 0        | 0        |
| MIR153-1   | 0        | 0        | 0        | 0        | 0         | 0        | 0         | 0        | 0         | 0         | 0        | 0        | 0        | 0        | 0        |
| MIR153-2   | 0        | 0        | 0        | 0        | 0         | 0        | 0         | 0        | 0         | 0         | 0        | 0        | 0        | 0        | 0        |
| MIR1537    | 0        | 0        | 0        | 0        | 0         | 0        | 0         | 0        | 0         | 0         | 0        | 0        | 0        | 0        | 0        |
| MIR1538    | 0        | 0        | 0        | 0        | 0         | 0        | 0         | 0        | 0         | 0         | 0        | 0        | 0        | 0        | 0        |
| MIR1539    | 0        | 0        | 0        | 0        | 0         | 0        | 0         | 0        | 0         | 0         | 0        | 0        | 0        | 0        | 0        |
| MIR154     | 0        | 0        | 0        | 0        | 0         | 0        | 0         | 0        | 0         | 0         | 0        | 0        | 0        | 0        | 0        |
| MIR155     | 0        | 0        | 0        | 0        | 0         | 0        | 0         | 0        | 0         | 0         | 0        | 0        | 0        | 0        | 0        |
| MIR155HG   | 0.219812 | 0.128603 | 0.194833 | 0.161802 | 0.0731665 | 0.213905 | 0.0896336 | 0.334887 | 0.0191219 | 0.0788247 | 0.354486 | 0.101109 | 0.151952 | 0.26259  | 0.405871 |
| MIR15A     | 0        | 0        | 0        | 0        | 0         | 0        | 0         | 0        | 0         | 0         | 0        | 0        | 0        | 0        | 0        |
| MIR15B     | 0        | 0        | 0        | 0        | 0         | 0        | 0         | 0        | 0         | 0         | 0        | 0        | 0        | 0        | 0        |
| MIR16-1    | 0        | 0        | 0        | 0        | 0         | 0        | 0         | 0        | 0         | 0         | 0        | 0        | 0        | 0        | 0        |
| MIR16-2    | 0        | 0        | 0        | 0        | 0         | 0        | 0         | 0        | 0         | 0         | 0        | 0        | 0        | 0        | 0        |
| MIR17      | 0        | 0        | 0        | 0        | 0         | 0        | 0         | 0        | 0         | 0         | 0        | 0        | 0        | 0        | 0        |
| MIR17HG    | 0.507321 | 0.675529 | 0.797414 | 0.66064  | 0.114625  | 0.396633 | 0.437065  | 0.950914 | 0.258378  | 0.31837   | 0.505019 | 0.320101 | 0.488006 | 0.88704  | 0.291431 |
| MIR181A1   | 0        | 0        | 0        | 0        | 0         | 0        | 0         | 0        | 0         | 0         | 0        | 0        | 0        | 0        | 0        |
| MIR181A1HG | 0.536428 | 0.166152 | 0.31698  | 0.19743  | 0.178555  | 0.228381 | 0.0874966 | 0.238366 | 0.0933299 | 0.625182  | 1.29763  | 0.164498 | 0.296658 | 0.320412 | 0.605298 |







|           |          |           |            |           |          |          |          |           |          |          |          |          |           |           |         |
|-----------|----------|-----------|------------|-----------|----------|----------|----------|-----------|----------|----------|----------|----------|-----------|-----------|---------|
| MIR2115   | 0        | 0         | 0          | 0         | 0        | 0        | 0        | 0         | 0        | 0        | 0        | 0        | 0         | 0         | 0       |
| MIR2116   | 0        | 0         | 0          | 0         | 0        | 0        | 0        | 0         | 0        | 0        | 0        | 0        | 0         | 0         | 0       |
| MIR2117   | 0        | 0         | 0          | 0         | 0        | 0        | 0        | 0         | 0        | 0        | 0        | 0        | 0         | 0         | 0       |
| MIR2117HG | 0        | 0.0443367 | 0.0380628  | 0.331903  | 0.428817 | 0.626831 | 3.83489  | 0.0408899 | 0.168105 | 0.173242 | 0.103879 | 0.329214 | 0.0593709 | 0.0721406 | 0       |
| MIR212    | 0        | 0         | 0          | 0         | 0        | 0        | 0        | 0         | 0        | 0        | 0        | 0.150541 | 0         | 0.439839  | 0       |
| MIR214    | 2.34E-38 | 0         | 0.00048437 | 0         | 6.80E-14 | 2.09E-43 | 9.00E-06 | 6.45E-44  | 0        | 0        | 0        | 0        | 0         | 0         | 0       |
|           |          |           | 1          |           |          |          |          |           |          |          |          |          |           |           |         |
| MIR215    | 0        | 0.10137   | 0          | 0.433629  | 0        | 0        | 0.240218 | 0.186978  | 0        | 0        | 0        | 0        | 0         | 0         | 0       |
| MIR216A   | 0        | 0         | 0          | 0         | 0        | 0        | 0        | 0         | 0        | 0        | 0        | 0        | 0         | 0         | 0       |
| MIR216B   | 0        | 0         | 0          | 0         | 0        | 0        | 0        | 0         | 0        | 0        | 0        | 0        | 0         | 0         | 0       |
| MIR217    | 0        | 0         | 0          | 0         | 0        | 0        | 0        | 0         | 0        | 0        | 0        | 0        | 0         | 0         | 0       |
| MIR217HG  | 0        | 0         | 0          | 0.0348169 | 0        | 0        | 0        | 0         | 0        | 0        | 0        | 0        | 0         | 0         | 0       |
| MIR218-1  | 0        | 0         | 0          | 0         | 0        | 0        | 0        | 0         | 0        | 0        | 0        | 0        | 0         | 0         | 0       |
| MIR218-2  | 0        | 0         | 0          | 0         | 0        | 0        | 0        | 0         | 0        | 0        | 0        | 0        | 0         | 0         | 0       |
| MIR219A1  | 0        | 0.016895  | 0          | 0         | 0        | 0        | 0        | 0         | 0        | 0        | 0        | 0        | 0         | 0         | 0       |
| MIR219A2  | 0        | 0         | 0          | 0         | 0        | 0        | 0        | 0         | 0        | 0        | 0        | 0        | 0         | 0         | 0       |
| MIR219B   | 0        | 0         | 0          | 0         | 0        | 0        | 0        | 0         | 0        | 0        | 0        | 0        | 0         | 0         | 0       |
| MIR22     | 0        | 0         | 0          | 0         | 0        | 0        | 0        | 0         | 0        | 0        | 0        | 0        | 0         | 0         | 0       |
| MIR221    | 0        | 0         | 0          | 0         | 0        | 0        | 0        | 0         | 0        | 0        | 0        | 0        | 0         | 0         | 0       |
| MIR222    | 0        | 0         | 0          | 0         | 0        | 0        | 0        | 0         | 0        | 0        | 0        | 0        | 0         | 0         | 0       |
| MIR223    | 0        | 0         | 0          | 0         | 0        | 0        | 0        | 0         | 0        | 0        | 0        | 0        | 0         | 0         | 0       |
| MIR224    | 0        | 0         | 0          | 0         | 0        | 0        | 0        | 0         | 0        | 0        | 0        | 0        | 0         | 0         | 0       |
| MIR2276   | 0        | 0         | 0          | 0         | 0        | 0        | 0        | 0         | 0        | 0        | 0        | 0        | 0         | 0         | 0       |
| MIR2277   | 0        | 0         | 0          | 0         | 0        | 0        | 0        | 0         | 0        | 0        | 0        | 0        | 0         | 0         | 0       |
| MIR2278   | 0        | 0         | 0          | 0         | 0        | 0        | 0        | 0         | 0        | 0        | 0        | 0        | 0         | 0         | 0       |
| MIR22HG   | 5.49617  | 4.62407   | 4.19707    | 7.08428   | 5.71351  | 8.63258  | 4.81753  | 3.22379   | 7.91917  | 8.89346  | 10.4045  | 7.72006  | 13.1314   | 11.3399   | 9.16822 |



|            |         |         |         |          |         |         |         |         |          |          |          |          |          |         |          |
|------------|---------|---------|---------|----------|---------|---------|---------|---------|----------|----------|----------|----------|----------|---------|----------|
| MIR2355    | 0       | 0       | 0       | 0        | 0       | 0       | 0       | 0       | 0        | 0        | 0        | 0        | 0        | 0       | 0        |
| MIR2392    | 0       | 0       | 0       | 0        | 0       | 0       | 0       | 0       | 0        | 0        | 0        | 0        | 0        | 0       | 0        |
| MIR23A     | 0       | 0       | 0       | 0        | 0       | 0       | 0       | 0       | 0        | 0        | 0        | 0        | 0        | 0       | 0        |
| MIR23B     | 0       | 0       | 0       | 0        | 0       | 0       | 0       | 0       | 0        | 0        | 0        | 0        | 0        | 0       | 0        |
| MIR23C     | 0       | 0       | 0       | 0        | 0       | 0       | 0       | 0       | 0        | 0        | 0        | 0        | 0        | 0       | 0        |
| MIR24-1    | 0       | 0       | 0       | 0        | 0       | 0       | 0       | 0       | 0        | 0        | 0        | 0        | 0        | 0       | 0        |
| MIR24-2    | 0       | 0       | 0       | 0        | 0       | 0       | 0       | 0       | 0        | 0        | 0        | 0        | 0        | 0       | 0        |
| MIR2467    | 0       | 0       | 0       | 0        | 0       | 0       | 0       | 0       | 0        | 0        | 0        | 0        | 0        | 0       | 0        |
| MIR25      | 0       | 0       | 0       | 0        | 0       | 0       | 0       | 0       | 0        | 0        | 0        | 0        | 0        | 0       | 0        |
| MIR2681    | 0.22041 | 0       | 0       | 0        | 0       | 0       | 0       | 0       | 0        | 0        | 0        | 0        | 0        | 0       | 0        |
| MIR2682    | 0       | 0       | 0       | 0        | 0       | 0       | 0       | 0       | 0        | 0        | 0        | 0        | 0        | 0       | 0        |
| MIR26A1    | 0       | 0       | 0       | 0        | 0       | 0       | 0       | 0       | 0        | 0        | 0        | 0        | 0        | 0       | 0        |
| MIR26A2    | 0       | 0       | 0       | 0        | 0       | 0       | 0       | 0       | 0        | 0        | 0        | 0        | 0        | 0       | 0        |
| MIR26B     | 0       | 0       | 0       | 0        | 0       | 0       | 0       | 0       | 0        | 0        | 0        | 0        | 0        | 0       | 0        |
| MIR27A     | 0       | 0       | 0       | 0        | 0       | 0       | 0       | 0       | 0        | 0        | 0        | 0        | 0        | 0       | 0        |
| MIR27B     | 0       | 0       | 0       | 0        | 0       | 0       | 0       | 0       | 0        | 0        | 0        | 0        | 0        | 0       | 0        |
| MIR28      | 0       | 0       | 0       | 0        | 0       | 0       | 0       | 0       | 0        | 0        | 0        | 0        | 0        | 0       | 0        |
| MIR2861    | 0       | 0       | 0       | 0        | 0       | 0       | 0       | 0       | 0        | 0        | 0        | 0        | 0        | 0       | 0        |
| MIR2909    | 0       | 0       | 0       | 0        | 0       | 0       | 0       | 0       | 0        | 0        | 0        | 0        | 0        | 0       | 0        |
| MIR296     | 0       | 0       | 0       | 0        | 0       | 0       | 0       | 0       | 0        | 0        | 0        | 0        | 0        | 0       | 0        |
| MIR298     | 0       | 0       | 0       | 0        | 0       | 0       | 0       | 0       | 0        | 0        | 0        | 0        | 0        | 0       | 0        |
| MIR299     | 0       | 0       | 0       | 0        | 0       | 0       | 0       | 0       | 0        | 0        | 0        | 0        | 0        | 0       | 0        |
| MIR29A     | 0       | 0       | 0       | 0        | 0       | 0       | 0       | 0       | 0        | 0        | 0        | 0        | 0        | 0       | 0        |
| MIR29B1    | 0       | 0       | 0       | 0        | 0       | 0       | 0       | 0       | 0        | 0        | 0        | 0        | 0        | 0       | 0        |
| MIR29B2    | 0       | 0       | 0       | 0        | 0       | 0       | 0       | 0       | 0        | 0        | 0        | 0        | 0        | 0       | 0        |
| MIR29B2CHG | 1.69465 | 2.82062 | 2.59223 | 0.854239 | 1.73642 | 1.34976 | 2.27706 | 1.41686 | 0.371367 | 0.465555 | 0.642155 | 0.751062 | 0.191641 | 1.10746 | 0.839788 |























|           |           |           |           |          |          |          |          |          |          |          |           |          |   |          |          |
|-----------|-----------|-----------|-----------|----------|----------|----------|----------|----------|----------|----------|-----------|----------|---|----------|----------|
| MIR376C   | 0         | 0         | 0         | 0        | 0        | 0        | 0        | 0        | 0        | 0        | 0         | 0        | 0 | 0        | 0        |
| MIR377    | 0         | 0         | 0         | 0        | 0        | 0        | 0        | 0        | 0        | 0        | 0         | 0        | 0 | 0        | 0        |
| MIR378A   | 0         | 0         | 0         | 0        | 0        | 0        | 0        | 0        | 0        | 0        | 0         | 0        | 0 | 0        | 0        |
| MIR378B   | 0         | 0         | 0         | 0        | 0        | 0        | 0        | 0        | 0        | 0        | 0         | 0        | 0 | 0        | 0        |
| MIR378C   | 0         | 0         | 0         | 0        | 0        | 0        | 0        | 0        | 0        | 0        | 0         | 0        | 0 | 0        | 0        |
| MIR378D1  | 0         | 0         | 0         | 0        | 0        | 0        | 0        | 0        | 0        | 0        | 0         | 0        | 0 | 0        | 0        |
| MIR378D2  | 0         | 0         | 0         | 0        | 0        | 0        | 0        | 0        | 0        | 0        | 0         | 0        | 0 | 0        | 0        |
| MIR378E   | 0         | 0         | 0         | 0        | 0        | 0        | 0        | 0        | 0        | 0        | 0         | 0        | 0 | 0        | 0        |
| MIR378F   | 0         | 0         | 0         | 0        | 0        | 0        | 0        | 0        | 0        | 0        | 0         | 0        | 0 | 0        | 0        |
| MIR378G   | 0         | 0         | 0         | 0        | 0        | 0        | 0        | 0        | 0        | 0        | 0         | 0        | 0 | 0        | 0        |
| MIR378H   | 0         | 0         | 0         | 0        | 0        | 0        | 0        | 0        | 0        | 0        | 0         | 0        | 0 | 0        | 0        |
| MIR378I   | 0         | 0         | 0         | 0        | 0        | 0        | 0        | 0        | 0        | 0        | 0         | 0        | 0 | 0        | 0        |
| MIR378J   | 0         | 0.306899  | 0.351295  | 0        | 0        | 0        | 0.484844 | 0.188694 | 0.258584 | 0        | 0.239685  | 0        | 0 | 0.221937 | 0        |
| MIR379    | 0         | 0         | 0         | 0        | 0        | 0        | 0        | 0        | 0        | 0        | 0         | 0        | 0 | 0        | 0        |
| MIR380    | 0         | 0         | 0         | 0        | 0        | 0        | 0        | 0        | 0        | 0        | 0         | 0        | 0 | 0        | 0        |
| MIR381    | 0         | 0         | 0         | 0        | 0        | 0        | 0        | 0        | 0        | 0        | 0         | 0        | 0 | 0        | 0        |
| MIR381HG  | 0.0544542 | 0.0262369 | 0.0900968 | 0        | 0.67669  | 0.231835 | 0.124348 | 0        | 0        | 0        | 0.0614721 | 0        | 0 | 0.256141 | 0.625625 |
| MIR382    | 0         | 0         | 0         | 0        | 0        | 0        | 0        | 0        | 0        | 0        | 0         | 0        | 0 | 0        | 0        |
| MIR383    | 0         | 0         | 0         | 0        | 0        | 0        | 0        | 0        | 0        | 0        | 0         | 0        | 0 | 0        | 0        |
| MIR384    | 0         | 0         | 0         | 0        | 0        | 0        | 0        | 0        | 0        | 0        | 0         | 0        | 0 | 0        | 0        |
| MIR3907   | 0         | 0         | 0         | 0        | 0        | 0        | 0        | 0        | 0        | 0        | 0         | 0        | 0 | 0        | 0        |
| MIR3908   | 0         | 0         | 0         | 0        | 0        | 0        | 0        | 0        | 0        | 0        | 0         | 0        | 0 | 0        | 0        |
| MIR3909   | 0         | 0         | 0         | 0.400833 | 0        | 0        | 0.22205  | 0        | 0        | 0.244092 | 0         | 1.11324  | 0 | 0        | 0        |
| MIR3910-1 | 0         | 0         | 0         | 0        | 0        | 0        | 0        | 0        | 0        | 0        | 0         | 0        | 0 | 0        | 0        |
| MIR3910-2 | 0         | 0         | 0         | 0        | 0        | 0        | 0        | 0        | 0        | 0        | 0         | 0        | 0 | 0        | 0        |
| MIR3911   | 0         | 0.1023    | 0         | 0        | 0.989426 | 0        | 0.242422 | 0        | 0        | 0        | 0         | 0.151922 | 0 | 0.110969 | 0        |































|           |          |          |          |           |          |         |          |          |           |         |           |          |          |          |          |
|-----------|----------|----------|----------|-----------|----------|---------|----------|----------|-----------|---------|-----------|----------|----------|----------|----------|
| MIR4674   | 0        | 0        | 0        | 0         | 0        | 0       | 0        | 0        | 0         | 0       | 0         | 0        | 0        | 0        | 0        |
| MIR4675   | 0        | 0        | 0        | 0         | 0        | 0       | 0        | 0        | 0         | 0       | 0         | 0        | 0        | 0        | 0        |
| MIR4676   | 0        | 0        | 0        | 0         | 0        | 0       | 0        | 0        | 0         | 0       | 0         | 0        | 0        | 0        | 0        |
| MIR4677   | 0        | 0        | 0        | 0         | 0        | 0       | 0        | 0        | 0         | 0       | 0         | 0        | 0        | 0        | 0        |
| MIR4678   | 0        | 0        | 0        | 0         | 0        | 0       | 0        | 0        | 0         | 0       | 0         | 0        | 0        | 0        | 0        |
| MIR4679-1 | 0        | 0        | 0        | 0         | 0        | 0       | 0        | 0        | 0         | 0       | 0         | 0        | 0        | 0        | 0        |
| MIR4679-2 | 0        | 0        | 0        | 0         | 0        | 0       | 0        | 0        | 0         | 0       | 0         | 0        | 0        | 0        | 0        |
| MIR4680   | 0        | 0        | 0        | 0         | 0        | 0       | 0        | 0        | 0         | 0       | 0         | 0        | 0        | 0        | 0        |
| MIR4681   | 0        | 0        | 0        | 0         | 0        | 0       | 0        | 0        | 0         | 0       | 0         | 0        | 0        | 0        | 0        |
| MIR4682   | 0        | 0        | 0        | 0         | 0        | 0       | 0        | 0        | 0         | 0       | 0         | 0        | 0        | 0        | 0        |
| MIR4683   | 0        | 0        | 0        | 0         | 0        | 0       | 0        | 0        | 0         | 0       | 0         | 0        | 0        | 0        | 0        |
| MIR4684   | 0        | 0        | 0        | 0         | 0        | 0       | 0        | 0        | 0         | 0       | 0         | 0        | 0        | 0        | 0        |
| MIR4685   | 0        | 0        | 0        | 0         | 0        | 0       | 0        | 0        | 0         | 0       | 0         | 0        | 0        | 0        | 0        |
| MIR4686   | 0        | 0        | 0        | 0         | 0        | 0       | 0        | 0        | 0         | 0       | 0         | 0        | 0        | 0        | 0        |
| MIR4687   | 0        | 0        | 0        | 0         | 0        | 0       | 0        | 0        | 0         | 0       | 0         | 0        | 0        | 0        | 0        |
| MIR4688   | 0        | 0        | 0        | 0         | 0        | 0       | 0        | 0        | 0         | 0       | 0         | 0        | 0        | 0        | 0        |
| MIR4689   | 0        | 0        | 0        | 0         | 0        | 0       | 0        | 0        | 0         | 0       | 0         | 0        | 0        | 0        | 0        |
| MIR4690   | 0        | 0        | 0        | 0         | 0        | 0       | 0        | 0        | 0         | 0       | 0         | 0        | 0        | 0        | 0        |
| MIR4691   | 0        | 0        | 0        | 0         | 0        | 0       | 0        | 0        | 0         | 0       | 0         | 0        | 0        | 0        | 0        |
| MIR4692   | 0        | 0        | 0        | 0         | 0        | 0       | 0        | 0        | 0         | 0       | 0         | 0        | 0        | 0        | 0        |
| MIR4693   | 0        | 0        | 0        | 0         | 0        | 0       | 0        | 0        | 0         | 0       | 0         | 0        | 0        | 0        | 0        |
| MIR4694   | 0        | 0        | 0        | 0         | 0        | 0       | 0        | 0        | 0         | 0       | 0         | 0        | 0        | 0        | 0        |
| MIR4695   | 0        | 0        | 0        | 0         | 0        | 0       | 0        | 0        | 0         | 0       | 0         | 0        | 0        | 0        | 0        |
| MIR4696   | 0        | 0        | 0        | 0         | 0        | 0       | 0        | 0        | 0         | 0       | 0         | 0        | 0        | 0        | 0        |
| MIR4697   | 0        | 0        | 0        | 0         | 0        | 0       | 0        | 0        | 0         | 0       | 0         | 0        | 0        | 0        | 0        |
| MIR4697HG | 0.427444 | 0.752345 | 0.941763 | 0.0629277 | 0.379411 | 0.32311 | 0.771903 | 0.589197 | 0.0212481 | 0.12591 | 0.0246189 | 0.259034 | 0.042212 | 0.107141 | 0.457266 |









|          |          |          |          |          |          |          |         |          |         |        |         |          |         |          |         |
|----------|----------|----------|----------|----------|----------|----------|---------|----------|---------|--------|---------|----------|---------|----------|---------|
| MIR4800  | 0        | 0        | 0        | 0        | 0        | 0        | 0       | 0        | 0       | 0      | 0       | 0        | 0       | 0        | 0       |
| MIR4801  | 0        | 0        | 0        | 0        | 0        | 0        | 0       | 0        | 0       | 0      | 0       | 0        | 0       | 0        | 0       |
| MIR4802  | 0        | 0        | 0        | 0        | 0        | 0        | 0       | 0        | 0       | 0      | 0       | 0        | 0       | 0        | 0       |
| MIR4803  | 0        | 0        | 0        | 0        | 0        | 0        | 0       | 0        | 0       | 0      | 0       | 0        | 0       | 0        | 0       |
| MIR4804  | 0        | 0        | 0        | 0        | 0        | 0        | 0       | 0        | 0       | 0      | 0       | 0        | 0       | 0        | 0       |
| MIR483   | 0        | 0        | 0        | 0        | 0        | 0        | 0       | 0        | 0       | 0      | 0       | 0        | 0       | 0        | 0       |
| MIR484   | 0        | 0        | 0        | 0        | 0        | 0        | 0       | 0        | 0       | 0      | 0       | 0        | 0       | 0        | 0       |
| MIR485   | 0        | 0        | 0        | 0        | 0        | 0        | 0       | 0        | 0       | 0      | 0       | 0        | 0       | 0        | 0       |
| MIR486-1 | 0        | 0        | 0        | 0        | 0        | 0        | 0       | 0        | 0       | 0      | 0       | 0        | 0       | 0        | 0       |
| MIR486-2 | 0        | 0        | 0        | 0        | 0        | 0        | 0       | 0        | 0       | 0      | 0       | 0        | 0       | 0        | 0       |
| MIR487A  | 0        | 0        | 0        | 0        | 0        | 0        | 0       | 0        | 0       | 0      | 0       | 0        | 0       | 0        | 0       |
| MIR487B  | 0        | 0        | 0        | 0        | 0        | 0        | 0       | 0        | 0       | 0      | 0       | 0        | 0       | 0        | 0       |
| MIR488   | 0        | 0        | 0        | 0        | 0        | 0        | 0       | 0        | 0       | 0      | 0       | 0        | 0       | 0        | 0       |
| MIR489   | 0        | 0        | 0        | 0        | 0        | 0        | 0       | 0        | 0       | 0      | 0       | 0        | 0       | 0        | 0       |
| MIR490   | 0        | 0        | 0        | 0        | 0        | 0        | 0       | 0        | 0       | 0      | 0       | 0        | 0       | 0        | 0       |
| MIR491   | 0        | 0        | 0        | 0        | 0        | 0        | 0       | 0        | 0       | 0      | 0       | 0        | 0       | 0        | 0       |
| MIR492   | 0        | 0        | 0        | 0        | 0        | 0        | 0       | 0        | 0       | 0      | 0       | 0        | 0       | 0        | 0       |
| MIR493   | 0        | 0        | 0        | 0        | 0        | 0        | 0       | 0        | 0       | 0      | 0       | 0        | 0       | 0        | 0       |
| MIR494   | 0        | 0        | 0        | 0        | 0        | 0        | 0       | 0        | 0       | 0      | 0       | 0        | 0       | 0        | 0       |
| MIR495   | 0        | 0        | 0        | 0        | 0        | 0        | 0       | 0        | 0       | 0      | 0       | 0        | 0       | 0        | 0       |
| MIR496   | 0        | 0        | 0        | 0        | 0        | 0        | 0       | 0        | 0       | 0      | 0       | 0        | 0       | 0        | 0       |
| MIR497   | 0.206634 | 0        | 0        | 0.212943 | 0        | 0        | 0       | 0        | 0       | 0      | 0       | 0        | 0       | 0        | 0       |
| MIR497HG | 0.886568 | 0.955098 | 1.13332  | 0.908783 | 3.10083  | 1.70446  | 1.44966 | 0.813516 | 0.37189 | 0.3855 | 1.09522 | 0.220941 | 0.53079 | 0.699907 | 1.86397 |
| MIR498   | 0        | 0        | 0        | 0        | 0        | 0        | 0       | 0        | 0       | 0      | 0       | 0        | 0       | 0        | 0       |
| MIR4999  | 0        | 0        | 0        | 0        | 0        | 0        | 0       | 0        | 0       | 0      | 0       | 0        | 0       | 0        | 0       |
| MIR499A  | 0        | 0.182798 | 0.313862 | 0        | 0.883996 | 0.161525 | 0       | 0        | 0       | 0      | 0       | 0.271467 | 0       | 0.099144 | 0       |

























|          |         |       |         |          |         |          |         |         |          |          |          |          |          |          |          |
|----------|---------|-------|---------|----------|---------|----------|---------|---------|----------|----------|----------|----------|----------|----------|----------|
| MIR5739  | 0       | 0     | 0       | 0        | 0       | 0        | 0       | 0       | 0        | 0        | 0        | 0        | 0        | 0        | 0        |
| MIR574   | 0       | 0     | 0       | 0        | 0       | 0        | 0       | 0       | 0        | 0        | 0        | 0        | 0        | 0        | 0        |
| MIR575   | 0       | 0     | 0       | 0        | 0       | 0        | 0       | 0       | 0        | 0        | 0        | 0        | 0        | 0        | 0        |
| MIR577   | 0       | 0     | 0       | 0        | 0       | 0        | 0       | 0       | 0        | 0        | 0        | 0        | 0        | 0        | 0        |
| MIR578   | 0       | 0     | 0       | 0        | 0       | 0        | 0       | 0       | 0        | 0        | 0        | 0        | 0        | 0        | 0        |
| MIR5787  | 0       | 0     | 0       | 0        | 0       | 0        | 0       | 0       | 0        | 0        | 0        | 0        | 0        | 0        | 0        |
| MIR579   | 0       | 0     | 0       | 0        | 0       | 0        | 0       | 0       | 0        | 0        | 0        | 0        | 0        | 0        | 0        |
| MIR580   | 0       | 0     | 0       | 0        | 0       | 0        | 0       | 0       | 0        | 0        | 0        | 0        | 0        | 0        | 0        |
| MIR581   | 0       | 0     | 0       | 0        | 0       | 0        | 0       | 0       | 0        | 0        | 0        | 0        | 0        | 0        | 0        |
| MIR583   | 0       | 0     | 0       | 0        | 0       | 0        | 0       | 0       | 0        | 0        | 0        | 0        | 0        | 0        | 0        |
| MIR585   | 0       | 0     | 0       | 0        | 0       | 0        | 0       | 0       | 0        | 0        | 0        | 0        | 0        | 0        | 0        |
| MIR586   | 0       | 0     | 0       | 0        | 0       | 0        | 0       | 0       | 0        | 0        | 0        | 0        | 0        | 0        | 0        |
| MIR587   | 0       | 0     | 0       | 0        | 0       | 0        | 0       | 0       | 0        | 0        | 0        | 0        | 0        | 0        | 0        |
| MIR588   | 0       | 0     | 0       | 0        | 0       | 0        | 0       | 0       | 0        | 0        | 0        | 0        | 0        | 0        | 0        |
| MIR589   | 0       | 0     | 0       | 0        | 0       | 0        | 0       | 0       | 0        | 0        | 0        | 0        | 0        | 0        | 0        |
| MIR590   | 0       | 0     | 0       | 0        | 0       | 0        | 0       | 0       | 0        | 0        | 0        | 0        | 0        | 0        | 0        |
| MIR591   | 0       | 0     | 0       | 0        | 0       | 0        | 0       | 0       | 0        | 0        | 0        | 0        | 0        | 0        | 0        |
| MIR592   | 0       | 0     | 0       | 0        | 0       | 0        | 0       | 0       | 0        | 0        | 0        | 0        | 0        | 0        | 0        |
| MIR593   | 0       | 0     | 0       | 0        | 0       | 0        | 0       | 0       | 0        | 0        | 0        | 0        | 0        | 0        | 0        |
| MIR595   | 0       | 0     | 0       | 0        | 0       | 0        | 0       | 0       | 0        | 0        | 0        | 0        | 0        | 0        | 0        |
| MIR596   | 0       | 0     | 0       | 0        | 0       | 0        | 0       | 0       | 0        | 0        | 0        | 0        | 0        | 0        | 0        |
| MIR597   | 0       | 0     | 0       | 0        | 0       | 0        | 0       | 0       | 0        | 0        | 0        | 0        | 0        | 0        | 0        |
| MIR598   | 0       | 0     | 0       | 0        | 0       | 0        | 0       | 0       | 0        | 0        | 0        | 0        | 0        | 0        | 0        |
| MIR599   | 0       | 0     | 0       | 0        | 0       | 0        | 0       | 0       | 0        | 0        | 0        | 0        | 0        | 0        | 0        |
| MIR600   | 0       | 0     | 0       | 0        | 0       | 0        | 0       | 0       | 0        | 0        | 0        | 0        | 0        | 0        | 0        |
| MIR600HG | 1.45031 | 1.569 | 1.67012 | 0.553993 | 1.94044 | 0.773882 | 1.60734 | 1.14455 | 0.494567 | 0.456285 | 0.227027 | 0.835722 | 0.583896 | 0.911615 | 0.844239 |



















|         |          |         |          |        |   |          |         |          |   |   |   |          |   |          |         |
|---------|----------|---------|----------|--------|---|----------|---------|----------|---|---|---|----------|---|----------|---------|
| MIR6784 | 0        | 0       | 0        | 0      | 0 | 0        | 0       | 0        | 0 | 0 | 0 | 0        | 0 | 0        | 0       |
| MIR6785 | 0        | 0       | 0        | 0      | 0 | 0        | 0       | 0        | 0 | 0 | 0 | 0        | 0 | 0        | 0       |
| MIR6786 | 0.819223 | 0       | 0        | 0      | 0 | 0        | 0       | 0        | 0 | 0 | 0 | 0        | 0 | 0        | 0       |
| MIR6787 | 0        | 0       | 0        | 0      | 0 | 0        | 0       | 0        | 0 | 0 | 0 | 0        | 0 | 0        | 0       |
| MIR6788 | 0        | 0       | 0        | 0      | 0 | 0        | 0       | 0        | 0 | 0 | 0 | 0        | 0 | 0        | 0       |
| MIR6789 | 0        | 0       | 0        | 0      | 0 | 0        | 0       | 0        | 0 | 0 | 0 | 0        | 0 | 0        | 0       |
| MIR6790 | 0        | 0       | 0        | 0      | 0 | 0        | 0       | 0        | 0 | 0 | 0 | 0        | 0 | 0        | 0       |
| MIR6791 | 0        | 0       | 0        | 0      | 0 | 0        | 0       | 0        | 0 | 0 | 0 | 0        | 0 | 0        | 0       |
| MIR6792 | 0        | 0       | 0        | 0      | 0 | 0        | 0       | 0        | 0 | 0 | 0 | 0        | 0 | 0        | 0       |
| MIR6793 | 0        | 0       | 0        | 0      | 0 | 0        | 0       | 0        | 0 | 0 | 0 | 0        | 0 | 0        | 0       |
| MIR6794 | 0        | 0       | 0        | 0      | 0 | 0        | 0       | 0        | 0 | 0 | 0 | 0        | 0 | 0        | 0       |
| MIR6795 | 0        | 0       | 0        | 0      | 0 | 0        | 0       | 0        | 0 | 0 | 0 | 0        | 0 | 0        | 0       |
| MIR6796 | 0        | 0       | 0        | 0      | 0 | 0        | 0       | 0        | 0 | 0 | 0 | 0        | 0 | 0        | 0       |
| MIR6797 | 0        | 0       | 0        | 0      | 0 | 0        | 0       | 0        | 0 | 0 | 0 | 0        | 0 | 0        | 0       |
| MIR6798 | 0        | 0       | 0        | 0      | 0 | 0        | 0       | 0        | 0 | 0 | 0 | 0        | 0 | 0        | 0       |
| MIR6799 | 0        | 0       | 0        | 0      | 0 | 0        | 0       | 0        | 0 | 0 | 0 | 0        | 0 | 0        | 0       |
| MIR6800 | 0        | 0       | 0        | 0      | 0 | 0        | 0       | 0        | 0 | 0 | 0 | 0        | 0 | 0        | 0       |
| MIR6801 | 0        | 0       | 0        | 0      | 0 | 0        | 0       | 0        | 0 | 0 | 0 | 0        | 0 | 0        | 0       |
| MIR6802 | 0        | 0       | 0        | 0      | 0 | 0        | 0       | 0        | 0 | 0 | 0 | 0        | 0 | 0        | 0       |
| MIR6803 | 0        | 0       | 0        | 0      | 0 | 0        | 0       | 0        | 0 | 0 | 0 | 0        | 0 | 0        | 0       |
| MIR6804 | 0        | 0       | 0        | 0      | 0 | 0        | 0       | 0        | 0 | 0 | 0 | 0        | 0 | 0        | 0       |
| MIR6805 | 0        | 0       | 0        | 0      | 0 | 0        | 0       | 0        | 0 | 0 | 0 | 0        | 0 | 0        | 0       |
| MIR6806 | 0        | 0       | 0        | 0      | 0 | 0        | 0       | 0        | 0 | 0 | 0 | 0        | 0 | 0        | 0       |
| MIR6807 | 0        | 0       | 0        | 0      | 0 | 0        | 0       | 0        | 0 | 0 | 0 | 0        | 0 | 0        | 0       |
| MIR6808 | 0        | 0       | 0        | 0      | 0 | 0        | 0       | 0        | 0 | 0 | 0 | 0        | 0 | 0        | 0       |
| MIR6809 | 0        | 0.28838 | 0.495144 | 0.2056 | 0 | 0.509638 | 1.13896 | 0.531921 | 0 | 0 | 0 | 0.428262 | 0 | 0.208544 | 0.28652 |









|           |          |           |         |          |          |          |         |          |          |          |          |          |          |          |          |
|-----------|----------|-----------|---------|----------|----------|----------|---------|----------|----------|----------|----------|----------|----------|----------|----------|
| MIR7114   | 0        | 0         | 0       | 0        | 0        | 0        | 0       | 0        | 0        | 0        | 0        | 0        | 0        | 0        | 0        |
| MIR7150   | 0        | 0         | 0       | 0        | 0        | 0        | 0       | 0        | 0        | 0        | 0        | 0        | 0        | 0        | 0        |
| MIR7151   | 0        | 0         | 0       | 0        | 0        | 0        | 0       | 0        | 0        | 0        | 0        | 0        | 0        | 0        | 0        |
| MIR7152   | 0        | 0         | 0       | 0        | 0        | 0        | 0       | 0        | 0        | 0        | 0        | 0        | 0        | 0        | 0        |
| MIR7153   | 0        | 0         | 0       | 0        | 0        | 0        | 0       | 0        | 0        | 0        | 0        | 0        | 0        | 0        | 0        |
| MIR7154   | 0        | 0         | 0       | 0        | 0        | 0        | 0       | 0        | 0        | 0        | 0        | 0        | 0        | 0        | 0        |
| MIR7155   | 0        | 0         | 0       | 0        | 0        | 0        | 0       | 0        | 0        | 0        | 0        | 0        | 0        | 0        | 0        |
| MIR7156   | 0        | 0         | 0       | 0        | 0        | 0        | 0       | 0        | 0        | 0        | 0        | 0        | 0        | 0        | 0        |
| MIR7157   | 0        | 0         | 0       | 0        | 0        | 0        | 0       | 0        | 0        | 0        | 0        | 0        | 0        | 0        | 0        |
| MIR7158   | 0        | 0         | 0       | 0        | 0        | 0        | 0       | 0        | 0        | 0        | 0        | 0        | 0        | 0        | 0        |
| MIR7159   | 0        | 0         | 0       | 0        | 0        | 0        | 0       | 0        | 0        | 0        | 0        | 0        | 0        | 0        | 0        |
| MIR7160   | 0        | 0         | 0       | 0        | 0        | 0        | 0       | 0        | 0        | 0        | 0        | 0        | 0        | 0        | 0        |
| MIR7161   | 0        | 0         | 0       | 0        | 0        | 0        | 0       | 0        | 0        | 0        | 0        | 0        | 0        | 0        | 0        |
| MIR7162   | 0        | 0         | 0       | 0        | 0        | 0        | 0       | 0        | 0        | 0        | 0        | 0        | 0        | 0        | 0        |
| MIR718    | 0        | 0         | 0       | 0        | 0        | 0        | 0       | 0        | 0        | 0        | 0        | 0        | 0        | 0        | 0        |
| MIR744    | 0        | 0         | 0       | 0        | 0        | 0        | 0       | 0        | 0        | 0        | 0        | 0        | 0        | 0        | 0        |
| MIR7515   | 0        | 0         | 0       | 0        | 0        | 0        | 0       | 0        | 0        | 0        | 0        | 0        | 0        | 0        | 0        |
| MIR7515HG | 0        | 0         | 0       | 0        | 0        | 0        | 0       | 0        | 0        | 0        | 0        | 0        | 0        | 0        | 0        |
| MIR758    | 0        | 0         | 0       | 0        | 0        | 0        | 0       | 0        | 0        | 0        | 0        | 0        | 0        | 0        | 0        |
| MIR759    | 0        | 0         | 0       | 0        | 0        | 0        | 0       | 0        | 0        | 0        | 0        | 0        | 0        | 0        | 0        |
| MIR760    | 0        | 0         | 0       | 0        | 0        | 0        | 0       | 0        | 0        | 0        | 0        | 0        | 0        | 0        | 0        |
| MIR761    | 0        | 0         | 0       | 0        | 0        | 0        | 0       | 0        | 0        | 0        | 0        | 0        | 0        | 0        | 0        |
| MIR762    | 0        | 0         | 0       | 0        | 0        | 0        | 0       | 0        | 0        | 0        | 0        | 0        | 0        | 0        | 0        |
| MIR762HG  | 0.749394 | 0.877895  | 0.86307 | 0.454278 | 0.79887  | 0.975916 | 1.00663 | 0.561529 | 0.536869 | 0.516389 | 0.630333 | 0.410044 | 0.407661 | 0.453104 | 0.654176 |
| MIR764    | 0        | 0         | 0       | 0        | 0        | 0        | 0       | 0        | 0        | 0        | 0        | 0        | 0        | 0        | 0        |
| MIR765    | 0.203009 | 0.0978129 | 0       | 0        | 0.315343 | 0        | 0       | 0.180418 | 0        | 0        | 0        | 0        | 0        | 0        | 0        |















|          |          |           |           |           |           |           |           |           |            |           |           |            |           |            |           |
|----------|----------|-----------|-----------|-----------|-----------|-----------|-----------|-----------|------------|-----------|-----------|------------|-----------|------------|-----------|
| MKS1     | 1.52041  | 2.15819   | 2.19926   | 2.56134   | 1.76776   | 2.91481   | 1.97504   | 1.35122   | 1.27512    | 1.06269   | 1.57247   | 1.33544    | 1.32753   | 1.15626    | 0.954466  |
| MKX      | 0.419742 | 0.171596  | 0.205187  | 0.124524  | 0.266729  | 0.666073  | 0.246885  | 0.2826    | 0.162654   | 0.0798211 | 0.21538   | 0.0591572  | 0.3775    | 0.20608    | 2.3016    |
| MKX-AS1  | 0        | 0         | 0         | 0         | 0         | 0.17776   | 0         | 0         | 0          | 0         | 0         | 0          | 0         | 0          | 0         |
| MLANA    | 1.68562  | 3.42422   | 3.49243   | 1.70578   | 1.10867   | 3.82741   | 2.35805   | 3.73834   | 1.62752    | 0.457432  | 0.171428  | 0.847532   | 0.39191   | 0.523824   | 0.283512  |
| MLC1     | 0.155248 | 0.0587721 | 0.123845  | 0.0228554 | 0.0258379 | 0.132192  | 0.0379837 | 0.0788409 | 0.00675267 | 0.027836  | 0.0625913 | 0.00396729 | 0.0178867 | 0.00579567 | 0.0318508 |
| MLEC     | 7.23932  | 7.17849   | 6.4959    | 13.2761   | 10.8523   | 17.7943   | 9.59164   | 6.31333   | 6.96835    | 9.00559   | 11.5305   | 5.88357    | 10.5528   | 9.14998    | 12.4126   |
| MLF1     | 0.719382 | 0.659403  | 0.733018  | 0.80463   | 0.218039  | 1.15039   | 0.580967  | 0.693904  | 0.331219   | 0.946943  | 1.96091   | 0.71561    | 1.29054   | 0.742791   | 1.02052   |
| MLF2     | 20.2788  | 19.0021   | 19.7827   | 45.1075   | 39.4639   | 65.7172   | 23.8956   | 15.2734   | 49.8491    | 38.0797   | 55.2401   | 28.7787    | 52.8059   | 31.4057    | 20.481    |
| MLH1     | 3.55427  | 3.14605   | 3.35866   | 5.2185    | 2.49299   | 6.14642   | 2.91182   | 2.57258   | 2.40086    | 3.61477   | 4.56661   | 2.5222     | 4.07574   | 3.53138    | 3.87301   |
| MLH3     | 2.6291   | 2.80601   | 3.23942   | 2.14453   | 1.01073   | 2.26861   | 1.66321   | 2.74548   | 1.12086    | 1.43469   | 1.72054   | 1.58968    | 1.42018   | 1.65134    | 2.19303   |
| MLIP     | 0.242485 | 0.130578  | 0.1239    | 0.301335  | 0.0997049 | 0.0850182 | 0.105859  | 0.155287  | 0.529838   | 0.353575  | 0.309965  | 0.408246   | 0.131142  | 0.264649   | 0.102423  |
| MLIP-AS1 | 0        | 0.0173147 | 0.0891874 | 0.0370335 | 0         | 0.0611988 | 0         | 0         | 0.087533   | 0         | 0         | 0.0514269  | 0         | 0.150256   | 0         |
| MLIP-IT1 | 0.395915 | 0.711007  | 0.565732  | 0.927278  | 0.167725  | 0.398411  | 0.616423  | 0.7357    | 1.53421    | 0.858307  | 0.853247  | 1.08165    | 0.208998  | 0.470279   | 0         |
| MLKL     | 1.34187  | 1.30104   | 1.01415   | 3.92655   | 1.94285   | 2.52496   | 0.737678  | 1.01587   | 0.807033   | 1.51784   | 2.06649   | 1.215      | 3.16379   | 2.81825    | 3.62817   |
| MLLT1    | 6.27251  | 7.66067   | 8.66544   | 9.34396   | 14.6191   | 17.9301   | 9.0563    | 5.41469   | 6.56309    | 4.96473   | 5.67747   | 5.20125    | 9.68826   | 7.22781    | 7.23748   |
| MLLT10   | 4.43264  | 4.80423   | 4.67446   | 3.79672   | 2.1877    | 3.26746   | 3.3637    | 3.82452   | 1.96799    | 2.69846   | 3.07994   | 2.66782    | 2.19269   | 3.28571    | 2.68217   |
| MLLT10P1 | 0.833984 | 0.442009  | 0.344965  | 0.257833  | 0         | 0.0355063 | 0.333275  | 1.0747    | 0.0507849  | 0.104674  | 0.188293  | 0.0895107  | 0         | 0          | 1.07794   |
| MLLT11   | 0.482594 | 0.366866  | 0.434723  | 0.408913  | 0.566391  | 0.913161  | 0.306117  | 0.428889  | 1.29304    | 1.23833   | 2.53024   | 0.621556   | 0.844151  | 0.700624   | 1.0935    |
| MLLT3    | 1.08975  | 0.857006  | 0.854932  | 0.481292  | 0.499079  | 0.848935  | 0.574845  | 0.93904   | 0.637373   | 0.440671  | 0.751576  | 0.369726   | 0.320562  | 0.463948   | 0.713533  |
| MLLT6    | 10.7538  | 12.0442   | 13.1211   | 9.83875   | 17.8404   | 23.839    | 12.5355   | 8.76455   | 2.92379    | 3.41592   | 3.70635   | 3.74465    | 5.99859   | 6.19616    | 10.7863   |
| MLN      | 0        | 0         | 0         | 0         | 0         | 0         | 0         | 0.0359574 | 0          | 0         | 0         | 0          | 0         | 0          | 0         |
| MLNR     | 0        | 0         | 0         | 0         | 0.0290147 | 0.0159048 | 0.0213269 | 0         | 0          | 0         | 0.0632582 | 0.0267304  | 0.024103  | 0          | 0         |
| MLPH     | 2.38444  | 1.18265   | 1.41918   | 0.794986  | 2.61449   | 2.21865   | 1.34892   | 1.25611   | 0.492756   | 0.494271  | 0.590719  | 0.386002   | 0.772693  | 0.459575   | 0.98392   |
| MLST8    | 2.97852  | 2.8218    | 3.08684   | 5.6422    | 5.86081   | 6.67325   | 4.32362   | 2.69934   | 3.95359    | 3.3403    | 6.69349   | 3.0466     | 4.3413    | 2.85855    | 2.30165   |
| MLX      | 5.03195  | 5.50267   | 5.18476   | 10.6317   | 4.56957   | 10.1159   | 6.24957   | 4.57613   | 12.3904    | 10.2682   | 13.5496   | 6.28082    | 12.4055   | 8.36634    | 4.5602    |
| MLXIP    | 3.68665  | 5.76668   | 6.74335   | 8.19343   | 8.28611   | 14.2325   | 6.73386   | 4.35483   | 4.09681    | 5.14987   | 4.1976    | 4.86106    | 10.0715   | 6.54979    | 8.57648   |

|          |           |           |            |            |            |           |            |           |            |          |           |            |            |           |           |
|----------|-----------|-----------|------------|------------|------------|-----------|------------|-----------|------------|----------|-----------|------------|------------|-----------|-----------|
| MLXPL    | 0.423219  | 0.139341  | 0.268423   | 0.043614   | 0.0328703  | 0.468475  | 0.700667   | 0.307166  | 0.00859056 | 0        | 0.0159254 | 0.0100942  | 0          | 0.0184327 | 0.0101299 |
| MLYCD    | 1.85566   | 1.50369   | 1.96253    | 1.73847    | 2.81697    | 2.89081   | 1.70943    | 1.33057   | 1.01443    | 1.08512  | 2.0472    | 0.927934   | 1.26529    | 1.21231   | 1.33248   |
| MMAA     | 0.700951  | 0.853703  | 0.869814   | 0.987212   | 0.429478   | 1.00138   | 0.533548   | 0.830595  | 0.829966   | 0.591398 | 1.04186   | 0.518267   | 0.510037   | 0.586156  | 0.559252  |
| MMAB     | 1.50087   | 1.95566   | 1.91682    | 3.10467    | 2.05059    | 4.23505   | 2.06389    | 1.21215   | 2.04138    | 2.00063  | 3.07943   | 1.63831    | 1.87311    | 1.8952    | 0.786659  |
| MMACHC   | 0.877537  | 1.36068   | 1.20773    | 2.21971    | 1.84641    | 1.71859   | 1.14768    | 1.21945   | 0.485792   | 0.77098  | 1.58501   | 0.593652   | 1.07575    | 1.19663   | 0.962377  |
| MMADHC   | 16.54     | 14.6736   | 15.042     | 28.5133    | 6.87962    | 19.5407   | 13.1467    | 14.3984   | 42.6413    | 35.677   | 51.5604   | 22.1821    | 39.9945    | 22.474    | 10.94     |
| MMD      | 0.773418  | 0.888614  | 1.36402    | 1.39261    | 0.620496   | 1.67172   | 0.650168   | 1.16321   | 0.900533   | 1.8561   | 3.55953   | 1.14937    | 2.25375    | 2.10107   | 2.02616   |
| MMD2     | 0         | 0         | 0          | 0          | 0          | 0         | 0.00924239 | 0         | 0          | 0        | 0         | 0          | 0          | 0         | 0         |
| MME      | 1.22065   | 0.101183  | 0.0841504  | 6.9929     | 0.642223   | 19.4845   | 0.206057   | 0.973994  | 0.0359664  | 6.97651  | 12.4977   | 0.13148    | 5.36045    | 1.63264   | 6.14492   |
| MMEL1    | 0.0173834 | 0.04231   | 0.0300892  | 0.0283959  | 0.0677034  | 0.0297301 | 0.010217   | 0.0157163 | 0          | 0        | 0.0205841 | 0          | 0.0056545  | 0.0561979 | 0.0366346 |
| MMGT1    | 3.02366   | 2.27074   | 2.60044    | 3.57288    | 0.612926   | 3.4316    | 2.36397    | 3.74709   | 2.87256    | 2.20912  | 3.43837   | 2.18888    | 5.00011    | 2.53031   | 3.03713   |
| MMP1     | 0.0337855 | 0.0108522 | 0.00931658 | 87.9437    | 3.16632    | 6.88511   | 0.0128584  | 0.0800686 | 0.548626   | 61.0027  | 90.3606   | 7.77605    | 343.335    | 34.962    | 28.4649   |
| MMP10    | 0         | 0         | 0          | 0.338965   | 0          | 0.0896237 | 0.0150222  | 0.0116928 | 0.0160237  | 2.74121  | 3.37153   | 0.70606    | 12.504     | 3.89891   | 2.21072   |
| MMP11    | 0.444476  | 0.418576  | 0.167137   | 0.655838   | 15.9426    | 5.2469    | 0.922706   | 1.28379   | 4.87189    | 25.1548  | 74.8226   | 0.26021    | 0.912462   | 5.09479   | 18.2214   |
| MMP12    | 0.0738608 | 0.0771057 | 0.0407352  | 1.8014     | 0.0764876  | 0.0733734 | 0          | 0.0547011 | 0          | 7.35443  | 17.3986   | 0.193781   | 6.60016    | 4.88326   | 3.67721   |
| MMP13    | 0         | 0.0451112 | 0.070414   | 0.596459   | 0.118993   | 0.304396  | 0.0194365  | 0.0605152 | 0          | 1.49561  | 2.921     | 0.0121806  | 0.576623   | 0.533824  | 5.29288   |
| MMP14    | 23.2332   | 19.2515   | 21.058     | 70.5135    | 95.5543    | 128.572   | 31.8573    | 26.2217   | 16.1318    | 78.1373  | 111.379   | 15.6057    | 99.2668    | 65.8559   | 102.002   |
| MMP15    | 1.84643   | 1.13108   | 0.869638   | 2.66056    | 4.53489    | 2.43484   | 1.75372    | 0.943913  | 2.42785    | 1.81842  | 1.93683   | 1.55501    | 3.28928    | 1.92436   | 1.95554   |
| MMP16    | 0.288603  | 0.369636  | 0.401951   | 0.184472   | 0.192939   | 0.28307   | 0.392084   | 0.26298   | 0.160171   | 1.09127  | 1.71971   | 0.488812   | 0.32527    | 0.950844  | 1.08602   |
| MMP17    | 0.499145  | 0.948108  | 0.833797   | 1.50358    | 4.44332    | 2.18229   | 1.53437    | 0.733644  | 0.80664    | 1.44572  | 1.40868   | 1.56597    | 1.80222    | 2.35289   | 2.93627   |
| MMP19    | 1.28854   | 0.947375  | 1.47266    | 5.26       | 2.01006    | 6.22774   | 1.08977    | 1.16647   | 0.338534   | 4.10871  | 7.55925   | 1.06916    | 3.93413    | 3.93791   | 6.02252   |
| MMP2     | 77.1465   | 32.7249   | 48.4245    | 145.808    | 120.692    | 537.899   | 87.584     | 98.3067   | 5.42661    | 128.233  | 326.399   | 12.1945    | 230.688    | 95.127    | 318.311   |
| MMP2-AS1 | 0         | 0.0142228 | 0.0244204  | 0.0304204  | 0          | 0         | 0          | 0.0787026 | 0          | 0        | 0         | 0          | 0          | 0         | 0         |
| MMP20    | 0         | 0         | 0          | 0          | 0          | 0         | 0          | 0         | 0          | 0        | 0         | 0          | 0          | 0         | 0.016992  |
| MMP21    | 0.0967317 | 0.145646  | 0.0600174  | 0.0498424  | 0.0563466  | 0.0205914 | 0.0552225  | 0.139696  | 0.014726   | 0        | 0         | 0          | 0.00780135 | 0.0252781 | 0         |
| MMP23A   | 0.0448625 | 0.123846  | 0.020419   | 0.00924928 | 0.00928228 | 0.0168203 | 0.0243093  | 0.478432  | 0.0758156  | 0.206189 | 0.182522  | 0.00100739 | 2.01E-10   | 0.15645   | 1.23168   |



|                |          |           |           |           |           |           |           |            |            |           |          |            |           |          |          |
|----------------|----------|-----------|-----------|-----------|-----------|-----------|-----------|------------|------------|-----------|----------|------------|-----------|----------|----------|
| MMP23B         | 1.5022   | 1.02402   | 1.6068    | 0.525023  | 5.55275   | 1.48515   | 2.20199   | 0.24632    | 0.252897   | 0.260897  | 1.16598  | 0.452578   | 0.144501  | 0.18107  | 0.398041 |
| MMP24          | 0.716172 | 0.954587  | 0.903279  | 0.525091  | 1.51255   | 0.625398  | 1.16226   | 0.880349   | 0.572754   | 0.85944   | 0.214979 | 1.18912    | 0.279825  | 0.769517 | 0.86713  |
| MMP24-AS1-EDM2 | 1.05103  | 0.426069  | 0.436104  | 0.277986  | 0.655096  | 0.628706  | 0.791909  | 0.32478    | 0.737293   | 0.332752  | 0.534831 | 0.164199   | 0.258262  | 0.316127 | 0.812346 |
| MMP24OS        | 9.54245  | 10.0107   | 10.9851   | 18.6969   | 26.3549   | 28.5622   | 12.7537   | 9.25588    | 38.0577    | 27.8455   | 43.2533  | 21.3761    | 43.3343   | 13.8948  | 9.93244  |
| MMP25          | 0.280448 | 0.285401  | 0.342309  | 6.45682   | 1.9196    | 2.30169   | 0.448212  | 0.309566   | 0.00793738 | 1.82549   | 3.02115  | 0.182395   | 1.90593   | 0.477105 | 1.07628  |
| MMP25-AS1      | 0.415258 | 0.648886  | 0.765418  | 0.669245  | 1.41991   | 0.928747  | 0.799462  | 0.734713   | 0.084352   | 0.184206  | 0.171622 | 0.32487    | 0.177092  | 0.392664 | 0.540105 |
| MMP26          | 0        | 0         | 0         | 0         | 0         | 0         | 0         | 0          | 0          | 0         | 0        | 0          | 0         | 0        | 0        |
| MMP27          | 0.646375 | 0.649948  | 1.04621   | 0.23169   | 0.0873082 | 0.323049  | 0.786142  | 0.586933   | 0.0342266  | 0.176363  | 0.475877 | 0.140761   | 0.0362642 | 0.088128 | 0.161439 |
| MMP28          | 3.44356  | 6.30409   | 8.1029    | 2.24725   | 5.59995   | 1.40043   | 4.08265   | 3.56279    | 1.45757    | 2.83833   | 2.86785  | 1.1558     | 2.0607    | 1.88801  | 1.29698  |
| MMP3           | 0.133564 | 0.0117006 | 0.0602694 | 60.8753   | 2.16902   | 1.64389   | 0.0277272 | 0.0539549  | 0.0443635  | 22.1128   | 29.7306  | 1.70286    | 76.163    | 11.461   | 4.02812  |
| MMP7           | 28.2654  | 2.65634   | 3.33558   | 5.13031   | 0.766915  | 8.07508   | 1.40928   | 4.18665    | 0.0250539  | 4.93152   | 13.1673  | 0.0294391  | 2.53508   | 1.26869  | 1.00448  |
| MMP8           | 0        | 0         | 0         | 0.0606281 | 0         | 0.0250474 | 0         | 0          | 0          | 0.286131  | 0.390182 | 0          | 0.0901506 | 0        | 0        |
| MMP9           | 2.12013  | 0.63009   | 0.737176  | 13.0052   | 2.95227   | 6.175     | 0.991955  | 1.7169     | 0.120658   | 17.8647   | 46.9379  | 1.06872    | 9.7862    | 3.06985  | 4.33644  |
| MMRN1          | 9.91113  | 2.39216   | 2.61233   | 4.77568   | 0.991152  | 11.3501   | 3.14812   | 3.71285    | 0.334665   | 5.84562   | 9.57431  | 0.849802   | 10.1599   | 5.18729  | 4.54834  |
| MMRN2          | 9.06561  | 3.83696   | 4.33856   | 6.30624   | 8.22383   | 16.3344   | 5.83617   | 3.56328    | 2.1178     | 6.30427   | 5.29514  | 3.7446     | 12.0626   | 5.73375  | 10.7368  |
| MMS19          | 4.8431   | 6.77855   | 7.47316   | 7.28522   | 8.68172   | 9.30952   | 7.58588   | 4.52686    | 4.88335    | 5.77133   | 5.75014  | 5.31269    | 6.39987   | 5.69294  | 5.08044  |
| MMS22L         | 1.04764  | 0.908808  | 0.860395  | 1.14236   | 0.311451  | 1.04389   | 0.589346  | 0.919963   | 0.264583   | 0.65533   | 0.853046 | 0.497652   | 0.860658  | 0.883865 | 0.550531 |
| MN1            | 0.771843 | 0.608004  | 0.552373  | 0.934288  | 2.04581   | 1.57523   | 2.03181   | 0.647842   | 1.60773    | 1.98362   | 1.58704  | 2.13897    | 3.397     | 1.92095  | 2.70958  |
| MNAT1          | 3.36353  | 2.69293   | 2.5472    | 4.67334   | 1.6376    | 4.63085   | 1.87242   | 2.8405     | 1.85459    | 4.78864   | 8.34962  | 2.38274    | 5.096     | 4.39917  | 3.50869  |
| MND1           | 0.439425 | 0.161312  | 0.138485  | 0.646915  | 0.0325038 | 0.890868  | 0.119457  | 0.20456    | 0.0764529  | 0.630313  | 1.01573  | 0.149724   | 0.837044  | 0.459325 | 0.450764 |
| MNDA           | 0.969754 | 0.997626  | 1.74543   | 5.14535   | 0.386769  | 3.36988   | 0.448879  | 1.22288    | 0.383044   | 6.03636   | 11.8941  | 0.196913   | 4.51505   | 0.678064 | 4.32863  |
| MNS1           | 1.16688  | 0.562219  | 0.454269  | 0.518726  | 0.106621  | 0.818242  | 0.182865  | 0.518511   | 0.111461   | 0.358958  | 0.594058 | 0.171898   | 0.250954  | 0.191329 | 0.575023 |
| MNT            | 3.57518  | 3.84816   | 3.8908    | 5.81217   | 7.72885   | 8.60764   | 6.11757   | 3.45767    | 7.44515    | 4.36723   | 3.88485  | 6.68261    | 7.1976    | 4.64138  | 4.8667   |
| MNX1           | 0        | 0.0127973 | 0.0219727 | 0.0273714 | 0.0137525 | 0.0226159 | 0.0202173 | 0.00786825 | 0.0215651  | 0.0111121 | 0        | 0.00633492 | 0         | 0        | 0        |
| MNX1-AS1       | 0        | 0         | 0         | 0         | 0         | 0         | 0         | 0          | 0          | 0         | 0        | 0          | 0         | 0        | 0        |
| MNX1-AS2       | 0        | 0         | 0         | 0         | 0         | 0.0547389 | 0         | 0.0571323  | 0          | 0         | 0        | 0.0459985  | 0         | 0        | 0        |

|           |           |                 |            |           |            |            |            |            |            |            |            |            |            |            |            |
|-----------|-----------|-----------------|------------|-----------|------------|------------|------------|------------|------------|------------|------------|------------|------------|------------|------------|
| MOAP1     | 3.63854   | 3.68614         | 3.91308    | 2.89116   | 3.00444    | 5.69085    | 3.19231    | 2.80816    | 4.73453    | 3.60533    | 4.72358    | 2.51441    | 3.42869    | 2.48717    | 2.97023    |
| MOB1A     | 11.1821   | 10.7235         | 11.864     | 16.9145   | 5.30732    | 16.5189    | 10.5097    | 12.6484    | 20.7888    | 15.2961    | 22.3347    | 9.29637    | 24.9891    | 12.6421    | 14.3954    |
| MOB1B     | 2.58171   | 2.05531         | 2.43188    | 2.02333   | 0.556045   | 2.21673    | 1.87947    | 3.13792    | 1.23522    | 1.80053    | 2.33277    | 1.20306    | 2.44256    | 1.79436    | 2.25107    |
| MOB2      | 7.62206   | 8.9206          | 9.7856     | 9.25442   | 16.4895    | 11.5316    | 7.78418    | 6.05897    | 12.1898    | 8.78852    | 12.0282    | 6.37849    | 11.7157    | 5.90657    | 4.54515    |
| MOB3A     | 5.06493   | 5.47658         | 6.32246    | 13.5537   | 10.8678    | 16.257     | 8.02001    | 5.98319    | 6.64237    | 8.92074    | 14.8942    | 5.90593    | 15.7521    | 9.08166    | 9.51891    |
| MOB3B     | 3.43688   | 2.78724         | 2.26226    | 4.07179   | 2.26989    | 3.44893    | 2.20706    | 2.56268    | 1.16198    | 2.15014    | 2.97492    | 1.75112    | 4.15573    | 2.4395     | 2.00692    |
| MOB3C     | 2.70584   | 2.78299         | 2.49502    | 4.05082   | 4.57644    | 6.55547    | 2.1511     | 1.94997    | 1.78462    | 3.88264    | 3.99982    | 2.92912    | 4.07685    | 3.85356    | 3.40714    |
| MOB4      | 4.66517   | 3.48336         | 3.58316    | 5.17329   | 0.441568   | 3.46301    | 2.77725    | 4.82866    | 8.22249    | 6.71201    | 8.07267    | 4.19719    | 7.52145    | 4.71061    | 3.2453     |
| MOBP      | 0.0263438 | 0.0114236       | 0.0196141  | 0.0108592 | 0.00409211 | 0.015702   | 0          | 0.0163885  | 0.00320838 | 0.00330642 | 0.0118956  | 0.00188497 | 0.0169969  | 0.0096379  | 0          |
| MOCOS     | 1.36539   | 1.04744         | 1.54428    | 3.0481    | 2.28498    | 3.51085    | 1.87155    | 0.7118     | 2.0335     | 3.16774    | 4.95942    | 3.22566    | 3.13983    | 3.4469     | 2.35154    |
| MOCS1     | 1.97405   | 0.857115        | 0.641667   | 1.38779   | 1.91116    | 7.38218    | 1.41958    | 1.04874    | 0.736764   | 1.14935    | 2.14792    | 1.31683    | 1.42177    | 1.79772    | 2.15958    |
| MOCS2     | 2.32481   | 1.97624         | 1.82251    | 2.5213    | 0.593277   | 3.79884    | 1.85176    | 1.63321    | 1.71905    | 2.58442    | 3.48673    | 1.509      | 2.63922    | 1.94988    | 2.44046    |
| MOCS3     | 1.03229   | 1.32389         | 1.4254     | 2.21365   | 1.56813    | 2.38489    | 1.20464    | 1.21422    | 2.35728    | 1.54333    | 2.2364     | 1.42295    | 3.06569    | 1.51145    | 1.29719    |
| MOG       | 0.0043502 | 0.00052399<br>8 | 0.00359879 | 1.33E-34  | 0.0084467  | 0.00370414 | 0.00620864 | 0.00193305 | 0.00132451 | 0.00409496 | 0.00122771 | 0          | 0.00140336 | 0          | 0.00156186 |
| MOGAT1    | 0         | 0.0203479       | 0.0174686  | 0         | 0          | 0.0179799  | 0.048219   | 0.0187661  | 0          | 0          | 0          | 0          | 0          | 0          | 0.0909754  |
| MOGAT2    | 0.0673988 | 0.0527699       | 0.055757   | 0.0434102 | 0.0261734  | 0.0645628  | 0.0192384  | 0.0449238  | 0          | 0          | 0.0380424  | 0.0241128  | 0.016307   | 0.00880639 | 0          |
| MOGAT3    | 0         | 0               | 0          | 0         | 0          | 0          | 0          | 0          | 0          | 0          | 0          | 0          | 0          | 0          | 0          |
| MOGS      | 5.26816   | 7.6611          | 7.69124    | 9.42447   | 15.2241    | 13.1579    | 6.60827    | 4.7174     | 7.76934    | 8.36788    | 6.78637    | 7.68193    | 10.3155    | 9.11238    | 8.30049    |
| MOK       | 0.851363  | 0.952806        | 1.1679     | 0.40536   | 0.42687    | 0.885509   | 0.812099   | 0.651268   | 0.118124   | 0.392252   | 0.450127   | 0.47423    | 0.253788   | 0.439327   | 0.61907    |
| MON1A     | 1.22461   | 1.24508         | 1.21913    | 2.82345   | 3.74001    | 3.11938    | 1.27973    | 0.691736   | 2.59105    | 1.82357    | 2.60084    | 1.95298    | 3.06001    | 2.83675    | 1.10291    |
| MON1B     | 4.18494   | 4.2459          | 4.19949    | 6.96588   | 8.53237    | 10.7086    | 5.24199    | 3.17076    | 4.02302    | 4.26169    | 4.66529    | 4.15651    | 8.31576    | 5.18083    | 4.76801    |
| MON2      | 5.77585   | 5.8777          | 6.65662    | 4.62569   | 3.41787    | 4.26421    | 4.98687    | 6.17147    | 3.6552     | 4.13692    | 4.03384    | 4.66483    | 3.57899    | 4.79095    | 4.49343    |
| MORC1     | 0         | 0               | 0          | 0         | 0          | 0          | 0          | 0          | 0          | 0          | 0          | 0          | 0          | 0          | 0.0176461  |
| MORC1-AS1 | 0         | 0               | 0          | 0         | 0          | 0          | 0          | 0          | 0          | 0          | 0          | 0          | 0          | 0          | 0          |
| MORC2     | 3.13926   | 3.77129         | 3.53918    | 3.43706   | 4.88053    | 4.89879    | 2.6844     | 2.89934    | 5.9599     | 2.6859     | 1.61018    | 3.92941    | 4.29777    | 3.59521    | 2.88683    |

|             |           |           |           |           |            |           |           |            |            |           |           |           |            |           |          |
|-------------|-----------|-----------|-----------|-----------|------------|-----------|-----------|------------|------------|-----------|-----------|-----------|------------|-----------|----------|
| MORC2-AS1   | 0.176283  | 0.175417  | 0.271178  | 0.0461173 | 0.0933831  | 0.0782747 | 0.220581  | 0.45443    | 0.0352145  | 0.107104  | 0.0611139 | 0.199604  | 0.0186552  | 0.232002  | 0.22948  |
| MORC3       | 6.92361   | 6.93189   | 7.38943   | 9.66212   | 1.87547    | 5.69533   | 3.53175   | 6.40486    | 7.67745    | 9.233     | 9.62535   | 5.79893   | 12.536     | 6.99714   | 4.81822  |
| MORC4       | 3.79683   | 5.82836   | 6.34193   | 5.28747   | 3.04733    | 5.57668   | 3.35641   | 2.9344     | 4.20508    | 4.129     | 3.31851   | 3.2825    | 5.00449    | 3.18322   | 2.70468  |
| MORF4L1     | 31.1504   | 20.8606   | 22.0272   | 41.126    | 15.1355    | 50.6117   | 17.0612   | 21.387     | 25.888     | 41.9348   | 57.4549   | 19.336    | 46.3712    | 27.9173   | 34.9916  |
| MORF4L2     | 18.722    | 14.0177   | 14.9065   | 32.7984   | 10.39      | 29.0669   | 12.5995   | 14.1936    | 28.058     | 37.3764   | 48.6009   | 20.6618   | 42.4974    | 26.7597   | 22.288   |
| MORF4L2-AS1 | 0.355072  | 0.292577  | 0.366901  | 0.0831925 | 0.125258   | 0.151254  | 0.194157  | 0.258198   | 0.00982078 | 0.0506044 | 0.0364279 | 0.0346191 | 0.0260136  | 0.0927187 | 0.139223 |
| MORN1       | 0.4318    | 0.767505  | 0.783473  | 0.875008  | 1.74729    | 1.1988    | 0.683593  | 0.599808   | 0.154672   | 0.373447  | 0.143367  | 0.810059  | 0.339465   | 0.445666  | 0.364776 |
| MORN2       | 2.40488   | 1.64025   | 1.29187   | 3.57261   | 0.727716   | 3.56357   | 1.6047    | 1.02699    | 3.80373    | 3.64556   | 5.53539   | 1.94423   | 2.53901    | 1.81189   | 2.6015   |
| MORN3       | 0.433108  | 0.616961  | 0.794486  | 0.0582171 | 0.292507   | 0.609299  | 0.430008  | 0.468587   | 0.321073   | 0.141808  | 0.106288  | 0.188635  | 0.0242991  | 0.0885762 | 0.243391 |
| MORN4       | 0.467536  | 0.76677   | 0.721491  | 0.537403  | 0.572616   | 1.33976   | 0.57488   | 0.463451   | 0.646058   | 0.507813  | 0.53794   | 0.289501  | 0.243642   | 0.263152  | 0.400282 |
| MORN5       | 0.0326879 | 0         | 0         | 0         | 0          | 0.0278333 | 0         | 0          | 0          | 0         | 0         | 0         | 0          | 0         | 0.046944 |
| MOS         | 0         | 0         | 0         | 0         | 0          | 0         | 0         | 0          | 0          | 0         | 0         | 0         | 0          | 0         | 0        |
| MOSMO       | 1.33898   | 1.1221    | 1.2758    | 1.00939   | 0.364185   | 1.12238   | 0.922044  | 1.50483    | 1.24367    | 1.2032    | 1.71152   | 0.529366  | 1.36813    | 1.14911   | 1.03256  |
| MOSPD1      | 1.81087   | 1.6171    | 1.57651   | 3.24378   | 0.559634   | 2.55912   | 1.10416   | 1.6599     | 7.88647    | 4.01015   | 7.01035   | 2.88994   | 4.90589    | 2.45777   | 1.90622  |
| MOSPD2      | 1.20079   | 2.05442   | 2.19371   | 2.00513   | 0.76855    | 2.12065   | 1.17426   | 1.5217     | 2.40353    | 2.14904   | 2.64205   | 1.88944   | 1.99784    | 1.59221   | 1.82029  |
| MOSPD3      | 4.23836   | 4.53115   | 4.00906   | 5.6204    | 11.0307    | 12.461    | 7.83408   | 3.82357    | 12.0573    | 4.39618   | 10.508    | 6.46587   | 4.107      | 2.78356   | 2.73333  |
| MOV10       | 4.19846   | 7.02065   | 7.38062   | 7.09448   | 7.01716    | 10.8737   | 6.63829   | 5.04817    | 3.47151    | 2.13106   | 3.01448   | 3.0851    | 3.31632    | 3.81848   | 4.93596  |
| MOV10L1     | 0.0429669 | 0.0155266 | 0.0222158 | 0.0774876 | 0.00834281 | 0.105184  | 0.0306614 | 0.00477318 | 0.0130822  | 0.0269639 | 0.0121261 | 0.019215  | 0.00693051 | 0.0870185 | 0.154265 |
| MOXD1       | 1.19967   | 2.84986   | 3.15952   | 7.91074   | 1.62762    | 7.61603   | 1.39576   | 2.75989    | 1.5258     | 3.85005   | 5.75998   | 3.01526   | 3.4733     | 2.97627   | 1.0141   |
| MOXD2P      | 0         | 0         | 0         | 0         | 0          | 0         | 0         | 0          | 0          | 0.019326  | 0         | 0         | 0          | 0         | 0        |
| MPC1        | 6.22769   | 3.782     | 4.40066   | 4.49582   | 1.71306    | 6.03472   | 3.83305   | 4.49691    | 5.35271    | 4.80385   | 6.95705   | 2.42532   | 2.37528    | 3.00907   | 3.4005   |
| MPC1L       | 0.0403189 | 0.0388525 | 0         | 0.0415498 | 0.187888   | 0.034331  | 0.0920696 | 0          | 0          | 0         | 0.09103   | 0         | 0          | 0         | 0.289515 |
| MPC2        | 4.74236   | 3.16445   | 3.26303   | 5.24635   | 2.37951    | 6.78736   | 2.84872   | 3.79885    | 2.26781    | 4.37487   | 9.16411   | 2.62536   | 3.9889     | 2.98193   | 3.20113  |
| MPDU1       | 4.93461   | 3.67261   | 4.09366   | 10.5683   | 8.94981    | 9.71796   | 5.38236   | 3.87097    | 11.0292    | 9.13445   | 17.7541   | 5.6316    | 7.6482     | 6.06579   | 6.25532  |
| MPDZ        | 3.04739   | 1.63741   | 1.91822   | 1.6903    | 0.957728   | 3.2504    | 1.89969   | 1.58354    | 0.470659   | 1.29591   | 2.04809   | 0.726126  | 1.33424    | 1.74689   | 3.0419   |
| MPEG1       | 4.7035    | 1.8535    | 2.35925   | 9.09688   | 3.30649    | 16.9239   | 5.90909   | 4.73165    | 0.612188   | 7.31323   | 15.1068   | 0.77072   | 8.59769    | 3.06142   | 12.0217  |

|           |           |            |            |            |           |           |            |            |           |            |           |           |            |            |           |
|-----------|-----------|------------|------------|------------|-----------|-----------|------------|------------|-----------|------------|-----------|-----------|------------|------------|-----------|
| MPG       | 5.91839   | 5.04016    | 5.14295    | 10.5238    | 13.2621   | 17.5602   | 7.74169    | 3.53599    | 4.92643   | 9.15518    | 23.0375   | 5.29048   | 10.1506    | 8.35248    | 5.4997    |
| MPHOSPH10 | 4.76831   | 4.48719    | 4.83069    | 6.01758    | 2.1555    | 6.38364   | 1.32917    | 3.50932    | 5.11538   | 5.27169    | 5.3618    | 4.44474   | 7.43885    | 4.74088    | 3.91881   |
| MPHOSPH6  | 4.39319   | 3.37255    | 3.32135    | 14.47      | 2.22029   | 8.00053   | 1.632      | 5.73502    | 6.45121   | 5.25008    | 7.78311   | 4.57228   | 7.49979    | 5.94342    | 3.19987   |
| MPHOSPH8  | 4.79888   | 5.50218    | 6.03794    | 5.10743    | 3.97563   | 6.42708   | 2.83556    | 3.83113    | 2.8529    | 3.72955    | 2.95046   | 2.8207    | 4.73003    | 3.72106    | 4.34533   |
| MPHOSPH9  | 1.47063   | 0.967138   | 0.99463    | 1.5687     | 0.432833  | 1.406     | 0.642188   | 1.07309    | 0.307937  | 1.28234    | 1.89898   | 0.793821  | 1.42159    | 1.35924    | 1.76371   |
| MPI       | 1.8189    | 2.35616    | 2.1338     | 3.07779    | 4.08256   | 3.72023   | 2.22641    | 2.01963    | 3.39263   | 2.28117    | 5.67696   | 2.47286   | 2.29393    | 2.66661    | 1.57917   |
| MPIG6B    | 0.0614109 | 0.183445   | 0.211174   | 0.0647783  | 0.219223  | 0.0720062 | 0.208428   | 0.139295   | 0.254809  | 0.0935348  | 0.0542786 | 0.117596  | 0.0477911  | 0.063088   | 0.0832312 |
| MPL       | 0.126985  | 0.113189   | 0.162829   | 0.143948   | 0.207114  | 0.189221  | 0.11599    | 0.253921   | 4.64734   | 0.382511   | 0.981951  | 1.90354   | 0.16386    | 0.182512   | 0.246195  |
| MPLKIP    | 4.00884   | 3.91044    | 4.31335    | 7.83159    | 5.38664   | 8.25097   | 4.85797    | 2.62286    | 6.67949   | 6.01928    | 11.1888   | 3.64273   | 8.48938    | 4.79452    | 5.26272   |
| MPND      | 2.24866   | 2.38222    | 2.73838    | 3.55513    | 6.07468   | 3.69859   | 2.39203    | 1.5764     | 2.7046    | 1.96334    | 2.19159   | 2.09866   | 2.40603    | 1.54023    | 1.22355   |
| MPO       | 0.0287938 | 0          | 0.00595507 | 0.0222547  | 0         | 0.177752  | 0.00821897 | 0.00639739 | 0         | 0.00903481 | 0.097514  | 0         | 0.00464441 | 0.00376223 | 0.0103379 |
| MPP1      | 3.83435   | 2.05046    | 2.09145    | 4.55931    | 3.77982   | 8.9874    | 2.7302     | 2.25617    | 2.57866   | 5.34136    | 8.34787   | 2.04261   | 3.30307    | 2.25176    | 4.75021   |
| MPP2      | 0.168657  | 0.210091   | 0.210989   | 0.0763051  | 0.249203  | 0.560427  | 0.394528   | 0.215693   | 0.090178  | 0.0929336  | 0.116093  | 0.0294338 | 0.0743139  | 0.111797   | 0.254028  |
| MPP3      | 0.522269  | 0.679421   | 0.712896   | 0.847686   | 1.05464   | 0.789352  | 0.626125   | 0.464149   | 0.373688  | 0.712857   | 0.420073  | 0.560546  | 0.383298   | 0.672165   | 0.984433  |
| MPP4      | 0.0659078 | 0.00907297 | 0.0545236  | 0.0679199  | 0.0585015 | 0.104222  | 0.0215004  | 0.0251029  | 0.0229338 | 0          | 0.116917  | 0.0606327 | 0.0121495  | 0.049209   | 0.0811302 |
| MPP5      | 3.02496   | 2.95869    | 3.05209    | 3.69567    | 1.07693   | 2.41055   | 2.25697    | 3.60521    | 3.16636   | 4.356      | 3.28434   | 3.20383   | 6.69361    | 3.47899    | 3.04034   |
| MPP6      | 1.02181   | 0.947617   | 0.96069    | 1.08527    | 0.252011  | 0.913682  | 0.45172    | 0.938453   | 0.85621   | 0.764488   | 1.16635   | 0.670037  | 0.947581   | 0.867265   | 0.64993   |
| MPP7      | 6.06844   | 10.7231    | 13.5751    | 4.92531    | 3.62703   | 4.4113    | 9.6179     | 9.77776    | 15.0632   | 6.1411     | 6.09095   | 8.02577   | 8.46365    | 3.38781    | 2.20644   |
| MPPE1     | 3.42398   | 3.38623    | 3.15538    | 2.79102    | 4.27383   | 4.02138   | 3.06189    | 3.08286    | 3.46013   | 2.74741    | 4.14605   | 2.43904   | 1.96234    | 2.01347    | 2.56429   |
| MPPED1    | 0.0778965 | 0.206425   | 0.335096   | 0.00802746 | 0.1815    | 0.126023  | 0.266819   | 0.00692279 | 0         | 0          | 0         | 0         | 0          | 0.00814242 | 0         |
| MPPED2    | 0.227946  | 0.10054    | 0.0956135  | 0.0595495  | 0.134641  | 0.229616  | 0.179605   | 0.154101   | 0.0156391 | 0.032234   | 0.101473  | 0.0459447 | 0.0414254  | 0.0537998  | 0.147533  |
| MPRIIP    | 8.86899   | 7.94045    | 9.12851    | 8.21403    | 12.646    | 11.2019   | 10.7611    | 6.43456    | 6.79936   | 8.07793    | 4.92084   | 8.06597   | 14.7884    | 9.19932    | 10.4489   |
| MPST      | 7.44035   | 10.9252    | 10.2117    | 20.7823    | 26.9233   | 20.575    | 11.1327    | 5.52919    | 20.7468   | 11.4729    | 21.6299   | 10.1405   | 14.3467    | 9.10314    | 4.68117   |
| MPV17     | 5.56169   | 5.29297    | 5.32349    | 12.6708    | 7.53254   | 15.166    | 5.09062    | 5.28998    | 7.02542   | 9.98037    | 19.5358   | 6.4133    | 8.54092    | 8.48011    | 8.6804    |
| MPV17L    | 1.99457   | 0.415313   | 0.439461   | 0.588751   | 0.35809   | 1.92878   | 0.73241    | 1.25597    | 0.0610343 | 0.0754792  | 0.520476  | 0.0717171 | 0.362139   | 0.240968   | 0.143943  |
| MPV17L2   | 1.80645   | 1.7736     | 1.49443    | 3.02071    | 2.2766    | 5.5142    | 1.08965    | 1.13591    | 2.40761   | 1.98922    | 3.75147   | 1.48767   | 2.71587    | 2.24454    | 1.83559   |

|            |           |           |           |           |           |           |           |           |           |           |           |           |           |           |           |
|------------|-----------|-----------|-----------|-----------|-----------|-----------|-----------|-----------|-----------|-----------|-----------|-----------|-----------|-----------|-----------|
| MPZ        | 0.307785  | 0.199628  | 0.235035  | 0.17079   | 0.551649  | 0.645107  | 1.29755   | 0.241972  | 0.0288344 | 0.104004  | 0.387541  | 0.0762329 | 0.0840151 | 0.117553  | 0.578023  |
| MPZL1      | 12.2734   | 7.58495   | 6.32843   | 23.6031   | 7.26875   | 25.9722   | 9.33543   | 8.76476   | 8.61884   | 16.048    | 18.3555   | 9.10294   | 24.3373   | 15.116    | 12.5184   |
| MPZL2      | 16.2349   | 15.0319   | 10.4802   | 53.506    | 19.7798   | 39.6535   | 6.88384   | 14.1637   | 94.0671   | 52.1949   | 56.5654   | 60.9733   | 61.5481   | 48.0824   | 15.0012   |
| MPZL3      | 3.99459   | 6.90976   | 7.25758   | 10.1298   | 4.76197   | 4.23683   | 6.80822   | 6.07322   | 50.4392   | 18.7212   | 18.5884   | 14.0666   | 26.7682   | 6.55756   | 2.29302   |
| MR1        | 1.63939   | 2.02715   | 1.97026   | 2.02135   | 1.45581   | 3.39472   | 1.60015   | 1.61684   | 0.80924   | 1.56961   | 2.3813    | 1.02563   | 1.71109   | 1.05851   | 1.80017   |
| MRAP       | 0.0451844 | 0.0415357 | 0.0198067 | 0.0233784 | 4.65E-30  | 0.0182029 | 0.050343  | 0.0182246 | 0.088546  | 0.0260581 | 7.06E-31  | 0.0481825 | 3.35E-37  | 0.0665324 | 0.193412  |
| MRAP2      | 0.658299  | 0.296582  | 0.268759  | 0.352413  | 0.185921  | 0.640609  | 0.263557  | 0.402691  | 0.0312364 | 0.107303  | 0.231627  | 0.0734073 | 0.104804  | 0.0938334 | 0.0859455 |
| MRAS       | 2.14906   | 0.972363  | 1.40062   | 1.68426   | 1.83042   | 4.9361    | 1.99494   | 1.29601   | 0.324415  | 1.35432   | 2.54325   | 0.348893  | 2.35366   | 1.17982   | 3.31975   |
| MRC1       | 7.64599   | 1.61965   | 2.51906   | 8.38021   | 2.61083   | 9.2627    | 4.66785   | 6.94172   | 0.19547   | 10.4023   | 18.3851   | 0.615677  | 9.10404   | 4.75341   | 8.86772   |
| MRC2       | 7.66672   | 10.2035   | 11.0042   | 10.1416   | 30.2796   | 21.1662   | 16.8325   | 5.26891   | 4.36049   | 11.1544   | 14.458    | 5.67919   | 13.5662   | 15.9188   | 42.3775   |
| MRE11      | 3.87982   | 3.32052   | 3.52883   | 3.08114   | 1.00786   | 2.77354   | 2.53279   | 3.90391   | 1.24937   | 1.68372   | 2.14786   | 1.32376   | 1.65186   | 1.84447   | 2.36098   |
| MREG       | 3.19811   | 3.37331   | 3.33692   | 11.8246   | 7.47402   | 5.40949   | 4.14494   | 3.7128    | 21.3291   | 7.59396   | 10.7983   | 5.46313   | 10.1497   | 5.24781   | 1.05512   |
| MRFAP1     | 26.8026   | 21.0547   | 23.3923   | 39.8735   | 34.1533   | 45.6083   | 18.7585   | 18.051    | 27.0488   | 33.0409   | 45.8695   | 20.4681   | 55.3588   | 30.1323   | 28.6513   |
| MRFAP1L1   | 10.6042   | 9.09015   | 9.20576   | 11.4526   | 7.56943   | 13.2529   | 5.03235   | 8.41579   | 9.42474   | 9.11025   | 16.2731   | 5.17288   | 11.2622   | 8.05864   | 8.14719   |
| MRGBP      | 1.63048   | 1.31043   | 1.34298   | 2.59428   | 2.26144   | 4.50708   | 1.17244   | 0.933941  | 2.24454   | 1.93908   | 3.85112   | 1.44215   | 3.01569   | 2.07809   | 1.74572   |
| MRGPRD     | 0.0718728 | 0.0230863 | 0.0198194 | 0         | 0.0372144 | 0.0611988 | 0.109416  | 0.0851661 | 0         | 0         | 0         | 0         | 0         | 0.0250426 | 0.206437  |
| MRGPRE     | 0         | 0.0383448 | 0.026335  | 0         | 0.0247243 | 0.0542118 | 0.236253  | 0.0565822 | 0         | 0         | 0         | 0         | 0.0410778 | 0         | 0.0228586 |
| MRGPRF     | 5.81873   | 2.11487   | 3.2622    | 2.1729    | 6.67648   | 13.0854   | 6.14593   | 2.01802   | 1.11113   | 3.71517   | 11.3406   | 1.72631   | 5.79487   | 5.80673   | 10.4965   |
| MRGPRF-AS1 | 0.0885576 | 0.0853368 | 0.0732611 | 0.0152102 | 0.366828  | 0.0879732 | 0.0505561 | 0.0787026 | 0         | 0.0370496 | 0.0833087 | 0.0105609 | 0         | 0.123424  | 0.423933  |
| MRGPRG     | 0         | 0.0128169 | 0         | 0         | 0         | 0         | 0         | 0         | 0         | 0         | 0         | 0         | 0         | 0         | 0         |
| MRGPRG-AS1 | 0         | 0         | 0         | 0         | 0         | 0         | 0         | 0         | 0         | 0         | 0         | 0         | 0         | 0         | 0         |
| MRGPRX1    | 0.155584  | 0.0187406 | 0         | 0.0400833 | 0         | 0.0334256 | 0         | 0.105096  | 0         | 0         | 0         | 0         | 0         | 0         | 0         |
| MRGPRX2    | 0.21144   | 0.449176  | 0.747376  | 0.0693302 | 0.0447871 | 0         | 0.471857  | 0.179369  | 0.04682   | 0.0965014 | 0.021699  | 0         | 0         | 0.0301385 | 0         |
| MRGPRX3    | 1.50328   | 1.75617   | 1.90843   | 1.07404   | 5.06232   | 1.77395   | 1.38175   | 1.19862   | 0.848494  | 0.80643   | 0.463383  | 1.46877   | 0.327971  | 1.79996   | 1.0342    |
| MRGPRX4    | 0         | 0         | 0         | 0         | 0         | 0.0955277 | 0         | 0         | 0         | 0         | 0         | 0         | 0         | 0         | 0         |
| MRI1       | 2.87286   | 5.14026   | 5.03336   | 4.09267   | 9.27547   | 4.04952   | 3.74872   | 3.03332   | 2.34953   | 3.52112   | 5.64794   | 4.06529   | 2.31613   | 3.30999   | 2.64876   |

|            |            |           |           |           |            |           |           |            |           |          |           |            |           |           |            |
|------------|------------|-----------|-----------|-----------|------------|-----------|-----------|------------|-----------|----------|-----------|------------|-----------|-----------|------------|
| MRLN       | 0.0843098  | 0.0406218 | 0         | 0.0434419 | 0          | 0         | 0         | 0.0374638  | 0         | 0        | 0         | 0          | 0         | 0         | 0          |
| MRM1       | 0.593412   | 0.748245  | 0.553581  | 1.0409    | 2.70648    | 1.05357   | 0.619875  | 0.561037   | 0.169145  | 0.570479 | 0.954946  | 0.370397   | 0.586518  | 1.17458   | 0.616495   |
| MRM2       | 3.57048    | 3.22471   | 3.169     | 6.00336   | 4.44593    | 7.3359    | 3.26793   | 2.86482    | 3.13369   | 3.82817  | 6.47837   | 2.67889    | 5.96898   | 3.42242   | 2.42889    |
| MRM3       | 2.70641    | 3.05961   | 2.82869   | 4.47605   | 3.6913     | 4.58646   | 3.01471   | 2.11191    | 2.92629   | 2.2535   | 3.30855   | 2.36159    | 2.88755   | 2.56676   | 2.351      |
| MRNIP      | 0.680677   | 0.921367  | 1.13572   | 0.546904  | 1.05064    | 1.0267    | 1.06296   | 0.554304   | 0.195113  | 0.279546 | 0.469498  | 0.479437   | 0.311996  | 0.371989  | 0.555971   |
| MRO        | 0.104131   | 0.0355383 | 0.0287148 | 0.0357699 | 0.107834   | 0.262303  | 0.0198155 | 0.104111   | 0.0105683 | 0.201488 | 0.342856  | 0.00931354 | 0         | 0.0204087 | 0.11839    |
| MROH1      | 2.97572    | 4.00467   | 3.75255   | 4.97757   | 10.426     | 5.99228   | 5.14784   | 2.9198     | 5.59129   | 5.65883  | 2.68205   | 7.18142    | 5.70661   | 5.48736   | 3.76114    |
| MROH2A     | 0.0130408  | 0.0314163 | 0.0287687 | 0         | 0.00675228 | 0         | 0.114153  | 0.00386319 | 0         | 0        | 0         | 0          | 0         | 0.0022719 | 0.00624274 |
| MROH2B     | 0.00876631 | 0         | 0         | 0         | 0          | 0         | 0         | 0          | 0         | 0        | 0         | 0          | 0.011312  | 0         | 0          |
| MROH3P     | 0.0810615  | 0.131816  | 0.192797  | 0.0835362 | 0.0472187  | 0.0345114 | 0.219814  | 0.108061   | 0.0246809 | 0.279786 | 0.0686312 | 0.0942527  | 0.0130751 | 0.0635494 | 0          |
| MROH5      | 0.0308163  | 0.0148478 | 0.0169956 | 0.0158786 | 0.0159561  | 0.0874656 | 0.0117284 | 0.0319515  | 0         | 0        | 0         | 0          | 0         | 0.016106  | 0.014752   |
| MROH6      | 1.14647    | 2.73106   | 3.16933   | 3.14815   | 5.78505    | 2.81341   | 3.55301   | 1.36063    | 5.27288   | 4.03082  | 1.36657   | 5.52832    | 5.92217   | 2.01345   | 1.21696    |
| MROH7      | 0.570315   | 0.675417  | 0.414311  | 0.234985  | 0.137085   | 0.425788  | 0.34432   | 0.574587   | 7.56E-07  | 4.87E-07 | 6.00E-19  | 0.0221498  | 1.17E-30  | 0.0632064 | 0.536101   |
| MROH7-TTC4 | 0.296111   | 0.236191  | 0.575257  | 0.147303  | 0.855726   | 0.193177  | 0.514279  | 0.379656   | 0.067007  | 0.041019 | 0.0287334 | 0.104408   | 0.037348  | 0.0811193 | 0.00788049 |
| MROH8      | 0.215382   | 0.195465  | 0.251354  | 0.111052  | 0.187913   | 0.312973  | 0.267369  | 0.15728    | 0.0308822 | 0.119532 | 0.178859  | 0.0726566  | 0.040891  | 0.0762231 | 0.14538    |
| MROH9      | 0.100186   | 0.120678  | 0.108782  | 0.116151  | 0.0097265  | 0.074644  | 0.0714935 | 0.17251    | 0         | 0.023577 | 0.0494803 | 0.0627253  | 0.0161599 | 0.0261809 | 0.0809327  |
| MRPL1      | 2.55442    | 2.01844   | 1.90188   | 5.00157   | 0.79358    | 2.91457   | 1.65271   | 2.36096    | 1.74216   | 4.18925  | 6.17095   | 1.94961    | 3.61483   | 3.00832   | 1.95652    |
| MRPL10     | 3.49001    | 2.59773   | 3.08861   | 6.23725   | 2.17928    | 8.07593   | 3.87887   | 2.24637    | 3.23373   | 2.59036  | 6.72773   | 2.2566     | 5.75275   | 3.57534   | 3.08052    |
| MRPL11     | 4.38614    | 2.95995   | 3.17778   | 8.36634   | 4.88773    | 9.0817    | 4.43252   | 2.69958    | 3.30132   | 5.21442  | 12.194    | 2.86549    | 5.92351   | 4.25728   | 3.46252    |
| MRPL12     | 7.52434    | 6.96505   | 6.09263   | 23.2387   | 22.1716    | 22.2299   | 8.66915   | 5.53198    | 10.4134   | 14.6522  | 31.0419   | 10.9961    | 23.626    | 15.3131   | 7.8261     |
| MRPL13     | 4.87881    | 3.65662   | 3.15643   | 12.9561   | 1.42501    | 7.75813   | 3.18992   | 3.24264    | 8.40491   | 15.3608  | 26.8317   | 6.84757    | 12.8602   | 9.67646   | 4.76088    |
| MRPL14     | 4.81667    | 5.22962   | 5.94971   | 10.2334   | 7.32819    | 10.5202   | 7.02503   | 3.41572    | 11.6117   | 8.73684  | 17.6902   | 6.96372    | 8.2694    | 7.05215   | 4.16935    |
| MRPL15     | 6.73517    | 4.74334   | 4.54283   | 10.9771   | 4.60412    | 9.36289   | 5.66552   | 4.19819    | 15.7285   | 10.9943  | 21.9282   | 5.96482    | 8.88735   | 7.66952   | 5.20684    |
| MRPL16     | 5.52144    | 4.33952   | 4.45434   | 8.11128   | 3.55842    | 11.0867   | 4.47106   | 3.68895    | 2.7661    | 5.23434  | 9.79158   | 2.78793    | 7.18797   | 6.48781   | 4.33029    |
| MRPL17     | 2.61166    | 2.79945   | 3.07494   | 6.85449   | 2.78051    | 7.00454   | 3.41747   | 2.24279    | 3.57383   | 5.20536  | 12.5217   | 3.33849    | 6.04592   | 5.04578   | 3.44163    |
| MRPL18     | 6.58611    | 5.10939   | 6.08299   | 11.3578   | 4.50659    | 14.4955   | 5.33049   | 5.00854    | 7.49315   | 8.5592   | 16.7332   | 6.20384    | 11.6184   | 8.20022   | 4.35808    |

|            |          |          |          |           |           |           |          |          |          |           |           |          |          |           |           |
|------------|----------|----------|----------|-----------|-----------|-----------|----------|----------|----------|-----------|-----------|----------|----------|-----------|-----------|
| MRPL19     | 2.43938  | 2.64129  | 2.68336  | 4.29335   | 1.07475   | 3.61289   | 2.51175  | 2.91158  | 2.04901  | 3.02085   | 4.9167    | 2.01836  | 4.10734  | 2.76929   | 2.14442   |
| MRPL2      | 4.30771  | 3.7477   | 3.60693  | 6.6678    | 5.12011   | 10.9445   | 4.36085  | 2.54189  | 4.16306  | 3.2177    | 6.67415   | 4.11803  | 4.38838  | 3.59131   | 2.3293    |
| MRPL20     | 10.5633  | 9.14615  | 8.75404  | 19.0964   | 12.9922   | 21.022    | 12.134   | 8.01041  | 13.6025  | 16.4879   | 33.2859   | 10.7556  | 15.9057  | 12.7204   | 6.8109    |
| MRPL21     | 8.68274  | 6.5111   | 5.91379  | 13.8927   | 10.6479   | 19.5115   | 8.46015  | 5.48276  | 8.7459   | 11.7581   | 27.6363   | 8.38484  | 10.9093  | 8.80298   | 5.62533   |
| MRPL22     | 1.6411   | 1.32487  | 1.34556  | 3.14185   | 0.668453  | 2.82578   | 1.37408  | 1.09547  | 2.21186  | 2.38015   | 3.80399   | 1.39344  | 2.56941  | 2.02799   | 1.17317   |
| MRPL23     | 7.92228  | 8.65605  | 8.10203  | 13.5319   | 12.9359   | 18.6702   | 10.4699  | 6.56944  | 11.5857  | 10.6088   | 26.1608   | 7.7218   | 9.05566  | 7.62901   | 4.56888   |
| MRPL23-AS1 | 0.243099 | 0.380669 | 0.502772 | 0.0375781 | 0.453141  | 0.0724485 | 0.902079 | 0.658942 | 0        | 0.0457672 | 0         | 0        | 0        | 0.0190581 | 0.0523682 |
| MRPL24     | 9.36207  | 7.09698  | 7.76562  | 19.8103   | 15.2018   | 20.4713   | 9.17858  | 5.79087  | 8.42223  | 10.6224   | 20.8836   | 6.75241  | 10.9209  | 9.12065   | 6.31024   |
| MRPL27     | 7.93382  | 7.70872  | 6.97193  | 21.5087   | 14.2672   | 23.7425   | 7.81819  | 5.35402  | 19.6457  | 18.0562   | 37.7205   | 12.0368  | 18.5638  | 14.3495   | 7.32807   |
| MRPL28     | 6.02937  | 5.02759  | 5.59252  | 12.5733   | 10.7847   | 18.7553   | 5.26162  | 4.11352  | 6.94751  | 9.60586   | 20.6026   | 6.07181  | 13.3207  | 10.4086   | 5.33531   |
| MRPL3      | 12.4374  | 9.12156  | 8.56341  | 22.1325   | 6.96973   | 20.9684   | 9.10759  | 9.88738  | 10.6415  | 16.9605   | 29.9911   | 8.20464  | 21.7882  | 16.1274   | 10.1556   |
| MRPL30     | 3.41328  | 3.30636  | 2.84481  | 5.51548   | 3.01954   | 4.53119   | 2.74958  | 3.34633  | 3.57913  | 4.0471    | 7.39532   | 2.46056  | 4.28598  | 3.34122   | 2.26412   |
| MRPL32     | 5.41594  | 4.58673  | 4.30282  | 11.5805   | 2.44602   | 9.44666   | 4.24963  | 3.85908  | 7.58395  | 11.8583   | 22.4626   | 6.28237  | 10.1906  | 8.3048    | 5.58508   |
| MRPL33     | 10.3652  | 6.69472  | 6.09849  | 14.319    | 4.511     | 13.1246   | 6.01936  | 6.07499  | 12.5149  | 12.1122   | 27.7396   | 7.06495  | 10.4638  | 9.71382   | 8.34117   |
| MRPL34     | 7.38761  | 6.24346  | 7.49604  | 9.23925   | 9.99      | 10.0566   | 8.21655  | 5.20565  | 7.27935  | 6.99166   | 16.5444   | 4.77282  | 7.7744   | 6.53511   | 6.69534   |
| MRPL35     | 2.78808  | 1.9589   | 1.97621  | 3.92236   | 0.795884  | 4.09078   | 1.54988  | 2.28266  | 1.75856  | 3.1068    | 5.28822   | 1.69499  | 4.05278  | 3.15778   | 2.07369   |
| MRPL36     | 6.74692  | 5.13948  | 5.1138   | 13.8669   | 4.56683   | 11.5861   | 4.73394  | 3.38327  | 15.2863  | 13.2935   | 31.4018   | 8.98095  | 13.5942  | 13.3366   | 6.00853   |
| MRPL37     | 10.0812  | 8.84567  | 8.73359  | 19.0229   | 12.9363   | 23.9069   | 14.0985  | 8.26936  | 16.518   | 15.7494   | 26.0123   | 14.4448  | 21.008   | 14.0786   | 8.34505   |
| MRPL38     | 5.93638  | 6.85324  | 7.57313  | 11.0238   | 13.9003   | 16.4279   | 8.79122  | 4.85788  | 6.38874  | 5.14545   | 9.02371   | 5.71959  | 9.95452  | 7.48773   | 4.09387   |
| MRPL39     | 5.0397   | 3.87561  | 4.15283  | 8.35043   | 1.22798   | 7.5896    | 2.7981   | 4.12757  | 5.53603  | 5.45715   | 7.58559   | 4.04442  | 7.81656  | 5.69143   | 3.54786   |
| MRPL4      | 4.87121  | 4.24412  | 4.72268  | 9.06761   | 8.52369   | 12.5661   | 6.44115  | 4.05535  | 8.06648  | 4.82101   | 9.85689   | 4.9458   | 8.81364  | 6.2541    | 2.76509   |
| MRPL40     | 3.49262  | 2.48738  | 2.19863  | 4.87172   | 2.48429   | 5.74757   | 2.77935  | 2.13201  | 2.59228  | 3.43899   | 7.16862   | 2.457    | 2.07133  | 2.11426   | 2.0435    |
| MRPL41     | 16.0928  | 13.7168  | 12.9962  | 23.968    | 35.7111   | 30.4725   | 14.5244  | 7.66178  | 18.1993  | 20.5829   | 44.9413   | 14.3113  | 22.7438  | 16.6014   | 11.7208   |
| MRPL42     | 3.65643  | 3.10105  | 2.80078  | 4.27487   | 0.786076  | 4.08444   | 2.8727   | 4.3517   | 4.6354   | 3.53359   | 5.43108   | 2.49896  | 4.46068  | 3.04346   | 2.53853   |
| MRPL42P5   | 0.243675 | 0.360103 | 0.428568 | 0.143595  | 0.0903475 | 0.117341  | 0.319815 | 0.418996 | 3.11E-24 | 0.08792   | 0.0687123 | 6.24E-17 | 3.53E-27 | 0.115506  | 0.226307  |
| MRPL43     | 3.43326  | 3.80163  | 4.11385  | 5.55315   | 5.09965   | 6.34717   | 4.55912  | 2.74325  | 6.84808  | 3.84108   | 8.07404   | 3.60722  | 4.68262  | 4.0176    | 2.51213   |

|          |         |         |         |         |         |          |         |          |          |          |         |          |          |          |          |
|----------|---------|---------|---------|---------|---------|----------|---------|----------|----------|----------|---------|----------|----------|----------|----------|
| MRPL44   | 3.65417 | 2.73664 | 3.0668  | 5.71681 | 2.87922 | 6.44842  | 3.12916 | 2.96513  | 3.38615  | 4.95193  | 7.38333 | 2.87991  | 6.85939  | 4.34555  | 3.72673  |
| MRPL45   | 5.63442 | 5.31624 | 5.38394 | 8.51936 | 3.99715 | 8.46023  | 4.91719 | 4.02969  | 7.24839  | 6.02374  | 12.2777 | 4.87349  | 7.8247   | 6.05662  | 4.05514  |
| MRPL45P2 | 1.35773 | 1.98187 | 1.73537 | 1.16094 | 1.29846 | 0.988158 | 1.43324 | 1.23685  | 0.454954 | 0.945021 | 1.13673 | 0.749864 | 0.251639 | 1.33652  | 0.99933  |
| MRPL46   | 4.39718 | 2.96608 | 2.96756 | 7.58417 | 3.55897 | 6.26651  | 3.56724 | 2.55038  | 5.32708  | 4.93797  | 10.2151 | 3.27878  | 5.70394  | 3.91896  | 3.656    |
| MRPL47   | 6.02111 | 3.85548 | 3.32614 | 7.94311 | 1.61467 | 7.09748  | 3.56052 | 3.43375  | 7.85853  | 11.3234  | 22.6495 | 5.29062  | 10.7812  | 6.32457  | 4.50663  |
| MRPL48   | 2.17682 | 1.7901  | 1.46232 | 3.86249 | 1.75424 | 2.36918  | 1.55105 | 1.30911  | 1.45513  | 2.8143   | 4.693   | 1.73324  | 2.39711  | 2.72877  | 1.57485  |
| MRPL49   | 6.10154 | 6.36958 | 7.00468 | 10.1267 | 8.71297 | 12.5603  | 6.03765 | 4.84223  | 10.4686  | 9.35085  | 11.6853 | 5.8747   | 11.2646  | 6.84789  | 3.6434   |
| MRPL50   | 4.80541 | 3.21087 | 3.30031 | 6.4471  | 1.12671 | 5.98321  | 2.43277 | 2.71952  | 5.43836  | 6.23043  | 11.4891 | 3.40596  | 7.98506  | 5.12966  | 2.89719  |
| MRPL51   | 16.3061 | 15.6637 | 12.4432 | 52.8425 | 26.5503 | 54.1406  | 16.1979 | 10.6028  | 39.0935  | 46.7239  | 96.4757 | 27.3219  | 42.1486  | 31.1233  | 19.8338  |
| MRPL52   | 2.68941 | 2.87292 | 3.14702 | 6.89231 | 3.87525 | 7.63836  | 3.21209 | 1.80832  | 4.00805  | 4.81894  | 9.88698 | 3.65878  | 5.8791   | 4.95659  | 2.49019  |
| MRPL53   | 7.41991 | 5.94135 | 6.02135 | 14.4918 | 14.4894 | 12.1545  | 6.253   | 5.52657  | 14.9319  | 16.1864  | 32.0288 | 12.2616  | 12.7889  | 9.89805  | 5.42945  |
| MRPL54   | 10.6614 | 6.94456 | 6.26917 | 16.2315 | 14.195  | 16.1001  | 10.9853 | 4.65495  | 16.1513  | 15.1063  | 32.7933 | 7.44246  | 13.3739  | 9.86284  | 8.05568  |
| MRPL55   | 4.49578 | 3.16305 | 3.42338 | 5.60702 | 7.61837 | 8.52621  | 4.25817 | 2.79229  | 5.81756  | 5.80297  | 11.9094 | 4.44145  | 5.47169  | 5.0999   | 2.93478  |
| MRPL57   | 2.98917 | 2.92274 | 2.64609 | 5.90985 | 2.5178  | 5.45725  | 3.143   | 2.16134  | 4.3632   | 3.90574  | 8.79122 | 2.42623  | 4.15563  | 3.78842  | 1.88833  |
| MRPL58   | 5.24576 | 4.67088 | 4.29711 | 9.69884 | 5.27254 | 9.87493  | 5.63712 | 3.95355  | 7.64142  | 6.48715  | 14.4271 | 5.88782  | 8.99225  | 6.19564  | 3.36056  |
| MRPL9    | 5.19698 | 5.24477 | 5.59784 | 11.4513 | 6.09336 | 11.7925  | 5.35985 | 4.78854  | 4.21445  | 6.38038  | 12.3938 | 4.5597   | 9.63681  | 6.358    | 3.72132  |
| MRPS10   | 5.81821 | 4.83022 | 4.9027  | 10.4203 | 1.96544 | 9.05187  | 3.65491 | 5.44946  | 6.66445  | 9.48775  | 10.8531 | 4.77439  | 15.2109  | 7.70327  | 5.28054  |
| MRPS11   | 1.93597 | 1.52618 | 1.33403 | 2.31921 | 1.47265 | 2.77256  | 1.89682 | 1.29926  | 1.48374  | 1.74593  | 3.86583 | 1.27112  | 1.72641  | 1.56751  | 1.45695  |
| MRPS12   | 4.14581 | 2.78134 | 2.74955 | 9.82464 | 5.48883 | 11.0521  | 4.27418 | 2.53403  | 6.19958  | 5.68644  | 13.1971 | 4.85645  | 9.23631  | 7.71128  | 2.36147  |
| MRPS14   | 2.7933  | 2.96088 | 2.87568 | 3.81677 | 1.09278 | 4.74813  | 1.67734 | 2.7307   | 1.67577  | 2.62292  | 4.46133 | 1.42869  | 2.06254  | 2.21689  | 2.6595   |
| MRPS15   | 9.6889  | 7.73036 | 5.97183 | 21.6006 | 10.3936 | 21.1967  | 9.28262 | 6.50065  | 20.0366  | 19.776   | 32.7856 | 13.2991  | 22.9624  | 17.1343  | 9.12708  |
| MRPS16   | 8.59298 | 8.08995 | 8.03183 | 12.6582 | 7.57471 | 13.9229  | 9.82122 | 6.92615  | 9.68413  | 11.0608  | 20.4522 | 7.46245  | 13.9114  | 10.4378  | 7.30594  |
| MRPS17   | 3.00662 | 3.27849 | 2.42183 | 9.17292 | 3.44129 | 6.90552  | 2.16812 | 2.17982  | 10.7924  | 5.66042  | 11.3434 | 3.99126  | 8.24438  | 7.31937  | 4.54514  |
| MRPS18A  | 5.44999 | 5.3362  | 5.16883 | 8.82573 | 5.98649 | 11.0712  | 6.71155 | 4.37646  | 8.41538  | 6.71818  | 13.7988 | 4.95809  | 10.0089  | 6.75484  | 4.10912  |
| MRPS18B  | 1.53454 | 1.27831 | 1.34793 | 2.03004 | 1.11818 | 2.89956  | 1.64135 | 0.928971 | 1.21793  | 1.0685   | 1.81989 | 0.821959 | 1.30712  | 0.956336 | 0.730469 |
| MRPS18C  | 5.06499 | 3.75311 | 3.57368 | 8.0155  | 2.73846 | 7.22864  | 3.40548 | 3.88715  | 7.68976  | 7.72485  | 14.8862 | 3.79057  | 7.64859  | 6.08222  | 3.30495  |



|           |          |          |          |          |          |           |           |          |           |          |           |           |           |          |          |
|-----------|----------|----------|----------|----------|----------|-----------|-----------|----------|-----------|----------|-----------|-----------|-----------|----------|----------|
| MRPS2     | 4.19199  | 3.71954  | 3.50462  | 7.44762  | 4.96098  | 9.33828   | 4.59886   | 3.01154  | 4.47126   | 3.3001   | 6.17318   | 3.16547   | 6.03379   | 4.71664  | 4.10445  |
| MRPS21    | 10.663   | 9.26204  | 8.47324  | 16.5292  | 7.83838  | 14.1561   | 7.57909   | 6.43322  | 14.8519   | 16.3047  | 32.2798   | 10.7889   | 11.5791   | 11.4441  | 6.85864  |
| MRPS22    | 5.72408  | 5.26228  | 5.00752  | 9.81447  | 1.60966  | 9.14578   | 4.11291   | 5.02861  | 7.87276   | 7.88624  | 14.8919   | 5.92      | 9.28588   | 7.694    | 4.48821  |
| MRPS23    | 4.35871  | 3.21367  | 2.90007  | 6.93748  | 2.31308  | 6.43219   | 3.20559   | 3.07411  | 3.81602   | 6.79448  | 14.4636   | 3.55163   | 6.43508   | 5.10738  | 3.74243  |
| MRPS24    | 13.6216  | 9.77343  | 7.64225  | 23.4716  | 13.8393  | 32.1169   | 13.6414   | 6.7831   | 14.7747   | 15.6235  | 36.2498   | 10.6204   | 18.4204   | 15.2271  | 8.78487  |
| MRPS25    | 5.08114  | 4.88151  | 4.82529  | 3.8477   | 4.50784  | 4.12627   | 4.34737   | 3.7653   | 1.45232   | 1.68484  | 2.10915   | 2.90806   | 1.78032   | 4.13769  | 3.42     |
| MRPS26    | 7.32826  | 5.77388  | 6.57841  | 10.1458  | 13.8399  | 14.3006   | 5.06099   | 3.36525  | 7.4601    | 5.25584  | 12.145    | 6.32734   | 6.38086   | 5.93719  | 3.83865  |
| MRPS27    | 6.59947  | 5.84985  | 6.00886  | 11.0504  | 5.32297  | 9.20736   | 5.61614   | 5.74113  | 5.26172   | 5.77232  | 8.07923   | 4.5813    | 7.80711   | 6.37553  | 4.23843  |
| MRPS28    | 4.84466  | 4.25839  | 3.95368  | 11.1658  | 5.23729  | 8.72416   | 3.88698   | 3.22915  | 7.09624   | 8.66888  | 16.9983   | 4.47363   | 7.47645   | 6.72356  | 5.17114  |
| MRPS30    | 5.45357  | 4.70169  | 4.77494  | 5.90534  | 4.23564  | 5.50401   | 4.48828   | 5.01889  | 4.24807   | 3.68298  | 6.84391   | 3.59515   | 6.296     | 4.87585  | 3.57808  |
| MRPS30-DT | 0.09954  | 0.231806 | 0.315662 | 0.034193 | 0        | 0.0423785 | 0.0378839 | 0.30962  | 0.0202048 | 0.145755 | 0.0374561 | 0.0830941 | 0.0749265 | 0.052024 | 0.500332 |
| MRPS31    | 3.94071  | 3.59753  | 3.546    | 4.95159  | 2.12097  | 4.91546   | 2.34836   | 3.36393  | 4.6099    | 3.68781  | 6.26312   | 2.89389   | 4.2264    | 3.08938  | 2.10985  |
| MRPS31P5  | 1.78709  | 1.0215   | 1.08576  | 0.724888 | 0.513741 | 0.724375  | 1.08666   | 1.08993  | 0.178337  | 0.245081 | 0.393659  | 0.353261  | 0.240382  | 0.60995  | 0.981281 |
| MRPS33    | 4.95721  | 4.01262  | 3.96034  | 10.4798  | 2.94809  | 8.99672   | 3.26661   | 3.27269  | 10.1772   | 8.92385  | 18.7709   | 6.64813   | 7.3288    | 5.92194  | 3.49856  |
| MRPS34    | 10.9613  | 11.1398  | 10.5263  | 24.129   | 25.3117  | 23.1314   | 13.2378   | 7.21071  | 14.6158   | 16.7928  | 31.9935   | 12.8239   | 19.2477   | 15.8046  | 7.95208  |
| MRPS35    | 5.5265   | 4.38504  | 4.91505  | 10.1709  | 1.8761   | 9.73355   | 3.35697   | 5.07416  | 6.41864   | 6.07887  | 10.4254   | 4.67016   | 9.24092   | 6.79701  | 3.8545   |
| MRPS36    | 3.30864  | 2.37445  | 2.29055  | 3.80445  | 0.324597 | 2.41691   | 2.14732   | 1.77974  | 7.38044   | 4.72094  | 7.72564   | 2.99042   | 4.95479   | 3.03982  | 1.42549  |
| MRPS5     | 2.21173  | 2.27956  | 2.02063  | 4.61135  | 3.49533  | 4.57442   | 1.79332   | 1.64655  | 1.8348    | 3.17023  | 3.63297   | 2.26603   | 4.8559    | 3.50135  | 2.17279  |
| MRPS6     | 6.98381  | 5.8214   | 6.06474  | 13.2526  | 3.75407  | 14.5276   | 8.24104   | 4.97147  | 8.00851   | 9.55049  | 14.5      | 9.947     | 14.9478   | 10.9982  | 5.1129   |
| MRPS7     | 7.25367  | 5.4889   | 5.29149  | 15.0595  | 7.27782  | 15.1805   | 6.08867   | 3.94357  | 11.5148   | 11.9257  | 21.0732   | 8.29676   | 16.2885   | 9.32627  | 5.59467  |
| MRPS9     | 4.16813  | 3.25231  | 3.38713  | 5.62706  | 1.94786  | 6.97414   | 2.39409   | 2.84606  | 3.5957    | 3.92472  | 5.87737   | 2.82608   | 5.72487   | 3.23691  | 2.43699  |
| MRRF      | 4.56806  | 3.54683  | 3.78906  | 3.93666  | 1.61912  | 5.38797   | 3.86868   | 3.71116  | 2.83434   | 2.94047  | 4.44105   | 2.85425   | 2.97966   | 2.84453  | 2.09914  |
| MRS2      | 2.71692  | 2.51202  | 2.41407  | 2.74173  | 1.53988  | 2.87264   | 2.08696   | 2.43277  | 2.7993    | 2.84823  | 3.70784   | 2.18221   | 3.57822   | 2.33711  | 1.86538  |
| MRS2P2    | 0.739889 | 0.514009 | 0.597854 | 0.292579 | 0.481104 | 0.146513  | 0.825136  | 0.894577 | 0.0419117 | 0.140375 | 0.0874091 | 0.332421  | 0.111017  | 0.319251 | 0.420088 |
| MRTFA     | 4.04829  | 4.62133  | 5.46519  | 5.41101  | 7.75232  | 9.51102   | 6.33433   | 3.60603  | 4.69855   | 4.25944  | 3.7577    | 4.53763   | 8.56077   | 5.02266  | 6.90729  |
| MRTFA-AS1 | 1.14997  | 1.36209  | 1.55582  | 0.617225 | 1.09783  | 0.50999   | 0.91636   | 1.06458  | 0.277188  | 0.917112 | 0.135226  | 1.46567   | 0.123659  | 2.37905  | 2.71809  |

|                |           |            |           |            |            |            |            |           |           |           |           |           |           |          |           |
|----------------|-----------|------------|-----------|------------|------------|------------|------------|-----------|-----------|-----------|-----------|-----------|-----------|----------|-----------|
| MRTFB          | 9.81008   | 6.98831    | 7.96779   | 6.90092    | 3.42123    | 9.19553    | 7.39419    | 7.86438   | 2.91258   | 4.42495   | 5.66306   | 4.03084   | 5.01692   | 4.73494  | 6.78978   |
| MRT04          | 5.25377   | 4.07174    | 3.79879   | 11.951     | 4.71309    | 11.2531    | 4.67331    | 3.63756   | 5.04688   | 5.91673   | 9.28707   | 4.33475   | 13.5391   | 8.18433  | 3.87489   |
| MRV11          | 4.77652   | 1.57217    | 1.86947   | 0.958707   | 2.99262    | 8.01008    | 3.78899    | 1.47154   | 0.604552  | 1.81679   | 2.87237   | 0.842007  | 1.29004   | 1.85597  | 7.24348   |
| MRV11-AS1      | 0.257145  | 0.408858   | 0.212728  | 0.238496   | 0.199718   | 0.19706    | 0.55784    | 0.15997   | 0.125269  | 0.193646  | 0.261256  | 0.128796  | 0.0497726 | 0.174714 | 0.110788  |
| MS4A1          | 0.180302  | 0.0248206  | 0.0266355 | 0.00663595 | 0          | 0          | 0.0220568  | 0.0400594 | 0         | 0.113149  | 0.130846  | 0         | 0.108021  | 0        | 0.147964  |
| MS4A10         | 0         | 0.00485657 | 0         | 0.0103875  | 0          | 0.0171655  | 0          | 0         | 0         | 0         | 0         | 0         | 0         | 0        | 0.0434273 |
| MS4A12         | 0         | 0          | 0         | 0          | 0          | 0          | 0          | 0         | 0         | 0         | 0         | 0         | 0         | 0        | 0         |
| MS4A13         | 0         | 0          | 0         | 0          | 0          | 0          | 0          | 0         | 0         | 0         | 0         | 0         | 0         | 0        | 0         |
| MS4A14         | 0.142538  | 0.049947   | 0.0375193 | 0.153567   | 0.0704491  | 0.700633   | 0.0517827  | 0.0460641 | 0.0157814 | 0.382196  | 0.351072  | 0.0927182 | 0.0877848 | 0.247194 | 0.344273  |
| MS4A15         | 0.0101505 | 0          | 0         | 0          | 0          | 0.00864298 | 0.0115895  | 0         | 0         | 0.0127399 | 0         | 0         | 0         | 0        | 0         |
| MS4A18         | 0         | 0          | 0         | 0          | 0          | 0          | 0          | 0         | 0         | 0         | 0         | 0         | 0         | 0        | 0         |
| MS4A2          | 1.11655   | 1.22878    | 2.08879   | 0.588394   | 0.335052   | 0.081028   | 0.666395   | 1.08251   | 0.278148  | 0.549407  | 0.623061  | 0.281438  | 0.605784  | 0.377987 | 0.710646  |
| MS4A3          | 0.0419511 | 0.00673757 | 0.0231366 | 0.0144106  | 0          | 0          | 0.0478985  | 0.0248551 | 0         | 0.017551  | 0.0315717 | 0         | 0         | 0        | 0.0401648 |
| MS4A4A         | 2.55283   | 0.267119   | 0.298649  | 4.10559    | 0.720986   | 5.69771    | 1.28072    | 2.06249   | 0.0471069 | 5.66374   | 16.869    | 0.13838   | 1.4807    | 0.849048 | 3.77728   |
| MS4A4E         | 0.987437  | 0.713643   | 0.697749  | 0.466392   | 1.72556    | 0.24523    | 0.775104   | 0.47534   | 0.225485  | 0.284014  | 0.394787  | 0.397427  | 0.0796361 | 0.494574 | 0.295434  |
| MS4A5          | 0         | 0          | 0         | 0          | 0          | 0          | 0          | 0         | 0         | 0         | 0         | 0         | 0         | 0        | 0         |
| MS4A6A         | 4.61405   | 0.903279   | 1.13684   | 4.63298    | 1.38538    | 9.63214    | 2.88866    | 2.8146    | 0.39901   | 6.55639   | 17.4548   | 0.358148  | 3.81074   | 1.74085  | 5.20175   |
| MS4A6E         | 0         | 0          | 0         | 0.144543   | 0          | 0          | 0          | 0         | 0         | 0.440105  | 1.78129   | 0         | 0.0452478 | 0        | 0         |
| MS4A7          | 2.1235    | 0.400357   | 0.496461  | 7.45298    | 1.0278     | 6.36773    | 1.15078    | 2.14702   | 0.262366  | 5.13731   | 11.5428   | 0.429401  | 2.89899   | 1.41544  | 4.1877    |
| MS4A8          | 0         | 0.00823536 | 0         | 0          | 0          | 0          | 0          | 0         | 0         | 0         | 0         | 0         | 0         | 0        | 0         |
| MSANTD1        | 0.109813  | 0.242502   | 0.196831  | 0.103735   | 0.440658   | 0.11688    | 0.208968   | 0.227716  | 0.0557249 | 0.0803987 | 0.0826433 | 0.078574  | 0.0236169 | 0.119569 | 0.0788525 |
| MSANTD2        | 2.01723   | 1.69057    | 1.75476   | 1.16539    | 1.16792    | 1.22837    | 0.823569   | 1.6189    | 0.543463  | 0.813252  | 1.34561   | 0.940382  | 0.441722  | 1.20445  | 2.30003   |
| MSANTD3        | 2.21353   | 1.82968    | 1.77715   | 5.22229    | 2.1689     | 5.11433    | 1.87501    | 1.80613   | 3.28175   | 8.67683   | 8.90832   | 3.26956   | 12.1056   | 4.6787   | 4.11332   |
| MSANTD3-TMEFF1 | 0.184928  | 0.0907838  | 0.161827  | 0.321783   | 0.00397547 | 0.338539   | 0.00115283 | 0.231895  | 0.223948  | 0.635025  | 0.989227  | 0.245195  | 0.734441  | 0.490501 | 0.833253  |
| MSANTD4        | 1.82767   | 1.30469    | 1.34965   | 1.16128    | 1.05374    | 2.12432    | 1.04339    | 1.77875   | 0.573545  | 1.21732   | 1.83537   | 0.593702  | 1.20814   | 1.16033  | 1.92429   |
| MSC            | 0.975559  | 0.374017   | 0.630506  | 1.72621    | 2.05268    | 6.80122    | 0.647043   | 0.711451  | 0.117879  | 2.46254   | 7.37265   | 0.182966  | 4.38335   | 2.21167  | 8.96496   |

|             |           |           |           |           |           |           |           |           |            |           |           |            |            |           |           |
|-------------|-----------|-----------|-----------|-----------|-----------|-----------|-----------|-----------|------------|-----------|-----------|------------|------------|-----------|-----------|
| MSC-AS1     | 0.379365  | 0.158359  | 0.135615  | 0.387223  | 0.331961  | 0.973837  | 0.137287  | 0.329031  | 0.0653343  | 0.5117    | 1.08646   | 0.0188671  | 0.361158   | 0.39976   | 1.60715   |
| MSGN1       | 0.0179543 | 0         | 0         | 0.0185024 | 0.0278892 | 0.0152878 | 0         | 0         | 0          | 0         | 0         | 0.0256935  | 0          | 0         | 0         |
| MSH2        | 3.35354   | 3.50607   | 3.44845   | 4.80858   | 1.22108   | 4.78985   | 2.05858   | 2.71115   | 1.76545    | 3.10473   | 3.69616   | 2.15185    | 3.62475    | 2.52164   | 2.08181   |
| MSH3        | 3.87586   | 2.79031   | 2.70577   | 3.66862   | 1.42309   | 2.52834   | 2.36891   | 3.29539   | 3.18631    | 2.14183   | 3.34607   | 2.58094    | 2.67892    | 2.34615   | 2.35277   |
| MSH4        | 0.0564981 | 0.0510406 | 0.122691  | 0.0800566 | 0.076791  | 0.0541209 | 0.0645078 | 0.0251054 | 0          | 0.0177277 | 0.0637794 | 0.00505324 | 0          | 0.0369105 | 0.0304269 |
| MSH5        | 0.0994029 | 0.137019  | 0.156567  | 0.113112  | 0.192073  | 0.214587  | 0.20312   | 0.131871  | 0.0459448  | 0.108029  | 0.122961  | 0.106049   | 0.0609988  | 0.127551  | 0.106482  |
| MSH5-SAPCD1 | 0.0907178 | 0.14194   | 0.155118  | 0.0903393 | 0.0408526 | 0.172567  | 0.224522  | 0.0953255 | 0.00032254 | 0.0188607 | 0.0193633 | 0.0753178  | 0.00027132 | 0.0544119 | 0.0622211 |
|             |           |           |           |           |           |           |           |           | 3          |           |           |            | 5          |           |           |
| MSH6        | 4.77949   | 4.49617   | 4.94988   | 7.91258   | 3.04191   | 8.87402   | 3.47481   | 3.69658   | 2.05775    | 4.57204   | 5.38958   | 2.96511    | 7.06096    | 5.62514   | 6.09225   |
| MSI1        | 0.132246  | 0.172414  | 0.0514839 | 0.104217  | 0.398764  | 0.29145   | 0.0977021 | 0.124443  | 0.0757933  | 0.0390547 | 0.158071  | 0.105758   | 0.0351336  | 0.113841  | 0.256953  |
| MSI2        | 2.25787   | 1.96653   | 2.05943   | 1.50048   | 0.948751  | 2.5067    | 1.74838   | 2.2304    | 0.683929   | 0.737526  | 1.03914   | 0.801565   | 1.63979    | 1.08323   | 1.6296    |
| MSL1        | 7.31248   | 9.697     | 10.6503   | 8.3536    | 7.20865   | 9.9407    | 6.21863   | 7.3925    | 7.57766    | 6.47092   | 7.32475   | 5.55306    | 8.02876    | 7.99194   | 6.69077   |
| MSL2        | 4.73048   | 4.87645   | 4.63585   | 4.7649    | 3.34621   | 4.84598   | 3.33486   | 4.72144   | 2.61766    | 3.45274   | 3.49437   | 2.51689    | 4.20719    | 3.83658   | 3.58843   |
| MSL3        | 2.44863   | 2.47642   | 2.61988   | 3.62887   | 2.07204   | 3.97932   | 2.20466   | 2.31292   | 2.90831    | 2.40594   | 3.61715   | 2.38281    | 2.56085    | 2.41083   | 2.72616   |
| MSL3P1      | 0.174445  | 0.319391  | 0.269385  | 0.215725  | 0.126454  | 0.604053  | 0.185897  | 0.279058  | 0.283273   | 0.496279  | 0.892735  | 0.158106   | 0.420191   | 0.285674  | 0.250525  |
| MSLN        | 0.16885   | 0.061016  | 0.0436515 | 0.119629  | 0.18032   | 0.10783   | 0.192788  | 0.0187575 | 0.0514102  | 0.105962  | 0.0357396 | 0.0226532  | 0.0272353  | 0.0275777 | 0         |
| MSMB        | 0.607797  | 1.41918   | 1.19902   | 0.337267  | 1.01674   | 0.11943   | 3.04276   | 1.78668   | 1.70822    | 0         | 0.105558  | 0.334535   | 0          | 0.048871  | 0         |
| MSMO1       | 6.25318   | 8.26295   | 7.32991   | 31.7809   | 2.54936   | 12.0199   | 5.55045   | 9.27764   | 30.3491    | 25.9832   | 19.8171   | 9.70675    | 33.617     | 13.5232   | 2.86418   |
| MSMP        | 2.24242   | 3.18408   | 2.88095   | 3.97585   | 2.67661   | 6.19629   | 3.74765   | 2.90597   | 3.63256    | 2.8745    | 2.45972   | 2.51205    | 6.48755    | 3.58698   | 1.27842   |
| MSN         | 38.7136   | 33.4071   | 37.4568   | 115.385   | 49.1697   | 136.071   | 36.1949   | 31.2089   | 39.609     | 96.2206   | 66.1498   | 58.3336    | 204.588    | 86.3234   | 80.6965   |
| MSR1        | 1.62712   | 0.26265   | 0.345057  | 2.08109   | 0.538852  | 3.61839   | 0.367786  | 0.987274  | 0.0754433  | 4.23471   | 9.77615   | 0.121152   | 1.00718    | 0.748958  | 3.64154   |
| MSRA        | 2.24605   | 1.60735   | 1.73968   | 3.35846   | 2.00098   | 6.64681   | 2.63988   | 1.49707   | 1.9443     | 2.363     | 3.67896   | 1.82768    | 2.90537    | 2.31899   | 1.81835   |
| MSRB1       | 3.82421   | 4.41579   | 4.13184   | 24.8178   | 9.44817   | 12.8426   | 4.57338   | 3.54513   | 15.8996    | 9.64093   | 23.2786   | 6.32185    | 12.709     | 7.86557   | 4.00067   |
| MSRB2       | 2.24913   | 1.89026   | 1.20519   | 3.77959   | 2.06445   | 4.60278   | 1.47367   | 1.38556   | 2.08552    | 3.91355   | 7.79008   | 1.78305    | 2.55596    | 2.31759   | 2.62441   |
| MSRB3       | 4.98995   | 1.84169   | 2.46053   | 1.91676   | 2.24016   | 5.46917   | 4.29088   | 1.96223   | 1.09078    | 4.77575   | 8.82372   | 1.05535    | 3.49559    | 3.69498   | 9.2807    |
| MSS51       | 1.11751   | 1.1413    | 1.23265   | 0.580737  | 1.11275   | 0.553037  | 1.01421   | 0.780941  | 0.244283   | 0.455544  | 0.345035  | 0.498903   | 0.0801127  | 0.878589  | 0.987626  |

|        |           |           |            |           |           |           |           |           |           |           |           |           |            |           |           |
|--------|-----------|-----------|------------|-----------|-----------|-----------|-----------|-----------|-----------|-----------|-----------|-----------|------------|-----------|-----------|
| MST1   | 1.1214    | 1.86242   | 1.95351    | 0.760253  | 3.28355   | 1.92423   | 1.12266   | 1.18519   | 0.641498  | 0.453323  | 0.343637  | 1.08606   | 0.313909   | 0.738313  | 0.812862  |
| MST1L  | 0.275009  | 0.352622  | 0.521653   | 0.0163311 | 0.061839  | 0.155438  | 0.0544034 | 0.246013  | 0.0589041 | 0.0812822 | 0.0674913 | 0.0280426 | 0.00639751 | 0.0825099 | 6.49E-22  |
| MST1P2 | 1.06984   | 1.48292   | 1.42835    | 0.285638  | 1.65951   | 1.29561   | 1.00194   | 1.05142   | 0.192169  | 0.148215  | 0.0232598 | 0.546929  | 0.0651594  | 0.236316  | 0.121983  |
| MST1R  | 1.68406   | 7.45018   | 8.35487    | 4.73311   | 7.64168   | 4.77984   | 5.16829   | 3.37426   | 2.00749   | 4.43871   | 1.54968   | 3.91804   | 5.97602    | 4.51018   | 1.58303   |
| MSTN   | 0.0820967 | 0.0830664 | 0.122249   | 0.0084603 | 0.0382573 | 0.0699042 | 0.0468677 | 0.0802568 | 0         | 0         | 0         | 0.0117485 | 0.0211873  | 0.0128722 | 0.0353704 |
| MSTO1  | 2.5655    | 2.12517   | 2.30714    | 3.76315   | 2.34371   | 5.10179   | 2.63673   | 1.73482   | 1.23204   | 2.08735   | 2.60955   | 1.57527   | 2.9897     | 2.48279   | 2.6482    |
| MSTO2P | 0.615197  | 0.58915   | 0.636332   | 0.311378  | 0.560004  | 0.823796  | 0.744525  | 0.477594  | 0.311067  | 0.146591  | 0.0609971 | 0.380089  | 0.223497   | 0.360846  | 0.359892  |
| MSX1   | 1.05141   | 0.356914  | 0.375597   | 0.788009  | 1.57753   | 4.34407   | 1.43238   | 0.329167  | 0.305575  | 0.674812  | 1.45667   | 0.290667  | 0.832541   | 0.774316  | 1.71587   |
| MSX2   | 0.837992  | 0.757667  | 0.907211   | 2.47344   | 1.63916   | 1.76182   | 1.13398   | 1.02976   | 1.04578   | 2.03861   | 4.34455   | 0.829084  | 4.13845    | 1.78973   | 2.19892   |
| MSX2P1 | 0.0321283 | 0         | 0.00885959 | 0.0331091 | 0.0166354 | 0.0638325 | 0.036683  | 0.0571058 | 0         | 0         | 0         | 0         | 0          | 0         | 0         |
| MT1A   | 0.116884  | 0.0563165 | 0          | 0.96362   | 0.272342  | 1.39335   | 0.133454  | 0.155815  | 0         | 0         | 0.593764  | 0.167267  | 0.452478   | 0.0305444 | 0.503581  |
| MT1B   | 0         | 0         | 0          | 0         | 0         | 0         | 0         | 0         | 0         | 0         | 0         | 0         | 0          | 0         | 0         |
| MT1DP  | 0         | 0         | 0          | 0         | 0         | 0.0692654 | 0         | 0         | 0         | 0         | 0.045915  | 0         | 0          | 0         | 0         |
| MT1E   | 29.3936   | 6.95783   | 8.8707     | 9.66203   | 3.4317    | 48.4965   | 7.56727   | 23.034    | 2.4281    | 7.77739   | 20.4078   | 9.90864   | 11.994     | 10.9972   | 5.80379   |
| MT1F   | 2.25202   | 0.600244  | 0.594583   | 1.67885   | 0.297716  | 6.60947   | 0.711205  | 0.851661  | 0.175066  | 0.601385  | 2.48815   | 0.308562  | 1.14384    | 0.450767  | 1.72031   |
| MT1G   | 6.00005   | 2.23153   | 1.65573    | 22.2007   | 1.24269   | 9.39077   | 2.80551   | 4.57058   | 1.11734   | 0.93237   | 1.74171   | 1.6355    | 2.35959    | 1.19462   | 0         |
| MT1H   | 0.757833  | 0.337048  | 0.385805   | 1.56194   | 0         | 1.29057   | 0.266237  | 1.03615   | 0.141993  | 0.073166  | 0.526461  | 0.208558  | 0.338504   | 0.243739  | 0.0837188 |
| MT1HL1 | 0.0732375 | 0         | 0          | 0         | 0         | 0         | 0         | 0         | 0         | 0         | 0         | 0         | 0          | 0         | 0         |
| MT1IP  | 0.0618798 | 0         | 0          | 0         | 0         | 0         | 0         | 0         | 0         | 0         | 0         | 0         | 0          | 0         | 0         |
| MT1JP  | 0         | 0.0819903 | 0.0938508  | 0.0584549 | 0         | 0.434691  | 0         | 0         | 0         | 0         | 0         | 0.0405869 | 0          | 0         | 0         |
| MT1L   | 0.543264  | 0.340279  | 0.359541   | 2.29538   | 0.590714  | 2.86801   | 0.0620281 | 0.531089  | 0.132327  | 1.3637    | 2.33045   | 0.427592  | 0.420613   | 0.4259    | 0.780196  |
| MT1M   | 3.68185   | 1.46986   | 1.43592    | 2.27655   | 0.735324  | 15.4961   | 1.08098   | 2.71119   | 0.128117  | 0.858204  | 1.95942   | 0.112905  | 1.49318    | 1.20956   | 1.73735   |
| MT1X   | 161.371   | 77.9606   | 64.8757    | 161.076   | 37.7695   | 121.358   | 38.3279   | 121.76    | 19.1819   | 15.3143   | 52.3996   | 36.0701   | 21.8474    | 24.0714   | 6.08785   |
| MT2A   | 69.1219   | 17.327    | 17.3666    | 433.907   | 44.8205   | 505.119   | 19.2334   | 58.2138   | 5.48747   | 43.4418   | 125.409   | 36.9291   | 172.042    | 94.7575   | 43.3837   |
| MT3    | 0         | 0         | 0.0319093  | 0.0794986 | 0.0599153 | 0.19706   | 0         | 0         | 0         | 0.0484115 | 0.0435427 | 0         | 0          | 0         | 0         |
| MT4    | 4.88051   | 1.0999    | 0          | 0.730089  | 0         | 0.0670272 | 0.0898775 | 1.53907   | 0.0958695 | 0.691593  | 0.177725  | 0.112649  | 0.0507884  | 0.123424  | 0.113049  |

|         |          |          |          |          |           |          |          |          |          |          |          |          |          |          |          |
|---------|----------|----------|----------|----------|-----------|----------|----------|----------|----------|----------|----------|----------|----------|----------|----------|
| MTA1    | 7.13848  | 7.76622  | 7.60435  | 9.92613  | 10.9999   | 13.9468  | 7.75044  | 6.37306  | 4.36681  | 5.17528  | 6.17262  | 5.46348  | 6.26186  | 8.3008   | 9.30388  |
| MTA2    | 12.6284  | 14.2436  | 15.0577  | 19.5494  | 18.1951   | 26.8877  | 15.3686  | 10.0529  | 17.8363  | 15.6238  | 16.0245  | 12.7705  | 26.1205  | 14.5266  | 11.1384  |
| MTA3    | 2.88427  | 3.01156  | 3.30292  | 3.33057  | 2.26687   | 3.40546  | 2.51507  | 2.65506  | 3.85647  | 2.782    | 2.95682  | 2.47998  | 2.90021  | 2.08848  | 1.41368  |
| MTAP    | 3.40021  | 3.11566  | 2.88681  | 5.48138  | 2.16966   | 3.54396  | 2.38949  | 2.76269  | 3.72295  | 3.39992  | 3.5358   | 3.47658  | 4.75474  | 6.33414  | 4.02537  |
| MTBP    | 0.982099 | 0.646573 | 0.626402 | 1.12797  | 0.244552  | 1.17457  | 0.402309 | 0.692916 | 0.319565 | 0.48929  | 0.812459 | 0.284306 | 0.686852 | 0.525043 | 0.65676  |
| MTCH1   | 23.2775  | 23.2085  | 25.3763  | 25.1567  | 36.188    | 40.4109  | 27.3454  | 14.9582  | 36.3758  | 23.7293  | 36.5362  | 17.8033  | 29.1949  | 18.5673  | 19.5085  |
| MTCH2   | 8.89446  | 7.76484  | 7.32888  | 15.5005  | 4.63728   | 16.8339  | 9.11979  | 7.13757  | 14.1358  | 13.9266  | 20.3892  | 11.8965  | 16.9317  | 11.525   | 8.11938  |
| MTCL1   | 3.69635  | 3.31665  | 2.03964  | 4.29073  | 13.6609   | 6.19775  | 2.24682  | 1.50239  | 4.858    | 1.71173  | 1.77973  | 3.72941  | 3.74275  | 3.26811  | 3.0443   |
| MTCP1   | 0.599211 | 0.621465 | 0.474654 | 0.302157 | 0.300649  | 0.277054 | 0.356644 | 0.449344 | 0.214237 | 0.312505 | 0.298989 | 0.300109 | 0.336558 | 0.352046 | 0.525325 |
| MTDH    | 8.92321  | 7.1147   | 7.17479  | 11.2018  | 8.43547   | 11.5742  | 5.6447   | 6.88514  | 11.846   | 11.567   | 13.9594  | 7.27576  | 14.7767  | 10.0234  | 8.22326  |
| MTERF1  | 1.96146  | 1.62086  | 1.63172  | 1.56965  | 0.476599  | 1.50221  | 0.950863 | 1.63606  | 0.667273 | 1.29281  | 1.83077  | 0.752703 | 1.28674  | 1.30577  | 1.6209   |
| MTERF2  | 1.52563  | 1.99342  | 2.17126  | 1.94527  | 1.76733   | 1.1119   | 0.841434 | 1.96484  | 0.503877 | 0.697775 | 1.21141  | 0.656828 | 1.0177   | 1.54742  | 0.668441 |
| MTERF3  | 1.81277  | 1.89969  | 2.21199  | 3.95418  | 0.844758  | 3.16428  | 1.05213  | 1.19486  | 2.09736  | 2.65442  | 3.44476  | 1.65379  | 1.98831  | 2.61333  | 1.51863  |
| MTERF4  | 2.77989  | 2.95609  | 3.03642  | 1.92059  | 1.63331   | 2.22388  | 2.21789  | 2.3922   | 1.4106   | 1.2528   | 1.30554  | 1.45681  | 0.96138  | 1.33548  | 2.37936  |
| MTF1    | 3.5441   | 3.55975  | 3.23254  | 5.68285  | 3.68647   | 5.45508  | 3.47975  | 3.12221  | 10.8922  | 4.88053  | 4.16529  | 5.95573  | 6.56309  | 4.8932   | 3.13637  |
| MTF2    | 2.41635  | 2.26903  | 2.47204  | 2.53055  | 1.33242   | 2.4728   | 1.32504  | 2.64071  | 1.30413  | 2.0406   | 3.18975  | 1.33182  | 2.39819  | 2.09504  | 2.13363  |
| MTFMT   | 1.33814  | 1.16219  | 1.08869  | 2.35369  | 1.36151   | 2.69183  | 0.933404 | 0.839883 | 0.934047 | 1.47492  | 2.52123  | 1.00105  | 2.12612  | 1.7147   | 1.42822  |
| MTFP1   | 1.0322   | 0.732908 | 0.629197 | 3.76965  | 1.57524   | 4.62582  | 0.702986 | 0.434527 | 0.727798 | 1.79555  | 5.29464  | 0.919971 | 3.28312  | 2.37558  | 1.22231  |
| MTFR1   | 1.91346  | 2.1026   | 2.11477  | 3.57744  | 2.07941   | 3.62565  | 2.2279   | 2.11053  | 3.39886  | 4.21464  | 3.22728  | 2.64627  | 4.30389  | 3.03575  | 2.37868  |
| MTFR1L  | 5.01276  | 4.60538  | 4.73816  | 4.31398  | 4.99196   | 6.6772   | 4.87491  | 3.46027  | 3.18763  | 3.39643  | 5.65983  | 2.67415  | 3.26584  | 3.44721  | 3.23312  |
| MTFR2   | 0.14487  | 0.255936 | 0.299618 | 0.584732 | 0.0375056 | 0.842928 | 0.192976 | 0.11802  | 0.102921 | 0.439416 | 0.354338 | 0.302338 | 0.981432 | 0.492152 | 0.208052 |
| MTG1    | 3.2993   | 3.92692  | 3.66945  | 4.98431  | 8.04629   | 5.42674  | 3.76501  | 2.65208  | 2.31627  | 2.33569  | 3.12588  | 3.13413  | 2.86281  | 4.22325  | 3.82456  |
| MTG2    | 2.11405  | 2.34331  | 2.49101  | 3.47671  | 5.74454   | 4.79226  | 2.15403  | 1.72446  | 2.59421  | 2.74046  | 3.2657   | 2.21318  | 3.16334  | 2.50892  | 3.24892  |
| MTHFD1  | 5.76803  | 4.94988  | 4.99606  | 13.4582  | 3.6911    | 15.8261  | 5.97826  | 4.53708  | 5.08814  | 7.11735  | 7.19866  | 5.69303  | 13.9347  | 8.09332  | 5.51248  |
| MTHFD1L | 1.0584   | 0.771562 | 0.898364 | 3.99385  | 1.06344   | 5.80932  | 1.42857  | 0.629407 | 0.862532 | 3.78766  | 2.78046  | 2.7083   | 6.7526   | 5.06484  | 3.63893  |
| MTHFD2  | 3.4436   | 2.52781  | 2.01091  | 8.0264   | 2.87908   | 6.21796  | 4.15152  | 3.1594   | 22.0303  | 8.11026  | 12.154   | 5.00769  | 14.3498  | 7.18315  | 4.85819  |

|          |           |          |           |           |          |          |           |           |          |          |           |           |          |           |          |
|----------|-----------|----------|-----------|-----------|----------|----------|-----------|-----------|----------|----------|-----------|-----------|----------|-----------|----------|
| MTHFD2L  | 0.944695  | 0.870343 | 1.02022   | 0.708766  | 0.245596 | 0.689962 | 0.988361  | 0.959002  | 2.03148  | 0.977326 | 1.18246   | 0.675955  | 0.645216 | 0.911041  | 0.579011 |
| MTHFD2P1 | 0         | 0.012891 | 0.0147557 | 0         | 0        | 0        | 0.0101827 | 0         | 0        | 0        | 0         | 0.0127626 | 0        | 0         | 0        |
| MTHFR    | 2.7961    | 3.64442  | 3.80077   | 4.11844   | 7.91715  | 6.83943  | 3.95814   | 2.83134   | 3.86415  | 3.14937  | 1.84653   | 4.09864   | 3.97945  | 2.50101   | 3.34281  |
| MTHFS    | 0.77324   | 0.662001 | 0.66838   | 2.41697   | 0.791956 | 1.9971   | 0.696133  | 0.553184  | 0.376678 | 1.22993  | 2.94564   | 0.436206  | 0.951206 | 0.444774  | 0.342414 |
| MTHFSD   | 1.21731   | 1.59344  | 1.64155   | 2.1754    | 2.63416  | 2.63625  | 0.988188  | 0.925511  | 1.0455   | 0.989132 | 1.17561   | 1.02207   | 1.17584  | 1.53355   | 1.07116  |
| MTIF2    | 4.12557   | 3.35481  | 3.31781   | 5.28672   | 1.66762  | 5.39988  | 1.80362   | 2.88274   | 2.65233  | 3.30122  | 4.30232   | 2.4691    | 4.95249  | 3.61104   | 3.06153  |
| MTIF3    | 5.71063   | 5.31285  | 4.78639   | 5.94304   | 2.53862  | 5.98218  | 2.29494   | 3.75626   | 7.77849  | 6.60157  | 13.1688   | 4.40868   | 7.29621  | 5.15436   | 4.10059  |
| MTLN     | 1.45348   | 1.16175  | 1.28631   | 3.34405   | 2.76532  | 2.29296  | 1.60808   | 0.851143  | 2.00346  | 2.87075  | 5.25311   | 1.70916   | 2.26812  | 1.93741   | 0.744339 |
| MTM1     | 2.95687   | 2.64163  | 2.7916    | 3.24149   | 0.952088 | 3.80241  | 1.54576   | 2.81937   | 4.90542  | 4.11695  | 3.45199   | 2.3856    | 4.54124  | 3.34071   | 2.07969  |
| MTMR1    | 4.44415   | 5.58808  | 6.14818   | 4.87086   | 3.7567   | 5.46011  | 4.83736   | 4.38102   | 7.77738  | 4.01584  | 3.89094   | 4.55986   | 6.8167   | 2.97315   | 2.49716  |
| MTMR10   | 5.02883   | 4.32073  | 4.26056   | 4.03967   | 2.31207  | 4.57595  | 3.67467   | 4.54857   | 4.16703  | 3.62711  | 3.60294   | 2.90738   | 4.21754  | 3.45405   | 3.99468  |
| MTMR11   | 1.37178   | 3.03368  | 2.73508   | 1.7234    | 5.07572  | 2.21143  | 2.26139   | 1.56843   | 4.28932  | 2.07962  | 3.11454   | 1.90795   | 1.55632  | 2.11058   | 3.14323  |
| MTMR12   | 7.4585    | 5.36137  | 5.54613   | 5.35405   | 5.61599  | 7.47205  | 7.16019   | 5.85492   | 9.88267  | 4.3304   | 5.75917   | 5.56976   | 7.33475  | 4.52563   | 3.12813  |
| MTMR14   | 4.78443   | 4.51769  | 4.55703   | 6.05446   | 5.29627  | 9.52904  | 5.06503   | 3.75512   | 7.14407  | 5.02712  | 5.80454   | 3.96116   | 6.62321  | 4.48375   | 2.98798  |
| MTMR2    | 3.7366    | 2.56634  | 2.84701   | 4.92982   | 1.5749   | 4.98121  | 2.70652   | 3.26579   | 4.54496  | 6.54782  | 7.98489   | 3.67155   | 9.01692  | 6.12238   | 5.90624  |
| MTMR3    | 6.58419   | 7.11834  | 7.7372    | 5.5408    | 7.63293  | 8.64581  | 8.16755   | 5.28461   | 10.6719  | 6.38963  | 4.51557   | 6.40564   | 6.36404  | 5.53824   | 4.78699  |
| MTMR4    | 5.43538   | 5.08849  | 4.97279   | 4.65208   | 5.09418  | 8.09336  | 6.16514   | 4.56941   | 5.05784  | 3.77724  | 3.80971   | 3.17894   | 3.96029  | 3.41349   | 3.3185   |
| MTMR6    | 3.18694   | 2.27333  | 2.55935   | 2.86799   | 1.16521  | 3.59047  | 2.42752   | 3.22281   | 5.0706   | 4.40105  | 6.08295   | 2.35021   | 4.85412  | 2.9833    | 3.47407  |
| MTMR7    | 1.08215   | 0.680477 | 0.706128  | 0.384145  | 0.184542 | 0.303118 | 0.515467  | 1.05576   | 0.194503 | 0.33716  | 0.22349   | 0.340767  | 0.259986 | 0.425103  | 0.393731 |
| MTMR8    | 0.669679  | 0.561515 | 0.395718  | 0.30473   | 0.229664 | 0.45914  | 0.615666  | 0.301442  | 0.381316 | 0.130989 | 0.166906  | 0.199137  | 0.190786 | 0.177274  | 0.074941 |
| MTMR9    | 1.9533    | 1.45154  | 1.63277   | 2.12891   | 1.16345  | 1.88145  | 1.30705   | 1.8054    | 1.06576  | 2.32971  | 2.71311   | 1.33904   | 3.17993  | 2.5108    | 2.3519   |
| MTMR9LP  | 1.15516   | 1.05557  | 1.35106   | 0.605476  | 3.82076  | 2.02656  | 1.20522   | 0.814209  | 0.194049 | 0.424955 | 0.933058  | 0.577159  | 0.257001 | 1.05654   | 3.94717  |
| MTNR1A   | 0.0179543 | 0        | 0         | 0.0185024 | 0        | 0        | 0         | 0         | 0        | 0        | 0.0608044 | 0         | 0        | 0         | 0        |
| MTNR1B   | 0.0139248 | 0.16773  | 0         | 0         | 1.96834  | 0        | 0.0158989 | 0.0495009 | 0.169589 | 0        | 0         | 0.0697451 | 0        | 0.0363886 | 0        |
| MTO1     | 2.52281   | 2.60266  | 2.70089   | 4.42734   | 1.93635  | 4.13202  | 2.4484    | 2.16952   | 3.35264  | 2.96149  | 3.19975   | 2.29358   | 3.84902  | 3.09081   | 1.9181   |
| MTOR     | 5.20951   | 5.45712  | 5.11938   | 9.02867   | 7.27636  | 8.53287  | 7.04438   | 4.25968   | 7.83706  | 5.83934  | 4.58434   | 6.7054    | 8.44394  | 6.07066   | 6.373    |

|           |           |           |           |           |           |           |           |           |           |           |           |           |            |           |           |
|-----------|-----------|-----------|-----------|-----------|-----------|-----------|-----------|-----------|-----------|-----------|-----------|-----------|------------|-----------|-----------|
| MTOR-AS1  | 0.196683  | 0.347471  | 0.271184  | 0.202688  | 0.101839  | 0.279122  | 0.636272  | 0.320459  | 0.079846  | 0.0411429 | 0         | 0.187643  | 0          | 0.119928  | 0.188308  |
| MTPAP     | 3.9615    | 2.74799   | 2.93315   | 2.61836   | 1.5224    | 3.09966   | 2.68802   | 3.05586   | 1.55472   | 1.66942   | 2.46845   | 1.84158   | 2.74989    | 2.5461    | 2.73257   |
| MTPN      | 6.78084   | 6.68495   | 6.37857   | 15.3051   | 7.78867   | 12.4811   | 6.00731   | 7.57782   | 15.1596   | 20.024    | 22.0326   | 14.2785   | 26.0095    | 12.7791   | 9.92641   |
| MTR       | 5.27615   | 4.26991   | 4.80183   | 3.52616   | 2.93846   | 6.25636   | 4.90793   | 3.87279   | 0.93703   | 2.17894   | 3.08569   | 1.78799   | 3.00391    | 2.88922   | 4.08292   |
| MTREX     | 6.55597   | 6.31159   | 6.34118   | 9.38615   | 2.07802   | 8.1784    | 3.96731   | 6.46888   | 6.45948   | 6.35745   | 6.88347   | 4.54286   | 9.66023    | 6.11077   | 5.48536   |
| MTRF1     | 0.856363  | 0.995718  | 0.790413  | 0.875214  | 0.527694  | 0.982287  | 0.597974  | 0.59124   | 0.64646   | 0.96823   | 1.01467   | 1.10903   | 0.707775   | 1.0505    | 0.88427   |
| MTRF1L    | 2.977     | 2.61318   | 2.48637   | 3.74963   | 1.67432   | 3.36041   | 2.12277   | 2.61023   | 4.48692   | 3.57897   | 4.01735   | 2.55452   | 5.01897    | 3.35328   | 2.60453   |
| MTRNR2L1  | 0         | 0         | 0         | 0         | 0         | 0         | 0         | 0         | 0         | 0         | 0         | 0         | 0          | 0         | 0         |
| MTRNR2L10 | 0         | 0         | 0         | 0         | 0         | 0         | 0         | 0         | 0.0251433 | 0         | 0         | 0         | 0          | 0         | 0         |
| MTRNR2L2  | 0.282413  | 10.7024   | 0.261091  | 0.0243599 | 1.90895   | 0.876841  | 0.455296  | 0.640913  | 0.088554  | 0         | 3.4484    | 0.944397  | 1.4991     | 1.01879   | 0.795166  |
| MTRNR2L3  | 0.769762  | 0.36282   | 0.595271  | 0.155203  | 0.181955  | 0.170985  | 0.382126  | 0.6841    | 0.264941  | 0.714096  | 0.0755622 | 0.347234  | 0.12956    | 0.63845   | 0.240321  |
| MTRNR2L4  | 0.112801  | 0.163048  | 0.10887   | 0.0193742 | 0.0584064 | 0.0480244 | 0.171724  | 0.0835403 | 0         | 0         | 0.0212231 | 0.0538082 | 0          | 0         | 0.134997  |
| MTRNR2L5  | 0         | 0.0449107 | 0.0550793 | 0.0411673 | 0         | 0         | 0.0152037 | 0.0236681 | 0         | 0         | 0         | 0         | 0          | 0         | 0         |
| MTRNR2L6  | 0         | 0.0239799 | 0         | 0         | 0         | 0         | 0.0189419 | 0.0147438 | 0         | 0         | 0         | 0         | 0          | 0         | 0         |
| MTRNR2L7  | 0         | 0         | 0         | 0         | 0         | 0         | 0         | 0         | 0         | 0         | 0         | 0         | 0          | 0         | 0         |
| MTRNR2L8  | 0.921376  | 7.97534   | 1.33384   | 2.06959   | 2.53558   | 0.976165  | 0.822406  | 0.936176  | 0.606211  | 1.10333   | 2.49622   | 1.53934   | 1.6551     | 1.51653   | 2.19551   |
| MTRNR2L9  | 0.263488  | 14.7053   | 0.508611  | 0.0905108 | 2.72859   | 1.19657   | 0.551544  | 0.312222  | 0.0534832 | 0         | 6.09763   | 1.25689   | 3.65503    | 0.849215  | 2.01815   |
| MTRR      | 2.74315   | 2.18116   | 2.54817   | 3.07806   | 1.22435   | 3.96504   | 2.35643   | 2.24894   | 1.53464   | 2.00458   | 3.34254   | 2.06297   | 3.19513    | 2.58281   | 2.71074   |
| MTSS1     | 8.09604   | 9.37474   | 11.1748   | 12.5654   | 9.32429   | 16.0234   | 9.13144   | 11.4844   | 6.68962   | 10.6498   | 8.13457   | 11.4258   | 20.9981    | 9.61049   | 6.51365   |
| MTSS1L    | 6.6123    | 9.54428   | 8.35911   | 7.0346    | 22.0809   | 18.7043   | 9.5566    | 6.55833   | 4.97793   | 4.80322   | 5.10229   | 7.56938   | 8.16043    | 12.0056   | 13.8101   |
| MTTP      | 0         | 0.013615  | 0.0140261 | 0         | 0.0877879 | 0.0384977 | 0.0193582 | 0.0502262 | 0.35103   | 0.0212798 | 0.0574189 | 0.0283068 | 0.00364634 | 0         | 0         |
| MTURN     | 7.16503   | 5.92056   | 6.85605   | 2.65816   | 3.76557   | 4.55536   | 5.65384   | 5.38777   | 4.90606   | 3.50222   | 3.79257   | 3.02764   | 3.688      | 2.98332   | 3.13842   |
| MTUS1     | 9.14676   | 5.48765   | 4.83346   | 6.73375   | 3.48793   | 7.64305   | 3.58407   | 5.94114   | 3.18873   | 4.6328    | 5.98206   | 4.36184   | 4.97423    | 4.28817   | 7.835     |
| MTUS2     | 0.244424  | 0.0898748 | 0.0718358 | 0.0894857 | 0.169854  | 0.0356001 | 0.110161  | 0.102895  | 0.0470022 | 0.153388  | 0.0798727 | 0.0966506 | 0.0498003  | 0.151279  | 0.0554247 |
| MTUS2-AS1 | 0.0623242 | 0         | 0.0687453 | 0.021409  | 0         | 0         | 0.0237199 | 0         | 0         | 0         | 0.0469042 | 0         | 0          | 0.0108578 | 0         |
| MTVR2     | 1.62457   | 1.13979   | 1.10818   | 0.264343  | 0.442724  | 0.388296  | 1.10642   | 1.49445   | 0.138845  | 0.107316  | 0.0321744 | 0.163148  | 0.0183889  | 0.0595841 | 0.654903  |

|           |            |            |                 |                 |            |            |            |                 |            |            |            |                 |            |                 |            |
|-----------|------------|------------|-----------------|-----------------|------------|------------|------------|-----------------|------------|------------|------------|-----------------|------------|-----------------|------------|
| MTX1      | 4.54996    | 4.11385    | 3.71758         | 8.62521         | 7.7439     | 11.6705    | 4.76209    | 2.93289         | 8.22647    | 6.27471    | 10.0825    | 4.99398         | 8.22695    | 5.73955         | 4.65874    |
| MTX2      | 4.05585    | 4.63676    | 4.87058         | 7.58034         | 3.79363    | 5.73109    | 2.88805    | 3.69494         | 7.94935    | 5.69261    | 12.5705    | 4.97201         | 5.99335    | 5.47034         | 2.19209    |
| MTX3      | 3.1678     | 2.46796    | 2.04149         | 2.57916         | 0.842772   | 2.54335    | 1.68189    | 2.94234         | 1.81889    | 1.91107    | 2.14365    | 1.73443         | 2.27911    | 1.86908         | 1.90186    |
| MUC1      | 1.10805    | 0.667342   | 0.604158        | 2.54326         | 1.23221    | 16.8541    | 1.96958    | 1.65615         | 0.0613398  | 0.774373   | 1.06606    | 1.21628         | 1.64916    | 0.809442        | 1.62746    |
| MUC12     | 0.0297778  | 0.0444087  | 0.0504417       | 0.0175354       | 0.0792947  | 0.0253554  | 0.0744748  | 0.0504077       | 0          | 0.270518   | 0.0320147  | 0.0304383       | 0.0677012  | 0.0815215       | 0.0549832  |
| MUC13     | 0.0160939  | 0          | 0               | 0               | 0          | 0.0205556  | 0.0275633  | 0               | 0          | 0          | 0          | 0.0115156       | 0.00519186 | 0.00420569      | 0          |
| MUC15     | 2.6882     | 5.85471    | 5.95476         | 3.40308         | 1.88648    | 1.5802     | 3.59122    | 5.821           | 23.8815    | 2.97148    | 4.15916    | 5.95594         | 0.981659   | 0.588376        | 0.44093    |
| MUC16     | 0.008451   | 0.0330835  | 0.0367041       | 0.0228611       | 0.0139478  | 0.00449744 | 0.138102   | 0.0239399       | 0.00192982 | 0.114024   | 0.00894386 | 0.00340139      | 0.0020447  | 0.00552107      | 0.016688   |
| MUC17     | 0          | 0          | 0               | 0               | 0          | 0          | 0          | 0               | 0          | 0.0182176  | 0          | 0               | 0.00208108 | 0               | 0          |
| MUC19     | 0          | 0.00134719 | 0.00077103<br>5 | 0.0038419       | 0          | 0.0150785  | 0.00106415 | 0.00082830<br>4 | 0          | 0.00116978 | 0          | 0.00066688<br>7 | 0          | 0.00535827      | 0.0013385  |
| MUC2      | 0          | 0.00387445 | 0               | 0               | 0          | 0.00912949 | 0          | 0.00476433      | 0          | 0.00336425 | 0          | 0               | 0          | 0               | 0          |
| MUC20     | 0.357284   | 3.331      | 2.97788         | 0.303758        | 1.37359    | 3.79518    | 2.17225    | 0.563605        | 0.424253   | 0.246635   | 0.272247   | 0.581595        | 0.0518665  | 0.116708        | 0.577243   |
| MUC21     | 0          | 0          | 0               | 0.0363723       | 0.00534878 | 0          | 0          | 0               | 0.00104842 | 0.00108045 | 0          | 0.00061596      | 0.00666498 | 0               | 0          |
| MUC22     | 0          | 0          | 0               | 0.00049596<br>7 | 0          | 0          | 0          | 0               | 0.00117228 | 0          | 0.0021732  | 0               | 0.0058998  | 0.00075460<br>5 | 0.00138234 |
| MUC3A     | 0.0198244  | 0.0248345  | 0.0196802       | 0.00408593      | 0.110859   | 0.0168803  | 0.0497968  | 0.0669496       | 0          | 1.06991    | 0.00447586 | 0.119153        | 1.46069    | 0.0932501       | 0.575102   |
| MUC4      | 0.0041317  | 0.0338422  | 0.0501312       | 0.00425784      | 0.0385078  | 0.0727072  | 0.0235872  | 0.0220315       | 0.00167732 | 0.00691428 | 0.00310945 | 0.0019709       | 0.00444292 | 0               | 0.00197788 |
| MUC5AC    | 0.00780541 | 0          | 0               | 0               | 0          | 0.00664621 | 0.0935757  | 0.017342        | 0          | 0          | 0          | 0               | 0.015108   | 0               | 0          |
| MUC5B     | 0.135634   | 0.158184   | 0.213514        | 0.0359421       | 0.222726   | 0.389368   | 0.392975   | 0.242359        | 0.00629284 | 0.0762003  | 0.0160405  | 0.0785641       | 0.357543   | 0.0175533       | 0.243021   |
| MUC5B-AS1 | 1.46E-07   | 0.227208   | 0.00876658      | 0               | 2.87E-23   | 2.24E-13   | 0.0337968  | 0.231549        | 0          | 0          | 0          | 0               | 1.60E-17   | 0               | 0          |
| MUC6      | 0.0722949  | 0.21457    | 0.133969        | 0.0536415       | 0.61989    | 0.118192   | 0.184899   | 0.195319        | 0          | 0.0326655  | 0          | 0.0848355       | 0.00186577 | 0.0574324       | 0.149507   |
| MUC7      | 0.0834284  | 0.00803942 | 0               | 0               | 0          | 1.1153     | 0.428652   | 0.0741443       | 0          | 0          | 0          | 0               | 0          | 0               | 0          |
| MUCL1     | 25.1308    | 43.3257    | 69.8089         | 14.4366         | 6.17531    | 58.1508    | 28.8556    | 71.9656         | 73.3749    | 6.83107    | 28.2627    | 24.9577         | 3.48103    | 2.91877         | 0.747648   |
| MUCL3     | 0.00874863 | 0.00187343 | 0.00160833      | 0.0832045       | 0.0196295  | 0.00993246 | 0.00110988 | 0.00345558      | 0          | 0          | 0          | 0.00208663      | 0.00878045 | 0.00254023      | 0          |
| MUL1      | 4.76419    | 3.66094    | 4.16716         | 6.79199         | 6.58142    | 7.76856    | 5.38585    | 3.4642          | 7.96949    | 5.10507    | 6.14345    | 4.36556         | 11.4995    | 5.16694         | 4.20525    |



|         |           |           |            |           |           |           |           |            |           |           |           |            |            |            |           |
|---------|-----------|-----------|------------|-----------|-----------|-----------|-----------|------------|-----------|-----------|-----------|------------|------------|------------|-----------|
| MUM1    | 3.24025   | 4.16229   | 4.30255    | 3.87115   | 8.59065   | 5.29364   | 4.13229   | 2.45992    | 2.30086   | 2.42632   | 2.64728   | 3.17513    | 3.78434    | 3.67405    | 4.43255   |
| MUM1L1  | 0.0322252 | 0.0362287 | 0.00898631 | 0         | 0         | 0.0731715 | 0.0306614 | 0.00954635 | 0.0392466 | 0.101115  | 0.109135  | 0.130662   | 0.166332   | 0.0364916  | 0.0231397 |
| MUS81   | 2.06708   | 3.13924   | 3.21487    | 4.25185   | 5.97225   | 5.79419   | 2.42621   | 1.62395    | 3.20223   | 3.07177   | 4.39628   | 2.99359    | 5.21204    | 4.98256    | 4.54787   |
| MUSK    | 0.199366  | 0.0640383 | 0.103081   | 0.0513631 | 0.0387105 | 0.183904  | 0.180207  | 0.14765    | 0.0101169 | 0.010426  | 0.0375099 | 0.0178314  | 0.0160787  | 0.0260493  | 0.0477191 |
| MUSTN1  | 7.92548   | 1.69441   | 1.93501    | 0.409503  | 2.25905   | 22.2207   | 5.21611   | 2.28349    | 0.145342  | 1.13071   | 0.849397  | 0.652243   | 0.0552111  | 0.891568   | 3.08725   |
| MUT     | 3.50183   | 3.36586   | 3.70496    | 4.40045   | 2.36824   | 5.48178   | 2.93071   | 2.87396    | 6.57133   | 4.28304   | 4.32962   | 2.7869     | 3.85398    | 2.82624    | 2.56585   |
| MUTYH   | 1.34716   | 1.68692   | 1.3938     | 1.78387   | 2.08973   | 1.82641   | 1.56831   | 1.01166    | 1.07701   | 0.96823   | 1.38062   | 0.95784    | 0.886195   | 0.865374   | 1.60777   |
| MVB12A  | 3.94554   | 4.55129   | 4.14427    | 9.179     | 12.082    | 10.6024   | 6.34713   | 2.92322    | 8.98485   | 6.19456   | 12.261    | 6.00201    | 6.71266    | 5.30686    | 4.85522   |
| MVB12B  | 1.86925   | 1.36579   | 1.69365    | 1.18542   | 1.75491   | 3.04336   | 1.89971   | 1.38436    | 0.271016  | 0.429688  | 0.931401  | 0.438483   | 0.622894   | 0.679928   | 1.23899   |
| MVD     | 3.40229   | 7.93217   | 8.04176    | 18.2885   | 16.3      | 21.4357   | 6.10441   | 3.11228    | 9.74431   | 18.0663   | 10.9314   | 9.08675    | 17.8988    | 10.1676    | 2.73837   |
| MVK     | 3.36505   | 4.93378   | 4.40614    | 10.5296   | 13.3273   | 13.3871   | 5.19064   | 2.61427    | 22.5944   | 11.5517   | 16.3773   | 9.79856    | 11.9123    | 7.67552    | 2.33631   |
| MVP     | 13.9254   | 12.2628   | 14.2934    | 40.8181   | 34.0403   | 56.6462   | 13.2616   | 10.3507    | 7.93708   | 22.3637   | 16.4702   | 16.1969    | 41.1743    | 19.8167    | 25.3053   |
| MX1     | 3.58527   | 2.64448   | 2.04533    | 37.7807   | 5.50041   | 69.7911   | 1.89877   | 2.54567    | 1.61721   | 0.658714  | 0.956511  | 1.07682    | 1.7502     | 1.14346    | 4.77659   |
| MX2     | 2.40732   | 0.971589  | 1.4225     | 7.10413   | 1.76043   | 21.23     | 1.67771   | 1.84074    | 0.390277  | 1.43224   | 3.34401   | 0.374699   | 2.30457    | 1.20506    | 4.9052    |
| MXD1    | 2.761     | 2.76784   | 2.55342    | 18.4348   | 2.98936   | 7.15117   | 3.29356   | 3.64767    | 24.1344   | 31.2696   | 34.3647   | 18.7832    | 45.8977    | 19.8869    | 6.55145   |
| MXD3    | 1.26472   | 1.57441   | 1.28116    | 1.45395   | 1.87607   | 1.08279   | 1.40238   | 1.05167    | 0.617026  | 1.26063   | 1.62058   | 0.960609   | 0.61266    | 1.09521    | 1.00245   |
| MXD4    | 8.66101   | 9.44246   | 8.69745    | 12.6106   | 23.2388   | 15.9925   | 8.76831   | 6.06181    | 7.48529   | 7.72172   | 11.8407   | 6.35519    | 7.45204    | 7.01755    | 10.6413   |
| MX11    | 5.84765   | 6.17285   | 6.90937    | 4.74503   | 2.68095   | 7.0192    | 5.96688   | 6.28023    | 20.0787   | 7.40756   | 10.3276   | 6.67981    | 4.62164    | 3.68068    | 3.19798   |
| MXRA5   | 7.23708   | 11.4398   | 16.3661    | 6.48163   | 13.7044   | 7.29696   | 12.0129   | 12.9516    | 1.62006   | 9.23748   | 15.2966   | 3.80893    | 5.87362    | 6.48555    | 38.1124   |
| MXRA7   | 6.14523   | 4.39867   | 5.60953    | 7.12789   | 4.58802   | 12.1351   | 7.78085   | 3.76975    | 2.25601   | 7.17531   | 14.3575   | 2.30554    | 9.61142    | 5.8675     | 7.83926   |
| MXRA8   | 10.7724   | 6.2541    | 8.3089     | 7.06373   | 37.6819   | 35.1502   | 15.4484   | 7.62443    | 2.14584   | 13.3712   | 37.9183   | 4.21834    | 10.1878    | 15.2542    | 36.3654   |
| MYADM   | 10.0115   | 10.1689   | 15.9934    | 11.0967   | 7.10233   | 13.3019   | 22.6724   | 9.54045    | 3.60475   | 22.9267   | 25.4895   | 12.553     | 53.3501    | 22.0673    | 27.3998   |
| MYADML  | 0.0321878 | 0.0516953 | 0.0710081  | 0.0110568 | 0         | 0         | 0.0245007 | 0.00953529 | 0         | 0         | 0         | 0.00767708 | 0.00692248 | 0.00560759 | 0         |
| MYADML2 | 0.0566306 | 0.0318331 | 0.0312326  | 0.0194532 | 0.0733058 | 0.0321468 | 0         | 0.0167762  | 0.0459798 | 0.0118462 | 0         | 0.00675345 | 0.0791652  | 0          | 0.121993  |
| MYB     | 0.736194  | 0.669414  | 0.691457   | 0.524794  | 0.232152  | 0.29222   | 0.625682  | 0.772331   | 0.0539309 | 0.0416842 | 0.118724  | 0.233678   | 0.114283   | 0.0405018  | 0.0476963 |
| MYBBP1A | 5.39596   | 6.36766   | 5.9712     | 10.0549   | 12.8881   | 15.7708   | 7.66408   | 4.81552    | 5.15546   | 3.68179   | 2.8315    | 6.64665    | 9.75257    | 7.51591    | 5.28648   |

|            |           |            |           |           |           |           |           |           |           |            |           |            |            |            |           |
|------------|-----------|------------|-----------|-----------|-----------|-----------|-----------|-----------|-----------|------------|-----------|------------|------------|------------|-----------|
| MYBL1      | 0.249617  | 0.137451   | 0.188063  | 0.197522  | 0.103859  | 0.288455  | 0.127234  | 0.182225  | 0.0434293 | 0.234971   | 0.332105  | 0.0956826  | 0.181183   | 0.319163   | 0.512116  |
| MYBL2      | 0.533365  | 0.401537   | 0.468815  | 4.21684   | 0.828501  | 5.5634    | 1.23699   | 0.518449  | 0.943919  | 3.03334    | 3.99835   | 1.72333    | 6.23721    | 5.01766    | 1.46015   |
| MYBPC1     | 0.252804  | 0.119037   | 0.1521    | 0         | 0.0535489 | 0.122306  | 0.0328004 | 0.137866  | 0         | 0          | 0.012972  | 0          | 0          | 0          | 0         |
| MYBPC2     | 0         | 0.0123965  | 0.0266058 | 0.258514  | 0.0799314 | 0.0602463 | 0.0146882 | 0.0057164 | 0.0313348 | 0.00807307 | 0.0145223 | 0.00460241 | 0.00830004 | 0          | 0         |
| MYBPC3     | 0.0439043 | 0.0317306  | 0.0544811 | 0.0509002 | 0.0511489 | 0.0514029 | 0.0187982 | 0.0341412 | 0         | 0.0137761  | 0.0495625 | 0.0157073  | 0.00354085 | 0.040156   | 0.0788151 |
| MYBPH      | 0         | 0.00617424 | 0.0742076 | 0         | 0.0796216 | 0.141848  | 0.0146312 | 0.0341655 | 0         | 0.0643342  | 0.101262  | 0.00916914 | 0.00826787 | 0.00669744 | 0         |
| MYBPHL     | 0.0168681 | 0.0487639  | 0.083727  | 0         | 0.026202  | 0         | 0.0385189 | 0.0449729 | 0.0821739 | 0.0211712  | 0         | 0.0482783  | 0.0544161  | 0.0617121  | 0         |
| MYC        | 8.52873   | 9.77322    | 9.1067    | 24.5998   | 11.7442   | 24.3868   | 11.1358   | 8.17619   | 25.3731   | 11.8556    | 16.3413   | 18.9161    | 18.9745    | 15.0909    | 5.44372   |
| MYCBP      | 1.84446   | 1.88636    | 1.29066   | 3.94074   | 0.208186  | 3.79315   | 1.74445   | 1.47126   | 2.95341   | 2.96206    | 4.7048    | 2.29535    | 3.75628    | 2.67465    | 1.73386   |
| MYCBP2     | 27.5268   | 29.656     | 25.4786   | 13.424    | 20.2607   | 18.4994   | 22.0977   | 22.0378   | 41.6885   | 10.0161    | 8.4454    | 20.4654    | 8.10639    | 8.49709    | 10.2751   |
| MYCBP2-AS1 | 0.402877  | 0.323521   | 0.444384  | 0.138392  | 0         | 0.266812  | 0.562212  | 0.397826  | 0.0545177 | 0.0561836  | 0.101066  | 0.288269   | 0.0577632  | 0.140374   | 0.385722  |
| MYCBPAP    | 0.0798036 | 0.0629192  | 0.0840244 | 0.381294  | 0.247925  | 0.0617743 | 0.0828338 | 0.0838179 | 0.759863  | 0.0819505  | 0.278455  | 0.186878   | 0.0561697  | 0.0227503  | 0.0833513 |
| MYCL       | 4.04337   | 5.34448    | 3.70073   | 5.36626   | 12.8302   | 4.01602   | 4.3871    | 2.8955    | 3.5296    | 3.20918    | 4.24258   | 3.81627    | 3.59799    | 1.47072    | 0.691445  |
| MYCN       | 0.434218  | 0.132134   | 0.107134  | 0.36897   | 0.354995  | 0.609732  | 0.321819  | 0.203104  | 0.0556662 | 0.296397   | 0.799764  | 0.0981141  | 0.211345   | 0.143331   | 0.306326  |
| MYCNOS     | 0.0115369 | 0.00555866 | 0         | 0.0237783 | 0.0179208 | 0         | 0.0131725 | 0.010253  | 0         | 0          | 0         | 0          | 0          | 0          | 0.0165685 |
| MYCNUT     | 0         | 0          | 0         | 0         | 0         | 0         | 0         | 0         | 0         | 0          | 0         | 0          | 0          | 0          | 0         |
| MYCT1      | 2.63905   | 1.24589    | 1.74909   | 1.95938   | 0.708823  | 2.94651   | 1.29385   | 1.58836   | 0.583534  | 2.94955    | 6.13862   | 0.674786   | 3.06192    | 1.99142    | 3.64802   |
| MYD88      | 5.00236   | 5.96923    | 5.65105   | 18.8686   | 9.22193   | 19.3696   | 5.40805   | 4.63183   | 14.6568   | 17.976     | 23.4071   | 10.1501    | 30.4548    | 14.7019    | 8.82677   |
| MYDGF      | 8.89609   | 6.69465    | 7.86954   | 18.7438   | 14.8448   | 24.1497   | 11.8418   | 5.32292   | 11.9876   | 15.1177    | 30.6498   | 7.12168    | 19.336     | 12.0035    | 12.9973   |
| MYEF2      | 0.594519  | 0.302804   | 0.43938   | 0.121683  | 0.140834  | 0.258047  | 0.324771  | 0.636729  | 0.0434771 | 0.0651444  | 0.0871865 | 0.0737116  | 0.106251   | 0.101636   | 0.289347  |
| MYEOV      | 1.67031   | 1.52908    | 2.06501   | 0.124316  | 0.418013  | 0.616306  | 1.2714    | 0.511304  | 0.101712  | 0.0465869  | 0         | 0.0132794  | 0.107767   | 0.0533485  | 0         |
| MYF5       | 0         | 0          | 0         | 0         | 0         | 0         | 0         | 0         | 0         | 0          | 0         | 0.0217888  | 0          | 0          | 0         |
| MYF6       | 0.0173097 | 0          | 0         | 0         | 0         | 0         | 0         | 0         | 0         | 0          | 0.0195405 | 0          | 0          | 0          | 0         |
| MYH1       | 0.0266454 | 0          | 0         | 0         | 0.0119432 | 0.0196405 | 5.59E-09  | 0         | 0         | 0.0144752  | 0.0043398 | 0.00558031 | 0          | 0          | 0.0143517 |
| MYH10      | 4.78241   | 3.78814    | 3.54447   | 5.54302   | 7.38247   | 8.77148   | 4.67069   | 3.75471   | 3.04662   | 8.37138    | 5.70844   | 6.99143    | 10.5166    | 7.80224    | 9.70296   |
| MYH11      | 31.6498   | 7.87213    | 10.1264   | 1.67663   | 20.5287   | 52.7624   | 32.6829   | 7.03795   | 1.14771   | 2.83324    | 3.28822   | 1.20735    | 4.05434    | 3.97068    | 20.8816   |

|        |           |            |            |           |           |            |            |            |            |           |           |            |            |            |            |
|--------|-----------|------------|------------|-----------|-----------|------------|------------|------------|------------|-----------|-----------|------------|------------|------------|------------|
| MYH13  | 0         | 0.00558278 | 0.00639038 | 0         | 0.0124236 | 0.0636072  | 0          | 0.00343251 | 0          | 0.0193905 | 0.0348807 | 0          | 0.00249195 | 0.0181676  | 0.0499211  |
| MYH14  | 5.06595   | 15.7121    | 21.5149    | 2.20138   | 8.03546   | 2.55733    | 15.8836    | 8.4807     | 0.758466   | 0.785846  | 0.858003  | 4.42011    | 1.1579     | 0.659727   | 0.567403   |
| MYH15  | 0.0883323 | 0.11034    | 0.167801   | 0.0472002 | 0.121965  | 0.0389997  | 0.108326   | 0.113392   | 0.0239064  | 0.0451677 | 0.0517047 | 0.0327725  | 0.0147756  | 0.0393268  | 0.0328887  |
| MYH16  | 0.0816693 | 0.0491869  | 0.076008   | 0.0105203 | 0.0792879 | 0.00869255 | 0.151527   | 0.0544357  | 0.012433   | 0.0256259 | 0         | 0.0292183  | 0.0329329  | 0.0160065  | 0.0146609  |
| MYH2   | 0.0160202 | 0.00362565 | 0.00313465 | 0         | 0.0118891 | 0.0128148  | 0.0171835  | 0.00683181 | 0          | 0         | 0         | 0          | 0          | 0          | 0          |
| MYH3   | 0.367234  | 0.400745   | 0.443896   | 0.150097  | 0.338742  | 0.122906   | 0.293211   | 0.313238   | 0.0560165  | 0.0625389 | 0.0432687 | 0.189157   | 0.0544053  | 0.102165   | 0.187154   |
| MYH4   | 0.0307805 | 1.94E-18   | 0          | 0.0118951 | 0.0119532 | 0.00982843 | 0          | 0          | 0          | 0         | 0         | 0          | 0          | 0.020109   | 0.0574689  |
| MYH6   | 0         | 0          | 0          | 0         | 0         | 0          | 0          | 0          | 0          | 0         | 0         | 0          | 0          | 0          | 0          |
| MYH7   | 0         | 0          | 0          | 0         | 0         | 0          | 0          | 0          | 0          | 0         | 0         | 0          | 0          | 0          | 0          |
| MYH7B  | 0.182782  | 0.343801   | 0.293697   | 0.12316   | 0.70981   | 0.227469   | 0.309029   | 0.199928   | 0.0342474  | 0.0617644 | 0.0317444 | 0.138331   | 0.0362862  | 0.130435   | 0.191826   |
| MYH8   | 0.0038329 | 0          | 0          | 0         | 0         | 0.00652733 | 0.00875256 | 0.00681273 | 0.00933608 | 0         | 0         | 0.00274254 | 0          | 0.00801296 | 0.00550453 |
| MYH9   | 61.9201   | 62.9508    | 70.023     | 157.409   | 126.812   | 187.035    | 65.9235    | 44.5713    | 66.3038    | 98.0535   | 65.4974   | 105.692    | 298.92     | 125.381    | 135.194    |
| MYHAS  | 0.0822342 | 0.093394   | 0.0971856  | 0.0847447 | 0.0821173 | 0.0900274  | 0.0871857  | 0.0991839  | 0.00715371 | 0.0589785 | 0.0464161 | 0.0420291  | 0.00757958 | 0.0429792  | 0.0506137  |
| MYL1   | 0         | 0          | 0          | 0         | 0         | 0          | 0          | 0          | 0          | 0         | 0         | 0          | 0          | 0          | 0          |
| MYL10  | 0         | 0          | 0          | 0         | 0         | 0          | 0          | 0          | 0          | 0         | 0         | 0.0328235  | 0          | 0          | 0          |
| MYL12A | 34.1618   | 25.9623    | 29.5032    | 81.8211   | 15.5845   | 75.8618    | 22.3366    | 24.9907    | 67.8389    | 78.8647   | 122.925   | 35.3104    | 87.4929    | 48.0836    | 42.1428    |
| MYL12B | 64.993    | 50.3091    | 49.0599    | 128.048   | 31.7685   | 94.9386    | 42.574     | 43.8591    | 167.738    | 174.62    | 249.205   | 93.2307    | 147.746    | 88.2435    | 53.0713    |
| MYL2   | 0.0837505 | 0          | 0          | 0         | 0         | 0.0237708  | 0.0318745  | 0.0248102  | 0          | 0         | 0         | 0          | 0          | 0          | 0          |
| MYL3   | 0.323853  | 0.276066   | 0.267914   | 0.231051  | 0.773932  | 0.742422   | 0.255991   | 0.199256   | 0.0606795  | 0.156334  | 0.309345  | 0.0534752  | 0.0482189  | 0.1953     | 0.751306   |
| MYL4   | 0.0243868 | 0.0117499  | 0.0403489  | 0.0753938 | 0.0757622 | 0.04153    | 0.0556881  | 0          | 0.0594007  | 0.336687  | 0.605652  | 0.0174494  | 0.0629369  | 0.0254912  | 0.14009    |
| MYL5   | 2.0706    | 2.43581    | 2.55514    | 2.36164   | 3.73449   | 3.9217     | 1.91573    | 1.69932    | 2.0525     | 2.72302   | 3.35399   | 2.31889    | 1.36177    | 1.60893    | 0.960374   |
| MYL6   | 192.411   | 142.367    | 136.311    | 501.54    | 319.896   | 389.029    | 171.38     | 100.296    | 435.6      | 731.737   | 1202.1    | 346.982    | 629.545    | 356.495    | 262.068    |
| MYL6B  | 5.43774   | 3.11254    | 3.40086    | 6.81417   | 7.1966    | 12.2792    | 3.60101    | 2.78359    | 3.89407    | 6.55193   | 13.9959   | 3.89086    | 4.21009    | 3.66051    | 4.06084    |
| MYL7   | 0         | 0.0373557  | 0.0962089  | 0         | 0         | 0          | 0          | 0          | 0          | 0.0486548 | 0         | 0          | 0          | 0.0405212  | 0          |
| MYL9   | 59.9948   | 15.2493    | 19.8972    | 21.2198   | 61.4758   | 147.403    | 87.1768    | 20.6878    | 15.588     | 60.6406   | 170.998   | 13.0317    | 29.5765    | 41.33      | 109.562    |
| MYLIP  | 4.95869   | 3.85971    | 4.17075    | 4.11601   | 3.6991    | 5.69812    | 4.41404    | 3.40226    | 2.17519    | 2.78079   | 4.1345    | 1.93041    | 2.84438    | 2.52861    | 4.57798    |

|           |           |            |           |            |            |           |           |            |            |            |            |            |            |            |           |
|-----------|-----------|------------|-----------|------------|------------|-----------|-----------|------------|------------|------------|------------|------------|------------|------------|-----------|
| MYLK      | 9.88245   | 3.07233    | 4.05859   | 4.39063    | 6.25633    | 12.2913   | 7.02576   | 3.72079    | 7.63093    | 8.56161    | 13.9183    | 2.83371    | 4.87315    | 7.01201    | 10.7331   |
| MYLK-AS1  | 0.408145  | 0.616451   | 0.583939  | 0.164678   | 0.454278   | 0.108529  | 0.642429  | 0.344012   | 0.0386092  | 0.161468   | 0.327269   | 0.17984    | 0.0592655  | 0.425135   | 0         |
| MYLK-AS2  | 0.324003  | 0.0669041  | 0         | 0          | 0.143797   | 0         | 0.26424   | 0.287947   | 0          | 0          | 0          | 0.132476   | 0          | 0.0725734  | 0.199418  |
| MYLK2     | 0.0414305 | 0.0359313  | 0.0137097 | 0.00853906 | 0.0514846  | 0.0493885 | 0.0378432 | 0          | 0.0605492  | 0.0207998  | 0.0467698  | 0.0533603  | 0.0801921  | 0.0476374  | 0         |
| MYLK3     | 0.0028206 | 0.0135933  | 0.011667  | 0.020347   | 0.0175255  | 0.0168119 | 0.0161024 | 0.0100269  | 0.0171759  | 0.00708029 | 0.00636822 | 0.00807287 | 0.00727936 | 0.00294834 | 0.0324059 |
| MYLK4     | 0.332641  | 0.322828   | 0.357102  | 0.150219   | 0.121663   | 0.373502  | 0.437894  | 0.180657   | 0.216002   | 0.253835   | 0.181095   | 0.207424   | 0.0805345  | 0.2031     | 0.260382  |
| MYLPF     | 0.272271  | 0.0954068  | 0         | 0.0510152  | 0.0768966  | 0.10538   | 0.226088  | 0.153982   | 0.0904352  | 0.0310662  | 0          | 0.0708427  | 0.0798491  | 0.0258729  | 0.142188  |
| MYMK      | 0         | 0          | 0         | 0          | 0          | 0         | 0         | 0          | 0          | 0          | 0          | 0          | 0          | 0          | 0         |
| MYMX      | 0.137266  | 0.0529095  | 0.136267  | 0.0282913  | 0.0852886  | 0.0935042 | 0.188071  | 0.0487962  | 0          | 0          | 0          | 0          | 0          | 0.0143482  | 0.118279  |
| MYNN      | 2.35441   | 1.88026    | 1.92633   | 1.70196    | 0.455477   | 1.54578   | 1.42779   | 2.13456    | 2.17944    | 2.19192    | 3.04726    | 1.20949    | 1.96697    | 1.60012    | 1.54199   |
| MYO10     | 4.3006    | 4.75879    | 5.18924   | 6.6854     | 5.00709    | 7.58586   | 4.31384   | 4.06854    | 2.92706    | 3.75856    | 3.15199    | 3.22497    | 8.07988    | 4.86257    | 4.45478   |
| MYO15A    | 0.0585258 | 0.061097   | 0.0484167 | 0.0201042  | 0.033334   | 0.101329  | 0.118054  | 0.079753   | 0.00475186 | 0.00734559 | 0.00880911 | 0.0181466  | 0.00755211 | 0.0224313  | 0.0868521 |
| MYO15B    | 2.1714    | 2.04334    | 2.09539   | 1.49263    | 6.02984    | 4.40023   | 2.34627   | 1.98151    | 0.596865   | 0.612059   | 0.498466   | 1.02423    | 0.493082   | 1.44934    | 6.04867   |
| MYO16     | 0.0707362 | 0.131882   | 0.203541  | 0.0190163  | 0.0573275  | 0.0445185 | 0.0983218 | 0.0464651  | 0.0074912  | 0.169842   | 0.045134   | 0.0836226  | 0.0238115  | 0.165561   | 0.0706686 |
| MYO16-AS1 | 0         | 0          | 0         | 0          | 0          | 0         | 0         | 0          | 0          | 0.0531022  | 0          | 0.0302733  | 0          | 0.132675   | 0         |
| MYO18A    | 7.59941   | 12.1824    | 11.8666   | 13.8524    | 24.1704    | 15.2868   | 13.9084   | 8.50524    | 13.6572    | 10.5302    | 4.19894    | 14.8146    | 23.9557    | 11.4822    | 8.60881   |
| MYO18B    | 0.0215861 | 0.00260013 | 0.0022322 | 0          | 0.00419134 | 0.0574385 | 0         | 0.00959199 | 0.00657238 | 0.0033866  | 0          | 0          | 0.00174091 | 0.0310251  | 0.0116252 |
| MYO19     | 8.98792   | 9.05       | 8.56388   | 9.53274    | 8.98964    | 9.51633   | 9.60364   | 7.27041    | 10.1353    | 8.30581    | 5.64958    | 9.69163    | 11.2744    | 8.6908     | 4.63534   |
| MYO1A     | 0.107231  | 0.0455874  | 0.0730548 | 0.0065003  | 0.0195962  | 0.0429676 | 0.144039  | 0.050452   | 0          | 0.0158337  | 0          | 0.01354    | 0.0406971  | 0.0197802  | 0         |
| MYO1B     | 8.26476   | 6.14573    | 4.63171   | 25.064     | 8.76615    | 18.5127   | 6.75329   | 6.05558    | 37.3987    | 26.1305    | 26.7131    | 13.8114    | 67.6993    | 20.0559    | 21.7635   |
| MYO1C     | 14.9666   | 14.485     | 14.4755   | 28.1535    | 27.5892    | 35.2623   | 20.4601   | 12.2219    | 22.5434    | 32.1978    | 18.9373    | 25.718     | 50.5971    | 23.606     | 25.0563   |
| MYO1D     | 12.8572   | 9.45113    | 10.6854   | 17.5267    | 13.7847    | 19.5038   | 12.9709   | 10.2837    | 19.5889    | 19.1643    | 17.7269    | 11.6549    | 24.2205    | 12.9886    | 15.9369   |
| MYO1E     | 8.81338   | 9.86977    | 12.0119   | 16.4613    | 9.82094    | 12.0434   | 10.5024   | 8.22705    | 28.2573    | 18.8038    | 13.1446    | 14.6248    | 31.0149    | 14.0058    | 12.7287   |
| MYO1F     | 1.20901   | 0.737499   | 1.04147   | 3.73776    | 2.6964     | 4.16031   | 0.835841  | 1.08925    | 0.310697   | 2.96525    | 4.44508    | 0.345237   | 3.26331    | 1.5681     | 4.72301   |
| MYO1G     | 0.712854  | 0.70053    | 0.85831   | 2.16748    | 1.54585    | 3.93038   | 0.693035  | 0.978514   | 0.26647    | 2.0906     | 2.28669    | 0.600969   | 3.2104     | 1.55298    | 2.61512   |
| MYO1H     | 0.309806  | 0.387576   | 0.103417  | 0.728146   | 0.633205   | 0.601639  | 0.155143  | 0.154571   | 1.37023    | 0.477521   | 0.589023   | 1.24449    | 0.185858   | 0.50848    | 0.421504  |

|         |           |            |            |            |           |            |            |           |            |            |           |            |           |           |            |
|---------|-----------|------------|------------|------------|-----------|------------|------------|-----------|------------|------------|-----------|------------|-----------|-----------|------------|
| MYO3A   | 0.0320098 | 0.00771139 | 0.00662018 | 0.00412337 | 0         | 0.00340699 | 0.0137054  | 0.0142238 | 0          | 0.00502194 | 0.0180675 | 0          | 0         | 0         | 0.0114925  |
| MYO3B   | 0.0727197 | 0.103361   | 0.11731    | 0.0674458  | 0.44054   | 0.120744   | 0.141149   | 0.0937095 | 0.079708   | 0.342265   | 0.246275  | 0.153497   | 0.0492643 | 0.108319  | 0.313304   |
| MYO5A   | 7.45505   | 6.10665    | 5.60194    | 12.6164    | 5.06376   | 9.59589    | 6.15152    | 5.67312   | 12.3577    | 20.096     | 9.84095   | 13.3945    | 27.4739   | 10.8354   | 8.91465    |
| MYO5B   | 3.95743   | 4.09739    | 4.24891    | 7.71491    | 5.07706   | 4.1031     | 5.88097    | 4.7637    | 15.2725    | 10.0017    | 4.57446   | 8.82357    | 15.3286   | 6.41137   | 2.77202    |
| MYO5C   | 5.14734   | 2.26721    | 2.09938    | 1.4042     | 1.46625   | 2.7436     | 2.06629    | 2.31331   | 1.51244    | 1.28788    | 0.634269  | 1.90209    | 1.43929   | 1.02933   | 1.88954    |
| MYO6    | 6.70377   | 5.49527    | 5.84795    | 5.50756    | 3.67862   | 5.26812    | 5.44141    | 5.80209   | 17.6631    | 9.46239    | 6.56911   | 7.93816    | 11.5562   | 5.56415   | 3.49289    |
| MYO7A   | 0.229415  | 0.118004   | 0.17953    | 0.383383   | 0.520095  | 1.23806    | 0.520338   | 0.236948  | 0.0188785  | 0.221791   | 0.311478  | 0.0665485  | 0.16802   | 0.21064   | 0.578798   |
| MYO7B   | 0.203342  | 0.122882   | 0.168219   | 0.0781371  | 0.128485  | 0.0498886  | 0.165273   | 0.128643  | 0.0125922  | 0.0302797  | 0.0116719 | 0.0394567  | 0.0333547 | 0.104474  | 0.519705   |
| MYO9A   | 5.55561   | 5.99326    | 6.51979    | 4.10198    | 2.95099   | 4.74412    | 4.76045    | 4.63942   | 3.76867    | 4.77214    | 4.30421   | 3.9809     | 4.95609   | 4.56956   | 4.66562    |
| MYO9B   | 5.47382   | 5.21327    | 5.51038    | 8.55682    | 10.4505   | 11.669     | 7.71959    | 4.10381   | 3.26854    | 9.16027    | 6.29575   | 5.88481    | 15.7804   | 7.95423   | 11.6105    |
| MYOC    | 1.15432   | 0.327159   | 0.524279   | 0.0349872  | 0.017579  | 0.780531   | 1.65392    | 0.452588  | 0          | 0          | 0         | 0          | 0         | 0         | 0          |
| MYOCD   | 0.960623  | 0.130903   | 0.199506   | 0.0660195  | 0.144785  | 1.85031    | 0.530998   | 0.238992  | 0.00658235 | 0.193329   | 0.281684  | 0.0657429  | 0.181329  | 0.400187  | 0.530852   |
| MYOD1   | 0         | 0          | 0          | 0          | 0         | 0.0109114  | 0          | 0         | 0          | 0          | 0.043398  | 0          | 0         | 0         | 0          |
| MYOF    | 22.1352   | 25.5061    | 22.6036    | 35.8909    | 24.7328   | 44.6414    | 19.0564    | 19.0371   | 18.1808    | 24.8442    | 18.7657   | 18.9673    | 30.9328   | 21.6838   | 30.5263    |
| MYOG    | 0         | 0          | 0.012489   | 0          | 0.0234502 | 0.0257091  | 0.0344736  | 0.0134166 | 0          | 0          | 0         | 0.021604   | 0         | 0.0157803 | 0          |
| MYOM1   | 0.862867  | 0.398579   | 0.45842    | 0.0897368  | 0.418085  | 0.512283   | 0.822503   | 0.249752  | 0.0626669  | 0.243424   | 0.236815  | 0.0509784  | 0.0331988 | 0.130327  | 0.773071   |
| MYOM2   | 0.0738952 | 0.507355   | 0.469947   | 0.199897   | 0.33718   | 0.20056    | 0.606418   | 0.147762  | 0.174367   | 0.104339   | 0.166837  | 0.185059   | 0.0089394 | 0.0265518 | 0.106123   |
| MYOM3   | 0.275322  | 0.355668   | 0.505047   | 2.17936    | 2.15695   | 2.86077    | 0.350801   | 0.617029  | 0.296435   | 1.90307    | 1.25673   | 1.26766    | 2.38136   | 1.17202   | 1.20338    |
| MYORG   | 1.47584   | 1.47061    | 1.36054    | 1.64301    | 1.94109   | 1.3117     | 1.02498    | 1.04992   | 2.67206    | 1.33404    | 0.733706  | 1.241      | 3.64896   | 1.54831   | 1.13452    |
| MYOSLID | 0.237608  | 0.0915867  | 0.0786265  | 0.465238   | 0.110726  | 0.323713   | 0.217035   | 0.0422333 | 0.14469    | 0.536801   | 0.992452  | 0.187017   | 0.551893  | 0.496738  | 0.0341236  |
| MYOT    | 0.264841  | 0.0834337  | 0.067414   | 0.0209944  | 0.0632908 | 0.138775   | 0.127933   | 0.190106  | 0.0124056  | 0.0255695  | 0.011499  | 0.0072885  | 0         | 0.0159713 | 0.0146287  |
| MYOZ1   | 0.321634  | 0.10566    | 0.0120945  | 0.0451982  | 0.090838  | 0.385904   | 0.233693   | 0.0389784 | 0.0534156  | 0.146794   | 0.115527  | 0.0418433  | 0         | 0.145177  | 0          |
| MYOZ2   | 0.133672  | 0.0729925  | 0.0737218  | 0          | 0         | 0.0455279  | 0.132273   | 0.0871174 | 0          | 0.0111848  | 0         | 0.00637639 | 0         | 0.0186301 | 0.012798   |
| MYOZ3   | 0.0422208 | 0.031967   | 0.0199589  | 0.0372941  | 0.0468454 | 0.138666   | 0.0826395  | 0.0696844 | 0.0220372  | 0.0302809  | 0.0544709 | 0.0172629  | 0.0233491 | 0.0598947 | 0.00866207 |
| MYPN    | 0         | 0.00172905 | 0.00296876 | 0.0961528  | 0.0167231 | 0.018334   | 0.00409738 | 0.0159464 | 0.0568171  | 0.0180164  | 0.03646   | 0.0231098  | 0         | 0.0225069 | 0.0257686  |
| MYPOP   | 1.50853   | 2.41096    | 1.96833    | 2.06014    | 4.76274   | 5.17974    | 2.18449    | 1.61315   | 2.40482    | 1.89336    | 3.82124   | 2.52736    | 2.49259   | 2.59603   | 1.93747    |

|             |            |            |            |            |           |           |           |            |           |            |            |            |           |           |           |
|-------------|------------|------------|------------|------------|-----------|-----------|-----------|------------|-----------|------------|------------|------------|-----------|-----------|-----------|
| MYRF        | 0.231585   | 0.319866   | 0.367201   | 0.095462   | 0.263803  | 0.354945  | 0.339334  | 0.15779    | 0.0282044 | 0.0532882  | 0.0566433  | 0.0966614  | 0.0647475 | 0.205762  | 0.277154  |
| MYRFL       | 0.0889547  | 0.0535747  | 0.0613247  | 0.0229176  | 0.0115148 | 0.0694318 | 0.0931018 | 0.0988194  | 0.23473   | 0.0465197  | 0.200838   | 0.159124   | 0.0143483 | 0.0038743 | 0         |
| MYRIP       | 1.93257    | 0.650753   | 0.578426   | 0.223772   | 0.870226  | 1.06869   | 1.04625   | 1.0691     | 0.0423128 | 0.14717    | 0.313762   | 0.170908   | 0.120485  | 0.297339  | 0.212054  |
| MYSM1       | 5.41335    | 4.42123    | 4.62372    | 4.1571     | 1.20324   | 3.46529   | 3.3132    | 5.39874    | 2.19883   | 3.30554    | 3.12108    | 2.77341    | 2.96598   | 3.80244   | 3.79086   |
| MYT1        | 0          | 0.00201458 | 0.006918   | 0.00430887 | 0.0194846 | 0.0106808 | 0         | 0          | 0         | 0          | 0.00944015 | 0.00299177 | 0         | 0         | 0         |
| MYT1L       | 0.00282405 | 0          | 0.00233625 | 0          | 0         | 0         | 0         | 0.00250978 | 0         | 0.00354447 | 0          | 0          | 0         | 0         | 0         |
| MYT1L-AS1   | 0          | 0          | 0          | 0          | 0         | 0         | 0         | 0          | 0         | 0          | 0          | 0          | 0         | 0         | 0         |
| MYZAP       | 4.40134    | 1.88979    | 1.97762    | 7.24486    | 6.33933   | 2.39556   | 3.43622   | 1.97958    | 23.0048   | 9.3944     | 7.6927     | 10.4564    | 11.4158   | 3.46437   | 2.00451   |
| MZB1        | 0.391781   | 0.134833   | 0.138904   | 0.144193   | 1.73877   | 0.119142  | 0.19171   | 0.770975   | 0.0340818 | 0.386355   | 0.189545   | 0.0400471  | 0.577771  | 0.0438775 | 0.0803781 |
| MZF1        | 1.72262    | 2.94307    | 2.70845    | 2.50973    | 6.84437   | 2.74277   | 2.33431   | 1.68277    | 1.9518    | 1.59305    | 1.05774    | 2.64592    | 1.47598   | 2.89441   | 2.15203   |
| MZF1-AS1    | 0.173873   | 0.458007   | 0.262857   | 0.325976   | 0.839693  | 0.381432  | 0.29361   | 0.276343   | 0.76495   | 0.164967   | 0.288113   | 0.452902   | 0.207784  | 0.450314  | 0.266139  |
| MZT1        | 1.08423    | 0.882993   | 1.08746    | 1.58206    | 0.0745215 | 1.33171   | 0.635403  | 1.27055    | 0.853048  | 1.37286    | 2.81619    | 0.611025   | 2.11719   | 1.25369   | 0.881893  |
| MZT2A       | 10.1616    | 8.67539    | 7.66693    | 28.7927    | 20.0098   | 29.9162   | 8.6142    | 5.64442    | 10.4235   | 24.2489    | 60.3727    | 11.4305    | 28.8911   | 17.8503   | 4.97726   |
| MZT2B       | 20.6773    | 13.8303    | 14.1826    | 33.1365    | 35.8378   | 36.8246   | 16.1553   | 7.89508    | 21.1173   | 37.0723    | 64.5933    | 22.3892    | 28.508    | 24.5571   | 12.5557   |
| N4BP1       | 6.43876    | 9.4277     | 9.19019    | 16.6135    | 9.22253   | 12.1103   | 7.38131   | 7.29389    | 19.1143   | 9.58556    | 9.10683    | 9.54279    | 14.2804   | 7.75846   | 5.45832   |
| N4BP2       | 2.60913    | 2.53933    | 2.48222    | 1.83083    | 0.803211  | 1.62989   | 1.31889   | 2.82889    | 1.8488    | 2.20003    | 2.23314    | 1.45448    | 2.00781   | 1.57191   | 1.82584   |
| N4BP2L1     | 1.62382    | 1.53458    | 2.02896    | 0.710075   | 0.5389    | 1.07495   | 1.0728    | 1.94414    | 0.181919  | 0.38705    | 0.603778   | 0.21376    | 0.289122  | 0.360122  | 0.927269  |
| N4BP2L2     | 8.99619    | 9.29583    | 10.1234    | 6.4002     | 1.6056    | 5.33675   | 5.24577   | 8.25975    | 5.17945   | 5.33772    | 5.84912    | 4.11482    | 4.24727   | 5.11384   | 6.48499   |
| N4BP2L2-IT2 | 4.32098    | 2.93703    | 3.14394    | 1.48755    | 0.668992  | 1.14851   | 2.356     | 5.36272    | 0.489934  | 0.867249   | 0.507553   | 1.18524    | 0.0946595 | 1.45691   | 1.68561   |
| N4BP3       | 1.13261    | 1.95374    | 2.14256    | 1.48587    | 3.74683   | 1.85639   | 1.76101   | 1.24704    | 2.38686   | 1.11103    | 0.706923   | 1.10636    | 1.4216    | 1.04248   | 1.65432   |
| N6AMT1      | 1.01991    | 1.10567    | 1.25321    | 1.19016    | 0.419368  | 1.03447   | 0.822003  | 0.946404   | 0.639337  | 0.640048   | 1.91328    | 0.600992   | 0.977388  | 0.776061  | 0.796983  |
| NAA10       | 7.53494    | 6.60266    | 5.97657    | 18.5592    | 15.37     | 22.7376   | 7.68138   | 4.58081    | 12.2777   | 11.8734    | 21.7558    | 10.5016    | 17.9368   | 11.414    | 8.44288   |
| NAA11       | 0.0152659  | 0          | 0          | 0          | 0         | 0         | 0.0174301 | 0.0271341  | 0         | 0          | 0          | 0          | 0         | 0         | 0         |
| NAA15       | 4.88525    | 4.47498    | 4.63535    | 8.28294    | 1.32029   | 5.46316   | 2.25186   | 4.63129    | 5.99994   | 5.12166    | 4.76028    | 4.25722    | 9.40257   | 7.1465    | 3.97011   |
| NAA16       | 2.25282    | 1.88921    | 1.94707    | 1.39711    | 0.673263  | 1.23163   | 1.44434   | 2.14544    | 1.55905   | 1.1639     | 1.26873    | 1.55786    | 1.36246   | 1.38288   | 1.39691   |
| NAA20       | 10.99      | 9.15136    | 8.7182     | 23.778     | 5.96006   | 20.0608   | 10.2484   | 7.77649    | 26.0078   | 32.9912    | 39.8054    | 19.6529    | 43.7752   | 20.2351   | 10.3724   |

|              |           |           |           |          |           |           |          |           |           |           |           |           |           |          |          |
|--------------|-----------|-----------|-----------|----------|-----------|-----------|----------|-----------|-----------|-----------|-----------|-----------|-----------|----------|----------|
| NAA25        | 4.95951   | 3.62363   | 3.95809   | 3.36903  | 1.69274   | 2.91238   | 3.34216  | 4.41113   | 2.28624   | 2.52582   | 2.6624    | 2.91975   | 2.70974   | 3.54615  | 3.02149  |
| NAA30        | 2.5703    | 2.42699   | 2.7253    | 2.60613  | 2.0726    | 3.06049   | 1.9722   | 3.35057   | 5.18364   | 3.45967   | 4.29102   | 2.17956   | 4.0174    | 2.53264  | 1.81964  |
| NAA35        | 3.78897   | 3.15178   | 3.24633   | 2.65855  | 1.85492   | 3.41809   | 2.29811  | 3.02024   | 2.73029   | 2.60636   | 2.17042   | 2.22208   | 3.43311   | 2.48269  | 2.34051  |
| NAA38        | 5.30685   | 3.62464   | 3.93082   | 7.75755  | 8.35454   | 9.12625   | 5.52312  | 2.97829   | 7.26315   | 7.88218   | 18.9291   | 4.16279   | 4.82757   | 5.76146  | 4.4717   |
| NAA40        | 1.37607   | 1.84265   | 1.64105   | 2.1793   | 2.70197   | 3.54557   | 1.48954  | 1.23882   | 0.587654  | 1.53272   | 1.62066   | 1.21052   | 1.36442   | 1.93653  | 1.82222  |
| NAA50        | 7.60042   | 6.12021   | 6.43989   | 13.4538  | 2.87709   | 11.1356   | 4.5127   | 8.33733   | 10.757    | 10.0626   | 10.9976   | 7.70987   | 19.2858   | 9.24467  | 6.24801  |
| NAA60        | 3.43859   | 3.49023   | 3.78905   | 5.66829  | 5.67448   | 8.39488   | 5.39539  | 2.98215   | 6.81682   | 5.03652   | 8.20869   | 4.17327   | 7.09766   | 4.01739  | 5.87225  |
| NAA80        | 1.79567   | 2.19909   | 2.41982   | 1.77042  | 2.87214   | 3.38614   | 2.91657  | 1.53488   | 2.56687   | 1.70644   | 2.59978   | 3.13839   | 2.35249   | 1.73229  | 1.41362  |
| NAAA         | 2.25512   | 1.80521   | 2.02681   | 1.53101  | 2.13305   | 3.42208   | 2.76404  | 2.09358   | 2.10491   | 1.50063   | 3.94223   | 0.94419   | 1.79487   | 0.863085 | 1.64907  |
| NAALAD2      | 0.535853  | 0.230271  | 0.431314  | 0.126859 | 0.0449927 | 0.400779  | 0.173624 | 0.353948  | 0.0705523 | 0.0908852 | 0.122617  | 0.0621757 | 0.158849  | 0.166522 | 0.363978 |
| NAALADL1     | 0.275615  | 0.186744  | 0.235133  | 0.310657 | 0.508399  | 0.528036  | 0.34419  | 0.0995084 | 0.0419585 | 0.291874  | 1.21537   | 0.0554653 | 0.272295  | 0.247583 | 0.71742  |
| NAALADL2     | 1.23442   | 0.667406  | 0.78344   | 0.223347 | 0.153691  | 0.489441  | 0.602501 | 0.850005  | 0.114762  | 0.141923  | 0.319124  | 0.111251  | 0.0942356 | 0.125585 | 0.493944 |
| NAALADL2-AS1 | 0         | 0         | 0.0516053 | 0        | 0         | 0         | 0        | 0         | 0         | 0         | 0         | 0         | 0         | 0        | 0        |
| NAALADL2-AS2 | 0.0286779 | 0.0414523 | 0         | 0        | 0         | 0         | 0.130974 | 0.0254865 | 0         | 0         | 0.0323738 | 0         | 0         | 0        | 0        |
| NAALADL2-AS3 | 0         | 0         | 0.0469254 | 0        | 0         | 0         | 0        | 0         | 0         | 0         | 0         | 0.0405869 | 0         | 0        | 0        |
| NAB1         | 9.82497   | 13.1777   | 13.7409   | 8.37694  | 11.4071   | 8.20293   | 9.90764  | 8.97756   | 8.16513   | 12.1103   | 14.1481   | 11.5353   | 13.7401   | 13.5083  | 8.59454  |
| NAB2         | 4.50741   | 6.99221   | 7.4647    | 6.88828  | 11.0593   | 13.4331   | 4.62006  | 4.5141    | 11.0309   | 6.32153   | 6.96745   | 3.75656   | 4.57149   | 5.51462  | 3.48179  |
| NABP1        | 1.22169   | 1.41049   | 1.48741   | 11.3369  | 1.477     | 7.48301   | 0.973793 | 2.09978   | 3.34774   | 6.89288   | 8.28135   | 5.49229   | 6.71117   | 7.4363   | 6.91043  |
| NABP2        | 6.14505   | 3.66118   | 3.21143   | 7.93284  | 4.43912   | 16.1333   | 5.60166  | 3.28847   | 5.83429   | 6.57236   | 13.0535   | 4.16055   | 9.3257    | 7.07086  | 5.17168  |
| NACA         | 52.2861   | 45.1611   | 44.6891   | 74.7796  | 14.9923   | 68.8268   | 26.9691  | 32.8984   | 79.6784   | 61.5645   | 105.382   | 44.08     | 53.9112   | 41.6553  | 22.511   |
| NACA2        | 0         | 0         | 0         | 0        | 0         | 0.0511844 | 0        | 0         | 0         | 0         | 0         | 0         | 0         | 0        | 0        |
| NACA4P       | 0         | 0.0317231 | 0         | 0        | 0         | 0         | 0        | 0         | 0.0400934 | 0         | 0         | 0         | 0         | 0        | 0        |
| NACAD        | 0.330546  | 0.199077  | 0.249323  | 0.135253 | 0.505901  | 0.509103  | 0.660461 | 0.207361  | 0.0236804 | 0.30505   | 0.422532  | 0.170429  | 0.335581  | 0.546219 | 1.17978  |
| NACC1        | 4.87033   | 5.05993   | 5.51818   | 12.8364  | 12.1428   | 13.4001   | 6.82913  | 4.34662   | 12.3766   | 8.88835   | 7.37904   | 8.28342   | 18.8539   | 9.4453   | 6.95748  |
| NACC2        | 2.31464   | 2.49714   | 2.57531   | 2.89348  | 6.02887   | 7.64075   | 3.06409  | 1.4787    | 2.50031   | 3.25878   | 2.7682    | 2.37867   | 5.92596   | 3.86062  | 4.19609  |
| NADK         | 4.66661   | 4.15863   | 4.09202   | 8.52469  | 9.43014   | 9.69573   | 5.05095  | 3.06826   | 9.8688    | 5.85709   | 6.92475   | 5.11444   | 8.47053   | 6.11406  | 5.20835  |

|           |           |            |           |           |           |           |           |           |           |           |           |           |           |            |           |
|-----------|-----------|------------|-----------|-----------|-----------|-----------|-----------|-----------|-----------|-----------|-----------|-----------|-----------|------------|-----------|
| NADK2     | 2.42705   | 1.89189    | 2.16405   | 2.07189   | 1.00074   | 3.23467   | 1.29361   | 2.19644   | 1.08224   | 1.67994   | 2.6646    | 1.03323   | 1.71284   | 1.66326    | 1.80259   |
| NADSYN1   | 7.21911   | 8.74617    | 5.77518   | 16.5377   | 25.3567   | 12.3913   | 8.10118   | 5.32388   | 26.0746   | 18.1334   | 12.9876   | 16.8457   | 17.8813   | 12.0856    | 7.54998   |
| NAE1      | 5.87015   | 4.64029    | 5.32485   | 9.22935   | 1.29192   | 8.26219   | 2.68369   | 4.80982   | 6.13624   | 5.94555   | 7.51113   | 3.77764   | 9.55785   | 5.30441    | 4.44883   |
| NAF1      | 3.0217    | 3.04197    | 3.26956   | 3.33049   | 2.9064    | 3.63791   | 3.90705   | 2.47203   | 2.59556   | 1.63255   | 2.7899    | 2.2337    | 2.93083   | 2.38983    | 1.9255    |
| NAGA      | 2.6025    | 2.39713    | 2.77472   | 4.42939   | 3.4444    | 7.50484   | 3.38278   | 2.2577    | 1.65664   | 3.41452   | 6.69623   | 1.40884   | 4.70476   | 2.68141    | 5.58399   |
| NAGK      | 7.28599   | 11.3241    | 9.31236   | 16.4869   | 31.518    | 18.5242   | 7.86413   | 6.30386   | 25.5722   | 22.9664   | 28.6203   | 19.971    | 22.8827   | 10.9875    | 10.519    |
| NAGLU     | 3.4856    | 2.36481    | 2.80783   | 3.77204   | 5.1559    | 6.89923   | 4.1982    | 2.21054   | 1.39814   | 3.03834   | 5.46553   | 1.56547   | 4.26699   | 3.07824    | 4.0978    |
| NAGPA     | 1.56103   | 1.49416    | 1.61208   | 2.55878   | 4.26377   | 3.40774   | 1.84214   | 1.07075   | 1.46734   | 1.32808   | 2.38903   | 1.16943   | 2.74436   | 1.67005    | 1.4745    |
| NAGPA-AS1 | 0.037418  | 0.1262     | 0.0309548 | 0         | 0.116246  | 0.0477914 | 0.106807  | 0.0665081 | 0.0227855 | 0.0704452 | 0.0633604 | 0.0535472 | 0.0724258 | 0.0293344  | 0.107474  |
| NAGS      | 0.435608  | 0.258317   | 0.341885  | 1.2201    | 0.867499  | 1.21736   | 0.153035  | 0.258088  | 0.925011  | 3.33647   | 4.89225   | 1.81419   | 2.77449   | 2.05485    | 0.802035  |
| NAIF1     | 0.987564  | 0.807259   | 0.907132  | 1.15107   | 1.48113   | 1.45562   | 1.01092   | 0.55081   | 0.837772  | 0.880468  | 0.938001  | 0.828461  | 1.31389   | 0.975334   | 1.00746   |
| NAIP      | 4.61432   | 4.37915    | 4.96402   | 3.98388   | 1.1272    | 4.1618    | 3.03549   | 3.90995   | 0.63806   | 2.5036    | 3.69915   | 1.2387    | 1.49696   | 2.7314     | 6.15001   |
| NALCN     | 0.336449  | 0.111901   | 0.151541  | 0.0101344 | 0.127299  | 0.183813  | 0.284451  | 0.282332  | 0.0039923 | 0.0288    | 0.0333046 | 0.0117277 | 0         | 0.00342651 | 0.0282462 |
| NALCN-AS1 | 0.076139  | 0.0201799  | 0.020981  | 0         | 0.0378944 | 0.0148586 | 0.0557076 | 0.0801267 | 0         | 0         | 1.48E-31  | 0         | 0         | 0          | 0         |
| NALT1     | 0.593412  | 0.204225   | 0.385716  | 0.262083  | 0.395046  | 0.324824  | 0.0967912 | 0.452036  | 0         | 0.159598  | 0.287095  | 0.151644  | 0.191433  | 0.199378   | 0.121745  |
| NAMA      | 0.0414564 | 0.00998717 | 0.0771653 | 0         | 0         | 0.088249  | 0.0236668 | 0.0644753 | 0         | 0.013008  | 0.0116998 | 0.0074158 | 0         | 0.0487506  | 0.0744208 |
| NAMPT     | 8.98745   | 5.59359    | 6.52395   | 57.8617   | 2.22867   | 37.2397   | 3.59357   | 13.1864   | 12.1455   | 27.2271   | 38.7693   | 9.04427   | 37.9928   | 14.7756    | 31.1904   |
| NANOG     | 0.825627  | 0.911179   | 0.973461  | 0.181452  | 0.223718  | 0.197437  | 1.08043   | 0.863285  | 0.0410687 | 0.0414364 | 0.0993842 | 0.198386  | 0.0639021 | 0.230063   | 0.142238  |
| NANOGNB   | 0         | 0          | 0         | 0         | 0         | 0         | 0         | 0         | 0         | 0         | 0         | 0         | 0         | 0          | 0         |
| NANOGP8   | 0.0810412 | 0.111563   | 0.0383103 | 0         | 0         | 0         | 0.0132186 | 0.0205779 | 0         | 0         | 0         | 0         | 0         | 0          | 0         |
| NANOS1    | 0.547321  | 0.621795   | 0.610065  | 1.66834   | 0.581701  | 2.26641   | 0.453885  | 0.614417  | 0.378896  | 1.1208    | 1.39831   | 0.469948  | 2.36782   | 1.09905    | 0.595722  |
| NANOS2    | 0         | 0.00712959 | 0         | 0         | 0         | 0.0125997 | 0         | 0         | 0         | 0         | 0         | 0         | 0         | 0          | 0         |
| NANOS3    | 0.0425033 | 0.174069   | 0.0351617 | 0         | 0.165056  | 0.126669  | 0.0485289 | 0.0188867 | 0.0258821 | 0.106692  | 0.167933  | 0.0760306 | 0.0137115 | 0.133285   | 0.1526    |
| NANP      | 1.0539    | 0.657476   | 0.745866  | 1.09235   | 0.208181  | 1.33829   | 0.632951  | 0.860819  | 0.600957  | 0.802823  | 1.43041   | 0.527427  | 1.21058   | 1.01247    | 0.778635  |
| NANS      | 6.30835   | 3.84878    | 4.75551   | 12.6172   | 6.87093   | 15.5105   | 4.96515   | 3.31736   | 6.52361   | 11.4548   | 15.6543   | 5.38183   | 16.0155   | 8.11574    | 8.20187   |
| NAP1L1    | 11.5418   | 7.91464    | 8.83827   | 13.6782   | 3.7161    | 12.9436   | 5.3993    | 10.4521   | 6.6098    | 11.6002   | 16.317    | 5.49947   | 13.6109   | 11.3387    | 10.7658   |



|          |           |           |           |            |           |            |           |           |           |            |           |           |            |           |           |
|----------|-----------|-----------|-----------|------------|-----------|------------|-----------|-----------|-----------|------------|-----------|-----------|------------|-----------|-----------|
| NAP1L2   | 1.15985   | 0.84908   | 0.989262  | 0.342826   | 0.321224  | 0.505282   | 0.657007  | 0.958863  | 0.372304  | 0.0677084  | 0.162397  | 0.154401  | 0.150826   | 0.0375931 | 0.16786   |
| NAP1L3   | 0.511866  | 0.194065  | 0.26379   | 0.155654   | 0.273724  | 0.607328   | 0.306587  | 0.305755  | 0.0919763 | 0.358084   | 0.738868  | 0.0540374 | 0.140764   | 0.0438563 | 0.614595  |
| NAP1L4   | 12.1046   | 12.8556   | 11.8462   | 25.7723    | 18.203    | 22.8756    | 8.51066   | 9.00956   | 17.2942   | 24.9633    | 24.9117   | 15.0469   | 29.2646    | 17.2066   | 12.0643   |
| NAP1L5   | 1.51431   | 1.42084   | 1.66483   | 0.995872   | 0.804716  | 1.21307    | 1.71762   | 2.08952   | 0.643064  | 1.16288    | 1.15839   | 1.0265    | 0.462802   | 1.03096   | 1.05876   |
| NAP1L6   | 0.0339673 | 0.0109106 | 0         | 0.0466724  | 0.0351753 | 0.0867681  | 0.116348  | 0         | 0         | 0          | 0         | 0         | 0          | 0         | 0         |
| NAPA     | 20.9531   | 23.08     | 20.3398   | 39.6974    | 36.9155   | 63.0066    | 28.8392   | 18.8867   | 83.8754   | 40.4789    | 57.4356   | 41.9064   | 47.1406    | 25.5887   | 15.6175   |
| NAPA-AS1 | 0.423348  | 0.594929  | 0.729633  | 0.508985   | 0.876809  | 0.330436   | 0.684768  | 0.595708  | 0.171864  | 0.132836   | 0.27878   | 0.302917  | 0.500761   | 0.258137  | 0.506652  |
| NAPB     | 1.78207   | 1.78618   | 1.59259   | 1.63993    | 0.925808  | 1.72041    | 1.082     | 1.46722   | 0.885566  | 1.25673    | 1.27163   | 1.12159   | 1.03826    | 1.4111    | 1.15553   |
| NAPEPLD  | 1.58184   | 2.10632   | 1.91967   | 1.599      | 1.31575   | 1.24569    | 1.54993   | 1.98984   | 1.47975   | 1.07742    | 1.66217   | 1.33083   | 0.995327   | 1.16254   | 1.33613   |
| NAPG     | 4.14893   | 2.95951   | 2.97877   | 4.39115    | 1.52893   | 3.90407    | 2.36856   | 3.89207   | 4.44597   | 5.30898    | 5.20403   | 3.65512   | 6.77658    | 4.42148   | 4.07962   |
| NAPRT    | 6.55018   | 8.47917   | 9.08371   | 19.8582    | 29.3418   | 19.0003    | 9.80624   | 5.50723   | 15.5576   | 13.2527    | 12.6103   | 17.1525   | 19.9294    | 13.0545   | 5.01571   |
| NAPSA    | 0.120865  | 0.364044  | 0.295875  | 0.0460713  | 0.300927  | 0.152268   | 0.0524683 | 0.164908  | 0.0725966 | 0.0187037  | 0.139682  | 0.120459  | 0.0576888  | 0.0856737 | 0.0856055 |
| NAPSB    | 0.972521  | 0.673216  | 0.8925    | 1.32697    | 0.94603   | 0.503763   | 0.574499  | 0.565196  | 0.233114  | 0.633354   | 1.70301   | 0.158161  | 1.67281    | 0.0818497 | 2.14912   |
| NARF     | 4.06447   | 5.97133   | 5.88881   | 8.43435    | 6.31353   | 12.4723    | 5.99737   | 3.76019   | 7.07342   | 7.0248     | 9.97894   | 5.83233   | 10.3461    | 6.34961   | 5.24701   |
| NARS     | 13.797    | 11.7306   | 12.1088   | 21.552     | 9.73701   | 25.2636    | 9.14003   | 10.7038   | 14.1863   | 18.5332    | 23.3991   | 12.2477   | 28.9463    | 18.6521   | 11.1368   |
| NARS2    | 2.2601    | 2.2443    | 2.40174   | 3.02972    | 2.35475   | 3.73154    | 1.94063   | 1.48603   | 1.33152   | 1.69507    | 2.60323   | 1.52512   | 2.25845    | 1.92069   | 1.68886   |
| NASP     | 6.27977   | 4.67911   | 4.84019   | 9.2181     | 4.64249   | 10.4308    | 3.05912   | 4.28101   | 3.63989   | 4.72198    | 6.15231   | 3.73357   | 8.14425    | 6.35836   | 5.77672   |
| NAT1     | 0.260201  | 0.265066  | 0.227557  | 0.497984   | 0.265606  | 0.797609   | 0.212207  | 0.211424  | 0.271625  | 0.737137   | 1.4435    | 0.244695  | 0.628353   | 0.586711  | 0.523155  |
| NAT10    | 5.63539   | 6.41268   | 6.98822   | 9.97405    | 6.49412   | 12.6642    | 7.29089   | 5.97531   | 3.613     | 3.46464    | 4.2088    | 4.99934   | 7.1943     | 6.14817   | 4.51537   |
| NAT14    | 0.68572   | 0.594703  | 0.567276  | 1.20131    | 3.59492   | 2.20415    | 0.99824   | 0.533235  | 0.542834  | 1.14036    | 4.85743   | 0.539716  | 1.59272    | 1.21852   | 1.52641   |
| NAT16    | 0         | 0.0113976 | 0.0195696 | 0.00812592 | 0         | 0.00671414 | 0.0360122 | 0.0140154 | 0         | 0          | 0         | 0         | 0.00508749 | 0         | 0         |
| NAT2     | 0.0351451 | 0.0169334 | 0         | 0          | 0         | 0          | 0         | 0.015617  | 0         | 0          | 0.0595117 | 0         | 0          | 0         | 0         |
| NAT8     | 0.0862742 | 0.0623523 | 0.107058  | 0.044454   | 0         | 0.0183653  | 0.0246263 | 0.0766733 | 0         | 0          | 0         | 0         | 0          | 0.0112727 | 0.0619503 |
| NAT8B    | 0.0278162 | 0         | 0         | 0.0286654  | 0         | 0.142111   | 0.0635192 | 0         | 0         | 0.104736   | 0.188406  | 0         | 0          | 0.0726897 | 0.0399475 |
| NAT8L    | 0.0788385 | 0.148144  | 0.143486  | 0.134055   | 0.226557  | 0.265163   | 0.229539  | 0.101594  | 0.0672115 | 0.00989505 | 0.0133498 | 0.0225644 | 0.0178032  | 0.0206022 | 0.0452888 |
| NAT9     | 2.79775   | 3.09368   | 3.42297   | 4.24189    | 6.89346   | 6.3709     | 2.19078   | 2.03866   | 2.10185   | 3.33656    | 3.54553   | 2.6308    | 2.96008    | 4.21859   | 2.90953   |

|          |           |           |           |            |           |           |           |          |           |          |           |           |           |           |           |
|----------|-----------|-----------|-----------|------------|-----------|-----------|-----------|----------|-----------|----------|-----------|-----------|-----------|-----------|-----------|
| NATD1    | 2.03136   | 2.29305   | 2.09261   | 2.32764    | 4.65799   | 4.7978    | 3.1753    | 1.97724  | 2.20891   | 2.10036  | 1.89459   | 2.00721   | 2.73671   | 1.9085    | 3.47297   |
| NAV1     | 5.31075   | 4.6461    | 4.72395   | 10.7534    | 5.95405   | 11.5532   | 6.94018   | 3.61586  | 4.97427   | 7.20848  | 5.95594   | 8.20582   | 13.5537   | 8.71087   | 9.95212   |
| NAV2     | 4.95162   | 2.03706   | 1.49227   | 2.52429    | 3.3555    | 4.67606   | 3.75435   | 2.47744  | 2.90295   | 2.87455  | 1.79546   | 2.94204   | 2.08432   | 2.66849   | 1.79346   |
| NAV2-AS2 | 0.403395  | 0.253443  | 0.330161  | 0.158537   | 0.297179  | 0.0402815 | 0.333711  | 0.150784 | 0.0452772 | 0.14604  | 0.0419357 | 0.067151  | 8.59E-28  | 0.189853  | 0.323683  |
| NAV2-AS4 | 0.202861  | 0.0977415 | 0.0839104 | 0.0522635  | 0.0525188 | 0.0719723 | 0.34743   | 0.135214 | 0         | 0        | 0         | 0         | 0         | 0.0176707 | 0.121389  |
| NAV2-AS5 | 0.203009  | 0.121423  | 0.121614  | 0.00721403 | 0.0869913 | 0.137096  | 0.383651  | 0.118205 | 0.0170512 | 0        | 0         | 0.0200357 | 0         | 0.0365867 | 0.0100533 |
| NAV3     | 1.16351   | 0.847706  | 1.04438   | 3.49031    | 0.662202  | 1.42391   | 1.17249   | 0.914719 | 1.54037   | 2.92952  | 1.97815   | 2.06614   | 3.29142   | 1.39223   | 0.987687  |
| NAXD     | 4.4313    | 5.68829   | 5.77309   | 5.25824    | 9.98584   | 7.5051    | 5.05027   | 3.92379  | 6.01727   | 5.54146  | 5.86958   | 5.17845   | 6.1146    | 4.91092   | 4.41293   |
| NAXE     | 10.3844   | 7.28126   | 7.70263   | 16.1479    | 14.0782   | 21.7803   | 11.8095   | 5.76113  | 16.3934   | 15.8838  | 25.7061   | 12.9994   | 16.5435   | 10.8871   | 8.50922   |
| NBAS     | 6.07107   | 5.80435   | 6.18172   | 6.57998    | 4.29423   | 6.06014   | 5.55987   | 5.36722  | 4.47105   | 5.47905  | 6.15206   | 4.17839   | 5.52263   | 4.80835   | 5.71851   |
| NBAT1    | 0.161346  | 0.0728802 | 0.0834229 | 0.124704   | 0.0939847 | 0.120211  | 0.0690823 | 0.152353 | 0.036844  | 0.151879 | 0.683023  | 0.07937   | 0.0845809 | 0.305683  | 1.27442   |
| NBDY     | 2.43457   | 1.99742   | 2.32141   | 3.99004    | 2.20221   | 2.39769   | 1.76383   | 1.88558  | 4.23916   | 4.47914  | 6.71076   | 2.76341   | 2.76304   | 1.81919   | 3.35593   |
| NBEA     | 1.71973   | 0.770898  | 1.06402   | 0.351042   | 0.561204  | 1.62254   | 0.773155  | 1.08985  | 0.0402293 | 0.158061 | 0.188776  | 0.0546566 | 0.209125  | 0.111137  | 0.753081  |
| NBEAL1   | 3.80948   | 4.68161   | 4.96288   | 4.23647    | 1.23826   | 2.93045   | 2.86761   | 3.37874  | 2.38355   | 3.6942   | 2.66217   | 2.84096   | 2.98866   | 3.98734   | 4.41781   |
| NBEAL2   | 8.1137    | 11.6382   | 11.2709   | 12.1193    | 30.4965   | 12.6812   | 16.8008   | 10.8826  | 17.9944   | 19.8274  | 7.85722   | 26.096    | 21.557    | 17.0445   | 9.78868   |
| NBEAP1   | 0.211159  | 0.0203479 | 0.0698743 | 0.0435211  | 0.852808  | 0.251719  | 0.0964379 | 0.112596 | 0.154301  | 0        | 0         | 0.30218   | 0.217982  | 0.0662166 | 0.363902  |
| NBL1     | 13.0863   | 20.6729   | 25.5727   | 27.3588    | 65.8122   | 39.9092   | 19.3874   | 13.0711  | 14.5538   | 27.5951  | 32.0747   | 14.9352   | 38.8353   | 26.3755   | 36.2667   |
| NBN      | 4.02702   | 2.8278    | 3.31523   | 4.54879    | 0.989286  | 4.91821   | 2.05843   | 3.59629  | 2.46416   | 3.93524  | 5.10458   | 1.87538   | 4.96571   | 3.61793   | 4.0103    |
| NBPF1    | 6.52728   | 4.59262   | 4.86571   | 1.93309    | 6.1263    | 7.11818   | 5.12747   | 4.23024  | 1.03633   | 3.03223  | 3.49227   | 1.06855   | 2.1041    | 3.13496   | 4.25188   |
| NBPF10   | 6.18693   | 8.52409   | 8.63612   | 5.19507    | 6.82202   | 6.63642   | 7.60194   | 4.82831  | 4.94602   | 5.41055  | 3.06713   | 6.50432   | 4.97591   | 6.41247   | 4.7794    |
| NBPF11   | 2.81195   | 2.70399   | 2.80386   | 1.30449    | 2.00982   | 1.81266   | 2.34743   | 1.80322  | 0.845011  | 1.28078  | 0.998526  | 1.07848   | 0.91463   | 1.22985   | 1.97335   |
| NBPF12   | 3.88894   | 3.59004   | 4.17894   | 1.58384    | 3.44864   | 3.45252   | 2.96951   | 2.84004  | 0.502945  | 1.29794  | 0.915988  | 2.05224   | 0.8961    | 1.98675   | 2.55268   |
| NBPF13P  | 0.0402838 | 0         | 0.0499884 | 0.0207568  | 0         | 0.0171506 | 0         | 0        | 0         | 0        | 0         | 0         | 0         | 0.010527  | 0         |
| NBPF14   | 1.4986    | 1.14876   | 0.707322  | 0.740636   | 1.49655   | 0.913482  | 0.722281  | 1.1328   | 1.15057   | 1.01766  | 0.877324  | 0.971571  | 1.2736    | 1.17648   | 0.826147  |
| NBPF15   | 8.72692   | 9.27905   | 8.93872   | 5.63512    | 8.98888   | 6.62947   | 9.19006   | 6.32921  | 4.89094   | 7.23744  | 7.85266   | 8.28305   | 8.28958   | 7.78388   | 9.73301   |
| NBPF18P  | 0         | 0.188806  | 0.0381386 | 0.0237546  | 0         | 0.0196275 | 0.0789561 | 0.061457 | 0         | 0.202518 | 0.0520431 | 0.065974  | 0.0446169 | 0.0481895 | 0         |

|           |            |            |           |           |           |            |           |            |            |           |           |           |            |            |            |
|-----------|------------|------------|-----------|-----------|-----------|------------|-----------|------------|------------|-----------|-----------|-----------|------------|------------|------------|
| NBPF19    | 0.00024491 |            |           |           |           |            |           | 0.00018026 |            |           |           |           | 0.00011768 |            |            |
|           | 7          | 2.74E-05   | 1.71E-05  | 3.15E-05  | 3.60E-05  | 2.10E-05   | 1.37E-05  |            | 0.00612165 | 2.01E-05  | 1.32E-05  | 2.76E-05  |            | 0.00225856 | 4.78E-07   |
| NBPF20    | 0.174599   | 0.18013    | 0.151147  | 0.123442  | 0.0647079 | 0.133793   | 0.195218  | 0.220003   | 0.123343   | 0.141229  | 0.0876589 | 0.151336  | 0.11136    | 0.179522   | 0.0886492  |
| NBPF22P   | 0          | 0          | 0         | 0         | 0         | 0          | 1.25E-07  | 0          | 0          | 1.38E-07  | 0         | 0         | 0          | 0          | 0          |
| NBPF25P   | 17.0784    | 16.2384    | 16.2245   | 11.4589   | 12.2574   | 13.5147    | 15.9847   | 12.3142    | 13.4919    | 13.3891   | 11.3869   | 15.1599   | 15.6781    | 14.9927    | 13.1981    |
| NBPF26    | 10.1792    | 9.74237    | 10.3675   | 2.2328    | 6.23547   | 3.81837    | 12.6301   | 8.51994    | 5.71558    | 5.46739   | 3.67947   | 7.12539   | 5.59954    | 4.31854    | 3.44285    |
| NBPF3     | 1.42447    | 1.46555    | 1.57092   | 1.01892   | 0.779059  | 1.13818    | 0.661939  | 1.15037    | 0.182615   | 0.890834  | 1.64014   | 0.632633  | 0.744443   | 0.627206   | 1.34401    |
| NBPF4     | 4.46E-21   | 8.73E-06   | 0.0229838 | 0         | 0         | 0          | 4.14E-06  | 3.22E-06   | 0          | 4.55E-06  | 1.64E-05  | 0         | 0          | 0          | 0          |
| NBPF6     | 0.0208308  | 0.0250817  | 2.69E-08  | 0         | 0         | 0.00886859 | 0.0118872 | 0.00925273 | 0          | 0.0130671 | 0.0470124 | 0         | 0          | 0          | 0          |
| NBPF7     | 0.488432   | 0.554789   | 0.667131  | 0.296084  | 0.358451  | 0.415893   | 0.690538  | 0.370243   | 0.12247    | 0.452231  | 0.0973021 | 0.40128   | 0.148298   | 0.412946   | 0.804604   |
| NBPF8     | 1.13329    | 1.54667    | 1.93153   | 0.866556  | 0.859425  | 1.06027    | 1.17529   | 1.28398    | 0.370375   | 0.729518  | 0.759441  | 0.648837  | 0.36121    | 1.23601    | 1.88464    |
| NBPF9     | 6.38806    | 8.93445    | 8.71777   | 5.30071   | 9.31023   | 6.98889    | 8.09381   | 5.46254    | 5.36951    | 7.35785   | 5.9369    | 6.6844    | 5.27446    | 6.88066    | 6.48401    |
| NBR1      | 11.148     | 10.5428    | 11.0178   | 12.555    | 8.04453   | 18.6317    | 9.89157   | 9.02268    | 11.0987    | 8.14952   | 9.23766   | 5.78954   | 8.36751    | 6.36495    | 8.49098    |
| NBR2      | 1.14984    | 1.40517    | 1.34901   | 0.99104   | 1.29898   | 1.48641    | 1.2293    | 0.91969    | 0.343727   | 0.419829  | 0.507408  | 0.545999  | 0.411399   | 0.633733   | 0.810643   |
| NCALD     | 4.68844    | 2.24158    | 2.89723   | 0.70693   | 2.17121   | 2.9952     | 4.3932    | 3.80915    | 1.75257    | 1.34003   | 2.42798   | 0.280481  | 0.755407   | 0.754793   | 2.0444     |
| NCAM1     | 0.208663   | 0.113782   | 0.130242  | 0.0363646 | 0.181306  | 0.173346   | 0.213846  | 0.127854   | 0.00330584 | 0.0340686 | 0.039835  | 0.0058267 | 0.0700529  | 0.0326294  | 0.565244   |
| NCAM1-AS1 | 0.0365981  | 2.11E-31   | 0         | 0         | 1.13E-33  | 0          | 0         | 0          | 0          | 0         | 0         | 0         | 0          | 0          | 0.0932296  |
| NCAM2     | 0.0266253  | 0.0503975  | 0.0707988 | 0.0470367 | 0.0177249 | 0.148981   | 0.0151999 | 0.0456345  | 0.0138971  | 0.0214826 | 0.0901698 | 0.0122471 | 0.0171785  | 0.0238552  | 0.0737432  |
| NCAN      | 0          | 0.00348132 | 0.0119548 | 0         | 0         | 0          | 0         | 0.00642136 | 0          | 0         | 0         | 0         | 0          | 0          | 0.00518832 |
| NCAPD2    | 2.90372    | 3.60784    | 3.52954   | 8.50566   | 5.27344   | 8.92224    | 4.50296   | 2.56346    | 2.90888    | 3.43897   | 3.70195   | 3.70056   | 6.38158    | 5.52933    | 3.35406    |
| NCAPD3    | 2.10166    | 2.64592    | 2.80096   | 3.71892   | 1.9113    | 2.2255     | 3.19634   | 2.03291    | 1.48848    | 1.40441   | 1.7992    | 1.86128   | 2.79988    | 2.11484    | 1.98054    |
| NCAPG     | 0.389324   | 0.412638   | 0.271977  | 2.29465   | 0.0675308 | 1.45634    | 0.255128  | 0.316251   | 0.291311   | 1.58684   | 1.77472   | 0.673749  | 3.18381    | 2.0171     | 1.33549    |
| NCAPG2    | 1.47523    | 1.14916    | 1.22661   | 2.29968   | 0.511814  | 3.6313     | 1.61596   | 1.03487    | 0.615606   | 1.5837    | 1.78369   | 0.972512  | 2.02923    | 1.92363    | 1.33354    |
| NCAPH     | 0.244455   | 0.15827    | 0.161153  | 1.11789   | 0.183929  | 0.894398   | 0.248584  | 0.162939   | 0.158163   | 0.690337  | 0.858062  | 0.382625  | 1.16812    | 0.834453   | 0.597914   |
| NCAPH2    | 4.46268    | 4.22806    | 4.41576   | 7.17888   | 8.33843   | 9.79319    | 4.98367   | 2.91742    | 3.845      | 5.56598   | 4.7319    | 4.20567   | 6.6123     | 5.24747    | 4.46678    |
| NCBP1     | 4.38269    | 4.36771    | 4.94194   | 5.47545   | 2.06435   | 3.4011     | 3.54431   | 5.01579    | 2.77123    | 3.9508    | 4.68346   | 3.15314   | 4.9022     | 4.71836    | 4.36411    |

|           |           |           |           |           |           |           |          |           |           |           |          |           |           |          |           |
|-----------|-----------|-----------|-----------|-----------|-----------|-----------|----------|-----------|-----------|-----------|----------|-----------|-----------|----------|-----------|
| NCBP2     | 5.54876   | 5.35447   | 5.51131   | 9.26735   | 3.60707   | 10.4935   | 3.50532  | 4.76123   | 3.51658   | 5.76354   | 8.76748  | 4.2379    | 8.8996    | 6.29548  | 6.14519   |
| NCBP2-AS1 | 0.658877  | 0.460499  | 0.272535  | 0.084874  | 0.255866  | 0.17532   | 0.329124 | 0.219583  | 0         | 0         | 0        | 0.117861  | 0         | 0.258268 | 0         |
| NCBP2-AS2 | 5.11504   | 4.22832   | 4.43895   | 5.76214   | 6.15381   | 6.78928   | 5.09585  | 3.58763   | 7.35941   | 3.55612   | 8.8312   | 2.97819   | 4.6591    | 4.46868  | 1.51238   |
| NCBP2L    | 0.0131869 | 0.0127073 | 0         | 0         | 0         | 0         | 0        | 0         | 0         | 0         | 0        | 0         | 0         | 0        | 0         |
| NCBP3     | 3.70164   | 4.03708   | 3.84128   | 3.45912   | 2.96501   | 3.79721   | 3.77439  | 3.29725   | 3.28212   | 2.74001   | 2.20587  | 3.32646   | 2.92286   | 3.91658  | 3.2814    |
| NCCRP1    | 24.7618   | 38.2333   | 35.215    | 96.5709   | 125.048   | 61.0257   | 63.1738  | 37.9557   | 467.556   | 110.608   | 258.317  | 145.535   | 111.379   | 66.9456  | 13.1901   |
| NCDN      | 2.53605   | 3.69583   | 2.37188   | 4.11333   | 11.6338   | 5.22305   | 2.9669   | 1.60988   | 5.37848   | 3.16732   | 3.5751   | 4.26837   | 5.4488    | 3.96005  | 2.90649   |
| NCEH1     | 1.08877   | 0.475487  | 0.772035  | 0.895395  | 0.249936  | 1.47966   | 0.869573 | 0.810311  | 0.117576  | 1.28574   | 2.40367  | 0.303175  | 1.92054   | 0.93625  | 1.27091   |
| NCF1      | 0.48471   | 0.0880855 | 0.251278  | 2.89617   | 0.456426  | 1.94262   | 1.04618  | 0.348709  | 0.031006  | 2.89376   | 5.23321  | 0.253958  | 1.99366   | 0.698231 | 1.58197   |
| NCF1B     | 0.364661  | 0.108849  | 0.20255   | 0.801053  | 0.794257  | 0.6179    | 0.432592 | 0.32031   | 0.0292219 | 0.730345  | 0.772376 | 0.0620023 | 0.236923  | 0.138389 | 0.0674492 |
| NCF1C     | 0.361995  | 0.144416  | 0.10373   | 0.593883  | 0.797302  | 0.951625  | 0.557367 | 0.251808  | 0.152915  | 0.635149  | 1.91918  | 0.091277  | 0.0946759 | 0.221717 | 0.633343  |
| NCF2      | 2.64465   | 1.59167   | 2.03431   | 6.31146   | 2.17655   | 4.91466   | 2.90303  | 3.1008    | 2.30548   | 7.34906   | 10.2659  | 0.803407  | 7.69336   | 2.42978  | 4.35776   |
| NCF4      | 1.35224   | 0.773693  | 1.02545   | 3.09188   | 2.62562   | 6.2848    | 2.09076  | 1.1642    | 0.360255  | 3.42976   | 6.39227  | 0.957486  | 2.16297   | 1.12637  | 2.91299   |
| NCF4-AS1  | 0         | 0         | 0         | 0.0239454 | 0         | 0         | 0        | 0         | 0         | 0.0583271 | 0.104922 | 0         | 0         | 0        | 0         |
| NCK1      | 4.39592   | 4.40174   | 4.31454   | 4.64482   | 1.43797   | 3.85504   | 2.43736  | 4.3158    | 12.5928   | 4.0126    | 5.58489  | 3.61955   | 2.79381   | 2.45611  | 2.2884    |
| NCK1-DT   | 0.370133  | 0.713343  | 0.676863  | 0.782941  | 0.756506  | 0.862552  | 0.422606 | 0.55401   | 0.569407  | 0.440105  | 0.879651 | 0.278779  | 0.251377  | 0.397077 | 0.531558  |
| NCK2      | 8.4085    | 6.53071   | 6.61875   | 10.9992   | 10.4464   | 12.5611   | 6.40041  | 4.75824   | 11.8681   | 12.4268   | 10.8832  | 7.29566   | 18.7949   | 8.62143  | 6.92891   |
| NCKAP1    | 20.426    | 18.4198   | 19.0954   | 24.4116   | 5.57691   | 18.2792   | 14.5003  | 18.2784   | 31.4587   | 31.6594   | 30.4332  | 17.3027   | 42.6188   | 24.2437  | 16.5085   |
| NCKAP1L   | 2.42283   | 1.29455   | 2.00919   | 3.319     | 2.06856   | 6.87337   | 2.92036  | 2.43996   | 0.392956  | 2.73166   | 5.27148  | 0.436549  | 2.6003    | 1.14057  | 4.44837   |
| NCKAP5    | 2.26738   | 2.33176   | 1.6337    | 2.4151    | 1.48171   | 2.02406   | 1.56929  | 1.62233   | 1.28049   | 1.70212   | 0.925442 | 1.69433   | 2.15306   | 2.43216  | 1.79443   |
| NCKAP5L   | 2.48906   | 2.11863   | 2.52018   | 2.1854    | 4.94484   | 5.60616   | 2.72868  | 1.92244   | 0.626987  | 2.54309   | 2.266    | 2.65965   | 2.57497   | 3.22137  | 5.22964   |
| NCKIPSD   | 2.63058   | 2.64271   | 2.87183   | 4.01468   | 3.97837   | 8.2634    | 3.76983  | 2.5641    | 7.12157   | 3.48564   | 6.17436  | 3.49405   | 4.34017   | 3.13678  | 3.01342   |
| NCL       | 59.7614   | 43.2525   | 43.3647   | 111.971   | 49.5773   | 129.848   | 25.3056  | 40.5751   | 44.4414   | 39.9408   | 35.5778  | 36.5137   | 92.4594   | 62.864   | 35.0957   |
| NCLN      | 4.5319    | 4.14907   | 4.04657   | 12.9374   | 11.2768   | 14.5327   | 5.88224  | 3.49313   | 3.53359   | 7.95228   | 7.39752  | 6.66283   | 16.5754   | 11.9529  | 6.94464   |
| NCMAP     | 0.0580026 | 0.0279466 | 0.0479839 | 0.0119547 | 0.0180196 | 0.0345719 | 0.112583 | 0.0463931 | 0         | 0         | 0        | 0         | 0         | 0        | 0.0249897 |
| NCOA1     | 8.13639   | 6.50251   | 7.47886   | 6.31823   | 3.33921   | 7.80832   | 6.65055  | 7.28341   | 10.9778   | 4.32433   | 5.46849  | 5.82184   | 6.10084   | 5.09902  | 5.21025   |

|            |            |            |            |           |           |           |            |           |          |           |           |            |            |           |           |
|------------|------------|------------|------------|-----------|-----------|-----------|------------|-----------|----------|-----------|-----------|------------|------------|-----------|-----------|
| NCOA2      | 5.29724    | 6.08662    | 6.68957    | 4.37094   | 3.5166    | 5.74718   | 6.52811    | 5.78617   | 7.88765  | 3.66218   | 3.81863   | 3.88056    | 4.44633    | 2.90038   | 3.61708   |
| NCOA3      | 6.98385    | 8.55105    | 9.10749    | 7.45846   | 3.46682   | 6.98045   | 5.85371    | 7.99784   | 7.13243  | 5.77612   | 4.54088   | 5.12094    | 7.31895    | 5.33505   | 5.06039   |
| NCOA4      | 23.7376    | 18.1296    | 18.9155    | 33.7922   | 15.7464   | 35.7524   | 22.7863    | 21.0762   | 42.0928  | 35.6424   | 45.025    | 21.889     | 42.6822    | 23.0801   | 23.4328   |
| NCOA5      | 5.13018    | 4.79168    | 4.70043    | 7.06627   | 5.39793   | 9.23072   | 4.40126    | 3.64231   | 4.46781  | 3.6421    | 4.65893   | 3.93735    | 8.14085    | 5.46358   | 4.31146   |
| NCOA6      | 4.10719    | 5.23284    | 5.44156    | 4.9564    | 3.36798   | 5.47842   | 5.36332    | 4.57563   | 4.41691  | 3.96719   | 3.2626    | 4.43433    | 5.46661    | 4.0765    | 4.42032   |
| NCOA7      | 2.65764    | 1.69208    | 2.12547    | 6.18577   | 0.884621  | 4.67917   | 1.80868    | 1.89649   | 0.880926 | 2.66191   | 4.79579   | 1.48241    | 2.8212     | 2.8105    | 4.31493   |
| NCOA7-AS1  | 0.233297   | 0.0899248  | 0.2316     | 0.192335  | 0         | 0.0794597 | 0.159822   | 0.290269  | 0        | 0.0585623 | 0.0526726 | 0.100158   | 0.0903132  | 0.0731587 | 0.402053  |
| NCOR1      | 10.6207    | 10.4745    | 11.2718    | 9.6784    | 6.44143   | 11.1506   | 10.0375    | 9.59079   | 7.78395  | 7.70379   | 5.66064   | 7.60063    | 10.232     | 7.93903   | 9.06435   |
| NCOR1P1    | 0.165702   | 0.053561   | 0.18341    | 0.113841  | 0.171595  | 0.188807  | 0          | 0.147262  | 0.135536 | 0.0693244 | 0.064192  | 0.0395214  | 0          | 0.0288677 | 0.079323  |
| NCOR2      | 11.0047    | 14.5141    | 14.7244    | 13.9624   | 27.0574   | 33.6894   | 22.2688    | 12.5756   | 9.87366  | 7.92159   | 7.30729   | 10.5169    | 16.5898    | 11.4348   | 21.6203   |
| NCR1       | 0          | 0          | 0.03321    | 0.103424  | 0         | 0.0341821 | 0.0458352  | 0.0356767 | 0        | 0.176347  | 0         | 0          | 0          | 0.0314716 | 0.028826  |
| NCR2       | 0          | 0          | 0          | 0         | 0         | 0         | 0          | 0         | 0        | 0         | 0         | 0          | 0          | 0         | 0         |
| NCR3       | 0.00472693 | 0.00341626 | 0.00391045 | 0.0146137 | 0.0220277 | 0.0201246 | 0.00269853 | 0.0126027 | 0        | 0         | 0.0106722 | 0.00169112 | 0.00762448 | 0         | 0.0169712 |
| NCR3LG1    | 0.540319   | 0.511932   | 0.770982   | 0.358753  | 0.383037  | 0.765761  | 1.59405    | 0.647774  | 0.141326 | 0.55982   | 0.446207  | 0.809551   | 0.786129   | 0.523093  | 0.859291  |
| NCRNA00250 | 0          | 0          | 0          | 0         | 0         | 0         | 0.0509133  | 0         | 0        | 0         | 0         | 0          | 0          | 0         | 0         |
| NCRUPAR    | 0.190478   | 0.0924843  | 0.0787883  | 0.0981464 | 0.221908  | 0.082507  | 0.217481   | 0         | 0        | 0.0597673 | 0         | 0.104374   | 0          | 0.049776  | 0         |
| NCS1       | 4.05119    | 5.34831    | 6.48881    | 4.81277   | 7.38352   | 5.98654   | 7.71623    | 3.05025   | 8.02255  | 6.03552   | 6.71652   | 5.20911    | 9.10213    | 5.22693   | 2.82608   |
| NCSTN      | 9.56443    | 9.70784    | 10.8391    | 16.0633   | 9.13114   | 19.455    | 11.6256    | 10.1365   | 12.9113  | 11.0933   | 16.488    | 9.21864    | 16.8239    | 9.35317   | 9.4389    |
| NDC1       | 2.08167    | 1.81185    | 2.07922    | 3.7072    | 0.476839  | 2.96916   | 1.86747    | 2.1953    | 1.29099  | 1.95051   | 2.82102   | 1.43458    | 3.40724    | 2.83523   | 1.73587   |
| NDC80      | 0.436862   | 0.379903   | 0.220368   | 2.08629   | 0.198614  | 1.92342   | 0.243315   | 0.208328  | 0.363351 | 2.03275   | 3.62054   | 0.640422   | 2.19302    | 2.0215    | 1.11706   |
| NDE1       | 4.04534    | 6.79431    | 7.80205    | 5.09984   | 5.9524    | 5.2606    | 6.26217    | 5.33102   | 5.67041  | 5.55016   | 4.18519   | 4.89315    | 5.61776    | 4.94988   | 2.85158   |
| NDEL1      | 15.0576    | 18.7449    | 21.538     | 29.8196   | 21.1442   | 24.7197   | 19.6795    | 15.149    | 69.6714  | 64.6028   | 35.0499   | 59.6497    | 69.7478    | 37.5452   | 21.0782   |
| NDFIP1     | 11.5554    | 7.99178    | 8.91011    | 12.4121   | 5.98653   | 15.3123   | 9.6528     | 10.0008   | 6.14332  | 12.2664   | 16.3276   | 6.91014    | 15.1186    | 7.60303   | 12.3077   |
| NDFIP2     | 5.87153    | 8.87469    | 9.8011     | 12.0915   | 4.95799   | 6.70556   | 8.14007    | 10.6969   | 21.0825  | 12.8981   | 11.6849   | 10.7576    | 19.4445    | 7.9045    | 4.51959   |
| NDFIP2-AS1 | 0          | 0          | 0          | 0.0553355 | 0         | 0         | 0          | 0         | 0        | 0         | 0         | 0          | 0.069289   | 0         | 0         |
| NDN        | 2.95236    | 1.79869    | 1.45333    | 7.80738   | 4.73763   | 13.4317   | 2.15905    | 1.48538   | 2.54072  | 6.18606   | 13.2487   | 1.92044    | 5.49414    | 2.26354   | 6.85051   |

|           |            |            |           |           |           |           |           |           |           |           |            |            |           |           |           |
|-----------|------------|------------|-----------|-----------|-----------|-----------|-----------|-----------|-----------|-----------|------------|------------|-----------|-----------|-----------|
| NDNF      | 0.757731   | 0.493255   | 0.806901  | 0.0581495 | 0.162779  | 1.15998   | 0.625856  | 0.436999  | 0.107991  | 0.445163  | 0.54599    | 0.0807498  | 0.286049  | 0.256994  | 1.36604   |
| NDOR1     | 2.33471    | 3.49129    | 3.37215   | 5.08582   | 11.042    | 5.66088   | 3.4784    | 2.20563   | 7.17211   | 3.75817   | 5.36221    | 4.36311    | 6.45405   | 4.05995   | 2.18759   |
| NDP       | 0.0462399  | 0.0222791  | 0.0286896 | 0.535453  | 0.0718265 | 0.226393  | 0.0263976 | 0.0308206 | 0.0140787 | 0.0435268 | 0.0650887  | 0.00827146 | 0.0820427 | 0.0362505 | 0.0498047 |
| NDP-AS1   | 0          | 0          | 5.15E-08  | 0.029708  | 1.07E-13  | 5.22E-36  | 0         | 5.53E-08  | 0         | 0         | 0.00037939 | 0          | 1.74E-35  | 1.01E-22  | 8.94E-08  |
|           |            |            |           |           |           |           |           |           |           |           | 7          |            |           |           |           |
| NDRG1     | 52.3384    | 74.752     | 84.4837   | 221.355   | 93.8985   | 231.689   | 60.0332   | 58.7855   | 146.664   | 341.051   | 214.825    | 208.839    | 487.206   | 242.372   | 98.0701   |
| NDRG2     | 14.7839    | 10.6559    | 12.1315   | 15.0199   | 14.0792   | 12.9695   | 15.9048   | 10.6127   | 6.8428    | 5.24583   | 3.86897    | 4.45174    | 7.35802   | 2.13763   | 2.89832   |
| NDRG3     | 3.97199    | 3.97873    | 3.93802   | 4.96399   | 2.24683   | 6.25585   | 4.34283   | 2.82476   | 2.5259    | 3.82297   | 5.40829    | 2.82563    | 4.32056   | 3.52387   | 3.8578    |
| NDRG4     | 8.53572    | 19.0341    | 4.74306   | 2.8989    | 45.039    | 3.35062   | 5.97622   | 6.1593    | 46.5826   | 8.33471   | 9.69039    | 16.9859    | 10.8861   | 3.68115   | 2.49793   |
| NDST1     | 12.0329    | 15.6577    | 14.4992   | 22.0111   | 31.6333   | 29.5791   | 19.2281   | 11.2808   | 29.9921   | 17.6318   | 15.7151    | 19.296     | 26.2161   | 16.0571   | 15.706    |
| NDST1-AS1 | 0          | 0.136986   | 0.0470407 | 0.175795  | 0         | 0.0968354 | 0         | 0         | 0.0692522 | 0         | 0          | 0.203433   | 0.110062  | 0         | 0         |
| NDST2     | 4.77964    | 6.55879    | 6.56305   | 6.73177   | 9.31411   | 8.35573   | 7.14909   | 4.76019   | 6.27052   | 5.80359   | 7.05532    | 5.63119    | 5.84401   | 5.36676   | 5.92851   |
| NDST3     | 0.081581   | 0.094694   | 0.0552187 | 0.0802502 | 0.0230406 | 0.018945  | 0.0592751 | 0.052729  | 0.0045162 | 0.0279252 | 0.00837225 | 0.03184    | 0.0143552 | 0.0213189 | 0.0532548 |
| NDST4     | 0.00692698 | 0.00333753 | 0         | 0         | 0         | 0         | 0         | 0         | 0         | 0         | 0          | 0          | 0         | 0         | 0         |
| NDUFA1    | 30.9526    | 17.0243    | 15.7183   | 45.9816   | 26.8509   | 43.4262   | 15.6043   | 16.0817   | 31.7813   | 44.8255   | 97.998     | 22.9652    | 27.4364   | 27.0781   | 18.8066   |
| NDUFA10   | 5.82741    | 3.85292    | 3.31358   | 4.34832   | 3.98285   | 6.48296   | 5.81164   | 5.24228   | 3.5109    | 2.9047    | 4.14576    | 4.08458    | 3.17359   | 3.73809   | 3.16651   |
| NDUFA11   | 5.36433    | 4.73277    | 4.63976   | 10.1064   | 6.91331   | 11.1744   | 6.93428   | 3.99031   | 8.11606   | 7.94883   | 16.6467    | 6.47046    | 6.98813   | 6.01485   | 4.10646   |
| NDUFA12   | 18.7368    | 11.3611    | 10.1803   | 24.9541   | 4.00805   | 24.8099   | 10.9685   | 11.3951   | 22.5775   | 25.0112   | 40.5101    | 15.7073    | 18.4661   | 16.3488   | 13.1691   |
| NDUFA13   | 44.6208    | 29.9752    | 27.2347   | 72.0328   | 74.2861   | 95.5123   | 39.441    | 22.8065   | 61.6756   | 72.0278   | 156.995    | 44.6067    | 51.9857   | 43.5396   | 34.2788   |
| NDUFA2    | 9.64078    | 6.99257    | 6.58195   | 14.5287   | 7.3267    | 17.3008   | 8.6995    | 4.6755    | 12.278    | 12.6206   | 27.8516    | 8.34463    | 7.20672   | 8.49263   | 7.10877   |
| NDUFA3    | 16.867     | 12.8831    | 11.5198   | 33.888    | 18.4823   | 32.5093   | 15.8992   | 11.2715   | 27.7079   | 24.4519   | 49.742     | 23.3891    | 17.6735   | 19.3051   | 13.426    |
| NDUFA4    | 18.0489    | 8.65288    | 9.08903   | 16.5719   | 2.00882   | 18.5761   | 10.2589   | 7.95521   | 17.0922   | 23.3589   | 55.9835    | 10.1465    | 14.1917   | 13.4885   | 7.94572   |
| NDUFA4L2  | 29.4938    | 33.8181    | 31.2324   | 48.6427   | 66.9054   | 104.302   | 51.291    | 40.0965   | 161.023   | 124.916   | 267.062    | 113.561    | 124.519   | 61.1193   | 42.9722   |
| NDUFA5    | 2.07384    | 1.31285    | 1.48904   | 1.76324   | 0.303905  | 2.19898   | 0.87728   | 1.67551   | 1.343     | 1.81711   | 3.03579    | 1.11228    | 1.85673   | 1.41294   | 1.65518   |
| NDUFA6    | 16.0404    | 10.7866    | 11.6088   | 22.4257   | 7.74651   | 19.1545   | 9.8597    | 8.72973   | 33.0235   | 22.7064   | 46.451     | 13.47      | 17.6061   | 14.1153   | 12.3396   |
| NDUFA6-DT | 1.92626    | 3.08695    | 2.74828   | 0.963765  | 3.68598   | 2.22257   | 2.6934    | 1.86076   | 1.37698   | 0.753327  | 0.850895   | 1.14858    | 0.432283  | 0.897319  | 1.2629    |

|            |          |          |          |           |           |           |          |          |           |           |           |           |           |           |           |
|------------|----------|----------|----------|-----------|-----------|-----------|----------|----------|-----------|-----------|-----------|-----------|-----------|-----------|-----------|
| NDUFA7     | 6.85413  | 5.68229  | 5.14221  | 11.4959   | 2.80179   | 12.7828   | 7.54067  | 5.30219  | 8.27993   | 8.70708   | 19.2652   | 6.63173   | 5.55018   | 7.26608   | 4.38369   |
| NDUFA8     | 4.41635  | 4.39595  | 3.61103  | 9.04941   | 3.61619   | 10.0133   | 4.10432  | 3.08819  | 6.60861   | 8.14259   | 16.0966   | 5.03398   | 7.33336   | 6.7635    | 3.46622   |
| NDUFA9     | 11.3198  | 6.99256  | 6.60397  | 13.6813   | 5.74203   | 16.9748   | 9.82072  | 6.85161  | 9.77476   | 12.7633   | 18.2831   | 7.08074   | 15.5164   | 9.24646   | 7.87014   |
| NDUFAB1    | 13.9136  | 9.88013  | 10.276   | 22.026    | 6.30592   | 22.6013   | 10.736   | 9.31247  | 14.1985   | 17.5501   | 36.3095   | 11.1721   | 18.2674   | 16.7923   | 6.57751   |
| NDUFAF1    | 2.31297  | 1.8359   | 2.04618  | 3.77514   | 2.11832   | 4.57643   | 1.40439  | 1.81794  | 3.76133   | 3.65813   | 5.35795   | 2.13331   | 5.12394   | 3.01866   | 2.8993    |
| NDUFAF2    | 5.0213   | 3.19477  | 3.08885  | 9.75213   | 2.64994   | 10.2504   | 3.12384  | 3.06083  | 5.48816   | 7.67582   | 13.0446   | 4.46806   | 10.3214   | 6.64499   | 4.299     |
| NDUFAF3    | 3.81839  | 3.39597  | 3.86081  | 6.98138   | 9.73669   | 10.3483   | 5.82858  | 3.27185  | 5.80049   | 6.97401   | 16.7013   | 3.90729   | 8.05311   | 5.09288   | 5.83748   |
| NDUFAF4    | 1.12308  | 0.744612 | 0.69086  | 1.62229   | 0.0894628 | 1.53659   | 0.48223  | 0.81042  | 1.12228   | 0.903574  | 2.41643   | 0.666225  | 1.35012   | 1.30939   | 0.827118  |
| NDUFAF4P1  | 0.188882 | 0.100586 | 0.189153 | 0.0512233 | 0.0926525 | 0.0592535 | 0.045402 | 0.291551 | 0.0121072 | 0.0374316 | 0.033667  | 0.0355659 | 0.0641399 | 0.0883268 | 0.0285536 |
| NDUFAF5    | 2.15528  | 1.43516  | 1.57599  | 1.28939   | 0.789953  | 1.17535   | 1.19816  | 1.29848  | 1.03226   | 1.2867    | 1.43978   | 0.872159  | 0.999965  | 0.999878  | 1.13609   |
| NDUFAF6    | 0.547351 | 0.599819 | 0.561753 | 0.451672  | 0.316437  | 0.572941  | 0.425246 | 0.521186 | 0.360872  | 0.304751  | 0.545881  | 0.253243  | 0.286767  | 0.317257  | 0.22459   |
| NDUFAF7    | 1.57325  | 1.21473  | 1.25205  | 0.797425  | 0.38695   | 0.714885  | 0.948472 | 1.40693  | 0.266956  | 0.573435  | 0.717695  | 0.486438  | 0.403459  | 0.849732  | 1.02892   |
| NDUFAF8    | 3.38123  | 2.66738  | 2.85517  | 7.36612   | 7.34767   | 6.96648   | 3.86058  | 2.46002  | 3.64856   | 6.26673   | 14.5362   | 2.8205    | 4.18225   | 4.94446   | 3.0192    |
| NDUFB1     | 22.2593  | 13.2797  | 12.0631  | 29.2001   | 8.32236   | 23.7977   | 12.1714  | 11.9773  | 32.4236   | 34.5929   | 67.777    | 23.8709   | 20.5624   | 21.2178   | 16.9751   |
| NDUFB10    | 20.4535  | 14.8462  | 12.196   | 31.7196   | 17.2267   | 37.3764   | 19.2588  | 13.4855  | 27.943    | 22.5457   | 49.4025   | 16.607    | 21.123    | 19.4189   | 14.2578   |
| NDUFB11    | 12.1892  | 8.55149  | 10.1178  | 20.5607   | 18.9021   | 25.0885   | 13.7292  | 7.7037   | 15.6225   | 12.6111   | 31.7972   | 10.0182   | 10.1759   | 9.82501   | 9.52144   |
| NDUFB2     | 25.4789  | 16.3753  | 16.5899  | 47.8402   | 23.3851   | 38.8945   | 21.8309  | 12.8787  | 42.192    | 59.0318   | 146.62    | 31.0109   | 35.534    | 35.6511   | 24.4405   |
| NDUFB2-AS1 | 0.506099 | 0.38614  | 0.430728 | 0.507578  | 0.588973  | 0.370683  | 0.465655 | 0.662069 | 0.188436  | 0.299902  | 0.0634597 | 0.402058  | 0.262955  | 0.42578   | 0.100838  |
| NDUFB3     | 7.73419  | 5.91933  | 4.5034   | 16.431    | 4.15864   | 10.7901   | 3.8719   | 4.1241   | 13.7305   | 21.169    | 39.0539   | 11.6002   | 14.0681   | 12.0644   | 9.31301   |
| NDUFB4     | 13.8562  | 10.8004  | 10.9229  | 20.1194   | 3.47969   | 22.51     | 11.3487  | 9.33448  | 25.8728   | 21.6736   | 35.9564   | 15.4875   | 21.1534   | 13.3206   | 8.18125   |
| NDUFB5     | 9.79046  | 7.16002  | 7.05076  | 16.9356   | 5.43141   | 12.3744   | 7.56041  | 8.37078  | 8.38383   | 12.288    | 20.9451   | 8.2563    | 9.44695   | 8.45206   | 6.3397    |
| NDUFB6     | 8.14441  | 5.02492  | 4.80307  | 10.8584   | 2.08764   | 11.7412   | 4.97176  | 3.55932  | 6.12161   | 10.9306   | 20.5122   | 5.84679   | 9.33021   | 6.75723   | 5.94471   |
| NDUFB7     | 31.4084  | 18.6457  | 17.4274  | 34.8571   | 45.8253   | 49.5898   | 25.6981  | 17.6294  | 27.721    | 33.9945   | 87.229    | 21.5334   | 27.4023   | 22.1531   | 17.166    |
| NDUFB8     | 21.3666  | 17.2597  | 19.9508  | 29.0912   | 19.0518   | 41.9605   | 21.5337  | 14.6417  | 33.0459   | 32.8953   | 61.3177   | 22.114    | 26.111    | 24.9798   | 19.2219   |
| NDUFB9     | 37.4987  | 21.4793  | 22.9533  | 44.0838   | 24.9494   | 68.4372   | 29.6579  | 18.4795  | 43.1209   | 32.8038   | 65.6222   | 27.8677   | 32.3968   | 31.475    | 18.2591   |
| NDUFC1     | 5.11281  | 4.26689  | 4.01886  | 10.8825   | 4.40396   | 10.9719   | 3.16433  | 3.73699  | 10.2035   | 8.15634   | 16.9376   | 7.74976   | 8.34456   | 5.94373   | 3.06515   |

|               |           |           |           |           |           |          |          |           |          |           |           |          |           |           |           |
|---------------|-----------|-----------|-----------|-----------|-----------|----------|----------|-----------|----------|-----------|-----------|----------|-----------|-----------|-----------|
| NDUFC2        | 4.88433   | 3.51087   | 3.40568   | 7.06994   | 2.89126   | 9.24185  | 4.14276  | 4.5082    | 5.95336  | 6.43649   | 14.9006   | 4.40264  | 6.6867    | 4.76565   | 4.01221   |
| NDUFC2-KCTD14 | 1.2165    | 0.298174  | 0.282616  | 0.815692  | 1.35687   | 1.99063  | 0.786792 | 0.705053  | 0.268815 | 0.618837  | 1.88095   | 0.298935 | 0.874693  | 0.576992  | 0.75346   |
| NDUFS1        | 10.2564   | 9.13082   | 8.74206   | 12.1585   | 7.67898   | 9.71517  | 8.79565  | 8.19367   | 17.2094  | 10.6039   | 11.5343   | 8.88239  | 14.3971   | 8.45187   | 7.80667   |
| NDUFS2        | 10.4373   | 10.2488   | 10.2081   | 21.0085   | 15.4068   | 24.2541  | 10.558   | 7.72982   | 11.1751  | 12.9338   | 14.9061   | 9.06228  | 16.0672   | 10.7662   | 8.37118   |
| NDUFS3        | 16.1205   | 10.8251   | 10.4612   | 19.3234   | 13.4575   | 27.0213  | 13.2533  | 9.24363   | 12.638   | 15.205    | 33.0725   | 10.0496  | 16.2085   | 11.8307   | 10.4318   |
| NDUFS4        | 12.2131   | 6.59422   | 6.64395   | 14.7407   | 4.2076    | 12.5439  | 6.07697  | 5.63816   | 12.1829  | 18.4899   | 34.0382   | 7.25966  | 13.6287   | 10.3073   | 6.75647   |
| NDUFS5        | 44.3815   | 28.4138   | 28.0644   | 67.7062   | 20.8391   | 59.4622  | 17.7702  | 19.8473   | 46.7951  | 72.8461   | 168.147   | 29.2039  | 44.9782   | 44.781    | 21.1875   |
| NDUFS6        | 16.386    | 12.0867   | 10.7956   | 25.9386   | 18.3026   | 29.1994  | 14.3692  | 12.0854   | 17.4874  | 17.0147   | 37.6628   | 15.804   | 17.6838   | 18.2979   | 8.97624   |
| NDUFS7        | 5.85486   | 4.60858   | 4.5823    | 9.35548   | 11.4244   | 12.8273  | 6.11402  | 4.13926   | 5.60829  | 6.9191    | 13.6346   | 6.15685  | 7.32579   | 6.26442   | 4.34586   |
| NDUFS8        | 17.0694   | 11.3726   | 10.6682   | 24.2352   | 23.0271   | 33.1865  | 17.4517  | 10.3861   | 16.652   | 15.7157   | 41.7555   | 14.9118  | 18.1819   | 18.0832   | 11.1201   |
| NDUFV1        | 23.2563   | 17.8508   | 19.1457   | 22.8556   | 34.6269   | 43.5196  | 20.0568  | 13.9219   | 17.2467  | 16.1709   | 22.9858   | 14.4274  | 20.5802   | 18.2732   | 14.3665   |
| NDUFV2        | 24.3873   | 16.0186   | 15.7488   | 44.1858   | 7.03521   | 50.049   | 16.8773  | 15.1493   | 46.7336  | 37.8234   | 64.4713   | 27.1718  | 38.5657   | 27.4817   | 19.1556   |
| NDUFV2-AS1    | 0.4656    | 0.593823  | 0.453149  | 0.282244  | 0.212717  | 0.559697 | 0.531607 | 0.462467  | 0.600404 | 0.1375    | 0.525604  | 0.411537 | 0.123695  | 0.343543  | 0.039333  |
| NDUFV3        | 5.78033   | 6.39201   | 6.29197   | 7.58036   | 6.64975   | 11.7496  | 6.22762  | 5.06949   | 10.1759  | 4.86842   | 5.97333   | 5.44985  | 7.88649   | 6.28063   | 5.02446   |
| NEAT1         | 209.655   | 218.957   | 229.631   | 157.812   | 151.547   | 110.227  | 237.463  | 223.264   | 80.216   | 258.956   | 33.6252   | 516.965  | 29.2465   | 328.225   | 211.032   |
| NEB           | 0.321101  | 1.07663   | 1.22047   | 0.326371  | 0.665499  | 0.164048 | 0.765388 | 0.642665  | 1.60604  | 0.172247  | 0.26218   | 0.648982 | 0.0363262 | 0.152189  | 0.127604  |
| NEBL          | 4.76796   | 4.91816   | 5.74208   | 1.99423   | 1.81425   | 1.94954  | 3.35424  | 5.35836   | 7.83724  | 3.14876   | 2.91105   | 5.02996  | 1.35538   | 1.89364   | 1.0648    |
| NEBL-AS1      | 0.146689  | 0.247009  | 0.242664  | 0.151623  | 0.743002  | 0.155986 | 0.125481 | 0.26035   | 0.133908 | 0.137976  | 0.124014  | 0.157232 | 0         | 0.0384816 | 0         |
| NECAB1        | 0.305845  | 0.208679  | 0.292508  | 0.112256  | 0.0215498 | 0.261701 | 0.163243 | 0.534377  | 0.039516 | 0.166283  | 0.464313  | 0.113124 | 0.081     | 0.138493  | 0.137069  |
| NECAB2        | 0.0432311 | 0.0138863 | 0.0119213 | 0.0445509 | 0.223843  | 0.159513 | 0        | 0.0128067 | 0        | 0.0180865 | 0.0976051 | 0        | 0.0092975 | 0.030126  | 0.0827804 |
| NECAB3        | 1.88413   | 1.81561   | 1.59625   | 1.48548   | 4.24902   | 3.44059  | 1.58103  | 1.31132   | 3.37288  | 1.35334   | 2.65228   | 1.6324   | 1.05453   | 1.38811   | 1.56483   |
| NECAP1        | 4.3555    | 3.37142   | 3.69915   | 4.48845   | 2.05186   | 4.73461  | 3.17944  | 3.95807   | 2.80443  | 3.06937   | 4.35259   | 2.63112  | 5.13658   | 3.24198   | 2.96089   |
| NECAP2        | 7.66245   | 11.1025   | 12.1165   | 14.4403   | 17.2059   | 17.708   | 9.0662   | 7.33354   | 14.1268  | 11.7388   | 18.0281   | 6.6922   | 12.6642   | 8.05589   | 6.89962   |
| NECTIN1       | 28.2696   | 51.782    | 51.3557   | 74.1861   | 79.5709   | 74.4525  | 51.0976  | 41.8158   | 74.8899  | 65.6611   | 39.0325   | 67.6559  | 147.209   | 50.941    | 19.7963   |
| NECTIN2       | 4.49266   | 4.55695   | 5.68209   | 9.33974   | 9.67357   | 13.7362  | 6.02391  | 3.1585    | 13.1587  | 8.7263    | 10.2895   | 5.68351  | 15.9888   | 8.75272   | 10.1894   |
| NECTIN3       | 0.757791  | 0.308066  | 0.467375  | 0.285874  | 0.210198  | 0.699979 | 0.502137 | 0.450978  | 0.078282 | 0.861938  | 1.39011   | 0.130714 | 0.781403  | 0.574632  | 1.14658   |



|             |           |           |           |           |           |           |           |           |           |           |           |           |           |          |          |
|-------------|-----------|-----------|-----------|-----------|-----------|-----------|-----------|-----------|-----------|-----------|-----------|-----------|-----------|----------|----------|
| NECTIN3-AS1 | 0.0410338 | 0.0494267 | 0.0509191 | 0         | 0         | 0.0698794 | 0.0234255 | 0.0547011 | 0         | 0         | 0         | 0         | 0         | 0        | 0.176789 |
| NECTIN4     | 15.8737   | 28.0327   | 28.3357   | 26.5873   | 45.5883   | 21.8218   | 26.4315   | 17.2258   | 64.9107   | 41.4553   | 23.4101   | 39.8903   | 49.5153   | 24.8094  | 7.36476  |
| NEDD1       | 2.13472   | 2.01898   | 2.13507   | 2.71203   | 0.578976  | 2.64477   | 1.25091   | 2.0126    | 1.53377   | 2.7927    | 2.77959   | 1.32945   | 3.26473   | 2.74795  | 2.13303  |
| NEDD4       | 2.46221   | 2.97593   | 3.58437   | 4.45885   | 1.23466   | 4.28471   | 1.62058   | 3.03005   | 2.44918   | 4.56049   | 4.98901   | 3.10236   | 4.38599   | 3.84187  | 5.91774  |
| NEDD4L      | 2.00483   | 1.26025   | 1.40293   | 1.21445   | 0.852033  | 1.34202   | 1.53698   | 1.80302   | 0.924738  | 2.08036   | 0.638134  | 1.23571   | 5.7923    | 1.77641  | 1.38628  |
| NEDD8       | 29.6446   | 25.5901   | 27.3745   | 59.7006   | 27.163    | 71.8734   | 27.5747   | 19.6134   | 61.1985   | 63.0751   | 125.189   | 42.0946   | 44.6535   | 39.5147  | 29.6532  |
| NEDD8-MDP1  | 0.477645  | 0.477443  | 0.198441  | 0.187338  | 0.67068   | 1.2739    | 0.43025   | 0.657908  | 0.667272  | 0.945044  | 0.782759  | 0.556941  | 0.511886  | 0.422645 | 1.25605  |
| NEDD9       | 5.56155   | 2.02373   | 2.65323   | 1.28325   | 1.08221   | 4.13557   | 3.10413   | 2.5158    | 0.824113  | 1.94987   | 3.34479   | 0.77354   | 1.69984   | 1.8813   | 5.07746  |
| NEFH        | 0.180465  | 0.0689609 | 0.0772206 | 0.0769548 | 0.173994  | 0.16956   | 0.0781565 | 0.0718954 | 0.12884   | 0.0624833 | 0.0983487 | 0.102411  | 0.21681   | 0.175628 | 0.14299  |
| NEFL        | 1.63327   | 0.540111  | 0.398866  | 2.24832   | 1.17022   | 1.14952   | 0.901443  | 0.257095  | 1.6148    | 2.40545   | 2.55813   | 1.2549    | 3.3091    | 2.62386  | 1.93879  |
| NEFM        | 0.644458  | 0.245948  | 0.147801  | 1.04551   | 1.55611   | 0.613945  | 0.101995  | 0.113414  | 1.56975   | 0.824878  | 0.30253   | 0.474824  | 2.70476   | 2.00426  | 0.320726 |
| NEGR1       | 2.28614   | 0.944139  | 1.45897   | 0.416495  | 0.519991  | 2.22123   | 1.99497   | 1.76688   | 0.0646345 | 0.384286  | 0.723535  | 0.111     | 0.539957  | 0.183492 | 4.2271   |
| NEGR1-IT1   | 0.043339  | 0         | 0.0358531 | 0         | 0         | 0.0369026 | 0         | 0         | 0         | 0         | 0         | 0         | 0         | 0        | 0.311202 |
| NEIL1       | 1.34344   | 1.85531   | 1.74462   | 0.579538  | 2.37801   | 1.32349   | 1.36445   | 1.36747   | 0.342451  | 0.352915  | 0.405595  | 0.76007   | 0.166301  | 0.636824 | 1.21145  |
| NEIL2       | 2.48525   | 2.22617   | 2.33427   | 2.22153   | 3.54053   | 5.54177   | 2.20265   | 2.17208   | 2.3495    | 1.87844   | 2.13128   | 1.72914   | 2.05528   | 1.6003   | 1.69583  |
| NEIL3       | 0.115619  | 0.190332  | 0.191296  | 1.02269   | 0.044899  | 0.713748  | 0.198015  | 0.214068  | 0.164279  | 0.846496  | 1.10941   | 0.179245  | 0.677587  | 0.453206 | 0.359761 |
| NEK1        | 1.75271   | 1.55339   | 1.5065    | 2.1625    | 0.793042  | 1.86209   | 0.904208  | 1.20398   | 0.866573  | 1.66501   | 1.80615   | 1.36917   | 1.37983   | 1.75855  | 1.87052  |
| NEK10       | 0.059982  | 0.0457587 | 0.0124053 | 0.0875687 | 0.0698796 | 0.16599   | 0.0570712 | 0.0577493 | 0.030438  | 0.0376418 | 0.0959256 | 0.0536484 | 0.0548251 | 0.164583 | 0.179462 |
| NEK11       | 0.726895  | 0.83952   | 0.902008  | 0.853738  | 0.589466  | 0.596186  | 0.726202  | 0.508253  | 0.162735  | 0.576913  | 0.61543   | 0.673087  | 0.741416  | 0.611762 | 0.652446 |
| NEK2        | 0.134306  | 0.132827  | 0.146194  | 1.09268   | 0.0768614 | 0.903147  | 0.153346  | 0.188463  | 0.137743  | 0.558936  | 0.91867   | 0.247836  | 0.77076   | 1.03075  | 0.294396 |
| NEK3        | 2.35325   | 1.39077   | 1.62464   | 0.854886  | 1.27545   | 1.47759   | 0.724871  | 1.25633   | 0.278351  | 0.988062  | 1.62449   | 0.508777  | 1.065     | 0.902523 | 2.01801  |
| NEK4        | 1.48387   | 1.5787    | 1.64505   | 1.9561    | 1.00622   | 2.90859   | 1.30292   | 1.4225    | 0.986154  | 1.39444   | 2.04073   | 1.40129   | 2.16505   | 1.93293  | 1.7416   |
| NEK5        | 0.347484  | 0.389588  | 0.424477  | 0.246713  | 0.2401    | 0.168798  | 0.451364  | 0.421817  | 0.0819688 | 0.154566  | 0.0477374 | 0.326658  | 0.0272877 | 0.309543 | 0.387497 |
| NEK6        | 3.48954   | 2.15631   | 2.85746   | 5.33564   | 3.82297   | 9.02864   | 3.38499   | 3.25881   | 0.345518  | 3.09786   | 7.60628   | 1.18246   | 3.72952   | 2.87284  | 6.47816  |
| NEK7        | 4.53676   | 3.78616   | 4.31841   | 5.85273   | 1.40943   | 5.2508    | 3.18469   | 4.1862    | 8.93591   | 10.5446   | 10.6791   | 3.83128   | 15.9002   | 9.02191  | 7.23124  |
| NEK8        | 0.722375  | 0.858425  | 0.763881  | 0.726062  | 0.955961  | 1.3859    | 0.563983  | 0.547067  | 0.276136  | 0.437025  | 0.265096  | 0.309781  | 0.323922  | 0.331327 | 0.546574 |

|            |            |           |            |           |            |           |           |            |            |           |           |            |            |            |           |
|------------|------------|-----------|------------|-----------|------------|-----------|-----------|------------|------------|-----------|-----------|------------|------------|------------|-----------|
| NEK9       | 5.70517    | 5.76251   | 5.63467    | 6.51331   | 5.79621    | 8.11005   | 4.77894   | 4.59187    | 2.22987    | 3.82389   | 5.50212   | 3.21755    | 4.55515    | 4.45742    | 5.94258   |
| NELFA      | 5.10122    | 5.59793   | 5.54663    | 6.40692   | 8.11332    | 8.4557    | 5.51392   | 4.59188    | 6.14419    | 3.90744   | 5.25053   | 5.62942    | 8.30686    | 4.31284    | 3.52833   |
| NELFB      | 7.12371    | 7.73137   | 7.6865     | 11.1879   | 19.5604    | 15.6852   | 8.63683   | 4.18866    | 10.571     | 8.44426   | 7.58486   | 6.47448    | 13.4578    | 8.12796    | 5.33487   |
| NELFCD     | 8.26322    | 7.34832   | 7.47549    | 14.0097   | 7.95404    | 15.8588   | 8.31123   | 5.97844    | 9.91694    | 7.63663   | 9.45283   | 5.42404    | 10.6757    | 8.46427    | 5.79653   |
| NELFE      | 1.59377    | 1.40684   | 1.43909    | 2.89526   | 2.42194    | 3.93447   | 1.50374   | 1.05188    | 2.37294    | 2.49036   | 3.20467   | 1.54586    | 3.28894    | 1.9665     | 1.38396   |
| NELL1      | 0.0966884  | 0.0133103 | 0.0171402  | 0.156577  | 0.096551   | 0.294032  | 0.0473124 | 0.135031   | 0          | 0.0606769 | 0.0779637 | 0.0247083  | 0.374297   | 0.220182   | 0.307469  |
| NELL2      | 8.95335    | 5.92289   | 6.84151    | 10.708    | 12.1332    | 15.1172   | 4.9116    | 9.78838    | 17.0951    | 30.9876   | 31.394    | 25.6327    | 22.0234    | 15.5009    | 8.90169   |
| NEMF       | 5.64102    | 5.40559   | 5.17367    | 5.10209   | 1.76148    | 4.66761   | 2.57848   | 4.43859    | 6.82896    | 4.88155   | 5.08788   | 4.17788    | 4.93164    | 4.81458    | 4.20652   |
| NEMP1      | 2.22489    | 2.45166   | 2.49162    | 2.11025   | 0.96641    | 1.95762   | 2.26276   | 1.95533    | 0.451613   | 1.28764   | 2.20465   | 0.905066   | 1.29992    | 1.69471    | 1.30176   |
| NEMP2      | 1.39355    | 1.83647   | 1.9056     | 1.15412   | 0.593057   | 1.38164   | 1.32955   | 1.58343    | 0.24024    | 1.08617   | 1.27862   | 0.796785   | 0.9648     | 1.57972    | 1.32507   |
| NENF       | 13.3396    | 8.21316   | 8.85658    | 14.2998   | 11.7431    | 28.5521   | 14.0056   | 6.71861    | 7.90031    | 13.8348   | 30.0345   | 5.74084    | 9.07867    | 8.42487    | 10.5768   |
| NEO1       | 6.49098    | 9.81353   | 10.5908    | 5.68984   | 6.29406    | 7.5871    | 10.114    | 8.60389    | 6.29884    | 1.95886   | 3.20672   | 3.75674    | 2.81028    | 2.01707    | 3.30113   |
| NEPRO      | 4.73757    | 3.60887   | 3.97019    | 3.5103    | 1.0965     | 4.45754   | 2.5802    | 3.60409    | 1.66171    | 2.4736    | 3.16076   | 1.72883    | 2.68069    | 2.88463    | 2.46976   |
| NES        | 4.49368    | 1.74374   | 2.15332    | 4.33473   | 7.62715    | 5.93627   | 2.50117   | 1.45087    | 1.3086     | 2.19015   | 3.64828   | 1.02212    | 2.86168    | 2.31376    | 7.28484   |
| NET1       | 15.5372    | 9.80083   | 8.03615    | 13.7841   | 7.44515    | 13.9117   | 8.09906   | 8.71363    | 14.2615    | 16.9486   | 17.5213   | 10.2463    | 25.422     | 13.9389    | 9.78852   |
| NETO1      | 0.00259335 | 0         | 0.0042908  | 0.0133626 | 0.00402837 | 0.0264984 | 0.011844  | 0.00230475 | 0.00315841 | 0.0358041 | 0.0322033 | 0.00185561 | 0.00334643 | 0.00542159 | 0.0707632 |
| NETO2      | 0.783554   | 0.942311  | 0.321513   | 5.0451    | 1.14897    | 3.06905   | 0.243341  | 0.896909   | 4.63396    | 3.61906   | 5.0737    | 3.10377    | 6.661      | 4.34413    | 1.64742   |
| NEU1       | 0.512645   | 0.524286  | 0.611299   | 0.709672  | 1.07839    | 1.45107   | 0.625193  | 0.314076   | 0.81658    | 0.694265  | 1.29934   | 0.480752   | 0.970638   | 0.541702   | 0.653974  |
| NEU2       | 1.68055    | 3.53153   | 4.00332    | 6.61445   | 13.8701    | 3.03435   | 2.03439   | 3.23899    | 29.8378    | 4.52349   | 9.02854   | 14.0531    | 1.28024    | 3.68264    | 1.91916   |
| NEU3       | 1.6254     | 1.43644   | 1.49792    | 1.44937   | 1.80531    | 2.05809   | 1.60582   | 1.36968    | 0.153852   | 1.07816   | 1.20741   | 0.656835   | 1.22801    | 1.08279    | 1.45137   |
| NEU4       | 0          | 0         | 0          | 0         | 0.0130867  | 0.0143473 | 0         | 0          | 0.0102605  | 0.010574  | 0.047553  | 0          | 0          | 0          | 0.0725949 |
| NEURL1     | 0.793783   | 0.803676  | 0.678858   | 0.541659  | 1.01641    | 0.579991  | 1.35335   | 0.686382   | 0.248216   | 0.471213  | 0.320894  | 0.333876   | 0.283756   | 0.431684   | 0.731739  |
| NEURL1-AS1 | 0          | 0         | 0.0179771  | 0         | 0          | 0         | 0         | 0          | 0          | 0         | 0         | 0          | 0          | 0          | 0         |
| NEURL1B    | 6.81591    | 3.79515   | 3.88939    | 4.75579   | 8.29515    | 9.74555   | 5.51631   | 3.30929    | 1.48091    | 3.07952   | 5.49885   | 1.91308    | 3.42913    | 5.91209    | 13.0478   |
| NEURL2     | 0.405652   | 0.216177  | 0.258671   | 0.408091  | 0.35813    | 0.298303  | 0.246826  | 0.254882   | 0.175586   | 0.243263  | 0.366152  | 0.140446   | 0.0103924  | 0.123151   | 0.121588  |
| NEURL3     | 0.0447425  | 0.0215576 | 0.00925353 | 0.0230542 | 0.0347503  | 0.0761953 | 0.0510855 | 0          | 0.0136228  | 0.0280782 | 0.0378815 | 0          | 0.00721691 | 0          | 0         |

|          |           |            |            |           |           |           |          |          |           |            |           |            |          |            |           |
|----------|-----------|------------|------------|-----------|-----------|-----------|----------|----------|-----------|------------|-----------|------------|----------|------------|-----------|
| NEURL4   | 2.01225   | 2.97307    | 3.00083    | 2.32657   | 6.38308   | 4.37274   | 2.68979  | 1.68522  | 1.98881   | 1.30479    | 0.972093  | 2.66891    | 1.81646  | 2.47649    | 2.65916   |
| NEUROD1  | 0         | 0          | 0          | 0         | 0         | 0         | 0        | 0        | 0         | 0          | 0         | 0          | 0        | 0          | 0         |
| NEUROD2  | 0.0228988 | 0.136074   | 0.107346   | 0.0235979 | 0.0711395 | 0.0129987 | 0.156871 | 0.108536 | 0         | 0.00958011 | 0         | 0.00546157 | 0        | 0.0039893  | 0.0109619 |
| NEUROD4  | 0         | 0          | 0          | 0         | 0         | 0         | 0        | 0        | 0         | 0          | 0         | 0          | 0        | 0          | 0         |
| NEUROD6  | 0         | 0.00515996 | 0          | 0         | 0         | 0         | 0        | 0        | 0         | 0          | 0         | 0          | 0        | 0          | 0         |
| NEUROG1  | 0         | 0          | 0          | 0         | 0         | 0         | 0        | 0        | 0         | 0          | 0         | 0          | 0        | 0          | 0         |
| NEUROG2  | 0.0101194 | 0.014627   | 0.00837148 | 0         | 0         | 0         | 0        | 0        | 0         | 0          | 0         | 0          | 0        | 0          | 0         |
| NEUROG3  | 0         | 0          | 0          | 0         | 0         | 0         | 0        | 0        | 0         | 0          | 0         | 0          | 0        | 0          | 0         |
| NEXMIF   | 0.262697  | 0.1713     | 0.227126   | 0.23815   | 0.076703  | 0.475958  | 0.250325 | 0.272082 | 0.0384885 | 0.0123952  | 0.0312161 | 0.0113063  | 0.237033 | 0.00309693 | 0.076588  |
| NEXN     | 1.78917   | 0.552145   | 0.750358   | 0.281494  | 0.233367  | 1.60661   | 0.327473 | 0.764686 | 0.0914848 | 0.711387   | 1.06383   | 0.102611   | 0.854756 | 0.90236    | 1.89168   |
| NEXN-AS1 | 0.373601  | 0.240436   | 0.168824   | 0.0624335 | 0.345062  | 0.349916  | 0.207518 | 0.179473 | 0.0491896 | 0.139405   | 0.193776  | 0.0874146  | 0.110751 | 0.196166   | 0.248145  |
| NF1      | 5.65653   | 5.34762    | 5.93569    | 5.40488   | 2.35595   | 7.15568   | 5.07562  | 5.41332  | 1.91517   | 3.85105    | 4.20454   | 2.47016    | 4.51898  | 4.52439    | 6.00051   |
| NF1P2    | 0         | 0          | 0          | 0         | 0         | 0         | 0        | 0        | 0         | 0          | 0         | 0          | 0        | 0          | 0         |
| NF2      | 4.21054   | 4.07798    | 4.1603     | 6.38498   | 6.91823   | 10.6997   | 4.90875  | 3.57545  | 4.15519   | 4.15839    | 4.204     | 4.271      | 7.45841  | 5.60879    | 5.78721   |
| NFAM1    | 0.557515  | 0.276578   | 0.35189    | 1.32356   | 0.699225  | 1.94106   | 0.358355 | 0.44409  | 0.0754433 | 0.850051   | 0.960361  | 0.103423   | 1.06313  | 0.448943   | 1.79704   |
| NFASC    | 1.22863   | 1.69928    | 1.16878    | 0.957694  | 2.89036   | 1.58974   | 2.29659  | 1.12167  | 2.75814   | 0.572689   | 0.389865  | 1.79567    | 0.55503  | 0.596192   | 1.22641   |
| NFAT5    | 10.3411   | 10.7512    | 11.8987    | 6.28156   | 3.42086   | 6.92126   | 8.71267  | 11.3534  | 6.51462   | 8.62985    | 6.70916   | 7.58339    | 7.03545  | 9.60154    | 7.99058   |
| NFATC1   | 1.82461   | 1.55522    | 2.05772    | 1.64843   | 2.18605   | 4.75841   | 3.29774  | 1.84698  | 1.62926   | 1.81254    | 2.90491   | 2.16909    | 2.46532  | 3.11317    | 5.20549   |
| NFATC2   | 2.22615   | 1.62891    | 2.15594    | 1.12564   | 1.67827   | 1.49874   | 3.2941   | 1.99425  | 2.33525   | 1.57211    | 2.44603   | 2.03038    | 1.44396  | 2.3735     | 6.32583   |
| NFATC2IP | 3.94116   | 4.74294    | 4.35217    | 5.73676   | 5.63744   | 6.82406   | 4.84234  | 3.63585  | 3.20723   | 4.59269    | 3.32496   | 4.10768    | 6.10353  | 5.59318    | 4.9105    |
| NFATC3   | 8.47897   | 8.52755    | 8.98088    | 8.37787   | 6.50707   | 8.3593    | 7.04228  | 7.34753  | 7.82299   | 6.09141    | 8.49767   | 6.23568    | 6.84814  | 5.79401    | 5.47467   |
| NFATC4   | 2.52787   | 1.89519    | 2.31658    | 2.18958   | 9.03809   | 9.27469   | 3.23458  | 1.84953  | 0.495416  | 2.08781    | 3.91147   | 1.52808    | 2.15353  | 5.67194    | 12.7063   |
| NFE2     | 0.37291   | 0.767698   | 0.962888   | 2.21261   | 3.33512   | 0.375261  | 2.45144  | 0.36154  | 2.13319   | 1.41831    | 2.2069    | 0.226399   | 1.0426   | 0.212617   | 0.324574  |
| NFE2L1   | 21.9173   | 25.0321    | 26.7246    | 37.3218   | 43.9298   | 47.1508   | 20.6945  | 17.9154  | 16.7686   | 25.8343    | 14.1547   | 20.0559    | 38.4409  | 24.8387    | 20.1541   |
| NFE2L2   | 17.1765   | 24.2149    | 24.6646    | 28.8407   | 10.2812   | 26.0724   | 14.2516  | 16.1201  | 40.476    | 28.0664    | 44.3863   | 21.1567    | 27.661   | 19.5206    | 16.9521   |
| NFE2L3   | 5.73274   | 4.44524    | 5.19665    | 2.71924   | 2.48059   | 2.40615   | 3.96716  | 6.74684  | 6.19172   | 2.9595     | 2.35201   | 3.03962    | 1.03838  | 1.40843    | 1.6215    |

|          |           |           |           |           |          |           |           |          |           |           |           |           |            |           |          |
|----------|-----------|-----------|-----------|-----------|----------|-----------|-----------|----------|-----------|-----------|-----------|-----------|------------|-----------|----------|
| NFIA     | 9.00958   | 5.40668   | 5.95207   | 5.25154   | 2.36362  | 8.34982   | 7.18405   | 8.477    | 1.98534   | 2.60823   | 4.65796   | 2.56085   | 3.29083    | 2.48355   | 3.69075  |
| NFIA-AS1 | 0.236154  | 0.0568912 | 0.293044  | 0.304204  | 0        | 0.351893  | 0.269633  | 0        | 0.0719021 | 0         | 0.066647  | 0.211218  | 0          | 0.0617121 | 0        |
| NFIA-AS2 | 0.0698131 | 0.033637  | 0.0192514 | 0.0359722 | 0        | 0.27741   | 0.0265701 | 0.031022 | 0         | 0.0146038 | 0.0394052 | 0.0416276 | 0.0225215  | 0.0364874 | 0        |
| NFIB     | 16.3303   | 10.727    | 13.0069   | 7.84157   | 3.4034   | 14.5012   | 12.9715   | 14.8671  | 2.53637   | 3.43348   | 5.64409   | 2.77104   | 4.44108    | 4.81758   | 8.67212  |
| NFIC     | 15.428    | 20.988    | 22.7848   | 19.1078   | 21.6592  | 39.6457   | 33.9907   | 20.4011  | 10.9079   | 7.64579   | 11.1181   | 9.57507   | 14.8477    | 8.85983   | 19.2957  |
| NFIL3    | 7.28007   | 2.61594   | 1.62476   | 10.8398   | 4.09213  | 12.4056   | 2.24242   | 5.21952  | 4.65735   | 6.18627   | 12.0129   | 4.1483    | 5.18442    | 6.57336   | 6.42758  |
| NFIX     | 29.709    | 35.9955   | 37.9694   | 22.2062   | 31.0449  | 55.9852   | 53.3279   | 30.2999  | 14.1453   | 6.08842   | 10.921    | 7.53507   | 8.44174    | 6.136     | 21.1486  |
| NFKB1    | 6.14844   | 7.65818   | 8.16808   | 14.0467   | 5.77829  | 13.1903   | 5.94008   | 5.91285  | 7.61762   | 8.3239    | 8.11668   | 6.79496   | 13.1079    | 7.64885   | 8.34916  |
| NFKB2    | 2.13261   | 4.04412   | 5.59824   | 6.15117   | 5.81109  | 8.11572   | 2.89746   | 2.85883  | 1.98787   | 4.56825   | 3.26822   | 2.37844   | 7.11808    | 3.35624   | 6.94665  |
| NFKBIA   | 35.5343   | 36.0849   | 48.0289   | 55.3548   | 28.952   | 36.1549   | 32.2585   | 39.337   | 60.5622   | 39.0011   | 55.369    | 41.3511   | 52.1135    | 24.9399   | 25.3462  |
| NFKBIB   | 2.57364   | 2.68434   | 2.58591   | 4.91828   | 5.59073  | 8.03524   | 1.99277   | 1.52483  | 5.68036   | 4.1089    | 3.37284   | 3.62657   | 8.51247    | 3.40655   | 2.60566  |
| NFKBID   | 0.942051  | 1.33646   | 1.29022   | 1.04632   | 2.43888  | 1.71124   | 1.39828   | 0.818612 | 0.892354  | 0.919622  | 1.32341   | 1.01109   | 0.884696   | 1.24731   | 1.30781  |
| NFKBIE   | 0.798036  | 1.14488   | 1.68386   | 2.02366   | 2.46532  | 2.47375   | 0.624511  | 0.788917 | 0.283931  | 1.36175   | 2.70265   | 0.442698  | 2.08848    | 1.22315   | 1.68693  |
| NFKBIL1  | 0.43437   | 0.436427  | 0.481959  | 0.530367  | 1.20875  | 0.971103  | 0.420734  | 0.27443  | 0.376076  | 0.506422  | 0.580983  | 0.325533  | 0.426358   | 0.402397  | 0.351817 |
| NFKBIZ   | 18.809    | 13.9536   | 17.3324   | 18.0818   | 9.32778  | 9.1753    | 16.7737   | 14.2476  | 9.36829   | 12.8107   | 13.047    | 15.3777   | 32.9466    | 13.1764   | 14.6715  |
| NFRKB    | 3.4719    | 4.24819   | 4.32659   | 4.07077   | 3.81779  | 7.03625   | 4.4495    | 3.57749  | 3.27914   | 2.9347    | 2.3746    | 2.91518   | 4.4601     | 3.64766   | 3.14175  |
| NFS1     | 2.66786   | 3.10014   | 2.94019   | 3.19644   | 2.42338  | 4.66119   | 2.47692   | 2.03461  | 2.60832   | 2.06237   | 2.75117   | 1.83627   | 2.70405    | 2.71631   | 1.8693   |
| NFU1     | 3.37261   | 2.40944   | 2.56557   | 5.59286   | 1.74627  | 5.80948   | 1.9475    | 2.30826  | 4.15467   | 8.19833   | 10.0432   | 3.18986   | 5.60254    | 2.9783    | 3.20116  |
| NFX1     | 7.66757   | 7.50476   | 7.50479   | 6.74388   | 5.33507  | 7.09258   | 6.09746   | 6.50049  | 8.40483   | 4.60781   | 3.91793   | 5.59535   | 4.66492    | 4.49597   | 4.62128  |
| NFXL1    | 2.54278   | 2.06032   | 1.77601   | 2.14209   | 1.75017  | 3.09544   | 1.34125   | 1.68283  | 1.69892   | 1.87611   | 1.94194   | 1.98849   | 1.83303    | 2.45898   | 1.57797  |
| NFYA     | 2.01698   | 2.41183   | 2.08894   | 3.28243   | 1.75044  | 3.30803   | 1.3554    | 1.54724  | 1.35512   | 2.52665   | 3.04974   | 1.39244   | 2.24252    | 2.94944   | 2.14745  |
| NFYB     | 2.93775   | 1.97587   | 2.39732   | 2.52058   | 0.43362  | 3.45223   | 1.3508    | 2.63445  | 1.10087   | 2.21898   | 3.9391    | 0.846521  | 2.27707    | 1.84803   | 2.19539  |
| NFYC     | 4.93745   | 5.12881   | 4.89967   | 7.32284   | 4.35873  | 8.43434   | 5.83696   | 4.50641  | 6.87308   | 4.24334   | 6.32867   | 4.30481   | 7.15049    | 4.19432   | 2.70189  |
| NFYC-AS1 | 0.862997  | 0.750838  | 0.708303  | 0.273263  | 0.636796 | 0.277391  | 0.471421  | 0.66523  | 0.0715895 | 0.166288  | 0.144535  | 0.196989  | 0.123946   | 0.369805  | 0.31677  |
| NGB      | 0         | 0         | 0         | 0         | 0        | 0.0210085 | 0         | 0        | 0         | 0         | 0         | 0         | 0.00795937 | 0         | 0        |
| NGDN     | 4.547     | 3.90414   | 4.44881   | 5.00121   | 2.64865  | 6.52728   | 3.3446    | 3.52292  | 4.1533    | 3.98755   | 6.94268   | 3.14922   | 3.66713    | 4.20449   | 2.80458  |

|          |           |           |           |           |           |          |           |           |           |          |           |           |           |           |           |
|----------|-----------|-----------|-----------|-----------|-----------|----------|-----------|-----------|-----------|----------|-----------|-----------|-----------|-----------|-----------|
| NGEF     | 2.70888   | 4.37224   | 4.48192   | 3.76827   | 3.3934    | 7.07998  | 5.61023   | 1.43967   | 1.73551   | 4.65695  | 3.4829    | 2.55391   | 5.07847   | 5.55776   | 1.14874   |
| NGF      | 0.264744  | 0.0956683 | 0.127759  | 1.11404   | 0.548319  | 1.2962   | 0.277087  | 0.235283  | 0.188083  | 2.18752  | 1.99242   | 0.884014  | 3.20272   | 1.47591   | 1.45746   |
| NGFR     | 7.56315   | 0.886187  | 1.2036    | 0.467229  | 2.9423    | 4.86168  | 4.58806   | 2.24164   | 0.609865  | 0.96823  | 0.465983  | 0.450001  | 0.414772  | 0.201593  | 2.17378   |
| NGLY1    | 3.01022   | 2.84226   | 2.65093   | 4.76157   | 1.52093   | 4.49932  | 1.83859   | 2.40914   | 2.71016   | 4.0625   | 3.72701   | 3.04556   | 4.18719   | 3.15078   | 2.24287   |
| NGRN     | 14.872    | 11.7081   | 12.8579   | 21.0718   | 15.8095   | 28.1255  | 12.7316   | 9.95655   | 12.2351   | 17.4281  | 21.5684   | 8.83487   | 21.6257   | 12.5012   | 10.443    |
| NHEG1    | 0.0170169 | 0.0327961 | 0.0281552 | 0         | 0.0528664 | 0        | 0.0194294 | 0.0151232 | 0.0414495 | 0        | 0         | 0.0365282 | 0         | 0.0088938 | 0         |
| NHEJ1    | 1.91483   | 1.94063   | 1.80258   | 3.35686   | 2.29063   | 2.85798  | 2.24912   | 1.35944   | 1.67532   | 2.18232  | 3.22999   | 1.82682   | 2.48508   | 1.92103   | 2.02294   |
| NHLH1    | 0.180876  | 0.614398  | 1.03247   | 0.139798  | 0.210722  | 0.154013 | 0.588576  | 0.257196  | 0.0660859 | 0.113509 | 0.0204186 | 0.090595  | 0.04668   | 0.0661735 | 0.025976  |
| NHLH2    | 0.12958   | 0.162328  | 0.157224  | 0.29378   | 0.214702  | 0.522257 | 0.128224  | 0.0307094 | 0.157814  | 0.40117  | 0.526608  | 0.129805  | 0.12262   | 0.0677244 | 0.0744375 |
| NHLRC1   | 0.910973  | 1.28541   | 1.10352   | 1.20701   | 1.51613   | 1.48672  | 1.23824   | 0.857787  | 0.845305  | 0.939192 | 1.24874   | 0.729424  | 0.958601  | 0.595143  | 0.295919  |
| NHLRC2   | 3.68942   | 3.02841   | 3.47448   | 3.38416   | 1.31041   | 3.05517  | 2.77799   | 3.80012   | 2.21799   | 2.59932  | 3.62129   | 1.88082   | 3.77032   | 2.70599   | 3.2706    |
| NHLRC3   | 3.12568   | 2.52567   | 2.52652   | 2.13398   | 1.46669   | 4.08649  | 1.87362   | 2.78942   | 0.634454  | 1.64278  | 2.85221   | 0.927217  | 0.81087   | 1.30349   | 2.66527   |
| NHLRC4   | 0.219782  | 0.116484  | 0.154546  | 0.0792721 | 0.290188  | 0.243284 | 0.112923  | 0.048831  | 0.026767  | 0.11034  | 0.161269  | 0.015726  | 0.0779912 | 0.0631772 | 0.157817  |
| NHP2     | 20.4332   | 15.9818   | 15.312    | 39.6008   | 17.3011   | 43.3584  | 23.0205   | 14.4262   | 31.1232   | 20.8498  | 42.0337   | 17.3546   | 22.6599   | 21.8544   | 10.7415   |
| NHS      | 1.33318   | 1.04412   | 0.889027  | 0.629477  | 0.846465  | 1.40063  | 0.957872  | 0.78387   | 0.22225   | 0.47717  | 0.623743  | 0.417115  | 0.672102  | 0.919324  | 1.46326   |
| NHS-AS1  | 0.42298   | 0.203798  | 0.0499884 | 0         | 0         | 0.205807 | 0.137984  | 0         | 0.0735917 | 0        | 0         | 0         | 0         | 0.0947434 | 0         |
| NHSL1    | 5.11795   | 6.92504   | 7.71736   | 6.08121   | 6.80243   | 7.69906  | 9.56151   | 7.12732   | 9.68418   | 6.13426  | 3.64595   | 6.81464   | 9.02763   | 4.70726   | 3.74715   |
| NHSL2    | 3.11468   | 1.08536   | 1.2441    | 1.61461   | 2.40443   | 3.11288  | 3.10363   | 1.45394   | 0.137939  | 1.16883  | 2.46482   | 0.562788  | 1.56301   | 1.86794   | 6.48823   |
| NICN1    | 2.31912   | 3.25387   | 2.82814   | 1.77477   | 4.21966   | 2.1925   | 3.45189   | 2.52382   | 1.72688   | 0.793442 | 2.12906   | 1.50265   | 0.538258  | 1.5141    | 3.82177   |
| NID1     | 10.6802   | 3.27069   | 3.7601    | 12.5108   | 14.5606   | 40.6518  | 7.71916   | 9.04402   | 3.12481   | 12.7133  | 24.5841   | 4.32219   | 16.7192   | 13.8212   | 37.3506   |
| NID2     | 1.73366   | 1.01651   | 1.10411   | 2.6468    | 3.0207    | 6.52571  | 2.44027   | 1.22688   | 1.59752   | 5.61251  | 12.338    | 1.6868    | 3.76993   | 5.17765   | 15.5907   |
| NIF3L1   | 3.28525   | 3.12731   | 2.91585   | 4.96181   | 2.14869   | 4.30361  | 2.56647   | 2.91966   | 2.93195   | 3.73937  | 7.0269    | 1.84629   | 3.64712   | 3.22549   | 2.8652    |
| NIFK     | 4.7121    | 4.25654   | 4.54382   | 11.1548   | 1.75767   | 8.67311  | 2.38334   | 4.04295   | 7.45858   | 6.66646  | 12.5026   | 5.26548   | 11.8957   | 9.52526   | 4.32009   |
| NIFK-AS1 | 0.404422  | 0.494294  | 0.536103  | 0.522723  | 0.440184  | 0.833414 | 0.384447  | 0.582354  | 0.220347  | 0.335139 | 0.777519  | 0.247816  | 0.345372  | 0.481332  | 0.346204  |
| NIM1K    | 0.084799  | 0.0885244 | 0.146149  | 0.0946701 | 0.0878147 | 0.174496 | 0.145231  | 0.0879226 | 0.0688504 | 0.133039 | 0.143591  | 0.0556196 | 0.0501525 | 0.129266  | 0.213119  |
| NIN      | 4.58967   | 3.98533   | 4.52691   | 4.92606   | 3.33951   | 4.72421  | 3.11185   | 3.52978   | 3.1054    | 4.49371  | 4.06322   | 3.69283   | 5.89927   | 5.43999   | 5.42743   |

|            |           |           |           |           |            |           |           |           |            |           |            |           |           |            |           |
|------------|-----------|-----------|-----------|-----------|------------|-----------|-----------|-----------|------------|-----------|------------|-----------|-----------|------------|-----------|
| NINJ1      | 9.0874    | 13.736    | 16.829    | 14.1683   | 9.37316    | 21.5366   | 14.6662   | 9.42482   | 3.54246    | 9.81835   | 21.2105    | 1.24099   | 6.53921   | 4.23959    | 7.55018   |
| NINJ2      | 1.15954   | 0.742358  | 1.10379   | 1.08035   | 0.666182   | 2.79968   | 2.19444   | 0.875218  | 1.39284    | 0.558211  | 1.27311    | 0.988795  | 0.430429  | 0.896582   | 0.980894  |
| NINL       | 0.676995  | 0.652375  | 0.498682  | 0.630764  | 1.58461    | 1.96232   | 0.370603  | 0.535722  | 0.112946   | 0.483048  | 0.46064    | 0.285336  | 0.553472  | 1.18266    | 1.2253    |
| NIP7       | 3.54282   | 3.71211   | 3.484     | 9.49259   | 3.68948    | 8.71867   | 2.96258   | 3.36142   | 6.12571    | 6.33799   | 10.4098    | 4.17735   | 13.7021   | 7.04146    | 3.86969   |
| NIPA1      | 1.22582   | 1.20494   | 1.22039   | 1.1257    | 0.692903   | 1.292     | 0.569465  | 1.22051   | 1.18491    | 1.8912    | 1.30053    | 1.15859   | 2.65593   | 1.36944    | 1.06937   |
| NIPA2      | 2.53204   | 2.34287   | 2.92527   | 4.889     | 1.80866    | 4.67279   | 1.37212   | 2.23038   | 4.33673    | 5.26614   | 6.56454    | 3.17377   | 9.13887   | 5.08525    | 3.54001   |
| NIPAL1     | 4.45663   | 5.73517   | 6.42398   | 4.51172   | 1.8239     | 3.58663   | 5.93568   | 6.31537   | 11.2168    | 5.08951   | 4.622      | 5.15024   | 8.56141   | 4.898      | 1.20985   |
| NIPAL2     | 9.21099   | 11.2643   | 11.6947   | 8.74829   | 5.08421    | 5.22607   | 8.74932   | 10.8203   | 30.7173    | 8.76882   | 11.874     | 11.2161   | 8.69893   | 5.30516    | 3.30539   |
| NIPAL3     | 3.70126   | 3.28814   | 3.33961   | 2.05925   | 2.9833     | 2.86315   | 3.0799    | 2.77015   | 1.35497    | 1.84883   | 1.2419     | 1.41646   | 2.09529   | 1.41632    | 1.28536   |
| NIPAL4     | 5.87224   | 12.8269   | 14.0192   | 23.6171   | 16.5       | 12.6566   | 11.9749   | 8.84429   | 61.7779    | 24.3958   | 25.385     | 26.6497   | 47.7192   | 18.6205    | 7.10541   |
| NIPBL      | 8.9526    | 9.41745   | 9.73772   | 7.49999   | 3.34611    | 7.68241   | 4.99288   | 7.69154   | 8.56502    | 7.54342   | 7.48889    | 5.87531   | 8.2097    | 6.79613    | 6.587     |
| NIPBL-DT   | 2.03923   | 1.60341   | 1.92389   | 1.03286   | 0.89637    | 2.74495   | 1.69423   | 1.96653   | 1.32632    | 0.958428  | 2.1355     | 0.710933  | 0.971377  | 1.16103    | 1.83816   |
| NIPSNAP1   | 3.35347   | 3.99951   | 3.53629   | 6.33573   | 5.30553    | 6.45998   | 3.81705   | 3.29303   | 3.39084    | 3.8452    | 6.21593    | 3.36965   | 3.45246   | 3.35929    | 2.27422   |
| NIPSNAP2   | 8.60363   | 4.41798   | 5.10168   | 9.09229   | 1.57861    | 11.446    | 3.45463   | 6.08612   | 3.37552    | 7.20376   | 13.4278    | 3.23919   | 6.13217   | 4.6415     | 6.6506    |
| NIPSNAP3A  | 5.18247   | 3.81855   | 3.65457   | 7.01219   | 1.27       | 5.25494   | 3.38769   | 4.2776    | 6.66498    | 7.00105   | 13.6211    | 4.1611    | 4.0754    | 4.18348    | 3.31417   |
| NIPSNAP3B  | 0.350948  | 0.298729  | 0.400008  | 0.136628  | 0.0908572  | 0.312109  | 0.325013  | 0.336151  | 0.132974   | 0.0734126 | 0.123255   | 0.0641732 | 0.0276747 | 0.0957863  | 0.296803  |
| NISCH      | 7.61418   | 13.6057   | 11.4696   | 7.59962   | 20.0673    | 10.3762   | 10.8525   | 8.19818   | 6.06973    | 3.96673   | 3.07607    | 6.43392   | 3.65562   | 6.22245    | 8.80129   |
| NIT1       | 1.73158   | 2.72991   | 2.51152   | 4.26595   | 5.01385    | 3.7037    | 2.30623   | 1.51376   | 5.58807    | 4.67245   | 4.91381    | 4.10455   | 5.32151   | 3.96217    | 2.42305   |
| NIT2       | 7.52013   | 9.21181   | 8.81208   | 11.4463   | 4.32747    | 14.0159   | 6.77751   | 5.95506   | 11.7311    | 10.0784   | 19.5069    | 7.96053   | 7.13107   | 7.29921    | 4.55006   |
| NKAIN1     | 0.324731  | 0.370163  | 0.321058  | 0.359131  | 0.565935   | 0.681145  | 0.651104  | 0.612383  | 0.607698   | 0.417512  | 1.28751    | 0.396702  | 0.178854  | 0.372553   | 0.261614  |
| NKAIN2     | 0.100013  | 0.0803131 | 0.0717062 | 0.0549688 | 0.010357   | 0.017032  | 0.0685151 | 0.112586  | 0.0568422  | 0.0418423 | 0.0225805  | 0.0906453 | 0.0215093 | 0.0453018  | 0.0191509 |
| NKAIN3     | 0.123799  | 0.0105261 | 0.0481953 | 0.0150092 | 0.0113119  | 0.0434053 | 0.0332586 | 0.0129437 | 0.00886898 | 0         | 0.00822077 | 0         | 0         | 0.00380603 | 0.0104583 |
| NKAIN3-IT1 | 0.14791   | 0.0158368 | 0.0163149 | 0.013549  | 0.00510569 | 0.0279875 | 0.0187644 | 0.0613436 | 0          | 0.0041254 | 0.0037105  | 0         | 0         | 0          | 0.0188816 |
| NKAIN4     | 0.0541992 | 0.0195855 | 0.0112093 | 0.0279269 | 0.0631425  | 0.0576874 | 0.0773536 | 0.0361258 | 0          | 0         | 0.107072   | 0         | 0.0174845 | 0.00708172 | 0         |
| NKAP       | 2.61363   | 2.44119   | 2.82654   | 3.31035   | 1.92787    | 4.40122   | 1.50042   | 1.73884   | 2.48958    | 2.93218   | 6.01631    | 1.91191   | 3.0994    | 2.587      | 1.69851   |
| NKAPD1     | 3.78274   | 3.51015   | 3.32217   | 4.41719   | 2.3715     | 4.51018   | 2.2584    | 2.57808   | 3.03494    | 3.54489   | 4.62736    | 1.96483   | 4.49558   | 2.6417     | 2.82617   |



|            |            |           |           |           |            |           |            |            |            |            |            |            |            |            |           |
|------------|------------|-----------|-----------|-----------|------------|-----------|------------|------------|------------|------------|------------|------------|------------|------------|-----------|
| NLE1       | 1.61208    | 1.52905   | 1.53612   | 2.88771   | 2.79255    | 4.03894   | 2.0719     | 1.23766    | 0.894292   | 1.08052    | 1.54353    | 1.09913    | 2.0421     | 1.93211    | 0.90909   |
| NLGN1      | 0.191806   | 0.16229   | 0.185767  | 0.0915994 | 0.0290674  | 0.298757  | 0.208315   | 0.203722   | 0.00569752 | 0.00587162 | 0.0105622  | 0.0133895  | 0.0150918  | 0.0122252  | 0.0470294 |
| NLGN1-AS1  | 0          | 0.0273972 | 0.0235203 | 0         | 0          | 0.0968354 | 0.0324619  | 0.0252673  | 0          | 0          | 0          | 0          | 0          | 0          | 0         |
| NLGN2      | 1.85802    | 2.31366   | 2.52609   | 4.26582   | 6.91746    | 8.90291   | 3.67979    | 1.72208    | 0.570265   | 2.29449    | 3.86317    | 1.53619    | 3.4228     | 3.788      | 9.32134   |
| NLGN3      | 0.365875   | 0.226651  | 0.177763  | 0.125682  | 0.288676   | 0.276923  | 0.205557   | 0.129031   | 0.0212188  | 0.116625   | 0.137676   | 0.0664872  | 0.029976   | 0.0758819  | 0.408678  |
| NLGN4X     | 0.326069   | 0.19033   | 0.217641  | 1.07872   | 1.82116    | 1.69509   | 0.287958   | 0.391545   | 1.92474    | 1.15198    | 1.46489    | 0.693469   | 0.760306   | 0.257474   | 1.4232    |
| NLGN4Y     | 0.824081   | 0.720523  | 0.751684  | 0.567144  | 0.658293   | 1.39243   | 0.0699437  | 1.00252    | 0.216543   | 0.67156    | 1.51056    | 0.394162   | 0.719874   | 0.784831   | 1.2664    |
| NLGN4Y-AS1 | 0.174008   | 0.125759  | 0.0719758 | 0.0448301 | 0          | 0.0740827 | 0          | 0.115983   | 0          | 0          | 0          | 0.0622537  | 0          | 0.022736   | 0.187423  |
| NLK        | 1.74652    | 1.72713   | 1.78576   | 1.58413   | 0.802709   | 2.07197   | 1.29954    | 1.8312     | 1.57738    | 1.91293    | 2.84295    | 1.25904    | 2.21571    | 2.06835    | 1.9164    |
| NLN        | 1.40018    | 1.07245   | 1.21801   | 2.31033   | 0.664111   | 2.27981   | 1.1685     | 1.22537    | 1.27244    | 1.3415     | 1.62588    | 1.1835     | 2.02401    | 1.35885    | 1.35847   |
| NLRC3      | 0.717858   | 0.393117  | 0.495369  | 0.245388  | 0.783277   | 0.354822  | 0.475784   | 0.466809   | 0.0127942  | 0.105481   | 0.162075   | 0.177897   | 0.250783   | 0.33126    | 0.839836  |
| NLRC4      | 0.0921247  | 0.0982857 | 0.097987  | 0.691685  | 0.0613292  | 0.49307   | 0.0826454  | 0.105265   | 0.0961694  | 0.611166   | 0.69084    | 0.0612093  | 0.517963   | 0.16508    | 0.623713  |
| NLRC5      | 4.20197    | 7.41621   | 8.98029   | 4.57448   | 7.42132    | 7.78152   | 6.10431    | 5.08853    | 1.43094    | 1.82314    | 2.35455    | 1.73954    | 3.17643    | 2.82963    | 7.91648   |
| NLRP1      | 7.03129    | 11.4504   | 12.2177   | 5.14217   | 14.4174    | 6.36183   | 9.80004    | 7.44945    | 4.4319     | 7.39629    | 2.9514     | 9.61409    | 6.60782    | 8.44859    | 9.29141   |
| NLRP10     | 1.62689    | 2.76007   | 2.90027   | 0.425042  | 6.94068    | 0.546305  | 5.88653    | 1.84294    | 22.3532    | 1.49548    | 2.03056    | 2.77904    | 0.221759   | 0.461069   | 0.230351  |
| NLRP11     | 0          | 0         | 0         | 0         | 0          | 0         | 0          | 0          | 0          | 0          | 0          | 0          | 0          | 0          | 0         |
| NLRP12     | 0.0478904  | 0.0317272 | 0.0198092 | 0.185072  | 0.130288   | 0.173307  | 0.0615147  | 0.0478812  | 0.00729064 | 0.390698   | 0.432498   | 0          | 0.142906   | 0.084475   | 0.14615   |
| NLRP13     | 0          | 0         | 0         | 0         | 0          | 0         | 0          | 0          | 0          | 0          | 0          | 0          | 0          | 0          | 0         |
| NLRP14     | 0.0363218  | 0.0116669 | 0.010016  | 0.0311922 | 0          | 0.0206184 | 0.0207355  | 0.0161399  | 0.0147453  | 0.0379897  | 0.0478366  | 0.00433154 | 0.0195289  | 0          | 0.0173876 |
| NLRP2      | 0.328397   | 0.408513  | 0.40504   | 0.479945  | 1.52962    | 2.40478   | 0.020452   | 0.238659   | 5.69377    | 0.674464   | 0.0202211  | 0.692115   | 0.123276   | 0.0374476  | 0.321848  |
| NLRP2B     | 0.0362289  | 0.0418936 | 0.0299711 | 0         | 0.0112552  | 0         | 0.00827301 | 0.00643945 | 0          | 0.00909421 | 0.00817959 | 0.0207382  | 0          | 0.00378697 | 0         |
| NLRP3      | 0.391295   | 0.124034  | 0.174631  | 0.689755  | 0.647804   | 1.13545   | 0.352712   | 0.233359   | 0.0501635  | 1.25364    | 0.645149   | 0.114203   | 1.43505    | 0.551633   | 1.01299   |
| NLRP4      | 0.00629914 | 0         | 0.0052111 | 0         | 0.00978475 | 0         | 0          | 0          | 0          | 0          | 0.00711095 | 0.0135216  | 0          | 0          | 0         |
| NLRP5      | 0          | 0         | 0         | 0         | 0          | 0         | 0          | 0          | 0          | 0          | 0          | 0.00426461 | 0          | 0          | 0         |
| NLRP6      | 0.134017   | 0.0363214 | 0.0415756 | 0.353903  | 0.169142   | 0.30668   | 0.0765081  | 0.0297758  | 0          | 0.126154   | 0.104011   | 0.0359598  | 0.0324251  | 0.00875539 | 0.0481163 |
| NLRP7      | 0          | 0         | 0         | 0         | 0.0113312  | 0         | 0          | 0.00615886 | 0.00834327 | 0          | 0.00763684 | 0          | 0.00436474 | 0          | 0.0239606 |



|           |            |            |           |           |          |           |           |           |            |           |           |           |           |            |           |
|-----------|------------|------------|-----------|-----------|----------|-----------|-----------|-----------|------------|-----------|-----------|-----------|-----------|------------|-----------|
| NLRP8     | 0          | 0          | 0         | 0         | 0        | 0         | 0         | 0         | 0          | 0         | 0         | 0         | 0         | 0          | 0         |
| NLRP9     | 0.0863547  | 0.115219   | 0.137382  | 0.0205364 | 0        | 0.039593  | 0.0910126 | 0.0944552 | 0.00809002 | 0.175082  | 0.0224962 | 0.0760481 | 0.0257149 | 0.0972089  | 0.0381588 |
| NLRX1     | 3.87528    | 5.19029    | 4.89204   | 12.9274   | 12.5712  | 15.4163   | 4.82185   | 4.87381   | 22.1218    | 9.79595   | 11.8111   | 10.1427   | 8.97378   | 9.20098    | 4.16821   |
| NMB       | 1.28073    | 0.638728   | 0.594814  | 3.19538   | 2.44315  | 5.18477   | 0.769631  | 0.579088  | 1.72398    | 3.32771   | 8.70009   | 2.39549   | 4.56651   | 2.73618    | 2.93641   |
| NMBR      | 0.00885012 | 0.0127924  | 0.0219643 | 0.0091203 | 0        | 0         | 0         | 0         | 0          | 0         | 0         | 0         | 0         | 0          | 0         |
| NMD3      | 5.27685    | 4.5009     | 4.98124   | 5.58732   | 1.85221  | 5.75524   | 3.36975   | 4.74818   | 9.03407    | 7.4994    | 9.83147   | 3.93598   | 8.7858    | 5.61915    | 4.94809   |
| NME1      | 14.2786    | 9.19319    | 7.7446    | 38.8137   | 16.6073  | 35.9724   | 11.9875   | 6.94892   | 20.9512    | 29.9509   | 56.3672   | 21.5232   | 25.0111   | 21.2391    | 10.5729   |
| NME1-NME2 | 0.80967    | 0.60243    | 0.369046  | 2.48207   | 5.42741  | 0.987448  | 1.05887   | 0.636632  | 1.10131    | 0.747521  | 1.6715    | 1.31775   | 1.15035   | 0.88737    | 0.823386  |
| NME2      | 54.4275    | 39.5837    | 39.3213   | 124.867   | 59.5073  | 119.332   | 51.8796   | 32.4973   | 60.4741    | 106.463   | 221.981   | 64.667    | 92.8141   | 75.4941    | 44.6435   |
| NME3      | 6.1167     | 6.43308    | 7.26927   | 7.45594   | 14.8547  | 9.75583   | 4.404     | 3.3468    | 3.05761    | 5.84376   | 14.1449   | 4.40933   | 5.4632    | 4.79528    | 5.11328   |
| NME4      | 3.30295    | 2.51928    | 2.2971    | 6.76142   | 6.81766  | 10.4203   | 2.37777   | 2.81598   | 1.41814    | 6.19724   | 18.7696   | 2.89211   | 4.40658   | 5.06763    | 5.29017   |
| NME5      | 0.0943844  | 0.0272855  | 0.0312326 | 0.0194532 | 0        | 0.0964405 | 0.043106  | 0.100657  | 0.0919597  | 0.0473848 | 0.213096  | 0.0135069 | 0.0487171 | 0.00986588 | 0.0542192 |
| NME6      | 1.98229    | 1.88995    | 1.99336   | 2.93788   | 1.53415  | 2.20082   | 1.68749   | 1.59362   | 3.03696    | 2.08357   | 2.79917   | 1.77924   | 2.57148   | 2.36127    | 1.8107    |
| NME7      | 1.79469    | 1.38465    | 1.3307    | 2.06537   | 0.401312 | 1.591     | 0.862169  | 1.29942   | 0.746918   | 2.23297   | 3.25244   | 1.00643   | 2.18197   | 1.78985    | 1.54558   |
| NME8      | 0.0600858  | 0.0434254  | 0.0414227 | 0.0722402 | 0        | 0         | 0.011434  | 0.0978987 | 0          | 0.025138  | 0.0791343 | 0         | 0.0387671 | 0.0209356  | 0         |
| NME9      | 0.823644   | 0.761161   | 0.664622  | 0.271334  | 0.293634 | 0.201199  | 0.416247  | 0.899983  | 0.147999   | 0.160995  | 0.0685912 | 0.198057  | 0.0609816 | 0.426944   | 0.368431  |
| NMI       | 2.62883    | 2.62369    | 2.47248   | 10.7234   | 1.11809  | 6.99503   | 0.857574  | 2.04425   | 4.66902    | 4.53674   | 8.62022   | 3.00063   | 6.04742   | 2.82966    | 3.37083   |
| NMNAT1    | 0.795131   | 0.95982    | 0.84075   | 1.00933   | 1.16968  | 1.24199   | 0.601228  | 0.84704   | 1.09664    | 1.3086    | 2.02109   | 0.870361  | 1.25706   | 1.26598    | 0.892352  |
| NMNAT2    | 0.698507   | 1.15472    | 1.56087   | 0.252355  | 0.386617 | 0.201675  | 1.01754   | 0.816998  | 0.132006   | 0.428272  | 0.380668  | 0.255645  | 0.323759  | 0.740632   | 0.818658  |
| NMNAT3    | 2.10104    | 2.42042    | 2.61373   | 1.04189   | 2.18394  | 1.25096   | 3.09332   | 1.86021   | 2.68389    | 0.406458  | 0.873826  | 0.842103  | 0.540194  | 0.309614   | 0.136122  |
| NMRAL1    | 4.01275    | 5.01753    | 4.67357   | 8.80773   | 8.02218  | 11.0556   | 4.8031    | 3.74      | 6.23067    | 8.44521   | 7.69126   | 6.17618   | 12.6087   | 4.74572    | 3.77805   |
| NMRAL2P   | 1.10819    | 2.16681    | 2.33456   | 0.584288  | 1.16094  | 0.724163  | 2.5453    | 1.07648   | 1.36534    | 1.00273   | 0.8437    | 1.88092   | 0.590287  | 1.18531    | 0.647702  |
| NMRK1     | 2.93348    | 4.12408    | 3.21548   | 5.05279   | 1.72504  | 4.08571   | 1.65075   | 2.53255   | 5.63968    | 4.18149   | 6.3274    | 3.57577   | 2.58213   | 2.50782    | 2.60294   |
| NMRK2     | 0          | 0.00977272 | 0         | 0         | 0        | 0         | 0.0231586 | 0         | 0          | 0         | 0         | 0         | 0         | 0          | 0         |
| NMS       | 0          | 0          | 0         | 0         | 0        | 0         | 0         | 0         | 0          | 0         | 0         | 0         | 0         | 0          | 0         |
| NMT1      | 6.52183    | 7.48919    | 6.99046   | 12.4532   | 12.311   | 14.1165   | 7.41944   | 5.65326   | 8.02344    | 7.32549   | 7.96519   | 6.29984   | 11.7545   | 7.15064    | 6.82102   |

|         |           |            |            |            |           |           |           |           |           |            |           |            |            |            |            |
|---------|-----------|------------|------------|------------|-----------|-----------|-----------|-----------|-----------|------------|-----------|------------|------------|------------|------------|
| NMT2    | 2.78028   | 2.17681    | 2.28113    | 2.97826    | 1.66925   | 3.24345   | 2.22941   | 2.34896   | 1.5538    | 1.93416    | 1.87386   | 1.46257    | 1.59615    | 1.379      | 1.3791     |
| NMU     | 4.97112   | 4.4236     | 2.67605    | 4.21596    | 1.92123   | 4.65814   | 6.46342   | 2.51546   | 21.6969   | 3.64206    | 7.81351   | 4.40792    | 2.28657    | 2.72244    | 1.12724    |
| NMUR1   | 0.0706874 | 0.0272466  | 0.0701731  | 0.0218536  | 0.0439208 | 0.0722273 | 0.112992  | 0.0628211 | 0         | 0.053232   | 0.111716  | 0.0151736  | 0.00456071 | 0.0147777  | 0.0913644  |
| NMUR2   | 0         | 0          | 0.00927595 | 0.011555   | 0         | 0         | 0         | 0         | 0         | 0          | 0         | 0          | 0          | 0          | 0          |
| NNAT    | 2.97071   | 3.00838    | 2.60474    | 1.22823    | 3.17767   | 2.43864   | 2.98564   | 2.45041   | 0.476621  | 0.960044   | 0.381543  | 1.82014    | 0.252497   | 2.20342    | 1.68609    |
| NNMT    | 17.2473   | 4.22567    | 6.34546    | 36.6359    | 8.99868   | 75.6895   | 9.56153   | 9.4366    | 1.10742   | 26.9116    | 78.4431   | 2.85436    | 17.5623    | 12.2949    | 44.5889    |
| NNT     | 4.85875   | 3.68792    | 3.8638     | 4.69381    | 2.69284   | 7.96196   | 4.22851   | 3.23576   | 1.92519   | 3.77498    | 5.59899   | 2.61411    | 5.071      | 3.58771    | 4.25227    |
| NNT-AS1 | 0.592687  | 0.67588    | 0.776575   | 0.767069   | 0.8922    | 1.002     | 0.827873  | 0.669889  | 0.230331  | 0.529289   | 0.912895  | 0.280669   | 0.231577   | 0.423287   | 0.804754   |
| NOA1    | 6.06515   | 5.45296    | 5.80754    | 6.40735    | 7.89051   | 8.76303   | 5.26624   | 4.5144    | 6.79276   | 5.85274    | 9.49606   | 4.50697    | 6.52856    | 5.00708    | 3.88098    |
| NOB1    | 8.50101   | 8.17928    | 8.34859    | 14.6724    | 11.0582   | 17.63     | 7.47316   | 6.37306   | 6.95513   | 7.44584    | 13.232    | 6.04537    | 13.7204    | 8.34084    | 5.65484    |
| NOBOX   | 0         | 0.0375986  | 0.00922233 | 0          | 0.0173165 | 0         | 0.101827  | 0         | 0.0135769 | 0          | 0         | 0.00797662 | 0          | 0          | 0.0160098  |
| NOC2L   | 7.19444   | 9.50371    | 8.98824    | 16.7739    | 19.3245   | 22.3863   | 9.12871   | 6.01535   | 12.648    | 8.2332     | 6.00636   | 9.3907     | 18.2512    | 11.855     | 6.80296    |
| NOC2LP2 | 0.0169896 | 0.00409962 | 0          | 0          | 0.0398254 | 0.0145089 | 0         | 0.0075229 | 0         | 0.0106794  | 0         | 0.018241   | 0.0765981  | 0.00443571 | 0          |
| NOC3L   | 2.10753   | 2.27676    | 2.60428    | 4.07055    | 0.864756  | 3.51006   | 1.71014   | 2.23228   | 1.77573   | 2.91135    | 4.2196    | 2.1956     | 2.95471    | 3.65084    | 2.51271    |
| NOC4L   | 2.58213   | 2.6669     | 2.90876    | 5.7607     | 6.18709   | 11.8002   | 3.35592   | 2.25817   | 3.47929   | 3.18913    | 4.46539   | 3.77379    | 6.07019    | 4.31421    | 2.44588    |
| NOCT    | 1.74973   | 2.56848    | 2.44145    | 8.49882    | 3.76886   | 3.22805   | 1.71809   | 2.11482   | 9.29103   | 10.2045    | 10.7057   | 6.34335    | 19.5227    | 9.83375    | 5.61198    |
| NOD1    | 2.64824   | 2.51934    | 2.43468    | 2.39542    | 3.70077   | 3.61695   | 2.84159   | 1.94553   | 1.39486   | 1.81354    | 1.89845   | 2.15768    | 1.86453    | 2.18725    | 3.51171    |
| NOD2    | 4.7147    | 4.23697    | 3.66434    | 6.27705    | 11.1176   | 3.76306   | 3.77729   | 4.02545   | 9.10058   | 5.06939    | 3.51996   | 6.62874    | 4.7114     | 3.12855    | 1.53819    |
| NODAL   | 0.668748  | 0.353906   | 0.47161    | 0.158169   | 0.238412  | 0.158694  | 0.625864  | 0.487154  | 0.120166  | 0.192637   | 0.0866316 | 0.196109   | 0.0778065  | 0.200542   | 0.0629774  |
| NOG     | 0.110089  | 0.0117872  | 0.0303577  | 0.0126055  | 0.0190006 | 0.187478  | 0.0977632 | 0.0217417 | 0.0297945 | 0.0153525  | 0.0276169 | 0.0262571  | 0.0157841  | 0.031965   | 0          |
| NOL10   | 4.6114    | 3.24513    | 3.15262    | 5.31128    | 1.35657   | 5.67297   | 2.2511    | 3.57494   | 3.25529   | 3.09735    | 4.02563   | 2.93035    | 5.07548    | 4.33962    | 2.88847    |
| NOL11   | 4.69209   | 4.32176    | 4.42158    | 9.15273    | 1.19191   | 7.05184   | 3.36342   | 5.33784   | 4.85513   | 5.70093    | 10.1455   | 4.28505    | 11.4209    | 6.292      | 4.59785    |
| NOL12   | 2.02094   | 2.67773    | 2.33926    | 3.17435    | 5.11389   | 3.59426   | 2.13997   | 1.89019   | 2.89796   | 2.03533    | 3.3117    | 2.25069    | 2.29234    | 2.87057    | 1.40435    |
| NOL3    | 4.07209   | 8.19139    | 7.81005    | 5.61207    | 20.5462   | 10.571    | 5.29234   | 4.41677   | 13.4055   | 6.87061    | 12.2398   | 6.79464    | 4.38062    | 3.83901    | 2.81402    |
| NOL4    | 0.0287194 | 0.00922496 | 0.00791957 | 0.00986539 | 0         | 0.0122271 | 0.0163954 | 0.0170156 | 0         | 0.00600763 | 0         | 0          | 0          | 0          | 0.00687412 |
| NOL4L   | 1.3336    | 1.06881    | 1.27131    | 1.41821    | 1.58292   | 2.59474   | 1.43288   | 1.27547   | 0.470891  | 1.36536    | 1.82358   | 0.64006    | 1.4397     | 2.17831    | 3.64692    |

|           |           |           |           |           |           |            |           |           |            |           |           |            |           |           |          |
|-----------|-----------|-----------|-----------|-----------|-----------|------------|-----------|-----------|------------|-----------|-----------|------------|-----------|-----------|----------|
| NOL4L-DT  | 0         | 0         | 0         | 0         | 0         | 0          | 0         | 0         | 0          | 0         | 0         | 0          | 0         | 0         | 0        |
| NOL6      | 4.54466   | 5.34681   | 5.20358   | 9.84834   | 9.6002    | 12.8964    | 5.82603   | 4.40766   | 5.17481    | 3.51339   | 3.83834   | 6.86549    | 9.12593   | 7.15311   | 5.47207  |
| NOL7      | 6.68904   | 4.414     | 5.07254   | 10.2219   | 7.62064   | 10.3495    | 3.15061   | 3.88452   | 6.67913    | 7.82432   | 12.9241   | 5.04589    | 10.2859   | 7.98871   | 4.52142  |
| NOL8      | 3.6204    | 3.41158   | 3.48934   | 4.20979   | 1.32687   | 4.11531    | 1.31387   | 2.60782   | 2.57116    | 2.83304   | 3.05774   | 2.94835    | 3.50095   | 3.25465   | 2.68865  |
| NOL9      | 3.5549    | 3.26446   | 3.47712   | 5.21976   | 3.16537   | 4.91769    | 3.45509   | 3.12559   | 2.11644    | 2.38018   | 3.04384   | 2.56583    | 5.40587   | 3.95737   | 2.82747  |
| NOLC1     | 7.03621   | 5.46302   | 5.2952    | 17.4517   | 5.37879   | 17.6809    | 4.83221   | 5.77657   | 7.29131    | 6.15328   | 6.35699   | 7.43305    | 17.3087   | 10.5997   | 6.59702  |
| NOM1      | 2.3029    | 2.19893   | 2.35225   | 2.63994   | 2.31778   | 2.13589    | 1.68815   | 1.94174   | 1.11723    | 0.793058  | 0.829316  | 1.77578    | 2.32817   | 2.23015   | 1.44863  |
| NOMO1     | 10.0566   | 8.29821   | 8.43342   | 15.4132   | 10.8238   | 25.7932    | 11.3991   | 8.2149    | 18.2932    | 13.0776   | 12.5617   | 9.72193    | 18.4234   | 10.7391   | 10.4199  |
| NOMO2     | 7.9663    | 6.34865   | 7.91159   | 10.0873   | 7.6401    | 19.1684    | 8.88438   | 6.645     | 16.4749    | 9.52814   | 9.26646   | 6.82469    | 14.417    | 9.26434   | 12.11    |
| NOMO3     | 5.84775   | 5.21823   | 4.44394   | 7.97615   | 4.21817   | 5.21555    | 7.48111   | 3.75354   | 5.16318    | 5.30183   | 5.54102   | 7.23925    | 9.41987   | 5.80035   | 1.19286  |
| NONO      | 23.51     | 23.515    | 23.7443   | 38.7604   | 25.727    | 47.9477    | 22.8027   | 19.1167   | 21.2926    | 24.2625   | 27.9115   | 18.8083    | 35.6351   | 24.9053   | 22.2164  |
| NOP10     | 14.4482   | 15.2566   | 13.7776   | 37.8473   | 10.9527   | 37.2388    | 17.9288   | 10.4184   | 50.4707    | 68.0295   | 121.594   | 35.5023    | 58.0246   | 44.358    | 20.563   |
| NOP14     | 5.9275    | 6.20009   | 6.123     | 10.2236   | 7.61257   | 12.6886    | 6.24879   | 5.30697   | 7.0549     | 4.68758   | 3.69113   | 6.23096    | 10.1163   | 7.30643   | 4.58548  |
| NOP14-AS1 | 1.25466   | 1.35301   | 1.47796   | 1.76363   | 1.31675   | 1.82778    | 1.76754   | 1.32957   | 1.64146    | 2.20528   | 2.4842    | 2.32233    | 4.06617   | 2.50237   | 1.33886  |
| NOP16     | 4.64632   | 4.392     | 4.44841   | 9.74113   | 5.5974    | 11.0784    | 4.9266    | 2.54539   | 8.34032    | 6.15506   | 10.0153   | 7.74818    | 9.19435   | 8.86872   | 2.82348  |
| NOP2      | 3.72648   | 4.0735    | 3.84068   | 8.20051   | 5.89706   | 10.3983    | 3.57224   | 3.02201   | 5.09631    | 3.77093   | 3.12      | 5.4328     | 13.5293   | 7.40905   | 3.57895  |
| NOP53     | 91.447    | 83.0659   | 97.338    | 73.1941   | 132.294   | 116.346    | 68.5947   | 60.2164   | 58.0565    | 39.8107   | 55.6156   | 29.6482    | 33.7584   | 33.4496   | 26.6633  |
| NOP53-AS1 | 0.34286   | 0.474936  | 0.390002  | 0.132498  | 0.732298  | 0.437911   | 0.5872    | 0.609411  | 0          | 0.215162  | 0         | 0.183994   | 0.138257  | 0.425585  | 0.184646 |
| NOP56     | 9.50175   | 8.142     | 8.41602   | 23.839    | 10.7894   | 21.0207    | 8.01073   | 6.53817   | 10.4491    | 10.1394   | 13.5324   | 11.7543    | 22.8281   | 17.6693   | 9.51457  |
| NOP58     | 10.0237   | 8.71949   | 9.31482   | 14.7234   | 3.06475   | 11.2385    | 4.57015   | 6.74166   | 7.34677    | 8.51056   | 11.354    | 6.7747     | 14.4928   | 11.2422   | 5.35755  |
| NOP9      | 4.76986   | 6.57743   | 6.22552   | 8.22797   | 8.82875   | 11.458     | 6.59355   | 4.93237   | 5.90333    | 6.75393   | 2.72833   | 7.68173    | 8.5424    | 7.24476   | 5.03265  |
| NORAD     | 43.6956   | 36.6236   | 39.5184   | 39.8178   | 25.4163   | 54.1462    | 30.9333   | 40.7629   | 36.4659    | 37.0822   | 48.1009   | 23.3651    | 50.0552   | 30.0327   | 47.4272  |
| NOS1      | 0.965676  | 1.45545   | 1.18381   | 0.934268  | 2.06219   | 0.790817   | 4.73292   | 0.55464   | 1.80572    | 1.85164   | 0.362682  | 2.0174     | 2.01092   | 0.696745  | 1.03151  |
| NOS1AP    | 0.228573  | 0.328771  | 0.40043   | 0.169736  | 0.255847  | 0.309114   | 0.33006   | 0.370426  | 0.0655004  | 0.0464076 | 0.125221  | 0.0697494  | 0.0173499 | 0.0386496 | 0.111029 |
| NOS2      | 0.0385167 | 0.0477204 | 0.0637275 | 0.0510334 | 0.0170942 | 0.0749634  | 0.0251298 | 0.0440106 | 0.00670129 | 0.0414364 | 0.0683266 | 0          | 0.0177506 | 0.0143789 | 0.063217 |
| NOS2P3    | 0         | 0         | 0         | 0         | 0         | 0.00694852 | 0         | 0         | 0          | 0.0102422 | 0         | 0.00583902 | 0         | 0.0255901 | 0        |

|           |            |           |            |           |           |            |            |           |           |           |           |           |           |            |           |
|-----------|------------|-----------|------------|-----------|-----------|------------|------------|-----------|-----------|-----------|-----------|-----------|-----------|------------|-----------|
| NOS3      | 1.23975    | 0.655653  | 0.612145   | 2.5791    | 2.39965   | 6.97366    | 1.29247    | 0.694301  | 1.22693   | 1.16634   | 1.57719   | 1.61479   | 2.55729   | 3.01899    | 6.22872   |
| NOSIP     | 5.11299    | 5.11341   | 5.18989    | 10.6941   | 12.4359   | 12.0155    | 5.85706    | 3.22864   | 12.1673   | 11.9481   | 21.3977   | 6.79948   | 12.7507   | 7.77953    | 3.69561   |
| NOSTRIN   | 3.41522    | 1.08778   | 1.40586    | 0.905252  | 0.459088  | 1.87343    | 0.665521   | 1.41544   | 0.359944  | 1.17465   | 2.34473   | 0.399448  | 0.386669  | 1.23144    | 1.16722   |
| NOTCH1    | 10.4855    | 13.5829   | 10.6933    | 15.6613   | 35.5697   | 28.5581    | 13.8693    | 10.157    | 5.75614   | 8.05712   | 5.99895   | 7.7761    | 13.3337   | 10.1121    | 14.1831   |
| NOTCH2    | 19.5993    | 22.1124   | 24.6693    | 16.778    | 25.3197   | 21.0169    | 27.1472    | 18.5547   | 34.5179   | 19.1351   | 13.5714   | 20.1352   | 27.0067   | 14.8961    | 17.1871   |
| NOTCH2NLA | 0.515905   | 1.11319   | 1.20286    | 1.10743   | 3.69E-05  | 0.145525   | 0.227497   | 4.06202   | 0.285     | 0.193681  | 0.0855722 | 0.121177  | 0.837896  | 0.419226   | 0.116204  |
| NOTCH2NLB | 14.3913    | 17.8631   | 19.1274    | 8.20942   | 6.02643   | 8.01435    | 14.4505    | 19.3298   | 7.88797   | 11.0891   | 7.43542   | 12.5716   | 10.1092   | 12.0235    | 11.8446   |
| NOTCH2NLC | 4.83925    | 5.63943   | 6.16802    | 1.64573   | 3.05102   | 5.15779    | 5.45227    | 0.165659  | 2.94498   | 4.90091   | 7.65419   | 2.68631   | 7.44609   | 4.137      | 4.50322   |
| NOTCH2NLR | 6.08448    | 6.12539   | 6.02302    | 9.84457   | 25.0004   | 10.5957    | 7.27586    | 0.208764  | 18.3569   | 15.8515   | 19.6471   | 9.46934   | 15.1086   | 5.42757    | 2.02095   |
| NOTCH3    | 23.8226    | 40.2079   | 40.6656    | 35.176    | 105.482   | 75.4131    | 44.8399    | 23.8677   | 40.9392   | 34.8772   | 26.8637   | 48.9398   | 57.8993   | 33.8769    | 65.2496   |
| NOTCH4    | 0.186867   | 0.192506  | 0.129394   | 0.323434  | 0.861175  | 0.665024   | 0.181531   | 0.139922  | 0.0672688 | 0.173635  | 0.236589  | 0.202039  | 0.306407  | 0.353428   | 1.03935   |
| NOTO      | 0          | 0         | 0.0264441  | 0         | 0         | 0          | 0          | 0         | 0         | 0.04012   | 0         | 0         | 0         | 0.0167066  | 0         |
| NOTUM     | 0.553262   | 0.492903  | 0.43179    | 0.0753032 | 0.437811  | 0.115552   | 0.321808   | 0.16699   | 0.0635671 | 0.235834  | 0.176763  | 0.21661   | 0.518605  | 0.523759   | 0.314823  |
| NOV       | 4.07517    | 1.89917   | 2.70143    | 1.43043   | 1.13335   | 6.47775    | 6.32916    | 1.59733   | 0.552659  | 0.435536  | 0.592623  | 0.636658  | 0.838154  | 0.469686   | 0.868924  |
| NOVA1     | 0.657994   | 0.369004  | 0.562186   | 0.116719  | 0.0754002 | 0.80367    | 1.58261    | 0.417009  | 0.0197056 | 0.101539  | 0.109592  | 0.0347321 | 0.0800352 | 0.109934   | 0.364043  |
| NOVA2     | 0.698282   | 0.35392   | 0.297586   | 0.781903  | 1.23493   | 2.01281    | 0.824887   | 0.448641  | 0.125171  | 0.572895  | 0.740499  | 0.374189  | 1.1663    | 1.16437    | 2.18363   |
| NOX1      | 0.192172   | 0.10141   | 0.174119   | 0.0565826 | 0         | 0.0701281  | 0.177623   | 0.154521  | 0.0445799 | 0.0459421 | 0         | 0.0589305 | 0         | 0.00478275 | 0         |
| NOX3      | 0          | 0         | 0          | 0.0116681 | 0         | 0          | 0          | 0         | 0         | 0         | 0         | 0.016203  | 0         | 0          | 0         |
| NOX4      | 0.537611   | 0.053878  | 0.0426959  | 0.270363  | 0.100211  | 0.875254   | 0.294636   | 0.152891  | 0.109998  | 0.998639  | 1.75271   | 0.22465   | 0.843573  | 1.11492    | 1.2415    |
| NOX5      | 0.111051   | 0.146562  | 0.0979939  | 0.152589  | 0.251357  | 0.111201   | 0.177512   | 0.0879196 | 0.441809  | 0.186163  | 0.270047  | 0.23838   | 0.253231  | 0.13982    | 0.0744256 |
| NOXA1     | 1.5731     | 2.66305   | 2.21587    | 1.69415   | 6.80237   | 2.57035    | 1.14887    | 1.17133   | 1.13916   | 1.22733   | 1.74384   | 3.34637   | 0.438901  | 1.22956    | 0.671647  |
| NOXO1     | 0.353653   | 0.313528  | 0.386188   | 0.379028  | 0.878953  | 0.566126   | 0.258425   | 0.364585  | 0.465166  | 0.124284  | 0.303415  | 0.495974  | 0.374207  | 0.487963   | 0.406312  |
| NOXRED1   | 0.211978   | 0.216285  | 0.288834   | 0.1285    | 0.0581075 | 0.276054   | 0.199319   | 0.210552  | 0.151862  | 0.0939016 | 0.140763  | 0.151676  | 0.104587  | 0.0782041  | 0.14326   |
| NPAP1     | 0.00287384 | 0.0069233 | 0.00237744 | 0         | 0.0491048 | 0.00244704 | 0.00656252 | 0         | 0         | 0         | 0         | 0.0102816 | 0         | 0.00450599 | 0         |
| NPAS1     | 0.163517   | 0.661792  | 0.712435   | 0.247146  | 0.897459  | 0.297029   | 0.809025   | 0.310016  | 0.597435  | 0.150502  | 0.18459   | 0.327602  | 0.0984667 | 0.0512766  | 0.0313107 |
| NPAS2     | 5.8898     | 3.45883   | 2.22345    | 7.33833   | 6.13219   | 5.27593    | 3.77486    | 4.06832   | 3.20291   | 3.09766   | 4.63919   | 2.3615    | 3.57259   | 4.97235    | 3.1294    |

|              |           |           |            |            |           |           |           |            |            |            |            |            |            |            |           |
|--------------|-----------|-----------|------------|------------|-----------|-----------|-----------|------------|------------|------------|------------|------------|------------|------------|-----------|
| NPAS3        | 0.247519  | 0.15839   | 0.262356   | 0.0757256  | 0.102128  | 0.167949  | 0.172215  | 0.226849   | 0.00471017 | 0.0242705  | 0.00873183 | 0.0304402  | 0.00998114 | 0.0687248  | 0.138855  |
| NPAS4        | 0.0280352 | 0.0270156 | 0.0579817  | 0          | 0         | 0.0417753 | 0.0480145 | 0          | 0.00853593 | 0.0263903  | 0.0395603  | 0.01003    | 0.0180882  | 0.0476204  | 0.0301966 |
| NPAT         | 2.71273   | 2.67043   | 2.91835    | 2.53114    | 0.591924  | 2.48331   | 1.6628    | 2.97416    | 1.9207     | 2.13565    | 2.65772    | 1.58197    | 2.16406    | 1.69187    | 2.01564   |
| NPB          | 0.136474  | 3.31E-15  | 0.127609   | 8.51E-24   | 0.83015   | 4.85E-13  | 0.17868   | 3.53E-11   | 0.513662   | 0.666319   | 2.13771    | 1.19124    | 0.0928487  | 0.453809   | 0.807937  |
| NPBWR1       | 0         | 0         | 0.0581932  | 0.0241637  | 0.509917  | 0         | 0.13386   | 0.041677   | 0.285569   | 0.382583   | 0.238228   | 0.301996   | 0.0756422  | 0.0245098  | 0.0673482 |
| NPBWR2       | 0         | 0         | 0          | 0          | 0         | 0         | 0         | 0          | 0          | 0          | 0          | 0          | 0          | 0          | 0         |
| NPC1         | 4.86831   | 6.58157   | 6.27247    | 10.7802    | 6.81641   | 11.6042   | 7.13041   | 5.56756    | 10.0791    | 11.2464    | 12.0479    | 7.16266    | 14.1437    | 7.18114    | 6.87139   |
| NPC1L1       | 0.0396662 | 0.0573354 | 0.0692755  | 0.00908383 | 0.0410769 | 0.0150112 | 0.0251609 | 0.00783379 | 0.0107353  | 0.00553169 | 0.0149261  | 0.00630717 | 0          | 0.00460696 | 0.0126591 |
| NPC2         | 25.7041   | 18.122    | 17.0802    | 35.4615    | 21.4799   | 47.5207   | 25.7293   | 18.9178    | 32.2594    | 43.8916    | 91.8205    | 30.9438    | 35.3055    | 20.4515    | 22.2263   |
| NPDC1        | 10.6022   | 4.39313   | 4.42303    | 8.64704    | 23.2446   | 14.6376   | 6.38119   | 5.30343    | 1.51258    | 3.64987    | 10.9256    | 3.43544    | 5.41375    | 7.86845    | 14.8345   |
| NPEPL1       | 5.60471   | 5.82776   | 5.68395    | 5.68243    | 9.06338   | 13.742    | 5.60835   | 4.30078    | 3.56397    | 4.56843    | 5.3605     | 5.43792    | 4.46717    | 4.85667    | 6.6047    |
| NPEPPS       | 11.5098   | 14.8353   | 14.8796    | 39.7885    | 17.3796   | 26.0786   | 13.6902   | 11.5892    | 25.1444    | 37.9213    | 22.585     | 26.9496    | 51.8547    | 28.5875    | 15.2244   |
| NPFF         | 1.82561   | 1.881     | 1.69615    | 1.01303    | 2.57403   | 0.884857  | 1.12238   | 1.17315    | 0.615705   | 0.493515   | 0.38047    | 1.18569    | 0.126848   | 1.37983    | 2.13777   |
| NPFFR1       | 0.035306  | 0.0765493 | 0.0584151  | 0          | 0.109685  | 0         | 0.0201556 | 0.0156885  | 0.0429987  | 0          | 0          | 0          | 0.0227792  | 0.0184524  | 0         |
| NPFFR2       | 0         | 0.0182126 | 0          | 0          | 0.0293582 | 0.0241397 | 0.0107897 | 0.00839837 | 0          | 0          | 0.0106679  | 0          | 0          | 0          | 0         |
| NPHP1        | 0.479692  | 0.291945  | 0.382911   | 0.225487   | 0.104579  | 0.530271  | 0.230609  | 0.284207   | 0.0204986  | 0.29575    | 0.532013   | 0.132476   | 0.157462   | 0.263903   | 0.338406  |
| NPHP3        | 2.45041   | 2.65368   | 2.35804    | 2.11896    | 1.40408   | 1.86125   | 1.46879   | 2.0157     | 0.36154    | 1.50923    | 1.46387    | 1.25383    | 1.09452    | 1.8587     | 1.82728   |
| NPHP3-ACAD11 | 1.15368   | 0.880245  | 0.98748    | 0.382852   | 0.295013  | 0.412079  | 0.827484  | 1.0446     | 0.520269   | 0.453446   | 0.386312   | 0.704878   | 0.191543   | 0.69526    | 0.892136  |
| NPHP3-AS1    | 0.0432522 | 0.0600389 | 0.0482621  | 0.0347692  | 0.0383087 | 0.012435  | 0.0227515 | 0.0331008  | 0          | 0.0116865  | 0.0275666  | 0.0166646  | 0.00929072 | 0.0221823  | 0.0806544 |
| NPHP4        | 1.14132   | 1.54335   | 1.50238    | 1.7985     | 2.84695   | 3.05897   | 2.68711   | 1.192      | 0.95783    | 1.14991    | 0.945148   | 1.38272    | 1.40975    | 1.41016    | 2.33899   |
| NPHS1        | 0.0046065 | 0         | 0.00381082 | 0          | 0         | 0         | 0         | 0          | 0          | 0.0115633  | 0          | 0          | 0          | 0          | 0         |
| NPHS2        | 0         | 0         | 0          | 0          | 0         | 0         | 0         | 0          | 0          | 0          | 0          | 0          | 0          | 0.00645441 | 0         |
| NPIPA1       | 5.93628   | 14.5548   | 15.9538    | 9.56618    | 3.26131   | 14.6209   | 4.60285   | 6.3256     | 4.05939    | 1.8184     | 3.3435     | 5.90361    | 1.51775    | 2.88254    | 8.97917   |
| NPIPA2       | 0.718584  | 0.984746  | 1.04239    | 1.05178    | 0.270026  | 0.646931  | 0.448255  | 0.835886   | 0.295228   | 0.243708   | 0.187012   | 0.338241   | 0.0327074  | 0.455743   | 0.992451  |
| NPIPA3       | 0.454784  | 0.623235  | 0.659727   | 0.665666   | 0.170897  | 0.409445  | 0.283697  | 0.529026   | 0.186847   | 0.15424    | 0.118358   | 0.214069   | 0.0207001  | 0.288432   | 0.628113  |
| NPIPA5       | 2.31976   | 1.53754   | 0.156525   | 2.77407    | 1.01748   | 2.39541   | 2.02277   | 3.99385    | 1.71163    | 0.484765   | 4.09E-06   | 1.1157     | 0.806266   | 1.58533    | 3.07642   |

|          |           |           |           |           |           |           |            |           |           |           |           |           |           |           |           |
|----------|-----------|-----------|-----------|-----------|-----------|-----------|------------|-----------|-----------|-----------|-----------|-----------|-----------|-----------|-----------|
| NPIPA7   | 2.21E-06  | 1.11E-05  | 1.67E-05  | 0.0163911 | 5.13E-18  | 1.61798   | 3.94E-11   | 3.19E-06  | 2.50E-06  | 0.132448  | 0.0272489 | 0.0659563 | 1.1816    | 1.12332   | 5.41E-10  |
| NPIPA8   | 0.898863  | 1.19535   | 1.01834   | 0.467714  | 0.545238  | 0.566162  | 1.07104    | 1.39382   | 0.242777  | 0.228397  | 0.231754  | 0.547231  | 0.159143  | 1.04257   | 1.35431   |
| NPIPB11  | 1.38592   | 1.95608   | 1.82796   | 0.576402  | 2.69115   | 1.30963   | 1.82428    | 1.63167   | 0.220919  | 0.517946  | 0.110905  | 1.08446   | 0.457985  | 1.06424   | 2.29231   |
| NPIPB12  | 1.31212   | 1.33084   | 1.17713   | 0.0911749 | 1.03194   | 0.598649  | 0.828916   | 0.501936  | 0.142466  | 0.452147  | 0.345066  | 0.677196  | 0.136306  | 0.499906  | 1.50025   |
| NPIPB13  | 1.57765   | 2.86362   | 2.89064   | 1.25833   | 1.10802   | 1.38825   | 1.17856    | 2.93896   | 0.0774035 | 0.59312   | 0.175212  | 1.21355   | 0.326178  | 1.11132   | 1.78546   |
| NPIPB15  | 0.172505  | 4.01144   | 5.95882   | 1.46881   | 1.12834   | 2.44282   | 0.0717902  | 0.294637  | 0.645645  | 0.627792  | 0.512572  | 0.114713  | 0.640872  | 2.19072   | 1.26024   |
| NPIPB2   | 0.164135  | 0.0474497 | 0.0814705 | 0.253719  | 0.0509917 | 0         | 0.112442   | 0.14587   | 0         | 0         | 0         | 0.0469772 | 0.180029  | 0         | 0.141431  |
| NPIPB3   | 14.7617   | 24.3053   | 25.0463   | 11.046    | 21.439    | 21.9081   | 15.1492    | 16.1211   | 3.53845   | 6.16676   | 5.02672   | 17.4007   | 2.53013   | 11.6795   | 12.8163   |
| NPIPB4   | 3.92404   | 4.04111   | 3.1943    | 2.72805   | 3.37881   | 2.47129   | 4.27652    | 5.54127   | 0.49135   | 1.23177   | 0.835877  | 3.54799   | 0.377153  | 2.75822   | 4.21976   |
| NPIPB5   | 21.4801   | 29.3365   | 34.1616   | 10.1989   | 10.5538   | 12.7227   | 14.7302    | 28.7036   | 3.08043   | 5.52175   | 3.19634   | 14.599    | 1.51513   | 13.0836   | 11.5425   |
| NPIPB6   | 0.208394  | 0.123348  | 0.197702  | 1.34E-08  | 0.0422035 | 6.64E-15  | 0.882221   | 0.0820642 | 0.100201  | 0         | 0         | 0.0323048 | 3.87E-15  | 0.0128265 | 0.0250633 |
| NPIPB8   | 3.01E-17  | 5.02E-13  | 9.92E-11  | 0.0370521 | 1.52E-19  | 8.29E-15  | 0.00777691 | 1.68E-06  | 1.56E-16  | 4.13E-33  | 0.0229661 | 3.41E-37  | 0         | 1.28E-34  | 1.75E-24  |
| NPIPB9   | 0.307164  | 0.445601  | 0.475341  | 0.142885  | 0.37881   | 0.275396  | 1.67546    | 0.302357  | 0.0420417 | 0.147759  | 3.93E-05  | 0.103804  | 0.0216834 | 0.165994  | 0.09415   |
| NPL      | 1.50583   | 0.848804  | 0.858708  | 3.16387   | 1.39663   | 4.63708   | 0.701078   | 1.56563   | 0.997091  | 2.58725   | 5.33076   | 0.857787  | 1.00929   | 1.36772   | 2.65597   |
| NPLOC4   | 10.1305   | 11.4016   | 11.7005   | 16.0327   | 17.2004   | 19.0091   | 13.7643    | 8.62818   | 26.0463   | 17.6028   | 14.2529   | 14.5401   | 26.7658   | 13.6592   | 11.2712   |
| NPM1     | 74.2418   | 52.7575   | 53.4734   | 157.228   | 34.8323   | 138.63    | 31.697     | 52.733    | 62.7689   | 109.518   | 151.327   | 68.7151   | 171.315   | 113.707   | 57.6141   |
| NPM2     | 0.0672372 | 0.116625  | 0.200244  | 0.0692899 | 0.438659  | 0.0229006 | 0.307077   | 0.0239019 | 0.0818874 | 0.0168779 | 0.0910829 | 0.019244  | 0.0520573 | 0.0562258 | 0.0965611 |
| NPM3     | 4.01111   | 2.17419   | 2.51054   | 11.2313   | 4.71397   | 13.7965   | 3.43482    | 2.18106   | 2.12115   | 6.19358   | 12.2138   | 3.37987   | 8.83648   | 8.41311   | 3.3729    |
| NPNT     | 1.93144   | 0.801019  | 0.715988  | 1.11866   | 1.40516   | 2.45648   | 1.41248    | 0.795241  | 1.72103   | 2.26459   | 1.94852   | 1.3925    | 1.70991   | 1.59468   | 2.07157   |
| NPPA     | 0.162598  | 0.274197  | 0.134512  | 0.167562  | 0.33676   | 0.299974  | 0.340356   | 0.192671  | 0.0990128 | 0.102038  | 0.0305921 | 0.174514  | 0         | 0.099144  | 0.0778369 |
| NPPA-AS1 | 0.469652  | 0.503245  | 0.475092  | 0.565427  | 0.49229   | 0.538028  | 0.953724   | 0.400377  | 0.0289812 | 0.330424  | 0.231888  | 0.238537  | 0.0752634 | 0.181093  | 0.711351  |
| NPPB     | 0.0331562 | 0.0159752 | 0         | 0         | 0         | 0         | 0          | 0         | 0         | 0         | 0         | 0.0237242 | 0         | 0         | 0         |
| NPPC     | 0.0893554 | 0.487932  | 0.197123  | 0.153472  | 0.1388    | 0.329701  | 0.0680154  | 0.0529411 | 0.108825  | 0.0747668 | 0         | 0.0852482 | 0.0576517 | 0.15567   | 0         |
| NPR1     | 2.23965   | 0.799332  | 0.956134  | 2.19405   | 2.68867   | 4.18135   | 1.55324    | 0.869885  | 0.262662  | 0.825945  | 1.24854   | 0.46691   | 1.49853   | 1.30638   | 3.03376   |
| NPR2     | 1.97694   | 1.5962    | 1.9689    | 4.65141   | 3.3853    | 5.10747   | 4.72167    | 1.84089   | 8.08568   | 1.90541   | 3.31322   | 3.59191   | 2.69033   | 2.38716   | 2.53875   |
| NPR3     | 5.32955   | 2.69598   | 1.65712   | 1.289     | 2.97542   | 3.14885   | 4.41892    | 1.82048   | 4.48909   | 2.3283    | 1.48705   | 2.67632   | 2.17154   | 0.866903  | 0.850433  |

|           |            |            |           |           |           |           |           |           |           |            |           |           |          |            |           |
|-----------|------------|------------|-----------|-----------|-----------|-----------|-----------|-----------|-----------|------------|-----------|-----------|----------|------------|-----------|
| NPRL2     | 1.71069    | 2.08754    | 2.06534   | 2.49389   | 2.47193   | 3.20863   | 1.62618   | 1.18525   | 1.20263   | 1.3046     | 2.53686   | 1.64201   | 1.35499  | 1.45082    | 1.31491   |
| NPRL3     | 2.72443    | 3.49577    | 2.79621   | 4.90955   | 5.47666   | 7.08976   | 4.54955   | 3.12042   | 1.33964   | 1.408      | 3.96367   | 2.51755   | 4.29575  | 2.9544     | 4.40433   |
| NPS       | 0          | 0          | 0         | 0         | 0         | 0         | 0         | 0         | 0         | 0          | 0         | 0         | 0        | 0          | 0         |
| NPSR1     | 0          | 0.0169807  | 0         | 0         | 0         | 0         | 0.0134132 | 0         | 0         | 0          | 0         | 0         | 0        | 0.0245595  | 0         |
| NPSR1-AS1 | 0.00747998 | 0.00540595 | 0         | 0         | 0         | 0         | 0         | 0         | 0         | 0.0140822  | 0         | 0         | 0        | 0.00781873 | 0         |
| NPTN      | 13.8255    | 13.4042    | 13.9807   | 19.4179   | 10.4449   | 20.6374   | 14.1058   | 12.1361   | 17.2973   | 21.0452    | 29.5324   | 15.5946   | 30.8007  | 18.9018    | 16.8485   |
| NPTN-IT1  | 3.3569     | 3.49154    | 3.51173   | 1.49174   | 2.15198   | 1.68628   | 3.74154   | 2.74656   | 0.421811  | 1.11462    | 0.721813  | 2.15413   | 0.595896 | 3.55998    | 2.42322   |
| NPTX1     | 0.0255395  | 0.229699   | 0.292272  | 0.0219327 | 0.0793434 | 0.0724885 | 0.486003  | 0.0907896 | 0.0207362 | 9.36532    | 10.8789   | 8.10765   | 22.6544  | 4.76303    | 11.144    |
| NPTX2     | 0.972469   | 0.300037   | 0.254051  | 1.74938   | 0.75529   | 2.24444   | 0.360371  | 0.902155  | 0.571401  | 0.856525   | 1.18446   | 0.347914  | 2.84546  | 2.35402    | 3.80999   |
| NPTXR     | 0.501466   | 0.162994   | 0.293028  | 0.307604  | 0.908775  | 0.555767  | 0.50894   | 0.258201  | 0.0484706 | 0.414599   | 0.961459  | 0.113909  | 0.346653 | 0.305769   | 1.0974    |
| NPVF      | 0          | 0          | 0         | 0         | 0         | 0         | 0         | 0         | 0         | 0          | 0         | 0         | 0        | 0          | 0         |
| NPW       | 0.0455572  | 0.340227   | 0.226129  | 0.399058  | 1.16764   | 0.465496  | 0.234071  | 0.222681  | 1.27612   | 0.0285895  | 0.411427  | 0.782337  | 0.191056 | 0.0714305  | 0         |
| NPY       | 0          | 0          | 0         | 0         | 0         | 0         | 0         | 0         | 0         | 0          | 0         | 0         | 0        | 0          | 0         |
| NPY1R     | 1.13446    | 0.671001   | 0.912618  | 0.0886901 | 0.279523  | 1.0326    | 0.946904  | 1.34197   | 0.0190572 | 0.00981978 | 0.0706575 | 0.0111964 | 0        | 0.0122673  | 0.0898887 |
| NPY2R     | 0          | 0          | 0         | 0         | 0         | 0.0162949 | 0         | 0         | 0         | 0          | 0         | 0         | 0        | 0          | 0         |
| NPY4R     | 0.18003    | 0.613458   | 0.313231  | 0.0618682 | 0.364907  | 4.96E-06  | 0.29456   | 0.367139  | 0.0722468 | 0.328291   | 0.162874  | 3.13E-06  | 3.38E-06 | 0.104087   | 0.131166  |
| NPY4R2    | 0.395848   | 0.1723     | 0.356734  | 0.163374  | 0.276512  | 0.271988  | 0.495938  | 0.114757  | 0.0386368 | 0.0379493  | 0.303011  | 0.171419  | 0.185483 | 0.0681818  | 0.212876  |
| NPY5R     | 0.0935073  | 0.0418351  | 0.0718304 | 0.006883  | 0.0518747 | 0.0796202 | 0.129641  | 0.172139  | 0         | 0          | 0         | 0         | 0        | 0          | 0.019184  |
| NPY6R     | 0.18595    | 0.164255   | 0.16665   | 0.0718601 | 0.060176  | 0.0461808 | 0.132695  | 0.254771  | 0         | 0.0486222  | 0         | 0.0443508 | 0        | 0.040494   | 0.022254  |
| NQO1      | 2.81695    | 0.842728   | 0.961284  | 1.21561   | 1.01188   | 4.18255   | 2.0906    | 1.4082    | 0.868405  | 4.57414    | 10.4541   | 2.25496   | 2.22073  | 4.22819    | 2.95828   |
| NQO2      | 5.26136    | 3.61266    | 3.59518   | 5.56528   | 6.96662   | 12.0881   | 4.24742   | 3.61504   | 7.98853   | 3.57814    | 5.56002   | 4.32022   | 3.92549  | 4.82731    | 4.02764   |
| NR0B1     | 0.0146013  | 0          | 0         | 0         | 0         | 0         | 0         | 0.0129764 | 0         | 0          | 0         | 0         | 0        | 0          | 0         |
| NR0B2     | 0.0182085  | 0.0250926  | 0.0150634 | 0         | 0.0848524 | 0.0155043 | 0         | 0         | 0         | 0          | 0         | 0         | 0        | 0.0285497  | 0         |
| NR1D1     | 6.55801    | 19.0593    | 23.7242   | 3.3064    | 5.17915   | 16.4105   | 46.3263   | 9.83617   | 10.7445   | 5.66495    | 6.8264    | 12.7836   | 12.7507  | 3.95079    | 7.06026   |
| NR1D2     | 4.98802    | 5.99915    | 7.67836   | 1.63104   | 0.69309   | 6.20074   | 6.79108   | 4.21981   | 7.61282   | 6.31865    | 6.64779   | 4.31606   | 7.95481  | 2.56517    | 7.21792   |
| NR1H2     | 10.0544    | 9.49663    | 9.78338   | 14.4925   | 21.1567   | 24.0243   | 11.973    | 5.71759   | 18.6241   | 12.4248    | 18.0755   | 10.4032   | 18.368   | 9.47973    | 9.54149   |

|           |           |           |           |            |           |           |           |            |           |            |           |            |            |            |           |
|-----------|-----------|-----------|-----------|------------|-----------|-----------|-----------|------------|-----------|------------|-----------|------------|------------|------------|-----------|
| NR1H3     | 1.05415   | 0.512567  | 0.73606   | 1.51489    | 1.4572    | 2.32223   | 1.00484   | 0.713378   | 0.494691  | 0.63119    | 1.69225   | 0.235279   | 0.499182   | 0.414474   | 1.02779   |
| NR1H4     | 0         | 0         | 0         | 0          | 0         | 0         | 0         | 0          | 0         | 0          | 0         | 0          | 0          | 0          | 0         |
| NR1I2     | 0.0152257 | 0.0122266 | 0.0209929 | 0          | 0         | 0.0345719 | 0.0115895 | 0.0180418  | 0         | 0          | 0         | 0.00363146 | 0          | 0.00795761 | 0.021866  |
| NR1I3     | 0.0535174 | 0.136698  | 0.176972  | 5.75E-40   | 0.281699  | 0.0158332 | 0.219965  | 0.0603647  | 3.72E-36  | 0.0414932  | 0         | 0.0361683  | 0.0576604  | 0.0712539  | 0.0578811 |
| NR2C1     | 2.2413    | 1.87689   | 1.81615   | 1.96773    | 0.404458  | 1.60413   | 1.18917   | 1.71964    | 0.876721  | 1.39692    | 2.15552   | 1.32607    | 1.01785    | 1.72108    | 1.70838   |
| NR2C2     | 8.27307   | 6.67808   | 7.13826   | 5.38717    | 4.54384   | 6.42563   | 7.98213   | 6.52759    | 3.95052   | 4.61976    | 4.505     | 3.86591    | 5.22047    | 5.2213     | 5.77886   |
| NR2C2AP   | 2.6177    | 3.00727   | 3.16358   | 6.21782    | 5.80708   | 6.47313   | 2.24648   | 1.8518     | 3.94252   | 2.43355    | 5.50006   | 2.05299    | 4.395      | 3.30895    | 1.88414   |
| NR2E1     | 0.0690425 | 0.0565517 | 0.0628285 | 0.0426902  | 0.16087   | 0.0587888 | 0.0472983 | 0.0122718  | 0.193398  | 0.00866554 | 0.0467642 | 0.0197607  | 0.00445459 | 0          | 0         |
| NR2E3     | 0.148089  | 0.186307  | 0.136122  | 0.0932618  | 0.102237  | 0.021016  | 0.140903  | 0.0877396  | 0         | 0.0206519  | 0.0278624 | 0.0353206  | 0.00530813 | 0.133296   | 0.0590763 |
| NR2F1     | 0.366463  | 0.119707  | 0.149013  | 0.243232   | 0.8008    | 0.43368   | 0.234029  | 0.160081   | 0.242067  | 0.304034   | 0.715194  | 0.12444    | 0.348649   | 0.223992   | 0.517367  |
| NR2F1-AS1 | 0.188629  | 0.0677501 | 0.0539072 | 0.088358   | 0.175803  | 0.116811  | 0.0626532 | 0.0518153  | 0.075184  | 0.142049   | 0.344573  | 0.0588956  | 0.0685959  | 0.0932083  | 0.379253  |
| NR2F2     | 6.56794   | 2.23927   | 2.54751   | 2.94315    | 6.019     | 11.2912   | 4.74418   | 3.01952    | 0.548951  | 2.91895    | 5.61421   | 1.11119    | 3.75126    | 3.65837    | 9.67711   |
| NR2F2-AS1 | 1.14707   | 0.419061  | 0.323264  | 0.0389699  | 0.744046  | 0.386392  | 0.388588  | 0.313667   | 0.0153517 | 0.142387   | 0.498037  | 0.0631352  | 0.0243983  | 0.355752   | 1.06805   |
| NR2F6     | 6.85055   | 6.60758   | 7.0257    | 12.176     | 26.9419   | 14.5173   | 7.19189   | 4.50344    | 17.4832   | 14.1853    | 14.0476   | 11.4099    | 14.4517    | 8.62916    | 4.40326   |
| NR3C1     | 8.37665   | 7.67238   | 7.7518    | 7.30848    | 4.87327   | 7.46187   | 7.77321   | 6.60068    | 5.0339    | 6.99068    | 8.62196   | 4.54041    | 6.27145    | 4.6812     | 6.28389   |
| NR3C2     | 3.69009   | 2.02592   | 2.55126   | 0.494984   | 0.710574  | 1.5548    | 2.84653   | 2.14113    | 0.120709  | 0.177028   | 0.284021  | 0.144565   | 0.169707   | 0.207204   | 0.684326  |
| NR4A1     | 2.25442   | 1.24198   | 1.64161   | 1.36128    | 1.28585   | 11.1328   | 3.61302   | 1.99311    | 1.22266   | 1.98952    | 3.1348    | 8.6872     | 6.60597    | 8.93833    | 13.8358   |
| NR4A2     | 1.21909   | 0.577902  | 0.623546  | 0.506576   | 0.49887   | 2.52254   | 1.09258   | 0.698984   | 0.486923  | 0.98715    | 1.20603   | 2.16196    | 3.72557    | 2.45269    | 3.56741   |
| NR4A3     | 0.315371  | 0.190821  | 0.221459  | 0.888076   | 0.182281  | 3.01945   | 0.284714  | 0.345455   | 0.209907  | 0.73181    | 1.31228   | 0.464431   | 1.33442    | 1.67892    | 4.8662    |
| NR5A1     | 0.0149551 | 0.0216168 | 0.0309298 | 0.00770584 | 0.0232305 | 0         | 0.0256129 | 0.00664543 | 0         | 0          | 0         | 0          | 0          | 0          | 0.0214774 |
| NR5A2     | 0.744121  | 0.433223  | 0.491006  | 0.575129   | 0.261448  | 0.546865  | 0.424807  | 0.515667   | 0.129465  | 0.572599   | 1.00502   | 0.0982476  | 0.334357   | 0.430579   | 0.896904  |
| NR6A1     | 0.980182  | 1.30686   | 1.2127    | 0.395017   | 0.858228  | 0.689039  | 1.0212    | 0.701699   | 0.682297  | 0.557514   | 0.237435  | 0.991262   | 0.304385   | 0.452042   | 0.353996  |
| NRADDP    | 0.365898  | 0.517967  | 0.491882  | 0.188534   | 0.461797  | 0.136306  | 0.574435  | 0.406475   | 0.278514  | 0.688859   | 0.438869  | 0.654525   | 0.0885283  | 0.382469   | 0.0985267 |
| NRAP      | 0         | 0.0100729 | 0.010377  | 0.00430887 | 0         | 0         | 0         | 0.00371592 | 0         | 0          | 0         | 0          | 0          | 0          | 0         |
| NRARP     | 2.90502   | 6.80697   | 7.14398   | 6.95196    | 8.17463   | 11.7514   | 4.56698   | 3.93931    | 9.20523   | 8.91023    | 9.30993   | 15.0811    | 17.1707    | 7.84528    | 5.05963   |
| NRAS      | 5.35709   | 5.01455   | 5.60956   | 9.5741     | 2.31644   | 7.96381   | 4.78764   | 6.85279    | 8.78349   | 12.9909    | 12.705    | 7.13834    | 18.6228    | 9.38805    | 7.26066   |



|          |           |          |           |           |           |           |           |           |           |           |           |           |           |           |           |
|----------|-----------|----------|-----------|-----------|-----------|-----------|-----------|-----------|-----------|-----------|-----------|-----------|-----------|-----------|-----------|
| NRAV     | 1.29318   | 1.97503  | 1.77629   | 3.33165   | 2.80468   | 3.03329   | 1.7551    | 1.34443   | 2.08012   | 4.37924   | 4.43461   | 2.54895   | 5.91132   | 3.58978   | 1.99733   |
| NRBF2    | 3.43311   | 3.4901   | 3.22282   | 11.4292   | 2.32601   | 6.14712   | 2.66881   | 3.53793   | 32.6192   | 14.1339   | 19.2129   | 10.0612   | 17.508    | 8.07426   | 3.96878   |
| NRBP1    | 11.6391   | 11.2309  | 11.7959   | 18.4172   | 13.6398   | 22.8627   | 12.6817   | 9.22197   | 23.4572   | 22.7296   | 24.7003   | 13.2023   | 32.0255   | 15.4108   | 11.5728   |
| NRBP2    | 4.52542   | 8.32931  | 7.09152   | 5.63729   | 11.3071   | 6.97094   | 6.21031   | 5.02175   | 2.42262   | 6.5927    | 2.29468   | 6.12918   | 5.01737   | 5.6498    | 5.83846   |
| NRCAM    | 0.221564  | 0.163465 | 0.16611   | 3.2537    | 0.150572  | 2.1342    | 0.0988182 | 0.246134  | 0.0590275 | 0.7517    | 1.36783   | 0.141195  | 2.32074   | 0.835923  | 1.00927   |
| NRDC     | 15.6536   | 18.3066  | 19.3896   | 19.8768   | 16.5566   | 21.6132   | 16.6943   | 14.3752   | 39.7937   | 20.4511   | 17.7989   | 14.8267   | 23.6529   | 15.1119   | 12.3354   |
| NRDE2    | 2.47013   | 2.63612  | 2.6164    | 2.91429   | 3.23632   | 2.82567   | 2.3261    | 2.03112   | 1.40577   | 1.47045   | 1.75908   | 1.47425   | 1.95118   | 2.05112   | 2.34561   |
| NREP     | 2.97007   | 3.47734  | 2.54071   | 7.47427   | 3.94606   | 5.1027    | 2.4585    | 3.00319   | 4.76782   | 7.80393   | 17.2752   | 4.89291   | 4.49906   | 6.77259   | 15.3814   |
| NREP-AS1 | 0         | 0        | 0         | 0         | 0         | 0         | 0         | 0.0337174 | 0         | 0         | 0         | 0         | 0         | 0         | 0.0544858 |
| NRF1     | 2.36256   | 2.06226  | 2.58696   | 2.30553   | 1.91768   | 2.78542   | 2.43275   | 1.74321   | 1.46538   | 1.75398   | 2.12231   | 1.63667   | 2.45021   | 2.24029   | 1.70997   |
| NRG1     | 0.268232  | 2.08125  | 3.0924    | 1.94821   | 0.453323  | 0.820399  | 0.798723  | 1.3235    | 2.09857   | 2.97875   | 2.05178   | 2.92037   | 8.23214   | 6.64504   | 2.6287    |
| NRG1-IT1 | 0         | 0        | 0.0303898 | 0         | 0         | 0         | 0.0838857 | 0         | 0         | 0         | 0         | 0         | 0         | 0         | 0         |
| NRG1-IT3 | 0.0458278 | 0        | 0.037912  | 0         | 0         | 0         | 0         | 0.040728  | 0         | 0         | 0         | 0         | 0         | 0         | 0         |
| NRG2     | 0.687819  | 0.960783 | 0.903724  | 0.25017   | 0.996593  | 1.32391   | 0.798526  | 0.595866  | 0.183024  | 0.0217634 | 0.0652488 | 0.0785789 | 0.0186461 | 0.10271   | 0.0498047 |
| NRG3     | 0.220515  | 0.122185 | 0.150501  | 0.0284059 | 0.137014  | 0.0891887 | 0.27066   | 0.063692  | 0         | 0.0207577 | 0.01867   | 0.0118338 | 0.0569101 | 0.0922006 | 0.0712547 |
| NRG3-AS1 | 0.141692  | 0        | 0.0390726 | 0         | 0         | 0         | 0.0539265 | 0         | 0         | 0         | 0         | 0         | 0         | 0         | 0         |
| NRG4     | 0.721562  | 0.649306 | 0.781272  | 0.262444  | 0.148346  | 0.316236  | 0.557315  | 0.801581  | 0.116309  | 0.452817  | 0.131766  | 0.250556  | 0.205389  | 0.404849  | 0.289542  |
| NRGN     | 1.17805   | 0.292957 | 0.361534  | 3.11337   | 2.27265   | 5.12875   | 0.954561  | 0.439046  | 0.485959  | 2.21787   | 6.28473   | 0.856525  | 2.73381   | 1.86697   | 2.53775   |
| NRIP1    | 4.82096   | 3.87381  | 3.40799   | 11.6912   | 1.69374   | 6.40523   | 2.67177   | 4.10209   | 9.17637   | 16.7493   | 13.8511   | 9.08623   | 19.7141   | 14.2438   | 6.47044   |
| NRIP2    | 1.90969   | 2.07552  | 1.6941    | 0.601178  | 3.44882   | 1.22949   | 2.41899   | 2.16692   | 0.233442  | 0.578042  | 0.931378  | 0.586381  | 0.182816  | 1.01293   | 3.00279   |
| NRIP3    | 0.261563  | 0.310645 | 0.316312  | 0.444558  | 0.235949  | 0.931237  | 0.377293  | 0.264819  | 1.97573   | 1.03712   | 2.04396   | 0.313668  | 0.861819  | 0.872771  | 0.562842  |
| NRIR     | 0.0278162 | 0.053609 | 0.0230115 | 0.114661  | 0         | 0.544757  | 0.0952788 | 0.0247207 | 0         | 0         | 0         | 0         | 0         | 0.0145379 | 0         |
| NRK      | 0.0401889 | 0.035961 | 0.0356219 | 0.0443741 | 0.0267545 | 0.0586634 | 0.049164  | 0.0178583 | 0.0349611 | 0.0648529 | 0.0939771 | 0.0225942 | 0.0148169 | 0.0135029 | 0.391646  |
| NRL      | 0.166339  | 0.170356 | 0.127907  | 0.164333  | 0.274407  | 0.173901  | 0.13756   | 0.1316    | 0.0803711 | 0.109974  | 0.124726  | 0.0756388 | 0.0283307 | 0.0890581 | 0.125836  |
| NRM      | 0.267788  | 0.287823 | 0.245674  | 0.536005  | 0.453297  | 0.657745  | 0.503706  | 0.233411  | 0.236239  | 0.351183  | 0.653044  | 0.265305  | 0.560411  | 0.326568  | 0.345133  |
| NRN1     | 4.28968   | 1.90948  | 2.46073   | 2.0284    | 2.50903   | 5.27601   | 2.98303   | 1.96107   | 0.515984  | 0.841939  | 2.63049   | 0.650506  | 1.41231   | 1.73453   | 3.49857   |

|           |           |           |            |            |            |           |          |            |            |           |            |           |             |            |           |
|-----------|-----------|-----------|------------|------------|------------|-----------|----------|------------|------------|-----------|------------|-----------|-------------|------------|-----------|
| NRN1L     | 0.310456  | 0.50314   | 0.256831   | 0.290849   | 0.350723   | 0.120159  | 0.161122 | 0.376237   | 0.171864   | 0.0354231 | 0.0318605  | 0.282723  | 0           | 0.118006   | 0.162129  |
| NRON      | 0.678185  | 0.355351  | 0.336625   | 0.0960972  | 0.474055   | 0.180458  | 0.580747 | 0.38423    | 0.0103244  | 0.095759  | 0.00956982 | 0.175906  | 0.0164085   | 0.159502   | 0.280013  |
| NRP1      | 10.3467   | 5.49806   | 5.63292    | 11.8118    | 7.95088    | 25.8598   | 10.0977  | 6.09999    | 4.17019    | 12.652    | 21.9951    | 3.88367   | 11.2959     | 11.7725    | 23.8402   |
| NRP2      | 2.51848   | 1.30156   | 1.44355    | 7.27937    | 3.45101    | 10.4211   | 1.93755  | 1.75327    | 1.28532    | 5.47525   | 7.06028    | 3.01412   | 12.193      | 7.08429    | 11.4276   |
| NRROS     | 1.52293   | 0.624578  | 0.734926   | 1.72823    | 2.53461    | 3.01032   | 1.57323  | 1.21649    | 0.298085   | 0.841939  | 2.14899    | 0.220534  | 1.25747     | 0.753308   | 1.19771   |
| NRSN1     | 0         | 0         | 0.00795082 | 0          | 0          | 0         | 0        | 0          | 0          | 0.036188  | 0          | 0         | 0           | 0.0150692  | 0.0276049 |
| NRSN2     | 1.38388   | 0.985487  | 1.08724    | 2.22441    | 2.69044    | 6.47726   | 1.80864  | 1.07518    | 0.551205   | 2.34866   | 5.11901    | 0.628998  | 2.49331     | 1.8696     | 4.12486   |
| NRSN2-AS1 | 0.365242  | 0.391953  | 0.466965   | 0.41061    | 0.257885   | 0.466498  | 0.72031  | 0.427877   | 0.161754   | 0.270882  | 0.693435   | 0.142549  | 0.246364    | 0.295014   | 0.405321  |
| NRTN      | 0.939078  | 0.894869  | 1.89902    | 0.817209   | 1.65321    | 1.33269   | 1.21517  | 0.834574   | 2.38904    | 0.183344  | 0.306252   | 0.31357   | 0.511639    | 0.109067   | 0.089909  |
| NRXN1     | 0.249534  | 0.0062865 | 0.0215877  | 0.00672293 | 0.00506683 | 0.0916558 | 0.251391 | 0.0550789  | 0.00397261 | 0.002047  | 0.00736452 | 0         | 0.00736592  | 0.0017048  | 0         |
| NRXN2     | 0.175137  | 0.152192  | 0.116426   | 0.183706   | 0.947308   | 0.932042  | 0.282094 | 0.200117   | 0.0114266  | 0.282618  | 0.550756   | 0.105175  | 0.16546     | 0.349791   | 0.821926  |
| NRXN3     | 0.0884059 | 0.0596936 | 0.115778   | 0.0198774  | 0.094883   | 0.128654  | 0.126983 | 0.0628542  | 0.0195761  | 0.056488  | 0.0689522  | 0.0530169 | 0.0487424   | 0.123493   | 0.143121  |
| NSA2      | 14.6035   | 12.5526   | 14.1738    | 20.0487    | 2.87969    | 17.4039   | 8.45567  | 10.0161    | 21.2064    | 18.44     | 30.6369    | 10.0896   | 17.4913     | 13.3819    | 11.072    |
| NSD1      | 7.67015   | 7.9982    | 7.96231    | 8.70954    | 7.62534    | 8.47458   | 7.50489  | 6.91417    | 7.44634    | 5.78087   | 4.93939    | 6.66108   | 8.47838     | 6.90036    | 6.96092   |
| NSD2      | 1.58425   | 1.53904   | 1.7456     | 2.69961    | 1.55568    | 2.93679   | 1.74231  | 1.42963    | 0.589229   | 1.47301   | 1.34935    | 1.53503   | 2.47887     | 2.69718    | 1.94433   |
| NSD3      | 6.13691   | 6.33587   | 6.35018    | 5.65126    | 4.18013    | 6.25943   | 4.76246  | 5.4744     | 4.88812    | 5.32582   | 5.43111    | 3.95201   | 5.79522     | 5.18847    | 5.33987   |
| NSDHL     | 4.13167   | 5.03492   | 4.16973    | 14.1342    | 5.07257    | 10.6751   | 4.685    | 2.66244    | 10.8766    | 10.4069   | 10.6265    | 7.19271   | 15.6369     | 8.10321    | 3.56832   |
| NSF       | 3.61678   | 3.12218   | 3.18369    | 5.47445    | 2.73889    | 6.29126   | 3.17819  | 3.46782    | 9.52024    | 5.67392   | 5.97721    | 3.7143    | 6.19225     | 4.15747    | 3.68542   |
| NSFL1C    | 9.58358   | 9.55966   | 9.47091    | 14.8078    | 11.4767    | 18.0079   | 10.8387  | 6.75043    | 17.1134    | 13.597    | 10.7821    | 11.4908   | 19.9702     | 9.41858    | 6.13766   |
| NSFP1     | 0.094851  | 0.0396755 | 0.0239008  | 0.19376    | 0.0025483  | 5.81E-05  | 1.36067  | 0.00037248 | 1.28411    | 0.424788  | 0.848281   | 0.0861298 | 0.000374378 | 0.468334   | 0.05868   |
| NSG1      | 10.8952   | 17.6041   | 17.0987    | 5.91565    | 20.4345    | 12.6269   | 14.3233  | 14.4103    | 36.3406    | 12.6705   | 11.7407    | 14.2639   | 13.7876     | 8.87973    | 2.8072    |
| NSG2      | 0         | 0         | 0          | 0.00972658 | 0          | 0         | 0        | 0.0083881  | 0.011495   | 0.0118462 | 0          | 0         | 0.0243585   | 0.00986588 | 0         |
| NSL1      | 0.989097  | 0.743099  | 0.850112   | 0.622398   | 0.432369   | 0.804935  | 0.593641 | 0.936593   | 0.144979   | 0.511946  | 1.17387    | 0.23549   | 0.567001    | 0.55354    | 0.922672  |
| NSMAF     | 6.00296   | 5.33357   | 5.8419     | 6.20518    | 2.89912    | 7.54996   | 4.65318  | 5.02498    | 3.90516    | 4.70036   | 5.94079    | 4.10265   | 4.93913     | 4.10005    | 4.00736   |
| NSMCE1    | 7.69256   | 5.69083   | 4.70527    | 13.9909    | 8.15795    | 13.1744   | 5.94664  | 4.89982    | 7.45778    | 8.53356   | 16.6791    | 5.72253   | 7.88769     | 5.61499    | 4.28755   |

|              |           |          |          |           |            |           |           |            |           |           |           |            |           |           |           |
|--------------|-----------|----------|----------|-----------|------------|-----------|-----------|------------|-----------|-----------|-----------|------------|-----------|-----------|-----------|
| NSMCE2       | 3.63244   | 2.95672  | 2.74321  | 3.91349   | 1.51747    | 3.54989   | 2.29364   | 2.67795    | 4.49094   | 4.35186   | 7.06726   | 2.33329    | 3.76402   | 2.99154   | 2.78616   |
| NSMCE3       | 3.27444   | 2.28629  | 2.47928  | 3.4173    | 2.69403    | 7.54924   | 2.59804   | 2.10855    | 2.07844   | 2.42058   | 7.18924   | 1.03249    | 3.49124   | 2.31324   | 4.38369   |
| NSMCE4A      | 6.29227   | 6.81736  | 6.25469  | 7.53685   | 4.70793    | 8.05071   | 3.93068   | 3.64507    | 5.07541   | 6.34689   | 12.7002   | 3.86585    | 4.86742   | 4.88126   | 4.44728   |
| NSMF         | 4.02817   | 3.66807  | 4.12881  | 6.4617    | 8.57898    | 12.1503   | 5.5032    | 2.92134    | 5.23757   | 6.65362   | 9.352     | 4.71767    | 6.81208   | 6.88204   | 5.4575    |
| NSRP1        | 5.69601   | 4.89477  | 3.89001  | 3.70783   | 1.71527    | 6.07245   | 0.830018  | 2.24895    | 5.68196   | 3.93837   | 3.97858   | 3.11436    | 3.90066   | 3.89078   | 3.81921   |
| NSUN2        | 7.01435   | 7.11628  | 6.80776  | 12.8725   | 7.70795    | 14.0781   | 6.40224   | 6.56308    | 9.15285   | 8.1145    | 6.03558   | 8.02436    | 16.4598   | 10.0044   | 6.9193    |
| NSUN3        | 1.36309   | 1.03724  | 1.06687  | 0.698902  | 0.360054   | 1.03527   | 0.769208  | 1.24605    | 0.517835  | 0.66156   | 1.15001   | 0.450068   | 0.725504  | 0.580163  | 0.979024  |
| NSUN4        | 1.87571   | 2.0278   | 2.07666  | 2.29927   | 1.64279    | 2.586     | 2.05583   | 1.57121    | 1.23464   | 1.3975    | 1.86065   | 1.53063    | 1.87194   | 1.87721   | 1.54205   |
| NSUN5        | 2.53893   | 2.46406  | 2.88816  | 4.5746    | 5.39554    | 5.68046   | 2.66759   | 1.81039    | 2.06118   | 2.32843   | 3.19822   | 2.42102    | 4.66406   | 2.83438   | 1.54452   |
| NSUN5P1      | 2.83594   | 4.87419  | 4.04399  | 2.42867   | 8.04589    | 3.84038   | 3.6519    | 2.23854    | 1.26055   | 1.33182   | 0.916833  | 2.42172    | 0.867547  | 2.94042   | 2.25557   |
| NSUN5P2      | 1.5642    | 2.55549  | 2.17606  | 1.46022   | 5.53361    | 1.79711   | 1.93511   | 0.945779   | 0.337373  | 0.614673  | 0.659599  | 0.840613   | 0.37807   | 1.38841   | 0.969288  |
| NSUN6        | 2.23719   | 2.68789  | 2.37055  | 2.14852   | 1.03515    | 2.04274   | 1.66305   | 1.87824    | 1.27537   | 1.07537   | 1.70875   | 1.26018    | 0.730927  | 1.41803   | 1.25781   |
| NSUN7        | 0.677375  | 0.498348 | 0.552536 | 0.265525  | 0.148163   | 0.567279  | 0.466313  | 0.498101   | 0.128399  | 0.0361443 | 0.0710193 | 0.0879845  | 0.0342923 | 0.0639748 | 0.221512  |
| NT5C         | 4.46346   | 4.69897  | 4.72639  | 10.3954   | 10.6426    | 10.3565   | 4.38277   | 3.09407    | 5.65343   | 8.26311   | 16.4765   | 4.64687    | 8.10667   | 8.4564    | 4.23066   |
| NT5C1A       | 0         | 0        | 0.017295 | 0         | 0.0324744  | 0.0356025 | 0.0477398 | 0          | 0         | 0         | 0         | 0          | 0         | 0.0218529 | 0         |
| NT5C1B       | 0.283208  | 0.193015 | 0.265873 | 0.253112  | 0.538904   | 0.193188  | 0.141732  | 0.214309   | 0.0962434 | 0.0263881 | 0.1428    | 0.177253   | 0.0120717 | 0.154261  | 0.0328609 |
| NT5C1B-RDH14 | 0.0161506 | 0.14044  | 0.109454 | 0.0897248 | 0.00173672 | 0.0889445 | 0.121271  | 0.00648187 | 9.15E-05  | 0.341512  | 2.00E-05  | 0.0929998  | 0.0232766 | 0.0293769 | 0.124972  |
| NT5C2        | 6.08037   | 4.89278  | 4.11112  | 9.15794   | 3.19253    | 10.282    | 3.2709    | 4.64431    | 10.2423   | 8.50071   | 9.0876    | 5.50269    | 11.9286   | 5.75165   | 5.30904   |
| NT5C3A       | 5.07991   | 4.27168  | 4.85718  | 11.9689   | 1.16286    | 4.55314   | 3.04047   | 5.24645    | 33.1225   | 9.27514   | 10.2378   | 5.85396    | 6.54817   | 3.42634   | 2.05807   |
| NT5C3B       | 5.32882   | 2.85203  | 3.61742  | 6.10004   | 6.18081    | 10.3918   | 5.02474   | 2.774      | 4.64053   | 8.20581   | 12.1264   | 4.6278     | 11.5119   | 5.45991   | 5.41151   |
| NT5DC1       | 4.62269   | 3.01129  | 3.35919  | 5.35072   | 1.75782    | 6.68203   | 3.33572   | 3.97023    | 2.79244   | 3.30479   | 4.02446   | 2.88428    | 3.31658   | 2.42375   | 2.23063   |
| NT5DC2       | 5.95215   | 6.95392  | 7.871    | 6.56142   | 8.69096    | 11.8358   | 12.3916   | 4.96056    | 6.54875   | 10.7852   | 23.3697   | 4.35253    | 9.09501   | 9.03371   | 11.8778   |
| NT5DC3       | 0.869388  | 0.534812 | 0.6051   | 0.545492  | 0.438526   | 1.14455   | 1.09886   | 0.670001   | 0.277402  | 0.72879   | 0.861921  | 0.727662   | 1.46958   | 1.1217    | 1.4743    |
| NT5DC4       | 0.0131122 | 0.018953 | 0        | 0.0135125 | 0          | 0.0111649 | 0.0149711 | 0          | 0         | 0.0329143 | 0         | 0.00938214 | 0         | 0.020559  | 0         |
| NT5E         | 2.17321   | 1.32942  | 1.58605  | 3.887     | 0.804172   | 10.9189   | 3.07241   | 1.43589    | 0.561219  | 4.60554   | 7.85436   | 0.781568   | 7.99441   | 3.96048   | 4.64882   |
| NT5M         | 0.684964  | 0.259808 | 0.253184 | 0.450559  | 0.430122   | 1.34021   | 0.499194  | 0.168375   | 0.0532474 | 0.0182915 | 0.625172  | 0.0521394  | 0.159849  | 0.137103  | 0.293016  |

|           |           |            |            |            |           |           |           |           |            |           |           |           |           |            |           |
|-----------|-----------|------------|------------|------------|-----------|-----------|-----------|-----------|------------|-----------|-----------|-----------|-----------|------------|-----------|
| NTAN1     | 5.99939   | 3.81721    | 4.373      | 9.78418    | 4.46951   | 11.5898   | 5.27587   | 4.27614   | 11.9174    | 15.4914   | 26.961    | 7.19692   | 16.3785   | 7.06998    | 6.61924   |
| NTF3      | 0.612951  | 0.431021   | 0.219276   | 0.59752    | 0.463196  | 1.17079   | 0.435041  | 0.206118  | 0.201758   | 0.207923  | 0.561037  | 0.260779  | 0.331342  | 0.207798   | 0.57099   |
| NTF4      | 0.926649  | 2.42212    | 1.89731    | 2.26798    | 5.43376   | 2.0712    | 1.19027   | 1.50294   | 0.338566   | 1.01766   | 1.17683   | 1.16032   | 0.328828  | 1.31974    | 1.19771   |
| NTHL1     | 2.07639   | 1.26096    | 1.39566    | 2.45183    | 4.19967   | 2.63361   | 1.08659   | 0.768883  | 0.842935   | 2.00885   | 3.90663   | 1.28452   | 1.80019   | 1.8652     | 2.57815   |
| NTM       | 0.262777  | 0.18124    | 0.255003   | 0.335077   | 0.49636   | 0.624726  | 0.670635  | 0.284717  | 0.273703   | 1.16412   | 2.42347   | 0.660326  | 1.27105   | 2.13909    | 2.60828   |
| NTM-AS1   | 0.0341343 | 0.0493393  | 0.0847149  | 0          | 0         | 0.0871947 | 0.155894  | 0.0606714 | 0          | 0         | 0         | 0         | 0         | 0          | 0.294127  |
| NTM-IT    | 0         | 0.0437854  | 0.0250596  | 0          | 0.0470539 | 0         | 0         | 0         | 0          | 0         | 0         | 0         | 0         | 0.0474957  | 0         |
| NTMT1     | 1.7643    | 1.51459    | 1.44592    | 2.93006    | 3.5645    | 3.76225   | 1.7445    | 1.30475   | 2.48753    | 2.07237   | 4.12235   | 1.85428   | 3.08747   | 2.37145    | 2.02026   |
| NTN1      | 2.46823   | 1.83348    | 2.34737    | 1.74646    | 2.40909   | 3.75983   | 4.47796   | 1.24014   | 0.189356   | 1.60017   | 1.7771    | 0.842714  | 9.12609   | 9.62729    | 13.7657   |
| NTN3      | 0.0699186 | 0.117907   | 0.0578416  | 0.0240177  | 0.470633  | 0.198449  | 0.0532205 | 0.0517815 | 0          | 0.0585033 | 0         | 0.0667048 | 0         | 0.121808   | 0.0669413 |
| NTN4      | 3.65678   | 2.05554    | 2.45679    | 0.987784   | 2.71103   | 3.41566   | 3.2769    | 1.78741   | 0.614051   | 1.21      | 2.2204    | 0.74135   | 1.8124    | 3.30693    | 2.23592   |
| NTN5      | 0.109051  | 0.490396   | 0.26062    | 0.0499468  | 0.97872   | 0.103173  | 0.30436   | 0.129221  | 0.0737844  | 0.121662  | 0.08207   | 0.0606892 | 0.0234531 | 0.0949914  | 0.382827  |
| NTNG1     | 0.0484773 | 0.0373713  | 0.0401038  | 0.00666097 | 0.0702818 | 0.143096  | 0.0590398 | 0.157969  | 0.00787198 | 0.0892378 | 0.193361  | 0.0046249 | 0.0229367 | 0.0135127  | 0.10675   |
| NTNG2     | 0.0918183 | 0.0349259  | 0.067963   | 0.253984   | 0.270238  | 0.403255  | 0.148976  | 0.0773057 | 0.011771   | 0.139503  | 0.381874  | 0.0311203 | 0.0623587 | 0.118708   | 0.569092  |
| NTPCR     | 1.52953   | 2.90647    | 1.71471    | 7.2035     | 2.931     | 7.81426   | 3.9334    | 1.27039   | 3.72559    | 4.53914   | 7.48752   | 4.36745   | 4.2425    | 4.14642    | 2.38136   |
| NTRK1     | 0.0486028 | 0.00780586 | 0.0201038  | 0.0500866  | 0.163577  | 0.0689745 | 0.0554931 | 0.0359951 | 0.0295964  | 0.0813354 | 0.146311  | 0.0405727 | 0.0470375 | 0.165113   | 0.267566  |
| NTRK2     | 4.06239   | 3.46937    | 3.7107     | 0.89649    | 1.09651   | 4.53976   | 2.53419   | 2.90856   | 0.720557   | 0.583551  | 0.740679  | 0.536659  | 0.491936  | 0.575273   | 0.784687  |
| NTRK3     | 1.15045   | 0.256585   | 0.497724   | 0.0335143  | 0.612518  | 2.48877   | 0.830826  | 0.256508  | 0.00495093 | 0.0102044 | 0.0275345 | 0.011635  | 0.0262283 | 0.023371   | 0.0992478 |
| NTRK3-AS1 | 0.0260718 | 0.0125618  | 0.00718947 | 0          | 0.0134995 | 0.0147999 | 0.0198453 | 0         | 0          | 0         | 0         | 0         | 0         | 0          | 0         |
| NTS       | 0.0933941 | 0.00899974 | 0          | 0          | 0.0580293 | 0         | 0.0639806 | 0.0166002 | 0          | 0         | 0.0210861 | 0.0133652 | 0         | 0.00976236 | 0         |
| NTSR1     | 0.0280047 | 0.0431778  | 0.0880362  | 0.12121    | 0.0522011 | 1.31628   | 0.0831345 | 0.0248882 | 0          | 0.428814  | 0.25291   | 0.204388  | 0.419188  | 1.10066    | 0.587186  |
| NTSR2     | 0         | 0          | 0          | 0.0444955  | 0         | 0.012255  | 0         | 0         | 0          | 0         | 0         | 0         | 0         | 0.00752212 | 0         |
| NUAK1     | 7.43048   | 7.05888    | 8.25777    | 2.993      | 4.74333   | 5.39669   | 4.79978   | 7.45995   | 0.578506   | 2.33363   | 3.01818   | 0.623924  | 2.55905   | 1.90273    | 3.59114   |
| NUAK2     | 3.61589   | 5.59456    | 4.94311    | 4.46924    | 11.445    | 5.90784   | 7.21912   | 3.46484   | 25.8156    | 16.4884   | 13.3904   | 23.4781   | 17.0823   | 11.346     | 4.33223   |
| NUB1      | 5.59597   | 5.73116    | 6.2171     | 7.54894    | 5.56926   | 8.96118   | 3.82875   | 4.86701   | 5.75359    | 4.63231   | 6.41239   | 3.62173   | 6.48616   | 3.79178    | 4.99757   |
| NUBP1     | 4.85755   | 3.15864    | 2.90263    | 8.1279     | 4.25512   | 9.76882   | 3.70442   | 2.166     | 6.61421    | 4.20732   | 8.88146   | 3.97586   | 7.73728   | 4.76572    | 4.65534   |

|           |          |          |          |           |          |           |          |           |           |           |          |           |           |           |          |
|-----------|----------|----------|----------|-----------|----------|-----------|----------|-----------|-----------|-----------|----------|-----------|-----------|-----------|----------|
| NUBP2     | 5.7839   | 5.58656  | 6.00879  | 9.71507   | 17.6816  | 11.6915   | 6.08566  | 3.55153   | 7.11325   | 5.95438   | 12.7736  | 5.55231   | 7.66894   | 7.17811   | 3.42665  |
| NUBPL     | 1.83621  | 1.3238   | 1.31088  | 1.48578   | 0.676094 | 2.10205   | 1.06379  | 1.33572   | 0.596346  | 1.19499   | 1.51242  | 0.627732  | 0.671338  | 0.906366  | 0.781342 |
| NUCB1     | 21.3124  | 16.5163  | 17.5866  | 32.2187   | 37.6776  | 56.7799   | 21.5367  | 13.8686   | 30.0654   | 20.1042   | 26.5207  | 16.1036   | 27.9587   | 17.747    | 31.6254  |
| NUCB1-AS1 | 0.267241 | 0.309026 | 0.176864 | 0.16524   | 0.332094 | 0.0455104 | 0.122051 | 0.237501  | 0         | 0.0670829 | 0        | 0.114731  | 0         | 0.223475  | 0.383792 |
| NUCB2     | 4.20618  | 3.05745  | 3.59262  | 2.80529   | 0.890951 | 6.55834   | 1.16424  | 2.62152   | 3.80317   | 6.21616   | 8.86959  | 2.99008   | 5.00466   | 3.83994   | 6.17133  |
| NUCKS1    | 23.1502  | 16.9848  | 18.9145  | 20.8278   | 7.83607  | 29.0133   | 13.8579  | 22.1681   | 9.68445   | 14.7391   | 20.9644  | 9.65798   | 14.7424   | 12.8759   | 17.5745  |
| NUDC      | 8.4377   | 8.70897  | 9.03949  | 14.3387   | 14.2567  | 18.6191   | 7.34566  | 6.45503   | 9.09465   | 8.84385   | 9.15045  | 7.72714   | 17.0649   | 10.461    | 6.52628  |
| NUDCD1    | 1.44006  | 1.16369  | 1.09282  | 2.43053   | 0.343463 | 2.09999   | 0.932155 | 1.05811   | 1.05644   | 2.1988    | 3.90414  | 0.989835  | 2.45083   | 2.1216    | 1.58773  |
| NUDCD2    | 1.25556  | 1.03046  | 1.05382  | 1.02013   | 0.6353   | 1.34863   | 0.76143  | 1.22007   | 0.783638  | 0.922019  | 1.50567  | 0.654251  | 0.905925  | 0.84277   | 0.707076 |
| NUDCD3    | 6.88596  | 6.90993  | 7.54219  | 10.0938   | 11.2739  | 12.2596   | 8.34046  | 5.46295   | 6.64372   | 5.75976   | 5.38771  | 6.10582   | 7.6405    | 5.61114   | 5.54953  |
| NUDT1     | 3.42451  | 2.88747  | 3.13     | 7.76962   | 5.40524  | 10.0411   | 4.91902  | 2.60163   | 2.89256   | 4.57541   | 10.6934  | 2.80602   | 3.68839   | 4.33015   | 2.93495  |
| NUDT10    | 0.178244 | 0.065504 | 0.066132 | 0.0246247 | 3.60E-15 | 0.158836  | 0.077527 | 0.0342129 | 0.0201304 | 0.0294162 | 0.182269 | 0         | 0.0287842 | 0.0544182 | 0.279722 |
| NUDT11    | 0.193362 | 0.106157 | 0.110531 | 0.157845  | 0.240061 | 0.240773  | 0.296796 | 0.124885  | 0.111966  | 0.277602  | 0.594516 | 0.0552904 | 0.267974  | 0.190139  | 0.548435 |
| NUDT12    | 1.69275  | 1.00037  | 1.00651  | 1.70354   | 0.513559 | 1.81858   | 1.53259  | 1.64541   | 1.75557   | 1.81751   | 2.81411  | 1.37207   | 1.39505   | 0.615147  | 1.00659  |
| NUDT13    | 1.47164  | 1.45211  | 1.45927  | 0.768671  | 0.313146 | 0.635124  | 0.897679 | 1.29891   | 0.208692  | 0.493393  | 0.432393 | 0.266856  | 0.169088  | 0.647977  | 0.419797 |
| NUDT14    | 1.18509  | 2.27582  | 2.22688  | 3.36721   | 5.99591  | 7.45282   | 1.77835  | 1.0833    | 2.88661   | 2.74108   | 5.92461  | 2.556     | 2.6106    | 2.59254   | 1.70193  |
| NUDT15    | 1.77873  | 1.32791  | 1.31383  | 3.62578   | 1.19173  | 2.75867   | 1.28326  | 1.70673   | 2.48767   | 2.41649   | 3.58565  | 1.91608   | 4.01985   | 2.33432   | 1.71235  |
| NUDT16    | 3.07002  | 1.85927  | 1.96908  | 1.98131   | 2.01044  | 4.60595   | 1.6532   | 1.65099   | 0.503241  | 1.27297   | 1.72706  | 0.527792  | 1.74501   | 1.30647   | 1.8293   |
| NUDT16L1  | 3.43885  | 3.75354  | 3.6808   | 4.8035    | 10.8607  | 7.86847   | 3.21926  | 2.52026   | 6.3517    | 4.41841   | 7.70886  | 3.68508   | 4.96324   | 3.22832   | 1.87247  |
| NUDT16P1  | 0.479699 | 0.311313 | 0.299656 | 0.363192  | 0.273724 | 0.408458  | 0.279442 | 0.304512  | 0.0476914 | 0.319467  | 0.629932 | 0.126087  | 0.334765  | 0.266062  | 0.239009 |
| NUDT17    | 0.78487  | 0.603015 | 0.684397 | 0.240463  | 0.790815 | 0.523808  | 0.411739 | 0.45245   | 0.361685  | 0.239617  | 0.502876 | 0.333922  | 0.0958043 | 0.354774  | 0.487426 |
| NUDT18    | 1.4931   | 1.35805  | 1.80238  | 2.04111   | 3.02929  | 3.45082   | 1.53082  | 0.771793  | 1.29888   | 1.72101   | 3.92142  | 0.850322  | 1.74974   | 1.17054   | 2.77881  |
| NUDT19    | 2.82366  | 2.84122  | 2.67793  | 5.24096   | 2.54443  | 4.03153   | 2.29774  | 2.19748   | 4.11337   | 2.86847   | 3.99765  | 2.88549   | 5.71202   | 3.00045   | 1.74751  |
| NUDT2     | 3.12162  | 4.10759  | 3.72226  | 5.92359   | 4.84896  | 5.79265   | 2.80217  | 2.02806   | 8.7048    | 4.53942   | 7.29087  | 2.27982   | 4.79207   | 2.85793   | 3.58643  |
| NUDT21    | 8.35503  | 6.43182  | 6.76416  | 9.8115    | 2.20247  | 10.6556   | 6.25973  | 8.522     | 4.48975   | 5.99789   | 8.51291  | 4.02808   | 8.39256   | 6.26324   | 6.18421  |
| NUDT22    | 5.42609  | 5.43669  | 5.84908  | 9.74315   | 14.75    | 12.6006   | 6.10145  | 3.81761   | 12.8162   | 10.6282   | 19.9306  | 8.60331   | 12.6509   | 8.27138   | 5.04744  |

|         |           |           |           |           |           |           |           |           |           |           |           |           |           |           |           |
|---------|-----------|-----------|-----------|-----------|-----------|-----------|-----------|-----------|-----------|-----------|-----------|-----------|-----------|-----------|-----------|
| NUDT3   | 10.7107   | 8.0873    | 8.51289   | 10.2715   | 9.5504    | 18.691    | 8.64796   | 6.96532   | 6.4854    | 8.96492   | 11.3568   | 6.40041   | 10.0741   | 7.81601   | 8.42193   |
| NUDT4   | 3.61256   | 1.23026   | 1.34975   | 1.4603    | 1.48761   | 2.11017   | 1.89352   | 2.12073   | 1.50017   | 1.66503   | 2.28524   | 1.00426   | 1.40899   | 1.52529   | 2.81947   |
| NUDT4B  | 4.71205   | 1.53688   | 1.88783   | 2.49942   | 2.24E-05  | 1.68944   | 1.67756   | 4.92867   | 3.37354   | 3.39145   | 3.37706   | 1.45882   | 4.19376   | 2.07557   | 5.17681   |
| NUDT4P2 | 5.5567    | 2.40867   | 2.16489   | 3.83184   | 5.19378   | 6.68388   | 3.56232   | 2.79947   | 3.46625   | 2.87424   | 7.88317   | 2.8354    | 5.26163   | 3.40137   | 2.86091   |
| NUDT5   | 4.10569   | 4.25175   | 4.4124    | 6.96512   | 3.10308   | 6.23308   | 3.9567    | 3.87957   | 3.33001   | 4.61309   | 7.62239   | 4.2368    | 5.51892   | 5.0691    | 3.6002    |
| NUDT6   | 0.858088  | 0.421599  | 0.517828  | 0.75931   | 0.740877  | 1.03421   | 0.557411  | 0.375455  | 0.145616  | 0.626376  | 1.21749   | 0.209546  | 0.311383  | 0.318051  | 0.426737  |
| NUDT7   | 0.925024  | 0.916609  | 0.837438  | 1.09715   | 0.433776  | 1.67932   | 0.617755  | 0.651463  | 0.446379  | 0.591453  | 1.02453   | 0.324696  | 0.382866  | 0.538189  | 0.451172  |
| NUDT8   | 5.41706   | 5.3567    | 4.38752   | 7.18995   | 17.2256   | 16.9288   | 6.37932   | 3.88163   | 12.1585   | 5.55309   | 12.9988   | 8.46238   | 6.02029   | 4.5803    | 1.46631   |
| NUDT9   | 2.39155   | 2.20163   | 1.98527   | 3.45549   | 2.27235   | 5.11542   | 0.994652  | 1.899     | 3.72338   | 2.09393   | 2.96882   | 2.3816    | 2.9906    | 2.52134   | 1.88843   |
| NUDT9P1 | 0.0644653 | 0.0517673 | 0.142214  | 0         | 0.0667579 | 0.146377  | 0.0736044 | 0.114583  | 0.052341  | 0.0269702 | 0.0242578 | 0.0615022 | 0.0831854 | 0.0224616 | 0.246881  |
| NUF2    | 0.314159  | 0.246672  | 0.221392  | 1.35496   | 0.0722959 | 1.22853   | 0.0797104 | 0.196473  | 0.198391  | 1.37275   | 1.57621   | 0.283068  | 0.990947  | 1.41085   | 0.334202  |
| NUFIP1  | 1.18801   | 0.844215  | 0.829074  | 1.62782   | 0.628878  | 1.74624   | 0.750208  | 0.961434  | 0.751725  | 0.882986  | 1.2662    | 0.778822  | 1.56726   | 1.23141   | 0.95315   |
| NUFIP2  | 6.08781   | 5.85615   | 6.05514   | 7.92867   | 2.01553   | 7.64332   | 4.7772    | 7.12305   | 5.54387   | 6.71977   | 6.38253   | 5.38031   | 9.5492    | 7.70203   | 6.7603    |
| NUGGC   | 0.102137  | 0.0659803 | 0.0738831 | 0.0429501 | 0.195785  | 0.0254699 | 0.0407882 | 0.125061  | 0.0652613 | 0.0597827 | 0.047049  | 0.0389868 | 0.0345732 | 0.0653478 | 0.119709  |
| NUMA1   | 17.8834   | 22.8193   | 22.9579   | 18.2714   | 41.514    | 28.4043   | 21.6033   | 15.8342   | 17.4516   | 9.64121   | 7.70298   | 14.9361   | 20.141    | 14.3874   | 15.2651   |
| NUMB    | 7.96947   | 8.10793   | 8.66631   | 12.9649   | 6.11781   | 13.0252   | 7.34432   | 7.03876   | 7.76628   | 12.0944   | 11.4286   | 6.82871   | 16.1184   | 9.42415   | 10.213    |
| NUMBL   | 2.34503   | 2.19629   | 2.50017   | 1.68647   | 3.80821   | 4.34056   | 3.54371   | 1.92247   | 1.45854   | 3.62004   | 2.03852   | 1.58372   | 4.1264    | 1.7139    | 3.8       |
| NUP107  | 2.80387   | 2.51349   | 2.5515    | 3.44834   | 1.04873   | 3.99275   | 1.8113    | 2.17382   | 1.25809   | 2.26894   | 2.92782   | 1.21958   | 2.78022   | 2.5645    | 2.11932   |
| NUP133  | 6.82637   | 5.63951   | 6.55632   | 6.93754   | 2.92249   | 8.10451   | 5.4242    | 5.07039   | 4.12308   | 4.7297    | 6.0208    | 3.57002   | 5.65044   | 4.64969   | 4.55107   |
| NUP153  | 8.49279   | 8.55945   | 8.78298   | 10.0537   | 3.09953   | 9.34542   | 6.64352   | 7.08287   | 12.3193   | 7.47306   | 8.26613   | 7.59808   | 12.7291   | 9.0884    | 6.52993   |
| NUP155  | 5.21173   | 4.00504   | 4.10984   | 6.42583   | 1.37829   | 6.84135   | 5.03768   | 4.23307   | 2.8263    | 4.00796   | 5.96588   | 2.79422   | 6.20289   | 4.49221   | 3.17871   |
| NUP160  | 4.80538   | 4.2248    | 4.21285   | 6.56384   | 2.2769    | 7.06082   | 3.81736   | 3.95169   | 2.58576   | 4.02087   | 4.76367   | 2.91941   | 6.3983    | 4.61046   | 4.26442   |
| NUP188  | 4.7424    | 5.9777    | 6.28324   | 9.66128   | 5.76954   | 11.0208   | 7.97591   | 5.24032   | 5.88954   | 5.39115   | 5.41321   | 5.90558   | 11.3922   | 6.3823    | 5.58511   |
| NUP205  | 6.63021   | 6.31447   | 6.86673   | 10.1579   | 3.03586   | 9.51372   | 7.08597   | 5.53853   | 4.81891   | 6.64155   | 6.05682   | 5.21105   | 10.4736   | 6.85722   | 4.85094   |
| NUP210  | 1.01138   | 1.25461   | 1.14746   | 2.40216   | 2.34408   | 1.69502   | 1.18409   | 1.31829   | 1.84958   | 0.749546  | 0.837267  | 1.54613   | 1.03164   | 0.495032  | 0.825375  |
| NUP210L | 0.114102  | 0.0853077 | 0.055334  | 0.0446014 | 0.0366703 | 0.0268018 | 0.0628929 | 0.0699341 | 0.0143755 | 0.0197531 | 0.0177665 | 0.0168917 | 0.0126928 | 0.0472965 | 0.0621557 |

|            |           |           |           |           |           |            |           |           |            |           |           |          |          |           |          |
|------------|-----------|-----------|-----------|-----------|-----------|------------|-----------|-----------|------------|-----------|-----------|----------|----------|-----------|----------|
| NUP210P1   | 0         | 0         | 0         | 0         | 0         | 0          | 0         | 0         | 0          | 0         | 0         | 0        | 0        | 0         | 0        |
| NUP214     | 5.92153   | 5.7929    | 6.08794   | 6.65001   | 4.57881   | 8.927      | 7.24513   | 5.62899   | 3.87644    | 3.87465   | 3.78325   | 4.53419  | 5.5014   | 4.40173   | 5.50952  |
| NUP35      | 2.57273   | 2.61813   | 2.701     | 3.80451   | 0.537624  | 3.22212    | 1.64656   | 2.41972   | 2.00925    | 2.3892    | 4.28481   | 2.03072  | 3.22306  | 2.85807   | 1.92194  |
| NUP37      | 2.88169   | 2.50955   | 2.53201   | 6.40047   | 1.0009    | 4.84649    | 2.39103   | 2.40194   | 2.50684    | 5.414     | 8.72875   | 2.16439  | 6.14362  | 4.27508   | 2.6733   |
| NUP43      | 3.45383   | 3.81169   | 3.99422   | 4.26127   | 2.22768   | 4.56906    | 3.28168   | 3.25534   | 1.57193    | 2.84244   | 3.43349   | 2.50978  | 2.94164  | 3.96627   | 2.68602  |
| NUP50      | 4.9349    | 5.80939   | 5.97227   | 10.3704   | 4.87515   | 10.3705    | 3.99648   | 4.79697   | 9.69421    | 8.5278    | 8.06905   | 6.53226  | 13.314   | 9.33157   | 6.31375  |
| NUP50-DT   | 1.52457   | 2.32123   | 2.57292   | 2.37239   | 1.68142   | 2.11599    | 1.967     | 1.80204   | 3.43501    | 2.62149   | 3.39048   | 2.46538  | 2.48863  | 2.80477   | 0.853898 |
| NUP54      | 5.09563   | 4.13845   | 4.11063   | 6.59428   | 0.857606  | 6.14225    | 2.52149   | 4.06205   | 3.85802    | 5.35046   | 7.90818   | 2.58398  | 7.18269  | 4.75879   | 3.99044  |
| NUP58      | 3.28329   | 3.66802   | 3.81584   | 5.80972   | 1.73319   | 4.74129    | 2.68201   | 3.43033   | 5.1365     | 6.78089   | 7.4008    | 3.62893  | 8.92461  | 6.27529   | 3.84114  |
| NUP62      | 4.69378   | 5.5598    | 4.98872   | 11.1799   | 6.92163   | 12.1058    | 6.46792   | 4.76098   | 5.8019     | 6.11513   | 6.82196   | 6.14456  | 14.6958  | 7.66142   | 6.18989  |
| NUP62CL    | 0.551651  | 0.632842  | 0.521559  | 1.0287    | 0.183622  | 0.60393    | 0.374915  | 0.665354  | 0.287935   | 0.346189  | 0.311372  | 0.310138 | 0.415242 | 0.43934   | 0.169766 |
| NUP85      | 5.02388   | 4.82246   | 5.28378   | 7.76591   | 6.04951   | 8.53892    | 4.54665   | 3.40052   | 3.56915    | 4.43584   | 5.29769   | 3.69924  | 6.43251  | 4.88      | 3.80324  |
| NUP88      | 4.29006   | 4.21008   | 3.68107   | 6.04602   | 3.39894   | 6.01322    | 2.79619   | 3.14789   | 6.66751    | 5.90213   | 6.66515   | 4.37142  | 5.57266  | 4.74374   | 3.26468  |
| NUP93      | 3.04595   | 2.46673   | 2.98306   | 5.11745   | 3.40279   | 7.4193     | 3.71663   | 2.49918   | 1.85855    | 2.79579   | 3.54966   | 2.77824  | 6.41572  | 3.99753   | 4.16226  |
| NUP98      | 7.42623   | 7.1798    | 8.15249   | 11.0223   | 3.8124    | 11.1013    | 8.15353   | 6.20305   | 7.28312    | 6.15358   | 7.37202   | 5.97123  | 10.8675  | 7.95082   | 7.1197   |
| NUPL2      | 2.2409    | 2.55653   | 2.34392   | 3.68959   | 1.32034   | 3.15822    | 1.54397   | 1.81984   | 1.85081    | 1.85887   | 3.43108   | 2.15633  | 3.32371  | 2.54431   | 2.18246  |
| NUPR1      | 21.5953   | 26.5689   | 24.5198   | 16.9457   | 50.2178   | 62.509     | 19.7021   | 16.5308   | 24.8171    | 21.9445   | 53.3679   | 11.657   | 7.62957  | 17.5467   | 9.58461  |
| NUPR2      | 0.154287  | 0.111507  | 0.159546  | 0.0794986 | 0         | 0          | 0.08808   | 0.0685587 | 0.0469761  | 0         | 0         | 0        | 0        | 0.0201593 | 0        |
| NUS1       | 4.66139   | 3.28644   | 3.16235   | 7.50609   | 1.99926   | 6.33334    | 2.82348   | 3.73996   | 8.41283    | 7.29047   | 9.53931   | 4.82194  | 10.9508  | 7.36668   | 5.38594  |
| NUSAP1     | 1.12226   | 1.10871   | 1.17027   | 5.18004   | 0.424827  | 4.55309    | 1.07677   | 1.08956   | 1.17153    | 3.31424   | 6.74966   | 1.74097  | 3.77858  | 3.75584   | 1.84195  |
| NUTF2      | 4.83392   | 4.19466   | 4.49384   | 11.9457   | 5.6253    | 11.2743    | 5.17775   | 4.21698   | 7.10791    | 8.05566   | 14.2082   | 5.71456  | 10.8429  | 8.19615   | 4.55069  |
| NUTM1      | 0.0717015 | 0.0637789 | 0.0866934 | 0.0113678 | 0.0514049 | 0.00939276 | 0.0251897 | 0.0490172 | 0.00671726 | 0.0207676 | 0.0124526 | 0.015786 | 0        | 0.0663008 | 0.118814 |
| NUTM2A     | 1.24607   | 1.32504   | 1.34746   | 1.5934    | 3.34915   | 1.67184    | 1.91746   | 1.09996   | 0.378448   | 0.620705  | 0.396936  | 0.459645 | 0.407607 | 1.15393   | 1.1673   |
| NUTM2A-AS1 | 3.0951    | 2.27938   | 1.66917   | 4.07491   | 3.68177   | 4.05162    | 3.78144   | 2.40206   | 2.8884     | 2.2387    | 5.25763   | 3.31298  | 2.98642  | 3.32413   | 2.22384  |
| NUTM2B     | 1.75376   | 2.06495   | 1.56475   | 0.660683  | 2.85773   | 1.06061    | 2.92762   | 1.66397   | 0.173269   | 0.497671  | 0.175158  | 1.13847  | 0.364174 | 0.951365  | 1.25839  |
| NUTM2B-AS1 | 4.52546   | 4.96159   | 4.12995   | 2.84753   | 1.82395   | 1.7944     | 4.77834   | 5.33402   | 1.20201    | 2.39517   | 1.74149   | 3.26758  | 0.896054 | 4.40642   | 3.47836  |

|        |           |            |           |            |           |            |           |           |           |            |            |           |           |            |           |
|--------|-----------|------------|-----------|------------|-----------|------------|-----------|-----------|-----------|------------|------------|-----------|-----------|------------|-----------|
| NUTM2D | 2.28427   | 1.96068    | 1.5458    | 0.804311   | 2.73032   | 1.42869    | 3.21146   | 2.04387   | 0.343815  | 0.531027   | 0.21197    | 1.26192   | 0.261178  | 1.90507    | 1.79212   |
| NUTM2E | 0         | 0          | 0         | 0.00724471 | 0         | 0          | 0         | 0         | 0         | 0          | 0          | 0         | 0         | 0          | 0.0100961 |
| NUTM2F | 8.27E-10  | 0.0140182  | 0.0429622 | 5.50E-07   | 0.0518321 | 0.182358   | 1.04E-08  | 1.06E-06  | 1.48E-15  | 6.84E-10   | 0          | 0.0322318 | 7.89E-10  | 1.90E-09   | 4.55E-11  |
| NUTM2G | 1.49641   | 1.85833    | 1.97785   | 0.777866   | 2.19371   | 0.740714   | 2.1697    | 1.47723   | 0.236267  | 0.702792   | 0.114477   | 1.02851   | 0.173526  | 1.41111    | 1.39303   |
| NVL    | 3.33404   | 4.78966    | 4.85955   | 3.814      | 3.06843   | 3.16169    | 3.18409   | 3.93174   | 2.45368   | 2.10827    | 2.44236    | 2.31282   | 2.25517   | 2.64425    | 2.7072    |
| NWD1   | 0.226785  | 0.0737235  | 0.0836347 | 0.0506839  | 0.0424429 | 0.116328   | 0.155986  | 0.111701  | 0.0598986 | 0.00685877 | 0.00925347 | 0.0136855 | 0.0282064 | 0.0199927  | 0.015696  |
| NWD2   | 0.13619   | 0.120798   | 0.0844996 | 0.216901   | 0.216358  | 0.0790665  | 0.268587  | 0.181552  | 0.900945  | 0.330211   | 0.656897   | 0.347711  | 0.199703  | 0.153682   | 0         |
| NXF1   | 8.99605   | 13.4254    | 11.6526   | 15.7753    | 18.6376   | 15.4768    | 10.6026   | 9.35883   | 13.9332   | 10.7236    | 8.61816    | 15.3935   | 11.1547   | 13.0988    | 12.9916   |
| NXF2   | 0         | 0          | 1.87E-26  | 0          | 0         | 0          | 3.77E-11  | 0         | 0         | 0          | 0          | 0         | 0         | 0          | 0         |
| NXF2B  | 0         | 0          | 1.87E-26  | 0          | 0         | 0          | 3.77E-11  | 0         | 0         | 0          | 0          | 0         | 0         | 0          | 0         |
| NXF3   | 0.0122127 | 0.00588426 | 0.0101032 | 0.0125855  | 0.0189705 | 0.0727926  | 0.0976084 | 0.0108536 | 0         | 0          | 0.151653   | 0         | 0         | 0.0127658  | 0         |
| NXF4   | 0         | 0          | 0         | 0          | 0         | 0.00545118 | 0         | 0         | 0         | 0          | 0          | 0         | 0         | 0          | 0         |
| NXF5   | 0         | 0.0054077  | 0.0185699 | 0          | 0         | 0.0191135  | 0.0128147 | 0         | 0         | 0          | 0          | 0         | 0         | 0          | 0         |
| NXN    | 7.80911   | 6.04775    | 5.98461   | 15.792     | 15.3149   | 19.2731    | 6.53803   | 3.77073   | 9.27476   | 16.2016    | 12.9811    | 12.1488   | 25.2356   | 13.4431    | 13.5052   |
| NXNL1  | 0.0254879 | 0.0368414  | 0.0210854 | 0          | 0         | 0          | 0.0873039 | 0.0453031 | 0         | 0          | 0          | 0         | 0.0164447 | 0          | 0         |
| NXNL2  | 0.0141982 | 0.0342045  | 0.0352372 | 0.0292633  | 0.0441094 | 0.0120896  | 0.016211  | 0.0126182 | 0         | 0          | 0.048084   | 0         | 0         | 0          | 0.0815616 |
| NXPE1  | 0.0245889 | 0.0473892  | 0.04882   | 0.0202716  | 0         | 0.0167497  | 0.0280748 | 0.0131115 | 0         | 0.0246893  | 0          | 0.0105564 | 0         | 0.00771073 | 0.0423753 |
| NXPE2  | 0.0260327 | 0.0564432  | 0.10768   | 0          | 0.0202189 | 0.144082   | 0.133755  | 0.0115678 | 0         | 0.0490105  | 0.0146938  | 0.0186271 | 0         | 0.00680291 | 0.0560793 |
| NXPE3  | 1.06317   | 0.46459    | 0.556169  | 0.718187   | 0.537321  | 1.71919    | 0.705225  | 0.781353  | 0.288083  | 0.731041   | 1.17433    | 0.297477  | 0.859076  | 0.729803   | 0.881412  |
| NXPE4  | 0.0855961 | 0.0567071  | 0.0619598 | 0.0220523  | 0.01662   | 0.072884   | 0.0488654 | 0.0285265 | 0.0130308 | 0          | 0          | 0.0153116 | 0         | 0.00559203 | 0.107561  |
| NXPH1  | 0         | 0          | 0         | 0          | 0         | 0          | 0         | 0         | 0         | 0          | 0          | 0         | 0         | 0          | 0         |
| NXPH2  | 0         | 0          | 0.0149575 | 0          | 0.0140426 | 0.00769766 | 0.0103219 | 0.0160685 | 0         | 0          | 0          | 0         | 0.0116655 | 0          | 0         |
| NXPH3  | 0.862862  | 0.510135   | 0.631059  | 0.0902092  | 0.589224  | 1.29196    | 1.0423    | 0.255613  | 0.0355366 | 0.188344   | 0.141169   | 0.134218  | 0.0699255 | 0.189538   | 0.885983  |
| NXPH4  | 2.43746   | 4.0177     | 5.07294   | 2.56476    | 5.00179   | 9.25221    | 4.57      | 5.30152   | 14.8896   | 6.39225    | 10.5864    | 8.4725    | 8.82332   | 3.13117    | 1.17912   |
| NXT1   | 3.87444   | 3.06469    | 3.15379   | 5.95706    | 3.31492   | 7.21554    | 3.83231   | 2.22801   | 5.5261    | 4.7328     | 8.02246    | 3.03912   | 7.25869   | 4.52636    | 4.10619   |
| NXT2   | 1.66199   | 1.27071    | 1.51047   | 2.16303    | 0.30301   | 2.0995     | 1.06017   | 2.33692   | 1.86257   | 1.80196    | 3.45288    | 1.20037   | 1.85766   | 1.097      | 1.00852   |



|            |           |           |           |           |           |            |          |            |            |           |            |            |           |            |           |
|------------|-----------|-----------|-----------|-----------|-----------|------------|----------|------------|------------|-----------|------------|------------|-----------|------------|-----------|
| NYAP1      | 0.0839686 | 0.189838  | 0.277859  | 0.0532505 | 0.43143   | 0.225494   | 0.19912  | 0.149249   | 0.015733   | 0.12971   | 0.0656239  | 0.0554601  | 0.0625109 | 0.0337582  | 0.0834851 |
| NYAP2      | 0.0303125 | 0.0194997 | 0.0166846 | 0.0623519 | 0         | 0.00858649 | 0        | 0.00896193 | 0.00614066 | 0.0126566 | 0.00569186 | 0.00361451 | 0.0130124 | 0.013176   | 0.0289641 |
| NYNRIN     | 3.34613   | 5.64985   | 6.19666   | 2.28873   | 8.35473   | 5.14659    | 8.18246  | 3.08632    | 3.56939    | 1.50835   | 2.3542     | 1.59335    | 1.26189   | 1.55332    | 3.57871   |
| NYX        | 0         | 0         | 0         | 0         | 0.0273482 | 0          | 0        | 0          | 0          | 0         | 0          | 0          | 0         | 0          | 0         |
| OACYLP     | 0         | 0         | 0         | 0         | 0         | 0.0333435  | 0        | 0          | 0          | 0         | 0.132617   | 0          | 0         | 0          | 0.0562375 |
| OAF        | 6.23274   | 2.15121   | 2.9995    | 5.54809   | 9.29372   | 9.40649    | 4.33367  | 2.7962     | 2.33562    | 7.45918   | 15.3348    | 2.6801     | 7.81067   | 5.91989    | 14.8897   |
| OARD1      | 2.95443   | 2.45336   | 2.20341   | 2.35267   | 0.973478  | 4.10701    | 1.50775  | 2.00902    | 1.75819    | 1.61528   | 3.48679    | 1.11304    | 1.64625   | 1.45053    | 1.38217   |
| OAS1       | 1.58114   | 2.07687   | 0.809735  | 13.6075   | 5.1899    | 23.7531    | 2.14917  | 1.32155    | 5.36432    | 0.944999  | 2.29489    | 2.19536    | 1.81562   | 0.639456   | 1.52733   |
| OAS2       | 1.51936   | 1.45506   | 0.794499  | 19.5274   | 2.68642   | 23.5711    | 0.839537 | 1.59033    | 1.78645    | 1.11121   | 2.20219    | 0.939507   | 2.43498   | 1.07643    | 3.03324   |
| OAS3       | 3.17916   | 2.9594    | 2.45988   | 25.5919   | 9.54637   | 22.4872    | 3.10847  | 3.098      | 4.36858    | 2.09134   | 2.59328    | 3.08791    | 6.93173   | 3.13002    | 4.63577   |
| OASL       | 0.332994  | 0.352971  | 0.165285  | 3.8205    | 1.25865   | 5.16043    | 0.304161 | 0.641196   | 31.3222    | 5.18248   | 12.5678    | 8.20426    | 1.06707   | 1.68816    | 1.08397   |
| OAT        | 12.3821   | 11.8305   | 10.7871   | 16.8509   | 5.43116   | 17.3333    | 11.326   | 9.79706    | 17.5667    | 16.7065   | 30.0432    | 10.1137    | 14.5473   | 12.2148    | 13.151    |
| OAZ1       | 77.7812   | 65.5668   | 68.5438   | 170.209   | 110.924   | 231.015    | 87.7095  | 49.0933    | 154.525    | 158.875   | 308.195    | 104.078    | 173.772   | 128.438    | 70.7224   |
| OAZ2       | 11.775    | 11.145    | 10.7606   | 13.9717   | 17.2311   | 25.9218    | 13.5535  | 8.74177    | 24.7462    | 13.5471   | 23.1542    | 10.8315    | 12.955    | 9.82529    | 15.759    |
| OAZ3       | 0.176629  | 0.200225  | 0.203491  | 1.35356   | 0.548591  | 1.34275    | 0.216559 | 0.22814    | 0.230922   | 0.575429  | 1.16415    | 0.327849   | 0.542562  | 0.420056   | 0.397089  |
| OBP2A      | 0.896434  | 0.462778  | 0.381509  | 0.0948922 | 0.415276  | 0.177852   | 0.48548  | 0.0956057  | 0.0373815  | 0         | 0.0692987  | 0.0145794  | 0         | 0.00046367 | 0.13224   |
|            |           |           |           |           |           |            |          |            |            |           |            |            |           | 9          |           |
| OBP2B      | 0.623957  | 0.184877  | 0.214675  | 0.0223311 | 0.279043  | 0.33572    | 0.176828 | 0.433213   | 0.026391   | 0         | 0          | 0.00521218 | 0         | 0.033649   | 0         |
| OBSCN      | 0.888702  | 2.03503   | 1.49084   | 1.25353   | 4.33877   | 1.21537    | 0.765269 | 1.35189    | 0.111981   | 0.191766  | 0.196364   | 0.487561   | 0.223659  | 0.723078   | 0.77188   |
| OBSCN-AS1  | 0.181243  | 0.243558  | 0.210103  | 0.110071  | 0.252478  | 0.152672   | 0.171218 | 0.275293   | 0.0738665  | 0.090412  | 0.050472   | 0.0660972  | 0.0726279 | 0.108205   | 0.0389604 |
| OBSL1      | 2.9235    | 2.86621   | 2.52116   | 2.35055   | 8.75143   | 5.81025    | 2.38997  | 1.66803    | 2.836      | 1.62503   | 1.79558    | 2.08956    | 1.46342   | 1.88708    | 3.57718   |
| OC90       | 0         | 0         | 0         | 0         | 0         | 0          | 0        | 0          | 0          | 0         | 0          | 0          | 0         | 0.00678764 | 0         |
| OCA2       | 0.390631  | 1.46308   | 1.67676   | 0.288626  | 0.824311  | 0.677786   | 1.68305  | 1.06768    | 0.3411     | 0         | 0.033281   | 0.216222   | 0.0285321 | 0.0693377  | 0.0952634 |
| OCELL      | 1.4707    | 0.866072  | 0.980091  | 1.97869   | 3.10946   | 3.58291    | 1.84245  | 0.943968   | 1.8409     | 1.84588   | 3.98917    | 1.11079    | 2.43811   | 1.31311    | 1.84809   |
| OCIAD1     | 11.0554   | 8.9559    | 8.75178   | 15.7191   | 5.19506   | 13.757     | 7.02524  | 9.63109    | 10.5393    | 9.79027   | 14.0598    | 7.93892    | 12.742    | 8.61011    | 9.1357    |
| OCIAD1-AS1 | 0.350652  | 0.295662  | 0.217563  | 0.451697  | 0         | 0.074644   | 0.100091 | 0.623261   | 0.106764   | 0.110026  | 0.0989607  | 0.564527   | 0.0565598 | 0.595615   | 0.503581  |

|         |           |            |           |           |           |           |           |           |           |           |           |           |           |            |           |
|---------|-----------|------------|-----------|-----------|-----------|-----------|-----------|-----------|-----------|-----------|-----------|-----------|-----------|------------|-----------|
| OCiAD2  | 5.1616    | 4.54137    | 4.27004   | 13.0956   | 3.92173   | 14.3555   | 4.45204   | 3.83929   | 9.976     | 14.7171   | 26.6321   | 9.05252   | 12.8504   | 13.767     | 4.43151   |
| OCLM    | 1.20428   | 1.274      | 1.14787   | 0.620521  | 0.121999  | 0.267502  | 1.0462    | 1.48906   | 0.127537  | 0.42716   | 0.147769  | 1.03028   | 0.0337823 | 0.862015   | 1.12793   |
| OCLN    | 3.3118    | 3.09583    | 3.98192   | 2.33202   | 0.842065  | 1.16063   | 3.22707   | 3.65589   | 7.50684   | 3.22205   | 2.27192   | 3.07172   | 3.35208   | 1.56608    | 0.865212  |
| OCLNP1  | 2.56124   | 2.10765    | 2.32931   | 1.56779   | 0.744172  | 0.671292  | 3.14982   | 2.46897   | 2.75913   | 1.78668   | 1.1816    | 0.463259  | 1.95645   | 1.12103    | 0.104235  |
| OCM     | 0.0477699 | 0.109446   | 0.13754   | 1.63E-05  | 0.291436  | 0         | 0.075931  | 0.177307  | 0.0491069 | 0         | 0         | 0.0435988 | 0         | 0          | 0         |
| OCM2    | 0.0616377 | 0.0221993  | 3.78E-33  | 0.08124   | 0.0218998 | 0         | 1.51E-13  | 3.53E-13  | 0.181857  | 0         | 0         | 0.0611468 | 0         | 0          | 0         |
| OCRL    | 3.79913   | 3.9019     | 4.1142    | 5.24927   | 2.2815    | 6.00979   | 3.87901   | 3.42001   | 3.34379   | 3.28909   | 3.58824   | 2.7631    | 3.84817   | 3.70521    | 3.57753   |
| OCSTAMP | 0         | 0.00569493 | 0.0195562 | 0         | 0         | 0         | 0         | 0         | 0         | 0.014835  | 0.0533721 | 0         | 0         | 0          | 0         |
| ODAM    | 0         | 0          | 0         | 0.111101  | 0         | 1.49937   | 0         | 0         | 0         | 0         | 0         | 0         | 0         | 0          | 0         |
| ODAPH   | 0.022489  | 0.0219106  | 0.0185699 | 0.0231552 | 0.0174885 | 0         | 0         | 0.0199931 | 0.0136691 | 0         | 0         | 0         | 0         | 0.00586594 | 0         |
| ODC1    | 4.94412   | 2.80678    | 3.11315   | 14.0045   | 2.31356   | 10.1232   | 3.32061   | 3.50887   | 2.67259   | 73.3791   | 73.6818   | 27.9609   | 162.369   | 72.3822    | 25.339    |
| ODF1    | 0         | 0          | 0         | 0         | 0         | 0.019825  | 0         | 0         | 0         | 0         | 0         | 0         | 0         | 0          | 0         |
| ODF2    | 2.20959   | 2.34037    | 1.96913   | 4.24035   | 3.81919   | 5.22796   | 2.36483   | 1.87351   | 2.02811   | 1.82954   | 1.37997   | 2.04972   | 2.98219   | 3.87916    | 3.70986   |
| ODF2L   | 2.81662   | 2.18612    | 2.13501   | 1.68255   | 0.932036  | 1.83959   | 1.23537   | 2.14448   | 1.28732   | 1.92819   | 1.84937   | 1.60885   | 2.01855   | 2.10153    | 3.55148   |
| ODF3    | 0.144193  | 0.0868433  | 0.149109  | 0.0185744 | 0.139989  | 0.0613894 | 0.0823177 | 0.224257  | 0         | 0         | 0.0203471 | 0.0128968 | 0         | 0.00942023 | 0.181195  |
| ODF3B   | 3.88899   | 4.27634    | 5.1318    | 10.843    | 11.3036   | 20.0311   | 2.7786    | 3.81667   | 2.81856   | 5.06075   | 7.24515   | 7.25544   | 4.41796   | 4.67612    | 6.51021   |
| ODF3L1  | 0.0580997 | 0.373244   | 0.512685  | 0.119747  | 0.180498  | 0.115433  | 0.287458  | 0.172114  | 0         | 0.0729211 | 0.0874498 | 0.318718  | 0.149943  | 0.161949   | 0         |
| ODF3L2  | 0.0288567 | 0.0139036  | 0.0358084 | 0.0892129 | 0.0672366 | 0.0614277 | 0.0164738 | 0         | 0         | 0.0543271 | 0.0162878 | 0         | 0.0372364 | 0.0226226  | 0         |
| ODF4    | 0         | 0.0283732  | 0.0487164 | 0.0404573 | 0         | 0.0167142 | 0.0448244 | 0         | 0.0239064 | 0.0492738 | 0.0221591 | 0.0702268 | 0         | 0.0205184  | 0         |
| ODR4    | 3.19584   | 2.53865    | 2.76175   | 2.41803   | 0.562859  | 2.59476   | 1.4582    | 2.44426   | 1.46137   | 2.75855   | 2.78959   | 1.71715   | 1.96228   | 2.32846    | 2.5422    |
| OFD1    | 2.70288   | 3.99838    | 4.1374    | 3.48018   | 2.39915   | 3.4757    | 2.3093    | 2.7616    | 4.195     | 3.43855   | 3.20343   | 3.1093    | 3.34148   | 3.34101    | 2.57899   |
| OGA     | 26.438    | 22.2979    | 21.5898   | 21.0256   | 13.4621   | 17.9906   | 15.0714   | 21.7819   | 15.605    | 14.6353   | 11.2195   | 11.495    | 16.7622   | 13.9303    | 13.9603   |
| OGDH    | 11.3133   | 11.9744    | 13.1098   | 19.5137   | 20.8848   | 20.9363   | 15.6488   | 9.90285   | 25.8369   | 21.3045   | 11.6537   | 18.9659   | 37.4164   | 14.3288    | 14.696    |
| OGDHL   | 0.0225566 | 0.0108681  | 0.0233255 | 0.156905  | 0.0175191 | 0.168058  | 0         | 0.0150348 | 0.0206035 | 0.0424662 | 0.0381954 | 0.0161398 | 0.010915  | 0.0618925  | 0.0485912 |
| OGFOD1  | 4.03194   | 3.40969    | 3.21698   | 6.88029   | 2.72323   | 7.31965   | 3.0269    | 3.0449    | 4.37105   | 4.43919   | 5.99277   | 3.71924   | 6.81668   | 4.93625    | 4.48078   |
| OGFOD2  | 1.75087   | 2.09501    | 1.81914   | 1.89839   | 4.0989    | 2.9181    | 1.45905   | 1.01031   | 1.1824    | 1.41641   | 1.79854   | 1.33592   | 1.71857   | 1.68271    | 1.83521   |

|          |           |            |            |           |           |            |           |            |           |            |           |           |            |            |           |
|----------|-----------|------------|------------|-----------|-----------|------------|-----------|------------|-----------|------------|-----------|-----------|------------|------------|-----------|
| OGFOD3   | 2.05592   | 1.784      | 2.28245    | 2.68243   | 4.16814   | 5.38496    | 2.13895   | 1.51926    | 1.06858   | 1.53721    | 2.55948   | 1.5714    | 2.14395    | 1.84047    | 1.95849   |
| OGFR     | 4.97883   | 5.40888    | 5.66145    | 8.63267   | 12.8358   | 16.7159    | 4.53909   | 3.51626    | 4.83018   | 4.97777    | 3.71849   | 3.80631   | 9.96673    | 4.84317    | 5.77728   |
| OGFR-AS1 | 0.17651   | 0.0700765  | 0          | 0         | 0.18098   | 0.0901813  | 0.0815984 | 0          | 0.0421941 | 0          | 0         | 0         | 0          | 0.0724286  | 0         |
| OGFRL1   | 7.20613   | 4.74754    | 5.34581    | 3.62157   | 1.05447   | 5.59131    | 4.47159   | 7.68501    | 2.2799    | 3.18191    | 5.14024   | 1.65706   | 3.68572    | 2.07554    | 2.50096   |
| OGFRP1   | 0.14907   | 0.574592   | 0.385378   | 0.230431  | 0.723614  | 0.301461   | 0.255304  | 0.380882   | 0.113469  | 0.140323   | 0.126211  | 0.239992  | 0.40876    | 0.340857   | 0.187322  |
| OGG1     | 1.5722    | 1.80546    | 1.78584    | 1.92241   | 3.37854   | 2.6566     | 2.26013   | 1.41172    | 0.853208  | 1.65632    | 2.31737   | 0.681964  | 1.77121    | 1.78815    | 1.84841   |
| OGN      | 0.881467  | 0.480354   | 0.447585   | 0.250587  | 0.122758  | 0.305399   | 0.541389  | 0.886024   | 0.0888436 | 0.335714   | 0.391164  | 0.321881  | 0.00392219 | 0.206518   | 3.78024   |
| OGT      | 15.7719   | 19.203     | 18.479     | 13.8783   | 7.64625   | 11.4201    | 17.0735   | 13.9192    | 8.9667    | 12.8281    | 11.7619   | 11.3367   | 5.49126    | 17.2309    | 13.8537   |
| OIP5     | 0.486828  | 0.387928   | 0.449208   | 1.15775   | 0.145425  | 0.781225   | 0.812388  | 0.216326   | 0.319255  | 0.705022   | 1.54302   | 0.495712  | 1.01478    | 0.959033   | 0.376463  |
| OIP5-AS1 | 7.45576   | 7.24133    | 7.30985    | 6.76041   | 3.60608   | 6.71135    | 5.65368   | 8.5522     | 9.79773   | 7.74274    | 10.1855   | 6.71732   | 7.49423    | 5.85644    | 5.12581   |
| OIT3     | 0.0193423 | 0.0186388  | 0.0320026  | 0.0199328 | 0.120181  | 0.0329394  | 0.0110422 | 0.00859491 | 0.0117784 | 0.145659   | 0.26202   | 0.0138399 | 0.0436784  | 0.0404365  | 0.250002  |
| OLA1     | 5.28355   | 4.36979    | 5.06883    | 8.93357   | 2.18693   | 7.20175    | 3.60026   | 5.05174    | 5.46507   | 7.53808    | 7.74418   | 5.17266   | 9.77435    | 6.11248    | 4.0211    |
| OLAH     | 0.0261039 | 0          | 0          | 0.286091  | 0.039203  | 0.0429793  | 0         | 0.0233643  | 0.0461052 | 0.031676   | 0.0427355 | 0.0912336 | 0.195399   | 0.0593567  | 0.163101  |
| OLFM1    | 2.62349   | 1.24667    | 1.54952    | 3.77388   | 1.67856   | 5.38784    | 1.58338   | 1.70196    | 0.431376  | 0.994602   | 2.10089   | 0.55413   | 6.03853    | 1.67549    | 2.7934    |
| OLFM2    | 9.89132   | 14.2295    | 16.8537    | 11.7804   | 23.4742   | 17.5086    | 23.9345   | 12.4081    | 15.1038   | 11.536     | 26.4869   | 10.9562   | 8.81444    | 11.1129    | 15.7276   |
| OLFM3    | 0         | 0.00247793 | 0          | 0         | 0         | 0.00437911 | 0         | 0          | 0         | 0          | 0         | 0         | 0          | 0          | 0         |
| OLFM4    | 0.103069  | 0.00764007 | 0.0327947  | 0.0163409 | 0.0123156 | 0.0607585  | 0.0452621 | 0.0915995  | 0.0386237 | 0.00995098 | 0.0179004 | 0.017019  | 0          | 0.00414374 | 0.0113862 |
| OLFM5P   | 0.159333  | 0.0959611  | 0.0823819  | 0         | 0.0309373 | 0.186546   | 0.0909604 | 0.177002   | 0.0242561 | 0          | 0         | 0.0142508 | 0          | 0.0104093  | 0.0572054 |
| OLFML1   | 3.49179   | 2.45061    | 3.07991    | 0.599731  | 1.56031   | 2.66096    | 3.78656   | 2.33095    | 0.233019  | 1.93112    | 5.46271   | 0.353664  | 0.673807   | 0.93748    | 5.70158   |
| OLFML2A  | 7.09161   | 6.04082    | 5.79578    | 2.98119   | 6.90024   | 4.87696    | 11.6975   | 4.2372     | 3.90722   | 5.85934    | 9.66928   | 4.43668   | 5.74978    | 9.38034    | 15.8255   |
| OLFML2B  | 2.89824   | 1.60308    | 1.84511    | 6.52917   | 12.2306   | 19.4036    | 4.89724   | 2.17819    | 1.06713   | 15.7423    | 39.4006   | 2.24914   | 6.64946    | 8.62396    | 44.7809   |
| OLFML3   | 8.22553   | 6.59117    | 9.48662    | 3.46514   | 11.7731   | 12.5902    | 10.0169   | 5.04212    | 1.66739   | 11.7122    | 32.8646   | 1.50469   | 2.28958    | 4.83133    | 22.0843   |
| OLIG1    | 0.0304647 | 0.0342496  | 0.0840086  | 0.0104649 | 0.0157741 | 0.0259403  | 0.0347837 | 0.0451242  | 0         | 0.0382364  | 0.0229273 | 0         | 0.0196557  | 0          | 0         |
| OLIG2    | 0.027617  | 0.0177417  | 0.00761558 | 0.0284601 | 0         | 0          | 0.0420429 | 0.0245437  | 0         | 0.0346622  | 0         | 0         | 0          | 0.0192451  | 0         |
| OLIG3    | 0         | 0          | 0          | 0         | 0         | 0          | 0         | 0          | 0         | 0          | 0         | 0         | 0          | 0          | 0         |
| OLMALINC | 0.491907  | 0.553019   | 0.542587   | 0.724178  | 1.23712   | 1.37623    | 0.775603  | 0.541253   | 0.827311  | 0.440996   | 0.740402  | 0.519579  | 0.347602   | 0.404002   | 0.23548   |

|          |            |            |            |           |            |            |            |            |            |            |            |            |            |            |           |
|----------|------------|------------|------------|-----------|------------|------------|------------|------------|------------|------------|------------|------------|------------|------------|-----------|
| OLR1     | 0          | 0          | 0.00760952 | 0.180104  | 0          | 0.00783227 | 0          | 0.00817473 | 0          | 1.3623     | 0.90339    | 0.0526533  | 0.148368   | 0.182683   | 0.10568   |
| OMA1     | 2.46508    | 3.40747    | 3.89049    | 4.03248   | 1.20822    | 0.866086   | 1.61222    | 2.60552    | 3.32282    | 1.86237    | 2.33699    | 1.92652    | 1.48237    | 1.58231    | 1.30608   |
| OMD      | 1.31101    | 1.2414     | 2.11641    | 0.440964  | 0.141421   | 0.186052   | 1.39292    | 2.16033    | 0.0776158  | 1.1084     | 1.52108    | 0.488576   | 0.111607   | 0.561478   | 1.94816   |
| OMG      | 1.51437    | 1.28277    | 1.12146    | 0.604106  | 0.132794   | 0.228777   | 0.850587   | 1.03109    | 0.118989   | 0.536486   | 0.303305   | 0.506833   | 0.0157591  | 0.874455   | 0.789254  |
| OMP      | 0.0470387  | 0          | 0          | 0         | 0          | 0.120159   | 0.107415   | 0.0418041  | 0          | 0          | 0          | 0.0673149  | 0          | 0.049169   | 0         |
| ONECUT1  | 0.00536215 | 0.00516713 | 0.00443595 | 0         | 0          | 0.0136974  | 0          | 0.00953087 | 0.0065305  | 0          | 0          | 0          | 0.0207578  | 0          | 0         |
| ONECUT2  | 0.00717748 | 0.00829972 | 0.00593771 | 0.0221898 | 0          | 0.0342245  | 0.003278   | 0.00510299 | 0.00349654 | 0.00180169 | 0.0178254  | 0.00308141 | 0          | 0.00600202 | 0         |
| ONECUT3  | 0          | 0          | 0          | 0         | 0          | 0          | 0          | 0          | 0          | 0          | 0          | 0.0111512  | 0          | 0          | 0         |
| OEOP     | 0.170924   | 0.214119   | 0.05656    | 0.0704567 | 0          | 0.378402   | 0.039031   | 0.121522   | 0.124899   | 0.0858107  | 0.115771   | 0.1223     | 0.0661674  | 0          | 0.0981871 |
| OOSP1    | 0          | 0          | 0.0164622  | 0         | 0          | 0          | 0          | 0          | 0          | 0          | 0          | 0          | 0          | 0          | 0         |
| OOSP2    | 0          | 0          | 0          | 0         | 0          | 0          | 0          | 0          | 0          | 0          | 0          | 0          | 0          | 0          | 0         |
| OPA1     | 7.334      | 5.07065    | 5.29856    | 6.32366   | 1.94809    | 7.3427     | 4.03762    | 6.4048     | 4.93499    | 6.36712    | 5.95016    | 4.368      | 8.5428     | 5.89179    | 4.98214   |
| OPA1-AS1 | 0          | 0.111063   | 0          | 0         | 0          | 0.117765   | 0.0526374  | 0.0819427  | 0          | 0          | 0          | 0          | 0.0297446  | 0.120474   | 0         |
| OPA3     | 1.53432    | 1.61378    | 1.54158    | 2.14729   | 2.56377    | 3.1157     | 1.71591    | 1.21732    | 1.81263    | 1.54301    | 1.27036    | 1.62772    | 2.38271    | 1.92634    | 1.69258   |
| OPALIN   | 0          | 0          | 0          | 0         | 0          | 0          | 0          | 0          | 0          | 0          | 0          | 0          | 0          | 0          | 0         |
| OPCML    | 0.0305143  | 0.0209779  | 0.0214504  | 0         | 0.0385671  | 0.0557729  | 0.0421849  | 0.00539974 | 0          | 0.0153544  | 0.00696669 | 0          | 0          | 0.00960426 | 0.0312916 |
| OPHN1    | 10.4078    | 10.112     | 9.34577    | 5.2623    | 2.95766    | 4.11155    | 7.43648    | 8.92298    | 3.88742    | 3.23448    | 1.95235    | 4.43594    | 1.2989     | 5.80017    | 5.39833   |
| OPLAH    | 2.45726    | 3.36374    | 3.18222    | 4.09425   | 4.86932    | 3.23626    | 2.45164    | 2.03074    | 1.797      | 1.24662    | 1.04347    | 1.55284    | 2.34478    | 1.44331    | 1.51711   |
| OPN1LW   | 0          | 0.0176854  | 0          | 0         | 0          | 3.81E-11   | 0          | 0          | 0          | 0          | 0.0207182  | 0          | 0          | 0          | 0         |
| OPN1MW   | 0          | 9.16E-06   | 1.08E-12   | 0         | 1.01E-12   | 0.00627548 | 0.00661261 | 0.00514705 | 0.0295642  | 0          | 2.27E-08   | 9.32E-13   | 0          | 0          | 0         |
| OPN1MW2  | 0          | 0.00130043 | 0.0044761  | 0         | 0.00420233 | 0.0119411  | 0          | 0          | 1.60E-09   | 0          | 0          | 0.00387149 | 0          | 0          | 0         |
| OPN1MW3  | 0          | 0.00308792 | 0.0106287  | 0         | 0.00997858 | 0.0283547  | 0          | 0          | 3.80E-09   | 0          | 0          | 0.00919298 | 0          | 0          | 0         |
| OPN1SW   | 0.23684    | 0.102864   | 0.141898   | 0.153539  | 0.264135   | 0.145772   | 0.219415   | 0.133628   | 0.02567    | 0          | 0.0479617  | 0.0615904  | 0.0413535  | 0.222775   | 0.122291  |
| OPN3     | 1.87198    | 1.2494     | 1.15124    | 2.90529   | 1.60418    | 2.83523    | 1.24135    | 1.08543    | 4.14462    | 1.99617    | 4.01619    | 1.78392    | 2.83211    | 1.67651    | 1.30857   |
| OPN4     | 0.327178   | 0.0788197  | 0.0238822  | 0.02975   | 0.224215   | 0.409688   | 0.439484   | 0.239457   | 0          | 0.0483109  | 0.195535   | 0.192792   | 0.00620864 | 0.15088    | 0.317853  |
| OPN5     | 0          | 0.00295226 | 0          | 0         | 0          | 0          | 0          | 0          | 0          | 0.00769047 | 0.00691703 | 0.0131529  | 0          | 0.00320243 | 0.0351987 |

|         |           |            |           |            |            |            |           |            |            |            |           |           |           |            |           |
|---------|-----------|------------|-----------|------------|------------|------------|-----------|------------|------------|------------|-----------|-----------|-----------|------------|-----------|
| OPRD1   | 0         | 0          | 0         | 0          | 0          | 0          | 0         | 0          | 0          | 0          | 0         | 0         | 0         | 0          | 0         |
| OPRK1   | 0.0178161 | 0.00214601 | 0         | 0          | 0          | 0.0265477  | 0         | 0.00395836 | 0.00542449 | 0          | 0         | 0.0127479 | 0         | 0          | 0         |
| OPRL1   | 0.0378567 | 0.0577598  | 0.0626354 | 0.104033   | 0.284222   | 0.204152   | 0.108059  | 0.0336439  | 0.0307368  | 0.063352   | 0.113961  | 0.031602  | 0.0569915 | 0.0560591  | 0.144979  |
| OPRM1   | 0.0109303 | 0.010565   | 0.010033  | 0.00246887 | 0.00755918 | 0.00604684 | 0         | 0.00426809 | 0.0014524  | 0.00750422 | 0         | 0.0113797 | 0         | 0.00504031 | 0.0103549 |
| OPRPN   | 0         | 0          | 0         | 0          | 0          | 0          | 0         | 0.0374297  | 0          | 0          | 0         | 0         | 0         | 0          | 0         |
| OPTC    | 0         | 0.0231662  | 0         | 0          | 0.0746866  | 0          | 0         | 0.028487   | 0.0195191  | 0          | 0         | 0         | 0         | 0.00837643 | 0         |
| OPTN    | 9.16843   | 11.1663    | 12.4869   | 12.9954    | 11.1935    | 16.9663    | 7.19915   | 7.605      | 10.3903    | 18.0647    | 11.5193   | 9.22578   | 24.9684   | 10.4209    | 11.0325   |
| OR10A2  | 0.0655782 | 0.0489065  | 0.0282741 | 0.14016    | 0          | 0.108037   | 0.0878988 | 0.0676566  | 0          | 0          | 0         | 0.0726293 | 0         | 0.100732   | 0.0490833 |
| OR10A3  | 0.02449   | 0.0471986  | 0.162079  | 0          | 0.0380414  | 0          | 0.0559238 | 0.108823   | 0.0298261  | 0.0307375  | 0         | 0.0525698 | 0         | 0.0255991  | 0         |
| OR10A4  | 0.0465187 | 0.0336201  | 0.0384835 | 0.0719083  | 0          | 0.0792201  | 0         | 0.020671   | 0          | 0.0583857  | 0         | 0.0499281 | 0.0300136 | 0.158033   | 0.10021   |
| OR10A5  | 0.0586037 | 0.0467534  | 0.0532456 | 0.066007   | 0          | 0.0206562  | 0.0821595 | 0          | 0          | 0.0913425  | 0.0547707 | 0.0694318 | 0         | 0.0685272  | 0.0924334 |
| OR10A6  | 0         | 0.0235993  | 0.0810394 | 0.0252377  | 0          | 0.0208529  | 0         | 0.108823   | 0.0596521  | 0          | 0         | 0.0350465 | 0         | 0.0383986  | 0         |
| OR10A7  | 0         | 0          | 0         | 0          | 0          | 0          | 0         | 0          | 0          | 0          | 0         | 0         | 0         | 0          | 0         |
| OR10AC1 | 0.0404245 | 0.0194772  | 0.0668841 | 0.145805   | 0.0627933  | 0.034421   | 0.0692331 | 0          | 0          | 0.0761054  | 0.0912685 | 0.0723121 | 0         | 0.0528191  | 0.0870821 |
| OR10AD1 | 0.145554  | 0.233767   | 0.280962  | 0.124998   | 0.188413   | 0.123937   | 0.166189  | 0.172475   | 0          | 0.0304475  | 0.0273853 | 0.121506  | 0         | 0.0380364  | 0.243873  |
| OR10AG1 | 0         | 0          | 0         | 0          | 0          | 0          | 0         | 0          | 0          | 0          | 0         | 0         | 0         | 0          | 0         |
| OR10C1  | 0         | 0          | 0         | 0          | 0          | 0          | 0         | 0          | 0          | 0          | 0         | 0         | 0         | 0          | 0         |
| OR10D3  | 0         | 0          | 0         | 0          | 0          | 0          | 0         | 0          | 0          | 0          | 0         | 0         | 0         | 0          | 0         |
| OR10G2  | 0         | 0          | 0.0346526 | 0          | 0.0325332  | 0.0178335  | 0         | 0          | 0          | 0          | 0         | 0         | 0         | 0          | 0         |
| OR10G3  | 0         | 0          | 0         | 0          | 0          | 0          | 0         | 0          | 0          | 0          | 0         | 0         | 0         | 0          | 0         |
| OR10G4  | 0         | 0          | 0.0204547 | 0          | 0          | 0.0105267  | 0         | 0.021974   | 0          | 0          | 0         | 0         | 0.0319055 | 0          | 0         |
| OR10G6  | 0         | 0          | 0.0191647 | 0          | 0          | 0          | 0         | 0.0205882  | 0          | 0          | 0         | 0         | 0         | 0          | 0         |
| OR10G7  | 0         | 0          | 0         | 0          | 0          | 0          | 0         | 0          | 0          | 0          | 0         | 0         | 0         | 0          | 0         |
| OR10G8  | 0         | 0          | 0         | 0          | 0          | 0.0210534  | 0         | 0          | 0          | 0          | 0         | 0         | 0         | 0          | 0         |
| OR10G9  | 0         | 0          | 0         | 0          | 0          | 0.0105267  | 0         | 0          | 0          | 0          | 0         | 0         | 0         | 0          | 0         |
| OR10H1  | 0         | 0.00995596 | 0.0250989 | 0          | 0          | 0.0527839  | 0         | 1.02E-05   | 0          | 0.0778042  | 0         | 0         | 0.0133319 | 0.0863969  | 0         |

|         |           |            |           |           |           |           |           |            |   |            |           |           |           |            |           |
|---------|-----------|------------|-----------|-----------|-----------|-----------|-----------|------------|---|------------|-----------|-----------|-----------|------------|-----------|
| OR10H2  | 0.0674725 | 0.0108364  | 0.0284992 | 0         | 0         | 0         | 0         | 0.00070661 | 0 | 0          | 0         | 0         | 0         | 0          | 0         |
|         |           |            |           |           |           |           |           | 9          |   |            |           |           |           |            |           |
| OR10H3  | 0         | 0          | 0         | 0         | 0         | 0         | 0         | 0          | 0 | 0          | 0         | 0         | 0         | 0          | 0         |
| OR10H4  | 0         | 0          | 0         | 0         | 0         | 0         | 0         | 0          | 0 | 0          | 0         | 0         | 0         | 0          | 0         |
| OR10H5  | 0         | 0          | 2.80E-07  | 0         | 0         | 0         | 0         | 0.0426125  | 0 | 0          | 0         | 0         | 0         | 1.25E-43   | 0         |
| OR10J1  | 0         | 0          | 0         | 0         | 0         | 0         | 0         | 0          | 0 | 0          | 0         | 0         | 0         | 0          | 0         |
| OR10J3  | 0.0233768 | 0          | 0         | 0         | 0         | 0         | 0         | 0          | 0 | 0          | 0         | 0         | 0         | 0          | 0         |
| OR10J4  | 0         | 0          | 0         | 0         | 0         | 0         | 0         | 0          | 0 | 0          | 0         | 0         | 0         | 0          | 0.0880822 |
| OR10J5  | 0         | 0          | 0         | 0         | 0         | 0         | 0         | 0          | 0 | 0          | 0         | 0         | 0         | 0          | 0         |
| OR10K1  | 0         | 0          | 0         | 0         | 0         | 0         | 0         | 0          | 0 | 0          | 0         | 0         | 0         | 0          | 0         |
| OR10K2  | 0         | 0          | 0         | 0         | 0         | 0         | 0         | 0          | 0 | 0          | 0         | 0         | 0         | 0          | 0         |
| OR10P1  | 0         | 0          | 0         | 0.025318  | 0         | 0         | 0         | 0          | 0 | 0          | 0         | 0         | 0         | 0          | 0         |
| OR10Q1  | 0.0446346 | 0.0430113  | 0.110775  | 0         | 0         | 0.114017  | 0.0254812 | 0.0793351  | 0 | 0          | 0.100774  | 0.0159686 | 0         | 0.023328   | 0         |
| OR10R2  | 0         | 0          | 0         | 0         | 0         | 0         | 0         | 0          | 0 | 0          | 0         | 0         | 0         | 0          | 0         |
| OR10S1  | 0         | 0          | 0         | 0         | 0         | 0         | 0         | 0          | 0 | 0          | 0         | 0         | 0.0299835 | 0          | 0         |
| OR10T2  | 0         | 0          | 0         | 0         | 0         | 0         | 0         | 0          | 0 | 0          | 0         | 0         | 0         | 0          | 0         |
| OR10V1  | 0.14931   | 0.0479599  | 0.12352   | 0         | 0.115965  | 0         | 0.0284129 | 0.0663472  | 0 | 0          | 0.0280921 | 0         | 0         | 0          | 0         |
| OR10V2P | 0.240447  | 0.130333   | 0.0994575 | 0.0929205 | 0         | 0.0255922 | 0.377486  | 0          | 0 | 0          | 0         | 0.0860232 | 0.0193919 | 0          | 0.0431641 |
| OR10W1  | 0.0315086 | 0.0303626  | 0.0651653 | 0         | 0.0978874 | 0.0268291 | 0.0719509 | 0.0420033  | 0 | 0          | 0         | 0.0225452 | 0         | 0.0494033  | 0         |
| OR10X1  | 0         | 0          | 0         | 0         | 0         | 0         | 0         | 0          | 0 | 0          | 0         | 0         | 0         | 0          | 0         |
| OR10Z1  | 0         | 0          | 0         | 0         | 0         | 0         | 0         | 0          | 0 | 0          | 0         | 0         | 0         | 0          | 0         |
| OR11A1  | 0         | 0          | 0         | 0         | 0         | 0         | 0         | 0          | 0 | 0.00162892 | 0         | 0         | 0         | 0          | 0         |
| OR11G2  | 0         | 0          | 0         | 0         | 0         | 0         | 0         | 0          | 0 | 0          | 0         | 0         | 0         | 0          | 0         |
| OR11H1  | 0         | 0.00566301 | 0         | 0         | 0         | 0         | 0         | 0.0208166  | 0 | 0          | 0         | 0         | 0         | 0.00614289 | 0         |
| OR11H12 | 0         | 0.00566301 | 0         | 0         | 0         | 0         | 0         | 0          | 0 | 0          | 0         | 0         | 0         | 0.00614289 | 0         |

|         |           |            |           |           |            |           |           |            |   |           |           |            |   |           |           |
|---------|-----------|------------|-----------|-----------|------------|-----------|-----------|------------|---|-----------|-----------|------------|---|-----------|-----------|
| OR11H2  | 0         | 3.67E-05   | 0.0176457 | 0         | 0          | 0         | 0         | 0.00013501 | 0 | 0         | 0         | 0          | 0 | 3.98E-05  | 0         |
|         |           |            |           |           |            |           |           | 3          |   |           |           |            |   |           |           |
| OR11H4  | 0.166155  | 0.0686195  | 0.0196365 | 0.0244611 | 0.0368709  | 0.0202113 | 0         | 0.105475   | 0 | 0.0297917 | 0         | 0.0679363  | 0 | 0         | 0.0681771 |
| OR11H6  | 0         | 0.0224586  | 0         | 0         | 0          | 0         | 0.0532205 | 0.0207126  | 0 | 0         | 0         | 0          | 0 | 0         | 0         |
| OR11H7  | 0.117743  | 0.050427   | 0.0216456 | 0.0269639 | 0          | 0         | 0.0298745 | 0.0581335  | 0 | 0         | 0.0147686 | 0.00936092 | 0 | 0.0205126 | 0         |
| OR11L1  | 0         | 0.0115074  | 0         | 0         | 0          | 0         | 0         | 0.0424512  | 0 | 0         | 0         | 0          | 0 | 0         | 0         |
| OR12D1  | 0         | 0          | 0         | 0         | 0.00384895 | 0         | 0         | 0          | 0 | 0         | 0         | 0          | 0 | 0         | 0         |
| OR12D2  | 0         | 0          | 0         | 0         | 0          | 0         | 0         | 0          | 0 | 0         | 0         | 0          | 0 | 0         | 0         |
| OR12D3  | 0         | 0.00099435 | 0         | 0         | 0          | 0         | 0         | 0          | 0 | 0         | 0         | 0          | 0 | 0         | 0         |
|         |           | 3          |           |           |            |           |           |            |   |           |           |            |   |           |           |
| OR13A1  | 0.0111372 | 0.00536606 | 0.0368538 | 0         | 0          | 0         | 0         | 0.00989779 | 0 | 0         | 0.0125725 | 0          | 0 | 0         | 0         |
| OR13C2  | 0         | 0          | 0.0200058 | 0         | 0          | 0         | 0         | 0          | 0 | 0         | 0         | 0          | 0 | 0         | 0         |
| OR13C3  | 0         | 0          | 0         | 0         | 0          | 0.0566265 | 0         | 0          | 0 | 0         | 0         | 0          | 0 | 0         | 0         |
| OR13C4  | 0         | 0          | 0         | 0         | 0          | 0         | 0         | 0          | 0 | 0         | 0         | 0          | 0 | 0         | 0         |
| OR13C5  | 0         | 0.0116517  | 0         | 0         | 0          | 0         | 0         | 0          | 0 | 0         | 0         | 0          | 0 | 0         | 0         |
| OR13C8  | 0         | 0          | 0         | 0         | 0          | 0         | 0         | 0          | 0 | 0         | 0         | 0.0171957  | 0 | 0         | 0         |
| OR13C9  | 0         | 0          | 0         | 0.0249212 | 0          | 0         | 0         | 0          | 0 | 0         | 0         | 0          | 0 | 0         | 0         |
| OR13D1  | 0.0444631 | 0.117827   | 0.0551745 | 0.114551  | 0.0690666  | 0.0189299 | 0.0507665 | 0.0395151  | 0 | 0         | 0         | 0.0318145  | 0 | 0         | 0         |
| OR13F1  | 0         | 0.0116153  | 0.0398866 | 0         | 0          | 0         | 0         | 0          | 0 | 0         | 0         | 0          | 0 | 0         | 0         |
| OR13G1  | 0.175326  | 0.072407   | 0.0621609 | 0         | 0          | 0.0213268 | 0.0857922 | 0          | 0 | 0.031436  | 0.0282745 | 0.0179215  | 0 | 0         | 0         |
| OR13H1  | 0         | 0          | 0         | 0         | 0          | 0         | 0         | 0          | 0 | 0         | 0         | 0          | 0 | 0         | 0         |
| OR13J1  | 0.123232  | 0.0950004  | 0.122336  | 0         | 0.0382845  | 0.0419723 | 0.168843  | 0.197134   | 0 | 0.0309339 | 0         | 0          | 0 | 0         | 0         |
| OR14A16 | 0.074655  | 0.0239799  | 0.0205866 | 0         | 0.038655   | 0         | 0         | 0.0221157  | 0 | 0         | 0         | 0          | 0 | 0         | 0.035738  |
| OR14A2  | 0.0640018 | 0.0246696  | 0.0741255 | 0.0131911 | 0          | 0.0217987 | 0.0438451 | 0.0455036  | 0 | 0.0160658 | 0.01445   | 0          | 0 | 0         | 0.0735317 |
| OR14C36 | 0         | 0          | 0         | 0         | 0          | 0         | 0         | 0          | 0 | 0         | 0         | 0          | 0 | 0         | 0         |
| OR14I1  | 0         | 0          | 0.0204547 | 0         | 0          | 0         | 0         | 0          | 0 | 0         | 0         | 0.0176917  | 0 | 0         | 0         |

|        |           |           |           |           |           |           |           |           |           |           |           |           |           |           |           |
|--------|-----------|-----------|-----------|-----------|-----------|-----------|-----------|-----------|-----------|-----------|-----------|-----------|-----------|-----------|-----------|
| OR14J1 | 0         | 0         | 0         | 0         | 0         | 0         | 0         | 0         | 0         | 0         | 0         | 0         | 0         | 0         | 0         |
| OR14K1 | 0.12245   | 0.0471986 | 0.0405197 | 0         | 0         | 0         | 0.111848  | 0.065294  | 0         | 0.0307375 | 0         | 0.0350465 | 0         | 0         | 0         |
| OR1A1  | 0         | 0         | 0         | 0         | 0         | 0         | 0         | 0         | 0         | 0         | 0         | 0         | 0         | 0         | 0         |
| OR1A2  | 0         | 0         | 0         | 0         | 0         | 0         | 0         | 0         | 0         | 0         | 0         | 0         | 0         | 0         | 0         |
| OR1B1  | 0.290195  | 0.0815619 | 0.180052  | 0         | 0.0375644 | 0.0205914 | 0.110445  | 0.236409  | 0         | 0         | 0         | 0         | 0.113751  | 0.0694594 |           |
| OR1C1  | 0.04898   | 0.035399  | 0.101299  | 0         | 0         | 0.0208529 | 0.0279619 | 0         | 0         | 0         | 0         | 0.0175233 | 0.0158008 | 0.0511982 | 0.105512  |
| OR1D2  | 0         | 0         | 0         | 0         | 0         | 0         | 0         | 0         | 0         | 0         | 0         | 0         | 0         | 0         | 0         |
| OR1D4  | 0         | 0         | 0         | 0         | 0         | 0         | 0         | 0         | 0         | 0         | 0         | 0         | 0         | 0         | 0         |
| OR1D5  | 0         | 0         | 0.0203893 | 0         | 0         | 0         | 0         | 0         | 0         | 0         | 0         | 0         | 0         | 0         | 0         |
| OR1E1  | 0         | 0         | 0.0202599 | 0         | 0         | 0         | 0         | 0         | 0         | 0         | 0         | 0.0175233 | 0         | 0         | 0         |
| OR1E2  | 0         | 0.0114719 | 0.0196971 | 0         | 0         | 0         | 0         | 0         | 0         | 0         | 0         | 0         | 0         | 0.012444  | 0         |
| OR1E3  | 0         | 0         | 0         | 0         | 0         | 0         | 0         | 0         | 0         | 0         | 0         | 0         | 0         | 0         | 0         |
| OR1F1  | 0         | 0         | 0         | 0.0253989 | 0         | 0         | 0         | 0         | 0         | 0.0309339 | 0.0556456 | 0         | 0         | 0         | 0.0353955 |
| OR1F12 | 0.045647  | 0.0989705 | 0.0566437 | 0.0470406 | 0.0354528 | 0.116604  | 0.0521183 | 0.101418  | 0         | 0         | 0         | 0         | 0         | 0         | 0         |
| OR1F2P | 0         | 0         | 0         | 0.0242128 | 0         | 0         | 0         | 0         | 0         | 0         | 0.0265235 | 0         | 0         | 0.0245595 | 0         |
| OR1G1  | 0         | 0         | 0         | 0         | 0         | 0         | 0         | 0         | 0         | 0         | 0         | 0         | 0         | 0         | 0         |
| OR1I1  | 0         | 0         | 0         | 0         | 0         | 0         | 0         | 0         | 0         | 0         | 0         | 0         | 0         | 0         | 0         |
| OR1J1  | 0.143301  | 0.126581  | 0.0395161 | 0.196901  | 0.222595  | 0.0203364 | 0.081808  | 0.127354  | 0         | 0.0299762 | 0         | 0.136714  | 0.0308189 | 0.374476  | 0.651693  |
| OR1J2  | 0.24568   | 0.0710234 | 0.0406488 | 0.202544  | 0.228975  | 0.104597  | 0.168306  | 0.10917   | 0         | 0         | 0         | 0.0703162 | 0         | 0.218285  | 0.423393  |
| OR1J4  | 0.270248  | 0.0473489 | 0.0406488 | 0.0759541 | 0.228975  | 0.146435  | 0.0841528 | 0.10917   | 0.0897632 | 0.0616707 | 0.110937  | 0.105474  | 0.0792557 | 0.256806  | 0.0705655 |
| OR1K1  | 0.511045  | 0.281405  | 0.322113  | 0.0250784 | 0.642624  | 0         | 0.30564   | 0.281156  | 0         | 0.0610871 | 0         | 0.121889  | 0         | 0.0508752 | 0         |
| OR1L1  | 0.04961   | 0.0358543 | 0         | 0         | 0.0385307 | 0.0211211 | 0         | 0.0440892 | 0         | 0         | 0.0280017 | 0.0177486 | 0         | 0.0259283 | 0         |
| OR1L3  | 0.142419  | 0.114366  | 0.0196365 | 0         | 0         | 0.0404226 | 0         | 0.16876   | 0         | 0         | 0         | 0         | 0         | 0         | 0.0340886 |
| OR1L4  | 0.259618  | 0.16782   | 0.132955  | 0.101921  | 0.0768144 | 0.0210534 | 0.197615  | 0.241713  | 0         | 0.031033  | 0         | 0.0176917 | 0.0159528 | 0.0258452 | 0.520797  |
| OR1L6  | 0.0865392 | 0.153835  | 0.132955  | 4.02E-32  | 0.0384072 | 0         | 0.141154  | 0.153818  | 0         | 0.031033  | 0.027912  | 0.10615   | 0         | 0.0387679 | 0.260399  |
| OR1L8  | 0.174195  | 0.13189   | 0.0205866 | 0.0512894 | 0         | 0.0423785 | 0.0852387 | 0.15481   | 0         | 0         | 0.0280921 | 0.0890294 | 0.0160557 | 0.13006   | 0.107214  |



|           |           |           |           |           |           |           |           |           |           |           |           |           |           |           |           |
|-----------|-----------|-----------|-----------|-----------|-----------|-----------|-----------|-----------|-----------|-----------|-----------|-----------|-----------|-----------|-----------|
| OR1M1     | 0         | 0         | 0         | 0         | 0         | 0         | 0         | 0         | 0         | 0         | 0         | 0         | 0         | 0         | 0         |
| OR1N1     | 0.173078  | 0         | 0         | 0.0254803 | 0.153629  | 0.0421068 | 0.0564615 | 0.21974   | 0         | 0         | 0         | 0.0884587 | 0         | 0.284298  | 0.177545  |
| OR1N2     | 0.139837  | 0.0224586 | 0         | 0.0480354 | 0.14481   | 0.0198449 | 0.0798308 | 0.186413  | 0         | 0         | 0.0526196 | 0.0500286 | 0         | 0.121808  | 0.167353  |
| OR1Q1     | 0.22041   | 0.165195  | 0.0607796 | 0.0252377 | 0.0760829 | 0.104265  | 0.0838857 | 0.282941  | 0         | 0.0614749 | 0.0552923 | 0.122663  | 0.0158008 | 0.243191  | 0.351707  |
| OR1S1     | 0.0236637 | 0.0114015 | 0.0195762 | 0         | 0         | 0         | 0.0270184 | 0.0630909 | 0         | 0         | 0         | 0         | 0         | 0         | 0         |
| OR1S2     | 0         | 0.0570075 | 0.0391525 | 0         | 0         | 0         | 0         | 0.0210303 | 0         | 0.0297003 | 0         | 0         | 0         | 0         | 0         |
| OR2A1     | 0.254251  | 0.176283  | 0.179554  | 0.134202  | 0.25045   | 0.137287  | 0.134527  | 0.0992007 | 0.0226573 | 0.038916  | 0.0140009 | 0.0621202 | 0         | 0.126401  | 0.151398  |
| OR2A1-AS1 | 0.287735  | 0.20143   | 0.218996  | 0.201897  | 0.249609  | 0.118551  | 0.244577  | 0.085037  | 2.52E-18  | 0.0570421 | 0.157816  | 0.0400088 | 0.0315497 | 0.125585  | 0.173444  |
| OR2A12    | 0.024805  | 0.0597571 | 0         | 0.0766868 | 0         | 0.0211211 | 0.0283215 | 0.0440892 | 0         | 0         | 0         | 0         | 0         | 0.0518567 | 0         |
| OR2A14    | 0.04961   | 0.0119514 | 0.0410409 | 0.0766868 | 0.0385307 | 0.0211211 | 0         | 0.154312  | 0         | 0.0311328 | 0         | 0         | 0         | 0.0388925 | 0.106869  |
| OR2A2     | 0.16928   | 0.0582585 | 0.200058  | 0.0747636 | 0         | 0         | 0         | 0.0429835 | 0         | 0         | 0         | 0.0173035 | 0         | 0.0252781 | 0         |
| OR2A20P   | 0.630568  | 1.03626   | 1.05731   | 0.478105  | 0.343332  | 0.722758  | 0.817905  | 0.511243  | 0.142714  | 0.503255  | 0.36448   | 0.173877  | 0.31998   | 0.136462  | 0.463814  |
| OR2A25    | 0.024805  | 0.0239028 | 0         | 0         | 0.0385307 | 0         | 0.0566431 | 0         | 0         | 0         | 0         | 0         | 0         | 0         | 0         |
| OR2A4     | 0.922282  | 3.92771   | 5.2331    | 4.13749   | 0.75526   | 0.93128   | 3.30148   | 1.37245   | 1.38779   | 0.940121  | 0.182809  | 1.13385   | 0.998301  | 0.787551  | 0.231297  |
| OR2A42    | 0.254251  | 0.176283  | 0.179554  | 0.134202  | 0.25045   | 0.137287  | 0.134527  | 0.0992007 | 0.0226573 | 0.038916  | 0.0140009 | 0.0621202 | 0         | 0.126401  | 0.151398  |
| OR2A5     | 0         | 0         | 0.0409093 | 0         | 0         | 0         | 0         | 0         | 0         | 0         | 0         | 0         | 0.0353835 | 0         | 0         |
| OR2A7     | 0.573496  | 2.63065   | 3.87317   | 2.57591   | 0.449349  | 0.754092  | 2.26      | 0.419178  | 0.999178  | 0.385043  | 2.45E-15  | 0.975135  | 0.261028  | 0.563133  | 0.212936  |
| OR2A9P    | 0.709859  | 1.12801   | 1.61336   | 1.20572   | 0.50815   | 0.921011  | 0.776889  | 0.622603  | 0.712801  | 0.120857  | 0.383533  | 0.250972  | 0.442322  | 0.40805   | 0.464023  |
| OR2AE1    | 0.452385  | 0.229438  | 0.315153  | 0.0245366 | 0.147939  | 0         | 0.434963  | 0.444362  | 0.0869927 | 0.119535  | 0         | 0.119255  | 0.0153619 | 0.049776  | 0.512907  |
| OR2AG1    | 0.0695683 | 0.0335191 | 0         | 0.143384  | 0         | 0.039491  | 0.0264769 | 0.0824353 | 0         | 0.0291051 | 0         | 0.0331853 | 0         | 0.0671714 | 0.0999089 |
| OR2AG2    | 0.0243355 | 0.0820765 | 0         | 0.0752353 | 0         | 0.0207213 | 0.0555709 | 0.0648821 | 0         | 0.0610871 | 0         | 0.0696508 | 0         | 0.0566968 | 0         |
| OR2AJ1    | 0.0233768 | 0.0112633 | 0         | 0         | 0         | 0         | 0.0533818 | 0         | 0         | 0         | 0         | 0         | 0         | 0         | 0         |
| OR2AK2    | 0         | 0.0221244 | 0         | 0         | 0.0713277 | 0         | 0         | 0.0816175 | 0         | 0.0576328 | 0         | 0         | 0         | 0         | 0         |
| OR2AP1    | 0         | 0         | 0         | 0         | 0         | 0         | 0         | 0         | 0         | 0         | 0         | 0         | 0         | 0         | 0         |
| OR2AT4    | 0         | 0         | 0         | 0         | 0         | 0.0409263 | 0         | 0         | 0         | 0         | 0         | 0         | 0         | 0         | 0         |
| OR2B11    | 0.024259  | 0.0233767 | 0         | 0.0249996 | 0.0753651 | 0.0206562 | 0.0276981 | 0         | 0         | 0.060895  | 0         | 0.0347159 | 0.0313035 | 0.0380364 | 0.104517  |



|        |            |           |            |            |           |          |           |            |   |           |   |           |           |           |           |
|--------|------------|-----------|------------|------------|-----------|----------|-----------|------------|---|-----------|---|-----------|-----------|-----------|-----------|
| OR2M2  | 0          | 0         | 0          | 0          | 0         | 0        | 0         | 0          | 0 | 0         | 0 | 0         | 0         | 0         | 0         |
| OR2M3  | 0          | 0         | 0          | 0          | 0         | 0        | 0         | 0          | 0 | 0         | 0 | 0         | 0         | 0         | 0         |
| OR2M4  | 0          | 0         | 0.0204547  | 0          | 0         | 0        | 0.0564615 | 0          | 0 | 0         | 0 | 0         | 0         | 0.0129226 | 0         |
| OR2M5  | 0          | 0         | 0          | 0          | 0         | 0        | 0         | 0          | 0 | 0         | 0 | 0         | 0         | 0         | 0         |
| OR2M7  | 0          | 0.0118751 | 0          | 0          | 0         | 0        | 0         | 0          | 0 | 0         | 0 | 0         | 0         | 0         | 0         |
| OR2S2  | 0          | 0.0106501 | 0.0182861  | 0          | 0.0343354 | 0        | 0         | 0          | 0 | 0         | 0 | 0         | 0         | 0         | 0         |
| OR2T1  | 0          | 0         | 0          | 0          | 0         | 0        | 0         | 0          | 0 | 0         | 0 | 0         | 0         | 0         | 0         |
| OR2T10 | 0          | 0         | 0          | 0          | 0         | 0        | 0         | 0          | 0 | 0         | 0 | 0         | 0         | 0         | 0         |
| OR2T11 | 0          | 0         | 0          | 0          | 0         | 0        | 0.194498  | 0          | 0 | 0         | 0 | 0         | 0         | 0         | 0         |
| OR2T12 | 0          | 0         | 0          | 0.0247659  | 0         | 0        | 0         | 0          | 0 | 1.84E-26  | 0 | 0         | 0         | 0         | 0         |
| OR2T2  | 0          | 0         | 0.00907835 | 0          | 0         | 0        | 0.189662  | 0.029258   | 0 | 0         | 0 | 0         | 0         | 0         | 0         |
| OR2T27 | 0          | 0         | 0          | 0          | 0         | 0        | 0         | 0          | 0 | 0         | 0 | 0         | 0         | 0         | 0         |
| OR2T29 | 0          | 0         | 0          | 0          | 0         | 0        | 0.0557468 | 4.53E-26   | 0 | 0         | 0 | 0         | 0         | 0         | 0         |
| OR2T3  | 0          | 0         | 0          | 0          | 0         | 0        | 3.13E-08  | 0.0429835  | 0 | 0         | 0 | 0         | 0         | 0         | 0         |
| OR2T33 | 0.00540769 | 0         | 0          | 0.00557278 | 0         | 0        | 0         | 0          | 0 | 0         | 0 | 0         | 0         | 0         | 0         |
| OR2T34 | 0          | 0         | 0          | 0          | 0         | 0        | 0.110445  | 0          | 0 | 0         | 0 | 0         | 0         | 0         | 0         |
| OR2T35 | 0          | 0         | 0.0105907  | 0          | 0         | 0        | 4.93E-05  | 0.034132   | 0 | 0         | 0 | 0         | 0         | 0         | 0         |
| OR2T4  | 0          | 0         | 0          | 0          | 0         | 0        | 0         | 0          | 0 | 0         | 0 | 0         | 0         | 0         | 0         |
| OR2T5  | 0          | 0         | 0          | 0          | 0         | 0        | 0.0557468 | 0.0650874  | 0 | 0         | 0 | 0         | 0         | 0         | 0         |
| OR2T6  | 0          | 0         | 0          | 0          | 0         | 0        | 0         | 0          | 0 | 0         | 0 | 0         | 0         | 0         | 0         |
| OR2T7  | 0          | 0         | 0          | 0          | 0         | 0        | 0         | 0          | 0 | 0         | 0 | 0         | 0         | 0         | 0         |
| OR2T8  | 0.0191006  | 0.0118751 | 0          | 0.0196837  | 0.076569  | 0        | 0         | 0          | 0 | 0.0928016 | 0 | 0         | 0.0159018 | 0         | 0.0707909 |
| OR2V1  | 0          | 0         | 0          | 0          | 0         | 0        | 0         | 0          | 0 | 0         | 0 | 0         | 0         | 0         | 0         |
| OR2V2  | 0          | 0         | 0          | 0          | 0         | 0        | 0         | 0          | 0 | 0         | 0 | 0         | 0         | 0         | 0         |
| OR2W1  | 0          | 0         | 0          | 0          | 0         | 0        | 0         | 0.00266973 | 0 | 0         | 0 | 0         | 0         | 0         | 0         |
| OR2W3  | 0.2449     | 0         | 0.0405197  | 0          | 0.228249  | 0.166823 | 0.335543  | 0.0435294  | 0 | 0.215162  | 0 | 0.0350465 | 0.300216  | 0.230392  | 0.105512  |





|        |           |           |            |           |           |           |           |           |          |           |          |           |           |           |           |
|--------|-----------|-----------|------------|-----------|-----------|-----------|-----------|-----------|----------|-----------|----------|-----------|-----------|-----------|-----------|
| OR4M2  | 0         | 0         | 0          | 0         | 0         | 0         | 0         | 0         | 0        | 0         | 0        | 0         | 0         | 0.0111583 | 0         |
| OR4N2  | 0         | 0         | 0          | 0         | 0         | 0         | 0         | 0         | 0        | 0         | 0        | 0         | 0         | 0         | 0         |
| OR4N3P | 0         | 0         | 0.0204985  | 0         | 0         | 0         | 0         | 0         | 0        | 0         | 0        | 0         | 0.0479607 | 0.0129503 | 0.0711699 |
| OR4N4  | 0         | 0         | 0          | 0         | 0         | 0         | 0         | 0         | 0        | 0         | 0        | 0         | 0         | 0         | 0         |
| OR4N5  | 0         | 0         | 0          | 0         | 0         | 0         | 0         | 0         | 0        | 0         | 0        | 0         | 0         | 0         | 0         |
| OR4P4  | 0         | 0         | 0          | 0         | 0         | 0         | 0         | 0         | 0        | 0         | 0        | 0         | 0         | 0         | 0         |
| OR4Q2  | 0         | 0         | 0          | 0         | 0         | 0         | 0         | 0         | 0        | 0         | 0        | 0         | 0         | 0         | 0         |
| OR4Q3  | 0         | 0         | 0          | 0         | 0         | 0         | 0         | 0         | 0        | 0         | 0        | 0         | 0         | 0         | 0         |
| OR4S1  | 0         | 0         | 0          | 0         | 0         | 0         | 0         | 0         | 0        | 0         | 0        | 0         | 0         | 0         | 0         |
| OR4S2  | 0         | 0         | 0          | 0         | 0         | 0         | 0         | 0         | 0        | 0         | 0        | 0         | 0         | 0         | 0         |
| OR4X1  | 0         | 0         | 0          | 0         | 0         | 0         | 0         | 0         | 0        | 0         | 0        | 0         | 0         | 0         | 0         |
| OR4X2  | 0         | 0         | 0          | 0         | 0         | 0         | 0         | 0         | 0        | 0         | 0        | 0         | 0         | 0         | 0         |
| OR51A2 | 0         | 0         | 0          | 0         | 0.0381626 | 0         | 0         | 0         | 0        | 0         | 0        | 0         | 0         | 0         | 0         |
| OR51A4 | 0         | 0         | 0          | 0         | 0         | 0         | 0         | 0         | 0        | 0         | 0        | 0         | 0         | 0.0128403 | 0         |
| OR51A7 | 0         | 0         | 0          | 0         | 0         | 0         | 0         | 0         | 0        | 0         | 0        | 0         | 0         | 0         | 0.0353955 |
| OR51B2 | 0.0219365 | 0         | 0.0362949  | 0.0452125 | 0         | 0.0373574 | 0         | 0.0194954 | 0        | 0         | 0        | 0         | 0         | 0         | 0         |
| OR51B4 | 0.024805  | 0.0119514 | 0.0410409  | 0         | 0         | 0         | 0         | 0.0220446 | 0        | 0         | 0        | 0         | 0         | 0         | 0         |
| OR51B5 | 0.0598321 | 0.0345936 | 0.0395979  | 0         | 0         | 0.0203785 | 0.0409886 | 0.0744433 | 0        | 0         | 0        | 0         | 0         | 0         | 0.0171853 |
| OR51B6 | 0.0739395 | 0.0475002 | 0.0203893  | 0         | 0         | 0.0209862 | 0         | 0.0219037 | 0        | 0         | 0        | 0         | 0         | 0         | 0         |
| OR51D1 | 0         | 0         | 0          | 0         | 0         | 0         | 0         | 0         | 0        | 0         | 0        | 0         | 0         | 0         | 0         |
| OR51E1 | 0.149118  | 0.0359236 | 0.00616803 | 0.092202  | 0.0694893 | 0.165063  | 0.0340515 | 0.039757  | 0.063563 | 0.664411  | 1.33826  | 0.0106698 | 0.346356  | 0.416954  | 1.2742    |
| OR51E2 | 0.0664791 | 0.0120115 | 0.0274981  | 0.0342543 | 0.0129081 | 0.283031  | 0.0379519 | 0.051696  | 0.020241 | 0.0938679 | 0.487803 | 0.0535136 | 0.085784  | 0.0651467 | 0.179011  |
| OR51F1 | 0         | 0         | 0          | 0         | 0         | 0         | 0         | 0.0219037 | 0        | 0.0309339 | 0        | 0.0176352 | 0         | 0         | 0         |
| OR51F2 | 0         | 0         | 0          | 0         | 0         | 0         | 0         | 0         | 0        | 0         | 0        | 0.0482783 | 0         | 0         | 0         |
| OR51G1 | 0         | 0         | 0          | 0         | 0         | 0         | 0         | 0         | 0        | 0         | 0        | 0         | 0         | 0         | 0         |
| OR51G2 | 0         | 0         | 0          | 0         | 0         | 0         | 0         | 0         | 0        | 0         | 0        | 0.0175233 | 0         | 0         | 0         |











|        |           |           |            |           |           |            |           |           |            |            |           |            |   |           |           |
|--------|-----------|-----------|------------|-----------|-----------|------------|-----------|-----------|------------|------------|-----------|------------|---|-----------|-----------|
| OR6C70 | 0         | 0         | 0          | 0         | 0         | 0          | 0         | 0         | 0          | 0          | 0         | 0          | 0 | 0         | 0         |
| OR6C74 | 0         | 0         | 0          | 0         | 0         | 0          | 0         | 0         | 0          | 0          | 0         | 0          | 0 | 0         | 0         |
| OR6C75 | 0         | 0         | 0          | 0         | 0         | 0          | 0         | 0         | 0          | 0          | 0         | 0          | 0 | 0         | 0         |
| OR6C76 | 0         | 0         | 0          | 0         | 0         | 0          | 0         | 0         | 0          | 0          | 0         | 0          | 0 | 0         | 0         |
| OR6F1  | 0.174759  | 0.0360863 | 0.0619598  | 0.0257277 | 0.11634   | 0.0850313  | 0.0285048 | 0.110936  | 0          | 0          | 0         | 0          | 0 | 0         | 0         |
| OR6J1  | 0         | 0         | 0          | 0         | 0         | 0          | 0.0206599 | 0         | 0          | 0          | 0         | 0          | 0 | 0         | 0         |
| OR6K2  | 0         | 0         | 0          | 0         | 0         | 0          | 0         | 0         | 0          | 0          | 0         | 0          | 0 | 0         | 0         |
| OR6K3  | 0         | 0         | 0          | 0         | 0         | 0          | 0         | 0         | 0          | 0          | 0         | 0          | 0 | 0         | 0         |
| OR6K6  | 0         | 0         | 0          | 0         | 0         | 0          | 0         | 0         | 0          | 0          | 0         | 0          | 0 | 0         | 0         |
| OR6M1  | 0         | 0         | 0.0203244  | 0.0759541 | 0         | 0          | 0         | 0         | 0          | 0          | 0         | 0.0351581  | 0 | 0         | 0         |
| OR6N1  | 0         | 0         | 0          | 0         | 0         | 0          | 0         | 0         | 0          | 0          | 0         | 0          | 0 | 0         | 0         |
| OR6N2  | 0         | 0         | 0          | 0         | 0         | 0          | 0         | 0         | 0          | 0          | 0         | 0          | 0 | 0         | 0         |
| OR6P1  | 0         | 0         | 0          | 0         | 0         | 0          | 0         | 0         | 0          | 0          | 0         | 0          | 0 | 0         | 0         |
| OR6Q1  | 0.0485179 | 0.0467534 | 0.0802749  | 0         | 0         | 0.0413124  | 0.0276981 | 0         | 0          | 0.0304475  | 0         | 0.0347159  | 0 | 0         | 0         |
| OR6S1  | 0         | 0         | 0          | 0         | 0         | 0          | 0         | 0         | 0          | 0          | 0         | 0          | 0 | 0         | 0         |
| OR6T1  | 0.0238097 | 0.0229438 | 0.0196971  | 0         | 0         | 0.060821   | 0.0271852 | 0.0211601 | 0          | 0          | 0         | 0          | 0 | 0         | 0         |
| OR6V1  | 0.024568  | 0.0236745 | 0.0203244  | 0         | 0         | 0          | 0         | 0.043668  | 0          | 0          | 0         | 0.0175791  | 0 | 0.0128403 | 0         |
| OR6W1P | 0.107857  | 0.0297198 | 0.0509869  | 0.0158786 | 0.0478684 | 0.0131277  | 0.0703701 | 0.0822872 | 0          | 0          | 0         | 0.0110288  | 0 | 0.0402748 | 0.0663842 |
| OR6X1  | 0.0246465 | 0         | 0          | 0         | 0         | 0          | 0         | 0         | 0          | 0          | 0         | 0          | 0 | 0         | 0         |
| OR6Y1  | 0         | 0         | 0          | 0         | 0         | 0.0201493  | 0.0270184 | 0         | 0          | 0          | 0         | 0          | 0 | 0         | 0         |
| OR7A10 | 0         | 1.39E-42  | 0          | 0         | 0         | 0          | 1.81E-39  | 1.35E-27  | 0          | 0          | 0         | 0          | 0 | 0         | 0         |
| OR7A17 | 0         | 0         | 0          | 0         | 0         | 0          | 0         | 0         | 0          | 0          | 0         | 0          | 0 | 0         | 0         |
| OR7A5  | 0.119071  | 0.156464  | 0.0358196  | 0.122706  | 0.0168144 | 0.138255   | 0.16067   | 0.1443    | 0.0131832  | 0.013586   | 0         | 0.123925   | 0 | 0.0169723 | 0.0466366 |
| OR7C1  | 0.0720967 | 0.150528  | 0.0397623  | 0.173361  | 0         | 0.122779   | 0.137196  | 0.106789  | 0.175611   | 0.0603259  | 0.0813882 | 0.171957   | 0 | 0.100482  | 0         |
| OR7C2  | 0         | 0         | 0          | 0         | 0         | 0          | 0         | 0         | 0          | 0          | 0         | 0          | 0 | 0         | 0         |
| OR7D2  | 0         | 0.0318096 | 0.00593845 | 0.0165255 | 0.022301  | 0.00611228 | 0         | 0.0204331 | 0.00874244 | 0.00909734 | 0         | 0.00517394 | 0 | 0.0189254 | 0.010309  |



|       |           |           |           |           |           |           |           |           |           |          |          |           |           |           |          |
|-------|-----------|-----------|-----------|-----------|-----------|-----------|-----------|-----------|-----------|----------|----------|-----------|-----------|-----------|----------|
| OR8H2 | 0         | 0         | 0         | 0         | 0         | 0         | 0         | 0         | 0         | 0        | 0        | 0         | 0         | 0         | 0        |
| OR8H3 | 0         | 0         | 0         | 0         | 0         | 0         | 0         | 0         | 0         | 0        | 0        | 0         | 0         | 0         | 0        |
| OR8I2 | 0         | 0         | 0         | 0         | 0         | 0         | 0         | 0         | 0         | 0        | 0        | 0         | 0         | 0         | 0        |
| OR8J1 | 0         | 0         | 0         | 0         | 0         | 0         | 0         | 0         | 0         | 0        | 0        | 0         | 0         | 0         | 0        |
| OR8J3 | 0         | 0         | 0         | 0         | 0         | 0         | 0         | 0         | 0         | 0        | 0        | 0         | 0         | 0         | 0        |
| OR8K1 | 0         | 0         | 0         | 0         | 0         | 0         | 0         | 0         | 0         | 0        | 0        | 0         | 0         | 0         | 0        |
| OR8K3 | 0         | 0         | 0         | 0         | 0         | 0         | 0         | 0         | 0         | 0        | 0        | 0         | 0         | 0         | 0        |
| OR8K5 | 0         | 0         | 0         | 0         | 0         | 0         | 0         | 0         | 0         | 0        | 0        | 0         | 0         | 0         | 0        |
| OR8S1 | 0         | 0         | 0         | 0         | 0         | 0         | 0         | 0.0190441 | 0         | 0        | 0        | 0         | 0         | 0         | 0        |
| OR8U1 | 0         | 0         | 0         | 0         | 0         | 0         | 0         | 0         | 0         | 0        | 0        | 0         | 0         | 0         | 0        |
| OR8U8 | 0         | 0         | 0         | 0         | 0         | 0         | 0         | 0         | 0         | 0        | 0        | 0         | 0         | 0         | 0        |
| OR9A2 | 0.074415  | 0         | 0.0615613 | 0         | 0         | 0.0422422 | 0.0283215 | 0.0881784 | 0         | 0        | 0        | 0         | 0.0388925 | 0.0712462 |          |
| OR9A4 | 0.02449   | 0         | 0         | 0         | 0         | 0         | 0         | 0.0217647 | 0         | 0        | 0        | 0.0350465 | 0         | 0.0383986 | 0        |
| OR9G1 | 0         | 0         | 0         | 0         | 0.0587404 | 0         | 0         | 0         | 0         | 0        | 0        | 0         | 0         | 0         | 0        |
| OR9G4 | 0         | 0         | 0         | 0         | 0         | 0         | 0         | 0         | 0         | 0        | 0        | 0         | 0         | 0         | 0        |
| OR9G9 | 0         | 0         | 0         | 0         | 0.0587404 | 0         | 0         | 0         | 0         | 0        | 0        | 0         | 0         | 0         | 0        |
| OR9I1 | 0.07347   | 0.165195  | 0.101299  | 0.0504753 | 0.152166  | 0         | 0.167771  | 0.130588  | 0         | 0        | 0        | 0.0350465 | 0         | 0.0383986 | 0        |
| OR9K2 | 0         | 0         | 0         | 0         | 0         | 0         | 0         | 0         | 0         | 0        | 0        | 0         | 0         | 0         | 0        |
| OR9Q1 | 0.0569558 | 0.0548844 | 0.0942358 | 0         | 0.0147453 | 0.0161657 | 0.0108384 | 0.0927989 | 0         | 0        | 0        | 0         | 0         | 0         | 0        |
| OR9Q2 | 0.08532   | 0.14388   | 0         | 0         | 0         | 0         | 0.0974156 | 0.0189563 | 0.0259775 | 0        | 0        | 0         | 0         | 0.011148  | 0        |
| ORAI1 | 7.16479   | 10.8314   | 13.4605   | 8.62205   | 5.40913   | 8.67222   | 14.5842   | 7.20277   | 8.20048   | 3.61636  | 7.9664   | 3.46183   | 6.15364   | 4.48551   | 3.31921  |
| ORAI2 | 0.673593  | 0.447726  | 0.55922   | 1.053     | 1.35541   | 2.31962   | 0.632147  | 0.452118  | 0.196407  | 1.07017  | 1.40693  | 0.364252  | 1.18206   | 1.37799   | 1.97258  |
| ORAI3 | 2.9299    | 4.10761   | 3.99887   | 3.06295   | 5.86556   | 6.17839   | 4.09403   | 2.32185   | 1.22378   | 1.91168  | 5.20602  | 1.48339   | 2.18381   | 1.75242   | 2.26335  |
| ORC1  | 0.576933  | 0.376498  | 0.338325  | 1.55786   | 0.215536  | 1.96501   | 0.825489  | 0.227159  | 0.266825  | 0.907429 | 0.948074 | 0.595702  | 1.7952    | 0.950395  | 0.597814 |
| ORC2  | 3.4347    | 3.50521   | 3.92663   | 4.02282   | 1.33874   | 3.65845   | 2.37324   | 3.54245   | 1.49726   | 2.27476  | 2.41082  | 1.98605   | 2.91523   | 2.99411   | 2.02949  |
| ORC3  | 3.67121   | 2.99577   | 2.97753   | 3.79256   | 0.92249   | 4.09903   | 1.65407   | 2.83885   | 2.34515   | 3.1283   | 4.70304  | 1.42288   | 2.50218   | 1.92344   | 2.40356  |

|             |           |           |          |           |           |           |           |           |           |           |           |            |           |           |          |
|-------------|-----------|-----------|----------|-----------|-----------|-----------|-----------|-----------|-----------|-----------|-----------|------------|-----------|-----------|----------|
| ORC4        | 28.6347   | 27.2812   | 26.1736  | 14.9672   | 7.05768   | 7.94829   | 18.2735   | 26.2546   | 6.13451   | 11.2853   | 5.91296   | 15.7703    | 4.13574   | 20.4238   | 17.9496  |
| ORC5        | 1.92944   | 2.28453   | 2.08012  | 4.06131   | 0.813041  | 2.91002   | 1.33585   | 2.28023   | 2.16236   | 2.60199   | 4.13608   | 1.98273    | 3.52934   | 2.41375   | 1.4002   |
| ORC6        | 0.820129  | 0.384139  | 0.397211 | 1.65292   | 0.404881  | 1.19805   | 0.599817  | 0.238844  | 0.267321  | 1.0495    | 1.5951    | 0.623131   | 1.248     | 1.4344    | 0.768357 |
| ORM1        | 0.1105    | 4.37E-14  | 7.14E-11 | 0.0162677 | 0.0245207 | 0         | 0.0901182 | 0.0280581 | 0         | 0.173103  | 0.0374024 | 0.0112951  | 0.0533913 | 0.0720832 | 0.158457 |
| ORM2        | 0.0820991 | 0.0924819 | 0.068053 | 0.0120865 | 0.0182183 | 0         | 0.0669559 | 0.0208465 | 0         | 9.29E-07  | 0.148546  | 0.00839202 | 2.77E-26  | 2.17E-13  | 0        |
| ORMDL1      | 5.32438   | 4.60948   | 4.43102  | 3.67253   | 0.922617  | 5.38258   | 2.33723   | 5.32572   | 5.16693   | 3.12833   | 5.26823   | 2.67897    | 3.46948   | 4.59544   | 3.74709  |
| ORMDL2      | 3.86077   | 4.36926   | 4.07275  | 15.1534   | 4.90461   | 9.18852   | 5.53971   | 3.1671    | 15.2243   | 16.2225   | 21.2504   | 9.8272     | 22.5197   | 9.47498   | 5.23643  |
| ORMDL3      | 3.88161   | 4.69322   | 4.57435  | 3.68563   | 7.67908   | 5.73721   | 4.08346   | 2.91266   | 4.92801   | 3.27083   | 3.32083   | 2.54594    | 3.26039   | 3.0175    | 2.95375  |
| OS9         | 28.4879   | 26.2678   | 27.0664  | 40.5324   | 54.3506   | 69.519    | 28.5477   | 20.8695   | 32.9223   | 33.7966   | 27.3122   | 24.2669    | 43.2031   | 24.6731   | 33.6075  |
| OSBP        | 9.50673   | 9.34963   | 9.42777  | 8.91486   | 7.44727   | 13.2549   | 7.75097   | 7.73663   | 9.08284   | 7.49174   | 7.28824   | 6.54821    | 8.41914   | 6.09419   | 5.83908  |
| OSBP2       | 0.762573  | 1.19248   | 1.37743  | 0.965865  | 1.44045   | 1.21329   | 1.52659   | 0.826511  | 2.96997   | 0.697057  | 0.531622  | 0.953821   | 1.37492   | 0.992886  | 0.53018  |
| OSBPL10     | 3.10368   | 2.26032   | 2.21766  | 3.20975   | 4.40296   | 4.4155    | 2.76596   | 2.05042   | 1.75282   | 3.5438    | 2.54869   | 3.00688    | 4.88037   | 4.01083   | 4.07072  |
| OSBPL10-AS1 | 0.0850847 | 0.184478  | 0.140776 | 0.131523  | 0         | 0.0362243 | 0.242868  | 0.0756162 | 0         | 0.0533951 | 0         | 0.243522   | 0         | 0.289049  | 0        |
| OSBPL11     | 2.75441   | 2.8634    | 3.01755  | 3.399     | 3.00739   | 3.79844   | 3.03665   | 2.35477   | 4.70368   | 3.68253   | 4.39933   | 2.46       | 4.51366   | 2.96782   | 2.28598  |
| OSBPL1A     | 4.60861   | 3.29065   | 3.39159  | 4.08766   | 3.67915   | 7.33807   | 3.87725   | 3.17856   | 10.4901   | 6.77523   | 7.29653   | 4.16536    | 6.52078   | 2.80144   | 3.7157   |
| OSBPL2      | 7.59764   | 11.2677   | 11.1371  | 9.78991   | 13.7747   | 8.82454   | 8.46214   | 8.95957   | 19.4963   | 9.27382   | 7.42987   | 10.1496    | 13.6497   | 7.02733   | 5.06652  |
| OSBPL3      | 3.34665   | 3.42978   | 3.02705  | 4.04627   | 3.48734   | 2.77283   | 3.06716   | 2.92268   | 3.19711   | 4.45509   | 2.62165   | 4.35823    | 4.53044   | 3.9258    | 2.91426  |
| OSBPL5      | 4.23925   | 5.27275   | 5.9599   | 5.57128   | 8.21276   | 9.64265   | 6.63488   | 3.41293   | 2.76273   | 3.52718   | 3.27998   | 3.13979    | 4.20644   | 4.54944   | 6.45573  |
| OSBPL6      | 1.23831   | 1.99178   | 2.5084   | 2.07888   | 0.800263  | 1.41909   | 1.56978   | 1.86452   | 1.92767   | 1.42956   | 1.27177   | 2.06522    | 1.4237    | 1.28628   | 1.0073   |
| OSBPL7      | 0.544393  | 0.295847  | 0.314205 | 0.371834  | 1.11112   | 1.32056   | 0.578205  | 0.247532  | 0.0462565 | 0.23835   | 0.628844  | 0.22647    | 0.277725  | 0.569048  | 1.2      |
| OSBPL8      | 7.43064   | 6.78533   | 7.66648  | 8.11393   | 3.26481   | 10.4053   | 5.39529   | 8.24358   | 6.55377   | 10.08     | 11.238    | 5.21259    | 14.0533   | 6.78623   | 9.42379  |
| OSBPL9      | 5.5398    | 3.87656   | 4.34551  | 3.81297   | 2.04582   | 6.31411   | 3.05433   | 3.85301   | 3.47015   | 5.9046    | 7.4802    | 2.66213    | 6.19625   | 4.68984   | 4.83533  |
| OSCAR       | 0.134618  | 0.291874  | 0.464022 | 0.936412  | 0.749304  | 1.32774   | 0.358639  | 0.289123  | 0.0683123 | 0.732157  | 1.67163   | 0.168565   | 0.528367  | 0.39869   | 0.93442  |
| OSCP1       | 0.764608  | 0.927578  | 0.960102 | 0.872375  | 0.869566  | 1.66251   | 0.982131  | 0.582446  | 0.947835  | 0.908251  | 1.6184    | 0.410323   | 0.51094   | 0.52093   | 0.50982  |
| OSER1       | 5.84254   | 4.29216   | 4.33807  | 5.34009   | 2.95033   | 6.27569   | 4.18399   | 3.03652   | 15.0231   | 10.7144   | 13.2842   | 6.55879    | 8.82453   | 5.43276   | 3.9433   |
| OSER1-DT    | 0.737677  | 1.247     | 1.61356  | 0.579812  | 0.912809  | 0.990091  | 1.08494   | 0.522246  | 0.563408  | 0.376621  | 1.21383   | 0.232602   | 0.532413  | 0.287523  | 0.430941 |

|             |           |            |           |           |           |           |            |           |            |            |            |            |            |            |            |
|-------------|-----------|------------|-----------|-----------|-----------|-----------|------------|-----------|------------|------------|------------|------------|------------|------------|------------|
| OSGEP       | 3.58895   | 3.04671    | 3.65238   | 4.24156   | 4.33602   | 5.90574   | 2.5367     | 1.98715   | 1.82123    | 2.84213    | 6.67208    | 1.63047    | 3.06905    | 3.27511    | 3.2725     |
| OSGEPL1     | 1.14031   | 1.21893    | 0.937807  | 1.01683   | 0.559301  | 1.05601   | 0.671525   | 0.956565  | 0.136437   | 0.761617   | 1.14873    | 0.45818    | 0.656541   | 0.822465   | 0.764208   |
| OSGEPL1-AS1 | 0.401005  | 0.158547   | 0.409507  | 0.216528  | 0.0955288 | 0.240246  | 0.259908   | 0.195694  | 0.0616079  | 0.0634905  | 0.171316   | 0.0797963  | 0.0326378  | 0.1776     | 0.181619   |
| OSGIN1      | 0.751553  | 0.224163   | 0.315803  | 0.245872  | 0.315018  | 2.40738   | 0.871719   | 0.296852  | 0.537561   | 1.15289    | 1.06388    | 0.973082   | 1.32385    | 0.311741   | 0.908003   |
| OSGIN2      | 1.80622   | 1.19568    | 1.38417   | 1.19696   | 0.476884  | 1.52054   | 1.22101    | 1.40967   | 0.53592    | 1.56698    | 2.16028    | 0.618738   | 1.88504    | 1.29165    | 1.39618    |
| OSM         | 0.05466   | 0.0105344  | 0.099481  | 0.664679  | 0.152831  | 0.651592  | 0.0374454  | 0.0485773 | 0.0665698  | 3.30671    | 8.83609    | 0.10951    | 2.0525     | 0.919881   | 2.33926    |
| OSMR        | 4.97807   | 4.42944    | 5.23499   | 16.071    | 2.66492   | 18.799    | 4.23473    | 5.67382   | 6.63215    | 10.9339    | 13.6919    | 5.94418    | 14.7435    | 10.964     | 13.8943    |
| OSMR-AS1    | 0.140901  | 0.135777   | 0.203986  | 0.50821   | 0.273586  | 0.899818  | 0.361972   | 0.125221  | 0.171602   | 0.61896    | 0.55671    | 0.075614   | 0.113636   | 0.0184103  | 0.101176   |
| OSR1        | 2.2361    | 1.14804    | 1.93073   | 0.843676  | 1.02495   | 5.43112   | 2.55311    | 1.44429   | 0.178578   | 0.322062   | 1.06213    | 0.262294   | 0.496675   | 0.491742   | 0.228127   |
| OSR2        | 5.37754   | 2.75882    | 4.38564   | 0.560903  | 1.9953    | 2.94757   | 7.63137    | 3.66657   | 0.172349   | 0.929063   | 1.56066    | 0.186937   | 0.386288   | 1.43372    | 6.19079    |
| OST4        | 38.4595   | 35.0623    | 32.4033   | 98.8545   | 28.547    | 66.4473   | 38.0087    | 28.3431   | 68.7756    | 85.911     | 214.183    | 61.5971    | 62.7861    | 55.8027    | 44.2332    |
| OSTC        | 9.66304   | 6.93043    | 6.9469    | 21.3651   | 2.80853   | 12.8978   | 6.17019    | 9.39112   | 12.111     | 24.4074    | 47.6707    | 8.62475    | 17.2259    | 13.6496    | 14.6851    |
| OSTCP1      | 0.448811  | 0.282058   | 0.322859  | 0.402185  | 0.0606225 | 0.0830776 | 0.178239   | 0.190762  | 0.0237653  | 0.17144    | 0.0881134  | 0.307174   | 0.11331    | 0.122383   | 0.280239   |
| OSTF1       | 16.3394   | 15.7536    | 14.8148   | 24.5762   | 11.8005   | 23.338    | 12.3768    | 13.9415   | 34.2821    | 26.0382    | 32.3138    | 18.1738    | 31.3306    | 14.1591    | 11.2897    |
| OSTM1       | 2.15007   | 2.1842     | 2.08728   | 4.02565   | 2.18093   | 4.4644    | 1.91658    | 2.16404   | 4.50516    | 4.93544    | 7.26979    | 2.33545    | 5.74273    | 3.64465    | 2.86456    |
| OSTM1-AS1   | 0.0208059 | 0.00334153 | 0         | 0         | 0         | 0         | 0.00791849 | 0         | 0          | 0.017409   | 0          | 0          | 0          | 0          | 0          |
| OSTN        | 0.0214951 | 0.0138089  | 3.42E-42  | 0.0147675 | 0         | 0         | 0.0654464  | 0.0318384 | 0.0087262  | 0          | 0          | 0          | 0          | 0          | 0          |
| OSTN-AS1    | 0         | 0          | 0.0374669 | 0         | 0         | 0         | 0          | 0         | 0          | 0          | 0          | 0          | 0          | 0          | 0.195125   |
| OTC         | 0.0702582 | 0.0135406  | 0.0116245 | 0         | 0         | 0.0598239 | 0          | 0.0374638 | 0          | 0          | 0          | 0          | 0          | 0          | 0          |
| OTOA        | 0.0189716 | 0.0114414  | 2.48E-10  | 5.65E-18  | 2.13E-18  | 0.0479615 | 0.0125787  | 0.0128857 | 0          | 0.0369443  | 0.126343   | 6.59E-27   | 0          | 0.00809031 | 7.31E-39   |
| OTOAP1      | 0.0685121 | 0.0548596  | 0.0503641 | 0.0717011 | 0.0270193 | 0.146106  | 0.0912257  | 0.0588479 | 0.0317764  | 0.0890225  | 0.103872   | 0.0560072  | 0          | 0.0475109  | 0.199843   |
| OTOF        | 0.0124275 | 0.0149694  | 0.0257022 | 0.102455  | 0         | 0.0343909 | 0.078041   | 0.0138056 | 0.00378381 | 0.00779887 | 0.00350727 | 0.00666914 | 0.0100227  | 0.00649514 | 0.00446185 |
| OTOG        | 0         | 0          | 0         | 0         | 0         | 0         | 0          | 0         | 0          | 0          | 0          | 0          | 0          | 0          | 0          |
| OTOGL       | 0.0544003 | 0.0151747  | 0.0118431 | 0.0147529 | 0         | 0.0170657 | 0.0359599  | 0.0305346 | 0.00348703 | 0.0215615  | 0.0711077  | 0.0102434  | 0.00738923 | 0.0254392  | 0.0287832  |
| OTOL1       | 0         | 0          | 0         | 0         | 0         | 0         | 0          | 0         | 0          | 0          | 0          | 0          | 0          | 0          | 0          |
| OTOP1       | 0.345063  | 0.372645   | 0.275617  | 0.049048  | 0.332691  | 0.0607897 | 0.353226   | 0.13747   | 0.115931   | 0.0298683  | 0.0134322  | 0.0766248  | 0.038385   | 0.0435316  | 0.0512643  |

|            |           |           |           |           |           |            |           |           |           |           |            |            |            |           |           |
|------------|-----------|-----------|-----------|-----------|-----------|------------|-----------|-----------|-----------|-----------|------------|------------|------------|-----------|-----------|
| OTOP2      | 0.43117   | 0.597265  | 0.142678  | 0.2666    | 1.9088    | 0.0367136  | 1.8215    | 0.0383188 | 3.03255   | 0.595279  | 0.4624     | 1.55028    | 0.396419   | 0.861957  | 0.634695  |
| OTOP3      | 1.03682   | 0.788293  | 0.35411   | 0.61756   | 2.99946   | 0.137691   | 5.03934   | 0.0929896 | 12.3957   | 2.2206    | 1.71808    | 2.57954    | 2.12346    | 1.65052   | 1.13383   |
| OTOR       | 0         | 0         | 0         | 0         | 0         | 0          | 0         | 0         | 0         | 0         | 0          | 0          | 0          | 0         | 0         |
| OTOS       | 0         | 0         | 0         | 0         | 0         | 0          | 0         | 0.0363385 | 0         | 0         | 0          | 0          | 0          | 0         | 0         |
| OTP        | 0         | 0         | 0         | 0         | 0         | 0.00735848 | 0         | 0         | 0         | 0         | 0          | 0          | 0          | 0         | 0         |
| OTUB1      | 9.65689   | 10.2772   | 10.2078   | 16.7099   | 18.5206   | 21.9034    | 13.4972   | 8.05608   | 29.9645   | 17.4488   | 25.9269    | 18.4328    | 21.9076    | 13.1589   | 7.51871   |
| OTUB2      | 3.56736   | 2.40691   | 1.8933    | 5.33275   | 5.62489   | 2.34559    | 5.34211   | 2.59684   | 37.8283   | 4.48491   | 8.51966    | 6.32792    | 2.14358    | 1.9644    | 0.926807  |
| OTUD1      | 3.91789   | 4.49896   | 6.30395   | 2.97258   | 4.11111   | 3.51328    | 4.42239   | 2.95994   | 5.74034   | 6.43828   | 4.20461    | 3.02145    | 5.1995     | 3.12783   | 4.42012   |
| OTUD3      | 2.0855    | 2.17228   | 2.10442   | 1.07642   | 1.31346   | 1.69712    | 1.72401   | 1.88184   | 2.83414   | 2.13593   | 0.966576   | 1.55579    | 1.58854    | 1.99612   | 1.21435   |
| OTUD4      | 4.37395   | 5.30384   | 5.45986   | 6.3971    | 2.74672   | 4.91987    | 3.36253   | 5.22629   | 4.81135   | 3.83307   | 3.73223    | 4.45952    | 6.77494    | 5.31887   | 4.49321   |
| OTUD5      | 6.64234   | 6.8425    | 7.06773   | 9.13723   | 12.162    | 11.8492    | 6.41728   | 5.00168   | 13.3242   | 7.03538   | 7.29479    | 6.46253    | 9.1869     | 5.57258   | 6.02141   |
| OTUD6A     | 0.0847821 | 0.0924271 | 0.0231165 | 0.0564949 | 0.127706  | 0.105005   | 0.0480313 | 0.109597  | 0.0333755 | 0.0343954 | 0.0309362  | 0.142002   | 0.0176812  | 0.152345  | 0.236137  |
| OTUD6B     | 1.94148   | 1.8946    | 1.99603   | 1.78328   | 1.30029   | 1.65315    | 1.51797   | 2.30683   | 1.58491   | 1.7746    | 2.35845    | 1.56535    | 1.96065    | 2.13971   | 1.44462   |
| OTUD6B-AS1 | 1.14406   | 1.10987   | 1.19819   | 0.861412  | 0.149589  | 1.17751    | 0.483795  | 0.920887  | 1.80148   | 1.0443    | 1.93072    | 0.658741   | 1.04632    | 0.650277  | 0.520009  |
| OTUD7A     | 0.680747  | 0.976586  | 1.11584   | 0.409723  | 0.730558  | 0.496823   | 0.872745  | 0.797952  | 0.262838  | 0.219762  | 0.250558   | 0.339841   | 0.145708   | 0.225113  | 0.326249  |
| OTUD7B     | 3.03042   | 3.00712   | 2.77558   | 3.01141   | 3.87791   | 4.94263    | 2.55796   | 2.51364   | 2.13534   | 2.23229   | 1.56794    | 1.68563    | 3.57292    | 2.29656   | 2.67341   |
| OTULIN     | 5.66921   | 6.46273   | 6.74213   | 4.02732   | 4.55958   | 3.13404    | 5.70406   | 5.7084    | 4.28988   | 4.03811   | 2.70612    | 3.86086    | 4.36702    | 3.85338   | 3.09963   |
| OTULINL    | 1.00479   | 0.6012    | 0.763323  | 0.605714  | 0.295836  | 0.827607   | 0.768575  | 0.913403  | 0.395911  | 0.704742  | 1.05644    | 0.279594   | 0.855908   | 0.430759  | 1.35341   |
| OTX1       | 4.25583   | 3.09398   | 2.31594   | 3.07159   | 2.83655   | 3.86795    | 3.52377   | 3.48048   | 1.85637   | 1.63845   | 1.32034    | 2.75361    | 1.67964    | 1.45525   | 0.791084  |
| OTX2       | 0         | 0         | 0         | 0         | 0         | 0          | 0         | 0         | 0         | 0         | 0          | 0          | 0          | 0         | 0         |
| OTX2-AS1   | 0         | 0         | 0         | 0         | 0         | 0          | 0         | 0         | 0         | 0         | 0          | 0          | 0          | 0         | 0         |
| OVAAL      | 0         | 0.0149573 | 0         | 0         | 0         | 0          | 0         | 0         | 0         | 0.0194815 | 0          | 0.0111063  | 0          | 0         | 0.0668739 |
| OVCA2      | 4.4117    | 3.49633   | 2.98494   | 9.64117   | 8.3863    | 10.1283    | 4.47845   | 2.80659   | 17.8206   | 11.6563   | 22.6914    | 10.0822    | 19.0192    | 11.3264   | 6.60847   |
| OVCH1      | 0.0811325 | 0.0418831 | 0.0287651 | 0.0185161 | 0.0602626 | 0.00740178 | 0.0430089 | 0.0555676 | 0         | 0.0459554 | 0.00704951 | 0.00621991 | 0.00934755 | 0.0248976 | 0.0291291 |
| OVCH1-AS1  | 0.053634  | 0.0129208 | 0.0221849 | 0.0524956 | 0.158525  | 0.0570858  | 0         | 0.0288555 | 0.11431   | 0.0734365 | 0.164153   | 0.0287824  | 0.0432554  | 0.0599838 | 0         |
| OVCH2      | 0.388171  | 1.03832   | 1.10732   | 0.0689693 | 1.45543   | 0.0455894  | 0.840555  | 0.666158  | 1.01071   | 0.117599  | 0.166213   | 0.641692   | 0.0345443  | 0.167897  | 0.0384457 |



|           |           |            |            |            |            |           |           |           |            |           |           |            |           |           |           |
|-----------|-----------|------------|------------|------------|------------|-----------|-----------|-----------|------------|-----------|-----------|------------|-----------|-----------|-----------|
| OVGP1     | 1.98192   | 1.36275    | 1.58835    | 0.159565   | 0.913961   | 0.922895  | 1.22573   | 0.880683  | 0.414864   | 0.557099  | 0.198098  | 0.487478   | 0.173161  | 0.555684  | 0.429908  |
| OVOL1     | 2.02942   | 7.20624    | 6.33539    | 10.5753    | 15.5716    | 9.25308   | 6.14694   | 3.32131   | 33.1941    | 14.9656   | 24.8288   | 25.3543    | 25.4413   | 15.4096   | 2.9255    |
| OVOL1-AS1 | 0.680678  | 1.14786    | 0.703881   | 0.569935   | 1.05733    | 1.0505    | 1.21434   | 0.983011  | 3.41958    | 0.907716  | 0.672351  | 4.93131    | 0.43917   | 1.57865   | 0.549866  |
| OVOL2     | 1.38186   | 1.84145    | 1.89499    | 1.32141    | 2.64929    | 1.31444   | 1.12291   | 0.92936   | 1.86489    | 1.375     | 1.33509   | 1.50541    | 2.71487   | 0.897896  | 0.375451  |
| OVOL3     | 0         | 0.21478    | 0.122925   | 0.0382818  | 0.17311    | 0.0632617 | 0.169656  | 0.0990415 | 0.0904836  | 0.186497  | 0.125806  | 0.265802   | 0.0239675 | 0.0582451 | 0.0533489 |
| OVOS      | 0.13634   | 0.145339   | 0.188734   | 0.113929   | 0.074096   | 0.0791027 | 0.138158  | 0.107327  | 0.00973611 | 0.0884547 | 0.0856997 | 0.172831   | 0.0329856 | 0.0853355 | 0.196462  |
| OVOS2     | 0.496232  | 0.0929023  | 0.0972154  | 0.151141   | 0.00680771 | 0.0427137 | 0.0327085 | 0.0407431 | 0.00492325 | 0.0379657 | 0.0509123 | 0.0380848  | 0.112151  | 0.0284237 | 0.0732263 |
| OXA1L     | 19.5349   | 15.8146    | 15.8043    | 21.3661    | 9.55716    | 33.898    | 18.1233   | 13.9989   | 11.9531    | 13.3322   | 27.9038   | 11.1552    | 14.454    | 13.348    | 11.5041   |
| OXCT1     | 5.72226   | 6.96828    | 4.93076    | 6.11498    | 6.37273    | 5.59339   | 5.2258    | 4.97144   | 23.4701    | 6.12297   | 7.21431   | 9.59742    | 4.76301   | 5.36044   | 3.15505   |
| OXCT1-AS1 | 0.138016  | 0.0586596  | 0.0675808  | 0.0138178  | 0.0227414  | 0.011988  | 0.107166  | 0.0371998 | 0.0489901  | 0         | 0.032618  | 0          | 0         | 0.0226719 | 0         |
| OXCT2     | 0.203009  | 0.213966   | 0.230922   | 0.156905   | 0.650396   | 0.399738  | 0.333197  | 0.135313  | 0.169979   | 0.191098  | 0.186202  | 0.217888   | 0.229216  | 0.709554  | 0.145773  |
| OXCT2P1   | 0         | 0.00618108 | 0.0318385  | 0          | 0.0199275  | 0.043694  | 0         | 0         | 0          | 0.0483042 | 0         | 0.00917931 | 0.0165541 | 0.0670486 | 0.128966  |
| OXER1     | 0.866388  | 1.01197    | 1.27058    | 0.324668   | 1.46814    | 0.894203  | 1.03418   | 0.839971  | 0.111911   | 0.230662  | 0.25192   | 0.178463   | 0.0677562 | 0.281292  | 0.377043  |
| OXGR1     | 0.739812  | 0.30613    | 0.460818   | 0.0269081  | 0.148718   | 0.466897  | 0.397503  | 0.487311  | 0          | 0.05462   | 0.0491268 | 0.168148   | 0.0224622 | 0.104625  | 0.124996  |
| OXLD1     | 3.75605   | 4.12061    | 4.0514     | 4.09403    | 9.02096    | 6.69166   | 3.03497   | 2.01568   | 5.31339    | 4.0071    | 7.48543   | 3.39046    | 3.70965   | 2.87666   | 2.46887   |
| OXNAD1    | 1.39979   | 1.14616    | 1.26678    | 1.03186    | 0.983488   | 0.830198  | 1.1571    | 1.05526   | 0.613428   | 1.09424   | 0.952223  | 1.40685    | 0.690404  | 1.29614   | 1.7343    |
| OXR1      | 5.51192   | 5.84327    | 5.89807    | 4.21162    | 2.92485    | 4.58036   | 4.36816   | 4.79958   | 12.0603    | 4.65675   | 6.73428   | 2.58743    | 4.7794    | 3.21621   | 3.09132   |
| OXSM      | 1.42465   | 1.43856    | 0.940352   | 2.10851    | 1.17712    | 2.38744   | 1.05558   | 0.808158  | 1.53203    | 2.28266   | 3.5758    | 1.38809    | 1.80902   | 1.75057   | 1.17535   |
| OXSR1     | 5.04      | 5.63574    | 6.16739    | 9.72333    | 5.24573    | 8.7529    | 4.05444   | 4.49732   | 11.9149    | 16.5047   | 9.61732   | 9.52636    | 23.8057   | 13.1626   | 6.75308   |
| OXT       | 0.0451132 | 0.0217362  | 0.111962   | 0.0464904  | 0.210229   | 0         | 0.309052  | 0         | 0.0549428  | 0.113243  | 0.0509271 | 0          | 0.116427  | 0.0943124 | 0.71267   |
| OXTR      | 0.0252543 | 0.0316366  | 0.0125353  | 0.0676658  | 0.0706116  | 0.0559097 | 0.0230676 | 0.0224439 | 0.0123028  | 0.0633935 | 0.028509  | 0.0433683  | 0.0586582 | 0.100312  | 0.0435221 |
| P2RX1     | 2.01209   | 0.506141   | 0.675175   | 0.358077   | 1.16734    | 3.33709   | 3.77354   | 0.409342  | 0.0393654  | 0.29412   | 0.784498  | 0.104075   | 0.302389  | 0.223836  | 0.638268  |
| P2RX2     | 0.0587685 | 0.215198   | 0.204193   | 0.0484501  | 0.219091   | 0.0300244 | 0.08052   | 0.104457  | 0          | 0.0147521 | 0         | 0.0336404  | 0.0303337 | 0.036858  | 0         |
| P2RX3     | 0.0182949 | 0          | 0.00504494 | 0.00628448 | 0.00947277 | 0         | 0         | 0         | 0          | 0         | 0.0137684 | 0.0043635  | 0         | 0         | 0         |
| P2RX4     | 1.55455   | 1.10241    | 1.39471    | 2.26763    | 1.41144    | 4.94049   | 1.39995   | 1.00211   | 0.573312   | 1.69005   | 5.46241   | 0.681492   | 2.20374   | 1.43613   | 2.42119   |
| P2RX5     | 0.0222951 | 0.0377026  | 1.56E-29   | 0.0145889  | 0.125273   | 0.0860967 | 9.30E-34  | 0         | 1.21E-30   | 0.0125853 | 0.0413092 | 0.00783417 | 0.0196845 | 0.0290149 | 0.086403  |

|               |          |            |           |           |           |           |           |           |           |           |           |            |           |           |           |
|---------------|----------|------------|-----------|-----------|-----------|-----------|-----------|-----------|-----------|-----------|-----------|------------|-----------|-----------|-----------|
| P2RX5-TAX1BP3 | 0.182074 | 0.175308   | 0.222888  | 0.190412  | 0.181399  | 0.194509  | 0.232004  | 0.191362  | 0.0725987 | 0.0970916 | 0.0882519 | 0.144162   | 0.229078  | 0.234499  | 0.157677  |
| P2RX6         | 0.082301 | 0.1031     | 0.0612767 | 0.178109  | 0.178979  | 0.0630704 | 0.112762  | 0.0585138 | 0.0100233 | 0.0516481 | 0.0557446 | 0.0471109  | 0         | 0.0258085 | 0.0590973 |
| P2RX6P        | 0        | 0          | 0         | 0         | 0         | 0         | 0         | 0         | 0         | 0         | 0         | 0          | 0         | 0         | 0         |
| P2RX7         | 1.89016  | 3.19844    | 3.74433   | 1.67211   | 2.8211    | 1.68216   | 3.4777    | 1.82655   | 0.936054  | 0.743143  | 0.835506  | 0.574388   | 1.13503   | 0.380869  | 0.940266  |
| P2RY1         | 3.87261  | 4.86881    | 5.00844   | 7.93572   | 3.85759   | 4.19998   | 3.30545   | 3.91721   | 6.20777   | 7.13795   | 4.48786   | 6.89917    | 12.94     | 4.75254   | 1.5862    |
| P2RY10        | 0.158297 | 0.155591   | 0.214766  | 0.202281  | 0.0393424 | 0.102439  | 0.0433773 | 0.270108  | 0.0848268 | 0.103313  | 0.221585  | 0.0135919  | 0.167497  | 0.115826  | 0.400109  |
| P2RY11        | 1.23339  | 0.934397   | 1.7182    | 8.53E-06  | 0.744462  | 0.496803  | 1.5547    | 0.657678  | 0.247902  | 8.73E-07  | 1.53E-06  | 0.00405945 | 7.54E-05  | 0.0441096 | 0.0105477 |
| P2RY12        | 0.39569  | 0.0650999  | 0.0718557 | 0.0298368 | 0         | 0.0986122 | 0.110192  | 0.223002  | 0.0235076 | 0.0726778 | 0.0217895 | 0          | 0.0435873 | 0.0151321 | 0.0277201 |
| P2RY13        | 0.810717 | 0.636261   | 1.03714   | 1.1197    | 0.103862  | 0.441232  | 0.448511  | 1.15131   | 0.193401  | 0.618912  | 1.66057   | 0.0837243  | 1.31037   | 0.135414  | 0.864217  |
| P2RY14        | 1.12694  | 0.767249   | 0.756635  | 0.370283  | 0.12685   | 0.354625  | 1.36129   | 1.24828   | 0.358039  | 0.532971  | 0.792803  | 0.20451    | 0.605913  | 0.123773  | 0.985128  |
| P2RY2         | 1.95007  | 3.7298     | 3.29734   | 5.77816   | 3.73331   | 4.40826   | 2.09061   | 2.40753   | 1.00933   | 4.08266   | 1.80974   | 3.01501    | 10.0187   | 3.86166   | 1.77415   |
| P2RY4         | 0.381246 | 0.673531   | 0.957862  | 0.0436539 | 0.263203  | 0.180348  | 1.22527   | 0.426662  | 0.0687874 | 0.0708893 | 0         | 0.050517   | 0.0182206 | 0.110698  | 0.141949  |
| P2RY6         | 0.275772 | 0.181823   | 0.246149  | 1.62288   | 0.484733  | 1.05049   | 0.290009  | 0.245083  | 0.0176768 | 0.573834  | 1.16332   | 0.103854   | 1.17525   | 0.451355  | 1.88642   |
| P2RY8         | 0.207708 | 0.0526721  | 0.099481  | 0.188701  | 0.280189  | 0.383974  | 0.0655295 | 0.131159  | 0.0332849 | 0.102906  | 0.215965  | 0.0625771  | 0.192202  | 0.134268  | 0.482767  |
| P3H1          | 2.52673  | 2.06493    | 2.54041   | 4.39356   | 7.20141   | 8.98657   | 2.83388   | 1.86797   | 1.20731   | 6.08065   | 15.1535   | 2.04794    | 5.34275   | 5.74971   | 11.5711   |
| P3H2          | 3.22379  | 2.54535    | 2.90542   | 2.26129   | 0.986911  | 1.41258   | 1.64562   | 1.57368   | 2.14222   | 2.62116   | 1.81299   | 1.71319    | 3.70449   | 2.65647   | 1.14899   |
| P3H2-AS1      | 1.47737  | 1.10893    | 1.1533    | 0.359377  | 0.689436  | 0.647869  | 1.15831   | 0.919217  | 0.193052  | 0.716225  | 0.143154  | 0.612474   | 0.0613635 | 0.613063  | 1.59352   |
| P3H3          | 1.80223  | 1.62397    | 2.20056   | 1.1965    | 7.7928    | 4.45617   | 2.35451   | 1.03185   | 0.443204  | 3.04498   | 4.77323   | 0.545576   | 1.80568   | 2.56312   | 9.88007   |
| P3H4          | 1.38752  | 1.60703    | 1.6482    | 2.52061   | 5.8856    | 3.02179   | 1.41158   | 0.893213  | 4.17043   | 3.48295   | 5.68298   | 2.67294    | 3.82763   | 3.10524   | 4.3685    |
| P4HA1         | 3.66752  | 3.81938    | 5.05675   | 6.75081   | 1.49291   | 8.20319   | 2.66873   | 4.46885   | 1.1705    | 8.91676   | 13.1062   | 1.76047    | 7.2774    | 6.4376    | 7.14414   |
| P4HA2         | 5.45354  | 4.61375    | 3.82893   | 6.86305   | 7.62802   | 6.62561   | 6.39539   | 2.88333   | 3.29705   | 9.83756   | 12.4643   | 5.0875     | 11.7587   | 8.53578   | 9.47376   |
| P4HA2-AS1     | 1.04032  | 0.970588   | 0.481554  | 0.587775  | 0.0442161 | 0.460096  | 0.70509   | 0.634549  | 0.424124  | 1.03807   | 0.670683  | 0.43489    | 1.01542   | 1.0288    | 0.356147  |
| P4HA3         | 0.241598 | 0.121256   | 0.108261  | 0.923277  | 3.01792   | 1.70574   | 0.264355  | 0.241551  | 0.0490398 | 2.07207   | 3.77282   | 0.316928   | 2.0394    | 1.55732   | 8.76089   |
| P4HA3-AS1     | 0        | 0.00516953 | 0         | 0         | 0         | 0         | 0         | 0         | 0         | 0         | 0.012112  | 0          | 0         | 0.0224304 | 0         |
| P4HB          | 88.5864  | 80.7537    | 72.7353   | 194.627   | 165.731   | 188.537   | 93.7447   | 68.6598   | 282.993   | 180.602   | 204.181   | 155.876    | 239.076   | 124.747   | 95.5319   |
| P4HTM         | 2.97148  | 2.66796    | 2.61762   | 1.43181   | 4.04862   | 3.8514    | 2.88325   | 1.98286   | 4.06356   | 0.941924  | 2.17523   | 0.827249   | 0.981493  | 1.2297    | 2.95661   |

|               |           |            |            |           |           |            |           |            |           |           |           |            |           |            |           |
|---------------|-----------|------------|------------|-----------|-----------|------------|-----------|------------|-----------|-----------|-----------|------------|-----------|------------|-----------|
| PA2G4         | 18.2254   | 18.9083    | 19.1893    | 44.4932   | 19.1108   | 45.3028    | 24.2002   | 18.3119    | 42.9654   | 32.487    | 35.3681   | 26.3022    | 54.7233   | 29.5987    | 14.1248   |
| PA2G4P4       | 0.782371  | 1.41894    | 1.28055    | 0.693554  | 0.940872  | 0.587384   | 0.739603  | 1.21118    | 0.204912  | 0.116145  | 0.0664774 | 0.939032   | 0.0976998 | 0.545202   | 0.483262  |
| PAAF1         | 1.82346   | 1.92059    | 2.0961     | 2.77499   | 2.12434   | 4.25174    | 2.03355   | 1.75244    | 1.82051   | 1.30398   | 2.28585   | 1.4261     | 1.75105   | 1.27438    | 1.15711   |
| PABPC1        | 148.091   | 171.857    | 149.764    | 419.261   | 184.912   | 313.098    | 115.323   | 172.588    | 350.409   | 288.783   | 310.493   | 255.305    | 520.571   | 200.854    | 130.354   |
| PABPC1L       | 0.674021  | 0.942755   | 0.77814    | 0.912308  | 1.25795   | 0.942257   | 0.821263  | 0.742062   | 0.140898  | 0.631317  | 0.335017  | 0.942965   | 0.19472   | 1.11203    | 1.31472   |
| PABPC1L2A     | 0         | 0          | 0          | 0         | 0         | 0          | 0         | 0          | 0         | 0         | 0         | 0          | 0         | 0          | 0         |
| PABPC1L2B     | 0         | 0          | 0          | 0         | 0         | 0          | 0         | 0          | 0         | 0         | 0         | 0          | 0         | 0          | 0         |
| PABPC1L2B-AS1 | 0         | 0          | 0          | 0         | 0         | 0          | 0         | 0          | 0         | 0         | 0         | 0          | 0         | 0          | 0         |
| PABPC1P2      | 0.035297  | 0.0368477  | 0.0340668  | 0.0121249 | 0.0274142 | 0.0100183  | 0.0268673 | 0.0209127  | 0         | 0         | 0         | 0.012628   | 0         | 0.0215224  | 0         |
| PABPC3        | 0         | 0          | 0.00797097 | 0.0198842 | 0         | 0.0164269  | 0         | 0.00852816 | 0         | 0.0121017 | 0.0108873 | 0.00690464 | 0.0186545 | 0.00503837 | 0         |
| PABPC4        | 14.2268   | 9.63309    | 10.9168    | 28.9178   | 12.4654   | 19.256     | 9.5134    | 9.64554    | 7.31882   | 13.6244   | 14.7078   | 9.10515    | 22.4513   | 15.6038    | 11.8133   |
| PABPC4L       | 0.243369  | 0.119472   | 0.113962   | 0.29812   | 0.20685   | 0.566939   | 0.235928  | 0.228529   | 0.0894782 | 0.29969   | 0.48208   | 0.108425   | 0.148133  | 0.172794   | 0.309942  |
| PABPC5        | 0.140993  | 0.0841072  | 0.122194   | 0.0276758 | 0.125149  | 0.29156    | 0.0689921 | 0.11337    | 0.0163537 | 0.168534  | 0.356224  | 0.0192161  | 0.0346546 | 0.0982524  | 0.414611  |
| PABPC5-AS1    | 0.51942   | 0.19465    | 0.0954891  | 0         | 0         | 0          | 0         | 0.153872   | 0.0702884 | 0         | 0.586361  | 0          | 0.0372364 | 0          | 0.663069  |
| PABPN1        | 8.87986   | 12.0083    | 10.8163    | 14.055    | 19.9774   | 15.1197    | 7.51082   | 7.03332    | 7.97387   | 10.1973   | 9.00564   | 10.3549    | 10.3543   | 12.889     | 9.43155   |
| PABPN1L       | 0.106242  | 0.051189   | 0.0439454  | 0         | 0.0550102 | 0.0301546  | 0.0808691 | 0.0786825  | 0.0215651 | 0         | 0.079956  | 0.0126698  | 0         | 0.00925445 | 0.050859  |
| PACERR        | 0.233473  | 0.0703069  | 0.0241432  | 0.0902254 | 0         | 0.1491     | 0.233251  | 0.0518729  | 0.0710861 | 0.219775  | 0.329453  | 0.0835282  | 0.301272  | 0.183035   | 0.0838243 |
| PACRG         | 0.345228  | 0.166336   | 0.31733    | 0.118589  | 0.158891  | 0.130648   | 0.277379  | 0.363626   | 0.093433  | 0.0641921 | 0.0433021 | 0.0823399  | 0.0329984 | 0.073509   | 0.257077  |
| PACRG-AS1     | 0.0216797 | 0.0052228  | 0.0358699  | 0         | 0.016838  | 0          | 0.0123766 | 0.00963354 | 0         | 0         | 0         | 0          | 0         | 0          | 0         |
| PACRG-AS2     | 0.0384649 | 0          | 0          | 0         | 0         | 0          | 0         | 0.0341844  | 0         | 0.0160925 | 0         | 0.0183484  | 0         | 0.0134023  | 0         |
| PACRG-AS3     | 0.0840038 | 0.0556522  | 0.0521204  | 0         | 0         | 0.00894102 | 0.0239782 | 0.0466597  | 0.0127884 | 0         | 0.0118537 | 0.00751337 | 0.0203246 | 0.016464   | 0         |
| PACRGL        | 1.57692   | 1.35728    | 1.51396    | 1.04002   | 0.493709  | 1.26389    | 1.00848   | 1.50621    | 0.702346  | 0.933548  | 1.04554   | 0.63537    | 0.763185  | 0.891092   | 0.903494  |
| PACS1         | 8.12814   | 8.71356    | 8.26672    | 20.5798   | 17.2985   | 27.4603    | 10.7331   | 7.5761     | 6.91938   | 10.5702   | 11.6644   | 11.6465    | 18.1455   | 10.0361    | 11.0295   |
| PACS2         | 3.61387   | 3.2874     | 3.40597    | 3.94027   | 7.43989   | 7.66941    | 4.60014   | 2.68535    | 2.24375   | 2.1221    | 2.82841   | 2.35855    | 2.21669   | 2.42493    | 4.49415   |
| PACSIN1       | 0.0514519 | 0.00743709 | 0.0212823  | 0.0159068 | 0.0239768 | 0.0481917  | 0.0822445 | 0.0502988  | 0         | 0.025831  | 0         | 0.0257706  | 0.0265572 | 0.0026891  | 0         |
| PACSIN2       | 6.31119   | 5.46505    | 6.19243    | 7.11496   | 7.57831   | 10.5028    | 6.4753    | 4.5706     | 5.32681   | 5.41588   | 4.24161   | 3.83533    | 7.9961    | 5.23466    | 5.58157   |

|          |            |           |            |            |           |            |           |            |           |          |           |           |            |            |           |
|----------|------------|-----------|------------|------------|-----------|------------|-----------|------------|-----------|----------|-----------|-----------|------------|------------|-----------|
| PACSIN3  | 4.05924    | 5.05377   | 4.78192    | 12.3933    | 15.8054   | 13.9821    | 3.2999    | 2.91487    | 3.33534   | 6.52129  | 3.10379   | 5.2823    | 14.1632    | 7.79596    | 3.12465   |
| PADI1    | 0.403063   | 1.00579   | 1.926      | 0.0619953  | 0.0467236 | 1.07571    | 1.49738   | 5.33037    | 0.417619  | 0.551189 | 1.0798    | 0.223835  | 0.00388141 | 0.11319    | 0.103675  |
| PADI2    | 3.20916    | 2.25927   | 3.57197    | 0.59583    | 3.25462   | 3.22938    | 3.42791   | 4.33226    | 0.142123  | 0.419426 | 0.832331  | 0.0569315 | 0.568113   | 0.133071   | 0.677982  |
| PADI3    | 0          | 0.0104931 | 0.0480441  | 0.0598484  | 0.0338292 | 0.0432691  | 0.0165772 | 0.0516126  | 0         | 0.127559 | 0.0573649 | 0.0363602 | 0.154564   | 0.159352   | 0.198084  |
| PADI4    | 0          | 0         | 0          | 0.0526481  | 0         | 0.00870022 | 0         | 0.00908063 | 0         | 0.205188 | 0.519052  | 0         | 0.0065924  | 0.0320412  | 0.0440217 |
| PADI6    | 0.00965904 | 0         | 0          | 0.00995392 | 0         | 0          | 0         | 0          | 0         | 0        | 0         | 0         | 0          | 0.00504823 | 0         |
| PAEP     | 0.274858   | 0.185403  | 0.0909528  | 0.311574   | 0.17078   | 0          | 0.0627648 | 0.0732813  | 0.100424  | 8.69337  | 2.5443    | 0.472004  | 0.851218   | 0.402228   | 0.236839  |
| PAF1     | 4.55596    | 5.20396   | 5.3692     | 9.21804    | 8.96819   | 12.0477    | 4.70857   | 3.21123    | 16.0599   | 11.0051  | 6.81682   | 9.28793   | 18.4354    | 8.64703    | 5.55583   |
| PAFAH1B1 | 18.7568    | 17.8363   | 19.1285    | 20.6209    | 13.4857   | 20.917     | 16.0408   | 17.8602    | 33.3217   | 30.9354  | 22.6726   | 21.9544   | 40.3589    | 20.6599    | 17.5891   |
| PAFAH1B2 | 5.45375    | 5.00833   | 5.10287    | 10.463     | 2.83692   | 8.87883    | 4.65673   | 5.25742    | 4.5496    | 6.92646  | 12.1458   | 4.27936   | 11.0266    | 7.68342    | 5.46339   |
| PAFAH1B3 | 2.14424    | 1.7387    | 1.56956    | 5.84245    | 5.67963   | 7.32719    | 1.9378    | 1.39037    | 1.51722   | 2.70276  | 6.30284   | 1.88795   | 3.57981    | 3.10859    | 1.65986   |
| PAFAH2   | 1.80957    | 2.35718   | 2.57163    | 2.99036    | 3.37306   | 2.4433     | 2.29485   | 1.89537    | 3.55764   | 2.12519  | 2.27623   | 1.52138   | 1.818      | 1.6213     | 1.18801   |
| PAG1     | 1.88281    | 1.36386   | 1.7162     | 2.36875    | 1.30505   | 2.59188    | 1.62583   | 2.16149    | 1.44562   | 2.28201  | 2.83557   | 0.850864  | 2.59774    | 2.5558     | 3.30105   |
| PAGE1    | 0          | 0         | 0          | 0          | 0         | 0          | 0         | 0          | 0         | 0        | 0         | 0         | 0          | 0          | 0         |
| PAGE2    | 0          | 0.0509451 | 0          | 0          | 0         | 0          | 0         | 0          | 0         | 0.463823 | 1.61656   | 0.0991585 | 0          | 0          | 0         |
| PAGE2B   | 0.0455572  | 0.125358  | 0.113064   | 0.046948   | 0         | 0          | 0.104031  | 0.0404874  | 0         | 5.85E-23 | 5.64E-28  | 0.0325974 | 0          | 0.0238102  | 0         |
| PAGE3    | 0          | 0         | 0          | 0          | 0         | 0          | 0         | 0          | 0.0341644 | 0        | 0         | 0         | 0          | 0          | 0         |
| PAGE4    | 0          | 0         | 0          | 0          | 0         | 0          | 0         | 0          | 0         | 0        | 0         | 0         | 0          | 0          | 0         |
| PAGE5    | 0          | 0         | 0.0254595  | 0          | 0         | 0          | 0         | 0.0820517  | 0         | 0        | 0         | 0         | 0          | 0          | 0         |
| PAGR1    | 3.39431    | 3.44375   | 4.01586    | 4.0404     | 9.30712   | 5.54344    | 3.79953   | 2.66707    | 2.4709    | 2.57435  | 4.22791   | 2.55427   | 3.46318    | 3.93066    | 4.00574   |
| PAH      | 0          | 0.0102842 | 0.00441447 | 0          | 0         | 0          | 0         | 0.00948472 | 0         | 0        | 0         | 0         | 0          | 0          | 0         |
| PAICS    | 7.51056    | 7.63037   | 8.93344    | 20.5359    | 4.67879   | 15.6574    | 7.3363    | 7.8436     | 6.00711   | 12.3816  | 16.5557   | 7.60919   | 17.129     | 14.285     | 5.86524   |
| PAIP1    | 7.54258    | 5.91083   | 6.60609    | 10.7178    | 3.47613   | 10.7337    | 3.93372   | 5.51572    | 7.25478   | 9.38595  | 12.7949   | 4.63667   | 13.6385    | 6.96711    | 6.38138   |
| PAIP2    | 11.9192    | 9.78369   | 8.13459    | 17.3427    | 4.14798   | 16.852     | 5.90727   | 9.65347    | 18.3273   | 16.5135  | 26.5492   | 10.7975   | 17.3724    | 10.7583    | 8.10938   |
| PAIP2B   | 2.11226    | 4.18062   | 4.20898    | 1.48019    | 2.68192   | 2.00188    | 3.50223   | 2.84029    | 3.69098   | 1.24487  | 1.10308   | 2.02919   | 0.739479   | 0.671976   | 0.416773  |
| PAK1     | 3.12656    | 3.75646   | 4.43559    | 6.93763    | 3.7406    | 6.21374    | 3.48624   | 3.25747    | 5.01495   | 6.61261  | 6.03017   | 4.09823   | 8.6912     | 5.27075    | 3.98377   |

|             |           |            |           |           |           |           |           |           |            |           |           |           |          |           |           |
|-------------|-----------|------------|-----------|-----------|-----------|-----------|-----------|-----------|------------|-----------|-----------|-----------|----------|-----------|-----------|
| PAK1IP1     | 3.2973    | 2.72241    | 2.89425   | 5.7909    | 1.97179   | 5.87885   | 2.17401   | 2.58643   | 3.92148    | 4.02188   | 5.90666   | 2.81345   | 6.78172  | 5.17804   | 3.35698   |
| PAK2        | 7.2645    | 6.0568     | 7.16409   | 13.8011   | 3.24415   | 13.9577   | 6.12792   | 7.82021   | 4.50734    | 9.36211   | 10.4819   | 5.62392   | 17.362   | 8.8418    | 11.3377   |
| PAK3        | 0.381014  | 0.151142   | 0.19789   | 0.0619968 | 0.0912246 | 0.196365  | 0.320549  | 0.229137  | 0.00348897 | 0.0629227 | 0.0970191 | 0.0143487 | 0.04436  | 0.0344369 | 0.191309  |
| PAK4        | 5.72534   | 5.86654    | 5.73614   | 10.6795   | 14.1966   | 12.535    | 8.33078   | 5.08818   | 14.3135    | 8.11497   | 7.76777   | 8.04198   | 12.0274  | 6.94784   | 4.04606   |
| PAK5        | 0.0193787 | 0.00933697 | 0         | 0         | 0.0150509 | 0.0330015 | 0         | 0.0301389 | 0          | 0         | 0         | 0         | 0        | 0         | 0.0278303 |
| PAK6        | 1.95394   | 5.44661    | 5.82184   | 4.53125   | 8.10795   | 6.264     | 3.92202   | 3.65542   | 3.23947    | 2.31068   | 1.05717   | 2.83321   | 4.28799  | 2.82367   | 0.685547  |
| PALB2       | 2.54357   | 2.54449    | 2.42504   | 3.13841   | 1.26681   | 3.01563   | 1.81673   | 2.31626   | 2.84079    | 2.33349   | 2.72973   | 2.33008   | 3.0651   | 2.20272   | 1.67902   |
| PALD1       | 2.93784   | 2.04026    | 2.02392   | 2.58384   | 4.51626   | 5.40848   | 1.83331   | 2.17425   | 3.92341    | 2.99433   | 2.79611   | 2.88133   | 2.38242  | 2.32169   | 2.80061   |
| PALLD       | 20.3624   | 20.1179    | 15.6693   | 27.4593   | 28.6181   | 26.5047   | 13.6641   | 16.8832   | 53.4558    | 25.0862   | 27.5357   | 27.2185   | 25.2221  | 26.7937   | 27.8907   |
| PALM        | 5.77373   | 4.92737    | 7.01475   | 2.43973   | 7.54254   | 12.2801   | 9.57104   | 3.81436   | 0.411899   | 1.10164   | 0.627233  | 0.956462  | 2.59255  | 3.03021   | 5.80539   |
| PALM2       | 0.17097   | 0.158477   | 0.195136  | 0.259254  | 0.181584  | 0.274297  | 0.182255  | 0.156877  | 0.0475217  | 0.187762  | 0.222289  | 0.209541  | 0.295457 | 0.642892  | 0.968088  |
| PALM2-AKAP2 | 1.73435   | 0.716974   | 0.859128  | 1.84599   | 2.28613   | 4.36004   | 1.47135   | 0.666625  | 0.335021   | 2.39179   | 3.54523   | 0.850461  | 2.83077  | 3.73428   | 5.14894   |
| PALM3       | 0.0512014 | 0.064141   | 0.0762434 | 0.0105529 | 0.14316   | 0.0610363 | 0.0584601 | 0.0273021 | 0          | 0.0128526 | 0.01156   | 0         | 0        | 0.0267601 | 0.102944  |
| PALMD       | 12.8104   | 17.7338    | 22.1385   | 7.38246   | 8.11575   | 11.0072   | 8.14859   | 12.9325   | 14.7925    | 13.8474   | 10.8435   | 18.4094   | 13.0494  | 9.96547   | 9.10196   |
| PAM         | 11.4734   | 8.63324    | 12.0319   | 7.76976   | 7.5289    | 10.7777   | 14.0775   | 8.56112   | 4.11339    | 11.5579   | 12.7065   | 6.64014   | 15.0883  | 11.0313   | 19.9756   |
| PAM16       | 3.05044   | 2.15091    | 2.33061   | 5.68994   | 4.85372   | 7.10782   | 1.87906   | 1.45783   | 2.06294    | 2.2687    | 6.5645    | 1.82416   | 3.22181  | 4.27074   | 1.59311   |
| PAMR1       | 0.719895  | 2.00875    | 3.0088    | 0.283847  | 0.30144   | 0.325146  | 5.53209   | 0.784429  | 0.144854   | 0.314275  | 0.289735  | 0.138854  | 0.125206 | 0.310814  | 0.845068  |
| PAN2        | 2.88247   | 4.49099    | 4.40447   | 2.59757   | 3.70216   | 3.62668   | 3.87998   | 2.66151   | 1.079      | 1.11197   | 1.46499   | 1.76786   | 1.1486   | 1.5826    | 2.81948   |
| PAN3        | 7.46933   | 6.39424    | 6.94922   | 5.53956   | 3.10075   | 5.59138   | 5.23025   | 7.0592    | 3.9757     | 4.3401    | 4.71639   | 3.6594    | 3.6354   | 4.01115   | 4.85503   |
| PAN3-AS1    | 0.636849  | 0.490499   | 0.513471  | 0.499111  | 3.08821   | 1.12408   | 0.653972  | 0.375388  | 0.406293   | 0.231796  | 0.337097  | 0.350754  | 0.271167 | 0.42125   | 0.383793  |
| PANCR       | 0         | 0.0134023  | 0         | 0         | 0         | 0         | 0         | 0         | 0          | 0         | 0         | 0         | 0        | 0         | 0         |
| PANDAR      | 0         | 0          | 0         | 0         | 0         | 0         | 0         | 0         | 0          | 0         | 0         | 0         | 0        | 0         | 0         |
| PANK1       | 0.697152  | 0.910544   | 1.00041   | 0.686136  | 1.14969   | 0.522193  | 0.768275  | 0.864112  | 1.7137     | 0.441516  | 0.663068  | 0.709812  | 0.293597 | 0.423894  | 0.148314  |
| PANK2       | 2.52452   | 2.66003    | 2.68116   | 2.35439   | 3.43224   | 3.04107   | 2.05063   | 2.14592   | 1.98334    | 2.4973    | 2.56917   | 1.597     | 2.28639  | 2.61581   | 2.77888   |
| PANK3       | 12.9552   | 12.5499    | 12.8146   | 15.0688   | 7.49339   | 11.8224   | 10.6648   | 11.4103   | 27.0539    | 15.0852   | 16.8154   | 11.0152   | 17.0038  | 12.3706   | 7.46763   |
| PANK4       | 1.9672    | 2.72975    | 2.95104   | 2.81113   | 5.77196   | 4.45935   | 2.87499   | 1.71721   | 3.67361    | 2.67754   | 2.19112   | 2.90276   | 4.0841   | 2.98391   | 2.68703   |

|           |           |           |           |            |           |           |            |           |           |            |                 |            |            |           |          |
|-----------|-----------|-----------|-----------|------------|-----------|-----------|------------|-----------|-----------|------------|-----------------|------------|------------|-----------|----------|
| PANO1     | 0.245864  | 0.2684    | 0.363975  | 0.279782   | 0.775373  | 0.54482   | 0.420176   | 0.0896144 | 0.371042  | 0.26162    | 0.38267         | 0.338431   | 0.160461   | 0.177028  | 0.127244 |
| PANTR1    | 0         | 0.0113474 | 0.0129888 | 0          | 0         | 0         | 0.00896336 | 0.0069768 | 0         | 0          | 0               | 0          | 0          | 0         | 0        |
| PANX1     | 3.70389   | 4.17345   | 5.17373   | 15.2334    | 4.54559   | 9.94555   | 3.07389    | 3.30657   | 5.13207   | 10.7562    | 10.4861         | 6.01836    | 19.4793    | 10.6535   | 9.9661   |
| PANX2     | 0.119333  | 0.114992  | 0.203611  | 0.176777   | 0.139023  | 1.12406   | 0.102188   | 0.0994245 | 0.0363334 | 0.346354   | 0.404135        | 0.128078   | 0.341655   | 0.101349  | 0.567685 |
| PANX3     | 0         | 0         | 0.0119735 | 0          | 0         | 0.012324  | 0          | 0         | 0         | 0          | 0               | 0          | 0          | 0.0151289 | 0        |
| PAOX      | 0.702026  | 2.02948   | 1.86042   | 2.21942    | 4.65769   | 1.68185   | 1.39932    | 0.803671  | 1.73896   | 1.25447    | 1.53127         | 1.34519    | 1.88086    | 1.51739   | 0.956933 |
| PAPLN     | 4.04506   | 4.30567   | 2.31073   | 1.68865    | 12.2545   | 4.33076   | 2.8393     | 2.5172    | 3.38122   | 4.98856    | 3.48355         | 6.47412    | 2.29877    | 3.46516   | 3.98859  |
| PAPOLA    | 8.27983   | 7.30474   | 7.73087   | 11.3644    | 1.81884   | 8.33612   | 4.61729    | 8.87863   | 7.55713   | 9.38328    | 10.6562         | 5.47471    | 14.2135    | 7.92361   | 8.25212  |
| PAPOLB    | 0.0543647 | 0.0707231 | 0.062964  | 0.0112049  | 0.0253341 | 0.0370327 | 0.0310359  | 0.106293  | 0         | 0          | 0               | 0.0194497  | 0.00701516 | 0.0710334 | 0.296683 |
| PAPOLG    | 1.51342   | 1.47649   | 1.34014   | 1.91804    | 0.374775  | 1.35535   | 0.958791   | 1.62904   | 1.33945   | 1.12868    | 1.46793         | 0.845237   | 1.54251    | 1.31011   | 1.48947  |
| PAPPA     | 1.00631   | 0.51535   | 0.343817  | 2.16538    | 0.452232  | 3.08254   | 0.556421   | 0.765154  | 0.0796495 | 1.73239    | 2.77676         | 1.031      | 0.910607   | 3.48864   | 1.99357  |
| PAPPA-AS1 | 4.63E-07  | 3.74E-07  | 4.60E-08  | 4.03E-07   | 8.06E-24  | 1.78E-12  | 1.56E-12   | 0.192282  | 1.73E-09  | 0.0443087  | 0.00059760<br>3 | 1.33E-06   | 2.07E-08   | 1.68E-10  | 1.19E-10 |
| PAPPA2    | 0.14737   | 0.017389  | 0.0522491 | 0.00309936 | 0.0654046 | 2.95272   | 0.0755462  | 0.0534571 | 0         | 0.00377478 | 0.0169757       | 0.00215198 | 0          | 0         | 0.194365 |
| PAPSS1    | 9.55948   | 9.45746   | 11.1846   | 12.6378    | 8.24483   | 13.3182   | 8.58624    | 8.71413   | 12.1192   | 11.0154    | 15.2005         | 7.98008    | 11.2899    | 7.67988   | 8.35485  |
| PAPSS2    | 1.13376   | 0.482675  | 0.664984  | 1.83601    | 1.25794   | 4.10671   | 0.958878   | 0.95961   | 0.336065  | 3.5537     | 6.12174         | 0.575161   | 2.74408    | 1.81842   | 5.91844  |
| PAQR3     | 1.64925   | 2.3194    | 2.33893   | 1.47336    | 0.657099  | 1.60949   | 1.96254    | 1.93684   | 5.46493   | 2.27832    | 2.72015         | 2.99236    | 2.38038    | 1.67917   | 1.25347  |
| PAQR4     | 1.78495   | 1.61337   | 2.2063    | 5.35983    | 2.66315   | 5.19495   | 2.75731    | 1.26182   | 1.49992   | 4.10959    | 3.14996         | 2.56015    | 7.23817    | 2.9513    | 2.34158  |
| PAQR5     | 1.58094   | 1.45402   | 1.04628   | 1.47737    | 1.65202   | 2.28188   | 1.52537    | 1.0877    | 4.98693   | 11.6962    | 12.2747         | 7.72674    | 16.8216    | 7.5153    | 3.12819  |
| PAQR6     | 1.67787   | 2.65293   | 1.74703   | 1.23223    | 3.13057   | 1.64217   | 1.66251    | 1.81681   | 1.45626   | 1.56127    | 0.304799        | 2.54602    | 0.721703   | 1.41619   | 1.41254  |
| PAQR7     | 3.59816   | 7.50264   | 7.46696   | 3.9368     | 11.8086   | 8.22659   | 7.47354    | 5.36813   | 19.785    | 5.71714    | 8.80649         | 5.91605    | 5.75933    | 2.88485   | 2.37481  |
| PAQR8     | 0.371227  | 0.553062  | 0.860702  | 0.714783   | 0.569056  | 0.794396  | 0.490779   | 0.468827  | 0.166568  | 0.576279   | 1.14141         | 0.216692   | 0.516845   | 0.541212  | 1.12238  |
| PAQR9     | 0         | 0         | 0         | 0          | 0         | 0         | 0.0376589  | 0         | 0.0267797 | 0          | 0               | 0          | 0.014187   | 0         | 0        |
| PAQR9-AS1 | 0         | 0         | 0         | 0          | 0         | 0         | 0          | 0         | 0         | 0          | 0               | 0          | 0          | 0         | 0        |
| PARAL1    | 0         | 0         | 0         | 0.0603024  | 0         | 0         | 0          | 0         | 0         | 0.0367218  | 0               | 0          | 0          | 0         | 0        |
| PARD3     | 11.6753   | 15.809    | 17.1382   | 7.70746    | 10.6799   | 6.62216   | 12.1412    | 11.6337   | 18.5758   | 7.08525    | 6.07023         | 8.30815    | 8.80133    | 5.44324   | 3.03478  |

|            |          |          |          |          |           |           |          |          |          |           |           |          |          |          |          |
|------------|----------|----------|----------|----------|-----------|-----------|----------|----------|----------|-----------|-----------|----------|----------|----------|----------|
| PARD3--AS1 | 0.274695 | 0.694849 | 1.02261  | 0        | 0.640044  | 0.0584748 | 0        | 0.244126 | 0.250911 | 0         | 0.0775241 | 0        | 0        | 0.107676 | 0        |
| PARD3B     | 4.18751  | 2.51417  | 2.76386  | 1.08248  | 2.37491   | 2.71219   | 3.2747   | 2.33002  | 0.637918 | 0.86707   | 0.910912  | 0.650305 | 0.635706 | 0.772434 | 2.01273  |
| PARD6A     | 0.256534 | 0.264862 | 0.272858 | 0.339899 | 0.42695   | 0.951754  | 0.64857  | 0.162847 | 0.87034  | 0.0229983 | 0.641247  | 0.10489  | 0.271917 | 0.277729 | 0.315785 |
| PARD6B     | 0.847492 | 1.13802  | 1.26225  | 0.971554 | 0.975475  | 0.661848  | 1.19094  | 1.12309  | 3.84155  | 1.29027   | 1.29071   | 1.35633  | 1.70834  | 0.982847 | 0.180045 |
| PARD6G     | 7.40046  | 9.05665  | 10.5016  | 7.54553  | 9.50768   | 6.44531   | 9.95896  | 8.20774  | 11.9976  | 7.81857   | 9.75111   | 6.75077  | 10.1025  | 6.36011  | 2.99942  |
| PARD6G-AS1 | 1.00326  | 1.75451  | 1.69579  | 0.536089 | 2.41457   | 0.464043  | 1.83137  | 1.57958  | 0.211185 | 0.715096  | 0.118848  | 1.28949  | 0.111878 | 1.16845  | 0.640358 |
| PARG       | 4.13007  | 3.76112  | 3.79145  | 3.65424  | 2.52756   | 3.25414   | 2.83395  | 3.66061  | 4.17512  | 3.14822   | 3.43288   | 3.52672  | 3.88772  | 3.13715  | 2.85152  |
| PARGP1     | 4.19943  | 3.48526  | 3.70002  | 2.4297   | 2.02122   | 2.19414   | 3.23517  | 2.93806  | 1.22357  | 1.6109    | 1.64713   | 1.9014   | 0.559493 | 2.49474  | 1.89239  |
| PARK7      | 24.8288  | 16.1981  | 14.4836  | 53.0097  | 20.4248   | 58.646    | 16.3054  | 11.7927  | 21.4105  | 37.3285   | 70.7929   | 17.1798  | 39.3266  | 31.1017  | 23.5178  |
| PARL       | 9.54984  | 6.31442  | 7.48382  | 11.0412  | 5.20542   | 13.9188   | 7.27513  | 7.64818  | 6.41888  | 6.87175   | 9.02232   | 4.78435  | 8.87175  | 5.95322  | 5.37747  |
| PARM1      | 6.03075  | 2.25705  | 2.826    | 1.93005  | 2.25482   | 6.12937   | 3.53958  | 2.63301  | 1.05403  | 1.8104    | 3.30318   | 0.822404 | 1.51268  | 1.33305  | 6.71435  |
| PARN       | 5.68255  | 5.17927  | 5.3655   | 6.77657  | 3.41651   | 7.64461   | 4.02832  | 4.89006  | 4.07744  | 4.1832    | 5.16075   | 3.52351  | 5.06607  | 4.31169  | 4.5925   |
| PARP1      | 7.37558  | 6.07201  | 7.00483  | 16.1591  | 7.39732   | 21.6395   | 6.86294  | 5.64642  | 3.90426  | 6.38522   | 6.28064   | 4.84526  | 14.2273  | 8.14364  | 8.05679  |
| PARP10     | 2.41205  | 4.21137  | 4.44246  | 5.26574  | 11.1417   | 9.75575   | 2.44237  | 2.42569  | 0.904477 | 1.01975   | 1.33996   | 0.849322 | 1.77331  | 1.45305  | 3.07204  |
| PARP11     | 1.03375  | 0.698259 | 0.773351 | 1.21312  | 0.491717  | 1.46563   | 0.638151 | 0.87475  | 0.463837 | 0.850487  | 1.25631   | 0.552101 | 0.82653  | 0.866001 | 1.16494  |
| PARP12     | 3.15198  | 3.18424  | 3.59611  | 7.0933   | 3.51348   | 7.38718   | 2.52685  | 2.61701  | 1.52215  | 3.0608    | 4.24643   | 2.50399  | 5.38496  | 3.46358  | 3.20455  |
| PARP14     | 5.41045  | 4.98511  | 4.51317  | 11.1482  | 3.24606   | 18.9825   | 2.55738  | 4.93377  | 1.28349  | 3.28229   | 4.73501   | 1.98937  | 5.86772  | 3.15571  | 6.62743  |
| PARP15     | 18.4065  | 16.3795  | 16.689   | 9.27219  | 4.11753   | 3.61526   | 10.3189  | 15.3143  | 2.22202  | 5.69882   | 1.86664   | 7.68707  | 1.30644  | 11.5615  | 11.2675  |
| PARP16     | 1.83294  | 2.45133  | 2.38079  | 2.22431  | 1.62317   | 3.59551   | 2.09279  | 1.88016  | 0.917963 | 1.02126   | 2.37857   | 1.04186  | 1.30971  | 1.06541  | 1.36537  |
| PARP2      | 4.30484  | 3.66372  | 4.05841  | 3.48834  | 1.14306   | 4.39652   | 2.08647  | 2.74671  | 2.43469  | 2.30898   | 3.36435   | 1.81654  | 3.46589  | 2.12811  | 2.23689  |
| PARP3      | 2.7386   | 1.85845  | 1.83478  | 2.3949   | 2.2618    | 4.31069   | 1.22211  | 1.49115  | 0.516737 | 1.31921   | 2.72142   | 0.896971 | 1.28787  | 1.11884  | 2.04957  |
| PARP4      | 8.5226   | 6.76911  | 6.42036  | 13.5405  | 3.33922   | 15.9226   | 5.5754   | 6.41586  | 2.86031  | 6.26721   | 7.60027   | 4.22389  | 10.0528  | 6.35189  | 9.62025  |
| PARP6      | 6.26488  | 6.91845  | 6.7622   | 6.07461  | 6.42754   | 11.7692   | 6.73033  | 5.34835  | 4.7477   | 4.7379    | 4.51544   | 5.17355  | 4.7821   | 5.30791  | 5.11891  |
| PARP8      | 2.09426  | 1.5949   | 1.36015  | 1.94558  | 0.650619  | 1.85509   | 1.04211  | 1.8612   | 0.479658 | 1.18087   | 1.98306   | 0.514408 | 1.17777  | 0.939355 | 1.83599  |
| PARP9      | 2.05849  | 1.94393  | 2.10153  | 8.36738  | 1.57519   | 8.34283   | 1.37425  | 2.3213   | 0.652998 | 1.76766   | 2.60786   | 1.2353   | 3.59807  | 1.75369  | 3.69644  |
| PARPBP     | 0.318375 | 0.160595 | 0.181352 | 0.62932  | 0.0324304 | 0.566715  | 0.214538 | 0.288094 | 0.114421 | 0.490557  | 0.677995  | 0.175529 | 0.447886 | 0.499129 | 0.314823 |

|          |           |            |            |           |           |            |            |            |            |            |            |           |            |            |           |
|----------|-----------|------------|------------|-----------|-----------|------------|------------|------------|------------|------------|------------|-----------|------------|------------|-----------|
| PARS2    | 0.630469  | 0.883268   | 0.866606   | 0.889612  | 0.753335  | 1.66832    | 0.664476   | 0.70685    | 0.992285   | 0.584347   | 0.799317   | 0.652385  | 0.438066   | 0.775617   | 0.919362  |
| PART1    | 0.202073  | 0.0939103  | 0.169305   | 0.213413  | 0.113536  | 0.251019   | 0.219739   | 0.184045   | 0.189902   | 0.348599   | 0.409556   | 0.165612  | 0.119467   | 0.289051   | 0.178446  |
| PARTICL  | 1.25494   | 1.17789    | 1.57749    | 0.722206  | 1.2405    | 1.73468    | 1.35842    | 0.999412   | 0.516075   | 0.7364     | 1.1407     | 0.466464  | 0.694012   | 0.519598   | 0.702176  |
| PARVA    | 6.82461   | 3.14085    | 3.92809    | 6.3363    | 4.25039   | 10.0917    | 5.36933    | 4.21509    | 1.47675    | 5.72386    | 9.99963    | 2.37633   | 6.96136    | 5.47785    | 12.4631   |
| PARVB    | 2.75969   | 1.38614    | 2.07146    | 4.76552   | 3.22747   | 7.4487     | 3.95386    | 1.63821    | 0.700748   | 3.31659    | 8.08309    | 1.37996   | 5.6235     | 3.66988    | 5.72304   |
| PARVG    | 0.658767  | 0.439026   | 0.606098   | 0.977078  | 1.12849   | 1.12186    | 0.400683   | 0.465083   | 0.112473   | 0.680002   | 1.69584    | 0.162996  | 0.94143    | 0.440834   | 1.50311   |
| PASD1    | 0         | 0          | 0          | 0         | 0         | 0          | 0          | 0          | 0          | 0          | 0          | 0         | 0          | 0          | 0         |
| PASK     | 1.36118   | 1.15       | 1.50495    | 0.935723  | 1.54443   | 1.45891    | 0.977868   | 1.01195    | 0.294588   | 0.505746   | 0.398768   | 1.13607   | 0.570977   | 0.787418   | 0.896857  |
| PATE1    | 0.0460406 | 0.00739435 | 0          | 0         | 0         | 0          | 0.0175225  | 0.027278   | 0          | 0          | 0          | 0         | 0          | 0          | 0         |
| PATE2    | 0         | 0.0272466  | 0.0116955  | 0         | 0         | 0          | 0.0161417  | 0.0251284  | 0          | 0          | 0          | 0.0101157 | 0          | 0.0147777  | 0         |
| PATE3    | 0         | 0.00834631 | 0.0143305  | 0         | 0         | 0          | 0          | 0          | 0          | 0.0217417  | 0          | 0         | 0          | 0.00905357 | 0         |
| PATE4    | 0.0466124 | 0.0224586  | 0.0289208  | 0.0120089 | 0.0724051 | 0.0198449  | 0.0266103  | 0          | 0          | 0.0292517  | 0          | 0.0166762 | 0          | 0.0243617  | 0.0669413 |
| PATJ     | 7.9322    | 10.2255    | 10.101     | 9.90812   | 6.40832   | 4.87458    | 8.16654    | 8.14223    | 8.80247    | 8.64769    | 3.90415    | 9.55306   | 11.0618    | 7.8627     | 2.75849   |
| PATL1    | 5.52921   | 5.44159    | 5.7896     | 8.65104   | 3.26652   | 11.5362    | 5.48072    | 5.48702    | 4.44605    | 5.43354    | 5.21626    | 4.46989   | 8.9692     | 5.42791    | 5.73401   |
| PATL2    | 0.247232  | 0.367718   | 0.311238   | 0.0996964 | 0.30055   | 0.247126   | 0.270008   | 0.248378   | 0          | 0.0944396  | 0.0970762  | 0.0615308 | 0.083224   | 0.039326   | 0.185247  |
| PATZ1    | 2.82022   | 1.8079     | 2.08268    | 1.89628   | 2.32098   | 3.96001    | 1.98578    | 1.81467    | 0.356928   | 0.783911   | 1.17693    | 0.498468  | 0.939241   | 0.934099   | 2.04234   |
| PAUPAR   | 0         | 0          | 0          | 0         | 0         | 0          | 0          | 0          | 0          | 0          | 0          | 0         | 0          | 0          | 0         |
| PAWR     | 3.83567   | 4.21254    | 3.8899     | 3.70189   | 4.97565   | 2.37789    | 3.12313    | 4.17888    | 10.4447    | 3.7507     | 4.00938    | 4.16376   | 3.63901    | 3.23599    | 2.30351   |
| PAX1     | 0         | 0.00416692 | 0.00715455 | 0.204985  | 0.0806035 | 0.0294559  | 0.0296233  | 0.0153719  | 0          | 0.0162819  | 0.00488147 | 0.0123763 | 0.0167397  | 0.00452002 | 0.235983  |
| PAX2     | 0         | 0          | 0          | 0         | 0         | 0.00465423 | 0          | 0          | 0          | 0.00686039 | 0          | 0         | 0          | 0          | 0         |
| PAX3     | 0.224417  | 0.497388   | 0.487342   | 0.254396  | 0.156869  | 0.415618   | 0.237015   | 0.388915   | 0.204986   | 0.021125   | 0.0253339  | 0.0802884 | 0.00723965 | 0          | 0         |
| PAX4     | 0         | 0          | 0          | 0         | 0         | 0          | 0          | 0          | 0          | 0          | 0          | 0         | 0          | 0          | 0         |
| PAX5     | 0.0154872 | 0.00870564 | 0.0042707  | 0.0452201 | 0.0681615 | 0.015385   | 0.00294713 | 0.00917583 | 0.00314361 | 0.0745125  | 0.0874156  | 0.0923459 | 0.0549575  | 0.055311   | 0.0926733 |
| PAX6     | 0.109891  | 0.0753027  | 0.0808086  | 0.0880802 | 0         | 0.0561425  | 0.050188   | 0.0933215  | 0.0803009  | 0.0490398  | 0.0441078  | 0.0541673 | 0.0456918  | 0.0293551  | 0.11924   |
| PAX6-AS1 | 0         | 0          | 0          | 0         | 0         | 0          | 0          | 0          | 0          | 0          | 0          | 0         | 0          | 0          | 0         |
| PAX7     | 0         | 0.00353261 | 0.00303272 | 0         | 0         | 0.0031215  | 0          | 0.00651596 | 0          | 0          | 0          | 0         | 0          | 0          | 0         |



|            |           |           |           |           |           |           |           |           |           |           |           |           |           |           |           |
|------------|-----------|-----------|-----------|-----------|-----------|-----------|-----------|-----------|-----------|-----------|-----------|-----------|-----------|-----------|-----------|
| PAX8       | 0.194048  | 0.756212  | 0.821537  | 0.341128  | 1.21456   | 0.884463  | 1.11431   | 0.319546  | 0.959214  | 1.04583   | 1.37232   | 0.763655  | 0.34982   | 1.04401   | 0.819638  |
| PAX8-AS1   | 0.445733  | 2.1838    | 1.40453   | 1.0219    | 6.01357   | 3.322     | 3.33945   | 1.19729   | 3.70848   | 3.84694   | 4.7717    | 2.60522   | 0.720577  | 4.58328   | 7.21404   |
| PAX9       | 0.0819619 | 0.0323104 | 0.0431484 | 0.660356  | 0.173611  | 0.393359  | 0.119104  | 0.0397314 | 0.0725966 | 0.804261  | 0.294397  | 0.250578  | 1.73547   | 0.334906  | 0.288919  |
| PAXBP1     | 3.64707   | 4.16336   | 4.43877   | 3.3365    | 2.29285   | 2.56417   | 2.06669   | 3.53804   | 2.00108   | 2.28535   | 2.31092   | 2.19714   | 2.18624   | 3.23786   | 3.11784   |
| PAXBP1-AS1 | 1.17517   | 0.713714  | 0.730282  | 0.40202   | 0.429725  | 0.447559  | 0.607782  | 0.791884  | 0.0877456 | 0.299793  | 0.294352  | 0.332285  | 0.189474  | 0.519346  | 0.919289  |
| PAXIP1     | 2.22203   | 1.92418   | 2.04664   | 2.40393   | 1.27107   | 2.96027   | 1.71889   | 1.9307    | 1.89828   | 1.46337   | 1.62988   | 1.6063    | 2.55163   | 1.86371   | 1.20644   |
| PAXIP1-AS1 | 2.46615   | 2.0573    | 2.52914   | 0.913657  | 1.94705   | 3.51428   | 1.54751   | 1.67548   | 1.99819   | 0.831373  | 1.23093   | 0.845838  | 0.683798  | 0.756306  | 0.482959  |
| PAXIP1-AS2 | 0.845142  | 1.0492    | 0.835419  | 0.833821  | 0.868824  | 1.45235   | 1.00875   | 0.855161  | 0.191202  | 0.656646  | 0.892354  | 0.411219  | 0.2589    | 0.417419  | 1.15094   |
| PAXX       | 5.00315   | 7.0163    | 6.77494   | 10.427    | 15.0222   | 11.2096   | 4.05296   | 3.85022   | 5.82094   | 4.87623   | 11.8007   | 6.4398    | 6.14943   | 6.50065   | 3.53236   |
| PBDC1      | 4.01569   | 3.85268   | 4.50226   | 8.33104   | 3.96699   | 7.10854   | 2.41315   | 2.50443   | 5.59851   | 6.60962   | 7.47584   | 4.33521   | 8.76132   | 6.2871    | 4.02175   |
| PBK        | 0.312162  | 0.248945  | 0.249338  | 1.5419    | 0.183926  | 1.72313   | 0.282675  | 0.162628  | 0.262192  | 1.48612   | 3.06216   | 0.431316  | 1.93766   | 1.54711   | 0.37101   |
| PBLD       | 1.02173   | 0.476658  | 0.604998  | 0.395956  | 0.604611  | 1.48451   | 0.666618  | 0.670213  | 0.368668  | 0.508881  | 0.915404  | 0.291128  | 0.470869  | 0.508573  | 0.826833  |
| PBOV1      | 0.101789  | 0.0802528 | 0.130138  | 0.0286081 | 0.0143739 | 0         | 0.0739576 | 0.0740138 | 0         | 0.0116141 | 0         | 0.0397268 | 0         | 0.0193452 | 0.0132892 |
| PBRM1      | 6.43196   | 6.72095   | 7.19842   | 7.62817   | 2.91387   | 6.88962   | 5.52304   | 6.64084   | 6.81257   | 6.36434   | 5.62896   | 5.34273   | 8.86221   | 6.27931   | 6.69654   |
| PBX1       | 5.36405   | 4.32952   | 3.70436   | 3.36657   | 3.1422    | 7.43563   | 4.35528   | 4.97254   | 4.36744   | 2.75651   | 4.51117   | 2.94208   | 2.34569   | 2.46113   | 3.37935   |
| PBX2       | 1.21925   | 1.38478   | 1.4576    | 1.58438   | 1.65877   | 2.21401   | 1.25453   | 1.14031   | 1.23282   | 1.25369   | 1.36359   | 1.06693   | 1.40189   | 1.25455   | 1.52473   |
| PBX3       | 2.24422   | 2.18775   | 2.2945    | 2.3742    | 1.33188   | 2.86322   | 1.89837   | 2.01435   | 1.98861   | 3.9771    | 4.38513   | 2.36869   | 3.95906   | 2.79789   | 2.90175   |
| PBX4       | 0.601987  | 0.670329  | 0.664008  | 0.193002  | 0.415597  | 0.467021  | 0.488767  | 0.475552  | 0.423599  | 0.100741  | 0.166117  | 0.0670036 | 0.0431554 | 0.216741  | 0.307388  |
| PBXIP1     | 6.69934   | 7.30855   | 7.20599   | 6.50241   | 17.5237   | 11.8732   | 7.29328   | 4.32372   | 5.25246   | 3.73307   | 4.1251    | 3.26831   | 5.08083   | 5.35191   | 9.02095   |
| PC         | 1.35333   | 0.744079  | 0.848706  | 6.73141   | 2.8566    | 3.02025   | 1.47665   | 0.640162  | 1.17634   | 3.28072   | 1.81111   | 2.35057   | 7.93956   | 4.05849   | 2.91534   |
| PCA3       | 0.295042  | 0.159214  | 0.146447  | 0.0547288 | 0.146656  | 0.14571   | 0.134748  | 0.220255  | 0.0143731 | 0         | 0.0199839 | 0.0802218 | 0         | 0.172706  | 0.296602  |
| PCARE      | 0.0525531 | 0.0902056 | 0.122275  | 0.0575423 | 0.163266  | 0.0391547 | 0.120007  | 0.0496238 | 0.0160009 | 0.0494696 | 0.0296629 | 0.0446537 | 0.0402645 | 0.0205999 | 0         |
| PCAT1      | 0.52281   | 0.654934  | 0.682397  | 0.287344  | 0.288748  | 0.237422  | 0.278566  | 0.598856  | 0.0424482 | 0.116654  | 0.22296   | 0.241077  | 0.059967  | 0.255027  | 0.0834246 |
| PCAT18     | 0.13362   | 0.0944245 | 0.0958015 | 0         | 0         | 0.0530955 | 0.101709  | 0.118751  | 0         | 0         | 0         | 0         | 0         | 0         | 0         |
| PCAT19     | 1.0453    | 0.311167  | 0.446142  | 1.06349   | 0.341289  | 1.06013   | 0.623351  | 0.384607  | 0.154064  | 0.760434  | 1.93913   | 0.309656  | 0.760334  | 0.748143  | 1.5203    |
| PCAT2      | 0.241493  | 0.0775699 | 0.0998899 | 0.0414775 | 0         | 0         | 0         | 0.143079  | 0.0490185 | 0.0505164 | 0         | 0.0575982 | 0         | 0.0420715 | 0.115605  |

|           |            |            |            |            |            |           |            |           |            |            |            |            |            |            |           |
|-----------|------------|------------|------------|------------|------------|-----------|------------|-----------|------------|------------|------------|------------|------------|------------|-----------|
| PCAT29    | 0          | 0.0645294  | 0.0221592  | 0          | 0          | 0         | 0.0611666  | 0.0238051 | 0          | 0          | 0          | 0          | 0          | 0          | 0         |
| PCAT4     | 0          | 0          | 0          | 0          | 0          | 0         | 0.037911   | 0         | 0          | 0          | 0          | 0          | 0          | 0.00578459 | 0         |
| PCAT5     | 0          | 0.00314104 | 0.00539312 | 0          | 0          | 0         | 0          | 0.0057937 | 0          | 0          | 0          | 0          | 0          | 0          | 0         |
| PCAT6     | 1.09051    | 1.7806     | 2.15513    | 1.15502    | 1.64689    | 2.6567    | 2.14436    | 1.45373   | 2.32421    | 1.59682    | 3.18021    | 1.84235    | 2.79482    | 1.23489    | 0.348025  |
| PCAT7     | 0          | 0.00576758 | 0.0197683  | 0.0246253  | 0          | 0.0203469 | 0          | 0.0212549 | 0          | 0.0149958  | 0          | 0.00854903 | 0          | 0.0249779  | 0         |
| PCBD1     | 3.3634     | 2.85491    | 2.91269    | 7.27136    | 1.82302    | 8.44541   | 3.66047    | 2.60752   | 2.38802    | 3.03582    | 6.89899    | 2.60118    | 3.09348    | 3.18658    | 2.19931   |
| PCBD2     | 2.24813    | 2.30235    | 1.98058    | 2.26661    | 1.10357    | 1.86453   | 1.52232    | 1.87686   | 0.877097   | 1.67343    | 1.47218    | 1.32309    | 1.51327    | 1.36317    | 1.24392   |
| PCBP1     | 45.8365    | 41.0536    | 43.0939    | 95.5074    | 48.3978    | 92.7308   | 61.4093    | 36.5986   | 86.1192    | 80.2857    | 117.132    | 59.018     | 159.301    | 68.5369    | 52.6654   |
| PCBP1-AS1 | 1.04755    | 0.855228   | 0.954871   | 0.309865   | 0.527335   | 1.23885   | 0.753073   | 0.612029  | 0.543394   | 0.389565   | 0.536528   | 0.291491   | 0.225291   | 0.370066   | 0.807925  |
| PCBP2     | 58.4288    | 51.7596    | 54.8306    | 80.2908    | 40.1662    | 96.4886   | 70.6239    | 50.4313   | 54.2912    | 50.8743    | 91.9923    | 45.1704    | 77.5444    | 51.5829    | 47.59     |
| PCBP2-OT1 | 2.11818    | 2.15454    | 1.78476    | 1.61692    | 2.3763     | 1.002     | 3.71727    | 2.12648   | 0.334406   | 0.935409   | 0.664211   | 2.66636    | 0.227773   | 3.52617    | 1.57732   |
| PCBP3     | 0.192735   | 0.142866   | 0.141047   | 0.664611   | 0.345443   | 1.69161   | 0.296233   | 0.144935  | 0.189589   | 0.446589   | 1.12134    | 0.127299   | 0.58828    | 0.600516   | 0.851668  |
| PCBP4     | 3.84862    | 3.75811    | 3.89703    | 4.53725    | 8.01884    | 7.82996   | 4.54658    | 2.63594   | 2.91231    | 7.53546    | 8.13309    | 4.72185    | 9.46893    | 5.35317    | 4.89333   |
| PCCA      | 3.78362    | 2.68127    | 2.94137    | 2.3537     | 1.95842    | 2.7796    | 2.10391    | 3.88219   | 2.42841    | 1.79117    | 2.86829    | 1.43856    | 0.841203   | 1.70964    | 2.50517   |
| PCCA-AS1  | 0.19994    | 0.240835   | 0.330809   | 0          | 0.077644   | 0.0851231 | 0.285356   | 0.088845  | 0          | 0          | 0.0564268  | 0.143062   | 0          | 0.0522487  | 0         |
| PCCB      | 4.56444    | 3.59604    | 3.64338    | 5.58103    | 4.40742    | 7.31099   | 5.05662    | 3.58508   | 4.07159    | 4.2115     | 7.19982    | 3.55728    | 5.65909    | 4.06193    | 3.96853   |
| PCDH1     | 12.4267    | 9.30772    | 8.70841    | 10.1855    | 19.2711    | 18.1446   | 14.0191    | 7.86436   | 32.3711    | 15.8454    | 11.0738    | 10.8615    | 22.9147    | 7.28313    | 12.2291   |
| PCDH10    | 0.0145737  | 0.0117031  | 0.010047   | 0.00500621 | 0.003773   | 0.0310233 | 0.0138665  | 0         | 0          | 0.00304858 | 0.00548397 | 0.00173798 | 0.00626859 | 0.00634738 | 0         |
| PCDH11X   | 0.0307238  | 0.0469171  | 0.0899562  | 0.00899815 | 0.0130534  | 0.0332163 | 0.0360516  | 0.0522376 | 0.00335025 | 0          | 0          | 0          | 0.0206191  | 0.00149028 | 0.0731715 |
| PCDH11Y   | 0.206977   | 0.176904   | 0.288296   | 0.0890822  | 0.316953   | 0.099214  | 0.119641   | 0.113996  | 0.0284274  | 0.11253    | 0.0166692  | 0.127174   | 0.0208671  | 0.0914506  | 0.156638  |
| PCDH12    | 1.22381    | 0.859836   | 0.924892   | 1.66097    | 2.027      | 2.86491   | 1.67516    | 0.824335  | 0.326441   | 0.925145   | 1.44125    | 0.560226   | 1.25835    | 2.03313    | 3.24158   |
| PCDH15    | 0.00656727 | 0.0118658  | 0.00679113 | 0.00169194 | 0.00510062 | 0         | 0.00374915 | 0.0160502 | 0          | 0          | 0.00370681 | 0          | 0          | 0          | 0         |
| PCDH17    | 0.271625   | 0.0710057  | 0.0956202  | 1.01842    | 0.641869   | 1.3262    | 0.168264   | 0.25167   | 0.306174   | 1.17508    | 1.75171    | 0.386643   | 3.03334    | 3.13225    | 4.43622   |
| PCDH18    | 3.36134    | 1.56312    | 2.23172    | 1.82654    | 1.45543    | 5.74429   | 2.47837    | 2.09215   | 1.11259    | 5.59569    | 11.8243    | 0.595002   | 2.79845    | 2.13427    | 6.78415   |
| PCDH19    | 1.29759    | 0.696063   | 0.55537    | 0.205347   | 0.456918   | 0.545369  | 0.717749   | 0.558673  | 0.0722264  | 0.160776   | 0.144607   | 0.0780787  | 0.032141   | 0.0657098  | 0.238473  |
| PCDH20    | 0.799373   | 0.0887012  | 0.0801573  | 0.0349481  | 0.0827801  | 0.321764  | 0.243386   | 0.133472  | 0.0118006  | 0.0547252  | 0.251576   | 0          | 0.0281319  | 0.0126602  | 0.048703  |

|           |           |            |            |            |            |            |            |            |            |            |            |            |            |            |            |
|-----------|-----------|------------|------------|------------|------------|------------|------------|------------|------------|------------|------------|------------|------------|------------|------------|
| PCDH7     | 2.7316    | 4.30303    | 5.15149    | 6.22045    | 7.21674    | 5.08603    | 6.02764    | 2.48972    | 3.00916    | 4.70576    | 3.17303    | 3.94571    | 10.1637    | 5.97256    | 3.42128    |
| PCDH8     | 0.0867214 | 0          | 0          | 0          | 0          | 0.0836877  | 0.0462073  | 0.0102761  | 0          | 0          | 0          | 0.00827353 | 0          | 0          | 0          |
| PCDH9     | 0.383281  | 0.129896   | 0.137042   | 0.043515   | 0.0454095  | 0.226792   | 0.218809   | 0.132787   | 0.0197794  | 0.0937655  | 0.143003   | 0.0116207  | 0.0272439  | 0.0373477  | 0.153937   |
| PCDH9-AS2 | 0         | 0          | 0          | 0          | 0          | 0          | 0          | 0          | 0          | 0          | 0          | 0          | 0          | 0          | 0          |
| PCDH9-AS3 | 0.0443353 | 0          | 0          | 0          | 0          | 0          | 0          | 0          | 0          | 0          | 0          | 0          | 0          | 0          | 0          |
| PCDH9-AS4 | 0         | 0          | 0          | 0          | 0          | 0          | 0          | 0          | 0          | 0          | 0          | 0          | 0          | 0          | 0          |
| PCDHA1    | 0.0098609 | 2.98E-16   | 0.00415504 | 0.00759555 | 0.00644997 | 0.0211934  | 0.00472616 | 2.38E-15   | 3.30E-15   | 0.0373424  | 2.63E-23   | 5.35E-16   | 5.24E-19   | 0.00260694 | 2.05E-15   |
| PCDHA10   | 0.0587716 | 0.0359813  | 0.0392845  | 0.0516959  | 0.213269   | 0.127953   | 0.0332909  | 0.0961641  | 0.0125091  | 0.0498835  | 0.00545125 | 0.0138862  | 0.0207535  | 0.0239954  | 0.043068   |
| PCDHA11   | 0.0344221 | 0.0170225  | 0.0302917  | 0.010305   | 0.18128    | 0.0209968  | 0.0267017  | 0.0520157  | 0.00491767 | 0.026895   | 0.0187884  | 0.00714386 | 0.0108098  | 0.00574245 | 0.0057399  |
| PCDHA12   | 0.0300974 | 0.0189274  | 0.0482571  | 0.0218686  | 0.205429   | 0.0234792  | 0.0771709  | 0.028106   | 0.0171166  | 0.00566798 | 1.29E-26   | 0.035592   | 2.56E-22   | 0.00700117 | 1.00E-18   |
| PCDHA13   | 0.0437517 | 0.0043881  | 0.0194239  | 0.018026   | 0.170187   | 0.0174507  | 0.0115844  | 0.00846776 | 1.13E-11   | 0.0113941  | 0.00493596 | 0.00653538 | 9.90E-22   | 0.00241422 | 0.0392877  |
| PCDHA2    | 0.0382852 | 0.00216252 | 0.00316736 | 0.011841   | 0.0119087  | 0.0140267  | 0.0183755  | 0.00680484 | 2.17E-18   | 3.73E-19   | 0.0129656  | 3.52E-19   | 3.44E-22   | 8.26E-20   | 1.35E-18   |
| PCDHA3    | 0.0176642 | 0.0194721  | 0.00768881 | 0.0133961  | 0.0137314  | 0.0558133  | 0.102089   | 0.0291955  | 6.18E-18   | 0.0453849  | 0.0293496  | 0.013075   | 0.0140046  | 0.0072479  | 0.0659818  |
| PCDHA4    | 0.0808531 | 0.0537357  | 0.0140265  | 0.124268   | 0.256791   | 0.100991   | 0.0726636  | 0.0795632  | 0.0994893  | 0.0280516  | 0.043818   | 0.0477677  | 0.02831    | 0.011882   | 0.0715828  |
| PCDHA5    | 0.0575629 | 0.024007   | 0.0216054  | 0.0448657  | 0.169096   | 0.0250019  | 0.0199022  | 0.0462665  | 9.20E-18   | 0.0173968  | 0.0098272  | 0.0067366  | 1.46E-21   | 0.014628   | 0.073542   |
| PCDHA6    | 0.0653836 | 0.00520212 | 0.0108876  | 0.0263165  | 0.261619   | 0.0326624  | 0.108637   | 0.0888739  | 0.0127178  | 0.0387637  | 0.0383636  | 0.0283161  | 0.0296686  | 0.00502451 | 0.0693856  |
| PCDHA7    | 0.0568758 | 0.0152137  | 0.0231296  | 0.0463393  | 0.21975    | 0.0470576  | 0.0327832  | 0.0536328  | 9.08E-18   | 0.0127094  | 0.00997932 | 0.00333103 | 0.045209   | 0.0276597  | 0.0611581  |
| PCDHA8    | 0.0381704 | 0.0212947  | 0.0072099  | 0.0728243  | 0.144332   | 0.029634   | 0.0159604  | 0.0349148  | 2.81E-05   | 1.07E-18   | 0.00491926 | 0.00977372 | 0.0028188  | 0.0233725  | 3.87E-18   |
| PCDHA9    | 0.0331807 | 0.0110971  | 0.0179465  | 0.024624   | 0.125011   | 0.00219686 | 0.0490063  | 0.0298794  | 0.00564891 | 0.0119056  | 5.13E-29   | 0.012529   | 0.00186931 | 0.00965706 | 0.0244564  |
| PCDHAC1   | 0.102167  | 0.0177273  | 0.0338172  | 0.054801   | 0.139868   | 0.0585601  | 0.0374465  | 0.0307091  | 0.00703424 | 0.0231911  | 0.0418127  | 0.023058   | 0.039631   | 0.0124192  | 0.00789453 |
| PCDHAC2   | 0.122424  | 0.028741   | 0.0156265  | 0.0457197  | 0.167146   | 0.127738   | 0.0846277  | 0.0436676  | 6.35E-21   | 0.0379436  | 0.0623413  | 0.002705   | 0.0194998  | 0.0109532  | 0.125038   |
| PCDHB1    | 0         | 0.00862055 | 0          | 0          | 0          | 0          | 0          | 0          | 0          | 0          | 0          | 0          | 0          | 0          | 0          |
| PCDHB10   | 0.873109  | 0.740773   | 0.844417   | 0.501214   | 0.618785   | 0.849782   | 0.407532   | 0.636123   | 0.176585   | 0.491054   | 0.875998   | 0.503308   | 0.31702    | 0.309216   | 0.449447   |
| PCDHB11   | 1.09952   | 1.21166    | 1.40672    | 0.209481   | 0.291802   | 1.01099    | 0.687225   | 1.25355    | 0.0630655  | 0.355038   | 0.484234   | 0.146877   | 0.0808525  | 0.228333   | 1.19819    |
| PCDHB12   | 0.525428  | 0.545321   | 0.566523   | 0.308801   | 0.750737   | 0.683811   | 0.425202   | 0.471156   | 0.0596768  | 0.349578   | 0.402625   | 0.183217   | 0.282078   | 0.277464   | 0.826371   |
| PCDHB13   | 1.46356   | 2.30661    | 2.78025    | 1.21116    | 2.31267    | 2.23679    | 2.64046    | 1.72222    | 1.2461     | 0.614516   | 1.06808    | 1.06261    | 2.00905    | 0.87267    | 1.23475    |

|          |           |           |           |           |           |           |           |           |           |           |           |           |           |           |           |
|----------|-----------|-----------|-----------|-----------|-----------|-----------|-----------|-----------|-----------|-----------|-----------|-----------|-----------|-----------|-----------|
| PCDHB14  | 1.37817   | 1.71902   | 2.19579   | 1.32978   | 1.74688   | 2.12056   | 1.42984   | 1.64165   | 1.08322   | 1.11853   | 1.25575   | 0.803172  | 1.74712   | 0.86515   | 1.24834   |
| PCDHB15  | 0.964346  | 0.908455  | 0.936869  | 0.719294  | 0.797668  | 1.17769   | 0.590955  | 0.754687  | 0.286566  | 0.638565  | 0.762726  | 0.435278  | 0.640253  | 0.508801  | 1.20074   |
| PCDHB16  | 1.06045   | 0.573458  | 0.820655  | 0.885137  | 0.910347  | 2.32891   | 1.23455   | 0.746629  | 0.100565  | 0.391832  | 0.789908  | 0.35294   | 0.311326  | 0.308552  | 0.958601  |
| PCDHB17P | 0.0444032 | 0.0645012 | 0.0545481 | 0.0447081 | 0.155657  | 0.0897368 | 0.0524133 | 0.111804  | 0.0128359 | 5.69E-37  | 0.0356168 | 0         | 0         | 0.0225631 | 0.0796763 |
| PCDHB18P | 0.549569  | 0.64824   | 0.680275  | 0.406999  | 0.752802  | 0.413739  | 0.437454  | 0.422531  | 0.127654  | 0.266768  | 0.233527  | 0.0950945 | 0.295457  | 0.26473   | 0.993184  |
| PCDHB19P | 0.385384  | 0.332784  | 0.414048  | 0.221785  | 0.241009  | 0.170467  | 0.211438  | 0.427009  | 0.0670506 | 0.138199  | 0.0791001 | 0.0823676 | 0.0710422 | 0.159565  | 0.230009  |
| PCDHB2   | 0.816209  | 0.706762  | 0.643509  | 2.10536   | 1.458     | 1.21311   | 1.01742   | 0.539882  | 0.0533217 | 0.331671  | 0.378591  | 0.118759  | 0.861874  | 0.383722  | 0.654699  |
| PCDHB3   | 0.398009  | 0.426507  | 0.678603  | 0.250462  | 0.616912  | 0.672991  | 0.413734  | 0.279735  | 0.0395391 | 0.107762  | 0.21721   | 0.304863  | 0.289981  | 0.111811  | 0.296313  |
| PCDHB4   | 0.792223  | 0.48344   | 0.772335  | 0.154071  | 0.455495  | 1.52133   | 0.477318  | 0.61133   | 0.0656488 | 0.244195  | 0.50822   | 0.205268  | 0.317213  | 0.223456  | 1.1289    |
| PCDHB5   | 0.260869  | 0.312925  | 0.350017  | 0.260183  | 0.833481  | 0.81652   | 0.547578  | 0.235069  | 0.203278  | 0.146843  | 0.147795  | 0.197911  | 0.474041  | 0.188774  | 0.515844  |
| PCDHB6   | 0.15543   | 0.193086  | 0.243638  | 0.16893   | 0.229009  | 0.409199  | 0.131371  | 0.226524  | 0.123411  | 0.167235  | 0.232338  | 0.0778841 | 0.0950022 | 0.144883  | 0.224431  |
| PCDHB7   | 0.656812  | 0.262323  | 0.417046  | 0.151578  | 0.245438  | 0.627176  | 0.212967  | 0.344055  | 0.0228684 | 0.226298  | 0.600151  | 0.0880585 | 0.116273  | 0.278057  | 1.08919   |
| PCDHB8   | 0.369043  | 0.159802  | 0.223579  | 0.134301  | 0.203806  | 0.341939  | 0.131849  | 0.0831242 | 0.126321  | 0.111931  | 0.362736  | 0.141527  | 0.231528  | 0.15213   | 0.329441  |
| PCDHB9   | 0.406786  | 0.587059  | 0.750852  | 0.344889  | 0.525143  | 0.623491  | 0.514568  | 0.382864  | 0.0761191 | 0.127899  | 0.283507  | 0.221823  | 0.184175  | 0.135033  | 0.584205  |
| PCDHGA1  | 0.0779794 | 0.101151  | 0.069316  | 0.0365759 | 0.0688374 | 0.117022  | 0.0939111 | 0.0559864 | 0.103601  | 0.207124  | 0.093341  | 0.0572447 | 0.126132  | 0.134484  | 0.142829  |
| PCDHGA10 | 1.36312   | 1.96195   | 2.35398   | 1.16084   | 1.67085   | 3.26415   | 1.69791   | 1.30553   | 0.541788  | 1.76259   | 2.14691   | 1.04385   | 1.05672   | 1.14457   | 1.59109   |
| PCDHGA11 | 1.01098   | 1.18066   | 1.41191   | 1.219     | 1.45231   | 0.917423  | 1.24746   | 1.03624   | 0.269191  | 1.04054   | 0.777643  | 0.643847  | 0.889916  | 1.22432   | 1.48309   |
| PCDHGA12 | 1.2777    | 1.16303   | 1.00607   | 1.32076   | 1.60398   | 2.78579   | 1.9271    | 1.12988   | 0.456615  | 0.940449  | 1.06666   | 1.0149    | 2.30483   | 1.50856   | 1.6959    |
| PCDHGA2  | 0.655934  | 0.374543  | 0.455347  | 0.293239  | 0.493545  | 0.537712  | 0.402912  | 0.308975  | 0.291232  | 0.1171    | 0.195876  | 0.264425  | 0.385403  | 0.218769  | 0.349538  |
| PCDHGA3  | 0.293964  | 0.226882  | 0.339242  | 0.13018   | 0.434343  | 0.251694  | 0.388777  | 0.276169  | 0.0358066 | 0.0671927 | 0.0811723 | 0.141743  | 0.297243  | 0.283705  | 0.310792  |
| PCDHGA4  | 0.584423  | 0.493033  | 0.475737  | 0.308186  | 0.984249  | 0.616838  | 0.529524  | 0.521488  | 0.200899  | 0.375441  | 0.344704  | 0.36013   | 0.368739  | 0.232364  | 0.412146  |
| PCDHGA5  | 0.404254  | 0.67495   | 0.779325  | 0.431286  | 1.08183   | 0.530947  | 0.775181  | 0.488385  | 0.233864  | 0.374861  | 0.460559  | 0.412658  | 0.271696  | 0.42865   | 0.670206  |
| PCDHGA6  | 0.674329  | 0.915025  | 1.19519   | 0.728693  | 1.39856   | 0.811918  | 0.909726  | 1.04232   | 0.281092  | 0.420593  | 0.641681  | 0.362552  | 0.680401  | 0.558899  | 0.833499  |
| PCDHGA7  | 0.571093  | 0.77421   | 0.892775  | 0.503258  | 1.07233   | 0.527865  | 0.845671  | 0.816402  | 0.210172  | 0.362334  | 0.509165  | 0.432676  | 0.278289  | 0.582316  | 0.569847  |
| PCDHGA8  | 0.333102  | 0.487671  | 0.574141  | 0.278611  | 0.617693  | 0.208075  | 0.414123  | 0.430537  | 0.0908499 | 0.186498  | 0.134465  | 0.255169  | 0.139208  | 0.215853  | 0.168253  |
| PCDHGA9  | 1.02586   | 1.64669   | 1.87299   | 1.25362   | 1.47612   | 1.476     | 1.71423   | 1.5909    | 0.859702  | 1.2404    | 1.57231   | 0.830195  | 1.77722   | 1.77701   | 1.80358   |

|            |          |           |            |          |           |          |          |           |           |          |           |          |           |          |          |
|------------|----------|-----------|------------|----------|-----------|----------|----------|-----------|-----------|----------|-----------|----------|-----------|----------|----------|
| PCDHGB1    | 0.472575 | 0.461038  | 0.412518   | 0.348178 | 0.453575  | 0.319447 | 0.356664 | 0.544222  | 0.176589  | 0.145133 | 0.242073  | 0.289728 | 0.292494  | 0.326223 | 0.343454 |
| PCDHGB2    | 0.783745 | 0.746161  | 0.718438   | 0.462161 | 0.992961  | 1.11056  | 0.900903 | 0.66643   | 0.310827  | 0.356369 | 0.683683  | 0.477186 | 0.578785  | 0.576053 | 0.836189 |
| PCDHGB3    | 0.589461 | 0.863094  | 0.877212   | 0.521265 | 1.10031   | 0.808082 | 0.753419 | 0.967779  | 0.277715  | 0.397363 | 0.570613  | 0.58707  | 0.523402  | 0.460409 | 1.04034  |
| PCDHGB4    | 0.588005 | 1.00198   | 1.25536    | 0.477551 | 0.99063   | 0.856705 | 0.930506 | 0.644138  | 0.277092  | 0.59702  | 0.526859  | 0.549698 | 0.979056  | 0.887951 | 0.210962 |
| PCDHGB5    | 1.36584  | 1.57506   | 1.88237    | 1.41581  | 1.82206   | 1.40393  | 2.39107  | 1.84211   | 1.61943   | 1.932    | 1.84766   | 1.70646  | 2.10604   | 1.54203  | 1.80251  |
| PCDHGB6    | 1.24945  | 1.3515    | 1.53086    | 1.46378  | 1.63355   | 1.93228  | 1.41615  | 0.841972  | 0.727522  | 1.23563  | 1.33242   | 1.35047  | 1.22095   | 1.48486  | 1.98016  |
| PCDHGB7    | 2.48488  | 2.1616    | 2.84138    | 2.20372  | 2.47968   | 3.97063  | 3.23204  | 2.18542   | 1.07842   | 1.86696  | 1.84289   | 1.28583  | 1.95863   | 2.12881  | 3.40537  |
| PCDHGB8P   | 0.891471 | 1.57681   | 1.59142    | 0.628575 | 1.00213   | 0.299635 | 1.27232  | 1.19882   | 0.0714284 | 0.559444 | 0.384006  | 0.537155 | 0.0908167 | 1.23837  | 1.06127  |
| PCDHGC3    | 9.13839  | 8.87632   | 9.84364    | 14.6441  | 14.4759   | 29.5186  | 14.3651  | 8.12966   | 9.90867   | 16.3131  | 15.0556   | 13.1021  | 29.1201   | 13.7125  | 19.1943  |
| PCDHGC4    | 0.524419 | 0.680908  | 0.566727   | 0.277837 | 0.653493  | 0.530624 | 0.656376 | 0.568676  | 0.071406  | 0.496266 | 0.200387  | 0.675858 | 0.088398  | 0.799715 | 0.767617 |
| PCDHGC5    | 0.434823 | 0.544902  | 0.559752   | 0.276604 | 0.900055  | 0.535216 | 0.783117 | 0.553641  | 0.135566  | 1.01346  | 0.277503  | 0.999211 | 1.80346   | 1.09431  | 1.14765  |
| PCED1A     | 2.3692   | 2.30159   | 2.19102    | 4.62501  | 10.3973   | 5.01875  | 2.13327  | 1.70327   | 1.70076   | 2.73184  | 5.56651   | 2.90118  | 2.00085   | 4.78188  | 7.0539   |
| PCED1B     | 0.857561 | 0.655359  | 0.644948   | 0.890139 | 0.773462  | 1.18573  | 0.458015 | 0.511764  | 0.439118  | 0.70631  | 0.784553  | 0.49362  | 0.918186  | 0.781467 | 0.698662 |
| PCED1B-AS1 | 0.480991 | 0.298599  | 0.459126   | 0.390821 | 0.186786  | 0.157522 | 0.232345 | 0.378142  | 0.0112652 | 0.255408 | 0.104419  | 0.152225 | 0.113391  | 0.37708  | 0.451653 |
| PCF11      | 9.82487  | 9.23665   | 9.69001    | 7.26145  | 6.37402   | 7.43103  | 4.86274  | 7.20553   | 9.25839   | 6.43041  | 5.67319   | 5.8107   | 5.56642   | 6.37992  | 4.68072  |
| PCF11-AS1  | 0.70137  | 0.793126  | 0.959295   | 0.502426 | 0.18304   | 0.253064 | 0.582722 | 0.635228  | 0.0723941 | 0.167734 | 0.13509   | 0.129488 | 0.0694138 | 0.40329  | 0.751373 |
| PCGEM1     | 0        | 0         | 0          | 0        | 0         | 0        | 0        | 0         | 0         | 0        | 0         | 0        | 0         | 0        | 0        |
| PCGF1      | 2.91204  | 2.78151   | 3.19093    | 5.65967  | 2.57913   | 5.8509   | 2.91655  | 2.72419   | 5.47535   | 5.03351  | 7.90113   | 3.65551  | 4.79597   | 4.59258  | 3.08152  |
| PCGF2      | 3.72861  | 2.76236   | 2.85734    | 3.18582  | 7.1313    | 9.21206  | 5.20457  | 3.41458   | 2.07882   | 1.86218  | 4.91662   | 2.68094  | 2.99478   | 3.14421  | 5.94663  |
| PCGF3      | 8.07828  | 10.4977   | 10.4853    | 6.6878   | 7.0284    | 7.72801  | 8.14038  | 8.15267   | 7.00055   | 6.33097  | 7.02009   | 7.77066  | 6.87329   | 6.9429   | 8.16312  |
| PCGF5      | 2.88892  | 2.24256   | 2.87362    | 2.03791  | 0.725661  | 3.24082  | 2.41824  | 3.17873   | 1.76967   | 1.87052  | 2.74359   | 0.838741 | 2.27629   | 1.40353  | 2.5272   |
| PCGF6      | 1.49444  | 1.11507   | 1.15045    | 2.0855   | 1.80552   | 2.1385   | 0.971644 | 1.31891   | 1.04906   | 1.82357  | 3.47952   | 0.831686 | 2.31676   | 1.45364  | 1.81831  |
| PCID2      | 2.5936   | 2.65431   | 2.75141    | 2.716    | 2.66251   | 2.53416  | 2.60891  | 2.233     | 1.50832   | 2.02886  | 2.74042   | 2.06942  | 1.89051   | 2.54859  | 2.43587  |
| PCIF1      | 7.31962  | 6.8963    | 8.43342    | 7.28664  | 8.61073   | 11.6468  | 10.8655  | 6.3678    | 6.4063    | 4.85731  | 7.01333   | 3.88659  | 6.2894    | 4.42204  | 5.18817  |
| PCK1       | 0.267201 | 0.0249177 | 0.00713056 | 0        | 0.0401666 | 0.880715 | 0.157461 | 0.0689417 | 0         | 0        | 0.0194604 | 0        | 0.0111224 | 0        | 0        |
| PCK2       | 2.77689  | 2.18172   | 1.88743    | 2.89761  | 5.3539    | 5.27554  | 2.74038  | 1.91601   | 12.2871   | 3.35393  | 6.15139   | 2.67587  | 4.38002   | 1.76857  | 1.4028   |

|            |           |           |           |           |          |                 |           |           |          |           |            |           |           |           |           |
|------------|-----------|-----------|-----------|-----------|----------|-----------------|-----------|-----------|----------|-----------|------------|-----------|-----------|-----------|-----------|
| PCLAF      | 1.38925   | 1.18171   | 0.90589   | 5.73274   | 0.960753 | 3.9193          | 1.04173   | 0.665739  | 1.37886  | 5.35109   | 7.07311    | 2.29274   | 4.46058   | 3.36872   | 1.53397   |
| PCLO       | 1.54718   | 1.15294   | 0.558837  | 0.465167  | 0.201482 | 0.832311        | 0.651622  | 1.38696   | 0.298246 | 0.0390713 | 0.0702837  | 0.119539  | 0.0749836 | 0.122024  | 0.0700403 |
| PCM1       | 10.1517   | 7.9945    | 9.11517   | 6.40897   | 2.87691  | 8.4953          | 3.83038   | 6.97993   | 4.77579  | 6.03481   | 5.49109    | 4.46276   | 6.67982   | 5.41692   | 5.94033   |
| PCMT1      | 8.44864   | 6.53725   | 7.55882   | 10.693    | 3.16912  | 11.6808         | 6.58814   | 6.84103   | 10.6858  | 12.5833   | 20.4879    | 6.37661   | 15.2871   | 9.0929    | 4.96118   |
| PCMTD1     | 7.99246   | 6.56067   | 6.22321   | 4.95567   | 1.37034  | 4.71115         | 4.88297   | 6.45964   | 6.36468  | 4.88628   | 7.03071    | 3.12872   | 4.60294   | 3.56827   | 5.37067   |
| PCMTD2     | 6.54895   | 5.96022   | 6.0931    | 5.37708   | 5.79858  | 5.22879         | 4.97814   | 6.40373   | 7.93265  | 3.2002    | 4.48114    | 4.14835   | 2.85506   | 3.85871   | 3.28796   |
| PCNA       | 8.12094   | 6.03933   | 6.05434   | 26.4795   | 4.49411  | 20.0204         | 7.40313   | 5.74809   | 6.93889  | 15.4902   | 30.2745    | 7.71705   | 23.6192   | 12.4814   | 9.03511   |
| PCNA-AS1   | 1.95E-08  | 3.77E-11  | 3.43E-10  | 9.84E-11  | 0.72379  | 0.00014795<br>6 | 4.83E-06  | 6.62E-29  | 3.93E-09 | 2.36E-11  | 4.10E-06   | 1.26E-05  | 2.36E-12  | 7.13E-13  | 1.26E-12  |
| PCNAP1     | 0.0878294 | 0.0423176 | 0.0181647 | 0.0905108 | 0        | 0.224357        | 0.0250702 | 0.0195139 | 0        | 0.0275587 | 0.0247871  | 0.0157111 | 0         | 0         | 0.0630671 |
| PCNP       | 8.65583   | 6.99924   | 7.31171   | 8.8956    | 2.36621  | 10.005          | 5.21777   | 9.74438   | 7.48846  | 9.58936   | 10.5775    | 5.12625   | 12.2087   | 7.26891   | 6.30091   |
| PCNT       | 3.35565   | 4.05534   | 3.79992   | 3.28063   | 6.3521   | 3.84234         | 3.34579   | 2.59292   | 2.13665  | 1.99644   | 1.29872    | 3.28058   | 2.41752   | 3.29869   | 2.9593    |
| PCNX1      | 5.44955   | 3.65717   | 4.1021    | 4.75182   | 2.4738   | 6.46894         | 3.66935   | 4.39722   | 1.53811  | 4.19101   | 4.71794    | 2.40974   | 4.24872   | 4.29672   | 6.42651   |
| PCNX2      | 2.86002   | 1.93805   | 1.93368   | 1.71683   | 1.51039  | 2.87486         | 4.18039   | 1.92813   | 1.17263  | 2.10289   | 1.8771     | 1.73821   | 1.17909   | 3.16335   | 1.77394   |
| PCNX3      | 4.64905   | 5.48533   | 5.69177   | 8.63031   | 13.6055  | 12.9863         | 7.82739   | 4.5671    | 7.85558  | 5.36611   | 5.5506     | 7.42982   | 9.40798   | 6.63359   | 6.91454   |
| PCNX4      | 3.48582   | 3.70259   | 4.33785   | 3.87288   | 1.59979  | 4.0095          | 2.57795   | 3.66998   | 2.12267  | 4.85358   | 5.10325    | 2.93351   | 4.00288   | 4.09138   | 4.4941    |
| PCOLCE     | 14.8141   | 12.361    | 16.4971   | 19.1236   | 68.3232  | 59.1045         | 20.9099   | 12.378    | 5.61973  | 33.655    | 113.033    | 7.05303   | 12.8764   | 20.3905   | 97.1029   |
| PCOLCE-AS1 | 0.121117  | 0.181498  | 0.207036  | 0.0189147 | 0.21836  | 0.170523        | 0.0881152 | 0.122123  | 3.25E-28 | 0         | 0.0479672  | 0.0130976 | 0         | 0.077148  | 0.0920155 |
| PCOLCE2    | 3.77357   | 3.499     | 5.38528   | 0.892891  | 0.885447 | 1.64055         | 12.418    | 1.60083   | 0.263806 | 0.0572353 | 0.296005   | 0.212092  | 0.360422  | 0.202586  | 0.50755   |
| PCOTH      | 0.448728  | 1.13647   | 0.856337  | 0.557016  | 0.215268 | 0.856192        | 1.73258   | 0.883823  | 2.31171  | 0.484951  | 0.83127    | 0.589016  | 0.852023  | 0.254058  | 0.0148919 |
| PCP2       | 0.387563  | 0.546863  | 0.572535  | 0.31381   | 1.84906  | 0.40072         | 0.221253  | 0.61506   | 0.101145 | 0.0694902 | 0.0937522  | 0.336736  | 0         | 0.130215  | 0.198782  |
| PCP4       | 0.707611  | 0.381048  | 0.516517  | 0.0428949 | 0        | 0.0354425       | 0.237626  | 0         | 0        | 0         | 0.140966   | 0         | 0         | 0.0435092 | 0         |
| PCP4L1     | 1.25142   | 2.38831   | 1.94951   | 7.20177   | 3.33237  | 2.4079          | 1.33604   | 4.08753   | 1.4647   | 0.75473   | 2.07317    | 2.69789   | 0.283117  | 0.696515  | 0.0933605 |
| PCSK1      | 1.1609    | 0.882612  | 0.540444  | 0.859732  | 0.946212 | 7.31027         | 0.267112  | 0.898338  | 0.118269 | 2.06646   | 3.03461    | 0.571671  | 1.25594   | 3.75585   | 5.57215   |
| PCSK1N     | 0.525481  | 0.33758   | 0.307923  | 0.338452  | 2.82288  | 2.21856         | 1.37495   | 0.25296   | 0.18666  | 0.219844  | 0.76622    | 0.234997  | 0.169519  | 0.251753  | 0.15722   |
| PCSK2      | 0.197021  | 0.821233  | 1.02721   | 0.273862  | 0.220634 | 0.909027        | 2.02456   | 1.08722   | 0.25669  | 0.0230029 | 0.00517237 | 0.0655691 | 0.0384306 | 0.239469  | 0.0460611 |

|            |           |           |           |           |           |          |           |           |           |           |           |           |           |           |           |
|------------|-----------|-----------|-----------|-----------|-----------|----------|-----------|-----------|-----------|-----------|-----------|-----------|-----------|-----------|-----------|
| PCSK4      | 0.0684959 | 0.0618794 | 0.09208   | 0.114704  | 0.678286  | 0.328069 | 0.11731   | 0.0760918 | 0.0729928 | 0.064477  | 0.0869888 | 0.245053  | 0.0441932 | 0.067123  | 0.0368883 |
| PCSK5      | 1.25102   | 0.257935  | 0.342362  | 1.35182   | 0.613356  | 2.7593   | 1.16395   | 0.455521  | 0.101728  | 0.717177  | 1.19795   | 0.161642  | 0.629556  | 0.636973  | 1.07961   |
| PCSK6      | 1.76506   | 1.6234    | 1.47227   | 2.26709   | 3.36616   | 2.69469  | 2.3449    | 2.31885   | 14.6603   | 4.89847   | 3.84066   | 5.261     | 3.43764   | 2.75794   | 1.45373   |
| PCSK6-AS1  | 0.108145  | 0.104212  | 0.178931  | 0.0371489 | 0.223982  | 0        | 0.164635  | 0.256294  | 0.263417  | 0.180978  | 0.162776  | 0.283729  | 0.0232582 | 0.0565214 | 0         |
| PCSK7      | 4.53393   | 4.47709   | 4.30275   | 8.02893   | 9.69322   | 8.07934  | 5.28545   | 3.20059   | 7.93029   | 5.45285   | 3.0696    | 7.22527   | 8.25867   | 6.56953   | 5.3706    |
| PCSK9      | 0.315155  | 0.66755   | 0.427971  | 3.70121   | 1.24695   | 1.84301  | 0.740034  | 0.295937  | 0.470726  | 0.709008  | 0.798804  | 0.404201  | 0.886238  | 1.92374   | 0.128095  |
| PCTP       | 1.24574   | 0.546863  | 0.446577  | 1.26237   | 0.677272  | 2.79326  | 0.726976  | 0.81188   | 0.556295  | 1.40718   | 2.60944   | 0.505104  | 1.43334   | 1.10322   | 0.685798  |
| PCYOX1     | 9.96395   | 9.74051   | 10.1193   | 12.6722   | 5.25498   | 12.325   | 8.75721   | 9.02343   | 11.1233   | 11.1769   | 12.1226   | 8.05646   | 13.1267   | 7.63481   | 7.21347   |
| PCYOX1L    | 1.26219   | 2.08071   | 1.76017   | 1.70951   | 3.13698   | 1.85008  | 1.51318   | 1.76271   | 3.76613   | 2.59125   | 3.04307   | 4.10279   | 3.02475   | 2.48321   | 1.11349   |
| PCYT1A     | 10.1937   | 13.7664   | 12.289    | 16.5015   | 17.314    | 14.8994  | 15.8262   | 10.5341   | 37.5809   | 18.0527   | 18.7242   | 18.641    | 22.1037   | 13.5414   | 8.38638   |
| PCYT1B     | 0.130788  | 0.0477177 | 0.0589901 | 0.142885  | 0.0246143 | 0.242868 | 0.085939  | 0.0387271 | 0.0530712 | 0.124302  | 0.165465  | 0.0226764 | 0.138021  | 0.101452  | 0.0739597 |
| PCYT1B-AS1 | 0         | 0         | 0         | 0         | 0         | 0        | 0         | 0         | 0         | 0         | 0         | 0         | 0         | 0         | 0         |
| PCYT2      | 1.31178   | 1.47287   | 1.31302   | 2.68038   | 3.25644   | 2.8899   | 1.55384   | 0.937294  | 1.71504   | 2.51231   | 1.9622    | 2.39259   | 2.47018   | 1.89937   | 1.27483   |
| PDAP1      | 10.4795   | 9.09466   | 8.38961   | 18.0979   | 14.9138   | 23.2129  | 8.90421   | 6.36768   | 14.096    | 15.4544   | 14.8753   | 11.041    | 24.0303   | 14.5003   | 9.78808   |
| PDC        | 0.0873323 | 0.151481  | 0.115596  | 0.0719988 | 0         | 0        | 0.0199426 | 0.217318  | 0.0425444 | 0.0219222 | 0         | 0.0499909 | 0         | 0.0365149 | 0         |
| PDCD1      | 0.175326  | 0.0791951 | 0.163172  | 0.248433  | 0.425534  | 0.289245 | 0.137625  | 0.116861  | 0.0266909 | 0.0412598 | 0.0742205 | 0.0862473 | 0.282799  | 0.389441  | 0.519318  |
| PDCD10     | 6.5385    | 5.58246   | 4.95735   | 9.26302   | 1.37561   | 6.9122   | 3.31986   | 6.25685   | 9.4911    | 12.6709   | 20.6441   | 5.92467   | 13.7226   | 8.41593   | 5.87147   |
| PDCD11     | 4.81546   | 5.30074   | 5.37723   | 8.30052   | 8.98729   | 9.98814  | 6.44126   | 4.46551   | 5.69775   | 4.60422   | 3.35529   | 6.95054   | 9.19273   | 7.29769   | 4.53788   |
| PDCD1LG2   | 1.33996   | 0.659449  | 0.657188  | 1.38087   | 0.341948  | 2.66496  | 0.764962  | 0.867617  | 0.0699395 | 1.14121   | 3.31702   | 0.376663  | 2.82209   | 0.76035   | 1.36079   |
| PDCD2      | 3.24744   | 3.09553   | 3.16328   | 4.9889    | 2.46771   | 4.33549  | 2.71793   | 2.64555   | 3.86958   | 3.41543   | 5.73654   | 2.2555    | 4.59787   | 3.57786   | 2.36066   |
| PDCD2L     | 1.16015   | 1.22397   | 1.20797   | 2.37053   | 2.1439    | 1.94164  | 1.69004   | 0.799951  | 1.51038   | 0.753161  | 1.87418   | 1.23087   | 2.40044   | 1.65177   | 1.0916    |
| PDCD4      | 29.4151   | 28.5679   | 24.4982   | 20.3129   | 12.5632   | 34.3339  | 10.6386   | 23.8703   | 23.4226   | 13.5206   | 17.4751   | 15.3781   | 9.23737   | 9.3184    | 8.28908   |
| PDCD4-AS1  | 0.333076  | 0.315429  | 0.24704   | 0.307737  | 0.214089  | 0.606339 | 0.262273  | 0.306218  | 0.461601  | 0.230645  | 0.479726  | 0.197234  | 0.214899  | 0.114053  | 0.230923  |
| PDCD5      | 10.0006   | 8.19685   | 9.09731   | 29.6935   | 5.53522   | 23.0012  | 5.38104   | 6.91263   | 15.6794   | 19.044    | 34.6467   | 14.2291   | 26.1801   | 17.1421   | 11.6657   |
| PDCD6      | 7.005     | 6.64982   | 7.57243   | 15.3672   | 6.22688   | 13.4363  | 6.04759   | 6.09854   | 8.99756   | 9.38438   | 18.5274   | 7.99734   | 12.1956   | 9.29685   | 6.77548   |
| PDCD6IP    | 11.0108   | 10.3316   | 10.4902   | 17.0053   | 6.61344   | 12.9054  | 9.84789   | 10.5948   | 26.5981   | 20.2895   | 17.2338   | 15.6118   | 29.6802   | 12.7577   | 10.1719   |

|           |           |            |           |            |            |           |           |           |            |           |            |            |            |            |           |
|-----------|-----------|------------|-----------|------------|------------|-----------|-----------|-----------|------------|-----------|------------|------------|------------|------------|-----------|
| PDCD6IPP2 | 0.143609  | 0.317272   | 0.255042  | 0.137831   | 0.0231826  | 0.380521  | 0.177777  | 0.102829  | 0.477879   | 0.385103  | 0.329946   | 0.170406   | 0.00846474 | 0.195065   | 3.56E-37  |
| PDCD7     | 4.87863   | 4.1419     | 4.67391   | 5.38728    | 4.95546    | 6.21385   | 3.25318   | 3.52773   | 2.92632    | 3.10744   | 4.11449    | 2.80541    | 4.23704    | 3.47467    | 2.93776   |
| PDCL      | 2.58812   | 2.18676    | 2.42655   | 3.15418    | 2.34223    | 3.78151   | 2.13276   | 2.2001    | 2.65868    | 2.85291   | 4.58998    | 1.4815     | 3.56233    | 2.2466     | 2.62874   |
| PDCL2     | 0         | 0.0647542  | 0.0222364 | 0          | 0          | 0.0457747 | 0         | 0.0238881 | 0.130944   | 0         | 0.09103    | 0.0576985  | 0          | 0          | 0.0772041 |
| PDCL3     | 6.30783   | 7.13643    | 6.55402   | 11.3591    | 6.38724    | 9.78884   | 6.88253   | 4.63011   | 21.7095    | 10.4569   | 18.5188    | 6.3003     | 13.265     | 7.77492    | 3.58643   |
| PDCL3P4   | 0.306063  | 0.328962   | 0.40901   | 0.0485241  | 0.329138   | 0.100234  | 0.26881   | 0.167387  | 0.0286731  | 0.118197  | 0          | 0.0336917  | 0          | 0.0246095  | 0         |
| PDE10A    | 0.386505  | 0.140673   | 0.149521  | 0.361054   | 0.142535   | 0.537458  | 0.301607  | 0.308897  | 0.0982078  | 0.652622  | 0.803577   | 0.254669   | 0.642267   | 0.601654   | 1.62927   |
| PDE11A    | 0.0732824 | 0.0353086  | 0.0606244 | 0.00730835 | 0.0440643  | 0.0301931 | 0.035088  | 0.0924387 | 0          | 0.002967  | 0.0026686  | 0.00169147 | 0          | 0          | 0.0509239 |
| PDE12     | 2.23262   | 1.97828    | 2.17217   | 2.48116    | 1.79364    | 2.51554   | 2.26512   | 2.48908   | 3.15667    | 1.96961   | 2.67982    | 2.05235    | 3.98855    | 2.27435    | 2.01994   |
| PDE1A     | 0.794468  | 0.252817   | 0.299579  | 0.125664   | 0.189418   | 0.748847  | 0.286896  | 0.417067  | 0.0585044  | 0.565819  | 0.9344     | 0.0925406  | 0.19073    | 0.301279   | 1.20464   |
| PDE1B     | 1.04      | 0.232858   | 0.258108  | 0.611528   | 0.456135   | 2.99523   | 0.649598  | 0.418638  | 0.156463   | 0.575871  | 1.34668    | 0.332678   | 0.694685   | 0.3613     | 1.33543   |
| PDE1C     | 0.0950611 | 0.034976   | 0.0214476 | 0.0178115  | 0.104706   | 0.178075  | 0.157873  | 0.0768022 | 0.0105249  | 0.0585711 | 0.163895   | 0.0296809  | 0.0412603  | 0.121949   | 0.305308  |
| PDE2A     | 4.45022   | 1.8165     | 2.12819   | 1.64042    | 3.98838    | 5.61474   | 3.9501    | 1.55921   | 0.570195   | 1.91749   | 1.92493    | 1.24126    | 2.03501    | 2.6607     | 3.5388    |
| PDE3A     | 1.88246   | 0.672557   | 0.540906  | 0.839907   | 1.28491    | 4.67409   | 1.09724   | 0.772975  | 1.1815     | 2.20238   | 4.32562    | 0.611462   | 0.926125   | 1.95502    | 5.00951   |
| PDE3B     | 0.889273  | 0.268012   | 0.302745  | 0.599634   | 0.687832   | 1.36484   | 0.284129  | 0.578912  | 0.0534832  | 0.473091  | 0.706432   | 0.219955   | 0.646951   | 1.53777    | 1.51886   |
| PDE4A     | 1.21453   | 0.847365   | 1.37337   | 1.56451    | 1.56806    | 4.33137   | 2.25565   | 1.05484   | 0.249728   | 1.16306   | 2.4661     | 0.40912    | 1.61301    | 1.38906    | 3.8452    |
| PDE4B     | 3.08865   | 0.750766   | 1.15129   | 2.6436     | 0.788332   | 6.88033   | 1.52106   | 1.6526    | 0.463564   | 3.41872   | 5.25017    | 0.519168   | 5.0369     | 2.82861    | 6.34327   |
| PDE4C     | 0.0193731 | 0.048538   | 0.064107  | 0.0119787  | 0.17454    | 0.0758811 | 0.0752064 | 0.024104  | 0.00943768 | 0.0145891 | 0.00874791 | 0.00277239 | 0          | 0.0445509  | 0.116853  |
| PDE4D     | 1.35478   | 0.650018   | 0.721688  | 0.994095   | 0.39958    | 2.0094    | 0.836437  | 0.916932  | 0.236668   | 1.07913   | 1.57835    | 0.576191   | 0.861415   | 1.10478    | 2.03386   |
| PDE4DIP   | 2.44511   | 2.02307    | 2.61868   | 2.18961    | 2.04345    | 2.78693   | 2.18999   | 1.486     | 0.215271   | 1.61256   | 2.25806    | 0.505606   | 1.42211    | 1.73894    | 4.12217   |
| PDE4DIPP1 | 0.0216594 | 0.00521791 | 0.0134386 | 0          | 0.00841113 | 0         | 0.0185475 | 0.0192491 | 0          | 0         | 0.00611269 | 0          | 0          | 0.00849011 | 0.10887   |
| PDE5A     | 3.43765   | 1.56205    | 1.75087   | 0.826161   | 1.32001    | 3.87461   | 2.28103   | 1.90942   | 0.761563   | 2.10899   | 3.01187    | 0.614929   | 0.943454   | 1.43631    | 6.86645   |
| PDE6A     | 0.235722  | 0.211926   | 0.185602  | 0.0722039  | 0.20636    | 0.0807135 | 0.116692  | 0.171568  | 0.0373028  | 0.0208009 | 0.0277834  | 0.0794724  | 0.0158792  | 0.118272   | 0.0414114 |
| PDE6B     | 0.16969   | 0.248422   | 0.210569  | 0.0807092  | 0.111517   | 0.0389007 | 0.156487  | 0.179807  | 0.0397429  | 0.0245744 | 0.0294705  | 0.0420291  | 0.0294762  | 0.0886872  | 0.121848  |
| PDE6C     | 0.0623592 | 0.0150228  | 0.025794  | 0          | 0          | 0         | 0.0533998 | 0.0969844 | 0          | 0         | 0          | 0          | 0          | 0.0122219  | 0         |
| PDE6D     | 2.53623   | 2.24032    | 2.05929   | 3.67847    | 2.42579    | 4.17916   | 2.06458   | 1.9305    | 2.40243    | 3.12427   | 6.68054    | 1.84834    | 3.03788    | 2.30129    | 2.61371   |



|         |           |           |           |           |           |           |           |           |           |           |           |           |          |           |          |
|---------|-----------|-----------|-----------|-----------|-----------|-----------|-----------|-----------|-----------|-----------|-----------|-----------|----------|-----------|----------|
| PDE6G   | 0.0904909 | 0.0980998 | 0.0561453 | 0.0466268 | 0.281127  | 0.404522  | 0.154979  | 0.0402104 | 0         | 0.198757  | 0.306459  | 0.161872  | 0.145961 | 0.118236  | 0        |
| PDE6H   | 0         | 0         | 0         | 0         | 0.0481247 | 0         | 0         | 0         | 0         | 0         | 0         | 0         | 0        | 0         | 0        |
| PDE7A   | 1.61636   | 1.37673   | 1.4028    | 2.24766   | 0.982245  | 1.70455   | 0.957503  | 1.29853   | 0.41183   | 1.69766   | 1.66434   | 0.769421  | 1.38758  | 1.5411    | 1.88075  |
| PDE7B   | 0.588565  | 0.304279  | 0.326971  | 0.513561  | 0.367032  | 1.24008   | 0.465988  | 0.435253  | 0.136036  | 1.623     | 3.36573   | 0.227474  | 0.471209 | 0.633182  | 2.93679  |
| PDE8A   | 5.43809   | 3.51081   | 3.66168   | 5.87211   | 3.00308   | 5.03485   | 3.41433   | 3.29563   | 3.69016   | 5.57669   | 6.34957   | 3.69293   | 5.93042  | 5.75231   | 7.10356  |
| PDE8B   | 0.529556  | 0.176995  | 0.21707   | 0.142576  | 0.22232   | 0.698708  | 0.544712  | 0.296791  | 0.174308  | 0.227537  | 0.25851   | 0.23554   | 0.193919 | 0.234381  | 1.05512  |
| PDE9A   | 1.98518   | 0.724919  | 0.942152  | 0.570667  | 1.62299   | 1.45015   | 0.81121   | 1.14213   | 0.152699  | 0.144251  | 0.283077  | 0.104665  | 0.249425 | 0.191126  | 0.555189 |
| PDF     | 1.88768   | 2.0466    | 2.33788   | 3.11445   | 3.70737   | 3.67917   | 1.97847   | 1.0237    | 3.12305   | 1.94187   | 3.13621   | 1.61081   | 3.43399  | 2.68387   | 0.960674 |
| PDGFA   | 3.20722   | 2.64962   | 2.49635   | 3.93387   | 5.3149    | 7.96108   | 2.53226   | 1.87578   | 1.59655   | 3.94261   | 8.66514   | 2.08247   | 5.26093  | 5.86025   | 8.07521  |
| PDGFB   | 3.10896   | 2.10811   | 2.91453   | 3.48839   | 6.29299   | 4.25193   | 2.90554   | 1.67485   | 1.25724   | 3.85685   | 7.22249   | 0.953372  | 3.96526  | 4.15315   | 6.88689  |
| PDGFC   | 3.54423   | 3.0956    | 4.26705   | 2.01272   | 1.60477   | 3.68565   | 2.49689   | 3.59881   | 1.06534   | 4.96893   | 7.13374   | 1.36511   | 3.78525  | 3.93728   | 2.85904  |
| PDGFD   | 4.58457   | 1.70624   | 2.16724   | 1.15873   | 1.31444   | 6.08011   | 3.40142   | 3.42535   | 0.57176   | 0.47284   | 0.870199  | 0.219798  | 0.317856 | 0.318065  | 5.5935   |
| PDGFRA  | 7.33461   | 4.07732   | 5.3365    | 14.3858   | 4.22214   | 25.4114   | 8.42742   | 5.08443   | 0.704552  | 6.62595   | 10.4422   | 1.8263    | 12.6158  | 12.1322   | 22.6702  |
| PDGFRB  | 21.6783   | 10.0636   | 14.1814   | 11.0492   | 35.382    | 68.7865   | 29.9679   | 17.1843   | 3.18319   | 16.856    | 33.2676   | 4.43269   | 16.9692  | 22.5684   | 68.4137  |
| PDGFRL  | 3.14648   | 3.26033   | 4.57282   | 0.588415  | 1.32097   | 4.82047   | 1.48418   | 2.15933   | 0.0887736 | 3.47648   | 7.8034    | 0.173853  | 0.870041 | 1.75243   | 5.89705  |
| PDHA1   | 4.40546   | 3.66812   | 3.92272   | 6.81196   | 4.08886   | 7.8473    | 3.02014   | 2.66158   | 2.87641   | 4.59551   | 4.83233   | 3.00679   | 6.66144  | 5.64096   | 3.58135  |
| PDHA2   | 0         | 0         | 0         | 0         | 0         | 0         | 0         | 0         | 0         | 0         | 0         | 0         | 0        | 0         | 0        |
| PDHB    | 8.91227   | 6.8635    | 7.61068   | 14.3838   | 6.98886   | 14.5042   | 7.04093   | 6.36193   | 14.3554   | 13.2064   | 24.1946   | 7.3232    | 13.3459  | 9.7592    | 8.31942  |
| PDHX    | 3.4086    | 2.58076   | 2.81005   | 3.6996    | 1.61218   | 4.84182   | 2.20712   | 2.99771   | 3.61282   | 3.11078   | 3.72284   | 2.19815   | 3.20822  | 2.76076   | 3.19298  |
| PDIA2   | 0.0270205 | 0.0390567 | 0.0335299 | 0         | 0.125916  | 0.0230076 | 0.0617022 | 0.0120068 | 0         | 0.0169567 | 0.0152514 | 0.0193339 | 0        | 0.0564884 | 0.116415 |
| PDIA3   | 28.8484   | 23.5529   | 25.9026   | 57.0516   | 22.3072   | 63.1056   | 22.951    | 25.6284   | 32.4366   | 40.1196   | 59.1944   | 26.1395   | 65.8699  | 33.8627   | 35.0786  |
| PDIA3P1 | 0.750966  | 0.766032  | 0.484892  | 0.447557  | 0.769588  | 0.638265  | 0.294498  | 0.69126   | 0.448307  | 0.357286  | 0.290804  | 0.277587  | 0.524033 | 0.380386  | 0.597214 |
| PDIA4   | 9.18823   | 7.55088   | 7.96435   | 27.768    | 13.4079   | 32.2158   | 9.90899   | 7.25998   | 9.09922   | 17.0424   | 23.4706   | 8.62753   | 30.9612  | 13.3535   | 17.091   |
| PDIA5   | 5.07107   | 2.43135   | 2.93044   | 5.28997   | 5.1356    | 9.10155   | 2.82405   | 2.10979   | 1.89216   | 4.41474   | 9.40076   | 1.63638   | 3.81713  | 4.19641   | 7.40767  |
| PDIA6   | 12.7417   | 8.79418   | 8.71781   | 30.7989   | 12.7353   | 29.4119   | 9.44967   | 9.40042   | 13.5293   | 19.2913   | 23.0117   | 9.75139   | 27.7965  | 16.2566   | 13.6113  |
| PDIK1L  | 1.78604   | 1.46898   | 1.67315   | 1.25988   | 0.718983  | 1.5722    | 1.36716   | 2.02546   | 1.80143   | 1.18713   | 1.61865   | 0.946769  | 1.54836  | 0.812505  | 0.751431 |

|                  |          |          |          |          |          |         |          |          |           |          |          |          |          |            |          |
|------------------|----------|----------|----------|----------|----------|---------|----------|----------|-----------|----------|----------|----------|----------|------------|----------|
| PDILT            | 0        | 0        | 0        | 0        | 0        | 0       | 0        | 0        | 0         | 0        | 0        | 0        | 0        | 0.00568668 | 0        |
| PDK1             | 4.19555  | 4.99052  | 6.19234  | 3.44335  | 1.1047   | 4.85799 | 5.43449  | 5.17634  | 5.08067   | 4.86692  | 5.76332  | 3.4256   | 3.38881  | 3.87474    | 1.68321  |
| PDK2             | 2.85876  | 3.21829  | 3.14955  | 2.57339  | 4.50423  | 5.87343 | 3.80157  | 2.54063  | 3.67278   | 2.57757  | 3.91268  | 2.16756  | 2.07337  | 1.55831    | 2.06747  |
| PDK3             | 7.70787  | 4.88436  | 5.76293  | 2.34938  | 3.04046  | 6.15811 | 8.12669  | 6.3131   | 4.77843   | 3.09353  | 4.51667  | 3.43266  | 2.77129  | 2.50365    | 3.86104  |
| PDK4             | 10.3268  | 0.678082 | 0.972802 | 0.895971 | 0.971599 | 21.0481 | 1.8711   | 4.78614  | 0.0457064 | 0.651593 | 1.37689  | 0.107413 | 0.92012  | 0.349791   | 2.41637  |
| PDLIM1           | 25.3402  | 28.0249  | 34.1591  | 67.9109  | 23.6627  | 69.6819 | 33.6989  | 20.8149  | 36.4094   | 59.6565  | 66.5211  | 50.0348  | 89.1276  | 56.3899    | 39.9257  |
| PDLIM2           | 3.31348  | 4.31754  | 4.95628  | 3.71581  | 9.93817  | 5.56541 | 6.65558  | 2.93423  | 12.4335   | 4.49583  | 7.37846  | 3.3034   | 5.74339  | 2.04139    | 2.73377  |
| PDLIM3           | 2.90811  | 0.487842 | 0.705363 | 0.957121 | 1.09976  | 4.18104 | 3.65068  | 0.527722 | 0.129802  | 3.21044  | 9.61666  | 0.593744 | 4.11608  | 4.05043    | 4.58092  |
| PDLIM4           | 7.48244  | 5.14044  | 4.38804  | 4.29189  | 4.91854  | 7.22987 | 7.84085  | 3.60269  | 2.7633    | 8.63175  | 10.177   | 6.14756  | 13.3571  | 6.55119    | 4.63426  |
| PDLIM5           | 6.94553  | 6.8897   | 8.30675  | 10.6361  | 4.45646  | 10.6815 | 7.43494  | 5.75804  | 25.1734   | 23.0158  | 20.5584  | 15.9086  | 34.7001  | 18.5533    | 14.0478  |
| PDLIM7           | 6.70813  | 4.41227  | 4.30502  | 13.6477  | 14.6196  | 23.2025 | 9.17932  | 3.70344  | 10.9054   | 29.3659  | 35.0863  | 18.6758  | 29.0179  | 27.5222    | 27.8358  |
| PDP1             | 2.8383   | 1.84843  | 2.09432  | 7.66048  | 1.29198  | 5.29385 | 2.49283  | 2.31456  | 3.39974   | 5.063    | 5.79197  | 2.09783  | 7.80114  | 3.96395    | 2.93393  |
| PDP2             | 0.712046 | 0.799662 | 0.656522 | 0.974478 | 0.692339 | 1.16185 | 0.727035 | 0.652317 | 0.882471  | 0.606292 | 0.856925 | 0.561291 | 0.96334  | 0.914104   | 0.396422 |
| PDPK1            | 5.47803  | 6.19109  | 6.38816  | 7.07536  | 7.7483   | 9.3395  | 6.71584  | 5.00605  | 7.12117   | 5.84371  | 5.34012  | 5.37614  | 8.6523   | 5.65077    | 4.55429  |
| PDPN             | 1.9493   | 1.08139  | 1.12432  | 19.4238  | 2.99174  | 10.8911 | 1.41874  | 2.43636  | 0.813411  | 8.14873  | 17.3236  | 2.18385  | 19.7069  | 7.99606    | 13.3726  |
| PDPR             | 4.68288  | 3.39829  | 3.39546  | 2.82385  | 5.41399  | 6.19034 | 4.1448   | 4.11674  | 1.26314   | 1.97872  | 3.17723  | 1.97405  | 4.90079  | 4.12361    | 4.79437  |
| PDRG1            | 2.73064  | 1.62428  | 1.57571  | 4.70738  | 3.71797  | 5.46831 | 1.61662  | 1.60287  | 2.13496   | 3.6388   | 5.82261  | 1.59202  | 3.90423  | 3.06574    | 2.17864  |
| PDS5A            | 8.13086  | 9.70874  | 9.32582  | 13.2974  | 3.86285  | 11.4411 | 5.79702  | 7.47519  | 10.4592   | 10.098   | 9.92176  | 8.64174  | 14.2242  | 10.2366    | 7.53657  |
| PDS5B            | 3.65758  | 2.71257  | 3.15603  | 2.5669   | 0.786298 | 3.00925 | 1.90656  | 3.44531  | 1.17659   | 3.01781  | 4.00351  | 1.40683  | 2.74221  | 2.61173    | 3.41761  |
| PDSS1            | 1.2877   | 0.562081 | 0.689972 | 2.13871  | 0.406205 | 1.52161 | 0.640901 | 0.653303 | 0.551623  | 1.13544  | 1.93049  | 0.742593 | 1.98321  | 1.63432    | 0.591302 |
| PDSS2            | 1.75267  | 1.40011  | 1.53078  | 2.26947  | 1.44728  | 2.4688  | 1.4804   | 1.36075  | 1.22201   | 1.39837  | 2.08152  | 1.19348  | 2.19016  | 1.60389    | 1.31935  |
| PDX1             | 0        | 0        | 0        | 0        | 0        | 0       | 0        | 0        | 0         | 0        | 0        | 0        | 0        | 0          | 0        |
| PDXDC1           | 6.0957   | 7.28446  | 7.9539   | 7.17592  | 5.31671  | 12.65   | 6.04349  | 5.091    | 5.3536    | 6.13317  | 4.53931  | 5.21421  | 6.67905  | 7.82469    | 9.97297  |
| PDXDC2P-NPIPB14P | 5.873    | 8.26285  | 10.1603  | 2.92827  | 4.87014  | 4.47951 | 7.02779  | 5.46448  | 1.35505   | 2.0134   | 1.13388  | 3.91742  | 0.896071 | 3.95483    | 5.74502  |
| PDXK             | 7.03483  | 5.79788  | 6.53772  | 13.3298  | 10.1624  | 17.5993 | 6.49255  | 5.51008  | 5.75992   | 9.22823  | 8.56247  | 8.07412  | 15.4353  | 8.06425    | 8.61852  |
| PDXP             | 1.01575  | 0.789724 | 0.601581 | 1.77236  | 1.03993  | 2.94853 | 0.909354 | 0.594974 | 0.688826  | 1.31834  | 3.14029  | 0.801132 | 1.89161  | 1.41769    | 1.01118  |

|            |           |            |           |           |           |           |          |            |           |            |           |           |           |            |           |
|------------|-----------|------------|-----------|-----------|-----------|-----------|----------|------------|-----------|------------|-----------|-----------|-----------|------------|-----------|
| PDYN       | 0         | 0          | 0.0190756 | 0         | 0         | 0         | 0        | 0.0136617  | 0.0374436 | 0.00964693 | 0         | 0         | 0.0198363 | 0.00803425 | 0         |
| PDYN-AS1   | 0         | 0.00606674 | 0         | 0.0259517 | 0         | 0.0536072 | 0        | 0          | 0         | 0.110625   | 0         | 0         | 0         | 0.039485   | 0.0361658 |
| PDZD11     | 4.34629   | 3.84815    | 3.64165   | 9.01537   | 2.85631   | 8.66685   | 4.53831  | 3.54899    | 6.89937   | 10.7702    | 18.3676   | 7.13679   | 10.0784   | 6.43609    | 3.94782   |
| PDZD2      | 5.70816   | 9.54357    | 8.10149   | 3.69409   | 6.52644   | 4.63146   | 9.49954  | 5.40153    | 12.6974   | 1.21846    | 1.60035   | 2.16737   | 1.00651   | 0.932098   | 1.63839   |
| PDZD3      | 0.0881453 | 0.0896584  | 0.0567156 | 0.0302788 | 0.0304267 | 0.0083394 | 0.055912 | 0.00870403 | 0.0119279 | 0.0491695  | 0.0110561 | 0.0420469 | 0         | 0.0153562  | 0.042196  |
| PDZD4      | 0.629517  | 0.838098   | 0.945629  | 0.460944  | 1.80132   | 0.714701  | 1.24838  | 0.456404   | 0.121055  | 0.200993   | 0.218181  | 0.181755  | 0.338468  | 0.383849   | 0.705807  |
| PDZD7      | 0.0426463 | 0.319537   | 0.44032   | 0.0220153 | 0.243179  | 0.105356  | 0.666804 | 0.162204   | 0.206001  | 0.125667   | 0.236654  | 0.0676015 | 0.0343542 | 0.0332335  | 0.0760425 |
| PDZD8      | 6.91368   | 5.20728    | 5.22645   | 7.15538   | 4.24922   | 6.05649   | 4.4658   | 5.41757    | 12.5654   | 9.80742    | 9.12212   | 8.12643   | 19.4232   | 8.50521    | 5.92878   |
| PDZD9      | 0.432742  | 0.283563   | 0.300716  | 0.124867  | 0         | 0.117912  | 0.335982 | 0.430736   | 0.126488  | 0.0217254  | 0.156324  | 0.0743133 | 0.0223362 | 0.153796   | 0.149153  |
| PDZK1      | 0.849857  | 0.671175   | 0.626219  | 0.131328  | 0.0722151 | 0.355497  | 0.638073 | 1.01118    | 0.122529  | 0.162186   | 0.117552  | 0.195238  | 0.0779049 | 0.295902   | 0.368535  |
| PDZK1IP1   | 23.4278   | 15.9278    | 14.4555   | 128.132   | 59.5533   | 34.8933   | 15.9608  | 19.0262    | 74.4366   | 36.9422    | 53.3325   | 49.308    | 71.285    | 20.6058    | 6.20858   |
| PDZK1P1    | 0.242081  | 0.169067   | 0.349687  | 0.0970956 | 0.146732  | 0.0578868 | 0.189031 | 0.255641   | 9.40E-06  | 0.0692933  | 0.0346736 | 0.0501016 | 1.99E-08  | 0.0503751  | 0.0741289 |
| PDZRN3     | 2.20273   | 1.08981    | 1.35272   | 1.39417   | 1.52532   | 2.90842   | 1.5512   | 1.1895     | 0.210301  | 1.45002    | 2.6961    | 0.150776  | 1.46449   | 1.05143    | 3.4919    |
| PDZRN3-AS1 | 0.17642   | 0.0618194  | 0.0663394 | 0.0578472 | 0.13702   | 0.266297  | 0.146495 | 0.0783936  | 0         | 0.0503238  | 0.0814728 | 0.040165  | 0.077608  | 0.0209556  | 0.057582  |
| PDZRN4     | 0.418316  | 0.0898809  | 0.0327355 | 0.023302  | 0.175619  | 0.178095  | 0.174267 | 0.216025   | 0.179     | 0.0851399  | 0.191443  | 0.0404481 | 0         | 0.0147723  | 0.584518  |
| PEA15      | 16.9102   | 18.3168    | 20.241    | 31.4835   | 17.7553   | 40.7959   | 24.2407  | 13.5793    | 28.871    | 54.6145    | 58.259    | 21.9848   | 82.0098   | 29.9014    | 29.6339   |
| PEAK1      | 7.67714   | 5.34746    | 6.04162   | 3.74182   | 4.2073    | 7.14566   | 6.98334  | 5.1084     | 3.92362   | 4.75389    | 4.64058   | 3.78218   | 6.06394   | 5.87122    | 11.9057   |
| PEAK3      | 0.832252  | 1.0706     | 1.37583   | 0.540496  | 1.24678   | 0.491498  | 2.24572  | 1.20439    | 0.118     | 0.37878    | 0.517105  | 0.678035  | 0.236552  | 0.411838   | 0.751879  |
| PEAR1      | 2.40146   | 1.06922    | 1.29501   | 0.93492   | 3.55762   | 3.14297   | 2.32047  | 1.1422     | 0.35205   | 1.33401    | 1.80228   | 0.709601  | 1.69288   | 1.93148    | 4.13219   |
| PEBP1      | 46.4795   | 34.7502    | 37.2738   | 45.8197   | 28.1369   | 76.7769   | 45.0233  | 30.7716    | 36.9526   | 29.9833    | 52.376    | 26.2974   | 36.6207   | 28.365     | 22.9976   |
| PEBP4      | 0.273074  | 0.07675    | 0.0376511 | 0         | 0.106045  | 0.639428  | 0.103929 | 0.121343   | 0         | 0          | 0.154133  | 0         | 0         | 0.0118934  | 0.196085  |
| PECAM1     | 13.8973   | 3.73108    | 4.33817   | 11.7186   | 6.72482   | 18.9448   | 6.10606  | 5.30703    | 1.42416   | 12.9938    | 23.2097   | 3.41379   | 15.2101   | 13.6194    | 25.7576   |
| PECR       | 0.839769  | 0.60692    | 0.592552  | 0.827227  | 0.479578  | 0.872785  | 1.09982  | 0.581688   | 0.180484  | 0.759498   | 1.22682   | 0.335784  | 0.422297  | 0.55508    | 0.461123  |
| PEF1       | 7.74569   | 9.31999    | 9.48211   | 14.2537   | 12.1289   | 17.6169   | 10.0118  | 7.05995    | 11.5819   | 10.7567    | 19.7507   | 8.14159   | 10.5944   | 9.02941    | 7.27091   |
| PEG10      | 0.722784  | 0.275907   | 0.346631  | 0.0539746 | 0.433906  | 0.404347  | 0.446512 | 0.350655   | 0.0765452 | 0.48207    | 1.1155    | 0.0499682 | 0.128411  | 0.113145   | 1.20349   |
| PEG13      | 0.570167  | 0.668013   | 0.729581  | 0.317036  | 1.2616    | 0.310853  | 0.599481 | 0.484845   | 0.0899223 | 0.447905   | 0.120395  | 0.692668  | 0.0608704 | 0.47379    | 0.488943  |

|          |          |           |          |           |          |          |          |           |           |           |           |           |          |           |           |
|----------|----------|-----------|----------|-----------|----------|----------|----------|-----------|-----------|-----------|-----------|-----------|----------|-----------|-----------|
| PEG3     | 0.953814 | 0.318171  | 0.439181 | 0.22978   | 1.48694  | 0.955661 | 0.484915 | 0.585083  | 0.109247  | 0.247687  | 0.115222  | 0.151871  | 0.203937 | 0.255811  | 0.515293  |
| PEG3-AS1 | 1.49E-08 | 2.64E-19  | 4.15E-32 | 9.22E-20  | 4.73E-32 | 5.45E-13 | 6.89E-15 | 7.86E-12  | 4.50E-24  | 1.15E-13  | 5.62E-27  | 6.49E-34  | 0.143963 | 6.74E-20  | 1.70E-26  |
| PEL1     | 7.47065  | 9.42494   | 11.156   | 7.79369   | 4.28489  | 6.99414  | 7.18295  | 7.21805   | 25.9335   | 11.3658   | 15.2925   | 13.6757   | 13.2511  | 7.64201   | 6.56433   |
| PEL2     | 2.18591  | 1.15305   | 1.60331  | 0.527572  | 0.561705 | 2.25221  | 1.65614  | 1.26742   | 0.296899  | 1.0505    | 1.96309   | 0.191876  | 0.768085 | 0.758097  | 1.87305   |
| PEL3     | 1.59701  | 1.95048   | 2.44583  | 1.90573   | 2.62317  | 3.4305   | 2.64726  | 1.12467   | 0.679291  | 1.34525   | 1.10993   | 0.722994  | 2.14342  | 1.39247   | 1.27409   |
| PELO     | 2.5658   | 2.28023   | 2.33868  | 3.02315   | 3.67065  | 4.9303   | 2.84979  | 1.64452   | 3.51235   | 4.52871   | 6.86509   | 2.50575   | 3.90605  | 3.4288    | 3.64316   |
| PELP1    | 4.50418  | 4.95789   | 5.18912  | 7.60696   | 10.3272  | 13.3783  | 7.02103  | 4.0686    | 3.89469   | 2.57524   | 2.82402   | 4.22799   | 6.85772  | 4.46013   | 4.91997   |
| PEMT     | 4.13792  | 3.48459   | 3.89273  | 5.07559   | 3.98171  | 8.57462  | 6.04156  | 3.51472   | 3.21102   | 2.96444   | 6.59342   | 2.06994   | 3.40218  | 3.70332   | 2.07727   |
| PENK     | 0.188993 | 0.0745034 | 0.028427 | 0.0708228 | 0.16013  | 0.378284 | 0.305456 | 0.0152692 | 0.0209247 | 0.0215641 | 0.0581862 | 0.0368808 | 0        | 0.0448982 | 0.0246743 |
| PEPD     | 7.38045  | 5.86376   | 5.7913   | 9.65847   | 9.51486  | 16.4508  | 9.22873  | 4.64563   | 12.0315   | 7.50014   | 16.7152   | 6.3107    | 6.99047  | 6.92036   | 8.5323    |
| PER1     | 24.5388  | 20.9658   | 27.5779  | 4.3455    | 3.79417  | 27.565   | 44.588   | 21.5809   | 22.8885   | 7.35888   | 5.55911   | 15.5151   | 8.05092  | 4.54643   | 8.42025   |
| PER2     | 6.80206  | 8.21799   | 11.535   | 1.59825   | 1.37176  | 5.42521  | 9.09965  | 6.68384   | 6.23533   | 4.35108   | 1.75901   | 10.4156   | 5.64121  | 3.61227   | 5.39265   |
| PER3     | 3.70738  | 10.1988   | 14.6843  | 1.1204    | 0.951364 | 6.69933  | 11.954   | 2.64744   | 9.59087   | 5.27174   | 4.72518   | 7.79484   | 6.08169  | 1.22357   | 8.29608   |
| PER4     | 0        | 0         | 0        | 0         | 0        | 0        | 0        | 0         | 0         | 0         | 0         | 0         | 0        | 0         | 0.085882  |
| PERM1    | 0.495827 | 2.10166   | 1.89571  | 1.85052   | 3.94462  | 1.95691  | 2.86885  | 1.29218   | 2.56233   | 1.37077   | 0.521908  | 2.83343   | 1.72057  | 1.52333   | 0.577354  |
| PERP     | 161.297  | 232.474   | 226.614  | 293.269   | 158.688  | 211.695  | 234.137  | 230.571   | 679.934   | 615.204   | 474.828   | 489.863   | 891.165  | 265.045   | 98.1484   |
| PES1     | 6.67448  | 6.18316   | 6.43523  | 13.2      | 13.0349  | 19.0884  | 6.74635  | 4.91445   | 8.06002   | 7.02145   | 6.80667   | 6.31581   | 15.733   | 9.86692   | 6.51762   |
| PET100   | 19.7444  | 15.6213   | 14.058   | 32.5778   | 26.3962  | 44.0515  | 16.5689  | 10.7872   | 34.5585   | 30.401    | 61.9343   | 20.9599   | 15.8715  | 16.6349   | 10.0716   |
| PET117   | 2.37212  | 2.00831   | 2.23305  | 2.01383   | 2.36116  | 3.09534  | 1.98567  | 1.23166   | 2.36199   | 1.72229   | 3.04136   | 1.2837    | 3.21565  | 1.28333   | 1.47518   |
| PEX1     | 3.53669  | 3.66811   | 4.0311   | 2.52156   | 1.55451  | 2.64562  | 3.06294  | 3.51096   | 2.87152   | 2.22932   | 2.76812   | 2.26067   | 1.78829  | 1.91689   | 1.89621   |
| PEX10    | 2.91388  | 3.15839   | 2.7951   | 3.95636   | 5.30413  | 6.86582  | 3.29444  | 1.82371   | 3.22218   | 3.56373   | 4.49335   | 2.27096   | 3.41576  | 3.08139   | 2.07408   |
| PEX11A   | 0.852462 | 0.691326  | 0.62841  | 0.965464  | 0.45887  | 1.02051  | 0.404744 | 0.570072  | 0.606474  | 0.677973  | 1.26722   | 0.416704  | 0.893074 | 0.807254  | 0.496969  |
| PEX11B   | 3.65822  | 3.65504   | 3.58382  | 5.4366    | 4.53104  | 6.18065  | 3.30849  | 3.61046   | 3.52907   | 4.86935   | 6.81397   | 3.18928   | 4.51554  | 2.99372   | 2.58535   |
| PEX11G   | 1.07689  | 1.17479   | 1.15983  | 1.36104   | 1.60966  | 3.40833  | 1.34556  | 0.686189  | 1.53425   | 0.535544  | 1.99555   | 0.857778  | 0.707916 | 0.318584  | 0.496065  |
| PEX12    | 0.90571  | 1.05148   | 1.14888  | 1.35115   | 0.696741 | 1.9684   | 0.81744  | 1.0119    | 0.735369  | 0.876929  | 1.2464    | 0.536964  | 0.884887 | 0.680742  | 0.780429  |
| PEX13    | 2.42515  | 2.72726   | 2.36804  | 4.08335   | 2.04955  | 3.19056  | 2.01767  | 2.62307   | 5.52467   | 4.4903    | 6.35593   | 2.77897   | 4.20509  | 2.96836   | 2.48615   |

|           |           |           |          |           |           |            |           |           |           |            |           |            |           |           |           |
|-----------|-----------|-----------|----------|-----------|-----------|------------|-----------|-----------|-----------|------------|-----------|------------|-----------|-----------|-----------|
| PEX14     | 3.16024   | 3.35794   | 3.4295   | 5.18846   | 6.3275    | 7.14164    | 3.64942   | 2.76584   | 4.90249   | 3.69496    | 3.9202    | 3.65409    | 5.45793   | 3.49804   | 2.27788   |
| PEX16     | 3.23857   | 2.55975   | 3.13072  | 3.23744   | 6.23646   | 6.09356    | 2.9637    | 1.99424   | 3.02833   | 3.16653    | 4.46381   | 2.41276    | 2.95035   | 2.89076   | 2.12517   |
| PEX19     | 6.27622   | 5.22124   | 4.86859  | 6.71484   | 4.81087   | 9.41521    | 6.55377   | 4.89947   | 8.36583   | 5.59724    | 8.53045   | 4.36437    | 6.72718   | 3.7912    | 3.82276   |
| PEX2      | 3.18019   | 2.34258   | 2.53391  | 2.71007   | 1.1479    | 2.42148    | 1.95517   | 2.69946   | 2.27174   | 2.65458    | 4.25741   | 1.58629    | 2.15708   | 1.94446   | 1.66877   |
| PEX26     | 3.38081   | 3.82187   | 4.21723  | 6.15478   | 6.97128   | 7.54097    | 5.20634   | 3.30163   | 2.23221   | 3.74234    | 3.81086   | 2.85889    | 6.63652   | 5.24868   | 4.07493   |
| PEX3      | 3.27275   | 3.64851   | 3.46029  | 3.03712   | 1.6989    | 3.4123     | 2.57377   | 3.17566   | 7.58531   | 2.42058    | 2.9217    | 3.30353    | 2.32164   | 2.0552    | 1.54671   |
| PEX5      | 3.14934   | 3.53648   | 3.7086   | 5.74569   | 4.80437   | 8.09729    | 3.47869   | 2.00571   | 2.96724   | 2.70384    | 2.33926   | 2.5287     | 4.6728    | 2.74777   | 2.54134   |
| PEX5L     | 0.0851177 | 0.0280602 | 0.053738 | 0.0138499 | 0         | 0.00953639 | 0.0230174 | 0.0637015 | 0.01364   | 0.00281135 | 0.0227575 | 0.00801368 | 0         | 0.0351207 | 0.0707704 |
| PEX5L-AS2 | 0         | 0         | 0        | 0         | 0         | 0          | 0         | 0         | 0         | 0          | 0         | 0          | 0         | 0         | 0         |
| PEX6      | 0.920724  | 2.2276    | 1.5125   | 5.23211   | 9.9398    | 3.70714    | 2.37283   | 0.853331  | 0.977166  | 1.66737    | 0.779537  | 1.02585    | 0.844395  | 2.162     | 1.9173    |
| PEX7      | 2.43611   | 2.13684   | 2.09283  | 2.86453   | 2.7168    | 2.96521    | 2.21091   | 1.9152    | 5.3062    | 2.01878    | 3.6315    | 1.87719    | 1.86395   | 1.61601   | 0.964347  |
| PF4       | 0         | 0         | 0        | 0.0224784 | 3.51E-05  | 0.018573   | 0         | 0.0387703 | 0         | 0.109508   | 0.879608  | 0          | 0.0261953 | 0.0570008 | 0         |
| PF4V1     | 0         | 0         | 0        | 0.0320559 | 0.0482687 | 0          | 0.0355161 | 0         | 0         | 0.0390415  | 0.0799856 | 0          | 0.0429219 | 0.0162575 | 0         |
| PFAS      | 1.71908   | 2.01478   | 2.25409  | 3.04708   | 4.21243   | 5.04269    | 2.70864   | 1.55833   | 0.560049  | 1.04105    | 1.12071   | 1.3838     | 1.97981   | 2.32028   | 2.48115   |
| PFDN1     | 10.1382   | 6.45964   | 7.51941  | 13.8342   | 8.55286   | 17.8307    | 7.82342   | 6.77302   | 9.34554   | 12.0663    | 24.3497   | 6.24107    | 14.9431   | 9.35488   | 8.71073   |
| PFDN2     | 8.7237    | 6.99957   | 6.41168  | 18.2773   | 7.72739   | 21.7932    | 5.1037    | 4.38904   | 16.1563   | 17.1929    | 27.4685   | 11.4523    | 23.421    | 14.168    | 7.71373   |
| PFDN4     | 1.78817   | 1.24265   | 1.13792  | 3.29571   | 0.160249  | 0.980908   | 0.628208  | 1.61974   | 1.7171    | 3.56073    | 4.11488   | 1.10725    | 2.04119   | 1.92307   | 2.0248    |
| PFDN5     | 79.0304   | 54.5353   | 53.2278  | 77.7621   | 51.9092   | 87.9758    | 46.8475   | 44.8778   | 74.8745   | 100.205    | 232.578   | 47.2441    | 50.9236   | 50.6894   | 36.7195   |
| PFDN6     | 0.890361  | 0.906659  | 0.799255 | 2.7266    | 1.04954   | 2.25288    | 0.894017  | 0.768831  | 1.50734   | 1.70398    | 2.82998   | 1.18379    | 1.65003   | 1.53794   | 0.652938  |
| PFKFB1    | 0.24555   | 0.141971  | 0.192979 | 0.126523  | 0.190712  | 0.0731788  | 0.420541  | 0.163668  | 0.0149526 | 0.123276   | 0.055439  | 0.0702789  | 0.0554496 | 0.102668  | 0.017632  |
| PFKFB2    | 3.67028   | 3.12702   | 2.36204  | 5.14919   | 2.85061   | 7.81092    | 4.82352   | 2.27205   | 15.7836   | 13.5209    | 6.64642   | 10.0011    | 14.4275   | 5.7416    | 2.44647   |
| PFKFB3    | 5.68228   | 4.78553   | 6.10573  | 19.1171   | 7.3237    | 23.0687    | 8.32081   | 6.72068   | 23.8687   | 16.4589    | 25.453    | 16.4932    | 20.2117   | 21.1797   | 11.9585   |
| PFKFB4    | 0.793673  | 0.917214  | 0.694645 | 1.58247   | 1.36686   | 3.49164    | 0.584427  | 0.95069   | 1.82114   | 5.20447    | 4.99269   | 2.68309    | 3.06503   | 5.01976   | 3.52682   |
| PFKL      | 12.5752   | 14.0034   | 14.8641  | 27.4504   | 31.0385   | 38.9885    | 16.7746   | 9.64481   | 20.5773   | 17.2139    | 13.9891   | 14.5211    | 22.893    | 17.7668   | 15.4884   |
| PFKM      | 2.98822   | 2.17875   | 1.96698  | 3.47582   | 4.77788   | 4.97372    | 3.33597   | 1.5934    | 1.35232   | 2.41477    | 2.7198    | 1.84781    | 4.14184   | 3.29023   | 3.58109   |
| PFKP      | 8.28022   | 5.78711   | 6.65799  | 10.7984   | 6.94323   | 19.3991    | 8.40828   | 5.62217   | 17.0675   | 16.3858    | 12.794    | 14.126     | 27.701    | 14.9327   | 9.09397   |

|         |           |            |            |            |          |           |           |           |           |           |            |            |           |           |            |
|---------|-----------|------------|------------|------------|----------|-----------|-----------|-----------|-----------|-----------|------------|------------|-----------|-----------|------------|
| PFN1    | 72.6844   | 63.179     | 58.3063    | 240.208    | 95.8644  | 227.781   | 91.6999   | 57.0017   | 135.456   | 194.135   | 350.466    | 153.196    | 274.077   | 166.192   | 96.2028    |
| PFN1P2  | 5.28463   | 4.81147    | 4.36177    | 2.11579    | 2.77403  | 2.95849   | 3.56481   | 4.68575   | 0.636211  | 1.49428   | 1.82399    | 2.85118    | 0.446778  | 4.1144    | 5.79237    |
| PFN2    | 5.47259   | 2.48851    | 2.73638    | 2.61598    | 2.42392  | 10.6672   | 2.53449   | 4.51198   | 3.42617   | 11.0339   | 21.0273    | 5.81078    | 7.68568   | 9.3158    | 7.02287    |
| PFN3    | 0.0436661 | 0.168312   | 0          | 0.0449992  | 0.203486 | 0.0743623 | 0.0997132 | 0         | 0         | 0         | 0          | 0          | 0.0563463 | 0.0228218 | 0          |
| PFN4    | 0.497214  | 0.312161   | 0.386401   | 0.279487   | 0.351066 | 0.205271  | 0.49889   | 0.254417  | 0.0734001 | 0.359304  | 0.561293   | 0.23718    | 0.213867  | 0.299239  | 0.476041   |
| PGA3    | 1.89E-26  | 0.00356683 | 0.00806797 | 0.00803811 | 0        | 0.231202  | 0.0875178 | 0.111209  | 0         | 0.0198458 | 0.0222588  | 0.00565699 | 0.0406116 | 0.0556276 | 0.0143212  |
| PGA4    | 3.23E-11  | 0.112465   | 0.230917   | 0.33053    | 0        | 0.257658  | 0.0975323 | 4.72E-05  | 0         | 0.0221168 | 0.0248059  | 0.00630432 | 0.0452588 | 0.211234  | 0.01596    |
| PGA5    | 0.050311  | 0.0291519  | 0.0240763  | 0.213712   | 0        | 0.0379246 | 0.13987   | 0.0223966 | 0         | 1.46E-17  | 0.0474426  | 0          | 0.0869767 | 0.126858  | 0.0177905  |
| PGAM1   | 38.945    | 31.6669    | 30.7725    | 125.968    | 46.4992  | 110.933   | 39.9935   | 29.0607   | 114.637   | 165.163   | 214.374    | 89.0621    | 218.491   | 105.597   | 53.6667    |
| PGAM1P5 | 0.356379  | 0.218539   | 0.250152   | 0.0222581  | 0.117426 | 0.0275866 | 0.493215  | 0.230342  | 0         | 0.040663  | 0.0243823  | 0.131363   | 0.0069677 | 0.355586  | 0.0930556  |
| PGAM2   | 3.21356   | 5.21753    | 4.53506    | 2.53245    | 8.30564  | 4.06997   | 4.50164   | 2.56795   | 3.55198   | 3.42326   | 0.579215   | 5.39101    | 2.07337   | 4.31884   | 2.90867    |
| PGAM4   | 2.03245   | 0.393009   | 0.313513   | 0.261318   | 0.426268 | 0.161109  | 0.602584  | 2.31221   | 4.78266   | 0.219306  | 0.19469    | 0.203722   | 0.0815169 | 0.163677  | 0.134007   |
| PGAM5   | 4.59447   | 4.93453    | 5.33064    | 11.976     | 8.72766  | 10.8704   | 5.56253   | 3.77978   | 7.6311    | 6.61457   | 11.168     | 5.91337    | 15.0921   | 9.37088   | 3.14591    |
| PGAP1   | 3.00913   | 3.5887     | 3.81444    | 2.21501    | 0.677377 | 1.94631   | 2.55086   | 4.23548   | 0.913679  | 1.69903   | 1.79878    | 1.68286    | 0.792062  | 1.44416   | 1.45731    |
| PGAP2   | 4.34762   | 7.27333    | 6.7865     | 8.28502    | 7.58994  | 6.10122   | 6.3275    | 4.5436    | 8.8597    | 3.34064   | 5.87715    | 6.31104    | 4.33601   | 3.83876   | 2.14103    |
| PGAP3   | 5.67433   | 4.86503    | 4.93531    | 3.73644    | 9.98586  | 9.69962   | 5.6665    | 4.31919   | 4.65583   | 2.87242   | 3.82208    | 3.07271    | 2.47204   | 2.45494   | 2.86817    |
| PGBD1   | 0.627483  | 0.554866   | 0.59849    | 0.334731   | 0.665088 | 0.477722  | 0.446721  | 0.426442  | 0.161831  | 0.574453  | 1.13336    | 0.311646   | 0.681098  | 0.679049  | 1.08137    |
| PGBD2   | 0.803044  | 1.17311    | 1.14492    | 1.69914    | 1.473    | 1.03295   | 0.702298  | 0.797194  | 1.45662   | 1.39391   | 1.16692    | 1.59543    | 0.876394  | 0.892991  | 0.368066   |
| PGBD3   | 2.14E-06  | 3.89E-05   | 0.00059157 | 2.12E-05   | 9.90E-14 | 6.92E-09  | 1.08E-07  | 0.104787  | 2.85E-06  | 1.27E-05  | 0.00059721 | 2.98E-05   | 7.75E-06  | 3.07E-07  | 0.00013614 |
|         |           |            | 1          |            |          |           |           |           |           |           | 7          |            |           |           | 5          |
| PGBD4   | 0.439299  | 0.654224   | 0.751616   | 0.535021   | 0.604839 | 0.450569  | 0.501577  | 0.470269  | 0.437741  | 1.21551   | 0.574809   | 0.442919   | 0.669933  | 0.448757  | 0.630888   |
| PGBD5   | 0.910818  | 1.0007     | 0.13129    | 1.92702    | 3.45129  | 1.72148   | 0.173324  | 0.3802    | 10.2944   | 1.95725   | 1.92398    | 2.55749    | 1.50475   | 1.30548   | 0.416198   |
| PGC     | 0.0255301 | 0.0061504  | 0.0528008  | 0          | 0        | 0         | 0.0145747 | 0         | 0         | 0         | 0          | 0          | 0.0164719 | 0         | 0          |
| PGCP1   | 0         | 0          | 0          | 0          | 0        | 0         | 0         | 0         | 0         | 0         | 0          | 0          | 0         | 0         | 0          |
| PGD     | 9.59363   | 8.53943    | 8.58359    | 25.4146    | 11.4839  | 33.263    | 9.59366   | 8.08969   | 13.5336   | 21.605    | 32.295     | 20.0665    | 16.0879   | 16.4058   | 13.8692    |
| PGF     | 2.03456   | 1.7505     | 1.78331    | 12.5801    | 8.22072  | 20.1081   | 1.7699    | 1.70051   | 6.0619    | 25.4597   | 24.6356    | 11.4903    | 36.0767   | 17.1468   | 8.36564    |

|            |            |            |           |           |           |           |           |            |           |             |           |            |            |           |           |
|------------|------------|------------|-----------|-----------|-----------|-----------|-----------|------------|-----------|-------------|-----------|------------|------------|-----------|-----------|
| PGGHG      | 1.50841    | 1.09187    | 1.40604   | 1.97044   | 7.27123   | 4.22099   | 1.73033   | 1.21467    | 0.293241  | 1.11992     | 1.40701   | 1.10464    | 1.06917    | 3.25707   | 6.92593   |
| PGGT1B     | 3.31827    | 2.65784    | 3.06104   | 4.84513   | 1.88512   | 4.74043   | 2.44182   | 3.69568    | 3.60718   | 4.9956      | 6.42842   | 3.50378    | 5.89167    | 3.60161   | 3.41261   |
| PGK1       | 37.1932    | 27.0736    | 29.5599   | 99.1092   | 38.412    | 109.778   | 34.3305   | 31.6111    | 69.5393   | 107.76      | 157.487   | 62.2945    | 146.575    | 81.0248   | 39.6148   |
| PGK2       | 0.0273882  | 0.00659803 | 0         | 0         | 0         | 0         | 0         | 0          | 0         | 0           | 0         | 0          | 0          | 0         | 0         |
| PGLS       | 12.773     | 12.1868    | 11.9817   | 32.586    | 33.852    | 37.2045   | 15.3402   | 10.3996    | 28.4022   | 25.5045     | 50.71     | 18.968     | 31.6039    | 17.2723   | 10.7987   |
| PGLYRP1    | 0.170169   | 0.468516   | 0.261442  | 0.200417  | 0.679711  | 0.186296  | 0.138781  | 0.28086    | 0.0592135 | 0.21358     | 0.768401  | 0.15655    | 0.0627386  | 0.241403  | 0.244385  |
| PGLYRP2    | 0.00838213 | 0.0282705  | 0.0277371 | 0.0863802 | 0         | 0.0856472 | 0         | 0.0819427  | 0.255212  | 0.0210409   | 0.0567743 | 0.0719716  | 0.0108162  | 0.0175235 | 0         |
| PGLYRP3    | 7.77354    | 10.9701    | 11.6212   | 11.325    | 12.5041   | 9.7438    | 14.9128   | 7.36436    | 36.2352   | 11.4652     | 17.6621   | 14.3431    | 13.9134    | 5.49611   | 1.81341   |
| PGLYRP4    | 1.29418    | 2.48899    | 2.04231   | 12.6645   | 8.73389   | 5.78771   | 1.726     | 2.06836    | 12.8743   | 8.91336     | 16.2057   | 10.6532    | 7.63429    | 6.42293   | 0.905878  |
| PGM1       | 6.73653    | 4.4363     | 4.68786   | 8.64933   | 5.24282   | 10.6727   | 5.36674   | 3.80927    | 3.85001   | 4.69531     | 6.70873   | 2.84961    | 5.87831    | 4.82309   | 4.69847   |
| PGM2       | 8.51247    | 9.9626     | 8.7036    | 25.7352   | 9.8033    | 17.3629   | 7.09155   | 8.63865    | 33.4606   | 27.4143     | 34.6782   | 22.2157    | 29.1488    | 15.0541   | 6.82587   |
| PGM2L1     | 0.655172   | 0.4925     | 0.607225  | 0.5435    | 0.346274  | 1.26852   | 0.397307  | 0.548438   | 0.105949  | 0.982675    | 1.7278    | 0.414327   | 1.10151    | 1.74621   | 3.68555   |
| PGM3       | 2.30697    | 2.33318    | 2.21474   | 2.97987   | 0.755285  | 2.6424    | 1.62457   | 2.22923    | 1.88324   | 3.73428     | 4.42719   | 1.57927    | 4.23246    | 2.76563   | 3.44278   |
| PGM5       | 5.61949    | 1.4249     | 1.91132   | 1.26668   | 3.4744    | 4.9328    | 3.52171   | 1.45207    | 0.227984  | 1.00552     | 1.74372   | 0.388877   | 2.41389    | 1.6045    | 4.81288   |
| PGM5-AS1   | 0.303317   | 0.198549   | 0.174809  | 0.0625153 | 0.141347  | 0.129457  | 0.320728  | 0.146871   | 0         | 0.0380693   | 0.0342407 | 0.0217031  | 3.03E-14   | 0.158526  | 0.304921  |
| PGM5P2     | 2.15068    | 2.00055    | 1.70804   | 1.0017    | 0.761006  | 0.709641  | 1.9751    | 2.65122    | 0.276296  | 0.993195    | 0.547141  | 1.01155    | 0.344803   | 1.48213   | 1.49375   |
| PGM5P3-AS1 | 0.0537522  | 0.00707559 | 8.13E-25  | 0.0186325 | 0.0280853 | 0.0756242 | 9.32E-05  | 6.26E-05   | 0         | 0.0222555   | 0         | 0          | 0.0116737  | 0         | 0         |
| PGM5P4     | 0.268066   | 0.172211   | 0.271044  | 0.0306944 | 0.0925332 | 0.177532  | 0.272062  | 0.0529411  | 0         | 0.149534    | 0         | 0          | 0.0576517  | 0.015567  | 0.0427752 |
| PGM5P4-AS1 | 0.00045025 | 0.0930036  | 0.110571  | 4.31E-17  | 3.97E-12  | 0.0294013 | 0.0519435 | 0.0820283  | 0         | 0.000402539 | 0         | 0.0238094  | 0.0966035  | 1.49E-33  | 1.14E-16  |
| PGP        | 1.97779    | 1.56806    | 1.59343   | 1.95451   | 3.51926   | 2.31244   | 1.82002   | 1.21989    | 2.37277   | 1.6024      | 3.67392   | 1.34651    | 2.61401    | 1.83208   | 1.54736   |
| PGPEP1     | 1.08403    | 0.768      | 1.00557   | 0.594918  | 1.48958   | 2.2284    | 1.28165   | 0.820879   | 0.109368  | 0.591726    | 1.07167   | 0.146869   | 0.647679   | 0.564885  | 1.38638   |
| PGPEP1L    | 0.117477   | 0.0424518  | 0.0364446 | 0         | 0.0456208 | 0.0625191 | 0.0167665 | 0          | 0         | 0.0184308   | 0.0165772 | 0.0210146  | 0          | 0.0230246 | 0.0421781 |
| PGR        | 0.37354    | 0.102656   | 0.160073  | 0.0750044 | 0.0392303 | 0.24487   | 0.248914  | 0.192456   | 0.0216197 | 0.0111402   | 0.0180356 | 0.00762114 | 0.0421665  | 0.0120612 | 0.066284  |
| PGR-AS1    | 0.162295   | 0.063625   | 6.36E-15  | 0         | 0.0815128 | 4.67E-11  | 0.11217   | 0.00016573 | 0         | 0           | 0         | 0.0270801  | 0.00224974 | 0         | 0.0271761 |

|             |           |            |           |           |           |           |           |           |           |           |           |           |           |            |           |
|-------------|-----------|------------|-----------|-----------|-----------|-----------|-----------|-----------|-----------|-----------|-----------|-----------|-----------|------------|-----------|
| PGRMC1      | 12.6269   | 8.68112    | 9.2385    | 13.646    | 5.82605   | 20.0966   | 9.39089   | 9.0781    | 12.2936   | 14.6672   | 30.6995   | 7.62829   | 15.7797   | 10.274     | 13.2496   |
| PGRMC2      | 7.71232   | 10.2916    | 10.5831   | 6.31165   | 4.828     | 8.27756   | 7.39732   | 10.7071   | 17.9154   | 7.02031   | 8.1272    | 5.79363   | 7.38709   | 4.38823    | 5.05122   |
| PGS1        | 3.31866   | 3.00571    | 3.14799   | 7.17089   | 7.42264   | 6.77033   | 2.93353   | 2.43906   | 1.63567   | 3.82326   | 3.7134    | 2.47905   | 4.35774   | 5.24413    | 6.03789   |
| PHACTR1     | 0.990023  | 0.730266   | 0.857012  | 0.694188  | 0.848194  | 1.49479   | 0.955576  | 0.893455  | 0.285896  | 0.512404  | 0.553045  | 0.230043  | 0.569614  | 0.458752   | 1.1946    |
| PHACTR2     | 3.89191   | 2.28123    | 2.12096   | 3.77648   | 2.00413   | 5.65399   | 2.42725   | 2.70559   | 3.60683   | 4.99766   | 5.58804   | 3.12357   | 8.11845   | 4.21902    | 7.28226   |
| PHACTR2-AS1 | 0.212998  | 0.205251   | 0.182984  | 0.14352   | 0.127254  | 0.0279023 | 0.121597  | 0.174734  | 0         | 0.185078  | 0.055488  | 0.257917  | 0.0422847 | 0.560892   | 0.505898  |
| PHACTR3     | 0.0753399 | 0.1089     | 0.130319  | 0.0705818 | 0.53195   | 0.198285  | 0.140761  | 0.0913034 | 0.0333657 | 0.0257889 | 0.154635  | 0.0245035 | 0.026514  | 0.0608537  | 0.236068  |
| PHACTR4     | 5.64328   | 5.9507     | 6.08566   | 7.6761    | 5.50154   | 6.45915   | 5.71368   | 5.63048   | 12.507    | 6.99451   | 7.50196   | 7.79916   | 8.81686   | 5.78838    | 5.0555    |
| PHAX        | 3.83281   | 3.27691    | 3.52308   | 5.25988   | 2.76456   | 4.98468   | 2.58361   | 3.08994   | 6.2781    | 4.77866   | 7.41219   | 2.94714   | 6.95531   | 4.23893    | 3.7974    |
| PHB         | 10.5093   | 7.68789    | 7.85267   | 22.8129   | 15.3591   | 26.8739   | 9.90895   | 7.10023   | 11.4779   | 13.2753   | 25.1687   | 8.6193    | 18.8033   | 15.0071    | 7.57878   |
| PHB2        | 34.579    | 27.6653    | 26.9998   | 56.0298   | 32.7356   | 78.8054   | 34.866    | 22.9763   | 27.8534   | 34.7038   | 69.887    | 23.9961   | 41.3584   | 34.8885    | 23.4933   |
| PHC1        | 3.30533   | 2.33002    | 1.86476   | 2.44177   | 3.15486   | 5.89042   | 2.99409   | 1.98939   | 1.49541   | 2.30618   | 3.05991   | 2.15517   | 1.83535   | 2.79853    | 4.93443   |
| PHC2        | 7.16781   | 4.51839    | 4.98573   | 14.7561   | 8.89689   | 29.9589   | 5.85649   | 4.28288   | 4.69533   | 9.51085   | 16.8019   | 3.93974   | 13.8776   | 10.518     | 11.4316   |
| PHC3        | 5.79538   | 4.95438    | 5.39793   | 3.61306   | 1.56978   | 4.06173   | 3.70731   | 5.56382   | 1.44405   | 2.72679   | 3.22889   | 2.09098   | 2.89761   | 3.1843     | 4.66834   |
| PHETA1      | 2.26029   | 3.43493    | 3.78088   | 3.47929   | 9.66076   | 5.85249   | 4.2363    | 2.43198   | 25.3982   | 2.97963   | 3.94773   | 3.7432    | 2.31131   | 2.59298    | 1.42908   |
| PHETA2      | 1.91536   | 1.44404    | 1.72409   | 2.66927   | 4.36261   | 5.14621   | 2.20955   | 1.33178   | 1.77671   | 3.78656   | 6.75547   | 1.04384   | 4.07871   | 3.05501    | 4.67475   |
| PHEX        | 0.228842  | 0.0921842  | 0.117933  | 0.146909  | 0.0174822 | 0.143746  | 0.0471169 | 0.180038  | 0.0685337 | 0.108296  | 0.0889347 | 0.0778448 | 0.254148  | 0.123524   | 0.161629  |
| PHEX-AS1    | 0.0485434 | 0.00584723 | 0.0100396 | 0.0125063 | 0         | 0         | 0.0138563 | 0.032356  | 0         | 0.0152317 | 0         | 0         | 0         | 0.00634272 | 0.0348572 |
| PHF1        | 2.65211   | 2.64311    | 3.62475   | 1.99006   | 4.29197   | 6.35833   | 3.07991   | 1.63107   | 0.681614  | 1.91115   | 2.19137   | 0.952439  | 2.06247   | 2.11606    | 3.06295   |
| PHF10       | 7.78095   | 8.19061    | 8.81003   | 9.35391   | 5.15673   | 10.4423   | 5.93136   | 6.92454   | 9.0991    | 7.85078   | 8.10541   | 6.12478   | 9.79544   | 7.19899    | 7.38169   |
| PHF11       | 2.47474   | 2.79365    | 2.86279   | 6.65873   | 1.23676   | 2.49343   | 1.7435    | 2.0649    | 2.6311    | 2.4753    | 2.97751   | 1.47312   | 4.00156   | 2.1567     | 3.56701   |
| PHF12       | 3.50267   | 3.27377    | 3.57846   | 2.94176   | 3.57576   | 5.59262   | 3.49989   | 3.28249   | 1.23957   | 1.82635   | 2.72881   | 1.78652   | 1.92131   | 2.56       | 3.35732   |
| PHF13       | 2.02423   | 3.43028    | 3.83955   | 3.02831   | 3.78103   | 5.34801   | 2.772     | 2.14083   | 6.52801   | 3.72782   | 3.8085    | 2.98251   | 4.64228   | 3.01565    | 2.15538   |
| PHF14       | 2.87158   | 2.7492     | 2.51869   | 2.60272   | 1.78588   | 3.09096   | 1.71076   | 2.47636   | 1.8086    | 1.88725   | 2.47556   | 1.55388   | 1.97637   | 2.17681    | 2.25882   |
| PHF19       | 1.31858   | 1.02304    | 1.22317   | 2.94247   | 1.82984   | 3.80994   | 1.76566   | 0.745329  | 0.761614  | 1.93484   | 2.56112   | 1.06142   | 2.51157   | 2.53109    | 2.57592   |
| PHF2        | 5.17463   | 5.45339    | 6.21721   | 5.44853   | 6.67368   | 9.61907   | 5.65628   | 4.64108   | 2.21312   | 3.34509   | 3.53617   | 2.9534    | 5.97662   | 4.66954    | 6.02716   |



|           |           |           |          |           |          |           |           |            |           |           |          |           |           |           |           |
|-----------|-----------|-----------|----------|-----------|----------|-----------|-----------|------------|-----------|-----------|----------|-----------|-----------|-----------|-----------|
| PHF20     | 3.73338   | 3.68092   | 3.98581  | 4.2321    | 3.61587  | 5.43764   | 3.46397   | 3.0455     | 4.53819   | 4.26313   | 3.86849  | 3.28996   | 5.30688   | 3.51259   | 4.67871   |
| PHF20L1   | 2.66928   | 2.65921   | 2.52532  | 3.52075   | 1.4195   | 3.59022   | 1.55398   | 2.35002    | 2.74009   | 4.09278   | 4.27065  | 2.11665   | 3.80997   | 3.60458   | 3.45447   |
| PHF21A    | 3.03559   | 3.07891   | 2.59601  | 3.0951    | 3.51033  | 5.8301    | 2.5769    | 2.60153    | 1.4403    | 1.85906   | 2.4718   | 1.54787   | 1.69413   | 2.23214   | 3.16557   |
| PHF21B    | 0.0233709 | 0.0140756 | 0        | 0         | 0.117985 | 0.02985   | 0.0333552 | 0.00519253 | 0         | 0         | 0        | 0         | 0         | 0.027483  | 0.0167818 |
| PHF23     | 2.55613   | 4.17002   | 4.00987  | 8.96278   | 9.45687  | 11.9662   | 2.88217   | 2.38479    | 11.9227   | 9.30513   | 9.62654  | 5.40348   | 11.6335   | 8.14875   | 5.2703    |
| PHF24     | 0.313105  | 0.220769  | 0.331675 | 0.118048  | 0.219455 | 0.464933  | 0.457766  | 0.22736    | 0.120909  | 0.594261  | 0.224143 | 0.254089  | 0.56416   | 0.419084  | 0.235797  |
| PHF3      | 7.74866   | 6.8149    | 7.41528  | 5.16364   | 1.61181  | 6.31671   | 3.00039   | 6.19949    | 2.28384   | 3.67164   | 4.26491  | 2.2703    | 3.39742   | 3.49166   | 4.38796   |
| PHF5A     | 5.80206   | 5.28741   | 5.7167   | 11.0402   | 6.34595  | 7.97492   | 5.55772   | 4.77014    | 12.1741   | 9.38229   | 22.2988  | 5.36434   | 11.679    | 7.83657   | 4.24427   |
| PHF6      | 1.8145    | 1.7982    | 1.74932  | 2.66229   | 0.444266 | 2.22771   | 1.30621   | 1.94176    | 1.12491   | 2.10672   | 2.87932  | 1.17419   | 2.04496   | 1.82561   | 1.9729    |
| PHF7      | 1.66911   | 1.63662   | 1.34851  | 1.13665   | 1.21296  | 2.20249   | 1.25935   | 1.11036    | 0.677597  | 0.80856   | 1.53162  | 0.942864  | 1.03912   | 0.816234  | 0.686875  |
| PHF8      | 2.70088   | 3.45841   | 3.7195   | 2.9713    | 3.81762  | 4.02457   | 3.53684   | 2.64774    | 2.19031   | 1.76724   | 1.66175  | 2.28289   | 2.65724   | 2.61746   | 3.01021   |
| PHGDH     | 25.4057   | 43.1971   | 20.0387  | 15.8129   | 117.785  | 34.4439   | 33.2693   | 16.056     | 84.5709   | 11.7341   | 22.2489  | 28.4757   | 8.55891   | 10.2287   | 4.27207   |
| PHGR1     | 0.0532024 | 0.0512675 | 0        | 0.109653  | 1.07434  | 0         | 0.303724  | 0          | 0.129589  | 0         | 0        | 0         | 0         | 0         | 0         |
| PHIP      | 5.07136   | 4.94468   | 5.53894  | 3.90121   | 1.44457  | 3.56749   | 3.15675   | 4.98468    | 2.92452   | 3.589     | 3.69076  | 2.75853   | 3.21339   | 3.73073   | 3.30975   |
| PHKA1     | 1.54011   | 1.866     | 1.45744  | 1.81553   | 1.24868  | 2.49163   | 1.32098   | 1.38542    | 1.64694   | 1.08908   | 0.932906 | 1.36271   | 1.52928   | 1.71588   | 0.415387  |
| PHKA1-AS1 | 0.154545  | 0.0744619 | 0        | 0.0796313 | 0        | 0.0328982 | 0.0441135 | 0          | 0         | 0.0484923 | 0        | 0.0552904 | 0         | 0.0201929 | 0         |
| PHKA2     | 2.81451   | 3.43451   | 3.3118   | 2.84789   | 2.8556   | 3.39491   | 3.05444   | 2.58657    | 1.30647   | 1.32167   | 1.25763  | 1.36973   | 1.21902   | 1.82466   | 2.22241   |
| PHKA2-AS1 | 0.36442   | 0.411703  | 0.44143  | 0.278586  | 0.249992 | 0.313548  | 0.600766  | 0.449644   | 0.0472953 | 0.127882  | 0.073902 | 0.134635  | 0.0492155 | 0.211909  | 0.229132  |
| PHKB      | 5.1456    | 3.7541    | 4.00122  | 5.83466   | 1.86248  | 5.0978    | 3.18813   | 3.64827    | 3.03932   | 4.17798   | 5.09302  | 3.00713   | 4.03848   | 4.0488    | 3.94004   |
| PHKG1     | 0.907025  | 1.12174   | 1.38471  | 0.295841  | 1.12674  | 1.67594   | 1.73697   | 0.779644   | 0.213562  | 0.151211  | 0.233187 | 0.332593  | 0.0393625 | 0.459754  | 0.625148  |
| PHKG2     | 1.05473   | 1.27468   | 1.30518  | 1.43197   | 2.17617  | 1.91546   | 1.28523   | 0.901632   | 1.36826   | 1.63368   | 1.79493  | 1.59742   | 1.55235   | 1.71162   | 1.01337   |
| PHLDA1    | 2.63407   | 1.56709   | 2.09814  | 4.05358   | 1.57464  | 3.5926    | 1.82327   | 3.02271    | 3.56551   | 7.58472   | 9.10177  | 3.07777   | 23.7272   | 12.5354   | 9.85343   |
| PHLDA2    | 1.93697   | 2.30286   | 1.9978   | 7.33634   | 3.71214  | 6.59723   | 2.41262   | 1.2743     | 20.8635   | 20.9011   | 21.6388  | 21.1133   | 39.0174   | 16.3948   | 7.00853   |
| PHLDA3    | 5.63006   | 6.09258   | 6.29145  | 10.489    | 22.1118  | 14.5004   | 5.01531   | 3.14632    | 14.8713   | 17.28     | 15.3109  | 8.3677    | 17.6707   | 8.67338   | 5.5904    |
| PHLDB1    | 8.88519   | 6.3015    | 7.24829  | 4.59667   | 11.7046  | 11.7575   | 9.75824   | 4.89508    | 1.62974   | 4.0989    | 4.85551  | 2.76704   | 4.44282   | 7.03138   | 16.5412   |
| PHLDB2    | 4.18909   | 4.85147   | 6.78072  | 5.2063    | 3.03175  | 7.49926   | 3.21922   | 2.47781    | 3.33599   | 5.41123   | 6.91393  | 2.21905   | 5.41008   | 8.43945   | 9.69391   |

|                 |          |           |           |            |           |           |           |           |           |           |           |           |           |           |          |
|-----------------|----------|-----------|-----------|------------|-----------|-----------|-----------|-----------|-----------|-----------|-----------|-----------|-----------|-----------|----------|
| PHLDB3          | 2.16646  | 4.56062   | 5.54598   | 5.57672    | 10.558    | 5.76375   | 4.12974   | 2.30549   | 10.0218   | 6.30186   | 2.89702   | 8.33629   | 7.76884   | 6.66253   | 1.46886  |
| PHLPP1          | 4.77228  | 5.21617   | 5.45608   | 4.85102    | 6.62236   | 4.96108   | 5.251     | 3.64128   | 6.42321   | 3.84211   | 3.17045   | 3.57226   | 3.91985   | 3.17719   | 1.85597  |
| PHLPP2          | 0.901642 | 0.740499  | 0.964165  | 0.567534   | 0.576938  | 1.0142    | 0.780873  | 0.730737  | 0.751827  | 0.829452  | 0.893501  | 0.447206  | 0.971761  | 0.808603  | 1.14773  |
| PHOSPHO1        | 0.340809 | 0.307888  | 0.387669  | 0.329263   | 0.678286  | 0.462497  | 0.316164  | 0.321813  | 0.0518834 | 0.735196  | 1.2624    | 0.243858  | 0.247374  | 0.70692   | 1.39186  |
| PHOSPHO2        | 0.398301 | 0.632353  | 0.801802  | 0.650896   | 0.418927  | 0.615709  | 0.578332  | 0.821144  | 0.313557  | 0.37717   | 0.514609  | 0.241216  | 0.219202  | 0.353199  | 0.487676 |
| PHOSPHO2-KLHL23 | 0.228638 | 0.117055  | 0.0997059 | 0.103237   | 7.40E-05  | 0.49933   | 0.277853  | 0.0901142 | 0.0811958 | 0.235498  | 0.346445  | 6.47E-05  | 0.129589  | 0.0988264 | 0.254607 |
| PHOX2A          | 0.122594 | 0.0590677 | 0.0563436 | 0.0421123  | 0.126954  | 0.0463944 | 0.0777633 | 0.121057  | 0         | 0         | 0         | 0.0097466 | 0         | 0.0569538 | 0.215185 |
| PHOX2B          | 0        | 0         | 0         | 0.00787115 | 0         | 0         | 0         | 0         | 0         | 0         | 0         | 0         | 0         | 0         | 0        |
| PHPT1           | 7.30908  | 7.6704    | 7.53753   | 13.5905    | 13.2865   | 15.6991   | 6.61416   | 6.58468   | 6.88091   | 8.15039   | 18.0038   | 8.34116   | 6.34921   | 6.60843   | 8.01123  |
| PHRF1           | 6.16537  | 8.20825   | 8.56276   | 9.10163    | 17.7192   | 13.8717   | 8.70198   | 6.75491   | 6.3839    | 5.19014   | 2.58298   | 8.33181   | 12.7013   | 8.81003   | 7.54589  |
| PHTF1           | 0.63547  | 0.531234  | 0.503239  | 0.878757   | 0.885863  | 1.7204    | 0.483706  | 0.579233  | 0.357199  | 1.22023   | 2.50772   | 0.411947  | 1.56642   | 1.26888   | 2.02023  |
| PHTF2           | 1.69545  | 1.37164   | 1.53037   | 1.5157     | 0.447115  | 1.74554   | 1.16229   | 1.84681   | 1.64163   | 2.18083   | 3.42769   | 0.801226  | 1.92734   | 1.77957   | 2.64156  |
| PHYH            | 2.56086  | 1.71593   | 2.01014   | 1.50978    | 1.05461   | 3.31645   | 2.24393   | 1.94773   | 0.681793  | 1.80889   | 4.2086    | 0.758514  | 1.29106   | 1.05828   | 2.73691  |
| PHYHD1          | 2.45933  | 3.28329   | 3.9293    | 3.25882    | 3.2733    | 3.17304   | 3.6831    | 2.0558    | 1.04403   | 0.856319  | 1.9092    | 0.708312  | 0.321414  | 0.590034  | 1.01093  |
| PHYHIP          | 0.455817 | 3.61039   | 5.82193   | 0.284686   | 1.08352   | 2.42871   | 1.85307   | 1.70016   | 0.0588778 | 0.0780132 | 0.17152   | 0.0247083 | 0.0579269 | 0.0794099 | 0.257877 |
| PHYHIPL         | 0.145419 | 0.168519  | 0.102776  | 0.0284222  | 0.0686506 | 0.144439  | 0.119045  | 0.1144    | 2.60E-25  | 0.0351785 | 0.0415299 | 0.0135012 | 0.0125323 | 3.66E-25  | 0.36061  |
| PHYKPL          | 2.28314  | 3.65683   | 3.86778   | 3.68584    | 5.56788   | 3.89475   | 2.74916   | 1.97366   | 2.60029   | 2.48415   | 2.36626   | 1.99048   | 4.10247   | 2.9852    | 4.36437  |
| PI15            | 0.772004 | 0.212316  | 0.217595  | 11.9156    | 0.0955107 | 2.993     | 0.132607  | 0.482694  | 0.869491  | 4.39025   | 7.94756   | 0.613495  | 5.38649   | 4.46339   | 4.4201   |
| PI16            | 14.6878  | 10.5772   | 16.1903   | 0.685215   | 1.98861   | 1.5971    | 24.701    | 6.60601   | 0.0241729 | 0.062279  | 0.0448124 | 0.0213029 | 0.0448209 | 0.0103736 | 0.270794 |
| PI3             | 31.3726  | 4.0859    | 2.45367   | 1624.61    | 297.586   | 54.067    | 6.00979   | 28.1784   | 167.791   | 1909.23   | 1650.06   | 1218.97   | 4324.77   | 666.479   | 197.078  |
| PI4K2A          | 4.03497  | 4.33031   | 4.18852   | 10.6517    | 8.5258    | 9.89301   | 6.11532   | 3.38946   | 16.6744   | 12.8828   | 12.4607   | 8.10374   | 14.9246   | 7.14121   | 4.44527  |
| PI4K2B          | 3.85929  | 3.39207   | 3.90748   | 5.34238    | 3.01233   | 5.10634   | 2.87916   | 4.01002   | 5.70574   | 6.48256   | 7.44889   | 4.50619   | 8.53932   | 5.40555   | 3.51114  |
| PI4KA           | 5.60595  | 5.7463    | 5.85132   | 7.27798    | 9.82583   | 7.47158   | 8.90002   | 5.11078   | 10.1407   | 5.56753   | 4.32026   | 6.8826    | 7.59056   | 5.49803   | 6.87345  |
| PI4KAP1         | 2.16151  | 2.32219   | 2.84121   | 0.746817   | 1.89162   | 1.44194   | 2.43888   | 1.57715   | 0.611612  | 0.279024  | 0.289768  | 0.922553  | 0.166907  | 2.25363   | 1.92584  |
| PI4KAP2         | 1.95465  | 1.51219   | 2.01949   | 1.0642     | 0.909239  | 2.49167   | 1.26401   | 1.12493   | 0.602441  | 1.33567   | 1.49612   | 0.686131  | 1.20574   | 1.36037   | 2.0718   |
| PI4KB           | 7.67213  | 8.69663   | 9.09961   | 11.266     | 14.6058   | 13.2986   | 9.44327   | 6.90801   | 15.5868   | 11.0277   | 9.85852   | 9.71715   | 14.7988   | 9.14013   | 9.01924  |

|         |          |           |           |           |           |          |           |           |           |           |           |           |            |           |           |
|---------|----------|-----------|-----------|-----------|-----------|----------|-----------|-----------|-----------|-----------|-----------|-----------|------------|-----------|-----------|
| PIANP   | 0.106755 | 0.183701  | 0.138782  | 0.0785818 | 0.236897  | 0.129858 | 0.104477  | 0.14909   | 0.0278606 | 0.0478532 | 0.352932  | 0.0709302 | 0.00491986 | 0.0956486 | 0.208069  |
| PIAS1   | 5.60759  | 5.46935   | 5.65609   | 4.4417    | 1.30517   | 5.17959  | 4.38416   | 6.86353   | 5.01685   | 3.83762   | 4.89882   | 2.27494   | 3.9067     | 2.83541   | 2.79108   |
| PIAS2   | 1.89552  | 1.3412    | 1.52414   | 0.838557  | 0.387083  | 0.947288 | 1.21494   | 2.10337   | 0.340886  | 0.607738  | 0.83859   | 0.536603  | 0.605775   | 0.925871  | 0.995598  |
| PIAS3   | 8.38956  | 7.9       | 8.68214   | 7.86494   | 9.30317   | 13.2143  | 10.6078   | 7.5906    | 11.3248   | 5.1848    | 8.53449   | 9.84324   | 6.3442     | 6.11864   | 7.35277   |
| PIAS4   | 2.56904  | 3.76557   | 3.45062   | 4.18688   | 7.9476    | 6.56867  | 3.79016   | 2.37935   | 5.18538   | 3.22442   | 3.74736   | 3.49572   | 5.37302    | 3.49252   | 3.29565   |
| PIBF1   | 3.36741  | 3.27881   | 3.37898   | 2.16617   | 0.950053  | 2.2747   | 1.14782   | 2.53035   | 1.39558   | 2.24999   | 3.69029   | 1.6801    | 1.47866    | 2.22291   | 2.41297   |
| PICALM  | 16.7821  | 13.0023   | 14.616    | 24.3002   | 4.89878   | 21.3189  | 11.3385   | 16.9828   | 19.8481   | 20.059    | 25.8367   | 12.3173   | 26.952     | 18.3485   | 20.2625   |
| PICART1 | 0.411148 | 0.338966  | 0.249429  | 0.160064  | 0.340616  | 0.27229  | 0.292093  | 0.454712  | 0.0222547 | 0.0344022 | 0.0412564 | 0.013075  | 0.058949   | 0.105054  | 0.0262427 |
| PICK1   | 2.6635   | 3.58217   | 2.95815   | 3.82544   | 7.02044   | 5.61628  | 2.95729   | 2.53484   | 4.26552   | 2.84283   | 2.32017   | 3.88663   | 4.13382    | 3.28284   | 1.70172   |
| PICSAR  | 0.409891 | 0.881116  | 1.40853   | 0.714838  | 1.17545   | 0.93966  | 0.72      | 0.420319  | 0.1536    | 0.395734  | 0.427122  | 0.518894  | 0.834064   | 2.01044   | 0.181125  |
| PID1    | 2.84055  | 1.5307    | 2.04689   | 1.77948   | 0.836026  | 2.03043  | 2.53485   | 1.91327   | 0.500714  | 1.87641   | 4.05047   | 0.727419  | 1.5771     | 1.75417   | 2.74822   |
| PIDD1   | 1.3772   | 2.4874    | 2.50777   | 2.00597   | 7.55314   | 3.42628  | 2.67051   | 1.70941   | 1.04009   | 0.898059  | 1.05962   | 2.2461    | 1.28072    | 1.6929    | 1.53586   |
| PIEZO1  | 5.69131  | 9.20956   | 10.0936   | 19.3459   | 26.2629   | 22.3212  | 14.6627   | 6.1791    | 15.2286   | 16.4187   | 6.99484   | 18.2296   | 36.7079    | 18.2765   | 14.3197   |
| PIEZO2  | 0.295453 | 0.501683  | 0.685952  | 0.378136  | 0.71432   | 0.39765  | 0.451599  | 0.209636  | 0.18862   | 0.601094  | 0.833825  | 0.182422  | 0.465801   | 0.541704  | 1.6288    |
| PIF1    | 0.119426 | 0.0616514 | 0.0846837 | 0.509869  | 0.450524  | 0.740882 | 0.0681784 | 0.0379057 | 0.0623346 | 0.37473   | 0.404451  | 0.299084  | 0.517356   | 1.01205   | 0.600288  |
| PIFO    | 0.166779 | 0.141806  | 0.243479  | 0.181981  | 0.0457174 | 0.267313 | 0.190423  | 0.261564  | 0.0238963 | 0.0861926 | 0.321171  | 0.112315  | 0.0632971  | 0.0307645 | 0.0563567 |
| PIGA    | 2.00412  | 1.68829   | 1.8533    | 2.84144   | 0.475885  | 1.44561  | 1.2097    | 2.15546   | 3.11706   | 4.16558   | 3.60975   | 3.83159   | 4.56273    | 2.86212   | 1.43908   |
| PIGB    | 1.2895   | 1.23632   | 1.30493   | 1.22434   | 0.594735  | 1.81181  | 1.21737   | 1.04884   | 1.30032   | 1.56173   | 2.64717   | 1.10145   | 1.64097    | 1.24553   | 1.5761    |
| PIGBOS1 | 1.87443  | 1.62632   | 1.74721   | 2.21415   | 1.53192   | 2.98358  | 1.03395   | 1.17806   | 1.05796   | 1.67486   | 3.60327   | 1.0017    | 1.85716    | 1.57014   | 1.95774   |
| PIGC    | 6.07891  | 5.67201   | 6.5733    | 5.83519   | 4.36182   | 6.60805  | 6.81737   | 5.15562   | 14.4121   | 5.26717   | 8.88266   | 4.85745   | 5.65419    | 3.92703   | 3.21285   |
| PIGF    | 1.9972   | 2.09339   | 1.78557   | 4.68305   | 0.693745  | 2.98084  | 1.5408    | 1.91949   | 4.15221   | 3.45451   | 5.9574    | 2.63358   | 2.36241    | 2.74959   | 1.44938   |
| PIGG    | 3.6551   | 3.72379   | 4.11847   | 3.33916   | 4.561     | 3.49294  | 3.96911   | 2.85741   | 2.6047    | 2.4015    | 2.5516    | 2.61277   | 2.94898    | 3.03184   | 3.33853   |
| PIGH    | 4.22706  | 3.92715   | 3.93115   | 3.18664   | 1.69878   | 4.37802  | 2.77306   | 3.16178   | 3.15983   | 3.39593   | 5.86064   | 1.98508   | 3.76926    | 3.25049   | 2.61471   |
| PIGK    | 2.06661  | 1.33085   | 1.20876   | 1.79452   | 0.411958  | 2.97401  | 1.43975   | 1.77437   | 1.30416   | 1.95321   | 4.01064   | 0.798435  | 1.77567    | 1.49854   | 2.42895   |
| PIGL    | 3.817    | 4.71387   | 4.37091   | 1.98747   | 2.6525    | 4.10542  | 4.74806   | 2.89232   | 2.0552    | 2.57186   | 2.78945   | 3.72301   | 1.65909    | 2.9294    | 2.9428    |
| PIGM    | 1.53145  | 1.43705   | 1.83836   | 1.4568    | 1.00644   | 1.75539  | 1.504     | 1.50855   | 1.19994   | 1.08876   | 1.72881   | 1.12644   | 1.73087    | 1.23418   | 1.15351   |

|            |           |           |           |           |          |           |           |          |           |           |            |           |           |           |           |
|------------|-----------|-----------|-----------|-----------|----------|-----------|-----------|----------|-----------|-----------|------------|-----------|-----------|-----------|-----------|
| PIGN       | 3.25664   | 3.65741   | 3.50707   | 5.3619    | 1.74031  | 3.5491    | 3.58282   | 4.08824  | 8.76499   | 5.78555   | 5.65919    | 5.57752   | 7.65731   | 3.95736   | 2.17484   |
| PIGO       | 2.8317    | 3.41751   | 3.39791   | 3.59811   | 4.96233  | 5.26239   | 3.72912   | 2.54103  | 2.65182   | 2.20837   | 2.64422    | 2.65958   | 3.24604   | 2.62661   | 3.00857   |
| PIGP       | 1.01709   | 1.0524    | 0.91038   | 1.63236   | 0.621599 | 2.15801   | 1.00899   | 1.17064  | 2.7414    | 1.9253    | 4.14095    | 1.2527    | 1.12956   | 1.68188   | 0.814147  |
| PIGQ       | 3.20202   | 3.1715    | 3.90611   | 4.82586   | 9.00832  | 10.292    | 4.70056   | 2.22558  | 3.81475   | 3.22095   | 4.31487    | 2.77933   | 4.43203   | 3.66713   | 4.91029   |
| PIGR       | 0.401097  | 0.0816497 | 0.112839  | 0.0744116 | 0.134855 | 0.904331  | 0.206569  | 0.203018 | 0.0263992 | 0.0477583 | 0.00611126 | 0.0709909 | 0.0104784 | 0.0604382 | 0.0740888 |
| PIGS       | 6.02541   | 6.44278   | 6.74393   | 8.71635   | 7.8455   | 11.4546   | 7.08196   | 5.29761  | 8.0152    | 6.23806   | 8.83888    | 4.95689   | 9.65134   | 5.41838   | 5.15956   |
| PIGT       | 12.4812   | 9.49548   | 11.637    | 13.0507   | 10.3727  | 28.0225   | 19.2521   | 10.1438  | 8.67726   | 10.7156   | 24.3474    | 8.77066   | 18.1384   | 11.761    | 15.2972   |
| PIGU       | 2.85498   | 2.78158   | 2.83212   | 4.90791   | 1.86418  | 5.0018    | 3.07222   | 2.58218  | 3.15396   | 3.726     | 6.11785    | 2.80209   | 3.83075   | 2.59474   | 2.61246   |
| PIGV       | 1.37057   | 2.57729   | 2.29358   | 2.62305   | 2.4696   | 3.0876    | 2.11035   | 1.54518  | 3.24301   | 1.89714   | 3.34197    | 1.66996   | 2.79939   | 1.87471   | 1.5859    |
| PIGW       | 2.00277   | 1.40353   | 1.49754   | 2.4376    | 0.64297  | 2.50595   | 1.47912   | 1.82162  | 2.76097   | 1.51912   | 2.31366    | 1.61917   | 3.90795   | 1.73134   | 1.60142   |
| PIGX       | 2.79695   | 2.55602   | 2.50054   | 6.71048   | 1.19714  | 6.69414   | 1.87096   | 2.08136  | 2.89785   | 2.55083   | 3.96148    | 1.70317   | 3.34071   | 2.37106   | 2.24056   |
| PIGY       | 8.89198   | 7.14597   | 6.62894   | 12.2854   | 7.96661  | 14.9103   | 7.51003   | 6.62835  | 15.1737   | 12.8312   | 24.382     | 7.87669   | 11.9201   | 8.00068   | 5.12271   |
| PIGZ       | 1.63074   | 1.36788   | 1.13937   | 0.609518  | 1.14187  | 2.25191   | 1.0805    | 0.961174 | 0.277843  | 0.657506  | 0.906146   | 0.411115  | 0.866795  | 0.684488  | 1.28626   |
| PIH1D1     | 6.01794   | 7.6068    | 6.97599   | 15.1213   | 15.8684  | 16.796    | 7.2316    | 4.82002  | 16.6716   | 10.7003   | 19.6466    | 8.75818   | 10.9292   | 8.46496   | 6.32184   |
| PIH1D2     | 0.174966  | 0.237605  | 0.13311   | 0.279759  | 0.074122 | 0.327846  | 0.0733745 | 0.127222 | 0.252659  | 0.259526  | 0.2577     | 0.136586  | 0.330397  | 0.200147  | 0.311163  |
| PIH1D3     | 0.0360297 | 0.0115731 | 0         | 0         | 0        | 0.0102263 | 0         | 0        | 0         | 0         | 0          | 0         | 0         | 0         | 0         |
| PIK3AP1    | 1.04868   | 0.34998   | 0.612849  | 3.6684    | 0.792062 | 3.8175    | 1.0161    | 0.782348 | 0.0820201 | 2.01052   | 3.36684    | 0.117028  | 2.62571   | 0.771844  | 2.56993   |
| PIK3C2A    | 5.98923   | 5.14089   | 5.72903   | 6.144     | 1.67382  | 5.92906   | 3.7003    | 6.17877  | 6.36289   | 6.21584   | 7.3138     | 4.12376   | 6.58887   | 5.52647   | 5.89688   |
| PIK3C2B    | 5.83102   | 9.2291    | 8.86621   | 6.99128   | 13.7773  | 10.4852   | 9.33837   | 5.94003  | 10.9504   | 2.99542   | 3.17725    | 7.26148   | 5.02961   | 4.03846   | 5.44402   |
| PIK3C2G    | 3.74611   | 10.3198   | 9.12751   | 2.63128   | 1.46923  | 1.25766   | 3.36219   | 7.51146  | 3.3253    | 1.04094   | 1.47275    | 1.16686   | 0.207428  | 0.338491  | 0.240892  |
| PIK3C3     | 6.53349   | 5.65978   | 6.05899   | 6.78668   | 2.73413  | 6.4014    | 4.51327   | 5.6208   | 5.52268   | 5.04554   | 5.3548     | 3.87438   | 5.04787   | 4.12805   | 5.60191   |
| PIK3CA     | 2.6383    | 2.29014   | 2.60441   | 2.49065   | 0.656281 | 2.65242   | 1.52456   | 2.85115  | 1.98381   | 3.22558   | 2.86739    | 1.48943   | 2.77353   | 2.31055   | 2.50012   |
| PIK3CB     | 3.75721   | 4.83515   | 5.42329   | 3.59344   | 1.55251  | 3.15512   | 4.03208   | 5.00706  | 5.25215   | 2.84801   | 2.65769    | 2.41293   | 3.47024   | 2.19393   | 1.48319   |
| PIK3CD     | 1.33361   | 1.42147   | 1.32226   | 2.80609   | 3.0707   | 4.29755   | 1.14568   | 0.964169 | 0.752034  | 3.44988   | 2.38166    | 2.60495   | 5.81829   | 4.57645   | 3.27006   |
| PIK3CD-AS1 | 0.0253901 | 0.0611666 | 0.105022  | 0.0784956 | 0.414115 | 0.0432386 | 0.0434843 | 0.112823 | 0         | 0.0956014 | 0.0143311  | 0.0635855 | 0.0409539 | 0.185779  | 0.145853  |
| PIK3CD-AS2 | 0.169104  | 0.0814767 | 0.0599548 | 0.0248952 | 0.375252 | 0.575958  | 0.193077  | 0.107347 | 0.088264  | 0.0606407 | 0.654504   | 0.207426  | 0.124691  | 0.15151   | 0.416322  |

|             |          |          |          |          |           |           |          |           |           |           |           |          |           |          |          |
|-------------|----------|----------|----------|----------|-----------|-----------|----------|-----------|-----------|-----------|-----------|----------|-----------|----------|----------|
| PIK3CG      | 0.632118 | 0.509121 | 0.718056 | 0.784291 | 0.576437  | 0.902421  | 0.66069  | 0.774183  | 0.145543  | 0.777583  | 1.44491   | 0.164267 | 0.750747  | 0.384612 | 0.993612 |
| PIK3IP1     | 10.5841  | 9.23891  | 9.7159   | 7.90812  | 9.52153   | 11.1559   | 8.41977  | 7.32716   | 6.43946   | 4.32238   | 5.48291   | 2.17623  | 4.52847   | 1.99555  | 3.97814  |
| PIK3IP1-AS1 | 0.274207 | 0.660585 | 0.725898 | 0.113031 | 0.0851876 | 0.233483  | 0.250464 | 0.487384  | 0.0667906 | 0.0688315 | 0         | 0        | 0         | 0.315287 | 0.315036 |
| PIK3R1      | 18.9045  | 8.03306  | 7.72963  | 13.2711  | 3.6273    | 20.0958   | 6.63972  | 11.9444   | 1.284     | 3.97355   | 6.16572   | 2.39063  | 4.12033   | 4.40349  | 7.22777  |
| PIK3R2      | 6.04077  | 11.2531  | 8.97449  | 14.3217  | 25.5726   | 21.0168   | 10.0761  | 7.05395   | 15.0299   | 6.9525    | 9.53264   | 10.2781  | 7.82867   | 6.97408  | 6.99489  |
| PIK3R3      | 3.83327  | 1.13077  | 1.06222  | 1.90615  | 2.25118   | 7.89566   | 1.17945  | 1.85941   | 0.523332  | 1.55169   | 2.22249   | 1.03159  | 2.88199   | 2.3494   | 4.71513  |
| PIK3R4      | 4.30803  | 4.2288   | 4.64676  | 5.28203  | 2.63965   | 5.4828    | 4.10597  | 3.61637   | 3.6134    | 3.09549   | 4.52104   | 2.76046  | 4.31152   | 3.88383  | 3.48919  |
| PIK3R5      | 0.943385 | 0.382005 | 0.547965 | 1.89783  | 0.857417  | 1.24765   | 0.67034  | 0.914215  | 0.116116  | 2.0028    | 1.92034   | 0.197479 | 1.33389   | 0.76843  | 1.7728   |
| PIK3R6      | 0.33776  | 0.613397 | 1.06931  | 0.267747 | 0.514568  | 0.315252  | 0.281816 | 0.738887  | 0.102838  | 0.13859   | 0.417951  | 0.130133 | 0.0963881 | 0.196897 | 0.438425 |
| PIKFYVE     | 5.12539  | 3.63316  | 3.88598  | 3.76428  | 2.03258   | 3.88831   | 3.51475  | 4.30472   | 2.21488   | 2.98124   | 2.98435   | 2.63428  | 2.89192   | 3.49596  | 4.34445  |
| PILRA       | 1.09681  | 0.623703 | 0.729447 | 5.24073  | 1.16099   | 5.04065   | 0.741565 | 0.912192  | 0.28732   | 3.03866   | 8.60824   | 0.467192 | 4.12556   | 1.48169  | 4.39177  |
| PILRB       | 1.80594  | 2.70307  | 2.29498  | 1.85618  | 2.41351   | 3.29959   | 1.50659  | 1.33698   | 1.59738   | 1.03652   | 0.0866967 | 1.28582  | 0.540658  | 1.82579  | 3.20491  |
| PIM1        | 14.2925  | 19.4735  | 17.6543  | 37.117   | 35.7899   | 36.2841   | 32.5106  | 15.8528   | 131.928   | 47.6609   | 71.9925   | 50.4425  | 58.7074   | 30.0045  | 12.2811  |
| PIM2        | 1.5344   | 1.01972  | 1.2256   | 2.22465  | 1.67664   | 2.55899   | 1.19615  | 1.48591   | 0.309307  | 1.47426   | 2.09053   | 0.628457 | 2.64908   | 1.22228  | 2.06682  |
| PIM3        | 10.8176  | 9.72579  | 11.5485  | 15.8897  | 23.5581   | 27.8734   | 8.3526   | 8.6282    | 17.0962   | 15.1278   | 19.6134   | 12.564   | 22.8402   | 12.4057  | 8.7317   |
| PIMREG      | 0.329758 | 0.317765 | 0.309999 | 1.25118  | 0.488946  | 1.34011   | 0.633218 | 0.146531  | 0.237314  | 1.26046   | 3.11341   | 0.139426 | 0.918729  | 1.16725  | 0.344418 |
| PIN1        | 7.3      | 6.78735  | 6.95311  | 13.3175  | 13.5154   | 17.7572   | 8.53768  | 5.87397   | 13.5042   | 14.3872   | 22.9852   | 8.4703   | 14.028    | 9.4248   | 5.95024  |
| PIN1P1      | 0        | 0        | 0        | 0        | 0         | 0         | 0        | 0         | 0         | 0         | 0         | 0        | 0         | 0        | 0        |
| PIN4        | 1.31759  | 0.747122 | 0.763746 | 1.19156  | 0.403767  | 1.41193   | 0.634503 | 0.868269  | 1.09162   | 1.28247   | 2.48913   | 0.885053 | 0.803841  | 0.735479 | 1.08128  |
| PIN4P1      | 0.295947 | 0.29469  | 0.228506 | 0.111827 | 0.153236  | 0.0839983 | 0.675805 | 0.359451  | 0.0240287 | 0.160959  | 0.0222725 | 0.119996 | 0.0254591 | 0.226856 | 0.15584  |
| PINCR       | 0        | 0        | 0        | 0        | 0         | 0         | 0        | 0.0184629 | 0         | 0         | 0         | 0        | 0         | 0        | 0        |
| PINK1       | 11.0009  | 11.607   | 11.3205  | 15.3097  | 26.4379   | 25.8447   | 12.7796  | 6.14334   | 27.7254   | 19.0712   | 17.1352   | 12.5469  | 25.6171   | 10.6717  | 9.6177   |
| PINK1-AS    | 2.52079  | 1.70344  | 2.0604   | 1.18462  | 0.829296  | 2.54414   | 2.65223  | 1.96514   | 0.875921  | 0.986786  | 1.28598   | 0.975315 | 1.22014   | 0.987632 | 1.57631  |
| PINLYP      | 0.927532 | 0.980998 | 0.655029 | 1.28224  | 0.7731    | 1.52177   | 0.852387 | 0.46242   | 1.4878    | 1.07897   | 1.83875   | 0.6313   | 0.861168  | 1.20601  | 0.519826 |
| PINX1       | 2.19638  | 2.33667  | 1.75603  | 4.39014  | 2.86219   | 5.32188   | 2.10382  | 1.44104   | 5.04469   | 3.75574   | 5.67441   | 2.97437  | 5.30694   | 3.27428  | 2.07463  |
| PIP         | 97.5142  | 8.30493  | 11.3677  | 0.207028 | 1.74753   | 14.1637   | 22.7081  | 27.4949   | 0         | 0         | 0.408213  | 0        | 0         | 0        | 0.115404 |

|             |           |           |          |           |           |           |           |           |           |           |           |           |           |           |           |
|-------------|-----------|-----------|----------|-----------|-----------|-----------|-----------|-----------|-----------|-----------|-----------|-----------|-----------|-----------|-----------|
| PIP4K2A     | 4.14796   | 2.24072   | 2.61901  | 3.95908   | 2.24346   | 8.19034   | 2.26246   | 3.13187   | 1.8645    | 3.29914   | 5.02815   | 1.57493   | 5.14747   | 3.09183   | 5.03608   |
| PIP4K2B     | 5.8544    | 6.3418    | 6.03226  | 7.36458   | 8.67371   | 11.5238   | 6.2833    | 4.53191   | 1.96198   | 4.10467   | 6.08929   | 3.39741   | 6.4265    | 5.39574   | 6.85949   |
| PIP4K2C     | 5.78036   | 4.91196   | 4.66894  | 9.26128   | 6.16461   | 12.2131   | 6.18943   | 3.66755   | 9.74535   | 8.51829   | 7.5885    | 7.1712    | 14.6488   | 6.59075   | 4.86309   |
| PIP4P1      | 5.23474   | 5.12882   | 5.33548  | 5.63975   | 6.90584   | 9.15992   | 5.86247   | 4.12911   | 11.561    | 7.23028   | 11.0271   | 5.52876   | 9.26776   | 4.46382   | 3.18335   |
| PIP4P2      | 1.66615   | 1.09975   | 1.31461  | 0.972642  | 0.493684  | 2.36177   | 1.53947   | 1.43794   | 0.293234  | 1.57141   | 2.54407   | 0.551293  | 1.44782   | 0.875834  | 1.36929   |
| PIP5K1A     | 5.65817   | 5.51964   | 5.90758  | 7.42171   | 4.37092   | 7.33794   | 6.89746   | 5.01229   | 15.5437   | 9.00852   | 11.2789   | 7.25775   | 12.1675   | 9.00496   | 6.29293   |
| PIP5K1B     | 0.88134   | 0.265402  | 0.390593 | 0.12975   | 0.256692  | 0.91126   | 0.332434  | 0.370651  | 0.0191674 | 0.0493827 | 0.071066  | 0.0225222 | 0.0609253 | 0.0904803 | 0.158214  |
| PIP5K1C     | 3.20545   | 3.30433   | 3.51378  | 5.48604   | 7.94556   | 10.0466   | 5.53312   | 2.46488   | 2.99945   | 3.6808    | 3.78112   | 3.58951   | 6.66156   | 5.21417   | 7.39494   |
| PIP5K1P1    | 0.152723  | 0.186589  | 0.194028 | 0.0618302 | 0.0931984 | 0.0510879 | 0.180602  | 0.222981  | 0         | 0.0547667 | 0.018472  | 0.0585416 | 0         | 0.0769692 | 0.070499  |
| PIP5KL1     | 0.514892  | 0.887875  | 0.68377  | 1.91299   | 3.70436   | 1.36142   | 0.711653  | 0.409426  | 2.80536   | 2.63599   | 4.03816   | 3.2576    | 2.78003   | 2.01829   | 0.661613  |
| PIPOX       | 0.249469  | 0.129444  | 0.214316 | 0.0692152 | 0.253373  | 0.2451    | 0.394388  | 0.102326  | 0.0233712 | 0.072256  | 0.119147  | 0.0411927 | 0.0804781 | 0.0451327 | 0.0413387 |
| PIPSL       | 0.0798207 | 0.0531843 | 0.060923 | 0.0948601 | 0.0668461 | 0.0575075 | 0.189277  | 0.119833  | 0.119637  | 0.130814  | 0.090013  | 0.0615252 | 0         | 0.096324  | 0.167238  |
| PIR         | 2.26657   | 2.17889   | 2.22106  | 1.68571   | 0.981891  | 2.74719   | 1.91577   | 1.311     | 3.53271   | 1.57505   | 3.59556   | 1.62624   | 1.27303   | 1.4972    | 0.980042  |
| PIR-FIGF    | 0.398603  | 0.0632231 | 0.127575 | 0.0503542 | 0.692651  | 0.28234   | 0.233183  | 0.270104  | 0.0160859 | 0.0158627 | 0.0435489 | 0.0358226 | 3.51E-27  | 0.0135949 | 1.45E-05  |
| PIRT        | 0.0934803 | 0.173727  | 0.060762 | 0.020643  | 0.414878  | 0.0852828 | 0.114357  | 0.0474729 | 0.146377  | 0.368743  | 0.437186  | 0.205441  | 0.2671    | 0.15704   | 0.0863033 |
| PISD        | 2.6785    | 2.84106   | 3.00228  | 4.01796   | 4.87903   | 5.1357    | 3.63027   | 2.56881   | 3.12913   | 2.49112   | 3.6618    | 2.95524   | 3.12893   | 2.94751   | 2.75817   |
| PISRT1      | 0         | 0.0839976 | 0        | 0         | 0         | 0         | 0.0497627 | 0         | 0         | 0         | 0         | 0         | 0         | 0         | 0         |
| PITHD1      | 13.8116   | 14.5124   | 12.2404  | 18.3062   | 25.9978   | 22.8526   | 12.9513   | 10.791    | 45.7886   | 31.5361   | 38.9307   | 27.2588   | 30.8854   | 16.2045   | 8.6267    |
| PITPNA      | 15.7357   | 20.0497   | 18.4614  | 22.153    | 18.2849   | 28.3267   | 16.3515   | 15.9172   | 32.5197   | 20.5655   | 20.3073   | 23.242    | 25.6869   | 16.6164   | 11.1826   |
| PITPNA-AS1  | 1.89509   | 1.75581   | 2.8724   | 2.54047   | 1.36721   | 3.20803   | 2.61849   | 2.27395   | 4.07643   | 1.58037   | 2.30477   | 1.18639   | 1.95243   | 0.985443  | 1.43754   |
| PITPNB      | 8.92471   | 8.26195   | 8.2098   | 14.1574   | 3.68496   | 15.8217   | 5.80038   | 7.87053   | 10.3119   | 10.5887   | 10.3332   | 7.97963   | 20.3455   | 11.5891   | 9.8591    |
| PITPNC1     | 1.22131   | 0.595451  | 0.670562 | 2.46474   | 1.60915   | 4.00497   | 0.751177  | 0.772051  | 0.672879  | 2.55478   | 3.63963   | 1.00392   | 5.25091   | 3.03002   | 5.52289   |
| PITPNM1     | 1.18837   | 1.26125   | 1.20056  | 7.79934   | 6.64372   | 8.84578   | 1.51315   | 0.973386  | 2.29434   | 4.64641   | 3.22706   | 2.99372   | 11.5469   | 7.43578   | 4.35704   |
| PITPNM2     | 1.35371   | 1.64826   | 1.57777  | 2.41554   | 2.4705    | 4.29831   | 2.23086   | 1.2564    | 0.950214  | 1.80366   | 1.21576   | 1.83703   | 3.21611   | 2.20789   | 3.18907   |
| PITPNM2-AS1 | 0.295758  | 0.407145  | 0.358269 | 0.130623  | 0.360968  | 0.341775  | 0.410048  | 0.206521  | 0.0385928 | 0.344692  | 0         | 0.219181  | 0.0136301 | 0.447166  | 0.515763  |
| PITPNM3     | 3.56649   | 6.03914   | 4.8004   | 3.88543   | 10.4967   | 4.26304   | 5.09934   | 3.1724    | 4.93479   | 2.88803   | 1.48694   | 4.38134   | 4.71913   | 4.57198   | 1.85911   |

|                     |           |            |            |            |            |            |           |            |            |            |            |           |            |            |           |
|---------------------|-----------|------------|------------|------------|------------|------------|-----------|------------|------------|------------|------------|-----------|------------|------------|-----------|
| PITRM1              | 6.75865   | 5.55432    | 5.0659     | 9.53713    | 4.22867    | 12.5467    | 7.64599   | 5.1838     | 8.38779    | 10.2598    | 7.56583    | 7.96126   | 14.3126    | 7.99418    | 7.80759   |
| PITRM1-AS1          | 1.11587   | 1.07952    | 1.08264    | 0.596192   | 0.770065   | 0.608357   | 1.19963   | 0.936008   | 0.218892   | 0.609443   | 0.230945   | 0.707606  | 0.151193   | 0.948829   | 1.00389   |
| PITX1               | 1.66071   | 1.03412    | 0.474019   | 10.2084    | 5.76273    | 3.95278    | 0.654224  | 0.448811   | 6.67088    | 15.2609    | 13.3424    | 5.81631   | 25.9724    | 8.01465    | 3.3334    |
| PITX2               | 0.0696273 | 0.0309669  | 0.0398774  | 0.0938308  | 0.0332785  | 0.0182421  | 0.024461  | 0.0333194  | 0.00652294 | 0.0134445  | 0.0060462  | 0.0229939 | 0.0311007  | 0.00279925 | 0         |
| PITX3               | 0         | 0.00803363 | 0.0137936  | 0          | 0.0776999  | 0          | 0         | 0.0148182  | 0          | 0.0418543  | 0          | 0         | 0.0430311  | 0          | 0.191564  |
| PIWIL1              | 0.0126881 | 0.0152833  | 0.0104965  | 0.0261509  | 0          | 0.00540187 | 0         | 0.0451044  | 0          | 0.00796242 | 0.00716163 | 0         | 0.00409314 | 0          | 0         |
| PIWIL2              | 0.3016    | 0.317877   | 0.33917    | 0.0242818  | 0.102482   | 0.216682   | 0.236745  | 0.21778    | 0          | 0.0768906  | 0.106396   | 0.0168596 | 0          | 0.0394073  | 0.121819  |
| PIWIL3              | 0.0186909 | 0.0238965  | 0.010074   | 0.0188237  | 0.00946684 | 0.00525016 | 0.0347593 | 0.00541111 | 0          | 0.00764191 | 0          | 0.0130893 | 0          | 0.0127288  | 0         |
| PIWIL4              | 0.448537  | 0.254454   | 0.299243   | 0.178928   | 0.0561881  | 0.252562   | 0.289103  | 0.289323   | 0.0264323  | 0.1362     | 0.318506   | 0.0724703 | 0.126026   | 0.166366   | 0.394805  |
| PJA1                | 1.96877   | 2.04042    | 2.51951    | 2.76589    | 3.09562    | 4.11227    | 2.04603   | 1.29262    | 2.16286    | 3.80231    | 3.59227    | 1.4892    | 5.1691     | 2.80971    | 2.36578   |
| PJA2                | 13.8887   | 12.5958    | 14.9264    | 14.3078    | 5.13137    | 18.9208    | 8.82428   | 13.5217    | 12.8685    | 19.645     | 16.1615    | 9.42417   | 19.3846    | 13.4519    | 15.6113   |
| PJKV                | 0.493971  | 0.572219   | 0.730348   | 0.303265   | 0.22856    | 0.429559   | 0.336     | 0.410979   | 0.128      | 0.184676   | 0.284748   | 0.157924  | 0          | 0.175776   | 0.316968  |
| PKD1                | 7.47989   | 12.9465    | 14.3168    | 7.70715    | 26.5956    | 16.8434    | 14.9176   | 8.30722    | 2.55187    | 3.26032    | 2.74681    | 5.92296   | 6.40226    | 7.11994    | 13.3671   |
| PKD1L1              | 0.231634  | 0.127548   | 0.128451   | 0.104926   | 0.328176   | 0.153885   | 0.244128  | 0.119895   | 0.148802   | 0.198076   | 0.267233   | 0.285948  | 0.0968956  | 0.481588   | 0.709179  |
| PKD1L2              | 0.149038  | 0.350914   | 0.460611   | 0.0608556  | 0.227139   | 0.318456   | 0.292173  | 0.144948   | 0.0171237  | 0.0141176  | 0.0222211  | 0.0140846 | 0          | 0.0117575  | 0.0121153 |
| PKD1L3              | 0.107016  | 0.0816824  | 0.0516123  | 0.0276039  | 0.0484397  | 0.102418   | 0.07121   | 0.0752232  | 0.0271277  | 0.0447547  | 0.10058    | 0.0318758 | 0.00862802 | 0.0535652  | 0.0896855 |
| PKD1P1              | 14.559    | 26.1752    | 28.3623    | 17.0095    | 47.8553    | 32.1791    | 23.9187   | 14.9766    | 6.88341    | 5.71144    | 5.10907    | 14.6453   | 5.97432    | 12.9003    | 22.9079   |
| PKD1P3-NPIPA1       | 0.513883  | 1.11445    | 1.17893    | 0.72563    | 2.81693    | 1.51557    | 0.920948  | 0.655281   | 0.205929   | 0.307256   | 0.188713   | 0.526481  | 0.347338   | 0.504471   | 0.788568  |
| PKD1P4-NPIPA8       | 0.211738  | 0.571789   | 0.588969   | 0.282031   | 1.56607    | 0.594442   | 0.414056  | 0.349133   | 0.011995   | 0.085737   | 0.109996   | 0.374393  | 0.148739   | 0.35408    | 0.554148  |
| PKD1P5-LOC105376752 | 0.226711  | 0.343639   | 0.433123   | 0.176673   | 2.75133    | 0.3629     | 0.43375   | 0.304646   | 0.168296   | 0.0747863  | 0.0585253  | 0.243767  | 0.0596351  | 0.722455   | 1.0733    |
| PKD1P6-NPIPP1       | 6.5176    | 9.51833    | 9.53169    | 6.14936    | 14.4745    | 10.3353    | 8.04137   | 7.06197    | 1.77669    | 2.0685     | 1.88398    | 4.24011   | 1.91035    | 5.62575    | 10.1356   |
| PKD2                | 4.70244   | 2.17132    | 2.21651    | 3.15552    | 2.76749    | 5.42404    | 2.36199   | 2.53907    | 1.43731    | 3.15116    | 5.18504    | 1.35306   | 2.94285    | 4.26051    | 6.3868    |
| PKD2L1              | 0.0150622 | 0.00725719 | 0.00623025 | 0.00776101 | 0          | 0.0384758  | 0         | 0.013386   | 0.0550321  | 0          | 0.0170033  | 0.0053887 | 0          | 0.00393608 | 0         |
| PKD2L2              | 0.0813002 | 0.0639213  | 0.0840365  | 0.0239935  | 0.0482215  | 0.0330416  | 0.0832475 | 0.0703105  | 0.00945192 | 0.00974075 | 9.35E-33   | 0.0703102 | 0.0269435  | 0.045663   | 0.107206  |
| PKDCC               | 2.35965   | 0.566228   | 0.964551   | 1.00128    | 2.93228    | 7.27255    | 2.64134   | 0.888166   | 0.0676185  | 0.313581   | 1.11773    | 0.0264846 | 0.776142   | 0.401412   | 3.77414   |
| PKDREJ              | 0.111788  | 0.183418   | 0.247443   | 0.0965192  | 0.0328517  | 0.0617421  | 0.182829  | 0.0993475  | 0.0551938  | 0.0341282  | 0.0784451  | 0.0713398 | 0.0194932  | 0.0426345  | 0.0433895 |

|            |           |           |           |            |            |            |           |           |            |           |            |            |            |            |            |
|------------|-----------|-----------|-----------|------------|------------|------------|-----------|-----------|------------|-----------|------------|------------|------------|------------|------------|
| PKHD1      | 0.0398858 | 0.0595744 | 0.0593934 | 0.00822069 | 0.00413042 | 0.0260377  | 0.0759005 | 0.0567154 | 0          | 0         | 0.00150087 | 0.00380524 | 0          | 0.00347434 | 0.00763747 |
| PKHD1L1    | 1.50963   | 0.39329   | 0.426842  | 0.212687   | 0.214326   | 0.225099   | 0.524243  | 0.589413  | 0.00706053 | 0.218288  | 0.0863873  | 0.141038   | 0.23041    | 0.201189   | 0.211474   |
| PKIA       | 1.05772   | 1.44924   | 1.67711   | 0.953755   | 0.521994   | 0.544131   | 0.880589  | 2.21294   | 0.516614   | 0.331886  | 0.522388   | 0.30746    | 0.248804   | 0.135323   | 0.158231   |
| PKIA-AS1   | 0.414296  | 0.720829  | 0.723552  | 0.166034   | 0.214515   | 0.0293973  | 0.578148  | 1.06367   | 0.0280315  | 0         | 0.0519654  | 0.0905789  | 0          | 0.0781911  | 0.132218   |
| PKIB       | 0.334523  | 0.46786   | 0.507395  | 0.594648   | 0.22127    | 0.143289   | 0.334477  | 0.603158  | 0.304426   | 0.226053  | 0.466529   | 0.276582   | 0.378255   | 0.285038   | 0.469004   |
| PKIG       | 4.6602    | 2.58788   | 3.35429   | 6.78319    | 6.11422    | 16.6346    | 4.29879   | 2.1995    | 2.02013    | 7.81524   | 18.7396    | 2.15706    | 11.1181    | 6.57754    | 10.9465    |
| PKLR       | 0.10029   | 0.114799  | 0.0368436 | 0.197023   | 0.315682   | 0.385291   | 0.0991059 | 0.143521  | 0.100638   | 0.213091  | 0.114103   | 0.135396   | 0.281893   | 0.200445   | 0.0673037  |
| PKM        | 70.1286   | 66.1492   | 73.3467   | 255.505    | 133.786    | 314.522    | 79.5941   | 56.6644   | 83.3596    | 269.39    | 182.46     | 170.562    | 418.863    | 195.903    | 118.539    |
| PKMYT1     | 0.472442  | 0.433875  | 0.498483  | 2.75895    | 1.14451    | 3.7921     | 1.14255   | 0.319157  | 0.496925   | 1.64998   | 2.06207    | 1.02481    | 4.15987    | 2.21279    | 0.896429   |
| PKN1       | 6.04408   | 2.39654   | 3.21129   | 4.73035    | 10.4546    | 14.8238    | 6.46277   | 2.4988    | 1.50995    | 4.86274   | 6.55636    | 1.42572    | 5.75657    | 4.74796    | 9.63393    |
| PKN2       | 5.41338   | 5.22183   | 5.38942   | 5.73634    | 1.68177    | 5.12758    | 3.33338   | 5.73335   | 4.27399    | 5.50107   | 5.07846    | 3.98292    | 7.29606    | 4.49167    | 3.73702    |
| PKN2-AS1   | 0.111076  | 0.0188888 | 0.054053  | 0          | 0          | 0.00556352 | 0.0223806 | 0.0290339 | 0.00795755 | 0         | 0          | 0          | 0.00843127 | 0          | 0          |
| PKN3       | 1.7037    | 1.1131    | 0.992234  | 1.76273    | 3.39803    | 3.49903    | 1.20604   | 0.987197  | 0.821665   | 1.05205   | 1.41552    | 0.8387     | 1.6796     | 2.06579    | 3.4352     |
| PKNOX1     | 1.50482   | 1.73551   | 2.02115   | 2.44645    | 1.20234    | 2.36384    | 1.66878   | 1.69859   | 1.60098    | 2.11122   | 2.89472    | 1.33973    | 2.62532    | 1.98655    | 1.82577    |
| PKNOX2     | 0.465343  | 0.352756  | 0.513286  | 0.338882   | 0.250584   | 0.586425   | 0.69425   | 0.286734  | 1.38283    | 0.155747  | 0.210126   | 0.159823   | 0.0640505  | 0.0940406  | 0.187122   |
| PKNOX2-AS1 | 0         | 0         | 0         | 0.040699   | 0          | 0          | 0.0450921 | 0         | 0          | 0         | 0          | 0.0282585  | 0          | 0          | 0          |
| PKP1       | 172.081   | 253.045   | 209.641   | 273.507    | 393.572    | 282.257    | 357.012   | 171.538   | 651.994    | 424.297   | 220.559    | 489.198    | 650.44     | 238.054    | 104.875    |
| PKP2       | 1.52757   | 0.615433  | 0.715964  | 1.46676    | 0.445416   | 2.82783    | 0.648843  | 1.11665   | 0.247632   | 1.45268   | 0.482609   | 0.65656    | 4.6151     | 1.89922    | 0.546577   |
| PKP3       | 32.4301   | 45.66     | 42.1044   | 80.5711    | 134.48     | 92.5418    | 41.3415   | 23.1099   | 193.457    | 128.202   | 59.5855    | 125.669    | 171.939    | 74.1106    | 28.3179    |
| PKP4       | 7.94012   | 8.07555   | 7.87328   | 8.6169     | 6.08712    | 11.2711    | 6.341     | 6.85838   | 5.07461    | 5.71671   | 5.76586    | 5.07027    | 8.03054    | 6.46111    | 7.1237     |
| PKP4-AS1   | 0.660878  | 0.786137  | 0.819112  | 0.323907   | 0.602357   | 0.20908    | 0.364434  | 0.597119  | 0.097147   | 0.143004  | 0.167355   | 0.371292   | 0.0589675  | 0.611073   | 0.836872   |
| PLA1A      | 0.627444  | 0.0232548 | 0.0598923 | 0.0746077  | 0.0562291  | 1.10962    | 0.0688842 | 0.0857878 | 0          | 0.0908662 | 0.217941   | 0          | 0.249122   | 0.145046   | 0.433216   |
| PLA2G10    | 0.0227885 | 0.10987   | 0.0566472 | 0.0706692  | 0.106647   | 0.0389632  | 0.155894  | 0.0809994 | 0          | 0.0856841 | 0          | 0.0325653  | 0.0293644  | 0.0835301  | 0.228765   |
| PLA2G12A   | 3.59856   | 3.28237   | 3.02452   | 3.1435     | 1.57256    | 3.31257    | 2.33702   | 3.13131   | 3.50503    | 3.73975   | 5.07042    | 2.71721    | 3.01773    | 2.49074    | 2.19671    |
| PLA2G12B   | 0.0146754 | 0         | 0.0607025 | 0          | 0          | 0          | 0.0335117 | 0         | 0          | 0         | 0          | 0.0105006  | 0          | 0.00766999 | 0          |
| PLA2G15    | 2.21501   | 2.18352   | 2.18345   | 2.57999    | 5.69492    | 4.27795    | 3.00383   | 1.87801   | 3.34878    | 2.01315   | 3.79381    | 1.6274     | 1.8343     | 1.54798    | 2.34007    |



|             |           |           |           |           |           |           |           |           |           |           |           |            |           |           |           |
|-------------|-----------|-----------|-----------|-----------|-----------|-----------|-----------|-----------|-----------|-----------|-----------|------------|-----------|-----------|-----------|
| PLA2G16     | 3.21749   | 0.590191  | 0.837703  | 1.11085   | 1.42071   | 4.38066   | 2.90906   | 1.23377   | 0.278475  | 1.02494   | 2.24935   | 0.175294   | 0.769245  | 0.435338  | 1.21968   |
| PLA2G1B     | 0         | 0.0197357 | 0         | 0         | 0         | 0.0348779 | 0         | 0         | 0         | 0         | 0         | 0.0293088  | 0         | 0         | 0         |
| PLA2G2A     | 46.3535   | 6.62339   | 10.2963   | 2.86565   | 5.85218   | 24.8235   | 16.8734   | 12.9345   | 0.0273117 | 0.0562925 | 0.531626  | 0.096276   | 2.79248   | 0.152367  | 19.3234   |
| PLA2G2C     | 0         | 0         | 0         | 0         | 0         | 0         | 0.0424823 | 0         | 0         | 0         | 0         | 0          | 0         | 0         | 0         |
| PLA2G2D     | 0.0117477 | 0.0169807 | 0.0291557 | 0         | 0.0182483 | 0.140043  | 0         | 0.0313212 | 0         | 0.0589785 | 0.0530469 | 0.00840582 | 0         | 0         | 0         |
| PLA2G2E     | 0         | 0         | 0         | 0         | 0.0738176 | 0         | 0         | 0         | 0         | 0         | 0         | 0          | 0         | 0.0248369 | 0         |
| PLA2G2F     | 1.41293   | 2.46881   | 3.35171   | 4.91201   | 4.11187   | 0.927682  | 2.94464   | 2.62485   | 7.42218   | 1.69859   | 1.71032   | 2.14987    | 0.587606  | 0.391471  | 0.452278  |
| PLA2G3      | 2.54668   | 4.04465   | 4.29871   | 6.45061   | 5.19458   | 6.06732   | 4.63081   | 2.6824    | 14.6097   | 15.7019   | 8.72145   | 14.3875    | 16.431    | 10.1596   | 1.68706   |
| PLA2G4A     | 1.35159   | 1.75181   | 1.43854   | 2.05262   | 1.00677   | 2.71226   | 1.27247   | 1.41192   | 1.5787    | 6.2697    | 3.69401   | 2.12649    | 10.8418   | 4.64741   | 2.84915   |
| PLA2G4B     | 5.22609   | 8.06086   | 8.29013   | 14.0488   | 10.2576   | 11.9216   | 5.02068   | 6.94308   | 48.4008   | 13.9507   | 21.2868   | 26.1823    | 9.19268   | 13.575    | 5.40607   |
| PLA2G4C     | 1.07286   | 0.799033  | 1.20079   | 0.88263   | 1.09234   | 0.758252  | 1.58339   | 0.560862  | 0.15372   | 0.407358  | 1.57751   | 0.348349   | 0.407178  | 0.973528  | 1.37244   |
| PLA2G4C-AS1 | 0         | 0.0134669 | 0         | 0         | 9.56E-38  | 0.0276856 | 0.0357006 | 0.0235597 | 0         | 1.66E-21  | 0         | 3.98E-39   | 0         | 0.0885575 | 0.0761428 |
| PLA2G4D     | 5.1594    | 4.62641   | 3.14641   | 43.3205   | 18.757    | 12.3822   | 3.72325   | 8.22934   | 102.22    | 10.147    | 21.577    | 40.3637    | 5.50776   | 13.2025   | 1.59505   |
| PLA2G4E     | 7.08164   | 15.8002   | 19.2216   | 32.0462   | 26.6059   | 10.5753   | 14.2928   | 15.2435   | 26.4468   | 15.6124   | 8.50627   | 16.9843    | 31.0236   | 17.5664   | 4.82654   |
| PLA2G4E-AS1 | 1.96936   | 5.86452   | 7.31678   | 4.06142   | 9.16458   | 2.10012   | 5.7736    | 5.77028   | 3.06592   | 3.2353    | 0.522722  | 4.72727    | 0.858785  | 7.37852   | 1.94178   |
| PLA2G4F     | 10.3718   | 24.8383   | 24.6278   | 12.881    | 47.6036   | 12.3813   | 22.6476   | 19.5069   | 28.4934   | 10.0316   | 7.62368   | 23.9804    | 9.72371   | 10.1801   | 3.42644   |
| PLA2G5      | 0.219945  | 0.0941979 | 0.242605  | 0.100737  | 0.151844  | 0.218493  | 0.19532   | 0.0325781 | 0.0148815 | 0.0613451 | 0.234496  | 0.00874312 | 0.0473024 | 0.0191588 | 0.631736  |
| PLA2G6      | 1.9786    | 3.27625   | 2.95177   | 1.33895   | 4.65117   | 2.06663   | 2.50761   | 1.94012   | 1.86351   | 0.794672  | 0.498836  | 1.54788    | 0.404252  | 0.865201  | 1.54389   |
| PLA2G7      | 0.4785    | 0.151825  | 0.125513  | 1.73189   | 0.235673  | 1.56018   | 0.239855  | 0.414879  | 0.454836  | 2.1386    | 6.12628   | 0.192066   | 2.29662   | 1.07964   | 1.20677   |
| PLA2R1      | 10.9788   | 8.37249   | 7.28335   | 5.76869   | 9.3144    | 4.71287   | 6.42738   | 8.75026   | 11.9145   | 6.91176   | 3.53264   | 7.72052    | 3.89366   | 6.22949   | 3.21367   |
| PLAA        | 3.34748   | 3.00154   | 3.12354   | 4.60216   | 2.08861   | 3.84743   | 2.59031   | 3.19848   | 4.55391   | 3.68379   | 4.02446   | 2.72809    | 5.73155   | 3.45666   | 2.95601   |
| PLAC1       | 0         | 0.0236076 | 0.0135113 | 0.0336621 | 0.0761097 | 0.152975  | 0.0372957 | 0.0290298 | 0         | 0.0204989 | 0         | 0.0233726  | 0.0843008 | 0.0426802 | 0.0703663 |
| PLAC4       | 2.05788   | 1.44383   | 1.66799   | 1.40348   | 1.05595   | 0.982445  | 1.43617   | 1.43638   | 0.132353  | 0.429508  | 0.159223  | 0.777595   | 0.196922  | 1.75228   | 1.79647   |
| PLAC8       | 0.180717  | 0.0653041 | 0.0840947 | 0.197874  | 0.0526342 | 0.480869  | 0.0773762 | 0.0401515 | 0.0275116 | 0.212642  | 0.522767  | 0.0242452  | 0.269632  | 0.0472253 | 0.227091  |
| PLAC8L1     | 0.266989  | 0.532098  | 0.461823  | 0.187595  | 0.0942558 | 0.124002  | 0.415689  | 0.431413  | 0.103461  | 0.0456952 | 0.095899  | 0.130253   | 0.0313199 | 0.158568  | 0.104572  |
| PLAC9       | 11.3827   | 3.40499   | 5.13226   | 2.30713   | 13.7428   | 6.27009   | 15.183    | 4.0512    | 0.755559  | 3.58855   | 12.3625   | 0.636903   | 1.166     | 1.48023   | 6.19792   |

|           |           |            |           |           |           |           |           |           |           |           |           |            |           |            |           |
|-----------|-----------|------------|-----------|-----------|-----------|-----------|-----------|-----------|-----------|-----------|-----------|------------|-----------|------------|-----------|
| PLAC9P1   | 0.115427  | 0.0278072  | 0.0954891 | 0.0594753 | 0.71719   | 0.0491422 | 0.658952  | 0         | 0         | 0.0724362 | 0.325756  | 0          | 0         | 0.060327   | 0         |
| PLAG1     | 0.126155  | 0.17931    | 0.169591  | 0.0975045 | 0.0489904 | 0.134274  | 0.140438  | 0.302712  | 0.192053  | 0.249381  | 0.256343  | 0.0722136  | 0.124126  | 0.126923   | 0.0226467 |
| PLAGL1    | 3.44124   | 5.45207    | 6.676     | 2.32832   | 3.40066   | 4.7842    | 5.51699   | 5.06346   | 2.58814   | 2.19913   | 3.99595   | 3.25388    | 2.68726   | 3.33435    | 6.67525   |
| PLAGL2    | 3.20795   | 3.16619    | 3.61857   | 3.21312   | 2.44068   | 3.63739   | 4.61579   | 3.61097   | 3.52819   | 2.56266   | 2.61441   | 2.86629    | 3.92038   | 2.82501    | 2.44454   |
| PLAT      | 2.29204   | 0.647369   | 0.731109  | 8.90759   | 2.14288   | 5.66522   | 1.76379   | 1.18131   | 0.560037  | 1.56913   | 2.75775   | 0.678625   | 7.84828   | 3.88287    | 2.74476   |
| PLAU      | 3.21756   | 8.8092     | 3.16997   | 19.2133   | 18.7485   | 20.7361   | 2.72014   | 4.47773   | 5.41727   | 18.2667   | 36.9818   | 5.03407    | 26.735    | 18.419     | 14.9585   |
| PLAUR     | 0.989708  | 0.593298   | 1.07581   | 9.47578   | 2.4133    | 7.75109   | 0.998619  | 0.490923  | 0.812913  | 13.6929   | 22.6439   | 5.76412    | 20.4635   | 8.08374    | 10.1477   |
| PLB1      | 0.488692  | 0.794206   | 0.808561  | 0.947269  | 1.34953   | 1.09313   | 1.20451   | 0.634228  | 3.12229   | 0.477057  | 1.09021   | 0.607764   | 0.315301  | 0.233114   | 0.473452  |
| PLBD1     | 22.3764   | 16.5298    | 11.7331   | 36.0336   | 19.7237   | 14.4531   | 18.1357   | 13.254    | 177.838   | 27.2277   | 48.5461   | 48.5042    | 20.8442   | 7.63799    | 7.07047   |
| PLBD1-AS1 | 1.22429   | 2.26439    | 1.43755   | 1.66866   | 1.96309   | 2.2867    | 1.93896   | 0.877458  | 4.28075   | 1.04093   | 2.13998   | 1.72377    | 0.789906  | 0.619227   | 0         |
| PLBD2     | 6.52121   | 5.55573    | 6.16547   | 9.40684   | 13.1509   | 28.1739   | 11.8964   | 6.14416   | 6.82745   | 10.4004   | 18.1917   | 6.70684    | 13.4609   | 7.13249    | 15.034    |
| PLCB1     | 1.28448   | 0.591031   | 0.781018  | 0.681701  | 0.813058  | 1.20308   | 0.722287  | 0.779096  | 0.187722  | 0.769802  | 1.33039   | 0.252746   | 1.01106   | 1.28223    | 2.32429   |
| PLCB1-IT1 | 0.24885   | 0.0599499  | 0.0514666 | 0.0641118 | 0         | 0.211893  | 0         | 0.0552893 | 0         | 0         | 0         | 0.0445147  | 0         | 0.0975449  | 0.625415  |
| PLCB2     | 0.605344  | 0.480154   | 0.562103  | 0.789328  | 1.3305    | 1.91099   | 0.521897  | 0.446486  | 0.0551676 | 0.537523  | 0.855358  | 0.20331    | 0.69345   | 0.456274   | 2.0817    |
| PLCB3     | 3.02622   | 4.91735    | 4.25158   | 10.2303   | 12.1252   | 10.909    | 5.42046   | 3.18856   | 7.55824   | 11.1412   | 4.95334   | 9.09789    | 20.2277   | 12.0388    | 5.99976   |
| PLCB4     | 3.25179   | 1.24947    | 1.61069   | 0.459457  | 0.501941  | 1.22596   | 1.23761   | 1.58129   | 0.104613  | 0.400434  | 0.332458  | 0.0936555  | 0.277101  | 0.235156   | 0.687284  |
| PLCD1     | 5.35906   | 6.52316    | 5.41464   | 9.55479   | 14.93     | 9.00933   | 5.20223   | 4.17779   | 23.8166   | 27.6482   | 17.6998   | 16.0575    | 25.6253   | 10.8747    | 6.40842   |
| PLCD3     | 5.11843   | 6.03513    | 6.12238   | 11.4021   | 16.4922   | 9.5007    | 11.3148   | 4.60814   | 29.3153   | 7.00208   | 6.63687   | 5.85884    | 10.0923   | 5.17236    | 3.60348   |
| PLCD4     | 1.02238   | 1.32623    | 0.455424  | 1.17148   | 2.02124   | 1.60716   | 1.14284   | 0.787885  | 1.22773   | 1.57932   | 0.847448  | 1.30962    | 1.3654    | 2.60445    | 1.22185   |
| PLCE1     | 0.918287  | 0.388885   | 0.431475  | 0.19441   | 0.262874  | 0.616551  | 0.842578  | 0.369832  | 0.0675752 | 0.306417  | 0.294391  | 0.20627    | 0.263123  | 0.528979   | 1.22714   |
| PLCE1-AS1 | 0.0821841 | 0.0322298  | 0.0407931 | 0.0169386 | 0         | 0.055983  | 0.0938352 | 0.043823  | 0         | 0         | 0         | 0.0245759  | 0.0424198 | 0.130378   | 0         |
| PLCE1-AS2 | 0.0194316 | 0.00936245 | 0.040188  | 0         | 0.015092  | 0.0330915 | 0.0221864 | 0.043173  | 0         | 0         | 0         | 0.0139038  | 0         | 0.00507791 | 0         |
| PLCG1     | 8.17853   | 8.65408    | 8.76969   | 7.1489    | 14.0587   | 13.9368   | 9.15326   | 6.66146   | 12.258    | 8.5576    | 6.84549   | 9.1333     | 9.18999   | 10.5041    | 10.1103   |
| PLCG1-AS1 | 0.713392  | 0.589749   | 0.463313  | 0.470522  | 0.24991   | 0.343472  | 0.475986  | 0.704619  | 0.211645  | 0.634199  | 0.34165   | 0.649656   | 0.214938  | 0.840362   | 0.420144  |
| PLCG2     | 108.066   | 113.229    | 111.17    | 90.3611   | 104.763   | 97.6768   | 165.102   | 144.356   | 89.3414   | 77.4195   | 259.423   | 58.6438    | 51.7802   | 60.3125    | 46.1003   |
| PLCH1     | 0.233392  | 0.0863762  | 0.125921  | 0.0418292 | 0.0683044 | 0.3917    | 0.127447  | 0.186377  | 0.0041195 | 0.0721715 | 0.0496394 | 0.00968107 | 0.0218237 | 0.0247498  | 0.0340039 |

|            |           |           |           |           |            |            |           |           |           |           |            |            |            |            |            |
|------------|-----------|-----------|-----------|-----------|------------|------------|-----------|-----------|-----------|-----------|------------|------------|------------|------------|------------|
| PLCH1-AS2  | 0         | 0         | 0         | 0         | 0          | 0          | 0         | 0         | 0         | 0         | 0          | 0          | 0          | 0.059292   | 0          |
| PLCH2      | 2.44144   | 8.08141   | 9.04657   | 1.54723   | 13.5413    | 2.82464    | 5.35116   | 4.96765   | 3.01872   | 2.4616    | 1.03449    | 4.88748    | 3.2966     | 5.43639    | 1.80168    |
| PLCL1      | 0.756492  | 0.383051  | 0.52152   | 0.353702  | 0.397138   | 0.87675    | 0.39588   | 0.420192  | 0.136492  | 0.316492  | 0.751191   | 0.170406   | 0.45193    | 0.386224   | 1.40329    |
| PLCL2      | 1.7336    | 0.743039  | 1.2098    | 1.07959   | 0.487362   | 2.07384    | 0.916826  | 1.04445   | 0.200771  | 1.04788   | 2.02905    | 0.224496   | 0.71022    | 0.722622   | 3.16172    |
| PLCXD1     | 1.14962   | 2.23314   | 1.72578   | 11.6367   | 6.26692    | 2.17223    | 2.98653   | 1.75255   | 18.4037   | 5.53916   | 5.07443    | 7.79622    | 5.56989    | 3.88517    | 1.8365     |
| PLCXD2     | 0.290904  | 0.321854  | 0.347615  | 0.544055  | 0.909923   | 0.12099    | 0.356748  | 0.239381  | 0.813552  | 0.189319  | 0.255453   | 0.272541   | 0.208544   | 0.119289   | 0.0464195  |
| PLCXD2-AS1 | 0.0240823 | 0.0348096 | 0.119535  | 0.0496349 | 0.0748161  | 0.0820229  | 0.082489  | 0.0428046 | 0.146647  | 0         | 0          | 0.0172315  | 0          | 0.0377593  | 0          |
| PLCXD3     | 0.616032  | 0.0662787 | 0.0865867 | 0.0493078 | 0.00929039 | 0.432875   | 0.119504  | 0.186036  | 0         | 0.0112599 | 0.00337584 | 0          | 0.0328001  | 0.00625175 | 0.0601252  |
| PLCZ1      | 0.0535967 | 0.160107  | 0.230563  | 0         | 0          | 0.00912738 | 0.0979119 | 0.247688  | 0         | 0.0134539 | 0          | 0.00766997 | 0          | 0          | 0          |
| PLD1       | 5.31625   | 10.4008   | 9.11694   | 8.9105    | 5.8354     | 5.92974    | 5.44707   | 6.57468   | 11.8259   | 8.82733   | 8.98909    | 10.0701    | 5.43244    | 5.1975     | 6.87344    |
| PLD2       | 7.71222   | 10.0407   | 8.90477   | 29.2326   | 19.1985    | 26.2042    | 8.8734    | 6.51859   | 22.6469   | 25.4244   | 14.7292    | 21.6045    | 45.8588    | 21.2113    | 6.47427    |
| PLD3       | 15.7254   | 14.1045   | 16.6253   | 17.7032   | 29.073     | 54.9811    | 21.4441   | 12.6007   | 15.4859   | 16.11     | 43.2178    | 11.4305    | 14.6268    | 13.9156    | 21.9046    |
| PLD4       | 0.196128  | 0.155643  | 0.152706  | 0.0237783 | 0.627228   | 0.196471   | 0.250277  | 0.184555  | 0.140507  | 0.1448    | 0.299546   | 0.0495298  | 0.066992   | 0.0723564  | 0.182253   |
| PLD5       | 0.0403541 | 0.0291648 | 0.0222558 | 0.041586  | 0.0417892  | 0.0114536  | 0.0153583 | 0.0119544 | 0         | 0.0168828 | 0          | 0.0144372  | 0.00433937 | 0.00703026 | 0.00965892 |
| PLD6       | 1.12258   | 1.01252   | 1.25557   | 0.481249  | 0.76725    | 0.7341     | 1.09715   | 1.1892    | 0.196873  | 0.394506  | 0.283864   | 0.366275   | 0.706898   | 0.342637   | 0.580379   |
| PLEC       | 25.0523   | 31.5284   | 35.5711   | 50.0427   | 63.8535    | 79.7135    | 41.1469   | 24.6348   | 7.90063   | 20.3522   | 13.4217    | 34.0732    | 68.6595    | 38.574     | 47.2162    |
| PLEK       | 1.93129   | 0.731128  | 1.04052   | 6.19654   | 1.61343    | 7.83542    | 1.25078   | 1.80291   | 0.256952  | 6.75249   | 9.591      | 0.220638   | 7.15176    | 1.50558    | 7.07379    |
| PLEK2      | 1.93728   | 4.92554   | 6.01612   | 8.46177   | 2.38426    | 6.50945    | 2.8755    | 3.03283   | 3.1398    | 4.88168   | 6.07299    | 2.46313    | 9.60518    | 8.13121    | 3.0818     |
| PLEKHA1    | 7.15436   | 10.0609   | 11.7642   | 7.01631   | 1.79959    | 6.71359    | 7.18431   | 8.79306   | 8.96065   | 7.58732   | 8.13835    | 5.03268    | 8.26465    | 7.35796    | 5.22004    |
| PLEKHA2    | 4.18611   | 3.1818    | 3.78498   | 5.87782   | 2.54203    | 5.07674    | 4.47393   | 3.12161   | 6.26681   | 5.01626   | 6.4295     | 2.655      | 7.12172    | 3.856      | 3.9577     |
| PLEKHA3    | 2.54958   | 1.88329   | 1.99288   | 2.48252   | 1.17938    | 3.43199    | 1.53043   | 2.0326    | 0.662117  | 2.23528   | 4.19026    | 0.710937   | 2.67913    | 2.00858    | 3.2846     |
| PLEKHA4    | 5.25469   | 1.71076   | 2.03069   | 5.91016   | 6.62313    | 26.4108    | 2.95695   | 1.84128   | 0.557679  | 1.65821   | 2.16089    | 0.741229   | 2.06323    | 2.65999    | 6.26348    |
| PLEKHA5    | 2.30664   | 2.50894   | 2.64161   | 1.9016    | 0.975922   | 1.86737    | 1.72651   | 2.17653   | 2.14142   | 2.66459   | 2.25484    | 2.0911     | 3.13223    | 2.40854    | 3.64207    |
| PLEKHA6    | 0.714831  | 0.425633  | 0.730806  | 0.25413   | 0.683684   | 0.398692   | 0.926657  | 0.288513  | 0.0418184 | 0.0705212 | 0.0458097  | 0.0469044  | 0.134938   | 0.130516   | 0.197248   |
| PLEKHA7    | 2.1347    | 2.20262   | 2.15048   | 2.40173   | 2.91368    | 2.43958    | 1.6451    | 1.76733   | 0.950168  | 1.54589   | 0.813264   | 1.49418    | 1.92779    | 1.37075    | 0.986935   |
| PLEKHA8    | 0.935537  | 1.06348   | 1.23091   | 1.09163   | 0.731309   | 1.06088    | 0.851297  | 1.10425   | 2.22173   | 1.50264   | 1.43222    | 1.34608    | 1.27188    | 1.32916    | 0.967421   |

|           |           |          |           |           |          |           |           |          |            |            |            |           |           |           |           |
|-----------|-----------|----------|-----------|-----------|----------|-----------|-----------|----------|------------|------------|------------|-----------|-----------|-----------|-----------|
| PLEKHA8P1 | 0.163327  | 0.282206 | 0.166088  | 0.433861  | 0.269282 | 0.703166  | 0.201389  | 0.19239  | 0.0157231  | 0.300582   | 0.484828   | 0.0710931 | 0.42807   | 0.409986  | 0.429507  |
| PLEKHB1   | 0.880269  | 0.389425 | 0.450172  | 0.164935  | 0.733402 | 0.524676  | 0.968514  | 0.739638 | 0.0682225  | 0.18079    | 0.0903376  | 0.194683  | 0.0309788 | 0.146385  | 0.160895  |
| PLEKHB2   | 7.60341   | 5.69123  | 6.52802   | 11.3104   | 4.97891  | 12.0082   | 5.97222   | 6.15885  | 9.50795    | 12.7104    | 13.3003    | 7.20336   | 16.6514   | 9.23848   | 8.11744   |
| PLEKHD1   | 0.24267   | 0.147691 | 0.274716  | 0.0526481 | 0.317432 | 0.0870022 | 0.233324  | 0.170262 | 0          | 0.0320606  | 0          | 0.0274163 | 0         | 0.0400516 | 0         |
| PLEKHF1   | 3.18067   | 1.25678  | 1.44225   | 2.00232   | 4.09312  | 4.65737   | 2.1121    | 1.44293  | 1.45872    | 2.98988    | 3.77086    | 1.26648   | 4.6796    | 2.76132   | 1.93035   |
| PLEKHF2   | 5.64331   | 5.8856   | 6.41199   | 7.01411   | 2.59464  | 4.9049    | 5.14221   | 5.41071  | 10.5328    | 7.99402    | 7.84209    | 5.94242   | 10.3692   | 4.91166   | 3.26198   |
| PLEKHG1   | 2.56257   | 2.04901  | 2.46381   | 2.44074   | 2.36988  | 4.41064   | 3.82292   | 2.34844  | 3.99711    | 3.20483    | 3.12486    | 2.92033   | 3.59112   | 3.88185   | 5.99916   |
| PLEKHG2   | 1.20415   | 0.911554 | 1.10203   | 2.19337   | 2.78171  | 4.18286   | 1.67136   | 1.12801  | 1.19947    | 4.44475    | 2.92651    | 3.8063    | 4.98305   | 5.10839   | 8.14673   |
| PLEKHG3   | 6.74486   | 8.37202  | 8.49355   | 13.845    | 10.8336  | 17.8624   | 7.57005   | 6.3667   | 5.94821    | 5.47252    | 3.10872    | 7.80676   | 10.0135   | 10.3095   | 5.094     |
| PLEKHG4   | 1.77359   | 1.80769  | 1.71178   | 1.58872   | 4.16782  | 2.49761   | 1.37079   | 1.51155  | 0.764318   | 1.9749     | 1.21156    | 1.83523   | 1.39371   | 2.33876   | 3.10876   |
| PLEKHG4B  | 0.157785  | 0.1035   | 0.0941038 | 0.0831918 | 0.49652  | 0.178095  | 0.0733185 | 0.158162 | 0.0111724  | 0.156587   | 0.144981   | 0.25468   | 0.121926  | 0.476573  | 1.11455   |
| PLEKHG5   | 3.56255   | 12.279   | 13.7895   | 7.05624   | 16.693   | 8.50771   | 12.1191   | 5.94802  | 3.70887    | 10.2604    | 2.4618     | 9.42315   | 7.19694   | 8.75845   | 8.50861   |
| PLEKHG6   | 1.59674   | 3.21437  | 2.5991    | 2.6581    | 5.98484  | 1.54125   | 3.23288   | 1.5397   | 3.62948    | 3.74852    | 1.97037    | 3.73282   | 5.23443   | 2.30761   | 2.07959   |
| PLEKHG7   | 0.0920905 | 0.201374 | 0.123066  | 0.116802  | 0        | 0.0603183 | 0.105146  | 0.365143 | 0.0345095  | 0.142256   | 0.111956   | 0.0810993 | 0.0228524 | 0.192522  | 0.0508668 |
| PLEKHH1   | 1.99514   | 2.31312  | 3.18434   | 0.666364  | 1.66004  | 1.15831   | 3.3087    | 2.71652  | 0.636445   | 0.358708   | 0.220496   | 0.583631  | 0.380717  | 0.792112  | 0.334364  |
| PLEKHH2   | 2.82216   | 2.45013  | 3.19919   | 0.877983  | 1.1218   | 1.85612   | 2.34829   | 2.20938  | 0.539069   | 0.898057   | 0.79271    | 1.28351   | 0.298464  | 1.42454   | 2.84378   |
| PLEKHH3   | 3.50134   | 5.80512  | 4.82762   | 7.37048   | 15.5537  | 8.83506   | 4.48527   | 2.92829  | 10.808     | 6.99377    | 4.57119    | 6.64003   | 9.47235   | 5.39315   | 2.85146   |
| PLEKHJ1   | 3.48889   | 4.17349  | 4.64258   | 8.68467   | 11.4289  | 8.34352   | 3.20249   | 2.8779   | 4.40678    | 6.55225    | 11.555     | 4.70963   | 7.63011   | 6.00336   | 2.75066   |
| PLEKHM1   | 2.15121   | 2.77452  | 2.84462   | 4.9033    | 6.10242  | 6.07503   | 4.41793   | 2.41583  | 7.87629    | 6.15068    | 5.13714    | 5.92148   | 8.18828   | 4.71193   | 3.43047   |
| PLEKHM1P1 | 7.09946   | 9.04599  | 8.53395   | 5.68649   | 16.0357  | 7.32211   | 12.0512   | 7.68805  | 8.73364    | 6.29535    | 3.96177    | 9.68548   | 2.67287   | 7.97096   | 7.39413   |
| PLEKHM2   | 9.60066   | 10.7289  | 10.7097   | 16.6792   | 25.3662  | 25.474    | 13.839    | 7.71471  | 30.1751    | 18.0677    | 16.1877    | 18.7496   | 30.6801   | 16.481    | 12.5147   |
| PLEKHM3   | 2.44952   | 2.16714  | 2.30364   | 2.16439   | 1.8365   | 2.33691   | 2.61896   | 2.15386  | 2.79931    | 1.786      | 1.94204    | 1.59229   | 2.497     | 1.6379    | 1.96226   |
| PLEKHN1   | 2.1946    | 7.06757  | 7.3407    | 8.46878   | 17.6056  | 7.28867   | 8.84051   | 3.70656  | 11.4085    | 5.96199    | 2.84207    | 9.84335   | 7.76624   | 4.92564   | 1.992     |
| PLEKHO1   | 2.5971    | 1.35461  | 2.01891   | 4.67308   | 5.67349  | 9.45631   | 2.24985   | 1.44347  | 1.6568     | 5.58795    | 11.9414    | 0.713822  | 5.46312   | 3.48176   | 6.25182   |
| PLEKHO2   | 3.37723   | 2.01078  | 2.43371   | 6.33898   | 5.81604  | 15.1037   | 3.01097   | 2.21651  | 1.5604     | 7.02555    | 8.68505    | 1.6644    | 6.52882   | 5.09055   | 9.37867   |
| PLEKHS1   | 0.311816  | 0.038196 | 0.0524656 | 0.0653563 | 0.14777  | 1.02153   | 0.120685  | 0.371053 | 0.00643655 | 0.00663323 | 0.00596612 | 0.0226894 | 0.0272789 | 0.0386705 | 0.0455396 |

|        |           |           |           |           |           |           |           |          |            |           |           |            |           |           |           |
|--------|-----------|-----------|-----------|-----------|-----------|-----------|-----------|----------|------------|-----------|-----------|------------|-----------|-----------|-----------|
| PLET1  | 0.982986  | 0.706669  | 1.14511   | 0.0846586 | 0.0933138 | 0.057448  | 0.737656  | 0.83829  | 0.0731619  | 0.0630617 | 0.0751209 | 0.133342   | 0.0387587 | 0.154955  | 0.729337  |
| PLG    | 0.0932745 | 0.0635681 | 0.0907803 | 0.0621966 | 0.0085228 | 0.0934377 | 0.0751749 | 0.117028 | 0.00668223 | 0.0344321 | 0.0247754 | 0.0235554  | 0.0141601 | 0.0315437 | 0.0236389 |
| PLGLA  | 4.50E-30  | 1.20E-31  | 9.10E-27  | 0         | 3.69E-36  | 1.85E-31  | 6.32E-28  | 0        | 1.20E-38   | 5.61E-45  | 7.41E-28  | 3.25E-41   | 1.49E-43  | 8.12E-26  | 1.53E-43  |
| PLGLB1 | 0.246066  | 0.40531   | 0.337683  | 0.108219  | 0.212221  | 0.092962  | 0.158846  | 0.363481 | 0.0803914  | 0.0702211 | 0.0375365 | 0.163373   | 0.0147335 | 0.13417   | 0.294319  |
| PLGLB2 | 0.230261  | 0.379279  | 0.315991  | 0.101267  | 0.198587  | 0.0869914 | 0.148642  | 0.340141 | 0.0752271  | 0.0657099 | 0.0351257 | 0.152877   | 0.0137871 | 0.125552  | 0.275412  |
| PLGRKT | 3.92294   | 2.60593   | 3.11091   | 9.1858    | 1.33412   | 4.74367   | 2.12028   | 3.05317  | 2.71396    | 4.66149   | 9.32871   | 3.10594    | 6.09552   | 3.16644   | 2.5669    |
| PLIN1  | 6.34013   | 0.101575  | 0.193781  | 0.0563249 | 0.230443  | 2.79235   | 1.9078    | 0.680035 | 0          | 0         | 0.0176286 | 0.0223475  | 0         | 0.0652932 | 0.112133  |
| PLIN2  | 6.22149   | 4.34231   | 5.71262   | 6.11589   | 4.04386   | 40.634    | 4.83643   | 5.3527   | 2.91529    | 7.5317    | 14.8809   | 1.08923    | 7.06017   | 5.4886    | 5.79815   |
| PLIN3  | 12.3331   | 14.5196   | 14.9482   | 44.8746   | 35.5648   | 38.0485   | 14.0139   | 11.1627  | 35.4009    | 47.2191   | 28.5488   | 26.4669    | 76.0093   | 32.6306   | 14.7716   |
| PLIN4  | 5.70107   | 0.514269  | 0.512316  | 0.394177  | 1.03553   | 2.73583   | 3.50212   | 0.812604 | 0.0354927  | 0.192031  | 0.0616849 | 0.119902   | 0.0916637 | 0.180872  | 0.49177   |
| PLIN5  | 0.189619  | 0.169019  | 0.25883   | 0.586225  | 0.132545  | 0.823438  | 0.151551  | 0.219073 | 0.0808273  | 0.154695  | 0.107028  | 0          | 0.079522  | 0.0396414 | 0         |
| PLK1   | 0.60983   | 0.783534  | 0.706292  | 4.31534   | 0.868337  | 4.82914   | 0.974798  | 0.505835 | 0.482758   | 2.883     | 5.51885   | 1.54177    | 6.24944   | 4.82867   | 1.51804   |
| PLK2   | 16.799    | 12.1406   | 12.6356   | 40.3537   | 10.0324   | 31.4743   | 13.305    | 13.0159  | 56.8168    | 45.2574   | 54.6741   | 37.4629    | 79.6656   | 48.6325   | 17.7192   |
| PLK3   | 2.7805    | 4.94792   | 6.709     | 10.4109   | 5.45644   | 5.65058   | 6.815     | 4.09375  | 29.5289    | 7.02616   | 9.88735   | 10.3654    | 9.52596   | 6.16646   | 4.88496   |
| PLK4   | 0.63723   | 0.45775   | 0.527162  | 1.3671    | 0.0809868 | 1.18384   | 0.429927  | 0.592059 | 0.423314   | 1.30148   | 1.32754   | 0.44352    | 1.82022   | 1.14144   | 0.499169  |
| PLK5   | 0         | 0.0173058 | 0.0198092 | 0         | 0.0371952 | 0.0101945 | 0.0273399 | 0        | 0          | 0.0150269 | 0         | 0.00856672 | 0         | 0         | 0         |
| PLLP   | 8.14722   | 10.7187   | 13.4927   | 2.19856   | 5.49924   | 1.98771   | 12.956    | 6.375    | 3.97272    | 0.562699  | 1.48342   | 0.829633   | 0.638366  | 0.323195  | 0.688261  |
| PLN    | 2.2829    | 0.417089  | 0.595724  | 0.197365  | 0.0237995 | 1.42854   | 0.944651  | 1.04847  | 0.0746392  | 2.32683   | 4.09051   | 0.147999   | 0.509094  | 0.660632  | 1.72728   |
| PLOD1  | 4.6257    | 4.6684    | 5.55292   | 12.4061   | 11.73     | 18.6496   | 5.86458   | 4.14984  | 4.16741    | 12.6554   | 20.8126   | 5.31967    | 17.5775   | 12.7857   | 19.5628   |
| PLOD2  | 2.17804   | 0.802168  | 0.731107  | 3.20814   | 0.602253  | 5.09282   | 1.36709   | 1.04384  | 1.01382    | 6.39044   | 9.45511   | 1.48093    | 6.6731    | 5.25655   | 8.1884    |
| PLOD3  | 2.97742   | 2.48334   | 2.65607   | 6.08056   | 7.14877   | 11.9613   | 3.52379   | 2.50791  | 1.21188    | 4.87855   | 7.79293   | 2.41967    | 8.60696   | 6.42361   | 10.394    |
| PLP1   | 1.24394   | 1.22657   | 1.90048   | 0.775112  | 0.415662  | 2.78348   | 2.60111   | 1.74182  | 0.431593   | 0.0998487 | 0.146957  | 0.0672729  | 0.0279971 | 0         | 0.0727045 |
| PLP2   | 67.2425   | 79.0235   | 81.2138   | 159.183   | 57.7266   | 154.542   | 110.854   | 71.1535  | 113.953    | 123.593   | 155.248   | 123.475    | 186.325   | 91.7157   | 46.051    |
| PLPBP  | 2.5538    | 2.45808   | 2.20517   | 5.38481   | 1.80066   | 5.60672   | 2.26415   | 2.25914  | 1.27563    | 2.25255   | 3.56046   | 1.30101    | 3.89523   | 2.82936   | 2.70421   |
| PLPPP1 | 10.4745   | 5.62986   | 5.40448   | 5.48805   | 7.59191   | 20.4332   | 8.23024   | 5.67232  | 10.7848    | 8.21973   | 16.4427   | 5.84708    | 8.80654   | 9.19692   | 19.3833   |
| PLPPP2 | 6.04258   | 8.24656   | 10.4976   | 5.41752   | 11.4277   | 4.15473   | 11.7114   | 6.87378  | 6.77043    | 5.47946   | 3.49592   | 5.80446    | 10.4094   | 3.21339   | 1.93083   |

|          |           |            |           |            |           |          |            |           |           |           |           |           |            |            |           |
|----------|-----------|------------|-----------|------------|-----------|----------|------------|-----------|-----------|-----------|-----------|-----------|------------|------------|-----------|
| PLPP3    | 24.7661   | 18.9946    | 27.1904   | 15.234     | 11.2694   | 37.19    | 24.6347    | 17.5956   | 2.02787   | 10.7653   | 23.859    | 4.53033   | 8.44088    | 11.9603    | 30.8853   |
| PLPP4    | 0.151262  | 0.160337   | 0.225242  | 0.0467639  | 0.140977  | 0.051519 | 0.138165   | 0.295744  | 0.128954  | 0.341728  | 1.16114   | 0.0649391 | 0.224465   | 0.276696   | 1.10788   |
| PLPP5    | 2.1948    | 1.78005    | 2.16462   | 2.2779     | 1.38313   | 3.04602  | 1.71225    | 1.7076    | 1.28419   | 2.07828   | 3.0067    | 1.40278   | 2.16191    | 2.10233    | 2.93889   |
| PLPP6    | 2.385     | 2.45547    | 2.2751    | 2.91415    | 1.87047   | 2.85105  | 2.11995    | 2.17482   | 5.17541   | 1.59909   | 3.0344    | 1.75656   | 2.61644    | 1.80276    | 1.31651   |
| PLPP7    | 0.397685  | 0.212901   | 0.255883  | 0.273217   | 0.669221  | 1.03468  | 0.302709   | 0.166897  | 0.0403613 | 0.693244  | 1.62116   | 0.102756  | 0.342112   | 0.571581   | 2.12586   |
| PLPPR1   | 0.0259451 | 0.0333354  | 0.0143091 | 0.0089124  | 0.0134339 | 0        | 0.00987443 | 0.0230579 | 0         | 0         | 0.0195259 | 0         | 0          | 0.00452002 | 0         |
| PLPPR2   | 3.96545   | 5.02451    | 4.25767   | 6.50362    | 12.7912   | 12.8093  | 7.66806    | 3.56165   | 18.7014   | 11.1401   | 15.7439   | 9.4298    | 15.0838    | 6.43804    | 7.69417   |
| PLPPR3   | 0.174518  | 0.256928   | 0.272706  | 0.0699401  | 0.78314   | 0.0743   | 0.675267   | 0.301578  | 0.0236159 | 0.0973503 | 0.0766147 | 0.187309  | 0.00625546 | 0.157085   | 0.668347  |
| PLPPR4   | 0.640558  | 0.739381   | 0.934024  | 0.422663   | 0.450975  | 1.2125   | 0.79977    | 0.536511  | 0.673491  | 1.63685   | 3.56353   | 0.577043  | 0.764131   | 1.6691     | 3.55395   |
| PLPPR5   | 0         | 0.00555451 | 0.0143055 | 0.00594012 | 3.84E-12  | 0        | 0.019744   | 0         | 0         | 0.0434076 | 0.019521  | 0.0041244 | 0          | 0          | 0.0165561 |
| PLRG1    | 4.14205   | 3.63611    | 3.4551    | 7.23013    | 2.10899   | 7.71108  | 2.68332    | 3.03799   | 6.58898   | 6.15018   | 8.15352   | 4.024     | 8.75562    | 5.4787     | 3.29593   |
| PLS1     | 0.465328  | 0.310641   | 0.32002   | 0.381316   | 0.0696689 | 0.615812 | 0.281651   | 0.38365   | 0.204837  | 0.218133  | 0.164551  | 0.120345  | 0.415978   | 0.348685   | 0.11272   |
| PLS3     | 26.4324   | 25.4567    | 28.1159   | 47.764     | 15.479    | 38.1486  | 21.9062    | 21.9083   | 67.4322   | 76.7324   | 69.2008   | 41.1207   | 92.4868    | 45.4412    | 30.8974   |
| PLS3-AS1 | 0.0671462 | 0.0700961  | 0.111096  | 0.0807288  | 0.139068  | 0.019058 | 0.114998   | 0.0696196 | 0.0817765 | 0.0561836 | 0.0757997 | 0.0400374 | 0.0216612  | 0.0877338  | 0         |
| PLSCR1   | 4.11548   | 2.34618    | 2.49498   | 18.4214    | 1.90319   | 23.8882  | 2.4511     | 2.76407   | 1.35189   | 7.16317   | 12.3891   | 2.64502   | 9.91184    | 4.59196    | 8.96331   |
| PLSCR2   | 0.0768022 | 0.0246696  | 0.0741255 | 0.197867   | 0.139184  | 0.217987 | 0.160765   | 0.0568795 | 0         | 0.0642631 | 0.10115   | 0.064113  | 0.0660698  | 0.0602102  | 0.183829  |
| PLSCR3   | 4.86459   | 4.04955    | 3.41965   | 14.7749    | 16.3544   | 14.3737  | 5.08364    | 2.35252   | 11.331    | 15.6757   | 18.8386   | 12.5915   | 25.6743    | 9.93252    | 9.98579   |
| PLSCR4   | 7.73122   | 3.77988    | 3.68989   | 4.36828    | 2.17189   | 10.1654  | 5.19377    | 4.28444   | 0.916919  | 2.29485   | 4.8566    | 1.14078   | 2.46958    | 2.39067    | 6.26021   |
| PLSCR5   | 0         | 0.0052106  | 0         | 0          | 0         | 0        | 0          | 0         | 0         | 0         | 0         | 0         | 0          | 0          | 0         |
| PLTP     | 15.8565   | 7.50128    | 7.50115   | 68.7664    | 28.5816   | 176.559  | 23.7374    | 13.8349   | 2.7551    | 15.9626   | 48.34     | 10.0147   | 7.3517     | 17.6367    | 23.585    |
| PLUT     | 0         | 0          | 0         | 0          | 0         | 0        | 0          | 0         | 0         | 0         | 0         | 0         | 0          | 0          | 0         |
| PLVAP    | 20.9935   | 6.04479    | 6.00792   | 23.9738    | 17.3036   | 51.1467  | 11.3885    | 8.92692   | 9.46861   | 17.1079   | 31.0469   | 15.1436   | 28.8461    | 28.6272    | 39.0065   |
| PLXDC1   | 1.55828   | 1.27139    | 1.59584   | 1.21652    | 4.73717   | 4.56619  | 1.83703    | 1.82826   | 0.536483  | 2.13717   | 5.87952   | 1.11756   | 1.38991    | 2.54587    | 10.6097   |
| PLXDC2   | 10.8265   | 9.64296    | 11.3503   | 8.27551    | 6.41722   | 9.97613  | 11.9108    | 11.6778   | 19.2134   | 14.3889   | 15.5121   | 10.7494   | 16.3465    | 7.94218    | 12.21     |
| PLXNA1   | 5.71046   | 6.86432    | 6.58036   | 10.1912    | 17.4155   | 13.4503  | 7.97441    | 4.23104   | 3.73694   | 7.10313   | 4.98825   | 6.21574   | 13.9238    | 8.43595    | 9.26776   |
| PLXNA2   | 2.92044   | 4.997      | 5.51127   | 2.64486    | 5.57631   | 3.39943  | 6.20016    | 2.60802   | 3.66022   | 2.3404    | 2.0548    | 3.66557   | 4.92593    | 4.17632    | 4.59204   |

|            |           |           |           |           |          |          |           |           |           |           |            |                 |           |           |           |
|------------|-----------|-----------|-----------|-----------|----------|----------|-----------|-----------|-----------|-----------|------------|-----------------|-----------|-----------|-----------|
| PLXNA3     | 1.4533    | 3.93213   | 3.91588   | 3.52163   | 5.86197  | 3.8875   | 4.64533   | 2.26938   | 1.53201   | 1.63475   | 1.88823    | 3.52919         | 1.58341   | 1.47791   | 3.88873   |
| PLXNA4     | 1.52115   | 0.486196  | 0.652181  | 0.549351  | 0.930685 | 3.43691  | 1.08528   | 1.02625   | 0.0548643 | 0.107428  | 0.172905   | 0.218114        | 0.363315  | 0.447345  | 0.808696  |
| PLXNB1     | 8.57537   | 13.2477   | 10.4474   | 15.5566   | 29.0759  | 13.5563  | 11.3146   | 8.47716   | 8.72706   | 9.19897   | 3.98243    | 17.6396         | 12.4803   | 12.6728   | 7.21756   |
| PLXNB2     | 14.1306   | 16.8818   | 19.07     | 29.4214   | 38.9794  | 42.4542  | 18.5573   | 13.5094   | 11.8793   | 19.95     | 13.4979    | 19.1316         | 37.201    | 18.1729   | 19.5326   |
| PLXNB3     | 0.805671  | 1.16979   | 1.07482   | 1.08084   | 4.50422  | 1.75522  | 1.71547   | 0.8676    | 0.897237  | 1.08408   | 0.577655   | 1.97354         | 0.995139  | 1.72794   | 1.25607   |
| PLXNC1     | 1.35482   | 2.10869   | 2.56787   | 3.29484   | 2.24061  | 3.1845   | 1.70182   | 2.2672    | 0.679664  | 4.77091   | 8.92654    | 0.689389        | 4.1667    | 2.03881   | 5.12595   |
| PLXND1     | 9.45691   | 4.92087   | 5.576     | 9.43797   | 18.6882  | 27.9279  | 11.4149   | 5.63052   | 1.98758   | 7.84354   | 13.1096    | 3.98975         | 11.5482   | 10.8959   | 25.9336   |
| PM20D1     | 0.222631  | 0.158347  | 0.0526218 | 0.262203  | 0.181146 | 0.144433 | 0.363133  | 0.348604  | 0.0645571 | 0.279425  | 0.0119678  | 0.227569        | 0.0205201 | 0.0387856 | 0.334952  |
| PM20D2     | 2.35261   | 2.41614   | 2.38101   | 2.82935   | 1.05284  | 2.69327  | 1.64309   | 2.14755   | 0.675929  | 0.764392  | 1.17543    | 0.955895        | 1.74289   | 1.36049   | 1.16384   |
| PMAIP1     | 0.812876  | 1.13465   | 1.43394   | 1.04712   | 0.779889 | 0.743047 | 0.996359  | 2.57095   | 2.14013   | 2.28054   | 2.75291    | 2.66012         | 4.02603   | 1.86807   | 0.875544  |
| PMCH       | 0.120918  | 0.0166019 | 0         | 8.59E-34  | 0        | 0.141103 | 1.64E-26  | 0.0776587 | 0.0367959 | 0.0423427 | 0.099994   | 1.16E-36        | 0         | 0.174157  | 0         |
| PMCHL1     | 0         | 0         | 0         | 0         | 0        | 0        | 0         | 0.0358946 | 0         | 0         | 0          | 0               | 0         | 0         | 0         |
| PMCHL2     | 0.0251282 | 0.0181607 | 0.0519695 | 0.038843  | 0        | 0        | 0         | 0         | 0         | 0         | 0          | 0               | 0         | 0         | 0         |
| PMEL       | 4.49829   | 7.71229   | 5.93844   | 7.23504   | 16.146   | 44.3154  | 14.256    | 6.77179   | 6.72001   | 0.646366  | 1.54238    | 4.14362         | 1.13921   | 0.406481  | 0.905622  |
| PMEPA1     | 5.4911    | 3.46409   | 4.12614   | 6.21741   | 8.01009  | 5.32511  | 5.04185   | 3.80261   | 3.49959   | 8.28015   | 13.5475    | 5.05214         | 14.4077   | 10.6784   | 15.3283   |
| PMF1       | 9.95755   | 8.58427   | 8.90455   | 13.0579   | 11.0513  | 15.8226  | 9.85102   | 7.40655   | 11.6015   | 12.9998   | 19.5303    | 8.89668         | 12.5712   | 7.55321   | 5.72754   |
| PMF1-BGLAP | 0.542913  | 0.188212  | 0.147368  | 1.21067   | 0.302092 | 0.571476 | 0.445638  | 0.362297  | 0.739397  | 0.420428  | 0.958481   | 0.00095828<br>9 | 0.845537  | 0.584485  | 0.595301  |
| PMFBP1     | 0.201669  | 0.32389   | 0.227502  | 0.541607  | 0.588552 | 0.265383 | 0.146529  | 0.179227  | 0.133969  | 0.230105  | 0.186267   | 0.419781        | 0.319375  | 0.396053  | 0.193081  |
| PML        | 3.67994   | 3.71833   | 3.87931   | 11.0456   | 7.51273  | 15.8511  | 4.16047   | 3.71092   | 1.60245   | 2.43189   | 3.20466    | 2.54927         | 5.59749   | 3.73825   | 6.02258   |
| PMM1       | 4.31114   | 3.97183   | 3.62617   | 3.73637   | 10.1991  | 8.92376  | 4.67517   | 2.66113   | 10.5669   | 6.92779   | 9.91674    | 4.7239          | 5.78417   | 4.7892    | 3.34177   |
| PMM2       | 4.98129   | 5.06413   | 4.37636   | 13.9935   | 8.80545  | 11.8253  | 6.08559   | 4.39154   | 8.33557   | 8.36521   | 11.0891    | 7.03582         | 14.9961   | 9.55462   | 8.74189   |
| PMP2       | 0.0513434 | 0.012369  | 0         | 0.0661386 | 0        | 0.169408 | 0.0366389 | 0.0285186 | 0.0547142 | 0         | 0.00724504 | 0.0551064       | 0         | 0.0100629 | 0.0460848 |
| PMP22      | 20.1433   | 9.92913   | 13.623    | 14.2923   | 6.10365  | 32.712   | 32.0081   | 15.902    | 1.95537   | 17.0092   | 33.5903    | 5.07894         | 21.406    | 15.3858   | 31.3255   |
| PMPCA      | 4.60517   | 4.9461    | 5.71458   | 8.86535   | 8.36216  | 12.1267  | 5.45276   | 3.85584   | 8.37393   | 5.4722    | 5.33104    | 5.87322         | 9.23      | 7.01996   | 4.21004   |
| PMPCB      | 4.86303   | 4.2988    | 4.57399   | 4.84343   | 1.73953  | 4.40023  | 2.81197   | 4.06307   | 5.04193   | 3.75195   | 4.91203    | 2.92759         | 3.93631   | 3.30337   | 2.44614   |

|          |           |           |          |           |           |           |           |           |           |            |           |            |           |           |           |
|----------|-----------|-----------|----------|-----------|-----------|-----------|-----------|-----------|-----------|------------|-----------|------------|-----------|-----------|-----------|
| PMS1     | 1.27945   | 1.26341   | 1.06593  | 1.3418    | 0.505634  | 0.973944  | 0.671052  | 1.1893    | 0.53409   | 0.947613   | 1.49537   | 0.857249   | 0.913     | 1.28777   | 1.16869   |
| PMS2     | 2.3076    | 3.08502   | 3.24955  | 3.21597   | 1.88092   | 3.0153    | 2.40923   | 2.21053   | 1.71406   | 1.82143    | 1.81422   | 1.52532    | 2.46061   | 1.74719   | 1.26303   |
| PMS2CL   | 2.32772   | 2.09669   | 1.98668  | 1.63142   | 1.89716   | 2.30252   | 1.17307   | 1.90199   | 1.27482   | 1.57276    | 1.27375   | 1.15254    | 1.30369   | 1.83449   | 2.20238   |
| PMS2P1   | 2.50021   | 2.86932   | 2.80919  | 3.05419   | 2.84748   | 3.64344   | 3.1847    | 2.36198   | 1.52118   | 1.56685    | 2.56015   | 1.40327    | 1.92371   | 1.24998   | 1.64689   |
| PMS2P2   | 0.973159  | 0.458174  | 1.29775  | 0.719353  | 0.38282   | 0.999845  | 1.01685   | 0.954202  | 0.309765  | 0.446088   | 0.701508  | 0.382743   | 7.36E-05  | 0.719926  | 5.18E-12  |
| PMS2P3   | 3.16858   | 3.35319   | 2.9979   | 2.70869   | 4.69832   | 2.88943   | 3.2762    | 2.63816   | 0.970282  | 1.52748    | 1.65231   | 1.59948    | 1.01589   | 2.90126   | 2.60126   |
| PMS2P4   | 1.73126   | 2.19297   | 2.25832  | 1.42624   | 1.42274   | 1.26932   | 1.68646   | 1.97666   | 0.632674  | 1.12993    | 1.2253    | 0.992752   | 0.444148  | 1.27123   | 1.34289   |
| PMS2P5   | 2.0516    | 2.3188    | 2.53972  | 1.28124   | 1.32557   | 1.20465   | 2.26352   | 2.44636   | 0.354785  | 0.505558   | 0.769123  | 0.970011   | 0.438347  | 0.943798  | 1.4357    |
| PMS2P7   | 6.94217   | 5.02132   | 4.25063  | 3.20028   | 3.72375   | 3.16547   | 4.30751   | 6.45555   | 1.37557   | 1.29662    | 2.26297   | 1.2147     | 0.511757  | 1.64114   | 1.8633    |
| PMS2P9   | 8.79421   | 12.5926   | 12.0911  | 4.83132   | 9.07478   | 3.97271   | 12.7013   | 12.0914   | 1.68078   | 2.75838    | 0.900545  | 5.29355    | 1.08162   | 7.06687   | 8.57075   |
| PMVK     | 9.56502   | 11.906    | 7.2346   | 18.4689   | 38.0718   | 20.3919   | 8.35911   | 5.53497   | 44.0384   | 19.4788    | 25.0541   | 22.3641    | 21.5207   | 10.4944   | 5.30873   |
| PNCK     | 0.119356  | 0.103513  | 0.148109 | 0.0983995 | 0.11124   | 0.558964  | 0.28618   | 0.0742513 | 0.0145362 | 0          | 0         | 0.0341609  | 0         | 0.0748565 | 0         |
| PNISR    | 7.47251   | 7.08478   | 7.01347  | 4.32154   | 2.18659   | 4.4105    | 3.49596   | 5.31427   | 2.41822   | 3.14355    | 3.11363   | 2.96287    | 3.02057   | 4.51787   | 5.27216   |
| PNKD     | 1.8601    | 1.67335   | 1.90689  | 3.3243    | 2.73578   | 6.36167   | 2.2508    | 1.35104   | 1.0913    | 1.76841    | 5.05769   | 0.840134   | 2.21285   | 1.76347   | 2.73346   |
| PNKP     | 3.99389   | 4.03653   | 4.38312  | 6.99828   | 12.4078   | 8.8969    | 4.80576   | 3.25066   | 5.12615   | 5.8904     | 7.98494   | 5.79245    | 9.00592   | 7.54831   | 8.70982   |
| PNKY     | 0         | 0         | 0        | 0         | 0         | 0         | 0         | 0         | 0         | 0.0186198  | 0         | 0          | 0         | 0         | 0         |
| PNLDC1   | 0.0953861 | 0.0114896 | 0        | 0.0122873 | 0.0555628 | 0         | 0.0816816 | 1.07024   | 0.0871271 | 0.0149649  | 0.161519  | 0.00853141 | 0         | 0.0498529 | 0         |
| PNLIP    | 0         | 0         | 0        | 0         | 0         | 0         | 0         | 0         | 0         | 0          | 0         | 0          | 0.0100012 | 0         | 0         |
| PNLIPRP1 | 0         | 0         | 0        | 0         | 0         | 0         | 0         | 0         | 0         | 0          | 0         | 0          | 0         | 0         | 0         |
| PNLIPRP2 | 0         | 0         | 0        | 0         | 0         | 0         | 0         | 0         | 0         | 0          | 0         | 0          | 0         | 0         | 0         |
| PNLIPRP3 | 5.87601   | 1.02424   | 0.788054 | 9.1141    | 1.09031   | 1.48563   | 1.23648   | 2.44174   | 29.8465   | 15.0017    | 10.731    | 10.0447    | 13.6832   | 4.64851   | 0.763226  |
| PNMA1    | 4.35191   | 3.02077   | 3.39013  | 6.54217   | 7.33129   | 9.80454   | 3.38923   | 2.45131   | 4.95888   | 5.72586    | 6.9095    | 3.35826    | 9.83588   | 5.39564   | 5.09297   |
| PNMA2    | 0.200579  | 0.19331   | 0.185797 | 0.123037  | 0.370916  | 0.524572  | 0.327165  | 0.314265  | 0.0988766 | 0.14985    | 0.113215  | 0.0341714  | 0.231094  | 0.242111  | 1.06307   |
| PNMA3    | 0.148076  | 0.115936  | 0.117395 | 0.0254328 | 0.134174  | 0.189127  | 0.0704452 | 0.109665  | 0         | 0.00774378 | 0         | 0.00441468 | 0         | 0.0290216 | 0.13291   |
| PNMA5    | 0.188428  | 0.457181  | 0.567854 | 0.0277401 | 0.114987  | 0.0229206 | 0.368814  | 0.364823  | 0.0245876 | 0.126695   | 0.0379843 | 0.192608   | 0.0043419 | 0.0281374 | 0.0483227 |
| PNMA6A   | 0.126992  | 0.105241  | 0.105057 | 0.0680519 | 0.497102  | 0.281144  | 0.179794  | 0.0812592 | 0.0247459 | 0.11476    | 0.258045  | 0.0254426  | 0.114709  | 0.0743363 | 0.255327  |



|              |           |          |            |           |          |            |           |           |           |           |           |           |           |           |          |
|--------------|-----------|----------|------------|-----------|----------|------------|-----------|-----------|-----------|-----------|-----------|-----------|-----------|-----------|----------|
| PNMA6E       | 0         | 0        | 0.00721929 | 0         | 0        | 0.00743062 | 0         | 0         | 0         | 0         | 0         | 0.0124883 | 0         | 0         | 0        |
| PNMA6F       | 0         | 0        | 0          | 0         | 0        | 0          | 0         | 0         | 0         | 0         | 0         | 0         | 0         | 0         | 0        |
| PNMA8A       | 0.363175  | 0.356001 | 0.145042   | 0.535584  | 1.19636  | 0.687791   | 0.22163   | 0.166945  | 0.0457559 | 0.762324  | 1.1027    | 0.0179215 | 0.642357  | 0.425439  | 0.233805 |
| PNMA8B       | 0.548925  | 0.59508  | 0.782527   | 0.257588  | 0.997319 | 1.41473    | 0.621148  | 0.452993  | 0.0895351 | 0.141482  | 0.331965  | 0.084165  | 0.139136  | 0.227977  | 0.246352 |
| PNMT         | 0.132498  | 0.138319 | 0.200955   | 0         | 0.343026 | 0.0376069  | 0.126069  | 0.215881  | 0         | 0.0831495 | 0.0747871 | 0         | 0         | 0.0230831 | 0.15857  |
| PNN          | 10.0633   | 10.3343  | 10.0347    | 8.29378   | 6.32051  | 8.01137    | 3.25354   | 5.58394   | 3.61895   | 4.17257   | 4.24559   | 4.89988   | 6.88203   | 8.87545   | 6.67308  |
| PNO1         | 1.98757   | 1.91873  | 1.93999    | 3.61023   | 0.777399 | 3.49437    | 1.59997   | 2.03325   | 2.87342   | 2.11773   | 3.46244   | 1.76491   | 4.34991   | 2.91832   | 2.27942  |
| PNOC         | 0.155438  | 0.124821 | 0.171453   | 0.0355964 | 0.187794 | 0.014706   | 0         | 0.107443  | 0         | 0.0433536 | 0.0584902 | 0.0123578 | 0.144861  | 0         | 0        |
| PNP          | 5.48703   | 4.96507  | 3.29769    | 39.1779   | 12.2355  | 17.5816    | 3.92922   | 4.01837   | 38.7916   | 41.9446   | 41.3413   | 24.8221   | 66.5917   | 30.836    | 13.646   |
| PNPLA1       | 1.06855   | 2.94749  | 3.18971    | 2.03717   | 6.79149  | 0.74305    | 3.58895   | 2.37409   | 13.3933   | 1.91113   | 2.09086   | 4.05865   | 1.25245   | 1.01921   | 0.601042 |
| PNPLA2       | 12.1103   | 8.69266  | 8.7642     | 9.89556   | 26.7952  | 20.7778    | 15.6345   | 8.11857   | 22.1002   | 6.55859   | 13.3588   | 10.9509   | 11.0496   | 7.97899   | 7.47715  |
| PNPLA3       | 1.06433   | 1.69745  | 1.65177    | 1.11383   | 1.71736  | 0.948417   | 4.23914   | 1.20986   | 3.66765   | 0.341728  | 0.381872  | 1.42276   | 0.393922  | 0.957296  | 0.319922 |
| PNPLA4       | 1.26046   | 1.38375  | 1.26053    | 1.84976   | 0.855047 | 2.58807    | 2.25893   | 1.40379   | 1.5351    | 1.21154   | 2.26044   | 1.39851   | 1.19928   | 1.17162   | 0.687411 |
| PNPLA5       | 0.0182229 | 0        | 0          | 0.0375584 | 0        | 0          | 0.0104031 | 0.0242925 | 0.0110967 | 0         | 0.0102857 | 0         | 0         | 0.0142861 | 0        |
| PNPLA6       | 2.89058   | 4.07396  | 3.84585    | 8.06837   | 11.1894  | 10.1195    | 4.60896   | 2.51572   | 5.23576   | 5.42464   | 3.94898   | 4.64373   | 9.81781   | 6.346     | 5.20227  |
| PNPLA7       | 1.46735   | 4.106    | 4.42858    | 0.531961  | 3.1925   | 1.65641    | 4.34397   | 2.46369   | 1.08854   | 0.107981  | 0.25899   | 0.495895  | 0.0894303 | 0.31975   | 0.919801 |
| PNPLA8       | 3.15989   | 2.58082  | 2.61408    | 3.55849   | 0.780717 | 3.08686    | 1.62593   | 2.96541   | 5.85474   | 5.57227   | 6.13086   | 3.63624   | 4.5549    | 2.88709   | 3.335    |
| PNPO         | 3.63343   | 3.63     | 3.06661    | 8.8653    | 7.62558  | 7.2625     | 4.20191   | 3.06288   | 5.9381    | 4.18309   | 6.4692    | 5.23786   | 5.3651    | 3.84684   | 3.80803  |
| PNPT1        | 3.0606    | 2.26291  | 2.20475    | 4.07546   | 0.805151 | 4.44699    | 1.74028   | 2.41592   | 1.49085   | 2.40981   | 3.02996   | 1.61843   | 3.44729   | 3.2274    | 2.45772  |
| PNRC1        | 51.8956   | 59.5748  | 64.4199    | 66.8526   | 77.1398  | 73.2162    | 53.3187   | 70.3619   | 46.9893   | 38.4296   | 65.1854   | 32.5522   | 46.8184   | 26.5842   | 31.8807  |
| PNRC2        | 11.8687   | 9.60325  | 10.2866    | 19.295    | 4.75053  | 21.3386    | 7.19162   | 12.7291   | 16.9651   | 13.9699   | 20.4979   | 6.74315   | 23.5605   | 11.0534   | 10.1058  |
| POC1A        | 0.357303  | 0.309878 | 0.312477   | 1.8621    | 0.666018 | 2.05144    | 0.512861  | 0.308469  | 0.298392  | 0.922531  | 1.08329   | 0.672021  | 2.31189   | 1.61132   | 0.674403 |
| POC1B        | 1.96948   | 1.35566  | 1.81774    | 1.67926   | 0.702694 | 1.57696    | 1.22727   | 1.79177   | 2.04934   | 2.00881   | 2.07705   | 1.61089   | 2.18747   | 1.7357    | 1.59917  |
| POC1B-AS1    | 0.598767  | 0.731302 | 0.921567   | 0.401798  | 0.800312 | 0.497986   | 0.699552  | 0.470258  | 0.237424  | 0.332065  | 0.408704  | 0.458325  | 0.134763  | 0.465774  | 0.379958 |
| POC1B-GALNT4 | 0.400729  | 0.218755 | 0.39206    | 0.232591  | 0.18078  | 0.381169   | 0.187616  | 0.245487  | 0.0487264 | 0.0406974 | 0.192943  | 0.08802   | 0.192586  | 0.131326  | 0.673988 |
| POC5         | 1.25991   | 1.07974  | 1.05083    | 1.607     | 0.384998 | 1.49488    | 0.471646  | 1.21148   | 0.553399  | 1.24431   | 1.31736   | 0.798046  | 1.51916   | 0.744841  | 0.593241 |

|         |          |          |          |         |          |         |          |          |          |          |          |          |          |          |          |
|---------|----------|----------|----------|---------|----------|---------|----------|----------|----------|----------|----------|----------|----------|----------|----------|
| PODN    | 11.1348  | 5.88041  | 8.5895   | 1.19353 | 12.667   | 13.6621 | 12.7519  | 7.01244  | 0.362941 | 2.26118  | 5.87961  | 0.513698 | 1.477    | 1.09734  | 19.8332  |
| PODNL1  | 0.552095 | 0.903189 | 0.870978 | 1.3496  | 3.35059  | 1.37751 | 1.51727  | 0.467835 | 2.63483  | 2.42528  | 4.26851  | 2.14515  | 3.02363  | 1.31525  | 1.99141  |
| PODXL   | 9.49081  | 3.438    | 3.80731  | 6.19757 | 7.08884  | 14.3318 | 6.00543  | 4.61944  | 3.74927  | 6.48513  | 6.71478  | 5.03086  | 9.60935  | 11.1217  | 23.0057  |
| PODXL2  | 2.30488  | 1.23167  | 1.56007  | 1.65187 | 2.42482  | 2.75652 | 1.37563  | 1.12661  | 1.13559  | 0.644318 | 0.650479 | 0.652184 | 1.03421  | 0.739204 | 0.25578  |
| POF1B   | 16.6546  | 26.8121  | 40.858   | 16.8318 | 6.84406  | 8.37774 | 29.0828  | 31.5599  | 47.8892  | 13.969   | 20.9705  | 17.3271  | 7.1069   | 4.11681  | 1.60662  |
| POFUT1  | 4.2891   | 3.41518  | 3.59194  | 5.91282 | 3.89083  | 8.60833 | 4.1305   | 3.06419  | 2.47629  | 3.44681  | 5.11867  | 2.6182   | 5.51757  | 3.81498  | 4.13355  |
| POFUT2  | 1.59706  | 1.69795  | 1.82753  | 1.44379 | 2.71104  | 3.88827 | 1.62693  | 1.07512  | 0.524113 | 1.18228  | 1.56538  | 0.86903  | 0.897759 | 2.30164  | 4.0378   |
| POGK    | 5.448    | 6.25997  | 6.77846  | 6.02497 | 4.91534  | 5.90462 | 6.02014  | 5.1428   | 5.12556  | 3.78659  | 4.17504  | 3.75842  | 5.90113  | 4.21368  | 3.64586  |
| POGLUT1 | 2.56935  | 2.57299  | 2.36519  | 3.06313 | 1.08581  | 1.96256 | 1.7616   | 2.27782  | 2.05544  | 2.24471  | 3.93841  | 2.13132  | 1.97871  | 2.1953   | 2.19766  |
| POGZ    | 6.88776  | 8.48816  | 8.48328  | 6.6301  | 6.39121  | 7.89905 | 7.43347  | 6.14302  | 3.65401  | 4.64242  | 5.79996  | 5.32563  | 5.42417  | 6.17195  | 7.16788  |
| POLA1   | 2.9121   | 2.47192  | 2.62215  | 3.40768 | 1.65195  | 2.85102 | 2.21979  | 2.3665   | 1.17377  | 1.50683  | 1.7539   | 1.25734  | 2.34255  | 1.9736   | 2.18951  |
| POLA2   | 1.4668   | 1.72116  | 1.77099  | 2.7319  | 1.48558  | 3.34758 | 2.48041  | 1.52039  | 0.902496 | 1.09701  | 2.35231  | 1.01967  | 2.59079  | 1.57236  | 1.58268  |
| POLB    | 3.95548  | 3.14292  | 2.8704   | 7.99158 | 2.39841  | 8.62692 | 2.37697  | 4.30162  | 16.9029  | 3.91937  | 5.01361  | 3.16542  | 11.2268  | 2.77455  | 2.8652   |
| POLD1   | 1.59945  | 1.89986  | 1.84705  | 5.0323  | 4.30983  | 5.15857 | 2.32561  | 1.14297  | 1.32779  | 2.29426  | 1.72451  | 1.84513  | 4.44372  | 2.69547  | 2.02512  |
| POLD2   | 7.07013  | 8.13983  | 7.00043  | 20.3825 | 15.3222  | 17.7104 | 9.75318  | 5.34883  | 10.8425  | 10.3693  | 15.1939  | 10.5979  | 16.6567  | 11.8284  | 6.09787  |
| POLD3   | 1.83223  | 1.56373  | 1.5712   | 2.98193 | 1.16273  | 3.9193  | 1.42867  | 1.57372  | 0.870808 | 1.7107   | 2.32059  | 1.09917  | 2.51565  | 2.03783  | 2.11789  |
| POLD4   | 3.76895  | 5.20788  | 5.34844  | 10.4071 | 15.0741  | 13.9957 | 5.14967  | 3.23707  | 15.0697  | 12.2955  | 20.8707  | 8.96656  | 11.1819  | 6.94807  | 5.66529  |
| POLDIP2 | 10.7336  | 10.1992  | 10.2799  | 21.1806 | 16.6203  | 30.9964 | 12.9444  | 8.45846  | 23.8719  | 18.4009  | 25.3499  | 13.7369  | 26.8167  | 13.9531  | 9.09626  |
| POLDIP3 | 8.54273  | 9.37505  | 9.48507  | 13.3454 | 13.9391  | 18.1596 | 9.44358  | 6.78522  | 8.79795  | 8.21829  | 7.63122  | 6.88076  | 10.6942  | 7.22197  | 7.50007  |
| POLE    | 3.33919  | 4.98402  | 5.31436  | 3.65267 | 5.11955  | 5.34192 | 5.96479  | 3.88742  | 1.92247  | 1.80341  | 0.943199 | 2.83197  | 3.14118  | 3.12777  | 2.63649  |
| POLE2   | 0.890574 | 0.629335 | 0.59922  | 1.00342 | 0.202894 | 1.17286 | 0.460962 | 0.949761 | 0.766464 | 0.983631 | 1.62196  | 0.501287 | 1.18749  | 0.868846 | 0.699174 |
| POLE3   | 8.07622  | 6.42074  | 6.26311  | 13.1641 | 4.98608  | 13.0764 | 5.75921  | 6.43725  | 7.716    | 7.56419  | 11.3145  | 4.80778  | 11.5565  | 7.57136  | 3.93782  |
| POLE4   | 6.63588  | 3.70629  | 3.49591  | 15.378  | 14.0515  | 15.8266 | 4.52336  | 2.58195  | 6.95594  | 12.3895  | 21.467   | 6.9923   | 12.0775  | 8.97246  | 4.88351  |
| POLG    | 5.28157  | 6.17655  | 6.486    | 8.31448 | 10.8728  | 9.32479 | 5.84568  | 3.87503  | 5.21106  | 5.49111  | 3.03741  | 6.01943  | 8.30577  | 7.70441  | 5.47321  |
| POLG2   | 2.32302  | 2.16858  | 2.45025  | 1.3017  | 1.64635  | 1.14972 | 1.17698  | 1.09677  | 0.654246 | 2.05916  | 2.08153  | 1.63101  | 0.646357 | 1.30517  | 1.64722  |
| POLH    | 1.67174  | 2.05653  | 2.2285   | 2.48522 | 2.59927  | 2.64281 | 1.71663  | 1.71468  | 1.34696  | 1.5822   | 1.98148  | 1.28232  | 1.49243  | 1.8053   | 1.59613  |

|         |          |          |          |          |          |          |          |          |           |          |          |          |          |          |          |
|---------|----------|----------|----------|----------|----------|----------|----------|----------|-----------|----------|----------|----------|----------|----------|----------|
| POLI    | 1.18556  | 1.32689  | 1.28982  | 1.18357  | 0.316521 | 1.27237  | 0.43711  | 1.11124  | 0.43993   | 0.995871 | 1.35229  | 0.430776 | 0.549784 | 0.835848 | 0.953283 |
| POLK    | 1.72719  | 1.66647  | 1.75254  | 1.35425  | 0.35929  | 1.15777  | 0.932959 | 1.70596  | 0.571295  | 1.37014  | 1.77653  | 0.767185 | 1.04717  | 1.44389  | 1.99306  |
| POLL    | 2.01384  | 2.14242  | 2.16579  | 2.5983   | 5.14274  | 3.30606  | 2.51088  | 1.46042  | 2.13869   | 1.87041  | 2.75533  | 2.09803  | 1.98016  | 2.37027  | 2.19802  |
| POLM    | 2.38771  | 2.94216  | 3.01631  | 2.77649  | 6.79136  | 3.96317  | 3.00252  | 2.05748  | 1.38521   | 1.38704  | 2.28565  | 2.49922  | 1.42604  | 2.4832   | 3.55649  |
| POLN    | 0.258028 | 0.348887 | 0.482172 | 0.409556 | 0.442551 | 0.416895 | 0.163611 | 0.275878 | 0.164508  | 0.278807 | 0.20346  | 0.224941 | 0.159284 | 0.289103 | 0.214362 |
| POLQ    | 0.329485 | 0.228602 | 0.294379 | 0.831204 | 0.131022 | 0.630682 | 0.340081 | 0.269394 | 0.0834654 | 0.443313 | 0.580239 | 0.369665 | 0.505095 | 0.833465 | 0.40883  |
| POLR1A  | 3.22031  | 3.18891  | 3.19418  | 5.85717  | 3.82078  | 6.73612  | 3.60638  | 3.20396  | 1.84161   | 1.90927  | 1.80947  | 3.33943  | 4.83945  | 3.45344  | 3.56895  |
| POLR1B  | 2.42595  | 2.05216  | 2.04573  | 3.78352  | 2.11004  | 3.77788  | 2.29523  | 1.88745  | 2.70946   | 1.48322  | 2.23134  | 2.58789  | 4.00493  | 3.21126  | 1.64883  |
| POLR1C  | 2.36919  | 2.56069  | 2.54265  | 3.63872  | 2.55764  | 4.76682  | 2.13063  | 2.24374  | 2.23925   | 2.81285  | 4.53325  | 2.21229  | 3.72408  | 3.49001  | 1.86544  |
| POLR1D  | 7.24943  | 8.15997  | 7.67089  | 14.5072  | 6.39228  | 13.7485  | 6.326    | 6.46996  | 11.8623   | 11.3975  | 17.518   | 8.85     | 16.5286  | 8.94357  | 4.41317  |
| POLR1E  | 4.38799  | 4.16021  | 4.30335  | 7.31772  | 4.63564  | 8.93911  | 3.50164  | 3.18684  | 4.59703   | 2.91653  | 4.95347  | 3.48577  | 6.25586  | 5.3018   | 3.10003  |
| POLR2A  | 19.2618  | 22.3891  | 20.2622  | 29.7465  | 34.4179  | 50.1161  | 29.2829  | 24.487   | 49.1178   | 22.1193  | 17.3163  | 34.7139  | 47.92    | 20.0982  | 20.8751  |
| POLR2B  | 10.4178  | 9.29418  | 9.92408  | 14.5482  | 3.89032  | 15.6787  | 7.05815  | 8.16771  | 7.79556   | 9.95981  | 10.319   | 6.6347   | 14.4754  | 10.2627  | 9.25543  |
| POLR2C  | 9.30084  | 7.10825  | 8.21434  | 12.4668  | 6.6757   | 15.1072  | 8.97888  | 5.95138  | 9.31188   | 9.53202  | 16.8137  | 4.80996  | 11.8113  | 9.06497  | 8.34593  |
| POLR2D  | 3.45404  | 3.02147  | 3.03035  | 5.01611  | 2.65946  | 7.23825  | 3.32999  | 2.82197  | 3.33378   | 2.94842  | 5.0341   | 3.07686  | 5.35617  | 3.87578  | 3.04488  |
| POLR2E  | 9.04206  | 8.045    | 7.47987  | 16.2963  | 16.3452  | 26.7569  | 10.8804  | 6.53238  | 11.1363   | 11.1294  | 20.4067  | 9.60028  | 17.8044  | 13.0654  | 7.23058  |
| POLR2F  | 2.40125  | 1.69554  | 1.62686  | 3.4274   | 3.3977   | 4.8648   | 2.53683  | 1.61892  | 2.53789   | 2.36428  | 5.07869  | 1.69841  | 2.55542  | 2.18903  | 1.45669  |
| POLR2G  | 9.81575  | 9.4854   | 8.71501  | 25.0748  | 9.40605  | 29.2176  | 11.3967  | 7.42105  | 10.4054   | 20.024   | 38.9543  | 9.95151  | 14.2182  | 12.9915  | 9.49043  |
| POLR2H  | 3.69304  | 4.91105  | 4.654    | 8.60107  | 8.3754   | 9.6224   | 3.75277  | 2.61471  | 4.52769   | 6.55101  | 9.53307  | 6.02481  | 6.12361  | 7.42463  | 4.86169  |
| POLR2I  | 6.7471   | 6.25551  | 5.38153  | 11.5928  | 6.85931  | 15.1007  | 7.92166  | 4.518    | 13.5374   | 9.7193   | 17.4932  | 8.4983   | 8.96201  | 5.56514  | 3.46847  |
| POLR2J  | 8.1282   | 6.33742  | 6.0149   | 14.5052  | 6.22559  | 12.2269  | 10.9473  | 5.1738   | 14.4446   | 10.1461  | 21.4674  | 8.24739  | 5.07591  | 9.65686  | 5.93635  |
| POLR2J2 | 8.01847  | 7.58698  | 9.58735  | 2.78597  | 7.24324  | 10.338   | 9.08809  | 7.61838  | 2.63199   | 3.74648  | 5.18779  | 5.93372  | 3.06849  | 4.99613  | 4.46964  |
| POLR2J3 | 6.66158  | 4.26106  | 3.30154  | 6.56284  | 1.52102  | 7.0014   | 4.26233  | 4.33125  | 5.18442   | 3.86047  | 8.35712  | 7.82103  | 9.42291  | 2.96237  | 4.96592  |
| POLR2J4 | 1.32887  | 1.23593  | 1.41139  | 0.411551 | 1.07668  | 1.075    | 1.68266  | 1.08089  | 0.327642  | 0.68055  | 0.403052 | 0.651118 | 0.239465 | 0.817631 | 0.781859 |
| POLR2K  | 9.70054  | 7.33809  | 7.05882  | 9.65282  | 1.7771   | 10.3299  | 5.68755  | 6.52402  | 13.8751   | 12.1453  | 26.0718  | 6.94099  | 10.7952  | 7.37444  | 5.95584  |
| POLR2L  | 18.9953  | 16.306   | 12.5889  | 45.4939  | 35.3336  | 46.5656  | 21.5374  | 12.9135  | 42.568    | 36.8723  | 68.3859  | 40.5858  | 34.6192  | 29.1757  | 16.2388  |

|            |           |            |            |          |           |            |           |           |            |           |           |           |            |           |           |
|------------|-----------|------------|------------|----------|-----------|------------|-----------|-----------|------------|-----------|-----------|-----------|------------|-----------|-----------|
| POLR2M     | 2.15401   | 1.57945    | 2.00423    | 1.46097  | 1.64845   | 4.08182    | 2.02329   | 1.79645   | 1.48833    | 2.12766   | 3.92782   | 0.89247   | 2.0804     | 1.13369   | 2.33163   |
| POLR3A     | 2.58463   | 2.58642    | 2.48445    | 3.22428  | 2.69822   | 3.79567    | 3.04662   | 2.3869    | 2.19623    | 2.93752   | 2.06327   | 2.21625   | 3.84828    | 3.08633   | 3.10072   |
| POLR3B     | 2.37512   | 2.40747    | 2.08631    | 3.43639  | 1.58815   | 2.66528    | 2.31675   | 2.47894   | 2.99482    | 1.9018    | 2.38528   | 2.10088   | 3.58244    | 2.38951   | 1.67161   |
| POLR3C     | 3.12572   | 2.56468    | 2.58582    | 3.24491  | 1.6483    | 4.41462    | 2.7392    | 2.27561   | 2.19838    | 2.80119   | 3.85406   | 1.56806   | 2.79809    | 2.04656   | 2.27759   |
| POLR3D     | 1.93159   | 3.09837    | 3.04701    | 4.45093  | 5.49767   | 7.42678    | 2.86294   | 2.16445   | 4.04739    | 3.22241   | 4.84861   | 2.7127    | 4.72956    | 4.00677   | 4.47976   |
| POLR3E     | 4.16835   | 5.81001    | 5.55741    | 4.28282  | 6.7736    | 5.45069    | 4.67432   | 4.08487   | 4.41933    | 3.33988   | 2.47882   | 3.87913   | 4.65444    | 4.55814   | 3.12676   |
| POLR3F     | 2.48957   | 1.77048    | 1.63116    | 2.25771  | 0.510466  | 2.25551    | 0.966454  | 1.99127   | 2.02539    | 2.14977   | 3.37251   | 1.6246    | 3.37955    | 2.11828   | 1.54455   |
| POLR3G     | 1.29629   | 1.26272    | 0.413801   | 2.70078  | 0.536228  | 1.44571    | 0.386104  | 1.14578   | 3.74092    | 3.69608   | 4.15147   | 3.99242   | 5.34999    | 2.76891   | 0.97129   |
| POLR3GL    | 6.67362   | 4.08982    | 4.82675    | 4.48436  | 3.39487   | 10.4678    | 3.85443   | 3.17359   | 1.97252    | 3.52677   | 7.57776   | 1.32643   | 2.56837    | 2.50886   | 3.1667    |
| POLR3H     | 3.51488   | 4.70881    | 4.58761    | 6.1465   | 9.58782   | 10.1226    | 4.47475   | 3.15477   | 4.78072    | 3.61292   | 4.34835   | 4.51622   | 7.05293    | 4.48651   | 4.4341    |
| POLR3K     | 1.8256    | 1.94866    | 1.95173    | 4.80465  | 2.92305   | 6.38532    | 1.95614   | 1.57252   | 1.7445     | 2.85534   | 6.59482   | 2.15032   | 3.89603    | 3.25876   | 1.33107   |
| POLRMT     | 4.29364   | 4.58058    | 4.83174    | 4.53142  | 11.3713   | 8.16762    | 4.83976   | 2.84699   | 5.38494    | 2.82061   | 2.39943   | 3.98299   | 4.58956    | 3.69551   | 2.94754   |
| POM121     | 5.44291   | 6.78099    | 7.08744    | 6.42356  | 7.19642   | 10.0631    | 8.61542   | 7.15484   | 4.92242    | 3.68358   | 3.62014   | 4.51376   | 8.17367    | 6.10022   | 4.96607   |
| POM121C    | 5.63535   | 7.07573    | 7.56493    | 8.37122  | 7.90313   | 13.2556    | 9.12574   | 6.61477   | 6.44266    | 5.05462   | 6.18783   | 6.71531   | 11.8423    | 6.47574   | 5.86339   |
| POM121L10P | 0.17563   | 0.183345   | 0.219083   | 0.108403 | 0.28205   | 0.241232   | 0.180675  | 0.177518  | 0.0325738  | 0.0436516 | 0.0570618 | 0.0812107 | 0.0311645  | 0.140344  | 0.243543  |
| POM121L12  | 0         | 0          | 0          | 0        | 0         | 0          | 0         | 0         | 0          | 0         | 0         | 0         | 0          | 0         | 0         |
| POM121L1P  | 0.0257779 | 0.0711755  | 0.0672449  | 3.80E-12 | 0.0447796 | 0.0709446  | 0.168494  | 0.0608941 | 0.0305347  | 0.035992  | 5.52E-37  | 0.0515875 | 0          | 0.0851761 | 0.11413   |
| POM121L2   | 0         | 0.00703513 | 0.00603961 | 0        | 0         | 0.00621641 | 0         | 0         | 0          | 0         | 0         | 0         | 0          | 0         | 0         |
| POM121L4P  | 0.010908  | 0.0117462  | 0.0180021  | 0        | 0.0407119 | 0.0479234  | 0         | 0.0210488 | 0          | 0         | 0         | 0         | 0.00689053 | 0         | 0.0161915 |
| POM121L8P  | 0.152918  | 0.0682051  | 0.088176   | 0.037895 | 0.0373657 | 0.0434112  | 0.0485362 | 0.153884  | 0.00825535 | 0.0117818 | 1.51E-25  | 0.0227105 | 0.0102389  | 0.0552525 | 0.0651259 |
| POM121L9P  | 0.17104   | 0.0868058  | 0.086504   | 0.155184 | 0.149164  | 0.685639   | 0.129942  | 0.123996  | 0.0192474  | 0.0354169 | 0.0461533 | 0.0869289 | 0.025289   | 0.127354  | 0.256224  |
| POMC       | 1.02789   | 1.14058    | 0.966297   | 0.898773 | 2.78207   | 2.93071    | 1.58259   | 0.567478  | 4.49528    | 0.762335  | 2.16249   | 0.735481  | 0.221063   | 0.219772  | 0.111832  |
| POMGNT1    | 4.37876   | 4.12708    | 4.4794     | 6.86796  | 6.05032   | 10.0278    | 4.09946   | 2.88157   | 2.86809    | 4.19175   | 6.4502    | 2.58821   | 5.93376    | 5.38062   | 4.32574   |
| POMGNT2    | 2.15495   | 1.83663    | 2.352      | 1.90349  | 2.27847   | 4.07072    | 3.42189   | 1.47256   | 4.20138    | 1.44325   | 2.5451    | 1.28925   | 1.8986     | 1.131     | 1.22231   |
| POMK       | 3.90708   | 3.7856     | 3.27941    | 6.50975  | 5.62606   | 6.37438    | 4.60751   | 2.9147    | 2.36183    | 3.86577   | 6.43886   | 2.65278   | 5.57524    | 4.35977   | 3.27654   |
| POMP       | 9.48849   | 6.57897    | 5.87078    | 20.7153  | 3.91233   | 18.546     | 4.70242   | 6.75733   | 11.498     | 20.4183   | 37.0336   | 8.29674   | 19.766     | 13.7265   | 8.18965   |

|          |            |            |            |            |           |            |           |            |           |           |           |            |           |           |            |
|----------|------------|------------|------------|------------|-----------|------------|-----------|------------|-----------|-----------|-----------|------------|-----------|-----------|------------|
| POMT1    | 2.25069    | 2.59102    | 2.71097    | 1.62049    | 2.91807   | 3.68977    | 2.38474   | 1.69619    | 1.39612   | 1.55931   | 2.18843   | 1.64908    | 1.92068   | 2.00443   | 2.44791    |
| POMT2    | 1.44822    | 1.44131    | 1.48089    | 1.29181    | 3.44445   | 2.61183    | 1.43125   | 0.894611   | 1.26645   | 1.72231   | 1.44189   | 1.93998    | 1.29588   | 2.16648   | 2.47534    |
| POMZP3   | 3.3206     | 1.81692    | 1.86878    | 5.65012    | 5.11095   | 5.96727    | 2.60858   | 3.11744    | 2.08248   | 2.28321   | 3.07473   | 1.45577    | 4.15887   | 2.09708   | 1.99795    |
| PON1     | 0.0540936  | 0.0390947  | 0.0447501  | 0          | 0.0280087 | 0.0383833  | 0.0205874 | 0.184283   | 0         | 0         | 0         | 0          | 0         | 0         | 0.0129475  |
| PON2     | 13.3626    | 7.8069     | 6.40114    | 10.627     | 4.10785   | 11.533     | 5.57554   | 9.08998    | 13.2237   | 9.02665   | 19.1284   | 8.13959    | 7.95339   | 7.3933    | 5.94798    |
| PON3     | 0.913286   | 0.898795   | 1.35032    | 0.280348   | 0.271656  | 0.380553   | 0.443728  | 2.55584    | 0.851959  | 0.170721  | 0.789691  | 0.250269   | 0.0250744 | 0.101558  | 0.195344   |
| POP1     | 0.761572   | 0.911499   | 0.910928   | 1.63963    | 0.941867  | 2.48235    | 0.852924  | 0.775974   | 1.00431   | 1.25417   | 1.15542   | 0.912836   | 2.54443   | 1.69607   | 0.585171   |
| POP4     | 2.88173    | 2.67375    | 2.35444    | 4.59707    | 1.95406   | 4.97587    | 3.08653   | 2.13288    | 3.85733   | 4.09836   | 8.27885   | 1.74915    | 3.82217   | 2.59723   | 2.11411    |
| POP5     | 3.72716    | 3.95354    | 3.22678    | 7.0864     | 3.76995   | 7.99558    | 3.72773   | 2.23394    | 3.34287   | 5.62082   | 10.6329   | 2.68755    | 4.5858    | 4.74158   | 3.11202    |
| POP7     | 7.82195    | 6.86748    | 6.90226    | 9.87762    | 13.5774   | 13.8492    | 9.49789   | 4.74468    | 21.4719   | 7.44872   | 16.3425   | 8.15536    | 10.8303   | 6.16459   | 3.92274    |
| POPDC2   | 0.719541   | 0.403416   | 0.411267   | 0.296603   | 0.690939  | 0.657239   | 0.672176  | 0.267414   | 0.286796  | 0.509019  | 1.47686   | 0.168497   | 0.405159  | 0.492301  | 0.901834   |
| POPDC3   | 0.0847731  | 0.02334    | 0.0100186  | 0.112321   | 0         | 0.195926   | 0.0138273 | 0.043051   | 0.0147492 | 0.395196  | 1.25775   | 0.0866534  | 0.273476  | 0.234189  | 0.173921   |
| POR      | 7.36244    | 8.83041    | 8.47339    | 23.3915    | 23.0598   | 23.4832    | 10.4469   | 7.56368    | 37.0395   | 16.0054   | 20.9402   | 19.0643    | 22.6337   | 14.8303   | 10.2808    |
| PORCN    | 2.03947    | 1.65001    | 1.84057    | 2.46139    | 3.06635   | 4.67113    | 2.71462   | 1.53142    | 5.63183   | 2.91564   | 6.29134   | 2.91858    | 2.32913   | 2.55934   | 1.5976     |
| POSTN    | 13.2284    | 8.71274    | 7.1484     | 10.556     | 40.416    | 30.2869    | 4.14341   | 20.6284    | 13.9177   | 172.075   | 332.992   | 19.4988    | 10.554    | 37.119    | 133.075    |
| POT1     | 1.52349    | 1.23205    | 1.43402    | 1.51452    | 0.158882  | 1.53559    | 1.20472   | 1.48791    | 0.708083  | 1.39863   | 2.02369   | 0.712608   | 1.17745   | 0.917227  | 1.52304    |
| POT1-AS1 | 0.0111372  | 0.00268303 | 0.0184269  | 0.0114772  | 0         | 0          | 0         | 0.00989779 | 0         | 0.0279566 | 0.0377175 | 0.00398447 | 0         | 0.0145519 | 0.0559804  |
| POTEA    | 0          | 0          | 0          | 0          | 0         | 0          | 0         | 0          | 0         | 0         | 0         | 0          | 0         | 0         | 0          |
| POTEB    | 0          | 0          | 0          | 0          | 0         | 0          | 7.50E-07  | 0          | 0         | 0         | 0         | 0          | 0         | 0         | 0          |
| POTEB2   | 0          | 0          | 0          | 0          | 0         | 0          | 7.50E-07  | 0          | 0         | 0         | 0         | 0          | 0         | 0         | 0          |
| POTEB3   | 0          | 0          | 0          | 0          | 0         | 0          | 4.11E-12  | 0          | 0         | 0         | 0         | 0          | 0         | 0         | 0          |
| POTEC    | 0          | 0          | 0          | 0          | 0         | 0          | 0         | 0          | 0         | 0         | 0         | 0          | 0         | 0         | 0          |
| POTED    | 0          | 0          | 0          | 0          | 0         | 0          | 0         | 0          | 0         | 0         | 0         | 0          | 0         | 0         | 0          |
| POTEE    | 0.00031438 | 0.0189645  | 0.0209543  | 0.00029408 | 0         | 0          | 0.0203701 | 0          | 0         | 0         | 0         | 0          | 0         | 0         | 0.00112462 |
|          | 5          |            |            | 8          |           |            |           |            |           |           |           |            |           |           |            |
| POTEF    | 0.00743934 | 0.0209526  | 0.00643735 | 0          | 0         | 0.00454369 | 0         | 0          | 0         | 0         | 0         | 0          | 0         | 9.15E-38  | 1.05E-08   |

|           |            |            |            |            |            |            |            |           |            |           |            |            |            |            |           |
|-----------|------------|------------|------------|------------|------------|------------|------------|-----------|------------|-----------|------------|------------|------------|------------|-----------|
| POTEG     | 0          | 0          | 0          | 0          | 0          | 0          | 0          | 0         | 0          | 0         | 0          | 0          | 0          | 0          | 0         |
| POTEH     | 0          | 0          | 0          | 0          | 0          | 0          | 0          | 0         | 0          | 0         | 0          | 0          | 0          | 0          | 0         |
| POTEH-AS1 | 0          | 0          | 0          | 0          | 0          | 0          | 0          | 0         | 0          | 0         | 0          | 0          | 0          | 0.0121604  | 0         |
| POTEI     | 0.00756324 | 0          | 0.0224004  | 0.00707495 | 0          | 0          | 0          | 0         | 0          | 0         | 0          | 0          | 0          | 4.02E-05   | 0.0270551 |
| POTEJ     | 0.00356092 | 2.13E-19   | 1.18E-18   | 0          | 0.0109701  | 0          | 0.010869   | 0         | 0          | 0         | 0          | 0          | 0          | 0.0294888  | 0.0127381 |
| POTEKP    | 0          | 0.0655922  | 0.0500538  | 0          | 0          | 0          | 0.0345412  | 0         | 0          | 0         | 0          | 0          | 0          | 0          | 0         |
| POTEM     | 0          | 0.00669107 | 0.00574424 | 0          | 0.0485362  | 0.0118248  | 0.011892   | 0         | 0          | 0         | 0          | 0          | 0          | 0.00907258 | 0.0299157 |
| POU1F1    | 0          | 0          | 0          | 0          | 0          | 0          | 0          | 0.0306979 | 0          | 0         | 0.0194967  | 0.0123578  | 0          | 0          | 0         |
| POU2AF1   | 0.16798    | 0.116844   | 0.120109   | 0.401296   | 0.559338   | 0.144388   | 0.0894762  | 0.380002  | 0.0185982  | 0.0862495 | 0.146531   | 0.0331725  | 0.487709   | 0.170002   | 0.219309  |
| POU2F1    | 2.59021    | 2.13497    | 2.30515    | 1.94555    | 0.944769   | 2.63087    | 2.14257    | 2.36251   | 1.01728    | 1.84431   | 1.72656    | 1.20346    | 2.15152    | 1.42579    | 1.43716   |
| POU2F2    | 0.254461   | 0.268485   | 0.301106   | 0.693746   | 0.385259   | 0.622583   | 0.305246   | 0.369273  | 0.0353056  | 0.287033  | 0.447245   | 0.0368757  | 0.719053   | 0.392243   | 1.07319   |
| POU2F3    | 1.8253     | 8.41808    | 11.4773    | 2.53126    | 1.7502     | 1.75889    | 5.77194    | 8.52475   | 3.65013    | 0.942776  | 1.09387    | 1.31143    | 1.03713    | 0.478955   | 0.507013  |
| POU3F1    | 3.94412    | 11.0288    | 15.8173    | 6.16603    | 13.1985    | 7.26188    | 10.3332    | 9.83424   | 12.8414    | 6.38873   | 5.9782     | 8.58514    | 5.95129    | 3.58158    | 2.3043    |
| POU3F2    | 0.0226504  | 0          | 0.00936901 | 0.0116709  | 0.00879598 | 0.00482163 | 0          | 0.0100649 | 0.00689641 | 0         | 0.00639237 | 0          | 0          | 0          | 0         |
| POU3F3    | 0.0359524  | 0.0915613  | 0.110472   | 0.03705    | 0          | 0.0918389  | 0.134876   | 0.0547739 | 0.00625513 | 0         | 0          | 0.00734997 | 0          | 0          | 0.014752  |
| POU3F4    | 0          | 0          | 0          | 0          | 0          | 0          | 0          | 0         | 0          | 0         | 0          | 0          | 0          | 0          | 0         |
| POU4F1    | 0.0121358  | 0.0204653  | 0.0100396  | 0.00625317 | 0.0282767  | 0.020667   | 0.00692816 | 0.0215707 | 0.0591204  | 0.0228476 | 0.00684993 | 0.0130253  | 0.00782998 | 0.0697699  | 0.0174286 |
| POU4F2    | 0.0147361  | 0          | 0          | 0          | 0          | 0          | 0          | 0         | 0          | 0         | 0          | 0          | 0.0142615  | 0.00770173 | 0         |
| POU4F3    | 0.0195796  | 0.0471687  | 0.0647904  | 0.0807093  | 0.0912415  | 0.066687   | 0          | 0.0174007 | 0.0238457  | 0         | 0.0442058  | 0.0140097  | 0.0884285  | 0.0102331  | 0         |
| POU5F1    | 0.0907587  | 0.0625426  | 0.0706099  | 0.0372022  | 0.0495434  | 0.0676405  | 0.0957229  | 0.0669235 | 0.0713787  | 0.0245247 | 0.0233255  | 0.0329518  | 0.0199085  | 0.0432388  | 0.0588046 |
| POU5F1B   | 0.254407   | 0.368477   | 0.330034   | 0.14348    | 0.27217    | 0.137113   | 0.197307   | 0.17953   | 0.117284   | 0.0847731 | 0.0329661  | 0.0417905  | 0.0188414  | 0.0725848  | 0.0419386 |
| POU5F1P3  | 0.842173   | 0.568978   | 0.603867   | 0.288635   | 0.419703   | 0.345919   | 0.620524   | 0.611603  | 0          | 0.132709  | 0.0296012  | 0.234062   | 0.0146289  | 0.233598   | 0.803527  |
| POU5F1P4  | 0.872688   | 1.1037     | 0.91467    | 0.660653   | 1.11312    | 0.203204   | 0.493719   | 0.645188  | 0.107703   | 0.304652  | 0.0579644  | 0.56523    | 0.0137874  | 1.06113    | 0.840066  |
| POU5F1P5  | 1.72894    | 1.55895    | 1.69593    | 1.78172    | 1.72648    | 0.336495   | 1.07162    | 1.30952   | 0.330888   | 1.44576   | 0.362469   | 1.55521    | 0.143422   | 2.68504    | 1.20601   |
| POU5F2    | 1.55478    | 1.12798    | 1.25666    | 1.105      | 1.83216    | 0.502161   | 1.08144    | 0.873528  | 0.0870599  | 0.358881  | 0.161394   | 0.549851   | 0.0461213  | 0.793918   | 0.872615  |
| POU6F1    | 1.33836    | 1.21407    | 1.63139    | 0.5523     | 1.13146    | 1.78       | 1.76475    | 1.06312   | 0.241612   | 0.379067  | 0.748738   | 0.264833   | 0.410739   | 0.663895   | 1.47982   |

|             |            |            |           |           |           |           |           |           |           |          |          |           |          |            |           |
|-------------|------------|------------|-----------|-----------|-----------|-----------|-----------|-----------|-----------|----------|----------|-----------|----------|------------|-----------|
| POU6F2      | 0.0995828  | 0.0143942  | 0         | 0         | 0         | 0.025438  | 0.0454802 | 0.0354004 | 0         | 0        | 0        | 0.0142508 | 0        | 0          | 0         |
| POU6F2-AS1  | 0          | 0          | 0         | 0         | 0         | 0         | 0         | 0         | 0         | 0        | 0        | 0         | 0        | 0          | 0         |
| POU6F2-AS2  | 0.00990713 | 0          | 0         | 0         | 0         | 0         | 0         | 0         | 0         | 0        | 0        | 0         | 0        | 0          | 0         |
| PP12613     | 0          | 0          | 0         | 0         | 0         | 0         | 0         | 0         | 0         | 0        | 0        | 0         | 0        | 0          | 1.25E-29  |
| PP2672      | 0          | 0          | 0         | 0         | 0.0147453 | 0         | 0         | 0         | 0         | 0        | 0        | 0         | 0        | 0          | 0         |
| PP2D1       | 0.482344   | 0.314424   | 0.250493  | 0.633839  | 0.0293822 | 0.18529   | 0.324227  | 0.588367  | 0.11528   | 0.308703 | 0.149524 | 0.243718  | 0.213604 | 0.415718   | 0.434749  |
| PP7080      | 5.34828    | 5.13517    | 5.16342   | 3.49538   | 5.87556   | 4.9709    | 4.60645   | 4.22751   | 3.31554   | 2.77076  | 3.75833  | 3.2198    | 2.9705   | 2.50208    | 2.78886   |
| PPA1        | 24.9383    | 15.7754    | 17.7045   | 43.9074   | 8.91826   | 31.239    | 13.2729   | 16.0813   | 22.1675   | 32.5272  | 49.8634  | 17.7169   | 49.612   | 29.9045    | 18.6348   |
| PPA2        | 8.20315    | 6.39852    | 6.93498   | 11.7893   | 2.19176   | 8.22166   | 4.56458   | 6.36824   | 8.33945   | 7.13587  | 12.3522  | 5.2559    | 6.74743  | 6.26107    | 4.64872   |
| PPAN        | 3.2957     | 4.09393    | 4.17393   | 6.89655   | 7.43321   | 7.12583   | 3.64041   | 2.9807    | 4.42465   | 2.71019  | 2.19997  | 3.95796   | 7.14093  | 4.90688    | 1.84465   |
| PPAN-P2RY11 | 1.79088    | 2.28413    | 2.23841   | 1.46725   | 2.48418   | 3.22572   | 1.67848   | 2.05764   | 0.909357  | 0.576991 | 0.895629 | 1.46588   | 1.73897  | 2.4831     | 1.50711   |
| PPARA       | 2.45677    | 3.58195    | 3.53258   | 2.16815   | 2.55899   | 2.70218   | 2.85039   | 2.5048    | 2.69664   | 1.90712  | 1.52361  | 1.8936    | 2.42459  | 1.59866    | 1.4664    |
| PPARD       | 6.39288    | 6.16529    | 5.47756   | 28.7002   | 17.4183   | 15.9105   | 6.4638    | 6.04578   | 40.5604   | 26.742   | 21.2229  | 22.7631   | 36.5773  | 19.0982    | 7.84704   |
| PPARG       | 0.990677   | 0.303453   | 0.397106  | 0.396441  | 0.237969  | 1.55375   | 0.314849  | 0.396346  | 0.310962  | 0.337556 | 0.707137 | 0.263081  | 0.243811 | 0.133446   | 0.479135  |
| PPARGC1A    | 2.81332    | 0.638599   | 0.890049  | 0.198157  | 0.35558   | 1.29424   | 1.31467   | 1.78822   | 0.0250911 | 0.295928 | 0.49357  | 0.0655172 | 0.165416 | 0.662803   | 0.851455  |
| PPARGC1B    | 3.19778    | 1.70138    | 1.93101   | 1.31066   | 1.34473   | 1.33775   | 1.96222   | 2.38599   | 0.471193  | 0.464128 | 0.480189 | 0.695906  | 1.35291  | 1.03673    | 0.887164  |
| PPAT        | 1.07497    | 1.21354    | 1.43217   | 1.94507   | 0.456281  | 1.75613   | 0.742127  | 0.916462  | 0.936222  | 1.23153  | 1.91903  | 1.29238   | 1.79037  | 1.82594    | 0.987307  |
| PPBP        | 0.053121   | 0.0085315  | 0         | 0.0547427 | 0.0550102 | 0.0150773 | 0.0606518 | 0.157365  | 0.0215651 | 10.0231  | 22.0878  | 0.076019  | 1.78222  | 0.120308   | 0.0254295 |
| PPBPP2      | 0          | 0          | 0         | 0         | 0         | 0         | 0         | 0         | 0         | 0        | 0        | 0         | 0        | 0          | 0         |
| PPCDC       | 1.53841    | 1.49167    | 1.61259   | 1.51645   | 1.97409   | 1.87947   | 1.80015   | 1.23983   | 0.453856  | 1.51111  | 1.77982  | 0.752082  | 1.01107  | 0.928891   | 1.3311    |
| PPCS        | 4.9269     | 4.19153    | 4.20567   | 5.50906   | 3.36146   | 6.22924   | 3.71057   | 3.86634   | 6.02205   | 5.0216   | 8.18153  | 3.72898   | 5.20483  | 4.39928    | 2.50981   |
| PPDPF       | 77.7696    | 104.033    | 88.5028   | 183.602   | 189.88    | 222.561   | 136.978   | 88.9979   | 271.867   | 143.736  | 333.499  | 205.341   | 176.962  | 110.818    | 62.1558   |
| PPDPFL      | 0.159843   | 0.0110021  | 0.0755622 | 0         | 0         | 0.194435  | 0.117324  | 0.0507341 | 0         | 0        | 0        | 0         | 0        | 0          | 0         |
| PPEF1       | 0.048349   | 0.0660033  | 0.0533303 | 0.0166083 | 0.0125171 | 0.102921  | 0.0368022 | 0.0286457 | 0.0785115 | 0.313529 | 0.35477  | 0.0172975 | 0        | 0.00421155 | 0.0694353 |
| PPEF1-AS1   | 0          | 0          | 0         | 0         | 0         | 0         | 0         | 0         | 0         | 0        | 0        | 0         | 0        | 0          | 0         |
| PPEF2       | 0.0203426  | 0.00326712 | 0.0224384 | 0         | 0         | 0         | 0.0232265 | 0.0301313 | 0         | 0        | 0        | 0         | 0        | 0.00708794 | 0         |

|            |            |           |           |            |           |           |           |            |            |           |           |           |           |            |           |
|------------|------------|-----------|-----------|------------|-----------|-----------|-----------|------------|------------|-----------|-----------|-----------|-----------|------------|-----------|
| PPFIA1     | 5.19104    | 5.07314   | 5.28171   | 5.57702    | 4.06983   | 7.71255   | 5.0869    | 4.04667    | 4.20643    | 6.62299   | 5.47702   | 4.466     | 7.52661   | 5.94309    | 6.20464   |
| PPFIA2     | 0.454545   | 0.0713046 | 0.107854  | 0.206977   | 0.0766273 | 0.552056  | 0.144833  | 0.12526    | 0.00858271 | 0.278617  | 0.350039  | 0.0352973 | 0.159139  | 0.268872   | 0.718569  |
| PPFIA2-AS1 | 0.0238834  | 0         | 0.0197581 | 0          | 0         | 0.0813457 | 0         | 0          | 0          | 0.0299762 | 0.107846  | 0         | 0.0308189 | 0.0249651  | 0.0342996 |
| PPFIA3     | 1.95706    | 4.74054   | 5.74128   | 2.95229    | 9.57471   | 3.47829   | 5.87321   | 1.85638    | 4.86797    | 2.68294   | 1.54815   | 4.76662   | 4.09031   | 2.48187    | 1.14246   |
| PPFIA4     | 0.367974   | 0.578362  | 0.69749   | 0.445477   | 0.743622  | 1.40844   | 0.599618  | 0.542924   | 0.831036   | 0.842979  | 0.580749  | 0.876801  | 0.191315  | 1.39851    | 0.405321  |
| PPFIBP1    | 6.32016    | 7.79986   | 8.33164   | 12.5314    | 4.78932   | 11.0603   | 5.64884   | 5.65029    | 3.39417    | 9.60369   | 9.15041   | 5.73012   | 15.9773   | 11.1334    | 10.7844   |
| PPFIBP2    | 3.31158    | 3.73409   | 3.83197   | 5.38622    | 5.75079   | 4.60345   | 3.33506   | 3.09053    | 6.17601    | 5.38855   | 2.81743   | 5.50084   | 6.77553   | 3.90418    | 3.08783   |
| PPHLN1     | 3.46123    | 3.00229   | 2.84324   | 4.66556    | 1.44432   | 5.50475   | 2.35115   | 2.79484    | 2.47825    | 2.96335   | 5.07784   | 2.29547   | 3.39844   | 3.06078    | 2.57278   |
| PPIA       | 88.8048    | 80.9843   | 75.1881   | 239.968    | 95.4715   | 207.671   | 85.765    | 62.263     | 181.132    | 213.988   | 360.392   | 165.732   | 203.148   | 159.823    | 72.1581   |
| PPIAL4A    | 2.75E-19   | 0         | 0.0112865 | 0          | 5.80E-30  | 0         | 0         | 4.87E-05   | 2.08E-30   | 0         | 0         | 0         | 0         | 0.00610763 | 0.0335652 |
| PPIAL4C    | 0.00498012 | 0         | 1.93E-06  | 0          | 9.93E-34  | 0         | 0         | 0.0232433  | 3.57E-34   | 0         | 0         | 0         | 0         | 1.05E-06   | 5.75E-06  |
| PPIAL4D    | 0.00498012 | 0         | 0.0277667 | 0.00506361 | 0.015265  | 0         | 0.0112204 | 0.00582506 | 3.57E-34   | 0         | 0         | 0         | 0         | 6.77E-43   | 0         |
| PPIAL4E    | 0.00498012 | 0         | 0.0277667 | 0.00506361 | 0.015265  | 0         | 0.0112204 | 0.00582506 | 3.57E-34   | 0         | 0         | 0         | 0         | 6.77E-43   | 0         |
| PPIAL4F    | 0.00498012 | 0         | 0.0277667 | 0.00506361 | 0.015265  | 0         | 0.0112204 | 0.00582506 | 3.57E-34   | 0         | 0         | 0         | 0         | 6.77E-43   | 0         |
| PPIAL4G    | 0.10912    | 0.0302186 | 4.24E-05  | 0.0323165  | 0.194846  | 0.0801057 | 0         | 6.60E-11   | 0.152828   | 0         | 0.0354006 | 0.0897532 | 0.0404693 | 0.0983663  | 0         |
| PPIAP30    | 0.406667   | 0.409689  | 0.428176  | 0.419082   | 0.287134  | 0.220355  | 0.844217  | 0.558546   | 0.045025   | 0.371206  | 0         | 0.396792  | 0         | 0.463728   | 0.212373  |
| PPIAP46    | 0          | 0.045513  | 0         | 0          | 0         | 0         | 0         | 0.0839495  | 0          | 0         | 0         | 0.0337948 | 0         | 0          | 0.271317  |
| PPIB       | 49.2418    | 30.5666   | 34.8758   | 131.414    | 79.8044   | 173.267   | 48.537    | 34.8913    | 64.0332    | 96.9298   | 201.897   | 51.2756   | 117.267   | 70.5602    | 85.1182   |
| PPIC       | 6.10407    | 4.88068   | 4.04287   | 15.6875    | 16.404    | 14.9389   | 4.21159   | 3.96043    | 11.3563    | 17.038    | 34.7919   | 10.9459   | 12.0445   | 9.86435    | 13.1493   |
| PPID       | 3.21782    | 4.3107    | 3.74769   | 6.86618    | 2.6266    | 5.18975   | 2.03151   | 2.54572    | 5.20989    | 4.40297   | 6.39608   | 3.9638    | 6.8227    | 4.74853    | 3.64259   |
| PPIE       | 2.69028    | 2.42752   | 2.3936    | 3.19706    | 2.86672   | 3.79393   | 2.66081   | 1.86931    | 1.61744    | 2.06646   | 3.6235    | 1.35038   | 2.32314   | 2.11341    | 1.53658   |
| PPIEL      | 1.42871    | 1.86416   | 1.58979   | 0.613007   | 1.22226   | 0.645195  | 1.98959   | 1.8104     | 0.263003   | 0.45674   | 0.35945   | 0.926247  | 0.131981  | 0.593766   | 0.864326  |
| PPIF       | 9.22566    | 9.29054   | 10.6432   | 65.814     | 28.7593   | 30.6787   | 16.1306   | 8.11486    | 59.5101    | 92.9501   | 90.0028   | 62.6475   | 168.451   | 68.5489    | 22.6914   |
| PPIG       | 8.08211    | 6.84452   | 5.94319   | 6.21358    | 2.67028   | 8.22176   | 1.8944    | 3.0783     | 6.08293    | 5.98972   | 5.648     | 4.2286    | 9.53515   | 6.26234    | 5.89558   |
| PPIH       | 6.95047    | 4.64711   | 4.52077   | 10.6661    | 5.47647   | 9.52066   | 4.19793   | 4.65513    | 3.74173    | 5.40481   | 9.80777   | 3.72994   | 6.09296   | 4.7382     | 2.82093   |
| PPIL1      | 2.73291    | 2.13893   | 2.06234   | 9.8778     | 2.13293   | 8.33192   | 2.05486   | 2.13259    | 4.41618    | 5.57179   | 7.85575   | 3.82509   | 8.86789   | 5.88056    | 3.82907   |



|                    |           |           |           |           |           |           |           |           |           |           |           |           |           |            |           |
|--------------------|-----------|-----------|-----------|-----------|-----------|-----------|-----------|-----------|-----------|-----------|-----------|-----------|-----------|------------|-----------|
| PPIL2              | 3.23015   | 4.5597    | 4.49973   | 5.368     | 6.34121   | 6.90162   | 4.07309   | 3.63996   | 3.04723   | 3.54607   | 3.59804   | 3.86855   | 4.50491   | 4.62431    | 4.65435   |
| PPIL3              | 3.09301   | 4.04124   | 4.00371   | 3.84368   | 0.310881  | 6.11941   | 2.07736   | 2.61946   | 3.3681    | 3.53952   | 6.34656   | 2.55162   | 3.58033   | 2.35825    | 3.60583   |
| PPIL4              | 4.84963   | 4.58964   | 5.01683   | 4.7718    | 1.51798   | 6.43906   | 2.38796   | 4.39111   | 2.49155   | 4.8144    | 5.22719   | 3.08448   | 4.23676   | 4.5967     | 5.95474   |
| PPIL6              | 0.228328  | 0.234507  | 0.223039  | 0.111764  | 0.0906392 | 0.205648  | 0.125059  | 0.134997  | 0.0818657 | 0.0573854 | 0.0721102 | 0.0938682 | 0.0653958 | 0.10015    | 0.0898486 |
| PPIP5K1            | 4.32021   | 6.36883   | 5.74319   | 4.90724   | 5.98833   | 4.31463   | 5.70454   | 3.98252   | 4.31161   | 3.11991   | 1.99842   | 4.36498   | 3.06634   | 4.04421    | 1.78938   |
| PPIP5K1P1-CATSPER2 | 0.063582  | 0.0607184 | 0.0800162 | 0.0743789 | 0.0402557 | 0.0107168 | 0.0294427 | 0.0174055 | 0.027078  | 0.0231412 | 1.04E-28  | 0.0322112 | 3.46E-25  | 0.00332293 | 0.0237472 |
| PPIP5K2            | 3.35723   | 2.95921   | 2.65702   | 2.55419   | 0.611861  | 3.20951   | 1.85432   | 3.23944   | 2.50564   | 3.05757   | 3.71123   | 1.59568   | 2.28141   | 2.50367    | 3.52902   |
| PPL                | 31.1418   | 47.7917   | 51.4641   | 54.3593   | 71.8464   | 63.9798   | 61.5275   | 29.9678   | 107.036   | 45.2979   | 25.9958   | 72.1736   | 122.317   | 38.2122    | 13.5332   |
| PPM1A              | 3.40638   | 3.35285   | 3.8747    | 2.73307   | 2.34012   | 2.97471   | 2.61832   | 4.05264   | 5.13385   | 3.34397   | 3.89344   | 1.99341   | 3.79642   | 2.36953    | 2.4722    |
| PPM1B              | 3.37977   | 2.98786   | 3.35376   | 2.0579    | 1.43423   | 2.8303    | 1.93681   | 2.98458   | 3.22181   | 2.41474   | 2.8215    | 1.61016   | 2.65166   | 2.48466    | 2.05993   |
| PPM1D              | 1.41949   | 1.18813   | 1.11018   | 1.72743   | 2.00177   | 2.37198   | 1.08971   | 1.26583   | 2.1359    | 1.86066   | 3.33065   | 1.06768   | 2.48186   | 1.62051    | 1.67678   |
| PPM1E              | 0.0466829 | 0.0517722 | 0.0964181 | 0.0512697 | 0.0661918 | 0.0642339 | 0.0692243 | 0.0585394 | 0.0175386 | 0.0269855 | 0.0323826 | 0.023417  | 0.011407  | 0.0335015  | 0.0361113 |
| PPM1F              | 5.07942   | 4.53339   | 4.78547   | 9.12586   | 10.8437   | 14.8185   | 5.07076   | 3.84775   | 3.16375   | 5.41723   | 5.22512   | 4.23808   | 9.66462   | 7.13137    | 8.17928   |
| PPM1G              | 8.94757   | 8.05057   | 7.94266   | 18.6798   | 13.4926   | 21.555    | 8.52868   | 6.40616   | 10.5543   | 12.6307   | 10.8157   | 9.71125   | 29.1176   | 15.5004    | 9.29809   |
| PPM1H              | 0.507654  | 0.384878  | 0.441583  | 0.32697   | 0.533439  | 0.632499  | 0.600933  | 0.417987  | 0.0818293 | 0.145235  | 0.269684  | 0.069443  | 0.267327  | 0.095594   | 0.450299  |
| PPM1J              | 1.02618   | 2.38757   | 2.37923   | 1.72541   | 2.41199   | 1.29917   | 1.31041   | 1.13998   | 0.805774  | 0.508406  | 0.792609  | 0.782565  | 0.653374  | 0.656294   | 0.465386  |
| PPM1K              | 1.21933   | 1.06769   | 0.534565  | 0.579049  | 1.77863   | 1.45328   | 0.485175  | 0.720959  | 2.66887   | 0.440773  | 0.872176  | 0.459846  | 0.358     | 0.422152   | 1.08434   |
| PPM1L              | 3.93374   | 3.37785   | 3.37207   | 1.18866   | 1.94438   | 2.42034   | 3.00038   | 3.33734   | 4.94229   | 1.85557   | 1.53761   | 3.60122   | 1.27224   | 0.716066   | 1.23013   |
| PPM1M              | 2.84594   | 2.75195   | 2.77128   | 2.78008   | 4.75844   | 3.41614   | 3.08016   | 1.69494   | 1.08314   | 2.30688   | 4.39516   | 0.813125  | 1.87445   | 2.1175     | 3.20727   |
| PPM1N              | 0.162028  | 0.474912  | 0.402124  | 0.417437  | 0.755058  | 0.310421  | 0.431664  | 0.311994  | 0.493331  | 0.186415  | 0.24388   | 0.357468  | 0.0958282 | 0.119968   | 0.0775644 |
| PPME1              | 6.57753   | 6.90909   | 7.81112   | 8.89932   | 6.694     | 13.9767   | 7.71138   | 6.40541   | 8.73704   | 7.42252   | 9.35028   | 7.69365   | 9.566     | 8.58312    | 5.18751   |
| PPOX               | 1.70821   | 2.70079   | 2.8891    | 2.20371   | 3.8524    | 2.75819   | 2.52827   | 1.25947   | 1.55645   | 1.65166   | 2.514     | 1.91942   | 1.04498   | 1.43507    | 1.34472   |
| PPP1CA             | 21.0838   | 21.063    | 18.0681   | 52.3617   | 39.509    | 60.8808   | 30.6593   | 17.8118   | 60.533    | 47.6916   | 72.1306   | 36.7593   | 67.459    | 36.3939    | 20.9882   |
| PPP1CB             | 26.7513   | 21.2629   | 20.0927   | 35.3357   | 15.7519   | 28.9831   | 17.0291   | 25.4803   | 80.5482   | 55.4961   | 54.2251   | 37.7874   | 77.829    | 34.0322    | 19.8898   |
| PPP1CC             | 18.7192   | 14.2683   | 14.6471   | 20.487    | 6.57135   | 21.707    | 11.4809   | 17.0373   | 47.5024   | 17.7566   | 30.6723   | 14.759    | 20.658    | 16.0165    | 12.7333   |
| PPP1R10            | 0.551266  | 1.03778   | 1.01403   | 1.24979   | 1.68126   | 1.68494   | 0.858148  | 0.647455  | 1.34715   | 1.33948   | 1.0323    | 1.19054   | 1.25671   | 1.05867    | 0.870333  |

|              |           |           |           |           |           |           |           |           |           |           |            |            |            |           |           |
|--------------|-----------|-----------|-----------|-----------|-----------|-----------|-----------|-----------|-----------|-----------|------------|------------|------------|-----------|-----------|
| PPP1R11      | 1.13827   | 1.15809   | 1.13891   | 2.71193   | 1.56806   | 3.04549   | 1.6474    | 0.999224  | 2.02219   | 2.26967   | 3.47569    | 1.62892    | 3.53615    | 1.73015   | 1.37974   |
| PPP1R12A     | 7.16803   | 5.68984   | 6.41632   | 5.43274   | 3.71343   | 6.74652   | 4.24548   | 4.94123   | 5.17332   | 7.11018   | 7.47203    | 3.65787    | 6.80022    | 6.51985   | 6.89444   |
| PPP1R12A-AS1 | 0.16563   | 0.181371  | 0.17439   | 0.124136  | 0.0935567 | 0.448738  | 0.0515758 | 0.133817  | 0.0916904 | 0.0944922 | 0.0679912  | 0.0754172  | 0.0485744  | 0.149522  | 0.0216242 |
| PPP1R12B     | 7.65067   | 5.65585   | 7.2573    | 1.89892   | 3.14983   | 5.68648   | 8.48448   | 3.76006   | 2.93171   | 2.6261    | 3.28683    | 2.11649    | 1.79089    | 3.31969   | 4.63766   |
| PPP1R12C     | 8.71868   | 8.09318   | 8.33622   | 9.8616    | 26.2496   | 21.3878   | 9.4021    | 4.91124   | 11.8256   | 9.92394   | 7.3046     | 8.55609    | 10.3238    | 11.349    | 12.8237   |
| PPP1R13B     | 5.04023   | 4.91313   | 5.08464   | 4.01581   | 6.67658   | 6.79517   | 4.87024   | 4.18071   | 9.54867   | 4.0709    | 2.93446    | 3.7066     | 3.98361    | 3.60501   | 2.88866   |
| PPP1R13L     | 15.7663   | 34.0046   | 34.0557   | 34.257    | 60.8784   | 31.8605   | 36.218    | 21.8883   | 56.7729   | 24.4764   | 24.054     | 38.3646    | 53.8578    | 25.9076   | 9.9458    |
| PPP1R14A     | 3.45508   | 0.746248  | 1.50306   | 0.951528  | 3.70133   | 8.72439   | 4.62505   | 0.979411  | 0.834324  | 2.05609   | 5.8169     | 0.831171   | 1.05695    | 2.30392   | 5.13303   |
| PPP1R14B     | 28.9581   | 27.7694   | 28.9996   | 75.5358   | 54.8859   | 57.1015   | 29.7973   | 17.7753   | 46.1152   | 51.2956   | 86.2119    | 34.3605    | 59.4851    | 41.5318   | 23.1341   |
| PPP1R14C     | 8.31098   | 14.338    | 16.6257   | 13.052    | 9.41409   | 8.10165   | 9.77604   | 12.8652   | 16.6615   | 15.8175   | 15.6447    | 13.0094    | 18.7204    | 9.39308   | 4.25413   |
| PPP1R14D     | 0.0795294 | 0.0638641 | 0.0877231 | 0.0546382 | 0.123537  | 0.203155  | 0.030268  | 0.0706791 | 0.0322859 | 0.0332725 | 0          | 0.0758739  | 0          | 0         | 0.0761428 |
| PPP1R15A     | 14.5579   | 13.5137   | 18.0449   | 20.677    | 26.5055   | 22.5341   | 21.5783   | 12.2301   | 36.6898   | 26.024    | 22.3652    | 37.8095    | 38.755     | 23.0592   | 16.7367   |
| PPP1R15B     | 7.67633   | 6.76945   | 7.35921   | 9.21708   | 6.75239   | 8.3814    | 7.37227   | 7.18853   | 16.577    | 9.56852   | 11.5971    | 8.29229    | 16.3242    | 9.28718   | 8.57367   |
| PPP1R16A     | 1.76539   | 2.98913   | 3.05099   | 3.40288   | 6.27277   | 4.54006   | 2.93782   | 1.8103    | 2.60269   | 1.63266   | 1.6863     | 2.16839    | 2.92826    | 2.70452   | 1.93998   |
| PPP1R16B     | 2.57555   | 0.820767  | 0.800914  | 1.03959   | 2.09507   | 2.9639    | 1.13915   | 1.10014   | 0.310523  | 0.640024  | 0.875998   | 0.277622   | 1.45431    | 0.957916  | 1.67694   |
| PPP1R17      | 0.0117716 | 0         | 0         | 0         | 0         | 0         | 0.0134405 | 0.031385  | 0         | 0         | 0.0265774  | 0          | 0.037975   | 0         | 0         |
| PPP1R18      | 0.750427  | 0.79344   | 0.86568   | 1.86818   | 2.01618   | 3.20199   | 0.882198  | 0.616282  | 0.789539  | 1.42064   | 1.43934    | 0.803438   | 2.35989    | 1.71045   | 1.62155   |
| PPP1R1A      | 1.6026    | 0.0668797 | 0.0835139 | 0.0390124 | 0.215617  | 0.977779  | 0.691577  | 0.302795  | 0         | 0         | 0.0569806  | 0.0180583  | 0.0325666  | 0.0395711 | 0.0362447 |
| PPP1R1B      | 8.99571   | 4.64926   | 6.99424   | 0.232339  | 7.51203   | 15.2618   | 7.40077   | 8.35531   | 0.013729  | 0.0141485 | 0          | 0          | 0.0290926  | 0         | 0.356162  |
| PPP1R1C      | 0.0351718 | 0.0112975 | 0.033946  | 0.0181228 | 0         | 0.0149742 | 0.013386  | 0.0312578 | 0         | 0.0147147 | 0.00661743 | 0.00838879 | 0.00756422 | 0.076593  | 0.0505112 |
| PPP1R2       | 4.68874   | 3.51967   | 3.82592   | 5.49063   | 3.18952   | 6.2474    | 3.43992   | 5.34879   | 13.3448   | 7.98837   | 13.6045    | 5.51524    | 8.88128    | 4.7741    | 4.47376   |
| PPP1R21      | 3.52726   | 4.08914   | 4.44248   | 5.35598   | 2.9296    | 4.10672   | 2.57254   | 3.30105   | 6.41738   | 5.80035   | 4.28248    | 4.1875     | 6.23282    | 3.81491   | 3.01867   |
| PPP1R26      | 1.47811   | 1.17792   | 1.07141   | 1.90042   | 2.93016   | 2.99266   | 1.19476   | 0.750643  | 0.657208  | 1.73151   | 0.985273   | 1.21544    | 3.72689    | 1.85652   | 1.68473   |
| PPP1R26-AS1  | 0.442778  | 0.247623  | 0.274723  | 0.179259  | 0.233356  | 0.282765  | 0.261802  | 0.196752  | 0.0577772 | 0.178628  | 0.0892573  | 0.0678899  | 0.0918251  | 0.169429  | 0.158971  |
| PPP1R27      | 0.028965  | 0.320983  | 0.0479238 | 0.119397  | 0.944846  | 0.271297  | 0.0330713 | 0.15445   | 0.352761  | 0.0727082 | 0.0653958  | 0.455955   | 0.0186881  | 0.105969  | 0         |
| PPP1R2B      | 0         | 0         | 0         | 0.0124875 | 0         | 0         | 0         | 0.0212856 | 0         | 0         | 0          | 0          | 0          | 0         | 0         |

|             |           |          |            |            |           |           |           |           |           |           |           |            |           |            |           |
|-------------|-----------|----------|------------|------------|-----------|-----------|-----------|-----------|-----------|-----------|-----------|------------|-----------|------------|-----------|
| PPP1R2C     | 0         | 0        | 0          | 0          | 0         | 0         | 0         | 0         | 0         | 0         | 0         | 0          | 0         | 0          | 0         |
| PPP1R2P2    | 0.0933658 | 0        | 0.0193097  | 0          | 0.0181287 | 0.0397499 | 0.0399758 | 0.010372  | 0         | 0         | 0         | 0          | 0         | 0          | 0         |
| PPP1R32     | 0.52632   | 0.514424 | 0.746416   | 0.139471   | 0.677404  | 0.883505  | 0.3949    | 0.46775   | 0.073257  | 0.226487  | 0.186733  | 0.312037   | 0.126129  | 0.196484   | 0.518306  |
| PPP1R35     | 2.89288   | 4.00431  | 4.50246    | 5.83607    | 12.2242   | 7.24365   | 2.71518   | 1.93911   | 5.01608   | 5.53861   | 7.22329   | 4.05215    | 5.1407    | 4.80493    | 2.78143   |
| PPP1R36     | 0.312744  | 0.261716 | 0.217873   | 0.0678509  | 0.178979  | 0.504563  | 0.187937  | 0.146285  | 0.260607  | 0.309889  | 0.185815  | 0.15311    | 0.159301  | 0.103234   | 0.0236389 |
| PPP1R37     | 4.16293   | 5.4809   | 4.90313    | 8.06297    | 17.0734   | 7.323     | 4.69939   | 3.11441   | 10.245    | 5.23474   | 4.39852   | 6.5576     | 8.18415   | 5.31435    | 3.11872   |
| PPP1R3A     | 0         | 0        | 0          | 0.00555158 | 0         | 0         | 0         | 0         | 0         | 0         | 0         | 0          | 0         | 0          | 0         |
| PPP1R3B     | 3.28206   | 3.05384  | 3.93136    | 4.37854    | 2.92533   | 5.46262   | 3.20816   | 3.39197   | 6.18792   | 5.4591    | 6.68199   | 3.3695     | 7.59269   | 6.48964    | 4.54611   |
| PPP1R3C     | 7.19846   | 2.77466  | 2.92543    | 0.816005   | 1.69123   | 7.19438   | 2.98965   | 5.29384   | 5.29303   | 3.01537   | 3.3622    | 3.76       | 5.35268   | 3.33428    | 3.55365   |
| PPP1R3D     | 1.90967   | 1.79075  | 1.67097    | 3.10787    | 2.51001   | 2.5958    | 1.65274   | 1.69533   | 7.08231   | 2.02809   | 2.88472   | 1.72392    | 2.1368    | 1.19985    | 1.28029   |
| PPP1R3E     | 1.5034    | 2.45588  | 2.71743    | 0.827705   | 2.00739   | 1.30204   | 2.09276   | 1.82569   | 0.551799  | 0.478192  | 0.546342  | 0.652064   | 0.192668  | 0.57047    | 1.17566   |
| PPP1R3F     | 0.877142  | 0.841989 | 0.99356    | 0.639697   | 2.26385   | 1.5512    | 0.79349   | 0.491704  | 0.772434  | 0.575857  | 0.662661  | 0.448988   | 0.31779   | 0.581857   | 0.513565  |
| PPP1R3G     | 0.493256  | 0.314737 | 0.430113   | 0.164859   | 0.621241  | 1.28271   | 0.426193  | 0.331736  | 0.0649439 | 0.284446  | 0.541776  | 0.124005   | 0.240835  | 0.30657    | 0.325471  |
| PPP1R42     | 0         | 0        | 0.00885959 | 0          | 0         | 0.0182379 | 0         | 0.0190353 | 0.0130429 | 0         | 0         | 0.00766287 | 0         | 0          | 0         |
| PPP1R7      | 4.66551   | 4.41775  | 4.58793    | 8.45755    | 5.18279   | 10.0737   | 4.19318   | 3.51418   | 8.4571    | 6.52851   | 8.85248   | 5.10296    | 6.6956    | 4.52591    | 3.28386   |
| PPP1R8      | 5.27453   | 4.05831  | 4.61856    | 7.02437    | 2.99996   | 7.69717   | 3.75235   | 3.79332   | 4.70418   | 5.09236   | 7.58491   | 3.07731    | 8.33506   | 5.10622    | 4.09044   |
| PPP1R9A     | 0.544388  | 0.144896 | 0.174331   | 0.0407183  | 0.0886539 | 0.259806  | 0.303263  | 0.339445  | 0.0053468 | 0.0137754 | 0.0297361 | 0.0157066  | 0.0538184 | 0.00803082 | 0.0851163 |
| PPP1R9B     | 8.14663   | 10.468   | 10.2935    | 19.7579    | 26.9241   | 27.3384   | 10.1104   | 6.44293   | 8.05006   | 11.6159   | 7.41011   | 12.1079    | 22.2558   | 15.371     | 13.7835   |
| PPP2CA      | 12.5429   | 11.9926  | 12.8256    | 28.6426    | 7.76187   | 17.5107   | 8.74757   | 13.2841   | 41.3341   | 25.7211   | 30.6326   | 16.709     | 34.2219   | 17.1826    | 10.5671   |
| PPP2CB      | 13.8976   | 13.5959  | 14.228     | 22.4937    | 8.48546   | 18.8557   | 9.64408   | 11.3487   | 31.5336   | 25.3165   | 25.184    | 14.416     | 39.338    | 18.1925    | 12.9065   |
| PPP2R1A     | 19.8886   | 18.3753  | 19.3241    | 40.8024    | 41.0866   | 51.0763   | 23.7006   | 14.2838   | 36.421    | 31.7808   | 43.8154   | 23.3591    | 51.5162   | 25.7951    | 19.3142   |
| PPP2R1B     | 3.1582    | 3.10214  | 3.48574    | 5.30802    | 2.2755    | 4.27182   | 2.79661   | 2.93973   | 4.55133   | 4.18133   | 4.56097   | 3.74468    | 5.81057   | 4.33643    | 3.16699   |
| PPP2R2A     | 5.87378   | 6.40334  | 6.46463    | 11.8506    | 3.54378   | 10.1553   | 4.4117    | 5.60004   | 17.4167   | 13.2438   | 12.4665   | 9.24452    | 20.1793   | 9.65637    | 5.00165   |
| PPP2R2B     | 0.648751  | 0.26925  | 0.456986   | 0.0926712  | 0.389125  | 0.563341  | 0.975406  | 0.319674  | 0.148634  | 0.628826  | 0.616341  | 0.422834   | 0.140905  | 0.268567   | 0.202942  |
| PPP2R2B-IT1 | 0.155322  | 0        | 0.0428312  | 0          | 0.0804232 | 0         | 0.0591141 | 0.0460126 | 0         | 0         | 0         | 0          | 0         | 0          | 0         |
| PPP2R2C     | 5.92475   | 9.57566  | 8.41559    | 26.5129    | 17.2386   | 10.9457   | 8.88754   | 6.81115   | 28.8796   | 29.8729   | 14.8981   | 26.4322    | 51.8772   | 20.858     | 6.24739   |

|            |           |            |           |            |           |            |            |            |            |          |           |            |           |            |           |
|------------|-----------|------------|-----------|------------|-----------|------------|------------|------------|------------|----------|-----------|------------|-----------|------------|-----------|
| PPP2R2D    | 2.47159   | 2.8381     | 3.04332   | 2.59244    | 4.67412   | 3.00862    | 3.02822    | 2.30226    | 2.65061    | 2.20077  | 2.88959   | 1.69283    | 2.83398   | 2.39469    | 2.79658   |
| PPP2R3A    | 7.1898    | 9.11206    | 8.43279   | 7.11787    | 3.5401    | 5.46975    | 6.59786    | 7.92079    | 8.54754    | 6.77796  | 6.31517   | 8.10795    | 7.44642   | 5.30432    | 3.78422   |
| PPP2R3B    | 0.93011   | 1.35591    | 1.42053   | 1.4353     | 3.86016   | 1.39713    | 1.3615     | 0.644328   | 1.10372    | 0.694444 | 0.883059  | 1.2423     | 1.42794   | 0.944811   | 0.616503  |
| PPP2R3C    | 1.84371   | 1.36499    | 1.63802   | 2.74693    | 0.903944  | 2.86048    | 1.21637    | 1.49118    | 1.80391    | 3.39498  | 5.06441   | 1.34851    | 4.79048   | 2.40167    | 3.0486    |
| PPP2R5A    | 7.47496   | 7.50339    | 7.23771   | 9.73537    | 8.92676   | 10.0347    | 5.014      | 5.51078    | 8.90542    | 9.28826  | 12.2633   | 5.46492    | 9.74613   | 7.38475    | 6.37478   |
| PPP2R5B    | 1.75887   | 3.01676    | 3.76645   | 3.83328    | 5.32047   | 4.17767    | 2.57514    | 1.3612     | 8.69142    | 6.30582  | 5.54813   | 4.58246    | 8.23691   | 5.75309    | 3.85542   |
| PPP2R5C    | 7.7699    | 7.22953    | 6.84494   | 9.24073    | 3.37832   | 9.72976    | 6.04779    | 7.1936     | 10.627     | 10.2363  | 13.2509   | 6.82394    | 10.9257   | 6.80635    | 7.1536    |
| PPP2R5D    | 5.88291   | 6.6064     | 6.78448   | 9.13242    | 6.92463   | 11.6881    | 7.54603    | 4.55561    | 7.76184    | 6.37039  | 7.66203   | 5.74187    | 9.14439   | 6.25751    | 6.12081   |
| PPP2R5E    | 3.04924   | 2.82214    | 2.99006   | 4.9749     | 2.4697    | 4.39931    | 2.59249    | 3.00234    | 3.03454    | 3.87755  | 4.1142    | 2.81621    | 6.10955   | 3.77414    | 3.39434   |
| PPP3CA     | 7.79031   | 7.59256    | 9.45389   | 6.72742    | 5.0895    | 9.04796    | 5.68485    | 9.24123    | 3.61666    | 7.51014  | 7.32473   | 3.57324    | 10.2758   | 5.3002     | 8.57921   |
| PPP3CB     | 4.86278   | 4.2226     | 4.34435   | 5.36552    | 2.29858   | 6.04117    | 3.88538    | 4.48548    | 3.05218    | 4.58373  | 6.92933   | 2.63454    | 5.88592   | 4.26796    | 5.81011   |
| PPP3CB-AS1 | 0.821823  | 0.884721   | 0.953747  | 0.569351   | 0.474701  | 0.398677   | 0.649996   | 0.992762   | 0.222547   | 0.364435 | 0.311779  | 0.43632    | 0.208461  | 0.542679   | 0.518602  |
| PPP3CC     | 4.22842   | 2.17505    | 3.0659    | 2.75265    | 1.54636   | 5.01045    | 2.35205    | 3.0834     | 1.14039    | 2.49893  | 4.46184   | 1.05789    | 3.10973   | 2.62722    | 4.47303   |
| PPP3R1     | 12.5976   | 11.0692    | 11.6934   | 14.3129    | 6.44721   | 14.6601    | 9.59197    | 13.3474    | 12.4125    | 12.1455  | 14.0216   | 8.95894    | 16.2311   | 9.10281    | 10.7403   |
| PPP3R2     | 0.0273316 | 0.00987659 | 0.0113053 | 0.00704151 | 0         | 0.00581813 | 0.00780159 | 0.00607252 | 0.00832171 | 0        | 0         | 0.00488913 | 0         | 0.00357117 | 0         |
| PPP4C      | 14.9511   | 15.1502    | 15.3705   | 36.7372    | 25.9821   | 35.5792    | 15.7903    | 10.8236    | 33.8383    | 31.2948  | 45.1665   | 20.8161    | 43.3184   | 24.8103    | 12.6817   |
| PPP4R1     | 12.0374   | 12.6007    | 12.9896   | 41.6295    | 10.1735   | 21.8495    | 10.0435    | 11.1144    | 31.5827    | 42.7223  | 34.2911   | 29.8751    | 70.0664   | 33.4447    | 15.9656   |
| PPP4R1-AS1 | 0.039426  | 0.0949802  | 0.0652319 | 0.406296   | 0.0612422 | 0.134283   | 0          | 0.0350385  | 0.384131   | 0        | 0.133521  | 0          | 0.10175   | 0.185452   | 0.226483  |
| PPP4R1L    | 1.16777   | 1.0416     | 1.16566   | 0.765812   | 1.30424   | 0.829986   | 1.3774     | 0.720467   | 0.305599   | 0.89636  | 0.773528  | 0.476482   | 0.491914  | 0.897836   | 1.26126   |
| PPP4R2     | 3.39232   | 3.2174     | 3.41506   | 4.81401    | 2.11974   | 4.6515     | 2.11978    | 3.82458    | 3.90744    | 5.71274  | 6.64978   | 2.74868    | 6.27636   | 4.64602    | 3.79669   |
| PPP4R3A    | 9.75297   | 9.02141    | 9.50015   | 9.96803    | 6.09411   | 7.94143    | 5.96872    | 8.09247    | 16.204     | 8.75241  | 8.73881   | 7.14356    | 10.4812   | 7.92121    | 7.20501   |
| PPP4R3B    | 8.464     | 8.4784     | 8.90366   | 11.0913    | 5.73081   | 11.0474    | 5.81913    | 8.68482    | 10.8861    | 9.24019  | 9.20541   | 6.99219    | 11.6486   | 8.73735    | 7.57422   |
| PPP4R3C    | 0         | 0          | 0         | 0          | 0         | 0          | 0          | 0          | 0          | 0        | 0         | 0          | 0         | 0          | 0         |
| PPP4R4     | 0.0750585 | 0.0940273  | 0.132467  | 0.3094     | 0         | 0.11078    | 0.0457064  | 0.0400235  | 0.0487535  | 0.929501 | 0.632664  | 0.136056   | 0.68444   | 0.638122   | 0.395243  |
| PPP5C      | 6.65675   | 5.78024    | 6.02157   | 9.45653    | 7.26391   | 14.0555    | 6.85461    | 4.92998    | 6.68017    | 6.20759  | 11.9976   | 4.5702     | 10.7774   | 7.63553    | 6.68599   |
| PPP5D1     | 0.0365176 | 0.0967711  | 0.0755249 | 0.0846731  | 0.0567245 | 0.10883    | 0.0833893  | 0.0730211  | 0.0333558  | 0        | 0.0515298 | 0.0130647  | 0.0117805 | 0          | 0.0917769 |



|           |            |           |           |           |          |            |            |           |   |            |            |            |            |            |          |
|-----------|------------|-----------|-----------|-----------|----------|------------|------------|-----------|---|------------|------------|------------|------------|------------|----------|
| PRAMEF11  | 0          | 0         | 0         | 0         | 0        | 0          | 0          | 0         | 0 | 0          | 0          | 0          | 0          | 0          | 0        |
| PRAMEF12  | 0          | 0         | 0         | 0         | 0        | 0          | 0          | 0         | 0 | 0          | 0          | 0          | 0          | 0          | 0        |
| PRAMEF13  | 0          | 0         | 0         | 0         | 0        | 0          | 0          | 0         | 0 | 0          | 0          | 0          | 0.00139736 | 0          | 0        |
| PRAMEF14  | 0          | 0         | 0         | 0         | 0        | 0          | 0          | 0         | 0 | 0          | 0          | 0          | 0.00139736 | 0          | 0        |
| PRAMEF15  | 0          | 0         | 0         | 0         | 0        | 0          | 0          | 0         | 0 | 0          | 0          | 1.60E-08   | 0          | 0          | 0        |
| PRAMEF17  | 0.00732839 | 0.0211856 | 0.0181877 | 0         | 0        | 0.0124801  | 0.00836732 | 0.0130257 | 0 | 0          | 0          | 0.00524366 | 0          | 0.026811   | 0.021049 |
| PRAMEF18  | 0          | 0         | 0         | 0         | 0        | 0          | 0          | 0         | 0 | 0          | 0          | 0          | 0          | 0          | 0        |
| PRAMEF19  | 0          | 0         | 0         | 0         | 0        | 0          | 0          | 0         | 0 | 0          | 0          | 0          | 0          | 0          | 0        |
| PRAMEF2   | 0          | 0         | 0         | 0         | 0        | 0          | 0          | 0         | 0 | 0          | 0          | 0          | 0          | 0.0220991  | 0        |
| PRAMEF20  | 0          | 0         | 0         | 0         | 0        | 0          | 0          | 0         | 0 | 0          | 0.00817959 | 0          | 0          | 0.0113609  | 0        |
| PRAMEF22  | 0          | 0         | 0         | 0         | 0        | 0          | 0          | 0         | 0 | 0          | 0          | 0          | 0          | 0          | 0        |
| PRAMEF25  | 0          | 0         | 0         | 0         | 0        | 0          | 0          | 0         | 0 | 0          | 0          | 2.11E-09   | 0          | 0          | 0        |
| PRAMEF26  | 0          | 0         | 0         | 0         | 0        | 0          | 0          | 0         | 0 | 0          | 0          | 1.32E-07   | 0          | 0          | 0        |
| PRAMEF27  | 0          | 0         | 0         | 0         | 0        | 0          | 0          | 0         | 0 | 0          | 0          | 0.00689263 | 0          | 0          | 0        |
| PRAMEF33  | 0          | 0         | 0         | 0         | 0        | 0          | 0          | 0         | 0 | 0          | 0          | 0          | 0          | 0          | 0        |
| PRAMEF34P | 0          | 0         | 0         | 0         | 0        | 0.00444931 | 0          | 0         | 0 | 0          | 0.00294938 | 0.00186944 | 0          | 0          | 0        |
| PRAMEF36P | 0          | 0         | 0         | 0         | 0        | 0.00444931 | 0          | 0         | 0 | 0          | 0.00294938 | 0.00186944 | 0          | 0          | 0        |
| PRAMEF4   | 0          | 0         | 0         | 0         | 0        | 0          | 0          | 0         | 0 | 0          | 0          | 0          | 0          | 0          | 0        |
| PRAMEF5   | 0          | 0         | 0         | 0         | 0        | 0          | 0          | 0         | 0 | 0          | 0          | 1.93E-08   | 0          | 0          | 0        |
| PRAMEF6   | 0          | 0         | 0         | 0         | 0        | 0          | 0          | 0         | 0 | 0          | 0          | 8.46E-07   | 0          | 0          | 0        |
| PRAMEF7   | 0          | 0         | 0         | 0         | 0        | 0          | 0          | 0         | 0 | 0.00310729 | 0          | 0          | 0          | 0.00129392 | 0        |
| PRAMEF8   | 0          | 0         | 0         | 0         | 0        | 0          | 0          | 0         | 0 | 0.00310729 | 0          | 0          | 0          | 0.00129392 | 0        |
| PRAMEF9   | 0          | 0         | 0         | 0         | 0        | 0          | 0          | 0         | 0 | 0          | 0          | 0.00701261 | 0          | 0          | 0        |
| PRAMENP   | 0          | 0         | 0         | 0         | 0        | 0          | 0          | 0         | 0 | 0          | 0.00859678 | 0          | 0          | 0          | 0        |
| PRAP1     | 0.0893554  | 0.387475  | 0.517448  | 0.0306944 | 0.2776   | 0.177532   | 0.204046   | 0.105882  | 0 | 0          | 0          | 0.127872   | 0          | 0.124536   | 0.384977 |
| PRB1      | 0.230489   | 0.278251  | 0.375845  | 4.99E-25  | 0.623135 | 0.021195   | 0.59761    | 0.168751  | 0 | 0          | 2.67E-13   | 0.0433261  | 0          | 4.80E-08   | 1.16E-11 |

|          |           |           |           |           |           |            |           |           |            |            |            |           |           |            |           |
|----------|-----------|-----------|-----------|-----------|-----------|------------|-----------|-----------|------------|------------|------------|-----------|-----------|------------|-----------|
| PRB2     | 0.183422  | 0.302421  | 0.482299  | 0.11691   | 0.872735  | 0.230985   | 0.434315  | 0.149445  | 0          | 0          | 0.0365905  | 0.0571808 | 0         | 0.0423514  | 0.0698243 |
| PRB3     | 0.0840801 | 0.232939  | 0.260839  | 0.0216617 | 0.750981  | 0.268474   | 0.384     | 0.186809  | 0          | 0          | 0          | 0.0451212 | 0.013562  | 0.0439439  | 0.0603748 |
| PRB4     | 0.176472  | 0.194347  | 0.29198   | 0.0519599 | 1.01817   | 0.0858649  | 0.143921  | 0.0448096 | 0          | 0          | 0          | 0.0901932 | 0         | 0          | 0.217231  |
| PRC1     | 2.83337   | 2.14426   | 2.22353   | 7.37398   | 1.69657   | 6.34814    | 2.89158   | 1.98819   | 2.48922    | 4.94025    | 6.20333    | 2.87106   | 7.35822   | 6.93649    | 2.63515   |
| PRC1-AS1 | 0.218909  | 0.21576   | 0.482642  | 0.0888669 | 0.0576885 | 0.133766   | 0.223392  | 0.170086  | 0.0419465  | 0.0655793  | 0.0607722  | 0.194236  | 1.86E-37  | 0.15529    | 0.328034  |
| PRCC     | 8.51377   | 9.21257   | 9.81176   | 16.3453   | 18.5418   | 19.4461    | 11.2641   | 6.83004   | 16.9671    | 9.89209    | 15.5917    | 10.3506   | 17.5974   | 12.3633    | 9.78461   |
| PRCD     | 0.14339   | 0.210037  | 0.149418  | 0.0638305 | 0.513912  | 0.251241   | 0.248149  | 0.119259  | 0          | 0.0138512  | 0.0377935  | 0.0740635 | 0.0145436 | 0.0486553  | 0.26684   |
| PRCP     | 11.2245   | 7.14063   | 7.38015   | 14.6811   | 5.78085   | 20.792     | 9.79634   | 8.52908   | 15.1056    | 14.621     | 29.787     | 9.18327   | 12.8165   | 10.1007    | 18.2161   |
| PRDM1    | 3.40413   | 4.06329   | 4.14975   | 13.9039   | 6.26676   | 6.18413    | 6.8826    | 5.23899   | 27.9926    | 11.1657    | 16.2276    | 14.8718   | 24.3399   | 8.58424    | 6.31103   |
| PRDM10   | 1.27438   | 1.69604   | 1.60469   | 1.4838    | 1.3671    | 1.51977    | 1.66004   | 1.22955   | 1.59064    | 1.19298    | 0.790843   | 1.44335   | 1.43094   | 1.88407    | 1.47627   |
| PRDM11   | 0.73713   | 0.611939  | 0.736498  | 0.469248  | 0.9896    | 0.801524   | 0.857952  | 0.504482  | 0.340695   | 0.397236   | 0.433352   | 0.362339  | 0.562543  | 0.360711   | 0.659801  |
| PRDM12   | 0.0371478 | 0         | 0         | 0         | 0         | 0          | 0.0106035 | 0         | 0          | 0          | 0.0629028  | 0         | 0         | 0.00970752 | 0         |
| PRDM13   | 0         | 0         | 0         | 0         | 0         | 0          | 0         | 0         | 0          | 0          | 0.00815406 | 0.0206735 | 0.0279621 | 0.0113254  | 0         |
| PRDM14   | 0         | 0         | 0.0081679 | 0         | 0         | 0          | 0         | 0         | 0          | 0          | 0          | 0         | 0         | 0          | 0         |
| PRDM15   | 0.984875  | 1.14259   | 1.02152   | 1.12839   | 1.53447   | 1.27945    | 1.14828   | 0.795944  | 0.692139   | 0.668475   | 0.544143   | 1.10922   | 0.956034  | 1.17099    | 1.09819   |
| PRDM16   | 0.334291  | 0.0805334 | 0.0834038 | 0.0628844 | 0.317332  | 0.718389   | 0.448326  | 0.153261  | 0.00646237 | 0.0332992  | 0.0628956  | 0.015187  | 0.102706  | 0.0623983  | 0.518187  |
| PRDM2    | 7.1051    | 6.36468   | 6.79468   | 7.25483   | 4.64414   | 8.10012    | 5.47891   | 7.48182   | 6.92055    | 7.05648    | 5.50706    | 6.83079   | 10.1689   | 5.20267    | 6.02087   |
| PRDM4    | 5.64648   | 4.70395   | 4.19723   | 7.6672    | 5.97868   | 8.24702    | 4.88371   | 4.29298   | 9.34916    | 8.62716    | 7.94189    | 6.79951   | 11.1382   | 6.63719    | 5.65952   |
| PRDM5    | 1.04271   | 0.479465  | 0.572685  | 0.530585  | 0.208342  | 0.880488   | 0.518698  | 0.542163  | 0.121195   | 0.62992    | 1.19663    | 0.198132  | 0.287525  | 0.508788   | 0.938248  |
| PRDM6    | 0.0423728 | 0.0738608 | 0.118591  | 0.0369799 | 0.0348457 | 0.13005    | 0.126631  | 0.0332272 | 0.00910683 | 0.0156418  | 0.02251    | 0.0160512 | 0         | 0.0078162  | 0.290062  |
| PRDM7    | 0         | 0         | 0         | 0         | 0         | 0          | 0         | 0         | 0          | 0.00901518 | 0          | 0.0051395 | 0.013903  | 0          | 0         |
| PRDM8    | 0.619854  | 0.298655  | 0.412952  | 0.520067  | 0.468643  | 0.957509   | 0.626309  | 0.209625  | 0.0334032  | 0.240967   | 0.452043   | 0.0274748 | 0.399927  | 0.203552   | 0.464789  |
| PRDM9    | 0         | 0         | 0         | 0         | 0         | 0.00533027 | 0         | 0         | 0          | 0          | 0          | 0         | 0         | 0          | 0         |
| PRDX1    | 43.7625   | 36.7016   | 36.671    | 94.3391   | 36.8295   | 105.351    | 47.3014   | 30.8974   | 85.518     | 96.5355    | 151.076    | 64.3807   | 116.208   | 73.9159    | 36.8858   |
| PRDX2    | 35.7625   | 41.2296   | 44.0459   | 54.1785   | 66.2531   | 72.9768    | 60.7904   | 33.1301   | 102.071    | 33.2165    | 81.523     | 39.3248   | 35.9485   | 32.2782    | 19.2758   |
| PRDX3    | 8.41052   | 5.51034   | 5.9705    | 17.3784   | 3.42057   | 15.8108    | 5.38537   | 7.02003   | 4.39481    | 12.8028    | 29.1246    | 5.2962    | 17.6907   | 11.1748    | 10.7728   |

|              |          |           |           |           |           |          |           |           |           |           |           |           |            |           |          |
|--------------|----------|-----------|-----------|-----------|-----------|----------|-----------|-----------|-----------|-----------|-----------|-----------|------------|-----------|----------|
| PRDX4        | 11.5087  | 7.04635   | 7.23415   | 19.8617   | 13.8176   | 25.0551  | 9.89824   | 6.9452    | 8.90556   | 22.96     | 54.5489   | 8.18085   | 22.4706    | 11.7278   | 19.2345  |
| PRDX5        | 37.438   | 26.109    | 20.1822   | 73.3933   | 78.1738   | 91.4563  | 29.3145   | 19.295    | 92.872    | 82.0373   | 152.998   | 51.0869   | 71.5568    | 46.9111   | 28.1683  |
| PRDX6        | 33.7999  | 23.7035   | 20.2347   | 36.7169   | 28.5225   | 57.9144  | 33.4018   | 23.4742   | 83.6624   | 33.6214   | 54.3006   | 34.1304   | 36.7036    | 23.8507   | 19.0263  |
| PREB         | 4.93283  | 4.31572   | 4.57886   | 8.66462   | 8.12179   | 14.3005  | 5.08942   | 2.957     | 6.31634   | 7.83514   | 12.0672   | 4.35339   | 9.70471    | 7.35896   | 6.31051  |
| PRELID1      | 23.5842  | 20.3455   | 18.13     | 79.9821   | 48.7425   | 76.2137  | 22.6927   | 17.4392   | 88.4693   | 103.84    | 147.366   | 69.5886   | 142.554    | 58.6101   | 26.0474  |
| PRELID2      | 0.64653  | 0.401451  | 0.576287  | 0.553659  | 0.304114  | 0.752107 | 0.358697  | 0.554351  | 0.0499057 | 0.297155  | 0.390625  | 0.110766  | 0.408325   | 0.459601  | 0.536176 |
| PRELID3A     | 0.54865  | 0.534704  | 0.691139  | 0.80955   | 1.14278   | 1.25286  | 0.541008  | 0.432186  | 0.106304  | 0.672961  | 0.760121  | 0.383651  | 0.490754   | 0.931933  | 1.30725  |
| PRELID3B     | 4.45335  | 3.55959   | 3.62382   | 5.27768   | 0.722342  | 4.63542  | 2.42456   | 5.06615   | 13.3658   | 6.74831   | 9.13753   | 5.21746   | 8.5011     | 5.21291   | 2.57838  |
| PRELP        | 10.9409  | 5.04558   | 7.11672   | 0.545111  | 4.08359   | 4.71062  | 15.8934   | 6.99503   | 0.28578   | 0.454248  | 1.30202   | 0.560615  | 2.04258    | 0.527972  | 5.83737  |
| PREP         | 5.8585   | 5.9637    | 6.28427   | 10.7538   | 6.46181   | 9.74922  | 8.14358   | 6.58331   | 17.373    | 11.755    | 11.2829   | 9.75675   | 13.0697    | 8.42539   | 5.51116  |
| PREPL        | 3.05041  | 3.23141   | 3.44146   | 3.76201   | 1.21407   | 3.05394  | 2.72659   | 3.73271   | 3.11178   | 2.71835   | 3.16771   | 2.01094   | 2.45859    | 2.47337   | 2.90757  |
| PREX1        | 2.21905  | 1.5735    | 1.97142   | 4.41899   | 4.28702   | 6.49737  | 2.04365   | 1.9318    | 0.701135  | 3.25809   | 3.6197    | 1.21831   | 3.99576    | 2.37608   | 6.8497   |
| PREX2        | 2.49625  | 1.44923   | 1.29437   | 1.57547   | 1.04823   | 1.93739  | 1.20915   | 1.21361   | 0.433961  | 1.40163   | 2.26965   | 0.51419   | 1.06215    | 1.41493   | 3.11893  |
| PRF1         | 0.572443 | 0.253922  | 0.233024  | 0.86147   | 1.21383   | 1.9884   | 0.259364  | 0.306859  | 0.0442648 | 0.114044  | 0.225663  | 0.0520125 | 0.580387   | 0.156715  | 1.35712  |
| PRG1         | 0.187773 | 0.022618  | 0         | 0.145129  | 0         | 0        | 0.0535984 | 0.125158  | 0         | 0         | 0         | 0.0671784 | 0.0605752  | 0         | 0        |
| PRG2         | 1.364    | 0.563311  | 0.781199  | 0.355272  | 0.256114  | 3.58638  | 1.02684   | 0.999075  | 0.164294  | 0.395068  | 1.06601   | 0.139426  | 0.212759   | 0.258519  | 0.473575 |
| PRG3         | 0        | 0         | 0.0220317 | 0         | 0         | 0        | 0         | 0         | 0         | 0         | 0         | 0.0190558 | 0          | 0         | 0        |
| PRG4         | 1.74214  | 0.58209   | 0.731597  | 0.16462   | 0.0715973 | 2.01593  | 4.60889   | 0.461004  | 0.011479  | 0.0357615 | 0.047637  | 0.0269975 | 0.120075   | 0.0714781 | 1.3364   |
| PRH1         | 0.746422 | 1.17842   | 0.972877  | 0.617618  | 0.272687  | 0.749453 | 0.604824  | 0.439052  | 0.234161  | 0.338874  | 0.772526  | 0.264097  | 0.317083   | 0.622703  | 0.650306 |
| PRH1-PRR4    | 0.844315 | 0.610766  | 1.25827   | 0.236203  | 1.34011   | 0.612489 | 1.32348   | 0.411178  | 0.21463   | 0.286246  | 0.252364  | 0.353584  | 0.00815583 | 0.282919  | 0.922245 |
| PRH1-TAS2R14 | 0.190033 | 0.152589  | 0.264069  | 0.147479  | 9.92E-18  | 0.325156 | 0.176358  | 0.225765  | 6.08E-13  | 0.248385  | 0.376521  | 0.101771  | 1.48E-14   | 0.217437  | 0.469286 |
| PRH2         | 0.269851 | 0.408413  | 0.574354  | 0.186606  | 0.175568  | 0.162278 | 0.25299   | 0.384644  | 0.044931  | 0.168443  | 0.151127  | 0.132671  | 0.00469996 | 0.238736  | 0.677984 |
| PRICKLE1     | 4.38937  | 2.16367   | 1.648     | 2.33624   | 2.89211   | 3.17891  | 2.4177    | 1.9033    | 2.27341   | 1.61036   | 2.78789   | 0.824866  | 1.67119    | 1.263     | 3.72678  |
| PRICKLE2     | 2.62583  | 1.27481   | 1.56003   | 1.56141   | 1.71162   | 4.15932  | 1.52005   | 2.26331   | 0.372557  | 2.26388   | 3.22796   | 0.929164  | 2.62878    | 2.54373   | 4.92792  |
| PRICKLE2-AS1 | 0.210231 | 0.0891489 | 0.119703  | 0.0881711 | 0.0778847 | 0.139914 | 0.0730171 | 0.157534  | 4.33E-15  | 0.0774415 | 0.0269314 | 0.0837767 | 0.00433714 | 0.27969   | 0.388443 |
| PRICKLE2-AS2 | 0.145007 | 0.0838397 | 0.191935  | 0.0896601 | 0.0450491 | 0.222248 | 0.165564  | 0.0773219 | 0         | 0         | 0.163694  | 0.0207512 | 0.0561345  | 0.166731  | 0        |



|              |           |           |           |           |           |           |           |           |           |           |           |           |            |           |           |
|--------------|-----------|-----------|-----------|-----------|-----------|-----------|-----------|-----------|-----------|-----------|-----------|-----------|------------|-----------|-----------|
| PRICKLE2-AS3 | 0.19229   | 0.0778325 | 0.075762  | 0.0317869 | 0.112567  | 0.0528418 | 0.0965893 | 0.0958602 | 0         | 0.0286617 | 0.0343425 | 0.0330027 | 0.00971481 | 0.189501  | 0.280393  |
| PRICKLE3     | 1.51395   | 3.06014   | 3.20289   | 3.87003   | 4.21858   | 4.26902   | 2.95756   | 2.13081   | 4.35995   | 3.36561   | 3.73626   | 4.17967   | 5.38427    | 3.77259   | 2.16139   |
| PRICKLE4     | 1.85594   | 1.27359   | 1.27947   | 1.21711   | 2.40243   | 2.62188   | 1.25217   | 0.987146  | 0.325351  | 0.617644  | 1.15867   | 1.18713   | 0.879941   | 1.53583   | 2.88748   |
| PRIM1        | 1.40885   | 1.53303   | 1.61074   | 3.36048   | 0.76226   | 2.15661   | 1.30132   | 1.70224   | 1.3688    | 1.35102   | 2.71621   | 0.985413  | 1.93031    | 1.75394   | 0.818405  |
| PRIM2        | 1.29186   | 1.15069   | 1.15309   | 1.85682   | 0.435667  | 1.80198   | 1.30034   | 0.913948  | 0.621057  | 1.2054    | 2.28347   | 0.766248  | 1.44766    | 1.36369   | 1.44028   |
| PRIMA1       | 0.513586  | 0.366598  | 0.514045  | 0.816767  | 0.265925  | 0.961005  | 1.36826   | 0.276113  | 0.169886  | 0.230784  | 0.1861    | 0.186011  | 0.351817   | 0.178948  | 0.154799  |
| PRIMPOL      | 1.21609   | 1.49943   | 1.65086   | 1.64425   | 0.917307  | 1.32606   | 0.932014  | 1.43818   | 0.525043  | 1.17638   | 1.33631   | 0.685683  | 0.911277   | 0.810618  | 1.72968   |
| PRKAA1       | 5.44477   | 3.92481   | 4.19736   | 4.04992   | 1.33856   | 6.71235   | 3.19435   | 4.66711   | 3.77441   | 4.205     | 6.48228   | 2.6129    | 4.59246    | 4.27152   | 4.98904   |
| PRKAA2       | 0.445439  | 0.232504  | 0.290705  | 0.0663055 | 0.0768801 | 0.448822  | 0.372965  | 0.266112  | 0.0180832 | 0.0559072 | 0.0866012 | 0.0371844 | 0.0351261  | 0.113816  | 0.152819  |
| PRKAB1       | 5.0508    | 2.61932   | 2.47194   | 3.61568   | 2.9496    | 5.52359   | 2.99347   | 2.57845   | 2.7       | 3.339     | 4.54832   | 1.95872   | 3.94284    | 2.94203   | 2.57474   |
| PRKAB2       | 3.60156   | 3.87678   | 3.66645   | 2.70285   | 2.80379   | 3.43825   | 3.8122    | 3.13297   | 5.21709   | 3.64815   | 4.78319   | 2.41933   | 2.56975    | 3.49444   | 4.04655   |
| PRKACA       | 8.67185   | 7.61054   | 8.00538   | 14.3952   | 9.86278   | 23.1688   | 12.4289   | 7.38689   | 12.1162   | 10.3812   | 17.1106   | 7.91058   | 15.9434    | 8.34765   | 8.9235    |
| PRKACB       | 1.78051   | 0.915063  | 0.84334   | 1.38514   | 0.742953  | 2.17898   | 1.0045    | 1.65062   | 0.582506  | 2.41437   | 4.02388   | 0.87431   | 1.76596    | 1.4141    | 2.50188   |
| PRKACG       | 0.0145462 | 0.0070086 | 0.0120337 | 0         | 0.0225953 | 0.0123859 | 0         | 0         | 0         | 0         | 0         | 0         | 0          | 0         | 0         |
| PRKAG1       | 7.29699   | 6.66194   | 6.82343   | 11.3391   | 4.92961   | 12.0184   | 6.96832   | 5.99204   | 11.0607   | 11.6198   | 18.2589   | 6.6502    | 11.7547    | 8.01897   | 7.2736    |
| PRKAG2       | 3.73225   | 1.79575   | 2.12298   | 1.4108    | 1.46352   | 2.40674   | 2.28224   | 2.06323   | 1.22353   | 1.28705   | 2.0743    | 0.804508  | 1.8035     | 1.1644    | 1.77171   |
| PRKAG2-AS1   | 0.965513  | 0.50749   | 0.484085  | 0.120605  | 0.363582  | 1.22073   | 0.701522  | 0.468037  | 0         | 0.183609  | 0.297257  | 0.0418697 | 0.0755084  | 0.030583  | 0.4622    |
| PRKAG3       | 0.161065  | 0.0727534 | 0.116589  | 0.0518695 | 0.0781843 | 0.197146  | 0.206886  | 0.0894633 | 0         | 0.0252692 | 0.0795473 | 0         | 0.0259796  | 0.0105225 | 0.0433706 |
| PRKAR1A      | 16.747    | 14.4654   | 15.7985   | 24.7674   | 13.7432   | 34.0654   | 13.3718   | 16.3666   | 16.8981   | 25.0048   | 30.6509   | 14.0094   | 33.3277    | 21.0498   | 26.3084   |
| PRKAR1B      | 1.57811   | 1.00797   | 0.746308  | 2.72518   | 4.5455    | 4.82759   | 1.24265   | 0.739246  | 0.994118  | 1.35624   | 2.36069   | 0.823246  | 2.9392     | 2.24278   | 2.61246   |
| PRKAR2A      | 7.03047   | 6.34422   | 5.83389   | 9.72773   | 6.25156   | 9.28251   | 6.93353   | 6.10202   | 8.71463   | 10.7261   | 10.1356   | 8.42167   | 16.4863    | 7.87364   | 5.57448   |
| PRKAR2A-AS1  | 0.146813  | 0.0643061 | 0.115933  | 0.103156  | 0.165855  | 0.340934  | 0.137149  | 0.118614  | 0.024382  | 0.0921326 | 0.195867  | 0.0572992 | 0.0301391  | 0.0871941 | 0.067086  |
| PRKAR2B      | 2.32632   | 0.663984  | 0.889032  | 0.788255  | 0.363321  | 1.84626   | 0.873341  | 1.0899    | 0.477331  | 0.476049  | 0.842071  | 0.248777  | 0.485354   | 0.363429  | 0.853378  |
| PRKCA        | 1.52      | 1.51939   | 1.82505   | 1.63983   | 1.53716   | 1.93914   | 1.70536   | 1.28518   | 0.443514  | 1.60636   | 2.06145   | 0.647651  | 1.60895    | 1.99708   | 3.5586    |
| PRKCA-AS1    | 0.102403  | 0.123348  | 0.155311  | 0.140706  | 0.212089  | 0.0435974 | 0.0974336 | 0.166846  | 0         | 0.235631  | 0         | 0.06106   | 0.0110116  | 0.374642  | 0.147063  |
| PRKCB        | 0.511146  | 0.748572  | 1.10373   | 0.633886  | 0.331949  | 0.737684  | 0.797929  | 1.00092   | 0.112546  | 0.413195  | 0.60962   | 0.103316  | 0.417359   | 0.223377  | 0.771395  |



|           |           |           |            |           |           |           |           |            |           |           |           |           |           |           |           |
|-----------|-----------|-----------|------------|-----------|-----------|-----------|-----------|------------|-----------|-----------|-----------|-----------|-----------|-----------|-----------|
| PRLHR     | 0         | 0         | 0          | 0         | 0         | 0         | 0         | 0.0103877  | 0         | 0         | 0         | 0         | 0         | 0         | 0         |
| PRLR      | 0.780311  | 0.659748  | 0.732428   | 0.342144  | 0.183563  | 0.394503  | 0.61252   | 1.51032    | 0.205601  | 0.242489  | 0.410794  | 0.175822  | 0.167011  | 0.234303  | 0.145466  |
| PRM1      | 0         | 0         | 0          | 0         | 0         | 0         | 0         | 0          | 0         | 0         | 0         | 0         | 0         | 0         | 0         |
| PRM2      | 0         | 0         | 0          | 0         | 0         | 0         | 0         | 0          | 0         | 0         | 0         | 0         | 0         | 0         | 0         |
| PRM3      | 0         | 0         | 0          | 0         | 0         | 0         | 0         | 0          | 0         | 0         | 0         | 0         | 0         | 0         | 0         |
| PRMT1     | 13.1655   | 11.6414   | 13.2113    | 32.0941   | 12.5868   | 35.6415   | 11.4762   | 7.45055    | 13.0143   | 17.1726   | 34.1727   | 10.8777   | 22.9403   | 21.0132   | 9.96241   |
| PRMT2     | 4.72289   | 5.06571   | 4.99039    | 5.00205   | 5.93051   | 7.90423   | 4.11327   | 3.85078    | 2.93091   | 3.96278   | 4.41504   | 2.80469   | 3.12605   | 3.62122   | 4.36298   |
| PRMT3     | 3.04001   | 2.2277    | 2.5009     | 4.98285   | 1.34168   | 4.07386   | 1.95304   | 2.39316    | 2.24825   | 3.17784   | 4.4929    | 2.78719   | 6.31032   | 4.18229   | 2.54167   |
| PRMT5     | 6.58559   | 5.8235    | 5.46273    | 12.621    | 7.49599   | 16.079    | 6.39448   | 5.18852    | 20.4377   | 10.2187   | 13.2725   | 7.98858   | 16.5437   | 8.73774   | 5.11626   |
| PRMT5-AS1 | 0.21552   | 0.205542  | 0.287433   | 0.131799  | 0.0601821 | 0.154289  | 0.0620601 | 0.254844   | 0.296108  | 0.0924107 | 1.18E-31  | 0.0708162 | 0.0467596 | 0.162187  | 0.0206038 |
| PRMT6     | 1.30998   | 2.11232   | 2.00848    | 2.72695   | 3.20151   | 3.25707   | 1.12676   | 1.87825    | 2.29739   | 1.91819   | 2.95762   | 1.27477   | 2.19187   | 1.80749   | 1.47996   |
| PRMT7     | 1.65974   | 2.30136   | 2.34591    | 2.19683   | 4.1392    | 2.75832   | 2.18182   | 1.78162    | 1.28376   | 0.674969  | 1.28184   | 1.18331   | 1.07623   | 1.27919   | 1.58061   |
| PRMT8     | 0.027805  | 0.0133969 | 0.00766743 | 0         | 0.0431908 | 0.0236756 | 0.0105823 | 0.0164739  | 0.0112878 | 0.0348982 | 0.0104628 | 0         | 0.0418592 | 0.106569  | 0         |
| PRMT9     | 1.56669   | 1.48588   | 1.70991    | 1.40492   | 0.503801  | 1.92847   | 1.15487   | 1.2067     | 1.41263   | 1.28331   | 1.57002   | 1.15248   | 1.06757   | 1.16071   | 1.03419   |
| PRNCR1    | 0.381625  | 0.551882  | 0.447238   | 0.242177  | 0.206941  | 0.0939747 | 0.297499  | 0.72652    | 0.0386838 | 0.0513019 | 0.0504606 | 0.154507  | 0.0216614 | 0.179658  | 0.0962185 |
| PRND      | 0.0114626 | 0.0690359 | 0.0284481  | 0.0945006 | 0.19586   | 0.126884  | 0         | 0.00509352 | 0.0488607 | 0.40283   | 0.815213  | 0.0369082 | 0.133121  | 0.0778813 | 1.41571   |
| PRNP      | 20.502    | 21.5887   | 22.9016    | 56.4555   | 16.3632   | 37.7314   | 15.0608   | 19.078     | 53.134    | 37.8677   | 44.4323   | 24.8631   | 66.5503   | 31.0789   | 22.2309   |
| PRNT      | 0         | 0         | 0          | 0         | 0         | 0         | 0         | 0          | 0         | 0         | 0         | 0         | 0         | 0         | 0         |
| PRO1804   | 0.840327  | 1.242     | 1.27762    | 0.292561  | 0.352789  | 0.435118  | 0.59642   | 0.857825   | 0.0829803 | 0.42758   | 0.179469  | 0.544399  | 0.0439601 | 0.231466  | 0.407708  |
| PROB1     | 0.377294  | 0.716854  | 0.371015   | 2.49427   | 3.31736   | 3.13381   | 0.430782  | 0.360613   | 1.20511   | 1.233     | 0.948269  | 2.07821   | 2.20463   | 1.78215   | 1.04279   |
| PROC      | 0.0520069 | 0.225519  | 0.204363   | 0.187581  | 0.121177  | 0.154991  | 0.148449  | 0.103994   | 0.0158346 | 0.277414  | 0.499029  | 0.0837277 | 0.0251659 | 0.169882  | 0.168049  |
| PROCA1    | 0.656312  | 0.440636  | 0.640855   | 0.210666  | 0.718649  | 0.403098  | 0.62651   | 0.564152   | 0.131035  | 0.0945274 | 0.121458  | 0.20786   | 0.0694178 | 0.326148  | 0.339935  |
| PROCR     | 3.4621    | 1.84843   | 1.56106    | 5.65704   | 2.76159   | 6.93163   | 2.58186   | 1.55227    | 2.716     | 5.77415   | 10.2812   | 2.73388   | 10.5549   | 6.09669   | 4.00897   |
| PRODH     | 3.59448   | 6.05697   | 7.71231    | 1.78278   | 11.988    | 2.56964   | 10.1065   | 4.50982    | 1.627     | 3.17248   | 0.813713  | 3.32841   | 2.49896   | 1.33111   | 1.06279   |
| PRODH2    | 0         | 0         | 0          | 0         | 0         | 0         | 0         | 0          | 0         | 0         | 0         | 0         | 0         | 0         | 0         |
| PROK1     | 0.151813  | 0.0812731 | 0.0139545  | 0.921303  | 0.812262  | 3.83491   | 0.0577784 | 0.224865   | 0.184891  | 0         | 0         | 0.0241392 | 0.0544161 | 0.0969761 | 0         |

|             |           |            |           |           |           |            |           |           |            |           |           |           |           |           |           |
|-------------|-----------|------------|-----------|-----------|-----------|------------|-----------|-----------|------------|-----------|-----------|-----------|-----------|-----------|-----------|
| PROK2       | 0         | 0          | 0         | 2.76495   | 0.267446  | 0.171038   | 0         | 0.0127512 | 0          | 1.09849   | 2.86685   | 0         | 1.26823   | 0.149976  | 0.494527  |
| PROKR1      | 0.0144373 | 0.00695613 | 0.0358308 | 0         | 0.0224262 | 0.0368796  | 0.0164841 | 0         | 0          | 0         | 0         | 0         | 0         | 0         | 0         |
| PROKR2      | 0.0309675 | 0          | 0.0085395 | 0         | 0.0160344 | 0          | 0.0117859 | 0         | 0          | 0         | 0         | 0         | 0         | 0.01079   | 0         |
| PROM1       | 1.78933   | 0.32621    | 0.475639  | 0.0996732 | 0.317174  | 2.51185    | 0.441729  | 1.02193   | 0.0392649  | 0.0337206 | 0.0363951 | 0.0153791 | 0.104006  | 0.0589754 | 0.200637  |
| PROM2       | 11.2002   | 21.4209    | 16.4877   | 24.3563   | 55.3402   | 25.3361    | 20.652    | 14.2487   | 34.3003    | 32.4612   | 14.6636   | 38.0778   | 35.888    | 18.759    | 8.72826   |
| PROP1       | 0.0474243 | 0.0533161  | 0.0653879 | 0         | 0         | 0          | 0.0180492 | 0.0421468 | 0          | 0         | 0         | 0         | 0         | 0         | 0         |
| PRORS1P     | 0.752445  | 0.502376   | 0.631368  | 0.21047   | 0.200367  | 0.247126   | 0.417285  | 0.47765   | 0.0130913  | 0.283319  | 0.0970762 | 0.16921   | 0.0277413 | 0.573037  | 0.432242  |
| PRORY       | 0         | 0          | 0         | 0         | 0         | 0          | 0         | 0.0239716 | 0          | 0         | 0         | 0         | 0         | 0         | 0         |
| PROS1       | 8.48027   | 7.87741    | 9.05188   | 4.76211   | 2.18081   | 16.6133    | 6.8648    | 9.29908   | 5.97294    | 5.10458   | 9.06873   | 2.65331   | 3.16019   | 2.59945   | 5.92216   |
| PROSER1     | 4.36086   | 4.67039    | 4.4225    | 3.77424   | 3.30352   | 4.92168    | 4.60593   | 5.17674   | 3.81153    | 2.57371   | 3.47228   | 3.36699   | 5.07832   | 3.17308   | 2.8999    |
| PROSER2     | 0.972105  | 0.889913   | 0.706542  | 1.41681   | 1.84438   | 1.73233    | 0.618383  | 0.697312  | 0.972502   | 1.59483   | 1.58337   | 1.12781   | 2.49087   | 1.7129    | 0.887499  |
| PROSER2-AS1 | 0.153994  | 0.183725   | 0.200191  | 0.204036  | 0.0911259 | 0.12488    | 0.184198  | 0.208544  | 0.0982389  | 0.064426  | 0.0248342 | 0.115434  | 0.0378499 | 0.306605  | 0.231686  |
| PROSER3     | 1.08921   | 1.60038    | 1.73969   | 1.68925   | 2.12747   | 1.98346    | 2.73352   | 1.47596   | 1.68116    | 1.13697   | 1.21741   | 2.05257   | 2.50486   | 1.49926   | 2.30765   |
| PROX1       | 0.80673   | 0.460296   | 0.381989  | 0.697355  | 0.626565  | 1.02586    | 0.939279  | 0.415079  | 0.0969578  | 0.746074  | 0.937658  | 0.412041  | 1.95529   | 0.999984  | 1.05185   |
| PROX1-AS1   | 0.0544703 | 0.0262446  | 0.0225308 | 0         | 0.0634583 | 0.00579759 | 0.0155481 | 0.0302554 | 0.00829233 | 0.0170914 | 0.0153725 | 0.0146156 | 0.0658949 | 0.0142343 | 0         |
| PROX2       | 0.447584  | 0.644084   | 0.607247  | 0.239849  | 0.342991  | 0.147363   | 0.340691  | 0.424294  | 0.0799489  | 0.149804  | 0.0673688 | 0.123833  | 0.0269527 | 0.271355  | 0.239974  |
| PROZ        | 0.029766  | 0.150588   | 0.0738736 | 0.0460121 | 0.115592  | 0.0126727  | 0.0339858 | 0.0661338 | 0.0181258  | 0         | 0.016801  | 0.0212984 | 0.0576146 | 0.0233355 | 0.0427477 |
| PRPF18      | 6.25745   | 5.27777    | 5.76051   | 5.39938   | 3.16268   | 5.52462    | 3.13058   | 4.71668   | 6.06694    | 5.05978   | 7.76873   | 3.94319   | 5.2721    | 4.54027   | 3.33338   |
| PRPF19      | 14.5188   | 12.9281    | 13.8683   | 27.3455   | 19.6184   | 31.2349    | 15.2559   | 10.6618   | 13.3099    | 9.09888   | 11.5109   | 9.64554   | 18.4924   | 13.088    | 7.69833   |
| PRPF3       | 8.26412   | 8.30167    | 7.92528   | 7.4315    | 7.19529   | 9.44966    | 6.55092   | 6.5726    | 4.54089    | 5.86884   | 4.58535   | 6.8234    | 5.79608   | 8.03769   | 7.03029   |
| PRPF31      | 7.19992   | 6.7329     | 6.8531    | 10.3151   | 12.5948   | 15.5536    | 6.01664   | 4.91953   | 6.86476    | 6.95232   | 6.90954   | 6.07784   | 11.0552   | 7.94777   | 6.33862   |
| PRPF38A     | 6.09467   | 5.29778    | 6.03652   | 7.8122    | 4.44825   | 8.72979    | 4.15615   | 5.28288   | 4.31122    | 5.00881   | 6.43716   | 3.51262   | 6.18925   | 5.7947    | 4.29243   |
| PRPF38B     | 4.18275   | 4.11256    | 3.60098   | 3.63783   | 1.95632   | 3.98033    | 1.83682   | 2.61435   | 3.00051    | 2.77489   | 2.83308   | 2.75607   | 3.16727   | 4.3794    | 2.69323   |
| PRPF39      | 5.68086   | 5.55979    | 4.95328   | 3.68388   | 1.32866   | 3.26372    | 3.45502   | 4.51082   | 5.04157    | 3.93977   | 3.92613   | 3.99552   | 2.59796   | 3.87159   | 2.79287   |
| PRPF4       | 3.30393   | 3.34935    | 3.06924   | 6.42322   | 3.33649   | 7.56181    | 3.16588   | 2.73495   | 3.85258    | 3.40171   | 3.87079   | 3.16882   | 6.75785   | 4.64149   | 2.61359   |
| PRPF40A     | 6.59942   | 5.40623    | 5.67694   | 7.00794   | 1.87778   | 6.64298    | 2.95484   | 5.61392   | 5.85704    | 6.89812   | 7.82139   | 4.49319   | 7.79093   | 6.10402   | 4.0093    |



|              |           |            |           |                 |           |           |          |           |                 |                 |          |            |           |           |            |
|--------------|-----------|------------|-----------|-----------------|-----------|-----------|----------|-----------|-----------------|-----------------|----------|------------|-----------|-----------|------------|
| PRR20G       | 0         | 0          | 0         | 0               | 0         | 0         | 0        | 0         | 0               | 0               | 0        | 0          | 0         | 0         | 0          |
| PRR22        | 1.33006   | 1.25766    | 1.3754    | 0.633933        | 1.83361   | 1.68464   | 1.06303  | 1.09339   | 0.323973        | 0.438208        | 0.225221 | 0.868421   | 0.268171  | 0.686458  | 0.382027   |
| PRR23A       | 0         | 0          | 0         | 0               | 0         | 0         | 0        | 0         | 0               | 0               | 0        | 0          | 0         | 0         | 0          |
| PRR23B       | 0         | 0          | 0         | 0               | 0         | 0         | 0        | 0         | 0               | 0               | 0        | 0          | 0         | 0         | 0          |
| PRR23C       | 0         | 0.00399523 | 0         | 0               | 0         | 0         | 0        | 0         | 0               | 0               | 0        | 0.00593317 | 0         | 0         | 0          |
| PRR23D1      | 0         | 0          | 0         | 0.00369672      | 0         | 0         | 0        | 0         | 0               | 0               | 0        | 0          | 0         | 0         | 0          |
| PRR23D2      | 0         | 0          | 0         | 0.003815        | 0         | 0         | 0        | 0         | 0               | 0               | 0        | 0          | 0         | 0         | 0          |
| PRR25        | 0.0191423 | 0.0553383  | 0.0475076 | 0.0197267       | 0.356815  | 0.0325988 | 0.152992 | 0.0510363 | 0.0233132       | 0.0240256       | 0        | 0.0136968  | 0         | 0.0200092 | 0          |
| PRR26        | 1.39768   | 1.35838    | 1.14042   | 0.458741        | 1.53165   | 0.823291  | 1.31163  | 0.923097  | 0.023318        | 0.390496        | 0.1567   | 0.791156   | 0.0741184 | 0.617912  | 0.838642   |
| PRR27        | 0         | 0          | 0         | 0               | 0         | 0         | 0        | 0         | 0               | 0               | 0        | 0          | 0         | 0         | 0          |
| PRR29        | 0.30387   | 0.14093    | 0.166028  | 0.393994        | 0.586819  | 1.06457   | 0.207667 | 0.0928447 | 0.0258706       | 0.183201        | 0.186748 | 0.0581043  | 0.198224  | 0.377884  | 0.678477   |
| PRR29-AS1    | 0.0632756 | 0.0114327  | 0.0130865 | 0.00815092      | 0.0491444 | 0.0740827 | 0.072246 | 0.0421756 | 0.00963282      | 0.00992717      | 0        | 0.00565942 | 0         | 0.0124015 | 0.011359   |
| PRR3         | 0.26166   | 0.246263   | 0.235133  | 0.126931        | 0.201214  | 0.191409  | 0.244627 | 0.241588  | 0.0715772       | 0.0859541       | 0.154393 | 0.100294   | 0.082086  | 0.0997046 | 0.199198   |
| PRR30        | 0         | 0          | 0         | 0               | 0         | 0         | 0        | 0         | 0               | 0               | 0        | 0          | 0         | 0         | 0          |
| PRR31        | 0         | 0          | 0         | 0               | 0.0555628 | 0.0913725 | 0        | 0         | 0               | 0               | 0        | 0          | 0         | 0         | 0          |
| PRR32        | 0         | 0.0272633  | 0         | 0               | 0         | 0         | 0        | 0         | 0               | 0               | 0        | 0.0269918  | 0         | 0         | 0          |
| PRR34        | 1.2353    | 2.59939    | 2.23156   | 0.636509        | 4.48385   | 1.5563    | 2.43227  | 1.60194   | 0.0614066       | 0.664472        | 0.455349 | 1.05526    | 0.113859  | 0.849852  | 1.17667    |
| PRR34-AS1    | 2.19399   | 4.12609    | 3.63005   | 1.99841         | 2.28667   | 1.27758   | 3.78178  | 3.53486   | 0.534406        | 1.77657         | 0.671117 | 2.64344    | 0.429232  | 1.27984   | 2.01248    |
| PRR35        | 0.0208778 | 0.00502962 | 0.0086358 | 0               | 0.0162152 | 0         | 0        | 0         | 0               | 0               | 0        | 0.0373466  | 0         | 0.0381908 | 0          |
| PRR36        | 0.261301  | 0.298701   | 0.207689  | 0.116159        | 0.52527   | 0.335923  | 0.368544 | 0.268649  | 0.280796        | 0.0321529       | 0.190867 | 0.153973   | 0.0198341 | 0.0294557 | 0.0294322  |
| PRR4         | 6.03689   | 2.68527    | 2.87341   | 0.00016725<br>1 | 3.26E-12  | 18.6487   | 3.28772  | 16.1422   | 0.00073882<br>6 | 0.00029635<br>6 | 0.117955 | 0.00210811 | 0.044158  | 0.190148  | 0.0888047  |
| PRR5         | 1.58803   | 1.68987    | 1.5632    | 3.62562         | 4.01689   | 3.70767   | 1.65924  | 0.974401  | 0.77904         | 1.48368         | 3.20437  | 1.12969    | 3.19692   | 2.54121   | 2.43644    |
| PRR5-ARHGAP8 | 0.727146  | 0.145852   | 0.0751099 | 0.0249026       | 0.435288  | 0.707608  | 0.757253 | 0.14646   | 0.00535923      | 0.0150788       | 0.438682 | 0.0932578  | 0.0160396 | 0.0715142 | 0.00828666 |
| PRR5L        | 0.351484  | 0.428669   | 0.358923  | 0.588599        | 1.33082   | 0.659361  | 0.213198 | 0.253801  | 0.14046         | 0.930549        | 1.35774  | 0.298652   | 0.605918  | 1.02184   | 0.843922   |
| PRR7         | 0.725534  | 0.856098   | 1.06568   | 1.1139          | 1.47201   | 1.42468   | 1.69059  | 0.539522  | 1.04592         | 0.947788        | 1.38735  | 0.646275   | 1.13684   | 0.719698  | 0.531611   |

|           |           |           |           |           |           |           |           |           |           |           |           |            |           |           |           |
|-----------|-----------|-----------|-----------|-----------|-----------|-----------|-----------|-----------|-----------|-----------|-----------|------------|-----------|-----------|-----------|
| PRR7-AS1  | 0.694292  | 0.627226  | 0.92138   | 0.29812   | 0.898729  | 0.468018  | 1.27165   | 0.681302  | 0.123312  | 0.181543  | 0.0816426 | 0.331189   | 0.0746589 | 0.544301  | 0.457     |
| PRR9      | 0.0753232 | 0.172386  | 0.218094  | 3.95876   | 0.204755  | 0         | 0.258005  | 1.40576   | 1.92644   | 62.7971   | 0.935336  | 46.1617    | 1.62804   | 3.33637   | 7.49102   |
| PRRC1     | 6.49267   | 5.27628   | 5.81538   | 7.07167   | 4.23921   | 9.59287   | 7.27251   | 8.0159    | 8.55528   | 7.70995   | 12.3454   | 5.47757    | 9.001     | 6.07353   | 8.77951   |
| PRRC2A    | 1.76889   | 2.33345   | 2.38174   | 4.40995   | 4.57629   | 5.83265   | 3.3332    | 1.84213   | 2.85344   | 2.09836   | 1.58445   | 2.80064    | 4.66824   | 2.58584   | 3.10798   |
| PRRC2B    | 12.5854   | 19.6425   | 19.3221   | 20.384    | 28.8887   | 28.6957   | 20.2284   | 13.6287   | 8.73681   | 8.59404   | 5.7217    | 13.6037    | 14.6077   | 12.4981   | 14.7804   |
| PRRC2C    | 16.9361   | 17.9717   | 18.5297   | 21.879    | 8.09756   | 24.8394   | 12.0745   | 16.0655   | 14.2611   | 15.813    | 11.0727   | 16.3458    | 26.5778   | 19.031    | 16.4069   |
| PRRG1     | 0.771182  | 0.572909  | 0.56255   | 1.0766    | 0.28325   | 1.4621    | 0.524836  | 0.580702  | 0.425653  | 0.886856  | 1.40663   | 0.399581   | 1.31866   | 1.18732   | 1.75675   |
| PRRG2     | 1.46869   | 2.87345   | 3.30138   | 2.82832   | 4.8854    | 2.50115   | 3.04892   | 1.12067   | 6.08882   | 2.94194   | 3.81836   | 3.43927    | 3.53195   | 2.44237   | 1.1931    |
| PRRG3     | 0.236722  | 0.523317  | 0.656617  | 0.157849  | 0.735422  | 0.972257  | 0.556462  | 0.148503  | 0         | 0.227202  | 0.550179  | 0.00996358 | 0.215621  | 0.181943  | 1.13987   |
| PRRG4     | 2.97542   | 3.29607   | 3.27044   | 7.40724   | 3.89482   | 4.05649   | 2.74355   | 4.10015   | 12.2199   | 8.81687   | 7.63766   | 6.76373    | 13.4381   | 5.91019   | 1.54839   |
| PRRT1     | 0.0525224 | 0.0707615 | 0.0548845 | 0.0170924 | 0.0536747 | 0.128344  | 0.0873546 | 0.0737014 | 0.0134666 | 0.0260215 | 0.0748943 | 0.00890081 | 0.0240778 | 0.0279596 | 0.109173  |
| PRRT2     | 0.711304  | 0.63597   | 0.734035  | 0.204036  | 1.62887   | 0.936597  | 1.45684   | 0.495291  | 0.0178616 | 0.211685  | 0.21523   | 0.362042   | 0.0189249 | 0.781843  | 1.24268   |
| PRRT3     | 0.880748  | 1.07102   | 1.31684   | 0.480505  | 3.02593   | 0.740335  | 1.21688   | 0.865502  | 0.695478  | 0.322825  | 0.446077  | 0.438131   | 0.505395  | 0.403172  | 0.832277  |
| PRRT3-AS1 | 0.577954  | 0.576402  | 0.926055  | 0.591844  | 0.39586   | 0.265241  | 0.502657  | 0.482439  | 0.289755  | 0.283846  | 0.314989  | 0.141662   | 0.194551  | 0.355341  | 0.533836  |
| PRRT4     | 0.261135  | 0.349147  | 0.594079  | 0.20183   | 0.496899  | 0.411353  | 0.13417   | 0.168254  | 0.087459  | 0.114713  | 0.0663274 | 0.158821   | 0.484387  | 0.283197  | 0.0562533 |
| PRRX1     | 16.6449   | 7.4394    | 9.64555   | 16.1219   | 8.3272    | 30.8328   | 14.8834   | 9.50821   | 2.37477   | 25.2017   | 48.7058   | 2.8311     | 17.683    | 12.9629   | 44.2986   |
| PRRX2     | 7.08966   | 4.83849   | 4.40246   | 7.19678   | 9.11774   | 8.27983   | 6.78263   | 2.46686   | 9.71102   | 10.0743   | 11.5959   | 4.07345    | 8.57807   | 4.70332   | 6.52539   |
| PRRX2-AS1 | 0.184407  | 0.333187  | 0.152554  | 0.0950183 | 0.0716119 | 0.15702   | 0.21055   | 0.491656  | 0         | 0.115725  | 0         | 0.395844   | 0         | 0.313232  | 0.132416  |
| PRSS1     | 0         | 0.0272966 | 0.023434  | 0         | 0         | 0         | 0         | 0.0503491 | 0         | 0         | 0         | 0          | 0         | 0         | 0         |
| PRSS12    | 2.34315   | 2.25549   | 2.33615   | 2.58679   | 3.26239   | 2.64585   | 1.91838   | 1.77656   | 2.38527   | 1.44822   | 1.04548   | 1.53898    | 2.2432    | 3.59984   | 2.57286   |
| PRSS16    | 0.306958  | 0.537101  | 0.407637  | 0.982287  | 1.04146   | 0.591524  | 0.479598  | 0.53124   | 1.08217   | 0.608312  | 0.346518  | 0.73983    | 0.979817  | 0.409518  | 0.162411  |
| PRSS21    | 0.0198143 | 0.0668277 | 0.065567  | 0.0816767 | 0.153892  | 0.0506147 | 0.0226233 | 0.22892   | 0         | 0.0248689 | 0.0447357 | 0          | 0.0255681 | 0         | 0.0284558 |
| PRSS22    | 0.617816  | 0.772341  | 0.773558  | 63.2375   | 9.88213   | 2.4597    | 0.476623  | 0.875534  | 1.44385   | 12.5325   | 2.41276   | 4.18168    | 35.7996   | 2.99335   | 2.37402   |
| PRSS23    | 2.22411   | 1.07432   | 1.12818   | 3.58343   | 2.37004   | 5.31568   | 1.79621   | 1.58617   | 2.80825   | 7.24025   | 12.9392   | 2.05514    | 6.34465   | 5.25986   | 10.5896   |
| PRSS27    | 1.51551   | 1.1105    | 0.587688  | 34.1802   | 8.65627   | 3.01101   | 0.79308   | 1.27671   | 16.7653   | 7.48958   | 7.25318   | 4.28105    | 12.7827   | 2.42572   | 1.08823   |
| PRSS3     | 3.70665   | 3.97979   | 5.49463   | 4.76992   | 5.17317   | 6.87307   | 7.71235   | 4.83256   | 29.7441   | 16.4836   | 26.7205   | 15.671     | 25.275    | 9.07658   | 2.29682   |

|         |            |           |            |           |           |           |           |           |           |           |           |            |            |            |           |
|---------|------------|-----------|------------|-----------|-----------|-----------|-----------|-----------|-----------|-----------|-----------|------------|------------|------------|-----------|
| PRSS30P | 0.0546748  | 0.0301064 | 0.0323077  | 0.177081  | 0.0606634 | 0.152966  | 0.017836  | 0.0416489 | 0.0380501 | 0.0294096 | 0         | 0.00558875 | 0.0100788  | 0.020411   | 0.0673028 |
| PRSS33  | 0          | 0.0329123 | 0          | 0         | 0         | 0         | 0.0155986 | 0         | 0         | 0         | 0         | 0.0195507  | 0.00881451 | 0.00714024 | 0.01962   |
| PRSS35  | 0.12433    | 0.0513462 | 0.0514271  | 0.0183036 | 0.0275895 | 0.105865  | 0.060838  | 0.0315696 | 0.0108157 | 0.167192  | 0.240604  | 0          | 0          | 0.0417729  | 0.242322  |
| PRSS36  | 0.228251   | 0.306359  | 0.316957   | 0.554446  | 1.31691   | 0.687176  | 0.325762  | 0.239074  | 1.3105    | 0.36833   | 0.736192  | 0.454963   | 0.33135    | 0.191723   | 0.47999   |
| PRSS37  | 0.0580026  | 0.0558931 | 0.111962   | 0.0996223 | 0.0300327 | 0.0658513 | 0.0883007 | 0.0171826 | 0         | 0.0242664 | 0.0873037 | 0.0553366  | 0          | 0.0404196  | 0.0832991 |
| PRSS38  | 0.0186187  | 0.0179416 | 0          | 0         | 0         | 0         | 0         | 0         | 0         | 0         | 0         | 0.0133222  | 0          | 0          | 0         |
| PRSS3P2 | 0          | 0         | 0.0222106  | 0         | 0.0834087 | 0.0228608 | 0.0306543 | 0.0477207 | 0         | 0         | 0         | 0          | 0          | 0          | 0         |
| PRSS40A | 0.00516414 | 0         | 0          | 0         | 0         | 0         | 0         | 0         | 0         | 0         | 0         | 0          | 0          | 0          | 0         |
| PRSS40B | 5.96E-05   | 0         | 0          | 0         | 0         | 0         | 0         | 0         | 0         | 0         | 0         | 0          | 0          | 0          | 0         |
| PRSS41  | 0          | 0         | 0          | 0         | 0         | 0         | 0         | 0         | 0         | 0         | 0         | 0          | 0          | 0.0139914  | 0         |
| PRSS42  | 0.0374079  | 0.102134  | 0.0515775  | 0.01285   | 0.0774766 | 0.0106175 | 0.0854224 | 0.0997352 | 0         | 0.0156503 | 0         | 0.0267664  | 0          | 0          | 0.0179075 |
| PRSS45  | 0.0978565  | 0.0353615 | 0.101192   | 0         | 0.0380012 | 0.0416617 | 0.0558647 | 0.0869667 | 0.0297945 | 0         | 0         | 0.0175047  | 0          | 0.012786   | 0         |
| PRSS46P | 0.0236154  | 0.045513  | 0.0195363  | 0         | 0.0366828 | 0         | 0         | 0         | 0.0287609 | 0         | 0         | 0          | 0          | 0          | 0         |
| PRSS47  | 0          | 0         | 0          | 0         | 0         | 0         | 0         | 0         | 0         | 0         | 0         | 0          | 0          | 0          | 0         |
| PRSS48  | 1.24336    | 1.4138    | 1.49489    | 0.546695  | 0.643789  | 0.395249  | 1.38177   | 1.39966   | 0.161522  | 0.811482  | 0.149717  | 1.44717    | 0.0641767  | 1.34299    | 0.809481  |
| PRSS50  | 0.0343624  | 0.0579471 | 0.0710674  | 0.0531171 | 0.133442  | 0.117036  | 0.0196169 | 0.076346  | 0         | 0.0215641 | 0         | 0.0245872  | 0.0332556  | 0.0269389  | 0.0246743 |
| PRSS53  | 0.947176   | 1.60552   | 1.8126     | 15.4764   | 7.28555   | 3.44952   | 0.912071  | 1.83567   | 0.486438  | 2.0625    | 2.39614   | 3.85408    | 1.06761    | 3.9245     | 2.29442   |
| PRSS54  | 0.0781848  | 0.0124368 | 0.0387898  | 0.0290492 | 7.40E-22  | 8.72E-16  | 4.53E-11  | 9.87E-21  | 1.49E-15  | 1.70E-21  | 1.65E-35  | 3.47E-27   | 1.36E-23   | 1.69E-25   | 1.55E-18  |
| PRSS55  | 0          | 0.0329658 | 0          | 0.0176272 | 0.02657   | 0.043694  | 0         | 0.0152015 | 0         | 0         | 0         | 0          | 0          | 0          | 0         |
| PRSS56  | 0.0214586  | 0         | 0.00887601 | 0         | 0         | 0         | 0         | 0.0286059 | 0         | 0         | 0         | 0          | 0          | 0.0112152  | 0         |
| PRSS57  | 0.0214685  | 0         | 0          | 0         | 0         | 0.164521  | 0         | 0.0190794 | 0         | 0         | 0         | 0.0153613  | 0          | 0.0112204  | 0         |
| PRSS58  | 0          | 0         | 0          | 0         | 0         | 0         | 0         | 0         | 0         | 0         | 0         | 0          | 0          | 0          | 0         |
| PRSS8   | 10.9534    | 15.8325   | 16.4558    | 64.1849   | 40.558    | 24.3062   | 20.7073   | 13.9974   | 98.0023   | 49.5597   | 58.2802   | 41.0979    | 80.362     | 23.6096    | 6.01876   |
| PRTFDC1 | 0.76988    | 0.410282  | 0.434249   | 0.50488   | 0.38051   | 0.794597  | 0.386238  | 0.539071  | 0.284129  | 0.951638  | 2.69948   | 0.325514   | 0.714979   | 0.823036   | 2.46257   |
| PRTG    | 0.105091   | 0.0487934 | 0.0284528  | 0.0827017 | 0.0652973 | 0.110635  | 0.0589042 | 0.0628304 | 0.0325792 | 0.0791404 | 0.183345  | 0.0601566  | 0.057942   | 0.140809   | 0.0548817 |
| PRTN3   | 0          | 0         | 0          | 0         | 0         | 0         | 0.0263976 | 0         | 0         | 0         | 0         | 0          | 0.0149169  | 0          | 0         |



|          |           |           |            |           |            |           |           |           |           |           |           |           |            |            |           |
|----------|-----------|-----------|------------|-----------|------------|-----------|-----------|-----------|-----------|-----------|-----------|-----------|------------|------------|-----------|
| PRUNE1   | 2.55226   | 2.22796   | 2.17972    | 3.86018   | 2.65858    | 4.44872   | 2.24556   | 2.41501   | 1.55419   | 2.50616   | 4.50822   | 1.71879   | 2.45069    | 2.18136    | 1.86503   |
| PRUNE2   | 3.22169   | 0.88785   | 1.08744    | 0.867749  | 2.03916    | 6.49159   | 2.37863   | 1.22553   | 0.288757  | 0.743951  | 1.2064    | 0.406659  | 0.457796   | 1.22915    | 5.66335   |
| PRX      | 0.424527  | 0.563002  | 0.73717    | 0.407167  | 1.05118    | 1.2276    | 0.748664  | 0.242807  | 0.194525  | 0.174091  | 0.142348  | 0.210527  | 0.295598   | 0.316339   | 0.362183  |
| PRXL2A   | 14.3678   | 15.5921   | 8.67927    | 25.2207   | 28.6845    | 32.2858   | 12.5845   | 9.70968   | 11.0511   | 39.1891   | 39.5373   | 18.4358   | 50.0771    | 28.4205    | 11.5496   |
| PRXL2B   | 2.20229   | 1.11272   | 1.31037    | 2.44643   | 4.83327    | 4.20354   | 0.923809  | 0.959484  | 1.32376   | 1.90591   | 2.84758   | 1.46524   | 2.74812    | 1.26828    | 1.34711   |
| PRXL2C   | 3.36283   | 1.65667   | 1.64105    | 4.18585   | 0.909734   | 6.51505   | 2.54533   | 2.04837   | 1.63362   | 5.02689   | 9.49053   | 1.63567   | 6.6675     | 4.71974    | 6.02324   |
| PRY      | 0         | 0         | 0.00386623 | 0         | 0.00725952 | 0         | 0         | 0         | 0         | 0         | 0         | 0         | 0          | 0          | 0         |
| PRY2     | 0         | 0         | 0.00386623 | 0         | 0.00725952 | 0         | 0         | 0         | 0         | 0         | 0         | 0         | 0          | 0          | 0         |
| PSAP     | 118.724   | 83.1532   | 90.2908    | 139.823   | 185.307    | 254.78    | 125.808   | 88.3553   | 152.685   | 153.417   | 235.237   | 102.443   | 165.949    | 81.9619    | 146.656   |
| PSAPL1   | 3.44673   | 13.8907   | 20.0292    | 1.69699   | 24.4884    | 1.52006   | 19.0275   | 6.60537   | 27.74     | 1.92405   | 1.89243   | 2.43085   | 0.127622   | 0.413524   | 1.02266   |
| PSAT1    | 12.0433   | 10.3599   | 8.16397    | 13.6902   | 7.82403    | 12.8403   | 9.17113   | 10.0834   | 6.84648   | 5.80678   | 7.45786   | 8.4485    | 13.5483    | 8.58919    | 1.95941   |
| PSCA     | 0.757016  | 0.877117  | 0.596435   | 0.482936  | 0.363971   | 1.24314   | 1.37882   | 0.768883  | 1.07562   | 0.361955  | 0.142429  | 0.206349  | 0.104662   | 0.0565214  | 0.025885  |
| PSD      | 0.211375  | 0.338689  | 0.353794   | 0.146907  | 0.794119   | 0.364151  | 0.252566  | 0.340755  | 0.173616  | 0.512085  | 1.12649   | 0.239177  | 0.0729462  | 0.215809   | 0.670657  |
| PSD2     | 0.0666503 | 0.0222322 | 0.0424137  | 0         | 0.0238918  | 0.0436553 | 0.0468303 | 0.0273384 | 0         | 0         | 0         | 0.0146739 | 0.00992365 | 0.00535914 | 0.0515406 |
| PSD2-AS1 | 0         | 0         | 0.0273118  | 0         | 0          | 0         | 0         | 0.0293404 | 0         | 0         | 0         | 0.0236226 | 0          | 0.0345095  | 0.189651  |
| PSD3     | 2.83081   | 2.3211    | 2.45273    | 1.74372   | 1.56938    | 2.11453   | 2.90007   | 2.32277   | 1.50875   | 2.55984   | 4.02695   | 1.23503   | 2.03722    | 2.82968    | 3.5365    |
| PSD4     | 4.87295   | 7.5791    | 7.91431    | 10.4931   | 15.4954    | 13.1439   | 9.03523   | 4.53475   | 17.1944   | 12.8892   | 5.39207   | 12.4681   | 20.4997    | 7.62844    | 3.7926    |
| PSEN1    | 6.22089   | 5.56978   | 6.35673    | 6.41471   | 3.51226    | 7.49729   | 5.84446   | 5.90006   | 6.50263   | 7.30702   | 7.37436   | 4.24999   | 9.95943    | 4.90781    | 5.31019   |
| PSEN2    | 1.72213   | 1.52363   | 1.77459    | 2.2106    | 4.88082    | 5.58251   | 2.47221   | 1.54839   | 2.79649   | 2.8693    | 2.97864   | 2.14739   | 3.80118    | 2.64755    | 1.90914   |
| PSENN    | 5.38975   | 4.75627   | 5.01813    | 12.2234   | 8.07206    | 14.7548   | 8.49183   | 4.1719    | 12.2342   | 14.1841   | 25.9078   | 7.83739   | 15.3057    | 7.86515    | 7.87908   |
| PSG1     | 0.170011  | 0.0746494 | 0.0647933  | 0.103656  | 4.29E-08   | 0.0319695 | 0.0792689 | 0.193816  | 0         | 0.0487878 | 0.0094906 | 0.119042  | 0.00588007 | 0.143041   | 0.010784  |
| PSG10P   | 0.0664267 | 0.0128022 | 0          | 0.0547637 | 0          | 0         | 0         | 0.0489467 | 0.0323601 | 0         | 0.0149975 | 0.028518  | 0          | 0.0486045  | 0.0572383 |
| PSG11    | 0.086301  | 0.0277208 | 0          | 0.0296452 | 0          | 0         | 0.0414952 | 0.0681824 | 0         | 0.0902639 | 0         | 0.0157363 | 0          | 0.0300698  | 0         |
| PSG2     | 0.0143567 | 1.99E-19  | 0          | 0.124776  | 0          | 0         | 5.98E-14  | 4.65E-29  | 0.0174849 | 1.24E-22  | 0         | 0.0767467 | 0          | 0          | 0         |
| PSG3     | 0.0606474 | 0.0134943 | 0.0210464  | 0         | 1.97E-08   | 0         | 0.058432  | 0.0294537 | 0         | 0         | 0         | 0.036461  | 1.68E-37   | 0.00812331 | 0         |
| PSG4     | 0.0891215 | 0.279728  | 0.153146   | 0.911415  | 0.0497451  | 0.0363579 | 0.0927513 | 0.121374  | 0.0395522 | 0.449523  | 1.0243    | 0.362035  | 0.0757609  | 0.0557914  | 0.153304  |

|           |           |           |            |           |            |           |           |           |          |           |           |           |           |           |           |
|-----------|-----------|-----------|------------|-----------|------------|-----------|-----------|-----------|----------|-----------|-----------|-----------|-----------|-----------|-----------|
| PSG5      | 0.0705581 | 0.0162204 | 0.0865766  | 0.165099  | 0.00034149 | 0         | 0.0515731 | 0.103004  | 0.137491 | 0         | 0         | 0.158804  | 0.392306  | 0.018032  | 0         |
|           |           |           |            |           | 5          |           |           |           |          |           |           |           |           |           |           |
| PSG6      | 0.113015  | 0.0363017 | 0.0832862  | 0         | 0.0390116  | 0.0106924 | 0.0716874 | 0.100439  | 0        | 0.0157607 | 0         | 0.0359403 | 0.0542684 | 0.0328149 | 0.108203  |
| PSG7      | 0.181062  | 0.10552   | 0.269222   | 0.136387  | 0.0881971  | 0.0966929 | 0.506627  | 0.299804  | 0.843048 | 0.303182  | 0.421502  | 0.383561  | 0.219801  | 0.100895  | 0.0978499 |
| PSG8      | 0.0115788 | 2.71E-19  | 0.00948944 | 0.0312281 | 0.0166067  | 0.0092473 | 0.0263253 | 0.0712184 | 9.49E-26 | 0.0272613 | 0         | 0.0621745 | 6.00E-34  | 0.0500983 | 0         |
| PSG8-AS1  | 0.086493  | 0.0178601 | 0.0102219  | 0         | 0.0191934  | 0         | 0.0141078 | 0.0549055 | 0        | 0.0930494 | 0         | 0.0353646 | 0         | 0.09041   | 0.0887249 |
| PSG9      | 0.066503  | 0.0128169 | 0.109841   | 0.109653  | 0.0206604  | 0         | 0.106303  | 0.0898568 | 0        | 0         | 0.0600589 | 0.0666186 | 0.0343259 | 0.0208544 | 0.0191013 |
| PSIP1     | 3.66708   | 2.5335    | 2.727      | 2.7799    | 1.02762    | 3.96257   | 1.49766   | 2.65585   | 0.972397 | 2.33349   | 3.01945   | 0.983447  | 2.80385   | 2.14012   | 3.07956   |
| PSKH1     | 5.1176    | 4.87201   | 5.04553    | 7.89234   | 10.0484    | 10.7573   | 5.93376   | 3.97467   | 8.33899  | 5.14702   | 6.45448   | 4.92666   | 6.43759   | 4.91526   | 5.79559   |
| PSKH2     | 0         | 0         | 0.00740927 | 0         | 0          | 0         | 0         | 0         | 0        | 0         | 0         | 0.0256339 | 0         | 0         | 0         |
| PSMA1     | 10.7334   | 8.8577    | 9.50306    | 18.5743   | 2.41175    | 15.9603   | 7.41207   | 8.999     | 14.771   | 16.2391   | 25.8338   | 9.7972    | 19.8898   | 13.9243   | 8.41812   |
| PSMA2     | 12.4568   | 9.07897   | 9.5597     | 24.2894   | 3.92887    | 18.535    | 8.17627   | 8.17647   | 17.539   | 25.6938   | 44.9346   | 11.5373   | 19.7764   | 16.7719   | 11.1923   |
| PSMA3     | 13.3571   | 9.57524   | 9.22745    | 24.4471   | 2.98976    | 22.7467   | 7.12232   | 8.75873   | 13.8104  | 22.4983   | 49.2413   | 11.0673   | 21.2309   | 14.8588   | 12.4886   |
| PSMA3-AS1 | 6.71753   | 7.20002   | 7.4879     | 4.58154   | 1.95735    | 3.20373   | 3.21181   | 5.74127   | 2.86395  | 3.14081   | 3.11544   | 3.94304   | 2.16992   | 4.4941    | 5.50541   |
| PSMA4     | 12.9974   | 11.0559   | 10.8202    | 26.8561   | 4.50637    | 21.3109   | 6.868     | 9.2496    | 19.8618  | 30.7541   | 49.18     | 11.6339   | 28.4145   | 21.2101   | 13.2051   |
| PSMA5     | 3.97698   | 3.47451   | 3.38419    | 8.06103   | 2.46546    | 7.40506   | 3.55604   | 2.87436   | 10.0444  | 8.6449    | 16.9303   | 5.5841    | 8.59424   | 5.88817   | 4.08572   |
| PSMA6     | 21.6099   | 17.0347   | 17.1012    | 39.2973   | 6.83678    | 35.572    | 14.9317   | 15.4217   | 31.6787  | 41.7023   | 67.5041   | 19.9798   | 40.6519   | 25.2658   | 15.5172   |
| PSMA7     | 28.57     | 21.4478   | 20.9265    | 63.3678   | 41.6272    | 70.2886   | 23.3002   | 17.7774   | 57.3545  | 59.6419   | 108.553   | 36.8095   | 69.5804   | 43.3659   | 29.7259   |
| PSMA8     | 0         | 0         | 0          | 0         | 0          | 0.228295  | 0         | 0         | 0        | 0         | 0         | 0         | 0         | 0         | 0         |
| PSMB1     | 33.2886   | 24.4172   | 25.3256    | 48.2193   | 15.9164    | 48.9104   | 29.3056   | 22.8105   | 43.8921  | 46.342    | 87.8926   | 23.3313   | 40.9036   | 30.2455   | 19.3909   |
| PSMB10    | 5.59022   | 6.05196   | 6.58486    | 11.4981   | 11.6138    | 20.1761   | 5.30581   | 3.82321   | 4.11858  | 11.2319   | 32.1246   | 6.56782   | 9.41029   | 8.75306   | 8.09434   |
| PSMB11    | 0         | 0         | 0          | 0         | 0          | 0         | 0         | 0         | 0        | 0         | 0         | 0         | 0         | 0         | 0         |
| PSMB2     | 5.73681   | 5.40631   | 5.55088    | 11.878    | 4.99889    | 12.4085   | 7.28085   | 6.21485   | 9.47633  | 8.71109   | 13.928    | 7.10218   | 13.16     | 7.72976   | 5.92242   |
| PSMB3     | 25.2945   | 16.8521   | 17.3657    | 53.691    | 29.6717    | 68.5011   | 29.9759   | 14.1597   | 30.7707  | 37.8045   | 85.7286   | 24.2983   | 39.1116   | 28.4607   | 21.9627   |
| PSMB4     | 38.9053   | 31.6559   | 34.5655    | 57.7289   | 29.1091    | 84.8956   | 42.5069   | 24.5033   | 45.7674  | 48.6104   | 109.106   | 30.8454   | 52.5114   | 39.0981   | 33.0567   |
| PSMB5     | 11.2214   | 10.9359   | 10.455     | 27.8845   | 18.568     | 29.8573   | 13.1029   | 7.70934   | 28.1275  | 26.7095   | 44.9739   | 18.0174   | 31.1377   | 21.5876   | 11.9779   |

|           |          |          |          |          |           |          |          |          |          |          |          |           |          |           |          |
|-----------|----------|----------|----------|----------|-----------|----------|----------|----------|----------|----------|----------|-----------|----------|-----------|----------|
| PSMB6     | 20.9669  | 17.6084  | 17.5426  | 49.4501  | 29.8477   | 49.6958  | 26.1817  | 13.5389  | 58.02    | 50.0658  | 74.0023  | 34.3339   | 62.4661  | 33.6519   | 16.1989  |
| PSMB7     | 27.2888  | 21.2909  | 22.3275  | 44.1371  | 19.853    | 51.7985  | 29.057   | 19.0928  | 47.1625  | 49.4071  | 74.7414  | 29.2722   | 47.6265  | 32.7272   | 17.249   |
| PSMB8     | 1.02855  | 0.865777 | 1.06708  | 2.2546   | 1.03966   | 3.46872  | 0.978436 | 0.655052 | 0.471284 | 0.935914 | 2.36498  | 0.368014  | 0.875431 | 0.644795  | 1.09037  |
| PSMB8-AS1 | 0.225478 | 0.150554 | 0.202355 | 0.27942  | 0.0794283 | 0.430709 | 0.136315 | 0.123209 | 0.030725 | 0.137691 | 0.401163 | 0.0580656 | 0.117109 | 0.0818507 | 0.427701 |
| PSMB9     | 0.555301 | 0.597667 | 0.578229 | 1.15589  | 0.708083  | 2.31005  | 0.463689 | 0.449311 | 0.13795  | 0.513184 | 1.77144  | 0.104769  | 0.664863 | 0.298888  | 0.71813  |
| PSMC1     | 20.8568  | 15.3105  | 15.9751  | 26.6492  | 13.7447   | 32.4964  | 14.2944  | 13.7436  | 32.2305  | 28.6586  | 39.7431  | 15.3761   | 36.0339  | 19.1307   | 14.8319  |
| PSMC2     | 9.01211  | 7.71169  | 8.32623  | 11.1224  | 6.46189   | 13.4136  | 5.52353  | 6.49705  | 14.2948  | 12.7046  | 19.2483  | 7.81543   | 12.4758  | 8.77213   | 6.19169  |
| PSMC3     | 18.9539  | 14.9193  | 15.8011  | 31.7441  | 25.5967   | 35.5955  | 16.3227  | 11.2211  | 39.3707  | 33.2569  | 35.683   | 18.5613   | 40.7505  | 21.55     | 14.4936  |
| PSMC3IP   | 0.618879 | 1.00637  | 0.80441  | 1.20342  | 0.841341  | 1.06318  | 0.547946 | 0.882692 | 0.323769 | 0.60627  | 0.755678 | 0.612795  | 1.11949  | 1.16612   | 0.561995 |
| PSMC4     | 9.68519  | 8.9777   | 8.57244  | 18.1927  | 11.0627   | 21.4458  | 10.8374  | 7.89819  | 20.6752  | 15.8286  | 21.8532  | 12.5882   | 23.1004  | 13.808    | 10.3495  |
| PSMC5     | 22.6658  | 16.7888  | 14.9935  | 30.3789  | 28.0629   | 37.3921  | 16.2509  | 13.896   | 37.1868  | 23.9636  | 29.1791  | 21.7754   | 34.6509  | 21.0385   | 16.6804  |
| PSMC6     | 9.2979   | 9.76472  | 9.69898  | 19.3282  | 3.70098   | 13.9785  | 6.86725  | 7.59181  | 16.0656  | 22.0815  | 29.3073  | 9.84421   | 23.8459  | 13.0751   | 7.86573  |
| PSMD1     | 11.3385  | 10.4865  | 9.36833  | 19.8614  | 7.25469   | 19.6283  | 8.99604  | 9.07436  | 25.032   | 22.3121  | 18.4729  | 15.4237   | 30.8189  | 16.8178   | 10.9554  |
| PSMD10    | 5.46964  | 4.60478  | 4.34242  | 9.2732   | 2.64936   | 8.6511   | 3.42471  | 4.3644   | 7.71795  | 8.23054  | 14.3574  | 5.34447   | 8.46203  | 5.7635    | 4.15982  |
| PSMD11    | 7.79306  | 8.10081  | 8.7198   | 13.8063  | 7.52445   | 14.875   | 9.51595  | 8.01105  | 15.3837  | 12.5425  | 12.9003  | 10.2289   | 19.3233  | 10.6595   | 6.79953  |
| PSMD12    | 4.98387  | 4.15596  | 4.66601  | 7.11421  | 2.07723   | 6.15551  | 3.32977  | 4.92481  | 7.48217  | 6.8189   | 7.6372   | 4.22994   | 11.9013  | 6.29028   | 3.90475  |
| PSMD13    | 12.1119  | 11.3082  | 13.3667  | 19.8485  | 17.3109   | 21.9419  | 13.1691  | 8.7317   | 20.81    | 21.304   | 29.3029  | 10.3114   | 24.9763  | 14.8798   | 10.1045  |
| PSMD14    | 9.48906  | 7.74118  | 9.26614  | 17.9323  | 5.21336   | 15.6661  | 7.1254   | 7.97789  | 19.2555  | 23.2781  | 29.5188  | 12.8078   | 28.7243  | 14.9557   | 8.71075  |
| PSMD2     | 18.0172  | 17.8863  | 16.708   | 33.6542  | 24.9204   | 41.3493  | 18.7094  | 13.2501  | 56.7968  | 37.0764  | 27.2156  | 26.2954   | 54.9575  | 27.5472   | 19.0284  |
| PSMD3     | 14.2858  | 14.1181  | 15.1099  | 24.7874  | 21.5333   | 33.8886  | 20.8178  | 11.4829  | 49.1154  | 23.8538  | 23.3303  | 17.3394   | 40.8149  | 19.385    | 11.1548  |
| PSMD4     | 16.579   | 15.5257  | 15.2346  | 29.5619  | 27.5755   | 33.5481  | 15.3369  | 10.9715  | 28.9928  | 23.5191  | 35.8959  | 14.2353   | 26.7699  | 17.303    | 13.6999  |
| PSMD5     | 5.36832  | 4.79814  | 4.375    | 7.78755  | 2.90362   | 7.61833  | 5.2559   | 5.44493  | 6.20588  | 6.3454   | 9.7474   | 3.93638   | 9.68685  | 5.77492   | 4.66206  |
| PSMD6     | 11.0373  | 8.84913  | 9.35956  | 16.8929  | 5.8581    | 15.4566  | 6.4876   | 8.73648  | 20.3008  | 16.9611  | 22.6348  | 11.3514   | 22.8076  | 13.5806   | 8.34071  |
| PSMD6-AS2 | 3.43196  | 3.08842  | 3.26729  | 0.916932 | 1.10005   | 0.742164 | 2.6227   | 2.96129  | 0.398071 | 1.21931  | 0.471471 | 1.2863    | 0.257747 | 1.72726   | 2.43829  |
| PSMD7     | 16.6159  | 14.4158  | 13.998   | 24.7493  | 12.7867   | 26.9394  | 10.4747  | 12.008   | 29.8396  | 20.6807  | 30.8032  | 15.3299   | 26.5464  | 17.3104   | 12.0208  |
| PSMD8     | 21.6393  | 18.9612  | 18.8346  | 42.6162  | 16.8884   | 49.105   | 26.2866  | 15.0214  | 51.6096  | 56.2442  | 77.1037  | 30.7733   | 66.8098  | 32.0191   | 19.0693  |

|           |           |            |           |           |          |            |           |           |           |           |           |            |            |           |           |
|-----------|-----------|------------|-----------|-----------|----------|------------|-----------|-----------|-----------|-----------|-----------|------------|------------|-----------|-----------|
| PSMD9     | 5.05764   | 4.30474    | 4.11077   | 9.74471   | 6.25137  | 9.73576    | 4.30289   | 2.74584   | 8.58028   | 9.84283   | 14.4401   | 5.59725    | 10.3989    | 6.13009   | 4.42304   |
| PSME1     | 19.4982   | 18.2129    | 17.1028   | 40.187    | 16.8331  | 42.349     | 17.2281   | 12.7481   | 22.5295   | 19.3072   | 40.2609   | 14.218     | 21.3543    | 17.022    | 18.8836   |
| PSME2     | 19.5976   | 16.0467    | 15.9354   | 43.8441   | 18.083   | 49.7523    | 11.2198   | 11.9337   | 10.9819   | 17.8696   | 44.3096   | 12.3846    | 23.6315    | 17.1293   | 23.1732   |
| PSME3     | 9.87955   | 9.37152    | 9.51155   | 24.6133   | 9.84109  | 20.7556    | 13.0057   | 9.43839   | 21.9786   | 16.595    | 18.2038   | 14.8846    | 30.409     | 15.8493   | 9.91551   |
| PSME4     | 7.54048   | 6.06305    | 6.6021    | 8.90622   | 3.008    | 6.36233    | 4.86865   | 5.75685   | 9.09611   | 8.0279    | 7.25732   | 6.42411    | 12.1974    | 9.61478   | 7.22875   |
| PSMF1     | 5.00506   | 3.92933    | 4.08328   | 6.56444   | 4.40762  | 9.10125    | 5.29431   | 4.36199   | 4.63237   | 4.36051   | 6.3407    | 4.09626    | 7.41387    | 4.29712   | 4.36129   |
| PSMG1     | 4.32189   | 3.42582    | 3.96463   | 10.9191   | 2.24682  | 10.4762    | 3.12392   | 2.95815   | 3.92646   | 6.45245   | 8.38065   | 4.35185    | 8.66898    | 7.6599    | 1.97716   |
| PSMG2     | 10.8027   | 8.62994    | 8.04478   | 14.6925   | 2.88462  | 13.3471    | 7.43246   | 7.06292   | 10.9921   | 9.49852   | 18.7095   | 7.07239    | 12.3681    | 7.33662   | 5.53462   |
| PSMG3     | 5.87189   | 5.65041    | 5.57676   | 7.35263   | 8.17837  | 8.98013    | 5.84287   | 3.30889   | 9.66822   | 7.16394   | 12.387    | 6.17312    | 7.30186    | 5.47772   | 3.72172   |
| PSMG3-AS1 | 0.523029  | 0.483772   | 0.442161  | 0.342282  | 0.871746 | 1.71639    | 0.623331  | 0.420717  | 0.362666  | 0.287498  | 0.349089  | 0.278632   | 0.435982   | 0.31925   | 0.219309  |
| PSMG4     | 3.30932   | 3.25317    | 3.85851   | 3.34169   | 2.51851  | 4.99269    | 3.55024   | 2.38837   | 2.21806   | 3.67964   | 7.52177   | 2.06596    | 2.67969    | 2.66985   | 1.46725   |
| PSORS1C1  | 0.0807415 | 0.18018    | 0.130075  | 0.091965  | 0.105616 | 0.293093   | 0.262008  | 0.0906395 | 0.129387  | 0.133341  | 0.225469  | 0.0881793  | 0.0438686  | 0.079956  | 0.0244116 |
| PSORS1C2  | 1.63753   | 2.91392    | 3.46288   | 2.77457   | 5.56585  | 1.86481    | 4.32434   | 2.44038   | 22.2883   | 0.727118  | 1.58016   | 1.80666    | 0.123153   | 0.0437548 | 0.0673287 |
| PSORS1C3  | 0.072405  | 0.00930289 | 0.0379357 | 0.0198975 | 0.011247 | 0.00411013 | 0.0358235 | 0.0171593 | 0.0382118 | 0.0121168 | 0.0326945 | 0.00345385 | 0.00155718 | 0.0264894 | 0.0173305 |
| PSPC1     | 3.61596   | 3.52004    | 3.35428   | 3.23206   | 3.25422  | 3.78411    | 2.72431   | 2.82372   | 2.01219   | 2.40814   | 4.23471   | 2.07104    | 2.68216    | 3.35762   | 3.40312   |
| PSPH      | 0.826735  | 1.16076    | 0.59318   | 2.57101   | 3.00669  | 2.02829    | 0.778563  | 0.780821  | 2.70146   | 1.79914   | 3.55249   | 1.78362    | 2.31943    | 1.68029   | 1.13501   |
| PSPN      | 0.236844  | 0.363837   | 0.195934  | 0.0697356 | 0.738048 | 0.378818   | 0.347684  | 0.121301  | 0.0412071 | 0.0424662 | 0.229172  | 0.266307   | 0.130981   | 0.0709922 | 0.150718  |
| PSRC1     | 0.246317  | 0.299278   | 0.354383  | 1.37955   | 0.731959 | 2.0244     | 0.721432  | 0.171318  | 0.326072  | 0.793043  | 1.31777   | 0.329504   | 1.10554    | 1.19221   | 0.692104  |
| PSTK      | 0.759679  | 0.575181   | 0.471344  | 0.615112  | 0.526805 | 0.554448   | 0.480154  | 0.421962  | 0.611294  | 0.340526  | 0.81164   | 0.349438   | 0.393863   | 0.255241  | 0.0974102 |
| PSTPIP1   | 0.55284   | 0.514364   | 0.481005  | 0.923336  | 2.10247  | 1.48526    | 0.598567  | 0.482848  | 0.24378   | 0.741725  | 1.17286   | 0.436493   | 1.45751    | 0.951504  | 2.23127   |
| PSTPIP2   | 2.55614   | 2.83929    | 2.91869   | 4.59799   | 1.03425  | 4.4117     | 1.34567   | 2.72739   | 1.87345   | 1.86346   | 1.86612   | 1.02401    | 4.09834    | 1.92793   | 1.0771    |
| PTAFR     | 1.56737   | 1.51283    | 1.60497   | 5.97161   | 1.85575  | 3.76033    | 1.84205   | 1.63797   | 9.14028   | 4.70978   | 6.13799   | 0.913273   | 8.96961    | 1.77711   | 3.64406   |
| PTAR1     | 3.43082   | 2.73469    | 3.17347   | 2.59353   | 0.679568 | 2.71739    | 2.57641   | 4.35867   | 1.39652   | 2.83793   | 3.66762   | 1.58988    | 2.5894     | 2.45738   | 2.95956   |
| PTBP1     | 23.3333   | 23.5248    | 26.1354   | 45.0107   | 29.6486  | 59.3267    | 32.9472   | 21.7715   | 30.5054   | 28.7997   | 38.4515   | 26.8511    | 58.5612    | 30.6555   | 23.9571   |
| PTBP2     | 2.54946   | 1.55785    | 1.85103   | 1.64437   | 0.326133 | 1.895      | 1.45887   | 2.19644   | 0.467569  | 1.67897   | 2.86447   | 1.06448    | 0.932753   | 1.82155   | 2.92045   |
| PTBP3     | 10.4838   | 12.069     | 12.2189   | 22.387    | 4.15637  | 14.8572    | 11.1324   | 14.7874   | 24.0575   | 21.9308   | 20.6901   | 16.8532    | 38.1526    | 16.6423   | 11.8025   |

|           |           |            |           |           |           |           |           |            |            |            |           |           |            |           |           |
|-----------|-----------|------------|-----------|-----------|-----------|-----------|-----------|------------|------------|------------|-----------|-----------|------------|-----------|-----------|
| PTCD1     | 1.1482    | 1.16493    | 0.926613  | 1.37732   | 2.06776   | 1.96707   | 1.26295   | 0.769968   | 1.00386    | 0.974815   | 0.637309  | 1.16704   | 1.67291    | 1.41308   | 0.88427   |
| PTCD2     | 1.00956   | 1.30594    | 1.07121   | 1.79805   | 1.41478   | 1.55107   | 0.977274  | 1.22879    | 0.975605   | 1.06051    | 1.59801   | 0.926514  | 1.17529    | 1.06101   | 0.977076  |
| PTCD3     | 3.99694   | 3.7191     | 4.03723   | 3.88875   | 1.84711   | 2.92634   | 2.55058   | 3.53687    | 2.06767    | 2.243      | 2.89035   | 2.464     | 3.35488    | 3.33912   | 2.87746   |
| PTCH1     | 1.49145   | 1.07445    | 1.23776   | 0.538613  | 0.899262  | 1.48576   | 1.71431   | 1.1617     | 0.343207   | 0.199465   | 0.367476  | 0.265899  | 0.354939   | 0.322811  | 0.39683   |
| PTCH2     | 0.419512  | 0.34891    | 0.355313  | 0.12352   | 0.449946  | 0.191362  | 0.872436  | 0.261867   | 0.145976   | 0.112828   | 0.0338269 | 0.32876   | 0.0676667  | 0.107017  | 0.631161  |
| PTCHD1    | 0.0306183 | 0.00421496 | 0.0325666 | 0         | 0         | 0.0297955 | 0.124853  | 0.00388728 | 0          | 0          | 0         | 0         | 0.0112884  | 0         | 0         |
| PTCHD1-AS | 0.0429484 | 0.0206932  | 0.0101514 | 0.0505824 | 0         | 0.0313457 | 0.0140106 | 0.0272635  | 0.00747233 | 0.00770066 | 0.0069262 | 0         | 0.00395858 | 0.01924   | 0.0352453 |
| PTCHD3    | 0.0640828 | 0.0529304  | 0.0227202 | 0.481143  | 0.412391  | 0.0545657 | 0.0209051 | 0.0406796  | 0.211838   | 0.0114901  | 0.062007  | 0.0720547 | 0.466618   | 0.105262  | 0         |
| PTCHD4    | 0.600049  | 0.453268   | 0.606028  | 0.324287  | 0.480273  | 0.558415  | 0.491914  | 0.300724   | 0.099679   | 0.54712    | 0.595894  | 0.351308  | 0.345058   | 0.401458  | 0.673734  |
| PTCRA     | 0         | 0          | 0         | 0         | 0.0307258 | 0         | 0         | 0.0703166  | 0          | 0.0496528  | 0.0669888 | 0         | 0          | 0.0103381 | 0         |
| PTCSC1    | 0.799173  | 0.353297   | 0.483921  | 0.500935  | 0.204766  | 0.168367  | 0.442124  | 0.929899   | 0.010034   | 0.32056    | 0.167412  | 0.112008  | 0          | 0.23683   | 0.816414  |
| PTCSC2    | 0.106979  | 0.0687253  | 0.0590002 | 0         | 0.0184639 | 0.0101212 | 0.0407149 | 0.08451    | 0.0144764  | 0.0596752  | 0         | 0.0170102 | 0.0153382  | 0.0310621 | 0.0512116 |
| PTCSC3    | 0.220984  | 0.358138   | 0.299149  | 0.22773   | 0.405676  | 0.0513177 | 0.1835    | 0.392784   | 0.0244667  | 0.151286   | 0.158749  | 0.301865  | 0.103693   | 0.220492  | 0.173106  |
| PTDSS1    | 11.7431   | 10.3888    | 10.903    | 11.3197   | 7.21226   | 18.5214   | 13.9338   | 7.82719    | 12.4096    | 11.1448    | 16.2241   | 7.69165   | 15.9985    | 10.0183   | 7.7318    |
| PTDSS2    | 1.98518   | 2.09757    | 1.86558   | 4.58507   | 6.05915   | 6.70955   | 2.54497   | 1.46248    | 3.96592    | 4.78651    | 5.87777   | 3.59473   | 7.75797    | 4.53699   | 3.60123   |
| PTEN      | 9.25002   | 7.47845    | 7.02714   | 12.5644   | 4.36486   | 11.5186   | 4.59427   | 8.45282    | 10.8282    | 12.471     | 17.4975   | 7.41273   | 14.5285    | 10.7948   | 8.96505   |
| PTENP1    | 0.0140339 | 0.0249664  | 0.0227061 | 1.15E-40  | 0.0194889 | 0.063609  | 0.0158371 | 0.0440645  | 0.0349041  | 0.0263093  | 0.0238485 | 0.0150091 | 0.0136844  | 0.0184006 | 0.0410064 |
| PTENP1-AS | 0         | 0.0328395  | 0         | 0         | 0.329809  | 0.0677959 | 0         | 0.0235867  | 0.0646459  | 0          | 0.0898817 | 0         | 0          | 0         | 0.0762302 |
| PTER      | 1.79573   | 1.38777    | 1.66696   | 1.96049   | 0.607591  | 2.49794   | 1.32627   | 1.86452    | 0.440288   | 1.17527    | 1.90673   | 0.483427  | 1.60216    | 1.14296   | 0.90219   |
| PTF1A     | 0         | 0          | 0         | 0         | 0         | 0         | 0         | 0.0154296  | 0          | 0          | 0         | 0         | 0          | 0         | 0         |
| PTGDR     | 0.465455  | 0.139705   | 0.18306   | 0.188721  | 0.260759  | 0.27938   | 0.409472  | 0.291595   | 0          | 0.0478848  | 0.215345  | 0         | 0.0787697  | 0.0957117 | 0.920492  |
| PTGDR2    | 0.235804  | 0.164683   | 0.247964  | 0.101718  | 0.161591  | 0.187129  | 0.390938  | 0.150954   | 0.0403951  | 0.0513553  | 0.103375  | 0.0727465 | 0.0803163  | 0.166109  | 0.059541  |
| PTGDS     | 32.1495   | 23.8531    | 29.1663   | 14.7738   | 91.1568   | 65.8404   | 13.0493   | 37.1585    | 3.26287    | 9.65845    | 36.7754   | 1.28479   | 5.1305     | 2.59191   | 22.1849   |
| PTGER1    | 0.0977187 | 0.0784706  | 0.0673665 | 0.201404  | 1.08783   | 1.42837   | 0.0371907 | 0.115792   | 0          | 0.0817647  | 0.147083  | 0.151494  | 0.147111   | 0.119168  | 0.444399  |
| PTGER2    | 0.663098  | 0.215994   | 0.370858  | 0.596721  | 0.101551  | 1.169     | 0.213269  | 0.282203   | 0.0113743  | 0.269604   | 0.579867  | 0.0400956 | 0.415776   | 0.161079  | 0.496265  |
| PTGER3    | 1.47399   | 2.28205    | 2.39427   | 1.33046   | 2.04724   | 1.5543    | 1.61178   | 2.9996     | 19.0118    | 1.22676    | 2.85643   | 2.54243   | 0.138371   | 0.326078  | 1.64321   |

|                    |            |           |           |            |           |           |           |           |            |            |            |            |           |           |            |
|--------------------|------------|-----------|-----------|------------|-----------|-----------|-----------|-----------|------------|------------|------------|------------|-----------|-----------|------------|
| PTGER4             | 2.52026    | 1.29917   | 1.78229   | 1.61976    | 1.39966   | 2.77476   | 2.39796   | 1.44503   | 0.717843   | 1.98124    | 4.12228    | 0.756229   | 2.16808   | 1.95809   | 4.11562    |
| PTGER4P2-CDK2AP2P2 | 0.0778824  | 0.092369  | 0.0941666 | 0.0679124  | 0.0930602 | 0.0969232 | 0.123125  | 0.0532426 | 0.00729631 | 0.0225578  | 0.0338152  | 0.0342935  | 0.112095  | 0.0250491 | 0.0258113  |
| PTGES              | 4.68818    | 6.21493   | 8.27106   | 14.3471    | 11.346    | 19.9486   | 8.14752   | 4.9261    | 3.54883    | 6.95695    | 13.3333    | 4.95765    | 21.5412   | 8.60295   | 7.97895    |
| PTGES2             | 4.26772    | 4.3333    | 4.09923   | 6.8676     | 8.85383   | 9.18641   | 4.09877   | 2.67277   | 4.30226    | 4.4577     | 6.86554    | 4.70006    | 5.82116   | 5.45398   | 3.22217    |
| PTGES2-AS1         | 0.667843   | 0.61852   | 0.753353  | 0.414241   | 0.773284  | 0.57639   | 0.868558  | 0.718878  | 0.21795    | 0.316279   | 0.140466   | 0.378368   | 0.141483  | 0.481925  | 0.437046   |
| PTGES3             | 13.6243    | 12.8891   | 14.5098   | 31.3987    | 8.55629   | 20.8421   | 10.4405   | 16.5621   | 18.5331    | 19.1085    | 24.3573    | 13.1442    | 31.0283   | 19.0879   | 11.2156    |
| PTGES3L            | 0.126891   | 0.072257  | 0.0661719 | 0.0356674  | 0.0312112 | 0.0589412 | 0.0888451 | 0.0205061 | 4.52E-27   | 0.025892   | 0.117132   | 0.0987859  | 0.0476269 | 0.0872703 | 0.132408   |
| PTGES3L-AARSD1     | 0.00011833 | 5.05E-05  | 0.0462502 | 3.25E-06   | 0.0108842 | 5.15E-06  | 0.122317  | 1.77E-06  | 0.0326601  | 0.206484   | 0.00052058 | 0.00081538 | 0.0160396 | 0.198536  | 0.00081362 |
|                    | 2          |           |           |            |           |           |           |           |            |            | 1          | 8          |           |           | 3          |
| PTGFR              | 4.94729    | 1.67127   | 2.33019   | 0.619185   | 0.79431   | 3.83522   | 2.35486   | 2.64337   | 0.0363284  | 1.67403    | 3.61266    | 0.240876   | 1.79533   | 1.50108   | 5.17122    |
| PTGFRN             | 10.1233    | 12.0587   | 13.616    | 26.7741    | 19.2731   | 25.8532   | 11.8054   | 8.54051   | 18.8663    | 21.6057    | 14.2259    | 18.9154    | 40.7194   | 25.1014   | 23.4898    |
| PTGIR              | 0.865368   | 0.304692  | 0.468084  | 1.28051    | 1.93016   | 3.75982   | 0.6587    | 0.295795  | 0.067559   | 0.724084   | 1.60311    | 0.269905   | 1.98995   | 1.58298   | 3.10695    |
| PTGIS              | 7.53812    | 3.55038   | 5.57316   | 0.651256   | 2.46376   | 14.3038   | 19.265    | 2.58059   | 0.0352132  | 0.388813   | 1.03514    | 0.0236437  | 0.823473  | 0.120891  | 6.69117    |
| PTGR1              | 6.83438    | 7.51858   | 6.18772   | 13.7536    | 9.29483   | 20.5677   | 5.35849   | 5.04414   | 13.2712    | 8.7619     | 14.2383    | 7.67112    | 9.57604   | 11.6051   | 4.92859    |
| PTGR2              | 1.47611    | 1.23943   | 1.26399   | 1.67241    | 0.58999   | 2.49908   | 0.926466  | 1.21979   | 1.21952    | 1.02926    | 1.21809    | 1.00061    | 0.718463  | 1.26325   | 0.61985    |
| PTGS1              | 6.70693    | 22.8846   | 23.5473   | 9.90486    | 20.2365   | 18.3468   | 22.1567   | 13.2714   | 19.2802    | 10.1208    | 10.1669    | 13.7951    | 18.3021   | 16.4437   | 11.7671    |
| PTGS2              | 0.33996    | 0.352414  | 0.507083  | 2.36744    | 0.112016  | 1.10526   | 0.423442  | 0.357061  | 0.144284   | 11.6498    | 9.22218    | 8.99659    | 132.728   | 23.6689   | 15.8747    |
| PTH                | 0          | 0.0116517 | 0         | 0          | 0         | 0         | 0         | 0.0214918 | 0          | 0          | 0          | 0          | 0         | 0         | 0          |
| PTH1R              | 0.895095   | 0.644308  | 0.99921   | 0.755719   | 1.77568   | 2.36913   | 1.18206   | 0.632555  | 0.13134    | 0.297778   | 1.0348     | 0.208344   | 0.132201  | 0.518543  | 0.867305   |
| PTH2               | 0          | 0         | 0         | 0          | 0         | 0         | 0         | 0         | 0          | 0          | 0          | 0          | 0         | 0         | 0          |
| PTH2R              | 0.0148926  | 0.0215264 | 0.0369605 | 0.00767361 | 0.115667  | 0.0190212 | 0.0340077 | 0.0330882 | 0          | 0.00934585 | 0.0672474  | 0          | 0.048043  | 0.0194588 | 0          |
| PTHLH              | 0.280628   | 0.160563  | 0.101568  | 1.20197    | 0.245201  | 1.37397   | 0.230296  | 0.311749  | 2.21085    | 59.162     | 19.0373    | 11.1379    | 95.7131   | 28.4353   | 13.2618    |
| PTK2               | 6.68384    | 4.77026   | 5.64441   | 6.13531    | 3.99195   | 7.66623   | 5.09024   | 4.56783   | 3.52373    | 7.07075    | 7.51775    | 3.9663     | 8.07059   | 5.64337   | 9.98835    |
| PTK2B              | 3.53526    | 4.35348   | 5.21974   | 4.59122    | 5.82071   | 4.36775   | 4.15744   | 4.73421   | 4.97427    | 2.79285    | 2.24012    | 2.71569    | 6.13113   | 2.96032   | 2.87749    |
| PTK6               | 8.04068    | 12.9859   | 12.6702   | 16.9637    | 29.3001   | 13.3062   | 10.3288   | 7.53467   | 35.7532    | 15.7554    | 15.0858    | 19.0322    | 18.8883   | 13.3004   | 3.86989    |
| PTK7               | 5.0388     | 6.66887   | 5.9297    | 17.6969    | 20.2952   | 21.3549   | 6.54361   | 5.01933   | 8.52032    | 17.5483    | 22.4239    | 11.0135    | 25.5173   | 22.8816   | 19.6685    |

|           |          |           |           |          |          |           |          |           |            |           |          |          |          |          |           |
|-----------|----------|-----------|-----------|----------|----------|-----------|----------|-----------|------------|-----------|----------|----------|----------|----------|-----------|
| PTMA      | 242.439  | 234.829   | 271.659   | 365.397  | 251.338  | 478.121   | 212.464  | 296.528   | 202.125    | 195.784   | 348.595  | 157.014  | 278.143  | 247.521  | 162.822   |
| PTMS      | 33.3003  | 37.1762   | 39.7813   | 70.7705  | 151.356  | 99.997    | 58.8125  | 26.4734   | 60.3428    | 58.3188   | 100.727  | 37.5384  | 89.1996  | 55.0952  | 46.8162   |
| PTN       | 1.55171  | 1.02801   | 0.903651  | 0.462894 | 1.79191  | 1.72113   | 0.31471  | 0.734882  | 0.882744   | 0.730337  | 1.60188  | 0.124178 | 0.131732 | 0.261439 | 6.91996   |
| PTOV1     | 7.6303   | 8.15565   | 8.1897    | 13.1845  | 18.8515  | 16.112    | 10.3768  | 5.86534   | 14.6064    | 11.4344   | 18.2793  | 9.19358  | 13.5029  | 10.411   | 10.7849   |
| PTOV1-AS1 | 1.22826  | 1.95189   | 1.67568   | 1.93195  | 1.15479  | 2.45866   | 1.23017  | 1.35968   | 1.23345    | 1.47398   | 1.22844  | 1.51872  | 1.1887   | 1.68933  | 1.65563   |
| PTOV1-AS2 | 2.43832  | 3.0991    | 3.25179   | 2.0362   | 6.23641  | 4.02711   | 2.424    | 2.27906   | 0.640842   | 1.21359   | 0.640683 | 2.57191  | 0.691663 | 3.40566  | 4.34699   |
| PTP4A1    | 9.51371  | 6.67419   | 7.52053   | 27.3598  | 2.7338   | 11.8414   | 8.04299  | 12.4885   | 16.1282    | 16.3071   | 15.8017  | 14.4997  | 22.2348  | 13.9281  | 8.69932   |
| PTP4A2    | 10.7027  | 6.99584   | 7.70402   | 12.5104  | 3.14749  | 21.677    | 6.64462  | 9.81534   | 5.53812    | 13.8397   | 20.0679  | 4.13463  | 19.5197  | 10.236   | 13.3232   |
| PTP4A3    | 2.55945  | 1.27722   | 1.753     | 2.00388  | 3.71754  | 20.3786   | 3.06461  | 2.48142   | 0.617351   | 1.74177   | 4.48404  | 0.654055 | 2.0749   | 2.51899  | 6.50407   |
| PTPA      | 10.6408  | 12.1208   | 10.8473   | 19.0465  | 32.2995  | 30.8639   | 13.6213  | 7.9518    | 22.1565    | 19.636    | 26.6766  | 14.1308  | 24.9911  | 13.3994  | 13.529    |
| PTPDC1    | 1.17071  | 1.18776   | 1.06299   | 1.15251  | 0.761416 | 1.38992   | 0.92916  | 0.934699  | 0.307184   | 1.03931   | 1.24638  | 0.578884 | 0.939571 | 1.18642  | 1.54461   |
| PTPMT1    | 3.20738  | 2.55528   | 2.74843   | 5.43144  | 2.84479  | 5.6911    | 3.19972  | 2.41803   | 4.21209    | 5.01382   | 8.8724   | 2.78407  | 6.1598   | 3.69569  | 2.68454   |
| PTPN1     | 8.26205  | 7.74565   | 8.82843   | 14.3851  | 6.68939  | 15.3475   | 7.9948   | 7.31957   | 5.91716    | 9.55455   | 9.21696  | 6.30225  | 17.6483  | 9.78034  | 9.95321   |
| PTPN11    | 13.6274  | 9.38977   | 10.0702   | 16.9634  | 8.28264  | 19.4238   | 9.85344  | 10.4663   | 19.1047    | 15.2872   | 13.5098  | 10.6242  | 27.522   | 14.8336  | 13.4901   |
| PTPN12    | 11.9961  | 10.8432   | 11.4397   | 16.2906  | 2.21343  | 13.2927   | 4.38395  | 9.04547   | 16.6875    | 20.422    | 15.4599  | 8.68904  | 41.9754  | 17.063   | 16.1193   |
| PTPN13    | 13.5941  | 20.3547   | 22.929    | 12.1959  | 10.6502  | 9.01296   | 16.6398  | 14.4212   | 19.0173    | 10.81     | 9.51269  | 12.8102  | 11.9931  | 12.6382  | 5.91719   |
| PTPN14    | 7.45784  | 10.8156   | 12.476    | 8.32065  | 6.52235  | 7.13597   | 8.81389  | 8.30018   | 6.28374    | 5.36945   | 5.35223  | 5.5149   | 7.14544  | 6.14991  | 7.09823   |
| PTPN18    | 4.5731   | 2.23986   | 2.38472   | 4.51767  | 5.25179  | 8.70631   | 4.11232  | 2.91501   | 0.921852   | 2.99257   | 5.02007  | 1.68799  | 3.2802   | 3.53407  | 4.49311   |
| PTPN2     | 2.89923  | 2.83455   | 2.5851    | 5.70228  | 1.14778  | 3.96233   | 1.75172  | 2.33096   | 3.23554    | 2.90257   | 4.69282  | 2.53457  | 4.1342   | 3.33123  | 3.53991   |
| PTPN20    | 0.268428 | 0.565637  | 0.663513  | 0.69989  | 0.145686 | 0.0688443 | 0.369256 | 0.551842  | 0.291467   | 0.231369  | 0.113177 | 0.229093 | 0.208661 | 0.278894 | 0.0139336 |
| PTPN21    | 3.15029  | 5.71797   | 6.26274   | 3.32705  | 5.55867  | 4.11242   | 5.48462  | 2.96187   | 5.56003    | 4.23435   | 2.99299  | 3.68225  | 5.45136  | 4.2388   | 3.45465   |
| PTPN22    | 0.487689 | 0.326525  | 0.335336  | 1.71007  | 0.216443 | 0.63098   | 0.115704 | 0.602281  | 0.601664   | 0.651846  | 1.26553  | 0.222062 | 0.396383 | 0.486604 | 1.03693   |
| PTPN23    | 4.86785  | 7.46706   | 7.14428   | 8.71438  | 12.1693  | 13.9197   | 10.8558  | 6.14849   | 8.45254    | 5.14173   | 4.64444  | 8.77498  | 12.5145  | 6.32934  | 5.88338   |
| PTPN3     | 5.21487  | 8.42424   | 10.0329   | 3.99153  | 4.16759  | 3.05272   | 8.80164  | 7.40928   | 13.1621    | 3.28444   | 2.19957  | 5.62917  | 3.0217   | 2.64897  | 1.45509   |
| PTPN4     | 1.87503  | 1.53934   | 1.42835   | 1.20925  | 0.688657 | 1.07188   | 1.13312  | 1.85434   | 0.81238    | 0.901016  | 1.31317  | 0.953115 | 0.957838 | 0.985289 | 0.88786   |
| PTPN5     | 0.155671 | 0.0472251 | 0.0572364 | 0.172306 | 0.161207 | 0.0883677 | 0.17774  | 0.0819835 | 0.00702183 | 0.0868368 | 0.182242 | 0.140265 | 0.200876 | 0.183814 | 0.240123  |

|           |           |            |            |           |           |           |            |           |           |           |            |            |           |            |           |
|-----------|-----------|------------|------------|-----------|-----------|-----------|------------|-----------|-----------|-----------|------------|------------|-----------|------------|-----------|
| PTPN6     | 2.72057   | 3.34258    | 4.21624    | 5.83158   | 5.22614   | 5.45932   | 2.98201    | 3.32854   | 1.98801   | 3.34631   | 5.49743    | 1.95963    | 5.4005    | 2.24185    | 3.49034   |
| PTPN7     | 0.37596   | 0.300181   | 0.377668   | 0.619901  | 0.500569  | 0.644823  | 0.233027   | 0.362761  | 0.104658  | 0.444905  | 0.551736   | 0.11529    | 0.731167  | 0.415443   | 0.755897  |
| PTPN9     | 3.84838   | 2.99047    | 3.54763    | 5.32611   | 3.69971   | 7.9923    | 3.74424    | 2.67979   | 1.51467   | 4.53559   | 7.64232    | 1.97706    | 6.11654   | 4.51936    | 6.42822   |
| PTPRA     | 11.2147   | 9.01853    | 10.0489    | 11.7236   | 7.33548   | 15.4561   | 11.1625    | 9.28558   | 15.0313   | 10.5165   | 12.59      | 7.99452    | 12.8499   | 8.78839    | 9.21436   |
| PTPRB     | 4.63046   | 1.76639    | 1.94272    | 2.01987   | 1.52087   | 3.91926   | 2.78423    | 1.84496   | 0.782247  | 2.40691   | 3.76666    | 1.60131    | 2.44962   | 3.53684    | 5.15392   |
| PTPRC     | 2.25969   | 1.2271     | 1.75576    | 5.01436   | 0.814492  | 3.42295   | 1.05126    | 2.47976   | 0.277485  | 4.3326    | 6.89862    | 0.448881   | 6.19214   | 1.84654    | 6.84906   |
| PTPRCAP   | 2.37299   | 2.11457    | 2.89189    | 2.18249   | 7.41179   | 3.32417   | 2.91334    | 2.08624   | 0.403984  | 1.05683   | 2.24675    | 1.13196    | 1.62982   | 1.58696    | 3.15141   |
| PTPRD     | 0.812397  | 0.383751   | 0.278618   | 0.62145   | 0.463062  | 0.974643  | 1.30171    | 0.323581  | 0.166287  | 0.645486  | 1.04297    | 0.48034    | 0.850096  | 1.50453    | 3.68314   |
| PTPRD-AS1 | 0.0693945 | 0.0167177  | 0.014352   | 0.0178783 | 0.0269484 | 0.0295442 | 0.0792323  | 0.030836  | 0         | 0         | 0.0979221  | 0.0124134  | 0         | 0.0816043  | 0.323892  |
| PTPRD-AS2 | 0         | 0          | 0          | 0         | 0         | 0         | 0          | 0         | 0         | 0         | 0          | 0          | 0         | 0          | 0         |
| PTPRE     | 3.00076   | 1.4414     | 1.35727    | 3.76489   | 1.87112   | 3.28219   | 2.29804    | 1.84022   | 5.37415   | 4.69249   | 5.13977    | 3.44761    | 7.57107   | 5.57528    | 4.70363   |
| PTPRF     | 23.4722   | 47.9889    | 47.4609    | 54.5485   | 56.5519   | 54.4581   | 35.6326    | 31.2431   | 34.2403   | 24.1327   | 12.3519    | 38.0969    | 47.2166   | 22.5122    | 10.4636   |
| PTPRG     | 6.9276    | 2.51595    | 2.43351    | 6.22787   | 5.09929   | 9.58622   | 4.18539    | 3.92295   | 1.47118   | 5.15137   | 7.45885    | 2.25426    | 6.19687   | 6.8174     | 10.3739   |
| PTPRG-AS1 | 0.283861  | 0.100565   | 0.19339    | 0.20649   | 0.0259373 | 0.305685  | 0.11439    | 0.281951  | 0.010463  | 0.0943082 | 0.188497   | 0.107564   | 0.075413  | 0.266172   | 0.407661  |
| PTPRH     | 0.0412427 | 0.0823242  | 0.126727   | 0.0789319 | 0.018304  | 0.205689  | 0.0403625  | 0.0418892 | 0.0430534 | 0.0665535 | 0.0598601  | 0.050589   | 0.0874315 | 0.110856   | 0.042307  |
| PTPRJ     | 1.7474    | 1.45632    | 1.90205    | 2.55803   | 1.09228   | 3.85503   | 1.74277    | 1.94689   | 0.345588  | 1.82091   | 2.69539    | 0.409734   | 2.36685   | 1.24655    | 2.82323   |
| PTPRK     | 8.15597   | 6.84074    | 6.51693    | 8.68809   | 5.24816   | 8.5016    | 6.34754    | 5.30702   | 7.15688   | 5.40343   | 6.71339    | 4.89804    | 7.06009   | 6.4059     | 7.44263   |
| PTPRM     | 9.00111   | 3.5244     | 4.01715    | 4.20349   | 5.87383   | 13.8687   | 5.91243    | 4.94366   | 1.22809   | 4.31558   | 6.39609    | 1.93095    | 4.20494   | 5.88138    | 14.5175   |
| PTPRN     | 0.0118379 | 0.00570367 | 0.00489656 | 0.140292  | 0.0183883 | 0.0151197 | 0.00675805 | 0.0157808 | 0         | 2.15437   | 4.17608    | 0.0127055  | 0.759954  | 0.361939   | 0.518521  |
| PTPRN2    | 0.548055  | 0.324173   | 0.357551   | 0.753048  | 1.36349   | 1.14958   | 0.422255   | 0.269272  | 0.336448  | 0.782935  | 0.985872   | 0.825742   | 0.635333  | 0.31904    | 0.774278  |
| PTPRO     | 0.0818311 | 0.0657125  | 0.11032    | 0.215508  | 0.0706178 | 0.224518  | 0.0588276  | 0.118514  | 0.0110735 | 0.155962  | 0.304502   | 0.0195175  | 0.0762623 | 0.085537   | 0.165398  |
| PTPRQ     | 0.0337184 | 0.0118153  | 0.0202867  | 0         | 0         | 0.0078302 | 0          | 0         | 0         | 0         | 0.00346035 | 0          | 0         | 0          | 0         |
| PTPRR     | 0.025812  | 0.00746197 | 0.00854141 | 0.01064   | 0         | 0.03077   | 0.0176828  | 0.0183517 | 0         | 0.0453554 | 0.0349663  | 0.00738767 | 0.026646  | 0.0026981  | 0.0593109 |
| PTPRS     | 8.56794   | 12.5228    | 16.3109    | 6.49884   | 13.0741   | 16.7641   | 17.8963    | 9.60225   | 3.12662   | 2.96913   | 3.57371    | 2.89854    | 4.57488   | 3.29435    | 8.65844   |
| PTPRT     | 0.218778  | 0.132642   | 0.203612   | 0.0319397 | 0.226558  | 0.128848  | 0.33514    | 0.173368  | 0         | 0         | 0.00411622 | 0.00130451 | 0.0105866 | 0.00857572 | 0.0418924 |
| PTPRU     | 3.76278   | 2.61566    | 4.03616    | 1.24322   | 4.1367    | 5.14311   | 4.88185    | 2.63295   | 1.78909   | 1.15364   | 1.19511    | 1.0012     | 2.75075   | 2.25182    | 2.11557   |



|         |           |            |           |           |           |           |           |           |          |           |           |            |            |           |           |
|---------|-----------|------------|-----------|-----------|-----------|-----------|-----------|-----------|----------|-----------|-----------|------------|------------|-----------|-----------|
| PTPRVP  | 0.07347   | 0.0762439  | 0.093507  | 0.0174722 | 0.114124  | 0.091432  | 0.116149  | 0.0502262 | 0        | 0         | 0         | 0.00808765 | 0          | 0.0206762 | 0.0324653 |
| PTPRZ1  | 8.94063   | 15.8369    | 13.4476   | 9.1404    | 7.65335   | 6.82312   | 7.65936   | 10.9552   | 12.2083  | 8.42325   | 9.51652   | 10.1033    | 6.0539     | 8.34045   | 2.71707   |
| PTRH1   | 2.49921   | 2.62883    | 3.17778   | 6.92533   | 12.4635   | 5.84494   | 4.65883   | 1.57628   | 9.69295  | 3.89239   | 6.86372   | 3.73756    | 4.74567    | 4.2875    | 1.3585    |
| PTRH2   | 2.40813   | 2.26027    | 2.56999   | 3.51298   | 1.00399   | 2.57421   | 1.51164   | 2.37176   | 1.77747  | 2.55142   | 4.82499   | 1.42471    | 2.40792    | 2.99279   | 1.67679   |
| PTRHD1  | 8.12958   | 6.43975    | 5.60796   | 10.5365   | 4.39917   | 12.8595   | 9.00464   | 4.92443   | 10.9649  | 10.9969   | 29.6564   | 9.06329    | 8.54188    | 8.6836    | 5.00017   |
| PTS     | 3.91499   | 3.28312    | 3.79222   | 8.784     | 1.61656   | 5.19023   | 2.63108   | 3.21507   | 8.72125  | 11.6312   | 15.7761   | 6.73726    | 10.5674    | 9.37601   | 4.62604   |
| PTTG1   | 2.43401   | 2.28782    | 1.63398   | 11.7809   | 4.46265   | 9.75115   | 3.1891    | 1.383     | 4.05775  | 10.6171   | 16.779    | 6.92359    | 8.94622    | 9.53041   | 3.29498   |
| PTTG1IP | 21.6366   | 12.7689    | 14.7758   | 26.5083   | 25.6329   | 42.2353   | 18.2988   | 12.8312   | 17.9524  | 35.4294   | 51.4304   | 14.567     | 45.7192    | 25.8598   | 29.3559   |
| PTTG2   | 0.36161   | 0.0967941  | 0.0997165 | 0.0828111 | 0.249647  | 0.0342118 | 0.09175   | 0.0714153 | 0        | 0.0504287 | 0.045357  | 0          | 0          | 0.167994  | 0         |
| PTTG3P  | 0.329673  | 0.127073   | 0.436366  | 0         | 0.409677  | 0.0842137 | 0.037641  | 0.20509   | 0        | 0         | 0         | 0.188712   | 0          | 0.103381  | 0.331417  |
| PTX3    | 0.895629  | 0.207133   | 0.217339  | 5.50091   | 0.593588  | 47.0687   | 0.177251  | 0.360835  | 0        | 0.404678  | 0.727959  | 0.068357   | 0.523922   | 0.137308  | 2.93262   |
| PTX4    | 0         | 0.00713415 | 0.0122492 | 0.0305177 | 0.0460002 | 0.0378234 | 0.101436  | 0.0263181 | 0.018033 | 0.0185841 | 0.0501451 | 0.0105947  | 0          | 0.0154774 | 0         |
| PUDP    | 0.898483  | 0.87492    | 0.993661  | 1.89081   | 0.734556  | 1.81196   | 1.13384   | 1.14311   | 0.967549 | 1.47193   | 2.17802   | 0.974484   | 2.00148    | 0.983662  | 1.14093   |
| PUF60   | 11.7271   | 11.2115    | 12.0666   | 22.9578   | 16.2979   | 22.9272   | 12.5014   | 8.58137   | 15.1823  | 13.1443   | 14.6106   | 10.7427    | 20.8667    | 12.8526   | 7.95996   |
| PUM1    | 10.7958   | 13.6459    | 13.5282   | 14.7039   | 10.8148   | 17.8617   | 13.8916   | 10.6676   | 13.3679  | 11.6727   | 11.0956   | 11.667     | 15.1952    | 12.2304   | 9.11607   |
| PUM2    | 12.0247   | 13.6669    | 13.8094   | 11.2659   | 4.27167   | 11.2355   | 10.1417   | 12.3489   | 13.2688  | 11.3268   | 12.3756   | 8.89212    | 10.9815    | 9.97251   | 8.44267   |
| PUM3    | 7.98899   | 6.18086    | 5.38388   | 11.8979   | 2.96471   | 10.6745   | 2.64359   | 5.48717   | 5.91911  | 7.21264   | 9.17164   | 6.61931    | 11.325     | 10.4221   | 4.58329   |
| PURA    | 3.8426    | 4.58328    | 4.59653   | 3.60852   | 3.34095   | 4.30301   | 3.08463   | 4.59217   | 3.56713  | 3.25365   | 4.09107   | 2.59309    | 3.86692    | 3.3746    | 3.36507   |
| PURB    | 6.01928   | 6.0027     | 6.25763   | 8.33018   | 3.68466   | 6.62285   | 4.36767   | 6.47135   | 8.71018  | 7.38871   | 7.25472   | 6.2246     | 10.8659    | 7.10064   | 4.64936   |
| PURG    | 0.0797825 | 0.0177417  | 0.0660017 | 0.0442713 | 0.0476653 | 0.0365797 | 0.0350358 | 0.0327249 | 0        | 0.100135  | 0.0831364 | 0.00878254 | 0.00791927 | 0.0416978 | 0.114578  |
| PURPL   | 0.146475  | 0.0303915  | 0.0346213 | 0         | 0         | 0.106904  | 0.16724   | 0         | 0        | 0         | 0         | 0          | 0          | 0.0109363 | 0         |
| PUS1    | 2.43436   | 2.47971    | 2.48285   | 5.39538   | 5.38719   | 5.19626   | 1.71337   | 1.48182   | 2.05774  | 1.71603   | 1.55599   | 2.68832    | 5.22826    | 4.52566   | 1.99546   |
| PUS10   | 0.745458  | 1.06663    | 0.981105  | 1.22216   | 0.526342  | 0.495295  | 0.58677   | 1.66127   | 1.59568  | 0.616662  | 0.822402  | 0.913235   | 0.411735   | 0.5608    | 0.63261   |
| PUS3    | 1.50606   | 1.91085    | 1.76505   | 3.19461   | 0.604351  | 3.1846    | 1.03174   | 1.31615   | 2.33861  | 1.77999   | 3.0461    | 1.74216    | 3.88679    | 2.20396   | 0.991323  |
| PUS7    | 2.71924   | 2.54773    | 2.68861   | 4.6322    | 1.50636   | 5.40632   | 2.34164   | 2.3817    | 2.74514  | 2.35205   | 2.95873   | 2.48018    | 5.09851    | 3.81152   | 2.11727   |
| PUS7L   | 1.936     | 1.48743    | 1.43711   | 2.35099   | 0.308856  | 1.88461   | 1.21277   | 2.30183   | 0.853917 | 1.91107   | 2.30955   | 1.1157     | 1.85001    | 1.64903   | 1.57803   |

|         |            |            |           |            |           |           |            |           |           |           |            |           |            |            |           |
|---------|------------|------------|-----------|------------|-----------|-----------|------------|-----------|-----------|-----------|------------|-----------|------------|------------|-----------|
| PUSL1   | 1.96449    | 3.08034    | 3.32161   | 4.45737    | 6.69194   | 7.08711   | 3.89572    | 2.23594   | 7.82816   | 5.92618   | 8.59831    | 5.11704   | 8.49431    | 5.60197    | 2.846     |
| PVALB   | 0.0777918  | 0.0187406  | 0         | 0          | 0         | 0.0331193 | 0          | 0         | 0         | 0.0488183 | 0.0439086  | 0         | 0.0501909  | 0          | 0         |
| PVALEF  | 0          | 0          | 0         | 0          | 0         | 0         | 0          | 0         | 0         | 0         | 0          | 0         | 0          | 0.00926154 | 0         |
| PVR     | 1.24123    | 1.52528    | 1.46646   | 3.95864    | 2.7889    | 3.32582   | 1.62522    | 1.3055    | 2.32068   | 4.48303   | 2.33104    | 3.36513   | 10.5554    | 5.62419    | 3.72319   |
| PVRIG   | 0.986795   | 1.67376    | 1.80498   | 0.397697   | 3.47559   | 0.624376  | 1.49809    | 1.03519   | 0.319888  | 0.141734  | 0.187212   | 0.789098  | 0.324006   | 0.947241   | 1.75041   |
| PVRIG2P | 0.717072   | 1.4471     | 1.43179   | 0.680564   | 13.0181   | 1.48649   | 1.93623    | 0.542038  | 0.817021  | 0.620942  | 0.00705559 | 2.3623    | 0.00036368 | 0.973263   | 1.90416   |
| PVT1    | 1.38381    | 1.44844    | 0.85859   | 1.9178     | 3.85434   | 2.0417    | 1.2531     | 1.06019   | 1.14777   | 0.658796  | 1.07735    | 2.68024   | 0.354052   | 1.69587    | 0.753814  |
| PWAR1   | 0.153519   | 0.04623    | 0.0952516 | 0.00988789 | 0.0149043 | 0.0408499 | 0.0657313  | 0.144962  | 0         | 0.036128  | 0.0433261  | 0         | 0.00619062 | 0.0300885  | 0.110237  |
| PWAR4   | 0          | 0          | 0         | 0          | 0         | 0         | 0          | 0         | 0         | 0         | 0          | 0         | 0          | 0          | 0         |
| PWAR5   | 2.93662    | 2.27113    | 2.94591   | 0.650508   | 0.405001  | 1.09251   | 1.98983    | 3.61595   | 0.0584938 | 0.740597  | 0.410512   | 0.353478  | 0.46482    | 0.706442   | 1.3598    |
| PWAR6   | 0.646762   | 0.471053   | 0.74243   | 0.155002   | 0.0545156 | 0.209184  | 0.475128   | 0.80203   | 0.0305304 | 0.289462  | 0.26601    | 0.154259  | 0.0517566  | 0.330165   | 0.496817  |
| PWARSN  | 2.38871    | 2.16377    | 2.91272   | 0.426441   | 1.04877   | 1.00828   | 1.57715    | 2.08097   | 0.0627393 | 0.591531  | 0.41495    | 0.420192  | 0.320177   | 0.937289   | 1.47295   |
| PWP1    | 6.55441    | 5.31486    | 5.90435   | 10.0359    | 2.59779   | 10.2701   | 4.82192    | 5.5923    | 6.2029    | 8.24763   | 11.8423    | 5.27603   | 12.932     | 8.59477    | 5.88308   |
| PWP2    | 2.3356     | 2.65769    | 2.4901    | 5.26008    | 5.67908   | 7.32628   | 3.03146    | 1.86118   | 2.83586   | 3.03834   | 2.31604    | 2.78362   | 5.61087    | 4.22974    | 2.93622   |
| PWRN1   | 0.0965635  | 0.00775429 | 0.0399421 | 0.0331705  | 0.124997  | 0         | 0.0183755  | 0         | 0.254808  | 0.0201995 | 0.018168   | 0.241828  | 0          | 0          | 0         |
| PWRN2   | 0.00538837 | 0          | 0         | 0          | 0.05859   | 0         | 0.00615227 | 0         | 0         | 0.0338148 | 0          | 0.0192776 | 0          | 0          | 0         |
| PWRN3   | 0.0817776  | 0.0525356  | 0.0676522 | 0.140457   | 0.508115  | 0         | 0.0311237  | 0.0969028 | 0.331986  | 0         | 0.0615445  | 0.663159  | 0.035175   | 0.0142468  | 0.0782953 |
| PWRN4   | 0          | 0          | 0         | 0          | 0         | 0         | 0          | 0         | 0         | 0         | 0          | 0         | 0          | 0          | 0         |
| PWWP2A  | 2.23821    | 2.63438    | 2.60283   | 2.66569    | 2.17542   | 2.34141   | 1.7341     | 2.20794   | 2.71031   | 1.79787   | 2.37506    | 1.56489   | 2.00727    | 1.9736     | 1.42809   |
| PWWP2B  | 2.93275    | 2.92001    | 3.20316   | 3.98101    | 7.63854   | 5.46212   | 3.34852    | 2.07093   | 2.53585   | 2.57997   | 2.25048    | 2.02873   | 4.65334    | 3.26007    | 2.62125   |
| PXDC1   | 7.73193    | 5.66174    | 7.11196   | 5.67433    | 8.24176   | 16.6522   | 7.05764    | 5.06222   | 7.72086   | 9.50578   | 14.2774    | 4.66443   | 10.6306    | 7.69618    | 7.75616   |
| PXDN    | 2.08487    | 1.12825    | 0.922476  | 18.3477    | 8.0097    | 10.0904   | 2.80868    | 2.07808   | 1.09878   | 11.8325   | 21.1095    | 2.95213   | 26.5388    | 16.2334    | 30.6207   |
| PXDNL   | 0.04333    | 0.0719099  | 0.0438114 | 0.0893057  | 0.336533  | 0.102486  | 0.0219879  | 0.0984097 | 0.0996788 | 0.0845968 | 0.168482   | 0.199802  | 0.0652314  | 0.062906   | 0.207425  |
| PXK     | 3.13572    | 2.72328    | 2.75588   | 2.5865     | 1.39746   | 3.9079    | 2.60518    | 3.55733   | 2.05636   | 2.56104   | 3.79006    | 1.6233    | 2.51106    | 2.5997     | 3.58578   |
| PXMP2   | 2.29738    | 1.93418    | 2.20064   | 5.30822    | 5.48441   | 2.94458   | 2.76113    | 1.8268    | 2.32671   | 3.0352    | 6.14239    | 2.00721   | 2.49643    | 2.69212    | 1.38919   |
| PXMP4   | 2.49952    | 3.96885    | 2.58216   | 1.62497    | 6.44215   | 2.0487    | 3.66792    | 2.02659   | 11.4731   | 1.21283   | 3.23282    | 2.94505   | 0.897369   | 0.648821   | 1.03666   |

|            |           |           |           |           |           |           |           |           |           |           |           |            |           |           |           |
|------------|-----------|-----------|-----------|-----------|-----------|-----------|-----------|-----------|-----------|-----------|-----------|------------|-----------|-----------|-----------|
| PXN        | 9.25011   | 7.44982   | 8.84015   | 20.8088   | 12.4554   | 31.5226   | 14.9874   | 7.56143   | 3.99671   | 12.7843   | 14.1321   | 7.78739    | 33.1875   | 18.5039   | 17.7781   |
| PXN-AS1    | 0.87598   | 0.719967  | 1.3382    | 0.890594  | 0.671617  | 1.23492   | 1.44357   | 0.836569  | 0.264982  | 0.588028  | 1.24827   | 0.637235   | 0.611311  | 0.65695   | 1.56205   |
| PXT1       | 0.0549194 | 0.0105844 | 0.0272599 | 0.0339576 | 0.0682471 | 0.0748211 | 0.012541  | 0.0195231 | 0         | 0.0137859 | 0.0123994 | 0.00785927 | 0.0212602 | 0.034444  | 0.141968  |
| PXYLP1     | 1.30925   | 1.21142   | 1.43875   | 0.818928  | 0.445191  | 1.4254    | 1.36843   | 1.14039   | 0.452176  | 0.866584  | 1.68386   | 0.302946   | 0.685022  | 0.524266  | 1.31898   |
| PYCARD     | 15.3965   | 17.0071   | 9.42433   | 36.1867   | 51.8697   | 42.5505   | 26.9277   | 11.6117   | 66.2631   | 22.626    | 69.3142   | 31.9165    | 19.125    | 12.1445   | 6.92007   |
| PYCARD-AS1 | 0.480676  | 0.814934  | 0.760463  | 1.26618   | 1.66305   | 0.484009  | 0.682024  | 0.424383  | 1.04753   | 0.633303  | 1.60189   | 0.697517   | 0.585275  | 0.329989  | 0.032031  |
| PYCR1      | 1.0071    | 0.897682  | 0.691506  | 3.72585   | 5.27192   | 2.70979   | 1.19586   | 0.832371  | 0.932162  | 3.23586   | 8.0719    | 1.33312    | 4.08707   | 3.12654   | 7.1014    |
| PYCR2      | 3.84193   | 4.03593   | 4.60531   | 10.2077   | 8.4849    | 15.2885   | 3.41677   | 3.03115   | 2.14854   | 4.75641   | 9.51495   | 2.88926    | 8.84443   | 5.91455   | 4.61667   |
| PYCR3      | 0.665843  | 0.936516  | 0.923617  | 1.90603   | 1.7447    | 2.70878   | 0.998291  | 0.627609  | 0.556996  | 1.05518   | 1.40461   | 1.02023    | 2.02214   | 1.20569   | 1.52611   |
| PYDC1      | 3.34242   | 2.95585   | 2.59008   | 0.654011  | 14.6557   | 0.756538  | 5.55532   | 3.53447   | 15.2522   | 0.849635  | 3.67765   | 1.05956    | 0         | 0.110563  | 0         |
| PYDC2      | 0         | 0         | 0         | 0         | 0         | 0         | 0         | 0         | 0         | 0         | 0         | 0          | 0         | 0         | 0         |
| PYDC5      | 1.78E-24  | 3.55E-24  | 7.40E-25  | 5.12E-41  | 1.20E-37  | 3.71E-34  | 1.12E-13  | 5.98E-38  | 6.35E-37  | 1.32E-21  | 3.45E-30  | 3.97E-30   | 1.23E-43  | 2.98E-43  | 1.22E-36  |
| PYGB       | 28.4428   | 17        | 18.7377   | 19.3349   | 21.7383   | 46.701    | 22.6436   | 15.4942   | 5.75858   | 14.0418   | 10.3845   | 6.99899    | 15.1306   | 10.898    | 10.3547   |
| PYGL       | 3.90325   | 5.66553   | 7.70931   | 29.7915   | 7.6673    | 23.3268   | 5.03224   | 5.29002   | 5.30835   | 36.4147   | 23.8952   | 22.1854    | 62.5261   | 28.2809   | 15.7774   |
| PYGM       | 0.35201   | 0.302203  | 0.275323  | 0.0593601 | 0.228659  | 0.82835   | 0.774597  | 0.227518  | 0.0467682 | 0.240987  | 0.252875  | 0.064113   | 0.045423  | 0.163906  | 0.44119   |
| PYGO1      | 0.482034  | 0.29749   | 0.358447  | 0.348841  | 0.147229  | 0.795527  | 0.303013  | 0.505406  | 0.102241  | 0.672981  | 0.935461  | 0.129825   | 0.349445  | 0.380728  | 1.00339   |
| PYGO2      | 5.13336   | 6.8159    | 6.24394   | 8.96408   | 12.3924   | 10.5926   | 6.25221   | 4.47035   | 7.57219   | 4.95882   | 6.86007   | 5.63119    | 8.12369   | 4.83188   | 4.12841   |
| PYHIN1     | 0.398065  | 0.0799141 | 0.128064  | 0.0683696 | 0.103055  | 0.225965  | 0.0504997 | 0.235845  | 0.0134666 | 0.0277562 | 0.0124824 | 0.00791184 | 0.0142683 | 0.0288953 | 0.0793988 |
| PYM1       | 4.66125   | 6.37053   | 5.5516    | 10.6352   | 7.52229   | 9.94563   | 5.23923   | 3.90076   | 9.87381   | 8.3544    | 13.2061   | 7.7217     | 8.17977   | 5.68759   | 2.3703    |
| PYROXD1    | 1.43547   | 1.85464   | 1.78751   | 2.01355   | 0.343103  | 1.58552   | 1.34681   | 1.30564   | 2.72051   | 2.56374   | 2.72016   | 1.75636    | 4.08663   | 1.80905   | 1.61016   |
| PYROXD2    | 1.00866   | 0.755978  | 0.593373  | 0.669867  | 2.14128   | 1.10697   | 0.473456  | 0.687247  | 0.0955445 | 0.182862  | 0.379549  | 0.136325   | 0.0795397 | 0.175723  | 1.27151   |
| PYURF      | 8.89198   | 7.14597   | 6.62894   | 12.2854   | 7.96661   | 14.9103   | 7.51003   | 6.62835   | 15.1737   | 12.8312   | 24.382    | 7.87669    | 11.9201   | 8.00068   | 5.12271   |
| PYY        | 0.0437487 | 0         | 0.036192  | 0         | 0.0339784 | 0.0372514 | 0.0499508 | 0         | 0         | 0.0274545 | 0.0740802 | 0.0156517  | 0         | 0.0114325 | 0         |
| PYY2       | 0.173032  | 0.0625271 | 0.0357861 | 0.0445787 | 0.50396   | 0.0184168 | 0.246953  | 0         | 0.0263417 | 0.0814399 | 0.170915  | 0.0309523  | 0.0139549 | 0.0113043 | 0         |
| PZP        | 0.140575  | 0.0943333 | 0.107979  | 0.0310407 | 0.0624026 | 0.132516  | 0.103174  | 0.0803074 | 0.0305701 | 0.0252034 | 0.0170015 | 0.0323287  | 0         | 0.0131196 | 0.216289  |
| QARS       | 23.7661   | 22.4082   | 22.3414   | 31.9078   | 30.2659   | 39.2813   | 28.7648   | 17.8118   | 38.5254   | 23.8784   | 32.6832   | 22.63      | 25.6779   | 19.8738   | 17.3663   |

|            |          |          |          |           |          |          |          |          |           |           |           |           |          |          |          |
|------------|----------|----------|----------|-----------|----------|----------|----------|----------|-----------|-----------|-----------|-----------|----------|----------|----------|
| QDPR       | 4.95623  | 3.06929  | 3.08089  | 6.76677   | 3.67538  | 8.39264  | 3.58074  | 2.28944  | 2.31896   | 2.96971   | 5.84785   | 2.85508   | 4.75141  | 3.27818  | 2.67419  |
| QKI        | 4.13164  | 3.53559  | 4.13872  | 3.84086   | 1.4413   | 5.62437  | 3.58843  | 5.27573  | 3.91727   | 4.38313   | 6.27995   | 2.71944   | 5.58151  | 3.77759  | 5.21231  |
| QPCT       | 5.85711  | 5.13992  | 6.54299  | 3.29105   | 2.78643  | 8.4008   | 9.97688  | 7.86231  | 14.8293   | 2.62667   | 7.24092   | 1.78916   | 1.30642  | 1.19322  | 1.09292  |
| QPCTL      | 0.791784 | 1.02637  | 0.911781 | 1.09405   | 2.52278  | 2.05502  | 1.33778  | 0.854499 | 1.12206   | 0.879828  | 1.49225   | 1.02826   | 0.997105 | 1.21273  | 1.38065  |
| QPRT       | 0.62417  | 0.747138 | 0.613175 | 0.663326  | 1.9694   | 1.34529  | 0.445411 | 0.4247   | 0.285063  | 1.57903   | 2.89551   | 0.181435  | 0.100678 | 0.356802 | 1.23253  |
| QRFP       | 0.347642 | 0.131607 | 0.16434  | 0.0767691 | 0.231432 | 0.16915  | 0.170112 | 0.110341 | 0.0604842 | 0.0311662 | 0.0280318 | 0.053303  | 0.144191 | 0.259562 | 0.285291 |
| QRFPR      | 0        | 0        | 0        | 0.0812939 | 0        | 0.117548 | 0        | 0        | 0.0240184 | 0.16089   | 0.30055   | 0.0705559 | 0.171776 | 0.159763 | 0.226579 |
| QRICH1     | 8.33278  | 8.20748  | 8.39993  | 8.86647   | 7.03586  | 10.4221  | 8.75089  | 7.7795   | 8.53417   | 6.66136   | 7.76091   | 6.218     | 9.92712  | 6.68616  | 7.45669  |
| QRICH2     | 0.364725 | 0.615055 | 0.610469 | 0.402082  | 0.968395 | 0.458615 | 0.280849 | 0.267601 | 0.232427  | 0.707941  | 0.282465  | 0.506768  | 0.344769 | 0.891042 | 0.627331 |
| QRSL1      | 1.75905  | 1.28078  | 1.29714  | 2.43245   | 0.584894 | 2.40224  | 1.03951  | 1.17872  | 1.14988   | 1.57296   | 2.11898   | 1.15812   | 2.36414  | 1.8769   | 1.29943  |
| QSER1      | 5.37369  | 5.6464   | 5.69015  | 7.51989   | 1.20511  | 6.41601  | 3.52622  | 5.77356  | 4.36505   | 5.00862   | 5.35831   | 3.86275   | 6.62551  | 5.39164  | 4.03663  |
| QSOX1      | 11.1318  | 10.5186  | 12.3153  | 63.3605   | 43.3317  | 44.7986  | 15.3317  | 10.4762  | 80.0595   | 87.4048   | 65.2311   | 70.9415   | 144.631  | 60.9776  | 24.9868  |
| QSOX2      | 1.10935  | 1.89909  | 2.1442   | 2.14947   | 2.12026  | 2.59003  | 1.57598  | 1.51293  | 1.43201   | 1.00095   | 1.12536   | 1.1998    | 2.88938  | 2.30315  | 2.019    |
| QTRT1      | 6.00262  | 5.8679   | 5.91302  | 10.0655   | 13.043   | 13.2063  | 4.43701  | 3.97785  | 4.07783   | 3.74518   | 5.69907   | 5.57362   | 5.52946  | 5.1592   | 4.95805  |
| QTRT2      | 2.73185  | 2.26967  | 2.22283  | 3.2655    | 1.61025  | 3.80198  | 1.83208  | 2.17228  | 1.87717   | 1.50143   | 2.41519   | 1.67698   | 3.35815  | 2.47681  | 2.05663  |
| R3HCC1     | 4.9665   | 3.92977  | 4.21707  | 5.44834   | 8.18978  | 10.1197  | 5.73712  | 2.54992  | 4.36355   | 3.89364   | 7.21786   | 2.60532   | 5.10257  | 3.55484  | 3.91139  |
| R3HCC1L    | 2.8319   | 2.42219  | 2.20002  | 3.48241   | 1.38621  | 3.18133  | 1.48083  | 1.88757  | 4.62999   | 4.1293    | 3.67371   | 2.2136    | 2.13805  | 2.69274  | 1.89678  |
| R3HDM1     | 2.44213  | 2.2893   | 1.9445   | 3.43744   | 1.01065  | 3.68681  | 1.5799   | 2.27624  | 1.38947   | 2.58783   | 2.97928   | 2.03592   | 3.60066  | 3.0748   | 2.63206  |
| R3HDM2     | 6.60755  | 7.96242  | 7.9498   | 7.8324    | 6.20552  | 9.00365  | 7.06701  | 6.57303  | 6.23069   | 4.57285   | 4.67602   | 4.94543   | 5.4738   | 4.85113  | 5.98279  |
| R3HDM4     | 8.04698  | 9.01177  | 9.84266  | 35.1481   | 18.5807  | 34.5754  | 11.7294  | 7.97009  | 14.5524   | 24.6473   | 33.7799   | 17.7586   | 41.568   | 19.0092  | 12.1444  |
| R3HDML     | 0        | 0        | 0        | 0         | 0        | 0        | 0        | 0        | 0         | 0         | 0         | 0         | 0        | 0        | 0        |
| RAB10      | 17.4138  | 21.5354  | 20.7794  | 49.5643   | 28.6359  | 30.4988  | 18.1931  | 22.551   | 58.9702   | 55.4385   | 54.8189   | 40.2021   | 74.3867  | 32.3816  | 17.527   |
| RAB11A     | 17.9165  | 15.7494  | 16.7486  | 24.9827   | 6.30155  | 19.3465  | 12.6144  | 19.8209  | 39.2772   | 22.8768   | 25.9301   | 18.9186   | 27.051   | 15.0288  | 8.92771  |
| RAB11B     | 15.6185  | 15.2644  | 14.3771  | 23.3275   | 31.1297  | 35.0874  | 20.6067  | 14.3623  | 21.7925   | 15.3067   | 26.5628   | 15.4968   | 21.1551  | 15.3755  | 15.9649  |
| RAB11B-AS1 | 1.8414   | 2.35015  | 1.93845  | 2.0218    | 4.54658  | 3.53386  | 2.3375   | 1.372    | 3.34439   | 1.73662   | 3.21472   | 2.0654    | 1.33649  | 1.49754  | 1.20327  |
| RAB11FIP1  | 4.00644  | 5.64339  | 7.06989  | 4.04982   | 4.78194  | 4.05107  | 8.12968  | 5.03715  | 13.9888   | 6.47047   | 4.07048   | 4.38859   | 9.37409  | 2.91149  | 2.42419  |

|           |          |           |           |           |           |          |          |          |           |          |          |           |          |           |           |
|-----------|----------|-----------|-----------|-----------|-----------|----------|----------|----------|-----------|----------|----------|-----------|----------|-----------|-----------|
| RAB11FIP2 | 2.25213  | 1.75394   | 1.6448    | 1.926     | 1.08937   | 2.90264  | 1.72528  | 1.9501   | 0.986189  | 1.95098  | 2.59542  | 0.882032  | 2.49328  | 1.57571   | 2.42446   |
| RAB11FIP3 | 2.76801  | 3.12613   | 3.34443   | 3.46913   | 9.54499   | 6.61448  | 3.83766  | 2.16404  | 2.97824   | 2.35745  | 1.63872  | 2.43106   | 3.67921  | 3.91315   | 4.71497   |
| RAB11FIP4 | 1.46352  | 2.45512   | 2.84195   | 1.26078   | 2.26938   | 1.71158  | 2.36214  | 1.61164  | 2.11836   | 0.734107 | 0.568012 | 0.933878  | 1.25407  | 0.525952  | 0.32279   |
| RAB11FIP5 | 5.37801  | 4.4351    | 4.81505   | 8.66758   | 8.95003   | 12.1358  | 7.80183  | 3.05056  | 7.42616   | 8.71675  | 5.42729  | 5.08759   | 16.4002  | 7.73871   | 7.47091   |
| RAB12     | 9.46072  | 8.06312   | 8.14      | 10.7981   | 5.0275    | 11.4199  | 5.10435  | 8.09044  | 11.9835   | 10.6379  | 12.7329  | 6.83136   | 14.5616  | 8.3051    | 6.87112   |
| RAB13     | 11.558   | 9.79747   | 8.94731   | 23.3766   | 14.4929   | 38.9973  | 7.04539  | 7.22386  | 15.1452   | 21.4378  | 38.4724  | 10.3279   | 20.4031  | 16.3577   | 16.3079   |
| RAB14     | 9.40999  | 11.0127   | 12.4404   | 15.4697   | 5.19092   | 15.5823  | 9.03612  | 12.7564  | 13.1916   | 12.8624  | 15.1436  | 10.1452   | 17.6286  | 10.7344   | 9.59078   |
| RAB15     | 2.17698  | 2.1466    | 2.2983    | 2.96081   | 1.89723   | 2.72123  | 1.70524  | 1.67601  | 0.60117   | 1.08022  | 1.62883  | 0.642999  | 1.94355  | 1.65045   | 2.32663   |
| RAB17     | 0.324165 | 0.262172  | 0.287327  | 0.107377  | 0.521523  | 1.27167  | 0.370121 | 0.277802 | 0.0140999 | 0.130776 | 0.20911  | 0.0579871 | 0.20168  | 0.0907622 | 0.133012  |
| RAB18     | 6.54741  | 6.17556   | 6.59743   | 8.83718   | 2.00581   | 7.80489  | 3.97138  | 8.63124  | 12.9301   | 12.3718  | 12.8472  | 8.23086   | 16.0852  | 8.33144   | 6.14448   |
| RAB19     | 0.218789 | 0.0468516 | 0.0804435 | 0.0250521 | 0.0755234 | 0.289794 | 0.111025 | 0.237651 | 0         | 0        | 0        | 0.0347888 | 0        | 0.0254109 | 0.0698243 |
| RAB1A     | 11.3201  | 9.82059   | 10.5612   | 21.574    | 3.56363   | 18.7662  | 5.60265  | 10.2909  | 29.8667   | 25.3168  | 29.5924  | 13.6906   | 34.9869  | 17.2188   | 13.1803   |
| RAB1B     | 27.1443  | 26.4308   | 27.0976   | 49.7608   | 54.503    | 76.5661  | 39.0886  | 20.3888  | 53.1851   | 50.7095  | 73.2052  | 44.5623   | 74.2465  | 37.784    | 25.688    |
| RAB20     | 1.0644   | 0.271074  | 0.352218  | 1.56699   | 0.921167  | 3.76771  | 0.38195  | 0.364866 | 0.129632  | 1.66037  | 3.10692  | 0.0979207 | 1.49122  | 0.619878  | 1.44126   |
| RAB21     | 4.44402  | 4.20413   | 4.52147   | 4.67831   | 1.70097   | 4.99654  | 2.96757  | 5.2143   | 7.23236   | 5.06437  | 5.58768  | 3.5878    | 7.16548  | 4.32595   | 3.412     |
| RAB22A    | 4.47291  | 3.61034   | 3.80211   | 6.26083   | 1.83673   | 5.42137  | 3.43014  | 4.71455  | 6.29461   | 8.51161  | 7.22675  | 6.54454   | 12.0597  | 5.6556    | 5.39404   |
| RAB23     | 2.17532  | 1.39748   | 1.7073    | 1.55197   | 1.06858   | 3.41167  | 1.43822  | 1.14425  | 0.718935  | 4.25875  | 6.86321  | 1.03102   | 2.61207  | 3.20427   | 5.17336   |
| RAB24     | 4.19066  | 8.51306   | 8.72429   | 14.5122   | 27.387    | 13.5767  | 4.13817  | 3.8697   | 19.2044   | 17.643   | 16.8489  | 13.651    | 17.7495  | 11.8456   | 5.60265   |
| RAB25     | 30.9468  | 34.7047   | 30.6737   | 90.103    | 98.2601   | 68.4889  | 46.1533  | 25.7967  | 167.12    | 107.174  | 123.22   | 113.19    | 118.402  | 55.4593   | 17.8487   |
| RAB26     | 0.798473 | 1.64879   | 1.23723   | 0.522445  | 1.96874   | 0.518011 | 1.3458   | 0.912364 | 0.385893  | 0.270426 | 0.157383 | 0.807115  | 0.261674 | 0.68228   | 0.382236  |
| RAB27A    | 1.91929  | 1.367     | 1.69719   | 3.95541   | 1.08036   | 3.23904  | 1.13283  | 1.89448  | 1.46431   | 2.95683  | 4.60717  | 1.31157   | 4.39599  | 2.39737   | 3.08202   |
| RAB27B    | 3.99542  | 4.09691   | 4.01885   | 4.01183   | 1.40655   | 2.29617  | 4.30904  | 5.41578  | 14.449    | 6.69867  | 6.12943  | 4.32963   | 5.67591  | 2.36972   | 1.16752   |
| RAB28     | 2.41994  | 2.53908   | 2.57103   | 2.94955   | 1.88905   | 3.63996  | 2.42641  | 2.06331  | 2.45353   | 2.5285   | 4.86737  | 1.90732   | 3.10683  | 2.76709   | 2.52271   |
| RAB29     | 1.33798  | 1.19038   | 1.07399   | 3.29007   | 1.68737   | 3.5588   | 1.31591  | 0.835889 | 0.435611  | 2.10328  | 3.17784  | 0.990533  | 2.54275  | 2.5652    | 3.30081   |
| RAB2A     | 9.9143   | 7.4096    | 8.13127   | 12.569    | 2.89517   | 12.2672  | 7.09127  | 10.6127  | 13.605    | 13.6241  | 19.0252  | 8.28853   | 15.8448  | 8.29738   | 10.7329   |
| RAB2B     | 3.38434  | 3.32067   | 2.98472   | 2.53432   | 2.23934   | 2.72418  | 2.80788  | 3.32288  | 2.78852   | 3.16401  | 6.3965   | 2.45468   | 3.74537  | 2.82848   | 3.01142   |

|           |           |           |           |           |           |           |           |           |            |           |           |            |           |           |           |
|-----------|-----------|-----------|-----------|-----------|-----------|-----------|-----------|-----------|------------|-----------|-----------|------------|-----------|-----------|-----------|
| RAB30     | 1.22671   | 1.29881   | 1.6546    | 1.28019   | 0.417693  | 1.71249   | 0.882997  | 1.5089    | 0.397857   | 0.836766  | 1.42745   | 0.457954   | 0.824447  | 0.853681  | 1.49362   |
| RAB30-AS1 | 0.962861  | 1.37519   | 1.76378   | 1.41751   | 1.28199   | 1.2298    | 0.667471  | 1.253     | 1.0889     | 1.29481   | 2.48446   | 0.885796   | 1.57527   | 1.95901   | 0.839551  |
| RAB31     | 6.81428   | 3.98677   | 4.00264   | 32.5439   | 5.97652   | 19.3952   | 5.59707   | 5.97872   | 11.5311    | 38.7995   | 51.5775   | 10.5559    | 41.1689   | 25.9779   | 27.5444   |
| RAB32     | 2.9862    | 1.84461   | 3.04049   | 6.39145   | 2.17063   | 6.94355   | 4.28379   | 1.65017   | 8.71913    | 9.41802   | 17.3955   | 3.15027    | 8.48481   | 6.46298   | 4.67343   |
| RAB33A    | 0.167098  | 0.0805103 | 0.103676  | 0.129149  | 0.324451  | 0.658053  | 0.238484  | 0.0742513 | 0          | 0.131078  | 0.400844  | 0.0298907  | 0.0673817 | 0.0436663 | 0.239974  |
| RAB33B    | 1.75308   | 1.49041   | 1.42552   | 1.49214   | 0.743519  | 1.82388   | 1.44143   | 1.22831   | 1.43551    | 1.65961   | 3.20154   | 0.890478   | 1.8877    | 1.19142   | 1.55527   |
| RAB34     | 6.71583   | 4.23678   | 5.29601   | 8.36477   | 9.41881   | 18.9757   | 6.53702   | 3.63905   | 2.08891    | 8.76258   | 20.8623   | 2.64467    | 9.81166   | 8.85073   | 12.1774   |
| RAB35     | 8.88796   | 8.29591   | 8.59438   | 14.2935   | 11.987    | 16.0192   | 7.59077   | 6.39027   | 15.1406    | 10.3859   | 10.7429   | 8.51315    | 19.2102   | 9.90634   | 9.6605    |
| RAB36     | 0.798929  | 0.689223  | 0.748493  | 1.16397   | 0.79253   | 1.58026   | 0.836873  | 0.687045  | 0.227872   | 0.436123  | 0.668857  | 0.64418    | 0.531738  | 0.671524  | 0.767731  |
| RAB37     | 0.214571  | 0.218583  | 0.167365  | 0.164262  | 0.352349  | 0.130503  | 0.202992  | 0.141658  | 0.0746639  | 0.261615  | 0.408321  | 0.0965055  | 0.158218  | 0.131369  | 0.272934  |
| RAB38     | 10.5887   | 11.4485   | 9.91373   | 42.7822   | 9.52899   | 20.5428   | 9.79135   | 9.59353   | 21.313     | 28.5495   | 37.7748   | 20.9829    | 43.5476   | 23.7521   | 4.66675   |
| RAB39A    | 0.112103  | 0.054013  | 0.0927395 | 0.243887  | 0.0967415 | 0.413635  | 0.0284435 | 0.0332093 | 0.0303398  | 0.0781671 | 0.787425  | 0          | 0.120547  | 0.14973   | 0.321988  |
| RAB39B    | 0.0724868 | 0.0381003 | 0.0490632 | 0.0882815 | 0.0409444 | 0.0448884 | 0.0677152 | 0.0937021 | 0          | 0         | 0.0223169 | 0.00943022 | 0.0297615 | 0.0206644 | 0.0378546 |
| RAB3A     | 0.601318  | 0.616593  | 0.650515  | 0.524341  | 0.862205  | 0.840229  | 0.933026  | 0.835859  | 0.0938895  | 0.290276  | 0.887679  | 0.496453   | 0.32828   | 0.120875  | 0.265714  |
| RAB3B     | 0.569063  | 0.536245  | 0.838168  | 0.0418528 | 0.0769739 | 0.0327782 | 0.522827  | 0.627027  | 0.0145026  | 0.228242  | 0.250512  | 0.0303271  | 0.328968  | 0.471973  | 0.539434  |
| RAB3C     | 0.119268  | 0.0330119 | 0.0293901 | 0.141215  | 0.019709  | 0.237682  | 0.0637421 | 0.0563805 | 0.00618106 | 0.165618  | 0.329435  | 0.00907866 | 0.176824  | 0.08886   | 0.142129  |
| RAB3D     | 22.2927   | 30.5215   | 28.3935   | 37.0665   | 40.0379   | 36.3083   | 32.1998   | 23.0465   | 71.7273    | 32.5138   | 30.5461   | 35.9247    | 45.302    | 21.1198   | 9.55944   |
| RAB3GAP1  | 6.67866   | 6.84896   | 7.47146   | 9.28299   | 4.85583   | 10.0844   | 5.03006   | 5.7021    | 7.84266    | 9.04698   | 6.9944    | 5.55673    | 13.0027   | 6.7827    | 4.87978   |
| RAB3GAP2  | 3.37878   | 3.36696   | 3.72776   | 5.12852   | 1.95221   | 5.24042   | 2.97446   | 3.31428   | 2.98816    | 4.72423   | 5.06543   | 3.30331    | 5.64755   | 4.16389   | 3.65514   |
| RAB3IL1   | 2.44594   | 1.38419   | 1.89837   | 2.77726   | 4.49019   | 11.5117   | 4.36676   | 1.5651    | 0.173317   | 1.65217   | 3.32343   | 0.318207   | 2.34709   | 1.24116   | 4.68782   |
| RAB3IP    | 1.99312   | 1.97566   | 1.57111   | 1.22472   | 1.6524    | 0.970839  | 1.30643   | 1.38184   | 1.65076    | 1.00572   | 0.656723  | 1.01135    | 0.962541  | 1.01908   | 0.787975  |
| RAB40A    | 0.355784  | 0.138451  | 0.192673  | 0.0570352 | 0.490499  | 0.353979  | 0.0809828 | 0.146384  | 0.0418806  | 0.142367  | 0.256931  | 0.0548169  | 3.06E-14  | 0.199728  | 0.320921  |
| RAB40AL   | 0.704134  | 0.458245  | 0.622453  | 0.203524  | 0.511284  | 0.494504  | 0.638768  | 0.648014  | 0          | 0.0960576 | 0.29865   | 0.18578    | 0.0580438 | 0.220684  | 0.323106  |
| RAB40B    | 2.39456   | 2.96675   | 2.81905   | 3.22695   | 3.74002   | 3.46171   | 2.14817   | 2.08132   | 2.41957    | 1.91554   | 3.16359   | 1.61923    | 1.6638    | 1.17586   | 1.37934   |
| RAB40C    | 6.74646   | 9.38647   | 8.76656   | 5.7327    | 18.2012   | 6.79934   | 8.92816   | 6.65486   | 10.7918    | 5.44689   | 5.56719   | 7.84228    | 5.66625   | 3.95075   | 2.00574   |
| RAB41     | 0.150839  | 0.124589  | 0.089132  | 0         | 0.0334722 | 0.0366965 | 0.123017  | 0.0574514 | 0.0787308  | 0.108182  | 0         | 0.0462555  | 0.013903  | 0.0563108 | 0.247571  |

|             |          |           |            |            |           |           |           |           |            |           |           |           |            |            |           |
|-------------|----------|-----------|------------|------------|-----------|-----------|-----------|-----------|------------|-----------|-----------|-----------|------------|------------|-----------|
| RAB42       | 0.536498 | 0.278767  | 0.304589   | 0.227655   | 1.50333   | 1.01217   | 0.408371  | 0.327212  | 0.0768699  | 0.607344  | 1.44878   | 0.0903244 | 0.203615   | 0.291393   | 0.755371  |
| RAB43       | 2.47405  | 2.56964   | 3.04961    | 1.85878    | 3.77249   | 7.35729   | 2.21738   | 1.14681   | 0.848396   | 1.28769   | 1.27493   | 0.7622    | 2.98125    | 2.0677     | 1.84671   |
| RAB44       | 0.174953 | 0.18703   | 0.257807   | 0.123952   | 0.390659  | 0.0605193 | 0.280907  | 0.165202  | 0.0332927  | 0.150964  | 0.0432032 | 0.113448  | 0.158736   | 0.114298   | 0.0706655 |
| RAB4A       | 5.94783  | 5.15829   | 5.12229    | 6.69517    | 5.37756   | 7.55768   | 5.74625   | 5.23849   | 10.4569    | 6.70901   | 9.52064   | 5.19971   | 7.43392    | 4.96574    | 2.97867   |
| RAB4B       | 2.01944  | 2.68534   | 2.38473    | 6.42202    | 7.6004    | 8.7553    | 2.03063   | 1.86225   | 7.74101    | 5.11213   | 9.70264   | 4.39697   | 6.29766    | 3.50049    | 3.77235   |
| RAB4B-EGLN2 | 0.481292 | 0.840426  | 0.439718   | 0.959574   | 1.93847   | 1.5786    | 0.261562  | 0.313561  | 1.64642    | 0.817594  | 0.869535  | 0.36711   | 0.570113   | 0.318329   | 0.417733  |
| RAB5A       | 13.1006  | 11.3837   | 11.4117    | 30.4262    | 4.50959   | 18.4777   | 7.78618   | 12.446    | 56.8825    | 32.8502   | 36.2468   | 22.9605   | 43.0838    | 17.3622    | 10.2002   |
| RAB5B       | 14.0065  | 18.4449   | 19.3366    | 24.4341    | 14.5769   | 23.2161   | 22.4951   | 15.8465   | 31.6726    | 23.4871   | 24.0948   | 18.1921   | 27.853     | 13.4079    | 11.9585   |
| RAB5C       | 17.2062  | 13.654    | 14.1402    | 30.4612    | 15.5584   | 42.722    | 20.1529   | 13.418    | 17.3195    | 23.9411   | 50.0112   | 14.4642   | 35.9226    | 19.8077    | 18.9337   |
| RAB5IF      | 11.5142  | 9.24685   | 8.16006    | 36.5545    | 17.6414   | 20.4272   | 9.86898   | 7.19501   | 44.3896    | 33.2509   | 47.9766   | 18.0909   | 42.9543    | 21.1348    | 9.23075   |
| RAB6A       | 14.7828  | 12.9985   | 13.1113    | 23.3873    | 8.59344   | 20.9791   | 12.9967   | 14.5359   | 31.503     | 26.0106   | 27.7904   | 17.5637   | 34.2095    | 17.6472    | 16.0021   |
| RAB6B       | 0.833655 | 0.456528  | 0.49117    | 0.318497   | 0.581149  | 2.36152   | 0.640751  | 0.51681   | 0.128769   | 0.45936   | 0.922731  | 0.136759  | 0.299108   | 0.520718   | 1.00451   |
| RAB6C       | 0.030187 | 0.0145915 | 0.029629   | 0.00778945 | 0.0467327 | 0.0150458 | 0.0172294 | 0.0227638 | 0          | 5.74E-14  | 2.62E-08  | 0         | 0.00976539 | 0          | 0.0108165 |
| RAB6C-AS1   | 0        | 0.0317296 | 0.00970266 | 0.00969495 | 0         | 0.029326  | 0.0429658 | 0.038708  | 0          | 5.11E-34  | 0         | 0         | 0          | 0.0049169  | 0.0270214 |
| RAB6D       | 2.18E-33 | 0         | 1.53E-16   | 0.00664167 | 9.25E-35  | 3.89E-23  | 4.76E-20  | 2.23E-23  | 0.00784246 | 0.0487333 | 0.021976  | 0.018625  | 0.0290665  | 0.00338689 | 1.65E-05  |
| RAB7A       | 30.3286  | 28.1415   | 28.9156    | 69.4331    | 27.6061   | 71.3636   | 31.8343   | 30.2617   | 91.3886    | 61.7637   | 71.506    | 49.4558   | 96.9228    | 44.009     | 29.5881   |
| RAB8A       | 9.41881  | 11.3658   | 12.664     | 21.1984    | 12.3188   | 24.4945   | 13.1452   | 9.84449   | 21.3755    | 17.5189   | 22.2014   | 13.456    | 28.19      | 15.0847    | 10.1068   |
| RAB8B       | 2.11729  | 1.19169   | 1.55128    | 2.46079    | 0.501445  | 3.60974   | 1.28461   | 2.31201   | 0.913504   | 4.30192   | 4.92501   | 0.937521  | 4.13802    | 2.04446    | 3.48385   |
| RAB9A       | 5.23352  | 5.34612   | 5.62276    | 6.79416    | 3.19372   | 6.17802   | 3.47275   | 4.4548    | 14.9827    | 10.514    | 13.0628   | 6.66271   | 9.50504    | 5.90568    | 2.7819    |
| RAB9B       | 0.253718 | 0.0910846 | 0.15373    | 0.107662   | 0.0309107 | 0.317702  | 0.295367  | 0.14148   | 0.0121176  | 0.0874155 | 0.11232   | 0.0320368 | 0.0353073  | 0.0416013  | 0.171469  |
| RAB9BP1     | 0        | 0         | 0          | 0          | 0         | 0         | 0         | 0         | 0          | 0         | 0         | 0         | 0          | 0          | 0         |
| RABAC1      | 18.784   | 13.5135   | 14.4956    | 25.1204    | 52.2087   | 38.9236   | 24.4594   | 10.6024   | 28.7095    | 40.5649   | 94.1105   | 20.4582   | 29.8636    | 21.3434    | 23.7638   |
| RABEP1      | 5.68932  | 3.84135   | 4.17658    | 4.76018    | 2.22054   | 7.53908   | 2.77364   | 3.73385   | 2.23033    | 5.02057   | 5.10358   | 2.68364   | 6.10149    | 5.38472    | 4.92703   |
| RABEP2      | 2.87258  | 4.77816   | 4.10622    | 4.3515     | 16.8866   | 4.95243   | 3.92883   | 2.53487   | 6.77444    | 3.14675   | 2.54381   | 5.25836   | 4.74804    | 4.01594    | 2.71139   |
| RABEPK      | 3.75519  | 2.98869   | 2.64632    | 4.61512    | 4.2344    | 5.23439   | 2.55665   | 2.60803   | 2.89648    | 3.19446   | 7.20654   | 2.55756   | 3.85859    | 4.05609    | 3.31564   |
| RABGAP1     | 10.9211  | 8.54759   | 9.21469    | 8.31086    | 5.50132   | 10.2216   | 7.10419   | 7.99006   | 9.69216    | 8.26259   | 7.44729   | 7.45325   | 9.85097    | 7.81772    | 7.3467    |

|           |           |           |           |           |          |           |           |           |           |           |          |           |           |           |          |
|-----------|-----------|-----------|-----------|-----------|----------|-----------|-----------|-----------|-----------|-----------|----------|-----------|-----------|-----------|----------|
| RABGAP1L  | 3.85457   | 3.63068   | 4.03065   | 1.91614   | 1.64993  | 2.01744   | 3.18064   | 3.70862   | 2.45164   | 2.17999   | 2.03867  | 1.5774    | 1.67233   | 1.99479   | 2.44004  |
| RABGEF1   | 5.53813   | 5.48454   | 6.18919   | 6.40006   | 4.23032  | 5.68205   | 5.27224   | 4.81347   | 17.7738   | 11.0591   | 9.11637  | 8.32317   | 11.974    | 8.07464   | 4.74852  |
| RABGGTA   | 3.66372   | 3.97789   | 3.03089   | 7.9984    | 8.81091  | 9.87437   | 4.19466   | 3.35468   | 11.8004   | 9.08271   | 8.4883   | 9.30161   | 14.6515   | 7.22147   | 3.87008  |
| RABGGTB   | 6.70324   | 5.4481    | 5.11968   | 9.90826   | 2.35594  | 6.69933   | 3.66442   | 5.6564    | 5.42604   | 7.71637   | 10.0589  | 5.09671   | 6.72758   | 9.80951   | 5.01754  |
| RABIF     | 1.80009   | 2.0698    | 1.73835   | 3.68054   | 1.88268  | 3.67007   | 1.88333   | 1.37032   | 7.51151   | 4.77064   | 5.16521  | 3.0584    | 7.12579   | 3.44463   | 2.26588  |
| RABL2A    | 0.7791    | 1.32995   | 1.69484   | 0.734813  | 0.808105 | 1.56598   | 1.09184   | 1.05845   | 0.453031  | 0.181414  | 0.653509 | 0.472182  | 0.253569  | 0.61241   | 0.848975 |
| RABL2B    | 2.16255   | 2.43248   | 1.99212   | 2.75917   | 2.89557  | 4.49876   | 2.27347   | 2.0953    | 0.785539  | 1.55886   | 2.06803  | 1.42511   | 2.06524   | 1.86216   | 2.583    |
| RABL3     | 3.2056    | 2.46114   | 2.51089   | 3.60945   | 0.623494 | 2.82316   | 1.89595   | 2.96126   | 2.18307   | 2.91918   | 3.45736  | 1.67601   | 3.39858   | 2.2099    | 1.86357  |
| RABL6     | 7.22854   | 8.8089    | 8.4408    | 15.2353   | 24.0183  | 19.7867   | 9.21771   | 5.72613   | 15.9044   | 12.3355   | 8.22716  | 11.3023   | 19.5839   | 11.8221   | 8.80884  |
| RAC1      | 39.0199   | 38.072    | 41.6198   | 69.2661   | 24.3609  | 67.0589   | 35.459    | 39.7106   | 86.1755   | 70.2025   | 78.6138  | 52.1498   | 100.9     | 43.0753   | 39.7636  |
| RAC2      | 2.84885   | 1.54235   | 1.91329   | 6.72397   | 4.23491  | 6.18176   | 2.04607   | 2.2868    | 0.858067  | 5.90165   | 15.5613  | 1.62197   | 8.85432   | 4.03452   | 5.96099  |
| RAC3      | 1.34856   | 1.81303   | 1.33155   | 1.36732   | 4.52743  | 5.14874   | 1.41557   | 1.41112   | 2.27816   | 2.02018   | 4.29697  | 1.2762    | 0.940253  | 1.1368    | 0.937115 |
| RACGAP1   | 1.35863   | 1.77862   | 1.38164   | 4.57594   | 1.63686  | 4.67821   | 2.05066   | 1.37824   | 3.34159   | 4.24224   | 5.37179  | 2.8595    | 5.31505   | 4.56874   | 2.16055  |
| RACGAP1P  | 0.0496988 | 0.119728  | 0.116491  | 0.008536  | 0        | 0.0141059 | 0.0662018 | 0.0956976 | 0         | 0         | 0        | 0.0059268 | 0         | 0         | 0        |
| RACK1     | 311.398   | 269.336   | 291.499   | 536.755   | 290.511  | 584.179   | 350.422   | 231.696   | 380.163   | 376.955   | 683.483  | 301.102   | 455.83    | 275.319   | 171.936  |
| RAD1      | 2.10077   | 1.86004   | 2.00779   | 2.22602   | 1.21315  | 2.55899   | 1.76084   | 2.16131   | 1.4749    | 1.70609   | 2.4273   | 1.344     | 2.1559    | 1.73348   | 1.66111  |
| RAD17     | 2.05931   | 1.7623    | 1.87692   | 2.32209   | 0.548649 | 2.12738   | 1.17578   | 2.19189   | 2.3403    | 2.15246   | 2.66841  | 1.4917    | 2.33668   | 1.78063   | 1.59917  |
| RAD18     | 1.53239   | 1.27264   | 1.14093   | 1.59579   | 0.444745 | 1.68595   | 1.04517   | 1.06798   | 0.564793  | 1.15398   | 1.32472  | 0.626138  | 1.7328    | 1.30039   | 0.886071 |
| RAD21     | 13.5273   | 11.6911   | 12.3548   | 17.998    | 4.39     | 20.4462   | 8.9485    | 11.6877   | 14.4079   | 17.0252   | 17.7716  | 9.0428    | 21.3462   | 13.6919   | 11.8942  |
| RAD21-AS1 | 0.0700928 | 0.0902489 | 0.0675043 | 0.0720922 | 0.233598 | 0.0700676 | 0.0533644 | 0.0413272 | 0.0712872 | 0.0581491 | 0.118531 | 0.0757903 | 0.0302833 | 0.0848034 | 0        |
| RAD21L1   | 0         | 0.0123348 | 0.0211787 | 0         | 0        | 0.0108993 | 0.014615  | 0         | 0         | 0         | 0.01445  | 0         | 0         | 0         | 0        |
| RAD23A    | 13.8273   | 15.5229   | 17.9154   | 27.6738   | 25.1903  | 32.5297   | 19.8071   | 12.3678   | 19.1001   | 14.356    | 21.6636  | 14.9316   | 24.4355   | 16.8782   | 14.1086  |
| RAD23B    | 13.6448   | 15.1069   | 16.4304   | 23.753    | 13.4505  | 20.4387   | 12.0047   | 16.0158   | 29.1816   | 20.9509   | 21.4615  | 13.1786   | 28.934    | 17.0465   | 10.3705  |
| RAD50     | 5.56387   | 6.16076   | 5.87948   | 5.59997   | 2.43585  | 7.76928   | 2.53102   | 3.79639   | 4.55875   | 4.35021   | 5.23542  | 4.18934   | 5.47295   | 4.52094   | 4.47198  |
| RAD51     | 0.38253   | 0.419302  | 0.522152  | 1.52756   | 0.20797  | 1.56345   | 0.622383  | 0.271969  | 0.395997  | 0.67216   | 0.960818 | 0.424251  | 1.76466   | 1.0996    | 0.535627 |
| RAD51-AS1 | 2.44684   | 2.89819   | 3.20498   | 0.861527  | 1.93207  | 0.625036  | 2.09529   | 2.3014    | 0.769828  | 0.358288  | 0.161127 | 0.714902  | 0.118402  | 1.24686   | 0.93706  |



|              |           |           |           |            |           |           |           |            |            |           |           |           |           |           |            |
|--------------|-----------|-----------|-----------|------------|-----------|-----------|-----------|------------|------------|-----------|-----------|-----------|-----------|-----------|------------|
| RAD51AP1     | 0.428386  | 0.309604  | 0.185634  | 1.17724    | 0.0633744 | 0.877173  | 0.232913  | 0.299132   | 0.173909   | 0.908915  | 1.6235    | 0.270031  | 1.0595    | 0.693002  | 0.615217   |
| RAD51AP2     | 0.0449271 | 0.0568222 | 0.032521  | 0.0289366  | 0.0261702 | 0.0526004 | 0.0128241 | 0.0399274  | 0.0205185  | 0.112776  | 0.0253585 | 0.0281282 | 0.0181167 | 0.0293511 | 0.0322605  |
| RAD51B       | 0.714503  | 0.781655  | 0.939261  | 0.393375   | 0.349685  | 0.252107  | 0.687281  | 0.75677    | 0.196686   | 0.202696  | 0.281752  | 0.260876  | 0.108933  | 0.289025  | 0.407635   |
| RAD51C       | 1.25428   | 1.30447   | 1.22744   | 2.53786    | 0.760326  | 3.21704   | 0.908161  | 1.25064    | 0.819675   | 1.84303   | 3.21175   | 0.722356  | 1.44087   | 1.79075   | 1.51574    |
| RAD51D       | 1.38077   | 1.18649   | 1.07133   | 1.45871    | 1.4941    | 2.29429   | 1.47775   | 1.04233    | 0.283773   | 0.910121  | 1.42086   | 0.427372  | 0.737212  | 1.23343   | 1.86559    |
| RAD51L3-RFFL | 0.291775  | 0.229705  | 0.0450351 | 0.00100338 | 0.0383369 | 0.0895362 | 0.0893572 | 0.00851504 | 0.0606751  | 0.0632695 | 0.141336  | 0.020483  | 0.0116971 | 0.160651  | 0.00164399 |
| RAD52        | 1.93475   | 2.26517   | 2.23772   | 1.2255     | 1.4931    | 1.32213   | 1.63919   | 1.56064    | 0.412729   | 0.742413  | 0.591235  | 0.81122   | 0.477054  | 1.10135   | 1.38927    |
| RAD54B       | 0.339344  | 0.264188  | 0.254735  | 0.477742   | 0.0646158 | 0.30989   | 0.223619  | 0.433735   | 0.17969    | 0.34265   | 0.514457  | 0.268471  | 0.337875  | 0.295423  | 0.213409   |
| RAD54L       | 0.242759  | 0.485583  | 0.383398  | 1.44795    | 0.2971    | 1.4031    | 0.66354   | 0.366112   | 0.295653   | 0.618608  | 0.639438  | 0.64743   | 1.03943   | 0.93043   | 0.464844   |
| RAD54L2      | 3.58577   | 3.09506   | 3.57183   | 3.16266    | 3.39242   | 5.43479   | 4.12289   | 2.88392    | 2.31167    | 2.49712   | 1.43278   | 2.425     | 4.00444   | 2.89244   | 3.24811    |
| RAD9A        | 1.9986    | 2.59289   | 2.91022   | 1.95055    | 5.42711   | 3.56495   | 3.21113   | 1.95081    | 1.8663     | 2.46493   | 1.93538   | 5.10128   | 1.80127   | 1.99118   | 1.72264    |
| RAD9B        | 0.289574  | 0.253341  | 0.296293  | 0.172766   | 0.0828594 | 0.136261  | 0.174014  | 0.3183     | 0.445476   | 0.105208  | 0.111832  | 0.0817886 | 0.0344163 | 0.0955857 | 0.14227    |
| RADIL        | 0.510787  | 0.331178  | 0.516461  | 0.292434   | 0.646497  | 0.698033  | 1.1664    | 0.246587   | 0.0768001  | 0.182038  | 0.199324  | 0.1489    | 0.382449  | 0.507553  | 1.05052    |
| RAE1         | 3.75407   | 3.9464    | 3.55561   | 7.89123    | 4.72143   | 7.50104   | 3.75051   | 3.89553    | 6.07874    | 6.67948   | 6.40496   | 5.88354   | 11.0645   | 6.04775   | 4.47235    |
| RAET1E       | 1.71262   | 4.64976   | 2.52626   | 4.86517    | 7.36155   | 3.17889   | 5.21444   | 1.86027    | 19.0038    | 6.91485   | 8.57217   | 8.85682   | 8.74045   | 3.03099   | 1.79586    |
| RAET1E-AS1   | 0.315586  | 0.167718  | 0.123375  | 0.149706   | 0.7244    | 0.0458899 | 0.341532  | 0.0149474  | 0.0633525  | 0.138325  | 0.237457  | 0.0981627 | 0.163356  | 0.0649936 | 0.120772   |
| RAET1G       | 0.442569  | 0.820781  | 0.125744  | 1.40176    | 1.93027   | 1.09394   | 1.35732   | 0.32398    | 5.82783    | 2.58877   | 3.14674   | 2.2952    | 2.60283   | 1.06248   | 0.859055   |
| RAET1K       | 0.024581  | 0.0276058 | 0         | 0.120748   | 0.0572743 | 0.094187  | 0         | 0.0327684  | 0.104779   | 0.162259  | 0.171061  | 0.0791478 | 0.287748  | 0.0795427 | 0.0248718  |
| RAET1L       | 0.36206   | 0.878979  | 0.887824  | 0.515414   | 1.89777   | 0.0609109 | 0.568518  | 0.613786   | 5.62156    | 13.7728   | 4.43309   | 4.95852   | 16.9441   | 2.26117   | 1.10733    |
| RAF1         | 12.7988   | 12.0199   | 11.9895   | 14.2917    | 11.7171   | 16.3541   | 14.1649   | 10.2474    | 21.875     | 12.6688   | 14.3249   | 10.5047   | 16.5602   | 11.2537   | 9.42424    |
| RAG1         | 0.0738608 | 0.0728692 | 0.0552835 | 0.101488   | 0.142048  | 0.221618  | 0.128506  | 0.0250062  | 0.0299847  | 0.0882885 | 0.138966  | 0.0503327 | 0.0975785 | 0.0827205 | 0.106073   |
| RAG2         | 0.0164135 | 0.0158166 | 0.033946  | 0.0169146  | 0.0281882 | 0         | 0.0187404 | 0          | 0.00999491 | 0         | 0.019069  | 0         | 0         | 0.0128676 | 0          |
| RAI1         | 3.62856   | 4.65242   | 5.32627   | 5.51094    | 8.42881   | 10.4987   | 7.13034   | 3.80743    | 2.57571    | 3.87924   | 2.37041   | 5.16457   | 6.96297   | 5.13825   | 5.38897    |
| RAI1-AS1     | 0.322327  | 0.574617  | 0.746624  | 0.465034   | 2.15294   | 0.494022  | 0.625638  | 0.630206   | 0.0392558  | 0.323642  | 0.0727733 | 0.714963  | 0         | 0.640155  | 0.648062   |
| RAI14        | 2.91659   | 2.11741   | 2.50108   | 4.93613    | 1.71274   | 5.18225   | 2.83824   | 2.34266    | 0.808605   | 6.00183   | 9.02515   | 1.14525   | 7.20054   | 5.18445   | 12.0776    |
| RAI2         | 3.12287   | 1.59005   | 2.08073   | 1.26989    | 2.00592   | 5.63437   | 2.66939   | 2.07026    | 0.853176   | 0.41314   | 1.10524   | 0.440861  | 1.59011   | 0.855777  | 2.50909    |

|            |            |            |           |           |            |           |           |           |           |          |          |            |            |            |            |
|------------|------------|------------|-----------|-----------|------------|-----------|-----------|-----------|-----------|----------|----------|------------|------------|------------|------------|
| RALA       | 5.23807    | 6.19835    | 6.32962   | 12.0012   | 3.13436    | 10.2668   | 3.77083   | 6.85099   | 9.06755   | 15.6502  | 16.3634  | 8.99279    | 21.9673    | 10.3566    | 7.91285    |
| RALB       | 8.987      | 7.21021    | 6.77419   | 23.4804   | 7.23435    | 23.4624   | 5.93692   | 6.84981   | 10.3343   | 17.5232  | 18.6958  | 10.2902    | 34.4138    | 14.5243    | 11.2895    |
| RALBP1     | 14.394     | 18.0962    | 17.5098   | 27.6127   | 18.7837    | 21.9011   | 12.0892   | 14.0204   | 28.3281   | 20.4743  | 15.955   | 15.7304    | 33.2656    | 14.7264    | 9.98464    |
| RALGAPA1   | 7.39073    | 7.47968    | 7.85238   | 4.74433   | 3.6048     | 3.39408   | 5.98698   | 6.28846   | 5.2848    | 4.57402  | 3.89625  | 4.73662    | 3.90407    | 4.52456    | 4.22514    |
| RALGAPA1P1 | 0.700719   | 0.788115   | 0.676427  | 0.659215  | 0.0906028  | 0.240148  | 0.317013  | 0.771051  | 1.08496   | 1.1408   | 0.34663  | 0.569852   | 0.518046   | 1.36494    | 0.909934   |
| RALGAPA2   | 6.84029    | 7.49293    | 8.02911   | 7.11237   | 7.17       | 8.00282   | 8.83323   | 6.84933   | 9.69423   | 2.24647  | 2.76888  | 3.97912    | 2.77694    | 4.05752    | 5.90962    |
| RALGAPB    | 7.02877    | 7.38501    | 7.69489   | 6.57817   | 4.21395    | 6.50962   | 6.73394   | 6.54053   | 9.12544   | 6.36774  | 5.09503  | 6.27371    | 7.37635    | 6.14547    | 5.92638    |
| RALGDS     | 7.85876    | 12.1338    | 14.0213   | 13.1859   | 13.1475    | 14.3208   | 13.495    | 7.80507   | 10.3082   | 12.0708  | 7.75821  | 15.5624    | 11.5852    | 9.54836    | 9.49502    |
| RALGPS1    | 1.41575    | 1.65493    | 1.55742   | 0.481116  | 1.18198    | 0.887984  | 1.69606   | 1.35519   | 1.07441   | 0.909381 | 0.441473 | 1.37308    | 0.79412    | 0.57515    | 0.805439   |
| RALGPS2    | 2.77743    | 5.01657    | 4.96353   | 3.45916   | 1.46335    | 3.18526   | 2.63857   | 5.71154   | 6.60911   | 4.59568  | 3.30743  | 4.28432    | 6.22768    | 2.79798    | 1.76012    |
| RALY       | 8.47564    | 7.58339    | 8.32317   | 10.868    | 9.53517    | 16.1219   | 9.37828   | 6.09742   | 7.91887   | 8.62339  | 13.4215  | 5.32206    | 11.6281    | 7.94448    | 6.81021    |
| RALY-AS1   | 0.413269   | 0.647138   | 0.569808  | 0.81628   | 0.534958   | 0.645137  | 0.983035  | 0.336672  | 1.00663   | 0.605144 | 1.86612  | 0.468199   | 0.666597   | 0.413985   | 0.544047   |
| RALYL      | 0.00514748 | 0.00496027 | 0.0127751 | 0         | 0          | 0         | 0         | 0         | 0         | 0        | 0        | 0          | 0          | 0          | 0.00739243 |
| RAMAC      | 5.54145    | 4.7228     | 5.11246   | 7.9767    | 2.19537    | 7.88491   | 4.481     | 4.89331   | 11.6185   | 8.40423  | 10.5668  | 6.23614    | 11.0166    | 5.4415     | 3.82478    |
| RAMP1      | 1.56822    | 0.48083    | 0.746952  | 1.2488    | 1.62399    | 3.47992   | 0.813881  | 0.358983  | 0.607698  | 0.298223 | 1.0461   | 0.425038   | 0.459911   | 0.32288    | 0.648348   |
| RAMP2      | 18.0787    | 4.78089    | 4.06782   | 7.73746   | 12.7606    | 19.4302   | 10.8923   | 6.14935   | 3.1915    | 7.90845  | 29.6157  | 4.31895    | 9.65056    | 9.11015    | 21.7347    |
| RAMP2-AS1  | 0.568451   | 0.205874   | 0.2059    | 0.184286  | 0.431128   | 0.465877  | 0.486779  | 0.30943   | 0.0346155 | 0.151611 | 0.144385 | 0.10677    | 0.146705   | 0.211682   | 0.449002   |
| RAMP3      | 7.98925    | 1.94537    | 1.62034   | 4.09002   | 10.702     | 19.7645   | 3.66836   | 2.00027   | 0.899764  | 6.38299  | 17.9214  | 2.44643    | 5.25439    | 5.65717    | 7.64905    |
| RAN        | 21.1702    | 17.3082    | 15.611    | 70.7701   | 16.1673    | 54.0493   | 19.1066   | 15.7128   | 38.7254   | 52.1491  | 74.3585  | 32.5606    | 71.2942    | 45.0345    | 21.7612    |
| RANBP1     | 6.24762    | 4.90795    | 4.45131   | 17.2058   | 8.37065    | 15.6649   | 4.59688   | 3.67967   | 6.18295   | 10.6203  | 24.3773  | 5.98654    | 14.7321    | 10.0893    | 5.93065    |
| RANBP10    | 3.34325    | 4.01565    | 3.94042   | 5.4355    | 5.79804    | 6.92251   | 3.68247   | 3.17044   | 8.58887   | 4.13194  | 4.28467  | 5.19518    | 4.93576    | 4.17913    | 3.18018    |
| RANBP17    | 0.394484   | 0.180321   | 0.184092  | 0.151145  | 0.0942722  | 0.279915  | 0.184783  | 0.287659  | 0.0184783 | 0.247559 | 0.451032 | 0.0253314  | 0.052209   | 0.169169   | 0.435791   |
| RANBP2     | 12.1534    | 11.4073    | 12.514    | 13.4241   | 4.36909    | 10.3782   | 8.26447   | 10.8692   | 12.8764   | 10.3121  | 7.66391  | 10.2848    | 15.3971    | 11.0665    | 8.46004    |
| RANBP3     | 5.21927    | 5.3475     | 5.31978   | 7.6717    | 9.53432    | 11.3624   | 5.29879   | 4.16674   | 5.06364   | 4.69739  | 6.09932  | 5.11243    | 7.77986    | 5.45556    | 5.33582    |
| RANBP3L    | 0.119957   | 0.0227059  | 0.0779716 | 0.0132449 | 0.00665479 | 0.0547186 | 0.0391322 | 0.0799556 | 0.0156529 | 0        | 0        | 0.00306543 | 0.00829236 | 0.00223909 | 0.0123052  |
| RANBP6     | 3.47496    | 2.95531    | 3.28482   | 5.04651   | 0.964451   | 3.8073    | 2.40686   | 3.35524   | 3.10396   | 4.27973  | 3.81539  | 2.40402    | 5.53724    | 3.25551    | 2.43772    |

|             |           |           |          |           |          |           |           |           |            |            |            |           |            |          |          |
|-------------|-----------|-----------|----------|-----------|----------|-----------|-----------|-----------|------------|------------|------------|-----------|------------|----------|----------|
| RANBP9      | 11.8258   | 9.95695   | 9.82993  | 13.6816   | 6.37454  | 14.578    | 7.13928   | 9.28217   | 38.0167    | 11.864     | 15.0887    | 9.89399   | 13.9889    | 8.4107   | 9.11088  |
| RANGAP1     | 6.35097   | 12.8925   | 12.1016  | 17.9692   | 35.9784  | 16.0001   | 11.251    | 7.11892   | 25.8991    | 10.9123    | 5.58111    | 15.6563   | 20.7218    | 12.4991  | 5.37219  |
| RANGRF      | 2.08207   | 2.64358   | 1.9197   | 3.70186   | 4.40756  | 5.6333    | 3.08614   | 1.95222   | 2.31675    | 3.88211    | 6.45936    | 2.47803   | 4.01068    | 3.03987  | 3.29723  |
| RAP1A       | 3.96514   | 2.6227    | 3.25508  | 3.66054   | 1.16161  | 5.19769   | 2.22392   | 3.10271   | 3.04997    | 5.74614    | 6.62589    | 1.81989   | 6.65379    | 3.57439  | 4.60175  |
| RAP1B       | 15.5794   | 11.0574   | 13.3156  | 25.4902   | 2.62391  | 22.757    | 7.21103   | 16.2075   | 15.9995    | 27.4804    | 36.0122    | 12.0944   | 39.5754    | 23.2913  | 25.0468  |
| RAP1GAP     | 1.35703   | 0.572108  | 0.795198 | 1.68981   | 0.728996 | 1.41548   | 0.858635  | 0.849237  | 1.70092    | 5.20899    | 2.68086    | 2.0674    | 8.63157    | 2.84585  | 0.673984 |
| RAP1GAP2    | 1.87104   | 1.47676   | 1.75143  | 2.86973   | 1.72985  | 3.71432   | 1.92342   | 1.61371   | 0.905816   | 1.96655    | 1.11298    | 1.31188   | 2.64266    | 2.47858  | 1.87296  |
| RAP1GDS1    | 3.75975   | 3.17236   | 3.16122  | 5.73885   | 1.43376  | 5.01425   | 3.08433   | 2.84917   | 4.34664    | 6.46432    | 5.72386    | 3.75569   | 7.47569    | 5.04919  | 3.06648  |
| RAP2A       | 4.05189   | 3.11902   | 3.05327  | 4.98006   | 2.14474  | 5.33572   | 2.43139   | 3.80392   | 6.51283    | 10.7043    | 14.5044    | 4.55322   | 11.2691    | 6.64729  | 5.05638  |
| RAP2B       | 3.78795   | 4.39506   | 3.72762  | 14.4124   | 9.62718  | 10.0907   | 3.26335   | 3.68667   | 9.21988    | 16.7625    | 15.8143    | 11.5869   | 29.4962    | 11.4759  | 6.10367  |
| RAP2C       | 2.7412    | 2.89927   | 2.60536  | 4.29131   | 3.39272  | 4.88423   | 2.20409   | 3.08809   | 5.27976    | 5.78722    | 6.301      | 3.53209   | 7.65097    | 3.82238  | 3.15254  |
| RAP2C-AS1   | 0.743932  | 0.7071    | 0.895175 | 0.432108  | 0.147074 | 0.454931  | 0.586856  | 0.913582  | 0.164732   | 0.24616    | 0.488615   | 0.280669  | 0.231264   | 0.229752 | 0.271951 |
| RAPGEF1     | 6.67911   | 5.31823   | 5.64355  | 9.1529    | 9.14386  | 14.3196   | 7.96025   | 4.69854   | 2.1912     | 6.27267    | 5.45637    | 3.4534    | 8.99387    | 7.86378  | 10.5354  |
| RAPGEF2     | 5.25304   | 3.86563   | 4.19675  | 3.04805   | 2.3985   | 4.41514   | 3.84165   | 3.60219   | 4.12002    | 4.65839    | 3.58331    | 2.79005   | 4.71366    | 3.51973  | 5.34147  |
| RAPGEF3     | 2.33465   | 1.1806    | 1.22378  | 0.906731  | 2.93495  | 2.32521   | 1.94118   | 1.43307   | 0.256155   | 1.22752    | 0.514439   | 0.835247  | 1.97673    | 1.70753  | 3.44849  |
| RAPGEF4     | 2.2774    | 2.95358   | 3.40688  | 2.46751   | 1.98552  | 1.88552   | 4.27038   | 2.43196   | 7.94821    | 2.7228     | 3.15011    | 3.64553   | 1.77427    | 2.70986  | 2.41096  |
| RAPGEF4-AS1 | 0.0600988 | 0.0796304 | 0.111865 | 0.0154834 | 0.108913 | 0.0341156 | 0.0800554 | 0.0311563 | 0.00609947 | 0.00628585 | 0.00565367 | 0.0465858 | 0.00323129 | 0.060203 | 0        |
| RAPGEF5     | 5.23882   | 3.87462   | 3.34802  | 5.35913   | 1.98149  | 6.28497   | 2.59771   | 3.5998    | 1.69403    | 5.91729    | 4.94738    | 3.16335   | 6.19189    | 4.89339  | 5.89742  |
| RAPGEF6     | 2.67206   | 2.84828   | 3.15351  | 2.31631   | 1.17659  | 2.40337   | 2.00575   | 2.79133   | 0.949537   | 1.79299    | 1.82712    | 1.32758   | 2.06944    | 2.21021  | 2.19686  |
| RAPGEFL1    | 12.8579   | 36.1621   | 37.5687  | 12.805    | 49.9266  | 14.1726   | 30.8364   | 19.612    | 48.8162    | 12.5795    | 10.211     | 23.6733   | 10.0551    | 9.10525  | 3.51723  |
| RAPH1       | 6.1617    | 5.8271    | 5.80494  | 6.64008   | 2.76383  | 7.55919   | 5.80637   | 7.65241   | 3.97063    | 4.71504    | 4.57995    | 3.81638   | 7.34538    | 5.43558  | 6.49447  |
| RAPSN       | 0.373945  | 0.407057  | 0.171863 | 0.142726  | 0.30119  | 0.495303  | 0.253012  | 0.418491  | 0.13494    | 0.243361   | 0.140712   | 0.0990992 | 0.0357433  | 0.347449 | 0.218791 |
| RARA        | 3.04602   | 2.79482   | 3.4865   | 4.23532   | 5.35458  | 9.60724   | 4.39442   | 3.25607   | 1.33249    | 3.16221    | 5.72293    | 1.555     | 4.53504    | 4.34878  | 6.47744  |
| RARA-AS1    | 0.45275   | 0.722345  | 0.618633 | 0.580292  | 1.1735   | 1.52911   | 0.616251  | 0.501064  | 0.532721   | 0.782745   | 0.958999   | 0.439275  | 0.496198   | 0.419514 | 1.09707  |
| RARB        | 0.75707   | 0.516287  | 0.515494 | 0.312073  | 0.16283  | 0.366946  | 0.352408  | 0.621065  | 0.14185    | 0.219277   | 0.710006   | 0.112508  | 0.195383   | 0.17349  | 0.275994 |
| RARG        | 12.7418   | 23.9751   | 24.229   | 23.3284   | 39.9842  | 24.1461   | 24.799    | 14.573    | 48.0972    | 22.2913    | 22.7067    | 22.4473   | 30.2022    | 17.4575  | 8.61181  |

|             |           |            |           |           |            |           |           |           |            |            |           |            |           |            |           |
|-------------|-----------|------------|-----------|-----------|------------|-----------|-----------|-----------|------------|------------|-----------|------------|-----------|------------|-----------|
| RARRES1     | 0.708461  | 0.294496   | 0.448185  | 0.615566  | 0.258937   | 5.06252   | 0.269632  | 0.345674  | 0.152263   | 0.941496   | 2.0543    | 0.129216   | 0.797676  | 0.326711   | 1.79548   |
| RARRES2     | 12.0869   | 3.56641    | 5.47754   | 16.8331   | 20.9097    | 24.5727   | 4.17221   | 5.35702   | 0.228224   | 18.7374    | 69.9151   | 0.357559   | 17.5312   | 9.92457    | 32.4738   |
| RARRES3     | 2.63195   | 1.57421    | 1.85199   | 1.93291   | 2.06766    | 12.2873   | 1.13986   | 1.37117   | 0.18422    | 0.759396   | 2.01492   | 0.259756   | 1.30775   | 0.316224   | 2.69366   |
| RARS        | 10.738    | 10.1441    | 10.3339   | 21.0385   | 4.57351    | 16.4616   | 6.36499   | 8.82156   | 20.8031    | 17.7433    | 23.8039   | 11.618     | 20.1698   | 15.4957    | 9.66932   |
| RARS2       | 5.31073   | 3.43478    | 3.69793   | 4.85303   | 1.73057    | 5.62197   | 2.78599   | 3.95438   | 3.77917    | 5.76477    | 7.98582   | 2.94901    | 5.993     | 3.90445    | 4.37786   |
| RASA1       | 5.55741   | 5.22746    | 6.068     | 5.64502   | 3.30476    | 5.62931   | 3.21979   | 4.28172   | 3.90231    | 7.32016    | 5.74503   | 3.9147     | 7.32386   | 5.9831     | 5.73523   |
| RASA2       | 3.03414   | 2.62394    | 2.97074   | 3.07191   | 0.775972   | 1.96991   | 2.24408   | 3.43158   | 3.48083    | 4.14733    | 2.85201   | 2.16514    | 5.02478   | 3.23793    | 2.75205   |
| RASA3       | 2.63141   | 1.33458    | 1.59612   | 2.58378   | 3.21213    | 7.69374   | 2.88995   | 2.10091   | 0.372241   | 2.67932    | 4.13503   | 0.785943   | 3.8516    | 3.88128    | 9.75976   |
| RASA4       | 11.5199   | 4.99803    | 6.46061   | 3.96771   | 9.52892    | 11.2549   | 10.6978   | 8.55338   | 3.48222    | 2.98479    | 2.68223   | 4.29905    | 5.14176   | 5.69165    | 11.5824   |
| RASA4B      | 2.75416   | 0.68807    | 0.640658  | 1.73076   | 6.68544    | 4.20229   | 2.26231   | 1.02635   | 0.442285   | 0.868367   | 1.19216   | 0.67457    | 1.73316   | 1.25292    | 3.99287   |
| RASA4CP     | 2.12013   | 2.12193    | 2.50007   | 1.89524   | 4.27533    | 2.04133   | 2.75603   | 1.51112   | 6.50943    | 1.07971    | 2.60914   | 2.20352    | 1.2711    | 1.47479    | 0.573605  |
| RASA4DP     | 0.019314  | 0.00232645 | 0.0159779 | 0         | 0.00750034 | 0.0205571 | 0.0220521 | 0.0171647 | 0          | 0.00606028 | 0         | 0.00345493 | 0         | 0.012618   | 0.0277374 |
| RASAL1      | 1.83896   | 2.61353    | 3.08089   | 5.41715   | 7.99468    | 2.57527   | 3.13628   | 2.01976   | 18.5649    | 4.59439    | 2.08248   | 7.46046    | 2.67145   | 3.22792    | 1.06303   |
| RASAL2      | 4.51442   | 4.12444    | 4.32639   | 2.85544   | 3.04913    | 2.98416   | 4.30709   | 3.39378   | 3.86229    | 4.20603    | 3.87326   | 3.63114    | 4.87784   | 3.81099    | 4.05503   |
| RASAL2-AS1  | 0.162751  | 0.226652   | 0.345805  | 0.0736718 | 0.0708403  | 0.237337  | 0.29955   | 0.134973  | 0.218987   | 0.166231   | 0.125909  | 0.142763   | 0.111888  | 0.194478   | 0.0859488 |
| RASAL3      | 0.595932  | 0.381852   | 0.614975  | 0.816723  | 1.99453    | 1.42289   | 0.420876  | 0.343977  | 0.493828   | 0.624582   | 0.554831  | 0.342883   | 0.745202  | 0.950436   | 1.72932   |
| RASD1       | 2.81004   | 1.36031    | 2.2808    | 6.92543   | 3.15019    | 22.076    | 2.39118   | 2.33241   | 2.48602    | 1.68026    | 5.49146   | 2.5228     | 8.78298   | 5.17492    | 7.29066   |
| RASD2       | 0.412713  | 0.225115   | 0.367193  | 0.16852   | 0.423358   | 1.39905   | 0.311184  | 0.332182  | 0.00948373 | 0.156376   | 0.334042  | 0.0445746  | 0.0954589 | 0.398844   | 1.57683   |
| RASEF       | 0.518809  | 0.25197    | 0.264385  | 0.461936  | 1.25719    | 0.491236  | 0.29381   | 0.545912  | 1.44062    | 0.797019   | 0.632525  | 1.23543    | 0.950642  | 0.698489   | 0.274188  |
| RASGEF1A    | 0.748114  | 0.213602   | 0.24068   | 0.606769  | 0.40888    | 0.448266  | 0.181907  | 0.209308  | 0.52305    | 0.330375   | 0.79761   | 0.242866   | 0.817874  | 0.52495    | 0.397921  |
| RASGEF1B    | 3.76603   | 6.01578    | 7.43974   | 7.40774   | 1.56564    | 3.51275   | 3.85387   | 6.68694   | 7.22245    | 6.06041    | 8.75849   | 5.26076    | 7.56679   | 3.10353    | 2.52471   |
| RASGEF1C    | 0.0939925 | 0.0201276  | 0.0259191 | 0.0430498 | 0.146003   | 0.284563  | 0.357725  | 0.0649699 | 0.0381574  | 0.0393234  | 0.0589477 | 0.0597815  | 0.0741198 | 0.169207   | 0         |
| RASGRF1     | 0.0346925 | 0.00848547 | 0.011258  | 0.022751  | 0.0709355  | 0.0349112 | 0.0288078 | 0.0335375 | 0.00384105 | 0.0197921  | 0.0178016 | 0          | 0.0264531 | 0.00989008 | 0.0226467 |
| RASGRF2     | 0.86829   | 0.49469    | 0.544602  | 0.58776   | 0.586223   | 0.922964  | 0.644725  | 0.479138  | 0.221172   | 0.662423   | 0.794764  | 0.172579   | 0.47417   | 0.828383   | 2.51432   |
| RASGRF2-AS1 | 0.085874  | 0.0448121  | 0         | 0         | 1.69E-18   | 0         | 0.0490241 | 0         | 0          | 1.13E-40   | 0.333835  | 2.62E-39   | 0         | 0.0768476  | 0.061663  |
| RASGRP1     | 2.53157   | 3.30885    | 3.82299   | 4.23583   | 1.23691    | 1.97139   | 2.10215   | 3.41159   | 4.1875     | 1.06875    | 1.39254   | 3.13867    | 1.44032   | 3.51708    | 1.30222   |

|            |           |           |           |          |           |           |           |           |           |           |            |           |          |            |           |
|------------|-----------|-----------|-----------|----------|-----------|-----------|-----------|-----------|-----------|-----------|------------|-----------|----------|------------|-----------|
| RASGRP2    | 0.941139  | 0.509597  | 0.311431  | 0.498791 | 1.68468   | 1.99197   | 0.736842  | 0.382357  | 0.382067  | 0.449991  | 1.14338    | 0.275777  | 0.537821 | 0.651155   | 1.39021   |
| RASGRP3    | 0.778449  | 0.541315  | 0.536076  | 1.15345  | 0.692838  | 2.12467   | 0.648589  | 0.474925  | 0.286981  | 1.64775   | 2.38455    | 0.391406  | 1.37644  | 2.02106    | 2.45949   |
| RASGRP4    | 0.438697  | 0.426207  | 0.517609  | 0.948647 | 0.96073   | 0.857315  | 0.75544   | 0.543271  | 0.0613112 | 0.640873  | 1.3964     | 0.133793  | 0.682092 | 0.394666   | 1.13611   |
| RASIP1     | 2.47411   | 1.12115   | 1.09585   | 3.10579  | 5.14959   | 4.39237   | 2.04062   | 1.07136   | 1.74987   | 2.53347   | 3.19647    | 2.23668   | 4.19645  | 4.32979    | 5.17368   |
| RASL10A    | 0.357242  | 0.456504  | 0.591071  | 0.192077 | 0.579047  | 0.290961  | 0.407887  | 0.248468  | 0.132416  | 0.0389891 | 0.245476   | 0.322298  | 0.170363 | 0.219181   | 0.245369  |
| RASL10B    | 0.0652121 | 0.0768049 | 0.0659365 | 0.440553 | 0.247615  | 0.746533  | 0.0579111 | 0.0579551 | 0.0705964 | 0.463805  | 0.61347    | 0.046661  | 0.392695 | 0.348401   | 0.385017  |
| RASL11A    | 2.47488   | 1.26341   | 1.35274   | 1.24485  | 2.21965   | 5.14288   | 2.13612   | 1.19138   | 1.23794   | 1.60858   | 4.97235    | 0.959206  | 2.08151  | 1.23188    | 3.30036   |
| RASL11B    | 0.827805  | 0.564086  | 0.303277  | 0.450912 | 0.826628  | 0.886116  | 1.25571   | 0.557018  | 0.489684  | 0.430434  | 0.627442   | 0.363851  | 0.236528 | 0.389382   | 0.271733  |
| RASL12     | 2.53347   | 0.734931  | 0.884758  | 0.993733 | 3.21363   | 8.98722   | 2.8726    | 0.654425  | 0.373673  | 1.2543    | 3.12715    | 0.269719  | 1.2726   | 1.42489    | 3.41175   |
| RASSF1     | 3.76046   | 3.94498   | 4.02684   | 4.5888   | 8.7879    | 7.19637   | 3.67508   | 2.6938    | 7.01033   | 6.69167   | 9.2175     | 3.29326   | 6.40204  | 5.20503    | 4.49273   |
| RASSF1-AS1 | 1.26989   | 1.131     | 1.16903   | 0.515831 | 3.79616   | 1.15328   | 1.64708   | 0.654186  | 0.286877  | 0.184777  | 0.332387   | 0.797192  | 0        | 0.866696   | 0.513747  |
| RASSF10    | 5.60469   | 3.49809   | 3.11008   | 1.2529   | 8.82656   | 2.57705   | 3.0618    | 2.39853   | 5.32419   | 1.5584    | 0.856578   | 2.59744   | 1.88038  | 2.16765    | 0.656306  |
| RASSF2     | 4.39588   | 2.00544   | 2.8952    | 3.89541  | 2.38165   | 4.12638   | 3.71457   | 3.37446   | 0.698304  | 3.95536   | 7.14395    | 0.650344  | 4.63929  | 2.47505    | 6.08733   |
| RASSF3     | 4.2946    | 2.50346   | 2.35755   | 4.86277  | 3.13989   | 8.77527   | 3.88189   | 2.91552   | 6.78      | 7.46132   | 9.89058    | 3.62296   | 8.22266  | 5.11262    | 5.40613   |
| RASSF4     | 2.27411   | 1.20496   | 1.55578   | 4.14537  | 1.9834    | 6.35806   | 1.50118   | 1.591     | 0.305015  | 1.32719   | 3.44049    | 0.438046  | 1.75716  | 1.31863    | 4.11624   |
| RASSF5     | 5.59963   | 7.23747   | 8.14359   | 13.8885  | 8.17183   | 10.9125   | 8.75932   | 5.59861   | 14.0456   | 11.135    | 9.46951    | 8.85199   | 16.932   | 4.98507    | 4.59533   |
| RASSF6     | 0.619869  | 0.86321   | 0.703536  | 0.638793 | 0.328785  | 0.289652  | 0.36682   | 0.393012  | 0.883821  | 0.592988  | 0.460814   | 0.338059  | 0.629169 | 0.426693   | 0.217125  |
| RASSF7     | 2.97685   | 5.05809   | 5.45927   | 4.83235  | 10.8646   | 4.8564    | 3.47406   | 2.51681   | 8.43806   | 4.62898   | 5.57605    | 4.4297    | 4.47867  | 4.07544    | 1.13499   |
| RASSF8     | 1.75832   | 0.662604  | 1.00766   | 1.33285  | 0.361119  | 3.69697   | 1.02436   | 1.30948   | 0.350925  | 3.08633   | 4.15466    | 0.555263  | 3.38649  | 3.02218    | 6.63974   |
| RASSF8-AS1 | 0.469693  | 0.257165  | 0.353239  | 0.330022 | 0.165817  | 1.78154   | 0.487527  | 0.474346  | 0.052003  | 0.669901  | 1.27736    | 0.12221   | 0.537214 | 0.725288   | 1.4104    |
| RASSF9     | 2.0102    | 1.71358   | 1.58836   | 1.0889   | 0.540438  | 1.95305   | 1.41242   | 0.927604  | 2.84053   | 1.35854   | 2.22562    | 1.35537   | 0.864646 | 0.62633    | 0.74023   |
| RAVER1     | 3.56295   | 3.30298   | 3.50185   | 7.25049  | 6.45523   | 10.5936   | 4.86254   | 3.71614   | 2.40896   | 2.99203   | 5.9059     | 3.9739    | 8.03955  | 5.19247    | 4.85776   |
| RAVER2     | 3.00897   | 1.97393   | 2.02826   | 1.8594   | 0.807846  | 2.4672    | 1.69656   | 2.26381   | 1.28616   | 1.18559   | 1.89906    | 0.797406  | 0.876527 | 1.06783    | 1.42518   |
| RAX        | 0         | 0.04883   | 0.101806  | 0.02984  | 0.0562233 | 0.117114  | 0.0495915 | 0.0128668 | 0         | 0         | 0.00817192 | 0         | 0.042035 | 0.00378341 | 0.103961  |
| RAX2       | 0.0287849 | 0.041607  | 0.0158753 | 0        | 0.0298086 | 0.0408499 | 0.0219104 | 0.0170544 | 0         | 0         | 0          | 0.0137309 | 0        | 0.0100295  | 0.0413387 |
| RB1        | 3.71492   | 3.11714   | 2.993     | 8.51128  | 1.77787   | 6.7311    | 2.54162   | 3.54718   | 5.28038   | 9.67216   | 9.90387    | 5.76736   | 16.2679  | 7.01097    | 7.02059   |

|             |            |           |           |            |            |            |            |            |           |            |           |            |          |            |           |
|-------------|------------|-----------|-----------|------------|------------|------------|------------|------------|-----------|------------|-----------|------------|----------|------------|-----------|
| RB1-DT      | 0.121486   | 0.0975562 | 0.234504  | 0.125195   | 0.125806   | 0.120684   | 0.0693543  | 0.107966   | 0.073978  | 0.0508257  | 0.0228571 | 0.0144877  | 0.039191 | 0          | 0.0581563 |
| RB1CC1      | 6.90091    | 6.02606   | 6.38377   | 5.38735    | 3.1436     | 5.37357    | 4.19328    | 5.4049     | 12.9789   | 8.36072    | 8.09592   | 5.07935    | 9.97521  | 5.15064    | 5.76284   |
| RBAK        | 2.83189    | 2.15561   | 1.8925    | 2.74862    | 0.795999   | 2.71985    | 1.36745    | 2.5632     | 2.17064   | 2.27261    | 2.63729   | 1.2827     | 2.51505  | 2.26155    | 1.54889   |
| RBAK-RBAKDN | 0.0363962  | 0.176581  | 1.61E-05  | 0.146524   | 0.197306   | 0.0880159  | 0.404212   | 0.00079602 | 0.056306  | 0.323372   | 0.0532159 | 4.31E-18   | 0.158177 | 0.0107988  | 1.54E-09  |
| RBAKDN      | 0.16156    | 4.11E-05  | 0.297584  | 4.14E-06   | 0          | 0.0127609  | 2.36E-13   | 0.212233   | 4.35E-07  | 2.36E-18   | 6.16E-08  | 0          | 5.26E-18 | 0.00916303 | 0.057403  |
| RBBP4       | 8.68097    | 7.46034   | 7.33956   | 10.294     | 3.60881    | 10.8439    | 7.13843    | 8.13736    | 6.01151   | 6.32222    | 8.88847   | 4.60467    | 7.0811   | 6.50365    | 6.16199   |
| RBBP5       | 2.69678    | 2.71247   | 3.12946   | 3.9524     | 1.78482    | 3.87332    | 2.42015    | 2.42933    | 3.17577   | 3.16743    | 3.02065   | 2.30504    | 3.71689  | 2.99992    | 2.65981   |
| RBBP6       | 7.91642    | 6.54042   | 6.49623   | 7.46773    | 6.85689    | 6.75692    | 4.12965    | 4.5523     | 17.4455   | 8.65085    | 9.53792   | 10.2607    | 7.95566  | 6.60123    | 5.68903   |
| RBBP7       | 11.5666    | 8.66397   | 9.01402   | 14.0434    | 6.82444    | 17.811     | 7.85726    | 8.45678    | 13.2465   | 11.3088    | 15.9101   | 8.15804    | 12.7617  | 8.84435    | 7.70539   |
| RBBP8       | 6.24959    | 4.72688   | 4.97085   | 8.27866    | 1.6483     | 7.07309    | 2.09608    | 4.16558    | 4.24172   | 7.9338     | 9.07597   | 3.14421    | 10.5676  | 6.10402    | 2.89825   |
| RBBP8NL     | 0.35944    | 1.18867   | 0.669047  | 1.30487    | 4.17482    | 1.57898    | 0.80214    | 0.602581   | 0.328318  | 0.758726   | 0.811527  | 0.56114    | 0.732622 | 0.478187   | 0.363688  |
| RBBP9       | 5.78426    | 3.96937   | 4.02072   | 3.95123    | 1.9107     | 5.37994    | 3.55563    | 4.17005    | 4.95459   | 3.90104    | 5.54755   | 3.33594    | 4.16557  | 2.84749    | 2.86951   |
| RBACK1      | 4.12175    | 4.99846   | 4.47368   | 7.74099    | 12.8635    | 11.807     | 5.78737    | 3.27092    | 4.87564   | 5.15294    | 7.57469   | 4.57013    | 6.38096  | 5.44175    | 5.40159   |
| RBFA        | 1.4467     | 1.78676   | 1.8913    | 1.55386    | 2.00667    | 2.1028     | 1.25164    | 1.10462    | 1.08693   | 0.961581   | 1.54113   | 1.09346    | 1.16741  | 1.27367    | 0.895433  |
| RFADN       | 0.0859272  | 0.317408  | 0.497595  | 0.0590336  | 0.0889831  | 0.0487772  | 0.032703   | 0.025455   | 0.0348832 | 0.0359491  | 0         | 0.0204944  | 0        | 0.0748488  | 0         |
| RBFOX1      | 0.00795978 | 0.0364338 | 0.0263396 | 0.00820278 | 0.00618214 | 0.00338882 | 0.00908822 | 0.028296   | 0         | 0.00499517 | 0         | 0.00284772 | 0        | 0          | 0.0114312 |
| RBFOX2      | 9.19115    | 7.79637   | 8.27215   | 7.18728    | 5.13351    | 13.3927    | 8.64528    | 6.89685    | 3.97508   | 8.16552    | 9.76153   | 4.47289    | 10.1174  | 8.66082    | 12.8836   |
| RBFOX3      | 0.133048   | 0.121087  | 0.128412  | 0.0761724  | 0.20667    | 0.100701   | 0.185668   | 0.223347   | 0         | 0.046386   | 0         | 0.0740443  | 0        | 0.046358   | 0.20169   |
| RBKS        | 0.358282   | 0.415234  | 0.256342  | 0.708502   | 0.120332   | 0.715485   | 0.221121   | 0.249565   | 0.542485  | 0.522601   | 0.568424  | 0.394933   | 0.424837 | 0.263167   | 0.180783  |
| RBL1        | 1.05065    | 0.864545  | 0.778113  | 1.92977    | 0.480215   | 1.39821    | 0.919706   | 0.795582   | 0.301646  | 1.08245    | 1.55475   | 0.72836    | 1.79172  | 1.26507    | 1.01859   |
| RBL2        | 10.7775    | 10.8972   | 11.2141   | 10.8185    | 5.76978    | 11.1924    | 8.65946    | 9.71337    | 8.73435   | 6.28816    | 7.93387   | 5.70865    | 5.84314  | 7.09221    | 7.60836   |
| RBM10       | 3.74819    | 4.78443   | 4.2552    | 9.66349    | 9.64436    | 8.92595    | 4.51047    | 3.31911    | 7.14289   | 5.5082     | 3.85833   | 5.32046    | 10.1777  | 5.74654    | 5.12147   |
| RBM11       | 0.126465   | 0.0221573 | 0.0285329 | 0          | 0          | 0.0587362  | 0.0525067  | 0.102174   | 0.0420054 | 0.0144297  | 0.0129785 | 0          | 0        | 0.0120175  | 0         |
| RBM12       | 6.78888    | 6.28447   | 6.57895   | 9.05991    | 3.4981     | 7.68264    | 6.5434     | 6.74476    | 5.25261   | 5.23454    | 5.86016   | 4.41881    | 10.4988  | 6.80224    | 6.04394   |
| RBM12B      | 3.02615    | 3.13251   | 3.15652   | 3.2027     | 2.86127    | 3.57343    | 2.18603    | 2.88697    | 0.850929  | 1.82219    | 1.97696   | 1.27256    | 1.8383   | 2.4139     | 2.80825   |
| RBM12B-AS1  | 2.38285    | 1.68282   | 1.80924   | 1.44645    | 1.77464    | 1.13956    | 2.23616    | 1.5665     | 0.19877   | 0.860346   | 0.589577  | 0.770751   | 0.421207 | 1.706      | 2.25013   |

|            |          |          |           |           |           |           |          |          |           |           |           |           |           |           |           |
|------------|----------|----------|-----------|-----------|-----------|-----------|----------|----------|-----------|-----------|-----------|-----------|-----------|-----------|-----------|
| RBM14      | 3.70367  | 5.86597  | 6.97981   | 5.66221   | 5.1227    | 7.76321   | 6.16431  | 3.96906  | 2.43045   | 3.66889   | 3.91512   | 5.15955   | 5.02649   | 6.51689   | 4.77232   |
| RBM14-RBM4 | 3.01211  | 2.73556  | 2.84033   | 2.10482   | 4.84741   | 1.84804   | 2.22694  | 1.67117  | 1.84521   | 1.38812   | 1.29146   | 2.47943   | 2.01269   | 1.33615   | 2.66171   |
| RBM15      | 5.69976  | 4.77094  | 4.93287   | 5.19257   | 5.86754   | 5.15195   | 5.02142  | 3.27306  | 2.16054   | 2.9885    | 2.56611   | 2.65453   | 4.8177    | 4.52662   | 3.36142   |
| RBM15-AS1  | 0.239503 | 0.145314 | 0.0953976 | 0.0731302 | 0.0275578 | 0.0226593 | 0.374736 | 0.173433 | 0         | 0         | 0.0400546 | 0.0317353 | 0.0171695 | 0.0463609 | 0.0764347 |
| RBM15B     | 7.40977  | 7.20155  | 7.64993   | 9.43825   | 9.63936   | 11.8193   | 7.87421  | 5.44918  | 9.81585   | 6.60649   | 6.19623   | 6.45773   | 14.0174   | 7.53235   | 6.30791   |
| RBM17      | 5.87194  | 5.03342  | 5.05587   | 7.26142   | 4.01149   | 8.1689    | 3.77582  | 4.26306  | 4.21965   | 4.6859    | 5.78442   | 3.77512   | 7.36595   | 5.98517   | 4.14512   |
| RBM18      | 2.46908  | 1.97691  | 2.04062   | 3.38118   | 0.731672  | 3.29849   | 1.59402  | 2.09212  | 2.56389   | 2.96036   | 4.36356   | 1.93655   | 3.63417   | 2.66769   | 2.06273   |
| RBM19      | 3.62763  | 3.68134  | 3.44527   | 4.65505   | 5.67955   | 6.48147   | 4.60993  | 2.99809  | 1.92696   | 2.64436   | 1.48998   | 3.26732   | 4.41126   | 4.4946    | 3.65565   |
| RBM20      | 0.332671 | 0.309784 | 0.314903  | 0.0494463 | 0.149064  | 0.38949   | 0.346963 | 0.210367 | 0.0116872 | 0.0160591 | 0.0649981 | 0.0183104 | 0.0103191 | 0.053498  | 0.183753  |
| RBM22      | 7.65516  | 5.9841   | 5.76978   | 9.5256    | 4.48981   | 12.0286   | 5.96961  | 6.1282   | 7.16054   | 7.20601   | 10.0338   | 5.24454   | 9.96725   | 6.83663   | 6.78611   |
| RBM23      | 6.10228  | 5.3736   | 6.16202   | 7.93144   | 7.7829    | 9.5193    | 5.23125  | 3.99446  | 8.12528   | 5.86822   | 7.70534   | 4.80728   | 6.6988    | 5.54189   | 5.59874   |
| RBM24      | 0.637198 | 0.102337 | 0.189769  | 0.0525321 | 0.0527888 | 0.419584  | 0.329815 | 0.15101  | 0.0206943 | 0.09597   | 0.450773  | 0.0364746 | 0.241189  | 0.150973  | 0.597863  |
| RBM25      | 12.8005  | 10.3577  | 10.1668   | 9.56644   | 5.14633   | 12.7588   | 5.60658  | 7.67163  | 6.49128   | 6.19685   | 5.58577   | 7.74289   | 7.94303   | 10.6339   | 8.20288   |
| RBM26      | 5.54387  | 5.4806   | 5.72646   | 5.01666   | 2.49085   | 5.17572   | 3.8635   | 5.669    | 2.46403   | 2.91078   | 2.81751   | 3.4516    | 3.55695   | 4.5806    | 4.0919    |
| RBM26-AS1  | 0.309074 | 0.487363 | 0.410649  | 0.27025   | 0.116387  | 0.550269  | 0.299422 | 0.258032 | 0.079846  | 0.105796  | 0.243177  | 0.0938214 | 0.0966849 | 0.12727   | 0.107605  |
| RBM27      | 5.07095  | 4.18236  | 4.58147   | 4.7918    | 2.29767   | 4.95663   | 3.59997  | 5.0507   | 3.17196   | 3.64197   | 3.56731   | 2.80802   | 5.00237   | 3.50476   | 3.46085   |
| RBM28      | 5.59422  | 4.8509   | 4.77102   | 4.94993   | 4.83758   | 7.80802   | 4.08259  | 3.88069  | 1.83623   | 3.06083   | 3.11573   | 2.87095   | 5.42735   | 4.71942   | 4.91031   |
| RBM3       | 38.2132  | 22.8322  | 24.2171   | 32.5618   | 12.4265   | 59.3626   | 24.3015  | 23.6676  | 36.6884   | 43.7342   | 79.5205   | 22.6534   | 34.715    | 25.9978   | 22.775    |
| RBM33      | 7.23318  | 7.78009  | 7.94193   | 4.54817   | 6.30895   | 5.10925   | 6.94829  | 6.71709  | 3.94735   | 3.83729   | 2.61383   | 4.81628   | 3.9148    | 5.32556   | 5.23412   |
| RBM34      | 4.90912  | 4.07009  | 3.82393   | 5.80021   | 2.68863   | 6.15912   | 2.41391  | 3.67745  | 5.39935   | 6.41916   | 9.83001   | 4.17433   | 7.85469   | 5.0678    | 3.36428   |
| RBM38      | 1.882    | 1.183    | 1.47911   | 3.26391   | 2.26724   | 4.2431    | 1.73267  | 0.985325 | 1.19108   | 3.00403   | 2.96508   | 1.32662   | 3.8949    | 2.81743   | 1.87574   |
| RBM39      | 20.7551  | 19.6527  | 18.242    | 23.6979   | 10.6053   | 18.9666   | 10.5136  | 15.0851  | 20.4932   | 22.2619   | 24.6395   | 15.8178   | 18.8443   | 21.7383   | 18.1819   |
| RBM4       | 7.54334  | 8.15412  | 8.26191   | 9.53666   | 5.91297   | 11.104    | 7.54488  | 7.2847   | 6.82981   | 7.76182   | 10.7886   | 6.61939   | 9.02813   | 7.9461    | 6.05558   |
| RBM41      | 1.46384  | 1.99969  | 1.66576   | 1.36835   | 0.62962   | 1.32341   | 0.738528 | 1.29213  | 1.60351   | 1.44901   | 1.23386   | 1.20811   | 1.49516   | 1.31344   | 1.33684   |
| RBM42      | 8.76813  | 8.09129  | 8.96372   | 15.6075   | 22.2243   | 25.4343   | 11.2453  | 6.08741  | 14.5781   | 9.76708   | 16.9902   | 8.85487   | 17.7301   | 9.942     | 8.07142   |
| RBM43      | 2.07542  | 1.35609  | 1.35062   | 1.23895   | 0.523812  | 2.34619   | 1.28272  | 1.97058  | 0.381665  | 0.734707  | 1.62868   | 0.410391  | 0.5608    | 0.525357  | 1.17185   |





|           |           |           |           |            |           |            |           |           |           |           |          |           |            |           |           |
|-----------|-----------|-----------|-----------|------------|-----------|------------|-----------|-----------|-----------|-----------|----------|-----------|------------|-----------|-----------|
| RBM1F     | 0         | 0         | 0         | 0          | 0         | 2.91E-06   | 0         | 0         | 0         | 0         | 0        | 0         | 0          | 0         | 0         |
|           |           |           |           |            |           | 0.00014024 |           |           |           |           |          |           |            |           |           |
| RBM1J     | 0         | 0         | 0         | 0          | 0         | 3          | 0         | 0         | 0         | 0         | 0        | 0         | 0          | 0         | 0         |
| RBM2EP    | 0         | 0         | 0         | 0          | 0         | 0          | 0         | 0         | 0         | 0         | 0        | 0         | 0          | 0         | 0         |
| RBM2FP    | 0         | 0         | 0         | 0          | 0         | 0          | 0         | 0         | 0         | 0         | 0        | 0         | 0          | 0         | 0         |
| RBM3AP    | 0         | 0         | 0         | 0          | 0         | 0          | 0         | 0         | 0         | 0         | 0        | 0         | 0          | 0         | 0         |
| RBP1      | 1.20808   | 1.81469   | 0.989612  | 2.67301    | 4.67303   | 2.7532     | 0.960135  | 1.21048   | 5.7554    | 11.7437   | 20.7909  | 4.05935   | 10.6601    | 9.49565   | 3.87814   |
| RBP2      | 0.0336382 | 0.162074  | 0.445246  | 0.0346651  | 0         | 0          | 0.115221  | 0.179369  | 0         | 0.0422193 | 0        | 0.048138  | 0          | 0         | 0.144926  |
| RBP3      | 0.0108246 | 0         | 0         | 0          | 0         | 0          | 0.0061796 | 0         | 0         | 0         | 0        | 0         | 0          | 0         | 0         |
| RBP4      | 2.1946    | 0.028838  | 0.0660192 | 0.18504    | 0.402878  | 1.90265    | 1.34398   | 0.195038  | 0         | 0         | 0.135133 | 0         | 0          | 0         | 0.744952  |
| RBP5      | 0.858306  | 1.07522   | 0.994072  | 1.52779    | 2.32712   | 2.2058     | 1.60361   | 0.846005  | 0.114035  | 0.685531  | 0.299485 | 0.658806  | 0.22151    | 1.76988   | 2.57733   |
| RBP7      | 2.71332   | 2.14042   | 2.24465   | 3.15253    | 2.02472   | 6.90844    | 1.45788   | 1.48938   | 2.52699   | 3.87292   | 6.7266   | 3.44513   | 4.10195    | 2.02983   | 2.02474   |
| RBPJ      | 5.21142   | 4.8469    | 6.10675   | 5.85461    | 1.10244   | 6.74665    | 4.90506   | 6.79492   | 3.74138   | 5.3188    | 7.05592  | 2.70594   | 5.82676    | 5.00309   | 5.39167   |
| RBPJL     | 0.018448  | 0.0177771 | 0.030523  | 0.00950561 | 0.0143281 | 0          | 0         | 0.0245926 | 0.0112338 | 0.0231542 | 0        | 0.0660003 | 0.00595129 | 0.0289252 | 0.0132469 |
| RBPMS     | 7.31118   | 2.79415   | 3.09087   | 3.21319    | 4.43623   | 13.3776    | 5.98454   | 3.3921    | 1.12939   | 3.52543   | 8.64023  | 2.2262    | 4.57404    | 5.38397   | 9.44781   |
| RBPMS-AS1 | 0.712877  | 0.147204  | 0.252747  | 0.341083   | 0.909604  | 0.628684   | 0.203485  | 0.181013  | 0.0620146 | 0.191729  | 0.517339 | 0.109303  | 0.246399   | 0.319355  | 0.621582  |
| RBPMS2    | 1.02506   | 0.422605  | 0.367175  | 0.304926   | 1.05057   | 2.72645    | 0.591222  | 0.347489  | 0.193052  | 0.291795  | 0.584546 | 0.143667  | 0.252272   | 0.347955  | 1.3507    |
| RBSN      | 4.24268   | 3.39639   | 4.09848   | 3.75838    | 4.04576   | 4.35942    | 4.36812   | 3.23528   | 4.54646   | 2.70822   | 3.07844  | 2.4059    | 3.78793    | 2.91449   | 3.2129    |
| RBX1      | 13.896    | 11.5691   | 10.0799   | 23.7443    | 5.39634   | 18.227     | 9.85795   | 7.42341   | 24.9502   | 28.3416   | 57.1246  | 14.9693   | 20.4694    | 14.9526   | 11.7391   |
| RC3H1     | 6.23447   | 5.64178   | 5.91454   | 5.42611    | 2.73277   | 4.57905    | 5.32566   | 7.54385   | 4.79933   | 4.94082   | 4.9134   | 4.46239   | 5.4366     | 4.51277   | 4.635     |
| RC3H2     | 4.22466   | 3.53933   | 3.44682   | 4.79568    | 1.76113   | 4.44885    | 3.32484   | 4.06487   | 4.83018   | 5.83263   | 6.44324  | 3.5704    | 6.76429    | 5.16294   | 4.97137   |
| RCAN1     | 3.54331   | 4.10942   | 5.53578   | 8.84257    | 2.8987    | 12.6727    | 5.28743   | 3.45422   | 59.5334   | 20.2313   | 18.4937  | 18.3082   | 21.0547    | 14.9229   | 11.4021   |
| RCAN2     | 5.78863   | 1.301     | 1.85511   | 0.800161   | 1.00809   | 4.5096     | 2.93086   | 2.90439   | 0.254052  | 1.17817   | 1.84462  | 0.480946  | 0.755186   | 0.738939  | 3.14555   |
| RCAN3     | 4.64389   | 4.55964   | 4.58736   | 5.74592    | 4.10508   | 4.96878    | 4.84002   | 4.44615   | 3.62785   | 5.12875   | 4.74227  | 3.78737   | 10.0087    | 3.87218   | 2.19382   |
| RCAN3AS   | 0.0436661 | 0.084156  | 0.0722474 | 0          | 0         | 0.0743623  | 0.0498566 | 0.155227  | 0         | 0.164416  | 0        | 0         | 0          | 0         | 0         |
| RCBTB1    | 1.79096   | 1.19464   | 1.45365   | 1.80646    | 0.957944  | 2.3558     | 1.59634   | 1.4002    | 0.29837   | 1.01789   | 1.47341  | 0.592381  | 0.844835   | 1.40626   | 1.72278   |

|           |          |          |            |           |           |           |           |           |            |           |           |          |            |            |           |
|-----------|----------|----------|------------|-----------|-----------|-----------|-----------|-----------|------------|-----------|-----------|----------|------------|------------|-----------|
| RCBTB2    | 1.63125  | 1.09351  | 0.889127   | 2.72117   | 1.04237   | 2.4946    | 0.859621  | 1.3382    | 1.5415     | 2.93756   | 3.62753   | 1.378    | 2.46399    | 1.76786    | 2.78145   |
| RCC1      | 2.14528  | 2.1786   | 1.9211     | 9.60077   | 5.90245   | 7.98301   | 2.569     | 1.38316   | 3.19736    | 3.37077   | 3.19429   | 3.18447  | 8.99442    | 6.83157    | 2.72303   |
| RCC1L     | 2.6601   | 2.73637  | 2.85006    | 4.78379   | 5.77      | 7.07288   | 2.82756   | 1.73009   | 2.25803    | 2.71197   | 3.46014   | 1.92825  | 4.56878    | 3.8764     | 3.22555   |
| RCC2      | 10.7905  | 15.182   | 16.6298    | 25.3969   | 23.1256   | 28.5152   | 14.4656   | 13.3841   | 27.5763    | 23.2485   | 17.9294   | 18.246   | 30.7121    | 16.2944    | 13.9878   |
| RCCD1     | 1.15422  | 1.93434  | 1.84052    | 2.03415   | 4.11851   | 2.14366   | 1.33695   | 0.988614  | 0.896398   | 0.986776  | 1.17079   | 1.31063  | 1.25196    | 1.47752    | 1.00898   |
| RCE1      | 2.78472  | 3.47936  | 3.41001    | 4.73425   | 8.45575   | 7.24742   | 2.92801   | 2.75447   | 4.40699    | 3.69258   | 5.63005   | 3.33215  | 4.59829    | 3.8811     | 2.64354   |
| RCHY1     | 1.68135  | 1.35512  | 1.5228     | 1.47835   | 0.247595  | 1.52797   | 1.27981   | 1.70445   | 1.04577    | 1.36813   | 1.62523   | 0.794677 | 1.42318    | 1.21735    | 1.19624   |
| RCL1      | 4.39144  | 3.81533  | 4.09016    | 5.20899   | 2.65365   | 4.48371   | 4.34854   | 2.92037   | 3.53698    | 2.21982   | 3.57341   | 2.21464  | 3.95502    | 3.2563     | 1.65965   |
| RCN1      | 8.30746  | 6.69438  | 7.37315    | 16.9455   | 8.38305   | 28.6231   | 7.06407   | 8.21265   | 3.44902    | 18.9182   | 41.7732   | 3.45339  | 16.5902    | 14.1022    | 29.2925   |
| RCN2      | 4.70619  | 3.63986  | 3.17544    | 6.88031   | 3.21909   | 7.75371   | 3.07717   | 3.99197   | 6.50244    | 7.77745   | 14.682    | 2.95836  | 7.56139    | 5.81572    | 4.97006   |
| RCN3      | 3.6949   | 2.88089  | 3.85183    | 8.36151   | 16.3846   | 13.2117   | 4.51802   | 2.80669   | 1.1554     | 9.76064   | 26.7175   | 1.98285  | 8.9639     | 7.35912    | 25.3127   |
| RCOR1     | 4.65997  | 5.85817  | 6.19337    | 11.7259   | 4.16575   | 7.64823   | 5.18288   | 5.03471   | 8.35384    | 14.5537   | 7.00798   | 7.98629  | 19.5856    | 9.62014    | 5.94744   |
| RCOR2     | 0.231075 | 0.244082 | 0.198514   | 0.0457941 | 0.690268  | 0.40865   | 0.334866  | 0.20536   | 0.140712   | 0.100393  | 0.190625  | 0.120826 | 0.160557   | 0.24154    | 0.140399  |
| RCOR3     | 5.42038  | 4.28234  | 4.17591    | 2.56932   | 1.88871   | 3.21055   | 3.1505    | 4.78806   | 1.6703     | 2.07588   | 2.32002   | 1.92749  | 1.84105    | 1.92357    | 2.34589   |
| RCS1      | 1.11948  | 0.425826 | 0.51821    | 0.642337  | 0.867058  | 1.32025   | 0.665646  | 0.644891  | 0.185059   | 0.829022  | 1.21474   | 0.275141 | 0.790306   | 0.555912   | 2.11095   |
| RCVRN     | 0.118177 | 0.161329 | 0.146647   | 0         | 0.214165  | 0.0167711 | 0.269862  | 0.0525131 | 0.0479755  | 0.0988831 | 0.0889383 | 0.084559 | 0.0127079  | 0.0617646  | 0.22629   |
| RD3       | 0.027125 | 0        | 0.00448794 | 0.0223625 | 0.0084269 | 0         | 0.0123882 | 0.0192852 | 0.00660704 | 0         | 0         | 0        | 0.00700037 | 0.00567068 | 0.0545369 |
| RD3L      | 0        | 0        | 0.0159414  | 0         | 0         | 0         | 0         | 0         | 0          | 0         | 0         | 0        | 0          | 0          | 0         |
| RDH10     | 2.7739   | 2.10746  | 1.74402    | 5.83752   | 4.17275   | 4.81835   | 2.06274   | 1.70229   | 5.14923    | 4.40504   | 2.248     | 2.08508  | 4.19733    | 1.67562    | 1.91216   |
| RDH10-AS1 | 0.354846 | 0.318005 | 0.205488   | 0.504637  | 0.0771678 | 0.138987  | 0.291709  | 0.372122  | 0.0518595  | 0.391924  | 0.0560808 | 0.264058 | 0.151104   | 0.148366   | 0.214034  |
| RDH11     | 6.13301  | 5.33635  | 4.74534    | 11.618    | 4.11888   | 9.40768   | 5.02528   | 4.76918   | 11.3027    | 10.8559   | 11.7799   | 6.42112  | 12.0977    | 9.88492    | 5.8416    |
| RDH12     | 5.85354  | 10.6994  | 10.2966    | 5.18138   | 23.8704   | 3.71455   | 9.4693    | 7.76488   | 42.3985    | 5.8929    | 9.62669   | 11.3042  | 2.06723    | 5.51321    | 1.02647   |
| RDH13     | 3.72196  | 5.76276  | 6.46256    | 5.5939    | 10.6666   | 5.12055   | 8.34644   | 4.31124   | 13.8739    | 8.69204   | 7.72342   | 9.11457  | 6.91811    | 8.75145    | 2.10205   |
| RDH14     | 3.11125  | 2.69499  | 2.86311    | 4.1095    | 3.84157   | 4.641     | 2.12361   | 2.56529   | 3.98114    | 4.12484   | 8.03363   | 2.31717  | 4.12468    | 2.64146    | 1.84609   |
| RDH16     | 0.387499 | 0.598737 | 0.414526   | 0.771119  | 1.95105   | 0.290129  | 0.350896  | 0.427502  | 1.0415     | 0.45281   | 0.920129  | 0.956091 | 0.547441   | 0.345687   | 0.211085  |
| RDH5      | 1.16446  | 1.64556  | 1.61866    | 0.649199  | 2.65063   | 1.52468   | 1.67852   | 0.956939  | 0.164797   | 0.631087  | 1.92618   | 0.749237 | 5.02E-08   | 0.814197   | 2.02449   |

|        |           |          |          |           |           |           |           |          |          |           |           |           |           |           |           |
|--------|-----------|----------|----------|-----------|-----------|-----------|-----------|----------|----------|-----------|-----------|-----------|-----------|-----------|-----------|
| RDH8   | 0         | 0        | 0        | 0         | 0         | 0         | 0         | 0        | 0        | 0.0338937 | 0.0914549 | 0         | 0.0174233 | 0.0423415 | 0.0969555 |
| RDM1   | 0.0141895 | 0        | 0        | 0         | 0         | 0.0120822 | 0.0162011 | 0        | 0        | 0         | 0         | 0.010153  | 0         | 0.0148321 | 0         |
| RDM1P5 | 0.0606182 | 0.165204 | 0.33953  | 0.0631018 | 0.376605  | 0.165121  | 0.244783  | 0.171838 | 0        | 0.0252034 | 0.0113343 | 0.0795028 | 0.0131998 | 0.110635  | 0.45052   |
| RDX    | 5.23512   | 3.60768  | 3.95476  | 5.56264   | 1.66527   | 7.02219   | 2.37187   | 3.5441   | 3.38349  | 7.35073   | 6.88932   | 3.42054   | 10.7308   | 6.31594   | 6.20037   |
| REC114 | 0.200156  | 0.265205 | 0.39326  | 0.1547    | 0.0388639 | 0.0213038 | 0.199965  | 0.377999 | 0.030471 | 0.0942062 | 0.0282439 | 0.0179021 | 0         | 0.235373  | 0.143725  |
| REC8   | 0.784342  | 1.30115  | 1.14988  | 1.98491   | 1.92777   | 2.31636   | 0.895536  | 1.11176  | 0.423208 | 0.847357  | 0.291406  | 0.767234  | 0.474025  | 0.716083  | 2.21006   |
| RECK   | 2.13144   | 1.64195  | 2.30477  | 0.902212  | 1.03583   | 1.96119   | 2.39624   | 1.49794  | 0.453402 | 0.975591  | 1.48247   | 0.541542  | 1.64443   | 1.45182   | 4.07157   |
| RECQL  | 4.29454   | 2.91712  | 3.36065  | 5.63454   | 1.04305   | 7.04316   | 2.01235   | 2.74493  | 1.63588  | 7.98297   | 11.4709   | 1.95428   | 7.96347   | 5.45491   | 6.81429   |
| RECQL4 | 0.376014  | 1.12208  | 1.04357  | 1.77497   | 1.93123   | 2.62334   | 0.997132  | 0.603662 | 0.487487 | 0.662233  | 0.472397  | 1.06751   | 1.41648   | 1.48976   | 0.818715  |
| RECQL5 | 1.59346   | 3.00865  | 2.55151  | 2.93003   | 6.35091   | 3.69036   | 2.34937   | 1.82471  | 4.33792  | 1.48456   | 1.14378   | 2.84241   | 1.28727   | 2.0342    | 1.48073   |
| REELD1 | 0.127651  | 0.113782 | 0.211203 | 0         | 0.0297428 | 0.114127  | 0.123885  | 0.187185 | 0        | 0.0320429 | 0         | 0         | 0         | 0.0166789 | 0.0733289 |
| REEP1  | 0.745215  | 0.32201  | 0.357175 | 0.316938  | 0.211304  | 0.478423  | 0.5875    | 0.446779 | 0.37456  | 2.36799   | 0.554159  | 0.672874  | 2.43839   | 1.16535   | 0.942814  |
| REEP2  | 0.347248  | 0.196834 | 0.160532 | 0.0526249 | 0.412479  | 0.773978  | 0.629698  | 0.145226 | 0        | 0.141004  | 0.288235  | 0.073078  | 0.0527159 | 0.101419  | 0.176009  |
| REEP3  | 3.93943   | 3.60978  | 4.01671  | 5.28769   | 1.74048   | 4.94827   | 3.99533   | 4.34666  | 9.55766  | 10.564    | 12.2221   | 5.92387   | 11.5122   | 7.06679   | 7.39437   |
| REEP4  | 7.51203   | 12.3267  | 11.1682  | 16.8863   | 26.2707   | 19.637    | 11.8415   | 9.36093  | 27.0363  | 14.1511   | 19.381    | 16.627    | 18.1077   | 10.0938   | 5.48128   |
| REEP5  | 15.3      | 12.056   | 13.4744  | 14.3511   | 5.35315   | 17.3345   | 10.1931   | 12.5016  | 14.934   | 13.787    | 24.3146   | 9.96438   | 14.0021   | 9.3434    | 10.197    |
| REEP6  | 0.873053  | 1.42745  | 1.4445   | 2.55163   | 2.93462   | 3.86322   | 1.27463   | 1.28468  | 1.4119   | 1.81431   | 2.31043   | 1.96625   | 1.92073   | 1.0996    | 0.369978  |
| REG1A  | 0         | 0        | 0        | 0         | 0         | 0.0731659 | 0         | 0        | 0        | 0         | 0         | 0         | 0         | 0         | 0         |
| REG1B  | 0         | 0        | 0        | 0         | 0         | 0.0488983 | 0         | 0        | 0        | 0         | 0         | 0         | 0         | 0         | 0         |
| REG1CP | 0         | 0        | 0        | 0         | 0         | 0         | 0         | 0        | 0        | 0         | 0         | 0         | 0         | 0         | 0         |
| REG3A  | 0         | 0        | 0        | 0         | 0         | 0         | 0         | 0        | 0        | 0         | 0         | 0         | 0         | 0         | 0         |
| REG3G  | 0         | 0        | 0        | 0         | 0         | 0         | 0         | 0        | 0        | 0         | 0         | 0         | 0         | 0         | 0         |
| REG4   | 0.0102312 | 0        | 0.016928 | 0         | 0         | 0         | 0         | 0        | 0        | 0         | 0         | 0         | 0         | 0         | 0         |
| REL    | 6.83914   | 7.5518   | 8.59082  | 4.07399   | 1.64887   | 3.49963   | 4.39217   | 12.2694  | 6.66192  | 3.38828   | 3.85859   | 4.27572   | 3.09815   | 2.72443   | 3.49478   |
| RELA   | 10.7098   | 11.8468  | 13.1373  | 19.9828   | 15.3111   | 26.7841   | 16.0922   | 10.1641  | 24.0967  | 17.1711   | 24.2203   | 14.8699   | 33.9758   | 15.0981   | 17.0308   |
| RELB   | 1.79041   | 3.04377  | 4.09841  | 6.8561    | 4.14008   | 7.7698    | 2.1023    | 2.07936  | 2.3168   | 3.19197   | 5.48925   | 1.38299   | 6.03835   | 3.08902   | 6.73493   |

|          |           |           |           |           |          |          |           |           |           |           |          |           |           |           |           |
|----------|-----------|-----------|-----------|-----------|----------|----------|-----------|-----------|-----------|-----------|----------|-----------|-----------|-----------|-----------|
| RELCH    | 6.01923   | 6.31768   | 6.46573   | 7.0243    | 3.51367  | 4.60523  | 5.0997    | 6.01865   | 8.88818   | 7.02885   | 5.57385  | 7.03443   | 6.84123   | 5.9326    | 3.55527   |
| RELL1    | 5.66388   | 6.20362   | 7.83373   | 9.64228   | 2.96406  | 13.0942  | 7.3384    | 5.76637   | 3.92303   | 7.43344   | 9.9029   | 5.40897   | 15.8739   | 6.6065    | 7.50753   |
| RELL2    | 0.686345  | 0.874596  | 0.694992  | 1.3982    | 3.07882  | 1.29557  | 0.898031  | 0.645549  | 4.15948   | 2.26937   | 2.69547  | 3.08091   | 2.17774   | 1.96321   | 0.593498  |
| RELN     | 0.862039  | 0.371014  | 0.503004  | 0.507043  | 0.782921 | 0.607989 | 1.40672   | 0.474598  | 0.085256  | 0.800792  | 0.860244 | 0.145974  | 1.10591   | 0.543572  | 0.496922  |
| RELT     | 1.0482    | 0.915194  | 1.16145   | 2.43536   | 1.7269   | 2.39631  | 1.03723   | 1.25337   | 1.8027    | 2.43984   | 2.41679  | 1.95459   | 3.11096   | 2.90519   | 2.40857   |
| REM1     | 0.942352  | 0.440685  | 0.504434  | 0.542685  | 2.34638  | 0.9322   | 0.822783  | 0.406426  | 0.135021  | 0.834881  | 1.87729  | 0.188401  | 0.786824  | 1.02849   | 1.73147   |
| REM2     | 0.286331  | 0.215936  | 0.278069  | 0.128293  | 0.251393 | 0.180206 | 0.213211  | 0.210212  | 0.0909703 | 0.21875   | 0.126482 | 0.19597   | 0.0401608 | 0.0520519 | 0.0536358 |
| REN      | 0.0947838 | 0.243564  | 0.0784119 | 0.244194  | 0.343541 | 0.201768 | 0.0901843 | 0.140393  | 2.11633   | 0.0396545 | 0.44583  | 1.17555   | 0.0101923 | 0         | 0         |
| RENBP    | 1.41596   | 0.856578  | 0.898058  | 1.15114   | 2.98151  | 3.09455  | 1.72448   | 0.796978  | 0.21077   | 0.691123  | 1.66948  | 0.24766   | 0.872966  | 0.476916  | 1.49123   |
| REP15    | 0.280915  | 0.520573  | 0.482661  | 0.60125   | 0.369226 | 0.533589 | 0.246723  | 0.345674  | 0.157903  | 0.542426  | 0.439086 | 0.201002  | 0.641328  | 0.858322  | 1.14822   |
| REPIN1   | 5.67051   | 5.68005   | 6.66883   | 8.34803   | 14.476   | 14.9895  | 5.77506   | 4.75269   | 5.44625   | 4.28181   | 6.36415  | 4.95747   | 7.01976   | 4.66061   | 5.07908   |
| REPS1    | 6.43216   | 5.76811   | 6.22626   | 6.33775   | 4.67812  | 5.59454  | 4.15526   | 5.60377   | 7.22352   | 5.10253   | 4.7454   | 3.89368   | 5.57293   | 4.16528   | 2.67941   |
| REPS2    | 0.427767  | 0.437447  | 0.568131  | 0.338866  | 0.185328 | 0.299815 | 0.46183   | 0.512056  | 0.276434  | 0.164354  | 0.364635 | 0.114519  | 0.182118  | 0.0882111 | 0.351044  |
| RER1     | 9.39343   | 11.2244   | 10.4685   | 19.316    | 14.72    | 21.5179  | 10.849    | 8.10448   | 21.7013   | 18.88     | 28.5774  | 13.5003   | 21.3132   | 14.2959   | 11.5489   |
| RERE     | 7.04495   | 7.64591   | 7.88697   | 7.53738   | 8.48783  | 17.0487  | 10.775    | 8.04764   | 2.69623   | 4.35243   | 5.92088  | 4.4393    | 7.08276   | 5.30435   | 8.08048   |
| REREP3   | 0.0300208 | 0.0303187 | 0.0504694 | 0.0969082 | 0.105553 | 0        | 0         | 0.0562952 | 0.035696  | 0.114229  | 0.103425 | 0.0879374 | 0         | 0         | 0         |
| RERG     | 3.57348   | 1.40043   | 1.77045   | 0.461605  | 1.08234  | 4.18701  | 1.89798   | 2.26464   | 0.460669  | 1.17437   | 2.35973  | 0.284894  | 0.693605  | 0.88961   | 1.21509   |
| RERG-AS1 | 0.138167  | 0.0665712 | 0.0571509 | 0         | 0        | 0        | 0         | 0.0613959 | 0         | 0         | 0        | 0         | 0         | 0         | 0         |
| RERGL    | 2.11859   | 0.418029  | 0.784517  | 0.020793  | 0.125368 | 0.73876  | 0.529862  | 0.448292  | 0         | 0.0253242 | 0.204996 | 0         | 0         | 0         | 0.0869303 |
| RESP18   | 0         | 0         | 0         | 0         | 0        | 0        | 0         | 0         | 0         | 0         | 0        | 0         | 0         | 0         | 0         |
| REST     | 5.50822   | 4.78539   | 5.17883   | 5.73938   | 2.15939  | 6.16921  | 3.12125   | 5.37183   | 3.64524   | 5.04783   | 5.53704  | 2.85064   | 5.76701   | 4.309     | 4.68761   |
| RET      | 0.208558  | 0.179557  | 0.260215  | 0.250158  | 0.488598 | 0.276565 | 0.210799  | 0.118502  | 0.312295  | 1.66498   | 0.158244 | 0.366955  | 0.74339   | 0.116149  | 0.707051  |
| RETN     | 0.0484164 | 0.0466555 | 0.0400535 | 0.299367  | 0.376037 | 2.30865  | 0.165841  | 0.0430285 | 0         | 0.182303  | 0.218624 | 0         | 0.124952  | 0.202436  | 0         |
| RETNLB   | 0         | 0         | 0         | 0         | 0        | 0        | 0         | 0         | 0         | 0         | 0        | 0         | 0         | 0         | 0         |
| RETREG1  | 0.993183  | 0.538724  | 0.893975  | 0.894763  | 0.64039  | 2.09027  | 1.01274   | 1.17133   | 0.121719  | 1.22303   | 2.29878  | 0.402254  | 1.4025    | 0.665991  | 2.21576   |
| RETREG2  | 8.69643   | 8.44889   | 10.3339   | 9.28634   | 13.1163  | 17.1805  | 9.28165   | 7.00417   | 6.6428    | 7.06131   | 8.714    | 5.3629    | 7.87513   | 5.89825   | 5.76535   |

|          |            |            |           |            |           |            |           |           |            |           |            |            |           |            |           |
|----------|------------|------------|-----------|------------|-----------|------------|-----------|-----------|------------|-----------|------------|------------|-----------|------------|-----------|
| RETREG3  | 9.97648    | 11.1063    | 10.5554   | 13.9004    | 14.2608   | 17.3882    | 11.0371   | 7.74872   | 15.7168    | 10.1423   | 12.1609    | 9.26869    | 13.434    | 7.8214     | 8.34173   |
| RETSAT   | 9.42917    | 11.0126    | 11.2121   | 10.5526    | 9.71745   | 17.9086    | 11.1969   | 7.05051   | 10.2834    | 10.352    | 8.1036     | 7.93714    | 9.65537   | 6.89349    | 5.1295    |
| REV1     | 4.93866    | 5.11648    | 5.69231   | 5.27843    | 2.22699   | 3.70839    | 3.86866   | 4.49277   | 4.71537    | 4.52992   | 4.18255    | 4.18087    | 3.46606   | 4.51977    | 3.96825   |
| REV3L    | 7.64474    | 5.14475    | 6.13217   | 3.6902     | 1.61708   | 9.51772    | 4.12913   | 6.43898   | 2.06219    | 3.42395   | 4.22406    | 2.38125    | 2.36571   | 3.4219     | 7.91643   |
| REX1BD   | 6.39064    | 6.551      | 6.9185    | 9.29593    | 21.6512   | 12.2491    | 5.31483   | 4.34724   | 5.6051     | 6.10645   | 16.6551    | 4.17751    | 4.80193   | 5.47051    | 5.77859   |
| REXO1    | 5.03681    | 5.11894    | 5.75495   | 6.82012    | 11.2297   | 9.36046    | 7.05447   | 5.18568   | 5.15598    | 4.02003   | 2.92566    | 5.27763    | 8.44863   | 5.66097    | 6.30482   |
| REXO1L2P | 0.00214665 | 0.00206858 | 0         | 0.00221219 | 0.0266759 | 0          | 0         | 0         | 0          | 0         | 0          | 0.00153599 | 0         | 0.00112193 | 0         |
| REXO2    | 7.44169    | 8.9686     | 7.11357   | 18.2778    | 9.66908   | 16.4443    | 6.69711   | 5.67383   | 22.1111    | 18.7302   | 30.0895    | 12.1198    | 18.536    | 13.2113    | 9.31191   |
| REXO4    | 2.42389    | 3.05166    | 2.67361   | 5.6657     | 6.75128   | 6.83225    | 2.78873   | 1.89829   | 3.1443     | 2.64592   | 3.10321    | 2.58492    | 4.92534   | 4.05774    | 2.28066   |
| REXO5    | 0.536906   | 0.416992   | 0.424279  | 0.470715   | 0.211612  | 0.750574   | 0.43003   | 0.370331  | 0.22447    | 0.543121  | 0.398036   | 0.344033   | 0.305047  | 0.272234   | 0.299219  |
| RFC1     | 6.21207    | 5.05301    | 5.23292   | 6.34333    | 2.20141   | 8.10937    | 2.99354   | 4.52157   | 3.81448    | 3.99033   | 4.96491    | 2.86979    | 5.73626   | 4.07879    | 4.5455    |
| RFC2     | 4.57597    | 4.25759    | 4.65675   | 10.0256    | 4.08956   | 12.2227    | 5.58253   | 3.7102    | 7.75641    | 6.65595   | 11.2229    | 4.26024    | 7.86221   | 5.41879    | 3.24081   |
| RFC3     | 1.80944    | 1.03917    | 1.24296   | 2.39744    | 0.238406  | 2.33858    | 1.36501   | 1.60808   | 0.590275   | 1.42953   | 2.06999    | 0.73405    | 1.93357   | 1.34255    | 1.48491   |
| RFC4     | 1.67915    | 1.4211     | 1.29248   | 4.36365    | 0.79383   | 4.46338    | 1.05029   | 0.804538  | 1.04918    | 2.40072   | 4.17022    | 1.22237    | 3.39144   | 2.21306    | 1.04847   |
| RFC5     | 2.35384    | 1.62143    | 1.55173   | 3.85649    | 0.999777  | 3.35871    | 1.86868   | 1.38915   | 0.918245   | 2.04263   | 3.03086    | 1.06581    | 3.33992   | 2.34991    | 1.98071   |
| RFESD    | 0.191502   | 0.336949   | 0.3639    | 0.251844   | 0.0885759 | 0.152598   | 0.241531  | 0.418646  | 0.119052   | 0.112466  | 0.297085   | 0.102562   | 0.131395  | 0.139252   | 0.0935906 |
| RFFL     | 3.99209    | 3.47073    | 3.45061   | 4.70764    | 2.85777   | 4.00165    | 3.04821   | 3.26773   | 4.80305    | 5.06993   | 5.10011    | 2.96633    | 5.51931   | 3.24167    | 3.01177   |
| RFK      | 1.18836    | 0.795006   | 0.91944   | 1.42727    | 0.531203  | 2.32221    | 0.917567  | 1.00293   | 1.86377    | 2.09241   | 4.00522    | 1.18063    | 3.66262   | 1.66219    | 1.98902   |
| RFLNA    | 0.101204   | 0.115727   | 0.136495  | 0.276212   | 4.37E-10  | 1.60584    | 0.265046  | 0.253613  | 0.0369031  | 0.218263  | 0.292292   | 0.0157946  | 0.345616  | 3.21E-05   | 0.782401  |
| RFLNB    | 1.40648    | 1.10583    | 1.48616   | 3.28097    | 4.41916   | 6.84267    | 3.02197   | 1.21588   | 0.887614   | 5.0471    | 8.8192     | 0.919462   | 4.93739   | 4.84825    | 3.41545   |
| RFNG     | 3.46893    | 4.39805    | 4.40934   | 5.97544    | 8.86929   | 9.59428    | 5.18939   | 2.3853    | 6.09044    | 5.30726   | 9.04678    | 4.75587    | 6.81242   | 4.73765    | 4.47272   |
| RFPL1    | 4.98E-21   | 0.0156687  | 1.76E-12  | 0          | 0         | 1.53E-19   | 0         | 0         | 0          | 4.10E-18  | 0.0162959  | 0          | 1.48E-06  | 0          | 0         |
| RFPL1S   | 0.0361964  | 0.0411972  | 0.0230221 | 0.0186507  | 0.0351409 | 0.0355741  | 0.0206639 | 0.0120631 | 0.00551039 | 0.0397514 | 0.0360951  | 0.0100618  | 0.0233533 | 0.0094589  | 0.0519826 |
| RFPL2    | 0          | 0          | 0         | 0          | 0         | 0.00642308 | 0         | 0         | 0          | 0         | 0.00851552 | 0          | 0.0243347 | 0.0118275  | 0.0108332 |
| RFPL3    | 3.98E-05   | 5.10E-18   | 2.67E-17  | 1.90E-16   | 1.64E-18  | 3.07E-16   | 0.0401815 | 0.0274052 | 0          | 2.14E-27  | 0.00072186 | 1.66E-12   | 0         | 2.18E-10   | 2.00E-07  |
| RFPL3S   | 0.135892   | 0.106431   | 0.250907  | 0.140086   | 0.105578  | 0.0978962  | 0.0915238 | 0.0906062 | 0          | 0.06398   | 0.0183863  | 0.0716666  | 0         | 0.0532845  | 0.0976102 |

|          |           |          |            |            |            |            |          |            |           |            |           |            |           |            |          |
|----------|-----------|----------|------------|------------|------------|------------|----------|------------|-----------|------------|-----------|------------|-----------|------------|----------|
| RFPL4A   | 0         | 0        | 0          | 0          | 0          | 0          | 0        | 0.0226516  | 0         | 0.03199    | 0         | 0          | 0         | 0          | 0        |
| RFPL4AL1 | 0         | 0        | 0          | 0          | 0          | 0          | 0        | 0          | 0         | 0          | 0         | 0          | 0         | 0          | 0        |
| RFPL4B   | 0         | 0        | 0          | 0          | 0          | 0.0103716  | 0        | 0          | 0         | 0          | 0.0137503 | 0          | 0         | 0          | 0        |
| RFT1     | 2.19718   | 2.47803  | 2.53121    | 2.46542    | 1.84752    | 3.20445    | 2.73673  | 2.13826    | 0.801671  | 1.28198    | 2.55209   | 1.20834    | 1.78666   | 1.55643    | 1.38213  |
| RFTN1    | 5.88984   | 3.85185  | 4.55361    | 12.751     | 6.38271    | 12.2818    | 5.63336  | 3.26122    | 4.31892   | 12.8689    | 12.0011   | 8.46177    | 20.7264   | 10.0004    | 14.9907  |
| RFTN2    | 0.959028  | 0.76296  | 1.03323    | 0.528629   | 0.496567   | 0.848251   | 0.407437 | 0.83909    | 0.280679  | 1.25966    | 3.26465   | 0.313848   | 0.527625  | 0.831498   | 2.08194  |
| RFWD3    | 3.435     | 3.92255  | 3.81597    | 6.65111    | 2.52631    | 5.23292    | 3.60715  | 3.55531    | 3.87609   | 3.44903    | 4.03069   | 2.87918    | 5.8919    | 3.86658    | 2.88603  |
| RFX1     | 1.27427   | 2.10429  | 2.10396    | 2.28851    | 3.36741    | 3.92139    | 2.10692  | 1.60707    | 2.15723   | 1.65906    | 1.34299   | 3.13257    | 1.91039   | 2.43183    | 2.17171  |
| RFX2     | 1.31136   | 2.77682  | 3.81794    | 1.2934     | 1.51245    | 1.84504    | 3.80423  | 2.47592    | 1.09672   | 1.71654    | 1.06739   | 4.36939    | 1.48883   | 2.47676    | 2.71581  |
| RFX3     | 0.92938   | 0.792804 | 0.885883   | 0.426166   | 0.273853   | 0.641237   | 0.670974 | 1.03873    | 0.13784   | 0.491718   | 0.651112  | 0.501471   | 0.310347  | 0.52441    | 0.825204 |
| RFX3-AS1 | 0.667789  | 0.653556 | 0.535178   | 0.215055   | 0.0972475  | 0.657459   | 0.333576 | 0.389468   | 0         | 0.419072   | 0.21202   | 0.179183   | 0.148106  | 0.305389   | 0.569423 |
| RFX4     | 0.0211497 | 0        | 0.00437413 | 0.00544884 | 0.00821319 | 0.00900434 | 0        | 0.00469902 | 0         | 0.00663626 | 0         | 0          | 0         | 0.00552688 | 0        |
| RFX5     | 3.08958   | 3.9388   | 3.50317    | 6.9281     | 5.37549    | 7.2495     | 2.70959  | 2.45583    | 2.14236   | 3.43618    | 4.70087   | 2.02301    | 3.92898   | 3.72433    | 4.80449  |
| RFX6     | 0         | 0        | 0          | 0          | 0          | 0          | 0        | 0          | 0         | 0          | 0         | 0.00472183 | 0         | 0          | 0        |
| RFX7     | 4.46135   | 3.84656  | 3.50182    | 5.35994    | 1.12419    | 5.00661    | 3.38976  | 4.31648    | 1.06553   | 2.57567    | 3.51125   | 2.15653    | 3.22917   | 3.44459    | 3.23818  |
| RFX8     | 0.414942  | 0.180578 | 0.343269   | 0.400022   | 0.540589   | 1.16253    | 0.320939 | 0.226018   | 0.0489051 | 0.201598   | 0.574189  | 0.0670424  | 0.0345443 | 0.328798   | 0.749692 |
| RFXANK   | 3.47946   | 3.8769   | 3.73356    | 7.22804    | 9.00039    | 8.15869    | 4.32374  | 2.5799     | 5.65223   | 4.36623    | 8.84609   | 3.82826    | 5.4954    | 4.03919    | 3.49866  |
| RFXAP    | 0.704532  | 0.682855 | 0.528621   | 0.523425   | 0.229057   | 0.739411   | 0.299316 | 0.480518   | 0.119727  | 0.277616   | 0.776833  | 0.111373   | 0.280136  | 0.492386   | 0.482368 |
| RGCC     | 3.2793    | 2.9185   | 4.09522    | 4.00363    | 2.36849    | 5.10435    | 2.52793  | 3.73113    | 2.97628   | 7.10443    | 16.7883   | 1.98773    | 5.18839   | 6.10237    | 5.12944  |
| RGL1     | 4.21125   | 2.82407  | 2.99759    | 4.64267    | 3.48925    | 7.76142    | 4.80827  | 3.59337    | 1.86643   | 2.87729    | 5.11894   | 1.93474    | 2.34054   | 1.95084    | 4.90826  |
| RGL2     | 1.15923   | 2.09267  | 2.03372    | 2.7732     | 4.47267    | 2.736      | 1.58607  | 1.09054    | 2.58242   | 2.225      | 1.84334   | 2.44275    | 2.71105   | 2.03475    | 1.64095  |
| RGL3     | 0.379542  | 0.148037 | 0.209323   | 0.260753   | 0.673783   | 0.623267   | 0.361124 | 0.152591   | 0.0440229 | 0.158788   | 0.295839  | 0.12932    | 0.145761  | 0.821799   | 1.3497   |
| RGL4     | 1.64985   | 2.12341  | 1.9881     | 1.01958    | 2.90619    | 1.5267     | 2.27082  | 1.6604     | 0.605551  | 0.472768   | 0.586806  | 1.16434    | 0.189564  | 1.5213     | 1.95826  |
| RGMA     | 1.77536   | 1.40807  | 1.1206     | 2.11468    | 2.34587    | 6.22839    | 2.42851  | 1.15773    | 0.905591  | 0.44131    | 1.34695   | 0.771264   | 1.99339   | 1.10863    | 1.85429  |
| RGMB     | 4.6185    | 5.68977  | 7.14405    | 3.03067    | 2.38614    | 5.07279    | 6.23675  | 5.60445    | 1.67391   | 2.38464    | 4.63188   | 2.07174    | 2.97005   | 2.05202    | 2.88097  |
| RGMB-AS1 | 0.193809  | 0.291126 | 0.424409   | 0.0939885  | 0.106254   | 0.349466   | 0.234301 | 0.243164   | 0.0277691 | 0.0858529  | 0.218786  | 0.0407869  | 0.0367778 | 0.0536257  | 0.147353 |

|           |           |            |           |           |            |           |           |           |            |           |            |            |           |            |           |
|-----------|-----------|------------|-----------|-----------|------------|-----------|-----------|-----------|------------|-----------|------------|------------|-----------|------------|-----------|
| RGN       | 0.471679  | 0.311251   | 0.313862  | 0.169071  | 0.382268   | 0.427822  | 0.327812  | 0.273384  | 0.0624405  | 0.115827  | 0.162055   | 0.0220108  | 0.105852  | 0.171492   | 0.353421  |
| RGP1      | 4.95214   | 5.96618    | 6.22345   | 8.79449   | 7.19388    | 11.3178   | 7.23286   | 4.17279   | 10.4198    | 6.9023    | 6.54678    | 7.72808    | 14.661    | 7.65207    | 5.07081   |
| RGPD1     | 0.192189  | 0.235495   | 0.209171  | 0.0566904 | 0.115058   | 0.132508  | 0.113816  | 0.243377  | 0.020825   | 0.247477  | 0.108678   | 0.237348   | 0.0276432 | 0.0817877  | 0.402522  |
| RGPD2     | 2.76E-05  | 0.00622391 | 3.32E-09  | 2.35E-09  | 0.0210674  | 0.0738666 | 3.66E-08  | 5.80E-07  | 8.13E-05   | 0.173112  | 0.0280306  | 0.0610244  | 0.0330354 | 0.0122726  | 0.311265  |
| RGPD3     | 0.156466  | 0.0279435  | 0.0489005 | 0.020058  | 1.76E-22   | 0.0198283 | 0.0523277 | 0.0531285 | 0.0141333  | 0.0236986 | 0.0407066  | 0.0255963  | 0.0261431 | 0.0153005  | 0.065315  |
| RGPD4     | 0.0598519 | 0.110058   | 0.121572  | 0.0853148 | 0.0461407  | 0.0993154 | 0.120214  | 0.0565418 | 0.0981707  | 0.207565  | 0.0435869  | 0.0466796  | 0.118082  | 0.0377686  | 0.102878  |
| RGPD4-AS1 | 0         | 0.0211588  | 0         | 0         | 0          | 0         | 0         | 0         | 0          | 0.0183725 | 0.0330495  | 0          | 0         | 0.0229517  | 0.0210224 |
| RGPD5     | 3.31959   | 3.12814    | 3.65857   | 1.50277   | 0.606373   | 1.62013   | 2.03596   | 2.36696   | 1.22937    | 1.37819   | 0.92704    | 1.1881     | 1.40829   | 1.54643    | 1.83156   |
| RGPD6     | 0.656886  | 0.544184   | 0.64207   | 0.186265  | 0.264667   | 0.394659  | 0.440077  | 0.337515  | 0.167296   | 0.137795  | 0.135336   | 0.156914   | 0.194556  | 0.197368   | 0.178176  |
| RGPD8     | 0.964719  | 0.506534   | 0.472615  | 0.671907  | 0.752737   | 0.627711  | 0.79751   | 0.917722  | 0.317187   | 0.805139  | 0.736534   | 0.367491   | 1.1299    | 0.404731   | 1.15248   |
| RGR       | 0.0313804 | 0          | 0         | 0         | 0          | 0.04008   | 0.0358291 | 0         | 0.0191089  | 0         | 0          | 0          | 0         | 0          | 0         |
| RGS1      | 0.907247  | 0.413282   | 0.477616  | 2.63484   | 0.102492   | 0.210684  | 0.169505  | 0.806286  | 0.44197    | 2.65004   | 5.605      | 1.10947    | 3.05447   | 0.70694    | 0.947579  |
| RGS10     | 4.11062   | 3.85808    | 3.91167   | 8.864     | 2.9527     | 5.6852    | 2.306     | 3.73765   | 5.5561     | 6.91875   | 14.5649    | 3.58731    | 9.35152   | 4.56999    | 4.57256   |
| RGS11     | 0.332047  | 0.528279   | 0.454033  | 0.113314  | 2.89188    | 0.338484  | 0.890209  | 0.318541  | 0.921354   | 0.166364  | 0.0965982  | 0.232525   | 0.147232  | 0.347859   | 0.942197  |
| RGS12     | 3.4629    | 4.70222    | 4.66097   | 5.67379   | 10.3948    | 6.64624   | 3.64909   | 2.8989    | 4.59063    | 5.39253   | 2.32096    | 6.21211    | 9.98287   | 5.1351     | 3.45895   |
| RGS13     | 0.325958  | 0.356936   | 0.808968  | 0.290104  | 0.0230148  | 0.0252318 | 0.219918  | 0.329187  | 0.0902229  | 0.111576  | 0.217435   | 0.0318044  | 0.191188  | 0.0929237  | 0.191503  |
| RGS14     | 2.5971    | 4.04594    | 4.15378   | 6.57202   | 8.30745    | 6.65057   | 3.00922   | 2.18841   | 5.18962    | 4.76871   | 8.32849    | 5.08622    | 5.84611   | 4.05699    | 2.33456   |
| RGS16     | 0.685156  | 0.385138   | 0.795108  | 2.40261   | 1.58164    | 3.71918   | 0.880075  | 0.482054  | 0.185432   | 1.74377   | 3.09382    | 0.640045   | 4.56181   | 1.49703    | 5.27518   |
| RGS17     | 0.157865  | 0.243398   | 0.117538  | 0.357906  | 0.147132   | 0.0403261 | 0.162221  | 0.126268  | 0.0384524  | 1.28789   | 1.22965    | 0.530897   | 1.23243   | 0.5693     | 0.634801  |
| RGS18     | 0.0971037 | 0.0727783  | 0.0714054 | 0.522578  | 0.0167595  | 0.395039  | 0.0123189 | 0.134241  | 0.0131402  | 0.758334  | 1.80261    | 0.0694803  | 0.382866  | 0.169169   | 0.619792  |
| RGS19     | 1.28649   | 1.49027    | 1.66434   | 5.71207   | 3.80538    | 6.47933   | 2.32831   | 1.02169   | 1.63347    | 3.62442   | 8.621      | 1.50808    | 4.04421   | 2.42483    | 3.06616   |
| RGS2      | 2.60574   | 2.18058    | 3.48875   | 8.03819   | 0.559209   | 7.54667   | 1.68331   | 2.22435   | 4.73936    | 16.0296   | 23.3582    | 3.85161    | 16.8231   | 5.46541    | 6.25336   |
| RGS20     | 0.93618   | 0.67863    | 0.627952  | 2.94643   | 1.00878    | 1.73792   | 0.73186   | 0.884467  | 10.0046    | 7.8651    | 6.6171     | 4.683      | 8.49988   | 4.05978    | 1.44137   |
| RGS21     | 0         | 0          | 0         | 0         | 0          | 0         | 0         | 0         | 0          | 0         | 0          | 0          | 0         | 0          | 0         |
| RGS22     | 0.38005   | 0.11806    | 0.198571  | 0.0360733 | 0.00776775 | 0.2129    | 0.119901  | 0.217764  | 0.00609024 | 0.018829  | 0.00564512 | 0.00357811 | 0.0096792 | 0.00261356 | 0.150813  |
| RGS3      | 1.74496   | 1.0602     | 0.898721  | 3.51717   | 4.44107    | 5.14136   | 1.09983   | 1.05026   | 1.12068    | 3.65405   | 7.05255    | 1.35647    | 4.56291   | 3.84743    | 6.63844   |

|        |           |            |            |            |            |            |            |            |            |           |            |            |           |           |            |
|--------|-----------|------------|------------|------------|------------|------------|------------|------------|------------|-----------|------------|------------|-----------|-----------|------------|
| RGS4   | 0.0290888 | 0.0224247  | 0.0288772  | 0.389699   | 0.117481   | 0.936258   | 0.0464977  | 0.031022   | 0.0708538  | 0.861623  | 1.44485    | 0.0915808  | 0.420402  | 0.623326  | 1.08616    |
| RGS5   | 12.4135   | 3.81954    | 2.32874    | 4.0124     | 4.22731    | 4.9929     | 4.61994    | 5.92869    | 4.51789    | 4.35862   | 6.1618     | 2.70339    | 4.53136   | 2.22718   | 21.0056    |
| RGS6   | 0.241184  | 0.133295   | 0.16138    | 0.0804124  | 0.132227   | 0.226506   | 0.425214   | 0.135541   | 0          | 0.0178065 | 0.00800785 | 0.017765   | 0.0411911 | 0.0278059 | 0.0152811  |
| RGS7   | 0         | 0          | 0          | 0          | 0.0261258  | 0.00716061 | 0.0192035  | 0          | 0          | 0         | 0          | 0          | 0         | 0.0307663 | 0          |
| RGS7BP | 0.16239   | 0.0948388  | 0.118057   | 0.0253557  | 0.0305755  | 0.104752   | 0.101134   | 0.0393597  | 0          | 0.0926438 | 0.177763   | 0          | 0.0285745 | 0.0154313 | 0.106006   |
| RGS8   | 0.0603207 | 0.00968781 | 0.00665354 | 0          | 0.00624659 | 0.0136966  | 0.00459148 | 0.028591   | 0          | 0         | 0.00453964 | 0.00575481 | 0.0207566 | 0.0105087 | 0.0288761  |
| RGS9   | 0.116567  | 0.155531   | 0.274462   | 0.110885   | 0.278568   | 0.13743    | 0.358326   | 0.310785   | 0.0218409  | 0.225083  | 0.070856   | 0.0192477  | 0.202484  | 0.0609231 | 0.103019   |
| RGS9BP | 0.0959629 | 0.123297   | 0.138928   | 0.00824105 | 0.472034   | 0.108948   | 0.0547837  | 0.0426419  | 0.243483   | 0.0501847 | 0.0270825  | 0.080108   | 0.0257978 | 0.0125386 | 0          |
| RGSL1  | 0.0123101 | 0          | 0.00509191 | 0.0190289  | 0          | 0          | 0          | 0.00547011 | 0          | 0         | 0.0277932  | 0          | 0.0238273 | 0         | 0.00883945 |
| RHAG   | 0.0120037 | 0          | 0          | 0          | 0.0186458  | 0          | 0.0137054  | 0.0213357  | 0          | 0         | 0.0135506  | 0.00858894 | 0         | 0         | 0          |
| RHBDD1 | 2.70343   | 2.4038     | 2.68376    | 3.00125    | 1.33616    | 2.93323    | 2.67981    | 2.59553    | 1.98048    | 2.19008   | 2.61256    | 2.01645    | 3.03392   | 2.07658   | 1.95888    |
| RHBDD2 | 9.32825   | 8.34441    | 10.1261    | 10.7964    | 8.0357     | 22.2564    | 14.3135    | 6.54378    | 9.77488    | 10.757    | 20.2056    | 8.10608    | 17.0933   | 8.68034   | 8.26233    |
| RHBDD3 | 1.49027   | 1.23544    | 1.44136    | 2.57467    | 5.2596     | 4.17073    | 1.52639    | 1.04201    | 1.68153    | 1.87044   | 3.87184    | 1.65438    | 2.2129    | 2.00448   | 2.32906    |
| RHBDF1 | 5.66974   | 6.63376    | 7.49953    | 6.2095     | 10.7896    | 7.73882    | 7.11823    | 4.317      | 6.39641    | 6.10645   | 4.66279    | 5.4737     | 8.23943   | 6.43992   | 4.93213    |
| RHBDF2 | 3.41529   | 5.56457    | 6.36235    | 10.7506    | 13.7014    | 10.0034    | 4.86702    | 5.07204    | 9.80426    | 5.85771   | 4.63089    | 9.00765    | 8.83899   | 5.39858   | 4.05658    |
| RHBDL1 | 0.268481  | 0.362203   | 0.333159   | 0.24901    | 0.729826   | 0.27433    | 0.229907   | 0.262464   | 0.0490469  | 0.320123  | 0.227311   | 0.220921   | 0.190545  | 0.329752  | 0.250622   |
| RHBDL2 | 1.7909    | 3.74104    | 4.11971    | 3.04817    | 5.24073    | 3.10889    | 3.35082    | 2.39254    | 10.0191    | 3.82845   | 3.96514    | 3.41439    | 3.51115   | 2.14375   | 1.19472    |
| RHBDL3 | 0.0434023 | 0.055765   | 0.0279264  | 0.104364   | 0.104874   | 0.102657   | 0.038543   | 0.0300007  | 0.00587323 | 0.0544743 | 0.0762156  | 0.0103518  | 0.0653401 | 0.100817  | 0.0415541  |
| RHBG   | 0.256167  | 0.744407   | 0.907279   | 0.189741   | 1.43001    | 0.0886123  | 0.996269   | 0.355718   | 1.59891    | 0.100474  | 0.280143   | 0.515515   | 0         | 0.121332  | 0          |
| RHCE   | 0.0765719 | 0.083018   | 0.162824   | 0.282196   | 0.0649683  | 0.249939   | 0.0478284  | 0.0622666  | 1.22078    | 0.194391  | 0.499785   | 0.186248   | 0.19732   | 0.107547  | 0.116164   |
| RHCG   | 12.3195   | 1.72892    | 0.763888   | 112.113    | 18.3197    | 29.0915    | 2.04185    | 3.4695     | 62.7186    | 245.93    | 261.967    | 198.665    | 370.969   | 122.625   | 24.4068    |
| RHD    | 0.327428  | 0.275686   | 0.12734    | 0.186108   | 0.298879   | 0.0897332  | 0.48612    | 0.409882   | 0.0856925  | 0.0434236 | 0.0896195  | 0.168145   | 0.0373221 | 0.374842  | 0.179527   |
| RHEB   | 7.36116   | 6.66891    | 7.16921    | 11.0685    | 5.56129    | 13.7135    | 5.53949    | 7.03759    | 9.58991    | 10.2049   | 17.7025    | 5.34691    | 12.0102   | 7.47302   | 6.69532    |
| RHEBL1 | 0.269733  | 0.415876   | 0.208266   | 0.296498   | 0.22346    | 0.275608   | 0.390098   | 0.287659   | 0.087601   | 0.225695  | 0.56839    | 0.167267   | 0.208836  | 0.206762  | 0.284071   |
| RHEX   | 1.52897   | 0.776864   | 0.977401   | 0.658907   | 0.561368   | 0.153861   | 0.491978   | 0.827646   | 0.236996   | 0.43614   | 0.847317   | 0.129293   | 0.313881  | 0.254261  | 0.479082   |
| RHNO1  | 1.88789   | 2.11338    | 2.31549    | 3.42644    | 1.12341    | 2.79915    | 1.3834     | 1.92822    | 1.48707    | 1.8508    | 4.13514    | 1.43148    | 2.01191   | 1.78194   | 1.42981    |



|            |           |          |           |            |            |            |            |           |            |            |           |            |           |            |            |
|------------|-----------|----------|-----------|------------|------------|------------|------------|-----------|------------|------------|-----------|------------|-----------|------------|------------|
| RHO        | 0         | 0        | 0         | 0          | 0          | 0          | 0.00954624 | 0.014861  | 0          | 0          | 0         | 0.00598247 | 0         | 0          | 0          |
| RHOA       | 68.4782   | 51.5343  | 56.5522   | 120.569    | 60.2305    | 154.896    | 80.8999    | 56.0405   | 109.482    | 137.759    | 169.357   | 96.7114    | 190.088   | 86.9884    | 91.4678    |
| RHOB       | 43.5163   | 25.445   | 24.6641   | 21.2465    | 50.2046    | 54.6918    | 31.7689    | 23.2112   | 43.8404    | 38.7047    | 42.6399   | 36.5592    | 30.8452   | 26.3269    | 32.508     |
| RHOBTB1    | 1.1146    | 0.989387 | 1.55338   | 0.986584   | 1.03451    | 2.0281     | 1.02971    | 0.826158  | 0.58016    | 1.63694    | 3.33618   | 0.74789    | 0.790752  | 1.20376    | 2.29811    |
| RHOBTB2    | 1.63349   | 1.09343  | 1.21653   | 1.35979    | 2.56206    | 5.95273    | 1.91951    | 1.05964   | 0.561486   | 1.04755    | 1.14409   | 0.526104   | 1.59755   | 1.76563    | 2.72262    |
| RHOBTB3    | 3.1434    | 1.94926  | 2.70363   | 1.34545    | 1.14965    | 4.71231    | 2.17431    | 3.41439   | 0.551964   | 2.75022    | 6.24743   | 0.428416   | 1.49693   | 1.81238    | 4.52626    |
| RHOC       | 20.6017   | 15.3607  | 21.0473   | 36.2823    | 24.1067    | 48.7234    | 22.3159    | 11.521    | 9.65019    | 28.7242    | 65.8384   | 9.65379    | 56.7969   | 29.7879    | 32.7438    |
| RHOD       | 7.12879   | 10.2158  | 8.60112   | 28.1224    | 48.8951    | 20.506     | 15.7425    | 6.13579   | 61.5715    | 68.9117    | 82.8939   | 43.8466    | 108.005   | 36.4153    | 14.8141    |
| RHOF       | 0.47984   | 0.490182 | 0.517851  | 0.497451   | 0.873168   | 0.746787   | 0.765595   | 0.431601  | 0.886001   | 1.30997    | 1.44183   | 0.808501   | 1.69775   | 0.36591    | 0.847804   |
| RHOG       | 9.35197   | 8.99493  | 9.37683   | 34.355     | 20.6864    | 34.0336    | 15.6861    | 7.65633   | 24.1469    | 28.3422    | 44.2888   | 18.3297    | 63.8138   | 19.4868    | 17.4371    |
| RHOH       | 0.374072  | 0.173432 | 0.233554  | 0.596421   | 0.372757   | 0.204332   | 0.0805855  | 0.307354  | 0.0085958  | 0.380914   | 0.549761  | 0.030301   | 0.660295  | 0.18444    | 0.638576   |
| RHOJ       | 2.45563   | 1.5529   | 1.97857   | 2.91283    | 1.75822    | 3.80616    | 1.54791    | 1.48332   | 0.451718   | 3.41917    | 6.88694   | 1.00208    | 4.59217   | 4.5889     | 7.86137    |
| RHOQ       | 6.36523   | 4.08586  | 4.52013   | 7.45377    | 1.56821    | 10.5629    | 3.79857    | 5.28574   | 6.60947    | 10.9118    | 16.8858   | 4.4509     | 10.963    | 8.36053    | 11.9832    |
| RHOT1      | 5.27482   | 6.34967  | 7.5282    | 4.89478    | 2.70963    | 4.67235    | 4.01202    | 6.95763   | 7.41707    | 4.06497    | 5.65781   | 4.04431    | 3.55224   | 3.08126    | 3.20871    |
| RHOT2      | 6.65184   | 8.6893   | 8.91703   | 9.75943    | 21.5772    | 17.3204    | 7.04893    | 4.8232    | 6.22147    | 7.01169    | 6.03191   | 7.79059    | 8.70255   | 10.0921    | 8.07116    |
| RHOU       | 2.03316   | 0.716603 | 0.72832   | 0.982455   | 0.740441   | 4.97414    | 1.29877    | 1.22766   | 1.5402     | 1.21487    | 1.85042   | 0.365436   | 1.22705   | 0.483009   | 1.22942    |
| RHOV       | 12.895    | 15.4278  | 12.9696   | 18.9538    | 33.8407    | 17.6834    | 10.9725    | 7.96166   | 24.9125    | 17.3089    | 15.752    | 18.0066    | 20.6768   | 12.2516    | 2.51466    |
| RHOXF1     | 0.12038   | 0.232004 | 0.14938   | 0          | 0.140244   | 0.051251   | 0          | 0.0534919 | 0          | 0          | 0         | 0.0215338  | 0         | 0.015729   | 0          |
| RHOXF1-AS1 | 0.451196  | 0.445391 | 0.465428  | 0.136089   | 0.0854711  | 1.19004    | 0.175909   | 0.361865  | 0          | 0.0690606  | 0.0869612 | 0.0472453  | 0.0710023 | 0.0460126  | 0.142238   |
| RHOXF1P1   | 0         | 0        | 0         | 0          | 0.0460887  | 0          | 0          | 0.0263687 | 0          | 0          | 0         | 0          | 0         | 0          | 0          |
| RHOXF2     | 0.162415  | 0.208043 | 0.182817  | 0.00243428 | 0.147596   | 0.00301703 | 0.00809113 | 0.017844  | 0.00143842 | 0.00148238 | 0         | 0.00338038 | 0         | 0.00493828 | 0.00848092 |
| RHOXF2B    | 0.0424954 | 0.031659 | 9.74E-06  | 0.0163993  | 0.00358494 | 0.0203252  | 0.0545085  | 0.120212  | 0.00969041 | 0.00998652 | 0         | 0.022773   | 0         | 0.0332683  | 0.0571344  |
| RHPN1      | 0.274103  | 0.705359 | 0.535973  | 0.520004   | 3.68684    | 1.12985    | 0.711278   | 0.265746  | 0.40211    | 0.304934   | 0.133617  | 1.19014    | 0.188908  | 0.582801   | 0.447326   |
| RHPN1-AS1  | 0.0689808 | 0.08309  | 0.0951096 | 0.0710867  | 0.035717   | 0.31326    | 0.0918867  | 0.0817392 | 0.0140018  | 0.0288593  | 0.0519138 | 0.0329051  | 0.0148353 | 0.0120175  | 0          |
| RHPN2      | 2.0056    | 1.08317  | 1.77304   | 0.141841   | 1.14027    | 1.90865    | 1.81099    | 1.61931   | 0.127717   | 0.115168   | 0.0517925 | 0.0797256  | 0.169151  | 0.116468   | 0.131778   |
| RIBC1      | 0.163729  | 0.36288  | 0.318303  | 0.151854   | 0.152596   | 0.181237   | 0.177593   | 0.210987  | 0.0897314  | 0.0308245  | 0.0277244 | 0.076149   | 0.0158455 | 0.0812932  | 0.176351   |

|         |            |            |           |            |            |            |            |            |            |            |            |            |           |            |            |
|---------|------------|------------|-----------|------------|------------|------------|------------|------------|------------|------------|------------|------------|-----------|------------|------------|
| RIBC2   | 0.131869   | 0.111189   | 0.218183  | 0.458646   | 0.230443   | 0.392997   | 0.150564   | 0.21974    | 0.0803009  | 0.0827547  | 0.241904   | 0.047178   | 0.116987  | 0.275682   | 0.284071   |
| RIC1    | 5.92936    | 5.29461    | 5.98179   | 5.36797    | 3.27982    | 5.45015    | 5.31814    | 5.02164    | 6.99888    | 6.12936    | 6.731      | 5.72727    | 6.28675   | 6.22213    | 4.95851    |
| RIC3    | 1.41071    | 2.19034    | 2.2259    | 0.60218    | 1.42529    | 0.6574     | 1.34158    | 1.29126    | 0.607797   | 0.297327   | 0.249596   | 0.858824   | 0.0652132 | 0.29128    | 0.140621   |
| RIC8A   | 6.8372     | 6.69054    | 7.02478   | 14.2086    | 17.8747    | 16.3311    | 7.16701    | 5.03225    | 12.7986    | 15.1535    | 12.6369    | 9.72469    | 22.8186   | 10.8131    | 9.07616    |
| RIC8B   | 0.94692    | 0.816669   | 0.833897  | 0.908932   | 0.411018   | 1.28326    | 0.567699   | 0.59641    | 0.317585   | 0.794158   | 1.2684     | 0.504879   | 0.749683  | 0.99371    | 1.16203    |
| RICTOR  | 4.53328    | 3.64925    | 4.02903   | 3.08137    | 0.635739   | 3.05441    | 3.17209    | 4.8824     | 2.0055     | 3.8435     | 3.98148    | 1.76397    | 3.2293    | 2.73289    | 3.31566    |
| RIDA    | 1.25902    | 1.32352    | 0.871114  | 4.45853    | 0.568928   | 3.07967    | 0.757958   | 1.30201    | 2.67638    | 2.41339    | 5.14243    | 1.5069     | 2.31878   | 1.328      | 0.394497   |
| RIF1    | 5.91816    | 5.02377    | 5.66529   | 5.6185     | 1.52569    | 5.41682    | 3.38771    | 5.42738    | 3.04866    | 4.08641    | 4.35808    | 2.97709    | 5.99378   | 4.86614    | 4.6986     |
| RIIAD1  | 0.0508639  | 0.024507   | 0.0420782 | 0          | 0          | 0.0433099  | 0          | 0          | 0          | 0.0638394  | 0.0574189  | 0          | 0         | 0          | 0          |
| RILP    | 1.4214     | 1.03351    | 1.34692   | 1.02536    | 2.89038    | 3.06978    | 1.04752    | 0.780903   | 0.472121   | 1.16771    | 3.00496    | 0.739675   | 1.74246   | 0.837438   | 1.7444     |
| RILPL1  | 1.85166    | 2.07903    | 2.05624   | 1.46696    | 3.49818    | 3.10125    | 1.69515    | 1.64561    | 0.69753    | 1.18526    | 1.3747     | 1.30545    | 1.70413   | 1.79893    | 1.84469    |
| RILPL2  | 3.00693    | 1.585      | 1.7434    | 2.29094    | 2.49508    | 5.05509    | 1.45251    | 1.26763    | 0.48515    | 2.30633    | 3.64105    | 0.717179   | 2.52041   | 1.78646    | 2.02998    |
| RIMBP2  | 0.502667   | 0.877775   | 0.475935  | 0.74558    | 0.938786   | 0.546771   | 0.421324   | 0.400248   | 0.191089   | 0.317273   | 0.318165   | 0.388779   | 0.211838  | 0.115413   | 0.438144   |
| RIMBP3  | 0.114166   | 0.0681753  | 0.050154  | 0.0493942  | 0.149027   | 0.175336   | 0.14641    | 0.125688   | 0.00486546 | 0.0509448  | 0.0835135  | 0.114484   | 0.0461308 | 0.106051   | 0.293718   |
| RIMBP3B | 0.0152937  | 0.0205531  | 0.0310842 | 0.0212373  | 0.0479588  | 0.120349   | 0.0232942  | 0.0225695  | 0          | 0.0538906  | 0.0478068  | 0.0058233  | 0.0453339 | 0.0665963  | 0.00019546 |
| RIMBP3C | 0.00052877 | 0.00071060 | 0.0103082 | 0.00073427 | 0.00165815 | 0.00911412 | 0.00080538 | 0.00304048 | 0          | 0.00186324 | 0.0016529  | 0.00020133 | 0.0015674 | 0.00690681 | 6.76E-06   |
|         | 4          | 9          |           | 1          |            |            | 7          |            |            |            |            | 8          |           |            |            |
| RIMKLA  | 0.1489     | 0.0738525  | 0.0797053 | 0.0248222  | 0.0510207  | 0.234928   | 0.145008   | 0.0739492  | 0.0613369  | 0.129171   | 0.249663   | 0.0438703  | 0.026843  | 0.0904106  | 0.0691834  |
| RIMKLB  | 4.2326     | 2.99333    | 2.71673   | 2.22535    | 2.9846     | 2.94018    | 2.30801    | 3.02275    | 1.24355    | 2.5068     | 2.34815    | 2.25351    | 2.30576   | 2.71696    | 2.69002    |
| RIMS1   | 0.23485    | 0.155835   | 0.281202  | 0.00849193 | 0.0640006  | 0.150856   | 0.138777   | 0.120835   | 0          | 0.00258562 | 0.00465117 | 0          | 0         | 0          | 0.0295855  |
| RIMS2   | 0.0281515  | 0.157833   | 0.0148202 | 0.232087   | 0.0993839  | 0.0239706  | 0.00584408 | 0.0295675  | 0.264932   | 0.0899384  | 0.066448   | 0.0915596  | 0.0544895 | 0.147132   | 0.0808581  |
| RIMS3   | 3.11818    | 3.32716    | 2.25647   | 4.53634    | 7.50412    | 5.28292    | 3.3921     | 1.3486     | 14.8083    | 13.8303    | 7.56772    | 10.654     | 24.2783   | 7.35372    | 4.25742    |
| RIMS4   | 0.131107   | 0.122862   | 0.238645  | 0.0283979  | 0.162984   | 0.167407   | 0.12545    | 0.0383233  | 0.11647    | 0          | 0          | 0.0127136  | 0         | 0.00464321 | 0.0318967  |
| RIN1    | 3.49015    | 6.31404    | 5.76084   | 19.6532    | 13.5792    | 20.4987    | 5.49354    | 3.94367    | 2.23663    | 5.048      | 4.43713    | 6.01135    | 9.76329   | 6.97941    | 3.50862    |
| RIN2    | 11.4764    | 10.7131    | 8.19419   | 27.6907    | 19.3979    | 28.6699    | 9.75572    | 9.73838    | 9.268      | 13.8757    | 21.8816    | 10.4824    | 16.9534   | 12.8066    | 20.0732    |

|         |            |            |            |           |           |           |           |           |           |           |           |            |           |           |           |
|---------|------------|------------|------------|-----------|-----------|-----------|-----------|-----------|-----------|-----------|-----------|------------|-----------|-----------|-----------|
| RIN3    | 2.54575    | 1.84544    | 2.16823    | 3.39855   | 4.10719   | 6.85769   | 3.73237   | 2.18017   | 1.74751   | 2.46898   | 3.99071   | 3.00556    | 4.64007   | 2.70941   | 5.42583   |
| RING1   | 0.9765     | 1.06075    | 1.10159    | 1.72903   | 2.04774   | 2.18641   | 0.922356  | 0.733712  | 1.219     | 1.10862   | 0.989607  | 1.07983    | 1.79559   | 1.28286   | 1.01354   |
| RINL    | 0.461349   | 0.404485   | 0.256526   | 0.826162  | 1.49201   | 0.882262  | 0.431764  | 0.470501  | 1.60271   | 0.844828  | 1.52826   | 0.61151    | 0.834423  | 0.636401  | 0.499631  |
| RINT1   | 3.88753    | 3.36178    | 3.62704    | 3.38674   | 1.20115   | 3.56323   | 2.59688   | 3.51118   | 4.2504    | 3.60684   | 4.77302   | 3.02944    | 4.2075    | 3.2112    | 3.00256   |
| RIOK1   | 3.12695    | 3.10655    | 3.20491    | 6.93913   | 1.93429   | 6.36186   | 2.09581   | 2.36908   | 4.39241   | 3.63521   | 4.93567   | 3.27362    | 5.85614   | 4.83534   | 2.92756   |
| RIOK2   | 1.69472    | 1.17125    | 1.40199    | 1.96031   | 0.483517  | 2.04044   | 0.676959  | 1.31731   | 1.5886    | 2.15185   | 3.22387   | 1.11009    | 2.26973   | 1.49516   | 1.35528   |
| RIOK3   | 12.9427    | 12.6822    | 11.6326    | 15.852    | 6.86199   | 14.2443   | 9.53192   | 11.8847   | 17.3328   | 19.2988   | 20.297    | 13.9281    | 21.2404   | 11.7953   | 6.28061   |
| RIOX1   | 2.50474    | 2.14245    | 2.04106    | 3.08391   | 2.63753   | 3.84215   | 1.96011   | 1.63407   | 1.38243   | 2.64919   | 2.89108   | 1.4633     | 3.93419   | 2.1622    | 1.61668   |
| RIOX2   | 2.66455    | 2.96358    | 2.63668    | 4.96007   | 1.97901   | 4.71367   | 1.97449   | 2.80603   | 5.19337   | 3.11795   | 4.01377   | 2.71359    | 3.41779   | 3.27733   | 2.23593   |
| RIPK1   | 5.62675    | 5.19813    | 5.40368    | 7.5482    | 4.58296   | 8.82816   | 4.877     | 4.3962    | 6.07213   | 6.23926   | 5.57311   | 4.32366    | 10.01     | 5.05044   | 6.41541   |
| RIPK2   | 2.14868    | 1.89799    | 2.41449    | 1.72529   | 1.27943   | 2.08114   | 1.87063   | 1.58335   | 12.2665   | 5.80938   | 8.44914   | 3.17737    | 4.80012   | 2.85427   | 2.14718   |
| RIPK3   | 2.01192    | 1.97938    | 2.20259    | 4.68053   | 3.78018   | 4.45206   | 1.99452   | 1.5846    | 2.27422   | 4.55134   | 4.1072    | 3.46533    | 4.92803   | 3.35603   | 4.65413   |
| RIPK4   | 5.53473    | 6.98645    | 4.93967    | 11.7708   | 16.7769   | 10.3467   | 4.74977   | 4.44605   | 13.838    | 9.54227   | 5.4046    | 12.6719    | 10.7939   | 5.5261    | 1.77684   |
| RIPOR1  | 4.62347    | 3.91766    | 4.10687    | 5.72286   | 7.74347   | 15.1267   | 5.80978   | 4.19156   | 2.07618   | 5.71213   | 8.35094   | 3.26754    | 11.0323   | 7.14132   | 10.2603   |
| RIPOR2  | 1.25142    | 0.457552   | 0.538247   | 1.34669   | 0.451569  | 1.81053   | 0.790286  | 0.814438  | 0.0573221 | 1.2614    | 1.88777   | 0.0752793  | 1.5916    | 0.674308  | 2.20674   |
| RIPOR3  | 1.94983    | 1.02135    | 0.67568    | 2.35479   | 7.37024   | 7.6379    | 1.14278   | 1.14125   | 5.5141    | 1.11992   | 1.68414   | 1.95255    | 1.80326   | 3.53593   | 5.64786   |
| RIPPLY1 | 0.0390271  | 0.0752153  | 0          | 0         | 0         | 0.0166155 | 0.0445598 | 0         | 0         | 0.0314152 | 0         | 0.0139625  | 0         | 0.0101986 | 0.0427384 |
| RIPPLY2 | 0          | 0          | 0.0234627  | 0         | 0         | 0.048299  | 0         | 0         | 0         | 0         | 0         | 0          | 0.0182987 | 0.103761  | 0         |
| RIPPLY3 | 0.00998406 | 0.00481047 | 0.00825952 | 0         | 0.0620348 | 0.119018  | 0         | 0         | 0         | 0.012531  | 0.0901661 | 0.00714386 | 0.0773    | 0.0417449 | 0         |
| RIT1    | 3.68986    | 2.91178    | 2.88201    | 4.74802   | 2.30297   | 5.10622   | 2.21655   | 3.2615    | 4.48572   | 8.41956   | 9.99689   | 3.86277    | 7.07331   | 5.03487   | 3.43725   |
| RIT2    | 0          | 0          | 0          | 0         | 0         | 0         | 0         | 0         | 0         | 0         | 0         | 0          | 0         | 0         | 0         |
| RITA1   | 3.29166    | 2.56362    | 2.06097    | 3.93816   | 4.55273   | 6.58468   | 3.4494    | 1.76322   | 4.61294   | 2.81555   | 5.38293   | 2.83116    | 4.46573   | 3.1049    | 2.00745   |
| RLBP1   | 0.105676   | 0.082739   | 0.0546392  | 0.0136128 | 0.0615568 | 0.0562386 | 0.165904  | 0.0821766 | 0.0321754 | 0.0497379 | 0         | 0          | 0         | 0         | 0.0948526 |
| RLF     | 4.99149    | 4.66187    | 5.3822     | 4.72031   | 1.24815   | 3.63221   | 2.87493   | 4.71245   | 5.19969   | 4.84735   | 4.64409   | 3.07079    | 4.34575   | 4.71243   | 2.97266   |
| RLIM    | 4.81405    | 3.93516    | 4.21322    | 4.88256   | 1.22773   | 4.02679   | 2.84647   | 5.06603   | 2.96734   | 3.92431   | 4.53982   | 2.83549    | 5.12618   | 3.91919   | 4.30269   |
| RLN1    | 0          | 0.0111062  | 0.0190693  | 0.0237546 | 0         | 0.039255  | 0.0263187 | 0.0204857 | 0         | 0         | 0         | 0.0164935  | 0         | 0         | 0         |



|             |           |           |           |           |           |           |           |           |          |           |           |          |           |           |          |
|-------------|-----------|-----------|-----------|-----------|-----------|-----------|-----------|-----------|----------|-----------|-----------|----------|-----------|-----------|----------|
| RNA45SN1    | 0         | 0         | 0         | 0         | 0         | 0         | 0         | 0         | 0        | 0         | 0         | 0        | 0         | 0         | 0        |
| RNA45SN2    | 0         | 0         | 0         | 0         | 0         | 0         | 0         | 0         | 0        | 0         | 0         | 0        | 0         | 0         | 0        |
| RNA45SN3    | 0         | 0         | 0         | 0         | 0         | 0         | 0         | 0         | 0        | 0         | 0         | 0        | 0         | 0         | 0        |
| RNA45SN4    | 0         | 0         | 0         | 0         | 0         | 0         | 0         | 0         | 0        | 0         | 0         | 0        | 0         | 0         | 0        |
| RNA45SN5    | 0         | 0         | 0         | 0         | 0         | 0         | 0         | 0         | 0        | 0         | 0         | 0        | 0         | 0         | 0        |
| RNA5-8SN1   | 0         | 0         | 0         | 0         | 0         | 0         | 0         | 0         | 0        | 0         | 0         | 0        | 0         | 0         | 0        |
| RNA5-8SN2   | 0         | 0         | 0         | 0         | 0         | 0         | 0         | 0         | 0        | 0         | 0         | 0        | 0         | 0         | 0        |
| RNA5-8SN3   | 0         | 0         | 0         | 0         | 0         | 0         | 0         | 0         | 0        | 0         | 0         | 0        | 0         | 0         | 0        |
| RNA5-8SN4   | 0         | 0         | 0         | 0         | 0         | 0         | 0         | 0         | 0        | 0         | 0         | 0        | 0         | 0         | 0        |
| RNA5-8SN5   | 0         | 0         | 0         | 0         | 0         | 0         | 0         | 0         | 0        | 0         | 0         | 0        | 0         | 0         | 0        |
| RNASE1      | 35.3828   | 10.5875   | 13.0663   | 36.4869   | 40.6559   | 135.237   | 66.1404   | 30.3847   | 4.53295  | 45.1878   | 147.298   | 5.54826  | 17.9027   | 15.3127   | 43.9263  |
| RNASE10     | 0         | 0         | 0         | 0         | 0         | 0.151352  | 0         | 0         | 0        | 0.0446189 | 0.080263  | 0        | 0         | 0.03716   | 0        |
| RNASE11     | 0         | 0         | 0         | 0         | 0         | 0         | 0         | 0         | 0        | 0         | 0         | 0        | 0         | 0         | 0        |
| RNASE12     | 0         | 0         | 0         | 0         | 0         | 0         | 0         | 0         | 0        | 0         | 0         | 0        | 0         | 0         | 0        |
| RNASE13     | 0.0288028 | 0.111021  | 0.142966  | 0.148411  | 0.156592  | 0.0367878 | 0.0164431 | 0.0383963 | 0.175393 | 0.0180752 | 0.0487722 | 0.226701 | 0         | 0.127956  | 0        |
| RNASE2      | 0.22041   | 0.682694  | 0.885645  | 1.10325   | 0.244552  | 1.07043   | 0.251657  | 0.671596  | 0.230087 | 0.981294  | 3.3371    | 0.270359 | 0.345361  | 0.0822828 | 0.361756 |
| RNASE3      | 0.129291  | 0.420486  | 0.347615  | 0.166547  | 0.200833  | 0.137612  | 0.036905  | 0.315983  | 0        | 0.0405683 | 0.21893   | 0        | 0.0208544 | 0         | 0        |
| RNASE4      | 5.29388   | 4.03456   | 5.2448    | 1.10357   | 2.32422   | 6.57803   | 5.10642   | 3.78179   | 3.71527  | 2.99711   | 6.65919   | 1.59955  | 1.71775   | 1.77231   | 3.58264  |
| RNASE6      | 1.37419   | 0.809238  | 0.902241  | 2.45015   | 0.813176  | 6.35198   | 0.946382  | 1.86097   | 0.371912 | 2.92933   | 7.3132    | 0.218504 | 2.5332    | 1.00321   | 2.75664  |
| RNASE7      | 3.66148   | 8.90268   | 10.6591   | 59.9105   | 21.5263   | 10.6554   | 21.8906   | 7.05725   | 117.183  | 31.0635   | 34.3575   | 29.4931  | 65.5383   | 13.0726   | 1.70841  |
| RNASE8      | 0.146013  | 0.0879391 | 0.0905942 | 0.0376176 | 0.0567021 | 0.0932461 | 0.208391  | 0.032441  | 0        | 0         | 0         | 0.026119 | 0.0471034 | 0         | 0        |
| RNASE9      | 0         | 0         | 0         | 0         | 0         | 0         | 0         | 0         | 0        | 0         | 0         | 0        | 0         | 0         | 0        |
| RNASEH1     | 3.04879   | 2.16931   | 2.56294   | 3.03078   | 1.78908   | 4.5522    | 2.64417   | 2.77519   | 2.12657  | 2.28818   | 3.03494   | 1.6306   | 3.74933   | 2.61225   | 2.48112  |
| RNASEH1-AS1 | 0.455107  | 0.438555  | 0.599606  | 0.83378   | 0.733122  | 0.932913  | 0.4234    | 0.464382  | 0.287399 | 0.719297  | 2.05504   | 0.361824 | 0.674268  | 0.607862  | 0.508349 |
| RNASEH2A    | 1.66176   | 1.97236   | 2.17944   | 8.75042   | 3.84045   | 10.1809   | 2.66091   | 1.38678   | 1.97448  | 3.15395   | 6.72586   | 2.39257  | 4.74627   | 4.27899   | 2.32829  |
| RNASEH2B    | 3.17439   | 2.2477    | 2.66157   | 3.41498   | 1.24939   | 3.31477   | 1.89792   | 2.50662   | 0.953453 | 2.3959    | 5.13312   | 0.859435 | 2.19341   | 1.41246   | 2.66445  |

|                 |          |           |           |           |          |           |           |           |           |           |          |           |           |           |           |
|-----------------|----------|-----------|-----------|-----------|----------|-----------|-----------|-----------|-----------|-----------|----------|-----------|-----------|-----------|-----------|
| RNASEH2B-AS1    | 0.185441 | 0.0893484 | 0.214774  | 0.114661  | 0.288054 | 0.0631603 | 0.169385  | 0.230726  | 0.0451693 | 0.0465495 | 0.083736 | 0.0265376 | 0.143575  | 0.0581518 | 0         |
| RNASEH2C        | 2.37528  | 2.33984   | 2.00557   | 3.77323   | 7.14914  | 3.78655   | 2.72976   | 1.95493   | 4.30484   | 3.77942   | 8.67541  | 1.98049   | 1.78114   | 2.93685   | 3.83226   |
| RNASEK          | 16.8834  | 15.6282   | 18.1053   | 28.5452   | 26.1958  | 48.29     | 26.6183   | 14.0072   | 43.909    | 29.925    | 57.5103  | 26.3242   | 37.8256   | 23.1719   | 17.9526   |
| RNASEK-C17orf49 | 1.1916   | 1.77966   | 0.682074  | 0.396271  | 3.12733  | 1.40516   | 1.94866   | 0.893743  | 0.88524   | 0.461467  | 0.576839 | 0.935662  | 0.712992  | 1.38673   | 0.52018   |
| RNASEL          | 0.949515 | 1.28571   | 1.20083   | 2.10322   | 1.11043  | 2.51843   | 0.878515  | 0.892347  | 0.259194  | 1.17804   | 1.43534  | 0.620834  | 0.982308  | 0.904102  | 1.68494   |
| RNASET2         | 8.23893  | 4.62084   | 5.11569   | 8.43321   | 8.59904  | 17.0733   | 5.55961   | 4.4097    | 1.42056   | 4.92636   | 14.1914  | 1.27177   | 5.51879   | 2.64167   | 6.3282    |
| RND1            | 0.152897 | 0.0736681 | 0.0574942 | 2.95076   | 0.237502 | 0.319557  | 0.0158703 | 0.0494117 | 0.761774  | 0.523368  | 0.721789 | 0.606683  | 1.08513   | 0.225203  | 0.359312  |
| RND2            | 0.284272 | 0.306258  | 0.359671  | 0.124334  | 0.45023  | 0.351215  | 0.560315  | 0.183286  | 0.312269  | 0.0419753 | 0.195061 | 0.0837704 | 0.0143851 | 0.0582638 | 0.160098  |
| RND3            | 8.76421  | 9.08901   | 9.41248   | 29.2199   | 5.04594  | 26.0592   | 6.64598   | 7.10744   | 47.0831   | 35.6804   | 40.8681  | 25.2957   | 59.7588   | 27.173    | 13.3799   |
| RNF10           | 11.8112  | 12.1905   | 11.8138   | 22.6895   | 23.7548  | 26.6047   | 14.5461   | 10.1026   | 34.0315   | 23.9844   | 21.2825  | 21.0326   | 36.8969   | 17.9748   | 13.9245   |
| RNF103          | 4.51982  | 3.64369   | 4.61863   | 3.54178   | 3.89691  | 4.72315   | 3.26635   | 3.88646   | 6.44823   | 4.24369   | 4.51753  | 2.5526    | 4.57283   | 2.59109   | 3.70048   |
| RNF103-CHMP3    | 0.628971 | 0.484526  | 1.18028   | 0.739977  | 1.30505  | 0.373475  | 1.01074   | 0.463804  | 0.687758  | 0.692928  | 0.55179  | 0.332992  | 0.128406  | 0.346399  | 0.361247  |
| RNF11           | 10.7434  | 10.5703   | 10.4696   | 19.1402   | 17.9629  | 15.7956   | 10.6762   | 13.4084   | 39.867    | 29.491    | 36.2053  | 21.871    | 43.0029   | 17.38     | 12.0014   |
| RNF111          | 3.20786  | 3.09119   | 3.38721   | 3.3968    | 1.54288  | 3.68999   | 3.09981   | 3.14841   | 3.20789   | 3.31978   | 3.77079  | 2.72964   | 3.75016   | 3.32431   | 2.86347   |
| RNF112          | 0.466016 | 0.231442  | 0.231313  | 0.0812718 | 0.690473 | 0.555529  | 0.384736  | 0.19752   | 0.043658  | 0.125978  | 0.194243 | 0.0872091 | 0.138771  | 0.374708  | 0.185333  |
| RNF113A         | 2.89065  | 2.2181    | 2.92276   | 3.36505   | 3.43693  | 4.66441   | 2.79112   | 1.93466   | 5.80229   | 2.17236   | 3.90776  | 1.94066   | 2.9357    | 2.061     | 1.81941   |
| RNF113B         | 0.520635 | 0.0890112 | 0.180619  | 0.173074  | 0.573934 | 0.286009  | 0.517741  | 0.358217  | 0.040908  | 0.105395  | 0        | 0.0841192 | 0         | 0.473992  | 0.482385  |
| RNF114          | 7.48608  | 6.16519   | 7.17862   | 8.83604   | 4.15302  | 13.8349   | 6.49085   | 5.41078   | 3.85025   | 6.07548   | 8.81091  | 4.14155   | 8.91549   | 6.73665   | 7.09994   |
| RNF115          | 6.38511  | 3.54534   | 4.21202   | 4.36631   | 2.50722  | 6.2655    | 4.71567   | 4.68309   | 2.52948   | 4.14105   | 8.3334   | 2.87031   | 4.83943   | 3.48601   | 4.41447   |
| RNF121          | 2.44539  | 2.63988   | 2.63478   | 2.70191   | 2.8587   | 3.50616   | 2.9264    | 1.71023   | 2.14923   | 2.14108   | 3.53844  | 1.93013   | 2.68383   | 2.17843   | 2.79986   |
| RNF122          | 1.70606  | 1.10196   | 1.14546   | 3.09586   | 1.76673  | 4.67386   | 1.11511   | 1.46127   | 4.47176   | 5.46181   | 5.28932  | 4.08679   | 3.84461   | 3.61187   | 4.84697   |
| RNF123          | 2.42968  | 2.89972   | 2.96036   | 3.86579   | 7.04294  | 5.51406   | 3.47637   | 2.08703   | 4.56861   | 3.45781   | 2.55921  | 3.7098    | 4.37817   | 3.91854   | 3.89813   |
| RNF125          | 2.77497  | 1.31619   | 1.82091   | 1.05314   | 0.647182 | 1.51945   | 1.40467   | 2.38232   | 0.162757  | 0.508124  | 1.16696  | 0.286866  | 0.887589  | 0.530003  | 1.28136   |
| RNF126          | 11.8941  | 11.5156   | 11.5105   | 20.0915   | 21.8745  | 24.3638   | 13.1159   | 9.77273   | 24.3592   | 14.6995   | 23.2914  | 16.5595   | 29.0581   | 16.0834   | 7.39257   |
| RNF126P1        | 0        | 0.0253809 | 0.0145262 | 0         | 0        | 0         | 0.0601456 | 0         | 0         | 0         | 0        | 0         | 0         | 0         | 0         |
| RNF128          | 1.08557  | 1.30108   | 0.965417  | 0.727164  | 1.30686  | 1.13233   | 1.12327   | 0.844171  | 2.37979   | 0.58758   | 0.819537 | 0.645679  | 0.306428  | 0.141842  | 0.0974387 |

|             |           |           |            |           |           |           |           |           |           |           |           |            |            |           |           |
|-------------|-----------|-----------|------------|-----------|-----------|-----------|-----------|-----------|-----------|-----------|-----------|------------|------------|-----------|-----------|
| RNF13       | 9.54042   | 7.60014   | 8.27879    | 8.69302   | 1.8857    | 8.1169    | 6.19284   | 7.76642   | 7.67662   | 6.81738   | 11.7801   | 4.52132    | 8.23914    | 5.38081   | 6.31426   |
| RNF130      | 8.80523   | 3.95667   | 4.99155    | 6.98729   | 4.51152   | 14.3679   | 6.34032   | 4.98965   | 1.58178   | 7.9067    | 18.1827   | 1.89523    | 8.40615    | 5.33429   | 10.5011   |
| RNF133      | 0.352839  | 0.247278  | 0.0796073  | 0.0991667 | 0.0498256 | 0.0955939 | 0.238054  | 0.156787  | 0         | 0.120777  | 0.217261  | 0.137709   | 0          | 0.15088   | 0.299427  |
| RNF135      | 6.79697   | 6.70045   | 6.23524    | 8.60515   | 10.9953   | 10.5632   | 6.36794   | 4.59527   | 12.8486   | 7.68041   | 10.9092   | 7.49648    | 7.42553    | 4.93629   | 5.49447   |
| RNF138      | 2.57074   | 1.91119   | 2.15284    | 2.50603   | 1.00077   | 3.1194    | 1.70198   | 2.96389   | 1.92315   | 1.79958   | 3.05894   | 1.40105    | 4.53166    | 2.10286   | 2.34033   |
| RNF138P1    | 1.87142   | 0.923192  | 0.856362   | 0.522925  | 0.870195  | 0.687861  | 1.17265   | 1.23745   | 0.158207  | 0.356654  | 0.109983  | 0.679691   | 0.0890511  | 0.931408  | 2.56516   |
| RNF139      | 5.49941   | 3.68817   | 4.28318    | 4.01372   | 1.40019   | 3.71759   | 3.60599   | 5.21117   | 6.59214   | 5.05225   | 5.43495   | 2.74991    | 5.99251    | 3.82356   | 3.59844   |
| RNF139-AS1  | 0.318063  | 0.484645  | 0.411131   | 0.192567  | 0.104988  | 0.108331  | 0.349536  | 0.364773  | 0.0484206 | 0.154691  | 0.107716  | 0.176376   | 0.00256516 | 0.236883  | 0.199841  |
| RNF14       | 3.57687   | 2.94468   | 3.01738    | 4.18415   | 1.9996    | 4.12154   | 2.18352   | 3.29433   | 2.10221   | 3.28188   | 3.94128   | 1.86646    | 3.65991    | 2.97878   | 3.42777   |
| RNF141      | 9.33882   | 11.3718   | 11.8793    | 11.773    | 3.9611    | 9.50559   | 7.14302   | 10.5255   | 14.569    | 14.5377   | 17.4512   | 10.4612    | 15.8349    | 10.0994   | 7.12091   |
| RNF144A     | 2.09238   | 1.54981   | 1.45054    | 1.89992   | 2.17817   | 3.82073   | 1.78759   | 1.71867   | 1.78499   | 4.27897   | 6.81902   | 1.97353    | 2.97849    | 2.38598   | 5.16929   |
| RNF144A-AS1 | 0.439322  | 0.508762  | 0.432397   | 0.640011  | 0.750595  | 0.436584  | 0.350037  | 0.344466  | 0.252086  | 0.395869  | 0.512141  | 0.698295   | 0.171703   | 0.546084  | 0.996557  |
| RNF144B     | 7.67912   | 7.52383   | 8.69458    | 9.83156   | 4.41869   | 6.51519   | 5.85567   | 12.0196   | 4.7629    | 9.24587   | 4.27991   | 9.10179    | 8.5837     | 6.14146   | 5.12141   |
| RNF145      | 8.06671   | 9.87576   | 8.9866     | 21.8146   | 7.02811   | 17.672    | 5.69905   | 6.23418   | 24.8583   | 19.0906   | 22.2414   | 16.6552    | 18.2256    | 14.2558   | 9.75051   |
| RNF146      | 4.14633   | 3.15577   | 3.45648    | 2.87868   | 1.92849   | 5.54317   | 2.28984   | 3.3525    | 4.98192   | 3.65584   | 5.27363   | 2.04431    | 2.94734    | 2.74938   | 3.26878   |
| RNF148      | 0.4977    | 0.308314  | 0.102933   | 0.23813   | 0         | 0.302704  | 0.324719  | 0.284345  | 0         | 0.111547  | 0.0601973 | 0.0890294  | 0.0458734  | 0.17651   | 0.485016  |
| RNF149      | 10.8689   | 12.4772   | 11.1932    | 22.3945   | 21.2626   | 17.2235   | 12.1376   | 10.2621   | 20.354    | 19.2957   | 28.9055   | 18.196     | 20.1765    | 15.4047   | 12.2642   |
| RNF150      | 1.7428    | 0.480859  | 0.501128   | 0.11257   | 0.393351  | 0.782152  | 0.759668  | 0.520699  | 0.163272  | 0.105942  | 0.235416  | 0.135005   | 0.0480534  | 0.0570913 | 0.762988  |
| RNF151      | 0         | 0.0114015 | 0.0195762  | 0.0243861 | 0.0367578 | 0         | 0         | 0         | 0         | 0.0297003 | 0         | 0          | 0.0152677  | 0         | 0         |
| RNF152      | 9.68033   | 5.01008   | 5.21862    | 3.19756   | 6.95083   | 7.16185   | 6.70481   | 6.3469    | 4.05998   | 3.44379   | 4.97907   | 2.21099    | 3.69779    | 3.17634   | 5.28467   |
| RNF157      | 0.31124   | 0.0707598 | 0.220014   | 0.276185  | 0.389394  | 0.962546  | 0.172108  | 0.207418  | 0.0691248 | 0.255266  | 0.459187  | 0.0644552  | 0.186151   | 0.342501  | 0.154792  |
| RNF157-AS1  | 0.0339798 | 0.0256102 | 0.00879447 | 0.0566335 | 0.0165132 | 0         | 0.0258574 | 0.0295159 | 0         | 0         | 0.0120007 | 0          | 0.054871   | 0         | 0.0185007 |
| RNF165      | 0.54899   | 0.574955  | 0.568384   | 0.203264  | 0.148086  | 0.26312   | 0.394108  | 0.604758  | 0.0120109 | 0.0123779 | 0.0111331 | 0.00940879 | 0.0127259  | 0.0360805 | 0.0849793 |
| RNF166      | 1.6732    | 1.38201   | 1.81498    | 2.03219   | 3.32838   | 4.47037   | 1.70572   | 1.50217   | 0.363887  | 1.35002   | 3.61384   | 0.922345   | 2.29677    | 1.36081   | 2.4397    |
| RNF167      | 11.1282   | 13.4379   | 13.5938    | 17.6949   | 21.4806   | 20.118    | 19.1691   | 10.3747   | 36.3809   | 19.6023   | 29.7906   | 23.2104    | 21.2949    | 14.3864   | 9.7946    |
| RNF168      | 6.21883   | 6.75217   | 7.20825    | 6.13645   | 7.58134   | 7.22013   | 3.52056   | 5.49214   | 14.3882   | 4.81035   | 4.46834   | 5.70781    | 6.75339    | 7.77023   | 4.38466   |

|            |            |            |           |           |           |          |            |           |           |           |           |            |           |           |           |
|------------|------------|------------|-----------|-----------|-----------|----------|------------|-----------|-----------|-----------|-----------|------------|-----------|-----------|-----------|
| RNF169     | 5.26406    | 4.78682    | 5.33043   | 7.19093   | 2.35659   | 4.72911  | 4.16257    | 4.47906   | 3.88537   | 4.60755   | 4.26841   | 3.25615    | 6.35979   | 4.07236   | 4.87335   |
| RNF17      | 0.00453163 | 0          | 0         | 0         | 0         | 0        | 0.00517407 | 0         | 0         | 0         | 0         | 0.00648501 | 0.0292379 | 0         | 0         |
| RNF170     | 1.97754    | 2.56201    | 2.74475   | 1.85251   | 1.23166   | 1.96317  | 1.6363     | 2.25271   | 3.64215   | 2.193     | 2.61304   | 1.53429    | 1.77961   | 1.40189   | 1.29652   |
| RNF175     | 0.221253   | 0.0852824  | 0.183036  | 0.30401   | 0.0229121 | 0.263752 | 0.168413   | 0.0917612 | 0.0179641 | 0.111078  | 0.233116  | 0.0105542  | 0.152268  | 0.0154182 | 0.190648  |
| RNF180     | 0.788483   | 0.631461   | 0.846213  | 0.298669  | 0.208545  | 0.722191 | 0.669116   | 0.810584  | 0.163508  | 0.304912  | 0.358445  | 0.144857   | 0.274987  | 0.247258  | 0.710021  |
| RNF181     | 11.7978    | 9.46873    | 9.41234   | 20.9184   | 14.0081   | 29.3388  | 10.7025    | 6.52074   | 16.4941   | 20.0407   | 40.3925   | 9.32049    | 14.9109   | 12.4334   | 8.95896   |
| RNF182     | 0.115807   | 0.0381772  | 0.0504229 | 0.0879363 | 0.08521   | 0.134937 | 0.0974284  | 0.0487513 | 0.0519619 | 0.0611997 | 0.192657  | 0.0261672  | 0.0471902 | 0.162464  | 0.253846  |
| RNF183     | 0.0573795  | 0.0368617  | 0         | 0         | 0         | 0        | 0.021838   | 0.016998  | 0.0232939 | 0         | 0         | 0.0136855  | 0         | 0         | 0         |
| RNF185     | 6.39646    | 7.95324    | 6.9821    | 11.1053   | 11.3937   | 11.4823  | 9.33237    | 5.77337   | 29.7261   | 12.6565   | 16.2826   | 9.8632     | 14.0296   | 9.25342   | 5.49638   |
| RNF186     | 0.0925722  | 0.00892054 | 0.0765823 | 0         | 0         | 0.457179 | 0          | 0         | 0         | 0         | 0         | 0          | 0         | 0         | 0         |
| RNF187     | 11.1985    | 12.9694    | 12.9613   | 23.3319   | 31.7381   | 28.9017  | 15.1476    | 8.79687   | 28.3026   | 18.2181   | 21.7811   | 16.1208    | 25.679    | 15.3656   | 7.74419   |
| RNF19A     | 7.70492    | 7.66156    | 8.70403   | 5.14995   | 3.84584   | 6.57566  | 4.87584    | 7.85886   | 14.3195   | 6.83197   | 7.05268   | 6.41781    | 5.95019   | 6.11205   | 5.73441   |
| RNF19B     | 7.19576    | 6.37188    | 6.69431   | 17.2011   | 10.1923   | 13.2046  | 4.99132    | 4.59144   | 13.1197   | 13.9768   | 12.4185   | 9.1116     | 25.4985   | 10.6459   | 7.73529   |
| RNF2       | 1.9943     | 1.63602    | 1.82236   | 2.391     | 0.404947  | 2.55828  | 1.31711    | 1.98089   | 2.30184   | 3.13291   | 4.65714   | 1.63683    | 2.87198   | 2.3435    | 1.99362   |
| RNF20      | 5.75934    | 5.36319    | 4.53141   | 5.74157   | 6.23775   | 8.26332  | 3.63313    | 4.33057   | 9.28081   | 3.65481   | 3.9036    | 4.13357    | 3.93938   | 3.70968   | 3.88685   |
| RNF207     | 0.583722   | 0.698633   | 0.665167  | 0.35011   | 0.58844   | 0.308623 | 0.335602   | 0.396575  | 0.100235  | 0.147085  | 0.159507  | 0.194315   | 0.0456792 | 0.162756  | 0.531282  |
| RNF208     | 1.39675    | 2.01892    | 2.02655   | 1.55011   | 4.13899   | 3.11051  | 2.84604    | 1.26041   | 6.88284   | 1.72609   | 4.05105   | 3.521      | 2.73125   | 1.95416   | 0.617202  |
| RNF212     | 0.239127   | 0.327644   | 0.389464  | 0.231026  | 0.185724  | 0.178162 | 0.230367   | 0.146105  | 0.154716  | 0.0750324 | 0.151844  | 0.12298    | 0.0771419 | 0.144506  | 0.268295  |
| RNF212B    | 0.213104   | 0.191663   | 0.235059  | 0.204969  | 0         | 0.157261 | 0.178431   | 0.3409    | 0.0173024 | 0.0178311 | 0.0481135 | 0.0406617  | 0.0916622 | 0.0816766 | 0.0816117 |
| RNF213     | 7.00588    | 7.664      | 8.09868   | 11.9514   | 11.6483   | 15.7413  | 8.11937    | 6.40637   | 2.9161    | 4.35368   | 3.45923   | 5.18935    | 6.82444   | 5.82899   | 12.3438   |
| RNF214     | 3.01183    | 3.96275    | 3.40882   | 3.21462   | 3.36742   | 5.84771  | 3.02312    | 2.61047   | 2.94252   | 2.21201   | 3.10107   | 2.3741     | 2.70129   | 3.04876   | 2.63799   |
| RNF215     | 1.08483    | 1.04538    | 0.947307  | 1.88809   | 3.53874   | 3.42802  | 0.977137   | 0.546327  | 0.675281  | 1.49773   | 2.53092   | 0.689978   | 0.902128  | 1.46155   | 1.92148   |
| RNF216     | 5.70277    | 5.01105    | 5.58049   | 4.92494   | 5.49992   | 7.8884   | 5.36478    | 4.3529    | 3.60952   | 3.37542   | 3.8649    | 3.61566    | 4.47355   | 4.16486   | 5.87067   |
| RNF216-IT1 | 0.137347   | 0.16544    | 0.0568118 | 0.0707703 | 0         | 0.292374 | 0.156819   | 0.183095  | 0         | 0         | 0         | 0.245689   | 0         | 0.107676  | 0         |
| RNF216P1   | 2.49049    | 2.75832    | 2.32316   | 2.23748   | 2.39661   | 3.55373  | 2.2434     | 1.81065   | 1.51755   | 2.48865   | 2.37149   | 1.76285    | 3.44317   | 2.68626   | 2.97756   |
| RNF217     | 1.90342    | 2.7021     | 2.77162   | 2.60102   | 2.3732    | 2.09158  | 1.41687    | 2.88362   | 5.65467   | 3.8408    | 3.68023   | 5.0644     | 3.15703   | 2.54726   | 2.22839   |



|            |           |           |           |           |           |          |           |          |          |           |           |           |           |           |           |
|------------|-----------|-----------|-----------|-----------|-----------|----------|-----------|----------|----------|-----------|-----------|-----------|-----------|-----------|-----------|
| RNF217-AS1 | 0.196909  | 0.262652  | 0.225182  | 0.165625  | 0.0791069 | 0.143441 | 0.105727  | 0.174097 | 0.087516 | 0.234721  | 0.113858  | 0.24068   | 0.0443873 | 0.151406  | 0.220686  |
| RNF219     | 1.96461   | 1.41737   | 1.64099   | 2.25091   | 0.549308  | 2.34755  | 0.928931  | 1.87203  | 0.797556 | 2.22319   | 2.09951   | 0.86218   | 2.35342   | 1.71091   | 1.34487   |
| RNF219-AS1 | 2.53E-09  | 0.0866512 | 0.0403461 | 0.0242891 | 2.97E-08  | 7.54E-11 | 0.0301923 | 0.045425 | 1.60E-08 | 0.0302132 | 2.44E-13  | 3.81E-12  | 3.67E-11  | 0.130653  | 4.97E-06  |
| RNF220     | 4.86843   | 3.9747    | 4.19553   | 6.24598   | 7.58275   | 7.92248  | 4.85536   | 3.36581  | 3.82244  | 3.83234   | 4.75614   | 2.77085   | 5.97783   | 3.02388   | 3.37822   |
| RNF222     | 1.07941   | 1.21108   | 1.41927   | 5.88072   | 3.95136   | 1.87676  | 0.835984  | 1.07333  | 14.7547  | 9.01913   | 4.91666   | 7.42098   | 13.9383   | 5.55465   | 1.51764   |
| RNF223     | 0.433159  | 0.566478  | 0.972636  | 3.74111   | 4.35747   | 1.51044  | 1.64856   | 0.586599 | 9.34497  | 5.79903   | 8.6154    | 8.60443   | 12.7093   | 3.26645   | 1.06641   |
| RNF224     | 0.215571  | 0.341271  | 0.331194  | 0.587116  | 1.29159   | 0.314667 | 0.562587  | 0.287372 | 0.731364 | 0.425171  | 0.0695293 | 2.1264    | 0.109281  | 0.265571  | 0.39804   |
| RNF225     | 2.26755   | 4.68554   | 5.68565   | 7.87759   | 13.9439   | 2.54785  | 5.97876   | 1.86978  | 31.3458  | 5.25192   | 9.18355   | 11.8091   | 7.55639   | 3.38432   | 2.01432   |
| RNF227     | 5.28362   | 10.3608   | 12.5649   | 2.43013   | 10.7924   | 5.04608  | 14.2571   | 7.3451   | 39.7758  | 1.73639   | 4.64917   | 3.76264   | 0.861647  | 1.02171   | 0.67759   |
| RNF24      | 3.34632   | 2.49253   | 3.43723   | 2.07484   | 1.97212   | 6.66805  | 3.94013   | 3.27637  | 1.88355  | 3.40305   | 5.94438   | 1.26034   | 2.69802   | 2.78607   | 6.20334   |
| RNF25      | 3.15789   | 2.50729   | 2.57564   | 3.97238   | 4.675     | 5.85752  | 2.87769   | 2.09497  | 7.45719  | 4.44728   | 7.113     | 3.23552   | 4.15144   | 3.27766   | 2.61888   |
| RNF26      | 4.52173   | 3.79083   | 3.95154   | 8.32829   | 6.52576   | 10.3395  | 6.11084   | 3.47786  | 4.81609  | 4.41637   | 8.46414   | 3.46484   | 8.04141   | 5.07455   | 3.82543   |
| RNF31      | 5.25203   | 5.9249    | 5.77037   | 6.77684   | 11.9667   | 12.1536  | 5.36004   | 4.61688  | 4.53686  | 3.68154   | 3.48293   | 4.33822   | 5.41602   | 5.02622   | 5.1133    |
| RNF32      | 0.979116  | 0.793482  | 0.948883  | 0.279268  | 0.483269  | 0.206019 | 0.716303  | 0.866985 | 0.261059 | 0.449199  | 0.201209  | 0.294507  | 0.246122  | 0.458527  | 0.403278  |
| RNF34      | 3.70776   | 4.21285   | 4.03787   | 6.35305   | 3.95423   | 7.85976  | 3.29826   | 3.39351  | 3.53163  | 5.51486   | 6.89688   | 3.41326   | 6.42689   | 5.55898   | 4.08501   |
| RNF38      | 5.25716   | 3.92676   | 4.29742   | 3.16995   | 1.53883   | 5.00444  | 4.15369   | 4.31328  | 2.67662  | 3.10844   | 3.75439   | 2.17715   | 3.95045   | 2.74107   | 3.26983   |
| RNF39      | 0.385384  | 0.743385  | 0.847239  | 0.959203  | 1.2532    | 1.01737  | 1.03533   | 0.479971 | 4.77636  | 1.33896   | 2.98968   | 3.25755   | 2.61132   | 2.86666   | 0.365782  |
| RNF4       | 6.94163   | 6.11261   | 6.87866   | 9.47108   | 7.22117   | 11.993   | 6.90453   | 6.12437  | 6.84309  | 7.5265    | 10.7232   | 5.71961   | 11.4      | 7.57553   | 7.48131   |
| RNF40      | 4.82022   | 5.42643   | 5.76494   | 8.22746   | 10.6547   | 10.897   | 5.77601   | 3.84731  | 6.11761  | 4.76876   | 3.54799   | 5.14085   | 8.64869   | 5.93539   | 5.16187   |
| RNF41      | 2.62061   | 2.59401   | 2.61636   | 2.93736   | 2.02772   | 4.05618  | 2.94119   | 2.02894  | 3.76558  | 3.13568   | 4.70646   | 1.86221   | 3.64144   | 2.90703   | 3.00728   |
| RNF43      | 1.30905   | 3.00994   | 3.10239   | 1.65438   | 2.68534   | 1.48886  | 2.09341   | 1.84809  | 2.25821  | 1.04866   | 0.935981  | 1.0785    | 1.37555   | 1.10131   | 0.495643  |
| RNF44      | 5.80109   | 8.76105   | 8.49172   | 8.27528   | 16.0053   | 12.4414  | 8.62136   | 6.29459  | 9.23007  | 5.08478   | 6.12093   | 8.50103   | 6.87804   | 4.70076   | 4.42564   |
| RNF5       | 0.0470358 | 0.114187  | 0.0910489 | 0.108829  | 0.130277  | 0.163465 | 0.0492493 | 0.159037 | 0.16908  | 0.0488317 | 0.0776927 | 0.0672476 | 0.0841    | 0.0388018 | 0.0337393 |
| RNF5P1     | 1.13348   | 1.10773   | 1.25037   | 1.44724   | 1.37019   | 2.00036  | 1.18682   | 0.818405 | 1.35544  | 1.17679   | 1.87216   | 0.804934  | 1.29028   | 0.935018  | 0.833423  |
| RNF6       | 4.59616   | 4.47595   | 4.44715   | 5.12695   | 1.73229   | 6.19531  | 2.23136   | 3.56987  | 7.64809  | 6.73349   | 6.72232   | 4.39652   | 11.2152   | 5.82284   | 4.36156   |
| RNF7       | 7.72455   | 5.50392   | 5.78168   | 9.7715    | 4.3488    | 9.68329  | 5.90312   | 5.19414  | 6.53307  | 9.2591    | 19.8741   | 4.71562   | 8.00321   | 6.686     | 4.87173   |

|             |           |            |           |           |           |           |          |           |           |           |           |           |           |           |          |
|-------------|-----------|------------|-----------|-----------|-----------|-----------|----------|-----------|-----------|-----------|-----------|-----------|-----------|-----------|----------|
| RNF8        | 1.4361    | 1.2556     | 1.16802   | 2.1243    | 1.61667   | 2.35635   | 0.939601 | 1.06477   | 1.91606   | 2.00498   | 1.8762    | 1.72609   | 2.26697   | 1.85111   | 1.18184  |
| RNFT1       | 1.45233   | 1.78548    | 1.73546   | 2.6412    | 1.69403   | 2.01985   | 1.52101  | 1.5682    | 2.67925   | 2.82897   | 4.2365    | 2.24225   | 2.44761   | 2.46988   | 1.74755  |
| RNFT1-DT    | 0.475473  | 0.42122    | 0.488673  | 0.194965  | 0.0587278 | 0.193123  | 0.435536 | 0.868161  | 0.176341  | 0.180405  | 0.200601  | 0.133492  | 0.106585  | 0.25779   | 0.542626 |
| RNFT2       | 0.191661  | 0.053868   | 0.0990971 | 0.0905264 | 0.111643  | 0.224395  | 0.109416 | 0.184527  | 0.0194518 | 0.0200462 | 0.162271  | 0.0685692 | 0.0875915 | 0.0333901 | 0.080281 |
| RNGTT       | 2.04823   | 1.79159    | 1.76965   | 3.47683   | 1.5462    | 2.44083   | 1.60096  | 2.00743   | 1.63192   | 1.98211   | 2.69576   | 1.7395    | 2.48864   | 2.36857   | 1.91748  |
| RNH1        | 24.128    | 29.2784    | 30.006    | 48.7035   | 91.5742   | 57.685    | 38.7923  | 20.3999   | 86.6213   | 91.1529   | 77.9021   | 78.8475   | 107.187   | 44.6031   | 24.3592  |
| RNLS        | 0.845674  | 0.796255   | 0.704942  | 0.765049  | 0.381051  | 0.758557  | 0.655993 | 0.849096  | 0.518899  | 0.615778  | 1.19515   | 0.434195  | 0.512304  | 0.438612  | 0.574799 |
| RNMT        | 4.5405    | 3.72046    | 4.12998   | 3.97687   | 2.0595    | 4.74914   | 3.41242  | 4.46632   | 3.78877   | 4.1416    | 4.13058   | 3.08188   | 4.27959   | 3.55957   | 3.19652  |
| RNPC3       | 8.44691   | 7.61913    | 8.87704   | 2.97329   | 2.3839    | 3.0526    | 5.22873  | 7.58329   | 2.24289   | 2.65043   | 2.32844   | 2.04687   | 2.24967   | 2.71428   | 3.01507  |
| RNPEP       | 8.17509   | 8.4584     | 8.22716   | 16.3368   | 16.1286   | 19.1751   | 10.0269  | 6.51636   | 10.8595   | 12.6511   | 17.9721   | 12.6638   | 13.7193   | 10.5671   | 7.02009  |
| RNPEPL1     | 7.24658   | 7.69611    | 8.2279    | 14.4378   | 18.5225   | 20.6071   | 10.2439  | 5.30206   | 8.06905   | 10.9046   | 14.3267   | 10.0959   | 19.6716   | 9.98746   | 9.54802  |
| RNPS1       | 12.2616   | 10.3195    | 11.2298   | 20.0946   | 13.1247   | 29.788    | 12.7893  | 8.87781   | 11.5714   | 11.5554   | 20.8531   | 11.8203   | 22.5553   | 14.625    | 10.0435  |
| RNR1        | 4.00273   | 245.046    | 6.2213    | 1.89997   | 36.5521   | 34.186    | 13.1566  | 5.15268   | 1.86132   | 0.456712  | 104.831   | 23.6762   | 36.7816   | 20.4129   | 20.3111  |
| RNR2        | 2.59951   | 176.8      | 4.23955   | 1.54609   | 36.7567   | 13.1795   | 9.32811  | 5.18811   | 1.21209   | 0.298299  | 68.9529   | 18.0581   | 31.6366   | 13.1126   | 18.6448  |
| RNU11       | 2.97E-28  | 2.89E-26   | 5.00E-30  | 0         | 0.119559  | 0.0759801 | 2.58E-11 | 0.41042   | 2.39E-37  | 0         | 3.03E-33  | 5.19E-19  | 2.00E-06  | 7.95E-16  | 0        |
| RNU12       | 4.65967   | 1.87092    | 1.15644   | 2.40096   | 1.93016   | 2.90961   | 4.6109   | 5.1074    | 0.756661  | 7.01804   | 7.01359   | 2.00047   | 4.00853   | 0.892962  | 2.00756  |
| RNU4ATAC    | 0.356047  | 0.343098   | 0.883641  | 0.550375  | 0         | 0         | 0.203261 | 0.158212  | 0         | 0.223438  | 0         | 0.127381  | 0.22972   | 0         | 0.511328 |
| RNU5D-1     | 0         | 0          | 0         | 0         | 0         | 0         | 0        | 0         | 0         | 0         | 0         | 0         | 0         | 0         | 0        |
| RNU5E-1     | 0         | 0          | 0         | 0         | 0         | 0         | 0        | 0         | 0         | 0         | 0         | 0         | 0         | 0         | 0        |
| RNU5F-1     | 0         | 0          | 0         | 0         | 0         | 0         | 0        | 0         | 0         | 0         | 0         | 0         | 0         | 0         | 0        |
| RNU6-2      | 0         | 0.00952235 | 0.0490493 | 0         | 0         | 0         | 0        | 0         | 0         | 0         | 0.0223105 | 0         | 0         | 0         | 0        |
| RNU6ATAC    | 1.29601   | 0.446027   | 0.306329  | 0         | 0         | 0.157648  | 0.845568 | 1.15179   | 0.225485  | 0         | 0.627015  | 0.264952  | 0.477817  | 0.290294  | 0        |
| RNU6ATAC35P | 0.0516298 | 0.068409   | 0.0533897 | 0.0133015 | 0.0200497 | 0.0329716 | 0        | 0.0114711 | 0         | 0.0162002 | 0         | 0.0277069 | 0         | 0         | 0        |
| RNVU1-19    | 0.276335  | 0.232999   | 0.400057  | 0         | 0.107311  | 0         | 0.709898 | 0.184188  | 1.00963   | 1.2139    | 1.1698    | 0.593175  | 0.624015  | 0         | 0        |
| RNVU1-20    | 0         | 0          | 0.117457  | 0         | 0         | 0         | 0.16211  | 0.126182  | 0.172918  | 0.178202  | 0.48084   | 0         | 0         | 0.148412  | 0.203904 |
| RNVU1-8     | 0         | 0.316331   | 0.271568  | 0.338292  | 0.254959  | 0         | 0        | 0.14587   | 0.399796  | 0.412013  | 1.29702   | 0.234886  | 0.211798  | 0.343137  | 0.471438 |

|            |           |           |           |           |           |           |           |           |           |            |            |           |           |            |           |
|------------|-----------|-----------|-----------|-----------|-----------|-----------|-----------|-----------|-----------|------------|------------|-----------|-----------|------------|-----------|
| RNY4       | 0         | 0         | 0         | 0         | 0         | 0         | 0         | 0         | 0         | 0          | 0          | 0         | 0         | 0          | 0         |
| RNY5       | 0         | 0         | 0         | 0         | 0         | 0         | 0         | 0         | 0         | 0          | 0          | 0         | 0         | 0          | 0         |
| ROBO1      | 11.0809   | 14.6503   | 9.61512   | 9.47826   | 13.5953   | 9.18597   | 6.00653   | 9.0879    | 19.4989   | 7.40787    | 9.20546    | 13.6087   | 7.8751    | 6.50635    | 8.47627   |
| ROBO2      | 0.656542  | 0.720393  | 0.415838  | 0.330363  | 0.729022  | 0.486973  | 0.524146  | 0.66097   | 0.771482  | 0.312229   | 0.312674   | 0.829442  | 0.243237  | 0.348498   | 0.261501  |
| ROBO3      | 0.498028  | 0.276686  | 0.218614  | 0.623211  | 1.07358   | 0.938999  | 0.481597  | 0.167106  | 0.148541  | 0.42097    | 0.676948   | 0.214539  | 0.550843  | 0.905707   | 1.08744   |
| ROBO4      | 5.13283   | 2.31324   | 2.49485   | 6.27791   | 7.16737   | 9.50137   | 4.72425   | 2.33175   | 2.04212   | 3.90625    | 7.48291    | 2.12334   | 6.43273   | 5.57332    | 7.02498   |
| ROCK1      | 7.83927   | 5.25318   | 5.37389   | 6.26885   | 4.68831   | 9.62338   | 3.28652   | 3.86972   | 3.62496   | 7.96745    | 7.09485    | 4.25865   | 10.6238   | 7.60124    | 9.22677   |
| ROCK1P1    | 0.0105029 | 0.0365893 | 4.34E-44  | 0.0928401 | 0         | 0.0277118 | 0.0123039 | 0.0518669 | 0         | 0.100086   | 0.0385115  | 0.0155721 | 2.15E-36  | 0.00586454 | 0.0330491 |
| ROCK2      | 6.62324   | 4.28543   | 4.5569    | 5.05976   | 2.61898   | 8.37496   | 2.36397   | 3.3092    | 3.19041   | 7.47872    | 6.68964    | 3.06905   | 8.90603   | 6.17533    | 9.41731   |
| ROCR       | 1.72138   | 0.368617  | 1.00211   | 0         | 0         | 0.217146  | 0         | 0.793241  | 0         | 0          | 0          | 0         | 0         | 0          | 0         |
| ROGDI      | 1.47552   | 1.46669   | 1.12168   | 2.00002   | 5.28604   | 2.68255   | 1.24455   | 1.01598   | 2.93027   | 2.55266    | 5.35718    | 2.8154    | 2.17844   | 1.40339    | 1.71813   |
| ROM1       | 0.357374  | 0.540315  | 0.703431  | 0.533377  | 1.28253   | 1.75234   | 0.576881  | 0.262845  | 0.570316  | 0.510409   | 1.02944    | 0.246893  | 0.44525   | 0.405762   | 0.371652  |
| ROMO1      | 19.5787   | 11.8279   | 12.21     | 39.7838   | 32.2841   | 54.1595   | 18.1128   | 6.69228   | 38.2126   | 46.6263    | 84.6107    | 26.2581   | 28.6975   | 26.5788    | 15.0681   |
| ROPN1      | 0.10783   | 0.0545745 | 0.0230257 | 0.066928  | 0.022084  | 0.176598  | 0.0172875 | 0.177063  | 9.36E-24  | 0.00950177 | 0          | 0.0054169 | 0         | 0          | 0         |
| ROPN1B     | 0.67612   | 0.441495  | 0.56932   | 0.031184  | 0.334755  | 0.826751  | 0.607727  | 0.561643  | 0.0777892 | 0          | 0          | 0         | 0         | 0          | 0         |
| ROPN1L     | 0.085874  | 0         | 0.0532808 | 0.0663718 | 0.033348  | 0.475284  | 0.024512  | 0.0381588 | 0.0261462 | 0.0538904  | 0.508941   | 0.0153613 | 0.0554055 | 0.0673223  | 0.0924945 |
| ROPN1L-AS1 | 0.0288207 | 0.138863  | 0.143055  | 0.0297006 | 0.0447686 | 0         | 0.131626  | 0.0256135 | 0.0351004 | 0.144692   | 0          | 0.041244  | 0         | 0          | 0.0827804 |
| ROR1       | 2.07735   | 1.58956   | 1.21171   | 0.631345  | 0.83679   | 1.50201   | 1.36281   | 0.898053  | 0.45025   | 0.366787   | 0.616077   | 0.337588  | 0.170376  | 0.237385   | 0.7787    |
| ROR1-AS1   | 0.274715  | 0.297007  | 0.304866  | 0.0690492 | 0.0624479 | 0.256737  | 0.114754  | 0.232234  | 0.0163206 | 0.0168193  | 0.060511   | 0.110269  | 0         | 0.0315171  | 0.230942  |
| ROR2       | 0.535642  | 0.391112  | 0.60301   | 0.722715  | 1.60403   | 2.25695   | 0.933131  | 0.579093  | 0.0941539 | 1.25447    | 2.69921    | 0.323998  | 2.53673   | 1.83555    | 5.45612   |
| RORA       | 11.2036   | 19.9006   | 26.0803   | 4.315     | 2.82981   | 5.24968   | 25.1586   | 18.8802   | 40.3294   | 11.4981    | 15.4058    | 14.312    | 6.42188   | 5.78607    | 5.15467   |
| RORA-AS1   | 2.05053   | 3.78126   | 4.7035    | 0.63394   | 1.57811   | 0.499991  | 5.58703   | 3.09798   | 0.896764  | 0.304156   | 0.515568   | 2.97444   | 0.114258  | 1.11067    | 0.883447  |
| RORA-AS2   | 0.0225786 | 0.0652722 | 0.13075   | 0         | 0         | 0.0384507 | 0.0257795 | 0.0601979 | 0         | 0          | 0          | 0         | 0         | 0.0354017  | 0.194554  |
| RORB       | 0.141029  | 0.0368541 | 0.031639  | 0.0738987 | 0.0594078 | 0.18725   | 0.0382086 | 0.0509836 | 0.0116445 | 0          | 0.00269837 | 0.0136827 | 0.0370133 | 0.026235   | 0.0205968 |
| RORB-AS1   | 0         | 0         | 0         | 0         | 0         | 0.215235  | 0.128272  | 0         | 0         | 0          | 0          | 0.0401929 | 0         | 0          | 0         |
| RORC       | 2.35463   | 3.02879   | 3.56226   | 2.03323   | 1.78963   | 2.79587   | 3.74902   | 1.97101   | 4.04281   | 0.478994   | 1.23556    | 0.649189  | 0.288043  | 0.444082   | 0.206822  |

|           |           |           |            |            |            |           |           |            |            |           |            |            |            |            |            |
|-----------|-----------|-----------|------------|------------|------------|-----------|-----------|------------|------------|-----------|------------|------------|------------|------------|------------|
| ROS1      | 0.0628204 | 0         | 0.00259847 | 0.0615014  | 0.00487909 | 0         | 0         | 0.00837444 | 0.00382541 | 0.0433654 | 0.106375   | 0.00449497 | 0.0344517  | 0.00656654 | 0.00902181 |
| RP1       | 0.456342  | 0.0958016 | 0.0404484  | 0.00671819 | 0.0151898  | 0.0138775 | 0.0558253 | 0.130358   | 0.0158792  | 0.0122733 | 0.0147187  | 0.0209909  | 0.0210307  | 0.0477008  | 0.0421306  |
| RP1L1     | 0.176975  | 0.164947  | 0.129605   | 0.107633   | 0.234343   | 0.377964  | 0.188814  | 0.152124   | 0.123668   | 0.0145653 | 0.0524019  | 0.103795   | 0.0411808  | 0.0424566  | 0.0916635  |
| RP2       | 1.34785   | 1.30174   | 1.43004    | 2.4977     | 0.732315   | 2.07405   | 1.17317   | 1.2462     | 1.89916    | 3.99025   | 4.93992    | 1.7126     | 4.5509     | 2.49556    | 2.40441    |
| RP9       | 2.68724   | 1.88656   | 1.8429     | 1.93888    | 1.43834    | 2.75593   | 1.17303   | 1.52771    | 2.02053    | 2.20927   | 2.61499    | 1.06709    | 1.11847    | 1.46259    | 0.973063   |
| RP9P      | 1.42663   | 1.73244   | 1.62659    | 1.1759     | 1.77912    | 2.33016   | 1.24848   | 0.853297   | 1.79743    | 1.51873   | 1.93164    | 0.66171    | 1.3597     | 1.36688    | 1.59416    |
| RPA1      | 8.03991   | 7.76024   | 6.89704    | 12.2007    | 6.79246    | 17.3928   | 7.74976   | 5.86237    | 12.9196    | 8.72544   | 9.06996    | 7.36658    | 11.3848    | 6.49854    | 5.33486    |
| RPA2      | 6.20911   | 5.96067   | 6.93634    | 7.98622    | 3.1967     | 10.4238   | 5.63927   | 5.31959    | 3.07922    | 5.00351   | 8.5625     | 4.29131    | 6.00157    | 3.89663    | 2.66837    |
| RPA3      | 1.06634   | 0.818657  | 0.745001   | 2.98271    | 0.34584    | 1.87186   | 0.86965   | 0.926845   | 1.37004    | 1.98548   | 4.36529    | 1.05866    | 1.75547    | 1.35348    | 1.36311    |
| RPA4      | 0.29978   | 0.498314  | 0.334799   | 0.339826   | 0.349247   | 0.280785  | 0.42785   | 0.346346   | 0.0547648  | 0.0752511 | 0.23689    | 0.235951   | 0.11605    | 0.266353   | 0.581206   |
| RPAIN     | 3.17913   | 3.29517   | 3.04142    | 2.66279    | 2.85565    | 3.14368   | 2.53755   | 2.87328    | 3.1063     | 3.38475   | 4.46262    | 2.86308    | 1.69954    | 2.24192    | 2.46414    |
| RPAP1     | 1.83385   | 2.15297   | 2.31039    | 3.55044    | 3.90818    | 4.09945   | 2.95168   | 1.87138    | 2.0468     | 1.31524   | 1.31688    | 1.89928    | 2.47481    | 2.46717    | 2.07993    |
| RPAP2     | 3.26472   | 2.99907   | 3.06378    | 3.22644    | 0.993453   | 2.72287   | 1.7916    | 2.83532    | 3.07941    | 3.0055    | 3.20694    | 2.16039    | 3.41147    | 2.97725    | 2.7341     |
| RPAP3     | 1.9584    | 1.84182   | 2.11344    | 2.51627    | 0.321758   | 2.32495   | 0.938851  | 1.84645    | 1.00144    | 2.22165   | 2.35251    | 1.2935     | 2.51091    | 2.12584    | 1.4964     |
| RPARP-AS1 | 1.21472   | 1.90231   | 1.84607    | 1.37344    | 1.75325    | 1.72906   | 1.25503   | 1.13182    | 1.05438    | 0.874536  | 1.1211     | 0.699623   | 0.410565   | 0.87405    | 0.229648   |
| RPE       | 3.41685   | 3.86696   | 4.00472    | 6.24503    | 1.43591    | 4.90396   | 2.99373   | 5.09203    | 3.62883    | 4.39186   | 6.20747    | 3.08549    | 4.33959    | 4.65382    | 3.71276    |
| RPE65     | 0.0887387 | 0.0128267 | 0.0220233  | 0          | 0.0137842  | 0.022668  | 0.0303957 | 0.0315454  | 0.0432295  | 0.133651  | 0.220385   | 0.0317475  | 0.0171761  | 0.449874   | 0          |
| RPEL1     | 0         | 0.010658  | 0          | 0          | 0          | 0         | 0         | 0          | 0.0135534  | 0         | 0.0251771  | 0          | 0          | 0.0116468  | 0          |
| RPF1      | 4.74579   | 3.72066   | 3.98422    | 6.82279    | 0.910105   | 5.03875   | 2.63571   | 3.92607    | 3.82468    | 5.0446    | 8.12209    | 3.21966    | 5.62493    | 4.28704    | 3.24791    |
| RPF2      | 1.65487   | 1.81818   | 1.87204    | 3.19116    | 0.827648   | 3.22385   | 1.20239   | 1.25901    | 1.71771    | 2.58841   | 3.92731    | 1.70439    | 3.91901    | 3.13203    | 1.52138    |
| RPGR      | 1.54638   | 0.879651  | 0.947733   | 1.15556    | 0.43388    | 1.07544   | 0.503798  | 0.967763   | 0.769104   | 1.38198   | 1.211      | 1.13834    | 2.06595    | 1.31175    | 0.860412   |
| RPGRIP1   | 0.0703793 | 0.0226065 | 0.0339632  | 0.018132   | 0.0819925  | 0.0349574 | 0.033482  | 0.057335   | 0.00714284 | 0.0441666 | 0.0397247  | 0.00419652 | 0.00756806 | 0.0183916  | 0          |
| RPGRIP1L  | 0.410167  | 0.606821  | 0.662668   | 0.509714   | 0.131174   | 0.501279  | 0.33333   | 0.439571   | 0.155738   | 0.405785  | 0.547462   | 0.255505   | 0.231947   | 0.355604   | 0.699931   |
| RPH3A     | 0         | 0         | 0          | 0.0738377  | 0          | 0.0266916 | 0         | 0          | 0          | 0.0112411 | 0.00505527 | 0          | 0.0288928  | 0          | 0.0257247  |
| RPH3AL    | 0.85715   | 1.31185   | 0.674335   | 1.87056    | 2.11466    | 1.40246   | 1.71746   | 0.784168   | 0.27633    | 0.400792  | 0.664049   | 0.637365   | 0.93798    | 0.478728   | 1.27925    |
| RPIA      | 2.85187   | 2.15231   | 2.10873    | 2.73087    | 3.07744    | 5.73774   | 1.52723   | 1.44669    | 2.55115    | 1.77386   | 4.20232    | 1.45369    | 3.18338    | 2.21598    | 2.33778    |

|                |           |            |           |           |           |           |           |           |           |           |          |           |          |          |           |
|----------------|-----------|------------|-----------|-----------|-----------|-----------|-----------|-----------|-----------|-----------|----------|-----------|----------|----------|-----------|
| RPL10          | 213.975   | 154.522    | 165.665   | 324.315   | 149.201   | 285.938   | 193.162   | 128.403   | 230.211   | 249.905   | 498.878  | 171.714   | 193.105  | 161.332  | 102.872   |
| RPL10A         | 407.208   | 327.371    | 344.7     | 613.356   | 229.595   | 524.087   | 306.099   | 291.322   | 453.401   | 401.566   | 909.564  | 319.697   | 287.92   | 290.462  | 153.608   |
| RPL10L         | 0         | 0          | 0         | 0         | 0         | 0         | 0         | 0         | 0         | 0         | 0        | 0         | 0        | 0        | 0         |
| RPL11          | 239.208   | 187.91     | 195.591   | 317.443   | 93.1809   | 288.697   | 155.247   | 183.392   | 239.259   | 277.203   | 621.494  | 166.591   | 169.977  | 180.608  | 88.5327   |
| RPL12          | 526.82    | 376.741    | 428.426   | 685.639   | 185.737   | 783.553   | 338.107   | 383.274   | 482.444   | 436.892   | 932.328  | 381.671   | 352.594  | 327.588  | 204.756   |
| RPL13          | 126.402   | 117.448    | 127.364   | 197.652   | 195.336   | 170.826   | 129.183   | 84.7012   | 146.797   | 102.052   | 219.987  | 98.561    | 92.0716  | 85.7674  | 47.2257   |
| RPL13A         | 192.48    | 168.549    | 185.281   | 253.534   | 159.876   | 324.898   | 173.222   | 129.497   | 180.142   | 179.885   | 367.977  | 116.011   | 141.061  | 136.127  | 85.079    |
| RPL13AP17      | 0.0517163 | 0.00622943 | 0.0427834 | 0         | 0         | 0.0110089 | 0.029524  | 0.0459612 | 0         | 0         | 0        | 0         | 0        | 0        | 0.0557034 |
| RPL13AP20      | 0.0353863 | 0.0682239  | 0.263185  | 0.0364311 | 0.165769  | 0.151114  | 0.121047  | 0         | 0         | 0.0443581 | 0.159551 | 0.0759087 | 0.0458   | 0.147967 | 0         |
| RPL13AP3       | 0         | 0.00757004 | 0.0129977 | 0.0323828 | 0         | 0.0133783 | 0.0358778 | 0.0698154 | 0         | 0.0394391 | 0        | 0.033726  | 0        | 0.016423 | 0         |
| RPL13AP5       | 678.345   | 565.196    | 577.685   | 909.402   | 940.531   | 853.745   | 518.718   | 430.503   | 791.572   | 667.778   | 1603.04  | 579.127   | 374.19   | 454.14   | 243.443   |
| RPL13AP6       | 1.24044   | 1.24655    | 1.2021    | 0.913078  | 1.54146   | 0.452665  | 1.0521    | 0.850422  | 0.215816  | 0.578269  | 0.360077 | 1.03972   | 0.137199 | 1.4448   | 1.06886   |
| RPL13P5        | 0.964294  | 0.339524   | 0.398866  | 0.573307  | 1.26744   | 0.978984  | 1.01631   | 0.560336  | 0.451693  | 0.605144  | 1.00483  | 0.769591  | 0.598228 | 1.18242  | 0.31958   |
| RPL14          | 174.791   | 118.666    | 134.724   | 252.85    | 61.8712   | 245.582   | 100.923   | 126.277   | 170.285   | 177.282   | 319.575  | 127.974   | 158.235  | 152.725  | 66.7468   |
| RPL15          | 64.1888   | 48.892     | 53.0236   | 79.7686   | 26.9793   | 70.8655   | 56.7129   | 47.1201   | 61.8901   | 70.2255   | 141.737  | 44.1602   | 54.9287  | 46.1035  | 35.4906   |
| RPL17          | 215.501   | 155.063    | 162.163   | 306.211   | 111.872   | 233.065   | 99.9959   | 130.815   | 208.394   | 281.953   | 602.119  | 167.752   | 192.298  | 191.536  | 103.309   |
| RPL17-C18orf32 | 1.80415   | 0.49366    | 1.8206    | 1.16456   | 0.0612305 | 0.894414  | 1.26544   | 2.39346   | 1.18404   | 1.54604   | 1.29096  | 0.255928  | 1.43759  | 1.79576  | 0.718074  |
| RPL18          | 250.734   | 234.713    | 256.49    | 388.7     | 334.234   | 436.703   | 306.389   | 205.428   | 359.863   | 211.24    | 422.975  | 208.773   | 193.873  | 200.752  | 107.878   |
| RPL18A         | 510.665   | 440.792    | 452.845   | 957.751   | 449.552   | 770.59    | 565.812   | 386.8     | 735.095   | 549.337   | 1157.59  | 467.046   | 509.661  | 467.203  | 188.273   |
| RPL19          | 321.536   | 227.246    | 246.155   | 434.569   | 240.945   | 508.525   | 248.333   | 229.201   | 337.09    | 287.397   | 546.608  | 234.315   | 251.102  | 236.129  | 148.545   |
| RPL19P12       | 0.102042  | 0.35399    | 0.287015  | 0.126188  | 0.412115  | 0.121642  | 0.489333  | 0.308333  | 0.0994202 | 0.102458  | 0        | 0.219041  | 0        | 0.213326 | 0.439634  |
| RPL21          | 320.488   | 224.584    | 231.33    | 399.253   | 165.929   | 361.017   | 156.584   | 168.858   | 354.767   | 397.2     | 750.654  | 244.295   | 248.667  | 243.949  | 116.069   |
| RPL21P28       | 123.496   | 77.3176    | 82.921    | 138.231   | 32.5928   | 107.639   | 44.8935   | 110.779   | 131.6     | 123.746   | 221.391  | 75.6988   | 71.9294  | 88.6824  | 60.4594   |
| RPL21P44       | 0.95997   | 1.06256    | 1.29855   | 0.868959  | 0.604526  | 0.243011  | 0.829453  | 1.17595   | 0.331782  | 0.732685  | 0.117155 | 0.566215  | 0.150657 | 0.752583 | 1.09918   |
| RPL22          | 68.1971   | 51.1166    | 51.8629   | 85.9157   | 33.0353   | 74.5048   | 32.9634   | 53.2687   | 62.4004   | 61.3816   | 106.207  | 48.2726   | 45.9125  | 48.0574  | 32.8538   |
| RPL22L1        | 3.86668   | 3.11603    | 2.53827   | 14.6341   | 0.868166  | 3.92372   | 2.23998   | 2.63557   | 8.27926   | 11.0519   | 18.3614  | 5.88436   | 12.3633  | 9.26994  | 3.29251   |

|           |           |           |           |           |          |           |           |           |          |            |           |            |            |           |           |
|-----------|-----------|-----------|-----------|-----------|----------|-----------|-----------|-----------|----------|------------|-----------|------------|------------|-----------|-----------|
| RPL23     | 387.656   | 304.18    | 312.401   | 534.446   | 144.233  | 388.382   | 249.494   | 286.485   | 414.529  | 506.232    | 1185.66   | 322.407    | 310.747    | 313.667   | 193.37    |
| RPL23A    | 256.578   | 186.412   | 184.37    | 354.916   | 156.694  | 294.026   | 150.208   | 158.371   | 334.334  | 259.176    | 528.034   | 213.139    | 161.771    | 171.67    | 113.072   |
| RPL23AP32 | 1.94103   | 1.11507   | 1.3896    | 0.192335  | 0.753773 | 0.41319   | 1.5343    | 0.762992  | 0        | 0.562198   | 0.0842762 | 0.400632   | 0.0240835  | 1.24857   | 3.0556    |
| RPL23AP53 | 1.92912   | 1.94215   | 2.409     | 1.62088   | 0.977479 | 2.46148   | 1.70286   | 2.15004   | 2.11894  | 1.6882     | 2.19287   | 1.51561    | 1.63579    | 1.64778   | 1.51278   |
| RPL23AP64 | 4.09482   | 3.66404   | 4.50662   | 1.39405   | 3.4075   | 1.49429   | 4.67533   | 3.47667   | 1.20223  | 2.34027    | 0.165091  | 3.76708    | 0.542545   | 3.05733   | 2.88783   |
| RPL23AP7  | 1.52526   | 1.15514   | 1.53999   | 0.915677  | 0.683949 | 1.98121   | 2.03478   | 1.27116   | 0.484033 | 1.39209    | 2.74982   | 0.543034   | 1.35719    | 1.13929   | 1.46279   |
| RPL23AP82 | 1.3086    | 0.823269  | 0.99382   | 1.51308   | 1.10851  | 2.23879   | 1.23181   | 0.556525  | 0.598766 | 1.58878    | 3.0967    | 0.571657   | 1.18202    | 1.41025   | 1.12601   |
| RPL23AP87 | 0.81936   | 0.616186  | 0.975689  | 0.847978  | 0.20138  | 0.724937  | 0.503583  | 0.689715  | 0.502598 | 0.525927   | 0.517332  | 0.370533   | 0.613713   | 0.270746  | 0.442889  |
| RPL23P8   | 0.0885012 | 0         | 0         | 0.0456015 | 0        | 0         | 0         | 0         | 0        | 0          | 0         | 0          | 0          | 0         | 0.0635494 |
| RPL24     | 242.261   | 172.716   | 185.937   | 375.567   | 109.063  | 350.185   | 159.531   | 171.824   | 255.727  | 364.172    | 689.633   | 208.938    | 324.992    | 227.47    | 118.693   |
| RPL26     | 266.555   | 176.824   | 173.968   | 337.552   | 54.6787  | 171.789   | 97.9769   | 132.957   | 293.323  | 364.902    | 842.812   | 196.084    | 205.309    | 214.775   | 101.771   |
| RPL26L1   | 4.06234   | 2.17082   | 2.11823   | 8.82943   | 0.994339 | 8.05009   | 2.13641   | 2.10052   | 4.97746  | 7.35445    | 20.7616   | 3.34713    | 6.32219    | 5.81614   | 4.73794   |
| RPL27     | 169.207   | 137.604   | 141.186   | 255.556   | 67.0295  | 220.039   | 153.077   | 114.045   | 236.9    | 227.926    | 480.444   | 167.804    | 163.852    | 164.91    | 66.5809   |
| RPL27A    | 54.6677   | 46.0105   | 46.2492   | 89.8356   | 51.0612  | 77.8264   | 48.6236   | 44.4992   | 75.7933  | 71.2569    | 146.815   | 59.5754    | 50.4693    | 56.7567   | 29.2853   |
| RPL28     | 36.1756   | 31.508    | 28.9633   | 75.9136   | 32.4591  | 76.6588   | 41.1618   | 29.6857   | 55.1532  | 43.4178    | 88.7718   | 42.4445    | 36.1828    | 34.845    | 19.7824   |
| RPL29     | 366.759   | 290.688   | 293.519   | 660.205   | 141.107  | 484.229   | 313.058   | 236.661   | 476.317  | 465.001    | 987.135   | 325.543    | 325.319    | 304.182   | 143.418   |
| RPL29P2   | 0         | 0         | 0         | 0         | 0.110783 | 0         | 0.122145  | 0         | 0        | 0          | 0         | 0          | 0          | 0         | 0         |
| RPL3      | 682.323   | 560.927   | 623.579   | 873.831   | 654.917  | 1041.62   | 531.706   | 430.756   | 699.107  | 583.076    | 951.068   | 434.042    | 494.005    | 461.624   | 251.19    |
| RPL30     | 372.085   | 289.797   | 299.659   | 417.368   | 91.7547  | 341.618   | 256.131   | 241.911   | 369.568  | 403.301    | 935.807   | 257.12     | 233.895    | 235.209   | 130.906   |
| RPL31     | 133.95    | 90.6522   | 92.3828   | 174.776   | 46.8471  | 104.03    | 63.2485   | 60.9956   | 151.37   | 186.642    | 421.35    | 106.993    | 100.5      | 96.3901   | 64.072    |
| RPL31P11  | 0.0149503 | 0.0288131 | 0.0123679 | 0.0308134 | 0        | 0.0381899 | 0.0341395 | 0.0664329 | 0        | 0.0187642  | 0.033754  | 0          | 0          | 0         | 0.128823  |
| RPL32     | 154.6     | 108.954   | 114.31    | 212.722   | 52.8708  | 202.409   | 109.755   | 100.539   | 149.526  | 167.682    | 345.564   | 108.493    | 96.0351    | 107.887   | 58.7841   |
| RPL32P3   | 1.97033   | 2.26875   | 2.22858   | 0.975091  | 2.4554   | 1.34596   | 2.91058   | 2.33476   | 0.433834 | 0.628721   | 0.477525  | 0.812442   | 0.237012   | 1.22177   | 1.64663   |
| RPL34     | 136.06    | 89.8549   | 95.533    | 151.034   | 38.5049  | 85.3435   | 61.4049   | 80.7769   | 106.991  | 145.01     | 349.408   | 77.6809    | 75.8599    | 84.5122   | 46.7464   |
| RPL34-AS1 | 0.110409  | 0.0620631 | 0.121785  | 0.0379267 | 0.019056 | 0.0208916 | 0.0910447 | 0.17444   | 0        | 0.00769862 | 0.0138487 | 0.00877788 | 0.00395753 | 0.0128233 | 0         |
| RPL35     | 346.24    | 258.356   | 266.54    | 549.111   | 238.437  | 449.982   | 252.924   | 225.618   | 411.694  | 431.978    | 953.983   | 282.267    | 260.722    | 288.637   | 121.313   |

|                |           |            |           |           |           |           |           |           |            |           |           |           |           |            |          |
|----------------|-----------|------------|-----------|-----------|-----------|-----------|-----------|-----------|------------|-----------|-----------|-----------|-----------|------------|----------|
| RPL35A         | 124.309   | 92.3797    | 99.2451   | 169.74    | 35.4276   | 156.535   | 84.5404   | 75.08     | 127.658    | 147.244   | 304.432   | 102.497   | 109.932   | 105.723    | 54.1431  |
| RPL36          | 180.813   | 180.546    | 184.426   | 387.034   | 170.042   | 350.011   | 192.006   | 148.429   | 272.68     | 214.772   | 410.938   | 198.07    | 161.677   | 164.58     | 71.8666  |
| RPL36A         | 43.1559   | 33.9638    | 33.6209   | 59.9134   | 23.8035   | 42.643    | 21.9396   | 24.1693   | 60.1383    | 56.9524   | 132.138   | 38.0931   | 29.3594   | 28.6529    | 16.3939  |
| RPL36A-HNRNPH2 | 9.41212   | 7.99814    | 7.61191   | 12.9729   | 5.45517   | 17.1288   | 4.84737   | 7.34015   | 16.0715    | 13.8315   | 16.715    | 8.14564   | 15.8641   | 8.90274    | 8.19598  |
| RPL36AL        | 44.0801   | 37.3751    | 38.4902   | 70.7221   | 26.1675   | 72.2326   | 21.1575   | 25.1303   | 50.8025    | 68.7158   | 116.818   | 33.5207   | 56.7511   | 43.0158    | 32.1419  |
| RPL37          | 100.709   | 70.7464    | 68.0338   | 130.383   | 23.1723   | 80.7946   | 56.9041   | 63.5238   | 112.491    | 109.398   | 213.265   | 66.6914   | 48.9705   | 60.655     | 33.4904  |
| RPL37A         | 749.935   | 614.247    | 631.025   | 1116.71   | 464.071   | 1026.83   | 663.571   | 475.909   | 1189.06    | 906.708   | 2011.61   | 794.815   | 558.799   | 584.118    | 275.353  |
| RPL38          | 228.539   | 203.731    | 202.15    | 382.625   | 117.019   | 391.003   | 198.247   | 182.693   | 260.141    | 253.644   | 495.984   | 224.524   | 189.732   | 206.768    | 114.293  |
| RPL39          | 457.835   | 303.863    | 313.594   | 687.767   | 105.359   | 318.165   | 242.735   | 251.524   | 507.005    | 662.048   | 1354.73   | 352.491   | 346.531   | 357.555    | 180.143  |
| RPL39L         | 1.59819   | 0.962542   | 1.11873   | 3.07226   | 0.525154  | 5.4957    | 1.50894   | 1.01063   | 0.823485   | 1.92875   | 6.41865   | 0.923636  | 2.71667   | 2.08821    | 1.45657  |
| RPL3L          | 0.0151361 | 0.0437567  | 0         | 0.0155982 | 0.0235115 | 0.0386645 | 0         | 0         | 0.0368681  | 0.0379946 | 0.0341735 | 0.0433211 | 0.0585943 | 0.00791077 | 0        |
| RPL4           | 441.212   | 358.4      | 383.23    | 526.545   | 291.784   | 541.033   | 346.446   | 339.373   | 484.809    | 465.738   | 825.649   | 330.534   | 394.785   | 343.704    | 180.367  |
| RPL41          | 874.169   | 733.084    | 740.138   | 1257.02   | 730.012   | 1049.84   | 603.619   | 644.212   | 1117.89    | 1235.96   | 2936.54   | 876.543   | 759.785   | 716.086    | 401.224  |
| RPL5           | 267.989   | 189.818    | 203.238   | 332.691   | 92.9974   | 304.657   | 145.987   | 177.532   | 244.912    | 266.498   | 480.888   | 171.811   | 241.219   | 200.575    | 116.357  |
| RPL6           | 177.096   | 141.226    | 142.828   | 284.919   | 103.931   | 241.518   | 103.332   | 127.09    | 236.15     | 251.632   | 494.883   | 175.608   | 210.383   | 172.388    | 90.7485  |
| RPL7           | 282.131   | 197.837    | 200.733   | 366.139   | 114.521   | 220.416   | 136.484   | 165.757   | 316.396    | 373.317   | 728.769   | 203.907   | 238.719   | 205.011    | 111.312  |
| RPL7A          | 473.418   | 390.424    | 418.729   | 815.2     | 556       | 739.374   | 455.146   | 333.011   | 609.823    | 461.324   | 818.348   | 447.906   | 439.649   | 393.024    | 209.762  |
| RPL7L1         | 6.53229   | 6.49922    | 6.21427   | 12.8551   | 7.01203   | 11.5616   | 5.63244   | 5.13407   | 9.68749    | 9.04294   | 12.4832   | 6.11374   | 14.9961   | 8.86948    | 5.38121  |
| RPL8           | 377.634   | 339.625    | 390.238   | 537.554   | 402.906   | 528.143   | 322.125   | 274.382   | 416.721    | 362.864   | 725.114   | 289.305   | 395.029   | 292.922    | 140.715  |
| RPL9           | 493.659   | 317.972    | 327.921   | 557.167   | 188.816   | 336.741   | 234.66    | 280.007   | 507.852    | 544.364   | 981.749   | 325.988   | 311.58    | 332.653    | 169.329  |
| RPLP0          | 571.229   | 453.376    | 436.893   | 964.398   | 591.755   | 974.674   | 610.277   | 391.479   | 1072.56    | 784.84    | 1641.58   | 643.946   | 665.566   | 561.611    | 264.019  |
| RPLPOP2        | 0.0722195 | 0.00948994 | 0.0325882 | 0.0473609 | 0.0509917 | 0.145349  | 0.0149923 | 0.0116696 | 0.00799592 | 0.502656  | 1.18584   | 0.0234886 | 0.19909   | 0.192157   | 0.867445 |
| RPLP1          | 879.601   | 898.01     | 946.559   | 1283.69   | 1519.11   | 947.087   | 1213.56   | 759.488   | 1360.43    | 828.055   | 1979.42   | 881.502   | 554.288   | 625.88     | 277.124  |
| RPLP2          | 394.934   | 345.852    | 376.542   | 591.402   | 406.597   | 664.088   | 392.554   | 292.202   | 527.466    | 398.467   | 886.31    | 429.203   | 329.801   | 324.274    | 154.991  |
| RPN1           | 23.232    | 16.3045    | 17.4445   | 46.9351   | 22.7734   | 49.8332   | 24.1439   | 15.6827   | 28.0171    | 40.5118   | 66.9378   | 20.4995   | 58.5662   | 29.0945    | 29.545   |
| RPN2           | 21.28     | 15.1783    | 15.8656   | 41.7047   | 20.355    | 45.4356   | 19.3057   | 15.4529   | 27.7316    | 36.2913   | 49.118    | 24.2043   | 52.9319   | 25.9235    | 27.1997  |

|             |          |          |           |           |          |           |          |          |           |          |           |          |           |           |          |
|-------------|----------|----------|-----------|-----------|----------|-----------|----------|----------|-----------|----------|-----------|----------|-----------|-----------|----------|
| RPP14       | 1.95502  | 1.46604  | 1.91018   | 2.04028   | 0.806104 | 1.06119   | 1.8159   | 1.57849  | 1.83852   | 2.13035  | 1.43874   | 1.85086  | 4.0134    | 1.56813   | 1.90284  |
| RPP21       | 0.658817 | 0.679385 | 0.54808   | 1.18901   | 0.93792  | 1.16444   | 0.787942 | 0.504826 | 0.947669  | 0.869751 | 1.89962   | 0.626585 | 0.761498  | 0.735459  | 0.500515 |
| RPP25       | 1.5475   | 0.989366 | 0.992976  | 2.12632   | 2.75821  | 4.89905   | 2.15197  | 1.20779  | 1.28062   | 1.31975  | 3.32589   | 1.17826  | 2.04168   | 1.34798   | 1.92323  |
| RPP25L      | 1.93209  | 2.26656  | 1.68523   | 6.12473   | 4.37131  | 4.9891    | 1.89428  | 1.41846  | 1.94384   | 1.87144  | 4.55183   | 1.72808  | 1.82921   | 1.99763   | 1.23656  |
| RPP30       | 2.02512  | 1.40314  | 1.42419   | 1.83585   | 0.508773 | 2.02366   | 1.2496   | 1.64547  | 0.754016  | 1.29844  | 2.2816    | 0.731658 | 1.25763   | 1.0271    | 0.871923 |
| RPP38       | 2.9295   | 2.83639  | 2.56197   | 4.41287   | 2.27526  | 3.84841   | 2.18209  | 2.0828   | 4.99492   | 3.43137  | 4.42513   | 2.89437  | 4.041     | 3.09132   | 1.54261  |
| RPP40       | 0.82026  | 0.931576 | 0.678577  | 2.65666   | 0.333705 | 2.14521   | 0.914248 | 0.867832 | 2.02175   | 1.93646  | 4.3653    | 1.64896  | 2.86035   | 1.59233   | 0.476808 |
| RPPH1       | 7593.36  | 6486.29  | 5961.29   | 9975.07   | 12744.4  | 8440.93   | 9983.62  | 6708.3   | 11586     | 8805.9   | 25252.2   | 5842.53  | 7990.91   | 5900.23   | 3836.41  |
| RPRD1A      | 3.70376  | 3.73512  | 3.41408   | 5.53419   | 2.1888   | 5.21533   | 2.32611  | 3.53584  | 5.41401   | 4.74166  | 5.89984   | 3.56784  | 6.02053   | 4.19754   | 2.35568  |
| RPRD1B      | 4.21978  | 4.39749  | 4.23754   | 5.51891   | 3.86231  | 6.05634   | 4.25841  | 4.34512  | 4.53503   | 4.07347  | 4.50046   | 3.57962  | 6.01976   | 3.91732   | 3.61377  |
| RPRD2       | 4.56607  | 5.15154  | 5.43097   | 4.82743   | 3.1397   | 5.72655   | 4.84056  | 4.43575  | 3.74392   | 3.29653  | 3.71497   | 3.69826  | 5.19999   | 2.96758   | 3.67089  |
| RPRM        | 0.519185 | 0.204669 | 0.0650767 | 0.0324264 | 0.439894 | 0.468872  | 0.556862 | 0.153803 | 0.0574826 | 0.236956 | 0.0888022 | 0.810525 | 0.0203015 | 1.0525    | 0.406699 |
| RPRML       | 0.254087 | 0.21424  | 0.210198  | 0.0218203 | 0.197342 | 0.0901464 | 0.580216 | 0.319899 | 0.0515748 | 0        | 0         | 0        | 0         | 0.0331992 | 0        |
| RPS10       | 244.135  | 168.71   | 176.714   | 390.46    | 241.292  | 398.064   | 208.575  | 144.512  | 330.676   | 343.787  | 824.197   | 220.596  | 233.28    | 206.972   | 108.025  |
| RPS10-NUDT3 | 1.01549  | 0.288913 | 0.342504  | 0.804136  | 5.58E-07 | 0.516693  | 0.448569 | 1.55807  | 0.184736  | 0.646925 | 0.136959  | 0.182572 | 0.681122  | 0.20724   | 0.962597 |
| RPS10P7     | 0.772555 | 1.05208  | 0.722474  | 0.692296  | 0.730462 | 0.457658  | 0.536917 | 0.925394 | 0.204574  | 0.21079  | 0.227509  | 0.240341 | 0.0866867 | 0.438881  | 0.675339 |
| RPS11       | 542.214  | 456.47   | 497.429   | 724.053   | 225.1    | 734.186   | 540.628  | 385.659  | 641.201   | 492.763  | 1024.97   | 448.234  | 413.86    | 372.51    | 255.395  |
| RPS12       | 604.296  | 439.798  | 426.874   | 865.745   | 266.438  | 709.259   | 391.369  | 300.459  | 779.896   | 715.258  | 1492.02   | 556.01   | 410.787   | 446.598   | 206.158  |
| RPS13       | 290.797  | 203.094  | 211.397   | 426.272   | 67.8209  | 371.285   | 228.325  | 178.965  | 351.868   | 304.032  | 538.02    | 246.67   | 223.186   | 218.063   | 119.877  |
| RPS14       | 455.324  | 330.209  | 359.146   | 519.998   | 281.978  | 564.666   | 399.43   | 282.97   | 448.499   | 460.956  | 988.419   | 308.173  | 260.869   | 303.833   | 157.084  |
| RPS14P3     | 1.51894  | 1.41047  | 1.4165    | 0.711503  | 0.857975 | 0.305702  | 0.882902 | 1.07992  | 0.100903  | 0.762568 | 0.311762  | 1.02756  | 0.10691   | 1.35678   | 0.79323  |
| RPS15       | 196.601  | 199.968  | 220.54    | 363.15    | 267.976  | 328.037   | 237.676  | 171.399  | 270.341   | 223.148  | 446.291   | 182.066  | 161.327   | 180.011   | 94.3378  |
| RPS15A      | 360.087  | 262.653  | 254.684   | 533.575   | 109.899  | 353.767   | 239.098  | 245.643  | 417.813   | 521.926  | 1220.83   | 322.964  | 286.232   | 314.557   | 148.183  |
| RPS15AP10   | 1.68592  | 1.69845  | 1.5215    | 1.10561   | 0.357111 | 0.369759  | 1.6916   | 2.08854  | 0.49776   | 1.15418  | 0.346035  | 1.84603  | 0.214253  | 1.57536   | 1.79755  |
| RPS16       | 261.395  | 190.5    | 199.095   | 406.528   | 150.376  | 363.742   | 251.267  | 192.702  | 308.081   | 304.976  | 540.139   | 268.695  | 292.621   | 239.232   | 138.738  |
| RPS16P5     | 0.886735 | 0.564949 | 0.648694  | 0.475783  | 0.660244 | 0.393122  | 0.334693 | 0.651286 | 0.116027  | 0.220749 | 0.0827284 | 0.576802 | 0.127662  | 0.896252  | 1.26294  |



|          |          |          |          |          |          |          |          |          |          |          |           |           |          |          |          |
|----------|----------|----------|----------|----------|----------|----------|----------|----------|----------|----------|-----------|-----------|----------|----------|----------|
| RPS17    | 128.697  | 94.2607  | 90.2982  | 180.782  | 55.9545  | 138.799  | 95.7184  | 89.5013  | 164.368  | 154.71   | 344.874   | 113.46    | 99.4634  | 110.519  | 47.977   |
| RPS18    | 212.693  | 167.822  | 179.398  | 290.543  | 82.7158  | 251.262  | 164.221  | 144.362  | 262.98   | 208.136  | 433.13    | 141.103   | 105.494  | 121.739  | 57.3089  |
| RPS18P9  | 2.22116  | 1.78365  | 2.31169  | 1.20602  | 1.03878  | 1.40321  | 1.63616  | 1.50702  | 1.65798  | 1.13909  | 2.9388    | 1.07662   | 0.87834  | 1.43549  | 2.40097  |
| RPS19    | 246.287  | 193.633  | 196.271  | 375.811  | 331.367  | 432.065  | 208.18   | 155.782  | 275.584  | 223.901  | 500.18    | 185.352   | 141.808  | 150.858  | 80.5835  |
| RPS19BP1 | 7.25209  | 6.7474   | 6.14989  | 12.1123  | 21.6473  | 19.9578  | 6.09985  | 5.23282  | 12.4869  | 15.6077  | 29.2824   | 6.11624   | 14.1985  | 10.3371  | 6.20325  |
| RPS2     | 573.786  | 563.287  | 573.412  | 1320.92  | 843.927  | 1202.48  | 686.883  | 462.422  | 804.368  | 768.941  | 1764.42   | 630.596   | 705.138  | 646.535  | 292.882  |
| RPS20    | 201.579  | 142.742  | 154.794  | 273.586  | 102.925  | 287.452  | 130.492  | 128.473  | 182.372  | 206.107  | 462.701   | 139.958   | 136.626  | 135.181  | 90.6522  |
| RPS21    | 268.717  | 197.812  | 201.899  | 368.223  | 118.378  | 365.009  | 215.396  | 135.715  | 307.836  | 313.134  | 707.635   | 236.098   | 193.51   | 193.071  | 92.6589  |
| RPS23    | 94.4019  | 65.9586  | 72.0703  | 112.656  | 39.5397  | 86.685   | 58.9317  | 55.3973  | 77.5488  | 121.823  | 252.135   | 63.4497   | 69.8333  | 80.2673  | 33.6475  |
| RPS24    | 98.3224  | 73.5571  | 69.961   | 127.142  | 32.5993  | 78.8284  | 35.0505  | 59.3804  | 133.864  | 132.816  | 293.029   | 80.5132   | 81.8237  | 78.5384  | 44.5128  |
| RPS25    | 383.507  | 287.583  | 325.163  | 478.397  | 120.196  | 396.764  | 219.072  | 241.419  | 394.141  | 400.281  | 848.021   | 294.402   | 264.189  | 261.776  | 162.669  |
| RPS26    | 67.1148  | 44.6319  | 18.8094  | 206.864  | 25.1013  | 163.006  | 64.4139  | 60.043   | 45.987   | 94.326   | 180.267   | 72.6581   | 79.8717  | 68.4351  | 42.8268  |
| RPS26P11 | 0.20938  | 0.423823 | 0.34684  | 0.345597 | 0.130015 | 0.42902  | 0.526387 | 0.223157 | 0.153075 | 0.157578 | 0.0473054 | 0.240051  | 0.216449 | 0.657011 | 0.363648 |
| RPS27    | 382.455  | 237.808  | 229.134  | 348.727  | 61.9837  | 333.739  | 222.293  | 223.174  | 336.625  | 354.567  | 780.134   | 209.738   | 166.46   | 174.116  | 129.348  |
| RPS27A   | 190.715  | 128.519  | 134.864  | 234.29   | 115.728  | 236.69   | 101.965  | 120.446  | 194.082  | 228.63   | 448.097   | 154.228   | 155.492  | 150.275  | 87.1186  |
| RPS27L   | 9.43656  | 6.47027  | 6.72921  | 12.1008  | 2.52042  | 12.1254  | 5.60657  | 6.03367  | 5.1223   | 20.3114  | 44.081    | 5.57584   | 10.1933  | 8.24597  | 10.8539  |
| RPS28    | 365.079  | 299.755  | 295.203  | 606.229  | 453.411  | 625.588  | 341.022  | 238.95   | 541.061  | 385.974  | 769.817   | 376.273   | 266.349  | 274.018  | 131.553  |
| RPS29    | 18.2046  | 12.4627  | 11.5348  | 20.3616  | 4.23238  | 18.8435  | 12.2398  | 7.43677  | 22.1224  | 21.4882  | 40.1804   | 15.5435   | 9.75094  | 13.1624  | 5.61087  |
| RPS2P32  | 0.361257 | 0.358997 | 0.709787 | 0.32575  | 0.385796 | 0.269155 | 0.386692 | 0.160528 | 0.164989 | 0.283384 | 0.356838  | 0.0807779 | 0.160243 | 0.42482  | 0.518811 |
| RPS3     | 142.561  | 119.769  | 133.628  | 232.751  | 176.819  | 201.866  | 120.186  | 95.0175  | 151.483  | 137.506  | 242.935   | 122.773   | 111.771  | 113.87   | 57.3957  |
| RPS3A    | 250.777  | 169.565  | 174.782  | 290.925  | 100.486  | 172.169  | 116.611  | 147.086  | 239.496  | 292.214  | 550.368   | 174.313   | 177.153  | 184.766  | 84.6205  |
| RPS4X    | 375.59   | 310.551  | 333.706  | 477.141  | 193.434  | 410.549  | 418.306  | 273.597  | 407.984  | 342.395  | 660.355   | 266.285   | 252.107  | 239.014  | 139.968  |
| RPS4Y1   | 63.5724  | 47.4867  | 55.3236  | 86.3318  | 44.1249  | 74.9136  | 5.00789  | 44.1619  | 46.2848  | 66.157   | 128.881   | 48.94     | 61.1421  | 53.4255  | 37.9421  |
| RPS4Y2   | 0        | 0        | 0        | 0        | 0        | 0        | 0        | 0        | 0        | 0        | 0         | 0         | 0        | 0        | 0        |
| RPS5     | 310.292  | 230.989  | 255.455  | 396.914  | 192.942  | 341.438  | 268.697  | 193.158  | 297.908  | 262.049  | 556.254   | 196.01    | 194.496  | 196.239  | 99.2605  |
| RPS6     | 642.31   | 523.597  | 551.203  | 847.739  | 507.538  | 838.706  | 396.965  | 440.107  | 635.486  | 612.998  | 1135.82   | 494.867   | 468.811  | 446.631  | 230.129  |

|             |           |            |           |          |           |           |          |           |           |           |           |          |           |            |           |
|-------------|-----------|------------|-----------|----------|-----------|-----------|----------|-----------|-----------|-----------|-----------|----------|-----------|------------|-----------|
| RPS6KA1     | 4.12109   | 3.5211     | 3.57368   | 10.8972  | 6.4632    | 11.1254   | 3.79755  | 2.49072   | 3.25188   | 4.49881   | 3.82945   | 2.35615  | 8.61787   | 5.07988    | 2.65472   |
| RPS6KA2     | 5.68619   | 2.6745     | 3.22921   | 3.60824  | 5.06851   | 8.6957    | 4.89155  | 3.34254   | 3.87424   | 3.09941   | 3.46255   | 2.39072  | 5.38813   | 3.18198    | 6.21396   |
| RPS6KA2-AS1 | 0.0806378 | 0.116558   | 0.155655  | 0.166199 | 0.0417528 | 0.228873  | 0.276209 | 0.214993  | 0         | 0         | 0         | 0        | 0         | 0.0421448  | 0         |
| RPS6KA2-IT1 | 0.519619  | 0.13481    | 0.231466  | 0.041191 | 0.248353  | 0.0680691 | 0.182549 | 0.319704  | 0.14604   | 0.0501674 | 0.0902439 | 0        | 0         | 0.125343   | 0.344418  |
| RPS6KA3     | 5.45395   | 4.64297    | 5.39354   | 5.33863  | 1.58531   | 4.73307   | 3.96531  | 5.8495    | 7.07724   | 5.67375   | 5.97738   | 3.31781  | 7.90939   | 5.00452    | 5.57444   |
| RPS6KA4     | 4.59612   | 5.02621    | 5.55995   | 14.4146  | 14.0609   | 21.2389   | 5.63519  | 3.53392   | 7.29571   | 13.6299   | 8.06169   | 10.531   | 32.4012   | 13.9504    | 7.9356    |
| RPS6KA5     | 1.93181   | 1.82891    | 2.16053   | 1.14622  | 0.821406  | 0.979242  | 1.29217  | 2.23011   | 1.83688   | 1.26594   | 0.968144  | 1.44393  | 1.07431   | 0.771452   | 0.642131  |
| RPS6KA6     | 0.194987  | 0.424748   | 0.311255  | 0.220751 | 0.132244  | 0.16369   | 0.257122 | 0.456407  | 0.501702  | 0.0517033 | 0.040303  | 0.143449 | 0.0673321 | 0.00861201 | 0.0552164 |
| RPS6KB1     | 3.87476   | 3.1461     | 3.16356   | 4.35405  | 1.33752   | 3.94265   | 2.36143  | 3.99482   | 5.13542   | 3.40636   | 3.5784    | 2.89331  | 5.50636   | 3.18989    | 2.5641    |
| RPS6KB2     | 15.1541   | 19.4034    | 18.7994   | 28.5252  | 44.7029   | 28.9912   | 21.6169  | 12.573    | 51.7214   | 43.7181   | 49.2549   | 40.6315  | 45.4955   | 22.7629    | 12.6185   |
| RPS6KC1     | 2.05756   | 1.92872    | 2.15388   | 2.42595  | 1.40988   | 2.28158   | 1.45332  | 1.64541   | 2.00823   | 2.78215   | 2.74728   | 2.8772   | 2.61073   | 2.2717     | 3.12629   |
| RPS6KL1     | 0.980071  | 0.673977   | 0.880807  | 0.344315 | 0.380597  | 1.28592   | 0.92573  | 0.803701  | 0.0759574 | 0.21247   | 0.0754349 | 0.398447 | 0.221318  | 0.405126   | 0.307092  |
| RPS7        | 303.768   | 237.302    | 242.275   | 505.077  | 161.084   | 346.74    | 181.141  | 190.307   | 408.268   | 556.891   | 1161.34   | 300.898  | 355.344   | 306.933    | 150.063   |
| RPS7P5      | 0         | 0          | 0         | 0        | 0         | 0         | 0        | 0         | 0         | 0         | 0         | 0        | 0         | 0          | 0         |
| RPS8        | 568.17    | 509.673    | 539.986   | 844.072  | 337.004   | 693.763   | 454.83   | 464.507   | 752.896   | 559.349   | 1057.4    | 494.247  | 456.934   | 427.205    | 232.796   |
| RPS9        | 210.267   | 173.635    | 186.026   | 333.597  | 377.088   | 372.119   | 200.907  | 131.735   | 212.478   | 231.154   | 526.442   | 171.591  | 198.751   | 169.655    | 87.3583   |
| RPSA        | 245.898   | 162.586    | 166.703   | 439.84   | 254.572   | 325.878   | 195.552  | 157.174   | 231.713   | 344.315   | 714.385   | 209.296  | 258.429   | 244.36     | 125.805   |
| RPSAP52     | 0.0202299 | 0.00974709 | 0.0334713 | 0        | 0         | 0.0516766 | 0        | 0.0539361 | 0         | 0.228516  | 0.251208  | 0        | 0.0391568 | 0.169169   | 0.0581055 |
| RPSAP58     | 1.97295   | 1.92525    | 1.87001   | 1.42317  | 0.908158  | 0.999305  | 0.785078 | 1.3891    | 2.80518   | 0.745832  | 1.23268   | 1.6802   | 0.841653  | 0.772962   | 0.274114  |
| RPSAP9      | 0.47728   | 0.40808    | 0.288047  | 0.595019 | 0.271476  | 0.325186  | 0.373007 | 0.234741  | 0.156864  | 0.46564   | 0.469265  | 0.17757  | 0.453897  | 0.286566   | 0.354273  |
| RPTN        | 6.05649   | 4.93642    | 1.99019   | 4.13642  | 0.564066  | 4.10243   | 1.45854  | 2.14954   | 25.5242   | 7.26783   | 13.1982   | 8.41197  | 1.17982   | 2.17917    | 0.856751  |
| RPTOR       | 3.57088   | 4.32601    | 4.83402   | 4.03142  | 6.40174   | 5.56685   | 6.57379  | 3.99679   | 2.29801   | 3.45223   | 2.31661   | 4.93348  | 6.63594   | 4.00902    | 4.27497   |
| RPUSD1      | 3.05367   | 2.24199    | 2.54472   | 4.62237  | 7.4018    | 9.11484   | 3.35887  | 2.13728   | 3.77353   | 3.18688   | 4.04069   | 2.69722  | 6.48797   | 3.79997    | 3.3895    |
| RPUSD2      | 2.16556   | 1.40701    | 1.29386   | 2.78395  | 2.22559   | 3.41783   | 1.81072  | 1.05949   | 1.70499   | 1.11191   | 2.03721   | 1.10344  | 2.71679   | 1.53767    | 1.00526   |
| RPUSD3      | 2.57998   | 3.07809    | 3.1761    | 5.5707   | 5.41504   | 6.45972   | 3.82244  | 2.22463   | 4.65708   | 3.77783   | 6.2757    | 3.53825  | 4.44883   | 2.81722    | 2.47012   |
| RPUSD4      | 3.6115    | 3.32034    | 3.50597   | 4.6427   | 2.71909   | 5.96981   | 3.45026  | 2.37445   | 2.62557   | 2.35891   | 2.99529   | 2.03038  | 3.70918   | 3.49094    | 2.27574   |

|        |           |          |           |          |          |          |          |          |           |           |          |           |          |          |          |
|--------|-----------|----------|-----------|----------|----------|----------|----------|----------|-----------|-----------|----------|-----------|----------|----------|----------|
| RRAD   | 2.86936   | 0.853677 | 1.19335   | 0.694805 | 1.38828  | 2.21625  | 0.930927 | 0.543453 | 0.210056  | 12.8703   | 0.796513 | 2.06433   | 1.1735   | 1.36034  | 1.32855  |
| RRAGA  | 10.0427   | 10.8904  | 11.2437   | 20.7564  | 14.0093  | 24.7221  | 16.8313  | 9.2492   | 25.1792   | 22.7798   | 38.8084  | 15.2247   | 28.0174  | 15.431   | 12.0658  |
| RRAGB  | 2.98679   | 2.49412  | 3.14545   | 1.76559  | 2.70401  | 2.22336  | 2.12354  | 2.49156  | 1.07119   | 1.4029    | 2.75115  | 1.30457   | 1.14678  | 1.49878  | 1.77629  |
| RRAGC  | 6.41875   | 6.8911   | 7.47465   | 14.1895  | 2.8412   | 12.1424  | 4.9793   | 6.54731  | 13.9843   | 16.0488   | 12.4462  | 9.25209   | 25.6229  | 9.56833  | 6.62778  |
| RRAGD  | 3.69274   | 3.7599   | 2.86834   | 4.08629  | 2.78777  | 4.42045  | 3.3097   | 2.55529  | 5.23546   | 2.58273   | 3.41553  | 2.46409   | 4.7287   | 1.83668  | 0.917609 |
| RRAS   | 8.47327   | 6.10686  | 7.04852   | 13.6905  | 11.5577  | 13.4305  | 10.7733  | 4.50568  | 3.80192   | 9.45645   | 20.9323  | 3.77878   | 9.268    | 6.23179  | 10.4496  |
| RRAS2  | 2.54498   | 1.91721  | 2.05489   | 4.40913  | 1.33242  | 3.10607  | 2.11238  | 2.23463  | 4.33191   | 4.99143   | 5.58208  | 2.45833   | 11.6537  | 6.08093  | 2.63282  |
| RRBP1  | 9.11199   | 7.33674  | 8.20457   | 22.5477  | 24.2694  | 41.0542  | 9.07976  | 6.95895  | 5.25508   | 13.1906   | 12.0155  | 12.5855   | 34.3274  | 16.2167  | 29.9764  |
| RREB1  | 7.82524   | 8.90671  | 9.47512   | 17.1055  | 10.4477  | 15.8772  | 10.2045  | 8.21545  | 5.38076   | 10.774    | 5.26323  | 12.0164   | 19.0673  | 10.233   | 7.19215  |
| RRH    | 0.0892406 | 0.136159 | 0.0738261 | 0        | 0        | 0        | 0.16982  | 0.158619 | 0         | 0.0186677 | 0        | 0.0425693 | 0        | 0.046641 | 0        |
| RRM1   | 9.63526   | 9.54384  | 8.37281   | 18.5714  | 6.28657  | 17.3567  | 8.12538  | 8.04527  | 12.8389   | 13.337    | 16.0089  | 10.3694   | 16.9453  | 9.14775  | 5.17983  |
| RRM2   | 0.687418  | 0.704628 | 0.613283  | 8.20213  | 0.565304 | 6.86889  | 1.50049  | 0.736697 | 1.28042   | 4.83835   | 6.4211   | 2.36771   | 13.1183  | 5.69562  | 2.33255  |
| RRM2B  | 2.74155   | 2.1358   | 2.39318   | 6.03574  | 1.07156  | 3.94878  | 1.44824  | 2.84387  | 1.58274   | 3.72583   | 4.78297  | 1.48716   | 3.90527  | 2.34934  | 2.29459  |
| RRN3   | 4.05507   | 3.03477  | 3.45645   | 5.30014  | 2.04331  | 6.32801  | 2.8654   | 3.23846  | 3.19027   | 3.38925   | 4.23632  | 2.3711    | 5.18151  | 4.50007  | 3.11263  |
| RRN3P1 | 1.3052    | 0.815619 | 0.711884  | 0.537128 | 0.472974 | 0.589592 | 0.386951 | 0.708961 | 0.0211865 | 0.31455   | 0.520233 | 0.234827  | 0.418352 | 0.499304 | 1.32649  |
| RRN3P2 | 1.26515   | 0.622977 | 0.827991  | 0.468007 | 0.481069 | 0.73423  | 0.972343 | 0.78786  | 0.0525413 | 0.240039  | 0.851446 | 0.215749  | 0.114933 | 0.710215 | 1.89456  |
| RRN3P3 | 1.60792   | 2.37643  | 2.64601   | 1.05783  | 3.13079  | 1.29265  | 2.51169  | 1.36198  | 0.754372  | 1.26752   | 0.647318 | 1.26793   | 0.601886 | 1.72911  | 1.05192  |
| RRNAD1 | 3.07011   | 3.48428  | 3.50171   | 3.05872  | 8.93581  | 3.69108  | 3.29572  | 2.33867  | 3.78873   | 1.34417   | 3.10882  | 1.97779   | 2.40198  | 2.07901  | 1.69917  |
| RRP1   | 4.86683   | 4.98602  | 5.13868   | 9.38409  | 10.1859  | 13.2609  | 4.03598  | 3.86994  | 6.3016    | 4.90277   | 3.38317  | 5.6359    | 12.1057  | 7.64424  | 4.17524  |
| RRP12  | 2.43142   | 3.40872  | 3.81095   | 5.94361  | 5.84802  | 6.41583  | 4.11346  | 2.04932  | 6.10714   | 4.32489   | 1.87707  | 6.2594    | 7.98881  | 5.38094  | 3.31164  |
| RRP15  | 1.64809   | 1.12861  | 1.24582   | 1.38883  | 0.461836 | 1.62536  | 0.895465 | 1.5574   | 0.881368  | 0.815116  | 1.56923  | 0.874981  | 1.8254   | 1.26709  | 0.963977 |
| RRP1B  | 4.59949   | 3.7242   | 4.30182   | 5.82292  | 4.45213  | 7.8948   | 4.20748  | 3.8208   | 2.64292   | 2.83217   | 2.81953  | 3.64588   | 8.03974  | 4.07783  | 3.54774  |
| RRP36  | 8.31822   | 6.59067  | 6.78963   | 13.9822  | 7.55161  | 13.0167  | 8.02008  | 5.88117  | 14.7908   | 13.0386   | 21.3887  | 7.53903   | 18.8079  | 11.6802  | 7.69852  |
| RRP7A  | 2.68201   | 4.00509  | 4.86542   | 5.81635  | 5.16772  | 5.60372  | 3.20068  | 2.12178  | 2.86225   | 2.78372   | 3.93049  | 3.20847   | 5.49403  | 8.3752   | 2.28621  |
| RRP7BP | 2.95705   | 3.42146  | 4.06654   | 2.24556  | 5.70457  | 2.23698  | 3.68997  | 2.89899  | 0.858482  | 1.40087   | 0.783685 | 2.3098    | 1.04264  | 3.18084  | 2.7616   |
| RRP8   | 3.58182   | 3.54071  | 3.71759   | 4.5084   | 4.94788  | 4.92931  | 3.80288  | 2.6429   | 2.35014   | 2.30584   | 3.10344  | 2.49669   | 3.76066  | 4.06179  | 2.90415  |

|          |           |            |           |           |            |           |           |           |            |            |            |           |            |            |           |
|----------|-----------|------------|-----------|-----------|------------|-----------|-----------|-----------|------------|------------|------------|-----------|------------|------------|-----------|
| RRP9     | 2.34064   | 2.64318    | 2.56565   | 8.08052   | 5.54462    | 9.99002   | 2.27159   | 1.69013   | 2.85063    | 2.62561    | 4.02949    | 3.56939   | 7.27712    | 5.28321    | 2.0799    |
| RRS1     | 3.29646   | 2.95434    | 3.33308   | 6.19306   | 5.20483    | 5.8217    | 2.38528   | 2.20626   | 3.07299    | 2.14532    | 2.7412     | 2.76638   | 8.5337     | 4.93465    | 3.07816   |
| RRS1-AS1 | 0.12716   | 0.094454   | 0.0832797 | 0.0600608 | 0.0576108  | 0.040603  | 0.10889   | 0.113009  | 0          | 0.119699   | 0.00598114 | 0.0606574 | 0.0102553  | 0.110765   | 0.0532634 |
| RS1      | 0         | 0.0221097  | 0.0189811 | 0.0157631 | 0.0118801  | 0         | 0         | 0.0203909 | 0.00931449 | 0.00959911 | 0          | 0.0054724 | 0.00493449 | 0.00399721 | 0.0768851 |
| RSAD1    | 3.81905   | 3.83705    | 3.82183   | 4.47971   | 6.21935    | 6.45129   | 3.5366    | 2.23662   | 6.33375    | 2.77215    | 4.12248    | 2.58151   | 2.85576    | 2.52031    | 2.55276   |
| RSAD2    | 0.632612  | 0.177801   | 0.245316  | 3.38865   | 0.368499   | 10.6834   | 0.361148  | 0.286963  | 0.329046   | 0.396996   | 1.06377    | 0.282907  | 0.420913   | 0.099878   | 0.785483  |
| RSBN1    | 2.52413   | 2.22051    | 2.52282   | 2.14112   | 1.18959    | 2.47384   | 2.14875   | 2.98488   | 1.84028    | 1.86204    | 2.53542    | 1.17948   | 1.70169    | 1.51127    | 1.68672   |
| RSBN1L   | 3.50066   | 2.93836    | 3.23201   | 2.92823   | 1.50399    | 3.16053   | 2.14183   | 2.86189   | 2.35791    | 2.52606    | 3.19355    | 2.03612   | 2.51503    | 2.61588    | 2.7814    |
| RSC1A1   | 5.98797   | 5.83702    | 5.47237   | 8.51746   | 1.7753     | 6.06352   | 4.09187   | 5.9498    | 7.27016    | 5.77339    | 6.06332    | 6.15027   | 7.11645    | 4.77486    | 3.59765   |
| RSF1     | 5.4905    | 5.37552    | 5.51544   | 4.54322   | 2.52778    | 6.50598   | 2.23374   | 3.44129   | 3.90888    | 4.75251    | 4.53407    | 3.07063   | 4.76688    | 3.87322    | 5.51565   |
| RSL1D1   | 9.68989   | 8.51664    | 8.57915   | 15.6567   | 5.34162    | 15.4731   | 5.20761   | 7.41396   | 8.28279    | 7.20657    | 9.61586    | 6.55284   | 13.5825    | 9.44326    | 4.67963   |
| RSL24D1  | 16.0257   | 10.1893    | 11.8279   | 17.4541   | 2.80662    | 17.405    | 8.808     | 13.4883   | 12.8203    | 17.7279    | 30.3114    | 9.82551   | 21.5512    | 12.6622    | 9.65727   |
| RSPH1    | 0.113367  | 0.421369   | 0.321549  | 0.0834485 | 0.125784   | 0.206851  | 0.29586   | 0.028786  | 0.374756   | 0.0203267  | 0.0365649  | 0.0231763 | 0.0208982  | 0.0761792  | 0         |
| RSPH10B  | 0.0298043 | 0.0287204  | 0.0523945 | 0.0115178 | 0.054977   | 0.0142751 | 0.0340296 | 0.0281431 | 0          | 0.0187037  | 0          | 0.0106629 | 0.0024037  | 0.015577   | 0.0454779 |
| RSPH10B2 | 0.0298043 | 0.0287204  | 0.0523945 | 0.0115178 | 0.054977   | 0.0142751 | 0.0340296 | 0.0281431 | 0          | 0.0187037  | 0          | 0.0106629 | 0.0024037  | 0.015577   | 0.0454779 |
| RSPH14   | 0.0739395 | 0.195938   | 0.321132  | 0.0571476 | 0.0574268  | 0.0944377 | 0.168843  | 0.213562  | 0.045025   | 0          | 0          | 0         | 0          | 0.019322   | 0         |
| RSPH3    | 1.32629   | 1.59757    | 1.44737   | 1.89023   | 1.80267    | 1.96429   | 1.5264    | 1.31349   | 2.40572    | 2.22246    | 1.96709    | 1.77937   | 2.74922    | 1.60206    | 1.63117   |
| RSPH4A   | 0.464491  | 0.357293   | 0.546053  | 0.193148  | 0.113923   | 0.145713  | 0.269822  | 0.427285  | 0.168717   | 0.0818223  | 0.0643941  | 0.110785  | 0.0841227  | 0.157583   | 0.152138  |
| RSPH6A   | 0.0465842 | 0.049379   | 0.0462453 | 0.0480064 | 0.202612   | 0.0158663 | 0.13829   | 0.0331202 | 0          | 0.0233872  | 0.0210351  | 0.0199994 | 0.00601118 | 0.0779103  | 0.0669009 |
| RSPH9    | 0.327805  | 0.210589   | 0.253105  | 0.225209  | 0.169732   | 0.111649  | 0.299422  | 0.213639  | 0.159692   | 0.137143   | 0.271371   | 0.109458  | 0.0563995  | 0.182747   | 0.188308  |
| RSPO1    | 2.34502   | 1.12987    | 0.997874  | 0.609944  | 2.0948     | 2.11159   | 1.44566   | 0.945485  | 0.118619   | 0.178663   | 0.279102   | 0.573604  | 0.531724   | 1.30392    | 1.52786   |
| RSPO2    | 0.0397306 | 0.00319047 | 0.010956  | 0         | 0          | 0.016915  | 0         | 0         | 0          | 0          | 0          | 0         | 0          | 0          | 0         |
| RSPO3    | 0.222189  | 0.0778577  | 0.11697   | 0.124894  | 0.00784402 | 0.382683  | 0.0922504 | 0.112195  | 0.00615004 | 0.114083   | 0.250824   | 0         | 0.185711   | 0.0211138  | 0.427874  |
| RSPO4    | 0.486952  | 0.316944   | 0.219089  | 1.09168   | 1.64551    | 1.7822    | 0.312133  | 1.17681   | 0.301729   | 0.214447   | 0.14466    | 0.183383  | 0.198429   | 0.325942   | 0.245377  |
| RSPRY1   | 3.88861   | 3.33055    | 3.43805   | 4.10994   | 2.29566    | 5.21209   | 2.7166    | 3.2556    | 3.6062     | 3.78216    | 4.91038    | 2.38117   | 3.71942    | 3.2841     | 3.49223   |
| RSRC1    | 4.8309    | 3.23811    | 3.52305   | 4.26521   | 1.05429    | 5.51859   | 2.46158   | 2.92134   | 2.0422     | 4.1424     | 5.87414    | 2.46631   | 3.25425    | 3.42904    | 3.49756   |

|                |           |            |            |           |           |            |           |            |           |            |          |            |            |           |           |
|----------------|-----------|------------|------------|-----------|-----------|------------|-----------|------------|-----------|------------|----------|------------|------------|-----------|-----------|
| RSRC2          | 7.41861   | 6.75312    | 6.4027     | 6.55571   | 3.0202    | 8.45461    | 2.19841   | 4.44569    | 6.64407   | 7.40388    | 8.60907  | 5.49056    | 6.33321    | 7.15274   | 6.83164   |
| RSRP1          | 3.70133   | 5.53895    | 4.64419    | 4.22379   | 6.20998   | 3.62687    | 3.43992   | 3.55314    | 4.45315   | 3.51447    | 3.41696  | 4.64153    | 1.32578    | 5.14636   | 3.58895   |
| RSU1           | 7.8069    | 5.44021    | 5.69828    | 11.2799   | 4.09971   | 12.6542    | 6.61129   | 5.49129    | 9.44036   | 12.6777    | 20.389   | 9.02316    | 13.0733    | 8.46015   | 11.2912   |
| RSU1P2         | 0.0125505 | 0.102799   | 0.176505   | 0         | 0         | 0          | 0         | 0.0111538  | 0         | 0          | 0        | 0.00898019 | 0          | 0         | 0         |
| RTBDN          | 0         | 0.00471487 | 0.00809538 | 0.0100844 | 0.0456015 | 0.00833235 | 0         | 0          | 0.0119178 | 0          | 0        | 0          | 0          | 0         | 0         |
| RTCA           | 4.28802   | 3.34988    | 3.51817    | 5.40096   | 2.86442   | 4.97346    | 2.75018   | 3.16787    | 4.40569   | 5.43732    | 7.65938  | 3.39651    | 10.2978    | 5.15085   | 3.67463   |
| RTCA-AS1       | 0.267035  | 0.657604   | 0.859096   | 0.275188  | 0.460887  | 0.202113   | 0.338769  | 0.395531   | 0.180677  | 0.111719   | 0.435427 | 0.0424602  | 0.22972    | 0.0775357 | 0.511328  |
| RTCB           | 12.1428   | 15.096     | 16.5508    | 19.2782   | 17.9746   | 23.2352    | 11.7795   | 11.5282    | 24.5703   | 18.5023    | 19.6385  | 13.9545    | 24.0238    | 12.7688   | 9.82934   |
| RTEL1          | 1.06176   | 1.53073    | 1.56186    | 3.8463    | 3.85705   | 2.83141    | 2.40133   | 1.1263     | 0.593179  | 0.727075   | 0.899477 | 1.61179    | 0.660596   | 1.89585   | 3.7564    |
| RTEL1-TNFRSF6B | 0.932216  | 0.60833    | 0.587234   | 0.534879  | 1.1365    | 0.994148   | 0.5152    | 0.814131   | 0.120248  | 0.525818   | 0.237661 | 0.246378   | 0.779275   | 0.859842  | 0.611498  |
| RTF1           | 6.73873   | 6.70018    | 6.79113    | 7.51445   | 4.55361   | 9.81964    | 4.69959   | 5.62834    | 7.92072   | 5.5074     | 5.64035  | 4.86461    | 7.44359    | 5.29256   | 4.92488   |
| RTF2           | 14.2705   | 12.3518    | 12.047     | 18.3964   | 16.3574   | 28.2775    | 14.0525   | 9.5472     | 17.3475   | 15.2474    | 22.8468  | 10.5526    | 21.8972    | 11.8182   | 9.71381   |
| RTKN           | 2.59943   | 4.36004    | 4.77126    | 6.02728   | 6.33432   | 4.3507     | 3.83051   | 2.69277    | 3.73962   | 5.28128    | 3.34708  | 3.4816     | 8.09227    | 4.49608   | 2.86983   |
| RTKN2          | 0.129445  | 0.152603   | 0.202779   | 0.178808  | 0.0342251 | 0.0586279  | 0.0628918 | 0.139516   | 0.11069   | 0.089875   | 0.276708 | 0.135976   | 0.0533087  | 0.205839  | 0.110748  |
| RTL1           | 0.1987    | 0.271254   | 0.292229   | 0.102383  | 1.22603   | 0.296084   | 0.296191  | 0.255072   | 0.0268883 | 0.166259   | 0.149539 | 0.185618   | 0.0391723  | 0.640405  | 1.83105   |
| RTL10          | 4.57629   | 6.3879     | 5.87208    | 4.5219    | 10.3269   | 5.46779    | 4.92239   | 3.48115    | 9.80869   | 3.03384    | 2.89803  | 3.81854    | 3.41169    | 3.72802   | 2.52466   |
| RTL3           | 0.122358  | 0          | 0.0072302  | 0.0180133 | 0         | 0.0818603  | 0.0399154 | 0          | 0         | 0.0219388  | 0.118394 | 0          | 0.0338333  | 0.0274069 | 0.0376545 |
| RTL4           | 0.0313326 | 0          | 0.0129449  | 0         | 0.0121532 | 0          | 0.0178661 | 0.00695322 | 0         | 0.00981978 | 0        | 0.055982   | 0          | 0.0040891 | 0         |
| RTL5           | 0.848258  | 0.655468   | 0.679672   | 0.549783  | 1.48338   | 1.83977    | 1.43754   | 0.734896   | 0.103958  | 0.341492   | 0.60225  | 0.209952   | 0.368303   | 0.769566  | 1.67791   |
| RTL6           | 2.65163   | 1.76769    | 1.38809    | 3.65538   | 3.707     | 5.99989    | 2.20365   | 1.34053    | 2.9435    | 2.84249    | 2.85105  | 2.17102    | 4.63884    | 3.48963   | 4.6446    |
| RTL8A          | 5.99507   | 6.66908    | 6.80199    | 12.0467   | 8.01626   | 16.4897    | 8.02437   | 6.16405    | 8.25403   | 7.59759    | 16.7399  | 6.27784    | 11.1123    | 7.10181   | 6.37541   |
| RTL8B          | 3.90562   | 3.57616    | 3.63234    | 4.88095   | 5.09719   | 6.83831    | 4.98677   | 3.17347    | 2.95731   | 2.89601    | 6.16071  | 3.01135    | 4.20882    | 3.1223    | 4.43856   |
| RTL8C          | 13.364    | 13.0256    | 13.3233    | 27.3992   | 28.1115   | 42.5352    | 20.3654   | 9.15036    | 21.8592   | 32.3419    | 54.435   | 23.6868    | 37.2754    | 23.7435   | 22.006    |
| RTL9           | 0.0213261 | 0.0308257  | 0.0141139  | 0.0131863 | 0         | 0.032686   | 0.0146096 | 0.0189528  | 0.0103891 | 0.0214131  | 0        | 0.00610375 | 0.00550379 | 0.0156043 | 0.0183762 |
| RTN1           | 0.619903  | 0.696917   | 1.18624    | 0.664639  | 0.875385  | 0.970372   | 0.772129  | 0.628826   | 0.236405  | 0.251488   | 0.685656 | 0.12097    | 0.420158   | 0.245446  | 0.458618  |
| RTN2           | 1.0115    | 1.18915    | 1.15476    | 1.61569   | 2.57678   | 2.28239    | 1.6746    | 0.701169   | 2.40219   | 2.9961     | 3.47124  | 1.75148    | 2.75403    | 2.11989   | 0.639161  |

|             |           |           |           |           |           |           |           |           |           |           |          |            |           |            |           |
|-------------|-----------|-----------|-----------|-----------|-----------|-----------|-----------|-----------|-----------|-----------|----------|------------|-----------|------------|-----------|
| RTN3        | 9.68332   | 10.2185   | 11.1811   | 10.8031   | 7.88195   | 12.7284   | 12.1446   | 9.5854    | 18.1657   | 11.9374   | 12.7109  | 9.33129    | 14.8237   | 6.31759    | 5.69751   |
| RTN4        | 19.6903   | 23.7963   | 28.1466   | 29.6742   | 29.9388   | 36.0759   | 23.3148   | 20.2217   | 31.0401   | 36.2014   | 33.7791  | 24.9614    | 67.4013   | 27.6941    | 17.7181   |
| RTN4IP1     | 1.06709   | 0.703753  | 0.76382   | 0.967087  | 0.470231  | 0.850618  | 0.682635  | 0.813826  | 0.884833  | 0.721898  | 0.991031 | 0.519853   | 0.605474  | 0.597263   | 0.521695  |
| RTN4R       | 0.494458  | 1.28416   | 1.57634   | 1.77722   | 1.16146   | 0.955007  | 2.06545   | 0.653791  | 1.51283   | 1.42283   | 1.40226  | 0.931956   | 2.54439   | 0.630306   | 0.173196  |
| RTN4RL1     | 1.4237    | 1.71951   | 2.38725   | 0.875033  | 1.85448   | 2.14727   | 1.39227   | 1.18583   | 0.412093  | 0.560906  | 0.381975 | 0.383723   | 1.26045   | 0.447119   | 0.238385  |
| RTN4RL2     | 0.510815  | 0.622831  | 1.17288   | 1.21397   | 1.27927   | 1.59778   | 1.41642   | 0.722646  | 0.177747  | 0.693462  | 2.6714   | 0.164103   | 0.766767  | 0.381392   | 1.07794   |
| RTP1        | 0.0208757 | 0         | 0         | 0         | 0         | 3.42E-22  | 0.0119188 | 0         | 0         | 0         | 0        | 0          | 0         | 0          | 0         |
| RTP2        | 0         | 0         | 0         | 0         | 0         | 0         | 0         | 0         | 0         | 0         | 0        | 0          | 0         | 0          | 0         |
| RTP3        | 0         | 0.122835  | 0.0703019 | 0         | 0         | 0.1206    | 0.323427  | 0.0503491 | 0         | 0         | 0        | 0          | 0         | 0          | 0         |
| RTP4        | 0.54939   | 0.68382   | 0.473431  | 2.40619   | 0.462254  | 3.39154   | 0.235228  | 0.69169   | 0.0836369 | 0.574617  | 1.31791  | 0.147414   | 1.13724   | 0.275171   | 0.887618  |
| RTP5        | 0         | 0.0248068 | 0.0106483 | 0         | 0         | 0.0657597 | 0         | 0         | 0         | 0         | 0        | 0          | 0         | 0          | 0         |
| RTRAF       | 21.6677   | 15.246    | 15.3201   | 31.1565   | 6.02003   | 31.8746   | 14.6576   | 15.3034   | 28.427    | 29.3233   | 61.4238  | 17.7097    | 27.1216   | 23.1899    | 15.7801   |
| RTTN        | 2.49604   | 1.55006   | 1.92185   | 1.42566   | 0.750103  | 1.43357   | 1.71367   | 1.65574   | 0.321872  | 0.937789  | 1.20444  | 0.628012   | 0.89679   | 1.12038    | 1.57911   |
| RUBCN       | 1.94615   | 2.4757    | 2.52081   | 2.19751   | 3.38569   | 3.61522   | 2.77466   | 1.78303   | 3.4988    | 3.26286   | 1.59764  | 2.8129     | 4.79644   | 3.24771    | 2.5668    |
| RUBCNL      | 0.497224  | 0.244314  | 0.219923  | 1.24296   | 0.550593  | 1.3414    | 0.219216  | 0.603772  | 0.017987  | 1.01334   | 1.85619  | 0.102154   | 0.752783  | 0.571201   | 2.72904   |
| RUFY1       | 5.23362   | 5.9688    | 5.86721   | 10.1537   | 9.6516    | 8.19767   | 4.28856   | 4.52681   | 11.2516   | 7.0275    | 5.74134  | 5.56991    | 8.89575   | 5.3406     | 4.6236    |
| RUFY2       | 2.44009   | 1.94136   | 2.11312   | 1.80786   | 0.674208  | 1.87801   | 1.26978   | 2.23622   | 2.21125   | 1.95403   | 1.93899  | 1.48074    | 2.38583   | 1.86485    | 2.0605    |
| RUFY3       | 4.4925    | 6.23532   | 6.06829   | 4.0741    | 4.06808   | 3.41394   | 3.63599   | 4.89318   | 3.23618   | 4.78816   | 3.48851  | 4.07239    | 3.53149   | 4.04314    | 3.83301   |
| RUFY4       | 0.0186187 | 0.0358831 | 0.0564766 | 0.0383742 | 0.0385617 | 0.0264226 | 0.0212582 | 0.066187  | 0.0226755 | 0.0545262 | 0        | 0.00444073 | 0.0160169 | 0.00973095 | 0.0534776 |
| RUNDC1      | 1.58838   | 1.88811   | 1.97453   | 1.88134   | 2.84687   | 2.17934   | 1.70099   | 1.43818   | 1.73044   | 1.65043   | 1.03219  | 1.40007    | 1.73406   | 1.72556    | 1.61292   |
| RUNDC3A     | 0.675362  | 1.15494   | 1.13315   | 3.23484   | 3.28019   | 1.67659   | 0.890574  | 0.828453  | 4.6223    | 3.85621   | 4.05897  | 2.57274    | 2.83538   | 2.96299    | 0.464462  |
| RUNDC3A-AS1 | 0.0182193 | 0.121756  | 0.0339126 | 0.0985714 | 0.099053  | 0.0581756 | 0.0676071 | 0.072863  | 0.188607  | 0.0457342 | 0.102837 | 0.068441   | 0.0323446 | 0.0714165  | 0.0523304 |
| RUNDC3B     | 0.378099  | 0.342596  | 0.289448  | 0.232622  | 0.157787  | 0.192207  | 0.180412  | 0.461404  | 0.164949  | 0.162906  | 0.305786 | 0.0969099  | 0.0910252 | 0.156319   | 0.3647    |
| RUNX1       | 7.07837   | 3.64795   | 3.27688   | 8.34624   | 5.42324   | 14.6597   | 4.05912   | 5.35004   | 1.56449   | 4.94975   | 8.40615  | 2.23048    | 7.27221   | 5.18014    | 13.7594   |
| RUNX1-IT1   | 1.24175   | 0.650643  | 0.924534  | 0.175953  | 0.337551  | 0.449366  | 0.53167   | 0.524191  | 0         | 0.116889  | 0.350444 | 0.288763   | 0.050073  | 0.835576   | 3.12078   |
| RUNX1T1     | 1.98177   | 0.823403  | 0.943224  | 0.421718  | 1.07544   | 1.99208   | 1.21071   | 1.07733   | 0.0752286 | 0.545922  | 0.993658 | 0.145485   | 0.619389  | 0.595901   | 1.82593   |

|            |          |           |            |            |           |            |            |            |           |           |           |            |            |           |           |
|------------|----------|-----------|------------|------------|-----------|------------|------------|------------|-----------|-----------|-----------|------------|------------|-----------|-----------|
| RUNX2      | 1.43616  | 0.784744  | 0.630553   | 1.19475    | 1.02196   | 1.20921    | 0.664149   | 1.03747    | 0.312685  | 1.87302   | 4.32483   | 0.433434   | 1.9878     | 1.24541   | 4.36121   |
| RUNX3      | 5.00051  | 2.26897   | 3.10057    | 2.48652    | 2.20205   | 4.07182    | 2.83808    | 2.82606    | 0.514401  | 1.09071   | 1.75924   | 0.781597   | 3.02269    | 4.34901   | 4.18331   |
| RUSC1      | 3.20228  | 4.05091   | 3.58893    | 4.92145    | 9.33053   | 6.38307    | 4.83998    | 2.39989    | 7.17899   | 6.37978   | 5.44423   | 5.21433    | 9.84584    | 4.93216   | 5.23653   |
| RUSC1-AS1  | 0.725838 | 1.24439   | 1.21357    | 1.01796    | 1.28355   | 0.863886   | 1.09006    | 0.819095   | 0.543001  | 0.440414  | 0.26532   | 1.0206     | 0.24767    | 1.47586   | 1.23862   |
| RUSC2      | 3.2608   | 2.64027   | 3.4376     | 4.84893    | 5.793     | 6.67085    | 5.77913    | 2.00995    | 5.07964   | 2.4546    | 2.91159   | 1.7291     | 4.20025    | 2.90243   | 5.46149   |
| RUVBL1     | 2.34234  | 2.30817   | 2.18575    | 6.45287    | 3.3438    | 6.75942    | 2.73216    | 1.82717    | 2.95885   | 3.67878   | 5.55422   | 2.9313     | 6.21473    | 5.17932   | 2.82802   |
| RUVBL1-AS1 | 0.35423  | 0.246529  | 0.586089   | 0.121682   | 0.489104  | 0.201082   | 0.224694   | 0.419747   | 0.239674  | 0.098799  | 0         | 0.112649   | 0.0253942  | 0.123424  | 0.0565244 |
| RUVBL2     | 6.70135  | 5.76036   | 5.25837    | 16.4617    | 12.3289   | 19.9809    | 6.87607    | 4.41231    | 8.16146   | 8.41089   | 10.7819   | 6.33228    | 14.2996    | 9.83832   | 5.19568   |
| RWDD1      | 7.10725  | 5.285     | 5.82298    | 7.53593    | 2.42497   | 9.0484     | 3.79943    | 6.47456    | 7.62177   | 10.1062   | 17.3295   | 6.07504    | 9.29473    | 5.51099   | 5.78195   |
| RWDD2A     | 0.657844 | 0.52541   | 0.598145   | 0.378662   | 0.24856   | 0.706489   | 0.51427    | 0.447694   | 0.324802  | 0.624824  | 0.896499  | 0.186586   | 0.271487   | 0.337623  | 1.16604   |
| RWDD2B     | 2.23758  | 1.65104   | 1.8934     | 3.43908    | 1.44988   | 3.16821    | 2.05844    | 1.88631    | 1.69737   | 3.5787    | 5.58597   | 2.01275    | 2.95335    | 2.30551   | 2.73603   |
| RWDD3      | 1.87528  | 1.2066    | 1.51284    | 2.08776    | 0.610231  | 2.04067    | 0.466315   | 1.6688     | 0.989995  | 2.19466   | 3.73291   | 0.481679   | 1.14152    | 1.15288   | 2.07672   |
| RWDD4      | 3.83815  | 2.75911   | 2.89182    | 5.47586    | 1.24151   | 4.47216    | 2.05576    | 3.91839    | 4.25725   | 6.30547   | 7.78318   | 3.52557    | 6.74904    | 5.13661   | 3.92276   |
| RXFP1      | 0        | 0.0147524 | 0.00361852 | 0.00901515 | 0.0135888 | 0.0409688  | 0.00499414 | 0.00777457 | 0.0106542 | 0.120777  | 0.291327  | 0.0438164  | 0.025399   | 0.212604  | 0.201014  |
| RXFP2      | 0        | 0         | 0          | 0          | 0         | 0          | 0          | 0          | 0         | 0         | 0         | 0          | 0          | 0         | 0         |
| RXFP3      | 0        | 0         | 0.0151169  | 0.00941555 | 0         | 0.00777971 | 0          | 0.0162397  | 0.0222547 | 0.0458696 | 0         | 0.00653749 | 0.0530541  | 0.0429768 | 0.0524853 |
| RXFP4      | 0.383698 | 0.340553  | 0.23389    | 0.208112   | 0.376431  | 0.18915    | 0.345864   | 0.305104   | 0.0491896 | 0.0506927 | 0.0455945 | 0.0288996  | 0.0651474  | 0.211092  | 0.522037  |
| RXRA       | 7.86742  | 16.5907   | 19.705     | 15.4327    | 29.5277   | 22.1705    | 17.6393    | 13.4965    | 13.7958   | 9.85029   | 8.15218   | 13.7454    | 16.6276    | 9.97375   | 6.98818   |
| RXRB       | 0.913713 | 1.0578    | 0.992693   | 1.15495    | 1.66346   | 1.57671    | 0.992179   | 0.629182   | 0.876228  | 0.89338   | 1.06321   | 0.834827   | 0.835223   | 0.864251  | 0.983696  |
| RXRG       | 0.12843  | 0.103132  | 0.113329   | 0.0617636  | 0.0531989 | 0.393683   | 0.322601   | 0.0608735  | 0.0729928 | 0.0214923 | 0.0193308 | 0.0245053  | 0.00552415 | 0.0223743 | 0.0122961 |
| RXYLT1     | 2.13333  | 1.91447   | 1.92376    | 2.91738    | 1.36635   | 4.13233    | 1.51225    | 1.65332    | 1.84703   | 2.10651   | 3.56104   | 1.49028    | 2.94199    | 2.07142   | 1.87309   |
| RXYLT1-AS1 | 0        | 0         | 0          | 0.0847232  | 0.0638528 | 0.210011   | 0          | 0          | 0         | 0         | 0.278426  | 0          | 0          | 0         | 0         |
| RYBP       | 3.90139  | 3.19307   | 3.4728     | 4.2242     | 0.87267   | 4.05282    | 2.28069    | 4.82176    | 4.42202   | 5.75193   | 5.96033   | 2.598      | 7.19236    | 4.27654   | 3.12268   |
| RYK        | 8.35984  | 7.90022   | 7.72331    | 8.97195    | 3.21586   | 9.23626    | 4.9073     | 6.59002    | 5.51251   | 8.3189    | 11.7121   | 4.13989    | 8.63398    | 7.28606   | 6.0029    |
| RYR1       | 0.369904 | 0.360798  | 0.291083   | 0.588841   | 1.02071   | 0.527508   | 0.508187   | 0.20446    | 0.488959  | 0.211374  | 0.185023  | 0.23993    | 0.288138   | 0.146175  | 0.112292  |
| RYR2       | 0.404455 | 0.273912  | 0.379051   | 0.0320618  | 0.369047  | 0.553912   | 0.545757   | 0.170926   | 0.0533917 | 0.0550232 | 0.0909967 | 0.0961289  | 0.0437962  | 0.130823  | 0.442745  |

|         |           |           |           |           |           |           |          |           |           |           |           |          |          |           |           |
|---------|-----------|-----------|-----------|-----------|-----------|-----------|----------|-----------|-----------|-----------|-----------|----------|----------|-----------|-----------|
| RYR3    | 0.97482   | 0.950105  | 0.592537  | 0.330776  | 3.33316   | 0.311267  | 0.627769 | 0.751441  | 0.736585  | 0.41032   | 0.273435  | 2.15951  | 0.105464 | 0.312214  | 0.452427  |
| S100A1  | 3.54548   | 1.483     | 2.28844   | 0.281056  | 4.11539   | 2.55448   | 3.11394  | 3.46256   | 0.0949011 | 0.244503  | 0.131948  | 0.390291 | 0        | 0.325807  | 0         |
| S100A10 | 50.7173   | 41.7595   | 53.7528   | 261.351   | 23.9207   | 158.787   | 64.5697  | 38.7763   | 32.861    | 219.573   | 214.379   | 110.391  | 288.431  | 136.365   | 85.8789   |
| S100A11 | 66.7019   | 86.9152   | 84.06     | 550.789   | 79.5239   | 281.457   | 79.9392  | 79.258    | 187.999   | 558.395   | 576.787   | 336.598  | 644.103  | 321.225   | 128.917   |
| S100A12 | 0.248316  | 0.0239285 | 0.0410849 | 18.271    | 0.385721  | 1.0149    | 0        | 0.441365  | 3.8105    | 18.0764   | 27.0787   | 14.1075  | 14.355   | 8.85105   | 2.06836   |
| S100A13 | 8.5177    | 3.2609    | 4.11043   | 8.91712   | 6.30777   | 13.0381   | 6.69081  | 3.18344   | 3.11828   | 11.3329   | 25.5719   | 3.43445  | 8.45873  | 6.19705   | 5.5947    |
| S100A14 | 53.9277   | 68.8712   | 53.9869   | 224.546   | 164.79    | 220.577   | 72.666   | 37.4292   | 270.821   | 421.098   | 380.892   | 212.258  | 438.022  | 229.896   | 66.2219   |
| S100A16 | 41.0931   | 40.9256   | 29.9029   | 192.751   | 108       | 147.166   | 57.6502  | 27.7159   | 188.182   | 259.373   | 243.29    | 178.961  | 332.492  | 151.887   | 46.6577   |
| S100A2  | 40.0312   | 18.1169   | 16.1603   | 452.77    | 57.1375   | 473.989   | 24.666   | 12.9777   | 80.2206   | 492.59    | 778.554   | 241.765  | 558.902  | 475.512   | 115.809   |
| S100A3  | 2.32058   | 1.54115   | 1.79003   | 3.74872   | 1.31521   | 12.9237   | 2.39893  | 1.28199   | 0.572879  | 5.78577   | 5.59329   | 3.00673  | 3.25747  | 3.86796   | 2.97236   |
| S100A4  | 42.4292   | 19.7906   | 28.7861   | 15.0963   | 31.6786   | 69.3554   | 74.2593  | 19.1088   | 5.19735   | 40.2226   | 118.771   | 10.5405  | 32.2468  | 36.0508   | 80.1446   |
| S100A5  | 0.0977875 | 0.157052  | 0.215725  | 0.0671819 | 0.253163  | 0.16653   | 0.186084 | 0.057937  | 0         | 0         | 0.11039   | 0        | 0        | 0.0681441 | 0.0468118 |
| S100A6  | 144.178   | 51.0352   | 73.8071   | 305.994   | 73.5826   | 306.121   | 141.289  | 56.2824   | 23.5224   | 444.379   | 512.529   | 83.355   | 306.703  | 166.239   | 215.379   |
| S100A7  | 519.902   | 70.4093   | 53.3808   | 3957.37   | 900.607   | 1147.66   | 45.625   | 446.772   | 5125.87   | 3350.71   | 4344.47   | 2127.87  | 3896.3   | 1112.82   | 158.535   |
| S100A7A | 4.84062   | 0.117266  | 0.125281  | 167.698   | 18.5842   | 21.1017   | 0.852187 | 7.29648   | 13.6221   | 14.5408   | 5.69653   | 20.2166  | 90.9034  | 6.93119   | 1.1418    |
| S100A8  | 468.309   | 28.6297   | 16.4029   | 5225.65   | 411.155   | 1637.89   | 28.0982  | 255.114   | 1655.46   | 6160.29   | 7892.06   | 2817.2   | 5305.94  | 1818.71   | 460.364   |
| S100A9  | 675.761   | 48.4098   | 37.9593   | 9262.44   | 1115.98   | 3980.07   | 64.0221  | 466.104   | 4824.82   | 8802.77   | 10961.9   | 4677.55  | 9357.64  | 3011.9    | 794.504   |
| S100B   | 1.97786   | 1.5326    | 1.72057   | 5.46334   | 1.01354   | 1.57995   | 0.977804 | 2.68194   | 0.620829  | 0.614208  | 2.2788    | 0.671133 | 0.907747 | 0.468903  | 0.322114  |
| S100G   | 0.0510884 | 0.0246152 | 0         | 0.210592  | 0         | 0         | 0        | 0         | 0         | 0.0641212 | 0         | 0        | 0        | 0.106804  | 0         |
| S100P   | 3.49415   | 1.0932    | 1.46407   | 17.5365   | 1.12782   | 5.06174   | 1.65798  | 2.86334   | 1.87904   | 15.6625   | 9.83553   | 1.55854  | 3.01563  | 4.41133   | 0.456185  |
| S100PPB | 2.02739   | 2.63444   | 2.59904   | 2.30615   | 1.46699   | 2.05524   | 1.63502  | 1.85652   | 1.26895   | 1.84315   | 2.86228   | 1.44331  | 1.60947  | 2.05243   | 2.95581   |
| S100Z   | 0.020177  | 0.0194432 | 0.0500756 | 0.020793  | 0.0626838 | 0.0343609 | 0        | 0.0717266 | 0         | 0.0253242 | 0.0455547 | 0        | 0        | 0         | 0.173861  |
| S1PR1   | 7.73204   | 2.36175   | 2.74942   | 4.94197   | 3.48884   | 11.6813   | 4.20184  | 3.75612   | 1.67266   | 4.76179   | 12.1548   | 1.66138  | 8.63109  | 7.06691   | 11.9324   |
| S1PR2   | 2.28794   | 1.84049   | 2.19775   | 2.03316   | 2.69829   | 5.99639   | 3.15418  | 2.03462   | 1.69869   | 2.11616   | 4.37491   | 0.766856 | 2.58105  | 1.84437   | 2.87016   |
| S1PR3   | 1.37468   | 0.812253  | 0.703814  | 1.81265   | 0.547597  | 3.16477   | 0.740859 | 0.796831  | 0.23124   | 2.22349   | 5.16624   | 0.509464 | 1.72082  | 1.68647   | 2.64511   |
| S1PR4   | 0.493331  | 0.160793  | 0.180052  | 1.1065    | 0.788853  | 1.16136   | 0.248501 | 0.322376  | 0.123699  | 1.05625   | 2.62075   | 0.249171 | 0.805099 | 0.439839  | 1.18776   |



|           |           |            |            |            |            |           |            |           |           |           |            |           |           |            |            |
|-----------|-----------|------------|------------|------------|------------|-----------|------------|-----------|-----------|-----------|------------|-----------|-----------|------------|------------|
| S1PR5     | 1.20787   | 4.33141    | 3.41722    | 2.96457    | 7.2471     | 3.58004   | 1.15802    | 1.90108   | 2.13357   | 1.73587   | 2.23785    | 1.92644   | 1.76682   | 1.31076    | 0.529663   |
| SAA1      | 17.6495   | 0.188853   | 0.165558   | 22.7199    | 4.30185    | 134.008   | 0.328687   | 2.77028   | 0.0790621 | 1.19E-05  | 0.401253   | 0.0312982 | 2.62046   | 0.222654   | 0.419533   |
| SAA2      | 3.11006   | 0.0280778  | 0.0519976  | 1.48565    | 0.160402   | 15.2121   | 0.0240786  | 0.357307  | 0         | 0.0498409 | 0.0229686  | 0.0188427 | 0.42836   | 0.0667958  | 0.071292   |
| SAA2-SAA4 | 9.40E-09  | 0.00404448 | 0.0486464  | 0.12828    | 0.0509867  | 0.48355   | 0.00141712 | 0.108167  | 0         | 2.19E-14  | 0          | 1.65E-40  | 3.60E-05  | 0.00030831 | 0          |
| SAA3P     | 0         | 0          | 0          | 0          | 0          | 0         | 0          | 0         | 0         | 0         | 0          | 0         | 0         | 8          | 0          |
| SAA4      | 0.556825  | 0.0460526  | 0.00990213 | 1.29E-06   | 0.00392491 | 1.09898   | 0.0779346  | 2.02E-14  | 0         | 0         | 0          | 0         | 0.0224113 | 0.108787   | 0          |
| SAAL1     | 2.6       | 2.03931    | 1.50063    | 3.24018    | 1.36189    | 3.28219   | 1.62237    | 2.23006   | 1.50962   | 2.08698   | 3.44701    | 1.50344   | 2.68206   | 2.36223    | 1.32424    |
| SAC3D1    | 1.22583   | 1.33068    | 1.24623    | 3.19618    | 6.17123    | 3.18163   | 1.34902    | 0.420015  | 2.73402   | 2.13171   | 3.2011     | 1.73309   | 4.20224   | 1.7522     | 1.12414    |
| SACM1L    | 3.3874    | 3.70021    | 3.53575    | 5.27402    | 1.43417    | 4.31088   | 2.49928    | 3.55926   | 2.39038   | 4.58917   | 6.35021    | 2.90066   | 4.73401   | 4.12555    | 3.58268    |
| SACS      | 1.80649   | 1.32458    | 1.57656    | 1.73985    | 0.505464   | 1.33568   | 1.10128    | 1.40835   | 0.938336  | 2.82227   | 2.99967    | 1.51395   | 3.4355    | 3.38149    | 3.64215    |
| SACS-AS1  | 0.0517973 | 0.014974   | 0.0171402  | 0.0106757  | 0          | 0.0176419 | 0.118281   | 0.0184133 | 0.0126167 | 0         | 0          | 0.014825  | 0         | 0.0595574  | 0.05951    |
| SAE1      | 6.21452   | 6.54648    | 6.23076    | 14.7489    | 9.51593    | 16.7104   | 6.83312    | 5.04374   | 9.57102   | 10.5736   | 16.336     | 6.21135   | 15.6107   | 9.73461    | 6.81739    |
| SAFB      | 9.19978   | 11.639     | 11.5589    | 12.7387    | 15.8729    | 18.4857   | 6.43256    | 8.02503   | 8.92581   | 7.08271   | 5.78034    | 9.36515   | 13.6294   | 10.589     | 7.20354    |
| SAFB2     | 4.54018   | 5.33565    | 5.4366     | 5.04439    | 6.92253    | 7.77262   | 3.16505    | 3.92856   | 2.07691   | 2.2427    | 2.34222    | 3.35899   | 5.0198    | 4.69031    | 3.96186    |
| SAG       | 0.0396965 | 0          | 0.0109466  | 0          | 0          | 0         | 0          | 0         | 0         | 0         | 0          | 0         | 0         | 0          | 0          |
| SAGE1     | 0         | 0          | 0          | 0          | 0          | 0         | 0          | 0         | 0         | 0         | 0          | 0         | 0         | 0          | 0          |
| SAGE2P    | 0         | 0          | 0          | 0          | 0          | 0         | 0          | 0         | 0         | 0         | 0          | 0         | 0         | 0          | 0          |
| SALL1     | 0.246111  | 0.0790533  | 0.0892984  | 0.307019   | 0.456071   | 0.459562  | 0.118316   | 0.161164  | 0.0420681 | 0.287217  | 0.570279   | 0.151383  | 0.289721  | 0.676991   | 0.837109   |
| SALL2     | 0.697714  | 0.486283   | 0.548157   | 0.34368    | 0.558936   | 1.07983   | 0.716464   | 0.397781  | 0.0908524 | 0.308424  | 0.579579   | 0.0847755 | 0.237821  | 0.266038   | 0.731023   |
| SALL3     | 0         | 0          | 0          | 0.00429722 | 0          | 0.0284051 | 0.0190443  | 0         | 0.0355494 | 0.0575704 | 0.00941464 | 0.038788  | 0.255589  | 0.102431   | 0.00598853 |
| SALL4     | 0.119912  | 0.0924408  | 0.0793598  | 0.0939155  | 0.12666    | 0.183787  | 0.109529   | 0.0468899 | 0.0175247 | 0.0541808 | 0.222      | 0.0377522 | 0.0309467 | 0.155425   | 0.454632   |
| SALRNA1   | 0.0385396 | 0          | 0          | 0          | 0          | 0.032816  | 0          | 0.0342508 | 0         | 0.0241856 | 0          | 0         | 0         | 0.0201425  | 0.0830217  |
| SALRNA2   | 0.0336056 | 0.183506   | 0.203873   | 0.103895   | 0.0696015  | 0.0286147 | 0.191849   | 0.069687  | 0.0136426 | 0.0984164 | 0.0126455  | 0.0641219 | 0.0216822 | 0.187347   | 0.17696    |
| SALRNA3   | 0         | 0.0436853  | 0.112511   | 0.023359   | 0.0704195  | 0.0772028 | 0.051761   | 0.0402892 | 0         | 0.0284495 | 0          | 0         | 0.0292493 | 0.0710807  | 0.0651055  |
| SAMD1     | 5.28004   | 5.91949    | 6.20222    | 15.4522    | 15.6579    | 10.5391   | 6.85066    | 4.88544   | 7.30739   | 8.40567   | 9.09559    | 8.19387   | 15.8019   | 7.41862    | 4.90749    |

|            |           |           |            |           |           |            |           |           |           |           |           |           |           |           |          |
|------------|-----------|-----------|------------|-----------|-----------|------------|-----------|-----------|-----------|-----------|-----------|-----------|-----------|-----------|----------|
| SAMD10     | 1.05051   | 1.57981   | 1.53621    | 2.00113   | 3.64272   | 3.9665     | 1.46598   | 1.22595   | 2.85604   | 2.14422   | 2.45564   | 2.20186   | 3.01237   | 1.33656   | 0.899103 |
| SAMD11     | 0.122891  | 0.294944  | 0.46093    | 0.0532173 | 0.574652  | 0.279007   | 0.234667  | 0.153763  | 0.314805  | 0.242804  | 0.401726  | 0.0787038 | 0.160816  | 0.168989  | 0.310808 |
| SAMD12     | 0.385913  | 0.293538  | 0.234985   | 0.165538  | 0.146061  | 0.276892   | 0.32208   | 0.282035  | 0.0644161 | 0.0614671 | 0.0906679 | 0.0714858 | 0.0682509 | 0.141289  | 0.109719 |
| SAMD12-AS1 | 0         | 0.0636273 | 0.0273118  | 0         | 0         | 0.0843338  | 0         | 0.0293404 | 0         | 0         | 0         | 0         | 0.0213007 | 0         | 0        |
| SAMD13     | 0.141194  | 0.0742141 | 0.0530936  | 0.0396832 | 0.0598156 | 0.0109296  | 0.117245  | 0.182519  | 0.109428  | 0.112772  | 0.173881  | 0.091844  | 0         | 0.0469601 | 0.258075 |
| SAMD14     | 0.315587  | 0.381827  | 0.371308   | 0.361357  | 0.958644  | 1.33165    | 0.512465  | 0.417585  | 0.102493  | 0.528126  | 0.910439  | 0.230829  | 0.375557  | 0.758721  | 0.886302 |
| SAMD15     | 0.250844  | 0.273249  | 0.0992466  | 0.325937  | 0.118588  | 0.371461   | 0.112072  | 0.0872331 | 0.212521  | 0.123196  | 0.295483  | 0.234111  | 0.175916  | 0.188103  | 0.234941 |
| SAMD3      | 0.105999  | 0.0638397 | 0.0949971  | 0.118338  | 0.0823263 | 0.323419   | 0.040342  | 0.133454  | 0.0107579 | 0.0332598 | 0.119659  | 0.031602  | 0.0227966 | 0.0184665 | 0.431311 |
| SAMD4A     | 2.96714   | 2.39588   | 3.72269    | 1.43754   | 1.48365   | 4.38785    | 3.61262   | 1.74144   | 0.95138   | 2.05153   | 2.42693   | 1.05684   | 3.71439   | 3.79116   | 9.92229  |
| SAMD4B     | 7.16052   | 8.71929   | 9.19617    | 14.0638   | 15.6855   | 19.1457    | 12.3398   | 7.60256   | 20.2355   | 14.5591   | 13.7393   | 13.8652   | 26.4118   | 13.7194   | 14.0807  |
| SAMD5      | 0.300084  | 0.382621  | 0.408705   | 0.780655  | 0.335389  | 0.548428   | 0.146243  | 0.471585  | 0.27633   | 0.312332  | 0.640334  | 0.290655  | 0.420281  | 1.23557   | 1.49784  |
| SAMD7      | 0         | 0         | 0          | 0         | 0         | 0          | 0         | 0         | 0         | 0         | 0         | 0         | 0         | 0         | 0        |
| SAMD8      | 3.06088   | 2.53115   | 2.54856    | 3.98793   | 1.01041   | 3.09268    | 2.17529   | 3.1692    | 4.44756   | 3.78783   | 4.69283   | 2.31533   | 3.50023   | 3.06837   | 3.02535  |
| SAMD9      | 1.2424    | 0.938577  | 0.723369   | 7.13914   | 0.503445  | 4.2085     | 0.551223  | 1.35617   | 3.44558   | 21.3987   | 7.07741   | 3.71767   | 28.7202   | 5.14173   | 4.0776   |
| SAMD9L     | 1.1691    | 1.16548   | 1.08739    | 2.64256   | 0.456513  | 3.21191    | 0.516237  | 0.995949  | 0.110131  | 1.22008   | 1.67706   | 0.242638  | 1.22105   | 0.60596   | 2.26338  |
| SAMHD1     | 8.33281   | 3.39736   | 4.3888     | 11.4615   | 2.98025   | 14.3941    | 4.2748    | 6.07398   | 0.564012  | 5.0973    | 9.08858   | 1.37021   | 8.97227   | 4.33822   | 9.89089  |
| SAMM50     | 8.8961    | 6.7628    | 6.83614    | 12.2643   | 7.32904   | 15.0488    | 8.81803   | 6.53572   | 6.90195   | 7.12939   | 11.2775   | 5.88446   | 11.4794   | 7.59073   | 6.24601  |
| SAMMSON    | 0.0342691 | 0.0440303 | 0.00944993 | 0.0117718 | 0         | 0.00972656 | 0.0260849 | 0         | 0         | 0         | 0.0128952 | 0         | 0         | 0         | 0        |
| SAMSN1     | 0.891923  | 0.38903   | 0.326213   | 3.15415   | 0.218757  | 1.76674    | 0.203674  | 0.617446  | 0.125778  | 3.88863   | 6.18958   | 0.288867  | 3.10144   | 0.765481  | 2.83149  |
| SAMSN1-AS1 | 0         | 0         | 0          | 0         | 0         | 0.0234595  | 0         | 0         | 0         | 0.0345797 | 0         | 0         | 0         | 0.0143995 | 0        |
| SAP130     | 3.43903   | 3.66225   | 3.73326    | 3.20989   | 2.44395   | 4.89256    | 4.54561   | 3.34447   | 4.47967   | 3.24893   | 3.37221   | 3.57507   | 4.61946   | 2.83636   | 2.76333  |
| SAP18      | 14.2117   | 10.6564   | 11.6155    | 17.7654   | 6.35867   | 22.1125    | 8.37162   | 9.72515   | 13.4375   | 15.8679   | 23.7413   | 10.4927   | 17.3717   | 10.8918   | 8.59436  |
| SAP25      | 0.868336  | 1.16418   | 1.21807    | 1.03102   | 4.69157   | 2.2985     | 1.0992    | 0.939467  | 0.11495   | 0.379079  | 0.234406  | 0.91847   | 0.0852549 | 0.897795  | 1.16571  |
| SAP30      | 3.6311    | 1.02558   | 1.50195    | 2.68819   | 1.68562   | 3.82037    | 0.929247  | 1.63206   | 0.508307  | 2.38347   | 4.42887   | 0.403161  | 1.34642   | 1.18883   | 0.629363 |
| SAP30BP    | 4.99371   | 5.28545   | 5.21472    | 8.47006   | 7.33733   | 9.90531    | 4.71088   | 3.90689   | 7.91633   | 8.30202   | 8.06777   | 6.23245   | 11.2346   | 6.90558   | 5.51393  |
| SAP30L     | 4.52967   | 3.38666   | 3.65263    | 3.16906   | 4.54739   | 5.59523    | 3.60384   | 3.02165   | 3.37654   | 2.70593   | 4.56747   | 2.22414   | 2.66766   | 2.57192   | 3.40898  |

|            |            |            |          |            |           |            |           |           |           |           |           |           |           |           |           |
|------------|------------|------------|----------|------------|-----------|------------|-----------|-----------|-----------|-----------|-----------|-----------|-----------|-----------|-----------|
| SAP30L-AS1 | 1.38858    | 0.762771   | 0.843515 | 0.476992   | 0.906544  | 0.525493   | 0.758254  | 1.06117   | 0.106207  | 0.353615  | 0.181743  | 0.883172  | 0.173122  | 0.950116  | 1.24275   |
| SAPCD1     | 0.0985763  | 0.493149   | 0.729336 | 0.00246987 | 0.254004  | 0.030116   | 0.908693  | 0.136417  | 0.0665897 | 0.0286723 | 0.0252541 | 8.77E-06  | 0.0124927 | 0.029839  | 2.01E-08  |
| SAPCD1-AS1 | 0.0661632  | 0.161582   | 0.14307  | 0.101266   | 0.0850184 | 0.0905266  | 0.523928  | 0.0374428 | 4.21E-26  | 0.0228716 | 0.0108615 | 0.0630987 | 0.0325694 | 0.0111145 | 0.0713687 |
| SAPCD2     | 2.68684    | 1.02692    | 1.10887  | 1.6551     | 1.79136   | 3.04356    | 1.07543   | 0.767328  | 0.720635  | 1.40953   | 1.04284   | 0.972054  | 1.92831   | 2.6602    | 0.442226  |
| SAR1A      | 13.3915    | 9.98149    | 10.2056  | 18.1183    | 5.70081   | 22.4645    | 8.75924   | 10.113    | 11.6377   | 17.602    | 26.177    | 9.18847   | 21.7631   | 14.0767   | 18.8748   |
| SAR1B      | 5.24381    | 4.55878    | 4.69501  | 4.81943    | 1.53504   | 4.99545    | 4.1875    | 4.98196   | 8.41195   | 5.44172   | 6.39883   | 5.02195   | 6.66798   | 4.49975   | 3.99775   |
| SARAF      | 25.2808    | 20.2674    | 23.1969  | 25.8193    | 14.5965   | 31.4666    | 21.2497   | 22.7913   | 28.7874   | 26.9171   | 35.545    | 20.4552   | 32.3664   | 19.1955   | 21.4841   |
| SARDH      | 0.113023   | 0.0704725  | 0.1265   | 0.0822163  | 0.454399  | 0.141525   | 0.091091  | 0.100445  | 0.024291  | 0.125166  | 0.247672  | 0.0523281 | 0.111527  | 0.118141  | 0.525136  |
| SARM1      | 1.27623    | 1.00715    | 1.37978  | 0.681098   | 1.80288   | 1.56544    | 1.79765   | 1.14832   | 0.222821  | 0.407059  | 0.47424   | 0.195761  | 0.44998   | 0.68107   | 1.42262   |
| SARNP      | 7.18013    | 5.81004    | 5.8419   | 11.8358    | 5.90421   | 12.3794    | 3.83271   | 4.50597   | 8.55224   | 14.5903   | 26.418    | 6.90414   | 13.3089   | 8.86623   | 5.06519   |
| SARS       | 8.56519    | 8.87085    | 8.72965  | 13.8714    | 12.3897   | 16.0916    | 9.3259    | 6.75197   | 26.1115   | 16.8004   | 14.889    | 12.8327   | 26.5092   | 11.9709   | 6.98298   |
| SARS2      | 2.05861    | 2.20299    | 2.06156  | 4.06426    | 3.41652   | 4.10543    | 2.51127   | 1.37695   | 1.90015   | 1.94462   | 3.60455   | 2.47307   | 2.80062   | 3.06096   | 1.91389   |
| SART1      | 5.06435    | 5.3849     | 5.36459  | 7.48404    | 11.7601   | 12.072     | 4.62291   | 3.55835   | 3.96837   | 3.36367   | 2.49575   | 5.30216   | 8.5129    | 4.62527   | 4.36567   |
| SART3      | 4.69216    | 4.71033    | 4.86306  | 6.05245    | 5.17437   | 7.02562    | 3.70661   | 4.19353   | 3.42484   | 2.78505   | 2.83974   | 2.78138   | 4.97498   | 4.01894   | 4.31236   |
| SASH1      | 11.1993    | 8.84694    | 10.1277  | 9.68428    | 12.8067   | 15.3633    | 11.7582   | 9.58373   | 16.3924   | 7.87952   | 8.63832   | 9.01616   | 11.162    | 6.9281    | 9.54154   |
| SASH3      | 0.971097   | 0.463749   | 0.732266 | 2.15204    | 2.08246   | 3.62948    | 0.60835   | 0.59572   | 0.16746   | 1.81206   | 3.37606   | 0.295156  | 2.93313   | 0.821942  | 2.28322   |
| SASS6      | 0.561669   | 0.447353   | 0.412498 | 0.998161   | 0.133541  | 0.74666    | 0.294472  | 0.529725  | 0.230343  | 0.44599   | 0.478776  | 0.274761  | 0.924453  | 0.590101  | 0.510315  |
| SAT1       | 58.9592    | 27.4777    | 12.4358  | 199.523    | 30.9216   | 146.718    | 16.9184   | 13.0649   | 48.6537   | 115.843   | 137.764   | 47.2667   | 142.621   | 63.6996   | 47.1241   |
| SAT2       | 4.35108    | 4.90676    | 5.15608  | 8.55581    | 13.9193   | 15.16      | 6.33746   | 3.21892   | 6.78862   | 6.90749   | 16.0365   | 5.4525    | 7.90596   | 6.09694   | 6.45136   |
| SATB1      | 1.18013    | 1.61935    | 1.26647  | 1.02       | 1.68109   | 1.74346    | 1.13631   | 1.05847   | 1.28162   | 1.17402   | 2.02596   | 0.879434  | 0.861414  | 1.03746   | 2.25715   |
| SATB1-AS1  | 0.0549064  | 0.0132274  | 0        | 0.084874   | 0         | 0.11688    | 0         | 0         | 0         | 0.137826  | 0.0929737 | 0         | 0         | 0.057393  | 0.197131  |
| SATB2      | 0.621171   | 0.441808   | 0.62644  | 0.576121   | 0.776509  | 1.13843    | 0.570763  | 0.420606  | 0.212545  | 0.523469  | 0.86818   | 0.317474  | 0.488566  | 0.660122  | 1.70344   |
| SATB2-AS1  | 0.00697921 | 0.00336269 | 0        | 0          | 0         | 0          | 0         | 0         | 0         | 0         | 0         | 0         | 0         | 0         | 0.010023  |
| SATL1      | 6.98E-41   | 8.36E-39   | 2.80E-44 | 1.21E-38   | 8.76E-21  | 2.20E-31   | 4.20E-45  | 0         | 4.16E-37  | 8.28E-40  | 8.63E-35  | 2.27E-39  | 6.35E-37  | 1.68E-38  | 1.64E-43  |
| SAV1       | 7.18385    | 5.14401    | 5.81498  | 6.76536    | 2.63238   | 9.53618    | 4.67741   | 5.31707   | 3.9214    | 5.44687   | 7.91837   | 2.83636   | 6.04687   | 4.30912   | 6.20073   |
| SAXO1      | 0.0700395  | 0.106059   | 0.132438 | 0.0103111  | 0.0932533 | 0.00851967 | 0.0799688 | 0.097814  | 0         | 0.0376743 | 0         | 0         | 0         | 0         | 0         |

|            |           |            |          |           |           |            |           |            |            |           |           |           |          |           |           |
|------------|-----------|------------|----------|-----------|-----------|------------|-----------|------------|------------|-----------|-----------|-----------|----------|-----------|-----------|
| SAXO2      | 0.143783  | 0.170305   | 0.109035 | 0.0493908 | 0.102366  | 0.0816195  | 0.0684028 | 0.127782   | 0.00729631 | 0.0451156 | 0.0473413 | 0.0471536 | 0.069576 | 0.0688849 | 0.232302  |
| SAYSD1     | 1.4228    | 1.07949    | 1.15916  | 1.3289    | 0.760947  | 1.95373    | 1.25025   | 1.13002    | 0.710673   | 0.999123  | 1.86234   | 0.628873  | 0.957493 | 0.999649  | 0.99321   |
| SBDS       | 20.8527   | 16.2531    | 17.9185  | 26.7642   | 11.0985   | 28.8643    | 12.8794   | 14.9914    | 48.8898    | 34.4241   | 34.6236   | 21.6456   | 54.35    | 23.2835   | 18.087    |
| SBDSP1     | 4.98444   | 3.45947    | 4.4306   | 3.08171   | 0.903466  | 4.7383     | 2.23226   | 3.29757    | 2.98403    | 4.24516   | 6.62709   | 2.2393    | 4.46093  | 3.34391   | 2.27105   |
| SBF1       | 6.31096   | 9.99171    | 10.5178  | 10.3833   | 24.6684   | 15.9938    | 12.6558   | 6.26759    | 21.2311    | 9.70274   | 4.91173   | 13.3886   | 19.6711  | 10.6491   | 7.94486   |
| SBF1P1     | 0.0113354 | 0.00182052 | 0        | 0         | 0.0117385 | 0.00965192 | 0.0388271 | 0.00671596 | 0          | 0         | 0         | 0         | 0        | 0         | 0         |
| SBF2       | 7.7481    | 6.20488    | 7.00488  | 5.88214   | 3.83626   | 7.61121    | 6.5345    | 5.98005    | 3.07686    | 4.70585   | 4.93637   | 3.30008   | 4.11045  | 4.44789   | 5.89944   |
| SBF2-AS1   | 1.60227   | 1.2827     | 1.3451   | 0.751101  | 0.320691  | 0.616897   | 1.27219   | 1.29957    | 0.89436    | 1.00633   | 1.31613   | 0.66352   | 0.943848 | 0.721199  | 0.461235  |
| SBK1       | 0.463603  | 0.274746   | 0.322161 | 0.124217  | 0.331262  | 0.714501   | 0.561086  | 0.222486   | 0.0395231  | 0.0232748 | 0.020934  | 0.0398064 | 0.137593 | 0.0242299 | 0.0932109 |
| SBK2       | 0         | 0          | 0        | 0.0449145 | 0         | 0          | 0         | 0.0193669  | 0          | 0         | 0         | 0         | 0        | 0         | 0         |
| SBK3       | 0         | 0.0439349  | 0        | 0.037588  | 0.0566574 | 0.263989   | 0         | 0          | 0          | 0         | 0         | 0         | 0.082366 | 0.0285947 | 0.026191  |
| SBNO1      | 4.87242   | 5.05124    | 5.35359  | 5.09572   | 2.42478   | 5.85873    | 3.39438   | 4.81158    | 4.04508    | 4.57318   | 3.89042   | 3.69236   | 6.7666   | 4.31713   | 3.83566   |
| SBNO2      | 5.93292   | 8.11552    | 8.64734  | 35.3541   | 20.3665   | 35.0132    | 7.21873   | 7.32151    | 7.42971    | 15.342    | 8.0116    | 15.0173   | 33.8268  | 18.5315   | 17.8797   |
| SBSN       | 143.397   | 242.916    | 264.424  | 492.893   | 521.657   | 302.397    | 194.778   | 154.693    | 1006.05    | 523.901   | 458.731   | 563.953   | 1006.06  | 260.155   | 90.0872   |
| SBSPON     | 1.51728   | 0.487365   | 0.509137 | 0.219783  | 0.596313  | 3.81875    | 1.01577   | 0.752738   | 0.111318   | 0.0917754 | 0.179888  | 0.0917749 | 0.216232 | 0.149682  | 0.568816  |
| SC5D       | 2.46078   | 2.94621    | 2.62695  | 4.90188   | 1.09719   | 3.63448    | 1.49159   | 3.34217    | 2.40623    | 3.95843   | 4.11032   | 2.55669   | 4.5065   | 2.02467   | 1.17026   |
| SCAANT1    | 0.726057  | 0.918291   | 0.525564 | 0.374111  | 0.422931  | 0.154557   | 0.207247  | 0.806573   | 0          | 0.569547  | 0.717174  | 0.194817  | 0.117112 | 0.806371  | 1.17305   |
| SCAF1      | 7.12589   | 7.56477    | 8.13675  | 12.1985   | 22.0629   | 18.7237    | 10.3049   | 5.38392    | 8.97261    | 6.12187   | 4.05241   | 8.03593   | 18.3107  | 8.6433    | 8.19157   |
| SCAF11     | 10.8098   | 10.6941    | 10.8658  | 12.1571   | 4.07007   | 13.0647    | 5.70154   | 9.29265    | 10.0705    | 11.2387   | 9.28292   | 8.23396   | 14.5799  | 10.0319   | 9.753     |
| SCAF4      | 6.45666   | 6.55098    | 6.83482  | 6.70402   | 5.86943   | 9.42599    | 6.78399   | 6.47522    | 6.21286    | 4.55198   | 4.42466   | 5.51207   | 8.64636  | 5.55332   | 4.58568   |
| SCAF8      | 10.1458   | 8.75096    | 9.51976  | 8.62499   | 5.87398   | 11.4835    | 7.991     | 8.85222    | 6.06006    | 5.58151   | 5.74156   | 5.17188   | 8.653    | 6.00283   | 7.44986   |
| SCAI       | 0.775387  | 0.868492   | 0.892401 | 0.439706  | 0.402964  | 0.546784   | 0.714362  | 1.02787    | 0.394737   | 0.384032  | 0.445055  | 0.427113  | 0.27271  | 0.394665  | 0.476361  |
| SCAMP1     | 2.40456   | 2.33274    | 2.39233  | 3.62802   | 0.793881  | 2.85384    | 1.90797   | 3.18243    | 5.0216     | 4.07193   | 5.04057   | 3.57187   | 4.12192  | 2.7609    | 2.49709   |
| SCAMP1-AS1 | 0.955584  | 1.10787    | 0.765823 | 1.86181   | 0.718983  | 2.07231    | 0.579623  | 0.92886    | 0.436423   | 1.01196   | 1.26414   | 0.373924  | 0.90554  | 0.639895  | 0.814827  |
| SCAMP2     | 11.8658   | 14.7629    | 14.7132  | 21.5713   | 25.9655   | 27.4416    | 19.0956   | 10.7831    | 29.3253    | 25.8698   | 29.5364   | 27.7471   | 37.4605  | 14.3737   | 13.9296   |
| SCAMP3     | 8.37687   | 7.43372    | 8.62282  | 12.8351   | 11.8001   | 20.9473    | 10.573    | 6.71194    | 9.96892    | 9.29425   | 14.2262   | 8.53257   | 14.3711  | 8.90248   | 5.87768   |

|           |          |           |          |          |          |          |          |          |           |          |          |           |          |           |          |
|-----------|----------|-----------|----------|----------|----------|----------|----------|----------|-----------|----------|----------|-----------|----------|-----------|----------|
| SCAMP4    | 6.30627  | 7.03438   | 7.04613  | 15.1075  | 14.3397  | 19.7485  | 11.0902  | 6.95788  | 8.22513   | 8.17413  | 12.1402  | 8.44476   | 15.9861  | 7.3427    | 7.27737  |
| SCAMP5    | 0.817198 | 0.289792  | 0.405626 | 0.40423  | 0.670238 | 6.47409  | 0.686725 | 0.447375 | 0.151279  | 0.836945 | 2.15499  | 0.0888785 | 1.04185  | 0.416853  | 0.722938 |
| SCAND1    | 6.05398  | 4.91073   | 5.36329  | 7.77089  | 14.2845  | 13.0896  | 7.19222  | 4.12714  | 9.68764   | 6.71349  | 15.5196  | 5.0775    | 8.42512  | 6.01575   | 5.8989   |
| SCAND2P   | 2.30291  | 1.97411   | 2.27173  | 1.21333  | 2.80544  | 1.40462  | 2.16966  | 1.87817  | 0.490792  | 0.924168 | 0.782759 | 0.985073  | 0.410324 | 1.15862   | 1.24342  |
| SCAP      | 9.06083  | 11.7595   | 12.0579  | 13.8473  | 23.9293  | 16.6491  | 11.7692  | 8.32726  | 17.0644   | 8.56847  | 7.49866  | 10.7124   | 12.5948  | 9.10577   | 7.2422   |
| SCAPER    | 5.14643  | 5.34831   | 4.69508  | 3.61493  | 1.61861  | 2.22832  | 2.6156   | 4.06122  | 3.76357   | 3.14479  | 2.402    | 5.30735   | 3.40769  | 3.26555   | 1.54787  |
| SCARA3    | 4.73489  | 2.2697    | 3.03771  | 3.42931  | 2.73934  | 8.37706  | 5.98541  | 1.84636  | 0.426609  | 1.6373   | 3.70886  | 0.211747  | 2.45876  | 1.01322   | 3.53874  |
| SCARA5    | 12.4719  | 9.74307   | 16.1153  | 0.844589 | 0.840055 | 1.40995  | 15.6023  | 4.60802  | 0.0746909 | 1.49748  | 1.60492  | 0.283238  | 1.81296  | 1.91443   | 4.39575  |
| SCARB1    | 4.05974  | 3.52982   | 4.17545  | 4.75776  | 7.09283  | 12.3611  | 8.85614  | 3.83299  | 2.31283   | 3.22037  | 5.24988  | 1.39505   | 3.39261  | 2.87169   | 1.92727  |
| SCARB2    | 15.9147  | 12.1144   | 11.7796  | 18.2258  | 10.4372  | 29.3622  | 11.5906  | 14.0786  | 12.4995   | 17.5483  | 29.0141  | 7.47905   | 16.8868  | 12.202    | 19.2359  |
| SCARF1    | 1.54802  | 1.02115   | 1.34488  | 2.39838  | 4.07261  | 4.49846  | 1.10288  | 1.057    | 0.504173  | 2.07832  | 2.44789  | 0.658241  | 2.69212  | 2.09047   | 4.01063  |
| SCARF2    | 1.99237  | 1.20153   | 1.33167  | 1.86962  | 14.5826  | 13.4369  | 2.59871  | 1.2547   | 0.594566  | 3.98277  | 8.66139  | 0.925215  | 2.25594  | 4.35826   | 9.5787   |
| SCARNA1   | 0        | 0.537382  | 0.461339 | 0        | 0.866245 | 0        | 0        | 0.495605 | 0         | 0.524944 | 0        | 0         | 0        | 0.14573   | 0        |
| SCARNA10  | 665.538  | 442.513   | 474.462  | 416.428  | 230.401  | 262.269  | 441.681  | 457.411  | 259.308   | 355.341  | 829.291  | 143.265   | 171.353  | 140.162   | 187.03   |
| SCARNA11  | 0.168927 | 0.162784  | 0        | 0        | 0.262403 | 0.287679 | 0        | 0.600514 | 0         | 0        | 0.190698 | 0         | 0        | 0.0882888 | 0        |
| SCARNA12  | 91.8865  | 88.7924   | 84.6659  | 98.1366  | 57.7849  | 62.3294  | 102.173  | 62.0837  | 87.2711   | 58.9545  | 150.561  | 57.2222   | 57.515   | 68.7208   | 30.6513  |
| SCARNA13  | 310.887  | 200.733   | 182.962  | 201.672  | 178.793  | 100.829  | 261.517  | 138.817  | 176.423   | 208.921  | 459.504  | 87.8882   | 108.947  | 98.8591   | 111.312  |
| SCARNA14  | 0        | 0.0813918 | 0        | 0        | 0        | 0        | 0        | 0        | 0.617204  | 0        | 0        | 0         | 0        | 0         | 0        |
| SCARNA15  | 0        | 0         | 0        | 0        | 0        | 0        | 0        | 0        | 0         | 0        | 0        | 0         | 0        | 0         | 0        |
| SCARNA16  | 1.73263  | 1.07333   | 1.53574  | 1.0203   | 3.2681   | 1.47532  | 2.26088  | 3.51959  | 2.11015   | 1.55331  | 1.67651  | 0.53132   | 0.87834  | 1.42301   | 0.533203 |
| SCARNA17  | 83.0071  | 75.7504   | 70.261   | 58.6892  | 139.271  | 66.2328  | 53.1618  | 61.7029  | 26.5119   | 29.7369  | 26.3738  | 43.4244   | 12.7683  | 35.0513   | 29.6838  |
| SCARNA18  | 0.518128 | 0.166428  | 0        | 0        | 0        | 0        | 0        | 0        | 0         | 0        | 0        | 0         | 0.111431 | 0.0902654 | 0        |
| SCARNA18B | 0        | 0         | 0        | 0        | 0        | 0        | 0        | 0        | 0         | 0        | 0        | 0         | 0        | 0         | 0        |
| SCARNA2   | 933.271  | 814.052   | 906.269  | 740.984  | 1167.58  | 475.806  | 738.236  | 467.766  | 456.674   | 457.005  | 1144.49  | 310.451   | 347.982  | 435.901   | 297.07   |
| SCARNA20  | 0        | 0.0857744 | 0        | 0        | 0        | 0        | 0        | 0.316425 | 0         | 0.223438 | 0        | 0         | 0        | 0.279129  | 0        |
| SCARNA21  | 6.20502  | 4.60571   | 7.07553  | 4.83905  | 8.85704  | 2.28475  | 7.46765  | 5.51451  | 2.65517   | 2.52582  | 9.27649  | 2.15993   | 2.81323  | 1.57768   | 3.3718   |

|           |          |           |           |           |           |           |           |           |           |           |           |           |           |           |           |
|-----------|----------|-----------|-----------|-----------|-----------|-----------|-----------|-----------|-----------|-----------|-----------|-----------|-----------|-----------|-----------|
| SCARNA21B | 0        | 0         | 0.137738  | 0         | 0         | 0         | 0         | 0         | 0         | 0         | 0         | 0         | 0         | 0         | 0         |
| SCARNA22  | 0.925722 | 0.892054  | 0.153165  | 0.763187  | 1.72556   | 0         | 1.05696   | 2.13903   | 0.90194   | 0.697126  | 1.88104   | 1.32476   | 1.07509   | 0.387058  | 0         |
| SCARNA23  | 0.356047 | 0         | 0         | 0         | 0         | 0         | 0         | 0         | 0         | 0         | 0         | 0         | 0         | 0         | 0         |
| SCARNA26A | 7.19311  | 7.30821   | 5.69192   | 5.6401    | 4.61509   | 2.13038   | 7.14162   | 3.19632   | 6.85596   | 7.26173   | 9.53232   | 4.13987   | 3.63205   | 2.4518    | 1.12285   |
| SCARNA26B | 0        | 0.0748367 | 0.513975  | 0         | 0.241269  | 0         | 0         | 0.276075  | 0         | 0.389891  | 0         | 0         | 0         | 0         | 0.223063  |
| SCARNA27  | 0        | 0         | 0         | 0         | 0         | 0         | 0         | 0         | 0         | 0         | 0         | 0         | 0         | 0         | 0         |
| SCARNA28  | 95.316   | 96.735    | 95.1357   | 39.2166   | 11.3036   | 18.6902   | 101.337   | 193.908   | 22.81     | 25.0043   | 56.1566   | 13.1451   | 11.3143   | 14.7142   | 17.8174   |
| SCARNA3   | 0.482147 | 0.15487   | 0.265911  | 0         | 0         | 0         | 0         | 0         | 0         | 0         | 0.181428  | 0         | 0         | 0.083997  | 0         |
| SCARNA4   | 0.179403 | 0.0864393 | 0.29683   | 0.369761  | 0.278676  | 0         | 0         | 0         | 0         | 0         | 0         | 0         | 0         | 0         | 0         |
| SCARNA5   | 60.8546  | 61.3688   | 63.4972   | 28.7396   | 45.2597   | 28.8502   | 73.3788   | 159.14    | 12.9776   | 18.076    | 61.461    | 14.8916   | 29.971    | 15.4893   | 19.0093   |
| SCARNA6   | 25.1441  | 22.9721   | 25.7673   | 12.1041   | 27.57     | 13.7053   | 30.2982   | 58.5327   | 5.40401   | 4.25876   | 13.161    | 4.60677   | 5.38891   | 5.0474    | 4.12331   |
| SCARNA7   | 268.109  | 213.248   | 202.943   | 167.598   | 109.917   | 85.2733   | 268.644   | 543.608   | 165.612   | 188.453   | 494.883   | 109.443   | 110.088   | 90.3502   | 104.543   |
| SCARNA8   | 0.176665 | 0         | 0.584597  | 0         | 0         | 0         | 0.40342   | 0.157005  | 0         | 0         | 0.199432  | 0         | 0.113983  | 0         | 0         |
| SCARNA9   | 53.17    | 35.9159   | 28.0404   | 37.9702   | 5.29563   | 7.59211   | 43.7156   | 70.734    | 17.0072   | 14.976    | 22.0551   | 8.91303   | 4.65296   | 19.4283   | 6.02585   |
| SCARNA9L  | 3.32515  | 2.59542   | 1.65048   | 2.6728    | 0.723115  | 1.75542   | 3.94841   | 4.60998   | 2.4298    | 3.83953   | 1.80177   | 1.66546   | 0.343259  | 2.85011   | 2.19666   |
| SCART1    | 0.777692 | 0.746824  | 0.922892  | 0.132651  | 1.46629   | 0.31968   | 1.05329   | 0.900876  | 0.0914482 | 0.195217  | 0.0726553 | 0.237934  | 0.0588274 | 0.291527  | 0.816466  |
| SCCPDH    | 3.28211  | 1.34259   | 1.84107   | 2.11996   | 2.01896   | 5.93171   | 2.21001   | 3.36561   | 0.501078  | 2.87535   | 6.40737   | 0.414823  | 1.56256   | 1.56387   | 3.22292   |
| SCD       | 9.60767  | 8.21618   | 5.74577   | 60.7667   | 14.0891   | 47.0306   | 8.39885   | 7.98932   | 80.928    | 118.945   | 38.5577   | 66.0804   | 101.382   | 52.176    | 10.4487   |
| SCD5      | 1.11565  | 0.592072  | 0.77581   | 0.627868  | 0.820451  | 1.56951   | 1.26162   | 0.546043  | 0.498861  | 0.764392  | 1.78876   | 0.239098  | 0.709381  | 0.74126   | 1.23843   |
| SCEL      | 10.4523  | 26.58     | 33.5443   | 7.99915   | 5.20404   | 5.29607   | 18.8969   | 22.8889   | 52.0566   | 31.5674   | 21.9633   | 15.0402   | 40.3191   | 9.36965   | 3.16292   |
| SCEL-AS1  | 0.244039 | 0.568312  | 0.370125  | 0.293404  | 0.189539  | 0.0692654 | 0.417954  | 0.506057  | 0.0990708 | 0.204196  | 0         | 0.0873083 | 0.0524843 | 0.127546  | 0         |
| SCFD1     | 8.10762  | 6.00052   | 6.37353   | 8.54218   | 2.00501   | 7.27277   | 4.24856   | 6.76626   | 8.95311   | 11.796    | 13.6377   | 6.75367   | 11.8153   | 7.75809   | 7.90721   |
| SCFD2     | 4.41862  | 3.53772   | 3.83032   | 4.72634   | 4.55311   | 4.65022   | 4.22917   | 3.25946   | 2.16676   | 2.10485   | 3.24307   | 2.42601   | 2.96377   | 3.02199   | 3.23567   |
| SCG2      | 1.25973  | 0.0303479 | 0.0372192 | 0.157637  | 0.531131  | 7.70771   | 0.102737  | 0.415831  | 0         | 2.73303   | 5.5969    | 0.0901371 | 0.754717  | 0.855907  | 3.23059   |
| SCG3      | 0.125853 | 0.047163  | 0.133036  | 0.0648478 | 0.0434431 | 0.0476278 | 0.0798308 | 0.0683516 | 0.0085153 | 0.0087755 | 0.0236788 | 0         | 0         | 0.0328883 | 0.0803295 |
| SCG5      | 0.160098 | 0.0342834 | 0.0588641 | 1.20989   | 0.0552639 | 1.39351   | 0.0609316 | 0.126473  | 0.151652  | 1.60752   | 3.49413   | 0.101826  | 0.837832  | 0.585719  | 0.459842  |

|          |           |            |           |           |           |           |           |           |           |           |           |           |           |           |           |
|----------|-----------|------------|-----------|-----------|-----------|-----------|-----------|-----------|-----------|-----------|-----------|-----------|-----------|-----------|-----------|
| SCGB1A1  | 0.409612  | 0.0740089  | 0.0423574 | 0         | 0.0795335 | 0         | 0         | 0.0910072 | 0         | 0         | 0         | 0.036636  | 0         | 0         | 0         |
| SCGB1B2P | 21.0721   | 3.64782    | 5.19598   | 0.466496  | 4.32445   | 3.02576   | 10.7117   | 14.2113   | 0.192958  | 0.326689  | 0.459913  | 0.348194  | 0.124127  | 0.348968  | 0.552585  |
| SCGB1C1  | 0         | 0          | 4.99E-06  | 0         | 0         | 0         | 0         | 0         | 0         | 0         | 0         | 0         | 0         | 0         | 0         |
| SCGB1C2  | 0         | 0          | 0.0534732 | 0         | 0         | 0         | 0         | 0         | 0         | 0         | 0         | 0         | 0         | 0         | 0         |
| SCGB1D1  | 0         | 0          | 0         | 0         | 0         | 0         | 0         | 0.0479432 | 0         | 0         | 0         | 0         | 0         | 0         | 0         |
| SCGB1D2  | 23.8828   | 12.3981    | 16.7414   | 0.163353  | 6.0736    | 6.70364   | 23.7695   | 16.0596   | 0         | 0         | 0         | 0.037807  | 0         | 0         | 0         |
| SCGB1D4  | 0         | 0          | 0         | 0         | 0         | 0         | 0         | 0         | 0         | 0         | 0         | 0         | 0         | 0         | 0         |
| SCGB2A1  | 1.46587   | 0.278232   | 0.220486  | 0         | 0         | 0.264764  | 0.202871  | 0.710589  | 0.162297  | 0         | 0         | 0         | 0         | 0         | 0         |
| SCGB2A2  | 102.223   | 38.5646    | 63.1123   | 0.188534  | 6.6783    | 37.2701   | 48.2003   | 60.646    | 0         | 0         | 0         | 0         | 0         | 0         | 0.919583  |
| SCGB2B2  | 0.677949  | 0.433236   | 0.407352  | 0.117667  | 0.266044  | 0.170141  | 0.562212  | 0.551768  | 0.0260737 | 0.0358272 | 0.048336  | 0.117443  | 0.0828776 | 0.100703  | 0.15373   |
| SCGB2B3P | 0.257145  | 0.247793   | 0.212728  | 0         | 0.399435  | 0         | 0.4404    | 0.342794  | 0         | 0.322743  | 0         | 0.0919971 | 0         | 0         | 0         |
| SCGB3A1  | 0.14899   | 0          | 0.16434   | 0.153538  | 0         | 0.0422876 | 0.226815  | 0.088273  | 0         | 0         | 0.112127  | 0.0710707 | 0         | 0         | 0         |
| SCGB3A2  | 0.178711  | 0.193738   | 0.406566  | 0         | 0         | 0         | 0.0510116 | 0.277941  | 0.0544124 | 0         | 0         | 0         | 0         | 0         | 0.0641628 |
| SCGN     | 0.0469433 | 0.00753933 | 0         | 0.032251  | 0         | 0.0666194 | 0         | 0         | 0         | 0         | 0         | 0.0111964 | 0         | 0         | 0         |
| SCHIP1   | 0.136839  | 0.11552    | 0.0831118 | 0.109496  | 0.0988267 | 0.0456311 | 0.0688493 | 0.155245  | 0.0924505 | 0.173157  | 0.762226  | 0.0509048 | 0.173869  | 2.14803   | 0.132378  |
| SCHLAP1  | 0.101486  | 0.0843436  | 0.046516  | 0.0446403 | 0.24102   | 0.0472487 | 0.143655  | 0.112402  | 0.0168272 | 0.0357638 | 0.038203  | 0.0335563 | 0.035658  | 0.0436404 | 0.0396852 |
| SCIMP    | 0.278826  | 0.201904   | 0.189662  | 0.140486  | 0.313116  | 0.395725  | 0.172002  | 0.21114   | 0.0331752 | 0.204684  | 0.461897  | 0.0684812 | 0.240112  | 0.0872623 | 0.281664  |
| SCIN     | 1.11609   | 0.618918   | 0.731678  | 0.549763  | 0.403433  | 0.794934  | 0.969761  | 0.673735  | 0.239368  | 0.149772  | 0.150557  | 0.13561   | 0.140396  | 0.0403552 | 0.534282  |
| SCLT1    | 1.51893   | 1.35232    | 1.08584   | 1.57806   | 0.602679  | 1.57451   | 0.655062  | 0.902378  | 0.919917  | 1.44535   | 1.94766   | 1.13999   | 1.31023   | 1.42377   | 1.32779   |
| SCLY     | 0.845074  | 0.75982    | 0.818732  | 1.31222   | 0.618981  | 1.21817   | 0.988874  | 0.642544  | 0.853582  | 0.808391  | 1.36979   | 0.463181  | 1.37586   | 1.05962   | 0.907663  |
| SCMH1    | 3.36734   | 2.87587    | 3.00278   | 4.48389   | 3.12118   | 6.66563   | 3.22665   | 2.32127   | 0.902589  | 1.85132   | 3.92585   | 1.46259   | 2.40445   | 2.90841   | 3.89074   |
| SCML1    | 1.32381   | 1.44651    | 1.38197   | 0.950085  | 0.403923  | 1.34862   | 1.02565   | 1.4356    | 0.499031  | 1.19669   | 1.75238   | 0.60329   | 1.00664   | 1.0337    | 1.30139   |
| SCML2    | 0.270131  | 0.321399   | 0.296442  | 0.244291  | 0.0770706 | 0.159601  | 0.365077  | 0.230271  | 0.107425  | 0.0830307 | 0.230264  | 0.134117  | 0.17073   | 0.0950819 | 0.118758  |
| SCML4    | 0.391781  | 0.130338   | 0.189063  | 0.0720967 | 0.137653  | 0.11517   | 0.133132  | 0.286007  | 0.0113606 | 0.0234155 | 0.0631817 | 0.0166863 | 0.0240738 | 0.0390022 | 0.241134  |
| SCN10A   | 0         | 0          | 0         | 0         | 0         | 0         | 0         | 0         | 0         | 0         | 0         | 0         | 0         | 0         | 0         |
| SCN11A   | 0.119345  | 0.0926428  | 0.106958  | 0.047829  | 0.0514957 | 0.0818614 | 0.0908431 | 0.0559783 | 0         | 0.0332868 | 0.0299391 | 0.0118604 | 0         | 0.0190591 | 0.233288  |

|          |           |           |           |            |           |           |           |           |            |           |            |            |            |            |           |
|----------|-----------|-----------|-----------|------------|-----------|-----------|-----------|-----------|------------|-----------|------------|------------|------------|------------|-----------|
| SCN1A    | 0.0393715 | 0.038408  | 0.0352714 | 0.0107649  | 0         | 0.172107  | 0.0119269 | 0.0301714 | 0          | 0         | 0.00294805 | 0.00373719 | 0          | 0.00409464 | 0.0300035 |
| SCN1B    | 0.61007   | 0.17751   | 0.229406  | 0.408244   | 0.584589  | 2.61422   | 0.619665  | 0.246445  | 0.0771945  | 0.437543  | 1.279      | 0.104879   | 0.462625   | 0.337483   | 2.74789   |
| SCN2A    | 0.106275  | 0.220817  | 0.353893  | 0.00815329 | 0.011734  | 0.094536  | 0.0612558 | 0.0947715 | 0.0183999  | 0.0316036 | 0.0483229  | 0.0108102  | 0          | 0.00131602 | 0         |
| SCN2B    | 0.141059  | 0.047575  | 0.0427877 | 0.0581461  | 0.306758  | 0.112102  | 0.0751597 | 0.104468  | 0.0171794  | 0.053113  | 0.0477714  | 0.0201863  | 0.0788757  | 0.0786384  | 0.222836  |
| SCN3A    | 0.383438  | 0.229879  | 0.248112  | 0.0511971  | 0.215534  | 0.197525  | 0.145668  | 0.181673  | 0.01529    | 0.0881542 | 0.104312   | 0.0628818  | 0.0935936  | 0.173533   | 0.217595  |
| SCN3B    | 0.328108  | 0.457718  | 0.432401  | 0.864969   | 0.574855  | 1.18898   | 0.453032  | 0.26447   | 0.538993   | 2.3272    | 0.658955   | 2.32859    | 3.62089    | 1.43169    | 0.739681  |
| SCN4A    | 0.0800592 | 0.0157152 | 0.0147179 | 0.0122227  | 0.0690887 | 0.113616  | 0.0169276 | 0.0263518 | 0.00361123 | 0         | 0.00334729 | 0          | 0.00382621 | 0.00154972 | 0.0723918 |
| SCN4B    | 0.773197  | 0.673345  | 0.619777  | 0.821546   | 2.73031   | 1.69703   | 1.28858   | 0.687152  | 0.567339   | 1.10908   | 0.834892   | 0.553242   | 1.15884    | 0.973872   | 1.46215   |
| SCN5A    | 0.0323039 | 0.0505847 | 0.0668102 | 0.047161   | 0.0669055 | 0.137532  | 0.132166  | 0.0598104 | 0.0229498  | 0.0608171 | 0.0516617  | 0.0173357  | 0.0798955  | 0.0253251  | 0.0463925 |
| SCN7A    | 0.416447  | 0.0321654 | 0.0736368 | 0.0131042  | 0         | 0.192188  | 0.210521  | 0.101708  | 0          | 0         | 0.0107661  | 0.00682396 | 0          | 0          | 0         |
| SCN8A    | 0.0635798 | 0.0804135 | 0.0624598 | 0.0716634  | 0.123452  | 0.153953  | 0.0499079 | 0.0723963 | 0.0604946  | 0.157105  | 0.246722   | 0.160647   | 0.106399   | 0.2108     | 0.174057  |
| SCN9A    | 0.392683  | 0.187686  | 0.263936  | 0.191023   | 0.0940785 | 0.310524  | 0.512708  | 0.398073  | 0.0115515  | 0.0953174 | 0.179093   | 0.0540717  | 0.157927   | 0.129473   | 0.15548   |
| SCNM1    | 2.96858   | 2.5179    | 2.23531   | 3.59845    | 3.97802   | 5.70204   | 2.54435   | 1.4488    | 4.2345     | 4.29964   | 6.27054    | 3.89702    | 4.06211    | 2.42488    | 2.58081   |
| SCNN1A   | 9.20408   | 13.0585   | 12.3331   | 7.34458    | 21.1536   | 11.0492   | 11.1103   | 11.0693   | 35.3753    | 11.7645   | 8.22329    | 14.1985    | 19.7492    | 4.1711     | 1.78269   |
| SCNN1B   | 6.98658   | 5.71059   | 4.09893   | 8.42128    | 11.3924   | 7.29964   | 6.93922   | 4.12619   | 30.226     | 9.39523   | 23.1982    | 14.4808    | 9.61337    | 8.80736    | 1.59975   |
| SCNN1D   | 0.356164  | 0.427187  | 0.545404  | 6.94242    | 1.49494   | 0.838828  | 0.354742  | 0.276121  | 3.2025     | 9.42545   | 14.4143    | 20.7733    | 49.302     | 12.0834    | 1.71949   |
| SCNN1G   | 2.7515    | 0.956045  | 0.771513  | 5.56195    | 1.20207   | 2.04438   | 0.596598  | 1.14624   | 3.31074    | 2.63987   | 5.42075    | 3.10934    | 2.1764     | 3.26328    | 0.379953  |
| SCO1     | 4.53889   | 3.64272   | 3.85313   | 5.86042    | 4.22208   | 6.696     | 3.8717    | 4.01033   | 2.49075    | 4.53754   | 8.05813    | 2.45465    | 6.41028    | 4.00657    | 4.39614   |
| SCO2     | 0.624082  | 0.775978  | 1.68288   | 5.26907    | 4.26528   | 6.58569   | 0.606026  | 0.626208  | 4.27736    | 6.34734   | 6.98644    | 4.92076    | 7.29067    | 4.35072    | 1.8091    |
| SCOC     | 3.82107   | 2.64296   | 3.06328   | 6.17046    | 0.443628  | 4.45273   | 2.24885   | 4.97125   | 4.76156    | 6.05657   | 7.7376     | 3.28371    | 6.98302    | 3.86543    | 3.50749   |
| SCOC-AS1 | 0.149162  | 0.0773969 | 0.0284763 | 0.0118243  | 0         | 0.205169  | 0.157208  | 0.0815771 | 0          | 0.014401  | 0.0647636  | 0.00820995 | 0.0148059  | 0.0179904  | 0.0988687 |
| SCP2     | 10.5105   | 7.98874   | 7.62009   | 11.5782    | 5.87817   | 14.0883   | 6.74167   | 7.96018   | 17.7193    | 12.9148   | 20.1169    | 8.77403    | 10.4204    | 8.08263    | 7.36589   |
| SCP2D1   | 0         | 0.0167428 | 0         | 0          | 0         | 0.0295886 | 0         | 0         | 0          | 0         | 0          | 0          | 0          | 0          | 0         |
| SCPEP1   | 18.443    | 10.95     | 10.0896   | 9.69924    | 16.1355   | 18.0748   | 9.08876   | 11.0399   | 12.7958    | 7.46707   | 16.5753    | 6.17255    | 5.36623    | 5.87055    | 8.11685   |
| SCRG1    | 0.386855  | 0.109643  | 0.0564766 | 0.0234509  | 0.0706965 | 0.368155  | 0.155894  | 0.323581  | 0.0277145  | 0.0571227 | 0.2312     | 0          | 0          | 0.0951471  | 0.294127  |
| SCRIB    | 6.87905   | 10.9605   | 9.76746   | 17.99      | 43.4708   | 18.6945   | 9.56094   | 7.13059   | 12.3102    | 8.80084   | 4.61626    | 17.775     | 18.3596    | 13.2966    | 6.61803   |



|            |           |           |           |           |           |           |            |           |           |           |           |            |           |            |           |
|------------|-----------|-----------|-----------|-----------|-----------|-----------|------------|-----------|-----------|-----------|-----------|------------|-----------|------------|-----------|
| SCRN1      | 3.28886   | 2.86598   | 3.42427   | 3.56111   | 2.84253   | 4.50771   | 2.7985     | 2.36351   | 2.10174   | 5.92762   | 5.84905   | 3.29283    | 9.02027   | 6.35507    | 5.48951   |
| SCRN2      | 3.19259   | 3.9459    | 3.78944   | 4.60347   | 8.97749   | 8.38092   | 3.94775    | 2.36629   | 3.79599   | 2.48657   | 3.81771   | 3.48525    | 3.54977   | 2.7502     | 2.71835   |
| SCRN3      | 1.48577   | 1.95037   | 1.78726   | 2.54666   | 0.624076  | 1.63302   | 1.07323    | 1.89979   | 1.96644   | 2.16924   | 2.26771   | 1.54584    | 1.96123   | 1.60059    | 0.958008  |
| SCRT1      | 0         | 0.0177089 | 0.0101353 | 0.0378765 | 0.0666077 | 0.020864  | 0.00699417 | 0.0108881 | 0         | 0.0153769 | 0         | 0.0262988  | 0         | 0          | 0         |
| SCRT2      | 0         | 0         | 0         | 0.013335  | 0.0100501 | 0.192818  | 0          | 0.0114999 | 0         | 0.0243614 | 0.0511265 | 0.00462943 | 0         | 0.00676297 | 0         |
| SCT        | 0.0400399 | 0.154335  | 0.43061   | 0         | 0.310979  | 0.306841  | 0.411446   | 0.213505  | 0         | 0         | 0.1808    | 0.0859488  | 0         | 0.0627798  | 0.287512  |
| SCTR       | 0.0888653 | 0.0733999 | 0.0315067 | 0.0261652 | 0.157758  | 0.0756676 | 0.115958   | 0.078976  | 0.0154611 | 0.0159336 | 0.0286622 | 0.0181673  | 0.0163815 | 0.0331749  | 0.0182317 |
| SCUBE1     | 0.185479  | 0.057656  | 0.0494973 | 0.0369952 | 0.0650579 | 0.147744  | 0.14346    | 0.0159521 | 0.058295  | 0.0525668 | 0.0337715 | 0.115591   | 0.0926481 | 0.237659   | 0.206223  |
| SCUBE2     | 2.50541   | 1.98586   | 1.841     | 1.20994   | 2.43426   | 3.76886   | 2.66988    | 2.43179   | 0.317096  | 0.468598  | 0.865124  | 0.298781   | 0.21553   | 0.611069   | 1.29107   |
| SCUBE3     | 0.816142  | 0.420699  | 0.553541  | 0.148422  | 0.428799  | 1.2749    | 1.1374     | 0.474658  | 0.036543  | 0.0979152 | 0.077906  | 0.115936   | 0.0290389 | 0.345005   | 0.715315  |
| SCX        | 0.357644  | 0.255698  | 0.238604  | 0.237783  | 0.716833  | 0.47153   | 0.289794   | 0.0922774 | 0.0983547 | 0.564721  | 0.221404  | 0.321944   | 0.186089  | 0.307514   | 0.596465  |
| SCYL1      | 7.91684   | 7.77659   | 7.8527    | 13.5155   | 16.1835   | 20.8406   | 9.4105     | 5.65986   | 20.2305   | 12.6596   | 14.6668   | 9.76654    | 19.7999   | 11.331     | 10.258    |
| SCYL2      | 3.61505   | 3.67889   | 4.15519   | 6.52245   | 1.5336    | 3.95715   | 2.7474     | 4.09351   | 7.95509   | 7.1946    | 7.03463   | 4.201      | 10.6591   | 5.62692    | 4.47464   |
| SCYL3      | 2.70376   | 2.81834   | 2.53416   | 3.34974   | 2.46642   | 2.85704   | 2.30034    | 2.09669   | 2.48106   | 3.00809   | 3.15368   | 2.35262    | 2.74473   | 2.00028    | 1.92534   |
| SDAD1      | 4.64503   | 4.65571   | 4.31761   | 7.76797   | 1.9457    | 7.44054   | 2.7071     | 3.93593   | 4.28596   | 4.65086   | 6.60714   | 3.37696    | 8.4906    | 4.44625    | 4.41153   |
| SDAD1P1    | 0.364687  | 0.253025  | 0.356     | 0.195427  | 0.215264  | 0.428526  | 0.258161   | 0.330586  | 0.293138  | 0.274632  | 0.296414  | 0.0730642  | 0.164706  | 0.141045   | 0.303767  |
| SDC1       | 56.6687   | 89.2984   | 99.812    | 201.52    | 156.676   | 157.049   | 109.81     | 71.8335   | 264.735   | 306.148   | 196.707   | 203.22     | 410.989   | 163.438    | 68.6513   |
| SDC2       | 4.46259   | 1.6478    | 2.23594   | 2.55947   | 2.39317   | 6.58752   | 4.20054    | 2.63218   | 1.14845   | 10.7603   | 26.0806   | 1.32096    | 4.29744   | 6.47642    | 12.6556   |
| SDC3       | 4.21194   | 2.5672    | 3.0096    | 6.18012   | 8.10804   | 17.2163   | 5.15993    | 2.78332   | 1.6842    | 4.3732    | 5.70366   | 1.81731    | 5.61873   | 3.39413    | 7.91156   |
| SDC4       | 27.9542   | 29.5117   | 38.7969   | 29.5015   | 23.3284   | 39.5931   | 29.0846    | 25.7095   | 10.6398   | 23.6646   | 18.2839   | 13.9158    | 50.329    | 14.5684    | 10.0014   |
| SDC4P      | 0         | 0         | 0         | 0         | 0         | 0         | 0          | 0         | 0         | 0         | 0         | 0          | 0         | 0          | 0         |
| SDCBP      | 11.4476   | 7.45646   | 7.61133   | 22.4155   | 3.29809   | 27.1738   | 6.06725    | 8.69042   | 3.24667   | 19.1128   | 26.9246   | 5.67172    | 21.5418   | 10.4927    | 16.0844   |
| SDCBP2     | 5.51681   | 6.20671   | 5.80369   | 23.8665   | 16.1576   | 11.284    | 6.68508    | 4.55695   | 51.491    | 43.067    | 41.5809   | 22.8427    | 61.1225   | 20.4237    | 5.7391    |
| SDCBP2-AS1 | 2.33664   | 1.82534   | 1.81932   | 1.42531   | 1.05419   | 0.98018   | 2.01074    | 1.90102   | 0.564968  | 0.959605  | 0.455792  | 1.49367    | 0.282673  | 1.95755    | 2.19602   |
| SDCCAG8    | 3.12784   | 3.40722   | 3.05318   | 3.48964   | 2.49435   | 4.23438   | 1.72095    | 2.40513   | 2.041     | 2.71459   | 4.50307   | 2.27413    | 2.31308   | 3.03704    | 2.77202   |
| SDE2       | 3.94858   | 3.5908    | 4.10706   | 3.5932    | 2.58253   | 5.1563    | 3.56582    | 4.17098   | 5.58932   | 3.7169    | 5.22643   | 2.94097    | 5.78052   | 3.57527    | 3.23327   |

|          |          |           |           |          |          |          |          |           |           |          |          |           |          |          |          |
|----------|----------|-----------|-----------|----------|----------|----------|----------|-----------|-----------|----------|----------|-----------|----------|----------|----------|
| SDF2     | 4.37407  | 4.29957   | 4.36887   | 8.41218  | 7.27164  | 8.80667  | 5.228    | 3.25026   | 8.05303   | 8.07879  | 17.5217  | 4.93016   | 10.1842  | 6.2007   | 4.3909   |
| SDF2L1   | 2.51555  | 1.65857   | 1.73055   | 6.03062  | 5.59392  | 8.81584  | 2.02564  | 1.31783   | 2.22518   | 3.29021  | 10.8508  | 1.42101   | 6.32123  | 2.96162  | 2.20562  |
| SDF4     | 15.2301  | 13.3569   | 15.1516   | 26.5597  | 40.539   | 39.2558  | 16.5737  | 10.5627   | 17.9819   | 20.3792  | 27.372   | 12.9732   | 31.3088  | 19.5243  | 20.8154  |
| SDHA     | 9.31777  | 7.06936   | 9.12713   | 9.93953  | 9.15277  | 16.0277  | 8.35345  | 5.90375   | 2.73661   | 7.86687  | 7.16196  | 4.29764   | 16.0622  | 10.1026  | 7.71715  |
| SDHAF1   | 3.04891  | 2.23802   | 2.86083   | 4.97657  | 4.5453   | 4.70435  | 2.85033  | 2.16406   | 3.11512   | 2.79939  | 7.53046  | 1.66912   | 3.81546  | 2.7592   | 1.99829  |
| SDHAF2   | 6.9676   | 6.05558   | 5.88973   | 10.389   | 5.16087  | 9.68326  | 5.65764  | 5.38234   | 6.91346   | 7.76808  | 14.4666  | 4.31986   | 9.64012  | 6.29089  | 5.12587  |
| SDHAF3   | 1.06883  | 0.775181  | 1.00521   | 1.31016  | 0.244671 | 1.22624  | 0.899212 | 0.639926  | 0.726222  | 1.32737  | 2.36236  | 1.19144   | 1.35018  | 1.02315  | 0.727096 |
| SDHAF4   | 2.42451  | 2.27261   | 1.85985   | 2.36224  | 1.98576  | 5.2174   | 2.46624  | 1.52788   | 2.20116   | 3.04301  | 6.61849  | 1.67172   | 1.08078  | 1.35931  | 0.94961  |
| SDHAP1   | 4.79394  | 4.85043   | 5.647     | 2.1682   | 8.40392  | 4.15412  | 2.87964  | 3.01202   | 1.78646   | 2.71529  | 2.28468  | 2.96281   | 1.26164  | 4.46049  | 3.0315   |
| SDHAP2   | 5.52381  | 10.4848   | 10.56     | 2.81372  | 12.1628  | 5.88512  | 6.50427  | 4.8852    | 4.94885   | 4.25926  | 3.42796  | 5.60983   | 2.1684   | 4.89925  | 5.45695  |
| SDHAP3   | 1.27902  | 1.0651    | 1.11842   | 0.909307 | 1.14389  | 1.74736  | 0.883884 | 1.20444   | 0.107822  | 0.488453 | 0.339134 | 0.32983   | 0.178767 | 0.893549 | 0.784528 |
| SDHB     | 10.8944  | 7.48897   | 8.00937   | 16.5385  | 6.75028  | 18.3464  | 9.62341  | 7.49056   | 14.6221   | 18.7727  | 30.6206  | 8.83654   | 17.0705  | 10.8807  | 9.66612  |
| SDHC     | 9.20415  | 7.93988   | 8.00002   | 16.4435  | 6.49306  | 13.5866  | 8.5632   | 7.29401   | 15.1648   | 16.6471  | 20.8081  | 11.4521   | 17.1983  | 10.2302  | 8.02336  |
| SDHD     | 13.2938  | 9.15926   | 10.4155   | 17.1584  | 5.21365  | 17.5095  | 10.3587  | 10.6291   | 8.85373   | 12.6747  | 27.9458  | 6.57555   | 12.9459  | 9.81275  | 11.4296  |
| SDK1     | 2.04864  | 1.22438   | 1.37024   | 2.91073  | 3.11114  | 5.44096  | 3.71513  | 1.70445   | 0.753811  | 0.618194 | 1.15141  | 0.389855  | 3.81909  | 2.35555  | 6.00314  |
| SDK2     | 0.839643 | 1.1419    | 0.83032   | 2.54467  | 3.03767  | 2.26246  | 0.618581 | 0.657964  | 0.883265  | 1.23535  | 0.787034 | 1.38073   | 2.02349  | 1.70683  | 1.46002  |
| SDR16C5  | 4.75446  | 7.05914   | 7.29329   | 7.32319  | 7.52357  | 3.76693  | 8.70869  | 6.11212   | 45.0751   | 12.5169  | 11.6386  | 8.95503   | 14.6854  | 4.07288  | 1.92608  |
| SDR16C6P | 0        | 0         | 0.0364677 | 0        | 0        | 0        | 0        | 0         | 0         | 0        | 0        | 0         | 0        | 0        | 0        |
| SDR39U1  | 3.72336  | 3.77077   | 4.04264   | 4.44299  | 5.87822  | 4.95555  | 2.78509  | 2.1058    | 4.1171    | 2.39904  | 5.40065  | 3.25838   | 2.00715  | 2.67196  | 1.418    |
| SDR42E1  | 7.07218  | 7.53022   | 7.01659   | 6.98728  | 5.84255  | 3.63585  | 7.73199  | 7.5007    | 11.0406   | 3.16114  | 4.13303  | 5.5795    | 2.36756  | 2.7373   | 0.586876 |
| SDR9C7   | 7.97222  | 10.6958   | 10.0446   | 20.3904  | 27.3336  | 12.0357  | 9.40185  | 8.2387    | 65.1543   | 29.9685  | 40.0988  | 26.6171   | 26.9956  | 17.1668  | 4.31225  |
| SDS      | 0.230853 | 0.1111229 | 0.143234  | 0.237901 | 0.112061 | 1.21627  | 0.197686 | 0.0769362 | 0.0351442 | 0.94167  | 2.55718  | 0.113562  | 0.158255 | 0.218685 | 0.849557 |
| SDSL     | 0.212172 | 0.0786366 | 0.067509  | 0.319564 | 1.11549  | 0.903308 | 0.204982 | 0.101533  | 0.278278  | 0.942284 | 2.78206  | 0.210205  | 0.200073 | 0.443561 | 0.562533 |
| SEBOX    | 0.605839 | 0.428124  | 0.167064  | 0.124867 | 0.690123 | 0.103173 | 0.184461 | 0.287157  | 0.0491896 | 0.152078 | 0        | 0.0577992 | 0.416943 | 0.211092 | 0.29002  |
| SEC11A   | 14.9029  | 9.73902   | 10.3477   | 18.232   | 5.62321  | 17.2232  | 9.48886  | 9.83942   | 11.1164   | 20.3135  | 35.5551  | 9.58496   | 21.0207  | 14.1715  | 13.2703  |
| SEC11C   | 9.81399  | 5.14856   | 4.37347   | 9.64998  | 2.75188  | 8.59595  | 4.10968  | 6.9725    | 12.0551   | 8.96466  | 14.1897  | 5.51311   | 9.54331  | 5.32029  | 2.66537  |

|            |            |           |           |           |           |           |           |           |           |           |           |           |           |           |           |
|------------|------------|-----------|-----------|-----------|-----------|-----------|-----------|-----------|-----------|-----------|-----------|-----------|-----------|-----------|-----------|
| SEC13      | 10.7944    | 7.34485   | 7.424     | 17.2455   | 11.3933   | 23.5489   | 9.76013   | 6.95365   | 12.2259   | 16.9952   | 24.4074   | 10.1764   | 21.0653   | 13.6756   | 12.261    |
| SEC14L1    | 5.20578    | 4.47138   | 5.34548   | 6.13902   | 4.64136   | 10.5237   | 5.39959   | 3.84181   | 9.02603   | 6.94338   | 5.66813   | 4.59682   | 7.70156   | 5.5637    | 7.7615    |
| SEC14L1P1  | 1.07977    | 1.10119   | 1.33989   | 0.491457  | 0.782719  | 0.413734  | 0.976003  | 0.943615  | 0.131504  | 0.440447  | 0.284416  | 0.63096   | 0.133527  | 0.531415  | 1.0984    |
| SEC14L2    | 1.60643    | 1.95911   | 1.2698    | 2.97198   | 2.36946   | 3.79509   | 1.21915   | 1.13111   | 5.59653   | 3.18887   | 4.2081    | 2.32618   | 2.79873   | 3.06688   | 1.60192   |
| SEC14L3    | 0.00975677 | 0         | 0         | 0         | 0         | 0         | 0         | 0         | 0         | 0         | 0         | 0         | 0         | 0         | 0         |
| SEC14L4    | 0.0459735  | 0.031011  | 0.0684585 | 0.0284262 | 0.0285651 | 0.0368542 | 0.0314946 | 0.0326859 | 0.0447924 | 0.0230806 | 0.062278  | 0.0131581 | 0.0269029 | 0.0384444 | 0.0132047 |
| SEC14L5    | 0.143389   | 0.319528  | 0.507108  | 0.062801  | 0.116935  | 0.122094  | 0.421572  | 0.21345   | 0.0567555 | 0.0809858 | 0.0687942 | 0.0641243 | 0.0601342 | 0.0711945 | 0.0566295 |
| SEC14L6    | 0.08444    | 0.140831  | 0.139709  | 0.0803242 | 0.121075  | 0.206256  | 0.2744    | 0.230902  | 1.1154    | 0.0326095 | 0.102655  | 0.0464762 | 0.022903  | 0.0203686 | 0.0652973 |
| SEC16A     | 7.72562    | 9.14519   | 9.7578    | 12.8659   | 13.1535   | 16.1725   | 12.3243   | 8.42665   | 11.5687   | 8.94516   | 6.93736   | 11.7038   | 16.4377   | 9.76961   | 11.6494   |
| SEC16B     | 0.571949   | 0.478355  | 0.478628  | 0.239899  | 0.829877  | 0.402697  | 0.313706  | 0.177071  | 0.102651  | 0.208075  | 0.295737  | 0.180746  | 0.0638348 | 0.274153  | 0.483116  |
| SEC1P      | 0.0829289  | 0.165751  | 0.0955027 | 0.028204  | 0.215063  | 0.092788  | 0.175893  | 0.106228  | 0.0342048 | 0.0464819 | 0.0207541 | 0.0613839 | 0         | 0.028746  | 0.150561  |
| SEC22A     | 2.68286    | 2.12829   | 2.0345    | 2.42266   | 0.547235  | 2.05944   | 1.45425   | 2.04111   | 2.93738   | 2.82306   | 3.58692   | 1.45913   | 2.23365   | 1.84125   | 1.48863   |
| SEC22B     | 8.41901    | 7.15941   | 7.12748   | 12.6911   | 4.2383    | 16.242    | 7.70407   | 7.26366   | 8.03807   | 12.9423   | 21.7413   | 4.82801   | 10.0708   | 8.02303   | 13.0792   |
| SEC22C     | 2.52721    | 2.07398   | 2.32427   | 2.87336   | 1.53186   | 3.04652   | 2.2074    | 1.92309   | 0.846778  | 2.36863   | 3.10519   | 1.31481   | 2.6009    | 2.44443   | 2.62365   |
| SEC23A     | 5.21473    | 4.45914   | 5.18449   | 8.44769   | 2.66837   | 9.35273   | 5.82657   | 4.84353   | 4.4023    | 12.7888   | 17.3897   | 4.34806   | 13.022    | 9.18573   | 14.802    |
| SEC23A-AS1 | 0.1413     | 0.0896449 | 0         | 0         | 0         | 0         | 0         | 0         | 0         | 0         | 0         | 0         | 0         | 0         | 0.200306  |
| SEC23B     | 4.61158    | 4.16287   | 4.49364   | 8.40278   | 4.57742   | 7.29994   | 4.59244   | 3.9688    | 6.60798   | 7.58773   | 7.16759   | 5.46907   | 12.9048   | 6.03353   | 4.36289   |
| SEC23IP    | 2.99347    | 3.01275   | 3.09742   | 4.7105    | 2.03709   | 4.07012   | 2.7451    | 2.98406   | 3.32547   | 3.15674   | 3.00735   | 2.66547   | 4.48203   | 3.58764   | 3.97141   |
| SEC24A     | 2.64576    | 2.47373   | 2.72307   | 4.81111   | 1.38011   | 3.77707   | 2.64277   | 3.173     | 4.06475   | 4.68686   | 5.54785   | 3.23024   | 6.95079   | 4.5373    | 4.48709   |
| SEC24B     | 7.79564    | 7.89463   | 8.5103    | 8.5413    | 1.78297   | 7.07776   | 6.74385   | 7.43823   | 7.54881   | 8.30167   | 8.41701   | 5.71149   | 10.5255   | 7.26636   | 5.49474   |
| SEC24B-AS1 | 0.532024   | 0.454416  | 0.660192  | 0.249212  | 0.0375644 | 0.247097  | 0.358947  | 0.515802  | 0.14726   | 0.121408  | 0.272995  | 0.034607  | 0.0156027 | 0.290698  | 0.520946  |
| SEC24C     | 8.51373    | 10.6894   | 10.7166   | 18.0623   | 12.9718   | 20.3779   | 13.0579   | 8.17277   | 22.6173   | 15.9201   | 13.4794   | 15.1455   | 24.3211   | 13.6871   | 10.7058   |
| SEC24D     | 4.54824    | 3.68779   | 4.5021    | 6.17958   | 3.10193   | 8.69928   | 5.28998   | 3.50418   | 4.09246   | 12.6808   | 16.8402   | 4.82502   | 10.2308   | 7.45662   | 17.6375   |
| SEC31A     | 16.4246    | 14.4861   | 14.7161   | 19.94     | 8.1732    | 22.1498   | 16.0069   | 14.3271   | 18.845    | 23.2403   | 25.3571   | 14.6418   | 26.2997   | 16.4987   | 24.6865   |
| SEC31B     | 1.44519    | 1.83991   | 1.73107   | 0.827392  | 2.33062   | 1.55956   | 1.71309   | 1.26206   | 0.244455  | 0.453464  | 0.226588  | 0.664246  | 0.129504  | 0.941524  | 1.6647    |
| SEC61A1    | 21.6555    | 18.0985   | 18.431    | 43.072    | 23.6926   | 54.2525   | 22.3054   | 17.0618   | 26.1036   | 35.8472   | 50.2649   | 21.6284   | 51.957    | 30.9667   | 32.8589   |



|            |           |           |           |           |           |            |           |           |           |          |           |            |           |           |           |
|------------|-----------|-----------|-----------|-----------|-----------|------------|-----------|-----------|-----------|----------|-----------|------------|-----------|-----------|-----------|
| SELENOW    | 30.3101   | 38.0228   | 47.7561   | 91.0205   | 57.4458   | 51.0847    | 52.9372   | 21.7257   | 48.817    | 79.3556  | 125.009   | 59.5992    | 84.3107   | 50.7251   | 38.7757   |
| SELL       | 0.537995  | 0.0536305 | 0.0767357 | 3.77578   | 0.345803  | 1.79289    | 0.105908  | 0.305011  | 0.0903748 | 3.31798  | 6.20941   | 0.099556   | 3.2377    | 0.70295   | 3.26369   |
| SELP       | 2.38656   | 1.14636   | 0.7366    | 3.73049   | 1.80256   | 4.4309     | 1.28328   | 1.01184   | 0.0711085 | 2.98622  | 7.55509   | 0.569216   | 4.83128   | 3.87546   | 5.20923   |
| SELPLG     | 1.01417   | 0.648855  | 1.03155   | 3.1097    | 1.85944   | 2.89502    | 1.29083   | 1.086     | 0.303724  | 2.31624  | 5.28327   | 0.261716   | 3.34678   | 1.40333   | 3.27111   |
| SEM1       | 2.86947   | 2.36662   | 2.01094   | 4.94884   | 1.98732   | 5.58305    | 1.42945   | 1.75018   | 5.57591   | 5.70615  | 10.4554   | 3.22035    | 3.43446   | 3.05434   | 1.74548   |
| SEMA3A     | 0.556186  | 0.358619  | 0.585295  | 0.632168  | 0.0571731 | 0.800916   | 0.345534  | 0.432505  | 0.0647488 | 0.564616 | 0.886397  | 0.158016   | 1.36151   | 1.03023   | 0.939709  |
| SEMA3B     | 1.05883   | 1.49735   | 2.28655   | 0.127538  | 1.64473   | 1.81487    | 1.76631   | 0.513274  | 0.619648  | 0.51777  | 0.760639  | 0.309937   | 0.0665409 | 0.495897  | 1.69835   |
| SEMA3B-AS1 | 0.136941  | 0.230931  | 0.0566437 | 0         | 0.106358  | 0.174905   | 0.234532  | 0.182553  | 0.0833894 | 0        | 0.618358  | 0.097985   | 0         | 0.178929  | 0.688327  |
| SEMA3C     | 21.9127   | 11.6298   | 10.5283   | 6.83254   | 3.756     | 5.83596    | 9.40243   | 11.0889   | 24.8999   | 17.5611  | 18.0335   | 14.7768    | 19.1071   | 7.52412   | 8.79889   |
| SEMA3D     | 0.539931  | 0.473966  | 0.709775  | 0.171498  | 0.120635  | 0.148      | 0.789595  | 0.335234  | 0.0405354 | 0.14853  | 0.112718  | 0.0582148  | 0.124074  | 0.115969  | 0.600145  |
| SEMA3E     | 0.708037  | 0.335506  | 0.339607  | 0.198469  | 0.461787  | 0.346741   | 0.481558  | 0.231414  | 0.0859478 | 0.140791 | 0.0839219 | 0.256373   | 0.0333114 | 0.104024  | 0.107633  |
| SEMA3F     | 8.01951   | 14.1985   | 12.8163   | 16.5778   | 27.4909   | 19.483     | 13.8943   | 8.60107   | 20.9242   | 16.2805  | 15.0995   | 16.7804    | 23.3787   | 15.2338   | 8.657     |
| SEMA3F-AS1 | 2.66864   | 2.27639   | 2.3976    | 0.910015  | 1.83634   | 0.98189    | 2.16138   | 2.02601   | 0.610006  | 0.946013 | 0.385066  | 1.24362    | 0.377813  | 1.70361   | 1.51501   |
| SEMA3G     | 2.80043   | 1.64739   | 2.04348   | 1.0211    | 4.79081   | 3.46588    | 1.94927   | 1.02528   | 0.379585  | 0.706468 | 0.677428  | 0.482638   | 1.70177   | 1.19618   | 5.31113   |
| SEMA4A     | 4.42352   | 8.80302   | 9.29283   | 9.53849   | 14.8253   | 11.3055    | 8.93037   | 7.18948   | 16.0477   | 6.23335  | 9.13986   | 9.22689    | 9.96731   | 6.31924   | 4.40841   |
| SEMA4B     | 12.9498   | 19.3101   | 12.5249   | 46.8956   | 42.8682   | 54.9885    | 10.4366   | 13.591    | 23.4981   | 25.6443  | 19.8963   | 29.8875    | 45.8423   | 22.0384   | 8.15258   |
| SEMA4C     | 4.26114   | 6.05251   | 5.48171   | 8.31244   | 13.7137   | 15.5007    | 5.03633   | 3.58428   | 3.9279    | 5.49536  | 5.26631   | 3.60374    | 6.33928   | 6.41896   | 6.79324   |
| SEMA4D     | 5.09331   | 6.51324   | 5.30712   | 3.92871   | 9.48351   | 6.13549    | 5.99822   | 4.56588   | 12.5346   | 3.46298  | 5.13821   | 6.94024    | 3.80271   | 2.81867   | 2.42191   |
| SEMA4F     | 0.543032  | 0.755774  | 0.769213  | 0.975808  | 1.29714   | 0.733786   | 0.636707  | 0.435642  | 0.166849  | 0.525985 | 0.517636  | 0.213659   | 0.518503  | 0.502888  | 0.647573  |
| SEMA4G     | 0.859695  | 1.89116   | 2.09527   | 0.737058  | 3.7779    | 0.719046   | 4.37479   | 1.18395   | 4.52378   | 0.578675 | 1.1742    | 1.35442    | 0.500325  | 0.665431  | 0.525735  |
| SEMA5A     | 4.78227   | 2.68946   | 3.14877   | 1.39769   | 3.65032   | 3.68987    | 2.76816   | 2.93674   | 1.70193   | 3.49803  | 5.43399   | 2.2817     | 3.34599   | 4.41906   | 6.54706   |
| SEMA5A-AS1 | 0.634056  | 0.444964  | 0.319283  | 0.18466   | 0.21411   | 0.176051   | 0.204593  | 0.391997  | 0.134297  | 0.224902 | 0.0466807 | 0.226842   | 0.035573  | 0.55471   | 0.831404  |
| SEMA5B     | 0.446072  | 0.103555  | 0.147609  | 0.0835801 | 0.529127  | 0.400543   | 0.356518  | 0.10091   | 0.0740817 | 0.218857 | 0.334181  | 0.206014   | 0.13082   | 0.199226  | 0.896863  |
| SEMA6A     | 3.72684   | 1.89178   | 1.69084   | 1.96834   | 1.77135   | 4.8531     | 2.09173   | 1.63028   | 0.674756  | 0.927881 | 1.55426   | 0.651435   | 1.2353    | 1.24797   | 2.40581   |
| SEMA6A-AS1 | 1.11488   | 0.823121  | 0.81931   | 0.413467  | 0.481572  | 0.785208   | 0.472845  | 0.777942  | 0.112305  | 0.179204 | 0.395296  | 0.228146   | 0.17543   | 0.519619  | 1.32674   |
| SEMA6A-AS2 | 0.0892821 | 0.0857824 | 0.105867  | 0         | 0.030842  | 0.00842529 | 0.0674368 | 0.0262454 | 0         | 0        | 0.0555628 | 0.00711922 | 0.0255329 | 0.0570409 | 0.0142196 |

|              |           |            |           |           |           |           |           |           |            |            |           |           |            |           |           |
|--------------|-----------|------------|-----------|-----------|-----------|-----------|-----------|-----------|------------|------------|-----------|-----------|------------|-----------|-----------|
| SEMA6B       | 1.83759   | 0.825976   | 0.971363  | 3.90838   | 4.56888   | 8.3683    | 1.0591    | 0.579149  | 0.557707   | 3.47797    | 3.65175   | 0.722534  | 6.01892    | 3.9306    | 4.89018   |
| SEMA6C       | 1.12205   | 1.50819    | 1.28526   | 1.34606   | 5.78297   | 2.94952   | 1.83299   | 1.00741   | 1.59779    | 0.729423   | 1.12375   | 0.835795  | 0.790769   | 1.08566   | 3.00796   |
| SEMA6D       | 2.23329   | 2.27147    | 0.953993  | 0.942853  | 1.74194   | 1.34709   | 1.04825   | 1.67138   | 0.905345   | 0.885163   | 1.6927    | 0.941061  | 0.418131   | 0.611004  | 2.19447   |
| SEMA7A       | 0.774303  | 1.0395     | 1.02927   | 4.18067   | 2.39524   | 2.11317   | 1.39789   | 0.841055  | 5.5775     | 2.86565    | 4.84113   | 3.11585   | 2.69429    | 2.02688   | 1.74878   |
| SEMG1        | 0         | 0          | 0         | 0         | 0         | 0         | 0         | 0         | 0          | 0          | 0         | 0         | 0          | 0         | 0         |
| SEMG2        | 0         | 0          | 0         | 0.0481324 | 0         | 0         | 0         | 0         | 0.0426624  | 0          | 0         | 0         | 0          | 0.0122054 | 0         |
| SENCR        | 0.303106  | 0.249129   | 0.13275   | 0.385856  | 0.387741  | 0.971637  | 0.264647  | 0.110919  | 0.130288   | 0.402808   | 0.664211  | 0.127577  | 0.402629   | 0.298196  | 0.742569  |
| SENP1        | 2.29297   | 2.24604    | 2.29576   | 2.61995   | 1.31617   | 2.59245   | 1.85147   | 2.35298   | 1.97055    | 2.32514    | 3.53752   | 1.58359   | 2.46663    | 2.05312   | 1.86452   |
| SENP2        | 5.01409   | 5.06214    | 5.72449   | 4.92075   | 3.36531   | 6.09566   | 3.8304    | 4.4883    | 5.67419    | 4.20153    | 4.4906    | 3.21961   | 6.42805    | 3.71501   | 3.39231   |
| SENP3        | 5.29781   | 6.35707    | 6.55812   | 9.25      | 9.44592   | 11.3294   | 5.46888   | 3.74341   | 9.40243    | 6.69085    | 8.06686   | 5.36933   | 11.1306    | 7.91544   | 4.92377   |
| SENP3-EIF4A1 | 0.641692  | 0.466528   | 0.400953  | 0.413665  | 1.79166   | 0.469302  | 0.892852  | 0.543467  | 0.0842309  | 0.440202   | 0.0653893 | 0.618161  | 0.398041   | 0.600538  | 0.40494   |
| SENP5        | 6.23802   | 5.02636    | 5.32141   | 4.57178   | 3.07794   | 5.25845   | 4.3572    | 4.81336   | 5.26444    | 5.22266    | 5.30638   | 4.0355    | 6.3116     | 5.53109   | 5.3067    |
| SENP6        | 6.64215   | 5.95096    | 6.10381   | 5.22921   | 3.12857   | 5.18933   | 3.00108   | 5.0299    | 3.91407    | 4.23737    | 4.88749   | 3.27624   | 4.69865    | 4.48781   | 5.10656   |
| SENP7        | 3.14957   | 2.90139    | 3.1385    | 1.79806   | 0.611546  | 1.80184   | 1.63458   | 3.16486   | 1.31856    | 1.97652    | 2.05046   | 1.71581   | 1.5587     | 1.98982   | 2.65993   |
| SENP8        | 0.836982  | 0.91829    | 0.90931   | 0.924886  | 0.391603  | 0.824304  | 0.5872    | 0.672144  | 0.601785   | 0.430325   | 0.762709  | 0.490651  | 0.318805   | 0.606096  | 0.49239   |
| SEPHS1       | 5.11845   | 3.55387    | 3.77626   | 5.23815   | 2.24958   | 7.23558   | 4.05275   | 3.53308   | 4.40075    | 4.6065     | 7.74151   | 2.78835   | 6.71925    | 4.21859   | 4.45531   |
| SEPHS2       | 8.62327   | 5.23622    | 5.92038   | 12.1835   | 7.09503   | 14.7858   | 5.90072   | 4.66293   | 3.75249    | 7.38837    | 14.2018   | 4.05711   | 12.658     | 6.82723   | 6.82822   |
| SEPSECS      | 1.75059   | 1.31359    | 1.39734   | 1.0013    | 0.407572  | 1.32304   | 0.917467  | 1.6833    | 0.689038   | 0.787277   | 1.16628   | 0.613096  | 0.544897   | 0.612814  | 1.03624   |
| SEPSECS-AS1  | 0.392605  | 0.328547   | 0.358979  | 0.14906   | 0.12839   | 0.22873   | 0.377486  | 0.459099  | 0          | 0.0518695  | 0.0699793 | 0.0887115 | 0.133319   | 0.0755973 | 0.207727  |
| 1-Sep        | 0.915837  | 1.0016     | 1.23869   | 0.704102  | 2.21295   | 1.1883    | 1.75939   | 1.00771   | 0.513432   | 0.237192   | 0.918992  | 0.228837  | 0.703444   | 0.501449  | 0.772453  |
| 10-Sep       | 9.24719   | 10.4047    | 10.9868   | 11.2586   | 4.5172    | 12.1101   | 7.28557   | 8.22554   | 14.2432    | 11.0389    | 10.8215   | 8.80812   | 18.4978    | 11.9972   | 7.40921   |
| 11-Sep       | 6.73585   | 2.83422    | 3.70833   | 4.26603   | 2.40982   | 8.72702   | 3.46065   | 4.36661   | 1.14141    | 8.51941    | 14.5917   | 1.74355   | 5.71498    | 6.74078   | 15.0168   |
| 12-Sep       | 0.0151857 | 0.00731672 | 0         | 0         | 0         | 0.0387913 | 0         | 0.0269916 | 0          | 0          | 0         | 0         | 0          | 0         | 0         |
| 14-Sep       | 0.0428009 | 0.0445893  | 0.0305435 | 0.0575489 | 0.0191208 | 0.0318475 | 0.0212572 | 0.0990878 | 0.00756288 | 0.00771546 | 0.0138753 | 0.0221867 | 0.00800207 | 0.0648823 | 0.0790296 |
| 2-Sep        | 22.2829   | 16.0718    | 16.1606   | 31.2926   | 12.9309   | 38.7529   | 13.0342   | 16.4183   | 20.6558    | 30.4969    | 45.6295   | 17.8277   | 35.0505    | 22.6      | 32.3804   |
| 3-Sep        | 0.118978  | 0.140708   | 0.128254  | 0.226644  | 0.184814  | 0.282435  | 0.267574  | 0.144188  | 0.144902   | 0.0588269  | 0.134311  | 0.0309571 | 0.0744379  | 0.0244964 | 0.176045  |

|                |           |           |          |            |           |          |            |           |           |           |           |           |            |            |          |
|----------------|-----------|-----------|----------|------------|-----------|----------|------------|-----------|-----------|-----------|-----------|-----------|------------|------------|----------|
| 4-Sep          | 1.0954    | 0.828862  | 0.6021   | 1.32582    | 2.45523   | 2.89205  | 0.679906   | 0.692557  | 1.57582   | 1.21798   | 3.70141   | 0.536552  | 0.469582   | 0.826096   | 2.95622  |
| SEPT4-AS1      | 0         | 0.0809505 | 0        | 0.351271   | 0.165157  | 0.253955 | 0.080931   | 0.0629942 | 0.0431633 | 0         | 0.23166   | 0         | 0          | 0.148185   | 0.203592 |
| 5-Sep          | 3.1333    | 7.64324   | 7.71487  | 6.37326    | 19.2324   | 9.20869  | 14.9001    | 5.95815   | 30.3      | 15.7963   | 13.3325   | 16.179    | 16.3235    | 9.02278    | 5.05877  |
| SEPT5-GP1BB    | 3.36842   | 5.76736   | 5.34788  | 2.41147    | 20.0636   | 6.40542  | 9.2797     | 3.32112   | 12.6402   | 5.80545   | 3.88454   | 6.9214    | 4.05001    | 3.5395     | 2.09215  |
| 6-Sep          | 1.79831   | 1.34651   | 1.8261   | 1.97008    | 1.21424   | 3.25904  | 1.39195    | 1.40741   | 0.345291  | 1.25053   | 2.09865   | 0.486873  | 1.53133    | 1.24681    | 2.50116  |
| 7-Sep          | 11.1147   | 8.21579   | 8.3613   | 10.562     | 3.66032   | 12.788   | 4.24102    | 7.87565   | 13.0701   | 16.3735   | 17.6595   | 7.41811   | 17.6511    | 9.59295    | 11.0698  |
| SEPT7-AS1      | 0.114854  | 0.276692  | 0.237538 | 0.14795    | 0.0892038 | 0.171144 | 0.0655682  | 0.102073  | 0.0699395 | 0.0360383 | 0.0324139 | 0.082181  | 0          | 0.0300138  | 0.329889 |
| SEPT7P2        | 2.62912   | 1.99764   | 2.43755  | 0.847432   | 0.803513  | 1.357    | 1.94744    | 1.63004   | 0.608874  | 1.03032   | 1.55256   | 0.806876  | 0.572949   | 1.44584    | 1.76805  |
| SEPT7P9        | 0.436932  | 0.136945  | 0.190351 | 0.0327458  | 0.049398  | 0.115711 | 0.190653   | 0.11361   | 0.120106  | 0.0373862 | 0.0407426 | 0.0703702 | 3.55E-33   | 0.0344896  | 0.152016 |
| 8-Sep          | 8.5568    | 11.5978   | 9.69204  | 12.3425    | 14.9768   | 17.1432  | 10.9361    | 6.49691   | 40.3872   | 14.3349   | 12.6298   | 18.0436   | 16.5953    | 11.0936    | 9.56798  |
| 9-Sep          | 12.9801   | 9.64821   | 12.4604  | 36.2183    | 19.9166   | 46.1167  | 13.8904    | 10.4881   | 4.76643   | 25.9286   | 16.6561   | 18.5145   | 59.4964    | 22.3708    | 21.1398  |
| SERAC1         | 1.32801   | 1.09244   | 1.2326   | 1.57996    | 0.595379  | 1.47094  | 0.992364   | 1.17063   | 3.78045   | 2.25627   | 2.37672   | 2.03179   | 2.58092    | 1.62515    | 1.1009   |
| SERBP1         | 21.1484   | 25.6088   | 23.9295  | 45.8058    | 26.7337   | 37.5458  | 14.3563    | 24.4253   | 51.7504   | 36.3384   | 46.3443   | 28.6645   | 47.375     | 30.1752    | 14.4853  |
| SERF1A         | 0.818507  | 0.689245  | 0.570627 | 0.478661   | 0.304829  | 0.57284  | 0.380467   | 0.398728  | 0.476092  | 0.505881  | 1.26638   | 0.337373  | 0.429975   | 0.569681   | 0.516259 |
| SERF1B         | 0.641288  | 0.280931  | 0.285454 | 0.724987   | 0.441258  | 0.614812 | 0.548926   | 0.571804  | 0.44693   | 0.769691  | 1.28921   | 0.520084  | 0.636748   | 0.433466   | 0.128414 |
| SERF2          | 14.4668   | 16.3123   | 16.7897  | 39.4748    | 32.7829   | 30.6946  | 20.3778    | 12.2428   | 24.8585   | 30.1617   | 73.9221   | 24.5388   | 21.3295    | 21.8098    | 21.7059  |
| SERF2-C15ORF63 | 0.0061195 | 0.176625  | 0.20635  | 0.00961136 | 0.212373  | 0.148898 | 0.00040688 | 0.170242  | 0.0232072 | 0.026116  | 0.0125631 | 0.112439  | 0.00992977 | 0.00127526 | 5.45E-06 |
|                |           |           |          |            |           |          | 6          |           |           |           |           |           |            |            |          |
| SERGEF         | 3.32418   | 3.23031   | 3.87552  | 3.80149    | 4.37925   | 5.72071  | 3.4111     | 2.36839   | 4.18515   | 3.06313   | 4.89263   | 2.58929   | 2.94111    | 3.10086    | 1.04745  |
| SERHL          | 0.732046  | 0.330133  | 0.288279 | 0.0965567  | 0.0601554 | 0.184301 | 0.0517771  | 0.201379  | 0.377831  | 0.0531076 | 3.29E-20  | 0.0714119 | 2.55E-22   | 0.153417   | 2.69E-17 |
| SERHL2         | 2.03465   | 0.915405  | 1.08552  | 0.458784   | 0.854051  | 0.602004 | 1.53657    | 1.65832   | 0.0539277 | 0.14766   | 0.211121  | 0.352246  | 0.134902   | 0.635172   | 0.753335 |
| SERINC1        | 28.2313   | 20.0413   | 23.1337  | 21.1756    | 4.70415   | 29.7313  | 17.0658    | 22.5332   | 18.142    | 30.7614   | 36.961    | 12.6291   | 39.6611    | 17.1952    | 26.5621  |
| SERINC2        | 4.23212   | 4.70663   | 2.92928  | 22.1622    | 10.1902   | 16.3966  | 8.83038    | 3.07732   | 21.2599   | 19.8149   | 24.0652   | 16.6811   | 40.5335    | 22.4982    | 8.77499  |
| SERINC3        | 16.5814   | 16.7745   | 18.6185  | 17.5564    | 7.27935   | 24.4544  | 16.4212    | 16.4252   | 25.1688   | 20.8303   | 21.8455   | 13.3799   | 27.7076    | 15.8425    | 16.1681  |
| SERINC4        | 0.25086   | 0.421749  | 0.454349 | 0.0675465  | 0.191602  | 0.131876 | 0.418824   | 0.281657  | 0.0226339 | 0.058955  | 0.010409  | 0.14705   | 0.0302985  | 0.15422    | 0.404965 |
| SERINC5        | 8.67427   | 12.3472   | 12.8611  | 15.6899    | 11.9716   | 11.6867  | 11.4402    | 10.428    | 16.708    | 11.9746   | 11.5778   | 14.1222   | 18.3573    | 10.2958    | 7.98217  |

|            |           |           |           |           |           |            |           |           |           |           |           |           |           |           |           |
|------------|-----------|-----------|-----------|-----------|-----------|------------|-----------|-----------|-----------|-----------|-----------|-----------|-----------|-----------|-----------|
| SERP1      | 8.99602   | 7.27676   | 7.45422   | 21.233    | 7.66129   | 11.8534    | 6.33109   | 10.407    | 17.656    | 28.8271   | 29.7084   | 13.9127   | 39.4666   | 17.6705   | 10.8343   |
| SERP2      | 0.207747  | 0.170163  | 0.18905   | 0.0856358 | 0.290433  | 0.672198   | 0.1186    | 0.12924   | 0.0253013 | 0.130372  | 0.257973  | 0.0743244 | 0.0402113 | 0.249729  | 0.238681  |
| SERPINA1   | 0.338954  | 0.184484  | 0.155782  | 8.48031   | 1.10178   | 2.27151    | 0.129002  | 0.384911  | 0.48161   | 4.49058   | 7.41187   | 0.23804   | 5.79937   | 0.774221  | 2.72237   |
| SERPINA10  | 0.0273774 | 0.0747482 | 0.0754951 | 0.0470221 | 0         | 0.00777051 | 0.0104196 | 0.0243308 | 0.0111142 | 0.103084  | 0.0103019 | 0.0391786 | 0         | 0.0906214 | 0.0262116 |
| SERPINA11  | 0.566383  | 0.0985444 | 0.0260307 | 0.0162132 | 0         | 0.0133963  | 0.16167   | 0.0699103 | 0.0766435 | 0.0592391 | 0.0888022 | 0         | 0.0203015 | 0.0246681 | 0         |
| SERPINA12  | 20.6216   | 35.8706   | 51.5622   | 4.28582   | 19.5541   | 5.74906    | 59.2242   | 23.4412   | 71.6188   | 2.62903   | 8.66641   | 9.24742   | 0.61669   | 0.451724  | 0.292059  |
| SERPINA13P | 0.0269419 | 0.025962  | 0.0334323 | 0         | 0         | 0          | 0         | 0         | 0         | 0         | 0         | 0         | 0         | 0.0260741 | 0         |
| SERPINA2   | 0         | 0         | 0         | 0         | 0         | 0          | 0         | 0         | 0         | 0         | 0         | 0         | 0         | 0         | 0         |
| SERPINA3   | 4.29384   | 4.29196   | 6.29757   | 53.9541   | 3.73057   | 26.9563    | 1.4957    | 3.47968   | 0.336809  | 12.7331   | 1.2652    | 0.749863  | 2.21629   | 0.266255  | 0.710714  |
| SERPINA4   | 0         | 0         | 0.0095299 | 0         | 0         | 0          | 0.0131528 | 0.0102377 | 0         | 0         | 0         | 0         | 0         | 0         | 0         |
| SERPINA5   | 1.17844   | 0.567792  | 0.79466   | 0.214309  | 0.307652  | 0.784193   | 2.1596    | 0.448844  | 0.0361818 | 0.0497166 | 0.0558956 | 0.0354289 | 0.127786  | 0.0414055 | 0.071109  |
| SERPINA6   | 0         | 0         | 0.0128321 | 0.0639399 | 0         | 0.0132078  | 0.0177104 | 0.0275705 | 0.0188912 | 0.0194684 | 0.0525314 | 0.0332965 | 0.0200158 | 0.0486417 | 0.111382  |
| SERPINA7   | 0         | 0         | 0         | 0         | 0         | 0          | 0         | 0         | 0         | 0         | 0         | 0         | 0         | 0         | 0         |
| SERPINA9   | 0.143227  | 0.31629   | 0.483823  | 0.319798  | 0.01854   | 0.010163   | 0.327063  | 0.180325  | 0.0290723 | 0         | 0.053895  | 0.0512413 | 0.0924091 | 0         | 0         |
| SERPINB1   | 6.11296   | 3.65169   | 4.57739   | 65.6562   | 4.3103    | 17.9923    | 3.93428   | 4.0193    | 1.70486   | 66.9324   | 44.5281   | 19.8551   | 261.549   | 44.3862   | 22.9466   |
| SERPINB10  | 0.09811   | 0.126056  | 0.117236  | 0.168509  | 0.0169332 | 0.102104   | 0.0746792 | 0.135632  | 1.65954   | 0.123138  | 0.073836  | 0.140401  | 0.196933  | 0.0227896 | 0.109588  |
| SERPINB11  | 0         | 0         | 0         | 0         | 0.018743  | 0.0616455  | 0         | 0.0214469 | 0.279211  | 0.196877  | 0.095349  | 0.0690698 | 0.295833  | 0.0882888 | 0.0693146 |
| SERPINB12  | 65.3029   | 62.5274   | 33.9916   | 48.5189   | 72.4512   | 32.2019    | 43.3847   | 44.0819   | 428.904   | 25.8141   | 66.2954   | 48.3043   | 6.33173   | 9.01287   | 2.00676   |
| SERPINB13  | 7.83612   | 9.13566   | 2.49117   | 74.5464   | 20.865    | 23.8028    | 3.33004   | 9.54404   | 70.1998   | 64.2002   | 63.1698   | 65.987    | 35.7498   | 41.5922   | 8.92128   |
| SERPINB2   | 6.50699   | 9.81724   | 9.97053   | 25.4139   | 10.6221   | 4.29418    | 12.0043   | 9.12534   | 94.7387   | 94.2901   | 59.9214   | 36.3315   | 121.471   | 34.1042   | 9.36019   |
| SERPINB3   | 28.4992   | 16.7146   | 1.35307   | 424.831   | 37.4949   | 28.1769    | 2.29239   | 21.6091   | 481.812   | 184.992   | 333.662   | 138.236   | 143.262   | 72.9289   | 21.0428   |
| SERPINB4   | 6.29879   | 0.959541  | 0.155913  | 265.116   | 9.74062   | 6.99322    | 0.460376  | 4.17185   | 10.6183   | 12.5499   | 25.9679   | 11.4868   | 25.3236   | 7.0505    | 2.06431   |
| SERPINB5   | 66.7132   | 78.5417   | 79.4181   | 130.706   | 40.0998   | 63.3167    | 89.8395   | 59.1173   | 265.992   | 271.77    | 211.863   | 190.041   | 228.496   | 124.594   | 46.3643   |
| SERPINB6   | 4.97666   | 3.37611   | 3.90235   | 6.96135   | 4.95605   | 10.5679    | 4.89786   | 3.43924   | 3.48602   | 11.2853   | 14.6397   | 4.97551   | 18.2706   | 6.74185   | 7.36638   |
| SERPINB7   | 16.7486   | 19.3567   | 16.5897   | 51.3867   | 12.0286   | 11.9135    | 29.538    | 19.1951   | 172.308   | 59.1733   | 68.5658   | 45.9012   | 70.2741   | 19.7456   | 4.87241   |
| SERPINB8   | 6.20517   | 7.3881    | 8.41626   | 7.44603   | 5.90517   | 6.61182    | 7.26407   | 6.38212   | 29.1896   | 9.27185   | 8.61067   | 8.59202   | 11.6974   | 5.18382   | 3.59978   |



|             |           |           |           |           |           |           |           |           |           |           |          |           |           |            |           |
|-------------|-----------|-----------|-----------|-----------|-----------|-----------|-----------|-----------|-----------|-----------|----------|-----------|-----------|------------|-----------|
| SERPINB9    | 6.06473   | 5.17213   | 5.31583   | 9.09225   | 7.87926   | 4.69577   | 4.25573   | 3.83137   | 2.00125   | 6.0588    | 6.10132  | 5.54248   | 15.6084   | 6.89826    | 8.37937   |
| SERPINB9P1  | 0.240303  | 0.160313  | 0.214088  | 0.361935  | 0.344561  | 1.40083   | 0.780901  | 0.361412  | 0.0225125 | 0.858415  | 0.855552 | 0.145491  | 0.632096  | 0.425084   | 0.530932  |
| SERPINC1    | 0.0578938 | 0.0697353 | 0.0478938 | 0         | 0.0899291 | 0.0616198 | 0.0330506 | 0.0385884 | 0         | 0         | 0        | 0.0310684 | 0.0560292 | 0.0680801  | 0.0623571 |
| SERPIND1    | 0.458485  | 0.44683   | 0.474113  | 0.236241  | 0.339906  | 0.186324  | 0.345023  | 0.379681  | 0.126905  | 0.130783  | 0.058815 | 0.328058  | 0.047061  | 0.310422   | 0.269363  |
| SERPINE1    | 2.48842   | 0.657156  | 1.0203    | 14.0556   | 1.04805   | 14.1278   | 1.73951   | 0.760808  | 1.92617   | 20.5605   | 33.0542  | 7.67238   | 29.9057   | 22.3484    | 13.5863   |
| SERPINE2    | 3.37013   | 0.672917  | 0.514902  | 9.07365   | 1.28516   | 62.1904   | 0.970641  | 1.04558   | 0.637852  | 9.21232   | 8.38863  | 4.19282   | 29.8327   | 14.9838    | 15.5771   |
| SERPINE3    | 0.0676206 | 0.210827  | 0.122377  | 0.0514306 | 0.124737  | 0.0985033 | 0.114586  | 0.19096   | 0.0198998 | 0.0625037 | 0.036605 | 0.0925053 | 0         | 0.0787129  | 0.0753897 |
| SERPINF1    | 27.0936   | 23.361    | 29.5154   | 25.3986   | 33.8652   | 125.318   | 31.9275   | 22.2016   | 7.32251   | 29.608    | 93.9701  | 5.98203   | 17.3526   | 17.7633    | 86.31     |
| SERPINF2    | 0.740183  | 0.556345  | 0.620496  | 0.691587  | 1.36438   | 1.26051   | 0.31551   | 0.447313  | 0.45674   | 0.334442  | 0.501345 | 0.331896  | 0.299272  | 0.247585   | 0.467718  |
| SERPING1    | 32.2692   | 16.0483   | 22.4478   | 35.6002   | 20.1772   | 196.986   | 45.6905   | 24.0114   | 2.2884    | 10.8835   | 33.1605  | 3.8497    | 21.92     | 12.7972    | 51.9097   |
| SERPINH1    | 8.88815   | 8.54576   | 9.45724   | 39.4546   | 33.1914   | 43.8043   | 11.7655   | 6.42737   | 8.723     | 35.9839   | 84.6426  | 10.1141   | 40.3711   | 38.3326    | 61.9018   |
| SERPINI1    | 0.616683  | 0.538193  | 0.702678  | 0.407685  | 0.45185   | 1.38705   | 0.478262  | 0.361924  | 0.311757  | 0.700981  | 1.32664  | 0.249766  | 0.352837  | 0.389199   | 2.05534   |
| SERPINI2    | 0.0261651 | 0.0126068 | 0         | 0         | 0         | 0         | 0.0149372 | 0         | 0         | 0         | 0        | 0         | 0         | 0.00683752 | 0         |
| SERTAD1     | 3.07549   | 3.15812   | 3.41885   | 11.9842   | 8.89771   | 11.4242   | 3.4676    | 2.13534   | 22.5204   | 12.0627   | 19.1602  | 8.77487   | 16.0231   | 6.65055    | 4.19595   |
| SERTAD2     | 5.68148   | 7.44651   | 8.58583   | 7.21334   | 3.80356   | 8.49972   | 5.68678   | 7.33657   | 8.20472   | 8.51303   | 11.118   | 6.74557   | 14.0813   | 6.01726    | 4.70269   |
| SERTAD3     | 3.2392    | 2.97527   | 3.15863   | 4.71593   | 4.30362   | 7.31205   | 3.50956   | 2.64598   | 4.41501   | 3.61573   | 8.13803  | 1.75556   | 5.57605   | 3.78212    | 2.65257   |
| SERTAD4     | 4.79442   | 3.62249   | 3.28407   | 3.70672   | 1.18559   | 4.03382   | 2.66444   | 4.37783   | 1.02571   | 0.69369   | 1.30232  | 0.605758  | 1.4745    | 1.06375    | 2.28043   |
| SERTAD4-AS1 | 0.896793  | 0.878116  | 0.741891  | 0.536616  | 1.21328   | 0.68971   | 0.75969   | 0.334224  | 0.317088  | 0.217852  | 1.11034  | 0.227693  | 0.522612  | 0.604778   | 1.16327   |
| SERTM1      | 0.043312  | 0.0139123 | 0.0238872 | 0         | 0         | 0.0368796 | 0.0741784 | 0         | 0         | 0         | 0        | 0         | 0         | 0.00377279 | 0.0518346 |
| SERTM2      | 0         | 0         | 0         | 0         | 0         | 0.0128657 | 0         | 0         | 0         | 0         | 0        | 0         | 0         | 0          | 0         |
| SESN1       | 5.88296   | 4.44372   | 3.79114   | 4.24972   | 1.68311   | 3.77729   | 2.47429   | 5.55117   | 2.03378   | 3.12788   | 3.61917  | 1.98385   | 1.76829   | 1.96873    | 2.59959   |
| SESN2       | 0.931495  | 1.24529   | 1.21559   | 5.94888   | 5.47185   | 4.8483    | 1.70018   | 0.99107   | 7.85331   | 6.44664   | 7.76067  | 4.61863   | 7.98647   | 6.35977    | 2.24213   |
| SESN3       | 14.3359   | 8.74254   | 6.37411   | 10.7407   | 6.79256   | 12.9888   | 5.70807   | 9.46142   | 8.31391   | 12.8832   | 17.6561  | 5.55516   | 6.23207   | 9.14621    | 6.95964   |
| SESTD1      | 2.57391   | 1.17932   | 1.58141   | 1.32625   | 0.550523  | 2.71976   | 1.44664   | 1.81502   | 0.469401  | 1.86269   | 2.21048  | 0.537295  | 1.55635   | 1.66013    | 2.73894   |
| SET         | 32.8655   | 25.5336   | 26.183    | 51.144    | 22.6711   | 52.2763   | 18.2335   | 25.6378   | 28.716    | 34.0452   | 38.213   | 19.8694   | 55.3311   | 35.2086    | 23.2906   |
| SETBP1      | 4.76052   | 3.61164   | 3.94349   | 2.40406   | 4.32424   | 4.41241   | 4.16018   | 3.25127   | 2.52034   | 2.72959   | 2.71199  | 2.9705    | 3.2564    | 2.7568     | 7.13633   |

|              |           |           |            |           |           |           |           |           |            |           |           |           |            |            |          |
|--------------|-----------|-----------|------------|-----------|-----------|-----------|-----------|-----------|------------|-----------|-----------|-----------|------------|------------|----------|
| SETD1A       | 3.91519   | 3.80738   | 3.84455    | 4.71888   | 7.01257   | 7.29694   | 5.67897   | 3.64853   | 2.78404    | 2.40519   | 1.79059   | 3.4562    | 5.31376    | 3.50357    | 3.79829  |
| SETD1B       | 4.8636    | 6.06248   | 5.91003    | 5.75058   | 11.6666   | 11.4187   | 7.90309   | 5.06291   | 5.04378    | 3.50013   | 2.68405   | 5.30849   | 6.6684     | 4.57721    | 6.01142  |
| SETD2        | 9.64064   | 9.11756   | 9.0889     | 8.01653   | 4.49316   | 8.1198    | 5.60671   | 7.9295    | 6.1181     | 6.94004   | 6.09021   | 6.07058   | 7.35912    | 6.90626    | 7.7555   |
| SETD3        | 8.48583   | 7.58918   | 8.3602     | 7.9282    | 5.3379    | 12.1282   | 7.04642   | 6.55046   | 9.20735    | 8.65249   | 11.4398   | 6.06176   | 10.1944    | 7.41126    | 6.607    |
| SETD4        | 2.05065   | 2.79292   | 2.81538    | 2.07471   | 3.45646   | 1.99555   | 1.94283   | 1.98309   | 0.819835   | 1.36903   | 1.33689   | 1.42716   | 0.679632   | 1.707      | 1.25319  |
| SETD5        | 10.2526   | 12.5647   | 12.8403    | 11.0322   | 9.66733   | 14.1509   | 10.9784   | 10.1213   | 11.2729    | 9.77317   | 9.33458   | 9.86227   | 9.44003    | 11.7961    | 11.8336  |
| SETD6        | 3.10802   | 3.49679   | 3.05196    | 2.24393   | 3.26121   | 3.0681    | 2.55808   | 2.84772   | 1.8555     | 1.50456   | 1.64341   | 2.03316   | 1.73568    | 2.12811    | 0.628037 |
| SETD7        | 8.06736   | 6.98724   | 8.11559    | 7.37979   | 5.38071   | 8.3554    | 8.14575   | 7.51508   | 11.9018    | 6.25895   | 7.92364   | 5.09139   | 9.86338    | 6.24815    | 8.78654  |
| SETD9        | 0.375805  | 0.379717  | 0.356168   | 0.327119  | 0.136021  | 0.338634  | 0.3416    | 0.304802  | 0.355486   | 0.453357  | 0.58899   | 0.203632  | 0.4355     | 0.415708   | 0.246273 |
| SETDB1       | 4.7836    | 4.62871   | 4.26144    | 5.12923   | 4.53707   | 7.85873   | 4.71308   | 3.95991   | 2.86756    | 2.39408   | 2.45051   | 3.05669   | 3.25622    | 3.34648    | 3.5669   |
| SETDB2       | 1.30668   | 0.989693  | 1.15408    | 0.792068  | 0.349912  | 1.0594    | 0.45744   | 1.48204   | 0.497801   | 0.739279  | 0.783405  | 0.321068  | 0.561189   | 0.559951   | 1.03162  |
| SETDB2-PHF11 | 1.18809   | 1.31626   | 1.11972    | 1.26822   | 1.12776   | 1.61347   | 0.976856  | 1.06198   | 0.777493   | 1.10543   | 1.86849   | 1.12563   | 0.888752   | 0.535614   | 0.477192 |
| SETMAR       | 2.65372   | 2.78566   | 2.80095    | 2.71758   | 2.05461   | 3.12377   | 2.0991    | 1.86306   | 1.31709    | 1.46174   | 2.26322   | 1.08928   | 1.47063    | 1.33043    | 1.67257  |
| SETSIP       | 0         | 0.0107566 | 0          | 0.0229986 | 0         | 0         | 0         | 0         | 0          | 0         | 0         | 0         | 0.0288169  | 0          | 0        |
| SETX         | 7.78322   | 7.20161   | 7.46567    | 7.73654   | 2.73861   | 6.54614   | 5.37109   | 6.25307   | 4.86585    | 6.44222   | 6.3653    | 4.78017   | 7.46591    | 6.77609    | 8.68112  |
| SEZ6         | 0.145418  | 0.0908247 | 0.0757446  | 0.0166509 | 0.133858  | 0.0596179 | 0.153735  | 0.0909436 | 0.00655937 | 0.0337991 | 0.0182399 | 0.0385373 | 0.00694986 | 0.0337786  | 0.116022 |
| SEZ6L        | 0.0176046 | 0.0118751 | 0.00291276 | 0.0217705 | 0.0437537 | 0.0269822 | 0.0683414 | 0.0406784 | 0          | 0         | 0.0238481 | 0         | 0.00681505 | 0.00184019 | 0        |
| SEZ6L2       | 0.637622  | 0.683398  | 0.177623   | 2.21264   | 1.34418   | 2.13292   | 0.869161  | 0.439454  | 1.52141    | 2.20485   | 4.86962   | 0.972991  | 1.83027    | 1.90768    | 2.84989  |
| SF1          | 19.5684   | 22.8419   | 23.8318    | 31.0695   | 24.53     | 41.0853   | 23.7864   | 17.1917   | 18.1795    | 15.0593   | 17.3696   | 19.7241   | 33.6528    | 20.4005    | 18.9213  |
| SF3A1        | 11.0089   | 11.0083   | 11.4712    | 15.3713   | 12.649    | 22.4598   | 13.4427   | 10.3171   | 10.8273    | 7.90743   | 9.44293   | 8.47762   | 17.5084    | 9.10239    | 10.0682  |
| SF3A2        | 14.8116   | 15.861    | 16.5928    | 22.8667   | 19.3472   | 39.4478   | 24.7585   | 14.9583   | 12.3334    | 9.75272   | 19.7288   | 12.6956   | 23.4293    | 12.704     | 13.8585  |
| SF3A3        | 10.4172   | 7.8916    | 9.24094    | 13.9994   | 6.3543    | 13.9189   | 6.354     | 7.4797    | 5.28788    | 7.86915   | 8.99815   | 5.38453   | 11.817     | 9.1657     | 7.91067  |
| SF3B1        | 27.8537   | 24.8831   | 26.6157    | 25.212    | 8.69669   | 24.602    | 17.5392   | 23.555    | 18.973     | 23.6891   | 26.8522   | 16.4596   | 25.3707    | 22.2781    | 24.9007  |
| SF3B2        | 20.1922   | 17.3309   | 18.9405    | 30.6402   | 33.2412   | 47.3993   | 22.4248   | 15.0597   | 23.9588    | 20.1943   | 20.5827   | 18.8025   | 33.1347    | 20.7221    | 20.6952  |
| SF3B3        | 7.02863   | 8.10604   | 8.87157    | 13.2228   | 8.03308   | 10.1997   | 8.5144    | 7.67054   | 15.0961    | 6.09925   | 5.99384   | 7.13488   | 9.59198    | 7.50622    | 5.6112   |
| SF3B4        | 8.98782   | 9.98693   | 10.5286    | 19.3142   | 9.34353   | 21.9703   | 14.3323   | 9.52529   | 14.6797    | 11.2078   | 17.2117   | 12.3718   | 24.679     | 11.0031    | 11.0065  |

|         |            |            |            |           |           |            |           |           |           |           |            |           |            |            |           |
|---------|------------|------------|------------|-----------|-----------|------------|-----------|-----------|-----------|-----------|------------|-----------|------------|------------|-----------|
| SF3B5   | 21.0077    | 15.9014    | 15.0671    | 37.7969   | 23.9986   | 48.8506    | 23.7708   | 12.2792   | 38.8556   | 35.2741   | 80.9646    | 19.1434   | 33.6927    | 25.898     | 15.1976   |
| SF3B6   | 18.0402    | 13.6961    | 13.3348    | 32.8512   | 3.54363   | 19.6549    | 10.0761   | 11.0441   | 23.1042   | 37.486    | 72.413     | 19.0724   | 37.1261    | 23.6421    | 12.7169   |
| SFI1    | 1.77091    | 2.1382     | 2.29346    | 1.67289   | 3.5286    | 2.23942    | 2.59967   | 1.65815   | 0.9821    | 0.992264  | 0.666379   | 1.27091   | 1.08137    | 1.53157    | 1.58953   |
| SFMBT1  | 2.45749    | 2.08188    | 2.33964    | 1.56974   | 1.16728   | 2.6805     | 2.51602   | 2.22914   | 1.4099    | 1.08336   | 0.974409   | 1.08992   | 1.46107    | 1.07475    | 1.58234   |
| SFMBT2  | 1.26564    | 0.561406   | 0.633912   | 0.603338  | 0.980754  | 1.81322    | 0.675018  | 0.752412  | 0.0594191 | 0.561919  | 0.890941   | 0.620159  | 0.855467   | 0.895468   | 2.07727   |
| SFN     | 168.313    | 312.455    | 266.109    | 1594.96   | 1527.08   | 1136.98    | 309.101   | 199.21    | 1675.76   | 1883.27   | 1560.97    | 1638.87   | 3793.16    | 1370.81    | 435.421   |
| SFPQ    | 40.0918    | 37.5849    | 37.2336    | 42.6697   | 27.2496   | 57.6826    | 30.7381   | 29.9334   | 27.1645   | 24.0861   | 29.3971    | 24.8646   | 38.586     | 34.8949    | 29.2951   |
| SFR1    | 0.998981   | 0.933478   | 1.02677    | 1.76259   | 0.446719  | 1.46925    | 0.587584  | 0.834004  | 0.626757  | 1.4438    | 2.03332    | 0.758119  | 1.22071    | 1.05213    | 1.21729   |
| SFRP1   | 29.8212    | 15.1147    | 14.3624    | 16.1934   | 22.9682   | 51.1553    | 14.2442   | 27.2946   | 10.1335   | 6.15142   | 8.81966    | 6.90997   | 10.5361    | 6.17911    | 19.4493   |
| SFRP2   | 17.5841    | 19.8751    | 29.4495    | 14.5614   | 39.9054   | 37.0453    | 35.6392   | 20.2782   | 1.57216   | 10.597    | 33.32      | 2.55465   | 10.1521    | 5.45212    | 61.4956   |
| SFRP4   | 2.1952     | 0.401319   | 0.721259   | 0.304838  | 0.918983  | 15.6959    | 4.38178   | 0.615714  | 0         | 3.80062   | 9.85972    | 0         | 2.04916    | 0.471943   | 28.7534   |
| SFRP5   | 0.270391   | 0.0473741  | 0.0711731  | 0.0126657 | 0.0954571 | 0.146513   | 0.308724  | 0.120151  | 0         | 0.0925552 | 0.0138745  | 0.0703536 | 0.00792978 | 0.115624   | 0.0353015 |
| SFSWAP  | 7.78236    | 7.54825    | 7.8382     | 6.71716   | 10.4734   | 9.78664    | 7.43445   | 6.43904   | 5.77786   | 5.64731   | 3.67525    | 7.04681   | 6.68304    | 7.90725    | 7.47695   |
| SFT2D1  | 3.68797    | 4.043      | 3.99366    | 7.66515   | 2.02757   | 6.86269    | 3.38284   | 3.68265   | 5.6018    | 5.92901   | 9.05157    | 3.21702   | 8.80934    | 4.90539    | 3.5706    |
| SFT2D2  | 13.2207    | 15.1107    | 15.0973    | 17.72     | 12.179    | 15.9766    | 21.4232   | 11.8696   | 30.4905   | 17.5096   | 22.9515    | 16.0372   | 21.1766    | 12.9575    | 10.5999   |
| SFT2D3  | 2.36288    | 2.031      | 1.96155    | 2.97802   | 2.45544   | 3.77856    | 2.14325   | 1.81457   | 2.42651   | 2.34566   | 3.68974    | 1.48452   | 2.6294     | 1.62221    | 1.32425   |
| SFTA1P  | 0.0333955  | 0          | 0          | 0.06883   | 0.103749  | 0.0284358  | 0         | 0         | 0         | 0.335318  | 0.150797   | 0.0955814 | 0.129279   | 0.226901   | 0         |
| SFTA2   | 0.00849598 | 0          | 0.00702847 | 0.0787982 | 0         | 0.00723422 | 0         | 0         | 0         | 0         | 0          | 0.0060791 | 0          | 0.0177615  | 0         |
| SFTA3   | 0          | 0          | 0          | 0         | 0         | 0          | 0         | 0         | 0         | 0         | 0          | 0         | 0          | 0          | 0         |
| SFTP1A1 | 0.0609562  | 0.0244747  | 0.09245    | 0         | 0.0631241 | 1.01E-09   | 0.0579982 | 0.0632016 | 0.0494919 | 0.0255021 | 0.114687   | 0.05785   | 0.00655478 | 0.084638   | 0.0437704 |
| SFTP1A2 | 0.0094269  | 0.00454203 | 0          | 0         | 0         | 0.0240807  | 0         | 0         | 0.0344427 | 0.0473269 | 0          | 0.0609893 | 0          | 0.00522174 | 0.0406147 |
| SFTP1B  | 0.138846   | 0.0790612  | 0.0839243  | 0.0325192 | 0.0490171 | 0.0644865  | 0.0792648 | 0.100959  | 0.0153726 | 0         | 0.00712452 | 0.0138139 | 0          | 0.0626713  | 0.108764  |
| SFTP1C  | 0          | 0.046891   | 0.112716   | 0         | 0.0302348 | 0.0331472  | 0.155566  | 0.0345965 | 0         | 0         | 0          | 0         | 0          | 0          | 0         |
| SFTP1D  | 1.06426    | 1.32974    | 1.29826    | 1.0038    | 7.73341   | 1.30554    | 1.42109   | 0.73742   | 5.40426   | 0.724475  | 1.40504    | 1.54882   | 0.942692   | 0.603364   | 0.362673  |
| SFXN1   | 2.41713    | 2.14765    | 1.79031    | 5.47558   | 1.83969   | 4.54259    | 2.00992   | 1.7654    | 2.11769   | 3.91887   | 6.28982    | 3.12392   | 7.77319    | 3.66329    | 2.84507   |
| SFXN2   | 0.961131   | 0.938364   | 0.795116   | 0.947032  | 1.00841   | 1.55781    | 0.933743  | 0.899131  | 0.523667  | 0.42327   | 0.409254   | 0.609292  | 0.402532   | 0.625708   | 0.605398  |

|           |           |           |           |           |           |           |            |           |           |           |           |           |           |          |           |
|-----------|-----------|-----------|-----------|-----------|-----------|-----------|------------|-----------|-----------|-----------|-----------|-----------|-----------|----------|-----------|
| SFXN3     | 6.41864   | 7.24613   | 8.53186   | 5.18671   | 8.52774   | 11.4665   | 10.8945    | 5.01211   | 6.94151   | 12.446    | 15.6416   | 5.93247   | 14.6273   | 7.73882  | 11.9285   |
| SFXN4     | 4.86174   | 2.36463   | 1.4337    | 4.2199    | 2.02497   | 4.32253   | 2.0838     | 2.19442   | 1.83048   | 2.50238   | 4.05129   | 1.76678   | 4.37365   | 3.02189  | 2.13646   |
| SFXN5     | 0.864211  | 1.86558   | 1.57356   | 3.40086   | 4.71822   | 3.41961   | 1.7171     | 1.02029   | 0.918367  | 2.16403   | 1.46338   | 2.40374   | 2.21667   | 2.18752  | 1.84951   |
| SGCA      | 0.653038  | 0.890213  | 1.18589   | 0.328281  | 0.643274  | 4.44843   | 1.85495    | 0.169863  | 0.0581947 | 0.219901  | 1.06085   | 0.148158  | 0.143871  | 0.283035 | 0.709103  |
| SGCB      | 2.70186   | 1.65254   | 1.96551   | 3.25297   | 0.529593  | 4.07107   | 1.69202    | 1.86978   | 0.856306  | 3.78105   | 6.69778   | 0.801078  | 4.25376   | 3.21242  | 6.01967   |
| SGCD      | 1.26164   | 0.639755  | 0.690779  | 0.268026  | 0.627267  | 0.89555   | 1.01851    | 1.04217   | 0.0750209 | 1.39737   | 2.53684   | 0.199158  | 0.575546  | 0.538958 | 3.55168   |
| SGCE      | 2.79118   | 0.871147  | 1.4677    | 1.22276   | 0.614365  | 4.36842   | 1.52248    | 1.46625   | 0.371588  | 3.9429    | 10.6773   | 0.363856  | 2.77784   | 2.0494   | 6.24805   |
| SGCG      | 0.237723  | 0.282978  | 0.358618  | 0.0288213 | 0.0651646 | 0.0833487 | 0.782342   | 0.223696  | 0.221398  | 0         | 0.0315717 | 0.0700401 | 0         | 0.116936 | 0.0602472 |
| SGCZ      | 0.0417455 | 0.0263024 | 0.0637566 | 0         | 0         | 0.01914   | 0.00366643 | 0.0342461 | 0         | 0         | 0         | 0         | 0         | 0        | 0         |
| SGF29     | 3.09646   | 2.35414   | 2.36201   | 3.25316   | 4.49755   | 6.62574   | 3.62727    | 2.41102   | 3.33036   | 1.69083   | 2.97346   | 2.30192   | 2.73728   | 2.18582  | 2.56997   |
| SGIP1     | 0.328901  | 0.12259   | 0.184816  | 0.364523  | 0.253842  | 0.648177  | 0.136985   | 0.222442  | 0.0453469 | 0.469923  | 0.705215  | 0.248658  | 0.24824   | 0.954629 | 1.8864    |
| SGK1      | 18.2229   | 9.47145   | 8.87501   | 25.7873   | 7.73381   | 19.9739   | 9.17678    | 14.1719   | 26.749    | 21.1642   | 24.6111   | 17.5835   | 33.1087   | 12.334   | 16.6222   |
| SGK2      | 0.235481  | 0.358528  | 0.319482  | 0.27179   | 0.43894   | 0.633608  | 0.408674   | 0.259502  | 0.88331   | 0.461062  | 0.595455  | 0.330246  | 0.0182317 | 0.511982 | 0.0541088 |
| SGK3      | 1.57717   | 1.78975   | 2.45095   | 0.791864  | 0.443132  | 1.21022   | 1.71224    | 1.83515   | 1.00714   | 1.2193    | 2.17226   | 0.905662  | 1.52118   | 0.819327 | 0.870756  |
| SGK494    | 0.863501  | 1.2806    | 1.3831    | 0.511198  | 1.34132   | 0.604895  | 1.26561    | 1.40419   | 0.268506  | 0.507302  | 0.241968  | 0.946506  | 0.134343  | 1.16507  | 1.09938   |
| SGMS1     | 6.49337   | 8.33998   | 9.34067   | 9.08737   | 6.15915   | 5.45026   | 6.18883    | 6.97644   | 11.4079   | 5.88213   | 9.20279   | 5.87722   | 7.54347   | 5.03096  | 4.28628   |
| SGMS1-AS1 | 1.04748   | 0.793704  | 0.86655   | 0.52589   | 0.500646  | 1.0825    | 0.84843    | 1.02639   | 0.0872283 | 0.292155  | 0.545758  | 0.198586  | 0.196395  | 0.205882 | 0.514296  |
| SGMS2     | 2.46537   | 1.57182   | 1.982     | 2.71296   | 0.561246  | 2.10368   | 1.62134    | 2.42514   | 3.75205   | 5.05811   | 3.14425   | 3.14543   | 7.96493   | 2.95267  | 3.29864   |
| SGO1      | 0.127866  | 0.182113  | 0.169158  | 0.657699  | 0.0673746 | 0.606744  | 0.197148   | 0.099121  | 0.108732  | 0.630418  | 0.751628  | 0.255113  | 0.640285  | 0.741603 | 0.222553  |
| SGO1-AS1  | 0.0168822 | 1.19E-19  | 5.56E-20  | 1.08E-31  | 0         | 1.15E-16  | 0.00706388 | 0         | 0.146374  | 0.229207  | 0.290312  | 0.147977  | 0.0550843 | 1.42E-21 | 0.13256   |
| SGO2      | 0.267264  | 0.293313  | 0.188344  | 0.84157   | 0.0615041 | 0.623714  | 0.101718   | 0.27271   | 0.415913  | 1.11193   | 1.31299   | 0.329348  | 0.92286   | 0.827754 | 0.611275  |
| SGPL1     | 9.0783    | 12.1732   | 12.7737   | 15.478    | 8.55576   | 12.8811   | 14.3181    | 8.58143   | 24.0621   | 17.6728   | 14.4599   | 13.6115   | 28.6522   | 11.3617  | 8.04839   |
| SGPP1     | 1.52682   | 1.05376   | 1.13223   | 2.48773   | 1.41019   | 3.03935   | 1.77469    | 1.28968   | 1.45744   | 3.15934   | 4.20029   | 1.64364   | 7.46811   | 3.18115  | 2.7557    |
| SGPP2     | 6.89385   | 11.0219   | 10.4877   | 10.9231   | 12.5372   | 7.41917   | 9.22033    | 7.39868   | 30.8912   | 12.5813   | 13.6517   | 15.0824   | 14.9429   | 5.85902  | 2.92018   |
| SGSH      | 3.68377   | 4.65634   | 5.28527   | 5.71819   | 10.7142   | 10.7882   | 6.4234     | 3.73272   | 3.97959   | 3.24033   | 4.55872   | 4.22945   | 5.23581   | 3.94728  | 4.47135   |
| SGSM1     | 0.306105  | 0.305098  | 0.390171  | 0.116833  | 0.28177   | 0.273516  | 0.379705   | 0.389589  | 0.0322174 | 0.0284588 | 0.0639916 | 0.0975999 | 0.0975296 | 0.139494 | 0.179099  |

|            |           |            |           |            |           |           |            |           |           |            |           |            |            |            |            |
|------------|-----------|------------|-----------|------------|-----------|-----------|------------|-----------|-----------|------------|-----------|------------|------------|------------|------------|
| SGSM2      | 4.7456    | 8.61888    | 7.52925   | 6.01265    | 15.4154   | 7.95205   | 5.78752    | 4.20904   | 5.0441    | 3.86137    | 2.97382   | 8.59444    | 2.66607    | 5.30848    | 5.8387     |
| SGSM3      | 3.99247   | 5.52554    | 5.2748    | 7.78764    | 16.1175   | 7.77933   | 5.51904    | 3.60721   | 7.12729   | 5.81679    | 4.35705   | 6.13061    | 7.04216    | 6.66107    | 5.97745    |
| SGTA       | 6.12816   | 5.40434    | 5.61548   | 11.4045    | 11.5689   | 17.1438   | 5.8441     | 4.25568   | 8.52265   | 9.6363     | 11.5449   | 6.774      | 17.5118    | 9.8541     | 6.27399    |
| SGTB       | 0.885234  | 0.646589   | 0.650512  | 1.09342    | 0.540589  | 1.08209   | 0.828627   | 1.00223   | 0.671948  | 1.37963    | 1.83493   | 0.383399   | 1.27631    | 0.796913   | 1.3986     |
| SH2B1      | 3.62662   | 4.41145    | 4.03808   | 3.39108    | 11.4216   | 6.30694   | 4.35893    | 2.77262   | 2.06422   | 1.81967    | 2.19472   | 3.4837     | 2.24071    | 3.62366    | 4.06281    |
| SH2B2      | 0.232063  | 0.3456     | 0.584664  | 0.89137    | 0.983113  | 1.48199   | 0.313138   | 0.234362  | 0.308321  | 0.635484   | 0.69065   | 0.211333   | 0.898356   | 0.562328   | 1.51487    |
| SH2B3      | 3.75472   | 2.16329    | 2.632     | 4.6441     | 3.80009   | 8.78858   | 3.59939    | 2.69829   | 1.01169   | 4.2434     | 8.01298   | 1.46812    | 5.36232    | 5.60917    | 9.85993    |
| SH2D1A     | 0.45054   | 0.093033   | 0.144524  | 0.104229   | 0.0142825 | 0.125267  | 0.0419928  | 0.196116  | 0.0111981 | 0.103863   | 0.197214  | 0.0131581  | 0.118647   | 0.0624721  | 0.25089    |
| SH2D1B     | 0.045647  | 0.00439869 | 0.0377625 | 0          | 0.0141811 | 0.0855093 | 0.0416947  | 0         | 0         | 0.0458334  | 0.0618358 | 0.00653234 | 0.0294512  | 0.0143143  | 0          |
| SH2D2A     | 0.163068  | 0.181312   | 0.166032  | 1.31851    | 0.857324  | 1.0574    | 0.257795   | 0.234103  | 0.106937  | 1.13354    | 1.51514   | 0.816754   | 4.13558    | 1.86842    | 3.06243    |
| SH2D3A     | 3.29071   | 4.2454     | 3.38867   | 6.92407    | 9.84177   | 5.56218   | 3.55535    | 2.66262   | 7.10623   | 5.51102    | 2.75007   | 6.2836     | 11.7249    | 5.87836    | 1.73517    |
| SH2D3C     | 1.47942   | 0.594878   | 0.683931  | 2.15235    | 2.16286   | 4.02918   | 0.888044   | 0.691227  | 0.384199  | 1.66567    | 2.40074   | 0.665493   | 2.47752    | 2.25993    | 4.03055    |
| SH2D4A     | 2.73514   | 2.59111    | 1.75988   | 3.45183    | 3.0274    | 2.7171    | 2.24788    | 2.11958   | 7.70819   | 3.29193    | 2.81915   | 3.92833    | 5.38791    | 2.1857     | 1.72681    |
| SH2D4B     | 0.0338596 | 0.0108761  | 0.0466851 | 0.00581555 | 0.0350638 | 0.0432465 | 0.064433   | 0.0300916 | 0         | 0.00708288 | 0.0127411 | 0.00807582 | 0.0364101  | 0.0176965  | 0.00810445 |
| SH2D5      | 0.0362176 | 0.0290837  | 0.0349554 | 1.65467    | 0.393809  | 1.32093   | 0.0344601  | 0.0321872 | 0.0661635 | 3.03803    | 0.517879  | 1.63263    | 14.8149    | 5.18651    | 2.40994    |
| SH2D6      | 0.0117061 | 0          | 0         | 0          | 0         | 0.0199353 | 0.0133657  | 0         | 0.0142568 | 0.0146924  | 0         | 0.0167521  | 0.00755275 | 0.0122363  | 0          |
| SH2D7      | 0.0366962 | 0.029468   | 0.0202384 | 0.0630274  | 0.133004  | 0.0208309 | 0          | 0.0326125 | 0.0297945 | 0.06141    | 0.0414254 | 0.0612665  | 0.0552444  | 0.0958951  | 0.0175668  |
| SH3BGR     | 0.223079  | 0.0692582  | 0.0547254 | 0.200462   | 0.0568695 | 0.213998  | 0.00698824 | 0.140608  | 0.152002  | 0.0970102  | 0.313222  | 0.00924094 | 0.0542107  | 0.00711308 | 0.516939   |
| SH3BGRL    | 9.88799   | 6.14713    | 5.84952   | 9.53028    | 2.51051   | 13.4177   | 5.03606    | 11.4708   | 8.29489   | 11.7202    | 20.006    | 6.85026    | 7.84968    | 6.94527    | 11.4764    |
| SH3BGRL2   | 4.70795   | 1.86766    | 1.95726   | 0.916155   | 0.80184   | 2.18142   | 2.46122    | 2.87148   | 7.80024   | 0.839853   | 1.49998   | 1.26881    | 0.647599   | 0.924279   | 0.912936   |
| SH3BGRL3   | 33.3135   | 34.6521    | 34.1358   | 111.419    | 43.0423   | 111.856   | 52.4688    | 37.6673   | 101.19    | 169.644    | 218.143   | 128.05     | 249.006    | 97.1008    | 68.291     |
| SH3BP1     | 4.52795   | 7.93081    | 9.64641   | 12.0478    | 12.3398   | 12.9352   | 7.62831    | 5.56291   | 12.5764   | 7.2245     | 7.21899   | 9.21218    | 23.1615    | 8.68433    | 4.44106    |
| SH3BP2     | 7.7277    | 16.7718    | 20.1576   | 6.30712    | 9.72698   | 10.8008   | 16.1006    | 13.2077   | 4.68708   | 6.10012    | 4.8969    | 5.22167    | 8.09098    | 5.52517    | 7.05802    |
| SH3BP4     | 7.01927   | 4.06398    | 4.96093   | 5.09846    | 4.98003   | 8.71049   | 6.03627    | 4.89289   | 2.27312   | 3.6764     | 4.32991   | 2.79878    | 6.29192    | 4.76775    | 4.36696    |
| SH3BP5     | 7.38623   | 3.59545    | 3.70355   | 4.07222    | 6.20768   | 16.0683   | 3.80591    | 3.45809   | 5.33136   | 3.84045    | 4.58045   | 1.81457    | 4.00597    | 4.11432    | 10.5845    |
| SH3BP5-AS1 | 5.16884   | 3.98509    | 4.99172   | 1.212      | 1.07967   | 1.55534   | 3.55664    | 4.17115   | 0.55519   | 1.17983    | 0.599942  | 1.26835    | 0.246876   | 2.0576     | 2.85326    |

|              |           |            |           |           |           |           |           |           |           |           |            |           |            |           |           |
|--------------|-----------|------------|-----------|-----------|-----------|-----------|-----------|-----------|-----------|-----------|------------|-----------|------------|-----------|-----------|
| SH3BP5L      | 3.25045   | 3.9826     | 3.49529   | 8.97419   | 12.7004   | 6.09163   | 4.79999   | 2.31286   | 15.2442   | 6.07655   | 4.10945    | 4.64401   | 10.6968    | 4.47696   | 3.69966   |
| SH3D19       | 10.0066   | 11.2371    | 12.6053   | 8.607     | 6.31199   | 7.77886   | 11.5583   | 9.37087   | 20.0899   | 11.5339   | 10.5152    | 12.4949   | 12.0946    | 9.48816   | 11.1864   |
| SH3D21       | 5.26753   | 5.97095    | 4.41705   | 8.94243   | 15.3471   | 13.6391   | 7.11062   | 6.3242    | 15.0383   | 20.2731   | 7.15191    | 23.7702   | 17.607     | 16.5746   | 7.35863   |
| SH3GL1       | 15.8904   | 20.0667    | 21.6708   | 34.2164   | 33.5288   | 45.2455   | 25.6337   | 13.9602   | 68.8088   | 36.2398   | 36.9861    | 31.6394   | 56.8068    | 29.1156   | 16.6572   |
| SH3GL1P1     | 0.872936  | 1.11709    | 0.96934   | 0.303992  | 2.08361   | 0.83703   | 1.44528   | 1.02634   | 1.12109   | 0.542461  | 0.2746     | 1.03286   | 0.141622   | 0.841352  | 1.07859   |
| SH3GL1P2     | 0.528063  | 0.545655   | 0.673377  | 0.269842  | 0.696953  | 0.331897  | 0.598779  | 0.449329  | 0.0416653 | 0.0859473 | 0.0918553  | 0.154661  | 0.00789703 | 0.360982  | 0.159732  |
| SH3GL2       | 0         | 0.00408001 | 0         | 0         | 0         | 0         | 0.0870164 | 0         | 0         | 0         | 0.00955932 | 0         | 0.0163905  | 0         | 0.0121611 |
| SH3GL3       | 0.174849  | 0.0370678  | 0         | 0.122527  | 0.184689  | 0.250122  | 0.111797  | 0.0683723 | 1.55877   | 0.447686  | 0.647416   | 0.450394  | 0.248186   | 0.4094    | 0.140619  |
| SH3GLB1      | 11.1825   | 9.11898    | 10.1425   | 9.16802   | 2.69286   | 11.6388   | 7.32685   | 10.0523   | 7.93705   | 12.231    | 14.4362    | 6.25577   | 13.0193    | 8.08567   | 10.189    |
| SH3GLB2      | 12.7614   | 23.3176    | 24.1875   | 12.8094   | 59.687    | 16.9619   | 18.7663   | 12.5101   | 50.8441   | 34.7805   | 23.3032    | 28.5151   | 25.1412    | 15.375    | 7.38267   |
| SH3KBP1      | 2.94715   | 2.30959    | 3.15647   | 3.20886   | 3.17459   | 5.26534   | 3.09456   | 2.87642   | 1.51157   | 3.09899   | 4.17851    | 1.29287   | 3.28232    | 2.11794   | 5.10794   |
| SH3PXD2A     | 10.7165   | 16.6928    | 14.1749   | 21.4237   | 34.8624   | 41.5145   | 18.584    | 10.8059   | 32.3332   | 20.5345   | 17.064     | 20.6276   | 29.7534    | 18.6859   | 33.6176   |
| SH3PXD2A-AS1 | 1.30416   | 2.82763    | 2.18617   | 5.41125   | 2.22128   | 4.3737    | 2.27275   | 2.62306   | 5.43371   | 5.77205   | 5.95349    | 4.8868    | 4.50241    | 3.73689   | 1.57721   |
| SH3PXD2B     | 7.39418   | 4.40436    | 5.43038   | 11.2564   | 9.41214   | 19.385    | 7.9189    | 6.66675   | 2.75672   | 8.16956   | 12.1537    | 4.03242   | 12.5914    | 7.34841   | 22.688    |
| SH3RF1       | 3.49014   | 2.15177    | 2.85093   | 2.55483   | 1.93231   | 4.03851   | 2.936     | 2.37514   | 2.2859    | 3.22192   | 3.3147     | 1.94688   | 4.013      | 3.15886   | 3.24473   |
| SH3RF2       | 14.3741   | 28.4172    | 25.0283   | 17.4855   | 26.4391   | 16.3515   | 35.6893   | 17.7424   | 45.5157   | 9.34503   | 7.85572    | 28.254    | 11.4331    | 11.9723   | 4.93685   |
| SH3RF3       | 2.21884   | 1.42473    | 1.01205   | 1.40069   | 2.93709   | 3.00167   | 1.46899   | 1.22104   | 0.626698  | 1.40331   | 1.59738    | 1.03016   | 1.58211    | 2.23596   | 3.69145   |
| SH3RF3-AS1   | 1.75528   | 0.98125    | 0.934241  | 0.831049  | 4.88415   | 1.79882   | 0.803511  | 0.454617  | 0.233951  | 0.829975  | 1.09244    | 0.473032  | 0.669375   | 1.30923   | 2.16028   |
| SH3TC1       | 1.42555   | 0.888128   | 1.0454    | 2.97045   | 3.43106   | 3.63261   | 0.977783  | 0.955986  | 1.23376   | 4.32558   | 2.41686    | 1.22179   | 7.12902    | 3.47966   | 4.76199   |
| SH3TC2       | 0.110578  | 0.0599905  | 0.0511413 | 0.122927  | 0.0797968 | 0.0822937 | 0.04573   | 0.0595826 | 0.028631  | 0.122395  | 0.0648717  | 0.0542014 | 0.359531   | 0.126507  | 0.0925316 |
| SH3TC2-DT    | 0.058442  | 0          | 0         | 0.0301131 | 0         | 0         | 0         | 0         | 0         | 0         | 0.0329869  | 0         | 0          | 0         | 0.25179   |
| SH3YL1       | 2.93849   | 3.15549    | 3.50075   | 3.16345   | 1.97397   | 2.11233   | 2.21845   | 3.82335   | 2.27668   | 2.24581   | 2.6487     | 2.48048   | 0.551423   | 1.78339   | 1.32394   |
| SHANK1       | 0.0336976 | 0.111333   | 0.107526  | 0.0347264 | 0.314064  | 0.100426  | 0.140158  | 0.0641735 | 0.02052   | 0.093651  | 0.176616   | 0.0396118 | 0.0559068  | 0.0880593 | 0.400979  |
| SHANK2       | 1.31302   | 0.55198    | 0.71216   | 0.519735  | 1.32707   | 1.37161   | 0.948149  | 0.869378  | 0.638056  | 2.18549   | 0.861367   | 2.11543   | 2.84296    | 0.99187   | 0.811709  |
| SHANK2-AS1   | 0.143873  | 0.138641   | 0.170032  | 0.0953136 | 0.207522  | 0.0962549 | 0.246405  | 0.310524  | 0.0125158 | 0.322457  | 0.0696065  | 0.573552  | 0.0397827  | 0.316891  | 0.427999  |
| SHANK2-AS3   | 0.151262  | 0.152386   | 0.216141  | 0.0425126 | 0.384483  | 0.081962  | 0.204107  | 0.183312  | 0.0334945 | 0.500511  | 0          | 0.432927  | 0.070977   | 0.229981  | 0.0592448 |

|          |           |           |            |            |           |           |           |            |           |           |            |            |            |            |           |
|----------|-----------|-----------|------------|------------|-----------|-----------|-----------|------------|-----------|-----------|------------|------------|------------|------------|-----------|
| SHANK3   | 4.85564   | 3.09987   | 3.11584    | 7.07982    | 13.5969   | 15.8397   | 5.34174   | 3.24813    | 0.747195  | 2.90716   | 2.59997    | 3.67858    | 4.98079    | 6.7954     | 19.2237   |
| SHARPIN  | 5.00837   | 5.62447   | 5.31352    | 8.37883    | 16.0941   | 12.9132   | 6.9261    | 3.12591    | 8.00866   | 7.10177   | 14.5159    | 6.7752     | 11.9636    | 7.00023    | 4.79511   |
| SHB      | 3.5516    | 3.78912   | 3.27201    | 9.94624    | 10.2755   | 8.95787   | 2.86578   | 2.68154    | 14.6335   | 5.86148   | 6.0834     | 7.1755     | 10.5621    | 6.05281    | 3.06916   |
| SHBG     | 0.014931  | 0.014388  | 0.012352   | 0.0615473  | 0.023193  | 0.203417  | 0.0340955 | 0          | 0.0545528 | 0.0374799 | 0.117987   | 0.0213671  | 0.00963341 | 0.0156072  | 0.0214428 |
| SHC1     | 12.3437   | 9.48853   | 9.66451    | 33.4657    | 23.201    | 59.5335   | 11.3353   | 9.08037    | 16.3607   | 34.9616   | 40.4711    | 19.4805    | 44.6757    | 32.8323    | 29.2231   |
| SHC2     | 1.00219   | 1.85547   | 2.04967    | 0.975404   | 7.6828    | 2.52844   | 2.06603   | 1.75658    | 0.282534  | 1.21126   | 2.45124    | 0.451501   | 1.07169    | 2.12424    | 3.14506   |
| SHC3     | 0.698935  | 0.546803  | 0.744811   | 0.385773   | 0.850149  | 1.01677   | 0.535621  | 0.730647   | 0.0461681 | 0.65421   | 0.928091   | 0.0779828  | 1.26724    | 1.53919    | 1.84079   |
| SHC4     | 0.584164  | 0.17377   | 0.168091   | 0.157043   | 0.331401  | 0.527685  | 0.179794  | 0.203148   | 0.0185595 | 0.0956329 | 0.126155   | 0.0327119  | 0.0819347  | 0.0716814  | 0.196967  |
| SHCBP1   | 0.622998  | 1.45222   | 1.44453    | 1.31117    | 0.5452    | 0.975029  | 0.460854  | 0.350917   | 0.293879  | 0.958135  | 1.13913    | 0.276253   | 1.25682    | 1.09606    | 0.579667  |
| SHCBP1L  | 0         | 0         | 0          | 0.00943791 | 0         | 0.0155964 | 0         | 0.00813914 | 0         | 0.0229892 | 0.0310158  | 0.019659   | 0          | 0          | 0         |
| SHD      | 0         | 0         | 0.00743228 | 0          | 0.0418662 | 0         | 0         | 0          | 0         | 0         | 0.0101419  | 0          | 0.0057965  | 0.0187819  | 0         |
| SHE      | 2.55275   | 1.00091   | 1.1426     | 1.45805    | 1.56401   | 3.09151   | 1.52143   | 1.01125    | 0.291749  | 1.03823   | 1.55494    | 0.637418   | 1.97545    | 1.90736    | 3.84344   |
| SHF      | 1.33732   | 1.1097    | 1.35217    | 0.635479   | 2.839     | 1.96111   | 1.39118   | 1.11587    | 2.09922   | 1.00708   | 0.897413   | 0.956887   | 0.498525   | 0.648462   | 1.40841   |
| SHH      | 0         | 0.0425746 | 0.0398727  | 0.00827823 | 0         | 0.02052   | 0         | 0.00713906 | 0         | 0         | 0.00906825 | 0.0229913  | 0          | 0.0125952  | 0.0115364 |
| SHISA2   | 0.328441  | 0.0733343 | 0.139168   | 0.214638   | 0.0995477 | 0.470652  | 0.164635  | 0.163744   | 0.0390248 | 0.382064  | 0.795796   | 0.160493   | 0.677073   | 0.393556   | 0.483187  |
| SHISA3   | 0.130331  | 0.0358831 | 0.0308054  | 0.0191871  | 0.0289213 | 0.0792679 | 0.180695  | 0.0330935  | 0         | 0.0116842 | 0.0315273  | 0          | 0          | 0.00973095 | 0         |
| SHISA4   | 0.905658  | 0.617617  | 0.89907    | 0.516909   | 1.51502   | 3.67782   | 2.17946   | 0.495307   | 0.37332   | 1.04926   | 3.17723    | 0.259209   | 0.620285   | 0.786467   | 1.58078   |
| SHISA5   | 8.0928    | 6.88037   | 7.28261    | 39.9355    | 14.1694   | 51.5396   | 8.98991   | 6.53725    | 7.3658    | 12.482    | 22.7459    | 7.73815    | 20.1879    | 12.1926    | 14.0153   |
| SHISA6   | 0.08427   | 0.0887242 | 0.0774602  | 0.0771935  | 0.116356  | 0.196661  | 0.103344  | 0.0915349  | 0.0418128 | 0.125354  | 0.193784   | 0.290321   | 0.217482   | 0.0734054  | 0.103093  |
| SHISA7   | 0.0651917 | 0.066516  | 0.0793105  | 0.00395188 | 0.0119136 | 0.0130611 | 0.0218923 | 0.0340806  | 0         | 0         | 0.00432902 | 0.0109756  | 0          | 0.00400847 | 0         |
| SHISA8   | 0.0108348 | 0.0678646 | 0.0448164  | 0.0223311  | 0.0168301 | 0.42438   | 0.0618539 | 0.0962903  | 0.422257  | 0.0679937 | 0.207929   | 0.0697731  | 0.0279621  | 0.0169882  | 0.155601  |
| SHISA9   | 19.6267   | 18.809    | 17.9659    | 9.554      | 6.33411   | 4.05725   | 11.404    | 19.1034    | 5.27107   | 6.40675   | 2.45526    | 10.3485    | 1.53662    | 12.81      | 11.2926   |
| SHISAL1  | 0.391382  | 0.282861  | 0.320939   | 0.576692   | 0.890596  | 1.08455   | 0.631103  | 0.308163   | 0.0250873 | 3.11971   | 0.988286   | 1.17913    | 7.06385    | 2.1514     | 5.45804   |
| SHISAL2A | 0.0252103 | 0.0364401 | 0.0104279  | 0.0519599  | 0.0195801 | 0.0321994 | 0         | 0.0336072  | 0         | 0.0158208 | 0.0853778  | 0.00901932 | 0.0162656  | 0.013176   | 0.0543078 |
| SHISAL2B | 0         | 0         | 0          | 0.0246635  | 0         | 0         | 0         | 0.085078   | 0.0291475 | 0         | 0          | 0          | 0          | 0          | 0         |
| SHKBP1   | 4.85368   | 4.74788   | 4.21769    | 11.9198    | 11.9172   | 16.8147   | 6.99426   | 3.49606    | 11.3338   | 9.46941   | 13.8637    | 7.91214    | 14.212     | 8.22396    | 9.27526   |

|         |            |            |            |            |                 |            |           |            |            |            |           |            |           |            |            |
|---------|------------|------------|------------|------------|-----------------|------------|-----------|------------|------------|------------|-----------|------------|-----------|------------|------------|
| SHLD1   | 0.56026    | 0.275133   | 0.418921   | 0.588467   | 0.30125         | 0.568795   | 0.492067  | 0.335133   | 0.629847   | 0.662616   | 1.37439   | 0.470264   | 0.521361  | 0.320972   | 0.324936   |
| SHLD2   | 5.54273    | 4.32992    | 4.93532    | 5.37509    | 0.609247        | 5.2867     | 3.17888   | 4.91081    | 2.50475    | 4.81259    | 5.8346    | 2.78132    | 5.07179   | 3.98559    | 5.52366    |
| SHLD2P1 | 0.00053884 | 0.134315   | 0.111182   | 0.143496   | 0.00035496<br>8 | 0.146899   | 2.85E-08  | 0.119104   | 0.108526   | 2.25E-05   | 0.256054  | 1.95E-06   | 8.79E-06  | 0.0232607  | 0.00810674 |
| SHLD2P3 | 0.66997    | 0.23074    | 0.130324   | 0.132736   | 0.0648244       | 0.242729   | 0.206088  | 0.668551   | 0.00925774 | 0.261002   | 0.185388  | 0.227559   | 0.0762905 | 0.0795883  | 0.130453   |
| SHMT1   | 6.07919    | 7.51335    | 7.40773    | 7.36244    | 6.81526         | 9.93705    | 6.8547    | 3.87402    | 8.77586    | 3.52552    | 4.81991   | 4.65689    | 4.1238    | 3.93854    | 1.22459    |
| SHMT2   | 3.88144    | 5.08053    | 5.45201    | 13.8497    | 7.20994         | 14.7762    | 5.78889   | 3.88068    | 4.72716    | 8.9718     | 14.8977   | 5.69915    | 18.589    | 10.8869    | 6.68907    |
| SHOC2   | 6.60058    | 5.62307    | 5.65621    | 6.34248    | 1.70168         | 6.65147    | 3.62042   | 6.30628    | 8.52811    | 8.78858    | 10.0426   | 4.73862    | 10.8579   | 6.11688    | 6.04007    |
| SHOX    | 0.010558   | 0.157697   | 0.266396   | 0.0163204  | 0.0205002       | 0.00224749 | 0.192876  | 0.0703728  | 0          | 0.00662566 | 0.0208576 | 0.00566588 | 0         | 0.00827708 | 0.0265345  |
| SHOX2   | 0.538544   | 0.307915   | 0.457403   | 0.429189   | 0.479619        | 1.52855    | 0.770665  | 0.344602   | 0.0874516  | 1.00037    | 1.98597   | 0.12331    | 0.537414  | 0.964492   | 2.56775    |
| SHPK    | 3.03437    | 2.89555    | 2.83009    | 3.52763    | 4.4352          | 5.64662    | 4.04542   | 2.54387    | 8.42284    | 3.96566    | 4.60032   | 4.06839    | 3.98302   | 4.09211    | 2.72784    |
| SHPRH   | 3.83355    | 3.85281    | 4.00565    | 2.48378    | 1.45641         | 2.70765    | 2.55074   | 3.3078     | 1.62553    | 1.80104    | 2.38433   | 1.74907    | 1.30602   | 2.15182    | 2.55694    |
| SHQ1    | 2.4297     | 2.1025     | 2.29908    | 4.01122    | 1.85552         | 4.22074    | 1.92056   | 2.19542    | 1.99912    | 2.43757    | 2.97216   | 2.57579    | 3.95839   | 2.56097    | 2.4157     |
| SHROOM1 | 0.830375   | 0.935592   | 0.622895   | 1.8898     | 2.72043         | 1.53038    | 0.702116  | 0.457268   | 0.419023   | 0.633461   | 0.683956  | 0.895304   | 0.541281  | 1.4539     | 1.88065    |
| SHROOM2 | 1.63085    | 1.24996    | 1.02186    | 3.59472    | 2.07823         | 2.95474    | 1.16896   | 1.15681    | 0.963675   | 1.29636    | 1.23758   | 1.45865    | 2.63249   | 1.35273    | 1.10166    |
| SHROOM3 | 1.96797    | 1.1091     | 1.83307    | 0.634171   | 0.991791        | 1.41281    | 2.00956   | 1.82736    | 0.135569   | 1.34967    | 0.298741  | 0.303568   | 1.65592   | 0.466523   | 0.775183   |
| SHROOM4 | 2.79348    | 1.08241    | 1.00962    | 1.50433    | 1.5756          | 2.72091    | 1.74132   | 1.34894    | 0.44814    | 1.54957    | 2.2163    | 0.816391   | 1.63999   | 2.30144    | 4.14411    |
| SHTN1   | 3.15799    | 4.17963    | 4.638      | 4.64858    | 1.0901          | 4.61447    | 2.46612   | 3.95691    | 3.4947     | 4.37466    | 3.02803   | 3.24438    | 5.4736    | 3.03203    | 3.02912    |
| SI      | 0          | 0          | 0          | 0          | 0               | 0          | 0         | 0          | 0          | 0          | 0         | 0          | 0         | 0          | 0          |
| SIAE    | 1.86391    | 1.7038     | 1.60324    | 4.89171    | 1.86435         | 2.20135    | 1.51963   | 1.91553    | 2.0685     | 3.1986     | 4.2061    | 2.77733    | 3.19811   | 1.84351    | 2.58652    |
| SIAH1   | 5.81513    | 4.72541    | 4.96047    | 4.74199    | 3.89696         | 6.23646    | 4.22481   | 5.82375    | 14.174     | 6.66625    | 10.2541   | 5.65024    | 5.16954   | 4.44422    | 4.51379    |
| SIAH2   | 6.3815     | 5.86237    | 6.16467    | 10.5304    | 7.73252         | 9.55208    | 6.06414   | 4.79193    | 25.9598    | 12.0902    | 14.613    | 10.9602    | 16.3259   | 9.8105     | 6.93149    |
| SIAH3   | 0.0115889  | 0.00279186 | 0.00479358 | 0.00597135 | 0.0180016       | 0.0197356  | 0.0198478 | 0.00514963 | 0          | 0          | 0         | 0          | 0         | 0          | 0          |
| SIDT1   | 0.485978   | 0.204619   | 0.264401   | 0.279734   | 0.32644         | 0.342973   | 0.169961  | 0.338514   | 0.042657   | 0.109901   | 0.128503  | 0.0595214  | 0.107342  | 0.0526292  | 0.389832   |
| SIDT2   | 7.00629    | 8.20006    | 9.0082     | 4.37428    | 8.5591          | 13.5115    | 12.1029   | 7.62026    | 11.2193    | 4.55592    | 7.28132   | 6.00862    | 4.2274    | 4.87062    | 7.67454    |
| SIGIRR  | 2.21783    | 1.64212    | 1.74145    | 2.04019    | 5.70281         | 4.45973    | 2.26042   | 1.42537    | 0.885094   | 1.69847    | 3.98886   | 2.25933    | 2.19085   | 2.04321    | 3.85089    |



|           |            |           |            |           |           |            |           |           |            |            |            |            |            |           |           |
|-----------|------------|-----------|------------|-----------|-----------|------------|-----------|-----------|------------|------------|------------|------------|------------|-----------|-----------|
| SIGLEC1   | 1.51187    | 0.472908  | 0.495733   | 3.5455    | 2.71758   | 10.372     | 2.88619   | 1.32833   | 0.0922744  | 0.548952   | 1.2674     | 0.172495   | 0.253307   | 0.370787  | 2.49273   |
| SIGLEC10  | 0.150014   | 0.149024  | 0.316775   | 3.84828   | 0.512627  | 0.847695   | 0.114515  | 0.23634   | 0.166091   | 0.348397   | 0.977594   | 0.141492   | 1.15706    | 0.120773  | 0.421085  |
| SIGLEC11  | 0.00731218 | 0.0528468 | 0.0435268  | 0.0177841 | 0.107952  | 0.109169   | 0.111388  | 0.0972829 | 0.00193157 | 0.0108561  | 0.0412727  | 0.00638978 | 0.00943556 | 0         | 0.0315036 |
| SIGLEC12  | 0.0196878  | 0.0189718 | 0.00814358 | 0.131878  | 0.030582  | 0.284987   | 0.0112395 | 0.0174969 | 0.0119888  | 0.160617   | 0.377827   | 0.0493051  | 0.495397   | 0.524776  | 0.282742  |
| SIGLEC14  | 0.161768   | 0.0737629 | 0.167003   | 2.63311   | 0.658929  | 1.45712    | 0.521978  | 0.243346  | 0          | 0.754745   | 1.67334    | 0.10016    | 2.33E-27   | 0.347918  | 0.783612  |
| SIGLEC15  | 0.246039   | 0.148182  | 0.127213   | 0.110928  | 0.143319  | 0.274967   | 0.158017  | 0.191327  | 0.056184   | 0.193003   | 0.312466   | 0.0550149  | 0.109136   | 0.0562585 | 0.353343  |
| SIGLEC16  | 0.0894936  | 0.198349  | 0.196463   | 0.0346774 | 0.319695  | 0.0988922  | 0.140725  | 0.106204  | 0.0274888  | 0.118442   | 0.00673514 | 0.0246694  | 0.0230963  | 0.0966648 | 0.154229  |
| SIGLEC17P | 0.399528   | 0.313702  | 0.514139   | 0.198238  | 0.758518  | 0.0881982  | 0.236532  | 0.40767   | 0.108129   | 0.222866   | 0.601357   | 0.127055   | 0.229132   | 0.131474  | 0.127505  |
| SIGLEC5   | 0.148878   | 0.061973  | 0.0801998  | 0.696816  | 0.146331  | 0.90414    | 0.0446147 | 1.17E-19  | 0          | 0.507677   | 0.711004   | 0.021131   | 0.44387    | 0.0873558 | 0.542503  |
| SIGLEC6   | 0.580672   | 0.475908  | 0.614084   | 0.345467  | 0.511434  | 0.0101945  | 0.560467  | 0.707577  | 0.131232   | 0.225403   | 0.473045   | 0.235585   | 0.486654   | 0.275326  | 0.438452  |
| SIGLEC7   | 0.0527778  | 0.0127146 | 0          | 0.544524  | 0.327928  | 0.407993   | 0.015065  | 0.0234522 | 0          | 0.409073   | 1.00254    | 0.018882   | 0.309634   | 0.144816  | 0.540112  |
| SIGLEC8   | 0.109869   | 0.147466  | 0.162306   | 0.145572  | 0.292567  | 0.00668227 | 0.107524  | 0.0627699 | 0.0382308  | 0.0689482  | 0.0797323  | 0.0561528  | 0.01519    | 0.0287111 | 0.0112704 |
| SIGLEC9   | 0.183311   | 0.0772819 | 0.113736   | 1.15706   | 0.640678  | 1.39503    | 0.156974  | 0.234186  | 0.0837197  | 1.03534    | 2.71603    | 0.0245933  | 1.1088     | 0.610767  | 0.921403  |
| SIGLECL1  | 0          | 0         | 0          | 0         | 0         | 0          | 0         | 0         | 0          | 0          | 0          | 0          | 0          | 0         | 0         |
| SIGMAR1   | 6.20618    | 8.95147   | 11.2841    | 13.9466   | 9.90986   | 15.8989    | 12.6329   | 7.80476   | 6.43686    | 8.34219    | 16.2269    | 6.60852    | 15.6292    | 9.68201   | 7.78199   |
| SIK1      | 11.0397    | 15.2773   | 20.7374    | 8.85517   | 8.32565   | 11.01      | 18.809    | 13.535    | 19.4651    | 10.8802    | 11.2789    | 33.4166    | 17.9595    | 13.2645   | 4.53149   |
| SIK1B     | 4.1534     | 5.83067   | 7.79881    | 3.333     | 3.13287   | 4.14342    | 7.88671   | 5.09501   | 7.32581    | 4.53962    | 4.24521    | 12.9608    | 6.75416    | 4.98845   | 1.70545   |
| SIK2      | 5.17514    | 4.20432   | 5.28153    | 3.68834   | 3.89418   | 8.26403    | 5.6281    | 4.30552   | 3.32808    | 3.65742    | 4.05398    | 3.12329    | 4.25433    | 3.90547   | 5.97351   |
| SIK3      | 4.22473    | 4.78394   | 4.6245     | 5.57654   | 5.06896   | 6.79593    | 5.32972   | 4.02142   | 4.58804    | 5.95289    | 3.97838    | 5.1737     | 6.50774    | 5.15582   | 6.97065   |
| SIKE1     | 3.60086    | 3.05223   | 3.44087    | 3.41874   | 1.13292   | 3.95324    | 2.26981   | 3.95205   | 4.46667    | 3.68776    | 4.98237    | 2.49003    | 3.85863    | 2.95586   | 2.40609   |
| SIL1      | 4.76134    | 3.90947   | 4.46861    | 7.06611   | 9.8011    | 9.77379    | 4.8382    | 3.64175   | 5.41594    | 4.92395    | 7.81929    | 3.66507    | 6.21162    | 3.54104   | 4.81491   |
| SIM1      | 0.399717   | 0.122811  | 0.148564   | 0.268644  | 0.755877  | 0.128249   | 0.238114  | 0.18534   | 0.134049   | 0.392624   | 0.732433   | 0.0538856  | 0.728835   | 0.0635812 | 0.016639  |
| SIM2      | 0.0323362  | 0.0473443 | 0.0762184  | 0         | 0.0689006 | 0.0153412  | 0.0798559 | 0.036796  | 0.010764   | 0.00554648 | 0.0102358  | 0.0067346  | 0.00285121 | 0.0185288 | 0         |
| SIMC1     | 1.06568    | 1.31137   | 1.33319    | 1.20653   | 0.719749  | 1.03931    | 1.26471   | 1.30837   | 0.844534   | 0.524286   | 1.07764    | 0.420917   | 1.0776     | 0.884662  | 1.01101   |
| SIN3A     | 6.9618     | 6.8744    | 7.52293    | 5.89841   | 4.04693   | 9.45704    | 5.9152    | 6.65779   | 4.97511    | 3.6688     | 3.07559    | 3.69041    | 4.49596    | 3.9811    | 4.91108   |
| SIN3B     | 4.062      | 5.43979   | 4.92169    | 5.3667    | 11.3575   | 8.6699     | 5.48461   | 3.76917   | 7.57027    | 4.9989     | 4.00705    | 8.20681    | 5.7254     | 7.3597    | 5.74977   |

|           |           |           |            |            |           |           |            |            |           |           |           |           |           |           |           |
|-----------|-----------|-----------|------------|------------|-----------|-----------|------------|------------|-----------|-----------|-----------|-----------|-----------|-----------|-----------|
| SINHCAF   | 5.30176   | 5.646     | 6.57595    | 8.66019    | 1.66305   | 5.48219   | 3.56674    | 5.84573    | 6.76957   | 4.76751   | 7.73174   | 3.80408   | 7.55112   | 5.96728   | 2.66438   |
| SIPA1     | 1.75477   | 1.7752    | 1.8133     | 3.14689    | 7.01326   | 5.51413   | 2.22457    | 1.27091    | 4.47959   | 3.86406   | 5.23078   | 1.62199   | 4.9598    | 3.10714   | 5.21951   |
| SIPA1L1   | 3.56391   | 2.94729   | 3.05156    | 3.6573     | 2.5354    | 4.81759   | 4.05208    | 2.73259    | 3.93013   | 3.37363   | 3.44285   | 2.85903   | 4.1818    | 4.16098   | 6.24724   |
| SIPA1L2   | 7.84177   | 4.58092   | 3.49895    | 14.1059    | 8.59097   | 11.1236   | 4.67695    | 4.28557    | 8.12809   | 13.9578   | 8.28624   | 13.5608   | 18.172    | 20.1605   | 6.91522   |
| SIPA1L3   | 3.85332   | 6.10958   | 6.79938    | 5.19416    | 9.59663   | 6.11838   | 7.33155    | 4.45366    | 4.52366   | 1.94034   | 2.48053   | 3.47388   | 4.3839    | 3.52699   | 3.18477   |
| SIRPA     | 7.99683   | 6.48508   | 7.5118     | 26.6962    | 10.742    | 31.4394   | 10.5874    | 6.49106    | 12.9001   | 17.5904   | 18.9341   | 10.5002   | 27.1452   | 12.9585   | 14.9994   |
| SIRPB1    | 0.171157  | 0.066096  | 0.0998648  | 0.307672   | 0.202732  | 0.372695  | 0.130195   | 0.140833   | 0.102578  | 0.715326  | 1.48328   | 0.0778477 | 0.929575  | 0.185058  | 0.660113  |
| SIRPB2    | 0.334933  | 0.263712  | 0.27708    | 0.850267   | 0.507577  | 1.28684   | 0.578287   | 0.348481   | 0.0397962 | 0.492147  | 0.977521  | 0.0526069 | 0.216097  | 0.35864   | 0.703912  |
| SIRPD     | 0         | 0         | 0          | 0.0587428  | 0.0442724 | 0.0728054 | 0          | 0.0759887  | 0         | 0.143088  | 0.0321744 | 0         | 0.0367778 | 0.014896  | 0.122794  |
| SIRPG     | 0.16184   | 0.0779768 | 0.0669425  | 0.138984   | 0.0209494 | 0.241157  | 0.0923916  | 0.119858   | 0         | 0.0169271 | 0.0761236 | 0.0289501 | 0.104418  | 0.0211461 | 0.116211  |
| SIRPG-AS1 | 0.0248316 | 0         | 0          | 0.00852989 | 0.0257147 | 0.0074435 | 0.00945064 | 0          | 0         | 0         | 0         | 0         | 0.0106808 | 0.0259562 | 0.0713226 |
| SIRT1     | 2.86291   | 2.61306   | 3.10609    | 2.65473    | 1.40135   | 2.63753   | 1.78621    | 2.72042    | 5.02998   | 2.67693   | 2.98462   | 2.32459   | 2.77575   | 2.1313    | 1.9771    |
| SIRT2     | 6.55993   | 7.28344   | 7.86895    | 10.1303    | 14.1609   | 14.4243   | 9.31833    | 5.97569    | 18.2696   | 11.5511   | 16.76     | 11.8173   | 14.0666   | 8.4856    | 6.67772   |
| SIRT3     | 2.57893   | 2.34056   | 2.15699    | 2.33634    | 4.31093   | 4.29161   | 2.12089    | 1.35672    | 1.44917   | 2.68703   | 3.12571   | 1.99915   | 1.88161   | 1.87162   | 1.62555   |
| SIRT4     | 0.191265  | 0.276463  | 0.237342   | 0.354787   | 0.802171  | 0.407149  | 0.065514   | 0.101988   | 0.0465878 | 0.0960228 | 0.323871  | 0.0821131 | 0.0370209 | 0.229916  | 0.274681  |
| SIRT5     | 1.22446   | 1.36712   | 1.20451    | 1.24566    | 1.1217    | 1.6508    | 1.03957    | 0.885904   | 0.731287  | 0.743782  | 1.01011   | 0.727302  | 0.481099  | 0.812252  | 0.580523  |
| SIRT6     | 2.46486   | 2.41373   | 2.56817    | 6.2885     | 8.42333   | 7.27203   | 3.04249    | 1.75245    | 5.54951   | 4.2475    | 5.94107   | 3.42248   | 6.10337   | 4.51236   | 2.4492    |
| SIRT7     | 4.06441   | 4.77334   | 3.60569    | 5.51117    | 12.0246   | 7.1948    | 4.03       | 2.60214    | 9.49291   | 7.2827    | 4.92025   | 7.28005   | 8.24655   | 6.12115   | 2.70729   |
| SIT1      | 0.505552  | 0.189453  | 0.325289   | 0.617465   | 0.959807  | 0.414528  | 0.171029   | 0.34945    | 0.0228039 | 0.211507  | 0.591843  | 0.0803858 | 0.374503  | 0.127219  | 0.510915  |
| SIVA1     | 10.7761   | 7.3181    | 7.99594    | 16.7968    | 22.0544   | 25.8146   | 8.73944    | 5.46869    | 7.34801   | 15.7478   | 32.8687   | 7.75353   | 12.0268   | 9.86782   | 6.07824   |
| SIX1      | 0.344519  | 0.0497983 | 0.0427515  | 0.115387   | 0.561915  | 0.366692  | 0.19668    | 0.137781   | 0.0104896 | 0.421596  | 0.904236  | 0.0369769 | 0.372322  | 0.0855288 | 1.01428   |
| SIX2      | 0.0107442 | 0.0414138 | 0.0622186  | 0.531467   | 1.40192   | 1.09783   | 0.196278   | 0.152777   | 0.104682  | 0.593344  | 1.28566   | 0.0538144 | 0.533773  | 0.443617  | 1.86704   |
| SIX3      | 0         | 0         | 0.00758841 | 0.0189057  | 0.0284971 | 0         | 0          | 0.00815205 | 0         | 0         | 0         | 0         | 0.0118365 | 0         | 0.0131733 |
| SIX3-AS1  | 0         | 0         | 0          | 0          | 0         | 0         | 0          | 0          | 0         | 0         | 0         | 0         | 0         | 0         | 0         |
| SIX4      | 0.262512  | 0.15379   | 0.219084   | 0.162503   | 0.394022  | 0.371946  | 0.16936    | 0.153651   | 0.0452419 | 0.27684   | 0.562065  | 0.182631  | 0.178517  | 0.269554  | 0.514536  |
| SIX5      | 1.91759   | 1.9784    | 2.34506    | 4.76849    | 8.21294   | 5.61423   | 1.90386    | 1.37694    | 0.863085  | 1.93588   | 2.09413   | 2.22715   | 3.16925   | 2.17147   | 3.00334   |

|         |           |            |           |           |           |           |           |           |           |           |           |            |          |           |           |
|---------|-----------|------------|-----------|-----------|-----------|-----------|-----------|-----------|-----------|-----------|-----------|------------|----------|-----------|-----------|
| SIX6    | 0.0156902 | 0          | 0         | 0.0161692 | 0.0487446 | 0         | 0         | 0.0139441 | 0         | 0         | 0         | 0          | 0        | 0.0225331 |           |
| SKA1    | 0.57044   | 0.683961   | 0.684202  | 1.58251   | 0.872362  | 0.912159  | 0.643745  | 0.404927  | 0.277918  | 1.29699   | 1.74248   | 0.919539   | 2.01615  | 1.4913    | 0.903959  |
| SKA2    | 1.65663   | 1.28122    | 0.999921  | 3.37778   | 0.574303  | 2.48217   | 0.966038  | 1.71871   | 1.35949   | 3.22148   | 4.77563   | 1.19554    | 3.90841  | 2.82416   | 1.91964   |
| SKA3    | 0.254331  | 0.283021   | 0.151213  | 1.65942   | 0.0621933 | 0.950139  | 0.345814  | 0.169107  | 0.26071   | 0.626912  | 0.945121  | 0.380091   | 1.42255  | 1.03773   | 0.343358  |
| SKAP1   | 0.763603  | 0.481121   | 0.643855  | 0.348059  | 0.501828  | 0.500152  | 0.536528  | 0.535071  | 0.0178843 | 0.0368616 | 0.248658  | 0.136595   | 0.151592 | 0.353043  | 0.632671  |
| SKAP2   | 1.65811   | 2.56639    | 2.41167   | 3.32252   | 1.0858    | 2.87445   | 1.7385    | 2.25854   | 2.09198   | 3.32566   | 4.57552   | 2.26429    | 3.89469  | 2.36191   | 2.33456   |
| SKI     | 12.9239   | 13.804     | 16.4316   | 13.7406   | 22.0092   | 22.1921   | 21.0484   | 13.4427   | 12.3074   | 8.47435   | 11.5544   | 10.0367    | 15.408   | 10.7561   | 15.3923   |
| SKIDA1  | 0.161398  | 0.219768   | 0.20028   | 0.126552  | 0.185305  | 0.104565  | 0.220333  | 0.165264  | 0.0769165 | 0.110093  | 0.174276  | 0.105442   | 0.119979 | 0.0825198 | 0.0705441 |
| SKIL    | 4.22143   | 4.08326    | 3.76068   | 5.2781    | 1.67516   | 3.069     | 2.72412   | 5.23306   | 14.8653   | 8.80788   | 9.7465    | 6.58514    | 10.1333  | 7.83119   | 6.44167   |
| SKINT1L | 0.107215  | 0.118075   | 0.152049  | 0.015784  | 0         | 0.0521668 | 0.0874387 | 0.163343  | 0         | 0.0384473 | 0         | 0.0109593  | 0        | 0         | 0.0219963 |
| SKIV2L  | 0.526315  | 0.683804   | 0.661907  | 0.854086  | 1.56326   | 1.49803   | 0.779413  | 0.536797  | 0.750807  | 0.532875  | 0.481508  | 0.773482   | 0.942934 | 0.75091   | 0.789064  |
| SKOR1   | 0.372845  | 0.205306   | 0.330476  | 0.0548897 | 0.330947  | 0.0982655 | 0.344617  | 0.268239  | 0.0324346 | 0.0668513 | 0.0200427 | 0.0698712  | 0.040093 | 0.0185586 | 0.165736  |
| SKOR2   | 0         | 0          | 0         | 0         | 0         | 0         | 0         | 0         | 0         | 0         | 0         | 0          | 0        | 0         | 0         |
| SKP1    | 23.0995   | 18.3601    | 19.4358   | 30.7151   | 9.29698   | 30.3061   | 15.7525   | 22.0535   | 35.5165   | 33.2446   | 52.8119   | 24.6829    | 28.4911  | 21.9997   | 14.8755   |
| SKP1P2  | 0.0122971 | 0          | 0         | 0         | 0         | 0         | 0         | 0         | 0         | 0         | 0         | 0          | 0        | 0         | 0         |
| SKP2    | 1.42107   | 1.86838    | 1.73753   | 4.92102   | 1.64123   | 4.02107   | 1.57609   | 1.61418   | 1.06316   | 2.32468   | 3.92929   | 2.22116    | 3.94176  | 3.82294   | 2.07727   |
| SLA     | 2.14987   | 0.631985   | 0.921018  | 2.61112   | 0.914382  | 3.92268   | 0.715939  | 1.62062   | 0.249362  | 2.2245    | 3.59705   | 0.343367   | 1.12288  | 0.825991  | 2.15021   |
| SLA2    | 0.42589   | 0.253226   | 0.352326  | 0.289482  | 0.647479  | 0.432081  | 0.341422  | 0.281859  | 0.165538  | 0.125104  | 0.29665   | 0.129675   | 0.24555  | 0.322043  | 0.637659  |
| SLAIN1  | 0.313185  | 0.14461    | 0.280679  | 0.100858  | 0.192567  | 0.290629  | 0.283088  | 0.226145  | 0.0397317 | 0.114648  | 0.114351  | 0.00466859 | 0.13471  | 0.0136403 | 0.196776  |
| SLAIN2  | 7.07651   | 8.71129    | 9.22083   | 9.10974   | 4.79641   | 6.69762   | 6.55434   | 7.45923   | 23.7827   | 10.201    | 9.20981   | 7.79626    | 13.0414  | 8.08518   | 4.96527   |
| SLAMF1  | 0.326991  | 0.111371   | 0.228534  | 0.319544  | 0.105089  | 0.278428  | 0.148052  | 0.280581  | 0.0137323 | 0.0495319 | 0.140016  | 0.0322718  | 0.360108 | 0.16206   | 0.75298   |
| SLAMF6  | 0.320261  | 0.223338   | 0.306775  | 0.451631  | 0.18328   | 0.365989  | 0.0962272 | 0.307091  | 0.041057  | 0.116357  | 0.275908  | 0.0723648  | 0.168567 | 0.0925007 | 0.387314  |
| SLAMF7  | 0.820619  | 1.18616    | 0.541794  | 4.14705   | 1.9856    | 1.21609   | 0.414423  | 1.01681   | 5.3911    | 7.12058   | 8.5779    | 3.89003    | 21.0362  | 4.60646   | 3.08227   |
| SLAMF8  | 0.791772  | 0.781631   | 0.956811  | 3.21313   | 0.943961  | 3.60872   | 0.579318  | 0.832776  | 0.0948927 | 2.09233   | 5.21041   | 0.30452    | 2.10459  | 0.942484  | 2.60019   |
| SLAMF9  | 0.0200199 | 0.00964591 | 0.0165619 | 0.0618934 | 0         | 0.10228   | 0         | 0         | 0         | 1.15585   | 2.2826    | 0.300821   | 1.75668  | 0.177876  | 0.172507  |
| SLBP    | 6.16938   | 5.06081    | 6.15885   | 9.1145    | 5.62108   | 9.96771   | 5.26821   | 4.73643   | 7.02111   | 6.62407   | 11.3773   | 4.36988    | 11.4867  | 6.40003   | 4.54171   |

|             |           |            |            |            |            |            |            |            |            |            |            |            |            |            |            |
|-------------|-----------|------------|------------|------------|------------|------------|------------|------------|------------|------------|------------|------------|------------|------------|------------|
| SLC10A1     | 0.383116  | 0.56061    | 0.48128    | 0.116981   | 0.396741   | 0.132904   | 0.388826   | 0.453976   | 0.172812   | 0.23152    | 0.0640726  | 0.233518   | 0.01831    | 0.237313   | 0.264913   |
| SLC10A2     | 0         | 0.00885208 | 0          | 0          | 0          | 0.00521461 | 0          | 0.0108852  | 0.00745849 | 0.0230592  | 0          | 0          | 0          | 0          | 0          |
| SLC10A3     | 5.78307   | 6.1971     | 6.77759    | 9.0167     | 11.8943    | 12.9762    | 8.26594    | 4.54944    | 24.9115    | 8.83101    | 12.3314    | 8.87365    | 11.1868    | 6.35841    | 4.73706    |
| SLC10A4     | 0.0109268 | 0.0263236  | 0.0451973  | 0          | 0          | 0.00930406 | 0          | 0.00971087 | 0          | 0.0274286  | 0.0863453  | 0.00781845 | 0.00704994 | 0.0342651  | 0          |
| SLC10A5     | 0.175726  | 0.152401   | 0.203522   | 0.0905451  | 0.109185   | 0.134665   | 0.0802551  | 0.234255   | 0.128408   | 0.132332   | 0.0198372  | 0.201178   | 0          | 0.0642893  | 0.0504728  |
| SLC10A6     | 6.45602   | 8.67852    | 10.0954    | 13.9572    | 5.55273    | 6.69112    | 9.16571    | 7.73682    | 17.8084    | 11.6613    | 10.819     | 10.2532    | 27.4279    | 12.2647    | 3.20857    |
| SLC10A7     | 0.70265   | 0.735895   | 0.749546   | 0.895598   | 0.22978    | 0.585701   | 0.650255   | 0.824939   | 0.941322   | 0.816915   | 1.06456    | 0.568918   | 0.827952   | 0.719008   | 1.11531    |
| SLC11A1     | 0.210282  | 0.0868433  | 0.0546732  | 3.13908    | 0.559956   | 2.9825     | 0.157776   | 0.218918   | 0.00731714 | 3.9061     | 4.19149    | 0.0816796  | 1.65133    | 1.03308    | 2.84735    |
| SLC11A2     | 4.91767   | 4.86668    | 5.45246    | 5.96152    | 2.73118    | 5.31383    | 4.39172    | 4.9084     | 3.55789    | 2.33058    | 3.99275    | 2.15115    | 3.71925    | 2.33913    | 3.54098    |
| SLC12A1     | 0.0192658 | 0.0116032  | 0.0278916  | 0.00992699 | 0.00748161 | 0.0164046  | 0.0164978  | 0.0128414  | 0          | 0          | 0          | 0          | 0.0248604  | 0          | 0.0899214  |
| SLC12A2     | 22.8227   | 8.74886    | 13.4236    | 3.01649    | 8.63175    | 13.2791    | 11.8768    | 18.4819    | 2.50684    | 3.29639    | 3.29682    | 2.42202    | 4.85726    | 3.47179    | 4.81319    |
| SLC12A3     | 0.0124716 | 0.002003   | 0.00343912 | 0          | 0.0129151  | 0.00707958 | 0.00949308 | 0.00369456 | 0.00506298 | 0.00521769 | 0.00938589 | 0          | 0          | 0.00434545 | 0.00597024 |
| SLC12A4     | 3.79725   | 6.68145    | 6.79413    | 9.13784    | 12.3993    | 14.8785    | 6.82835    | 3.94163    | 3.17752    | 5.21912    | 3.93572    | 5.22691    | 8.7771     | 8.90987    | 9.46922    |
| SLC12A5     | 0.0184967 | 0.0516895  | 0.0673278  | 0.0114368  | 0.0402244  | 0.0157497  | 0.045269   | 0.0328766  | 0.00901075 | 0.0139291  | 0.0141716  | 0.0158818  | 0          | 0.00966718 | 0.0531272  |
| SLC12A5-AS1 | 0         | 2.13E-38   | 0.0103347  | 0.0387352  | 0.0397049  | 0          | 0.0349938  | 0          | 0          | 0.0786524  | 0.0225734  | 0.0443778  | 0          | 0.0193355  | 0.0376608  |
| SLC12A6     | 3.01323   | 3.46601    | 3.28593    | 3.72734    | 3.4862     | 3.12119    | 2.42718    | 2.95006    | 3.97485    | 6.92456    | 4.91053    | 4.90736    | 7.90703    | 4.78306    | 3.56822    |
| SLC12A7     | 6.65406   | 4.49265    | 5.73934    | 2.97221    | 5.32731    | 8.8573     | 6.2473     | 3.33875    | 0.361354   | 1.35267    | 1.92593    | 0.780518   | 2.92498    | 2.14135    | 4.3488     |
| SLC12A8     | 0.460886  | 0.526604   | 0.332256   | 0.983838   | 0.828416   | 0.919427   | 0.443532   | 0.315975   | 0.336784   | 0.735469   | 1.01083    | 0.343909   | 0.824115   | 0.788019   | 0.57679    |
| SLC12A9     | 2.85587   | 3.41771    | 3.38313    | 3.97916    | 8.53696    | 6.59144    | 3.59879    | 2.13241    | 2.27619    | 2.62444    | 3.66956    | 2.84671    | 3.87223    | 3.43977    | 4.35829    |
| SLC12A9-AS1 | 0.504481  | 0.3646     | 0.46951    | 0.194956   | 0.391816   | 0.429559   | 0.576      | 0.112085   | 0.1536     | 0.395734   | 0.498309   | 0.180485   | 0          | 0.032958   | 0          |
| SLC13A1     | 0.0108006 | 0.0103954  | 0.00891378 | 0.005549   | 0.00836923 | 0.00919121 | 0.0184573  | 0.019261   | 0.00657821 | 0.0203083  | 0.00607855 | 0.00386204 | 0          | 0.00846696 | 0.0231989  |
| SLC13A2     | 1.44371   | 0.463733   | 0.883085   | 0.00901686 | 1.75328    | 0.417216   | 1.5285     | 1.38413    | 0          | 0          | 0          | 0          | 0          | 0.00457299 | 0.0125657  |
| SLC13A3     | 0.322418  | 0.431809   | 0.402351   | 0.191472   | 0.271635   | 0.614213   | 0.311972   | 0.291395   | 0.0865202  | 0.164611   | 0.265266   | 0.0703826  | 0.123403   | 0.174222   | 0.565057   |
| SLC13A4     | 0.158731  | 0.336509   | 0.275759   | 0.43348    | 0.456145   | 0.324379   | 0.217481   | 0.324455   | 0.309307   | 0.348643   | 0.179188   | 0.539489   | 0.056327   | 0.506056   | 0.5471     |
| SLC13A5     | 0.0211095 | 0.0542447  | 0.0407476  | 0.10877    | 0.153022   | 0.191728   | 0.0482043  | 0.0312673  | 0.317078   | 0.353261   | 0.81022    | 0.26181    | 0.281475   | 0.54796    | 0.0808424  |
| SLC14A1     | 1.44872   | 0.873776   | 1.38386    | 0.0912954  | 0.226655   | 0.106495   | 0.821101   | 1.61633    | 0.0507735  | 0.0588656  | 0.0647111  | 0.048474   | 0.0235358  | 0.049025   | 0          |

|              |           |            |           |           |           |           |           |           |           |           |            |           |           |            |           |
|--------------|-----------|------------|-----------|-----------|-----------|-----------|-----------|-----------|-----------|-----------|------------|-----------|-----------|------------|-----------|
| SLC14A2      | 0.119709  | 0.0996421  | 0.0523655 | 0.0696049 | 0.105313  | 0.0625601 | 0.136531  | 0.115419  | 0.0126535 | 0.0456702 | 0.070372   | 0.111991  | 0.0268135 | 0.0574162  | 0.0759819 |
| SLC14A2-AS1  | 0.0570201 | 0.00343415 | 0         | 0         | 0         | 0.0424829 | 0.0162759 | 0.0126687 | 0         | 0         | 0          | 0         | 0         | 0.0074503  | 0.0409441 |
| SLC15A1      | 3.85594   | 4.92099    | 5.60836   | 8.22952   | 4.08121   | 3.54796   | 4.92651   | 4.46607   | 40.2549   | 4.01288   | 7.33556    | 9.26208   | 1.50416   | 1.75612    | 0.786533  |
| SLC15A2      | 0.255609  | 0.151421   | 0.145594  | 0.0906828 | 0.13018   | 0.257018  | 0.081334  | 0.197372  | 0.0204133 | 0.105185  | 0.122989   | 0.0239862 | 0.0405535 | 0.124873   | 0.0361068 |
| SLC15A3      | 2.61398   | 0.922197   | 1.14005   | 4.19283   | 3.85656   | 11.7063   | 1.41111   | 1.07892   | 0.199804  | 2.27873   | 3.01259    | 0.203472  | 2.992     | 1.78347    | 4.28805   |
| SLC15A4      | 3.16153   | 3.02256    | 3.3225    | 5.16499   | 3.40286   | 5.89979   | 3.40129   | 2.78021   | 3.76954   | 4.06178   | 6.43539    | 2.56497   | 6.54771   | 3.69069    | 3.77767   |
| SLC15A5      | 0         | 0.00762961 | 0         | 0.0163186 | 0         | 0         | 0         | 0.0211094 | 0         | 0         | 0.00893795 | 0         | 0         | 0          | 0         |
| SLC16A1      | 3.68365   | 3.99403    | 4.42131   | 23.3895   | 3.04197   | 14.0709   | 3.27187   | 2.95649   | 4.26889   | 14.4425   | 12.8276    | 5.33531   | 22.2481   | 15.7052    | 4.99825   |
| SLC16A1-AS1  | 0.954035  | 1.17883    | 0.942002  | 1.14174   | 1.36243   | 0.707529  | 0.878457  | 0.518722  | 0.112443  | 0.366949  | 0.677459   | 0.440411  | 0.287913  | 1.06158    | 1.12703   |
| SLC16A10     | 2.32951   | 1.92852    | 2.83442   | 1.70767   | 0.360611  | 1.0838    | 3.33613   | 3.23703   | 0.594716  | 1.8889    | 3.71416    | 0.19475   | 0.65078   | 1.03342    | 1.59801   |
| SLC16A11     | 0.539106  | 1.23072    | 1.11497   | 0.343921  | 2.55213   | 0.852506  | 0.923301  | 0.695854  | 0.922325  | 0.193324  | 0.217351   | 0.303085  | 0.115943  | 0.221383   | 0.42398   |
| SLC16A12     | 0.350501  | 0.060313   | 0.062134  | 0.0980403 | 0.0544448 | 0.123642  | 0.097189  | 0.0444994 | 0.0914722 | 0.0628449 | 0.0226098  | 0.0931515 | 0.0904565 | 0.00785087 | 0.122245  |
| SLC16A12-AS1 | 0         | 0          | 0         | 0         | 0         | 0         | 0         | 0         | 0         | 0         | 0          | 3.92E-27  | 0         | 0          | 0         |
| SLC16A13     | 0.595788  | 1.26306    | 1.46768   | 1.92379   | 4.17487   | 1.67975   | 1.58725   | 0.823646  | 2.69279   | 1.87775   | 2.55577    | 1.8852    | 2.66517   | 1.40469    | 0.703515  |
| SLC16A14     | 2.39429   | 2.48469    | 2.17662   | 0.520591  | 1.44679   | 1.20978   | 1.72435   | 2.4365    | 0.724187  | 0.435902  | 0.653438   | 0.553488  | 0.39044   | 0.376783   | 0.491215  |
| SLC16A2      | 1.9896    | 1.11211    | 1.03565   | 1.01941   | 1.95329   | 2.09385   | 1.58888   | 1.21687   | 0.626196  | 1.90092   | 2.31541    | 0.739798  | 3.16232   | 1.69122    | 2.82521   |
| SLC16A3      | 0.580982  | 0.503056   | 0.535936  | 5.99141   | 2.68854   | 9.05002   | 0.835753  | 0.554499  | 0.51892   | 9.65238   | 17.5484    | 1.52787   | 11.0749   | 6.59111    | 7.49267   |
| SLC16A4      | 0.751341  | 0.702968   | 0.556515  | 0.513185  | 0.366413  | 0.915001  | 0.758106  | 0.892894  | 0.106401  | 0.625018  | 0.877758   | 0.168783  | 0.264928  | 0.461175   | 1.3676    |
| SLC16A5      | 2.43324   | 2.12919    | 2.1664    | 2.26015   | 4.66102   | 3.61416   | 3.43848   | 1.88124   | 3.2159    | 2.21858   | 2.62365    | 1.3741    | 1.69663   | 1.96745    | 2.13114   |
| SLC16A6      | 1.52142   | 1.90874    | 1.39417   | 1.06132   | 0.499925  | 1.4001    | 0.761653  | 1.93975   | 3.22121   | 1.56435   | 3.42178    | 1.70829   | 0.879673  | 0.880787   | 0.840363  |
| SLC16A7      | 1.3837    | 1.34053    | 1.40639   | 1.75364   | 0.4316    | 2.07354   | 1.79348   | 1.78323   | 1.99371   | 2.64932   | 3.10234    | 3.02214   | 3.27186   | 2.92563    | 2.62357   |
| SLC16A8      | 0.451631  | 0.582235   | 0.525089  | 0.213841  | 0.7205    | 0.374165  | 0.515658  | 0.357981  | 0.208122  | 0.107241  | 0.179131   | 0.323154  | 0.0551279 | 0.108452   | 0         |
| SLC16A9      | 3.66888   | 0.301807   | 0.31462   | 1.49276   | 0.225877  | 1.80488   | 0.312899  | 0.407575  | 0.817369  | 2.27433   | 1.97615    | 1.37662   | 4.09195   | 3.28846    | 1.004     |
| SLC17A1      | 0         | 0          | 0         | 0         | 0         | 0         | 0.0143375 | 0         | 0         | 0         | 0          | 0         | 0         | 0          | 0         |
| SLC17A2      | 0         | 0          | 0         | 0         | 0         | 0         | 0         | 0         | 0         | 0         | 0          | 0         | 0         | 0          | 0         |
| SLC17A3      | 0         | 0          | 0         | 0         | 0         | 0         | 0.014615  | 0         | 0         | 0.0160658 | 0          | 0         | 0         | 0          | 0         |

|          |            |            |            |            |            |           |            |            |           |           |           |            |           |           |           |
|----------|------------|------------|------------|------------|------------|-----------|------------|------------|-----------|-----------|-----------|------------|-----------|-----------|-----------|
| SLC17A4  | 0          | 0          | 0          | 0          | 0          | 0         | 0          | 0          | 0         | 0         | 0         | 0          | 0         | 0         | 0         |
| SLC17A5  | 1.94837    | 1.80012    | 2.61128    | 1.80635    | 1.50783    | 4.61432   | 3.03788    | 2.4701     | 1.82858   | 3.90915   | 7.74151   | 1.28918    | 3.74421   | 2.48554   | 2.91846   |
| SLC17A6  | 0          | 0          | 0          | 0          | 0          | 0         | 0          | 0          | 0         | 0         | 0         | 0          | 0         | 0         | 0         |
| SLC17A7  | 0.676561   | 0.277268   | 0.353833   | 0.136238   | 0.39863    | 0.490001  | 1.17203    | 0.23498    | 0.0473549 | 0.126885  | 0.263363  | 0.0779007  | 0.155539  | 0.170704  | 0.547238  |
| SLC17A8  | 0.00581046 | 0          | 0          | 0          | 0          | 0         | 0.00663419 | 0          | 0         | 0         | 0         | 0.00415754 | 0         | 0         | 0         |
| SLC17A9  | 0.226722   | 0.340318   | 0.396762   | 0.575122   | 0.921078   | 0.579151  | 0.477902   | 0.247989   | 0.138061  | 0.755176  | 1.39783   | 0.492916   | 0.466969  | 1.58145   | 3.25601   |
| SLC18A1  | 0          | 0          | 0          | 0.00806547 | 0          | 0         | 0          | 0          | 0         | 0.0098231 | 0         | 0          | 0.0100993 | 0         | 0         |
| SLC18A2  | 1.37472    | 1.9986     | 2.67009    | 1.48444    | 0.427082   | 0.524204  | 1.71292    | 2.53377    | 1.89263   | 1.92046   | 2.17264   | 1.32578    | 3.34345   | 1.30577   | 2.15453   |
| SLC18A3  | 0.0669427  | 0.00460772 | 0.00791139 | 0.0689864  | 0.0445651  | 0.276861  | 0.021838   | 0.0339961  | 0.011647  | 0         | 0.107957  | 0          | 0         | 0.0349872 | 0         |
| SLC18B1  | 4.2755     | 2.92447    | 2.93697    | 4.69124    | 2.35708    | 5.2739    | 2.57157    | 2.73104    | 1.94103   | 2.44353   | 4.05082   | 1.65936    | 2.94325   | 2.49892   | 3.17972   |
| SLC19A1  | 0.313407   | 0.313309   | 0.368596   | 0.923627   | 0.628213   | 1.75077   | 0.612163   | 0.296928   | 0.111335  | 0.500313  | 1.20102   | 0.170207   | 1.21096   | 0.567269  | 0.720472  |
| SLC19A2  | 2.90243    | 2.86128    | 2.95924    | 2.6106     | 2.0565     | 2.50932   | 3.59006    | 3.28653    | 12.0464   | 5.77583   | 6.56729   | 6.09825    | 6.05323   | 5.10305   | 1.74592   |
| SLC19A3  | 0.294894   | 0.106563   | 0.101649   | 0.823054   | 0.534418   | 0.967776  | 0.385803   | 0.185638   | 2.13244   | 0.269881  | 0.714345  | 0.329695   | 0.384492  | 0.272929  | 0.317629  |
| SLC1A1   | 0.736567   | 0.52786    | 0.435243   | 0.618724   | 0.451888   | 1.01719   | 0.501766   | 0.632596   | 0.120613  | 0.660334  | 1.28567   | 0.279018   | 0.307501  | 0.608175  | 1.16447   |
| SLC1A2   | 0.0967628  | 0.194556   | 0.295565   | 0.0690348  | 0.0664815  | 0.0760544 | 0.327192   | 0.148837   | 0.0158639 | 0.053717  | 0.0315096 | 0.0173091  | 0.0936463 | 0.0651606 | 0.0881885 |
| SLC1A3   | 2.38426    | 1.96507    | 1.27165    | 2.99163    | 1.07929    | 2.22063   | 1.0324     | 2.05126    | 0.307185  | 1.73219   | 3.42218   | 0.561857   | 1.77167   | 1.44261   | 1.7428    |
| SLC1A4   | 3.90885    | 5.39338    | 5.46158    | 12.1145    | 7.78724    | 9.70878   | 5.75159    | 3.10364    | 7.42689   | 5.62942   | 4.95937   | 5.95771    | 6.9753    | 4.22252   | 3.17198   |
| SLC1A5   | 15.0944    | 9.04636    | 7.46479    | 20.0857    | 9.85625    | 31.0649   | 9.05794    | 8.7826     | 5.49469   | 9.11457   | 12.1827   | 7.48942    | 29.2722   | 14.0912   | 7.79589   |
| SLC1A6   | 0.0225346  | 0.323011   | 0.480037   | 0.127724   | 0.358791   | 0.0623608 | 0.604639   | 0.270363   | 0.260724  | 0.0212124 | 0.082676  | 0.0362793  | 0.0109044 | 0         | 0         |
| SLC1A7   | 0.372964   | 0.139422   | 0.132992   | 0.0397604  | 0.439501   | 0.20259   | 0.462548   | 0.194304   | 0         | 0.0242125 | 0.0145183 | 0.0276068  | 0.0290421 | 0.0571338 | 0.572563  |
| SLC20A1  | 3.61846    | 2.12976    | 2.50021    | 5.21908    | 2.07583    | 9.00979   | 2.81689    | 2.12558    | 3.97286   | 7.56063   | 8.13863   | 7.49761    | 15.3297   | 8.91139   | 7.31259   |
| SLC20A2  | 7.62659    | 6.84222    | 8.607      | 10.4007    | 5.01618    | 9.12779   | 6.76517    | 5.89345    | 23.1557   | 12.5532   | 9.15577   | 9.94652    | 24.6487   | 11.8876   | 5.61709   |
| SLC22A1  | 0.315697   | 0.228162   | 0.321437   | 0.0625645  | 0.169749   | 0.206779  | 0.318862   | 0.129492   | 0.0739392 | 0.213356  | 0.013707  | 0.104257   | 0.0235023 | 0.177689  | 0.296442  |
| SLC22A10 | 0.00895282 | 0.00862721 | 0.0444384  | 0          | 0          | 0.0152464 | 0          | 0.00795653 | 0         | 0         | 0         | 0          | 0         | 0         | 0.0257148 |
| SLC22A11 | 0          | 0          | 0          | 0          | 0.00925332 | 0.0101447 | 0.00680154 | 0          | 0         | 0         | 0         | 0          | 0         | 0         | 0.0342202 |
| SLC22A12 | 0          | 0          | 0          | 0          | 0          | 0         | 0          | 0.00640536 | 0         | 0         | 0         | 0          | 0         | 0         | 0         |

|            |            |           |            |            |            |            |           |            |           |           |           |            |            |            |           |
|------------|------------|-----------|------------|------------|------------|------------|-----------|------------|-----------|-----------|-----------|------------|------------|------------|-----------|
| SLC22A13   | 0.0271208  | 0.130672  | 0.0897448  | 0.111795   | 0.196597   | 0.0384883  | 0.0619312 | 0.0321369  | 0.03303   | 0.363086  | 0         | 0.155245   | 0.0174982  | 0.41106    | 0.0259659 |
| SLC22A14   | 0          | 0.0148808 | 0.0255501  | 0.084874   | 0.0159916  | 0          | 0         | 0.0182986  | 0.0125381 | 0.0775273 | 0.0464869 | 0.0662968  | 0.00664225 | 0.0968507  | 0.0147849 |
| SLC22A15   | 1.00025    | 1.3395    | 1.27367    | 1.37438    | 0.822565   | 1.13978    | 1.25962   | 0.90637    | 1.30179   | 1.63081   | 1.56643   | 1.65244    | 1.12937    | 1.31719    | 1.4224    |
| SLC22A16   | 0.0233179  | 0         | 0.00964512 | 0.0240298  | 0          | 0.268041   | 0.0133118 | 0.0103615  | 0         | 0.117066  | 0.210584  | 0          | 0.0376115  | 0.0853088  | 0         |
| SLC22A17   | 1.82659    | 2.26824   | 2.63271    | 0.92177    | 2.95432    | 4.07268    | 2.33279   | 1.65679    | 0.286672  | 1.46534   | 3.79449   | 0.747804   | 0.868692   | 1.24991    | 3.25873   |
| SLC22A18   | 1.74415    | 2.70073   | 2.56136    | 1.66104    | 3.92376    | 8.13673    | 4.10643   | 2.21283    | 2.27067   | 1.79656   | 4.42669   | 1.9021     | 2.12646    | 1.0373     | 1.86566   |
| SLC22A18AS | 0.171132   | 0.184309  | 0.24651    | 0.145235   | 0.344011   | 0.767721   | 0.252861  | 0.223658   | 0.0735597 | 0.30323   | 0.511376  | 0.158464   | 0.227322   | 0.210449   | 0.245767  |
| SLC22A2    | 0.009213   | 0         | 0          | 0          | 0          | 0.00784475 | 0         | 0          | 0         | 0.0115633 | 0         | 0.00659215 | 0          | 0          | 0         |
| SLC22A20P  | 0.253142   | 0.30492   | 0.338289   | 0.180603   | 0.196609   | 0.232128   | 0.311263  | 0.302847   | 0.0948612 | 0.0855399 | 0.043964  | 0.195063   | 0.0125635  | 0.086506   | 0.0699124 |
| SLC22A23   | 5.81769    | 8.9294    | 7.15464    | 17.0654    | 15.1407    | 12.7709    | 7.33244   | 5.55596    | 22.3599   | 15.8211   | 11.1837   | 17.3068    | 23.2595    | 11.8169    | 5.14813   |
| SLC22A24   | 0.0185888  | 0.0179127 | 0.0384449  | 0          | 0          | 0          | 0         | 0.0165202  | 0         | 0         | 0         | 0.00665039 | 0          | 0.00485766 | 0         |
| SLC22A25   | 0.010071   | 0.0436711 | 0.0249942  | 0          | 0          | 0          | 0.0344961 | 0.0179005  | 0         | 0         | 0         | 0          | 0          | 0          | 0         |
| SLC22A3    | 2.75632    | 2.27761   | 2.33929    | 4.08409    | 2.63989    | 3.20428    | 1.99749   | 2.6717     | 1.24361   | 1.80143   | 1.58801   | 3.36708    | 2.35886    | 2.77664    | 0.574278  |
| SLC22A31   | 0.0124425  | 0.0599499 | 0.0720532  | 0.0384671  | 0.0966375  | 0.13773    | 0.113652  | 0.0442314  | 0.151536  | 0.0156166 | 0.014046  | 0.0356118  | 0.00802784 | 0.013006   | 0         |
| SLC22A4    | 1.12305    | 0.443008  | 0.436715   | 0.682057   | 0.534436   | 1.31629    | 0.397806  | 0.513318   | 0.104483  | 0.739667  | 1.30705   | 0.233071   | 0.837869   | 0.659135   | 1.19784   |
| SLC22A5    | 1.47259    | 1.77972   | 1.73064    | 1.27581    | 2.14936    | 1.38234    | 1.18246   | 1.0883     | 0.713675  | 0.563261  | 0.584553  | 0.705237   | 0.810735   | 0.895127   | 0.634584  |
| SLC22A6    | 0          | 0.0351281 | 0.0344655  | 0          | 0          | 0          | 0.011892  | 0          | 0         | 0         | 0         | 0          | 0          | 0          | 0         |
| SLC22A7    | 0          | 0.0174297 | 0.022445   | 0          | 0.0140481  | 0.0154013  | 0.0103259 | 0          | 0         | 0.0227018 | 0         | 0          | 0          | 0          | 0         |
| SLC22A8    | 0.0105966  | 0.0153169 | 0.00876628 | 0          | 0          | 0.0270687  | 0.0241978 | 0          | 0         | 0         | 0         | 0          | 0          | 0          | 0         |
| SLC22A9    | 0          | 0         | 0          | 0          | 0.0155759  | 0          | 0         | 0          | 0         | 0         | 0         | 0          | 0          | 0          | 0         |
| SLC23A1    | 0.519518   | 0.647033  | 0.632509   | 0.414161   | 3.63907    | 0.217008   | 0.671512  | 0.670778   | 4.21412   | 0.258359  | 0.431554  | 0.5611     | 0.240325   | 0.174184   | 0.0985406 |
| SLC23A2    | 4.71974    | 3.89231   | 3.63325    | 5.80695    | 3.49503    | 7.15232    | 4.63991   | 3.42795    | 2.26092   | 3.70084   | 4.45799   | 4.29476    | 5.71789    | 4.88031    | 5.13431   |
| SLC23A3    | 0.200994   | 0.479599  | 0.506748   | 0.266311   | 1.08531    | 0.171144   | 0.458977  | 0.229663   | 0.186505  | 0.384409  | 0.0324139 | 0.451996   | 0.0679279  | 0.800369   | 0.384871  |
| SLC24A1    | 1.49905    | 1.38114   | 1.46067    | 1.33163    | 1.33986    | 1.83242    | 1.15664   | 1.46862    | 0.368523  | 0.750837  | 0.812745  | 0.547842   | 0.878005   | 0.860551   | 1.24374   |
| SLC24A2    | 0.00426994 | 0.0401177 | 0.0406225  | 0.00660044 | 0.00331634 | 0.0254506  | 0.0121882 | 0.00948691 | 0         | 0.0294756 | 0.0241011 | 0.00458288 | 0.0922905  | 0.16849    | 0.177833  |
| SLC24A3    | 4.15968    | 2.74108   | 2.15135    | 7.19964    | 8.36564    | 7.78815    | 2.70423   | 2.8453     | 7.50844   | 3.12204   | 3.54029   | 4.20693    | 4.17353    | 2.45395    | 2.63224   |

|              |          |           |           |           |           |           |           |           |            |           |            |            |           |            |           |
|--------------|----------|-----------|-----------|-----------|-----------|-----------|-----------|-----------|------------|-----------|------------|------------|-----------|------------|-----------|
| SLC24A4      | 0.060946 | 0.0180872 | 0.021331  | 0.0555597 | 0.0473494 | 0.0878218 | 0.0749389 | 0.0729126 | 0.00285482 | 0.0500149 | 0.063508   | 0.0117407  | 0.0544459 | 0.0318646  | 0.104358  |
| SLC24A5      | 0.385749 | 0.73678   | 0.909712  | 0.513809  | 0.22232   | 0.93534   | 0.870866  | 1.02569   | 0.564217   | 0.0995732 | 0.0969411  | 0.249073   | 0.0827239 | 0.0455431  | 1.26E-12  |
| SLC25A1      | 7.09991  | 8.72117   | 9.23833   | 17.2684   | 18.7136   | 24.961    | 10.2382   | 5.43255   | 12.2244    | 15.1802   | 20.3525    | 10.5009    | 16.873    | 11.4305    | 6.59261   |
| SLC25A10     | 2.48493  | 3.75733   | 2.57675   | 6.60848   | 10.7439   | 8.58062   | 3.76551   | 2.10663   | 5.66222    | 3.82309   | 6.69621    | 5.07188    | 4.47729   | 4.43485    | 1.46365   |
| SLC25A11     | 8.2636   | 9.57155   | 9.59792   | 13.5623   | 19.1144   | 17.677    | 11.6809   | 7.06022   | 22.0103    | 10.2113   | 21.1423    | 9.93634    | 12.6354   | 10.1822    | 7.28189   |
| SLC25A12     | 6.72647  | 3.93262   | 3.69694   | 3.28097   | 1.54659   | 4.20438   | 3.50291   | 4.08984   | 1.70608    | 2.39031   | 3.80971    | 1.6692     | 3.11855   | 2.20553    | 2.59374   |
| SLC25A13     | 4.50107  | 4.2326    | 3.8495    | 6.22194   | 2.25175   | 5.72725   | 3.43438   | 3.00817   | 8.55367    | 5.79484   | 5.68664    | 5.53363    | 8.29598   | 4.76926    | 2.59187   |
| SLC25A14     | 1.08877  | 1.04917   | 1.34008   | 1.43672   | 0.433122  | 1.20972   | 0.742843  | 0.96761   | 1.326      | 1.48318   | 1.87361    | 0.988057   | 1.36211   | 1.1936     | 1.10597   |
| SLC25A15     | 1.48432  | 1.22094   | 1.17361   | 1.71785   | 1.49017   | 1.98901   | 1.12291   | 0.984403  | 2.93776    | 1.56137   | 2.51089    | 1.22139    | 2.13056   | 1.61653    | 1.1641    |
| SLC25A16     | 2.59728  | 1.84031   | 1.8629    | 2.27269   | 1.07311   | 2.27377   | 2.33599   | 2.20199   | 1.56946    | 2.20103   | 3.37444    | 1.34985    | 2.19863   | 1.9789     | 2.98593   |
| SLC25A17     | 1.91692  | 2.12976   | 1.97683   | 3.53594   | 1.69956   | 3.76381   | 1.8189    | 1.68026   | 2.21733    | 2.71354   | 5.12827    | 1.87892    | 3.32633   | 2.8043     | 1.83529   |
| SLC25A18     | 0.227105 | 0.218845  | 0.214717  | 0.111447  | 0.0839933 | 0.138126  | 0.246953  | 0.18261   | 0.105367   | 0.108587  | 0.0366247  | 0.0619046  | 0.0418648 | 0.15826    | 0.124248  |
| SLC25A19     | 0.350249 | 0.682898  | 0.519129  | 1.35771   | 1.01929   | 1.81059   | 0.608345  | 0.31224   | 0.956687   | 1.22116   | 2.46907    | 0.682549   | 1.69786   | 0.954753   | 0.888503  |
| SLC25A2      | 0.435444 | 0.637181  | 1.04066   | 0.282539  | 0.425878  | 0.0274648 | 0.93911   | 0.429985  | 0.0589247  | 0.0607252 | 0.036412   | 0.219254   | 0.0520271 | 0.269727   | 0.0463224 |
| SLC25A20     | 2.04275  | 1.36142   | 1.29526   | 2.11772   | 3.30611   | 4.02036   | 1.56421   | 1.4893    | 2.21969    | 2.54851   | 4.26682    | 1.12905    | 2.62016   | 1.70054    | 1.63371   |
| SLC25A21     | 0.153237 | 0.100941  | 0.0570585 | 0.130918  | 0.0103094 | 0.216391  | 0.076317  | 0.0553632 | 0.0214231  | 0.0935965 | 0.00791608 | 0.0251727  | 0.204286  | 0.0721855  | 0.143151  |
| SLC25A21-AS1 | 0.325491 | 0.190911  | 0.154171  | 0.0854376 | 0.302316  | 0.386297  | 0.382616  | 0.248668  | 0          | 0.0374877 | 0.396082   | 0.00936622 | 0.0506735 | 0.00988295 | 0.0751954 |
| SLC25A22     | 1.10386  | 2.43045   | 2.61842   | 3.98614   | 5.2692    | 5.1547    | 2.79823   | 1.71579   | 2.39704    | 2.64067   | 2.79167    | 3.6457     | 4.79867   | 2.90507    | 2.41164   |
| SLC25A23     | 5.87941  | 6.3359    | 6.77841   | 3.86005   | 7.57426   | 6.64081   | 8.56107   | 5.12407   | 7.10343    | 1.33481   | 1.72912    | 2.42649    | 2.23545   | 1.87726    | 1.44088   |
| SLC25A24     | 2.98561  | 2.47664   | 2.35699   | 6.11076   | 1.7887    | 4.39704   | 2.1009    | 2.86437   | 3.88193    | 7.718     | 11.6387    | 3.12587    | 9.06472   | 4.77742    | 4.3133    |
| SLC25A25     | 3.12261  | 2.22507   | 2.98836   | 3.48382   | 3.8444    | 5.35811   | 2.97608   | 1.96551   | 9.95304    | 5.08238   | 4.3929     | 7.56193    | 7.40313   | 4.96483    | 4.66594   |
| SLC25A25-AS1 | 1.524    | 1.95616   | 1.90359   | 0.831818  | 2.09594   | 1.39512   | 2.19918   | 1.73449   | 0.286111   | 0.498984  | 0.1564     | 0.797372   | 0.178777  | 0.900399   | 0.553651  |
| SLC25A26     | 2.69128  | 2.03778   | 2.2878    | 2.61068   | 1.81957   | 2.94007   | 1.82585   | 1.70175   | 1.54551    | 1.98685   | 3.39967    | 1.30962    | 1.9499    | 1.56803    | 1.35323   |
| SLC25A27     | 2.34841  | 2.87542   | 2.59676   | 1.00638   | 1.98647   | 0.956922  | 1.47783   | 1.94242   | 0.245421   | 0.573934  | 0.734947   | 1.19787    | 0.180021  | 0.777746   | 1.21325   |
| SLC25A28     | 6.93547  | 7.57959   | 7.36273   | 14.9539   | 11.6979   | 16.6265   | 4.52012   | 5.02617   | 11.9449    | 7.93887   | 9.25737    | 8.74298    | 9.92891   | 8.2141     | 6.19842   |
| SLC25A29     | 3.26553  | 3.03655   | 4.1526    | 1.72906   | 3.0909    | 3.10527   | 3.40393   | 2.27365   | 0.683954   | 1.18346   | 1.64361    | 0.491128   | 1.00201   | 1.13056    | 1.21475   |



|              |           |           |           |           |           |           |          |           |           |           |           |           |           |            |           |
|--------------|-----------|-----------|-----------|-----------|-----------|-----------|----------|-----------|-----------|-----------|-----------|-----------|-----------|------------|-----------|
| SLC25A3      | 46.1493   | 32.468    | 33.0848   | 90.8606   | 35.4016   | 102.311   | 46.0504  | 27.0702   | 58.7255   | 71.6818   | 99.0014   | 46.7684   | 97.6992   | 58.5669    | 40.0733   |
| SLC25A30     | 2.68479   | 1.98812   | 2.41987   | 2.45866   | 1.07447   | 2.31577   | 2.29447  | 3.0006    | 1.89903   | 2.42794   | 2.89182   | 1.78263   | 3.69888   | 1.89645    | 1.85208   |
| SLC25A30-AS1 | 0.099043  | 0.0968427 | 0.191183  | 0         | 0.358979  | 0.113694  | 0.15766  | 0.0888202 | 0.0804155 | 0         | 0.111807  | 0.0708679 | 0.0213007 | 0.0345095  | 0         |
| SLC25A31     | 0         | 0         | 0         | 0         | 0         | 0         | 0        | 0         | 0         | 0         | 0         | 0         | 0         | 0          | 0.0526725 |
| SLC25A32     | 3.20953   | 2.21079   | 2.5741    | 3.88628   | 1.3364    | 4.14509   | 2.12014  | 2.52317   | 2.46232   | 3.4644    | 6.58806   | 1.97503   | 5.48607   | 3.67965    | 3.2845    |
| SLC25A33     | 1.66326   | 1.1601    | 1.15319   | 1.71404   | 0.639752  | 2.09064   | 1.06709  | 1.28108   | 2.99026   | 1.47123   | 2.44984   | 0.906747  | 1.83964   | 1.71375    | 1.2057    |
| SLC25A34     | 0.593391  | 0.406102  | 0.25544   | 0.31044   | 0.792202  | 0.480947  | 0.490129 | 0.435046  | 0.256817  | 0.264664  | 0.106374  | 0.483831  | 0.12767   | 0.385061   | 0.465071  |
| SLC25A34-AS1 | 0.0441577 | 0.0366909 | 0         | 0         | 0.129547  | 0.0622623 | 0        | 0.0649846 | 1.06E-39  | 1.09E-39  | 0.309045  | 0.0579138 | 0.0406931 | 0.0797105  | 0.26253   |
| SLC25A35     | 0.678285  | 0.669384  | 0.425406  | 0.373258  | 1.07098   | 0.791118  | 0.873221 | 0.467929  | 0.270777  | 0.383681  | 0.525816  | 0.396746  | 0.303537  | 0.316766   | 0.562752  |
| SLC25A36     | 5.79939   | 3.63399   | 4.17749   | 2.78869   | 1.34973   | 4.02916   | 3.39585  | 5.82482   | 0.925208  | 3.06609   | 5.20714   | 1.30743   | 2.14318   | 2.37189    | 2.9949    |
| SLC25A37     | 2.86713   | 2.92081   | 2.8101    | 3.09764   | 2.87332   | 3.11073   | 3.1584   | 2.03247   | 2.4064    | 2.32165   | 2.86647   | 1.33258   | 2.09127   | 2.57514    | 3.34476   |
| SLC25A38     | 3.1691    | 2.1086    | 2.4166    | 3.38804   | 3.44924   | 4.3781    | 2.3261   | 2.06921   | 1.11587   | 1.75878   | 3.90607   | 1.21863   | 2.41329   | 2.30418    | 1.85764   |
| SLC25A39     | 15.1294   | 16.7093   | 14.7684   | 48.1193   | 49.2913   | 32.2537   | 18.9567  | 13.1339   | 50.1324   | 42.0471   | 55.4201   | 38.4804   | 55.1474   | 34.4301    | 14.6933   |
| SLC25A3P1    | 0         | 0         | 0         | 0         | 0         | 0         | 0        | 0         | 0         | 0         | 0         | 0         | 0         | 0          | 0         |
| SLC25A4      | 1.90066   | 1.33959   | 1.5507    | 1.38673   | 0.829596  | 2.31835   | 1.8174   | 1.15402   | 0.656815  | 0.65717   | 1.13487   | 0.614424  | 0.891853  | 0.725187   | 1.0377    |
| SLC25A40     | 1.82462   | 1.88632   | 1.98646   | 1.80656   | 0.411894  | 1.99224   | 1.5965   | 2.58568   | 0.726619  | 1.37746   | 2.13695   | 0.843258  | 1.69726   | 1.01246    | 1.06839   |
| SLC25A41     | 0.070173  | 0.0879071 | 0.313481  | 0         | 0.0436012 | 0.0239006 | 0.064097 | 0.0374183 | 0.0512777 | 0         | 0         | 0.0200843 | 0         | 0.00733509 | 0         |
| SLC25A42     | 0.981232  | 1.16505   | 1.17123   | 0.606713  | 1.56774   | 2.27974   | 1.16835  | 0.921868  | 0.563372  | 0.650961  | 0.894063  | 0.521558  | 0.402462  | 0.54214    | 0.825372  |
| SLC25A43     | 2.61997   | 4.71186   | 5.07237   | 6.27177   | 5.90674   | 4.22935   | 3.24068  | 4.13131   | 9.83838   | 6.93061   | 8.95501   | 5.35709   | 9.34997   | 4.21728    | 3.97164   |
| SLC25A44     | 2.91103   | 3.19883   | 3.46964   | 5.88757   | 4.44663   | 6.03959   | 4.22202  | 2.81298   | 7.23799   | 4.00305   | 5.41777   | 3.7891    | 6.37262   | 4.66236    | 3.55483   |
| SLC25A45     | 0.612647  | 0.587353  | 0.548198  | 0.405868  | 1.13616   | 1.1764    | 0.578158 | 0.505579  | 0.296931  | 0.40016   | 0.635145  | 0.322064  | 0.363009  | 0.30386    | 1.32874   |
| SLC25A46     | 4.45393   | 3.56331   | 3.74163   | 4.14468   | 1.685     | 4.09777   | 3.40599  | 5.06939   | 5.06615   | 4.91516   | 6.77656   | 2.88105   | 5.69997   | 3.6803     | 2.88467   |
| SLC25A47     | 0.0125641 | 0.0484286 | 0.0311817 | 0.0129477 | 0.0195164 | 0.0213963 | 0        | 0.0111659 | 0         | 0.0157692 | 0.0141833 | 0         | 0.0162126 | 0.00656654 | 0.0541309 |
| SLC25A48     | 0.705209  | 1.24804   | 0.768516  | 0.181685  | 1.69593   | 0.259821  | 1.20003  | 0.699046  | 0.272524  | 0.297873  | 0.382737  | 0.354187  | 0.0874994 | 0.262254   | 0         |
| SLC25A5      | 68.6825   | 42.796    | 40.3267   | 88.8806   | 41.5559   | 101.982   | 56.7153  | 41.3612   | 150.69    | 63.7233   | 101.831   | 70.2433   | 77.8517   | 64.7883    | 29.5166   |
| SLC25A5-AS1  | 0.45405   | 0.443789  | 0.535443  | 0.240989  | 0.236254  | 0.250961  | 0.353145 | 0.347377  | 0.283719  | 0.199087  | 0.144947  | 0.151341  | 0.0876452 | 0.366392   | 0.325041  |

|             |           |            |           |            |            |           |           |           |            |            |           |            |            |            |            |
|-------------|-----------|------------|-----------|------------|------------|-----------|-----------|-----------|------------|------------|-----------|------------|------------|------------|------------|
| SLC25A51    | 1.71255   | 1.89172    | 1.8634    | 2.18045    | 1.25405    | 1.59912   | 1.5637    | 1.55109   | 1.08101    | 1.66767    | 2.33971   | 1.43815    | 2.6922     | 2.22102    | 1.92276    |
| SLC25A51P1  | 0         | 0          | 0         | 0          | 0          | 0         | 0         | 0         | 0          | 0          | 0         | 0          | 0          | 0          | 0          |
| SLC25A52    | 0.0226352 | 0.0341388  | 0.0573701 | 0.0686601  | 0.0355936  | 2.53E-39  | 0.0558272 | 5.25E-40  | 4.10E-31   | 1.21E-38   | 0.0520409 | 0.0504098  | 0          | 0.0245365  | 1.02E-37   |
| SLC25A53    | 0.0334652 | 0.0268734  | 0.0430652 | 0.0459825  | 0.0346554  | 0.0569904 | 0.042455  | 0.0330457 | 0.00452854 | 0.0233346  | 0.0293829 | 0.00798175 | 0.0431832  | 0.0446976  | 0.117481   |
| SLC25A6     | 49.5221   | 39.1476    | 41.9422   | 72.8827    | 77.0945    | 85.6096   | 42.3514   | 35.8478   | 45.3173    | 36.886     | 74.3454   | 31.7687    | 41.0171    | 38.5281    | 32.5421    |
| SLC26A1     | 0.296944  | 0.726581   | 0.669073  | 0.325757   | 1.28233    | 1.09369   | 0.72466   | 0.388754  | 0.027525   | 0.193717   | 0.0974836 | 0.27689    | 0.223863   | 0.43593    | 0.851754   |
| SLC26A10    | 0.177088  | 0.147038   | 0.0955983 | 0.08758    | 0.220528   | 0.602049  | 0.190131  | 0.0866493 | 0.0117001  | 0.17997    | 0.223442  | 0.0568179  | 0.0123967  | 0.189033   | 0.739205   |
| SLC26A11    | 1.50092   | 2.01612    | 2.20115   | 1.53894    | 3.49718    | 2.76259   | 1.89546   | 1.2059    | 1.17248    | 1.42713    | 1.7457    | 1.40481    | 2.02481    | 1.43023    | 1.6874     |
| SLC26A2     | 4.14999   | 1.79239    | 2.71713   | 2.1856     | 1.07736    | 6.46211   | 2.8142    | 3.62703   | 0.830734   | 2.0108     | 3.68185   | 1.07047    | 2.1413     | 1.80497    | 3.10343    |
| SLC26A3     | 0         | 0.00770606 | 0.0132312 | 0.00824105 | 0          | 0         | 0         | 0.014214  | 0.00973933 | 0.0301108  | 0         | 0          | 0          | 0.00417953 | 0.0114846  |
| SLC26A4     | 0.182691  | 0.0747432  | 0.0816752 | 0.277578   | 0.0364983  | 0.210713  | 0.0647522 | 0.146123  | 0.00571949 | 0.0707707  | 0.116632  | 0.0302781  | 0.0727197  | 0.053566   | 0.0810771  |
| SLC26A4-AS1 | 0.0731308 | 0.0200758  | 0.0147728 | 0.0122683  | 0          | 0.092781  | 0.0271852 | 0.0846404 | 0          | 5.70E-36   | 0         | 0          | 0.0115214  | 0.0130536  | 0.0170969  |
| SLC26A5     | 0.232634  | 0.328529   | 0.331812  | 0.107468   | 0.112146   | 0.040983  | 0.357205  | 0.3422    | 0          | 0.0100683  | 0.027167  | 0.0516587  | 0          | 0.00419257 | 0.0115204  |
| SLC26A6     | 0.953135  | 1.67754    | 1.31634   | 2.91423    | 2.87545    | 3.09877   | 0.944356  | 0.728057  | 0.738698   | 1.82903    | 2.45428   | 1.87689    | 2.54623    | 4.28162    | 4.73997    |
| SLC26A7     | 0.132625  | 0.082695   | 0.0613123 | 0          | 0.00605919 | 0.0972196 | 0.0445373 | 0.246132  | 0          | 0.00489582 | 0.0220172 | 0.0139554  | 0.00251673 | 0.00611608 | 0          |
| SLC26A8     | 0.0320719 | 0.0216338  | 0.0265321 | 0.0727122  | 0.0597824  | 0.0163853 | 0.0219712 | 0.0342034 | 0.015624   | 0.0080507  | 0.0289641 | 0.013769   | 0.0289696  | 0.0402292  | 0.00921185 |
| SLC26A9     | 0.342467  | 0.720446   | 0.949695  | 6.19856    | 1.49102    | 1.39642   | 0.7545    | 0.664439  | 3.11346    | 1.86462    | 0.451944  | 1.33911    | 2.56124    | 0.514275   | 0.464117   |
| SLC27A1     | 2.65945   | 3.45938    | 3.40934   | 2.35576    | 7.19183    | 5.02794   | 3.35998   | 2.50657   | 0.933247   | 1.16382    | 1.6065    | 0.838571   | 1.09683    | 1.68948    | 3.48639    |
| SLC27A2     | 0.0580754 | 0.130581   | 0.176162  | 0.129672   | 0.0451056  | 0.222527  | 0.0994629 | 0.111827  | 0          | 0.085039   | 0.0655599 | 0.0207773  | 0.0686949  | 0.0607055  | 0.23631    |
| SLC27A3     | 4.56625   | 4.55038    | 4.45981   | 5.35862    | 9.32705    | 8.52126   | 4.06522   | 3.36983   | 1.16368    | 2.75195    | 3.58787   | 2.74191    | 4.80204    | 4.18427    | 5.09883    |
| SLC27A4     | 6.03197   | 8.65957    | 7.02084   | 13.9993    | 24.0148    | 14.909    | 14.5596   | 5.1419    | 46.2911    | 19.0132    | 15.2045   | 17.8911    | 27.5275    | 11.6225    | 6.03163    |
| SLC27A5     | 0.489282  | 0.414909   | 0.234766  | 0.171435   | 0.562418   | 0.24997   | 0.469263  | 0.278293  | 0.154932   | 0.171948   | 0.408731  | 0.140038   | 0.183096   | 0.189233   | 0.0843205  |
| SLC27A6     | 0.494234  | 0.838631   | 1.28585   | 0.0738149  | 0.033379   | 0.115882  | 0.0654261 | 0.693862  | 0.0436175  | 0.00899007 | 0.0242578 | 0.0102504  | 0.0184856  | 0.018718   | 0          |
| SLC28A1     | 0.0252103 | 0.0182201  | 0         | 0          | 0.0783206  | 0         | 0         | 0.0168036 | 0          | 0          | 0         | 0.00450966 | 0          | 0          | 0          |
| SLC28A2     | 0.248242  | 0.236285   | 0.287347  | 0.119499   | 0.264684   | 0.0662108 | 0.273836  | 0.151929  | 0.0700663  | 0.0834746  | 0.0427633 | 0.116575   | 0.0182552  | 0.217424   | 0.206938   |
| SLC28A3     | 3.25052   | 2.54613    | 2.9834    | 4.71245    | 1.56853    | 2.65723   | 3.11839   | 3.71353   | 7.34359    | 9.42072    | 5.30872   | 8.0682     | 7.95135    | 7.15476    | 1.89212    |

|            |           |            |            |           |           |            |            |            |            |           |           |           |           |            |            |
|------------|-----------|------------|------------|-----------|-----------|------------|------------|------------|------------|-----------|-----------|-----------|-----------|------------|------------|
| SLC29A1    | 9.20293   | 7.14613    | 9.47337    | 5.44106   | 5.32313   | 9.14987    | 14.739     | 7.71713    | 1.78462    | 3.65884   | 7.36067   | 2.19129   | 6.57301   | 4.75315    | 5.11071    |
| SLC29A2    | 0.59301   | 0.746739   | 0.804129   | 0.474629  | 1.37892   | 0.721834   | 0.624139   | 0.498206   | 0.130717   | 0.206977  | 0.194962  | 0.363475  | 0.148097  | 0.302722   | 0.0805033  |
| SLC29A3    | 0.841878  | 0.591888   | 0.540112   | 0.610847  | 1.04084   | 1.37518    | 0.647358   | 0.496249   | 0.481269   | 0.808656  | 1.96863   | 0.338074  | 1.13623   | 0.565717   | 0.9623     |
| SLC29A4    | 0.248161  | 0.31242    | 0.271521   | 0.527974  | 0.858005  | 1.71771    | 0.301623   | 0.313032   | 2.00839    | 0.442084  | 1.34649   | 0.687352  | 0.330555  | 0.619213   | 0.517342   |
| SLC2A1     | 32.1883   | 45.8067    | 49.0484    | 75.1028   | 60.2218   | 97.0588    | 39.8639    | 55.3894    | 103.051    | 156.95    | 169.412   | 109.858   | 130.553   | 113.361    | 20.2067    |
| SLC2A1-AS1 | 0.535338  | 1.8849     | 1.70334    | 0.42437   | 0.927514  | 0.806473   | 0.893338   | 0.933228   | 0.752286   | 0.801116  | 0.697303  | 1.10495   | 0.544665  | 0.73176    | 0.325267   |
| SLC2A10    | 1.5957    | 0.753033   | 0.958408   | 1.52615   | 1.57039   | 4.10871    | 1.41011    | 1.13644    | 0.15973    | 1.26201   | 3.84944   | 0.348003  | 1.85105   | 1.70223    | 4.46552    |
| SLC2A11    | 0.502467  | 0.506979   | 0.518373   | 0.188847  | 0.780505  | 0.624149   | 0.627696   | 0.362494   | 0.309574   | 0.170646  | 0.413739  | 0.135352  | 0.110606  | 0.188462   | 0.33109    |
| SLC2A12    | 1.12016   | 1.42396    | 1.47379    | 0.766731  | 0.308191  | 0.594805   | 1.2648     | 0.914688   | 0.538643   | 0.181576  | 0.429283  | 0.1952    | 0.168013  | 0.196588   | 0.379912   |
| SLC2A13    | 0.713823  | 0.571625   | 0.672542   | 0.473382  | 0.595474  | 1.94724    | 0.90935    | 0.798856   | 0.865331   | 0.717566  | 1.53329   | 0.432726  | 0.597015  | 0.680516   | 1.10108    |
| SLC2A14    | 0         | 0          | 0.00464875 | 0.13923   | 0.033105  | 0.238903   | 0          | 0.00502334 | 0.00654488 | 0.0207685 | 0.0556483 | 0.0335927 | 0.0890635 | 0.083607   | 0.00798734 |
| SLC2A2     | 0         | 0.00972725 | 0.0167016  | 0         | 0         | 0.00573016 | 0.0153673  | 0.0239228  | 0          | 0         | 0         | 0.0048152 | 0         | 0          | 0          |
| SLC2A3     | 2.00988   | 1.4809     | 2.42065    | 6.66479   | 1.37677   | 12.3497    | 1.97274    | 1.73864    | 0.930062   | 12.2719   | 16.873    | 1.95023   | 7.68543   | 5.5551     | 10.0427    |
| SLC2A4     | 0.418912  | 0.638197   | 0.918063   | 0.113606  | 0.342482  | 0.694623   | 1.25868    | 0.378826   | 0.0358026  | 0.0368967 | 0.182523  | 0.073621  | 0.227604  | 0.203577   | 1.17156    |
| SLC2A4RG   | 13.449    | 16.3454    | 16.272     | 17.0396   | 35.8127   | 38.0721    | 16.3727    | 10.4594    | 13.3257    | 13.3937   | 24.9615   | 10.8764   | 10.2658   | 9.64948    | 8.76696    |
| SLC2A5     | 0.633116  | 0.944536   | 0.814033   | 0.754634  | 0.627984  | 6.53406    | 0.505139   | 0.745695   | 0.510946   | 0.746756  | 1.79969   | 0.343852  | 0.482306  | 0.370761   | 0.175274   |
| SLC2A6     | 0.327239  | 0.293439   | 0.368473   | 0.974218  | 0.98839   | 1.65636    | 0.394388   | 0.258509   | 0.110706   | 0.695939  | 1.4366    | 0.266669  | 1.04394   | 0.831392   | 1.98426    |
| SLC2A7     | 0         | 0.0144908  | 0.0248805  | 0.0154968 | 0.0700763 | 0.0512177  | 0.0343392  | 0.0133643  | 0          | 0.0377478 | 0.0339514 | 0.0645593 | 0.0582136 | 0.133609   | 0.0647882  |
| SLC2A8     | 1.81389   | 1.90214    | 1.73007    | 3.48563   | 5.33686   | 6.33244    | 1.93703    | 1.2517     | 2.20911    | 2.19626   | 3.54123   | 1.71015   | 3.53846   | 3.11729    | 1.53233    |
| SLC2A9     | 1.24676   | 0.901065   | 0.543332   | 5.42611   | 3.52747   | 5.01417    | 0.991377   | 0.801336   | 0.976126   | 4.70842   | 5.02656   | 3.55243   | 7.19658   | 7.19106    | 2.42998    |
| SLC30A1    | 9.35814   | 9.37696    | 9.11739    | 9.80929   | 12.3453   | 13.2708    | 9.50635    | 6.8185     | 36.7195    | 8.29089   | 14.8235   | 10.085    | 13.2669   | 7.06074    | 10.9196    |
| SLC30A10   | 0         | 0          | 0          | 0         | 0.0124306 | 0          | 0.00913693 | 0          | 0.00974607 | 0.0100439 | 0.0451688 | 0.0114519 | 0         | 0.0209121  | 0          |
| SLC30A2    | 0.111131  | 0.365888   | 0.490322   | 0.0858929 | 0.15824   | 0.157711   | 0.264346   | 0.106994   | 1.61286    | 0.0464936 | 0.313633  | 0.0265058 | 0.131452  | 0.058082   | 0.0132999  |
| SLC30A3    | 0.0356184 | 0.00858074 | 0          | 0.0183529 | 0.0553277 | 0.0303286  | 0.0711689  | 0          | 0          | 0.0223524 | 0.0201044 | 0.012743  | 0.0114904 | 0.00465393 | 0.0255763  |
| SLC30A4    | 1.69442   | 1.49264    | 1.53075    | 1.9903    | 1.04349   | 1.59854    | 1.28062    | 1.45522    | 2.732      | 2.23959   | 2.35289   | 1.53213   | 2.4825    | 1.60031    | 1.62801    |
| SLC30A5    | 2.75107   | 3.35717    | 3.61724    | 4.86225   | 1.64884   | 4.28698    | 2.41835    | 2.89063    | 3.85455    | 3.87455   | 6.03533   | 2.82204   | 5.04847   | 4.0081     | 3.50335    |

|         |           |           |            |           |           |           |           |            |           |            |           |            |            |            |           |
|---------|-----------|-----------|------------|-----------|-----------|-----------|-----------|------------|-----------|------------|-----------|------------|------------|------------|-----------|
| SLC30A6 | 2.43787   | 2.24865   | 2.48988    | 3.18768   | 0.674371  | 2.79027   | 1.89219   | 2.39288    | 2.50132   | 2.50441    | 4.34485   | 2.03708    | 3.50672    | 2.53953    | 2.97352   |
| SLC30A7 | 2.85066   | 2.16878   | 2.62156    | 3.46303   | 0.708831  | 3.11324   | 2.39926   | 3.44464    | 1.96914   | 3.29856    | 5.28817   | 1.79984    | 4.28538    | 3.01505    | 3.89163   |
| SLC30A8 | 0         | 0.0038135 | 0.00654773 | 0         | 0.0184418 | 0.0033697 | 0         | 0.00703407 | 0         | 0          | 0         | 0.00283165 | 0.00255331 | 0          | 0         |
| SLC30A9 | 7.5937    | 5.58047   | 6.08243    | 8.38868   | 1.66462   | 8.75621   | 4.48098   | 7.51812    | 8.60003   | 10.1633    | 12.0413   | 6.05302    | 10.5635    | 7.65571    | 6.1764    |
| SLC31A1 | 5.08087   | 5.33496   | 5.5898     | 7.06303   | 5.33444   | 8.03418   | 7.3443    | 6.21817    | 24.7111   | 8.21314    | 11.3186   | 6.19681    | 8.96594    | 5.12885    | 4.25019   |
| SLC31A2 | 7.08381   | 7.80044   | 8.62306    | 9.42422   | 10.0309   | 8.97545   | 11.3203   | 6.66651    | 39.5775   | 16.6848    | 17.5545   | 10.408     | 26.9597    | 7.96371    | 4.74002   |
| SLC32A1 | 0         | 0         | 0          | 0         | 0         | 0         | 0         | 0          | 0.0219003 | 0.0225695  | 0.131948  | 0.0193001  | 0          | 0.00939827 | 0         |
| SLC33A1 | 3.68101   | 2.76866   | 3.25626    | 3.58683   | 1.79274   | 4.14808   | 3.80063   | 3.23899    | 2.7002    | 3.04192    | 5.19771   | 2.10797    | 3.82504    | 2.85406    | 3.13172   |
| SLC34A1 | 0.0267472 | 0.12565   | 0.15489    | 0.0826914 | 0.207739  | 0.0740185 | 0.0992522 | 0.00594268 | 0.0732941 | 0.0671411  | 0.188714  | 0.138753   | 0.103543   | 0.0524223  | 0.0768248 |
| SLC34A2 | 1.93222   | 0.41697   | 0.594359   | 0.0729174 | 1.36965   | 6.96572   | 1.55362   | 1.43663    | 0         | 0.00683135 | 0         | 0          | 0.228261   | 0.0312915  | 0.242316  |
| SLC34A3 | 0.11054   | 0.222723  | 0.191206   | 0.124271  | 0.327804  | 0.23103   | 0.275369  | 0.10717    | 0.45283   | 0.0756758  | 0.0567208 | 0.683088   | 0.0259345  | 0.183823   | 0.0144318 |
| SLC35A1 | 4.16478   | 4.04842   | 3.85725    | 3.64125   | 0.886469  | 2.85355   | 2.60636   | 3.32362    | 4.65818   | 3.52038    | 5.53766   | 2.98002    | 2.70276    | 3.10958    | 3.5573    |
| SLC35A2 | 1.68146   | 2.06958   | 2.09286    | 4.94635   | 3.08678   | 5.12174   | 2.26018   | 1.43321    | 3.33238   | 3.88507    | 5.0215    | 3.36876    | 5.98162    | 3.23161    | 2.60139   |
| SLC35A3 | 2.54989   | 2.21692   | 2.69192    | 2.22376   | 0.798082  | 1.19577   | 1.71206   | 2.65846    | 1.38587   | 2.24025    | 2.21258   | 1.78911    | 1.98403    | 1.81802    | 1.88564   |
| SLC35A4 | 9.40556   | 9.28399   | 8.48593    | 22.1501   | 15.7867   | 26.6397   | 13.5859   | 7.98021    | 19.7482   | 13.1221    | 19.3827   | 11.9242    | 22.9144    | 12.4791    | 8.22693   |
| SLC35A5 | 1.97537   | 1.54698   | 1.54895    | 2.15705   | 0.380662  | 2.16608   | 1.14718   | 1.63798    | 1.17589   | 2.35679    | 3.0713    | 1.42471    | 2.33844    | 1.51701    | 2.39313   |
| SLC35B1 | 7.19717   | 4.39522   | 4.26645    | 8.46803   | 4.44064   | 15.3145   | 6.31487   | 4.41736    | 8.88785   | 6.72532    | 15.1466   | 5.28344    | 10.7608    | 5.64613    | 6.00358   |
| SLC35B2 | 4.45812   | 3.95136   | 4.90391    | 5.68472   | 6.49884   | 11.1045   | 4.77691   | 3.38731    | 2.19566   | 5.11579    | 11.6913   | 2.20138    | 5.11419    | 4.8956     | 5.47373   |
| SLC35B3 | 1.67623   | 2.02577   | 1.95363    | 2.54815   | 1.61117   | 2.10544   | 1.14197   | 1.82713    | 1.52263   | 2.87098    | 4.31769   | 1.53071    | 2.21676    | 2.39588    | 2.42057   |
| SLC35B4 | 1.24629   | 0.935904  | 0.952362   | 1.82678   | 0.759601  | 2.56193   | 1.043     | 1.17702    | 0.521114  | 1.73045    | 2.69115   | 0.8383     | 2.63798    | 2.19903    | 2.46773   |
| SLC35C1 | 1.75309   | 1.46258   | 1.58167    | 3.44953   | 3.49988   | 5.97592   | 2.54567   | 1.22339    | 3.3817    | 2.45873    | 4.72175   | 2.1257     | 5.0481     | 3.03467    | 3.55682   |
| SLC35C2 | 4.98613   | 6.75964   | 6.67667    | 7.2515    | 10.7262   | 10.8342   | 6.97367   | 4.18985    | 5.00532   | 5.67521    | 11.0497   | 4.64619    | 6.62063    | 5.14784    | 6.48115   |
| SLC35D1 | 2.6833    | 2.93784   | 2.85998    | 4.37858   | 2.00336   | 3.17858   | 2.65876   | 2.80496    | 2.86219   | 4.00631    | 4.51334   | 3.29139    | 4.74072    | 3.96195    | 2.20718   |
| SLC35D2 | 1.85804   | 1.17679   | 1.17142    | 2.19271   | 1.03576   | 2.59005   | 1.24036   | 1.37162    | 1.51467   | 2.44487    | 2.81639   | 1.22226    | 2.89065    | 1.60935    | 1.95825   |
| SLC35D3 | 0         | 0.0185613 | 0.0318694  | 0         | 0.134641  | 0         | 0         | 0          | 0         | 0          | 0         | 0          | 0          | 0          | 0         |
| SLC35E1 | 5.60741   | 6.13473   | 6.57859    | 12.1051   | 7.05854   | 10.3966   | 7.01458   | 5.68204    | 16.0713   | 12.6157    | 12.6653   | 9.72174    | 18.7373    | 9.58526    | 6.20612   |

|          |           |           |           |            |           |            |           |           |           |            |            |           |            |            |            |
|----------|-----------|-----------|-----------|------------|-----------|------------|-----------|-----------|-----------|------------|------------|-----------|------------|------------|------------|
| SLC35E2A | 2.22866   | 3.41937   | 3.41766   | 1.73119    | 8.10936   | 2.93857    | 3.72503   | 2.13837   | 1.71863   | 1.40306    | 1.55443    | 1.74598   | 0.985326   | 1.48245    | 5.58181    |
| SLC35E2B | 5.19127   | 7.23018   | 5.82452   | 7.22551    | 10.906    | 7.42022    | 5.52402   | 4.7002    | 6.16325   | 3.72545    | 5.37826    | 5.5232    | 4.42647    | 4.25851    | 5.91395    |
| SLC35E3  | 1.78056   | 1.5631    | 1.57649   | 1.40519    | 1.27603   | 1.9919     | 1.57115   | 1.46011   | 0.9446    | 1.63814    | 2.1842     | 0.993568  | 1.8806     | 1.21392    | 1.36538    |
| SLC35E4  | 0.612156  | 0.850443  | 0.901386  | 1.05805    | 1.49691   | 1.26759    | 0.82479   | 0.612399  | 3.60643   | 1.28773    | 1.14656    | 1.15333   | 1.79434    | 1.41473    | 1.29903    |
| SLC35F1  | 0.186265  | 0.0811605 | 0.092148  | 0.070808   | 0.0746685 | 0.284334   | 0.121659  | 0.0427913 | 0.0232438 | 0.0119978  | 0.00538451 | 0.043023  | 0.0522779  | 0.0476769  | 0.151682   |
| SLC35F2  | 3.4386    | 3.69344   | 4.62634   | 4.13042    | 2.71036   | 4.76177    | 3.38427   | 3.47768   | 5.60156   | 4.76479    | 3.42023    | 2.98802   | 6.08576    | 3.69735    | 1.89772    |
| SLC35F3  | 0.385939  | 0.182745  | 0.264229  | 0.7543     | 0.289412  | 0.47027    | 0.136754  | 0.141927  | 0.0405199 | 0.350768   | 0.623469   | 1.00938   | 0.57529    | 1.00159    | 0.468252   |
| SLC35F4  | 0.0329777 | 0.0370748 | 0.0424379 | 0.00755212 | 0.0170753 | 0.00936004 | 0.025102  | 0.0195386 | 0         | 0          | 0          | 0         | 0.00709236 | 0.00383014 | 0.0315735  |
| SLC35F5  | 4.16361   | 5.30475   | 6.37146   | 5.05985    | 3.45074   | 4.16913    | 4.84532   | 5.18839   | 9.0896    | 7.60923    | 7.99543    | 5.55995   | 7.92269    | 5.35696    | 4.57369    |
| SLC35F6  | 8.44201   | 11.9944   | 12.4211   | 11.7907    | 12.6998   | 19.3003    | 16.3775   | 9.56878   | 17.8394   | 14.5754    | 16.2617    | 14.8959   | 24.9397    | 11.0721    | 9.54101    |
| SLC35G1  | 0.276335  | 0.292563  | 0.415096  | 0.262289   | 0.096015  | 0.625391   | 0.427599  | 0.352218  | 0.0708515 | 0.191669   | 0.316052   | 0.0676428 | 0.340158   | 0.298351   | 0.156652   |
| SLC35G2  | 1.08975   | 0.590011  | 0.669166  | 1.14617    | 0.523531  | 1.82711    | 0.654186  | 0.589072  | 0.287329  | 0.987031   | 2.23209    | 0.377813  | 1.30472    | 1.70864    | 1.46821    |
| SLC35G3  | 0.0123495 | 0.0238008 | 0.0510821 | 0.0300827  | 0.0959156 | 0.0120054  | 0.0282006 | 0.0131916 | 0         | 0          | 0.0139411  | 0.0281257 | 0.00796787 | 0.033164   | 0.070942   |
| SLC35G4  | 0         | 0         | 0         | 0          | 0         | 0          | 0         | 0         | 0         | 0          | 0          | 0         | 0          | 0          | 0          |
| SLC35G5  | 0.269777  | 0.124344  | 0.0478241 | 0.0794324  | 0.119731  | 0.0707173  | 0.0512992 | 0.187252  | 0         | 0.110529   | 0.152273   | 0.125633  | 0          | 0.155389   | 0.415108   |
| SLC35G6  | 0.135566  | 0.192289  | 0.144193  | 0.0526133  | 0.330913  | 0.157456   | 0.412798  | 0.083714  | 0         | 0.0833725  | 0          | 0.300778  | 0.162438   | 0.206817   | 0.166877   |
| SLC36A1  | 2.1331    | 1.59853   | 1.5082    | 3.33536    | 2.61407   | 4.8299     | 3.17712   | 1.66614   | 2.89452   | 3.48788    | 5.1451     | 2.99452   | 4.87645    | 3.3079     | 3.61992    |
| SLC36A2  | 0.05412   | 0.0195569 | 0.0167894 | 0.0278861  | 0         | 0.0172809  | 0.0386203 | 0.0180365 | 0         | 0.00849077 | 0          | 0.0145216 | 0          | 0.0141427  | 0.00971539 |
| SLC36A3  | 0.318091  | 0.153261  | 0.17971   | 0.0719565  | 0.036154  | 0.0132122  | 0.168306  | 0.337852  | 0.037795  | 0.0778999  | 0          | 0.0555128 | 0.0100112  | 0.0283838  | 0          |
| SLC36A4  | 0.828114  | 0.771398  | 0.755104  | 0.76616    | 0.245835  | 1.35385    | 0.684973  | 0.856985  | 1.72575   | 1.70457    | 2.1522     | 0.753184  | 1.75487    | 1.18686    | 1.35842    |
| SLC37A1  | 2.04014   | 1.16604   | 1.4121    | 0.921693   | 1.10781   | 3.1209     | 1.58183   | 1.55854   | 0.704819  | 0.440216   | 0.725895   | 0.292792  | 0.70529    | 0.672145   | 1.36001    |
| SLC37A2  | 4.39035   | 8.23207   | 7.17262   | 4.17583    | 10.6204   | 8.44396    | 11.0826   | 4.51398   | 73.3708   | 6.33392    | 11.8923    | 10.1144   | 6.09228    | 3.85384    | 2.38421    |
| SLC37A3  | 3.29077   | 2.65217   | 3.42521   | 3.67486    | 2.44432   | 4.79404    | 2.95117   | 2.34496   | 2.71072   | 3.82236    | 4.83608    | 2.38032   | 6.76335    | 3.95263    | 6.01487    |
| SLC37A4  | 1.64236   | 1.79953   | 1.9518    | 2.69769    | 2.92669   | 5.16076    | 1.85615   | 1.47441   | 1.14733   | 1.20331    | 2.87984    | 1.44358   | 1.99556    | 1.82566    | 1.56843    |
| SLC38A1  | 8.5582    | 11.3813   | 10.91     | 12.4186    | 4.45533   | 7.65475    | 7.23586   | 9.41056   | 12.2629   | 12.5793    | 8.41172    | 9.01927   | 21.5021    | 10.0789    | 3.89917    |
| SLC38A10 | 4.65109   | 5.55697   | 5.9986    | 7.92668    | 18.0899   | 15.5196    | 5.95754   | 3.56187   | 4.05392   | 4.23989    | 4.07755    | 5.05635   | 7.52538    | 5.70572    | 9.01158    |

|              |           |            |           |           |           |           |            |           |           |           |           |           |            |            |          |
|--------------|-----------|------------|-----------|-----------|-----------|-----------|------------|-----------|-----------|-----------|-----------|-----------|------------|------------|----------|
| SLC38A11     | 0.170013  | 0.0409575  | 0.0439522 | 0.0328507 | 0.115539  | 0.0814298 | 0.0121322  | 0.103877  | 0.0517642 | 0.080019  | 0.143943  | 0.0988398 | 0          | 0.0944099  | 0.839302 |
| SLC38A2      | 35.1056   | 44.0062    | 41.1245   | 80.8201   | 14.3678   | 47.4881   | 36.6566    | 37.2957   | 55.0973   | 71.3268   | 62.7336   | 49.2565   | 107.353    | 56.967     | 34.1499  |
| SLC38A3      | 0.0280976 | 0.00902523 | 0.0154962 | 0         | 0         | 0.526344  | 0.0320809  | 0.0499416 | 1.2091    | 0.305633  | 0.634374  | 0.368584  | 0.211498   | 0.112585   | 0.24211  |
| SLC38A4      | 0.296333  | 0.447931   | 0.596046  | 0.329331  | 0.0722052 | 0.588756  | 0.139318   | 0.438927  | 0.290136  | 0.503198  | 0.73464   | 0.3035    | 0.307408   | 0.485888   | 0.208614 |
| SLC38A5      | 3.16536   | 4.58094    | 2.868     | 16.059    | 7.70854   | 8.18451   | 3.49496    | 1.97845   | 4.36341   | 7.29083   | 9.62041   | 5.68299   | 17.1237    | 8.81716    | 4.44594  |
| SLC38A6      | 1.20716   | 0.677079   | 0.665854  | 1.02436   | 0.405769  | 1.18547   | 0.685054   | 1.07589   | 0.250947  | 1.43975   | 1.7952    | 0.320816  | 0.452584   | 0.671885   | 1.33808  |
| SLC38A7      | 1.26445   | 1.44662    | 1.39195   | 3.44711   | 2.60581   | 4.85566   | 1.76582    | 1.1909    | 1.77924   | 2.29517   | 3.2131    | 1.76986   | 3.42257    | 2.50653    | 2.91561  |
| SLC38A8      | 0         | 0          | 0         | 0         | 0         | 0.0138288 | 0          | 0         | 0         | 0         | 0.0183338 | 0         | 0          | 0.00848812 | 0        |
| SLC38A9      | 1.05196   | 1.38734    | 1.14918   | 2.27933   | 0.576108  | 1.91778   | 1.1241     | 1.19858   | 1.33044   | 1.86198   | 2.70239   | 1.12905   | 2.21888    | 1.61768    | 2.03369  |
| SLC39A1      | 7.22611   | 7.81658    | 8.49395   | 15.9641   | 14.3355   | 27.3928   | 9.77782    | 5.1336    | 8.5185    | 12.3615   | 22.9624   | 6.22378   | 20.0132    | 11.877     | 10.5494  |
| SLC39A10     | 1.89752   | 1.65696    | 1.82966   | 2.66338   | 0.468478  | 1.59431   | 1.32479    | 1.90227   | 1.408     | 2.64446   | 3.15397   | 1.24383   | 2.13232    | 1.93093    | 2.42431  |
| SLC39A11     | 4.36605   | 3.30569    | 2.81993   | 4.66377   | 5.57656   | 5.19359   | 2.25237    | 2.42996   | 2.90601   | 2.33941   | 3.43865   | 2.30411   | 2.65787    | 2.14922    | 2.0623   |
| SLC39A12     | 0.0164837 | 0.00397104 | 0.0136364 | 0         | 0         | 0.035089  | 0.00941025 | 0         | 0         | 0.0103443 | 0         | 0         | 0.00531758 | 0.00430754 | 0        |
| SLC39A12-AS1 | 0         | 0          | 0         | 0         | 0.0182854 | 0         | 0          | 0         | 0         | 0         | 0         | 0         | 0          | 0          | 0        |
| SLC39A13     | 4.80119   | 4.23965    | 4.38885   | 8.53087   | 11.2797   | 13.7339   | 5.10142    | 3.15081   | 3.30861   | 5.11458   | 10.1937   | 3.65544   | 7.47966    | 7.60828    | 9.17713  |
| SLC39A14     | 1.51064   | 1.15728    | 1.68398   | 10.6483   | 1.64845   | 9.67948   | 2.39316    | 1.25527   | 0.519742  | 5.01974   | 8.33047   | 1.04037   | 12.6243    | 5.65892    | 14.5084  |
| SLC39A2      | 2.95409   | 7.05368    | 5.61675   | 5.41577   | 11.9155   | 4.50263   | 6.95075    | 4.59798   | 24.389    | 4.11737   | 7.90401   | 5.67551   | 1.72695    | 1.05772    | 0.234389 |
| SLC39A3      | 1.331     | 1.13287    | 1.10595   | 2.81579   | 3.45192   | 3.49985   | 1.7674     | 0.76601   | 1.60673   | 2.06795   | 3.61404   | 1.36772   | 2.86757    | 1.97354    | 1.41467  |
| SLC39A4      | 0.552277  | 0.747602   | 1.13133   | 1.96939   | 1.5932    | 1.00769   | 0.780709   | 0.755704  | 1.07831   | 0.92422   | 1.44483   | 0.827974  | 1.49318    | 0.609361   | 0.440633 |
| SLC39A5      | 0.0768507 | 0.0634763  | 0.054494  | 0.0339415 | 0.221698  | 0.046741  | 0.125351   | 0.107326  | 0.0133708 | 0.0413381 | 0         | 0.0471332 | 0          | 0.0631173  | 0.157668 |
| SLC39A6      | 15.2355   | 14.0996    | 13.2806   | 21.8209   | 17.4517   | 18.7631   | 11.183     | 13.9539   | 48.8179   | 33.1527   | 30.6912   | 29.933    | 33.3674    | 25.9501    | 13.4247  |
| SLC39A7      | 1.59222   | 1.14885    | 1.3068    | 2.0782    | 3.069     | 4.22385   | 1.37468    | 0.934506  | 1.59075   | 2.78358   | 2.67752   | 1.38108   | 3.94293    | 2.70434    | 3.17601  |
| SLC39A8      | 2.37542   | 1.04451    | 1.41501   | 6.23476   | 0.895594  | 12.3815   | 1.5448     | 1.81047   | 0.444716  | 1.75121   | 3.3758    | 0.258527  | 2.84946    | 0.982352   | 3.12987  |
| SLC39A9      | 6.50835   | 5.72844    | 5.73142   | 9.17074   | 4.86236   | 10.2598   | 6.10274    | 5.58516   | 7.95563   | 7.5816    | 9.78866   | 5.74108   | 10.1471    | 6.98064    | 6.56227  |
| SLC3A1       | 0.171432  | 0.040132   | 0.0469232 | 1.14E-30  | 5.25E-40  | 0.0115501 | 0.0707444  | 0.105507  | 9.53E-34  | 7.16E-30  | 0.0566318 | 0.0260213 | 1.90E-36   | 0.00691948 | 1.16E-42 |
| SLC3A2       | 17.0664   | 13.7867    | 12.8255   | 30.6219   | 33.0139   | 44.6538   | 13.3759    | 9.72386   | 35.7321   | 26.6251   | 31.8701   | 20.5941   | 43.8058    | 23.6629    | 11.1551  |

|             |           |            |            |            |            |            |           |            |           |            |            |            |           |           |           |
|-------------|-----------|------------|------------|------------|------------|------------|-----------|------------|-----------|------------|------------|------------|-----------|-----------|-----------|
| SLC40A1     | 10.6713   | 4.6198     | 4.03455    | 5.68694    | 8.01489    | 9.41542    | 6.74973   | 8.20253    | 7.40135   | 7.35047    | 13.8143    | 2.32968    | 5.26507   | 5.56649   | 18.1685   |
| SLC41A1     | 1.87746   | 2.32482    | 2.68274    | 4.67769    | 3.1743     | 5.57361    | 2.49651   | 2.13588    | 4.12363   | 2.94696    | 2.81721    | 2.67685    | 4.97329   | 3.49824   | 3.73636   |
| SLC41A2     | 0.85681   | 0.419482   | 0.705001   | 0.67884    | 0.171732   | 0.976671   | 0.689002  | 0.524016   | 0.0897632 | 0.832555   | 1.44045    | 0.197764   | 0.698441  | 0.560961  | 1.61419   |
| SLC41A3     | 4.45706   | 2.59937    | 3.1235     | 4.03139    | 4.89367    | 5.84285    | 3.99975   | 2.52198    | 2.30406   | 2.44489    | 5.63776    | 2.59262    | 4.01351   | 3.24279   | 3.68397   |
| SLC43A1     | 1.2979    | 1.99436    | 2.87292    | 0.659727   | 1.83901    | 2.29244    | 2.6434    | 2.2368     | 0.117485  | 0.671414   | 1.83147    | 0.29492    | 0.735556  | 0.838761  | 1.83877   |
| SLC43A2     | 1.70152   | 1.25393    | 0.648493   | 5.26868    | 3.98174    | 4.77905    | 0.957226  | 1.10319    | 1.29109   | 2.28343    | 3.31876    | 1.4801     | 1.97191   | 1.39159   | 2.19914   |
| SLC43A3     | 5.9986    | 5.67409    | 7.39477    | 16.1572    | 5.58336    | 26.4581    | 11.088    | 5.6743     | 1.5456    | 5.9855     | 13.9082    | 2.43655    | 14.8913   | 7.77385   | 8.84115   |
| SLC44A1     | 7.59823   | 6.08906    | 5.89091    | 7.44256    | 3.37314    | 5.76502    | 6.2353    | 6.62654    | 14.2078   | 7.44252    | 8.82971    | 7.12924    | 7.99031   | 6.37016   | 5.68138   |
| SLC44A2     | 18.3898   | 19.0373    | 17.2759    | 23.1368    | 33.3469    | 33.8372    | 26.3018   | 14.6987    | 54.5186   | 31.8208    | 35.7134    | 29.5542    | 35.8836   | 22.4776   | 17.6849   |
| SLC44A3     | 1.00326   | 1.19208    | 1.14648    | 1.14779    | 1.21503    | 1.5565     | 1.01929   | 0.974732   | 0.818025  | 1.07779    | 1.64125    | 0.78478    | 0.773468  | 0.906501  | 0.683775  |
| SLC44A3-AS1 | 1.77355   | 2.18657    | 2.25834    | 2.84905    | 1.80961    | 1.83587    | 2.8985    | 2.20974    | 0.487055  | 5.89231    | 1.35437    | 2.05283    | 2.68121   | 5.59795   | 2.87166   |
| SLC44A4     | 0.0976602 | 0.0302076  | 0.0448841  | 0.0410022  | 0.0318383  | 0.182738   | 0.0468047 | 0.0482179  | 0.0176206 | 0.0196723  | 0.0122496  | 0.0215674  | 0.0606762 | 0.0289865 | 0         |
| SLC44A5     | 0.217011  | 1.51727    | 2.20619    | 1.21758    | 0.876443   | 0.102657   | 0.401949  | 0.458582   | 0.281915  | 0.514479   | 0.108879   | 1.36644    | 0.0373372 | 0.488964  | 0.0415541 |
| SLC45A1     | 0.283908  | 0.127966   | 0.143952   | 0.103817   | 0.455233   | 0.397707   | 0.230047  | 0.154644   | 0.133846  | 0.0229892  | 0.320496   | 0.0327651  | 0.10636   | 0.12445   | 0.657625  |
| SLC45A2     | 0.05125   | 0.0987722  | 0.157477   | 0.0754495  | 0.0227454  | 0.342876   | 0.175547  | 0.0910935  | 0.0802501 | 0.00918915 | 0.01653    | 0.0209547  | 0         | 0.030612  | 0.11566   |
| SLC45A3     | 0.985393  | 1.48368    | 0.968034   | 1.12831    | 4.10301    | 2.0277     | 1.28917   | 0.626394   | 1.54179   | 1.19383    | 2.64964    | 0.944996   | 1.19207   | 1.19811   | 1.05153   |
| SLC45A4     | 0.615351  | 0.81604    | 1.11024    | 0.869673   | 0.974058   | 1.5145     | 2.09438   | 0.627601   | 0.189141  | 0.42662    | 0.774043   | 0.23273    | 1.22699   | 0.568175  | 1.08571   |
| SLC46A1     | 0.837506  | 0.806421   | 0.877485   | 0.723046   | 1.27004    | 1.57505    | 1.35539   | 0.639698   | 0.183932  | 0.455676   | 0.932517   | 0.193397   | 0.566573  | 0.448011  | 1.04404   |
| SLC46A2     | 1.12848   | 2.93697    | 3.65005    | 0.419417   | 4.31045    | 0.897875   | 7.47729   | 1.88249    | 10.0261   | 1.18417    | 2.69401    | 1.27075    | 0.298397  | 0.430258  | 0.571208  |
| SLC46A3     | 1.34263   | 0.626892   | 0.881704   | 1.19105    | 0.387012   | 2.18039    | 0.940327  | 1.33468    | 0.202289  | 0.67753    | 1.57035    | 0.217888   | 0.817139  | 0.701717  | 1.39148   |
| SLC47A1     | 0.395246  | 1.11541    | 1.68159    | 0.458226   | 0.230232   | 1.20796    | 0.862265  | 1.13533    | 0.171916  | 0.274612   | 0.557729   | 0.101003   | 0.487252  | 0.387324  | 0.273675  |
| SLC47A2     | 1.39753   | 1.93251    | 0.739926   | 3.49966    | 5.14489    | 2.34425    | 4.4758    | 2.24803    | 1.13185   | 3.7975     | 2.70565    | 5.59482    | 0.550023  | 1.29283   | 0.76267   |
| SLC48A1     | 4.65302   | 5.51653    | 5.4963     | 4.65358    | 6.2206     | 8.42409    | 7.26355   | 4.11488    | 4.97011   | 4.76775    | 5.03741    | 4.08802    | 6.24044   | 3.65578   | 4.55713   |
| SLC49A3     | 0.958654  | 1.81641    | 2.53011    | 1.43507    | 2.06861    | 2.41851    | 1.56663   | 1.29098    | 0.873463  | 0.984442   | 2.31004    | 0.865564   | 0.782213  | 0.874284  | 1.85032   |
| SLC4A1      | 0         | 0.00675389 | 0.00386545 | 0.00481518 | 0          | 0          | 0         | 0.00415256 | 0         | 0.011729   | 0.0105494  | 0          | 0.0150735 | 0         | 0         |
| SLC4A10     | 0.011493  | 0.00922916 | 0.00950781 | 0          | 0.00595086 | 0.00978613 | 0.0131223 | 0.0136187  | 0         | 0          | 0.00864944 | 0.00822354 | 0.0197739 | 0         | 0.0605197 |

|            |            |           |            |            |            |           |            |            |           |           |            |            |           |           |            |
|------------|------------|-----------|------------|------------|------------|-----------|------------|------------|-----------|-----------|------------|------------|-----------|-----------|------------|
| SLC4A11    | 3.77587    | 1.89253   | 1.96539    | 1.12295    | 3.51323    | 3.30681   | 2.41599    | 1.85238    | 2.45361   | 1.12912   | 1.03701    | 2.34816    | 1.214     | 1.14234   | 1.02812    |
| SLC4A1AP   | 4.2229     | 3.54766   | 3.67726    | 5.38588    | 4.22572    | 6.10281   | 2.87092    | 2.65955    | 5.94468   | 4.78585   | 4.20779    | 3.83885    | 7.51633   | 4.55536   | 4.02286    |
| SLC4A2     | 3.41894    | 3.98593   | 3.66064    | 7.28212    | 12.564     | 12.0921   | 4.63127    | 2.16577    | 5.49159   | 4.67848   | 5.0134     | 4.29332    | 9.74189   | 6.78733   | 5.65839    |
| SLC4A3     | 0.315636   | 0.394372  | 0.238988   | 1.30108    | 1.92793    | 1.57612   | 0.256544   | 0.266248   | 0.319255  | 1.65176   | 0.567685   | 0.987597   | 1.44278   | 1.39242   | 1.575      |
| SLC4A4     | 0.138685   | 0.029234  | 0.0430237  | 0.00595495 | 0.00448803 | 0.169752  | 0.122058   | 0.0770323  | 0         | 0.0290106 | 0.0391395  | 0.00620205 | 0.0354187 | 0         | 0.0165974  |
| SLC4A5     | 1.15788    | 1.22386   | 1.32606    | 0.454917   | 0.449646   | 0.890406  | 1.32202    | 0.897179   | 0.700675  | 0.331523  | 0.404383   | 0.310684   | 0.464575  | 0.523839  | 0.639161   |
| SLC4A7     | 3.37814    | 1.55303   | 1.78857    | 3.69016    | 1.19816    | 3.87361   | 1.65532    | 3.60766    | 1.78281   | 3.10219   | 4.5444     | 2.83613    | 4.16663   | 5.2967    | 4.10351    |
| SLC4A8     | 0.0825526  | 0.119936  | 0.082698   | 0.215046   | 0.266855   | 0.135831  | 0.0760575  | 0.0778959  | 0.140907  | 0.308027  | 0.150397   | 0.336229   | 0.24317   | 0.232806  | 0.181375   |
| SLC4A9     | 0.0136136  | 0.059033  | 0.0675726  | 0.0140292  | 0.0422931  | 0.0521629 | 0.031087   | 0.0302465  | 0         | 0.0341728 | 0.015368   | 0.00487043 | 0.0131751 | 0.0106726 | 0          |
| SLC50A1    | 3.36773    | 3.29717   | 3.91158    | 6.33027    | 3.97575    | 12.2274   | 5.12176    | 2.86127    | 6.23431   | 7.15184   | 10.5992    | 4.06758    | 6.11003   | 4.09054   | 2.74712    |
| SLC51A     | 0.46127    | 0.544122  | 0.276328   | 0.835965   | 0.247073   | 0.961599  | 0.308734   | 0.282716   | 0.329317  | 0.459161  | 0.341159   | 0.227622   | 0.133411  | 0.307585  | 0.4797     |
| SLC51B     | 0.270823   | 0.0118624 | 0.0814705  | 0.0507438  | 0.267706   | 0.293494  | 0.309217   | 0.0875218  | 0.119939  | 0         | 0.0277932  | 0          | 0.0476546 | 0.180147  | 0.247505   |
| SLC52A1    | 0.34499    | 4.54338   | 7.49174    | 0.306144   | 1.11643    | 0.228475  | 1.25829    | 0.962377   | 0.315119  | 0.0962216 | 0.0540903  | 0.164566   | 0.0123659 | 0.0901533 | 0.0275249  |
| SLC52A2    | 2.76056    | 3.14519   | 3.5372     | 7.21906    | 13.0739    | 11.4082   | 4.43165    | 2.17666    | 5.71296   | 6.5909    | 10.5205    | 5.21289    | 12.5614   | 8.41266   | 5.14194    |
| SLC52A3    | 0.609706   | 0.579256  | 0.603849   | 1.16814    | 1.90751    | 1.62328   | 0.56868    | 0.633437   | 0.177794  | 0.237118  | 0.591341   | 0.129035   | 0.919731  | 0.273777  | 0.406976   |
| SLC5A1     | 2.82266    | 3.23369   | 4.09917    | 5.83594    | 1.80055    | 2.09455   | 3.04602    | 5.17033    | 13.2929   | 7.34089   | 3.31628    | 3.89377    | 4.20463   | 1.13533   | 0.400285   |
| SLC5A10    | 0.376301   | 0.859054  | 0.661643   | 0.951771   | 2.62141    | 0.559673  | 0.991345   | 0.438807   | 3.34767   | 1.51757   | 1.94869    | 2.55733    | 2.41854   | 0.896855  | 0.382791   |
| SLC5A11    | 0.023769   | 0.0839832 | 0.0589901  | 0          | 0.0492286  | 0.0539706 | 0.0452311  | 0.0211239  | 0         | 0         | 0.00894407 | 0          | 0         | 0.0041409 | 0.0455137  |
| SLC5A12    | 0.0111033  | 0.0035665 | 0          | 0          | 0          | 0.0157572 | 0          | 0.00657848 | 0         | 0         | 0.0125343  | 0          | 0         | 0         | 0          |
| SLC5A2     | 0.227173   | 0.119141  | 0.184649   | 0.0538111  | 0.223213   | 0.05413   | 0.0609383  | 0.0999852  | 0.0463729 | 1.47E-33  | 0.0294947  | 0.0365923  | 0.0259819 | 0.0345063 | 0.0203826  |
| SLC5A3     | 3.04496    | 2.76599   | 3.10071    | 4.70894    | 1.83911    | 2.89267   | 2.7332     | 2.69983    | 2.17208   | 3.16258   | 2.3591     | 4.02813    | 3.66767   | 5.33527   | 2.77576    |
| SLC5A4     | 0.217682   | 0.264967  | 0.23695    | 0.0944538  | 0.213559   | 0.32193   | 0.183137   | 0.0712739  | 0.0558131 | 0.273213  | 0.33627    | 0.163955   | 0.0665277 | 0.281432  | 0.937857   |
| SLC5A4-AS1 | 0.182267   | 0.196437  | 0.17856    | 0.0790867  | 0.312925   | 0.0816829 | 0.147865   | 0.0596781  | 0.0175247 | 0.0842812 | 0.0108293  | 0.140713   | 0.0154733 | 0.215589  | 0.606176   |
| SLC5A5     | 0.0517742  | 0.0374357 | 0.053539   | 0.133387   | 0.112414   | 0.039975  | 0.0443355  | 0.0230063  | 0.0157638 | 0.0324909 | 0          | 0.0463072  | 0.0876866 | 0.0169121 | 0.00929428 |
| SLC5A6     | 1.9763     | 1.85589   | 2.44917    | 5.12021    | 3.10879    | 6.76316   | 2.24413    | 1.73219    | 2.32323   | 1.77799   | 3.09736    | 2.40414    | 3.83092   | 3.33501   | 3.06854    |
| SLC5A7     | 0.00447641 | 0         | 0.00740641 | 0          | 0          | 0         | 0.00511102 | 0          | 0         | 0         | 0          | 0          | 0         | 0         | 0          |



|            |            |            |            |            |           |            |            |           |            |           |            |            |            |            |           |
|------------|------------|------------|------------|------------|-----------|------------|------------|-----------|------------|-----------|------------|------------|------------|------------|-----------|
| SLC5A8     | 0.0557328  | 0.0973418  | 0.0345796  | 0.00717929 | 0.129858  | 0.00593197 | 0.00795424 | 0.037148  | 0.18666    | 0.0174876 | 0.0314577  | 0.0348935  | 0.0179793  | 0          | 0         |
| SLC5A9     | 0.339299   | 0.53812    | 0.491211   | 0.167544   | 0.373327  | 0.553742   | 0.540747   | 0.44603   | 0.550972   | 0.106464  | 0.087777   | 0.161852   | 0.00456071 | 0.0960552  | 0.263942  |
| SLC6A1     | 0.834261   | 0.317598   | 0.255615   | 0.148596   | 0.287977  | 0.223633   | 0.252833   | 1.62472   | 0.0188155  | 0.12927   | 0.156963   | 0.0405328  | 0.176098   | 0.148032   | 1.23509   |
| SLC6A1-AS1 | 0.2774     | 0.0190936  | 0.295051   | 0.122515   | 0.123114  | 0.101229   | 0.0904931  | 0.457841  | 0          | 0         | 0          | 0          | 0          | 0.103558   | 0.853673  |
| SLC6A10P   | 0.133317   | 0.690844   | 1.07969    | 0.0187075  | 0.300378  | 0.175405   | 0.207583   | 0.236154  | 0          | 0.0911049 | 0.0823927  | 0.173337   | 0.0350886  | 0.17099    | 0.0261    |
| SLC6A11    | 0.58897    | 0.935547   | 0.448154   | 1.81923    | 1.6634    | 1.12368    | 0.801926   | 0.550019  | 2.5278     | 4.19021   | 2.7466     | 2.55671    | 4.53256    | 2.79755    | 1.04259   |
| SLC6A12    | 0.017484   | 0.0196562  | 0.0385708  | 0.0300297  | 0.0452646 | 0.104212   | 0.0465797  | 0.0414356 | 0          | 0.0438886 | 0.111845   | 0          | 0.0451225  | 0.0213218  | 0.0585884 |
| SLC6A13    | 0.00749451 | 0.0180548  | 0.0309999  | 0.0154466  | 0         | 0.0191444  | 0.025671   | 0.0199815 | 0.0456374  | 0.0188128 | 0.00846037 | 0.0160876  | 0          | 0          | 0         |
| SLC6A14    | 2.2565     | 1.25335    | 0.994193   | 19.5698    | 2.13458   | 3.36349    | 0.694759   | 2.19466   | 12.7465    | 9.12648   | 2.36413    | 9.00902    | 22.9277    | 6.81105    | 1.49287   |
| SLC6A15    | 0.2863     | 0.217581   | 0.15627    | 0.729997   | 0.142128  | 1.19377    | 0.171869   | 0.241324  | 0.226463   | 0.655695  | 0.403163   | 0.342129   | 1.35397    | 0.961041   | 0.262805  |
| SLC6A16    | 0.591793   | 0.311747   | 0.424296   | 0.138235   | 0.171595  | 0.557654   | 0.531543   | 0.2244    | 0.0480492  | 0.0594209 | 0.10689    | 0.0508132  | 0.0661824  | 0.127843   | 0.328624  |
| SLC6A17    | 0.44492    | 0.782534   | 0.990494   | 0.540511   | 0.618069  | 2.4055     | 1.35878    | 0.691159  | 0.387674   | 0.37682   | 0.16742    | 0.354587   | 0.994207   | 0.155023   | 0.233766  |
| SLC6A18    | 0          | 0          | 0          | 0          | 0         | 0          | 0          | 0         | 0          | 0         | 0          | 0          | 0          | 0          | 0         |
| SLC6A19    | 0          | 0          | 0          | 0          | 0         | 0          | 0          | 0         | 0          | 0         | 0          | 0          | 0          | 0          | 0         |
| SLC6A2     | 0.0650695  | 0.146307   | 0.168668   | 0.353162   | 0.161721  | 0.140361   | 0.0891531  | 0.158064  | 0.0739642  | 0.152449  | 0.0881464  | 0.316601   | 0.607347   | 0.453442   | 0.0436091 |
| SLC6A20    | 0.0809496  | 0.108797   | 0.0916393  | 0.00439057 | 0.0198541 | 0.0253943  | 0.048645   | 0.0681548 | 0.0103776  | 0.176463  | 0.0240479  | 0.0487761  | 0.134694   | 0.024494   | 0.0978979 |
| SLC6A3     | 0.0588283  | 0.00850331 | 0.0146001  | 0.00606243 | 0.0274142 | 0.0250458  | 0.0201505  | 0.0209127 | 0.00716462 | 0         | 0          | 0          | 0          | 0.00307462 | 0.0337939 |
| SLC6A4     | 0.550024   | 0.859809   | 0.49283    | 0.0902573  | 0.540643  | 0.176      | 0.260369   | 0.433022  | 0.392534   | 0.114323  | 0.0988983  | 0.125337   | 0.00678101 | 0.0824239  | 0.115718  |
| SLC6A5     | 0          | 0          | 0          | 0.00833028 | 0         | 0          | 0          | 0         | 0          | 0         | 0          | 0          | 0          | 0          | 0         |
| SLC6A6     | 3.2666     | 4.43683    | 5.86811    | 3.99141    | 3.99202   | 14.3559    | 6.21978    | 3.19537   | 3.21902    | 6.23921   | 6.75129    | 3.60723    | 8.0251     | 7.2859     | 16.4994   |
| SLC6A7     | 0.0362082  | 0.0203533  | 0.00499232 | 0.0373136  | 0.0937396 | 0.0462462  | 0.0413413  | 0         | 0          | 0         | 0.0204373  | 0.0215899  | 0.0311484  | 0.0536179  | 0.147332  |
| SLC6A8     | 8.20136    | 8.11162    | 9.36588    | 12.1923    | 7.07297   | 34.2008    | 10.3037    | 7.69416   | 6.4949     | 8.0523    | 11.0244    | 7.33181    | 19.3245    | 12.3101    | 4.84796   |
| SLC6A9     | 7.41224    | 14.0821    | 11.9045    | 5.18832    | 19.1702   | 5.8568     | 18.1593    | 6.4053    | 27.8832    | 9.90303   | 7.49851    | 23.0807    | 15.3521    | 5.84341    | 4.54682   |
| SLC7A1     | 20.6248    | 17.0259    | 11.4201    | 30.9138    | 27.0683   | 40.5284    | 18.6188    | 10.949    | 26.42      | 18.9282   | 16.9249    | 20.6097    | 34.8476    | 21.2377    | 12.2435   |
| SLC7A10    | 0.0987037  | 0.00584293 | 0          | 0          | 0         | 0.0308682  | 0.0551176  | 0.0213726 | 0          | 0         | 0          | 0.00874189 | 0          | 0          | 0         |
| SLC7A11    | 0.474573   | 0.379667   | 0.370727   | 1.46966    | 0.298086  | 1.11929    | 1.09255    | 0.593871  | 3.41183    | 2.55573   | 3.17061    | 2.6495     | 4.48124    | 3.48126    | 1.15932   |

|             |           |           |           |            |            |           |           |           |           |           |            |            |            |            |           |
|-------------|-----------|-----------|-----------|------------|------------|-----------|-----------|-----------|-----------|-----------|------------|------------|------------|------------|-----------|
| SLC7A11-AS1 | 0.0405649 | 0.053902  | 0.0377851 | 0.125406   | 0.0386218  | 0.021171  | 0.102686  | 0.054902  | 0.109767  | 0.144216  | 0.129775   | 0.18619    | 0.126715   | 0.320138   | 0.153307  |
| SLC7A13     | 0.0124091 | 0.0119578 | 0.0615943 | 0.025576   | 0.0192757  | 0.0316987 | 0.0141684 | 0.0441129 | 0         | 0         | 0.0140084  | 0.0266372  | 0          | 0          | 0         |
| SLC7A14     | 0.0365429 | 0.0198078 | 0.0283414 | 0.00235365 | 0.00709546 | 0.0213921 | 0.101856  | 0.0243572 | 0         | 0         | 0.00515654 | 0.00653685 | 0.00294716 | 0.00954945 | 0.0229601 |
| SLC7A2      | 8.18293   | 2.93319   | 4.18796   | 1.47883    | 1.29534    | 5.85349   | 2.45602   | 4.79235   | 0.283507  | 1.5681    | 3.09688    | 0.510237   | 0.796587   | 0.879371   | 7.25759   |
| SLC7A3      | 0.0102087 | 0         | 0         | 0          | 0          | 0         | 0.0116559 | 0.0272178 | 0         | 0         | 0          | 0          | 0          | 0.0053355  | 0         |
| SLC7A4      | 0.0900508 | 0.0867757 | 0.206934  | 0.0927999  | 0.0777111  | 0.0851967 | 0.251331  | 0.133383  | 0.0365572 | 0.0376743 | 0.0451805  | 0.0644337  | 0.0839227  | 0.0888996  | 0.0287387 |
| SLC7A5      | 14.3463   | 9.70057   | 3.5076    | 53.3227    | 22.007     | 78.849    | 11.8567   | 6.18941   | 31.4619   | 27.1511   | 21.3858    | 25.1955    | 85.2383    | 41.9482    | 12.3515   |
| SLC7A5P2    | 7.29173   | 7.45443   | 10.0328   | 3.72858    | 8.797      | 3.09703   | 6.82149   | 5.85876   | 1.61956   | 2.57082   | 2.03712    | 5.67948    | 0.797295   | 5.97935    | 2.99375   |
| SLC7A6      | 3.78555   | 4.25185   | 4.83772   | 1.94397    | 3.12944    | 3.32419   | 3.72613   | 3.83754   | 2.85824   | 2.78519   | 2.99522    | 2.92284    | 3.56677    | 3.98345    | 4.49613   |
| SLC7A6OS    | 2.06485   | 1.96729   | 2.29128   | 2.6342     | 2.53119    | 2.85262   | 2.234     | 1.55399   | 1.16712   | 1.56109   | 2.29831    | 0.967019   | 1.90429    | 1.75815    | 1.10536   |
| SLC7A7      | 1.17503   | 0.402048  | 0.577607  | 2.39549    | 0.886164   | 3.24082   | 0.874967  | 0.839958  | 0.0829599 | 1.57097   | 4.12356    | 0.249793   | 2.4282     | 1.1882     | 2.02989   |
| SLC7A8      | 7.79166   | 6.85818   | 4.20191   | 13.9173    | 22.317     | 21.7532   | 7.43154   | 6.89938   | 26.7728   | 10.9736   | 18.7776    | 14.1413    | 5.78158    | 8.98831    | 8.21902   |
| SLC7A9      | 0.077879  | 0.11257   | 0.0966405 | 0.120385   | 0.0604865  | 0.0221043 | 0.01482   | 0.0115354 | 0         | 0         | 0.0146526  | 0          | 0.0167491  | 0.040703   | 0.167766  |
| SLC8A1      | 0.920146  | 1.70115   | 2.41338   | 1.66301    | 0.77962    | 2.27926   | 2.13302   | 2.1373    | 0.182527  | 1.21612   | 2.23484    | 0.289292   | 1.82824    | 1.02921    | 2.49773   |
| SLC8A1-AS1  | 0.207872  | 0.200312  | 0.133751  | 0.166614   | 0.0717548  | 0.0196667 | 0.474682  | 0.65685   | 0         | 0.144945  | 0.0260735  | 0.0165264  | 0.104314   | 0.132786   | 0.89559   |
| SLC8A2      | 0.0362247 | 0.043634  | 0.0337136 | 0.116658   | 0.239145   | 0.150369  | 0.0361902 | 0.0321935 | 0.413603  | 0.15913   | 0.153349   | 0.230038   | 0.198662   | 0.182226   | 0.0195087 |
| SLC8A3      | 0.148037  | 0.210017  | 0.29596   | 0.088991   | 0.191627   | 0.0735299 | 0.291096  | 0.131563  | 0.0400649 | 0.0567726 | 0.0789153  | 0.0294234  | 0.0902062  | 0.0494311  | 0.124016  |
| SLC8B1      | 4.84359   | 4.07464   | 4.36052   | 7.00672    | 11.2857    | 10.2721   | 5.09406   | 3.44711   | 6.55354   | 6.11986   | 5.73098    | 5.65729    | 11.0883    | 5.71616    | 5.75639   |
| SLC9A1      | 3.82139   | 4.20446   | 5.01446   | 7.17193    | 6.48931    | 11.4776   | 6.60318   | 4.02936   | 6.59767   | 8.16526   | 7.26136    | 8.3146     | 22.0613    | 8.32075    | 6.79864   |
| SLC9A2      | 1.05926   | 0.297881  | 0.330743  | 0.097692   | 0.0640234  | 0.119324  | 0.362359  | 0.358972  | 0.0752955 | 0.0258655 | 0.00465283 | 0.0117966  | 0.0265927  | 0.0344664  | 0         |
| SLC9A3      | 1.07931   | 1.06966   | 1.00587   | 0.637217   | 1.97216    | 1.38053   | 0.907028  | 0.714402  | 0.751737  | 0.477046  | 0.88774    | 0.849337   | 0.442214   | 0.669023   | 0.223652  |
| SLC9A3-AS1  | 3.09509   | 4.83112   | 3.45339   | 1.51865    | 7.7537     | 6.03458   | 2.47027   | 2.53436   | 3.54522   | 2.08563   | 0.836137   | 9.39474    | 0.733526   | 4.53428    | 1.65643   |
| SLC9A3R1    | 9.24115   | 12.8211   | 13.0296   | 21.732     | 22.6287    | 22.0715   | 13.8149   | 9.00854   | 22.2297   | 25.3008   | 18.6612    | 21.1675    | 37.3887    | 14.6035    | 8.22666   |
| SLC9A3R2    | 9.75474   | 2.7511    | 2.37395   | 4.59228    | 15.9132    | 16.8788   | 6.30685   | 4.01256   | 2.00389   | 4.47443   | 6.56734    | 4.51305    | 8.17052    | 7.28395    | 12.5322   |
| SLC9A4      | 1.305     | 1.46632   | 1.34481   | 0.572656   | 0.413649   | 0.235792  | 1.31648   | 1.44723   | 0.158131  | 0.385659  | 0.2006     | 0.608651   | 0.106679   | 0.785338   | 0.702717  |
| SLC9A5      | 0.4503    | 0.58808   | 0.617599  | 0.158753   | 0.892747   | 0.534776  | 0.575023  | 0.352798  | 0.10824   | 0.260277  | 0.133772   | 0.258609   | 0.0955695  | 0.421146   | 0.433961  |

|             |            |            |            |            |           |            |            |            |            |            |           |           |            |            |           |
|-------------|------------|------------|------------|------------|-----------|------------|------------|------------|------------|------------|-----------|-----------|------------|------------|-----------|
| SLC9A6      | 2.26047    | 1.96847    | 2.20195    | 2.53622    | 1.32244   | 2.97047    | 2.24017    | 2.02197    | 2.53253    | 3.24858    | 3.18701   | 2.08306   | 4.37218    | 1.98183    | 1.68641   |
| SLC9A7      | 1.20397    | 1.12574    | 1.45395    | 0.444476   | 0.61623   | 0.836632   | 0.695231   | 1.36721    | 0.949449   | 0.509493   | 0.94775   | 0.696441  | 0.605665   | 0.466511   | 0.361049  |
| SLC9A7P1    | 0.0770268  | 0.0472343  | 0.0695149  | 0.0865946  | 0.0435088 | 0.274274   | 0.0559661  | 0.0809014  | 0.0255845  | 0.105465   | 0.252956  | 0.0250522 | 0.0180717  | 0.0622162  | 0.160902  |
| SLC9A8      | 1.87459    | 1.6988     | 1.68104    | 1.88653    | 1.50144   | 2.32256    | 1.93968    | 1.60415    | 0.544003   | 1.18559    | 0.979555  | 0.872379  | 1.73625    | 1.284      | 1.88765   |
| SLC9A9      | 2.76287    | 2.85915    | 2.85573    | 2.30145    | 1.77417   | 2.21129    | 3.09628    | 3.09053    | 3.31047    | 1.69781    | 2.48507   | 1.87647   | 0.802784   | 1.16053    | 1.90603   |
| SLC9A9-AS1  | 0.134033   | 0.0645792  | 0.0739211  | 0.184167   | 0.0693999 | 0.0380425  | 0.102023   | 0.198529   | 0.108825   | 0.168225   | 0.100871  | 0.15984   | 0.115303   | 0.140103   | 0         |
| SLC9B1      | 0.237869   | 0.150804   | 0.225716   | 0.112327   | 0.0454095 | 0.144137   | 0.145911   | 0.181861   | 0.0253243  | 0.0611514  | 0.187006  | 0.0418946 | 0.013419   | 0.0561379  | 0.223908  |
| SLC9B2      | 1.44428    | 0.812411   | 0.748901   | 2.08657    | 1.25591   | 2.51253    | 1.10462    | 0.816808   | 0.47972    | 1.33569    | 2.19209   | 0.731801  | 1.44458    | 1.2677     | 2.10394   |
| SLC9C1      | 0.0834886  | 0.214539   | 0.299293   | 0.06883    | 0.0432289 | 0.0094786  | 0.216069   | 0.291844   | 0.0406719  | 0.0768437  | 0.0376993 | 0.0876163 | 0.0107733  | 0.0843606  | 0.279767  |
| SLC9C2      | 0          | 0.00251879 | 0          | 0          | 0         | 0          | 0.00596882 | 0          | 0          | 0          | 0.0177043 | 0         | 0          | 0.00273223 | 0         |
| SLCO1A2     | 0.0117617  | 0.0156161  | 0.0145982  | 0.00606012 | 0.0182692 | 0.00250362 | 0          | 0.00783926 | 0.0107428  | 0.00369037 | 0         | 0.0126232 | 0          | 0          | 0.0168905 |
| SLCO1B1     | 0          | 0          | 0          | 0          | 0         | 0          | 0          | 0          | 0          | 0          | 0         | 0         | 0          | 0          | 0         |
| SLCO1B3     | 0          | 0.00354778 | 0.00609149 | 0          | 0         | 0.0125396  | 0.0168145  | 0          | 0          | 0          | 0         | 0         | 0          | 0.00384842 | 0         |
| SLCO1B7     | 0          | 0.0405901  | 0          | 0          | 0         | 0.0102475  | 0          | 0          | 0          | 0          | 0         | 0         | 0          | 0          | 0         |
| SLCO1C1     | 0.0582134  | 0.0218152  | 0.0428073  | 0.0199969  | 0.0301418 | 0.324945   | 0.0369256  | 0.0172451  | 0.0236324  | 0.0974184  | 0.16794   | 0.0601658 | 0.00417322 | 0.0405665  | 0.371563  |
| SLCO2A1     | 5.34871    | 3.16592    | 2.48897    | 7.81056    | 3.66898   | 8.32477    | 2.36521    | 2.71767    | 1.90885    | 14.3962    | 10.647    | 4.39965   | 17.7463    | 10.5403    | 17.4328   |
| SLCO2B1     | 5.22029    | 1.55824    | 1.61303    | 8.46604    | 5.87982   | 17.2405    | 3.86474    | 4.90744    | 0.41794    | 6.73473    | 18.049    | 0.944981  | 5.23       | 4.32082    | 8.45278   |
| SLCO3A1     | 3.28725    | 4.83527    | 4.90435    | 3.01771    | 5.52294   | 5.11231    | 4.33569    | 3.02554    | 4.99288    | 2.24787    | 3.26303   | 2.1872    | 3.31791    | 2.54353    | 5.14417   |
| SLCO4A1     | 1.66014    | 1.81884    | 2.69211    | 3.26884    | 1.92314   | 4.2121     | 4.4385     | 2.3933     | 12.1346    | 5.25485    | 6.04356   | 6.38274   | 10.0308    | 3.75667    | 2.01263   |
| SLCO4A1-AS1 | 0.339372   | 0.573535   | 0.883403   | 0.612078   | 0.441974  | 0.964365   | 1.29444    | 0.679008   | 1.06702    | 0.240794   | 0.10715   | 1.04743   | 0.305862   | 0.389511   | 0.441424  |
| SLCO4C1     | 0.00868081 | 0.00627382 | 0          | 0.0357833  | 0.0134843 | 0.0295664  | 0          | 0.0115722  | 0.00528613 | 0.0871625  | 0.127394  | 0         | 0.0196029  | 0.00680546 | 0.0124667 |
| SLCO5A1     | 0.0980882  | 0.0222402  | 0.0286396  | 0.0356763  | 0.0358506 | 0.108086   | 0.00658788 | 0.0461502  | 0          | 0.0651763  | 0.162837  | 0.0165141 | 0.0595633  | 0.015078   | 0.182299  |
| SLCO6A1     | 0          | 0          | 0.00711996 | 0          | 0         | 0          | 0          | 0.0152976  | 0          | 0          | 0         | 0         | 0          | 0          | 0         |
| SLED1       | 1.17258    | 0.936657   | 0.79135    | 1.04938    | 1.29417   | 0.341571   | 1.55021    | 0.987246   | 0.751617   | 0.890772   | 0.278673  | 0.529903  | 0.298636   | 0.451568   | 1.72829   |
| SLF1        | 1.17749    | 0.725247   | 0.833507   | 1.20092    | 0.0848524 | 1.17833    | 0.519748   | 0.970934   | 0.288287   | 0.662754   | 1.04146   | 0.369146  | 0.986837   | 0.754982   | 1.07214   |
| SLF2        | 3.83406    | 3.61667    | 3.78085    | 3.30846    | 1.53376   | 4.43241    | 2.40639    | 3.24579    | 1.63853    | 2.44956    | 2.91697   | 1.90054   | 1.72118    | 2.43541    | 3.23823   |

|             |           |            |            |           |           |            |           |            |            |           |           |            |           |            |           |
|-------------|-----------|------------|------------|-----------|-----------|------------|-----------|------------|------------|-----------|-----------|------------|-----------|------------|-----------|
| SLFN11      | 1.63024   | 1.09652    | 1.33926    | 1.89671   | 1.59789   | 3.9792     | 1.63358   | 1.1231     | 0.225895   | 2.52629   | 4.26919   | 0.385032   | 1.93853   | 1.8662     | 7.1998    |
| SLFN12      | 1.38759   | 0.736216   | 0.608121   | 1.25972   | 0.641491  | 1.55426    | 0.678989  | 1.02031    | 0.281655   | 1.01592   | 2.00464   | 0.384142   | 0.889938  | 0.725215   | 1.76739   |
| SLFN12L     | 0.513916  | 0.247612   | 0.236967   | 0.173641  | 0.392601  | 0.459113   | 0.288576  | 0.306979   | 0.0718236  | 0.0740183 | 0.104617  | 0.102479   | 0.130456  | 0.19374    | 0.810643  |
| SLFN13      | 0.479171  | 0.326762   | 0.293741   | 0.263054  | 0.277986  | 0.494746   | 0.348913  | 0.354333   | 0.0722702  | 0.158221  | 0.267902  | 0.160971   | 0.19754   | 0.297034   | 0.5145    |
| SLFN14      | 0.0321208 | 0.0116072  | 0.00664315 | 0.0165507 | 0.0623684 | 0          | 0         | 0.0142732  | 0.00977989 | 0         | 0         | 0.00574583 | 0         | 0.00419694 | 0.0115324 |
| SLFN5       | 4.17187   | 2.05851    | 2.26348    | 5.78786   | 1.18812   | 12.1827    | 2.09096   | 2.57727    | 1.00872    | 3.90311   | 4.91674   | 1.2791     | 5.43974   | 2.6955     | 7.48212   |
| SLFNL1      | 0.563049  | 0.42152    | 0.409098   | 0.352224  | 0.597929  | 0.181899   | 0.884612  | 0.331331   | 0.133399   | 0.254815  | 0.0978949 | 0.498118   | 0.0414802 | 0.973508   | 0.137435  |
| SLFNL1-AS1  | 0.873431  | 0.846279   | 1.01102    | 0.61402   | 1.13664   | 0.474919   | 1.22945   | 0.759586   | 0.248734   | 0.426294  | 0.0924296 | 0.979606   | 0.14699   | 1.66606    | 0.832171  |
| SLIRP       | 14.924    | 8.10768    | 6.76357    | 21.3979   | 3.02376   | 17.6065    | 7.50738   | 5.9204     | 13.2235    | 20.8486   | 40.3847   | 10.1214    | 14.0108   | 14.4017    | 6.33665   |
| SLIT1       | 0.0437707 | 0.0548325  | 0.0434523  | 0.0300713 | 0.0906548 | 0.0447243  | 0.0799616 | 0.0466798  | 0.0177693  | 0.0366245 | 0.0230588 | 0.0334071  | 0.013179  | 0.0259267  | 0.0502883 |
| SLIT1-AS1   | 0.0335893 | 0          | 0          | 0         | 0         | 0          | 0         | 0          | 0          | 0         | 0         | 0          | 0         | 0          | 0         |
| SLIT2       | 2.69167   | 1.74071    | 2.48071    | 1.71221   | 1.24362   | 3.15683    | 2.70302   | 1.39498    | 1.13232    | 1.04447   | 1.40913   | 0.895219   | 1.06827   | 0.715386   | 2.88473   |
| SLIT2-IT1   | 0.115523  | 0.111321   | 0.191137   | 0.11905   | 0         | 0          | 0.0879334 | 0.0684447  | 0.0468979  | 0.144993  | 0.130411  | 0.0275532  | 0         | 0          | 0.0553017 |
| SLIT3       | 14.1322   | 8.38072    | 12.5894    | 2.17816   | 7.37513   | 15.991     | 23.084    | 7.66377    | 0.631238   | 3.21089   | 5.90204   | 1.28951    | 3.31638   | 4.50942    | 24.2444   |
| SLITRK1     | 0         | 0          | 0          | 0         | 0         | 0          | 0         | 0          | 0          | 0         | 0         | 0          | 0         | 0          | 0         |
| SLITRK2     | 0.534433  | 0.464506   | 0.54615    | 0.340168  | 0.154638  | 0.597828   | 0.987086  | 0.465647   | 0.0510494  | 0.039457  | 0.236592  | 0.104973   | 0.185929  | 0.342302   | 0.240789  |
| SLITRK3     | 0.0189232 | 0.00911748 | 0          | 0         | 0         | 0.00402821 | 0.0108029 | 0.00840867 | 0          | 0         | 0         | 0          | 0         | 0          | 0         |
| SLITRK4     | 0.230329  | 0.264171   | 0.4018     | 0.0283801 | 0.0388892 | 0.620343   | 0.431633  | 0.246972   | 0.00304907 | 0.0565604 | 0.121528  | 0.00179138 | 0.200297  | 0.0981358  | 0.363141  |
| SLITRK5     | 0.119723  | 0.0978129  | 0.0775124  | 0.0268214 | 0.0323429 | 0.0354584  | 0.0713198 | 0.0740175  | 0          | 0         | 0         | 0.00372458 | 0.0134339 | 0.00272055 | 0         |
| SLITRK6     | 0.786011  | 1.13347    | 1.08069    | 1.24353   | 0.318134  | 1.47053    | 0.581441  | 1.08225    | 0.303361   | 1.10463   | 1.181     | 0.875303   | 0.66427   | 0.613313   | 0.294127  |
| SLK         | 11.1046   | 10.4715    | 9.7549     | 11.3608   | 5.55262   | 10.8558    | 4.43795   | 8.22489    | 20.5906    | 17.2109   | 12.9387   | 10.6741    | 25.8867   | 12.223     | 8.11037   |
| SLMAP       | 4.42025   | 4.81934    | 4.82463    | 5.7258    | 2.50046   | 5.46882    | 3.27567   | 3.66877    | 6.36359    | 7.86972   | 6.45541   | 5.25045    | 8.09294   | 5.8519     | 3.76128   |
| SLMO2-ATP5E | 7.29213   | 5.91142    | 5.66131    | 12.471    | 3.6145    | 10.0733    | 5.14884   | 3.13202    | 27.8568    | 14.3546   | 22.3186   | 10.308     | 15.3867   | 10.1061    | 6.40929   |
| SLN         | 0.158514  | 0.0305498  | 0.0524536  | 0         | 0.0492454 | 1.64667    | 0.0361972 | 0.197224   | 0          | 0.198951  | 0.071577  | 0.0226842  | 0.552271  | 0.927879   | 0.364234  |
| SLPI        | 48.0335   | 32.1985    | 30.3888    | 512.366   | 242.174   | 58.093     | 59.72     | 26.9519    | 366.224    | 1432.85   | 1062.3    | 446.828    | 1696.99   | 576.488    | 115.881   |
| SLTM        | 10.0065   | 9.80035    | 8.34684    | 9.19089   | 6.49155   | 11.5779    | 3.49151   | 5.79049    | 17.3713    | 8.9996    | 7.0733    | 11.8694    | 10.1192   | 9.16033    | 7.01393   |

|               |          |          |          |          |          |          |          |          |          |          |          |                 |          |          |          |
|---------------|----------|----------|----------|----------|----------|----------|----------|----------|----------|----------|----------|-----------------|----------|----------|----------|
| SLU7          | 5.8125   | 4.05996  | 4.12487  | 5.54028  | 2.10632  | 7.9168   | 2.33625  | 3.68189  | 6.82564  | 5.1504   | 5.92697  | 2.79544         | 6.78222  | 3.89278  | 4.36746  |
| SLURP1        | 102.915  | 80.588   | 65.7081  | 45.2565  | 272.196  | 107.447  | 243.622  | 58.5622  | 998.989  | 71.4002  | 262.57   | 98.7401         | 12.0956  | 8.35653  | 2.16624  |
| SLURP2        | 38.5215  | 44.5152  | 38.5408  | 115.05   | 157.852  | 122.383  | 76.2288  | 42.4503  | 391.807  | 127.919  | 227.693  | 132.806         | 150.594  | 48.5591  | 15.322   |
| SLX1A         | 1.96772  | 1.2893   | 1.11825  | 3.17586  | 2.89018  | 5.12054  | 1.94288  | 0.969317 | 2.1113   | 2.03611  | 4.2733   | 2.04524         | 2.04695  | 2.10081  | 2.62153  |
| SLX1A-SULT1A3 | 0.502147 | 0.461538 | 0.463074 | 0.472354 | 1.7042   | 0.636093 | 0.315894 | 0.271226 | 0.201249 | 0.235467 | 0.21825  | 0.368555        | 0.118076 | 0.539458 | 0.666792 |
| SLX1B         | 1.96772  | 1.2893   | 1.11825  | 3.17586  | 2.89018  | 5.12054  | 1.94288  | 0.969317 | 2.1113   | 2.03611  | 4.2733   | 2.04524         | 2.04695  | 2.10081  | 2.62153  |
| SLX1B-SULT1A4 | 0.502147 | 0.461538 | 0.463074 | 0.472354 | 1.7042   | 0.636093 | 0.315894 | 0.271226 | 0.201249 | 0.235467 | 0.21825  | 0.368555        | 0.118076 | 0.539458 | 0.666792 |
| SLX4          | 0.724704 | 0.81118  | 0.803731 | 0.909891 | 1.22895  | 1.89973  | 1.03701  | 0.604682 | 0.373856 | 0.806307 | 0.521584 | 0.781214        | 1.37006  | 1.14621  | 1.11803  |
| SLX4IP        | 1.3133   | 1.69228  | 1.27911  | 1.91993  | 0.97256  | 1.67413  | 1.01128  | 1.10947  | 1.0694   | 1.19312  | 1.44376  | 1.26204         | 1.00005  | 1.3628   | 1.53517  |
| SMA4          | 12.9778  | 9.8634   | 11.0583  | 4.95588  | 3.90682  | 4.38851  | 7.40419  | 9.77311  | 2.29587  | 2.52975  | 6.17712  | 2.35963         | 1.5419   | 3.73063  | 10.0422  |
| SMA5          | 6.50553  | 7.07898  | 8.51231  | 5.41382  | 7.59646  | 4.19128  | 6.99884  | 4.85606  | 1.10284  | 3.82312  | 6.6181   | 1.92274         | 0.961797 | 3.86345  | 8.27873  |
| SMAD1         | 5.47159  | 4.91235  | 4.30795  | 7.17405  | 4.01451  | 6.35343  | 4.34865  | 5.37802  | 3.9931   | 4.6898   | 8.10685  | 2.8475          | 5.85531  | 4.22886  | 5.03337  |
| SMAD1-AS1     | 0.197814 | 0.984174 | 0.155026 | 1.42541  | 6.46451  | 0.399667 | 0.811398 | 0.225095 | 1.36E-06 | 1.24E-08 | 0.159576 | 0.00034646<br>2 | 0.216141 | 0.42028  | 1.26E-06 |
| SMAD1-AS2     | 0.680072 | 0.565974 | 0.545555 | 0.530935 | 0.160059 | 0.105286 | 0.282358 | 0.769225 | 0.050197 | 0.206924 | 0.116321 | 0.250678        | 0.106371 | 0.344664 | 0.325556 |
| SMAD2         | 7.17552  | 6.20842  | 6.89051  | 6.34813  | 2.57233  | 8.7035   | 5.39266  | 7.54561  | 5.97719  | 6.49959  | 7.22788  | 4.14961         | 7.12836  | 6.44579  | 7.74721  |
| SMAD3         | 5.21008  | 5.08621  | 6.11401  | 7.13012  | 4.24461  | 10.664   | 6.61098  | 3.60547  | 1.56611  | 3.1665   | 3.03348  | 2.03024         | 3.99725  | 2.81252  | 4.76744  |
| SMAD4         | 5.11358  | 4.66699  | 5.40686  | 4.13581  | 2.32803  | 4.92706  | 3.86523  | 4.976    | 2.39727  | 3.36137  | 4.24754  | 2.18439         | 4.09598  | 3.30694  | 4.20238  |
| SMAD5         | 6.14677  | 6.70278  | 7.61024  | 7.13436  | 2.46177  | 7.21657  | 4.40091  | 8.13798  | 3.36384  | 5.95516  | 7.85932  | 3.76598         | 6.04881  | 5.12487  | 5.98506  |
| SMAD5-AS1     | 0.831563 | 0.98624  | 1.32294  | 0.553722 | 0.635916 | 0.348586 | 0.555064 | 0.761764 | 0.109065 | 0.449593 | 0.404377 | 0.448543        | 0.132067 | 0.541593 | 0.385828 |
| SMAD6         | 1.25326  | 0.707566 | 0.547016 | 1.10928  | 3.27246  | 2.45506  | 0.886652 | 0.526149 | 0.440108 | 1.02291  | 0.91136  | 1.1223          | 3.49233  | 2.04539  | 2.82674  |
| SMAD7         | 3.5615   | 2.43152  | 3.0186   | 2.61071  | 3.87258  | 4.51454  | 2.35545  | 1.58856  | 2.8644   | 3.27241  | 2.68538  | 2.72145         | 5.22437  | 3.99675  | 4.34272  |
| SMAD9         | 1.09259  | 0.600205 | 0.489595 | 0.609888 | 0.514294 | 1.25101  | 0.689897 | 0.717219 | 0.100807 | 0.628518 | 1.09791  | 0.41458         | 0.694252 | 0.599154 | 1.14711  |
| SMAGP         | 7.84507  | 7.92871  | 4.23396  | 10.6062  | 9.63286  | 10.195   | 7.89094  | 4.66466  | 19.0408  | 8.93208  | 16.4682  | 11.2802         | 12.1839  | 7.87818  | 4.02377  |
| SMAP1         | 4.64655  | 4.11589  | 3.90228  | 5.44889  | 3.08619  | 7.35096  | 3.74597  | 4.07821  | 12.0049  | 9.53831  | 10.5994  | 7.14924         | 9.39912  | 5.35938  | 3.39635  |
| SMAP2         | 8.57655  | 6.06665  | 6.76007  | 12.3459  | 10.0442  | 15.0348  | 7.96697  | 7.94412  | 27.0774  | 7.82136  | 16.3876  | 6.60958         | 8.76104  | 5.93074  | 7.57181  |

|             |           |            |           |           |           |           |           |           |            |           |           |           |           |           |           |
|-------------|-----------|------------|-----------|-----------|-----------|-----------|-----------|-----------|------------|-----------|-----------|-----------|-----------|-----------|-----------|
| SMARCA1     | 3.45907   | 2.48365    | 2.72643   | 2.8796    | 1.68019   | 7.35852   | 1.97473   | 2.21797   | 0.919395   | 3.56369   | 6.00356   | 1.1166    | 2.98779   | 3.22411   | 6.52915   |
| SMARCA2     | 12.1598   | 13.0909    | 14.0075   | 8.61381   | 10.9475   | 15.0726   | 9.93874   | 11.3081   | 7.48227    | 4.68228   | 4.04823   | 5.77395   | 5.95676   | 5.00265   | 8.86652   |
| SMARCA4     | 8.3039    | 11.1376    | 11.2168   | 14.5978   | 19.6725   | 21.3394   | 10.5877   | 9.36852   | 15.7552    | 8.57317   | 5.62535   | 12.0607   | 18.1113   | 10.6833   | 8.40674   |
| SMARCA5     | 4.41269   | 4.01246    | 3.96907   | 7.11113   | 1.88026   | 7.92424   | 2.37554   | 3.1489    | 4.44157    | 5.08059   | 7.39993   | 3.11784   | 8.02508   | 5.76431   | 5.26769   |
| SMARCA5-AS1 | 0.519506  | 0.436539   | 0.414976  | 0.119357  | 4.15103   | 0.373809  | 1.02389   | 0.224653  | 1.40E-11   | 0.0674835 | 0.523861  | 0.370749  | 0.119496  | 0.187179  | 1.29798   |
| SMARCAD1    | 4.15579   | 3.73261    | 3.0974    | 4.56145   | 1.01094   | 4.04602   | 2.43066   | 3.53304   | 2.46379    | 3.5429    | 3.9611    | 2.54157   | 3.50088   | 2.86255   | 2.85462   |
| SMARCAL1    | 1.98787   | 2.49697    | 2.60237   | 3.83117   | 3.06619   | 3.75945   | 2.21395   | 1.70467   | 1.84337    | 2.53876   | 3.02358   | 2.2758    | 3.14116   | 2.46431   | 2.15365   |
| SMARCB1     | 10.1291   | 9.13127    | 9.15003   | 18.8239   | 13.7246   | 23.9579   | 12.4808   | 8.51902   | 11.4696    | 11.3492   | 21.9634   | 9.07115   | 17.0601   | 11.771    | 10.0694   |
| SMARCC1     | 10.5927   | 11.2185    | 10.9912   | 17.5195   | 10.7904   | 16.1804   | 9.54697   | 10.0105   | 14.0904    | 9.7378    | 8.05052   | 10.1796   | 15.7125   | 10.1038   | 8.88496   |
| SMARCC2     | 10.0505   | 13.1957    | 12.9228   | 12.0606   | 14.134    | 18.9303   | 14.8107   | 10.7263   | 11.0652    | 7.97789   | 5.6527    | 8.71582   | 11.5168   | 9.27978   | 10.0203   |
| SMARCD1     | 6.66816   | 5.5933     | 5.41592   | 12.9161   | 6.09113   | 16.9876   | 6.95858   | 4.96644   | 4.84147    | 6.54809   | 9.27228   | 5.36526   | 12.4365   | 8.51861   | 7.70567   |
| SMARCD2     | 13.7908   | 12.3834    | 13.3314   | 14.0188   | 12.1527   | 18.1717   | 11.9874   | 11.8955   | 8.48327    | 8.34104   | 10.9187   | 6.92068   | 10.2062   | 7.36663   | 5.88106   |
| SMARCD3     | 2.471     | 2.78766    | 3.84905   | 1.81356   | 2.56512   | 7.07158   | 2.35339   | 3.40651   | 0.26424    | 1.60363   | 3.23848   | 0.336364  | 0.715481  | 1.24736   | 2.89087   |
| SMARCE1     | 15.9162   | 11.7356    | 11.2453   | 15.6239   | 5.03377   | 21.3583   | 8.0549    | 10.2286   | 12.038     | 12.5978   | 18.3451   | 7.22297   | 18.3178   | 10.5018   | 13.2341   |
| SMC1A       | 4.55176   | 4.43429    | 4.53865   | 7.42364   | 3.93161   | 7.33051   | 5.30876   | 3.6724    | 3.09105    | 3.13287   | 2.70463   | 3.44037   | 7.67921   | 4.55087   | 4.77965   |
| SMC1B       | 0.136072  | 0.0550715  | 0.031519  | 0.0560903 | 0.0591825 | 0.0556143 | 0.0807883 | 0.0532088 | 0.00662879 | 0         | 0.0184329 | 0.0116835 | 0         | 0.0341361 | 0.0625331 |
| SMC2        | 1.84409   | 1.6372     | 1.58635   | 2.83546   | 0.370904  | 3.54081   | 0.998238  | 1.25691   | 1.86563    | 2.66955   | 2.70794   | 1.37207   | 2.78963   | 2.39223   | 1.59851   |
| SMC2-AS1    | 0.0296706 | 0.00953049 | 0.0136364 | 0.0101921 | 0         | 0.022457  | 0.0301128 | 0.0380882 | 0          | 0         | 0.0037216 | 0         | 0         | 0         | 0.0142036 |
| SMC3        | 7.02396   | 5.99295    | 6.27166   | 5.8812    | 1.40754   | 9.1677    | 1.81215   | 3.62634   | 4.16753    | 6.82376   | 6.95709   | 3.55594   | 10.2474   | 6.34782   | 4.44552   |
| SMC4        | 2.73697   | 2.07994    | 1.86437   | 5.46081   | 0.714844  | 3.65728   | 1.00379   | 1.89066   | 1.6383     | 3.53504   | 3.4497    | 2.27488   | 5.50862   | 5.02204   | 3.29872   |
| SMC5        | 5.22222   | 4.2509     | 4.27525   | 3.6624    | 1.72363   | 3.9379    | 1.94027   | 4.26869   | 2.14995    | 3.54017   | 3.49072   | 2.44853   | 3.23668   | 3.66416   | 4.45194   |
| SMC5-AS1    | 0.846425  | 0.590267   | 0.350111  | 0.390224  | 0.449797  | 0.303461  | 0.508643  | 0.316729  | 0.0271277  | 0.279566  | 0.25145   | 0.159379  | 0.129342  | 0.209548  | 0.991652  |
| SMC6        | 3.11124   | 2.84331    | 3.13449   | 3.7459    | 0.895482  | 3.3499    | 1.13554   | 2.16667   | 1.85975    | 3.33608   | 3.34332   | 1.85463   | 4.28738   | 3.13482   | 2.59749   |
| SMCHD1      | 5.52423   | 4.25608    | 4.64068   | 5.37386   | 1.59599   | 5.07875   | 3.06838   | 4.79326   | 3.4647     | 5.0544    | 6.04336   | 2.5836    | 4.28738   | 4.17738   | 5.22767   |
| SMCO1       | 0.0123892 | 0.0179079  | 0         | 0.0510698 | 0         | 0.0316478 | 0.0141456 | 0.022021  | 0.105621   | 0.0466492 | 0         | 0.0886481 | 0.0639477 | 0.0194254 | 0.035585  |
| SMCO2       | 0.0909711 | 0.0876625  | 0.19567   | 0.318744  | 0.0565238 | 0.108445  | 0.0415471 | 0.064678  | 0.0886341  | 0.342534  | 0.287546  | 0.273388  | 0.187821  | 0.123618  | 0.0261292 |

|           |           |           |           |           |           |           |           |           |           |           |           |            |            |           |           |
|-----------|-----------|-----------|-----------|-----------|-----------|-----------|-----------|-----------|-----------|-----------|-----------|------------|------------|-----------|-----------|
| SMCO3     | 0.142994  | 0.063597  | 0.100096  | 0.0340061 | 0.0170861 | 0.121758  | 0.0753536 | 0.273714  | 0         | 0         | 0.0372514 | 0.00787047 | 0          | 0.0402419 | 0.0473902 |
| SMCO4     | 0.830776  | 1.01786   | 1.11928   | 1.98135   | 1.91729   | 3.27423   | 0.731741  | 0.8438    | 3.1221    | 2.20459   | 3.51021   | 1.05301    | 2.25125    | 1.20335   | 2.99979   |
| SMCP      | 0         | 0         | 0         | 0         | 0         | 0         | 0         | 0         | 0         | 0.0377233 | 0         | 0          | 0          | 0.0471256 | 0         |
| SMCR2     | 0         | 0.0198058 | 0         | 0         | 0         | 0         | 0         | 0         | 0         | 0         | 0         | 0          | 0          | 0         | 0         |
| SMCR5     | 0.301088  | 0.670452  | 0.66646   | 0.327051  | 1.03651   | 0.533531  | 0.826911  | 0.846136  | 0.0693739 | 0.439176  | 0.101048  | 0.815164   | 0.0367519  | 0.544386  | 0.724562  |
| SMCR8     | 3.92229   | 3.48314   | 3.93094   | 4.45197   | 3.742     | 5.37258   | 4.37766   | 3.59903   | 3.45655   | 2.83176   | 2.13154   | 2.68825    | 6.14507    | 3.06057   | 3.16739   |
| SMDT1     | 5.7089    | 6.20988   | 6.87957   | 5.07027   | 6.47957   | 7.78678   | 5.26648   | 4.05173   | 12.1308   | 5.5711    | 11.4705   | 5.48155    | 3.98524    | 3.99691   | 1.63206   |
| SMG1      | 13.0192   | 18.175    | 19.1629   | 12.8932   | 8.95548   | 10.55     | 11.5859   | 14.6229   | 6.68653   | 8.86323   | 6.67093   | 9.4506     | 10.0983    | 10.4038   | 8.14086   |
| SMG1P1    | 32.8926   | 23.2238   | 29.3109   | 11.5936   | 5.31187   | 7.4758    | 17.1322   | 29.0633   | 4.19277   | 9.21207   | 7.11027   | 9.63502    | 3.12263    | 16.6156   | 11.7028   |
| SMG1P2    | 4.7711    | 2.9407    | 3.47935   | 2.01742   | 1.87673   | 1.36569   | 3.38528   | 4.21391   | 1.5543    | 1.57601   | 3.12012   | 2.27766    | 2.05943    | 2.72566   | 2.38342   |
| SMG1P3    | 32.1159   | 40.6625   | 46.3421   | 16.0258   | 16.2382   | 15.4682   | 28.6961   | 31.9482   | 5.35795   | 10.0117   | 9.99909   | 21.4591    | 2.98969    | 17.3533   | 18.4378   |
| SMG1P5    | 13.8507   | 11.111    | 13.8245   | 5.68666   | 10.4331   | 5.477     | 6.46121   | 10.5064   | 2.49245   | 5.00893   | 7.6011    | 3.98951    | 4.05344    | 5.46148   | 7.37999   |
| SMG1P6    | 0.435964  | 0.338223  | 0.36066   | 0.22083   | 0.11478   | 0.0817938 | 0.185609  | 0.479386  | 0.035997  | 0.139114  | 0.100098  | 0.163903   | 0.00953498 | 0.166063  | 0.328968  |
| SMG1P7    | 6.86308   | 8.32503   | 8.54023   | 3.71419   | 13.3734   | 4.41015   | 6.33209   | 4.56484   | 1.85948   | 3.48149   | 1.61074   | 5.89051    | 1.17052    | 6.76936   | 5.50082   |
| SMG5      | 6.24451   | 9.37795   | 7.97638   | 10.5553   | 17.8918   | 13.2359   | 8.28557   | 5.81244   | 11.8776   | 9.57785   | 6.06311   | 11.2018    | 13.4439    | 11.0015   | 8.03202   |
| SMG6      | 4.59186   | 5.23402   | 5.06499   | 4.77111   | 6.69345   | 7.46243   | 5.16628   | 3.64298   | 3.76731   | 3.91903   | 2.51777   | 4.53932    | 5.67691    | 4.84402   | 4.64336   |
| SMG7      | 6.40095   | 6.44803   | 6.07445   | 7.72305   | 5.11155   | 8.72243   | 7.06123   | 6.16964   | 13.772    | 6.11823   | 6.61084   | 5.4036     | 8.0269     | 5.78939   | 6.08348   |
| SMG7-AS1  | 0.141461  | 0.122685  | 0.226252  | 0.0777493 | 0.278335  | 0.224844  | 0.226122  | 0.0921939 | 0.114856  | 0.0828559 | 0.0958152 | 0.155203   | 0.0121693  | 0.108436  | 0.0677187 |
| SMG8      | 2.4376    | 2.28408   | 2.39759   | 3.71691   | 2.72976   | 3.55384   | 2.59709   | 2.05298   | 3.59872   | 2.79263   | 3.23971   | 1.9774     | 4.85534    | 2.45541   | 1.79106   |
| SMG9      | 1.47589   | 1.48649   | 1.43825   | 1.92911   | 2.42856   | 3.08494   | 1.68512   | 1.22642   | 0.751481  | 1.32388   | 1.84964   | 0.894945   | 1.66506    | 1.82599   | 1.93993   |
| SMILR     | 0.0813464 | 0.0979848 | 0.0336477 | 0.125745  | 0.252718  | 0         | 0         | 0.036147  | 0.0495354 | 0.357343  | 0.45915   | 0          | 0.0524843  | 0.0425152 | 0         |
| SMIM1     | 0.242336  | 0.330823  | 0.367541  | 0.124867  | 0.752862  | 1.03173   | 0.507267  | 0.0717892 | 0.0983792 | 0.101385  | 0.136783  | 0.0577992  | 0.182413   | 0.105546  | 0         |
| SMIM10    | 1.56698   | 0.413795  | 0.673086  | 0.590029  | 0.421279  | 2.05271   | 1.25583   | 0.883765  | 0.2569    | 1.04009   | 2.24517   | 0.269523   | 0.24303    | 0.377987  | 1.55795   |
| SMIM10L1  | 1.05422   | 1.12331   | 1.04349   | 1.59241   | 0.997193  | 2.31553   | 0.784783  | 0.824707  | 0.670104  | 1.27631   | 2.28628   | 0.712002   | 1.49536    | 1.12254   | 1.2501    |
| SMIM10L2A | 0.455682  | 0.530639  | 0.578583  | 0.29297   | 1.00164   | 0.91174   | 0.414069  | 0.402345  | 0.0344181 | 0.112029  | 0.0654076 | 0.0726847  | 0.0683898  | 0.106182  | 0.151418  |
| SMIM10L2B | 0.70828   | 0.592906  | 0.703515  | 0.50182   | 1.18124   | 1.16236   | 0.703175  | 0.394193  | 0.397226  | 0.421972  | 0.485325  | 0.229741   | 0.479736   | 0.295876  | 0.1957    |

|               |           |            |           |           |           |           |           |            |           |           |           |           |            |           |           |
|---------------|-----------|------------|-----------|-----------|-----------|-----------|-----------|------------|-----------|-----------|-----------|-----------|------------|-----------|-----------|
| SMIM10L2B-AS1 | 0         | 0          | 0         | 0         | 0.174088  | 0         | 0         | 0          | 0         | 0         | 0         | 0.0400956 | 0          | 0         | 0         |
| SMIM11A       | 0.221623  | 0.27091    | 0.203714  | 0.329895  | 0.146629  | 0.387905  | 0.243671  | 0.175076   | 0.27491   | 0.314218  | 0.509639  | 0.132148  | 0.135046   | 0.298157  | 0.353643  |
| SMIM11B       | 1.2072    | 1.47566    | 1.10965   | 1.79697   | 0.798695  | 2.11293   | 1.32729   | 0.953653   | 1.49746   | 1.71157   | 2.77603   | 0.71982   | 0.735608   | 1.62407   | 1.92633   |
| SMIM12        | 2.91965   | 2.3918     | 2.3042    | 3.71609   | 2.3748    | 5.39571   | 2.93138   | 2.09129    | 4.11746   | 3.14033   | 4.19781   | 2.2424    | 5.08191    | 3.19612   | 2.82141   |
| SMIM13        | 1.23831   | 1.39532    | 1.42439   | 1.28628   | 0.574757  | 1.13422   | 1.32937   | 1.33288    | 3.46687   | 1.75235   | 2.23329   | 1.21081   | 2.09446    | 1.60896   | 1.33909   |
| SMIM14        | 6.43017   | 7.47912    | 5.61259   | 8.90085   | 10.7958   | 7.91303   | 4.36138   | 6.09468    | 27.1243   | 10.2276   | 16.2278   | 11.9202   | 4.23019    | 4.6143    | 4.83078   |
| SMIM15        | 3.24323   | 3.46044    | 3.31218   | 6.2306    | 2.20173   | 6.96148   | 2.62396   | 4.41955    | 5.59812   | 5.89967   | 9.72705   | 4.05094   | 10.2352    | 5.36545   | 3.97916   |
| SMIM15-AS1    | 0         | 0.0781006  | 0.0334226 | 0         | 0         | 0.0687601 | 0.0455506 | 0          | 0         | 0.0500605 | 0         | 0.084776  | 0          | 0.0826257 | 0         |
| SMIM17        | 0.891688  | 0.737628   | 0.840569  | 0.389632  | 0.728269  | 0.266533  | 0.635099  | 0.680582   | 0.144934  | 0.339804  | 0.143755  | 0.791665  | 0.0529402  | 0.391017  | 0.655036  |
| SMIM18        | 0.145921  | 0.239043   | 0.144859  | 0.0601503 | 0.0453331 | 0.0745498 | 0.166608  | 0.518729   | 0.0710861 | 0.0366291 | 0.0988359 | 0.146174  | 0          | 0.137276  | 0.251473  |
| SMIM19        | 2.1947    | 2.22275    | 2.20431   | 1.71079   | 1.0861    | 2.57764   | 2.01871   | 1.72758    | 2.63269   | 1.90593   | 3.77991   | 1.03751   | 1.2635     | 0.87152   | 1.24509   |
| SMIM2         | 0.0381269 | 0.00918507 | 7.79E-42  | 0         | 0         | 0.0162323 | 0.0217661 | 0          | 0         | 0.0239266 | 0         | 0.0870194 | 0          | 0.0697438 | 0         |
| SMIM2-AS1     | 0.018426  | 0.0177559  | 0.0914597 | 0         | 0         | 0.062758  | 0.126229  | 0.032751   | 0.134645  | 0.185012  | 0.062402  | 0.113655  | 0.0237767  | 0.0385209 | 0.0529241 |
| SMIM2-IT1     | 0         | 0          | 0         | 0         | 0         | 0.041226  | 0         | 0          | 0         | 0         | 0         | 0         | 0          | 0.0253045 | 0         |
| SMIM20        | 3.37788   | 2.0014     | 1.94477   | 5.00982   | 1.31175   | 5.79131   | 2.18897   | 1.80524    | 1.94575   | 4.44011   | 9.2496    | 1.25747   | 2.50336    | 3.60243   | 3.17941   |
| SMIM21        | 0         | 0.00556143 | 0         | 0         | 0         | 0         | 0         | 0.00512908 | 0         | 0         | 0         | 0         | 0.00372364 | 0         | 0         |
| SMIM22        | 1.09614   | 0.199297   | 0.222424  | 0.149193  | 0.481892  | 0.140883  | 0.401437  | 0.349227   | 0         | 0         | 0.0700419 | 0.0295969 | 0.0800631  | 0.108093  | 0.0891055 |
| SMIM23        | 0         | 0.0214849  | 0         | 0         | 0         | 0         | 0.0509133 | 0          | 0         | 0         | 0         | 0         | 0          | 0         | 0         |
| SMIM24        | 0.0509759 | 0.0736829  | 0.105427  | 0         | 0         | 0         | 0.145507  | 0.203864   | 0.0310414 | 0.03199   | 0.0287727 | 0         | 0          | 0         | 0         |
| SMIM25        | 0.276335  | 0.0665712  | 0.0571509 | 2.01713   | 0.411358  | 0.852946  | 0.0920238 | 0.122792   | 0.308499  | 1.79195   | 2.49558   | 0.148294  | 0.906307   | 0.246726  | 0.694491  |
| SMIM26        | 9.7092    | 7.96477    | 9.24387   | 15.3966   | 3.96546   | 14.539    | 9.46103   | 6.54593    | 17.7371   | 13.6568   | 27.3539   | 9.85183   | 13.0147    | 9.44896   | 7.21224   |
| SMIM27        | 1.05079   | 0.827348   | 0.964699  | 0.686699  | 0.577257  | 0.654685  | 0.936398  | 0.694698   | 0.780333  | 0.482507  | 1.01262   | 0.568487  | 0.330715   | 0.616164  | 0.717728  |
| SMIM29        | 5.01076   | 6.57579    | 7.70982   | 7.67525   | 11.6903   | 9.57908   | 9.48327   | 5.40615    | 11.2552   | 4.62499   | 10.6087   | 5.24547   | 4.37764    | 4.35113   | 3.47203   |
| SMIM3         | 1.98312   | 0.769177   | 0.779275  | 5.97772   | 1.61725   | 7.50584   | 0.781172  | 0.978152   | 0.978165  | 5.4883    | 10.4323   | 2.05752   | 6.12241    | 4.16141   | 4.32898   |
| SMIM30        | 3.22401   | 2.61205    | 2.75207   | 7.76646   | 1.43541   | 5.4904    | 2.08672   | 2.75573    | 4.90185   | 8.8919    | 20.1912   | 3.87906   | 8.25426    | 5.35555   | 3.83383   |
| SMIM31        | 0         | 0.007141   | 0         | 0         | 0         | 0.0279494 | 0         | 0          | 1.08E-26  | 0         | 0         | 0         | 0          | 0         | 0.0425698 |





|                    |            |            |            |           |          |           |            |            |           |           |           |            |            |           |           |
|--------------------|------------|------------|------------|-----------|----------|-----------|------------|------------|-----------|-----------|-----------|------------|------------|-----------|-----------|
| SMS                | 5.56238    | 3.29244    | 4.36215    | 11.581    | 2.20895  | 11.3264   | 3.18985    | 4.12693    | 2.4216    | 11.3251   | 11.0384   | 4.69142    | 25.3973    | 11.8653   | 7.42805   |
| SMTN               | 5.72869    | 7.07849    | 7.24548    | 19.0922   | 29.5246  | 26.5846   | 8.23605    | 4.59965    | 25.9165   | 21.072    | 8.27194   | 19.9275    | 46.0327    | 25.9337   | 17.2052   |
| SMTNL1             | 0.140346   | 0.243435   | 0.104494   | 0.231409  | 0.239806 | 0.215105  | 0.160242   | 0.187092   | 0         | 0         | 0.0158433 | 0.0502106  | 0.0271652  | 0.0880211 | 0.0201555 |
| SMTNL2             | 0.10594    | 0.074245   | 0.087641   | 0.0198498 | 2.27394  | 0.237817  | 0.0659775  | 0.205419   | 0.0117294 | 0.0846144 | 0.0978488 | 0.00689117 | 0.0559243  | 0.176173  | 0.622403  |
| SMU1               | 4.63448    | 4.48952    | 4.79247    | 5.72108   | 2.84409  | 7.10872   | 3.86056    | 4.06653    | 4.58697   | 4.63292   | 6.10494   | 3.601      | 6.58674    | 4.52198   | 4.09185   |
| SMUG1              | 1.32529    | 2.21107    | 2.19819    | 2.94213   | 3.4925   | 2.63308   | 2.13801    | 1.25984    | 1.52572   | 2.06887   | 3.89279   | 1.53328    | 1.91433    | 1.75058   | 1.75177   |
| SMURF1             | 6.31869    | 6.88256    | 8.25324    | 6.57053   | 5.95577  | 7.23778   | 6.47728    | 5.47194    | 8.60355   | 8.07567   | 5.22016   | 6.32852    | 12.7217    | 7.10541   | 5.76716   |
| SMURF2             | 3.51995    | 5.26383    | 7.21054    | 3.70761   | 1.80397  | 3.38968   | 2.98688    | 4.10182    | 3.09123   | 4.23006   | 3.87897   | 1.68764    | 5.24119    | 3.77322   | 3.71394   |
| SMURF2P1-LRRC37BP1 | 2.51059    | 2.10359    | 2.04848    | 1.71018   | 1.19546  | 2.57142   | 1.47025    | 2.0669     | 0.976452  | 1.79683   | 2.06731   | 1.12662    | 1.79524    | 1.8087    | 2.0693    |
| SMYD1              | 0          | 0.00251765 | 0.00432277 | 0         | 0        | 0.0133479 | 0          | 0.00464385 | 0         | 0         | 0         | 0          | 0          | 0         | 0         |
| SMYD2              | 3.72212    | 3.82498    | 3.90865    | 10.29     | 3.47757  | 9.00512   | 2.97956    | 2.94172    | 5.00149   | 10.6706   | 16.6832   | 5.93586    | 10.5719    | 7.99671   | 5.42433   |
| SMYD3              | 2.20599    | 1.87754    | 1.96701    | 3.9477    | 2.25708  | 3.79049   | 2.4584     | 1.52614    | 1.28701   | 2.25478   | 5.44284   | 1.01134    | 1.07386    | 1.62241   | 2.78867   |
| SMYD4              | 1.6268     | 2.2162     | 1.76175    | 2.28921   | 2.58773  | 2.88379   | 1.71855    | 1.71797    | 1.77555   | 1.6946    | 1.54336   | 1.65534    | 1.97758    | 1.76294   | 1.28803   |
| SMYD5              | 3.2366     | 2.98423    | 3.36371    | 6.11337   | 4.32734  | 8.57484   | 3.96308    | 2.88443    | 1.93248   | 2.04811   | 3.21609   | 1.87076    | 4.69999    | 3.36433   | 3.14625   |
| SNAI1              | 0.108525   | 0.130723   | 0.213227   | 2.60025   | 0.86396  | 2.86465   | 0.371733   | 0.180841   | 0.413037  | 2.29855   | 5.86525   | 0.640636   | 2.70452    | 3.61591   | 3.29246   |
| SNAI2              | 8.42763    | 7.61355    | 6.11859    | 21.5879   | 4.61936  | 25.0974   | 7.12909    | 8.39674    | 5.26559   | 15.5908   | 30.1516   | 9.78336    | 14.7831    | 18.2093   | 13.096    |
| SNAI3              | 0.189143   | 0.23434    | 0.402359   | 0.501217  | 0.944373 | 0.966319  | 0.262235   | 0.252142   | 0.131632  | 0.305221  | 0.366033  | 0.183672   | 0.278936   | 0.374235  | 0.56267   |
| SNAI3-AS1          | 0.073704   | 0.327497   | 0.237118   | 0.531679  | 0.610601 | 1.00413   | 0.0935031  | 0.094614   | 0.139632  | 0.226126  | 0.240363  | 0.257826   | 0.232483   | 0.312448  | 0.364588  |
| SNAP23             | 5.53824    | 4.31505    | 4.88607    | 7.48634   | 2.17791  | 8.81963   | 4.02212    | 5.03091    | 4.81321   | 7.28098   | 12.0588   | 4.31388    | 9.74142    | 6.10503   | 5.33593   |
| SNAP25             | 0.0451572  | 0.0326361  | 0.0498096  | 0.0853156 | 0.116908 | 0.173028  | 0.0171863  | 0.0401319  | 0.0549964 | 0.377846  | 1.07051   | 0.0538519  | 0.0291352  | 0.114072  | 0.961963  |
| SNAP25-AS1         | 0.00782124 | 0          | 0          | 0         | 0        | 0.0133194 | 0          | 0.0139017  | 0         | 0.0490823 | 0.0706336 | 0.0279815  | 0.00504622 | 0.0122632 | 0.078626  |
| SNAP29             | 3.54668    | 4.03267    | 4.01693    | 5.64755   | 3.85561  | 7.93605   | 4.76264    | 2.95892    | 18.2634   | 7.38273   | 10.129    | 6.7466     | 11.5887    | 4.85696   | 3.84546   |
| SNAP47             | 1.49401    | 1.32272    | 1.38725    | 1.60553   | 2.86699  | 2.38643   | 1.5316     | 1.06801    | 1.67295   | 1.14101   | 1.58744   | 1.00505    | 1.56685    | 1.27335   | 1.4719    |
| SNAP91             | 0.00841872 | 0          | 0.00348228 | 0         | 0        | 0.0143369 | 0.00480611 | 0.00374093 | 0         | 0         | 0         | 0          | 0          | 0         | 0         |
| SNAPC1             | 1.29831    | 1.28468    | 1.37681    | 2.9812    | 1.0422   | 2.51519   | 0.73621    | 1.23901    | 0.551827  | 1.94667   | 3.28538   | 1.04744    | 2.03513    | 1.92181   | 1.1012    |
| SNAPC2             | 2.39931    | 2.38471    | 2.91494    | 3.88544   | 6.30388  | 9.36271   | 3.86654    | 1.69366    | 3.43972   | 3.61366   | 7.53745   | 2.74683    | 4.89175    | 3.21019   | 3.64261   |



|          |           |           |           |          |           |           |          |           |           |          |          |          |           |          |          |
|----------|-----------|-----------|-----------|----------|-----------|-----------|----------|-----------|-----------|----------|----------|----------|-----------|----------|----------|
| SNAR-E   | 0         | 0         | 0         | 0        | 0         | 0         | 0        | 0         | 0         | 0        | 0        | 0        | 0         | 0        | 0        |
| SNAR-F   | 0         | 0         | 0         | 0        | 0         | 0         | 0        | 0         | 0         | 0        | 0        | 0        | 0         | 0        | 0        |
| SNAR-G1  | 0         | 0         | 0         | 0        | 0         | 0         | 0        | 0         | 0         | 0        | 0        | 0        | 0         | 0        | 0        |
| SNAR-G2  | 0         | 0         | 0         | 0        | 0         | 0         | 0        | 0         | 0         | 0        | 0        | 0        | 0         | 0        | 0        |
| SNAR-H   | 0         | 0         | 0         | 0        | 0         | 0         | 0        | 0         | 0         | 0        | 0        | 0        | 0         | 0        | 0        |
| SNAR-I   | 0         | 0         | 0         | 0        | 0         | 0         | 0        | 0         | 0         | 0        | 0        | 0        | 0         | 0        | 0        |
| SNCA     | 1.13753   | 0.94872   | 1.00708   | 0.596411 | 0.847321  | 1.92019   | 0.751933 | 0.632577  | 0.396981  | 0.53435  | 1.06635  | 0.447425 | 0.493578  | 0.535418 | 0.238835 |
| SNCA-AS1 | 0.0281889 | 0.0679091 | 0.0233198 | 0        | 0.131361  | 0.0480049 | 0        | 0         | 0         | 0        | 0        | 0        | 0         | 0        | 0        |
| SNCAIP   | 1.94034   | 1.07538   | 0.600761  | 0.918757 | 1.41678   | 2.14981   | 0.525384 | 0.539216  | 0.838551  | 0.551184 | 1.39541  | 1.16413  | 0.326045  | 0.496019 | 2.32668  |
| SNCB     | 0         | 0.0141148 | 0.0121174 | 0.105663 | 0.0455053 | 0.0873051 | 0        | 0.0130175 | 0.784916  | 2.59216  | 4.15033  | 2.20094  | 3.64789   | 1.6995   | 0.399678 |
| SNCG     | 4.22417   | 1.97031   | 2.19338   | 1.43561  | 4.08355   | 8.16936   | 2.9246   | 1.23805   | 0.383106  | 1.74845  | 5.19977  | 0.755626 | 1.01478   | 1.16258  | 2.25878  |
| SND1     | 14.3627   | 11.7919   | 12.6489   | 25.9232  | 18.8221   | 30.2653   | 18.0985  | 11.8674   | 13.9968   | 21.3438  | 18.4496  | 15.228   | 31.1821   | 18.2901  | 18.9598  |
| SND1-IT1 | 1.23418   | 1.16759   | 1.30419   | 1.04905  | 0.531751  | 0.544619  | 1.44     | 1.28898   | 0.2304    | 0.644482 | 0.294917 | 1.48255  | 0.0523106 | 1.3089   | 2.54868  |
| SNED1    | 5.96495   | 3.37243   | 4.36472   | 2.07153  | 3.95857   | 9.26447   | 4.92779  | 3.35686   | 0.248808  | 1.15381  | 1.54695  | 0.694641 | 1.47937   | 1.76774  | 6.86112  |
| SNF8     | 7.13244   | 5.39911   | 5.28152   | 10.8453  | 9.06475   | 18.0638   | 6.26431  | 5.24533   | 7.14765   | 8.59722  | 15.1837  | 5.21053  | 10.3728   | 6.52573  | 6.90035  |
| SNHG1    | 7.78019   | 8.54419   | 8.93795   | 10.6329  | 3.11575   | 7.33638   | 5.10089  | 5.38837   | 4.29355   | 7.19021  | 10.8928  | 7.17614  | 10.4807   | 13.2075  | 7.8126   |
| SNHG10   | 1.17785   | 1.36823   | 1.10382   | 1.01672  | 1.25176   | 0.893736  | 0.692678 | 1.0063    | 0.182422  | 0.577565 | 1.18776  | 0.637249 | 0.544843  | 0.976896 | 0.525421 |
| SNHG11   | 2.78909   | 1.86699   | 1.97268   | 1.99661  | 3.63791   | 4.56846   | 1.65302  | 2.00567   | 1.40021   | 2.27138  | 4.01378  | 2.08707  | 1.86819   | 1.63574  | 1.58996  |
| SNHG12   | 2.7374    | 2.85055   | 2.978     | 4.21402  | 4.35849   | 3.00035   | 2.55215  | 1.83639   | 2.21194   | 3.05757  | 3.99005  | 4.60677  | 3.1295    | 6.3945   | 2.38964  |
| SNHG14   | 0.725453  | 0.440946  | 0.590866  | 0.192915 | 0.420244  | 0.340989  | 0.378927 | 0.539923  | 0.0461504 | 0.254215 | 0.190291 | 0.105576 | 0.0885865 | 0.273978 | 0.465462 |
| SNHG15   | 4.07299   | 3.17618   | 2.57092   | 8.8314   | 4.60793   | 8.90079   | 2.6881   | 1.5274    | 6.65216   | 9.07163  | 11.4815  | 10.6129  | 12.9723   | 7.01369  | 4.49688  |
| SNHG16   | 23.4348   | 18.8924   | 19.6814   | 35.173   | 10.7083   | 46.3301   | 17.8972  | 18.0878   | 32.3168   | 22.6149  | 36.4187  | 20.4093  | 33.3818   | 26.0788  | 14.8764  |
| SNHG17   | 3.13804   | 2.52497   | 2.98541   | 3.26618  | 4.46013   | 6.72008   | 2.49013  | 1.78485   | 1.73891   | 2.63884  | 3.11736  | 3.96304  | 6.58011   | 2.84553  | 1.82518  |
| SNHG18   | 0.887124  | 1.52975   | 1.2489    | 1.13875  | 2.27251   | 2.50466   | 1.27944  | 0.705413  | 0.852961  | 1.93386  | 5.76275  | 1.02453  | 1.20499   | 1.44789  | 2.10102  |
| SNHG19   | 9.33501   | 12.9623   | 11.1012   | 13.2943  | 9.86839   | 11.2054   | 9.10406  | 5.35795   | 20.2905   | 9.35685  | 19.6857  | 8.53485  | 3.34606   | 7.82654  | 2.42057  |
| SNHG20   | 1.3471    | 1.6366    | 1.51715   | 1.21496  | 2.34309   | 1.63492   | 1.34734  | 1.25646   | 0.600615  | 0.538204 | 0.591519 | 0.675034 | 0.49527   | 1.38364  | 0.886164 |



|          |          |           |           |          |          |          |          |          |          |          |          |          |          |           |          |
|----------|----------|-----------|-----------|----------|----------|----------|----------|----------|----------|----------|----------|----------|----------|-----------|----------|
| SNORA108 | 0        | 0         | 0         | 0        | 0        | 0        | 0        | 0        | 0        | 0        | 0        | 0        | 0        | 0         | 0        |
| SNORA109 | 0        | 0         | 0         | 0        | 0        | 0        | 0        | 0        | 0        | 0        | 0        | 0        | 0        | 0         | 0        |
| SNORA10B | 0        | 0.0838397 | 0         | 0        | 0        | 0        | 0        | 0        | 0        | 0        | 0        | 0        | 0        | 0         | 0        |
| SNORA11  | 0.176665 | 0         | 0         | 0        | 0.274421 | 0.300855 | 0        | 0        | 0        | 0        | 0.398864 | 0        | 0        | 0         | 0        |
| SNORA110 | 0.214288 | 0.361364  | 0.0886369 | 0        | 0.166431 | 0        | 0.489333 | 0.190441 | 0        | 0.403429 | 0        | 0.153328 | 0        | 0.111996  | 0.923232 |
| SNORA111 | 0        | 0         | 0         | 0        | 0        | 0        | 0        | 0        | 0        | 0        | 0        | 0        | 0        | 0         | 1.20131  |
| SNORA112 | 0        | 0         | 0         | 0        | 0        | 0        | 0        | 0        | 0        | 0        | 0        | 0        | 0        | 0         | 0        |
| SNORA113 | 0.300559 | 0.362035  | 0.124322  | 0        | 0        | 0        | 0.171584 | 0.267112 | 0        | 0        | 0        | 0.215058 | 0        | 0.314171  | 0        |
| SNORA114 | 0        | 0.0790828 | 0         | 0.338292 | 0        | 0        | 0        | 0        | 0        | 0        | 0        | 0        | 0        | 0         | 0        |
| SNORA115 | 0.160716 | 0.15487   | 0         | 0        | 0.499294 | 0.136847 | 0        | 0.142831 | 0        | 0        | 0.181428 | 0        | 0.207386 | 0.083997  | 0        |
| SNORA116 | 0.472307 | 0.45513   | 0.130242  | 0.81121  | 0        | 0.134054 | 0.35951  | 0.279832 | 0        | 0        | 0        | 0.450598 | 0        | 0.493697  | 0        |
| SNORA117 | 0        | 0         | 0         | 0        | 0        | 0        | 0        | 0        | 0        | 0        | 0        | 0        | 0        | 0         | 0        |
| SNORA118 | 0.176665 | 0         | 0         | 0.182058 | 0.274421 | 0        | 0        | 0        | 0        | 0        | 0        | 0        | 0        | 0.461663  | 0        |
| SNORA119 | 0        | 0.0774352 | 0.265911  | 0        | 0.748941 | 0        | 0.1835   | 0        | 0        | 0.201715 | 0        | 0.114996 | 0        | 0.167994  | 0        |
| SNORA11B | 0        | 0.263402  | 0.452257  | 0.187792 | 0        | 0.155165 | 0.208063 | 0.323899 | 0        | 0        | 0        | 0.391169 | 0        | 0.190481  | 0        |
| SNORA11C | 0        | 0         | 0         | 0        | 0        | 0        | 0        | 0        | 0        | 0        | 0        | 0        | 0        | 0         | 0        |
| SNORA11D | 0        | 0         | 0         | 0        | 0.141532 | 0        | 0        | 0        | 0        | 0        | 0.154285 | 0        | 0        | 0.0238102 | 0        |
| SNORA11E | 0        | 0         | 0         | 0        | 0.141532 | 0        | 0        | 0        | 0        | 0        | 0.154285 | 0        | 0        | 0.0238102 | 0        |
| SNORA11F | 0.180805 | 0.348459  | 0.149575  | 0        | 0        | 0        | 0        | 0.642738 | 0        | 0        | 0.408213 | 0.258742 | 0        | 0.188993  | 0        |
| SNORA11G | 0        | 0         | 0         | 0        | 0        | 0        | 0        | 0        | 0        | 0        | 0.199432 | 0        | 0        | 0.184665  | 0.761138 |
| SNORA12  | 2.99128  | 2.73078   | 2.86532   | 0.973453 | 0        | 0.536218 | 2.15706  | 12.3126  | 0.958695 | 0.592794 | 0.533176 | 0.675897 | 0.812614 | 0.575979  | 0        |
| SNORA120 | 0.629743 | 0.15171   | 0.130242  | 0        | 0.244552 | 0        | 0.71902  | 0.419747 | 0        | 0        | 0        | 0        | 0        | 0         | 0.90439  |
| SNORA13  | 0.696032 | 0.335359  | 0         | 0        | 0        | 0        | 0.198677 | 1.39179  | 0.423844 | 0        | 0        | 0        | 0        | 0.181888  | 0        |
| SNORA14A | 0.345419 | 0.083214  | 0         | 0        | 0        | 0        | 0.197194 | 0.306979 | 0.420681 | 0.216768 | 0.194967 | 0.247156 | 0        | 0.361062  | 0        |
| SNORA14B | 0.51429  | 0.660781  | 0.709095  | 0.706654 | 0        | 0        | 0.5872   | 2.59     | 0        | 0        | 0.387046 | 0.367988 | 0        | 0.26879   | 1.23098  |
| SNORA15  | 0.174008 | 0         | 0         | 0        | 0        | 0        | 0        | 0        | 0.211922 | 0        | 0.196433 | 0        | 0        | 0         | 0        |

|            |          |          |          |          |          |          |          |          |          |          |          |          |          |           |          |
|------------|----------|----------|----------|----------|----------|----------|----------|----------|----------|----------|----------|----------|----------|-----------|----------|
| SNORA15B-1 | 0        | 0        | 0        | 0        | 0        | 0        | 0        | 0        | 0        | 0        | 0        | 0        | 0        | 0         | 0        |
| SNORA15B-2 | 0        | 0        | 0        | 0        | 0        | 0        | 0        | 0        | 0        | 0        | 0        | 0        | 0        | 0         | 0        |
| SNORA16A   | 0.518128 | 0.998568 | 1.14302  | 0.355964 | 2.14622  | 1.91178  | 1.38036  | 0.767448 | 0.210341 | 0.433536 | 0.584902 | 1.48294  | 0.445725 | 0.722124  | 1.48819  |
| SNORA16B   | 0.174008 | 0.167679 | 0.287903 | 0        | 0        | 0        | 0        | 0.154644 | 0        | 0        | 0        | 0        | 0        | 0.363777  | 0        |
| SNORA17A   | 0        | 0        | 0        | 0        | 4.03E-28 | 0        | 0        | 0        | 0        | 9.25E-43 | 9.34E-13 | 0        | 0        | 2.84E-38  | 0        |
| SNORA17B   | 18.1466  | 13.8823  | 7.09463  | 19.2465  | 22.0945  | 9.52057  | 15.7433  | 21.027   | 16.4641  | 15.417   | 28.2065  | 8.79748  | 12.479   | 4.20152   | 0.229868 |
| SNORA18    | 0.350652 | 1.0137   | 0.290084 | 0.903393 | 0.272342 | 0.298576 | 0.400363 | 0.623261 | 0.640583 | 1.76042  | 1.78129  | 0.627253 | 0        | 1.19123   | 0.755372 |
| SNORA19    | 0.551025 | 0        | 0        | 0        | 0        | 0        | 0.209714 | 0        | 0        | 0        | 0        | 0        | 0        | 0.0959966 | 0        |
| SNORA1B    | 0        | 0        | 0        | 0.17932  | 0        | 0        | 0        | 0        | 0        | 0        | 0        | 0        | 0        | 0.272832  | 0        |
| SNORA20    | 0        | 0.591324 | 0.580169 | 0.180679 | 0.272342 | 0        | 0.400363 | 2.0256   | 0        | 0.220052 | 0.791686 | 0        | 0        | 0         | 0        |
| SNORA20B   | 0        | 0        | 0        | 0        | 0        | 0        | 0        | 0        | 0        | 0        | 0        | 0        | 0        | 0         | 0        |
| SNORA21    | 6.26428  | 3.85662  | 2.59113  | 3.76572  | 5.40589  | 2.66698  | 4.96691  | 1.39179  | 0.847688 | 0.655193 | 4.51796  | 2.11662  | 2.13311  | 1.45511   | 1.24949  |
| SNORA21B   | 0.34286  | 0.743378 | 0.283638 | 0.353327 | 0.53258  | 0.14597  | 0.978666 | 0.304705 | 0        | 0        | 0.774092 | 0        | 0.553029 | 0.179194  | 0        |
| SNORA22    | 1.72709  | 0.41607  | 0.714387 | 0        | 0        | 1.32354  | 1.38036  | 2.30235  | 0.420681 | 0        | 0        | 0.370734 | 0        | 0.180531  | 0.248032 |
| SNORA22B   | 0.335407 | 0.242406 | 0        | 0        | 0        | 0        | 0        | 0.596163 | 0        | 0        | 0        | 0        | 0        | 0.0876491 | 0        |
| SNORA22C   | 0        | 0        | 0        | 0        | 0        | 0        | 0        | 0.15349  | 0.210341 | 0        | 0        | 0        | 0        | 0         | 0        |
| SNORA23    | 5.26535  | 4.24788  | 2.63378  | 2.64995  | 2.47269  | 3.12794  | 6.01181  | 8.81469  | 2.83348  | 2.15162  | 4.97631  | 2.97895  | 2.76514  | 2.30392   | 0.879268 |
| SNORA24    | 7.77324  | 5.6179   | 4.53063  | 7.10026  | 1.64653  | 3.45983  | 6.05129  | 5.49516  | 4.73347  | 7.53889  | 9.97161  | 4.80351  | 8.0928   | 7.75594   | 1.77599  |
| SNORA24B   | 0        | 0        | 0.146149 | 0        | 0        | 0        | 0        | 0.157005 | 0        | 0.443464 | 0        | 0        | 0        | 0         | 0        |
| SNORA25    | 1.05196  | 0.337899 | 0.290084 | 4.15561  | 0        | 0        | 0.600545 | 0.467446 | 1.06764  | 0        | 0.593764 | 0.752703 | 0.11312  | 0.274899  | 0.503581 |
| SNORA25B   | 0        | 0        | 0        | 0        | 0        | 0        | 0        | 0        | 0        | 0        | 0        | 0        | 0        | 0         | 0        |
| SNORA26    | 1.51758  | 1.46238  | 0.784654 | 0.390977 | 1.76799  | 0        | 0.21659  | 1.3487   | 0.46206  | 0.476179 | 1.28487  | 0.8144   | 0.367175 | 0.198288  | 0        |
| SNORA27    | 2.38778  | 1.23896  | 1.36754  | 3.2178   | 0        | 0.469191 | 0.629143 | 1.46912  | 3.57913  | 3.22743  | 3.31754  | 0.788546 | 0.711037 | 1.63194   | 0        |
| SNORA28    | 0.183675 | 0.35399  | 0.303898 | 0        | 0        | 0        | 0.419428 | 0.163235 | 0        | 0        | 0.207346 | 0.262849 | 0        | 0.767973  | 0        |
| SNORA29    | 0.330615 | 0        | 0.136754 | 0.170354 | 0        | 0        | 0        | 0.293823 | 0        | 0        | 0        | 0        | 0        | 0.172794  | 0        |
| SNORA2A    | 1.20001  | 0.743378 | 0.567276 | 0        | 0.53258  | 0.729852 | 0.391466 | 0.457058 | 0        | 0        | 0.193523 | 0.122663 | 0        | 0         | 0        |

|          |           |           |           |           |          |           |           |          |          |          |          |           |          |           |          |
|----------|-----------|-----------|-----------|-----------|----------|-----------|-----------|----------|----------|----------|----------|-----------|----------|-----------|----------|
| SNORA2B  | 0.168927  | 0.162784  | 0.558995  | 0         | 0.262403 | 0         | 0         | 0.150129 | 0        | 0        | 0        | 0         | 0.441444 | 0         |          |
| SNORA2C  | 3.88533   | 8.22057   | 4.75145   | 3.48169   | 3.14883  | 1.43839   | 7.32928   | 8.10694  | 3.90896  | 1.90819  | 6.67443  | 3.86791   | 1.41688  | 1.50091   | 0.970404 |
| SNORA30  | 0         | 0.518636  | 0         | 0         | 0        | 0.15276   | 0.204837  | 0        | 0        | 0.22517  | 0        | 0         | 0        | 0.0937641 | 0        |
| SNORA30B | 0.179403  | 0.0864393 | 0         | 0.184881  | 0        | 0         | 0         | 0        | 0        | 0        | 0        | 0         | 0        | 0         | 0        |
| SNORA31  | 1.06814   | 0.943519  | 1.76728   | 1.10075   | 0.276532 | 0.606339  | 1.62609   | 0.158212 | 1.7345   | 1.56406  | 1.40676  | 6.24165   | 1.1486   | 2.69824   | 0.511328 |
| SNORA31B | 0         | 0         | 0         | 0         | 0        | 0         | 0         | 0        | 0        | 0        | 0        | 0         | 0        | 0         | 0        |
| SNORA32  | 0         | 0.0921543 | 0.158228  | 0         | 0        | 0         | 0         | 0        | 0        | 0        | 0        | 0         | 0        | 0         | 1.09872  |
| SNORA33  | 0.174008  | 0.335359  | 0.143952  | 0         | 0        | 0         | 0         | 0        | 0        | 0        | 0        | 0.124507  | 0        | 0         | 0        |
| SNORA35  | 0         | 0         | 0         | 0         | 0        | 0         | 0         | 0        | 0        | 0        | 0        | 0         | 0        | 0         | 0        |
| SNORA35B | 0.364457  | 0.0878006 | 0         | 0         | 0        | 0         | 0         | 0.647799 | 0        | 0        | 0        | 0         | 0        | 0         | 0        |
| SNORA36A | 0         | 0         | 0         | 0         | 0        | 0         | 0         | 0        | 0        | 1.17E-14 | 0        | 0         | 0        | 0         | 0        |
| SNORA36B | 0         | 0         | 0         | 0         | 0        | 0         | 0         | 0        | 0        | 0        | 0        | 0         | 0        | 0         | 0        |
| SNORA36C | 0         | 0         | 0         | 0         | 0        | 0         | 0         | 0        | 0        | 0        | 0        | 0         | 0        | 0         | 0        |
| SNORA37  | 5.92032   | 9.76765   | 5.19453   | 4.06737   | 18.9499  | 4.73555   | 15.3628   | 32.2067  | 4.80685  | 2.02653  | 5.8732   | 6.54677   | 4.63001  | 3.00045   | 2.06117  |
| SNORA38  | 0.0250466 | 0.0965426 | 0.0621609 | 0.0774337 | 0.272342 | 0.0853074 | 0.0285974 | 0.066778 | 0        | 0        | 0        | 0.0179215 | 0        | 0.0785427 | 0        |
| SNORA38B | 0.701305  | 0         | 0         | 0.542036  | 0.272342 | 0.149288  | 0.200182  | 0.311631 | 0.427055 | 0.220052 | 0        | 0.627253  | 0        | 0.274899  | 0        |
| SNORA3A  | 3.91652   | 3.43098   | 2.65092   | 2.01804   | 0.553064 | 1.66743   | 4.47175   | 2.21497  | 1.30088  | 3.12813  | 5.62706  | 1.91071   | 1.49318  | 1.02347   | 1.27832  |
| SNORA3B  | 0.176665  | 0.936316  | 0.292299  | 0.182058  | 0        | 0.150428  | 0.40342   | 0.157005 | 0        | 0.665196 | 0.199432 | 0.379225  | 0.341949 | 0.36933   | 0.507425 |
| SNORA3C  | 0         | 0         | 0         | 0         | 0        | 0         | 0         | 0        | 0        | 0        | 0        | 0         | 0        | 0         | 0        |
| SNORA4   | 1.68927   | 1.30227   | 0.558995  | 2.43718   | 0.787208 | 0.575358  | 0.964379  | 1.35116  | 0.205735 | 1.48415  | 1.90698  | 0.725232  | 1.52588  | 1.32433   | 0.242601 |
| SNORA40  | 0         | 0.351202  | 0.452257  | 0.375584  | 0        | 0.465496  | 0.624189  | 6.96384  | 0.887736 | 1.14358  | 0        | 0.13039   | 1.17573  | 1.23813   | 0        |
| SNORA40B | 0         | 0         | 0.149575  | 0         | 0        | 0         | 0         | 0.160685 | 0        | 0        | 0        | 0.129371  | 0        | 0         | 0        |
| SNORA40C | 0         | 0         | 0         | 0         | 0        | 0         | 0         | 0        | 0        | 0        | 0        | 0         | 0        | 0         | 0        |
| SNORA41  | 0.701305  | 0.337899  | 0.145042  | 0.180679  | 0        | 0         | 0         | 0        | 0.427055 | 0        | 0        | 0.125451  | 0        | 0.183266  | 0        |
| SNORA41B | 0         | 0         | 0         | 0         | 0        | 0         | 0         | 0        | 0        | 0        | 0        | 0         | 0        | 0         | 0        |
| SNORA44  | 0.350652  | 0.253424  | 0         | 0         | 0        | 0         | 0.200182  | 0.311631 | 0.640583 | 0        | 0        | 0.125451  | 0.452478 | 0.183266  | 0.25179  |



|          |          |           |          |          |          |          |          |          |          |          |          |          |          |           |          |
|----------|----------|-----------|----------|----------|----------|----------|----------|----------|----------|----------|----------|----------|----------|-----------|----------|
| SNORA46  | 0.17143  | 0.247793  | 0.567276 | 0        | 0.26629  | 0        | 0.391466 | 0.152353 | 0        | 0        | 0.193523 | 0.490651 | 0        | 0         | 0        |
| SNORA47  | 1.34163  | 0.323208  | 0.416208 | 0.172823 | 2.34451  | 0.571189 | 0.765913 | 2.38465  | 0.816975 | 0.42097  | 1.1359   | 0.359989 | 0.108201 | 0.350596  | 0.240843 |
| SNORA48  | 79.3721  | 89.0402   | 54.4585  | 90.4518  | 104.386  | 43.4992  | 102.564  | 130.719  | 64.9314  | 48.8418  | 106.825  | 57.0382  | 36.8317  | 32.7924   | 15.2641  |
| SNORA48B | 0        | 0.165195  | 0        | 0        | 0        | 0        | 0        | 0        | 0        | 0        | 0        | 0        | 0        | 0         | 0        |
| SNORA49  | 27.873   | 22.22     | 16.4903  | 14.1009  | 8.65928  | 5.4659   | 25.6525  | 76.5656  | 9.87526  | 5.93659  | 10.6791  | 6.0436   | 3.7057   | 2.82524   | 3.15381  |
| SNORA50A | 3.57356  | 1.47582   | 0.703881 | 0.701458 | 0.792996 | 0.579588 | 1.55435  | 2.11725  | 0.414495 | 1.0679   | 0.576301 | 0.487043 | 0.43917  | 0.266814  | 0        |
| SNORA50B | 1.20001  | 0.660781  | 0.567276 | 0        | 0.53258  | 0        | 0.391466 | 1.06647  | 0        | 0.430325 | 0.774092 | 0.490651 | 0.110606 | 0.0895968 | 0        |
| SNORA50C | 1.04405  | 1.00608   | 1.15161  | 1.97252  | 1.62177  | 1.62982  | 2.5828   | 1.85572  | 0.635766 | 0.655193 | 1.57147  | 0.871551 | 1.34723  | 0.727553  | 0        |
| SNORA50D | 0        | 0         | 0        | 0        | 0        | 0        | 0        | 0        | 0        | 0        | 0        | 0        | 0        | 0         | 0        |
| SNORA51  | 0        | 0.337899  | 0.145042 | 0        | 0        | 0        | 0.200182 | 0        | 0        | 0        | 0        | 0        | 0.226239 | 0.183266  | 0        |
| SNORA52  | 1.72709  | 2.32999   | 0.857264 | 1.60184  | 2.68277  | 1.17648  | 1.97194  | 4.29771  | 1.89306  | 0.650304 | 0.974837 | 1.97725  | 1.33717  | 1.17345   | 0.744097 |
| SNORA53  | 35.6403  | 24.8437   | 23.9702  | 17.6487  | 5.17668  | 14.2671  | 16.2772  | 31.5096  | 11.0488  | 12.0835  | 21.214   | 5.56398  | 15.1707  | 3.87058   | 2.9248   |
| SNORA54  | 45.1572  | 29.5538   | 23.0369  | 15.1241  | 7.89128  | 8.49121  | 41.0324  | 9.36412  | 11.4576  | 10.6269  | 12.5318  | 7.13538  | 8.74055  | 6.09695   | 1.62129  |
| SNORA55  | 0.168927 | 0.0813918 | 0.139749 | 0        | 0.262403 | 0        | 0.385752 | 0        | 0        | 0        | 0        | 0.241744 | 0.544955 | 0.176578  | 0        |
| SNORA56  | 0        | 0         | 7.77E-38 | 0        | 0        | 0        | 0        | 8.98E-40 | 0        | 1.08E-07 | 0        | 0        | 0        | 7.01E-45  | 0        |
| SNORA57  | 142.586  | 139.72    | 121.812  | 83.7136  | 137.524  | 49.3311  | 153.046  | 114.709  | 76.612   | 41.7184  | 91.7027  | 44.0104  | 45.1962  | 22.324    | 17.622   |
| SNORA58  | 0.392255 | 0.236243  | 0.243376 | 0.202115 | 0.152327 | 0.167    | 0        | 0.348604 | 0        | 0        | 0        | 0.210502 | 0        | 0.410019  | 0.140832 |
| SNORA58B | 0        | 0         | 0.422329 | 0        | 0        | 0.144897 | 0        | 0        | 0        | 0        | 0        | 0.121761 | 0        | 0         | 0        |
| SNORA59A | 0.761285 | 1.06372   | 0.944682 | 0.549168 | 0.295634 | 0.356523 | 0.912671 | 1.08251  | 0.695369 | 0.286647 | 0.730486 | 0.435776 | 0.171912 | 0.179046  | 0.163995 |
| SNORA59B | 0.761285 | 1.06372   | 0.944682 | 0.549168 | 0.295634 | 0.356523 | 0.912671 | 1.08251  | 0.695369 | 0.286647 | 0.730486 | 0.435776 | 0.171912 | 0.179046  | 0.163995 |
| SNORA5A  | 6.04483  | 4.90963   | 3.71481  | 9.25506  | 1.87794  | 2.94119  | 6.11301  | 1.99537  | 5.46885  | 6.50304  | 11.698   | 2.34798  | 4.68011  | 4.06194   | 3.96852  |
| SNORA5B  | 0.525978 | 0.422374  | 0.145042 | 0.722715 | 0        | 0        | 0.400363 | 0.155815 | 0        | 0.660157 | 0        | 0.125451 | 0        | 0         | 0        |
| SNORA5C  | 1.18249  | 0.244175  | 0.279497 | 0.348169 | 0        | 0.575358 | 0.578627 | 0.150129 | 0.411469 | 0.636064 | 0.381396 | 0.241744 | 0.326973 | 0         | 0.242601 |
| SNORA6   | 0.62129  | 0.374184  | 0.256987 | 0.160064 | 0.723808 | 0.26451  | 0        | 0        | 0        | 0.974728 | 0.17534  | 0.44455  | 0.30064  | 0.324713  | 0        |
| SNORA60  | 0        | 0         | 0.140776 | 0.350729 | 0        | 0.144897 | 0        | 0        | 0.207247 | 0        | 0        | 0        | 0        | 0         | 0        |
| SNORA61  | 0.586803 | 1.70E-06  | 7.01E-08 | 5.27E-13 | 2.76E-24 | 9.62E-41 | 1.11145  | 1.84E-16 | 2.41E-18 | 3.16E-20 | 2.93E-14 | 5.92E-16 | 7.14E-14 | 9.36E-22  | 5.82E-08 |

|          |          |           |          |          |          |          |          |          |          |          |          |          |          |          |          |
|----------|----------|-----------|----------|----------|----------|----------|----------|----------|----------|----------|----------|----------|----------|----------|----------|
| SNORA62  | 0.450839 | 0.217221  | 1.24322  | 0.309735 | 0.466872 | 0.383883 | 0.343169 | 0.400668 | 0.366047 | 0.565849 | 1.01788  | 0.215058 | 0.193919 | 0.235628 | 0        |
| SNORA63  | 9.77151  | 14.9502   | 11.0619  | 15.3697  | 1.33145  | 2.33553  | 10.1781  | 135.746  | 4.38443  | 3.01227  | 2.32228  | 2.94391  | 0.995452 | 4.47984  | 1.72337  |
| SNORA63B | 2.03659  | 0.713643  | 1.22532  | 0.763187 | 0.287593 | 0.630592 | 2.11392  | 1.64541  | 0.45097  | 1.859    | 0.627015 | 0.397427 | 0.358363 | 1.16117  | 0        |
| SNORA63C | 0        | 0         | 0.146149 | 0        | 0        | 0        | 0        | 0.471014 | 0        | 0        | 0        | 0.379225 | 0        | 0        | 0        |
| SNORA63D | 1.05196  | 0.337899  | 0.145042 | 0        | 0.272342 | 0        | 0.600545 | 1.71397  | 0.213528 | 0.660157 | 0        | 0        | 0.226239 | 0.274899 | 0.755372 |
| SNORA63E | 0.174008 | 0         | 0        | 0        | 0        | 0.148165 | 0.198677 | 0        | 0.211922 | 0        | 0        | 0        | 0        | 0        | 0        |
| SNORA64  | 0.518128 | 0.665712  | 0.571509 | 1.77982  | 1.60966  | 0.588239 | 0.591582 | 3.37677  | 0.210341 | 0        | 0.389935 | 1.1122   | 1.11431  | 0.541593 | 0.248032 |
| SNORA65  | 0.170169 | 0.0819903 | 0.140776 | 0.526094 | 0.264332 | 0        | 0        | 0.302465 | 0.207247 | 0.21358  | 0.768401 | 0.243522 | 0        | 0.177876 | 0        |
| SNORA66  | 0        | 0.0838397 | 0        | 0.17932  | 0        | 0        | 0.397353 | 0        | 0        | 0        | 0        | 0        | 0        | 0        | 0        |
| SNORA67  | 2.02713  | 3.58124   | 2.23598  | 3.48169  | 3.41123  | 2.44527  | 3.47176  | 1.95167  | 2.88028  | 4.24042  | 4.00466  | 3.38442  | 0.762938 | 2.73695  | 3.15381  |
| SNORA68  | 39.3258  | 25.2357   | 16.5544  | 39.8091  | 16.2177  | 7.55644  | 28.0134  | 24.2791  | 27.3379  | 21.8398  | 33.1972  | 15.1899  | 12.9109  | 7.63931  | 6.74723  |
| SNORA68B | 0        | 0.251519  | 0        | 0        | 0        | 0.296331 | 0.198677 | 0        | 0        | 0        | 0        | 0        | 0        | 0        | 0        |
| SNORA69  | 0        | 0         | 0        | 0        | 0        | 0        | 0        | 0        | 0        | 0        | 0        | 0        | 0        | 0        | 0        |
| SNORA70  | 11.4858  | 11.5637   | 8.65096  | 19.433   | 9.05386  | 4.52508  | 11.3525  | 13.2547  | 12.3182  | 8.39133  | 18.3847  | 12.2663  | 7.52119  | 7.34694  | 2.46195  |
| SNORA70B | 0        | 0.083214  | 0.285755 | 0        | 0        | 0        | 0        | 0.15349  | 0        | 0        | 0        | 0        | 0        | 0.361062 | 0        |
| SNORA70C | 0        | 0         | 0        | 0        | 0        | 0        | 0        | 0        | 0        | 0        | 0        | 0        | 0        | 0        | 0        |
| SNORA70D | 0        | 0         | 0        | 0        | 0        | 0        | 0.195733 | 0        | 0        | 0        | 0        | 0        | 0        | 0        | 0        |
| SNORA70E | 0        | 0.0825976 | 0        | 0        | 0        | 0        | 0        | 0        | 0        | 0        | 0        | 0.245326 | 0        | 0        | 0.246195 |
| SNORA70F | 0.85715  | 0.578183  | 0.425457 | 0        | 1.06516  | 0.14597  | 0.5872   | 0.914116 | 0        | 1.07581  | 0.387046 | 0.981302 | 0.331817 | 0.447984 | 0        |
| SNORA70G | 0.325958 | 0.863785  | 0.67414  | 0.33591  | 0.506326 | 0.693873 | 1.48868  | 0.144842 | 0        | 0.613667 | 0.367967 | 0.816312 | 0.841227 | 1.61842  | 0.936235 |
| SNORA70H | 0        | 0         | 0        | 0        | 0        | 0        | 0        | 0        | 0        | 0        | 0        | 0        | 0        | 0        | 0        |
| SNORA70I | 0.17143  | 0         | 0        | 0.353327 | 0        | 0        | 0        | 0.761764 | 0        | 0        | 0        | 0        | 0        | 0        | 0        |
| SNORA70J | 0        | 0         | 0        | 0        | 0        | 0        | 0        | 0        | 0        | 0        | 0        | 0        | 0        | 0        | 0        |
| SNORA71A | 3.01866  | 4.44411   | 2.49725  | 5.87599  | 14.3276  | 0.428391 | 4.21252  | 6.11067  | 5.31034  | 4.63067  | 6.05812  | 4.55985  | 3.89525  | 3.24302  | 0.240843 |
| SNORA71B | 2.04203  | 1.88578   | 1.12621  | 1.40292  | 2.37899  | 0.144897 | 0.97147  | 2.26849  | 1.24348  | 0.21358  | 0.3842   | 0.487043 | 0.219585 | 0.44469  | 1.71069  |
| SNORA71C | 0.670813 | 1.37363   | 0.416208 | 1.38258  | 5.99153  | 0.285594 | 2.10626  | 0.596163 | 0.816975 | 1.47339  | 1.70384  | 2.63992  | 0.86561  | 0.350596 | 0        |

|            |           |           |           |           |          |          |           |          |          |          |          |           |          |           |          |
|------------|-----------|-----------|-----------|-----------|----------|----------|-----------|----------|----------|----------|----------|-----------|----------|-----------|----------|
| SNORA71D   | 1.34163   | 1.37363   | 0.832416  | 1.38258   | 4.68902  | 0.285594 | 0.957391  | 2.38465  | 0        | 0.210485 | 0.94658  | 0.359989  | 0.432805 | 0.613543  | 0        |
| SNORA71E   | 0         | 0.245971  | 0.140776  | 0         | 0        | 0        | 0         | 0        | 0        | 0        | 0        | 0         | 0        | 0         | 0        |
| SNORA72    | 0.350652  | 0.16895   | 0         | 0.361357  | 0        | 0        | 0         | 0.155815 | 0        | 0        | 0.197921 | 0.125451  | 0        | 0         | 0        |
| SNORA73B   | 72.9288   | 86.3769   | 55.2887   | 77.4821   | 113.634  | 44.8912  | 92.4195   | 251.527  | 108.48   | 67.3038  | 131.52   | 56.0599   | 82.5982  | 52.3355   | 20.5903  |
| SNORA74A   | 12.3815   | 10.1471   | 6.79668   | 6.08164   | 12.2227  | 5.32062  | 14.269    | 12.4434  | 5.35527  | 8.71407  | 22.468   | 7.94855   | 13.14    | 1.57242   | 1.49564  |
| SNORA74B   | 1.92859   | 4.48213   | 3.09708   | 1.1691    | 14.0977  | 1.25577  | 1.94294   | 1.81479  | 0.828989 | 0.42716  | 3.0736   | 1.46113   | 3.29377  | 0.830088  | 1.95508  |
| SNORA74C-1 | 0.0567232 | 0.0546602 | 0.0938508 | 0.0876823 | 0.132166 | 0        | 0.0323823 | 0        | 0        | 0        | 0        | 0.0202935 | 0        | 0         | 0        |
| SNORA74C-2 | 0.0567232 | 0.0546602 | 0.0938508 | 0.0876823 | 0.132166 | 0        | 0.0323823 | 0        | 0        | 0        | 0        | 0.0202935 | 0        | 0         | 0        |
| SNORA74D   | 0.160716  | 0.309741  | 0.132955  | 0.331244  | 0        | 0.136847 | 0.367     | 0.428492 | 0.782934 | 0.806859 | 0.181428 | 0.459985  | 0        | 0.167994  | 0        |
| SNORA75    | 0.506782  | 0.569743  | 0.279497  | 0.174085  | 0        | 0.143839 | 0.385752  | 0        | 0        | 0        | 0.190698 | 0.120872  | 0        | 0.176578  | 0        |
| SNORA75B   | 0         | 0         | 0         | 0         | 0        | 0        | 0         | 0        | 0        | 0        | 0        | 0         | 0        | 0         | 0        |
| SNORA77    | 1.29601   | 0.267616  | 0.153165  | 0.190797  | 0        | 0.157648 | 0.211392  | 0        | 0        | 0.232375 | 0.209005 | 0         | 0        | 0         | 1.06356  |
| SNORA77B   | 0         | 0.446027  | 0.612658  | 0.763187  | 0.86278  | 0.630592 | 0.422784  | 1.80995  | 0.225485 | 0.464751 | 0        | 0.132476  | 0        | 0.387058  | 0.265891 |
| SNORA78    | 0         | 0.263402  | 0.452257  | 0.375584  | 0.849193 | 0        | 0.416126  | 0.485849 | 0        | 0.228716 | 0.617141 | 0.13039   | 0.587865 | 0         | 0        |
| SNORA79    | 0.165308  | 0         | 0         | 0.170354  | 0        | 0        | 0         | 0        | 0        | 0.207478 | 0        | 0         | 0        | 0         | 0        |
| SNORA79B   | 4.53479   | 3.61644   | 2.32851   | 1.61146   | 1.9432   | 2.39668  | 3.92789   | 20.5676  | 2.66621  | 1.76637  | 2.64787  | 1.11888   | 1.21068  | 1.87972   | 0.22457  |
| SNORA7A    | 3.38E-23  | 9.36E-27  | 4.34E-44  | 0         | 7.39E-14 | 1.29E-43 | 4.03E-26  | 8.52E-41 | 6.77E-33 | 5.43E-39 | 0        | 1.42E-32  | 0        | 0         | 0        |
| SNORA7B    | 2.99694   | 2.40662   | 1.1019    | 2.05896   | 1.81039  | 0.28354  | 2.85151   | 3.69921  | 1.62219  | 0.626912 | 1.50363  | 0         | 0.214846 | 0.261055  | 1.43466  |
| SNORA8     | 2.33095   | 2.08574   | 1.79059   | 1.37264   | 0        | 0.14177  | 1.52081   | 1.18375  | 0.405549 | 0.835882 | 0.375908 | 0.595664  | 0        | 1.04422   | 0        |
| SNORA80A   | 1.02102   | 2.78767   | 0.985433  | 1.22755   | 4.75798  | 1.01428  | 3.69159   | 0.60493  | 0.414495 | 0.21358  | 2.3052   | 1.33937   | 0.548962 | 0.622566  | 0        |
| SNORA80B   | 0.340339  | 0.163981  | 0         | 0         | 0        | 0        | 0         | 0        | 0        | 0.640741 | 0.3842   | 0.852326  | 0.988132 | 1.51195   | 0        |
| SNORA80C   | 0         | 0         | 0         | 0         | 0        | 0        | 0         | 0        | 0        | 0        | 0        | 0         | 0        | 0         | 0        |
| SNORA80D   | 0         | 0.247793  | 0.567276  | 0.176664  | 0        | 0        | 0         | 0.457058 | 0        | 0.215162 | 0.193523 | 0.613314  | 0        | 0.0895968 | 0        |
| SNORA80E   | 0.172709  | 0.332856  | 0         | 0.88991   | 0.268277 | 0        | 0         | 0.15349  | 0        | 0        | 0        | 0         | 0        | 0         | 0        |
| SNORA81    | 3.06992   | 1.37817   | 2.67549   | 1.31762   | 0.403923 | 0.221416 | 1.63294   | 2.85038  | 0.791731 | 1.79503  | 1.17419  | 1.58152   | 0.302535 | 1.40549   | 2.42737  |
| SNORA84    | 1.04405   | 0.754557  | 0         | 0.717281  | 0        | 0.740827 | 0.794706  | 3.24752  | 1.27153  | 0.436796 | 0.196433 | 0.622537  | 0.336807 | 0.818497  | 0        |































|          |          |          |          |          |          |          |          |          |          |          |          |          |          |          |          |
|----------|----------|----------|----------|----------|----------|----------|----------|----------|----------|----------|----------|----------|----------|----------|----------|
| SNORD86  | 0        | 0        | 0        | 0        | 0        | 0        | 0        | 0        | 0        | 0        | 0        | 0        | 0        | 0        | 0        |
| SNORD87  | 0        | 0        | 0        | 0        | 0        | 0        | 0        | 0        | 0        | 0        | 0        | 0        | 0        | 0        | 0        |
| SNORD88A | 0        | 0        | 0        | 0        | 0        | 0        | 0        | 0        | 0        | 0        | 0        | 0        | 0        | 0        | 0        |
| SNORD88B | 0        | 0        | 0        | 0        | 0        | 0        | 0        | 0        | 0        | 0        | 0        | 0        | 0        | 0        | 0        |
| SNORD88C | 0        | 0        | 0        | 0        | 0        | 0        | 0        | 0        | 0        | 0        | 0        | 0        | 0        | 0        | 0        |
| SNORD89  | 1.01505  | 0.880316 | 0.671774 | 0.627621 | 0.315343 | 0.345719 | 2.54968  | 0.360835 | 0.247242 | 1.01919  | 0.229172 | 1.16207  | 0.785883 | 1.16712  | 0        |
| SNORD9   | 0        | 0.108259 | 0        | 0.231549 | 0        | 0.573961 | 0.256544 | 0        | 0        | 0        | 0        | 0.160772 | 0        | 0        | 0        |
| SNORD90  | 0        | 0        | 0        | 0        | 0        | 0        | 0        | 0        | 0        | 0        | 0        | 0        | 0        | 0        | 0        |
| SNORD91A | 0        | 0        | 0        | 0        | 0        | 0        | 0        | 0        | 0        | 0        | 0        | 0        | 0        | 0        | 0        |
| SNORD91B | 0        | 0        | 0        | 0        | 0        | 0        | 0        | 0        | 0        | 0        | 0        | 0        | 0        | 0        | 0        |
| SNORD92  | 0        | 0        | 0        | 0        | 0        | 0        | 0        | 0        | 0        | 0        | 0        | 0        | 0        | 0        | 0        |
| SNORD93  | 0        | 0        | 0        | 0        | 0        | 0        | 0        | 0        | 0        | 0        | 0        | 0        | 0        | 0        | 0        |
| SNORD94  | 17.9063  | 13.4296  | 9.50291  | 5.39662  | 22.829   | 6.76045  | 16.0087  | 9.4581   | 2.67455  | 2.54425  | 5.91164  | 4.10965  | 2.72478  | 0.971177 | 2.66861  |
| SNORD95  | 0        | 0        | 0        | 0        | 0        | 0        | 0        | 0        | 0        | 0        | 0        | 0        | 0        | 0        | 0        |
| SNORD96A | 0        | 0        | 0        | 0        | 0        | 0        | 0        | 0        | 0        | 0        | 0        | 0        | 0        | 0        | 0        |
| SNORD96B | 0        | 0        | 0        | 0        | 0        | 0        | 0        | 0        | 0        | 0        | 0        | 0        | 0        | 0        | 0        |
| SNORD97  | 3.09661  | 1.57052  | 2.4269   | 4.19887  | 1.26582  | 0.832648 | 0.930422 | 45.046   | 0.396981 | 1.22733  | 0.367967 | 0.699696 | 0.105153 | 0.766621 | 0        |
| SNORD98  | 0        | 0        | 0        | 0        | 0        | 0        | 0        | 0        | 0        | 0        | 0        | 0        | 0        | 0        | 0        |
| SNORD99  | 0        | 0        | 0        | 0        | 0        | 0        | 0        | 0        | 0        | 0        | 0        | 0        | 0        | 0        | 0        |
| SNPH     | 0.591397 | 0.404501 | 0.352393 | 0.600928 | 2.11995  | 0.809933 | 0.764954 | 0.455751 | 1.26422  | 0.856458 | 0.630264 | 1.87907  | 1.01128  | 0.94456  | 1.14628  |
| SNRK     | 9.16547  | 6.38037  | 8.4193   | 6.75806  | 2.33895  | 7.06274  | 6.08019  | 9.3561   | 5.24257  | 7.6605   | 7.85613  | 4.56633  | 13.8899  | 5.81548  | 8.09486  |
| SNRK-AS1 | 0.990349 | 0.757139 | 0.96247  | 0.399914 | 0.245158 | 0.214941 | 0.623686 | 1.06392  | 1.01E-07 | 0.415087 | 0.118855 | 0.400046 | 0.167443 | 0.649654 | 0.639531 |
| SNRNP200 | 18.4946  | 15.5096  | 16.2256  | 19.8851  | 16.767   | 33.1391  | 20.5894  | 13.5902  | 11.7639  | 12.1998  | 10.2888  | 11.0106  | 20.473   | 13.0975  | 14.5533  |
| SNRNP25  | 2.79166  | 1.76604  | 2.00976  | 6.17103  | 3.60816  | 9.23606  | 1.82486  | 1.55299  | 2.5175   | 3.93176  | 7.52976  | 1.57056  | 3.97356  | 2.94036  | 2.75439  |
| SNRNP27  | 4.82817  | 3.89267  | 4.11404  | 5.4068   | 2.87493  | 7.31778  | 3.19734  | 5.20627  | 4.68454  | 5.57507  | 9.15668  | 2.47586  | 6.63524  | 3.40661  | 2.98156  |
| SNRNP35  | 1.26252  | 1.76088  | 1.59415  | 2.32822  | 2.46247  | 1.89139  | 1.25725  | 1.3498   | 2.67058  | 1.49129  | 1.68241  | 1.22866  | 2.17423  | 1.70171  | 1.13151  |

|          |           |            |          |           |          |           |           |           |           |            |          |            |            |          |         |
|----------|-----------|------------|----------|-----------|----------|-----------|-----------|-----------|-----------|------------|----------|------------|------------|----------|---------|
| SNRNP40  | 6.5838    | 5.33502    | 5.52911  | 12.4975   | 5.86609  | 13.8088   | 6.36193   | 4.45801   | 4.40834   | 6.79669    | 10.7302  | 3.96652    | 10.1415    | 7.3065   | 5.32109 |
| SNRNP48  | 1.80796   | 1.84375    | 1.46815  | 1.67456   | 0.801167 | 1.38835   | 1.27276   | 1.72013   | 1.07393   | 1.51047    | 1.06431  | 1.38095    | 1.4277     | 1.54782  | 1.70443 |
| SNRNP70  | 15.1924   | 23.7131    | 20.9821  | 23.0231   | 48.2276  | 30.93     | 15.979    | 12.6546   | 10.8156   | 11.861     | 9.3034   | 20.0028    | 15.577     | 19.6533  | 17.0604 |
| SNRPA    | 8.14056   | 5.97578    | 6.5464   | 13.9525   | 6.62047  | 16.4882   | 8.11049   | 5.75742   | 4.67165   | 6.1874     | 11.3869  | 6.22124    | 10.3762    | 7.54395  | 5.6108  |
| SNRPA1   | 8.71595   | 5.10301    | 6.45237  | 10.7609   | 3.04542  | 11.0324   | 4.23368   | 4.48852   | 8.09754   | 7.54257    | 11.908   | 6.25174    | 13.4606    | 7.81866  | 5.53939 |
| SNRPB    | 27.6795   | 20.9863    | 23.3464  | 57.09     | 31.9894  | 73.6796   | 26.8133   | 17.0535   | 38.5262   | 44.4399    | 78.6027  | 26.8427    | 66.1621    | 38.6269  | 21.6771 |
| SNRPB2   | 5.09394   | 3.6417     | 3.32571  | 8.64035   | 1.34729  | 9.36645   | 2.92378   | 4.8452    | 4.72835   | 7.48201    | 15.4018  | 3.96995    | 10.2595    | 6.69178  | 5.63496 |
| SNRPC    | 7.91082   | 4.81029    | 5.11283  | 16.4223   | 5.25797  | 19.4631   | 6.8394    | 4.56308   | 7.38801   | 10.5734    | 18.9985  | 6.57211    | 10.0363    | 8.80576  | 5.27085 |
| SNRPD1   | 5.274     | 3.89726    | 4.02199  | 10.6502   | 2.31859  | 10.3372   | 2.7268    | 3.87854   | 4.46676   | 6.99409    | 13.7849  | 4.03816    | 6.80551    | 7.08055  | 3.22564 |
| SNRPD2   | 31.1001   | 21.1539    | 20.4436  | 54.9176   | 16.8866  | 49.4082   | 23.9927   | 17.6543   | 31.4958   | 43.3595    | 100.834  | 22.6541    | 33.6959    | 30.7366  | 16.4975 |
| SNRPD2P2 | 0.0303715 | 0.0292669  | 0.201003 | 0         | 0        | 0         | 0.0693543 | 0.0269916 | 0         | 0          | 0        | 0          | 0          | 0        | 0       |
| SNRPD3   | 8.75783   | 8.1517     | 9.0922   | 14.6362   | 6.25623  | 12.3942   | 6.8167    | 8.37664   | 9.47561   | 9.99046    | 17.3795  | 7.21469    | 12.7646    | 8.43683  | 6.02935 |
| SNRPE    | 4.96689   | 3.07225    | 3.28717  | 7.67779   | 0.813235 | 5.45231   | 2.29907   | 3.4836    | 2.69758   | 6.2171     | 13.578   | 2.3821     | 4.96282    | 4.89719  | 3.31592 |
| SNRPF    | 8.98873   | 5.96203    | 6.32552  | 18.7368   | 3.30932  | 18.5878   | 6.33109   | 7.4697    | 6.53992   | 9.81661    | 18.3176  | 6.22285    | 10.4504    | 10.25    | 5.19711 |
| SNRPG    | 4.4189    | 3.86846    | 3.59366  | 12.5191   | 1.41935  | 7.89513   | 3.83105   | 2.94203   | 5.72833   | 12.4271    | 24.5528  | 5.65918    | 10.1188    | 9.24593  | 5.11989 |
| SNRPN    | 1.898     | 1.48844    | 1.91177  | 1.22736   | 2.00065  | 2.93727   | 1.86447   | 1.06999   | 0.577014  | 1.62894    | 2.74685  | 0.650094   | 1.24841    | 0.902566 | 1.97684 |
| SNTA1    | 3.37256   | 1.76314    | 1.86547  | 1.63074   | 4.8854   | 7.08237   | 2.95858   | 1.55576   | 2.74629   | 3.51294    | 5.11348  | 1.71964    | 3.09483    | 2.20718  | 2.21576 |
| SNTB1    | 3.00046   | 2.12255    | 3.00172  | 0.800579  | 1.73423  | 3.73523   | 3.59579   | 2.79058   | 1.11043   | 1.10349    | 2.02178  | 0.452681   | 1.43465    | 1.63381  | 1.96412 |
| SNTB2    | 5.16816   | 4.64355    | 4.68499  | 5.26248   | 3.70492  | 6.67959   | 5.08143   | 4.33202   | 3.53078   | 4.9229     | 6.44384  | 3.54204    | 5.70467    | 5.38241  | 7.04797 |
| SNTG1    | 0         | 0.00157273 | 0        | 0.0134553 | 0        | 0.0194559 | 0         | 0         | 0         | 0.00409688 | 0.025794 | 0.00467122 | 0.00210603 | 0        | 0       |
| SNTG2    | 0.993422  | 0.460918   | 0.74066  | 0.935278  | 0.609631 | 0.92943   | 0.504114  | 0.555882  | 0.0149367 | 0.307863   | 0.747633 | 0.0877555  | 0.308606   | 0.461516 | 1.12725 |
| SNTN     | 0         | 0.0133222  | 0        | 0         | 0        | 0         | 0         | 0.0122865 | 0         | 0          | 0        | 0          | 0          | 0        | 0       |
| SNU13    | 12.8809   | 10.745     | 10.7114  | 21.1922   | 10.9798  | 22.6072   | 15.0123   | 9.7732    | 18.8447   | 13.2153    | 24.2252  | 12.0945    | 18.9057    | 11.6348  | 8.71207 |
| SNUPN    | 2.3822    | 2.12339    | 2.52252  | 4.32066   | 1.9612   | 5.74043   | 2.33913   | 1.63017   | 1.56667   | 1.92849    | 3.29427  | 1.26987    | 2.40538    | 2.39047  | 2.66849 |
| SNURF    | 2.24536   | 1.99732    | 2.92227  | 2.1082    | 3.39117  | 4.79189   | 2.77601   | 1.51053   | 1.09554   | 2.70819    | 4.85905  | 1.0183     | 2.11448    | 1.3558   | 2.66985 |
| SNW1     | 10.7895   | 9.19864    | 9.42075  | 14.4395   | 6.79854  | 17.2659   | 5.60834   | 7.57411   | 8.7178    | 9.89309    | 11.6825  | 6.72895    | 14.8434    | 8.31063  | 8.74248 |

|         |           |           |            |          |           |            |           |          |           |           |           |            |           |            |          |
|---------|-----------|-----------|------------|----------|-----------|------------|-----------|----------|-----------|-----------|-----------|------------|-----------|------------|----------|
| SNX1    | 7.77935   | 9.00866   | 8.88982    | 8.86588  | 8.30965   | 12.0225    | 6.89607   | 6.8789   | 4.90159   | 5.2051    | 5.89744   | 4.60633    | 5.39987   | 4.77575    | 6.07175  |
| SNX10   | 0.423995  | 0.286002  | 0.321529   | 4.64614  | 0.24149   | 1.72089    | 0.0968207 | 0.477294 | 0.240976  | 1.67629   | 3.0553    | 0.606759   | 1.96507   | 0.886393   | 0.578465 |
| SNX11   | 2.30662   | 1.92636   | 1.75785    | 3.48632  | 3.7567    | 3.89835    | 2.24257   | 1.7766   | 3.70305   | 4.132     | 5.54708   | 2.41064    | 4.93369   | 2.79102    | 2.4995   |
| SNX12   | 7.4602    | 8.44828   | 7.951      | 14.3938  | 10.249    | 13.7633    | 9.70953   | 6.62199  | 15.4082   | 11.1632   | 15.5012   | 9.92911    | 13.5674   | 8.56173    | 6.92097  |
| SNX13   | 2.92938   | 2.42446   | 2.43406    | 2.94579  | 0.837345  | 2.53274    | 1.68951   | 3.01567  | 3.13348   | 2.76291   | 3.30208   | 2.08377    | 2.90708   | 2.5345     | 2.38108  |
| SNX14   | 4.34145   | 3.97382   | 4.20884    | 4.98079  | 1.78253   | 4.08656    | 3.59506   | 4.45614  | 6.01028   | 7.00985   | 8.54474   | 3.47449    | 6.90059   | 4.93989    | 4.34329  |
| SNX15   | 4.01469   | 5.24031   | 5.49191    | 6.51837  | 10.2958   | 7.69148    | 5.98726   | 3.23552  | 9.62331   | 7.32519   | 8.47211   | 6.84245    | 11.8532   | 5.44162    | 3.52605  |
| SNX16   | 1.88841   | 1.29704   | 1.46251    | 2.11168  | 0.5305    | 1.19171    | 0.932792  | 2.01153  | 2.84629   | 3.25264   | 3.19767   | 1.50933    | 2.77377   | 1.83043    | 1.0771   |
| SNX17   | 9.73394   | 8.8463    | 8.93161    | 17.3958  | 14.6743   | 20.715     | 10.2813   | 6.5429   | 7.58772   | 13.6014   | 24.1351   | 7.92778    | 15.2926   | 10.5948    | 8.90346  |
| SNX18   | 2.92158   | 2.57904   | 3.02979    | 2.88533  | 5.01907   | 6.38207    | 3.34769   | 2.52226  | 6.88332   | 4.61852   | 6.19965   | 2.82959    | 6.52799   | 3.22842    | 4.39057  |
| SNX19   | 6.06126   | 6.75842   | 6.62408    | 9.05369  | 9.33502   | 9.43071    | 7.96258   | 5.34393  | 6.23692   | 6.05579   | 5.62167   | 5.61102    | 9.05454   | 7.30954    | 7.21108  |
| SNX2    | 3.41243   | 2.43403   | 2.23767    | 3.25139  | 1.37021   | 4.00493    | 1.98088   | 2.40099  | 3.36166   | 3.95057   | 5.62564   | 2.17998    | 3.15018   | 2.25238    | 2.8141   |
| SNX20   | 0.382098  | 0.359526  | 0.439489   | 0.974886 | 0.502763  | 0.603634   | 0.330821  | 0.431804 | 0.140832  | 0.456789  | 1.00325   | 0.106483   | 0.666921  | 0.21862    | 1.05705  |
| SNX21   | 7.36223   | 9.35406   | 11.2076    | 4.33456  | 20.9611   | 8.1891     | 12.9857   | 5.68261  | 19.9385   | 7.22941   | 10.3298   | 7.83115    | 5.24039   | 4.46972    | 4.68571  |
| SNX22   | 0.396389  | 0.627613  | 0.854496   | 0.473713 | 0.715721  | 2.70637    | 0.546448  | 0.348864 | 0.189192  | 0.353545  | 0.712795  | 1.08466    | 0.134272  | 0.888335   | 0.61979  |
| SNX24   | 3.17611   | 3.5236    | 2.97894    | 3.3773   | 2.3411    | 3.4451     | 2.94497   | 2.81366  | 4.52104   | 3.26271   | 3.28854   | 3.04701    | 4.20281   | 2.48465    | 2.25159  |
| SNX25   | 2.54901   | 2.17108   | 2.60997    | 2.02395  | 1.86074   | 3.03625    | 2.09929   | 1.88779  | 2.2138    | 4.03842   | 2.69669   | 2.24248    | 3.43301   | 2.78457    | 2.65051  |
| SNX27   | 3.64542   | 4.25095   | 4.36416    | 4.53763  | 2.70951   | 6.33054    | 4.27779   | 3.63745  | 3.43717   | 3.10763   | 3.93823   | 2.40504    | 4.01271   | 3.28126    | 3.87953  |
| SNX29   | 4.62578   | 4.27204   | 4.51999    | 5.41758  | 5.45284   | 5.66528    | 5.39146   | 4.16636  | 6.41288   | 6.47737   | 4.09062   | 6.78179    | 10.8166   | 5.71405    | 6.48058  |
| SNX29P1 | 1.20229   | 1.10066   | 1.64106    | 0.729829 | 0.896801  | 1.33149    | 1.77624   | 1.45602  | 0.548065  | 0.625411  | 0.685972  | 0.891479   | 0.507936  | 0.760088   | 0.209769 |
| SNX29P2 | 1.19633   | 0.829935  | 0.806195   | 0.239533 | 1.32632   | 1.12594    | 1.5658    | 0.73202  | 0.175795  | 0.326846  | 0.39872   | 0.316862   | 0.278487  | 0.376145   | 1.73617  |
| SNX3    | 17.6204   | 13.9193   | 14.4245    | 33.9853  | 11.7243   | 27.5435    | 15.0436   | 18.6157  | 37.682    | 37.7941   | 51.048    | 30.7013    | 48.9454   | 23.4622    | 17.9777  |
| SNX30   | 3.25877   | 2.23131   | 2.39131    | 2.10087  | 2.04181   | 3.30852    | 3.32471   | 2.51214  | 2.86451   | 2.72291   | 2.4525    | 1.67424    | 2.63259   | 1.59186    | 2.34656  |
| SNX31   | 0.0273343 | 0.0307302 | 0.00753762 | 0        | 0.0141532 | 0.00775827 | 0         | 0.016195 | 0         | 0.0228716 | 0.0822854 | 0.00651948 | 0.0293933 | 0.00476204 | 0        |
| SNX32   | 0.230752  | 0.21582   | 0.179665   | 0.125892 | 0.421691  | 0.173367   | 0.154979  | 0.253325 | 0.0495935 | 0.187399  | 0.137907  | 0.281657   | 0.0262729 | 0.0993185  | 0.331389 |
| SNX33   | 6.58573   | 9.75378   | 10.1207    | 9.30962  | 13.4879   | 16.6523    | 11.7122   | 6.15818  | 8.13395   | 11.3206   | 7.7415    | 8.4104     | 12.6317   | 9.87334    | 7.67937  |

|           |           |           |           |           |           |           |          |           |           |           |            |           |           |          |           |
|-----------|-----------|-----------|-----------|-----------|-----------|-----------|----------|-----------|-----------|-----------|------------|-----------|-----------|----------|-----------|
| SNX4      | 3.64069   | 2.29183   | 2.26266   | 4.6191    | 1.02306   | 5.42888   | 1.87997  | 2.64208   | 2.28382   | 5.99308   | 9.34538    | 2.34974   | 6.63967   | 4.07332  | 3.44186   |
| SNX5      | 7.03762   | 5.88234   | 6.4697    | 14.0639   | 4.32747   | 10.7678   | 4.63616  | 6.58616   | 6.07619   | 9.4157    | 14.6043    | 6.43623   | 9.60994   | 9.50716  | 6.74662   |
| SNX6      | 5.98401   | 5.67004   | 5.48508   | 10.8705   | 3.15707   | 10.2928   | 4.89222  | 6.06428   | 9.42222   | 12.0856   | 16.8282    | 6.15555   | 15.9296   | 7.49479  | 7.44541   |
| SNX7      | 5.64852   | 3.48568   | 3.47183   | 6.32387   | 2.78573   | 7.87411   | 3.28733  | 3.03582   | 5.7352    | 7.80915   | 13.359     | 3.3957    | 6.01361   | 7.0265   | 5.67664   |
| SNX8      | 1.9929    | 1.74391   | 1.95173   | 2.16448   | 3.38399   | 6.63799   | 2.20293  | 1.41082   | 0.493754  | 1.2813    | 2.31591    | 0.9856    | 3.2744    | 1.91211  | 2.48326   |
| SNX9      | 13.4349   | 8.18565   | 10.28     | 19.6866   | 8.42807   | 21.3133   | 11.7433  | 9.85482   | 21.0259   | 15.3865   | 19.9093    | 8.54409   | 18.2585   | 13.6065  | 18.2486   |
| SOAT1     | 1.36697   | 0.742745  | 0.96191   | 1.82622   | 0.639574  | 3.25348   | 1.03048  | 1.18265   | 0.449301  | 2.28208   | 4.16833    | 0.667     | 2.79039   | 2.16054  | 2.63488   |
| SOAT2     | 0.100476  | 0.05379   | 0.120064  | 0         | 0.260124  | 0.0570362 | 0.203948 | 0.089295  | 0.0271931 | 0.154132  | 0.0126028  | 0.0559172 | 0         | 0.122531 | 0.016033  |
| SOBP      | 0.649877  | 0.259443  | 0.390162  | 0.367388  | 0.559542  | 1.46088   | 1.10665  | 0.313531  | 0.0316591 | 0.475415  | 0.645595   | 0.0611149 | 0.575036  | 0.459989 | 1.66928   |
| SOCS1     | 1.27515   | 0.577708  | 0.456596  | 2.47126   | 0.886903  | 3.468     | 0.608447 | 0.659652  | 0.278148  | 1.26602   | 2.51373    | 1.03497   | 3.58559   | 1.28316  | 3.4439    |
| SOCS2     | 1.48149   | 0.560235  | 0.659181  | 1.7761    | 1.28357   | 1.37203   | 0.748039 | 0.83928   | 0.366607  | 1.24455   | 3.10495    | 0.392765  | 1.67559   | 1.62261  | 3.37365   |
| SOCS2-AS1 | 0.0806378 | 0.135984  | 0.100064  | 0.207749  | 0.375775  | 0.411972  | 0.184139 | 0.286657  | 0         | 0.151813  | 0.409635   | 0.173096  | 0         | 0.168579 | 0.868546  |
| SOCS3     | 5.46234   | 3.85405   | 5.47016   | 53.1017   | 12.1626   | 56.9941   | 5.28094  | 5.02731   | 4.34576   | 34.9369   | 42.0091    | 36.4587   | 62.1657   | 35.5443  | 47.3591   |
| SOCS4     | 2.01659   | 1.78902   | 1.59456   | 2.00674   | 0.435778  | 1.89697   | 1.43199  | 2.18523   | 2.40374   | 2.43162   | 3.14089    | 1.46892   | 3.1729    | 2.28044  | 2.11875   |
| SOCS5     | 3.59902   | 2.46119   | 3.02664   | 2.85458   | 1.29546   | 4.80185   | 3.00968  | 3.71029   | 2.66622   | 4.17448   | 5.80017    | 1.5913    | 4.97733   | 2.99403  | 5.49663   |
| SOCS6     | 2.83449   | 2.54066   | 2.78374   | 2.79047   | 1.62958   | 2.83489   | 1.99785  | 2.78293   | 4.16565   | 4.23332   | 3.58859    | 2.52953   | 7.02657   | 3.73047  | 2.30824   |
| SOCS7     | 2.32649   | 3.3684    | 3.26852   | 2.63368   | 4.22216   | 3.86315   | 2.89809  | 2.26094   | 2.67442   | 1.94787   | 1.36228    | 2.0279    | 2.46492   | 2.41517  | 1.8747    |
| SOD1      | 33.1197   | 24.5199   | 24.6016   | 44.9064   | 21.7558   | 58.3624   | 20.7558  | 19.7151   | 21.351    | 31.7258   | 83.7374    | 19.9057   | 22.4518   | 24.517   | 18.4953   |
| SOD2      | 19.9205   | 8.01552   | 10.8048   | 119.529   | 8.88004   | 142.748   | 7.21458  | 15.6045   | 2.85328   | 25.7539   | 41.1493    | 4.15276   | 79.3324   | 20.6928  | 51.0779   |
| SOD2-OT1  | 0.1774    | 0.192797  | 0.349171  | 0.106736  | 0.217812  | 0.239317  | 0.177048 | 0.276443  | 0.0954258 | 0.050224  | 0.286918   | 0.0484647 | 0         | 0.150708 | 0.233618  |
| SOD3      | 23.6123   | 7.64284   | 10.8938   | 9.63966   | 24.5225   | 126.82    | 24.2983  | 11.1918   | 0.866399  | 6.17413   | 22.4691    | 0.909742  | 8.92586   | 4.78602  | 29.5845   |
| SOGA1     | 3.4583    | 4.7487    | 5.35118   | 4.26786   | 7.29571   | 6.8472    | 5.63639  | 3.94555   | 1.38536   | 2.74647   | 2.85674    | 3.29067   | 4.68139   | 4.4931   | 6.53898   |
| SOGA3     | 0.193622  | 0.128273  | 0.127908  | 0.0974642 | 0.155137  | 0.307427  | 0.118842 | 0.0605383 | 0.0101392 | 0.191711  | 0.260858   | 0.054647  | 0.0725275 | 0.120447 | 0.261548  |
| SOHLH1    | 0         | 0.0505572 | 0.0868061 | 0         | 0         | 0         | 0        | 0.0103615 | 0         | 0         | 0          | 0         | 0         | 0        | 0         |
| SOHLH2    | 0         | 0.0098408 | 0         | 0         | 0.0105764 | 0.0187716 | 0        | 0.0121022 | 0         | 0.0130615 | 0.00614015 | 0         | 0         | 0        | 0.0391094 |
| SON       | 21.808    | 20.4008   | 22.5418   | 22.3351   | 17.6089   | 24.2345   | 21.4364  | 18.0903   | 18.5782   | 17.2199   | 14.9117    | 16.124    | 26.4878   | 18.2481  | 19.1675   |

|            |           |            |            |           |            |           |            |            |           |           |           |            |           |            |           |
|------------|-----------|------------|------------|-----------|------------|-----------|------------|------------|-----------|-----------|-----------|------------|-----------|------------|-----------|
| SORBS1     | 5.9886    | 1.66246    | 2.06952    | 1.35816   | 1.597      | 10.5076   | 6.79238    | 2.10665    | 2.40763   | 1.29038   | 1.53599   | 1.45599    | 1.21446   | 1.3808     | 3.31226   |
| SORBS2     | 1.91505   | 0.483084   | 0.524536   | 0.13812   | 0.396366   | 1.18512   | 1.64506    | 0.861279   | 0.0910328 | 0.397903  | 0.832157  | 0.130941   | 0.219512  | 0.367757   | 1.25853   |
| SORBS3     | 15.6284   | 9.03466    | 10.9811    | 8.62301   | 18.3633    | 39.6221   | 23.8729    | 10.3621    | 6.98845   | 7.4232    | 16.5523   | 5.44753    | 10.2969   | 8.55122    | 19.397    |
| SORCS1     | 0.113558  | 0.165509   | 0.237206   | 0.160909  | 0.0970168  | 0.273157  | 0.210692   | 0.171565   | 0.01383   | 0.0106895 | 0         | 0.0203134  | 0.0146534 | 0.0103863  | 0.0203854 |
| SORCS2     | 0.814385  | 0.700026   | 0.328951   | 1.54847   | 6.27759    | 1.18177   | 0.711566   | 0.584442   | 2.67282   | 3.0904    | 2.49042   | 3.83825    | 2.74066   | 1.96231    | 3.53613   |
| SORCS3     | 0.0120453 | 0.00386908 | 0.00332158 | 0         | 0          | 0.0786326 | 0.0595961  | 0          | 0         | 0         | 0         | 0          | 0         | 0.00209847 | 0         |
| SORCS3-AS1 | 0         | 0          | 0          | 0         | 0          | 0         | 0.0408408  | 0.0158946  | 0         | 0         | 0         | 0          | 0         | 0          | 0         |
| SORD       | 2.94679   | 4.23246    | 4.76324    | 8.97044   | 4.89989    | 6.44633   | 2.94512    | 3.30727    | 4.7657    | 3.86891   | 6.22939   | 4.22845    | 4.97216   | 4.16538    | 2.13318   |
| SORD2P     | 0         | 0.0199119  | 0          | 0.212943  | 0          | 0.049265  | 0          | 0          | 0         | 0.0622434 | 0.149289  | 0.0059141  | 0         | 0.129595   | 0         |
| SORL1      | 3.1552    | 2.12079    | 2.5945     | 2.60817   | 2.27037    | 2.2125    | 2.84877    | 2.38797    | 0.387864  | 4.70129   | 4.20943   | 0.977904   | 8.31705   | 3.48548    | 3.76192   |
| SORT1      | 10.3056   | 7.59006    | 6.48246    | 7.79333   | 11.4046    | 14.1505   | 10.7       | 7.9732     | 47.48     | 20.6134   | 19.7894   | 18.8173    | 23.1656   | 8.00507    | 5.88645   |
| SOS1       | 3.87851   | 4.26562    | 4.3249     | 4.15461   | 1.09775    | 4.97507   | 2.66209    | 3.67438    | 3.81546   | 3.9565    | 3.53032   | 3.13551    | 4.27597   | 3.77641    | 4.95468   |
| SOS2       | 5.05843   | 5.5397     | 6.35013    | 6.31387   | 1.64682    | 4.81454   | 3.43437    | 5.25146    | 2.65241   | 4.57984   | 4.31407   | 2.608      | 4.71655   | 3.94953    | 4.04242   |
| SOST       | 0         | 0          | 0.00832416 | 0.435514  | 0.10941    | 0.0856783 | 0.0229774  | 0          | 2.19358   | 0.366244  | 0.65882   | 0.230393   | 0.525858  | 0.094661   | 0.216759  |
| SOSTDC1    | 2.2784    | 2.45804    | 3.02191    | 0.472143  | 1.7888     | 1.32849   | 1.97932    | 3.0923     | 0.271451  | 0.916944  | 2.05482   | 0.141761   | 0.135816  | 0.278282   | 0         |
| SOWAHA     | 0.153221  | 0.0353073  | 0.104711   | 0.041191  | 0.0724364  | 0.0283621 | 0.0152124  | 0.0769658  | 0.1217    | 0.0919735 | 0.0977643 | 0.00953337 | 0.0988575 | 0.0174087  | 0.200911  |
| SOWAHB     | 0.490449  | 0.289474   | 0.278942   | 0.303253  | 0.590423   | 0.370629  | 0.223991   | 0.272419   | 1.29915   | 1.56969   | 0.4014    | 0.478141   | 2.42468   | 0.71452    | 0.2025    |
| SOWAHC     | 8.87134   | 6.14078    | 6.61086    | 10.9665   | 9.18426    | 8.22707   | 6.41579    | 6.25779    | 35.011    | 21.4201   | 11.8896   | 18.9648    | 40.7881   | 16.2513    | 5.07758   |
| SOWAHD     | 0.130998  | 0.084156   | 0.0602062  | 0.149997  | 0.203486   | 0.359418  | 0.0997132  | 0.0517424  | 0.514078  | 0.164416  | 0.246468  | 0          | 0.131475  | 0.08368    | 0.0418067 |
| SOX1       | 0.0225346 | 0.0190007  | 0.0186422  | 0.0116113 | 0.017502   | 0.0287819 | 0.0257293  | 0.0300403  | 0.0137223 | 0.0212124 | 0         | 0.0282172  | 0.123583  | 0          | 0         |
| SOX1-OT    | 0.09796   | 0          | 0          | 0         | 0          | 0.0417058 | 0.0559238  | 0          | 0         | 0         | 0         | 0          | 0         | 0          | 0         |
| SOX10      | 3.00811   | 2.32208    | 2.98355    | 1.00832   | 3.15277    | 6.73392   | 4.00699    | 3.05424    | 0.295447  | 0.0811933 | 0.0365138 | 0.156221   | 0.0886933 | 0.0887516  | 0.255486  |
| SOX11      | 0         | 0.00127889 | 0          | 0.0136768 | 0.00412308 | 0.0271215 | 0.00303062 | 0.00235894 | 0.0161633 | 0.0366459 | 0.0329604 | 0          | 0.0376762 | 0.0305198  | 0.0457433 |
| SOX12      | 2.15631   | 2.59975    | 2.10856    | 3.42537   | 7.20063    | 4.65363   | 1.9628     | 1.43947    | 1.10128   | 1.70864   | 1.96868   | 0.895875   | 1.42971   | 1.88782    | 2.86127   |
| SOX13      | 5.3241    | 1.65084    | 2.15288    | 1.57514   | 4.68672    | 5.37524   | 3.31516    | 2.56022    | 0.401367  | 0.927105  | 0.904422  | 0.870053   | 3.05748   | 2.33121    | 5.05114   |
| SOX14      | 0         | 0.0437496  | 0          | 0         | 0          | 0.0386582 | 0          | 0.0100871  | 0         | 0         | 0         | 0          | 0         | 0          | 0         |

|           |           |           |            |            |            |           |           |           |            |           |            |            |            |            |           |
|-----------|-----------|-----------|------------|------------|------------|-----------|-----------|-----------|------------|-----------|------------|------------|------------|------------|-----------|
| SOX15     | 6.50795   | 8.94294   | 7.856      | 21.5057    | 10.8827    | 22.5474   | 7.62012   | 6.74276   | 10.2916    | 22.379    | 17.7294    | 15.7755    | 41.3141    | 17.0414    | 5.36455   |
| SOX17     | 1.32949   | 0.702255  | 0.399205   | 0.90324    | 4.05384    | 2.49889   | 0.494747  | 0.560139  | 0.503743   | 0.778704  | 2.21234    | 0.408702   | 1.58213    | 1.17353    | 3.06906   |
| SOX18     | 5.4566    | 3.27653   | 2.53777    | 8.46276    | 20.5996    | 19.6829   | 4.30843   | 1.78534   | 3.15745    | 5.19607   | 14.7866    | 3.32161    | 11.3674    | 10.2724    | 16.8813   |
| SOX2      | 0.506715  | 0.0621455 | 0.0762164  | 0.218368   | 0.0286219  | 0.305945  | 0.11571   | 0.155567  | 0.0224408  | 0.196575  | 0.114404   | 0.0791058  | 0.148604   | 0.0240756  | 0.0396931 |
| SOX2-OT   | 0.187049  | 0.02731   | 0.0328236  | 0.0175236  | 0.00880459 | 0.067569  | 0.0647171 | 0.040299  | 0          | 0         | 0.00639863 | 0.00405571 | 0          | 0          | 0         |
| SOX21     | 2.34681   | 7.67445   | 7.83138    | 3.82378    | 9.69235    | 2.32232   | 4.6982    | 4.28404   | 6.72052    | 2.41809   | 2.4971     | 3.9711     | 2.25588    | 0.34393    | 0.580697  |
| SOX21-AS1 | 1.19358   | 2.93517   | 3.35977    | 1.43768    | 6.57342    | 1.39249   | 1.66367   | 2.17661   | 2.2843     | 0.651756  | 0.953681   | 1.4197     | 1.12013    | 0.170132   | 0.100177  |
| SOX3      | 0         | 0         | 0          | 0          | 0          | 0         | 0         | 0         | 0          | 0.0140053 | 0.0629837  | 0          | 0          | 0          | 0         |
| SOX30     | 0.0333377 | 0.0192752 | 0.00551586 | 0.0068711  | 0.020714   | 0.0397413 | 0.0304512 | 0.0237022 | 0.00812032 | 0.0251054 | 0.0752683  | 0.0381665  | 0.0129056  | 0.0243933  | 0.0287263 |
| SOX4      | 4.42176   | 4.73641   | 4.83938    | 7.10892    | 13.2212    | 16.1187   | 3.53728   | 4.77719   | 5.22919    | 6.91933   | 9.6833     | 2.69202    | 6.21392    | 5.65601    | 9.89323   |
| SOX5      | 0.721031  | 1.36149   | 2.08409    | 0.210579   | 0.190447   | 0.442441  | 1.14988   | 1.36979   | 0.0995456  | 0.326082  | 0.530553   | 0.0584845  | 0.111122   | 0.239531   | 0.616264  |
| SOX5-AS1  | 0.0651917 | 0.361219  | 0.808968   | 0.100773   | 0          | 0.0277549 | 0.223301  | 0.231748  | 0          | 0.0409111 | 0.0367967  | 0          | 0          | 0.034072   | 0.0936235 |
| SOX6      | 0.894773  | 1.43149   | 1.13896    | 0.88643    | 0.468418   | 1.24807   | 1.29538   | 0.841333  | 0.803756   | 0.564619  | 0.798029   | 0.670303   | 0.456103   | 0.466357   | 0.315928  |
| SOX7      | 12.687    | 12.8617   | 5.24488    | 20.5028    | 16.845     | 23.5715   | 5.90066   | 7.39757   | 33.0437    | 5.72431   | 13.1027    | 12.9728    | 8.77777    | 7.05513    | 4.23819   |
| SOX8      | 0.630001  | 0.380344  | 0.627929   | 0.0547547  | 0.589524   | 0.704478  | 0.63265   | 0.290065  | 0.101686   | 0.0190534 | 0.0342743  | 0.0760356  | 0.10774    | 0.138847   | 0.261618  |
| SOX9      | 8.26538   | 5.50164   | 5.06136    | 8.67533    | 8.60806    | 15.9091   | 5.40033   | 7.82134   | 8.94862    | 13.2313   | 5.55186    | 4.87439    | 13.8311    | 3.63728    | 1.19124   |
| SOX9-AS1  | 0.270888  | 0.093579  | 0.160674   | 0.00526713 | 0.0714537  | 0.0652805 | 0.157564  | 0.19532   | 0.00622474 | 0.0320748 | 0.00576979 | 0          | 0.00329765 | 0.00534257 | 0         |
| SP1       | 12.4193   | 14.3203   | 15.4767    | 15.1996    | 7.72864    | 13.9906   | 14.4237   | 13.1029   | 10.7022    | 10.0974   | 11.1046    | 7.30739    | 14.1244    | 8.42831    | 9.52011   |
| SP100     | 4.27768   | 3.38017   | 3.33109    | 7.27956    | 2.21334    | 9.45623   | 1.86177   | 3.15907   | 1.51797    | 2.87051   | 4.34744    | 1.58235    | 3.57974    | 2.73692    | 4.60095   |
| SP110     | 2.95999   | 2.33144   | 2.01695    | 6.73839    | 3.30075    | 8.71022   | 2.00053   | 2.52457   | 1.17137    | 2.89159   | 3.46771    | 1.98991    | 3.72334    | 2.06139    | 3.96181   |
| SP140     | 0.357945  | 0.24302   | 0.307053   | 0.203164   | 0.181581   | 0.341131  | 0.097843  | 0.438417  | 0.0490886  | 0.110667  | 0.163171   | 0.0679727  | 0.117582   | 0.105989   | 0.372593  |
| SP140L    | 1.51752   | 0.999769  | 1.15102    | 1.60516    | 0.964396   | 1.9025    | 0.85074   | 1.09615   | 0.202239   | 0.920631  | 0.97311    | 0.608596   | 1.2502     | 1.25321    | 1.98868   |
| SP2       | 3.51757   | 3.26422   | 3.13146    | 3.80888    | 3.98537    | 4.48324   | 4.5257    | 4.09105   | 3.45075    | 2.74415   | 3.49237    | 2.97453    | 6.84213    | 2.86842    | 3.46034   |
| SP2-AS1   | 0.562137  | 0.725662  | 0.579105   | 0.404416   | 0.49426    | 0.406402  | 0.702379  | 0.518432  | 0.103339   | 0.173057  | 0.347224   | 0.311154   | 0.191609   | 0.570964   | 0.731139  |
| SP3       | 10.1837   | 7.62997   | 8.53892    | 8.51019    | 3.38281    | 10.346    | 6.38597   | 8.65692   | 5.1404     | 10.1826   | 11.9799    | 4.42746    | 10.3755    | 7.53378    | 7.65511   |
| SP4       | 1.34039   | 1.09664   | 1.25016    | 0.619867   | 0.299913   | 0.803038  | 1.06832   | 1.18793   | 0.31654    | 0.470678  | 0.741897   | 0.188629   | 0.757011   | 0.525894   | 0.66654   |

|            |           |           |           |            |           |           |           |           |           |           |           |           |            |            |            |
|------------|-----------|-----------|-----------|------------|-----------|-----------|-----------|-----------|-----------|-----------|-----------|-----------|------------|------------|------------|
| SP5        | 0.142638  | 0.481077  | 0.550668  | 0.894206   | 0.738555  | 0.556667  | 0.651439  | 0.25353   | 0.0723822 | 0.074594  | 0.0402552 | 0.068041  | 0.153382   | 0.0434869  | 0.0512116  |
| SP6        | 1.48884   | 2.71148   | 2.56796   | 1.16701    | 4.52715   | 1.31177   | 2.86162   | 1.34358   | 10.1863   | 2.73441   | 2.01166   | 2.64885   | 3.71994    | 2.07602    | 0.660434   |
| SP7        | 0.0139542 | 0.0168084 | 0.0173159 | 0.00719011 | 0.0216757 | 0.0178227 | 0.0398312 | 0.018602  | 0         | 0         | 0         | 0.0049923 | 0          | 0.00729308 | 0          |
| SP8        | 0.539943  | 0.499374  | 0.482618  | 0.613987   | 0.0289213 | 0.311787  | 1.09834   | 0.76115   | 0         | 0.0155789 | 0         | 0.155425  | 0.0280296  | 0.0129746  | 0.00891294 |
| SP9        | 0.111341  | 0.107292  | 0.184218  | 0.0819573  | 0.197659  | 0.0270873 | 0.0908041 | 0.0706791 | 0         | 0         | 0         | 0.0227622 | 0          | 0.0665049  | 0.1599     |
| SPA17      | 0.833306  | 0.564483  | 0.429089  | 2.16352    | 0.383662  | 0.820207  | 0.786482  | 0.592663  | 1.11364   | 1.519     | 2.5336    | 0.596664  | 1.19518    | 0.916527   | 0.673949   |
| SPAAR      | 0.479028  | 0.216378  | 0.0866875 | 0.200546   | 0.372048  | 0.675562  | 0.119643  | 0.133038  | 0.054694  | 0.112731  | 0.371775  | 0.0428447 | 0.164192   | 0.0547665  | 0.0644948  |
| SPACA1     | 0         | 0         | 0         | 0          | 0         | 0         | 0         | 0         | 0         | 0         | 0         | 0         | 0          | 0          | 0          |
| SPACA3     | 0.0231662 | 0         | 0         | 0          | 0         | 0         | 0         | 0         | 0         | 0.029076  | 0         | 0         | 0          | 0          | 0          |
| SPACA4     | 0.0476194 | 0.172078  | 0.118182  | 0.196293   | 0.258893  | 0.101368  | 0.163111  | 0.0846404 | 0.173985  | 0.119535  | 0.0268782 | 0.408876  | 0.0460857  | 0.18666    | 0.136775   |
| SPACA5     | 3.83E-05  | 0.0562017 | 6.34E-05  | 0          | 5.95E-05  | 0         | 7.29E-05  | 1.14E-05  | 0         | 0         | 0         | 0         | 0          | 8.84E-12   | 0          |
| SPACA5B    | 0.054797  | 0.0495098 | 0.090664  | 0          | 0.0851187 | 0         | 0.104276  | 0.016233  | 0         | 0         | 0         | 0         | 0          | 0.0382167  | 0          |
| SPACA6     | 0.490883  | 0.653751  | 0.624607  | 0.471104   | 1.55539   | 0.670842  | 0.837072  | 0.291739  | 0.0399796 | 0.370812  | 0.345871  | 0.461943  | 0.254158   | 1.36683    | 1.35145    |
| SPACA6P-AS | 0.0942729 | 0.112576  | 0.0821491 | 0.061533   | 0.530725  | 0.193976  | 0.253436  | 0.0726771 | 0.021342  | 0.0659824 | 0.0395643 | 0.0794119 | 0.045225   | 0.277813   | 0.436217   |
| SPACA7     | 0         | 0         | 0         | 0          | 0         | 0         | 0         | 0         | 0         | 0         | 0         | 0         | 0          | 0          | 0          |
| SPACA9     | 1.36825   | 2.91952   | 2.20723   | 3.22292    | 3.40059   | 2.51319   | 2.63347   | 1.38102   | 4.18975   | 3.04207   | 3.47532   | 2.88811   | 3.36721    | 1.79799    | 0.603532   |
| SPAG1      | 0.740623  | 1.34163   | 1.62911   | 0.90523    | 0.642108  | 0.713738  | 1.27171   | 0.913322  | 4.55192   | 2.23382   | 1.87306   | 1.36797   | 4.11539    | 1.44031    | 0.643124   |
| SPAG11A    | 0         | 0         | 0         | 0          | 0         | 0         | 0         | 0         | 0         | 3.00E-09  | 0         | 0         | 0.0107925  | 0          | 1.93E-05   |
| SPAG11B    | 0         | 0         | 0         | 0          | 0         | 0         | 0         | 0         | 0         | 0.109714  | 0         | 0         | 0.00169446 | 0          | 0.0313751  |
| SPAG16     | 1.28444   | 1.56952   | 1.51065   | 1.34757    | 1.23797   | 1.88429   | 0.821608  | 1.58847   | 1.23448   | 1.30133   | 2.81259   | 0.730809  | 0.943533   | 0.873501   | 1.07788    |
| SPAG17     | 0.163047  | 0.278805  | 0.0661195 | 0.148257   | 0.55123   | 0.710494  | 0.0766547 | 0.326741  | 3.20831   | 1.76954   | 2.81864   | 3.49993   | 0.550737   | 1.4236     | 0.28466    |
| SPAG4      | 0.122938  | 0.185104  | 0.152554  | 0.1742     | 0.453542  | 0.353295  | 0.298279  | 0.300457  | 0.0935778 | 0.424324  | 0.745951  | 0.175931  | 0.297446   | 0.240948   | 0.198624   |
| SPAG5      | 1.00278   | 0.893108  | 0.844657  | 2.68057    | 0.783556  | 2.48913   | 1.20046   | 0.675145  | 0.680955  | 1.75441   | 1.6946    | 0.913206  | 2.43504    | 2.6332     | 0.523682   |
| SPAG5-AS1  | 0.830445  | 0.677496  | 0.757128  | 0.392756   | 0.827779  | 0.109982  | 0.874955  | 0.648761  | 0.198441  | 0.345811  | 0.263818  | 0.589198  | 0.161128   | 0.898975   | 0.883332   |
| SPAG6      | 0.029491  | 0.0284184 | 0.048794  | 0          | 0         | 0.0376668 | 0.0252539 | 0.0262091 | 0         | 0         | 0         | 0         | 0          | 0.00770664 | 0          |
| SPAG7      | 9.84426   | 7.19083   | 7.88237   | 14.3796    | 12.1      | 14.1883   | 6.93469   | 5.75893   | 10.4768   | 12.9507   | 26.9922   | 6.67226   | 9.70201    | 7.74116    | 8.2037     |

|             |           |            |           |           |           |           |           |           |           |           |           |           |           |           |           |
|-------------|-----------|------------|-----------|-----------|-----------|-----------|-----------|-----------|-----------|-----------|-----------|-----------|-----------|-----------|-----------|
| SPAG8       | 0.0992412 | 0.167356   | 0.388038  | 0.194762  | 0.0616637 | 0.118304  | 0.329698  | 0.158755  | 0.0486814 | 0.0373674 | 0.0673442 | 0.134919  | 0.0512239 | 0.135176  | 0.0570092 |
| SPAG9       | 9.3831    | 8.87349    | 10.5994   | 9.2925    | 6.58233   | 10.6358   | 7.08311   | 7.77994   | 17.7806   | 15.2319   | 10.9281   | 10.8942   | 20.6979   | 11.2831   | 11.3509   |
| SPAM1       | 0         | 0.00369228 | 0         | 0         | 0.0119037 | 0         | 0         | 0         | 0.037332  | 0         | 0         | 0         | 0         | 0         | 0         |
| SPANXA1     | 0         | 0          | 0         | 0         | 0         | 0         | 0         | 0         | 0         | 0         | 0         | 0         | 0         | 0         | 0.119269  |
| SPANXA2     | 0         | 0          | 0         | 0         | 0         | 0         | 0         | 0         | 0         | 0         | 0         | 0         | 0         | 0         | 0.119269  |
| SPANXA2-OT1 | 0         | 0.00656308 | 0.0112687 | 0         | 0         | 0         | 0.0155527 | 0         | 0         | 0         | 0         | 0         | 0         | 0         | 0         |
| SPANXB1     | 0.0246728 | 0.0237754  | 0         | 0         | 0         | 0         | 0         | 0.0219271 | 0         | 0         | 0         | 0         | 0         | 0         | 0         |
| SPANXC      | 0         | 0          | 0         | 0         | 0         | 0         | 0.0599183 | 0         | 0         | 0         | 0         | 0         | 0         | 0         | 0         |
| SPANXD      | 0         | 0.0161137  | 0.027667  | 0         | 0.0519496 | 0.0284769 | 9.87E-12  | 0.029722  | 0         | 0         | 0         | 0         | 0         | 0         | 0         |
| SPANXN1     | 0         | 0          | 0         | 0         | 0         | 0         | 0         | 0         | 0         | 0         | 0         | 0         | 0         | 0         | 0         |
| SPANXN2     | 0         | 0          | 0         | 0         | 0         | 0         | 0         | 0         | 0         | 0         | 0         | 0         | 0         | 0         | 0         |
| SPANXN3     | 0         | 0          | 0         | 0         | 0         | 0         | 0         | 0         | 0         | 0         | 0         | 0         | 0         | 0         | 0         |
| SPANXN4     | 0         | 0          | 0         | 0         | 0         | 0         | 0         | 0         | 0         | 0         | 0         | 0         | 0         | 0         | 0         |
| SPANXN5     | 0         | 0          | 0         | 0         | 0         | 0.0351266 | 0         | 0         | 0         | 0.103554  | 0         | 0         | 0.0266164 | 0         | 0         |
| SPARC       | 105.496   | 69.5499    | 85.0334   | 89.5573   | 244.865   | 213.931   | 121.229   | 77.8254   | 66.8348   | 289.227   | 698.453   | 74.595    | 134.578   | 196.415   | 784.901   |
| SPARCL1     | 46.1144   | 14.9529    | 16.4631   | 23.0412   | 15.6403   | 82.5777   | 11.0226   | 14.0935   | 4.38201   | 42.6048   | 74.3109   | 5.24435   | 19.647    | 18.8861   | 74.2271   |
| SPART       | 3.45322   | 2.97836    | 3.43874   | 3.38626   | 1.68585   | 5.05164   | 2.97302   | 2.73345   | 2.19425   | 3.52115   | 4.56166   | 1.73422   | 4.3923    | 2.86305   | 3.63476   |
| SPART-AS1   | 0.238281  | 0.15786    | 0.0985615 | 0.0306944 | 0         | 0.101447  | 0         | 0.105882  | 0         | 0         | 0.100871  | 0.0426241 | 0.0384344 | 0.046701  | 0.0427752 |
| SPAST       | 2.15598   | 2.1565     | 2.22632   | 2.59107   | 1.40679   | 2.33992   | 1.60549   | 2.24456   | 2.61149   | 2.14505   | 3.10718   | 1.6963    | 2.63519   | 1.99985   | 1.95859   |
| SPATA1      | 0.472526  | 0.429469   | 0.470865  | 0.320946  | 0.0834087 | 0.192031  | 0.196187  | 0.639457  | 0.104633  | 0.188704  | 0.121233  | 0.215158  | 0.0485023 | 0.275027  | 0.339304  |
| SPATA12     | 0.824825  | 0.984291   | 0.904515  | 0.434887  | 1.16205   | 0.400163  | 0.777498  | 0.877938  | 0.140169  | 0.481507  | 0.0216541 | 0.809788  | 0.0309403 | 0.491242  | 0.413216  |
| SPATA13     | 3.1173    | 1.567      | 2.28996   | 0.958223  | 1.63073   | 2.10887   | 3.21679   | 2.32867   | 0.788008  | 0.882002  | 1.07144   | 0.522753  | 1.52609   | 1.41871   | 4.77535   |
| SPATA13-AS1 | 0.694826  | 0.180265   | 0.397945  | 0.0550799 | 0.24907   | 0.0455104 | 0.0610254 | 0.190001  | 0         | 0         | 0         | 0         | 0         | 0.167606  | 0.46055   |
| SPATA16     | 0         | 0          | 0         | 0         | 0         | 0         | 0         | 0         | 0         | 0         | 0         | 0         | 0         | 0         | 0         |
| SPATA17     | 0.0813822 | 0.111626   | 0.117819  | 0.146767  | 0         | 0.103944  | 0.162609  | 0.0813664 | 0         | 0.102143  | 0.0229676 | 0.0291156 | 0.0131268 | 0.0425339 | 0.0438281 |
| SPATA17-AS1 | 7.47E-11  | 0.032542   | 1.12E-22  | 8.28E-08  | 0         | 0         | 0         | 2.37E-13  | 0         | 0         | 0         | 0         | 0         | 0         | 0         |



|            |            |            |            |            |            |            |            |            |            |            |           |            |            |            |            |
|------------|------------|------------|------------|------------|------------|------------|------------|------------|------------|------------|-----------|------------|------------|------------|------------|
| SPATA18    | 1.85808    | 2.1106     | 1.95792    | 1.80784    | 1.43506    | 1.72798    | 1.78372    | 1.57751    | 1.79518    | 1.30936    | 1.40032   | 1.63032    | 1.09502    | 0.73512    | 1.25223    |
| SPATA19    | 0.025516   | 0          | 0.0211087  | 0.0788851  | 0.0396352  | 0.0217266  | 0.0291334  | 0          | 0.0310757  | 0.0320253  | 0.0864133 | 0.0912871  | 0          | 0.0266716  | 0          |
| SPATA2     | 1.52172    | 1.64773    | 2.01065    | 1.75104    | 1.69556    | 2.38999    | 2.14879    | 1.55308    | 1.7878     | 1.19454    | 1.54787   | 1.43126    | 2.3834     | 1.51195    | 1.06566    |
| SPATA20    | 5.83997    | 4.08003    | 4.47926    | 2.75981    | 7.19244    | 12.9786    | 5.2105     | 3.94447    | 2.72305    | 3.72772    | 6.27239   | 1.55805    | 2.58372    | 1.89675    | 6.80542    |
| SPATA21    | 0.029733   | 0.0585953  | 0.0863523  | 0.0125326  | 0.047227   | 0.0258881  | 0.121356   | 0.0778207  | 5.38E-35   | 4.21E-36   | 1.21E-38  | 0.0130527  | 2.36E-35   | 0.0885453  | 0.0593921  |
| SPATA22    | 0.0130178  | 0.116128   | 0.0123963  | 4.52E-30   | 2.38E-20   | 0.0484486  | 2.99E-36   | 0.0233817  | 7.58E-34   | 0.121129   | 0.071612  | 0.0153399  | 0.0898692  | 0.0297627  | 1.54E-30   |
| SPATA24    | 0.23894    | 0.328928   | 0.33886    | 0.633175   | 0.212089   | 0.668493   | 0.389734   | 0.21235    | 0.24943    | 0.514105   | 0.655067  | 0.439632   | 0.726768   | 0.356801   | 0.294127   |
| SPATA25    | 0.611569   | 0.542801   | 0.479305   | 0.132682   | 1.19997    | 0.274075   | 0.477763   | 0.4863     | 0.117603   | 0.121197   | 0.254352  | 0.161219   | 0          | 0.285987   | 0.87829    |
| SPATA2L    | 0.890498   | 1.43018    | 1.6207     | 1.32554    | 3.33517    | 2.59489    | 1.31047    | 0.756227   | 2.60286    | 1.35362    | 2.02169   | 0.906205   | 2.22796    | 1.93405    | 1.19361    |
| SPATA3     | 0          | 0          | 0          | 0          | 0          | 0          | 0          | 0          | 0          | 0          | 0         | 0          | 0          | 0          | 0          |
| SPATA3-AS1 | 0.00659534 | 0.00635547 | 0.0218245  | 0          | 0.0204897  | 0          | 0.00753035 | 0.0117228  | 0          | 0          | 0         | 0.0141574  | 0          | 0.010341   | 0          |
| SPATA31A1  | 0          | 2.16E-20   | 2.42E-18   | 0          | 0          | 0          | 0          | 1.14E-38   | 0          | 0.00610083 | 0         | 0.0155397  | 1.09E-12   | 0          | 0.0039019  |
| SPATA31A3  | 0.00397268 | 2.49E-10   | 2.24E-09   | 0.00564755 | 0          | 0          | 1.25E-18   | 5.01E-08   | 0          | 0.0247304  | 0         | 2.56E-05   | 0.00132467 | 0          | 0          |
| SPATA31A5  | 0.0038341  | 0.00162018 | 0.00296774 | 0          | 0          | 0          | 1.21E-18   | 0.0039852  | 0.00109226 | 9.56E-27   | 0         | 6.49E-09   | 0.00127846 | 0          | 0          |
| SPATA31A6  | 3.12E-14   | 0.00330917 | 0          | 0          | 0          | 0          | 0.012541   | 0          | 0          | 0.0249214  | 0         | 3.90E-08   | 0.00147379 | 0          | 0          |
| SPATA31A7  | 0.00397268 | 0.00167874 | 0.00307501 | 0          | 0          | 0          | 1.25E-18   | 0.00412925 | 0.00113174 | 9.90E-27   | 0         | 6.72E-09   | 0.00132467 | 0          | 0          |
| SPATA31C1  | 0          | 0          | 0          | 0          | 0.0285386  | 0          | 0.00699232 | 0          | 0          | 0          | 0         | 0          | 0          | 0.00093255 | 0.00256248 |
|            |            |            |            |            |            |            |            |            |            |            |           |            |            | 2          |            |
| SPATA31C2  | 0          | 0.0116029  | 0          | 0          | 3.42E-11   | 0          | 0          | 0.0103225  | 0          | 0          | 0         | 0          | 0          | 0.00215093 | 0.00591035 |
| SPATA31D1  | 0          | 0          | 0          | 0          | 0          | 0          | 0          | 0          | 0          | 0          | 0         | 0          | 0          | 0          | 0          |
| SPATA31D3  | 0          | 0          | 0          | 0          | 0          | 0          | 0.00273675 | 0          | 0          | 0          | 0         | 0          | 0          | 0          | 0          |
| SPATA31D4  | 0          | 0          | 0          | 0          | 0          | 0          | 0.00285018 | 0          | 0          | 0          | 0         | 0          | 0          | 0          | 0          |
| SPATA31D5P | 0          | 0          | 0          | 0          | 0          | 0          | 0.00520817 | 0          | 0          | 0          | 0         | 0          | 0          | 0          | 0          |
| SPATA31E1  | 0.00520419 | 0          | 0.00861055 | 0          | 0.00808391 | 0.00886261 | 0          | 0.00462505 | 0          | 0.0065318  | 0         | 0.00372374 | 0          | 0.0108798  | 0.0149478  |
| SPATA32    | 0.0720967  | 0.0607903  | 0.134198   | 0.0185744  | 0.0839933  | 0.153474   | 0.0617383  | 0.112129   | 0          | 0          | 0         | 0.0515871  | 0          | 0.0188405  | 0.025885   |
| SPATA33    | 0.492405   | 0.593121   | 0.651764   | 1.16711    | 1.38952    | 1.34169    | 0.515361   | 0.437609   | 0.469761   | 0.731323   | 0.917176  | 0.869078   | 0.70423    | 1.13664    | 0.636441   |

|            |           |           |           |           |           |           |           |           |           |           |           |           |           |            |           |
|------------|-----------|-----------|-----------|-----------|-----------|-----------|-----------|-----------|-----------|-----------|-----------|-----------|-----------|------------|-----------|
| SPATA4     | 0.0375394 | 0         | 0.0310553 | 0         | 0         | 0         | 0         | 0         | 0         | 0         | 0         | 0         | 0         | 0          | 0         |
| SPATA41    | 0.190659  | 0.229656  | 0.163793  | 0.226707  | 0.353113  | 0.218539  | 0.117217  | 0.13034   | 0.0625157 | 0.128852  | 0.132449  | 0.125928  | 0.118281  | 0.103479   | 0.157967  |
| SPATA42    | 0.0761285 | 0.0916996 | 0.0944682 | 0.235358  | 0         | 0         | 0         | 0.0338283 | 0         | 0.191098  | 0.214849  | 0.108944  | 0         | 0.0397881  | 0.054665  |
| SPATA45    | 0.0459188 | 0.0221244 | 0.0759745 | 0.0473206 | 0.0713277 | 0.0781984 | 0         | 0         | 0         | 0         | 0.0518366 | 0         | 0         | 0          | 0         |
| SPATA46    | 0.0789192 | 0.17111   | 0.244828  | 0.121993  | 0.0919416 | 0.117598  | 0.202742  | 0.105205  | 0.0240287 | 0.148578  | 0         | 0.0282344 | 0.0254591 | 0.030935   | 0.0283345 |
| SPATA48    | 0         | 0         | 0         | 0         | 0         | 0         | 0         | 0         | 0         | 0         | 0         | 0         | 0.0106352 | 0          | 0         |
| SPATA5     | 1.58682   | 1.38285   | 1.3564    | 2.17051   | 1.04696   | 1.88222   | 1.43962   | 1.41296   | 0.75908   | 0.898795  | 1.20785   | 0.929145  | 1.36254   | 1.37095    | 1.23227   |
| SPATA5L1   | 1.87883   | 1.99462   | 2.25242   | 5.02916   | 3.85832   | 2.75898   | 1.5089    | 1.35844   | 1.74524   | 2.18826   | 2.59728   | 1.81146   | 4.01674   | 1.97224    | 1.08616   |
| SPATA6     | 2.05644   | 1.50294   | 1.64007   | 0.685771  | 0.545554  | 1.4205    | 1.30854   | 1.70438   | 0.320803  | 0.527809  | 0.751217  | 0.261222  | 0.250453  | 0.429915   | 1.06186   |
| SPATA6L    | 0.496198  | 0.568676  | 0.322812  | 0.466665  | 0.269394  | 0.631708  | 0.291522  | 0.419573  | 0.739257  | 0.102789  | 0.32086   | 0.406748  | 0.0404066 | 0.292066   | 0.145288  |
| SPATA7     | 1.96595   | 1.51224   | 1.48371   | 1.51652   | 0.428604  | 1.06704   | 1.03701   | 1.47131   | 0.322042  | 1.37082   | 1.95975   | 0.551159  | 0.793691  | 0.823196   | 1.519     |
| SPATA8     | 0         | 0.0193756 | 0.0166339 | 0.0414415 | 0.031233  | 0         | 0.0459148 | 0         | 0         | 0.0757087 | 0.136189  | 0         | 0         | 0          | 0         |
| SPATA8-AS1 | 0         | 0         | 0         | 0         | 0         | 0         | 0         | 0         | 0         | 0         | 0         | 0         | 0         | 0          | 0         |
| SPATA9     | 0.127608  | 0.107725  | 0.151654  | 0.0404802 | 0.040678  | 0.0278727 | 0.0600359 | 0.187189  | 0.0079733 | 0.0410847 | 0.0938146 | 0.0253152 | 0.0380158 | 0.0489042  | 0.0658145 |
| SPATC1     | 0.0682015 | 0.0711978 | 0.0940352 | 0.0819976 | 0.229538  | 0.0967878 | 0.0648919 | 0.0606118 | 0         | 0.0855999 | 0.0384955 | 0.0162667 | 0.058671  | 0.0475268  | 0.0163243 |
| SPATC1L    | 0.939313  | 1.1844    | 1.24      | 1.3696    | 1.28833   | 1.58261   | 1.66576   | 0.976873  | 0.657178  | 0.539299  | 1.56799   | 0.893754  | 1.038     | 0.595378   | 0.660135  |
| SPATS1     | 0         | 0.0201276 | 0         | 0.0430498 | 0         | 0.0177852 | 0         | 0.0371257 | 0         | 0         | 0         | 0         | 0         | 0          | 0         |
| SPATS2     | 2.28129   | 3.44518   | 3.30145   | 3.09813   | 1.52917   | 3.53365   | 2.09992   | 2.1322    | 2.5917    | 2.6487    | 3.51101   | 2.17222   | 2.66992   | 2.91453    | 3.01378   |
| SPATS2L    | 3.48402   | 2.78947   | 2.85357   | 4.53209   | 2.32565   | 7.56726   | 3.28202   | 2.39367   | 3.42137   | 6.70068   | 9.76975   | 2.76565   | 8.88872   | 4.95832    | 9.00583   |
| SPC24      | 0.305548  | 0.248167  | 0.14444   | 1.44843   | 0.379697  | 1.59819   | 0.52828   | 0.139652  | 0.287066  | 1.13952   | 1.99071   | 0.593417  | 1.46445   | 1.25929    | 0.890147  |
| SPC25      | 13.5859   | 12.6948   | 12.8834   | 9.06319   | 2.62278   | 3.49301   | 9.45097   | 11.2544   | 2.07361   | 4.90066   | 2.93528   | 6.14974   | 2.62998   | 10.3097    | 7.57376   |
| SPCS1      | 12.124    | 9.30937   | 11.0185   | 19.2471   | 3.81379   | 20.7576   | 10.1121   | 11.685    | 10.8411   | 13.5723   | 26.6735   | 9.45372   | 15.6867   | 10.3913    | 7.78785   |
| SPCS2      | 8.39235   | 5.64534   | 6.11555   | 10.5157   | 2.07093   | 9.54737   | 5.357     | 6.37232   | 6.26579   | 7.93749   | 10.1685   | 4.24994   | 9.85343   | 6.28005    | 6.49262   |
| SPCS3      | 8.08698   | 5.51711   | 6.15274   | 10.4303   | 2.37002   | 10.0331   | 6.03106   | 9.42459   | 9.56693   | 11.5151   | 17.5137   | 6.41698   | 15.9422   | 7.90844    | 8.77191   |
| SPDEF      | 2.20064   | 0.774838  | 1.29037   | 0.0249212 | 1.14572   | 1.62672   | 1.11826   | 1.53666   | 0         | 0.015176  | 0.0409492 | 0         | 0.0468081 | 0.00631952 | 0         |
| SPDL1      | 0.523082  | 0.542179  | 0.545458  | 0.797251  | 0.163871  | 1.12285   | 0.220827  | 0.402367  | 0.262316  | 0.739276  | 1.03212   | 0.289358  | 0.890519  | 0.831642   | 0.511329  |

|                 |           |           |           |            |            |           |           |                 |                 |           |            |           |                 |           |           |
|-----------------|-----------|-----------|-----------|------------|------------|-----------|-----------|-----------------|-----------------|-----------|------------|-----------|-----------------|-----------|-----------|
| SPDYA           | 0.141932  | 0.125484  | 0.223432  | 0.0442478  | 0.0168608  | 0.0822607 | 0         | 0.0975648       | 0.162303        | 0.0558688 | 0.0741798  | 0.12827   | 0.0138689       | 0.155976  | 0.0821495 |
| SPDYC           | 0         | 0.0337558 | 0.0386389 | 0          | 0.0362756  | 0         | 0         | 0               | 0               | 0         | 0          | 0         | 0               | 0         | 0         |
| SPDYE1          | 1.75453   | 2.92607   | 2.80095   | 1.04754    | 2.22372    | 0.890564  | 3.56436   | 3.67202         | 0.274023        | 0.856472  | 0.218482   | 1.55049   | 0.338582        | 2.06587   | 2.48941   |
| SPDYE10P        | 0.0541854 | 0.0465245 | 0.0407306 | 0.0114576  | 0.0419361  | 0.0208523 | 0.0409653 | 0.062882        | 0               | 0.0300846 | 0          | 0.0195397 | 0.00722601      | 0.0170163 | 0.0539378 |
| SPDYE11         | 2.92E-09  | 1.58E-10  | 1.71E-10  | 5.68E-07   | 1.20E-09   | 4.97E-07  | 3.73E-07  | 4.30E-12        | 0.00038104<br>6 | 1.43E-13  | 0.00426106 | 9.66E-10  | 0.0074416       | 1.67E-08  | 2.63E-07  |
| SPDYE13P        | 1.76E-06  | 6.05E-07  | 5.27E-06  | 0.00202517 | 0.0103746  | 2.48E-05  | 8.03E-07  | 0.00026126<br>7 | 0.00015734<br>9 | 7.88E-07  | 1.48E-12   | 3.67E-05  | 0.00030776<br>3 | 1.90E-08  | 0.0194053 |
| SPDYE14P        | 1.76E-06  | 6.05E-07  | 5.27E-06  | 0.00202517 | 0.0103746  | 2.48E-05  | 8.03E-07  | 0.00026126<br>7 | 0.00015734<br>9 | 7.88E-07  | 1.48E-12   | 3.67E-05  | 0.00030776<br>3 | 1.90E-08  | 0.0194053 |
| SPDYE15P        | 1.76E-06  | 6.05E-07  | 5.27E-06  | 0.00202517 | 0.0103746  | 2.48E-05  | 8.03E-07  | 0.00026126<br>7 | 0.00015734<br>9 | 7.88E-07  | 1.48E-12   | 3.67E-05  | 0.00030776<br>3 | 1.90E-08  | 0.0194053 |
| SPDYE16         | 2.24E-44  | 0.0276312 | 0         | 0          | 0.147089   | 0         | 9.51E-42  | 0.0226854       | 3.99E-26        | 0         | 0          | 0.0212104 | 0               | 3.36E-36  | 0         |
| SPDYE17         | 0.210535  | 0.402027  | 0.298287  | 0.131276   | 0.562358   | 0.166861  | 0.455819  | 0.197091        | 0.0279409       | 0.0554437 | 0.0119955  | 0.127154  | 0.0159328       | 0.109705  | 0.168939  |
| SPDYE18         | 0.35477   | 1.15599   | 1.14203   | 0.194523   | 1.42513    | 0.190396  | 0.915663  | 0.613022        | 0.090775        | 0.0701616 | 0.0210351  | 0.397284  | 0.0480895       | 0.447984  | 0.134252  |
| SPDYE2          | 0.811696  | 1.27106   | 1.27506   | 0.47851    | 1.0759     | 0.398798  | 1.6146    | 0.979842        | 0.0770141       | 0.197419  | 0.161003   | 0.938134  | 0.0925699       | 0.980091  | 1.46071   |
| SPDYE2B         | 0.811696  | 1.27106   | 1.27506   | 0.47851    | 1.0759     | 0.398798  | 1.6146    | 0.979842        | 0.0770141       | 0.197419  | 0.161003   | 0.938134  | 0.0925699       | 0.980091  | 1.46071   |
| SPDYE3          | 0.296265  | 0.703282  | 0.55923   | 0.107266   | 0.442947   | 0.373766  | 0.812174  | 0.800033        | 0.0625549       | 0.102056  | 0.0448681  | 0.252571  | 0.0306647       | 0.165736  | 0.537046  |
| SPDYE4          | 0         | 0.0439003 | 0.0452257 | 0          | 0.0283064  | 0         | 0.0416126 | 0.03239         | 0               | 0         | 0          | 0         | 0               | 0.0190481 | 0         |
| SPDYE5          | 1.84991   | 2.7958    | 2.74124   | 0.851491   | 2.53908    | 1.01426   | 2.7114    | 3.40803         | 0.202873        | 0.676224  | 0.370557   | 1.23502   | 0.132425        | 1.61581   | 1.62026   |
| SPDYE6          | 2.50061   | 3.0425    | 2.75288   | 1.6319     | 2.88942    | 1.15726   | 3.59734   | 5.92152         | 0.598516        | 1.14218   | 0.1996     | 2.22195   | 0.572343        | 2.70054   | 3.94165   |
| SPDYE7P         | 2.00096   | 2.58688   | 3.27624   | 0.851871   | 2.87427    | 0.954292  | 3.7908    | 3.01709         | 0.305727        | 0.53846   | 0.234713   | 1.40039   | 0.182539        | 1.96264   | 3.14958   |
| SPDYE8P         | 0.389348  | 0.50787   | 0.610888  | 0.191349   | 0.00554655 | 0.133677  | 0.447811  | 1.18542         | 0.026748        | 0.0869887 | 0.0651588  | 0.156859  | 0.0252929       | 0.236234  | 0.20254   |
| SPECC1          | 2.26913   | 1.05106   | 1.20217   | 2.28976    | 2.41442    | 4.3753    | 1.21264   | 1.14165         | 1.65073         | 3.01301   | 4.61691    | 1.94207   | 4.37469         | 2.98867   | 4.04801   |
| SPECC1L         | 4.17408   | 3.3406    | 3.17363   | 4.6419     | 3.75073    | 6.30162   | 3.0356    | 2.57009         | 2.75328         | 3.77247   | 3.60231    | 2.59038   | 5.70012         | 4.28769   | 4.57747   |
| SPECC1L-ADORA2A | 0.639816  | 0.408955  | 0.520779  | 0.649428   | 0.165733   | 0.632596  | 0.466234  | 0.46219         | 0.119726        | 1.17088   | 0.49518    | 0.172714  | 0.375569        | 0.450457  | 1.00496   |

|        |           |            |           |           |           |           |           |           |            |           |           |           |            |            |           |
|--------|-----------|------------|-----------|-----------|-----------|-----------|-----------|-----------|------------|-----------|-----------|-----------|------------|------------|-----------|
| SPEF1  | 0.0729145 | 0.0632363  | 0.048256  | 0.0150281 | 0.0453045 | 0.0372514 | 0.0499508 | 0.0518402 | 0          | 0.146424  | 0.0164623 | 0.0208689 | 0          | 0.0304866  | 0         |
| SPEF2  | 0.371084  | 0.244245   | 0.23024   | 0.208278  | 0.0823459 | 0.225695  | 0.117272  | 0.256175  | 0.0322813  | 0.0914863 | 0.194493  | 0.0260779 | 0.00855077 | 0.0519495  | 0.171297  |
| SPEG   | 1.06163   | 0.387941   | 0.473664  | 0.321655  | 1.78186   | 3.71911   | 1.32563   | 0.291526  | 0.0750584  | 0.279465  | 0.424168  | 0.186349  | 0.191121   | 0.770975   | 2.04711   |
| SPEM1  | 0.0235673 | 0          | 0         | 0         | 0         | 0.0200672 | 0         | 0         | 0          | 0         | 0         | 0         | 0          | 0          | 0         |
| SPEM2  | 0.070173  | 0.0202862  | 0.0116104 | 0.0289261 | 0         | 0.0119503 | 0.0160242 | 0.0124728 | 0          | 0         | 0         | 0.0301264 | 0          | 0          | 0         |
| SPEM3  | 0.0125301 | 0.0362231  | 0.0207315 | 0.0193689 | 0.0681224 | 0.0053346 | 0         | 0.0278392 | 0.00763011 | 0         | 0         | 0.0044828 | 0          | 0.0163719  | 0         |
| SPEN   | 9.26138   | 9.67784    | 10.1263   | 8.47912   | 8.41763   | 11.227    | 8.89516   | 8.33504   | 5.77913    | 5.78705   | 3.80335   | 6.85159   | 9.3777     | 7.2522     | 7.55952   |
| SPERT  | 0.0529286 | 0.00637546 | 0.0109466 | 0.0136361 | 0.0205541 | 0.011267  | 0         | 0.0352789 | 0          | 0         | 0         | 0         | 0.025612   | 0.00691571 | 0         |
| SPESP1 | 0.24259   | 0.435683   | 0.615441  | 0.133331  | 0.179444  | 0.170206  | 0.0553962 | 0.15289   | 0.0984823  | 1.01421   | 1.49137   | 0.231439  | 1.6172     | 0.446841   | 0.464519  |
| SPG11  | 6.0937    | 7.11767    | 7.30503   | 7.48739   | 4.60215   | 5.57801   | 5.66271   | 6.46151   | 5.47148    | 4.51851   | 4.58434   | 4.51414   | 4.10292    | 4.32359    | 5.08902   |
| SPG21  | 11.5536   | 9.12022    | 9.17163   | 17.6558   | 8.3689    | 20.6031   | 13.3009   | 10.5658   | 14.2458    | 13.7947   | 25.3962   | 9.24349   | 17.1179    | 12.1455    | 13.1707   |
| SPG7   | 6.5168    | 7.34564    | 7.96312   | 5.60675   | 9.8442    | 7.24285   | 6.94416   | 4.97526   | 3.49507    | 3.32218   | 2.72423   | 5.12573   | 3.49627    | 5.69835    | 5.34684   |
| SPHAR  | 3.83E-29  | 3.31E-26   | 8.60E-26  | 2.34E-28  | 0         | 2.14E-43  | 6.93E-25  | 2.36E-20  | 5.60E-38   | 1.89E-29  | 1.28E-28  | 1.69E-41  | 8.91E-39   | 6.44E-29   | 1.87E-20  |
| SPHK1  | 1.95284   | 1.18443    | 1.65354   | 6.43985   | 5.3769    | 7.13379   | 1.98486   | 1.19104   | 6.72466    | 15.2637   | 12.9677   | 4.85495   | 33.8765    | 11.3792    | 9.63439   |
| SPHK2  | 1.01586   | 1.40978    | 1.30794   | 1.45236   | 3.356     | 2.88738   | 1.82967   | 0.858308  | 0.540189   | 1.20318   | 1.61519   | 0.926512  | 1.54626    | 1.3722     | 1.40754   |
| SPHKAP | 0.117172  | 0.025808   | 0.044312  | 0.0137998 | 0.0988043 | 0.0513103 | 0.137605  | 0.252893  | 0.00815438 | 0         | 0         | 0         | 0          | 0          | 0         |
| SPI1   | 3.99415   | 2.89854    | 4.8       | 16.3458   | 6.56175   | 17.4665   | 4.673     | 4.51377   | 1.02093    | 9.01528   | 23.6949   | 0.799747  | 9.57628    | 3.3761     | 9.01721   |
| SPIB   | 0.0458927 | 0.0252707  | 0.0596604 | 0.0608063 | 0.0203678 | 0.0390771 | 0.0299422 | 0.0407856 | 0.0159692  | 0.0822859 | 0.0666092 | 0         | 0.0845993  | 0.0308386  | 0.0094154 |
| SPIC   | 0         | 0          | 0         | 0.126411  | 0         | 0.0870407 | 0         | 0.0363385 | 0.024899   | 0         | 0.0230792 | 0         | 0          | 0.0213703  | 0.381689  |
| SPICE1 | 2.57706   | 2.60707    | 2.4315    | 2.20009   | 1.25586   | 1.57046   | 1.88949   | 2.1331    | 0.89234    | 1.17858   | 1.55917   | 1.17507   | 1.02697    | 1.66161    | 2.33429   |
| SPIDR  | 5.44576   | 4.60096    | 4.93372   | 5.5028    | 6.04487   | 6.82267   | 4.15417   | 4.63046   | 3.55636    | 3.2143    | 3.90123   | 2.9572    | 3.67692    | 3.91083    | 5.67326   |
| SPIN1  | 8.91727   | 7.55265    | 8.51289   | 8.37418   | 3.63139   | 10.1746   | 7.16257   | 8.19711   | 8.67202    | 8.97546   | 11.4321   | 5.61357   | 11.319     | 7.22426    | 8.25411   |
| SPIN2A | 0.710714  | 0.72875    | 0.689756  | 0.557189  | 1.12441   | 0.415676  | 0.367613  | 0.93196   | 0.0299672  | 0.17067   | 0.127708  | 0.182178  | 0.0387993  | 0.373244   | 0.398277  |
| SPIN2B | 1.31897   | 1.19043    | 1.31672   | 1.18469   | 1.6885    | 1.56745   | 1.09373   | 0.925437  | 0.633681   | 0.622271  | 1.85986   | 0.969732  | 0.699313   | 1.29607    | 1.70347   |
| SPIN3  | 0.854385  | 0.737384   | 0.569563  | 0.619747  | 0.431648  | 1.04534   | 0.539845  | 0.61924   | 0.166689   | 0.515348  | 0.618025  | 0.537144  | 0.280974   | 0.544084   | 0.744542  |
| SPIN4  | 0.872367  | 0.691494   | 0.824116  | 1.2702    | 0.778082  | 1.44249   | 1.0603    | 0.735272  | 1.72733    | 2.30284   | 2.11572   | 1.42962   | 3.36256    | 1.78845    | 1.55189   |

|            |           |            |           |           |           |           |           |           |           |           |          |            |           |           |          |
|------------|-----------|------------|-----------|-----------|-----------|-----------|-----------|-----------|-----------|-----------|----------|------------|-----------|-----------|----------|
| SPINDOC    | 0.976596  | 0.995791   | 0.779726  | 3.67457   | 2.92814   | 3.84838   | 0.518626  | 0.857825  | 0.719162  | 2.85053   | 3.97397  | 1.13755    | 2.09543   | 2.5758    | 2.39732  |
| SPINK1     | 0.287938  | 0.260125   | 0.327529  | 0.296729  | 0         | 0.0612939 | 0.328759  | 0.159935  | 0.0876692 | 0.45174   | 0.162523 | 0.206028   | 0.0696662 | 0.526712  | 0        |
| SPINK13    | 0.0350122 | 0.101216   | 0.0868936 | 0         | 0.054386  | 0.208687  | 0.119927  | 0.0311159 | 1.44979   | 1.4062    | 1.4624   | 0.0501043  | 0.474383  | 0.182989  | 0.100564 |
| SPINK14    | 0         | 0.0549294  | 0         | 0         | 0         | 0         | 0         | 0         | 0         | 0         | 0        | 0.0271913  | 0         | 0         | 0        |
| SPINK2     | 0.0448075 | 0.0323834  | 0.0556018 | 0.0230877 | 0         | 0         | 0         | 0         | 0.0272852 | 0.028119  | 0.101164 | 0.0160305  | 0         | 0.0117092 | 0.128698 |
| SPINK4     | 0         | 0.027738   | 0.0476258 | 0.0593273 | 0.0894258 | 0         | 0.0657313 | 0.0511632 | 0.0701135 | 0.144512  | 0.129978 | 0.123578   | 0.0371437 | 0.0300885 | 0        |
| SPINK5     | 32.565    | 49.4858    | 56.3473   | 30.3786   | 54.1294   | 30.4737   | 24.0175   | 38.0867   | 219.355   | 265.86    | 135.348  | 143.533    | 316.363   | 67.7081   | 22.2818  |
| SPINK6     | 1.10506   | 0.0456371  | 0         | 43.0459   | 1.2261    | 1.3442    | 0.180245  | 0.505071  | 44.2972   | 218.504   | 80.4793  | 53.1575    | 148.89    | 59.8176   | 22.082   |
| SPINK7     | 2.5293    | 5.70736    | 1.15083   | 17.9849   | 7.33389   | 4.05606   | 3.12852   | 6.06913   | 204.846   | 140.737   | 156.421  | 84.396     | 88.8019   | 15.4004   | 6.90154  |
| SPINK8     | 0         | 0          | 0         | 0         | 0         | 0         | 0         | 0         | 0.0640583 | 0         | 0        | 0.112905   | 0         | 0.0274899 | 0        |
| SPINK9     | 1.48156   | 4.28304    | 0.0422639 | 0.26324   | 2.22202   | 0         | 0.758304  | 3.81386   | 112.058   | 10.1953   | 28.7209  | 13.1233    | 3.39508   | 0.453918  | 0.953802 |
| SPINT1     | 21.7921   | 21.5578    | 23.7668   | 27.7218   | 36.7053   | 24.4382   | 27.9661   | 16.5665   | 54.5256   | 21.8169   | 25.1504  | 23.3892    | 44.4638   | 15.3894   | 5.62076  |
| SPINT1-AS1 | 2.90883   | 3.12268    | 2.89189   | 2.70839   | 5.98492   | 2.32474   | 3.72907   | 2.53977   | 6.92987   | 1.21696   | 3.51414  | 2.13612    | 1.48165   | 1.12021   | 0.183221 |
| SPINT2     | 34.1493   | 41.6161    | 43.1578   | 83.8813   | 88.0977   | 75.9      | 35.105    | 24.3683   | 86.9488   | 70.1185   | 86.3798  | 54.6214    | 105.993   | 50.7419   | 14.866   |
| SPINT3     | 0         | 0          | 0         | 0         | 0         | 0         | 0.0555126 | 0         | 0         | 0         | 0        | 0          | 0         | 0         | 0        |
| SPINT4     | 0.219158  | 0.0211187  | 0.108782  | 0         | 0         | 0         | 0         | 0         | 0         | 0         | 0        | 0          | 0         | 0         | 0        |
| SPIRE1     | 5.30559   | 3.14849    | 3.52952   | 4.2466    | 2.7382    | 5.41256   | 3.86311   | 3.42182   | 15.4393   | 5.73398   | 6.33993  | 4.10086    | 6.63896   | 3.85955   | 3.51035  |
| SPIRE2     | 0.36384   | 0.642779   | 0.542969  | 0.580801  | 1.38522   | 0.820071  | 0.464293  | 0.228247  | 0.269345  | 0.259667  | 0.249659 | 0.439      | 0.409657  | 0.47726   | 0.307364 |
| SPN        | 0.484295  | 0.784554   | 1.14765   | 0.608557  | 0.990094  | 0.438975  | 0.51371   | 0.860803  | 0.186458  | 0.15294   | 0.310389 | 0.123142   | 0.52615   | 0.246582  | 0.897431 |
| SPNS1      | 6.18055   | 5.82981    | 6.03001   | 8.54622   | 17.0081   | 16.0907   | 9.33733   | 5.17676   | 10.0872   | 7.21906   | 14.7687  | 7.19098    | 11.9765   | 6.95232   | 7.4793   |
| SPNS2      | 7.18983   | 6.20135    | 7.51217   | 31.0943   | 16.2975   | 17.756    | 7.30483   | 5.51515   | 54.1161   | 15.1391   | 29.751   | 12.2345    | 14.873    | 11.9886   | 7.55078  |
| SPNS3      | 0.244512  | 0.0765762  | 0.192164  | 0.125988  | 0.132934  | 0.374758  | 0.0977115 | 0.152111  | 0.208452  | 0.0460331 | 0.317427 | 0.00874774 | 0.0946547 | 0.0127793 | 0.175575 |
| SPO11      | 0         | 0          | 0         | 0         | 0         | 0         | 0         | 0         | 0         | 0         | 0        | 0          | 0         | 0         | 0        |
| SPOCD1     | 0.0350475 | 0.00562881 | 0.0193292 | 0.108352  | 0.0453674 | 0.581928  | 0.0333468 | 0.0103824 | 0.014228  | 0.557185  | 1.08142  | 0.0961302  | 0.342956  | 0.656372  | 0.385884 |
| SPOCK1     | 4.85683   | 0.988707   | 1.39219   | 1.54155   | 0.945834  | 18.4649   | 2.759     | 2.97414   | 0.134301  | 1.46829   | 3.02553  | 0.325906   | 1.7787    | 1.45087   | 7.64291  |
| SPOCK2     | 1.02858   | 0.410017   | 0.547891  | 0.915091  | 1.2529    | 1.87767   | 0.46469   | 0.644485  | 0.112652  | 0.273984  | 0.304904 | 0.280624   | 1.36547   | 0.845046  | 1.65783  |

|        |          |           |           |          |          |          |           |           |           |           |           |            |           |          |            |
|--------|----------|-----------|-----------|----------|----------|----------|-----------|-----------|-----------|-----------|-----------|------------|-----------|----------|------------|
| SPOCK3 | 0        | 0.0031287 | 0         | 0        | 0        | 0        | 0         | 0         | 0         | 0.0652007 | 0.0219913 | 0.00929263 | 0         | 0        | 0.00932557 |
| SPON1  | 4.67186  | 2.54184   | 2.57908   | 8.64936  | 9.1115   | 25.0842  | 2.12441   | 4.36016   | 0.795584  | 5.50743   | 10.3699   | 2.44669    | 9.42647   | 11.189   | 28.0345    |
| SPON2  | 6.60561  | 4.97623   | 5.46596   | 4.70829  | 24.0207  | 11.8911  | 13.4885   | 4.39937   | 6.14459   | 18.925    | 39.2883   | 10.0749    | 13.6177   | 16.8734  | 35.0747    |
| SPOP   | 5.01027  | 4.6044    | 4.96775   | 5.94531  | 5.05874  | 9.58637  | 4.43345   | 4.1908    | 4.75595   | 4.59609   | 7.03671   | 3.20014    | 4.57322   | 4.02414  | 5.57642    |
| SPOPL  | 2.26022  | 2.74197   | 2.96499   | 2.43321  | 0.733528 | 2.74936  | 1.69125   | 3.55468   | 4.98926   | 3.9614    | 3.91839   | 3.03523    | 6.09875   | 3.9531   | 2.83442    |
| SPOUT1 | 2.57017  | 2.70392   | 2.59269   | 3.1552   | 5.34898  | 4.84806  | 2.24454   | 1.80188   | 2.00185   | 1.60052   | 1.79598   | 1.99212    | 2.46889   | 2.6554   | 1.85009    |
| SPP1   | 1.04616  | 0.153675  | 0.0527717 | 2.22193  | 0.753069 | 2.75927  | 0.0437001 | 0.85037   | 0.0621513 | 31.5287   | 71.1062   | 0.191703   | 2.16487   | 0.453417 | 0.659597   |
| SPP2   | 0        | 0         | 0         | 0        | 0        | 0        | 0         | 0         | 0         | 0         | 0         | 0          | 0         | 0        | 0          |
| SPPL2A | 8.71186  | 9.65872   | 10.2849   | 12.9905  | 4.82792  | 12.8094  | 7.50636   | 9.32371   | 8.58374   | 11.7464   | 17.1649   | 5.8202     | 17.3546   | 9.80085  | 8.894      |
| SPPL2B | 2.82766  | 3.66915   | 3.78996   | 4.27092  | 9.6047   | 6.93379  | 4.49637   | 2.68554   | 2.02487   | 1.84304   | 2.69203   | 3.11739    | 2.81879   | 3.57733  | 4.06958    |
| SPPL2C | 0        | 0         | 0         | 0        | 0        | 0        | 0         | 0         | 0         | 0         | 0         | 0          | 0         | 0        | 0          |
| SPPL3  | 12.4095  | 13.673    | 13.8456   | 12.4302  | 11.4316  | 14.9191  | 14.9815   | 11.0534   | 15.1953   | 12.7823   | 13.4456   | 11.3939    | 16.5085   | 8.79412  | 5.93247    |
| SPR    | 1.28484  | 1.40625   | 1.24663   | 4.29914  | 3.7945   | 4.1465   | 1.8111    | 0.549786  | 1.12047   | 2.76732   | 4.44082   | 1.83868    | 5.26041   | 3.12545  | 1.36681    |
| SPRED1 | 3.24736  | 2.43609   | 2.65478   | 6.12758  | 2.99287  | 5.24769  | 2.56153   | 3.19216   | 1.24708   | 3.44719   | 6.13979   | 1.25765    | 3.38992   | 3.06932  | 4.5491     |
| SPRED2 | 3.38436  | 3.41952   | 3.82914   | 4.05698  | 2.80635  | 6.79335  | 3.53456   | 3.11389   | 2.07907   | 2.76727   | 4.99481   | 1.54199    | 4.69144   | 3.26974  | 4.89612    |
| SPRED3 | 0.169448 | 0.562905  | 0.656631  | 0.629556 | 0.685735 | 1.11629  | 0.483676  | 0.396293  | 0.206369  | 1.15292   | 0.583925  | 0.322256   | 0.995455  | 0.857643 | 1.05024    |
| SPRN   | 0.761722 | 1.05321   | 0.827092  | 0.226858 | 2.33633  | 0.562593 | 0.817377  | 0.506739  | 0.0585543 | 0.180644  | 0.0614456 | 0.482558   | 0.0900453 | 0.465449 | 0.873133   |
| SPRNP1 | 0.221523 | 0.299648  | 0.335655  | 0.127709 | 0.664811 | 0.149488 | 0.224032  | 0.156024  | 0.0628863 | 0.0388847 | 0.011658  | 0.13462    | 0.026652  | 0.185047 | 0.28179    |
| SPRR1A | 30.3759  | 7.79693   | 6.7224    | 202.442  | 35.5149  | 193.934  | 14.3796   | 32.3394   | 321.356   | 1360.56   | 1446.73   | 763.193    | 1883.15   | 608.882  | 200.685    |
| SPRR1B | 154.572  | 102.842   | 48.0036   | 1381.79  | 273.998  | 377.469  | 76.2649   | 147.798   | 1764.28   | 3545.01   | 2698.19   | 2813.72    | 4913.54   | 1501.91  | 541.99     |
| SPRR2A | 87.2104  | 2.18339   | 3.27832   | 1509.97  | 140.422  | 277.797  | 4.08837   | 34.4655   | 477.487   | 574.845   | 747.731   | 535.052    | 1538.88   | 446.599  | 148.331    |
| SPRR2B | 28.6245  | 3.7463    | 4.93872   | 365.15   | 47.5514  | 38.7659  | 2.54214   | 22.5515   | 110.526   | 32.4504   | 69.058    | 71.0842    | 83.8195   | 13.3497  | 7.41751    |
| SPRR2C | 0.102403 | 0         | 0.0282383 | 23.1812  | 1.11347  | 0.174389 | 0         | 0.0606714 | 1.12244   | 2.82757   | 0.693601  | 3.68802    | 12.0908   | 1.49857  | 0          |
| SPRR2D | 37.0252  | 17.8078   | 25.9997   | 710.012  | 70.3915  | 34.3786  | 10.0765   | 58.1152   | 84.2797   | 363.758   | 127.723   | 242.407    | 722.853   | 153.919  | 41.2576    |
| SPRR2E | 261.265  | 140.627   | 177.844   | 1390.8   | 325.193  | 172.708  | 113.815   | 294.362   | 1044.99   | 537.819   | 633.89    | 672.779    | 1127.85   | 183.912  | 66.5194    |
| SPRR2F | 1.82799  | 0.0332427 | 0.17122   | 166.502  | 12.2199  | 1.82286  | 0.27566   | 1.83913   | 4.79226   | 2.38124   | 0.700854  | 9.25505    | 37.3079   | 0.252374 | 1.01083    |

|           |            |           |           |           |            |           |            |            |            |            |           |            |            |            |           |
|-----------|------------|-----------|-----------|-----------|------------|-----------|------------|------------|------------|------------|-----------|------------|------------|------------|-----------|
| SPRR2G    | 306.094    | 212.755   | 233.664   | 900.157   | 574.08     | 136.972   | 149.031    | 422.396    | 746.442    | 307.182    | 561.821   | 443.081    | 271.598    | 136.345    | 35.3328   |
| SPRR3     | 0.0234717  | 0.011309  | 0         | 4.47483   | 0.729192   | 0.119915  | 0.0803975  | 0.166877   | 7.40373    | 7.51215    | 10.9166   | 1.76343    | 4.2554     | 1.45981    | 1.44945   |
| SPRR4     | 0          | 0.28438   | 0.179891  | 1.63266   | 0.0482539  | 1.03159   | 0.390153   | 2.31903    | 0.49183    | 1.71552    | 2.06901   | 2.86734    | 1.56333    | 2.93866    | 0.490738  |
| SPRTN     | 1.77754    | 1.58503   | 1.77289   | 2.21365   | 1.34557    | 1.86316   | 1.24631    | 1.74438    | 2.21973    | 2.07388    | 2.63969   | 1.59791    | 2.39388    | 1.55186    | 1.58919   |
| SPRY1     | 10.9131    | 7.83215   | 10.5265   | 8.99556   | 5.95802    | 11.9298   | 10.2446    | 7.5277     | 4.07817    | 4.62306    | 7.08767   | 3.08211    | 5.31766    | 5.17072    | 6.36091   |
| SPRY2     | 3.67287    | 2.61892   | 2.59487   | 4.84866   | 2.44658    | 5.84963   | 3.19872    | 2.04306    | 0.808103   | 1.84224    | 4.7288    | 0.858425   | 1.84215    | 2.13327    | 1.62669   |
| SPRY3     | 0.189998   | 0.10375   | 0.119457  | 0.121395  | 0.106248   | 0.169331  | 0.127268   | 0.159849   | 0.043194   | 0.0985665  | 0.13155   | 0.0797566  | 0.058024   | 0.156896   | 0.272861  |
| SPRY4     | 1.10046    | 0.667305  | 0.688838  | 2.67342   | 1.83288    | 4.77413   | 1.2278     | 1.03377    | 2.42058    | 4.38513    | 6.88219   | 2.93406    | 7.46447    | 6.07742    | 3.76771   |
| SPRY4-AS1 | 0          | 0.0943374 | 0         | 0.0807093 | 0.121655   | 0.10003   | 0          | 0.0348014  | 0          | 0.147446   | 0.353646  | 0.0560388  | 0.0252653  | 0.0818651  | 0         |
| SPRY4-IT1 | 0.167947   | 0.129471  | 0.2223    | 0.242303  | 0.521758   | 0.31461   | 0.345161   | 0.388068   | 0.122724   | 0.463739   | 0.341264  | 0.528749   | 0          | 1.77308    | 1.44716   |
| SPRYD3    | 5.9752     | 6.35878   | 7.31345   | 9.80989   | 15.9638    | 16.6345   | 8.55265    | 4.99459    | 7.29635    | 8.03446    | 6.36211   | 6.36512    | 14.7841    | 8.91079    | 7.36822   |
| SPRYD4    | 1.95699    | 2.51089   | 2.38296   | 3.72756   | 2.57878    | 3.18292   | 2.44783    | 1.96394    | 2.67797    | 1.97326    | 2.97869   | 2.21842    | 2.97217    | 2.39038    | 1.19998   |
| SPRYD7    | 1.44554    | 1.42415   | 1.8503    | 2.27527   | 1.73155    | 2.10654   | 1.26454    | 1.77682    | 3.31956    | 2.99676    | 3.70209   | 2.08923    | 3.62392    | 1.94702    | 0.908888  |
| SPSB1     | 7.67723    | 8.34601   | 7.6656    | 5.19534   | 9.41113    | 10.8867   | 8.9945     | 4.75094    | 11.3936    | 6.16909    | 8.53253   | 4.83981    | 8.49823    | 4.33842    | 6.01389   |
| SPSB2     | 1.69264    | 1.87575   | 2.07495   | 1.61746   | 5.13901    | 2.2012    | 1.73934    | 1.44958    | 3.39202    | 1.54505    | 2.57087   | 4.70141    | 1.44949    | 2.75045    | 1.87838   |
| SPSB3     | 10.4801    | 13.2051   | 14.4218   | 8.8337    | 28.6513    | 12.6533   | 12.4444    | 7.05288    | 22.1119    | 7.58375    | 10.3458   | 10.0743    | 7.5732     | 8.0764     | 8.49073   |
| SPSB4     | 0.0636673  | 0.0268414 | 0.0460863 | 0.0902151 | 0.148346   | 0.155859  | 0.236253   | 0.0565822  | 0.0387698  | 1.73802    | 0.134761  | 0.205      | 0.179715   | 0.133101   | 0.0457171 |
| SPTA1     | 0.00866132 | 0.0347763 | 0.0501568 | 0.0059505 | 0.00896935 | 0.0196667 | 0.00988922 | 0.00769746 | 0          | 0.00362362 | 0.0162959 | 0.0020658  | 0.00186275 | 0.00301786 | 0.0456088 |
| SPTAN1    | 29.2712    | 29.9025   | 36.8022   | 25.9499   | 36.2643    | 41.9777   | 48.4933    | 22.1343    | 35.0425    | 29.4421    | 16.7707   | 26.4325    | 52.8239    | 25.0748    | 31.9279   |
| SPTB      | 0.790903   | 0.921001  | 0.836136  | 0.690679  | 1.32562    | 1.27716   | 0.797224   | 0.810141   | 0.220467   | 0.292119   | 0.165429  | 0.539698   | 0.394881   | 0.865015   | 0.872766  |
| SPTBN1    | 27.859     | 17.7653   | 21.0784   | 17.1913   | 19.3413    | 26.3073   | 28.7605    | 16.13      | 6.38201    | 12.3314    | 10.429    | 9.79373    | 21.1748    | 16.648     | 25.5164   |
| SPTBN2    | 11.042     | 26.7217   | 28.7436   | 20.3957   | 45.0143    | 17.9321   | 29.1037    | 16.5141    | 31.5403    | 14.0393    | 5.9533    | 27.6693    | 27.0769    | 11.9794    | 3.76804   |
| SPTBN4    | 0.106358   | 0.10005   | 0.106841  | 0.0234868 | 0.110141   | 0.260907  | 0.141676   | 0.114777   | 0.00925231 | 0.00953504 | 0.0228696 | 0.00724783 | 0.00653541 | 0.00264702 | 0.0218206 |
| SPTBN5    | 0.138191   | 0.337346  | 0.405297  | 0.486228  | 0.831035   | 0.272317  | 0.228118   | 0.297041   | 0.180323   | 0.272555   | 0.144858  | 0.456258   | 0.169404   | 0.528272   | 0.462128  |
| SPTLC1    | 7.66616    | 7.31111   | 8.03849   | 9.91417   | 3.5062     | 9.59235   | 6.9694     | 7.88944    | 13.9126    | 10.0451    | 11.1402   | 7.75049    | 17.1161    | 8.729      | 8.25225   |
| SPTLC2    | 5.41441    | 5.70919   | 5.6705    | 8.87494   | 4.41658    | 7.49234   | 3.8419     | 5.00082    | 19.0816    | 9.36802    | 7.92025   | 8.73003    | 12.4114    | 6.13668    | 4.82017   |

|            |            |           |           |          |           |           |           |           |           |          |           |            |            |           |           |
|------------|------------|-----------|-----------|----------|-----------|-----------|-----------|-----------|-----------|----------|-----------|------------|------------|-----------|-----------|
| SPTLC3     | 4.09042    | 6.68183   | 5.19945   | 2.95193  | 4.56099   | 4.29254   | 5.74227   | 5.27208   | 24.537    | 4.69104  | 5.92046   | 6.93615    | 2.33044    | 2.31597   | 1.70046   |
| SPTSSA     | 3.82673    | 2.75467   | 2.67464   | 12.0471  | 1.64566   | 6.92121   | 2.50267   | 4.47228   | 3.60385   | 8.72324  | 11.2482   | 6.43036    | 16.6053    | 5.90459   | 4.8661    |
| SPTSSB     | 3.97595    | 4.64611   | 4.35282   | 0.59768  | 3.42993   | 1.11858   | 3.34289   | 6.96768   | 30.1008   | 2.51705  | 6.43679   | 5.73987    | 0.225419   | 0.544155  | 0.130457  |
| SPTY2D1    | 3.37718    | 2.68591   | 2.83022   | 4.83154  | 2.13162   | 4.48145   | 2.456     | 3.41882   | 5.4545    | 5.1127   | 5.19289   | 3.25973    | 7.65599    | 4.45681   | 3.32362   |
| SPTY2D1OS  | 0.25457    | 0.285362  | 0.315587  | 0.312828 | 0.121614  | 0.119996  | 0.358441  | 0.304398  | 0.445335  | 0.210852 | 0.552829  | 0.33906    | 0.0505135  | 0.222684  | 0.260896  |
| SPX        | 0.0163094  | 0.0117872 | 0         | 0        | 0         | 0         | 0.0186216 | 0         | 0         | 0.02047  | 0         | 0          | 0.00526137 | 0         | 0.0468447 |
| SPZ1       | 0          | 0         | 0         | 0        | 0         | 0         | 0.0141229 | 0.0109928 | 0         | 0        | 0         | 0          | 0          | 0         | 0         |
| SQLE       | 8.19956    | 10.5687   | 12.9644   | 30.1212  | 11.3055   | 19.1126   | 14.0209   | 12.3653   | 26.1959   | 24.46    | 19.308    | 13.1578    | 37.4119    | 14.989    | 3.54714   |
| SQOR       | 7.9232     | 7.18976   | 7.05555   | 26.9361  | 8.10052   | 25.856    | 7.72468   | 7.1453    | 12.1848   | 27.5537  | 28.5841   | 10.5481    | 40.726     | 14.6213   | 8.22136   |
| SQSTM1     | 23.579     | 18.5975   | 22.324    | 29.4295  | 45.9597   | 55.9631   | 24.4803   | 15.3817   | 25.7581   | 25.4564  | 43.6342   | 15.4539    | 28.6715    | 17.3496   | 21.7007   |
| SRA1       | 3.93783    | 3.30175   | 2.72078   | 6.33648  | 4.44238   | 7.48338   | 3.62953   | 3.20635   | 4.12603   | 5.74312  | 9.68539   | 3.93523    | 7.74977    | 5.69134   | 5.02337   |
| SRARP      | 0.22469    | 0.0120288 | 0.0619598 | 0        | 0         | 0.0637735 | 0.0285048 | 0.0221873 | 0         | 0        | 0         | 0          | 0          | 0         | 0         |
| SRBD1      | 1.71662    | 2.05264   | 1.80883   | 2.91179  | 0.953713  | 2.48059   | 1.24466   | 1.53116   | 1.04533   | 2.26462  | 3.11895   | 1.48381    | 1.98066    | 2.32481   | 2.86117   |
| SRC        | 3.03954    | 4.41709   | 3.99971   | 9.09332  | 11.5536   | 9.50209   | 3.91906   | 2.61885   | 7.72918   | 8.2327   | 5.79672   | 6.23559    | 14.4144    | 8.21115   | 5.65046   |
| SRCAP      | 6.38566    | 8.95972   | 8.83248   | 11.729   | 16.8145   | 18.547    | 12.7907   | 7.89008   | 8.28293   | 5.83767  | 4.00091   | 9.30107    | 12.983     | 8.88633   | 9.98931   |
| SRCIN1     | 0.288878   | 0.594703  | 0.57844   | 0.35859  | 1.35638   | 0.461204  | 1.13192   | 0.525131  | 0.155921  | 0.123604 | 0.062998  | 0.342934   | 0.192736   | 0.152696  | 0.0895731 |
| SRD5A1     | 4.95649    | 6.77306   | 6.12838   | 8.87349  | 7.21128   | 4.17473   | 4.81072   | 4.35047   | 6.10174   | 5.04788  | 7.18651   | 5.88157    | 4.09747    | 2.99886   | 2.42039   |
| SRD5A1P1   | 0          | 0         | 0         | 0        | 0         | 0         | 0         | 0         | 0         | 0        | 0         | 0          | 0          | 0         | 0         |
| SRD5A2     | 0.00946546 | 0.0136818 | 0         | 0        | 0.0294063 | 0.0402986 | 0.0108074 | 0         | 0.0461115 | 0        | 0.0106853 | 0.00677279 | 0          | 0.0197883 | 0.0135936 |
| SRD5A3     | 3.00559    | 3.01377   | 1.62322   | 5.76808  | 3.22406   | 3.69397   | 2.05254   | 2.38385   | 7.17591   | 3.13174  | 6.35696   | 4.67447    | 2.82098    | 2.05989   | 1.15647   |
| SRD5A3-AS1 | 0.449865   | 0.325128  | 0.144729  | 0.180288 | 0.465864  | 0.212808  | 0.228285  | 0.244324  | 0.030438  | 0.156841 | 0.0564268 | 0.393422   | 0.16125    | 0.391865  | 0.14357   |
| SREBF1     | 4.21406    | 11.4412   | 12.578    | 14.3859  | 17.7043   | 19.134    | 14.4192   | 6.7582    | 8.26963   | 6.5812   | 5.56806   | 9.71679    | 11.0794    | 6.16486   | 4.34346   |
| SREBF2     | 13.1819    | 19.7155   | 19.9075   | 33.2112  | 29.7489   | 25.0242   | 19.6823   | 13.6408   | 23.8481   | 20.1838  | 13.9221   | 19.8557    | 32.6708    | 13.9786   | 8.92062   |
| SREBF2-AS1 | 0.939948   | 0.960701  | 0.851694  | 0.618686 | 1.64594   | 0.790262  | 0.965483  | 0.823205  | 0.230432  | 0.459706 | 0.42571   | 0.556372   | 0.494848   | 0.58783   | 0.111827  |
| SREK1      | 4.53611    | 4.20202   | 3.58897   | 2.92571  | 1.48653   | 4.03897   | 2.20715   | 3.28287   | 2.77776   | 2.6985   | 3.1149    | 2.76183    | 2.30099    | 3.80289   | 3.63744   |
| SREK1P1    | 2.20185    | 2.33492   | 2.57863   | 2.66929  | 0.671457  | 2.02437   | 1.83923   | 2.6231    | 6.34208   | 5.26006  | 4.39938   | 3.29836    | 6.51481    | 2.93873   | 2.28915   |



|            |          |           |          |           |          |           |           |           |            |           |           |           |           |           |           |
|------------|----------|-----------|----------|-----------|----------|-----------|-----------|-----------|------------|-----------|-----------|-----------|-----------|-----------|-----------|
| SRF        | 4.69694  | 6.06009   | 7.14767  | 10.3236   | 9.56234  | 11.7347   | 5.04084   | 3.11864   | 14.5386    | 9.38051   | 8.68816   | 6.61291   | 20.4182   | 12.146    | 6.51175   |
| SRFBP1     | 2.57054  | 2.11533   | 2.30881  | 3.25451   | 0.88732  | 2.86279   | 1.09013   | 1.95813   | 2.10697    | 1.83336   | 3.16898   | 1.72251   | 3.72241   | 2.51636   | 1.85167   |
| SRGAP1     | 1.79793  | 0.80104   | 0.934096 | 1.48449   | 1.10199  | 2.39092   | 1.37886   | 1.6099    | 0.583696   | 2.10028   | 1.44276   | 1.05011   | 3.10798   | 2.09162   | 2.73763   |
| SRGAP2     | 4.19073  | 6.86939   | 7.8997   | 3.21165   | 6.27423  | 5.22422   | 9.80089   | 5.41953   | 6.15539    | 2.47113   | 2.64961   | 2.58051   | 2.13819   | 2.86245   | 4.59787   |
| SRGAP2-AS1 | 0.905758 | 1.28696   | 1.30746  | 0.390508  | 0.703478 | 0.39349   | 1.55125   | 1.19102   | 0.135075   | 0.382807  | 0.198238  | 0.72084   | 0.0775212 | 0.821185  | 0.836218  |
| SRGAP2B    | 2.7597   | 3.38842   | 4.36792  | 1.4391    | 1.27977  | 2.13119   | 2.52288   | 3.66366   | 3.1838     | 1.878     | 2.37935   | 1.63985   | 1.38012   | 1.62001   | 2.97028   |
| SRGAP2C    | 1.81317  | 2.78508   | 2.86983  | 0.945528  | 0.840914 | 1.40017   | 1.85041   | 2.99749   | 2.09182    | 1.23394   | 1.93709   | 1.07741   | 0.906863  | 1.32299   | 1.95156   |
| SRGAP2D    | 1.33896  | 1.70004   | 2.19116  | 1.06197   | 1.84347  | 1.522     | 2.23171   | 1.63923   | 2.96789    | 1.49859   | 2.92572   | 1.09592   | 0.875024  | 0.919142  | 1.63218   |
| SRGAP3     | 1.64977  | 1.08754   | 0.956001 | 0.861999  | 0.79958  | 0.940157  | 0.837503  | 1.36782   | 0.0752286  | 0.229352  | 0.482302  | 0.254138  | 0.189304  | 0.312074  | 0.465722  |
| SRGAP3-AS2 | 0.465367 | 0.241469  | 0.192492 | 0.276677  | 0.305832 | 0.0762027 | 0.42916   | 0.20679   | 0.0217986  | 0         | 0.0202054 | 0.0768421 | 0.0577408 | 0.102901  | 0.0257048 |
| SRGAP3-AS3 | 0.35954  | 0.18235   | 0.250473 | 0.0585027 | 0.264548 | 0.11279   | 0.259271  | 0.302712  | 0          | 0.0237505 | 0         | 0.0677002 | 0         | 0.0395603 | 0         |
| SRGAP3-AS4 | 0        | 0         | 0        | 0         | 0        | 0         | 0         | 0.046428  | 0          | 0         | 0         | 0         | 0         | 0         | 0         |
| SRGN       | 5.61368  | 1.97513   | 2.42957  | 28.6728   | 3.94419  | 20.3185   | 2.58476   | 4.45881   | 1.17363    | 49.5716   | 109.687   | 1.72928   | 29.8039   | 9.60926   | 24.1637   |
| SRI        | 4.73447  | 3.70917   | 3.32759  | 8.9845    | 2.51121  | 7.75949   | 3.8345    | 3.07018   | 7.64116    | 6.84805   | 12.6663   | 4.28962   | 6.3949    | 5.7234    | 3.81424   |
| SRL        | 0.222451 | 0.0760008 | 0.107071 | 0.0875291 | 0.125652 | 0.265181  | 0.170865  | 0.107834  | 0.00985167 | 0.0558399 | 0.0410924 | 0.037622  | 0.0887243 | 0.0760994 | 0.15683   |
| SRM        | 10.5807  | 7.13013   | 7.6853   | 32.655    | 21.6034  | 40.8671   | 12.143    | 8.45001   | 14.6131    | 15.4932   | 33.9859   | 14.0749   | 25.289    | 20.1815   | 15.3258   |
| SRMS       | 0.134889 | 0.111414  | 0.278974 | 1.52907   | 0.583687 | 0.24612   | 0.154012  | 0.205505  | 0.868333   | 0.278134  | 0.369805  | 0.634251  | 0.497312  | 0.292066  | 0.124533  |
| SRP14      | 25.1629  | 16.1494   | 15.5599  | 32.5206   | 13.5571  | 33.6836   | 13.4359   | 16.7156   | 25.6537    | 35.7915   | 69.408    | 16.0262   | 29.6358   | 22.6224   | 17.1815   |
| SRP14-AS1  | 0.181241 | 0.214953  | 0.24797  | 0.158039  | 0.108281 | 0.231486  | 0.222853  | 0.0805359 | 0.0254689  | 0.0962398 | 0.0786916 | 0.0399023 | 0.0854529 | 0.12387   | 0.0800876 |
| SRP19      | 2.3892   | 2.28974   | 2.55746  | 3.5713    | 1.31539  | 2.57207   | 1.65472   | 2.77693   | 2.8313     | 2.77054   | 4.67114   | 2.1826    | 3.25821   | 3.23067   | 2.13018   |
| SRP54      | 6.28038  | 6.11066   | 7.45336  | 9.25337   | 2.71077  | 10.4361   | 4.10087   | 5.72575   | 9.21816    | 9.57614   | 11.1444   | 5.66256   | 12.1757   | 7.45563   | 6.46952   |
| SRP54-AS1  | 0.152544 | 0.167995  | 0.216334 | 0.0449145 | 0.101551 | 0.0927778 | 0.0497627 | 0.174302  | 0.0530803  | 0.0820534 | 0.0492008 | 0.109149  | 0.0703003 | 0.0341683 | 0.062592  |
| SRP68      | 8.77134  | 9.22162   | 9.71676  | 15.9023   | 9.83957  | 16.3228   | 8.36445   | 7.88269   | 14.987     | 11.6074   | 11.0893   | 9.89339   | 19.6587   | 10.3273   | 7.17332   |
| SRP72      | 12.9289  | 9.02419   | 8.4597   | 17.7764   | 3.99135  | 16.6985   | 6.55629   | 10.7015   | 14.0998    | 17.6321   | 19.3223   | 9.6577    | 20.4513   | 13.4418   | 9.11296   |
| SRP9       | 18.7714  | 14.0277   | 15.1863  | 25.3956   | 3.50615  | 24.2797   | 12.6574   | 23.9832   | 22.1657    | 25.5506   | 45.3179   | 14.0756   | 32.6569   | 19.3604   | 15.2231   |
| SRPK1      | 8.0289   | 10.1397   | 7.3399   | 10.0722   | 8.17244  | 10.0867   | 8.11982   | 7.69768   | 70.3857    | 12.1812   | 16.0686   | 15.7378   | 12.7751   | 10.0704   | 4.90599   |

|           |           |            |           |           |            |          |           |            |           |            |           |            |            |            |            |
|-----------|-----------|------------|-----------|-----------|------------|----------|-----------|------------|-----------|------------|-----------|------------|------------|------------|------------|
| SRPK2     | 7.0359    | 7.08473    | 7.51312   | 8.1105    | 4.16037    | 7.86431  | 5.23628   | 6.32854    | 9.27443   | 9.5578     | 7.45674   | 6.22453    | 11.0402    | 7.10185    | 4.80803    |
| SRPK3     | 0.13872   | 0.167093   | 0.315586  | 0.0833902 | 0.377089   | 0.334667 | 0.290373  | 0.113009   | 0.0281575 | 0.0435268  | 0.0652488 | 0.0330859  | 0.0149169  | 0.10271    | 0.182617   |
| SRPRA     | 14.124    | 11.886     | 13.6777   | 23.5249   | 13.7541    | 34.4413  | 15.5282   | 11.4478    | 16.0709   | 15.7821    | 15.8677   | 12.2749    | 30.6151    | 15.3431    | 16.0915    |
| SRPRB     | 6.02522   | 3.46708    | 3.4336    | 10.1658   | 4.65419    | 8.90848  | 4.42113   | 3.76139    | 4.25726   | 6.27791    | 9.52795   | 4.39907    | 7.95974    | 5.96435    | 4.72622    |
| SRPX      | 5.70367   | 1.69926    | 2.05239   | 5.06318   | 4.83604    | 16.8169  | 2.77709   | 3.72875    | 0.162923  | 2.68642    | 7.24873   | 0.304562   | 3.44459    | 1.75427    | 11.1603    |
| SRPX2     | 2.24033   | 0.605904   | 0.804289  | 3.22351   | 1.34604    | 4.33712  | 3.05263   | 1.18334    | 0.360364  | 4.98705    | 7.28893   | 1.59546    | 4.00226    | 4.34667    | 5.55457    |
| SRR       | 1.39427   | 1.20587    | 1.14729   | 1.92869   | 0.311452   | 2.46348  | 1.00015   | 1.41879    | 1.48242   | 1.64858    | 2.12857   | 1.1302     | 1.96557    | 1.29971    | 1.12228    |
| SRRD      | 2.81326   | 2.54642    | 2.43387   | 4.37093   | 2.7358     | 5.31233  | 2.43778   | 2.03156    | 6.94071   | 3.47943    | 6.97438   | 3.18676    | 4.88114    | 3.09565    | 2.30101    |
| SRRM1     | 12.6411   | 13.0301    | 13.4624   | 15.7702   | 7.25707    | 20.2074  | 11.7846   | 14.4321    | 10.3883   | 8.85779    | 8.64617   | 8.9135     | 15.1174    | 10.2539    | 10.5408    |
| SRRM2     | 31.5634   | 50.0892    | 45.1383   | 50.833    | 61.4975    | 59.8954  | 61.0862   | 45.0121    | 27.9355   | 26.0034    | 16.6926   | 50.8699    | 42.6273    | 36.6281    | 51.53      |
| SRRM2-AS1 | 0.0844123 | 0.149224   | 0.0698318 | 0.0289965 | 0.0437982  | 0.203803 | 0.0803161 | 0.100025   | 0.0171546 | 0.106085   | 0.0958176 | 0.0705354  | 0.0635395  | 0.0661764  | 0          |
| SRRM3     | 0.543734  | 0.722701   | 0.522198  | 1.55219   | 3.47551    | 1.28784  | 0.649361  | 0.43879    | 5.48036   | 1.88259    | 1.62976   | 1.80665    | 2.11295    | 0.783942   | 0.466727   |
| SRRM4     | 0.0027301 | 0.00394621 | 0.0112927 | 0         | 0.00424079 | 0        | 0.02182   | 0.00485257 | 0         | 0.00342656 | 0         | 0.00195346 | 0          | 0.00285374 | 0.00784153 |
| SRRM5     | 0.390013  | 0.461938   | 0.257211  | 0.169379  | 0.827015   | 0.17417  | 0.279086  | 0.296857   | 0.0627896 | 0.103667   | 0.0341694 | 0.30754    | 0.00663286 | 0.342088   | 0.368051   |
| SRRT      | 7.81164   | 11.2691    | 11.3297   | 15.1266   | 18.2788    | 19.0588  | 9.43657   | 7.49524    | 7.75499   | 7.20144    | 3.91927   | 10.2445    | 14.4807    | 12.8702    | 10.1374    |
| SRSF1     | 14.2435   | 12.4726    | 12.9571   | 20.2734   | 7.65104    | 19.3113  | 9.57605   | 14.1452    | 10.4139   | 14.4078    | 19.7553   | 9.91589    | 24.9651    | 17.9044    | 12.9634    |
| SRSF10    | 2.31358   | 1.6807     | 2.00837   | 2.28147   | 0.474235   | 1.85033  | 1.24287   | 2.32798    | 0.835295  | 1.62443    | 2.2671    | 1.05991    | 2.17257    | 1.88127    | 1.74266    |
| SRSF11    | 12.6129   | 10.9557    | 11.1284   | 8.01111   | 5.15971    | 10.0955  | 6.42358   | 9.82202    | 5.80338   | 7.56324    | 6.28725   | 7.17992    | 6.56681    | 9.0279     | 7.705      |
| SRSF12    | 0.276508  | 0.1797     | 0.122353  | 0.212055  | 0.0799092  | 0.344951 | 0.102789  | 0.3086     | 0.0313261 | 0.1937     | 0.290365  | 0.156438   | 0.215741   | 0.198288   | 0.230872   |
| SRSF2     | 24.087    | 22.4091    | 24.5559   | 33.2909   | 18.7756    | 39.0068  | 19.9727   | 17.4099    | 22.2991   | 24.6274    | 40.2238   | 23.6582    | 36.3073    | 29.8876    | 18.5854    |
| SRSF3     | 16.2708   | 12.4856    | 12.886    | 24.8035   | 9.61635    | 20.8008  | 13.902    | 14.2716    | 17.2482   | 19.5421    | 26.2201   | 15.3819    | 26.3005    | 15.7379    | 12.7775    |
| SRSF4     | 11.3154   | 11.0934    | 10.7155   | 14.2438   | 8.75284    | 11.8158  | 6.06812   | 7.75554    | 9.89282   | 10.1836    | 6.69146   | 9.1568     | 13.9403    | 11.6175    | 10.2074    |
| SRSF5     | 58.3764   | 62.5205    | 64.7776   | 62.1517   | 38.2909    | 44.9846  | 42.1774   | 47.6936    | 62.4066   | 37.1288    | 42.5386   | 38.384     | 63.9187    | 32.1395    | 34.6584    |
| SRSF6     | 16.2186   | 15.737     | 14.929    | 26.7978   | 13.5503    | 21.6395  | 13.4292   | 15.2079    | 18.9584   | 16.5062    | 22.4222   | 16.3904    | 24.9041    | 19.9484    | 17.0819    |
| SRSF7     | 8.74947   | 8.85243    | 8.96898   | 16.462    | 6.22501    | 12.1926  | 6.22114   | 6.30498    | 8.4251    | 10.5498    | 18.6313   | 8.02364    | 13.2401    | 11.1283    | 8.39919    |
| SRSF8     | 6.22898   | 5.23289    | 5.18386   | 6.56726   | 5.30928    | 7.27583  | 4.62586   | 4.90177    | 10.9124   | 5.45259    | 6.77336   | 4.92935    | 8.93079    | 4.46412    | 3.83818    |

|           |           |          |           |           |          |           |           |           |           |           |           |          |           |           |          |
|-----------|-----------|----------|-----------|-----------|----------|-----------|-----------|-----------|-----------|-----------|-----------|----------|-----------|-----------|----------|
| SRSF9     | 19.907    | 17.5571  | 17.6783   | 42.5048   | 35.4389  | 40.5148   | 18.6154   | 14.4547   | 40.4419   | 40.2227   | 59.2743   | 27.858   | 46.7882   | 29.9267   | 15.5085  |
| SRXN1     | 4.27746   | 2.51294  | 1.76575   | 11.0866   | 5.13368  | 9.21177   | 3.7538    | 2.24875   | 21.9594   | 14.3992   | 12.1155   | 8.88016  | 21.5508   | 9.96794   | 6.05646  |
| SRY       | 1.90467   | 3.53251  | 4.16583   | 1.23684   | 2.63438  | 0.599845  | 0.268113  | 2.55066   | 3.17764   | 1.27715   | 1.50215   | 2.22162  | 0.269344  | 0.981827  | 0.861822 |
| SS18      | 9.84774   | 9.10712  | 8.67422   | 11.5292   | 2.95029  | 11.8689   | 6.5355    | 9.28367   | 12.4293   | 10.5232   | 12.4093   | 8.28916  | 13.3835   | 8.68229   | 8.2391   |
| SS18L1    | 2.69451   | 3.78266  | 3.9577    | 2.15332   | 2.053    | 2.2468    | 2.51328   | 2.85374   | 2.45979   | 1.96255   | 1.96481   | 2.71386  | 1.62739   | 2.56602   | 1.98496  |
| SS18L2    | 4.09121   | 2.91716  | 3.04325   | 6.02004   | 1.66038  | 4.32641   | 2.80985   | 2.69522   | 14.3502   | 6.95753   | 11.0166   | 4.82021  | 6.48941   | 4.03468   | 2.64177  |
| SSB       | 6.69121   | 5.71575  | 5.61373   | 11.7256   | 1.99808  | 13.8819   | 2.32338   | 4.46021   | 6.25352   | 7.31115   | 9.53701   | 4.48539  | 12.9273   | 8.28113   | 7.07125  |
| SSBP1     | 11.2345   | 8.49418  | 7.30648   | 15.87     | 4.08086  | 19.1908   | 6.84773   | 7.51125   | 13.3665   | 14.1439   | 26.3985   | 8.86719  | 15.021    | 11.7071   | 7.37204  |
| SSBP2     | 2.3456    | 3.14312  | 4.29919   | 1.10811   | 0.653766 | 1.96012   | 2.19761   | 2.79388   | 1.21894   | 1.58473   | 2.63919   | 1.00995  | 0.958692  | 0.913404  | 1.77643  |
| SSBP3     | 8.17895   | 8.96107  | 8.00767   | 8.15751   | 7.75552  | 15.8238   | 8.20974   | 6.42187   | 11.3644   | 5.7844    | 6.80838   | 6.31027  | 7.57144   | 5.01072   | 5.06611  |
| SSBP3-AS1 | 0.62692   | 1.08912  | 0.942304  | 0.254784  | 1.23442  | 0.285703  | 0.715797  | 0.604238  | 0.0752764 | 0.221648  | 0.0996781 | 0.815022 | 0.0683637 | 0.586088  | 0.16485  |
| SSBP4     | 5.93022   | 3.29847  | 3.73239   | 7.078     | 8.61497  | 14.2455   | 5.06996   | 2.87015   | 1.5306    | 5.25325   | 11.7234   | 3.07941  | 8.08766   | 5.89265   | 8.99483  |
| SSC4D     | 0.100936  | 0.129195 | 0.0972912 | 0.135982  | 0.321296 | 0.213098  | 0.0388815 | 0.0694279 | 0.0516459 | 0.116514  | 0.23757   | 0.101275 | 0.107904  | 0.128423  | 1.80E-34 |
| SSC5D     | 1.20259   | 1.07172  | 1.56337   | 0.647606  | 8.81347  | 2.29436   | 9.12123   | 1.31787   | 0.165182  | 1.61719   | 3.51133   | 0.737558 | 0.761318  | 2.75984   | 11.3948  |
| SSH1      | 3.75939   | 3.54746  | 4.00994   | 6.48459   | 3.28552  | 7.58345   | 4.0336    | 3.50888   | 3.21078   | 3.32154   | 3.81468   | 2.36924  | 5.75596   | 5.37592   | 7.40229  |
| SSH2      | 3.27248   | 2.28604  | 2.54661   | 3.63435   | 2.10367  | 3.8924    | 2.86299   | 2.78715   | 1.38479   | 3.01085   | 2.68717   | 1.8223   | 3.65322   | 2.39159   | 3.65089  |
| SSH3      | 5.14647   | 7.92326  | 8.27557   | 10.3586   | 16.5506  | 13.6463   | 6.03216   | 5.59571   | 10.8022   | 10.1937   | 7.91575   | 7.70435  | 11.658    | 8.52322   | 4.98892  |
| SSMEM1    | 0.0200199 | 0        | 0         | 0         | 0        | 0.0170467 | 0         | 0         | 0         | 0         | 0.0226    | 0        | 0         | 0         | 0        |
| SSNA1     | 10.0836   | 8.02232  | 8.26047   | 15.6885   | 20.3241  | 20.9625   | 8.95776   | 5.52987   | 14.9764   | 14.9093   | 31.1231   | 10.3651  | 17.0581   | 12.3141   | 5.2274   |
| SSPN      | 2.08567   | 1.06152  | 1.47024   | 0.655901  | 0.577985 | 1.40489   | 1.88943   | 1.32274   | 0.214657  | 1.99709   | 4.41045   | 0.213693 | 0.476983  | 0.575735  | 4.31716  |
| SSPO      | 0.0356527 | 0.116667 | 0.105688  | 0.0367411 | 0.366899 | 0.126491  | 0.161132  | 0.0580894 | 0.0271381 | 0.0186449 | 0.0184467 | 0.048895 | 0.0172522 | 0.0364909 | 0.121604 |
| SSR1      | 6.76108   | 5.48418  | 5.89087   | 10.7363   | 2.46746  | 10.0772   | 5.25185   | 6.71144   | 6.2825    | 9.11578   | 12.0175   | 6.73167  | 12.4245   | 7.74413   | 8.68319  |
| SSR2      | 31.029    | 22.9363  | 26.0952   | 36.22     | 31.0877  | 71.3554   | 36.9325   | 24.3371   | 23.6719   | 41.5546   | 98.1338   | 18.4011  | 41.0757   | 30.6694   | 37.8196  |
| SSR3      | 11.7264   | 7.0825   | 7.7398    | 13.5014   | 3.78078  | 11.8829   | 7.76847   | 8.83947   | 10.2019   | 16.8122   | 25.5072   | 7.9643   | 18.3409   | 11.3862   | 13.5691  |
| SSR4      | 18.7625   | 14.3818  | 12.9882   | 33.5967   | 24.1165  | 31.0442   | 22.1971   | 11.438    | 27.9968   | 27.2709   | 57.6567   | 18.6399  | 21.1223   | 16.1985   | 15.644   |
| SSR4P1    | 0.481933  | 0.365596 | 0.500482  | 0.528347  | 0.684897 | 0.838182  | 0.608794  | 0.282497  | 0.0999048 | 0.141567  | 0.30096   | 0.220108 | 0.17201   | 0.171492  | 0.32397  |

|            |            |           |            |           |           |           |           |            |           |           |            |            |           |            |           |
|------------|------------|-----------|------------|-----------|-----------|-----------|-----------|------------|-----------|-----------|------------|------------|-----------|------------|-----------|
| SSRP1      | 15.0319    | 12.6538   | 13.8753    | 29.298    | 17.8662   | 36.2873   | 15.1664   | 10.5501    | 14.0578   | 14.4771   | 13.642     | 12.4945    | 29.1697   | 18.9994    | 13.0281   |
| SSSCA1     | 3.81335    | 3.40856   | 4.19898    | 9.72959   | 6.74046   | 9.04684   | 4.0837    | 3.10851    | 5.18872   | 6.93164   | 11.7268    | 5.64527    | 7.33017   | 6.47386    | 3.55024   |
| SSSCA1-AS1 | 0.310125   | 0.644386  | 0.705532   | 0.339567  | 1.32476   | 0.627159  | 0.951618  | 0.430645   | 0.566545  | 0.413566  | 0.547019   | 0.624101   | 0.400182  | 0.506515   | 0.334034  |
| SST        | 0          | 0         | 0          | 5.35861   | 0.455053  | 1.71492   | 0         | 0          | 0         | 0.0919206 | 0.537394   | 0.759849   | 0.236262  | 5.12913    | 0.578481  |
| SSTR1      | 0.107868   | 0.0493738 | 0.0267708  | 0.0389063 | 0.041889  | 0.3628    | 0.129318  | 0.0383456  | 0.0131371 | 0.0135385 | 0.00608847 | 0.00771823 | 0.0139192 | 0.00845647 | 0.0232368 |
| SSTR2      | 0.156161   | 0.0865268 | 0.142106   | 0.0482785 | 0.0970287 | 0.990619  | 0.0891498 | 0.0832697  | 0         | 0.0685993 | 0.317315   | 0.00558687 | 0.0856411 | 0.318304   | 0.549454  |
| SSTR3      | 0          | 0         | 0.00445349 | 0.0221908 | 0         | 0.0137516 | 0         | 0.00478428 | 0         | 0         | 0          | 0          | 0         | 0          | 0.0386559 |
| SSTR4      | 0          | 0         | 0          | 0         | 0         | 0         | 0         | 0          | 0         | 0         | 0.0623028  | 0.0131633  | 0         | 0          | 0         |
| SSTR5      | 0.00851474 | 0         | 0.028176   | 0.0175494 | 0         | 0.0145004 | 0.0194437 | 0.00756719 | 0         | 0         | 0          | 0          | 0         | 0          | 0         |
| SSTR5-AS1  | 0          | 0         | 0          | 0         | 0         | 0         | 0         | 0          | 0         | 0         | 0          | 0          | 0         | 0          | 0         |
| SSU72      | 15.2392    | 12.0749   | 12.7686    | 28.5719   | 25.0237   | 29.5514   | 14.6417   | 12.3122    | 40.3208   | 23.0503   | 29.9953    | 18.3641    | 31.1585   | 17.1547    | 9.97345   |
| SSUH2      | 0.26212    | 0.0789335 | 0.00903519 | 0.0112551 | 0.305373  | 0.0650977 | 0.0748202 | 0.174713   | 0.0266028 | 0.164494  | 0.209597   | 0.0781476  | 0.0211398 | 0.0684978  | 0.752876  |
| SSX1       | 0          | 0         | 0          | 0         | 0         | 0         | 0         | 0          | 0.0203653 | 0         | 0.0188769  | 0          | 0.0107889 | 0          | 0         |
| SSX2       | 0          | 0         | 0          | 0         | 0         | 0         | 0         | 0          | 0         | 0         | 0          | 0          | 0         | 0          | 0         |
| SSX2B      | 0          | 0         | 0          | 0         | 0         | 0         | 0         | 0          | 0         | 0         | 0          | 0          | 0         | 0          | 0         |
| SSX2IP     | 1.01445    | 0.731342  | 0.798516   | 1.31457   | 0.258712  | 1.1442    | 0.652604  | 0.857825   | 0.484051  | 1.28749   | 1.37593    | 0.617527   | 1.88052   | 1.21273    | 0.755619  |
| SSX3       | 0          | 0         | 0          | 0         | 0         | 0         | 0         | 0          | 0         | 0         | 0          | 0          | 0         | 0.00917026 | 0         |
| SSX4       | 0          | 0         | 0          | 0         | 0         | 0         | 0         | 0          | 0         | 0         | 0          | 0          | 0         | 0          | 0         |
| SSX4B      | 0          | 0         | 0          | 0         | 0         | 0         | 0         | 0          | 0         | 0         | 0          | 0          | 0         | 0          | 0         |
| SSX5       | 0          | 0         | 0          | 0         | 0         | 0         | 0         | 0          | 0         | 0         | 0          | 0          | 0         | 0          | 0         |
| SSX6P      | 0          | 0         | 0          | 0         | 0         | 0.030647  | 0.0205474 | 0          | 0         | 0         | 0          | 0.0386302  | 0         | 0          | 0         |
| SSX7       | 0          | 0         | 0          | 0         | 0         | 0         | 0         | 0          | 0         | 0         | 0          | 0          | 0         | 0          | 0         |
| SSX8P      | 0          | 0         | 0          | 0         | 0         | 0         | 0         | 0.014214   | 0         | 0         | 0          | 0          | 0         | 0          | 0         |
| SSX9P      | 0          | 0         | 0          | 0         | 0         | 0         | 0         | 0          | 0         | 0         | 0          | 0          | 0         | 0          | 0         |
| ST13       | 19.9123    | 17.2425   | 18.7977    | 26.5581   | 9.69656   | 30.8357   | 14.3417   | 18.865     | 18.1246   | 19.1562   | 24.6371    | 14.862     | 25.4166   | 16.48      | 12.6215   |
| ST13P4     | 0.127873   | 0.12995   | 0.132374   | 0.0654174 | 0.114852  | 0.0941263 | 0.0897761 | 0.0691974  | 0.0579751 | 0.060799  | 0          | 0.125913   | 0.0620736 | 0.0830951  | 0.0235049 |

|             |            |                 |           |            |           |           |            |            |                 |           |           |                 |           |           |           |
|-------------|------------|-----------------|-----------|------------|-----------|-----------|------------|------------|-----------------|-----------|-----------|-----------------|-----------|-----------|-----------|
| ST14        | 12.5814    | 20.2165         | 20.2189   | 48.1834    | 46.7557   | 33.1359   | 16.6871    | 13.7865    | 52.6644         | 33.1839   | 18.4859   | 28.7282         | 53.5146   | 25.4703   | 9.14503   |
| ST18        | 0.0256045  | 0.0180937       | 0.0367152 | 0.0175908  | 0.010606  | 0.0101742 | 0.00389792 | 0.0409593  | 0.00415779      | 0.025709  | 0.0289043 | 0.00854966      | 0.0132159 | 0.0115978 | 0.0367713 |
| ST20        | 0.361306   | 0.573961        | 0.544196  | 0.800367   | 0.68046   | 0.513725  | 0.351646   | 0.431584   | 0.445338        | 0.50544   | 0.979512  | 0.529015        | 0.452688  | 0.383398  | 0.659504  |
| ST20-AS1    | 0.880995   | 1.11275         | 0.890296  | 0.916958   | 2.24776   | 1.68767   | 1.07554    | 0.357158   | 0.987943        | 0.858868  | 1.34341   | 0.695826        | 1.54075   | 0.760017  | 0.73232   |
| ST20-MTHFS  | 0.00069364 | 0.00041329<br>3 | 0.0189411 | 0.00405773 | 2.47E-14  | 0.0810126 | 0.00036665 | 0.00568427 | 0.00034838<br>2 | 0.017365  | 0.0159303 | 0.00028400<br>1 | 0.124751  | 0.0398939 | 0.259414  |
| ST3GAL1     | 2.78208    | 1.22048         | 1.42816   | 3.21598    | 3.2231    | 8.11308   | 2.16821    | 1.59915    | 0.772265        | 3.07928   | 3.82271   | 0.681763        | 4.48742   | 2.7415    | 5.91206   |
| ST3GAL2     | 2.61074    | 1.78411         | 2.37921   | 3.09777    | 4.56433   | 4.96857   | 2.83241    | 1.46978    | 0.551045        | 3.18537   | 4.62629   | 1.0345          | 4.22116   | 3.71565   | 7.47631   |
| ST3GAL3     | 1.26628    | 0.9367          | 0.924311  | 1.18979    | 1.12233   | 2.1818    | 1.40327    | 0.695075   | 0.21772         | 1.2247    | 1.37061   | 0.426378        | 1.0669    | 0.957679  | 1.41204   |
| ST3GAL4     | 2.58016    | 1.17515         | 1.72576   | 2.1821     | 4.20279   | 4.10013   | 2.39974    | 1.41485    | 0.296088        | 1.7816    | 4.57707   | 0.566759        | 2.196     | 1.3731    | 3.09726   |
| ST3GAL5     | 1.29622    | 0.860289        | 1.35638   | 0.482122   | 0.380026  | 1.48745   | 1.18594    | 1.17867    | 0.784096        | 0.549478  | 0.944825  | 0.242618        | 0.51508   | 0.854676  | 0.770501  |
| ST3GAL5-AS1 | 0.207375   | 0.269774        | 0.240177  | 0.0213706  | 0         | 0.211893  | 0.426193   | 0.147438   | 0.0252559       | 0         | 0.0234101 | 0.0296765       | 0         | 0.032515  | 0         |
| ST3GAL6     | 1.49179    | 1.47453         | 1.86224   | 1.04943    | 0.824971  | 1.06334   | 1.07091    | 1.50033    | 0.737605        | 1.54719   | 1.39159   | 1.10831         | 1.19302   | 1.11388   | 0.700442  |
| ST3GAL6-AS1 | 0.320904   | 0.319005        | 0.348554  | 0.372165   | 0.463239  | 0.717514  | 0.481061   | 0.267928   | 0               | 0.415495  | 0.203841  | 0.0861351       | 0.0582514 | 0.21006   | 0.345762  |
| ST5         | 5.87311    | 4.67599         | 5.04176   | 22.1521    | 9.48963   | 20.8656   | 5.89697    | 4.30149    | 3.01924         | 4.445     | 5.65269   | 4.65285         | 10.1616   | 8.21369   | 9.09145   |
| ST6GAL1     | 4.08007    | 2.45085         | 3.1621    | 3.33264    | 3.45214   | 5.80953   | 2.90947    | 2.80487    | 0.485653        | 1.91652   | 4.12278   | 0.504543        | 2.35005   | 1.76134   | 3.01006   |
| ST6GAL2     | 0.130218   | 0.181126        | 0.107148  | 0.0260438  | 0.112862  | 0.0753164 | 0.119027   | 0.0533422  | 0.0346261       | 0.237894  | 0.499261  | 0.00226037      | 0.0101909 | 0.108969  | 0.189458  |
| ST6GALNAC1  | 0.69071    | 0.197212        | 0.148142  | 0.685434   | 0.437112  | 1.2053    | 0.20446    | 0.204615   | 0.342714        | 1.03815   | 1.07814   | 0.506425        | 0.352113  | 0.922545  | 0.563328  |
| ST6GALNAC2  | 5.58512    | 10.9229         | 11.6511   | 10.5369    | 8.00957   | 11.2057   | 8.61133    | 6.10677    | 21.4639         | 11.605    | 16.42     | 11.0292         | 10.5835   | 6.8034    | 3.18943   |
| ST6GALNAC3  | 0.229235   | 0.0513354       | 0.0747874 | 0.239561   | 0.0551675 | 0.390381  | 0.106905   | 0.0975585  | 0.027525        | 0.255295  | 0.302515  | 0.0970282       | 0.295802  | 0.241304  | 0.324574  |
| ST6GALNAC4  | 2.23082    | 1.11441         | 0.905763  | 2.87718    | 3.67783   | 6.49101   | 2.00016    | 1.07034    | 3.96699         | 2.18152   | 5.60828   | 1.38077         | 2.63138   | 3.51208   | 3.08581   |
| ST6GALNAC5  | 0.272223   | 0.0397458       | 0.0341215 | 0.0637576  | 0.0384414 | 0.179114  | 0.108314   | 0.0513182  | 0.0100466       | 0.0672981 | 0.186246  | 0.0206588       | 0.066529  | 0.0301796 | 0.349482  |
| ST6GALNAC6  | 7.34089    | 5.73649         | 6.31499   | 8.84878    | 13.7017   | 19.2504   | 8.9252     | 4.01247    | 9.79572         | 9.45492   | 14.4691   | 5.69531         | 8.51782   | 7.76951   | 9.85804   |
| ST7         | 2.32596    | 1.92787         | 2.1557    | 2.85688    | 1.01999   | 2.47406   | 2.62244    | 2.19986    | 1.79185         | 2.52458   | 3.38787   | 1.86149         | 2.87851   | 2.19414   | 2.17645   |
| ST7-AS1     | 1.09469    | 0.623171        | 0.630506  | 0.476359   | 0.821719  | 0.610585  | 0.845063   | 0.323506   | 0.233974        | 0.289931  | 0.470906  | 0.158992        | 0.276621  | 0.412173  | 0.574189  |
| ST7-AS2     | 0.404161   | 0.259641        | 0.270665  | 0.228083   | 0.134529  | 0.106519  | 0.208755   | 0.333529   | 0.0234392       | 0.193243  | 0.0651783 | 0.206563        | 0.0496691 | 0.301761  | 0.331672  |

|                        |           |            |           |            |           |           |           |           |           |           |            |           |            |           |           |
|------------------------|-----------|------------|-----------|------------|-----------|-----------|-----------|-----------|-----------|-----------|------------|-----------|------------|-----------|-----------|
| ST7-OT3                | 0.0486087 | 0.0822774  | 0.135912  | 0          | 0.0702132 | 0.0608163 | 0.0801822 | 0.0439035 | 0         | 0.124737  | 0.053019   | 0         | 0.0153551  | 0.101044  | 0.167502  |
| ST7-OT4                | 0.56974   | 0.553512   | 0.551495  | 0.423374   | 0.269872  | 0.323782  | 0.844507  | 0.951124  | 0.233864  | 0.431986  | 0.212674   | 0.506464  | 0.229305   | 0.654725  | 0.82443   |
| ST7L                   | 2.22196   | 3.66822    | 3.8673    | 1.72974    | 1.27749   | 1.81007   | 2.06472   | 2.5047    | 1.14219   | 1.43665   | 1.44961    | 1.30769   | 0.698181   | 1.45036   | 1.21563   |
| ST8SIA1                | 0.297805  | 0.326003   | 0.293668  | 0.476305   | 0.455193  | 0.541643  | 0.228497  | 0.32395   | 0.0145077 | 0.346864  | 0.215158   | 0.102282  | 0.101451   | 0.141949  | 0.143703  |
| ST8SIA2                | 0         | 0.00592176 | 0.0101676 | 0.046441   | 0.0890933 | 0.118606  | 0.0374211 | 0.0327684 | 0.0149685 | 0.23653   | 0.337612   | 0.0615594 | 0.185028   | 0.34259   | 0.3942    |
| ST8SIA3                | 0         | 0          | 0         | 0          | 0         | 0         | 0         | 0         | 0         | 0         | 0          | 0         | 0          | 0         | 0         |
| ST8SIA4                | 0.487785  | 0.298706   | 0.351462  | 1.33615    | 0.161317  | 1.4604    | 0.201216  | 0.469861  | 0.306616  | 1.81692   | 3.49218    | 0.209414  | 1.1208     | 0.973698  | 1.7626    |
| ST8SIA5                | 0.0163903 | 0.00789708 | 0.0135592 | 0.00844532 | 0.0254597 | 0.0837366 | 0.0187139 | 0.0145663 | 0         | 0.0102857 | 0.00925128 | 0         | 0.00528746 | 0.0171325 | 0.0117692 |
| ST8SIA6                | 0.529504  | 0.188499   | 0.251108  | 0.0903657  | 0.0681054 | 0.49107   | 0.265703  | 0.254772  | 0.127332  | 0.118524  | 0.114219   | 0.0627436 | 0.0935684  | 0.051118  | 0.106558  |
| ST8SIA6-AS1            | 0.0415495 | 0.0400383  | 0.0687453 | 0.0428179  | 0.129081  | 0.0707576 | 0.0474398 | 0         | 0         | 0.104298  | 0.375233   | 0.0297298 | 0          | 0.108578  | 0         |
| STAB1                  | 5.83404   | 2.32023    | 2.91017   | 9.0744     | 16.8019   | 23.2179   | 9.16894   | 5.04151   | 0.486017  | 6.20341   | 11.5827    | 2.13667   | 5.78645    | 6.34899   | 22.3362   |
| STAB2                  | 0.227775  | 0.306203   | 0.290789  | 0.182567   | 0.886717  | 0.0838044 | 0.195852  | 0.149946  | 0.0821938 | 0.342351  | 0.761865   | 0.0563384 | 0.560622   | 0.339499  | 1.06615   |
| STAC                   | 0.0975867 | 0.0578692  | 0.111781  | 0.0928301  | 0.174907  | 0.217322  | 0.282839  | 0.10007   | 0.0365691 | 0.0847947 | 0.296593   | 0.0161137 | 0.106552   | 0.192242  | 0.20483   |
| STAC2                  | 9.36817   | 5.16319    | 8.287     | 0.198876   | 7.82276   | 16.324    | 9.12147   | 9.06924   | 0.0167672 | 0.0778616 | 0.0466251  | 0.0739556 | 0.013324   | 0.0647591 | 0.286691  |
| STAC3                  | 0.349804  | 0.525848   | 0.532464  | 0.490258   | 0.543367  | 1.50118   | 0.415371  | 0.360617  | 0.204491  | 0.228301  | 0.821362   | 0.240283  | 0.315969   | 0.380272  | 0.301418  |
| STAG1                  | 9.17031   | 7.91944    | 8.7871    | 7.55745    | 3.34718   | 8.22037   | 5.75947   | 7.82334   | 4.71943   | 6.15686   | 7.58078    | 4.20558   | 7.78094    | 5.71063   | 7.40516   |
| STAG2                  | 7.9524    | 7.37984    | 7.70857   | 8.40459    | 2.48037   | 8.14899   | 4.59791   | 6.99283   | 9.45485   | 9.47132   | 9.81136    | 4.95851   | 9.34916    | 6.42767   | 6.67845   |
| STAG3                  | 0.170948  | 0.211411   | 0.296965  | 0.078752   | 0.151624  | 0.215673  | 0.274264  | 0.172978  | 0.101091  | 0.0412446 | 0.181262   | 0.0886842 | 0.0416827  | 0.091346  | 0.124851  |
| STAG3L1                | 0.572411  | 1.10169    | 1.04471   | 0.370449   | 1.19563   | 0.770826  | 0.817049  | 0.632299  | 0.290336  | 0.497992  | 0.562921   | 0.473314  | 0.446993   | 0.595992  | 0.623587  |
| STAG3L2                | 5.1606    | 7.22683    | 8.15645   | 4.25391    | 9.68403   | 5.04684   | 7.50047   | 6.33529   | 2.50281   | 3.04383   | 4.02446    | 3.05763   | 2.97455    | 5.54234   | 4.50861   |
| STAG3L3                | 3.09363   | 3.51528    | 2.95401   | 2.10557    | 6.55188   | 2.74848   | 4.77137   | 3.68142   | 0.632717  | 1.40678   | 0.910768   | 1.38635   | 0.603173   | 3.39022   | 2.66624   |
| STAG3L4                | 2.22813   | 1.585      | 1.53895   | 1.70045    | 1.69787   | 1.73614   | 1.416     | 1.51315   | 1.4208    | 1.54336   | 2.61019    | 1.78981   | 1.41723    | 1.92254   | 1.79615   |
| STAG3L5P               | 4.54458   | 3.32385    | 3.01116   | 1.11053    | 3.50334   | 1.05593   | 6.55256   | 3.32335   | 0.735014  | 0.27988   | 0.456111   | 1.70835   | 0.202473   | 1.66655   | 2.05446   |
| STAG3L5P-PVRIG2P-PILRB | 5.47159   | 7.59553    | 6.54048   | 5.56166    | 11.9377   | 4.48498   | 5.9822    | 4.78561   | 3.72699   | 2.4238    | 2.18322    | 6.51751   | 1.01915    | 4.68095   | 5.64283   |
| STAM                   | 3.41221   | 2.58579    | 2.73701   | 4.86671    | 1.43322   | 3.8817    | 2.63056   | 3.27026   | 12.7396   | 7.40056   | 6.18169    | 5.57054   | 11.0079    | 5.06188   | 3.55964   |
| STAM-AS1               | 0.0439147 | 0.0507811  | 0.0435952 | 0.0362043  | 0.0682147 | 0.112178  | 0.0701965 | 0.0546388 | 0.117663  | 0.0551175 | 0.0495742  | 0.0502754 | 0.0566671  | 0.0963973 | 0.0378402 |

|            |           |           |           |          |           |           |           |          |           |          |           |           |           |           |          |
|------------|-----------|-----------|-----------|----------|-----------|-----------|-----------|----------|-----------|----------|-----------|-----------|-----------|-----------|----------|
| STAM2      | 3.686     | 3.77101   | 3.72433   | 3.78598  | 0.914336  | 3.63979   | 2.72073   | 4.0659   | 4.60285   | 4.38684  | 4.91717   | 2.90757   | 3.04083   | 2.9682    | 3.28224  |
| STAMB      | 2.97442   | 2.71119   | 2.8036    | 3.05924  | 1.61215   | 2.72028   | 2.51232   | 2.7001   | 3.0011    | 2.5179   | 2.77522   | 2.37305   | 3.11242   | 2.43487   | 1.8194   |
| STAMBPL1   | 1.061     | 0.958511  | 1.17945   | 1.4123   | 0.944223  | 1.12928   | 0.719278  | 0.775951 | 0.565328  | 0.818418 | 1.67184   | 0.395403  | 1.62581   | 0.9993    | 3.14269  |
| STAP1      | 0.0699538 | 0.0449397 | 0.0289354 | 0.108134 | 0.0543312 | 0.0992746 | 0.0399355 | 0.124338 | 0.0425979 | 0.073166 | 0.276392  | 0.0250269 | 0.112835  | 0.0487479 | 0        |
| STAP2      | 8.80851   | 15.3949   | 14.026    | 19.8771  | 25.8214   | 21.5781   | 15.7994   | 7.96208  | 39.9214   | 17.9347  | 25.8705   | 18.294    | 21.9268   | 12.2923   | 4.34646  |
| STAR       | 0.601118  | 1.07576   | 1.15797   | 0.592921 | 0.400176  | 0.4241    | 0.822698  | 0.78588  | 0.324213  | 0.355676 | 0.465317  | 0.325659  | 0.487568  | 0.390469  | 0.197322 |
| STARD10    | 6.35619   | 8.92391   | 9.0431    | 15.1039  | 23.5442   | 11.4786   | 10.4606   | 5.1626   | 21.5929   | 21.2592  | 27.1112   | 16.2846   | 25.5748   | 11.8826   | 4.46384  |
| STARD13    | 1.68055   | 1.00696   | 1.2324    | 1.51617  | 1.6208    | 3.51191   | 1.56035   | 0.940985 | 0.521053  | 2.29471  | 3.48159   | 0.790645  | 1.79126   | 3.36374   | 5.83478  |
| STARD13-AS | 0.753495  | 0.363045  | 0.563978  | 0.295809 | 0.390146  | 0.15276   | 0.409674  | 0.510204 | 0         | 0.315238 | 0.0810097 | 0.256736  | 0.11575   | 0.637596  | 0.927526 |
| STARD3     | 4.80417   | 4.95062   | 4.87549   | 6.66815  | 13.0438   | 10.0225   | 5.27179   | 3.40986  | 6.41528   | 5.47884  | 7.48804   | 4.99632   | 7.42136   | 4.75413   | 4.71637  |
| STARD3NL   | 2.15407   | 1.31395   | 1.27286   | 3.53206  | 1.03842   | 4.39115   | 1.12674   | 0.924175 | 0.878782  | 4.48823  | 9.76269   | 1.06296   | 4.05985   | 2.36254   | 3.7488   |
| STARD4     | 0.601135  | 0.637924  | 0.594007  | 2.05653  | 0.232096  | 1.3995    | 0.544971  | 0.704522 | 0.697564  | 2.58901  | 1.94752   | 0.843417  | 2.53057   | 2.12367   | 0.876209 |
| STARD4-AS1 | 0.828535  | 0.912671  | 0.702554  | 0.717233 | 0.624057  | 0.358557  | 0.659612  | 0.749673 | 0.201566  | 0.406833 | 0.713366  | 0.842288  | 0.192259  | 1.22115   | 2.31486  |
| STARD5     | 3.58753   | 8.60871   | 10.4457   | 14.8607  | 10.599    | 5.83991   | 10.9029   | 4.95437  | 19.3828   | 5.5401   | 6.03511   | 8.49368   | 6.52414   | 4.23713   | 1.91942  |
| STARD6     | 0         | 0         | 0         | 0        | 0         | 0         | 0         | 0        | 0.0297631 | 0        | 0         | 0.0174862 | 0.0630698 | 0         | 0        |
| STARD7     | 14.7713   | 11.7361   | 12.7851   | 19.6286  | 11.9998   | 21.2472   | 13.2      | 11.2641  | 13.3506   | 11.6371  | 20.508    | 8.94689   | 17.233    | 12.5236   | 10.5     |
| STARD7-AS1 | 1.23333   | 1.07599   | 1.14543   | 0.87438  | 1.21752   | 1.60104   | 1.53274   | 1.14685  | 0.720617  | 0.552956 | 0.847598  | 0.642683  | 0.482466  | 0.878838  | 0.809948 |
| STARD8     | 1.30301   | 0.438815  | 0.499806  | 1.25451  | 1.59681   | 3.8583    | 1.17371   | 0.6932   | 0.334955  | 1.22231  | 1.4404    | 0.422616  | 1.46322   | 1.35259   | 3.04975  |
| STARD9     | 3.81213   | 2.39914   | 2.88953   | 0.846305 | 2.53979   | 1.75766   | 4.48821   | 2.07207  | 0.209801  | 0.710143 | 0.504608  | 0.632244  | 0.531772  | 1.82706   | 4.44459  |
| STAT1      | 8.10992   | 9.60806   | 8.82289   | 35.6365  | 7.81267   | 41.5302   | 6.60744   | 11.0131  | 7.12793   | 9.03794  | 11.7148   | 5.44514   | 22.7745   | 7.34765   | 16.5928  |
| STAT2      | 7.0091    | 8.94779   | 7.64987   | 18.3513  | 15.5016   | 26.9689   | 8.79832   | 8.26321  | 5.59374   | 6.42223  | 9.032     | 5.82665   | 9.50383   | 8.24111   | 17.5676  |
| STAT3      | 25.6545   | 23.5768   | 27.3486   | 85.3764  | 30.5817   | 75.2254   | 23.7517   | 28.9296  | 29.682    | 35.9243  | 29.717    | 26.3371   | 64.1386   | 28.5302   | 31.4787  |
| STAT4      | 0.544664  | 0.294876  | 0.396671  | 1.31254  | 0.151291  | 1.01433   | 0.342169  | 0.386184 | 0.0456226 | 0.967125 | 1.87429   | 0.0911334 | 0.435047  | 0.556028  | 3.41078  |
| STAT5A     | 4.08015   | 3.314     | 4.42632   | 4.94616  | 4.29489   | 8.94612   | 3.53755   | 2.97118  | 0.975661  | 2.15907  | 2.60601   | 0.957558  | 5.22616   | 2.54404   | 4.82707  |
| STAT5B     | 7.55802   | 6.52946   | 7.0252    | 7.88912  | 7.85246   | 12.364    | 7.29864   | 5.47307  | 4.70098   | 6.06901  | 5.87866   | 3.63899   | 7.28658   | 6.51757   | 8.63234  |
| STAT6      | 16.2873   | 22.2364   | 23.6499   | 26.8733  | 35.662    | 39.8174   | 23.1856   | 14.5376  | 29.8635   | 16.637   | 13.2434   | 18.6592   | 25.3169   | 19.4996   | 16.1858  |

|            |           |           |          |           |           |           |           |           |           |           |           |           |           |           |          |
|------------|-----------|-----------|----------|-----------|-----------|-----------|-----------|-----------|-----------|-----------|-----------|-----------|-----------|-----------|----------|
| STATH      | 0         | 0         | 0        | 0         | 0         | 0         | 0         | 0         | 0         | 0         | 0         | 0         | 0         | 0         | 0.27697  |
| STAU1      | 10.2224   | 9.59699   | 10.5137  | 16.5654   | 10.0941   | 22.7059   | 9.7812    | 9.45651   | 18.8169   | 14.5609   | 15.652    | 11.1171   | 22.2062   | 11.5591   | 10.8916  |
| STAU2      | 2.72871   | 2.44433   | 2.61739  | 3.14735   | 0.943947  | 3.82235   | 1.75474   | 3.25081   | 4.9085    | 3.45926   | 3.99651   | 3.10823   | 2.99495   | 2.35847   | 2.53369  |
| STAU2-AS1  | 0.179056  | 0.226464  | 0.18516  | 0.0691961 | 0.121685  | 0.0857611 | 0.140553  | 0.198913  | 0.0545177 | 0.0702295 | 0         | 0.0800748 | 0         | 0.169619  | 0.128574 |
| STBD1      | 0.411619  | 0.429324  | 0.396403 | 1.20862   | 0.700261  | 2.09992   | 0.774095  | 0.346058  | 0.94557   | 1.96854   | 2.68063   | 0.561145  | 1.65341   | 1.06565   | 0.668391 |
| STC1       | 0.364128  | 0.0862833 | 0.118518 | 3.32184   | 0.148359  | 21.3986   | 0.470275  | 0.0901856 | 0.0218099 | 2.45741   | 2.57415   | 0.576613  | 4.22881   | 2.95136   | 3.43765  |
| STC2       | 0.727687  | 0.129392  | 0.182748 | 0.486544  | 0.181663  | 5.3405    | 0.153312  | 0.311806  | 0.32179   | 0.532771  | 0.4743    | 0.257241  | 0.628795  | 0.638396  | 0.746465 |
| STEAP1     | 1.22411   | 0.390656  | 0.463021 | 6.85195   | 0.61591   | 7.58144   | 0.563497  | 0.940782  | 0.0654271 | 6.62499   | 15.2299   | 0.616221  | 7.54998   | 3.6423    | 7.93944  |
| STEAP1B    | 0.267424  | 0.0724926 | 0.115938 | 1.4487    | 0.159447  | 1.75692   | 0.0780851 | 0.0843878 | 0.998693  | 3.0649    | 2.57224   | 0.353698  | 1.35114   | 0.476251  | 0.694449 |
| STEAP2     | 1.1818    | 0.876449  | 1.02293  | 2.62019   | 0.383917  | 2.65948   | 0.908349  | 1.06497   | 0.0632054 | 1.65284   | 3.4107    | 0.245965  | 1.59353   | 1.77705   | 5.66691  |
| STEAP2-AS1 | 0.221465  | 0.0711367 | 0.152676 | 0         | 0.0573352 | 0.031429  | 0.0421435 | 0.164016  | 0         | 0.0463268 | 0         | 0         | 0.0238146 | 0.0192912 | 0        |
| STEAP3     | 3.10515   | 1.46916   | 2.01387  | 4.43158   | 2.31513   | 5.52537   | 2.06966   | 1.35911   | 0.53692   | 2.2209    | 2.84865   | 1.16638   | 3.79489   | 1.8005    | 1.57795  |
| STEAP3-AS1 | 0.258577  | 0.176834  | 0.100081 | 0.149905  | 0.165227  | 0.145129  | 0.180307  | 0.179523  | 0.0584866 | 0.112946  | 0.0907411 | 0.175588  | 0.037045  | 0.130206  | 0.10707  |
| STEAP4     | 10.2756   | 4.89243   | 5.08786  | 23.8814   | 5.93647   | 43.4057   | 5.68705   | 10.3647   | 13.0323   | 20.7813   | 14.303    | 22.7326   | 25.0505   | 9.04525   | 25.0435  |
| STH        | 0.0260034 | 0.0125288 | 0.172095 | 0.0267973 | 0.0403923 | 0         | 0.118759  | 0.0924387 | 0         | 0         | 0         | 0.0186061 | 0         | 0.0135905 | 0        |
| STIL       | 0.66844   | 0.441506  | 0.446779 | 1.80195   | 0.178783  | 1.24764   | 0.293151  | 0.499634  | 0.479824  | 1.08343   | 1.58912   | 0.649329  | 1.80792   | 1.21002   | 0.692954 |
| STIM1      | 11.4004   | 11.1942   | 11.9587  | 19.0881   | 19.1078   | 18.6749   | 14.2559   | 8.52094   | 16.727    | 20.2861   | 11.7992   | 18.452    | 33.3188   | 13.4003   | 10.1836  |
| STIM2      | 3.34838   | 3.03745   | 2.78824  | 4.54621   | 2.51493   | 3.80525   | 2.53864   | 2.8503    | 5.56082   | 3.50491   | 3.96913   | 2.63261   | 4.55693   | 3.67524   | 2.31882  |
| STIMATE    | 4.27015   | 4.20706   | 3.96004  | 3.08803   | 5.71083   | 4.77905   | 5.57423   | 3.24457   | 3.87166   | 2.74787   | 2.99057   | 2.66756   | 3.4256    | 2.93593   | 3.16193  |
| STIP1      | 6.43131   | 7.33024   | 7.40368  | 15.8093   | 8.35596   | 16.5912   | 7.12466   | 5.29773   | 15.5389   | 13.083    | 13.5487   | 10.6463   | 24.5151   | 12.5163   | 7.17601  |
| STK10      | 2.88375   | 2.89743   | 3.70251  | 4.10899   | 5.22604   | 5.84403   | 4.93886   | 2.63801   | 10.1148   | 3.47945   | 3.46808   | 2.23122   | 4.6837    | 2.76717   | 4.66601  |
| STK11      | 5.84934   | 6.25609   | 6.30004  | 13.1842   | 20.707    | 16.8788   | 5.95266   | 3.46561   | 12.9485   | 8.53851   | 6.98597   | 7.67822   | 11.5589   | 7.43235   | 5.03212  |
| STK11IP    | 1.85195   | 2.25537   | 2.28225  | 3.50768   | 6.49743   | 4.80144   | 2.84364   | 1.62884   | 3.60098   | 2.42859   | 1.45623   | 2.65482   | 3.61346   | 2.63673   | 3.1182   |
| STK16      | 1.40817   | 1.49216   | 1.50565  | 2.19263   | 2.08879   | 2.96443   | 1.55465   | 1.12481   | 2.20417   | 2.14429   | 2.82426   | 1.42897   | 1.90374   | 1.4862    | 1.21961  |
| STK17A     | 3.01866   | 2.25679   | 2.65789  | 4.95426   | 1.09685   | 3.11648   | 1.84088   | 2.65659   | 12.6488   | 14.3721   | 10.15     | 5.94507   | 18.679    | 10.2596   | 4.97742  |
| STK17B     | 4.29371   | 3.02142   | 3.67615  | 4.87148   | 1.5309    | 4.441     | 2.85799   | 5.75521   | 2.79891   | 6.82523   | 9.44205   | 1.81914   | 6.87081   | 4.03359   | 7.12073  |



|            |           |            |            |            |            |            |           |           |           |           |           |            |            |            |            |
|------------|-----------|------------|------------|------------|------------|------------|-----------|-----------|-----------|-----------|-----------|------------|------------|------------|------------|
| STK19      | 0.401958  | 0.533      | 0.565818   | 0.587326   | 0.909724   | 0.800415   | 0.633202  | 0.296225  | 0.841279  | 0.647941  | 0.900872  | 0.54692    | 0.699302   | 0.519219   | 0.378945   |
| STK24      | 16.6542   | 16.1955    | 17.7206    | 29.4376    | 12.5671    | 24.0256    | 19.1688   | 17.8575   | 46.1463   | 21.2812   | 22.3065   | 19.526     | 34.3145    | 18.4492    | 10.7988    |
| STK24-AS1  | 0.320824  | 0.400497   | 0.373984   | 0.330618   | 0.362436   | 0.384931   | 0.366306  | 0.194401  | 0.106562  | 0.146424  | 0.279859  | 0.250427   | 0.0940881  | 0.198163   | 0.335086   |
| STK25      | 6.33843   | 8.49057    | 7.58611    | 13.6734    | 16.4578    | 12.9823    | 7.41294   | 4.57824   | 9.73387   | 11.1015   | 13.2256   | 9.29848    | 16.5037    | 12.3766    | 9.36966    |
| STK26      | 1.44297   | 1.59105    | 1.50938    | 1.80159    | 0.775881   | 1.589      | 1.50496   | 1.20841   | 6.22685   | 2.49024   | 2.25545   | 2.49185    | 6.13208    | 2.91512    | 1.21548    |
| STK3       | 2.72475   | 2.68244    | 2.93664    | 4.48697    | 1.57237    | 3.80778    | 1.89987   | 2.63103   | 3.03134   | 4.44668   | 4.32817   | 2.38122    | 5.17107    | 3.82288    | 3.64424    |
| STK31      | 0.0800372 | 0.14832    | 0.122238   | 0.0253786  | 0.019127   | 0.0471812  | 0.15465   | 0.0820735 | 0.367411  | 0.0077273 | 0         | 0.00881057 | 0          | 0          | 0.0176836  |
| STK32A     | 0.714911  | 0.451572   | 0.656337   | 0.0898459  | 0.440138   | 0.415723   | 0.960601  | 0.623731  | 0.0955625 | 0.0547126 | 0.0836571 | 0.0155957  | 0.0168752  | 0.0592362  | 0.225374   |
| STK32A-AS1 | 0.0393255 | 0.0442111  | 0.0542214  | 0.00675434 | 0          | 0.0502277  | 0.0823177 | 0.0232995 | 0.023947  | 0         | 0.0147979 | 0          | 0          | 0          | 0          |
| STK32B     | 0.735207  | 0.455884   | 0.518306   | 0.757654   | 0.794456   | 1.25204    | 1.07302   | 0.437488  | 0.0778609 | 0.545632  | 0.80109   | 0.224147   | 0.804336   | 0.491174   | 1.43228    |
| STK32C     | 0.395561  | 0.527379   | 0.632059   | 0.859947   | 1.25414    | 1.67946    | 0.643431  | 0.293754  | 0.303568  | 0.625689  | 0.831909  | 0.360579   | 1.03135    | 0.642869   | 0.91826    |
| STK33      | 0.045078  | 0.0369228  | 0          | 0.00929084 | 0.00700217 | 0.00767667 | 0.0102937 | 0.0200308 | 0         | 0.022631  | 0.0457987 | 0          | 0.00581682 | 0.00235597 | 0.00647377 |
| STK35      | 3.5377    | 5.04398    | 5.74277    | 6.82639    | 6.21302    | 7.09428    | 5.27161   | 3.91718   | 6.62984   | 5.50491   | 4.71492   | 5.32868    | 8.72243    | 5.20915    | 3.66528    |
| STK36      | 1.08798   | 1.29017    | 1.0242     | 1.52715    | 1.88669    | 2.18822    | 1.07623   | 0.950236  | 0.765324  | 0.735737  | 0.989968  | 1.02679    | 0.44175    | 1.53187    | 2.12821    |
| STK38      | 6.25264   | 7.09688    | 7.26067    | 7.98044    | 5.64334    | 7.65222    | 5.44342   | 4.73549   | 12.6995   | 7.20773   | 7.19519   | 6.51715    | 8.88675    | 7.39193    | 7.45088    |
| STK38L     | 3.75575   | 3.39597    | 4.15522    | 4.68006    | 1.05816    | 5.03478    | 2.18299   | 3.2369    | 7.2234    | 6.19014   | 8.00277   | 2.10893    | 6.05065    | 5.1672     | 5.96767    |
| STK39      | 6.63048   | 3.52162    | 4.07589    | 6.65079    | 3.78817    | 9.39556    | 3.60767   | 5.52197   | 10.4771   | 10.4601   | 7.89993   | 8.06225    | 15.6204    | 8.06125    | 3.51245    |
| STK4       | 3.9065    | 3.71019    | 4.04833    | 4.82974    | 2.61514    | 3.93939    | 3.99691   | 3.94874   | 8.75985   | 3.78576   | 4.22375   | 3.82003    | 4.31458    | 3.43344    | 3.60977    |
| STK4-AS1   | 0.0437487 | 0.0210788  | 0.018096   | 0.0901686  | 0          | 0.1111754  | 0.0124877 | 0.0583203 | 0.133202  | 0.137273  | 0.160507  | 0.0391292  | 0.0493962  | 0.0400137  | 0.0157072  |
| STK40      | 5.05019   | 7.17987    | 9.3548     | 8.70641    | 8.23082    | 15.2091    | 8.9568    | 6.50329   | 11.5654   | 7.7503    | 6.97081   | 7.06181    | 13.1939    | 8.234      | 6.74252    |
| STKLD1     | 0.286438  | 0.352067   | 0.20311    | 0.138555   | 0.290572   | 0.233943   | 0.573999  | 0.213001  | 0.0996713 | 0.0586954 | 0.0395943 | 0.117117   | 0.0339444  | 0.128319   | 0.159508   |
| STMN1      | 3.82934   | 2.22271    | 1.83908    | 8.44865    | 2.04597    | 7.62085    | 2.03205   | 2.33541   | 2.82482   | 5.35458   | 12.0041   | 2.69862    | 5.06155    | 5.58439    | 3.22029    |
| STMN2      | 3.12256   | 0.986872   | 1.12963    | 0.506998   | 0.951365   | 6.06139    | 0.664899  | 1.48123   | 0.0244561 | 0.579678  | 0.974752  | 0.00718415 | 0.297988   | 0.325347   | 3.44619    |
| STMN3      | 4.1593    | 2.9387     | 3.56701    | 5.57825    | 7.64515    | 8.56188    | 3.50127   | 2.92855   | 0.629328  | 3.13646   | 4.72404   | 1.03648    | 2.33378    | 3.72342    | 4.7689     |
| STMN4      | 0         | 0.00931163 | 0.00799397 | 0          | 0          | 0.00822798 | 0.011033  | 0.0429387 | 0.0353056 | 0         | 0         | 0          | 0          | 0          | 0          |
| STMND1     | 0         | 0.0168694  | 0.0289645  | 0.0360811  | 0.027193   | 0.0596248  | 0         | 0         | 0.0213204 | 0         | 0         | 0          | 0          | 0          | 0          |

|               |           |            |           |            |           |           |           |            |                 |            |            |            |            |            |           |
|---------------|-----------|------------|-----------|------------|-----------|-----------|-----------|------------|-----------------|------------|------------|------------|------------|------------|-----------|
| STMP1         | 5.91084   | 4.5308     | 3.79386   | 15.4192    | 3.68414   | 7.32861   | 4.37932   | 6.35637    | 8.12396         | 9.47687    | 12.9791    | 12.1312    | 9.97046    | 7.31642    | 4.65681   |
| STN1          | 2.36394   | 2.03365    | 1.64839   | 1.83996    | 1.51984   | 3.75512   | 1.7654    | 1.60263    | 2.67461         | 2.09303    | 2.9548     | 1.83199    | 2.44908    | 1.46319    | 1.90772   |
| STOM          | 24.9716   | 14.7762    | 18.2828   | 55.0295    | 10.035    | 74.8458   | 16.6101   | 20.4563    | 24.6623         | 22.466     | 36.8026    | 16.027     | 42.2249    | 20.775     | 38.9981   |
| STOML1        | 1.08951   | 1.22049    | 1.39705   | 2.33911    | 2.94758   | 3.44797   | 1.03664   | 0.782683   | 0.641337        | 1.11675    | 1.36316    | 1.00046    | 1.68122    | 1.22427    | 0.873611  |
| STOML2        | 11.2562   | 10.0364    | 9.71327   | 25.7328    | 14.3696   | 32.3751   | 12.5195   | 6.97087    | 15.6981         | 17.9843    | 29.9962    | 11.0628    | 24.8549    | 18.0125    | 9.8246    |
| STOML3        | 0.0579155 | 0.00558092 | 0         | 0.0119367  | 0         | 0         | 0         | 0.0205882  | 0.0141069       | 0          | 0          | 0.00828802 | 0          | 0.0302692  | 0         |
| STON1         | 1.84628   | 1.18144    | 1.03315   | 3.45181    | 1.31495   | 4.00041   | 1.51739   | 1.12133    | 0.450081        | 2.2676     | 3.45873    | 1.03676    | 1.50966    | 1.75785    | 3.60595   |
| STON1-GTF2A1L | 0.0818719 | 0.429531   | 0.250336  | 0.408219   | 0.12142   | 0.746228  | 0.246377  | 0.0293341  | 0.00033953<br>3 | 0.304037   | 0.368327   | 0.181661   | 0.438998   | 0.35232    | 0.74688   |
| STON2         | 5.74236   | 6.37191    | 4.69318   | 14.7876    | 7.5668    | 8.59911   | 4.66053   | 5.63466    | 5.18299         | 12.4485    | 9.14597    | 8.58424    | 19.7445    | 11.8382    | 6.09902   |
| STOX1         | 0.399351  | 0.142758   | 0.0905858 | 0.199134   | 0.130069  | 0.515548  | 0.198566  | 0.080141   | 0.149047        | 0.11318    | 0.247223   | 0.142873   | 0.062337   | 0.138023   | 0.0370012 |
| STOX2         | 1.91168   | 1.35558    | 1.30969   | 1.05205    | 1.49331   | 1.02886   | 1.56842   | 1.82239    | 0.918396        | 1.09313    | 0.789047   | 1.24479    | 0.97165    | 0.905788   | 0.519318  |
| STPG1         | 0.675986  | 1.06859    | 0.873395  | 1.98029    | 1.27421   | 2.00487   | 0.997295  | 0.769514   | 1.87781         | 1.48714    | 1.43189    | 1.4565     | 1.93569    | 1.43305    | 0.818092  |
| STPG2         | 0.0419765 | 0.208991   | 0.289383  | 0          | 0.065204  | 0.0953132 | 0.175734  | 0.161656   | 0.0852045       | 0          | 0.110568   | 0.0400471  | 0          | 0.0292517  | 0         |
| STPG2-AS1     | 0         | 0          | 0         | 0          | 0         | 0         | 0         | 0          | 0               | 0          | 0          | 0          | 0          | 0          | 0         |
| STPG3         | 0.101648  | 0.239315   | 0.282811  | 0          | 0.197818  | 0.182697  | 0.301658  | 0.139732   | 0               | 0.0360129  | 0          | 0.0706476  | 0          | 0.0219314  | 0         |
| STPG3-AS1     | 0.2408    | 0.308728   | 0.362096  | 0.0280418  | 0.324582  | 0.24108   | 0.236446  | 0.130587   | 0.0662801       | 0.0427513  | 0          | 0.144572   | 0          | 0.119544   | 0         |
| STPG4         | 0.0485383 | 0.0187092  | 0.0240926 | 0.010004   | 0.0603174 | 0.0413297 | 0.0554194 | 0.0172547  | 0               | 0.0243682  | 0          | 0          | 0.00626333 | 0.0456628  | 0.111531  |
| STRA6         | 0.0216695 | 0.0250577  | 0.0107559 | 0.0535946  | 0.107713  | 0.0295221 | 0.0296899 | 0.00770323 | 0.0369475       | 0.152306   | 0.273977   | 0.0651215  | 0.0559243  | 0.122315   | 0.161825  |
| STRA8         | 0         | 0.0449171  | 0.0192805 | 0          | 0.0362026 | 0         | 0         | 0          | 0               | 0          | 0          | 0          | 0          | 0          | 0         |
| STRADA        | 3.37685   | 3.30019    | 3.19643   | 4.01469    | 4.5758    | 5.33604   | 2.57039   | 2.54701    | 1.73061         | 2.7053     | 3.08208    | 2.55332    | 3.0595     | 2.89976    | 3.23306   |
| STRADB        | 1.7741    | 1.37823    | 1.44292   | 1.59203    | 0.557351  | 2.97033   | 1.11522   | 1.2578     | 0.558372        | 1.4636     | 2.07025    | 0.570525   | 1.0932     | 1.25019    | 2.14705   |
| STRAP         | 15.7567   | 11.8589    | 12.1004   | 28.6195    | 10.8319   | 28.9849   | 13.0109   | 12.74      | 25.4041         | 25.4179    | 28.8685    | 16.3335    | 39.0264    | 22.9848    | 14.7601   |
| STRBP         | 1.48519   | 1.73664    | 1.49815   | 1.90954    | 0.718222  | 1.53604   | 1.11983   | 1.56273    | 1.73627         | 1.42003    | 1.15068    | 1.17548    | 1.8645     | 1.39318    | 0.699236  |
| STRC          | 0.457406  | 0.640936   | 0.649179  | 0.0864899  | 0.430216  | 0.489524  | 0.589329  | 0.566868   | 0.0357751       | 0.0579358  | 0.0189488  | 0.108094   | 0.0487347  | 0.103081   | 0.0542388 |
| STRCP1        | 0.0170955 | 0.037066   | 0.0424278 | 0.00440436 | 0.0199164 | 0.0109175 | 0.0634371 | 0.0189913  | 0               | 0.00536416 | 0.00482468 | 0.0152904  | 0          | 0.00446743 | 0         |

|              |           |          |           |           |           |          |           |           |           |           |            |           |           |           |           |
|--------------|-----------|----------|-----------|-----------|-----------|----------|-----------|-----------|-----------|-----------|------------|-----------|-----------|-----------|-----------|
| STRIP1       | 4.49075   | 5.17547  | 4.89986   | 7.66243   | 7.77614   | 8.87857  | 5.90684   | 3.88392   | 9.82188   | 8.87879   | 6.05166    | 7.64758   | 10.1302   | 7.0446    | 5.38242   |
| STRIP2       | 0.324701  | 0.209246 | 0.127592  | 1.30081   | 0.353061  | 0.476925 | 0.250245  | 0.17314   | 2.49627   | 1.29901   | 0.861385   | 0.667955  | 1.34601   | 0.963064  | 0.885991  |
| STRN         | 4.23333   | 4.05091  | 4.33523   | 4.50286   | 1.58217   | 3.54596  | 3.45516   | 4.88317   | 9.24473   | 6.10376   | 5.39362    | 4.21557   | 9.76121   | 4.58277   | 2.8384    |
| STRN3        | 5.14166   | 4.92566  | 5.80445   | 6.39453   | 3.28667   | 6.79115  | 3.16061   | 4.36976   | 9.86029   | 8.27652   | 6.57781    | 6.0716    | 9.46054   | 8.05041   | 5.04607   |
| STRN4        | 10.036    | 9.89327  | 10.0558   | 17.4671   | 19.2065   | 25.194   | 10.8823   | 7.52869   | 16.4549   | 11.9175   | 11.6791    | 11.5502   | 18.2853   | 11.8168   | 10.2712   |
| STS          | 1.62504   | 1.17741  | 1.16933   | 1.14382   | 1.79555   | 2.73086  | 2.96168   | 1.37062   | 8.16281   | 0.858169  | 1.88639    | 0.914852  | 1.18299   | 0.661827  | 1.77014   |
| STT3A        | 6.35174   | 5.85192  | 6.39073   | 12.135    | 3.87492   | 11.7347  | 6.48656   | 5.04895   | 4.83478   | 9.62857   | 14.7462    | 5.48139   | 13.0107   | 9.42944   | 10.2775   |
| STT3A-AS1    | 0.0547117 | 0.105444 | 0         | 0         | 0         | 0        | 0.249872  | 0.0972464 | 0.0666327 | 0         | 0          | 0         | 0         | 0.171568  | 0         |
| STT3B        | 13.033    | 10.8385  | 10.3387   | 17.3155   | 7.72546   | 13.9857  | 8.47408   | 11.2789   | 29.9189   | 18.8225   | 22.7282    | 11.5518   | 21.412    | 15.6547   | 12.1972   |
| STUB1        | 11.1126   | 12.0626  | 12.0325   | 15.5089   | 23.564    | 22.3729  | 12.0224   | 7.59598   | 30.5181   | 16.4403   | 30.1382    | 13.2456   | 17.7056   | 12.3103   | 7.36915   |
| STUM         | 0.898089  | 0.612166 | 0.887082  | 0.0959555 | 0.485232  | 1.72891  | 1.27576   | 0.654     | 0.0548714 | 0.0376988 | 0.0474703  | 0.0171935 | 0.0523242 | 0.0612235 | 0.578023  |
| STX10        | 6.34648   | 6.03561  | 5.86874   | 10.9232   | 16.3101   | 12.9157  | 6.18394   | 3.44024   | 9.87405   | 12.1984   | 17.7234    | 8.02415   | 12.7773   | 8.39659   | 6.06032   |
| STX11        | 1.11426   | 1.15072  | 1.35661   | 2.27923   | 1.43692   | 1.90472  | 0.974577  | 1.10611   | 2.71922   | 3.50948   | 3.15653    | 2.62954   | 5.87885   | 1.9163    | 1.77534   |
| STX12        | 6.39647   | 7.25391  | 8.55612   | 8.72961   | 3.21079   | 9.5362   | 5.99882   | 6.66661   | 28.1307   | 9.31124   | 13.6016    | 7.5725    | 10.2956   | 7.98645   | 7.77206   |
| STX16        | 9.35983   | 12.057   | 11.1096   | 8.62715   | 11.6306   | 9.69287  | 8.18642   | 9.39199   | 7.9855    | 7.09225   | 5.47502    | 9.10008   | 7.06095   | 8.53571   | 7.52707   |
| STX16-NPEPL1 | 1.11761   | 1.34998  | 1.35391   | 0.570729  | 3.69222   | 0.389542 | 1.30242   | 0.684259  | 0.213766  | 0.681765  | 0.00125786 | 0.242053  | 0.237094  | 0.224185  | 0.374046  |
| STX17        | 4.99847   | 6.18226  | 6.26638   | 5.27881   | 2.42506   | 4.99496  | 4.78906   | 5.77608   | 8.10725   | 4.41086   | 4.27737    | 4.75354   | 4.90881   | 4.01143   | 3.52186   |
| STX17-AS1    | 0.461184  | 0.949423 | 1.10989   | 0.648087  | 0.195376  | 0.571189 | 0.430826  | 1.00602   | 1.22546   | 0.263106  | 0.94658    | 0.719977  | 0.108201  | 0.372508  | 0.180632  |
| STX18        | 2.86173   | 3.13458  | 3.34383   | 4.01608   | 3.27337   | 4.88381  | 2.44864   | 2.32143   | 2.69138   | 3.58585   | 5.4679     | 2.36182   | 3.64486   | 3.04095   | 2.91923   |
| STX18-AS1    | 0.719983  | 0.581736 | 0.58342   | 0.21222   | 0.826915  | 0.404592 | 0.597152  | 0.679453  | 0.0909948 | 0.159383  | 0.163816   | 0.213843  | 0.0249593 | 0.161079  | 0.362139  |
| STX18-IT1    | 0.384294  | 0.123439 | 0.0353239 | 0.132009  | 0.0663268 | 0        | 0.0975055 | 0.0379476 | 0.104006  | 0         | 0          | 0.0611051 | 0         | 0.0223165 | 0.551895  |
| STX19        | 0.660658  | 1.29255  | 1.35808   | 1.05219   | 0.217685  | 0.613682 | 0.160007  | 0.907395  | 1.29225   | 0.728685  | 0.949201   | 0.644616  | 0.632921  | 0.387142  | 0.0575023 |
| STX1A        | 0.25049   | 0.430285 | 0.468503  | 0.50505   | 0.67669   | 0.695506 | 0.397914  | 0.367797  | 0.145902  | 1.48994   | 0.663898   | 0.787062  | 1.51075   | 1.44009   | 1.51714   |
| STX1B        | 0.311941  | 1.07833  | 0.909353  | 0.346977  | 1.82284   | 0.712519 | 0.672754  | 0.638063  | 0.319606  | 0.28587   | 0.296247   | 0.510176  | 0.108618  | 0.30019   | 0.575983  |
| STX2         | 1.24598   | 0.844486 | 1.13087   | 1.58506   | 0.935308  | 1.91152  | 1.35455   | 0.916589  | 0.406593  | 2.1774    | 3.25729    | 0.759296  | 2.00014   | 2.19354   | 3.71576   |
| STX3         | 2.45548   | 2.36962  | 2.41277   | 2.31314   | 2.28743   | 2.63864  | 2.06087   | 2.15682   | 3.58249   | 3.70992   | 3.1835     | 2.56769   | 3.71741   | 2.88796   | 1.94542   |

|            |           |           |           |            |           |           |           |           |            |           |            |            |            |           |            |
|------------|-----------|-----------|-----------|------------|-----------|-----------|-----------|-----------|------------|-----------|------------|------------|------------|-----------|------------|
| STX4       | 5.50405   | 7.82999   | 8.67484   | 9.70605    | 13.5431   | 15.3729   | 4.32049   | 4.19576   | 10.2139    | 8.36718   | 7.28462    | 7.21452    | 11.2582    | 6.8631    | 8.02376    |
| STX5       | 7.47944   | 8.64898   | 8.51933   | 11.4407    | 13.4426   | 13.832    | 10.1208   | 5.96592   | 15.8696    | 11.4978   | 20.0547    | 7.89055    | 13.2888    | 8.0637    | 8.46887    |
| STX6       | 4.86403   | 5.10491   | 4.51079   | 8.41702    | 6.26561   | 8.68741   | 3.98549   | 5.10945   | 7.3577     | 7.8516    | 6.96403    | 6.27502    | 11.8318    | 6.46511   | 4.52804    |
| STX7       | 5.146     | 4.22799   | 4.36109   | 5.43732    | 2.12486   | 6.86581   | 4.36151   | 5.14396   | 5.51362    | 6.44707   | 7.34813    | 4.09826    | 7.53787    | 3.70358   | 5.19192    |
| STX8       | 4.90117   | 4.83811   | 4.39082   | 8.84504    | 4.30795   | 6.39224   | 5.18653   | 3.95204   | 4.48408    | 6.84162   | 12.604     | 3.57534    | 5.56858    | 3.67366   | 5.56228    |
| STXBP1     | 2.89361   | 2.96261   | 3.19014   | 3.00598    | 4.17761   | 8.00758   | 4.10315   | 2.48347   | 4.63957    | 5.18407   | 3.44436    | 3.89882    | 7.30977    | 4.55227   | 5.06044    |
| STXBP2     | 4.6426    | 6.48022   | 6.98661   | 14.8698    | 12.0857   | 12.2069   | 7.28521   | 4.39551   | 12.8142    | 11.039    | 10.6663    | 9.27291    | 16.535     | 7.05366   | 4.62361    |
| STXBP3     | 6.14466   | 5.25152   | 6.03641   | 5.91764    | 1.07947   | 5.36446   | 2.99632   | 5.96469   | 10.223     | 6.18581   | 6.92623    | 4.6322     | 8.94963    | 4.25328   | 5.39713    |
| STXBP4     | 1.17132   | 0.774609  | 0.940495  | 0.978283   | 0.332973  | 1.05277   | 0.576905  | 0.745006  | 0.354302   | 1.0041    | 1.21424    | 0.451921   | 0.614954   | 0.756223  | 1.13793    |
| STXBP5     | 5.64409   | 6.46223   | 6.57978   | 5.78221    | 3.31491   | 4.59937   | 5.10883   | 5.67817   | 6.6021     | 5.61102   | 5.32375    | 5.33852    | 6.41751    | 4.40094   | 4.14374    |
| STXBP5-AS1 | 0.348114  | 0.269253  | 0.261628  | 1.06112    | 0.861745  | 0.271058  | 0.239796  | 0.322508  | 1.38913    | 0.52434   | 0.929506   | 0.652682   | 0.309237   | 0.257105  | 0.325007   |
| STXBP5L    | 0.0694923 | 0.0162339 | 0.0174209 | 0.00651035 | 0         | 0.0573787 | 0.0384699 | 0.0374297 | 0.00512932 | 0.0105721 | 0.00237722 | 0.00150678 | 0.00407601 | 0.0176096 | 0.00604847 |
| STXBP6     | 0.586471  | 0.789026  | 1.02632   | 0.330082   | 0.189206  | 0.341878  | 0.82414   | 0.813884  | 1.21423    | 0.107581  | 0.371768   | 0.203362   | 0.21248    | 0.0730921 | 0.213801   |
| STYK1      | 0.409543  | 0.368587  | 0.460261  | 0.987429   | 0.552141  | 0.53953   | 0.123518  | 0.473845  | 1.44928    | 0.387939  | 0.802523   | 0.375975   | 0.74285    | 0.432129  | 0.199751   |
| STYX       | 2.81861   | 2.64493   | 2.85528   | 3.52092    | 1.01171   | 3.34819   | 2.20065   | 3.7081    | 3.20813    | 3.87206   | 5.19502    | 2.54692    | 5.68037    | 3.1669    | 2.85422    |
| STYXL1     | 1.67987   | 2.62461   | 2.09131   | 6.90781    | 5.57351   | 5.11051   | 3.05394   | 2.31911   | 10.8651    | 7.08262   | 7.23564    | 4.53956    | 9.29158    | 2.87259   | 1.38192    |
| SUB1       | 7.62196   | 4.40685   | 5.10439   | 19.776     | 2.27565   | 10.384    | 3.18715   | 6.94384   | 7.22523    | 16.1593   | 24.4346    | 6.95054    | 18.4188    | 12.2508   | 7.72387    |
| SUCLA2     | 5.13339   | 4.69421   | 4.03437   | 7.34003    | 2.49185   | 7.56732   | 3.00384   | 4.02038   | 11.019     | 8.85904   | 10.9138    | 5.5938     | 10.5847    | 6.69057   | 4.23902    |
| SUCLG1     | 12.1036   | 10.0486   | 8.92233   | 17.7276    | 12.5834   | 15.8919   | 9.88406   | 7.77814   | 47.2791    | 21.3516   | 32.2401    | 17.9006    | 17.6168    | 12.5024   | 8.25776    |
| SUCLG2     | 8.33428   | 5.30947   | 6.02476   | 7.89906    | 3.86085   | 12.9426   | 5.35824   | 7.1288    | 5.12273    | 5.7374    | 8.69214    | 3.08429    | 6.25753    | 4.65106   | 6.40264    |
| SUCLG2-AS1 | 0.0881304 | 0.13588   | 0.0874892 | 0.0999031  | 0.0821382 | 0.14258   | 0.0603747 | 0.078323  | 0.0321999  | 0.0331838 | 0.139284   | 0.0126119  | 0.0284307  | 0.0644851 | 0.0632832  |
| SUCNR1     | 0.232482  | 0.304037  | 0.55866   | 1.11233    | 0.0429911 | 0.221522  | 0.13904   | 0.418141  | 0.0606723  | 0.319578  | 0.4624     | 0.0396065  | 0.16071    | 0.0810036 | 0.103342   |
| SUCO       | 3.91717   | 3.96639   | 4.46905   | 3.84152    | 1.69477   | 3.28379   | 2.30544   | 4.2994    | 6.22856    | 5.67241   | 5.03354    | 3.96841    | 7.28132    | 3.90056   | 3.49829    |
| SUDS3      | 6.92138   | 7.0753    | 7.12289   | 7.63711    | 5.77103   | 5.78926   | 6.33773   | 6.00759   | 7.87505    | 6.07601   | 5.75228    | 5.9156     | 7.38378    | 5.92243   | 4.40761    |
| SUFU       | 3.12557   | 4.30508   | 4.49094   | 4.54151    | 7.59193   | 6.65717   | 4.09754   | 3.4241    | 3.13173    | 2.21139   | 3.8167     | 3.37013    | 3.13941    | 2.82817   | 3.13339    |
| SUGCT      | 0.843757  | 0.309741  | 0.409946  | 0.703894   | 0.353666  | 1.18601   | 0.367     | 0.321369  | 0.309912   | 1.07581   | 2.63071    | 0.479151   | 0.846826   | 0.83297   | 1.03864    |

|                         |           |           |            |           |            |           |           |           |           |           |           |            |            |            |           |
|-------------------------|-----------|-----------|------------|-----------|------------|-----------|-----------|-----------|-----------|-----------|-----------|------------|------------|------------|-----------|
| SUGP1                   | 2.90258   | 3.52295   | 3.556      | 5.74262   | 5.42077    | 8.06541   | 3.95917   | 2.85525   | 4.04772   | 3.05903   | 3.41421   | 2.96469    | 5.52526    | 3.5204     | 2.9752    |
| SUGP2                   | 4.75209   | 5.08055   | 4.90428    | 5.03871   | 7.35236    | 6.02902   | 5.7036    | 4.4019    | 2.16267   | 4.10737   | 2.04295   | 5.4655     | 3.18814    | 6.47592    | 7.23359   |
| SUGT1                   | 4.79266   | 4.60707   | 5.02146    | 7.93374   | 2.09324    | 6.3957    | 3.18426   | 4.47802   | 5.5087    | 8.47139   | 10.6619   | 6.51477    | 12.1041    | 6.47951    | 4.4764    |
| SUGT1P1                 | 0.42133   | 0.899014  | 0.398347   | 0.465207  | 0.607723   | 0.691888  | 0.377976  | 0.508173  | 0.256566  | 0.264406  | 0.305762  | 0.559878   | 0.388343   | 0.408953   | 0.648303  |
| SUGT1P3                 | 0.543185  | 0.349542  | 0.540939   | 0.136413  | 0.364698   | 0.216735  | 0.327466  | 0.625098  | 0.107476  | 0.129347  | 0.249053  | 0.214965   | 0          | 0.126836   | 0.475258  |
| SUGT1P4-STRA6LP         | 0.635901  | 0.435587  | 0.417279   | 0.0400701 | 0.3346     | 0.391732  | 0.45479   | 0.456497  | 0.016821  | 0.0502365 | 0.122907  | 0.0215804  | 0.0385717  | 0.102434   | 0.477455  |
| SUGT1P4-STRA6LP-CCDC180 | 0.705514  | 0.407212  | 0.411999   | 0.141801  | 0.442      | 0.477141  | 0.578314  | 0.281957  | 0.0164512 | 0.0430144 | 0.0885826 | 0.0977198  | 0.0560426  | 0.0881509  | 0.549706  |
| SULF1                   | 3.21329   | 1.09702   | 0.750389   | 2.10036   | 2.4643     | 6.42592   | 2.46546   | 1.10312   | 0.478556  | 12.0575   | 20.334    | 1.13777    | 7.11038    | 6.63892    | 14.1343   |
| SULF2                   | 14.3608   | 14.423    | 8.98559    | 29.0026   | 25.9261    | 35.4535   | 7.49799   | 11.8436   | 14.0582   | 27.9443   | 29.3022   | 24.2917    | 28.1574    | 22.9095    | 44.8562   |
| SULT1A1                 | 1.0307    | 0.685929  | 0.819455   | 0.392777  | 1.02608    | 2.17318   | 0.660352  | 0.713764  | 0.220086  | 0.66612   | 1.43917   | 0.206836   | 0.682155   | 1.88267    | 0.777971  |
| SULT1A2                 | 0.120977  | 0.0627557 | 0.0815381  | 0.0346094 | 0.0254175  | 0.028681  | 0.165189  | 0.0738398 | 0         | 0.0238388 | 0.0207203 | 0.0114585  | 0.060619   | 0.024857   | 0.0663823 |
| SULT1A3                 | 1.45749   | 0.521806  | 0.558419   | 0.637436  | 0.00470101 | 1.62713   | 0.922891  | 0.741504  | 0.309126  | 0.602266  | 0.946743  | 0.702163   | 0.255538   | 0.495177   | 1.68532   |
| SULT1A4                 | 1.45749   | 0.521806  | 0.558419   | 0.637436  | 0.00470101 | 1.62713   | 0.922891  | 0.741504  | 0.309126  | 0.602266  | 0.946743  | 0.702163   | 0.255538   | 0.495177   | 1.68532   |
| SULT1B1                 | 0         | 0         | 0.0292522  | 0.309735  | 0          | 0.120434  | 0         | 0         | 0         | 0.332852  | 0.419128  | 0          | 0.0798491  | 0.0646822  | 0.152344  |
| SULT1C2                 | 0.0960957 | 0.0655922 | 0.0728724  | 0.0247574 | 0          | 0.0818242 | 0.100576  | 0.0427009 | 0         | 0.0100508 | 0.02712   | 0          | 0          | 0.00837064 | 0.0230009 |
| SULT1C2P1               | 0.0740973 | 0.0178506 | 0.0306492  | 0         | 0.0383662  | 0.0105155 | 0.0564013 | 0.0219505 | 0         | 0         | 0         | 0.00883643 | 0          | 0.0258177  | 0.0886776 |
| SULT1C3                 | 0         | 0         | 0.0126457  | 0         | 0          | 0         | 0         | 0         | 0         | 0.115113  | 0         | 0          | 0.0591748  | 0.00798915 | 0.065858  |
| SULT1C4                 | 0.316594  | 0.171607  | 0.248814   | 0.32626   | 0.159829   | 0.370667  | 0.0632585 | 0.0633066 | 0.0578365 | 0.158943  | 0.375265  | 0.101939   | 0.173625   | 0.219242   | 0.284168  |
| SULT1E1                 | 2.58734   | 1.48467   | 0.849719   | 0.214378  | 0.222158   | 0.110708  | 0.207829  | 0.982162  | 0.20585   | 0         | 0.0293546 | 0.0651215  | 0.00838864 | 0.0135905  | 0.0373442 |
| SULT2A1                 | 0         | 0         | 0          | 0         | 0          | 0         | 0         | 0         | 0         | 0         | 0         | 0          | 0          | 0          | 0         |
| SULT2B1                 | 11.9422   | 17.0478   | 18.0011    | 51.8225   | 35.3345    | 17.5744   | 49.9898   | 16.586    | 114.787   | 68.0781   | 84.1577   | 53.521     | 116.691    | 40.1623    | 14.1225   |
| SULT4A1                 | 0         | 0.022618  | 0.00776696 | 0.0870776 | 0.0145838  | 0.303784  | 0.032159  | 0.0500632 | 0.0114343 | 0.141405  | 0.211973  | 0.0335892  | 0.0242301  | 0.0343485  | 0         |
| SULT6B1                 | 0         | 0         | 0          | 0         | 0          | 0         | 0.0282912 | 0         | 0         | 0         | 0         | 0          | 0          | 0          | 0         |
| SUMF1                   | 6.99327   | 6.20225   | 6.8662     | 9.53547   | 6.68742    | 10.5689   | 5.93043   | 5.1205    | 8.79089   | 9.46274   | 16.4419   | 7.11117    | 8.53344    | 5.59163    | 6.39812   |
| SUMF2                   | 14.5434   | 12.9155   | 11.3904    | 29.7176   | 25.7845    | 25.6224   | 13.761    | 8.91816   | 21.2028   | 15.8163   | 26.5597   | 12.1519    | 15.6379    | 13.0871    | 14.5329   |
| SUMO1                   | 11.3936   | 8.96526   | 8.96676    | 17.5486   | 5.15259    | 17.3151   | 6.05647   | 10.8176   | 11.3779   | 17.2537   | 28.5885   | 8.24943    | 14.8019    | 10.8778    | 11.4932   |

|           |           |           |            |            |           |           |            |           |          |            |           |            |            |           |           |
|-----------|-----------|-----------|------------|------------|-----------|-----------|------------|-----------|----------|------------|-----------|------------|------------|-----------|-----------|
| SUMO1P1   | 0.0191423 | 0         | 0          | 0          | 0         | 0         | 0          | 0         | 0        | 0.21623    | 0.0432186 | 0          | 0.024701   | 0         | 0.0549815 |
| SUMO1P3   | 0.657096  | 0.769955  | 0.886424   | 0.265599   | 0.242487  | 0.363936  | 0.70127    | 1.29394   | 0.153955 | 0.360418   | 0.217928  | 0.690631   | 0.0280598  | 0.799666  | 1.70757   |
| SUMO2     | 31.9572   | 30.3561   | 32.7417    | 55.8653    | 17.9072   | 52.5555   | 27.589     | 29.5973   | 54.1238  | 49.2384    | 93.866    | 37.8879    | 60.1892    | 36.978    | 32.5816   |
| SUMO3     | 15.8064   | 11.3769   | 11.4415    | 23.4769    | 11.5651   | 29.9236   | 14.0853    | 13.4796   | 13.1465  | 17.026     | 28.628    | 11.7234    | 24.6564    | 13.5436   | 15.7963   |
| SUMO4     | 1.07642   | 0.826576  | 0.834836   | 0.346651   | 0.156755  | 0.572849  | 0.49929    | 0.866949  | 0.204837 | 0.591071   | 0.683519  | 0.48138    | 0.217032   | 1.09001   | 0.676321  |
| SUN1      | 14.7177   | 16.9427   | 19.0681    | 11.0597    | 11.9107   | 13.5119   | 15.9171    | 12.5397   | 8.42842  | 12.4816    | 8.08801   | 9.60411    | 15.658     | 10.89     | 9.8457    |
| SUN2      | 14.775    | 13.5201   | 16.6327    | 13.0012    | 27.4697   | 23.7351   | 20.2034    | 9.39359   | 25.4451  | 13.7637    | 8.82346   | 12.2163    | 24.1644    | 11.6586   | 10.1786   |
| SUN3      | 0         | 0         | 0          | 0          | 0         | 0.0256923 | 0          | 0.0268157 | 0        | 0.0189354  | 0.017031  | 0.010795   | 0          | 0         | 0         |
| SUN5      | 0         | 0         | 0          | 0          | 0         | 0         | 0          | 0         | 0        | 0          | 0         | 0          | 0          | 0         | 0         |
| SUOX      | 1.88942   | 1.59425   | 1.78858    | 2.0246     | 3.48978   | 3.72189   | 1.91043    | 1.77941   | 0.904414 | 1.52196    | 2.1117    | 1.29812    | 1.30395    | 1.64582   | 1.56597   |
| SUPT16H   | 12.5844   | 9.75565   | 9.94474    | 17.0165    | 6.99949   | 20.072    | 7.10243    | 9.12018   | 8.24989  | 9.40738    | 11.0047   | 6.90096    | 16.9337    | 10.3318   | 8.71354   |
| SUPT20H   | 3.37606   | 4.04343   | 3.76152    | 5.50922    | 1.30632   | 4.78458   | 2.40718    | 3.47231   | 2.25809  | 3.8694     | 5.50486   | 2.62507    | 3.71595    | 3.72016   | 3.50295   |
| SUPT20HL1 | 0.01731   | 0.0064909 | 0.0074344  | 0.0123304  | 0.0186544 | 0.0714978 | 0.00512093 | 0.0160616 | 0        | 0.00562925 | 0.0303786 | 0.0032092  | 0.00315363 | 0.0023441 | 0.0687112 |
| SUPT20HL2 | 0.0229712 | 0.0129104 | 0.00737995 | 0.00613507 | 0.0369446 | 0.0581339 | 0.0102043  | 0.0316535 | 0        | 0.00560859 | 1.99E-11  | 0.00639485 | 0.00262422 | 0.0116775 | 0.0342212 |
| SUPT3H    | 0.573687  | 0.383207  | 0.319992   | 0.537455   | 0.3308    | 0.377467  | 0.213377   | 0.432596  | 0.174672 | 0.403657   | 0.397404  | 0.25811    | 0.294429   | 0.329363  | 0.418185  |
| SUPT4H1   | 8.95291   | 7.38842   | 7.76923    | 12.2208    | 6.73996   | 14.5647   | 8.47983    | 6.49133   | 15.2901  | 12.5297    | 24.0077   | 7.61889    | 14.7639    | 7.89743   | 5.4873    |
| SUPT5H    | 10.686    | 11.4418   | 12.0873    | 17.3877    | 20.01     | 21.9369   | 11.2036    | 8.60883   | 12.752   | 11.6773    | 6.09914   | 13.0915    | 24.3156    | 13.0055   | 11.2907   |
| SUPT6H    | 11.9301   | 11.8453   | 12.3695    | 12.8872    | 13.1539   | 20.3334   | 12.1907    | 10.0752   | 11.6928  | 8.07948    | 5.51126   | 9.72024    | 13.7493    | 9.4841    | 10.3463   |
| SUPT7L    | 2.89076   | 2.52671   | 2.66       | 3.92609    | 3.20726   | 3.41826   | 2.40444    | 2.49482   | 2.32259  | 2.66971    | 3.67442   | 2.71969    | 3.83679    | 3.1246    | 3.98638   |
| SUPV3L1   | 3.48651   | 2.72322   | 3.05721    | 4.24777    | 1.81824   | 4.5634    | 2.54884    | 2.78643   | 2.46421  | 2.00432    | 2.51063   | 2.29726    | 3.3823     | 2.68743   | 1.50092   |
| SURF1     | 8.27645   | 6.81013   | 7.91154    | 9.07794    | 9.5129    | 15.7006   | 7.77772    | 5.30459   | 8.7016   | 6.68386    | 15.3297   | 4.57251    | 5.41151    | 5.87963   | 4.90737   |
| SURF2     | 4.02607   | 4.42067   | 4.62213    | 6.60452    | 7.65781   | 11.2873   | 4.00268    | 3.09123   | 7.30493  | 6.08438    | 8.50241   | 5.70273    | 10.0369    | 5.2963    | 1.69132   |
| SURF4     | 15.4152   | 14.1199   | 15.6193    | 38.1778    | 24.7596   | 42.7996   | 17.3364    | 13.3911   | 30.0268  | 31.2606    | 53.5044   | 18.4013    | 49.9358    | 27.0457   | 30.0389   |
| SURF6     | 4.16176   | 4.5799    | 4.66722    | 6.41788    | 10.5688   | 10.4449   | 2.68777    | 3.13369   | 3.06051  | 2.3811     | 2.5565    | 2.96364    | 5.09475    | 3.81033   | 2.08262   |
| SUSD1     | 0.953655  | 0.810431  | 0.646054   | 2.64652    | 1.37638   | 2.71101   | 0.943102   | 0.840857  | 1.27119  | 2.36559    | 2.37351   | 1.19817    | 2.46602    | 1.89165   | 2.81462   |
| SUSD2     | 1.75227   | 4.25288   | 6.36381    | 0.779251   | 2.91388   | 4.42658   | 4.93945    | 5.66692   | 0.575578 | 1.26846    | 2.88917   | 0.837598   | 0.478492   | 1.44022   | 4.4691    |

|          |            |           |           |            |           |           |           |           |            |           |            |           |            |            |           |
|----------|------------|-----------|-----------|------------|-----------|-----------|-----------|-----------|------------|-----------|------------|-----------|------------|------------|-----------|
| SUSD3    | 0.10472    | 0.370007  | 0.563105  | 0.485625   | 0.298221  | 0.430976  | 0.358697  | 0.325732  | 0.127537   | 0.109528  | 0.748698   | 0.0374649 | 0.247737   | 0.109462   | 0.225586  |
| SUSD4    | 0.841434   | 0.942505  | 0.832933  | 0.526203   | 1.08361   | 0.41641   | 0.402354  | 1.06098   | 1.16491    | 0.586715  | 1.01482    | 1.2453    | 0.450088   | 0.612672   | 0.268535  |
| SUSD5    | 1.41494    | 0.323047  | 0.394005  | 0.476515   | 0.667986  | 1.72452   | 0.733853  | 0.612303  | 0.11263    | 0.557143  | 0.694247   | 0.215058  | 0.534024   | 0.616258   | 1.05586   |
| SUSD6    | 7.96468    | 9.88529   | 9.74496   | 20.0995    | 12.8852   | 21.7267   | 9.95125   | 8.25298   | 19.3374    | 8.46685   | 12.5469    | 10.0683   | 11.828     | 7.08509    | 11.4321   |
| SUV39H1  | 1.48528    | 1.29251   | 1.19111   | 1.843      | 1.13003   | 2.61972   | 1.67854   | 1.15163   | 1.13518    | 0.932089  | 1.35162    | 0.737424  | 1.80903    | 1.30303    | 1.12094   |
| SUV39H2  | 1.21951    | 1.14845   | 1.10632   | 1.69232    | 0.473581  | 1.1682    | 0.601264  | 1.1577    | 0.776371   | 0.878364  | 1.60352    | 0.847806  | 1.37694    | 1.53911    | 0.955296  |
| SUZ12    | 2.81909    | 3.08774   | 3.14312   | 3.75531    | 1.0068    | 3.40616   | 2.11176   | 2.97381   | 3.35612    | 3.77249   | 4.4714     | 1.99369   | 4.86495    | 3.46267    | 2.94021   |
| SUZ12P1  | 1.21207    | 1.74817   | 1.59735   | 0.975523   | 1.02549   | 0.879551  | 1.05041   | 1.49234   | 0.347477   | 0.568894  | 0.705484   | 0.624046  | 0.421418   | 1.20655    | 1.65684   |
| SV2A     | 0.351038   | 0.147074  | 0.189393  | 0.225441   | 0.371424  | 1.17395   | 0.255585  | 0.140162  | 0.018588   | 0.593837  | 1.28647    | 0.127409  | 0.666333   | 0.688669   | 1.03749   |
| SV2B     | 0.280482   | 0.170913  | 0.251143  | 0.0799124  | 0.087137  | 0.179822  | 0.226055  | 0.211146  | 0.0120563  | 0.124247  | 0.156452   | 0.0118054 | 0.175643   | 0.107788   | 0.137428  |
| SV2C     | 0.0378969  | 0.0278695 | 0.031351  | 0.00822187 | 0.0340809 | 0.0458556 | 0.0455468 | 0.0212713 | 0.0242917  | 0.0475645 | 0.0202646  | 0.0313978 | 0.0283116  | 0.0177217  | 0.0143223 |
| SVBP     | 3.65417    | 2.52916   | 2.73508   | 3.01856    | 2.16235   | 5.1364    | 2.5828    | 1.82995   | 2.40178    | 4.76835   | 9.52701    | 1.86761   | 2.65703    | 2.8799     | 2.95712   |
| SVEP1    | 10.0106    | 5.34181   | 7.71376   | 2.54089    | 2.78145   | 16.0883   | 12.9733   | 5.27563   | 0.228353   | 0.833072  | 1.40333    | 0.821064  | 1.05731    | 1.31804    | 6.75336   |
| SVIL     | 9.77433    | 12.6903   | 11.2278   | 19.8739    | 11.1425   | 19.9799   | 10.1581   | 8.62294   | 7.85136    | 7.86207   | 5.3152     | 9.03847   | 12.645     | 9.29807    | 8.58292   |
| SVIL-AS1 | 2.82197    | 2.60042   | 2.5704    | 2.53786    | 2.5257    | 2.37295   | 2.28882   | 2.39477   | 1.8161     | 3.04428   | 2.62796    | 1.98096   | 2.68736    | 2.38039    | 2.58181   |
| SVIL2P   | 0.125158   | 0.0536231 | 0.0461013 | 0.0287723  | 0.0216594 | 0.0711038 | 0.0480664 | 0.0491607 | 0.0339414  | 0.017441  | 0.0632587  | 0.0301152 | 0.00900331 | 0.00727169 | 0.019899  |
| SVIP     | 1.1246     | 0.893574  | 0.935787  | 0.440529   | 0.153236  | 1.12558   | 0.675805  | 1.51963   | 0.36043    | 0.635582  | 1.23984    | 0.315284  | 0.517669   | 0.305912   | 0.576135  |
| SVOP     | 0.00738687 | 0.0303268 | 0.0308035 | 0.0114186  | 0.0114744 | 0.015857  | 0.0295465 | 0.0131341 | 0.00450253 | 0.0324495 | 0.00416943 | 0.0241932 | 0.0166809  | 0.00772261 | 0         |
| SVOPL    | 0.254459   | 0.134862  | 0.147355  | 0.0524455  | 0.0395263 | 0.0650006 | 0.2179    | 0.384441  | 0          | 0         | 0.129264   | 0         | 0          | 0.0132991  | 0         |
| SWAP70   | 8.11105    | 6.42504   | 6.89427   | 8.23168    | 4.42554   | 10.2322   | 5.35295   | 5.93605   | 8.67151    | 7.82995   | 7.23507    | 4.15178   | 12.9802    | 7.0092     | 7.83592   |
| SWI5     | 1.78996    | 1.74514   | 1.84661   | 4.34024    | 3.89259   | 6.95717   | 1.73114   | 1.42233   | 5.46273    | 2.82804   | 7.53577    | 2.65193   | 3.00266    | 2.49836    | 3.32666   |
| SWSAP1   | 0.459519   | 0.711174  | 0.599019  | 0.832296   | 1.42758   | 1.42282   | 0.953935  | 0.507384  | 1.1532     | 0.71656   | 1.27327    | 0.717378  | 1.05115    | 0.560384   | 0.699923  |
| SWT1     | 1.59567    | 1.35674   | 1.53359   | 1.03378    | 0.200477  | 1.04899   | 0.730093  | 1.30861   | 0.550138   | 1.03818   | 0.887411   | 0.684206  | 0.571533   | 0.873824   | 1.24689   |
| SYAP1    | 3.62412    | 3.34997   | 3.3783    | 6.74558    | 3.33486   | 7.23952   | 3.3433    | 3.47754   | 5.51719    | 6.18024   | 9.20514    | 3.96021   | 9.30208    | 5.0029     | 5.97782   |
| SYBU     | 1.50255    | 0.885613  | 0.936688  | 0.353703   | 1.14639   | 1.27982   | 1.17652   | 0.593346  | 0.361789   | 0.320413  | 0.345827   | 0.215878  | 0.34739    | 0.16011    | 0.799912  |
| SYCE1    | 0.0300559  | 0.0072407 | 0         | 0          | 0.0466872 | 0         | 0         | 0         | 0          | 0         | 0.0169647  | 0         | 0          | 0          | 0         |

|           |           |            |            |            |           |           |           |           |           |           |           |            |            |           |           |
|-----------|-----------|------------|------------|------------|-----------|-----------|-----------|-----------|-----------|-----------|-----------|------------|------------|-----------|-----------|
| SYCE1L    | 0.715095  | 0.588986   | 0.651063   | 1.52502    | 1.47504   | 1.08801   | 0.400831  | 0.271963  | 0.90163   | 0.614692  | 1.31085   | 0.53431    | 0.493466   | 0.51962   | 0.891991  |
| SYCE2     | 0.34727   | 0.358543   | 0.246245   | 0.178936   | 0.0770614 | 0.19009   | 0.254894  | 0.308624  | 0.151048  | 0.0311328 | 0.252016  | 0.106492   | 0.0320081  | 0.129642  | 0.427477  |
| SYCE3     | 0         | 0.0225266  | 0.0773558  | 0.48181    | 0.145249  | 0.15924   | 0         | 0         | 0         | 0         | 0.263895  | 0.0334535  | 0          | 0.097742  | 0         |
| SYCN      | 0.0807785 | 0.272442   | 0.367541   | 0.208112   | 1.75668   | 0.928555  | 0.230576  | 0.179473  | 0.836223  | 0.354849  | 0.0911889 | 2.31197    | 0.130295   | 0.759931  | 0         |
| SYCP1     | 0.0127615 | 0.00307435 | 0          | 0          | 0         | 0.0217326 | 0         | 0.0170121 | 0         | 0         | 0         | 0          | 0          | 0         | 0         |
| SYCP2     | 0.816911  | 0.221775   | 0.312175   | 0.162387   | 0.0579721 | 0.187138  | 0.089958  | 0.357473  | 0.101006  | 0.104092  | 0.168522  | 0.121652   | 0.0481584  | 0.153877  | 0.160792  |
| SYCP2L    | 0.347627  | 0.203128   | 0.189681   | 0.0457327  | 0.022978  | 0.195234  | 0.194232  | 0.177477  | 0         | 0.0371325 | 0.0667961 | 0.0529226  | 0.00477206 | 0.0231938 | 0.254929  |
| SYCP3     | 0.266483  | 0.0691362  | 0.16958    | 0.042249   | 0.0636832 | 0.122181  | 0.0936191 | 0.218611  | 0         | 0         | 0.115702  | 0          | 0          | 0.0321406 | 0.264949  |
| SYDE1     | 2.24214   | 1.11068    | 1.40273    | 3.46588    | 4.66917   | 8.31071   | 2.61599   | 1.24539   | 0.836268  | 2.84049   | 5.68703   | 1.29347    | 3.95108    | 3.70226   | 6.90289   |
| SYDE2     | 0.835135  | 0.688781   | 0.914403   | 0.248064   | 0.465485  | 0.46431   | 0.544073  | 0.755296  | 0.173505  | 0.0924864 | 0.110913  | 0.130057   | 0.14263    | 0.112971  | 0.197541  |
| SYF2      | 7.54072   | 5.64125    | 5.90422    | 6.76429    | 3.49983   | 10.9453   | 2.75095   | 4.75707   | 5.93214   | 6.7019    | 10.2768   | 2.93542    | 5.85671    | 4.15211   | 4.37664   |
| SYK       | 4.62257   | 4.57293    | 4.38824    | 7.28118    | 5.33674   | 8.46376   | 5.4898    | 3.7476    | 4.7046    | 5.87763   | 5.7397    | 5.00311    | 9.9748     | 4.80712   | 3.39679   |
| SYMPK     | 5.04527   | 6.58177    | 6.59214    | 10.3644    | 13.1075   | 11.2693   | 6.82052   | 5.53479   | 6.25899   | 5.26423   | 3.57449   | 6.20783    | 7.56572    | 7.29546   | 7.53135   |
| SYN1      | 0.115355  | 0.121581   | 0.190859   | 0.0891573  | 0.134389  | 0.491115  | 0.131708  | 0.115332  | 0.0351223 | 0.108587  | 0.195332  | 0.0619046  | 0.0697747  | 0.150724  | 0.144956  |
| SYN2      | 0.604437  | 0.805272   | 0.580576   | 0.284272   | 0.195342  | 0.725374  | 0.370538  | 0.410992  | 0.0296431 | 0.0356404 | 0.0366354 | 0.0116105  | 0.0261731  | 0.0190815 | 0.0116517 |
| SYN3      | 0.132498  | 0.1064     | 0.0974329  | 0.030343   | 0.400197  | 0.125356  | 0.0756412 | 0.0654186 | 0.0179298 | 0         | 0.0332387 | 0.026335   | 0.0189972  | 0.0115416 | 0.105714  |
| SYNC      | 1.46034   | 0.774633   | 0.801485   | 1.44266    | 0.76268   | 2.44211   | 1.27787   | 0.622579  | 0.491408  | 1.58705   | 2.45424   | 0.281818   | 1.61829    | 1.15604   | 1.39375   |
| SYNCRIP   | 12.4712   | 10.3331    | 11.1855    | 16.3173    | 3.73122   | 14.6647   | 7.44145   | 14.0722   | 10.7548   | 11.439    | 12.2979   | 7.88835    | 20.332     | 13.0708   | 9.52353   |
| SYNDIG1   | 0.11501   | 0.0125939  | 0.00864945 | 0.0861968  | 0.341058  | 0.16915   | 0.0955012 | 0.0092919 | 0.0127335 | 0.0787357 | 0.419001  | 0.00374056 | 0.0640849  | 0.0300545 | 0.435444  |
| SYNDIG1L  | 0.0798955 | 0.0470493  | 0.0660952  | 0.00914829 | 0.0551579 | 0.158737  | 0.091222  | 0.0631151 | 0         | 0.0111419 | 0.0100213 | 0.0127039  | 0.0229103  | 0         | 0.0254978 |
| SYNE1     | 3.5178    | 3.51297    | 4.62633    | 1.7713     | 2.15556   | 3.63446   | 5.33515   | 2.58456   | 0.935585  | 1.47301   | 1.89086   | 1.21513    | 2.08647    | 2.89833   | 6.27592   |
| SYNE1-AS1 | 0.076142  | 0.0786403  | 0.0351513  | 2.37E-39   | 3.53E-33  | 0.0296139 | 0.177189  | 0.0399729 | 3.87E-13  | 0.103131  | 0.047239  | 0          | 6.90E-39   | 0.0381856 | 0         |
| SYNE2     | 15.2615   | 18.8124    | 19.4514    | 15.6511    | 8.23624   | 13.2303   | 10.3749   | 13.9171   | 4.83375   | 7.95821   | 4.17067   | 7.4284     | 8.72754    | 8.0644    | 6.64475   |
| SYNE3     | 4.23061   | 1.94996    | 2.72272    | 1.35844    | 3.12598   | 3.94966   | 3.76562   | 2.18457   | 0.196241  | 0.813253  | 0.855308  | 0.66846    | 1.49306    | 1.76762   | 4.33514   |
| SYNE4     | 0.186501  | 0.138873   | 0.182339   | 0.174722   | 1.05346   | 0.245423  | 0.251657  | 0.150679  | 0.206488  | 0         | 0         | 0.0849204  | 0.0218781  | 0.106335  | 0.0973959 |
| SYNGAP1   | 0.804808  | 1.05385    | 0.788441   | 1.05954    | 2.28196   | 2.11815   | 1.30581   | 0.816203  | 0.400977  | 0.434979  | 0.545551  | 0.832104   | 0.604973   | 1.37861   | 2.15677   |







|          |           |           |           |          |          |          |           |           |           |           |           |          |           |          |          |
|----------|-----------|-----------|-----------|----------|----------|----------|-----------|-----------|-----------|-----------|-----------|----------|-----------|----------|----------|
| TAAR2    | 0         | 0         | 0         | 0        | 0        | 0        | 0         | 0         | 0         | 0         | 0         | 0        | 0         | 0        | 0        |
| TAAR3P   | 0         | 0         | 0         | 0        | 0        | 0        | 0         | 0         | 0         | 0         | 0         | 0        | 0         | 0        | 0        |
| TAAR5    | 0         | 0         | 0         | 0        | 0        | 0        | 0         | 0         | 0         | 0         | 0         | 0        | 0         | 0        | 0        |
| TAAR6    | 0         | 0         | 0         | 0        | 0        | 0        | 0         | 0         | 0         | 0         | 0         | 0        | 0         | 0        | 0        |
| TAAR8    | 0         | 0         | 0         | 0        | 0        | 0        | 0         | 0         | 0         | 0         | 0         | 0        | 0         | 0        | 0        |
| TAAR9    | 0         | 0         | 0         | 0        | 0        | 0        | 0         | 0         | 0         | 0         | 0         | 0        | 0         | 0        | 0        |
| TAB1     | 2.87042   | 3.21936   | 3.17774   | 4.21167  | 7.09326  | 5.64921  | 2.73883   | 2.14131   | 1.73471   | 1.97056   | 1.88061   | 1.77515  | 2.87296   | 2.20535  | 2.61115  |
| TAB2     | 9.20378   | 8.56521   | 8.54288   | 10.2248  | 2.25888  | 8.82431  | 5.52224   | 8.15106   | 17.1893   | 13.4924   | 11.3198   | 7.18145  | 17.9769   | 8.37741  | 8.81638  |
| TAB2-AS1 | 0         | 0         | 0         | 0        | 0        | 0        | 0         | 0         | 0         | 0         | 0         | 0        | 0         | 0        | 0        |
| TAB3     | 3.40309   | 3.23167   | 3.5741    | 3.60186  | 1.20766  | 4.23039  | 2.60074   | 3.82139   | 4.319     | 4.0444    | 3.16418   | 2.89858  | 5.99735   | 3.29879  | 1.94413  |
| TAB3-AS1 | 0.236154  | 0.30342   | 0.195363  | 0.405605 | 0.244552 | 0        | 0         | 0.419747  | 0.191739  | 0         | 0         | 0.112649 | 0.101577  | 0.123424 | 0.452195 |
| TAC1     | 0.058442  | 0         | 0.0161158 | 0        | 0.121041 | 0.87914  | 0.0222424 | 0.0346256 | 0         | 0.0244503 | 0.0219913 | 0        | 0         | 0        | 0        |
| TAC3     | 0         | 0.100186  | 0.0172018 | 0        | 0        | 0        | 0.0712237 | 0.0184794 | 0         | 0         | 0         | 0        | 0         | 0        | 0        |
| TAC4     | 0.412202  | 0.810329  | 0.864883  | 0.194573 | 0.53258  | 0.29815  | 1.09784   | 0.604012  | 0.083513  | 0.301227  | 0         | 0.245326 | 0.0221212 | 0.430065 | 0.393912 |
| TACC1    | 7.89395   | 2.83933   | 3.38566   | 2.96481  | 2.40964  | 5.97807  | 4.99762   | 4.25828   | 1.49001   | 3.21755   | 4.25876   | 1.7874   | 5.79368   | 3.47535  | 8.22389  |
| TACC2    | 7.94704   | 18.378    | 19.1506   | 6.95475  | 22.1176  | 8.0682   | 17.2886   | 10.6279   | 19.9429   | 4.46377   | 3.28485   | 11.3463  | 4.72131   | 4.83168  | 2.87571  |
| TACC3    | 0.995225  | 0.919724  | 0.843566  | 6.02755  | 2.73705  | 5.84859  | 1.63927   | 0.688729  | 1.3611    | 2.88729   | 3.25074   | 1.78027  | 5.18954   | 4.90303  | 2.84682  |
| TACO1    | 3.3084    | 2.36828   | 2.33292   | 4.31858  | 4.84543  | 5.92924  | 3.79541   | 1.97416   | 4.39381   | 3.28236   | 6.06456   | 2.11925  | 5.23476   | 3.11241  | 2.60189  |
| TACR1    | 1.96065   | 1.32879   | 1.5683    | 0.835906 | 1.20958  | 2.08387  | 1.68821   | 1.20695   | 0.0903205 | 0.302511  | 0.183136  | 0.354869 | 0.463534  | 0.324616 | 0.472618 |
| TACR2    | 0.4119    | 0.309228  | 0.348677  | 0.138201 | 0.223194 | 0.407823 | 0.568728  | 0.349037  | 0.0816637 | 0.13225   | 0.118949  | 0.178206 | 0.154509  | 0.125161 | 0.46773  |
| TACR3    | 0.0396059 | 0.0508873 | 0         | 0.02721  | 0.102536 | 0        | 0.0150736 | 0         | 0.257256  | 0         | 0         | 0        | 0         | 0        | 0        |
| TACSTD2  | 46.9451   | 76.7793   | 87.347    | 102.04   | 84.1994  | 58.8993  | 81.2104   | 62.1495   | 324.502   | 140.959   | 142.216   | 110.737  | 167.723   | 67.95    | 16.939   |
| TADA1    | 2.60578   | 2.1289    | 2.28349   | 2.15464  | 0.975923 | 2.49066  | 1.88155   | 2.89246   | 1.55542   | 1.40904   | 1.82542   | 1.45181  | 1.96034   | 1.34575  | 1.31644  |
| TADA2A   | 3.21432   | 2.56643   | 2.83955   | 2.73276  | 1.81886  | 2.7956   | 2.25443   | 2.43832   | 3.21562   | 1.48404   | 3.3953    | 1.76602  | 2.10348   | 2.17192  | 2.02781  |
| TADA2B   | 4.03795   | 3.39246   | 4.10008   | 3.87902  | 4.77098  | 5.02023  | 3.60271   | 2.92051   | 6.4938    | 3.59885   | 2.66712   | 2.73558  | 6.5582    | 3.10387  | 3.05373  |
| TADA3    | 5.3169    | 4.52482   | 5.01316   | 10.9457  | 9.76274  | 16.1855  | 5.83606   | 3.72498   | 7.11376   | 7.64866   | 13.9615   | 5.12169  | 9.80758   | 6.86794  | 6.0037   |

|           |            |           |            |          |            |            |          |          |           |           |           |          |            |           |           |
|-----------|------------|-----------|------------|----------|------------|------------|----------|----------|-----------|-----------|-----------|----------|------------|-----------|-----------|
| TAF1      | 6.41618    | 6.01731   | 6.23047    | 4.28137  | 4.23984    | 6.22537    | 4.89611  | 5.30582  | 2.37115   | 2.50124   | 1.77858   | 3.14206  | 2.75308    | 3.50118   | 3.77111   |
| TAF10     | 12.0106    | 8.926     | 10.4047    | 27.5277  | 20.1966    | 30.3911    | 10.5114  | 6.94818  | 21.3548   | 17.7055   | 34.9514   | 12.3233  | 20.963     | 15.5007   | 10.0482   |
| TAF11     | 6.4451     | 5.26123   | 4.80478    | 7.28312  | 4.87915    | 6.61072    | 4.09385  | 4.80613  | 8.37269   | 6.82473   | 12.1428   | 5.30074  | 7.30338    | 6.38071   | 4.06411   |
| TAF12     | 2.53776    | 2.63002   | 2.86523    | 4.737    | 2.72718    | 4.62072    | 2.0957   | 2.18443  | 5.24835   | 3.98643   | 7.6575    | 3.01497  | 4.88113    | 3.47851   | 2.75059   |
| TAF13     | 5.25431    | 5.21782   | 5.83989    | 15.5828  | 3.92512    | 6.89881    | 4.25898  | 4.95476  | 18.4159   | 17.6194   | 21.3261   | 9.24116  | 31.8562    | 12.5987   | 9.84994   |
| TAF15     | 15.7807    | 16.0517   | 16.218     | 20.6167  | 8.43358    | 20.1291    | 6.65725  | 11.7716  | 10.8574   | 9.21389   | 8.63301   | 8.9561   | 14.148     | 12.885    | 7.49376   |
| TAF1A     | 0.537739   | 0.464408  | 0.512003   | 0.794638 | 0.551609   | 0.86392    | 0.243272 | 0.342643 | 0.271847  | 0.35656   | 0.48105   | 0.333948 | 0.5106     | 0.710568  | 0.553696  |
| TAF1A-AS1 | 0.0968329  | 0.0583194 | 0.12016    | 0.249473 | 0.0752074  | 0.144291   | 0.110561 | 0.107571 | 0.0589658 | 0.24307   | 0.245953  | 0.10393  | 0.015619   | 0.0632613 | 0         |
| TAF1B     | 3.00955    | 2.71654   | 3.24608    | 4.06325  | 0.7249     | 4.27368    | 1.59849  | 2.87777  | 1.72825   | 3.96855   | 5.77344   | 1.39018  | 6.90669    | 3.23544   | 2.65344   |
| TAF1C     | 4.29044    | 5.10826   | 4.70666    | 5.10251  | 10.7368    | 8.45547    | 5.09993  | 3.37247  | 2.3678    | 2.97244   | 2.27558   | 4.99306  | 2.65802    | 3.93205   | 4.88025   |
| TAF1D     | 6.65017    | 5.95841   | 6.04916    | 9.75725  | 1.30067    | 6.269      | 2.85485  | 5.00031  | 4.69613   | 7.28141   | 8.4529    | 5.72917  | 8.65523    | 10.8746   | 7.0147    |
| TAF1L     | 0.00374815 | 0.0017992 | 0.00308121 | 0        | 0.00580068 | 0.00317637 | 0        | 0        | 0         | 0         | 0         | 0        | 0.00720646 | 0         | 0         |
| TAF2      | 4.38888    | 3.36741   | 3.38671    | 5.12624  | 1.69004    | 4.14533    | 2.94243  | 3.61367  | 2.90278   | 4.13716   | 4.08018   | 2.97543  | 5.6485     | 4.46717   | 3.95261   |
| TAF3      | 2.79288    | 2.4614    | 2.16534    | 2.60335  | 3.6189     | 4.41563    | 2.16327  | 1.92704  | 1.56397   | 1.40038   | 1.41005   | 1.48121  | 2.69841    | 2.07583   | 2.34811   |
| TAF4      | 1.5352     | 2.2817    | 2.38285    | 2.74157  | 2.05069    | 3.10834    | 2.03832  | 1.63101  | 1.97933   | 1.44983   | 1.49031   | 1.66024  | 2.8844     | 1.73541   | 1.31423   |
| TAF4B     | 1.9043     | 2.31385   | 2.66438    | 1.93028  | 0.686978   | 1.70124    | 1.60992  | 1.86348  | 1.05823   | 1.13628   | 1.13947   | 0.886052 | 1.14137    | 0.949046  | 0.81447   |
| TAF5      | 0.761564   | 0.665915  | 0.770023   | 1.29349  | 0.788647   | 1.1288     | 0.450866 | 0.607879 | 0.583981  | 0.71688   | 0.740305  | 0.499509 | 1.06461    | 0.656006  | 0.90129   |
| TAF5L     | 2.11182    | 1.35668   | 1.42457    | 2.2192   | 1.14638    | 3.00344    | 1.36117  | 1.26803  | 2.18479   | 1.77179   | 2.09347   | 1.31338  | 3.0816     | 1.94241   | 1.49469   |
| TAF6      | 2.66491    | 3.13193   | 2.98246    | 5.29301  | 7.05803    | 8.09691    | 4.64518  | 2.10921  | 4.04969   | 3.45716   | 5.07779   | 3.05635  | 5.17594    | 3.83809   | 3.56016   |
| TAF6L     | 2.94349    | 3.11586   | 2.90578    | 3.07846  | 6.05102    | 4.83566    | 2.66114  | 1.68236  | 3.93133   | 2.10127   | 3.48342   | 2.09832  | 3.00754    | 2.59068   | 2.24719   |
| TAF7      | 10.9312    | 9.97487   | 11.4957    | 13.5719  | 7.40913    | 12.2873    | 9.03827  | 8.52279  | 16.0026   | 13.416    | 14.9924   | 7.72054  | 21.4966    | 9.37077   | 7.68998   |
| TAF7L     | 0.431179   | 0.293557  | 0.403228   | 0.125575 | 0.0291204  | 0.199534   | 0.192641 | 0.333214 | 0.2169    | 0.0588232 | 0.0846517 | 0.234743 | 0.0423339  | 0.0979795 | 0.0538458 |
| TAF8      | 2.33947    | 2.38335   | 2.28095    | 2.6426   | 2.70263    | 3.50086    | 2.20393  | 2.02679  | 1.38222   | 2.12325   | 2.35693   | 1.4671   | 2.3522     | 2.23277   | 2.4218    |
| TAF9      | 6.01106    | 5.11082   | 5.00631    | 9.63508  | 1.3329     | 10.6503    | 3.71234  | 4.5466   | 7.69838   | 9.46519   | 15.5939   | 5.72436  | 11.7878    | 8.37021   | 4.86729   |
| TAF9B     | 3.92459    | 2.91518   | 3.01174    | 2.95348  | 0.454545   | 4.14786    | 2.3191   | 4.37511  | 1.83432   | 2.75454   | 3.90573   | 1.63809  | 2.27669    | 2.465     | 2.52146   |
| TAGAP     | 0.98704    | 0.568559  | 0.798301   | 1.25584  | 0.471099   | 0.798194   | 0.906613 | 0.779187 | 0.141029  | 1.13502   | 1.50019   | 0.102584 | 1.44444    | 0.484169  | 2.04312   |

|           |           |           |            |            |           |           |            |           |           |          |          |           |           |            |           |
|-----------|-----------|-----------|------------|------------|-----------|-----------|------------|-----------|-----------|----------|----------|-----------|-----------|------------|-----------|
| TAGLN     | 41.7134   | 8.96542   | 12.2968    | 6.4104     | 30.2302   | 87.4039   | 36.3542    | 9.50055   | 6.26883   | 25.3722  | 65.633   | 5.12247   | 12.0349   | 18.5857    | 45.3703   |
| TAGLN2    | 73.7177   | 62.3635   | 70.566     | 173.926    | 86.2054   | 194.98    | 93.2171    | 50.4113   | 115.515   | 210.139  | 282.208  | 127.136   | 293.642   | 165.84     | 105.966   |
| TAGLN3    | 0         | 0.0141506 | 0.0121482  | 0.0605319  | 0.0456208 | 0         | 0.0167665  | 0         | 0.0178843 | 0        | 0.265235 | 0.0105073 | 0.217913  | 0.0460491  | 0.0421781 |
| TAL1      | 1.05216   | 0.515689  | 0.55527    | 0.546816   | 0.859455  | 0.834116  | 0.688691   | 0.475598  | 0.143607  | 0.369988 | 0.563163 | 0.246624  | 0.623255  | 1.17092    | 1.49801   |
| TAL2      | 0         | 0.0516235 | 0.0295456  | 0          | 0.0554771 | 0.0304105 | 0          | 0.0634803 | 0         | 0.089651 | 0        | 0         | 0         | 0.037332   | 0         |
| TALAM1    | 559.08    | 515.594   | 575.946    | 569.335    | 234       | 377.908   | 442.566    | 624.329   | 388.404   | 813.291  | 229.01   | 828.565   | 404.034   | 823.104    | 695.275   |
| TALDO1    | 21.0391   | 18.9642   | 18.4216    | 51.172     | 35.5732   | 42.2022   | 24.7871    | 15.3057   | 70.1353   | 51.13    | 79.1335  | 40.4994   | 53.9971   | 31.7813    | 20.3482   |
| TAMM41    | 2.35862   | 2.38865   | 2.26192    | 2.11326    | 2.10024   | 1.86123   | 2.15269    | 2.28307   | 0.676967  | 1.02762  | 1.53481  | 1.34905   | 0.625186  | 1.88049    | 1.32687   |
| TANC1     | 8.65237   | 9.73504   | 11.3996    | 4.07534    | 5.81608   | 6.28073   | 10.6636    | 8.67605   | 4.12171   | 3.32063  | 3.04472  | 2.95337   | 4.09262   | 4.42569    | 5.41748   |
| TANC2     | 3.94419   | 4.29339   | 4.10553    | 6.85825    | 2.92257   | 6.79569   | 4.89475    | 3.65584   | 1.81874   | 4.79953  | 4.08331  | 3.68489   | 7.04324   | 5.57362    | 7.00829   |
| TANGO2    | 1.56752   | 1.76393   | 1.83529    | 1.73881    | 2.68567   | 2.88229   | 2.12867    | 1.30052   | 1.03381   | 1.77131  | 2.04584  | 1.23712   | 1.94543   | 2.2373     | 2.28855   |
| TANGO6    | 2.51221   | 2.18246   | 2.18557    | 2.98491    | 3.5591    | 2.69536   | 2.53929    | 1.85698   | 2.15868   | 1.57955  | 1.74605  | 1.74943   | 2.81094   | 2.65108    | 2.17299   |
| TANK      | 6.79919   | 5.50128   | 4.81303    | 8.73287    | 1.57037   | 7.61233   | 3.25915    | 4.79177   | 12.6625   | 10.6609  | 17.2195  | 6.2337    | 9.90548   | 6.48557    | 5.36621   |
| TAOK1     | 8.35822   | 7.83839   | 8.79966    | 11.1849    | 2.59481   | 10.2691   | 7.43205    | 8.91407   | 22.7205   | 15.6239  | 16.5747  | 12.5477   | 15.2534   | 10.8967    | 8.50949   |
| TAOK2     | 4.03528   | 4.63809   | 4.37711    | 5.31079    | 10.6024   | 9.75827   | 4.57111    | 2.75551   | 4.23579   | 3.90036  | 3.09398  | 4.18213   | 6.02422   | 5.74825    | 6.72733   |
| TAOK3     | 4.07739   | 3.22544   | 3.46698    | 3.64741    | 1.97286   | 3.92375   | 2.28175    | 3.2821    | 4.09656   | 3.46376  | 3.79303  | 2.40156   | 5.22838   | 3.04542    | 3.35885   |
| TAP1      | 1.0389    | 1.48207   | 1.89923    | 2.77299    | 1.52319   | 3.77168   | 1.18961    | 0.966717  | 0.52895   | 1.0323   | 1.61893  | 0.561094  | 1.93559   | 0.914641   | 1.36687   |
| TAP2      | 0.657899  | 0.596804  | 0.664073   | 1.11123    | 0.715139  | 1.5977    | 0.526191   | 0.441335  | 0.278919  | 0.747229 | 0.449645 | 0.472424  | 1.39387   | 0.679087   | 0.688864  |
| TAPBP     | 3.36027   | 4.36398   | 4.90957    | 7.79066    | 6.19606   | 9.45375   | 4.09144    | 3.7917    | 2.75298   | 4.0793   | 5.55694  | 4.04636   | 7.96468   | 4.19947    | 5.35443   |
| TAPBPL    | 2.56464   | 3.12614   | 2.89086    | 2.92723    | 5.98361   | 7.0994    | 2.67156    | 2.44269   | 1.53061   | 1.66715  | 3.0451   | 1.17708   | 1.39759   | 1.27097    | 3.34564   |
| TAPT1     | 1.91682   | 1.64538   | 1.88618    | 1.51789    | 0.705193  | 1.45175   | 1.10004    | 1.68109   | 1.28396   | 1.1206   | 1.37234  | 1.16219   | 1.54916   | 1.05981    | 1.39088   |
| TAPT1-AS1 | 0.363456  | 1.43597   | 1.49586    | 0.983199   | 2.04657   | 0.394585  | 0.68472    | 0.532966  | 0.199192  | 0.239492 | 0.307722 | 0.468112  | 0.0996625 | 0.389414   | 0.417575  |
| TARBP1    | 7.24968   | 5.77966   | 5.31448    | 4.85825    | 3.57389   | 3.84517   | 4.15676    | 5.28824   | 2.61528   | 2.59893  | 3.27462  | 3.16986   | 1.76096   | 3.09581    | 2.2935    |
| TARBP2    | 2.06052   | 1.76123   | 1.67572    | 3.04718    | 4.05061   | 4.3714    | 2.07351    | 1.11736   | 2.35353   | 2.25011  | 4.04764  | 2.0741    | 3.1621    | 2.54932    | 1.87247   |
| TARDBP    | 12.1944   | 14.1757   | 14.8098    | 14.8629    | 8.70384   | 15.3975   | 9.66854    | 13.159    | 11.4093   | 11.627   | 11.071   | 8.77619   | 17.7503   | 13.6272    | 8.63026   |
| TARID     | 0.0465343 | 0.0149473 | 0.00641607 | 0.00799249 | 0         | 0.0132078 | 0.00885522 | 0.0137853 | 0         | 0        | 0        | 0         | 0         | 0.00405347 | 0.0668291 |

|         |           |           |           |           |           |            |           |           |           |           |            |           |           |            |           |
|---------|-----------|-----------|-----------|-----------|-----------|------------|-----------|-----------|-----------|-----------|------------|-----------|-----------|------------|-----------|
| TARM1   | 0         | 0         | 0         | 0         | 0         | 0          | 0         | 0         | 0         | 0         | 0          | 0         | 0         | 0          | 0         |
| TARP    | 0.428158  | 0.293153  | 0.316918  | 0.394784  | 0.210024  | 0.441322   | 0.154376  | 0.200269  | 0.0548893 | 0.0848498 | 0.178071   | 0.0644965 | 0.145392  | 0.117776   | 0.873789  |
| TARS    | 5.46777   | 5.83597   | 5.2006    | 16.5579   | 5.46165   | 13.6622    | 4.61545   | 3.89786   | 19.6211   | 23.4414   | 20.2253    | 13.9389   | 46.7996   | 18.4263    | 11.4112   |
| TARS2   | 2.38982   | 2.77468   | 2.51934   | 3.79678   | 3.62198   | 7.0232     | 2.87073   | 1.92475   | 3.14297   | 2.89531   | 3.07251    | 2.13747   | 3.5924    | 2.58479    | 2.47872   |
| TARSL2  | 2.22016   | 1.44546   | 1.70299   | 2.44723   | 1.51698   | 2.72199    | 1.12306   | 1.68587   | 0.43639   | 1.7019    | 1.49108    | 0.930025  | 2.11239   | 2.00858    | 1.14017   |
| TAS1R1  | 0.0993619 | 0.0957482 | 0.0890491 | 0.0682636 | 0.0514478 | 0.119858   | 0.340345  | 0.0956633 | 0.0605058 | 0.114317  | 0.00934727 | 0.207364  | 0.0373962 | 0.0259654  | 0.0475654 |
| TAS1R2  | 0.119341  | 0.0796161 | 0.121511  | 0         | 0         | 0.00781674 | 0.314446  | 0.0979022 | 0.0223607 | 0.0345659 | 0          | 0.0394117 | 0         | 0.00479793 | 0         |
| TAS1R3  | 0.345621  | 0.555085  | 0.526994  | 0.181578  | 1.46323   | 0.334685   | 0.7815    | 0.554091  | 0.156816  | 0.297699  | 0.0153005  | 0.693413  | 0.227365  | 0.520658   | 0.739667  |
| TAS2R1  | 0         | 0         | 0.0282591 | 0         | 0         | 0          | 0         | 0         | 0         | 0         | 0          | 0         | 0         | 0          | 0         |
| TAS2R10 | 0.100186  | 0.193085  | 0.331525  | 0.0258112 | 0.038906  | 0.0853074  | 0         | 0.0890373 | 0         | 0.031436  | 0.0848234  | 0.0179215 | 0         | 0.104724   | 0.683431  |
| TAS2R13 | 0.395849  | 0.544932  | 0.736818  | 0.276813  | 0.263525  | 0.264833   | 0.338976  | 0.452312  | 0.0516536 | 0.070976  | 0.159595   | 0.151736  | 0         | 0.265999   | 0.324851  |
| TAS2R14 | 0.895122  | 0.958651  | 0.996371  | 0.404971  | 0.226095  | 0.521338   | 0.439122  | 1.16894   | 0         | 0.277385  | 0.351258   | 0.336288  | 0.0939106 | 0.40312    | 0.430188  |
| TAS2R16 | 0         | 0         | 0         | 0         | 0         | 0          | 0         | 0         | 0         | 0         | 0          | 0         | 0         | 0          | 0         |
| TAS2R19 | 0.716003  | 1.69152   | 1.45216   | 0.714059  | 0.574038  | 0.649      | 0.922994  | 1.0058    | 0.112517  | 0.144945  | 0.860425   | 0.380108  | 0.014902  | 0.7605     | 1.29363   |
| TAS2R20 | 0.375346  | 0.694835  | 0.759939  | 0.295193  | 0.230148  | 0.311192   | 0.31578   | 0.395025  | 0.0481189 | 0.198357  | 0.278762   | 0.247367  | 0.0318647 | 0.345883   | 0.638342  |
| TAS2R3  | 1.51344   | 1.88377   | 1.30419   | 0.433235  | 1.2734    | 0.644338   | 1.128     | 1.43843   | 0.0512001 | 0.34297   | 0.118645   | 0.345929  | 0.108496  | 0.769019   | 1.17731   |
| TAS2R30 | 1.90448   | 1.30091   | 1.87467   | 0.720456  | 0.599153  | 0.718448   | 0.924043  | 1.45687   | 0.0587201 | 0.514372  | 0.435427   | 0.431236  | 0.0466618 | 0.718174   | 1.83492   |
| TAS2R31 | 1.2071    | 1.3257    | 1.50014   | 0.993244  | 0.563356  | 0.405315   | 1.41899   | 1.34434   | 0.0828177 | 0.341394  | 0.383824   | 0.528639  | 0.0731233 | 0.582541   | 1.26956   |
| TAS2R38 | 0.0202476 | 0         | 0.0167503 | 0.0208658 | 0         | 0.0172406  | 0         | 0         | 0         | 0         | 0          | 0         | 0         | 0.0211646  | 0         |
| TAS2R39 | 0.0227562 | 0.0657857 | 0.0376511 | 0.0938037 | 0.0353482 | 0          | 0         | 0.0404476 | 0         | 0         | 0          | 0         | 0.0440465 | 0.0237868  | 0         |
| TAS2R4  | 1.28573   | 1.23896   | 1.23383   | 0.58299   | 1.03853   | 0.59118    | 0.99824   | 1.50829   | 0.0939521 | 0.387292  | 0.174171   | 0.441586  | 0.0497726 | 0.416625   | 0.0738585 |
| TAS2R40 | 0.0443779 | 0.0534548 | 0.0183562 | 0.137198  | 0.137868  | 0.245617   | 0.0253346 | 0.0197197 | 0.189165  | 0.0556988 | 0.125243   | 0.0476303 | 0         | 0.0463876  | 0.414259  |
| TAS2R41 | 0.250466  | 0.16895   | 0.248644  | 0.0774337 | 0.116718  | 0.0426537  | 0.285974  | 0.133556  | 0         | 0.0628721 | 0          | 0.071686  | 0.0807997 | 0.235628   | 0         |
| TAS2R42 | 0.09796   | 0.0943972 | 0         | 0         | 0         | 0          | 0.0838857 | 0.0870587 | 0.0298261 | 0         | 0          | 0         | 0         | 0.0895968  | 0.246195  |
| TAS2R43 | 0.399912  | 0.231233  | 0.652478  | 0.313023  | 0.17502   | 0.115128   | 0.133058  | 0.485963  | 0.0548893 | 0.0848498 | 0          | 0.361277  | 0         | 0.221738   | 0.0647251 |
| TAS2R46 | 0.622125  | 0.615289  | 0.411733  | 0.256447  | 0.115965  | 0.127136   | 0.694097  | 0.331736  | 0         | 0.124933  | 0.421381   | 0.124641  | 0         | 0.286132   | 0.643284  |

|          |           |           |            |           |           |           |            |           |          |           |           |           |           |           |           |
|----------|-----------|-----------|------------|-----------|-----------|-----------|------------|-----------|----------|-----------|-----------|-----------|-----------|-----------|-----------|
| TAS2R5   | 0.885473  | 1.45444   | 1.24862    | 0.559947  | 0.937804  | 0.428391  | 1.03398    | 0.643856  | 0.171565 | 0.454647  | 0.181743  | 0.475185  | 0.0779049 | 0.473305  | 0.260111  |
| TAS2R50  | 0.324003  | 0.624438  | 0.51693    | 0.262345  | 0.143797  | 0.236472  | 0.449208   | 0.493623  | 0        | 0.145235  | 0.0261256 | 0.165595  | 0         | 0.0967646 | 0.199418  |
| TAS2R60  | 0.314378  | 0.302944  | 0.140041   | 0.0996848 | 0.187822  | 0.123549  | 0.497003   | 0.214918  | 0        | 0.0910561 | 0.054599  | 0.103821  | 0.0156027 | 0.189586  | 0.104189  |
| TAS2R7   | 0         | 0.0305219 | 0.0698743  | 0         | 0         | 0         | 0          | 0.0562982 | 0        | 0.106011  | 0         | 0         | 0         | 0         | 0         |
| TAS2R8   | 0         | 0.0359699 | 0.0205866  | 0         | 0         | 0         | 0          | 0         | 0        | 0         | 0         | 0         | 0         | 0         | 0         |
| TAS2R9   | 0.0215284 | 0.0311182 | 0.0534295  | 0.0443713 | 0         | 0.0366623 | 0          | 0         | 0        | 0         | 0.0243029 | 0         | 0         | 0         | 0         |
| TASP1    | 2.83594   | 2.13242   | 2.19679    | 2.03691   | 1.30821   | 3.18311   | 1.75637    | 1.90936   | 0.826835 | 1.7797    | 2.54175   | 1.46348   | 1.62459   | 1.92685   | 2.6905    |
| TAT      | 0         | 0         | 0.00694435 | 0         | 0.0260785 | 0         | 0.00958433 | 0         | 0        | 0         | 0.0094761 | 0         | 0         | 0         | 0         |
| TAT-AS1  | 0         | 0.0275325 | 0          | 0         | 0         | 0         | 0          | 0         | 0        | 0         | 0         | 0         | 0         | 0         | 0         |
| TATDN1   | 4.42375   | 3.31862   | 3.95292    | 5.29891   | 0.692996  | 4.65636   | 2.038      | 3.68146   | 2.88374  | 3.66131   | 5.70776   | 1.55619   | 3.19994   | 2.40974   | 2.65399   |
| TATDN2   | 6.91886   | 7.33531   | 7.8853     | 8.08271   | 11.2822   | 11.5055   | 8.47054    | 5.83455   | 5.72673  | 4.84214   | 4.30192   | 4.66716   | 7.2118    | 6.00711   | 5.38474   |
| TATDN3   | 2.3578    | 1.40457   | 1.55078    | 2.08182   | 0.932543  | 2.40003   | 1.28301    | 1.67809   | 0.90311  | 1.52372   | 2.50871   | 0.944558  | 1.51092   | 1.19811   | 1.3897    |
| TAX1BP1  | 13.8366   | 11.9503   | 12.4123    | 12.5295   | 4.94938   | 12.55     | 6.01528    | 9.42026   | 21.5234  | 18.5145   | 17.3507   | 10.1578   | 20.8631   | 10.3016   | 10.1667   |
| TAX1BP3  | 18.3606   | 19.7023   | 18.622     | 94.366    | 53.5858   | 78.55     | 23.1181    | 14.8158   | 36.3097  | 48.603    | 69.4439   | 46.8365   | 86.3369   | 39.5208   | 30.7159   |
| TAZ      | 2.32984   | 3.49022   | 3.93133    | 3.55893   | 8.28932   | 5.37666   | 3.58521    | 2.09028   | 2.06731  | 1.96338   | 3.66301   | 2.86576   | 2.37649   | 3.23553   | 3.02728   |
| TBATA    | 0.0225786 | 0.0598329 | 0.0560358  | 0.0116339 | 0.0175362 | 0         | 0.0386692  | 0.020066  | 0        | 0         | 0         | 0.0323112 | 0         | 0.0295014 | 0.0162129 |
| TBC1D1   | 3.18822   | 1.18686   | 1.42148    | 2.74601   | 1.74116   | 6.44669   | 2.14579    | 1.28548   | 0.911455 | 3.13384   | 4.7849    | 1.18865   | 4.26336   | 3.35543   | 6.24626   |
| TBC1D10A | 6.67459   | 8.68617   | 7.37169    | 12.6102   | 19.3995   | 13.4562   | 6.8613     | 5.29991   | 15.9644  | 8.39163   | 10.111    | 7.08992   | 9.36745   | 7.72609   | 4.90805   |
| TBC1D10B | 4.49769   | 5.77882   | 6.36439    | 8.72599   | 14.4759   | 12.9276   | 6.77476    | 3.39666   | 9.93526  | 6.78468   | 5.34749   | 6.51702   | 12.4068   | 7.35004   | 6.28741   |
| TBC1D10C | 0.846838  | 1.12345   | 0.86371    | 0.56187   | 2.88314   | 1.23471   | 1.351      | 0.886624  | 0.211922 | 0.393116  | 0.772638  | 0.564433  | 0.523922  | 0.497161  | 1.68264   |
| TBC1D12  | 2.2825    | 1.90467   | 2.24791    | 1.65109   | 2.50125   | 1.64874   | 2.44981    | 2.13225   | 4.0006   | 2.13721   | 2.79479   | 1.4402    | 2.07783   | 1.82622   | 1.98875   |
| TBC1D13  | 3.4747    | 3.12549   | 3.27186    | 4.36294   | 6.44744   | 7.321     | 4.15011    | 2.33447   | 2.19535  | 2.11359   | 3.71502   | 2.17653   | 4.22743   | 3.04328   | 4.01085   |
| TBC1D14  | 11.345    | 11.2387   | 10.7661    | 17.5563   | 15.9856   | 16.7095   | 10.5922    | 9.13288   | 23.581   | 15.337    | 13.3165   | 13.6149   | 21.7206   | 9.73308   | 8.04904   |
| TBC1D15  | 4.51649   | 3.5116    | 3.65885    | 2.64733   | 0.875436  | 3.84945   | 2.31027    | 3.87174   | 2.28143  | 3.24291   | 4.54801   | 1.7873    | 2.61861   | 2.35511   | 3.05152   |
| TBC1D16  | 3.48894   | 2.99404   | 3.18442    | 3.64615   | 5.70269   | 8.60221   | 4.42773    | 2.81684   | 1.89765  | 2.25889   | 2.02938   | 2.1419    | 3.76105   | 3.33888   | 4.47839   |
| TBC1D17  | 5.71744   | 9.19019   | 9.29838    | 6.76677   | 18.8687   | 10.8916   | 9.41332    | 6.01767   | 11.2292  | 4.43296   | 7.68788   | 6.70202   | 4.51351   | 4.12026   | 4.96023   |

|              |           |            |            |            |           |            |           |            |           |           |            |            |           |            |           |
|--------------|-----------|------------|------------|------------|-----------|------------|-----------|------------|-----------|-----------|------------|------------|-----------|------------|-----------|
| TBC1D19      | 1.27706   | 1.33436    | 1.51714    | 1.18598    | 0.53053   | 1.11269    | 1.25465   | 1.40549    | 0.415957  | 1.07167   | 1.45841    | 0.823457   | 0.517367  | 1.04774    | 1.21557   |
| TBC1D2       | 3.80167   | 5.61016    | 5.58822    | 11.5007    | 12.9624   | 10.8348    | 5.39529   | 3.5294     | 14.1959   | 9.96891   | 5.96569    | 7.80986    | 18.2608   | 7.9641     | 4.93626   |
| TBC1D20      | 6.76321   | 6.73678    | 7.68564    | 6.49472    | 8.26134   | 8.41325    | 9.00507   | 6.19466    | 13.7744   | 8.07906   | 12.2824    | 6.11392    | 7.88848   | 7.21014    | 7.30323   |
| TBC1D21      | 0         | 0          | 0          | 0          | 0         | 0          | 0         | 0          | 0         | 0         | 0          | 0          | 0         | 0          | 0         |
| TBC1D22A     | 4.07107   | 3.97396    | 3.98056    | 4.67888    | 6.55243   | 6.05163    | 5.65662   | 3.43815    | 4.20181   | 3.56808   | 4.31533    | 3.29479    | 3.81083   | 3.71206    | 3.11818   |
| TBC1D22A-AS1 | 1.53022   | 1.88607    | 1.73694    | 0.586766   | 2.06371   | 2.0706     | 2.09929   | 1.07529    | 0.0866806 | 0.550864  | 0.174082   | 1.18828    | 0.206642  | 1.09734    | 1.46506   |
| TBC1D22B     | 2.59993   | 3.62045    | 3.25484    | 3.48031    | 2.57343   | 3.66599    | 3.88647   | 2.79396    | 6.04151   | 3.84798   | 3.46376    | 3.70831    | 4.22504   | 3.21261    | 2.35933   |
| TBC1D23      | 4.61553   | 4.94119    | 4.86276    | 6.21714    | 1.71142   | 5.04564    | 2.93071   | 4.94341    | 10.6984   | 11.0178   | 10.4074    | 4.96443    | 9.88641   | 6.79804    | 4.46458   |
| TBC1D24      | 0.961517  | 1.2307     | 1.2396     | 0.679867   | 1.42354   | 1.84127    | 1.19526   | 1.02564    | 0.175297  | 0.576973  | 0.89476    | 0.379997   | 0.969042  | 0.917733   | 1.09864   |
| TBC1D25      | 2.46404   | 2.63827    | 2.84733    | 2.17076    | 3.48034   | 4.02491    | 2.92819   | 1.94652    | 3.65419   | 2.47551   | 2.8636     | 2.27883    | 2.73617   | 2.34201    | 2.0542    |
| TBC1D26      | 0.0188369 | 0.0178984  | 0.0307312  | 0          | 0.0577033 | 0.052718   | 0.0282761 | 0          | 0         | 0.0155414 | 0          | 0.00886007 | 0.0159784 | 0.00647168 | 0.0355659 |
| TBC1D27P     | 0.006765  | 0.00325948 | 0.00559648 | 0.00697152 | 0         | 0          | 0         | 0.00601217 | 0         | 0         | 0          | 0          | 0         | 0          | 0.0582923 |
| TBC1D28      | 0.0173019 | 7.43E-28   | 0.00967925 | 0          | 0         | 0.00996259 | 0         | 0.0103982  | 0         | 0         | 0          | 0          | 0         | 0          | 0         |
| TBC1D29      | 0         | 0.0500779  | 0.028661   | 0          | 0         | 0          | 0         | 0.0307898  | 0         | 0         | 0          | 0          | 0         | 0.0181071  | 0         |
| TBC1D2B      | 6.9921    | 5.96047    | 6.28612    | 7.38243    | 11.3412   | 15.8448    | 6.67667   | 5.61402    | 3.75374   | 6.5065    | 7.65209    | 4.34794    | 6.23651   | 5.96506    | 12.2275   |
| TBC1D3       | 0.47985   | 0.600766   | 0.826653   | 0.15077    | 0.290341  | 0.35126    | 0.755597  | 1.09435    | 0.299651  | 2.22945   | 0.00214318 | 0.908632   | 0.0785899 | 1.54011    | 1.2529    |
| TBC1D30      | 0.297065  | 0.162035   | 0.173882   | 0.161731   | 0.365673  | 0.326922   | 0.175989  | 0.201741   | 0.112633  | 0.179389  | 0.281567   | 0.142374   | 0.267608  | 0.209453   | 0.382351  |
| TBC1D31      | 0.687941  | 0.733746   | 0.671262   | 0.842249   | 0.255736  | 0.851123   | 0.402805  | 0.569581   | 0.486947  | 0.75274   | 0.935902   | 0.450169   | 0.90668   | 0.676073   | 0.616426  |
| TBC1D32      | 1.44454   | 1.55685    | 1.61643    | 0.685558   | 0.436964  | 0.60853    | 0.802963  | 1.75001    | 0.398155  | 0.553456  | 0.892597   | 0.546724   | 0.19376   | 0.542393   | 0.529554  |
| TBC1D3B      | 0.132884  | 0.145375   | 0.14113    | 0.0276412  | 4.59983   | 0.0230057  | 0.0623739 | 0.201518   | 0.0655564 | 0.440738  | 7.56E-13   | 0.108935   | 2.07E-13  | 2.40442    | 4.83E-13  |
| TBC1D3C      | 0.30129   | 1.79006    | 1.2942     | 2.18366    | 2.65871   | 1.76987    | 1.51727   | 0.450355   | 0.433624  | 1.18142   | 0.671215   | 1.63034    | 0.684111  | 2.46011    | 0.067896  |
| TBC1D3D      | 0.297703  | 0.1714     | 0.188556   | 0.443338   | 0.141088  | 0.265011   | 0.146034  | 0.126378   | 0.524824  | 0.459765  | 0.195201   | 0.669023   | 0.270169  | 0.306454   | 0.177192  |
| TBC1D3E      | 0.312483  | 0.179904   | 0.197917   | 0.465356   | 0.148097  | 0.278171   | 0.153288  | 0.132652   | 0.550879  | 0.482588  | 0.204891   | 0.702211   | 0.283589  | 0.321669   | 0.185991  |
| TBC1D3F      | 0.139019  | 0.114316   | 0.0884733  | 0.191046   | 0.0549472 | 0.507695   | 0.0599205 | 0.0646196  | 0.187233  | 0.448814  | 0.0696184  | 0.265585   | 0.0963571 | 0.10931    | 0.0631965 |
| TBC1D3G      | 0.178012  | 0.113038   | 0.114963   | 0.221669   | 0.072987  | 0.277467   | 0.0730187 | 0.0811143  | 0.262427  | 0.385117  | 0.0976007  | 0.345767   | 0.135085  | 0.153232   | 0.0885961 |
| TBC1D3H      | 0.0336172 | 0.0392425  | 0.0468497  | 0.0896603  | 0.165462  | 0.129297   | 0.0494063 | 0.0413621  | 0.1346    | 0.352721  | 0.0184313  | 0.178079   | 0.0255096 | 0.0596795  | 0.0919998 |



|                     |           |           |           |           |           |           |           |            |           |            |            |            |           |           |           |
|---------------------|-----------|-----------|-----------|-----------|-----------|-----------|-----------|------------|-----------|------------|------------|------------|-----------|-----------|-----------|
| TBC1D3I             | 0.297703  | 0.1714    | 0.188556  | 0.443338  | 0.141088  | 0.265011  | 0.146034  | 0.126378   | 0.524824  | 0.459765   | 0.195201   | 0.669023   | 0.270169  | 0.306454  | 0.177192  |
| TBC1D3J             | 0.0284037 | 0.0874615 | 0.0165825 | 0.0218654 | 0.439978  | 0.515752  | 0.0017569 | 0.00835426 | 0.0271563 | 0.00245061 | 0.00502901 | 0.0138054  | 0.0185278 | 0.433551  | 0.0112807 |
| TBC1D3K             | 0.297703  | 0.1714    | 0.188556  | 0.443338  | 0.141088  | 0.265011  | 0.146034  | 0.126378   | 0.524824  | 0.459765   | 0.195201   | 0.669023   | 0.270169  | 0.306454  | 0.177192  |
| TBC1D3L             | 0.212358  | 0.129031  | 0.134496  | 0.382092  | 0.100643  | 0.189041  | 0.119827  | 0.0901459  | 0.374361  | 0.32796    | 0.139237   | 0.477215   | 0.192714  | 0.2186    | 0.126393  |
| TBC1D3P1-DHX40P1    | 0.211646  | 0.0346936 | 0.0378384 | 0.0532713 | 9.22E-09  | 0.18843   | 0.16164   | 0.194136   | 0.0936789 | 0.382876   | 0.453528   | 0.0192451  | 0.0312702 | 0.0945104 | 1.03E-13  |
| TBC1D3P2            | 0.0124143 | 0.0239084 | 0.0408042 | 0         | 1.12E-41  | 0.0324012 | 0         | 0.0109959  | 0.0151057 | 0.0473277  | 0          | 0.00912514 | 0         | 0.0131967 | 0         |
| TBC1D3P5            | 0         | 0         | 0         | 0         | 0.0116604 | 0         | 0         | 0          | 0         | 0          | 0          | 0          | 0         | 0         | 0         |
| TBC1D4              | 7.73949   | 8.52556   | 8.98577   | 5.45207   | 6.93134   | 6.33247   | 5.3785    | 6.21258    | 3.65368   | 3.05567    | 3.87043    | 3.29332    | 3.59473   | 3.8192    | 3.21709   |
| TBC1D5              | 4.52786   | 4.13153   | 4.20665   | 6.07904   | 2.31152   | 6.87915   | 4.09226   | 4.21843    | 2.38237   | 2.54775    | 3.84505    | 2.10953    | 3.04282   | 2.29601   | 4.13536   |
| TBC1D7              | 1.12603   | 1.02899   | 0.984805  | 2.03776   | 0.950469  | 2.16856   | 1.2804    | 0.713723   | 1.56762   | 1.33733    | 2.33615    | 1.01376    | 1.18519   | 1.26985   | 0.898639  |
| TBC1D7-LOC100130357 | 0.687142  | 0.561701  | 0.687499  | 0.15778   | 0.192704  | 0.109715  | 0.59216   | 0.703622   | 3.15E-19  | 0.223827   | 0.104019   | 0.063673   | 1.07E-19  | 0.24348   | 0.508935  |
| TBC1D8              | 11.1172   | 7.5629    | 6.64584   | 5.308     | 8.05158   | 11.907    | 6.76279   | 6.73345    | 3.08684   | 3.38597    | 2.95947    | 4.76745    | 2.95128   | 3.61872   | 2.92917   |
| TBC1D8-AS1          | 0.186788  | 0.211494  | 0.154524  | 0.125119  | 0.130566  | 0.421476  | 0.191942  | 0.116201   | 0         | 0.0586096  | 0.158145   | 0.0735086  | 0.0482059 | 0.0488118 | 0.0536503 |
| TBC1D8B             | 0.642965  | 0.419544  | 0.492393  | 0.810257  | 0.365256  | 0.872833  | 0.44047   | 0.382031   | 0.183459  | 0.936105   | 1.52631    | 0.273406   | 0.651887  | 0.643279  | 1.58821   |
| TBC1D9              | 3.01627   | 1.47971   | 1.50763   | 4.3517    | 3.79412   | 4.41463   | 2.33606   | 2.05451    | 3.64266   | 3.20861    | 4.69556    | 1.80506    | 4.59984   | 3.1639    | 5.57372   |
| TBC1D9B             | 14.5896   | 13.7393   | 13.1448   | 16.4427   | 26.6431   | 30.146    | 16.4276   | 10.3577    | 16.3494   | 13.6659    | 10.9711    | 13.4651    | 20.2694   | 13.9066   | 12.9471   |
| TBCA                | 4.32218   | 3.78677   | 3.48955   | 10.2337   | 2.4828    | 7.57806   | 2.76442   | 3.54701    | 7.84408   | 8.67727    | 15.1181    | 5.82659    | 8.128     | 5.71414   | 4.14266   |
| TBCB                | 6.24023   | 4.47092   | 4.11597   | 11.3704   | 8.63015   | 12.0728   | 5.31223   | 3.25296    | 8.36966   | 11.5831    | 20.733     | 7.3067     | 12.1231   | 6.24226   | 7.46314   |
| TBCC                | 4.31742   | 3.9848    | 4.33703   | 5.86489   | 5.96612   | 7.7344    | 4.27329   | 3.06459    | 6.45316   | 4.6095     | 7.29492    | 2.98893    | 6.48461   | 3.68508   | 3.96581   |
| TBCCD1              | 2.11154   | 2.41466   | 2.32891   | 2.17481   | 1.74229   | 2.73471   | 1.88426   | 1.77319    | 1.48741   | 1.7684     | 2.79325    | 1.55773    | 1.39085   | 2.3855    | 2.00916   |
| TBCD                | 4.99466   | 4.99191   | 4.94903   | 6.98066   | 8.55772   | 12.2062   | 6.2138    | 4.42287    | 3.63199   | 4.36923    | 4.59451    | 3.78993    | 6.03395   | 6.18139   | 6.69554   |
| TBCE                | 2.12622   | 1.78963   | 1.75195   | 3.07786   | 1.51745   | 2.40018   | 1.53249   | 1.8291     | 2.42123   | 2.43156    | 2.88254    | 1.92763    | 2.66545   | 2.25663   | 1.93429   |
| TBCEL               | 2.41473   | 1.5653    | 1.63279   | 2.66846   | 1.03778   | 3.5545    | 1.88458   | 2.03348    | 1.10084   | 2.395      | 3.9977     | 1.20603    | 2.07919   | 1.9216    | 3.26093   |
| TBCK                | 1.73034   | 2.31739   | 2.32016   | 3.70309   | 1.44478   | 1.83294   | 1.53718   | 1.77789    | 1.59698   | 1.58696    | 2.34136    | 1.65937    | 1.38395   | 1.76507   | 1.88349   |
| TBILA               | 1.52933   | 6.15964   | 8.61896   | 1.1697    | 1.61465   | 0.325551  | 5.70223   | 4.21546    | 1.04768   | 1.34962    | 0.107901   | 1.64141    | 0.508775  | 0.880473  | 0.480443  |
| TBK1                | 3.47858   | 3.11005   | 2.84672   | 4.41144   | 0.8734    | 3.63862   | 1.74619   | 3.4246     | 6.38217   | 5.64566    | 7.30366    | 3.27756    | 5.90596   | 3.7184    | 3.92979   |

|           |           |           |            |            |           |            |           |           |           |            |           |            |           |            |           |
|-----------|-----------|-----------|------------|------------|-----------|------------|-----------|-----------|-----------|------------|-----------|------------|-----------|------------|-----------|
| TBKBP1    | 1.46114   | 1.14636   | 1.02814    | 1.20575    | 3.03489   | 3.71335    | 1.27198   | 0.850765  | 0.934067  | 1.15935    | 1.08699   | 0.684971   | 1.60732   | 1.48342    | 1.9617    |
| TBL1X     | 2.99576   | 3.48342   | 3.26728    | 5.0331     | 4.15165   | 6.38531    | 3.77172   | 2.25909   | 5.51253   | 4.46467    | 3.36012   | 4.54295    | 7.33442   | 3.59169    | 4.57289   |
| TBL1XR1   | 6.90461   | 7.05213   | 8.10787    | 8.77465    | 2.37953   | 7.45247    | 5.60144   | 9.40306   | 5.43015   | 7.78542    | 10.1643   | 4.11633    | 8.982     | 6.55095    | 5.49989   |
| TBL1Y     | 0.278832  | 0.379873  | 0.373844   | 0.346795   | 0.567539  | 0.368413   | 0.0439119 | 0.179443  | 0.644042  | 0.144812   | 0.27135   | 0.48846    | 0.0558313 | 0.130654   | 0.0414246 |
| TBL2      | 2.51724   | 2.43933   | 3.11197    | 4.04416    | 3.54768   | 4.43729    | 2.56731   | 1.94805   | 2.91071   | 3.11502    | 4.3503    | 2.35262    | 5.4837    | 3.61796    | 3.98065   |
| TBL3      | 3.74714   | 5.18416   | 5.72743    | 7.34611    | 10.8928   | 9.853      | 6.89631   | 3.82967   | 7.07357   | 4.9046     | 5.2775    | 5.7773     | 7.96093   | 5.59548    | 3.53633   |
| TBP       | 2.71056   | 2.57683   | 2.72503    | 2.90604    | 1.98249   | 3.59137    | 1.7764    | 2.12806   | 1.92444   | 2.07478    | 2.53846   | 1.93077    | 2.56444   | 2.40767    | 2.19947   |
| TBPL1     | 1.6662    | 1.31636   | 1.41894    | 2.3736     | 0.628016  | 1.74214    | 1.06311   | 1.31746   | 1.31304   | 1.87598    | 3.3193    | 1.47273    | 1.96825   | 1.29984    | 1.07328   |
| TBPL2     | 0         | 0.0172211 | 0.0147842  | 0          | 0         | 0.045651   | 0.0612139 | 0         | 0         | 0          | 0         | 0          | 0         | 0          | 0         |
| TBR1      | 0         | 0.011134  | 0.00955844 | 0.00595347 | 0         | 0.00491912 | 0.0131922 | 0.025671  | 0         | 0.00725085 | 0.0260865 | 0.00826733 | 0         | 0.00301936 | 0         |
| TBRG1     | 3.46675   | 3.03434   | 3.19154    | 3.1171     | 2.38872   | 3.65645    | 2.47037   | 2.66442   | 2.16448   | 2.38606    | 2.79571   | 2.34968    | 3.53165   | 3.3306     | 3.59855   |
| TBRG4     | 4.69776   | 5.1491    | 5.08083    | 9.01177    | 10.6615   | 9.37683    | 5.71206   | 3.37071   | 6.55105   | 6.70017    | 8.79269   | 6.64995    | 9.44723   | 8.97609    | 4.17644   |
| TBX1      | 3.40047   | 4.07614   | 3.43445    | 4.61002    | 10.513    | 4.19561    | 4.12757   | 1.98781   | 5.39789   | 2.71409    | 3.29831   | 3.3308     | 3.7862    | 3.7486     | 2.54844   |
| TBX10     | 0         | 0.0288131 | 0.0247359  | 0.0154067  | 0         | 0.01273    | 0         | 0.0132866 | 0         | 0.0187642  | 0         | 0          | 0         | 0          | 0         |
| TBX15     | 2.40791   | 0.961368  | 1.16157    | 1.09157    | 1.53057   | 3.1777     | 1.86332   | 1.15481   | 0.322507  | 1.46858    | 2.97545   | 0.308452   | 1.07677   | 0.762813   | 3.26351   |
| TBX18     | 2.72024   | 1.68014   | 2.24406    | 0.522914   | 0.912656  | 1.6178     | 2.04736   | 1.35287   | 0.204446  | 0.972061   | 0.8743    | 0.177442   | 0.334771  | 0.570282   | 1.62182   |
| TBX18-AS1 | 0.30653   | 0.147691  | 0.190188   | 0          | 0         | 0.0652517  | 0.0874966 | 0.102157  | 0         | 0.0480909  | 0.0865087 | 0          | 0         | 0.0400516  | 0         |
| TBX19     | 0.451052  | 0.683581  | 0.773421   | 0.371857   | 0.624206  | 0.474843   | 0.589905  | 0.546623  | 0.279659  | 0.329377   | 0.286993  | 0.492911   | 0.444461  | 0.480051   | 0.38866   |
| TBX2      | 3.26605   | 0.590524  | 0.708046   | 2.28617    | 4.66914   | 6.31408    | 1.65736   | 1.02838   | 0.39193   | 2.93907    | 4.37488   | 0.627104   | 2.91126   | 3.53205    | 9.9119    |
| TBX2-AS1  | 0.851021  | 0.307526  | 0.46935    | 0.267973   | 2.01962   | 1.04669    | 0.99866   | 0.273114  | 0.0575805 | 0.47472    | 0.800581  | 0.169147   | 0.122017  | 0.580686   | 1.86721   |
| TBX20     | 0         | 0.0121999 | 0          | 0.32617    | 0.0786633 | 0          | 0         | 0         | 0.0154188 | 0          | 0.0428757 | 0.0543528  | 0.0490102 | 0.00661683 | 0         |
| TBX21     | 0.0899808 | 0.0693666 | 0.0818823  | 0.0927278  | 0.321474  | 0.329455   | 0.0513686 | 0.0559772 | 0.0109586 | 0.022587   | 0.0711039 | 0.0193151  | 0.0754717 | 0.0329195  | 0.103379  |
| TBX22     | 0.0568393 | 0.013693  | 0.0470214  | 0          | 0.0588607 | 0.0241989  | 0.0432648 | 0.016838  | 0         | 0          | 0         | 0          | 0         | 0          | 0         |
| TBX3      | 10.8094   | 6.579     | 5.13163    | 5.4351     | 13.9046   | 9.16702    | 5.73451   | 5.88692   | 3.53573   | 2.16197    | 4.0147    | 3.23711    | 5.79726   | 4.95405    | 4.39169   |
| TBX4      | 0.831895  | 0.440244  | 0.552818   | 0.730806   | 0.847357  | 2.1831     | 0.46713   | 0.23634   | 0.116264  | 0.231074   | 0.184742  | 0.209799   | 0.602727  | 0.384892   | 0.822584  |
| TBX5      | 0.228141  | 0.115034  | 0.118508   | 0.0492082  | 0.362623  | 0.347859   | 0.145386  | 0.0895884 | 0.0710779 | 0.086568   | 0.137755  | 0.0189815  | 0.0787325 | 0.0360482  | 0.342878  |

|          |           |           |           |           |           |           |           |           |           |           |           |           |            |           |           |
|----------|-----------|-----------|-----------|-----------|-----------|-----------|-----------|-----------|-----------|-----------|-----------|-----------|------------|-----------|-----------|
| TBX5-AS1 | 0.108145  | 0.0766264 | 0.0999906 | 0.0131114 | 0.158105  | 0.189585  | 0.138003  | 0.0621891 | 0.0464854 | 0.0239529 | 0.0502692 | 0.0136554 | 0.0697747  | 0.0897692 | 0.0913588 |
| TBX6     | 0.398132  | 0.445532  | 0.446234  | 0.476462  | 1.17703   | 0.831108  | 0.366592  | 0.502206  | 0.344109  | 0.241789  | 0.362453  | 0.395148  | 0.455742   | 0.234931  | 0.350439  |
| TBXA2R   | 0.462683  | 0.137186  | 0.117774  | 0.339267  | 0.870741  | 2.19713   | 0.741619  | 0.134429  | 0.15171   | 0.480206  | 1.45645   | 0.171898  | 0.625745   | 0.571993  | 1.34172   |
| TBXAS1   | 0.996139  | 0.23584   | 0.24154   | 1.9469    | 1.0538    | 1.9962    | 1.09814   | 0.824231  | 0.146419  | 1.88616   | 4.23633   | 0.264214  | 1.57352    | 0.982905  | 2.2322    |
| TBXT     | 0         | 0         | 0         | 0         | 0         | 0         | 0         | 0         | 0         | 0.0116936 | 0         | 0         | 0          | 0.0146082 | 0         |
| TC2N     | 5.2089    | 4.43717   | 5.00587   | 4.6302    | 1.07926   | 5.71537   | 2.93279   | 8.82809   | 3.00011   | 3.64144   | 3.49864   | 2.71773   | 6.19435    | 2.9909    | 1.7356    |
| TCAF1    | 4.73731   | 4.41155   | 5.01766   | 5.59821   | 4.59016   | 9.6016    | 4.18526   | 3.69943   | 1.43766   | 3.04604   | 3.59445   | 1.73929   | 4.32422    | 3.80926   | 5.00218   |
| TCAF2    | 2.62947   | 2.04826   | 2.00564   | 5.28029   | 2.67533   | 5.02307   | 2.28861   | 2.26917   | 2.95371   | 3.78262   | 3.25181   | 3.39039   | 6.28298    | 2.95877   | 1.98738   |
| TCAF2P1  | 0.720008  | 0.552378  | 0.410857  | 0.605326  | 0.956598  | 1.07871   | 0.306718  | 0.578601  | 0.595856  | 0.760192  | 0.43993   | 0.643659  | 1.10976    | 0.741133  | 0.625533  |
| TCAIM    | 1.2775    | 1.34721   | 1.38229   | 2.16656   | 0.630802  | 1.79014   | 1.46827   | 1.30451   | 1.5507    | 1.70958   | 2.06293   | 1.4014    | 2.09607    | 1.21376   | 1.23323   |
| TCAM1P   | 0.0418626 | 0.0268934 | 0.0346317 | 0.0287604 | 0.0108379 | 0.0891137 | 0.0318649 | 0.018602  | 0.0424866 | 0.017514  | 0.0393814 | 0.0199692 | 0.00450159 | 0.0291723 | 0.04008   |
| TCAP     | 0.264355  | 0.115791  | 0.278336  | 0         | 0.335973  | 0.204631  | 0.219514  | 0.0854314 | 0.0292686 | 0.0603259 | 0         | 0.137566  | 0.0155055  | 0.0502412 | 0.172567  |
| TCEA1    | 12.3873   | 10.8406   | 11.331    | 11.4461   | 6.18283   | 12.2484   | 7.69403   | 13.493    | 11.8785   | 11.0752   | 15.4211   | 7.84265   | 13.9075    | 9.43388   | 7.64968   |
| TCEA2    | 2.33045   | 1.76766   | 1.74658   | 1.55748   | 4.31891   | 4.38129   | 2.35787   | 0.933028  | 0.660381  | 1.20184   | 2.26613   | 0.668652  | 0.647589   | 0.98887   | 1.24264   |
| TCEA3    | 6.99581   | 9.73613   | 9.48526   | 3.84319   | 11.8324   | 6.09197   | 8.25938   | 6.73443   | 4.36475   | 1.70962   | 3.88152   | 1.98714   | 0.571674   | 1.45147   | 1.27248   |
| TCEAL1   | 4.24891   | 1.9775    | 2.12396   | 1.60239   | 1.23575   | 4.41846   | 2.25017   | 2.41027   | 1.6515    | 3.01815   | 6.81714   | 1.07378   | 1.86647    | 1.71984   | 2.31097   |
| TCEAL2   | 0.12612   | 0.0708944 | 0.0521677 | 0.0216617 | 0.130605  | 0.769626  | 0.0959999 | 0.0373617 | 0         | 0.0263823 | 0         | 0         | 0          | 0         | 0         |
| TCEAL3   | 5.53375   | 3.01317   | 3.72605   | 2.41676   | 4.02555   | 11.332    | 2.79418   | 2.88861   | 0.977102  | 2.63359   | 5.36445   | 1.04509   | 2.46872    | 2.0213    | 4.13608   |
| TCEAL4   | 7.05874   | 5.08045   | 5.44174   | 4.90956   | 3.75107   | 11.6301   | 2.4328    | 4.02031   | 4.60445   | 3.648     | 6.77195   | 2.51755   | 2.33353    | 3.88909   | 3.87601   |
| TCEAL5   | 0.079393  | 0.0191264 | 0.0328397 | 0         | 0.0616624 | 0         | 0         | 0.0176395 | 0         | 0.0996463 | 0.0672186 | 0         | 0          | 0.0311207 | 0.0570092 |
| TCEAL6   | 0         | 0         | 0.0131961 | 0         | 0.024018  | 0.0136958 | 0.0179015 | 0         | 0         | 0         | 2.00E-26  | 0         | 0          | 0         | 0         |
| TCEAL7   | 0.526421  | 0.178486  | 0.209682  | 0.140646  | 0.181714  | 0.531249  | 0.178089  | 0.138619  | 0.0474905 | 1.51719   | 3.87372   | 0.0837042 | 0.0503177  | 0.213991  | 0.560006  |
| TCEAL8   | 8.51634   | 5.74096   | 5.41827   | 8.3631    | 4.38982   | 9.62542   | 5.58129   | 8.80741   | 12.4416   | 11.312    | 25.4791   | 4.85033   | 5.9875     | 5.88813   | 9.10435   |
| TCEAL9   | 5.01539   | 3.40971   | 2.79536   | 6.02261   | 2.31078   | 8.84869   | 1.96542   | 3.58847   | 18.8939   | 18.111    | 21.6154   | 8.86514   | 11.2982    | 6.64199   | 5.95142   |
| TCEANC   | 0.387189  | 0.379653  | 0.533851  | 0.364009  | 0.263789  | 0.543694  | 0.286964  | 0.295807  | 0.297823  | 0.477437  | 0.628794  | 0.208998  | 0.175307   | 0.287567  | 0.0585319 |
| TCEANC2  | 0.734504  | 0.918938  | 0.870601  | 0.900045  | 0.814956  | 1.26661   | 0.609594  | 0.710363  | 1.22906   | 0.511294  | 0.707227  | 0.700007  | 0.597351   | 0.554858  | 0.602766  |



|          |           |            |           |           |           |           |           |           |           |           |           |            |          |            |           |
|----------|-----------|------------|-----------|-----------|-----------|-----------|-----------|-----------|-----------|-----------|-----------|------------|----------|------------|-----------|
| TCL6     | 0         | 0          | 0         | 0         | 0         | 0         | 0         | 0         | 0         | 0         | 0         | 0          | 0        | 0          | 0         |
| TCN1     | 0.398763  | 0.270406   | 0         | 1.44589   | 0.206472  | 0.930596  | 0.134902  | 0.380639  | 21.1167   | 1.59415   | 4.51822   | 3.60356    | 0.161991 | 0.710142   | 0         |
| TCN2     | 3.14977   | 1.2862     | 1.10882   | 2.93516   | 4.0599    | 12.7156   | 2.12973   | 1.82647   | 1.00663   | 1.87852   | 4.40049   | 0.767234   | 1.60704  | 1.36017    | 4.95658   |
| TCOF1    | 2.44403   | 2.80348    | 2.88749   | 7.01879   | 4.60611   | 7.80485   | 2.96245   | 2.03137   | 1.44361   | 1.91417   | 1.34682   | 2.60244    | 7.25415  | 4.41931    | 3.08853   |
| TCP1     | 20.4558   | 15.9819    | 16.1417   | 35.8167   | 10.8984   | 34.0855   | 12.291    | 13.604    | 28.2907   | 29.5868   | 33.1881   | 21.7187    | 49.7333  | 27.319     | 15.5448   |
| TCP10    | 0         | 0          | 0         | 0         | 0         | 0         | 0         | 0         | 0         | 0         | 0         | 0          | 0        | 0          | 0         |
| TCP10L   | 1.58E-35  | 0.00533042 | 1.50E-30  | 4.82E-40  | 0.0132801 | 2.53E-18  | 5.38E-24  | 2.96E-26  | 1.54E-13  | 0         | 0         | 1.37E-28   | 9.46E-24 | 4.29E-25   | 2.08E-17  |
| TCP10L2  | 0         | 0          | 0         | 0         | 0         | 0         | 0         | 0         | 0         | 0         | 0         | 0          | 0        | 0          | 0         |
| TCP11    | 0.0541992 | 0.052228   | 0.0896748 | 0.0111708 | 0         | 0.11076   | 0.0495063 | 0.0578013 | 0.0396051 | 0         | 0.0856578 | 0.0232686  | 0        | 0.045323   | 0.0155674 |
| TCP11L1  | 2.21509   | 3.23144    | 2.48147   | 2.64731   | 3.02264   | 3.44479   | 2.82769   | 2.0301    | 3.57825   | 3.29179   | 3.55115   | 2.06924    | 3.28013  | 2.78974    | 4.49559   |
| TCP11L2  | 7.89825   | 7.53043    | 7.91683   | 5.36594   | 4.44009   | 6.02067   | 9.11339   | 6.99699   | 18.9023   | 8.89553   | 11.7938   | 7.10462    | 6.01264  | 4.08864    | 5.34133   |
| TCP11X2  | 0         | 0          | 0         | 0         | 0         | 0         | 0         | 0         | 0         | 0         | 0         | 0          | 0        | 0          | 0         |
| TCTA     | 4.11767   | 3.72901    | 3.60261   | 4.58774   | 5.81013   | 6.37898   | 3.67991   | 2.75895   | 4.14842   | 4.07225   | 5.91386   | 2.75348    | 4.08242  | 3.08164    | 3.21992   |
| TCTE1    | 0.178764  | 0.125884   | 0.170638  | 0         | 0         | 0.128797  | 0.141305  | 0.244416  | 0.0167473 | 0.017259  | 0         | 0.00983926 | 0        | 0.00718691 | 0         |
| TCTE3    | 0.388514  | 0.421182   | 0.372539  | 0.345778  | 0.192021  | 0.225555  | 0.312531  | 0.400209  | 0.129045  | 0.0997414 | 0.199356  | 0.214812   | 0.159515 | 0.184595   | 0.202893  |
| TCTEX1D1 | 0.153333  | 0.0689529  | 0.118391  | 0.410837  | 0.079393  | 0.896519  | 0.105042  | 0.181693  | 0.0373485 | 0.230938  | 0.496202  | 0.058514   | 0.389123 | 0.272471   | 0.601895  |
| TCTEX1D2 | 1.38922   | 2.11256    | 1.71928   | 3.69042   | 2.97765   | 2.42926   | 1.2064    | 1.14722   | 4.43779   | 2.94463   | 5.86937   | 3.1236     | 1.45621  | 1.4385     | 1.8111    |
| TCTEX1D4 | 0.5658    | 0.747482   | 1.11733   | 1.22257   | 0.878883  | 0.777051  | 1.41706   | 0.811026  | 0.955822  | 1.8097    | 0.350265  | 4.20517    | 0.306172 | 1.46902    | 1.25816   |
| TCTN1    | 1.5876    | 1.27007    | 1.48684   | 1.46938   | 0.893378  | 1.96397   | 1.12181   | 1.24588   | 0.795298  | 0.797042  | 2.03567   | 0.72445    | 0.649376 | 0.80157    | 1.54868   |
| TCTN2    | 2.54319   | 2.35115    | 3.01121   | 1.43327   | 1.67894   | 3.26854   | 2.02354   | 1.78695   | 0.745293  | 1.16706   | 2.39545   | 0.949667   | 1.83058  | 1.41641    | 1.94031   |
| TCTN3    | 4.96828   | 4.22575    | 4.62041   | 7.90631   | 4.04247   | 8.78453   | 4.92977   | 4.10002   | 3.24149   | 3.6481    | 8.52726   | 3.13172    | 5.31528  | 4.66775    | 5.14501   |
| TDG      | 3.51944   | 3.40172    | 3.07622   | 6.03013   | 2.0211    | 4.11679   | 2.56527   | 3.99346   | 7.13515   | 6.71065   | 9.08574   | 5.14332    | 12.0739  | 7.70708    | 3.82908   |
| TDGF1    | 0.0316739 | 0.0406959  | 0.0524057 | 0.0435211 | 0.0328003 | 0.0719197 | 0.0120547 | 0.121979  | 0.0257168 | 0.0265027 | 0.0238372 | 0.0075545  | 0        | 0.0110361  | 0.181951  |
| TDGF1P3  | 0         | 0.00411464 | 0         | 1.78E-41  | 5.05E-22  | 0         | 0         | 0         | 0         | 1.28E-26  | 0         | 0          | 0        | 0          | 0         |
| TDH      | 0         | 0          | 0         | 0         | 0.0264916 | 0         | 0         | 0.0151567 | 0.0415411 | 0.0428105 | 0.0962624 | 0.073218   | 0.022007 | 0.0802212  | 0.122463  |
| TDO2     | 0         | 0.00654767 | 0.0112423 | 3.23503   | 0.0844372 | 0.219856  | 0         | 0         | 0.0496517 | 3.32598   | 7.96195   | 0          | 0.832953 | 0.11364    | 0.448876  |



|           |           |           |           |           |           |            |           |           |           |           |            |           |            |            |           |
|-----------|-----------|-----------|-----------|-----------|-----------|------------|-----------|-----------|-----------|-----------|------------|-----------|------------|------------|-----------|
| TEDC1     | 1.20913   | 2.10164   | 2.89801   | 1.77009   | 2.43991   | 1.64538    | 2.96754   | 1.15492   | 0.192675  | 1.30484   | 0.829182   | 3.19384   | 1.53109    | 1.87221    | 1.46058   |
| TEDC2     | 0.113725  | 0.130137  | 0.129362  | 0.981525  | 0.37539   | 1.00467    | 0.243464  | 0.101069  | 0.0692522 | 0.392526  | 0.962861   | 0.345837  | 1.41247    | 0.416064   | 0.183739  |
| TEDDM1    | 0.222173  | 0.33006   | 0.413544  | 0.162177  | 0.086278  | 0.0472944  | 0.25367   | 0.320855  | 0.090194  | 0.0464751 | 0.0940522  | 0.0529903 | 0.0119454  | 0.0967646  | 0.0132945 |
| TEF       | 5.81682   | 9.15629   | 12.2232   | 1.41165   | 3.06066   | 9.66907    | 11.6905   | 4.11531   | 7.88814   | 4.29816   | 3.97233    | 4.89003   | 6.77908    | 1.60047    | 4.64728   |
| TEFM      | 1.59011   | 1.99863   | 1.84449   | 2.76078   | 1.12761   | 2.14868    | 1.49979   | 1.61285   | 2.21023   | 2.473     | 4.85831    | 1.58298   | 2.26374    | 2.24025    | 1.34038   |
| TEK       | 3.11906   | 1.23636   | 1.18782   | 1.96956   | 1.82345   | 2.87061    | 1.59508   | 1.39675   | 0.608493  | 2.4779    | 3.49912    | 0.898953  | 3.48334    | 2.1955     | 6.24876   |
| TEKT1     | 0.0163787 | 0         | 0.0270992 | 0         | 0         | 0          | 0         | 0         | 0         | 0         | 0          | 0         | 0          | 0          | 0         |
| TEKT2     | 0.04601   | 0.0517261 | 0.114188  | 0.0316098 | 0.166762  | 0.026118   | 0.0525328 | 0.0272599 | 0         | 0.0577473 | 0          | 0.0329214 | 0.385911   | 0.0801562  | 0.0660762 |
| TEKT3     | 0.0518903 | 0.137508  | 0.289759  | 0.0133686 | 0.0604526 | 0.0441839  | 0.325856  | 0.0807025 | 0.110594  | 0.0162819 | 0.0439332  | 0.0371289 | 0          | 0.00678003 | 0.167672  |
| TEKT4     | 0.0428772 | 0.0301641 | 0.0172638 | 0.0215055 | 0.0488456 | 0.00893423 | 0         | 0.0556383 | 0.0259695 | 0.0263384 | 0          | 0.151027  | 0.03383    | 0.0384456  | 0.119918  |
| TEKT4P2   | 2.09004   | 1.72374   | 2.03228   | 1.09785   | 2.12393   | 1.8548     | 1.58853   | 1.93594   | 1.77147   | 2.39469   | 6.13875    | 2.44479   | 2.51329    | 1.68262    | 1.46141   |
| TEKT5     | 0.0719175 | 0.0762321 | 0.0832933 | 0.0296452 | 0.0223425 | 0.110226   | 0.0164226 | 0.115046  | 0         | 0.0361055 | 0          | 0.0205836 | 0.00928016 | 0.0300698  | 0.0206565 |
| TELO2     | 2.6634    | 3.49131   | 3.4805    | 6.13437   | 10.9965   | 7.07601    | 3.69206   | 2.13833   | 2.98118   | 2.90644   | 1.89191    | 4.2792    | 3.89444    | 4.89571    | 3.48542   |
| TEMN3-AS1 | 0         | 0         | 0         | 0         | 0         | 0          | 0         | 0         | 0         | 0         | 0.125907   | 0         | 0          | 0          | 0         |
| TEN1      | 3.37649   | 3.27131   | 3.30571   | 5.41175   | 7.03696   | 8.32936    | 5.20594   | 2.03832   | 11.045    | 5.94277   | 10.4998    | 3.923     | 5.26973    | 3.00452    | 1.99926   |
| TEN1-CDK3 | 1.16153   | 1.84989   | 1.99293   | 0.688599  | 2.6039    | 0.672314   | 1.12918   | 1.39545   | 0.380826  | 0.764096  | 0.137163   | 1.24136   | 0.0391619  | 1.04424    | 0.827802  |
| TENM1     | 0.825705  | 0.606273  | 0.721687  | 0.0943403 | 0.170084  | 0.139087   | 1.00835   | 0.445077  | 0.0349779 | 0.0202763 | 0.00405268 | 0.0269719 | 0.0382183  | 0.0300208  | 0.340278  |
| TENM2     | 3.21894   | 3.37132   | 1.93209   | 13.5011   | 6.03559   | 9.64141    | 3.02057   | 2.83581   | 3.47739   | 14.2681   | 4.65464    | 9.83994   | 30.5306    | 11.4391    | 7.17348   |
| TENM3     | 0.505604  | 0.254867  | 0.117749  | 0.656772  | 0.808476  | 1.17939    | 0.293492  | 0.258653  | 0.230266  | 2.26637   | 2.65957    | 1.24188   | 3.89262    | 1.68987    | 4.17971   |
| TENM4     | 1.92517   | 3.66092   | 3.12027   | 5.07341   | 4.54804   | 4.40432    | 2.51211   | 2.33336   | 1.22329   | 1.30355   | 1.47906    | 1.82609   | 1.19031    | 1.64095    | 2.0141    |
| TENT2     | 5.30843   | 4.59556   | 4.96521   | 4.19995   | 1.54942   | 4.38885    | 3.73924   | 5.11716   | 3.03962   | 4.08893   | 4.87618    | 2.72622   | 3.91385    | 3.30917    | 4.01467   |
| TENT4A    | 4.8502    | 4.82213   | 5.11538   | 3.67646   | 3.50638   | 5.48044    | 4.30953   | 3.39931   | 4.63038   | 3.58901   | 3.63288    | 3.41453   | 4.04588    | 4.4163     | 3.14935   |
| TENT4B    | 1.28668   | 1.2495    | 1.27213   | 1.09076   | 0.611561  | 1.21948    | 0.990251  | 1.47055   | 1.25432   | 1.48242   | 1.66828    | 1.09009   | 1.91986    | 1.34793    | 1.19638   |
| TENT5A    | 4.66408   | 5.26339   | 6.47169   | 3.25106   | 3.13882   | 5.58313    | 4.63785   | 5.41311   | 4.59548   | 2.98129   | 4.61342    | 3.0422    | 2.09928    | 1.99581    | 3.40536   |
| TENT5B    | 17.0697   | 28.957    | 29.4926   | 27.4762   | 56.9372   | 33.1781    | 36.397    | 12.7703   | 117.112   | 52.9549   | 48.9498    | 61.3482   | 65.2055    | 32.3126    | 9.6181    |
| TENT5C    | 1.43633   | 0.43667   | 0.62926   | 0.287696  | 0.389659  | 0.740698   | 0.43886   | 1.02119   | 0.0591307 | 0.284375  | 0.443039   | 0.118696  | 1.08595    | 0.334108   | 0.74375   |

|          |           |            |            |           |           |           |           |            |           |            |           |            |            |           |           |
|----------|-----------|------------|------------|-----------|-----------|-----------|-----------|------------|-----------|------------|-----------|------------|------------|-----------|-----------|
| TENT5D   | 0         | 0.00345972 | 0.0118806  | 0         | 0         | 0         | 0         | 0.00638151 | 0         | 0          | 0         | 0          | 0          | 0         | 0         |
| TEP1     | 2.48441   | 2.77667    | 3.06498    | 4.311     | 5.01215   | 4.68414   | 3.40744   | 2.31563    | 0.993642  | 2.07516    | 1.86157   | 2.22207    | 2.5873     | 2.92149   | 4.22685   |
| TEPP     | 0.228432  | 0.103183   | 0.0354329  | 0.720931  | 0.243949  | 0.10941   | 0.0978062 | 0.0761294  | 0.243429  | 0.340463   | 0.580211  | 0.245174   | 0.736917   | 0.186545  | 0.123022  |
| TEPSIN   | 2.12392   | 3.08189    | 3.17025    | 3.76465   | 7.91688   | 4.12867   | 2.63678   | 2.11239    | 2.56991   | 2.67273    | 1.98564   | 3.92039    | 2.6303     | 3.34808   | 3.28984   |
| TERB1    | 0.0283848 | 0.0227937  | 0.0469638  | 0.0195009 | 0.0146971 | 0.0241693 | 0         | 0.0756781  | 0         | 0          | 0         | 0          | 0.00610457 | 0.0148351 | 0         |
| TERB2    | 0.0181514 | 0          | 0          | 0         | 0         | 0         | 0         | 0          | 0         | 0          | 0         | 0.0129878  | 0          | 0         | 0         |
| TERC     | 35.0481   | 31.3752    | 33.8762    | 63.405    | 38.1013   | 64.5361   | 33.3376   | 21.1605    | 10.6868   | 22.9928    | 66.3857   | 16.0087    | 21.6858    | 35.804    | 8.62229   |
| TERF1    | 2.83033   | 2.39966    | 2.52902    | 2.56222   | 1.48169   | 3.58171   | 1.57116   | 2.65433    | 1.77112   | 2.51216    | 4.25425   | 1.35385    | 2.81483    | 2.25158   | 2.35798   |
| TERF2    | 3.63837   | 3.89232    | 4.08566    | 4.53428   | 4.40256   | 5.71372   | 3.63481   | 3.37212    | 3.43944   | 2.86908    | 2.68      | 2.80066    | 4.61519    | 3.47049   | 3.09337   |
| TERF2IP  | 8.76381   | 8.19879    | 7.82254    | 10.5814   | 9.95296   | 14.378    | 5.48398   | 7.33414    | 11.8213   | 10.5338    | 10.5726   | 6.11297    | 13.3922    | 7.97635   | 7.50264   |
| TERT     | 0         | 0.0111146  | 0.00477089 | 0.0118862 | 0         | 0.0245527 | 0.0790152 | 0          | 0         | 0          | 0         | 0.00412646 | 0          | 0.0030141 | 0         |
| TES      | 5.27156   | 5.08377    | 5.73425    | 9.07913   | 4.40244   | 9.07396   | 4.38241   | 4.49782    | 10.8678   | 14.8688    | 18.2462   | 7.34113    | 21.7031    | 12.8657   | 9.02432   |
| TESC     | 1.94365   | 1.23049    | 1.25269    | 0.885043  | 2.59789   | 3.6179    | 1.83213   | 0.682909   | 0.16515   | 0.482224   | 1.40323   | 0.177885   | 0.88949    | 0.401611  | 1.68778   |
| TESC-AS1 | 0         | 0          | 0          | 0         | 0         | 0         | 0         | 0          | 0         | 0          | 0         | 0          | 0          | 0         | 0         |
| TESK1    | 4.6084    | 4.74218    | 5.86689    | 5.43155   | 7.7156    | 10.2524   | 6.17539   | 2.93473    | 3.87607   | 4.80266    | 7.29982   | 2.93541    | 6.77751    | 5.60068   | 5.82559   |
| TESK2    | 2.64836   | 3.77372    | 3.32992    | 2.73696   | 4.219     | 2.41521   | 3.10113   | 2.20654    | 2.66646   | 1.43535    | 2.38664   | 1.69578    | 1.73297    | 1.54144   | 1.29661   |
| TESMIN   | 0.0861685 | 0.128922   | 0.0787883  | 0.271071  | 0.169073  | 0.37458   | 0.0932063 | 0.124945   | 0.0331401 | 0.0683055  | 0.204786  | 0.0486757  | 0.172639   | 0.154069  | 0.0716441 |
| TESPA1   | 0.318186  | 0.258705   | 0.341371   | 0.14858   | 0.208513  | 0.122766  | 0.261118  | 0.353471   | 0.0968787 | 0.0935991  | 0.21327   | 0.0747044  | 0.256615   | 0.119527  | 0.307017  |
| TET1     | 1.33536   | 0.729494   | 0.721155   | 0.281198  | 0.281322  | 0.795725  | 0.818857  | 0.770427   | 0.0823453 | 0.369754   | 0.667861  | 0.155504   | 0.171379   | 0.29406   | 0.967544  |
| TET2     | 4.35035   | 5.37098    | 4.98966    | 3.61456   | 2.34639   | 3.11518   | 3.81674   | 4.67302    | 5.74346   | 4.69616    | 4.3159    | 3.89531    | 4.46165    | 3.8194    | 2.92208   |
| TET2-AS1 | 0.0920811 | 0.22183    | 0.25392    | 0.158154  | 0         | 0.0522706 | 0.14018   | 0.354614   | 0         | 0.0385237  | 0.0346494 | 0.131773   | 0          | 0.160419  | 0.0881601 |
| TET3     | 5.40215   | 10.2694    | 11.7644    | 5.58801   | 10.636    | 6.04142   | 12.2339   | 8.31411    | 8.34406   | 5.11197    | 2.69585   | 7.0589     | 10.438     | 5.32282   | 3.46461   |
| TEX10    | 2.8487    | 3.01414    | 3.18704    | 4.30514   | 1.73487   | 4.2313    | 2.74408   | 3.12222    | 3.59853   | 3.07859    | 3.89411   | 2.48341    | 4.55156    | 4.15987   | 2.73078   |
| TEX101   | 0.106466  | 0.218012   | 0.264229   | 0.836587  | 0.496135  | 0.203972  | 0.0455848 | 0.0591363  | 0.243119  | 0.0835161  | 0.18028   | 0.685614   | 0.137383   | 0.159976  | 0.057337  |
| TEX11    | 0         | 0.00355117 | 0          | 0.0455725 | 0         | 0.0251032 | 0         | 0.0065502  | 0         | 0.00925061 | 0.0166405 | 0.0105474  | 0.0285321  | 0.0192605 | 0         |
| TEX12    | 0.303449  | 0.126712   | 0.133885   | 0         | 0         | 0.0516766 | 0.207881  | 0.107872   | 0.0246378 | 0          | 0.0228371 | 0.0868504  | 0          | 0.0634383 | 0.0290528 |





|            |           |            |           |           |           |           |           |            |           |           |           |           |           |           |           |
|------------|-----------|------------|-----------|-----------|-----------|-----------|-----------|------------|-----------|-----------|-----------|-----------|-----------|-----------|-----------|
| TEX45      | 0.0275677 | 0.026565   | 0.0228059 | 0.0284093 | 0.0214111 | 0.0117368 | 0.0629517 | 0.0244998  | 0         | 0         | 0.0155602 | 0.0197254 | 0         | 0.0144081 | 0         |
| TEX46      | 0         | 0.0655922  | 0.0375403 | 0.0935278 | 0.140977  | 0         | 0         | 0          | 0         | 0         | 0         | 0         | 0         | 0         | 0         |
| TEX47      | 0         | 0          | 0         | 0         | 0.0705577 | 0         | 0         | 0          | 0         | 0         | 0         | 0         | 0         | 0         | 0         |
| TEX48      | 0.0316594 | 0          | 0.0261909 | 0         | 0         | 0.10783   | 0         | 0.0562726  | 0         | 0         | 0.0714791 | 0         | 0.0204265 | 0.0165466 | 0         |
| TEX49      | 0         | 0.0337899  | 0         | 0         | 0         | 0.0298576 | 0         | 0          | 0         | 0         | 0         | 0         | 0         | 0         | 0.100716  |
| TEX50      | 0         | 0          | 0         | 0         | 0         | 0         | 0         | 0          | 0         | 0         | 0         | 0         | 0         | 0         | 0         |
| TEX51      | 0         | 0          | 0         | 0         | 0         | 0         | 0         | 0          | 0         | 0         | 0         | 0         | 0         | 0         | 0         |
| TEX53      | 0         | 0.13738    | 0.196566  | 0         | 0.442905  | 0.0809281 | 0.217035  | 0.2534     | 0         | 0         | 0.053646  | 0         | 0         | 0.0248369 | 0         |
| TEX9       | 1.70131   | 1.83342    | 1.18182   | 1.09746   | 0.181561  | 0.873611  | 0.756242  | 1.69666    | 0.711759  | 0.847609  | 1.0116    | 0.35312   | 0.377065  | 0.37332   | 0.298418  |
| TF         | 1.71386   | 0.236757   | 0.297445  | 0.611369  | 0.195477  | 0.78579   | 0.424207  | 0.687007   | 0.0218946 | 0.0601697 | 0.0135296 | 0.192951  | 0.0193317 | 0.341382  | 0.240968  |
| TFAM       | 2.03025   | 1.70717    | 1.63321   | 2.92289   | 0.57583   | 2.984     | 1.15657   | 2.43256    | 1.23368   | 1.69878   | 2.53032   | 1.10726   | 2.88124   | 1.85636   | 1.60331   |
| TFAMP1     | 0         | 0.00501605 | 0.017225  | 0         | 0         | 0         | 0         | 0.00925219 | 0         | 0         | 0         | 0         | 0         | 0         | 0         |
| TFAP2A     | 8.56147   | 16.7699    | 16.7366   | 20.2277   | 13.9775   | 20.5351   | 14.9994   | 15.444     | 12.9024   | 13.4785   | 11.9127   | 14.78     | 22.0736   | 12.8871   | 4.32618   |
| TFAP2A-AS1 | 0.542942  | 1.9631     | 1.6456    | 1.21024   | 2.20102   | 0.962688  | 1.38013   | 1.23596    | 0.397173  | 1.08769   | 0.263537  | 1.09551   | 0.483236  | 0.818317  | 0.662688  |
| TFAP2A-AS2 | 1.01633   | 2.40336    | 2.32922   | 1.57      | 1.37383   | 0.599945  | 1.69125   | 2.17822    | 0.396456  | 1.18814   | 0.358335  | 0.960245  | 0.471691  | 1.62972   | 0.597038  |
| TFAP2B     | 1.05487   | 2.12578    | 1.5197    | 0.93001   | 1.83172   | 1.66664   | 1.34181   | 1.16205    | 0.830426  | 0.0906143 | 0.194697  | 0.353001  | 0.0621079 | 0.113199  | 0.0518418 |
| TFAP2C     | 12.5449   | 24.6638    | 17.8425   | 23.3251   | 26.1745   | 18.2753   | 15.3471   | 15.9085    | 22.2239   | 17.2963   | 16.2316   | 19.3107   | 25.1834   | 14.4682   | 6.40365   |
| TFAP2D     | 0         | 0          | 0         | 0         | 0         | 0         | 0         | 0          | 0         | 0         | 0         | 0         | 0         | 0         | 0         |
| TFAP2E     | 0.994717  | 1.82021    | 1.39193   | 1.94112   | 2.67934   | 1.07225   | 1.08741   | 0.987471   | 0.979473  | 1.27504   | 0.597294  | 1.34778   | 2.36915   | 1.47669   | 0.942228  |
| TFAP4      | 3.07132   | 2.19887    | 2.26347   | 4.90365   | 4.48524   | 5.29484   | 2.96344   | 2.57576    | 0.790251  | 1.05872   | 1.80682   | 1.40059   | 3.26545   | 2.02346   | 1.33567   |
| TFB1M      | 0.829478  | 1.0625     | 0.92271   | 0.992721  | 0.478438  | 1.40906   | 0.742856  | 0.981282   | 0.44493   | 0.589303  | 1.15081   | 0.532327  | 0.66424   | 0.688588  | 0.682397  |
| TFB2M      | 2.91556   | 2.20391    | 2.1118    | 4.08621   | 1.73103   | 4.65618   | 2.29324   | 2.0844     | 3.1405    | 3.69185   | 7.03607   | 2.30868   | 5.60151   | 3.095     | 2.08425   |
| TFCP2      | 3.78139   | 4.07906    | 4.20534   | 5.41829   | 3.71588   | 5.67571   | 2.64595   | 3.54328    | 4.54459   | 3.29954   | 2.7286    | 2.9553    | 5.10053   | 3.50006   | 3.61439   |
| TFCP2L1    | 24.0752   | 12.5808    | 6.41003   | 5.28307   | 5.79925   | 8.34842   | 11.1091   | 12.924     | 6.4439    | 2.56499   | 3.96977   | 4.95037   | 2.8172    | 2.38368   | 1.08091   |
| TFDP1      | 9.48393   | 8.49327    | 8.20118   | 22.07     | 10.3151   | 25.4628   | 10.1322   | 7.68046    | 17.5557   | 15.8174   | 20.0256   | 13.6029   | 26.4775   | 15.6789   | 10.869    |
| TFDP2      | 4.17591   | 3.48275    | 4.12133   | 1.80382   | 1.59168   | 3.59449   | 3.49612   | 3.3144     | 0.75599   | 1.35482   | 2.41909   | 0.749198  | 1.3399    | 1.33228   | 2.08772   |

|           |           |            |           |           |           |           |           |           |           |          |          |           |           |           |          |
|-----------|-----------|------------|-----------|-----------|-----------|-----------|-----------|-----------|-----------|----------|----------|-----------|-----------|-----------|----------|
| TFDP3     | 0.0551025 | 0.00663731 | 0         | 0.0141962 | 0.0213983 | 0.0469191 | 0         | 0         | 0         | 0        | 0        | 0         | 0         | 0         | 0        |
| TFE3      | 5.11827   | 6.03756    | 6.85918   | 10.9156   | 12.4832   | 17.6497   | 7.30681   | 4.41753   | 9.46868   | 10.8778  | 9.8066   | 7.78055   | 16.1998   | 10.4619   | 7.22529  |
| TFEB      | 2.53008   | 1.69197    | 1.93205   | 2.02307   | 2.47109   | 4.04208   | 2.23179   | 1.30099   | 1.93744   | 1.70989  | 1.58569  | 1.32597   | 2.32576   | 1.81323   | 1.48257  |
| TFEC      | 0.172836  | 0.0914392  | 0.112143  | 0.286377  | 0.0263209 | 0.337619  | 0.127689  | 0.207815  | 0.012382  | 0.421093 | 0.772789 | 0.0484975 | 0.345471  | 0.210773  | 0.5889   |
| TFF1      | 0         | 0          | 0         | 0         | 0         | 0         | 0         | 0         | 0         | 0        | 0        | 0         | 0         | 0         | 0        |
| TFF2      | 0         | 0          | 0         | 0         | 0         | 0         | 0         | 0         | 0         | 0        | 0        | 0         | 0         | 0.0171083 | 0        |
| TFF3      | 2.45922   | 0.729978   | 0.762916  | 0.995618  | 1.46662   | 0.46741   | 1.95548   | 0.468333  | 0.0802248 | 0.826762 | 1.71031  | 0.361355  | 1.38834   | 1.3771    | 1.73434  |
| TFG       | 9.65574   | 10.4333    | 10.4784   | 23.9063   | 5.45868   | 21.6637   | 9.16215   | 10.5367   | 23.079    | 25.2818  | 25.4089  | 16.0423   | 38.9537   | 18.2066   | 13.7725  |
| TFIP11    | 4.44218   | 4.28086    | 4.30854   | 6.71677   | 5.48722   | 8.01327   | 4.02009   | 3.2904    | 6.03626   | 4.32981  | 3.51823  | 3.96604   | 7.9443    | 4.65754   | 4.24364  |
| TFPI      | 4.00315   | 1.43688    | 2.16038   | 2.58596   | 0.425681  | 6.61593   | 1.53992   | 2.80316   | 0.359928  | 3.67553  | 5.84748  | 0.6267    | 4.48266   | 2.70724   | 4.90018  |
| TFPI2     | 0.160979  | 0.068437   | 0.0940044 | 0.243961  | 0.0735457 | 0.459592  | 0.108118  | 0.0504933 | 0         | 0.52294  | 1.55001  | 0.0474289 | 1.01419   | 0.252404  | 0.217587 |
| TFPT      | 2.31165   | 2.29202    | 2.43335   | 3.51664   | 5.6586    | 5.95939   | 1.87396   | 1.65622   | 3.16677   | 2.72907  | 5.47065  | 2.60106   | 3.50117   | 2.9809    | 2.69837  |
| TFR2      | 0.124175  | 0.175748   | 0.218293  | 0.231938  | 0.482215  | 0.231291  | 0.398752  | 0.137945  | 0.812866  | 0.214296 | 0.359205 | 0.310976  | 0.0350511 | 0.133854  | 0.222913 |
| TFRC      | 5.64255   | 6.19968    | 7.21351   | 27.7285   | 2.81075   | 7.3726    | 4.87057   | 5.04969   | 3.40142   | 7.93227  | 11.8469  | 3.28688   | 12.2723   | 8.45896   | 5.84385  |
| TG        | 2.08077   | 0.587016   | 0.520937  | 0.237     | 0.263675  | 0.277418  | 0.965931  | 0.756717  | 0.016672  | 0.17525  | 0.040179 | 0.0568112 | 0.083023  | 0.0558059 | 0.106161 |
| TGDS      | 1.19426   | 1.06144    | 0.949605  | 1.66087   | 0.324191  | 1.37231   | 0.582493  | 1.18501   | 0.720174  | 1.14965  | 2.12042  | 0.862818  | 1.34655   | 1.39984   | 1.06569  |
| TGFA      | 1.98646   | 2.24885    | 2.51926   | 11.697    | 2.4293    | 2.81632   | 2.21818   | 2.58984   | 14.3916   | 14.8798  | 10.1431  | 5.83487   | 36.6298   | 7.54662   | 2.75516  |
| TGFA-IT1  | 0.188155  | 0.158648   | 0.116741  | 0.484748  | 0.146135  | 0.240317  | 0.161122  | 0.167216  | 0         | 0.295192 | 0        | 0.201945  | 0.182095  | 0.540859  | 0        |
| TGFB1     | 6.26492   | 5.93536    | 7.49478   | 16.8539   | 18.4402   | 26.8594   | 10.9224   | 6.36313   | 9.1827    | 16.8813  | 34.0653  | 10.1012   | 29.3351   | 23.4057   | 21.4987  |
| TGFB111   | 5.66794   | 2.79066    | 3.6116    | 4.00049   | 8.13001   | 13.845    | 9.89838   | 3.08625   | 2.64335   | 7.0049   | 21.0294  | 2.48481   | 7.11378   | 7.31829   | 14.9795  |
| TGFB2     | 0.562773  | 0.637024   | 0.84822   | 0.754734  | 0.496965  | 0.863204  | 0.70417   | 0.726238  | 0.469447  | 1.21432  | 1.99292  | 0.648147  | 1.02214   | 1.6862    | 2.18106  |
| TGFB2-AS1 | 0.124648  | 0.0400383  | 0.0687453 | 0         | 0         | 0.106136  | 0.0948797 | 0.0369257 | 0.101205  | 0.156447 | 0        | 0         | 0.053615  | 0         | 0        |
| TGFB2-OT1 | 2.86E-14  | 8.82E-23   | 4.93E-12  | 8.09E-20  | 4.96E-31  | 3.39E-08  | 2.56E-32  | 1.70E-15  | 5.50E-18  | 5.75E-08 | 1.65E-12 | 2.46E-11  | 2.89E-14  | 7.58E-19  | 9.70E-14 |
| TGFB3     | 2.61876   | 1.49219    | 1.70804   | 2.25392   | 4.01347   | 12.083    | 2.55716   | 1.20254   | 1.00156   | 5.93675  | 9.83002  | 0.993235  | 4.31994   | 3.7311    | 12.0532  |
| TGFB1     | 23.8279   | 34.7201    | 47.3827   | 53.6509   | 25.7604   | 87.7532   | 57.8031   | 23.8379   | 17.2832   | 83.2471  | 187.49   | 21.4181   | 92.2896   | 89.9341   | 190.721  |
| TGFB1     | 5.75471   | 3.57216    | 3.73698   | 9.5151    | 2.76489   | 8.46863   | 4.36417   | 4.45262   | 5.5533    | 11.6509  | 13.0329  | 5.18822   | 14.3465   | 7.57578   | 11.6864  |

|              |           |           |           |           |           |           |           |            |           |           |           |            |            |          |            |
|--------------|-----------|-----------|-----------|-----------|-----------|-----------|-----------|------------|-----------|-----------|-----------|------------|------------|----------|------------|
| TGFBR2       | 26.4549   | 11.8333   | 14.2728   | 19.6104   | 13.178    | 43.3663   | 19.9513   | 14.9786    | 3.23028   | 17.4908   | 29.8697   | 7.76031    | 16.6049    | 13.0293  | 27.328     |
| TGFBR3       | 13.2696   | 7.39802   | 9.29111   | 2.9137    | 4.76718   | 11.0613   | 17.3844   | 9.11663    | 1.12295   | 2.31452   | 4.06366   | 1.93299    | 1.61348    | 2.00051  | 6.11278    |
| TGFBR3L      | 0.128982  | 0.248582  | 0.335352  | 0.0949426 | 1.1735    | 0.188274  | 0.336611  | 0.147379   | 0.381493  | 0.161886  | 0.520016  | 0.342792   | 0.14266    | 0.192605 | 0.0793862  |
| TGFBRAP1     | 4.56758   | 3.09927   | 3.30833   | 3.48596   | 3.17405   | 5.5312    | 4.2806    | 3.55381    | 3.26502   | 2.10766   | 2.94417   | 2.27356    | 3.73491    | 2.43253  | 2.63978    |
| TGIF1        | 3.10367   | 3.11226   | 3.04957   | 6.53543   | 3.73328   | 7.14584   | 2.45626   | 2.70848    | 2.63366   | 4.53527   | 7.17177   | 4.93457    | 5.17244    | 5.4988   | 4.4814     |
| TGIF2        | 1.84568   | 1.74798   | 2.05576   | 2.28968   | 2.35252   | 4.4083    | 1.51964   | 1.65109    | 0.947843  | 1.23133   | 2.90524   | 0.534563   | 1.58596    | 1.70222  | 1.18308    |
| TGIF2-RAB5IF | 0.224726  | 0.36657   | 0.172638  | 0.0131524 | 0.295305  | 0.152718  | 0.0874053 | 0.0141621  | 0.0204913 | 0.0540723 | 8.84E-05  | 0.00203187 | 0.00820443 | 0.328263 | 0.00015042 |
|              |           |           |           |           |           |           |           |            |           |           |           |            |            |          | 9          |
| TGIF2LX      | 0         | 0         | 0         | 0         | 0         | 0         | 0         | 0          | 0         | 0         | 0         | 0          | 0          | 0        | 0          |
| TGIF2LY      | 0         | 0         | 0         | 0         | 0         | 0         | 0         | 0          | 0         | 0         | 0         | 0          | 0          | 0        | 0          |
| TGM1         | 10.634    | 14.359    | 13.1889   | 81.9491   | 42.4089   | 36.8787   | 12.3984   | 10.8726    | 177.284   | 95.3726   | 69.0066   | 97.878     | 155.571    | 71.7371  | 21.7586    |
| TGM2         | 2.85297   | 0.147718  | 0.0915887 | 8.34185   | 2.45393   | 28.0607   | 0.709826  | 0.276253   | 0.0933471 | 4.54276   | 6.4797    | 0.179762   | 8.77508    | 4.74252  | 6.23754    |
| TGM3         | 18.8896   | 16.9447   | 16.8856   | 32.5537   | 20.5731   | 10.3352   | 28.0823   | 15.735     | 141.507   | 10.4491   | 18.1816   | 41.5935    | 9.47669    | 11.3184  | 2.70658    |
| TGM4         | 0.162055  | 0.17847   | 0.178752  | 0.0636201 | 0.131858  | 0.0394251 | 0.0881093 | 0.281184   | 0.0939834 | 0.532704  | 0.0435572 | 0.0773033  | 0.672154   | 0.108896 | 0.22165    |
| TGM5         | 4.53325   | 6.71785   | 5.02336   | 5.36979   | 15.1227   | 2.56385   | 6.69433   | 3.88756    | 59.9365   | 9.41645   | 13.7094   | 14.4829    | 6.08177    | 4.7473   | 1.59756    |
| TGM6         | 0.30292   | 0.0535155 | 0.0167064 | 1.20705   | 0.266639  | 0.26653   | 0         | 0.0538419  | 0.0491896 | 0.0253463 | 0.0455945 | 0.252872   | 0.0195442  | 0        | 0          |
| TGM7         | 0.01001   | 0         | 0         | 0         | 0.0310979 | 0.0255701 | 0         | 0.00889603 | 0.256011  | 0.0251271 | 0.0113    | 0.0143248  | 0          | 0        | 0          |
| TGOLN2       | 13.3906   | 13.2269   | 13.4087   | 15.864    | 14.2419   | 22.3412   | 16.26     | 13.9946    | 7.4895    | 11.815    | 12.3429   | 8.51944    | 18.1446    | 13.5552  | 16.9802    |
| TGS1         | 2.86049   | 2.91902   | 2.83652   | 4.27067   | 1.76088   | 4.0092    | 1.92746   | 2.86306    | 2.43343   | 2.59447   | 2.94125   | 2.16038    | 6.48344    | 3.09004  | 2.89073    |
| TH           | 0.0363503 | 0.0291902 | 0.0300716 | 0.0374601 | 0.0564646 | 0.0412691 | 0.179849  | 0.0215368  | 0.0885413 | 0.197701  | 0.24621   | 0.121378   | 0.359614   | 0.493955 | 0.226216   |
| TH2LCRR      | 0.124559  | 0.397897  | 0.249417  | 0.154034  | 0.193483  | 0.128721  | 0.287441  | 0.405591   | 0.0303398 | 0.0312669 | 0.0281223 | 0.232439   | 0          | 0.172548 | 0.192038   |
| THADA        | 3.92209   | 4.22002   | 4.34302   | 4.88302   | 2.73052   | 3.15504   | 3.93671   | 4.20805    | 2.24396   | 2.3933    | 2.76054   | 2.50101    | 2.78399    | 3.54386  | 3.11788    |
| THAP1        | 0.779623  | 0.751268  | 0.742145  | 1.69489   | 0.696753  | 1.57321   | 0.695047  | 0.654899   | 0.689358  | 1.80957   | 2.70057   | 0.8253     | 2.5426     | 1.42892  | 0.782212   |
| THAP10       | 0.40701   | 0.24513   | 0.430237  | 0.34953   | 0.263428  | 0.452458  | 0.232356  | 0.281335   | 0.192769  | 0.24123   | 0.306309  | 0.0889859  | 0.233423   | 0.147723 | 0.113656   |
| THAP11       | 5.89007   | 5.02549   | 5.33964   | 6.39867   | 13.3618   | 6.80202   | 6.26274   | 3.84961    | 10.6705   | 5.02083   | 8.22832   | 4.77643    | 5.45493    | 5.83614  | 3.31306    |
| THAP12       | 6.71873   | 4.20313   | 5.04269   | 6.22589   | 2.03049   | 6.85129   | 3.13191   | 5.82057    | 4.00887   | 4.96441   | 7.53101   | 2.21957    | 4.82427    | 4.03189  | 5.86523    |

|           |           |            |           |           |            |          |            |            |           |            |           |           |           |            |            |
|-----------|-----------|------------|-----------|-----------|------------|----------|------------|------------|-----------|------------|-----------|-----------|-----------|------------|------------|
| THAP2     | 0.0908508 | 0.214259   | 0.150316  | 0.364642  | 0.163405   | 0.268718 | 0.098271   | 0.182729   | 0.273703  | 0.366087   | 0.561377  | 0.390037  | 0.527548  | 0.384859   | 0.267814   |
| THAP3     | 0.784395  | 0.916494   | 0.937148  | 1.00337   | 2.20112    | 1.32504  | 0.709214   | 0.674775   | 0.587991  | 0.795427   | 1.58608   | 0.604325  | 0.768921  | 0.927214   | 0.65982    |
| THAP4     | 7.35826   | 5.96018    | 5.80644   | 10.1551   | 10.9026    | 14.7328  | 7.95683    | 4.8979     | 10.5787   | 7.59381    | 8.38543   | 6.75809   | 11.0216   | 7.3053     | 5.99343    |
| THAP5     | 1.98509   | 1.53914    | 1.71294   | 1.47289   | 0.322584   | 2.17396  | 0.906603   | 2.04102    | 1.5324    | 2.3305     | 3.28898   | 1.07512   | 1.81672   | 1.25457    | 1.91225    |
| THAP6     | 1.37082   | 1.30596    | 1.30587   | 1.19328   | 0.290368   | 1.2424   | 0.865583   | 1.65205    | 0.524884  | 1.00364    | 1.20751   | 0.616754  | 0.780594  | 0.740877   | 1.17077    |
| THAP7     | 3.46593   | 3.63628    | 3.94627   | 3.64848   | 6.1046     | 6.49223  | 4.11001    | 2.45089    | 3.17713   | 2.45566    | 6.77331   | 2.17337   | 3.41436   | 2.79595    | 2.63145    |
| THAP7-AS1 | 0.600745  | 0.384239   | 0.377156  | 0.660039  | 0.423112   | 1.01638  | 0.742039   | 0.484342   | 0.322555  | 0.175983   | 0.483645  | 0.225129  | 0.311602  | 0.153508   | 0.326472   |
| THAP8     | 0.519926  | 0.928714   | 0.818276  | 0.810232  | 1.98951    | 1.64127  | 1.04248    | 0.586036   | 1.0502    | 0.795806   | 2.74856   | 0.789411  | 0.760907  | 0.715792   | 0.655621   |
| THAP9     | 0.822721  | 0.559493   | 0.566025  | 0.483685  | 0.10097    | 0.481439 | 0.415898   | 0.621506   | 0.492467  | 0.566979   | 0.621631  | 0.288043  | 0.398081  | 0.326404   | 0.55171    |
| THAP9-AS1 | 5.30744   | 3.91968    | 4.61242   | 3.317     | 0.491727   | 2.99913  | 1.73487    | 3.63465    | 1.61012   | 3.14597    | 4.51299   | 3.2696    | 3.58422   | 2.18893    | 2.25753    |
| THBD      | 14.4414   | 13.6231    | 13.5994   | 13.7821   | 13.0975    | 24.9697  | 22.7278    | 9.19217    | 28.0528   | 18.0174    | 23.6958   | 24.7078   | 36.6406   | 22.2592    | 18.4646    |
| THBS1     | 15.4553   | 5.71158    | 7.44359   | 38.0184   | 14.5822    | 136.546  | 11.521     | 9.22604    | 8.37047   | 43.5804    | 74.1314   | 12.1881   | 172.801   | 67.4449    | 153.439    |
| THBS2     | 10.5503   | 17.9708    | 24.6669   | 10.402    | 32.1226    | 82.1748  | 29.4209    | 18.3748    | 6.57074   | 33.8477    | 58.0174   | 15.8809   | 59.8439   | 42.0579    | 130.538    |
| THBS3     | 3.88743   | 4.42862    | 4.68824   | 3.3516    | 5.90842    | 5.40788  | 7.28328    | 3.10747    | 2.02297   | 3.29362    | 4.95568   | 3.34086   | 2.63872   | 4.55592    | 9.44166    |
| THBS4     | 12.0023   | 3.16427    | 4.83872   | 4.20433   | 4.10063    | 1.53359  | 6.14774    | 1.49782    | 0.139533  | 0.0319548  | 0.0646674 | 0.346128  | 0.234079  | 0.146371   | 5.12688    |
| THCAT155  | 0         | 0.00559492 | 0         | 0         | 0.00601257 | 0        | 0.00441947 | 0.00687995 | 0         | 0.00485815 | 0         | 0         | 0         | 0.00202301 | 0.00555885 |
| THCAT158  | 0.119294  | 0.186803   | 0.0986885 | 0.030734  | 0          | 0.126972 | 0.272412   | 0.185533   | 0.0363217 | 0          | 0.033667  | 0.0426791 | 0.0769679 | 0.358503   | 0          |
| THEG      | 0         | 0.0504555  | 0.129947  | 0.107917  | 0.027111   | 0.23778  | 0.0597828  | 0.139599   | 0.0212561 | 0.109528   | 0.0788103 | 0         | 0.0788254 | 0.0364874  | 0          |
| THEG5     | 0         | 0          | 0         | 0         | 0          | 0        | 0          | 0          | 0         | 0          | 0         | 0         | 0         | 0          | 0          |
| THEGL     | 0.0473596 | 0.251004   | 0.195896  | 0.0488054 | 0.0735658  | 0.20163  | 0.180245   | 0.0420893  | 0.0192262 | 0.0792549  | 0         | 0.0225914 | 0.112039  | 0.0330029  | 0          |
| THEM4     | 1.66043   | 0.808645   | 1.13666   | 0.977782  | 0.514453   | 1.51292  | 0.730735   | 1.09779    | 0.272536  | 0.836973   | 1.65211   | 0.44513   | 1.58529   | 1.08535    | 1.42689    |
| THEM5     | 12.5632   | 22.7823    | 19.6508   | 5.63335   | 41.3511    | 13.2199  | 31.5289    | 19.8662    | 103.545   | 5.19168    | 15.0744   | 25.5988   | 3.39872   | 3.48805    | 1.34652    |
| THEM6     | 2.82455   | 2.19502    | 1.89811   | 2.8937    | 6.4719     | 4.26     | 2.4873     | 1.50172    | 2.49171   | 1.93369    | 3.45037   | 2.04475   | 3.34547   | 1.88749    | 0.797006   |
| THEMIS    | 0.273059  | 0.220928   | 0.289826  | 0.175208  | 0.19207    | 0.11406  | 0.147061   | 0.238093   | 0.050197  | 0.0323318  | 0.0523443 | 0.0442372 | 0.206093  | 0.07001    | 0.347754   |
| THEMIS2   | 1.64822   | 0.765483   | 0.632563  | 4.87673   | 2.37549    | 7.80574  | 1.18345    | 1.17788    | 0.269026  | 3.97742    | 7.33705   | 0.620069  | 4.25369   | 1.86496    | 5.55158    |
| THG1L     | 1.34045   | 1.35949    | 1.38461   | 2.07587   | 1.16188    | 2.23861  | 0.997769   | 0.901684   | 1.28076   | 1.34778    | 2.12349   | 1.00682   | 1.14198   | 1.3818     | 1.05293    |

|           |           |           |           |            |           |           |           |           |           |            |           |           |            |            |           |
|-----------|-----------|-----------|-----------|------------|-----------|-----------|-----------|-----------|-----------|------------|-----------|-----------|------------|------------|-----------|
| THNSL1    | 0.411296  | 0.61521   | 0.599251  | 0.803421   | 0.276532  | 0.538387  | 0.196252  | 0.501915  | 0.149526  | 0.531628   | 0.457372  | 0.267938  | 0.372304   | 0.548632   | 0.731729  |
| THNSL2    | 0.219744  | 0.899946  | 0.165262  | 2.81007    | 5.21318   | 2.88319   | 2.54318   | 0.346196  | 0.0243294 | 1.45423    | 0.112756  | 2.96599   | 1.80445    | 1.67052    | 1.93652   |
| THOC1     | 3.42779   | 3.29786   | 3.67559   | 4.47742    | 1.40744   | 3.67164   | 1.40845   | 2.75528   | 2.51278   | 2.61696    | 3.36429   | 2.36675   | 3.89494    | 3.00107    | 3.32363   |
| THOC2     | 5.67644   | 5.77013   | 5.85629   | 5.78172    | 1.99931   | 5.43759   | 3.12754   | 4.84311   | 4.42128   | 4.63404    | 4.90379   | 3.59822   | 5.02517    | 4.92447    | 4.35449   |
| THOC3     | 5.62121   | 4.49501   | 3.91889   | 12.1965    | 9.56287   | 16.5798   | 6.74241   | 3.84908   | 6.08881   | 8.11977    | 10.8945   | 10.2201   | 14.4697    | 12.0028    | 3.11264   |
| THOC5     | 4.25214   | 3.41728   | 3.35778   | 4.84092    | 4.90809   | 7.16973   | 4.43278   | 2.82301   | 4.12448   | 3.18524    | 3.87047   | 2.87416   | 6.10507    | 4.03185    | 5.12906   |
| THOC6     | 3.37358   | 4.38758   | 4.85113   | 8.57108    | 8.62953   | 9.6342    | 4.62807   | 2.44418   | 3.37712   | 4.04659    | 8.02939   | 3.44703   | 5.89368    | 4.35719    | 3.47098   |
| THOC7     | 8.29381   | 7.12841   | 6.93615   | 13.0259    | 2.86918   | 12.1967   | 3.9698    | 6.67886   | 10.4317   | 10.6823    | 17.0901   | 7.91694   | 10.3986    | 8.07317    | 6.42363   |
| THOC7-AS1 | 0.481431  | 0.59647   | 0.512066  | 0.141751   | 0.213665  | 0.234247  | 0.314104  | 0.5501    | 0         | 0.0431603  | 0         | 0.0984218 | 0.0221869  | 0.215671   | 0.148156  |
| THOP1     | 2.67822   | 2.61083   | 2.73087   | 7.77564    | 6.37161   | 9.22796   | 3.97223   | 1.73967   | 3.57603   | 4.43353    | 3.02338   | 3.70535   | 10.1153    | 5.38046    | 2.824     |
| THORLNC   | 0.151758  | 0.109679  | 0.0627723 | 0          | 0         | 0.19383   | 0.086636  | 0.0337174 | 0.046206  | 0          | 0.0428289 | 0         | 0.0979133  | 0          | 0.0544858 |
| THPO      | 0.0423478 | 0.0612114 | 0.0963409 | 0.0763711  | 0.115116  | 0.225366  | 0.0604391 | 0.0658615 | 0         | 0.0265754  | 0.0956107 | 0.0681771 | 0.0409838  | 0.027666   | 0.28888   |
| THRA      | 5.97543   | 4.77421   | 5.7522    | 3.48798    | 8.43416   | 8.92342   | 7.04361   | 3.94701   | 2.02488   | 2.44937    | 3.19034   | 1.91716   | 2.81614    | 2.14024    | 3.81722   |
| THRA1/BTR | 0.190739  | 0.0919012 | 0.105195  | 0          | 0         | 0         | 0.0362967 | 0.282522  | 0         | 0          | 0.0358868 | 0         | 0          | 0.0664592  | 0         |
| THRAP3    | 16.9207   | 13.9656   | 14.6682   | 27.9596    | 14.4598   | 28.3616   | 13.4059   | 13.6414   | 14.9908   | 18.54      | 14.4671   | 13.2779   | 29.1863    | 15.8519    | 16.9056   |
| THRB      | 1.77737   | 2.51661   | 2.21029   | 1.75186    | 2.31557   | 1.97231   | 2.33702   | 2.03817   | 4.29784   | 0.975068   | 1.42392   | 1.91583   | 0.434655   | 0.792585   | 0.732821  |
| THRB-AS1  | 0.523007  | 0.718179  | 0.584102  | 0.323384   | 3.69647   | 0.445333  | 0.418007  | 0.325363  | 0.254785  | 0.22975    | 0.059041  | 0.654894  | 0.0168721  | 0.0956712  | 0.0751104 |
| THRIL     | 1.79687   | 2.18526   | 2.3157    | 3.85469    | 1.37702   | 2.15402   | 2.01591   | 1.76379   | 1.91079   | 2.11555    | 2.20915   | 2.0808    | 4.80761    | 2.93683    | 1.13599   |
| THRSP     | 0.254966  | 0.103947  | 0.227151  | 0.424442   | 0.0913961 | 0.2171    | 0.403078  | 0.139441  | 0.0477723 | 0          | 0         | 0         | 0          | 0.0717534  | 0.140832  |
| THSD1     | 3.08613   | 1.74799   | 1.73133   | 2.74259    | 3.30356   | 2.72659   | 1.8665    | 1.43391   | 2.69249   | 3.22172    | 3.41499   | 2.19529   | 3.97155    | 3.01159    | 3.23093   |
| THSD4     | 3.53836   | 6.13434   | 3.24411   | 3.86909    | 6.15617   | 3.75722   | 2.76155   | 3.6749    | 2.00066   | 0.983125   | 0.867622  | 1.8044    | 1.47497    | 1.66449    | 1.19545   |
| THSD4-AS1 | 0.194014  | 0.213666  | 0.160502  | 0.0856871  | 0         | 0         | 0.0949365 | 0.123159  | 0.0337553 | 0          | 0         | 0.0793268 | 0          | 0.115886   | 0.119412  |
| THSD4-AS2 | 0.843926  | 1.45965   | 0.662352  | 0.412545   | 0.924359  | 0.221105  | 0.667085  | 0.682703  | 0.039531  | 0.081478   | 0.0122139 | 0.247734  | 0.0209422  | 0.271429   | 0.388457  |
| THSD7A    | 0.8199    | 0.487743  | 0.560711  | 0.975614   | 0.896606  | 1.50983   | 0.51425   | 0.608187  | 0.159767  | 0.664086   | 1.07119   | 0.248744  | 0.660186   | 0.686768   | 1.67987   |
| THSD7B    | 0.0418088 | 0.0183128 | 0.0125771 | 0.00783366 | 0.318813  | 0.0388359 | 0.034717  | 0.0135113 | 0.0138868 | 0.00954078 | 0         | 0.0163174 | 0.00490451 | 0.00198646 | 0.0545842 |
| THTPA     | 1.64381   | 1.92167   | 1.74636   | 2.02387    | 4.04512   | 2.40892   | 2.05465   | 1.4455    | 1.33816   | 1.14016    | 1.61149   | 1.65285   | 1.37875    | 1.45147    | 2.00039   |

|             |           |           |            |            |           |           |           |            |           |           |           |           |           |            |          |
|-------------|-----------|-----------|------------|------------|-----------|-----------|-----------|------------|-----------|-----------|-----------|-----------|-----------|------------|----------|
| THUMPD1     | 5.21658   | 4.0933    | 4.26871    | 4.51251    | 1.64458   | 5.29081   | 2.85777   | 5.26642    | 3.83695   | 4.03162   | 4.18891   | 2.23956   | 4.7783    | 3.47317    | 3.42475  |
| THUMPD2     | 2.44636   | 1.58655   | 1.68066    | 2.05871    | 0.499659  | 1.41272   | 1.14046   | 2.24182    | 1.52578   | 1.2218    | 1.90161   | 1.65353   | 1.52376   | 1.44669    | 1.03332  |
| THUMPD3     | 3.93667   | 4.15765   | 4.50257    | 5.32121    | 2.32134   | 5.61968   | 2.61585   | 3.74659    | 3.9162    | 3.86516   | 4.92235   | 2.87501   | 4.80815   | 4.30035    | 2.9896   |
| THUMPD3-AS1 | 1.36588   | 1.70283   | 1.92797    | 0.888532   | 0.636503  | 0.559706  | 1.02343   | 1.45665    | 1.08133   | 0.968577  | 1.68762   | 0.977321  | 0.387789  | 0.959257   | 0.821407 |
| THY1        | 4.02837   | 1.64233   | 2.06504    | 9.29018    | 16.5708   | 20.459    | 4.02944   | 2.93239    | 2.43908   | 14.34     | 41.8086   | 2.77154   | 10.352    | 9.8042     | 44.7977  |
| THYN1       | 3.85426   | 3.31735   | 4.02912    | 5.65095    | 2.99349   | 7.84663   | 2.76042   | 2.63129    | 1.62158   | 3.23232   | 6.72423   | 1.90541   | 2.41893   | 2.48138    | 3.09468  |
| TIA1        | 3.72653   | 4.08732   | 3.97919    | 3.88681    | 1.29414   | 3.60642   | 2.52103   | 3.78599    | 2.02433   | 3.52848   | 5.12412   | 2.40214   | 2.66913   | 3.6572     | 4.61501  |
| TIAF1       | 0.532304  | 1.11037   | 1.43863    | 1.1892     | 1.89858   | 0.841569  | 1.26575   | 0.83448    | 0.31663   | 1.12848   | 0.0811406 | 1.46199   | 0.33243   | 0.602702   | 1.12917  |
| TIAL1       | 7.14354   | 7.23975   | 7.41127    | 8.71789    | 4.14213   | 8.7614    | 6.50264   | 7.37911    | 8.28882   | 7.97096   | 10.2901   | 6.52583   | 10.9258   | 8.70716    | 8.07367  |
| TIAM1       | 7.19408   | 9.32121   | 8.49034    | 14.1397    | 13.1259   | 7.76797   | 9.46804   | 6.72045    | 22.9826   | 10.7377   | 5.31528   | 12.6524   | 15.5825   | 7.42368    | 3.66401  |
| TIAM2       | 0.460893  | 0.222958  | 0.184162   | 0.0685978  | 0.296257  | 0.226511  | 0.338456  | 0.248916   | 0.0211565 | 0.15795   | 0.148388  | 0.0347651 | 0.174222  | 0.103898   | 0.994535 |
| TICAM1      | 1.69194   | 2.85526   | 3.39725    | 7.21095    | 5.78462   | 6.45766   | 2.88315   | 2.47083    | 7.414     | 4.98343   | 6.58419   | 4.93986   | 16.6268   | 5.72784    | 3.65087  |
| TICAM2      | 0.428585  | 0.197728  | 0.125966   | 0.216392   | 0.294678  | 0.70046   | 0.282443  | 0.586769   | 0.0835639 | 0.658971  | 1.24874   | 0.113871  | 0.287695  | 0.427373   | 0.628662 |
| TICRR       | 0.433781  | 0.232411  | 0.229666   | 1.17299    | 0.269524  | 1.49517   | 0.48339   | 0.209716   | 0.109886  | 0.692526  | 0.611126  | 0.474262  | 1.17994   | 1.05921    | 0.608012 |
| TIE1        | 2.77229   | 1.83137   | 1.75493    | 4.76151    | 7.95355   | 8.86804   | 2.54817   | 1.43591    | 0.990957  | 3.91717   | 5.57678   | 1.87136   | 6.38214   | 5.83523    | 11.8022  |
| TIFA        | 2.23673   | 2.41664   | 1.96253    | 2.59218    | 2.05892   | 2.15464   | 2.33026   | 1.84727    | 11.0248   | 2.64664   | 4.76093   | 2.17703   | 1.71524   | 1.13359    | 1.42766  |
| TIFAB       | 0.12726   | 0.262781  | 0.375993   | 0.693193   | 0.254157  | 0.10836   | 0.166058  | 0.129254   | 0.287834  | 0.0912707 | 0.0615686 | 0.117074  | 0.398806  | 0.0285049  | 0.208869 |
| TIGAR       | 0.574004  | 0.454161  | 0.363126   | 2.36031    | 0.54634   | 1.33461   | 0.382304  | 0.492623   | 2.38507   | 2.39791   | 2.00111   | 1.43348   | 3.53098   | 1.83382    | 1.30521  |
| TIGD1       | 1.87193   | 1.99955   | 2.0307     | 1.01914    | 0.603496  | 0.977406  | 2.00625   | 1.71855    | 0.408643  | 0.454377  | 0.608036  | 0.688662  | 0.290546  | 0.775298   | 0.64672  |
| TIGD2       | 1.92026   | 0.973344  | 0.697872   | 1.69292    | 0.275869  | 1.52166   | 0.93783   | 0.956863   | 1.20313   | 0.794088  | 1.17785   | 0.595664  | 1.33921   | 0.788968   | 0.446339 |
| TIGD3       | 0         | 0.0170153 | 0.00973833 | 0.0363931  | 0.109713  | 0.170398  | 0.0403214 | 0          | 0.0860192 | 0.0147746 | 0.159465  | 0.0421146 | 0         | 0.00615238 | 0        |
| TIGD4       | 0.0468104 | 0.022554  | 0.0774497  | 0.00964789 | 0.0436276 | 0.0558018 | 0.0213786 | 0.00832023 | 0.011402  | 0.0705022 | 0.0211372 | 0.0602893 | 0.0483229 | 0.0146791  | 0        |
| TIGD5       | 1.81345   | 2.05261   | 2.30191    | 3.08502    | 6.37904   | 4.46081   | 1.91716   | 1.12559    | 2.65263   | 1.86661   | 1.81969   | 1.97725   | 3.0396    | 1.97581    | 1.66733  |
| TIGD6       | 0.771621  | 0.613798  | 0.734205   | 0.702765   | 0.528618  | 1.01268   | 0.674113  | 0.770366   | 0.347039  | 0.402237  | 1.02514   | 0.354813  | 0.589728  | 0.4905     | 0.405502 |
| TIGD7       | 0.870395  | 0.650185  | 0.747961   | 0.45196    | 0.251539  | 0.867524  | 0.377486  | 0.821505   | 0.197217  | 0.431893  | 0.563643  | 0.11104   | 0.339556  | 0.412589   | 0.494185 |
| TIGIT       | 0.561422  | 0.349398  | 0.445096   | 0.216961   | 0.145347  | 0.192545  | 0.169156  | 0.457366   | 0.0474825 | 0.0685069 | 0.237666  | 0.050214  | 0.301855  | 0.158938   | 0.470326 |

|          |           |          |           |          |           |          |          |           |          |           |           |         |           |           |          |
|----------|-----------|----------|-----------|----------|-----------|----------|----------|-----------|----------|-----------|-----------|---------|-----------|-----------|----------|
| TIMD4    | 0.0507152 | 0        | 0.0279701 | 0.313581 | 0.0525188 | 0.187128 | 0.270223 | 0.0150238 | 0        | 0         | 0.0381675 | 0       | 0.0109071 | 0.0353413 | 0        |
| TIMELESS | 1.12436   | 0.874942 | 0.712376  | 3.83471  | 1.91286   | 4.14866  | 1.16659  | 0.634436  | 0.825954 | 1.37759   | 1.08794   | 1.23869 | 2.97367   | 2.13836   | 1.12774  |
| TIMM10   | 7.27942   | 3.88785  | 3.60755   | 9.62476  | 5.81374   | 13.7708  | 4.46934  | 3.8755    | 7.36005  | 9.05022   | 23.6061   | 5.97025 | 8.13051   | 6.10162   | 3.84634  |
| TIMM10B  | 6.75074   | 5.75974  | 6.17751   | 5.83232  | 2.4666    | 7.91152  | 7.1778   | 6.72319   | 2.92567  | 4.34375   | 6.65551   | 2.81429 | 5.27498   | 4.63479   | 4.37382  |
| TIMM13   | 6.66396   | 7.08463  | 5.98246   | 13.6864  | 16.0156   | 18.5662  | 9.09467  | 4.59436   | 8.75936  | 11.8369   | 22.8383   | 8.73031 | 12.6862   | 10.5895   | 5.6709   |
| TIMM17A  | 5.31495   | 3.58247  | 3.38134   | 9.48808  | 2.16692   | 9.22939  | 2.96254  | 3.57051   | 8.56272  | 9.48971   | 18.9604   | 5.22038 | 12.5917   | 7.50232   | 4.86825  |
| TIMM17B  | 4.43926   | 4.22711  | 4.56013   | 7.08984  | 5.13092   | 11.2504  | 4.70828  | 3.4591    | 6.99516  | 6.62797   | 11.1865   | 4.10976 | 5.85053   | 4.49735   | 3.50493  |
| TIMM21   | 2.82122   | 2.20251  | 2.38383   | 4.18223  | 1.14831   | 4.75308  | 1.67088  | 1.72961   | 2.00276  | 2.93499   | 5.04119   | 2.25615 | 3.73781   | 3.65075   | 3.01164  |
| TIMM22   | 2.72201   | 2.62301  | 2.65856   | 4.4857   | 5.01053   | 5.84033  | 3.45018  | 2.2699    | 4.00148  | 3.31105   | 4.91378   | 2.56543 | 5.09073   | 2.76381   | 2.89311  |
| TIMM23   | 8.03818   | 6.79231  | 6.83483   | 16.1725  | 5.01245   | 17.3809  | 7.25418  | 5.87272   | 13.2334  | 13.5143   | 23.5771   | 9.03518 | 21.0681   | 12.9406   | 9.14505  |
| TIMM23B  | 5.16246   | 4.68315  | 4.59869   | 2.73105  | 3.36446   | 2.2882   | 4.70898  | 4.39664   | 1.60632  | 1.8576    | 2.66199   | 3.49449 | 1.54172   | 3.94921   | 3.86516  |
| TIMM29   | 2.57145   | 3.30162  | 3.20439   | 3.82646  | 7.47056   | 4.17124  | 2.72987  | 2.04854   | 4.07787  | 2.98764   | 4.14725   | 2.43466 | 5.1403    | 2.71539   | 2.45416  |
| TIMM44   | 4.08475   | 3.90274  | 3.77168   | 6.34399  | 6.81236   | 8.5327   | 4.13535  | 2.56067   | 4.83384  | 4.56036   | 5.05531   | 3.80868 | 7.89891   | 5.41882   | 3.25716  |
| TIMM50   | 2.04003   | 1.76192  | 1.47409   | 3.45879  | 2.45886   | 4.51212  | 2.38242  | 1.4444    | 2.03608  | 2.00799   | 3.83663   | 1.82614 | 3.5855    | 2.33593   | 1.58645  |
| TIMM8A   | 2.08877   | 1.88314  | 1.79158   | 2.93168  | 1.63224   | 2.13864  | 1.49238  | 1.67411   | 3.58953  | 1.2706    | 2.43029   | 1.81549 | 1.88508   | 1.76812   | 1.08579  |
| TIMM8B   | 7.65      | 6.04921  | 6.52871   | 15.7854  | 5.4084    | 12.0381  | 5.65011  | 4.63563   | 16.0402  | 19.325    | 44.4166   | 10.6221 | 13.5869   | 11.4059   | 4.0352   |
| TIMM9    | 4.83952   | 2.76859  | 2.93775   | 6.12306  | 1.21086   | 5.56075  | 2.68647  | 2.81598   | 3.41772  | 3.34822   | 5.33855   | 2.56573 | 3.72152   | 3.48562   | 3.25895  |
| TIMMDC1  | 7.68529   | 8.09176  | 8.26877   | 17.6514  | 10.7193   | 16.4526  | 7.26535  | 5.71968   | 16.2249  | 13.9308   | 26.2568   | 10.4055 | 15.3723   | 10.5466   | 8.97152  |
| TIMP1    | 18.3426   | 9.21513  | 13.4186   | 139.713  | 27.0404   | 202.223  | 24.6932  | 12.5292   | 4.27708  | 59.5525   | 174.009   | 7.21313 | 92.8998   | 40.2085   | 68.5772  |
| TIMP2    | 47.8184   | 28.5219  | 38.8883   | 33.4351  | 58.1186   | 144.218  | 91.2007  | 43.0204   | 9.54687  | 64.38     | 162.837   | 11.3447 | 65.4343   | 59.3725   | 186.633  |
| TIMP3    | 56.4782   | 21.6895  | 30.5226   | 6.15151  | 15.0979   | 28.0755  | 48.3733  | 26.6262   | 10.0237  | 9.6523    | 11.6722   | 6.89123 | 10.0108   | 6.88782   | 30.5161  |
| TIMP4    | 2.49429   | 0.143395 | 0.164138  | 0.350514 | 0.198128  | 1.38775  | 0.550163 | 0.667534  | 0.01726  | 0.0533624 | 0.479956  | 0       | 0.128013  | 0.0962905 | 0.407059 |
| TINAG    | 0         | 0        | 0         | 0        | 0         | 0        | 0        | 0         | 0        | 0.0161014 | 0         | 0       | 0         | 0         | 0        |
| TINAGL1  | 10.2576   | 3.29485  | 4.5241    | 4.42279  | 14.3417   | 11.8702  | 5.68792  | 3.85925   | 1.58166  | 7.25857   | 13.5726   | 1.92383 | 7.68521   | 8.01239   | 20.1516  |
| TINCR    | 2.26285   | 9.46598  | 10.4421   | 5.2708   | 12.7599   | 4.46592  | 8.11902  | 5.15155   | 10.0345  | 3.64934   | 4.45108   | 4.05891 | 3.70395   | 2.86755   | 0.658851 |
| TINF2    | 6.86229   | 8.13046  | 8.07237   | 22.4283  | 11.5821   | 18.8297  | 9.03406  | 5.86299   | 18.2264  | 20.3011   | 18.3071   | 12.7043 | 23.8005   | 13.0767   | 11.8048  |



|            |           |            |           |            |           |            |          |           |           |           |           |           |            |            |           |
|------------|-----------|------------|-----------|------------|-----------|------------|----------|-----------|-----------|-----------|-----------|-----------|------------|------------|-----------|
| TIPARP     | 6.02085   | 8.43468    | 10.8117   | 8.46871    | 2.18586   | 5.47007    | 6.65177  | 7.22401   | 12.0233   | 8.63666   | 8.58235   | 12.1345   | 12.4749    | 9.82225    | 4.179     |
| TIPARP-AS1 | 0.686872  | 0.791001   | 1.22634   | 0.44512    | 1.49219   | 0.368503   | 0.900466 | 0.549196  | 1.52539   | 0.811803  | 0.502112  | 1.27963   | 0.865376   | 0.796073   | 0.17538   |
| TIPIN      | 1.12099   | 0.914704   | 0.807704  | 1.63966    | 0.140426  | 1.6627     | 0.9909   | 0.819491  | 0.41838   | 1.15734   | 2.53092   | 0.517483  | 2.15811    | 1.30405    | 0.778977  |
| TIPRL      | 3.13519   | 2.91327    | 3.25365   | 5.06993    | 0.750073  | 4.40956    | 2.50896  | 3.88092   | 3.69899   | 4.55862   | 7.23652   | 2.36849   | 4.64164    | 4.15866    | 2.91459   |
| TIRAP      | 1.82537   | 2.19872    | 2.30363   | 1.84271    | 2.69076   | 2.63276    | 2.17985  | 1.53119   | 1.40644   | 1.34422   | 1.76624   | 1.17949   | 1.64039    | 1.25093    | 1.63172   |
| TJAP1      | 2.89896   | 2.26431    | 2.23144   | 2.47881    | 3.5312    | 5.7715     | 2.31776  | 1.71139   | 0.702736  | 1.30009   | 2.28374   | 1.01476   | 2.15746    | 1.92933    | 3.29469   |
| TJP1       | 11.9341   | 10.4296    | 10.4242   | 17.0836    | 9.39511   | 16.9731    | 10.6128  | 9.84796   | 27.1631   | 17.4079   | 12.5152   | 15.0967   | 26.2689    | 13.7496    | 12.43     |
| TJP2       | 6.09424   | 7.40527    | 7.78651   | 13.387     | 14.1689   | 11.1624    | 6.58584  | 6.07792   | 26.598    | 13.9983   | 8.97375   | 14.337    | 27.209     | 13.3506    | 7.62566   |
| TJP3       | 1.0548    | 1.30397    | 1.81409   | 0.393321   | 3.029     | 0.839056   | 2.3532   | 0.844906  | 4.86804   | 0.513874  | 0.282016  | 0.536259  | 0.0940232  | 0.0797909  | 0         |
| TK1        | 1.77603   | 1.68511    | 1.84222   | 9.39061    | 2.80123   | 9.81812    | 2.54257  | 1.59053   | 2.29612   | 5.62419   | 10.8729   | 3.56801   | 9.10536    | 5.75501    | 3.59046   |
| TK2        | 3.28837   | 2.28209    | 2.50199   | 2.5338     | 2.636     | 5.46516    | 3.01398  | 2.18177   | 0.85425   | 1.96896   | 3.50783   | 1.20074   | 2.0973     | 2.3119     | 2.81077   |
| TKFC       | 2.06976   | 2.31536    | 2.2717    | 3.13203    | 3.83193   | 4.50635    | 2.23039  | 1.65717   | 1.51806   | 0.944417  | 1.2664    | 1.4915    | 1.25035    | 1.42142    | 1.0239    |
| TKT        | 13.1818   | 9.79361    | 9.13282   | 42.281     | 17.87     | 41.908     | 11.228   | 6.84925   | 12.6242   | 27.881    | 24.714    | 16.7741   | 37.8588    | 27.1745    | 13.4881   |
| TKTL1      | 0.071848  | 0.00769277 | 0.0132084 | 0.00822683 | 0.0372016 | 0.0475826  | 0.127608 | 0.0141895 | 0.11667   | 0         | 0.0180239 | 0.0171364 | 0.00515067 | 0.0166893  | 0         |
| TKTL2      | 0.0247873 | 0.00796192 | 0         | 0          | 0         | 0.00703535 | 0        | 0.0220289 | 0         | 0         | 0         | 0         | 0          | 0.00863661 | 0.0118659 |
| TLCD1      | 1.85609   | 2.04941    | 2.11129   | 1.65373    | 2.67291   | 2.28833    | 4.12806  | 1.44334   | 7.29954   | 1.28612   | 3.25206   | 2.2688    | 2.03332    | 1.15196    | 0.971823  |
| TLCD2      | 1.10316   | 1.28091    | 1.06534   | 2.68252    | 2.36767   | 3.11003    | 0.797664 | 0.813469  | 1.44926   | 1.66327   | 0.95542   | 1.32324   | 2.43423    | 1.77586    | 1.13639   |
| TLDC1      | 3.43631   | 4.46716    | 2.45456   | 8.04941    | 9.27081   | 6.22398    | 2.19543  | 2.19944   | 9.82099   | 9.12226   | 6.56386   | 7.47497   | 10.7084    | 8.81109    | 3.78794   |
| TLDC2      | 0.429535  | 0.360261   | 0.646332  | 0.184999   | 0.444911  | 0.341272   | 0.423017 | 0.387281  | 2.77E-16  | 0.0699845 | 0.206413  | 0.0613545 | 0.0129603  | 0.316313   | 0.660361  |
| TLE1       | 5.1324    | 3.71063    | 4.0338    | 3.11832    | 6.22379   | 6.41528    | 4.32021  | 2.83282   | 3.44771   | 2.87461   | 3.57316   | 3.30951   | 4.06286    | 3.34936    | 3.62534   |
| TLE2       | 3.19647   | 2.19314    | 2.21658   | 1.67932    | 3.57788   | 11.5007    | 3.30971  | 1.61533   | 0.524783  | 1.05214   | 1.94571   | 0.392404  | 1.27886    | 1.87125    | 3.26288   |
| TLE3       | 8.21948   | 10.5489    | 9.1646    | 27.9205    | 26.7339   | 20.7997    | 10.7663  | 9.66785   | 14.7081   | 13.403    | 9.54838   | 10.8827   | 24.6859    | 8.24791    | 9.97093   |
| TLE4       | 2.3767    | 3.77557    | 4.19043   | 3.47296    | 2.85017   | 3.67696    | 3.56663  | 2.40041   | 3.2145    | 2.96239   | 3.74878   | 2.3027    | 3.62038    | 2.79112    | 2.06916   |
| TLE6       | 0.154493  | 0.0744371  | 0.0596435 | 0.0636838  | 0.111991  | 0.368337   | 0.035279 | 0.0274601 | 0.0250873 | 0         | 0.116269  | 0.0147392 | 0.0531616  | 0.0915108  | 0.0443743 |
| TLK1       | 5.7742    | 5.41827    | 5.96721   | 5.94649    | 3.64141   | 6.45224    | 3.39938  | 5.75218   | 7.65861   | 6.93911   | 6.8735    | 5.92156   | 9.59949    | 5.42414    | 4.36941   |
| TLK2       | 4.54961   | 4.28612    | 3.85758   | 4.71267    | 2.935     | 4.98648    | 3.05063  | 3.86947   | 2.72994   | 3.93775   | 4.48233   | 2.68994   | 4.39671    | 3.84785    | 3.82588   |

|            |            |            |            |           |           |            |           |            |            |            |           |            |           |            |           |
|------------|------------|------------|------------|-----------|-----------|------------|-----------|------------|------------|------------|-----------|------------|-----------|------------|-----------|
| TLL1       | 0.901677   | 0.362752   | 0.403738   | 0.478403  | 0.508475  | 1.14025    | 0.465486  | 0.449594   | 0.0181211  | 0.332413   | 0.423277  | 0.0894301  | 0.268799  | 0.251959   | 0.542756  |
| TLL2       | 0.00341797 | 0.0329366  | 0.00848275 | 0.0246562 | 0.0690207 | 0.0291035  | 0.0507328 | 0.00607521 | 0.333016   | 0.0557687  | 0.0655938 | 0.00489129 | 0.0507209 | 0.0125047  | 0.0539949 |
| TLN1       | 20.635     | 14.37      | 16.0538    | 30.017    | 27.7227   | 51.2253    | 25.7222   | 13.7199    | 7.536      | 18.9215    | 17.889    | 10.3865    | 34.1321   | 19.3954    | 34.8521   |
| TLN2       | 2.539      | 1.14484    | 1.01571    | 0.722715  | 1.32082   | 2.4106     | 1.83963   | 0.971087   | 0.203244   | 1.03979    | 0.735617  | 0.30563    | 0.594759  | 0.498401   | 1.47793   |
| TLNRD1     | 3.47411    | 2.36463    | 2.44104    | 6.63661   | 7.47026   | 11.0059    | 2.66751   | 1.3887     | 3.1225     | 5.32193    | 6.87606   | 2.86032    | 11.9024   | 7.38183    | 6.83028   |
| TLR1       | 1.26781    | 0.754385   | 1.15014    | 2.48818   | 0.351316  | 1.89382    | 0.692008  | 1.42317    | 0.263649   | 2.44938    | 4.80615   | 0.194849   | 2.2248    | 0.498284   | 2.74124   |
| TLR10      | 0.0464021  | 0.0419198  | 0.0815726  | 0.107592  | 0.0630687 | 0.00493885 | 0.0397353 | 0.0773219  | 0.0282563  | 0.0436796  | 0.23572   | 0.0249015  | 0.0711037 | 0.0212203  | 0.249897  |
| TLR2       | 1.34429    | 0.522152   | 0.690769   | 8.08616   | 0.772704  | 2.85404    | 0.547682  | 0.894702   | 0.245218   | 3.56026    | 4.47906   | 0.224578   | 2.91911   | 0.99971    | 2.50888   |
| TLR3       | 1.05784    | 1.18437    | 1.26546    | 0.956807  | 0.106393  | 1.34138    | 0.964506  | 1.16331    | 0.101954   | 0.238794   | 0.644335  | 0.185144   | 0.373172  | 0.14319    | 0.5574    |
| TLR4       | 2.40197    | 0.812043   | 1.2055     | 3.20551   | 0.41664   | 4.70749    | 2.00203   | 1.90698    | 0.30716    | 3.12526    | 4.81749   | 0.257802   | 2.71977   | 1.29931    | 4.90985   |
| TLR5       | 0.818983   | 1.02178    | 0.933273   | 1.73269   | 0.471796  | 0.748154   | 0.606879  | 0.891729   | 0.819081   | 0.912183   | 1.76946   | 0.586004   | 0.608889  | 0.581109   | 0.537452  |
| TLR6       | 0.659731   | 0.384732   | 0.431664   | 0.72744   | 0.226787  | 0.632682   | 0.347126  | 0.533586   | 0.130858   | 0.905845   | 0.925384  | 0.16161    | 0.84261   | 0.445364   | 1.15657   |
| TLR7       | 0.278162   | 0.0897697  | 0.0966399  | 0.21987   | 0.180628  | 0.292116   | 0.393711  | 0.290967   | 0.0282308  | 0.320028   | 0.601852  | 0.0364892  | 0.302105  | 0.086486   | 0.532634  |
| TLR8       | 0.281778   | 0.0666018  | 0.0879649  | 1.41355   | 0.0908432 | 0.792223   | 0.157828  | 0.30712    | 0.01295    | 0.947544   | 1.83053   | 0.0304332  | 1.19372   | 0.247302   | 1.19874   |
| TLR8-AS1   | 0.0145645  | 0.00701742 | 0          | 0         | 0         | 0.0124015  | 0.0166293 | 0.0129437  | 0          | 0.01828    | 0         | 0          | 0.0469848 | 0.0456724  | 0.0627495 |
| TLR9       | 0.0956819  | 0.0893207  | 0.138521   | 0.0431388 | 0.23223   | 0.0560119  | 0.0887627 | 0.106293   | 0.00728311 | 0.0525396  | 0.0270032 | 0.0599051  | 0.0463001 | 0.0812622  | 0.128823  |
| TLX1       | 0          | 0.00523506 | 0          | 0         | 0         | 0          | 0         | 0          | 0          | 0          | 0         | 0.0077744  | 0         | 0          | 0         |
| TLX1NB     | 0          | 0.00735775 | 0          | 0         | 0.0118605 | 0.0195045  | 0         | 0          | 0.0185982  | 0.00958327 | 0         | 0          | 0         | 0.00399062 | 0         |
| TLX2       | 0.0322626  | 0.0932677  | 0.0266899  | 0.0554126 | 0.46774   | 0.0183141  | 0.0859516 | 0.0669021  | 0.0785845  | 0.0134976  | 0.0971213 | 0.0384746  | 0         | 0.073068   | 0         |
| TLX3       | 0          | 0          | 0          | 0.0319485 | 0.0240785 | 0          | 0         | 0          | 0          | 0          | 0         | 0          | 0         | 0.0405076  | 0         |
| TM2D1      | 2.94399    | 2.766      | 2.92257    | 3.47209   | 1.52435   | 2.7853     | 3.24931   | 3.43036    | 1.8724     | 3.03812    | 5.77902   | 1.49796    | 2.52204   | 2.2909     | 2.34886   |
| TM2D2      | 1.92594    | 1.71195    | 1.89825    | 4.51313   | 2.01418   | 3.63703    | 2.19171   | 1.82459    | 2.07464    | 3.2629     | 6.50809   | 1.96022    | 5.26568   | 2.62774    | 3.30447   |
| TM2D3      | 3.53737    | 3.5895     | 4.44277    | 4.48491   | 2.098     | 5.55857    | 3.19437   | 3.09609    | 3.3029     | 3.04057    | 6.24402   | 2.45439    | 3.10531   | 3.17097    | 2.60164   |
| TM4SF1     | 24.6622    | 9.16584    | 11.039     | 54.7793   | 10.4382   | 36.3471    | 8.87571   | 9.98582    | 13.0844    | 157.791    | 75.8895   | 34.0688    | 195.782   | 31.6159    | 31.1529   |
| TM4SF1-AS1 | 0.14915    | 0.0958168  | 0.0822581  | 0.0512343 | 0.11584   | 0.126999   | 0.198677  | 0.0883679  | 0          | 0.249597   | 0.224495  | 0.124507   | 0.336807  | 0.025984   | 0         |
| TM4SF18    | 0.619113   | 0.670461   | 0.614609   | 0.917526  | 0.366361  | 0.994086   | 0.397201  | 0.534496   | 0.617571   | 1.63551    | 3.70085   | 0.485182   | 1.17933   | 1.03852    | 2.15931   |

|                  |           |           |           |           |           |            |            |           |            |            |           |            |            |            |           |
|------------------|-----------|-----------|-----------|-----------|-----------|------------|------------|-----------|------------|------------|-----------|------------|------------|------------|-----------|
| TM4SF19          | 0.0712672 | 0.843577  | 0.309784  | 0.398672  | 0.826328  | 0.307701   | 0.399354   | 0.214246  | 5.01375    | 6.39578    | 10.2942   | 7.25904    | 7.69308    | 10.664     | 1.58748   |
| TM4SF19-AS1      | 0.29962   | 0.505536  | 0.187051  | 0.141105  | 0.611954  | 0.221182   | 0.242123   | 0.272331  | 0.155498   | 0.699884   | 0.331158  | 2.18879    | 0.284145   | 1.75511    | 0.329251  |
| TM4SF19-TCTEX1D2 | 0.190506  | 0.16377   | 0.0143345 | 0.42677   | 1.61673   | 0.26641    | 0.0815275  | 0.0776694 | 1.23993    | 2.43002    | 1.68616   | 1.49951    | 0.932471   | 1.89027    | 5.50E-05  |
| TM4SF20          | 0.0766961 | 0.0877642 | 0.0237932 | 0.0296391 | 0.0148919 | 0.00816322 | 0.0328384  | 0.0852014 | 0.0116759  | 0          | 0.0108225 | 0.00685976 | 0.024742   | 0.0400847  | 0         |
| TM4SF4           | 0         | 0         | 0         | 0.0148411 | 0         | 0          | 0          | 0         | 0          | 0          | 0.0162574 | 0          | 0          | 0.0075268  | 0         |
| TM4SF5           | 0         | 0.0157495 | 0         | 0         | 0         | 0          | 0          | 0         | 0          | 0          | 0         | 0          | 0          | 0          | 0         |
| TM6SF1           | 1.25535   | 0.521926  | 0.770513  | 0.907661  | 0.267338  | 0.784447   | 0.48548    | 0.683788  | 0.184945   | 0.927569   | 1.90856   | 0.253535   | 1.05163    | 0.624356   | 1.30852   |
| TM6SF2           | 0.0156056 | 0.022557  | 0.0387301 | 0.112574  | 0.242408  | 0.45179    | 0.0534538  | 0.0138689 | 0.0950291  | 0          | 0.193784  | 0.0334986  | 0.0906177  | 0.21206    | 0.201704  |
| TM7SF2           | 6.66391   | 9.54874   | 7.78502   | 8.34215   | 26.8105   | 8.17289    | 14.7222    | 6.4234    | 115.238    | 14.6596    | 40.7299   | 23.8414    | 5.95964    | 5.90802    | 2.69877   |
| TM7SF3           | 4.77462   | 5.65621   | 5.41348   | 12.4877   | 4.84233   | 7.35969    | 5.3785     | 4.33327   | 6.37308    | 6.50094    | 6.4908    | 5.10167    | 7.51574    | 4.85438    | 3.81112   |
| TM9SF1           | 5.76337   | 5.78127   | 6.04067   | 9.9828    | 7.85243   | 9.69002    | 7.63069    | 4.00068   | 8.94244    | 8.11234    | 10.4485   | 6.02265    | 11.67      | 6.84973    | 7.51707   |
| TM9SF2           | 16.8223   | 13.9106   | 14.9461   | 24.372    | 8.25348   | 23.4958    | 15.1102    | 16.9807   | 23.5348    | 26.2455    | 35.4833   | 16.9646    | 34.5746    | 17.8285    | 19.9891   |
| TM9SF3           | 14.1346   | 10.8746   | 12.6005   | 15.8013   | 3.89352   | 15.5273    | 7.75505    | 15.5396   | 14.6574    | 15.2094    | 18.8156   | 9.09692    | 20.3403    | 12.4758    | 12.9264   |
| TM9SF4           | 7.37407   | 9.13088   | 8.76868   | 12.9263   | 11.8339   | 13.0849    | 10.6514    | 7.48966   | 15.3756    | 8.19884    | 10.7274   | 10.2496    | 12.0557    | 7.86411    | 7.28361   |
| TMA16            | 2.8597    | 2.52315   | 3.17429   | 3.82986   | 0.899666  | 4.3871     | 2.45228    | 3.53875   | 1.82222    | 2.27166    | 3.74585   | 1.83898    | 2.74813    | 2.96398    | 2.85923   |
| TMA7             | 44.4502   | 30.0297   | 29.6425   | 83.2686   | 28.5115   | 68.5986    | 24.6927    | 31.1707   | 57.2463    | 68.1603    | 132.745   | 46.11      | 52.3391    | 40.9578    | 29.2249   |
| TMBIM1           | 25.9859   | 30.7385   | 30.9972   | 48.5984   | 41.479    | 57.3378    | 35.1887    | 24.7571   | 32.0336    | 57.4416    | 53.1338   | 37.9826    | 112.228    | 36.7797    | 23.0095   |
| TMBIM4           | 7.94933   | 5.34432   | 6.01228   | 8.9778    | 1.63324   | 6.61127    | 5.11858    | 6.09942   | 7.10624    | 8.81702    | 18.4431   | 5.09268    | 7.8423     | 6.29842    | 5.50896   |
| TMBIM6           | 47.4      | 42.3439   | 45.8353   | 86.9038   | 36.7412   | 88.968     | 48.5328    | 41.4803   | 74.5048    | 76.1531    | 93.5218   | 56.4884    | 112.823    | 54.7465    | 46.872    |
| TMBIM7P          | 0.0269419 | 0.0064905 | 0.0557205 | 0         | 0         | 0          | 0          | 0.0119718 | 0.0164061  | 0          | 0         | 0          | 0          | 0.00704049 | 0         |
| TMC1             | 0.0289198 | 0.0034835 | 0.0119622 | 0.275675  | 0.0898448 | 0.0554058  | 0.00825492 | 0.0449776 | 0.00880526 | 0.027223   | 0.0734554 | 0.0517322  | 0.00932945 | 0.0113361  | 0.093448  |
| TMC2             | 0.0730295 | 0.0703735 | 0.102706  | 0.0225777 | 0.05672   | 0.0870571  | 0.0416914  | 0.0389415 | 0          | 0.00916595 | 0         | 0.0313527  | 0.0376946  | 0.00763368 | 0         |
| TMC3             | 0.059139  | 0.0241663 | 0.0394601 | 0.0050787 | 0.0640246 | 0.109105   | 0.053886   | 0.0131394 | 0.0900308  | 0          | 0.0667605 | 0.0282103  | 0          | 0.00601312 | 0.0212328 |
| TMC3-AS1         | 0.193396  | 0.112051  | 0.0768184 | 0.0664334 | 0.288279  | 0.0548914  | 0.133065   | 0.190971  | 5.76E-29   | 0.0809106  | 0.0970311 | 0          | 0.0554569  | 0.0299352  | 0.0925803 |
| TMC4             | 1.48317   | 0.79102   | 0.956894  | 0.547935  | 0.796938  | 3.02619    | 1.0118     | 1.03626   | 0.0795242  | 0.280986   | 0.284317  | 0.106792   | 0.0962952  | 0.199887   | 1.39322   |
| TMC5             | 0.2133    | 0.381722  | 0.545125  | 0.804669  | 0.201164  | 0.421623   | 0.226143   | 0.382512  | 0.6448     | 0.0191224  | 0.0859961 | 0.149896   | 0.0663526  | 0.0179164  | 0.0711113 |

|              |           |           |           |           |          |           |           |           |            |           |           |           |            |           |          |
|--------------|-----------|-----------|-----------|-----------|----------|-----------|-----------|-----------|------------|-----------|-----------|-----------|------------|-----------|----------|
| TMC6         | 2.84647   | 4.18895   | 3.85855   | 8.5211    | 13.4449  | 9.96505   | 2.80843   | 2.53659   | 3.21234    | 7.22292   | 4.83742   | 6.99573   | 7.55576    | 5.09776   | 4.37671  |
| TMC7         | 0.253879  | 0.203871  | 0.169495  | 0.564569  | 0.456629 | 0.322365  | 0.127136  | 0.219297  | 0.303771   | 1.48141   | 0.591916  | 0.407931  | 1.87069    | 1.07519   | 0.937561 |
| TMC8         | 1.08933   | 1.24906   | 1.43841   | 0.798764  | 3.0344   | 1.93091   | 0.962721  | 1.03327   | 0.771772   | 1.50526   | 2.11062   | 1.1317    | 0.80758    | 0.684293  | 1.47416  |
| TMCC1        | 2.68876   | 2.70103   | 2.5742    | 3.0635    | 2.47429  | 3.08326   | 2.60116   | 2.47185   | 5.36497    | 3.49865   | 3.03876   | 2.54456   | 4.16863    | 2.99768   | 2.48707  |
| TMCC1-AS1    | 0.0727977 | 0.0860933 | 0.0656982 | 0.10912   | 0.01028  | 0.135243  | 0.0604495 | 0.047052  | 0.00805995 | 0.0664499 | 0.0747087 | 0.042618  | 0.00853977 | 0.0484238 | 0.104547 |
| TMCC2        | 0.454734  | 0.559398  | 0.604302  | 0.219352  | 1.27746  | 0.519012  | 0.430826  | 0.408429  | 1.0605     | 0.789318  | 0.961144  | 1.15958   | 0.380785   | 0.510725  | 0.298738 |
| TMCC3        | 2.23623   | 2.52924   | 2.18862   | 3.32396   | 1.92521  | 2.61089   | 2.26763   | 2.17936   | 4.25141    | 3.91033   | 3.89364   | 2.3269    | 6.29217    | 2.83869   | 2.1283   |
| TMCO1        | 4.26187   | 3.28314   | 3.54211   | 6.6237    | 1.77052  | 6.35913   | 3.16863   | 4.03867   | 4.67142    | 6.15765   | 9.77898   | 3.97496   | 7.78865    | 4.33062   | 4.49791  |
| TMCO2        | 0         | 0         | 0.0258375 | 0         | 0        | 0         | 0         | 0         | 0          | 0         | 0         | 0.0223475 | 0          | 0         | 0        |
| TMCO3        | 4.51196   | 3.71796   | 3.64386   | 6.99183   | 7.90424  | 9.36778   | 3.49053   | 2.67522   | 4.80102    | 8.3304    | 12.3817   | 3.4107    | 9.63734    | 5.99519   | 7.97211  |
| TMCO4        | 1.50242   | 1.07897   | 1.19576   | 1.34269   | 1.6191   | 2.49272   | 1.32492   | 0.911865  | 0.342155   | 0.87386   | 0.965232  | 0.58267   | 0.916817   | 0.934192  | 1.38582  |
| TMCO5A       | 0         | 0.0190203 | 0.0571509 | 0         | 0        | 0         | 0.0225364 | 0.0438542 | 0          | 0         | 0         | 0         | 0          | 0         | 0        |
| TMCO5B       | 0         | 0         | 0         | 0         | 0        | 0         | 0         | 0         | 0          | 0         | 0         | 0         | 0          | 0         | 0        |
| TMCO6        | 1.58647   | 2.17062   | 1.94361   | 2.22147   | 3.04749  | 2.24799   | 1.65928   | 1.17314   | 0.899698   | 0.94239   | 1.98232   | 1.61175   | 1.44552    | 1.5697    | 0.834822 |
| TMED1        | 2.33167   | 2.10942   | 2.51375   | 4.98466   | 5.60623  | 7.76205   | 2.60559   | 1.80766   | 2.79439    | 4.46756   | 8.1765    | 2.15646   | 5.33737    | 3.68831   | 3.8651   |
| TMED10       | 21.032    | 16.5107   | 18.0367   | 32.7126   | 9.26489  | 30.3531   | 16.0686   | 22.4934   | 22.4111    | 27.8974   | 38.7282   | 20.052    | 34.4685    | 20.5631   | 19.0323  |
| TMED10P1     | 0.413166  | 0.434083  | 0.351295  | 0.325249  | 0.258499 | 0.395781  | 0.327597  | 0.438585  | 0.118809   | 0.288092  | 0.34981   | 0.332585  | 0.329514   | 0.263925  | 0.436778 |
| TMED11P      | 0.217102  | 0.313809  | 0.287363  | 0.0447459 | 0        | 0.0369719 | 0         | 0.308707  | 0          | 0         | 0         | 0.0310684 | 0          | 0.181547  | 0        |
| TMED2        | 30.3881   | 23.7342   | 24.3368   | 48.8319   | 14.5469  | 45.9185   | 22.8844   | 29.6185   | 40.0099    | 49.1748   | 77.73     | 27.9208   | 68.0738    | 36.9257   | 35.9422  |
| TMED3        | 4.72114   | 4.46134   | 4.0897    | 6.61765   | 8.25311  | 9.74148   | 6.4636    | 3.4242    | 13.6101    | 8.40215   | 16.0532   | 6.73068   | 8.61028    | 5.34564   | 3.71984  |
| TMED4        | 6.55986   | 6.90214   | 7.34544   | 6.56461   | 6.89135  | 7.48751   | 7.25228   | 5.41108   | 7.60905    | 6.70489   | 10.4585   | 6.02921   | 6.79858    | 6.09579   | 5.90555  |
| TMED5        | 1.99813   | 1.4477    | 1.69014   | 2.72236   | 0.621917 | 3.0459    | 1.35004   | 2.4475    | 2.13272    | 3.5739    | 4.38874   | 1.63855   | 5.08666    | 2.73787   | 2.7621   |
| TMED6        | 0.443165  | 0.462634  | 0.244411  | 0.177603  | 0.229463 | 0.335421  | 0.281106  | 0.328207  | 0.209893   | 0.216307  | 0.111173  | 0.105699  | 0.127079   | 0.321691  | 0.353578 |
| TMED7        | 5.93815   | 3.93411   | 4.40357   | 7.4192    | 1.48157  | 6.48695   | 4.67205   | 8.27584   | 6.07612    | 8.52573   | 13.8349   | 4.43953   | 12.7361    | 6.5397    | 7.01422  |
| TMED7-TICAM2 | 0.504066  | 0.558055  | 0.673625  | 1.27059   | 2.19591  | 1.39466   | 0.38563   | 0.355732  | 0.303484   | 1.46713   | 2.52733   | 0.535562  | 2.55418    | 1.11276   | 1.49198  |
| TMED8        | 2.12385   | 1.73654   | 1.82384   | 1.9032    | 1.06682  | 2.54064   | 1.97356   | 1.9824    | 1.1703     | 1.73847   | 1.66462   | 1.13149   | 2.28632    | 1.82187   | 1.67839  |

|                |           |           |           |            |           |          |           |           |            |            |            |            |            |           |            |
|----------------|-----------|-----------|-----------|------------|-----------|----------|-----------|-----------|------------|------------|------------|------------|------------|-----------|------------|
| TMED9          | 10.5527   | 8.61701   | 8.43553   | 22.2908    | 21.6441   | 25.1913  | 10.2912   | 6.18373   | 19.0397    | 26.4002    | 38.7716    | 13.1852    | 29.0139    | 16.5041   | 12.2927    |
| TMEFF1         | 6.09E-08  | 0.0677914 | 2.17E-06  | 2.65E-06   | 0.170774  | 1.41E-08 | 0.0841158 | 7.60E-07  | 2.58E-06   | 0.170242   | 0.303857   | 0.0433351  | 1.71E-07   | 0.0190627 | 0.232887   |
| TMEFF2         | 0.0440363 | 0.0077154 | 0.016559  | 0.00412551 | 0         | 0.013635 | 0.0137125 | 0.0249046 | 0          | 0.00502455 | 0.00903844 | 0.00286446 | 0.00774872 | 0         | 0.00574924 |
| TMEM100        | 1.83167   | 0.312854  | 0.481044  | 0.269656   | 0.255919  | 2.19505  | 0.674985  | 0.465097  | 0.0472121  | 0.218947   | 0.426675   | 0.0901479  | 0.343906   | 0.516645  | 0.389706   |
| TMEM101        | 2.66599   | 3.62944   | 3.51939   | 5.54153    | 7.59512   | 6.11464  | 3.2771    | 1.90553   | 3.38505    | 3.9014     | 7.38943    | 2.4271     | 5.18224    | 3.05948   | 2.06912    |
| TMEM102        | 0.978335  | 2.02169   | 2.6079    | 2.99099    | 4.12005   | 3.31365  | 1.53902   | 0.956409  | 3.5083     | 2.59225    | 2.50335    | 2.09229    | 3.35946    | 2.48274   | 1.18646    |
| TMEM104        | 0.984396  | 1.30314   | 1.43521   | 2.10423    | 2.57375   | 4.83832  | 2.54836   | 1.21699   | 1.00896    | 2.05512    | 2.70664    | 1.64583    | 3.41774    | 2.14455   | 2.5055     |
| TMEM105        | 0.0139458 | 0.0369561 | 0.0403793 | 0.0574862  | 0         | 0.676856 | 0.0477686 | 0.0743632 | 0.00849221 | 0.0262551  | 0.0944584  | 0.0449037  | 0.0179955  | 0.0291547 | 0.010014   |
| TMEM106A       | 0.826289  | 0.819655  | 0.890358  | 1.24507    | 1.5208    | 1.72051  | 1.96614   | 1.09225   | 0.101478   | 0.714625   | 1.16009    | 0.2981     | 0.685437   | 1.27379   | 2.24368    |
| TMEM106B       | 4.08575   | 3.43045   | 3.30949   | 2.96197    | 0.789181  | 3.70584  | 4.02807   | 5.38025   | 4.65142    | 3.65649    | 5.25       | 2.08456    | 3.45447    | 1.97014   | 2.78587    |
| TMEM106C       | 3.65801   | 3.99543   | 4.15945   | 8.29027    | 3.78055   | 6.34119  | 4.4761    | 2.62923   | 7.95162    | 10.8652    | 14.7409    | 5.18264    | 13.0136    | 5.53747   | 4.03943    |
| TMEM107        | 1.47338   | 1.98964   | 1.69151   | 2.33435    | 1.21439   | 1.96292  | 1.68225   | 1.56774   | 3.45453    | 2.95627    | 5.67999    | 4.4393     | 2.12756    | 1.67107   | 1.09396    |
| TMEM108        | 0.116856  | 0.174271  | 0.179533  | 0.0573445  | 0.121012  | 0.236908 | 0.330379  | 0.0840706 | 0.013554   | 0.0349205  | 0.0502537  | 0.0716688  | 0.122068   | 0.0668906 | 0.319657   |
| TMEM108-AS1    | 0.0494933 | 0.0381546 | 0.131022  | 0.0306025  | 0.0307521 | 0        | 0.0904157 | 0.0527826 | 0          | 0.0124238  | 0          | 0.0212483  | 0          | 0.0258673 | 0.127941   |
| TMEM109        | 15.9327   | 10.5577   | 12.6354   | 15.7599    | 19.3445   | 29.3279  | 17.4389   | 9.16413   | 7.67197    | 10.0472    | 21.2353    | 6.85124    | 16.0886    | 9.04635   | 11.1066    |
| TMEM11         | 4.09939   | 3.85782   | 4.67297   | 6.92316    | 5.11125   | 6.66595  | 4.47705   | 2.87557   | 8.66608    | 6.1088     | 10.4163    | 4.71868    | 7.91703    | 5.0016    | 3.54416    |
| TMEM110-MUSTN1 | 0.119037  | 0.0486384 | 0.245844  | 0.462084   | 2.85409   | 1.28873  | 1.23196   | 0.238998  | 0.515614   | 0.031691   | 1.48937    | 0.253864   | 0.335544   | 0.3872    | 1.06445    |
| TMEM114        | 0         | 0         | 0         | 0          | 0         | 0        | 0         | 0         | 0          | 0.0774584  | 0.0464455  | 0.0147195  | 0          | 0         | 0          |
| TMEM115        | 7.64439   | 8.39361   | 8.87367   | 10.6896    | 16.9879   | 14.2974  | 9.5984    | 5.64505   | 15.3777    | 8.58236    | 14.3909    | 6.18905    | 12.1094    | 7.43632   | 8.53516    |
| TMEM116        | 1.57678   | 2.54873   | 3.9869    | 0.576584   | 0.513559  | 1.39674  | 2.62788   | 2.12457   | 0.588491   | 0.398996   | 0.889993   | 0.345747   | 0.28715    | 0.265837  | 0.42002    |
| TMEM117        | 3.64239   | 4.11594   | 3.25583   | 5.51108    | 3.09265   | 3.02916  | 2.92523   | 3.11361   | 6.01496    | 5.94691    | 5.54049    | 5.19587    | 5.57637    | 4.16223   | 2.03917    |
| TMEM119        | 8.96247   | 1.88253   | 2.21865   | 1.87194    | 12.7639   | 5.04141  | 5.66438   | 3.31244   | 0.678292   | 11.2703    | 30.6814    | 1.20165    | 6.00367    | 6.77997   | 26.9361    |
| TMEM120A       | 3.30825   | 3.04625   | 2.91927   | 5.71238    | 4.77343   | 7.83732  | 4.85167   | 2.49582   | 5.04978    | 7.19715    | 11.984     | 4.25033    | 8.11097    | 4.86434   | 4.18094    |
| TMEM120B       | 1.19726   | 1.48206   | 1.36935   | 1.40434    | 2.60814   | 2.12469  | 1.69047   | 1.13903   | 0.868678   | 0.863228   | 0.873188   | 1.42908    | 1.49544    | 1.59664   | 2.00873    |
| TMEM121        | 0.44649   | 0.16732   | 0.225725  | 0.268404   | 0.982533  | 0.517467 | 0.283215  | 0.165335  | 0.0453145  | 0.326895   | 0.924058   | 0.0709945  | 0.288073   | 0.27873   | 0.427477   |
| TMEM121B       | 0.182624  | 0.0879911 | 0.139749  | 0.216429   | 0.226943  | 0.664771 | 0.198089  | 0.105496  | 0.0389228  | 0.120336   | 0.298932   | 0.0294013  | 0.114883   | 0.0524961 | 0.196703   |

|              |            |            |           |           |           |           |           |           |            |           |           |            |            |            |           |
|--------------|------------|------------|-----------|-----------|-----------|-----------|-----------|-----------|------------|-----------|-----------|------------|------------|------------|-----------|
| TMEM123      | 33.5929    | 19.5587    | 20.1055   | 34.6184   | 9.70327   | 27.8464   | 16.6052   | 33.1259   | 34.2153    | 26.6277   | 43.0018   | 15.8583    | 27.289     | 16.479     | 13.0353   |
| TMEM125      | 1.40261    | 1.18561    | 1.09927   | 1.16649   | 5.23663   | 0.911442  | 2.2898    | 1.07157   | 10.9836    | 2.53253   | 3.38898   | 3.5038     | 3.23879    | 1.09317    | 0.494746  |
| TMEM126A     | 4.66822    | 2.78086    | 2.90226   | 6.06444   | 0.791057  | 6.81758   | 2.19662   | 2.69039   | 4.30709    | 6.67582   | 12.0408   | 2.38877    | 5.45796    | 5.05708    | 3.2505    |
| TMEM126B     | 2.43421    | 1.51166    | 1.62592   | 2.34129   | 0.658204  | 2.52562   | 1.67788   | 1.73066   | 1.83366    | 2.81756   | 5.37371   | 1.12891    | 2.29183    | 1.72929    | 1.92918   |
| TMEM127      | 10.6621    | 9.15253    | 9.70397   | 13.8227   | 16.0061   | 18.5129   | 14.4172   | 9.36794   | 27.1178    | 11.3393   | 18.6571   | 8.7899     | 18.0267    | 9.42794    | 11.5636   |
| TMEM128      | 2.82903    | 2.43586    | 2.73044   | 2.79393   | 1.34275   | 2.97765   | 2.58707   | 2.53749   | 2.31291    | 2.87675   | 6.75686   | 1.62127    | 1.69007    | 1.93036    | 1.58      |
| TMEM129      | 4.503      | 4.52001    | 4.69023   | 6.03595   | 12.0127   | 7.60589   | 4.13544   | 2.79117   | 3.17921    | 3.32754   | 4.53077   | 2.70834    | 4.54218    | 3.86702    | 2.99912   |
| TMEM130      | 0.0681393  | 0.0363807  | 0.0567469 | 0.0156682 | 0         | 0.0774257 | 0.0172424 | 0.013421  | 0          | 0.0189539 | 0.0340954 | 0.0216769  | 0          | 0.00394635 | 0.0216877 |
| TMEM131      | 7.9269     | 9.16968    | 8.51202   | 9.84217   | 6.69514   | 10.8499   | 7.18882   | 9.08542   | 13.9613    | 9.45052   | 10.4786   | 10.3914    | 10.3434    | 8.1147     | 7.09562   |
| TMEM131L     | 3.38456    | 3.11264    | 2.61682   | 4.67583   | 1.84079   | 4.60161   | 2.37443   | 2.39729   | 2.51026    | 4.88456   | 4.15388   | 4.27598    | 7.22054    | 4.56445    | 3.21172   |
| TMEM132A     | 1.51876    | 1.26712    | 0.984473  | 6.41638   | 7.94557   | 3.54371   | 0.960871  | 0.490818  | 1.19308    | 2.65713   | 3.39931   | 1.15258    | 8.47554    | 3.25068    | 5.41035   |
| TMEM132B     | 0.237921   | 0.39619    | 0.588748  | 0.167758  | 0.233415  | 0.142166  | 0.657679  | 0.365391  | 0.12963    | 0.120494  | 0.193192  | 0.0671996  | 0.0807924  | 0.118894   | 0.122887  |
| TMEM132C     | 0.566062   | 0.211879   | 0.394754  | 0.0482102 | 0.196205  | 0.270873  | 0.347192  | 0.274401  | 0.0569752  | 0         | 0         | 0.0133895  | 0.00905505 | 0.0146702  | 0.0403109 |
| TMEM132D     | 0.00801213 | 0.00193018 | 0         | 0.0165135 | 0.031114  | 0.0477556 | 0.036592  | 0.014241  | 0.00487894 | 0.0603363 | 0.0090447 | 0.00859934 | 0.0180929  | 0.0188437  | 0.0287661 |
| TMEM132D-AS1 | 0          | 0          | 0         | 0         | 0         | 0         | 0         | 0         | 0          | 0         | 0         | 0          | 0          | 0          | 0         |
| TMEM132D-AS2 | 0          | 0          | 0         | 0.0152296 | 0         | 0         | 0         | 0         | 0          | 0         | 0         | 0          | 0          | 0          | 0         |
| TMEM132E     | 0.0598656  | 0.0240368  | 0.0536522 | 0.0102822 | 0.0852427 | 0.195403  | 0.0968329 | 0.0443363 | 0          | 0         | 0         | 0.0142785  | 0.00321875 | 0.0677915  | 0.121797  |
| TMEM134      | 16.9689    | 20.3147    | 18.8714   | 26.7106   | 42.2892   | 28.5799   | 20.439    | 12.6867   | 40.9029    | 18.4111   | 36.37     | 19.5986    | 14.7981    | 12.9186    | 5.65345   |
| TMEM135      | 1.45536    | 1.09418    | 0.891913  | 1.08479   | 0.340488  | 1.38897   | 1.17569   | 1.35682   | 0.85364    | 0.719776  | 1.09912   | 0.510645   | 0.608455   | 0.69669    | 0.827248  |
| TMEM136      | 0.425309   | 0.38735    | 0.42908   | 0.277942  | 0.257816  | 0.494638  | 0.302022  | 0.28118   | 0.0758018  | 0.214825  | 0.644065  | 0.111337   | 0.0903537  | 0.561135   | 0.908749  |
| TMEM138      | 3.28686    | 3.5939     | 3.47965   | 4.52872   | 3.34269   | 4.25289   | 2.88623   | 2.42605   | 1.82723    | 3.31801   | 6.21703   | 2.65764    | 3.41981    | 3.24116    | 3.71852   |
| TMEM139      | 0.804898   | 0.533849   | 0.493442  | 0.690333  | 0.513152  | 0.828246  | 0.389823  | 0.424075  | 0.24587    | 0.138209  | 0.207182  | 0.124754   | 0.272348   | 0.172657   | 0.171321  |
| TMEM140      | 4.70139    | 3.498      | 3.48066   | 5.6896    | 5.67512   | 12.4123   | 5.05107   | 2.76316   | 1.49939    | 4.39145   | 5.36499   | 2.14129    | 5.41833    | 3.30828    | 4.04297   |
| TMEM141      | 9.6834     | 7.87565    | 7.51988   | 17.4563   | 17.3042   | 14.2168   | 9.60872   | 6.06481   | 19.8088    | 21.362    | 36.722    | 11.2519    | 12.5128    | 11.4189    | 6.50782   |
| TMEM143      | 0.831703   | 0.910348   | 0.934842  | 0.568291  | 1.02511   | 1.54723   | 0.980578  | 0.650772  | 0.473431   | 0.374433  | 0.78581   | 0.452798   | 0.279971   | 0.477208   | 0.882841  |
| TMEM144      | 0.955575   | 0.981313   | 1.07326   | 0.740358  | 0.357541  | 0.979955  | 0.740636  | 1.22116   | 0.620118   | 0.385191  | 0.755895  | 0.519043   | 0.39152    | 0.466616   | 0.350594  |

|              |            |            |           |            |            |           |           |           |           |           |           |            |           |           |           |
|--------------|------------|------------|-----------|------------|------------|-----------|-----------|-----------|-----------|-----------|-----------|------------|-----------|-----------|-----------|
| TMEM145      | 0.0390271  | 0.0689474  | 0.10762   | 0.0402185  | 0.0202075  | 0         | 0.0445598 | 0         | 0         | 0         | 0         | 0.0093083  | 0.0251801 | 0.0135982 | 0.168143  |
| TMEM147      | 14.0631    | 14.1981    | 15.3403   | 24.9606    | 21.2495    | 32.7004   | 21.8286   | 9.53863   | 34.0211   | 23.5442   | 50.7637   | 19.2681    | 28.3493   | 18.1057   | 9.90897   |
| TMEM147-AS1  | 1.12373    | 1.85045    | 1.76511   | 0.542369   | 1.98858    | 1.44131   | 1.39672   | 1.20094   | 0.32915   | 0.321355  | 0.192691  | 0.661565   | 0.22026   | 0.854942  | 0.592412  |
| TMEM14A      | 2.30518    | 1.91343    | 1.3028    | 3.95141    | 2.16262    | 5.14999   | 2.05867   | 1.27787   | 1.13966   | 4.78386   | 10.4348   | 2.48229    | 4.57967   | 3.04179   | 2.49109   |
| TMEM14B      | 6.15015    | 4.17073    | 4.48494   | 5.82406    | 2.56212    | 7.62112   | 5.02201   | 4.27756   | 4.42249   | 5.42422   | 11.4895   | 3.29361    | 3.82782   | 3.47496   | 3.61744   |
| TMEM14C      | 12.8095    | 9.37514    | 10.1292   | 15.451     | 9.78227    | 23.2586   | 11.4645   | 9.24527   | 17.0729   | 16.3955   | 39.0013   | 9.29113    | 9.74898   | 11.107    | 11.5361   |
| TMEM14EP     | 4.59997    | 4.25157    | 5.10845   | 2.63766    | 1.52916    | 1.35641   | 3.06543   | 4.40621   | 0.305181  | 2.26894   | 1.41438   | 3.13772    | 0.404186  | 4.78958   | 5.11526   |
| TMEM150A     | 2.07007    | 1.93737    | 2.18067   | 2.86993    | 3.3312     | 5.19915   | 1.88743   | 1.37647   | 1.77747   | 1.70094   | 3.44643   | 1.86481    | 2.47902   | 2.12489   | 2.26709   |
| TMEM150B     | 0.212105   | 0.102196   | 0.0584895 | 0.534308   | 0.402689   | 0.541815  | 0.215267  | 0.0837785 | 0         | 0.147897  | 0.399068  | 0.016863   | 0.197671  | 0.209394  | 0.30461   |
| TMEM150C     | 1.44123    | 0.61108    | 0.551104  | 0.613897   | 0.507447   | 2.75982   | 0.680164  | 0.853901  | 0.226234  | 0.651204  | 1.10634   | 0.256665   | 0.516599  | 0.502168  | 0.791123  |
| TMEM151A     | 0          | 0.0176295  | 0.0151348 | 0.00942671 | 0          | 0.0467336 | 0.0522213 | 0         | 0         | 0.034443  | 0.030979  | 0.00654525 | 0.0590189 | 0.033466  | 0.0131369 |
| TMEM151B     | 0.0400832  | 0.0241409  | 0.0207248 | 0          | 0.00778289 | 0.072527  | 0.0228829 | 0.0222641 | 0.0122042 | 0         | 0         | 0.00358508 | 0         | 0         | 0.0215867 |
| TMEM154      | 11.2621    | 24.6938    | 26.4978   | 21.1502    | 9.36735    | 7.98412   | 13.9022   | 21.463    | 49.5089   | 26.4096   | 20.0166   | 24.556     | 30.3604   | 18.1434   | 5.98378   |
| TMEM155      | 0.00842178 | 0.00405774 | 0         | 0          | 0          | 0.0143421 | 0         | 0         | 0.0307703 | 0         | 0.0285214 | 0.00602601 | 0         | 0         | 0.0967579 |
| TMEM156      | 0.0358993  | 0.057656   | 0.0593968 | 0.0246635  | 0          | 0.0305677 | 0.0409886 | 0.116982  | 0.0291475 | 0.0450573 | 0.0135086 | 0.0256869  | 0.046324  | 0.0312709 | 0.103112  |
| TMEM158      | 0.398374   | 0.473859   | 0.638529  | 2.28361    | 0.580137   | 1.04943   | 0.440637  | 0.221276  | 0.62163   | 2.79688   | 5.04524   | 0.39194    | 4.48194   | 2.44644   | 2.02028   |
| TMEM159      | 8.32715    | 11.9645    | 14.2296   | 7.79287    | 8.38145    | 11.0249   | 10.733    | 8.53966   | 6.86185   | 9.30397   | 10.4211   | 6.2427     | 11.7134   | 4.52871   | 2.9683    |
| TMEM160      | 6.07726    | 4.86884    | 6.22596   | 9.61266    | 19.8132    | 16.9381   | 8.06839   | 4.05072   | 9.55299   | 7.40585   | 24.929    | 4.85407    | 6.58822   | 5.68769   | 3.24752   |
| TMEM161A     | 1.97609    | 2.42911    | 2.54645   | 4.36002    | 7.00485    | 5.7597    | 2.51657   | 1.91379   | 1.8667    | 2.11453   | 5.01921   | 2.28407    | 3.42442   | 3.05864   | 2.92887   |
| TMEM161B     | 1.45136    | 1.31561    | 1.43266   | 1.32836    | 0.47382    | 0.749867  | 1.0055    | 1.73583   | 0.850842  | 1.14854   | 1.41625   | 0.785026   | 1.23797   | 1.18796   | 0.897325  |
| TMEM161B-AS1 | 0.399305   | 0.352717   | 0.399153  | 0.222893   | 0.155065   | 0.623339  | 0.246953  | 0.266152  | 0.202629  | 0.250584  | 0.525893  | 0.166666   | 0.161018  | 0.173912  | 0.119469  |
| TMEM163      | 0.0489024  | 0.0647953  | 0.101139  | 0.163785   | 0.227887   | 0.0312298 | 0.0558352 | 0.130381  | 0.193562  | 0.322232  | 0.841872  | 0.0612342  | 0.591592  | 0.146961  | 0.386265  |
| TMEM164      | 3.23427    | 4.58601    | 4.74436   | 4.56064    | 7.48173    | 5.40205   | 6.60693   | 3.29457   | 7.02523   | 3.67129   | 3.01806   | 2.86076    | 4.64869   | 2.97994   | 2.60318   |
| TMEM165      | 12.0839    | 10.6246    | 8.7896    | 37.427     | 23.4588    | 24.3148   | 6.89214   | 9.70969   | 42.6715   | 26.8248   | 51.6239   | 16.4318    | 26.2567   | 23.3421   | 15.3386   |
| TMEM167A     | 5.82234    | 4.72087    | 5.16726   | 7.26874    | 1.37151    | 7.55246   | 4.70643   | 6.92761   | 7.74229   | 7.87122   | 9.84766   | 4.66784    | 9.55412   | 6.77426   | 7.14433   |
| TMEM167B     | 6.33243    | 5.37063    | 5.96103   | 5.73947    | 1.68626    | 6.85893   | 4.14951   | 5.7886    | 3.93755   | 5.41049   | 8.28523   | 2.22331    | 6.03467   | 3.66731   | 4.54147   |

|          |           |           |           |           |           |           |           |           |           |           |           |            |           |          |           |
|----------|-----------|-----------|-----------|-----------|-----------|-----------|-----------|-----------|-----------|-----------|-----------|------------|-----------|----------|-----------|
| TMEM168  | 2.52345   | 3.33831   | 3.42143   | 2.51982   | 0.962924  | 2.35928   | 2.13408   | 3.46965   | 1.998     | 2.03155   | 2.83805   | 1.5883     | 2.4038    | 2.20736  | 2.1672    |
| TMEM169  | 0.0267472 | 0.0451053 | 0.0387226 | 0.0620186 | 0.114256  | 0.0512436 | 0.0458087 | 0.0475414 | 0.0407189 | 0.117497  | 0.332137  | 0.0287076  | 0.0517716 | 0.174741 | 0.192062  |
| TMEM17   | 1.14212   | 0.712485  | 0.606691  | 0.867258  | 0.205424  | 1.07487   | 0.370622  | 0.769282  | 0.497824  | 1.25241   | 1.69647   | 0.645174   | 0.98511   | 0.590641 | 0.345313  |
| TMEM170A | 1.1082    | 1.28511   | 1.42798   | 1.63415   | 1.43714   | 1.67958   | 1.0752    | 1.46192   | 1.55629   | 1.78438   | 2.57065   | 1.34072    | 2.25552   | 1.73012  | 0.981215  |
| TMEM170B | 0.613444  | 0.433409  | 0.525689  | 0.209779  | 0.162376  | 0.580897  | 0.452283  | 0.52073   | 1.33005   | 0.466104  | 0.689396  | 0.330678   | 0.195233  | 0.149523 | 0.39901   |
| TMEM171  | 0.786059  | 0.237811  | 0.0756144 | 1.09264   | 0.596313  | 1.21411   | 0.480057  | 0.113723  | 0.75696   | 0.665371  | 0.866727  | 0.771729   | 1.33277   | 0.4586   | 0         |
| TMEM173  | 8.01147   | 5.64864   | 5.37843   | 16.5877   | 11.2718   | 33.6624   | 5.66314   | 4.96719   | 3.10336   | 8.9233    | 19.1891   | 6.80536    | 14.9045   | 10.6214  | 16.1138   |
| TMEM174  | 0.0526577 | 0.0507425 | 0.0435621 | 0         | 0         | 0.0112093 | 0         | 0         | 0         | 0         | 0         | 0          | 0         | 0        | 0         |
| TMEM175  | 2.86832   | 3.40294   | 3.77873   | 3.09761   | 6.92738   | 6.06403   | 3.8021    | 2.3658    | 2.6439    | 1.51646   | 3.18254   | 2.5514     | 1.86964   | 2.07925  | 3.44213   |
| TMEM176A | 4.32539   | 1.70805   | 2.72981   | 8.63916   | 8.58901   | 8.48611   | 6.9242    | 3.82423   | 0.325845  | 5.31687   | 21.1925   | 0.462644   | 5.16427   | 1.79453  | 12.0714   |
| TMEM176B | 4.61528   | 1.86381   | 2.72562   | 9.07243   | 12.4942   | 9.23402   | 9.13797   | 3.5208    | 0.552341  | 4.41982   | 13.1758   | 0.687195   | 6.74729   | 1.83351  | 16.7236   |
| TMEM177  | 0.548946  | 0.537997  | 0.588301  | 1.13784   | 0.746114  | 1.16855   | 0.733604  | 0.471226  | 0.334277  | 0.391468  | 0.929538  | 0.348151   | 0.804948  | 0.459697 | 0.223965  |
| TMEM178A | 0.758789  | 0.335129  | 0.3034    | 0.130326  | 0.333954  | 0.484574  | 0.360983  | 0.292218  | 0.046206  | 0.0317453 | 0.142763  | 0.0542933  | 0.0489567 | 0.125582 | 0.671992  |
| TMEM178B | 0.381443  | 0.0823863 | 0.063474  | 0.0677738 | 0.0783206 | 0.158663  | 0.180215  | 0.167549  | 0.0160191 | 0.0275144 | 0.0148483 | 0.00784289 | 0.0381887 | 0.026352 | 0.0787069 |
| TMEM179  | 0.0190165 | 0         | 0         | 0         | 0.0295392 | 0.0539743 | 0         | 0         | 0         | 0         | 0         | 0          | 0         | 0        | 0         |
| TMEM179B | 7.88079   | 8.98539   | 9.77036   | 13.0435   | 10.8927   | 18.948    | 11.7      | 8.02641   | 10.1796   | 6.70313   | 17.9645   | 7.39428    | 7.83007   | 7.31863  | 7.82583   |
| TMEM18   | 1.80152   | 1.42065   | 1.56849   | 1.49147   | 1.3625    | 2.2837    | 1.65246   | 1.54107   | 1.02717   | 0.931532  | 1.85469   | 1.3711     | 1.10573   | 1.24659  | 1.31783   |
| TMEM181  | 5.62174   | 4.92762   | 5.30698   | 6.43855   | 2.89085   | 6.82426   | 4.92053   | 5.25528   | 3.7654    | 4.27335   | 6.14293   | 4.08694    | 6.3274    | 5.51999  | 5.46241   |
| TMEM182  | 0.112517  | 0.0884521 | 0.0832842 | 0.17698   | 0.064392  | 0.352973  | 0.0878997 | 0.0947331 | 0.0576983 | 0.230413  | 0.240666  | 0.0847465  | 0.0802373 | 0.148564 | 0.119066  |
| TMEM183A | 2.9797    | 2.20218   | 2.43586   | 1.6839    | 1.13669   | 2.0173    | 1.78551   | 2.44867   | 1.22434   | 1.01313   | 1.89718   | 0.951156   | 2.19145   | 1.49106  | 1.17321   |
| TMEM183B | 8.44091   | 7.27292   | 7.72392   | 13.6552   | 9.95063   | 11.2012   | 8.64756   | 5.53118   | 13.4476   | 14.9107   | 23.6965   | 9.17159    | 15.2193   | 10.4867  | 7.134     |
| TMEM184A | 2.32689   | 6.54189   | 4.89252   | 7.96529   | 19.117    | 7.03825   | 6.40791   | 3.29888   | 14.9873   | 11.93     | 4.88078   | 14.2341    | 16.1758   | 8.85926  | 3.59905   |
| TMEM184B | 4.88761   | 4.05424   | 4.83824   | 8.34551   | 7.87956   | 13.1152   | 5.38973   | 3.29887   | 6.38866   | 9.81215   | 12.9282   | 6.10199    | 19.9913   | 11.7871  | 13.3444   |
| TMEM184C | 3.51855   | 3.22181   | 2.96875   | 4.74104   | 2.64812   | 4.58017   | 2.40864   | 2.98172   | 3.5078    | 3.80062   | 5.6856    | 2.57332    | 5.59      | 3.49889  | 3.86807   |
| TMEM185A | 4.0581    | 4.2316    | 4.08803   | 5.97976   | 6.78045   | 6.21584   | 4.12046   | 3.09412   | 12.1186   | 6.66264   | 9.02686   | 6.13942    | 8.33296   | 4.13622  | 3.03224   |
| TMEM185B | 3.70647   | 3.62988   | 3.41447   | 6.14514   | 4.16521   | 6.65053   | 3.59558   | 3.10004   | 3.1233    | 4.08946   | 5.08609   | 3.22935    | 8.6025    | 4.02303  | 3.72775   |



|                |           |            |           |           |          |            |            |           |           |           |           |           |           |            |           |
|----------------|-----------|------------|-----------|-----------|----------|------------|------------|-----------|-----------|-----------|-----------|-----------|-----------|------------|-----------|
| TMEM186        | 1.93392   | 1.89438    | 1.81142   | 2.8659    | 2.60681  | 3.22536    | 1.3139     | 1.09372   | 2.6278    | 1.44432   | 2.16511   | 1.22366   | 2.09334   | 1.71243    | 0.504972  |
| TMEM187        | 1.04123   | 1.42477    | 1.52751   | 1.8742    | 3.32104  | 2.95531    | 1.41076    | 0.703272  | 1.87679   | 1.35912   | 2.74264   | 1.69866   | 1.00321   | 0.769124   | 1.01683   |
| TMEM189        | 7.00527   | 7.80081    | 7.63095   | 10.3156   | 12.8091  | 10.8637    | 6.99381    | 6.96343   | 7.51139   | 7.41655   | 9.63913   | 6.16509   | 9.04134   | 6.45015    | 4.08048   |
| TMEM189-UBE2V1 | 2.65853   | 2.761      | 2.59115   | 5.38986   | 4.17166  | 5.47947    | 3.08837    | 1.98378   | 2.83523   | 3.83077   | 8.42068   | 2.20165   | 3.89265   | 2.81612    | 1.38879   |
| TMEM19         | 4.46167   | 7.02842    | 6.93811   | 5.87791   | 4.75412  | 4.31518    | 3.35264    | 7.23267   | 5.6819    | 4.01593   | 6.92682   | 3.37731   | 2.94276   | 2.45131    | 1.7981    |
| TMEM190        | 0.153012  | 0.20274    | 0.28481   | 0         | 0.23768  | 0.0651438  | 0.349408   | 0.407953  | 0.0931756 | 0.192046  | 0         | 0.218968  | 0.0493613 | 0.239912   | 0.274681  |
| TMEM191A       | 0.251934  | 0.2362     | 0.388157  | 0.198376  | 0.474884 | 0.304499   | 0.40219    | 0.0926373 | 0.40438   | 0.445554  | 0.745639  | 0.119523  | 0.573897  | 0.317053   | 0.0848732 |
| TMEM191B       | 0.391743  | 0.326256   | 0.255327  | 0.357731  | 0.241944 | 0.197878   | 0.0116927  | 0.433089  | 0.278536  | 0.409065  | 0.735551  | 0.196923  | 0.141741  | 0.350683   | 0.0249148 |
| TMEM191C       | 0.125803  | 0.140712   | 0.110057  | 0.0128557 | 0.196854 | 0.0957331  | 0.0325033  | 0.0486461 | 0.10191   | 0.115108  | 0.131121  | 4.74E-05  | 0.11518   | 4.14E-09   | 0         |
| TMEM192        | 2.02856   | 1.65462    | 1.52483   | 1.53868   | 0.919722 | 2.83205    | 1.46375    | 1.68842   | 1.50491   | 1.32472   | 2.08656   | 1.10151   | 1.76059   | 1.10058    | 0.931653  |
| TMEM196        | 0.0170924 | 0.00823536 | 0         | 0         | 0        | 0.00485131 | 0.00650517 | 0.0151903 | 0         | 0         | 0         | 0         | 0         | 0.00297774 | 0         |
| TMEM198        | 0.215451  | 0.263845   | 0.200516  | 0.471811  | 1.01795  | 1.49056    | 0.297244   | 0.21559   | 0.459192  | 0.360551  | 0.486435  | 0.41752   | 0.220096  | 0.384731   | 0.515692  |
| TMEM198B       | 3.29199   | 5.02389    | 4.68573   | 1.69506   | 4.26361  | 3.50017    | 4.71667    | 3.72135   | 1.2335    | 1.12967   | 2.07054   | 1.59824   | 0.71331   | 1.75006    | 2.75572   |
| TMEM199        | 2.8745    | 2.44054    | 2.56045   | 3.9017    | 2.70646  | 3.82477    | 2.7448     | 2.24754   | 3.95745   | 2.89731   | 3.40264   | 1.95158   | 4.40174   | 2.36686    | 1.94266   |
| TMEM200A       | 0.405583  | 0.344969   | 0.465628  | 0.507529  | 0.623582 | 2.11791    | 0.311871   | 0.367805  | 0.312502  | 0.971348  | 1.83141   | 0.174715  | 1.18557   | 0.469374   | 1.81872   |
| TMEM200B       | 1.19243   | 0.796834   | 1.12357   | 0.569338  | 2.09632  | 2.97015    | 1.40429    | 0.611883  | 0.23316   | 1.09864   | 1.99443   | 0.256889  | 1.3915    | 1.1467     | 1.83142   |
| TMEM200C       | 0.098272  | 0.0777875  | 0.162595  | 0.130207  | 0.338011 | 0.376548   | 0.0961747  | 0.0187148 | 0.0256466 | 0.0352404 | 0.0950887 | 0.0301355 | 0.244561  | 0.102722   | 0.151212  |
| TMEM201        | 1.3549    | 1.43687    | 1.60961   | 1.74625   | 2.11563  | 3.09958    | 2.24576    | 1.19784   | 0.517009  | 0.69265   | 1.08624   | 1.10616   | 1.90356   | 1.29978    | 1.22439   |
| TMEM202        | 0         | 0          | 0         | 0         | 0        | 0          | 0          | 0         | 0         | 0         | 0         | 0         | 0         | 0          | 0         |
| TMEM202-AS1    | 0.338529  | 0.177936   | 0.178217  | 0.222004  | 0.478047 | 0.419277   | 0.491936   | 0.109402  | 0.262366  | 0.115879  | 0.277932  | 0.176165  | 0.0397122 | 0.0965072  | 0.397775  |
| TMEM203        | 6.51456   | 5.83332    | 6.17678   | 8.56807   | 11.7597  | 8.39658    | 6.57203    | 3.87295   | 13.5132   | 6.36568   | 10.3092   | 5.02318   | 8.4735    | 4.8118     | 3.52442   |
| TMEM204        | 4.33782   | 1.94991    | 2.46587   | 3.9333    | 7.07692  | 8.99666    | 2.90525    | 1.98138   | 1.04774   | 4.50151   | 12.0232   | 1.45654   | 4.52645   | 4.67358    | 7.09968   |
| TMEM205        | 6.63018   | 6.9229     | 7.53996   | 8.02965   | 10.0491  | 16.5865    | 8.87602    | 5.92411   | 4.6577    | 3.8804    | 12.4072   | 3.46535   | 4.46223   | 4.51132    | 4.05509   |
| TMEM206        | 0.798409  | 0.748576   | 0.758682  | 1.53438   | 0.837976 | 1.35967    | 0.702176   | 0.565729  | 1.27459   | 2.22084   | 2.44814   | 0.864645  | 3.23696   | 1.99619    | 1.41003   |
| TMEM207        | 0         | 0.00770606 | 0.0529248 | 0.0329642 | 0        | 0          | 0          | 0.0284279 | 0         | 0         | 0         | 0.022888  | 0         | 0          | 0         |
| TMEM208        | 6.07598   | 4.52215    | 4.69955   | 9.92675   | 7.63487  | 11.8825    | 6.48616    | 3.44623   | 7.27954   | 9.11397   | 23.3372   | 4.02941   | 7.99976   | 6.35114    | 5.63989   |

|             |            |            |           |           |            |           |            |           |            |           |           |           |           |            |           |
|-------------|------------|------------|-----------|-----------|------------|-----------|------------|-----------|------------|-----------|-----------|-----------|-----------|------------|-----------|
| TMEM209     | 3.04415    | 1.7348     | 1.91041   | 2.9412    | 0.723264   | 3.32343   | 2.08039    | 2.67939   | 1.13652    | 2.2198    | 2.7842    | 1.10845   | 3.59582   | 2.10843    | 1.72101   |
| TMEM210     | 0          | 0.0218641  | 0.0750806 | 0         | 0          | 0         | 0          | 0         | 0          | 0         | 0         | 0         | 0         | 0          | 0         |
| TMEM211     | 0.131794   | 0.139701   | 0.109029  | 0.0271635 | 0.327555   | 0.0897768 | 0.391244   | 0.163979  | 0          | 0         | 0         | 0         | 0         | 0          | 0         |
| TMEM212     | 2.74928    | 2.43775    | 2.70692   | 1.80591   | 0.384679   | 0.631145  | 1.79398    | 2.93741   | 0.407852   | 1.0236    | 0.332327  | 1.79324   | 0.225985  | 1.75108    | 1.4578    |
| TMEM212-AS1 | 0          | 0          | 0         | 0         | 0          | 0         | 0          | 0         | 0          | 0         | 0         | 0         | 0         | 0          | 0         |
| TMEM213     | 0.618948   | 0.397163   | 0.691096  | 0         | 0.582624   | 0.4256    | 0.543632   | 0.72199   | 0.00831435 | 0         | 0         | 0.0097696 | 0         | 0.00713603 | 0.0490212 |
| TMEM214     | 6.62314    | 6.80423    | 7.60148   | 13.0387   | 11.1039    | 18.0011   | 10.6045    | 5.87256   | 10.4583    | 10.1759   | 12.9683   | 7.86034   | 15.8012   | 10.0025    | 13.3274   |
| TMEM215     | 0.00859857 | 0.00828584 | 0.0284534 | 0         | 0.00667827 | 0.0146431 | 0.00981757 | 0.0191042 | 0          | 0         | 0         | 0         | 0         | 0.011235   | 0         |
| TMEM216     | 1.7182     | 1.63881    | 1.69699   | 2.927     | 1.17107    | 2.65732   | 1.50136    | 1.29327   | 0.491113   | 1.56237   | 4.2751    | 0.765249  | 1.6063    | 0.97131    | 1.30931   |
| TMEM217     | 0.092519   | 0.165726   | 0.181819  | 0.576042  | 0.160539   | 0.278566  | 0.217373   | 0.136221  | 0.849124   | 0.754817  | 0.459037  | 0.364892  | 0.504665  | 0.460195   | 0.0583829 |
| TMEM218     | 0.968374   | 1.08781    | 1.07114   | 1.68192   | 0.870419   | 1.61206   | 1.16777    | 0.908959  | 2.18647    | 1.01739   | 1.74416   | 1.37801   | 1.03547   | 0.909869   | 0.789109  |
| TMEM219     | 14.8727    | 14.1979    | 17.0183   | 22.632    | 33.3582    | 31.5414   | 17.616     | 10.047    | 18.0286    | 14.916    | 35.5664   | 13.0951   | 11.0008   | 10.8606    | 12.7422   |
| TMEM220     | 1.43833    | 1.30645    | 1.54786   | 0.888112  | 0.443701   | 1.58143   | 1.14393    | 1.4139    | 0.189345   | 0.430003  | 0.873881  | 0.349694  | 0.395942  | 0.563485   | 0.904083  |
| TMEM220-AS1 | 0.137226   | 0.0930006  | 0.158494  | 0.0180254 | 0.112642   | 0.180099  | 0.213723   | 0.0302465 | 0.0498899  | 0         | 0.0768401 | 0.0365282 | 0.0655838 | 0.106726   | 0.0733155 |
| TMEM221     | 0.131903   | 0.132884   | 0.13888   | 0.0370719 | 0.242145   | 0.0612622 | 0.177985   | 0.149195  | 0.014604   | 0.0451506 | 0.0270732 | 0.0858004 | 0         | 0.0313357  | 0.0861045 |
| TMEM222     | 5.19002    | 4.17176    | 4.11809   | 9.56555   | 8.1976     | 12.0998   | 5.92582    | 3.48153   | 6.57918    | 6.98381   | 12.6192   | 5.84713   | 11.7603   | 5.87499    | 4.42555   |
| TMEM223     | 2.49461    | 2.67759    | 2.84016   | 3.6907    | 3.83662    | 4.90021   | 3.29947    | 1.93164   | 1.20323    | 2.01499   | 5.66009   | 1.6259    | 3.39431   | 2.50431    | 1.45431   |
| TMEM225     | 0.0209061  | 0          | 0.017295  | 0         | 0          | 0         | 0          | 0.0185796 | 0          | 0         | 0         | 0         | 0         | 0          | 0         |
| TMEM225B    | 0.778421   | 0.620284   | 0.643965  | 0.2314    | 0.186024   | 1.79725   | 0.700765   | 0.412417  | 0.200545   | 0.0751537 | 0.456269  | 0.257068  | 0.086925  | 0.234713   | 0.300976  |
| TMEM229A    | 0          | 0          | 0         | 0         | 0.0422269  | 0         | 0          | 0.0080531 | 0          | 0         | 0         | 0         | 0         | 0          | 0         |
| TMEM229B    | 0.327591   | 0.199119   | 0.283514  | 0.358367  | 0.696749   | 1.21875   | 0.35677    | 0.349363  | 0.0675178  | 0.0948832 | 0.193439  | 0.0721231 | 0.198353  | 0.113264   | 0.390846  |
| TMEM230     | 4.51693    | 4.1152     | 3.46496   | 9.14043   | 1.88803    | 8.40555   | 3.82576    | 4.04345   | 3.79076    | 6.5763    | 12.0986   | 3.70796   | 7.503     | 5.73868    | 8.72778   |
| TMEM231     | 1.6663     | 1.44156    | 1.64192   | 1.30505   | 1.04684    | 2.74939   | 1.50511    | 1.19128   | 1.74976    | 0.910911  | 1.53828   | 0.964423  | 0.907851  | 0.735411   | 1.75488   |
| TMEM232     | 0.130506   | 0.174666   | 0.125958  | 0.104603  | 0.0563113  | 0.0432149 | 0.0662255  | 0.109539  | 0.0264903  | 0.136499  | 0.106401  | 0.0311268 | 0.0140336 | 0.0303147  | 0.0624743 |
| TMEM233     | 0.0450692  | 0.00723835 | 0         | 0.131595  | 0.035004   | 0.166295  | 0.111494   | 0.0200269 | 0.0274446  | 0.037711  | 0.152633  | 0.0214988 | 0.0775425 | 0.0981465  | 0.204963  |
| TMEM234     | 1.33986    | 2.37443    | 2.52087   | 1.69864   | 3.36463    | 1.75491   | 2.63479    | 1.63565   | 0.733191   | 2.01386   | 1.5132    | 1.5151    | 1.43144   | 1.84323    | 1.90212   |

|             |           |            |            |           |            |            |           |           |           |           |           |           |            |           |           |
|-------------|-----------|------------|------------|-----------|------------|------------|-----------|-----------|-----------|-----------|-----------|-----------|------------|-----------|-----------|
| TMEM235     | 0         | 0.00447639 | 0          | 0         | 0          | 0.00791088 | 0         | 0         | 0         | 0         | 0         | 0         | 0.00485571 | 0         |           |
| TMEM236     | 0.0572795 | 0.0327089  | 0.0438756  | 0.0896354 | 0.0263629  | 0.0614176  | 0.0605555 | 0.115008  | 0.0361719 | 0.13047   | 0.134113  | 0.0121437 | 0.0424315  | 0.0665262 | 0.0731206 |
| TMEM237     | 5.58592   | 5.78526    | 5.4982     | 3.42659   | 2.07099    | 3.10137    | 3.80104   | 4.22563   | 2.26932   | 2.28826   | 3.36829   | 2.0861    | 2.236      | 2.17649   | 1.98968   |
| TMEM238     | 2.27235   | 1.86968    | 1.50388    | 2.70199   | 8.30849    | 1.72651    | 1.79619   | 0.745654  | 4.47053   | 1.44796   | 1.77591   | 1.45083   | 1.30822    | 0.913563  | 0.602472  |
| TMEM238L    | 0.105883  | 0.218641   | 0.262782   | 0.249407  | 0.0234962  | 0.270475   | 0.431764  | 0.120986  | 2.06326   | 0.208834  | 0.939156  | 0.649391  | 0.800265   | 0.403186  | 0.0434462 |
| TMEM239     | 0.0178389 | 0.00573005 | 0.00491921 | 0.0245114 | 0.00923668 | 0.0860745  | 0         | 0.0105692 | 0         | 0.0223897 | 0.0268506 | 0.017019  | 0.0268557  | 0.0217546 | 0.145174  |
| TMEM240     | 0.145033  | 0.199654   | 0.222822   | 0.128109  | 0.514939   | 0.352838   | 0.354843  | 0.165719  | 0.0504667 | 0.23404   | 0.584727  | 0.163074  | 0.133678   | 0.357344  | 0.41657   |
| TMEM241     | 1.54535   | 1.2672     | 1.28457    | 2.50363   | 1.76572    | 2.84677    | 1.52691   | 1.50543   | 2.32543   | 1.85565   | 3.41353   | 2.83876   | 1.97971    | 1.99586   | 1.03497   |
| TMEM242     | 1.82768   | 1.20203    | 1.07729    | 1.4079    | 0.830415   | 2.01923    | 0.996443  | 1.20198   | 0.840282  | 1.37062   | 2.17155   | 1.00043   | 1.25291    | 1.12478   | 1.3977    |
| TMEM243     | 2.56817   | 2.18746    | 2.32886    | 2.15033   | 3.2565     | 3.52221    | 1.74885   | 2.60716   | 0.697077  | 1.64063   | 4.9367    | 0.8688    | 1.72892    | 1.74444   | 2.94079   |
| TMEM244     | 0         | 0.02046    | 0          | 0.0875214 | 0          | 0          | 0         | 0         | 0         | 0.0532971 | 0         | 0         | 0          | 0.0221937 | 0         |
| TMEM245     | 5.9934    | 5.45333    | 5.64767    | 5.13555   | 3.71764    | 6.41918    | 4.81097   | 5.15927   | 3.89813   | 4.2497    | 5.72039   | 3.4995    | 3.86878    | 3.82968   | 3.79868   |
| TMEM246     | 2.56634   | 3.47128    | 3.40073    | 3.42806   | 3.66375    | 2.63729    | 4.01334   | 2.55286   | 7.59396   | 1.83311   | 3.05338   | 3.0436    | 2.38948    | 1.04102   | 0.746226  |
| TMEM246-AS1 | 0.0864226 | 0.280556   | 0.200539   | 0         | 0.0832156  | 0          | 0.0611668 | 0.0980814 | 0.130489  | 0.0436244 | 0.0315682 | 0.0383321 | 0          | 0.055998  | 0         |
| TMEM247     | 0         | 0          | 0          | 0         | 0          | 0          | 0         | 0         | 0         | 0         | 0         | 0         | 0          | 0         | 0         |
| TMEM248     | 12.3415   | 8.48272    | 10.1646    | 13.0559   | 8.65223    | 16.3442    | 11.1295   | 9.83247   | 10.1024   | 10.0821   | 15.2759   | 6.54486   | 14.7697    | 9.56686   | 12.493    |
| TMEM249     | 0.0795682 | 0.0662605  | 0.022874   | 0.118046  | 0.348098   | 0.296081   | 0.0911864 | 0.0702976 | 1.86E-40  | 0.0173518 | 0.0156067 | 0.123329  | 0.0751074  | 0.116237  | 0.124808  |
| TMEM25      | 1.22251   | 1.27436    | 1.39298    | 0.863656  | 1.3257     | 2.14082    | 1.61529   | 0.908802  | 0.318376  | 0.328105  | 0.954757  | 0.335591  | 0.367094   | 0.482216  | 0.507931  |
| TMEM250     | 3.2422    | 6.31468    | 6.85183    | 12.0254   | 17.2734    | 13.5761    | 5.4662    | 3.27927   | 9.26038   | 7.97544   | 7.70314   | 6.84597   | 13.0496    | 8.30267   | 3.99252   |
| TMEM251     | 1.59373   | 1.76451    | 1.72521    | 3.11005   | 0.658409   | 2.85845    | 1.50994   | 1.61226   | 2.56045   | 3.19197   | 4.49782   | 1.46791   | 4.30998    | 2.3305    | 1.75313   |
| TMEM252     | 0.651655  | 0.170445   | 0.154027   | 0.0767485 | 0.0867638  | 0.174389   | 0.382648  | 0.148921  | 0.0226755 | 0.0233684 | 0.0210182 | 0.0133222 | 0.13214    | 0.0973095 | 0.347605  |
| TMEM253     | 0.151658  | 0.358049   | 0.40148    | 0.234432  | 0.400482   | 0.387405   | 0.259738  | 0.188694  | 0.166232  | 0.133243  | 0.119842  | 0.260437  | 0.107634   | 0.134747  | 0.1089    |
| TMEM254     | 3.93105   | 7.30011    | 6.13111    | 6.26832   | 4.21455    | 4.72828    | 7.35077   | 5.11083   | 15.1599   | 4.06555   | 6.89352   | 4.86069   | 3.20514    | 2.05985   | 1.94569   |
| TMEM254-AS1 | 0.345223  | 0.858037   | 1.01986    | 0.288836  | 0.409759   | 0.431376   | 0.555126  | 0.361332  | 0.355446  | 0.100508  | 0.103576  | 0.176147  | 0.0369903  | 0.113887  | 0.0515877 |
| TMEM255A    | 0.403696  | 0.430466   | 0.542011   | 0.10912   | 0.0514     | 0.152148   | 0.710281  | 0.405823  | 0.225679  | 0.141206  | 0.26148   | 0.0236767 | 0.0683181  | 0.044965  | 0         |
| TMEM255B    | 1.09878   | 0.843745   | 0.980003   | 2.01695   | 2.98687    | 4.37099    | 0.99972   | 0.656089  | 0.188183  | 1.68076   | 2.82963   | 0.651077  | 1.96063    | 2.23427   | 2.66285   |

|                |            |            |           |            |           |           |            |           |            |            |           |            |            |           |           |
|----------------|------------|------------|-----------|------------|-----------|-----------|------------|-----------|------------|------------|-----------|------------|------------|-----------|-----------|
| TMEM256        | 3.79394    | 3.35177    | 3.43735   | 8.8977     | 5.26774   | 6.01679   | 4.93944    | 2.99242   | 5.31368    | 10.0934    | 23.008    | 6.27767    | 4.89567    | 4.61089   | 2.65618   |
| TMEM256-PLSCR3 | 0.678863   | 1.51788    | 2.15689   | 7.85924    | 5.05717   | 7.79842   | 3.14317    | 2.30217   | 5.602      | 7.49693    | 6.96607   | 7.1099     | 17.6977    | 6.7647    | 5.03454   |
| TMEM258        | 24.1566    | 13.5382    | 12.95     | 38.5887    | 7.60967   | 39.5079   | 17.8732    | 10.8593   | 21.465     | 30.4604    | 69.9226   | 18.4128    | 19.1461    | 21.8956   | 16.2543   |
| TMEM259        | 16.3571    | 24.993     | 24.6737   | 25.4532    | 64.6651   | 42.0386   | 21.467     | 15.1902   | 29.8503    | 23.8659    | 21.7356   | 27.9532    | 30.6397    | 25.5356   | 19.8218   |
| TMEM26         | 0.0044144  | 0.00807084 | 0         | 0.0304831  | 0.0394772 | 0.124756  | 0.00382513 | 0.0208415 | 0.0204007  | 0.125366   | 0.32594   | 0.00958858 | 0.0412369  | 0.0472757 | 0.0625467 |
| TMEM26-AS1     | 0.00927272 | 3.34E-14   | 0.0112423 | 0.00238933 | 0.0931777 | 0.153509  | 0          | 0         | 0          | 0.0372729  | 0.119917  | 0          | 0.0168541  | 0         | 0         |
| TMEM260        | 1.92723    | 1.7002     | 1.69315   | 2.1539     | 1.0541    | 1.58554   | 1.29548    | 1.51495   | 1.36862    | 1.79882    | 2.61685   | 1.02161    | 1.324      | 1.19452   | 1.52811   |
| TMEM262        | 0.0452013  | 0.152451   | 0.0747874 | 0.0465812  | 0.0702132 | 0.153953  | 0.309656   | 0.0401711 | 0          | 0          | 0.161714  | 0          | 0.0236242  | 0.259659  |           |
| TMEM263        | 1.62418    | 1.27412    | 1.35333   | 2.18737    | 1.05652   | 3.15036   | 0.789975   | 1.92805   | 0.614128   | 3.49564    | 6.77794   | 0.709033   | 2.02394    | 2.74886   | 5.08609   |
| TMEM265        | 1.88451    | 2.60182    | 2.99035   | 3.97493    | 3.80034   | 3.07789   | 2.6424     | 1.9882    | 4.40233    | 5.35293    | 6.75534   | 3.5248     | 5.85895    | 3.71507   | 2.38985   |
| TMEM266        | 0.500171   | 1.18191    | 1.37618   | 0.159064   | 1.39361   | 0.38607   | 1.01158    | 0.793488  | 0.129238   | 0.0847555  | 0.0871217 | 0.110442   | 0.0124483  | 0.151258  | 0.346356  |
| TMEM267        | 1.39143    | 0.932925   | 1.01241   | 0.958821   | 0.169264  | 1.12769   | 0.803917   | 1.25149   | 1.0821     | 1.25193    | 2.24258   | 0.629752   | 1.00591    | 1.09084   | 0.866721  |
| TMEM268        | 2.04173    | 1.23342    | 1.29466   | 1.66082    | 1.6421    | 3.6579    | 1.42593    | 1.55202   | 0.334491   | 0.910562   | 1.76082   | 0.574724   | 1.60818    | 1.11314   | 1.59261   |
| TMEM269        | 0.158703   | 0.0764656  | 0.114166  | 0.00711079 | 0.0321549 | 0.0646291 | 0.0472701  | 0.122645  | 0.00840359 | 0.00866038 | 0.0155788 | 0.0197489  | 0.00890386 | 0.0432757 | 0.0495473 |
| TMEM270        | 0          | 0          | 0         | 0          | 0         | 0         | 0          | 0         | 0          | 0          | 0         | 0          | 0          | 0         | 0         |
| TMEM271        | 0.67871    | 0.907345   | 0.782904  | 0.157618   | 1.98975   | 0.42326   | 1.03688    | 0.373802  | 0.570465   | 0.0839853  | 0.129495  | 0.0547194  | 0          | 0.0299766 | 0         |
| TMEM272        | 0.0560636  | 0.0864393  | 0.0510177 | 0.0462201  | 0.148046  | 0.0238687 | 0.0512093  | 0.0597896 | 0          | 0.0281462  | 0.0253155 | 0.0361035  | 0.0144688  | 0.0263712 | 0.0644115 |
| TMEM273        | 4.17112    | 0.929222   | 0.955423  | 1.35194    | 1.37596   | 3.0361    | 1.6643     | 1.66414   | 0.16387    | 2.42058    | 4.21503   | 0.521495   | 1.91712    | 1.51195   | 3.10785   |
| TMEM30A        | 12.3099    | 9.78856    | 10.3269   | 12.9954    | 3.37022   | 17.6767   | 8.80406    | 12.8954   | 17.3371    | 18.4672    | 24.8962   | 9.85746    | 23.7475    | 13.2003   | 15.587    |
| TMEM30B        | 3.38132    | 2.93954    | 3.21535   | 8.73554    | 3.73897   | 5.40784   | 2.77803    | 2.94948   | 7.11938    | 5.22478    | 5.46391   | 5.49124    | 12.5182    | 3.85577   | 3.92072   |
| TMEM30CP       | 0          | 0.0645792  | 0         | 0          | 0         | 0         | 0          | 0         | 0          | 0          | 0         | 0          | 0          | 0.046701  | 0         |
| TMEM31         | 0.0316162  | 0.091399   | 0.183086  | 0          | 0.0491109 | 0.0538415 | 0.0360983  | 0.0842935 | 0.038505   | 0          | 0         | 0          | 0          | 0.049572  | 0         |
| TMEM33         | 4.12058    | 3.69763    | 4.14568   | 8.36605    | 2.50624   | 5.42126   | 3.18786    | 4.96533   | 4.47129    | 5.25833    | 5.73498   | 4.47837    | 8.89676    | 5.86989   | 3.69532   |
| TMEM35A        | 0.156523   | 0.0700284  | 0.10174   | 0.0806508  | 0.069467  | 0.390312  | 0.497843   | 0.119233  | 0.0272325  | 0.0701616  | 0.2398    | 0.0239992  | 0.0144268  | 0.0409029 | 0.0321124 |
| TMEM35B        | 3.12744    | 1.85644    | 2.11119   | 3.94485    | 2.13752   | 5.6029    | 2.11392    | 2.09011   | 0.853187   | 2.35515    | 5.5923    | 0.787694   | 2.17923    | 2.35373   | 3.52126   |
| TMEM37         | 2.23611    | 1.36161    | 1.52075   | 1.80957    | 3.21774   | 4.40377   | 2.78807    | 1.1948    | 1.01916    | 1.34301    | 3.80966   | 0.853986   | 1.40732    | 1.16152   | 2.02925   |

|              |           |           |           |           |           |          |          |          |           |           |            |           |           |           |           |
|--------------|-----------|-----------|-----------|-----------|-----------|----------|----------|----------|-----------|-----------|------------|-----------|-----------|-----------|-----------|
| TMEM38A      | 0.213628  | 0.198997  | 0.282765  | 0.102737  | 0.154858  | 0.848874 | 0.308957 | 0.189855 | 0.03469   | 0.0715001 | 0.450165   | 0.101904  | 0.266475  | 0.126538  | 0.245438  |
| TMEM38B      | 1.07779   | 0.45635   | 0.5728    | 0.996257  | 0.23337   | 1.37936  | 0.656311 | 0.702422 | 0.906904  | 0.803443  | 1.73286    | 0.542167  | 1.12104   | 0.436984  | 0.600374  |
| TMEM39A      | 3.10849   | 2.27771   | 2.42658   | 2.54751   | 1.36833   | 3.17698  | 2.23798  | 2.72977  | 1.46039   | 2.99266   | 5.88326    | 1.62361   | 2.70785   | 2.92141   | 3.90118   |
| TMEM39B      | 1.86505   | 1.89651   | 1.79863   | 2.70777   | 2.737     | 3.93068  | 2.03533  | 1.69413  | 1.55611   | 2.22443   | 3.90837    | 1.59991   | 3.16454   | 2.19185   | 2.81162   |
| TMEM40       | 4.28349   | 6.16217   | 5.92839   | 22.8455   | 9.69679   | 8.44413  | 6.62917  | 6.05302  | 43.4765   | 38.7668   | 50.863     | 23.147    | 46.7026   | 19.7029   | 5.4665    |
| TMEM41A      | 3.90493   | 4.09818   | 4.64586   | 4.23505   | 3.12822   | 4.59365  | 4.39309  | 3.53586  | 4.21738   | 3.9969    | 5.44322    | 3.19826   | 6.14279   | 3.34158   | 2.83338   |
| TMEM41B      | 3.46721   | 3.66595   | 3.57024   | 4.47914   | 2.6491    | 3.48241  | 2.67585  | 3.27726  | 4.00089   | 5.3807    | 6.2347     | 3.7905    | 7.08173   | 4.72005   | 3.09669   |
| TMEM42       | 0.988818  | 2.03049   | 1.96714   | 2.47473   | 1.97483   | 3.32777  | 1.39781  | 0.899702 | 0.716827  | 1.9207    | 4.75736    | 0.960214  | 1.16963   | 1.0459    | 1.25101   |
| TMEM43       | 19.2997   | 23.0788   | 26.53     | 23.3429   | 20.2443   | 24.6472  | 24.5185  | 16.7889  | 14.9109   | 16.0271   | 19.8014    | 15.1969   | 22.4647   | 17.0901   | 16.2104   |
| TMEM44       | 0.955111  | 0.659306  | 0.828122  | 0.709809  | 1.58347   | 1.74382  | 0.734    | 0.522352 | 0.212511  | 0.979757  | 1.53436    | 0.4337    | 1.21469   | 1.30076   | 2.12343   |
| TMEM44-AS1   | 0.435748  | 0.466555  | 0.520695  | 0.166315  | 0.30083   | 0.508453 | 0.184268 | 0.358571 | 0.078621  | 0.303838  | 0.801623   | 0.10393   | 0.031238  | 0.354264  | 0.417193  |
| TMEM45A      | 61.4198   | 82.1246   | 95.2107   | 31.5644   | 48.4751   | 34.2395  | 80.2702  | 108.147  | 306.15    | 40.5673   | 92.1366    | 84.9452   | 13.3709   | 19.7518   | 10.0172   |
| TMEM45B      | 4.22592   | 4.84507   | 4.60335   | 13.4867   | 6.28938   | 7.36621  | 5.25447  | 5.68266  | 38.3843   | 21.4104   | 19.3196    | 18.2454   | 38.5699   | 11.8353   | 3.17747   |
| TMEM47       | 2.34627   | 0.863668  | 1.03898   | 0.623595  | 0.957698  | 2.05615  | 2.0271   | 1.5068   | 0.271149  | 1.94888   | 4.39508    | 0.359456  | 2.04419   | 1.74243   | 4.88625   |
| TMEM50A      | 11.8225   | 11.9207   | 12.3829   | 21.1243   | 6.19975   | 21.8029  | 11.0884  | 12.9908  | 26.1254   | 20.4664   | 28.179     | 13.9473   | 24.9006   | 13.4664   | 14.062    |
| TMEM50B      | 5.63958   | 5.24905   | 6.77167   | 3.86688   | 1.95438   | 3.24547  | 3.59982  | 5.30141  | 4.36261   | 3.44625   | 5.26354    | 2.69019   | 2.75047   | 2.60323   | 2.92293   |
| TMEM51       | 1.24821   | 2.10986   | 2.06522   | 4.68134   | 3.46459   | 2.94458  | 1.23826  | 1.4912   | 4.41103   | 5.44469   | 6.06365    | 3.39682   | 8.74653   | 3.3474    | 1.83667   |
| TMEM51-AS1   | 0.236722  | 0.547998  | 0.600207  | 0.275228  | 0.257175  | 0.220604 | 0.260727 | 0.192692 | 0.111515  | 0.220545  | 0.187496   | 0.223961  | 0.542342  | 0.148     | 0.0530783 |
| TMEM52       | 0.700573  | 0.465581  | 0.639518  | 0.273847  | 0.262676  | 0.493679 | 1.32396  | 0.515264 | 1.00033   | 0.0303204 | 0.463607   | 0.207426  | 0.0623456 | 0.101007  | 0         |
| TMEM52B      | 0.0149987 | 0         | 0         | 0.0386416 | 0         | 0        | 0        | 0        | 0         | 0         | 0.00846585 | 0         | 0.043547  | 0.0039195 | 0         |
| TMEM53       | 0.714957  | 0.410541  | 0.388907  | 0.645947  | 0.973655  | 1.50109  | 0.972868 | 0.470018 | 1.14508   | 0.786712  | 0.917659   | 0.609681  | 1.09319   | 0.516992  | 0.576678  |
| TMEM54       | 13.0269   | 17.6333   | 15.8282   | 73.2704   | 82.111    | 48.6149  | 19.8238  | 12.5902  | 88.6461   | 67.6474   | 97.702     | 66.6034   | 98.741    | 40.0522   | 12.7158   |
| TMEM56       | 0.164567  | 0.0967973 | 0.0744008 | 0.0447608 | 0.0200134 | 0.120244 | 0.167768 | 0.104448 | 0.0162705 | 0.0215403 | 0.0729134  | 0.0345487 | 0.0334826 | 0.0238175 | 0.0718119 |
| TMEM56-RWDD3 | 0.633694  | 0.544929  | 0.373411  | 0.244652  | 0.156686  | 0.274386 | 0.37173  | 0.499798 | 0.0985356 | 0.390683  | 0.579965   | 0.131814  | 0.280855  | 0.315525  | 0.355717  |
| TMEM59       | 9.95139   | 8.21044   | 8.39306   | 10.1129   | 6.22914   | 13.339   | 7.99287  | 8.97534  | 18.0372   | 12.3495   | 21.5656    | 7.68067   | 9.83994   | 6.35812   | 6.62832   |
| TMEM59L      | 0.0571786 | 0.0206622 | 0         | 0.0294621 | 2.04282   | 0.328636 | 0.130569 | 0.101631 | 0         | 0.0538238 | 0.193643   | 0.0102282 | 0.184457  | 0.0971232 | 0.739042  |

|            |           |           |           |          |           |           |           |           |           |            |           |           |           |            |           |
|------------|-----------|-----------|-----------|----------|-----------|-----------|-----------|-----------|-----------|------------|-----------|-----------|-----------|------------|-----------|
| TMEM60     | 2.83655   | 2.52902   | 2.43432   | 4.78084  | 1.15301   | 5.03372   | 2.23983   | 2.23817   | 3.71288   | 3.79307    | 7.0626    | 1.65026   | 3.66025   | 2.52164    | 2.62693   |
| TMEM61     | 0.170031  | 0.345898  | 0.125032  | 0.62301  | 0.381501  | 0.36999   | 0.172565  | 0.0839495 | 0.575217  | 0.545371   | 0.57583   | 0.554235  | 0.828866  | 0.503571   | 0.16279   |
| TMEM62     | 2.39825   | 1.54188   | 1.829     | 2.06985  | 1.12923   | 2.09313   | 2.10502   | 1.5519    | 1.86201   | 2.09762    | 3.46876   | 1.28164   | 1.29106   | 1.25343    | 1.61446   |
| TMEM63A    | 4.76582   | 4.77528   | 5.86018   | 4.0276   | 7.28994   | 8.47451   | 6.00518   | 4.47102   | 0.898801  | 1.60466    | 1.97717   | 1.60649   | 3.03464   | 2.80591    | 4.60517   |
| TMEM63B    | 5.05477   | 8.80905   | 9.09731   | 9.33072  | 14.5448   | 11.7731   | 10.0922   | 5.69894   | 17.0357   | 11.1698    | 9.11326   | 11.673    | 17.3779   | 9.53459    | 5.74375   |
| TMEM63C    | 1.45233   | 0.526365  | 0.467829  | 0.229578 | 0.206298  | 0.178748  | 0.371755  | 0.468311  | 0.104353  | 0.553838   | 0.145089  | 0.31574   | 0.223894  | 0.0895636  | 0.110747  |
| TMEM64     | 3.89003   | 2.96175   | 2.32814   | 2.64282  | 3.37187   | 4.20785   | 2.60456   | 3.54247   | 1.5324    | 2.67623    | 5.14492   | 1.41231   | 2.86921   | 2.60785    | 2.13116   |
| TMEM65     | 2.27293   | 3.09122   | 2.58712   | 2.27033  | 2.55408   | 2.85501   | 2.21478   | 3.40486   | 3.49457   | 3.17648    | 4.2279    | 2.56831   | 4.24344   | 2.80273    | 2.84751   |
| TMEM67     | 0.693884  | 0.742942  | 0.855415  | 0.658984 | 0.183162  | 0.424781  | 0.507457  | 0.677123  | 0.160177  | 0.466754   | 0.578521  | 0.318015  | 0.351129  | 0.675533   | 0.722954  |
| TMEM68     | 1.21958   | 1.53197   | 1.71548   | 1.53545  | 0.518739  | 1.05772   | 1.01616   | 1.57897   | 1.26586   | 1.31097    | 1.7102    | 1.19067   | 1.32184   | 1.22987    | 0.691198  |
| TMEM69     | 2.84431   | 4.76465   | 3.83727   | 8.71864  | 2.00396   | 7.28611   | 3.46468   | 3.34712   | 5.37965   | 6.31733    | 9.5196    | 4.53506   | 8.41214   | 5.15188    | 3.36539   |
| TMEM70     | 2.14327   | 1.8771    | 1.91281   | 3.64489  | 1.45961   | 4.22526   | 1.53095   | 2.26132   | 3.62607   | 2.67677    | 6.87705   | 1.6771    | 3.95775   | 2.99078    | 2.07727   |
| TMEM71     | 0.324739  | 0.16168   | 0.214917  | 0.970493 | 0.134515  | 0.543804  | 0.259543  | 0.307841  | 0.0659159 | 0.815161   | 1.3686    | 0.0387265 | 0.460944  | 0.32813    | 0.839459  |
| TMEM72     | 0.247306  | 0.119156  | 0.17819   | 0.115096 | 0.0743519 | 0.081514  | 0.282366  | 0.163066  | 0         | 0.0300382  | 0         | 0         | 0         | 0.00416945 | 0.114569  |
| TMEM72-AS1 | 0.196365  | 0.0574429 | 0.0754219 | 0        | 0.0762558 | 0.0597152 | 0.0960872 | 0.0623261 | 0         | 0.00880209 | 0.0158337 | 0         | 0         | 0.00366532 | 0.0201432 |
| TMEM74     | 0.0280032 | 0.0464736 | 0.0283142 | 0.121845 | 0.0483317 | 0.071533  | 0.0852616 | 0.0442433 | 0.0682094 | 0.0741989  | 0.0702491 | 0.060111  | 0.142532  | 0.0374023  | 0.089369  |
| TMEM74B    | 0.966025  | 1.40134   | 1.15148   | 0.535224 | 4.77601   | 1.93699   | 1.11484   | 0.683126  | 2.61869   | 1.00387    | 2.07551   | 1.22635   | 0.335094  | 1.87297    | 2.22272   |
| TMEM75     | 0.58793   | 0.803467  | 0.654398  | 0.649943 | 1.47782   | 0.300369  | 0.610254  | 0.883505  | 0.221319  | 0.281748   | 0.0362018 | 1.68272   | 0.0413814 | 1.07268    | 0.73688   |
| TMEM79     | 19.2105   | 29.5154   | 21.0973   | 44.0305  | 84.0578   | 36.0393   | 23.034    | 17.2999   | 113.899   | 61.7245    | 55.6235   | 68.1313   | 77.9532   | 38.3934    | 13.9355   |
| TMEM80     | 2.12948   | 4.01047   | 3.82205   | 2.06931  | 5.83175   | 2.98944   | 3.9138    | 1.78674   | 6.30355   | 4.21938    | 4.20201   | 4.82755   | 4.77893   | 2.27889    | 2.18277   |
| TMEM81     | 0.555989  | 0.644596  | 0.589315  | 0.537153 | 0.539777  | 0.591772  | 0.476108  | 0.416911  | 0.232764  | 0.915893   | 0.706098  | 0.522146  | 0.739863  | 0.644734   | 0.573901  |
| TMEM82     | 0         | 0.0176295 | 0.0454045 | 0        | 0.0568366 | 0.0155779 | 0.0417771 | 0         | 0         | 0          | 0         | 0         | 0         | 0.0286851  | 0.0788214 |
| TMEM86A    | 3.07589   | 3.85936   | 4.20046   | 11.9776  | 13.4041   | 6.12947   | 8.46752   | 3.61374   | 42.9288   | 6.03385    | 11.9116   | 9.53126   | 4.86114   | 3.99358    | 1.43615   |
| TMEM86B    | 1.0045    | 1.51563   | 1.4761    | 0.844474 | 2.42262   | 1.81192   | 1.4789    | 1.03367   | 0.386325  | 0.696728   | 0.164124  | 1.13486   | 0.520182  | 1.38847    | 1.36666   |
| TMEM87A    | 7.32891   | 6.31234   | 6.60375   | 7.45182  | 4.89777   | 8.17161   | 5.31631   | 6.53713   | 8.01596   | 10.0303    | 11.6221   | 6.24635   | 11.684    | 6.91952    | 6.43144   |
| TMEM87B    | 3.6878    | 3.38906   | 3.68131   | 6.19253  | 1.92537   | 6.06781   | 2.89044   | 4.37507   | 4.13932   | 4.6561     | 6.11108   | 3.35012   | 7.20893   | 3.95778    | 4.38415   |

|            |           |           |           |           |           |           |           |           |            |           |           |           |           |           |           |
|------------|-----------|-----------|-----------|-----------|-----------|-----------|-----------|-----------|------------|-----------|-----------|-----------|-----------|-----------|-----------|
| TMEM88     | 0.741425  | 0.701702  | 0.788604  | 0.573045  | 1.43961   | 1.53319   | 0.483734  | 0.611851  | 0.419237   | 0.531751  | 0.807085  | 1.38311   | 0.546701  | 0.691966  | 0.570418  |
| TMEM88B    | 0.0470387 | 0.521271  | 0.895016  | 0.0484748 | 1.46135   | 0.28037   | 0.107415  | 0.418041  | 0.0572879  | 0         | 0.212403  | 0.100972  | 0         | 1.05713   | 0.607982  |
| TMEM89     | 0.104878  | 0.0842196 | 0.115683  | 0         | 0         | 0.0893021 | 0.0798308 | 0.0621378 | 0          | 0.0438775 | 0         | 0         | 0.0225556 | 0.255798  | 0         |
| TMEM8A     | 1.82942   | 1.12544   | 1.44011   | 4.14889   | 3.80534   | 9.84222   | 1.86471   | 1.25453   | 0.817198   | 3.86127   | 7.80339   | 1.43582   | 5.64843   | 4.58216   | 3.78182   |
| TMEM8B     | 1.59267   | 1.36862   | 1.78619   | 0.609141  | 2.08503   | 2.34529   | 1.8419    | 1.23668   | 0.289955   | 0.412159  | 1.12602   | 0.358328  | 0.346943  | 0.506306  | 1.32049   |
| TMEM9      | 6.26576   | 3.33934   | 3.23871   | 6.38948   | 5.0483    | 9.79322   | 5.14363   | 3.39603   | 3.10259    | 5.10174   | 12.9836   | 2.2182    | 4.5623    | 3.69084   | 4.90945   |
| TMEM91     | 1.49851   | 2.42862   | 2.40833   | 3.53638   | 5.58311   | 3.42051   | 2.39543   | 2.20167   | 3.26857    | 1.97829   | 4.35155   | 2.14688   | 1.09129   | 1.93773   | 1.75174   |
| TMEM92     | 0.271208  | 0.114833  | 0.169971  | 0.296426  | 0.561705  | 0.384883  | 0.131369  | 0.1899    | 0.0400364  | 0.268189  | 0.38038   | 0.147012  | 0.0848396 | 0.558388  | 0.92061   |
| TMEM92-AS1 | 0.0310229 | 0.0448419 | 0.0769929 | 0.0959099 | 0.0481892 | 0.132078  | 0.106263  | 0.220564  | 0          | 0.0389369 | 0.140084  | 0.28857   | 0.120095  | 0.389134  | 0.579186  |
| TMEM94     | 3.15158   | 3.86319   | 4.31914   | 4.34881   | 6.50383   | 9.06102   | 4.90411   | 3.36771   | 1.47396    | 1.71804   | 2.14337   | 1.94883   | 2.30504   | 3.01353   | 4.68108   |
| TMEM95     | 0.0573321 | 0.0920782 | 0.126478  | 0.295412  | 0.26717   | 0.211543  | 0.0436399 | 0.101904  | 0.605142   | 0.335802  | 0.151015  | 0.984543  | 0.147961  | 0.589297  | 0.0823361 |
| TMEM97     | 1.87113   | 1.61851   | 1.59174   | 4.26335   | 0.785122  | 4.26201   | 1.98375   | 1.63858   | 1.14953    | 1.4985    | 3.24458   | 0.950852  | 2.68172   | 1.65009   | 0.7908    |
| TMEM98     | 4.99554   | 3.1953    | 3.58916   | 5.19914   | 4.52493   | 9.12998   | 4.69884   | 2.98545   | 0.875611   | 4.04509   | 10.5649   | 0.922435  | 3.1911    | 3.15508   | 7.88628   |
| TMEM99     | 0.662451  | 1.75034   | 2.16559   | 1.39838   | 0.979224  | 1.67401   | 3.52563   | 1.28192   | 0.832817   | 0.925317  | 1.80926   | 0.733938  | 0.889288  | 0.93816   | 0.797918  |
| TMEM9B     | 8.01652   | 6.61699   | 6.82865   | 10.7417   | 6.97707   | 8.97578   | 6.74375   | 7.4174    | 12.3612    | 10.6177   | 16.428    | 8.47845   | 12.4171   | 7.47172   | 5.01873   |
| TMEM9B-AS1 | 0.725281  | 1.95188   | 2.22497   | 2.08372   | 2.35564   | 2.56954   | 2.44714   | 0.708272  | 0.673782   | 0.468943  | 0.917994  | 1.43782   | 0.340325  | 0.740666  | 1.79912   |
| TMF1       | 4.68712   | 3.95159   | 4.0025    | 3.66676   | 1.75361   | 4.71197   | 2.45903   | 3.50255   | 4.02244    | 5.85327   | 6.6376    | 2.77914   | 6.17822   | 4.26005   | 5.35607   |
| TMIE       | 0.223845  | 0.20372   | 0.205756  | 0.0640773 | 0.154537  | 0.508269  | 0.11359   | 0.110519  | 0.0908725  | 0.109258  | 0.0561539 | 0.151269  | 0.0401176 | 0.012999  | 0         |
| TMIGD1     | 0.0381584 | 0         | 0         | 0         | 0         | 0         | 0         | 0         | 0          | 0         | 0         | 0         | 0         | 0         | 0         |
| TMIGD2     | 0.0731218 | 0.0088078 | 0.0302458 | 0         | 0.0283959 | 0.0622623 | 0         | 0.0162461 | 0          | 0         | 0.0412727 | 0         | 0.0117945 | 0.0286625 | 0.236277  |
| TMIGD3     | 0.170467  | 0.0525653 | 0.0165906 | 0.372004  | 0.0162359 | 1.15685   | 0.0229905 | 0.0983875 | 0.0366364  | 0.076594  | 0.373559  | 0.0215244 | 0.207027  | 0.132837  | 0.144005  |
| TMLHE      | 1.63785   | 1.88908   | 2.05098   | 2.57802   | 0.627324  | 2.33071   | 1.76758   | 1.60015   | 1.20913    | 1.57695   | 2.23518   | 1.20403   | 1.37882   | 1.34558   | 2.24744   |
| TMLHE-AS1  | 0.108781  | 0.117927  | 0.064681  | 0.0385349 | 0.0264021 | 0.0549962 | 0.0582197 | 0.0966751 | 0.00414008 | 0.0255995 | 0.0422124 | 0.0121618 | 0         | 0.0870568 | 0.0244098 |
| TMOD1      | 2.55548   | 0.820982  | 0.849584  | 0.280013  | 0.595217  | 2.58025   | 1.6811    | 0.782164  | 0.110841   | 0.258504  | 0.167146  | 0.133872  | 0.280847  | 0.251295  | 0.829452  |
| TMOD2      | 1.34061   | 1.51645   | 1.75864   | 1.73989   | 0.87681   | 1.98475   | 1.25732   | 1.12647   | 1.79844    | 1.9546    | 2.87598   | 1.34689   | 1.26979   | 1.35784   | 1.8387    |
| TMOD3      | 12.4346   | 11.5522   | 11.6859   | 22.3213   | 7.42713   | 17.2269   | 9.59894   | 12.2586   | 23.3773    | 23.5376   | 17.8557   | 17.507    | 38.9327   | 17.9178   | 13.0709   |

|             |           |            |           |           |           |           |           |            |            |           |           |           |           |            |           |
|-------------|-----------|------------|-----------|-----------|-----------|-----------|-----------|------------|------------|-----------|-----------|-----------|-----------|------------|-----------|
| TMOD4       | 0.0875304 | 0.160259   | 0.218289  | 0.0362301 | 0.108772  | 0.0447186 | 0.0199879 | 0.140022   | 0.0644414  | 0.110742  | 0         | 0.0250522 | 0.0112948 | 0.0921148  | 0         |
| TMPO        | 2.87309   | 2.67608    | 3.13437   | 5.51166   | 2.44447   | 5.14029   | 2.55677   | 2.70704    | 1.72773    | 3.08615   | 5.83893   | 1.56642   | 5.54024   | 3.85873    | 2.72114   |
| TMPO-AS1    | 0.211255  | 0.150717   | 0.170525  | 0.361462  | 0.210288  | 0.691254  | 0.170212  | 0.121023   | 0.0476204  | 0.211464  | 0.414194  | 0.10742   | 0.398265  | 0.283526   | 0.120552  |
| TMPPE       | 2.1622    | 2.5244     | 2.76264   | 2.48046   | 2.0188    | 3.04696   | 3.60661   | 2.13911    | 0.96531    | 1.33129   | 1.57898   | 1.36362   | 2.7788    | 1.61436    | 2.47745   |
| TMPRSS11A   | 0.0476587 | 0.0183701  | 0.023656  | 0         | 0.0296122 | 0.0324646 | 0.010883  | 0.025413   | 0.16252    | 0.0478532 | 0.0322804 | 0.0409213 | 0.116847  | 0.17436    | 0.136888  |
| TMPRSS11B   | 0         | 0          | 0         | 0.0811517 | 0         | 0         | 0         | 0          | 0          | 0.0219636 | 0         | 0         | 0.0282264 | 0.013719   | 0.0125657 |
| TMPRSS11BNL | 0         | 0          | 0         | 0         | 0         | 0         | 0         | 0          | 0          | 0         | 0         | 0         | 0         | 0          | 0         |
| TMPRSS11D   | 0.523899  | 0.244409   | 0.0412768 | 15.3913   | 0.723375  | 3.77409   | 0.0664635 | 0.229104   | 5.41837    | 11.7002   | 6.47743   | 4.61142   | 26.4619   | 6.43243    | 3.03343   |
| TMPRSS11E   | 0.362965  | 0.281899   | 0.183747  | 2.29452   | 0.143056  | 0.0876438 | 0.197932  | 0.255169   | 0.329888   | 1.73384   | 0.128427  | 0.170556  | 0.290107  | 0.45868    | 0.0855805 |
| TMPRSS11F   | 0.256278  | 1.11668    | 1.62235   | 1.5272    | 0.155774  | 0.161291  | 0.483443  | 1.25763    | 1.72344    | 0.475491  | 0.490563  | 0.350802  | 0.122215  | 0.582358   | 0.0320042 |
| TMPRSS11GP  | 0.0678682 | 0.1308     | 0.0561453 | 0.13988   | 0         | 0         | 0         | 0          | 0.165312   | 0         | 0         | 0.145685  | 0         | 0          | 0         |
| TMPRSS12    | 0.0475217 | 0.0228967  | 0.0524177 | 0.0163242 | 0.0984234 | 0.0404641 | 0.0361725 | 0          | 0.135044   | 0         | 0.0715281 | 0.0906747 | 0.0204405 | 0.0331159  | 0.022749  |
| TMPRSS13    | 3.37122   | 6.26103    | 6.33956   | 13.621    | 12.4419   | 8.69179   | 7.43257   | 3.91995    | 35.8783    | 17.1673   | 17.2906   | 11.9298   | 14.1683   | 8.24821    | 2.83664   |
| TMPRSS15    | 0         | 0.00282725 | 0.0097087 | 0         | 0         | 0         | 0         | 0.00521491 | 0          | 0         | 0         | 0         | 0         | 0          | 0         |
| TMPRSS2     | 1.55449   | 0.544099   | 0.680475  | 0.0646525 | 0.768792  | 1.68569   | 0.549173  | 0.861114   | 0          | 0         | 0.0236075 | 0         | 0.094448  | 0.00728649 | 0.130142  |
| TMPRSS3     | 0.192361  | 0.0479393  | 0.0768237 | 0.0546852 | 0.185464  | 0.141201  | 0.0530146 | 0.0648449  | 0          | 0         | 0.014976  | 0         | 0.0213984 | 0.0242674  | 0.0190521 |
| TMPRSS4     | 0.228622  | 0.755338   | 0.940257  | 10.73     | 1.83652   | 4.11029   | 0.320698  | 1.4687     | 0.198883   | 3.36955   | 3.25926   | 2.54725   | 7.12657   | 4.36642    | 1.13508   |
| TMPRSS5     | 0.81065   | 0.371531   | 0.507059  | 0.122253  | 0.721747  | 0.370382  | 0.756261  | 0.492006   | 0.1204     | 0.124079  | 0.1116    | 0.120252  | 0.0127568 | 0.0568352  | 0.127778  |
| TMPRSS6     | 0.0204685 | 0.095333   | 0.135464  | 0.0351556 | 0.0529911 | 0.0290478 | 0.0934811 | 0.0970171  | 0.00830944 | 0.0428168 | 0         | 0.0341734 | 0.0264123 | 0.0677523  | 0.176372  |
| TMPRSS7     | 0         | 0.0212637  | 0.0949246 | 0         | 0.0137106 | 0.0225469 | 0.0100778 | 0.0156885  | 0.0107497  | 0         | 0         | 0         | 0         | 0.00461311 | 0         |
| TMPRSS9     | 0.292619  | 0.442276   | 0.418854  | 0.121486  | 0.611222  | 0.154532  | 0.544625  | 0.399494   | 0.0251764  | 0.0432861 | 0.046774  | 0.148704  | 0.0267362 | 0.163227   | 0.223282  |
| TMSB10      | 240.649   | 107.343    | 106.214   | 789.016   | 416.921   | 982.97    | 148.895   | 126.307    | 273.319    | 976.868   | 1528.4    | 428.416   | 847.704   | 507.311    | 417.247   |
| TMSB15A     | 0.0347493 | 0.0334855  | 0         | 0.107431  | 0         | 0.0295886 | 0         | 0          | 0.126962   | 0.21807   | 1.37297   | 0.0248641 | 0         | 0.199777   | 0         |
| TMSB15B     | 0.260985  | 0.152935   | 0.245082  | 0.239877  | 0.0867683 | 0.508318  | 0.249663  | 0.188061   | 0.0859056  | 0.309857  | 0.58924   | 0.060565  | 0.159284  | 0.23086    | 0.536887  |
| TMSB15B-AS1 | 0.0724126 | 0.0209337  | 0.0958476 | 0.0149246 | 0.091804  | 0.140167  | 0.198428  | 0.0386125  | 0          | 0.018177  | 0.016349  | 0.0414505 | 0.0373762 | 0.0634131  | 0.0623961 |
| TMSB4X      | 316.534   | 151.926    | 189.325   | 515.591   | 169.115   | 709.072   | 165.139   | 167.124    | 163.916    | 713.612   | 1401.4    | 177.81    | 548.749   | 375.29     | 490.091   |



|                 |           |           |           |          |          |          |           |          |           |           |          |           |          |           |           |
|-----------------|-----------|-----------|-----------|----------|----------|----------|-----------|----------|-----------|-----------|----------|-----------|----------|-----------|-----------|
| TMSB4Y          | 0.749685  | 0.615394  | 0.459402  | 0.343365 | 0.280347 | 0.661989 | 0.0792561 | 0.567553 | 0.405792  | 0.26137   | 0.376134 | 0.298011  | 0.152274 | 0.116094  | 0.518383  |
| TMTC1           | 3.0109    | 1.04192   | 1.10796   | 1.0507   | 0.915054 | 4.16502  | 1.36244   | 1.43634  | 0.441502  | 1.58616   | 2.02627  | 0.500767  | 2.48672  | 1.60913   | 4.53372   |
| TMTC2           | 1.4298    | 1.86535   | 2.27076   | 1.57055  | 1.73732  | 2.08955  | 1.21618   | 1.75129  | 1.35215   | 1.23407   | 0.929589 | 1.13152   | 1.6309   | 0.914285  | 0.93549   |
| TMTC3           | 3.9616    | 5.07144   | 4.84287   | 5.46988  | 0.8734   | 3.59758  | 3.18423   | 5.83649  | 6.46043   | 7.4684    | 8.6759   | 4.96117   | 7.61411  | 5.26274   | 3.81136   |
| TMTC4           | 1.53168   | 1.45323   | 1.76181   | 1.72439  | 1.23035  | 2.67094  | 1.56316   | 1.49176  | 1.00937   | 0.85587   | 1.49814  | 0.874514  | 0.869779 | 1.27206   | 1.09984   |
| TMUB1           | 3.02395   | 3.713     | 3.98446   | 5.21476  | 11.6485  | 8.8044   | 5.17901   | 2.24315  | 7.18747   | 4.94318   | 7.59822  | 4.60666   | 6.8365   | 4.17419   | 3.905     |
| TMUB2           | 3.88783   | 4.30032   | 4.45853   | 4.28834  | 6.03372  | 6.61003  | 3.72182   | 3.44446  | 3.50625   | 4.17534   | 5.44521  | 3.09236   | 3.66474  | 3.66524   | 4.31922   |
| TMX1            | 4.22475   | 3.33189   | 3.28036   | 5.49883  | 2.50584  | 7.00252  | 2.9818    | 3.99021  | 3.68206   | 5.85469   | 9.70398  | 3.33369   | 6.93638  | 4.534     | 4.19606   |
| TMX2            | 11.0573   | 9.54578   | 9.82536   | 17.0752  | 7.9656   | 18.2294  | 11.8721   | 8.91508  | 10.9434   | 12.3933   | 15.7425  | 9.88473   | 21.4407  | 12.6418   | 8.53034   |
| TMX2-CTNND1     | 0.422312  | 0.778995  | 0.959489  | 0.367039 | 1.54128  | 0.801385 | 1.04719   | 0.517447 | 0.215245  | 0.510713  | 0.70015  | 0.514816  | 0.304969 | 0.665397  | 1.0829    |
| TMX3            | 2.62174   | 2.4976    | 2.45501   | 4.22867  | 0.603574 | 4.06843  | 2.11587   | 3.06236  | 2.84457   | 4.60355   | 5.86627  | 2.27005   | 5.42454  | 3.87414   | 5.37179   |
| TMX4            | 6.07111   | 3.47134   | 4.26129   | 3.904    | 2.11123  | 7.5448   | 3.78882   | 4.03411  | 1.71931   | 3.84999   | 5.61167  | 1.57159   | 5.30752  | 3.2924    | 5.12241   |
| TNC             | 21.7491   | 6.64373   | 6.43825   | 160.502  | 31.1545  | 186.483  | 16.0818   | 8.06442  | 8.74738   | 43.0671   | 56.0152  | 25.8809   | 211.964  | 146.912   | 141.1     |
| TNF             | 0.0656616 | 0.0863598 | 0.123321  | 0.166422 | 0.044106 | 0.122398 | 0.0486294 | 0.135635 | 0.0151292 | 0.0890941 | 0.108181 | 0.0279356 | 0.127094 | 0.0435927 | 0.0688123 |
| TNFAIP1         | 8.20841   | 8.99406   | 8.83156   | 22.4468  | 10.7214  | 22.2072  | 7.99645   | 7.30926  | 24.8147   | 20.7502   | 20.4341  | 16.2335   | 32.9869  | 19.9526   | 15.1457   |
| TNFAIP2         | 12.6109   | 12.1976   | 15.2018   | 10.9165  | 12.8211  | 23.2838  | 12.5886   | 8.43888  | 3.46329   | 6.33118   | 4.16758  | 3.64903   | 7.98627  | 5.63204   | 15.2449   |
| TNFAIP3         | 3.99558   | 7.0414    | 10.1505   | 7.56558  | 3.76336  | 4.15085  | 4.31105   | 6.10341  | 3.31352   | 6.4433    | 8.35382  | 15.4375   | 11.4181  | 8.41669   | 7.74437   |
| TNFAIP6         | 0.585077  | 0.258408  | 0.726026  | 11.1544  | 0.454413 | 8.49683  | 0.835028  | 0.722178 | 0.158346  | 8.26123   | 20.6767  | 0.383752  | 7.46589  | 2.95594   | 13.2339   |
| TNFAIP8         | 2.18492   | 2.67476   | 2.70856   | 5.89097  | 1.46627  | 3.2656   | 1.65056   | 3.17372  | 2.27511   | 4.88811   | 5.42481  | 2.40883   | 5.52382  | 2.62888   | 3.28951   |
| TNFAIP8L1       | 1.4369    | 1.45938   | 1.64753   | 3.38878  | 3.31509  | 3.94618  | 1.79237   | 1.04148  | 0.788737  | 2.31126   | 2.80689  | 1.4719    | 3.44259  | 3.09889   | 2.93037   |
| TNFAIP8L2       | 0.903718  | 0.80459   | 0.975156  | 1.70065  | 1.37327  | 1.57247  | 0.874818  | 0.680931 | 0.334974  | 0.986313  | 2.90531  | 0.393604  | 1.40698  | 0.87277   | 1.29785   |
| TNFAIP8L2-SCNM1 | 0.174255  | 0.310457  | 0.488503  | 0.675638 | 0.649058 | 1.07384  | 0.631547  | 0.91407  | 1.3188    | 1.02734   | 0.307196 | 0.394432  | 1.58685  | 1.50401   | 1.01257   |
| TNFAIP8L3       | 4.108     | 5.26184   | 5.40889   | 5.59567  | 3.86974  | 4.81394  | 5.15478   | 4.02135  | 17.8329   | 11.7922   | 9.40115  | 10.5351   | 12.7075  | 6.32943   | 2.75996   |
| TNFRSF10A       | 2.77717   | 2.6443    | 2.89919   | 4.59275  | 4.53986  | 4.18893  | 2.4914    | 1.69242  | 3.68829   | 3.23666   | 3.22465  | 2.41295   | 9.21504  | 4.16088   | 3.1527    |
| TNFRSF10B       | 3.66767   | 2.32036   | 2.6883    | 6.79523  | 3.45465  | 8.09698  | 2.61568   | 2.2341   | 1.56813   | 5.16295   | 7.34311  | 1.77082   | 7.39049  | 6.48473   | 7.41251   |
| TNFRSF10C       | 0.308881  | 0.138794  | 0.0980269 | 3.18561  | 0.240624 | 1.37278  | 0.0842162 | 0.101971 | 0.0565977 | 3.61423   | 9.1395   | 0.0775879 | 2.30992  | 0.460747  | 2.42705   |

|                 |           |           |            |           |           |           |            |            |           |          |           |            |           |           |           |
|-----------------|-----------|-----------|------------|-----------|-----------|-----------|------------|------------|-----------|----------|-----------|------------|-----------|-----------|-----------|
| TNFRSF10D       | 1.06623   | 0.579911  | 0.541141   | 2.79751   | 0.772226  | 2.35603   | 0.776737   | 0.616215   | 0.732922  | 3.39072  | 6.35049   | 0.800359   | 7.04807   | 3.30936   | 2.62096   |
| TNFRSF11A       | 1.39574   | 1.40081   | 1.41726    | 1.402     | 2.37156   | 0.853799  | 1.54758    | 1.19563    | 6.52939   | 0.815818 | 1.49029   | 1.31236    | 0.653448  | 0.742642  | 0.448651  |
| TNFRSF11B       | 0.207163  | 0.0903081 | 0.0571266  | 0.254152  | 0.076618  | 0.890382  | 0.180215   | 0.113972   | 0.0600717 | 1.04004  | 0.924308  | 0.225875   | 3.18876   | 2.35106   | 3.01762   |
| TNFRSF12A       | 1.79403   | 2.2042    | 3.28369    | 12.7799   | 4.31947   | 13.7484   | 2.38123    | 1.39509    | 17.6706   | 26.2323  | 47.8463   | 9.11413    | 49.9607   | 31.5282   | 11.9805   |
| TNFRSF13B       | 0         | 0.0082111 | 0.0281967  | 0.0351246 | 0         | 0         | 0          | 0.030291   | 0         | 0        | 0.0192383 | 0          | 0.0549771 | 0.0089069 | 0.048949  |
| TNFRSF13C       | 0.520347  | 0.787949  | 0.614954   | 0.153209  | 2.65577   | 0.99163   | 1.07507    | 0.638609   | 3.53075   | 0.186597 | 0.895096  | 0.744644   | 0.0959215 | 0.155403  | 0.28468   |
| TNFRSF14        | 2.71697   | 2.88638   | 3.68668    | 2.83278   | 7.35175   | 5.69264   | 3.09214    | 3.01278    | 0.689995  | 1.71008  | 3.40372   | 1.23289    | 1.8609    | 1.82192   | 3.83626   |
| TNFRSF14-AS1    | 0.270485  | 0.400145  | 0.405584   | 0.238357  | 0.88747   | 0.561631  | 0.447994   | 0.356963   | 0.0750205 | 0.125052 | 0.129406  | 0.194821   | 0.0830262 | 0.161452  | 0.55335   |
| TNFRSF17        | 0.116414  | 0.011218  | 0.0770445  | 0.0479871 | 0         | 0         | 0.0797505  | 0.35176    | 0         | 0        | 0         | 0.0499783  | 0.0150219 | 0.0121686 | 0.033437  |
| TNFRSF18        | 0.462861  | 2.17438   | 2.72824    | 0.973858  | 1.61771   | 1.85565   | 1.60746    | 1.1655     | 0.540225  | 0.484115 | 1.32805   | 0.275991   | 0.460396  | 1.05836   | 0.720121  |
| TNFRSF19        | 6.61705   | 13.8631   | 17.0815    | 3.15144   | 4.34266   | 4.31005   | 12.0872    | 13.8302    | 5.206     | 2.83823  | 4.98709   | 3.52627    | 1.31126   | 2.81756   | 3.39831   |
| TNFRSF1A        | 16.9031   | 16.9929   | 18.1569    | 39.6702   | 30.4583   | 49.7609   | 19.649     | 16.8387    | 24.3974   | 36.5678  | 45.4744   | 23.2923    | 54.0792   | 25.523    | 30.7129   |
| TNFRSF1B        | 4.6538    | 1.73253   | 1.95363    | 9.44249   | 7.18983   | 13.9685   | 3.28592    | 2.8319     | 0.674921  | 5.89632  | 7.86257   | 0.842618   | 10.1414   | 4.11743   | 10.084    |
| TNFRSF21        | 5.52205   | 2.07583   | 1.85042    | 18.506    | 6.9095    | 16.8762   | 2.51035    | 2.63166    | 7.10445   | 12.9204  | 14.7127   | 9.49828    | 21.0037   | 18.3161   | 11.9092   |
| TNFRSF25        | 2.35907   | 7.74664   | 7.64993    | 3.50326   | 10.2746   | 3.66013   | 5.85665    | 3.66626    | 1.07556   | 5.4055   | 0.955982  | 5.09855    | 1.37375   | 5.14292   | 4.88208   |
| TNFRSF4         | 0.230592  | 0.272707  | 0.312156   | 0.734498  | 1.40019   | 1.85636   | 0.311152   | 0.149041   | 0.0510609 | 0.473591 | 2.01148   | 0.209993   | 1.46072   | 0.580675  | 1.32464   |
| TNFRSF6B        | 1.1235    | 1.22299   | 1.74049    | 17.3331   | 4.13741   | 15.7324   | 2.20026    | 1.56589    | 0.122064  | 4.68842  | 17.6109   | 0.634835   | 4.22542   | 4.22148   | 6.45839   |
| TNFRSF8         | 0.125573  | 0.0968046 | 0.171406   | 0.148817  | 0.399868  | 0.29404   | 0.2294     | 0.117178   | 0.16058   | 0.110325 | 0.155932  | 0.0134776  | 0.360534  | 0.111571  | 0.324609  |
| TNFRSF9         | 0.0424785 | 0.0502366 | 0.0670877  | 0.0955098 | 0.0299926 | 0.0361699 | 0.00881828 | 0.058343   | 0.0188124 | 0.12117  | 0.170015  | 0.0193419  | 0.204306  | 0.078713  | 0.316114  |
| TNFSF10         | 7.95357   | 8.9636    | 7.47944    | 19.8331   | 5.57305   | 11.4865   | 2.98391    | 7.60542    | 13.1545   | 14.4192  | 16.7295   | 8.62561    | 15.4335   | 6.15434   | 7.49553   |
| TNFSF11         | 0.0339465 | 0.012267  | 0.00702074 | 0         | 0         | 0.0216788 | 0.00968976 | 0.0226266  | 0         | 0.223684 | 0.431116  | 0.00607241 | 0.120462  | 0.106452  | 0.0487515 |
| TNFSF12         | 4.49649   | 2.64203   | 3.59409    | 3.94511   | 6.87948   | 10.4272   | 6.16154    | 3.24013    | 0.767589  | 3.28245  | 10.3952   | 0.896657   | 3.44576   | 2.66514   | 6.0002    |
| TNFSF12-TNFSF13 | 0.257775  | 0.152974  | 0.1704     | 0.77422   | 0.309534  | 1.72973   | 0.155697   | 0.00029257 | 0.226643  | 0.647039 | 1.02388   | 0.00060838 | 0.461565  | 0.352511  | 1.97086   |
|                 |           |           |            |           |           |           |            | 5          |           |          |           | 1          |           |           |           |
| TNFSF13         | 2.0999    | 1.27088   | 1.50034    | 2.65834   | 2.49527   | 4.66267   | 2.65981    | 1.5993     | 0.752408  | 1.88684  | 6.39791   | 0.778073   | 3.04662   | 1.29471   | 1.15516   |
| TNFSF13B        | 0.433228  | 0.30058   | 0.408572   | 1.10721   | 0.336477  | 2.26497   | 0.247323   | 0.377317   | 0.0949722 | 1.10924  | 2.23011   | 0.0929959  | 1.35286   | 0.226424  | 1.64253   |

|           |           |           |           |           |           |           |           |            |            |           |           |           |           |           |           |
|-----------|-----------|-----------|-----------|-----------|-----------|-----------|-----------|------------|------------|-----------|-----------|-----------|-----------|-----------|-----------|
| TNFSF14   | 0.0774987 | 0.0886827 | 0.120211  | 0.144755  | 0.210669  | 0.115481  | 0.0497731 | 0.116226   | 0.0117981  | 0.413393  | 0.191376  | 0.076247  | 0.171881  | 0.0961975 | 0.271289  |
| TNFSF15   | 0.222913  | 0.302648  | 0.212791  | 0.356427  | 0.204952  | 0.279675  | 0.161303  | 0.191623   | 0.13757    | 0.588966  | 0.293584  | 0.0811944 | 0.216307  | 0.125322  | 0.157396  |
| TNFSF18   | 0.0928197 | 0.0596293 | 0.153574  | 0         | 0         | 0.0263449 | 0.247283  | 0.137484   | 0          | 0         | 0.0698546 | 0.0221383 | 0         | 0.0970233 | 0         |
| TNFSF4    | 0.391728  | 0.155786  | 0.138885  | 0.0768928 | 0.0579513 | 0.153539  | 0.220082  | 0.165779   | 0.0454363  | 0.148278  | 0.470289  | 0.0489399 | 0.148435  | 0.0747442 | 0.214313  |
| TNFSF8    | 0.457333  | 0.184029  | 0.286872  | 0.378072  | 0.187357  | 0.676124  | 0.33281   | 0.39304    | 0.0428446  | 0.643384  | 1.15736   | 0.0611316 | 0.327494  | 0.336207  | 1.22697   |
| TNFSF9    | 0.750585  | 0.830441  | 0.0344965 | 0.487019  | 1.92161   | 1.90551   | 0.698292  | 0.172941   | 7.2961     | 1.34331   | 3.37358   | 1.60125   | 0.816091  | 0.37776   | 0.538968  |
| TNIK      | 0.615845  | 0.433589  | 0.473752  | 0.435588  | 0.314167  | 0.787542  | 0.295791  | 0.379685   | 0.0359793  | 0.308039  | 0.348889  | 0.104066  | 0.326963  | 0.264858  | 0.642926  |
| TNIP1     | 11.9542   | 9.31786   | 9.8463    | 27.7236   | 18.7074   | 27.2091   | 10.841    | 8.80809    | 14.9027    | 18.5378   | 11.6915   | 10.2439   | 38.2752   | 12.3479   | 15.0017   |
| TNIP2     | 4.41524   | 3.44527   | 4.07512   | 8.55029   | 7.86331   | 12.7667   | 3.18799   | 2.57221    | 3.37288    | 6.69546   | 6.76524   | 3.15921   | 10.1426   | 6.00332   | 5.36281   |
| TNIP3     | 0.0674233 | 0.0162428 | 0.0348608 | 5.76699   | 0.248738  | 0.315755  | 0         | 0.0749003  | 0          | 0.380804  | 0.656471  | 0.0422128 | 1.04946   | 0.158573  | 0.823042  |
| TNK1      | 1.45733   | 2.00347   | 2.02463   | 3.0363    | 4.1707    | 3.97894   | 1.75437   | 1.28108    | 0.839202   | 1.91857   | 0.768927  | 1.37146   | 2.07471   | 1.6351    | 1.34219   |
| TNK2      | 4.94929   | 9.63957   | 8.71642   | 6.4287    | 26.8986   | 10.7342   | 7.21901   | 4.39739    | 8.10416    | 6.41083   | 4.13716   | 10.0742   | 7.70496   | 8.42974   | 6.55368   |
| TNK2-AS1  | 0.2898    | 0.761785  | 0.854723  | 0.384217  | 1.05366   | 0.600186  | 0.670314  | 0.414413   | 1.55519    | 0.422501  | 0.201541  | 0.796162  | 0.16922   | 0.473306  | 0.261458  |
| TNKS      | 5.03655   | 4.47584   | 4.6732    | 3.87348   | 2.91743   | 5.82619   | 4.50906   | 4.98817    | 3.28867    | 3.16221   | 4.05806   | 2.86198   | 2.71911   | 3.05571   | 4.10996   |
| TNKS1BP1  | 20.948    | 31.5993   | 33.0475   | 41.8966   | 66.8889   | 47.6635   | 30.719    | 20.2319    | 27.2461    | 26.9557   | 10.1136   | 39.0115   | 67.6933   | 32.2839   | 25.2299   |
| TNKS2     | 8.83449   | 9.06059   | 9.67654   | 10.3472   | 6.13668   | 9.80275   | 6.95767   | 9.31017    | 12.5744    | 11.7549   | 11.2473   | 8.56215   | 10.6693   | 9.10156   | 7.36349   |
| TNKS2-AS1 | 0.121645  | 0.205137  | 0.0754753 | 0.188039  | 0.188957  | 0.129474  | 0.0347227 | 0.135135   | 0.0740753  | 0.0381694 | 0.102992  | 0.0217601 | 0         | 0.0476829 | 0.0436746 |
| TNMD      | 1.15029   | 0.16544   | 0.184638  | 0         | 0         | 0.131568  | 0.392047  | 0.0305158  | 0          | 0.0215482 | 0.0581431 | 0         | 0         | 0.0179459 | 0.0739681 |
| TNN       | 0.0739395 | 0.0601175 | 0.019115  | 0.0285738 | 0.251242  | 0.0314792 | 0.0369345 | 0.229989   | 0.0506531  | 0.0812014 | 0.198238  | 0.284368  | 0.271324  | 0.156991  | 0.13937   |
| TNNC1     | 0.365767  | 0.272358  | 0.357604  | 0.1028    | 0.154953  | 0.226506  | 0.797275  | 0.0886535  | 0          | 0.0417341 | 0.150147  | 0         | 0         | 0         | 0         |
| TNNC2     | 0.271871  | 0.720455  | 0.787189  | 0.0700428 | 0.686254  | 0.144684  | 0.737233  | 0.332223   | 0.57944    | 0.0853066 | 0.306909  | 0.0486328 | 0.0438525 | 0.12433   | 0.146416  |
| TNNI1     | 0.097952  | 0.321288  | 0.330365  | 0.322239  | 0.251638  | 0.384946  | 0.176361  | 0.187496   | 0.165177   | 0.12294   | 0.0722995 | 0.191392  | 0.2771    | 0.114202  | 0.0541044 |
| TNNI2     | 0.372812  | 0.525063  | 0.37959   | 0.265981  | 0.93548   | 6.81288   | 6.09029   | 0.560703   | 0.209559   | 1.87167   | 1.16545   | 1.82626   | 0.333051  | 2.72798   | 0.24711   |
| TNNI3     | 0.0825555 | 0.397765  | 0.227652  | 0.39702   | 0.128237  | 0.0937265 | 0.502716  | 0.0489123  | 0.234601   | 0.172693  | 0.18639   | 0.118141  | 0.319586  | 0.287647  | 0.11856   |
| TNNI3K    | 3.64E-05  | 3.93E-06  | 0.0626259 | 6.22E-10  | 5.22E-40  | 0.0168692 | 1.63E-07  | 0.00966616 | 0.00011231 | 6.25E-13  | 2.41E-06  | 2.04E-17  | 5.48E-25  | 0.0109447 | 1.62E-06  |

|            |            |           |           |           |           |           |            |            |           |           |           |           |            |            |           |
|------------|------------|-----------|-----------|-----------|-----------|-----------|------------|------------|-----------|-----------|-----------|-----------|------------|------------|-----------|
| TNNT1      | 0.957172   | 2.71767   | 2.72902   | 3.59329   | 9.50503   | 0.247417  | 2.8883     | 1.26079    | 10.5748   | 4.80539   | 5.557     | 4.13376   | 8.1607     | 3.92168    | 0.785497  |
| TNNT2      | 2.1275     | 3.18353   | 2.69011   | 0.623868  | 4.19138   | 0.839493  | 1.7774     | 1.92149    | 1.36926   | 3.19125   | 1.01535   | 3.09407   | 0.546829   | 1.65433    | 0.571327  |
| TNNT3      | 0.631995   | 0.877264  | 0.933626  | 0.0930413 | 0.350609  | 0.243442  | 0.704411   | 0.58841    | 0.0916308 | 0.0755446 | 0.067947  | 0.236872  | 0.0970857  | 0.133696   | 0.259321  |
| TNP1       | 0.230853   | 0.19465   | 0.143234  | 0         | 0.0896488 | 0.0982843 | 0.329476   | 0.307745   | 0         | 0         | 0         | 0         | 0          | 0          | 0         |
| TNP2       | 0          | 0         | 0         | 0         | 0         | 0         | 0          | 0          | 0         | 0         | 0         | 0         | 0          | 0.0202606  | 0         |
| TNPO1      | 5.80483    | 4.27479   | 4.15486   | 7.46856   | 1.50938   | 6.93548   | 3.95556    | 5.89731    | 4.07028   | 7.05099   | 8.15527   | 3.64314   | 9.48466    | 6.21848    | 5.80069   |
| TNPO2      | 6.56681    | 9.38345   | 9.86778   | 7.78655   | 11.1039   | 15.134    | 9.32983    | 6.46594    | 7.34632   | 6.75558   | 5.89406   | 7.25913   | 8.27647    | 7.76732    | 6.68133   |
| TNPO3      | 5.73897    | 6.02269   | 5.6394    | 8.8659    | 5.77798   | 8.94148   | 5.38538    | 4.96092    | 6.95248   | 6.33914   | 5.22741   | 5.54034   | 10.8015    | 6.44857    | 4.57879   |
| TNR        | 0.00891832 | 0         | 0         | 0.0229765 | 0         | 0.0151877 | 0.00509133 | 0.00396293 | 0         | 0.0391769 | 0.0453045 | 0         | 0          | 0.00466111 | 0.0320196 |
| TNRC17     | 1.16213    | 1.39983   | 1.51993   | 0.5874    | 1.74502   | 0.636134  | 1.39007    | 1.25412    | 0.080877  | 0.430633  | 0.137438  | 1.05724   | 0.0571278  | 1.53292    | 1.88355   |
| TNRC18     | 9.46303    | 11.3005   | 11.9003   | 11.5074   | 28.1199   | 22.991    | 12.5595    | 7.9916     | 4.94915   | 5.38069   | 4.08321   | 6.82902   | 12.567     | 9.86527    | 14.6309   |
| TNRC18P1   | 0.355105   | 0.289092  | 0.212728  | 0.694036  | 0.79887   | 0.291941  | 0.391466   | 0.217647   | 0.283348  | 0.199794  | 0.152054  | 0.490651  | 0.0553029  | 0.29439    | 0.615488  |
| TNRC6A     | 8.30753    | 6.7673    | 6.73457   | 4.42562   | 3.65525   | 6.15957   | 5.75732    | 6.36656    | 3.18322   | 3.96733   | 2.88584   | 4.31651   | 5.01028    | 4.90572    | 5.72594   |
| TNRC6B     | 7.51296    | 7.41059   | 7.31597   | 4.79417   | 5.00921   | 7.64592   | 7.0431     | 7.10063    | 3.66667   | 3.3529    | 3.54258   | 3.42352   | 4.72524    | 3.70718    | 5.52901   |
| TNRC6C     | 2.87298    | 1.8373    | 1.89489   | 1.06144   | 1.87931   | 3.7471    | 2.11107    | 1.59745    | 0.519664  | 0.69552   | 0.634728  | 0.679204  | 1.39764    | 1.05446    | 1.9659    |
| TNRC6C-AS1 | 0.776081   | 1.0872    | 0.889121  | 1.42692   | 2.2715    | 1.52885   | 0.552466   | 0.634851   | 0.165187  | 0.545043  | 0.412961  | 0.65897   | 0.34461    | 0.646563   | 1.12097   |
| TNS1       | 25.8799    | 12.7152   | 15.357    | 8.2252    | 16.3556   | 57.2865   | 36.429     | 13.4902    | 2.97872   | 7.22489   | 9.64854   | 3.03759   | 11.2999    | 7.74754    | 31.5899   |
| TNS2       | 11.0372    | 5.12574   | 6.1159    | 3.8335    | 11.2594   | 20.7062   | 9.96367    | 5.93608    | 0.953854  | 3.42969   | 5.31146   | 2.16554   | 3.85405    | 4.70531    | 15.6643   |
| TNS3       | 6.03943    | 3.31095   | 3.20936   | 7.24128   | 7.91844   | 11.0533   | 4.65489    | 3.18045    | 0.947168  | 4.30099   | 7.51395   | 1.17381   | 5.93508    | 3.33112    | 9.1533    |
| TNS4       | 23.5977    | 38.9781   | 47.3843   | 48.5777   | 19.034    | 42.5963   | 33.0819    | 32.0132    | 32.048    | 23.2047   | 13.7172   | 36.7301   | 38.0848    | 30.5597    | 16.6508   |
| TNXA       | 0.037025   | 0.0255846 | 0.0584084 | 5.39E-05  | 0.036926  | 9.58E-06  | 0.0153729  | 0.0321927  | 5.87E-09  | 3.64E-08  | 0.0212784 | 5.85E-06  | 0.00875451 | 8.11E-06   | 0.0440865 |
| TNXB       | 1.89808    | 1.93271   | 3.11271   | 0.258736  | 1.39986   | 1.64278   | 10.8501    | 1.6985     | 0.0402842 | 0.233126  | 0.146665  | 0.504567  | 0.702061   | 0.587763   | 1.8275    |
| TOB1       | 17.4725    | 16.6911   | 19.0164   | 19.0295   | 14.0659   | 19.9603   | 18.3224    | 17.0146    | 61.845    | 20.8704   | 31.5834   | 22.5384   | 27.9894    | 12.2018    | 6.23016   |
| TOB1-AS1   | 0.1472     | 0.259667  | 0.230017  | 0.11648   | 0.40067   | 0.271468  | 0.298787   | 0.15989    | 0.457558  | 0.0982492 | 0.240023  | 0.244633  | 0.136911   | 0.0586367  | 0.0234886 |
| TOB2       | 7.422      | 10.9675   | 11.1057   | 9.1271    | 19.144    | 14.0165   | 11.5826    | 6.42935    | 23.6043   | 9.6017    | 11.6235   | 9.71441   | 10.6959    | 9.99441    | 7.13508   |
| TOB2P1     | 0.10953    | 0.0248345 | 0.0319803 | 0.0265586 | 0.0500406 | 0.137152  | 0.0735634  | 0.0629855  | 0         | 0.0485193 | 0.145466  | 0.0276606 | 0.0997669  | 0.0336736  | 0.101782  |

|            |           |           |           |           |           |           |          |           |           |           |            |           |            |           |           |
|------------|-----------|-----------|-----------|-----------|-----------|-----------|----------|-----------|-----------|-----------|------------|-----------|------------|-----------|-----------|
| TOE1       | 1.72995   | 1.38377   | 1.45602   | 2.78179   | 1.42775   | 2.36439   | 1.5244   | 1.22959   | 1.57896   | 1.14148   | 1.85675    | 1.0641    | 2.58435    | 1.33496   | 1.47285   |
| TOGARAM1   | 3.04625   | 2.91316   | 3.24896   | 2.0328    | 2.14985   | 2.43895   | 2.41514  | 2.54876   | 1.48139   | 1.77738   | 2.17445    | 1.61818   | 1.107      | 1.88109   | 1.9825    |
| TOGARAM2   | 0.0587056 | 0.0534277 | 0.0971308 | 0.0604978 | 0.0810578 | 0.138853  | 0.320246 | 0.0753605 | 0.0238323 | 0.0163737 | 0.00736348 | 0.107347  | 0.00841701 | 0.0477277 | 0.0936763 |
| TOLLIP     | 9.07296   | 13.4492   | 14.8974   | 20.118    | 31.1795   | 24.7874   | 14.2198  | 10.4354   | 32.4068   | 17.2765   | 18.2818    | 18.7819   | 28.9258    | 14.6198   | 7.27982   |
| TOLLIP-AS1 | 0.694292  | 0.32337   | 0.287183  | 0.286195  | 0.575186  | 0.610886  | 0.634176 | 0.43192   | 0.253671  | 0.319516  | 0.287382   | 0.182154  | 0.0895907  | 0.084669  | 0.199418  |
| TOM1       | 10.7329   | 10.7796   | 10.8201   | 17.0582   | 31.0519   | 20.2366   | 14.1173  | 8.60176   | 38.9679   | 20.4305   | 21.1072    | 16.7103   | 27.9057    | 12.4261   | 12.1494   |
| TOM1L1     | 3.95114   | 3.95864   | 3.45124   | 5.16485   | 2.30762   | 3.48927   | 3.53959  | 3.06125   | 8.19586   | 6.15686   | 5.80453    | 5.57136   | 8.38145    | 4.6372    | 1.17705   |
| TOM1L2     | 9.82262   | 14.606    | 14.8394   | 12.4728   | 21.4654   | 15.0829   | 16.1591  | 9.90155   | 18.6278   | 10.7368   | 7.91962    | 15.1098   | 15.2024    | 10.5076   | 6.54015   |
| TOMM20     | 26.4453   | 20.1305   | 22.098    | 23.4903   | 7.43409   | 29.6085   | 14.8461  | 22.6943   | 22.2487   | 17.1021   | 24.6129    | 14.4559   | 20.1722    | 16.3049   | 10.1231   |
| TOMM20L    | 0.213377  | 0.0783325 | 0.0941585 | 0.0390977 | 0         | 0.0969148 | 0.137396 | 0.137692  | 0.046206  | 0         | 0          | 0.0542933 | 0.0250244  | 0.0594864 | 0         |
| TOMM22     | 10.3212   | 7.31788   | 6.70581   | 18.1077   | 9.56732   | 17.834    | 10.0407  | 5.86155   | 10.9554   | 11.0795   | 21.9576    | 8.71804   | 13.8923    | 10.6922   | 5.71212   |
| TOMM34     | 1.70552   | 1.54553   | 1.85008   | 3.73632   | 1.87729   | 4.96257   | 2.78554  | 1.88712   | 2.65487   | 2.89193   | 4.3734     | 2.32754   | 4.62018    | 3.08735   | 2.46556   |
| TOMM40     | 9.00292   | 6.05181   | 5.93914   | 19.8528   | 12.7478   | 23.5992   | 8.57824  | 4.64541   | 8.97815   | 11.1868   | 19.2533    | 8.16947   | 25.2893    | 14.8541   | 7.54365   |
| TOMM40L    | 1.70726   | 1.4546    | 1.61126   | 3.08053   | 3.0005    | 3.49894   | 1.3732   | 1.03769   | 2.05268   | 2.00553   | 2.61167    | 1.29657   | 2.72662    | 2.22592   | 1.30785   |
| TOMM5      | 9.66637   | 7.405     | 7.25629   | 19.4486   | 4.56812   | 14.5454   | 7.15345  | 6.97708   | 20.0881   | 19.6749   | 42.1759    | 9.62464   | 18.1492    | 15.8378   | 7.63885   |
| TOMM6      | 20.3789   | 15.6031   | 14.0565   | 35.523    | 12.5864   | 28.1284   | 15.842   | 12.2587   | 24.3241   | 27.6524   | 55.2799    | 23.2492   | 20.7891    | 20.622    | 11.1307   |
| TOMM7      | 62.0317   | 38.1041   | 37.9716   | 63.6805   | 50.7165   | 63.1149   | 43.2824  | 35.0098   | 53.0787   | 64.9174   | 169.766    | 44.2578   | 29.5377    | 38.3829   | 25.3859   |
| TOMM70     | 7.09432   | 6.33443   | 6.78245   | 8.88956   | 2.7618    | 7.95532   | 4.41506  | 7.19215   | 6.23409   | 5.20398   | 5.99286    | 4.16882   | 8.21322    | 5.76993   | 5.24786   |
| TONSL      | 0.436285  | 0.752868  | 0.690564  | 2.31199   | 1.80673   | 1.76206   | 1.00393  | 0.549168  | 0.387041  | 0.556669  | 0.237243   | 1.02598   | 1.42985    | 1.1277    | 0.945138  |
| TONSL-AS1  | 0.0836264 | 0.163486  | 0.163139  | 0.081809  | 0.230836  | 0.232594  | 0.048239 | 0.051591  | 0.164966  | 0.0728601 | 0.152909   | 0.306692  | 0.237211   | 0.275043  | 0.18008   |
| TOP1       | 7.48227   | 8.0275    | 7.8759    | 21.0373   | 5.74287   | 16.3913   | 5.33537  | 6.56289   | 17.467    | 17.8489   | 15.9708    | 13.5846   | 27.2568    | 16.5007   | 9.57775   |
| TOP1MT     | 1.90925   | 3.10532   | 3.49926   | 5.68519   | 5.29242   | 5.29922   | 2.96276  | 1.46242   | 2.23532   | 1.94617   | 1.54801    | 2.28693   | 3.64788    | 4.53724   | 2.04508   |
| TOP1P1     | 0.172575  | 0.221708  | 0.205737  | 0.138166  | 0.0890258 | 0.122778  | 0.16448  | 0.231217  | 0.0232848 | 0.0603968 | 0.196478   | 0.0897448 | 0.0680027  | 0.0501131 | 0.0561685 |
| TOP1P2     | 0         | 0         | 0         | 0         | 0         | 0         | 0        | 0         | 0         | 0         | 0          | 0         | 0          | 0         | 0         |
| TOP2A      | 1.38786   | 1.5816    | 1.29789   | 8.25387   | 0.481155  | 8.43662   | 1.38252  | 1.18694   | 1.3718    | 5.22572   | 7.03889    | 2.62799   | 6.24991    | 7.17787   | 2.71529   |
| TOP2B      | 12.8775   | 11.8664   | 12.5031   | 12.5357   | 5.30228   | 14.5792   | 5.99305  | 11.3731   | 8.0214    | 10.2152   | 10.86      | 6.56324   | 11.5915    | 9.16925   | 10.4588   |

|          |          |          |           |           |           |          |           |          |           |           |          |           |          |          |          |
|----------|----------|----------|-----------|-----------|-----------|----------|-----------|----------|-----------|-----------|----------|-----------|----------|----------|----------|
| TOP3A    | 2.19226  | 2.06755  | 2.13968   | 2.9184    | 2.70169   | 3.75397  | 2.2622    | 1.96057  | 1.35601   | 1.70992   | 1.79166  | 1.6651    | 2.81096  | 2.44152  | 2.67161  |
| TOP3B    | 1.67077  | 2.07726  | 1.87488   | 2.21604   | 3.60228   | 2.90361  | 2.46126   | 1.52231  | 2.25305   | 1.38256   | 1.4458   | 2.32308   | 1.9111   | 1.91447  | 1.97556  |
| TOPAZ1   | 0        | 0        | 0         | 0         | 0         | 0        | 0         | 0        | 0         | 0         | 0        | 0         | 0        | 0        | 0        |
| TOPBP1   | 5.21942  | 3.78467  | 3.85123   | 5.41436   | 1.51182   | 5.3647   | 2.96004   | 3.80428  | 3.37767   | 3.74032   | 4.34619  | 2.49594   | 5.12359  | 3.55395  | 3.84687  |
| TOPORS   | 4.09285  | 3.81579  | 3.87221   | 4.03492   | 1.47311   | 3.72116  | 2.43153   | 2.61223  | 5.23455   | 4.71238   | 4.63285  | 2.67855   | 5.05956  | 3.53327  | 3.40886  |
| TOR1A    | 3.9341   | 4.17224  | 4.1273    | 7.5988    | 4.64301   | 8.00966  | 4.20325   | 3.21308  | 9.19446   | 6.42728   | 11.5494  | 4.24602   | 9.12498  | 5.11736  | 5.66565  |
| TOR1AIP1 | 7.43852  | 5.127    | 5.99775   | 7.18904   | 3.21006   | 7.78718  | 5.58366   | 5.47933  | 8.60031   | 10.9481   | 11.3163  | 5.4531    | 17.3739  | 8.46139  | 7.92791  |
| TOR1AIP2 | 3.0713   | 3.36072  | 3.39646   | 5.90206   | 2.23412   | 4.35611  | 3.09986   | 2.98729  | 7.21153   | 5.88821   | 5.06732  | 4.52162   | 8.50938  | 4.69416  | 3.95402  |
| TOR1B    | 2.39492  | 2.54393  | 2.72667   | 4.02381   | 2.57832   | 3.98426  | 2.88787   | 1.96685  | 4.30294   | 4.03761   | 5.12162  | 2.63548   | 7.25679  | 3.51137  | 2.73565  |
| TOR2A    | 1.1969   | 1.25462  | 1.22447   | 2.42921   | 2.98039   | 2.96407  | 1.42917   | 0.844466 | 1.84714   | 1.59397   | 2.60947  | 1.34672   | 1.963    | 1.50419  | 1.08907  |
| TOR3A    | 4.29706  | 3.19492  | 3.96084   | 6.27147   | 5.96329   | 7.83783  | 3.15046   | 2.49099  | 3.12141   | 4.38031   | 7.33783  | 2.69228   | 5.18601  | 3.95016  | 3.75906  |
| TOR4A    | 0.563077 | 0.386546 | 0.592858  | 1.3774    | 3.13638   | 4.6105   | 0.649398  | 0.414486 | 0.263223  | 4.82248   | 2.22154  | 2.16506   | 11.0016  | 4.50054  | 2.5158   |
| TOX      | 0.380956 | 0.137663 | 0.250269  | 0.15588   | 0.156641  | 0.228973 | 0.27505   | 0.209112 | 0.0409377 | 0.0984403 | 0.240323 | 0.0881889 | 0.173499 | 0.076128 | 0.297687 |
| TOX2     | 0.532684 | 0.355369 | 0.359318  | 0.430711  | 0.496465  | 0.949014 | 0.486561  | 0.247627 | 0.159692  | 0.617144  | 0.943631 | 0.42806   | 0.676794 | 0.663886 | 1.31816  |
| TOX3     | 0.158195 | 0.065012 | 0.0808317 | 0.0191794 | 0.0144548 | 0.130739 | 0.0849987 | 0.219156 | 0.0169998 | 0         | 0        | 0         | 0        | 0        | 0        |
| TOX4     | 8.63757  | 8.62296  | 9.54289   | 11.8874   | 7.69831   | 13.6082  | 9.70049   | 7.52146  | 19.3082   | 12.0617   | 12.1     | 8.77729   | 15.23    | 7.81652  | 6.76001  |
| TP53     | 9.13618  | 11.8274  | 11.637    | 16.0817   | 13.4143   | 22.3139  | 15.5234   | 10.3434  | 10.2353   | 6.03815   | 13.1136  | 8.27441   | 5.591    | 6.93015  | 8.5612   |
| TP53AIP1 | 2.64473  | 5.243    | 2.80029   | 4.20264   | 8.37315   | 4.19447  | 2.63548   | 1.78823  | 1.74572   | 3.1167    | 3.81363  | 2.99024   | 1.8757   | 2.99312  | 0.792492 |
| TP53BP1  | 3.81462  | 3.63873  | 3.62776   | 3.52503   | 3.32771   | 4.70792  | 3.29696   | 2.7819   | 2.0158    | 2.28397   | 2.57143  | 1.83702   | 2.36694  | 2.78509  | 4.55441  |
| TP53BP2  | 4.96789  | 4.27501  | 4.94527   | 7.47011   | 3.58816   | 5.79366  | 4.30377   | 3.82234  | 5.29692   | 6.73262   | 7.17382  | 4.90663   | 13.3141  | 6.38753  | 4.40697  |
| TP53I11  | 3.32266  | 3.74474  | 4.71268   | 8.47099   | 4.62268   | 20.1771  | 5.68508   | 4.62618  | 1.02632   | 5.77795   | 6.67008  | 3.16994   | 9.02232  | 5.8213   | 6.64591  |
| TP53I13  | 3.44361  | 3.39157  | 3.51911   | 4.51419   | 11.4455   | 7.30891  | 2.93439   | 2.08152  | 3.20712   | 8.89842   | 9.00393  | 4.76491   | 9.54878  | 5.40594  | 4.67272  |
| TP53I3   | 2.53732  | 1.86393  | 1.27072   | 7.0001    | 7.33476   | 5.28013  | 2.20849   | 1.54712  | 6.11105   | 14.1237   | 17.006   | 6.00831   | 10.3436  | 5.90508  | 5.62109  |
| TP53INP1 | 4.82766  | 3.95955  | 3.55681   | 3.82303   | 2.35336   | 4.65801  | 4.17026   | 5.20377  | 8.90136   | 4.50198   | 7.61764  | 3.2521    | 2.6577   | 2.43322  | 3.61648  |
| TP53INP2 | 4.91715  | 3.22078  | 2.51904   | 5.73116   | 5.7991    | 13.986   | 5.11758   | 2.79912  | 20.1452   | 7.62973   | 8.85767  | 7.19429   | 9.54951  | 4.35126  | 8.21613  |
| TP53RK   | 2.31225  | 2.08931  | 2.43506   | 2.75759   | 2.33408   | 3.6339   | 2.25618   | 2.24396  | 4.18648   | 2.70404   | 4.98811  | 2.2927    | 3.69642  | 2.59626  | 2.51268  |

|           |            |            |           |           |           |            |            |            |           |           |           |           |                 |            |          |
|-----------|------------|------------|-----------|-----------|-----------|------------|------------|------------|-----------|-----------|-----------|-----------|-----------------|------------|----------|
| TP53TG1   | 4.56986    | 3.99474    | 3.21343   | 6.25673   | 3.44787   | 6.14249    | 3.57786    | 2.1757     | 7.15573   | 4.58851   | 10.8335   | 3.73698   | 2.37982         | 2.59313    | 1.96887  |
| TP53TG3   | 3.15E-13   | 0.00255727 | 0         | 1.83E-18  | 1.64E-13  | 0.00122929 | 0.00233593 | 0.00363642 | 0.017868  | 0         | 0         | 5.15E-11  | 0.00056884<br>9 | 0.00471555 | 0        |
| TP53TG3B  | 3.15E-13   | 0.00255727 | 0         | 1.83E-18  | 1.64E-13  | 0.00122929 | 0.00233593 | 0.00363642 | 0.017868  | 0         | 0         | 5.15E-11  | 0.00056884<br>9 | 0.00471555 | 0        |
| TP53TG3C  | 0.0198891  | 0.00200478 | 0         | 0         | 0.0103481 | 0          | 0          | 0          | 2.04E-13  | 0         | 0         | 0.0209407 | 0.0182766       | 3.63E-08   | 0        |
| TP53TG3D  | 0.027105   | 0.0634106  | 0.0111311 | 0.0277321 | 1.75E-13  | 0.011457   | 0          | 0          | 0.324936  | 0         | 0         | 0.131002  | 0.0132509       | 0.0555514  | 0        |
| TP53TG3E  | 7.05E-13   | 5.74E-21   | 0         | 4.09E-18  | 3.67E-13  | 0.00274586 | 0          | 0          | 7.67E-26  | 0         | 0         | 2.79E-26  | 0.00127064<br>5 | 0.00089908 | 0        |
| TP53TG3F  | 8.42E-13   | 6.85E-21   | 0         | 4.89E-18  | 4.38E-13  | 0.00327712 | 0          | 0          | 9.16E-26  | 0         | 0         | 3.33E-26  | 0.00151648      | 0.00107304 | 0        |
| TP53TG3HP | 0          | 0          | 0         | 0         | 0         | 0          | 0          | 0          | 0         | 0         | 0         | 0         | 0               | 0          | 0        |
| TP53TG5   | 0.0591307  | 0.0717555  | 0.21708   | 0.171977  | 0.141886  | 0.0930215  | 0.137137   | 6.57E-20   | 1.81E-17  | 0.0549559 | 0.262231  | 0.160064  | 0.187757        | 0.182495   | 0.267345 |
| TP63      | 18.7695    | 30.9367    | 35.3301   | 55.0827   | 14.1963   | 31.5057    | 20.0975    | 34.1721    | 33.1066   | 28.5879   | 23.4899   | 41.431    | 51.5384         | 33.7096    | 10.5766  |
| TP73      | 1.31784    | 2.88495    | 2.27688   | 2.36375   | 5.06633   | 3.93977    | 1.59448    | 1.42789    | 0.856255  | 0.68548   | 0.923078  | 1.10421   | 0.956332        | 0.681252   | 0.209551 |
| TP73-AS1  | 1.55085    | 1.62265    | 1.8932    | 1.31795   | 2.53835   | 3.3306     | 1.85352    | 1.30524    | 0.45519   | 0.700573  | 0.96689   | 0.676703  | 0.653097        | 1.01372    | 1.89576  |
| TPBG      | 5.59776    | 5.36846    | 3.95904   | 8.12833   | 14.1852   | 12.6384    | 3.11587    | 5.11084    | 12.0217   | 12.0965   | 17.1389   | 9.86815   | 17.6853         | 10.2763    | 7.55156  |
| TPBGL     | 0.0909191  | 0.0119472  | 0.0478639 | 0.22146   | 0.0770339 | 0.563029   | 0.0849342  | 0.102838   | 0.0100663 | 0.134861  | 0.354562  | 0.0118282 | 0.154651        | 0.0302389  | 0.154312 |
| TPCN1     | 4.70895    | 3.83627    | 4.02739   | 3.78999   | 7.63272   | 8.66825    | 5.92633    | 4.12767    | 4.04961   | 2.90754   | 4.86646   | 3.13611   | 3.57146         | 4.12172    | 6.55578  |
| TPCN2     | 1.98001    | 2.59132    | 2.73889   | 1.73201   | 3.74798   | 3.66596    | 3.15448    | 1.82105    | 1.12159   | 1.72802   | 1.72057   | 1.67703   | 1.71718         | 2.44992    | 2.71789  |
| TPD52     | 3.42565    | 4.21577    | 4.35002   | 4.19368   | 1.82483   | 3.72115    | 2.7041     | 5.45404    | 4.93319   | 4.68288   | 5.76094   | 4.71066   | 5.89695         | 2.80469    | 1.47792  |
| TPD52L1   | 6.61825    | 4.70494    | 3.10599   | 8.18435   | 4.18976   | 11.0581    | 4.96162    | 3.23311    | 11.5582   | 6.57212   | 11.2019   | 7.06458   | 6.19297         | 5.09924    | 1.55422  |
| TPD52L2   | 13.4111    | 11.5228    | 11.6546   | 34.4971   | 21.4243   | 41.5465    | 12.9181    | 10.0382    | 32.0287   | 30.3032   | 46.8933   | 18.5036   | 46.4137         | 22.0843    | 15.5231  |
| TPD52L3   | 0.00662176 | 0          | 0         | 0         | 0         | 0.00563834 | 0          | 0          | 0         | 0         | 0         | 0         | 0               | 0          | 0        |
| TPGS1     | 2.70072    | 2.06197    | 2.16548   | 3.18994   | 6.64769   | 5.58985    | 2.49059    | 1.2924     | 3.947     | 3.93724   | 9.82642   | 1.93243   | 4.2892          | 2.73616    | 3.69956  |
| TPGS2     | 2.43649    | 2.87534    | 2.65431   | 4.72295   | 2.72162   | 5.15725    | 3.66819    | 2.42972    | 5.10979   | 6.05152   | 8.42837   | 3.82986   | 5.92004         | 3.89427    | 2.9549   |
| TPH1      | 0.357028   | 0.393192   | 0.253164  | 0.223385  | 0.0396134 | 0.0760011  | 0.174704   | 0.396621   | 0.0465878 | 0.0480114 | 0.0143943 | 0.027371  | 0.0740419       | 0.113292   | 0.18312  |

|           |            |            |          |           |          |          |           |          |           |          |          |           |           |           |          |
|-----------|------------|------------|----------|-----------|----------|----------|-----------|----------|-----------|----------|----------|-----------|-----------|-----------|----------|
| TPH2      | 0.00980638 | 0.00472486 | 0        | 0         | 0        | 0.02505  | 0         | 0        | 0         | 0        | 0        | 0         | 0         | 0         | 0        |
| TPI1      | 57.706     | 39.0804    | 38.5691  | 165.639   | 87.0626  | 172.217  | 54.5424   | 37.966   | 147.329   | 168.569  | 258.905  | 106.332   | 223.72    | 123.929   | 61.5645  |
| TPI1P2    | 0.137688   | 0.182435   | 0.189842 | 0.390201  | 0.196054 | 0.381028 | 0.104805  | 0.183548 | 0.209611  | 0.172813 | 0.155433 | 0.229879  | 0.333133  | 0.143923  | 0.197737 |
| TPI1P3    | 0.383021   | 0.184432   | 0.332574 | 0.315639  | 0.356861 | 0.326533 | 0.393162  | 0.187158 | 0.256629  | 0.288343 | 0.281127 | 0.192125  | 0.284673  | 0.290048  | 0.219306 |
| TPK1      | 0.449313   | 0.236469   | 0.263051 | 0.612624  | 0.12885  | 0.612134 | 0.276236  | 0.301019 | 0.0336746 | 0.216897 | 0.561841 | 0.0741912 | 0.731425  | 0.249281  | 0.416943 |
| TPM1      | 13.0541    | 5.56469    | 6.24302  | 3.04184   | 7.3396   | 8.87366  | 7.17409   | 6.03018  | 2.58377   | 13.043   | 27.7415  | 2.11581   | 7.6759    | 7.38404   | 19.9443  |
| TPM1-AS   | 3.31478    | 1.42727    | 1.69714  | 0.211985  | 2.01482  | 0.896649 | 3.18372   | 1.74033  | 0.116711  | 0.52494  | 0.621188 | 0.462518  | 0.27835   | 1.27961   | 4.06327  |
| TPM2      | 24.8337    | 5.02278    | 6.37372  | 9.80353   | 29.2575  | 54.8371  | 24.6442   | 4.82176  | 2.90093   | 26.408   | 65.8471  | 5.08146   | 11.602    | 19.7498   | 36.4881  |
| TPM3      | 7.04932    | 4.5939     | 5.10121  | 14.9173   | 5.48563  | 16.6367  | 5.11388   | 5.53125  | 6.18971   | 14.561   | 16.0852  | 7.76487   | 24.715    | 12.1766   | 9.06673  |
| TPM3P9    | 1.27082    | 1.67336    | 1.37127  | 1.32588   | 2.69741  | 1.68697  | 1.34283   | 1.15044  | 0.394137  | 0.584505 | 0.463347 | 0.598671  | 1.08984   | 1.415     | 1.55299  |
| TPM4      | 52.4597    | 50.03      | 59.6028  | 174.4     | 56.7306  | 178.272  | 41.8138   | 40.9976  | 173.623   | 189.784  | 219.304  | 113.621   | 309.936   | 168.058   | 129.669  |
| TPMT      | 2.3764     | 1.82589    | 2.14942  | 3.89874   | 1.19109  | 3.11887  | 1.41092   | 2.37103  | 4.76964   | 7.85823  | 7.5901   | 3.59119   | 9.80857   | 3.82877   | 2.53003  |
| TPO       | 0.941612   | 0.173675   | 0.194742 | 0.379046  | 0.205685 | 0.63891  | 0.965912  | 0.804137 | 0.0089592 | 0.101563 | 0.274045 | 0.015791  | 0.0569553 | 0.0384475 | 2.03898  |
| TPP1      | 7.39556    | 7.3633     | 7.52708  | 18.6719   | 11.8542  | 22.3554  | 10.2241   | 9.45424  | 7.67466   | 13.5163  | 22.6575  | 8.46488   | 18.744    | 8.96982   | 16.3783  |
| TPP2      | 5.48674    | 4.45499    | 4.84001  | 5.48625   | 2.05275  | 4.36214  | 3.65276   | 4.48589  | 3.52957   | 4.36176  | 4.73979  | 3.05816   | 4.73803   | 4.15056   | 5.03287  |
| TPPP      | 1.19904    | 3.96625    | 5.9357   | 1.12476   | 1.68344  | 0.562842 | 4.69067   | 2.47959  | 0.449323  | 3.46325  | 0.143166 | 5.07618   | 4.33175   | 2.17728   | 1.31908  |
| TPPP2     | 0.0290377  | 0          | 0        | 0         | 0        | 0        | 0         | 0        | 0         | 0        | 0        | 0         | 0         | 0         | 0        |
| TPPP3     | 15.8243    | 26.4963    | 38.5579  | 9.96673   | 15.3042  | 2.07161  | 43.9413   | 15.4392  | 6.07303   | 47.2919  | 18.7031  | 88.6451   | 63.6179   | 33.8178   | 18.423   |
| TPR       | 10.9751    | 9.13259    | 8.98699  | 8.37449   | 3.83323  | 12.55    | 3.51242   | 5.54942  | 7.60235   | 8.77089  | 7.88342  | 6.93663   | 11.331    | 8.52916   | 9.32762  |
| TPRA1     | 2.15682    | 2.3632     | 2.48345  | 3.77902   | 5.75359  | 3.86178  | 2.77898   | 1.79366  | 7.01971   | 2.45198  | 5.20325  | 2.22732   | 3.44465   | 2.47415   | 2.20205  |
| TPRG1     | 2.43012    | 4.37065    | 5.7664   | 3.519     | 2.83111  | 2.27073  | 5.20097   | 5.00314  | 10.3236   | 2.88325  | 5.66519  | 2.83915   | 1.15959   | 1.24032   | 0.590747 |
| TPRG1-AS1 | 0.69728    | 0.655922   | 0.247217 | 1.19761   | 0.670501 | 0.678542 | 0.454932  | 0.383614 | 0.242631  | 0.458416 | 0.262381 | 0.451406  | 0.36419   | 0.190891  | 0.429164 |
| TPRG1-AS2 | 6.97E-22   | 0.130136   | 0.222155 | 0.0702572 | 1.58E-25 | 0.271632 | 0.0662698 | 0.232863 | 0.0905711 | 1.07E-25 | 2.59E-27 | 2.80E-28  | 1.40E-44  | 1.16E-21  | 5.05E-13 |
| TPRG1L    | 12.3487    | 10.0159    | 9.82127  | 14.8581   | 14.2937  | 19.9983  | 11.3557   | 7.59315  | 28.6386   | 21.112   | 20.4096  | 15.2836   | 22.6099   | 10.4609   | 6.65549  |
| TPRKB     | 3.01207    | 1.77492    | 1.82851  | 4.17592   | 0.370263 | 2.63854  | 0.890696  | 2.7539   | 2.42797   | 2.96453  | 5.13706  | 1.27142   | 4.05451   | 2.41232   | 1.55601  |
| TPRN      | 2.19907    | 3.2295     | 3.58752  | 2.03959   | 6.87283  | 4.43404  | 3.21386   | 1.79019  | 5.27075   | 1.98725  | 2.47255  | 2.33507   | 2.38364   | 1.99524   | 1.30116  |



|               |            |            |           |           |           |           |           |           |           |           |            |           |           |            |           |
|---------------|------------|------------|-----------|-----------|-----------|-----------|-----------|-----------|-----------|-----------|------------|-----------|-----------|------------|-----------|
| TPRX1         | 0          | 0          | 0         | 0         | 0         | 0         | 0         | 0         | 0         | 0         | 0          | 0         | 0         | 0.00657725 | 0         |
| TPRXL         | 0.655378   | 0.843702   | 0.304974  | 1.78344   | 0.811242  | 1.30792   | 0.350761  | 0.482338  | 0.586161  | 1.37523   | 1.47968    | 1.48742   | 2.43137   | 0.995476   | 0.308833  |
| TPSAB1        | 45.501     | 12.3108    | 17.4136   | 22.343    | 26.4254   | 2.1076    | 19.216    | 28.26     | 13.7691   | 13.8097   | 37.5065    | 8.17656   | 15.5747   | 9.02595    | 22.3683   |
| TPSB2         | 2.77209    | 26.5735    | 39.1746   | 11.5743   | 65.9525   | 4.18281   | 38.2086   | 5.816     | 16.7592   | 16.8629   | 58.1248    | 17.5166   | 33.5872   | 22.7346    | 13.2497   |
| TPSD1         | 0          | 0.670211   | 0.857263  | 0.196545  | 0.926678  | 0.0233895 | 0.437345  | 0.0968363 | 0         | 0.0342764 | 0.0307626  | 0.369912  | 0.123253  | 0.471189   | 0         |
| TPSG1         | 0.31736    | 0.211913   | 0.253297  | 0.0450031 | 0.520531  | 0.0370407 | 0.937159  | 0.417859  | 0.0255074 | 0.0525736 | 0.189145   | 0.149859  | 0         | 0.171817   | 0.554877  |
| TPST1         | 5.11156    | 3.24027    | 3.0898    | 4.96527   | 3.61069   | 4.65988   | 4.23866   | 3.34938   | 3.22946   | 3.69636   | 9.286      | 1.50981   | 3.56004   | 2.74819    | 5.39625   |
| TPST2         | 2.11627    | 2.07858    | 1.81819   | 2.82513   | 3.67331   | 2.62859   | 2.21678   | 1.88766   | 2.88476   | 3.54802   | 6.80752    | 2.8618    | 4.9982    | 2.73773    | 2.91097   |
| TPT1          | 184.607    | 122.041    | 126.498   | 274.349   | 60.3324   | 183.947   | 107.139   | 149.149   | 299.98    | 308.809   | 493.684    | 203.227   | 308.705   | 193.054    | 103.453   |
| TPT1-AS1      | 2.92478    | 3.39419    | 3.87758   | 2.56852   | 2.97508   | 1.77175   | 3.10619   | 1.82442   | 0.741071  | 2.0431    | 2.1071     | 1.71781   | 0.690369  | 2.16858    | 4.01952   |
| TPTE          | 0          | 0          | 0         | 0         | 0         | 0         | 0         | 0         | 0         | 0         | 0          | 0         | 0.0162204 | 0.0394713  | 0         |
| TPTE2         | 0.0320985  | 0.019332   | 0.0265542 | 0         | 0.012465  | 0.0341644 | 0.0183245 | 0.0142633 | 0         | 0         | 0.00905881 | 0         | 0         | 0          | 0.0230488 |
| TPTE2P1       | 0.0571698  | 0.0430395  | 0.0295593 | 0.0441864 | 0.011549  | 0.0243397 | 0.0603201 | 0.023048  | 0         | 0.0241854 | 0.0040336  | 0.0164396 | 0         | 0.028012   | 0.0410515 |
| TPTE2P3       | 0.00885689 | 0.00426738 | 0         | 0.0273818 | 0         | 0         | 0         | 0.0236138 | 0         | 0.0222326 | 0.0199966  | 0         | 0         | 0.00925799 | 0         |
| TPTE2P5       | 0.33152    | 0.44183    | 0.448204  | 0.168869  | 0.203394  | 0.183448  | 0.213453  | 0.369249  | 0.109174  | 0.0611739 | 0.0452095  | 0.131208  | 0.021425  | 0.195907   | 0.20761   |
| TPTE2P6       | 0.0426364  | 0.0369772  | 0.0282175 | 0.0351505 | 0.131388  | 0.0145217 | 0.0220814 | 0.0662491 | 0         | 0.027902  | 0.00962624 | 0.0217816 | 0         | 0.00891346 | 0         |
| TPTEP1        | 2.60562    | 2.29252    | 2.7982    | 3.90063   | 4.77646   | 3.41408   | 1.7924    | 2.18383   | 6.01162   | 4.69219   | 3.92798    | 5.28861   | 4.95982   | 3.41498    | 0.488086  |
| TPTEP2        | 0.517307   | 0.551424   | 0.939131  | 0.43333   | 0.313736  | 0.959081  | 0.517201  | 0.568343  | 0.391817  | 0.432625  | 0.628544   | 0.214112  | 0.200887  | 0.842652   | 0.612045  |
| TPTEP2-CSNK1E | 1.70148    | 1.08303    | 0.892089  | 0.648632  | 0.16281   | 1.26242   | 2.02778   | 1.13394   | 0.652851  | 0.480111  | 0.135362   | 0.158434  | 0.398342  | 1.00685    | 1.17758   |
| TPX2          | 2.37624    | 1.26062    | 0.852192  | 6.3499    | 1.38417   | 7.0171    | 2.77084   | 1.2581    | 3.52513   | 4.27534   | 5.63606    | 1.78166   | 7.2824    | 6.22615    | 2.41422   |
| TRA2A         | 7.63492    | 8.9956     | 9.1823    | 11.3155   | 4.98306   | 9.55252   | 4.36389   | 7.30659   | 6.36272   | 9.75518   | 14.7235    | 7.69276   | 10.8455   | 9.71943    | 7.87141   |
| TRA2B         | 8.09577    | 7.01603    | 7.28236   | 12.3919   | 3.95708   | 12.4543   | 5.07773   | 7.34837   | 6.30361   | 10.4657   | 14.324     | 6.30629   | 14.1582   | 10.4007    | 7.30926   |
| TRABD         | 5.43094    | 6.05399    | 5.83916   | 10.2477   | 17.0486   | 14.3888   | 4.65608   | 4.17911   | 7.91642   | 7.16077   | 7.30578    | 9.07181   | 11.0187   | 8.32247    | 5.63903   |
| TRABD2A       | 0.226206   | 0.101205   | 0.147034  | 0.216461  | 0.0669288 | 0.2293    | 0.0676434 | 0.124449  | 0.0196781 | 0.128436  | 0.170239   | 0.084782  | 0.180696  | 0.098521   | 0.262983  |
| TRABD2B       | 0.951535   | 0.559993   | 0.408569  | 0.681998  | 1.52921   | 1.10459   | 0.823283  | 0.517921  | 0.116287  | 0.173562  | 0.23416    | 0.327467  | 0.520456  | 0.631537   | 0.789653  |
| TRADD         | 3.04962    | 4.63925    | 5.08413   | 9.63558   | 19.5015   | 8.66012   | 3.99453   | 2.03612   | 9.40776   | 7.22774   | 10.0658    | 6.23608   | 10.1276   | 5.81724    | 3.71269   |

|              |          |          |          |          |          |          |          |          |           |          |          |           |          |           |          |
|--------------|----------|----------|----------|----------|----------|----------|----------|----------|-----------|----------|----------|-----------|----------|-----------|----------|
| TRAF1        | 1.31017  | 1.44288  | 2.00034  | 1.10516  | 2.1373   | 1.79616  | 1.07429  | 1.19584  | 0.351165  | 0.761887 | 0.759499 | 0.550173  | 1.01503  | 1.07076   | 1.38757  |
| TRAF2        | 1.56523  | 2.68361  | 2.90925  | 3.30982  | 6.17309  | 4.37046  | 1.7059   | 2.04141  | 1.91865   | 1.84972  | 1.89316  | 1.99266   | 3.16079  | 2.47011   | 2.16029  |
| TRAF3        | 2.48812  | 2.95114  | 3.24261  | 3.66513  | 4.03133  | 4.93665  | 2.28697  | 2.10544  | 1.72535   | 2.25995  | 2.38881  | 1.86977   | 4.80642  | 2.64277   | 2.96204  |
| TRAF3IP1     | 1.91196  | 1.6208   | 1.90722  | 1.89038  | 1.17937  | 3.26071  | 0.91117  | 1.41845  | 1.1474    | 1.11291  | 0.938419 | 1.34823   | 1.963    | 1.74655   | 1.58382  |
| TRAF3IP2     | 3.68394  | 3.5168   | 3.6906   | 8.85532  | 3.76243  | 7.94566  | 3.51212  | 3.89336  | 6.33396   | 4.95608  | 5.87906  | 3.73021   | 10.566   | 5.62829   | 4.16479  |
| TRAF3IP2-AS1 | 0.787831 | 0.759101 | 0.737714 | 0.714634 | 0.626873 | 0.593037 | 0.873677 | 0.809863 | 0.16251   | 0.428902 | 0.459247 | 0.419168  | 0.251978 | 0.656645  | 1.12642  |
| TRAF3IP3     | 0.522311 | 0.199763 | 0.356742 | 0.383991 | 0.817254 | 0.367797 | 0.287353 | 0.343494 | 0.0632261 | 0.715427 | 0.552105 | 1.04303   | 0.442938 | 0.402551  | 0.657325 |
| TRAF4        | 3.30159  | 2.43609  | 2.41464  | 7.15816  | 4.85598  | 6.09107  | 2.45847  | 2.11913  | 2.67093   | 3.75348  | 5.59963  | 2.92729   | 9.67839  | 5.1725    | 2.59981  |
| TRAF5        | 2.15155  | 1.02053  | 1.45252  | 1.14308  | 0.658028 | 1.78455  | 1.44467  | 1.26319  | 0.386941  | 1.06337  | 2.17084  | 0.538422  | 0.852322 | 1.67217   | 3.11391  |
| TRAF6        | 2.4525   | 2.0422   | 2.2055   | 1.92377  | 0.99946  | 1.95562  | 2.04908  | 2.47192  | 1.92566   | 1.97363  | 2.17904  | 1.31509   | 2.47777  | 1.82918   | 1.80665  |
| TRAF7        | 10.6547  | 12.9819  | 12.5732  | 25.0494  | 23.2461  | 31.4312  | 13.9982  | 9.1311   | 22.5656   | 16.5719  | 16.7142  | 16.9917   | 26.5411  | 17.5398   | 11.1221  |
| TRAFD1       | 6.63934  | 7.5377   | 8.75688  | 7.50978  | 7.83666  | 11.7838  | 6.54985  | 5.0141   | 10.6661   | 6.68839  | 7.16619  | 5.36525   | 10.3382  | 5.49416   | 4.09833  |
| TRAIIP       | 0.537413 | 0.49583  | 0.444586 | 0.930888 | 0.266422 | 1.1586   | 0.874707 | 0.32518  | 0.264588  | 0.473591 | 0.735751 | 0.237265  | 0.95168  | 0.729081  | 0.344844 |
| TRAK1        | 5.45622  | 7.60813  | 6.99328  | 6.38075  | 7.54285  | 6.44549  | 6.72549  | 5.01637  | 6.62888   | 6.03624  | 4.12129  | 6.40223   | 6.89061  | 5.16492   | 4.93758  |
| TRAK2        | 4.51727  | 2.76418  | 3.00369  | 3.42744  | 2.15904  | 7.57203  | 4.14962  | 3.31502  | 1.03208   | 4.12985  | 6.53641  | 1.129     | 4.06752  | 3.10034   | 7.21555  |
| TRAM1        | 10.9152  | 7.09943  | 7.43514  | 12.3818  | 3.17793  | 13.8252  | 8.08786  | 13.2054  | 9.60654   | 16.5052  | 23.1015  | 6.94696   | 20.04    | 9.82428   | 13.5104  |
| TRAM1L1      | 0.901974 | 0.649127 | 0.510045 | 0.341213 | 0.159616 | 0.729132 | 0.78216  | 0.892921 | 0.444963  | 0.2866   | 0.721773 | 0.138881  | 0.272558 | 0.0895084 | 0.491904 |
| TRAM2        | 4.24688  | 2.92948  | 3.47805  | 3.19369  | 3.20929  | 9.45788  | 5.71765  | 3.38082  | 0.794805  | 3.35046  | 5.94925  | 1.8256    | 4.20426  | 5.17451   | 8.10539  |
| TRAM2-AS1    | 0.832354 | 0.592843 | 0.553859 | 0.419559 | 0.210804 | 1.34814  | 0.454517 | 0.47439  | 0.0991676 | 0.760806 | 1.01112  | 0.0712096 | 0.227654 | 0.293169  | 0.740607 |
| TRANK1       | 1.43009  | 1.29091  | 1.53114  | 2.7296   | 1.71686  | 4.32885  | 1.14248  | 1.09852  | 0.377012  | 0.834526 | 1.0976   | 0.413362  | 1.25322  | 0.830595  | 3.51276  |
| TRAP1        | 10.2612  | 10.2815  | 11.3907  | 17.1084  | 12.338   | 20.4018  | 12.0152  | 8.00844  | 7.15688   | 8.64071  | 11.2082  | 8.89287   | 14.639   | 10.4518   | 5.15338  |
| TRAPPC1      | 12.9697  | 12.6263  | 10.7295  | 31.2872  | 25.1519  | 36.7592  | 16.7544  | 11.7394  | 26.9531   | 22.0611  | 45.6975  | 20.2753   | 24.5028  | 16.0069   | 16.752   |
| TRAPPC10     | 4.90877  | 4.37698  | 4.88116  | 5.0249   | 4.20899  | 6.08018  | 5.10767  | 3.84479  | 5.71528   | 5.0356   | 3.92324  | 4.27576   | 6.60675  | 4.44176   | 4.72317  |
| TRAPPC11     | 5.35124  | 4.93382  | 4.64969  | 6.08028  | 2.3682   | 6.39557  | 4.39237  | 4.86412  | 4.77805   | 6.37825  | 6.20156  | 4.17083   | 6.42987  | 4.54704   | 4.48116  |
| TRAPPC12     | 6.46428  | 9.11868  | 10.445   | 8.32466  | 15.4534  | 10.2591  | 9.29662  | 6.43754  | 7.19162   | 4.96007  | 5.97246  | 6.13429   | 7.64918  | 6.40718   | 6.47871  |
| TRAPPC13     | 1.80421  | 1.29153  | 1.13225  | 1.80753  | 0.455472 | 1.26455  | 1.0348   | 1.61699  | 1.40246   | 2.00069  | 2.29305  | 0.880223  | 1.4065   | 1.47045   | 1.23678  |



|           |            |           |           |            |            |            |           |           |            |            |           |            |            |            |            |
|-----------|------------|-----------|-----------|------------|------------|------------|-----------|-----------|------------|------------|-----------|------------|------------|------------|------------|
| TREX1     | 5.14812    | 4.66941   | 6.51703   | 3.61538    | 6.77501    | 7.38629    | 6.39685   | 3.62141   | 2.66809    | 3.21155    | 6.01512   | 2.27961    | 2.37381    | 1.48953    | 2.50279    |
| TREX2     | 2.02847    | 3.1364    | 3.46298   | 24.5717    | 11.9735    | 9.15426    | 5.68484   | 2.27801   | 76.8985    | 11.9196    | 37.9498   | 25.0965    | 12.3381    | 9.05963    | 2.06569    |
| TRG-AS1   | 0.197466   | 0.0729424 | 0.119796  | 0.169579   | 0.09202    | 0.179349   | 0.105215  | 0.157942  | 0.00801639 | 0.12392    | 0.178332  | 0.0141292  | 0.0637021  | 0.116965   | 0.226869   |
| TRH       | 0.012245   | 0.0176995 | 0.0405197 | 0.0252377  | 0.0190207  | 0.0104265  | 0.0838857 | 0.032647  | 0          | 0.0307375  | 0         | 0          | 0          | 0.0191993  | 0.0351707  |
| TRHDE     | 0.329674   | 0.0564631 | 0.0297873 | 0.0651906  | 0.0712678  | 0.443782   | 0.101533  | 0.181549  | 0.052469   | 0.024722   | 0.0313927 | 0.0117909  | 0.0107578  | 0.0152502  | 0.0419046  |
| TRHDE-AS1 | 0.172369   | 0.033076  | 0.0138496 | 0.0269905  | 0.244391   | 0.166564   | 0.0686526 | 0.0613713 | 0.0171295  | 0.00614015 | 0.0144219 | 0.0166055  | 0          | 0.00802359 | 0.0165355  |
| TRHR      | 0.0654683  | 0.0236577 | 0.02708   | 0.0337335  | 0          | 0.0278727  | 0.093437  | 0.0727285 | 0          | 0          | 0         | 0.0117111  | 0.0211199  | 0.0427708  | 0.0940208  |
| TRIAP1    | 4.77741    | 3.915     | 3.90362   | 8.05075    | 2.55476    | 5.98516    | 3.93454   | 4.08916   | 8.9183     | 6.16817    | 11.7808   | 4.45509    | 4.85093    | 3.85789    | 2.2495     |
| TRIB1     | 2.62835    | 4.88722   | 6.7782    | 10.0777    | 3.81439    | 7.28135    | 4.34647   | 4.21661   | 7.33389    | 13.6679    | 10.8446   | 9.42547    | 20.3608    | 10.0154    | 9.12649    |
| TRIB2     | 4.74839    | 2.84967   | 2.57244   | 5.63489    | 3.76952    | 9.69656    | 3.10659   | 2.96423   | 1.36898    | 2.70954    | 4.77923   | 1.60483    | 2.76538    | 3.25861    | 5.61984    |
| TRIB3     | 0.601222   | 0.869034  | 1.37938   | 0.908713   | 1.02107    | 2.42315    | 2.91972   | 0.755167  | 1.34729    | 2.57569    | 4.29846   | 0.739928   | 2.56018    | 2.01522    | 0.897968   |
| TRIL      | 1.57492    | 1.02794   | 0.704466  | 2.53829    | 2.24727    | 1.37221    | 0.930459  | 0.874785  | 0.239759   | 0.321786   | 0.677044  | 0.19       | 0.16837    | 0.160317   | 0.401072   |
| TRIM10    | 0.00244822 | 0.0224122 | 0.0303801 | 0          | 0.00126765 | 0.00416926 | 0.0139765 | 0.036263  | 0.00099388 | 0.00204851 | 0         | 0          | 0.00631832 | 0          | 0.00117199 |
| TRIM11    | 2.84666    | 2.87572   | 2.95259   | 4.73269    | 8.24252    | 5.88031    | 3.16184   | 2.37701   | 4.69237    | 3.2814     | 2.99993   | 3.02144    | 5.12153    | 3.97342    | 2.53194    |
| TRIM13    | 2.3829     | 2.94825   | 2.70376   | 3.55646    | 1.88281    | 2.44545    | 1.74542   | 2.55646   | 3.97923    | 3.21589    | 4.54359   | 3.09985    | 2.71163    | 3.12313    | 3.27146    |
| TRIM14    | 4.42182    | 5.17511   | 5.31475   | 13.2205    | 5.42629    | 14.8768    | 3.82807   | 5.79426   | 4.93295    | 3.16864    | 4.37977   | 3.40455    | 4.51093    | 3.05078    | 1.89572    |
| TRIM15    | 0.00390227 | 0.029456  | 0.0527278 | 0.00268093 | 0.00606157 | 0.00110758 | 0.0118813 | 0.013872  | 0          | 0          | 0         | 0.00558435 | 0          | 0.00067983 | 0          |
| TRIM16    | 5.71114    | 8.3919    | 8.65652   | 18.244     | 14.348     | 11.2694    | 8.27796   | 5.17312   | 33.1783    | 25.5984    | 16.8381   | 17.2903    | 40.9495    | 15.9543    | 7.32348    |
| TRIM16L   | 1.14898    | 0.821018  | 0.859139  | 1.52032    | 1.28506    | 1.08348    | 0.502501  | 0.822286  | 1.53831    | 2.22248    | 2.15508   | 2.47109    | 1.98704    | 1.48951    | 0.65556    |
| TRIM17    | 0.465496   | 0.753252  | 0.726587  | 1.30336    | 2.08737    | 0.957256   | 0.611713  | 0.522972  | 0.117663   | 0.672433   | 0.148723  | 0.471332   | 0.578004   | 0.858395   | 0.769418   |
| TRIM2     | 3.6633     | 2.09725   | 2.59159   | 1.91229    | 1.90922    | 3.35154    | 2.34461   | 3.00257   | 1.4823     | 2.12961    | 2.18616   | 0.840845   | 1.93417    | 1.2879     | 2.25163    |
| TRIM21    | 1.99157    | 2.32378   | 2.1736    | 6.14476    | 3.5036     | 9.17366    | 2.19173   | 1.71663   | 1.92872    | 1.9726     | 3.76512   | 1.02155    | 5.27915    | 2.00025    | 2.37772    |
| TRIM22    | 5.91489    | 4.66081   | 3.91461   | 14.1895    | 5.67559    | 20.8661    | 3.45367   | 4.57135   | 1.23101    | 3.30784    | 7.18436   | 1.22683    | 3.40085    | 1.9605     | 11.8064    |
| TRIM23    | 1.94046    | 1.65831   | 1.65437   | 1.53493    | 0.820378   | 1.71796    | 1.38218   | 1.78252   | 2.48611    | 2.18225    | 3.24896   | 1.12944    | 1.84925    | 1.59103    | 2.02827    |

|              |            |            |           |            |            |            |            |            |            |            |            |            |            |            |           |
|--------------|------------|------------|-----------|------------|------------|------------|------------|------------|------------|------------|------------|------------|------------|------------|-----------|
| TRIM24       | 3.18477    | 2.57325    | 2.74943   | 2.6387     | 1.61609    | 3.19901    | 2.24379    | 2.21908    | 2.59752    | 2.2779     | 3.3603     | 1.39374    | 3.02067    | 2.02096    | 2.19971   |
| TRIM25       | 8.01385    | 9.47536    | 9.8461    | 17.227     | 9.96362    | 17.5961    | 9.60078    | 9.36715    | 13.1556    | 5.11254    | 7.36375    | 5.24114    | 7.06296    | 4.70851    | 7.59737   |
| TRIM26       | 0.923618   | 0.953006   | 0.920904  | 1.21867    | 1.4961     | 1.58185    | 0.876808   | 0.663128   | 1.02859    | 0.642898   | 0.410689   | 0.775161   | 1.21317    | 0.794707   | 0.703184  |
| TRIM27       | 0.766416   | 0.743894   | 0.684062  | 1.07725    | 1.0103     | 1.50695    | 0.635517   | 0.545121   | 0.533591   | 0.830266   | 1.67883    | 0.514834   | 0.933236   | 1.02688    | 0.918112  |
| TRIM28       | 18.9352    | 20.745     | 23.1313   | 37.2212    | 40.092     | 47.6434    | 25.013     | 15.0695    | 28.3857    | 19.0047    | 18.5678    | 23.5437    | 38.2403    | 23.8519    | 17.2416   |
| TRIM29       | 144.458    | 192.091    | 167.772   | 251.349    | 300.33     | 241.786    | 214.328    | 138.626    | 474.56     | 236.248    | 151.768    | 317.447    | 289.073    | 141.136    | 51.4884   |
| TRIM3        | 2.11442    | 1.89666    | 2.17666   | 1.41528    | 2.58741    | 2.6977     | 2.15801    | 1.31116    | 1.1675     | 1.16051    | 1.06682    | 1.25023    | 1.51774    | 1.62743    | 2.11877   |
| TRIM31       | 0.00152538 | 0.0110243  | 0.0227142 | 0          | 0.00710832 | 0.00519536 | 0.00348326 | 0.00271126 | 0.00185774 | 0.00382901 | 0.00688785 | 0.00327435 | 0.00393667 | 0.00876953 | 0         |
| TRIM31-AS1   | 0          | 0.00541164 | 0.0278751 | 0.017362   | 0          | 0.0095637  | 0.0128241  | 0.00499093 | 0.00683951 | 0          | 0.00633963 | 0.00401831 | 0.0181167  | 0.0176106  | 0         |
| TRIM32       | 2.78165    | 2.45261    | 2.5174    | 3.71947    | 2.51325    | 4.25488    | 2.39444    | 1.99095    | 2.0387     | 3.03825    | 3.32278    | 1.95027    | 3.45691    | 2.70272    | 2.94024   |
| TRIM33       | 5.33687    | 5.08115    | 5.45956   | 3.93537    | 2.25895    | 4.13547    | 3.95143    | 6.00076    | 5.84395    | 4.04753    | 4.19189    | 4.14033    | 4.64839    | 4.02501    | 3.28817   |
| TRIM34       | 0.723005   | 1.42887    | 1.37869   | 1.75445    | 0.754958   | 1.45069    | 0.654274   | 1.001      | 1.12209    | 0.76813    | 1.4181     | 0.470316   | 0.748233   | 0.55795    | 1.08892   |
| TRIM35       | 7.8018     | 6.98315    | 8.69909   | 5.30553    | 6.56942    | 8.11524    | 6.52169    | 6.53489    | 5.59053    | 3.6944     | 3.24873    | 4.02833    | 5.23489    | 4.17196    | 2.78148   |
| TRIM36       | 0.154346   | 0.142358   | 0.244427  | 0.186325   | 0          | 0.120159   | 0.0956661  | 0.22731    | 0.0590781  | 0.116232   | 0.104542   | 0.0599524  | 0.281678   | 0.0645343  | 0.164662  |
| TRIM37       | 1.98792    | 2.05191    | 2.29363   | 2.41711    | 1.51192    | 3.36196    | 1.73012    | 1.49713    | 1.81765    | 2.32119    | 2.38589    | 1.82361    | 2.60828    | 2.38633    | 2.22966   |
| TRIM38       | 4.33341    | 4.23325    | 3.65633   | 5.02498    | 4.42579    | 7.8908     | 2.72267    | 3.82925    | 3.20963    | 4.10238    | 4.24211    | 1.97396    | 3.62618    | 3.42948    | 5.75687   |
| TRIM39       | 0.268481   | 0.218343   | 0.220685  | 0.231345   | 0.253167   | 0.355001   | 0.220555   | 0.176266   | 0.182657   | 0.263781   | 0.163483   | 0.257138   | 0.325553   | 0.311316   | 0.284791  |
| TRIM39-RPP21 | 0.0192356  | 0.0724297  | 0.100141  | 0.0456889  | 0.306698   | 0.217087   | 0.159517   | 0.0558924  | 0.100296   | 0.143919   | 0.103396   | 0.0630847  | 0.0966949  | 0.0803476  | 0.0116676 |
| TRIM4        | 4.53756    | 5.95573    | 5.68059   | 6.31061    | 7.4851     | 7.51077    | 5.40246    | 4.0921     | 9.0229     | 3.97315    | 4.94862    | 4.06088    | 2.80673    | 3.67277    | 3.80612   |
| TRIM40       | 0          | 0          | 0         | 0.00143086 | 0          | 0          | 0          | 0          | 0          | 0.00348535 | 0          | 0          | 0.00179167 | 0.00072567 | 0         |
|              |            |            |           |            |            |            |            |            |            |            |            |            |            | 6          |           |
| TRIM41       | 4.25205    | 4.6697     | 4.60477   | 5.50176    | 10.668     | 8.30632    | 3.49867    | 2.81309    | 3.51646    | 2.79923    | 2.56049    | 4.71964    | 3.8114     | 4.31584    | 3.20296   |
| TRIM42       | 0.054369   | 0          | 0         | 0          | 0          | 0.00771574 | 0.0103461  | 0.0241593  | 0          | 0          | 0          | 0          | 0          | 0          | 0         |
| TRIM43       | 0          | 0          | 0         | 0          | 0          | 0          | 0          | 0          | 0          | 0.00778419 | 0          | 0.0197725  | 0          | 0.00648291 | 0         |
| TRIM43B      | 0          | 0          | 0         | 0          | 0          | 0          | 0          | 0          | 0          | 0.00959736 | 0          | 0          | 0          | 0.00799297 | 0         |
| TRIM44       | 7.51968    | 6.34869    | 6.43554   | 9.10242    | 5.28891    | 13.0593    | 4.98146    | 6.09599    | 3.28205    | 4.69982    | 5.23978    | 4.02311    | 6.33178    | 6.14654    | 7.15379   |

|              |            |            |            |            |           |           |            |            |                 |           |            |            |            |            |           |
|--------------|------------|------------|------------|------------|-----------|-----------|------------|------------|-----------------|-----------|------------|------------|------------|------------|-----------|
| TRIM45       | 1.18914    | 1.25447    | 1.21685    | 0.599403   | 0.863342  | 0.731889  | 0.639167   | 0.574354   | 0.495866        | 0.689469  | 0.342894   | 0.735257   | 0.662987   | 2.334      | 0.436221  |
| TRIM46       | 0.0667646  | 0.0643364  | 0.115486   | 0.0562933  | 0.235701  | 0.201556  | 0.0762297  | 0.124064   | 0.014784        | 0.121886  | 0.116479   | 0.0738293  | 0.0430762  | 0.218881   | 0.305081  |
| TRIM47       | 5.63492    | 5.89808    | 5.86296    | 14.7123    | 17.0929   | 21.9526   | 10.2286    | 3.78997    | 7.48545         | 7.93239   | 10.0323    | 7.11991    | 11.5799    | 9.7438     | 7.62248   |
| TRIM48       | 0          | 0          | 0.0132495  | 0          | 0.0664915 | 0.0409121 | 0          | 0          | 0               | 0         | 0.01808    | 0          | 0          | 0          | 0         |
| TRIM49       | 0.0138923  | 0.0103104  | 0          | 0          | 2.14E-12  | 0         | 0          | 0.00475442 | 0.130307        | 0.0470015 | 0.17832    | 0.183739   | 0.0621293  | 0          | 0         |
| TRIM49B      | 0          | 0          | 0          | 0          | 0.0264527 | 0         | 0          | 0          | 0               | 0         | 7.94E-27   | 5.04E-34   | 0          | 0          | 0         |
| TRIM49C      | 0.0138923  | 4.58E-18   | 0          | 0          | 2.14E-12  | 0         | 0          | 0.00475442 | 9.16E-07        | 0.0470015 | 0.00285594 | 0.0306232  | 1.08E-07   | 0          | 0         |
| TRIM49D1     | 0          | 0          | 0          | 0          | 0.01612   | 0         | 0          | 0          | 0.0476096       | 0.0196258 | 0.0353039  | 0.00559426 | 0          | 0.00817246 | 0         |
| TRIM49D2     | 0          | 0          | 0          | 0          | 5.90E-05  | 0         | 0          | 0          | 0.00017439<br>6 | 7.19E-05  | 0.00012932 | 2.05E-05   | 0          | 2.99E-05   | 0         |
| TRIM5        | 1.56859    | 1.90467    | 1.7738     | 3.58493    | 1.80777   | 3.92076   | 1.41544    | 1.30972    | 1.11695         | 1.86554   | 2.956      | 1.06806    | 2.76273    | 2.17846    | 2.87037   |
| TRIM50       | 2.56E-42   | 0.0184689  | 0.0310094  | 0          | 0.14354   | 0.116691  | 0.0744597  | 0          | 0               | 0         | 0.0416085  | 0.0181972  | 9.33E-11   | 9.42E-37   | 0         |
| TRIM51       | 0.0568975  | 0.0274141  | 0.0353022  | 0          | 0.0441907 | 0.0605593 | 0          | 0.0252829  | 0.121266        | 0.0357061 | 0.0321151  | 0.0305338  | 0          | 0          | 0         |
| TRIM51EP     | 0.0341544  | 0.00658245 | 0.00565099 | 0          | 0.0106107 | 0.0232656 | 0.00779929 | 0.0182122  | 0.033277        | 0.0257204 | 0.0771122  | 0.0146631  | 0.00881451 | 0          | 0         |
| TRIM51HP     | 0          | 0          | 0          | 0          | 0         | 0         | 0          | 0          | 0               | 0         | 0          | 0          | 0          | 0          | 0         |
| TRIM52       | 2.25642    | 2.22127    | 2.34786    | 1.56745    | 1.5673    | 1.26886   | 1.49295    | 1.8719     | 0.301111        | 0.853179  | 0.683618   | 0.661694   | 0.576552   | 1.4709     | 1.52459   |
| TRIM52-AS1   | 2.01306    | 1.16941    | 1.13385    | 1.16232    | 1.46369   | 1.36155   | 1.14107    | 1.2942     | 0.452083        | 0.519655  | 1.46665    | 0.326899   | 0.672437   | 0.552173   | 0.984173  |
| TRIM53AP     | 0.00939107 | 0          | 0          | 0          | 2.50E-36  | 0         | 0.00764141 | 0          | 0               | 9.33E-40  | 0.0453307  | 0          | 0          | 0          | 0         |
| TRIM54       | 0.044938   | 0.00541295 | 0          | 0          | 0.017451  | 0.0286981 | 0.0384815  | 0          | 0               | 0         | 0          | 0.00803858 | 0          | 0.0117433  | 0         |
| TRIM55       | 0          | 0          | 0.0134308  | 0.00836534 | 0.0252186 | 0         | 0          | 0.00721418 | 0.00988623      | 0.0101883 | 0.00916367 | 0          | 0          | 0          | 0         |
| TRIM56       | 3.22915    | 4.5684     | 4.4023     | 4.03469    | 7.90836   | 8.55749   | 3.48553    | 2.71303    | 0.584838        | 1.50062   | 1.17823    | 1.60581    | 3.26583    | 2.82478    | 3.93375   |
| TRIM58       | 0.189683   | 0.0614413  | 0.0855258  | 0.0740096  | 0.364859  | 0.168162  | 0.147869   | 0.119672   | 0.0273328       | 0.467973  | 0.0810725  | 0.0548995  | 0.300781   | 0.40819    | 0.0966922 |
| TRIM59       | 0.700989   | 0.457274   | 0.283202   | 1.09187    | 0.148397  | 0.837416  | 0.369785   | 0.859611   | 0.49764         | 1.14497   | 2.00259    | 0.625748   | 1.00453    | 0.968837   | 0.64455   |
| TRIM59-IFT80 | 0.548061   | 0.584866   | 0.701613   | 0.530627   | 0.11373   | 0.277473  | 0.4246     | 0.576508   | 0.385162        | 0.486506  | 0.460103   | 0.344708   | 0.202184   | 0.572614   | 0.71939   |
| TRIM6        | 0.674842   | 0.447731   | 0.242278   | 0.781449   | 0.359939  | 1.27489   | 0.248469   | 0.198769   | 0.201996        | 0.485397  | 0.806437   | 0.285904   | 1.40436    | 0.441861   | 0.331129  |

|              |            |           |            |           |           |           |           |            |           |            |           |            |            |            |            |
|--------------|------------|-----------|------------|-----------|-----------|-----------|-----------|------------|-----------|------------|-----------|------------|------------|------------|------------|
| TRIM6-TRIM34 | 0.528921   | 0.107533  | 0.140212   | 0.322142  | 0.489143  | 0.678425  | 0.228374  | 0.0197995  | 0.0670301 | 0.335658   | 0.171788  | 0.130215   | 0.2982     | 0.154318   | 0.00076421 |
|              |            |           |            |           |           |           |           |            |           |            |           |            |            |            | 5          |
| TRIM60       | 0          | 0.0221559 | 0.0577957  | 0.0240146 | 0.0547803 | 3.68E-29  | 0.0765287 | 0.0306066  | 0.0279619 | 0          | 0         | 0.0294519  | 0          | 0.0300576  | 0          |
| TRIM61       | 0.629843   | 0.409329  | 0.52105    | 0.392462  | 0.318537  | 0.411581  | 0.200689  | 0.338454   | 0.107034  | 0.238994   | 0.38031   | 0.188652   | 0.226812   | 0.505258   | 0.63107    |
| TRIM62       | 3.346      | 3.95199   | 3.87813    | 3.83724   | 5.90128   | 4.422     | 4.95451   | 4.18167    | 13.9161   | 2.23101    | 3.80999   | 5.63209    | 2.21129    | 2.27094    | 1.40153    |
| TRIM63       | 0.366105   | 0.220494  | 0.421851   | 0.040423  | 0.446826  | 0.478733  | 0.238861  | 0.348604   | 0.0636963 | 0.0656427  | 0.0295205 | 0.205824   | 0.0927964  | 0.0341683  | 0.131443   |
| TRIM64       | 0.0452897  | 0.0570138 | 0          | 0         | 1.45E-19  | 0         | 0         | 0.00017778 | 0.0487014 | 0.00012553 | 0.0511265 | 0.0283852  | 0          | 0          | 0.00014364 |
|              |            |           |            |           |           |           |           | 2          |           | 8          |           |            |            |            | 4          |
| TRIM64B      | 0          | 0.0254735 | 0          | 0         | 0.0519496 | 0         | 0         | 0.0295251  | 0.251536  | 0.0208486  | 5.75E-24  | 0.0762433  | 0          | 0          | 0.0238556  |
| TRIM64C      | 0          | 0         | 0          | 0         | 0         | 0         | 0         | 0          | 0         | 0          | 0         | 0          | 0          | 0          | 0          |
| TRIM65       | 3.09561    | 3.18405   | 3.6298     | 4.80601   | 4.92353   | 4.75603   | 2.89672   | 2.63748    | 1.47526   | 3.16736    | 4.05674   | 2.43169    | 4.69789    | 3.42218    | 2.75439    |
| TRIM66       | 2.19732    | 3.2287    | 2.63244    | 1.64573   | 2.42536   | 1.89928   | 2.98025   | 2.39355    | 0.843864  | 1.40871    | 0.640216  | 1.8439     | 0.560344   | 1.41506    | 1.49603    |
| TRIM67       | 0.0271568  | 0.151781  | 0.0561651  | 0.0251873 | 0.839461  | 0.0763082 | 0.0527116 | 0.0579233  | 0.598639  | 0.0647608  | 0.09197   | 0.122418   | 0.0543165  | 0.0156127  | 0.0429007  |
| TRIM68       | 1.23586    | 1.26043   | 1.30227    | 1.54396   | 1.71595   | 3.25102   | 1.2534    | 0.993227   | 0.327935  | 0.883886   | 1.09896   | 0.700495   | 1.15819    | 0.757777   | 0.92213    |
| TRIM69       | 0.145325   | 0.22173   | 0.180335   | 0.361925  | 0.150494  | 0.567153  | 0.138273  | 0.139916   | 0.117993  | 0.106399   | 0.136712  | 0.199303   | 0.117204   | 0.158236   | 0.469587   |
| TRIM7        | 2.9474     | 4.70364   | 5.06293    | 3.45224   | 8.37495   | 3.14627   | 3.96168   | 2.24459    | 7.32513   | 3.87372    | 4.29566   | 3.77552    | 3.80019    | 2.57992    | 1.06681    |
| TRIM71       | 0.00266472 | 0.0102712 | 0.00881776 | 0         | 0.0248353 | 0.0113449 | 0         | 0          | 0         | 0          | 0         | 0          | 0.00515778 | 0.0013927  | 0.0229612  |
| TRIM72       | 0.0752794  | 0.0569969 | 0.0800697  | 0.0886602 | 0.517855  | 0.137356  | 0.135067  | 0.086017   | 0.563189  | 0.0269953  | 0.0242803 | 0.107729   | 0          | 0.0168619  | 0          |
| TRIM73       | 0.852101   | 0.808142  | 0.838851   | 0.105374  | 0.989301  | 0.713993  | 1.10737   | 0.560384   | 0.103776  | 0.106947   | 0.260839  | 0.190535   | 0.0109954  | 0.151417   | 0.171321   |
| TRIM74       | 0.0157329  | 0.0379017 | 0.0520614  | 0         | 0.0488772 | 0         | 0         | 0.0699103  | 0         | 0          | 0         | 0          | 0          | 0.00822269 | 0          |
| TRIM77       | 0          | 0         | 0          | 0         | 0         | 0         | 0         | 0          | 0         | 0          | 0         | 0          | 0          | 0          | 0          |
| TRIM8        | 11.1329    | 9.92235   | 11.215     | 12.7989   | 17.5916   | 27.698    | 13.2739   | 8.51235    | 4.48895   | 8.52839    | 12.8883   | 4.87994    | 15.1259    | 9.79335    | 17.1402    |
| TRIM9        | 0.576148   | 0.171077  | 0.232773   | 0.196762  | 0.348617  | 0.69309   | 0.271545  | 0.256016   | 0.0530342 | 0.07988    | 0.215539  | 0.0743007  | 0.298247   | 0.215336   | 0.457006   |
| TRIML1       | 0          | 0         | 0          | 0         | 0         | 0         | 0         | 0          | 0.0148894 | 0.0613775  | 0.0276023 | 0.00874774 | 0.0157758  | 0          | 0          |
| TRIML2       | 0          | 0         | 0          | 0         | 0         | 0         | 0         | 0          | 0.0164925 | 0          | 0         | 0.0387583  | 0.0873714  | 0.226482   | 0.116687   |
| TRIO         | 7.37251    | 6.84626   | 7.64289    | 6.93142   | 7.43903   | 8.95986   | 8.98635   | 5.52535    | 3.32386   | 8.47614    | 5.35698   | 6.42687    | 9.56518    | 9.63829    | 12.612     |

|         |          |          |          |          |          |          |          |          |          |          |          |          |          |          |          |
|---------|----------|----------|----------|----------|----------|----------|----------|----------|----------|----------|----------|----------|----------|----------|----------|
| TRIOBP  | 3.94236  | 3.13023  | 3.22966  | 4.03197  | 5.74685  | 6.2334   | 3.53879  | 3.12145  | 2.10251  | 3.8633   | 4.0443   | 2.15676  | 3.68766  | 3.14184  | 2.67188  |
| TRIP10  | 6.44478  | 8.23057  | 8.7486   | 14.0103  | 9.94646  | 18.778   | 10.2141  | 4.69459  | 20.0837  | 20.6194  | 12.36    | 13.1288  | 25.2505  | 14.3195  | 9.18097  |
| TRIP11  | 2.93573  | 3.43812  | 3.3863   | 3.44526  | 1.3882   | 3.30606  | 1.39309  | 2.39712  | 4.20141  | 3.6352   | 3.5728   | 2.88747  | 3.5044   | 3.0397   | 3.58434  |
| TRIP12  | 9.88561  | 8.28861  | 8.37984  | 14.8915  | 5.26388  | 13.0082  | 7.32157  | 8.83856  | 10.2543  | 11.0391  | 9.49957  | 8.37684  | 16.6258  | 11.7631  | 9.67383  |
| TRIP13  | 0.355923 | 0.300106 | 0.267677 | 2.28409  | 0.26387  | 2.15588  | 0.461796 | 0.222858 | 0.285699 | 1.24878  | 1.50672  | 0.769804 | 2.92268  | 1.77988  | 0.638937 |
| TRIP4   | 4.75036  | 4.13765  | 4.28054  | 7.50547  | 3.17447  | 6.46069  | 3.64897  | 3.3909   | 6.83126  | 7.8586   | 8.1727   | 4.10681  | 10.1345  | 5.3121   | 3.7467   |
| TRIP6   | 12.9717  | 15.9559  | 16.4136  | 23.3595  | 36.4826  | 38.3322  | 16.0324  | 9.60292  | 19.1765  | 21.0889  | 31.3597  | 18.516   | 30.1448  | 21.5055  | 16.4474  |
| TRIQK   | 1.67679  | 1.01665  | 1.14045  | 1.17711  | 0.262211 | 1.56671  | 1.02792  | 1.36017  | 0.561931 | 1.65962  | 2.70594  | 0.797174 | 1.31783  | 1.12927  | 2.04445  |
| TRIR    | 24.8797  | 24.0554  | 24.9271  | 52.6373  | 54.4768  | 53.4701  | 25.3488  | 16.7182  | 38.0731  | 37.1095  | 67.2736  | 23.9562  | 42.3236  | 30.6989  | 18.7818  |
| TRIT1   | 4.26182  | 4.34279  | 3.98256  | 4.70334  | 2.52502  | 4.39193  | 3.37884  | 3.02819  | 3.23608  | 3.32189  | 5.65799  | 3.20602  | 4.25566  | 4.06815  | 2.57391  |
| TRMO    | 3.95414  | 3.41528  | 3.79629  | 2.71204  | 2.21857  | 3.88489  | 3.03498  | 3.38483  | 3.76883  | 2.8549   | 3.15001  | 2.17638  | 2.7901   | 2.14264  | 2.03217  |
| TRMT1   | 3.1635   | 4.24446  | 3.88314  | 7.75113  | 8.248    | 7.91418  | 3.62264  | 2.70365  | 3.30727  | 3.59573  | 3.28677  | 4.54049  | 4.90099  | 5.12601  | 3.43085  |
| TRMT10A | 0.358807 | 0.495585 | 0.425457 | 0.733359 | 0.102181 | 0.463371 | 0.320912 | 0.387968 | 0.517101 | 0.450339 | 0.681831 | 0.308083 | 0.783244 | 0.553208 | 0.274823 |
| TRMT10B | 2.2595   | 3.03899  | 2.93507  | 1.83306  | 2.1208   | 2.74263  | 2.10777  | 2.21313  | 1.12415  | 1.21884  | 1.38931  | 1.50666  | 1.19107  | 1.84423  | 1.42225  |
| TRMT10C | 2.98539  | 2.6532   | 2.7084   | 4.8087   | 0.720931 | 4.03733  | 1.67567  | 2.92071  | 4.03307  | 4.17205  | 6.32962  | 2.62977  | 6.93579  | 3.80896  | 2.73817  |
| TRMT11  | 1.1045   | 1.00757  | 1.09647  | 1.00164  | 0.383168 | 1.01884  | 0.71882  | 1.191    | 0.309387 | 0.864106 | 1.20944  | 0.542674 | 0.612854 | 0.971724 | 0.877702 |
| TRMT112 | 12.7985  | 10.5432  | 10.7475  | 29.8157  | 22.0912  | 30.562   | 11.9908  | 9.52604  | 22.5959  | 18.9364  | 39.5694  | 16.5006  | 23.1111  | 17.6194  | 11.6615  |
| TRMT12  | 2.30492  | 1.80401  | 1.88091  | 2.32155  | 2.6569   | 2.38     | 1.86957  | 1.68693  | 1.15588  | 1.79334  | 2.41359  | 1.37312  | 1.66208  | 1.95143  | 1.54274  |
| TRMT13  | 1.35541  | 1.67572  | 1.51666  | 1.99063  | 0.640519 | 1.23733  | 0.786262 | 1.7495   | 0.817019 | 0.977121 | 1.30164  | 1.11117  | 1.27628  | 1.38459  | 1.07005  |
| TRMT1L  | 0.895828 | 1.2332   | 1.09258  | 1.77249  | 1.12117  | 2.56731  | 0.759814 | 0.900771 | 0.773064 | 1.55482  | 2.15546  | 0.897383 | 1.11964  | 1.47682  | 1.52177  |
| TRMT2A  | 3.011    | 3.59338  | 3.40146  | 4.27281  | 8.10517  | 7.50825  | 3.50842  | 2.20424  | 3.49765  | 2.75215  | 2.94982  | 3.44926  | 3.86871  | 3.84444  | 2.94894  |
| TRMT2B  | 3.10722  | 3.71483  | 3.41847  | 2.69055  | 5.16706  | 2.8269   | 3.24595  | 2.87603  | 3.8549   | 1.55348  | 2.28508  | 2.05264  | 1.89663  | 1.99796  | 1.72199  |
| TRMT44  | 3.0652   | 2.71539  | 2.52232  | 2.17271  | 4.43381  | 3.14855  | 2.58314  | 2.03226  | 2.38008  | 1.29256  | 1.52872  | 1.72905  | 1.34459  | 1.63168  | 1.53721  |
| TRMT5   | 1.48673  | 1.52247  | 1.24672  | 1.98655  | 0.68898  | 2.26318  | 0.891945 | 1.21774  | 1.26699  | 1.23389  | 1.73725  | 0.962393 | 1.99859  | 1.40398  | 1.05905  |
| TRMT6   | 2.35471  | 2.25483  | 2.02133  | 4.6095   | 1.45388  | 4.18617  | 1.49612  | 2.35534  | 3.80368  | 2.96775  | 2.89172  | 2.53784  | 7.25301  | 3.88765  | 1.85354  |
| TRMT61A | 2.1922   | 2.45996  | 2.73508  | 3.46595  | 5.74565  | 5.79445  | 2.91879  | 1.85305  | 1.55669  | 1.46982  | 1.81372  | 1.80872  | 3.25265  | 2.74679  | 1.78436  |



|           |           |            |           |           |           |           |           |            |           |            |            |           |            |           |            |
|-----------|-----------|------------|-----------|-----------|-----------|-----------|-----------|------------|-----------|------------|------------|-----------|------------|-----------|------------|
| TRMT61B   | 2.15706   | 2.26122    | 2.3253    | 2.75635   | 1.83332   | 2.53409   | 2.15062   | 1.60448    | 2.39471   | 1.7944     | 3.25866    | 1.62      | 2.73842    | 2.37053   | 1.43677    |
| TRMT9B    | 0.379533  | 0.612941   | 0.581711  | 0.717491  | 0.3383    | 0.406088  | 0.549294  | 0.378281   | 0.140816  | 0.185752   | 0.195786   | 0.351265  | 0.267065   | 0.294896  | 0.405461   |
| TRMU      | 2.36851   | 2.70818    | 2.99271   | 3.01155   | 4.72245   | 4.10374   | 2.48902   | 1.80124    | 2.62626   | 2.33677    | 3.95076    | 2.97632   | 2.51651    | 2.70365   | 3.06302    |
| TRNAU1AP  | 2.18222   | 2.83332    | 2.76494   | 4.46219   | 2.15873   | 5.79932   | 2.71452   | 1.93938    | 3.1193    | 4.19485    | 6.11977    | 2.84346   | 4.24613    | 4.10591   | 2.12778    |
| TRNP1     | 2.06613   | 2.70042    | 2.58352   | 2.20263   | 3.94721   | 3.07369   | 2.0201    | 1.49851    | 3.9914    | 6.22966    | 5.32164    | 3.22863   | 3.66974    | 2.51965   | 1.6712     |
| TRNT1     | 2.36008   | 2.03409    | 2.23014   | 2.82002   | 0.742686  | 3.27423   | 1.69578   | 2.39579    | 1.74689   | 2.23437    | 2.6183     | 1.91435   | 2.20532    | 2.7009    | 2.16219    |
| TRO       | 0.524712  | 0.317696   | 0.357251  | 0.181839  | 0.86555   | 1.09917   | 0.54078   | 0.259984   | 0.107449  | 0.629428   | 1.11652    | 0.109643  | 0.131821   | 0.402862  | 1.18034    |
| TROAP     | 0.273737  | 0.26594    | 0.292016  | 1.70339   | 0.302517  | 1.71483   | 0.839952  | 0.230773   | 0.266835  | 1.03884    | 1.30079    | 0.876609  | 1.28271    | 1.80961   | 0.734183   |
| TROVE2    | 4.68817   | 4.50138    | 4.49646   | 5.20416   | 1.58188   | 5.14944   | 3.68295   | 5.0514     | 4.93472   | 6.45831    | 7.58666    | 3.70333   | 7.35887    | 4.285     | 5.44002    |
| TRPA1     | 0.0608396 | 0.0110038  | 0.0162708 | 0.106812  | 0.0422729 | 0.117007  | 0.0105378 | 0.0363959  | 0         | 0.262723   | 0.396854   | 0.0244442 | 0.241602   | 0.20335   | 1.62719    |
| TRPC1     | 1.02118   | 0.604329   | 0.899887  | 0.434669  | 0.353457  | 0.689946  | 0.716045  | 0.700383   | 0.0878689 | 0.619946   | 1.25929    | 0.131046  | 0.239911   | 0.562718  | 1.25135    |
| TRPC2     | 0.0572376 | 0.0551559  | 0.110486  | 0.0393233 | 0         | 0.276176  | 0.10892   | 0.08478    | 0         | 0.0957853  | 0.021538   | 0.0136517 | 0          | 0.0698013 | 0.301401   |
| TRPC3     | 0.0127897 | 0.00924344 | 0.0105806 | 0.0856714 | 0.0298003 | 0.152464  | 0.0365073 | 0.0227329  | 0.0155765 | 0.072236   | 0.22379    | 0.0228785 | 0.0618891  | 0.096925  | 0.348986   |
| TRPC4     | 0.0749399 | 0.0348177  | 0.0265695 | 0.082744  | 0.0665186 | 0.161805  | 0.042782  | 0.028543   | 0.0619321 | 0.154523   | 0.250772   | 0.0746871 | 0.217579   | 0.184644  | 0.507366   |
| TRPC4AP   | 9.87038   | 10.3381    | 10.6176   | 15.2502   | 15.5251   | 20.2343   | 11.428    | 8.53193    | 18.1207   | 17.2727    | 16.2438    | 13.002    | 20.7676    | 12.3322   | 13.0641    |
| TRPC5     | 0.162477  | 0.103106   | 0.137691  | 0.0571737 | 0.0123114 | 0.0539891 | 0.0950178 | 0.130309   | 0         | 0.0397903  | 0.0536828  | 0.0198487 | 0.0102272  | 0.0310674 | 0.0626027  |
| TRPC5OS   | 0         | 0.00369963 | 0         | 0         | 0         | 0         | 0         | 0.00682403 | 0         | 0          | 0          | 0         | 0          | 0         | 0          |
| TRPC6     | 0.762737  | 0.749503   | 0.946485  | 0.765338  | 0.756086  | 0.482823  | 0.538563  | 0.557448   | 0.776144  | 1.31631    | 2.44149    | 0.843772  | 1.3177     | 1.68635   | 2.7745     |
| TRPC7     | 0         | 0          | 0         | 0         | 0         | 0         | 0         | 0          | 0         | 0          | 0          | 0         | 0          | 0         | 0          |
| TRPC7-AS2 | 0         | 0          | 0         | 0         | 0         | 0         | 0         | 0          | 0         | 0          | 0          | 0         | 0          | 0         | 0          |
| TRPM1     | 0.204173  | 0.903401   | 0.976845  | 0.140271  | 0.248436  | 0.356395  | 1.03349   | 0.619962   | 0.037299  | 0.0170839  | 0.00768288 | 0.153396  | 0.00658658 | 0.003557  | 0.00977396 |
| TRPM2     | 0.2063    | 0.195182   | 0.19549   | 0.637793  | 1.11868   | 1.10826   | 0.325482  | 0.293347   | 0.0456817 | 0.310713   | 0.448836   | 0.0697806 | 0.300088   | 0.301899  | 0.770308   |
| TRPM2-AS  | 0         | 0.0127728  | 0         | 0         | 0.123537  | 0.0225727 | 0.0908041 | 0          | 0         | 0          | 0          | 0.0189685 | 0          | 0.0831311 | 0.152286   |
| TRPM3     | 0.145119  | 0.0632615  | 0.0914688 | 0         | 0.0590386 | 0.138277  | 0.102571  | 0.073697   | 0         | 0.01301    | 0.0117015  | 0.0074169 | 0          | 0.023476  | 0.0595456  |
| TRPM4     | 7.81932   | 8.6165     | 9.57284   | 8.3537    | 21.854    | 9.03383   | 11.7282   | 6.23927    | 3.58314   | 5.53546    | 2.48301    | 9.01225   | 7.73817    | 6.11243   | 6.56807    |
| TRPM5     | 0.0176754 | 0.0709692  | 0.0292448 | 0         | 0.018304  | 0.0200672 | 0.0269083 | 0.0104723  | 0         | 0.00739483 | 0          | 0.0590205 | 0.0152055  | 0.0523484 | 0.0338456  |

|             |            |           |           |           |           |           |           |           |            |           |           |           |           |            |           |
|-------------|------------|-----------|-----------|-----------|-----------|-----------|-----------|-----------|------------|-----------|-----------|-----------|-----------|------------|-----------|
| TRPM6       | 0.225321   | 0.178266  | 0.128643  | 0.425491  | 0.399805  | 0.650628  | 0.165303  | 0.221593  | 0.355912   | 0.286027  | 0.248181  | 0.61148   | 0.396128  | 0.316682   | 0.296478  |
| TRPM7       | 5.46809    | 5.30468   | 5.67794   | 5.13042   | 1.89789   | 4.0458    | 3.53962   | 5.40747   | 2.97874    | 4.11725   | 4.70562   | 2.57333   | 3.36576   | 3.76043    | 4.69509   |
| TRPM8       | 0.00411725 | 0.0178538 | 0         | 0         | 0         | 0.0280463 | 0         | 0.0182953 | 0.00501435 | 0.0155027 | 0         | 0         | 0         | 0.00215185 | 0         |
| TRPS1       | 14.1627    | 10.1162   | 6.99021   | 14.8691   | 8.54486   | 11.733    | 7.12107   | 10.0877   | 15.769     | 17.4661   | 11.3391   | 22.5698   | 14.5155   | 13.482     | 8.54474   |
| TRPT1       | 4.31075    | 3.62948   | 3.58416   | 5.63146   | 9.40156   | 9.84372   | 3.90269   | 2.47663   | 12.8068    | 6.96798   | 14.304    | 5.88851   | 6.2087    | 5.2911     | 3.25172   |
| TRPV1       | 0.859094   | 1.05486   | 0.953866  | 0.704819  | 1.74619   | 1.01642   | 1.08032   | 0.695021  | 0.68926    | 0.897708  | 0.6817    | 1.5488    | 0.814964  | 1.19599    | 0.698157  |
| TRPV2       | 1.02199    | 0.933194  | 1.09773   | 1.97048   | 2.30443   | 2.82116   | 1.91028   | 0.673868  | 0.46173    | 2.25507   | 4.22401   | 0.57793   | 2.1483    | 1.74025    | 3.57456   |
| TRPV3       | 2.60008    | 4.02127   | 3.65686   | 7.13578   | 5.7808    | 3.1098    | 4.7332    | 2.99967   | 14.3303    | 13.1524   | 9.5009    | 18.15     | 12.0321   | 15.5694    | 3.70257   |
| TRPV4       | 1.38615    | 1.62148   | 2.33482   | 1.10449   | 1.909     | 1.61834   | 2.01504   | 1.7399    | 0.957215   | 1.89222   | 2.46818   | 0.961156  | 1.00959   | 1.31822    | 1.19031   |
| TRPV5       | 0.0645778  | 0.0272593 | 0.0200337 | 0         | 0         | 0.0137468 | 0.0368664 | 0.0215217 | 0          | 0         | 0.0182251 | 0         | 0         | 0          | 0         |
| TRPV6       | 1.7411     | 3.08737   | 2.1704    | 0.262173  | 2.49458   | 0.453556  | 1.70653   | 1.33538   | 1.433      | 0.0798266 | 0.044874  | 0.40389   | 0.0102589 | 0.0540166  | 0.022835  |
| TRRAP       | 6.32029    | 7.6355    | 8.40476   | 5.70217   | 7.16028   | 7.22207   | 9.3383    | 6.52541   | 4.27999    | 3.16662   | 3.08095   | 4.56392   | 4.93531   | 4.47373    | 6.04596   |
| TRUB1       | 1.56005    | 1.34972   | 1.36353   | 2.51637   | 1.09575   | 2.81267   | 1.05324   | 1.76018   | 2.6517     | 2.40922   | 3.91272   | 1.79087   | 3.10276   | 2.4177     | 1.41245   |
| TRUB2       | 3.00388    | 2.93476   | 2.68981   | 5.9834    | 4.4521    | 6.57902   | 3.44553   | 2.27028   | 4.27316    | 3.71461   | 6.15272   | 2.90344   | 4.15541   | 3.05792    | 2.39868   |
| TRY2P       | 0          | 0         | 0         | 0         | 0         | 0         | 0         | 0         | 0          | 0         | 0         | 0         | 0         | 0          | 0         |
| TSACC       | 0.115812   | 0.241799  | 0.159679  | 0.139239  | 0.0299826 | 0.0493061 | 0.110192  | 0.205848  | 0.117538   | 0.12113   | 0         | 0.248599  | 0.0871747 | 0.272377   | 0.0831602 |
| TSC1        | 4.52332    | 4.49079   | 4.3109    | 3.34659   | 3.96373   | 4.87612   | 4.84871   | 3.45419   | 3.22881    | 3.08808   | 1.8739    | 2.91368   | 2.3621    | 2.89898    | 3.15929   |
| TSC2        | 5.33731    | 6.84291   | 6.32141   | 7.61996   | 13.3184   | 10.6404   | 9.16144   | 5.42709   | 9.3887     | 5.77334   | 3.96428   | 7.60382   | 9.84215   | 5.92896    | 7.84823   |
| TSC22D1     | 5.75095    | 3.75826   | 4.42325   | 5.34751   | 3.85532   | 11.1628   | 4.4495    | 4.54777   | 2.45232    | 6.96857   | 7.60415   | 4.47931   | 10.0696   | 8.38558    | 12.0614   |
| TSC22D1-AS1 | 0.148158   | 0.0739247 | 0.0982866 | 0.0486837 | 0.251595  | 0.113183  | 0.10531   | 0.187051  | 0.0108969  | 0.0452131 | 0.0422339 | 0.0525777 | 0.0242818 | 0.16391    | 0.146916  |
| TSC22D2     | 4.96388    | 4.7142    | 4.94156   | 9.74403   | 11.5011   | 7.86189   | 5.21288   | 3.5761    | 14.8655    | 14.657    | 12.0852   | 13.3395   | 26.5688   | 17.8609    | 7.62752   |
| TSC22D3     | 27.4048    | 10.1905   | 14.9768   | 5.57386   | 4.06339   | 12.6108   | 16.84     | 14.749    | 2.38004    | 5.62012   | 10.0578   | 3.69947   | 4.23931   | 4.19003    | 6.91691   |
| TSC22D4     | 6.61366    | 8.51614   | 9.15903   | 14.8122   | 22.93     | 21.4754   | 12.4857   | 5.35982   | 17.5408    | 9.21505   | 15.3595   | 9.02667   | 14.5872   | 9.22775    | 7.54546   |
| TSEN15      | 1.50045    | 1.17864   | 1.12053   | 2.22612   | 0.544134  | 3.06726   | 1.21321   | 1.44762   | 1.12344    | 1.76597   | 2.42539   | 1.30337   | 2.67069   | 1.83081    | 1.72722   |
| TSEN2       | 2.04715    | 1.8356    | 1.89625   | 1.99561   | 1.43649   | 1.93157   | 1.58833   | 1.48919   | 0.433181   | 0.962278  | 1.19564   | 1.24988   | 1.14742   | 1.75154    | 0.987556  |
| TSEN34      | 3.34822    | 3.51828   | 3.79291   | 7.09159   | 6.97817   | 7.5071    | 3.54434   | 2.44479   | 5.82973    | 4.98369   | 9.88607   | 3.19633   | 6.60019   | 3.86038    | 2.41631   |

|             |           |           |           |            |            |           |           |            |           |            |            |            |            |            |           |
|-------------|-----------|-----------|-----------|------------|------------|-----------|-----------|------------|-----------|------------|------------|------------|------------|------------|-----------|
| TSEN54      | 1.8958    | 3.95243   | 4.3006    | 4.95177    | 8.68632    | 5.16762   | 3.11751   | 1.92855    | 6.31672   | 3.65144    | 4.33408    | 3.79648    | 4.58493    | 3.60187    | 2.22603   |
| TSFM        | 2.44852   | 2.27336   | 2.49739   | 4.95976    | 2.36271    | 4.98949   | 2.26429   | 2.05506    | 2.29629   | 3.04183    | 5.40077    | 1.91794    | 2.89329    | 2.45931    | 2.70502   |
| TSG1        | 0         | 0.0216995 | 0.0298063 | 0.00309413 | 0.00466388 | 0         | 0.0102844 | 0.00266835 | 0         | 0          | 0          | 0          | 0          | 0          | 0.0215596 |
| TSG101      | 9.98679   | 10.3223   | 10.859    | 17.918     | 7.40813    | 18.9422   | 9.32009   | 8.13138    | 23.6519   | 21.7477    | 24.978     | 13.9921    | 33.4229    | 13.838     | 11.7229   |
| TSGA10      | 0.56206   | 0.555871  | 0.485369  | 0.157507   | 0.291024   | 0.570945  | 0.16325   | 0.38997    | 0.576443  | 0.179455   | 0.211498   | 0.321029   | 0.15269    | 0.11338    | 0.198257  |
| TSGA10IP    | 0.0134085 | 0.0193812 | 0.0443698 | 0          | 0.020828   | 0.0342515 | 0         | 0          | 0.01633   | 0          | 0.0151365  | 0.00959413 | 0          | 0.00700786 | 0         |
| TSGA13      | 0.113333  | 0.0744004 | 0.0339611 | 0.0951868  | 0.0478259  | 0.043694  | 0.0362379 | 0.0184719  | 0.0374975 | 0.0644056  | 0          | 0.0369119  | 0.0198649  | 0.0430105  | 0.132651  |
| TSHB        | 0.0410338 | 0.0988535 | 0.0678921 | 0          | 0          | 0.0349397 | 0.046851  | 0.0364674  | 0         | 0          | 0          | 0          | 0          | 0          | 0         |
| TSHR        | 0.0915698 | 0.25543   | 0.287064  | 0.0893987  | 0.20213    | 0.14363   | 0.104551  | 0.227006   | 0.0117391 | 0.00604892 | 0.0272029  | 0.0275876  | 0.018657   | 0.0755658  | 0.124584  |
| TSHZ1       | 4.11243   | 3.08195   | 3.54801   | 2.90362    | 3.84214    | 5.32207   | 3.50683   | 3.14632    | 1.33594   | 2.89389    | 2.02498    | 1.92373    | 2.7782     | 2.1763     | 3.26186   |
| TSHZ2       | 2.44657   | 1.996     | 1.64809   | 1.272      | 2.45168    | 2.91491   | 2.02261   | 1.53999    | 0.918541  | 0.671857   | 0.799488   | 0.663379   | 1.10141    | 1.28925    | 2.91391   |
| TSHZ3       | 1.1369    | 0.59981   | 0.754407  | 1.26126    | 1.12763    | 2.74837   | 1.09943   | 0.842432   | 0.219201  | 1.31022    | 2.44155    | 0.407816   | 1.7593     | 1.82178    | 3.25255   |
| TSIX        | 0.0474365 | 0.0379716 | 0.0367276 | 0.0180282  | 0.0274476  | 0.0165345 | 0.109635  | 0.0559105  | 0.0068515 | 0.0133521  | 0.00705583 | 0.0201238  | 0.00201941 | 0.0249493  | 0.024273  |
| TSKS        | 0.166037  | 0.449227  | 0.390941  | 0.710749   | 1.74587    | 0.250131  | 0.174993  | 0.136209   | 0.27999   | 0.144273   | 0.475798   | 0          | 0.387303   | 0.320412   | 0         |
| TSKU        | 8.05206   | 8.2994    | 9.81061   | 12.4027    | 7.47798    | 15.4955   | 8.7192    | 6.49337    | 2.37017   | 5.09945    | 11.3701    | 3.52198    | 10.4157    | 6.45079    | 5.49992   |
| TSL         | 0.687941  | 0.671421  | 0.685855  | 0.163602   | 0.411004   | 0.300396  | 0.82575   | 0.642738   | 0.0644489 | 0.0442788  | 0.0796513  | 0.201945   | 0.0455237  | 0.387206   | 0.607982  |
| TSLP        | 0.0651305 | 0.235357  | 0.179602  | 0.335595   | 0.151755   | 0.120159  | 0.0805609 | 0.125412   | 0.198304  | 0.102182   | 0.355367   | 0.128157   | 0.0420219  | 0.11914    | 0         |
| TSN         | 7.15693   | 5.93851   | 6.09505   | 10.7407    | 2.88411    | 10.6742   | 5.37501   | 7.05093    | 5.7815    | 8.01574    | 10.5617    | 5.09268    | 10.7517    | 6.40052    | 4.56703   |
| TSNARE1     | 2.72433   | 4.25078   | 4.01579   | 1.73555    | 7.32662    | 2.78368   | 4.58099   | 2.86626    | 2.67445   | 1.20194    | 1.26745    | 2.66999    | 0.791864   | 1.44399    | 1.34368   |
| TSNAX       | 7.00616   | 5.87999   | 6.90627   | 6.14419    | 2.33178    | 8.24528   | 3.66254   | 6.74086    | 6.22078   | 6.1915     | 11.7033    | 3.9172     | 6.39154    | 4.46357    | 4.22236   |
| TSNAX-DISC1 | 0.25902   | 0.295516  | 0.422277  | 0.218077   | 0.183527   | 0.200557  | 0.44861   | 0.276219   | 0.0102992 | 0.125653   | 0.127604   | 0.18752    | 0.0249119  | 0.203691   | 0.40068   |
| TSNAXIP1    | 0.153319  | 0.0816472 | 0.100134  | 0.133052   | 0.313364   | 0.199259  | 0.0184268 | 0.0645427  | 0.137587  | 0.101279   | 0.14575    | 0.196312   | 0.00520634 | 0.139175   | 0.115887  |
| TSPAN1      | 2.01738   | 0.561299  | 0.622907  | 0.366016   | 0.353092   | 0.895178  | 0.583956  | 0.643922   | 0.0865121 | 0.873725   | 0.320757   | 0.121985   | 1.3016     | 0.638563   | 0.387655  |
| TSPAN10     | 0.215585  | 0.311616  | 0.214017  | 1.0664     | 1.84183    | 0.871946  | 0.258455  | 0.0862173  | 0.170663  | 1.88054    | 0.839621   | 0.694156   | 1.64827    | 0.478865   | 0.216725  |
| TSPAN11     | 1.76007   | 1.06655   | 1.24952   | 2.72714    | 3.28338    | 2.92649   | 2.02859   | 0.795045   | 0.238174  | 3.15954    | 5.57553    | 0.919971   | 7.5518     | 5.69984    | 15.4948   |
| TSPAN12     | 1.12827   | 0.334868  | 0.470425  | 0.604611   | 0.743099   | 1.80613   | 0.443148  | 0.593605   | 0.252835  | 1.35945    | 2.10921    | 0.180837   | 0.768719   | 0.773664   | 1.90552   |



|         |          |          |          |          |          |           |          |          |           |           |           |           |           |           |          |
|---------|----------|----------|----------|----------|----------|-----------|----------|----------|-----------|-----------|-----------|-----------|-----------|-----------|----------|
| TSPY10  | 0        | 0        | 0        | 0        | 0        | 0         | 0        | 0        | 0         | 0         | 0         | 0         | 0         | 0         | 0        |
| TSPY2   | 0        | 0        | 0        | 0        | 0        | 0         | 0        | 0        | 0         | 0         | 0         | 0         | 0         | 0         | 0        |
| TSPY26P | 0.533338 | 0.376278 | 0.425457 | 0.372956 | 0.976397 | 0.664976  | 0.674192 | 0.609411 | 0.231981  | 0.406418  | 0.258031  | 0.149921  | 0.208922  | 0.139373  | 0.5471   |
| TSPY3   | 0        | 0        | 0        | 0        | 0        | 0         | 0        | 0        | 0         | 0         | 0         | 0         | 0         | 0         | 0        |
| TSPY4   | 0        | 0        | 0        | 0        | 0        | 0         | 0        | 0        | 0         | 0         | 0         | 0         | 0         | 0         | 0        |
| TSPY8   | 0        | 0        | 0        | 0        | 0        | 0         | 0        | 0        | 0         | 0         | 0         | 0         | 0         | 0         | 0        |
| TSPYL1  | 9.23181  | 10.1054  | 10.6777  | 12.5529  | 11.942   | 13.7668   | 8.02919  | 7.53246  | 15.1674   | 11.4111   | 8.81783   | 9.83051   | 19.8977   | 8.871     | 7.38164  |
| TSPYL2  | 7.27517  | 4.92869  | 6.60752  | 2.04088  | 3.2161   | 8.89139   | 3.59732  | 4.35644  | 0.85713   | 1.04766   | 1.48735   | 1.15354   | 1.38863   | 1.74505   | 4.44248  |
| TSPYL4  | 3.13728  | 3.21753  | 3.70769  | 2.1419   | 2.85435  | 4.42204   | 3.90827  | 2.81305  | 4.24388   | 2.93211   | 3.66176   | 1.47115   | 3.18082   | 2.12573   | 3.21019  |
| TSPYL5  | 2.5824   | 0.874465 | 1.04243  | 0.951205 | 1.17602  | 3.92089   | 1.97751  | 1.39637  | 0.543124  | 0.995782  | 2.13079   | 0.230044  | 1.30482   | 1.15725   | 1.67559  |
| TSPYL6  | 0.67298  | 0.414322 | 0.581481 | 0.154117 | 0.371688 | 0.0700375 | 0.426882 | 0.498408 | 0.0273205 | 0.103236  | 0.0253237 | 0.26752   | 0.0144735 | 0.203221  | 0.257729 |
| TSR1    | 6.10262  | 6.63508  | 7.07994  | 10.2211  | 5.81523  | 10.5578   | 5.59689  | 4.87649  | 7.39806   | 5.49694   | 4.76408   | 6.48841   | 11.3391   | 8.2416    | 4.75947  |
| TSR2    | 3.927    | 3.53025  | 3.69281  | 3.708    | 5.41897  | 6.92404   | 3.68093  | 2.87976  | 3.18346   | 2.36577   | 3.01477   | 2.05678   | 3.23739   | 2.7387    | 2.53946  |
| TSR3    | 6.70639  | 7.28328  | 7.45939  | 15.1328  | 25.5469  | 17.1959   | 6.18084  | 4.29904  | 10.088    | 11.2655   | 20.6355   | 6.9008    | 12.8969   | 9.11859   | 5.04791  |
| TSSC2   | 0.517076 | 0.143441 | 0.362949 | 0.435978 | 0.70584  | 0.987302  | 0.644051 | 0.194954 | 0.019083  | 0.0983308 | 0.194571  | 0.0336347 | 0.0404381 | 0.0245678 | 0.540062 |
| TSSC4   | 3.48113  | 3.24803  | 3.06268  | 6.01695  | 10.6432  | 6.34386   | 4.04824  | 2.01338  | 8.42317   | 5.01646   | 6.07135   | 4.57313   | 7.37974   | 4.90947   | 3.0816   |
| TSSK1B  | 0.3082   | 0.517485 | 0.301322 | 0.365732 | 0.507756 | 0.111333  | 0.181278 | 0.290503 | 0.034123  | 0.24616   | 0.0632582 | 0.287352  | 0.0723089 | 0.244059  | 0.201189 |
| TSSK2   | 6.67E-41 | 2.41E-38 | 1.05E-41 | 0        | 1.09E-35 | 0         | 0        | 1.54E-44 | 0         | 1.37E-42  | 0         | 4.95E-34  | 0         | 1.15E-33  | 1.88E-32 |
| TSSK3   | 2.4111   | 2.9509   | 2.88275  | 0.707326 | 1.77695  | 0.959076  | 3.37584  | 2.92482  | 0.535849  | 0.728934  | 0.099337  | 1.02001   | 0.124905  | 1.41652   | 1.59231  |
| TSSK4   | 1.47969  | 1.73028  | 2.0631   | 0.5654   | 1.39458  | 0.721987  | 1.89828  | 1.72875  | 0.161986  | 0.479942  | 0.3566    | 1.03497   | 0.107269  | 0.825488  | 1.00282  |
| TSSK6   | 0.385183 | 0.494898 | 0.491252 | 0.396942 | 0.947342 | 0.505633  | 0.568061 | 0.527741 | 0.0781848 | 0.241722  | 0.108706  | 0.206706  | 0.279583  | 0.30197   | 0.18439  |
| TST     | 4.63261  | 3.85799  | 3.76634  | 16.6885  | 7.97147  | 12.3099   | 5.22096  | 2.36022  | 17.6069   | 9.14765   | 16.9061   | 5.88654   | 9.04407   | 4.11186   | 2.32282  |
| TSTA3   | 15.2309  | 16.9561  | 16.7184  | 36.1479  | 20.6118  | 37.2496   | 15.7715  | 16.5539  | 28.8278   | 23.9163   | 35.5226   | 25.9597   | 31.8739   | 21.1756   | 9.77682  |
| TSTD1   | 6.47454  | 9.79001  | 7.54996  | 8.9081   | 17.1186  | 10.0289   | 8.76868  | 5.72343  | 29.9473   | 14.3506   | 29.5857   | 14.7607   | 8.42133   | 9.08965   | 1.73106  |
| TSTD2   | 2.48981  | 2.6356   | 2.56302  | 2.50434  | 1.53173  | 1.94859   | 2.09454  | 1.91199  | 1.49402   | 1.66492   | 1.92002   | 1.85626   | 1.75947   | 1.7451    | 2.74168  |
| TSTD3   | 1.17758  | 0.7758   | 0.825068 | 0.619148 | 0.559956 | 0.501347  | 0.699701 | 0.619378 | 0.146343  | 0.573096  | 0.664671  | 0.378306  | 0.558197  | 0.753618  | 0.603983 |

|            |            |            |           |            |           |            |            |            |            |           |           |            |            |            |           |
|------------|------------|------------|-----------|------------|-----------|------------|------------|------------|------------|-----------|-----------|------------|------------|------------|-----------|
| TTBK1      | 0          | 0.00321716 | 0         | 0.00344051 | 0.0207439 | 0.011371   | 0.00381188 | 0.00296705 | 0          | 0         | 0         | 0.00238884 | 0.00861614 | 0.00697956 | 0.0431516 |
| TTBK2      | 2.10242    | 2.08146    | 2.29747   | 1.58573    | 2.04511   | 2.46281    | 1.94011    | 1.48818    | 1.11239    | 1.60597   | 1.21223   | 1.20406    | 1.41752    | 1.67295    | 2.61755   |
| TTC1       | 8.21406    | 7.20053    | 6.74357   | 14.8054    | 6.695     | 15.9297    | 6.79321    | 6.2591     | 12.6855    | 9.97632   | 16.3594   | 7.39698    | 11.1031    | 8.62686    | 6.23462   |
| TTC12      | 1.84237    | 2.01979    | 2.29725   | 2.22193    | 2.36412   | 2.52364    | 2.23312    | 1.82718    | 2.22753    | 1.24834   | 1.31872   | 1.42812    | 0.736468   | 1.16874    | 1.04493   |
| TTC13      | 2.61054    | 2.39693    | 2.68351   | 2.16814    | 1.3772    | 2.67819    | 2.34594    | 2.07614    | 1.98816    | 2.15489   | 2.82783   | 2.06931    | 2.86921    | 2.2654     | 2.40507   |
| TTC14      | 3.18896    | 3.86157    | 3.84577   | 2.31659    | 1.17436   | 2.28049    | 2.10749    | 3.49881    | 0.940338   | 2.17032   | 2.71016   | 1.29196    | 1.35696    | 2.77641    | 3.48822   |
| TTC16      | 0.0239493  | 0.0423103  | 0.0594378 | 0          | 0.0372016 | 0          | 0          | 0.0212842  | 0          | 0.0100196 | 0         | 0.0171364  | 0.00515067 | 0.012517   | 0.0343943 |
| TTC17      | 7.6911     | 8.16974    | 8.34643   | 5.81413    | 3.82654   | 6.48204    | 5.77963    | 6.80033    | 5.40031    | 6.38069   | 6.01461   | 5.19433    | 6.58823    | 6.51037    | 7.11313   |
| TTC19      | 7.26603    | 5.74918    | 6.35385   | 5.49674    | 4.34747   | 5.5668     | 5.2816     | 6.49803    | 3.88926    | 4.36185   | 4.44902   | 3.26275    | 3.62913    | 4.22593    | 3.44324   |
| TTC21A     | 0.376342   | 0.322886   | 0.364784  | 0.347779   | 0.439465  | 0.580471   | 0.360342   | 0.241517   | 0.185845   | 0.198073  | 0.301194  | 0.171411   | 0.172268   | 0.332516   | 0.796174  |
| TTC21B     | 3.40998    | 3.6626     | 4.09688   | 1.85502    | 0.813893  | 1.48596    | 2.06973    | 3.09434    | 0.416841   | 0.922798  | 1.13527   | 0.701442   | 0.766082   | 1.46861    | 2.16033   |
| TTC21B-AS1 | 0.372274   | 0.0896837  | 0.282307  | 0.12788    | 0.0963784 | 0.105662   | 0.495893   | 0.110282   | 0          | 0.155747  | 0.0700419 | 0.0221977  | 0.0200158  | 0.129711   | 0.222764  |
| TTC22      | 1.92796    | 4.73167    | 3.68209   | 4.71094    | 21.1739   | 3.71933    | 3.87805    | 2.12169    | 9.5939     | 7.61858   | 3.63872   | 7.93209    | 10.9718    | 3.39291    | 1.53582   |
| TTC23      | 1.91084    | 1.93867    | 1.78854   | 2.26175    | 1.95053   | 2.65907    | 1.64565    | 1.56719    | 1.63568    | 1.69937   | 1.9229    | 1.20319    | 1.68374    | 1.73487    | 2.09344   |
| TTC23L     | 0.333473   | 0.220351   | 0.252227  | 0.0589121  | 0.0739999 | 0.0892409  | 0.184935   | 0.203221   | 0.0232076  | 0.0478335 | 0.0430228 | 0.0409044  | 0.0122946  | 0.0248982  | 0.095782  |
| TTC24      | 0.00791215 | 0.0114366  | 0         | 0.0081537  | 0.0245806 | 0.0269484  | 0.00903384 | 0.021095   | 0.00963611 | 0         | 0         | 0.0226454  | 0.00510488 | 0.016541   | 0.0227257 |
| TTC25      | 0.2189     | 0.200028   | 0.193579  | 0.0544511  | 0.117251  | 0.218527   | 0.21546    | 0.221374   | 0.0183859  | 0.132634  | 0.0937318 | 0.048609   | 0.0243506  | 0.165693   | 0.303528  |
| TTC26      | 0.626771   | 0.480436   | 0.443875  | 0.841635   | 0.199144  | 0.873307   | 0.493349   | 0.582341   | 0.260228   | 0.625754  | 0.916594  | 0.339751   | 0.735254   | 0.558507   | 0.770559  |
| TTC27      | 3.25176    | 3.25958    | 3.25436   | 5.13281    | 2.19292   | 4.97713    | 2.75287    | 3.05202    | 1.73866    | 2.33929   | 4.07372   | 1.82165    | 4.0374     | 2.98865    | 2.47165   |
| TTC28      | 3.00033    | 2.10247    | 2.36186   | 1.34743    | 2.58619   | 4.48654    | 3.04851    | 2.05762    | 0.444377   | 1.12323   | 1.95335   | 0.737614   | 1.21628    | 1.43737    | 4.11253   |
| TTC28-AS1  | 0.89184    | 0.954707   | 0.923383  | 0.504859   | 1.08981   | 0.52081    | 0.755069   | 0.698774   | 0.119881   | 0.251111  | 0.306731  | 0.316763   | 0.140081   | 0.395192   | 0.392582  |
| TTC29      | 0.00950824 | 0.00458121 | 0.0235977 | 0.00979852 | 0         | 0.00809614 | 0.0108562  | 0.00845013 | 0          | 0         | 0         | 0          | 0.0122693  | 0.00496942 | 0.013655  |
| TTC3       | 10.1542    | 11.405     | 11.6505   | 7.93965    | 5.41999   | 8.63339    | 6.31559    | 9.29386    | 9.87949    | 9.50884   | 10.0939   | 8.24613    | 6.74091    | 7.29298    | 13.3024   |
| TTC3-AS1   | 0.120641   | 0.416576   | 0.499016  | 0.0207208  | 0.0624659 | 0          | 0.252532   | 0.428864   | 0.024488   | 0.277599  | 0.0453964 | 0.215805   | 0.0389186  | 0.199666   | 0.317637  |
| TTC30A     | 0.758859   | 0.661523   | 0.871171  | 0.837804   | 0.317383  | 0.780588   | 0.543665   | 0.713549   | 0.78896    | 0.708178  | 1.23014   | 0.643706   | 0.799644   | 0.597139   | 0.610255  |
| TTC30B     | 0.979499   | 0.860372   | 1.11187   | 1.22661    | 0.472872  | 1.2078     | 0.918812   | 0.715814   | 0.536288   | 0.781843  | 1.72086   | 0.748464   | 0.615344   | 0.670191   | 0.581663  |

|            |           |           |           |            |           |           |           |           |           |           |            |           |            |            |            |
|------------|-----------|-----------|-----------|------------|-----------|-----------|-----------|-----------|-----------|-----------|------------|-----------|------------|------------|------------|
| TTC31      | 3.09733   | 3.52527   | 3.33364   | 4.22599    | 4.90941   | 4.31934   | 3.41013   | 2.24705   | 2.95425   | 2.86602   | 3.30027    | 2.69679   | 2.79874    | 3.03112    | 4.14177    |
| TTC32      | 1.88773   | 1.38202   | 1.56166   | 1.08637    | 0.22849   | 1.02288   | 0.951711  | 1.45978   | 2.11989   | 0.738481  | 1.41145    | 0.613963  | 0.490344   | 0.820039   | 0.492912   |
| TTC33      | 0.991965  | 0.828301  | 0.911031  | 0.658398   | 0.424391  | 1.00928   | 0.753463  | 0.971228  | 0.557979  | 1.19226   | 1.87425    | 0.538348  | 0.827133   | 0.878719   | 0.959786   |
| TTC34      | 0.0521534 | 0.0691028 | 0.0862899 | 0.0134364  | 0.486073  | 0.0444079 | 0.0446603 | 0.0231748 | 0         | 0.0327289 | 0          | 0.0186586 | 0          | 0.0477008  | 0.187247   |
| TTC36      | 0.441968  | 0.116153  | 0.166194  | 0.267668   | 0.510069  | 0.349595  | 0.252312  | 0.357077  | 0.195734  | 0.075643  | 0.090714   | 0.100622  | 0.0129616  | 0.178494   | 0          |
| TTC37      | 9.7295    | 10.9708   | 10.9557   | 9.2321     | 4.08398   | 7.85269   | 7.77803   | 8.81984   | 13.6135   | 11.8958   | 12.7743    | 8.40167   | 9.14388    | 7.78451    | 7.93617    |
| TTC38      | 1.21479   | 1.70464   | 1.8412    | 3.81045    | 2.60321   | 7.96545   | 1.86284   | 0.961398  | 0.809932  | 3.08276   | 3.18312    | 1.48464   | 3.2438     | 4.18942    | 3.55285    |
| TTC39A     | 1.23918   | 1.98458   | 1.82889   | 3.05765    | 3.05451   | 3.46763   | 1.70049   | 2.04228   | 8.55201   | 6.67395   | 6.9747     | 6.26497   | 8.74213    | 4.36327    | 1.4872     |
| TTC39A-AS1 | 0.0356047 | 0.343098  | 0.147274  | 0.146767   | 0.387145  | 0.272852  | 0.162609  | 0.158212  | 0.0433625 | 0.312813  | 0.281353   | 0.433094  | 0          | 0.427997   | 0.306797   |
| TTC39B     | 5.58292   | 6.76539   | 5.96657   | 10.3893    | 4.72936   | 6.55577   | 6.00378   | 6.59431   | 30.501    | 11.0077   | 12.4876    | 10.9809   | 8.06684    | 7.02654    | 3.58002    |
| TTC39C     | 3.45778   | 4.34407   | 4.69003   | 3.61669    | 2.7229    | 3.67482   | 3.54684   | 4.52567   | 5.09395   | 2.3115    | 3.72386    | 2.94249   | 2.09255    | 2.03333    | 2.1191     |
| TTC39C-AS1 | 0.123627  | 0.119131  | 0.204547  | 0.076441   | 0.153629  | 0.0421068 | 0         | 0.153818  | 0.0602257 | 0.031033  | 0.055824   | 0.0530752 | 0          | 0.0258452  | 0.106527   |
| TTC3P1     | 1.40206   | 0.776424  | 0.610067  | 0.609844   | 0.551541  | 0.790721  | 0.966731  | 0.881932  | 0.232847  | 0.399938  | 0.421381   | 0.19543   | 0.187969   | 0.247431   | 0.849867   |
| TTC4       | 2.37576   | 2.62082   | 2.1117    | 5.89167    | 3.37041   | 4.23781   | 2.15506   | 1.97735   | 3.63286   | 3.45644   | 4.37575    | 3.09895   | 6.36217    | 4.03892    | 2.2275     |
| TTC41P     | 0.0666208 | 0.0345681 | 0.0296765 | 0.0686547  | 0.0318416 | 0.043636  | 0.029256  | 0.0683158 | 0.0249651 | 0         | 0.0983471  | 0.0256679 | 0.0132257  | 0.0374973  | 0.0367984  |
| TTC5       | 3.69792   | 3.21068   | 3.28503   | 2.95402    | 3.06483   | 3.53968   | 3.21622   | 2.74603   | 1.93446   | 1.86897   | 4.32859    | 1.81133   | 1.48917    | 1.8873     | 2.01378    |
| TTC6       | 0.264971  | 0.135747  | 0.180357  | 0.00691292 | 0.0260501 | 0.10567   | 0.111057  | 0.283177  | 0         | 0         | 0.00378632 | 0.0167995 | 0.00216403 | 0.00175298 | 0.00481686 |
| TTC7A      | 3.33538   | 3.8685    | 4.41998   | 5.31942    | 6.75028   | 5.05275   | 4.7025    | 2.87893   | 1.86248   | 4.59605   | 2.17942    | 3.50101   | 8.80175    | 3.45473    | 3.4186     |
| TTC7B      | 1.5141    | 1.77258   | 1.98322   | 3.50389    | 4.0127    | 3.4945    | 1.65292   | 1.52265   | 2.25647   | 3.69235   | 4.16812    | 2.60391   | 5.22288    | 2.91198    | 3.54776    |
| TTC8       | 2.212     | 1.47432   | 1.67743   | 2.21304    | 0.744466  | 2.80168   | 1.06285   | 1.41704   | 0.718392  | 1.55009   | 2.92365    | 1.1409    | 1.558      | 1.62816    | 1.60159    |
| TTC9       | 1.35301   | 1.18197   | 1.12297   | 5.76011    | 3.62455   | 1.34848   | 1.17507   | 1.13936   | 6.41295   | 8.21242   | 5.25818    | 3.31697   | 18.4064    | 4.08286    | 1.29327    |
| TTC9B      | 0.109813  | 0.0396821 | 0.0908449 | 0.0282913  | 0         | 0         | 0         | 0         | 0         | 0.10337   | 0.0619825  | 0         | 0          | 0.0286965  | 0          |
| TTC9C      | 2.57332   | 3.57373   | 3.64545   | 3.51851    | 3.00447   | 4.55415   | 3.14937   | 2.34674   | 2.17128   | 2.4065    | 4.5568     | 2.00976   | 1.81221    | 2.43493    | 2.58451    |
| TTF1       | 2.39208   | 1.73235   | 1.76644   | 2.69196    | 1.34496   | 2.85531   | 1.01373   | 1.4216    | 1.72474   | 1.62088   | 1.5407     | 1.30733   | 2.53755    | 1.99804    | 1.54906    |
| TTF2       | 2.05494   | 3.06908   | 3.2422    | 3.22318    | 1.8219    | 3.24374   | 2.32448   | 2.10591   | 1.6549    | 1.54989   | 1.62545    | 1.59659   | 2.18409    | 2.29502    | 1.54747    |
| TTI1       | 2.32889   | 2.66603   | 2.65575   | 3.75335    | 2.30293   | 3.78214   | 2.34584   | 2.06973   | 1.43594   | 1.75819   | 2.32594    | 1.82509   | 2.76416    | 2.67231    | 2.9171     |





|        |            |            |            |            |           |            |            |            |           |          |          |            |          |            |          |
|--------|------------|------------|------------|------------|-----------|------------|------------|------------|-----------|----------|----------|------------|----------|------------|----------|
| TTY14  | 1.14517    | 1.09069    | 1.20073    | 1.16641    | 1.53063   | 1.08848    | 0.045611   | 0.733712   | 2.80559   | 1.63786  | 2.2548   | 1.34343    | 1.54644  | 1.35014    | 0.325097 |
| TTY15  | 1.42602    | 1.338      | 1.38424    | 1.30577    | 1.08355   | 0.85711    | 0.131061   | 1.36542    | 0.32799   | 0.969708 | 1.31077  | 0.748683   | 0.683637 | 1.0568     | 1.33148  |
| TTY16  | 0          | 0          | 0          | 0          | 0         | 0          | 0          | 0          | 0.2936    | 0.453858 | 0.136071 | 0          | 0        | 0.125996   | 0        |
| TTY17A | 0          | 0          | 0          | 0          | 0         | 0          | 0          | 0          | 0         | 0        | 0        | 0          | 0        | 0          | 0        |
| TTY17B | 0          | 0          | 0          | 0          | 0         | 0          | 0          | 0          | 0         | 0        | 0        | 0          | 0        | 0          | 0        |
| TTY17C | 0          | 0          | 0          | 0          | 0         | 0          | 0          | 0          | 0         | 0        | 0        | 0          | 0        | 0          | 0        |
| TTY18  | 0          | 0          | 0          | 0          | 0         | 0          | 0          | 0          | 0         | 0        | 0        | 0          | 0        | 0          | 0        |
| TTY19  | 0          | 0          | 0          | 0          | 0         | 0          | 0          | 0          | 0         | 0        | 0        | 0.0615594  | 0        | 0          | 0        |
| TTY1B  | 0.00615507 | 0          | 0.00632419 | 0          | 0         | 0          | 0          | 0.00925579 | 0         | 0        | 0        | 0          | 0        | 0          | 0        |
| TTY2   | 0.0744036  | 0.0136567  | 0.019808   | 0          | 0.0165106 | 0.00603368 | 0          | 0.00411835 | 0         | 0        | 0        | 0.00253513 | 0        | 0          | 0        |
| TTY20  | 0          | 0          | 0          | 0          | 0         | 0          | 0          | 0          | 0         | 0        | 0        | 0          | 0        | 0          | 0        |
| TTY21  | 0          | 0          | 0          | 0          | 0         | 0          | 0          | 0          | 0         | 0        | 0        | 0          | 0        | 0          | 0        |
| TTY21B | 0          | 0          | 0          | 0          | 0         | 0          | 0          | 0          | 0         | 0        | 0        | 0          | 0        | 0          | 0        |
| TTY22  | 0.108398   | 0          | 0          | 0          | 0         | 0          | 0          | 0          | 0         | 0        | 0        | 0          | 0        | 0          | 0        |
| TTY23  | 0          | 0          | 0          | 0          | 0         | 0          | 0          | 0.0100428  | 0         | 0        | 0        | 0          | 0        | 0          | 0        |
| TTY23B | 0          | 0          | 0          | 0          | 0         | 0          | 0          | 0.0100428  | 0         | 0        | 0        | 0          | 0        | 0          | 0        |
| TTY2B  | 0.0744036  | 0.0136567  | 0.019808   | 0          | 0.0165106 | 0.00603368 | 0          | 0.00411835 | 0         | 0        | 0        | 0.00253513 | 0        | 0          | 0        |
| TTY3   | 0          | 0          | 0          | 0          | 0         | 0          | 0          | 0          | 0         | 0        | 0        | 0          | 0        | 0          | 0        |
| TTY3B  | 0          | 0          | 0          | 0          | 0         | 0          | 0          | 0          | 0         | 0        | 0        | 0          | 0        | 0          | 0        |
| TTY4   | 0          | 0.00644335 | 0.014224   | 0.00590629 | 0         | 0.00162671 | 0.00436255 | 0.00169784 | 0.0302471 | 0        | 0        | 0.0177706  | 0        | 0.00299544 | 0        |
| TTY4B  | 0          | 0.00644335 | 0.014224   | 0.00590629 | 0         | 0.00162671 | 0.00436255 | 0.00169784 | 0.0302471 | 0        | 0        | 0.0177706  | 0        | 0.00299544 | 0        |
| TTY4C  | 0          | 0.00644335 | 0.014224   | 0.00590629 | 0         | 0.00162671 | 0.00436255 | 0.00169784 | 0.0302471 | 0        | 0        | 0.0177706  | 0        | 0.00299544 | 0        |
| TTY5   | 0          | 0          | 0          | 0          | 0         | 0          | 0          | 0          | 0         | 0        | 0        | 0          | 0        | 0          | 0        |
| TTY6   | 0          | 0          | 0          | 0          | 0         | 0          | 0          | 0          | 0         | 0        | 0        | 0          | 0        | 0          | 0        |
| TTY6B  | 0          | 0          | 0          | 0          | 0         | 0          | 0          | 0          | 0         | 0        | 0        | 0          | 0        | 0          | 0        |
| TTY7   | 0          | 0          | 0          | 0          | 0         | 0          | 0          | 0          | 0         | 0        | 0        | 0          | 0        | 1.71E-07   | 0        |

|         |           |           |           |           |           |            |           |           |           |           |           |           |            |            |           |
|---------|-----------|-----------|-----------|-----------|-----------|------------|-----------|-----------|-----------|-----------|-----------|-----------|------------|------------|-----------|
| TTY7B   | 0         | 0         | 0         | 0         | 0         | 0          | 0         | 0         | 0         | 0         | 0         | 0         | 0          | 0.00544334 | 0         |
| TTY8    | 0         | 0         | 0         | 0         | 0         | 0          | 0         | 0         | 0         | 0         | 0         | 0         | 0          | 0          | 0         |
| TTY8B   | 0         | 0         | 0         | 0         | 0         | 0          | 0         | 0         | 0         | 0         | 0         | 0         | 0          | 0          | 0         |
| TTY9A   | 0         | 0         | 0         | 0         | 0.0054901 | 0          | 0         | 0         | 0         | 0         | 0         | 0         | 0          | 0          | 0         |
| TTY9B   | 0         | 0         | 0         | 0         | 0.0054901 | 0          | 0         | 0         | 0         | 0         | 0         | 0         | 0          | 0          | 0         |
| TTYH1   | 0.922324  | 0.608113  | 0.913605  | 0.0875444 | 1.47039   | 0.919683   | 1.69047   | 0.776544  | 0         | 0.167549  | 0.0821991 | 0.0607846 | 0.01566    | 0.13954    | 0.278858  |
| TTYH2   | 1.03362   | 0.825582  | 0.781919  | 0.723406  | 0.755559  | 1.89671    | 1.38841   | 0.889119  | 0.242341  | 0.575804  | 1.56616   | 0.300578  | 0.574162   | 0.381327   | 1.07957   |
| TTYH3   | 3.69079   | 2.99463   | 2.88653   | 16.2822   | 15.6411   | 28.8438    | 5.42508   | 3.55305   | 5.51204   | 18.8365   | 25.1016   | 7.16707   | 28.6218    | 19.3223    | 27.991    |
| TUB     | 1.56826   | 1.72063   | 1.9231    | 1.02594   | 2.0828    | 1.63441    | 1.72103   | 1.37699   | 0.209194  | 0.492768  | 0.779573  | 0.459011  | 0.558643   | 0.470037   | 2.07916   |
| TUB-AS1 | 0.0458051 | 0.0441392 | 0.0284199 | 0.0118009 | 0         | 0.00975062 | 0         | 0.0203539 | 0         | 0         | 0         | 0         | 0          | 0          | 0.0822275 |
| TUBA1A  | 20.8179   | 19.3351   | 24.0539   | 19.5738   | 22.7738   | 29.0641    | 30.08     | 13.375    | 23.2632   | 34.892    | 66.2518   | 13.1682   | 21.326     | 14.8791    | 36.1575   |
| TUBA1B  | 80.9901   | 56.5087   | 73.0621   | 189.145   | 59.4431   | 220.416    | 94.4015   | 58.2793   | 44.3184   | 157.218   | 292.153   | 56.3068   | 252.12     | 133.478    | 100.99    |
| TUBA1C  | 57.6944   | 59.6187   | 48.1911   | 240.916   | 84.4606   | 187.399    | 65.6726   | 39.2751   | 244.442   | 278.52    | 329.024   | 177.761   | 469.975    | 194.708    | 80.4523   |
| TUBA3C  | 0         | 0         | 0         | 0         | 0         | 0          | 0         | 0         | 0         | 0         | 0         | 0         | 0          | 0          | 0         |
| TUBA3D  | 0.0894661 | 0.26861   | 0.208815  | 0.129804  | 0.264332  | 0.241495   | 0.376848  | 0.205392  | 0.0518118 | 0.0425661 | 0.0236645 | 0.101467  | 0.0274481  | 0.236923   | 0.0814613 |
| TUBA3E  | 0.115581  | 0.055656  | 0.164109  | 0.0173089 | 0.0233436 | 1.56E-26   | 0.0639162 | 0.062805  | 0.0183024 | 0.0491991 | 0.0258158 | 0.0107529 | 0          | 0.00811436 | 3.78E-07  |
| TUBA3FP | 0.198892  | 0.105833  | 0.0339261 | 0.0428878 | 0.275564  | 0.0803315  | 0.14003   | 0.105321  | 0.0143804 | 0.0296397 | 0.0399882 | 0.0642193 | 0.00761825 | 0.0752864  | 0.143843  |
| TUBA4A  | 23.0781   | 41.5951   | 44.1956   | 68.5184   | 67.8245   | 46.9234    | 43.0664   | 27.5245   | 148.867   | 166.382   | 141.638   | 111.412   | 249.839    | 101.346    | 33.2836   |
| TUBA4B  | 0.0514744 | 0.0653965 | 0.112232  | 0.0524376 | 0.391806  | 0.0433065  | 0.0389171 | 0.0151141 | 0.206672  | 0.383522  | 0.0383573 | 0.352648  | 0.12048    | 0.302715   | 0.0244494 |
| TUBA8   | 0.370463  | 0.414738  | 0.432668  | 0.258258  | 0.287729  | 0.482445   | 0.460305  | 0.203352  | 0.238861  | 0.164107  | 0.0984016 | 0.17152   | 0.0984204  | 0.244873   | 0.281664  |
| TUBAL3  | 0.0514862 | 0.105429  | 0.0532413 | 0.0928516 | 0.139958  | 0.164399   | 0.0881779 | 0.0343175 | 0.0470283 | 0.145396  | 0.116243  | 0.0644696 | 0.307272   | 0.134545   | 0.388189  |
| TUBB    | 8.25623   | 6.69224   | 7.80006   | 15.1952   | 5.48534   | 17.4018    | 10.1732   | 5.94939   | 4.54369   | 10.2326   | 19.0415   | 4.9997    | 16.6313    | 9.49331    | 9.65369   |
| TUBB1   | 0.463391  | 0.28706   | 0.421684  | 0.0886855 | 0.69924   | 0.0958244  | 0.173842  | 0.305926  | 0.120934  | 0.174481  | 0.336285  | 0.0947338 | 0.256266   | 0.439399   | 0.380279  |
| TUBB2A  | 20.9693   | 28.6392   | 25.1816   | 92.3168   | 106.897   | 100.786    | 38.994    | 19.1645   | 278.998   | 302.562   | 279.64    | 191.316   | 387.697    | 167.74     | 67.8131   |
| TUBB2B  | 1.57571   | 1.45948   | 1.27327   | 0.781133  | 4.62143   | 2.2657     | 1.33167   | 1.02209   | 7.23082   | 6.16013   | 0.751454  | 9.82126   | 21.0365    | 0.0896067  | 2.58587   |
| TUBB3   | 1.04835   | 1.3129    | 1.24364   | 24.2679   | 7.56902   | 29.4765    | 2.43598   | 1.37418   | 4.34188   | 48.8142   | 28.0717   | 26.8024   | 83.4772    | 35.8871    | 16.6847   |

|          |           |            |           |           |           |           |           |           |           |           |            |            |           |           |           |
|----------|-----------|------------|-----------|-----------|-----------|-----------|-----------|-----------|-----------|-----------|------------|------------|-----------|-----------|-----------|
| TUBB4A   | 0.0935245 | 0.286755   | 0.365749  | 0.175236  | 0.343379  | 0.687755  | 0.854266  | 0.340023  | 0.0724869 | 0.0320142 | 0.00959795 | 0.00608397 | 0.0329135 | 0         | 0         |
| TUBB4B   | 43.7766   | 64.7793    | 77.0592   | 128.932   | 91.8302   | 111.022   | 101.183   | 38.9487   | 147.642   | 129.685   | 134.124    | 103.785    | 284.349   | 114.742   | 47.9127   |
| TUBB6    | 11.0403   | 9.41821    | 9.54613   | 55.7236   | 16.9718   | 38.1693   | 11.396    | 7.58382   | 19.8757   | 44.5609   | 44.6024    | 21.8359    | 91.9882   | 40.2908   | 23.202    |
| TUBB8    | 0         | 0.014828   | 0.0127298 | 0.0158574 | 0         | 0.137694  | 0.0351383 | 0.0140591 | 0         | 0         | 0.018024   | 0.0111661  | 0         | 0.0582669 | 0         |
| TUBB8P12 | 0.0153877 | 0.00741401 | 0.0127298 | 0.0475723 | 0         | 0.0786144 | 0.0175691 | 0.0136753 | 0         | 0         | 0.0521123  | 0.0110103  | 0         | 0.0321691 | 0         |
| TUBBP5   | 0.904841  | 0.477917   | 0.230323  | 1.62296   | 0.121632  | 1.48529   | 0.456956  | 0.486911  | 0.264903  | 0.611514  | 0.461249   | 0.778083   | 0.089817  | 0.417229  | 0.162433  |
| TUBD1    | 0.96856   | 1.406      | 1.15549   | 1.27455   | 0.40336   | 1.40717   | 0.511321  | 1.02913   | 1.14068   | 0.910962  | 1.49058    | 0.909191   | 1.34805   | 1.00073   | 0.691234  |
| TUBE1    | 1.5919    | 1.5243     | 2.07542   | 1.17327   | 0.594718  | 1.49275   | 1.10435   | 1.22671   | 0.908027  | 1.32779   | 1.85393    | 0.663244   | 1.45612   | 1.15321   | 0.737942  |
| TUBG1    | 4.81457   | 5.05285    | 5.8594    | 11.2641   | 5.20629   | 13.4242   | 7.4729    | 4.44799   | 16.739    | 13.4523   | 15.2198    | 9.62305    | 21.0879   | 10.5306   | 5.85942   |
| TUBG2    | 2.62318   | 2.70711    | 2.9876    | 2.83809   | 3.43804   | 5.88445   | 2.75327   | 2.41987   | 1.97581   | 2.17962   | 3.98496    | 2.43444    | 1.62373   | 2.93331   | 3.80187   |
| TUBGCP2  | 3.84812   | 4.62746    | 4.56422   | 6.74873   | 6.64404   | 7.48562   | 5.26406   | 3.47684   | 5.57689   | 6.33993   | 5.04173    | 5.69665    | 8.98015   | 7.05572   | 4.54593   |
| TUBGCP3  | 4.24027   | 3.5635     | 3.7405    | 3.18761   | 2.09985   | 4.30986   | 3.46034   | 3.2924    | 1.56013   | 2.34861   | 3.0081     | 2.18451    | 3.13229   | 2.70952   | 2.7948    |
| TUBGCP4  | 1.80418   | 1.67826    | 1.60952   | 2.35754   | 1.66716   | 3.03555   | 2.08635   | 1.14635   | 1.25457   | 1.03993   | 1.38148    | 1.57537    | 2.54783   | 2.24842   | 1.52424   |
| TUBGCP5  | 3.79332   | 2.62216    | 2.72474   | 2.94794   | 1.28067   | 2.49603   | 1.46906   | 2.46826   | 1.15623   | 2.51378   | 2.6229     | 1.82339    | 2.8907    | 2.17841   | 2.24845   |
| TUBGCP6  | 3.7681    | 5.91899    | 6.06589   | 4.40617   | 12.6201   | 4.42968   | 5.65883   | 4.18255   | 2.74879   | 2.60114   | 1.31084    | 5.02919    | 2.27487   | 4.63807   | 5.09672   |
| TUFM     | 19.366    | 14.4297    | 14.2737   | 30.7707   | 19.9968   | 39.3835   | 19.6107   | 12.5134   | 22.6329   | 22.1604   | 36.0536    | 17.407     | 34.4347   | 24.0334   | 13.3684   |
| TUFT1    | 7.19924   | 17.9549    | 20.9366   | 11.4038   | 15.4082   | 10.811    | 14.4317   | 10.5622   | 56.318    | 20.0025   | 15.2976    | 18.21      | 24.0248   | 20.2902   | 4.14175   |
| TUG1     | 10.6508   | 11.5127    | 12.3348   | 14.6749   | 7.31079   | 10.3081   | 7.94864   | 11.3864   | 13.4236   | 11.2271   | 11.6075    | 8.7809     | 15.2706   | 11.5796   | 10.4703   |
| TULP1    | 0.160567  | 0.273352   | 0.380786  | 0.0661876 | 0.532088  | 0.191409  | 0.464436  | 0.180752  | 0.378068  | 0.0403056 | 0.132924   | 0.122549   | 0.0345323 | 0.100703  | 0.0768648 |
| TULP2    | 0.0394484 | 0.0380137  | 0.0435126 | 0.0542036 | 0.0408513 | 0.0223932 | 0.150136  | 0.0350584 | 0.0960874 | 0.264063  | 0.0296882  | 0.413987   | 0.0169679 | 0.16494   | 0.0755372 |
| TULP3    | 2.23532   | 4.87169    | 5.45522   | 4.6225    | 2.74306   | 6.13508   | 3.64968   | 2.68848   | 4.94565   | 4.47955   | 6.08981    | 3.19887    | 4.84583   | 3.58271   | 4.32307   |
| TULP4    | 5.94572   | 7.72165    | 8.34064   | 6.59345   | 7.05803   | 7.75909   | 8.5433    | 6.84404   | 9.84022   | 6.27758   | 4.38214    | 8.07188    | 9.86966   | 4.65689   | 5.23404   |
| TUNAR    | 0         | 0.00320606 | 0         | 0         | 0         | 0         | 0         | 0         | 0         | 0         | 0          | 0          | 0         | 0.0139109 | 0         |
| TUSC1    | 2.49233   | 1.9683     | 2.26336   | 6.48863   | 5.26866   | 7.42765   | 2.41774   | 1.29068   | 2.45341   | 3.56324   | 7.38287    | 2.06491    | 4.81202   | 3.52094   | 2.39517   |
| TUSC2    | 3.98544   | 3.32401    | 2.88775   | 5.31092   | 4.31219   | 7.9924    | 3.23239   | 2.06409   | 5.13835   | 4.43293   | 9.33944    | 3.36303    | 6.3132    | 4.64717   | 2.96048   |
| TUSC3    | 1.69261   | 1.0036     | 0.813142  | 2.06608   | 0.903966  | 2.90363   | 0.931849  | 1.01545   | 0.786536  | 2.24911   | 4.33827    | 1.03338    | 2.25739   | 2.17728   | 2.04351   |

|              |          |            |            |           |           |            |           |           |           |           |           |            |           |          |          |
|--------------|----------|------------|------------|-----------|-----------|------------|-----------|-----------|-----------|-----------|-----------|------------|-----------|----------|----------|
| TUSC7        | 0.02202  | 0.00530479 | 0.00910826 | 0.0113461 | 0.0171024 | 0.00937488 | 0.0251418 | 0.0587087 | 0         | 0         | 0         | 0.00787796 | 0         | 0        | 0        |
| TUSC8        | 0.365304 | 0.103535   | 0.0888838  | 0         | 0.033379  | 0.182971   | 0.0981392 | 0.171874  | 0         | 0         | 0         | 0.0153756  | 0         | 0        | 0.308601 |
| TUT1         | 2.60421  | 2.81726    | 2.81831    | 3.14788   | 6.18234   | 5.84346    | 2.61809   | 2.35079   | 2.47347   | 1.624     | 1.9229    | 2.53138    | 2.38296   | 2.10153  | 2.11696  |
| TUT4         | 4.83824  | 5.63062    | 5.99896    | 5.31621   | 1.86199   | 3.99513    | 2.96761   | 4.88349   | 2.89565   | 2.67629   | 2.47858   | 2.9807     | 2.27678   | 2.94429  | 3.84633  |
| TUT7         | 10.4249  | 11.5912    | 11.1178    | 13.0778   | 6.6447    | 10.7685    | 7.92762   | 10.3279   | 25.4554   | 11.6725   | 9.71603   | 13.0874    | 11.2441   | 9.78734  | 7.06477  |
| TVP23A       | 0.250252 | 0.264441   | 0.305584   | 0.150908  | 0.235976  | 0.0603292  | 0.183268  | 0.289571  | 0.0577373 | 0.0533322 | 0.0805531 | 0.128437   | 0.0275092 | 0.148827 | 0.279043 |
| TVP23B       | 2.65287  | 3.01973    | 3.04786    | 5.17964   | 1.40955   | 4.25653    | 2.02472   | 2.96869   | 5.56127   | 7.09339   | 7.86278   | 3.88727    | 7.95943   | 4.55922  | 2.84332  |
| TVP23C       | 2.71953  | 4.25513    | 4.49389    | 1.31508   | 1.09656   | 1.02822    | 2.44313   | 2.95008   | 0.516225  | 1.00891   | 0.614432  | 1.46344    | 0.409053  | 1.39584  | 1.4628   |
| TVP23C-CDRT4 | 1.35692  | 1.28958    | 2.47605    | 1.56959   | 2.20104   | 1.38029    | 1.17821   | 0.898835  | 0.807569  | 1.2121    | 1.30876   | 0.943472   | 0.974896  | 0.895011 | 0.915676 |
| TWF1         | 8.24998  | 7.34673    | 6.57024    | 22.2005   | 2.1116    | 14.4601    | 5.58908   | 9.54591   | 17.3711   | 28.1478   | 26.2472   | 13.8378    | 53.1503   | 20.0988  | 11.1941  |
| TWF2         | 7.46274  | 5.18078    | 5.2665     | 11.1983   | 15.2646   | 18.1417    | 6.3255    | 4.0629    | 6.62579   | 10.6714   | 23.2478   | 4.99332    | 10.9714   | 7.57741  | 10.2675  |
| TWIST1       | 1.81966  | 1.772      | 2.04601    | 2.32421   | 4.12042   | 6.01221    | 1.66796   | 1.30968   | 0.624267  | 2.29995   | 6.88581   | 0.797715   | 2.76147   | 2.99376  | 4.50881  |
| TWIST2       | 3.22366  | 1.97822    | 2.87913    | 8.36306   | 5.85451   | 11.0207    | 4.01029   | 2.08099   | 0.507849  | 4.6298    | 9.41466   | 2.94926    | 12.3345   | 14.6354  | 18.8408  |
| TWISTNB      | 2.46772  | 1.81356    | 1.94309    | 2.29182   | 0.498781  | 3.03286    | 1.22208   | 2.48904   | 1.44839   | 2.09717   | 2.56423   | 1.10623    | 3.02702   | 1.94548  | 1.82749  |
| TWNK         | 1.15557  | 1.18656    | 0.935076   | 2.17998   | 1.91271   | 2.29053    | 1.19683   | 0.987695  | 1.06898   | 0.673666  | 0.605915  | 1.07083    | 2.0493    | 1.70625  | 0.9522   |
| TWSG1        | 3.4998   | 2.61251    | 2.89018    | 5.32742   | 2.04822   | 6.12271    | 2.25828   | 2.88582   | 2.95664   | 7.38546   | 13.348    | 3.88857    | 7.87934   | 5.15253  | 7.91089  |
| TXK          | 0.246203 | 0.33674    | 0.374501   | 0.171874  | 0.135704  | 0.189351   | 0.317378  | 0.4729    | 0.27083   | 0.159489  | 0.134483  | 0.37506    | 0.107607  | 0.249051 | 0.319361 |
| TXLNA        | 9.71854  | 10.7996    | 10.3752    | 17.2009   | 16.1007   | 21.3331    | 11.1073   | 8.65418   | 9.37366   | 11.0955   | 10.4481   | 8.88742    | 18.3129   | 10.5496  | 12.6542  |
| TXLNB        | 0.237162 | 0.214253   | 0.228897   | 0.336053  | 0.145823  | 0.5932     | 0.135392  | 0.17125   | 0.0300871 | 0.0992209 | 0.156174  | 0.0247473  | 0.0988226 | 0.17818  | 0.368977 |
| TXLNG        | 1.61622  | 1.69695    | 1.82484    | 1.96937   | 0.850481  | 2.21446    | 1.46666   | 1.5393    | 1.46186   | 1.0506    | 1.24804   | 1.38247    | 2.18406   | 1.78573  | 1.73138  |
| TXLNGY       | 2.41682  | 2.14341    | 2.20276    | 1.50106   | 0.403518  | 1.29161    | 0.0794467 | 2.35812   | 0.807886  | 0.995595  | 1.45579   | 1.21815    | 0.532743  | 1.58074  | 1.71211  |
| TXN          | 49.9657  | 31.7306    | 38.6661    | 93.0354   | 11.9278   | 61.0701    | 25.6021   | 33.4579   | 71.3088   | 565.371   | 308.659   | 167.848    | 308.152   | 199.227  | 85.2351  |
| TXN2         | 10.1857  | 8.74694    | 9.90238    | 19.2261   | 17.4095   | 27.494     | 11.1155   | 7.97457   | 16.2869   | 12.1319   | 25.1479   | 10.424     | 13.0765   | 10.3754  | 7.36374  |
| TXNDC11      | 4.00208  | 3.178      | 3.35241    | 5.10907   | 3.63845   | 6.2587     | 3.41272   | 3.03949   | 3.47397   | 3.90477   | 5.90485   | 3.22346    | 6.61986   | 4.06314  | 3.62184  |
| TXNDC12      | 3.24175  | 2.20713    | 2.46304    | 5.26919   | 2.4081    | 6.14893    | 2.52875   | 2.83187   | 2.28077   | 4.37738   | 9.50732   | 2.09373    | 4.63764   | 3.12389  | 3.29307  |
| TXNDC12-AS1  | 0.177568 | 0.0285184  | 0.195863   | 0         | 0         | 0.151197   | 0.0675805 | 0.420821  | 0.072086  | 0.0742888 | 0.0668174 | 0.169406   | 0.0381887 | 0.154675 | 0.595024 |

|          |           |           |           |          |           |           |           |           |           |           |           |            |           |           |           |
|----------|-----------|-----------|-----------|----------|-----------|-----------|-----------|-----------|-----------|-----------|-----------|------------|-----------|-----------|-----------|
| TXNDC15  | 4.1719    | 3.28567   | 3.70038   | 3.29719  | 4.16109   | 5.50737   | 3.61728   | 3.29507   | 2.41438   | 4.62985   | 10.3823   | 1.84493    | 4.37957   | 3.45591   | 7.48701   |
| TXNDC16  | 1.41621   | 1.19651   | 1.18396   | 0.966112 | 0.371808  | 0.794015  | 1.01915   | 1.44474   | 0.923123  | 0.663429  | 0.973869  | 0.438875   | 0.405387  | 0.518643  | 0.515625  |
| TXNDC17  | 4.22199   | 2.90031   | 2.52768   | 23.169   | 3.11492   | 12.74     | 2.74552   | 2.81352   | 9.52264   | 18.9988   | 32.0453   | 8.98936    | 14.4679   | 14.1809   | 5.15049   |
| TXNDC2   | 0.0108704 | 0.0157126 | 0         | 0.044809 | 0.0168855 | 0.04628   | 0.0496458 | 0.0193214 | 0.0264778 | 0.0272869 | 0.0122713 | 0.00777805 | 0.0561081 | 0.0681761 | 0.109279  |
| TXNDC5   | 15.3528   | 7.28016   | 8.24282   | 27.567   | 15.0366   | 37.6132   | 9.54978   | 10.5127   | 11.3058   | 39.6001   | 68.0438   | 13.9978    | 54.4031   | 28.6272   | 31.1194   |
| TXNDC8   | 0         | 0.0153591 | 0.0703235 | 0        | 0.0165056 | 0         | 0.0363967 | 0.0188867 | 0         | 0.106692  | 0         | 0.0228092  | 0         | 0.0277676 | 0         |
| TXNDC9   | 4.25046   | 3.61486   | 2.92814   | 9.55542  | 1.8562    | 5.38373   | 2.15882   | 3.81778   | 7.70039   | 12.7009   | 18.4075   | 5.02196    | 11.2525   | 6.61699   | 4.54013   |
| TXNIP    | 176.172   | 88.8281   | 98.3133   | 77.7059  | 61.3255   | 115.802   | 79.2352   | 138.348   | 43.8027   | 30.5834   | 41.6812   | 14.0235    | 36.288    | 11.6624   | 29.0778   |
| TXNL1    | 9.37711   | 9.02812   | 9.15076   | 17.6743  | 5.45904   | 16.8928   | 7.63688   | 8.76537   | 19.428    | 16.2816   | 25.4493   | 10.8002    | 18.4221   | 13.5176   | 8.32654   |
| TXNL4A   | 6.56659   | 6.22295   | 5.73944   | 12.8217  | 5.46792   | 10.9539   | 6.18217   | 4.44797   | 11.4738   | 10.491    | 19.1463   | 6.74103    | 11.2979   | 9.78748   | 6.06638   |
| TXNL4B   | 1.15483   | 1.34435   | 1.00024   | 2.22043  | 1.46879   | 1.94025   | 1.09731   | 1.10897   | 1.02888   | 1.58561   | 2.16109   | 1.14796    | 2.01024   | 1.36106   | 1.46926   |
| TXNRD1   | 5.09043   | 2.93157   | 3.18956   | 5.95468  | 3.09584   | 8.44238   | 3.6684    | 3.72535   | 10.1861   | 5.53844   | 9.46981   | 2.27737    | 7.70235   | 4.06686   | 6.01281   |
| TXNRD2   | 1.17119   | 0.965739  | 1.25715   | 1.30206  | 2.57854   | 2.47377   | 1.56378   | 0.756985  | 1.002     | 0.97289   | 1.3112    | 0.97653    | 1.36453   | 1.04246   | 1.52907   |
| TXNRD3   | 2.50538   | 2.19442   | 2.04639   | 3.21916  | 2.96419   | 3.85463   | 2.14542   | 1.45704   | 1.63185   | 2.32853   | 2.86049   | 1.69412    | 2.14846   | 1.87297   | 1.94483   |
| TXNRD3NB | 2.02E-37  | 0.0250709 | 0         | 1.59E-28 | 0.041655  | 0.0698792 | 1.99E-30  | 0.0401584 | 4.96E-25  | 3.29E-28  | 0.0322298 | 0.0200196  | 6.52E-34  | 9.61E-42  | 0.0350011 |
| TYK2     | 5.07208   | 6.71193   | 6.97677   | 7.95548  | 15.385    | 12.0286   | 6.86725   | 5.28716   | 4.85021   | 4.48559   | 3.77001   | 4.67782    | 6.49575   | 6.79664   | 8.70029   |
| TYMP     | 9.95851   | 7.37737   | 7.72133   | 141.776  | 61.6155   | 113.735   | 4.76427   | 6.30975   | 26.981    | 128.877   | 72.7385   | 53.5335    | 126.135   | 44.1617   | 28.704    |
| TYMS     | 1.78716   | 1.32107   | 1.16441   | 8.12752  | 1.89453   | 8.42475   | 2.19885   | 1.52748   | 1.81466   | 5.38041   | 11.5351   | 2.47792    | 8.39952   | 3.83727   | 3.35849   |
| TYMSOS   | 0.30539   | 0.105694  | 0.0486907 | 0.343419 | 0.260445  | 1.17283   | 0.0626161 | 0.0487384 | 0.0667906 | 0.206495  | 0.808651  | 0.03953    | 0.0178685 | 0.258818  | 0.0804976 |
| TYR      | 0.549157  | 1.71175   | 2.03045   | 1.51298  | 1.54938   | 6.50823   | 3.04548   | 1.98206   | 0.559618  | 0.0421989 | 0.177123  | 0.489166   | 0.231388  | 0.0351445 | 0.112666  |
| TYRO3    | 3.31308   | 6.04761   | 6.27049   | 2.68696  | 11.1881   | 3.20637   | 7.20878   | 3.46621   | 17.8587   | 3.76608   | 3.49072   | 4.70646    | 4.00756   | 3.00985   | 1.11407   |
| TYRO3P   | 1.50001   | 1.30349   | 0.930687  | 0.331244 | 2.24682   | 0.63862   | 1.43742   | 0.952205  | 0.2936    | 0.672382  | 0.090714  | 0.651646   | 0.0518465 | 0.741974  | 0.653956  |
| TYROBP   | 9.59397   | 3.16974   | 5.15083   | 25.4638  | 9.85409   | 29.3091   | 10.0599   | 8.14353   | 2.7661    | 23.9354   | 82.9754   | 1.51305    | 18.0647   | 7.04042   | 18.4459   |
| TYRP1    | 5.5524    | 11.899    | 13.7467   | 7.13995  | 4.94988   | 42.3446   | 24.026    | 17.471    | 7.56582   | 0.484788  | 1.07191   | 2.7983     | 0.269977  | 0.0841138 | 0.300468  |
| TYSND1   | 2.61662   | 3.88423   | 3.77984   | 3.09774  | 8.45813   | 4.49018   | 2.90259   | 1.66902   | 3.06122   | 2.06965   | 2.44968   | 2.57693    | 2.88514   | 2.41492   | 1.33208   |
| TYW1     | 3.90786   | 3.87344   | 4.15956   | 3.76432  | 2.98094   | 3.7326    | 2.74393   | 3.64615   | 2.8081    | 2.17666   | 2.37752   | 2.27036    | 2.74266   | 2.78556   | 2.27305   |

|           |           |          |          |          |          |          |          |          |          |          |          |          |          |          |           |
|-----------|-----------|----------|----------|----------|----------|----------|----------|----------|----------|----------|----------|----------|----------|----------|-----------|
| TYW1B     | 1.34127   | 1.25896  | 1.28044  | 1.20145  | 0.888806 | 0.766591 | 1.35321  | 1.56775  | 0.230786 | 0.514454 | 0.553325 | 0.743699 | 0.175486 | 0.729031 | 1.13631   |
| TYW3      | 2.69507   | 1.90918  | 2.02504  | 2.85386  | 0.748848 | 2.42775  | 1.07508  | 1.78476  | 1.45092  | 1.94128  | 3.30273  | 1.39196  | 3.12018  | 2.08144  | 2.57954   |
| TYW5      | 1.2935    | 1.10725  | 1.14501  | 0.906019 | 0.345565 | 0.670043 | 0.459848 | 1.1677   | 0.551116 | 0.741032 | 0.746598 | 0.596744 | 0.767939 | 0.849927 | 0.717954  |
| U2AF1     | 14.494    | 11.8016  | 11.4368  | 20.894   | 10.0445  | 24.2301  | 10.1497  | 7.95946  | 16.3468  | 13.2793  | 22.0027  | 9.43751  | 18.046   | 14.1768  | 8.15367   |
| U2AF1L4   | 1.38494   | 1.74723  | 1.74873  | 1.59623  | 3.84967  | 2.7154   | 1.37322  | 1.00409  | 0.90993  | 0.709019 | 1.31657  | 1.7081   | 0.775982 | 1.24765  | 2.72172   |
| U2AF1L5   | 3.3074    | 2.69494  | 2.60376  | 4.77437  | 2.28415  | 5.56754  | 2.31656  | 1.82325  | 3.72266  | 3.04087  | 5.00288  | 2.14518  | 4.11461  | 3.23538  | 1.89042   |
| U2AF2     | 9.66085   | 11.4641  | 11.1291  | 25.8604  | 24.5249  | 29.9322  | 12.1951  | 7.607    | 14.8807  | 14.0273  | 14.7025  | 13.4602  | 25.8962  | 15.0933  | 13.099    |
| U2SURP    | 5.78188   | 4.97026  | 5.34512  | 6.52536  | 1.34171  | 5.29485  | 3.08146  | 5.95801  | 3.08099  | 4.44445  | 3.94537  | 2.94723  | 6.5763   | 4.91927  | 4.88677   |
| UACA      | 7.08013   | 4.0179   | 3.80777  | 2.67584  | 1.83867  | 5.1491   | 1.83546  | 2.76804  | 14.5043  | 7.70019  | 9.08787  | 4.21456  | 5.44523  | 4.02202  | 7.26411   |
| UAP1      | 5.37142   | 3.48694  | 4.16363  | 9.60424  | 1.3614   | 9.8936   | 3.31911  | 3.35468  | 4.30129  | 10.9783  | 10.2758  | 4.2594   | 15.4523  | 9.07507  | 6.23104   |
| UAP1L1    | 3.29436   | 1.78278  | 1.4793   | 2.56569  | 5.87579  | 5.20613  | 2.44216  | 1.82755  | 0.820859 | 3.67726  | 3.71892  | 1.67442  | 3.63865  | 4.49315  | 3.34833   |
| UBA1      | 19.0205   | 21.4839  | 21.7545  | 47.1141  | 35.4793  | 46.5104  | 29.5379  | 15.8179  | 41.0834  | 46.3436  | 27.3866  | 36.572   | 81.909   | 32.9823  | 28.0781   |
| UBA2      | 12.6874   | 10.3808  | 10.539   | 17.3256  | 4.9506   | 16.8961  | 8.93359  | 10.6736  | 14.0981  | 14.9649  | 21.9396  | 8.58731  | 19.8455  | 13.2575  | 10.2016   |
| UBA3      | 6.10525   | 6.77247  | 7.11973  | 9.85954  | 2.22243  | 9.31826  | 5.47434  | 7.04674  | 6.25163  | 11.0348  | 17.0513  | 4.98582  | 12.4936  | 8.06568  | 7.07391   |
| UBA5      | 3.08939   | 2.65869  | 2.60413  | 3.23632  | 2.14345  | 3.56658  | 1.89608  | 2.35958  | 3.28767  | 2.92969  | 4.20221  | 2.01033  | 3.02556  | 2.79342  | 2.69865   |
| UBA52     | 33.639    | 23.7558  | 23.6525  | 56.2587  | 24.6231  | 52.9367  | 29.6993  | 21.0951  | 52.2106  | 49.8819  | 89.998   | 37.8558  | 41.306   | 31.1749  | 18.646    |
| UBA6      | 3.0441    | 3.3606   | 3.64083  | 9.00417  | 0.769503 | 4.02251  | 1.99604  | 3.54119  | 2.25153  | 5.4156   | 5.44638  | 2.60965  | 8.92618  | 5.52715  | 4.52637   |
| UBA6-AS1  | 1.58666   | 1.25628  | 1.17047  | 2.05169  | 0.56514  | 2.21155  | 0.957725 | 1.34722  | 0.541558 | 1.54748  | 2.6582   | 0.846052 | 1.91701  | 1.30463  | 0.899849  |
| UBA7      | 2.15853   | 3.1335   | 3.5367   | 3.72177  | 5.751    | 5.14509  | 2.45656  | 1.99282  | 0.646577 | 1.21869  | 2.27899  | 0.95968  | 1.40619  | 1.26323  | 5.54775   |
| UBAC1     | 8.60272   | 10.2429  | 11.434   | 11.8418  | 9.95485  | 14.8085  | 9.65247  | 7.392    | 9.37508  | 9.72379  | 13.9794  | 6.53687  | 12.8764  | 8.58416  | 5.71444   |
| UBAC2     | 5.13019   | 7.01768  | 7.3835   | 10.8889  | 9.56317  | 11.1058  | 6.56735  | 5.29834  | 12.9646  | 8.99195  | 16.1672  | 8.40711  | 10.3497  | 6.3088   | 5.23992   |
| UBAC2-AS1 | 0.0641118 | 0.227931 | 0.274373 | 0.344385 | 0.241099 | 0.216432 | 0.233524 | 0.158886 | 0.403064 | 0.19173  | 0.244451 | 0.227543 | 0.131776 | 0.153196 | 0.0182517 |
| UBALD1    | 3.53779   | 4.63228  | 4.87785  | 7.67979  | 11.4233  | 10.0692  | 6.07769  | 3.0422   | 10.5521  | 4.33751  | 10.8533  | 6.85588  | 6.76316  | 4.9906   | 3.92814   |
| UBALD2    | 8.54938   | 6.78584  | 6.13285  | 23.5794  | 21.1306  | 22.6948  | 7.9987   | 8.0769   | 21.4629  | 16.3972  | 24.8432  | 11.7865  | 16.4541  | 10.1393  | 6.31679   |
| UBAP1     | 6.8725    | 7.42229  | 7.51929  | 15.9125  | 10.2199  | 12.9344  | 7.41304  | 5.45494  | 27.6016  | 18.2147  | 16.9621  | 12.8434  | 25.2046  | 14.1714  | 8.43358   |
| UBAP1L    | 1.33872   | 1.17715  | 1.12132  | 0.362141 | 1.94952  | 0.983163 | 1.31833  | 1.02615  | 0.203801 | 0.462062 | 0.188905 | 0.46697  | 0.06478  | 0.769639 | 0.648866  |

|            |            |            |            |           |           |           |           |           |           |           |           |            |           |           |            |
|------------|------------|------------|------------|-----------|-----------|-----------|-----------|-----------|-----------|-----------|-----------|------------|-----------|-----------|------------|
| UBAP2      | 5.21814    | 6.84696    | 6.00152    | 8.51769   | 4.78755   | 8.01709   | 6.39565   | 4.99585   | 8.01059   | 7.29291   | 5.40722   | 6.97932    | 10.5759   | 5.81871   | 4.46203    |
| UBAP2L     | 11.039     | 12.3424    | 12.922     | 16.7288   | 9.82153   | 26.311    | 12.7122   | 11.9324   | 12.6197   | 9.58985   | 10.6989   | 10.5822    | 14.8329   | 11.3947   | 11.2711    |
| UBASH3A    | 0.0724352  | 0.087251   | 0.194751   | 0.0839774 | 0.239098  | 0.138775  | 0.0310141 | 0.104608  | 0.0110272 | 0.0454568 | 0.0511065 | 0.0453507  | 0.0642604 | 0.141967  | 0.364091   |
| UBASH3B    | 0.91808    | 1.14461    | 1.56891    | 2.50685   | 1.46774   | 2.37373   | 1.94728   | 1.62289   | 2.62392   | 3.10781   | 2.42457   | 1.74537    | 5.30945   | 2.34133   | 1.75637    |
| UBB        | 56.1065    | 45.8285    | 49.8424    | 116.036   | 97.2559   | 117.418   | 48.9155   | 41.1227   | 160.947   | 81.6734   | 152.773   | 77.9538    | 84.6238   | 51.7157   | 54.8014    |
| UBBP4      | 0          | 0.00763222 | 0          | 0.0163242 | 0         | 0         | 0         | 0         | 0         | 0         | 0         | 0          | 0.0204405 | 0         | 0          |
| UBC        | 213.391    | 130.249    | 131.901    | 268.361   | 196.851   | 283.24    | 176.064   | 142.414   | 418.925   | 394.195   | 515.751   | 321.683    | 381.231   | 211.338   | 145.957    |
| UBD        | 0.103526   | 0.0482713  | 0.0524914  | 0.110128  | 0.0570621 | 0.403788  | 0.0190649 | 0.0504545 | 0         | 0.100595  | 0.237506  | 0.00955814 | 0.396457  | 0.0942512 | 0.350109   |
| UBE2A      | 6.48201    | 5.82473    | 6.00466    | 13.8932   | 4.40272   | 14.8163   | 6.50045   | 6.51636   | 15.8789   | 15.2813   | 19.5039   | 10.5812    | 20.1397   | 11.3419   | 9.29129    |
| UBE2B      | 4.20863    | 4.2249     | 4.46294    | 4.78984   | 0.477684  | 5.15468   | 3.13998   | 4.80223   | 8.34654   | 5.69028   | 8.71846   | 3.40117    | 6.026     | 3.64612   | 3.76022    |
| UBE2C      | 0.643373   | 0.664258   | 0.593072   | 7.74781   | 0.742397  | 6.32345   | 1.28027   | 0.669795  | 0.91788   | 4.38357   | 10.3963   | 2.31491    | 6.55859   | 6.39843   | 1.53114    |
| UBE2CP5    | 2.01485    | 2.2711     | 1.77387    | 0.819115  | 2.03865   | 1.03881   | 1.43517   | 2.08633   | 0.945524  | 1.34562   | 0.834684  | 1.79879    | 1.12108   | 2.14474   | 2.57502    |
| UBE2D1     | 1.0896     | 1.02057    | 0.728324   | 2.45233   | 1.00197   | 2.5013    | 0.806155  | 1.69653   | 2.52662   | 2.91017   | 5.18576   | 1.63412    | 3.52627   | 1.53074   | 1.81517    |
| UBE2D2     | 9.77091    | 8.50502    | 8.67767    | 15.12     | 8.51695   | 14.8518   | 7.81835   | 8.67626   | 19.9545   | 13.7432   | 19.9089   | 10.62      | 18.6569   | 11.7072   | 8.1757     |
| UBE2D3     | 13.4841    | 12.8134    | 14.1574    | 26.3577   | 9.55319   | 20.0998   | 11.7452   | 16.9945   | 34.5351   | 26.3085   | 31.1335   | 18.6574    | 38.095    | 18.363    | 14.5439    |
| UBE2D4     | 3.43408    | 2.37446    | 2.77069    | 1.54304   | 1.96039   | 3.04631   | 3.14979   | 2.48145   | 1.81685   | 1.6743    | 2.15595   | 1.49601    | 1.3961    | 1.2522    | 1.94061    |
| UBE2DNL    | 0          | 0          | 0          | 0         | 0         | 0         | 0         | 0         | 0         | 0         | 0         | 0          | 0         | 0         | 0.134742   |
| UBE2E1     | 7.97002    | 7.70329    | 7.99138    | 16.6986   | 2.82976   | 15.8586   | 5.97996   | 9.7779    | 12.6696   | 20.202    | 28.4658   | 11.4055    | 18.7363   | 11.1685   | 10.3272    |
| UBE2E1-AS1 | 0          | 0          | 0          | 0         | 0         | 0.0759872 | 0         | 0         | 0         | 0         | 0.0335805 | 0          | 0.038385  | 0.015547  | 0.128161   |
| UBE2E2     | 6.27229    | 5.03048    | 4.732      | 8.3338    | 3.12513   | 8.66616   | 5.41992   | 6.00668   | 10.7938   | 10.5295   | 13.7308   | 8.64668    | 11.7757   | 6.13713   | 4.81549    |
| UBE2E2-AS1 | 0          | 0.0177276  | 0          | 0.0379167 | 0         | 0         | 0         | 0.0326989 | 0         | 0         | 0         | 0          | 0.0949557 | 0         | 0          |
| UBE2E3     | 9.83335    | 9.14591    | 7.80614    | 13.7253   | 8.67445   | 16.2668   | 8.74503   | 8.1702    | 11.5727   | 13.1591   | 21.3538   | 9.71305    | 14.4834   | 9.30961   | 7.87716    |
| UBE2E4P    | 1.46E-41   | 1.82E-40   | 5.49E-43   | 0.0244966 | 2.38E-25  | 7.37E-40  | 2.84E-38  | 5.04E-44  | 2.58E-43  | 1.86E-42  | 1.78E-40  | 7.25E-39   | 3.65E-41  | 4.64E-42  | 4.80E-39   |
| UBE2F      | 3.77346    | 3.72159    | 3.22365    | 9.54778   | 3.81346   | 6.74714   | 2.87776   | 3.52255   | 14.3882   | 11.3367   | 13.2199   | 8.77582    | 15.4228   | 7.31796   | 3.95199    |
| UBE2F-SCLY | 0.00492683 | 0.0476447  | 0.00916459 | 0.0207997 | 0.409955  | 0.426233  | 0.013688  | 0.0114453 | 0.0419609 | 0.249581  | 0.219555  | 0.205644   | 0.0130395 | 0.142564  | 0.00114686 |
| UBE2G1     | 6.49398    | 6.3137     | 6.55569    | 11.0012   | 5.92888   | 8.99855   | 4.62066   | 6.49328   | 19.534    | 13.2042   | 14.533    | 9.86572    | 17.1292   | 10.1766   | 4.66942    |

|            |           |           |           |           |           |           |           |           |           |            |           |           |           |            |           |
|------------|-----------|-----------|-----------|-----------|-----------|-----------|-----------|-----------|-----------|------------|-----------|-----------|-----------|------------|-----------|
| UBE2G2     | 9.49405   | 7.8785    | 7.18642   | 10.9974   | 8.59165   | 10.4107   | 7.36522   | 6.19732   | 7.34055   | 6.43546    | 7.58827   | 6.13049   | 10.5225   | 8.82463    | 7.09766   |
| UBE2H      | 8.10743   | 9.32506   | 10.2349   | 15.6423   | 8.58158   | 16.7617   | 7.1372    | 6.97811   | 19.6164   | 15.0438    | 11.8605   | 8.27161   | 18.501    | 9.86461    | 9.83386   |
| UBE2I      | 6.8184    | 7.14705   | 7.1456    | 13.1368   | 8.56244   | 14.9075   | 7.48842   | 5.00819   | 8.93702   | 8.56645    | 12.3373   | 7.36467   | 12.1122   | 7.7134     | 6.43314   |
| UBE2J1     | 6.56661   | 5.12078   | 4.793     | 8.51379   | 3.14617   | 9.79854   | 4.74682   | 5.31006   | 10.1201   | 10.6033    | 13.9473   | 5.8923    | 14.3678   | 7.01443    | 7.58573   |
| UBE2J2     | 5.34652   | 6.09925   | 5.66429   | 9.18954   | 9.36713   | 10.221    | 6.86352   | 3.87384   | 11.8434   | 8.43877    | 11.0849   | 7.58321   | 17.3647   | 8.1844     | 6.3963    |
| UBE2K      | 7.34506   | 6.9738    | 7.37993   | 10.5532   | 1.22048   | 9.20082   | 5.52369   | 9.2422    | 12.6494   | 10.4154    | 11.1119   | 7.20108   | 12.5569   | 8.00066    | 5.58481   |
| UBE2L3     | 5.91034   | 5.96058   | 5.87904   | 15.3783   | 5.84731   | 14.9924   | 6.60099   | 5.35689   | 12.1326   | 13.1877    | 19.122    | 9.47746   | 19.4637   | 10.6704    | 9.19313   |
| UBE2L5     | 0.0672031 | 0.0890435 | 0.0694939 | 0         | 0         | 0.0214584 | 0.0287739 | 0.06719   | 0         | 0.0105433  | 0         | 0.0180321 | 0         | 0.00439041 | 0.048256  |
| UBE2L6     | 5.32435   | 4.54215   | 4.65734   | 16.2693   | 5.23872   | 19.9998   | 5.7002    | 4.23624   | 2.40945   | 3.89958    | 10.0876   | 1.96662   | 7.49583   | 3.19911    | 7.41764   |
| UBE2M      | 8.09399   | 7.1338    | 7.12305   | 13.208    | 13.1625   | 17.2363   | 8.11445   | 5.12841   | 23.8764   | 12.2935    | 18.5485   | 11.4417   | 19.1742   | 10.6193    | 5.75748   |
| UBE2MP1    | 0         | 0         | 0         | 0         | 0         | 0         | 0         | 0         | 0         | 0          | 0.0271859 | 0         | 0         | 0          | 0         |
| UBE2N      | 7.9985    | 6.10403   | 7.05205   | 17.2891   | 2.40882   | 10.7487   | 6.23324   | 8.52686   | 18.9855   | 15.286     | 21.0274   | 10.1161   | 16.7514   | 11.6121    | 7.14998   |
| UBE2NL     | 0         | 0         | 0         | 0         | 0         | 0         | 0         | 0         | 0         | 0          | 0         | 0         | 0         | 0          | 0         |
| UBE2O      | 3.50063   | 4.45194   | 4.43691   | 4.96588   | 6.57893   | 6.90722   | 4.12027   | 3.39145   | 4.58444   | 2.9074     | 1.90759   | 4.05096   | 4.49766   | 3.83986    | 2.824     |
| UBE2Q1     | 5.30646   | 5.73967   | 5.50665   | 8.02139   | 6.34659   | 12.2589   | 4.21406   | 3.95654   | 7.88813   | 6.29965    | 8.13842   | 4.93239   | 9.9468    | 6.18852    | 4.77457   |
| UBE2Q1-AS1 | 0.208967  | 0.100683  | 0.129654  | 0         | 0.324597  | 0.0444831 | 0.477183  | 0.23214   | 0.0636245 | 0          | 0         | 0.149521  | 0.0674121 | 0.21843    | 0.0750256 |
| UBE2Q2     | 4.57631   | 3.5153    | 3.47757   | 11.3993   | 3.5543    | 7.56518   | 2.49311   | 3.93922   | 5.93971   | 20.1605    | 16.3172   | 8.25162   | 23.6253   | 14.9114    | 8.9663    |
| UBE2Q2L    | 1.4871    | 1.20911   | 1.34557   | 1.43672   | 2.30999   | 1.66195   | 1.27345   | 1.19771   | 0.169793  | 0.81658    | 0.734455  | 1.26357   | 0.839538  | 1.40872    | 1.46827   |
| UBE2Q2P1   | 4.43793   | 3.75707   | 3.41058   | 2.3184    | 7.5902    | 2.28911   | 2.77483   | 2.82921   | 1.7698    | 2.31837    | 1.34881   | 3.91697   | 0.858835  | 3.7465     | 2.85987   |
| UBE2Q2P2   | 1.32345   | 0.780087  | 0.554753  | 0.707992  | 0.458162  | 0.162829  | 0.739504  | 0.981157  | 0.341657  | 0.767555   | 0.427187  | 1.22095   | 0.345687  | 1.01811    | 0.420975  |
| UBE2QL1    | 0.0490879 | 0.116437  | 0.184302  | 0.0739341 | 0.111443  | 0.0707346 | 0.0862261 | 0.0604042 | 0.0275924 | 0.0473926  | 0.157717  | 0.0432292 | 0.048725  | 0.043417   | 0.395864  |
| UBE2R2     | 8.53131   | 8.68637   | 9.54916   | 13.4151   | 13.7199   | 15.4703   | 10.8791   | 8.16798   | 25.7889   | 12.2392    | 14.8477   | 9.74174   | 15.8631   | 9.44144    | 7.37508   |
| UBE2S      | 2.89531   | 2.2938    | 2.15408   | 15.6394   | 6.88195   | 14.0804   | 2.83986   | 1.46788   | 6.65001   | 10.2676    | 22.4185   | 4.99148   | 18.7682   | 15.2946    | 5.69288   |
| UBE2T      | 0.507523  | 0.427931  | 0.482838  | 2.95504   | 0.19709   | 2.26878   | 0.782289  | 0.338283  | 0.772633  | 2.03838    | 4.72668   | 0.853393  | 2.27579   | 2.05572    | 1.02041   |
| UBE2U      | 0.2844    | 0.102771  | 0.0588189 | 0.0732706 | 0.0331329 | 0.0242163 | 0.0649437 | 0.145332  | 0         | 0.00892378 | 0.0321052 | 0.0101748 | 0         | 0          | 0.0102109 |
| UBE2V1     | 8.15109   | 8.82801   | 8.93699   | 16.1358   | 5.98661   | 20.3566   | 8.73125   | 9.31536   | 17.0144   | 15.8439    | 14.1942   | 15.0407   | 21.4909   | 11.5529    | 9.70621   |



|           |           |          |           |            |           |           |          |           |           |           |           |          |          |          |          |
|-----------|-----------|----------|-----------|------------|-----------|-----------|----------|-----------|-----------|-----------|-----------|----------|----------|----------|----------|
| UBE2V2    | 4.252     | 4.35345  | 4.18338   | 8.34109    | 0.943547  | 6.95658   | 2.14998  | 5.39832   | 8.7664    | 10.0254   | 12.9257   | 5.4655   | 14.2851  | 7.59545  | 5.60482  |
| UBE2W     | 1.32099   | 1.38767  | 1.48463   | 1.59349    | 0.290297  | 1.34497   | 0.996747 | 2.21831   | 1.27833   | 1.82507   | 2.46516   | 0.991002 | 1.82519  | 1.41427  | 2.02212  |
| UBE2Z     | 11.7122   | 12.3813  | 13.7926   | 20.34      | 14.9846   | 28.0209   | 12.409   | 9.63901   | 17.0142   | 16.2704   | 23.3175   | 11.2409  | 24.0886  | 14.541   | 15.1509  |
| UBE3A     | 8.99398   | 7.43868  | 8.34781   | 8.00575    | 4.81163   | 7.32976   | 5.80387  | 9.14266   | 10.7003   | 8.08414   | 8.30861   | 6.0728   | 10.5663  | 6.68134  | 5.95853  |
| UBE3B     | 3.22539   | 5.01475  | 4.36598   | 6.76743    | 6.99493   | 5.25538   | 4.77019  | 3.47554   | 6.18226   | 4.53418   | 3.69353   | 5.10609  | 6.40046  | 4.4177   | 3.82577  |
| UBE3C     | 10.3498   | 9.05871  | 9.11641   | 16.0102    | 9.34636   | 13.7535   | 10.1238  | 7.8523    | 19.1223   | 12.0819   | 13.7259   | 10.7967  | 20.9552  | 12.6279  | 11.3354  |
| UBE3D     | 0.629548  | 0.620439 | 0.556316  | 0.641396   | 0.466728  | 0.700522  | 0.449249 | 0.425975  | 0.339796  | 0.332221  | 0.581467  | 0.527241 | 0.360024 | 0.594496 | 0.20548  |
| UBE4A     | 7.73729   | 7.76409  | 8.34369   | 8.70762    | 4.02243   | 9.08052   | 8.5928   | 8.29109   | 12.2244   | 7.41306   | 8.57714   | 7.06534  | 11.0137  | 7.09894  | 7.08743  |
| UBE4B     | 7.28258   | 10.0427  | 10.1379   | 8.6286     | 10.8355   | 9.76397   | 10.0769  | 8.03944   | 15.1352   | 8.1028    | 7.3947    | 8.90637  | 9.146    | 6.26896  | 5.67036  |
| UBFD1     | 3.08824   | 3.0415   | 3.1178    | 4.37718    | 3.46296   | 7.3333    | 3.38673  | 2.63195   | 3.22383   | 3.19274   | 4.36575   | 2.30711  | 2.99181  | 3.35811  | 3.97003  |
| UBIAD1    | 1.38631   | 1.0592   | 1.21423   | 1.37004    | 0.921001  | 2.10663   | 1.48343  | 0.97261   | 0.576763  | 0.657687  | 1.22918   | 0.546361 | 1.59453  | 0.896216 | 1.25657  |
| UBL3      | 7.46052   | 6.92491  | 8.13664   | 7.89133    | 5.51728   | 6.017     | 8.64586  | 7.34017   | 28.7823   | 6.93757   | 13.2732   | 4.3742   | 6.81653  | 3.63201  | 5.38389  |
| UBL4A     | 5.85863   | 5.28978  | 5.04761   | 10.2127    | 9.8098    | 10.9698   | 5.30255  | 3.50565   | 9.79752   | 6.78005   | 9.30081   | 5.53373  | 11.2647  | 6.30676  | 3.87897  |
| UBL4B     | 0.337631  | 0.28838  | 0.266616  | 0.680061   | 1.09659   | 1.16302   | 0.367973 | 0.218224  | 0         | 0.154095  | 0.0866234 | 0.142754 | 0.366363 | 0.112293 | 0.617121 |
| UBL5      | 30.378    | 21.2513  | 22.3544   | 65.574     | 38.5218   | 56.5947   | 26.1752  | 14.2153   | 89.0695   | 74.2858   | 142.534   | 51.3627  | 49.9968  | 38.9977  | 22.2828  |
| UBL7      | 4.30796   | 5.15962  | 4.54594   | 7.50424    | 9.82848   | 8.48265   | 7.61556  | 3.1542    | 16.8577   | 4.42385   | 10.0302   | 4.95647  | 4.73772  | 3.97216  | 4.1831   |
| UBL7-AS1  | 1.47698   | 1.60496  | 1.8836    | 0.970408   | 2.91072   | 1.81501   | 2.20088  | 1.34749   | 1.42013   | 0.776194  | 1.02323   | 0.957135 | 0.682748 | 1.00487  | 1.02441  |
| UBLCP1    | 4.01108   | 3.38784  | 2.88059   | 6.21517    | 1.00108   | 4.99612   | 1.65836  | 4.1973    | 7.0757    | 7.18325   | 9.40349   | 4.79715  | 8.16717  | 5.10769  | 3.8679   |
| UBN1      | 6.21598   | 6.04298  | 6.23813   | 7.0108     | 9.51305   | 10.5014   | 6.08338  | 5.31878   | 6.91335   | 6.04697   | 4.34532   | 5.9127   | 11.1462  | 7.13436  | 6.34473  |
| UBN2      | 3.47021   | 5.03827  | 5.28829   | 2.67597    | 1.79696   | 2.36226   | 3.60658  | 4.02065   | 2.61874   | 1.93458   | 1.49765   | 2.49531  | 1.71399  | 2.15225  | 2.3046   |
| UBOX5     | 2.01034   | 1.553    | 1.82721   | 1.37546    | 2.41143   | 2.27284   | 2.45394  | 1.65983   | 1.32904   | 0.949641  | 1.08563   | 1.05568  | 1.24403  | 1.01953  | 1.18754  |
| UBOX5-AS1 | 0.278224  | 0.364101 | 0.41965   | 0.125156   | 0.591987  | 0.108262  | 0.316507 | 0.405323  | 0.0333101 | 0.112488  | 0.0647632 | 0.230786 | 0        | 0.166947 | 0.273314 |
| UBP1      | 8.7715    | 7.03659  | 7.04998   | 11.1479    | 6.71786   | 10.259    | 5.67219  | 8.18961   | 7.20507   | 7.48792   | 8.07426   | 5.59388  | 10.2097  | 8.58343  | 7.65212  |
| UBQLN1    | 12.7988   | 11.9155  | 12.7102   | 16.4683    | 7.99537   | 17.0392   | 10.0486  | 12.0554   | 19.354    | 19.1373   | 19.7823   | 13.0751  | 27.1679  | 15.6741  | 10.5419  |
| UBQLN2    | 4.78705   | 4.92287  | 5.37174   | 12.9784    | 4.81706   | 12.9029   | 5.67443  | 5.64436   | 12.691    | 18.3986   | 15.4782   | 11.08    | 28.4525  | 7.14127  | 8.38202  |
| UBQLN3    | 0.0853637 | 0.123389 | 0.0470793 | 0.00977442 | 0.0883996 | 0.0807623 | 0.162443 | 0.0758642 | 0         | 0.0238089 | 0         | 0        | 0        | 0        | 0        |

|            |          |           |          |           |           |           |          |          |           |           |           |           |           |           |           |
|------------|----------|-----------|----------|-----------|-----------|-----------|----------|----------|-----------|-----------|-----------|-----------|-----------|-----------|-----------|
| UBQLN4     | 3.95751  | 5.72964   | 6.071    | 11.8918   | 11.121    | 13.1083   | 6.93141  | 4.85448  | 9.12473   | 7.38636   | 7.14942   | 7.66127   | 10.6926   | 7.66112   | 3.95454   |
| UBQLNL     | 0.198312 | 0.128992  | 0.262493 | 0.06131   | 0.0770119 | 0.101316  | 0.135856 | 0.114558 | 0.0362283 | 0.0124451 | 0.0559675 | 0.0567591 | 0         | 0.015547  | 0.0996806 |
| UBR1       | 3.49013  | 2.37123   | 2.39289  | 3.12554   | 1.20217   | 3.03796   | 2.28587  | 2.62373  | 2.82402   | 3.40537   | 3.6161    | 2.15733   | 3.14059   | 3.18124   | 3.96948   |
| UBR2       | 5.42027  | 5.72671   | 6.06417  | 5.4891    | 3.08042   | 3.96961   | 4.50466  | 4.70822  | 3.42761   | 4.76538   | 4.57145   | 3.39727   | 4.93312   | 4.30104   | 4.21021   |
| UBR3       | 7.48737  | 6.55609   | 7.03184  | 5.41586   | 2.64884   | 5.11419   | 5.3858   | 6.77053  | 6.25166   | 5.55518   | 4.93079   | 4.62241   | 5.42223   | 4.84857   | 4.16656   |
| UBR4       | 12.6207  | 13.1004   | 14.4851  | 11.8557   | 13.6648   | 17.4627   | 18.8189  | 11.4778  | 15.7415   | 13.3987   | 7.35472   | 14.4898   | 16.6814   | 12.912    | 14.2618   |
| UBR5       | 11.4221  | 10.5737   | 11.3276  | 11.5494   | 6.52052   | 11.806    | 8.24311  | 9.3058   | 9.91146   | 11.0764   | 8.53654   | 9.23107   | 11.6087   | 10.1084   | 9.16486   |
| UBR5-AS1   | 0.280333 | 0.435221  | 0.48959  | 0.32099   | 0.290303  | 0.265222  | 0.248947 | 0.387546 | 0.189675  | 0.351847  | 0.45711   | 0.133724  | 0.281352  | 0.162794  | 0.626257  |
| UBR7       | 4.19757  | 3.42608   | 3.84054  | 4.75185   | 2.16045   | 6.86559   | 3.11166  | 3.13469  | 3.50985   | 4.12821   | 5.91961   | 2.9183    | 5.91363   | 3.41194   | 3.54497   |
| UBTD1      | 3.51315  | 4.81462   | 6.19715  | 4.98686   | 11.0629   | 7.46104   | 6.27433  | 3.45021  | 13.6516   | 5.97066   | 13.7804   | 4.76342   | 7.63787   | 4.65104   | 3.73001   |
| UBTD2      | 3.06271  | 2.51861   | 2.78135  | 4.09754   | 1.81236   | 4.61441   | 2.05958  | 2.62638  | 3.0476    | 4.54731   | 6.22162   | 2.20244   | 5.47746   | 3.18136   | 5.47876   |
| UBTF       | 10.427   | 10.9185   | 10.3627  | 12.2733   | 18.0585   | 17.0709   | 11.2457  | 9.25525  | 9.40748   | 6.71396   | 6.35985   | 7.3374    | 13.347    | 8.23873   | 7.78133   |
| UBTFL1     | 0        | 0         | 0        | 0         | 0         | 0         | 0        | 0        | 0         | 0         | 0         | 0.0280194 | 0         | 0         | 0         |
| UBXN1      | 14.488   | 13.3594   | 15.3531  | 16.4637   | 25.1352   | 26.3915   | 12.2258  | 9.68336  | 21.7068   | 13.3534   | 25.199    | 9.92585   | 16.9736   | 12.1494   | 9.33468   |
| UBXN10     | 0.261386 | 0.163922  | 0.226534 | 0.0940643 | 0.199789  | 0.0777218 | 0.288968 | 0.294982 | 0.035371  | 0.0572815 | 0.154562  | 0.020781  | 0.0401536 | 0.0824008 | 0.148962  |
| UBXN10-AS1 | 0.136403 | 0.0657211 | 0.18807  | 0.0937115 | 0.070627  | 0         | 0.155741 | 0.121224 | 0         | 0.114133  | 0.205309  | 0.0325333 | 0         | 0.166344  | 0         |
| UBXN11     | 1.44086  | 1.85665   | 1.96815  | 1.47333   | 2.6719    | 3.20508   | 1.46658  | 1.10184  | 0.462506  | 0.869164  | 1.10958   | 0.839162  | 0.944045  | 1.33098   | 1.97301   |
| UBXN2A     | 4.16893  | 3.54018   | 3.37803  | 5.55608   | 2.48776   | 5.46522   | 3.37803  | 3.69413  | 6.83423   | 6.70549   | 7.78386   | 3.38538   | 9.07108   | 4.10853   | 2.38782   |
| UBXN2B     | 2.0588   | 1.71969   | 1.7248   | 2.78553   | 0.452999  | 2.50541   | 1.11818  | 2.06179  | 1.78115   | 1.48048   | 1.91631   | 1.24889   | 1.71868   | 1.44227   | 1.16268   |
| UBXN4      | 13.6414  | 13.6314   | 14.5571  | 15.5016   | 7.07519   | 16.3824   | 8.21553  | 12.6101  | 16.7541   | 14.8708   | 14.9243   | 9.68238   | 16.5871   | 12.4662   | 12.4781   |
| UBXN6      | 19.0323  | 16.9752   | 16.8978  | 22.689    | 38.5829   | 43.5245   | 18.4824  | 12.26    | 28.4541   | 20.9435   | 31.081    | 16.7259   | 27.5257   | 19.0389   | 15.5258   |
| UBXN7      | 5.4483   | 6.14317   | 6.62306  | 6.15896   | 3.44905   | 6.14251   | 5.47716  | 6.3285   | 6.09339   | 5.97263   | 5.57626   | 4.5703    | 5.43691   | 4.60869   | 4.69186   |
| UBXN7-AS1  | 0.286038 | 0.175752  | 0.345256 | 0.0267973 | 0.161569  | 0.154991  | 0.449855 | 0.207987 | 0.0316693 | 0.0328153 | 0.117419  | 0.0930307 | 0         | 0.135905  | 0.336098  |
| UBXN8      | 1.27951  | 1.08655   | 0.952647 | 2.63714   | 0.869537  | 2.43772   | 0.675665 | 1.30768  | 0.779147  | 1.82672   | 2.94297   | 1.1444    | 2.25989   | 2.03961   | 1.05658   |
| UC.134     | 0.309896 | 0.226955  | 0.153821 | 0.140517  | 0         | 0.105549  | 0.212298 | 0.341508 | 0.0452903 | 0.124465  | 0.0979536 | 0.0709565 | 0.0239932 | 0.18788   | 0.338238  |
| UCA1       | 0.120016 | 0.173476  | 0.157202 | 0.381346  | 0.124284  | 0.238448  | 0.205545 | 0.195543 | 1.23023   | 1.01677   | 0.293546  | 0.500935  | 0.780789  | 0.350217  | 0.0718158 |

|           |           |           |           |           |          |           |          |           |           |           |           |          |           |           |           |
|-----------|-----------|-----------|-----------|-----------|----------|-----------|----------|-----------|-----------|-----------|-----------|----------|-----------|-----------|-----------|
| UCHL1     | 1.6266    | 0.17857   | 0.340668  | 0.806303  | 1.1514   | 3.83952   | 1.03439  | 0.841735  | 0.5266    | 2.42919   | 8.6698    | 0.265187 | 0.464958  | 0.527298  | 1.53762   |
| UCHL1-AS1 | 0         | 0         | 0         | 0         | 0        | 0         | 0        | 0         | 0         | 0         | 0         | 0        | 0         | 0         | 0         |
| UCHL3     | 8.53689   | 6.70189   | 7.06231   | 19.9532   | 2.3183   | 11.3186   | 6.02096  | 6.34892   | 35.6255   | 21.3292   | 27.384    | 16.1465  | 24.8823   | 15.8083   | 6.25861   |
| UCHL5     | 2.63545   | 2.02999   | 2.33177   | 1.98982   | 0.505028 | 1.97396   | 1.43366  | 2.94024   | 1.80555   | 1.68438   | 1.63493   | 1.56072  | 2.45805   | 1.88518   | 1.41893   |
| UCK1      | 3.91808   | 3.36965   | 3.31688   | 4.749     | 6.9691   | 10.4666   | 3.50002  | 2.44466   | 4.11659   | 3.88566   | 5.91265   | 2.22246  | 4.87248   | 3.6711    | 3.01751   |
| UCK2      | 4.69771   | 4.50302   | 4.17578   | 8.98873   | 6.0566   | 8.65344   | 5.3534   | 3.6685    | 4.57925   | 5.01762   | 4.87256   | 5.30371  | 10.4559   | 5.36764   | 3.64069   |
| UCKL1     | 3.46996   | 4.39487   | 4.44088   | 5.67113   | 5.7593   | 6.25952   | 4.3586   | 2.97335   | 4.78311   | 3.96648   | 5.7731    | 4.77591  | 4.82456   | 4.94353   | 4.45923   |
| UCKL1-AS1 | 0.44417   | 0.985535  | 0.84455   | 0.663949  | 2.4973   | 1.22889   | 1.35686  | 0.85114   | 0.238884  | 0.276692  | 0.094207  | 1.14704  | 0.193784  | 0.801017  | 1.0478    |
| UCMA      | 0         | 0         | 0         | 0         | 0        | 0         | 0        | 0         | 0         | 0         | 0         | 0        | 0         | 0         | 0         |
| UCN       | 0.320218  | 0.168312  | 0.38532   | 0.179997  | 0.587848 | 0.446174  | 0.232664 | 0.181099  | 0         | 0.182685  | 0.394349  | 0.104148 | 0         | 0.243433  | 0.0836134 |
| UCN2      | 0.68572   | 2.14003   | 1.76629   | 1.46149   | 3.38915  | 2.37534   | 1.93954  | 0.706363  | 0.588387  | 2.09294   | 2.0232    | 3.21153  | 3.02658   | 6.14145   | 7.05013   |
| UCN3      | 0.0192859 | 0.0185845 | 0.0159546 | 0         | 0        | 0.0164217 | 0.06606  | 0.0342794 | 0         | 0         | 0         | 0        | 0         | 0.0100796 | 0         |
| UCP1      | 0         | 0.0111507 | 0.0574367 | 0.0238496 | 0        | 0         | 0.026424 | 0         | 0.0281856 | 0.0290469 | 0.0261256 | 0        | 0         | 0         | 0         |
| UCP2      | 3.69783   | 2.08652   | 3.12889   | 6.67962   | 4.89223  | 9.49384   | 4.04547  | 3.74865   | 0.616454  | 3.72351   | 10.7613   | 0.734412 | 6.29566   | 2.71158   | 8.05668   |
| UCP3      | 0.365242  | 0.33276   | 0.373572  | 0.198461  | 0.309462 | 0.254453  | 0.197137 | 0.342302  | 0.080877  | 0.125023  | 0.0599727 | 0.175811 | 0.0257075 | 0.267248  | 0.41009   |
| UEVLD     | 2.70984   | 2.64411   | 2.2136    | 3.50951   | 0.914409 | 3.22703   | 1.69976  | 3.32489   | 4.28383   | 3.04086   | 3.72909   | 1.92503  | 3.49989   | 2.43589   | 1.76767   |
| UFC1      | 14.583    | 15.5632   | 15.9376   | 29.7376   | 13.3608  | 21.9717   | 14.2718  | 11.897    | 39.6659   | 28.8916   | 44.8932   | 21.4004  | 27.2951   | 15.0063   | 14.9593   |
| UFD1      | 7.61987   | 5.13553   | 4.93415   | 11.3463   | 5.03747  | 13.7007   | 5.95543  | 4.9076    | 9.70818   | 12.837    | 20.0452   | 6.93692  | 14.9246   | 7.75759   | 6.02522   |
| UFL1      | 5.31657   | 4.7997    | 5.07665   | 4.90604   | 1.11139  | 6.49056   | 3.73266  | 5.21405   | 5.37571   | 5.35347   | 6.34968   | 3.55211  | 6.55152   | 3.93214   | 4.63175   |
| UFM1      | 5.59776   | 4.48359   | 4.70118   | 5.72822   | 0.944693 | 6.43133   | 2.86714  | 4.98646   | 4.20514   | 6.02442   | 7.95803   | 2.69986  | 9.0292    | 5.44455   | 4.98686   |
| UFSP1     | 0.441484  | 0.638141  | 0.365227  | 0.814142  | 1.51593  | 1.26625   | 0.344891 | 0.144552  | 0.764068  | 0.554108  | 1.65252   | 0.432275 | 0.629653  | 0.534342  | 0.133479  |
| UFSP2     | 4.84881   | 3.93637   | 4.45652   | 5.72566   | 1.44016  | 5.41397   | 3.12809  | 4.38873   | 4.0895    | 5.69152   | 7.49207   | 3.45701  | 6.66594   | 5.30267   | 4.10418   |
| UGCG      | 5.42235   | 7.4903    | 8.94287   | 21.5193   | 4.80278  | 11.5623   | 7.71248  | 8.53054   | 39.7353   | 18.9978   | 27.5322   | 14.9167  | 31.5607   | 16.4339   | 11.8465   |
| UGDH      | 3.93198   | 4.2461    | 4.39101   | 14.3947   | 3.21698  | 11.826    | 3.23915  | 3.17909   | 8.28102   | 10.1882   | 12.9646   | 5.33159  | 13.8108   | 7.03944   | 8.06992   |
| UGDH-AS1  | 111.997   | 105.343   | 104.903   | 55.6153   | 35.4259  | 30.3553   | 72.9142  | 118.291   | 20.4808   | 41.6124   | 20.1508   | 64.7282  | 11.5272   | 77.2792   | 83.0083   |
| UGGT1     | 4.66235   | 3.79601   | 3.77495   | 6.49992   | 3.61788  | 5.98913   | 3.93226  | 3.91275   | 2.69767   | 5.03551   | 5.19656   | 3.55364  | 7.02029   | 4.59543   | 4.87019   |

|         |            |            |           |           |            |                 |           |            |           |            |           |           |                 |            |           |
|---------|------------|------------|-----------|-----------|------------|-----------------|-----------|------------|-----------|------------|-----------|-----------|-----------------|------------|-----------|
| UGGT2   | 2.63875    | 1.39355    | 1.44106   | 2.45802   | 0.40843    | 2.54671         | 1.59755   | 2.25747    | 0.749101  | 2.35133    | 3.62017   | 1.06835   | 2.11753         | 1.91654    | 2.85904   |
| UGP2    | 13.827     | 9.49885    | 9.4353    | 19.5631   | 4.9122     | 18.6873         | 7.52493   | 9.94202    | 21.651    | 30.0117    | 34.4882   | 11.7144   | 28.1966         | 17.0689    | 14.361    |
| UGT1A1  | 0.0572175  | 0.0506755  | 0.0939104 | 1.29E-11  | 9.91E-30   | 9.37E-12        | 0.105035  | 0.161032   | 1.73E-15  | 3.75E-10   | 2.78E-13  | 0.014459  | 5.43E-10        | 4.22E-09   | 2.42E-09  |
| UGT1A10 | 4.76E-18   | 0.0082705  | 0.0131576 | 7.16E-12  | 5.49E-30   | 5.19E-12        | 7.95E-24  | 0.0143533  | 9.61E-16  | 2.08E-10   | 1.54E-13  | 3.83E-17  | 3.01E-10        | 2.34E-09   | 1.34E-09  |
| UGT1A3  | 0.077052   | 0.110804   | 0.218559  | 0.090904  | 0.0431597  | 0.0232632       | 0.264692  | 0.227235   | 2.24E-15  | 4.84E-10   | 3.59E-13  | 0.0146121 | 7.01E-10        | 5.45E-09   | 3.12E-09  |
| UGT1A4  | 0.0564269  | 0.216802   | 0.173979  | 9.02E-12  | 0.0212106  | 0.0674793       | 0.571258  | 0.355972   | 1.21E-15  | 2.62E-10   | 0.0839341 | 0.0142475 | 3.79E-10        | 2.95E-09   | 1.69E-09  |
| UGT1A5  | 0.096315   | 0.187514   | 0.286859  | 1.67E-11  | 0.0215798  | 1.21E-11        | 0.476445  | 0.221481   | 0.0792645 | 4.84E-10   | 3.59E-13  | 0.0730605 | 7.01E-10        | 5.45E-09   | 3.12E-09  |
| UGT1A6  | 0.114149   | 0.623359   | 0.650464  | 0.0731076 | 0.0188122  | 0.131236        | 0.767544  | 0.522863   | 0.087809  | 0.00392115 | 0.0472831 | 7.23E-10  | 0.00567748      | 0.0585276  | 0.0252748 |
| UGT1A7  | 0.0778293  | 0.0172046  | 0.0272904 | 2.16E-11  | 1.65E-29   | 0.0471949       | 0.0355773 | 0.0744687  | 0.0267221 | 0.0453815  | 0.0292629 | 0.0886108 | 9.07E-10        | 0.0377128  | 4.04E-09  |
| UGT1A8  | 3.79E-18   | 8.01E-20   | 4.35E-22  | 5.69E-12  | 4.36E-30   | 4.13E-12        | 6.32E-24  | 0.0142439  | 7.63E-16  | 1.65E-10   | 1.22E-13  | 3.04E-17  | 2.39E-10        | 1.86E-09   | 1.06E-09  |
| UGT1A9  | 5.76E-18   | 1.22E-19   | 0.0132395 | 8.65E-12  | 6.64E-30   | 6.27E-12        | 9.61E-24  | 0.014444   | 1.16E-15  | 2.51E-10   | 1.86E-13  | 4.63E-17  | 3.64E-10        | 2.83E-09   | 1.62E-09  |
| UGT2A1  | 0          | 0          | 0         | 0.0209337 | 0          | 0.00094280<br>8 | 0         | 7.63E-08   | 0         | 0          | 0         | 0         | 0               | 0          | 0         |
| UGT2A2  | 0          | 0          | 0         | 7.18E-06  | 0          | 0.00641917      | 0         | 0.0320367  | 0         | 0          | 0         | 0         | 0               | 0          | 0         |
| UGT2A3  | 0.00377414 | 0          | 0         | 0         | 0          | 0               | 0         | 0.00335415 | 0         | 0          | 0         | 0         | 0               | 0          | 0         |
| UGT2B10 | 0          | 0          | 0.0023249 | 0         | 0          | 0               | 0         | 0.00499517 | 0         | 0          | 0         | 0         | 0               | 0          | 0         |
| UGT2B11 | 0.025033   | 0.132674   | 0.269218  | 0         | 0.0194425  | 0               | 0.014291  | 0.0111236  | 0         | 0          | 0         | 0         | 0               | 0          | 0         |
| UGT2B15 | 0          | 0          | 0         | 0         | 0          | 0               | 0         | 0          | 0         | 0          | 0         | 0         | 0.00010588<br>9 | 0          | 0         |
| UGT2B17 | 0.0111587  | 0          | 0         | 0         | 0.00866662 | 0               | 0         | 0          | 0         | 0          | 0         | 0         | 0.00708417      | 0          | 0         |
| UGT2B28 | 0          | 0.00608329 | 0         | 0         | 0          | 0               | 0         | 0          | 0         | 0          | 0         | 0         | 0               | 0          | 0         |
| UGT2B4  | 0          | 0.00458687 | 0         | 0         | 0.0295756  | 0.0162123       | 0         | 0          | 0         | 0          | 0         | 0         | 0               | 0          | 0.0957032 |
| UGT2B7  | 0.0981053  | 0.0614492  | 0.0973916 | 0         | 0          | 0.0751819       | 0.0672081 | 0.0697503  | 0         | 0          | 0         | 0         | 0               | 0.00512741 | 0         |
| UGT3A1  | 0          | 0.00426738 | 0         | 0         | 0          | 0               | 0         | 0.00787127 | 0         | 0          | 0         | 0         | 0               | 0          | 0         |
| UGT3A2  | 0          | 0.3413     | 0.521787  | 0.059999  | 0.015073   | 0.214824        | 0.044317  | 0.112109   | 0         | 0          | 0.0109541 | 0         | 0               | 0          | 0         |
| UGT8    | 4.01497    | 3.47203    | 3.3926    | 1.6784    | 0.908733   | 0.823772        | 2.18406   | 3.91618    | 0.443853  | 0.906405   | 0.296633  | 1.40802   | 0.180259        | 1.78428    | 1.57883   |

|            |           |           |            |           |           |           |           |                 |            |            |           |            |            |           |           |
|------------|-----------|-----------|------------|-----------|-----------|-----------|-----------|-----------------|------------|------------|-----------|------------|------------|-----------|-----------|
| UHMK1      | 4.92909   | 4.01576   | 4.36739    | 8.60544   | 2.59924   | 7.21501   | 3.45793   | 5.35209         | 3.35958    | 5.68656    | 7.60406   | 3.73921    | 9.50937    | 6.45173   | 4.40308   |
| UHRF1      | 0.699145  | 0.585748  | 0.60417    | 4.54786   | 1.30045   | 4.9104    | 0.960964  | 0.360141        | 0.450146   | 1.90032    | 1.70417   | 1.23312    | 7.95856    | 3.1839    | 2.1808    |
| UHRF1BP1   | 2.21749   | 1.86597   | 2.00538    | 2.0475    | 1.39572   | 3.61267   | 2.0573    | 2.00701         | 1.04749    | 1.82127    | 1.42927   | 1.5265     | 2.91102    | 2.15593   | 2.06671   |
| UHRF1BP1L  | 4.4013    | 2.81178   | 3.1657     | 3.34694   | 0.958732  | 3.54108   | 2.47375   | 3.51432         | 4.12131    | 4.54642    | 3.91619   | 1.94315    | 5.47618    | 3.10565   | 4.40746   |
| UHRF2      | 4.91479   | 4.3164    | 4.34378    | 6.15469   | 3.2277    | 4.43915   | 2.80577   | 3.64356         | 1.84874    | 4.41952    | 5.46395   | 3.06704    | 3.67277    | 5.70962   | 5.25347   |
| UIMC1      | 4.4564    | 3.61378   | 3.66165    | 4.2344    | 3.43769   | 4.46343   | 2.73381   | 2.94686         | 2.24455    | 3.06206    | 3.12075   | 2.9887     | 2.70468    | 3.695     | 3.35184   |
| ULBP1      | 0         | 0.0106881 | 0.00846026 | 0.0815006 | 0.0555997 | 0.134973  | 0         | 3.65E-34        | 0.685024   | 0.400992   | 0.252083  | 0.556129   | 0.559902   | 0.308982  | 0.136521  |
| ULBP2      | 0.10607   | 0.142123  | 0.114872   | 1.12227   | 0.6735    | 1.42415   | 0.168152  | 0.182061        | 3.53794    | 9.49619    | 5.77362   | 3.66306    | 9.82651    | 3.27307   | 1.52856   |
| ULBP3      | 0.220831  | 0.152506  | 0.0791642  | 0.773746  | 0.240118  | 0.513961  | 0.20171   | 0.111212        | 0.564788   | 1.33963    | 1.01378   | 0.584638   | 2.47438    | 0.965645  | 0.507425  |
| ULK1       | 5.94309   | 9.23529   | 8.46922    | 8.20714   | 18.6217   | 12.3172   | 11.9267   | 7.18409         | 24.1429    | 10.0791    | 11.677    | 12.1136    | 14.7431    | 9.43649   | 7.30665   |
| ULK2       | 1.67134   | 2.08763   | 1.94409    | 2.60704   | 1.95892   | 2.09372   | 1.41676   | 1.31206         | 1.38785    | 1.95786    | 2.34699   | 1.24662    | 1.43126    | 1.64115   | 2.12387   |
| ULK3       | 10.9638   | 16.1244   | 14.3761    | 9.61434   | 28.3207   | 15.1745   | 14.7967   | 9.40071         | 41.1875    | 11.7095    | 17.1514   | 20.5201    | 8.73755    | 10.3228   | 5.07156   |
| ULK4       | 2.39084   | 1.17364   | 1.17704    | 1.35024   | 0.811304  | 1.41086   | 1.32634   | 1.81267         | 0.44417    | 0.63858    | 0.757339  | 0.786091   | 0.456087   | 1.33663   | 1.48723   |
| ULK4P1     | 0.0557007 | 0.144775  | 0.14314    | 0.0488437 | 0         | 0.0444722 | 0.0329012 | 0.00076730<br>3 | 0.00876628 | 9.16E-05   | 2.22E-06  | 0.0519846  | 0.0193337  | 1.28E-09  | 0.330719  |
| ULK4P2     | 0.0557007 | 0.144775  | 0.14314    | 0.0488437 | 0         | 0.0444722 | 0.0329012 | 0.00076730<br>3 | 0.00876628 | 9.16E-05   | 2.22E-06  | 0.0519846  | 0.0193337  | 1.28E-09  | 0.330719  |
| ULK4P3     | 0.28873   | 0.0590879 | 0.0763999  | 0.190601  | 0.203162  | 0.0407431 | 0.203107  | 0.200799        | 0.0924877  | 0.1484     | 0.144733  | 7.62E-08   | 0.105322   | 0.0924812 | 0.040435  |
| UMAD1      | 0.90609   | 0.86404   | 0.969365   | 1.30336   | 0.498479  | 1.18458   | 0.635814  | 0.956243        | 0.655212   | 0.544926   | 1.09745   | 0.599281   | 1.13759    | 0.942193  | 0.867507  |
| UMOD       | 0         | 0         | 0          | 0         | 0         | 0         | 0         | 0               | 0          | 0          | 0         | 0          | 0          | 0         | 0         |
| UMODL1     | 0.0083882 | 0.0101039 | 0.010409   | 0.0129664 | 0.0195447 | 0.0178561 | 0         | 0.00745474      | 0          | 0.00526403 | 0.0378769 | 0.0300099  | 0.0487082  | 0.0811048 | 0.0963722 |
| UMODL1-AS1 | 0         | 0.0104163 | 0.0178847  | 0.0111395 | 0         | 0         | 0         | 0               | 0          | 0          | 0         | 0.00773446 | 0.00697421 | 0.022598  | 0         |
| UMPS       | 3.00288   | 3.37656   | 3.03597    | 3.9249    | 2.4506    | 3.75323   | 2.99957   | 2.28662         | 3.40981    | 2.61746    | 3.60778   | 2.73487    | 3.59973    | 3.24325   | 1.84268   |
| UNC119     | 4.56379   | 4.07255   | 4.27814    | 4.1048    | 5.15956   | 7.31216   | 4.67122   | 3.29995         | 3.40398    | 3.55884    | 7.49928   | 2.43465    | 3.98994    | 3.28146   | 3.18014   |
| UNC119B    | 4.17773   | 4.27645   | 4.51251    | 5.86492   | 5.6242    | 8.5509    | 3.378     | 2.78812         | 2.6624     | 3.95734    | 5.08394   | 2.53055    | 5.76047    | 4.9382    | 3.75833   |
| UNC13A     | 0.0329338 | 0.015868  | 0.00778433 | 0.0290908 | 0.0255788 | 0.126192  | 0.0107436 | 0.0104531       | 0.00859493 | 0.0354303  | 0.0451449 | 0.038714   | 0.0151777  | 0.0811453 | 0.131756  |

|           |            |            |            |            |            |            |            |            |            |            |           |           |            |            |            |
|-----------|------------|------------|------------|------------|------------|------------|------------|------------|------------|------------|-----------|-----------|------------|------------|------------|
| UNC13B    | 5.84577    | 7.44407    | 6.30756    | 8.1272     | 9.04171    | 7.41476    | 8.31646    | 4.71075    | 11.8193    | 8.17886    | 5.13363   | 9.42526   | 10.5885    | 6.81141    | 3.26542    |
| UNC13C    | 0.230317   | 0.0182918  | 0.0397819  | 0.0182576  | 0.0117943  | 0.0948233  | 0.135819   | 0.0517339  | 0.0123297  | 0.0127064  | 0.0114285 | 0         | 0.00489888 | 0          | 0.00363477 |
| UNC13D    | 1.0383     | 1.36876    | 1.19033    | 3.4001     | 4.29818    | 2.36059    | 1.23364    | 1.1148     | 2.91421    | 5.54345    | 3.71268   | 6.11694   | 8.40614    | 5.09882    | 3.33045    |
| UNC45A    | 5.56871    | 6.76279    | 6.51963    | 10.0287    | 17.2323    | 13.5638    | 8.2111     | 4.04699    | 12.5789    | 8.81486    | 5.61852   | 8.6681    | 13.5131    | 7.03222    | 5.54976    |
| UNC45B    | 0.0040752  | 0.00392699 | 0.00337129 | 0          | 0.0189906  | 0.0104099  | 0          | 0          | 0          | 0          | 0.0184016 | 0         | 0.0026293  | 0          | 0          |
| UNC50     | 5.37881    | 5.53272    | 5.84027    | 7.6034     | 3.18815    | 8.30124    | 4.24238    | 5.23624    | 5.55956    | 6.39565    | 9.64731   | 4.00061   | 6.2216     | 5.38198    | 3.8115     |
| UNC5A     | 0.0433971  | 0.0388317  | 0.0205149  | 0.287498   | 0.125191   | 0.83934    | 0.0424709  | 0.0440774  | 0.0604032  | 0.272339   | 0.440909  | 0.0576676 | 0.223997   | 0.17821    | 0.400652   |
| UNC5B     | 4.02736    | 6.1483     | 2.00348    | 5.76685    | 22.8011    | 9.50409    | 3.73924    | 2.64183    | 17.684     | 8.81941    | 8.5731    | 12.4373   | 13.3687    | 7.98571    | 9.29072    |
| UNC5B-AS1 | 0.393468   | 2.63687    | 0.295913   | 0.294894   | 5.00065    | 0.548235   | 0.449249   | 0.317892   | 52.5812    | 2.11005    | 5.45125   | 6.16821   | 0.323099   | 0.916048   | 1.18151    |
| UNC5C     | 0.325661   | 0.205449   | 0.310112   | 0.0676036  | 0.203802   | 0.357094   | 0.181902   | 0.189477   | 0.0171202  | 0.199958   | 0.121662  | 0.08382   | 0.0196511  | 0.106531   | 0.346562   |
| UNC5CL    | 0.406927   | 0.384998   | 0.446811   | 0.198238   | 0.563142   | 0.447291   | 0.616672   | 0.282739   | 0.0540645  | 0.269297   | 0.0501131 | 0.137643  | 0.147981   | 0.181743   | 0.170007   |
| UNC5D     | 0.00496579 | 0.011963   | 0.0164322  | 0.0895543  | 0.0578519  | 0.0782236  | 0.0141744  | 0.0110329  | 0.0393105  | 0.021814   | 0         | 0.0319784 | 0.0720877  | 0.0493114  | 0.0178287  |
| UNC79     | 0.00643995 | 0.0148353  | 0.00532758 | 0.0287584  | 0.00666898 | 0.0292455  | 0.00980391 | 0.00763106 | 0.0444445  | 0.0269427  | 0.024233  | 0.0122879 | 0.0152351  | 0.00448774 | 0.0154143  |
| UNC80     | 0.00682585 | 0.0115108  | 0.0141171  | 0.00351712 | 0.00795218 | 0.00871819 | 0.0194838  | 0.0212319  | 0.00207828 | 0.00214179 | 0.0154111 | 0         | 0          | 0.00267562 | 0.00490139 |
| UNC93A    | 2.56536    | 3.06895    | 3.3194     | 2.06749    | 5.02369    | 1.5496     | 4.11819    | 3.92644    | 15.0206    | 2.3942     | 4.20783   | 2.60433   | 0.495132   | 0.441193   | 0.25191    |
| UNC93B1   | 4.53688    | 3.84821    | 4.59461    | 6.3092     | 6.98538    | 12.9562    | 5.64683    | 3.27877    | 2.81735    | 3.51667    | 8.34084   | 1.86927   | 4.93437    | 3.12161    | 4.32459    |
| UNCX      | 0          | 0          | 0          | 0          | 0          | 0          | 0          | 0          | 0          | 0          | 0         | 0         | 0          | 0          | 0          |
| UNG       | 4.19625    | 5.05216    | 5.6482     | 8.85037    | 6.12321    | 7.17945    | 6.58926    | 4.10309    | 7.17146    | 4.68975    | 6.47068   | 5.05322   | 7.33963    | 3.93645    | 3.11855    |
| UNK       | 3.80289    | 4.63267    | 4.84237    | 4.231      | 6.36325    | 7.57773    | 5.40002    | 4.14206    | 3.45826    | 3.41424    | 4.63995   | 4.16531   | 3.68485    | 2.85307    | 3.39281    |
| UNKL      | 1.77348    | 2.21465    | 2.13067    | 1.51348    | 4.54622    | 3.93796    | 2.29557    | 1.66755    | 0.948687   | 0.86201    | 1.10034   | 1.19073   | 1.38272    | 1.45232    | 1.55557    |
| UNQ6494   | 0          | 0          | 0          | 0          | 0          | 0          | 0          | 0.00937448 | 0          | 0          | 0         | 0         | 0          | 0.011026   | 0          |
| UOX       | 0.052558   | 0.0168822  | 0.0144932  | 0          | 0          | 0.0149175  | 0          | 0.0311395  | 0          | 0          | 0         | 0         | 0          | 0.0366255  | 0          |
| UPB1      | 0.100768   | 0.0971031  | 0.194512   | 0.0346148  | 0.0173919  | 0.133471   | 0.178972   | 0.0796037  | 0          | 0.224843   | 0.0126394 | 0.0160227 | 0.0144478  | 0.0175553  | 0.32159    |
| UPF1      | 5.66961    | 8.55747    | 7.96083    | 11.8138    | 17.0789    | 17.1426    | 7.51453    | 5.74211    | 9.00065    | 6.06855    | 5.01146   | 7.89477   | 12.2539    | 7.80604    | 7.87047    |
| UPF2      | 4.24947    | 4.14609    | 3.52947    | 4.39226    | 2.07513    | 5.19278    | 1.67056    | 2.85317    | 3.48125    | 3.47582    | 3.00181   | 2.62788   | 4.5203     | 4.13156    | 3.07573    |
| UPF3A     | 4.98345    | 4.78041    | 4.5293     | 3.90118    | 4.52875    | 6.7114     | 2.14179    | 3.26391    | 2.69745    | 3.41812    | 2.50668   | 3.6992    | 5.32236    | 3.79462    | 3.19705    |



|              |           |            |            |           |            |           |           |           |           |           |            |            |            |            |            |
|--------------|-----------|------------|------------|-----------|------------|-----------|-----------|-----------|-----------|-----------|------------|------------|------------|------------|------------|
| URAHF        | 0.327668  | 0.495869   | 0.62308    | 0.228684  | 0.658636   | 0.25585   | 0.32442   | 0.29566   | 0.130454  | 0.308204  | 0.211673   | 0.283094   | 0.0834226  | 0.355568   | 0.456545   |
| URB1         | 2.9948    | 3.82496    | 4.23322    | 3.73542   | 3.9415     | 5.96917   | 4.02583   | 2.98183   | 2.03447   | 1.91325   | 1.4721     | 2.83665    | 4.3505     | 4.09515    | 2.99778    |
| URB1-AS1     | 1.8795    | 1.2705     | 1.16034    | 1.24307   | 0.435747   | 1.7198    | 1.82566   | 1.1468    | 2.56233   | 1.09146   | 2.94507    | 0.8631     | 0.705866   | 0.703742   | 0.846016   |
| URB2         | 1.41809   | 1.58311    | 1.46727    | 2.24893   | 1.40292    | 2.50543   | 1.6098    | 1.28934   | 1.90625   | 1.26179   | 1.34249    | 1.57904    | 2.95574    | 2.46907    | 1.3851     |
| URGCP        | 2.93923   | 3.53393    | 3.55468    | 4.10711   | 5.84523    | 5.22865   | 2.61724   | 2.07733   | 2.32983   | 3.74603   | 2.01859    | 2.49373    | 4.53595    | 3.83935    | 2.96262    |
| URGCP-MRPS24 | 0.31151   | 0.0917554  | 0.255571   | 0.344847  | 0.00284151 | 0.0693978 | 1.21216   | 0.0121765 | 0.171022  | 0.409483  | 0.00918231 | 0.281104   | 0.67725    | 0.614111   | 0.00149479 |
| URI1         | 8.84631   | 8.94614    | 9.3128     | 9.71743   | 4.99321    | 9.87783   | 5.65331   | 7.95986   | 10.7817   | 6.5561    | 9.23286    | 6.32519    | 8.48406    | 6.12398    | 4.88634    |
| URM1         | 3.23267   | 2.72826    | 2.70469    | 4.98082   | 5.78775    | 6.96195   | 3.44531   | 2.4392    | 1.96852   | 3.14182   | 6.83055    | 2.12532    | 3.69741    | 3.28032    | 2.83376    |
| UROC1        | 0         | 0.00971031 | 0.011115   | 0         | 0.0417407  | 0.0343211 | 0         | 0         | 0         | 0         | 0.0227509  | 0.00480681 | 0          | 0.00351105 | 0          |
| UROD         | 7.98415   | 5.30764    | 5.47579    | 9.11126   | 7.39694    | 16.3947   | 6.37945   | 4.00631   | 4.42697   | 8.94515   | 21.861     | 4.34998    | 9.42197    | 6.08094    | 8.22928    |
| UROS         | 2.25488   | 1.65535    | 1.45577    | 3.59549   | 2.76896    | 6.33732   | 2.418     | 1.50297   | 2.30086   | 3.28905   | 7.07749    | 2.03859    | 2.36903    | 1.85136    | 2.3412     |
| USB1         | 1.71952   | 1.43515    | 1.29425    | 9.02477   | 4.26195    | 6.77666   | 2.04376   | 1.51982   | 3.29576   | 4.54631   | 6.43857    | 4.1012     | 9.56669    | 5.27427    | 3.42754    |
| USE1         | 2.94695   | 3.89492    | 3.53388    | 6.51963   | 7.6014     | 6.28474   | 3.61169   | 2.85928   | 6.02567   | 3.9702    | 7.96587    | 3.61755    | 3.05264    | 3.54671    | 2.71793    |
| USF1         | 5.39795   | 5.73029    | 5.23763    | 7.81125   | 8.40446    | 10.6852   | 4.392     | 3.42981   | 7.61854   | 8.19962   | 10.9485    | 5.14383    | 7.1689     | 6.78934    | 6.35748    |
| USF2         | 16.9627   | 17.2287    | 16.2129    | 23.9188   | 39.3775    | 38.1126   | 17.9012   | 12.5189   | 27.9578   | 18.4355   | 23.181     | 17.4209    | 26.2037    | 16.2065    | 13.0063    |
| USF3         | 3.63853   | 3.04982    | 3.2475     | 2.65169   | 1.16447    | 2.91557   | 2.60057   | 3.4542    | 2.56214   | 2.42429   | 2.42635    | 1.97042    | 3.14823    | 1.83812    | 2.51206    |
| USH1C        | 0         | 0.00335864 | 0.00576674 | 0         | 0          | 0         | 0         | 0         | 0         | 0         | 0          | 0          | 0          | 0.00364324 | 0          |
| USH1G        | 0.888619  | 1.96263    | 1.30929    | 1.47723   | 8.4533     | 0.878155  | 3.46591   | 0.495744  | 7.90754   | 2.07594   | 1.25942    | 3.36017    | 1.18852    | 1.53567    | 0.791785   |
| USH2A        | 0.0722325 | 0.0541375  | 0.0682923  | 0.0354465 | 0.0195908  | 0.025383  | 0.0497454 | 0.0672511 | 0.0111709 | 0.0187074 | 0.0116488  | 0.00656308 | 0.00665772 | 0.0173778  | 0.0510442  |
| USHBP1       | 1.0388    | 0.30769    | 0.24654    | 0.368537  | 1.38876    | 0.877272  | 0.476371  | 0.363225  | 0.0933299 | 0.309919  | 0.365259   | 0.219331   | 0.412025   | 0.618574   | 1.24728    |
| USO1         | 9.26747   | 9.84977    | 10.706     | 13.3423   | 2.40664    | 11.6209   | 5.24841   | 8.18048   | 18.0432   | 12.9828   | 11.9022    | 9.94069    | 17.8459    | 10.7142    | 9.05563    |
| USP1         | 4.66943   | 4.23664    | 4.46947    | 5.16423   | 1.81544    | 4.77391   | 2.32264   | 3.75292   | 4.51185   | 5.31398   | 6.21093    | 2.67051    | 6.89686    | 4.02516    | 3.84775    |
| USP10        | 6.548     | 7.24687    | 7.78077    | 11.7988   | 5.57886    | 11.5399   | 6.37383   | 6.5659    | 7.29816   | 4.98089   | 5.9882     | 6.70139    | 10.8522    | 8.08572    | 5.80378    |
| USP11        | 4.97329   | 3.95188    | 4.41686    | 4.66118   | 4.4035     | 12.2549   | 4.73062   | 3.30707   | 1.54207   | 2.84289   | 4.49456    | 1.73145    | 2.87289    | 3.68382    | 7.708      |
| USP12        | 5.0778    | 5.01941    | 6.47539    | 4.37481   | 1.18952    | 3.91232   | 4.27783   | 5.80077   | 5.0137    | 5.76681   | 5.87725    | 3.19201    | 6.79772    | 4.98543    | 4.82713    |
| USP12-AS1    | 0.376923  | 0.472178   | 0.311817   | 0.466116  | 0.117098   | 0.192567  | 0.258215  | 0.267982  | 0.0918099 | 0.189231  | 0          | 0.377578   | 0          | 0.315194   | 0.324785   |



|           |           |           |           |           |            |            |           |            |           |           |            |            |            |           |          |
|-----------|-----------|-----------|-----------|-----------|------------|------------|-----------|------------|-----------|-----------|------------|------------|------------|-----------|----------|
| USP12-AS2 | 0         | 0.0426684 | 0.0244204 | 0         | 0          | 0.0251352  | 0.0674081 | 0.0524684  | 0         | 0.0370496 | 0.0333235  | 0          | 0          | 0         | 0        |
| USP13     | 1.6512    | 0.9277    | 1.1343    | 0.919951  | 0.525665   | 1.17993    | 1.29572   | 1.24189    | 0.25226   | 0.842152  | 1.47868    | 0.490543   | 0.988174   | 1.18013   | 1.84763  |
| USP14     | 6.25355   | 5.40896   | 5.81833   | 7.99386   | 2.57768    | 8.62975    | 4.6223    | 5.83469    | 5.52722   | 7.13596   | 7.46804    | 5.19971    | 9.30873    | 6.95305   | 4.43045  |
| USP15     | 3.69275   | 3.49117   | 3.72198   | 3.75352   | 1.1141     | 2.90499    | 2.60499   | 3.92264    | 7.67257   | 5.52279   | 5.03738    | 3.81289    | 5.22159    | 3.62795   | 2.69198  |
| USP16     | 7.44754   | 6.20701   | 5.3792    | 6.91295   | 1.40907    | 5.53663    | 3.16809   | 5.73133    | 9.03313   | 7.9123    | 8.62248    | 4.35258    | 9.69886    | 6.43423   | 6.27288  |
| USP17L1   | 2.54E-08  | 0.124414  | 0.27626   | 1.17E-05  | 0.0444592  | 0.137831   | 0.177837  | 0.198429   | 1.12E-32  | 0.0151951 | 0.00546676 | 0.0552971  | 0.0187467  | 3.31E-12  | 4.85E-05 |
| USP17L10  | 3.73E-17  | 3.47E-33  | 0         | 7.04E-26  | 1.58E-38   | 1.73E-11   | 1.49E-43  | 8.09E-36   | 0         | 0         | 1.13E-30   | 0          | 0          | 0.0107909 | 9.96E-33 |
| USP17L11  | 0.0521805 | 0.0881443 | 0.0141027 | 0.0277657 | 0.0729164  | 0.00054904 | 0.0294783 | 0.0141116  | 0         | 0         | 0.00109333 | 0.00800239 | 0.00024011 | 0.0222712 | 2.81E-09 |
|           |           |           |           |           |            | 7          |           |            |           |           |            |            | 5          |           |          |
| USP17L12  | 5.01E-15  | 8.48E-15  | 2.58E-13  | 4.30E-07  | 2.40E-11   | 3.39E-19   | 9.32E-15  | 2.60E-13   | 0         | 0         | 1.13E-30   | 8.33E-15   | 0.00024011 | 2.74E-12  | 4.51E-18 |
|           |           |           |           |           |            |            |           |            |           |           |            |            | 5          |           |          |
| USP17L13  | 1.09E-12  | 7.65E-11  | 1.77E-14  | 4.38E-15  | 7.80E-17   | 3.48E-19   | 1.49E-13  | 1.82E-08   | 0         | 0         | 1.13E-30   | 1.83E-09   | 0.00024011 | 4.50E-34  | 0        |
|           |           |           |           |           |            |            |           |            |           |           |            |            | 5          |           |          |
| USP17L15  | 0.0501048 | 0.137005  | 0.263514  | 9.40E-09  | 0.374832   | 0.0194288  | 5.63E-09  | 0.0362222  | 0         | 0         | 5.18E-08   | 0.0445144  | 1.68E-05   | 1.37E-06  | 0.133433 |
| USP17L17  | 2.69E-05  | 1.80E-08  | 6.77E-09  | 3.29E-13  | 3.02E-14   | 6.96E-19   | 2.56E-07  | 1.63E-06   | 0         | 0         | 7.37E-07   | 2.75E-07   | 0.00024011 | 2.98E-17  | 7.02E-21 |
|           |           |           |           |           |            |            |           |            |           |           |            |            | 5          |           |          |
| USP17L18  | 0.0782696 | 0.131789  | 0.0194753 | 0.0214547 | 0.106183   | 0.00054904 | 0.0442049 | 0.0211674  | 0         | 0         | 0.00081999 | 0.0119998  | 0.00024011 | 0.0333613 | 2.81E-09 |
|           |           |           |           |           |            | 7          |           |            |           |           | 7          |            | 5          |           |          |
| USP17L19  | 2.34E-16  | 7.71E-18  | 6.96E-16  | 3.44E-08  | 1.29E-13   | 3.79E-09   | 1.91E-15  | 4.59E-19   | 0         | 0         | 8.15E-11   | 9.39E-11   | 2.19E-19   | 5.75E-16  | 4.55E-18 |
| USP17L2   | 0.546243  | 0.527638  | 0.490205  | 0.269889  | 0.845277   | 0.199308   | 0.0889401 | 0.263147   | 0.0707737 | 0.0455852 | 0.0492008  | 0.00921618 | 0          | 0.0121487 | 0.390012 |
| USP17L20  | 0.0590002 | 0.10149   | 0.0266412 | 0.0279544 | 0.0728948  | 0.00054904 | 0.0294787 | 0.0199309  | 0         | 0         | 0.00109357 | 0.0146304  | 0.00016007 | 0.0201966 | 1.87E-09 |
|           |           |           |           |           |            | 7          |           |            |           |           |            |            | 7          |           |          |
| USP17L21  | 5.01E-15  | 8.48E-15  | 2.58E-13  | 4.30E-07  | 2.40E-11   | 3.39E-19   | 9.32E-15  | 2.60E-13   | 0         | 0         | 1.13E-30   | 8.33E-15   | 0.00024011 | 2.74E-12  | 4.51E-18 |
|           |           |           |           |           |            |            |           |            |           |           |            |            | 5          |           |          |
| USP17L22  | 0.0102607 | 0.0204932 | 0.0204902 | 0.0205195 | 0.00319167 | 0.00054904 | 1.32E-05  | 0.00878032 | 0         | 0         | 0.00082035 | 0.00994586 | 0.00012005 | 4.55E-05  | 1.40E-09 |
|           |           |           |           |           |            | 7          |           |            |           |           | 6          |            | 8          |           |          |

|          |            |                 |            |                 |          |                 |            |            |           |           |            |            |                 |           |            |
|----------|------------|-----------------|------------|-----------------|----------|-----------------|------------|------------|-----------|-----------|------------|------------|-----------------|-----------|------------|
| USP17L24 | 0.00409066 | 0.00425583      | 0.00242619 | 9.13E-06        | 2.90E-05 | 0.00048041<br>7 | 6.48E-05   | 0.00299923 | 0         | 0         | 0.00163999 | 3.39E-05   | 0.00024011<br>5 | 4.93E-11  | 0.00171323 |
| USP17L25 | 0.00409066 | 0.00425583      | 0.00242619 | 9.13E-06        | 2.90E-05 | 0.00048041<br>7 | 6.48E-05   | 0.00299923 | 0         | 0         | 0.00163999 | 3.39E-05   | 0.00024011<br>5 | 4.93E-11  | 0.00171323 |
| USP17L26 | 0.00409066 | 0.00425583      | 0.00242619 | 9.13E-06        | 2.90E-05 | 0.00048041<br>7 | 6.48E-05   | 0.00299923 | 0         | 0         | 0.00163999 | 3.39E-05   | 0.00024011<br>5 | 4.93E-11  | 0.00171323 |
| USP17L27 | 0.00409066 | 0.00425583      | 0.00242619 | 9.13E-06        | 2.90E-05 | 0.00048041<br>7 | 6.48E-05   | 0.00299923 | 0         | 0         | 0.00163999 | 3.39E-05   | 0.00024011<br>5 | 4.93E-11  | 0.00171323 |
| USP17L28 | 0.00409066 | 0.00425583      | 0.00242619 | 9.13E-06        | 2.90E-05 | 0.00048041<br>7 | 6.48E-05   | 0.00299923 | 0         | 0         | 0.00163999 | 3.39E-05   | 0.00024011<br>5 | 4.93E-11  | 0.00171323 |
| USP17L29 | 0.00409066 | 0.00425583      | 0.00242619 | 9.13E-06        | 2.90E-05 | 0.00048041<br>7 | 6.48E-05   | 0.00299923 | 0         | 0         | 0.00163999 | 3.39E-05   | 0.00024011<br>5 | 4.93E-11  | 0.00171323 |
| USP17L3  | 1.24E-07   | 0.00811603      | 6.31E-05   | 0.0257232       | 9.88E-12 | 8.50E-06        | 0.00207811 | 0.0414022  | 2.46E-17  | 0.0151951 | 0.00546676 | 0.00921618 | 5.55E-18        | 0.0485949 | 0.173264   |
| USP17L30 | 0.00409066 | 0.00425583      | 0.00242619 | 9.13E-06        | 2.90E-05 | 0.00048041<br>7 | 6.48E-05   | 0.00299923 | 0         | 0         | 0.00163999 | 3.39E-05   | 0.00024011<br>5 | 4.93E-11  | 0.00171323 |
| USP17L4  | 0.0753437  | 0.245379        | 0.190711   | 0.0474914       | 0.277751 | 0.071075        | 0.12932    | 0.165027   | 1.12E-32  | 0.0151951 | 0.00546676 | 1.82E-20   | 5.55E-18        | 6.49E-16  | 2.21E-09   |
| USP17L5  | 0.00409066 | 0.00425583      | 0.00242619 | 9.13E-06        | 2.90E-05 | 0.00048041<br>7 | 6.48E-05   | 0.00299923 | 0         | 0         | 0.00163999 | 3.39E-05   | 0.00024011<br>5 | 4.93E-11  | 0.00171323 |
| USP17L6P | 0.169675   | 0.128473        | 0.0801342  | 7.79E-31        | 0.42245  | 0.00608956      | 0.165738   | 0.0567783  | 0         | 0         | 1.78E-09   | 0.0612636  | 0               | 5.67E-18  | 1.46E-06   |
| USP17L7  | 0.494188   | 0.381254        | 0.437238   | 0.179658        | 0.463143 | 0.0371111       | 0.0538322  | 0.400249   | 0.0353869 | 0.127639  | 0          | 0.0103951  | 0.0187467       | 0.0531507 | 0.333824   |
| USP17L8  | 2.41E-14   | 4.41E-14        | 5.32E-10   | 0.00359425      | 4.40E-12 | 3.22E-18        | 0.0331015  | 1.14E-13   | 1.12E-32  | 2.05E-37  | 0          | 1.82E-20   | 0               | 2.01E-23  | 2.93E-06   |
| USP17L9P | 0.0815951  | 0.00025667<br>2 | 1.05E-05   | 0.00045527<br>5 | 2.38E-09 | 0.00054904<br>7 | 4.14E-05   | 0.00605062 | 0         | 0         | 1.11E-15   | 6.34E-07   | 2.08E-19        | 2.38E-21  | 2.85E-13   |
| USP18    | 0.659605   | 0.30137         | 0.413958   | 3.58623         | 1.30724  | 4.73525         | 0.337604   | 0.525561   | 0.138504  | 0.328294  | 0.603393   | 0.162747   | 0.770436        | 0.261526  | 0.718624   |
| USP19    | 6.01575    | 6.09657         | 6.3128     | 7.05388         | 11.5045  | 11.8258         | 6.51357    | 4.59021    | 5.91693   | 3.4852    | 4.2267     | 4.76484    | 5.25496         | 4.06496   | 4.76931    |
| USP2     | 1.6673     | 2.07277         | 2.495      | 7.02522         | 4.87924  | 3.10587         | 5.77601    | 1.81553    | 31.0905   | 12.12     | 10.156     | 15.3383    | 23.8564         | 8.03578   | 4.15963    |

|            |           |           |           |           |           |            |           |           |           |          |           |           |           |           |          |
|------------|-----------|-----------|-----------|-----------|-----------|------------|-----------|-----------|-----------|----------|-----------|-----------|-----------|-----------|----------|
| USP2-AS1   | 0.0400399 | 0.0868132 | 0.0828095 | 0.165049  | 0         | 0.136374   | 0.0457162 | 0.0355841 | 0.024382  | 0.125635 | 0.0678001 | 0.157573  | 0.322919  | 0.12556   | 0.143756 |
| USP20      | 2.44006   | 3.06349   | 3.19161   | 3.06704   | 6.65439   | 4.32172    | 2.82031   | 1.97706   | 2.72765   | 2.15698  | 1.7138    | 2.77485   | 2.2661    | 2.51913   | 2.4321   |
| USP21      | 2.44509   | 3.76713   | 4.24935   | 3.84795   | 5.53517   | 4.93052    | 3.84132   | 2.72887   | 3.12789   | 2.09347  | 2.99557   | 3.56686   | 2.55589   | 2.48151   | 2.54512  |
| USP22      | 16.7011   | 16.5658   | 18.7715   | 24.8684   | 21.3835   | 44.1271    | 19.0536   | 14.1846   | 16.0151   | 16.6324  | 21.2008   | 13.0033   | 26.8257   | 19.5638   | 21.992   |
| USP24      | 8.2164    | 6.2969    | 6.83973   | 6.73626   | 3.52769   | 6.63495    | 5.71435   | 6.0549    | 3.77304   | 5.08765  | 4.17449   | 4.69251   | 6.87564   | 5.49799   | 4.82146  |
| USP25      | 5.05261   | 4.31206   | 4.16338   | 5.40804   | 2.11684   | 5.25903    | 2.90719   | 3.48106   | 4.16381   | 4.07597  | 4.34978   | 2.68009   | 4.68421   | 3.4217    | 3.63379  |
| USP26      | 0.0248494 | 0         | 0         | 0         | 0         | 0.00705297 | 0.0283722 | 0         | 0         | 0        | 0         | 0         | 0         | 0         | 0        |
| USP27X     | 0.668825  | 0.826282  | 0.688077  | 0.645061  | 0.399583  | 1.29232    | 0.411192  | 0.548673  | 0.532593  | 0.495057 | 0.445268  | 0.22701   | 0.343005  | 0.35852   | 0.123143 |
| USP27X-AS1 | 0.141486  | 0.238595  | 0.217373  | 0.145805  | 0.156983  | 0.576551   | 0.10385   | 0.0987964 | 0.0615407 | 0.101474 | 0.365074  | 0.0506185 | 0.0586838 | 0.0845105 | 0.130623 |
| USP28      | 1.753     | 1.67897   | 1.49608   | 3.04603   | 0.927549  | 2.43692    | 1.09572   | 1.43663   | 1.7142    | 1.24196  | 1.89225   | 1.10173   | 1.59885   | 1.46458   | 1.47622  |
| USP29      | 0         | 0         | 0         | 0         | 0         | 0          | 0         | 0         | 0         | 0        | 0         | 0         | 0         | 0         | 0        |
| USP3       | 4.34864   | 3.74336   | 4.05367   | 3.59948   | 1.79208   | 3.99465    | 3.95724   | 4.72877   | 5.04544   | 3.41952  | 4.58777   | 2.85565   | 3.95443   | 3.3157    | 3.16002  |
| USP3-AS1   | 0.982023  | 0.807618  | 0.94616   | 0.641525  | 0.27407   | 0.2983     | 0.815813  | 1.51997   | 0.136328  | 0.360435 | 0.429824  | 0.623804  | 0.0614656 | 0.68476   | 0.876684 |
| USP30      | 1.95823   | 2.07591   | 2.25816   | 1.49474   | 1.00598   | 2.50655    | 2.67661   | 1.8545    | 2.05982   | 1.10841  | 1.491     | 0.907629  | 1.17755   | 0.886747  | 0.891632 |
| USP30-AS1  | 0.334362  | 0.387651  | 0.176186  | 0.292633  | 0.220547  | 0.120896   | 0.16211   | 0.297     | 0.144098  | 0.118801 | 0.21978   | 0.016932  | 0.045803  | 0.136044  | 0.033984 |
| USP31      | 3.40504   | 4.67165   | 5.51567   | 3.79435   | 2.10023   | 3.25855    | 3.06032   | 3.20492   | 2.48449   | 2.25631  | 2.49339   | 1.85903   | 2.7301    | 3.159     | 2.21203  |
| USP32      | 5.52691   | 5.37716   | 5.95254   | 7.47515   | 3.1254    | 7.14289    | 5.40332   | 4.77782   | 16.7312   | 9.13462  | 6.06494   | 7.39348   | 11.4483   | 7.20581   | 5.24226  |
| USP32P1    | 3.36664   | 3.9394    | 6.12202   | 0.202525  | 0.192104  | 0.330435   | 0.97405   | 2.39381   | 6.86E-13  | 0.301687 | 0.628445  | 0.194429  | 0.0272946 | 2.05017   | 2.19581  |
| USP32P2    | 0.262822  | 0.72562   | 0.460774  | 0.102122  | 1.49404   | 0.283011   | 0.473536  | 0.412918  | 0.212036  | 0.551393 | 0.254468  | 1.17159   | 0.148148  | 0.895577  | 0.746092 |
| USP32P3    | 0.0882926 | 0.100096  | 0.249202  | 0.0267612 | 0.0161352 | 0.0132671  | 0.0592998 | 0.170781  | 0.0316266 | 0.032593 | 0.0469042 | 0.033446  | 0.0167547 | 0.0841478 | 0.111882 |
| USP33      | 5.5043    | 5.18378   | 5.20335   | 6.35599   | 1.66709   | 5.75629    | 3.65651   | 5.28717   | 3.19336   | 5.12779  | 6.27018   | 2.782     | 5.58851   | 4.6414    | 4.77168  |
| USP34      | 12.155    | 11.9437   | 13.0986   | 11.845    | 3.13456   | 10.2787    | 8.41451   | 11.6272   | 10.1313   | 10.8191  | 9.51986   | 8.76751   | 13.4708   | 10.4617   | 11.3184  |
| USP35      | 0.919591  | 0.786916  | 0.780562  | 0.982216  | 2.54441   | 1.72917    | 1.21948   | 0.553351  | 1.55161   | 1.71925  | 0.778578  | 1.37082   | 1.44621   | 1.52947   | 1.41007  |
| USP36      | 4.95615   | 5.45575   | 6.52521   | 4.49521   | 6.08361   | 7.50166    | 6.84587   | 5.04725   | 3.99864   | 2.41363  | 2.34297   | 4.51113   | 5.46986   | 4.72914   | 4.6422   |
| USP37      | 1.51271   | 1.89639   | 2.08332   | 2.05774   | 0.72507   | 1.9971     | 1.37515   | 1.71824   | 1.27032   | 1.61291  | 2.04269   | 1.28237   | 1.72519   | 1.76193   | 1.35312  |
| USP38      | 3.08793   | 2.4478    | 2.58149   | 5.00974   | 2.91565   | 2.97465    | 2.69413   | 2.65219   | 9.86144   | 4.97925  | 6.01921   | 4.33427   | 7.18409   | 3.47221   | 2.61911  |

|           |          |           |           |           |           |           |           |           |           |           |           |           |            |           |           |
|-----------|----------|-----------|-----------|-----------|-----------|-----------|-----------|-----------|-----------|-----------|-----------|-----------|------------|-----------|-----------|
| USP39     | 5.60565  | 4.6079    | 4.34286   | 7.36393   | 5.58209   | 8.36892   | 5.43606   | 3.77502   | 4.87073   | 5.08192   | 7.54326   | 3.63183   | 6.99306    | 5.01131   | 3.49606   |
| USP4      | 6.55619  | 7.89937   | 7.92669   | 8.30812   | 8.3027    | 9.70368   | 8.27051   | 6.17988   | 11.1057   | 6.50898   | 6.3664    | 6.42101   | 7.11737    | 6.34465   | 5.94345   |
| USP40     | 3.79881  | 5.23091   | 5.532     | 5.28623   | 3.98084   | 5.07297   | 3.16599   | 3.26255   | 1.75125   | 1.94956   | 2.13489   | 2.33489   | 2.93213    | 3.4002    | 3.41417   |
| USP42     | 2.09734  | 2.5481    | 2.8681    | 2.04026   | 1.98001   | 2.43631   | 2.42564   | 2.10898   | 3.09932   | 1.79274   | 1.98493   | 1.80472   | 2.62181    | 2.17106   | 2.01236   |
| USP43     | 0.555789 | 0.471307  | 0.321851  | 2.7435    | 1.53673   | 1.17839   | 0.298253  | 0.316121  | 1.16425   | 4.22033   | 0.834464  | 1.65038   | 5.32517    | 2.02173   | 1.42077   |
| USP44     | 0.158068 | 0.0918396 | 0.130765  | 0.062283  | 0.036108  | 0.122717  | 0.0424652 | 0.152873  | 0.0169861 | 0.0291753 | 0.073475  | 0.0232857 | 0.0659902  | 0.0461663 | 0.106826  |
| USP45     | 1.14173  | 0.96386   | 1.04693   | 0.712835  | 0.274724  | 0.567236  | 0.664133  | 1.54908   | 0.258474  | 0.520412  | 0.596739  | 0.465415  | 0.35247    | 0.824723  | 1.03855   |
| USP46     | 2.02354  | 1.90232   | 1.81712   | 1.64392   | 0.925492  | 1.4565    | 1.9405    | 1.99113   | 2.70188   | 1.74371   | 2.02397   | 1.37128   | 1.91852    | 1.3245    | 0.946342  |
| USP46-AS1 | 1.47609  | 0.762005  | 0.828623  | 1.03221   | 0.736999  | 2.40153   | 0.632009  | 0.843319  | 0.706246  | 0.827076  | 1.42828   | 0.358348  | 0.680263   | 0.647485  | 0.908511  |
| USP47     | 5.93764  | 5.78565   | 5.84309   | 6.30564   | 2.17277   | 6.30819   | 2.95754   | 5.35869   | 5.74159   | 6.88876   | 5.66957   | 4.5492    | 9.41275    | 5.91157   | 5.34853   |
| USP48     | 5.31463  | 5.40285   | 5.69845   | 5.47199   | 3.1836    | 5.03082   | 3.49666   | 4.84879   | 3.58632   | 4.19264   | 4.41455   | 3.48249   | 4.5841     | 4.84119   | 4.79735   |
| USP49     | 1.00391  | 1.02535   | 1.15007   | 0.619779  | 0.600051  | 0.837087  | 0.890044  | 0.949748  | 0.312704  | 0.357098  | 0.279405  | 0.493225  | 0.304456   | 0.596013  | 0.77402   |
| USP5      | 10.7299  | 11.221    | 11.9256   | 16.2989   | 19.3383   | 20.398    | 13.6511   | 9.00068   | 18.9969   | 12.8116   | 10.1637   | 11.6226   | 15.9379    | 10.5601   | 7.89756   |
| USP50     | 0.269208 | 0.108377  | 0.0864066 | 0.0528462 | 0         | 0.0727623 | 0.122526  | 0.173044  | 0.0845703 | 0.0435946 | 0.020246  | 0.0123359 | 0          | 0.0733357 | 0.0738064 |
| USP51     | 0.431008 | 0.35202   | 0.321774  | 0.26      | 0.26127   | 0.617631  | 0.258058  | 0.308304  | 0.102423  | 0.250689  | 0.373817  | 0.0338486 | 0.128868   | 0.159333  | 0.437817  |
| USP53     | 5.86384  | 3.44242   | 3.77686   | 3.75012   | 0.67592   | 2.90436   | 2.42404   | 4.09481   | 4.73963   | 4.93291   | 3.47417   | 2.85993   | 5.10103    | 3.87352   | 2.32327   |
| USP54     | 3.65817  | 4.44638   | 5.36457   | 2.81301   | 2.45404   | 3.7603    | 4.43249   | 3.72252   | 4.98997   | 2.79611   | 1.80009   | 2.79534   | 1.95489    | 2.40976   | 2.47637   |
| USP6      | 0.228788 | 0.0903691 | 0.0789645 | 0.032089  | 0.0561986 | 0.0924267 | 0.768326  | 0.0699399 | 0.0148742 | 0.0465602 | 0.0119275 | 0.0127038 | 0.00243492 | 0.0383874 | 0.0211191 |
| USP6NL    | 3.48971  | 2.74545   | 3.035     | 3.50687   | 2.32397   | 3.09028   | 2.7914    | 3.14589   | 9.96037   | 5.30535   | 4.17784   | 4.84025   | 5.43377    | 3.08666   | 2.24111   |
| USP7      | 12.7939  | 13.1971   | 13.8895   | 15.6347   | 6.9671    | 15.7101   | 11.1009   | 11.7842   | 20.3181   | 11.49     | 10.352    | 10.4773   | 19.5295    | 11.42     | 9.04607   |
| USP8      | 6.36306  | 5.29329   | 5.00144   | 6.05938   | 2.27878   | 7.10676   | 3.05092   | 4.59489   | 7.81386   | 5.65082   | 5.27065   | 4.19573   | 6.54426    | 5.31943   | 5.46787   |
| USP9X     | 8.78624  | 8.41856   | 8.75666   | 11.7002   | 4.35121   | 11.6351   | 7.81593   | 7.85154   | 11.4755   | 10.7444   | 8.98096   | 8.73293   | 13.6812    | 9.19524   | 9.44711   |
| USP9Y     | 3.10956  | 3.13529   | 3.27992   | 2.47523   | 0.773408  | 2.1551    | 0.215813  | 3.02778   | 0.993796  | 2.18141   | 2.07652   | 1.52565   | 1.36974    | 2.14202   | 3.11508   |
| USPL1     | 2.25187  | 1.78826   | 1.67768   | 1.50419   | 0.501616  | 1.55815   | 1.15528   | 1.59567   | 0.865233  | 1.54557   | 1.78384   | 1.06597   | 1.39456    | 1.43122   | 1.52114   |
| UST       | 1.38616  | 2.54706   | 3.14369   | 1.1732    | 1.85845   | 1.59318   | 2.13631   | 1.56915   | 1.0848    | 1.03857   | 2.02889   | 0.610939  | 1.39422    | 0.931064  | 1.40787   |
| UST-AS1   | 0.311391 | 0.385799  | 0.478409  | 0.0687638 | 0.0345499 | 0.0662864 | 0.419025  | 0.385458  | 0.0135443 | 0.0139581 | 0.0753262 | 0.0875321 | 0.00717529 | 0.0929981 | 0.255541  |

|           |          |            |           |           |           |           |           |           |           |           |           |           |           |           |           |
|-----------|----------|------------|-----------|-----------|-----------|-----------|-----------|-----------|-----------|-----------|-----------|-----------|-----------|-----------|-----------|
| UTAT33    | 0.178109 | 0.092348   | 0.102196  | 0         | 2.13E-25  | 0         | 0.64104   | 0.0806964 | 0         | 3.32E-39  | 3.08E-34  | 0.0628272 | 0         | 0.101818  | 0.121518  |
| UTF1      | 0        | 0          | 0         | 0         | 0.031071  | 0.017032  | 0         | 0         | 0         | 0.0251054 | 0.0677415 | 0         | 0         | 0.0104543 | 0         |
| UTP11     | 7.35512  | 7.14619    | 6.50574   | 11.2916   | 5.38826   | 12.4308   | 5.04006   | 5.11811   | 9.2538    | 9.45136   | 12.0169   | 7.10337   | 10.0876   | 11.0103   | 8.49174   |
| UTP14A    | 2.97072  | 2.40817    | 2.22314   | 7.21639   | 3.24343   | 4.73985   | 2.08813   | 2.02699   | 3.21826   | 3.65014   | 3.41884   | 3.06303   | 6.12932   | 3.98211   | 2.50735   |
| UTP14C    | 2.72687  | 2.11602    | 2.31948   | 2.97062   | 1.8651    | 2.46894   | 1.55842   | 2.12008   | 1.82472   | 2.06904   | 2.39279   | 1.56438   | 2.85733   | 2.04884   | 3.13593   |
| UTP15     | 1.95773  | 1.60421    | 1.61206   | 2.34986   | 0.416291  | 2.59524   | 1.07874   | 1.98612   | 1.72046   | 1.71602   | 2.59976   | 1.20905   | 3.27358   | 2.17221   | 1.32423   |
| UTP18     | 5.2207   | 6.61701    | 7.2558    | 7.94986   | 6.90743   | 7.63555   | 5.39981   | 4.83623   | 9.39521   | 7.1538    | 9.38803   | 5.35282   | 9.28877   | 6.43299   | 4.18101   |
| UTP20     | 3.16965  | 2.44919    | 2.71565   | 4.50257   | 1.25682   | 4.76356   | 2.45764   | 2.41972   | 1.42336   | 1.79569   | 2.48498   | 1.66514   | 3.44044   | 3.34004   | 2.49365   |
| UTP23     | 2.12557  | 1.65553    | 1.73768   | 1.8997    | 0.525943  | 2.32244   | 1.02374   | 1.66614   | 1.13781   | 1.55032   | 2.80297   | 0.942154  | 2.26141   | 1.88322   | 1.76492   |
| UTP25     | 1.89268  | 1.83041    | 1.88839   | 2.39451   | 1.37256   | 2.75178   | 1.79045   | 1.8299    | 1.78361   | 1.25279   | 1.79179   | 1.20596   | 1.97425   | 1.62348   | 1.99355   |
| UTP3      | 4.61075  | 4.99172    | 4.5809    | 7.84632   | 6.84994   | 8.71703   | 2.38364   | 3.44282   | 10.2926   | 4.17558   | 4.66304   | 4.11391   | 9.6592    | 5.47889   | 3.59139   |
| UTP4      | 6.8998   | 4.88275    | 4.93505   | 10.909    | 3.57259   | 14.5303   | 5.53333   | 4.77234   | 8.16554   | 5.88928   | 8.3685    | 5.40718   | 11.3545   | 8.382     | 5.42633   |
| UTP6      | 5.34588  | 5.64284    | 5.76685   | 9.45899   | 3.9518    | 9.02754   | 4.2867    | 4.11352   | 6.61987   | 6.97688   | 6.90779   | 4.81949   | 9.69662   | 6.87661   | 4.52272   |
| UTRN      | 19.4252  | 15.6231    | 17.0802   | 10.7804   | 12.4583   | 16.041    | 13.3555   | 13.5805   | 7.57074   | 7.56608   | 7.23178   | 8.31903   | 7.71153   | 8.68417   | 18.9911   |
| UTS2      | 0        | 0.0147691  | 0         | 0         | 0         | 0         | 0.0349987 | 0         | 0         | 0.0384727 | 0.10381   | 0         | 0.435098  | 0.0640825 | 0         |
| UTS2B     | 0.172996 | 0.125028   | 0.119262  | 0.0396173 | 0.0597162 | 0.0900191 | 0.0987607 | 0.145203  | 0.011705  | 0.0241253 | 0.0650971 | 0.0825223 | 0         | 0.0502308 | 0.0552099 |
| UTS2R     | 0        | 0.00851197 | 0.0146149 | 0         | 0.0274421 | 0         | 0         | 0.0314009 | 0         | 0         | 0         | 0         | 0         | 0         | 0.0253713 |
| UTY       | 4.22005  | 4.21161    | 4.08038   | 3.85027   | 2.28388   | 2.36655   | 0.405106  | 3.83881   | 2.97243   | 2.80685   | 2.91903   | 2.73875   | 1.44115   | 2.74643   | 2.86041   |
| UVRAG     | 3.75862  | 2.83408    | 3.2947    | 2.36372   | 2.12939   | 3.55898   | 2.5626    | 2.55204   | 1.51131   | 1.91734   | 2.75619   | 1.68928   | 2.32388   | 1.97612   | 3.06243   |
| UVRAG-DT  | 0.101653 | 0.0816301  | 0.252284  | 0.139675  | 0.157903  | 0         | 0.193441  | 0.0602273 | 0.0412674 | 0.0425284 | 0.0382513 | 0.0727356 | 0         | 0         | 0         |
| UVSSA     | 4.13921  | 3.97707    | 3.66146   | 2.40859   | 5.47184   | 3.86223   | 4.26756   | 4.60031   | 1.34467   | 1.96165   | 1.09531   | 3.45756   | 2.05073   | 2.55301   | 2.98591   |
| UXS1      | 2.63102  | 2.0386     | 2.55865   | 3.3743    | 1.22991   | 4.73337   | 2.29774   | 2.1843    | 2.36053   | 3.25043   | 4.1246    | 1.19799   | 3.68771   | 2.00443   | 2.32157   |
| UXT       | 13.4406  | 9.30485    | 11.4146   | 16.0907   | 7.55701   | 20.6192   | 12.0839   | 8.97774   | 12.4031   | 14.3509   | 32.4417   | 8.47643   | 10.3662   | 10.817    | 8.01303   |
| UXT-AS1   | 7.74E-33 | 0.0864148  | 6.27E-42  | 0.123402  | 1.53E-28  | 0.103827  | 0.137728  | 0.0534761 | 0.0737469 | 3.21E-30  | 0.0667651 | 3.99E-34  | 0.0384385 | 4.16E-33  | 4.17E-28  |
| VAC14     | 4.41456  | 4.48671    | 4.40215   | 7.06149   | 9.24712   | 9.54282   | 6.3642    | 3.89029   | 4.01874   | 4.46806   | 6.87957   | 4.5786    | 6.56931   | 5.18545   | 5.12315   |
| VAC14-AS1 | 0.384505 | 0.410577   | 0.361075  | 0.128511  | 0.225994  | 0.0884868 | 0.344093  | 0.424836  | 0.037969  | 0.0913015 | 0.0703878 | 0.208202  | 0.0938684 | 0.336742  | 0.402955  |

|           |           |            |           |            |            |            |            |            |            |          |            |           |           |          |           |
|-----------|-----------|------------|-----------|------------|------------|------------|------------|------------|------------|----------|------------|-----------|-----------|----------|-----------|
| VAMP1     | 2.27986   | 3.21576    | 2.78067   | 1.03632    | 2.5357     | 1.4369     | 1.95821    | 1.86088    | 0.125829   | 0.596499 | 0.754221   | 1.31588   | 0.191091  | 1.41476  | 3.06644   |
| VAMP2     | 13.3601   | 16.7516    | 18.5388   | 11.1875    | 17.3773    | 20.0484    | 22.4832    | 18.1279    | 18.536     | 10.6738  | 14.7487    | 11.5816   | 15.1569   | 7.47803  | 10.4795   |
| VAMP3     | 16.6882   | 14.0635    | 15.5248   | 25.472     | 5.73882    | 27.5884    | 14.2126    | 16.3328    | 31.279     | 31.1678  | 42.0735    | 21.3358   | 39.9332   | 19.0128  | 14.8923   |
| VAMP4     | 1.3199    | 1.49036    | 1.64157   | 1.3972     | 0.453287   | 1.72786    | 1.03031    | 1.70366    | 1.47626    | 2.03977  | 2.28567    | 1.4359    | 2.02181   | 1.46883  | 1.8375    |
| VAMP5     | 6.19468   | 3.43743    | 3.2821    | 7.56731    | 8.43318    | 18.9948    | 4.64903    | 3.30938    | 1.73776    | 8.03704  | 22.1184    | 3.13758   | 6.15234   | 5.31114  | 8.54649   |
| VAMP7     | 2.3587    | 1.71516    | 1.75328   | 2.81189    | 0.65571    | 3.23862    | 1.53038    | 2.35146    | 3.47682    | 3.44107  | 4.66702    | 1.9337    | 3.8102    | 2.25625  | 2.18118   |
| VAMP8     | 25.4096   | 28.0204    | 25.9551   | 74.7144    | 46.2336    | 50.7887    | 27.071     | 20.4351    | 73.1882    | 56.4468  | 67.5697    | 40.0756   | 47.7009   | 26.3422  | 10.9217   |
| VANGL1    | 2.58374   | 2.41225    | 2.50647   | 3.28546    | 1.40205    | 3.96867    | 2.29918    | 1.89046    | 2.0314     | 3.2992   | 3.40534    | 2.83453   | 5.71782   | 3.39048  | 2.2059    |
| VANGL2    | 3.64097   | 9.81934    | 8.68562   | 6.09608    | 10.7606    | 6.54658    | 5.72717    | 5.22645    | 6.0142     | 4.40154  | 4.86194    | 5.72713   | 4.46391   | 3.82168  | 2.03691   |
| VAPA      | 8.07391   | 6.83633    | 6.69585   | 13.2004    | 3.15597    | 10.3488    | 5.63307    | 8.21355    | 12.0053    | 10.2084  | 15.1587    | 6.49214   | 13.1806   | 8.15285  | 5.39368   |
| VAPB      | 3.84846   | 3.85034    | 3.88075   | 5.33287    | 2.94368    | 5.41925    | 3.77154    | 3.66633    | 3.25248    | 3.6373   | 3.7915     | 2.98104   | 6.7416    | 3.76977  | 3.52965   |
| VARS      | 0.984256  | 1.09257    | 1.13289   | 2.38075    | 2.45406    | 4.33107    | 1.58244    | 0.902543   | 1.84996    | 1.45469  | 1.20926    | 1.73639   | 3.05177   | 1.80545  | 1.37481   |
| VARS2     | 0.430756  | 0.39966    | 0.360624  | 0.537582   | 0.888941   | 0.86902    | 0.483567   | 0.335082   | 0.43529    | 0.31894  | 0.278702   | 0.432392  | 0.515852  | 0.448645 | 0.375327  |
| VASH1     | 2.11497   | 1.41438    | 1.72084   | 2.34166    | 5.60462    | 3.6418     | 1.76982    | 1.28175    | 0.721238   | 2.03248  | 2.48487    | 1.22858   | 3.60779   | 3.66251  | 6.21314   |
| VASH1-AS1 | 1.40563   | 1.40451    | 1.30903   | 1.31929    | 1.92912    | 1.86711    | 1.07708    | 0.895203   | 0.928294   | 0.741806 | 0.74385    | 0.975984  | 0.648482  | 1.16907  | 3.2959    |
| VASH2     | 0.319286  | 0.136468   | 0.191711  | 0.137982   | 0.12799    | 0.447266   | 0.158756   | 0.201374   | 0.0313592  | 0.187441 | 0.540651   | 0.0736959 | 0.0764199 | 0.10766  | 0.5177    |
| VASN      | 6.21877   | 5.8694     | 8.3651    | 7.77704    | 10.9154    | 18.5613    | 12.4963    | 4.71311    | 14.1631    | 6.01435  | 14.1708    | 7.7132    | 9.62105   | 5.61672  | 7.94782   |
| VASP      | 9.63115   | 9.67041    | 10.6346   | 28.7236    | 18.7752    | 34.2575    | 12.4735    | 6.99658    | 13.2928    | 27.4614  | 43.6606    | 12.0544   | 38.6857   | 21.1699  | 20.4643   |
| VAT1      | 34.9076   | 36.5935    | 38.9506   | 34.9183    | 89.0647    | 54.7953    | 63.5402    | 27.2271    | 164.76     | 40.1264  | 60.5682    | 36.6614   | 37.7247   | 22.7527  | 27.5724   |
| VAT1L     | 0.0183142 | 0.00882406 | 0.0202011 | 0.0943666  | 0.037931   | 0.550999   | 0.0139404  | 0.0162761  | 0.00743488 | 0.145579 | 0.330791   | 0.0087362 | 0.0275712 | 0.252057 | 0.0789045 |
| VAV1      | 0.559468  | 0.394848   | 0.808324  | 2.00574    | 1.62793    | 2.50938    | 0.647779   | 0.630264   | 0.431853   | 0.860429 | 1.3432     | 0.202976  | 1.18458   | 0.498319 | 1.67483   |
| VAV2      | 1.76041   | 1.57687    | 1.36162   | 6.42572    | 5.2319     | 6.13407    | 2.21154    | 1.06421    | 0.900593   | 3.62861  | 2.0573     | 2.57389   | 7.12866   | 5.6028   | 4.80283   |
| VAV3      | 7.77458   | 11.1144    | 9.81864   | 11.0404    | 4.67553    | 9.91973    | 6.60731    | 7.99969    | 6.15602    | 7.46012  | 9.42068    | 9.0913    | 3.15386   | 3.49922  | 2.29452   |
| VAV3-AS1  | 0.112163  | 0.036028   | 0.0618597 | 0          | 0          | 0.0955057  | 0          | 0.0332272  | 0          | 0        | 0.0422062  | 0         | 0         | 0        | 0         |
| VAX1      | 0         | 0.00770606 | 0.0033078 | 0.00824105 | 0.00621098 | 0.00340463 | 0.00913061 | 0.00355349 | 0          | 0        | 0.00902751 | 0.002861  | 0.023218  | 0        | 0         |
| VAX2      | 0.323114  | 0.126491   | 0.217184  | 0.0832446  | 0.439169   | 0.412691   | 0.253633   | 0.19742    | 0.0245948  | 0.101385 | 0.182378   | 0.0288996 | 0         | 0.116101 | 0.29002   |

|          |           |            |           |           |           |           |           |           |           |          |            |            |          |            |           |
|----------|-----------|------------|-----------|-----------|-----------|-----------|-----------|-----------|-----------|----------|------------|------------|----------|------------|-----------|
| VBPI     | 3.35143   | 2.30214    | 2.51028   | 7.30421   | 1.0025    | 4.48301   | 1.83572   | 3.36085   | 3.11641   | 7.20484  | 10.9666    | 2.92465    | 7.48783  | 4.3672     | 2.56915   |
| VCAM1    | 2.46387   | 0.748483   | 1.10582   | 4.19956   | 1.35805   | 6.68143   | 0.915723  | 1.38059   | 0.167195  | 3.69094  | 7.34099    | 0.19646    | 3.80403  | 0.96674    | 10.7502   |
| VCAN     | 11.4224   | 4.31993    | 5.6066    | 8.33846   | 9.29993   | 31.5972   | 9.50881   | 8.59112   | 0.992034  | 25.5342  | 46.9383    | 2.4807     | 7.3156   | 9.24347    | 70.7183   |
| VCAN-AS1 | 0         | 0          | 0         | 0         | 0         | 0.139429  | 0.186962  | 0.0970171 | 0         | 0.205521 | 0.123234   | 0.0390554  | 0        | 0.0570546  | 0.31355   |
| VCL      | 15.0182   | 17.2976    | 22.0524   | 29.5506   | 16.4607   | 28.6637   | 19.9882   | 10.4749   | 30.6505   | 26.6585  | 25.7157    | 20.4706    | 44.3837  | 30.4839    | 34.6794   |
| VCP      | 25.1033   | 26.4098    | 26.7333   | 55.2018   | 44.7092   | 55.9619   | 29.5426   | 19.5816   | 63.9381   | 54.4679  | 43.1437    | 39.3173    | 87.7547  | 38.2611    | 29.4409   |
| VCPPI1   | 3.81283   | 2.91041    | 3.29474   | 3.65211   | 1.91705   | 4.33841   | 2.60491   | 3.37092   | 2.90268   | 3.67705  | 3.16025    | 2.23196    | 4.13656  | 3.07123    | 3.30494   |
| VCPKMT   | 1.76235   | 2.01078    | 2.06541   | 1.61436   | 1.08361   | 1.39641   | 1.28557   | 1.81639   | 1.81843   | 1.68967  | 2.3625     | 1.82146    | 1.73717  | 1.68865    | 1.28305   |
| VCX      | 0.0277613 | 0.0485522  | 0.113166  | 0.049327  | 0.0743519 | 0.114401  | 0.0273257 | 0         | 0         | 0        | 0          | 3.93E-06   | 0        | 0          | 0         |
| VCX2     | 0.04082   | 0          | 0.046983  | 0         | 1.07E-13  | 3.15E-10  | 5.58E-05  | 0         | 0         | 0        | 0          | 0.0203126  | 0        | 1.08E-07   | 0.0815616 |
| VCX3A    | 8.19E-19  | 7.45E-05   | 8.37E-34  | 0         | 4.95E-18  | 0.0274536 | 0.0367151 | 0.020665  | 0         | 0        | 1.20E-15   | 9.43E-07   | 0        | 6.26E-16   | 0         |
| VCX3B    | 0.145787  | 0.0316798  | 0.0535134 | 0         | 0.06119   | 3.84E-24  | 0.0588246 | 5.06E-06  | 0         | 0        | 2.93E-19   | 2.31E-10   | 0        | 0.0192498  | 9.28E-10  |
| VCY      | 6.69E-06  | 0.00185736 | 0         | 0         | 0         | 0         | 7.44E-17  | 0         | 0         | 0        | 0.00978798 | 0          | 0        | 0.00512078 | 0         |
| VCY1B    | 9.65E-06  | 0.00267725 | 0         | 0         | 0         | 0         | 1.07E-16  | 0         | 0         | 0        | 0.0141086  | 0          | 0        | 0.00738122 | 0         |
| VDAC1    | 19.0536   | 15.619     | 15.0703   | 43.7292   | 10.812    | 44.1413   | 17.5569   | 16.6487   | 32.8643   | 36.6811  | 47.2264    | 27.3177    | 57.0989  | 32.4822    | 17.4117   |
| VDAC2    | 22.5827   | 18.7147    | 19.0907   | 46.8858   | 12.5686   | 31.8956   | 16.1328   | 17.9335   | 41.1818   | 46.2563  | 48.5961    | 32.0827    | 56.8272  | 34.0315    | 13.8748   |
| VDAC3    | 13.2546   | 11.397     | 11.7112   | 19.2503   | 7.98348   | 21.0494   | 9.57438   | 9.45571   | 15.3739   | 21.0496  | 32.047     | 11.5595    | 21.4577  | 16.0228    | 11.0932   |
| VDR      | 4.30962   | 4.92341    | 4.92903   | 12.3678   | 7.93302   | 13.5305   | 4.2966    | 5.10808   | 6.43811   | 8.434    | 5.50732    | 5.73782    | 17.7504  | 7.51589    | 4.20762   |
| VEGFA    | 4.23289   | 5.49863    | 5.37676   | 15.9459   | 8.0405    | 19.2315   | 4.805     | 5.53661   | 9.28082   | 16.2841  | 15.1166    | 16.4807    | 18.4254  | 24.9823    | 6.53639   |
| VEGFB    | 8.61614   | 7.87652    | 8.75074   | 6.7519    | 14.1406   | 15.5792   | 10.4525   | 5.9481    | 11.0556   | 10.8624  | 26.5739    | 8.42194    | 10.018   | 6.71455    | 9.22516   |
| VEGFC    | 0.985989  | 0.619185   | 0.568226  | 1.40426   | 1.66925   | 3.84876   | 0.98663   | 0.502129  | 0.984946  | 2.12742  | 3.43923    | 0.848187   | 4.14573  | 2.60556    | 3.65934   |
| VEGFD    | 1.01261   | 0.191019   | 0.219891  | 0.0377878 | 0.0804689 | 0.451584  | 0.218025  | 0.27426   | 7.42E-10  | 1.33E-07 | 2.00E-07   | 0.00968329 | 0        | 1.24E-23   | 0.208313  |
| VENTX    | 0.124735  | 0.161805   | 0.269879  | 0.355964  | 0.611076  | 1.47877   | 0.394388  | 0.21318   | 0         | 0.240853 | 0.389935   | 0.0892509  | 0.241434 | 0.3059     | 1.51575   |
| VENTXP1  | 0         | 0          | 0         | 0         | 0         | 0         | 0         | 0         | 0         | 0        | 0          | 0          | 0        | 0          | 0         |
| VENTXP7  | 0         | 0.0348459  | 0.0199433 | 0         | 0.0748941 | 0.0410542 | 0.05505   | 0         | 0         | 0        | 0.0272142  | 0          | 0        | 0.0629978  | 0         |
| VEPH1    | 0.18155   | 0.216497   | 0.240305  | 0.0841915 | 0.0705024 | 0.139129  | 0.207288  | 0.137144  | 0.0939706 | 0.358885 | 0.876149   | 0.0357235  | 0.105421 | 0.0474429  | 0.202064  |

|           |           |           |           |            |           |           |            |           |            |            |           |            |            |           |           |
|-----------|-----------|-----------|-----------|------------|-----------|-----------|------------|-----------|------------|------------|-----------|------------|------------|-----------|-----------|
| VEZF1     | 4.8173    | 3.76278   | 3.9379    | 4.75817    | 1.59872   | 6.71473   | 4.07483    | 4.13302   | 1.90921    | 3.74376    | 6.55153   | 1.87859    | 5.02947    | 3.99455   | 5.39915   |
| VEZT      | 3.77426   | 3.96214   | 3.89646   | 4.20496    | 1.42111   | 4.20008   | 2.24403    | 3.77779   | 3.9315     | 5.46622    | 6.01994   | 3.55681    | 6.01041    | 4.93423   | 3.47201   |
| VGF       | 0.0906504 | 0.170339  | 0.149985  | 0.112101   | 0.267542  | 0.632939  | 0.279455   | 0.120844  | 0.121442   | 0.0341327  | 0.0204666 | 0.246479   | 0.040941   | 0.118445  | 0.0130185 |
| VGLL1     | 0.0190478 | 0.018355  | 0         | 0.0588879  | 0         | 0.0324379 | 0.0434963  | 0.0507842 | 0          | 0.167348   | 0.0645077 | 0          | 0.147474   | 0.099552  | 0.0820651 |
| VGLL2     | 0         | 0         | 0         | 0          | 0         | 0         | 0          | 0         | 0          | 0          | 0         | 0          | 0          | 0         | 0         |
| VGLL3     | 2.52658   | 1.2212    | 1.54778   | 1.12265    | 0.742084  | 3.69504   | 2.73188    | 1.81907   | 0.35299    | 1.88162    | 3.64877   | 0.296062   | 1.47667    | 1.28812   | 5.97668   |
| VGLL4     | 6.48538   | 6.09646   | 6.22227   | 7.94023    | 11.0571   | 15.8022   | 6.26699    | 4.92792   | 6.99668    | 7.21484    | 12.943    | 5.7698     | 9.09041    | 7.98541   | 11.753    |
| VHL       | 5.10021   | 4.31544   | 4.51717   | 6.66149    | 7.54197   | 7.01307   | 3.79443    | 4.42596   | 3.56194    | 4.30975    | 7.55199   | 2.65969    | 5.8097     | 3.99834   | 4.84166   |
| VHLL      | 0.0684706 | 0.0109967 | 0         | 0          | 0         | 0.0583018 | 0          | 0         | 0          | 0          | 0         | 0.0163308  | 0.0589025  | 0.0357857 | 0         |
| VIL1      | 0.0422627 | 0.0244354 | 0.0489478 | 0.00871059 | 0         | 0.0143945 | 0.00965083 | 0.0375596 | 0.0102942  | 0          | 0         | 0.00604802 | 0          | 0.013253  | 0         |
| VILL      | 1.02138   | 1.59238   | 1.57314   | 1.10391    | 2.69586   | 2.50302   | 1.13774    | 0.981519  | 0.677588   | 1.28194    | 1.11552   | 1.15863    | 0.846509   | 1.35408   | 1.24025   |
| VIM       | 294.289   | 109.913   | 146.045   | 140.571    | 217.756   | 320.936   | 222.363    | 132.521   | 41.7902    | 304.669    | 807.348   | 58.6824    | 246.219    | 226.533   | 444.077   |
| VIM-AS1   | 0.324119  | 0.145034  | 0.189513  | 0.31504    | 0.183374  | 0.380056  | 0.127978   | 0.35768   | 0.0202921  | 0.461308   | 0.892756  | 0.0667013  | 0.463779   | 0.513735  | 0.225474  |
| VIP       | 0.0583316 | 0.0562101 | 0.036192  | 0.0450843  | 0.0226523 | 0         | 0          | 0.0518402 | 0          | 0          | 0.0658491 | 0.09391    | 0.0282264  | 0.144811  | 0.0837715 |
| VIPAS39   | 2.69703   | 2.70412   | 2.54071   | 3.56658    | 3.49926   | 4.16156   | 2.83908    | 2.20985   | 2.62016    | 3.27744    | 4.24133   | 2.50985    | 2.76608    | 2.30179   | 1.73514   |
| VIPR1     | 4.74677   | 6.31842   | 6.21705   | 6.76059    | 6.4237    | 7.15361   | 5.64716    | 4.31008   | 3.91538    | 2.94003    | 4.07898   | 4.15832    | 5.75289    | 1.72691   | 1.13451   |
| VIPR1-AS1 | 0         | 0         | 0         | 0          | 0         | 0         | 0          | 0         | 0          | 0          | 0         | 0.0914888  | 0          | 0         | 0         |
| VIPR2     | 0.085063  | 0.0287883 | 0.0539564 | 0.0155041  | 0.183295  | 0.106156  | 0.132551   | 0.0450081 | 0.00606403 | 0.00625623 | 0.0112417 | 0.00714253 | 0.00963755 | 0         | 0.0500547 |
| VIRMA     | 5.27562   | 4.63739   | 4.68991   | 5.9749     | 2.20693   | 5.63957   | 3.89639    | 4.22122   | 4.60568    | 4.6241     | 4.63471   | 3.08966    | 6.12238    | 4.45892   | 4.26083   |
| VIT       | 3.74748   | 1.13578   | 1.73899   | 0.186866   | 0.177346  | 1.90999   | 2.53811    | 1.79056   | 0.0736131  | 0.244446   | 0.333583  | 0.100914   | 0.116993   | 0.0842408 | 0.192898  |
| VKORC1    | 10.8191   | 10.4061   | 13.7115   | 40.6567    | 22.6815   | 26.1653   | 12.7476    | 10.0127   | 9.51082    | 28.3579    | 63.8898   | 14.8132    | 30.546     | 21.991    | 18.9839   |
| VKORC1L1  | 3.46368   | 3.83751   | 4.06766   | 4.11185    | 1.86649   | 4.30044   | 3.22298    | 3.1867    | 5.32869    | 3.47108    | 4.21142   | 2.92048    | 4.33171    | 3.35129   | 3.50606   |
| VLDLR     | 1.81704   | 1.3254    | 1.25265   | 4.43232    | 1.82711   | 6.49039   | 1.30792    | 1.18967   | 2.08992    | 4.91318    | 2.99754   | 3.60179    | 4.40883    | 3.46568   | 2.13045   |
| VLDLR-AS1 | 0.183259  | 0.040828  | 0.0866315 | 0.189951   | 0.0813329 | 0.183796  | 0.0896742  | 0         | 0.0323642  | 0.232963   | 0.236431  | 0.170262   | 0.305123   | 0.193712  | 0.112793  |
| VMA21     | 4.1265    | 3.32659   | 3.75992   | 6.03701    | 1.00954   | 5.63615   | 3.15623    | 5.21812   | 3.0956     | 3.87738    | 6.15076   | 3.30615    | 6.24383    | 3.99704   | 3.69505   |
| VMAC      | 1.80155   | 2.17672   | 1.91456   | 1.38528    | 3.09981   | 1.8054    | 2.32594    | 1.63802   | 0.624472   | 0.678341   | 1.20459   | 0.942006   | 0.572236   | 0.898114  | 1.69167   |



|            |           |            |           |           |           |           |           |           |           |           |           |            |           |            |           |
|------------|-----------|------------|-----------|-----------|-----------|-----------|-----------|-----------|-----------|-----------|-----------|------------|-----------|------------|-----------|
| VMO1       | 0.143924  | 0.41607    | 0.452445  | 1.27554   | 1.16253   | 3.2108    | 0.460119  | 0.179071  | 0.315511  | 1.44512   | 2.85952   | 0.432524   | 1.95005   | 0.676991   | 1.94292   |
| VMP1       | 7.31439   | 5.6292     | 5.66286   | 23.5515   | 4.02448   | 13.8495   | 5.24993   | 8.40544   | 13.3454   | 28.0339   | 31.7344   | 15.1856    | 19.8722   | 26.5853    | 20.8443   |
| VN1R1      | 0.339904  | 0.612361   | 0.562386  | 0.121837  | 0.11478   | 0.037751  | 0.185609  | 0.538488  | 0.071994  | 0.0741939 | 0.266928  | 0.232636   | 0.0381399 | 0.254887   | 0.488146  |
| VN1R10P    | 0         | 0          | 0         | 0         | 0         | 0         | 0         | 0         | 0         | 0         | 0         | 0          | 0         | 0          | 0         |
| VN1R2      | 0.123571  | 0.161604   | 0.204453  | 0.0363838 | 0.0274212 | 0.0450938 | 0.141928  | 0.156885  | 0.0859974 | 0.0221563 | 0.079712  | 0.0631559  | 0.0569481 | 0.0461311  | 0.202815  |
| VN1R3      | 0         | 0          | 0         | 0         | 0         | 0.0310575 | 0         | 0.0162077 | 0         | 0         | 0         | 0          | 0         | 0.00953158 | 0         |
| VN1R4      | 0         | 0          | 0         | 0         | 0         | 0         | 0         | 0         | 0         | 0         | 0         | 0          | 0         | 0          | 0         |
| VN1R5      | 0.129291  | 0.083059   | 0.0713056 | 0         | 0         | 0.0733929 | 0.14762   | 0.0766019 | 0         | 0         | 0         | 0          | 0         | 0.0563108  | 0.0618926 |
| VNN1       | 0.180617  | 0.087024   | 0.0846708 | 1.75584   | 0.0374081 | 0.261448  | 0.103111  | 0.112362  | 0.0146647 | 0.385378  | 0.720426  | 0.0947733  | 0.345715  | 0.0597856  | 0.16428   |
| VNN2       | 0.132596  | 0.00491436 | 0.0506273 | 4.09932   | 0.0792181 | 0.677421  | 0.104811  | 0.0453231 | 0         | 2.89317   | 6.24069   | 0.00729814 | 1.52674   | 0.20257    | 0.395496  |
| VNN3       | 0.367558  | 0.0569235  | 0         | 2.32679   | 0.367036  | 0.0447102 | 0.0149881 | 0.139995  | 1.45485   | 0.609606  | 0.755761  | 0.835957   | 0.406537  | 0.157798   | 0.339339  |
| VOPP1      | 5.80606   | 2.64081    | 3.48712   | 6.61158   | 5.13173   | 11.3658   | 4.52773   | 3.50877   | 1.09603   | 5.09378   | 10.0544   | 1.31695    | 8.0615    | 4.93413    | 9.6724    |
| VPREB1     | 0.0356047 | 0.0171549  | 0.0294547 | 0         | 0         | 0         | 0         | 0.063285  | 0         | 0         | 0         | 0          | 0         | 0          | 0         |
| VPREB3     | 0.118682  | 0.0762439  | 0.0981824 | 0         | 0.122903  | 0.235798  | 0.135508  | 0.105475  | 0         | 0         | 0.133978  | 0.0283068  | 0         | 0          | 0         |
| VPS11      | 4.46575   | 4.3033     | 4.84298   | 4.9873    | 4.27202   | 8.12224   | 5.87628   | 3.85013   | 3.22749   | 4.00475   | 5.38036   | 3.12848    | 5.08635   | 3.27246    | 3.73873   |
| VPS13A     | 5.34316   | 5.59124    | 5.12421   | 4.44799   | 2.04118   | 3.26217   | 3.86242   | 5.85593   | 5.74106   | 4.52706   | 3.13174   | 6.92177    | 3.74153   | 4.1676     | 3.00301   |
| VPS13A-AS1 | 0.163694  | 0.214118   | 0         | 0         | 1.37141   | 0         | 0.297469  | 3.74E-43  | 0.226964  | 0.462813  | 0.0716494 | 0.0927923  | 0         | 0.0614689  | 0         |
| VPS13B     | 7.27658   | 5.91722    | 6.14153   | 4.73059   | 2.5008    | 3.86341   | 4.87873   | 5.91632   | 3.07924   | 4.43789   | 4.00573   | 4.31908    | 3.57752   | 5.01812    | 6.50491   |
| VPS13C     | 6.81119   | 5.56209    | 6.44226   | 5.30096   | 1.9638    | 6.54108   | 4.13069   | 6.07462   | 1.74787   | 5.03945   | 5.46833   | 2.96232    | 3.86128   | 4.12753    | 8.35739   |
| VPS13D     | 17.7658   | 21.961     | 22.3499   | 13.3161   | 14.8992   | 14.9944   | 20.89     | 16.9219   | 16.1913   | 11.2414   | 5.81497   | 15.1956    | 11.512    | 9.69961    | 9.1982    |
| VPS16      | 3.76056   | 3.57684    | 3.48479   | 7.32974   | 7.53803   | 7.86711   | 4.3513    | 2.37617   | 4.3379    | 5.33144   | 4.53511   | 4.44011    | 7.15226   | 4.99822    | 5.95731   |
| VPS18      | 3.67199   | 2.67387    | 2.81162   | 4.51887   | 6.1192    | 7.66991   | 3.6227    | 2.0594    | 2.80047   | 3.42299   | 3.09885   | 2.32981    | 5.8577    | 3.17373    | 3.4047    |
| VPS25      | 9.55543   | 8.47937    | 7.1405    | 17.2704   | 9.55817   | 22.8711   | 11.7973   | 7.31625   | 16.5738   | 14.7607   | 37.0548   | 10.113     | 16.0293   | 12.5895    | 8.11305   |
| VPS26A     | 6.17036   | 5.74922    | 5.83765   | 7.81866   | 1.52467   | 7.38638   | 3.83458   | 5.76194   | 10.5713   | 8.51038   | 8.5587    | 6.33229    | 12.4161   | 5.85369    | 4.51837   |
| VPS26B     | 8.42355   | 9.43519    | 10.8582   | 8.80856   | 9.77979   | 13.0458   | 10.7297   | 6.85771   | 6.59503   | 5.80782   | 6.82025   | 4.83336    | 7.76805   | 5.4302     | 5.31817   |
| VPS26C     | 4.60809   | 3.96226    | 4.33671   | 5.81921   | 2.60801   | 7.46163   | 3.97876   | 3.72494   | 4.68535   | 5.76848   | 8.195     | 3.5046     | 7.90637   | 4.63996    | 3.98976   |

|            |           |           |           |          |           |           |           |           |           |          |           |           |          |           |          |
|------------|-----------|-----------|-----------|----------|-----------|-----------|-----------|-----------|-----------|----------|-----------|-----------|----------|-----------|----------|
| VPS28      | 15.8437   | 15.0539   | 15.533    | 27.0237  | 29.4607   | 29.5136   | 19.8      | 11.4557   | 29.0338   | 21.4477  | 30.9361   | 21.7221   | 26.025   | 15.7782   | 14.3913  |
| VPS29      | 10.9983   | 8.63717   | 8.38391   | 16.0082  | 2.76135   | 11.5576   | 6.75302   | 7.92881   | 20.9824   | 22.0615  | 33.7585   | 10.4967   | 17.4295  | 12.0262   | 7.8975   |
| VPS33A     | 1.62415   | 1.48738   | 1.51603   | 2.17625  | 1.44163   | 3.15094   | 1.54458   | 1.20924   | 2.24623   | 1.63867  | 2.29959   | 1.49978   | 2.65145  | 1.51272   | 1.23683  |
| VPS33B     | 2.02761   | 2.48238   | 2.63294   | 2.60333  | 3.20121   | 3.90583   | 2.66611   | 2.05307   | 3.01591   | 2.61787  | 2.27016   | 2.17027   | 3.43135  | 2.18458   | 1.49176  |
| VPS33B-DT  | 0.0714292 | 0.0137663 | 0.0354547 | 0.014722 | 0.0221908 | 0.0364926 | 0.0489333 | 0.0126961 | 0.0173985 | 0        | 0.0322539 | 0.0306657 | 0        | 0.0223992 | 0        |
| VPS35      | 9.58604   | 8.84356   | 8.33368   | 15.3685  | 4.72541   | 13.8334   | 7.1323    | 9.18382   | 11.6917   | 13.8968  | 14.911    | 8.36115   | 14.8089  | 9.42789   | 6.85004  |
| VPS35L     | 4.9567    | 4.61611   | 4.14474   | 7.96821  | 5.52069   | 7.52015   | 5.10973   | 3.92443   | 6.54334   | 7.24312  | 7.91689   | 5.16263   | 7.42383  | 5.26199   | 6.56359  |
| VPS36      | 6.48308   | 9.34071   | 9.35475   | 7.36857  | 5.27185   | 5.17449   | 5.76833   | 8.63598   | 8.50805   | 7.80935  | 9.52347   | 6.74564   | 5.75506  | 6.10712   | 4.86707  |
| VPS37A     | 2.30683   | 1.87637   | 2.1202    | 2.06528  | 1.53087   | 2.24213   | 1.83393   | 2.23442   | 2.69274   | 2.30583  | 3.35839   | 1.48787   | 2.96213  | 2.08011   | 1.86106  |
| VPS37B     | 6.15408   | 5.05816   | 7.26403   | 12.9442  | 8.74863   | 13.1612   | 7.54559   | 5.61139   | 10.7554   | 12.5634  | 12.3548   | 8.43937   | 28.12    | 13.2352   | 7.6411   |
| VPS37C     | 4.89168   | 6.61916   | 7.5743    | 6.83948  | 10.4696   | 11.1633   | 8.3532    | 5.77605   | 6.82654   | 4.45631  | 4.76511   | 4.57661   | 9.45716  | 4.74477   | 5.14842  |
| VPS37D     | 0.331645  | 0.416848  | 0.584506  | 0.237753 | 0.649549  | 0.847174  | 0.378661  | 0.320368  | 0.0878057 | 0.108587 | 0.911548  | 0.0309523 | 0.148853 | 0.188405  | 0.20708  |
| VPS39      | 9.04023   | 9.26358   | 9.32404   | 8.50133  | 10.2764   | 12.4157   | 9.82451   | 7.2599    | 9.14721   | 5.7238   | 6.20662   | 5.8519    | 6.45304  | 6.36319   | 7.35185  |
| VPS41      | 5.10251   | 4.82578   | 4.8862    | 5.17054  | 3.73155   | 6.48268   | 3.71471   | 4.78684   | 4.75133   | 4.6235   | 5.46647   | 3.39381   | 4.80231  | 3.97171   | 4.82175  |
| VPS45      | 4.68096   | 4.16845   | 4.37347   | 5.3864   | 2.55536   | 5.1446    | 2.78327   | 3.42241   | 4.93589   | 3.82912  | 5.37707   | 3.23699   | 4.4144   | 3.31015   | 3.68338  |
| VPS4A      | 13.4115   | 12.6624   | 14.0864   | 17.5693  | 20.9814   | 28.6353   | 14.4749   | 10.3122   | 16.0099   | 13.7225  | 13.8432   | 11.6738   | 22.3977  | 14.2134   | 11.6236  |
| VPS4B      | 7.56363   | 9.04136   | 9.71447   | 15.9209  | 7.41757   | 13.5515   | 6.63338   | 8.53026   | 16.596    | 17.6792  | 14.3467   | 12.3828   | 28.2634  | 12.3068   | 7.53672  |
| VPS50      | 1.46965   | 1.78167   | 1.67336   | 1.88093  | 0.441847  | 1.51041   | 1.21339   | 1.62912   | 2.01601   | 2.34537  | 3.05053   | 1.37101   | 1.94231  | 1.44949   | 1.1858   |
| VPS51      | 14.3386   | 17.135    | 18.7507   | 14.8975  | 34.5565   | 19.1349   | 17.8071   | 9.87379   | 20.3628   | 10.2295  | 11.2928   | 11.4179   | 11.1825  | 10.2066   | 7.3457   |
| VPS52      | 0.920149  | 1.16374   | 1.12776   | 1.35136  | 1.5786    | 1.33134   | 1.20414   | 0.905292  | 1.54806   | 0.887464 | 0.728785  | 1.05809   | 1.14433  | 0.794975  | 0.838852 |
| VPS53      | 3.3185    | 3.82489   | 4.01281   | 3.66436  | 3.99639   | 4.47373   | 4.27664   | 3.17212   | 4.66284   | 4.00339  | 2.05866   | 4.7841    | 4.43745  | 3.23314   | 2.2904   |
| VPS54      | 4.53126   | 4.14869   | 3.99307   | 4.29937  | 1.25111   | 3.69056   | 2.69268   | 3.83135   | 5.13749   | 4.31994  | 4.84706   | 2.61618   | 5.54423  | 3.98242   | 3.57828  |
| VPS72      | 4.42442   | 5.33294   | 5.45969   | 9.14944  | 7.07949   | 12.8139   | 5.8457    | 3.84      | 9.55145   | 8.72894  | 13.2299   | 6.76566   | 12.6692  | 7.46311   | 4.46268  |
| VPS8       | 3.70202   | 3.61244   | 3.75834   | 4.12618  | 1.91498   | 2.95329   | 2.70027   | 2.9291    | 4.36859   | 4.38479  | 3.58674   | 3.29699   | 3.48999  | 3.10514   | 3.18995  |
| VPS9D1     | 2.2291    | 2.35915   | 2.20388   | 4.13862  | 5.80192   | 6.08925   | 2.13929   | 1.60581   | 2.87685   | 2.65887  | 2.0228    | 3.73295   | 2.99343  | 2.80287   | 3.12312  |
| VPS9D1-AS1 | 0.636619  | 1.20472   | 1.34944   | 2.42122  | 2.89832   | 2.9626    | 1.12209   | 1.24806   | 0.424715  | 0.420293 | 0.822008  | 1.65597   | 1.42161  | 1.86285   | 0.923041 |

|            |            |           |           |           |           |            |            |           |           |           |            |           |           |           |           |
|------------|------------|-----------|-----------|-----------|-----------|------------|------------|-----------|-----------|-----------|------------|-----------|-----------|-----------|-----------|
| VRK1       | 3.2615     | 2.26549   | 2.29342   | 4.94357   | 0.992137  | 3.40198    | 1.70678    | 2.22222   | 1.72126   | 3.15542   | 3.98864    | 1.52662   | 5.3046    | 3.20323   | 1.13195   |
| VRK2       | 2.82542    | 2.27316   | 2.26161   | 4.51862   | 0.758928  | 3.62001    | 1.67818    | 2.3822    | 2.96949   | 4.89286   | 5.13975    | 2.88845   | 8.15229   | 3.4058    | 3.33679   |
| VRK3       | 1.91664    | 2.68841   | 2.3191    | 4.13492   | 3.645     | 4.11812    | 2.87351    | 1.67948   | 3.99224   | 3.19246   | 3.22526    | 3.12093   | 4.29924   | 3.2907    | 2.22519   |
| VRTN       | 0          | 0         | 0         | 0         | 0         | 0.0173062  | 0.00773536 | 0         | 0         | 0         | 0          | 0         | 0         | 0         | 0         |
| VSIG1      | 0.0650025  | 0.0965138 | 0.136078  | 0.228473  | 0.0555457 | 0.304562   | 0.0489938  | 0.0699146 | 0.0958102 | 0.323277  | 0.242203   | 0.143283  | 0.170728  | 0.340293  | 0.0821665 |
| VSIG10     | 1.98448    | 1.10325   | 1.39679   | 0.839002  | 1.32214   | 2.15061    | 2.13906    | 1.14698   | 1.23942   | 1.80563   | 0.966068   | 0.433598  | 1.96384   | 0.918712  | 0.936703  |
| VSIG10L    | 4.37824    | 4.62212   | 4.60035   | 9.87304   | 16.1815   | 4.83143    | 10.1272    | 3.8407    | 54.9233   | 16.5881   | 16.6028    | 18.8415   | 21.2755   | 8.03851   | 2.70119   |
| VSIG2      | 0.615675   | 0.228186  | 0.339553  | 0.42298   | 0.318785  | 0.698985   | 0.39654    | 0.477012  | 0.134584  | 0.198137  | 0.0891051  | 0.124253  | 0.203708  | 0.387784  | 0.430758  |
| VSIG4      | 3.87477    | 0.518873  | 0.864695  | 9.8249    | 2.47642   | 12.0735    | 4.25532    | 2.5991    | 0.0257168 | 2.35874   | 6.0785     | 0.181308  | 0.885553  | 0.513179  | 2.00146   |
| VSIG8      | 0.664063   | 1.2293    | 1.53851   | 0.585116  | 0.817603  | 0.697503   | 2.98293    | 0.811258  | 3.31165   | 1.13887   | 0.123908   | 0.470394  | 1.9807    | 0.191308  | 0.420482  |
| VSIR       | 8.16528    | 6.63948   | 6.55835   | 8.54947   | 12.0358   | 15.7343    | 10.7014    | 3.7619    | 6.73196   | 7.4306    | 11.834     | 7.76453   | 12.6449   | 4.60965   | 6.70576   |
| VSNL1      | 4.2477     | 3.71504   | 2.31084   | 17.0456   | 3.62181   | 10.2904    | 1.56831    | 2.23628   | 9.03908   | 12.6184   | 16.9784    | 9.62184   | 19.7129   | 11.806    | 3.31535   |
| VSTM1      | 0          | 0         | 0         | 0.140646  | 0         | 0.0166015  | 0          | 0         | 0         | 0         | 0.0660294  | 0         | 0.0754766 | 0         | 0.0280003 |
| VSTM2A     | 0.00418803 | 0         | 0         | 0         | 0         | 0.00356605 | 0.00956351 | 0         | 0         | 0         | 0          | 0         | 0         | 0         | 0         |
| VSTM2A-OT1 | 0          | 0         | 0         | 0         | 0         | 0          | 0          | 0         | 0         | 0         | 0          | 0         | 0         | 0         | 0         |
| VSTM2B     | 0          | 0         | 0         | 0         | 0         | 0          | 0          | 0         | 0         | 0         | 0          | 0         | 0         | 0         | 0         |
| VSTM2L     | 0.0472066  | 0.176273  | 0.331948  | 0.0972956 | 0.293313  | 0.150734   | 0.175172   | 0.115372  | 0.0287462 | 0.207372  | 0.119903   | 0.0759996 | 0.0456862 | 0.0246722 | 0.0847434 |
| VSTM4      | 1.97138    | 1.78319   | 2.39332   | 0.915827  | 1.60958   | 2.51381    | 2.10454    | 2.18789   | 0.229871  | 1.82802   | 3.15932    | 0.473028  | 1.66748   | 2.68721   | 6.90687   |
| VSTM5      | 0.383799   | 0.09246   | 0         | 0.0791031 | 0.0596172 | 0.13072    | 0.0876417  | 0.0682176 | 0         | 0.144512  | 0.129978   | 0         | 0         | 0         | 0         |
| VSX1       | 0          | 0         | 0.0102547 | 0         | 0         | 0.0211098  | 0.0212298  | 0         | 0         | 0         | 0          | 0         | 0         | 0         | 0         |
| VSX2       | 0.0309089  | 0.0260617 | 0.0191775 | 0.0159263 | 0         | 0.00657963 | 0.0441135  | 0.0480712 | 0         | 0         | 0          | 0         | 0         | 0         | 0.0332918 |
| VTA1       | 3.63529    | 3.55624   | 3.8177    | 6.85988   | 0.846493  | 4.55206    | 3.25278    | 4.12576   | 6.11601   | 5.86131   | 8.77605    | 3.59321   | 7.53929   | 4.29023   | 3.1998    |
| VTCN1      | 1.22508    | 0.336753  | 0.493744  | 0.0728355 | 0.25617   | 0.896031   | 0.636615   | 0.446667  | 0.459081  | 0.344975  | 0.00886516 | 0.539433  | 0.395208  | 0.894752  | 0.225561  |
| VTI1A      | 3.14193    | 2.7061    | 2.68712   | 2.82282   | 2.1866    | 3.59417    | 2.87979    | 2.8556    | 2.37893   | 2.95195   | 2.82088    | 2.49766   | 3.91005   | 2.26253   | 2.48233   |
| VTI1B      | 10.3471    | 9.41951   | 10.1725   | 17.4736   | 13.2759   | 18.4886    | 8.31419    | 7.56132   | 13.4895   | 14.01     | 21.3686    | 9.15149   | 16.8283   | 10.629    | 8.52879   |
| VTN        | 0.345007   | 0.24602   | 0.159832  | 0.156437  | 0.235802  | 0.669793   | 0.204837   | 0.3802    | 0.0504215 | 0.0519623 | 0.186945   | 0.0987446 | 0.0445193 | 0.129827  | 0.416198  |

|           |           |            |            |            |           |            |           |            |            |            |            |            |            |            |            |
|-----------|-----------|------------|------------|------------|-----------|------------|-----------|------------|------------|------------|------------|------------|------------|------------|------------|
| VTRNA1-1  | 0         | 0          | 0          | 0          | 0         | 0          | 0         | 0          | 0          | 0          | 0          | 0          | 0          | 0          | 0          |
| VTRNA1-2  | 0         | 0          | 0          | 0          | 0         | 0          | 0         | 0          | 0          | 0          | 0          | 0          | 0          | 0          | 0          |
| VTRNA1-3  | 0         | 0          | 0          | 0          | 0         | 0          | 0         | 0          | 0          | 0          | 0          | 0          | 0          | 0          | 0          |
| VTRNA2-1  | 0         | 0          | 0          | 0          | 0         | 0          | 0         | 0          | 0          | 0          | 0          | 0          | 0          | 0          | 0          |
| VWA1      | 2.67246   | 2.26414    | 2.29302    | 8.9021     | 12.2299   | 10.7307    | 2.25729   | 1.68196    | 4.27713    | 9.03402    | 11.5908    | 3.90264    | 12.8325    | 7.26417    | 7.68316    |
| VWA2      | 0.847759  | 1.80709    | 1.8128     | 1.14665    | 2.05172   | 0.837868   | 1.24882   | 1.61111    | 0.825057   | 0.365758   | 0.363153   | 0.682418   | 0.268601   | 0.397581   | 0.402206   |
| VWA3A     | 0.120641  | 0.225242   | 0.0665354  | 0.0362613  | 0.733975  | 0.089884   | 0.0918297 | 0.0893467  | 0.287733   | 0.0378544  | 0.0907928  | 0.0467578  | 0.00648644 | 0.0236447  | 0.00721902 |
| VWA3B     | 0         | 0.0020596  | 0.00353631 | 0.00881034 | 0         | 0.00363982 | 0.014642  | 0          | 0.0104121  | 0.0107303  | 0.00965113 | 0.00611728 | 0          | 0.00446826 | 0.0122779  |
| VWA5A     | 4.86714   | 6.10596    | 7.22685    | 9.01997    | 5.45972   | 13.701     | 6.09787   | 4.97456    | 4.19725    | 4.79818    | 5.62319    | 4.09497    | 4.36981    | 3.25055    | 3.18761    |
| VWA5B1    | 0.0206865 | 0.00996708 | 0.0427834  | 0          | 0.0241    | 0          | 0.0177144 | 0.00919223 | 0          | 0          | 0          | 0          | 0          | 0          | 0          |
| VWA5B2    | 0.0556056 | 0.0589416  | 0.050601   | 0.0114606  | 0.0950122 | 0          | 0.0634887 | 0.0247088  | 0.00677214 | 0.0279163  | 0.0188315  | 0.0119362  | 0          | 0.0290619  | 0.135756   |
| VWA7      | 0.0264734 | 0.0529345  | 0.0678921  | 0.0272816  | 0.0637396 | 0.0450835  | 0.0710322 | 0.0199983  | 0.0128967  | 0.0332268  | 0.0448278  | 0.0350435  | 0.0469714  | 0.0249051  | 0.0646326  |
| VWA8      | 4.33581   | 3.05312    | 2.96712    | 3.45165    | 1.82801   | 2.72971    | 2.61603   | 3.28183    | 1.22794    | 1.90016    | 2.13544    | 1.8449     | 2.58598    | 2.76366    | 2.79286    |
| VWA8-AS1  | 0.0333955 | 0.0268174  | 0.0184181  | 0.114717   | 0         | 0.0663502  | 0.0254199 | 0.0692512  | 0.0271146  | 0.0139716  | 0.0125664  | 0.00796511 | 0          | 0.00581797 | 0          |
| VWC2      | 0.313555  | 0.393761   | 0.383574   | 0.051563   | 0.264256  | 0.0653269  | 0.331347  | 0.388348   | 0.158438   | 0.0502397  | 0.0941396  | 0.0501224  | 0.00860869 | 0.00697352 | 0.0335334  |
| VWC2L     | 0.0169339 | 0.0543935  | 0.0560358  | 0.0290849  | 0.0263043 | 0.0192254  | 0.0451141 | 0.010033   | 0          | 0.00708461 | 0          | 0.0282723  | 0          | 0.020651   | 0.056745   |
| VWC2L-IT1 | 0         | 0          | 0          | 0.0496866  | 0         | 0          | 0         | 0          | 0          | 0          | 0          | 0          | 0          | 0          | 0          |
| VWCE      | 0.608683  | 0.163981   | 0.20575    | 0.148385   | 0.447331  | 1.2985     | 0.239131  | 0.395531   | 0.0557973  | 0.21358    | 0.443308   | 0.0468311  | 0.0633418  | 0.259973   | 0.413574   |
| VWDE      | 0.121029  | 0.018223   | 0.0219021  | 0.00779526 | 0.041125  | 0.0933934  | 0.0475019 | 0.0907543  | 0          | 0          | 0.0128088  | 0.00270624 | 0          | 0.00197672 | 0.00543166 |
| VWF       | 27.2804   | 9.45499    | 10.2833    | 19.6642    | 43.2748   | 54.7612    | 19.078    | 9.90681    | 5.58419    | 14.553     | 23.0927    | 5.62288    | 14.1833    | 17.4221    | 26.5913    |
| VXN       | 0.133582  | 0.125505   | 0.110508   | 0.013766   | 0.0414997 | 0.0284358  | 0.0762597 | 0.0178075  | 0          | 0.0419147  | 0.052779   | 0.0191163  | 0.0215466  | 0.00698157 | 0.0479601  |
| WAC       | 9.39263   | 8.43335    | 8.40296    | 9.56698    | 2.66088   | 9.44615    | 4.90514   | 7.50124    | 15.7301    | 11.6177    | 11.0063    | 6.71494    | 14.3486    | 8.95497    | 7.38023    |
| WAC-AS1   | 4.80425   | 4.34121    | 4.26288    | 6.60566    | 2.79515   | 6.66031    | 3.44062   | 3.79904    | 5.52074    | 5.02486    | 6.42935    | 3.37904    | 7.63809    | 5.00832    | 3.87015    |
| WAPL      | 7.30798   | 8.33163    | 8.99573    | 7.55362    | 3.74779   | 6.94498    | 6.12175   | 7.45422    | 10.4927    | 5.98732    | 6.30555    | 4.60892    | 8.71671    | 6.31657    | 5.77502    |
| WARS      | 7.11129   | 4.47834    | 4.62515    | 12.3587    | 4.33618   | 30.475     | 6.6149    | 5.93188    | 4.88122    | 7.01703    | 9.69143    | 4.10642    | 16.7934    | 7.77567    | 12.6092    |
| WARS2     | 2.52582   | 1.71829    | 1.93581    | 2.71086    | 1.00206   | 2.64989    | 1.64085   | 2.18898    | 1.36206    | 1.30122    | 1.96455    | 1.04997    | 2.2211     | 1.68025    | 1.49286    |

|           |          |           |            |           |           |            |           |           |          |           |           |            |           |           |           |
|-----------|----------|-----------|------------|-----------|-----------|------------|-----------|-----------|----------|-----------|-----------|------------|-----------|-----------|-----------|
| WARS2-IT1 | 0.576517 | 0.416662  | 0.238468   | 0.297059  | 0.0639665 | 0          | 0.42316   | 0.475763  | 0.200609 | 0.10337   | 0         | 0.235722   | 0.053138  | 0.430447  | 0.295697  |
| WAS       | 0.8979   | 0.56058   | 0.836965   | 3.8837    | 2.49483   | 5.81489    | 1.14071   | 1.37117   | 0.215628 | 2.07931   | 5.7819    | 0.479591   | 3.05979   | 1.20956   | 3.94114   |
| WASF1     | 0.747478 | 0.754922  | 0.755121   | 2.02203   | 0.826161  | 1.95836    | 0.796003  | 0.80482   | 0.71777  | 1.05543   | 1.57403   | 0.78169    | 1.26595   | 1.47626   | 1.25927   |
| WASF2     | 25.156   | 26.2605   | 27.8217    | 37.3924   | 28.6077   | 51.0618    | 35.0757   | 24.7091   | 35.8026  | 32.8353   | 32.8816   | 25.1396    | 54.079    | 25.4242   | 22.4106   |
| WASF3     | 2.11022  | 1.29545   | 1.28249    | 1.54991   | 1.02794   | 3.25084    | 1.85987   | 1.25026   | 1.00884  | 1.39397   | 2.16277   | 0.917213   | 1.56155   | 1.08838   | 1.29596   |
| WASH2P    | 3.62742  | 4.69494   | 5.83091    | 3.365     | 6.75239   | 5.51943    | 4.74017   | 3.14986   | 4.88001  | 3.24494   | 2.47758   | 3.26182    | 3.18978   | 3.304     | 2.73697   |
| WASH3P    | 3.89863  | 6.54389   | 6.82438    | 3.12235   | 10.2111   | 4.01015    | 5.07945   | 3.52555   | 3.88547  | 2.5771    | 1.89617   | 4.44027    | 3.09239   | 3.558     | 2.49343   |
| WASH5P    | 14.5835  | 18.5837   | 19.5277    | 6.96957   | 18.107    | 13.6878    | 24.1146   | 16.9001   | 3.62901  | 4.79899   | 1.31896   | 13.5075    | 2.33097   | 12.6728   | 14.1477   |
| WASH7P    | 11.3464  | 11.9105   | 11.4975    | 6.35344   | 24.4644   | 14.6138    | 12.2918   | 8.60551   | 6.69302  | 5.58865   | 4.28288   | 9.5235     | 5.62785   | 9.73356   | 8.00031   |
| WASH8P    | 8.18072  | 6.12526   | 6.57098    | 3.99058   | 9.81543   | 6.4205     | 6.17406   | 5.89029   | 2.91541  | 4.43149   | 2.55668   | 2.49058    | 2.29381   | 4.46035   | 3.27753   |
| WASHC1    | 2.66215  | 2.19936   | 2.60298    | 5.44147   | 8.16625   | 7.37292    | 3.06639   | 2.96666   | 3.61354  | 2.58379   | 2.31901   | 3.90926    | 3.56441   | 3.92851   | 1.94415   |
| WASHC2A   | 7.1515   | 6.31402   | 6.56277    | 7.24852   | 6.77944   | 13.4062    | 6.63699   | 5.46543   | 7.91986  | 5.90592   | 5.28213   | 5.48232    | 7.82496   | 5.66961   | 6.35186   |
| WASHC2C   | 5.48605  | 5.09069   | 4.61712    | 6.42335   | 6.72242   | 8.48259    | 4.46792   | 3.98756   | 7.33525  | 4.13644   | 4.15635   | 4.17478    | 6.12867   | 3.61062   | 5.15815   |
| WASHC3    | 5.72306  | 4.54816   | 4.39499    | 7.23712   | 1.48755   | 8.5425     | 3.07195   | 4.7417    | 7.69202  | 8.4136    | 16.5506   | 4.38866    | 3.35413   | 3.02688   | 4.55158   |
| WASHC4    | 5.07831  | 4.94925   | 4.70492    | 7.82135   | 1.50844   | 6.05233    | 3.33992   | 6.03053   | 6.10725  | 9.80053   | 9.43929   | 5.32808    | 8.98708   | 6.60218   | 6.72151   |
| WASHC5    | 6.76239  | 5.17232   | 5.38742    | 8.2743    | 2.86558   | 9.97366    | 5.12623   | 5.45668   | 5.88748  | 7.274     | 9.77901   | 4.75517    | 9.07379   | 5.90973   | 6.01688   |
| WASIR1    | 0        | 0         | 0          | 0         | 0         | 0          | 0         | 0         | 0        | 0         | 0         | 0          | 0         | 0         | 0         |
| WASIR2    | 0        | 0.0215056 | 0.0369249  | 0         | 0         | 0          | 0.0254812 | 0.119003  | 0        | 0.0280105 | 0         | 0.0319373  | 0         | 0.034992  | 0.0320505 |
| WASL      | 7.41598  | 6.40155   | 6.53971    | 12.1259   | 5.29496   | 10.6839    | 6.77386   | 7.68222   | 17.6453  | 11.2674   | 13.5416   | 9.25349    | 16.9195   | 8.52701   | 7.31693   |
| WBP1      | 6.9824   | 10.4116   | 11.1617    | 5.62866   | 18.3383   | 10.9934    | 7.74596   | 7.39589   | 6.88863  | 6.44309   | 13.97     | 5.67127    | 4.91635   | 4.21109   | 6.59005   |
| WBP11     | 10.3252  | 8.27335   | 8.90691    | 11.1578   | 5.09526   | 16.6992    | 8.17227   | 11.1453   | 8.35872  | 7.06077   | 8.63689   | 6.06892    | 12.4915   | 7.33243   | 6.86106   |
| WBP11P1   | 0        | 0         | 0.00644198 | 0         | 0.0120959 | 0.00663846 | 0         | 0.0138581 | 0        | 0         | 0         | 0.00557183 | 0         | 0         | 0         |
| WBP1L     | 11.2818  | 11.4294   | 11.807     | 13.8728   | 15.1204   | 21.5566    | 11.3248   | 9.53063   | 36.9578  | 11.8406   | 18.4061   | 9.10078    | 13.485    | 9.9189    | 11.1896   |
| WBP2      | 11.8895  | 17.2708   | 18.7185    | 16.8208   | 19.6855   | 30.5508    | 20.0576   | 13.843    | 37.6039  | 22.4187   | 28.2479   | 23.1008    | 29.1505   | 12.9433   | 10.033    |
| WBP2NL    | 0.279795 | 0.240731  | 0.264533   | 0.0308932 | 0.0465663 | 0.178681   | 0.365098  | 0.355227  | 0        | 0.100335  | 0.0338415 | 0.0143001  | 0.0193417 | 0.0365583 | 0         |
| WBP4      | 2.83491  | 2.49573   | 2.38867    | 3.12885   | 1.29118   | 3.75494    | 1.06895   | 1.84292   | 2.41896  | 2.7784    | 3.34843   | 1.63403    | 3.81057   | 2.69807   | 1.78433   |

|           |           |           |           |           |           |           |           |           |            |           |           |            |            |           |           |
|-----------|-----------|-----------|-----------|-----------|-----------|-----------|-----------|-----------|------------|-----------|-----------|------------|------------|-----------|-----------|
| WDCP      | 0.939033  | 0.735935  | 0.703086  | 1.64142   | 0.61854   | 1.92809   | 0.821084  | 0.765871  | 0.506675   | 0.939884  | 1.35526   | 0.510307   | 0.98165    | 0.879057  | 1.13519   |
| WDFY1     | 5.55751   | 4.4684    | 4.90544   | 5.59933   | 3.13707   | 8.28125   | 4.43044   | 4.92582   | 4.18796    | 6.62648   | 8.44713   | 4.44876    | 6.65591    | 5.6899    | 7.20453   |
| WDFY2     | 8.9437    | 9.61962   | 10.1785   | 8.50295   | 8.26764   | 6.68421   | 10.9747   | 8.85018   | 11.8322    | 11.5761   | 7.19501   | 13.0685    | 12.8306    | 10.0728   | 5.08711   |
| WDFY3     | 6.60814   | 7.41691   | 7.7414    | 7.59615   | 4.38662   | 7.00591   | 7.73506   | 6.61692   | 7.92001    | 6.46186   | 6.17876   | 5.63741    | 6.64875    | 5.97386   | 6.70902   |
| WDFY3-AS2 | 0.450801  | 0.307469  | 0.329344  | 0.168932  | 0.345577  | 0.31406   | 0.320858  | 0.369416  | 0.256687   | 0.198398  | 0.363498  | 0.117295   | 0.120874   | 0.125454  | 0.327907  |
| WDFY4     | 0.776597  | 0.51672   | 0.609951  | 0.845561  | 0.829347  | 0.767536  | 0.667659  | 0.499144  | 0.0844471  | 0.513463  | 0.793188  | 0.14388    | 1.03492    | 0.357564  | 2.09781   |
| WDHD1     | 0.96685   | 0.739436  | 0.679236  | 1.99274   | 0.22051   | 1.74454   | 0.714044  | 0.791061  | 0.443905   | 1.48317   | 1.38597   | 0.763184   | 1.79221    | 1.35954   | 0.787931  |
| WDPCP     | 1.06511   | 1.01056   | 1.07269   | 0.678325  | 0.563485  | 0.697336  | 0.88124   | 0.938068  | 0.31053    | 0.547324  | 1.07778   | 0.400936   | 0.246498   | 0.66012   | 0.764818  |
| WDR1      | 29.4801   | 25.709    | 28.8787   | 63.8258   | 35.0128   | 72.4779   | 28.265    | 17.8852   | 54.7473    | 61.7623   | 52.4921   | 41.6165    | 129.073    | 59.3964   | 41.4827   |
| WDR11     | 7.09838   | 5.98283   | 6.13515   | 8.10604   | 3.71338   | 7.07651   | 5.43662   | 5.244     | 4.97744    | 5.43019   | 5.82777   | 5.11406    | 7.44066    | 5.43457   | 6.24147   |
| WDR11-AS1 | 0.0277717 | 0.0356822 | 0.0306329 | 0.057239  | 0.043139  | 0.0315296 | 0.0211392 | 0.0740434 | 0          | 0.151044  | 0.0104502 | 0.0463665  | 0.00597366 | 0.0774116 | 0.0930618 |
| WDR12     | 3.04247   | 2.44807   | 2.3911    | 5.7586    | 2.06369   | 4.90491   | 1.98006   | 2.09101   | 3.11252    | 4.13683   | 6.90348   | 3.05501    | 5.19537    | 4.89229   | 2.59249   |
| WDR13     | 5.0918    | 5.04508   | 5.68659   | 6.83836   | 12.0043   | 9.55935   | 5.72924   | 3.89749   | 9.08178    | 6.57629   | 9.36368   | 5.54136    | 7.14802    | 5.90181   | 5.40178   |
| WDR17     | 0.124966  | 0.0616789 | 0.052951  | 0.0502559 | 0.0142035 | 0.0674774 | 0.156602  | 0.0758453 | 0.00371206 | 0.0191274 | 0.0791373 | 0.00654266 | 0.0255647  | 0.0350458 | 0.166335  |
| WDR18     | 4.68531   | 3.53716   | 3.6168    | 12.6091   | 11.0791   | 10.2278   | 5.86064   | 3.27544   | 2.94395    | 6.18019   | 12.1111   | 4.65502    | 9.47316    | 5.54478   | 4.37151   |
| WDR19     | 2.56007   | 2.3461    | 2.39745   | 1.93646   | 0.962356  | 3.03876   | 1.59596   | 1.93391   | 0.70464    | 1.63228   | 1.68198   | 1.11374    | 1.36104    | 1.61631   | 1.93388   |
| WDR20     | 2.69945   | 2.73975   | 2.63165   | 1.90015   | 1.97127   | 2.22844   | 2.73309   | 2.35126   | 2.54821    | 2.07096   | 1.95993   | 2.03793    | 2.53697    | 2.05325   | 1.73077   |
| WDR24     | 1.80529   | 2.76294   | 2.93421   | 3.14444   | 7.21402   | 4.38246   | 3.92844   | 2.26502   | 3.68164    | 1.75046   | 2.08589   | 2.66958    | 2.46655    | 2.07575   | 2.51128   |
| WDR25     | 1.20577   | 1.1666    | 1.19056   | 1.2025    | 1.02712   | 1.805     | 1.63207   | 0.950604  | 0.639506   | 0.537002  | 1.6356    | 0.681861   | 0.859518   | 0.808065  | 1.00547   |
| WDR26     | 14.8145   | 13.3166   | 14.2086   | 13.4622   | 8.99779   | 15.6286   | 12.7469   | 15.0666   | 42.8281    | 16.2395   | 18.9404   | 14.8728    | 15.3207    | 11.0342   | 10.4953   |
| WDR27     | 1.37697   | 1.8118    | 1.64862   | 2.01756   | 2.77669   | 1.33448   | 1.28061   | 0.818789  | 0.432968   | 0.747854  | 0.989179  | 1.28979    | 0.316598   | 1.29801   | 1.46694   |
| WDR3      | 3.21746   | 3.19823   | 3.23455   | 6.08389   | 2.23465   | 6.78045   | 2.26959   | 3.14589   | 2.639      | 2.95189   | 4.25207   | 2.86171    | 5.7424     | 4.48943   | 2.59753   |
| WDR31     | 0.544269  | 0.649989  | 0.561859  | 0.647175  | 0.874341  | 0.613956  | 0.515201  | 0.372077  | 0.691186   | 0.373669  | 0.425362  | 0.339511   | 0.438198   | 0.42061   | 0.334034  |
| WDR33     | 5.46084   | 4.67675   | 4.79749   | 4.90682   | 2.54445   | 4.6024    | 3.61804   | 4.85679   | 2.96229    | 3.08387   | 2.68755   | 2.77369    | 4.59345    | 3.30153   | 3.17609   |
| WDR34     | 3.98447   | 3.23235   | 3.73855   | 7.33329   | 9.84746   | 8.34633   | 4.11331   | 1.99114   | 3.72088    | 4.55356   | 8.90973   | 3.54325    | 6.38173    | 4.93004   | 3.85746   |
| WDR35     | 1.5131    | 1.20114   | 1.40614   | 1.19179   | 0.429692  | 1.89851   | 0.932297  | 1.30621   | 0.284129   | 0.916081  | 1.42216   | 0.357707   | 0.875177   | 0.85178   | 1.32103   |

|        |           |            |           |           |           |           |          |           |           |           |           |            |           |           |           |
|--------|-----------|------------|-----------|-----------|-----------|-----------|----------|-----------|-----------|-----------|-----------|------------|-----------|-----------|-----------|
| WDR36  | 3.58802   | 3.12598    | 3.53751   | 5.48844   | 1.2652    | 4.34058   | 2.85004  | 3.90947   | 2.27041   | 3.00516   | 4.77569   | 2.87128    | 5.27324   | 4.55052   | 3.08061   |
| WDR37  | 3.70409   | 3.76526    | 3.575     | 4.45854   | 3.68769   | 4.78654   | 3.77649  | 2.87706   | 6.6445    | 4.04427   | 3.30324   | 4.21618    | 5.63787   | 4.83718   | 3.71215   |
| WDR38  | 0.116716  | 0.192807   | 0.179317  | 0.0343654 | 0.1813    | 0.0993819 | 0.285562 | 0.088909  | 0.0406133 | 0.188344  | 0.0188225 | 0.0477218  | 0.0860621 | 0.0610007 | 0.335237  |
| WDR4   | 2.42643   | 2.87841    | 2.88416   | 3.91776   | 5.11615   | 2.87162   | 3.11047  | 2.35103   | 1.25886   | 1.7371    | 1.86894   | 2.16865    | 3.09148   | 4.75675   | 1.74862   |
| WDR41  | 3.16126   | 3.1806     | 2.68882   | 4.41908   | 2.68098   | 3.75232   | 2.5801   | 2.63025   | 6.47937   | 6.25305   | 7.17082   | 3.45024    | 4.55377   | 4.13208   | 3.76486   |
| WDR43  | 7.76678   | 6.16113    | 6.61501   | 10.503    | 2.49435   | 9.14702   | 5.20847  | 6.28504   | 13.0591   | 6.37535   | 8.87872   | 7.30661    | 15.5915   | 10.4308   | 4.62165   |
| WDR44  | 2.56773   | 2.24841    | 2.10574   | 4.48688   | 1.13587   | 3.74539   | 1.76542  | 2.03394   | 2.30462   | 4.92524   | 3.43425   | 3.09143    | 7.10572   | 5.053     | 3.19056   |
| WDR45  | 5.86312   | 5.55789    | 5.807     | 8.60515   | 10.4949   | 12.4757   | 6.91383  | 3.55569   | 16.9403   | 6.94076   | 13.4078   | 6.07391    | 11.5594   | 7.36285   | 6.32683   |
| WDR45B | 13.07     | 11.7412    | 13.3878   | 17.8849   | 9.61609   | 24.0479   | 11.5318  | 10.7251   | 15.0679   | 16.4827   | 18.9454   | 12.1812    | 27.3355   | 15.5555   | 9.66128   |
| WDR46  | 1.09299   | 1.11554    | 1.10677   | 1.76223   | 2.1329    | 2.86538   | 1.27032  | 0.753772  | 1.522     | 1.20466   | 1.29356   | 1.07079    | 1.76302   | 1.33804   | 1.3362    |
| WDR47  | 4.77784   | 7.1584     | 8.97306   | 4.24755   | 3.4519    | 3.63123   | 4.51878  | 5.84493   | 10.4068   | 7.46431   | 5.32192   | 5.81889    | 7.6399    | 5.74923   | 2.8115    |
| WDR48  | 4.02913   | 3.58584    | 3.87242   | 4.82916   | 2.14467   | 4.20428   | 2.40857  | 3.59444   | 2.88169   | 3.98114   | 4.55416   | 2.14476    | 3.6394    | 2.9347    | 3.95829   |
| WDR49  | 0.10854   | 0.0929708  | 0.0249421 | 0.0310703 | 0.0187333 | 0.0821511 | 0.103272 | 0.0267947 | 0         | 0.0529777 | 0.108913  | 0.0258877  | 0.0778102 | 0.0567275 | 0.0606187 |
| WDR5   | 4.89327   | 5.89942    | 5.84653   | 8.57176   | 7.79294   | 11.7009   | 5.30472  | 4.25181   | 4.54264   | 4.35295   | 5.68805   | 4.96319    | 9.07259   | 6.57411   | 3.83217   |
| WDR53  | 1.39407   | 1.80474    | 1.82311   | 3.51178   | 2.13267   | 2.84769   | 1.80072  | 1.43291   | 14.1485   | 4.25939   | 7.41567   | 4.20159    | 3.96577   | 3.172     | 1.10215   |
| WDR54  | 1.87172   | 1.03334    | 0.741951  | 1.98914   | 1.87771   | 2.93847   | 1.40245  | 1.16094   | 0.617377  | 1.37037   | 3.89573   | 0.962598   | 1.20763   | 1.47755   | 1.59602   |
| WDR55  | 4.30235   | 3.84452    | 3.98214   | 7.26414   | 5.19753   | 7.2628    | 3.79349  | 2.70705   | 4.05899   | 5.34728   | 5.963     | 3.41041    | 6.79258   | 5.29254   | 3.73508   |
| WDR59  | 4.67435   | 6.38358    | 6.38021   | 5.95939   | 6.32254   | 5.82292   | 5.14282  | 3.9457    | 4.98569   | 2.92236   | 2.62845   | 4.33084    | 3.60241   | 4.03698   | 2.92271   |
| WDR5B  | 1.56021   | 1.68206    | 1.32275   | 1.06619   | 0.446894  | 1.02699   | 0.9665   | 1.51442   | 0.707505  | 1.11105   | 1.14296   | 0.791751   | 0.606838  | 0.879047  | 0.937578  |
| WDR6   | 6.0125    | 9.62026    | 12.1244   | 6.32774   | 13.2807   | 7.12744   | 4.6425   | 4.84634   | 2.59154   | 3.20867   | 3.3948    | 4.2476     | 5.16528   | 7.83359   | 7.03372   |
| WDR60  | 3.33873   | 2.40644    | 2.64078   | 1.60004   | 1.77933   | 2.92608   | 1.43804  | 2.05532   | 0.74051   | 1.30142   | 1.53211   | 1.38675    | 1.7128    | 2.07693   | 1.94132   |
| WDR61  | 9.68623   | 6.79692    | 6.99134   | 12.4775   | 7.37162   | 12.0117   | 6.43898  | 5.92186   | 14.4887   | 9.44435   | 16.2552   | 8.396      | 9.07026   | 7.94197   | 7.18875   |
| WDR62  | 0.634057  | 1.1233     | 0.617339  | 0.975094  | 2.10619   | 1.31235   | 1.16945  | 0.654522  | 2.48889   | 0.997818  | 1.47008   | 1.92641    | 1.61748   | 1.09102   | 0.70045   |
| WDR63  | 0.130319  | 0.354576   | 0.386843  | 0.371292  | 0.0833535 | 0.202347  | 0.140041 | 0.258884  | 0.0933608 | 0.365612  | 0.242305  | 0.142612   | 0.0642972 | 0.0961556 | 0.209172  |
| WDR64  | 0.0105918 | 0.00510328 | 0         | 0         | 0         | 0.0180375 | 0        | 0         | 0         | 0         | 0         | 0.00757871 | 0         | 0         | 0         |
| WDR66  | 0.824421  | 0.841169   | 0.953935  | 1.89908   | 1.12995   | 1.11033   | 0.369136 | 0.550705  | 0.977802  | 2.96218   | 2.40879   | 1.708      | 3.59127   | 2.4698    | 1.03694   |

|           |           |            |            |            |            |            |           |           |           |           |            |           |            |            |           |
|-----------|-----------|------------|------------|------------|------------|------------|-----------|-----------|-----------|-----------|------------|-----------|------------|------------|-----------|
| WDR7      | 3.41969   | 2.87265    | 2.96041    | 2.54478    | 1.66367    | 3.28252    | 3.13518   | 2.65214   | 1.94304   | 1.65139   | 2.32841    | 1.7601    | 1.73883    | 2.35201    | 2.70655   |
| WDR70     | 6.23329   | 5.83717    | 6.00283    | 7.29105    | 5.18275    | 7.57569    | 4.81763   | 4.58322   | 3.88007   | 4.7609    | 7.22906    | 3.52994   | 4.48917    | 4.59434    | 4.19279   |
| WDR72     | 1.42881   | 0.709531   | 0.518703   | 0.170579   | 0.168819   | 0.116661   | 0.706184  | 0.660882  | 0.0922723 | 0.0512033 | 0.0399691  | 0.0969059 | 0.00752041 | 0.0504715  | 0.0880569 |
| WDR73     | 2.68625   | 3.01701    | 3.34086    | 2.83235    | 4.22716    | 2.69545    | 2.73191   | 2.6717    | 1.46145   | 1.69622   | 1.93079    | 2.0365    | 2.14573    | 2.40801    | 2.39038   |
| WDR74     | 5.91547   | 4.98884    | 5.56177    | 10.2108    | 8.85463    | 12.6945    | 5.66251   | 3.79962   | 4.75788   | 4.42157   | 7.57833    | 5.14361   | 8.6603     | 6.03143    | 3.40867   |
| WDR75     | 5.9298    | 4.7835     | 4.91256    | 7.10605    | 1.06584    | 7.27075    | 3.13373   | 4.96123   | 3.23949   | 6.20913   | 8.12836    | 4.27924   | 6.76641    | 6.3178     | 4.34311   |
| WDR76     | 1.10342   | 1.05221    | 1.08874    | 2.25051    | 0.249957   | 2.22653    | 1.18111   | 0.975519  | 0.398952  | 1.31998   | 1.64136    | 0.596256  | 1.99116    | 1.56489    | 0.891365  |
| WDR77     | 3.64362   | 4.08393    | 3.60069    | 7.39874    | 4.83278    | 7.07551    | 4.44843   | 3.02539   | 4.57958   | 5.02383   | 6.69573    | 5.53928   | 7.81912    | 7.08585    | 4.45502   |
| WDR78     | 0.602714  | 0.332688   | 0.387268   | 0.337693   | 0.0454477  | 0.533133   | 0.193754  | 0.296423  | 0.178165  | 0.257052  | 0.475612   | 0.196788  | 0.162343   | 0.195731   | 0.403374  |
| WDR81     | 3.50013   | 3.56721    | 3.60288    | 4.98973    | 8.68999    | 7.894      | 4.28881   | 3.1163    | 2.39852   | 1.78454   | 2.08586    | 2.92603   | 3.90082    | 2.93058    | 4.28616   |
| WDR82     | 13.4642   | 11.436     | 12.061     | 18.4206    | 9.33553    | 19.5729    | 10.4539   | 9.91961   | 13.3376   | 11.8908   | 12.6428    | 8.86619   | 16.5182    | 11.763     | 11.3756   |
| WDR83     | 1.2573    | 1.66724    | 2.11032    | 1.48357    | 3.44554    | 2.2826     | 1.80382   | 1.37545   | 2.79929   | 1.13965   | 1.43353    | 1.25036   | 1.18502    | 1.33048    | 0.716176  |
| WDR83OS   | 18.2241   | 16.6807    | 17.1443    | 30.7469    | 21.4609    | 37.0775    | 22.5878   | 13.2818   | 25.1085   | 21.0177   | 36.8065    | 19.0597   | 19.9958    | 16.5067    | 13.6651   |
| WDR86     | 0.0939078 | 0.160875   | 0.112215   | 0.11828    | 0.38899    | 0.906228   | 0.142961  | 0.12055   | 0.0508307 | 0.144056  | 0.376925   | 0.0298638 | 0.208695   | 0.119974   | 0.599393  |
| WDR86-AS1 | 0.09796   | 0.0235993  | 0.0202599  | 0.0252377  | 0.0380414  | 0.104265   | 0         | 0.0435294 | 0         | 0         | 0.0829385  | 0         | 0          | 0.0255991  | 0         |
| WDR87     | 0.0127132 | 0.00245016 | 0.00210345 | 0.00262026 | 0.00394959 | 0.00649506 | 0         | 0.0316355 | 0         | 0         | 0.00287032 | 0         | 0          | 0.00132889 | 0         |
| WDR88     | 0.113385  | 0.230662   | 0.198022   | 0.194743   | 0.273973   | 0.257455   | 0.186996  | 0.111963  | 0.0153433 | 0.0316243 | 0.127997   | 0.0811297 | 0.0487701  | 0.0724286  | 0         |
| WDR89     | 1.13001   | 1.16191    | 1.14894    | 2.23143    | 0.519723   | 1.5911     | 0.720785  | 1.0267    | 0.561252  | 1.10134   | 1.51081    | 0.736277  | 1.50296    | 1.11189    | 0.834082  |
| WDR90     | 1.55791   | 1.948      | 2.01096    | 1.90246    | 3.53588    | 3.95472    | 2.72776   | 1.34742   | 0.584975  | 0.781084  | 0.744964   | 1.82301   | 1.00246    | 1.84675    | 2.31533   |
| WDR91     | 2.84816   | 3.51343    | 3.30829    | 6.06453    | 6.49731    | 4.98207    | 2.53971   | 2.79765   | 2.0141    | 4.72787   | 2.82763    | 4.52909   | 3.00758    | 4.22817    | 3.29169   |
| WDR92     | 1.27774   | 1.79327    | 1.7375     | 2.03273    | 1.09162    | 2.20995    | 1.13975   | 1.44203   | 1.21574   | 1.25289   | 1.76695    | 0.965683  | 1.12839    | 1.25678    | 0.997778  |
| WDR93     | 0.0741764 | 0.0476525  | 0.015341   | 0.0382205  | 0.0192036  | 0.073687   | 0.0282308 | 0.0274674 | 0         | 0         | 0.006978   | 0.0176917 | 0          | 0.0129226  | 0         |
| WDR97     | 0.129136  | 0.146661   | 0.141169   | 0.0807977  | 0.308054   | 0.13352    | 0.142178  | 0.0860741 | 0.0561691 | 0.0347313 | 0.0104128  | 0.1056    | 0.0119026  | 0.0674922  | 0.0662342 |
| WDSUB1    | 1.74521   | 2.29281    | 1.99975    | 1.60859    | 1.11131    | 1.46757    | 1.86886   | 1.28126   | 1.61061   | 1.00678   | 1.5296     | 0.969525  | 0.93717    | 1.30304    | 1.60344   |
| WDTC1     | 6.87228   | 9.81102    | 9.92025    | 10.002     | 15.5241    | 15.3512    | 10.8132   | 6.29968   | 13.0135   | 8.04688   | 6.33753    | 8.70762   | 10.8979    | 6.63635    | 6.02105   |
| WDYHV1    | 2.47238   | 1.77057    | 1.43061    | 2.84023    | 0.58761    | 2.1167     | 1.66596   | 1.72898   | 1.82639   | 1.56002   | 2.27246    | 2.08806   | 1.54286    | 2.28778    | 2.3671    |



|          |           |           |           |            |            |           |           |           |           |            |            |            |           |            |           |
|----------|-----------|-----------|-----------|------------|------------|-----------|-----------|-----------|-----------|------------|------------|------------|-----------|------------|-----------|
| WEE1     | 4.14024   | 8.47248   | 12.3285   | 4.40216    | 1.74993    | 3.64223   | 4.48561   | 6.31718   | 3.74694   | 5.09595    | 4.17028    | 6.45274    | 4.25782   | 4.6057     | 1.87247   |
| WEE2     | 0.134988  | 0.0884711 | 0.0729557 | 0.00779144 | 0.0117443  | 0         | 0.0269349 | 0.0739117 | 0         | 0          | 0          | 0.00540982 | 0         | 0.00395151 | 0         |
| WEE2-AS1 | 0.339123  | 0.220418  | 0.14673   | 0.189784   | 0.174819   | 0.200371  | 0.197185  | 0.127297  | 0.074763  | 0.051365   | 0.219446   | 0.0658865  | 0.0330057 | 0.0802093  | 0.17632   |
| WFDC1    | 0.910649  | 0.189123  | 0.0259777 | 1.32677    | 1.317      | 1.77809   | 0.878409  | 0.279072  | 0.841362  | 2.30562    | 4.98054    | 0.82011    | 0.709107  | 2.14176    | 3.76559   |
| WFDC10A  | 0         | 0         | 0         | 0          | 0          | 0         | 0         | 0         | 0         | 0          | 0          | 0          | 0         | 0          | 0         |
| WFDC10B  | 0.219713  | 0.0352869 | 0.272643  | 0          | 0.0568816  | 0.0311804 | 0.16724   | 0         | 0         | 0          | 0          | 0          | 0         | 0.0382771  | 0         |
| WFDC11   | 0         | 0         | 0         | 0          | 0          | 0         | 0         | 0         | 0         | 0          | 0          | 0          | 0         | 0          | 0         |
| WFDC12   | 23.8607   | 15.7176   | 7.64338   | 71.4255    | 96.0037    | 30.2973   | 49.0585   | 20.541    | 600.711   | 154.692    | 167.184    | 81.4709    | 126.901   | 22.2846    | 7.85821   |
| WFDC13   | 0.826538  | 0.146292  | 0.12559   | 0          | 0.078606   | 0.14363   | 0.404449  | 0.0899459 | 0         | 0          | 0          | 0          | 0         | 0          | 0         |
| WFDC2    | 2.33066   | 0.669829  | 0.811826  | 1.30625    | 0.508115   | 4.94391   | 0.746968  | 1.01748   | 0         | 0.0513196  | 0.646217   | 0.029257   | 0.448481  | 0.213703   | 0.293607  |
| WFDC21P  | 8.81699   | 6.22538   | 6.22689   | 2.48992    | 8.62208    | 0.444258  | 10.3747   | 3.9048    | 34.7927   | 3.87292    | 10.5088    | 3.80643    | 0.264492  | 0.292164   | 0.321124  |
| WFDC3    | 4.65175   | 0.880903  | 1.26361   | 0.0715488  | 0.575186   | 1.08383   | 1.55902   | 0.781569  | 0.0281856 | 0          | 0.0522512  | 0.0331189  | 0         | 0          | 0.0332363 |
| WFDC5    | 13.754    | 20.6255   | 26.3487   | 35.9852    | 25.7789    | 7.39459   | 36.0539   | 17.2138   | 101.059   | 26.9069    | 62.3371    | 37.4621    | 19.0388   | 17.9889    | 5.0279    |
| WFDC6    | 0.0373878 | 0         | 0         | 0          | 0          | 0         | 0.0853764 | 0         | 0         | 0          | 0          | 0          | 0         | 0          | 0         |
| WFDC8    | 0         | 0         | 0         | 0          | 0          | 0         | 0         | 0         | 0         | 0          | 0          | 0          | 0         | 0          | 0         |
| WFDC9    | 0         | 0         | 0         | 0          | 0          | 0         | 0         | 0         | 0         | 0          | 0          | 0          | 0         | 0          | 0         |
| WFIKKN1  | 0.308891  | 0.457933  | 0.383304  | 0.269349   | 0.793539   | 0.434989  | 0.569716  | 0.454008  | 0.217035  | 0.0447334  | 0.120704   | 0.382534   | 0.0613215 | 0.142812   | 0.153556  |
| WFIKKN2  | 0.0167622 | 0.0699946 | 0.0970683 | 0.0575799  | 0.00867918 | 0.0285456 | 0.102072  | 0.07945   | 0.0884629 | 0.00701277 | 0.00630749 | 0.0159918  | 0         | 0.00292022 | 0         |
| WFS1     | 3.6622    | 3.6515    | 4.54971   | 2.5291     | 4.90842    | 6.72378   | 6.33743   | 2.99473   | 1.6803    | 2.05084    | 3.37338    | 1.92891    | 3.35145   | 2.31279    | 2.92189   |
| WHAMM    | 3.0385    | 3.226     | 3.19921   | 2.93943    | 3.94172    | 3.43091   | 2.3037    | 2.46161   | 4.17592   | 2.59267    | 2.17601    | 2.24387    | 2.47959   | 2.55783    | 2.32844   |
| WHAMMP1  | 6.38675   | 5.586     | 5.26134   | 5.03112    | 2.08921    | 3.29584   | 3.72227   | 4.29428   | 3.39092   | 3.80628    | 6.40388    | 3.07839    | 2.24273   | 3.64981    | 4.06907   |
| WHAMMP2  | 0.736171  | 0.401405  | 0.417303  | 0.34427    | 0.34298    | 0.378741  | 0.269308  | 0.460851  | 0.0913385 | 0.226209   | 0.296593   | 0.243931   | 0.175275  | 0.393851   | 0.475821  |
| WHAMMP3  | 0.87801   | 0.968652  | 0.660296  | 0.657957   | 1.19111    | 0.930541  | 0.453647  | 0.624123  | 0.239431  | 0.470729   | 0.657826   | 0.44471    | 0.399758  | 0.667788   | 1.21606   |
| WHRN     | 1.16457   | 1.34077   | 1.69229   | 0.898967   | 1.71412    | 1.85695   | 1.15039   | 0.945816  | 0.154049  | 0.89232    | 0.374208   | 1.12352    | 0.63318   | 1.07369    | 1.30916   |
| WIF1     | 0.0309952 | 0.876124  | 1.47011   | 0.117119   | 0.0160487  | 0.0527839 | 1.09707   | 0.0367279 | 0         | 0          | 0          | 0          | 0         | 0          | 0         |
| WIPF1    | 5.00099   | 2.89004   | 3.59259   | 6.31299    | 4.21991    | 11.3442   | 4.56572   | 3.72846   | 0.514533  | 5.34571    | 11.3242    | 1.82784    | 7.233     | 5.20949    | 14.223    |

|        |           |           |           |           |           |           |           |           |            |            |           |           |           |            |           |
|--------|-----------|-----------|-----------|-----------|-----------|-----------|-----------|-----------|------------|------------|-----------|-----------|-----------|------------|-----------|
| WIPF2  | 5.73445   | 6.49464   | 6.96517   | 7.88655   | 5.96658   | 9.87262   | 8.47959   | 6.19448   | 10.157     | 6.25626    | 6.17558   | 5.88948   | 11.4211   | 5.68984    | 5.19149   |
| WIPF3  | 0.309754  | 0.413087  | 0.3798    | 0.450315  | 0.274946  | 0.786545  | 0.435768  | 0.196631  | 0.0471557  | 0.187444   | 0.199814  | 0.178101  | 0.142751  | 0.182127   | 0.182705  |
| WIPI1  | 6.59642   | 2.8615    | 3.69964   | 7.81631   | 3.31297   | 13.4144   | 3.93793   | 4.60804   | 9.58645    | 9.53861    | 19.0438   | 4.04089   | 9.7671    | 7.90182    | 11.965    |
| WIPI2  | 6.18841   | 6.53343   | 6.57999   | 9.55624   | 11.3703   | 10.8385   | 8.13786   | 5.29943   | 27.4251    | 11.0024    | 13.5426   | 8.86259   | 12.554    | 5.99509    | 5.64391   |
| WISP1  | 0.900923  | 0.605991  | 0.664137  | 4.68809   | 1.19854   | 1.91021   | 0.585616  | 0.979034  | 0.244431   | 6.51023    | 14.8879   | 2.24665   | 8.6156    | 10.604     | 17.5821   |
| WISP2  | 23.5389   | 22.4988   | 36.1064   | 0.565655  | 12.0161   | 38.7041   | 40.1386   | 13.7608   | 0.0621856  | 2.73967    | 10.4185   | 0.155274  | 0.658876  | 0.440324   | 14.1892   |
| WISP3  | 0.613999  | 0.568912  | 0.729355  | 0.957228  | 0.391283  | 0.187676  | 0.736995  | 0.615629  | 1.03539    | 0.889191   | 1.03081   | 0.473128  | 1.27987   | 0.921566   | 0.090439  |
| WIZ    | 4.66699   | 4.98223   | 5.00711   | 9.38243   | 10.7034   | 13.0458   | 6.44557   | 3.86057   | 6.43062    | 4.2654     | 5.58547   | 6.19981   | 9.74905   | 5.94735    | 6.21162   |
| WLS    | 6.70748   | 9.74899   | 11.7038   | 10.5703   | 7.6411    | 14.2743   | 9.84746   | 7.76354   | 3.81158    | 7.11351    | 10.7596   | 3.52378   | 8.12999   | 6.35839    | 6.35311   |
| WNK1   | 33.925    | 33.0228   | 31.8237   | 33.5004   | 28.2054   | 33.0031   | 29.0879   | 28.8091   | 50.8604    | 29.219     | 23.7604   | 38.4984   | 38.2386   | 30.0879    | 19.4784   |
| WNK2   | 1.74272   | 2.97052   | 4.58002   | 0.203312  | 1.67588   | 1.66879   | 2.69794   | 3.62454   | 0.00333716 | 0.00687826 | 0.0138927 | 0.0254882 | 0.0371261 | 0.00572842 | 0.0275461 |
| WNK3   | 0.2734    | 0.167118  | 0.160348  | 0.13036   | 0.120433  | 0.165042  | 0.1025    | 0.166818  | 0.0720606  | 0.0896272  | 0.154317  | 0.0875931 | 0.0776668 | 0.121564   | 0.149436  |
| WNK4   | 0.105246  | 0.0800671 | 0.201629  | 0.0399586 | 0.249527  | 0.0518827 | 0.132816  | 0.0689197 | 0.0202386  | 0.0278094  | 0.0187594 | 0.0792699 | 0.0250173 | 0.0839568  | 0.0397754 |
| WNT1   | 0.0202654 | 0.0244104 | 0.0335299 | 0.010442  | 0.0157396 | 0.0603949 | 0.0231383 | 0.0180102 | 0.0246809  | 0.0127176  | 0         | 0         | 0         | 0.00529578 | 0         |
| WNT10A | 1.00368   | 1.90148   | 1.62032   | 1.3657    | 7.68933   | 1.5018    | 2.1473    | 0.874665  | 2.36166    | 2.67843    | 2.09005   | 2.38456   | 1.49632   | 1.61953    | 0.405833  |
| WNT10B | 0.410303  | 1.09671   | 0.703108  | 0.271819  | 1.15329   | 0.19132   | 0.725014  | 0.382007  | 0.642475   | 0.147135   | 0.198506  | 0.237662  | 0.0504239 | 0.0561635  | 0.168356  |
| WNT11  | 1.78947   | 1.00686   | 1.16244   | 0.470308  | 1.06336   | 0.940816  | 2.22142   | 0.715117  | 0.117014   | 0.150736   | 0.244038  | 0.180461  | 0.123979  | 0.276183   | 0.0517431 |
| WNT16  | 1.02524   | 2.76005   | 3.41633   | 0.605845  | 1.11367   | 0.31134   | 1.3343    | 3.20493   | 2.98621    | 0.269953   | 0.380392  | 0.574554  | 0.22666   | 0.0149883  | 0.154444  |
| WNT2   | 0.175205  | 0.379875  | 0.474357  | 0.262624  | 0.074224  | 0.488243  | 0.509203  | 0.0353882 | 0          | 0.90959    | 2.16665   | 0.0284919 | 1.3976    | 1.32361    | 5.31825   |
| WNT2B  | 1.76537   | 4.11631   | 4.85569   | 0.942829  | 2.1017    | 0.789996  | 2.55265   | 2.30184   | 0.996541   | 0.873348   | 0.647322  | 1.10642   | 0.798136  | 1.28297    | 1.06408   |
| WNT3   | 0.972629  | 6.19186   | 7.70958   | 2.12549   | 7.88631   | 1.9383    | 2.74872   | 4.87983   | 5.13306    | 2.70123    | 4.46199   | 2.58634   | 1.13045   | 2.29293    | 0.673643  |
| WNT3A  | 0.311481  | 0.686599  | 0.818131  | 0.192594  | 0.653181  | 0.503922  | 0.844643  | 0.352944  | 0.303479   | 0.185697   | 0.0527435 | 0.178298  | 0.135652  | 0.183143   | 0.190114  |
| WNT4   | 2.5484    | 5.16272   | 5.42253   | 1.28256   | 10.0345   | 0.9689    | 8.85762   | 3.02852   | 4.60498    | 2.91585    | 3.88706   | 3.10411   | 1.84305   | 1.76245    | 1.20859   |
| WNT5A  | 4.57296   | 4.14061   | 1.07914   | 6.01876   | 4.43824   | 4.18423   | 1.31591   | 2.92129   | 10.2815    | 10.5862    | 16.8594   | 9.34701   | 11.9359   | 20.2477    | 16.6421   |
| WNT5B  | 1.30186   | 1.58743   | 1.52435   | 0.474721  | 1.35334   | 1.62866   | 0.891853  | 0.569592  | 0.268318   | 1.06836    | 1.88792   | 0.157641  | 0.529817  | 0.779852   | 0.532127  |
| WNT6   | 0.19059   | 0.321402  | 0.281552  | 0.224467  | 1.77631   | 0.417304  | 0.52848   | 0.157282  | 0.132638   | 0.119605   | 0.122944  | 0.0876678 | 0.087834  | 0.0853805  | 0.117305  |

|            |           |           |           |           |           |           |           |           |            |           |           |            |            |           |           |
|------------|-----------|-----------|-----------|-----------|-----------|-----------|-----------|-----------|------------|-----------|-----------|------------|------------|-----------|-----------|
| WNT7A      | 0.0270047 | 0.156135  | 0.0111701 | 0.431352  | 0.629215  | 0.643837  | 0.292915  | 0.119998  | 0.723552   | 0.762608  | 0.884064  | 0.318823   | 2.50896    | 0.952685  | 0.465386  |
| WNT7B      | 1.32516   | 4.13454   | 3.74396   | 1.62167   | 5.95477   | 1.8487    | 4.90384   | 3.06516   | 2.91079    | 3.15566   | 2.81825   | 4.89334    | 5.93912    | 2.53537   | 1.32538   |
| WNT8A      | 0         | 0.0160134 | 0         | 0         | 0         | 0         | 0         | 0         | 0          | 0         | 0         | 0          | 0          | 0         | 0         |
| WNT8B      | 0.162326  | 0.256979  | 0.153471  | 0.131436  | 0.216127  | 0.1086    | 0.251531  | 0.0721309 | 0.0141211  | 0.0291051 | 0.052356  | 0.0331853  | 0.0149617  | 0.0908986 | 0.0999089 |
| WNT9A      | 0.254383  | 0.236774  | 0.205661  | 0.208527  | 0.48495   | 0.19199   | 0.429068  | 0.123313  | 0.394303   | 0.602272  | 0.189269  | 0.310257   | 0.596824   | 0.525763  | 0.672532  |
| WNT9B      | 0.0763797 | 0.205751  | 0.218281  | 0.132378  | 0.350539  | 0.153722  | 0.0990999 | 0.111076  | 0.253696   | 0.0784345 | 0.0823039 | 0.218607   | 0.185919   | 0.161492  | 0.413834  |
| WRAP53     | 0.872558  | 0.791937  | 0.788988  | 1.88204   | 1.78091   | 2.53992   | 1.10052   | 0.748405  | 0.679618   | 1.13335   | 2.05019   | 0.936507   | 1.6169     | 1.41053   | 0.670264  |
| WRAP73     | 1.66183   | 1.8836    | 1.97203   | 3.1865    | 3.32196   | 4.80182   | 1.75745   | 1.36795   | 2.18982    | 2.34222   | 3.85964   | 2.11501    | 3.90212    | 2.37782   | 2.71916   |
| WRB        | 1.30158   | 1.0653    | 1.02404   | 1.2937    | 0.597731  | 1.45275   | 0.877207  | 0.871047  | 1.14644    | 1.34026   | 2.37478   | 0.585087   | 0.715062   | 0.737125  | 0.864579  |
| WRB-SH3BGR | 0.182641  | 0.225191  | 0.221206  | 0.0143674 | 0.325493  | 0.473603  | 0.341163  | 0.314277  | 0.173824   | 0.179826  | 0.421266  | 0.157302   | 0.00611784 | 0.172918  | 0.245723  |
| WRN        | 2.96948   | 2.37889   | 2.81237   | 2.11295   | 0.809954  | 2.21241   | 2.16948   | 2.61284   | 0.800076   | 1.06116   | 1.44329   | 1.02864    | 1.21454    | 1.57815   | 1.66689   |
| WRNIP1     | 5.58178   | 6.48354   | 6.94946   | 10.4655   | 10.1724   | 11.0702   | 4.71548   | 3.9445    | 6.13677    | 7.28226   | 7.47573   | 4.90696    | 11.8868    | 7.51152   | 3.87728   |
| WSB1       | 12.5058   | 10.6991   | 10.8682   | 12.3036   | 8.12222   | 12.8375   | 11.0324   | 10.2717   | 8.69654    | 17.1793   | 17.831    | 13.473     | 11.3017    | 25.7062   | 18.2258   |
| WSB2       | 7.92559   | 6.43098   | 5.99996   | 15.4561   | 10.075    | 17.0345   | 10.148    | 6.02149   | 21.3156    | 20.1303   | 24.5004   | 12.4393    | 27.7739    | 13.9764   | 8.35969   |
| WSCD1      | 0.409506  | 0.210715  | 0.286147  | 0.241733  | 0.487886  | 1.46923   | 0.285984  | 0.102467  | 0.00484206 | 0.10479   | 0.381494  | 0.0312926  | 0.297558   | 0.211948  | 0.559554  |
| WSCD2      | 0.352613  | 0.344091  | 0.107082  | 0.124193  | 0.138666  | 0.524479  | 0.693088  | 0.0991688 | 0.021744   | 0.0112042 | 0.0806191 | 0.0223561  | 0.0172788  | 0.034992  | 0.147432  |
| WSPAR      | 0         | 0         | 0         | 0         | 0         | 0         | 0         | 0         | 0          | 0         | 0         | 0          | 0          | 0         | 0         |
| WT1        | 0         | 0         | 0         | 0         | 0         | 0         | 0         | 0         | 0          | 0         | 0         | 0          | 0          | 0.010933  | 0.180251  |
| WT1-AS     | 0         | 0         | 0         | 0         | 0         | 0         | 0         | 0         | 0          | 0         | 0         | 0.00385642 | 0          | 0         | 0         |
| WTAP       | 11.0396   | 7.72139   | 8.35712   | 15.4469   | 5.3568    | 14.9403   | 5.13164   | 9.20114   | 8.75277    | 11.2399   | 15.8982   | 6.63735    | 14.5809    | 9.16924   | 12.2609   |
| WTAPP1     | 0.0175193 | 0.0590876 | 0.0289865 | 0.27984   | 0.0408204 | 0.0372937 | 0.0100015 | 0.0311395 | 0.0106683  | 0.0219886 | 0.108774  | 0.0313389  | 0.073472   | 0.105298  | 0.03774   |
| WTIP       | 2.34161   | 1.99336   | 1.7026    | 3.26796   | 7.12785   | 6.21401   | 2.03815   | 0.839876  | 1.24047    | 2.14821   | 2.93973   | 1.27727    | 2.16118    | 2.78242   | 3.19696   |
| WWC1       | 2.32495   | 3.124     | 3.70185   | 5.97737   | 5.61194   | 3.96519   | 3.6152    | 2.817     | 6.13567    | 3.27579   | 1.27546   | 3.7817     | 7.84133    | 3.3546    | 1.46972   |
| WWC2       | 2.01631   | 1.39616   | 1.61312   | 1.78191   | 1.40616   | 1.98757   | 1.62435   | 1.39598   | 1.15736    | 2.53195   | 1.60055   | 1.5257     | 3.63238    | 3.2474    | 3.50652   |
| WWC2-AS1   | 0.0572848 | 0.248406  | 0.09478   | 0         | 0         | 0         | 0.130812  | 0.0509099 | 0          | 0.0718983 | 0.0646674 | 0.0819776  | 0.0739197  | 0.0299395 | 0.411341  |
| WWC2-AS2   | 0.22304   | 0.173989  | 0.263592  | 0.284575  | 0.643422  | 0.542616  | 0.14552   | 0.103829  | 0.168157   | 0.279938  | 0.419641  | 0.227987   | 0.294661   | 0.222039  | 0.137277  |



|             |           |            |            |            |            |            |           |            |            |            |           |                 |            |            |           |
|-------------|-----------|------------|------------|------------|------------|------------|-----------|------------|------------|------------|-----------|-----------------|------------|------------|-----------|
| XIST        | 0         | 0.0059058  | 0.00370747 | 0.691801   | 0.00881851 | 0.00108504 | 44.8835   | 0.00225779 | 0.00146191 | 0          | 0         | 0.00093517<br>6 | 0.00542129 | 0          | 0         |
| XK          | 0.223648  | 0.295254   | 0.318229   | 0.401027   | 0.250129   | 0.281841   | 0.311531  | 0.198759   | 0.354091   | 0.336841   | 0.33831   | 0.368059        | 0.432889   | 0.170656   | 0.0963559 |
| XKR3        | 0         | 0.0132039  | 0          | 0          | 0          | 0          | 0         | 0.0121774  | 0          | 0          | 0.0309362 | 0               | 0          | 0          | 0         |
| XKR4        | 0.0532841 | 0          | 0          | 0.030506   | 0          | 0.110906   | 0.263631  | 0.0526161  | 0.00721045 | 0          | 0.0267338 | 0.00423624      | 0.00763969 | 0.00309429 | 0.0595176 |
| XKR5        | 0.0184113 | 0.0266126  | 0.0418857  | 0.0142301  | 0          | 0.0548695  | 0.0420429 | 0.0204531  | 0.00560573 | 0.0173311  | 0.0259801 | 0               | 0          | 0.0168395  | 0.0132205 |
| XKR6        | 0.432378  | 0.411445   | 0.366636   | 0.61824    | 1.0914     | 0.317542   | 0.320889  | 0.244967   | 0.342282   | 0.345958   | 0.219646  | 0.344183        | 0.181329   | 0.271176   | 0.186285  |
| XKR7        | 0         | 0          | 0.0131585  | 0.00819573 | 0.0247073  | 0.0203155  | 0         | 0.00706791 | 0          | 0.00998176 | 0         | 0.00569054      | 0          | 0          | 0.0228429 |
| XKR8        | 1.10041   | 0.80772    | 0.860555   | 1.78075    | 2.21678    | 2.01306    | 1.07973   | 0.481337   | 1.51817    | 1.45666    | 2.84354   | 1.02728         | 1.97463    | 1.09633    | 1.38279   |
| XKR9        | 1.03402   | 0.922849   | 0.91445    | 0.599305   | 0.200412   | 0.262132   | 0.637502  | 1.31348    | 0.16894    | 0.226768   | 0.0434209 | 0.43374         | 0.0652666  | 0.707237   | 0.514839  |
| XKRX        | 2.95478   | 5.28787    | 4.78807    | 5.11122    | 7.46471    | 2.74405    | 7.80393   | 3.73694    | 36.8756    | 4.5338     | 7.20264   | 7.73085         | 1.81213    | 2.60918    | 0.676152  |
| XKRY        | 0         | 0.00176323 | 0.00302745 | 0          | 0          | 0          | 0         | 0.00650462 | 0          | 0          | 0         | 0               | 0          | 0          | 0         |
| XKRY2       | 0         | 0.00176323 | 0.00302745 | 0          | 0          | 0          | 0         | 0.00650462 | 0          | 0          | 0         | 0               | 0          | 0          | 0         |
| XLOC_007697 | 0         | 6.70E-38   | 0          | 0          | 0          | 0          | 0         | 0          | 0          | 0          | 0         | 0               | 0          | 0          | 0         |
| XLOC_008559 | 0         | 0          | 0          | 0          | 0          | 0          | 0         | 0          | 0          | 0          | 0         | 0               | 0          | 0          | 0         |
| XLOC_009911 | 0         | 0.0447818  | 0          | 0          | 0          | 0          | 0.0530602 | 0          | 0          | 0.0583271  | 0         | 0               | 0          | 0          | 0         |
| XPA         | 2.80546   | 2.5426     | 2.84027    | 1.47422    | 1.16045    | 2.1858     | 1.80576   | 2.25311    | 1.65513    | 1.51618    | 2.16218   | 1.14301         | 1.13834    | 1.36657    | 1.0957    |
| XPC         | 6.24718   | 7.0185     | 8.08802    | 5.77928    | 7.35685    | 10.0539    | 5.25069   | 4.83009    | 1.66568    | 2.85596    | 2.83168   | 2.61532         | 3.49884    | 3.36801    | 5.27493   |
| XPNPEP1     | 6.54419   | 5.38032    | 6.43399    | 9.28563    | 4.68901    | 12.7744    | 5.96892   | 4.7536     | 4.64386    | 7.10269    | 9.81315   | 4.4119          | 10.8901    | 6.60333    | 5.99753   |
| XPNPEP2     | 1.09709   | 0.545323   | 0.832915   | 0.500891   | 0.841294   | 4.36926    | 2.73516   | 0.999686   | 0.0338261  | 0.0958644  | 0.431116  | 0.0198734       | 0.10304    | 0.0580645  | 1.34621   |
| XPNPEP3     | 1.78148   | 1.84972    | 1.98177    | 2.07285    | 1.06525    | 1.91729    | 2.11835   | 1.7786     | 1.28744    | 1.26266    | 1.68137   | 1.77105         | 1.66775    | 1.67943    | 1.39579   |
| XPO1        | 10.4982   | 10.3034    | 10.4964    | 16.8033    | 4.09359    | 12.6233    | 6.48837   | 12.1021    | 6.9793     | 10.0371    | 12.0513   | 6.39065         | 14.7339    | 10.4202    | 8.56025   |
| XPO4        | 3.20748   | 2.56178    | 2.72706    | 3.33195    | 0.698254   | 3.32719    | 2.29088   | 3.41649    | 1.49696    | 2.07751    | 2.73282   | 1.69029         | 3.35644    | 2.33835    | 2.60242   |
| XPO5        | 4.10534   | 4.85794    | 5.0491     | 6.99192    | 4.39727    | 7.23847    | 5.30209   | 3.72327    | 6.87998    | 4.43991    | 4.41603   | 5.25493         | 7.60989    | 5.85001    | 3.69693   |
| XPO6        | 9.42216   | 8.30607    | 8.43666    | 15.4594    | 13.1984    | 16.4427    | 9.6898    | 6.77727    | 10.8296    | 11.4996    | 12.467    | 9.76036         | 19.681     | 12.7676    | 11.5912   |
| XPO7        | 7.22385   | 6.61312    | 6.56941    | 9.11347    | 4.73714    | 11.7738    | 7.24401   | 6.15674    | 6.29541    | 7.34737    | 7.60631   | 5.49337         | 9.26189    | 6.72626    | 5.6424    |

|           |          |          |          |           |           |          |          |            |           |          |          |           |           |           |          |
|-----------|----------|----------|----------|-----------|-----------|----------|----------|------------|-----------|----------|----------|-----------|-----------|-----------|----------|
| XPOT      | 6.5278   | 5.66483  | 5.43606  | 8.90504   | 2.91313   | 6.75906  | 4.64901  | 5.91355    | 9.38643   | 10.0354  | 9.86072  | 7.5275    | 12.9911   | 10.6819   | 6.16869  |
| XPR1      | 1.92787  | 1.71427  | 1.67083  | 2.95656   | 0.968954  | 2.93701  | 1.23583  | 1.56338    | 1.10646   | 2.45664  | 2.66213  | 1.26359   | 3.59975   | 2.36006   | 2.11942  |
| XRCC1     | 3.46815  | 3.85658  | 3.77993  | 5.49153   | 6.03713   | 7.13429  | 4.13582  | 2.69082    | 5.45745   | 3.10921  | 3.43039  | 3.56872   | 4.84466   | 3.15912   | 3.7632   |
| XRCC2     | 0.341225 | 0.305263 | 0.336872 | 0.818455  | 0.0832438 | 0.580061 | 0.172199 | 0.286958   | 0.0918398 | 0.293553 | 0.417125 | 0.320109  | 0.778457  | 0.729679  | 0.29654  |
| XRCC3     | 3.56923  | 4.47042  | 4.78092  | 3.69628   | 7.94177   | 3.86802  | 4.22543  | 2.49399    | 0.811712  | 2.4325   | 1.06918  | 2.88017   | 1.85586   | 4.91797   | 4.05537  |
| XRCC4     | 0.903852 | 0.618287 | 0.60003  | 1.7479    | 0.415998  | 1.22569  | 0.305774 | 0.783434   | 1.06002   | 1.68063  | 3.0862   | 1.24555   | 2.05186   | 2.29198   | 1.5865   |
| XRCC5     | 29.2561  | 24.1186  | 26.0837  | 49.6183   | 15.0714   | 53.9933  | 21.9789  | 25.7725    | 27.3968   | 38.2183  | 48.2905  | 21.1073   | 46.7064   | 31.2475   | 26.7635  |
| XRCC6     | 32.6939  | 28.0494  | 30.2237  | 63.3656   | 30.803    | 73.9481  | 28.9237  | 23.5915    | 39.6742   | 47.3308  | 41.5482  | 31.7306   | 64.4084   | 36.896    | 27.4355  |
| XRCC6P5   | 0        | 0        | 0        | 0         | 0         | 0        | 0        | 0.00950832 | 0         | 0        | 0        | 0         | 0         | 0         | 0        |
| XRN1      | 5.8244   | 5.55254  | 6.2974   | 4.82599   | 1.65976   | 4.44511  | 4.06337  | 6.51391    | 5.69301   | 4.18722  | 4.38487  | 3.74311   | 4.58963   | 3.79283   | 4.82491  |
| XRN2      | 9.08076  | 6.96881  | 7.41175  | 15.3253   | 4.28933   | 17.4168  | 6.15286  | 7.04316    | 5.99267   | 9.35917  | 12.5858  | 6.17981   | 13.8999   | 10.2102   | 10.2984  |
| XRRA1     | 1.63312  | 2.609    | 2.62113  | 1.96148   | 1.56799   | 1.51222  | 1.28645  | 1.07389    | 0.41846   | 1.13343  | 1.43432  | 1.82481   | 0.974593  | 1.82975   | 2.04997  |
| XXYL1     | 3.09111  | 2.24178  | 1.87127  | 3.8823    | 3.32608   | 4.55807  | 3.27197  | 1.96018    | 4.44108   | 3.32398  | 6.36104  | 3.32342   | 4.25362   | 2.78935   | 3.15601  |
| XXYL1-AS1 | 0        | 0        | 0        | 0.0553355 | 0         | 0        | 0.122617 | 0          | 0         | 0        | 0        | 0         | 0         | 0         | 0        |
| XXYL1-AS2 | 0.408407 | 0.511619 | 0.247766 | 0.252525  | 0.338345  | 0.301386 | 0.683915 | 0.629127   | 0         | 0.170864 | 0.030736 | 0.253263  | 0.0175668 | 0.199221  | 0.508321 |
| XYLB      | 0.738641 | 0.750656 | 0.359445 | 0.626863  | 0.780979  | 0.734649 | 0.680355 | 0.557148   | 0.120952  | 0.22982  | 0.455456 | 0.295348  | 0.196234  | 0.31792   | 0.574962 |
| XYLT1     | 3.40959  | 2.66275  | 3.27881  | 3.49695   | 4.69671   | 4.56534  | 4.29061  | 2.9638     | 2.35786   | 4.12409  | 3.25392  | 3.34066   | 6.82845   | 3.1974    | 4.77769  |
| XYLT2     | 3.63757  | 4.37229  | 4.09921  | 4.67588   | 7.67703   | 7.00457  | 3.63229  | 2.91866    | 0.978396  | 2.33924  | 2.60458  | 1.54972   | 3.45411   | 2.92564   | 3.09196  |
| YAE1      | 0.700057 | 0.697744 | 0.692692 | 1.05385   | 0.330493  | 1.24477  | 0.336961 | 0.561157   | 0.718851  | 0.783887 | 1.38686  | 0.486177  | 0.99191   | 0.807089  | 0.965944 |
| YAF2      | 1.26105  | 0.874748 | 0.907247 | 0.662419  | 0.560217  | 0.697742 | 0.949616 | 1.33004    | 0.91731   | 0.754426 | 1.0746   | 0.686394  | 0.60468   | 0.74884   | 0.761057 |
| YAP1      | 11.6932  | 12.0713  | 13.4999  | 21.3278   | 9.70572   | 19.2188  | 11.2201  | 12.1516    | 20.655    | 17.421   | 14.542   | 12.2484   | 27.3094   | 17.5199   | 14.7246  |
| YARS      | 6.37046  | 5.46517  | 5.42916  | 15.3871   | 9.9532    | 18.775   | 7.8331   | 4.62557    | 13.0213   | 12.1321  | 10.4519  | 10.8537   | 30.2898   | 15.5333   | 8.40239  |
| YARS2     | 2.46021  | 2.29377  | 2.45817  | 4.69748   | 2.34919   | 4.24409  | 2.07938  | 1.96874    | 2.15316   | 2.41946  | 4.68891  | 2.08803   | 4.25346   | 3.60696   | 2.30957  |
| YBEY      | 1.66083  | 1.80963  | 1.805    | 1.10746   | 1.24777   | 2.90229  | 2.40443  | 1.39883    | 0.912199  | 1.08994  | 2.36503  | 0.776711  | 1.1486    | 0.862349  | 0.810643 |
| YBX1      | 47.2775  | 27.2149  | 27.5468  | 74.106    | 22.6928   | 79.4837  | 29.7529  | 27.5188    | 40.3149   | 56.8577  | 88.1924  | 33.4157   | 72.2924   | 55.315    | 34.842   |
| YBX2      | 0.380113 | 0.260629 | 0.423307 | 0         | 0.090838  | 0.522838 | 0.717771 | 0.220878   | 0.0356104 | 0        | 0        | 0.0209216 | 0         | 0.0152818 | 0.104979 |

|            |           |           |          |          |           |          |           |          |           |           |          |          |          |           |          |
|------------|-----------|-----------|----------|----------|-----------|----------|-----------|----------|-----------|-----------|----------|----------|----------|-----------|----------|
| YBX3       | 71.7036   | 78.1921   | 76.1383  | 165.727  | 144.648   | 162.441  | 78.9907   | 61.9524  | 229.883   | 106.872   | 109.452  | 95.22    | 118.659  | 81.3969   | 46.4197  |
| YBX3P1     | 0         | 0         | 0        | 0        | 0.0408978 | 0        | 0         | 0        | 0.0160328 | 0.0330454 | 0        | 0        | 0        | 0         | 0        |
| YDJC       | 2.43884   | 2.40848   | 2.89044  | 4.99094  | 7.36178   | 7.14306  | 3.39681   | 1.59868  | 2.75958   | 1.95383   | 4.95957  | 2.52476  | 2.68951  | 3.10977   | 2.06175  |
| YEATS2     | 3.05826   | 3.80406   | 3.06207  | 5.54385  | 4.94827   | 6.22353  | 2.9258    | 3.07815  | 3.11678   | 4.51954   | 4.35617  | 4.00745  | 3.77129  | 5.28881   | 4.18039  |
| YEATS2-AS1 | 1.09587   | 0.680851  | 0.763437 | 0.609242 | 0.716743  | 0.503393 | 0.971349  | 1.24303  | 0.15805   | 0.506737  | 0.244165 | 0.918251 | 0.120943 | 0.746082  | 0.82832  |
| YEATS4     | 2.37444   | 1.64177   | 1.17348  | 2.84415  | 0.718504  | 4.1749   | 1.07386   | 2.24723  | 2.17824   | 1.83841   | 3.32444  | 0.860519 | 2.13879  | 1.52303   | 0.819284 |
| YES1       | 7.72414   | 5.90806   | 6.22791  | 10.7971  | 2.44646   | 12.0039  | 4.54986   | 6.9164   | 8.48775   | 12.9945   | 10.9448  | 7.26667  | 20.0567  | 10.7512   | 7.67186  |
| YIF1A      | 7.32898   | 8.10686   | 8.48823  | 19.3817  | 12.122    | 21.8859  | 12.2573   | 5.10061  | 14.7339   | 15.4692   | 31.2296  | 11.0938  | 18.6217  | 13.8974   | 10.7625  |
| YIF1B      | 2.36098   | 1.99392   | 2.35344  | 4.38798  | 4.40445   | 5.68587  | 2.68485   | 1.52205  | 2.76794   | 3.6963    | 7.98639  | 3.14596  | 3.35649  | 3.67742   | 2.28617  |
| YIPF1      | 4.02592   | 3.32198   | 3.44022  | 7.04309  | 3.08938   | 8.1082   | 3.82598   | 3.12799  | 6.66473   | 5.82452   | 7.33425  | 3.95012  | 7.94034  | 4.39724   | 3.70447  |
| YIPF2      | 4.70378   | 4.807     | 4.80394  | 9.25564  | 12.7205   | 12.5008  | 5.95328   | 3.30083  | 10.6196   | 10.997    | 15.1537  | 5.50766  | 10.7665  | 6.72116   | 6.05881  |
| YIPF3      | 12.0414   | 11.3205   | 11.723   | 22.987   | 22.2629   | 28.6087  | 15.6264   | 9.50078  | 19.7979   | 18.5414   | 32.4581  | 12.7558  | 25.5906  | 14.8969   | 14.91    |
| YIPF4      | 5.29994   | 5.43631   | 6.25519  | 8.86015  | 3.51259   | 5.79647  | 4.84104   | 5.62077  | 12.2209   | 8.52929   | 15.4892  | 4.53384  | 9.87093  | 6.3217    | 4.93894  |
| YIPF5      | 3.89404   | 3.72337   | 3.65945  | 6.27835  | 1.64494   | 6.69999  | 2.77784   | 4.10397  | 4.44048   | 6.70448   | 10.4336  | 3.06924  | 6.94908  | 4.87605   | 5.33246  |
| YIPF6      | 3.08719   | 2.92528   | 3.09648  | 2.92331  | 0.806883  | 4.02464  | 2.43967   | 3.34279  | 4.50469   | 3.16269   | 4.22954  | 2.65973  | 3.90998  | 2.73988   | 2.55012  |
| YIPF7      | 0.0246991 | 0.0119004 | 0        | 0        | 0         | 0        | 0.0282006 | 0        | 0         | 0         | 0        | 0        | 0        | 0.0129088 | 0        |
| YJEFN3     | 0.381232  | 0.691515  | 0.445246 | 0.300431 | 1.25404   | 0.821084 | 0.486488  | 0.398597 | 0.0273117 | 0.281462  | 0.202524 | 0.336966 | 0.11575  | 0.421939  | 0.676321 |
| YJU2       | 4.30531   | 3.70918   | 3.85295  | 6.26753  | 7.03569   | 7.10016  | 4.38572   | 3.11501  | 5.18491   | 3.4551    | 4.67949  | 2.94314  | 6.34033  | 3.14518   | 3.01104  |
| YKT6       | 9.91483   | 7.79645   | 8.24374  | 19.6244  | 13.8676   | 27.693   | 9.88752   | 6.04532  | 15.6927   | 26.8838   | 23.0846  | 13.9313  | 38.0308  | 20.1148   | 13.3617  |
| YLPM1      | 7.85846   | 9.08416   | 9.15044  | 7.68803  | 6.41933   | 11.1305  | 7.76125   | 8.17447  | 4.04235   | 3.1842    | 2.78048  | 5.03887  | 6.22081  | 5.50745   | 6.22901  |
| YME1L1     | 14.2448   | 11.2978   | 11.3141  | 21.3227  | 6.63725   | 20.822   | 8.07497   | 12.5191  | 18.9187   | 17.7461   | 19.1938  | 10.5768  | 24.3928  | 13.9405   | 11.8722  |
| YOD1       | 6.38455   | 5.94375   | 5.37292  | 14.278   | 4.65831   | 6.32194  | 14.6406   | 9.16878  | 111.63    | 22.2057   | 30.431   | 24.6234  | 20.866   | 8.10761   | 4.63299  |
| YPEL1      | 0.816233  | 0.755081  | 0.814953 | 0.367496 | 0.80301   | 0.803085 | 0.787703  | 0.771498 | 0.128518  | 0.216768  | 0.299274 | 0.212977 | 0.210149 | 0.342769  | 0.975696 |
| YPEL2      | 4.38356   | 3.3972    | 3.72885  | 3.49174  | 3.22251   | 4.32764  | 3.3131    | 3.16848  | 3.30233   | 3.69748   | 4.79869  | 1.66481  | 3.92416  | 2.69561   | 3.94491  |
| YPEL3      | 8.90228   | 11.0604   | 10.4681  | 14.4078  | 28.6876   | 19.8904  | 12.273    | 9.27085  | 33.3172   | 13.5818   | 19.5618  | 15.1864  | 13.098   | 8.71729   | 8.16404  |
| YPEL4      | 0.483658  | 0.489371  | 0.490143 | 0.473503 | 0.619813  | 0.813362 | 0.621253  | 0.537294 | 0.0294521 | 0.288344  | 0.655188 | 0.138428 | 0.280849 | 0.657231  | 0.781418 |





|            |            |            |           |           |           |           |            |           |           |           |           |            |           |           |            |
|------------|------------|------------|-----------|-----------|-----------|-----------|------------|-----------|-----------|-----------|-----------|------------|-----------|-----------|------------|
| ZASP       | 1.08E-22   | 1.42E-15   | 2.27E-10  | 2.79E-12  | 1.04E-05  | 2.35E-15  | 1.71E-19   | 6.16E-14  | 8.16E-17  | 1.48E-11  | 5.17E-16  | 4.40E-17   | 6.97E-12  | 2.99E-13  | 0.00022659 |
| ZBBX       | 0.00665413 | 0.00320606 | 0         | 0         | 0         | 0         | 0          | 0         | 0         | 0         | 0         | 0.00476121 | 0         | 0         | 0          |
| ZBED1      | 3.74017    | 3.40173    | 3.53452   | 4.76848   | 6.21657   | 7.1975    | 3.01832    | 2.74661   | 4.97769   | 2.6111    | 3.14525   | 2.76305    | 4.09176   | 2.61105   | 3.33488    |
| ZBED2      | 2.11155    | 1.27046    | 1.32098   | 2.74979   | 0.37532   | 2.4599    | 0.431804   | 1.09233   | 0.985154  | 5.7751    | 2.03977   | 2.33772    | 9.17732   | 3.21194   | 2.30829    |
| ZBED3      | 0.850726   | 0.417852   | 0.423635  | 0.348977  | 1.51392   | 0.984596  | 0.603546   | 0.374357  | 0.100591  | 0.300628  | 0.484844  | 0.147747   | 0.30908   | 0.237422  | 0.604944   |
| ZBED3-AS1  | 0.141858   | 0          | 0.0670598 | 0.0208841 | 0.0944374 | 0.155301  | 0.069415   | 0.0900509 | 0         | 0.0508702 | 0.0686312 | 0.0290008  | 0         | 0.0635494 | 0.0291036  |
| ZBED4      | 3.15587    | 3.39734    | 3.33643   | 4.02111   | 4.18171   | 3.93491   | 3.23105    | 2.6852    | 5.18606   | 3.89345   | 2.74308   | 3.4052     | 5.95233   | 4.08924   | 3.29661    |
| ZBED5      | 4.66915    | 5.65459    | 6.12575   | 4.33312   | 1.50826   | 4.62992   | 2.64143    | 5.8829    | 2.78669   | 4.67337   | 5.06118   | 3.15361    | 3.56817   | 4.01567   | 4.1227     |
| ZBED5-AS1  | 1.45554    | 2.43451    | 2.27063   | 1.5214    | 1.45347   | 1.75283   | 2.04175    | 1.64467   | 5.74855   | 1.59197   | 3.80265   | 1.77051    | 1.44891   | 1.11936   | 1.34379    |
| ZBED6      | 11.9627    | 11.0941    | 12.1237   | 14.5718   | 5.1544    | 12.7284   | 11.3809    | 11.6859   | 12.2588   | 13.4761   | 10.5533   | 11.8109    | 17.0475   | 14.7089   | 15.6164    |
| ZBED6CL    | 0.644205   | 1.14455    | 0.879337  | 1.30285   | 2.58924   | 1.00793   | 0.845862   | 0.615454  | 2.11834   | 1.67773   | 1.34537   | 1.5096     | 1.74568   | 0.989025  | 0.485709   |
| ZBED8      | 0.324398   | 0.438403   | 0.46473   | 0.391378  | 0.307258  | 0.357066  | 0.189711   | 0.344552  | 0.086725  | 0.427014  | 0.786002  | 0.169841   | 0.137832  | 0.326684  | 0.488602   |
| ZBED9      | 0.0217143  | 0.0439415  | 0.025149  | 0.0447543 | 0.0438487 | 0.0369788 | 0.0123963  | 0.0347361 | 0.0370237 | 0.0572326 | 0.107856  | 0.107206   | 0.137297  | 0.116893  | 0.0374213  |
| ZBP1       | 0.0906386  | 0.0837028  | 0.0999768 | 0.186811  | 0.12906   | 0.244396  | 0.00862402 | 0.147679  | 0         | 0.0379202 | 0.0511598 | 0.0270226  | 0.194932  | 0.0157906 | 0.0542369  |
| ZBTB1      | 3.00848    | 3.97752    | 3.71672   | 3.75327   | 1.32882   | 3.30987   | 2.13566    | 3.36345   | 3.92705   | 3.8563    | 4.70277   | 2.74275    | 3.65471   | 4.01237   | 3.5019     |
| ZBTB10     | 1.47533    | 0.8375     | 1.1455    | 0.616558  | 0.61605   | 1.63251   | 0.701224   | 1.33533   | 0.168363  | 0.645677  | 1.13334   | 0.212426   | 0.791041  | 0.793575  | 1.93976    |
| ZBTB11     | 3.21941    | 3.48535    | 3.46548   | 3.95286   | 1.56087   | 3.17791   | 2.43694    | 3.25231   | 3.19003   | 3.72344   | 3.79545   | 2.65932    | 4.39951   | 4.27332   | 2.20804    |
| ZBTB11-AS1 | 0.88866    | 1.11731    | 1.41961   | 1.11855   | 2.24345   | 1.41904   | 1.27091    | 0.772351  | 0.83661   | 0.916166  | 1.00718   | 0.552753   | 1.28043   | 0.892714  | 1.04964    |
| ZBTB12     | 0.186053   | 0.294099   | 0.311817  | 0.207804  | 0.743114  | 0.27399   | 0.25773    | 0.186242  | 0.0271975 | 0.0703514 | 0.0840322 | 0.122505   | 0.0622444 | 0.165995  | 0.134944   |
| ZBTB14     | 2.31064    | 1.98739    | 2.22081   | 1.98325   | 1.12341   | 2.65112   | 1.46256    | 1.93366   | 1.26148   | 1.47696   | 2.51846   | 0.999883   | 1.48289   | 1.2685    | 1.17067    |
| ZBTB16     | 11.8123    | 4.30011    | 6.02064   | 0.556052  | 0.4012    | 6.90256   | 5.04538    | 10.4178   | 0.102776  | 0.121965  | 0.0692834 | 0.16651    | 0.21449   | 0.159047  | 0.503136   |
| ZBTB17     | 2.20331    | 2.68192    | 2.68613   | 4.31922   | 6.29176   | 6.03735   | 2.56296    | 1.53852   | 3.83341   | 3.83619   | 2.84258   | 3.46125    | 5.0396    | 4.54992   | 2.96201    |
| ZBTB18     | 2.05032    | 1.93378    | 2.25592   | 1.14098   | 1.39338   | 1.94223   | 1.80257    | 2.15926   | 1.64806   | 1.01005   | 1.61441   | 0.762874   | 0.866473  | 0.803691  | 1.22198    |
| ZBTB2      | 2.46127    | 1.78741    | 1.98302   | 2.14676   | 1.42954   | 2.09574   | 1.84088    | 2.23175   | 1.77246   | 1.95198   | 2.94759   | 1.37825    | 3.04711   | 1.8382    | 2.05934    |
| ZBTB20     | 5.5238     | 3.56794    | 4.3694    | 2.20845   | 1.68322   | 4.47045   | 4.12624    | 4.65875   | 0.600406  | 1.45624   | 2.20605   | 1.24528    | 1.72051   | 2.71155   | 6.49475    |

|            |           |          |           |           |          |           |           |          |           |           |           |           |           |           |           |
|------------|-----------|----------|-----------|-----------|----------|-----------|-----------|----------|-----------|-----------|-----------|-----------|-----------|-----------|-----------|
| ZBTB20-AS1 | 0.511597  | 0.317849 | 0.222752  | 0.124867  | 0.104564 | 0.160491  | 0.384293  | 0.239297 | 0.0163965 | 0.0506927 | 0.0303963 | 0.105965  | 0         | 0.316638  | 0.116008  |
| ZBTB20-AS3 | 0.254786  | 0.265979 | 0.351295  | 0.175043  | 0        | 0         | 0.339391  | 0.415126 | 0.0517168 | 0.0532971 | 0         | 0.151922  | 0.0547955 | 0.0221937 | 0         |
| ZBTB20-AS4 | 0.822864  | 0.429507 | 0.879278  | 0.353327  | 1.43797  | 0.175164  | 0.508906  | 0.639881 | 0.0417565 | 0.0430325 | 0.116114  | 0.245326  | 0         | 0.161274  | 0.541629  |
| ZBTB20-AS5 | 0.372075  | 0.179271 | 0.0923419 | 0.0383434 | 0        | 0.0633634 | 0.0424823 | 0.363736 | 0         | 0.0466992 | 0         | 0.0266229 | 0.0240061 | 0.15557   | 0.641216  |
| ZBTB21     | 2.27701   | 2.69383  | 3.11526   | 2.00907   | 0.857165 | 2.13247   | 1.89015   | 2.86432  | 4.71543   | 2.20715   | 2.58757   | 2.67929   | 2.76804   | 2.84126   | 2.88255   |
| ZBTB22     | 0.846345  | 0.998621 | 1.1239    | 0.861696  | 1.7204   | 1.09037   | 0.842392  | 0.568267 | 1.07206   | 0.764225  | 0.698852  | 0.620146  | 0.844802  | 0.495525  | 0.618691  |
| ZBTB24     | 2.29734   | 1.72923  | 1.68931   | 1.90831   | 0.787763 | 2.58766   | 1.73871   | 2.01322  | 2.34817   | 1.43508   | 1.30561   | 1.10484   | 2.07727   | 1.60175   | 1.56639   |
| ZBTB25     | 1.42514   | 1.66582  | 1.98509   | 1.00719   | 1.49479  | 1.00615   | 1.22634   | 1.35685  | 0.479286  | 0.739908  | 0.835688  | 0.704232  | 0.498106  | 0.760733  | 1.15955   |
| ZBTB26     | 1.29551   | 1.13354  | 1.03744   | 1.01465   | 0.370278 | 0.961914  | 0.816505  | 0.939497 | 0.631116  | 0.637393  | 1.08808   | 0.422701  | 0.561697  | 0.94793   | 1.07166   |
| ZBTB3      | 1.06303   | 1.87977  | 1.9136    | 1.74886   | 2.40547  | 1.94144   | 1.9292    | 1.16186  | 1.48794   | 0.918093  | 1.55879   | 0.828642  | 1.0393    | 0.940898  | 1.13992   |
| ZBTB32     | 0.0878294 | 0.17985  | 0.227058  | 0.169708  | 0.375181 | 0.280446  | 0.162956  | 0.107326 | 0.0267416 | 0.0551175 | 0.0247871 | 0.188533  | 0.120418  | 0.189352  | 0.0788338 |
| ZBTB33     | 3.17229   | 4.04999  | 4.18887   | 4.12235   | 0.710725 | 3.84031   | 2.54239   | 4.46909  | 3.89007   | 3.25417   | 3.62541   | 2.37277   | 3.98102   | 2.30478   | 1.8336    |
| ZBTB34     | 2.30972   | 2.14077  | 2.46795   | 1.79517   | 1.80211  | 2.51317   | 2.78613   | 2.43189  | 5.08054   | 2.47405   | 3.24033   | 1.58202   | 2.42303   | 2.03098   | 1.9244    |
| ZBTB37     | 3.25407   | 2.78874  | 2.99356   | 1.64922   | 2.04398  | 2.25601   | 2.42617   | 2.31514  | 1.18027   | 1.26097   | 1.22448   | 1.32959   | 0.917819  | 1.49626   | 1.71098   |
| ZBTB38     | 5.40676   | 4.34215  | 4.32461   | 5.2181    | 2.79819  | 5.99365   | 3.63533   | 4.49116  | 4.74724   | 7.8817    | 7.75249   | 3.28375   | 8.123     | 6.2092    | 8.02554   |
| ZBTB39     | 1.78081   | 1.59091  | 1.74023   | 1.29609   | 1.31971  | 1.93016   | 1.91466   | 1.6189   | 1.48203   | 0.675185  | 0.933955  | 0.807002  | 1.03886   | 1.18668   | 1.17217   |
| ZBTB4      | 10.1136   | 12.7069  | 13.9267   | 11.4293   | 19.145   | 21.2445   | 14.1589   | 8.90413  | 12.3954   | 9.26728   | 9.33107   | 9.46068   | 13.3239   | 10.3263   | 10.7998   |
| ZBTB40     | 2.61234   | 3.03069  | 2.97444   | 2.33934   | 3.25429  | 3.70142   | 3.23539   | 2.10205  | 1.34471   | 1.48917   | 1.26677   | 1.85445   | 1.60744   | 3.16513   | 2.97915   |
| ZBTB41     | 1.12471   | 1.19063  | 1.20555   | 1.22313   | 0.352772 | 1.25464   | 0.75012   | 1.42243  | 0.730981  | 1.55414   | 2.20663   | 0.648062  | 1.04662   | 0.878901  | 1.37062   |
| ZBTB42     | 1.04868   | 1.08633  | 1.36096   | 1.58727   | 1.92421  | 2.84066   | 1.13      | 0.646561 | 0.710428  | 0.682779  | 0.806483  | 0.478353  | 1.16714   | 0.688533  | 0.790669  |
| ZBTB43     | 5.6385    | 5.23165  | 5.27364   | 4.90011   | 3.10614  | 3.90691   | 5.24316   | 5.1178   | 11.9362   | 6.07983   | 4.31344   | 8.70143   | 6.84563   | 4.98446   | 3.4839    |
| ZBTB44     | 4.54773   | 4.53975  | 4.86211   | 4.52431   | 1.6438   | 4.44973   | 3.14645   | 4.86154  | 2.3859    | 2.37069   | 3.62756   | 2.19013   | 3.00293   | 2.66413   | 3.01518   |
| ZBTB45     | 1.50963   | 2.35124  | 2.34672   | 2.53981   | 4.4173   | 3.82641   | 2.30889   | 1.49764  | 2.44571   | 1.55986   | 2.85353   | 1.88906   | 3.15308   | 2.36334   | 1.28065   |
| ZBTB46     | 1.08624   | 0.950969 | 1.11976   | 0.869339  | 1.88677  | 2.12372   | 0.913444  | 0.758732 | 0.449863  | 0.905544  | 1.41063   | 0.494062  | 1.33014   | 0.928914  | 2.15852   |
| ZBTB46-AS1 | 0.0638136 | 0.122985 | 0.123179  | 0.0438411 | 0.528664 | 0.126785  | 0.218581  | 0.170137 | 0         | 0.10679   | 0         | 0.152201  | 0.0274481 | 0.266814  | 0.733155  |
| ZBTB47     | 3.87469   | 3.20731  | 4.31444   | 3.09651   | 6.31901  | 7.28553   | 4.25125   | 2.50606  | 2.07797   | 2.21003   | 2.57129   | 1.52153   | 2.95273   | 2.58955   | 5.4378    |

|            |           |            |           |           |            |           |           |           |           |           |            |           |           |           |           |
|------------|-----------|------------|-----------|-----------|------------|-----------|-----------|-----------|-----------|-----------|------------|-----------|-----------|-----------|-----------|
| ZBTB48     | 1.91053   | 3.05576    | 3.14476   | 2.75031   | 6.02723    | 3.21165   | 2.38378   | 1.73293   | 1.78709   | 2.00238   | 1.65647    | 2.43812   | 1.65838   | 2.50147   | 2.07904   |
| ZBTB49     | 0.92006   | 0.818399   | 0.84571   | 0.623995  | 0.732908   | 1.05795   | 0.601565  | 0.852616  | 0.593785  | 0.720498  | 0.692423   | 0.444512  | 0.441409  | 0.75212   | 1.08416   |
| ZBTB5      | 3.78333   | 4.77543    | 5.03245   | 3.7398    | 2.98481    | 3.64534   | 4.98469   | 3.77375   | 6.23249   | 3.63008   | 3.74829    | 3.8184    | 5.19673   | 3.95987   | 2.8811    |
| ZBTB6      | 1.59588   | 1.35308    | 1.41819   | 1.45283   | 0.332863   | 1.4549    | 1.1847    | 2.30033   | 1.42164   | 1.95345   | 2.41267    | 0.835237  | 1.78643   | 1.34395   | 1.21478   |
| ZBTB7A     | 6.72281   | 11.2879    | 10.489    | 14.3672   | 22.9726    | 18.2659   | 11.9755   | 7.51538   | 23.4409   | 13.416    | 9.45079    | 13.3851   | 20.9012   | 11.5277   | 8.46314   |
| ZBTB7B     | 18.7281   | 29.0928    | 27.5252   | 32.0994   | 55.9002    | 34.7952   | 26.6176   | 18.7212   | 56.5401   | 25.1994   | 14.704     | 28.4123   | 37.0549   | 18.2417   | 6.47051   |
| ZBTB7C     | 11.1066   | 9.96747    | 7.33735   | 5.62556   | 15.5227    | 10.1601   | 13.3621   | 7.6659    | 29.5951   | 2.13407   | 4.32714    | 6.983     | 1.13552   | 1.94101   | 1.41371   |
| ZBTB8A     | 1.67224   | 0.671337   | 0.748603  | 0.822305  | 0.425094   | 0.941605  | 0.751876  | 1.18084   | 0.439922  | 0.900554  | 1.38642    | 0.437412  | 0.905875  | 0.809768  | 1.00582   |
| ZBTB8B     | 0.0115197 | 0.00555036 | 0         | 0         | 0.00894703 | 0         | 0.0065764 | 0         | 0         | 0         | 0.00650215 | 0         | 0         | 0         | 0         |
| ZBTB8OS    | 2.03616   | 1.9557     | 1.76152   | 3.33263   | 0.785548   | 2.35701   | 1.21559   | 1.33648   | 4.16545   | 3.95866   | 6.52013    | 2.37108   | 3.1598    | 2.69177   | 2.04502   |
| ZBTB9      | 0.793915  | 0.793833   | 0.840399  | 1.49115   | 1.08736    | 2.15523   | 0.843111  | 0.656252  | 0.712178  | 0.669654  | 1.06006    | 0.598609  | 1.33565   | 0.977104  | 0.62525   |
| ZC2HC1A    | 2.05339   | 3.2012     | 3.97084   | 1.18608   | 1.00564    | 1.13592   | 1.85916   | 4.63193   | 1.07518   | 1.05879   | 2.00058    | 0.996657  | 0.548498  | 0.5571    | 1.63411   |
| ZC2HC1B    | 0.0699891 | 0.146128   | 0.1737    | 0.0480838 | 0.0362391  | 0.0595948 | 0.0266371 | 0.124401  | 0.0284129 | 0         | 0.0263363  | 0.033386  | 0.0150522 | 0.0609656 | 0.0670088 |
| ZC2HC1C    | 0.53416   | 0.366467   | 0.398666  | 0.2872    | 0.180377   | 0.365842  | 0.338089  | 0.433437  | 0.091925  | 0.0728723 | 0.0393261  | 0.153713  | 0.127366  | 0.166898  | 0.100059  |
| ZC3H10     | 1.45513   | 1.26377    | 1.33413   | 1.28942   | 2.10195    | 3.01469   | 1.42861   | 1.11198   | 0.575678  | 0.918985  | 1.14044    | 0.649911  | 0.98668   | 0.988183  | 1.49078   |
| ZC3H11A    | 16.5119   | 17.4963    | 18.2407   | 19.1855   | 9.39559    | 20.2998   | 13.0587   | 13.6179   | 16.9348   | 17.6913   | 18.0312    | 14.0034   | 23.4153   | 16.3653   | 18.3424   |
| ZC3H11B    | 0         | 0          | 0         | 0         | 0          | 0         | 0         | 0         | 0         | 0         | 0          | 0         | 0         | 0         | 0         |
| ZC3H12A    | 13.6297   | 4.90632    | 5.40858   | 28.1593   | 8.69202    | 11.1903   | 3.5578    | 9.05711   | 10.9822   | 5.90272   | 5.92495    | 15.7791   | 52.3788   | 12.1477   | 12.0838   |
| ZC3H12B    | 0.347656  | 0.221292   | 0.266497  | 0.0788851 | 0.128814   | 0.18196   | 0.214859  | 0.235269  | 0.0233068 | 0.0640505 | 0.108017   | 0.0593366 | 0.0452728 | 0.141693  | 0.247349  |
| ZC3H12C    | 2.32823   | 2.23849    | 2.86955   | 2.03914   | 0.922506   | 1.63564   | 1.57218   | 3.56611   | 1.12333   | 1.0719    | 1.89854    | 0.992779  | 1.14612   | 0.657861  | 1.61898   |
| ZC3H12D    | 0.47635   | 0.359039   | 0.44089   | 0.442289  | 0.502944   | 0.622464  | 0.215398  | 0.662255  | 0.0689276 | 0.124309  | 0.19167    | 0.094     | 0.331682  | 0.325375  | 0.460581  |
| ZC3H13     | 5.45379   | 3.73967    | 3.23108   | 4.21762   | 2.63268    | 5.99025   | 2.08375   | 3.31539   | 3.49976   | 2.41836   | 2.72024    | 2.65405   | 4.11437   | 3.464     | 3.56262   |
| ZC3H14     | 4.50868   | 4.53089    | 4.83231   | 5.73581   | 2.38741    | 6.18412   | 3.46909   | 3.93982   | 3.84645   | 4.66089   | 5.25019    | 3.82997   | 6.29085   | 4.44587   | 3.95519   |
| ZC3H15     | 9.14655   | 8.28067    | 8.66173   | 12.6013   | 4.68536    | 10.144    | 4.6084    | 8.04191   | 16.1212   | 12.1063   | 14.9797    | 8.22927   | 15.7088   | 11.2393   | 6.4821    |
| ZC3H18     | 3.70995   | 4.85774    | 4.8834    | 7.47692   | 9.18839    | 10.2552   | 4.0133    | 3.63277   | 3.01962   | 2.83664   | 2.23501    | 4.06247   | 8.22264   | 5.49536   | 4.94301   |
| ZC3H18-AS1 | 0.0378154 | 0.00911003 | 0.0156418 | 0         | 0.146851   | 0.048299  | 0.0431764 | 0.0504108 | 0         | 0         | 0.0426889  | 0.013529  | 0         | 0.019764  | 0         |

|          |           |            |           |           |           |           |           |           |           |           |           |            |           |           |          |
|----------|-----------|------------|-----------|-----------|-----------|-----------|-----------|-----------|-----------|-----------|-----------|------------|-----------|-----------|----------|
| ZC3H3    | 2.97321   | 3.94714    | 3.86183   | 5.77863   | 5.94582   | 8.52704   | 5.36221   | 3.17584   | 4.28332   | 3.76715   | 3.45206   | 4.17903    | 7.65499   | 3.99002   | 4.32062  |
| ZC3H4    | 4.6884    | 5.58081    | 5.44065   | 8.11494   | 10.4568   | 14.6087   | 6.21283   | 4.08595   | 3.29969   | 3.8802    | 3.05853   | 4.39438    | 8.22762   | 4.55067   | 4.53223  |
| ZC3H6    | 2.98238   | 2.72123    | 3.18567   | 1.03757   | 0.641782  | 2.46773   | 1.9877    | 2.56137   | 0.576463  | 0.717425  | 0.996211  | 0.574035   | 0.755712  | 0.660387  | 1.08013  |
| ZC3H7A   | 4.89425   | 3.88637    | 3.49698   | 5.37491   | 2.40226   | 6.32079   | 2.83213   | 3.89146   | 2.50391   | 4.0419    | 4.00511   | 2.54294    | 6.07288   | 4.26007   | 4.57261  |
| ZC3H7B   | 6.72663   | 8.03759    | 7.7028    | 11.3455   | 14.1965   | 15.1618   | 7.57773   | 5.59642   | 3.50894   | 4.52755   | 4.17798   | 4.43597    | 9.20138   | 7.11696   | 8.03436  |
| ZC3H8    | 2.27968   | 2.51655    | 2.30367   | 2.37901   | 0.694778  | 2.24825   | 1.25201   | 1.94905   | 1.88021   | 1.37629   | 1.51476   | 1.58987    | 2.02938   | 1.56096   | 0.849557 |
| ZC3HAV1  | 4.56519   | 4.27462    | 4.12501   | 8.52956   | 3.30141   | 6.98309   | 3.78584   | 4.50623   | 3.50482   | 4.35543   | 5.28975   | 3.58391    | 10.615    | 4.73971   | 6.70534  |
| ZC3HAV1L | 2.42916   | 2.74155    | 2.87238   | 2.89787   | 2.95304   | 3.77708   | 3.15038   | 1.68952   | 0.836083  | 1.60727   | 3.90469   | 1.47363    | 2.26575   | 3.18087   | 2.21828  |
| ZC3HC1   | 1.51382   | 1.32062    | 1.03413   | 3.12006   | 2.29804   | 3.62286   | 1.41417   | 1.2842    | 0.642487  | 1.71287   | 3.27541   | 1.23909    | 2.1458    | 2.18176   | 1.91051  |
| ZC4H2    | 1.19242   | 0.875799   | 0.47518   | 0.726802  | 1.05035   | 1.12057   | 0.821858  | 0.536322  | 1.88613   | 0.748302  | 1.33788   | 0.671119   | 0.689592  | 0.608008  | 0.814463 |
| ZCCHC10  | 1.08886   | 0.906596   | 0.829667  | 1.79143   | 0.385752  | 1.78924   | 0.55618   | 1.07804   | 0.942236  | 1.55844   | 2.97593   | 0.922629   | 1.94736   | 1.47264   | 1.19338  |
| ZCCHC12  | 0         | 0.00488422 | 0.0167723 | 0         | 0.0157465 | 0.0431581 | 0         | 0         | 0.0246918 | 0.0254463 | 0.0572177 | 0.00725338 | 0         | 0.0211924 | 0        |
| ZCCHC13  | 0         | 0          | 0         | 0         | 0         | 0         | 0         | 0         | 0         | 0         | 0         | 0          | 0         | 0         | 0        |
| ZCCHC14  | 5.22401   | 5.53258    | 6.12791   | 4.43448   | 4.97806   | 8.45724   | 6.84783   | 4.87778   | 2.602     | 4.45518   | 6.63064   | 3.54384    | 5.81845   | 5.28208   | 8.13716  |
| ZCCHC17  | 5.30086   | 3.91232    | 3.53809   | 6.65453   | 3.1252    | 7.67313   | 3.41132   | 3.27625   | 6.49986   | 7.34865   | 11.0024   | 4.3446     | 5.96181   | 4.74127   | 4.25619  |
| ZCCHC18  | 0.125863  | 0.106125   | 0.136661  | 0.0486395 | 0.109974  | 0.113869  | 0.10778   | 0.104865  | 0         | 0.0493659 | 0.0888022 | 0.0168859  | 0.0101508 | 0.111006  | 0.135566 |
| ZCCHC2   | 2.3258    | 2.18292    | 2.69323   | 2.42725   | 1.35251   | 3.01837   | 2.10287   | 2.17717   | 1.43786   | 1.55589   | 1.46272   | 0.781409   | 1.31398   | 1.48397   | 1.51325  |
| ZCCHC23  | 0.0593107 | 0.137169   | 0.196264  | 0.0244486 | 0.018426  | 0.0202009 | 0.0677191 | 0.0737946 | 0         | 0         | 0         | 0.0169754  | 0         | 0         | 0        |
| ZCCHC24  | 6.40177   | 3.18397    | 3.83222   | 3.85482   | 6.86759   | 20.5013   | 7.41115   | 3.12831   | 1.22894   | 5.3075    | 8.18048   | 1.82017    | 6.2077    | 4.61993   | 12.3549  |
| ZCCHC3   | 2.64133   | 2.21801    | 2.55968   | 3.04169   | 4.32432   | 4.36959   | 2.21157   | 1.70652   | 1.55225   | 2.07328   | 2.36645   | 0.94197    | 3.35424   | 2.44103   | 2.75765  |
| ZCCHC4   | 1.62861   | 1.17848    | 1.3125    | 1.44299   | 0.802812  | 1.25881   | 1.28312   | 1.20169   | 0.783137  | 0.867409  | 1.42466   | 0.769708   | 1.25239   | 1.07732   | 0.863057 |
| ZCCHC7   | 4.23559   | 4.13434    | 3.78896   | 4.09864   | 2.20122   | 4.17987   | 2.52083   | 3.48591   | 3.72822   | 3.90109   | 4.54281   | 3.33877    | 3.06111   | 3.37169   | 3.74416  |
| ZCCHC8   | 2.02185   | 2.66874    | 2.59449   | 2.50513   | 1.88437   | 2.55433   | 1.6213    | 1.82609   | 2.10161   | 2.73827   | 2.9406    | 2.33487    | 2.96692   | 3.01772   | 1.93125  |
| ZCCHC9   | 2.2238    | 2.85308    | 2.85579   | 4.51676   | 2.51041   | 4.77789   | 1.60906   | 2.17166   | 7.16452   | 4.62479   | 5.64839   | 3.41366    | 5.6307    | 3.53406   | 2.52522  |
| ZCRB1    | 5.84852   | 4.53525    | 4.94213   | 5.06998   | 3.15822   | 7.84393   | 3.36748   | 3.94845   | 6.22102   | 6.66315   | 12.6803   | 3.20593    | 5.32815   | 3.67327   | 4.18158  |
| ZCWPW1   | 0.731129  | 0.898738   | 1.0546    | 0.482981  | 0.829932  | 0.877951  | 0.610031  | 0.591454  | 0.308227  | 0.282351  | 0.380933  | 0.248157   | 0.0907155 | 0.24005   | 0.309614 |

|           |           |           |          |           |           |           |           |           |            |           |           |            |            |           |           |
|-----------|-----------|-----------|----------|-----------|-----------|-----------|-----------|-----------|------------|-----------|-----------|------------|------------|-----------|-----------|
| ZCWPW2    | 0.181236  | 0.231594  | 0.228156 | 0.105565  | 0.0367203 | 0.201287  | 0.0989662 | 0.210088  | 0.163145   | 0.10879   | 0.222384  | 0.118403   | 0.0762604  | 0.111195  | 0.113164  |
| ZDBF2     | 0.876814  | 1.019     | 0.827423 | 1.28272   | 0.533847  | 0.83101   | 0.576021  | 0.888881  | 0.657353   | 0.978831  | 0.920179  | 0.926887   | 0.633942   | 0.732295  | 0.740343  |
| ZDHHHC1   | 2.64523   | 2.84274   | 3.23295  | 2.109     | 4.78533   | 5.67266   | 3.97727   | 1.88649   | 1.63068    | 2.13138   | 4.47306   | 2.52364    | 2.64783    | 2.22454   | 3.34552   |
| ZDHHHC11  | 0.506199  | 1.16813   | 1.96158  | 0.183036  | 0.441432  | 0.34028   | 1.58179   | 0.844488  | 0.0432627  | 0.624185  | 0.0501259 | 1.04847    | 0.670383   | 0.273844  | 0.816242  |
| ZDHHHC11B | 0.542647  | 1.46252   | 2.01661  | 0.100484  | 0.362192  | 0.111904  | 2.37665   | 1.20188   | 0          | 0.57998   | 0         | 1.36808    | 0.188733   | 0.166178  | 0.316595  |
| ZDHHHC12  | 5.20029   | 5.48408   | 4.35905  | 10.6117   | 13.8019   | 14.3544   | 7.68735   | 4.05537   | 11.4085    | 7.78041   | 14.8511   | 8.46453    | 11.5988    | 7.55974   | 3.41266   |
| ZDHHHC13  | 3.30887   | 4.68198   | 4.58583  | 13.3946   | 2.11205   | 3.86184   | 3.37628   | 3.33781   | 14.0232    | 17.1251   | 16.111    | 13.3006    | 22.7053    | 8.60192   | 3.7688    |
| ZDHHHC14  | 1.21237   | 1.05225   | 1.52505  | 2.85819   | 2.08962   | 3.43635   | 1.87727   | 0.833923  | 0.566342   | 1.59461   | 1.85607   | 1.59237    | 2.61453    | 1.63618   | 2.15851   |
| ZDHHHC15  | 0.43626   | 0.23583   | 0.143775 | 0.124274  | 0.0716228 | 0.314088  | 0.263227  | 0.318365  | 0.00431964 | 0.0445163 | 0.108106  | 0.0304542  | 0.0205956  | 0.0889789 | 0.0967802 |
| ZDHHHC16  | 2.24863   | 3.09472   | 3.39813  | 5.59817   | 5.39497   | 6.21796   | 3.68589   | 1.97861   | 3.19952    | 5.32318   | 8.65827   | 3.47279    | 5.49438    | 5.57943   | 4.25246   |
| ZDHHHC17  | 3.7296    | 2.30808   | 2.82896  | 2.39094   | 0.594388  | 2.71381   | 1.91903   | 2.9616    | 0.873059   | 2.33445   | 2.97454   | 1.20955    | 1.96256    | 2.22014   | 3.25546   |
| ZDHHHC18  | 3.87069   | 4.92704   | 4.75742  | 7.74979   | 8.70384   | 8.77008   | 5.93466   | 3.47926   | 7.38986    | 11.0673   | 11.6854   | 7.33808    | 15.7119    | 9.4599    | 5.78115   |
| ZDHHHC19  | 0.0139332 | 0.0134265 | 0        | 0.50255   | 0.0432862 | 0.0237279 | 0.0159085 | 0.037148  | 0          | 0         | 0.0943731 | 0.00996958 | 0.00898963 | 0.0072821 | 0         |
| ZDHHHC2   | 1.72228   | 0.51345   | 0.529842 | 0.654476  | 0.551778  | 1.26943   | 0.817301  | 1.22449   | 0.15076    | 0.72955   | 1.34274   | 0.127084   | 0.767423   | 0.641345  | 0.842503  |
| ZDHHHC20  | 6.69631   | 7.34916   | 7.02062  | 7.81032   | 3.75905   | 5.45839   | 5.63964   | 9.19922   | 12.7327    | 11.2807   | 16.6156   | 6.49636    | 10.3572    | 6.57941   | 8.62894   |
| ZDHHHC21  | 1.8401    | 1.63756   | 1.27376  | 3.02966   | 0.598847  | 1.38153   | 1.56897   | 3.02891   | 3.04468    | 4.65463   | 2.96367   | 3.65881    | 4.75341    | 2.43517   | 1.8308    |
| ZDHHHC22  | 0.0769298 | 0.0247106 | 0.010607 | 0.0198196 | 0         | 0.0272936 | 0.0292787 | 0.0170922 | 0.0156153  | 0         | 0         | 0.00458711 | 0          | 0.0201034 | 0         |
| ZDHHHC23  | 0.942493  | 1.0498    | 1.2066   | 0.73122   | 0.929623  | 0.979503  | 1.35844   | 0.808946  | 2.34808    | 0.67917   | 0.934503  | 0.658994   | 0.44393    | 0.453256  | 0.396283  |
| ZDHHHC24  | 1.72264   | 1.66198   | 1.87735  | 1.85088   | 2.65402   | 3.72422   | 1.93668   | 1.25648   | 1.08618    | 1.05747   | 2.42187   | 1.14396    | 1.48496    | 1.42559   | 1.49921   |
| ZDHHHC3   | 4.60308   | 5.77642   | 6.28856  | 4.06282   | 6.74473   | 4.53098   | 6.00999   | 4.67482   | 6.00399    | 4.61471   | 5.11932   | 4.15433    | 4.36447    | 3.47357   | 3.16095   |
| ZDHHHC4   | 4.148     | 2.78423   | 2.47307  | 5.30645   | 3.08834   | 7.41718   | 3.07028   | 2.58049   | 2.14267    | 4.12904   | 8.81621   | 2.0162     | 3.16538    | 2.67627   | 3.75911   |
| ZDHHHC5   | 15.9311   | 20.0199   | 20.3254  | 29.9584   | 17.4227   | 24.559    | 21.6491   | 15.57     | 37.8405    | 23.2375   | 22.3901   | 21.5709    | 37.7519    | 19.6473   | 12.3835   |
| ZDHHHC6   | 3.26417   | 2.71945   | 2.77318  | 3.73119   | 1.28562   | 3.0912    | 2.10531   | 2.60461   | 2.09609    | 2.5071    | 3.65502   | 2.25302    | 4.5223     | 3.09456   | 3.20363   |
| ZDHHHC7   | 5.50825   | 5.40672   | 5.88468  | 7.17019   | 7.07341   | 9.19972   | 5.74818   | 3.66358   | 5.20138    | 5.99045   | 7.02426   | 3.91093    | 9.24745    | 6.10511   | 5.98112   |
| ZDHHHC8   | 2.80745   | 3.62196   | 3.67481  | 4.99168   | 7.88987   | 8.31185   | 4.75549   | 2.44579   | 2.58687    | 2.59638   | 3.54457   | 4.08699    | 5.15406    | 4.85566   | 5.2587    |
| ZDHHHC8P1 | 0.172574  | 0.21006   | 0.270502 | 0.0374405 | 0.507916  | 0.0232017 | 0.362967  | 0.145297  | 0.0221237  | 0.250797  | 0.0922805 | 0.162475   | 0.439515   | 0.0474708 | 0.156529  |

|           |          |           |           |           |          |           |           |           |           |           |           |          |           |          |          |
|-----------|----------|-----------|-----------|-----------|----------|-----------|-----------|-----------|-----------|-----------|-----------|----------|-----------|----------|----------|
| ZDHH9     | 4.25097  | 5.10433   | 6.51534   | 5.69099   | 5.00401  | 8.91977   | 10.4601   | 4.80253   | 9.39517   | 4.53153   | 6.55007   | 3.21822  | 6.0393    | 3.89796  | 4.92614  |
| ZEB1      | 4.52786  | 2.1149    | 2.96639   | 1.88997   | 0.901269 | 4.79134   | 2.42485   | 2.37977   | 0.414916  | 2.54321   | 3.39733   | 0.75973  | 2.56644   | 2.81587  | 6.12329  |
| ZEB1-AS1  | 0.605688 | 0.539297  | 0.638742  | 0.36837   | 0.944338 | 0.855669  | 0.481552  | 0.476341  | 0.152585  | 0.285201  | 0.41847   | 0.234784 | 0.258601  | 0.666083 | 1.1521   |
| ZEB2      | 6.24171  | 2.98553   | 3.80651   | 4.03625   | 3.29835  | 9.19096   | 5.06936   | 4.2907    | 0.747202  | 5.15841   | 8.70109   | 0.892187 | 4.413     | 3.69735  | 10.9382  |
| ZEB2-AS1  | 0.178685 | 0.0309258 | 0.112422  | 0.130673  | 0.465757 | 0.21116   | 0.234067  | 0.113569  | 0         | 0         | 0.493258  | 7.30E-42 | 0.039593  | 0        | 0        |
| ZER1      | 5.63769  | 6.75319   | 6.6417    | 5.29929   | 8.6569   | 10.4857   | 8.34895   | 4.87153   | 8.46618   | 4.10901   | 5.66521   | 4.80448  | 5.92338   | 3.91741  | 5.55228  |
| ZFAND1    | 5.01045  | 3.44108   | 3.84416   | 5.19465   | 1.38085  | 4.88564   | 2.68738   | 3.72569   | 4.28136   | 3.89236   | 6.44303   | 2.3708   | 5.05112   | 3.31031  | 2.49526  |
| ZFAND2A   | 3.15937  | 1.7945    | 1.57244   | 8.04692   | 2.03486  | 7.7643    | 3.72458   | 1.39248   | 3.94161   | 7.64053   | 9.68475   | 4.63151  | 13.1585   | 4.13478  | 2.32396  |
| ZFAND2B   | 4.89801  | 5.44472   | 5.4557    | 6.38152   | 13.7493  | 9.48807   | 6.4712    | 2.75168   | 12.8039   | 8.56259   | 10.0513   | 5.55738  | 11.1847   | 4.81814  | 2.91415  |
| ZFAND3    | 8.4226   | 6.68773   | 6.75523   | 12.3434   | 8.16487  | 16.1408   | 8.40367   | 6.47945   | 8.41425   | 9.95247   | 11.6088   | 6.42406  | 15.4022   | 8.39758  | 9.55308  |
| ZFAND4    | 1.29155  | 1.36691   | 1.64378   | 1.12053   | 0.900228 | 1.04334   | 0.88227   | 1.11839   | 0.867147  | 0.665037  | 0.822462  | 0.529208 | 0.740712  | 0.729832 | 0.665836 |
| ZFAND5    | 8.61081  | 6.06323   | 5.86912   | 14.8848   | 4.47641  | 11.8257   | 5.36936   | 7.4399    | 8.56984   | 10.1633   | 14.0623   | 6.08938  | 13.1076   | 8.08712  | 8.52097  |
| ZFAND6    | 5.37051  | 4.46849   | 4.56782   | 7.86836   | 2.64677  | 7.42878   | 4.30952   | 5.76001   | 23.1421   | 10.6524   | 16.6664   | 6.21934  | 8.18247   | 5.03314  | 4.42931  |
| ZFAS1     | 21.8598  | 14.8712   | 16.6127   | 26.564    | 5.31544  | 37.9935   | 11.1557   | 11.5643   | 17.3007   | 29.7816   | 52.9371   | 15.0453  | 17.9821   | 16.7786  | 8.5354   |
| ZFAT      | 0.922087 | 1.0403    | 1.07715   | 1.40794   | 1.38352  | 1.43275   | 1.03844   | 0.777076  | 1.01279   | 0.829163  | 0.89764   | 0.897743 | 1.02591   | 1.07251  | 1.26166  |
| ZFAT-AS1  | 0.596333 | 0.326113  | 0.32696   | 0.253803  | 0.117588 | 0.0575483 | 0.476984  | 0.16727   | 2.11E-32  | 0.10568   | 0.27749   | 0.289395 | 4.40E-28  | 0.25618  | 0.238276 |
| ZFC3H1    | 5.70655  | 6.59881   | 6.4621    | 5.18773   | 3.26947  | 4.50667   | 2.80556   | 5.09737   | 2.81148   | 5.16985   | 3.6097    | 4.2914   | 4.02186   | 6.58514  | 4.9497   |
| ZFHX2     | 0.115942 | 0.303601  | 0.333619  | 0.135066  | 0.45416  | 0.201739  | 0.319436  | 0.212799  | 0.0890202 | 0.0347981 | 0.0910499 | 0.140671 | 0.0471598 | 0.158078 | 0.285959 |
| ZFHX3     | 3.58851  | 2.47111   | 2.78397   | 2.51951   | 2.79936  | 6.06132   | 4.62198   | 2.70328   | 0.580517  | 2.2385    | 2.24449   | 1.49843  | 2.97835   | 2.29293  | 5.85465  |
| ZFHX4     | 2.34946  | 1.03933   | 0.929982  | 1.0833    | 1.18989  | 1.49087   | 1.9499    | 0.948957  | 0.276646  | 0.353774  | 0.774897  | 0.403369 | 0.476045  | 0.212309 | 3.73605  |
| ZFHX4-AS1 | 0.108272 | 0.0195626 | 0.0447849 | 0.0278943 | 0.126137 | 0.0806679 | 0.0309052 | 0.0240557 | 0         | 0         | 0         | 0        | 0         | 0        | 0.485911 |
| ZFP1      | 0.995064 | 0.762877  | 0.947441  | 1.01899   | 0.418013 | 1.58799   | 0.628802  | 0.773093  | 0.975597  | 0.871878  | 1.77326   | 0.546311 | 1.00945   | 0.785002 | 1.03358  |
| ZFP14     | 0.722449 | 0.895505  | 0.975668  | 0.356344  | 0.407641 | 0.507371  | 0.504087  | 0.760035  | 0.112803  | 0.329374  | 0.637805  | 0.156847 | 0.217125  | 0.354993 | 0.691684 |
| ZFP2      | 0.371738 | 0.353625  | 0.307528  | 0.255391  | 0.103643 | 0.21102   | 0.195894  | 0.347311  | 0.0696515 | 0.131596  | 0.129122  | 0.122764 | 0.036899  | 0.184323 | 0.273776 |
| ZFP28     | 0.832409 | 0.935261  | 1.01269   | 0.569478  | 0.526986 | 0.67007   | 0.511148  | 0.634093  | 0.268353  | 0.544327  | 0.58829   | 0.280287 | 0.379105  | 0.658064 | 0.532424 |
| ZFP3      | 1.5614   | 1.77696   | 1.80532   | 1.15548   | 0.554171 | 1.223     | 1.0157    | 1.58941   | 0.440136  | 0.564074  | 0.711328  | 0.474075 | 0.403562  | 0.77247  | 0.991435 |



|              |            |            |           |           |           |           |            |           |            |            |            |            |            |            |           |
|--------------|------------|------------|-----------|-----------|-----------|-----------|------------|-----------|------------|------------|------------|------------|------------|------------|-----------|
| ZFY          | 2.02336    | 1.83065    | 1.48638   | 2.25076   | 0.812953  | 1.83516   | 0.155269   | 1.8861    | 2.49936    | 2.71538    | 2.96798    | 1.37996    | 2.64017    | 2.02241    | 1.86422   |
| ZFY-AS1      | 0.132246   | 0.0424788  | 0.145871  | 0         | 0.0684746 | 0.0375352 | 0          | 0.0391764 | 0          | 0.0553274  | 0          | 0          | 0          | 0          | 0         |
| ZFYVE1       | 2.79322    | 3.10763    | 3.05858   | 4.84111   | 4.81216   | 6.10599   | 3.46753    | 2.36051   | 3.84095    | 4.61488    | 3.70928    | 3.35768    | 4.72171    | 3.59123    | 3.64674   |
| ZFYVE16      | 2.39705    | 2.5626     | 2.30594   | 3.0527    | 0.808484  | 2.72663   | 1.50192    | 2.69768   | 2.57022    | 3.61586    | 4.28501    | 1.929      | 2.94752    | 2.93063    | 3.79287   |
| ZFYVE19      | 1.51894    | 2.37713    | 1.88501   | 3.33682   | 5.72906   | 3.66661   | 2.00633    | 1.15838   | 3.31596    | 2.64173    | 2.74663    | 1.82153    | 2.05188    | 2.70977    | 1.32153   |
| ZFYVE21      | 12.2396    | 13.0522    | 16.0073   | 14.1484   | 11.6412   | 20.1378   | 10.9589    | 9.94946   | 12.2318    | 11.0829    | 19.2605    | 8.60385    | 14.7931    | 9.39072    | 5.2931    |
| ZFYVE26      | 4.00907    | 3.88631    | 3.97753   | 4.24239   | 4.8601    | 5.03089   | 5.0745     | 3.59482   | 2.55783    | 3.08633    | 2.37898    | 3.3273     | 3.45244    | 3.0192     | 3.36314   |
| ZFYVE27      | 3.78417    | 3.7739     | 3.6804    | 4.6158    | 6.67594   | 5.87189   | 3.09602    | 2.51053   | 2.15256    | 2.77766    | 2.19135    | 2.67524    | 3.49415    | 3.545      | 3.61217   |
| ZFYVE28      | 0.722234   | 0.965988   | 1.08396   | 1.26081   | 3.38404   | 1.3778    | 1.19413    | 0.708502  | 1.37468    | 1.55537    | 0.503444   | 2.053      | 1.49216    | 1.15304    | 1.46797   |
| ZFYVE9       | 5.70223    | 5.43261    | 5.81549   | 6.20232   | 3.48073   | 5.40918   | 4.95421    | 5.32109   | 5.34418    | 4.92598    | 3.70136    | 3.68807    | 5.3921     | 3.96747    | 3.67232   |
| ZG16         | 0          | 0          | 0.0211904 | 0         | 0         | 0         | 0          | 0         | 0          | 0          | 0          | 0          | 0          | 0          | 0         |
| ZG16B        | 2.90686    | 1.97965    | 3.69963   | 0.230431  | 2.25768   | 1.26137   | 1.88287    | 5.56419   | 0.408487   | 0          | 0.157763   | 0.0399987  | 0.126235   | 0          | 0         |
| ZGLP1        | 0.210391   | 0.360426   | 0.222398  | 0.168633  | 0.835182  | 0.537436  | 0.120109   | 0.186978  | 0.0711758  | 0.205382   | 0.2111116  | 0.192357   | 0.0226239  | 0.219919   | 0.386079  |
| ZGPAT        | 3.05736    | 3.77762    | 3.57231   | 6.10031   | 11.0181   | 6.88382   | 3.68712    | 1.84296   | 4.5303     | 3.09323    | 2.0205     | 4.35591    | 6.29986    | 5.0977     | 3.48421   |
| ZGRF1        | 0.648967   | 0.555879   | 0.659016  | 0.866937  | 0.0906729 | 0.555511  | 0.50182    | 0.555387  | 0.217456   | 0.465441   | 0.627945   | 0.282543   | 0.423141   | 0.563504   | 0.591745  |
| ZHX1         | 5.83257    | 6.33104    | 5.78599   | 5.67071   | 1.93988   | 5.95702   | 3.33641    | 5.86195   | 11.8165    | 6.54448    | 6.88495    | 4.77885    | 8.10411    | 5.49507    | 3.45765   |
| ZHX1-C8orf76 | 1.04258    | 1.11568    | 1.10178   | 0.833774  | 2.54207   | 0.634399  | 1.08931    | 1.01816   | 0.833019   | 0.502892   | 1.39934    | 0.594258   | 0.226614   | 0.685731   | 0.490168  |
| ZHX2         | 3.05092    | 3.13484    | 3.63346   | 3.84572   | 4.59601   | 5.97596   | 4.48289    | 2.65682   | 1.92019    | 2.49928    | 2.76801    | 1.86071    | 3.97657    | 3.13561    | 6.21935   |
| ZHX3         | 5.98555    | 4.36384    | 4.46493   | 3.15576   | 5.81102   | 6.10056   | 6.36598    | 4.601     | 8.55076    | 3.60506    | 3.36278    | 4.79829    | 4.10994    | 3.49272    | 3.81564   |
| ZIC1         | 0.0442421  | 0.0810028  | 0.161041  | 0.0638299 | 0.0755956 | 0.0339044 | 0.21216    | 0.137615  | 0          | 0.0166585  | 0.00998877 | 0.00949693 | 0.00285448 | 0.00924915 | 0.0571835 |
| ZIC2         | 0.131188   | 0.0929533  | 0.0255359 | 0         | 0.179806  | 0.0262834 | 0.0792984  | 0.164596  | 0.33834    | 0.0387421  | 0.078403   | 0.13252    | 0.00995784 | 0.020166   | 0.0443299 |
| ZIC3         | 0.0101305  | 0          | 0         | 0         | 0         | 0         | 0.00578332 | 0         | 0          | 0          | 0          | 0          | 0          | 0          | 0         |
| ZIC4         | 0.0311062  | 0.0385392  | 0.0624951 | 0.0228971 | 0.020708  | 0.018919  | 0.0710322  | 0.0789847 | 0          | 0.00557736 | 0          | 0          | 0          | 0.0023225  | 0.0701997 |
| ZIC5         | 0.00923321 | 0.00667306 | 0         | 0         | 0         | 0.0157239 | 0.0105422  | 0         | 0.00562251 | 0          | 0          | 0          | 0          | 0          | 0         |
| ZIK1         | 0.800592   | 0.30478    | 0.441538  | 0.198619  | 0.383826  | 0.471295  | 0.33291    | 0.478725  | 0.156487   | 0.35355    | 0.630407   | 0.141443   | 0.411317   | 0.402927   | 0.496806  |
| ZIM2         | 0.233877   | 0.0510172  | 0.0665912 | 1.17E-17  | 0.59647   | 0.105348  | 0.108594   | 0.101244  | 1.65E-11   | 7.31E-26   | 0.0482627  | 0.0306535  | 4.68E-27   | 0.0375889  | 1.78E-24  |



|           |           |           |           |           |           |            |           |           |           |          |           |           |           |           |           |
|-----------|-----------|-----------|-----------|-----------|-----------|------------|-----------|-----------|-----------|----------|-----------|-----------|-----------|-----------|-----------|
| ZIM2-AS1  | 0.0107592 | 0         | 0.0267023 | 0.0110877 | 0.0167128 | 0.00916132 | 0.0122845 | 0         | 0         | 0        | 0         | 0         | 0         | 0         | 0         |
| ZIM3      | 0         | 0         | 0.014576  | 0         | 0         | 0          | 0         | 0         | 0         | 0        | 0         | 0         | 0         | 0         | 0         |
| ZKSCAN1   | 8.72391   | 8.55006   | 8.62994   | 7.53052   | 5.55802   | 9.32365    | 6.71577   | 7.31234   | 5.28666   | 6.18517  | 4.66932   | 5.47848   | 6.10496   | 5.96003   | 5.38451   |
| ZKSCAN2   | 0.652786  | 0.499167  | 0.49167   | 0.706183  | 0.423762  | 1.15869    | 0.526552  | 0.531075  | 0.324336  | 0.505447 | 0.623261  | 0.388076  | 0.683098  | 0.516005  | 0.718271  |
| ZKSCAN3   | 0.982504  | 1.21732   | 1.19385   | 0.658738  | 1.07152   | 0.980326   | 0.782767  | 0.955886  | 0.23893   | 0.533907 | 0.507086  | 0.457658  | 0.380527  | 0.667657  | 0.634297  |
| ZKSCAN4   | 0.971744  | 0.698809  | 0.774415  | 0.62946   | 0.668182  | 0.951624   | 0.492708  | 0.798306  | 0.383241  | 0.598134 | 0.816669  | 0.416267  | 0.438165  | 0.504131  | 0.964436  |
| ZKSCAN5   | 1.20451   | 1.18798   | 1.00497   | 1.724     | 1.04745   | 2.23095    | 1.10492   | 1.02929   | 0.946626  | 1.53763  | 1.65028   | 0.913423  | 1.62071   | 1.61149   | 1.70765   |
| ZKSCAN7   | 0.290102  | 0.274742  | 0.251992  | 0.48855   | 0.462294  | 0.700668   | 0.293519  | 0.184529  | 0.0357731 | 0.377327 | 0.77362   | 0.19458   | 0.205158  | 0.415703  | 0.619979  |
| ZKSCAN8   | 3.72923   | 2.79913   | 3.17869   | 1.86951   | 1.05495   | 3.15711    | 2.79083   | 3.72475   | 0.394934  | 1.33235  | 1.83381   | 0.829616  | 1.12704   | 1.67723   | 3.06663   |
| ZMAT1     | 1.01105   | 0.695914  | 0.72152   | 0.188919  | 0.112179  | 0.47302    | 0.291768  | 0.552946  | 0.0338282 | 0.11853  | 0.206948  | 0.0556487 | 0.071684  | 0.113233  | 0.247318  |
| ZMAT2     | 11.4861   | 9.40881   | 8.52484   | 16.5304   | 12.0273   | 15.3915    | 7.10165   | 8.95564   | 14.3528   | 14.2198  | 15.8103   | 8.67692   | 14.7481   | 8.31663   | 6.68406   |
| ZMAT3     | 2.58897   | 2.10664   | 2.10971   | 2.32952   | 1.44201   | 3.6211     | 2.05826   | 2.94599   | 4.50307   | 3.56928  | 6.43693   | 2.79617   | 2.95924   | 2.2879    | 3.32871   |
| ZMAT4     | 0.0750484 | 0.0180797 | 0.0310427 | 0         | 0         | 0          | 0         | 0         | 0.0114251 | 0        | 0.0847203 | 0         | 0         | 0.0294177 | 0         |
| ZMAT5     | 1.97518   | 2.36373   | 2.12618   | 9.3023    | 7.36065   | 5.08894    | 4.17214   | 1.62554   | 3.86261   | 27.5496  | 15.168    | 11.034    | 34.5627   | 11.6832   | 5.90899   |
| ZMIZ1     | 12.198    | 11.0636   | 12.2527   | 14.073    | 16.8159   | 22.6952    | 22.3074   | 13.4159   | 13.5313   | 11.4842  | 11.8715   | 10.1395   | 22.8809   | 9.82855   | 15.9825   |
| ZMIZ1-AS1 | 0.84658   | 0.857039  | 0.542969  | 0.205853  | 0.591026  | 0.631758   | 0.705943  | 0.380412  | 0.868855  | 0.119387 | 0.257713  | 0.122512  | 0.0613719 | 0.0795434 | 0.21857   |
| ZMIZ2     | 5.64247   | 9.5538    | 10.343    | 8.56633   | 14.5067   | 15.8507    | 10.5361   | 7.55741   | 7.2074    | 5.13019  | 6.58535   | 7.96994   | 9.32501   | 6.81994   | 7.93742   |
| ZMPSTE24  | 5.01616   | 4.12205   | 3.98639   | 8.88425   | 2.35118   | 8.9035     | 3.58999   | 4.91283   | 8.10393   | 11.426   | 12.2002   | 6.38311   | 15.3941   | 8.28155   | 8.56899   |
| ZMYM1     | 0.832555  | 1.10552   | 1.17251   | 1.72105   | 0.277124  | 0.928334   | 0.667673  | 1.2552    | 0.95964   | 1.13202  | 1.47131   | 0.602807  | 1.25657   | 1.08005   | 1.01773   |
| ZMYM2     | 5.91185   | 5.46863   | 5.69517   | 4.55565   | 1.4565    | 4.95039    | 3.8485    | 5.53718   | 3.02033   | 4.65097  | 4.67443   | 2.64273   | 3.53883   | 4.36887   | 4.1571    |
| ZMYM3     | 2.42349   | 2.43211   | 2.54692   | 2.92221   | 3.19001   | 3.97421    | 2.51771   | 2.0912    | 1.28273   | 1.36171  | 1.70194   | 1.80466   | 1.79091   | 1.54831   | 2.10446   |
| ZMYM4     | 4.65139   | 4.74517   | 4.70694   | 5.78015   | 2.1461    | 5.82204    | 2.5247    | 3.72706   | 3.29312   | 4.6376   | 5.43459   | 3.36713   | 4.52851   | 4.63484   | 5.25668   |
| ZMYM4-AS1 | 0.180836  | 0.0484034 | 0.486657  | 0.443569  | 0.175498  | 0.0813292  | 0.437673  | 0.612419  | 0.229262  | 0.274158 | 0.309507  | 0.0657006 | 9.90E-22  | 0.267432  | 2.53E-17  |
| ZMYM5     | 1.74023   | 1.83435   | 2.05742   | 1.42232   | 0.704276  | 1.5272     | 0.829794  | 1.80137   | 1.04752   | 2.19253  | 1.75375   | 0.915994  | 1.3895    | 1.62389   | 1.015     |
| ZMYM6     | 2.85239   | 2.53405   | 2.40064   | 2.19301   | 0.691867  | 1.73155    | 1.70544   | 2.60694   | 2.33967   | 2.12883  | 2.1382    | 1.87034   | 2.05515   | 2.0175    | 1.99651   |
| ZMYND10   | 0.147722  | 0.172005  | 0.122206  | 0.0634298 | 0.267706  | 0.199156   | 0.323272  | 0.0109402 | 0.299847  | 0.030901 | 0.264036  | 0.0880823 | 0.0238273 | 0.0965072 | 0.0530367 |

|         |          |           |           |          |           |          |           |           |           |           |          |           |           |           |          |
|---------|----------|-----------|-----------|----------|-----------|----------|-----------|-----------|-----------|-----------|----------|-----------|-----------|-----------|----------|
| ZMYND11 | 6.77462  | 5.75749   | 5.94075   | 5.93653  | 3.48289   | 7.86003  | 4.04719   | 6.40922   | 4.98241   | 4.61348   | 6.2563   | 3.89357   | 6.33371   | 4.58925   | 5.91915  |
| ZMYND12 | 0.156548 | 0.137532  | 0.0971308 | 0.255435 | 0.0810578 | 0.233273 | 0.104266  | 0.0927514 | 0.206546  | 0.0163737 | 0.235631 | 0.12122   | 0.0841701 | 0.0409095 | 0.074941 |
| ZMYND15 | 0.463239 | 0.387176  | 0.586568  | 0.691716 | 0.675515  | 1.28797  | 0.313029  | 0.361278  | 0.287843  | 0.450891  | 0.67235  | 0.351754  | 0.408672  | 0.360693  | 1.059    |
| ZMYND19 | 3.61505  | 4.60678   | 4.01079   | 6.96338  | 8.6068    | 7.5228   | 4.01182   | 2.95753   | 9.11404   | 3.90119   | 7.38001  | 4.65357   | 5.25337   | 5.42976   | 2.13489  |
| ZMYND8  | 4.4884   | 4.30859   | 4.51773   | 4.36689  | 3.38457   | 8.63853  | 3.71992   | 4.81663   | 3.29404   | 3.19197   | 2.80887  | 3.06648   | 3.06219   | 2.72842   | 2.48755  |
| ZNF10   | 1.31405  | 1.07379   | 1.0349    | 0.574167 | 0.310258  | 0.371474 | 0.474107  | 0.976296  | 0.320073  | 0.560751  | 0.551824 | 0.507729  | 0.172955  | 0.568654  | 0.868085 |
| ZNF100  | 1.81727  | 0.903033  | 1.10505   | 0.896361 | 0.136719  | 0.815574 | 0.691635  | 1.19173   | 0.561191  | 0.656317  | 1.204    | 0.503822  | 0.591259  | 0.752254  | 0.691494 |
| ZNF101  | 1.54515  | 1.10614   | 1.11293   | 1.29093  | 1.68843   | 1.58545  | 0.801401  | 1.1826    | 0.896383  | 0.880951  | 1.90935  | 0.687073  | 1.69193   | 0.957865  | 1.28102  |
| ZNF106  | 8.85239  | 6.26069   | 6.83805   | 6.31912  | 5.01183   | 7.62199  | 6.37176   | 6.96564   | 3.16517   | 4.72876   | 6.03029  | 2.90054   | 5.99139   | 4.24056   | 7.87533  |
| ZNF107  | 1.65204  | 2.56547   | 2.74333   | 1.32774  | 0.617233  | 0.50239  | 1.4738    | 2.88074   | 1.2377    | 0.601491  | 1.05209  | 1.027     | 0.665016  | 0.770291  | 0.843879 |
| ZNF112  | 0.908978 | 1.10642   | 1.00428   | 0.50534  | 0.371567  | 0.855454 | 0.42333   | 0.765307  | 0.349589  | 0.84814   | 0.816847 | 0.308083  | 0.474576  | 0.821998  | 0.798703 |
| ZNF114  | 0.181779 | 0.0924111 | 0.103438  | 0.134743 | 0.0891314 | 0.160042 | 0.0762479 | 0.139425  | 0.030436  | 0.0925099 | 0.101477 | 0.0184124 | 0.0474527 | 0.0651628 | 0.272817 |
| ZNF117  | 0.91165  | 1.49627   | 1.73382   | 1.47707  | 0.347821  | 0.523587 | 0.498381  | 1.52073   | 1.51828   | 1.36213   | 0.866194 | 1.27986   | 0.446304  | 1.01278   | 2.21372  |
| ZNF12   | 4.47501  | 3.56342   | 3.78524   | 3.58944  | 2.29342   | 4.05561  | 2.20765   | 3.64392   | 3.09523   | 3.55127   | 5.00527  | 1.83159   | 2.67196   | 3.16302   | 3.28229  |
| ZNF121  | 6.75637  | 6.50407   | 6.59519   | 8.78517  | 1.88867   | 5.21179  | 4.35405   | 6.20099   | 6.22606   | 5.58395   | 7.78311  | 4.68608   | 10.3141   | 8.34048   | 3.09544  |
| ZNF124  | 1.5371   | 1.39805   | 1.66324   | 1.77158  | 0.730536  | 1.14454  | 1.07285   | 1.26305   | 0.662028  | 1.12944   | 2.02754  | 0.723136  | 0.808345  | 1.19977   | 1.57586  |
| ZNF131  | 2.94204  | 2.86703   | 2.78036   | 3.2003   | 1.52334   | 3.19662  | 1.82536   | 2.57833   | 2.92991   | 3.1733    | 3.85744  | 2.20744   | 3.02525   | 2.83503   | 2.5967   |
| ZNF132  | 0.50394  | 0.901325  | 0.915905  | 0.629484 | 0.818374  | 0.708662 | 0.758458  | 0.760004  | 0.585845  | 0.795412  | 0.939523 | 0.721165  | 0.576383  | 0.778171  | 0.58117  |
| ZNF133  | 2.77608  | 2.37172   | 2.29657   | 2.40031  | 4.11239   | 2.62901  | 1.56936   | 1.4141    | 2.71301   | 2.51548   | 2.01025  | 2.23829   | 1.68627   | 2.77441   | 2.00313  |
| ZNF134  | 2.81558  | 2.33171   | 3.05011   | 1.78631  | 1.5282    | 2.28175  | 1.77051   | 2.32739   | 1.58616   | 1.7875    | 1.76639  | 0.720706  | 2.05841   | 1.84861   | 1.48689  |
| ZNF135  | 0.701305 | 0.772341  | 1.01299   | 0.372829 | 1.04614   | 0.582934 | 0.502043  | 0.657887  | 0.0677865 | 0.202588  | 0.251329 | 0.151337  | 0.0466843 | 0.351987  | 0.399668 |
| ZNF136  | 2.0135   | 1.65633   | 1.89932   | 1.14503  | 0.705633  | 1.12382  | 0.925191  | 1.34753   | 0.598104  | 0.947684  | 1.30282  | 0.456813  | 1.20009   | 0.952885  | 1.56925  |
| ZNF137P | 0.232921 | 0.480323  | 0.439331  | 0.259235 | 0.202612  | 0.364926 | 0.170203  | 0.488522  | 0.0340406 | 0.304034  | 0.273457 | 0.146662  | 0.282526  | 0.326249  | 0.521827 |
| ZNF138  | 1.95661  | 2.13744   | 2.07449   | 0.991326 | 0.319161  | 0.544738 | 0.767767  | 2.03767   | 0.767768  | 0.750203  | 0.795999 | 0.92576   | 0.512188  | 0.563777  | 0.482853 |
| ZNF14   | 2.17918  | 1.38866   | 1.41508   | 0.829061 | 0.691563  | 0.678371 | 0.579669  | 1.47854   | 0.285376  | 0.725437  | 1.57829  | 0.318559  | 0.569454  | 0.579673  | 1.15536  |
| ZNF140  | 1.78708  | 2.3159    | 2.29973   | 2.30028  | 1.07422   | 1.75488  | 1.28993   | 1.83161   | 1.67613   | 1.79609   | 2.78261  | 0.965153  | 1.54619   | 1.64614   | 1.25865  |

|          |          |           |          |           |           |           |           |           |           |           |           |            |           |          |           |
|----------|----------|-----------|----------|-----------|-----------|-----------|-----------|-----------|-----------|-----------|-----------|------------|-----------|----------|-----------|
| ZNF141   | 1.536    | 1.33466   | 1.46508  | 0.763796  | 0.482146  | 0.716312  | 1.01185   | 1.60999   | 0.2844    | 0.546131  | 0.576348  | 0.423431   | 0.315367  | 0.699125 | 0.970677  |
| ZNF142   | 2.17953  | 2.76576   | 2.70611  | 2.56364   | 3.68545   | 4.24916   | 3.44237   | 2.13167   | 1.67314   | 1.67767   | 1.42092   | 2.38841    | 3.10231   | 3.19417  | 2.68748   |
| ZNF143   | 2.20671  | 2.1189    | 2.37777  | 3.60132   | 0.902693  | 3.00238   | 1.38979   | 1.64708   | 2.03717   | 3.03579   | 3.6879    | 1.30925    | 5.63429   | 2.77866  | 2.21049   |
| ZNF146   | 6.57803  | 5.9311    | 5.89858  | 8.09624   | 2.26547   | 7.44091   | 2.80953   | 4.70988   | 5.20442   | 6.21466   | 7.85939   | 3.60303    | 7.68282   | 6.26413  | 5.78362   |
| ZNF148   | 3.07487  | 2.42945   | 2.60442  | 2.31845   | 0.891466  | 2.37934   | 1.80877   | 2.96734   | 1.34653   | 2.39333   | 2.85847   | 1.36181    | 2.60851   | 2.08525  | 2.34092   |
| ZNF154   | 1.64351  | 1.50472   | 1.80268  | 0.3208    | 0.800718  | 0.364821  | 1.23826   | 1.63018   | 0.167141  | 0.256272  | 0.188933  | 0.522124   | 0.125259  | 0.990179 | 0.855666  |
| ZNF155   | 1.22699  | 1.05477   | 1.12397  | 0.899234  | 0.700887  | 1.40131   | 0.662003  | 0.877503  | 1.21895   | 0.844184  | 0.777701  | 0.716148   | 1.14331   | 1.00895  | 1.14687   |
| ZNF157   | 0.136537 | 0.0394714 | 0.112953 | 0.0562822 | 0.148463  | 0.0581298 | 0.0155894 | 0.08494   | 0         | 0.0171368 | 0.0770667 | 0.0195392  | 0.0352372 | 0        | 0.0196085 |
| ZNF16    | 2.19399  | 2.45946   | 2.22486  | 2.42507   | 3.03698   | 2.3578    | 2.56563   | 1.87908   | 3.74947   | 2.30954   | 2.83627   | 2.37377    | 1.50117   | 1.59518  | 1.5119    |
| ZNF160   | 3.87205  | 3.75579   | 4.24049  | 2.69376   | 1.49211   | 3.61547   | 2.10615   | 2.98787   | 1.53222   | 2.27787   | 2.53819   | 1.52974    | 1.66183   | 2.68345  | 2.83226   |
| ZNF165   | 0.321296 | 0.295537  | 0.209417 | 1.03345   | 0.272227  | 0.364772  | 0.211214  | 0.164402  | 2.6324    | 1.29532   | 0.824325  | 1.58837    | 1.6207    | 1.16529  | 0.573282  |
| ZNF169   | 0.625939 | 0.627301  | 0.759471 | 0.40423   | 0.414848  | 0.362426  | 0.581271  | 0.504363  | 0.1423    | 0.188548  | 0.339171  | 0.262754   | 0.129233  | 0.401295 | 0.479428  |
| ZNF17    | 2.44726  | 2.34601   | 2.33978  | 1.72785   | 1.11807   | 1.65118   | 1.46961   | 2.21254   | 1.43352   | 1.3923    | 1.72068   | 1.02398    | 1.42597   | 1.41181  | 1.5323    |
| ZNF174   | 1.20456  | 1.17224   | 1.01623  | 0.921783  | 1.38943   | 1.53342   | 1.15065   | 0.906226  | 0.457535  | 0.785861  | 1.07034   | 0.52055    | 0.62328   | 0.673188 | 0.608034  |
| ZNF175   | 1.26326  | 0.873289  | 0.809607 | 0.874742  | 0.690286  | 1.16068   | 0.735425  | 1.01618   | 0.297971  | 0.676821  | 1.01459   | 0.48946    | 0.589539  | 0.657623 | 1.21902   |
| ZNF177   | 0.412984 | 0.167567  | 0.219293 | 0.127881  | 0.0154319 | 0.476927  | 0.0744452 | 0.0264776 | 0.0205016 | 0.179969  | 0.138648  | 0.00587698 | 1.70E-11  | 0.15683  | 0.188977  |
| ZNF18    | 2.20642  | 1.92684   | 1.89912  | 1.88925   | 1.96567   | 2.41058   | 1.74123   | 1.93204   | 1.07684   | 1.17084   | 1.61168   | 1.29434    | 1.14095   | 1.35243  | 1.35136   |
| ZNF180   | 1.11022  | 0.906934  | 0.972725 | 1.13371   | 0.587917  | 1.11292   | 0.818187  | 0.861096  | 0.854296  | 1.00708   | 1.76032   | 0.668012   | 1.06795   | 0.923127 | 0.862435  |
| ZNF181   | 1.19138  | 1.20685   | 1.41715  | 0.941903  | 0.343218  | 1.25277   | 0.689477  | 1.1186    | 0.544419  | 1.34549   | 2.1782    | 0.437695   | 0.738746  | 0.809945 | 0.998885  |
| ZNF182   | 0.911852 | 0.956035  | 0.903092 | 0.767634  | 0.588512  | 1.07716   | 0.39592   | 0.599223  | 0.305005  | 0.564174  | 1.07286   | 0.510017   | 0.443313  | 0.69808  | 0.986762  |
| ZNF184   | 0.948342 | 0.964619  | 1.0199   | 0.74202   | 0.452843  | 0.84339   | 0.609568  | 0.820956  | 0.804204  | 0.872862  | 1.32036   | 0.540338   | 0.586937  | 0.594774 | 0.605306  |
| ZNF185   | 8.99604  | 13.6395   | 12.5954  | 33.7031   | 18.9176   | 22.1319   | 14.126    | 9.66697   | 35.9315   | 65.0108   | 24.0994   | 43.5808    | 113.265   | 28.961   | 15.7883   |
| ZNF189   | 2.18558  | 2.42265   | 2.81748  | 2.41121   | 1.07264   | 3.16256   | 1.2324    | 2.07345   | 0.930812  | 2.18777   | 2.53537   | 0.925834   | 1.46204   | 2.03228  | 3.09063   |
| ZNF19    | 0.936522 | 0.57725   | 0.572343 | 0.539072  | 0.275221  | 0.574729  | 0.443129  | 0.644847  | 0.143857  | 0.180021  | 0.695286  | 0.247517   | 0.353834  | 0.304263 | 0.64219   |
| ZNF192P1 | 0.168415 | 0.0676208 | 0.058052 | 0.130168  | 0.109003  | 0.0478011 | 0.0160242 | 0.0498911 | 0         | 0.140919  | 0.0950599 | 0.0100421  | 0         | 0.183377 | 0.0604664 |
| ZNF195   | 1.66245  | 1.35205   | 1.30291  | 1.97727   | 0.766941  | 2.0914    | 0.763534  | 1.11086   | 0.783992  | 1.65512   | 2.22946   | 1.02854    | 1.31051   | 1.72141  | 1.56174   |

|            |           |          |           |           |           |           |           |           |            |           |           |           |           |           |           |
|------------|-----------|----------|-----------|-----------|-----------|-----------|-----------|-----------|------------|-----------|-----------|-----------|-----------|-----------|-----------|
| ZNF197     | 1.69889   | 1.52246  | 1.50711   | 1.38127   | 0.873449  | 1.46239   | 0.967126  | 1.25634   | 0.781039   | 1.13442   | 1.32238   | 0.675077  | 1.10049   | 0.660052  | 1.22718   |
| ZNF197-AS1 | 0.0742955 | 0.143187 | 0.122925  | 0.0765637 | 0.0577033 | 0.0948925 | 0.169656  | 0.0990415 | 0          | 0.186497  | 0.0419352 | 0.0531604 | 0.0479351 | 0.0970752 | 0.0533489 |
| ZNF2       | 0.758196  | 0.770514 | 0.756049  | 0.810003  | 0.946839  | 1.03251   | 0.831596  | 0.546509  | 0.626917   | 0.817753  | 0.889441  | 0.572884  | 0.478657  | 0.742794  | 0.783514  |
| ZNF20      | 0.649167  | 1.08021  | 0.879175  | 1.11307   | 0.294985  | 0.709315  | 0.406501  | 0.806151  | 1.17559    | 0.805856  | 0.890505  | 0.543674  | 0.639691  | 0.646388  | 0.606711  |
| ZNF200     | 0.911044  | 0.646239 | 0.68564   | 1.62344   | 0.815686  | 1.60536   | 0.548995  | 0.849019  | 0.724289   | 1.31815   | 1.69981   | 0.611134  | 1.70626   | 1.25651   | 1.11757   |
| ZNF202     | 1.2325    | 1.31992  | 1.20811   | 1.69706   | 1.69731   | 1.60947   | 0.786393  | 1.03551   | 0.996493   | 1.18294   | 0.947048  | 0.852244  | 1.19281   | 1.75114   | 1.123     |
| ZNF204P    | 0.74566   | 1.50628  | 1.35709   | 0.398442  | 0.377509  | 0.286889  | 0.485596  | 0.657771  | 0.174899   | 0.180243  | 0.280585  | 0.494017  | 0.17462   | 0.242489  | 0.222105  |
| ZNF205     | 1.84005   | 1.90619  | 1.84652   | 2.61571   | 4.58502   | 4.43168   | 2.29589   | 1.20645   | 1.54568    | 1.96716   | 1.98508   | 1.61068   | 2.75803   | 2.23126   | 1.21822   |
| ZNF205-AS1 | 0.188072  | 0.293011 | 0.227319  | 0.130631  | 0.0319276 | 0.201377  | 0.405966  | 0.226847  | 0.0539642  | 0.151062  | 0.0238571 | 0.0891674 | 0         | 0.094809  | 0.20916   |
| ZNF207     | 27.845    | 26.3418  | 25.475    | 38.0163   | 11.0185   | 35.8911   | 23.1711   | 25.2431   | 30.3943    | 31.672    | 40.925    | 23.3386   | 41.9414   | 31.434    | 24.8523   |
| ZNF208     | 0.411056  | 0.150672 | 0.115521  | 0.0628314 | 0.116093  | 0.068662  | 0.0920696 | 0.227228  | 0.00718594 | 0.0345591 | 0.0288632 | 0.0379966 | 0.0444134 | 0.0719546 | 0.240086  |
| ZNF211     | 1.46516   | 1.65331  | 1.77533   | 0.841948  | 1.3114    | 1.74845   | 1.07586   | 1.12785   | 1.18739    | 1.10062   | 1.61095   | 0.904164  | 0.695808  | 1.21553   | 1.22808   |
| ZNF212     | 2.56138   | 2.19442  | 1.92818   | 4.22672   | 4.58      | 3.38018   | 2.17222   | 1.88841   | 2.93893    | 3.9694    | 1.98964   | 2.99956   | 5.51041   | 2.74195   | 1.99891   |
| ZNF213     | 2.4869    | 2.60924  | 2.64756   | 3.88625   | 5.82616   | 4.73271   | 3.14202   | 1.85386   | 3.36805    | 1.98706   | 1.59546   | 1.76971   | 3.17401   | 1.81468   | 1.78575   |
| ZNF213-AS1 | 0.63772   | 0.872231 | 0.578622  | 0.529991  | 0.894734  | 0.437911  | 0.540224  | 0.457058  | 0.175377   | 0.180736  | 0.487678  | 0.235512  | 0.106182  | 0.322549  | 0.206804  |
| ZNF214     | 0.152139  | 0.161698 | 0.129562  | 0.272066  | 0.118162  | 0.392443  | 0.0255452 | 0.107372  | 0.0926442  | 0.230264  | 0.308133  | 0.112061  | 0.207867  | 0.135642  | 0.23777   |
| ZNF215     | 0.240064  | 0.175724 | 0.0763837 | 0.570906  | 0.129081  | 0.542475  | 0.0843375 | 0.151806  | 0.376708   | 0.504106  | 0.745255  | 0.422823  | 0.637423  | 0.533238  | 0.411062  |
| ZNF217     | 5.77036   | 6.14029  | 6.65593   | 10.8096   | 4.14675   | 9.69738   | 4.98937   | 7.32915   | 5.5771     | 7.63416   | 8.69772   | 4.7254    | 10.2919   | 6.71213   | 7.69715   |
| ZNF219     | 6.03536   | 7.80859  | 8.54963   | 8.3041    | 16.9711   | 17.7168   | 8.18245   | 3.94128   | 6.57579    | 5.58632   | 4.78653   | 5.2474    | 7.13595   | 5.17117   | 3.38565   |
| ZNF22      | 3.37065   | 2.24632  | 2.2933    | 4.05789   | 0.929719  | 5.18579   | 1.57057   | 3.00489   | 1.67528    | 3.99329   | 9.36445   | 0.901605  | 3.84134   | 2.61778   | 5.08196   |
| ZNF221     | 0.404862  | 0.716763 | 0.529658  | 0.397817  | 0.365634  | 0.761623  | 0.268755  | 0.309602  | 0.275206   | 0.449057  | 0.637729  | 0.235794  | 0.291589  | 0.703689  | 1.244     |
| ZNF222     | 0.689828  | 0.384506 | 0.38045   | 0.27878   | 0.189095  | 0.771655  | 0.432421  | 0.44477   | 0.428303   | 1.00162   | 1.08411   | 0.135495  | 0.523616  | 0.459504  | 0.582753  |
| ZNF223     | 0.908884  | 0.97263  | 0.831039  | 0.670431  | 1.07      | 0.733171  | 0.447864  | 0.60368   | 0.570937   | 0.7685    | 1.50122   | 0.397044  | 0.438262  | 0.820039  | 0.741944  |
| ZNF224     | 3.38533   | 2.70921  | 2.60253   | 1.50979   | 1.22194   | 2.00578   | 1.62525   | 2.37923   | 0.807495   | 1.39157   | 1.68102   | 1.12702   | 0.877536  | 1.37589   | 2.34318   |
| ZNF225     | 0.717769  | 0.581191 | 0.585542  | 0.565035  | 0.433589  | 0.789429  | 0.335778  | 0.615744  | 0.224611   | 0.456692  | 0.658345  | 0.242525  | 0.47918   | 0.507999  | 0.544036  |
| ZNF226     | 1.70695   | 2.10709  | 2.16195   | 1.34316   | 1.00715   | 1.65062   | 0.876267  | 1.48171   | 1.6357     | 1.46148   | 2.80077   | 0.639087  | 0.623225  | 1.43501   | 1.75778   |

|             |          |          |          |           |           |          |           |           |           |           |           |           |           |           |          |
|-------------|----------|----------|----------|-----------|-----------|----------|-----------|-----------|-----------|-----------|-----------|-----------|-----------|-----------|----------|
| ZNF227      | 2.57637  | 2.20523  | 2.39396  | 1.84863   | 1.35311   | 2.49547  | 1.49188   | 2.14533   | 1.35758   | 1.77895   | 1.96671   | 1.19376   | 1.33838   | 1.7825    | 2.01432  |
| ZNF229      | 0.147811 | 0.227897 | 0.237573 | 0.282887  | 0.439524  | 0.151031 | 0.110904  | 0.142622  | 0.144014  | 0.466447  | 0.648373  | 0.274984  | 0.689368  | 0.682031  | 0.236536 |
| ZNF23       | 1.62586  | 1.13736  | 1.24936  | 1.43013   | 0.581189  | 1.74933  | 0.621375  | 0.85245   | 0.753936  | 1.33196   | 1.34391   | 0.798283  | 0.978775  | 1.10574   | 1.61199  |
| ZNF230      | 0.560093 | 0.477655 | 0.528217 | 0.542561  | 0.217505  | 0.59614  | 0.492412  | 0.388256  | 0.341065  | 0.576439  | 0.790344  | 0.204388  | 0.480621  | 0.354202  | 0.514793 |
| ZNF232      | 0.811857 | 0.847808 | 0.713361 | 1.20729   | 0.616249  | 1.18131  | 1.35047   | 0.403216  | 0.713402  | 0.651401  | 0.855443  | 0.497765  | 0.876202  | 0.708977  | 0.546068 |
| ZNF233      | 0.415191 | 0.377863 | 0.349836 | 0.182239  | 0.358297  | 0.144031 | 0.175575  | 0.362154  | 0.14046   | 0.328105  | 0.199631  | 0.291579  | 0.0595287 | 0.289329  | 0.353343 |
| ZNF234      | 0.940815 | 1.48353  | 1.45673  | 1.20285   | 0.898729  | 1.42654  | 0.706554  | 1.08204   | 0.82106   | 0.884037  | 1.02231   | 0.691177  | 0.619993  | 1.51983   | 1.10547  |
| ZNF235      | 0.979408 | 0.922814 | 0.984286 | 0.725207  | 0.766314  | 0.704227 | 0.63782   | 0.722123  | 0.724521  | 1.293     | 0.876314  | 0.53987   | 0.304253  | 1.0086    | 1.16692  |
| ZNF236      | 2.63151  | 2.50172  | 2.46722  | 2.10822   | 1.65264   | 2.48164  | 2.37457   | 2.23053   | 1.3233    | 1.92131   | 1.57796   | 1.84849   | 1.59926   | 1.96393   | 2.2228   |
| ZNF236-DT   | 0.214453 | 0.275538 | 0.162626 | 0.257833  | 0.444159  | 0.563029 | 0.285665  | 0.111176  | 0.0652949 | 0.0897202 | 0.625401  | 0.0639362 | 0.138364  | 0.196144  | 0.128326 |
| ZNF239      | 0.197877 | 0.103631 | 0.142346 | 0.265981  | 0.13364   | 0.534773 | 0.186638  | 0.129981  | 0.0419117 | 0.161972  | 0.602152  | 0.0861831 | 0.0777119 | 0.202342  | 0.383021 |
| ZNF24       | 6.07624  | 5.05745  | 5.51175  | 5.65388   | 2.59973   | 6.10574  | 3.97192   | 5.72848   | 6.52168   | 6.04307   | 6.89541   | 4.10362   | 7.53806   | 5.4433    | 4.35293  |
| ZNF248      | 1.17154  | 1.17951  | 1.23249  | 0.516421  | 0.73108   | 0.838983 | 0.771263  | 0.892216  | 0.216495  | 0.450471  | 0.554238  | 0.482127  | 0.164938  | 0.662734  | 0.967671 |
| ZNF25       | 2.11604  | 1.32155  | 1.34232  | 0.911654  | 0.600764  | 1.68822  | 0.959304  | 1.37091   | 0.552235  | 1.3335    | 2.0224    | 0.445318  | 0.625264  | 0.855006  | 1.24493  |
| ZNF250      | 1.52835  | 2.18094  | 2.06331  | 1.19298   | 3.75895   | 1.36781  | 1.79328   | 1.5779    | 2.93855   | 2.7345    | 1.8024    | 2.7386    | 1.14553   | 1.34748   | 1.23288  |
| ZNF251      | 2.82458  | 3.20021  | 3.29174  | 1.15005   | 2.30734   | 2.57548  | 2.05627   | 2.16825   | 1.16229   | 1.29441   | 1.43356   | 1.64659   | 0.983203  | 1.40384   | 3.62538  |
| ZNF252P     | 1.74319  | 1.918    | 1.61838  | 2.0819    | 0.946727  | 2.61295  | 1.00732   | 1.28406   | 1.67141   | 1.85087   | 2.45379   | 1.32659   | 1.46018   | 1.72189   | 1.30375  |
| ZNF252P-AS1 | 0.135883 | 0.113712 | 0.159744 | 0.0515906 | 0.155528  | 0.146151 | 0.0571594 | 0.0953382 | 0         | 0.0987379 | 0.0161469 | 0.0460554 | 0.0184571 | 0.0635429 | 0.225958 |
| ZNF253      | 1.74247  | 1.60024  | 1.57688  | 0.952395  | 0.403755  | 0.901689 | 0.857351  | 1.56567   | 0.773816  | 0.628303  | 1.30411   | 0.371968  | 0.453419  | 0.900628  | 0.843352 |
| ZNF254      | 2.45456  | 2.0884   | 2.41737  | 1.39022   | 1.02885   | 1.28554  | 1.21221   | 2.54065   | 1.31675   | 2.0905    | 2.42454   | 2.0316    | 1.25374   | 1.72321   | 2.60883  |
| ZNF256      | 3.04734  | 2.36636  | 2.94547  | 1.10075   | 0.910929  | 1.4891   | 1.69783   | 2.15913   | 0.522901  | 0.670313  | 0.981189  | 0.344677  | 1.14184   | 0.788128  | 1.0377   |
| ZNF257      | 0.329549 | 0.182749 | 0.149173 | 0.160193  | 0.0676099 | 0.238251 | 0.0709941 | 0.226564  | 0.0227181 | 0.140474  | 0.315866  | 0.0667362 | 0.0682    | 0.136489  | 0.196453 |
| ZNF26       | 1.53835  | 1.1794   | 1.36334  | 0.661381  | 0.741426  | 0.763416 | 0.865334  | 1.10061   | 0.498826  | 0.647646  | 0.975706  | 0.42691   | 0.503552  | 0.788842  | 0.829056 |
| ZNF260      | 1.52158  | 1.85778  | 1.78354  | 1.79449   | 0.386412  | 1.69807  | 0.894687  | 1.66914   | 1.50977   | 2.29481   | 2.77075   | 0.863277  | 1.53276   | 1.36948   | 1.51236  |
| ZNF263      | 3.98751  | 3.31296  | 3.3512   | 3.94952   | 6.38002   | 5.30292  | 3.24166   | 2.42303   | 2.91723   | 3.05943   | 3.58681   | 1.92564   | 3.3409    | 3.3654    | 3.13646  |
| ZNF264      | 4.0928   | 3.95656  | 4.38033  | 2.8236    | 3.21867   | 2.93735  | 3.34739   | 4.14295   | 2.94532   | 3.19451   | 3.12313   | 2.34694   | 3.84006   | 2.89088   | 2.84188  |

|            |           |            |           |           |           |           |           |           |           |           |           |            |            |            |           |
|------------|-----------|------------|-----------|-----------|-----------|-----------|-----------|-----------|-----------|-----------|-----------|------------|------------|------------|-----------|
| ZNF266     | 5.17155   | 5.21729    | 5.40357   | 4.224     | 3.69544   | 2.78597   | 2.50419   | 3.36581   | 3.49583   | 2.64746   | 3.2674    | 2.73992    | 2.45511    | 3.39816    | 3.28749   |
| ZNF267     | 2.29225   | 1.742      | 2.11193   | 2.23827   | 0.633237  | 2.04287   | 0.984319  | 2.51824   | 1.06622   | 3.35511   | 4.42093   | 0.99462    | 3.48391    | 2.02234    | 2.47618   |
| ZNF268     | 1.55391   | 1.61902    | 1.73902   | 1.91024   | 0.557494  | 1.31306   | 0.702478  | 1.46861   | 0.994278  | 1.46027   | 2.46654   | 0.682922   | 1.39699    | 1.33571    | 1.12714   |
| ZNF271P    | 1.52364   | 1.25538    | 1.20079   | 1.98359   | 0.490152  | 1.66967   | 0.741149  | 0.921418  | 1.19133   | 2.42719   | 2.68176   | 1.13536    | 2.21039    | 1.68452    | 1.72202   |
| ZNF273     | 2.73165   | 4.90519    | 4.88387   | 0.891523  | 0.798145  | 0.397335  | 1.73606   | 3.68109   | 0.945054  | 0.342193  | 0.331453  | 0.791212   | 0.28754    | 0.345275   | 0.466845  |
| ZNF274     | 2.8229    | 4.10347    | 4.70368   | 3.71672   | 3.80113   | 3.3774    | 2.81223   | 2.53008   | 3.54512   | 3.78394   | 2.87076   | 2.92394    | 6.72291    | 4.07505    | 2.10168   |
| ZNF275     | 1.76502   | 0.772784   | 0.83586   | 1.01889   | 0.73946   | 2.83742   | 1.30029   | 1.09021   | 0.147172  | 1.33285   | 2.14544   | 0.358963   | 1.41994    | 1.3263     | 2.77671   |
| ZNF276     | 4.1235    | 5.60383    | 5.84194   | 3.78287   | 7.99853   | 4.60404   | 4.58467   | 3.90149   | 2.29348   | 2.20577   | 1.98184   | 3.98583    | 1.91132    | 3.61378    | 3.96774   |
| ZNF277     | 2.97147   | 2.53971    | 2.8786    | 2.70715   | 0.722462  | 2.53017   | 1.21942   | 2.68673   | 2.77975   | 2.49715   | 4.39478   | 1.35582    | 2.9619     | 1.98517    | 2.07804   |
| ZNF28      | 1.4087    | 1.38262    | 1.61108   | 1.56305   | 0.474676  | 1.14433   | 0.713897  | 1.1444    | 0.699856  | 1.3951    | 2.08743   | 0.502067   | 1.40419    | 1.14823    | 1.06718   |
| ZNF280A    | 0         | 0.00516713 | 0         | 0         | 0         | 0.0273948 | 0.0122447 | 0         | 0         | 0         | 0.0242128 | 0          | 0.00691927 | 0          | 0         |
| ZNF280B    | 0.0807926 | 0.0369808  | 0.0601536 | 0.0124889 | 0.0125499 | 0.103191  | 0.0184493 | 0.0789819 | 0.0147595 | 0.0354911 | 0.0501627 | 0.00289046 | 0.0052127  | 0.00633386 | 0.0290071 |
| ZNF280C    | 1.18303   | 0.912004   | 0.87674   | 1.03628   | 0.237364  | 1.25917   | 0.613464  | 1.08643   | 0.46826   | 0.847588  | 1.27985   | 0.557273   | 0.80145    | 0.811524   | 1.11142   |
| ZNF280D    | 2.94042   | 2.24544    | 2.18129   | 2.05328   | 0.568732  | 1.59745   | 1.52957   | 2.84274   | 0.801946  | 1.69921   | 2.50555   | 1.24491    | 1.19945    | 1.72666    | 2.47011   |
| ZNF281     | 1.576     | 1.11735    | 1.28811   | 2.74588   | 0.4705    | 2.72016   | 0.994277  | 1.41744   | 0.726255  | 3.45713   | 5.10758   | 0.877078   | 4.03063    | 3.21558    | 5.21313   |
| ZNF282     | 4.17242   | 4.58952    | 4.65344   | 12.2178   | 11.4741   | 9.73717   | 4.60158   | 3.37848   | 3.91466   | 7.75049   | 3.74021   | 5.77193    | 14.4772    | 6.17378    | 4.27882   |
| ZNF283     | 1.10724   | 1.47517    | 1.45726   | 1.40902   | 0.690578  | 1.36421   | 0.794923  | 1.32694   | 0.939862  | 1.22126   | 2.10217   | 0.876289   | 1.28806    | 1.43796    | 0.891442  |
| ZNF284     | 0.457436  | 0.707328   | 0.836051  | 0.38918   | 0.404851  | 0.620483  | 0.473701  | 0.453802  | 0.41459   | 0.494018  | 0.702528  | 0.350143   | 0.281408   | 0.617149   | 0.679852  |
| ZNF285     | 0.110506  | 0.231729   | 0.0914181 | 0.439249  | 0.220697  | 0.248677  | 0.0540736 | 0.0491041 | 0.0384524 | 0.307113  | 0.302957  | 0.118605   | 0.178244   | 0.358907   | 0.351407  |
| ZNF286A    | 1.3572    | 1.41783    | 1.26029   | 1.19149   | 0.760177  | 1.58117   | 0.896821  | 1.04239   | 1.87946   | 1.29931   | 1.97971   | 1.01767    | 1.03019    | 1.42844    | 1.23687   |
| ZNF286B    | 0.473698  | 0.385003   | 0.399558  | 0.197104  | 0.322492  | 0.31566   | 0.21247   | 0.328867  | 0.133926  | 0.0842667 | 0.246879  | 0.135416   | 0.0850961  | 0.277764   | 0.183711  |
| ZNF287     | 0.488385  | 0.540656   | 0.476174  | 0.33553   | 0.406409  | 0.554472  | 0.308684  | 0.335861  | 0.594797  | 0.277297  | 0.626804  | 0.220488   | 0.148174   | 0.206632   | 0.333992  |
| ZNF292     | 6.3108    | 5.19196    | 5.8914    | 3.52341   | 1.00354   | 3.29269   | 3.21895   | 6.2551    | 2.51603   | 3.59897   | 3.73227   | 2.28085    | 2.52002    | 3.19361    | 3.12367   |
| ZNF295-AS1 | 0.151372  | 0.235007   | 0.250451  | 0.173325  | 0.287384  | 0.214818  | 0.230442  | 0.0448422 | 0.16387   | 0.295535  | 0.493653  | 0.409173   | 0.0325547  | 0.413148   | 0.434778  |
| ZNF296     | 1.24739   | 1.78385    | 1.63572   | 1.96923   | 2.47357   | 3.57058   | 1.98483   | 1.40341   | 4.92925   | 0.632903  | 1.25834   | 1.42427    | 1.3442     | 0.839199   | 0.647956  |
| ZNF3       | 3.41395   | 3.07056    | 3.11723   | 2.74862   | 3.02666   | 3.753     | 3.27964   | 2.69473   | 1.51981   | 1.81846   | 2.48642   | 1.46741    | 2.14103    | 2.18871    | 2.62304   |

|           |           |           |           |           |           |          |           |           |           |           |           |          |           |           |           |
|-----------|-----------|-----------|-----------|-----------|-----------|----------|-----------|-----------|-----------|-----------|-----------|----------|-----------|-----------|-----------|
| ZNF30     | 0.694376  | 0.607921  | 0.574437  | 0.610857  | 0.447227  | 0.814775 | 0.348066  | 0.361231  | 0.13407   | 0.467641  | 0.927254  | 0.39384  | 0.262249  | 0.402743  | 0.960729  |
| ZNF30-AS1 | 0         | 0.026053  | 0         | 0         | 0         | 0        | 0.123477  | 0.0480552 | 0         | 0         | 0         | 0        | 0         | 0         | 0.388275  |
| ZNF300    | 0.77306   | 0.751655  | 0.725954  | 0.82537   | 0.281275  | 0.759064 | 0.572533  | 0.588     | 0.330797  | 0.769223  | 1.37586   | 0.418596 | 0.597631  | 1.08835   | 0.620118  |
| ZNF300P1  | 0.344277  | 0.244209  | 0.126582  | 0.354787  | 0.163405  | 0.203574 | 0.196542  | 0.297466  | 0.442584  | 0.372088  | 0.582968  | 0.32161  | 0.308508  | 0.229916  | 0.13734   |
| ZNF302    | 2.46412   | 2.57948   | 3.04866   | 2.08506   | 1.41944   | 2.38771  | 1.38228   | 2.26761   | 0.840083  | 2.08758   | 2.90785   | 0.851141 | 1.33514   | 1.6863    | 1.3981    |
| ZNF304    | 2.37246   | 1.84808   | 2.05813   | 1.79324   | 1.76376   | 2.18127  | 1.96045   | 1.72286   | 1.69766   | 1.39036   | 1.69864   | 1.09648  | 1.56346   | 1.39675   | 1.54449   |
| ZNF311    | 0.0408315 | 0.0705922 | 0.0596095 | 0.075493  | 0.0354436 | 0.100212 | 0.02331   | 0.0362876 | 0.0131633 | 0.0271311 | 0.0488051 | 0.029216 | 0.018596  | 0.0426807 | 0.0258702 |
| ZNF316    | 2.53841   | 3.45503   | 3.48318   | 3.19905   | 9.91718   | 5.38723  | 3.00049   | 1.80702   | 2.11032   | 1.22383   | 0.891425  | 2.57577  | 3.02802   | 3.08112   | 2.59867   |
| ZNF317    | 4.23823   | 3.63235   | 4.02778   | 4.47499   | 3.87511   | 5.33154  | 4.41966   | 3.55706   | 3.4723    | 2.80077   | 2.16631   | 2.76972  | 3.79571   | 3.43295   | 3.32285   |
| ZNF318    | 3.71457   | 3.66025   | 3.93146   | 2.71384   | 2.86929   | 4.33207  | 3.29392   | 2.7951    | 1.09137   | 1.72337   | 1.96774   | 1.39409  | 2.20452   | 2.67565   | 3.06376   |
| ZNF319    | 1.37619   | 1.27066   | 1.13395   | 3.53139   | 2.86162   | 3.51543  | 1.30837   | 0.901447  | 2.2236    | 2.7182    | 2.12917   | 2.18125  | 4.07873   | 2.28386   | 1.84253   |
| ZNF32     | 4.3184    | 3.74688   | 3.97145   | 4.32488   | 5.28397   | 4.74892  | 2.86395   | 2.76226   | 6.57007   | 3.72834   | 9.35518   | 2.12073  | 2.51179   | 2.42142   | 2.55731   |
| ZNF32-AS1 | 0.503225  | 0.550862  | 0.333303  | 1.16E-15  | 9.45E-20  | 0.459436 | 0.220112  | 0.349951  | 3.64E-12  | 5.48E-10  | 3.73E-14  | 0.475411 | 0.138903  | 0.101324  | 1.03724   |
| ZNF32-AS2 | 0.470562  | 0.508209  | 0.390149  | 0.200757  | 0.217012  | 0.331356 | 0.349657  | 0.473839  | 0.0315011 | 0.161544  | 0.203048  | 0        | 0         | 0.108008  | 0.719064  |
| ZNF32-AS3 | 0         | 0.0173506 | 0         | 0         | 0         | 0        | 0         | 0.0320036 | 0         | 0         | 0.0135506 | 0        | 0         | 0         | 0         |
| ZNF320    | 0.701506  | 0.830237  | 0.868669  | 0.67876   | 0.494967  | 0.426839 | 0.456188  | 0.632543  | 0.231264  | 0.43416   | 0.788881  | 0.21255  | 0.376676  | 0.527263  | 0.685428  |
| ZNF321P   | 0.579924  | 0.610518  | 0.597809  | 0.529903  | 0.154422  | 0.288321 | 0.385168  | 0.694857  | 0.227501  | 0.334718  | 0.227508  | 0.232893 | 0.45497   | 0.390437  | 0.266504  |
| ZNF322    | 2.19981   | 1.83945   | 2.10162   | 2.22309   | 1.0141    | 3.35147  | 1.76628   | 1.63128   | 1.82066   | 2.88569   | 4.81707   | 1.08997  | 2.24954   | 2.24752   | 2.6225    |
| ZNF324    | 2.17875   | 2.76482   | 2.99435   | 2.22384   | 4.81262   | 3.26019  | 2.85632   | 1.92799   | 2.83871   | 2.30252   | 1.51415   | 2.05724  | 2.98933   | 2.0317    | 1.66648   |
| ZNF324B   | 0.817728  | 1.4478    | 1.61522   | 1.4073    | 2.62214   | 2.00981  | 1.09175   | 0.818097  | 1.07841   | 0.803824  | 0.503695  | 0.932209 | 0.962999  | 1.07946   | 1.1097    |
| ZNF326    | 3.12852   | 2.03041   | 2.28875   | 1.46349   | 0.607868  | 2.01719  | 1.63589   | 2.66447   | 0.589337  | 0.947987  | 1.05928   | 1.04927  | 1.1511    | 1.24035   | 1.56513   |
| ZNF329    | 1.57994   | 1.35259   | 1.5763    | 1.44649   | 1.53782   | 1.58202  | 0.929059  | 1.16307   | 0.966223  | 1.10639   | 1.8601    | 0.596781 | 0.958119  | 1.02775   | 1.41203   |
| ZNF330    | 3.87749   | 3.70709   | 4.06515   | 5.99383   | 3.86387   | 8.79397  | 2.04654   | 2.60076   | 4.60356   | 4.10146   | 5.82254   | 4.87708  | 6.65563   | 4.21881   | 3.02945   |
| ZNF331    | 1.57842   | 1.92594   | 2.15877   | 1.34277   | 1.31093   | 2.27308  | 1.42724   | 1.2741    | 1.27296   | 0.815477  | 1.41112   | 1.23804  | 1.21432   | 1.24942   | 1.63291   |
| ZNF333    | 1.01272   | 0.832672  | 0.771045  | 0.585286  | 0.747375  | 1.18568  | 0.926724  | 0.788366  | 0.286939  | 0.526301  | 0.573951  | 0.342606 | 0.286747  | 0.629653  | 1.32773   |
| ZNF334    | 0.388546  | 0.129109  | 0.114534  | 0.0644335 | 0.201182  | 0.243378 | 0.0560911 | 0.226236  | 0.0543914 | 0.0448428 | 0.131082  | 0        | 0.0172888 | 0.109705  | 0.109035  |

|            |           |          |          |           |           |           |          |          |           |           |           |           |           |           |          |
|------------|-----------|----------|----------|-----------|-----------|-----------|----------|----------|-----------|-----------|-----------|-----------|-----------|-----------|----------|
| ZNF335     | 3.65444   | 4.88656  | 4.78639  | 3.93207   | 6.20147   | 6.21014   | 5.06875  | 3.48337  | 3.60234   | 4.14956   | 1.85438   | 4.48579   | 4.67205   | 5.05612   | 4.48676  |
| ZNF337     | 2.29363   | 2.87753  | 3.32275  | 2.20358   | 2.12115   | 1.86889   | 1.92748  | 1.66231  | 1.08908   | 1.63507   | 1.26491   | 1.46525   | 1.00525   | 2.1727    | 2.67796  |
| ZNF337-AS1 | 0.366565  | 0.52946  | 0.625114 | 0.271185  | 0.248401  | 0.179144  | 0.381757 | 0.401098 | 0.0346256 | 0.235008  | 0.290533  | 0.179029  | 0.165973  | 0.263187  | 0.166597 |
| ZNF33A     | 3.41725   | 3.22548  | 3.17815  | 2.31278   | 0.824623  | 2.53961   | 1.57236  | 2.82983  | 1.70363   | 2.06694   | 2.47461   | 1.55022   | 1.60229   | 1.82322   | 2.28415  |
| ZNF33B     | 1.77119   | 2.03206  | 1.82973  | 1.98881   | 0.735061  | 1.772     | 1.00392  | 1.56225  | 0.579374  | 1.44209   | 1.77146   | 0.829995  | 0.912072  | 1.06786   | 1.02946  |
| ZNF33BP1   | 0.897307  | 0.630491 | 1.00522  | 0.288969  | 0         | 0.270599  | 0.256129 | 0.631316 | 0.0455341 | 0.140777  | 0.0211031 | 0.147136  | 0         | 0.205175  | 0.805404 |
| ZNF34      | 1.1343    | 1.42332  | 1.33471  | 0.597081  | 1.12816   | 1.13261   | 1.07149  | 0.950055 | 0.973974  | 0.622943  | 0.801457  | 0.700683  | 0.400146  | 0.5075    | 1.45922  |
| ZNF341     | 0.782428  | 0.813169 | 0.690075 | 0.919599  | 1.6272    | 1.05165   | 0.967181 | 0.597662 | 1.00016   | 0.827824  | 0.416083  | 0.860593  | 0.817721  | 0.926008  | 0.659341 |
| ZNF341-AS1 | 0.214951  | 0.103567 | 0.148185 | 0.147675  | 0.445191  | 0.122019  | 0.122712 | 0.191031 | 1.43982   | 0.0899285 | 0.323537  | 0.230705  | 0.0693426 | 0.224686  | 0.102899 |
| ZNF343     | 1.86603   | 1.89777  | 1.78224  | 1.51372   | 1.53802   | 2.22816   | 1.44108  | 1.52783  | 1.39802   | 1.07885   | 1.10546   | 1.12109   | 1.14779   | 1.75718   | 1.78136  |
| ZNF345     | 1.18275   | 1.25597  | 1.19751  | 0.739804  | 0.493581  | 0.851772  | 0.483734 | 0.758278 | 0.573316  | 0.531751  | 1.04954   | 0.307359  | 0.159455  | 0.464386  | 0.904218 |
| ZNF346     | 1.77141   | 1.74085  | 1.73773  | 1.15856   | 1.82101   | 2.1948    | 2.02255  | 1.45597  | 1.24759   | 1.34141   | 1.49039   | 1.59562   | 1.19063   | 1.55399   | 1.24809  |
| ZNF347     | 1.58259   | 1.5347   | 1.68264  | 1.03489   | 0.764205  | 1.20058   | 0.996038 | 1.40188  | 0.426213  | 0.80845   | 1.37413   | 0.450005  | 0.634838  | 0.863674  | 1.57332  |
| ZNF35      | 2.7258    | 1.94895  | 1.843    | 2.01673   | 1.96777   | 2.14244   | 1.67581  | 1.93331  | 2.38338   | 2.03953   | 2.53465   | 1.58156   | 2.84656   | 1.97712   | 2.91085  |
| ZNF350     | 3.47986   | 2.15773  | 2.78065  | 1.80324   | 0.998161  | 2.06235   | 1.29806  | 2.30189  | 1.36052   | 1.91082   | 2.94625   | 0.735662  | 1.60097   | 0.971366  | 1.56172  |
| ZNF350-AS1 | 0.25502   | 0.153591 | 0.21097  | 0         | 0.0495167 | 0.0814298 | 0.254777 | 0.14165  | 0.0388232 | 0.0400095 | 0.0719714 | 0.0228092 | 0         | 0.0499817 | 0.13734  |
| ZNF354A    | 1.64152   | 1.74235  | 1.55475  | 2.18602   | 1.22258   | 1.9529    | 0.487819 | 1.15539  | 2.22247   | 2.42444   | 3.30388   | 1.48385   | 1.56463   | 1.83514   | 1.68822  |
| ZNF354B    | 2.71539   | 2.39441  | 2.13954  | 1.76741   | 1.27807   | 1.77411   | 0.900022 | 1.9891   | 1.76446   | 1.83434   | 2.26998   | 1.2742    | 1.23201   | 1.68663   | 1.77331  |
| ZNF354C    | 1.20244   | 0.842351 | 0.824591 | 0.974201  | 0.559113  | 0.804945  | 0.745165 | 0.938567 | 0.298668  | 0.789345  | 1.37527   | 0.416039  | 0.625241  | 0.733879  | 1.18153  |
| ZNF358     | 5.9013    | 4.90447  | 5.48977  | 5.16558   | 14.4312   | 18.6566   | 8.63211  | 3.41214  | 3.33378   | 3.91159   | 14.5142   | 2.10279   | 4.4803    | 3.86464   | 8.06658  |
| ZNF362     | 6.69107   | 5.56457  | 6.28734  | 6.28106   | 8.05557   | 12.2639   | 6.58473  | 5.84714  | 1.85121   | 3.17028   | 5.91317   | 2.77235   | 3.12      | 2.95185   | 5.87468  |
| ZNF365     | 0.0738412 | 0.220879 | 0.407244 | 0.0824368 | 0.071688  | 0.0759737 | 0.101874 | 0.10117  | 0.123654  | 0.409329  | 0.475832  | 0.532756  | 1.54439   | 0.202611  | 0.198835 |
| ZNF366     | 0.892102  | 0.642967 | 0.695315 | 1.00671   | 0.87611   | 2.32278   | 0.631347 | 0.727303 | 0.264886  | 0.712524  | 0.944651  | 0.519627  | 1.07505   | 1.09627   | 1.77882  |
| ZNF367     | 0.525126  | 0.484943 | 0.558542 | 1.25626   | 0.436983  | 1.08058   | 0.60671  | 0.377795 | 0.388295  | 0.761089  | 0.910374  | 0.451785  | 1.4843    | 0.862569  | 0.439919 |
| ZNF37A     | 1.93685   | 1.61125  | 1.8484   | 1.03495   | 0.609585  | 1.30966   | 1.00695  | 1.55068  | 0.475371  | 0.70704   | 0.82171   | 0.585748  | 1.00053   | 1.27252   | 1.33927  |
| ZNF37BP    | 1.38699   | 1.49401  | 1.57825  | 0.602401  | 0.804832  | 0.728511  | 0.749337 | 0.939829 | 0.152092  | 0.393517  | 0.371938  | 0.420166  | 0.272578  | 0.844329  | 1.57596  |



|             |           |           |           |           |           |           |           |           |           |           |           |           |           |           |          |
|-------------|-----------|-----------|-----------|-----------|-----------|-----------|-----------|-----------|-----------|-----------|-----------|-----------|-----------|-----------|----------|
| ZNF382      | 0.270152  | 0.141997  | 0.16931   | 0.0337454 | 0.0762982 | 0.292767  | 0.0934701 | 0.152784  | 0.0199403 | 0.246596  | 0.536005  | 0.076149  | 0.068664  | 0.183979  | 0.352703 |
| ZNF383      | 1.7972    | 1.26345   | 1.37189   | 0.942871  | 0.837502  | 1.21032   | 1.04465   | 1.54638   | 0.955107  | 0.871509  | 1.02363   | 0.444236  | 0.384758  | 0.947834  | 1.00894  |
| ZNF384      | 4.33068   | 4.57971   | 4.40603   | 5.13537   | 4.97614   | 7.48729   | 5.5768    | 3.84286   | 4.86486   | 4.01247   | 5.04506   | 3.81563   | 4.9503    | 4.54052   | 4.40185  |
| ZNF385A     | 17.7575   | 26.0401   | 23.4015   | 26.4098   | 43.9905   | 42.9977   | 44.0823   | 24.1017   | 50.0786   | 29.3082   | 31.8198   | 40.3797   | 46.9634   | 21.0243   | 10.7754  |
| ZNF385B     | 0.0486028 | 0.0858645 | 0.0804154 | 0.0166955 | 0.289405  | 0.193128  | 0.129484  | 0.0143981 | 0.10852   | 0.686268  | 0.109733  | 0.292703  | 0.49912   | 0.150295  | 0.180316 |
| ZNF385C     | 0.347681  | 0.32215   | 0.354001  | 0.0734964 | 0.304654  | 0.296046  | 0.274826  | 0.221839  | 0.032572  | 0.0559455 | 0.0100638 | 0.0574096 | 0.0172555 | 0.111823  | 0.268861 |
| ZNF385D     | 1.81364   | 0.898454  | 1.0566    | 1.56628   | 0.39679   | 2.31643   | 1.15204   | 0.953466  | 0.03111   | 0.705333  | 2.22039   | 0.137082  | 1.15367   | 1.00129   | 2.09103  |
| ZNF385D-AS1 | 0.25293   | 0.0304663 | 0.0523103 | 0.162907  | 0.0982217 | 0.0807623 | 0.108295  | 0.0561957 | 0         | 0         | 0.214144  | 0.135733  | 0         | 0         | 0.499453 |
| ZNF385D-AS2 | 0         | 0         | 0         | 0         | 0         | 0         | 0         | 0         | 0         | 0         | 0         | 0         | 0         | 0         | 0        |
| ZNF391      | 0.396965  | 0.399263  | 0.410497  | 0.501128  | 0.439344  | 0.388712  | 0.260614  | 0.33956   | 0.120865  | 0.242888  | 0.375304  | 0.29114   | 0.268926  | 0.230812  | 0.391938 |
| ZNF394      | 4.76916   | 5.02052   | 5.02535   | 4.88896   | 8.12025   | 6.33099   | 4.57797   | 3.82725   | 6.21626   | 4.70381   | 6.33828   | 3.34545   | 4.79911   | 4.04561   | 3.73892  |
| ZNF395      | 11.0944   | 11.8775   | 14.2416   | 10.6086   | 12.1278   | 29.9324   | 10.6312   | 10.1082   | 4.10282   | 6.21829   | 6.17505   | 4.8037    | 6.83155   | 5.50875   | 4.3743   |
| ZNF396      | 0.319451  | 0.222629  | 0.155732  | 0.229266  | 0.115193  | 0.539158  | 0.16283   | 0.202787  | 0.0486319 | 0.157513  | 0.18031   | 0.0816341 | 0.0552075 | 0.0626095 | 0.213001 |
| ZNF397      | 2.4873    | 2.71973   | 2.78475   | 2.16457   | 1.49382   | 2.49836   | 1.7799    | 2.1567    | 1.31679   | 1.27013   | 1.38081   | 1.46109   | 1.28666   | 1.75468   | 1.59659  |
| ZNF398      | 3.37693   | 3.53718   | 3.75575   | 4.37784   | 3.00455   | 3.08981   | 3.14841   | 3.65109   | 3.15877   | 3.79199   | 3.46023   | 2.85953   | 4.12289   | 2.9471    | 2.02023  |
| ZNF404      | 0.21359   | 0.296625  | 0.23906   | 0.116529  | 0.136615  | 0.0962834 | 0.172143  | 0.368475  | 0.0918099 | 0.0946153 | 0.184383  | 0.134849  | 0.0810629 | 0.36116   | 0.108262 |
| ZNF407      | 3.55716   | 2.67013   | 2.82615   | 3.12733   | 1.80999   | 2.23293   | 1.88596   | 2.83351   | 1.37232   | 2.19852   | 1.35876   | 1.92585   | 2.44209   | 3.22303   | 2.49723  |
| ZNF408      | 1.54955   | 1.51516   | 1.28944   | 2.13228   | 3.48306   | 3.12782   | 1.42579   | 0.874873  | 3.61896   | 2.07069   | 2.57243   | 1.91748   | 2.82286   | 1.84363   | 1.51848  |
| ZNF41       | 1.53591   | 1.37256   | 1.31653   | 1.43215   | 0.967664  | 1.26412   | 0.750854  | 1.17618   | 1.25133   | 1.12155   | 1.27666   | 0.714359  | 1.43319   | 1.17998   | 1.51012  |
| ZNF410      | 5.79959   | 5.67639   | 5.53097   | 8.98535   | 6.50157   | 7.26257   | 5.51065   | 4.01508   | 14.7335   | 8.60984   | 8.69069   | 6.26145   | 10.5007   | 6.20696   | 5.43145  |
| ZNF414      | 2.74805   | 3.20636   | 2.97383   | 3.59733   | 5.35315   | 5.51466   | 3.833     | 2.33663   | 2.40609   | 2.49826   | 4.62815   | 1.63682   | 2.74101   | 1.87101   | 2.58126  |
| ZNF415      | 0.812287  | 0.583625  | 0.689665  | 0.4112    | 0.343111  | 0.637048  | 0.292877  | 0.493927  | 0.12149   | 0.599182  | 0.941101  | 0.132557  | 0.537875  | 0.476673  | 1.05399  |
| ZNF416      | 2.02422   | 1.6284    | 1.93624   | 1.92771   | 1.20719   | 2.02369   | 2.21833   | 1.62228   | 2.94953   | 2.50658   | 2.989     | 1.17682   | 2.9094    | 1.78528   | 1.05121  |
| ZNF417      | 2.41291   | 2.82718   | 3.12392   | 1.89988   | 2.23417   | 1.91234   | 2.38402   | 2.31694   | 0.969507  | 1.4705    | 1.73078   | 1.12024   | 1.19549   | 1.94106   | 2.59721  |
| ZNF418      | 1.02119   | 1.1803    | 1.52823   | 0.443411  | 0.873331  | 0.830447  | 0.713984  | 1.09109   | 0.244546  | 0.259219  | 0.310865  | 0.332503  | 0.162865  | 0.425774  | 0.420192 |
| ZNF419      | 1.60684   | 1.5701    | 1.81185   | 1.04922   | 1.13835   | 1.70832   | 1.23261   | 1.18069   | 1.09192   | 0.834714  | 1.89699   | 0.585714  | 0.77403   | 1.19703   | 1.20603  |

|            |          |          |          |          |           |           |          |           |           |          |          |          |           |          |          |
|------------|----------|----------|----------|----------|-----------|-----------|----------|-----------|-----------|----------|----------|----------|-----------|----------|----------|
| ZNF420     | 0.673814 | 0.64139  | 0.663474 | 0.433567 | 0.255284  | 0.551354  | 0.375287 | 0.604672  | 0.284218  | 0.404289 | 0.526891 | 0.301039 | 0.241759  | 0.395112 | 0.462599 |
| ZNF423     | 1.5241   | 0.829446 | 1.02308  | 0.643209 | 1.40243   | 1.98988   | 1.77     | 0.810115  | 0.116674  | 0.404441 | 0.632494 | 0.286654 | 0.678035  | 0.738906 | 1.89279  |
| ZNF425     | 0.467464 | 0.592531 | 0.470012 | 0.785599 | 1.21767   | 0.64911   | 0.262762 | 0.370703  | 1.44519   | 0.983876 | 0.57642  | 0.540318 | 0.58465   | 0.398425 | 0.227222 |
| ZNF426     | 1.62872  | 1.67899  | 1.79392  | 6.32996  | 1.56408   | 1.83568   | 1.36228  | 1.75323   | 4.99746   | 6.2396   | 7.34032  | 4.0134   | 7.22345   | 5.43426  | 2.40252  |
| ZNF426-DT  | 0.299264 | 0.204269 | 0.082524 | 0.1542   | 0.154953  | 0.0212349 | 0.113896 | 0.0443268 | 0.151862  | 0.125202 | 0.225221 | 0.071377 | 0.209174  | 0.117306 | 0        |
| ZNF428     | 4.30657  | 2.57911  | 2.41253  | 5.41906  | 7.90711   | 10.3235   | 2.66461  | 1.86346   | 1.58926   | 3.42403  | 8.23779  | 2.29654  | 3.14621   | 3.4178   | 4.27534  |
| ZNF429     | 0.663862 | 1.0162   | 1.09576  | 0.458291 | 0.335512  | 0.730253  | 0.518615 | 0.866628  | 0.371372  | 0.354814 | 0.763761 | 0.429951 | 0.235679  | 0.503013 | 0.702497 |
| ZNF43      | 1.82216  | 1.08618  | 1.17566  | 0.666056 | 0.527291  | 0.586804  | 0.693496 | 1.46713   | 0.734989  | 0.698807 | 1.31419  | 0.356597 | 0.422028  | 0.506695 | 1.24692  |
| ZNF430     | 2.44481  | 2.55506  | 2.36449  | 1.83178  | 1.13746   | 1.42804   | 1.09229  | 2.10976   | 4.29366   | 2.86837  | 3.21988  | 2.32821  | 2.3432    | 2.39504  | 1.48414  |
| ZNF431     | 1.48404  | 1.75059  | 1.92441  | 1.38642  | 0.807257  | 0.881186  | 1.29462  | 1.80344   | 2.8002    | 2.21093  | 1.98348  | 2.26161  | 1.41669   | 2.16116  | 1.54114  |
| ZNF432     | 2.23289  | 1.73704  | 2.2359   | 1.13615  | 0.830985  | 1.13285   | 1.35971  | 2.06297   | 1.04244   | 2.38213  | 2.76748  | 1.14502  | 1.17053   | 4.30824  | 1.85723  |
| ZNF433     | 1.72184  | 1.52818  | 1.37867  | 1.6773   | 0.819021  | 1.15446   | 1.01052  | 1.44653   | 0.377098  | 1.09635  | 1.11523  | 0.646749 | 0.892991  | 0.920206 | 0.71665  |
| ZNF433-AS1 | 0.876169 | 0.779665 | 0.641239 | 0.537846 | 0.240808  | 0.301719  | 0.543651 | 0.591714  | 0.0959415 | 0.308887 | 0.463442 | 0.261465 | 0.228621  | 0.225707 | 0.413467 |
| ZNF436     | 4.93999  | 6.34585  | 6.57128  | 6.48651  | 3.54141   | 8.70408   | 3.52427  | 5.02394   | 2.01656   | 3.98152  | 5.00612  | 2.77464  | 3.39432   | 3.11414  | 5.66664  |
| ZNF436-AS1 | 0.786546 | 2.07837  | 2.7962   | 0.355429 | 0.79955   | 0.746941  | 0.865816 | 0.761168  | 0.192491  | 0.143211 | 0.159965 | 0.163962 | 0.0816275 | 0.365242 | 0.883774 |
| ZNF438     | 1.69619  | 1.41056  | 1.56301  | 1.67333  | 1.05016   | 2.88343   | 1.44732  | 1.02999   | 0.757204  | 1.42431  | 1.89435  | 0.755845 | 1.219     | 1.08526  | 1.50838  |
| ZNF439     | 1.53745  | 2.00505  | 2.5132   | 0.548442 | 1.21706   | 1.0196    | 1.15621  | 1.19556   | 1.62938   | 0.705067 | 1.66884  | 1.08951  | 0.314755  | 0.726275 | 1.23137  |
| ZNF44      | 3.72113  | 3.16768  | 3.15746  | 1.81127  | 1.70207   | 1.9036    | 1.66252  | 2.30054   | 1.16433   | 1.45835  | 1.64375  | 1.33128  | 0.882527  | 1.49513  | 2.03833  |
| ZNF440     | 5.43012  | 6.84605  | 8.8696   | 3.49102  | 1.64923   | 2.98819   | 3.09646  | 5.05213   | 2.71003   | 3.81388  | 2.84762  | 6.1231   | 3.08207   | 2.46193  | 1.97145  |
| ZNF441     | 2.04479  | 1.28353  | 1.48068  | 0.680957 | 0.202052  | 0.917073  | 0.790106 | 1.56754   | 0.354855  | 0.966489 | 1.03375  | 0.32017  | 0.644537  | 0.416057 | 0.762164 |
| ZNF442     | 0.772248 | 0.531008 | 0.440284 | 0.645036 | 0.0883892 | 0.498361  | 0.224825 | 0.716049  | 0.396573  | 0.31214  | 0.458827 | 0.191235 | 0.246503  | 0.301829 | 0.408596 |
| ZNF443     | 1.79511  | 1.61279  | 1.69903  | 0.893841 | 0.467099  | 0.811731  | 0.823055 | 1.51749   | 0.466805  | 0.943624 | 0.96923  | 0.591607 | 0.441375  | 0.669711 | 0.853007 |
| ZNF444     | 1.58099  | 2.27443  | 2.12419  | 2.78476  | 9.8233    | 5.21293   | 1.90755  | 1.05628   | 3.75535   | 2.13911  | 3.06318  | 2.094    | 3.60273   | 2.71915  | 2.62477  |
| ZNF445     | 2.5855   | 2.54587  | 2.38923  | 2.09664  | 2.69031   | 3.48013   | 2.48023  | 1.99074   | 0.605019  | 1.48508  | 1.23886  | 1.12615  | 1.35637   | 1.7915   | 2.79213  |
| ZNF446     | 1.22883  | 1.63717  | 1.84832  | 1.88034  | 3.68746   | 2.62377   | 1.53059  | 1.00108   | 1.2018    | 0.782841 | 1.16651  | 0.992503 | 0.594628  | 0.827131 | 1.04281  |
| ZNF449     | 0.570166 | 0.848869 | 0.811293 | 0.840229 | 0.389693  | 1.07779   | 0.481738 | 0.582724  | 0.270815  | 1.01618  | 1.60268  | 0.562998 | 0.378904  | 0.834383 | 1.29375  |

|            |          |          |          |           |           |          |           |           |           |           |           |           |           |          |           |
|------------|----------|----------|----------|-----------|-----------|----------|-----------|-----------|-----------|-----------|-----------|-----------|-----------|----------|-----------|
| ZNF45      | 1.5239   | 1.56561  | 1.67763  | 1.7354    | 1.64871   | 2.19124  | 1.06969   | 1.27527   | 0.909913  | 1.39913   | 1.78723   | 0.869765  | 1.52264   | 1.73237  | 1.59242   |
| ZNF451     | 2.84518  | 2.66401  | 2.83328  | 2.95858   | 0.6478    | 2.18819  | 1.93956   | 2.55574   | 1.30996   | 2.61307   | 3.00646   | 1.83648   | 2.74679   | 2.81244  | 2.79803   |
| ZNF451-AS1 | 0.50311  | 0.436331 | 0.332966 | 0.311082  | 0         | 0.171357 | 0.344661  | 0.32789   | 0.285941  | 0.126291  | 0.151453  | 0.215993  | 0.086561  | 0.368126 | 0.192674  |
| ZNF454     | 0.13365  | 0.118346 | 0.164352 | 0.0967831 | 0.269324  | 0.252207 | 0.070112  | 0.0834647 | 0.021996  | 0.036269  | 0.0937864 | 0.043938  | 0.0326276 | 0.122711 | 0.217875  |
| ZNF460     | 11.8575  | 12.4337  | 14.3435  | 16.4515   | 11.2413   | 11.8867  | 13.3143   | 12.3757   | 11.3039   | 14.7156   | 13.7833   | 14.8778   | 21.9075   | 14.3173  | 13.4373   |
| ZNF460-AS1 | 0.363028 | 0.655922 | 0.675726 | 0.0935278 | 0.140977  | 0.103038 | 0.483576  | 0.376401  | 0.0736879 | 0         | 0.102453  | 0.173171  | 0.117112  | 0.237168 | 0.260677  |
| ZNF461     | 0.780697 | 0.715117 | 0.862294 | 0.5085    | 0.54535   | 0.556911 | 0.455602  | 0.654852  | 0.338236  | 0.58699   | 0.568921  | 0.179807  | 0.350734  | 0.388292 | 0.656039  |
| ZNF462     | 3.85567  | 4.73684  | 3.64374  | 3.69628   | 3.51413   | 5.46283  | 3.83142   | 3.33572   | 2.58202   | 1.99986   | 1.95679   | 3.67      | 2.0991    | 2.69346  | 2.93935   |
| ZNF467     | 1.4475   | 2.27582  | 1.96778  | 2.04126   | 4.43119   | 3.57504  | 1.65271   | 0.962932  | 3.88661   | 4.04787   | 4.96901   | 4.37305   | 5.13926   | 1.76081  | 2.24899   |
| ZNF468     | 1.35433  | 1.25982  | 1.23138  | 1.40426   | 0.4315    | 1.52617  | 0.916738  | 1.06354   | 0.795721  | 1.13099   | 2.15486   | 0.600308  | 1.35902   | 1.25497  | 0.877441  |
| ZNF469     | 0.510083 | 0.396097 | 0.588737 | 0.655715  | 3.12305   | 1.89553  | 1.12677   | 0.66518   | 0.160109  | 1.29581   | 1.75516   | 0.73999   | 2.23247   | 2.31779  | 8.77039   |
| ZNF470     | 0.534744 | 0.632408 | 0.707804 | 0.464234  | 0.307086  | 0.62366  | 0.392234  | 0.489637  | 0.189457  | 0.508453  | 0.45      | 0.185514  | 0.261374  | 0.525084 | 0.260641  |
| ZNF471     | 0.703873 | 1.12572  | 1.21032  | 0.786126  | 0.515195  | 0.793889 | 0.441802  | 0.694321  | 0.17055   | 0.360774  | 0.349451  | 0.290054  | 0.37805   | 0.543145 | 0.725061  |
| ZNF473     | 0.740265 | 0.959729 | 0.825935 | 1.50566   | 0.68842   | 1.81634  | 0.811848  | 0.740122  | 1.22185   | 1.50369   | 1.58887   | 1.61343   | 1.64338   | 1.47121  | 1.43381   |
| ZNF474     | 0.094269 | 0.193036 | 0.155972 | 0.0364301 | 0.0366081 | 0.120403 | 0.121088  | 0.0628339 | 0.0143511 | 0.192266  | 0.0798135 | 0.556479  | 0.106438  | 0.067745 | 0.186151  |
| ZNF479     | 0        | 0        | 0        | 0         | 0         | 0        | 0         | 0         | 0         | 0         | 0         | 0         | 0         | 0        | 0         |
| ZNF48      | 0.902834 | 0.848554 | 1.27812  | 0.760042  | 1.5308    | 1.98143  | 0.929195  | 0.672403  | 0.425882  | 0.646374  | 0.832575  | 0.345747  | 0.410214  | 0.701145 | 0.986133  |
| ZNF480     | 1.60262  | 1.41995  | 1.2452   | 1.23992   | 0.264833  | 1.65496  | 0.572863  | 1.33769   | 0.676313  | 1.38784   | 1.79816   | 0.561161  | 1.12201   | 1.08455  | 1.46209   |
| ZNF483     | 0.919145 | 0.551202 | 0.720851 | 0.234629  | 0.141902  | 0.572021 | 0.534353  | 0.603277  | 0.0462144 | 0.179923  | 0.268126  | 0.156876  | 0.0952108 | 0.232847 | 0.429911  |
| ZNF484     | 1.88999  | 1.28479  | 1.38551  | 1.46077   | 0.290674  | 1.52565  | 1.03624   | 1.57157   | 0.290573  | 1.19194   | 1.85367   | 0.569054  | 1.24054   | 1.16139  | 1.90805   |
| ZNF485     | 0.681335 | 0.807241 | 0.72073  | 1.28917   | 0.347     | 1.11274  | 0.420845  | 0.665073  | 1.14266   | 0.406545  | 0.706098  | 0.567434  | 0.605342  | 0.519549 | 0.417058  |
| ZNF486     | 0.659194 | 0.555102 | 0.52568  | 0.563039  | 0.368993  | 0.632089 | 0.56279   | 0.591115  | 0.347167  | 0.521756  | 1.60897   | 0.208215  | 0.655205  | 0.654159 | 0.665239  |
| ZNF487     | 0.782114 | 0.617464 | 0.841906 | 0.456405  | 0.190285  | 0.401181 | 0.419599  | 0.544338  | 0.172144  | 0.626827  | 0.563786  | 0.296668  | 0.316145  | 0.325044 | 0.771365  |
| ZNF488     | 0.237887 | 0.174656 | 0.112456 | 0.24515   | 0.070385  | 0.144684 | 0.0711365 | 0.181212  | 0.0206943 | 0.0710889 | 0.0383636 | 0.0121582 | 0.0986681 | 0.023682 | 0.0569394 |
| ZNF490     | 1.45305  | 1.54671  | 1.48928  | 1.61196   | 1.60869   | 2.23346  | 1.41454   | 1.29716   | 0.98155   | 1.03912   | 1.22232   | 1.05435   | 1.05392   | 0.980892 | 1.14273   |
| ZNF491     | 0.524674 | 0.545091 | 0.590033 | 0.20276   | 0.496641  | 0.216396 | 0.290168  | 0.429858  | 0.06989   | 0.174919  | 0.453473  | 0.263966  | 0.142812  | 0.205663 | 0.659311  |

|            |          |           |          |           |          |          |          |          |           |           |          |           |           |           |           |
|------------|----------|-----------|----------|-----------|----------|----------|----------|----------|-----------|-----------|----------|-----------|-----------|-----------|-----------|
| ZNF492     | 0.177151 | 0.0993863 | 0.106251 | 0.0759963 | 0.110092 | 0.185687 | 0.16513  | 0.133485 | 0.0796767 | 0.0752688 | 0.190788 | 0.0720004 | 0.039017  | 0.0911798 | 0.125272  |
| ZNF493     | 1.54882  | 1.46698   | 1.70208  | 0.610151  | 0.451098 | 0.540343 | 0.93647  | 1.60025  | 0.464422  | 0.623605  | 0.634406 | 0.807962  | 0.184564  | 0.882032  | 0.98152   |
| ZNF496     | 2.81534  | 1.82137   | 1.83303  | 1.94249   | 2.93866  | 3.95236  | 2.07347  | 1.53124  | 1.01143   | 1.59594   | 1.72329  | 1.04545   | 1.6119    | 1.99911   | 2.88022   |
| ZNF497     | 0.315015 | 0.657896  | 0.369881 | 0.473399  | 1.26737  | 0.517697 | 0.26966  | 0.338756 | 0.0928741 | 0.2638    | 0.209364 | 0.295102  | 0.416185  | 0.336477  | 0.509116  |
| ZNF500     | 1.02601  | 1.18496   | 1.12665  | 1.10696   | 2.62294  | 1.67001  | 1.24821  | 0.856763 | 0.73823   | 0.755716  | 0.985356 | 0.715992  | 0.664717  | 1.01791   | 1.32839   |
| ZNF501     | 0.718516 | 0.74184   | 0.928407 | 0.479531  | 0.361405 | 0.62346  | 0.406283 | 0.620313 | 0.141678  | 0.480966  | 0.842015 | 0.146891  | 0.375281  | 0.307575  | 1.27757   |
| ZNF502     | 1.30163  | 1.31996   | 1.26848  | 0.919993  | 0.561044 | 0.696325 | 0.809215 | 1.07804  | 0.406683  | 0.581622  | 1.0001   | 0.433979  | 0.659531  | 0.74796   | 0.910182  |
| ZNF503     | 3.38371  | 3.23746   | 1.62992  | 5.3557    | 8.15201  | 7.4884   | 3.37853  | 1.74179  | 4.08181   | 3.84475   | 4.18924  | 2.58786   | 6.08215   | 4.13481   | 5.37766   |
| ZNF503-AS1 | 0.511706 | 0.414648  | 0.288627 | 0.191755  | 0.523882 | 0.11883  | 0.345238 | 0.3204   | 0.396582  | 0.45249   | 0.17067  | 0.12482   | 0.195089  | 0.121564  | 0.0835084 |
| ZNF503-AS2 | 0.476577 | 0.605134  | 0.352257 | 0.994587  | 1.74527  | 0.97306  | 0.392234 | 0.271554 | 0.809481  | 0.947504  | 1.37323  | 0.503667  | 0.706193  | 0.687858  | 0.409573  |
| ZNF506     | 4.02428  | 4.17651   | 4.38321  | 2.49688   | 0.876018 | 2.43657  | 2.27355  | 3.8549   | 1.61957   | 1.6778    | 2.60155  | 1.32515   | 1.83728   | 2.20151   | 3.15965   |
| ZNF507     | 3.77219  | 2.55871   | 2.84777  | 2.36086   | 1.04335  | 3.05628  | 2.14664  | 2.87273  | 0.86551   | 1.48659   | 1.82791  | 1.0642    | 2.11656   | 1.796     | 1.92923   |
| ZNF510     | 1.92281  | 1.51541   | 1.75467  | 1.07587   | 0.590171 | 1.2209   | 1.27876  | 1.48568  | 0.659878  | 0.995184  | 1.22703  | 0.732824  | 0.735399  | 0.982495  | 1.31902   |
| ZNF511     | 3.6966   | 3.06117   | 3.43681  | 6.6715    | 6.35478  | 7.08429  | 4.75969  | 2.65711  | 4.05578   | 5.4252    | 16.0578  | 2.83575   | 7.34313   | 5.43433   | 3.27525   |
| ZNF512     | 2.42493  | 2.45718   | 2.35248  | 2.31218   | 1.99987  | 3.491    | 1.86959  | 2.10508  | 0.685041  | 2.23558   | 1.90492  | 1.03301   | 1.17341   | 2.73075   | 2.89909   |
| ZNF512B    | 3.65222  | 5.01619   | 5.03638  | 4.79596   | 8.26741  | 10.0728  | 5.32009  | 3.5027   | 2.62206   | 2.14331   | 1.5943   | 3.03888   | 3.12244   | 3.49969   | 3.63918   |
| ZNF513     | 2.63698  | 3.55536   | 3.71163  | 3.29372   | 7.50877  | 4.77925  | 1.92227  | 2.26926  | 3.3847    | 3.0559    | 2.09245  | 3.09769   | 2.27575   | 3.78573   | 2.79913   |
| ZNF514     | 2.40752  | 3.61436   | 3.64031  | 1.78892   | 3.33497  | 2.56871  | 1.73478  | 1.97652  | 0.965444  | 1.16998   | 1.25118  | 1.3944    | 1.03476   | 1.77424   | 1.44941   |
| ZNF516     | 4.011    | 4.50629   | 5.0716   | 3.65513   | 6.17629  | 5.6701   | 4.55206  | 3.15453  | 2.71531   | 3.05757   | 3.03174  | 3.23088   | 3.50705   | 2.70909   | 3.75672   |
| ZNF517     | 0.551248 | 0.882637  | 0.944022 | 0.622713  | 1.94525  | 1.06803  | 0.701962 | 0.623295 | 0.321052  | 0.344252  | 0.482091 | 0.305972  | 0.304714  | 0.321915  | 0.417677  |
| ZNF518A    | 1.97837  | 1.90009   | 1.8014   | 1.73882   | 0.605102 | 1.19261  | 1.15191  | 1.92742  | 1.1141    | 1.8211    | 1.61818  | 1.16503   | 1.6379    | 1.68023   | 1.84804   |
| ZNF518B    | 1.53153  | 2.10763   | 2.18065  | 1.92213   | 0.927754 | 2.17346  | 0.678124 | 2.04016  | 3.34034   | 2.02692   | 2.07544  | 1.11733   | 2.23891   | 2.29146   | 1.16442   |
| ZNF519     | 0.591941 | 0.510104  | 0.416349 | 0.2956    | 0.13367  | 0.219819 | 0.464467 | 0.537655 | 0.0254068 | 0.104733  | 0.226667 | 0.100756  | 0.0824402 | 0.167634  | 0.265891  |
| ZNF521     | 5.07463  | 2.51457   | 2.5227   | 2.32691   | 4.65726  | 4.64202  | 4.44388  | 3.1197   | 0.323191  | 3.74553   | 7.22129  | 1.23588   | 2.60728   | 4.08298   | 7.91627   |
| ZNF524     | 2.75756  | 4.5764    | 4.66388  | 5.11514   | 12.2792  | 7.9311   | 4.78104  | 2.65037  | 6.39339   | 4.12758   | 7.65552  | 4.45776   | 5.10026   | 3.60839   | 3.08016   |
| ZNF525     | 1.76751  | 1.76923   | 1.95592  | 1.42245   | 0.3232   | 0.958251 | 0.817807 | 1.48402  | 0.534759  | 0.996055  | 1.31496  | 0.656636  | 0.699177  | 0.984788  | 0.553848  |

|            |           |           |           |            |           |            |           |           |           |           |           |           |            |            |           |
|------------|-----------|-----------|-----------|------------|-----------|------------|-----------|-----------|-----------|-----------|-----------|-----------|------------|------------|-----------|
| ZNF526     | 1.67477   | 2.22801   | 1.97402   | 2.55832    | 4.38574   | 3.76073    | 2.5891    | 1.79794   | 2.07579   | 1.47885   | 1.78186   | 1.58543   | 2.54841    | 2.27348    | 1.9795    |
| ZNF527     | 0.613816  | 0.649993  | 0.679023  | 0.567282   | 0.427799  | 0.469008   | 0.376307  | 0.477148  | 0.324415  | 0.402327  | 0.759407  | 0.202935  | 0.451507   | 0.483657   | 0.615391  |
| ZNF528     | 1.98967   | 1.62579   | 1.97809   | 0.737431   | 0.804292  | 0.812414   | 1.27537   | 1.61315   | 0.340098  | 0.679076  | 0.807806  | 0.349672  | 0.450431   | 1.08854    | 1.13629   |
| ZNF528-AS1 | 0.928525  | 0.447378  | 0.53625   | 0.162488   | 0.244922  | 0.671287   | 0.500075  | 0.420383  | 0.106683  | 0.109943  | 0.237326  | 0.11282   | 0.124337   | 0.192284   | 0.52836   |
| ZNF529     | 1.29065   | 1.1421    | 1.34871   | 0.714104   | 0.398031  | 0.864269   | 0.809869  | 1.1408    | 0.405699  | 0.510803  | 0.888252  | 0.392463  | 0.487289   | 0.658333   | 0.77946   |
| ZNF529-AS1 | 0.43329   | 0.371848  | 0.469655  | 0.357839   | 0.229214  | 0.2834     | 0.34354   | 0.25626   | 0.229027  | 0.161736  | 0.311356  | 0.134557  | 0.12942    | 0.323467   | 0.0540136 |
| ZNF530     | 0.690087  | 0.54168   | 0.586011  | 0.301416   | 0.269761  | 0.373574   | 0.594853  | 0.552369  | 0.144713  | 0.281062  | 0.371454  | 0.143882  | 0.427549   | 0.384555   | 0.446302  |
| ZNF532     | 6.91065   | 6.87883   | 6.56077   | 8.43398    | 7.05015   | 7.6188     | 6.23301   | 5.08494   | 5.6342    | 6.10557   | 7.94087   | 5.63353   | 7.04628    | 6.23469    | 9.7772    |
| ZNF534     | 0.0355937 | 0.044589  | 0.0942261 | 0.00366804 | 0         | 0.00606152 | 0.0568957 | 0.0158164 | 0         | 0         | 0.0120543 | 0         | 0          | 0          | 0.0255586 |
| ZNF536     | 0.132938  | 0.0284674 | 0.0366586 | 0.00304437 | 0.0275332 | 0.113195   | 0.114682  | 0.0315052 | 0         | 0         | 0.0066698 | 0.0021138 | 0.00953011 | 0.00463195 | 0         |
| ZNF540     | 0.578005  | 0.575668  | 0.689326  | 0.148825   | 0.225806  | 0.239977   | 0.292183  | 0.361738  | 0.107174  | 0.106941  | 0.155378  | 0.117244  | 0.00845753 | 0.18772    | 0.150604  |
| ZNF541     | 0.162073  | 0.101057  | 0.0788695 | 0.117897   | 0.17771   | 0.438362   | 0.146951  | 0.101673  | 0.0290274 | 0.0119658 | 0.0322871 | 0.0545729 | 0.00922664 | 0.0622841  | 0.0479206 |
| ZNF542P    | 0.977191  | 0.76034   | 0.827585  | 0.913202   | 0.593967  | 1.52976    | 0.589047  | 0.916993  | 0.421343  | 1.29504   | 1.98015   | 0.442976  | 1.32753    | 1.15468    | 1.08957   |
| ZNF543     | 2.78872   | 3.14503   | 3.38792   | 2.31213    | 3.4686    | 2.70747    | 2.5753    | 2.4845    | 2.32899   | 1.69201   | 1.91577   | 1.95276   | 1.57664    | 2.28568    | 2.15579   |
| ZNF544     | 2.67014   | 3.30031   | 3.15787   | 2.13394    | 2.34893   | 1.37111    | 2.32696   | 2.57156   | 1.15145   | 1.66197   | 2.10075   | 1.87157   | 1.99524    | 2.65579    | 2.26949   |
| ZNF546     | 0.314359  | 0.312558  | 0.376853  | 0.169357   | 0.125399  | 0.223402   | 0.128384  | 0.304914  | 0.0245795 | 0.123034  | 0.237594  | 0.0784311 | 0.111612   | 0.192878   | 0.385073  |
| ZNF547     | 0.519063  | 0.524359  | 0.387218  | 0.480705   | 0.514995  | 0.647227   | 0.19505   | 0.353804  | 0.296492  | 0.447839  | 0.673362  | 0.127779  | 0.444402   | 0.468982   | 0.360002  |
| ZNF548     | 2.36009   | 2.2228    | 2.43419   | 1.5725     | 1.56438   | 1.94461    | 1.77128   | 2.16072   | 1.53627   | 1.35339   | 2.18192   | 0.979009  | 1.526      | 1.51261    | 2.06723   |
| ZNF549     | 1.34781   | 1.09045   | 1.2358    | 0.798651   | 0.628085  | 1.12374    | 0.660439  | 0.883394  | 0.458247  | 0.817626  | 0.963623  | 0.417904  | 0.811627   | 0.968583   | 1.08879   |
| ZNF550     | 1.59515   | 1.42327   | 1.50179   | 0.918782   | 0.984451  | 1.07013    | 0.981165  | 1.08351   | 0.549453  | 0.62017   | 0.909455  | 0.395829  | 0.544045   | 0.912291   | 0.987294  |
| ZNF551     | 3.27149   | 2.96073   | 3.48335   | 1.628      | 1.46849   | 1.30279    | 2.89734   | 3.09538   | 0.848372  | 1.15532   | 1.4955    | 1.08587   | 1.61717    | 1.66432    | 1.26836   |
| ZNF552     | 3.80752   | 3.50732   | 3.60073   | 3.21367    | 3.10985   | 2.2555     | 2.92265   | 3.74326   | 1.37228   | 3.22291   | 2.11438   | 2.68095   | 1.57394    | 3.24064    | 1.98487   |
| ZNF554     | 1.17476   | 1.39399   | 1.32093   | 0.816091   | 1.04989   | 1.3855     | 1.17186   | 0.893408  | 1.32254   | 0.337755  | 0.558119  | 0.690037  | 0.420919   | 0.402946   | 0.427473  |
| ZNF555     | 0.746741  | 0.618556  | 0.68769   | 0.477845   | 0.267297  | 0.615596   | 0.458492  | 0.655938  | 0.201348  | 0.452542  | 0.526127  | 0.22862   | 0.321452   | 0.386053   | 0.499243  |
| ZNF556     | 0         | 0         | 0         | 0          | 0         | 0.0361799  | 0         | 0.0503491 | 0         | 0         | 0         | 0         | 0          | 0          | 0         |
| ZNF557     | 1.6236    | 1.49952   | 1.50906   | 1.57381    | 1.38381   | 1.61891    | 1.29456   | 1.55603   | 0.756188  | 1.01163   | 1.61081   | 0.659509  | 1.162      | 1.02392    | 1.30708   |

|               |           |          |            |           |           |           |           |          |           |           |            |            |           |            |           |
|---------------|-----------|----------|------------|-----------|-----------|-----------|-----------|----------|-----------|-----------|------------|------------|-----------|------------|-----------|
| ZNF558        | 1.74559   | 2.1455   | 2.20291    | 2.5551    | 1.91706   | 2.65555   | 1.36468   | 1.497    | 1.44212   | 1.98856   | 2.29062    | 1.43995    | 2.00501   | 2.29825    | 1.55683   |
| ZNF559        | 2.21071   | 1.79453  | 2.08448    | 1.24419   | 0.775808  | 1.50127   | 0.908378  | 1.64642  | 0.284384  | 0.903646  | 1.11887    | 0.422341   | 0.619367  | 0.959904   | 1.89097   |
| ZNF559-ZNF177 | 0.0728799 | 0.276295 | 0.159695   | 0.089193  | 0.208078  | 0.0110061 | 0.143151  | 0.226769 | 4.79E-05  | 9.92E-05  | 0.0855073  | 0.0917944  | 0.032141  | 0.112665   | 0.167709  |
| ZNF56         | 0.240152  | 0.103529 | 0.104563   | 0.0651272 | 0.0981681 | 0.129149  | 0.0577258 | 0.101097 | 0         | 0.015864  | 0.028537   | 0.00904395 | 0         | 0.0594539  | 0         |
| ZNF560        | 0         | 0        | 0.00683282 | 0         | 0         | 0         | 0         | 0        | 0.0100591 | 0.0310995 | 0.00932392 | 0          | 0         | 0.00863353 | 0         |
| ZNF561        | 3.03011   | 4.85695  | 4.45377    | 6.36616   | 2.43442   | 3.91704   | 2.75647   | 3.29235  | 11.1316   | 5.38012   | 7.3201     | 4.41946    | 5.92403   | 6.66867    | 2.55664   |
| ZNF561-AS1    | 0.68142   | 1.1248   | 0.897775   | 0.97531   | 1.17609   | 0.89182   | 0.878879  | 1.03175  | 1.95179   | 0.7919    | 2.30772    | 0.74942    | 0.480357  | 0.679304   | 0.942361  |
| ZNF562        | 3.95198   | 4.82289  | 4.99092    | 7.93297   | 2.44043   | 3.38484   | 2.69564   | 4.57083  | 9.3379    | 8.43554   | 7.21966    | 6.72397    | 11.6809   | 8.49812    | 4.88042   |
| ZNF563        | 1.31865   | 1.27068  | 1.08397    | 0.756857  | 0.25928   | 0.930936  | 0.657503  | 0.875218 | 1.03676   | 0.55517   | 1.1871     | 0.447876   | 0.296159  | 0.314057   | 0.491414  |
| ZNF564        | 3.99587   | 2.89358  | 3.2667     | 2.23286   | 1.24383   | 2.53344   | 1.83749   | 3.007    | 1.29073   | 1.60605   | 2.33075    | 0.921219   | 1.21561   | 1.48938    | 2.08573   |
| ZNF565        | 1.0946    | 1.11009  | 1.06077    | 0.805748  | 0.761086  | 1.27823   | 0.738101  | 0.843087 | 0.533242  | 0.785116  | 1.10622    | 0.589326   | 0.491     | 0.790037   | 1.16776   |
| ZNF566        | 0.888069  | 0.715178 | 0.806095   | 0.526026  | 0.217181  | 0.725009  | 0.582094  | 0.833107 | 0.240347  | 0.459267  | 0.793654   | 0.282414   | 0.458575  | 0.515754   | 0.879768  |
| ZNF567        | 1.3482    | 1.23715  | 1.27226    | 0.84479   | 0.326236  | 0.698017  | 0.680712  | 1.09581  | 0.792103  | 0.960861  | 1.36899    | 0.431438   | 0.778062  | 0.917082   | 0.98269   |
| ZNF568        | 0.780321  | 0.642127 | 0.616774   | 0.513536  | 0.318028  | 0.615094  | 0.28669   | 0.405104 | 0.221119  | 0.489691  | 0.6454     | 0.187956   | 0.246744  | 0.375526   | 0.571414  |
| ZNF569        | 0.512511  | 0.5839   | 0.481399   | 0.385114  | 0.116099  | 0.472762  | 0.158483  | 0.370075 | 0.221064  | 0.542745  | 0.668961   | 0.152798   | 0.344447  | 0.301343   | 0.590357  |
| ZNF57         | 3.28441   | 3.333    | 2.86018    | 3.21191   | 2.21796   | 2.60829   | 2.41737   | 2.25614  | 9.87453   | 2.23104   | 3.58356    | 4.37556    | 3.02268   | 2.64988    | 1.25531   |
| ZNF570        | 0.88164   | 0.741482 | 0.768428   | 0.539455  | 0.43408   | 0.817732  | 0.485338  | 0.706575 | 0.335543  | 0.726173  | 0.955274   | 0.230931   | 0.568829  | 0.376444   | 0.887433  |
| ZNF571        | 0.808046  | 0.892053 | 0.954033   | 0.711445  | 0.341212  | 0.66132   | 0.564309  | 0.725096 | 0.401287  | 0.403703  | 0.513656   | 0.449071   | 0.329005  | 0.348516   | 0.473195  |
| ZNF571-AS1    | 0.415437  | 0.38722  | 0.510633   | 0.0928076 | 0.364896  | 0.100541  | 0.277214  | 0.382079 | 0.0133115 | 0.078458  | 0.0784082  | 0.168974   | 0.0448133 | 0.243944   | 0.0698243 |
| ZNF572        | 0.367462  | 0.32005  | 0.403372   | 0.291293  | 0.164653  | 0.379077  | 0.314667  | 0.288889 | 0.180732  | 0.0975621 | 0.327069   | 0.0455069  | 0.0775085 | 0.132959   | 0.324752  |
| ZNF573        | 1.53033   | 2.06372  | 1.71157    | 1.66515   | 0.637444  | 1.01915   | 1.08351   | 1.26886  | 0.43731   | 0.697469  | 0.974765   | 0.544438   | 0.628823  | 0.987485   | 1.14185   |
| ZNF574        | 2.82889   | 2.82777  | 2.92796    | 3.64736   | 4.29483   | 5.42248   | 2.84262   | 1.85427  | 3.11787   | 2.69101   | 2.8611     | 2.21189    | 4.06327   | 2.76969    | 1.89344   |
| ZNF575        | 0.554568  | 0.814631 | 0.850417   | 0.738766  | 1.15558   | 0.886828  | 1.05016   | 0.564978 | 0.131786  | 0.356508  | 0.77873    | 0.416164   | 0.610885  | 0.466574   | 0.835279  |
| ZNF576        | 1.13634   | 1.24679  | 1.42405    | 1.79712   | 1.92242   | 2.63449   | 1.65712   | 1.04988  | 1.37023   | 1.17204   | 3.099      | 0.78893    | 1.45906   | 1.41712    | 1.13104   |
| ZNF577        | 1.77656   | 2.25845  | 2.31758    | 0.718234  | 1.072     | 0.71563   | 1.09222   | 1.46348  | 0.299582  | 0.531712  | 0.725069   | 0.620919   | 0.167525  | 0.874938   | 0.647653  |
| ZNF578        | 0.265331  | 0.183337 | 0.148459   | 0.202707  | 0.131     | 0.138555  | 0.122744  | 0.144248 | 0.100349  | 0.0995153 | 0.14178    | 0.0792954  | 0.0713834 | 0.112046   | 0.1497    |

|            |          |          |          |          |          |          |          |          |          |           |           |           |           |           |           |
|------------|----------|----------|----------|----------|----------|----------|----------|----------|----------|-----------|-----------|-----------|-----------|-----------|-----------|
| ZNF579     | 1.67595  | 1.59442  | 1.56308  | 2.54117  | 5.20666  | 5.80818  | 1.95011  | 1.20484  | 1.26107  | 1.42019   | 1.96424   | 1.09989   | 1.65296   | 1.551     | 1.96229   |
| ZNF580     | 3.11118  | 3.65561  | 3.77569  | 4.08332  | 10.0758  | 9.33449  | 4.7084   | 2.38673  | 4.14652  | 2.43132   | 6.52724   | 2.80367   | 3.58855   | 3.7813    | 4.6788    |
| ZNF581     | 4.20954  | 4.15649  | 4.23201  | 6.7308   | 8.53279  | 10.062   | 6.22882  | 3.13715  | 6.80501  | 4.0514    | 8.99267   | 3.67388   | 5.9313    | 4.193     | 2.43986   |
| ZNF582     | 0.429123 | 0.466988 | 0.526381 | 0.259235 | 0.344781 | 0.49769  | 0.152056 | 0.328766 | 0.198237 | 0.21358   | 0.367496  | 0.22764   | 0.128887  | 0.224279  | 0.0850034 |
| ZNF582-AS1 | 0.370558 | 0.156899 | 0.250815 | 0.138862 | 0.191868 | 0.267719 | 0.141031 | 0.16965  | 0        | 0.0422808 | 0.0887333 | 0.0883815 | 0.0507144 | 0.0997694 | 0.0967579 |
| ZNF583     | 0.555572 | 0.480993 | 0.531422 | 0.295212 | 0.242717 | 0.576545 | 0.297344 | 0.432028 | 0.105723 | 0.522975  | 0.685969  | 0.124227  | 0.324847  | 0.449161  | 0.673204  |
| ZNF584     | 1.77298  | 2.38098  | 2.34054  | 2.15754  | 2.63685  | 3.34053  | 2.16431  | 1.78521  | 3.33082  | 1.47957   | 2.06535   | 2.15934   | 2.1418    | 1.942     | 1.43564   |
| ZNF585A    | 0.851474 | 0.924155 | 0.767978 | 0.533004 | 0.308478 | 0.715505 | 0.478211 | 0.719924 | 0.598159 | 0.59275   | 0.99731   | 0.333822  | 0.431469  | 0.457171  | 0.696261  |
| ZNF585B    | 1.3049   | 1.49823  | 1.47246  | 1.06977  | 0.712969 | 1.82643  | 0.964573 | 0.993043 | 0.54254  | 0.993099  | 1.8147    | 0.626841  | 0.560548  | 1.13169   | 1.64562   |
| ZNF586     | 3.73143  | 3.91009  | 4.32674  | 3.17294  | 2.40717  | 1.93588  | 2.77045  | 4.43972  | 1.67624  | 2.71275   | 2.76218   | 2.2979    | 1.81549   | 3.61803   | 1.94733   |
| ZNF587     | 4.39052  | 4.42049  | 4.39559  | 3.33446  | 3.95066  | 2.7243   | 3.6421   | 4.46674  | 2.45014  | 2.65307   | 2.44812   | 3.18785   | 3.26098   | 4.42063   | 4.25466   |
| ZNF587B    | 3.76133  | 3.47574  | 3.53491  | 3.29235  | 3.05656  | 2.73092  | 2.87442  | 4.14979  | 1.37249  | 2.09053   | 2.00165   | 2.24345   | 2.50454   | 3.58909   | 1.8473    |
| ZNF589     | 3.41229  | 3.53348  | 3.42617  | 4.38849  | 3.06701  | 4.39929  | 3.51115  | 2.84914  | 3.10008  | 1.84781   | 1.46782   | 3.81498   | 2.17496   | 3.98032   | 3.14184   |
| ZNF592     | 4.91213  | 5.14248  | 4.79166  | 4.55764  | 6.77316  | 6.57509  | 5.56975  | 4.16935  | 5.86526  | 4.53869   | 3.35075   | 4.29627   | 6.84792   | 4.38037   | 4.088     |
| ZNF593     | 4.38613  | 3.09264  | 3.39251  | 12.0534  | 7.86561  | 16.5482  | 3.78649  | 2.50361  | 5.55895  | 7.87713   | 15.9813   | 5.68993   | 9.47903   | 8.53586   | 3.37997   |
| ZNF594     | 0.512497 | 0.868824 | 0.714475 | 0.68463  | 0.50861  | 1.11925  | 0.232978 | 0.430161 | 0.127145 | 0.387133  | 0.551761  | 0.247866  | 0.104097  | 0.615071  | 0.579268  |
| ZNF595     | 2.70435  | 2.73305  | 2.84392  | 1.78627  | 0.502116 | 1.47014  | 1.12165  | 2.44145  | 0.918587 | 1.22565   | 1.39828   | 0.81846   | 0.786248  | 1.26482   | 1.28045   |
| ZNF596     | 1.17405  | 0.638399 | 0.694077 | 0.487182 | 0.419151 | 0.537525 | 0.373299 | 0.630023 | 0.476656 | 0.574636  | 0.682979  | 0.303663  | 0.285867  | 0.478815  | 0.477229  |
| ZNF597     | 0.58824  | 0.524333 | 0.566581 | 0.545579 | 0.202328 | 0.550967 | 0.345412 | 0.750561 | 0.214923 | 0.326962  | 0.626104  | 0.240515  | 0.477123  | 0.58194   | 0.597385  |
| ZNF598     | 5.70161  | 6.80161  | 6.70578  | 15.3617  | 15.6537  | 19.5949  | 7.36483  | 5.32353  | 15.8372  | 9.0098    | 6.57599   | 11.8556   | 20.1439   | 13.5783   | 7.96133   |
| ZNF599     | 0.475491 | 0.511893 | 0.633064 | 0.329224 | 0.473167 | 0.714857 | 0.517452 | 0.521619 | 0.126677 | 0.242446  | 0.4529    | 0.170113  | 0.17736   | 0.264045  | 0.320093  |
| ZNF600     | 1.08004  | 1.45844  | 1.67336  | 1.15055  | 0.509429 | 1.17404  | 0.690925 | 0.948369 | 0.810017 | 0.708552  | 0.986376  | 0.576629  | 0.91744   | 1.29067   | 1.02974   |
| ZNF605     | 1.20338  | 1.53084  | 1.45079  | 0.975459 | 0.507209 | 0.618546 | 0.762392 | 1.1738   | 0.527252 | 0.888721  | 1.03542   | 0.779669  | 0.549172  | 0.878216  | 1.1012    |
| ZNF606     | 1.53821  | 1.63539  | 1.83657  | 0.675016 | 1.35487  | 0.984683 | 1.24013  | 1.6713   | 0.626482 | 0.633781  | 1.05427   | 0.345727  | 0.557444  | 0.774943  | 0.466198  |
| ZNF607     | 0.713977 | 1.00253  | 1.19818  | 1.12468  | 0.792181 | 1.43301  | 0.611397 | 0.652652 | 0.465827 | 0.569673  | 0.765691  | 0.364907  | 0.552785  | 0.700999  | 0.358876  |
| ZNF608     | 0.975739 | 1.75013  | 1.11584  | 2.12935  | 2.38812  | 3.63749  | 1.33407  | 0.936382 | 0.269623 | 0.982809  | 1.09686   | 1.06779   | 0.724767  | 1.11849   | 1.77221   |

|              |          |           |          |           |           |          |           |           |           |          |          |           |           |           |           |
|--------------|----------|-----------|----------|-----------|-----------|----------|-----------|-----------|-----------|----------|----------|-----------|-----------|-----------|-----------|
| ZNF609       | 4.62754  | 5.86714   | 6.22114  | 6.3824    | 6.51649   | 9.24355  | 6.03486   | 4.37512   | 3.8041    | 4.72598  | 3.66553  | 4.25085   | 7.05261   | 5.79582   | 5.98231   |
| ZNF610       | 0.242895 | 0.149799  | 0.152714 | 0.140174  | 0.045276  | 0.339188 | 0.133118  | 0.129519  | 0         | 0.036583 | 0.31807  | 0.0347596 | 0.0564173 | 0.0660128 | 0.111625  |
| ZNF611       | 1.71639  | 1.62601   | 1.48977  | 1.37143   | 0.75305   | 1.53766  | 1.03065   | 1.4407    | 0.599635  | 1.09774  | 1.48943  | 0.740467  | 1.39946   | 1.25486   | 1.83828   |
| ZNF613       | 1.00581  | 0.85493   | 0.808526 | 0.899615  | 0.442179  | 0.912989 | 0.444192  | 0.556565  | 0.889829  | 1.4053   | 2.1209   | 0.488841  | 0.906069  | 0.71413   | 0.463319  |
| ZNF614       | 1.16309  | 0.884709  | 0.884397 | 0.851771  | 0.23064   | 0.804929 | 0.644212  | 0.884108  | 0.614828  | 0.969059 | 1.57     | 0.304558  | 0.999497  | 0.799301  | 1.1728    |
| ZNF615       | 1.22163  | 1.03822   | 1.1463   | 0.734372  | 0.395335  | 1.16059  | 0.774897  | 0.970075  | 0.695686  | 1.07897  | 1.39822  | 0.42896   | 0.529108  | 0.727152  | 1.31581   |
| ZNF616       | 0.945886 | 1.28209   | 1.11786  | 1.06581   | 0.339067  | 1.3099   | 0.617133  | 0.766724  | 0.753221  | 1.08934  | 1.16166  | 0.572684  | 0.700817  | 0.926248  | 1.03747   |
| ZNF618       | 1.95389  | 1.05467   | 1.14647  | 1.00172   | 1.73052   | 3.37118  | 1.82272   | 1.26644   | 0.235576  | 0.869686 | 1.49258  | 0.39419   | 1.18955   | 1.45501   | 2.12738   |
| ZNF619       | 1.27431  | 1.23237   | 1.27335  | 0.974317  | 0.90813   | 1.14728  | 1.11599   | 1.44505   | 0.34488   | 0.527396 | 0.830122 | 0.428121  | 0.565798  | 0.615879  | 0.767447  |
| ZNF620       | 0.636068 | 0.388977  | 0.330561 | 0.226899  | 0.21534   | 0.416617 | 0.214148  | 0.492811  | 0.119178  | 0.173995 | 0.340609 | 0.0933585 | 0.2315    | 0.29834   | 0.245935  |
| ZNF621       | 3.11284  | 2.87217   | 3.09649  | 1.92584   | 1.57646   | 2.91999  | 2.5854    | 2.42216   | 0.850585  | 1.31486  | 1.38898  | 1.1771    | 1.47857   | 2.1174    | 3.3264    |
| ZNF622       | 5.23865  | 4.07935   | 4.82034  | 8.90836   | 7.83997   | 11.1574  | 4.34153   | 3.75614   | 7.49618   | 10.2317  | 7.95195  | 4.29646   | 20.2797   | 5.49734   | 4.47866   |
| ZNF623       | 3.19325  | 3.79494   | 4.20991  | 3.32375   | 3.27639   | 3.54656  | 3.34109   | 2.97552   | 3.0761    | 2.83499  | 2.91155  | 2.5523    | 2.90093   | 3.00574   | 2.99849   |
| ZNF624       | 0.867046 | 0.961627  | 0.947354 | 0.887897  | 0.29647   | 0.919366 | 0.722239  | 0.983795  | 0.969628  | 1.11561  | 1.34199  | 0.690628  | 1.07309   | 0.74956   | 0.759643  |
| ZNF625       | 1.3054   | 1.1881    | 1.36348  | 1.61342   | 0.97833   | 1.41108  | 1.08817   | 1.03208   | 0.331931  | 0.663398 | 1.75703  | 0.524325  | 0.862814  | 0.825111  | 1.27355   |
| ZNF625-ZNF20 | 0.248133 | 0.0886732 | 0.29076  | 0.0392145 | 0.355587  | 0.337885 | 0.0863085 | 0.0667694 | 0.0123235 | 0.122901 | 0.281321 | 0.135443  | 0.0089594 | 0.02109   | 0.0119609 |
| ZNF626       | 0.619722 | 0.93167   | 1.27749  | 0.502537  | 0.168331  | 0.487316 | 0.63798   | 0.800554  | 0.342319  | 0.416535 | 0.883087 | 0.34408   | 0.264376  | 0.722124  | 0.656556  |
| ZNF627       | 2.53738  | 2.00187   | 2.28935  | 2.05395   | 1.13123   | 2.31721  | 1.59297   | 1.928     | 1.61514   | 2.65549  | 4.13647  | 1.27254   | 1.80032   | 1.55853   | 1.80549   |
| ZNF628       | 1.13098  | 1.22898   | 1.53782  | 1.60568   | 2.40159   | 2.28973  | 2.32163   | 0.962353  | 1.06969   | 0.671998 | 0.93039  | 0.908253  | 1.74663   | 1.11932   | 0.95035   |
| ZNF629       | 3.24615  | 3.11352   | 3.24256  | 3.02554   | 3.92578   | 5.80196  | 3.78843   | 2.78403   | 1.97212   | 1.26786  | 1.26421  | 1.34545   | 1.54029   | 1.65507   | 2.65694   |
| ZNF630       | 0.786067 | 0.917772  | 0.837023 | 0.530699  | 0.690467  | 0.354122 | 0.654239  | 0.584732  | 0.695938  | 0.309647 | 0.592947 | 0.494484  | 0.307155  | 0.758649  | 0.454057  |
| ZNF630-AS1   | 0.107935 | 0.275064  | 0.37344  | 0.197678  | 0.0367743 | 0.065788 | 0.165003  | 0.299547  | 0.0301195 | 0        | 0        | 0.0467379 | 0.0157288 | 0.136023  | 0.18597   |
| ZNF638       | 9.77153  | 9.41426   | 9.65105  | 8.89473   | 3.81567   | 9.38061  | 5.14958   | 7.69179   | 6.91446   | 7.56315  | 7.73068  | 5.75955   | 6.49462   | 8.51437   | 8.66861   |
| ZNF639       | 2.74742  | 1.8579    | 1.78866  | 2.55456   | 0.780806  | 2.67945  | 1.73749   | 2.05003   | 1.63528   | 1.97909  | 3.29581  | 0.975537  | 3.38529   | 1.96495   | 2.64032   |
| ZNF641       | 2.68289  | 1.89494   | 1.95788  | 1.99085   | 1.67312   | 3.60969  | 1.80522   | 1.85302   | 0.685987  | 1.4263   | 1.62309  | 0.749489  | 1.5684    | 1.52098   | 2.71057   |
| ZNF644       | 5.44157  | 4.43722   | 4.94512  | 4.30414   | 0.856645  | 3.81576  | 2.76966   | 4.93882   | 4.18957   | 5.62932  | 6.24735  | 3.01883   | 5.41683   | 5.41991   | 4.20924   |



|               |           |            |           |           |           |           |           |            |            |            |          |            |           |            |            |
|---------------|-----------|------------|-----------|-----------|-----------|-----------|-----------|------------|------------|------------|----------|------------|-----------|------------|------------|
| ZNF646        | 2.73631   | 3.49177    | 3.76867   | 4.62931   | 6.66519   | 6.19304   | 3.43495   | 2.83269    | 4.34952    | 2.95242    | 1.36352  | 3.07022    | 3.70168   | 3.09014    | 2.77326    |
| ZNF648        | 0.0063423 | 0.00305582 | 0.0157404 | 0.0130718 | 0.0394071 | 0.0216015 | 0.0289657 | 0.0169095  | 0          | 0.00796024 | 0        | 0.00907617 | 0         | 0.00662953 | 0.0546501  |
| ZNF649        | 2.21565   | 2.04487    | 2.03138   | 1.72942   | 0.802088  | 1.9444    | 1.46228   | 2.10966    | 1.35382    | 1.27817    | 2.50974  | 0.898019   | 1.71667   | 1.39904    | 1.29773    |
| ZNF649-AS1    | 0.0421358 | 0.100265   | 0.119146  | 0.246662  | 1.06E-41  | 0.121985  | 0.110288  | 2.14E-37   | 0          | 0          | 8.41E-43 | 9.45E-34   | 0         | 0.0572983  | 0          |
| ZNF652        | 7.61838   | 7.08833    | 6.98802   | 3.0473    | 4.48861   | 4.38272   | 11.2604   | 6.43963    | 5.62168    | 2.30842    | 3.08532  | 1.96693    | 2.54598   | 1.93185    | 4.14992    |
| ZNF653        | 0.743884  | 1.0404     | 1.14531   | 0.873065  | 2.4715    | 1.29321   | 0.931917  | 0.523372   | 1.14504    | 0.894749   | 0.606488 | 0.887115   | 0.879908  | 0.707375   | 0.534156   |
| ZNF654        | 2.1844    | 2.15869    | 2.45014   | 2.5589    | 0.553408  | 2.04995   | 1.73394   | 3.01271    | 2.60776    | 2.95392    | 2.74622  | 1.72006    | 2.73513   | 2.3454     | 1.55561    |
| ZNF655        | 6.4415    | 7.91907    | 7.55211   | 6.67334   | 4.02711   | 3.84294   | 4.52029   | 6.03498    | 5.43186    | 6.83653    | 6.23896  | 5.80412    | 5.58136   | 6.10634    | 5.17325    |
| ZNF658        | 2.04701   | 2.66254    | 3.09208   | 1.35302   | 0.659571  | 1.5032    | 1.31728   | 2.27282    | 1.23368    | 1.54258    | 1.84105  | 1.61916    | 0.966897  | 0.928167   | 0.760164   |
| ZNF658B       | 0.445343  | 0.530453   | 0.496531  | 0.502902  | 0.236983  | 0.366127  | 0.289313  | 0.438582   | 0.332447   | 0.356432   | 0.4323   | 0.324562   | 0.165885  | 0.274268   | 0.285329   |
| ZNF66         | 1.13701   | 1.04898    | 1.4046    | 0.546454  | 0.324722  | 0.451515  | 0.48901   | 0.888137   | 0.155241   | 0.236778   | 0.31657  | 0.350233   | 0.151324  | 0.56494    | 0.666338   |
| ZNF660        | 0.416396  | 0.257842   | 0.368709  | 0.102408  | 0.210151  | 0.274438  | 0.293254  | 0.330397   | 0.0473947  | 0.258868   | 0.430521 | 0.0863198  | 0.15567   | 0.235932   | 0.547698   |
| ZNF660-ZNF197 | 0.235141  | 0.233049   | 0.318336  | 0.26846   | 0.0615923 | 0.38142   | 0.163924  | 0.275246   | 0.0897423  | 0.095359   | 0.126147 | 0.123798   | 0.141689  | 0.417675   | 0.526704   |
| ZNF662        | 2.54436   | 2.32675    | 2.12115   | 2.16004   | 2.98711   | 2.35401   | 2.32585   | 2.65614    | 12.0022    | 2.13718    | 2.99213  | 3.29219    | 0.849982  | 1.36473    | 1.01658    |
| ZNF663P       | 0.0201069 | 0          | 0.0166339 | 0         | 0         | 0         | 0.0229574 | 0.053608   | 0          | 0          | 0        | 0.014387   | 0.0389186 | 0          | 0          |
| ZNF664        | 7.58153   | 5.12313    | 5.31763   | 9.49222   | 3.9517    | 12.9148   | 4.85178   | 5.9743     | 7.56782    | 12.6356    | 9.63653  | 8.07663    | 17.7525   | 8.83871    | 8.19379    |
| ZNF664-RFLNA  | 0.228019  | 0.0686334  | 0.0054087 | 0.0110549 | 0.333692  | 0.500059  | 0.0161357 | 0.00418085 | 0.00217569 | 0.0103158  | 0.021632 | 0.00667076 | 0.0076768 | 0.075737   | 0.00528424 |
| ZNF665        | 0.38489   | 0.302097   | 0.415985  | 0.217512  | 0.154288  | 0.322443  | 0.333135  | 0.248268   | 0.0302421  | 0.124665   | 0.175199 | 0.0399773  | 0.052069  | 0.103825   | 0.178307   |
| ZNF667        | 0.40068   | 0.212603   | 0.310491  | 0.0574941 | 0.165446  | 0.220251  | 0.179519  | 0.329046   | 0.012354   | 0.108218   | 0.131687 | 0.0290326  | 0.0916261 | 0.140492   | 0.109258   |
| ZNF667-AS1    | 1.45456   | 0.926094   | 0.773558  | 0.548728  | 0.887633  | 1.43759   | 1.15661   | 0.934892   | 0.189802   | 0.521606   | 1.45142  | 0.232316   | 0.511133  | 0.624462   | 0.634139   |
| ZNF668        | 1.17039   | 1.17316    | 1.26502   | 2.27889   | 3.43503   | 2.37373   | 1.59148   | 0.940832   | 2.2921     | 3.04864    | 1.91212  | 1.85163    | 3.96915   | 2.51132    | 1.90043    |
| ZNF669        | 1.6778    | 1.32116    | 1.06128   | 1.39936   | 0.988428  | 1.34583   | 1.02404   | 1.36706    | 0.768699   | 1.34767    | 2.56282  | 0.583343   | 1.56105   | 1.31628    | 0.858395   |
| ZNF670        | 0.523723  | 0.376899   | 0.431929  | 0.477219  | 0.102761  | 0.427167  | 0.408454  | 0.342957   | 0.221564   | 0.3598     | 0.460528 | 0.106504   | 0.394814  | 0.381961   | 0.380025   |
| ZNF670-ZNF695 | 4.35E-14  | 0.0209804  | 0.0221067 | 0.0979547 | 1.52E-12  | 8.73E-08  | 0.0497934 | 0.0551411  | 0          | 1.05E-43   | 3.83E-15 | 0.0261789  | 0         | 0.0644404  | 0          |
| ZNF671        | 1.78527   | 1.45914    | 1.59289   | 0.452718  | 0.871142  | 0.429775  | 1.54745   | 1.60321    | 0.147986   | 0.457524   | 0.68585  | 0.454783   | 0.277408  | 0.981909   | 1.02018    |
| ZNF672        | 2.97992   | 3.68683    | 3.68541   | 4.84553   | 5.62905   | 4.82609   | 4.2145    | 2.66161    | 5.58971    | 4.05022    | 4.43738  | 3.48226    | 6.22681   | 3.63141    | 3.33331    |

|            |           |            |          |           |           |           |           |           |           |           |           |           |           |            |           |
|------------|-----------|------------|----------|-----------|-----------|-----------|-----------|-----------|-----------|-----------|-----------|-----------|-----------|------------|-----------|
| ZNF674     | 0.623393  | 0.599149   | 0.501617 | 0.530735  | 0.160829  | 0.424453  | 0.56032   | 0.544103  | 0.464893  | 0.628111  | 0.609602  | 0.458633  | 0.340259  | 0.54353    | 0.605344  |
| ZNF674-AS1 | 0.743422  | 0.622943   | 0.650664 | 0.63288   | 0.38493   | 0.559621  | 0.602782  | 0.488337  | 1.3253    | 0.419206  | 0.70544   | 0.254405  | 0.368428  | 0.557477   | 0.510614  |
| ZNF675     | 2.1163    | 2.24124    | 2.26211  | 2.17011   | 0.650958  | 1.24891   | 1.11246   | 2.08563   | 3.15159   | 1.69627   | 2.88576   | 1.34935   | 1.1018    | 1.26486    | 1.12844   |
| ZNF676     | 0.212973  | 0.129217   | 0.137034 | 0.0975443 | 0.0367578 | 0.134329  | 0.0630429 | 0.0701009 | 0         | 0.0396004 | 0.0267133 | 0.016932  | 0.0254461 | 0.0206128  | 0.033984  |
| ZNF677     | 0.435043  | 0.371984   | 0.380174 | 0.246263  | 0.314091  | 0.406955  | 0.258853  | 0.27772   | 0.164174  | 0.1615    | 0.338935  | 0.0701487 | 0.193714  | 0.208158   | 0.27279   |
| ZNF678     | 0.522919  | 0.498913   | 0.539673 | 0.517541  | 0.136719  | 0.398969  | 0.339906  | 0.591262  | 0.0945827 | 0.412635  | 0.622456  | 0.175967  | 0.329034  | 0.462718   | 0.944298  |
| ZNF679     | 0         | 0          | 0        | 0         | 0         | 0         | 0         | 0         | 0         | 0         | 0         | 0         | 0         | 0          | 0         |
| ZNF680     | 1.07423   | 0.910305   | 1.01341  | 0.84969   | 0.16101   | 0.569677  | 0.548707  | 1.35247   | 0.246739  | 0.620913  | 0.978647  | 0.327009  | 0.4347    | 0.600839   | 0.832262  |
| ZNF681     | 0.520069  | 0.528614   | 0.518642 | 0.928728  | 0.105131  | 0.312409  | 0.264362  | 0.572994  | 1.73096   | 0.639327  | 1.00932   | 1.42732   | 0.360826  | 1.10027    | 0.485986  |
| ZNF682     | 1.06922   | 1.1693     | 1.19296  | 0.478442  | 0.218536  | 0.335421  | 0.666623  | 1.10653   | 0.565426  | 0.194235  | 0.412928  | 0.352329  | 0.0816936 | 0.330882   | 0.666747  |
| ZNF683     | 0.0267241 | 0.0772564  | 0.198972 | 0.01377   | 0.228314  | 0.125154  | 0.0610254 | 0.0237501 | 0         | 0.0335415 | 0.0301682 | 0.0095609 | 0         | 0.00698359 | 0.268654  |
| ZNF684     | 0.717357  | 0.377538   | 0.556929 | 0.557286  | 0.171431  | 0.422876  | 0.214214  | 0.510022  | 0.0672047 | 0.304736  | 0.921934  | 0.221109  | 0.412991  | 0.305706   | 0.523033  |
| ZNF687     | 3.07975   | 3.17816    | 3.76569  | 3.46539   | 5.21637   | 6.19998   | 4.12896   | 2.84925   | 3.15194   | 2.56478   | 2.98848   | 2.30961   | 3.80954   | 2.85628    | 2.59138   |
| ZNF688     | 1.93809   | 2.10563    | 1.76051  | 2.23223   | 6.78841   | 3.57016   | 1.76449   | 1.5648    | 2.05183   | 1.87605   | 4.74751   | 1.52271   | 1.49563   | 1.53595    | 1.83737   |
| ZNF689     | 1.42704   | 0.966623   | 1.10645  | 1.35985   | 1.15935   | 2.6234    | 1.48618   | 0.891476  | 0.414495  | 0.839334  | 2.11648   | 0.337512  | 1.32136   | 0.886261   | 1.45774   |
| ZNF69      | 0.517019  | 0.464084   | 0.47616  | 0.326342  | 0.333186  | 0.632837  | 0.266048  | 0.310151  | 0.0787088 | 0.17871   | 0.432505  | 0.152668  | 0.125092  | 0.388436   | 0.807474  |
| ZNF691     | 0.762559  | 1.29469    | 1.09146  | 1.5592    | 1.67336   | 1.98915   | 0.912126  | 0.484071  | 0.722331  | 0.789979  | 1.12045   | 0.658221  | 0.445142  | 0.91729    | 0.486725  |
| ZNF692     | 0.987973  | 2.65392    | 2.05416  | 2.65796   | 6.47817   | 2.3674    | 1.45746   | 1.30539   | 1.15      | 1.21806   | 1.35218   | 3.09043   | 1.4159    | 3.34946    | 1.53186   |
| ZNF695     | 0.0246465 | 0.00890629 | 0.015292 | 0.0597132 | 0         | 0.0314792 | 0         | 0.0164278 | 0.0375208 | 0.0309339 | 0.0765127 | 0.0495152 | 0.0477054 | 0.0272809  | 0.0796398 |
| ZNF696     | 0.765835  | 1.11412    | 1.17718  | 0.987792  | 1.98779   | 1.544     | 0.885689  | 0.641091  | 0.463342  | 0.66354   | 0.501987  | 0.583329  | 0.570621  | 0.741125   | 1.18499   |
| ZNF697     | 0.856475  | 0.74411    | 0.625623 | 0.784032  | 1.50732   | 1.04737   | 0.525359  | 0.70853   | 0.377288  | 1.30368   | 1.61999   | 0.462883  | 0.890616  | 1.27861    | 1.57022   |
| ZNF699     | 1.22448   | 0.858908   | 1.08224  | 0.834052  | 0.466028  | 0.799053  | 0.85637   | 1.18123   | 0.658543  | 1.0377    | 1.54769   | 0.484253  | 0.976845  | 0.840527   | 1.09719   |
| ZNF7       | 2.65348   | 3.04377    | 3.08148  | 2.71733   | 2.72486   | 2.95897   | 2.83318   | 2.5062    | 2.34599   | 2.15988   | 2.63826   | 1.92247   | 1.56517   | 2.15278    | 2.68665   |
| ZNF70      | 1.06557   | 1.17668    | 1.24365  | 0.860674  | 1.92361   | 2.4375    | 1.40077   | 0.895802  | 0.392831  | 0.650628  | 0.949313  | 0.424496  | 0.624325  | 0.984383   | 2.15068   |
| ZNF700     | 5.20939   | 4.89307    | 5.13451  | 3.01717   | 1.37551   | 2.83262   | 2.40467   | 3.2117    | 2.84673   | 3.2241    | 3.67433   | 2.77989   | 1.74487   | 2.75601    | 2.69236   |
| ZNF701     | 1.06473   | 1.00413    | 1.06799  | 0.984884  | 0.691722  | 0.936977  | 0.793896  | 0.912909  | 0.127915  | 0.570972  | 1.00548   | 0.318929  | 0.775871  | 0.895906   | 1.38223   |

|            |            |            |            |            |           |            |           |           |           |           |           |           |            |            |           |
|------------|------------|------------|------------|------------|-----------|------------|-----------|-----------|-----------|-----------|-----------|-----------|------------|------------|-----------|
| ZNF702P    | 0.12669    | 0.126501   | 0.198036   | 0.087536   | 0.155936  | 0.164381   | 0.0440841 | 0.125921  | 0.0397453 | 0.213224  | 0.2528    | 0.0347264 | 0.177952   | 0.205831   | 0.224739  |
| ZNF703     | 10.9254    | 10.1085    | 12.4741    | 3.60343    | 16.7777   | 26.0373    | 18.3997   | 9.14458   | 2.97931   | 3.72085   | 8.4017    | 2.7492    | 4.55667    | 3.9223     | 10.48     |
| ZNF704     | 3.29949    | 2.42686    | 2.59914    | 1.46552    | 0.947082  | 1.9958     | 2.69273   | 2.31468   | 0.527036  | 0.662268  | 0.699177  | 0.568635  | 1.00161    | 0.521288   | 1.23602   |
| ZNF705A    | 0.0180267  | 0.00387814 | 0.00588731 | 0          | 0         | 0.00569306 | 0         | 0.0264508 | 0.0163965 | 0.0325927 | 0.0101283 | 9.05E-24  | 0          | 9.57E-26   | 0         |
| ZNF705B    | 4.20E-10   | 0.00980135 | 0.0317242  | 0          | 0         | 0          | 0         | 2.47E-08  | 0         | 0         | 0         | 7.45E-42  | 0          | 0.00513606 | 0         |
| ZNF705D    | 0.00856366 | 0.0154285  | 4.69E-23   | 0.00647559 | 7.42E-28  | 0.0174486  | 0         | 1.41E-28  | 0         | 3.47E-33  | 0         | 0         | 0          | 0.00488513 | 0         |
| ZNF705E    | 0.201496   | 0.131719   | 0.199984   | 0.020793   | 0.0313419 | 0.0615385  | 0.199658  | 0.224615  | 0.0327645 | 0.0434082 | 0.0202331 | 0.061258  | 0.00433937 | 0.0843632  | 0.0289768 |
| ZNF705G    | 0          | 2.09E-16   | 0          | 0          | 0         | 1.08E-27   | 0         | 8.19E-31  | 0         | 8.79E-07  | 6.41E-05  | 0.0227502 | 0          | 0          | 0         |
| ZNF706     | 5.56471    | 9.00995    | 8.85681    | 7.57986    | 4.17771   | 7.21179    | 6.54874   | 6.73486   | 20.8477   | 9.99615   | 15.7427   | 10.1695   | 8.42706    | 6.7603     | 3.05156   |
| ZNF707     | 1.15715    | 1.52818    | 1.49358    | 1.2715     | 3.56243   | 2.24363    | 1.36895   | 0.792968  | 0.865944  | 0.778667  | 0.605926  | 1.16714   | 1.36725    | 1.23142    | 1.38151   |
| ZNF708     | 2.1139     | 1.13755    | 1.28546    | 0.809132   | 0.74201   | 0.705957   | 0.71467   | 1.93721   | 0.307601  | 1.06815   | 1.61774   | 0.518588  | 0.690794   | 1.30569    | 2.10537   |
| ZNF709     | 0.689709   | 0.65552    | 0.695634   | 0.379724   | 0.337551  | 0.551076   | 0.436894  | 0.487006  | 0.230134  | 0.284599  | 0.495955  | 0.209571  | 0.195067   | 0.207395   | 0.515608  |
| ZNF71      | 1.37659    | 1.25521    | 1.50005    | 1.38048    | 2.01186   | 2.59638    | 1.37739   | 0.730094  | 0.910377  | 1.51412   | 2.08036   | 0.699025  | 1.79067    | 1.1759     | 1.37112   |
| ZNF710     | 4.76228    | 5.18674    | 4.85441    | 7.07134    | 11.138    | 9.7026     | 4.74384   | 4.10595   | 9.75202   | 6.66553   | 4.70914   | 7.30001   | 11.4086    | 5.87796    | 4.48418   |
| ZNF710-AS1 | 2.65431    | 2.87999    | 2.96667    | 2.77845    | 0.958038  | 5.24186    | 2.728     | 3.77735   | 1.89676   | 1.46932   | 1.12959   | 1.57396   | 0.956217   | 1.21313    | 1.74384   |
| ZNF711     | 1.54152    | 1.913      | 2.86932    | 0.778612   | 0.346574  | 0.4145     | 1.78322   | 2.42449   | 0.802833  | 0.216388  | 0.366354  | 0.547871  | 0.23883    | 0.161663   | 0.233033  |
| ZNF713     | 0.494947   | 0.497527   | 0.426636   | 0.341884   | 0.253785  | 0.396271   | 0.29749   | 0.340632  | 0.329257  | 0.243285  | 0.282473  | 0.307625  | 0.174429   | 0.346697   | 0.380932  |
| ZNF714     | 1.09334    | 0.897063   | 0.979763   | 0.606185   | 0.212113  | 0.326458   | 0.785554  | 1.15567   | 0.44135   | 0.764653  | 0.557315  | 0.657731  | 0.301584   | 0.57232    | 0.682603  |
| ZNF716     | 0          | 0          | 0          | 0          | 0         | 0          | 0         | 0         | 0         | 0         | 0         | 0         | 0          | 0          | 0         |
| ZNF717     | 1.32509    | 1.47677    | 1.72057    | 1.16368    | 0.832281  | 1.44717    | 1.15774   | 1.28004   | 0.722708  | 0.773717  | 1.13816   | 1.1254    | 0.494381   | 0.990649   | 0.827392  |
| ZNF718     | 1.33635    | 1.17613    | 1.52491    | 0.750241   | 1.04052   | 0.484238   | 1.01355   | 1.06444   | 0.17686   | 0.51285   | 0.679725  | 0.535124  | 0.230054   | 0.720339   | 0.611791  |
| ZNF720     | 1.08457    | 1.36268    | 1.22162    | 1.30683    | 0.855315  | 1.39945    | 0.904931  | 1.26045   | 1.47329   | 1.3403    | 1.71408   | 1.06258   | 0.947366   | 1.0988     | 0.850678  |
| ZNF721     | 5.2512     | 5.14653    | 5.9788     | 2.64017    | 0.850075  | 2.07876    | 1.9415    | 4.19705   | 2.48254   | 2.29454   | 2.60012   | 1.90593   | 1.83752    | 2.60366    | 2.75152   |
| ZNF722P    | 0          | 0          | 0          | 0          | 0         | 0          | 0         | 0         | 0         | 0         | 0         | 0         | 0          | 0          | 0         |
| ZNF723     | 0          | 0          | 0.0104335  | 0          | 0         | 0          | 0         | 0         | 0         | 0         | 0         | 0         | 0          | 0          | 0         |
| ZNF724     | 0.611116   | 0.34798    | 0.38081    | 0.752457   | 0.110954  | 0.3852     | 0.244667  | 0.373828  | 0.193317  | 0.40841   | 0.770509  | 0.159007  | 0.389168   | 0.489464   | 0.33054   |

|               |           |           |           |           |           |           |           |           |           |           |            |           |            |            |           |
|---------------|-----------|-----------|-----------|-----------|-----------|-----------|-----------|-----------|-----------|-----------|------------|-----------|------------|------------|-----------|
| ZNF726        | 0.391801  | 0.264609  | 0.229935  | 0.393409  | 0.223674  | 0.176787  | 0.367053  | 0.241062  | 0.261016  | 0.121887  | 0.294863   | 0.222838  | 0.101547   | 0.119013   | 0.12023   |
| ZNF727        | 1.58648   | 0.515762  | 0.212375  | 0.484948  | 0.500361  | 0.522244  | 0.317731  | 0.821251  | 0.0995959 | 0.0478983 | 0.0461583  | 0.0507122 | 0.123112   | 0.0598367  | 0.274033  |
| ZNF728        | 0.0615507 | 0.0254195 | 0.0800157 | 0         | 0.027317  | 0.0973321 | 0.020079  | 0.0547011 | 0         | 0.0110361 | 0.00992615 | 0         | 0.0850975  | 0.00919116 | 0.0126278 |
| ZNF729        | 0         | 0         | 0         | 0         | 0         | 0         | 0         | 0         | 0         | 0         | 0          | 0         | 0          | 0          | 0         |
| ZNF730        | 0.0391095 | 0.0235544 | 0.0161771 | 0.0705311 | 0         | 0.0166506 | 0.0111635 | 0.0521359 | 0.047631  | 0.0245432 | 0.176599   | 0.0279839 | 0.00630831 | 0.0306605  | 0.0140415 |
| ZNF732        | 0.701904  | 0.392076  | 0.434254  | 0.49501   | 0.0464294 | 0.322733  | 0.431625  | 0.468295  | 0.07224   | 0.161894  | 0.324505   | 0.0851147 | 0.263256   | 0.497908   | 0.1852    |
| ZNF733P       | 0         | 0         | 0         | 0         | 0         | 0         | 0         | 0         | 0         | 0         | 0          | 0         | 0          | 0          | 0         |
| ZNF735        | 0         | 0         | 0         | 0         | 0         | 0         | 0         | 0         | 0         | 0         | 0          | 0         | 0          | 0          | 0         |
| ZNF736        | 1.98811   | 1.78962   | 1.87988   | 0.994979  | 0.960136  | 1.18499   | 1.75127   | 2.04389   | 0.926667  | 0.83176   | 0.950375   | 0.767471  | 0.603352   | 1.18146    | 1.37119   |
| ZNF737        | 0.81915   | 1.00862   | 1.28002   | 0.474661  | 0.248487  | 0.342876  | 0.55109   | 0.943694  | 0.275441  | 0.411939  | 0.756588   | 0.329571  | 0.218878   | 0.392086   | 0.609987  |
| ZNF738        | 0.369068  | 0.259621  | 0.168943  | 0.192703  | 0.221672  | 0.205315  | 0.157319  | 0.223038  | 0.0329621 | 0.157494  | 0.277755   | 0.0668999 | 0.090486   | 0.243043   | 0.409889  |
| ZNF74         | 0.733245  | 1.30827   | 1.00467   | 1.06261   | 2.20678   | 1.81452   | 0.758708  | 0.453098  | 0.802314  | 0.747742  | 0.750141   | 0.91405   | 0.609838   | 1.06585    | 0.534743  |
| ZNF740        | 4.1055    | 4.60856   | 4.30055   | 4.73517   | 6.1492    | 7.3203    | 3.71277   | 3.04938   | 2.39737   | 3.11217   | 3.47441    | 2.59909   | 3.17862    | 3.13189    | 3.49856   |
| ZNF746        | 2.49833   | 2.52793   | 2.45513   | 3.5618    | 5.407     | 5.12055   | 2.39071   | 2.10992   | 3.10463   | 3.40215   | 3.1504     | 2.50461   | 6.58819    | 3.48135    | 3.05845   |
| ZNF747        | 1.89228   | 2.00205   | 2.75967   | 1.73561   | 2.91916   | 3.71529   | 2.32389   | 1.80306   | 0.483092  | 1.21607   | 2.11412    | 0.772372  | 1.6782     | 1.41381    | 1.48485   |
| ZNF749        | 1.28242   | 1.78849   | 1.80399   | 1.2435    | 1.01703   | 1.18411   | 1.075     | 1.03872   | 0.988507  | 0.706308  | 0.946802   | 0.828555  | 0.757586   | 1.49886    | 0.98691   |
| ZNF750        | 18.1025   | 31.2226   | 27.1554   | 30.3595   | 32.6145   | 23.8559   | 35.1188   | 25.2148   | 99.0339   | 33.7257   | 43.3762    | 42.6623   | 67.1158    | 20.954     | 8.43668   |
| ZNF75A        | 1.60211   | 1.38167   | 1.67621   | 0.721453  | 1.32796   | 1.32405   | 0.753214  | 1.35801   | 0.672258  | 0.853327  | 1.50462    | 0.645424  | 1.12488    | 1.45302    | 0.860394  |
| ZNF75D        | 1.47228   | 1.58826   | 1.25753   | 1.29897   | 2.28695   | 1.53576   | 1.01406   | 1.05646   | 1.00678   | 1.00324   | 1.17614    | 1.05834   | 0.839705   | 1.17831    | 1.36379   |
| ZNF76         | 3.26907   | 3.17101   | 2.75451   | 3.44019   | 4.20481   | 6.09      | 3.29806   | 2.12132   | 2.3488    | 2.16006   | 2.06974    | 2.00496   | 2.53885    | 2.31878    | 2.23563   |
| ZNF761        | 1.4309    | 1.61934   | 1.7349    | 1.42506   | 0.466886  | 1.38593   | 0.678961  | 1.04694   | 0.644882  | 1.15061   | 1.33154    | 0.658101  | 0.728603   | 1.47165    | 1.21368   |
| ZNF763        | 0.599972  | 0.658923  | 0.678817  | 0.354607  | 0.17817   | 0.413203  | 0.231701  | 0.493999  | 0.161184  | 0.354366  | 0.428289   | 0.145203  | 0.170779   | 0.156786   | 0.595543  |
| ZNF764        | 1.44851   | 1.2722    | 1.47906   | 1.56097   | 2.25004   | 2.64297   | 1.66331   | 1.14755   | 0.383067  | 0.727212  | 1.18668    | 0.864693  | 1.2817     | 1.63956    | 1.90194   |
| ZNF765        | 1.33505   | 1.37458   | 1.73461   | 1.12259   | 0.631138  | 0.822356  | 0.787946  | 0.8933    | 0.844958  | 1.09627   | 1.25053    | 0.683868  | 1.03       | 1.18621    | 1.29533   |
| ZNF765-ZNF761 | 0.119498  | 0.0245137 | 0.0346661 | 0.196685  | 4.45E-05  | 0.222162  | 0.0396044 | 0.0974506 | 0.0657801 | 0.0106043 | 0.0171705  | 0.130853  | 0.0773736  | 0.0798228  | 0.416531  |
| ZNF766        | 3.5862    | 2.66117   | 2.70934   | 2.42905   | 1.01503   | 3.06023   | 1.46553   | 2.49577   | 1.28849   | 1.66959   | 2.20421    | 0.951822  | 1.28489    | 1.52872    | 2.26789   |

|            |          |           |          |           |           |          |           |          |           |           |          |           |           |          |          |
|------------|----------|-----------|----------|-----------|-----------|----------|-----------|----------|-----------|-----------|----------|-----------|-----------|----------|----------|
| ZNF767P    | 3.80759  | 4.14687   | 4.15475  | 1.91994   | 4.6663    | 2.26315  | 3.05952   | 2.90994  | 1.05766   | 1.55714   | 0.807011 | 2.19777   | 0.561735  | 2.15927  | 2.49859  |
| ZNF768     | 4.39868  | 3.91598   | 4.74711  | 4.41964   | 6.19599   | 9.57635  | 3.40145   | 2.20336  | 0.925317  | 2.7604    | 2.62949  | 1.35909   | 3.27661   | 3.28644  | 4.07737  |
| ZNF77      | 0.964294 | 1.35011   | 1.17314  | 1.15741   | 0.898729  | 1.20748  | 1.02328   | 0.856984 | 0.994787  | 0.783127  | 0.934887 | 0.803621  | 0.944215  | 1.41115  | 0.928663 |
| ZNF770     | 8.67864  | 11.3881   | 10.7395  | 16.0004   | 3.07495   | 12.1065  | 7.8234    | 13.606   | 30.4103   | 16.2136   | 17.6521  | 15.3254   | 18.969    | 12.9992  | 6.03964  |
| ZNF771     | 0.5408   | 0.536458  | 0.565814 | 0.639267  | 1.75422   | 1.11058  | 0.617468  | 0.254445 | 0.445546  | 0.439197  | 1.38259  | 0.170716  | 0.297609  | 0.415655 | 0.456857 |
| ZNF772     | 1.18726  | 1.2161    | 1.62873  | 0.585347  | 0.742998  | 0.59803  | 1.10689   | 1.27148  | 0.483717  | 0.83083   | 1.09922  | 0.375865  | 0.760505  | 0.826793 | 0.723729 |
| ZNF773     | 1.13577  | 1.04599   | 1.13699  | 0.62544   | 1.0957    | 1.06805  | 0.971903  | 1.28289  | 0.414356  | 0.455285  | 0.782533 | 0.317672  | 0.608999  | 0.571346 | 0.692695 |
| ZNF774     | 0.491066 | 0.52174   | 0.666657 | 0.324396  | 0.312941  | 0.600401 | 0.517554  | 0.50356  | 0.107345  | 0.173839  | 0.227427 | 0.0900951 | 0.0812393 | 0.368527 | 0.198912 |
| ZNF775     | 0.406911 | 0.446027  | 0.429197 | 1.28945   | 1.20094   | 2.08754  | 0.383293  | 0.207936 | 0.111504  | 1.0342    | 0.976122 | 0.211088  | 0.564454  | 0.531673 | 0.438281 |
| ZNF776     | 3.17872  | 2.56804   | 2.98776  | 1.96456   | 1.3312    | 2.32317  | 2.0618    | 2.7667   | 1.7626    | 2.02499   | 2.51237  | 1.26707   | 2.34429   | 1.90128  | 2.14124  |
| ZNF777     | 2.76481  | 2.18513   | 2.59886  | 3.95164   | 3.30002   | 4.24654  | 2.91593   | 2.01525  | 1.9818    | 2.41112   | 1.5393   | 1.73573   | 5.17654   | 2.31123  | 2.28284  |
| ZNF778     | 2.14881  | 1.78325   | 1.75642  | 1.34848   | 1.51449   | 2.40317  | 1.94811   | 1.63036  | 2.17954   | 1.31226   | 0.890647 | 1.55589   | 1.88716   | 1.25717  | 1.087    |
| ZNF780A    | 1.14115  | 1.28595   | 1.19344  | 1.33656   | 0.481388  | 1.27619  | 0.570054  | 1.17413  | 0.406632  | 1.0288    | 1.16195  | 0.592853  | 0.784676  | 1.0887   | 1.09702  |
| ZNF780B    | 1.0735   | 1.32467   | 1.32598  | 0.898207  | 0.354658  | 0.747926 | 0.777863  | 1.04322  | 0.246257  | 0.721188  | 0.9442   | 0.382715  | 0.419658  | 0.892519 | 0.956036 |
| ZNF781     | 0.15468  | 0.0851738 | 0.121869 | 0.0683152 | 0.0457659 | 0.144251 | 0.0504596 | 0.196381 | 0.0269118 | 0.0462236 | 0.157984 | 0.0368925 | 0.0760371 | 0.165535 | 0.264452 |
| ZNF782     | 2.33842  | 2.13716   | 2.36393  | 1.23192   | 0.871445  | 0.8661   | 1.21524   | 2.0782   | 0.887586  | 0.987094  | 0.94701  | 1.00918   | 0.476977  | 1.24135  | 1.4683   |
| ZNF783     | 1.85581  | 2.50555   | 2.46709  | 2.32815   | 4.90447   | 2.78859  | 2.35686   | 1.56109  | 1.02735   | 1.20939   | 1.20993  | 1.76104   | 1.73842   | 2.31592  | 2.78632  |
| ZNF784     | 1.22904  | 1.49718   | 1.39084  | 1.80425   | 3.72819   | 2.46819  | 1.28413   | 0.958311 | 1.84986   | 1.39705   | 0.680627 | 1.31912   | 1.45877   | 0.993824 | 1.56524  |
| ZNF785     | 1.27636  | 1.85446   | 1.81877  | 1.20526   | 4.18397   | 2.47457  | 1.47295   | 1.16539  | 0.423     | 0.854059  | 1.14425  | 0.954459  | 1.05186   | 1.80044  | 2.17843  |
| ZNF786     | 1.3951   | 1.60027   | 1.52321  | 2.19667   | 2.24407   | 1.82709  | 0.865167  | 1.27132  | 1.7422    | 1.09326   | 0.943336 | 1.03877   | 1.36159   | 1.14738  | 0.732257 |
| ZNF787     | 3.47499  | 2.89391   | 2.94042  | 6.0442    | 7.72687   | 7.53995  | 2.68872   | 1.56765  | 2.9002    | 3.81905   | 3.1064   | 2.89033   | 6.78873   | 3.95964  | 2.64725  |
| ZNF788P    | 1.02654  | 1.41116   | 1.7868   | 2.12323   | 1.24888   | 0.63633  | 0.643332  | 1.2242   | 3.03014   | 0.589082  | 1.15162  | 0.46324   | 0.807433  | 0.378852 | 0.659112 |
| ZNF789     | 2.06436  | 2.5011    | 2.65462  | 1.21288   | 1.05568   | 1.23834  | 1.77722   | 2.00751  | 0.506995  | 0.634835  | 0.67649  | 0.830213  | 0.208447  | 1.1438   | 1.1791   |
| ZNF79      | 1.5037   | 1.67452   | 1.87007  | 1.88826   | 2.16561   | 2.9169   | 2.0125    | 1.20361  | 1.37047   | 1.59983   | 1.95605  | 0.904929  | 1.41351   | 1.53016  | 1.91638  |
| ZNF790     | 1.65481  | 1.53991   | 1.65754  | 0.994778  | 0.756029  | 1.27091  | 0.842826  | 1.62205  | 0.543361  | 0.906125  | 1.29117  | 0.557206  | 0.758887  | 0.932712 | 1.08341  |
| ZNF790-AS1 | 0.878294 | 0.899248  | 1.34419  | 0.407298  | 0.409288  | 0.46741  | 0.827316  | 0.839096 | 0.133708  | 0.358264  | 0.594891 | 0.1414    | 0.0991674 | 0.252469 | 0.220735 |

|                |           |            |            |            |            |            |            |            |            |            |          |            |            |            |           |
|----------------|-----------|------------|------------|------------|------------|------------|------------|------------|------------|------------|----------|------------|------------|------------|-----------|
| ZNF791         | 6.45594   | 5.35411    | 5.4232     | 3.94785    | 2.36299    | 3.56999    | 3.96095    | 5.31708    | 3.37776    | 3.17828    | 5.17277  | 2.16368    | 3.06416    | 3.45488    | 3.99635   |
| ZNF792         | 1.77382   | 0.995186   | 0.768186   | 1.17162    | 1.79376    | 1.83984    | 1.27091    | 0.872854   | 0.282726   | 0.90398    | 1.63285  | 0.477022   | 0.779617   | 1.19462    | 1.89775   |
| ZNF793         | 0.519039  | 0.775838   | 0.679474   | 0.368411   | 0.414933   | 0.310901   | 0.434524   | 0.783771   | 0.193947   | 0.187804   | 0.242142 | 0.334457   | 0.161459   | 0.369067   | 0.406507  |
| ZNF793-AS1     | 0.132095  | 0.318227   | 0.240412   | 0.24503    | 0.123114   | 0.382422   | 0.211151   | 0.117395   | 0.289578   | 0.298427   | 0.149119 | 0.0567105  | 0.1875     | 0.110462   | 0.303528  |
| ZNF799         | 1.08981   | 1.09123    | 1.05387    | 0.979782   | 0.666879   | 0.792602   | 0.595568   | 0.815443   | 0.501373   | 0.862534   | 1.08114  | 0.354269   | 0.578329   | 0.738954   | 1.19217   |
| ZNF8           | 2.17944   | 3.07936    | 2.86334    | 2.50662    | 3.86784    | 3.021      | 2.68456    | 2.1719     | 2.77874    | 1.56799    | 2.54782  | 1.73951    | 1.76666    | 2.1403     | 2.48141   |
| ZNF8-ERVK3-1   | 0.882411  | 0.681778   | 0.812228   | 0.373101   | 0.983139   | 0.578045   | 0.644104   | 0.742381   | 0.129048   | 0.295298   | 0.241312 | 0.481315   | 0.233232   | 0.952222   | 0.780513  |
| ZNF80          | 0.0471345 | 0.019196   | 0.0454918  | 0.0404779  | 0.0488108  | 0.0492263  | 0.0269083  | 0.0700905  | 0          | 0.00985978 | 0        | 4.47E-36   | 0.00506849 | 0.0249969  | 0         |
| ZNF800         | 4.3564    | 4.62769    | 5.91981    | 5.08975    | 3.24335    | 4.33716    | 3.80261    | 5.29196    | 10.3098    | 4.87243    | 7.09448  | 4.47832    | 6.23349    | 4.88242    | 3.49467   |
| ZNF804A        | 0         | 0.00952032 | 0.0245194  | 0.0356344  | 0.0230197  | 0.0420619  | 0.00564013 | 0.0219505  | 0          | 0.0681998  | 0.139411 | 0.00353457 | 0.0828658  | 0.00258177 | 0.0141884 |
| ZNF804B        | 0         | 0          | 0          | 0          | 0          | 0          | 0          | 0.00334161 | 0.00457931 | 0          | 0        | 0          | 0          | 0          | 0         |
| ZNF805         | 2.36428   | 2.13167    | 2.35676    | 1.42656    | 1.47046    | 1.69659    | 1.88022    | 2.28937    | 1.49384    | 1.65721    | 2.4176   | 1.23364    | 1.85428    | 1.46382    | 2.12219   |
| ZNF806         | 0.0253095 | 0.0147999  | 0.0125627  | 0          | 0.00786289 | 0.00431015 | 0.00577952 | 0.0134958  | 0          | 0.00635322 | 0        | 0.0108658  | 0          | 0.00264558 | 0.0581563 |
| ZNF807         | 0.0663668 | 0.0411127  | 0.00784333 | 0.0195408  | 0          | 0.0807292  | 0.0324752  | 0.0421295  | 0          | 0          | 0        | 0          | 0          | 0.0148655  | 0         |
| ZNF808         | 3.63382   | 3.47197    | 3.87031    | 2.40097    | 0.972203   | 1.93638    | 2.00282    | 2.68661    | 0.98539    | 1.45743    | 1.83247  | 1.19428    | 1.59971    | 2.27031    | 2.44728   |
| ZNF81          | 1.23092   | 1.31243    | 1.28141    | 1.487      | 0.681566   | 1.03056    | 1.17679    | 1.26405    | 0.753147   | 0.964657   | 1.17348  | 1.02404    | 0.691585   | 1.02964    | 1.26872   |
| ZNF812P        | 0.0795    | 0.218568   | 0.186344   | 0.68409    | 0.167665   | 0.191512   | 0.0803945  | 0.440476   | 0.384767   | 0.947395   | 0.300266 | 0.362175   | 0.926832   | 0.581153   | 0.253438  |
| ZNF813         | 0.907299  | 0.853387   | 0.866545   | 0.983324   | 0.162662   | 0.662685   | 0.512077   | 0.886504   | 0.602941   | 0.779247   | 1.13454  | 0.302299   | 0.558396   | 0.730362   | 0.497176  |
| ZNF814         | 2.4043    | 2.42893    | 2.64491    | 1.00211    | 1.2791     | 0.903057   | 1.86824    | 2.42914    | 0.824744   | 0.998328   | 0.843069 | 1.36887    | 0.807669   | 2.25186    | 1.45947   |
| ZNF815P        | 0.285596  | 0.399227   | 0.184245   | 0.30462    | 0.828321   | 0.265448   | 0.430877   | 0.284345   | 0.199827   | 0.149758   | 0.369052 | 0.232877   | 0.0952754  | 0.185871   | 0.164945  |
| ZNF816         | 1.26368   | 1.35239    | 1.35009    | 0.86497    | 0.306674   | 1.08008    | 0.477944   | 0.746002   | 0.425847   | 1.12857    | 1.32042  | 0.412864   | 0.618774   | 0.728407   | 0.608603  |
| ZNF816-ZNF321P | 0.1034    | 0.223977   | 0.090773   | 0.00135059 | 0.703621   | 0.0495589  | 0.0898354  | 0.00114893 | 0.142048   | 0.0865573  | 0.198208 | 0.0644858  | 0.0425274  | 0.129218   | 0.0595328 |
| ZNF818P        | 1.01961   | 0.978997   | 0.928454   | 1.05074    | 1.70915    | 0.786991   | 0.770525   | 0.814882   | 0.330545   | 0.533984   | 1.06821  | 0.215194   | 0.373886   | 0.306702   | 0.51619   |
| ZNF821         | 1.1388    | 1.1518     | 1.37032    | 0.785611   | 2.11982    | 1.34632    | 1.05309    | 0.844786   | 1.24938    | 1.0395     | 1.0412   | 0.774436   | 1.0748     | 0.664051   | 0.554164  |
| ZNF823         | 2.26819   | 2.30361    | 2.55378    | 2.18225    | 0.730971   | 1.71496    | 1.02085    | 1.46374    | 2.79678    | 2.44519    | 3.48484  | 1.89232    | 1.94921    | 1.52486    | 1.5003    |
| ZNF826P        | 0.109165  | 0.07013    | 0.0301031  | 0          | 0.0565238  | 0.0929529  | 0          | 0.355729   | 0          | 0.228356   | 0.082156 | 0.0781107  | 0.0704329  | 0.095091   | 0         |

|         |          |           |           |           |           |           |           |          |            |           |           |           |           |           |           |
|---------|----------|-----------|-----------|-----------|-----------|-----------|-----------|----------|------------|-----------|-----------|-----------|-----------|-----------|-----------|
| ZNF827  | 1.90558  | 1.45444   | 0.994479  | 1.6334    | 2.01025   | 2.11542   | 1.80633   | 1.41127  | 0.701297   | 1.05801   | 1.50447   | 0.917493  | 2.10274   | 1.69714   | 2.76224   |
| ZNF829  | 0.60868  | 0.461157  | 0.525435  | 0.381812  | 0.239798  | 0.555839  | 0.282017  | 0.556623 | 0.257845   | 0.420729  | 0.76181   | 0.167267  | 0.395562  | 0.297375  | 0.544755  |
| ZNF83   | 4.73796  | 5.26382   | 6.80895   | 1.85109   | 1.15293   | 1.42974   | 2.49008   | 3.0408   | 1.2999     | 2.80177   | 2.36571   | 2.84883   | 2.497     | 3.43457   | 3.75732   |
| ZNF830  | 2.75147  | 3.17629   | 3.03879   | 3.46877   | 2.95056   | 4.57864   | 2.98207   | 2.4701   | 3.91231    | 2.36653   | 3.516     | 2.13864   | 3.46936   | 2.70818   | 2.50727   |
| ZNF831  | 0.223973 | 0.0972408 | 0.150672  | 0.17501   | 0.263798  | 0.121551  | 0.118027  | 0.188112 | 0.00299752 | 0.0185347 | 0.0250059 | 0.0528325 | 0.084163  | 0.124776  | 0.367604  |
| ZNF833P | 0.497576 | 0.551958  | 0.469066  | 0.357744  | 0.0718983 | 0.118236  | 0.343512  | 0.555326 | 0.169114   | 0.188805  | 0.0783769 | 0.149035  | 0.111988  | 0.211672  | 0.0332363 |
| ZNF835  | 0.133486 | 0.100493  | 0.151839  | 0.0515853 | 0.544291  | 0.0568306 | 0.104781  | 0.126045 | 0.0101606  | 0.0628268 | 0.0282541 | 0.0179086 | 0.0430621 | 0.0479637 | 0         |
| ZNF836  | 1.89037  | 2.04258   | 1.91548   | 1.34867   | 1.12938   | 1.59534   | 1.18774   | 1.61042  | 1.58706    | 1.11611   | 1.69835   | 0.70832   | 1.05728   | 1.33583   | 1.4056    |
| ZNF837  | 0.853777 | 0.83918   | 0.866401  | 0.586561  | 2.0512    | 1.23102   | 0.84484   | 0.556428 | 0.845707   | 0.357193  | 0.514031  | 0.464284  | 0.433337  | 0.333178  | 0.343317  |
| ZNF839  | 1.82242  | 2.03587   | 2.13025   | 1.95007   | 2.28805   | 2.27044   | 1.67567   | 1.47628  | 1.78738    | 1.03908   | 1.04988   | 1.31553   | 1.34576   | 1.19972   | 1.10402   |
| ZNF84   | 0.958586 | 1.03544   | 1.06207   | 0.545242  | 0.350499  | 0.62277   | 0.470841  | 0.824251 | 0.322187   | 0.73828   | 0.992538  | 0.30843   | 0.324299  | 0.592903  | 0.78219   |
| ZNF841  | 3.65305  | 3.62915   | 3.93997   | 2.19893   | 1.62411   | 2.12213   | 2.39243   | 3.76992  | 1.43449    | 2.87631   | 3.03988   | 2.41842   | 2.08984   | 7.49872   | 3.41986   |
| ZNF843  | 0.247002 | 0.206973  | 0.266528  | 0.121738  | 0.433725  | 0.448072  | 0.294281  | 0.248148 | 0.15695    | 0.134788  | 0.290958  | 0.146     | 0.173222  | 0.0673535 | 0.123383  |
| ZNF844  | 2.77297  | 2.47405   | 2.30734   | 1.86909   | 0.951631  | 1.77086   | 1.59225   | 1.99158  | 1.72785    | 1.44678   | 2.18396   | 1.07858   | 1.1702    | 0.813111  | 1.49338   |
| ZNF845  | 1.49935  | 1.25652   | 1.05695   | 1.31661   | 0.276956  | 1.32379   | 0.72037   | 1.03604  | 1.14105    | 1.21865   | 1.82244   | 0.557084  | 1.46611   | 0.981737  | 1.3199    |
| ZNF846  | 1.77955  | 2.52959   | 2.18995   | 1.65141   | 2.57172   | 1.24387   | 1.11195   | 1.92772  | 2.26434    | 1.63347   | 2.70851   | 2.03984   | 1.13673   | 1.42981   | 1.4622    |
| ZNF847P | 0        | 0         | 0         | 0         | 0         | 0         | 0         | 0        | 0          | 0         | 0         | 0         | 0         | 0         | 0         |
| ZNF85   | 1.00622  | 0.589803  | 0.514295  | 0.554795  | 0.258842  | 0.474778  | 0.439058  | 0.637933 | 1.07716    | 0.933105  | 1.70746   | 0.729149  | 0.343212  | 0.509146  | 0.773152  |
| ZNF850  | 0.986148 | 0.779871  | 0.962114  | 0.352137  | 0.195553  | 0.387844  | 0.540731  | 0.724569 | 0.124118   | 0.316013  | 0.527858  | 0.197315  | 0.266881  | 0.368848  | 0.555302  |
| ZNF852  | 1.3254   | 1.76809   | 1.52885   | 1.06536   | 1.06794   | 1.70721   | 1.29483   | 1.14934  | 0.513914   | 0.737231  | 0.961012  | 0.857084  | 0.72006   | 1.05252   | 0.98409   |
| ZNF853  | 0.976778 | 0.531259  | 0.530445  | 0.376702  | 1.12632   | 1.71446   | 0.561048  | 0.356818 | 0.124069   | 0.218115  | 0.49383   | 0.107195  | 0.235846  | 0.216104  | 0.628237  |
| ZNF860  | 0.570275 | 0.799955  | 0.621066  | 0.791299  | 0.381245  | 0.522461  | 0.370892  | 0.282275 | 0.465951   | 0.869776  | 0.717111  | 0.717956  | 0.950119  | 0.64892   | 0.435411  |
| ZNF862  | 1.17214  | 2.33763   | 2.1432    | 1.32116   | 3.48112   | 1.99612   | 1.38013   | 0.932201 | 0.6286     | 0.626912  | 0.601453  | 0.721945  | 0.337308  | 0.713552  | 1.38206   |
| ZNF865  | 2.31477  | 2.68223   | 2.58034   | 2.58784   | 5.6586    | 5.51481   | 3.56129   | 2.05718  | 1.12765    | 1.49666   | 1.96906   | 1.1778    | 2.3956    | 2.14831   | 2.40425   |
| ZNF876P | 0.923236 | 0.423443  | 0.572825  | 0.283597  | 0.0413684 | 0.241884  | 0.547332  | 0.749491 | 0.0973037  | 0.17827   | 0.290619  | 0.0508154 | 0.108824  | 0.338695  | 0.509955  |
| ZNF878  | 0.105076 | 0.101255  | 0.0977923 | 1.4483    | 0.285635  | 0.357884  | 0.0449898 | 0.140075 | 0.191957   | 1.31882   | 0.489299  | 0.4981    | 2.22028   | 0.741386  | 0.26408   |

|           |           |            |            |            |            |           |           |           |            |           |            |           |            |            |           |
|-----------|-----------|------------|------------|------------|------------|-----------|-----------|-----------|------------|-----------|------------|-----------|------------|------------|-----------|
| ZNF879    | 0.695796  | 0.739954   | 0.627469   | 0.549083   | 0.36027    | 0.624486  | 0.314912  | 0.462381  | 0.5573     | 0.464184  | 0.757162   | 0.363304  | 0.279061   | 0.602813   | 0.297075  |
| ZNF880    | 2.64989   | 1.89788    | 2.48842    | 1.32849    | 0.365531   | 2.19536   | 1.19153   | 2.03676   | 0.647946   | 0.975935  | 1.96346    | 0.241584  | 0.69312    | 0.973207   | 1.39587   |
| ZNF883    | 0.107009  | 0.299976   | 0.169002   | 0.200501   | 0.0453331  | 0.1988    | 0.133286  | 0.181555  | 0.0710861  | 0.476179  | 0.713815   | 0.132253  | 0.00627649 | 0.208457   | 0.265444  |
| ZNF888    | 1.40453   | 1.51188    | 1.31162    | 1.54       | 0.410325   | 1.08971   | 0.896929  | 1.28405   | 0.747989   | 1.1369    | 1.56099    | 0.405887  | 0.882393   | 1.18101    | 1.41284   |
| ZNF890P   | 0.0313668 | 2.40E-29   | 0.0219742  | 0.0586428  | 8.84E-16   | 1.83E-08  | 1.61E-18  | 2.39E-21  | 0          | 0.0441955 | 0.148116   | 0.116224  | 0.0185028  | 0.0573314  | 3.46E-23  |
| ZNF891    | 1.03506   | 1.19108    | 1.27194    | 0.88025    | 0.639998   | 0.53907   | 0.883477  | 0.910941  | 0.45283    | 0.466668  | 0.930222   | 0.352329  | 0.382534   | 0.640755   | 1.28443   |
| ZNF90     | 0.431658  | 0.294143   | 0.392808   | 0.196999   | 0.0478939  | 0.183776  | 0.211223  | 0.339779  | 0.00751016 | 0.0696568 | 0.146187   | 0.0485356 | 0.167102   | 0.207041   | 0.37195   |
| ZNF91     | 8.2258    | 8.29008    | 7.32938    | 4.12732    | 1.46752    | 4.03169   | 3.24944   | 7.44928   | 7.97955    | 3.42912   | 4.77395    | 3.61413   | 1.83893    | 2.94367    | 3.3969    |
| ZNF92     | 1.37113   | 0.81745    | 0.956705   | 0.863494   | 0.0752974  | 0.595544  | 0.672064  | 1.24932   | 0.548194   | 0.903913  | 1.50875    | 0.227928  | 0.839969   | 0.53565    | 0.447527  |
| ZNF93     | 0.737198  | 0.68245    | 0.664681   | 0.776776   | 0.0771993  | 0.543079  | 0.312094  | 0.426958  | 0.332901   | 0.758921  | 1.80467    | 0.242999  | 0.539767   | 0.441571   | 0.38066   |
| ZNF98     | 0.0256637 | 0.0106779  | 0.0211645  | 0.068313   | 5.55E-29   | 5.77E-26  | 0.0172096 | 0.0131938 | 2.17E-27   | 1.57E-25  | 1.01E-10   | 0.0113044 | 0.0324253  | 1.45E-18   | 1.21E-24  |
| ZNF99     | 0.0792872 | 0.00848928 | 0.00242933 | 0.00605243 | 0.00912299 | 0.0100018 | 0.0100586 | 0.023488  | 0          | 0         | 0.0232051  | 0         | 0          | 0.00153478 | 0.0253037 |
| ZNFX1     | 6.57955   | 6.36895    | 7.12658    | 10.1237    | 6.38099    | 15.89     | 7.82787   | 5.772     | 4.86909    | 5.88112   | 4.88548    | 4.25841   | 8.98865    | 6.07487    | 9.27767   |
| ZNHIT1    | 8.7784    | 6.72417    | 7.22991    | 16.2073    | 17.899     | 23.3688   | 11.7119   | 5.51814   | 11.26      | 14.2914   | 30.1027    | 8.99699   | 15.3336    | 10.2543    | 9.78362   |
| ZNHIT2    | 1.62833   | 2.18673    | 1.97761    | 3.99873    | 7.31899    | 4.26275   | 2.15585   | 1.30857   | 6.07594    | 2.41333   | 4.84967    | 3.86718   | 3.57647    | 2.3992     | 1.06973   |
| ZNHIT3    | 3.76309   | 3.81097    | 3.43715    | 3.49539    | 2.60733    | 3.57717   | 3.06331   | 3.17184   | 2.70975    | 3.29985   | 6.49885    | 2.25239   | 2.33631    | 2.83506    | 2.11852   |
| ZNHIT6    | 2.00919   | 1.78676    | 1.90621    | 2.14751    | 0.817948   | 2.09875   | 0.882649  | 2.00133   | 1.15526    | 1.09213   | 1.09191    | 1.12766   | 1.53728    | 1.90111    | 1.72162   |
| ZNRD1     | 0.527102  | 0.434916   | 0.414253   | 1.26971    | 0.747128   | 1.02387   | 0.402472  | 0.363044  | 0.718182   | 0.959271  | 1.77022    | 0.612877  | 1.01813    | 0.943541   | 0.525158  |
| ZNRD1ASP  | 0.0343575 | 0.0603264  | 0.065318   | 0.0217885  | 0.031303   | 0.0362874 | 0.0226317 | 0.0372868 | 0.00523044 | 0.0132684 | 0.00857752 | 0.021038  | 0.00426293 | 0.0252085  | 0.0246708 |
| ZNRF1     | 2.37774   | 3.01812    | 3.21503    | 3.20191    | 5.76521    | 4.49584   | 2.79468   | 2.91223   | 2.21446    | 1.70532   | 3.34958    | 1.7764    | 3.2906     | 2.40449    | 2.84084   |
| ZNRF2     | 3.85272   | 4.99524    | 5.716      | 6.48626    | 8.7691     | 4.26014   | 3.99415   | 5.17757   | 6.54949    | 6.14518   | 6.90894    | 4.57539   | 6.68909    | 3.57973    | 3.28521   |
| ZNRF2P1   | 0.864735  | 0.69368    | 0.724783   | 0.809057   | 2.53005    | 1.38271   | 0.839823  | 0.566267  | 0.15243    | 0.851602  | 0.911956   | 0.453686  | 0.800179   | 0.71955    | 0.964083  |
| ZNRF2P2   | 0.786697  | 0.497208   | 0.799584   | 0.474183   | 2.28872    | 0.936168  | 0.383274  | 0.353471  | 0.146456   | 0.157584  | 0.3343     | 0.17099   | 0.0515769  | 0.252473   | 0.120313  |
| ZNRF3     | 2.16048   | 2.6633     | 2.28785    | 1.32811    | 2.40015    | 1.53689   | 3.20054   | 1.80764   | 2.9934     | 0.823782  | 1.11912    | 1.27437   | 1.36746    | 1.28817    | 0.810043  |
| ZNRF3-AS1 | 0.680146  | 0.688567   | 0.549588   | 0.165463   | 0.364461   | 0.141257  | 0.709233  | 0.512316  | 0.10391    | 0.136251  | 0.0601973  | 0.404448  | 0.020643   | 0.234108   | 0.283153  |
| ZNRF4     | 0         | 0.00773278 | 0.0132771  | 0          | 0          | 0         | 0.0183245 | 0.0142633 | 0          | 0         | 0          | 0         | 0          | 0          | 0         |



|             |            |           |            |           |           |           |            |            |           |            |            |            |            |            |           |
|-------------|------------|-----------|------------|-----------|-----------|-----------|------------|------------|-----------|------------|------------|------------|------------|------------|-----------|
| ZP1         | 0.0234717  | 0.022618  | 0.0097087  | 0.0241882 | 0         | 0.0699503 | 0.0669979  | 0.0312895  | 0.0428788 | 0.0294593  | 0.092738   | 0.0167946  | 0          | 0          | 0.0337083 |
| ZP2         | 0          | 0.0243376 | 0.0139291  | 0         | 0.0130772 | 0         | 0.00961222 | 0          | 0         | 0          | 0.00950368 | 0.0180714  | 0          | 0.00439999 | 0.0241807 |
| ZP3         | 1.15575    | 0.889998  | 0.576186   | 1.73252   | 2.02202   | 2.36526   | 0.811641   | 0.832042   | 0.716513  | 0.328923   | 0.604205   | 0.656814   | 0.658524   | 0.503493   | 0.203678  |
| ZP4         | 0          | 0         | 0          | 0.597765  | 0.0183883 | 0         | 0          | 0          | 0.0288344 | 0.0148578  | 0.0400905  | 0.203288   | 0.030551   | 0.030935   | 0         |
| ZBPB        | 0.0377538  | 0.0181903 | 0          | 0         | 0         | 0         | 0          | 0.0503286  | 0         | 0          | 0          | 0          | 0          | 0          | 0         |
| ZBPB2       | 0          | 0         | 0          | 0         | 0         | 0         | 0          | 0.00911281 | 0         | 0          | 0          | 0          | 0          | 0.0107183  | 0         |
| ZPLD1       | 0.00619959 | 0         | 0.0102575  | 0.0127777 | 0         | 0         | 0          | 0.00550968 | 0         | 0.00778112 | 0          | 0.00443597 | 0.00399994 | 0.00324017 | 0         |
| ZPR1        | 5.7109     | 3.96766   | 4.25556    | 9.98513   | 5.58176   | 10.2629   | 4.94532    | 3.60219    | 8.41401   | 8.36243    | 9.94796    | 6.32073    | 14.0762    | 8.17175    | 4.26973   |
| ZRANB1      | 6.72001    | 5.95891   | 6.52003    | 6.30745   | 4.22632   | 6.85444   | 5.56604    | 6.08039    | 23.0128   | 8.64001    | 10.2769    | 6.28938    | 8.54151    | 7.07329    | 4.90273   |
| ZRANB2      | 8.29097    | 8.37492   | 8.40877    | 8.36113   | 3.15169   | 8.37857   | 5.53973    | 10.065     | 6.82741   | 6.94125    | 8.92886    | 5.11172    | 6.80464    | 7.47918    | 6.7297    |
| ZRANB2-AS1  | 1.12637    | 1.37715   | 1.82932    | 0.924388  | 0.318491  | 0.916941  | 1.17634    | 0.732773   | 1.53337   | 1.14885    | 1.63962    | 1.25337    | 0.17384    | 0.40545    | 1.4071    |
| ZRANB2-AS2  | 0.0886707  | 0.270578  | 0.146709   | 0.182755  | 0.0459121 | 0.251673  | 0.0337471  | 0.236409   | 0.071994  | 0.0741939  | 0.100098   | 0.0422975  | 0          | 0.0772386  | 0         |
| ZRANB3      | 0.632844   | 0.581389  | 0.629324   | 0.594719  | 0.183362  | 0.471849  | 0.333201   | 0.512879   | 0.135777  | 0.444469   | 0.521921   | 0.16658    | 0.258101   | 0.419866   | 0.423813  |
| ZRSR2       | 1.84609    | 1.58979   | 1.73416    | 1.77679   | 1.84785   | 2.86917   | 0.907365   | 1.21931    | 1.26563   | 1.17264    | 1.11972    | 0.878615   | 1.51195    | 1.53633    | 1.70457   |
| ZSCAN1      | 0.0450692  | 0.0814314 | 0.08389    | 0         | 0.280032  | 0.0383759 | 0.0385939  | 0.0600807  | 0         | 0          | 0          | 0.00806206 | 0          | 0.0294439  | 0.0323626 |
| ZSCAN10     | 0.00844945 | 0         | 0.00698998 | 0         | 0         | 0.0287784 | 0          | 0          | 0         | 0          | 0          | 0          | 0          | 0.00441605 | 0         |
| ZSCAN12     | 1.02064    | 0.674615  | 0.613357   | 0.573362  | 0.372026  | 0.916121  | 0.437525   | 0.69421    | 0.417332  | 0.670562   | 0.9442     | 0.316373   | 0.444554   | 0.681712   | 1.05831   |
| ZSCAN12P1   | 0.0856093  | 0.0879955 | 0.0519362  | 0.264669  | 0.0620577 | 0.106913  | 0.0716804  | 0.121732   | 0.743739  | 0.293693   | 0.322141   | 0.322614   | 0.184116   | 0.128264   | 0.221302  |
| ZSCAN16     | 0.937995   | 1.09644   | 1.10578    | 0.796883  | 0.514785  | 0.850979  | 0.996411   | 1.04064    | 0.443974  | 0.48527    | 0.885401   | 0.403118   | 0.498914   | 0.529128   | 0.682178  |
| ZSCAN16-AS1 | 0.477355   | 0.275452  | 0.262748   | 0.360035  | 0.394684  | 0.554671  | 0.265939   | 0.272864   | 0.10315   | 0.292329   | 0.920255   | 0.14393    | 0.136613   | 0.322878   | 0.47133   |
| ZSCAN18     | 2.52229    | 2.25998   | 3.3394     | 1.47445   | 5.77387   | 2.47424   | 1.81886    | 1.63859    | 0.520958  | 0.684981   | 1.25438    | 0.770454   | 1.0056     | 1.4159     | 1.60992   |
| ZSCAN2      | 0.6516     | 0.590333  | 0.640922   | 0.57694   | 1.23752   | 1.05105   | 0.661172   | 0.50157    | 0.19831   | 0.428518   | 0.628533   | 0.312058   | 0.349063   | 0.398136   | 0.859951  |
| ZSCAN20     | 0.5377     | 0.457342  | 0.408511   | 1.05169   | 1.18467   | 1.29411   | 0.507431   | 0.38034    | 0.273971  | 0.833256   | 0.526477   | 0.510368   | 0.934564   | 1.1155     | 1.11103   |
| ZSCAN21     | 1.34149    | 1.61128   | 1.57911    | 1.82593   | 1.60025   | 2.43727   | 1.63731    | 1.31209    | 1.31395   | 1.36583    | 1.99408    | 0.714234   | 0.926099   | 1.54057    | 1.47583   |
| ZSCAN22     | 0.730329   | 1.15573   | 1.1523     | 1.05908   | 1.74615   | 1.2791    | 1.00273    | 0.885831   | 1.72446   | 0.897594   | 0.858023   | 1.10719    | 1.29236    | 1.28168    | 0.713524  |
| ZSCAN23     | 0.0878572  | 0.144631  | 0.145363   | 0.135809  | 0.1251    | 0.317939  | 0.0835938  | 0.110614   | 0.0445834 | 0.0827024  | 0.14877    | 0.151922   | 0.00472375 | 0.424742   | 0.504696  |

|            |           |            |           |           |           |            |           |           |          |           |           |           |            |            |          |
|------------|-----------|------------|-----------|-----------|-----------|------------|-----------|-----------|----------|-----------|-----------|-----------|------------|------------|----------|
| ZSCAN25    | 1.99933   | 1.94095    | 1.87396   | 1.60573   | 2.07785   | 1.76206    | 1.74136   | 1.96152   | 0.886846 | 0.924325  | 0.957182  | 1.09495   | 1.21491    | 1.21791    | 1.11056  |
| ZSCAN26    | 1.92661   | 1.62828    | 1.77673   | 1.52162   | 1.00574   | 1.82874    | 1.15396   | 1.27013   | 0.567367 | 1.20905   | 1.65792   | 0.564977  | 0.886431   | 1.26279    | 1.95041  |
| ZSCAN29    | 1.95232   | 2.00462    | 1.72436   | 2.51809   | 2.3466    | 2.83468    | 1.68714   | 1.30955   | 2.06604  | 1.84943   | 1.34193   | 1.89015   | 2.46866    | 2.37079    | 2.19916  |
| ZSCAN30    | 1.31571   | 1.465      | 1.21568   | 1.66052   | 1.19941   | 1.73191    | 0.865196  | 1.0921    | 0.595669 | 1.22165   | 1.34341   | 0.918194  | 0.796517   | 1.63713    | 1.76251  |
| ZSCAN31    | 0.532678  | 1.4851     | 0.688812  | 0.76745   | 2.20916   | 1.18016    | 0.419241  | 0.450419  | 5.80721  | 2.55743   | 2.08421   | 2.4608    | 1.04439    | 1.26226    | 0.460481 |
| ZSCAN32    | 1.70774   | 1.65588    | 1.60035   | 2.03736   | 1.7061    | 3.29439    | 1.49677   | 1.2595    | 1.44121  | 1.56529   | 2.30379   | 1.10025   | 2.06649    | 1.3851     | 1.74018  |
| ZSCAN4     | 0.0515206 | 0.203552   | 0.144913  | 0.0106187 | 0.0320117 | 0.00877382 | 0         | 0.0549447 | 0        | 0.0258655 | 0         | 0.0147457 | 0          | 0.0269269  | 0        |
| ZSCAN5A    | 0.573525  | 0.429773   | 0.475428  | 0.497006  | 0.465689  | 0.532401   | 0.461359  | 0.278019  | 0.396869 | 0.310837  | 0.610652  | 0.349229  | 0.605356   | 0.374687   | 0.421187 |
| ZSCAN5B    | 0         | 0.0077918  | 0.0470986 | 0         | 0.0663268 | 0.0249887  | 0.0162509 | 0         | 0        | 0         | 0         | 0.0520573 | 0.0187083  | 0          | 0        |
| ZSCAN5C    | 0         | 0          | 0         | 0         | 0         | 0          | 0         | 0         | 0        | 0         | 0.0175222 | 0         | 0          | 0.00811239 | 0        |
| ZSCAN9     | 1.87919   | 1.13633    | 1.08509   | 1.27371   | 1.35177   | 1.68602    | 1.1664    | 1.4459    | 0.47616  | 0.775639  | 1.50917   | 0.586575  | 0.667251   | 1.1008     | 0.978073 |
| ZSWIM1     | 1.73483   | 1.89607    | 1.75479   | 2.73357   | 2.20571   | 2.72221    | 2.74113   | 1.87533   | 1.75971  | 1.47519   | 3.05596   | 1.39961   | 2.03649    | 1.46981    | 1.71727  |
| ZSWIM2     | 0         | 0.00911748 | 0         | 0.0390018 | 0         | 0          | 0         | 0         | 0        | 0.0118753 | 0         | 0         | 0.00610457 | 0.00989008 | 0        |
| ZSWIM3     | 0.241398  | 0.408959   | 0.347867  | 0.922847  | 0.532222  | 1.15372    | 0.213383  | 0.249137  | 0.673345 | 0.566864  | 0.791152  | 0.45689   | 0.462222   | 0.468032   | 0.346678 |
| ZSWIM4     | 1.08275   | 2.27177    | 2.36065   | 5.14478   | 6.25527   | 4.06927    | 3.62957   | 1.54056   | 8.28225  | 4.54548   | 2.63123   | 5.60251   | 6.20465    | 4.22885    | 3.98315  |
| ZSWIM5     | 0.622594  | 0.494864   | 0.456003  | 0.204332  | 0.351114  | 0.59091    | 0.470887  | 0.50397   | 0.12557  | 0.0895895 | 0.102963  | 0.0595869 | 0.138162   | 0.178242   | 0.256278 |
| ZSWIM6     | 2.69575   | 2.58352    | 2.20576   | 3.54082   | 1.52211   | 3.23718    | 2.22801   | 2.43687   | 3.62628  | 4.14353   | 4.7048    | 3.25291   | 4.72944    | 3.63109    | 4.11906  |
| ZSWIM7     | 2.06458   | 2.84453    | 2.66635   | 2.73668   | 1.15663   | 2.47618    | 1.68842   | 2.22807   | 1.50317  | 1.89594   | 3.0513    | 1.39928   | 1.3933     | 2.04942    | 1.67781  |
| ZSWIM8     | 7.85515   | 10.8498    | 10.7272   | 10.9141   | 21.0714   | 15.454     | 11.7687   | 8.20944   | 16.7168  | 8.85034   | 6.3958    | 12.3149   | 11.0236    | 9.86733    | 8.89582  |
| ZSWIM8-AS1 | 1.85662   | 1.8376     | 1.84719   | 0.986902  | 1.72767   | 1.32554    | 2.12964   | 1.61956   | 0.830475 | 1.06735   | 0.209586  | 1.12439   | 0.470651   | 1.60757    | 1.50708  |
| ZSWIM9     | 0.99977   | 0.966516   | 1.08321   | 0.983762  | 3.13603   | 2.57035    | 0.751184  | 0.475784  | 0.282799 | 0.356205  | 0.342225  | 0.443063  | 0.769894   | 0.57309    | 0.66695  |
| ZUP1       | 1.56293   | 1.59871    | 1.56262   | 2.00685   | 0.415447  | 1.74358    | 1.23102   | 1.88666   | 1.74061  | 1.93017   | 2.47198   | 1.21998   | 1.88737    | 1.78223    | 1.6084   |
| ZW10       | 3.18727   | 3.65385    | 3.69533   | 4.61944   | 1.756     | 4.37169    | 3.60327   | 3.41166   | 7.00816  | 3.57667   | 4.33359   | 3.22427   | 4.2901     | 2.63411    | 1.93916  |
| ZWILCH     | 1.40679   | 1.04183    | 1.0007    | 2.66158   | 0.381084  | 1.98923    | 0.696886  | 1.08167   | 1.04369  | 2.64537   | 3.73901   | 1.11617   | 3.46468    | 2.07495    | 1.99707  |
| ZWINT      | 1.12527   | 0.807234   | 0.620602  | 4.2906    | 1.43719   | 4.47139    | 1.08494   | 0.82226   | 1.005    | 2.77758   | 4.00847   | 1.4314    | 4.38031    | 2.86215    | 1.40056  |
| ZXDA       | 1.50413   | 1.17054    | 1.4525    | 0.590752  | 0.816644  | 0.96185    | 1.09569   | 1.41524   | 0.302366 | 0.446971  | 0.932178  | 0.30472   | 0.503296   | 0.410211   | 0.573359 |

|        |           |          |           |           |          |          |          |          |          |          |          |           |           |          |           |
|--------|-----------|----------|-----------|-----------|----------|----------|----------|----------|----------|----------|----------|-----------|-----------|----------|-----------|
| ZXDB   | 2.02134   | 1.68922  | 2.1385    | 1.09947   | 1.20924  | 1.41802  | 1.74323  | 1.87346  | 1.14987  | 1.29183  | 1.48788  | 1.10427   | 1.17928   | 0.884359 | 1.36212   |
| ZXDC   | 6.0598    | 5.37496  | 5.44719   | 3.88145   | 5.27704  | 4.72957  | 5.32118  | 4.14875  | 3.95282  | 3.29303  | 2.98378  | 3.86871   | 3.38311   | 4.10568  | 3.8517    |
| ZYG11A | 0.0812797 | 0.154037 | 0.0762057 | 0.0446726 | 0.117838 | 0.184556 | 0.160858 | 0.149285 | 0.184781 | 0.102014 | 0.140691 | 0.0969297 | 0.0874021 | 0.246386 | 0.0466912 |
| ZYG11B | 3.70084   | 3.10471  | 3.55775   | 3.44767   | 1.61157  | 3.80712  | 3.64782  | 3.19806  | 3.576    | 3.58894  | 5.87843  | 2.25838   | 3.7412    | 3.22222  | 3.2575    |
| ZYX    | 18.8713   | 16.2525  | 21.7172   | 52.6083   | 28.7531  | 96.4277  | 31.0721  | 14.6859  | 35.1704  | 41.6323  | 75.9429  | 24.8973   | 101.373   | 49.1553  | 47.7089   |
| ZZEF1  | 7.67305   | 7.43117  | 7.7792    | 5.87501   | 7.82395  | 8.30091  | 9.26869  | 6.20729  | 5.05833  | 4.95289  | 3.2786   | 5.49754   | 6.07623   | 5.12801  | 6.27101   |
| ZZZ3   | 4.528     | 4.25315  | 4.34256   | 5.02154   | 1.34987  | 4.45167  | 3.02884  | 3.84901  | 2.52377  | 3.68276  | 4.59917  | 2.67852   | 4.00877   | 3.64814  | 3.13264   |

DFS, diabetic foot skin; DFU, diabetic foot ulcer.

Supplementary Table 2. The gene expression matrix of the GSE80178 dataset, modified according to the NetworkAnalyst file upload requirements.

| #NAME     | GSM211423<br>7 | GSM211423<br>8 | GSM211423<br>9 | GSM211423<br>1 | GSM211423<br>2 | GSM211423<br>3 | GSM211423<br>4 | GSM211423<br>5 | GSM211423<br>6 |
|-----------|----------------|----------------|----------------|----------------|----------------|----------------|----------------|----------------|----------------|
| #CLASS    | DFS            | DFS            | DFS            | DFU            | DFU            | DFU            | DFU            | DFU            | DFU            |
| DDX11L1   | 6.36201        | 5.95529        | 6.52406        | 6.00201        | 10.2399        | 6.23718        | 6.61285        | 6.48685        | 6.65763        |
| LINC01000 | 10.5671        | 10.2014        | 10.745         | 9.26543        | 10.8643        | 9.84103        | 8.68276        | 11.1539        | 10.6143        |
| RPL23AP87 | 7.57841        | 7.97144        | 7.72151        | 7.04584        | 8.85889        | 8.35241        | 7.94656        | 7.42224        | 7.84184        |
| LINC01128 | 6.89836        | 6.60739        | 6.82861        | 6.62397        | 7.01661        | 8.60592        | 7.15058        | 8.808          | 7.71298        |
| SAMD11    | 5.85841        | 5.92626        | 5.97857        | 6.65674        | 6.12942        | 7.17527        | 6.68733        | 6.49594        | 6.4952         |
| KLHL17    | 6.58803        | 6.5448         | 6.29779        | 7.11198        | 6.23526        | 7.24646        | 7.00814        | 6.92682        | 6.95621        |
| ISG15     | 6.17364        | 6.37127        | 6.33556        | 6.63838        | 6.37498        | 7.37832        | 7.05864        | 7.15647        | 6.79273        |
| AGRN      | 7.47395        | 7.1522         | 7.19858        | 8.04655        | 6.8601         | 7.59796        | 7.91377        | 8.09215        | 7.74508        |
| LINC01342 | 5.47024        | 5.83075        | 5.30582        | 6.48297        | 6.54805        | 6.57103        | 6.6426         | 6.16082        | 5.98502        |
| mir200b   | 6.01306        | 5.956          | 6.00522        | 6.32452        | 5.22935        | 6.59472        | 6.09572        | 5.84529        | 6.02483        |
| mir200a   | 5.13666        | 4.77495        | 5.15641        | 5.27377        | 4.98316        | 5.14184        | 4.89351        | 5.11184        | 5.12965        |
| mir429    | 4.42325        | 4.43479        | 4.0936         | 5.13483        | 4.35745        | 5.14537        | 4.57318        | 4.56085        | 4.78539        |

|           |         |         |         |         |         |         |         |         |         |
|-----------|---------|---------|---------|---------|---------|---------|---------|---------|---------|
| PUSL1     | 6.87779 | 6.60595 | 6.71328 | 7.5733  | 6.38015 | 7.97414 | 7.85495 | 7.82248 | 7.47419 |
| CPTP      | 7.24153 | 6.82479 | 6.92985 | 7.81764 | 6.26559 | 8.27393 | 8.30175 | 7.79251 | 8.26645 |
| LOC148413 | 5.83511 | 5.71993 | 5.55839 | 6.23741 | 5.97629 | 6.17611 | 6.18262 | 6.0055  | 6.04063 |
| tmem88b   | 8.18606 | 8.15612 | 7.97945 | 9.03663 | 9.26998 | 9.31881 | 8.84218 | 9.3265  | 8.82311 |
| VWA1      | 6.82535 | 6.6794  | 6.64433 | 7.46353 | 8.11522 | 8.18197 | 7.51704 | 7.61998 | 7.5689  |
| MIB2      | 7.99371 | 7.77811 | 7.95364 | 8.5902  | 8.48945 | 8.63401 | 8.25339 | 8.37861 | 8.24212 |
| MMP23B    | 5.7345  | 5.7163  | 5.77807 | 6.53903 | 6.57646 | 6.7741  | 6.46105 | 6.56345 | 6.38655 |
| MMP23A    | 7.3483  | 7.20173 | 7.3715  | 7.92227 | 7.48093 | 8.03457 | 7.65143 | 7.98675 | 7.89106 |
| CALML6    | 6.1475  | 6.45919 | 6.37643 | 6.81896 | 6.91139 | 6.68777 | 6.27175 | 6.63163 | 6.85844 |
| SKI       | 7.78841 | 7.64716 | 7.84074 | 7.54434 | 5.75477 | 7.23365 | 7.87229 | 7.06595 | 7.44363 |
| RER1      | 7.12401 | 7.03849 | 6.95915 | 7.595   | 6.94219 | 7.80368 | 7.58329 | 7.79287 | 7.6576  |
| LOC115110 | 5.13052 | 5.43223 | 5.33127 | 5.21979 | 7.2832  | 5.58267 | 5.45504 | 5.96835 | 5.61882 |
| ACTRT2    | 4.72069 | 5.24913 | 5.34028 | 5.79983 | 5.43107 | 6.14662 | 5.78268 | 5.2566  | 5.52345 |
| PRDM16    | 5.65764 | 5.70004 | 5.9005  | 6.06726 | 6.5166  | 6.49743 | 5.81001 | 6.32935 | 6.09275 |
| MIR4251   | 2.12296 | 2.78564 | 2.71502 | 2.53458 | 2.44651 | 3.79417 | 3.21627 | 2.87654 | 2.29875 |
| ARHGEF16  | 6.21184 | 6.20243 | 6.13273 | 6.74356 | 6.62947 | 6.9113  | 6.62455 | 6.77606 | 6.49407 |
| TPRG1L    | 9.10426 | 9.1464  | 8.93902 | 9.4434  | 7.69759 | 9.43384 | 9.95307 | 9.89328 | 9.68577 |
| TP73      | 7.34793 | 6.88502 | 6.92276 | 6.63802 | 6.45584 | 6.86144 | 6.90021 | 6.44142 | 6.44081 |
| CCDC27    | 5.37707 | 5.59096 | 5.25938 | 5.96079 | 6.36724 | 6.05193 | 5.79792 | 6.10646 | 5.99586 |
| SMIM1     | 4.90265 | 5.227   | 5.16139 | 5.69189 | 5.67518 | 5.61171 | 5.36904 | 5.6971  | 5.5245  |
| LINC01134 | 6.53331 | 6.53801 | 6.52639 | 6.82221 | 6.99656 | 7.11185 | 6.59022 | 6.95157 | 7.08569 |
| LINC01346 | 6.07857 | 6.17669 | 6.26817 | 6.47091 | 7.70276 | 6.01052 | 6.32706 | 6.44644 | 6.44084 |
| AJAP1     | 6.16102 | 6.41058 | 6.67096 | 8.54605 | 7.82516 | 11.0061 | 9.57048 | 9.70673 | 10.599  |
| RNF207    | 6.4102  | 6.89891 | 6.58939 | 7.01897 | 6.89182 | 7.20069 | 6.84151 | 7.12694 | 6.956   |
| HES3      | 5.85139 | 5.85979 | 5.82561 | 6.1918  | 5.80331 | 6.76029 | 6.5444  | 6.52963 | 5.94295 |
| ESPN      | 6.44344 | 6.29994 | 6.69797 | 6.90094 | 7.15701 | 7.33348 | 7.37902 | 6.84688 | 6.87636 |

|          |         |         |         |         |         |         |         |         |         |
|----------|---------|---------|---------|---------|---------|---------|---------|---------|---------|
| ZBTB48   | 6.86826 | 6.62433 | 6.7824  | 7.09403 | 7.1409  | 7.06809 | 7.05806 | 7.05521 | 7.14546 |
| PHF13    | 7.50996 | 7.43896 | 7.19594 | 8.4269  | 8.48208 | 8.65512 | 8.09094 | 8.65447 | 7.96907 |
| CAMTA1   | 7.44285 | 7.33843 | 7.11388 | 7.58702 | 7.07265 | 6.96453 | 7.41414 | 7.17506 | 6.98557 |
| VAMP3    | 10.0737 | 9.56927 | 10.1908 | 9.60929 | 8.74698 | 9.58705 | 9.81969 | 9.94444 | 10.0095 |
| PER3     | 8.17692 | 8.77255 | 7.83605 | 8.2392  | 6.41136 | 7.51666 | 7.79217 | 6.82819 | 8.17257 |
| PARK7    | 7.36256 | 7.39222 | 7.55905 | 8.4221  | 6.40633 | 7.46237 | 8.49359 | 7.53332 | 7.58673 |
| ENO1-AS1 | 4.16372 | 3.68833 | 4.01224 | 4.65163 | 5.69131 | 4.25874 | 4.08326 | 3.97067 | 4.31941 |
| ca6      | 8.87282 | 7.4987  | 8.55535 | 6.3637  | 6.00744 | 5.43701 | 5.94622 | 5.38256 | 5.54771 |
| H6PD     | 7.98875 | 7.72002 | 8.1144  | 7.11339 | 5.72198 | 6.95976 | 7.11084 | 6.57084 | 6.51218 |
| SPSB1    | 6.95807 | 6.63997 | 7.13851 | 7.29048 | 5.98695 | 7.3531  | 7.19817 | 7.45403 | 7.56507 |
| TMEM201  | 6.61858 | 6.47358 | 6.57125 | 6.60996 | 5.78568 | 6.41412 | 6.46838 | 6.47817 | 6.12298 |
| NMNAT1   | 6.36912 | 6.89062 | 6.33189 | 6.39305 | 6.39768 | 7.03017 | 6.79165 | 6.50411 | 6.8678  |
| UBE4B    | 10.0667 | 9.84242 | 9.65467 | 9.07614 | 7.38933 | 8.5043  | 8.98635 | 8.57701 | 9.11139 |
| KIF1B    | 9.29955 | 9.30003 | 9.20113 | 8.36302 | 7.11498 | 8.81983 | 8.8307  | 9.08095 | 9.42441 |
| PGD      | 8.74385 | 8.26667 | 8.3178  | 8.71444 | 6.28531 | 8.74143 | 8.89853 | 8.034   | 8.60798 |
| PEX14    | 6.73546 | 6.7483  | 6.71248 | 7.01274 | 7.2876  | 7.12142 | 7.22549 | 7.03305 | 7.21019 |
| TARDBP   | 8.23828 | 8.44488 | 8.39708 | 7.67989 | 5.30564 | 6.87577 | 7.57159 | 7.37456 | 7.62519 |
| EXOSC10  | 5.87605 | 5.93928 | 5.82213 | 6.3828  | 6.31224 | 6.80812 | 6.62597 | 6.33658 | 6.07049 |
| MTOR-AS1 | 4.21368 | 4.20634 | 4.31954 | 4.53114 | 5.09183 | 4.32289 | 4.58914 | 4.14196 | 4.49636 |
| ANGPTL7  | 5.62433 | 9.1179  | 8.23748 | 6.10274 | 6.28356 | 5.83301 | 5.73096 | 5.98823 | 5.78719 |
| UBIAD1   | 7.26949 | 7.42876 | 7.4966  | 7.32989 | 7.03955 | 6.67871 | 7.68886 | 6.46246 | 6.96729 |
| DISP3    | 5.53657 | 5.36501 | 5.27879 | 5.75467 | 6.42453 | 5.9713  | 5.12883 | 5.13956 | 5.54312 |
| FBXO44   | 6.91663 | 7.21662 | 6.85795 | 6.69735 | 6.493   | 6.71259 | 7.01642 | 6.91198 | 6.72549 |
| FBXO6    | 6.47329 | 6.7599  | 6.44578 | 6.75428 | 6.19653 | 6.86634 | 7.40484 | 6.78575 | 7.03157 |
| DRAXIN   | 5.72516 | 5.82511 | 5.66416 | 5.94569 | 5.90486 | 6.36049 | 5.58829 | 6.36549 | 5.75039 |
| AGTRAP   | 7.31163 | 7.31086 | 7.27652 | 7.90895 | 7.57003 | 7.55735 | 8.52822 | 7.94089 | 8.04343 |

|          |         |         |         |         |         |         |         |         |         |
|----------|---------|---------|---------|---------|---------|---------|---------|---------|---------|
| NPPA-AS1 | 6.1081  | 5.37939 | 6.24216 | 5.43476 | 6.02307 | 5.56607 | 5.62677 | 5.86584 | 5.84321 |
| MFN2     | 8.5099  | 8.86132 | 8.68094 | 8.72901 | 5.69297 | 8.15475 | 9.02482 | 7.98917 | 8.22132 |
| miip     | 6.1098  | 6.01474 | 5.98936 | 6.9395  | 6.70291 | 6.42716 | 6.98975 | 6.67032 | 6.43055 |
| VPS13D   | 10.0304 | 10.2093 | 10.0079 | 8.80083 | 6.76516 | 8.62109 | 9.053   | 9.14001 | 9.3056  |
| AADACL4  | 4.45568 | 4.8004  | 4.55191 | 4.35935 | 5.46425 | 5.1316  | 4.81783 | 5.26341 | 5.07639 |
| AADACL3  | 5.54137 | 6.09195 | 5.78975 | 6.11827 | 6.82116 | 6.19195 | 5.96336 | 6.42411 | 5.90768 |
| c1orf158 | 3.49536 | 3.85081 | 3.25879 | 4.09884 | 4.76866 | 4.39875 | 3.99469 | 3.88332 | 3.7559  |
| PRAMEF12 | 4.1688  | 4.42383 | 4.16408 | 3.70473 | 4.97998 | 4.74738 | 4.37545 | 4.57127 | 4.63606 |
| PRAMEF2  | 4.79835 | 4.91935 | 4.89916 | 4.96087 | 5.83591 | 5.16061 | 4.59267 | 5.07673 | 5.20318 |
| PRAMEF8  | 5.46777 | 5.44735 | 5.67689 | 5.3808  | 7.37767 | 6.41782 | 5.81852 | 5.97416 | 5.95609 |
| PRAMEF22 | 6.98769 | 6.87406 | 6.90539 | 7.30293 | 7.79142 | 6.73003 | 7.29305 | 6.89259 | 6.93126 |
| Pramef5  | 6.55932 | 6.59546 | 6.80202 | 6.79474 | 9.00496 | 7.07882 | 6.59823 | 7.12515 | 6.67219 |
| PRAMEF15 | 5.28827 | 5.36625 | 5.58357 | 5.829   | 9.08208 | 6.17968 | 5.8746  | 5.99014 | 5.93863 |
| PRAMEF20 | 4.77738 | 5.02037 | 5.59476 | 5.22076 | 6.88548 | 5.64996 | 5.18426 | 5.33689 | 5.34039 |
| PRAMEF17 | 5.19795 | 5.3768  | 5.36052 | 5.65119 | 7.2654  | 5.71029 | 5.33703 | 5.70003 | 5.74876 |
| PDPN     | 6.6819  | 6.45002 | 7.08025 | 7.74891 | 6.54111 | 7.24893 | 7.51578 | 7.26369 | 7.47784 |
| TMEM51   | 6.73422 | 6.33006 | 6.39375 | 8.09849 | 6.33482 | 8.23134 | 7.43929 | 7.7105  | 7.83668 |
| fhad1    | 5.15301 | 5.06031 | 5.22989 | 5.75219 | 5.95799 | 5.94016 | 5.25357 | 5.75586 | 5.60546 |
| CTRC     | 6.82526 | 6.75677 | 6.95946 | 7.31091 | 7.00847 | 7.67522 | 7.38967 | 7.39006 | 7.26468 |
| TMEM82   | 6.01611 | 6.15423 | 6.08716 | 7.02257 | 6.82162 | 7.12964 | 6.91263 | 6.80093 | 6.89697 |
| FBLIM1   | 6.08518 | 5.71064 | 5.29232 | 7.44697 | 5.65745 | 8.33333 | 7.46717 | 7.89096 | 8.01418 |
| C1orf64  | 5.16324 | 5.2615  | 5.699   | 5.64755 | 5.89502 | 4.99701 | 5.10613 | 5.70285 | 5.33535 |
| SZRD1    | 7.87039 | 7.54999 | 7.60501 | 7.89953 | 6.83206 | 7.74287 | 8.03565 | 7.51467 | 7.92152 |
| NECAP2   | 8.50577 | 8.14137 | 8.17147 | 8.28708 | 6.91606 | 8.0744  | 8.58498 | 8.02743 | 8.24216 |
| MIR3675  | 1.94664 | 1.80673 | 1.87445 | 2.08404 | 2.11805 | 2.50942 | 2.24299 | 2.10491 | 1.90582 |
| MST1P2   | 6.65074 | 6.4971  | 6.25034 | 7.29842 | 8.09315 | 7.70281 | 6.9857  | 7.13001 | 7.0201  |

|              |         |         |         |         |         |         |         |         |         |
|--------------|---------|---------|---------|---------|---------|---------|---------|---------|---------|
| MIR3972      | 5.87969 | 5.77626 | 5.83097 | 5.83536 | 8.28024 | 5.44667 | 5.28096 | 6.07552 | 6.01265 |
| ARHGEF10L    | 7.86029 | 7.44244 | 7.32272 | 7.27299 | 6.49652 | 7.70785 | 7.3296  | 8.1129  | 7.77414 |
| ACTL8        | 5.58215 | 5.98882 | 5.78019 | 6.00542 | 6.35345 | 6.28017 | 5.5999  | 5.89651 | 5.81957 |
| KLHDC7A      | 5.687   | 5.92016 | 5.98842 | 6.60789 | 6.57736 | 6.07248 | 5.89336 | 5.84825 | 5.84459 |
| PAX7         | 6.1987  | 6.42332 | 6.09896 | 6.71898 | 6.48059 | 6.98595 | 6.48936 | 6.40685 | 6.49677 |
| MRTO4        | 6.75351 | 7.31079 | 7.00214 | 7.57837 | 6.55635 | 6.93679 | 7.59621 | 6.57297 | 6.77398 |
| PQLC2        | 6.96544 | 7.26124 | 6.98176 | 7.35388 | 6.6379  | 7.68315 | 8.05846 | 7.20744 | 7.2264  |
| OTUD3        | 6.44524 | 6.9014  | 6.62951 | 6.97904 | 5.67545 | 6.40823 | 6.86259 | 7.09213 | 6.53622 |
| UBXN10       | 5.86409 | 6.12118 | 6.20933 | 6.49116 | 6.57284 | 6.62818 | 6.27216 | 6.97186 | 6.36569 |
| VWA5B1       | 5.72715 | 5.65652 | 5.86838 | 5.826   | 6.37723 | 6.13145 | 6.16102 | 6.38027 | 5.87047 |
| CDA          | 9.01324 | 6.67747 | 8.21346 | 11.4139 | 11.3652 | 11.6037 | 11.6758 | 11.6849 | 12.1106 |
| PINK1        | 8.17963 | 8.09502 | 8.0362  | 8.54209 | 7.33256 | 8.78367 | 9.04504 | 9.07508 | 8.76288 |
| LOC100506801 | 6.34234 | 6.18014 | 6.24584 | 6.35249 | 7.36023 | 6.51832 | 6.34624 | 6.49439 | 6.55534 |
| LDLRAD2      | 5.15358 | 5.48946 | 5.53085 | 6.01132 | 5.78063 | 6.66158 | 5.91074 | 6.07393 | 6.08539 |
| LINC00339    | 5.9954  | 6.22575 | 5.8394  | 5.37804 | 6.27436 | 5.20189 | 5.41933 | 5.16359 | 4.5595  |
| ZBTB40       | 8.48741 | 8.6869  | 8.53986 | 7.22671 | 6.01221 | 6.46461 | 7.38669 | 7.48491 | 7.10697 |
| EPHA8        | 5.6962  | 5.55155 | 5.92707 | 6.37163 | 6.37163 | 6.71261 | 5.8143  | 6.24076 | 6.03429 |
| EPHB2        | 6.93319 | 6.11893 | 6.6798  | 6.51815 | 6.35722 | 6.42511 | 6.79502 | 6.11625 | 6.3922  |
| MIR4684      | 3.16506 | 3.56861 | 3.25248 | 3.27191 | 2.97603 | 3.21281 | 3.44122 | 3.30025 | 3.29358 |
| KDM1A        | 8.80392 | 8.67387 | 8.76449 | 8.84672 | 6.48694 | 8.50397 | 9.30152 | 8.89065 | 8.40033 |
| MIR3115      | 4.85549 | 4.87007 | 4.68327 | 4.95611 | 4.30273 | 4.35188 | 3.7264  | 5.47453 | 4.29398 |
| ZNF436-AS1   | 5.68706 | 5.53308 | 5.63799 | 5.81926 | 6.0752  | 6.0238  | 5.69924 | 5.44058 | 5.62433 |
| RPL11        | 9.68479 | 10.0451 | 9.88006 | 10.1263 | 9.28746 | 10.1272 | 10.2137 | 9.27871 | 9.52511 |
| PITHD1       | 7.98973 | 8.4545  | 8.03032 | 8.218   | 6.72675 | 8.10287 | 8.75523 | 8.34336 | 8.87962 |
| MIR378F      | 5.53539 | 5.39346 | 5.3703  | 5.31435 | 6.30036 | 5.35669 | 4.61977 | 5.41837 | 5.36852 |
| PNRC2        | 3.56455 | 3.25106 | 3.0412  | 4.47863 | 3.47456 | 3.72825 | 4.8687  | 3.3141  | 4.09397 |

|           |         |         |         |         |         |         |         |         |         |
|-----------|---------|---------|---------|---------|---------|---------|---------|---------|---------|
| LOC284632 | 5.28686 | 5.45376 | 5.31201 | 5.34381 | 6.40593 | 6.26099 | 5.91927 | 6.05772 | 5.27724 |
| GRHL3     | 8.98366 | 8.74809 | 8.7462  | 8.94858 | 8.24943 | 9.85017 | 8.81027 | 9.18409 | 9.29178 |
| NIPAL3    | 7.78189 | 7.61421 | 8.00981 | 6.69256 | 5.75617 | 5.85197 | 6.87701 | 7.32429 | 6.67609 |
| RCAN3     | 8.72013 | 8.63417 | 8.80956 | 7.68484 | 5.96761 | 8.37242 | 8.85492 | 7.45286 | 7.86465 |
| NCMAP     | 5.70238 | 5.94524 | 5.61089 | 6.44838 | 6.47243 | 6.28439 | 6.03856 | 6.18539 | 6.16014 |
| SRRM1     | 10.2561 | 10.1627 | 10.2952 | 9.18734 | 7.35455 | 8.40843 | 9.45273 | 9.30436 | 9.33706 |
| CLIC4     | 9.36623 | 8.72469 | 9.27486 | 9.65402 | 7.00993 | 9.34367 | 9.75984 | 10.3855 | 9.69147 |
| MIR4425   | 3.93137 | 4.3685  | 4.12749 | 4.27119 | 4.36911 | 4.32136 | 4.44735 | 4.06888 | 4.46906 |
| TMEM50A   | 12.1213 | 11.8917 | 12.0937 | 11.6937 | 11.6765 | 11.5243 | 11.8963 | 11.7402 | 11.8772 |
| TMEM57    | 9.17755 | 9.09506 | 9.11586 | 9.02131 | 8.65103 | 10.4769 | 9.7355  | 10.1355 | 9.95885 |
| LDLRAP1   | 7.44913 | 7.37345 | 7.16758 | 7.6099  | 7.04059 | 7.81359 | 7.71935 | 8.3606  | 7.5777  |
| PAQR7     | 5.94709 | 5.67519 | 5.82754 | 6.09991 | 6.02764 | 6.42728 | 6.04468 | 6.24901 | 6.32701 |
| EXTL1     | 5.44029 | 5.62968 | 5.40121 | 5.30889 | 5.37981 | 5.84225 | 5.24091 | 5.40548 | 5.41125 |
| PDIK1L    | 6.98832 | 7.17688 | 7.07894 | 6.7028  | 6.69882 | 6.32804 | 7.00854 | 6.44003 | 6.34465 |
| ZNF593    | 7.08573 | 6.85611 | 6.74427 | 7.92187 | 6.41923 | 8.20997 | 8.36385 | 7.37844 | 7.7704  |
| CNKSR1    | 7.47128 | 7.29932 | 6.9344  | 7.29371 | 6.48346 | 8.10456 | 7.85262 | 7.74893 | 8.35049 |
| CEP85     | 6.97615 | 6.99245 | 6.72564 | 6.73006 | 6.26973 | 6.60065 | 6.75169 | 6.75533 | 7.04206 |
| SH3BGRL3  | 8.6251  | 8.33979 | 8.7164  | 9.86145 | 9.64663 | 9.92504 | 10.0473 | 9.73457 | 9.95065 |
| CD52      | 5.98339 | 6.70484 | 6.89163 | 6.16328 | 6.50637 | 6.30109 | 6.49477 | 6.22673 | 5.60286 |
| LIN28A    | 4.68426 | 5.13225 | 4.94072 | 5.40038 | 6.6286  | 5.76245 | 5.17558 | 5.47173 | 5.30026 |
| DHDDS     | 8.31216 | 7.83839 | 8.108   | 7.35091 | 6.04388 | 7.47514 | 7.66184 | 7.85483 | 8.17465 |
| HMGN2     | 7.57618 | 7.24364 | 7.04368 | 5.12785 | 5.43604 | 4.31281 | 5.45915 | 4.95286 | 5.237   |
| MIR1976   | 8.18097 | 8.51953 | 8.05093 | 8.45952 | 10.1301 | 8.25221 | 8.05872 | 8.19204 | 8.45535 |
| ARID1A    | 8.34889 | 8.16502 | 8.26956 | 7.56139 | 6.23719 | 7.35185 | 7.82479 | 7.32536 | 8.08727 |
| SFN       | 12.2972 | 11.6167 | 11.7412 | 13.2479 | 12.0262 | 13.3022 | 13.4432 | 12.7172 | 13.2913 |
| NUDC      | 7.90343 | 8.17914 | 8.03576 | 8.20432 | 7.15807 | 8.2393  | 8.30232 | 7.91754 | 8.02003 |



|           |         |         |         |         |         |         |         |         |         |
|-----------|---------|---------|---------|---------|---------|---------|---------|---------|---------|
| TRNP1     | 7.16503 | 7.61311 | 7.3226  | 8.38206 | 7.41759 | 8.06977 | 8.34847 | 8.38783 | 8.41435 |
| WDTC1     | 8.4129  | 7.90375 | 8.00117 | 8.24082 | 7.0536  | 8.25863 | 8.48399 | 8.37096 | 8.14017 |
| TMEM222   | 7.30828 | 7.58887 | 7.31885 | 7.64315 | 7.0575  | 7.80631 | 8.64775 | 7.90317 | 8.03472 |
| SYTL1     | 7.62493 | 7.18885 | 7.20873 | 7.08821 | 7.29506 | 7.45166 | 7.19557 | 6.90133 | 7.23202 |
| GPR3      | 6.20545 | 6.06609 | 6.17105 | 6.88532 | 7.00791 | 6.53118 | 6.26479 | 6.88889 | 6.43243 |
| STX12     | 9.53994 | 9.27025 | 8.99839 | 9.47996 | 8.00167 | 8.69102 | 8.82226 | 9.4073  | 9.04257 |
| SCARNA1   | 4.97644 | 6.14131 | 5.15476 | 5.63453 | 4.93261 | 5.39273 | 6.53305 | 4.7964  | 4.53126 |
| THEMIS2   | 6.41755 | 6.4019  | 6.5911  | 6.4896  | 6.72537 | 6.89212 | 6.69053 | 8.41062 | 6.54753 |
| ATPIF1    | 6.52844 | 6.84719 | 6.46682 | 7.57132 | 6.14767 | 6.89995 | 7.9035  | 6.89042 | 6.89227 |
| SESN2     | 7.40742 | 7.02056 | 6.70127 | 8.55318 | 7.60878 | 10.1145 | 8.98084 | 10.2804 | 9.56964 |
| MED18     | 5.20601 | 5.23276 | 4.66572 | 6.05562 | 4.67197 | 6.30592 | 5.66851 | 5.54016 | 6.64803 |
| PHACTR4   | 10.2869 | 10.2245 | 10.0914 | 9.53347 | 9.60877 | 10.1808 | 9.90007 | 10.5372 | 10.5186 |
| TRNAU1AP  | 6.78535 | 6.83454 | 6.747   | 7.07097 | 6.2023  | 7.26734 | 7.23775 | 6.81307 | 7.1776  |
| GMEB1     | 8.04018 | 8.22069 | 8.03086 | 8.06022 | 7.02786 | 8.51242 | 8.21022 | 7.96643 | 8.5734  |
| MATN1-AS1 | 6.0132  | 6.21104 | 6.04758 | 5.98313 | 6.03148 | 6.50478 | 6.07263 | 6.20966 | 6.10166 |
| SERINC2   | 8.02333 | 7.79997 | 7.81865 | 8.64054 | 8.49155 | 8.93682 | 8.73194 | 8.64617 | 9.16292 |
| LINC01225 | 6.37073 | 6.33588 | 6.35227 | 6.73588 | 6.92327 | 6.71845 | 6.27601 | 6.54631 | 6.68418 |
| LINC01226 | 4.99029 | 5.51038 | 5.14157 | 5.68037 | 6.44612 | 5.69298 | 5.66476 | 5.6288  | 5.45996 |
| TINAGL1   | 6.88987 | 6.8222  | 7.14975 | 7.31691 | 6.48669 | 7.22931 | 6.84405 | 8.30347 | 7.41362 |
| HCRTR1    | 5.2507  | 5.37475 | 5.66416 | 6.38296 | 6.28824 | 6.12038 | 5.60196 | 6.2066  | 6.15836 |
| TMEM39B   | 6.53556 | 6.41514 | 6.50332 | 6.69442 | 6.15531 | 6.52807 | 6.7768  | 6.20357 | 6.43998 |
| KPNA6     | 10.2023 | 9.90962 | 10.0064 | 9.84105 | 7.46601 | 9.55362 | 9.95685 | 10.082  | 10.3787 |
| TXLNA     | 8.08176 | 7.8708  | 7.93703 | 7.56276 | 5.57528 | 7.17114 | 7.75884 | 7.58467 | 7.52208 |
| CCDC28B   | 5.21735 | 4.93519 | 5.11379 | 5.79732 | 5.75167 | 5.65575 | 5.84459 | 5.49218 | 5.17171 |
| IQCC      | 6.70534 | 6.75312 | 6.67335 | 6.86977 | 6.41333 | 6.48015 | 6.84783 | 6.73594 | 6.57398 |
| DCDC2B    | 5.76341 | 5.80625 | 6.04662 | 5.58908 | 5.82141 | 5.84473 | 5.81862 | 6.15517 | 5.93967 |

|           |         |         |         |         |         |         |         |         |         |
|-----------|---------|---------|---------|---------|---------|---------|---------|---------|---------|
| LCK       | 5.3996  | 5.81077 | 5.47376 | 6.19947 | 5.9967  | 6.23738 | 6.07425 | 5.83465 | 5.85773 |
| HDAC1     | 8.48202 | 7.95337 | 8.16064 | 8.9254  | 7.16344 | 8.68902 | 9.05334 | 9.23015 | 8.94456 |
| TSSK3     | 5.88333 | 6.1584  | 6.01582 | 6.21947 | 5.85121 | 5.85865 | 6.35613 | 5.552   | 5.90918 |
| ZBTB8B    | 5.51451 | 5.60607 | 5.81329 | 5.8692  | 7.3085  | 6.34358 | 5.81461 | 6.03736 | 5.97317 |
| ZBTB8A    | 7.58115 | 7.76082 | 8.39574 | 6.73511 | 5.7682  | 6.18816 | 7.54727 | 5.98266 | 6.80826 |
| RBBP4     | 9.43983 | 9.32891 | 9.63776 | 8.63389 | 7.13578 | 7.95405 | 8.73283 | 8.19223 | 8.46239 |
| KIAA1522  | 7.69834 | 7.30749 | 7.34791 | 7.71132 | 6.94679 | 7.54736 | 7.75161 | 6.82179 | 7.43527 |
| S100PBP   | 6.96726 | 6.87477 | 6.69739 | 5.52424 | 5.88003 | 5.31082 | 5.9482  | 5.81532 | 5.77161 |
| HPCA      | 6.46902 | 6.86618 | 6.58846 | 7.93705 | 7.31441 | 8.68633 | 7.78621 | 7.83044 | 7.98861 |
| AZIN2     | 6.49832 | 6.37728 | 6.32096 | 6.2941  | 6.33252 | 6.05542 | 6.14256 | 6.05692 | 6.05049 |
| ZNF362    | 8.17111 | 8.15163 | 8.02738 | 7.07737 | 6.43496 | 7.05163 | 7.55489 | 6.3517  | 6.41716 |
| ZSCAN20   | 5.95088 | 6.2611  | 6.36133 | 6.54799 | 6.54871 | 6.28824 | 6.38129 | 6.18398 | 6.29538 |
| HMGB4     | 4.85454 | 4.97358 | 4.89815 | 4.84743 | 5.98775 | 4.86713 | 4.86888 | 4.91601 | 5.08063 |
| CSMD2-AS1 | 5.04043 | 5.1967  | 5.01555 | 5.262   | 6.20843 | 5.50763 | 5.09152 | 5.48241 | 5.23408 |
| C1ORF94   | 5.20034 | 5.31662 | 5.32058 | 6.05757 | 6.30128 | 5.63506 | 5.6186  | 5.76849 | 5.15598 |
| SMIM12    | 4.67135 | 4.51357 | 4.61817 | 5.02127 | 5.58017 | 5.03136 | 5.31091 | 4.98969 | 5.01163 |
| NCDN      | 7.18653 | 7.13456 | 7.02748 | 7.7686  | 6.87682 | 7.15618 | 7.56087 | 6.89664 | 7.04813 |
| TFAP2E    | 6.9705  | 7.00643 | 6.71038 | 7.41994 | 7.38969 | 7.39982 | 7.26249 | 7.55078 | 7.05328 |
| CLSPN     | 2.8373  | 3.71823 | 3.05555 | 3.78394 | 3.85311 | 3.40857 | 3.1955  | 2.90944 | 3.05347 |
| TEKT2     | 5.41258 | 5.75482 | 5.65546 | 5.86196 | 6.18263 | 6.02781 | 6.11985 | 5.87265 | 6.15917 |
| ADPRHL2   | 7.15805 | 7.12681 | 6.95727 | 8.41373 | 6.22773 | 8.33124 | 8.19153 | 7.47961 | 7.53342 |
| MAP7D1    | 7.56624 | 7.28908 | 7.18619 | 8.64328 | 7.506   | 8.98956 | 8.49725 | 8.58877 | 9.02466 |
| THRAP3    | 9.48248 | 9.40096 | 9.52813 | 8.78205 | 5.93012 | 8.08613 | 9.42529 | 8.81951 | 9.1023  |
| SH3D21    | 8.05593 | 7.93775 | 8.11844 | 8.32982 | 8.40259 | 9.39334 | 8.86366 | 9.69337 | 9.41073 |
| MIR4255   | 3.37153 | 3.18787 | 3.62415 | 3.44882 | 3.88755 | 4.9056  | 3.33962 | 3.61204 | 2.98179 |
| ZC3H12A   | 8.57135 | 7.89844 | 8.2346  | 9.0632  | 8.45624 | 9.46764 | 9.25635 | 9.0576  | 8.96422 |

|           |         |         |         |         |         |         |         |         |         |
|-----------|---------|---------|---------|---------|---------|---------|---------|---------|---------|
| CDCA8     | 7.43976 | 7.06902 | 6.97306 | 7.40207 | 6.98795 | 7.1381  | 7.60793 | 7.1974  | 6.98307 |
| C1orf122  | 6.74401 | 6.79512 | 6.4663  | 7.67623 | 5.77318 | 7.35566 | 7.56559 | 7.18251 | 7.24713 |
| MIR3659   | 5.96141 | 5.75939 | 5.46299 | 5.59394 | 4.5607  | 5.13991 | 5.13927 | 4.76237 | 5.3205  |
| LINC01343 | 5.74254 | 4.97442 | 4.93519 | 5.78939 | 5.62124 | 5.36717 | 5.96925 | 5.23721 | 5.1939  |
| AKIRIN1   | 8.25447 | 8.25237 | 8.21792 | 8.9076  | 7.5023  | 8.62821 | 9.21224 | 9.55514 | 9.2026  |
| MACF1     | 10.7843 | 10.6915 | 10.9485 | 9.90945 | 8.15038 | 10.3932 | 10.2391 | 10.8985 | 11.1596 |
| KIAA0754  | 7.65553 | 7.40606 | 7.71473 | 6.43694 | 6.45449 | 6.29963 | 6.18717 | 7.70856 | 8.0887  |
| BMP8A     | 7.50619 | 7.48477 | 7.32358 | 7.70548 | 8.01834 | 7.83387 | 7.57303 | 8.03529 | 7.62244 |
| PPIE      | 6.74449 | 7.3938  | 6.91676 | 6.84596 | 6.88586 | 6.71293 | 6.98689 | 6.49308 | 6.47435 |
| MFSD2A    | 8.32284 | 8.54271 | 8.82616 | 8.50022 | 6.26292 | 7.60169 | 8.61671 | 7.63172 | 7.87802 |
| RLF       | 9.44389 | 9.35445 | 9.37417 | 8.68233 | 7.72771 | 10.2045 | 9.02365 | 9.48455 | 9.1819  |
| TMCO2     | 4.49351 | 4.81941 | 4.55349 | 5.04918 | 5.98808 | 5.66581 | 4.96019 | 4.83533 | 5.12008 |
| ZMPSTE24  | 9.50687 | 8.99816 | 9.42406 | 9.56136 | 7.57533 | 9.14138 | 10.0974 | 9.97746 | 9.83275 |
| SMAP2     | 9.24216 | 9.32341 | 9.40038 | 8.82567 | 8.39341 | 8.3729  | 8.90307 | 9.11999 | 8.54306 |
| ZFP69B    | 6.75783 | 6.40439 | 6.34989 | 5.68944 | 6.49639 | 5.53386 | 5.8996  | 5.79132 | 5.41627 |
| ZFP69     | 7.19961 | 6.45852 | 6.48897 | 5.65415 | 5.16922 | 5.24638 | 5.89035 | 5.42466 | 5.12407 |
| EXO5      | 5.8339  | 5.56967 | 5.64986 | 5.7369  | 5.90394 | 5.68482 | 5.59208 | 5.20486 | 5.46704 |
| ZNF684    | 5.9125  | 6.17868 | 6.1947  | 5.49981 | 4.94353 | 5.38718 | 5.84677 | 5.20113 | 5.13836 |
| Mir30e    | 8.49447 | 8.26519 | 8.6848  | 7.35452 | 6.42049 | 7.04949 | 6.64973 | 6.67384 | 6.82582 |
| Mir30c1   | 6.04826 | 5.95666 | 5.87925 | 6.17046 | 6.30386 | 5.11022 | 5.72008 | 5.58965 | 5.73276 |
| CTPS1     | 7.44463 | 7.68084 | 7.44483 | 8.44458 | 6.22973 | 7.53308 | 7.89151 | 7.62604 | 7.85127 |
| SLFN1-AS1 | 6.47024 | 6.14483 | 6.51024 | 6.47964 | 6.11574 | 6.40509 | 6.60497 | 6.36934 | 6.28548 |
| guca2b    | 5.91556 | 5.57978 | 5.59283 | 5.94102 | 6.84429 | 5.52486 | 5.42152 | 5.80698 | 5.88166 |
| RIMKLA    | 5.50923 | 5.69475 | 6.08241 | 6.40539 | 6.21586 | 7.83814 | 6.36926 | 6.50935 | 5.72076 |
| PPCS      | 7.22133 | 7.33122 | 7.18446 | 7.26757 | 6.6234  | 6.93454 | 7.77992 | 6.87673 | 7.11498 |
| CCDC30    | 5.742   | 5.76356 | 5.73116 | 5.14684 | 5.36977 | 4.88537 | 5.03446 | 4.81434 | 5.12288 |

|              |         |         |         |         |         |         |         |         |         |
|--------------|---------|---------|---------|---------|---------|---------|---------|---------|---------|
| PPIH         | 7.64534 | 7.88996 | 7.88626 | 7.23617 | 6.39811 | 6.61565 | 7.62128 | 6.25402 | 6.55487 |
| YBX1         | 11.6711 | 11.5815 | 11.982  | 11.8291 | 10.3397 | 11.5093 | 11.5553 | 11.0992 | 11.2946 |
| C1ORF50      | 7.35911 | 7.31968 | 7.62269 | 7.41131 | 6.98912 | 7.10987 | 8.08266 | 7.30986 | 7.00118 |
| LOC100129924 | 4.80733 | 5.21229 | 5.06459 | 5.3708  | 5.23345 | 5.23133 | 4.8787  | 5.14603 | 5.24294 |
| ERMAP        | 7.61493 | 7.78757 | 7.52672 | 6.85706 | 7.04888 | 6.67976 | 6.78919 | 6.18743 | 6.18065 |
| ZNF691       | 5.92857 | 6.24739 | 5.83235 | 5.77478 | 5.49149 | 5.56347 | 5.43138 | 5.05812 | 5.46638 |
| SLC2A1-AS1   | 6.09055 | 6.45464 | 6.32395 | 6.34888 | 6.84102 | 6.80783 | 6.487   | 6.85195 | 6.41315 |
| cfap57       | 5.2759  | 4.98349 | 4.96276 | 5.56934 | 6.21801 | 5.3469  | 5.34012 | 5.50931 | 5.12343 |
| tmem125      | 6.75159 | 6.69779 | 6.49961 | 7.26059 | 6.88199 | 7.16189 | 7.07335 | 6.95352 | 7.35151 |
| TIE1         | 6.99039 | 6.52445 | 6.83236 | 6.84384 | 6.25602 | 6.68664 | 6.82076 | 6.94485 | 6.8267  |
| MPL          | 6.0844  | 5.99093 | 5.99405 | 7.20154 | 6.58799 | 6.95781 | 6.72255 | 6.40474 | 7.41108 |
| CDC20        | 7.5314  | 6.97542 | 7.02613 | 8.70437 | 6.98154 | 8.42743 | 7.96203 | 9.08987 | 8.06663 |
| SZT2         | 8.33821 | 8.21233 | 8.07609 | 7.51895 | 6.8337  | 7.84253 | 7.68035 | 8.95157 | 8.58512 |
| KDM4A        | 8.09235 | 8.47588 | 7.79401 | 7.74392 | 5.68269 | 7.08885 | 7.79128 | 7.9013  | 7.4037  |
| ARTN         | 5.83946 | 5.51664 | 5.56796 | 7.2251  | 6.39279 | 7.04838 | 6.92431 | 7.13894 | 7.53625 |
| IPO13        | 7.53245 | 7.65645 | 7.46628 | 8.0818  | 7.07232 | 7.86212 | 8.26708 | 7.96445 | 8.3921  |
| DPH2         | 7.03287 | 6.90671 | 7.23747 | 7.24118 | 6.87647 | 6.88119 | 7.44236 | 6.51917 | 6.86122 |
| CCDC24       | 6.11608 | 6.08412 | 6.25402 | 6.36431 | 6.48219 | 6.43347 | 6.35742 | 6.52434 | 6.3477  |
| KLF17        | 5.20568 | 4.9276  | 4.59311 | 5.72318 | 5.52456 | 6.10488 | 5.68803 | 5.46092 | 5.51091 |
| DMAP1        | 7.42513 | 7.79319 | 7.60295 | 6.41059 | 6.58203 | 6.36887 | 6.68981 | 6.44866 | 6.95871 |
| RNF220       | 7.34536 | 7.18989 | 7.23368 | 7.10271 | 7.15337 | 6.94115 | 6.87779 | 6.73474 | 7.0134  |
| C1orf228     | 5.91407 | 5.90526 | 5.69209 | 5.81813 | 6.15934 | 5.74974 | 6.09941 | 5.73343 | 5.59531 |
| KIF2C        | 6.74739 | 5.80028 | 5.73165 | 6.42217 | 6.35662 | 5.8127  | 6.49118 | 6.27175 | 6.08224 |
| PLK3         | 8.36103 | 7.29657 | 7.40435 | 8.61892 | 7.61856 | 8.45969 | 8.33766 | 9.61341 | 8.59276 |
| BTBD19       | 7.21166 | 6.62172 | 6.91111 | 7.29853 | 6.92622 | 7.37353 | 6.62051 | 7.968   | 7.63981 |
| UROD         | 7.57444 | 7.51733 | 7.72222 | 7.29468 | 7.03783 | 6.97294 | 7.60528 | 6.90537 | 7.29029 |

|             |         |         |         |         |         |         |         |         |         |
|-------------|---------|---------|---------|---------|---------|---------|---------|---------|---------|
| LINC01144   | 6.53132 | 6.46206 | 6.73527 | 6.53569 | 6.57315 | 6.40963 | 6.11468 | 6.19202 | 6.50683 |
| HPDL        | 5.83534 | 6.14035 | 6.159   | 6.48325 | 6.58665 | 6.75183 | 6.74915 | 6.35176 | 6.3904  |
| NASP        | 6.99052 | 7.03734 | 7.07634 | 6.71815 | 5.85779 | 5.9567  | 6.57494 | 6.55576 | 6.15953 |
| TMEM69      | 8.94291 | 8.7284  | 8.55262 | 8.65561 | 7.9056  | 7.69794 | 8.84964 | 8.8626  | 8.72681 |
| mast2       | 7.56442 | 7.24361 | 7.35676 | 7.42008 | 7.35061 | 7.11913 | 7.55774 | 7.61475 | 7.63931 |
| TSPAN1      | 4.92808 | 5.28302 | 5.63249 | 4.73622 | 4.90394 | 4.61889 | 4.86396 | 6.32507 | 5.71779 |
| LURAP1      | 5.89156 | 5.97198 | 6.05624 | 6.61109 | 6.4432  | 6.56531 | 6.40238 | 6.11205 | 6.28215 |
| RAD54L      | 6.16532 | 6.08335 | 6.26632 | 6.30801 | 6.54334 | 6.27934 | 6.13151 | 5.85732 | 5.87536 |
| Uqcrh       | 6.85892 | 6.94592 | 6.67151 | 7.28509 | 6.47851 | 7.24019 | 7.40858 | 6.77091 | 6.81675 |
| FAAH        | 6.85024 | 6.82243 | 6.83897 | 7.19389 | 6.82268 | 6.8048  | 7.09534 | 6.83513 | 7.03226 |
| FAAHP1      | 5.4412  | 4.93159 | 5.02875 | 5.4718  | 6.39802 | 5.60796 | 5.06651 | 5.61672 | 5.33173 |
| DMBX1       | 6.03928 | 6.29378 | 6.30089 | 6.63206 | 6.37506 | 6.52447 | 6.45388 | 6.94501 | 6.57648 |
| MKNK1-AS1   | 4.87152 | 5.05618 | 5.34494 | 5.56586 | 6.02085 | 5.81215 | 5.3045  | 5.70052 | 5.3754  |
| TEX38       | 6.29146 | 6.24013 | 6.08336 | 6.4358  | 6.56845 | 5.79663 | 5.8429  | 6.12527 | 6.12308 |
| EFCAB14-AS1 | 4.13197 | 3.66167 | 3.8868  | 4.65746 | 4.19982 | 4.31553 | 4.31244 | 4.21449 | 3.93006 |
| LINC00853   | 5.34428 | 5.58047 | 5.29531 | 5.77018 | 6.67217 | 5.93152 | 5.60162 | 5.77765 | 5.73457 |
| FOXE3       | 5.43019 | 5.58297 | 5.4065  | 6.4859  | 6.0839  | 6.58133 | 5.34872 | 6.10011 | 5.90342 |
| FOXD2       | 5.61122 | 5.58658 | 5.66745 | 6.18101 | 6.28399 | 6.41332 | 6.27093 | 6.59401 | 6.11764 |
| TRABD2B     | 5.65471 | 5.2909  | 5.24861 | 6.00028 | 6.24577 | 6.23762 | 5.92474 | 5.74553 | 5.40666 |
| MIR4421     | 5.33574 | 4.27633 | 4.96515 | 4.58654 | 7.16102 | 4.37419 | 5.08118 | 4.79436 | 4.43059 |
| C1orf185    | 4.12739 | 4.12613 | 4.06758 | 3.91055 | 5.22562 | 4.31361 | 4.55055 | 4.23522 | 4.55528 |
| RNF11       | 9.91978 | 9.72669 | 9.57142 | 10.9039 | 10.255  | 11.272  | 11.0651 | 10.8613 | 11.1228 |
| OSBPL9      | 8.67032 | 8.51044 | 8.63442 | 7.54154 | 7.29553 | 8.31589 | 7.96012 | 8.85022 | 8.46681 |
| BTF3L4      | 7.70624 | 8.05999 | 7.83831 | 6.80428 | 6.42572 | 5.92298 | 6.91422 | 6.44411 | 6.70096 |
| PRPF38A     | 9.58018 | 9.47974 | 9.66625 | 8.5322  | 6.85171 | 8.37819 | 8.89446 | 8.89308 | 9.08963 |
| GPX7        | 7.98916 | 7.75487 | 8.02581 | 7.99649 | 6.77187 | 6.65719 | 7.84645 | 6.75763 | 7.16082 |

|              |         |         |         |         |         |         |         |         |         |
|--------------|---------|---------|---------|---------|---------|---------|---------|---------|---------|
| ZYG11B       | 8.59105 | 8.42941 | 8.33778 | 7.96486 | 5.27598 | 7.49199 | 8.38695 | 7.80064 | 7.4801  |
| ZYG11A       | 5.8753  | 5.28941 | 4.93859 | 5.31716 | 5.4597  | 5.35287 | 5.18993 | 5.33519 | 5.20243 |
| SCP2         | 9.39196 | 9.35305 | 9.19242 | 9.35759 | 6.62851 | 9.10464 | 9.41829 | 8.53287 | 8.65825 |
| PODN         | 7.89731 | 8.25136 | 8.43435 | 6.78567 | 6.59171 | 7.00677 | 6.58677 | 6.19557 | 6.12501 |
| cpt2         | 7.6003  | 7.13369 | 7.16338 | 7.44441 | 5.85676 | 7.13786 | 7.61518 | 7.1216  | 6.97125 |
| LOC100507564 | 6.07818 | 5.72442 | 5.90567 | 5.80783 | 5.49249 | 5.97664 | 5.46597 | 5.46922 | 5.94993 |
| LRRC42       | 7.38867 | 7.1104  | 7.31154 | 8.25968 | 6.03901 | 7.9081  | 8.06167 | 7.79135 | 7.82723 |
| TCEANC2      | 6.84498 | 6.59178 | 6.56584 | 6.18983 | 5.50579 | 5.69277 | 6.2986  | 5.67787 | 6.03831 |
| MRPL37       | 9.72348 | 9.64816 | 9.97461 | 9.54474 | 9.09256 | 9.13556 | 9.73209 | 9.24245 | 9.7106  |
| ACOT11       | 6.14093 | 5.78447 | 6.54407 | 7.13341 | 5.9468  | 7.08543 | 7.24732 | 8.33389 | 7.84478 |
| MROH7-TTC4   | 6.44414 | 6.43367 | 6.60361 | 6.48507 | 6.38181 | 6.33742 | 6.27747 | 6.2827  | 6.47626 |
| LEXM         | 5.26374 | 5.16853 | 5.1793  | 5.66894 | 5.46216 | 5.86434 | 6.15655 | 6.29028 | 6.41485 |
| TMEM61       | 5.83971 | 5.74856 | 6.09676 | 6.61803 | 7.20834 | 6.97431 | 7.1904  | 6.77763 | 6.69381 |
| PCSK9        | 6.53781 | 6.48456 | 6.61538 | 7.01183 | 6.68411 | 6.65485 | 6.76229 | 6.74528 | 6.90769 |
| LOC100507634 | 6.1667  | 6.17144 | 6.10437 | 6.87613 | 6.70651 | 6.84134 | 6.98683 | 6.63382 | 6.75719 |
| MIR4422      | 5.24198 | 5.4686  | 4.89283 | 6.27808 | 5.35225 | 6.60718 | 6.02613 | 5.89818 | 5.9878  |
| LINC01135    | 5.86799 | 5.59298 | 5.45834 | 5.53778 | 6.70106 | 5.85937 | 5.94738 | 5.82025 | 5.95536 |
| FGGY         | 6.9151  | 6.22839 | 6.24264 | 5.84197 | 6.17716 | 5.82896 | 6.35036 | 6.22799 | 6.29359 |
| HOOK1        | 9.1751  | 9.13278 | 8.93702 | 9.0787  | 7.78211 | 9.89198 | 9.37732 | 9.35345 | 9.71164 |
| NFIA         | 9.45433 | 9.28619 | 9.77287 | 7.8241  | 6.88328 | 6.98828 | 8.25433 | 7.15375 | 7.45537 |
| PATJ         | 9.75588 | 9.85606 | 9.37254 | 8.77328 | 7.3232  | 9.46934 | 9.05993 | 9.52417 | 9.87852 |
| MIR3116-1    | 4.85527 | 4.73494 | 5.38806 | 5.15732 | 4.73029 | 5.0857  | 4.98275 | 5.10185 | 5.98829 |
| L1TD1        | 4.83077 | 5.01505 | 4.97225 | 5.60757 | 5.29364 | 5.38517 | 4.96723 | 5.80738 | 5.22813 |
| USP1         | 7.9443  | 8.32356 | 8.1217  | 7.70887 | 4.39246 | 6.85244 | 7.91258 | 6.7298  | 6.86065 |
| ANGPTL3      | 3.22108 | 3.11637 | 2.65792 | 3.17603 | 2.9126  | 3.0034  | 3.17221 | 2.6584  | 2.88861 |
| LINC00466    | 3.52004 | 3.42455 | 3.29363 | 3.09105 | 4.17895 | 3.67457 | 3.63245 | 3.50705 | 4.11607 |

|             |         |         |         |         |         |         |         |         |         |
|-------------|---------|---------|---------|---------|---------|---------|---------|---------|---------|
| FOXD3       | 4.43161 | 4.61784 | 4.45342 | 5.23743 | 4.61109 | 5.48465 | 5.2362  | 5.36168 | 5.25382 |
| EFCAB7      | 6.69421 | 7.21076 | 6.57061 | 5.13466 | 5.03049 | 4.56606 | 5.74563 | 5.02228 | 5.14686 |
| DLEU2L      | 5.67378 | 6.4731  | 5.94583 | 2.63009 | 5.58837 | 3.98507 | 3.48549 | 3.4897  | 4.73016 |
| PGM1        | 7.52673 | 7.32442 | 7.63915 | 7.75656 | 6.4367  | 7.41264 | 7.61204 | 6.60561 | 7.08415 |
| ROR1        | 8.26057 | 8.59913 | 8.48289 | 6.53893 | 5.54287 | 6.06139 | 6.672   | 6.62319 | 5.57369 |
| UBE2U       | 3.76955 | 6.34088 | 6.74112 | 3.03206 | 4.52766 | 3.64715 | 3.66795 | 3.52425 | 3.51117 |
| CACHD1      | 9.51504 | 9.28995 | 8.9121  | 6.24273 | 6.2767  | 6.0156  | 7.30272 | 5.99954 | 6.48178 |
| MIR4794     | 3.59152 | 3.00974 | 2.65323 | 2.58015 | 2.29244 | 2.55498 | 2.64602 | 2.57427 | 2.64024 |
| LEPR        | 7.08056 | 6.64383 | 6.99183 | 6.57065 | 6.11374 | 6.51796 | 6.72439 | 7.16996 | 6.94651 |
| SGIP1       | 7.7906  | 6.73483 | 7.05881 | 5.83337 | 6.33408 | 5.65873 | 6.43186 | 6.87058 | 7.33717 |
| MIR3117     | 2.51641 | 2.56225 | 2.4703  | 2.43084 | 2.30778 | 2.70673 | 2.73518 | 2.65355 | 2.20616 |
| TCTEX1D1    | 4.70873 | 4.37296 | 4.8027  | 4.8801  | 5.1947  | 3.49691 | 4.20328 | 4.94109 | 5.33139 |
| MIER1       | 8.43897 | 8.39303 | 8.39595 | 7.81255 | 5.91114 | 7.37439 | 8.23705 | 8.00948 | 7.93035 |
| IL23R       | 3.8769  | 4.29551 | 4.0582  | 4.45444 | 4.56023 | 4.22987 | 4.41685 | 4.25323 | 4.05502 |
| GNG12-AS1   | 5.7967  | 6.3435  | 5.92992 | 4.71582 | 5.85789 | 5.17707 | 5.1503  | 4.91492 | 5.00424 |
| DEPDC1      | 3.9504  | 3.76115 | 3.65269 | 4.01261 | 5.01409 | 4.27864 | 3.99666 | 4.84296 | 3.98987 |
| LRRC7       | 4.95171 | 4.66678 | 4.0975  | 4.7057  | 4.73685 | 5.17433 | 4.47053 | 4.81816 | 4.73917 |
| SRSF11      | 10.6714 | 10.9647 | 10.9278 | 9.00642 | 6.80172 | 7.36764 | 8.7913  | 9.49341 | 9.51287 |
| HHLA3       | 5.85766 | 5.67887 | 5.7048  | 6.1964  | 5.95261 | 6.17818 | 6.37341 | 5.80501 | 7.18674 |
| CTH         | 5.6515  | 5.47762 | 5.24462 | 6.1743  | 5.24781 | 5.91499 | 5.7329  | 7.05542 | 6.40351 |
| ZRANB2-AS1  | 4.84385 | 4.61834 | 4.78524 | 4.97313 | 4.30723 | 4.97943 | 4.85114 | 4.75845 | 5.08724 |
| ZRANB2-AS2  | 5.25097 | 5.20961 | 5.03    | 4.77266 | 5.13464 | 4.86245 | 4.90235 | 4.90331 | 4.33289 |
| FPGT-TNNI3K | 6.27824 | 6.56913 | 6.28477 | 5.94108 | 5.6767  | 5.72897 | 5.87653 | 5.67429 | 5.45241 |
| TYW3        | 7.39792 | 7.45702 | 7.65095 | 7.08118 | 6.35475 | 6.24839 | 7.35994 | 6.12221 | 6.52701 |
| LHX8        | 5.29434 | 4.96996 | 4.87637 | 5.15372 | 5.75209 | 5.28455 | 5.26419 | 5.19714 | 5.15024 |
| ak5         | 5.3091  | 5.02414 | 5.21548 | 5.96988 | 5.53426 | 5.41947 | 5.57863 | 5.14549 | 4.81504 |

|           |         |         |         |         |         |         |         |         |         |
|-----------|---------|---------|---------|---------|---------|---------|---------|---------|---------|
| NEXN      | 5.52012 | 4.97559 | 6.3332  | 4.6885  | 4.12072 | 4.63207 | 4.69023 | 4.67894 | 4.62367 |
| MGC27382  | 4.08737 | 4.23992 | 3.74012 | 4.36354 | 5.19978 | 4.39022 | 4.34732 | 3.95814 | 4.33748 |
| PTGFR     | 7.07777 | 7.32245 | 7.68178 | 5.91016 | 6.15235 | 6.74322 | 6.16249 | 5.75455 | 5.89637 |
| IFI44L    | 7.6955  | 6.63496 | 6.55872 | 4.63075 | 5.69766 | 4.44518 | 4.99494 | 4.44695 | 5.15282 |
| IFI44     | 8.08273 | 6.73985 | 7.73973 | 5.51734 | 4.99489 | 4.51805 | 5.3409  | 5.29816 | 5.1113  |
| ADGRL2    | 8.99078 | 8.98237 | 8.30628 | 9.38314 | 7.47737 | 10.0186 | 9.24368 | 9.89482 | 10.6013 |
| SAMD13    | 5.29991 | 5.31148 | 5.40115 | 4.83905 | 5.81971 | 5.34463 | 4.78446 | 5.43726 | 5.12275 |
| DNASE2B   | 5.18587 | 5.126   | 5.33733 | 5.42458 | 6.61519 | 5.74455 | 5.52306 | 5.26246 | 5.08125 |
| RPF1      | 9.1543  | 9.41483 | 9.29945 | 9.15113 | 7.19011 | 8.19267 | 9.39642 | 8.27024 | 8.53168 |
| WDR63     | 5.84909 | 5.58057 | 5.68837 | 5.34731 | 5.19727 | 5.30245 | 5.53977 | 5.06675 | 4.9617  |
| MIR4423   | 3.1239  | 3.12797 | 2.83745 | 2.92892 | 2.7966  | 2.9641  | 3.08971 | 2.7758  | 2.83612 |
| LOC646626 | 5.60952 | 5.69624 | 5.2726  | 5.4337  | 5.51297 | 5.52193 | 5.34714 | 5.35638 | 5.48223 |
| CLCA2     | 11.9306 | 11.7888 | 11.6376 | 12.0742 | 10.193  | 11.3759 | 12.2324 | 11.7924 | 12.3786 |
| CLCA1     | 3.91116 | 3.94132 | 3.98633 | 4.0007  | 4.64175 | 4.36008 | 4.06931 | 4.0153  | 4.20652 |
| CLCA4     | 8.53777 | 6.06004 | 6.39274 | 5.91921 | 4.77264 | 5.33368 | 7.02506 | 5.42054 | 4.36998 |
| SH3GLB1   | 9.44845 | 9.43877 | 9.36911 | 9.25399 | 6.84551 | 9.36244 | 9.56786 | 9.40859 | 9.33817 |
| HS2ST1    | 7.96864 | 7.79345 | 8.0466  | 7.84286 | 6.47045 | 7.13436 | 7.97481 | 7.20866 | 7.10926 |
| LINC01140 | 6.08725 | 6.17407 | 6.60839 | 5.9497  | 5.5694  | 5.77455 | 5.77403 | 6.14808 | 5.82445 |
| LMO4      | 7.48568 | 9.49216 | 8.15224 | 7.90018 | 6.57201 | 7.28587 | 7.74324 | 7.01065 | 7.06504 |
| PKN2      | 9.45775 | 9.42498 | 9.34105 | 8.43409 | 5.71596 | 8.19173 | 8.50032 | 8.85231 | 8.91186 |
| ZNF326    | 8.77165 | 8.74417 | 9.14166 | 7.44238 | 5.91779 | 6.80447 | 7.75674 | 7.58724 | 7.54789 |
| CDC7      | 6.75315 | 6.73573 | 6.93083 | 5.94919 | 5.67103 | 5.49345 | 6.23992 | 5.80443 | 5.65133 |
| EPHX4     | 4.75681 | 4.89722 | 5.07092 | 4.35113 | 5.46196 | 5.02062 | 4.8803  | 4.85894 | 4.68543 |
| BTBD8     | 4.47348 | 4.04025 | 4.37362 | 3.45457 | 3.23234 | 3.62951 | 3.29738 | 3.51387 | 3.21583 |
| KIAA1107  | 6.31478 | 6.34723 | 5.86792 | 4.68357 | 4.88473 | 5.06448 | 4.67042 | 4.43294 | 4.366   |
| C1orf146  | 2.99818 | 3.20981 | 2.85329 | 3.22473 | 3.17614 | 3.23159 | 3.09974 | 2.98318 | 3.27332 |



|              |         |         |         |         |         |         |         |         |         |
|--------------|---------|---------|---------|---------|---------|---------|---------|---------|---------|
| RPAP2        | 8.79182 | 8.63963 | 8.71946 | 7.85115 | 6.80356 | 7.71491 | 8.43344 | 7.50784 | 7.99068 |
| MTF2         | 7.78214 | 7.97596 | 7.79144 | 6.94657 | 5.51414 | 6.57866 | 7.22886 | 6.47067 | 6.47012 |
| CCDC18       | 6.08973 | 5.61729 | 6.00947 | 5.09718 | 4.09426 | 4.81616 | 5.72425 | 5.24171 | 4.96679 |
| FNBP1L       | 8.75232 | 8.54748 | 8.81164 | 7.22082 | 5.66665 | 8.52707 | 7.9503  | 9.22834 | 9.08528 |
| LOC100129046 | 6.2147  | 6.49787 | 6.62043 | 6.06127 | 6.41239 | 5.70603 | 5.65265 | 5.93748 | 6.12472 |
| MIR760       | 5.87936 | 5.45403 | 5.62191 | 6.43774 | 6.17223 | 5.88507 | 6.14263 | 6.22927 | 6.06415 |
| LOC729970    | 5.21138 | 5.36879 | 5.58743 | 5.47708 | 5.27076 | 4.9346  | 5.48257 | 5.09962 | 5.43793 |
| FLJ31662     | 5.28238 | 5.57178 | 5.32572 | 4.85505 | 7.16    | 5.59806 | 5.25912 | 5.34994 | 5.30115 |
| PTBP2        | 8.99098 | 8.60917 | 9.04736 | 7.27313 | 5.87634 | 6.54815 | 7.14739 | 7.33767 | 7.166   |
| DPYD-AS1     | 3.9162  | 4.50606 | 3.90196 | 4.64659 | 4.50157 | 4.23981 | 4.53635 | 4.10885 | 4.21445 |
| LOC729987    | 4.62036 | 4.92209 | 5.09291 | 4.81978 | 6.13261 | 4.91987 | 5.02829 | 4.91028 | 4.96335 |
| SNX7         | 7.96036 | 7.89345 | 7.7405  | 8.16273 | 5.62361 | 7.13283 | 8.49789 | 7.31474 | 7.42694 |
| LOC100129620 | 4.70946 | 4.88165 | 4.72221 | 4.87277 | 4.99107 | 4.8287  | 4.50216 | 4.99667 | 4.79655 |
| PLPPR4       | 7.86013 | 6.35239 | 6.6177  | 6.93825 | 5.33009 | 5.33127 | 5.99941 | 4.90237 | 5.93986 |
| PALMD        | 10.7802 | 10.4471 | 11.0255 | 8.72128 | 6.35005 | 9.04089 | 10.3142 | 9.01561 | 9.8651  |
| MFSD14A      | 9.83971 | 9.88917 | 10.1227 | 9.26754 | 7.39721 | 8.82535 | 10.0322 | 9.37543 | 9.52794 |
| TRMT13       | 7.54042 | 8.0287  | 8.03685 | 7.10375 | 5.96983 | 6.23886 | 6.78204 | 6.29956 | 6.53334 |
| RTCA         | 8.44155 | 8.12712 | 8.34083 | 8.2225  | 5.70759 | 8.77319 | 8.3022  | 7.95061 | 8.24429 |
| MIR553       | 6.45559 | 6.31747 | 6.26237 | 3.44568 | 2.76133 | 3.2943  | 3.87026 | 3.80848 | 4.56849 |
| CDC14A       | 8.56995 | 8.67659 | 8.68751 | 6.64474 | 6.71454 | 4.85995 | 6.67565 | 5.90391 | 5.94999 |
| gpr88        | 5.62935 | 5.73801 | 5.80655 | 6.82329 | 6.49766 | 6.92763 | 6.30213 | 6.58025 | 6.21969 |
| VCAM1        | 6.3982  | 6.60085 | 6.01252 | 5.92763 | 5.75812 | 5.6236  | 6.13959 | 6.15954 | 6.31825 |
| S1PR1        | 7.19035 | 6.35023 | 7.86545 | 7.12001 | 5.6927  | 6.54505 | 6.83659 | 6.87799 | 7.11598 |
| PRMT6        | 6.34947 | 5.54369 | 6.05209 | 6.52468 | 4.98456 | 5.49767 | 7.15469 | 5.11763 | 5.1993  |
| NTNG1        | 5.237   | 5.26791 | 5.172   | 5.576   | 6.17297 | 5.32575 | 5.45144 | 5.34316 | 5.14107 |
| VAV3-AS1     | 3.78651 | 3.98462 | 4.16785 | 3.90706 | 4.51249 | 3.90738 | 4.59971 | 3.77655 | 3.84873 |

|          |         |         |         |         |         |         |         |         |         |
|----------|---------|---------|---------|---------|---------|---------|---------|---------|---------|
| PRPF38B  | 8.65987 | 9.01231 | 8.75738 | 8.21307 | 5.92439 | 7.09064 | 8.18658 | 7.94365 | 8.05011 |
| FNDC7    | 4.75349 | 4.8787  | 5.14285 | 5.36468 | 6.44906 | 5.31191 | 5.23989 | 5.60329 | 5.46719 |
| STXBP3   | 8.26528 | 8.85027 | 8.39193 | 7.95865 | 5.16328 | 6.94558 | 8.2588  | 7.20929 | 7.42182 |
| SPATA42  | 4.39774 | 3.9613  | 4.39087 | 4.11807 | 4.38975 | 3.92832 | 4.03835 | 4.11221 | 3.8762  |
| GP5M2    | 9.45661 | 9.10486 | 9.8844  | 8.99212 | 5.53396 | 8.52923 | 9.35667 | 8.94269 | 8.7359  |
| TMEM167B | 9.0102  | 9.26205 | 8.91451 | 9.01311 | 7.94021 | 9.11133 | 9.27388 | 9.40803 | 8.56898 |
| Scarna2  | 7.1029  | 7.6502  | 7.37954 | 7.80111 | 6.48006 | 8.419   | 7.52329 | 7.49651 | 6.89513 |
| KIAA1324 | 8.17642 | 7.66072 | 8.44417 | 6.21268 | 6.7014  | 6.85439 | 6.30333 | 6.69541 | 6.48734 |
| SARS     | 9.58674 | 9.37531 | 9.39271 | 9.20117 | 7.33375 | 9.41333 | 9.49423 | 9.41819 | 9.57514 |
| SYPL2    | 6.37909 | 6.2887  | 6.20385 | 6.85203 | 7.28468 | 6.19547 | 6.32985 | 6.60146 | 6.65224 |
| ATXN7L2  | 6.03    | 5.82944 | 6.0284  | 6.4276  | 6.4131  | 6.87318 | 6.31902 | 6.45825 | 6.49654 |
| CYB561D1 | 7.26429 | 7.42818 | 6.90027 | 7.73359 | 6.95173 | 7.0367  | 7.18037 | 6.80773 | 6.6712  |
| GPR61    | 4.17073 | 4.63782 | 4.68018 | 5.29775 | 5.06453 | 5.58017 | 4.83802 | 5.13977 | 5.01833 |
| MIR197   | 6.35027 | 5.91854 | 5.92764 | 6.75259 | 6.34998 | 6.12506 | 6.43474 | 5.87821 | 6.99704 |
| AMPD2    | 7.3719  | 7.21593 | 6.92994 | 7.22028 | 7.00913 | 6.80051 | 7.18234 | 7.11295 | 6.87774 |
| GSTM4    | 7.38943 | 7.78058 | 6.97555 | 5.7325  | 5.94755 | 6.19625 | 5.38402 | 5.93792 | 6.50215 |
| GSTM2    | 6.94588 | 7.54273 | 7.10304 | 6.09275 | 7.39402 | 5.75955 | 6.14193 | 5.97551 | 6.00763 |
| GSTM1    | 5.92212 | 5.65272 | 5.70155 | 5.64333 | 6.33252 | 6.2854  | 5.58571 | 5.80988 | 5.60267 |
| GSTM5    | 6.81578 | 6.21109 | 6.86027 | 5.6305  | 6.9754  | 5.74046 | 5.30062 | 6.67198 | 5.74854 |
| CSF1     | 7.28849 | 7.05528 | 7.38411 | 6.19602 | 7.23069 | 6.67948 | 6.91419 | 6.83686 | 6.77084 |
| AHCYL1   | 9.10068 | 8.83918 | 8.98435 | 8.71485 | 7.8538  | 9.52759 | 8.70877 | 9.32945 | 9.10951 |
| UBL4B    | 5.98868 | 6.46904 | 5.71569 | 6.09111 | 6.38544 | 6.00358 | 5.95759 | 5.88246 | 6.2996  |
| RBM15    | 7.00632 | 7.74804 | 7.15841 | 6.82782 | 5.76184 | 5.80616 | 7.02201 | 6.9353  | 6.36646 |
| PROK1    | 5.29479 | 5.57034 | 5.71596 | 5.02896 | 5.39073 | 6.03241 | 5.59847 | 5.81556 | 5.58537 |
| CYMP     | 5.57486 | 5.68192 | 5.74653 | 5.94025 | 6.62632 | 5.99475 | 5.39065 | 6.14866 | 5.68911 |
| CD53     | 7.08593 | 6.2169  | 8.14043 | 6.49925 | 6.37877 | 7.1858  | 6.89161 | 7.40348 | 7.37183 |

|             |         |         |         |         |         |         |         |         |         |
|-------------|---------|---------|---------|---------|---------|---------|---------|---------|---------|
| LRIF1       | 4.82636 | 5.00592 | 4.77656 | 5.16405 | 4.76914 | 5.17887 | 4.92723 | 4.95478 | 5.59074 |
| CEPT1       | 8.04304 | 8.38241 | 7.84389 | 8.02576 | 6.3215  | 7.44543 | 8.36098 | 7.39272 | 7.90353 |
| CHI3L2      | 6.08366 | 7.52194 | 5.72508 | 5.57987 | 6.21205 | 5.87809 | 8.1471  | 5.41553 | 5.51389 |
| CHIAP2      | 3.83305 | 4.64204 | 4.01865 | 4.99105 | 5.89494 | 4.33025 | 4.8768  | 4.6252  | 4.16493 |
| PIFO        | 4.9611  | 4.43118 | 4.91349 | 4.85634 | 4.76116 | 4.83004 | 5.19493 | 4.68509 | 4.36973 |
| C1orf162    | 6.46827 | 6.42449 | 7.09951 | 6.36149 | 6.10042 | 5.7332  | 6.15564 | 5.51309 | 5.45709 |
| FAM212B-AS1 | 6.56281 | 6.76459 | 6.46075 | 7.05827 | 7.6968  | 7.57893 | 6.61818 | 6.41323 | 6.92586 |
| DDX20       | 6.9969  | 6.81169 | 7.39066 | 6.24462 | 5.83937 | 5.60367 | 6.61685 | 6.01631 | 6.05021 |
| CTTNBP2NL   | 9.09703 | 9.21444 | 9.14025 | 8.38453 | 7.03359 | 9.27012 | 8.38519 | 9.74958 | 9.51344 |
| LRIG2       | 9.07535 | 9.60747 | 9.38665 | 7.30766 | 5.72963 | 6.65546 | 7.90993 | 7.73073 | 7.8342  |
| AP4B1-AS1   | 4.06439 | 3.86152 | 3.67976 | 4.14315 | 4.72488 | 4.40397 | 4.02085 | 4.02085 | 3.85888 |
| DCLRE1B     | 7.53873 | 7.90394 | 7.91608 | 7.25833 | 6.90721 | 6.54679 | 7.35817 | 6.87198 | 6.85665 |
| HIPK1       | 9.57795 | 9.44674 | 9.52883 | 8.88744 | 7.00371 | 8.6841  | 8.83759 | 8.43693 | 9.0075  |
| OLFML3      | 6.71697 | 6.56386 | 6.70968 | 6.35139 | 5.80341 | 6.21202 | 5.9039  | 5.38967 | 5.41627 |
| SYCP1       | 3.1433  | 3.15871 | 3.28097 | 3.24335 | 3.49448 | 3.76333 | 3.41812 | 3.33383 | 3.6156  |
| MAB21L3     | 8.01461 | 8.19267 | 6.75513 | 6.3207  | 5.49459 | 6.67676 | 7.53844 | 4.74165 | 5.50966 |
| MIR320B1    | 2.89572 | 2.88425 | 2.38501 | 2.56001 | 3.41308 | 2.74468 | 3.36164 | 3.03296 | 3.55057 |
| CD2         | 6.40936 | 6.39185 | 6.69797 | 6.77483 | 6.85972 | 6.58983 | 6.78956 | 6.17669 | 6.05023 |
| PTGFRN      | 9.90831 | 9.35427 | 9.55692 | 9.86926 | 7.56795 | 9.19992 | 9.9479  | 9.50237 | 10.0435 |
| CD101       | 5.99997 | 6.15141 | 6.13425 | 5.83091 | 5.84284 | 5.68882 | 5.2506  | 5.82405 | 5.9984  |
| GDAP2       | 4.63537 | 4.7598  | 4.54904 | 4.88991 | 4.94039 | 4.89799 | 5.12239 | 4.65254 | 4.6996  |
| WDR3        | 7.23302 | 7.46861 | 7.37885 | 7.18396 | 6.08466 | 6.33086 | 7.32184 | 6.39373 | 6.41759 |
| HAO2        | 5.05338 | 5.18107 | 5.01764 | 5.10709 | 6.18673 | 5.47625 | 4.7379  | 5.2078  | 5.31403 |
| PHGDH       | 9.16056 | 9.47034 | 8.74024 | 8.63834 | 6.74534 | 7.56088 | 8.58602 | 6.39222 | 7.44135 |
| EMBP1       | 6.65927 | 6.34967 | 6.51863 | 6.80809 | 5.28865 | 7.47012 | 7.19617 | 7.06577 | 7.08395 |
| MIR3118-1   | 3.81712 | 3.19972 | 2.72644 | 3.55917 | 4.46983 | 3.18484 | 3.29617 | 2.67828 | 3.14888 |

|              |         |         |         |         |         |         |         |         |         |
|--------------|---------|---------|---------|---------|---------|---------|---------|---------|---------|
| LOC100132057 | 5.89609 | 5.51531 | 5.83969 | 6.26085 | 6.9003  | 6.79845 | 5.84432 | 6.05082 | 6.15312 |
| SRGAP2B      | 10.0109 | 10.3922 | 9.82734 | 7.31204 | 7.65931 | 6.10544 | 6.69291 | 8.33529 | 7.27978 |
| SEC22B       | 9.1233  | 8.8805  | 9.17866 | 9.02166 | 8.26138 | 8.28552 | 8.74468 | 9.23314 | 9.03809 |
| NOTCH2NL     | 11.456  | 11.38   | 11.2707 | 10.3908 | 10.3177 | 10.4575 | 10.1755 | 12.174  | 11.6424 |
| HFE2         | 4.31483 | 5.06221 | 4.7754  | 5.78668 | 5.7239  | 5.50824 | 4.91801 | 5.38464 | 5.04607 |
| TXNIP        | 10.3741 | 10.614  | 11.5761 | 8.52791 | 6.80837 | 7.69825 | 9.4558  | 9.26323 | 7.2012  |
| ANKRD34A     | 5.3018  | 5.19084 | 5.28345 | 5.81225 | 6.22586 | 5.87378 | 5.6865  | 6.02852 | 5.83487 |
| LIX1L        | 8.45728 | 7.33748 | 8.33784 | 7.7608  | 6.53106 | 7.47094 | 7.36801 | 7.01972 | 7.24513 |
| RBM8A        | 7.91072 | 8.03227 | 7.95588 | 8.3096  | 7.70504 | 8.25733 | 8.1379  | 7.38532 | 7.68095 |
| PEX11B       | 9.13403 | 9.08821 | 8.97127 | 8.9059  | 8.41427 | 8.07166 | 8.95589 | 8.14635 | 8.75995 |
| ANKRD35      | 7.79303 | 8.07201 | 7.57317 | 6.89286 | 5.8408  | 6.06925 | 6.87032 | 5.91762 | 5.48226 |
| RNF115       | 8.43109 | 8.47588 | 8.66183 | 8.06124 | 6.52798 | 7.57962 | 8.37433 | 7.43688 | 7.77094 |
| PDZK1        | 4.56338 | 4.28606 | 4.62654 | 4.20498 | 5.26331 | 3.9863  | 4.23398 | 3.91118 | 4.03242 |
| GPR89A       | 8.53223 | 8.64118 | 8.73528 | 7.41692 | 7.07871 | 6.73465 | 7.75884 | 7.1221  | 7.79271 |
| CHD1L        | 7.80507 | 8.02518 | 7.94151 | 7.46142 | 6.23715 | 6.98201 | 7.85184 | 6.99389 | 7.57153 |
| BCL9         | 9.00255 | 9.17761 | 8.82369 | 7.44708 | 6.78589 | 6.76781 | 7.97493 | 7.23951 | 7.57669 |
| GPR89B       | 9.01191 | 9.04127 | 9.20852 | 7.89091 | 7.23522 | 7.07639 | 8.11899 | 7.56731 | 8.22788 |
| LOC645166    | 5.61864 | 5.17159 | 5.53631 | 5.72189 | 6.71478 | 5.11259 | 6.21962 | 6.77014 | 6.08052 |
| BOLA1        | 7.54019 | 7.42699 | 7.25334 | 7.62832 | 7.07942 | 7.2372  | 7.86918 | 7.08448 | 7.31096 |
| VPS45        | 9.28752 | 9.25574 | 9.14662 | 8.3826  | 6.41562 | 7.69131 | 8.05744 | 7.64952 | 8.36721 |
| CA14         | 5.32389 | 5.04964 | 5.23001 | 5.25146 | 5.75546 | 5.11844 | 5.32149 | 4.92181 | 5.21289 |
| C1orf54      | 5.98786 | 6.13276 | 5.98902 | 6.62462 | 6.18161 | 6.00344 | 6.41078 | 5.75052 | 6.41321 |
| MRPS21       | 10.5114 | 10.602  | 10.8231 | 10.3853 | 9.39111 | 9.50371 | 10.3361 | 9.64972 | 10.2401 |
| PRPF3        | 8.23742 | 8.27541 | 8.28275 | 7.14714 | 6.94352 | 6.89196 | 7.34239 | 6.88466 | 7.41557 |
| RPRD2        | 9.25557 | 9.44283 | 9.23378 | 7.81392 | 5.97086 | 7.42436 | 8.52475 | 7.53986 | 7.90296 |
| ECM1         | 9.49946 | 9.99453 | 9.18799 | 10.1164 | 8.65871 | 10.3635 | 9.10302 | 11.708  | 10.9632 |

|              |         |         |         |         |         |         |         |         |         |
|--------------|---------|---------|---------|---------|---------|---------|---------|---------|---------|
| FALEC        | 6.76694 | 6.48447 | 6.11789 | 6.61125 | 6.57826 | 6.58166 | 6.14006 | 7.4435  | 6.6917  |
| ADAMTSL4     | 6.19629 | 6.08071 | 6.01517 | 7.4373  | 6.50504 | 7.88623 | 7.27229 | 8.11981 | 8.16458 |
| CERS2        | 5.93455 | 5.66142 | 6.02841 | 6.78062 | 5.66387 | 6.37075 | 7.1994  | 5.87483 | 6.2187  |
| ANXA9        | 10.0224 | 10.3101 | 8.94665 | 8.52684 | 6.33911 | 5.84631 | 6.86463 | 6.39521 | 5.57345 |
| PRUNE1       | 7.9766  | 7.81552 | 7.83158 | 7.09147 | 6.72704 | 6.8339  | 7.52894 | 7.65857 | 6.83452 |
| BNIPL        | 11.2532 | 11.0947 | 10.635  | 10.7    | 8.72482 | 10.5349 | 10.7057 | 10.3183 | 11.2341 |
| ZNF687       | 7.64139 | 7.66465 | 7.48867 | 7.55237 | 7.25155 | 7.60142 | 8.10001 | 7.92311 | 7.64521 |
| CGN          | 6.98872 | 7.24704 | 7.23217 | 6.23995 | 6.26092 | 6.94549 | 6.53664 | 7.17284 | 6.11727 |
| TUFT1        | 9.3847  | 9.13735 | 8.85741 | 9.90502 | 8.52984 | 9.84422 | 9.48475 | 10.4116 | 9.43877 |
| MIR554       | 8.2571  | 7.42681 | 7.67606 | 5.98637 | 5.30377 | 4.84351 | 5.38158 | 9.09443 | 6.60977 |
| SNX27        | 8.94222 | 8.63139 | 8.82205 | 7.29412 | 6.13273 | 7.02018 | 7.73059 | 7.81872 | 7.32771 |
| RIIAD1       | 5.04818 | 5.85241 | 5.40852 | 5.81057 | 6.12908 | 5.57032 | 5.37317 | 5.43852 | 5.74282 |
| OAZ3         | 4.773   | 4.9944  | 5.08255 | 5.72389 | 5.9711  | 5.93409 | 6.00615 | 5.18649 | 4.9637  |
| LOC100132111 | 6.10304 | 5.98241 | 6.48437 | 6.14529 | 6.46196 | 6.19078 | 6.79646 | 5.58527 | 6.1589  |
| LCE5A        | 5.50327 | 5.92427 | 6.01748 | 5.18072 | 5.96254 | 6.02814 | 5.70456 | 5.80904 | 5.59914 |
| CRCT1        | 12.3252 | 11.351  | 11.7997 | 12.6205 | 13.3768 | 13.5858 | 13.2182 | 13.765  | 13.4034 |
| LCE3C        | 5.8931  | 6.37402 | 5.84055 | 9.63339 | 5.93909 | 7.19244 | 9.23277 | 8.54473 | 10.4775 |
| LCE3B        | 7.98507 | 7.83217 | 8.09005 | 8.32159 | 9.07164 | 8.387   | 8.59607 | 8.27492 | 8.20701 |
| LCE2D        | 11.1829 | 11.9619 | 10.6782 | 11.187  | 10.2591 | 7.57393 | 9.38683 | 6.14131 | 10.3029 |
| LCE2C        | 13.4365 | 13.5536 | 13.371  | 13.2673 | 12.5474 | 9.97021 | 12.4104 | 8.90108 | 12.276  |
| LCE2B        | 12.0204 | 12.5286 | 12.4031 | 11.9739 | 10.0405 | 6.57808 | 10.1421 | 5.05713 | 9.44982 |
| LCE2A        | 13.0852 | 13.2206 | 13.1595 | 13.1925 | 11.694  | 9.77605 | 11.7995 | 8.83988 | 11.768  |
| LCE4A        | 7.86751 | 8.17959 | 7.76019 | 7.46458 | 7.30829 | 6.1146  | 6.35675 | 6.09669 | 6.27358 |
| C1orf68      | 10.0592 | 11.0445 | 10.3865 | 10.3331 | 10.3807 | 7.45531 | 9.84642 | 7.8449  | 7.06833 |
| KPRP         | 12.96   | 12.9892 | 12.7467 | 13.0855 | 13.101  | 11.609  | 12.6289 | 12.6471 | 12.9383 |
| LCE1F        | 13.1995 | 13.319  | 13.1798 | 13.6115 | 13.2697 | 11.5299 | 12.7588 | 12.1958 | 12.1409 |

|         |         |         |         |         |         |         |         |         |         |
|---------|---------|---------|---------|---------|---------|---------|---------|---------|---------|
| LCE1E   | 7.06845 | 7.46399 | 7.18643 | 7.2693  | 5.50692 | 5.05393 | 5.99132 | 5.11239 | 4.69594 |
| LCE1B   | 10.9151 | 11.2345 | 10.3646 | 10.7866 | 6.12235 | 4.69055 | 7.68578 | 3.54752 | 7.11641 |
| LCE1A   | 12.1618 | 12.4457 | 11.8153 | 12.3557 | 8.75554 | 7.37849 | 9.63633 | 6.77375 | 9.00431 |
| Lce6a   | 11.5697 | 11.7833 | 11.4058 | 12.0251 | 6.43719 | 6.72305 | 9.62348 | 6.13383 | 7.28953 |
| SMCP    | 4.18381 | 4.31723 | 4.10427 | 4.70013 | 5.6348  | 4.83416 | 4.55638 | 4.30717 | 4.44405 |
| IVL     | 10.8631 | 9.35604 | 9.8697  | 12.0341 | 10.1916 | 12.7121 | 12.4707 | 12.256  | 12.6036 |
| SPRR4   | 6.46029 | 6.20919 | 6.62028 | 8.68115 | 9.4719  | 10.0722 | 8.76453 | 9.79917 | 10.3195 |
| SPRR1A  | 12.4859 | 10.4564 | 12.5021 | 13.5325 | 13.6134 | 13.4202 | 13.471  | 13.4589 | 13.628  |
| SPRR3   | 6.09224 | 6.43966 | 6.51466 | 8.52332 | 7.90073 | 7.96518 | 7.98084 | 7.74157 | 8.16494 |
| SPRR1B  | 10.1759 | 9.49871 | 10.4273 | 11.488  | 12.5553 | 12.3338 | 11.6769 | 12.2305 | 12.1899 |
| LELP1   | 5.11364 | 4.75793 | 4.627   | 5.4069  | 6.1227  | 5.4273  | 4.85402 | 4.81485 | 5.25578 |
| PRR9    | 6.79406 | 5.96867 | 6.57462 | 8.32877 | 11.3729 | 11.1917 | 10.3676 | 11.3466 | 12.368  |
| LOR     | 13.5995 | 13.1077 | 13.3287 | 13.6242 | 9.35753 | 11.5062 | 11.509  | 7.5542  | 9.94266 |
| S100A9  | 9.68197 | 8.02061 | 9.28238 | 12.4745 | 12.7712 | 12.9774 | 12.6367 | 12.6849 | 12.509  |
| S100A7A | 6.68644 | 6.13353 | 5.73588 | 8.65749 | 8.58479 | 9.89479 | 11.0003 | 9.59151 | 9.9125  |
| S100A1  | 6.13502 | 6.14006 | 6.06526 | 6.14914 | 6.45134 | 6.55582 | 5.92645 | 6.28075 | 6.38214 |
| CHTOP   | 8.90626 | 8.88603 | 8.89124 | 8.18831 | 7.12964 | 7.55709 | 8.11515 | 8.08608 | 8.40255 |
| SNAPIN  | 8.68486 | 8.38416 | 8.22731 | 8.93506 | 7.71199 | 8.67258 | 9.15534 | 7.95357 | 8.50247 |
| NPR1    | 5.60579 | 5.93267 | 6.1693  | 6.08487 | 6.18035 | 6.05608 | 5.93154 | 6.14146 | 6.11017 |
| INTS3   | 9.21756 | 8.96199 | 8.54156 | 7.97846 | 6.5951  | 7.5773  | 7.93261 | 7.52691 | 8.14017 |
| CREB3L4 | 6.79765 | 6.30813 | 6.27643 | 6.20503 | 6.39413 | 6.12493 | 6.03718 | 6.01042 | 5.76638 |
| UBAP2L  | 10.0114 | 10.1687 | 10.0565 | 9.27876 | 7.50379 | 8.47649 | 9.41906 | 8.70447 | 9.25021 |
| HAX1    | 7.38388 | 7.50527 | 7.63477 | 7.8031  | 7.48718 | 8.26734 | 8.12603 | 7.57601 | 7.9866  |
| AQP10   | 5.91065 | 6.07233 | 5.83701 | 6.33447 | 7.35134 | 6.39061 | 6.25719 | 6.7562  | 6.50205 |
| IL6R    | 7.63552 | 7.69404 | 7.54222 | 7.77044 | 6.46839 | 9.21284 | 7.87754 | 7.93828 | 8.13657 |
| TDRD10  | 5.59402 | 5.43843 | 5.69502 | 5.26044 | 6.64917 | 4.91047 | 5.19407 | 5.23104 | 5.18375 |

|            |         |         |         |         |         |         |         |         |         |
|------------|---------|---------|---------|---------|---------|---------|---------|---------|---------|
| CKS1B      | 7.74779 | 8.00101 | 7.54185 | 8.12301 | 7.31857 | 7.01558 | 7.55389 | 7.03988 | 7.18825 |
| MIR4258    | 7.02211 | 6.65194 | 6.80786 | 6.09179 | 6.37572 | 6.13866 | 5.61981 | 4.63687 | 4.7016  |
| FLAD1      | 6.74138 | 6.74697 | 6.58716 | 6.99113 | 6.28398 | 6.51086 | 7.23629 | 6.31626 | 6.36586 |
| lenep      | 4.9422  | 5.1962  | 5.15479 | 5.14352 | 5.82496 | 5.05837 | 4.99059 | 5.13898 | 4.94582 |
| ZBTB7B     | 8.33302 | 8.10417 | 8.26521 | 8.2728  | 7.24166 | 8.55927 | 8.57459 | 7.98445 | 8.58851 |
| DCST1      | 6.14035 | 6.43151 | 6.2176  | 6.57066 | 6.54735 | 6.84468 | 6.49678 | 6.47991 | 6.5752  |
| ADAM15     | 8.39234 | 8.18585 | 8.55273 | 8.37716 | 7.06887 | 8.27958 | 8.45031 | 8.30368 | 8.27848 |
| EFNA4      | 8.62048 | 8.45041 | 8.72638 | 7.21763 | 5.49444 | 6.83775 | 7.86104 | 7.36842 | 7.05795 |
| EFNA3      | 9.18981 | 8.97103 | 9.44858 | 9.03753 | 8.31672 | 8.78336 | 9.05894 | 9.24408 | 8.4968  |
| EFNA1      | 8.16066 | 8.05818 | 7.54259 | 8.25978 | 6.85255 | 9.0342  | 8.24509 | 8.36652 | 8.44495 |
| TRIM46     | 5.85983 | 5.88839 | 6.09819 | 6.36469 | 5.82806 | 6.35953 | 6.05761 | 5.92912 | 6.1252  |
| mir92b     | 7.7908  | 7.26334 | 7.36868 | 8.99125 | 9.38048 | 8.98477 | 8.22802 | 8.10366 | 8.10809 |
| MTX1       | 7.3157  | 6.97171 | 7.27649 | 7.67416 | 6.54344 | 7.26821 | 8.24769 | 7.44477 | 7.40354 |
| HCN3       | 7.56162 | 7.67924 | 7.07517 | 7.36387 | 6.48453 | 7.59672 | 7.01138 | 7.80019 | 7.45543 |
| FDPS       | 6.40721 | 6.8013  | 6.50539 | 6.53933 | 6.14315 | 7.22228 | 7.11676 | 6.85466 | 7.29549 |
| RUSC1      | 7.56785 | 7.35604 | 7.56438 | 8.0882  | 7.11127 | 8.26238 | 8.31436 | 7.82549 | 8.38535 |
| POU5F1P4   | 6.83355 | 7.07746 | 7.02469 | 7.43418 | 8.93087 | 8.26347 | 7.41157 | 7.99475 | 8.0406  |
| ASH1L-AS1  | 6.714   | 6.60891 | 6.5017  | 6.46991 | 6.69891 | 6.75248 | 6.73811 | 6.52678 | 6.2661  |
| MSTO1      | 6.8162  | 7.00801 | 7.32172 | 6.3518  | 6.17782 | 5.67838 | 6.39859 | 6.23292 | 6.03577 |
| DAP3       | 8.04224 | 8.12702 | 8.07263 | 7.75976 | 6.29455 | 7.8316  | 8.11335 | 7.62301 | 7.54095 |
| SYT11      | 8.33134 | 7.71643 | 8.80059 | 7.41873 | 7.35889 | 6.85471 | 7.4934  | 7.87234 | 7.78986 |
| RXFP4      | 6.34867 | 6.75818 | 6.43853 | 7.07887 | 7.54032 | 7.0909  | 6.83998 | 7.1247  | 6.87156 |
| MEX3A      | 6.76803 | 7.2919  | 7.17563 | 7.53583 | 9.25969 | 7.76258 | 7.34698 | 7.48573 | 6.7848  |
| LMNA       | 9.07628 | 8.15897 | 8.69792 | 8.62531 | 6.54194 | 8.92292 | 9.2236  | 8.57373 | 8.92469 |
| PMF1-BGLAP | 6.98984 | 6.87322 | 7.05682 | 7.53314 | 6.64148 | 7.34687 | 7.52342 | 7.03115 | 7.00899 |
| TMEM79     | 9.41452 | 9.21578 | 9.29471 | 10.3091 | 9.20708 | 10.2816 | 10.3037 | 9.62504 | 10.447  |

|           |         |         |         |         |         |         |         |         |         |
|-----------|---------|---------|---------|---------|---------|---------|---------|---------|---------|
| TSACC     | 4.11502 | 4.46238 | 4.22074 | 4.78335 | 5.29136 | 4.68318 | 4.71152 | 4.32415 | 4.36294 |
| TTC24     | 5.33753 | 5.61273 | 5.88801 | 6.31751 | 6.89699 | 6.25679 | 6.02509 | 5.9057  | 6.53096 |
| NAXE      | 8.68618 | 8.74703 | 8.70891 | 9.50303 | 7.82081 | 8.87891 | 9.85953 | 8.56067 | 8.96291 |
| HAPLN2    | 6.03368 | 5.93511 | 5.70908 | 6.63094 | 6.14569 | 7.05092 | 7.08113 | 6.37895 | 6.70196 |
| BCAN      | 5.43798 | 5.78902 | 5.77597 | 6.15427 | 6.29149 | 6.13675 | 5.69895 | 6.10158 | 5.79446 |
| RRNAD1    | 7.25704 | 7.34452 | 7.10222 | 6.93108 | 6.38998 | 6.28245 | 6.85111 | 6.47699 | 6.51672 |
| PRCC      | 8.34263 | 8.28168 | 8.22989 | 8.37832 | 6.74264 | 7.56643 | 8.63639 | 7.6468  | 8.40989 |
| PEAR1     | 6.38034 | 6.31807 | 6.43654 | 5.89818 | 6.21622 | 6.22043 | 6.1647  | 6.30723 | 6.76925 |
| LRRC71    | 5.49184 | 5.61387 | 5.61387 | 5.67662 | 6.10105 | 6.11942 | 5.87117 | 6.13583 | 5.80397 |
| KIRREL    | 8.18172 | 8.05797 | 8.07545 | 8.13747 | 6.67122 | 7.74359 | 7.85321 | 7.68293 | 7.55834 |
| CD1D      | 4.92964 | 5.66643 | 5.38381 | 5.96729 | 6.71695 | 6.48098 | 5.6791  | 5.87443 | 5.93995 |
| CD1A      | 7.505   | 6.79665 | 7.35971 | 6.7583  | 7.03878 | 6.57273 | 7.01878 | 5.641   | 6.30737 |
| CD1C      | 6.19463 | 5.79271 | 5.92406 | 5.81671 | 7.04325 | 5.76699 | 6.02595 | 5.82097 | 5.73234 |
| CD1E      | 5.9779  | 4.92592 | 5.36057 | 4.90833 | 5.53335 | 5.2751  | 4.9879  | 4.5358  | 4.71872 |
| MNDA      | 5.07098 | 4.54135 | 5.31994 | 4.48579 | 4.82154 | 4.85532 | 4.96458 | 5.04802 | 4.86136 |
| CADM3     | 6.58101 | 6.92376 | 7.06166 | 6.28275 | 6.77531 | 6.7106  | 6.28285 | 6.49305 | 6.27172 |
| DUSP23    | 8.35418 | 8.11487 | 8.06259 | 8.85676 | 7.66703 | 8.56145 | 9.62786 | 8.08353 | 8.40845 |
| FCRL6     | 5.74635 | 5.85269 | 5.97974 | 6.32914 | 6.72557 | 6.5294  | 5.79797 | 6.35152 | 6.40823 |
| SLAMF8    | 6.68478 | 6.39937 | 6.85258 | 6.829   | 6.99457 | 6.50165 | 6.80717 | 7.04229 | 7.06365 |
| LINC01133 | 6.42573 | 7.11566 | 6.21498 | 5.88034 | 5.91279 | 7.61097 | 6.33118 | 5.99853 | 5.38435 |
| PEA15     | 11.2539 | 11.1384 | 11.2113 | 11.3752 | 11.2131 | 11.913  | 11.576  | 11.6412 | 12.0338 |
| SUMO1P3   | 2.84051 | 2.4912  | 2.05295 | 3.20268 | 3.23462 | 2.88015 | 2.56135 | 2.46586 | 3.20787 |
| NCSTN     | 9.95069 | 9.65047 | 9.95773 | 9.10392 | 7.93198 | 9.18826 | 9.44865 | 8.93563 | 9.53259 |
| NHLH1     | 5.95373 | 6.00046 | 6.00016 | 6.33421 | 6.77733 | 5.97758 | 6.03225 | 6.0541  | 6.24324 |
| SLAMF7    | 7.34624 | 7.18464 | 6.48947 | 7.76932 | 9.91818 | 9.85511 | 9.25796 | 9.96864 | 9.49183 |
| LY9       | 5.91329 | 6.19382 | 6.33135 | 6.22428 | 7.05566 | 6.60424 | 6.14127 | 6.39928 | 6.43119 |



|           |         |         |         |         |         |         |         |         |         |
|-----------|---------|---------|---------|---------|---------|---------|---------|---------|---------|
| KLHDC9    | 6.07586 | 6.12957 | 6.23016 | 6.14713 | 6.0596  | 6.49983 | 6.17401 | 6.14497 | 6.27914 |
| NIT1      | 8.33163 | 7.77219 | 7.63895 | 7.76589 | 7.41883 | 8.64944 | 8.25532 | 8.43896 | 8.84939 |
| UFC1      | 10.7008 | 10.4791 | 10.4323 | 9.7177  | 9.76145 | 9.69065 | 10.2567 | 9.88818 | 10.3339 |
| USP21     | 8.30933 | 7.96856 | 8.15085 | 7.34259 | 7.52728 | 7.0923  | 7.83454 | 7.73926 | 7.43817 |
| PPOX      | 6.10793 | 5.96701 | 6.0887  | 5.79608 | 5.39733 | 5.30696 | 5.60183 | 5.81187 | 5.14056 |
| TOMM40L   | 6.19975 | 6.25889 | 6.07661 | 5.99488 | 5.84109 | 5.99517 | 6.65754 | 6.21407 | 5.94677 |
| pcp411    | 8.5014  | 8.4568  | 7.89532 | 6.99006 | 7.20178 | 8.11861 | 7.56209 | 7.49483 | 6.43232 |
| HSPA6     | 6.01654 | 6.01559 | 5.9349  | 6.66095 | 6.18794 | 7.55159 | 7.14655 | 6.71436 | 6.84312 |
| HSPA7     | 5.6875  | 5.51947 | 5.67317 | 5.93387 | 4.92875 | 6.85174 | 5.44672 | 5.5829  | 5.84082 |
| FCRLA     | 4.95534 | 5.06692 | 5.13712 | 5.53154 | 5.84077 | 5.64977 | 5.39543 | 5.30757 | 5.29827 |
| FCRLB     | 5.27502 | 5.60791 | 5.69703 | 6.20514 | 5.69182 | 6.33332 | 6.27371 | 5.99126 | 6.15207 |
| DUSP12    | 7.26587 | 7.39319 | 7.63615 | 7.13464 | 6.40821 | 6.95001 | 7.64944 | 6.76447 | 6.78863 |
| ATF6      | 10.7792 | 10.5494 | 10.4193 | 9.74203 | 8.14407 | 9.77328 | 10.1275 | 9.55038 | 10.037  |
| NOS1AP    | 6.07715 | 5.7713  | 5.66448 | 6.2608  | 6.43732 | 6.68064 | 5.8174  | 6.15289 | 6.05179 |
| MIR556    | 2.22554 | 2.08627 | 2.32571 | 2.45146 | 1.94561 | 2.1123  | 2.72907 | 1.87938 | 2.11593 |
| C1orf226  | 6.09313 | 5.74909 | 6.16722 | 5.66745 | 6.91302 | 6.26533 | 5.95653 | 6.82133 | 6.38978 |
| UHMK1     | 7.72944 | 8.03943 | 7.97878 | 8.13686 | 7.08815 | 8.00959 | 8.75871 | 8.16647 | 7.9835  |
| UAP1      | 8.56979 | 8.28307 | 8.90908 | 9.86163 | 7.94738 | 9.7375  | 9.44026 | 10.0879 | 10.0224 |
| DDR2      | 7.97895 | 8.4431  | 8.70869 | 7.70201 | 7.51722 | 7.42609 | 7.68512 | 7.64266 | 7.91939 |
| HSD17B7   | 6.3811  | 6.30311 | 6.42671 | 5.69392 | 6.30475 | 4.81163 | 5.26212 | 5.35048 | 5.54626 |
| RGS4      | 4.9615  | 4.94014 | 4.7331  | 5.57697 | 6.20321 | 5.7712  | 5.03937 | 5.47177 | 5.75002 |
| PBX1      | 8.22874 | 8.473   | 7.93804 | 6.99561 | 6.42399 | 6.38582 | 6.98853 | 6.03817 | 6.486   |
| LRRC52    | 4.04354 | 4.30736 | 4.31002 | 4.72104 | 5.83796 | 5.51706 | 4.61021 | 4.5741  | 4.92597 |
| MGST3     | 6.5582  | 6.41336 | 6.717   | 5.79539 | 5.23192 | 5.53131 | 6.31759 | 5.8144  | 5.84057 |
| LOC440700 | 4.46686 | 4.37496 | 4.54605 | 4.62582 | 5.07118 | 5.62267 | 4.76733 | 4.31716 | 4.89205 |
| UCK2      | 7.63663 | 7.69222 | 7.62644 | 7.78791 | 7.47157 | 8.21269 | 8.28569 | 7.50932 | 8.23823 |

|           |         |         |         |         |         |         |         |         |         |
|-----------|---------|---------|---------|---------|---------|---------|---------|---------|---------|
| FMO9P     | 3.39696 | 2.96656 | 2.99439 | 3.18115 | 3.66945 | 3.55997 | 3.31507 | 2.90339 | 2.82701 |
| POGK      | 7.81025 | 8.05547 | 7.99765 | 7.15748 | 5.85908 | 6.59071 | 7.39716 | 6.3149  | 6.83991 |
| MAEL      | 5.2121  | 4.97245 | 5.05847 | 5.34784 | 5.23915 | 5.7408  | 5.33065 | 5.41259 | 5.36775 |
| DUSP27    | 5.42629 | 5.38967 | 5.58519 | 5.7212  | 6.37829 | 6.21685 | 5.67717 | 6.25279 | 5.79793 |
| POU2F1    | 9.37143 | 9.5127  | 9.45387 | 7.98765 | 7.58595 | 9.27125 | 8.4759  | 10.1009 | 8.94354 |
| RCSD1     | 5.36607 | 6.00968 | 5.84935 | 5.73603 | 6.32492 | 5.74313 | 5.8074  | 6.013   | 5.88427 |
| MPZL1     | 8.17351 | 8.05141 | 8.12234 | 7.86588 | 6.40952 | 7.56311 | 8.41878 | 8.09696 | 7.86557 |
| DCAF6     | 8.78182 | 8.39449 | 8.62459 | 8.13177 | 6.58109 | 7.5637  | 8.49654 | 7.28785 | 7.69013 |
| SFT2D2    | 10.8801 | 10.4121 | 10.6357 | 10.3004 | 9.67869 | 10.5472 | 10.5901 | 10.8333 | 10.7298 |
| TBX19     | 6.72104 | 6.65038 | 6.67729 | 5.93927 | 6.80143 | 6.40352 | 6.08201 | 7.22491 | 6.82424 |
| MIR557    | 7.5025  | 7.53888 | 7.79327 | 8.12311 | 9.35714 | 8.34299 | 8.09413 | 8.33939 | 7.96627 |
| XCL1      | 4.16611 | 3.89611 | 4.00579 | 4.38195 | 5.39873 | 5.06746 | 4.92833 | 3.9557  | 4.21066 |
| LINC00626 | 4.18386 | 4.52202 | 4.28182 | 5.11518 | 5.42939 | 4.86871 | 4.7367  | 4.94721 | 4.61534 |
| BLZF1     | 9.27355 | 9.39763 | 9.26893 | 9.30431 | 7.93795 | 9.94523 | 9.33997 | 10.0506 | 10.2209 |
| KIFAP3    | 5.52285 | 5.20128 | 5.10986 | 6.99658 | 4.39324 | 6.46641 | 6.78754 | 5.69307 | 5.86387 |
| METTLL11B | 4.02083 | 3.95211 | 3.77235 | 3.98547 | 4.9741  | 4.27232 | 4.23125 | 3.93274 | 4.17144 |
| MIR3119-1 | 1.79034 | 1.77312 | 1.77007 | 2.23321 | 1.81265 | 2.51936 | 2.39057 | 2.2554  | 2.08784 |
| PRRX1     | 8.54476 | 8.01205 | 8.49973 | 7.85146 | 6.13885 | 6.95634 | 7.14675 | 6.5657  | 7.30134 |
| MROH9     | 3.90799 | 3.75827 | 3.18384 | 3.43888 | 4.73223 | 3.85918 | 3.94593 | 3.76992 | 3.63127 |
| FMO3      | 7.46512 | 5.72614 | 8.02003 | 5.26613 | 5.27874 | 5.64905 | 5.97806 | 5.55397 | 5.47721 |
| FMO6P     | 6.44525 | 6.22714 | 5.7156  | 6.07129 | 6.38081 | 5.87141 | 5.49845 | 5.71069 | 5.53902 |
| FMO2      | 6.68365 | 7.02608 | 7.05091 | 8.29083 | 6.28147 | 5.09358 | 6.38243 | 6.68133 | 5.75908 |
| FMO1      | 6.74038 | 6.00304 | 6.29879 | 6.24305 | 6.1987  | 5.29632 | 4.39085 | 4.85797 | 4.80912 |
| FMO4      | 7.43682 | 7.10992 | 7.01129 | 6.05467 | 6.29312 | 5.05397 | 6.50515 | 5.44427 | 5.27836 |
| TOP1P1    | 5.2956  | 5.47896 | 5.51361 | 3.60692 | 4.20784 | 4.17063 | 4.53007 | 4.15541 | 3.6843  |
| PRRC2C    | 11.2734 | 11.1156 | 11.1022 | 10.1097 | 8.20196 | 10.1362 | 10.3909 | 10.6349 | 11.1056 |

|           |         |         |         |         |         |         |         |         |         |
|-----------|---------|---------|---------|---------|---------|---------|---------|---------|---------|
| METTL13   | 7.24029 | 7.37208 | 7.28828 | 7.27974 | 7.08529 | 7.38272 | 7.63592 | 7.19567 | 7.19465 |
| DNM3      | 6.56424 | 6.98501 | 6.75915 | 5.64141 | 5.48737 | 5.6902  | 6.07721 | 6.1933  | 6.02351 |
| MIR214    | 4.94266 | 4.86049 | 5.02595 | 5.04682 | 4.52159 | 5.47218 | 4.76677 | 5.3682  | 5.22568 |
| C1orf105  | 5.11299 | 5.16553 | 5.03962 | 5.58226 | 6.29285 | 5.40935 | 5.18693 | 5.59229 | 5.34645 |
| SUCO      | 9.01659 | 8.7436  | 8.77782 | 8.36758 | 6.45602 | 9.19462 | 8.78748 | 9.49171 | 9.19893 |
| PRDX6     | 10.287  | 10.7217 | 10.3525 | 10.2722 | 8.7428  | 9.54457 | 10.2365 | 9.97809 | 9.88721 |
| LOC730159 | 2.67091 | 2.94683 | 2.77709 | 3.12598 | 4.34008 | 3.45386 | 3.15532 | 2.97463 | 3.08618 |
| KLHL20    | 8.63231 | 8.6274  | 8.59428 | 7.93633 | 6.40253 | 6.95984 | 8.34791 | 7.4806  | 7.58171 |
| GAS5-AS1  | 5.74918 | 5.71903 | 5.44929 | 5.09304 | 5.44359 | 4.63153 | 5.67351 | 5.08133 | 5.46413 |
| ZBTB37    | 7.74461 | 8.24624 | 7.95878 | 6.84574 | 6.95337 | 7.04561 | 7.24661 | 6.52185 | 6.85685 |
| RABGAP1L  | 7.62407 | 7.63323 | 7.28579 | 6.57182 | 5.98862 | 5.8262  | 6.42519 | 6.09381 | 6.50811 |
| GPR52     | 8.47305 | 8.22554 | 7.73062 | 7.14778 | 6.77988 | 5.32714 | 5.81762 | 6.57535 | 7.00875 |
| CACYBP    | 6.61739 | 6.79161 | 6.71022 | 6.6139  | 6.01849 | 6.53018 | 6.98376 | 6.4311  | 6.36377 |
| TNN       | 5.76157 | 5.69891 | 5.82946 | 6.38851 | 6.83754 | 6.0743  | 5.92254 | 6.10724 | 6.07741 |
| KIAA0040  | 5.40858 | 5.45662 | 5.86415 | 6.7368  | 6.64855 | 7.19625 | 7.17006 | 6.55963 | 6.24788 |
| PAPPA2    | 5.42992 | 5.594   | 5.4927  | 5.58873 | 6.05731 | 5.49702 | 5.56946 | 5.7421  | 5.47721 |
| RASAL2    | 9.27441 | 9.06257 | 9.1075  | 8.84444 | 7.71943 | 8.96494 | 8.58506 | 8.86704 | 9.19598 |
| TEX35     | 4.61378 | 4.07819 | 3.86431 | 4.45386 | 5.89754 | 5.60992 | 5.02403 | 5.09414 | 4.85305 |
| C1orf220  | 6.38521 | 6.14246 | 5.97433 | 5.65703 | 6.26228 | 5.86963 | 5.65522 | 5.65431 | 5.64015 |
| MIR4424   | 2.29503 | 2.81946 | 2.06947 | 2.90752 | 2.20412 | 1.87066 | 3.13928 | 2.30276 | 2.41238 |
| RALGPS2   | 9.06342 | 9.04894 | 8.58263 | 8.48376 | 5.96556 | 9.5556  | 8.86194 | 9.10597 | 9.49658 |
| ABL2      | 5.21002 | 5.39579 | 5.3736  | 6.29422 | 5.15264 | 5.60942 | 6.21398 | 6.18579 | 6.64225 |
| SOAT1     | 6.80125 | 6.61847 | 7.14529 | 7.55869 | 6.63138 | 6.64604 | 7.08652 | 7.33542 | 7.13045 |
| AXDND1    | 5.10378 | 5.22476 | 5.05384 | 5.14144 | 5.81527 | 5.4883  | 5.40744 | 5.17738 | 5.43838 |
| TDRD5     | 4.25315 | 4.96701 | 4.71897 | 4.70233 | 5.03821 | 5.15908 | 4.57553 | 4.95047 | 4.53007 |
| TOR1AIP1  | 8.98918 | 8.91071 | 9.1506  | 8.98918 | 7.37098 | 9.66418 | 9.17361 | 9.10089 | 9.63326 |

|           |         |         |         |         |         |         |         |         |         |
|-----------|---------|---------|---------|---------|---------|---------|---------|---------|---------|
| cep350    | 9.23877 | 9.39949 | 9.25981 | 8.33303 | 6.91047 | 8.98362 | 8.66171 | 8.77394 | 9.03469 |
| qsox1     | 9.37553 | 9.12141 | 9.20881 | 10.7535 | 10.9095 | 12.2063 | 11.3142 | 12.1861 | 11.9283 |
| LHX4      | 4.36387 | 4.09338 | 4.28965 | 4.95168 | 4.8853  | 5.03025 | 5.10786 | 5.30332 | 6.41908 |
| XPR1      | 8.95675 | 8.63492 | 8.63614 | 8.63551 | 7.44471 | 7.42163 | 8.73662 | 8.86069 | 8.5716  |
| KIAA1614  | 5.82555 | 5.98704 | 5.93041 | 6.04948 | 7.06643 | 6.37486 | 6.0214  | 6.26239 | 5.82102 |
| IER5      | 7.22844 | 6.71264 | 6.72095 | 7.82498 | 6.2032  | 8.30319 | 8.58764 | 8.74561 | 8.2565  |
| GM140     | 4.46371 | 4.89305 | 4.76204 | 4.94506 | 6.03619 | 4.82266 | 4.3739  | 5.2237  | 4.56146 |
| LINC00272 | 3.71761 | 3.59337 | 4.50042 | 4.38471 | 4.0885  | 3.81865 | 3.83456 | 3.73964 | 4.32868 |
| RGSL1     | 4.3346  | 4.56908 | 4.30703 | 4.69451 | 5.79991 | 4.44302 | 4.63786 | 4.63518 | 4.62164 |
| LOC284648 | 5.40715 | 4.62001 | 4.97243 | 5.33643 | 5.96305 | 5.36423 | 5.53641 | 5.09866 | 5.2766  |
| NPL       | 8.37371 | 6.98588 | 7.65617 | 6.1961  | 6.42368 | 5.87547 | 6.28516 | 6.17032 | 5.9375  |
| DHX9      | 9.63913 | 9.57653 | 9.8406  | 9.30734 | 6.01567 | 8.41584 | 9.36346 | 8.64952 | 8.91251 |
| RGL1      | 8.57516 | 8.49103 | 8.69079 | 7.32529 | 7.31196 | 7.06145 | 7.48076 | 6.91609 | 6.95549 |
| tsen15    | 7.5467  | 7.14585 | 7.53748 | 7.18771 | 5.45372 | 6.65538 | 7.60008 | 6.68738 | 6.90259 |
| c1orf21   | 9.81554 | 9.78714 | 9.38547 | 8.55633 | 7.55821 | 8.65607 | 8.66701 | 8.68907 | 8.45065 |
| RNF2      | 8.4011  | 8.33988 | 8.46265 | 8.48611 | 6.86587 | 8.84002 | 8.53534 | 8.5235  | 8.30325 |
| SWT1      | 6.82263 | 6.88546 | 6.54991 | 5.74409 | 4.94704 | 5.78643 | 5.96567 | 5.71434 | 6.04189 |
| HMCN1     | 7.82218 | 7.87895 | 7.80974 | 7.2855  | 5.57487 | 5.31524 | 6.90629 | 5.94086 | 6.03459 |
| PRG4      | 4.13871 | 5.31775 | 7.80725 | 4.32142 | 4.56028 | 4.31199 | 4.15754 | 3.83129 | 4.2381  |
| C1orf27   | 8.26985 | 7.91694 | 8.22982 | 6.87177 | 5.19399 | 6.99997 | 7.49772 | 7.40062 | 7.66686 |
| OCLM      | 7.38111 | 7.25197 | 7.61572 | 4.91792 | 4.11212 | 4.36596 | 3.67182 | 6.51805 | 6.24267 |
| LOC440704 | 4.04024 | 3.8216  | 3.76764 | 4.34271 | 5.47998 | 4.35378 | 4.45543 | 4.4054  | 4.28188 |
| RGS18     | 4.06644 | 3.87765 | 3.74069 | 4.00267 | 3.66536 | 3.91197 | 4.25422 | 3.69026 | 3.78263 |
| RGS21     | 4.57877 | 4.912   | 4.62596 | 4.62174 | 5.5974  | 4.73888 | 5.13257 | 4.56021 | 4.84358 |
| RGS1      | 7.23272 | 4.65798 | 5.37761 | 5.18587 | 4.2877  | 5.96552 | 6.2672  | 5.03337 | 4.82408 |
| RGS13     | 5.41948 | 4.52328 | 5.2534  | 4.73385 | 4.81417 | 4.58117 | 4.93308 | 4.07185 | 4.64661 |

|           |         |         |         |         |         |         |         |         |         |
|-----------|---------|---------|---------|---------|---------|---------|---------|---------|---------|
| MIR1278   | 3.54782 | 3.52434 | 3.0187  | 3.97567 | 3.13506 | 4.06798 | 4.06482 | 3.85989 | 3.86094 |
| CFH       | 7.90271 | 8.10011 | 9.08564 | 6.20549 | 5.14399 | 5.61517 | 6.49301 | 4.96863 | 6.43715 |
| CFHR3     | 4.14466 | 3.77629 | 4.31337 | 3.858   | 5.26302 | 4.40514 | 4.0565  | 4.52906 | 4.20123 |
| CFHR4     | 3.24459 | 2.89261 | 3.36481 | 4.24937 | 3.38769 | 4.19788 | 3.53838 | 3.5242  | 3.1535  |
| CFHR2     | 2.84089 | 3.01653 | 1.86649 | 2.10997 | 1.79838 | 2.1954  | 2.83256 | 2.55808 | 2.94021 |
| CFHR5     | 3.27894 | 3.43626 | 3.09423 | 2.7272  | 4.53492 | 3.93048 | 3.7122  | 4.02868 | 3.76423 |
| CRB1      | 5.11671 | 5.07391 | 5.23222 | 5.30552 | 5.98165 | 5.33359 | 5.23753 | 5.2182  | 5.37003 |
| C1orf53   | 5.49917 | 5.21172 | 5.6626  | 6.48539 | 5.85066 | 6.23089 | 6.65516 | 5.3836  | 6.01849 |
| LHX9      | 4.63992 | 5.28218 | 4.79009 | 5.30118 | 5.7356  | 5.70004 | 5.05669 | 5.30987 | 5.20244 |
| NEK7      | 9.11619 | 8.60403 | 9.15667 | 9.64374 | 6.7384  | 8.76007 | 9.34985 | 9.25623 | 9.71708 |
| GPR25     | 6.11006 | 5.98882 | 6.36926 | 6.5536  | 6.53626 | 7.25534 | 7.21684 | 7.33278 | 6.72312 |
| C1ORF106  | 7.90538 | 7.82972 | 7.91917 | 8.1944  | 7.7034  | 8.45434 | 8.31518 | 8.20249 | 8.29518 |
| pkp1      | 11.7576 | 11.7678 | 11.7253 | 11.8992 | 10.8004 | 11.9576 | 12.0222 | 11.7494 | 12.2262 |
| RPS10P7   | 3.84059 | 3.98656 | 3.7748  | 3.97724 | 3.79361 | 4.22552 | 4.10364 | 4.60122 | 4.04609 |
| NAV1      | 9.26347 | 8.85306 | 9.16124 | 9.06095 | 7.16218 | 8.81736 | 9.62807 | 8.60726 | 9.08035 |
| MIR1231   | 7.09507 | 7.11605 | 6.9597  | 6.33626 | 7.29048 | 6.97356 | 6.32761 | 7.0086  | 7.30548 |
| IPO9      | 9.01454 | 8.96752 | 9.13494 | 8.35325 | 6.14444 | 7.5843  | 8.40635 | 8.18094 | 8.18195 |
| SHISA4    | 6.40267 | 6.31535 | 6.26109 | 6.90381 | 6.52609 | 7.02973 | 6.78405 | 7.04931 | 6.72884 |
| LMOD1     | 5.97824 | 6.38083 | 6.58749 | 7.06713 | 6.88737 | 6.85514 | 6.58501 | 6.65714 | 7.07537 |
| TIMM17A   | 7.01349 | 7.35177 | 7.18399 | 7.77689 | 6.64174 | 7.03992 | 7.79123 | 6.72069 | 7.38682 |
| RNPEP     | 8.6371  | 8.31034 | 8.57916 | 8.65236 | 7.30012 | 8.35201 | 9.0791  | 7.88079 | 8.20484 |
| GPR37L1   | 6.28776 | 6.5242  | 6.34532 | 7.16106 | 7.21987 | 7.02701 | 6.83097 | 7.03124 | 6.82054 |
| LGR6      | 6.93557 | 7.27929 | 6.11325 | 6.74347 | 6.53553 | 6.6221  | 6.7044  | 6.51999 | 6.39553 |
| PCAT6     | 7.00116 | 7.35114 | 6.85717 | 7.79607 | 7.977   | 7.84193 | 8.11193 | 7.01942 | 7.15854 |
| MGAT4EP   | 5.22874 | 5.44275 | 5.24791 | 5.62135 | 6.04177 | 5.72044 | 5.5146  | 5.57693 | 5.63003 |
| LOC148709 | 4.54125 | 4.42647 | 4.63835 | 5.07878 | 6.19623 | 5.15919 | 4.49807 | 5.09275 | 4.96711 |

|           |         |         |         |         |         |         |         |         |         |
|-----------|---------|---------|---------|---------|---------|---------|---------|---------|---------|
| ADORA1    | 6.59478 | 6.37722 | 6.59007 | 6.33401 | 7.47426 | 7.73354 | 7.00852 | 6.63925 | 6.86214 |
| PRELP     | 8.03957 | 8.16357 | 9.29121 | 6.44481 | 7.07533 | 6.84341 | 7.70362 | 6.78755 | 7.32812 |
| OPTC      | 5.75521 | 5.99425 | 5.57979 | 6.22595 | 7.63773 | 6.56682 | 6.28853 | 6.21702 | 6.24026 |
| LAX1      | 5.6838  | 5.823   | 5.81174 | 5.69306 | 6.6407  | 5.82896 | 5.85086 | 5.83854 | 5.87325 |
| ZC3H11A   | 10.0631 | 10.4534 | 10.0162 | 9.50856 | 8.04739 | 9.7113  | 9.54537 | 10.2349 | 9.95525 |
| SNRPE     | 5.55511 | 5.34978 | 5.60045 | 6.28078 | 6.07031 | 5.79864 | 5.67501 | 5.72383 | 5.84567 |
| SOX13     | 6.4013  | 6.37754 | 6.81455 | 6.33349 | 6.02243 | 6.54685 | 6.65675 | 6.56625 | 6.40183 |
| ETNK2     | 4.44897 | 4.11051 | 4.2845  | 4.21878 | 4.5443  | 4.66995 | 4.24035 | 4.49003 | 4.74056 |
| MDM4      | 9.54356 | 9.49353 | 9.53091 | 7.60994 | 6.3144  | 7.20784 | 7.79879 | 7.92217 | 8.00819 |
| NFASC     | 7.84222 | 6.89635 | 7.04612 | 6.85266 | 6.34366 | 6.44042 | 6.78964 | 6.23272 | 6.47795 |
| CNTN2     | 6.19137 | 6.35673 | 6.39317 | 6.6583  | 6.64114 | 6.5699  | 6.49797 | 6.49308 | 6.77048 |
| TMCC2     | 6.56366 | 6.34223 | 6.47834 | 7.11334 | 6.77267 | 7.40054 | 7.02612 | 7.07275 | 7.13759 |
| LEMD1-AS1 | 4.80909 | 4.72112 | 4.75679 | 5.01127 | 6.33797 | 5.31569 | 5.23369 | 5.12131 | 5.00901 |
| CDK18     | 6.88246 | 7.21314 | 7.02669 | 7.25363 | 7.73902 | 7.47291 | 7.01795 | 7.23015 | 7.33617 |
| MFSD4A    | 7.0202  | 7.20202 | 7.73837 | 6.2516  | 6.31626 | 6.42928 | 6.12841 | 6.22734 | 6.15031 |
| NUCKS1    | 5.85532 | 5.56181 | 5.67686 | 6.52304 | 4.20631 | 5.24733 | 7.80955 | 4.73922 | 4.65915 |
| AVPR1B    | 5.15422 | 5.46259 | 5.39121 | 5.93476 | 6.30601 | 5.82663 | 5.84195 | 5.77395 | 5.70478 |
| CTSE      | 5.63374 | 5.58646 | 5.50087 | 5.77604 | 6.11971 | 5.98088 | 5.66971 | 5.76367 | 5.93695 |
| SRGAP2    | 9.5829  | 9.80136 | 9.16155 | 7.69446 | 6.95592 | 6.66153 | 7.14841 | 7.70957 | 6.97986 |
| RASSF5    | 8.45338 | 8.24981 | 8.38973 | 7.94586 | 8.24065 | 8.76309 | 8.39512 | 9.93594 | 8.74583 |
| DYRK3     | 6.52686 | 5.60571 | 5.40768 | 6.66463 | 5.0872  | 6.6422  | 6.67965 | 6.67062 | 6.7368  |
| MAPKAPK2  | 9.03021 | 8.85192 | 9.04668 | 9.24032 | 8.21646 | 8.96942 | 9.3375  | 9.328   | 9.58801 |
| IL19      | 5.403   | 5.19671 | 5.28598 | 5.45235 | 6.35871 | 5.56993 | 5.34831 | 5.67002 | 5.61996 |
| IL20      | 7.04699 | 5.24193 | 4.88882 | 6.86893 | 7.24667 | 6.22703 | 7.16047 | 7.13027 | 6.99704 |
| IL24      | 5.13386 | 4.86398 | 5.19498 | 8.45581 | 5.91374 | 7.49692 | 6.59767 | 10.8927 | 9.72882 |
| CR2       | 3.83023 | 3.98096 | 3.87076 | 4.17072 | 5.0698  | 4.28448 | 4.35817 | 4.28235 | 4.48851 |

|           |         |         |         |         |         |         |         |         |         |
|-----------|---------|---------|---------|---------|---------|---------|---------|---------|---------|
| CR1       | 4.78489 | 4.9116  | 4.53552 | 5.33334 | 6.07476 | 5.39674 | 4.75478 | 4.79845 | 5.36929 |
| CR1L      | 4.17542 | 4.20011 | 3.30265 | 4.51751 | 5.37484 | 5.13991 | 4.16033 | 4.7867  | 4.63458 |
| LOC148696 | 5.38571 | 5.48219 | 5.31243 | 5.96306 | 6.57232 | 6.37449 | 6.02031 | 5.8804  | 5.84558 |
| mir205    | 10.4533 | 10.3095 | 10.0358 | 9.37362 | 8.63512 | 7.96154 | 9.40482 | 9.68118 | 10.1749 |
| CAMK1G    | 4.17834 | 4.91626 | 4.58141 | 4.85561 | 6.35321 | 4.87894 | 4.56412 | 5.03954 | 4.75987 |
| GOS2      | 6.27895 | 6.45852 | 7.48039 | 6.49629 | 6.52979 | 8.35216 | 6.66655 | 7.72917 | 7.39131 |
| HSD11B1   | 7.14527 | 8.31097 | 7.01079 | 6.4246  | 6.48053 | 6.16685 | 6.44178 | 6.52568 | 6.72053 |
| TRAF3IP3  | 6.3335  | 6.04413 | 6.23995 | 6.21405 | 5.7368  | 6.26894 | 6.43641 | 6.32834 | 6.54839 |
| DIEXF     | 7.70642 | 7.89694 | 7.87475 | 6.91295 | 6.22828 | 6.15337 | 6.86659 | 6.64622 | 7.01068 |
| SYT14     | 3.47906 | 3.15733 | 3.42486 | 3.88591 | 4.72868 | 3.65421 | 4.01808 | 4.23214 | 4.08948 |
| SERTAD4   | 8.54576 | 8.55165 | 9.06793 | 6.52138 | 6.00574 | 6.26155 | 7.73756 | 6.45633 | 5.53093 |
| HHAT      | 6.80799 | 6.70576 | 6.63213 | 6.34049 | 6.83664 | 6.44244 | 6.52186 | 6.90182 | 6.17873 |
| RCOR3     | 9.64745 | 9.36609 | 9.49109 | 6.97405 | 6.67849 | 6.69547 | 7.1074  | 7.79758 | 7.48483 |
| TRAF5     | 7.05256 | 6.69989 | 7.22173 | 5.88944 | 5.73739 | 5.31188 | 5.98536 | 5.60574 | 5.69645 |
| LINC00467 | 6.13092 | 6.29164 | 6.4593  | 6.09379 | 6.60031 | 5.67872 | 7.16113 | 5.84039 | 6.34215 |
| RD3       | 5.37271 | 5.62035 | 5.77418 | 5.75025 | 6.48929 | 5.88638 | 5.7421  | 5.60648 | 5.767   |
| DTL       | 7.9429  | 7.4974  | 8.0466  | 7.68126 | 6.81014 | 6.35293 | 7.01015 | 7.06024 | 6.57602 |
| MIR3122   | 4.96343 | 4.50858 | 5.01123 | 4.26812 | 4.43535 | 4.26614 | 4.56355 | 4.92757 | 4.31007 |
| NENF      | 7.23249 | 7.52819 | 7.35846 | 8.20064 | 6.43012 | 8.43789 | 8.44612 | 7.60441 | 7.56586 |
| ATF3      | 8.05166 | 6.01299 | 5.43129 | 6.08385 | 5.53816 | 7.53747 | 6.80572 | 8.17295 | 6.26348 |
| TATDN3    | 7.10302 | 7.34584 | 7.70725 | 6.22031 | 5.53226 | 6.03076 | 6.77514 | 5.86993 | 5.74029 |
| FLVCR1    | 7.4488  | 7.40206 | 7.46503 | 6.61367 | 5.50183 | 6.06068 | 6.96856 | 6.02592 | 6.58065 |
| VASH2     | 5.65847 | 6.04504 | 5.8594  | 6.33533 | 6.62442 | 6.23127 | 6.08739 | 6.19206 | 6.09702 |
| PROX1     | 6.10393 | 5.96362 | 6.57255 | 6.00968 | 6.52771 | 6.24933 | 6.37091 | 5.93688 | 6.08855 |
| SMYD2     | 9.00621 | 8.41703 | 9.04792 | 8.99907 | 6.80139 | 8.9364  | 8.82804 | 8.14433 | 8.74407 |
| KCTD3     | 9.10003 | 9.18894 | 9.26178 | 8.33519 | 5.88479 | 7.55504 | 8.58519 | 8.16363 | 8.01875 |

|           |       |         |         |         |         |         |         |         |         |         |
|-----------|-------|---------|---------|---------|---------|---------|---------|---------|---------|---------|
| SPATA17   |       | 5.79076 | 5.21372 | 5.47627 | 5.21411 | 4.94834 | 5.13898 | 5.649   | 5.09428 | 4.7528  |
| LINC00210 |       | 5.32091 | 5.28837 | 5.29023 | 5.78899 | 6.32847 | 5.75672 | 5.52516 | 5.87993 | 5.4728  |
| RRP15     |       | 6.89919 | 6.9623  | 7.00004 | 6.84272 | 5.39029 | 6.66284 | 7.57645 | 6.08735 | 6.84177 |
| LYPLAL1   |       | 7.61461 | 7.84813 | 7.73301 | 6.70962 | 5.70195 | 6.14055 | 6.92363 | 6.42908 | 6.2692  |
| mark1     |       | 8.00399 | 7.18313 | 7.22716 | 7.53633 | 5.49068 | 6.75853 | 7.68871 | 6.95013 | 7.84355 |
| C1orf115  |       | 6.29909 | 6.48218 | 6.35089 | 6.14476 | 6.33466 | 6.55408 | 6.34291 | 6.40597 | 6.21892 |
|           | 44257 | 6.55736 | 6.80073 | 7.09031 | 6.28836 | 6.62246 | 6.47209 | 6.34908 | 6.3862  | 6.49705 |
|           | 44256 | 5.88093 | 5.50853 | 5.77118 | 5.77321 | 6.35281 | 5.85996 | 5.93917 | 5.929   | 5.93486 |
| HLX       |       | 5.46484 | 5.31386 | 5.96905 | 6.05866 | 6.10555 | 5.93052 | 5.70107 | 5.85771 | 6.13869 |
| BROX      |       | 10.5287 | 10.7113 | 10.7137 | 9.77615 | 7.98991 | 9.98335 | 10.309  | 9.67183 | 10.084  |
| DISP1     |       | 6.91534 | 6.94534 | 6.87048 | 5.29293 | 6.38632 | 5.17649 | 5.74217 | 5.5563  | 5.56375 |
| CCDC185   |       | 5.45418 | 5.20539 | 5.19258 | 6.37856 | 5.36439 | 6.52784 | 5.96761 | 5.7118  | 6.00878 |
| FBXO28    |       | 9.5974  | 9.45967 | 9.14981 | 8.7694  | 6.75462 | 8.32857 | 8.77263 | 8.31484 | 8.35598 |
| CNIH4     |       | 8.31064 | 8.42309 | 8.67408 | 8.99368 | 7.72103 | 8.3197  | 9.31044 | 8.17525 | 8.44707 |
| CNIH3     |       | 5.4008  | 5.72535 | 5.58296 | 5.43399 | 6.43936 | 5.57063 | 5.21008 | 5.663   | 5.5918  |
| SRP9      |       | 10.7198 | 10.3899 | 10.6818 | 10.2151 | 8.52487 | 9.86587 | 10.6197 | 9.93455 | 10.1203 |
| MIXL1     |       | 5.13498 | 4.98337 | 5.10734 | 5.82256 | 6.45313 | 5.64342 | 5.47783 | 5.5228  | 5.70258 |
| STUM      |       | 6.68977 | 7.25737 | 6.99911 | 7.71054 | 7.08802 | 7.95753 | 7.31998 | 7.43509 | 7.56936 |
| PSEN2     |       | 6.41872 | 6.8217  | 6.22437 | 6.7391  | 6.17577 | 6.42891 | 6.99344 | 6.90593 | 6.9027  |
| COQ8A     |       | 6.95374 | 7.12011 | 7.44551 | 7.08859 | 6.8248  | 7.16814 | 6.7867  | 7.06546 | 6.46264 |
| CDC42BPA  |       | 6.28564 | 5.52762 | 5.95592 | 6.90847 | 5.93837 | 6.80514 | 6.71599 | 6.36345 | 6.41943 |
| ZNF678    |       | 5.72599 | 5.89371 | 5.44087 | 4.55645 | 5.08236 | 4.23952 | 4.69511 | 4.04056 | 4.67277 |
| ARF1      |       | 9.43455 | 8.92974 | 9.41425 | 9.70661 | 8.78529 | 9.91213 | 10.0524 | 9.78507 | 9.99936 |
| MIR3620   |       | 6.74709 | 6.8188  | 6.3649  | 7.06408 | 8.22464 | 7.26609 | 7.04185 | 6.5825  | 7.12546 |
| GUK1      |       | 7.06704 | 6.83255 | 6.81002 | 7.57997 | 7.48767 | 8.38158 | 7.7688  | 7.90377 | 7.67997 |
| MIR4666A  |       | 3.39855 | 3.21287 | 3.07515 | 4.10701 | 3.4173  | 4.05905 | 4.28156 | 3.90119 | 3.89279 |



|             |         |         |         |         |         |         |         |         |         |
|-------------|---------|---------|---------|---------|---------|---------|---------|---------|---------|
| RNF187      | 8.22354 | 7.94386 | 8.03467 | 9.48186 | 8.28448 | 9.37362 | 9.34224 | 8.35833 | 8.55837 |
| RHOU        | 6.36685 | 6.70642 | 6.58471 | 6.27273 | 5.96129 | 6.18842 | 5.94217 | 6.02267 | 5.77709 |
| URB2        | 6.39206 | 6.55495 | 6.65658 | 6.79993 | 6.0609  | 6.01543 | 6.50034 | 6.22424 | 6.16792 |
| GALNT2      | 7.56052 | 7.18058 | 7.31543 | 7.88985 | 5.5167  | 7.67806 | 7.74502 | 8.55351 | 7.87371 |
| COG2        | 7.64367 | 7.80171 | 7.58817 | 6.59628 | 6.40349 | 5.84385 | 7.03814 | 6.15628 | 6.54192 |
| CAPN9       | 5.05855 | 5.06199 | 4.93274 | 5.57888 | 5.93922 | 5.25632 | 5.27039 | 5.03531 | 5.47272 |
| ARV1        | 8.47209 | 8.83701 | 8.70624 | 7.67875 | 6.88047 | 6.3461  | 8.43752 | 7.47565 | 7.654   |
| TRIM67      | 5.8075  | 6.29749 | 5.8267  | 6.42672 | 6.58907 | 6.94302 | 6.30797 | 6.37398 | 6.51938 |
| GNPAT       | 8.29081 | 8.55408 | 8.30012 | 8.26202 | 6.1278  | 7.59682 | 8.50736 | 7.62828 | 8.03743 |
| SPRTN       | 7.70902 | 7.54935 | 7.60519 | 7.2533  | 6.56655 | 6.48162 | 7.09805 | 7.12138 | 7.31195 |
| TSNAX-DISC1 | 6.56283 | 6.59457 | 6.60895 | 5.86335 | 6.90265 | 6.00325 | 6.02804 | 6.05202 | 6.03708 |
| MAP10       | 4.27619 | 4.12973 | 4.13939 | 4.57202 | 4.62444 | 4.58108 | 4.22877 | 3.97312 | 4.45118 |
| MLK4        | 6.95992 | 7.24028 | 6.91473 | 6.68985 | 6.492   | 6.8379  | 6.7729  | 6.52847 | 6.64049 |
| MIR4427     | 4.28639 | 4.23581 | 3.65078 | 3.75769 | 2.79649 | 2.45093 | 3.38644 | 4.34518 | 5.28642 |
| MIR4671     | 2.22195 | 1.95011 | 2.27178 | 1.95375 | 2.50331 | 2.53207 | 2.82473 | 2.67464 | 2.58781 |
| coa6        | 6.00478 | 5.44537 | 5.61111 | 6.66772 | 4.46851 | 6.22915 | 7.06884 | 6.17772 | 6.61377 |
| IRF2BP2     | 7.56806 | 7.45016 | 7.37925 | 8.88123 | 8.43294 | 8.5734  | 9.15753 | 7.97161 | 7.92865 |
| LINC00184   | 5.12721 | 5.47216 | 5.2025  | 5.7603  | 6.55503 | 5.96295 | 5.57754 | 4.92323 | 5.70199 |
| LINC01132   | 5.44411 | 4.80718 | 5.24626 | 5.17019 | 5.91686 | 5.42735 | 5.29347 | 5.40892 | 5.8397  |
| GGPS1       | 6.50287 | 6.54767 | 6.55083 | 6.49718 | 6.39418 | 6.36345 | 6.4728  | 6.9938  | 6.64184 |
| TBCE        | 7.41767 | 7.34642 | 7.0056  | 7.44454 | 5.3547  | 6.80927 | 7.57683 | 6.84828 | 7.36448 |
| GPR137B     | 9.99992 | 9.46883 | 10.0675 | 9.82321 | 8.68725 | 8.80959 | 10.3109 | 9.54042 | 8.89647 |
| EDARADD     | 6.44328 | 6.3334  | 6.33453 | 6.76758 | 6.28662 | 6.35951 | 6.66377 | 6.06482 | 5.81824 |
| MTR         | 8.72011 | 9.44649 | 9.02409 | 7.78128 | 7.13706 | 7.15553 | 7.67816 | 7.25329 | 7.19391 |
| RYR2        | 5.88917 | 5.47923 | 5.69244 | 4.98072 | 5.805   | 5.42548 | 5.06644 | 5.10393 | 5.22717 |
| RPS7P5      | 5.02344 | 4.87351 | 5.17173 | 5.85766 | 6.43399 | 6.14972 | 5.79871 | 5.51328 | 5.58432 |

|           |         |         |         |         |         |         |         |         |         |
|-----------|---------|---------|---------|---------|---------|---------|---------|---------|---------|
| FMN2      | 4.56208 | 4.45464 | 5.00576 | 5.03253 | 5.20028 | 4.99055 | 5.12675 | 4.81846 | 4.80759 |
| MIR3123   | 3.63478 | 3.76653 | 3.74333 | 4.10889 | 4.75853 | 4.24298 | 3.3788  | 4.59602 | 4.38818 |
| KMO       | 3.66918 | 3.8859  | 4.15107 | 4.57461 | 6.505   | 4.91285 | 4.90687 | 4.74478 | 5.14128 |
| WDR64     | 4.20369 | 4.26143 | 4.04906 | 4.30095 | 5.04445 | 5.1796  | 4.86366 | 4.38431 | 4.60675 |
| EXO1      | 5.25977 | 5.01424 | 5.20306 | 5.9552  | 4.84975 | 4.9107  | 5.32583 | 5.25983 | 5.23331 |
| SDCCAG8   | 8.46818 | 8.46232 | 8.11983 | 7.26907 | 5.20728 | 6.83349 | 7.77728 | 7.10145 | 7.43687 |
| MIR4677   | 7.45446 | 7.2033  | 6.98288 | 5.44764 | 6.29325 | 5.89717 | 5.27771 | 5.79928 | 6.383   |
| LOC339529 | 5.73154 | 5.78916 | 5.65658 | 5.99796 | 6.60163 | 6.30883 | 6.2725  | 5.82094 | 6.26811 |
| zbtb18    | 6.72092 | 7.20643 | 6.69554 | 6.65797 | 6.18913 | 6.55124 | 6.65609 | 6.43102 | 6.09222 |
| C1orf100  | 5.54269 | 5.38853 | 5.28247 | 5.3812  | 6.16668 | 5.60912 | 5.71907 | 5.77104 | 5.53514 |
| C1orf101  | 6.11129 | 6.2564  | 6.12925 | 5.54618 | 6.19963 | 6.32232 | 5.52616 | 5.88615 | 5.71582 |
| DES12     | 8.26664 | 7.74235 | 8.15999 | 8.0022  | 5.88943 | 8.00667 | 8.1079  | 8.14022 | 7.83232 |
| cox20     | 8.74999 | 8.67074 | 8.82259 | 8.43843 | 6.877   | 7.74992 | 8.93862 | 7.87481 | 8.5653  |
| EFCAB2    | 6.58304 | 6.38487 | 6.88687 | 5.61244 | 6.04638 | 6.08026 | 5.71553 | 5.76537 | 6.06008 |
| KIF26B    | 6.44874 | 5.97754 | 6.30234 | 6.43711 | 6.4112  | 6.13241 | 6.53914 | 6.26603 | 6.32784 |
| SCCPDH    | 7.18538 | 5.92795 | 7.45212 | 6.46617 | 5.72448 | 5.50693 | 6.5383  | 5.50746 | 5.79089 |
| LINC01341 | 5.40155 | 5.40525 | 5.59151 | 5.85766 | 5.64211 | 5.74811 | 5.57805 | 5.47587 | 5.6574  |
| VN1R5     | 3.32719 | 3.78771 | 3.57406 | 3.75746 | 5.44461 | 3.51684 | 4.23372 | 3.94961 | 3.63085 |
| MIR3124   | 3.07739 | 3.18651 | 3.76389 | 3.86593 | 4.20632 | 4.12568 | 3.81694 | 3.80138 | 3.89472 |
| ZNF672    | 7.00817 | 7.05462 | 6.99613 | 7.47874 | 7.15997 | 7.70067 | 7.8497  | 7.47063 | 7.68137 |
| PGBD2     | 6.55553 | 6.60921 | 6.49771 | 6.59038 | 6.09241 | 6.13866 | 6.70983 | 5.63259 | 6.12356 |
| WASH7P    | 9.63602 | 9.88774 | 9.92406 | 9.32268 | 9.36776 | 9.09373 | 9.37561 | 9.44981 | 9.47692 |
| LOC729737 | 9.50871 | 9.31763 | 9.90547 | 9.4138  | 10.0683 | 10.0373 | 8.82409 | 10.9283 | 10.0102 |
| LINC00115 | 4.95728 | 5.47611 | 5.35121 | 3.60183 | 2.46386 | 3.66894 | 2.83815 | 3.10429 | 3.46364 |
| NOC2L     | 5.854   | 5.79881 | 5.74768 | 6.67228 | 5.01736 | 5.88182 | 6.36286 | 5.68719 | 6.02873 |
| PERM1     | 6.71264 | 6.73645 | 6.17297 | 6.78386 | 6.69169 | 7.25398 | 7.01926 | 6.86055 | 6.92089 |

|              |         |         |         |         |         |         |         |         |         |
|--------------|---------|---------|---------|---------|---------|---------|---------|---------|---------|
| HES4         | 6.64705 | 6.65086 | 6.82623 | 7.76924 | 6.06024 | 8.26134 | 7.30088 | 7.87311 | 7.52307 |
| Rnf223       | 7.56518 | 7.36946 | 7.08932 | 8.82179 | 9.61823 | 10.8726 | 9.29219 | 10.6948 | 9.67342 |
| C1orf159     | 6.5355  | 6.53372 | 6.30968 | 6.88933 | 6.94755 | 7.30979 | 7.19396 | 7.26185 | 7.29488 |
| SDF4         | 7.50494 | 7.61303 | 7.82276 | 8.40598 | 7.06981 | 8.74627 | 8.46063 | 7.95702 | 7.9784  |
| CPSF3L       | 7.41353 | 7.38517 | 7.40202 | 7.77443 | 6.70338 | 8.00196 | 8.22918 | 8.08655 | 7.80215 |
| MXRA8        | 8.78084 | 8.82371 | 9.15125 | 9.06338 | 8.26173 | 8.56712 | 8.93231 | 7.96491 | 8.04187 |
| AURKAIP1     | 7.24533 | 7.0776  | 7.18874 | 8.55333 | 7.73161 | 8.23439 | 8.7166  | 8.34999 | 8.11037 |
| CCNL2        | 8.44655 | 8.27167 | 8.1355  | 7.17208 | 6.00176 | 6.92575 | 7.21086 | 7.80054 | 7.68168 |
| MRPL20       | 7.378   | 7.31995 | 7.30617 | 7.61559 | 7.01809 | 7.55998 | 7.82475 | 7.32762 | 7.64418 |
| ANKRD65      | 6.33768 | 6.21348 | 6.44575 | 6.769   | 6.86445 | 6.94471 | 6.51404 | 6.98185 | 6.50874 |
| TMEM240      | 4.6581  | 4.95419 | 4.6621  | 5.24197 | 4.62064 | 5.42482 | 5.07398 | 5.20723 | 5.20661 |
| SSU72        | 8.47043 | 8.27823 | 7.99785 | 9.05459 | 7.80949 | 8.27063 | 9.05054 | 8.14033 | 8.56846 |
| FNDC10       | 7.84245 | 7.82437 | 7.79091 | 8.363   | 6.59078 | 7.95367 | 8.69206 | 7.47646 | 7.61407 |
| CDK11A       | 6.88581 | 7.0413  | 6.52533 | 5.36732 | 4.65338 | 4.88975 | 5.86844 | 6.58456 | 6.68559 |
| NADK         | 7.82709 | 7.74959 | 7.88671 | 8.01978 | 7.59199 | 7.97353 | 8.02276 | 7.74702 | 7.78727 |
| TMEM52       | 6.02248 | 6.13991 | 6.29142 | 7.17317 | 6.9826  | 7.112   | 6.21253 | 6.75246 | 6.89703 |
| MORN1        | 5.88741 | 5.87036 | 5.82777 | 5.68869 | 6.54849 | 5.83465 | 6.06664 | 5.57406 | 5.86444 |
| LOC100129534 | 6.24175 | 6.80433 | 6.24753 | 6.63394 | 6.74253 | 6.74887 | 5.83074 | 6.24181 | 6.10349 |
| PEX10        | 6.78564 | 6.45459 | 6.70751 | 6.77064 | 5.84106 | 6.52486 | 6.75844 | 6.53958 | 6.62458 |
| PANK4        | 6.18591 | 6.33784 | 6.1998  | 6.2399  | 5.99518 | 6.26715 | 6.31148 | 6.30875 | 6.59121 |
| HES5         | 5.55991 | 5.77504 | 5.50632 | 6.54291 | 4.93031 | 6.52525 | 6.81072 | 6.17781 | 5.76937 |
| MMEL1        | 6.19418 | 6.51778 | 6.4426  | 6.65533 | 6.67343 | 7.1044  | 6.52418 | 7.00083 | 6.78587 |
| TTC34        | 6.20582 | 6.5122  | 6.71166 | 7.01836 | 7.86202 | 7.34079 | 7.022   | 7.2007  | 7.22309 |
| LINC00982    | 6.04987 | 5.94479 | 6.0873  | 6.71891 | 7.10425 | 6.99573 | 6.35703 | 6.74536 | 6.60774 |
| MEGF6        | 7.57367 | 7.39109 | 7.17477 | 7.00882 | 6.90809 | 6.97735 | 6.51897 | 6.73562 | 6.77193 |
| MIR551A      | 5.12838 | 5.42397 | 5.03095 | 6.0449  | 5.76553 | 6.42755 | 6.03017 | 6.07082 | 6.10495 |

|            |         |         |         |         |         |         |         |         |         |
|------------|---------|---------|---------|---------|---------|---------|---------|---------|---------|
| TP73-AS1   | 5.58898 | 6.15498 | 5.61866 | 5.59205 | 5.8758  | 5.61023 | 5.64052 | 5.49694 | 5.56794 |
| LRRC47     | 8.80177 | 8.26637 | 8.40747 | 8.51947 | 6.78624 | 8.07925 | 8.73498 | 7.91234 | 7.66878 |
| CEP104     | 8.07058 | 7.76009 | 7.84434 | 7.68618 | 6.60555 | 7.62791 | 7.99848 | 7.56101 | 7.6673  |
| C1orf174   | 8.66114 | 8.32539 | 8.60034 | 8.34129 | 6.91473 | 7.58718 | 8.55989 | 7.69413 | 7.62889 |
| MIR4689    | 7.46275 | 7.26491 | 7.3715  | 7.50098 | 8.75356 | 7.92185 | 7.28938 | 7.96155 | 7.87951 |
| NPHP4      | 6.26332 | 6.0071  | 6.17263 | 6.31642 | 6.23547 | 6.6091  | 6.61317 | 6.4259  | 6.16429 |
| CHD5       | 5.54165 | 5.36939 | 5.4312  | 6.41794 | 5.83233 | 6.30615 | 5.88565 | 6.2208  | 6.18084 |
| RPL22      | 6.06408 | 6.2452  | 6.25927 | 6.76022 | 6.32229 | 7.2305  | 6.54022 | 6.36258 | 6.3953  |
| ICMT       | 8.87426 | 8.62226 | 8.82925 | 8.49767 | 6.45114 | 7.58946 | 8.82306 | 8.38952 | 8.3007  |
| GPR153     | 7.55188 | 7.14427 | 7.23566 | 8.43894 | 7.53917 | 9.23714 | 8.75262 | 8.38949 | 9.18819 |
| ACOT7      | 6.60793 | 6.28933 | 6.34609 | 7.44299 | 7.18083 | 7.73331 | 7.35466 | 7.56351 | 7.32333 |
| HES2       | 6.1612  | 5.84472 | 6.15064 | 7.18385 | 6.11912 | 7.31382 | 7.92654 | 6.85891 | 6.78497 |
| MIR4252    | 5.59071 | 5.60177 | 5.88247 | 6.25286 | 6.92528 | 6.43579 | 5.87758 | 5.76341 | 6.39802 |
| NOL9       | 9.0177  | 8.83994 | 8.78726 | 8.35026 | 6.6133  | 7.35539 | 8.64512 | 7.5339  | 8.05294 |
| KLHL21     | 7.63308 | 6.97755 | 7.23439 | 7.79047 | 7.00797 | 8.61045 | 7.97693 | 8.2157  | 8.12772 |
| UTS2       | 4.54793 | 4.75545 | 4.38591 | 4.49692 | 4.95577 | 4.98555 | 5.46192 | 4.63811 | 4.64713 |
| ERRFI1     | 10.0129 | 9.43388 | 10.0382 | 10.071  | 10.5345 | 10.561  | 9.66495 | 11.0355 | 10.4382 |
| RERE       | 8.48993 | 8.2979  | 8.60483 | 7.8685  | 7.15376 | 7.95748 | 8.1004  | 8.20195 | 7.97153 |
| GPR157     | 8.80857 | 9.06767 | 8.84028 | 9.70713 | 7.68595 | 10.0967 | 9.65013 | 9.67831 | 9.05368 |
| MIR34A     | 5.02713 | 5.06497 | 4.98177 | 4.50656 | 4.96134 | 4.96509 | 4.71993 | 5.13168 | 4.96973 |
| PIK3CD-AS1 | 5.73633 | 5.82027 | 5.64049 | 5.73141 | 6.37039 | 6.10408 | 5.63016 | 6.15421 | 6.26084 |
| CLSTN1     | 9.60743 | 9.49495 | 9.42771 | 9.49885 | 6.80244 | 9.26248 | 9.8395  | 9.47711 | 9.55989 |
| LZIC       | 8.41577 | 8.02789 | 8.1832  | 7.86451 | 5.67947 | 8.0315  | 8.52975 | 7.72399 | 8.11506 |
| CASZ1      | 9.61567 | 9.44078 | 9.47157 | 8.93723 | 6.97988 | 9.07191 | 8.83176 | 8.55001 | 9.02894 |
| c1orf127   | 5.26211 | 5.34275 | 5.35146 | 5.9055  | 6.04911 | 6.13903 | 5.6506  | 5.8378  | 5.63376 |
| MASP2      | 5.87453 | 6.20073 | 5.76854 | 6.40169 | 6.85975 | 6.26602 | 6.37233 | 6.07856 | 5.77331 |

|            |         |         |         |         |         |         |         |         |         |
|------------|---------|---------|---------|---------|---------|---------|---------|---------|---------|
| SRM        | 8.87639 | 8.73478 | 9.19303 | 10.0263 | 7.78819 | 8.95091 | 9.97419 | 8.1252  | 9.04939 |
| MTOR       | 8.92724 | 8.87487 | 8.69699 | 8.61508 | 6.94668 | 7.74291 | 8.63211 | 8.20481 | 8.54486 |
| FBXO2      | 6.01944 | 6.28651 | 6.29067 | 6.82237 | 6.45035 | 7.15308 | 6.98976 | 7.09531 | 6.87992 |
| MAD2L2     | 7.13153 | 6.8299  | 7.03878 | 7.43089 | 6.9462  | 7.08435 | 7.75129 | 7.05566 | 7.01695 |
| MTHFR      | 7.65085 | 7.29731 | 7.38225 | 6.85288 | 5.2804  | 6.95034 | 7.3823  | 6.93686 | 7.05515 |
| NPPA       | 5.6374  | 5.55654 | 5.81712 | 5.66583 | 6.59111 | 6.16037 | 6.0936  | 6.06636 | 6.1171  |
| nppb       | 6.10301 | 6.48136 | 6.36724 | 6.87413 | 7.20036 | 7.13772 | 6.91907 | 6.72085 | 7.00567 |
| KIAA2013   | 8.00015 | 7.89205 | 8.09437 | 8.47774 | 6.81623 | 8.10308 | 8.37702 | 8.0979  | 7.9698  |
| DHRS3      | 8.48123 | 8.2053  | 8.28648 | 8.44602 | 6.89882 | 8.87006 | 8.34525 | 6.90458 | 7.47799 |
| PRAMEF11   | 4.15217 | 4.53637 | 4.11282 | 5.05549 | 4.05429 | 5.59852 | 4.89948 | 5.38778 | 5.34334 |
| HNRNPCL1   | 3.0094  | 3.35142 | 3.12697 | 3.27681 | 7.20291 | 3.92241 | 3.90852 | 3.30812 | 3.43095 |
| PRAMEF4    | 4.0697  | 4.0663  | 4.09067 | 4.52216 | 6.57565 | 5.2055  | 4.32377 | 5.09745 | 4.47148 |
| PRAMEF10   | 6.36926 | 6.45672 | 6.42329 | 6.56134 | 9.35229 | 6.65687 | 6.30097 | 7.47022 | 7.30951 |
| HNRNPCL2   | 5.15568 | 5.48903 | 5.80153 | 5.49562 | 6.50392 | 5.43994 | 5.54085 | 5.52602 | 5.96781 |
| PRAMEF14   | 5.50728 | 5.35382 | 5.08745 | 5.6295  | 7.18768 | 5.84549 | 5.57554 | 5.81534 | 5.78389 |
| PRAMEF18   | 5.42489 | 5.52478 | 5.28095 | 5.84831 | 6.53989 | 5.80256 | 5.13421 | 5.73766 | 5.5951  |
| PRAMEF19   | 5.10553 | 5.33881 | 5.05704 | 5.38786 | 6.15057 | 5.57689 | 5.24235 | 5.35116 | 5.35767 |
| LRRC38     | 5.73592 | 6.11966 | 5.98594 | 6.12903 | 5.90114 | 5.95014 | 6.02728 | 5.89073 | 6.45108 |
| TMEM51-AS1 | 6.35474 | 6.15887 | 5.86775 | 6.42179 | 6.44066 | 7.00859 | 6.5627  | 6.9539  | 6.59106 |
| AGMAT      | 5.39699 | 5.23802 | 5.49789 | 6.18097 | 6.20838 | 6.02742 | 5.54859 | 5.41735 | 5.71308 |
| UQCRHL     | 6.99237 | 7.10223 | 7.03993 | 8.76467 | 6.47149 | 8.69904 | 9.14775 | 7.63792 | 7.91917 |
| FLJ37453   | 5.62296 | 5.30938 | 5.28121 | 5.94848 | 5.45429 | 5.96232 | 6.23894 | 5.70165 | 5.49411 |
| ZBTB17     | 6.72259 | 6.5519  | 6.63082 | 7.16039 | 6.50006 | 8.35873 | 7.3684  | 7.79513 | 7.27237 |
| EPHA2      | 8.31387 | 7.43116 | 7.83722 | 9.51372 | 7.00268 | 10.8537 | 9.39383 | 9.94551 | 10.3947 |
| ARHGEF19   | 7.17767 | 7.195   | 7.2828  | 7.28104 | 7.00203 | 6.85067 | 7.02096 | 6.81901 | 6.75652 |
| RSG1       | 6.5765  | 6.5966  | 6.26785 | 6.80164 | 7.02454 | 6.78959 | 6.54353 | 6.37528 | 6.48458 |

|              |         |         |         |         |         |         |         |         |         |
|--------------|---------|---------|---------|---------|---------|---------|---------|---------|---------|
| FBXO42       | 9.11983 | 9.06523 | 8.60527 | 8.78053 | 6.97092 | 9.01779 | 8.47987 | 9.3781  | 8.37838 |
| SPATA21      | 6.05615 | 6.37744 | 6.41986 | 6.21833 | 7.50843 | 6.7128  | 6.54621 | 6.674   | 6.57891 |
| ESPNP        | 4.94054 | 5.47634 | 5.21448 | 6.31884 | 6.08651 | 6.24058 | 5.91414 | 5.92275 | 5.9707  |
| mst1l        | 6.20367 | 6.05036 | 6.11102 | 6.12868 | 6.24924 | 6.20987 | 6.32829 | 5.92053 | 5.74856 |
| MFAP2        | 6.24969 | 6.35157 | 6.42248 | 8.54278 | 6.3119  | 6.94476 | 7.25135 | 7.04219 | 7.52775 |
| ATP13A2      | 8.17662 | 7.66481 | 7.91978 | 8.86263 | 6.51726 | 9.19185 | 9.02721 | 8.95393 | 9.51447 |
| RCC2         | 10.7098 | 10.2348 | 10.5316 | 10.4293 | 9.04151 | 10.0436 | 10.2608 | 9.26728 | 10.2404 |
| MIR1290      | 8.13073 | 8.27798 | 8.14717 | 6.02777 | 7.08674 | 4.49066 | 5.7413  | 6.78906 | 6.05271 |
| IFFO2        | 10.1618 | 9.87068 | 10.2323 | 10.8732 | 9.12803 | 11.825  | 11.0688 | 11.1114 | 11.58   |
| UBR4         | 10.0062 | 9.67444 | 9.83405 | 9.0151  | 7.21188 | 8.6944  | 9.08894 | 9.85551 | 9.86167 |
| EMC1         | 7.56123 | 7.49369 | 7.92581 | 7.57443 | 6.61043 | 7.06993 | 7.69393 | 6.94962 | 7.62735 |
| AKR7L        | 6.26444 | 6.01837 | 6.05293 | 5.4083  | 5.65763 | 6.14434 | 4.87693 | 5.32184 | 5.98793 |
| LOC100506730 | 7.60158 | 8.18263 | 8.04126 | 6.21218 | 6.82524 | 6.29081 | 6.79334 | 6.08457 | 5.99915 |
| TMCO4        | 6.1227  | 6.12631 | 6.07815 | 5.88747 | 6.08615 | 6.57949 | 6.0205  | 5.81256 | 6.0456  |
| RNF186       | 5.9231  | 5.75723 | 5.71757 | 6.39047 | 6.71815 | 6.42768 | 5.93267 | 6.10436 | 6.10217 |
| LINC01141    | 5.82992 | 6.04948 | 6.03834 | 6.28187 | 7.32237 | 5.88226 | 5.97805 | 6.29866 | 6.14101 |
| CAMK2N1      | 7.45976 | 7.42344 | 7.69486 | 7.80736 | 6.88052 | 8.00508 | 7.63331 | 8.02065 | 7.88121 |
| MUL1         | 7.03816 | 6.69163 | 6.94215 | 6.99737 | 6.13879 | 7.36113 | 7.41794 | 6.96683 | 7.38509 |
| DDOST        | 8.33347 | 8.41668 | 8.51499 | 8.53452 | 6.75372 | 8.32413 | 8.52214 | 8.1491  | 8.31413 |
| KIF17        | 5.61722 | 5.60253 | 5.69695 | 6.48644 | 6.69168 | 6.57672 | 6.20459 | 6.74724 | 6.35848 |
| SH2D5        | 5.81136 | 6.10545 | 6.06849 | 6.96903 | 6.5497  | 7.60049 | 6.59462 | 7.28216 | 7.91658 |
| MIR1256      | 4.76171 | 4.06181 | 4.3018  | 3.35249 | 3.12953 | 3.3128  | 3.48826 | 4.25481 | 4.69815 |
| ECE1         | 8.34973 | 7.88975 | 8.61504 | 7.59583 | 6.39189 | 7.21578 | 7.90458 | 8.28063 | 7.8433  |
| RAP1GAP      | 5.82896 | 6.19534 | 5.95543 | 6.85608 | 6.95148 | 8.79635 | 7.778   | 8.4533  | 7.94116 |
| USP48        | 8.44829 | 8.11689 | 8.16794 | 7.03278 | 5.62937 | 6.49208 | 7.42181 | 7.5802  | 7.15106 |
| HSPG2        | 8.96966 | 7.97159 | 8.79917 | 8.07439 | 6.77561 | 7.3721  | 8.11223 | 8.77392 | 8.27821 |

|           |         |         |         |         |         |         |         |         |         |
|-----------|---------|---------|---------|---------|---------|---------|---------|---------|---------|
| MIR4253   | 5.07859 | 4.93939 | 4.68352 | 5.72946 | 5.84272 | 4.00174 | 4.35404 | 4.85122 | 4.93068 |
| C1orf234  | 5.10209 | 5.41752 | 5.15685 | 5.72456 | 6.47254 | 5.08605 | 5.70055 | 5.32332 | 5.19709 |
| LUZP1     | 7.92334 | 7.62552 | 7.95113 | 7.82363 | 6.59003 | 7.47847 | 7.94129 | 8.44993 | 8.22588 |
| HNRNPR    | 8.52949 | 8.68136 | 8.85818 | 8.01665 | 5.13263 | 7.34986 | 8.44085 | 7.38286 | 7.67953 |
| ZNF436    | 8.75235 | 8.78994 | 8.40341 | 7.44841 | 5.91565 | 6.93516 | 8.27295 | 6.29526 | 7.00718 |
| E2F2      | 6.71426 | 6.59042 | 6.6967  | 6.9025  | 6.69037 | 6.60329 | 6.50705 | 6.36852 | 6.21181 |
| TCEB3-AS1 | 6.68324 | 6.78366 | 6.51937 | 6.85445 | 6.41139 | 6.30843 | 6.45616 | 5.85387 | 5.84401 |
| GALE      | 6.42753 | 6.19198 | 6.62147 | 6.98133 | 6.68359 | 7.03152 | 7.0934  | 7.08359 | 7.27525 |
| HMGCL     | 6.62753 | 6.75627 | 6.35406 | 6.12275 | 6.68233 | 7.22925 | 6.46095 | 6.10575 | 5.9084  |
| CNR2      | 5.25276 | 5.07932 | 5.05215 | 5.28183 | 6.09496 | 5.38582 | 5.53229 | 5.50202 | 5.14214 |
| stpg1     | 6.07735 | 6.16339 | 6.05721 | 6.09908 | 5.56978 | 6.27172 | 6.50371 | 6.31641 | 6.60643 |
| RCAN3AS   | 4.40766 | 3.92916 | 4.28909 | 4.82428 | 5.5325  | 5.05357 | 4.87494 | 4.38423 | 4.53943 |
| RUNX3     | 6.38401 | 6.04924 | 6.22478 | 4.97491 | 5.86953 | 5.61898 | 5.98553 | 5.83645 | 5.73282 |
| RSRP1     | 8.4171  | 8.2775  | 7.80964 | 7.91754 | 6.33493 | 7.20105 | 6.75597 | 7.26848 | 7.95829 |
| LOC646471 | 5.64896 | 5.67765 | 5.90559 | 6.1267  | 5.67616 | 5.80787 | 6.40644 | 5.91591 | 5.99608 |
| AUNIP     | 4.56308 | 5.01191 | 5.03265 | 5.62011 | 6.08913 | 4.94153 | 5.83723 | 5.56771 | 4.88037 |
| STMN1     | 5.85799 | 6.08511 | 6.1182  | 6.99919 | 6.45053 | 5.8766  | 6.23258 | 6.12309 | 5.7727  |
| UBXN11    | 5.8302  | 5.75155 | 5.82114 | 5.54637 | 5.70849 | 6.17816 | 5.83669 | 5.88679 | 6.24763 |
| AIM1L     | 7.05921 | 6.9244  | 6.46799 | 7.57032 | 6.78414 | 8.71913 | 7.63508 | 8.26136 | 8.16873 |
| ZNF683    | 5.78661 | 5.76259 | 5.99873 | 6.06549 | 6.28075 | 6.66077 | 6.3075  | 6.43753 | 6.25483 |
| GPN2      | 6.872   | 7.32428 | 7.18696 | 7.08264 | 6.28831 | 7.11153 | 7.52316 | 7.01043 | 7.30427 |
| GPATCH3   | 6.30185 | 6.2887  | 6.38517 | 6.71475 | 6.6394  | 6.79565 | 7.20239 | 6.82263 | 6.91246 |
| KDF1      | 7.28615 | 7.5475  | 7.17718 | 7.51438 | 6.49431 | 7.61151 | 7.90053 | 7.28118 | 7.81806 |
| MAP3K6    | 8.83104 | 8.39196 | 8.75175 | 8.48978 | 6.27743 | 7.79943 | 8.88993 | 7.97195 | 8.79762 |
| FCN3      | 6.49335 | 6.59744 | 6.64642 | 7.21175 | 7.67009 | 7.49113 | 7.08475 | 7.17688 | 7.20877 |
| CD164L2   | 7.77611 | 7.69514 | 7.72274 | 8.05833 | 7.40104 | 7.68738 | 7.77351 | 8.0984  | 7.7589  |

|          |         |         |         |         |         |         |         |         |         |
|----------|---------|---------|---------|---------|---------|---------|---------|---------|---------|
| FGR      | 5.85248 | 6.18349 | 6.14117 | 6.48701 | 6.15222 | 6.45337 | 5.97003 | 6.36055 | 6.27237 |
| EYA3     | 9.34886 | 9.22436 | 9.24505 | 8.52335 | 7.19536 | 8.37583 | 8.64612 | 8.84775 | 9.35121 |
| ptafr    | 7.43887 | 7.46381 | 7.28515 | 7.2287  | 6.94827 | 7.64469 | 7.87479 | 7.86985 | 8.10942 |
| TMEM200B | 6.38718 | 6.24443 | 6.62854 | 6.79693 | 6.96257 | 6.53936 | 6.61737 | 6.77599 | 6.55442 |
| SRSF4    | 8.59424 | 8.87026 | 8.50578 | 8.41228 | 6.51027 | 8.36651 | 8.34422 | 8.40898 | 8.45248 |
| MECR     | 6.09757 | 6.43604 | 6.52736 | 6.06589 | 5.35126 | 5.53976 | 6.41632 | 5.48596 | 5.73138 |
| LAPTM5   | 8.43044 | 7.51179 | 9.39523 | 8.15327 | 7.17517 | 7.95218 | 8.15468 | 8.34689 | 8.57817 |
| MIR4420  | 4.30697 | 4.61236 | 4.17728 | 4.83824 | 5.2955  | 4.72837 | 4.81738 | 5.27575 | 4.7563  |
| SDC3     | 6.67303 | 6.07333 | 6.61946 | 6.52344 | 6.58864 | 6.36459 | 6.79858 | 6.12827 | 6.77236 |
| PUM1     | 9.56662 | 9.45917 | 9.24382 | 8.53834 | 6.73582 | 8.73769 | 8.62441 | 8.96079 | 9.00845 |
| NKAIN1   | 5.83475 | 6.16798 | 5.95308 | 6.24944 | 6.65807 | 7.16357 | 5.91986 | 6.22124 | 6.0748  |
| SNRNP40  | 8.14681 | 7.91218 | 8.11763 | 7.99076 | 6.82058 | 7.18087 | 8.442   | 6.93146 | 7.10846 |
| PEF1     | 7.98596 | 7.46838 | 7.73723 | 7.37488 | 6.46078 | 7.54076 | 7.73444 | 6.82712 | 7.49327 |
| ADGRB2   | 5.92352 | 5.87408 | 6.0074  | 6.46133 | 6.66214 | 6.32599 | 6.21536 | 6.76041 | 6.44364 |
| MIR4254  | 6.00489 | 6.02839 | 6.34247 | 6.53776 | 7.05775 | 7.01099 | 6.26079 | 6.59271 | 6.99239 |
| SPOCD1   | 5.05944 | 5.22901 | 5.01264 | 6.04459 | 5.66766 | 6.60182 | 5.74527 | 6.32851 | 5.94036 |
| TMEM234  | 7.25518 | 7.33745 | 7.1711  | 6.97779 | 6.66266 | 6.76806 | 6.87618 | 7.04391 | 7.34384 |
| MARCKSL1 | 6.53749 | 6.18735 | 6.11635 | 7.36567 | 6.08486 | 8.38349 | 7.31823 | 8.30552 | 7.68732 |
| FAM229A  | 7.73403 | 7.6563  | 7.7573  | 7.68197 | 7.60047 | 8.20114 | 7.67621 | 7.6587  | 7.64245 |
| BSDC1    | 7.95535 | 7.79716 | 7.87565 | 7.57355 | 6.25566 | 7.64948 | 7.77687 | 7.86945 | 7.87349 |
| ZBTB8OS  | 6.57283 | 6.80883 | 6.65144 | 6.43089 | 5.55737 | 6.24206 | 6.74919 | 6.40225 | 6.59583 |
| YARS     | 8.09128 | 7.76168 | 7.83899 | 8.30027 | 6.51    | 8.08277 | 8.38643 | 7.87065 | 8.23077 |
| FNDC5    | 6.49144 | 6.57234 | 6.67767 | 7.03439 | 7.48727 | 7.4456  | 6.98687 | 6.696   | 7.10771 |
| TMEM54   | 8.51973 | 8.63894 | 8.3797  | 10.4218 | 10.1399 | 10.6583 | 10.8574 | 9.88866 | 10.2194 |
| RNF19B   | 8.52997 | 8.31477 | 8.52451 | 9.13325 | 6.89474 | 10.4401 | 9.81821 | 10.4797 | 9.56521 |
| TRIM62   | 8.32806 | 7.89519 | 8.16598 | 8.00882 | 6.34872 | 7.93034 | 8.09599 | 6.8842  | 7.66664 |



|           |         |         |         |         |         |         |         |         |         |
|-----------|---------|---------|---------|---------|---------|---------|---------|---------|---------|
| PHC2      | 6.69797 | 6.98432 | 6.95189 | 7.18757 | 6.17035 | 6.92919 | 7.1653  | 7.38095 | 6.99565 |
| CSMD2     | 6.032   | 6.0224  | 5.97342 | 6.26604 | 6.93249 | 6.33723 | 6.06578 | 6.43035 | 6.25772 |
| MIR552    | 4.64677 | 4.52413 | 4.74956 | 4.64506 | 5.43767 | 4.44982 | 4.26736 | 5.23761 | 4.55924 |
| LOC653160 | 6.52896 | 6.97312 | 6.83948 | 6.22687 | 5.93952 | 6.3006  | 6.13969 | 5.77746 | 6.21471 |
| SFPQ      | 9.58021 | 9.61994 | 9.50775 | 8.24816 | 6.35544 | 7.14654 | 7.8024  | 7.83086 | 8.14642 |
| KIAA0319L | 8.3868  | 8.53955 | 8.24817 | 7.92672 | 6.91746 | 7.65315 | 7.93449 | 7.71708 | 7.76177 |
| TRAPPC3   | 8.47412 | 8.38286 | 8.43733 | 8.51805 | 8.06848 | 8.5786  | 8.8343  | 8.7289  | 9.03222 |
| STK40     | 8.25949 | 7.809   | 8.15887 | 8.26321 | 7.51603 | 9.54191 | 8.51056 | 9.40661 | 9.43521 |
| OSCP1     | 6.40341 | 6.53328 | 6.30768 | 6.14972 | 6.21667 | 6.42096 | 6.52605 | 6.18342 | 6.09274 |
| MRPS15    | 9.35912 | 9.00972 | 9.72515 | 9.9564  | 8.377   | 9.71778 | 10.4076 | 9.4325  | 9.83783 |
| CSF3R     | 5.39383 | 5.02243 | 5.17711 | 5.71193 | 5.94529 | 6.04216 | 5.64946 | 5.85759 | 5.97936 |
| LINC01137 | 7.43763 | 7.31629 | 6.95082 | 7.46733 | 5.80981 | 7.19571 | 7.70505 | 7.31824 | 7.51812 |
| MEAF6     | 9.30989 | 9.20104 | 9.16752 | 9.09392 | 7.67777 | 9.06785 | 9.38812 | 8.83146 | 9.13096 |
| SNIP1     | 8.58016 | 8.47711 | 8.58967 | 8.71444 | 8.11525 | 8.82168 | 8.54383 | 8.92778 | 8.84541 |
| GNL2      | 8.68164 | 8.76996 | 8.63697 | 8.14126 | 7.15559 | 7.924   | 8.88794 | 8.24832 | 8.40201 |
| RSPO1     | 7.37651 | 6.98134 | 7.72073 | 6.70787 | 7.51744 | 7.25945 | 6.92759 | 6.85386 | 6.56541 |
| EPHA10    | 4.67562 | 4.82807 | 4.89572 | 5.1364  | 5.53316 | 5.2891  | 5.29302 | 5.21538 | 5.33991 |
| YRDC      | 8.09417 | 7.79409 | 7.89443 | 8.72073 | 6.93354 | 8.01576 | 8.5933  | 7.90125 | 7.96044 |
| MTF1      | 9.23313 | 9.33945 | 9.20584 | 9.60218 | 7.72954 | 9.1629  | 9.4278  | 9.6098  | 9.64227 |
| FHL3      | 7.73683 | 7.4014  | 7.64882 | 8.06732 | 6.12429 | 7.33667 | 8.71866 | 7.43929 | 7.18118 |
| POU3F1    | 9.56816 | 8.41398 | 8.7624  | 8.9486  | 7.09908 | 7.98113 | 9.21017 | 7.75374 | 7.69847 |
| RRAGC     | 8.49325 | 7.85159 | 8.15613 | 8.42666 | 6.50425 | 9.03012 | 8.90378 | 9.54231 | 9.08309 |
| PPIEL     | 7.00621 | 6.46334 | 6.72191 | 5.31739 | 6.13859 | 5.68658 | 5.28943 | 5.63282 | 5.27679 |
| HEYL      | 6.45628 | 6.05438 | 6.3435  | 6.8756  | 6.25687 | 7.29143 | 6.88577 | 6.68918 | 6.59639 |
| HPCAL4    | 5.53319 | 5.39631 | 5.62961 | 5.83942 | 5.76786 | 5.55819 | 5.87055 | 5.88639 | 5.76098 |
| BMP8B     | 5.18818 | 5.15009 | 4.98282 | 5.7893  | 6.03526 | 5.88453 | 5.43453 | 5.71456 | 5.87363 |

|           |         |         |         |         |         |         |         |         |         |
|-----------|---------|---------|---------|---------|---------|---------|---------|---------|---------|
| OXCT2     | 4.92631 | 4.70553 | 4.60325 | 5.23099 | 5.08472 | 5.35963 | 5.32596 | 5.5088  | 5.31496 |
| TRIT1     | 7.9815  | 8.58505 | 8.00378 | 7.48707 | 6.32919 | 6.63284 | 7.57922 | 7.18446 | 6.52382 |
| PPT1      | 9.37056 | 8.693   | 9.64264 | 7.96561 | 6.56815 | 6.21248 | 8.24524 | 7.59561 | 7.67953 |
| RIMS3     | 7.26735 | 7.15984 | 7.27554 | 8.48891 | 7.63314 | 10.0585 | 9.24017 | 9.67171 | 9.33038 |
| NFYC-AS1  | 5.90025 | 6.196   | 6.40513 | 5.49399 | 5.67116 | 5.29758 | 4.84944 | 5.5533  | 5.26466 |
| SLFNL1    | 5.71439 | 5.6929  | 6.00076 | 5.8717  | 6.30921 | 6.53357 | 5.7408  | 6.25816 | 6.32355 |
| SCMH1     | 8.16086 | 8.35713 | 8.24819 | 7.61091 | 6.70134 | 6.59117 | 7.60063 | 6.86466 | 7.12989 |
| EDN2      | 6.56324 | 6.24611 | 6.46344 | 7.36807 | 7.21278 | 7.65087 | 6.87992 | 7.89575 | 7.04998 |
| HIVEP3    | 6.43925 | 6.33042 | 6.66646 | 6.43105 | 5.68509 | 5.88484 | 6.42958 | 6.11173 | 6.35518 |
| GUCA2A    | 6.33126 | 6.4966  | 6.32784 | 7.31398 | 7.50693 | 7.43562 | 6.7982  | 6.81386 | 6.88299 |
| FOXJ3     | 9.59761 | 9.66561 | 9.70755 | 8.38768 | 7.30304 | 9.09765 | 8.2084  | 9.25897 | 9.05796 |
| CLDN19    | 6.61942 | 6.43641 | 6.52842 | 7.35992 | 7.69096 | 7.97502 | 7.43103 | 7.15375 | 7.39541 |
| P3H1      | 7.21791 | 6.72158 | 7.01501 | 7.51817 | 6.57416 | 6.42023 | 7.00764 | 6.87549 | 6.88933 |
| SVBP      | 7.31901 | 7.26216 | 8.32245 | 7.63885 | 6.90911 | 7.70902 | 8.31981 | 7.67367 | 8.3257  |
| EBNA1BP2  | 7.96612 | 8       | 7.98838 | 8.47474 | 6.44241 | 8.4258  | 8.89976 | 7.9864  | 8.2697  |
| C1orf210  | 7.34194 | 7.17331 | 7.45472 | 7.82786 | 6.88028 | 8.23257 | 8.17161 | 8.0538  | 7.99306 |
| ELOVL1    | 9.62744 | 9.16458 | 9.03042 | 10.0164 | 10.5594 | 10.6176 | 10.2321 | 10.826  | 10.9388 |
| MED8      | 8.64455 | 8.65659 | 8.42022 | 8.74086 | 8.50329 | 9.76611 | 9.40484 | 9.26151 | 9.40709 |
| KDM4A-AS1 | 5.37568 | 5.16072 | 5.27798 | 6.05048 | 6.36114 | 5.67086 | 5.69773 | 5.69773 | 5.3173  |
| ERIS      | 6.91721 | 7.13406 | 6.84406 | 6.43619 | 5.61948 | 6.36672 | 6.71946 | 6.04575 | 6.38517 |
| TMEM53    | 7.84641 | 7.67904 | 7.75952 | 7.744   | 8.01557 | 7.45861 | 8.11478 | 7.50108 | 7.90636 |
| BEST4     | 5.48376 | 5.56578 | 5.71211 | 5.96713 | 5.81616 | 5.95889 | 5.68855 | 6.06134 | 5.78603 |
| TCTEX1D4  | 5.99173 | 6.00183 | 6.18147 | 6.55611 | 6.33908 | 6.80379 | 5.95161 | 6.78299 | 6.61407 |
| PTCH2     | 5.95942 | 5.74472 | 5.81347 | 5.94707 | 6.45622 | 6.02781 | 5.80339 | 6.11403 | 5.95103 |
| HECTD3    | 8.64991 | 8.47507 | 8.48132 | 7.88908 | 6.09591 | 7.47497 | 8.2242  | 7.44871 | 7.9276  |
| MUTYH     | 6.59636 | 6.62617 | 6.77318 | 6.90422 | 7.09468 | 7.27625 | 6.75251 | 7.0225  | 6.89781 |

|           |         |         |         |         |         |         |         |         |         |
|-----------|---------|---------|---------|---------|---------|---------|---------|---------|---------|
| TESK2     | 8.4516  | 7.75979 | 7.54879 | 6.70537 | 6.08027 | 7.71905 | 6.96871 | 7.11195 | 5.76589 |
| PRDX1     | 11.1847 | 10.8037 | 11.0939 | 11.4224 | 8.81914 | 10.9615 | 11.5919 | 11.1901 | 11.6954 |
| ccdc17    | 7.17428 | 6.17805 | 6.62084 | 6.35104 | 6.1941  | 6.00191 | 5.84749 | 6.35104 | 6.6454  |
| GPBP1L1   | 10.3403 | 10.5184 | 10.4178 | 9.52222 | 8.70574 | 9.9985  | 9.74401 | 9.89035 | 10.2065 |
| RPS15AP10 | 7.34882 | 6.76377 | 6.68113 | 6.28053 | 4.70167 | 4.70377 | 5.90219 | 6.7403  | 7.06424 |
| IPP       | 7.26157 | 7.20846 | 6.87253 | 6.68284 | 5.31628 | 6.7104  | 6.89861 | 6.20296 | 6.60712 |
| LRRC41    | 8.78445 | 8.59016 | 8.63134 | 8.89943 | 8.08225 | 8.36694 | 9.23512 | 8.08129 | 8.61163 |
| KNCN      | 5.43756 | 5.30342 | 5.47972 | 5.45539 | 5.98194 | 6.25409 | 5.59511 | 5.86484 | 5.94061 |
| MKNK1     | 7.27152 | 7.35655 | 7.46675 | 7.18589 | 5.80143 | 6.79685 | 7.33238 | 7.25929 | 7.69349 |
| MOB3C     | 6.52627 | 6.58747 | 6.70761 | 6.60718 | 6.39465 | 6.59923 | 6.84369 | 6.40532 | 6.96063 |
| ATPAF1    | 7.25275 | 7.66419 | 7.67059 | 7.09243 | 6.23507 | 6.80915 | 7.17336 | 6.45751 | 6.50047 |
| EFCAB14   | 10.4856 | 10.2305 | 10.4901 | 9.55513 | 8.4655  | 9.62065 | 10.0197 | 10.0782 | 9.85317 |
| PDZK1IP1  | 9.00412 | 8.77858 | 8.97445 | 9.79714 | 10.3464 | 10.3264 | 10.5357 | 10.0202 | 9.94164 |
| TAL1      | 5.16721 | 4.74807 | 4.92517 | 5.4281  | 5.96104 | 5.38393 | 5.30353 | 5.56675 | 5.38821 |
| STIL      | 6.8187  | 6.51961 | 6.64139 | 6.10768 | 5.22922 | 5.68213 | 6.58102 | 6.21441 | 6.35669 |
| FOXD2-AS1 | 6.20865 | 6.46676 | 6.44422 | 6.03882 | 6.86637 | 6.07121 | 6.32392 | 6.44582 | 6.30516 |
| SPATA6    | 7.69175 | 7.89964 | 7.92483 | 5.73987 | 5.51569 | 5.60986 | 6.10333 | 5.59581 | 5.63203 |
| AGBL4     | 5.36018 | 5.41228 | 5.33979 | 5.91877 | 6.39534 | 5.92544 | 5.64698 | 5.50805 | 5.6099  |
| BEND5     | 4.91384 | 5.10009 | 4.88842 | 4.75859 | 5.64419 | 4.30864 | 4.70553 | 4.47982 | 4.75712 |
| DMRTA2    | 4.89919 | 5.03976 | 5.14419 | 5.77555 | 4.87391 | 6.06284 | 5.23248 | 5.43679 | 5.44949 |
| FAF1      | 9.0845  | 8.87598 | 9.09229 | 8.11096 | 7.92176 | 7.97988 | 8.26244 | 8.11216 | 8.10046 |
| TTC39A    | 7.50873 | 6.4328  | 6.86066 | 7.60894 | 7.06071 | 8.82437 | 7.67374 | 8.07208 | 8.26051 |
| EPS15     | 9.73835 | 9.52563 | 10.0727 | 8.4991  | 6.05272 | 8.87451 | 8.56208 | 9.28487 | 9.26855 |
| NRDC      | 10.8139 | 11.1524 | 10.5276 | 9.88608 | 8.3499  | 9.70545 | 9.88938 | 10.2997 | 10.07   |
| TXNDC12   | 9.89005 | 9.05434 | 10.0042 | 9.02495 | 6.86314 | 8.35243 | 9.4411  | 8.59719 | 8.93945 |
| CC2D1B    | 7.02246 | 7.08203 | 6.94979 | 7.19398 | 6.21336 | 7.06044 | 7.44071 | 6.89152 | 7.2463  |

|          |         |         |         |         |         |         |         |         |         |
|----------|---------|---------|---------|---------|---------|---------|---------|---------|---------|
| COA7     | 6.65693 | 6.40098 | 6.47047 | 6.75167 | 6.45567 | 6.59692 | 6.96513 | 6.4935  | 6.01649 |
| ECHDC2   | 8.03475 | 7.71115 | 7.24938 | 6.84565 | 5.89728 | 6.82067 | 7.4782  | 6.80737 | 6.74119 |
| GLIS1    | 6.57978 | 6.71762 | 6.6145  | 7.02169 | 7.34023 | 7.19517 | 7.00334 | 6.69885 | 7.0577  |
| NDC1     | 8.10267 | 8.19888 | 8.50551 | 8.24077 | 6.16502 | 7.21896 | 7.96761 | 7.16042 | 7.21417 |
| LDLRAD1  | 5.73659 | 5.83525 | 5.53948 | 6.85438 | 7.02971 | 6.62435 | 6.34272 | 6.188   | 6.54526 |
| TMEM59   | 10.68   | 10.404  | 10.5796 | 9.88159 | 9.28461 | 9.80589 | 10.1664 | 9.72212 | 9.67948 |
| CDCP2    | 5.11337 | 5.18193 | 5.31036 | 5.51    | 5.89452 | 5.77738 | 6.04593 | 5.57079 | 6.15102 |
| CYB5RL   | 5.93057 | 5.99478 | 5.86033 | 5.87676 | 6.18855 | 6.1373  | 6.32894 | 5.83061 | 6.00288 |
| SSBP3    | 8.09773 | 7.98861 | 7.94056 | 7.96218 | 7.10366 | 7.42336 | 7.7568  | 7.84095 | 7.55561 |
| TTC22    | 8.41645 | 7.6736  | 7.80721 | 8.12147 | 6.90184 | 7.75041 | 8.85624 | 7.53663 | 8.83193 |
| DHCR24   | 12.029  | 11.7245 | 11.6455 | 11.6509 | 8.574   | 10.3732 | 11.462  | 10.8472 | 11.3831 |
| USP24    | 9.13621 | 9.13022 | 9.10511 | 8.2252  | 5.97655 | 7.27565 | 8.3561  | 7.94958 | 8.30434 |
| PLPP3    | 8.41366 | 8.63533 | 9.15141 | 7.78218 | 6.07134 | 7.27368 | 8.14629 | 7.76412 | 8.19337 |
| C1orf168 | 4.27363 | 4.5076  | 4.12259 | 4.68211 | 5.44823 | 4.85339 | 5.23582 | 5.01275 | 4.81284 |
| DAB1     | 4.80337 | 5.60227 | 5.4111  | 5.3797  | 5.94515 | 5.4642  | 5.47549 | 5.58101 | 5.47866 |
| OMA1     | 7.3842  | 7.45979 | 7.18672 | 6.57601 | 5.15786 | 6.6518  | 7.30006 | 6.05064 | 6.19573 |
| TACSTD2  | 11.2086 | 11.0555 | 10.7058 | 11.9926 | 11.3599 | 11.8628 | 11.9623 | 11.7491 | 11.6418 |
| JUN      | 10.4332 | 8.24325 | 8.2021  | 9.78087 | 7.10803 | 10.2846 | 10.1418 | 9.50176 | 9.09946 |
| HSD52    | 5.16606 | 5.25749 | 5.08719 | 5.30515 | 7.2017  | 5.50448 | 5.14991 | 5.47589 | 5.46688 |
| MIR4711  | 4.27032 | 4.73036 | 4.35149 | 5.18361 | 4.47609 | 5.31324 | 4.64507 | 5.08012 | 4.71941 |
| C1orf87  | 4.4452  | 4.58961 | 4.45448 | 4.82098 | 5.87374 | 4.60175 | 4.93908 | 4.65101 | 4.6112  |
| TM2D1    | 7.15912 | 7.26718 | 7.25379 | 6.20688 | 5.20982 | 5.42966 | 6.60193 | 6.46828 | 6.44259 |
| KANK4    | 5.55578 | 5.53836 | 5.53755 | 6.38036 | 5.83641 | 6.00828 | 5.95744 | 5.75405 | 6.33319 |
| DOCK7    | 8.62819 | 8.6678  | 8.38462 | 7.78869 | 5.58979 | 7.40321 | 8.17114 | 6.94071 | 7.49395 |
| ITGB3BP  | 6.2932  | 6.38347 | 6.68976 | 5.91988 | 5.89834 | 5.94699 | 6.23317 | 5.78569 | 5.79245 |
| JAK1     | 10.8167 | 10.8466 | 10.7104 | 10.3878 | 8.73799 | 10.411  | 10.4414 | 10.938  | 10.3359 |

|           |         |         |         |         |         |         |         |         |         |
|-----------|---------|---------|---------|---------|---------|---------|---------|---------|---------|
| MIR3671   | 6.85105 | 6.88141 | 8.58751 | 3.29337 | 4.26    | 2.36272 | 3.0249  | 4.3136  | 4.85976 |
| MIR101-1  | 4.57126 | 4.90413 | 4.88521 | 4.79956 | 4.27538 | 4.31641 | 4.78376 | 4.82335 | 5.03723 |
| INSL5     | 4.52537 | 4.68912 | 4.21989 | 4.68675 | 5.32179 | 4.69706 | 4.86217 | 4.70216 | 4.31488 |
| WDR78     | 5.50612 | 5.50213 | 5.51472 | 4.45749 | 5.51697 | 4.84715 | 5.29443 | 5.08842 | 4.60155 |
| SERBP1    | 11.0267 | 11.387  | 11.0329 | 10.7164 | 8.97056 | 10.3714 | 10.6217 | 10.1428 | 10.6224 |
| WLS       | 8.18435 | 8.073   | 7.90151 | 8.05128 | 6.12333 | 6.88183 | 7.38073 | 7.5281  | 7.30628 |
| MIR1262   | 2.79137 | 2.78924 | 2.73804 | 2.56746 | 1.91759 | 2.94686 | 3.35114 | 2.34874 | 2.48767 |
| RPE65     | 4.34337 | 4.83544 | 4.29755 | 4.99845 | 5.55837 | 4.6309  | 5.10722 | 5.01786 | 4.92269 |
| LRRC40    | 8.27844 | 7.81536 | 8.32912 | 7.49333 | 4.62118 | 6.76701 | 7.81414 | 7.01629 | 7.11459 |
| ANKRD13C  | 9.6887  | 9.94167 | 9.39306 | 8.69671 | 6.29166 | 8.35678 | 8.59964 | 8.83192 | 9.04193 |
| ptger3    | 7.24775 | 7.30709 | 6.78277 | 6.07411 | 5.19087 | 5.02501 | 5.34751 | 4.425   | 4.76369 |
| NEGR1     | 7.68396 | 7.50103 | 7.97661 | 5.65599 | 6.30267 | 6.33384 | 6.05022 | 6.35193 | 6.11536 |
| NEGR1-IT1 | 4.32679 | 4.34848 | 4.05827 | 3.49261 | 5.46172 | 3.93215 | 3.67423 | 3.91611 | 3.55651 |
| LRRIQ3    | 2.42399 | 2.52672 | 2.21238 | 2.58494 | 3.28975 | 2.89131 | 2.6984  | 2.77514 | 2.56678 |
| ERICH3    | 4.1261  | 4.21159 | 4.46353 | 5.00907 | 5.6862  | 5.00121 | 4.82389 | 4.76092 | 4.42104 |
| ASB17     | 3.29445 | 3.22284 | 2.96712 | 3.46589 | 3.47237 | 3.31    | 3.23087 | 3.2456  | 3.50709 |
| USP33     | 7.662   | 7.70676 | 7.63    | 6.18844 | 4.5066  | 5.63207 | 7.19194 | 6.70659 | 5.99018 |
| FUBP1     | 8.9819  | 9.14839 | 9.17137 | 8.05223 | 5.5077  | 6.71185 | 8.13799 | 7.69479 | 7.99927 |
| LINC01555 | 5.28667 | 4.83216 | 5.07237 | 5.19646 | 5.75632 | 5.17686 | 5.21275 | 5.19024 | 5.36586 |
| LPAR3     | 7.55297 | 7.61777 | 7.58642 | 8.26496 | 7.43906 | 9.44518 | 8.94759 | 9.35452 | 9.37289 |
| MCOLN2    | 6.37579 | 5.8825  | 6.65434 | 5.99801 | 6.41468 | 5.86191 | 5.39368 | 5.27014 | 5.63347 |
| MCOLN3    | 7.62888 | 6.66386 | 7.05545 | 5.77779 | 5.46042 | 5.02974 | 5.84155 | 5.6484  | 5.41513 |
| C1orf52   | 8.5542  | 8.51005 | 8.56113 | 7.64101 | 6.12162 | 7.23908 | 7.88117 | 8.1425  | 7.51081 |
| BCL10     | 8.21385 | 7.94258 | 8.1599  | 8.60433 | 8.14427 | 9.42609 | 9.06873 | 9.2045  | 8.77468 |
| DDAH1     | 7.24868 | 6.88327 | 7.02529 | 6.71189 | 6.74332 | 6.1738  | 6.19263 | 6.41798 | 6.6858  |
| ODF2L     | 7.92276 | 7.92119 | 7.80974 | 6.77116 | 4.94055 | 6.38895 | 6.99331 | 7.60801 | 7.48979 |

|            |         |         |         |         |         |         |         |         |         |
|------------|---------|---------|---------|---------|---------|---------|---------|---------|---------|
| SELENOF    | 11.7606 | 11.3334 | 11.9584 | 10.9155 | 8.92879 | 10.4752 | 11.1802 | 10.5482 | 11.2927 |
| LINC01364  | 4.02417 | 4.06459 | 3.76143 | 4.65452 | 5.75836 | 4.04704 | 4.2382  | 4.12912 | 4.15001 |
| GTF2B      | 8.04824 | 7.84842 | 7.91681 | 8.27252 | 7.09011 | 7.92656 | 8.23365 | 8.19521 | 7.97278 |
| GBP3       | 7.15511 | 7.8602  | 6.84802 | 6.51788 | 5.79539 | 6.33366 | 7.08266 | 6.37686 | 6.74277 |
| GBP4       | 7.44489 | 6.23993 | 6.80171 | 5.54822 | 5.18968 | 5.71009 | 5.94228 | 5.60037 | 5.77707 |
| GBP5       | 5.29806 | 4.84486 | 5.25685 | 4.79613 | 5.40019 | 5.16961 | 5.42411 | 5.19407 | 5.18883 |
| GEMIN8P4   | 5.26825 | 5.16009 | 5.18774 | 5.37702 | 5.67154 | 5.76651 | 5.62524 | 5.91033 | 5.97942 |
| barhl2     | 6.00656 | 6.15701 | 6.06067 | 6.35132 | 7.03557 | 6.61192 | 6.16558 | 6.19839 | 6.69307 |
| ZNF644     | 9.21084 | 9.1798  | 9.15733 | 8.61289 | 5.45885 | 7.41466 | 8.25987 | 8.34985 | 8.53256 |
| GFI1       | 5.0554  | 5.04289 | 5.18016 | 5.69722 | 5.52485 | 5.53861 | 5.41124 | 5.49142 | 5.63025 |
| EVI5       | 8.46502 | 8.21308 | 8.37815 | 7.28638 | 6.05592 | 7.39199 | 8.24078 | 7.64729 | 8.19323 |
| TMED5      | 7.79829 | 7.66496 | 7.90795 | 8.15949 | 5.64541 | 8.35784 | 7.94762 | 7.51976 | 8.42136 |
| CCDC18-AS1 | 7.05464 | 7.2634  | 6.86912 | 5.45251 | 5.85883 | 5.36289 | 5.38911 | 5.72557 | 5.38946 |
| BCAR3      | 6.52463 | 7.10757 | 6.91122 | 7.36359 | 6.90345 | 7.10256 | 6.84061 | 7.56517 | 7.07431 |
| ARHGAP29   | 8.71568 | 8.69005 | 8.48055 | 6.90552 | 5.18727 | 4.95593 | 6.02727 | 6.55994 | 6.28708 |
| ALG14      | 7.65788 | 7.56733 | 7.96139 | 8.16298 | 7.57097 | 7.60579 | 8.15776 | 7.2604  | 7.84826 |
| DPYD       | 7.83063 | 7.51088 | 7.9434  | 6.09728 | 5.12358 | 5.85524 | 7.02799 | 6.67309 | 6.65354 |
| MIR137HG   | 4.10267 | 4.50355 | 4.24596 | 5.02211 | 5.23889 | 5.05451 | 5.12673 | 4.49341 | 4.73349 |
| MIR2682    | 4.90081 | 5.00712 | 4.74668 | 5.20308 | 4.41483 | 5.2914  | 5.29422 | 5.12197 | 5.13066 |
| PLPPR5     | 4.12433 | 4.2034  | 4.04416 | 5.08867 | 4.94077 | 4.603   | 4.65399 | 4.35017 | 5.11079 |
| FRRS1      | 9.26688 | 9.06686 | 9.11573 | 8.63026 | 6.80571 | 8.92837 | 8.90372 | 8.56784 | 8.84145 |
| SASS6      | 7.73811 | 7.40574 | 7.50889 | 6.85461 | 4.79889 | 5.93504 | 6.98645 | 6.31095 | 6.068   |
| LRRC39     | 6.10224 | 6.55251 | 6.74042 | 4.16962 | 4.17454 | 3.49981 | 4.86808 | 4.26969 | 4.0147  |
| DBT        | 8.17186 | 7.92013 | 8.00159 | 6.50423 | 4.65641 | 5.50491 | 7.11968 | 5.98544 | 6.19234 |
| LINC01349  | 4.43219 | 4.42626 | 4.4046  | 4.75034 | 5.57137 | 5.28054 | 4.71805 | 4.31766 | 5.11437 |
| EXTL2      | 6.35338 | 6.07958 | 6.8572  | 5.76624 | 5.01462 | 4.85605 | 5.63325 | 5.53902 | 5.24521 |

|           |         |         |         |         |         |         |         |         |         |
|-----------|---------|---------|---------|---------|---------|---------|---------|---------|---------|
| DPH5      | 6.28004 | 6.79395 | 6.39372 | 6.01582 | 5.27144 | 6.06541 | 5.69317 | 4.89617 | 5.77214 |
| OLFM3     | 5.02413 | 4.97994 | 5.09828 | 5.2328  | 6.4679  | 5.05124 | 4.76318 | 5.60711 | 5.45635 |
| VAV3      | 8.02358 | 8.24138 | 7.74896 | 5.75943 | 5.60478 | 5.8143  | 6.7685  | 6.50992 | 5.96919 |
| HENMT1    | 5.39276 | 5.17777 | 5.27078 | 5.58016 | 5.29894 | 5.37533 | 5.12115 | 4.84094 | 4.77984 |
| aknad1    | 4.38147 | 4.4892  | 4.63437 | 4.73155 | 5.54908 | 4.82042 | 5.04397 | 4.43524 | 4.27717 |
| CLCC1     | 8.43272 | 8.41906 | 8.16241 | 7.25455 | 5.53181 | 6.76571 | 7.71543 | 6.84848 | 7.40857 |
| WDR47     | 9.39743 | 9.60967 | 9.41036 | 9.02426 | 6.93484 | 8.30547 | 8.86618 | 8.98732 | 9.29363 |
| c1orf194  | 4.46327 | 4.51966 | 4.54605 | 5.13458 | 5.58069 | 5.39265 | 4.60326 | 5.26528 | 5.07285 |
| PSRC1     | 5.96084 | 5.80619 | 6.12675 | 6.15002 | 6.31656 | 6.391   | 5.99324 | 6.43878 | 6.11945 |
| MYBPHL    | 5.45197 | 5.59512 | 5.1728  | 6.45018 | 5.95186 | 5.83782 | 5.92727 | 5.94273 | 5.98503 |
| SORT1     | 11.083  | 10.795  | 10.8964 | 10.8545 | 10.5644 | 11.2346 | 11.1752 | 11.2896 | 11.3031 |
| AMIGO1    | 6.26577 | 6.36565 | 6.0612  | 6.59607 | 6.90881 | 6.21249 | 6.2498  | 5.76157 | 6.17108 |
| GSTM3     | 7.90386 | 8.33969 | 7.47944 | 6.61218 | 7.04209 | 7.53018 | 8.22939 | 7.99429 | 7.00155 |
| EPS8L3    | 4.80829 | 5.1367  | 5.20528 | 5.50708 | 5.94298 | 5.81535 | 5.57812 | 5.6163  | 5.609   |
| ALX3      | 5.7046  | 5.67406 | 5.53278 | 6.35024 | 5.80193 | 6.04547 | 5.86936 | 6.06817 | 5.83243 |
| LOC440600 | 4.59389 | 4.71164 | 4.85513 | 5.18425 | 5.71517 | 5.87844 | 4.71659 | 5.39638 | 5.23638 |
| LAMTOR5   | 6.91079 | 7.07524 | 7.00858 | 7.35013 | 6.67673 | 7.86135 | 7.70456 | 7.5084  | 7.13256 |
| DRAM2     | 8.83514 | 8.36108 | 8.87102 | 7.99987 | 7.55654 | 7.75512 | 8.28307 | 8.19808 | 8.05065 |
| DENND2D   | 8.29196 | 8.0822  | 7.21721 | 8.35967 | 7.07059 | 7.7905  | 8.02824 | 7.49498 | 8.40219 |
| PGCP1     | 5.66713 | 5.94636 | 5.42164 | 6.19666 | 6.09338 | 6.1076  | 5.81813 | 5.94478 | 5.71993 |
| WDR77     | 7.62671 | 7.81962 | 7.46948 | 8.21941 | 7.09253 | 7.2948  | 8.39059 | 7.40694 | 7.79967 |
| Tmigd3    | 5.04871 | 4.9522  | 5.86767 | 4.9711  | 6.91487 | 5.49846 | 5.60837 | 5.71451 | 5.57031 |
| LINC01160 | 4.54485 | 4.64496 | 4.73839 | 4.65468 | 4.6938  | 4.16507 | 3.80771 | 4.64286 | 5.20601 |
| MIR4256   | 5.06535 | 4.9154  | 5.32253 | 5.88845 | 5.51259 | 5.30286 | 6.08715 | 5.15618 | 5.70636 |
| ST7L      | 7.24151 | 7.30161 | 7.36636 | 6.26381 | 6.07046 | 6.36083 | 6.41174 | 5.64401 | 6.05435 |
| RHOC      | 6.48271 | 6.41198 | 6.52666 | 7.10251 | 6.42692 | 7.04056 | 7.2737  | 7.18464 | 7.13578 |

|            |         |         |         |         |         |         |         |         |         |
|------------|---------|---------|---------|---------|---------|---------|---------|---------|---------|
| LOC643441  | 6.01144 | 5.91476 | 6.36703 | 6.90739 | 7.34762 | 6.41276 | 6.28543 | 6.62126 | 6.7368  |
| PHTF1      | 5.80235 | 5.7805  | 5.78019 | 5.71713 | 5.80611 | 5.27493 | 5.86435 | 5.45713 | 5.60309 |
| RSBN1      | 8.01269 | 8.28105 | 8.2899  | 7.64869 | 6.43268 | 7.84832 | 7.36883 | 7.38304 | 7.26619 |
| BCL2L15    | 4.28705 | 4.27261 | 4.51427 | 4.06347 | 4.83662 | 4.26946 | 4.17728 | 4.22629 | 4.29099 |
| SYT6       | 5.64108 | 5.72867 | 5.60246 | 6.17934 | 6.30613 | 6.09812 | 5.66779 | 6.24792 | 6.17206 |
| TRIM33     | 10.4089 | 10.3259 | 10.5172 | 9.20665 | 8.94432 | 9.61082 | 9.51864 | 10.564  | 10.0358 |
| BCAS2      | 9.19844 | 9.02083 | 9.14339 | 9.13687 | 7.38218 | 8.34951 | 9.01747 | 9.21467 | 9.12496 |
| DENND2C    | 9.49143 | 9.90302 | 9.26452 | 9.50622 | 8.47594 | 10.4568 | 9.44769 | 10.5614 | 10.1537 |
| AMPD1      | 3.81627 | 3.94845 | 4.18654 | 4.40412 | 5.96775 | 5.22274 | 4.52871 | 4.13779 | 4.03692 |
| NRAS       | 10.1074 | 10.2777 | 10.3497 | 10.3857 | 8.12419 | 10.6364 | 10.4398 | 10.0475 | 10.9741 |
| SIKE1      | 8.12441 | 7.90997 | 7.76451 | 7.47172 | 6.10195 | 7.24181 | 7.60072 | 7.6634  | 6.9998  |
| TSPAN2     | 7.61011 | 5.67212 | 7.02909 | 5.52076 | 5.54729 | 5.4473  | 5.93057 | 5.48735 | 5.74543 |
| NGF        | 5.39053 | 5.59914 | 5.5589  | 6.74248 | 6.29143 | 6.32507 | 7.59638 | 6.85783 | 6.42981 |
| CASQ2      | 5.96632 | 6.3601  | 7.24714 | 5.3021  | 5.35202 | 4.072   | 5.03124 | 4.80754 | 4.61311 |
| NHLH2      | 4.79936 | 4.92061 | 4.70486 | 5.4289  | 5.80229 | 5.4901  | 5.88188 | 5.02645 | 5.20844 |
| ATP1A1-AS1 | 6.47947 | 6.91416 | 6.75109 | 6.89615 | 6.67009 | 6.59415 | 6.69153 | 6.56927 | 6.65341 |
| CD58       | 7.4291  | 7.53156 | 7.42674 | 7.20322 | 5.96499 | 6.99683 | 7.77479 | 6.87691 | 7.48617 |
| TRIM45     | 6.3897  | 6.49416 | 6.33401 | 7.19098 | 6.97392 | 7.88497 | 6.99033 | 6.92839 | 7.56125 |
| VTCN1      | 6.55794 | 6.96601 | 6.65318 | 6.14894 | 6.51409 | 6.06963 | 5.89416 | 5.95749 | 5.83428 |
| SPAG17     | 5.59438 | 5.3073  | 5.37337 | 6.33114 | 7.5717  | 6.75437 | 6.83181 | 6.59337 | 7.03896 |
| TBX15      | 7.77124 | 7.35585 | 7.7301  | 6.62367 | 7.00436 | 6.54415 | 6.65763 | 6.72756 | 6.68124 |
| LINC00622  | 6.61921 | 7.21063 | 6.05498 | 4.95067 | 7.46074 | 4.86836 | 4.55413 | 5.87776 | 5.55506 |
| ZNF697     | 6.20891 | 5.92514 | 6.15464 | 6.28491 | 6.04227 | 6.50239 | 6.44012 | 6.55689 | 6.21514 |
| HMGCS2     | 6.34657 | 7.07405 | 7.43986 | 5.81892 | 6.00162 | 5.7932  | 5.81813 | 5.71009 | 5.47026 |
| ADAM30     | 3.93749 | 4.08732 | 3.79549 | 4.39409 | 4.92449 | 4.5928  | 4.00924 | 4.42193 | 4.78293 |
| NOTCH2     | 10.9998 | 11.2081 | 11.0235 | 10.3192 | 9.07584 | 10.3915 | 10.4598 | 11.6337 | 11.1439 |



|           |         |         |         |         |         |         |         |         |         |
|-----------|---------|---------|---------|---------|---------|---------|---------|---------|---------|
| Ppial4g   | 4.34571 | 4.50359 | 4.93056 | 4.83488 | 7.02996 | 5.15403 | 5.02275 | 5.23574 | 5.50614 |
| LINC00623 | 7.41582 | 7.19669 | 7.26249 | 6.35083 | 7.77876 | 6.51073 | 6.47051 | 6.22216 | 6.40653 |
| PFN1P2    | 4.24959 | 4.66531 | 4.06469 | 3.68397 | 4.15717 | 4.09718 | 3.87772 | 3.34087 | 3.53433 |
| LOC653513 | 5.12637 | 5.37207 | 5.73287 | 6.0516  | 6.325   | 6.09948 | 5.42067 | 6.07494 | 6.49926 |
| PDE4DIP   | 6.5839  | 7.03531 | 6.93078 | 6.04442 | 7.24412 | 5.85175 | 5.76926 | 5.94888 | 6.15217 |
| NUDT4P1   | 6.65607 | 7.18916 | 7.23304 | 6.33798 | 4.91887 | 5.43708 | 7.13991 | 6.33759 | 5.8783  |
| POLR3GL   | 5.53542 | 5.88957 | 5.81748 | 5.67767 | 5.24092 | 5.60573 | 5.58353 | 5.41793 | 5.28654 |
| gnrhr2    | 6.07046 | 5.87874 | 6.27883 | 6.37685 | 6.90178 | 6.22829 | 6.56406 | 5.5519  | 5.89979 |
| NUDT17    | 6.15369 | 6.14259 | 6.07024 | 6.5824  | 6.34125 | 6.66895 | 6.51708 | 6.05841 | 6.25512 |
| POLR3C    | 8.49916 | 8.47047 | 8.76349 | 7.51223 | 5.65429 | 6.52649 | 8.02776 | 6.94053 | 7.69387 |
| CD160     | 5.15068 | 5.02276 | 4.95719 | 5.04151 | 5.69778 | 4.70487 | 5.15072 | 4.63766 | 5.14811 |
| PDZK1P1   | 5.45806 | 5.23919 | 5.41223 | 5.46602 | 6.81256 | 5.6517  | 4.83353 | 5.61045 | 5.62994 |
| LOC728989 | 5.97464 | 6.03176 | 6.11997 | 6.22467 | 7.04156 | 6.26433 | 5.57224 | 6.02199 | 5.47713 |
| FMO5      | 7.17662 | 7.9541  | 7.64651 | 6.69182 | 6.73538 | 5.97219 | 6.73831 | 6.30441 | 6.27598 |
| LINC00624 | 4.06031 | 4.6849  | 4.29121 | 4.16435 | 5.48516 | 3.96958 | 4.10997 | 3.89408 | 4.39046 |
| LOC388692 | 4.06134 | 5.52507 | 3.64761 | 4.40846 | 8.78219 | 4.27924 | 4.38015 | 3.95809 | 3.92632 |
| SV2A      | 5.34688 | 5.62402 | 5.45446 | 5.9103  | 6.15755 | 6.05146 | 5.73016 | 5.89126 | 5.49644 |
| MTMR11    | 8.23109 | 7.88779 | 7.45237 | 7.40098 | 7.44215 | 6.90674 | 7.15735 | 6.8083  | 7.34299 |
| OTUD7B    | 7.10585 | 7.06322 | 7.10945 | 6.17237 | 5.98492 | 6.77543 | 7.02007 | 6.7371  | 6.39264 |
| APH1A     | 8.06121 | 8.49904 | 8.28046 | 8.92485 | 7.77872 | 8.64377 | 8.90712 | 7.81799 | 8.4713  |
| MCL1      | 9.6517  | 8.33762 | 9.17881 | 9.55248 | 6.60718 | 10.2538 | 9.33088 | 9.72991 | 9.67069 |
| ENSA      | 9.51234 | 9.19868 | 9.23404 | 8.58529 | 7.06078 | 8.57695 | 9.33946 | 8.32817 | 8.84789 |
| GOLPH3L   | 8.62224 | 7.84694 | 7.67312 | 7.10489 | 5.2531  | 7.5663  | 7.1884  | 7.11721 | 7.04796 |
| HORMAD1   | 9.30482 | 4.90014 | 5.21396 | 6.88932 | 6.26909 | 4.73041 | 8.60188 | 4.76458 | 8.43383 |
| CTSS      | 7.39546 | 6.61984 | 7.85059 | 6.82117 | 5.28232 | 6.64952 | 7.25505 | 6.37507 | 6.77059 |
| CTSK      | 10.8783 | 10.5335 | 11.647  | 10.1609 | 7.08674 | 8.10447 | 9.25356 | 8.58072 | 8.62105 |

|          |         |         |         |         |         |         |         |         |         |
|----------|---------|---------|---------|---------|---------|---------|---------|---------|---------|
| ARNT     | 10.0522 | 9.97254 | 10.0107 | 9.31826 | 7.7344  | 9.0681  | 9.32989 | 9.507   | 9.17511 |
| CDC42SE1 | 9.12937 | 8.84254 | 8.82296 | 9.01562 | 7.22883 | 8.61638 | 8.98083 | 8.72221 | 9.33611 |
| TMOD4    | 4.92806 | 5.16414 | 5.07202 | 4.51248 | 5.46328 | 4.93433 | 5.16951 | 5.00356 | 5.13582 |
| vps72    | 7.27826 | 7.05117 | 7.1595  | 6.96301 | 6.07994 | 6.84894 | 7.53733 | 7.20173 | 8.07888 |
| SELENBP1 | 7.14673 | 7.46329 | 7.26147 | 6.97291 | 7.29013 | 6.62528 | 6.72707 | 6.61007 | 6.45655 |
| POGZ     | 9.00368 | 9.07729 | 8.80343 | 7.66101 | 6.08162 | 6.97821 | 7.61413 | 7.78528 | 8.05703 |
| MRPL9    | 8.91219 | 8.42648 | 8.66957 | 8.64659 | 6.87988 | 8.19657 | 8.97246 | 8.01226 | 8.34467 |
| TDRKH    | 6.29722 | 6.46344 | 6.39965 | 6.35604 | 6.93749 | 6.37689 | 6.34497 | 7.04254 | 6.51935 |
| LINGO4   | 5.44507 | 5.67576 | 5.63392 | 5.70497 | 6.50443 | 5.77815 | 5.27651 | 5.80832 | 5.84734 |
| rorc     | 7.20336 | 7.64119 | 6.80391 | 6.69168 | 6.22447 | 6.33373 | 6.5451  | 6.08639 | 6.14036 |
| C2CD4D   | 6.32371 | 6.73455 | 6.2684  | 6.37624 | 6.21194 | 6.72774 | 6.33654 | 6.49596 | 6.33545 |
| THEM5    | 10.9531 | 11.083  | 10.6576 | 10.342  | 7.85047 | 8.599   | 10.5689 | 7.91918 | 9.78234 |
| THEM4    | 7.55073 | 6.61388 | 7.78446 | 5.75969 | 4.98368 | 5.07037 | 6.91252 | 5.69746 | 5.43269 |
| S100A10  | 9.33903 | 7.96744 | 8.78755 | 9.09142 | 7.89284 | 8.98205 | 9.15103 | 9.00561 | 9.48126 |
| S100A11  | 8.32751 | 8.00701 | 8.22936 | 9.07298 | 8.55997 | 9.04852 | 8.72058 | 9.04147 | 9.23875 |
| TCHHL1   | 5.39654 | 5.64087 | 5.66862 | 5.60191 | 6.20253 | 5.53938 | 6.03119 | 5.94951 | 5.79302 |
| TCHH     | 5.22961 | 4.55154 | 4.13737 | 4.97907 | 4.65909 | 5.27069 | 5.01801 | 4.86153 | 4.76985 |
| RPTN     | 9.06725 | 9.43518 | 9.96574 | 9.00461 | 7.98729 | 7.52689 | 7.64691 | 6.66849 | 7.56234 |
| HRNR     | 11.3833 | 12.5797 | 7.98611 | 11.9378 | 5.42687 | 8.54466 | 8.77257 | 5.54808 | 5.65632 |
| FLG      | 13.5537 | 13.6676 | 13.4288 | 13.2054 | 9.5891  | 11.4447 | 10.2836 | 8.33169 | 8.52216 |
| FLG2     | 12.6323 | 12.6614 | 12.1878 | 11.6766 | 5.43262 | 8.14686 | 8.35089 | 4.32995 | 5.44433 |
| CRNN     | 6.59178 | 6.60717 | 7.09008 | 7.10551 | 6.92425 | 6.31333 | 6.10341 | 6.5279  | 6.47054 |
| LCE3E    | 10.84   | 10.6286 | 10.4212 | 12.5581 | 13.3218 | 12.9455 | 12.6456 | 13.1615 | 12.8798 |
| Lce3d    | 13.1929 | 13.1818 | 13.131  | 13.7957 | 14.0264 | 13.8771 | 13.8037 | 13.9403 | 13.8151 |
| LCE3A    | 7.20242 | 7.48856 | 8.6079  | 11.8145 | 13.3185 | 11.3889 | 12.5577 | 13.0988 | 9.06381 |
| LCE1C    | 11.8191 | 11.6895 | 11.3073 | 12.043  | 7.03023 | 6.63807 | 9.001   | 5.62017 | 7.25239 |

|          |         |         |         |         |         |         |         |         |         |
|----------|---------|---------|---------|---------|---------|---------|---------|---------|---------|
| SPRR2D   | 4.94899 | 3.70998 | 4.12139 | 4.60343 | 6.6557  | 5.46607 | 5.63333 | 6.09813 | 5.95898 |
| SPRR2A   | 7.38789 | 7.33651 | 7.34867 | 9.02106 | 9.65432 | 8.70219 | 8.45361 | 7.94788 | 8.02905 |
| Sprr2b   | 5.44128 | 4.91901 | 8.29859 | 10.545  | 12.3616 | 11.3256 | 12.5036 | 11.1089 | 9.98549 |
| SPRR2C   | 5.67067 | 6.38312 | 5.43606 | 8.62642 | 8.31698 | 10.2302 | 9.36411 | 8.67708 | 9.65226 |
| SPRR2E   | 4.15755 | 4.47867 | 5.7163  | 4.2594  | 6.46695 | 6.54692 | 5.91293 | 6.26119 | 5.47289 |
| SPRR2F   | 6.00242 | 6.06682 | 6.18489 | 9.34382 | 11.5616 | 11.905  | 12.5436 | 10.8349 | 8.93123 |
| SPRR2G   | 10.7055 | 12.6876 | 12.5919 | 12.3388 | 13.2342 | 12.6057 | 12.9211 | 13.2568 | 12.6038 |
| PGLYRP3  | 9.88678 | 9.64723 | 9.64757 | 9.71817 | 9.42771 | 10.7103 | 9.9308  | 9.86392 | 10.0885 |
| PGLYRP4  | 8.25925 | 8.33976 | 7.23422 | 8.83081 | 10.4465 | 10.2287 | 10.234  | 11.3102 | 10.8764 |
| S100A12  | 5.11841 | 5.45199 | 5.31233 | 11.0398 | 12.2256 | 11.9693 | 12.0601 | 12.1893 | 12.1008 |
| S100A8   | 10.8943 | 9.09021 | 11.4531 | 12.9465 | 13.0133 | 12.908  | 12.8993 | 13.014  | 12.9657 |
| S100A7L2 | 4.06601 | 4.21424 | 3.66474 | 4.83796 | 4.42874 | 4.69549 | 4.83528 | 4.42702 | 4.20547 |
| S100A7   | 12.2864 | 11.9671 | 12.7162 | 13.3522 | 13.4737 | 13.5357 | 13.5958 | 13.7278 | 13.6856 |
| S100A6   | 5.88671 | 6.63769 | 6.27946 | 7.11566 | 5.51262 | 7.39922 | 7.47825 | 7.2869  | 7.32056 |
| S100A5   | 4.13064 | 4.63327 | 3.97934 | 5.01054 | 5.13265 | 5.3814  | 4.66728 | 4.53185 | 4.60799 |
| S100A4   | 5.4767  | 5.97725 | 6.14172 | 6.42635 | 6.30853 | 6.20214 | 6.45299 | 6.44825 | 6.56054 |
| S100A3   | 6.38914 | 6.35749 | 6.60069 | 7.61165 | 6.36495 | 6.93057 | 7.48915 | 7.16255 | 7.27673 |
| S100A2   | 7.43282 | 7.30073 | 7.49945 | 9.08281 | 7.80338 | 9.44008 | 8.58797 | 8.58862 | 8.65155 |
| S100A16  | 9.07986 | 8.96557 | 9.11443 | 9.98853 | 9.36225 | 10.0863 | 9.86069 | 9.74868 | 10.0157 |
| S100A14  | 10.5305 | 10.5054 | 10.1506 | 11.6539 | 11.0159 | 12.2184 | 11.7859 | 11.8587 | 11.8085 |
| S100A13  | 6.10432 | 6.34512 | 6.87339 | 6.65209 | 5.58536 | 6.77898 | 6.66322 | 6.15812 | 6.64327 |
| GATAD2B  | 10.1463 | 10.0059 | 10.2078 | 9.11473 | 7.58148 | 8.48865 | 9.27571 | 9.23423 | 9.10518 |
| DENND4B  | 7.14872 | 6.94624 | 7.11671 | 7.07701 | 6.49408 | 6.77745 | 6.97102 | 6.76177 | 6.79005 |
| CRTC2    | 8.12287 | 8.11017 | 8.25697 | 7.84648 | 7.03115 | 8.12089 | 7.89065 | 8.20109 | 8.21441 |
| JTB      | 8.10421 | 7.92966 | 8.14384 | 7.88205 | 6.85898 | 7.85039 | 8.41417 | 7.51106 | 7.77502 |
| NUP210L  | 5.0993  | 5.33252 | 5.37214 | 5.36302 | 5.83915 | 5.59998 | 5.15577 | 5.34392 | 5.40142 |

|              |         |         |         |         |         |         |         |         |         |
|--------------|---------|---------|---------|---------|---------|---------|---------|---------|---------|
| TPM3         | 7.02237 | 6.09822 | 6.13626 | 4.82371 | 5.83455 | 5.64983 | 4.32585 | 6.52795 | 6.24902 |
| mir190b      | 2.34515 | 2.45336 | 2.38507 | 2.59391 | 3.16926 | 2.42721 | 1.97867 | 2.19007 | 2.36387 |
| c1orf43      | 10.6633 | 10.6153 | 10.766  | 10.7883 | 10.4388 | 10.541  | 10.9821 | 10.2174 | 10.6467 |
| SHE          | 6.75404 | 6.19248 | 6.94857 | 6.74208 | 6.69842 | 6.60841 | 6.41383 | 6.6711  | 6.38489 |
| UBE2Q1       | 9.09653 | 9.12453 | 9.08177 | 8.71296 | 8.82361 | 8.79762 | 9.00723 | 9.02988 | 8.56697 |
| pmvk         | 7.08105 | 7.10419 | 6.89971 | 8.07747 | 6.21801 | 8.27052 | 8.61591 | 7.12529 | 7.77854 |
| PBXIP1       | 6.19356 | 6.16142 | 5.80926 | 6.01188 | 5.89657 | 5.60515 | 5.92973 | 5.92008 | 5.53604 |
| PYGO2        | 7.76994 | 7.50325 | 7.46051 | 7.25067 | 6.29746 | 6.83567 | 7.72949 | 7.45897 | 7.38633 |
| SHC1         | 9.78397 | 9.41345 | 9.72588 | 10.3579 | 9.54008 | 10.5935 | 10.8319 | 10.4523 | 10.7797 |
| DCST2        | 6.48137 | 6.36126 | 6.32224 | 6.37156 | 6.28816 | 6.4239  | 6.20191 | 6.17514 | 6.23918 |
| LOC100505666 | 6.89708 | 6.80249 | 7.23332 | 6.23344 | 6.43198 | 5.99007 | 6.06503 | 6.26789 | 6.26144 |
| DPM3         | 6.99319 | 6.77789 | 7.1831  | 7.87961 | 8.1115  | 7.68335 | 7.05826 | 7.31752 | 7.4404  |
| KRTCAP2      | 7.13166 | 7.14133 | 7.56755 | 7.90344 | 7.41308 | 7.15833 | 7.73361 | 7.13874 | 7.38747 |
| THBS3        | 7.46739 | 7.21927 | 7.42487 | 6.34079 | 6.01656 | 6.25008 | 6.81053 | 6.11189 | 6.31513 |
| SCAMP3       | 7.96756 | 7.58183 | 8.00858 | 7.96939 | 7.35139 | 7.46022 | 8.55326 | 8.10835 | 8.06975 |
| CLK2         | 7.92328 | 7.71218 | 8.05841 | 7.11031 | 6.75115 | 7.27277 | 7.11062 | 7.39173 | 7.35354 |
| RUSC1-AS1    | 6.04516 | 6.00638 | 6.0634  | 6.60191 | 6.47129 | 6.5888  | 6.43586 | 6.02703 | 6.33461 |
| YY1AP1       | 8.0128  | 7.7363  | 7.90691 | 6.82989 | 5.75873 | 6.62589 | 6.88096 | 7.25609 | 6.89346 |
| GON4L        | 7.59838 | 7.82026 | 7.68056 | 6.31785 | 5.7953  | 6.67053 | 6.84964 | 6.81936 | 6.80524 |
| RIT1         | 8.15009 | 7.44242 | 7.53914 | 7.91509 | 6.54177 | 9.22649 | 8.40134 | 9.18482 | 8.56868 |
| KIAA0907     | 8.64173 | 8.89769 | 8.43176 | 7.88253 | 7.14179 | 6.73899 | 7.19264 | 8.97407 | 8.97635 |
| SCARNA4      | 10.6429 | 10.9518 | 10.7669 | 8.63046 | 10.002  | 10.5658 | 9.07623 | 9.52439 | 9.05018 |
| ARHGEF2      | 7.19216 | 6.78793 | 7.23791 | 7.3482  | 6.71614 | 7.84001 | 7.23369 | 7.62883 | 7.77531 |
| UBQLN4       | 7.58986 | 7.28103 | 7.04597 | 7.40956 | 6.09353 | 7.08323 | 7.94524 | 6.73154 | 7.79475 |
| PAQR6        | 7.35254 | 7.42193 | 7.45469 | 7.33154 | 7.45537 | 7.46847 | 7.53258 | 7.58151 | 7.76831 |
| GLMP         | 7.69519 | 7.3119  | 7.7212  | 7.87017 | 7.39121 | 7.55581 | 7.95407 | 8.61725 | 7.81127 |

|           |         |         |         |         |         |         |         |         |         |
|-----------|---------|---------|---------|---------|---------|---------|---------|---------|---------|
| VHLL      | 4.53792 | 4.48058 | 4.62731 | 5.34231 | 4.87537 | 5.54119 | 5.32547 | 5.08947 | 5.55703 |
| C1orf61   | 5.32024 | 5.3155  | 5.37719 | 5.96338 | 6.51238 | 5.90881 | 5.81849 | 5.59785 | 6.12099 |
| mir9-1    | 5.43006 | 5.33071 | 5.25134 | 4.8901  | 6.56768 | 5.42118 | 4.72776 | 5.37403 | 5.25342 |
| MEF2D     | 9.17574 | 8.64325 | 9.32346 | 9.17645 | 8.60556 | 9.27849 | 9.15863 | 9.89864 | 9.20094 |
| IQGAP3    | 6.42243 | 5.7645  | 5.87473 | 6.66987 | 6.01138 | 6.29895 | 6.16558 | 6.23326 | 6.24627 |
| GPATCH4   | 6.73368 | 6.85215 | 6.91187 | 6.87732 | 6.38054 | 6.75734 | 7.17576 | 6.39609 | 6.89293 |
| NES       | 6.82503 | 6.57503 | 6.83879 | 7.03294 | 6.8257  | 6.84951 | 6.88274 | 7.12272 | 6.83604 |
| CRABP2    | 9.00272 | 8.78224 | 8.25912 | 10.3855 | 8.82668 | 10.062  | 10.5873 | 8.34766 | 9.38602 |
| ISG20L2   | 9.17777 | 9.19729 | 9.07924 | 9.29842 | 7.35813 | 7.5877  | 9.46936 | 8.45339 | 8.98014 |
| MRPL24    | 7.52096 | 7.35984 | 7.43626 | 7.88396 | 6.31875 | 7.40243 | 8.3526  | 6.90571 | 7.30366 |
| HDGF      | 7.22627 | 6.92413 | 7.09915 | 7.31538 | 7.06795 | 7.04932 | 7.60221 | 6.53812 | 7.09566 |
| SH2D2A    | 5.19714 | 5.4103  | 5.50119 | 6.23885 | 6.29977 | 6.47591 | 6.84551 | 6.13809 | 6.58455 |
| INSRR     | 5.96631 | 5.58456 | 5.82717 | 6.11668 | 6.41285 | 6.626   | 6.01784 | 6.52033 | 6.24027 |
| ARHGEF11  | 7.66276 | 7.6209  | 7.79684 | 7.16007 | 6.32463 | 7.42469 | 7.55923 | 6.90402 | 7.21529 |
| MIR765    | 6.02264 | 6.0433  | 5.77809 | 5.44398 | 5.97183 | 4.77681 | 5.19751 | 5.56748 | 5.47188 |
| ETV3L     | 4.31332 | 4.98566 | 4.59949 | 5.37666 | 5.75698 | 5.60515 | 5.02574 | 5.58223 | 5.54206 |
| ETV3      | 8.60958 | 8.74248 | 8.50258 | 7.93964 | 6.3032  | 8.06685 | 8.07442 | 7.66135 | 7.86299 |
| FCRL5     | 4.02683 | 3.67854 | 3.99883 | 4.65221 | 5.59609 | 4.65628 | 4.77083 | 4.18371 | 4.69172 |
| FCRL4     | 4.68461 | 4.67804 | 4.16589 | 5.16922 | 6.05315 | 5.15969 | 4.75542 | 4.89589 | 4.56789 |
| FCRL3     | 4.73601 | 4.46064 | 4.89043 | 5.07016 | 5.9536  | 5.46452 | 5.2785  | 4.7999  | 5.15478 |
| fcr12     | 4.33163 | 4.38283 | 4.68613 | 4.69113 | 5.83796 | 4.63389 | 4.49137 | 4.85414 | 4.39833 |
| FCRL1     | 5.42816 | 5.51103 | 5.6805  | 6.35795 | 6.49357 | 5.89452 | 5.96055 | 5.76455 | 5.64787 |
| CD5L      | 5.72043 | 5.67806 | 5.82123 | 6.09663 | 7.38765 | 6.18063 | 5.61982 | 5.87005 | 6.09916 |
| LOC646268 | 5.42485 | 5.54041 | 5.58462 | 5.69651 | 6.32704 | 5.64989 | 5.80544 | 5.86535 | 5.69336 |
| CD1B      | 4.13242 | 4.36653 | 3.56662 | 4.42969 | 6.08189 | 4.10733 | 4.0988  | 4.18118 | 4.10676 |
| AIM2      | 4.99141 | 4.53269 | 5.07034 | 4.96439 | 5.29606 | 5.07611 | 5.25893 | 4.67876 | 5.03989 |

|          |         |         |         |         |         |         |         |         |         |
|----------|---------|---------|---------|---------|---------|---------|---------|---------|---------|
| VSIG8    | 6.3321  | 6.01976 | 6.30213 | 6.32739 | 6.61728 | 6.47697 | 7.15357 | 7.65832 | 7.35933 |
| CFAP45   | 5.59421 | 5.84334 | 6.20164 | 6.16491 | 6.18218 | 5.99913 | 6.08467 | 5.86618 | 6.4565  |
| TAGLN2   | 7.6559  | 7.29043 | 7.90116 | 8.44212 | 7.66661 | 8.3456  | 8.24875 | 7.88358 | 8.51596 |
| SLAMF9   | 5.44369 | 5.85172 | 5.63491 | 5.16447 | 6.01084 | 9.24239 | 5.86653 | 7.20007 | 6.29746 |
| dcaf8    | 7.8777  | 7.85243 | 7.79568 | 6.74305 | 5.16453 | 5.95756 | 6.85475 | 6.53919 | 6.76722 |
| PEX19    | 7.45057 | 7.59111 | 7.57022 | 7.42476 | 6.22229 | 7.29023 | 7.29944 | 7.24161 | 7.09298 |
| SLAMF6   | 4.41132 | 4.57801 | 5.75258 | 4.65746 | 5.30443 | 4.49921 | 4.86976 | 4.13421 | 4.54606 |
| CD84     | 5.61031 | 5.70956 | 6.9488  | 5.25907 | 5.33148 | 5.67657 | 5.35302 | 5.42662 | 5.63078 |
| SLAMF1   | 4.97586 | 4.86528 | 5.32123 | 5.23953 | 5.57595 | 5.65141 | 5.06617 | 5.4985  | 5.14303 |
| CD48     | 4.78805 | 5.26414 | 5.46457 | 5.35982 | 5.4861  | 5.71374 | 5.41207 | 4.6209  | 5.59561 |
| ITLN1    | 4.83633 | 5.22364 | 5.03346 | 5.39785 | 6.08278 | 5.61389 | 5.35621 | 5.50406 | 5.34936 |
| ITLN2    | 4.97589 | 5.07466 | 5.08884 | 5.2981  | 5.62482 | 5.22089 | 5.3037  | 5.3451  | 5.33317 |
| F11R     | 10.2445 | 10.0062 | 10.0377 | 10.4645 | 9.05449 | 11.147  | 10.6278 | 11.4824 | 10.9877 |
| TSTD1    | 7.86081 | 7.45253 | 7.11154 | 8.97179 | 7.86888 | 8.70658 | 9.24877 | 8.72283 | 8.59244 |
| USF1     | 7.56936 | 7.27433 | 7.44075 | 7.37604 | 6.1717  | 7.43258 | 7.88035 | 7.84542 | 7.66256 |
| ARHGAP30 | 7.94769 | 7.72621 | 7.71122 | 6.68727 | 6.19502 | 6.84441 | 7.10563 | 7.34129 | 7.53527 |
| NECTIN4  | 9.22953 | 9.09527 | 9.04645 | 9.32146 | 8.33277 | 10.5598 | 9.75263 | 9.6488  | 9.87961 |
| PFDN2    | 8.2176  | 8.31494 | 8.14981 | 10.0716 | 7.83623 | 10.619  | 10.0955 | 10.1326 | 9.64157 |
| DEDD     | 9.19398 | 8.88894 | 9.09559 | 8.87789 | 7.48986 | 8.84293 | 8.87048 | 8.85494 | 9.178   |
| APOA2    | 6.1031  | 6.06006 | 6.29329 | 6.39399 | 6.95544 | 6.30535 | 6.42503 | 6.3804  | 6.4754  |
| MPZ      | 5.09623 | 5.52931 | 5.20145 | 5.56326 | 5.47363 | 5.95543 | 5.05494 | 5.55583 | 5.63946 |
| CFAP126  | 5.11336 | 5.31166 | 4.54243 | 5.82739 | 6.34018 | 5.8629  | 6.33918 | 5.22165 | 5.46973 |
| RPL31P11 | 2.58939 | 2.44015 | 2.53764 | 2.80919 | 3.47638 | 2.93354 | 2.72907 | 2.62636 | 2.26384 |
| OLFML2B  | 7.32555 | 6.55116 | 6.83494 | 7.55598 | 6.48964 | 6.27994 | 6.85538 | 6.10567 | 6.44284 |
| C1orf111 | 6.34332 | 6.3539  | 6.34523 | 6.29319 | 7.28355 | 6.08802 | 6.36563 | 6.38589 | 6.28919 |
| SH2D1B   | 4.55482 | 4.84321 | 4.79278 | 4.81734 | 5.9434  | 5.00513 | 4.9117  | 5.1634  | 4.7674  |

|              |         |         |         |         |         |         |         |         |         |
|--------------|---------|---------|---------|---------|---------|---------|---------|---------|---------|
| CCDC190      | 5.60228 | 5.32328 | 5.52069 | 5.90858 | 6.42567 | 5.77373 | 5.51972 | 5.92759 | 5.57989 |
| RGS5         | 7.45998 | 7.65407 | 7.57455 | 5.76854 | 6.31214 | 5.26401 | 5.53998 | 5.68486 | 6.25636 |
| LOC100505795 | 4.54695 | 4.55783 | 4.52001 | 4.72587 | 5.81834 | 4.74352 | 4.67879 | 4.42317 | 4.16857 |
| TMCO1        | 9.47767 | 9.31929 | 9.70796 | 9.13988 | 7.08778 | 9.05913 | 9.71961 | 9.59251 | 9.8306  |
| MIR921       | 4.62894 | 4.73035 | 5.36514 | 5.80952 | 4.84677 | 5.70889 | 4.95192 | 5.30166 | 4.41665 |
| TADA1        | 7.85578 | 7.71448 | 7.77976 | 6.59223 | 6.13591 | 5.92616 | 7.33131 | 6.46028 | 6.38648 |
| ILDR2        | 5.04478 | 5.06942 | 5.14817 | 5.66995 | 6.28389 | 5.70382 | 5.68492 | 5.38038 | 5.4583  |
| GPA33        | 5.32972 | 5.77115 | 5.81497 | 6.06443 | 6.47586 | 6.20536 | 6.0769  | 6.24505 | 6.44881 |
| CD247        | 5.03382 | 4.68494 | 5.40392 | 5.48637 | 6.3811  | 6.18382 | 5.4525  | 5.85969 | 5.39675 |
| CREG1        | 10.2531 | 9.64522 | 10.121  | 9.28439 | 10.091  | 9.30786 | 9.72667 | 9.94956 | 9.0901  |
| ADCY10       | 4.02058 | 4.26248 | 4.30159 | 4.25684 | 5.21446 | 4.51629 | 4.38828 | 4.33135 | 4.17556 |
| MPC2         | 8.71334 | 8.26673 | 8.95063 | 8.52007 | 6.77632 | 8.50883 | 9.06893 | 7.60533 | 8.17562 |
| GPR161       | 6.10711 | 6.08572 | 5.76981 | 6.65995 | 6.18188 | 6.61584 | 6.48365 | 6.3043  | 6.35776 |
| ANKRD36BP1   | 5.90886 | 5.5778  | 5.66212 | 5.89601 | 3.33744 | 5.35314 | 6.86834 | 5.94123 | 5.31227 |
| LOC100505918 | 4.28176 | 4.6855  | 4.35395 | 4.97623 | 4.94993 | 4.76418 | 4.45025 | 4.58223 | 4.29218 |
| XCL2         | 5.45882 | 5.07532 | 5.41384 | 6.11685 | 7.06372 | 5.84985 | 5.339   | 5.76289 | 5.73509 |
| DPT          | 8.91985 | 7.94632 | 9.64232 | 5.95851 | 6.6216  | 6.684   | 8.26876 | 6.35382 | 7.50677 |
| NME7         | 6.03107 | 5.99727 | 6.26208 | 6.0283  | 5.76035 | 5.57173 | 5.99281 | 6.40213 | 5.55777 |
| SELL         | 4.92674 | 4.92842 | 5.039   | 5.2104  | 5.40141 | 5.39608 | 4.72573 | 5.3001  | 5.31069 |
| SELE         | 9.17982 | 6.77841 | 6.88343 | 5.74078 | 6.62995 | 6.79095 | 8.62092 | 7.11121 | 8.91177 |
| METTL18      | 5.72062 | 6.01509 | 5.91297 | 6.09054 | 4.96401 | 5.49445 | 6.17667 | 5.65615 | 5.60371 |
| SCYL3        | 8.58771 | 8.97672 | 8.4407  | 7.45412 | 6.99118 | 7.16448 | 7.97984 | 7.5635  | 7.88005 |
| LINC01142    | 4.81091 | 4.81895 | 4.44339 | 4.41993 | 5.32391 | 4.37312 | 4.56315 | 4.71217 | 4.55805 |
| MIR1295A     | 6.03248 | 5.35459 | 5.75729 | 6.15196 | 6.12879 | 6.4532  | 5.63586 | 6.12847 | 6.03882 |
| VAMP4        | 9.39858 | 9.07147 | 9.18768 | 7.86879 | 7.1773  | 8.75051 | 8.75832 | 9.3237  | 9.03853 |
| DNM3OS       | 7.24781 | 7.29185 | 7.09879 | 6.71812 | 6.44557 | 5.96744 | 6.32948 | 6.32795 | 6.66072 |

|              |         |         |         |         |         |         |         |         |         |
|--------------|---------|---------|---------|---------|---------|---------|---------|---------|---------|
| LOC100506023 | 6.71058 | 6.85527 | 6.54282 | 5.79933 | 7.24522 | 5.37615 | 5.48699 | 6.25769 | 5.83629 |
| ANKRD45      | 4.09498 | 4.09625 | 4.47234 | 4.57558 | 4.63345 | 4.5707  | 4.21307 | 4.9383  | 4.79039 |
| CENPL        | 5.7147  | 6.00318 | 5.67237 | 5.43762 | 5.42991 | 5.36994 | 5.88552 | 5.88025 | 5.58552 |
| gas5         | 8.87403 | 8.91945 | 9.02461 | 8.56536 | 6.10056 | 7.20655 | 8.26678 | 7.89502 | 8.34743 |
| RC3H1        | 9.79457 | 9.87535 | 9.8482  | 8.59987 | 7.76196 | 8.7367  | 8.96127 | 9.84539 | 9.06361 |
| MRPS14       | 7.89201 | 7.66901 | 7.69436 | 7.53422 | 5.73458 | 6.62482 | 7.69971 | 7.17513 | 7.36824 |
| Scarna3      | 6.99194 | 7.36429 | 6.80885 | 5.97075 | 6.38424 | 6.30089 | 6.04773 | 5.97831 | 5.85998 |
| ASTN1        | 6.15368 | 5.92476 | 6.15276 | 6.74641 | 7.17873 | 6.89827 | 6.41548 | 6.54831 | 6.48928 |
| MIR488       | 3.70097 | 3.82856 | 4.059   | 2.86986 | 4.9072  | 4.55428 | 3.31259 | 3.18745 | 3.29992 |
| SEC16B       | 6.45144 | 6.2909  | 6.41502 | 6.3662  | 6.37303 | 6.36088 | 6.00764 | 6.08668 | 6.05846 |
| LOC730102    | 7.04358 | 7.12104 | 7.28553 | 6.77876 | 6.09622 | 5.22247 | 7.01918 | 6.05394 | 6.44908 |
| RASAL2-AS1   | 5.20481 | 5.37401 | 5.4801  | 5.83983 | 5.88387 | 5.61223 | 5.37216 | 5.38571 | 5.65295 |
| ANGPTL1      | 7.23285 | 7.4978  | 9.0997  | 5.13196 | 5.00459 | 5.09499 | 5.1183  | 5.22572 | 5.02472 |
| TOR1AIP2     | 9.0142  | 8.69538 | 8.52544 | 8.62291 | 6.89198 | 9.64301 | 8.7029  | 10.3102 | 9.64742 |
| LHX4-AS1     | 6.85705 | 6.67401 | 7.05737 | 5.47719 | 5.74516 | 6.00655 | 5.37806 | 5.9607  | 6.24753 |
| ACBD6        | 6.77308 | 6.63516 | 6.6025  | 6.18433 | 4.35512 | 5.52828 | 6.87235 | 5.62962 | 5.72627 |
| MIR3121      | 3.64931 | 4.16477 | 3.59053 | 3.32565 | 3.33268 | 3.80856 | 3.94711 | 3.64931 | 3.46178 |
| STX6         | 8.47162 | 8.18943 | 8.32521 | 8.03654 | 6.11011 | 7.90889 | 8.87445 | 8.76079 | 8.56303 |
| ZNF648       | 5.28562 | 5.22848 | 5.10564 | 5.76048 | 6.45955 | 5.39677 | 5.3804  | 5.26318 | 5.39101 |
| GLUL         | 9.01845 | 8.16993 | 9.02024 | 7.83257 | 7.63699 | 7.28136 | 8.23347 | 7.69473 | 7.46298 |
| TEDDM1       | 4.42189 | 4.31244 | 4.43215 | 4.84156 | 6.19338 | 4.96068 | 4.54483 | 5.06801 | 4.372   |
| RGS16        | 7.42032 | 6.91814 | 6.48121 | 7.21641 | 7.27102 | 6.91777 | 7.10993 | 7.06391 | 7.2445  |
| RGS8         | 5.32721 | 5.67461 | 5.39152 | 6.23848 | 6.89868 | 5.81846 | 5.13573 | 5.56457 | 5.99985 |
| SHCBP1L      | 2.8373  | 2.83531 | 3.038   | 3.2743  | 3.4085  | 3.46256 | 3.68977 | 3.55261 | 2.97267 |
| NMNAT2       | 6.30293 | 5.69099 | 5.74659 | 6.27593 | 6.29812 | 6.34706 | 6.05796 | 5.90641 | 6.07083 |
| SMG7-AS1     | 4.92088 | 4.32316 | 4.28844 | 4.54195 | 6.26597 | 5.18958 | 5.14416 | 4.75634 | 4.82485 |



|             |         |         |         |         |         |         |         |         |         |
|-------------|---------|---------|---------|---------|---------|---------|---------|---------|---------|
| NCF2        | 6.7011  | 7.18958 | 7.51632 | 6.87495 | 6.64911 | 7.57364 | 7.43675 | 8.26797 | 7.76746 |
| colgalt2    | 4.94779 | 5.1902  | 5.20504 | 5.10055 | 6.07113 | 6.06395 | 5.127   | 5.80938 | 5.60192 |
| TRMT1L      | 6.97924 | 7.1538  | 6.67442 | 6.72023 | 4.77196 | 6.09356 | 6.69041 | 6.14508 | 5.73339 |
| IVNS1ABP    | 9.90581 | 9.69025 | 9.83678 | 9.08225 | 7.34873 | 8.83322 | 8.89192 | 8.92546 | 8.34045 |
| GS1-279B7.1 | 2.4794  | 2.93992 | 2.76864 | 3.43947 | 3.17303 | 3.03191 | 3.25319 | 2.79433 | 3.17053 |
| PDC         | 3.2694  | 3.19287 | 2.90012 | 3.53901 | 3.57963 | 3.61463 | 3.47145 | 3.26189 | 3.07658 |
| PTGS2       | 7.70405 | 6.53906 | 6.32152 | 11.0307 | 6.22203 | 11.5495 | 8.13469 | 12.452  | 12.8051 |
| UCHL5       | 7.80633 | 8.02882 | 7.99295 | 7.15946 | 5.03723 | 7.1791  | 7.78671 | 6.9307  | 7.41325 |
| GLRX2       | 7.12847 | 7.3529  | 7.24114 | 7.60945 | 5.0768  | 6.59358 | 7.67402 | 6.91633 | 7.10649 |
| MIR4735     | 2.09099 | 2.79629 | 1.8951  | 2.05361 | 1.60329 | 3.12202 | 2.43131 | 2.03757 | 1.98997 |
| ZBTB41      | 7.73919 | 8.20162 | 7.74081 | 6.84205 | 4.61004 | 5.23236 | 6.77226 | 5.42147 | 5.53666 |
| DENND1B     | 7.86366 | 7.53586 | 7.57308 | 8.21204 | 6.44421 | 8.58978 | 8.35182 | 8.33276 | 8.54395 |
| MIR181A1HG  | 6.31636 | 5.82012 | 6.40513 | 5.98693 | 6.29949 | 5.57393 | 5.80762 | 6.21018 | 6.12233 |
| Mir181b1    | 5.5236  | 4.52228 | 5.47965 | 4.74337 | 5.98886 | 5.37712 | 4.90607 | 4.98763 | 4.97112 |
| MIR181A1    | 3.16622 | 3.16771 | 3.18287 | 3.06498 | 4.01677 | 3.67229 | 3.52565 | 3.69916 | 3.52565 |
| LINC00862   | 3.97206 | 4.10384 | 3.90819 | 4.40008 | 3.87322 | 4.39065 | 4.38888 | 5.67116 | 5.1805  |
| ZNF281      | 7.66583 | 7.65456 | 7.73288 | 7.6761  | 6.23006 | 6.88476 | 7.43839 | 8.25499 | 7.86903 |
| KIF14       | 5.18562 | 4.97984 | 4.81542 | 5.68451 | 4.5321  | 4.47244 | 5.33496 | 5.63807 | 4.79457 |
| DDX59       | 6.69536 | 6.96705 | 7.02798 | 6.2013  | 5.44586 | 5.61514 | 6.66968 | 5.59044 | 6.11904 |
| KIF21B      | 6.16562 | 6.24512 | 6.3817  | 6.30698 | 6.27215 | 6.46202 | 6.59049 | 7.01503 | 6.52586 |
| TMEM9       | 7.4217  | 7.58857 | 7.61232 | 7.62338 | 7.29708 | 7.70901 | 7.62318 | 7.46054 | 7.64405 |
| TNNT2       | 7.14664 | 7.49493 | 7.51079 | 7.40915 | 7.17979 | 7.13696 | 7.32865 | 6.98422 | 8.16154 |
| LAD1        | 9.95808 | 9.79202 | 9.84271 | 10.2355 | 9.194   | 10.5788 | 10.5547 | 9.96461 | 10.5334 |
| CSRP1       | 8.66114 | 8.01022 | 8.80523 | 8.21898 | 7.23002 | 8.07454 | 7.86854 | 8.92464 | 8.71735 |
| ARL8A       | 9.27452 | 9.51728 | 9.25607 | 9.67501 | 8.42008 | 9.69877 | 9.84054 | 9.61426 | 9.9224  |
| UBE2T       | 6.85063 | 6.76254 | 7.00599 | 7.56278 | 6.66873 | 6.82348 | 7.26041 | 7.05966 | 6.58617 |

|              |         |         |         |         |         |         |         |         |         |
|--------------|---------|---------|---------|---------|---------|---------|---------|---------|---------|
| SYT2         | 6.07927 | 6.33883 | 6.2017  | 6.85886 | 6.89099 | 6.79858 | 6.52605 | 6.96207 | 6.5638  |
| KDM5B        | 9.74957 | 9.83961 | 9.61102 | 9.75696 | 7.78762 | 10.1752 | 9.87368 | 9.91831 | 10.1403 |
| RABIF        | 8.1971  | 8.2279  | 8.14949 | 9.02659 | 7.88362 | 8.72336 | 9.30352 | 8.60127 | 9.12975 |
| KLHL12       | 7.15026 | 7.17102 | 6.83286 | 6.9744  | 6.04865 | 6.84477 | 6.69148 | 6.91518 | 6.7626  |
| ADIPOR1      | 11.4041 | 11.0492 | 11.0718 | 10.857  | 11.1376 | 10.6351 | 10.9757 | 11.2692 | 11.2251 |
| CYB5R1       | 8.36779 | 8.35244 | 7.97407 | 9.1088  | 8.33707 | 8.92967 | 8.57471 | 9.45816 | 8.95575 |
| LOC100506747 | 4.35991 | 4.92706 | 4.57223 | 5.14173 | 5.44829 | 5.1461  | 4.60381 | 4.67444 | 4.73333 |
| MYOG         | 6.33147 | 6.61286 | 6.62608 | 6.90606 | 7.22342 | 6.72316 | 6.57535 | 6.87383 | 6.75559 |
| MYBPH        | 5.96391 | 6.01064 | 6.43246 | 6.61752 | 7.17555 | 6.79188 | 6.33863 | 6.55114 | 6.48728 |
| CHI3L1       | 9.33185 | 8.3523  | 8.95863 | 7.27969 | 7.27711 | 7.67404 | 8.07946 | 8.7071  | 8.4877  |
| CHIT1        | 5.25195 | 5.42275 | 5.71861 | 5.41389 | 5.89615 | 5.6119  | 5.55922 | 5.55504 | 5.32722 |
| LINC01136    | 5.64209 | 4.8852  | 4.76267 | 5.00419 | 6.10143 | 5.95252 | 5.20894 | 5.10034 | 5.41976 |
| FMOD         | 9.29322 | 8.69267 | 9.93301 | 8.73397 | 6.66304 | 7.56639 | 9.24456 | 7.3308  | 9.22423 |
| LINC00303    | 4.5427  | 4.54304 | 4.84418 | 5.04055 | 5.81986 | 5.66312 | 5.20817 | 5.13037 | 5.09014 |
| REn          | 5.18019 | 5.12941 | 4.61962 | 5.44851 | 4.89791 | 5.22388 | 5.92234 | 4.70817 | 4.86217 |
| KISS1        | 5.71672 | 5.73984 | 5.67444 | 6.40215 | 7.08162 | 6.48777 | 6.32338 | 6.10461 | 6.19994 |
| golt1a       | 5.16734 | 5.16045 | 5.13803 | 5.48939 | 6.07221 | 5.10729 | 5.43999 | 5.05418 | 4.98206 |
| LINC00628    | 5.23788 | 5.61877 | 5.591   | 5.56081 | 6.49521 | 5.85534 | 5.53056 | 5.88237 | 5.8412  |
| LRRN2        | 5.77218 | 5.7351  | 5.69741 | 6.09063 | 6.43559 | 6.40826 | 6.12425 | 6.19076 | 6.18268 |
| TMEM81       | 5.79429 | 5.38848 | 5.23212 | 5.49336 | 5.72041 | 5.93886 | 6.1389  | 7.22292 | 5.83986 |
| RBBP5        | 8.49899 | 8.58984 | 8.33587 | 7.9951  | 7.44811 | 8.8579  | 8.23872 | 9.53391 | 8.73434 |
| DSTYK        | 7.72653 | 7.39525 | 7.45659 | 6.49013 | 6.30698 | 6.23249 | 7.24568 | 6.10882 | 6.26952 |
| KLHDC8A      | 5.49636 | 5.84983 | 5.54611 | 6.24318 | 6.22133 | 6.22612 | 5.73082 | 6.11327 | 6.23237 |
| lemd1        | 5.67058 | 5.08133 | 5.41935 | 5.13416 | 5.90454 | 6.11466 | 5.92015 | 5.86706 | 5.80684 |
| mir135b      | 5.65565 | 5.22064 | 5.01123 | 6.05825 | 6.25981 | 5.67448 | 6.10484 | 5.78259 | 6.49232 |
| LOC284578    | 5.8407  | 6.62041 | 7.62067 | 5.37563 | 6.58647 | 4.83563 | 4.01683 | 5.16858 | 4.98777 |

|             |         |         |         |         |         |         |         |         |         |
|-------------|---------|---------|---------|---------|---------|---------|---------|---------|---------|
| PM20D1      | 5.4987  | 5.26248 | 5.14063 | 5.35266 | 6.07942 | 6.03932 | 5.66906 | 5.44465 | 5.51361 |
| EIF2D       | 8.99704 | 9.15896 | 9.02704 | 8.40715 | 6.77558 | 7.74596 | 8.67636 | 7.38391 | 7.95078 |
| IL10        | 4.45699 | 4.59593 | 5.30833 | 4.75549 | 5.6266  | 4.76642 | 5.18975 | 4.81489 | 5.49551 |
| FCMR        | 5.35578 | 5.17277 | 5.41952 | 5.86306 | 6.2257  | 5.67989 | 5.592   | 5.69345 | 5.52288 |
| PIGR        | 4.96    | 5.17381 | 5.17587 | 5.92275 | 5.82875 | 6.43482 | 5.32601 | 5.85698 | 5.71077 |
| c1orf116    | 9.75994 | 9.88684 | 9.54309 | 10.6191 | 8.75619 | 10.7018 | 10.2062 | 10.5274 | 11.562  |
| YOD1        | 9.93156 | 9.35286 | 9.16459 | 9.70236 | 8.75031 | 9.65659 | 9.05714 | 9.72041 | 10.6418 |
| Mir29c      | 6.92844 | 7.15632 | 7.01608 | 6.22834 | 6.23314 | 6.15886 | 5.73112 | 6.15414 | 5.58125 |
| Mir29b2     | 5.25145 | 4.80453 | 5.19618 | 3.8401  | 4.9874  | 5.02234 | 3.43683 | 4.25932 | 4.57257 |
| CD34        | 9.76002 | 9.71003 | 10.596  | 8.42042 | 5.90157 | 6.62209 | 7.84577 | 8.83654 | 8.93679 |
| PLXNA2      | 8.92974 | 8.30726 | 8.40127 | 7.94298 | 6.26045 | 6.92873 | 7.88645 | 7.90365 | 8.14566 |
| IRF6        | 10.5666 | 9.7923  | 9.77126 | 10.62   | 8.62909 | 12.1903 | 10.6441 | 11.8275 | 11.569  |
| SERTAD4-AS1 | 6.26799 | 5.77836 | 6.10914 | 6.62498 | 6.17568 | 6.2496  | 6.4113  | 5.7776  | 6.346   |
| NEK2        | 5.87789 | 6.61219 | 5.12622 | 5.8383  | 6.19713 | 5.27448 | 6.11242 | 5.58897 | 5.35691 |
| LPGAT1      | 7.91144 | 7.58677 | 7.6947  | 7.21595 | 5.18586 | 7.29093 | 7.71852 | 7.33561 | 7.5326  |
| INTS7       | 8.05221 | 7.93948 | 7.52472 | 7.68558 | 5.27377 | 6.16309 | 7.40006 | 6.56087 | 7.11273 |
| RPL21P28    | 8.87612 | 9.16145 | 9.42048 | 10.3808 | 8.39334 | 10.2435 | 10.5057 | 9.64864 | 9.37841 |
| TMEM206     | 6.66609 | 6.97428 | 6.5169  | 7.34661 | 7.55783 | 6.65687 | 8.05482 | 8.80608 | 7.95247 |
| SPATA45     | 4.57669 | 4.29297 | 4.45894 | 5.02229 | 4.93456 | 4.46571 | 4.30239 | 5.01218 | 4.58001 |
| FLVCR1-AS1  | 4.93096 | 5.46378 | 5.26907 | 5.16142 | 5.65703 | 5.63976 | 5.24002 | 5.39511 | 5.1529  |
| ANGEL2      | 7.72675 | 7.79107 | 7.87665 | 6.46904 | 4.4973  | 5.38218 | 6.2947  | 5.57268 | 5.64319 |
| ESRRG       | 6.40198 | 6.48598 | 6.59387 | 5.53191 | 6.36074 | 5.67054 | 5.46455 | 5.52467 | 5.66937 |
| GPATCH2     | 7.46885 | 7.69624 | 7.47789 | 7.08962 | 5.22784 | 6.73071 | 7.33448 | 7.00247 | 7.3191  |
| TGFB2-AS1   | 5.14222 | 5.25519 | 4.9591  | 5.06877 | 6.44127 | 5.55236 | 5.5946  | 5.2015  | 4.99058 |
| LYPLAL1-AS1 | 4.96144 | 5.02159 | 5.00855 | 5.03642 | 5.17392 | 5.28254 | 5.31138 | 5.1394  | 4.71525 |
| EPRS        | 9.25381 | 9.0595  | 9.23101 | 8.88733 | 6.20676 | 8.96642 | 9.05916 | 8.12285 | 9.15811 |

|          |         |         |         |         |         |         |         |         |         |
|----------|---------|---------|---------|---------|---------|---------|---------|---------|---------|
| Mir215   | 2.35363 | 2.55717 | 2.53244 | 2.66529 | 2.39324 | 2.66376 | 2.69473 | 2.75661 | 2.36988 |
| Mir194-1 | 3.76351 | 3.49094 | 3.37749 | 4.08921 | 3.03153 | 3.72578 | 4.58775 | 3.12219 | 3.77828 |
| RAB3GAP2 | 8.84261 | 8.76054 | 8.71269 | 8.1185  | 6.34941 | 8.32089 | 8.32213 | 8.83311 | 9.00197 |
| C1orf140 | 5.12052 | 4.78089 | 5.01371 | 4.60788 | 6.62436 | 4.72341 | 4.52613 | 4.57605 | 4.51551 |
| DUSP10   | 7.99362 | 7.46003 | 7.33108 | 8.71848 | 6.4875  | 8.9434  | 7.7541  | 9.81282 | 8.04857 |
| HHIPL2   | 6.00525 | 5.97468 | 6.09702 | 6.5277  | 7.29771 | 6.30975 | 6.11216 | 6.53342 | 6.27983 |
| TLR5     | 8.30878 | 7.8682  | 7.43492 | 7.53339 | 7.10155 | 6.42442 | 7.52671 | 7.33155 | 6.84479 |
| SUSD4    | 7.49893 | 5.84372 | 6.40168 | 6.89102 | 6.10153 | 6.44218 | 6.8014  | 5.95423 | 6.0486  |
| CAPN8    | 5.8787  | 5.37233 | 5.89971 | 5.7753  | 6.72316 | 5.85486 | 5.41667 | 6.0114  | 6.73701 |
| PARP1    | 7.42391 | 7.65657 | 7.86892 | 7.32608 | 5.76806 | 6.44582 | 7.63557 | 6.64515 | 6.53452 |
| NVL      | 7.92291 | 7.8249  | 7.75586 | 6.26159 | 5.09091 | 5.46537 | 6.76588 | 5.99743 | 6.19412 |
| MIR320B2 | 2.59143 | 3.35796 | 2.87861 | 2.57608 | 2.28231 | 2.76612 | 2.84293 | 2.67416 | 2.81628 |
| WDR26    | 8.33485 | 8.10897 | 8.16064 | 7.80989 | 6.68436 | 7.75304 | 7.77359 | 8.63704 | 7.73802 |
| MIR4742  | 8.0146  | 6.63584 | 8.08858 | 5.30295 | 4.49187 | 3.9797  | 4.24089 | 7.16556 | 5.99188 |
| LBR      | 7.62744 | 7.28993 | 7.48908 | 7.8636  | 6.73399 | 6.62511 | 8.09146 | 7.31864 | 6.87807 |
| ENAH     | 10.087  | 9.94557 | 9.54478 | 10.2469 | 8.23123 | 9.74385 | 10.5616 | 9.77267 | 10.7216 |
| TMEM63A  | 8.04135 | 8.2108  | 8.26311 | 6.8942  | 6.76811 | 6.7329  | 7.14026 | 7.08166 | 6.74368 |
| lefty1   | 4.88243 | 5.04275 | 4.82747 | 5.49286 | 6.25755 | 5.92528 | 4.9963  | 5.39183 | 5.48303 |
| LEFTY2   | 5.29809 | 5.17984 | 5.11157 | 5.53412 | 6.93004 | 6.28015 | 6.02957 | 5.67538 | 5.52465 |
| SDE2     | 8.09525 | 7.85717 | 7.9277  | 7.8774  | 5.2704  | 7.65679 | 8.39766 | 7.78374 | 7.42126 |
| ACBD3    | 10.3502 | 10.2847 | 10.4287 | 10.2327 | 8.3799  | 10.2806 | 10.316  | 10.423  | 10.5104 |
| LIN9     | 6.79033 | 7.0233  | 6.96675 | 6.71567 | 4.96619 | 6.10686 | 6.88912 | 5.92773 | 5.87776 |
| ITPKB    | 7.76462 | 7.63581 | 7.58209 | 7.89287 | 7.1105  | 7.53738 | 7.97728 | 6.93977 | 7.53619 |
| c1orf35  | 6.49837 | 6.54547 | 6.75924 | 7.23902 | 6.95287 | 7.50645 | 6.77538 | 7.27322 | 7.34677 |
| MRPL55   | 7.29875 | 7.05733 | 7.32611 | 7.2624  | 7.51539 | 7.51126 | 7.57583 | 7.58575 | 7.48539 |
| TRIM11   | 6.63037 | 6.06553 | 6.64196 | 6.6492  | 6.46146 | 7.35946 | 6.79128 | 6.79197 | 6.72861 |

|            |         |         |         |         |         |         |         |         |         |
|------------|---------|---------|---------|---------|---------|---------|---------|---------|---------|
| TRIM17     | 6.06299 | 6.22119 | 6.11097 | 7.18355 | 6.82652 | 7.27768 | 6.70897 | 6.60331 | 6.60992 |
| NUP133     | 8.37385 | 8.2022  | 8.37725 | 7.75601 | 5.68566 | 7.09744 | 7.87366 | 6.87578 | 6.82368 |
| PGBD5      | 7.30967 | 6.87111 | 6.78623 | 9.12996 | 6.78122 | 7.5492  | 8.1365  | 7.01128 | 7.13626 |
| c1orf198   | 7.09882 | 7.00922 | 6.92492 | 6.93535 | 5.28383 | 6.20691 | 6.97448 | 6.26966 | 6.73481 |
| TTC13      | 8.36893 | 8.68342 | 9.02234 | 7.28148 | 6.29104 | 6.77055 | 7.99217 | 7.36373 | 7.56878 |
| LOC149373  | 5.38038 | 5.73496 | 5.5732  | 5.94567 | 7.08854 | 6.1499  | 6.04065 | 6.16391 | 5.51242 |
| C1orf131   | 5.92564 | 6.04078 | 5.87932 | 5.59362 | 6.53063 | 5.57239 | 5.72099 | 5.7201  | 5.68153 |
| EXOC8      | 8.14747 | 7.98437 | 8.12698 | 7.88634 | 5.86698 | 7.93541 | 8.13161 | 8.08804 | 8.07532 |
| EGLN1      | 9.40127 | 9.8797  | 9.81362 | 9.19314 | 7.3707  | 10.0784 | 9.56851 | 8.99778 | 9.12646 |
| SNRPD2P2   | 5.07719 | 5.5143  | 4.90764 | 5.39193 | 5.30916 | 5.39732 | 5.31712 | 5.20882 | 5.38534 |
| LINC00582  | 5.96413 | 6.13452 | 6.06128 | 6.3181  | 7.05998 | 6.71648 | 5.97736 | 6.34204 | 6.18214 |
| DISC2      | 5.28325 | 5.05492 | 4.97346 | 5.13318 | 5.39607 | 5.06357 | 4.96688 | 5.1283  | 5.22887 |
| SIPA1L2    | 8.30509 | 8.15669 | 8.13992 | 8.74436 | 7.96155 | 9.38782 | 9.05642 | 9.83483 | 9.58958 |
| PCNX2      | 7.87984 | 8.12943 | 7.83809 | 7.48702 | 6.83385 | 7.23104 | 7.65578 | 7.54875 | 7.31886 |
| TARBP1     | 8.91856 | 9.2359  | 8.8718  | 7.19519 | 5.66278 | 5.69827 | 7.32782 | 6.04562 | 6.26314 |
| LINC01354  | 5.20793 | 4.84228 | 5.1332  | 5.49728 | 5.77361 | 5.60068 | 4.71883 | 5.44287 | 5.5641  |
| TOMM20     | 8.68193 | 8.93431 | 9.19635 | 9.0089  | 7.74398 | 8.95801 | 9.39298 | 8.0335  | 8.62832 |
| RBM34      | 7.96751 | 7.85148 | 8.00635 | 7.62481 | 6.09289 | 7.57464 | 8.20512 | 7.38883 | 7.76029 |
| ARID4B     | 7.71326 | 7.76808 | 7.78908 | 6.81593 | 5.16694 | 6.60089 | 6.82064 | 7.49311 | 7.07245 |
| MIR4753    | 3.86449 | 3.3897  | 3.37174 | 3.7126  | 2.96276 | 3.40341 | 4.08072 | 3.63969 | 3.44102 |
| LYST       | 9.55121 | 9.46555 | 9.22772 | 8.7972  | 6.30727 | 8.34089 | 8.48923 | 8.23526 | 9.11184 |
| MIR1537    | 4.21361 | 4.8122  | 4.0417  | 3.42902 | 3.13586 | 3.44929 | 3.51925 | 4.17753 | 3.54915 |
| NID1       | 8.49882 | 7.87199 | 9.14139 | 8.47393 | 6.90749 | 7.12938 | 8.71542 | 7.80542 | 8.0524  |
| ERO1B      | 6.02426 | 4.77141 | 5.52212 | 4.75662 | 3.94938 | 4.75483 | 4.9721  | 5.17702 | 4.73504 |
| LGALS8-AS1 | 5.81242 | 6.16408 | 6.1142  | 6.57942 | 6.83882 | 6.94265 | 6.35003 | 6.25768 | 6.41125 |
| HEATR1     | 8.84571 | 9.04054 | 8.9662  | 8.37824 | 6.59937 | 7.19429 | 8.1871  | 7.12697 | 7.817   |

|            |         |         |         |         |         |         |         |         |         |
|------------|---------|---------|---------|---------|---------|---------|---------|---------|---------|
| ZP4        | 4.87431 | 4.82917 | 4.91159 | 5.65044 | 7.08194 | 5.76034 | 6.22542 | 5.39648 | 5.73776 |
| LINC01139  | 7.0701  | 8.72354 | 8.24608 | 5.93876 | 6.16237 | 4.38404 | 5.19674 | 4.98066 | 5.54607 |
| GREM2      | 5.88928 | 5.83731 | 6.216   | 6.38074 | 6.87473 | 6.6996  | 6.32354 | 6.49093 | 6.51417 |
| RGS7       | 3.98387 | 3.65907 | 3.67709 | 4.33875 | 4.37133 | 4.38644 | 4.25347 | 3.92016 | 3.99012 |
| FH         | 7.99074 | 7.89322 | 8.06212 | 8.47599 | 6.30796 | 7.63122 | 8.21977 | 7.43367 | 8.07808 |
| OPN3       | 6.80911 | 7.239   | 7.04802 | 6.91502 | 6.72933 | 6.54296 | 6.71896 | 6.25047 | 6.19263 |
| CHML       | 7.76013 | 7.66845 | 7.98528 | 7.29765 | 5.17206 | 5.74797 | 6.9941  | 6.51481 | 6.46102 |
| MAP1LC3C   | 4.88018 | 5.26734 | 5.32835 | 5.39904 | 5.53356 | 5.59825 | 5.42333 | 5.83416 | 5.64182 |
| LINC01347  | 8.7663  | 8.6977  | 8.96134 | 6.91056 | 7.46913 | 7.79074 | 6.61318 | 8.64824 | 8.38231 |
| CEP170     | 8.03017 | 7.59837 | 7.85784 | 6.83905 | 5.99052 | 5.73952 | 6.36926 | 6.53351 | 6.81259 |
| ADSS       | 8.27493 | 8.34589 | 8.47484 | 8.14414 | 6.56919 | 7.92378 | 8.81672 | 7.53185 | 7.89379 |
| HNRNPU     | 8.93757 | 9.05607 | 9.24137 | 6.8079  | 5.37666 | 4.90511 | 6.74343 | 7.23102 | 7.53473 |
| SMYD3      | 6.57498 | 6.30265 | 6.38719 | 6.13788 | 5.66523 | 5.44366 | 5.51308 | 5.68246 | 5.94029 |
| LOC255654  | 6.17245 | 6.17922 | 6.37327 | 6.00019 | 6.46737 | 6.26242 | 5.90826 | 7.04769 | 6.73078 |
| AHCTF1     | 9.04528 | 9.20458 | 9.37804 | 8.23556 | 6.23075 | 7.21444 | 8.22335 | 7.95708 | 8.14258 |
| ZNF695     | 5.12433 | 5.27179 | 5.19829 | 5.39672 | 6.31617 | 5.49376 | 5.22353 | 4.72388 | 5.18597 |
| ZNF669     | 6.01646 | 5.68281 | 6.50823 | 5.50941 | 6.08839 | 5.6528  | 6.35324 | 5.41108 | 5.47911 |
| ZNF124     | 5.36168 | 5.94119 | 5.75797 | 5.03505 | 5.20005 | 5.39045 | 5.11857 | 4.90758 | 4.90485 |
| MIR3916    | 8.87947 | 9.44561 | 9.09863 | 7.73941 | 8.91623 | 7.10499 | 7.64292 | 7.70102 | 8.18819 |
| ZNF496     | 6.74733 | 6.14619 | 7.02733 | 6.36508 | 6.23644 | 6.13866 | 6.57795 | 6.61172 | 6.57254 |
| GCSAML-AS1 | 5.36255 | 4.96022 | 5.18541 | 5.38867 | 6.49209 | 5.43166 | 5.43448 | 5.35619 | 5.68787 |
| SH3BP5L    | 7.07174 | 7.04183 | 6.84931 | 7.39882 | 6.99686 | 6.86695 | 6.97142 | 8.0594  | 8.29597 |
| ZNF692     | 7.33378 | 6.79496 | 6.77626 | 7.35134 | 7.10625 | 7.55298 | 6.98404 | 7.42283 | 7.33504 |
| PRR26      | 5.42319 | 5.34239 | 5.85689 | 5.80288 | 6.76881 | 6.14524 | 5.71087 | 5.77722 | 5.81762 |
| GTPBP4     | 7.46978 | 7.39266 | 7.52322 | 7.81571 | 6.00484 | 7.11062 | 7.99208 | 7.37056 | 7.73381 |
| IDI2-AS1   | 5.77352 | 5.62167 | 5.45517 | 5.61356 | 5.55206 | 5.50055 | 5.37333 | 5.22548 | 5.72904 |

|            |         |         |         |         |         |         |         |         |         |
|------------|---------|---------|---------|---------|---------|---------|---------|---------|---------|
| WDR37      | 8.43805 | 8.42532 | 8.07182 | 8.55191 | 7.0641  | 8.39218 | 8.83307 | 8.38278 | 8.39863 |
| LINC00200  | 5.82903 | 5.63263 | 5.94514 | 6.16391 | 6.38286 | 6.90224 | 6.0419  | 6.44899 | 6.28906 |
| PITRM1-AS1 | 6.30637 | 6.36834 | 6.36921 | 6.64935 | 6.76262 | 6.7072  | 6.19781 | 6.22961 | 6.26648 |
| LINC00705  | 5.05189 | 5.31129 | 5.09097 | 5.12775 | 6.20289 | 5.54486 | 5.01639 | 5.54893 | 5.16562 |
| UCN3       | 4.46358 | 4.82107 | 4.95562 | 5.28459 | 5.11778 | 5.76484 | 5.14706 | 5.11706 | 5.21581 |
| NET1       | 9.08735 | 9.15584 | 9.33609 | 9.51282 | 8.37864 | 10.7628 | 9.82413 | 10.4862 | 9.93684 |
| CALML3     | 11.4508 | 10.7735 | 10.415  | 12.5972 | 10.7658 | 11.469  | 12.2949 | 10.8029 | 11.8496 |
| RBM17      | 7.39948 | 7.67449 | 7.4374  | 7.22852 | 5.56253 | 6.82544 | 7.23484 | 6.72394 | 6.59199 |
| MIR3155A   | 7.11454 | 7.05736 | 7.32743 | 7.58664 | 8.63213 | 7.68397 | 7.76904 | 7.70861 | 7.55474 |
| LOC399715  | 5.43837 | 5.75352 | 5.51059 | 5.42338 | 5.77313 | 5.72866 | 5.72089 | 6.47374 | 5.58699 |
| PRKCQ-AS1  | 5.05749 | 4.59521 | 4.97693 | 4.9748  | 5.10088 | 4.82689 | 5.01943 | 4.90918 | 4.87844 |
| LINC00707  | 5.72622 | 5.88001 | 5.96283 | 7.37681 | 7.52667 | 9.16407 | 7.77373 | 11.5962 | 10.8544 |
| ITIH2      | 5.34598 | 5.12241 | 5.49038 | 5.33551 | 6.51627 | 5.57691 | 5.23738 | 5.55046 | 5.52656 |
| GATA3-AS1  | 4.10519 | 4.34539 | 4.27461 | 5.48059 | 5.67248 | 5.25588 | 4.93018 | 5.3911  | 4.7126  |
| GATA3      | 9.29429 | 8.72546 | 8.46575 | 7.69451 | 6.19702 | 7.18129 | 7.44907 | 6.14859 | 6.15931 |
| ECHDC3     | 7.69796 | 6.73616 | 6.96573 | 7.30096 | 5.88014 | 6.59507 | 7.49515 | 6.62297 | 6.72453 |
| PROSER2    | 6.96657 | 6.93691 | 6.72265 | 7.84598 | 7.25417 | 8.13005 | 7.44843 | 7.80356 | 7.76792 |
| DHTKD1     | 7.92043 | 7.93382 | 7.89844 | 7.49337 | 7.05981 | 7.23515 | 7.70073 | 7.64979 | 7.4606  |
| SEC61A2    | 6.87509 | 6.74302 | 6.78025 | 5.22886 | 5.23355 | 4.88299 | 5.72847 | 6.26368 | 5.80251 |
| CDC123     | 9.16179 | 9.24649 | 9.37242 | 9.17045 | 6.85773 | 8.3231  | 9.26274 | 8.22983 | 8.78718 |
| CAMK1D     | 9.38982 | 9.02328 | 9.28032 | 8.82542 | 7.80067 | 8.84847 | 8.81321 | 8.11588 | 8.57804 |
| MIR4480    | 7.86472 | 7.0823  | 7.02222 | 5.31282 | 5.57034 | 5.4901  | 4.86563 | 5.41142 | 6.25127 |
| OPTN       | 8.25267 | 7.97081 | 7.82326 | 8.15695 | 7.29182 | 9.11136 | 8.78625 | 9.08808 | 8.89689 |
| MCM10      | 5.91107 | 5.69684 | 6.2802  | 6.75619 | 6.26852 | 6.21925 | 5.44011 | 6.24709 | 6.19324 |
| PRPF18     | 7.31407 | 7.76885 | 7.40735 | 7.06058 | 4.83237 | 6.22287 | 6.83975 | 6.56253 | 6.58714 |
| MIR1265    | 2.44913 | 2.55779 | 2.92048 | 2.79618 | 4.44177 | 3.34297 | 2.7951  | 2.7804  | 2.8655  |

|              |         |         |         |         |         |         |         |         |         |
|--------------|---------|---------|---------|---------|---------|---------|---------|---------|---------|
| HSPA14       | 7.20157 | 7.20907 | 7.68105 | 6.79858 | 5.93386 | 6.50793 | 7.6613  | 7.15247 | 7.03965 |
| SUV39H2      | 6.48786 | 6.47243 | 6.14251 | 6.14582 | 4.96831 | 5.24615 | 6.27777 | 5.47253 | 5.28191 |
| MEIG1        | 3.58534 | 3.54297 | 3.26117 | 3.81631 | 4.14485 | 4.37317 | 4.28903 | 3.65134 | 3.5316  |
| OLAH         | 3.18382 | 3.60043 | 3.32294 | 3.66827 | 4.13513 | 4.30402 | 4.08783 | 3.501   | 3.62631 |
| RPP38        | 6.91748 | 6.90216 | 6.99854 | 6.19274 | 6.06524 | 6.35374 | 6.44342 | 6.29816 | 6.08441 |
| PTER         | 8.44022 | 8.35815 | 8.73039 | 7.60371 | 6.94795 | 6.85997 | 7.41652 | 7.07889 | 7.19233 |
| VIM          | 9.43881 | 9.25502 | 9.98718 | 8.74837 | 7.34891 | 7.90526 | 8.51946 | 8.67164 | 8.35921 |
| ST8SIA6-AS1  | 4.13104 | 4.17423 | 4.24349 | 4.78761 | 5.08225 | 5.13758 | 5.08665 | 4.45108 | 4.6681  |
| STAM         | 9.97514 | 9.4752  | 9.77707 | 9.80434 | 8.36925 | 9.89179 | 10.4613 | 10.8    | 10.8946 |
| TMEM236      | 5.95365 | 5.68448 | 6.0703  | 4.97411 | 5.90569 | 5.82833 | 4.85964 | 6.09791 | 6.1251  |
| Mir511       | 3.67295 | 3.9841  | 3.967   | 3.87745 | 4.52455 | 4.07528 | 3.58652 | 4.15081 | 3.72341 |
| ARL5B        | 10.2954 | 9.74212 | 10.2328 | 10.3055 | 9.03862 | 11.805  | 10.2738 | 11.0469 | 11.7093 |
| plxdc2       | 12.1391 | 12.1468 | 12.1768 | 11.3069 | 10.4278 | 10.8758 | 11.3575 | 11.4934 | 12.0976 |
| MIR4675      | 5.8962  | 6.0037  | 6.03872 | 6.59109 | 6.22835 | 6.83951 | 6.6908  | 6.46097 | 6.21536 |
| NEBL-AS1     | 5.8995  | 5.49309 | 5.68451 | 5.82316 | 5.65526 | 6.02539 | 5.70864 | 5.64046 | 5.4089  |
| LOC100130992 | 5.43079 | 5.23533 | 5.52615 | 5.50459 | 5.71688 | 6.44756 | 5.7104  | 5.44465 | 5.64513 |
| COMMD3       | 7.97941 | 8.1672  | 8.06812 | 7.78908 | 6.06405 | 7.46306 | 8.23418 | 7.00201 | 7.25172 |
| SPAG6        | 4.49188 | 4.93222 | 4.7772  | 5.26931 | 5.31109 | 4.99523 | 4.75804 | 4.73988 | 4.93094 |
| ARMC3        | 3.51378 | 3.83341 | 4.05629 | 3.90113 | 4.25547 | 4.38838 | 4.25208 | 4.04439 | 3.97775 |
| MSRB2        | 7.51107 | 7.27441 | 7.2757  | 8.41301 | 6.49528 | 7.98787 | 8.62842 | 8.30024 | 7.9031  |
| OTUD1        | 7.21027 | 7.16705 | 6.76676 | 7.18908 | 5.32835 | 6.80128 | 7.32581 | 7.20835 | 6.79534 |
| KIAA1217     | 8.9539  | 8.46549 | 8.9629  | 8.45598 | 5.99362 | 8.29885 | 9.00023 | 8.31908 | 9.31241 |
| MIR603       | 6.14964 | 5.63902 | 6.01182 | 5.11246 | 5.63167 | 5.64102 | 5.05397 | 5.71916 | 5.76564 |
| THNSL1       | 6.25455 | 6.95379 | 6.18234 | 6.36733 | 6.60029 | 6.08061 | 6.04625 | 6.48299 | 6.47913 |
| GPR158       | 3.93471 | 3.93773 | 3.87804 | 4.53821 | 4.97167 | 4.6618  | 4.25098 | 4.36775 | 4.54142 |
| MYO3A        | 3.9141  | 4.29422 | 4.04534 | 4.10406 | 4.81491 | 4.39752 | 4.30723 | 4.24633 | 4.2546  |



|              |         |         |         |         |         |         |         |         |         |
|--------------|---------|---------|---------|---------|---------|---------|---------|---------|---------|
| LINC00264    | 4.44294 | 5.12472 | 4.49868 | 4.77551 | 6.04122 | 4.57959 | 4.92601 | 4.26274 | 4.28418 |
| LINC00202-2  | 5.2802  | 5.35577 | 5.19874 | 5.44177 | 6.1951  | 6.4093  | 5.72605 | 5.39675 | 5.51556 |
| MASTL        | 9.16183 | 9.11332 | 8.96254 | 8.37954 | 6.72899 | 7.88676 | 8.30838 | 8.08228 | 8.09117 |
| WAC          | 9.24628 | 9.42475 | 9.31152 | 8.44238 | 8.26357 | 8.65285 | 8.65637 | 8.87826 | 9.318   |
| BAMBI        | 5.94709 | 7.29153 | 6.35218 | 7.03692 | 6.41909 | 7.71014 | 7.55961 | 7.83544 | 7.08885 |
| SVIL-AS1     | 7.82211 | 7.92162 | 7.8329  | 7.40993 | 7.33559 | 7.32177 | 7.63738 | 8.25382 | 8.41116 |
| MAP3K8       | 8.97783 | 8.21815 | 8.17569 | 7.88306 | 7.45618 | 9.67813 | 8.17208 | 9.41076 | 8.43742 |
| ZEB1         | 7.39872 | 7.20808 | 7.87233 | 5.97317 | 5.84278 | 5.33064 | 6.04734 | 6.57235 | 6.55529 |
| ARHGAP12     | 6.10174 | 5.60011 | 5.88847 | 6.89423 | 6.07379 | 6.82782 | 7.41306 | 6.68489 | 6.37352 |
| CCDC7        | 6.22579 | 6.49718 | 6.17232 | 4.72868 | 4.31491 | 4.88983 | 5.27892 | 4.80299 | 4.83568 |
| CREM         | 6.08846 | 5.83682 | 6.11891 | 6.62343 | 5.60059 | 6.2504  | 6.63604 | 5.84579 | 6.19747 |
| CCNY         | 7.51493 | 7.63382 | 7.96577 | 7.67817 | 6.13867 | 7.55342 | 8.08191 | 7.3583  | 7.67967 |
| ANKRD30A     | 3.98361 | 4.55797 | 4.82022 | 4.48711 | 4.42603 | 3.9606  | 4.18606 | 4.01618 | 4.20108 |
| ZNF33A       | 7.40061 | 7.94812 | 7.82321 | 5.65017 | 5.60974 | 5.46178 | 6.15665 | 6.26611 | 6.15093 |
| ZNF37A       | 6.73439 | 7.00361 | 7.02338 | 5.82382 | 5.70235 | 5.88837 | 5.93945 | 6.18537 | 6.21879 |
| LOC100129055 | 3.922   | 3.84905 | 4.12957 | 4.91705 | 4.46986 | 5.19835 | 4.75881 | 4.2895  | 3.80764 |
| HSD17B7P2    | 7.44604 | 7.16762 | 6.9818  | 6.1856  | 6.04227 | 6.28122 | 6.28393 | 6.06052 | 6.56847 |
| LINC00999    | 6.58257 | 6.8922  | 7.24626 | 5.36929 | 7.1556  | 5.49767 | 5.62655 | 6.48718 | 6.09576 |
| ACTR3BP5     | 3.48776 | 2.95145 | 2.73044 | 3.81554 | 5.4356  | 2.86862 | 2.96027 | 2.82271 | 3.03901 |
| LINC00839    | 6.92743 | 6.58263 | 7.0785  | 7.35685 | 8.0098  | 7.30132 | 7.07846 | 7.22468 | 7.20868 |
| RET          | 5.70521 | 5.66826 | 5.59049 | 6.29684 | 6.27774 | 6.02406 | 6.86351 | 5.82887 | 7.07534 |
| CSGALNACT2   | 8.21523 | 7.84549 | 8.02426 | 7.83048 | 6.10831 | 9.4379  | 8.31885 | 9.12927 | 8.49651 |
| FXD4         | 5.9226  | 5.68651 | 6.18351 | 6.60077 | 7.31055 | 7.04108 | 6.42833 | 6.90294 | 6.2917  |
| ZNF485       | 6.94708 | 7.4214  | 7.04585 | 6.35965 | 6.45211 | 5.86533 | 6.57134 | 5.59009 | 6.09355 |
| ZNF32-AS3    | 5.22865 | 5.26853 | 5.6305  | 5.15088 | 5.80143 | 4.77153 | 4.85832 | 5.38002 | 5.18393 |
| ZNF32-AS1    | 4.5427  | 5.11656 | 4.59617 | 4.1689  | 5.02349 | 4.50062 | 4.58142 | 4.53663 | 3.97896 |

|             |         |         |         |         |         |         |         |         |         |
|-------------|---------|---------|---------|---------|---------|---------|---------|---------|---------|
| ZNF32-AS2   | 5.26863 | 5.30586 | 4.97594 | 5.07493 | 5.91606 | 4.75158 | 4.7139  | 4.72205 | 3.90801 |
| LINC00619   | 5.67054 | 5.42307 | 5.28831 | 6.00651 | 7.13625 | 5.70841 | 5.19069 | 5.73832 | 5.72222 |
| LINC00840   | 5.317   | 5.15617 | 5.56421 | 4.8139  | 6.80786 | 5.38653 | 5.43124 | 5.44807 | 5.44516 |
| LINC00841   | 5.10165 | 4.68167 | 4.71687 | 5.05936 | 4.81607 | 5.10907 | 4.93656 | 4.78348 | 4.92506 |
| C10orf142   | 4.7738  | 5.16032 | 4.81366 | 4.80295 | 5.17581 | 5.4363  | 5.19538 | 4.90531 | 5.33062 |
| TMEM72      | 5.82115 | 5.71753 | 5.68929 | 6.34614 | 6.22883 | 6.92683 | 5.99362 | 6.35259 | 6.62491 |
| RASSF4      | 5.9839  | 6.22898 | 6.41892 | 6.05345 | 6.26541 | 6.09018 | 5.74701 | 6.10053 | 6.17896 |
| C10orf10    | 6.29934 | 6.26204 | 6.43974 | 6.30555 | 6.58134 | 6.66916 | 6.27325 | 6.34651 | 6.56719 |
| ZNF22       | 6.40699 | 5.9101  | 6.4201  | 5.79383 | 4.77756 | 4.85509 | 5.78747 | 5.28768 | 4.93921 |
| ANKRD30BP3  | 3.31874 | 4.04257 | 3.86022 | 3.53063 | 3.87097 | 3.62382 | 3.53562 | 3.70245 | 3.73685 |
| MIR3156-1   | 1.99215 | 1.76067 | 1.89181 | 2.10651 | 1.95386 | 2.24738 | 1.93879 | 1.91954 | 2.17657 |
| ALOX5       | 6.94387 | 6.67511 | 7.43375 | 6.53084 | 6.09852 | 6.69575 | 7.07332 | 7.25252 | 6.83455 |
| GPRIN2      | 7.55035 | 8.14494 | 7.96444 | 7.38274 | 8.3745  | 7.14172 | 7.10197 | 7.03409 | 6.58078 |
| NPY4R       | 4.32473 | 4.83474 | 4.95929 | 5.13779 | 6.61592 | 4.13268 | 4.83123 | 4.57422 | 4.43491 |
| CTSLP2      | 5.97673 | 6.12606 | 6.498   | 6.83152 | 7.68003 | 7.5976  | 6.71431 | 7.48611 | 7.14286 |
| ANXA8       | 10.2434 | 10.3103 | 10.5635 | 10.4177 | 9.62228 | 10.9607 | 10.9459 | 10.9473 | 11.357  |
| ZNF488      | 5.30029 | 5.57851 | 5.7441  | 6.21613 | 6.71065 | 5.97426 | 6.02042 | 5.94377 | 5.93131 |
| MAPK8       | 7.70786 | 7.74433 | 7.76251 | 6.98095 | 5.12128 | 6.12344 | 6.87924 | 8.52557 | 7.59987 |
| WDFY4       | 5.44011 | 5.35385 | 5.58733 | 5.26616 | 5.84107 | 5.66194 | 5.25363 | 5.52975 | 5.65651 |
| VSTM4       | 6.19883 | 5.95944 | 6.18408 | 6.73862 | 6.73199 | 6.7529  | 6.67783 | 6.57589 | 6.48372 |
| FAM170B-AS1 | 4.93771 | 4.87309 | 4.91733 | 5.30813 | 5.68747 | 5.10595 | 4.95517 | 5.2333  | 5.19063 |
| C10orf71    | 5.39409 | 5.53093 | 5.37586 | 5.41191 | 6.10543 | 5.97656 | 5.52463 | 5.60951 | 5.67567 |
| CHAT        | 5.81368 | 5.70757 | 5.81822 | 6.41273 | 6.65886 | 6.59482 | 6.47177 | 6.45388 | 6.65127 |
| c10orf53    | 5.30117 | 5.31607 | 5.34818 | 5.78953 | 5.98789 | 5.83    | 5.51596 | 5.84594 | 5.7586  |
| NCOA4       | 10.1608 | 10.1358 | 10.3309 | 9.83308 | 8.79973 | 9.68567 | 9.93478 | 9.87637 | 10.262  |
| PARG        | 9.90717 | 10.2558 | 10.228  | 8.93714 | 7.9009  | 9.15471 | 9.14577 | 8.93398 | 8.90812 |

|            |         |         |         |         |         |         |         |         |         |
|------------|---------|---------|---------|---------|---------|---------|---------|---------|---------|
| MIR605     | 3.93787 | 4.09134 | 4.28993 | 3.41141 | 4.10312 | 3.00914 | 3.04603 | 2.83917 | 3.49071 |
| DKK1       | 5.26451 | 5.06757 | 6.46395 | 5.04746 | 4.91066 | 4.31476 | 5.01874 | 4.25874 | 4.62807 |
| MTRNR2L5   | 3.2626  | 3.03347 | 2.8159  | 3.4992  | 3.74571 | 4.37378 | 3.76577 | 3.48606 | 3.03682 |
| CISD1      | 6.58585 | 6.56963 | 6.41977 | 6.86524 | 5.77004 | 6.06033 | 6.94488 | 6.1015  | 6.52346 |
| UBE2D1     | 8.41854 | 8.24787 | 8.12593 | 8.49265 | 8.52629 | 8.29188 | 8.95797 | 9.34384 | 8.95996 |
| BICC1      | 7.86579 | 6.89045 | 7.32079 | 6.53087 | 6.24587 | 5.36409 | 6.74014 | 6.1988  | 6.20547 |
| PHYHIPL    | 4.48999 | 4.72809 | 4.21524 | 4.32475 | 4.81634 | 4.41462 | 4.17023 | 4.54769 | 4.27191 |
| CDK1       | 6.1353  | 5.45513 | 5.56112 | 6.70206 | 4.862   | 5.80943 | 5.76032 | 5.88827 | 5.69328 |
| c10orf107  | 4.81387 | 4.69829 | 4.55502 | 4.94938 | 4.78556 | 4.70775 | 4.87556 | 4.37053 | 4.24538 |
| ARID5B     | 9.40545 | 8.9864  | 8.99339 | 8.30366 | 7.74854 | 8.96864 | 8.83667 | 9.15655 | 9.08011 |
| ZNF365     | 5.23345 | 5.18115 | 5.35551 | 5.55215 | 6.48395 | 5.95201 | 6.12265 | 6.44313 | 6.23852 |
| ADO        | 6.94856 | 6.82125 | 6.98823 | 7.02591 | 6.4505  | 7.08423 | 7.48262 | 6.60412 | 6.70135 |
| NRBF2      | 9.42443 | 9.2596  | 8.72495 | 10.0111 | 9.78114 | 11.2742 | 10.683  | 10.8925 | 10.7438 |
| JMJD1C-AS1 | 6.35446 | 6.36823 | 6.10328 | 7.48331 | 6.88564 | 7.56258 | 7.24235 | 7.32772 | 7.25223 |
| REEP3      | 9.80789 | 9.55466 | 9.51546 | 10.0047 | 7.91456 | 9.49586 | 10.1294 | 9.92814 | 10.3581 |
| ANXA2P3    | 4.75934 | 4.57433 | 5.05274 | 5.27155 | 5.6971  | 5.71066 | 5.90466 | 5.33404 | 5.58807 |
| LRRTM3     | 4.91295 | 4.84303 | 4.78714 | 5.19325 | 5.46436 | 5.54519 | 5.01829 | 5.20893 | 5.0623  |
| SIRT1      | 8.35731 | 8.65347 | 8.07173 | 7.79996 | 6.36682 | 8.29989 | 7.94586 | 7.71859 | 8.17546 |
| MYPN       | 4.73177 | 4.51104 | 4.63739 | 5.0976  | 5.98513 | 5.31709 | 4.75929 | 5.0863  | 4.8841  |
| HNRNPH3    | 9.61199 | 9.43782 | 9.31183 | 8.17943 | 6.37606 | 8.28008 | 8.549   | 8.65012 | 8.81796 |
| TET1       | 7.11171 | 7.08847 | 7.1381  | 6.28716 | 5.99611 | 5.59256 | 6.20468 | 5.98112 | 5.47997 |
| CCAR1      | 10.08   | 10.1839 | 10.0637 | 9.10667 | 6.98982 | 8.11831 | 9.30416 | 8.50187 | 8.94369 |
| MIR1254-1  | 7.89424 | 7.87458 | 7.94108 | 6.01048 | 7.61644 | 5.39584 | 5.93436 | 7.51811 | 7.32732 |
| STOX1      | 5.65842 | 5.80795 | 5.58839 | 5.16281 | 5.52851 | 4.2472  | 4.25531 | 4.01811 | 4.17006 |
| DDX50      | 7.24148 | 7.58541 | 7.48699 | 7.03704 | 6.19588 | 7.88818 | 7.42207 | 7.39023 | 6.81269 |
| DDX21      | 8.79123 | 8.95272 | 9.13615 | 9.40481 | 6.08623 | 9.13756 | 9.69518 | 8.59854 | 9.29727 |

|            |         |         |         |         |         |         |         |         |         |
|------------|---------|---------|---------|---------|---------|---------|---------|---------|---------|
| kif1bp     | 8.08119 | 7.65262 | 7.94806 | 7.22082 | 5.91235 | 6.94783 | 7.51773 | 6.99636 | 7.21471 |
| SRGN       | 8.44387 | 7.21742 | 9.13375 | 8.55085 | 6.86703 | 10.8054 | 8.73279 | 9.81113 | 9.51526 |
| VPS26A     | 9.12979 | 8.85131 | 9.10975 | 8.91635 | 6.87825 | 9.19036 | 9.12577 | 9.26016 | 9.02811 |
| HKDC1      | 5.16799 | 5.8764  | 5.74634 | 5.93825 | 5.918   | 6.17634 | 5.956   | 5.87236 | 5.68034 |
| HK1        | 8.38116 | 8.14874 | 8.37578 | 8.1388  | 6.99413 | 8.90329 | 8.50255 | 8.76835 | 8.22269 |
| tspan15    | 6.89158 | 6.57934 | 6.87529 | 6.93049 | 6.48826 | 6.72297 | 7.34315 | 7.39834 | 6.99577 |
| C10orf35   | 4.39085 | 4.90981 | 4.69501 | 5.0875  | 5.51859 | 5.10615 | 4.99347 | 5.15885 | 5.16526 |
| EIF4EBP2   | 11.5228 | 11.2994 | 12.005  | 11.3545 | 10.1643 | 10.5119 | 11.5308 | 11.0309 | 11.5094 |
| NODAL      | 5.57505 | 6.11988 | 6.26048 | 5.78823 | 5.61713 | 5.4267  | 6.18371 | 5.78266 | 6.01508 |
| PALD1      | 6.68019 | 6.96507 | 7.06975 | 7.45301 | 6.75034 | 7.267   | 7.4622  | 6.78576 | 6.70706 |
| SGPL1      | 9.5572  | 9.65803 | 9.47611 | 9.43869 | 6.90914 | 9.52755 | 9.5717  | 8.87189 | 9.69695 |
| UNC5B      | 8.89104 | 8.36479 | 7.95214 | 8.99868 | 6.93354 | 8.97823 | 9.24278 | 8.49047 | 8.95514 |
| CDH23      | 6.09437 | 6.01701 | 6.32208 | 6.17197 | 6.04746 | 6.1325  | 6.01306 | 6.26137 | 6.14546 |
| CHST3      | 7.3142  | 7.24808 | 7.63382 | 7.16293 | 6.02548 | 6.94867 | 7.61863 | 6.94346 | 6.84816 |
| ANAPC16    | 8.07717 | 8.03335 | 8.3012  | 8.10193 | 5.0799  | 7.82559 | 8.69559 | 6.99582 | 7.3568  |
| DDIT4      | 7.49807 | 6.89996 | 8.02622 | 9.25744 | 9.65733 | 11.6887 | 10.1323 | 10.7258 | 8.92168 |
| MCU        | 9.33409 | 9.11792 | 9.28185 | 8.46422 | 6.87446 | 8.07428 | 8.68529 | 9.69611 | 9.16225 |
| MIR4676    | 2.37579 | 2.31442 | 2.37065 | 2.61063 | 2.45245 | 3.02343 | 2.94943 | 2.41234 | 2.35514 |
| OIT3       | 4.94629 | 5.32541 | 5.04831 | 6.10457 | 5.66404 | 5.83623 | 5.61623 | 5.68935 | 5.27677 |
| NUDT13     | 5.92331 | 6.04389 | 6.09439 | 5.34183 | 6.4564  | 5.44035 | 5.42331 | 5.08797 | 5.31909 |
| DNAJC9-AS1 | 5.24782 | 4.55959 | 4.99984 | 5.34497 | 5.84677 | 5.19146 | 5.25086 | 4.79811 | 5.09211 |
| MRPS16     | 6.4028  | 6.36285 | 6.56599 | 7.12456 | 6.90109 | 7.00672 | 8.07095 | 6.28824 | 6.68555 |
| CHCHD1     | 5.86545 | 5.36506 | 5.56505 | 6.71758 | 4.43577 | 6.02898 | 7.128   | 5.73423 | 6.14821 |
| ZSWIM8     | 8.42791 | 8.43433 | 8.35828 | 8.40059 | 6.98273 | 8.70216 | 8.47769 | 8.26538 | 8.34808 |
| CAMK2G     | 6.08109 | 5.81217 | 6.36807 | 5.86296 | 5.59952 | 6.56724 | 6.47711 | 6.14851 | 5.53233 |
| VCL        | 10.3923 | 9.25477 | 9.61785 | 10.0015 | 7.217   | 9.51835 | 9.87239 | 10.1642 | 10.4262 |

|            |         |         |         |         |         |         |         |         |         |
|------------|---------|---------|---------|---------|---------|---------|---------|---------|---------|
| ADK        | 10.7306 | 10.7632 | 10.5973 | 10.6649 | 8.75385 | 10.5914 | 10.7185 | 10.4869 | 10.6933 |
| KAT6B      | 9.15607 | 8.97525 | 9.0087  | 7.43732 | 6.26721 | 7.30155 | 7.65747 | 6.73696 | 7.13602 |
| SAMD8      | 7.53031 | 7.92349 | 7.46037 | 7.79224 | 6.81511 | 8.7983  | 7.82958 | 8.06369 | 7.94903 |
| VDAC2      | 8.70663 | 8.19879 | 8.51676 | 8.59527 | 8.35625 | 9.06462 | 8.67081 | 8.98169 | 8.83041 |
| ZNF503-AS1 | 5.16789 | 5.23557 | 5.19388 | 5.43053 | 6.26517 | 5.33503 | 4.98503 | 5.22371 | 5.50488 |
| ZNF503-AS2 | 6.08327 | 6.06462 | 6.0374  | 6.30779 | 6.02358 | 6.38518 | 6.40912 | 6.26863 | 6.12234 |
| c10orf11   | 5.78835 | 5.70846 | 5.97207 | 5.83891 | 6.18309 | 5.4703  | 5.46278 | 4.78314 | 5.24182 |
| MIR606     | 6.94041 | 6.71846 | 6.81789 | 5.38496 | 6.5339  | 5.39361 | 5.43397 | 6.06619 | 5.32992 |
| DLG5-AS1   | 5.81286 | 6.05384 | 5.93208 | 5.93446 | 6.36654 | 6.04093 | 6.22464 | 6.02315 | 6.07853 |
| RPS24      | 6.64825 | 7.06785 | 6.87066 | 6.86701 | 6.81078 | 6.75431 | 6.68757 | 6.60718 | 6.63621 |
| LINC00856  | 5.21195 | 5.00518 | 5.45027 | 5.86215 | 7.23045 | 5.70457 | 5.22199 | 5.66873 | 6.15003 |
| PPIF       | 9.66516 | 9.67254 | 9.64467 | 10.9686 | 11.8252 | 12.5305 | 11.6182 | 12.8013 | 12.3197 |
| EIF5AL1    | 5.63085 | 5.45757 | 5.56928 | 6.10079 | 6.14036 | 6.64557 | 6.10089 | 6.42824 | 6.85408 |
| SFTP1      | 4.92156 | 5.57737 | 4.83641 | 5.46619 | 6.154   | 5.40445 | 5.47035 | 5.4659  | 5.60178 |
| BEND3P3    | 4.09916 | 4.39046 | 4.86165 | 5.20947 | 5.66284 | 4.72983 | 4.5087  | 4.79612 | 4.93351 |
| LOC642361  | 6.55462 | 7.14028 | 6.54654 | 6.78011 | 5.94825 | 6.6507  | 6.76582 | 5.99434 | 6.14478 |
| TMEM254    | 8.85346 | 8.56965 | 8.04868 | 6.8828  | 6.07332 | 7.35453 | 7.72377 | 6.22925 | 7.19738 |
| PLAC9      | 5.75182 | 6.14431 | 6.36654 | 6.93689 | 6.50338 | 6.86231 | 6.48813 | 6.4254  | 6.44782 |
| LINC00857  | 3.97241 | 4.0902  | 4.23317 | 5.00912 | 5.57334 | 4.85607 | 4.75727 | 5.15188 | 4.78806 |
| dydc2      | 4.24753 | 4.84471 | 4.24385 | 5.08914 | 5.5341  | 5.33198 | 5.15334 | 5.23902 | 4.78806 |
| TSPAN14    | 9.0414  | 9.00156 | 9.32538 | 8.77768 | 7.25691 | 8.69963 | 8.75047 | 8.60913 | 8.8004  |
| SH2D4B     | 5.45281 | 5.03106 | 5.39835 | 5.48358 | 6.0497  | 5.50403 | 5.42143 | 5.66091 | 5.7103  |
| NRG3       | 5.54118 | 5.52749 | 5.60229 | 5.71344 | 6.18975 | 5.67325 | 5.33993 | 5.20097 | 5.43183 |
| GHITM      | 9.68508 | 9.77726 | 9.97337 | 9.69174 | 8.32533 | 9.86992 | 10.4956 | 10.0284 | 10.1975 |
| C10orf99   | 10.6896 | 11.0149 | 10.8538 | 11.512  | 12.4579 | 11.6386 | 12.3382 | 11.1196 | 12.4154 |
| CDHR1      | 10.5369 | 10.0524 | 10.5709 | 8.1577  | 7.59087 | 7.53408 | 8.87681 | 7.77612 | 8.65098 |

|           |         |         |         |         |         |         |         |         |         |
|-----------|---------|---------|---------|---------|---------|---------|---------|---------|---------|
| RGR       | 5.78271 | 5.85936 | 5.61842 | 6.33283 | 6.89473 | 6.18661 | 5.97094 | 6.36549 | 5.97371 |
| LINC00858 | 4.21661 | 4.22053 | 3.86    | 4.51588 | 4.64051 | 4.37317 | 4.13583 | 4.32333 | 3.98921 |
| GRID1-AS1 | 5.22229 | 5.74541 | 5.23573 | 5.39446 | 7.06902 | 5.23836 | 5.27749 | 5.63316 | 5.55646 |
| OPN4      | 6.50397 | 6.76829 | 6.74097 | 7.12969 | 6.9792  | 7.25883 | 6.5089  | 7.07851 | 6.70853 |
| LDB3      | 5.53565 | 6.02244 | 6.7295  | 5.72264 | 5.81923 | 6.19232 | 6.37724 | 6.05042 | 6.07316 |
| ADIRF     | 7.01247 | 7.57766 | 8.26675 | 9.1941  | 7.50119 | 9.8515  | 9.01451 | 9.69762 | 9.90347 |
| AGAP11    | 6.32673 | 6.91226 | 7.20753 | 4.82925 | 7.53564 | 5.77512 | 5.98082 | 6.76229 | 7.30809 |
| LINC00863 | 7.02835 | 6.91772 | 7.27117 | 7.8731  | 8.00532 | 7.71913 | 7.50965 | 7.22726 | 7.49005 |
| MIR4678   | 3.17992 | 3.37341 | 3.37836 | 3.59608 | 4.27612 | 3.26144 | 4.25906 | 2.97507 | 4.82111 |
| MINPP1    | 7.58084 | 7.80689 | 6.87063 | 7.54637 | 5.43178 | 6.13986 | 7.93335 | 5.8143  | 7.03252 |
| PAPSS2    | 6.88957 | 6.10115 | 7.03401 | 7.11632 | 6.3201  | 6.73719 | 7.06356 | 5.97578 | 6.58038 |
| CFL1P1    | 5.56268 | 5.31473 | 5.37847 | 5.60878 | 5.64293 | 5.03873 | 5.73476 | 5.39423 | 5.0547  |
| PTEN      | 8.60736 | 8.6872  | 8.51387 | 6.38824 | 5.72    | 6.52804 | 7.40767 | 8.29406 | 8.25199 |
| STAMBPL1  | 7.49341 | 7.44051 | 7.05542 | 6.19084 | 6.13014 | 6.02105 | 6.49271 | 5.84059 | 5.85857 |
| IFIT2     | 5.93606 | 5.49588 | 5.5281  | 4.81459 | 5.56277 | 4.87129 | 5.25486 | 5.09625 | 4.74385 |
| IFIT3     | 6.13388 | 5.33575 | 5.66793 | 4.77179 | 4.53888 | 4.63108 | 5.65154 | 4.37251 | 3.78093 |
| IFIT1B    | 3.97417 | 4.35451 | 3.8792  | 3.73921 | 6.45114 | 4.44335 | 4.13636 | 4.63626 | 4.35789 |
| IFIT1     | 6.60682 | 5.57125 | 5.78846 | 4.93671 | 4.97245 | 4.65602 | 5.32301 | 4.94306 | 4.40183 |
| IFIT5     | 7.93863 | 7.12116 | 7.83132 | 6.60808 | 6.5801  | 7.03933 | 7.47601 | 6.32195 | 5.99291 |
| mir107    | 6.40873 | 6.42091 | 6.31185 | 6.26745 | 7.44664 | 5.54808 | 6.02886 | 6.24674 | 7.03133 |
| KIF20B    | 6.88573 | 6.37369 | 6.76304 | 5.87219 | 3.90286 | 5.4101  | 6.53863 | 6.20136 | 5.46829 |
| LINC00865 | 2.77886 | 3.14516 | 3.21865 | 3.47555 | 3.10871 | 3.16463 | 3.27622 | 3.60749 | 3.16732 |
| RPP30     | 7.6692  | 7.47488 | 8.04273 | 7.44094 | 5.89434 | 6.42315 | 7.44568 | 6.82724 | 6.86099 |
| PCGF5     | 8.2012  | 8.51786 | 8.24406 | 7.19074 | 6.23857 | 7.26538 | 7.68201 | 7.21641 | 6.92463 |
| HECTD2    | 7.31929 | 7.32315 | 7.13758 | 6.50793 | 4.78294 | 5.88193 | 6.66225 | 6.55327 | 6.98458 |
| 44260     | 8.60582 | 7.97362 | 7.98677 | 8.81777 | 7.28176 | 8.31363 | 8.83927 | 9.23519 | 8.56996 |

|           |         |         |         |         |         |         |         |         |         |
|-----------|---------|---------|---------|---------|---------|---------|---------|---------|---------|
| KIF11     | 7.55404 | 7.10578 | 6.9257  | 7.23246 | 5.10409 | 6.10531 | 6.59321 | 6.4212  | 5.91645 |
| HHEX      | 5.28917 | 5.39514 | 5.61529 | 6.21018 | 6.3846  | 5.61025 | 5.62116 | 5.68329 | 5.64532 |
| EXOC6     | 7.68109 | 7.73257 | 7.68753 | 6.74256 | 5.15051 | 6.69211 | 7.19393 | 5.82177 | 6.76778 |
| CEP55     | 7.02228 | 6.2226  | 6.07436 | 7.20177 | 6.07836 | 6.52093 | 7.24367 | 6.97684 | 6.57911 |
| FFAR4     | 5.7408  | 5.57565 | 5.7417  | 5.60607 | 5.91893 | 5.98228 | 5.39016 | 5.62243 | 5.43036 |
| ACSM6     | 6.15383 | 6.30811 | 4.63228 | 4.42525 | 5.47801 | 4.77843 | 4.61893 | 4.45075 | 4.73271 |
| ENTPD1    | 6.99174 | 5.90115 | 7.68875 | 5.64441 | 5.69388 | 4.387   | 5.38089 | 5.52154 | 5.95063 |
| CC2D2B    | 5.18172 | 4.93451 | 5.71631 | 4.42116 | 4.7544  | 4.31302 | 4.36563 | 4.65748 | 4.71304 |
| CCNJ      | 7.39139 | 7.4246  | 7.49599 | 7.23709 | 6.4932  | 6.48806 | 7.4694  | 6.19601 | 6.89486 |
| ZNF518A   | 7.18283 | 7.41935 | 6.84555 | 6.23769 | 6.08252 | 5.49767 | 5.79267 | 5.67932 | 5.85122 |
| LCOR      | 8.67184 | 8.66408 | 8.73451 | 8.11194 | 7.37724 | 8.68248 | 8.21385 | 7.97983 | 8.37156 |
| SLIT1-AS1 | 4.30678 | 4.33537 | 3.9555  | 4.73333 | 5.21867 | 4.82954 | 4.43987 | 4.54467 | 4.34916 |
| FRAT1     | 5.84755 | 5.08544 | 5.61816 | 6.51036 | 5.38095 | 5.87483 | 6.2495  | 5.99575 | 5.78229 |
| UBTD1     | 7.28328 | 7.28882 | 7.24536 | 8.01935 | 7.57214 | 8.07676 | 8.02332 | 7.97147 | 7.54495 |
| ANKRD2    | 6.35282 | 6.45689 | 6.3063  | 6.80544 | 7.19413 | 7.13481 | 6.54271 | 6.73733 | 6.51979 |
| HOGA1     | 5.36456 | 5.7904  | 5.78308 | 5.96901 | 6.17068 | 6.21588 | 5.84038 | 6.11049 | 5.9727  |
| C10orf62  | 5.55456 | 5.92405 | 5.81    | 6.10301 | 6.5126  | 5.70541 | 5.72963 | 5.92752 | 6.22726 |
| PI4K2A    | 8.88433 | 8.6451  | 8.47508 | 8.97933 | 8.76315 | 10.7499 | 9.66548 | 10.6609 | 10.0666 |
| MARVELD1  | 7.71118 | 7.57194 | 7.89072 | 7.60172 | 6.5354  | 7.17363 | 7.82849 | 6.82728 | 7.2264  |
| R3HCC1L   | 7.53457 | 7.72671 | 7.45661 | 7.37823 | 6.52149 | 8.58779 | 7.13607 | 7.61085 | 7.54771 |
| CNNM1     | 6.10419 | 6.11345 | 6.1073  | 5.66596 | 6.29753 | 5.96331 | 5.83    | 5.6941  | 5.62314 |
| NKX2-3    | 4.95391 | 4.74764 | 4.98221 | 5.96874 | 5.33006 | 5.83275 | 5.5553  | 5.767   | 5.60802 |
| ENTPD7    | 8.74362 | 8.68695 | 8.44278 | 9.19455 | 7.63256 | 9.26326 | 9.78491 | 9.22339 | 9.92266 |
| CUTC      | 7.21519 | 7.84146 | 7.42375 | 6.90603 | 6.65298 | 6.72054 | 7.55906 | 6.74632 | 6.92918 |
| dnmbp     | 4.49938 | 4.42597 | 4.53441 | 5.39555 | 4.85181 | 4.90847 | 5.2759  | 4.45038 | 4.7213  |
| SCD       | 10.4759 | 9.10318 | 10.4183 | 11.1447 | 10.6248 | 11.161  | 11.8994 | 10.6576 | 12.2318 |

|             |         |         |         |         |         |         |         |         |         |
|-------------|---------|---------|---------|---------|---------|---------|---------|---------|---------|
| PAX2        | 6.19161 | 5.9823  | 6.07296 | 6.69294 | 6.72529 | 7.01274 | 6.45147 | 6.76902 | 6.45568 |
| MIR608      | 6.09078 | 6.45076 | 5.72325 | 6.19531 | 4.71748 | 5.76328 | 6.25573 | 5.47152 | 5.9334  |
| c10orf2     | 6.49784 | 6.76458 | 6.50657 | 6.57946 | 6.17683 | 6.36645 | 6.57622 | 6.32899 | 6.2854  |
| SFXN3       | 8.05172 | 7.82508 | 7.73389 | 7.70471 | 7.14331 | 7.54445 | 7.85932 | 8.0375  | 8.26009 |
| KAZALD1     | 5.72099 | 5.66961 | 5.64459 | 6.04846 | 5.93236 | 6.06186 | 5.76128 | 5.7866  | 5.83138 |
| TLX1        | 5.01049 | 5.13907 | 5.49138 | 5.90572 | 6.12007 | 6.33882 | 5.66702 | 5.99102 | 5.93697 |
| LBX1-AS1    | 5.48533 | 5.69559 | 5.55434 | 5.97712 | 6.05399 | 5.92347 | 5.98799 | 6.11926 | 6.0215  |
| BTRC        | 9.00348 | 8.84243 | 8.65585 | 8.36991 | 7.04946 | 9.22882 | 8.97381 | 10.1203 | 9.87045 |
| DPCD        | 6.8566  | 6.82008 | 6.92365 | 7.17016 | 7.8602  | 7.54012 | 7.24354 | 7.02783 | 7.22286 |
| MIR3158-1   | 3.42821 | 3.16682 | 3.63387 | 2.97307 | 2.16799 | 4.47612 | 2.51267 | 3.13194 | 3.10222 |
| kcnip2      | 5.02589 | 5.38403 | 5.14977 | 5.5706  | 5.60789 | 5.70519 | 5.7702  | 5.51793 | 5.56797 |
| HPS6        | 6.14039 | 6.17374 | 6.25348 | 6.29692 | 5.37195 | 6.54005 | 6.24954 | 6.35235 | 6.67241 |
| NOLC1       | 8.38008 | 8.30442 | 8.64444 | 8.15032 | 5.45012 | 7.25728 | 8.76269 | 7.56259 | 8.09405 |
| ELOVL3      | 6.68331 | 5.25741 | 5.43374 | 6.356   | 5.63924 | 4.92988 | 5.4171  | 5.15663 | 5.34301 |
| GBF1        | 9.60258 | 9.36305 | 9.2711  | 8.86289 | 6.93942 | 8.94368 | 9.20703 | 9.40112 | 9.45264 |
| NFKB2       | 7.58893 | 7.12879 | 7.34135 | 7.96875 | 6.62069 | 8.27262 | 7.6797  | 8.26605 | 8.36611 |
| FBXL15      | 5.19064 | 5.44108 | 5.32513 | 6.06958 | 5.77941 | 6.23393 | 5.91374 | 6.03625 | 5.97775 |
| MIR146B     | 4.61776 | 4.1031  | 4.47255 | 5.10722 | 5.39946 | 5.0701  | 4.76003 | 4.63533 | 4.5736  |
| RPARP-AS1   | 6.6047  | 6.94216 | 6.50981 | 6.57822 | 5.8436  | 5.79927 | 6.38645 | 5.62973 | 5.74668 |
| MFSD13A     | 6.92084 | 7.14458 | 7.08738 | 6.85002 | 7.48081 | 7.20526 | 7.08772 | 6.91761 | 6.94286 |
| sufu        | 8.09219 | 8.15225 | 7.79546 | 6.8044  | 6.53612 | 6.6067  | 6.88798 | 7.10435 | 6.59532 |
| TRIM8       | 8.18668 | 8.06734 | 8.34276 | 7.79875 | 5.24881 | 7.82879 | 8.05502 | 6.94476 | 7.63696 |
| SFXN2       | 6.8992  | 7.29673 | 7.26734 | 7.32748 | 6.82011 | 6.8158  | 6.54196 | 6.10907 | 6.75882 |
| WBP1L       | 9.65607 | 9.63475 | 9.71162 | 9.32251 | 8.03284 | 8.98933 | 9.68641 | 8.70356 | 9.36516 |
| BORCS7-ASMT | 6.68906 | 6.68442 | 6.53532 | 5.81149 | 4.61642 | 5.29638 | 5.49187 | 5.39191 | 5.65786 |
| CNNM2       | 7.52206 | 7.01598 | 7.1431  | 6.36637 | 6.88337 | 6.72073 | 6.74777 | 7.81394 | 6.51353 |



|              |         |         |         |         |         |         |         |         |         |
|--------------|---------|---------|---------|---------|---------|---------|---------|---------|---------|
| RPEL1        | 4.13991 | 3.97116 | 4.1547  | 4.18322 | 4.89784 | 4.92681 | 4.26251 | 4.17162 | 4.18805 |
| PDCD11       | 8.47055 | 8.63072 | 8.44359 | 8.58733 | 7.10839 | 7.71301 | 8.56544 | 7.64709 | 8.27358 |
| NEURL1       | 7.07349 | 7.09253 | 6.92512 | 7.02443 | 8.23853 | 7.10273 | 6.91632 | 7.32393 | 7.46299 |
| SH3PXD2A-AS1 | 7.928   | 6.71191 | 8.03257 | 8.21316 | 7.89513 | 8.45136 | 8.10824 | 8.368   | 9.53816 |
| SLK          | 10.5556 | 10.7914 | 10.6179 | 10.2961 | 8.73579 | 11.4287 | 10.7768 | 11.3123 | 10.7429 |
| SFR1         | 7.41677 | 6.75703 | 7.27962 | 6.14965 | 4.9909  | 6.14519 | 6.75754 | 6.53526 | 6.47873 |
| GSTO1        | 6.37801 | 6.07294 | 6.68837 | 7.62642 | 6.48548 | 8.41155 | 7.78456 | 7.75486 | 8.24989 |
| GSTO2        | 7.81681 | 8.05261 | 7.84451 | 7.07289 | 6.55998 | 6.64964 | 7.62838 | 6.96029 | 6.77414 |
| CFAP58       | 5.06507 | 4.77495 | 5.04845 | 5.3919  | 5.76805 | 5.61381 | 5.65291 | 5.33705 | 5.28345 |
| SORCS3       | 4.11334 | 4.22708 | 4.13206 | 4.09625 | 4.91706 | 5.10494 | 4.49958 | 4.35087 | 4.76437 |
| ADD3         | 7.68429 | 7.71311 | 8.03746 | 5.93239 | 5.16419 | 5.00914 | 6.12875 | 5.62963 | 5.21941 |
| MXI1         | 7.84485 | 7.62961 | 7.52543 | 7.1719  | 7.07663 | 8.2128  | 7.47729 | 7.32481 | 7.22898 |
| DUSP5        | 7.59809 | 7.13463 | 7.12829 | 8.37405 | 7.87755 | 9.67276 | 9.00865 | 10.3957 | 8.70171 |
| SMC3         | 9.14681 | 9.3347  | 9.31194 | 8.34748 | 5.3345  | 7.57381 | 8.75882 | 8.43808 | 8.19283 |
| RBM20        | 5.53277 | 5.71273 | 5.77953 | 5.70683 | 6.85285 | 5.32827 | 5.55066 | 5.70156 | 5.93297 |
| PDCD4-AS1    | 2.28125 | 2.06924 | 2.1156  | 2.90034 | 2.78731 | 2.5899  | 2.79581 | 1.99397 | 2.43481 |
| PDCD4        | 9.05417 | 9.30646 | 9.48843 | 8.38502 | 4.50657 | 7.3705  | 9.02827 | 6.85904 | 6.90334 |
| SHOC2        | 10.0326 | 9.94539 | 10.0552 | 9.41405 | 8.14728 | 9.92472 | 9.66862 | 9.89517 | 10.0815 |
| MIR548E      | 3.40421 | 3.40339 | 3.34344 | 3.16204 | 3.76318 | 3.05301 | 3.58001 | 4.50998 | 3.9555  |
| ADRA2A       | 7.07668 | 6.42682 | 6.82752 | 6.21186 | 6.01482 | 6.12955 | 6.08937 | 5.60556 | 5.63478 |
| TECTB        | 4.33378 | 4.58357 | 4.64777 | 4.83593 | 5.58924 | 5.0566  | 4.75727 | 4.76904 | 4.86189 |
| ACSL5        | 7.01333 | 5.85627 | 7.27966 | 6.42039 | 6.16897 | 5.54545 | 6.19513 | 5.8747  | 6.81377 |
| VTI1A        | 7.7631  | 7.66325 | 8.02723 | 6.88332 | 6.35552 | 7.45581 | 7.44289 | 7.57193 | 7.65717 |
| MIR4295      | 9.21656 | 8.40009 | 8.65246 | 4.91419 | 5.02679 | 4.21735 | 5.17694 | 7.66967 | 7.94577 |
| HABP2        | 5.50143 | 5.65644 | 5.4119  | 5.71969 | 6.58709 | 6.3124  | 5.96598 | 5.6462  | 5.85633 |
| NHLRC2       | 9.40036 | 9.43996 | 9.46509 | 8.18675 | 5.36998 | 7.09169 | 8.15691 | 7.92156 | 8.38585 |

|          |         |         |         |         |         |         |         |         |         |
|----------|---------|---------|---------|---------|---------|---------|---------|---------|---------|
| ADRB1    | 5.60923 | 5.9808  | 5.95243 | 6.5038  | 6.2979  | 6.39075 | 6.12502 | 6.10685 | 6.43679 |
| TDRD1    | 3.86949 | 4.17581 | 3.98065 | 3.88698 | 4.97774 | 4.48039 | 4.12086 | 4.06021 | 4.40438 |
| VWA2     | 6.75692 | 6.64516 | 6.38404 | 6.82918 | 6.44523 | 6.79954 | 6.67504 | 6.73282 | 6.5768  |
| TRUB1    | 6.55147 | 6.82642 | 6.60038 | 6.95663 | 4.45941 | 5.91769 | 6.98516 | 6.10918 | 5.83766 |
| ATRNL1   | 5.4456  | 4.21901 | 3.96852 | 4.91291 | 5.11745 | 4.89562 | 6.21216 | 4.87593 | 5.34602 |
| CCDC172  | 2.66683 | 3.01551 | 3.00082 | 3.29363 | 3.18836 | 4.00555 | 3.09094 | 2.94107 | 3.15375 |
| PNLIPRP3 | 8.37385 | 8.15537 | 9.10544 | 10.5272 | 9.46466 | 11.3285 | 10.4317 | 11.2992 | 11.3038 |
| PNLIP    | 4.79789 | 4.91654 | 4.44364 | 4.8801  | 5.4981  | 5.33198 | 4.74824 | 4.86381 | 4.53294 |
| PNLIPRP1 | 4.96813 | 5.23679 | 5.16102 | 5.5097  | 6.09734 | 5.91303 | 5.25003 | 6.0832  | 5.40741 |
| PNLIPRP2 | 4.46629 | 4.7779  | 4.55286 | 4.96998 | 6.01309 | 5.43671 | 5.07509 | 4.97536 | 4.80026 |
| HSPA12A  | 4.56088 | 4.6747  | 4.90015 | 5.1826  | 4.76645 | 5.27414 | 5.25263 | 4.99866 | 4.88699 |
| ENO4     | 5.29318 | 5.22205 | 5.23009 | 5.34023 | 5.60266 | 4.90007 | 4.88053 | 4.62274 | 4.81017 |
| EMX2     | 6.99723 | 7.02655 | 6.60804 | 6.86013 | 5.59505 | 7.28321 | 7.42431 | 6.45045 | 6.74105 |
| CASC2    | 5.36426 | 4.99802 | 5.66112 | 5.06188 | 5.96213 | 5.01341 | 5.26085 | 4.99702 | 5.08291 |
| PRLHR    | 6.78888 | 6.82328 | 6.63013 | 7.53639 | 7.3924  | 7.9182  | 7.3627  | 7.42706 | 7.25573 |
| NANOS1   | 7.08771 | 6.89569 | 7.00081 | 7.81327 | 7.29022 | 7.85254 | 7.74142 | 7.65574 | 7.83278 |
| GRK5     | 7.59726 | 7.59691 | 7.98841 | 7.52332 | 7.27538 | 7.09761 | 7.58478 | 7.5274  | 7.63407 |
| MIR4681  | 6.15686 | 6.0036  | 6.02539 | 5.95762 | 6.56073 | 6.01849 | 5.71464 | 5.38454 | 5.35559 |
| TIAL1    | 5.16456 | 5.5187  | 5.27867 | 5.37009 | 5.17342 | 5.07803 | 5.80538 | 4.58325 | 5.16507 |
| BAG3     | 8.61172 | 8.05103 | 8.27701 | 9.06139 | 7.51832 | 9.02349 | 9.39884 | 9.18211 | 9.33823 |
| INPP5F   | 8.10966 | 7.88633 | 7.60969 | 7.04067 | 5.74326 | 6.17907 | 7.3365  | 7.62611 | 6.97133 |
| SEC23IP  | 7.55805 | 7.36523 | 7.31354 | 7.22482 | 5.85711 | 6.58279 | 7.33289 | 6.85783 | 7.09965 |
| MIR4682  | 7.08334 | 7.19266 | 7.36273 | 6.94816 | 8.11484 | 6.81024 | 6.58083 | 7.13415 | 7.28291 |
| PLPP4    | 6.34071 | 6.77944 | 6.19489 | 6.51661 | 7.40546 | 6.1669  | 6.59892 | 6.54495 | 6.28049 |
| WDR11    | 8.91681 | 8.76666 | 8.77909 | 7.91168 | 5.5558  | 7.55756 | 8.49056 | 7.80441 | 7.93237 |
| BTBD16   | 6.99336 | 6.34641 | 6.12365 | 5.63776 | 5.91682 | 5.1277  | 5.7476  | 5.43906 | 5.5046  |

|           |         |         |         |         |         |         |         |         |         |
|-----------|---------|---------|---------|---------|---------|---------|---------|---------|---------|
| MIR3941   | 4.08826 | 5.07402 | 4.09433 | 4.23627 | 4.16889 | 4.24733 | 3.63979 | 4.0924  | 3.83686 |
| ARMS2     | 5.90372 | 5.79529 | 5.79192 | 6.41553 | 6.59626 | 6.51186 | 6.16676 | 6.5621  | 6.33165 |
| HTRA1     | 9.28836 | 8.96721 | 8.78947 | 8.96108 | 6.46909 | 7.49663 | 8.88471 | 8.6725  | 8.37797 |
| DMBT1     | 5.56506 | 5.51383 | 5.58233 | 5.75344 | 6.38296 | 5.83183 | 5.56621 | 5.80314 | 6.08744 |
| DMBT1P1   | 5.78996 | 6.53963 | 6.46726 | 5.96035 | 7.0798  | 5.62138 | 5.6024  | 5.7949  | 5.78944 |
| LOC399815 | 4.92976 | 5.45784 | 5.03138 | 5.49223 | 5.15036 | 5.04965 | 5.26943 | 4.96074 | 4.98077 |
| PSTK      | 6.14023 | 6.4168  | 6.41359 | 5.96665 | 5.84237 | 6.15719 | 6.51496 | 5.64444 | 6.04113 |
| HMX3      | 5.19954 | 5.53193 | 5.56871 | 6.53203 | 6.71356 | 6.61566 | 5.87047 | 6.08844 | 5.94715 |
| HMX2      | 5.83718 | 5.82183 | 5.5196  | 6.39789 | 6.26447 | 6.81921 | 6.35922 | 6.59391 | 6.31618 |
| BUB3      | 9.58525 | 9.29057 | 9.41796 | 9.72222 | 6.66937 | 8.94676 | 9.7178  | 9.09263 | 9.54803 |
| GPR26     | 5.83559 | 5.70772 | 5.76662 | 6.07207 | 7.05576 | 6.66332 | 6.23781 | 6.41382 | 6.11171 |
| LHPP      | 6.6494  | 6.53569 | 6.3513  | 6.64358 | 6.14316 | 6.32137 | 6.61469 | 6.35504 | 6.31374 |
| TEX36-AS1 | 4.71247 | 4.43054 | 4.49622 | 5.44141 | 5.13282 | 5.26622 | 4.6651  | 5.47257 | 4.98073 |
| LOC283038 | 4.20522 | 4.31616 | 4.21808 | 4.75453 | 4.76369 | 4.44286 | 4.52377 | 4.76621 | 4.71307 |
| EDRF1     | 7.70945 | 7.90538 | 8.04428 | 6.60589 | 5.73024 | 6.11214 | 6.80006 | 6.81393 | 6.86985 |
| BCCIP     | 6.36356 | 7.06498 | 6.61075 | 6.79885 | 5.6452  | 6.50239 | 7.20331 | 6.216   | 6.48433 |
| fank1     | 5.66009 | 5.94499 | 5.65211 | 5.73046 | 5.76696 | 5.84547 | 5.69139 | 5.71318 | 5.96384 |
| DOCK1     | 9.59669 | 9.36717 | 9.45811 | 8.7537  | 6.90606 | 8.36356 | 9.06337 | 8.65572 | 8.86063 |
| NPS       | 4.49435 | 5.33656 | 5.24127 | 5.7345  | 6.91593 | 5.89458 | 4.96894 | 5.384   | 5.31818 |
| FOXI2     | 6.12514 | 5.97608 | 6.4119  | 6.4081  | 5.70283 | 6.91334 | 6.29517 | 6.47583 | 6.5601  |
| MGMT      | 7.0828  | 6.97513 | 6.85784 | 6.87671 | 6.63976 | 6.73722 | 6.94461 | 6.5107  | 6.87147 |
| GLRX3     | 8.72583 | 8.7079  | 8.6926  | 8.7772  | 7.50686 | 8.53435 | 8.88469 | 8.37298 | 8.9157  |
| JAKMIP3   | 4.98331 | 5.22687 | 4.93458 | 5.74982 | 5.60768 | 6.34131 | 5.70321 | 5.74948 | 5.77949 |
| DPYSL4    | 5.90051 | 6.0945  | 5.88054 | 6.89769 | 7.09437 | 7.60598 | 6.65171 | 6.49935 | 6.85941 |
| LRRC27    | 6.16361 | 6.4462  | 6.22452 | 6.35891 | 6.5299  | 6.23702 | 6.26458 | 6.27083 | 6.32735 |
| PWWP2B    | 5.38588 | 5.80062 | 5.88047 | 6.76822 | 5.61298 | 6.90374 | 6.40098 | 6.41939 | 6.06243 |

|           |         |         |         |         |         |         |         |         |         |
|-----------|---------|---------|---------|---------|---------|---------|---------|---------|---------|
| C10orf91  | 5.82051 | 5.80649 | 6.02285 | 6.54621 | 6.72237 | 6.46317 | 6.24339 | 6.50514 | 6.25558 |
| LINC01168 | 4.08712 | 4.21068 | 4.27397 | 4.56822 | 5.98738 | 4.92874 | 4.40257 | 4.79996 | 4.5009  |
| ADGRA1    | 6.22906 | 6.26271 | 6.22587 | 6.70613 | 6.8777  | 6.89014 | 6.38198 | 6.63859 | 6.55874 |
| KNDC1     | 5.96315 | 6.14845 | 6.01125 | 6.45159 | 6.21456 | 6.68733 | 6.33494 | 6.48968 | 6.5447  |
| UTF1      | 5.94077 | 5.73831 | 5.9513  | 6.73348 | 6.68753 | 7.08665 | 6.43709 | 6.40266 | 6.48281 |
| VENTX     | 4.45263 | 5.38093 | 5.30072 | 6.1654  | 5.75317 | 6.62425 | 5.91693 | 5.83747 | 5.7418  |
| ZNF511    | 6.6884  | 6.56264 | 6.64801 | 7.07635 | 7.66432 | 8.88319 | 7.54595 | 7.30687 | 6.59887 |
| PRAP1     | 6.70135 | 6.82306 | 6.56987 | 6.95916 | 7.499   | 6.94898 | 7.00238 | 7.16458 | 7.32743 |
| PAOX      | 6.65375 | 6.5435  | 6.40006 | 7.08856 | 6.90238 | 7.37267 | 7.1263  | 6.72137 | 6.92868 |
| MTG1      | 8.01856 | 7.78259 | 7.8848  | 7.67902 | 6.85851 | 7.40455 | 7.46723 | 7.23236 | 7.71557 |
| SCART1    | 5.9675  | 6.01867 | 6.1536  | 6.15956 | 6.44005 | 6.4416  | 5.69562 | 6.15156 | 6.2067  |
| DIP2C     | 7.53034 | 7.66704 | 7.77754 | 7.57355 | 7.28657 | 7.59591 | 7.71567 | 7.00578 | 7.27805 |
| IDI2      | 4.67137 | 4.9269  | 4.75767 | 5.27159 | 5.17327 | 5.19537 | 5.47509 | 5.09707 | 5.44582 |
| IDI1      | 8.24856 | 7.55264 | 7.36801 | 7.95762 | 5.76846 | 8.33339 | 8.56774 | 8.08495 | 8.42581 |
| LINC00700 | 4.41672 | 4.64579 | 4.49529 | 4.83772 | 5.59128 | 5.14885 | 5.04396 | 4.62345 | 4.77725 |
| LINC00701 | 5.87034 | 6.16605 | 6.21014 | 6.69797 | 7.45903 | 7.58536 | 6.58456 | 6.91498 | 6.82852 |
| PITRM1    | 8.57872 | 8.73559 | 8.53526 | 8.71347 | 7.05084 | 8.54004 | 8.60289 | 8.33045 | 8.80743 |
| KLF6      | 10.6951 | 9.61107 | 10.158  | 10.0373 | 7.58712 | 10.1142 | 9.91983 | 10.2233 | 10.665  |
| CALML5    | 11.2615 | 10.6241 | 10.6786 | 12.189  | 7.78473 | 11.0696 | 10.9771 | 6.4021  | 6.24234 |
| ASB13     | 6.97514 | 7.25233 | 7.17748 | 7.25274 | 7.1296  | 7.08138 | 7.76813 | 6.8476  | 6.90564 |
| GDI2      | 10.6162 | 10.5454 | 10.9393 | 10.4885 | 8.67623 | 10.3405 | 10.6107 | 10.8169 | 10.5425 |
| ANKRD16   | 7.64489 | 7.63798 | 7.67661 | 6.86805 | 6.70762 | 6.54931 | 7.62505 | 6.56233 | 6.56152 |
| SFMBT2    | 7.37723 | 7.2586  | 7.55524 | 6.83794 | 6.93071 | 7.02779 | 7.07671 | 6.85783 | 6.75716 |
| LINC00710 | 3.82391 | 3.8154  | 4.01562 | 4.47456 | 5.57418 | 4.47742 | 4.48947 | 4.3341  | 4.61453 |
| CELF2-AS2 | 2.95088 | 3.19129 | 3.25714 | 3.54815 | 3.82859 | 3.28026 | 3.54815 | 3.42155 | 3.51662 |
| USP6NL    | 9.3967  | 9.30387 | 9.41225 | 9.11981 | 7.86349 | 10.0257 | 9.21706 | 9.58959 | 9.55128 |

|              |         |         |         |         |         |         |         |         |         |
|--------------|---------|---------|---------|---------|---------|---------|---------|---------|---------|
| PROSER2-AS1  | 4.5043  | 4.9527  | 4.59981 | 5.2282  | 5.43739 | 5.03216 | 4.44937 | 4.85746 | 4.78833 |
| UPF2         | 7.99774 | 8.35926 | 7.87208 | 7.35461 | 5.24288 | 6.94852 | 7.70348 | 7.22304 | 7.08598 |
| MIR548AK     | 2.22747 | 2.06654 | 2.95224 | 3.4969  | 3.09771 | 1.88086 | 2.94431 | 2.32093 | 2.81995 |
| NUDT5        | 8.75798 | 8.71207 | 8.72747 | 8.04198 | 6.8152  | 8.0432  | 8.37469 | 8.047   | 8.45069 |
| MIR4481      | 5.90459 | 5.04342 | 4.95507 | 5.28188 | 6.40883 | 3.55959 | 5.0122  | 4.30266 | 5.61825 |
| MIR548Q      | 2.75908 | 2.52794 | 2.73932 | 2.35862 | 2.62675 | 2.36833 | 2.35751 | 2.26033 | 1.89592 |
| CCDC3        | 6.92092 | 5.81058 | 6.7488  | 6.46005 | 6.15147 | 6.60259 | 6.33586 | 6.20624 | 6.43212 |
| UCMA         | 5.49219 | 5.45648 | 5.53303 | 6.27124 | 6.99593 | 6.63487 | 6.20997 | 6.24254 | 6.08105 |
| PHYH         | 7.17689 | 7.34073 | 7.40337 | 6.72621 | 5.40111 | 6.11721 | 6.75922 | 6.28214 | 6.6669  |
| SEPHS1       | 8.94531 | 9.2441  | 9.06009 | 8.82936 | 7.78451 | 8.45027 | 8.92106 | 8.49408 | 8.67038 |
| BEND7        | 5.82196 | 5.36585 | 5.8881  | 5.66932 | 5.88248 | 5.38043 | 4.97192 | 4.93982 | 4.96861 |
| FRMD4A       | 7.47671 | 7.10523 | 7.28526 | 6.49712 | 6.51554 | 6.53174 | 6.63845 | 6.41145 | 6.82892 |
| MIR4293      | 6.6513  | 6.61608 | 6.61957 | 6.9186  | 7.72676 | 6.73317 | 6.71123 | 7.07189 | 6.64264 |
| CDNF         | 7.86113 | 8.18341 | 8.15221 | 6.12463 | 7.04684 | 6.23551 | 6.57318 | 6.03849 | 6.18844 |
| DCLRE1C      | 7.30052 | 7.58234 | 7.02263 | 5.79429 | 4.94834 | 6.63309 | 6.33414 | 6.04998 | 6.24376 |
| ACBD7        | 4.65782 | 4.34778 | 4.40892 | 4.49079 | 4.40101 | 4.72379 | 4.29471 | 4.19982 | 4.47449 |
| NMT2         | 7.18269 | 7.76999 | 7.14248 | 6.35078 | 6.04804 | 6.59163 | 7.18273 | 6.49732 | 6.27953 |
| PPIAP30      | 7.84953 | 8.10891 | 7.85678 | 7.30225 | 7.25359 | 7.77058 | 7.46143 | 7.83187 | 7.56588 |
| RSU1         | 11.0906 | 10.7968 | 11.1381 | 10.4991 | 10.3604 | 10.3582 | 10.7228 | 11.0075 | 10.9823 |
| CUBN         | 6.23981 | 6.13883 | 6.43533 | 5.54047 | 6.24892 | 5.58222 | 5.37987 | 5.70897 | 5.62565 |
| TRDMT1       | 6.72037 | 6.31543 | 7.08993 | 5.61289 | 6.05977 | 5.19693 | 5.6885  | 5.79389 | 5.67151 |
| SLC39A12-AS1 | 3.74977 | 3.28644 | 3.59823 | 4.0023  | 4.96228 | 4.17033 | 3.83476 | 4.00912 | 4.01499 |
| NEBL         | 8.28225 | 7.97347 | 7.96038 | 7.37586 | 6.35008 | 7.03888 | 7.20636 | 7.70282 | 7.37798 |
| C10orf113    | 6.59579 | 6.26037 | 6.69763 | 4.28645 | 4.01387 | 4.44283 | 4.36765 | 5.11297 | 4.11817 |
| CASC10       | 4.89757 | 4.95704 | 4.82209 | 5.92633 | 4.51056 | 6.04716 | 5.68339 | 5.57721 | 5.34119 |
| skida1       | 5.76997 | 5.89043 | 5.76598 | 6.01323 | 6.31781 | 6.32147 | 5.62157 | 5.89771 | 5.84119 |

|              |         |         |         |         |         |         |         |         |         |
|--------------|---------|---------|---------|---------|---------|---------|---------|---------|---------|
| EBLN1        | 3.28742 | 3.45646 | 3.44469 | 4.07998 | 4.93554 | 4.55807 | 3.62762 | 4.01493 | 3.9684  |
| LOC100499489 | 5.66398 | 6.18359 | 5.9503  | 6.53854 | 6.55044 | 6.37849 | 5.88706 | 6.22509 | 6.28083 |
| c10orf67     | 4.01015 | 3.88203 | 3.50728 | 3.52515 | 3.79799 | 3.67996 | 3.78124 | 3.32339 | 3.51817 |
| ARHGAP21     | 8.23253 | 7.43429 | 8.34554 | 7.62291 | 5.56043 | 8.50464 | 7.97461 | 8.73974 | 9.36114 |
| PRTFDC1      | 7.02842 | 6.64439 | 6.15887 | 6.83716 | 5.45076 | 5.6674  | 6.26209 | 5.91497 | 5.70352 |
| ABI1         | 10.391  | 10.074  | 10.3733 | 10.5119 | 9.33174 | 10.6392 | 10.6785 | 10.8024 | 10.8782 |
| LINC00202-1  | 7.21169 | 7.45154 | 7.43067 | 7.11065 | 7.33185 | 6.91901 | 7.16043 | 7.1091  | 7.37379 |
| ANKRD26      | 7.19257 | 7.35207 | 6.90874 | 5.99094 | 5.48806 | 6.00829 | 6.34869 | 5.45311 | 5.98076 |
| YME1L1       | 10.9963 | 10.5764 | 10.6606 | 10.1935 | 8.81744 | 10.3574 | 10.6474 | 10.3522 | 10.5646 |
| ACBD5        | 7.66876 | 7.94225 | 7.71253 | 7.37896 | 5.44715 | 7.48123 | 7.58929 | 6.29935 | 6.94735 |
| PTCHD3       | 5.11694 | 5.57553 | 5.62965 | 6.08011 | 5.9243  | 5.27345 | 6.36839 | 4.9991  | 5.14315 |
| MKX          | 6.20789 | 5.83982 | 6.14556 | 5.63636 | 6.34625 | 5.54814 | 6.11601 | 5.93256 | 5.77065 |
| ARMC4        | 4.63907 | 4.88318 | 4.52782 | 4.71137 | 5.35313 | 5.18449 | 4.99284 | 4.71851 | 4.9554  |
| WAC-AS1      | 6.8905  | 7.3786  | 7.02162 | 6.64775 | 5.94253 | 6.24714 | 7.46825 | 6.25418 | 7.11776 |
| LINC00837    | 4.23962 | 4.59286 | 4.42733 | 4.6943  | 5.40661 | 4.70417 | 4.85387 | 5.20452 | 4.77242 |
| svil         | 9.00239 | 8.47107 | 8.30143 | 7.77297 | 6.49445 | 8.06735 | 8.28366 | 7.92013 | 8.41591 |
| MIR604       | 9.68353 | 8.72039 | 8.79027 | 7.1517  | 7.69283 | 5.62491 | 6.68155 | 7.59251 | 8.04136 |
| MIR938       | 6.83709 | 5.50799 | 5.92762 | 4.51456 | 4.09846 | 4.66247 | 4.73077 | 5.85532 | 6.1513  |
| KIAA1462     | 7.02719 | 6.75904 | 7.01581 | 6.27986 | 5.58609 | 6.26283 | 6.67469 | 6.97416 | 6.61008 |
| MTPAP        | 8.38091 | 8.43174 | 8.76964 | 7.39722 | 5.8037  | 6.51192 | 7.79801 | 6.30822 | 7.08352 |
| ZNF438       | 7.08409 | 7.01599 | 7.18701 | 5.24748 | 4.92507 | 5.26935 | 6.12941 | 5.86351 | 6.26902 |
| ZEB1-AS1     | 6.10056 | 6.07152 | 5.99148 | 6.46396 | 6.3082  | 6.19779 | 6.13211 | 5.88688 | 6.18888 |
| KIF5B        | 11.6125 | 11.5065 | 11.5053 | 11.2352 | 8.31183 | 11.2904 | 11.5625 | 11.7135 | 11.9521 |
| EPC1         | 7.99834 | 7.87597 | 8.05787 | 6.39903 | 4.98425 | 6.7031  | 7.14703 | 6.21185 | 6.77486 |
| NRP1         | 9.11844 | 8.75883 | 9.0741  | 8.08915 | 7.35175 | 7.12782 | 8.07024 | 7.94512 | 8.17026 |
| LINC00838    | 3.9809  | 4.16764 | 4.53027 | 4.89971 | 6.04509 | 5.28624 | 4.74103 | 5.29503 | 4.74654 |

|            |         |         |         |         |         |         |         |         |         |
|------------|---------|---------|---------|---------|---------|---------|---------|---------|---------|
| PARD3      | 10.0797 | 10.2859 | 9.92371 | 9.12521 | 7.63367 | 9.68268 | 9.46372 | 9.35386 | 9.28303 |
| CUL2       | 8.71579 | 9.11147 | 8.80021 | 8.63577 | 6.10222 | 7.84714 | 8.80924 | 8.3608  | 8.47547 |
| FZD8       | 6.62106 | 7.33439 | 6.869   | 6.85621 | 6.75846 | 7.14625 | 6.96959 | 6.86775 | 6.85152 |
| NAMPT      | 9.37611 | 9.61963 | 9.50255 | 9.84423 | 10.2581 | 11.9115 | 11.2999 | 11.0776 | 10.2865 |
| MTRNR2L7   | 4.34227 | 4.11169 | 4.43242 | 4.31879 | 5.00074 | 4.77513 | 4.74284 | 5.08497 | 4.42799 |
| ZNF248     | 5.60582 | 5.66244 | 5.90968 | 5.26289 | 5.78788 | 5.64234 | 5.46539 | 5.34719 | 5.41191 |
| ZNF25      | 7.27424 | 7.43469 | 7.72435 | 5.74674 | 5.53588 | 4.88792 | 5.93447 | 5.25324 | 5.68331 |
| SEPT7P9    | 4.54069 | 4.31315 | 4.62881 | 4.5702  | 4.48543 | 4.94591 | 3.83879 | 4.02977 | 4.06872 |
| LOC441666  | 3.713   | 4.17295 | 3.47251 | 3.3329  | 5.08326 | 3.86559 | 2.88541 | 3.57135 | 2.585   |
| ZNF33B     | 7.95427 | 7.96604 | 8.44331 | 6.13904 | 5.65506 | 6.4928  | 6.54293 | 6.27846 | 6.48098 |
| HNRNPF     | 8.04291 | 8.24217 | 8.01097 | 8.69162 | 6.48126 | 8.05567 | 8.49117 | 7.80487 | 7.9756  |
| ZNF239     | 4.86083 | 4.87869 | 5.03208 | 5.4993  | 5.35735 | 5.85741 | 5.1339  | 5.29441 | 5.64833 |
| ZNF32      | 7.18292 | 7.50045 | 7.45598 | 6.88149 | 6.99845 | 7.02153 | 7.15722 | 7.20699 | 7.02781 |
| HNRNPA3P1  | 4.05586 | 3.92728 | 4.2367  | 5.10929 | 3.96093 | 4.11764 | 5.59614 | 3.99892 | 3.98244 |
| CXCL12     | 8.65155 | 8.41424 | 8.69546 | 7.55981 | 7.0961  | 7.26913 | 7.30171 | 6.78547 | 6.91251 |
| C10orf25   | 5.77785 | 5.52892 | 5.60852 | 5.3906  | 5.9079  | 5.88851 | 5.94409 | 5.52453 | 5.67941 |
| RSU1P2     | 4.08652 | 4.70809 | 4.59501 | 4.24769 | 5.56252 | 4.09933 | 4.05538 | 4.40405 | 4.20493 |
| SYT15      | 6.38528 | 6.94033 | 6.83775 | 6.3568  | 6.31112 | 6.26239 | 6.30255 | 6.03731 | 6.42481 |
| LINC00842  | 7.82368 | 7.52936 | 6.89695 | 5.63948 | 6.81151 | 5.00411 | 7.11321 | 6.09594 | 6.51644 |
| HNRNPA1P33 | 7.49014 | 7.41609 | 7.45021 | 7.28519 | 5.43732 | 7.74164 | 8.14167 | 6.97864 | 9.09267 |
| ANXA8L1    | 10.2397 | 10.3479 | 10.5713 | 10.4164 | 9.60033 | 10.9934 | 10.9436 | 10.9249 | 11.2979 |
| LINC00864  | 5.13406 | 4.97676 | 5.3052  | 5.39432 | 7.22552 | 5.65427 | 5.31462 | 5.67335 | 5.44288 |
| GDF2       | 5.32241 | 5.54006 | 5.34212 | 6.22976 | 5.62642 | 6.11617 | 5.52061 | 5.88805 | 6.27707 |
| GDF10      | 6.1245  | 6.2303  | 6.13881 | 6.08571 | 6.22224 | 6.39237 | 6.44329 | 6.30427 | 6.14661 |
| FRMPD2B    | 5.96936 | 6.11092 | 6.16819 | 6.32072 | 7.5235  | 6.4188  | 6.63293 | 6.33735 | 6.03337 |
| AGAP12P    | 9.54671 | 9.63364 | 9.89851 | 8.65393 | 8.60271 | 8.15873 | 9.26869 | 9.04398 | 9.01215 |

|           |         |         |         |         |         |         |         |         |         |
|-----------|---------|---------|---------|---------|---------|---------|---------|---------|---------|
| FRMPD2    | 5.65122 | 5.72939 | 5.76061 | 5.96819 | 7.00164 | 5.56005 | 5.81087 | 6.0928  | 5.89568 |
| ARHGAP22  | 5.07188 | 5.37402 | 5.32981 | 5.34436 | 6.08139 | 5.36864 | 5.53059 | 5.8468  | 5.64915 |
| LRRC18    | 4.94664 | 5.25644 | 5.15126 | 4.94664 | 5.61485 | 4.92035 | 4.34831 | 5.03279 | 5.10801 |
| MIR4294   | 6.45751 | 6.71426 | 6.90412 | 7.27532 | 8.59075 | 7.12761 | 6.88282 | 7.17689 | 7.19673 |
| DRGX      | 4.68881 | 5.72343 | 5.12352 | 5.60919 | 5.87412 | 5.89343 | 5.52285 | 5.48281 | 5.49907 |
| OGDHL     | 5.42768 | 6.08036 | 6.04419 | 6.54756 | 6.81861 | 6.29498 | 6.115   | 5.84334 | 6.35547 |
| TIMM23    | 10.1023 | 10.1283 | 10.101  | 10.0263 | 7.6023  | 9.03198 | 10.6503 | 9.45378 | 10.1124 |
| FAM21EP   | 5.15592 | 5.44606 | 5.25363 | 5.04543 | 5.91389 | 5.49811 | 5.6201  | 5.26649 | 5.24273 |
| ASAH2     | 5.49209 | 6.14698 | 5.98882 | 6.30973 | 6.54889 | 5.79242 | 5.22807 | 5.94169 | 5.66886 |
| SGMS1     | 9.68263 | 9.75317 | 9.30749 | 8.68938 | 6.6086  | 8.16133 | 9.09802 | 7.69948 | 8.35553 |
| A1CF      | 4.18521 | 4.29481 | 4.28389 | 4.42982 | 5.34968 | 4.52465 | 4.67469 | 4.61299 | 4.62905 |
| PRKG1-AS1 | 3.08745 | 3.21463 | 3.39951 | 3.54713 | 3.57821 | 3.9528  | 3.53077 | 3.54321 | 3.47401 |
| PCDH15    | 4.25285 | 4.31693 | 4.31769 | 4.82678 | 5.34284 | 5.1278  | 4.77885 | 4.68894 | 4.54621 |
| MIR548F1  | 1.74027 | 2.08043 | 1.61746 | 1.93483 | 1.86054 | 1.84735 | 2.21678 | 1.8201  | 2.26895 |
| ZWINT     | 5.66207 | 5.49047 | 5.84301 | 6.01838 | 5.52532 | 6.15883 | 6.06894 | 5.98991 | 5.84382 |
| MIR3924   | 2.19605 | 2.5201  | 1.94895 | 2.08173 | 2.27392 | 2.33357 | 2.33972 | 2.08538 | 1.90935 |
| IPMK      | 8.63709 | 8.70309 | 9.11592 | 8.89436 | 6.20497 | 9.90021 | 9.02194 | 9.15792 | 8.61294 |
| CCDC6     | 11.3232 | 11.1151 | 11.4532 | 10.7928 | 9.92678 | 10.3829 | 10.8197 | 10.8675 | 10.9306 |
| LINC01553 | 3.42339 | 3.4761  | 3.3756  | 3.91797 | 4.38273 | 3.9749  | 3.09217 | 3.32981 | 3.613   |
| RHOBTB1   | 7.01322 | 6.62732 | 6.7279  | 6.4609  | 6.54589 | 6.5559  | 6.92823 | 6.24318 | 6.1255  |
| TMEM26    | 4.71306 | 4.3788  | 4.49071 | 5.22333 | 5.90402 | 4.82249 | 4.99472 | 4.54873 | 5.15541 |
| RTKN2     | 4.61818 | 4.44634 | 4.87435 | 4.8801  | 4.42355 | 5.72214 | 5.59921 | 4.84404 | 4.84098 |
| EGR2      | 6.59916 | 5.96811 | 5.72015 | 6.40539 | 6.32845 | 6.60485 | 6.14957 | 6.11214 | 6.10157 |
| JMJD1C    | 9.53628 | 9.49313 | 9.25111 | 9.03874 | 8.75687 | 9.99416 | 9.16269 | 10.7047 | 10.2493 |
| MIR1296   | 7.17796 | 7.36233 | 7.39045 | 7.07583 | 6.62902 | 7.11988 | 6.70476 | 7.22243 | 7.43315 |
| HERC4     | 8.6769  | 8.78399 | 8.55855 | 8.72732 | 6.35997 | 8.83334 | 8.80535 | 9.3168  | 9.85943 |



|           |         |         |         |         |         |         |         |         |         |
|-----------|---------|---------|---------|---------|---------|---------|---------|---------|---------|
| ATOH7     | 4.40914 | 4.39046 | 4.62847 | 4.58125 | 4.65557 | 4.4613  | 4.52397 | 4.64715 | 4.60104 |
| pblid     | 7.01247 | 6.77684 | 7.32417 | 6.28807 | 6.9187  | 6.55631 | 6.3887  | 5.8112  | 6.31846 |
| RUFY2     | 8.70425 | 8.97091 | 8.92744 | 7.66345 | 6.72573 | 7.36609 | 8.234   | 7.83684 | 8.06925 |
| DNA2      | 6.08458 | 5.90119 | 5.90544 | 5.83897 | 5.34521 | 5.59749 | 5.94282 | 5.84363 | 5.47256 |
| tacr2     | 6.44552 | 6.27986 | 6.30409 | 6.74582 | 7.49125 | 6.80612 | 7.332   | 6.80773 | 6.91302 |
| NEUROG3   | 5.76258 | 5.67687 | 5.62134 | 6.42776 | 6.5454  | 6.39248 | 6.22651 | 6.23198 | 6.28835 |
| TYSND1    | 7.12044 | 7.28586 | 7.0882  | 7.62236 | 7.34542 | 7.18451 | 7.3782  | 7.08167 | 7.13177 |
| SAR1A     | 9.59832 | 9.30099 | 9.74018 | 9.58682 | 7.94672 | 9.33638 | 9.8121  | 9.85623 | 9.67925 |
| PPA1      | 8.82857 | 8.69288 | 9.00463 | 8.30296 | 7.42969 | 8.69109 | 9.2842  | 8.47484 | 8.60434 |
| NPFFR1    | 5.38019 | 5.1394  | 5.40921 | 5.61179 | 6.11489 | 5.78456 | 5.9169  | 5.80059 | 5.6288  |
| LRRC20    | 7.09483 | 6.93488 | 6.96092 | 7.93665 | 8.29625 | 7.80752 | 7.58944 | 9.4533  | 8.47273 |
| PRF1      | 5.75458 | 5.7968  | 5.7364  | 6.26041 | 5.82704 | 6.68846 | 6.32354 | 6.24445 | 6.02781 |
| PCBD1     | 6.89484 | 6.71523 | 6.92963 | 7.24815 | 5.49274 | 7.22729 | 7.3133  | 6.85413 | 7.41465 |
| UNC5B-AS1 | 6.0883  | 5.4934  | 5.30422 | 6.77376 | 5.30179 | 6.54062 | 6.07907 | 6.10469 | 6.42432 |
| c10orf105 | 5.59614 | 5.30565 | 5.56817 | 6.76088 | 5.52268 | 6.58536 | 6.44415 | 6.63539 | 6.22179 |
| c10orf54  | 7.15252 | 7.44908 | 7.47614 | 7.93311 | 6.43399 | 8.13517 | 7.98784 | 8.38294 | 7.48417 |
| PSAP      | 10.7645 | 10.5956 | 10.8538 | 10.8859 | 7.7501  | 10.5811 | 11.0875 | 10.9283 | 10.8034 |
| ASCC1     | 7.56691 | 7.16528 | 7.47498 | 7.3106  | 6.69708 | 7.17496 | 7.40817 | 7.1632  | 7.02436 |
| MICU1     | 8.39176 | 8.41578 | 8.03267 | 7.22405 | 6.23836 | 7.33709 | 7.0609  | 8.23755 | 7.89919 |
| ecd       | 9.58255 | 9.8743  | 10.044  | 8.98692 | 6.71235 | 8.91279 | 9.46834 | 8.5951  | 9.42673 |
| CFAP70    | 6.32967 | 6.40415 | 6.50352 | 5.30399 | 6.13327 | 5.21964 | 5.19872 | 5.27984 | 5.75263 |
| ANXA7     | 9.26247 | 9.01044 | 9.4616  | 9.11352 | 6.36938 | 9.1244  | 9.89588 | 8.86358 | 9.35275 |
| MSS51     | 7.05281 | 6.77876 | 6.93206 | 5.90298 | 6.33931 | 6.13802 | 5.3834  | 5.77785 | 6.04648 |
| USP54     | 8.19717 | 8.15459 | 8.09345 | 7.19568 | 8.25565 | 7.49359 | 8.16199 | 8.17546 | 7.52483 |
| MYOZ1     | 6.97452 | 5.80806 | 6.0825  | 5.96126 | 6.60927 | 5.86792 | 5.47536 | 6.57872 | 6.73282 |
| SYNPO2L   | 6.63816 | 5.93386 | 5.13031 | 6.41258 | 6.1199  | 6.07712 | 6.30141 | 9.42996 | 7.93199 |

|             |         |         |         |         |         |         |         |         |         |
|-------------|---------|---------|---------|---------|---------|---------|---------|---------|---------|
| BMS1P4      | 6.83376 | 7.15932 | 7.20933 | 5.37749 | 5.20242 | 4.96699 | 5.32885 | 4.92772 | 5.7075  |
| ZSWIM8-AS1  | 7.02306 | 6.74045 | 7.01562 | 7.27325 | 6.27919 | 7.76845 | 7.74146 | 6.50594 | 6.97882 |
| NDST2       | 8.55118 | 8.48087 | 8.44552 | 8.07575 | 7.20684 | 7.51666 | 8.64711 | 8.01465 | 8.27049 |
| DUPD1       | 5.31813 | 5.50799 | 5.16641 | 6.16412 | 5.6237  | 6.61597 | 6.39014 | 6.06303 | 6.02968 |
| DUSP13      | 6.0659  | 6.12819 | 6.03636 | 6.70613 | 6.87309 | 6.56891 | 6.32914 | 6.62701 | 6.80809 |
| COMTD1      | 6.37644 | 6.01062 | 6.19573 | 6.87132 | 6.07189 | 6.89715 | 6.80303 | 6.81051 | 6.82109 |
| ZNF503      | 7.01703 | 7.56422 | 7.18853 | 7.88869 | 6.66222 | 7.69819 | 7.52977 | 6.97309 | 7.42382 |
| ZMIZ1-AS1   | 6.62902 | 6.62233 | 6.76689 | 6.60001 | 6.83325 | 6.35674 | 6.20957 | 6.34948 | 6.47188 |
| SFTPA2      | 5.50428 | 6.01299 | 5.46627 | 5.85766 | 5.76698 | 6.19332 | 5.31545 | 5.91502 | 6.16194 |
| SFTPD       | 6.54932 | 6.62563 | 6.59481 | 6.36691 | 7.47014 | 7.16947 | 7.1138  | 6.48101 | 6.80163 |
| TMEM254-AS1 | 5.89732 | 5.66765 | 5.54265 | 4.61652 | 4.63113 | 5.07343 | 5.02936 | 4.7292  | 5.16759 |
| ANXA11      | 7.67438 | 7.7325  | 7.90622 | 7.80313 | 8.10366 | 8.60358 | 8.33013 | 9.12697 | 8.52383 |
| DYDC1       | 2.7537  | 3.08759 | 2.97377 | 3.26856 | 3.00431 | 3.17064 | 3.27402 | 2.85139 | 2.98527 |
| MIR346      | 7.70374 | 7.94724 | 7.84403 | 8.78749 | 9.19974 | 8.52459 | 7.97026 | 8.38584 | 8.65351 |
| WAPL        | 9.26323 | 8.99232 | 8.82294 | 8.44495 | 6.33716 | 8.16503 | 8.68383 | 8.30861 | 8.39503 |
| MMRN2       | 6.76042 | 6.90378 | 7.14447 | 6.43126 | 5.94315 | 7.2429  | 7.27291 | 7.517   | 7.43022 |
| GLUD1       | 8.0353  | 8.14804 | 8.4115  | 7.17821 | 5.55858 | 6.22056 | 6.8131  | 7.49124 | 7.57405 |
| NUTM2A-AS1  | 7.61499 | 7.1595  | 7.36892 | 5.9846  | 5.37267 | 5.525   | 5.96005 | 5.96102 | 5.87395 |
| ANKRD22     | 9.0753  | 9.22744 | 8.8669  | 9.64706 | 9.88351 | 10.8172 | 9.88761 | 11.3707 | 10.3481 |
| FAS-AS1     | 5.06012 | 4.47292 | 4.29635 | 4.63824 | 4.8599  | 4.93897 | 4.7827  | 4.39269 | 4.65566 |
| MIR4679-1   | 2.46593 | 2.31437 | 2.10541 | 2.03869 | 1.69303 | 3.2148  | 2.24571 | 1.88674 | 1.91831 |
| CH25H       | 7.09207 | 6.17933 | 5.52043 | 6.18633 | 6.52045 | 5.58989 | 5.47566 | 5.42652 | 5.38173 |
| PANK1       | 6.73363 | 6.97937 | 6.94498 | 6.50048 | 6.11636 | 6.13917 | 7.16059 | 5.97295 | 5.72924 |
| FLJ37201    | 4.87887 | 5.21132 | 5.09901 | 5.16295 | 5.73613 | 5.11256 | 5.12467 | 5.51591 | 5.02703 |
| ANKRD1      | 4.65116 | 4.64751 | 4.74081 | 5.31674 | 5.41281 | 5.21645 | 5.53027 | 5.30066 | 5.22788 |
| NUDT9P1     | 4.35253 | 4.66038 | 5.04268 | 3.43379 | 5.90752 | 3.06252 | 3.43823 | 3.72137 | 4.07138 |

|            |         |         |         |         |         |         |         |         |         |
|------------|---------|---------|---------|---------|---------|---------|---------|---------|---------|
| HECTD2-AS1 | 5.23051 | 5.35943 | 5.76361 | 5.62458 | 5.63504 | 6.56176 | 5.47769 | 5.21704 | 5.89286 |
| FGFBP3     | 4.8776  | 5.22227 | 5.21947 | 5.51143 | 5.52432 | 5.79821 | 5.63713 | 5.29767 | 5.08417 |
| cpeb3      | 7.33242 | 7.13886 | 6.86683 | 6.44808 | 5.80143 | 6.23718 | 6.45127 | 6.53854 | 5.71303 |
| IDE        | 12.3142 | 12.3944 | 12.0698 | 11.5352 | 8.72666 | 9.72786 | 10.3271 | 9.54761 | 9.90207 |
| MYOF       | 11.2724 | 11.3978 | 10.9445 | 10.2413 | 7.37894 | 9.37402 | 10.3445 | 10.1134 | 10.3288 |
| PLCE1-AS1  | 4.91858 | 4.84936 | 5.05452 | 4.94249 | 5.27942 | 5.27707 | 4.89402 | 5.14817 | 4.89014 |
| NOC3L      | 7.49412 | 7.68203 | 7.58425 | 6.92662 | 4.95742 | 5.93759 | 7.07697 | 5.93036 | 6.48791 |
| PDLIM1     | 10.5525 | 9.79725 | 10.0859 | 10.6057 | 9.3563  | 10.4355 | 11.2455 | 10.5506 | 10.8543 |
| sorbs1     | 7.84507 | 7.98797 | 8.66609 | 6.44173 | 7.31424 | 6.09451 | 6.67388 | 7.73607 | 7.25868 |
| TCTN3      | 9.002   | 8.73181 | 9.22448 | 7.99028 | 5.99352 | 6.56257 | 8.32191 | 7.10226 | 7.83677 |
| ENTPD1-AS1 | 6.14502 | 6.17018 | 6.06503 | 5.30353 | 5.32297 | 5.35845 | 5.37327 | 4.97937 | 5.20365 |
| MIR3157    | 6.49909 | 6.31572 | 6.27987 | 6.1002  | 7.46352 | 6.20898 | 5.88157 | 6.02196 | 6.47521 |
| BLNK       | 8.9187  | 9.0093  | 8.4858  | 9.74337 | 8.3629  | 9.99442 | 9.58403 | 9.65954 | 10.3893 |
| OPALIN     | 5.30638 | 5.37106 | 5.54002 | 5.97667 | 6.70407 | 5.6774  | 5.62287 | 5.99666 | 5.67055 |
| TLL2       | 3.83125 | 4.73477 | 3.75518 | 5.18301 | 4.43722 | 4.36808 | 4.04366 | 4.14155 | 4.14169 |
| TM9SF3     | 11.1061 | 10.7998 | 11.2615 | 10.7826 | 8.74436 | 10.6725 | 10.8464 | 10.6933 | 10.8435 |
| pik3ap1    | 6.51869 | 6.27146 | 6.69829 | 6.63042 | 7.20714 | 7.33678 | 6.60665 | 6.80625 | 6.91685 |
| MIR607     | 2.35915 | 2.5266  | 2.43916 | 2.88733 | 2.55155 | 2.70573 | 2.64332 | 2.72522 | 2.63512 |
| SLIT1      | 6.22672 | 6.32851 | 6.07597 | 6.32977 | 6.52635 | 6.28207 | 5.99093 | 6.06831 | 6.15657 |
| FRAT2      | 6.89601 | 7.11131 | 7.14944 | 7.15974 | 6.71491 | 7.94035 | 7.38757 | 7.28052 | 6.93261 |
| RRP12      | 8.03029 | 7.87058 | 7.7222  | 8.06838 | 6.50459 | 7.86133 | 8.43907 | 7.52735 | 8.21237 |
| EXOSC1     | 8.36224 | 8.12506 | 8.25232 | 8.41399 | 7.49762 | 8.14712 | 8.28154 | 8.49489 | 8.60897 |
| MMS19      | 8.40354 | 8.37535 | 8.3502  | 7.90913 | 6.39929 | 7.63617 | 7.84319 | 7.66702 | 7.6225  |
| MORN4      | 6.20834 | 6.06326 | 5.82113 | 5.96109 | 6.07098 | 5.60972 | 6.06801 | 5.31086 | 5.0558  |
| AVP11      | 9.98515 | 9.33781 | 9.52108 | 9.68237 | 9.39911 | 10.2533 | 9.41057 | 10.6754 | 10.0253 |
| SFRP5      | 6.0105  | 6.42409 | 6.0837  | 6.93797 | 6.59966 | 6.80719 | 6.81582 | 6.48735 | 6.73062 |

|          |         |         |         |         |         |         |         |         |         |
|----------|---------|---------|---------|---------|---------|---------|---------|---------|---------|
| CRTAC1   | 6.61297 | 6.45904 | 6.72409 | 6.77266 | 6.34411 | 7.23609 | 6.50099 | 6.57435 | 6.30588 |
| LOXL4    | 5.46116 | 5.70029 | 6.05556 | 6.25514 | 6.14018 | 6.08813 | 6.20388 | 6.17334 | 6.19767 |
| PYROXD2  | 6.60232 | 6.52577 | 6.42344 | 6.15891 | 6.40095 | 6.0842  | 5.65367 | 6.17276 | 6.19746 |
| HPS1     | 7.41921 | 7.1121  | 7.39006 | 7.27432 | 6.37506 | 7.37936 | 7.37097 | 7.21895 | 7.5194  |
| HPSE2    | 5.46574 | 7.22549 | 6.47084 | 5.40465 | 5.47703 | 5.89787 | 5.17026 | 5.51057 | 5.14855 |
| ERLIN1   | 9.5175  | 9.64037 | 9.03569 | 9.38513 | 6.05961 | 8.80055 | 9.31041 | 8.87057 | 8.70056 |
| CHUK     | 7.42276 | 7.66477 | 7.76866 | 7.85852 | 6.10109 | 7.26936 | 7.96049 | 7.67307 | 7.69384 |
| PKD2L1   | 5.64364 | 5.63128 | 5.7032  | 6.27793 | 6.72528 | 6.38969 | 6.0423  | 6.27726 | 5.95645 |
| SEC31B   | 7.14671 | 7.16655 | 6.68996 | 5.93292 | 6.10639 | 5.83324 | 5.76027 | 5.88239 | 5.95936 |
| MRPL43   | 6.92585 | 7.06739 | 7.0189  | 7.09269 | 6.03728 | 6.43304 | 7.25253 | 6.28615 | 6.55777 |
| PDZD7    | 5.90872 | 5.82479 | 5.76869 | 6.14289 | 6.13458 | 6.31441 | 6.24232 | 6.28012 | 5.94517 |
| TLX1NB   | 5.63894 | 5.59751 | 5.77571 | 6.33401 | 6.68536 | 6.62723 | 6.15775 | 6.15555 | 6.18148 |
| LBX1     | 4.71076 | 4.64416 | 4.4945  | 5.22701 | 4.36012 | 5.51209 | 5.01464 | 5.29174 | 5.06217 |
| FBXW4    | 7.05349 | 7.11561 | 6.82829 | 5.69448 | 5.89312 | 6.29945 | 7.01569 | 6.44809 | 6.17344 |
| FGF8     | 5.39881 | 5.28657 | 5.66701 | 6.44932 | 6.26435 | 6.68913 | 5.67319 | 6.52793 | 5.85339 |
| NPM3     | 6.36296 | 6.44296 | 6.5151  | 7.44051 | 5.09781 | 7.05628 | 7.10131 | 6.6409  | 6.61384 |
| MGEA5    | 10.596  | 10.6975 | 10.7321 | 9.48717 | 7.68465 | 9.28762 | 9.29472 | 10.593  | 9.90676 |
| c10orf76 | 9.6294  | 9.34377 | 9.06145 | 8.86778 | 5.80779 | 8.36588 | 9.13915 | 8.41239 | 9.16357 |
| LDB1     | 10.6419 | 10.7864 | 10.5931 | 9.77949 | 8.33642 | 9.3073  | 9.80147 | 9.58389 | 9.43951 |
| PITX3    | 6.44761 | 6.38373 | 6.18893 | 6.89915 | 7.32485 | 7.54716 | 6.74185 | 7.06243 | 6.97994 |
| PSD      | 6.33451 | 6.22856 | 6.49893 | 6.79881 | 6.85978 | 6.71937 | 6.88694 | 6.67271 | 6.63332 |
| CUEDC2   | 7.33112 | 7.26187 | 7.15968 | 7.43577 | 6.09858 | 7.37587 | 7.64332 | 7.2587  | 7.02378 |
| ARL3     | 7.20653 | 7.72589 | 7.40244 | 7.80859 | 6.84147 | 7.17801 | 8.13718 | 7.63147 | 7.22907 |
| PCGF6    | 7.03891 | 6.80963 | 7.08504 | 6.41953 | 6.07051 | 5.9182  | 7.16349 | 6.00123 | 5.50889 |
| USMG5    | 7.16314 | 7.02364 | 7.39338 | 7.8994  | 7.57903 | 7.64993 | 8.55805 | 7.65741 | 7.95375 |
| CALHM2   | 6.48129 | 6.52236 | 7.23374 | 7.05652 | 6.37736 | 7.10701 | 6.83288 | 6.57526 | 6.87345 |

|           |         |         |         |         |         |         |         |         |         |
|-----------|---------|---------|---------|---------|---------|---------|---------|---------|---------|
| calhm1    | 5.6553  | 5.92619 | 5.65895 | 6.11439 | 6.52203 | 6.0467  | 5.63    | 6.01698 | 5.98202 |
| calhm3    | 5.72675 | 5.79061 | 5.86316 | 6.6708  | 6.0961  | 6.84715 | 6.19217 | 6.2797  | 6.0899  |
| SH3PXD2A  | 8.99214 | 8.44015 | 8.47814 | 7.91977 | 6.04845 | 9.40139 | 8.35736 | 9.27773 | 9.07316 |
| STN1      | 6.8517  | 6.44968 | 6.98046 | 7.15996 | 6.03494 | 7.50783 | 7.74143 | 8.55091 | 7.08646 |
| Cfap43    | 4.67054 | 4.5892  | 4.60077 | 4.07211 | 5.54642 | 4.30185 | 3.85763 | 4.38247 | 4.15556 |
| MIR609    | 5.06588 | 5.02527 | 5.52046 | 5.31413 | 5.71578 | 5.36534 | 5.29192 | 5.48163 | 5.64434 |
| MIR4482   | 6.93476 | 6.54408 | 6.50504 | 6.43049 | 6.56433 | 6.11071 | 6.05125 | 7.00061 | 6.68935 |
| SORCS1    | 5.20619 | 5.7996  | 5.58213 | 5.20666 | 6.02994 | 5.27378 | 5.09371 | 5.50587 | 5.2627  |
| ADD3-AS1  | 6.24494 | 6.14275 | 6.63009 | 6.5521  | 7.70297 | 6.79381 | 6.88415 | 6.72384 | 6.92307 |
| SMNDC1    | 8.44196 | 8.63631 | 8.26682 | 8.0579  | 6.56499 | 8.27712 | 8.20021 | 7.83232 | 8.31592 |
| BBIP1     | 7.26911 | 7.0027  | 7.44214 | 7.05936 | 6.41216 | 6.66408 | 6.82938 | 6.57637 | 6.89421 |
| RPL13AP6  | 4.61206 | 4.59053 | 4.5533  | 4.46802 | 3.93893 | 5.25309 | 4.62919 | 4.36786 | 4.81451 |
| NRAP      | 5.24352 | 5.12724 | 5.02552 | 5.58446 | 6.02791 | 5.73023 | 5.17319 | 5.52095 | 5.64088 |
| MIR4483   | 1.79894 | 2.26133 | 2.06747 | 3.31763 | 1.86018 | 2.7619  | 2.51019 | 2.15509 | 1.70304 |
| DCLRE1A   | 5.75888 | 6.02789 | 5.57919 | 5.48852 | 5.09711 | 4.79323 | 5.79534 | 4.56721 | 5.34518 |
| CCDC186   | 9.75811 | 9.72331 | 9.55116 | 8.65491 | 6.82879 | 8.7651  | 8.8215  | 9.58085 | 9.34153 |
| AFAP1L2   | 7.38115 | 6.84496 | 6.86935 | 7.54872 | 5.33883 | 7.33825 | 7.50181 | 7.29484 | 7.36269 |
| ABLIM1    | 10.4304 | 10.0609 | 10.2407 | 10.0732 | 9.6358  | 10.1002 | 10.0597 | 10.082  | 10.5057 |
| GFRA1     | 7.07224 | 7.06927 | 8.0693  | 6.88789 | 7.05724 | 6.94903 | 6.38728 | 6.54448 | 6.43481 |
| SHTN1     | 8.64772 | 9.01538 | 8.60157 | 8.22527 | 7.39864 | 7.89691 | 8.60872 | 7.71025 | 8.72032 |
| VAX1      | 4.89916 | 5.15398 | 5.35059 | 5.6547  | 6.042   | 6.03488 | 5.96354 | 6.01059 | 5.61236 |
| MIR3663   | 4.45279 | 4.30847 | 4.24133 | 4.38583 | 4.98115 | 4.69222 | 4.80325 | 4.54395 | 4.7013  |
| PDZD8     | 8.0745  | 7.9459  | 7.90832 | 7.52564 | 7.57931 | 8.934   | 8.74925 | 9.42915 | 8.24266 |
| EMX2OS    | 6.46364 | 6.20863 | 5.96032 | 6.68914 | 5.7893  | 6.94663 | 6.59482 | 6.01914 | 6.63034 |
| RAB11FIP2 | 8.4487  | 8.7924  | 8.45296 | 7.56506 | 5.56657 | 6.75336 | 7.91665 | 7.0923  | 7.52973 |
| SFXN4     | 7.47526 | 7.74895 | 7.89023 | 7.31348 | 6.59258 | 6.64626 | 7.50006 | 6.50747 | 6.71649 |

|           |         |         |         |         |         |         |         |         |         |
|-----------|---------|---------|---------|---------|---------|---------|---------|---------|---------|
| PRDX3     | 8.95968 | 9.45634 | 9.31219 | 9.09128 | 6.87139 | 7.98895 | 9.09786 | 8.35183 | 8.48824 |
| RGS10     | 6.75118 | 7.17502 | 6.71052 | 7.66037 | 6.81781 | 7.70103 | 7.876   | 7.91353 | 7.5564  |
| MCMBP     | 8.89152 | 9.00824 | 9.23037 | 8.55502 | 6.55885 | 8.03828 | 8.80771 | 8.12019 | 8.42387 |
| WDR11-AS1 | 5.32781 | 5.19613 | 5.14374 | 5.77559 | 6.5843  | 5.63829 | 5.47682 | 5.66747 | 5.61132 |
| FGFR2     | 9.43876 | 9.854   | 8.92889 | 7.56326 | 7.06723 | 6.51304 | 7.59027 | 6.56599 | 6.04214 |
| ATE1      | 8.47619 | 8.21433 | 8.22159 | 7.55387 | 5.87763 | 6.9234  | 8.10093 | 6.77804 | 7.59499 |
| NSMCE4A   | 7.95364 | 8.1634  | 8.00874 | 7.32291 | 5.94194 | 6.50428 | 7.61554 | 6.22755 | 6.14623 |
| c10orf88  | 8.56433 | 8.93878 | 8.41735 | 7.52934 | 6.46393 | 6.86697 | 8.30601 | 7.42139 | 8.14568 |
| CHST15    | 8.3798  | 8.23264 | 8.1889  | 9.24954 | 8.00466 | 9.16129 | 8.94725 | 9.34397 | 9.84982 |
| OAT       | 8.03302 | 8.02425 | 7.99532 | 8.34092 | 5.7636  | 7.23994 | 8.03817 | 6.74177 | 6.86983 |
| NKX1-2    | 6.91877 | 6.91653 | 7.09286 | 7.66913 | 7.53873 | 8.1134  | 7.43837 | 7.8495  | 7.76721 |
| METTL10   | 8.12497 | 7.8374  | 8.17642 | 7.09325 | 5.81078 | 6.90447 | 7.52149 | 6.81543 | 6.74112 |
| CTBP2     | 6.65559 | 6.35229 | 6.36994 | 6.68806 | 6.42061 | 6.38944 | 6.57539 | 6.71315 | 6.56039 |
| TEX36     | 4.45322 | 4.36886 | 4.52703 | 4.64882 | 6.00126 | 5.08939 | 4.90435 | 4.97979 | 4.99822 |
| mmp21     | 5.15163 | 5.59045 | 5.3326  | 5.2786  | 5.73851 | 5.40375 | 5.4552  | 5.26858 | 5.34437 |
| UROS      | 7.34927 | 7.34217 | 7.30163 | 7.37676 | 6.4215  | 6.51081 | 7.19446 | 6.2689  | 6.76455 |
| DHX32     | 9.04359 | 9.09411 | 9.00609 | 9.45645 | 7.07321 | 9.55102 | 9.63028 | 8.85067 | 9.35806 |
| ADAM12    | 6.8405  | 6.02179 | 5.9057  | 7.49383 | 6.23361 | 6.72898 | 6.55295 | 6.70731 | 6.98908 |
| C10orf90  | 4.60291 | 4.6942  | 4.60088 | 4.45916 | 4.69188 | 4.85125 | 4.46464 | 4.49416 | 4.32514 |
| clrn3     | 3.62827 | 3.68619 | 3.63087 | 4.23915 | 5.21692 | 3.98312 | 3.84632 | 3.87655 | 3.81211 |
| MKI67     | 8.35802 | 7.49593 | 7.46113 | 7.85358 | 6.94783 | 7.23596 | 7.4582  | 7.85756 | 7.59082 |
| EBF3      | 7.19609 | 6.65768 | 7.23749 | 5.58668 | 6.01937 | 6.17762 | 5.80419 | 6.09933 | 5.7083  |
| MIR4297   | 5.62824 | 5.6273  | 5.94839 | 6.06316 | 7.70394 | 5.96333 | 5.68292 | 6.48415 | 6.43131 |
| LINC00959 | 5.95856 | 5.89679 | 5.90765 | 6.04267 | 6.02036 | 5.47762 | 5.94879 | 5.94879 | 5.96851 |
| MIR378C   | 3.32297 | 4.3401  | 3.23273 | 4.14304 | 3.48648 | 4.72133 | 3.94316 | 4.34789 | 3.8567  |
| TCERG1L   | 4.81536 | 5.30077 | 5.12275 | 5.2957  | 6.05106 | 6.53506 | 5.82585 | 5.56679 | 5.9163  |

|           |         |         |         |         |         |         |         |         |         |
|-----------|---------|---------|---------|---------|---------|---------|---------|---------|---------|
| LINC01164 | 5.72055 | 5.99896 | 6.09274 | 5.98726 | 6.41002 | 6.10059 | 5.95469 | 6.20416 | 6.24097 |
| BNIP3     | 9.46498 | 9.33467 | 9.24978 | 11.4481 | 12.0665 | 12.3744 | 11.4515 | 11.843  | 11.3808 |
| STK32C    | 6.57519 | 6.59626 | 6.50767 | 6.85215 | 6.73837 | 6.87968 | 7.13192 | 6.6543  | 6.49498 |
| nkx6-2    | 6.17055 | 6.48425 | 6.38891 | 7.15345 | 6.58982 | 7.8243  | 7.05791 | 7.44806 | 6.957   |
| CFAP46    | 5.57498 | 5.56895 | 5.56447 | 5.91729 | 5.8703  | 6.2063  | 5.86192 | 6.00576 | 5.9321  |
| mir202    | 3.56066 | 3.33593 | 3.62473 | 4.01751 | 3.76298 | 3.98705 | 4.32042 | 3.81071 | 3.76313 |
| ADAM8     | 6.19634 | 6.17483 | 6.2763  | 7.03613 | 6.9475  | 7.88086 | 6.81617 | 7.66356 | 7.1748  |
| CALY      | 6.56376 | 6.55307 | 6.62438 | 7.31185 | 7.70066 | 7.39218 | 7.04893 | 6.889   | 7.2351  |
| FUOM      | 6.00221 | 6.21433 | 6.14922 | 6.74881 | 5.29127 | 7.33005 | 7.01152 | 7.30445 | 6.94091 |
| MIR3944   | 6.92278 | 6.8088  | 6.6759  | 7.58556 | 8.01611 | 7.42269 | 7.40562 | 7.17097 | 7.00406 |
| SPRN      | 6.06933 | 6.20989 | 6.21568 | 6.15494 | 6.69016 | 6.84872 | 5.71773 | 6.6813  | 6.60524 |
| SPRNP1    | 4.59954 | 5.07909 | 4.7793  | 5.20032 | 4.94834 | 5.98643 | 5.39861 | 5.20032 | 5.30117 |
| MIR1324   | 4.95303 | 4.83377 | 4.75982 | 5.32082 | 7.16761 | 5.49642 | 5.02444 | 5.11028 | 5.11276 |
| ODF3      | 5.60561 | 5.80529 | 5.91768 | 6.30278 | 6.21263 | 6.60595 | 6.13866 | 6.5273  | 5.91826 |
| BET1L     | 4.99758 | 5.55707 | 5.5278  | 6.25463 | 6.09181 | 6.10015 | 6.65669 | 5.40779 | 5.82803 |
| RIC8A     | 6.84638 | 6.63308 | 6.69266 | 7.98584 | 6.89943 | 7.41138 | 7.46735 | 7.37179 | 7.645   |
| IFITM2    | 8.52594 | 7.1114  | 8.82484 | 8.48276 | 8.20074 | 8.30324 | 8.48455 | 8.08992 | 8.56656 |
| ifitm1    | 10.1502 | 9.09729 | 9.44477 | 9.27905 | 7.50286 | 8.04358 | 9.78778 | 8.8936  | 9.22908 |
| PKP3      | 8.59415 | 8.43732 | 8.30265 | 9.76569 | 8.69405 | 10.5131 | 10.1834 | 8.86739 | 9.58407 |
| ptdss2    | 6.48135 | 6.46221 | 6.31153 | 7.1335  | 6.54639 | 7.78647 | 7.35898 | 7.38434 | 7.3446  |
| LRRC56    | 6.35989 | 6.44218 | 6.47139 | 7.05333 | 7.22422 | 7.28837 | 6.66501 | 6.90888 | 6.93131 |
| RASSF7    | 6.18843 | 6.18408 | 6.09551 | 6.90979 | 6.7143  | 7.36837 | 6.97546 | 6.7224  | 6.63731 |
| PHRF1     | 7.82614 | 7.74858 | 8.02677 | 7.65926 | 7.22212 | 7.72419 | 7.80126 | 7.95186 | 7.76725 |
| DRD4      | 5.76911 | 6.38078 | 5.97334 | 6.92171 | 6.15202 | 6.81651 | 6.53141 | 6.38712 | 6.77289 |
| EPS8L2    | 7.7099  | 7.74839 | 7.47954 | 8.23958 | 7.27057 | 8.72958 | 8.33873 | 8.09873 | 8.29274 |
| TMEM80    | 7.52525 | 7.97089 | 7.53515 | 7.56793 | 7.07779 | 8.39997 | 7.33195 | 9.45983 | 8.88675 |

|            |         |         |         |         |         |         |         |         |         |
|------------|---------|---------|---------|---------|---------|---------|---------|---------|---------|
| TALDO1     | 7.53262 | 7.72848 | 7.43861 | 8.09969 | 6.94344 | 8.22345 | 8.29594 | 7.95043 | 7.97867 |
| PNPLA2     | 7.95211 | 7.74467 | 8.11014 | 8.56625 | 7.40489 | 7.94564 | 8.26865 | 8.31731 | 8.03053 |
| cracr2b    | 6.1317  | 6.23038 | 6.1573  | 6.6639  | 6.35456 | 6.89269 | 6.47064 | 6.42533 | 6.32953 |
| CD151      | 8.62795 | 8.43372 | 8.69931 | 9.23614 | 7.89247 | 9.14705 | 9.36165 | 9.24424 | 9.43378 |
| TSPAN4     | 6.68884 | 6.42972 | 6.83581 | 7.10005 | 7.27628 | 7.37543 | 6.87097 | 7.13766 | 7.09867 |
| TOLLIP-AS1 | 6.80837 | 6.92755 | 6.71998 | 7.43605 | 7.43656 | 7.27225 | 7.15964 | 7.06157 | 7.22708 |
| BRSK2      | 6.46078 | 6.59411 | 6.62867 | 7.05003 | 7.11488 | 7.28377 | 6.98348 | 7.0686  | 7.08976 |
| KRTAP5-AS1 | 6.10191 | 6.48268 | 6.0677  | 6.96045 | 6.78606 | 7.03511 | 6.61173 | 7.3614  | 6.99734 |
| Krtap5-5   | 5.46565 | 5.55741 | 5.30878 | 6.71991 | 6.87723 | 6.39346 | 6.37111 | 6.03458 | 6.02166 |
| KRTAP5-6   | 6.51101 | 6.48157 | 6.79748 | 6.49997 | 7.79453 | 6.53827 | 6.38426 | 6.82569 | 6.68451 |
| syt8       | 6.63874 | 6.37449 | 6.65268 | 7.0617  | 6.81952 | 7.01132 | 7.14771 | 7.02792 | 6.95748 |
| LSP1       | 6.46937 | 6.34822 | 6.81832 | 7.01943 | 7.27132 | 6.5168  | 7.1586  | 6.94038 | 7.12833 |
| MRPL23     | 5.86525 | 5.94155 | 6.07291 | 6.65062 | 5.90265 | 6.71504 | 6.57218 | 6.06359 | 6.20623 |
| IGF2-AS    | 6.16988 | 6.0836  | 5.98824 | 7.19196 | 7.23235 | 7.70047 | 6.98209 | 6.91313 | 7.30649 |
| MIR4686    | 6.92639 | 6.59821 | 7.16842 | 7.73626 | 8.18345 | 7.83414 | 7.06864 | 9.02417 | 8.42298 |
| TSPAN32    | 5.90953 | 6.18879 | 5.90414 | 6.37727 | 6.68044 | 6.42153 | 6.32354 | 6.37619 | 6.39802 |
| CD81       | 7.89059 | 7.67036 | 7.6784  | 7.96692 | 7.646   | 7.66933 | 7.91901 | 7.76424 | 7.90393 |
| TSSC4      | 6.45049 | 6.55429 | 6.32165 | 6.97062 | 6.72394 | 6.87321 | 7.30509 | 6.81373 | 6.71735 |
| KCNQ1DN    | 6.31038 | 6.75129 | 6.52777 | 7.0468  | 7.53294 | 6.7939  | 6.52065 | 6.76137 | 6.71791 |
| NAP1L4     | 5.49935 | 5.8886  | 5.71726 | 7.02768 | 6.21035 | 6.60146 | 6.9797  | 6.39027 | 6.40423 |
| MRGPRG-AS1 | 6.28106 | 6.04677 | 6.34991 | 7.09009 | 6.84508 | 7.116   | 6.66332 | 6.74558 | 6.87892 |
| TSSC2      | 6.36561 | 6.17687 | 6.24292 | 6.1455  | 6.61421 | 6.55642 | 6.22488 | 6.11489 | 6.6227  |
| ART1       | 5.34242 | 5.48721 | 5.80686 | 5.66163 | 6.30775 | 5.84177 | 5.5383  | 6.19016 | 6.0788  |
| PGAP2      | 8.00625 | 8.19257 | 7.90916 | 7.47277 | 6.70195 | 6.72718 | 7.76758 | 6.74108 | 7.34701 |
| STIM1      | 7.80472 | 7.80754 | 8.00148 | 7.61845 | 6.81154 | 8.34584 | 8.08156 | 8.36954 | 8.28919 |
| RRM1       | 9.08376 | 9.25121 | 9.07408 | 9.0543  | 6.53199 | 8.4283  | 9.09032 | 8.29305 | 8.45585 |



|              |         |         |         |         |         |         |         |         |         |
|--------------|---------|---------|---------|---------|---------|---------|---------|---------|---------|
| LOC100506082 | 4.11556 | 4.28026 | 3.87992 | 4.39363 | 5.1187  | 4.83251 | 4.28644 | 4.29932 | 4.4081  |
| MMP26        | 4.3055  | 4.35572 | 4.19011 | 4.6932  | 5.14138 | 4.4661  | 4.19443 | 4.29761 | 4.45225 |
| TRIM6-TRIM34 | 6.50351 | 6.60464 | 6.56918 | 6.00668 | 5.83476 | 5.6292  | 6.47193 | 5.67998 | 5.67071 |
| TRIM22       | 7.8346  | 7.5297  | 7.49008 | 6.08251 | 6.19476 | 5.53132 | 6.63439 | 5.84542 | 6.12352 |
| C11orf42     | 3.58035 | 3.35349 | 3.31359 | 3.88312 | 3.64283 | 4.30413 | 3.48568 | 4.00905 | 3.42781 |
| CNGA4        | 5.25218 | 4.88787 | 5.47208 | 5.24439 | 5.40821 | 5.79125 | 5.24541 | 5.58177 | 4.99363 |
| CCKBR        | 5.36188 | 5.30648 | 5.26784 | 5.98802 | 6.12722 | 6.28237 | 5.94225 | 5.73025 | 5.97091 |
| TIMM10B      | 8.94093 | 8.79978 | 9.00518 | 7.66465 | 7.85031 | 7.84084 | 7.88281 | 8.47722 | 7.88813 |
| DNHD1        | 6.46334 | 6.65655 | 6.40168 | 5.45509 | 6.12676 | 5.49856 | 5.50966 | 6.15816 | 5.96039 |
| DCHS1        | 6.03978 | 6.35121 | 6.23101 | 6.7265  | 6.37527 | 6.94882 | 6.5325  | 6.54805 | 6.44275 |
| ZNF215       | 5.92586 | 4.10686 | 5.5305  | 5.69255 | 4.862   | 5.96085 | 6.37075 | 5.59494 | 5.53608 |
| MIR302E      | 2.1156  | 2.27064 | 2.02886 | 2.46885 | 2.32    | 2.57337 | 2.34155 | 2.04905 | 2.31072 |
| SYT9         | 4.55184 | 5.57262 | 5.3936  | 5.62779 | 5.81285 | 5.6396  | 5.01134 | 5.55854 | 5.17654 |
| olfml1       | 6.76926 | 6.44212 | 7.29282 | 6.24034 | 5.81038 | 6.10882 | 5.70231 | 5.57115 | 5.58257 |
| TUB          | 6.83024 | 6.59357 | 6.67113 | 6.4602  | 6.40679 | 6.24953 | 6.37367 | 6.231   | 6.42596 |
| ST5          | 6.45235 | 5.9409  | 6.09741 | 6.2454  | 6.31333 | 5.80515 | 6.4097  | 6.02098 | 6.2555  |
| AKIP1        | 6.66747 | 6.3356  | 6.58178 | 7.75832 | 6.07932 | 6.63437 | 7.80813 | 6.6927  | 6.59607 |
| KRT8P41      | 5.37562 | 5.38208 | 5.78019 | 5.29033 | 6.35392 | 6.294   | 5.72187 | 5.77811 | 5.02528 |
| IPO7         | 10.4083 | 10.1444 | 10.5059 | 9.92739 | 6.38598 | 9.82212 | 10.1906 | 10.199  | 10.5142 |
| ZNF143       | 7.516   | 7.33663 | 7.25362 | 6.64252 | 5.47526 | 7.77539 | 7.66111 | 8.01711 | 7.77029 |
| WEE1         | 9.33686 | 8.89911 | 9.46404 | 8.47585 | 5.66988 | 8.65164 | 8.18393 | 7.78011 | 7.21133 |
| SWAP70       | 8.85927 | 9.01174 | 8.73261 | 8.26654 | 6.13286 | 8.54896 | 8.61228 | 8.62445 | 8.21673 |
| SBF2-AS1     | 6.75051 | 6.87434 | 6.74459 | 6.61148 | 7.29388 | 6.45451 | 6.79054 | 6.89275 | 6.80485 |
| ADM          | 6.22467 | 6.73233 | 6.66873 | 9.34727 | 9.32152 | 10.8548 | 8.92936 | 10.292  | 9.31912 |
| AMPD3        | 6.92513 | 7.20822 | 6.94808 | 7.78152 | 8.50719 | 9.52488 | 8.5548  | 9.51324 | 9.33142 |
| MRVI1-AS1    | 5.9073  | 6.32822 | 5.87604 | 6.14522 | 6.57665 | 6.52996 | 5.87416 | 6.41892 | 6.44554 |

|             |         |         |         |         |         |         |         |         |         |
|-------------|---------|---------|---------|---------|---------|---------|---------|---------|---------|
| ZBED5-AS1   | 7.23887 | 6.92602 | 7.04002 | 7.17599 | 5.73653 | 6.59096 | 7.32986 | 5.95657 | 6.20911 |
| USP47       | 8.59696 | 8.52188 | 8.54219 | 8.15003 | 5.5901  | 8.62054 | 8.74389 | 8.56783 | 8.5266  |
| MICALCL     | 9.00965 | 8.47375 | 8.70424 | 8.13768 | 6.20203 | 8.54594 | 8.42083 | 9.15236 | 9.22832 |
| TEAD1       | 9.49451 | 9.02259 | 9.23247 | 8.52062 | 7.01892 | 7.88805 | 7.96779 | 9.51933 | 9.19468 |
| RASSF10     | 7.47704 | 7.85066 | 7.25727 | 7.26699 | 5.06238 | 6.51549 | 7.9347  | 6.40934 | 6.46617 |
| ARNTL       | 8.39723 | 8.74507 | 9.05974 | 6.82932 | 6.52642 | 7.92703 | 6.67854 | 7.7833  | 7.21654 |
| FAR1        | 8.39421 | 7.98236 | 8.61597 | 7.81165 | 5.49087 | 6.60152 | 8.05763 | 7.85819 | 7.67326 |
| CALCB       | 4.71217 | 4.56479 | 4.47389 | 4.94486 | 5.43721 | 4.90764 | 4.50533 | 5.35809 | 4.87919 |
| INSC        | 5.44472 | 5.41078 | 5.47444 | 6.10085 | 6.51019 | 6.37454 | 5.95701 | 6.7068  | 6.04111 |
| C11orf58    | 5.82941 | 6.17798 | 6.00115 | 5.39873 | 4.21294 | 5.31743 | 6.10424 | 5.44332 | 5.61621 |
| NUCB2       | 5.31565 | 4.97054 | 5.50373 | 5.02521 | 5.24337 | 5.58564 | 5.52342 | 5.46063 | 5.72915 |
| NCR3LG1     | 6.87541 | 6.98171 | 6.89455 | 6.40081 | 6.6457  | 6.45439 | 6.9518  | 6.7973  | 6.98284 |
| MYOD1       | 5.57365 | 5.99497 | 5.82519 | 6.47677 | 6.37935 | 6.71537 | 6.06104 | 6.65687 | 6.40037 |
| LOC494141   | 2.95769 | 3.72429 | 3.27153 | 3.53106 | 3.92214 | 4.01831 | 4.10898 | 3.71302 | 3.52148 |
| SAA1        | 5.29322 | 4.9382  | 5.82396 | 5.80385 | 5.75356 | 5.78987 | 5.34096 | 4.90466 | 4.92231 |
| LDHA        | 8.68763 | 7.20755 | 8.41839 | 8.05863 | 7.53085 | 8.60171 | 8.06539 | 9.76169 | 8.90028 |
| ldhc        | 4.71068 | 4.4172  | 4.03865 | 3.89091 | 4.93746 | 4.47383 | 4.49047 | 4.41341 | 4.24932 |
| LDHAL6A     | 4.70753 | 3.96907 | 4.63436 | 4.84744 | 5.41914 | 5.60086 | 5.25658 | 5.3658  | 4.85037 |
| SPTY2D1-AS1 | 5.75929 | 6.14337 | 5.64569 | 5.77945 | 6.06141 | 5.89635 | 5.89259 | 5.209   | 5.48413 |
| TMEM86A     | 9.04575 | 8.49249 | 8.00705 | 8.67801 | 8.46944 | 7.70356 | 8.48988 | 8.45799 | 8.58669 |
| NAV2        | 7.94467 | 7.66345 | 8.32585 | 8.22146 | 6.82689 | 7.34355 | 7.8782  | 8.67577 | 8.53917 |
| MIR4486     | 5.76724 | 6.0358  | 6.22848 | 6.89552 | 7.25994 | 7.29648 | 6.81906 | 7.40788 | 7.60131 |
| PRMT3       | 7.24601 | 7.29948 | 7.31795 | 7.34992 | 5.31625 | 6.4641  | 7.595   | 6.54809 | 6.97089 |
| NELL1       | 5.34369 | 6.12505 | 5.50226 | 5.72123 | 6.85228 | 6.06095 | 5.48699 | 5.60267 | 5.67501 |
| ANO5        | 5.0388  | 4.83295 | 4.61094 | 4.69222 | 5.22133 | 4.6738  | 4.27221 | 4.72762 | 4.62961 |
| GAS2        | 4.76744 | 4.78944 | 4.77005 | 4.97789 | 5.03037 | 5.18717 | 5.12833 | 5.24142 | 4.87339 |

|           |         |         |         |         |         |         |         |         |         |
|-----------|---------|---------|---------|---------|---------|---------|---------|---------|---------|
| LUZP2     | 4.06184 | 4.75358 | 4.86248 | 4.60781 | 4.91123 | 4.40564 | 4.48001 | 4.18712 | 4.32625 |
| ANO3      | 5.28375 | 5.37113 | 5.28335 | 5.31622 | 5.86661 | 5.51011 | 5.2217  | 5.10366 | 5.04275 |
| FIBIN     | 6.28683 | 6.78865 | 7.22447 | 5.2808  | 6.25344 | 6.09272 | 6.02418 | 6.15012 | 5.93951 |
| BDNF-AS   | 6.60614 | 8.38288 | 6.52265 | 4.81563 | 5.05901 | 4.70273 | 4.70617 | 4.4304  | 4.92052 |
| MIR610    | 5.35228 | 5.09388 | 5.40026 | 4.89685 | 5.82725 | 5.02228 | 5.73546 | 5.77638 | 5.56804 |
| METTL15   | 7.15857 | 6.89349 | 6.67928 | 6.30769 | 5.54885 | 6.17777 | 5.84701 | 6.08764 | 6.253   |
| ARL14EP   | 7.35311 | 7.88542 | 7.7565  | 6.45614 | 5.52847 | 6.29455 | 7.24265 | 6.20121 | 6.57852 |
| ELP4      | 8.29579 | 7.73854 | 8.14065 | 7.52961 | 4.84152 | 6.52572 | 7.78297 | 6.26548 | 7.11614 |
| WT1-AS    | 4.79261 | 4.64143 | 4.79905 | 5.08867 | 5.46602 | 5.72797 | 5.06996 | 4.84924 | 4.84078 |
| PRRG4     | 9.7008  | 9.26127 | 9.33263 | 10.3968 | 7.60429 | 10.0303 | 10.6718 | 10.0471 | 10.3754 |
| QSER1     | 9.3092  | 9.35009 | 9.07197 | 8.07679 | 6.34391 | 7.05035 | 8.34288 | 7.72049 | 8.06221 |
| DEPDC7    | 6.69155 | 6.75933 | 6.2256  | 6.85372 | 5.49821 | 5.98928 | 6.48206 | 5.86655 | 5.93628 |
| TCP11L1   | 6.90118 | 7.72211 | 6.72478 | 6.88251 | 5.7889  | 5.92716 | 6.57722 | 6.41939 | 6.49946 |
| LINC00294 | 7.73261 | 8.91199 | 7.80975 | 7.57131 | 6.35713 | 6.05348 | 7.77127 | 7.33518 | 7.38871 |
| CSTF3-AS1 | 4.66892 | 5.0145  | 4.95363 | 5.12413 | 6.83712 | 5.99943 | 5.16087 | 5.29067 | 5.57473 |
| HIPK3     | 10.4415 | 10.5488 | 10.5717 | 9.97383 | 7.95161 | 10.3749 | 10.4401 | 9.92314 | 10.8436 |
| KIAA1549L | 5.7859  | 5.76593 | 5.8997  | 6.7217  | 6.35321 | 6.44007 | 5.67448 | 6.26951 | 5.96896 |
| CAPRIN1   | 10.8028 | 10.4758 | 10.8133 | 9.95352 | 6.98797 | 9.41289 | 10.279  | 10.0182 | 10.2582 |
| NAT10     | 8.84596 | 8.82588 | 8.96707 | 8.0853  | 6.55897 | 7.3758  | 8.23683 | 7.25652 | 7.65684 |
| CAT       | 10.1441 | 11.015  | 9.9754  | 10.2668 | 8.41112 | 9.36167 | 9.72874 | 9.7158  | 9.60149 |
| EHF       | 11.3455 | 10.7606 | 10.9421 | 10.4992 | 11.5873 | 12.1778 | 11.1888 | 12.5696 | 11.9162 |
| CD44      | 12.2641 | 12.0106 | 12.1397 | 11.3954 | 9.20166 | 11.4071 | 11.6621 | 11.2015 | 11.6793 |
| fjx1      | 7.47052 | 7.3704  | 7.5215  | 8.6822  | 6.51801 | 8.12191 | 8.6378  | 7.8053  | 7.84059 |
| TRIM44    | 8.7001  | 9.04416 | 8.5957  | 8.02599 | 5.96655 | 6.96622 | 8.16349 | 7.01559 | 7.52316 |
| LDLRAD3   | 8.88621 | 9.08265 | 8.91641 | 8.16582 | 6.6958  | 7.87985 | 7.86999 | 8.00103 | 8.15707 |
| MIR3973   | 7.84219 | 7.28078 | 6.95063 | 5.32244 | 6.60767 | 5.07858 | 5.13579 | 5.46763 | 5.71263 |

|               |         |         |         |         |         |         |         |         |         |
|---------------|---------|---------|---------|---------|---------|---------|---------|---------|---------|
| PRR5L         | 6.3113  | 6.31138 | 6.06832 | 6.02464 | 6.69083 | 6.67511 | 5.7887  | 6.36946 | 6.38301 |
| RAG1          | 4.13932 | 3.89639 | 3.85969 | 4.25255 | 5.08678 | 3.7265  | 4.00013 | 4.04034 | 3.8513  |
| API5          | 9.76747 | 9.68468 | 9.93116 | 9.40921 | 6.40634 | 8.79692 | 9.7456  | 8.81351 | 9.22758 |
| TTC17         | 9.62517 | 9.80037 | 9.60735 | 8.32543 | 6.62959 | 7.29418 | 8.35534 | 8.72525 | 8.87777 |
| HSD17B12      | 5.30884 | 5.37269 | 5.59731 | 5.08071 | 4.82997 | 5.36196 | 5.48462 | 5.28042 | 5.3354  |
| MIR670        | 4.37331 | 4.89346 | 5.33768 | 5.63401 | 5.40947 | 5.44149 | 5.15413 | 5.78118 | 5.45805 |
| mir129-2      | 3.04348 | 3.77001 | 3.41343 | 4.5695  | 5.50144 | 4.48141 | 4.52894 | 3.86618 | 3.92868 |
| SEC14L1P1     | 7.22417 | 7.60597 | 7.55605 | 6.30698 | 5.56595 | 6.74812 | 6.5399  | 6.77561 | 7.03847 |
| c11orf96      | 5.81925 | 5.67602 | 5.76119 | 5.73049 | 6.05395 | 6.31062 | 5.86444 | 6.37504 | 5.70008 |
| ACCSL         | 4.82139 | 5.0894  | 4.34903 | 5.24234 | 5.35553 | 5.25906 | 4.92325 | 4.62801 | 4.91414 |
| ACCS          | 7.04696 | 7.02129 | 7.20548 | 6.27235 | 6.62687 | 6.41859 | 6.5114  | 6.33646 | 6.31171 |
| EXT2          | 9.20321 | 9.13663 | 9.06991 | 9.13358 | 7.07245 | 8.04104 | 8.85123 | 8.82575 | 8.94171 |
| CD82          | 7.00696 | 7.53656 | 7.35207 | 7.5887  | 6.30182 | 7.8755  | 8.3694  | 8.81999 | 7.64289 |
| TSPAN18       | 6.60295 | 6.62192 | 6.73154 | 6.74401 | 6.03523 | 6.65051 | 6.39392 | 6.19424 | 6.26524 |
| LOC221122     | 5.25792 | 5.34945 | 5.11858 | 5.26096 | 5.52259 | 5.56676 | 4.88818 | 5.14975 | 5.00194 |
| Prdm11        | 6.72349 | 6.52376 | 6.9146  | 6.97941 | 7.40011 | 7.1902  | 7.15654 | 7.09608 | 7.0425  |
| LOC100507384  | 5.15143 | 5.62973 | 5.49747 | 5.83897 | 6.64115 | 6.14759 | 5.61311 | 5.85342 | 5.8008  |
| DKFZp779M0652 | 5.6891  | 5.9745  | 6.02019 | 6.49042 | 7.25807 | 6.97142 | 5.99938 | 6.46877 | 6.4254  |
| CRY2          | 8.02835 | 8.34571 | 7.96469 | 7.2142  | 7.2204  | 7.31571 | 7.43767 | 8.27678 | 7.52633 |
| MAPK8IP1      | 4.77822 | 4.95576 | 4.81311 | 5.5846  | 5.15542 | 6.13185 | 5.8941  | 5.14352 | 5.56916 |
| LARGE2        | 8.65144 | 8.38056 | 8.31832 | 8.9974  | 7.86238 | 7.25228 | 8.92094 | 7.96641 | 7.97218 |
| CREB3L1       | 6.47272 | 6.06394 | 6.21767 | 6.85497 | 6.64132 | 6.47696 | 6.53163 | 6.30721 | 6.33086 |
| MIR4688       | 6.55056 | 6.71701 | 6.65431 | 7.24778 | 8.20711 | 7.92424 | 7.62357 | 7.42591 | 7.67873 |
| MDK           | 7.3472  | 7.12304 | 7.29469 | 8.08967 | 7.51739 | 7.76175 | 7.29242 | 7.78776 | 7.37914 |
| MIR3160-1     | 6.59694 | 6.50767 | 6.10531 | 6.57041 | 6.73752 | 6.92903 | 6.01653 | 6.37242 | 6.7821  |
| ATG13         | 8.914   | 8.58258 | 8.63419 | 8.27918 | 7.92472 | 8.76703 | 8.48349 | 9.56913 | 9.22292 |

|            |         |         |         |         |         |         |         |         |         |
|------------|---------|---------|---------|---------|---------|---------|---------|---------|---------|
| ZNF408     | 6.19898 | 5.89993 | 5.99221 | 6.71662 | 6.37291 | 6.68936 | 7.11518 | 6.76363 | 6.53784 |
| F2         | 5.15121 | 5.22364 | 5.07668 | 5.67267 | 6.01408 | 6.25249 | 5.50734 | 5.76509 | 5.6658  |
| LRP4-AS1   | 5.73197 | 5.60797 | 5.85756 | 6.1423  | 5.66036 | 6.56824 | 5.94368 | 5.84806 | 5.94672 |
| C11ORF49   | 7.71309 | 7.82123 | 7.62408 | 7.20887 | 7.29351 | 6.86123 | 7.05526 | 6.2689  | 6.33412 |
| MADD       | 8.53529 | 8.53726 | 8.46532 | 7.80141 | 6.28796 | 6.93494 | 7.66901 | 7.2635  | 7.45818 |
| MIR4487    | 5.29794 | 5.06426 | 5.42174 | 5.79332 | 5.60408 | 4.86268 | 5.36273 | 5.51089 | 5.90345 |
| KBTBD4     | 6.34176 | 6.58025 | 6.32576 | 6.44716 | 6.33415 | 6.3105  | 6.78871 | 6.14889 | 6.34932 |
| MIR3161    | 6.82019 | 6.29218 | 6.60379 | 7.46952 | 7.5519  | 8.00185 | 7.20474 | 7.85685 | 7.26312 |
| TRIM49B    | 4.39148 | 4.83532 | 4.37206 | 4.82036 | 6.65568 | 4.96395 | 4.53183 | 4.57455 | 4.66865 |
| LOC646813  | 2.56548 | 2.09942 | 2.31474 | 2.28052 | 2.37607 | 2.34846 | 2.27483 | 2.1644  | 2.14016 |
| TRIM48     | 5.00665 | 5.23975 | 4.17823 | 5.11321 | 5.0124  | 5.58715 | 5.26107 | 4.73515 | 4.43222 |
| LRRC55     | 5.46651 | 5.49975 | 5.52446 | 6.12642 | 6.03986 | 6.10392 | 5.86123 | 6.11374 | 5.98817 |
| RTN4RL2    | 6.58301 | 6.31367 | 6.52595 | 7.04766 | 6.74964 | 6.6642  | 6.60996 | 6.59978 | 6.76105 |
| SMTNL1     | 5.94989 | 5.99983 | 6.05396 | 5.98914 | 6.30767 | 6.18606 | 6.33837 | 6.44359 | 6.24576 |
| MIR130A    | 5.02277 | 5.21411 | 5.12034 | 5.9014  | 5.59523 | 5.73028 | 5.90978 | 5.29655 | 5.77097 |
| SELENOH    | 7.83822 | 7.65898 | 8.01374 | 7.59799 | 5.64531 | 7.19685 | 7.89613 | 7.1516  | 7.48115 |
| ZFP91-CNTF | 9.40103 | 9.51572 | 9.5962  | 9.0928  | 7.31643 | 8.06214 | 9.25719 | 8.91724 | 8.88567 |
| GLYATL1    | 4.76859 | 4.95911 | 4.96711 | 5.15996 | 6.15385 | 5.37003 | 5.18226 | 5.36118 | 4.97439 |
| DTX4       | 6.0181  | 6.28273 | 6.36734 | 6.39204 | 6.89155 | 6.4514  | 6.12987 | 6.17778 | 6.5082  |
| STX3       | 8.66866 | 8.54266 | 8.41631 | 8.54218 | 7.17581 | 8.42201 | 8.79203 | 8.40279 | 8.92709 |
| OOSP2      | 4.63463 | 4.60508 | 4.20218 | 4.69143 | 5.4381  | 4.93471 | 4.67141 | 4.99799 | 4.63233 |
| LINC00301  | 2.771   | 2.93378 | 2.76882 | 2.92256 | 3.71491 | 3.1781  | 3.09905 | 2.59297 | 2.73223 |
| CCDC86     | 7.61329 | 7.44639 | 7.75241 | 8.20154 | 7.75494 | 8.46875 | 8.21664 | 8.34421 | 8.31242 |
| ZP1        | 5.0306  | 4.85574 | 5.09462 | 5.44716 | 5.94123 | 6.08783 | 5.29314 | 5.82533 | 5.6327  |
| TMEM109    | 9.35142 | 9.11091 | 9.64071 | 9.03166 | 7.57357 | 7.96458 | 9.53522 | 8.58877 | 8.30268 |
| tmem132a   | 6.5264  | 6.14568 | 6.34942 | 7.1266  | 7.02942 | 7.40013 | 7.22598 | 7.50769 | 6.95281 |

|          |         |         |         |         |         |         |         |         |         |
|----------|---------|---------|---------|---------|---------|---------|---------|---------|---------|
| CD6      | 5.94006 | 5.89991 | 6.01517 | 6.22367 | 6.64597 | 6.24345 | 6.23066 | 5.93672 | 6.60941 |
| CD5      | 6.41859 | 6.4228  | 6.90737 | 7.04696 | 7.42952 | 7.56698 | 6.83188 | 7.02599 | 6.95351 |
| TKFC     | 7.23922 | 7.0506  | 6.98737 | 7.09158 | 7.31378 | 6.73421 | 7.13119 | 6.92589 | 6.98182 |
| TMEM138  | 7.55545 | 7.26909 | 7.46686 | 6.80885 | 5.8895  | 6.04661 | 7.04042 | 6.62459 | 6.49947 |
| TMEM216  | 7.37416 | 7.14853 | 7.31694 | 6.79206 | 7.39037 | 6.62391 | 7.02269 | 6.5327  | 6.49199 |
| SDHAF2   | 7.86277 | 7.94199 | 7.88146 | 8.19271 | 7.02594 | 7.8085  | 8.22591 | 7.77396 | 7.87465 |
| LRRC10B  | 6.80162 | 6.77942 | 6.77481 | 7.30499 | 6.79583 | 7.23572 | 6.7876  | 6.82831 | 6.973   |
| MYRF     | 6.21883 | 6.2342  | 6.20694 | 6.55329 | 7.13165 | 6.35458 | 6.4302  | 6.48588 | 6.39201 |
| FEN1     | 5.98692 | 6.30435 | 6.13409 | 6.86611 | 6.95224 | 6.1009  | 6.97032 | 6.29668 | 6.49204 |
| FADS2    | 6.99542 | 6.65165 | 7.10784 | 7.34511 | 7.29789 | 6.64281 | 7.15886 | 6.80248 | 7.1316  |
| BEST1    | 5.7423  | 5.94947 | 5.89708 | 5.93238 | 5.79221 | 6.55321 | 5.86049 | 6.17419 | 5.80529 |
| INCENP   | 7.05187 | 6.80397 | 6.85647 | 7.22362 | 6.0075  | 6.95048 | 7.5053  | 6.89294 | 6.48075 |
| ASRGL1   | 4.97003 | 4.60334 | 5.01035 | 5.36026 | 5.08309 | 5.04112 | 4.93697 | 5.37294 | 5.10289 |
| ROM1     | 4.69302 | 4.96351 | 4.93259 | 5.60209 | 5.58699 | 5.44138 | 5.26219 | 5.60069 | 5.51882 |
| METTL12  | 6.24854 | 6.18266 | 5.73369 | 6.60812 | 6.24309 | 6.43271 | 6.6293  | 6.31371 | 6.19597 |
| UQCC3    | 6.24987 | 5.90659 | 6.3246  | 6.62289 | 6.80891 | 6.69006 | 7.29894 | 6.4804  | 6.37745 |
| TTC9C    | 7.33802 | 8.00015 | 7.68933 | 6.69698 | 5.61736 | 6.18829 | 6.86506 | 6.64898 | 6.27788 |
| POLR2G   | 7.39344 | 7.16333 | 7.40555 | 7.38683 | 6.44897 | 6.98307 | 7.9536  | 7.26113 | 6.98307 |
| TMEM179B | 7.60016 | 7.6753  | 7.59394 | 7.54288 | 6.74492 | 6.69609 | 7.92488 | 6.55206 | 7.25601 |
| RARRES3  | 6.84306 | 6.44107 | 7.05383 | 6.26854 | 6.32594 | 6.17107 | 6.43301 | 6.3017  | 6.2666  |
| RTN3     | 9.96569 | 9.71333 | 9.79996 | 9.32778 | 7.96264 | 8.67149 | 9.16795 | 9.41809 | 9.51645 |
| MARK2    | 8.00709 | 8.00301 | 7.83872 | 8.30418 | 7.00127 | 8.15878 | 8.28292 | 7.49822 | 8.18386 |
| COX8A    | 10.2348 | 10.4172 | 10.6479 | 11.4636 | 10.0861 | 10.8818 | 11.5993 | 10.3028 | 10.9231 |
| FLRT1    | 5.78129 | 5.81375 | 5.90126 | 6.60053 | 6.76218 | 6.58424 | 6.11175 | 6.61824 | 6.25295 |
| STIP1    | 7.54645 | 7.38108 | 7.2677  | 7.83927 | 6.54925 | 7.93152 | 8.1267  | 8.15162 | 8.37885 |
| FERMT3   | 5.92938 | 5.71329 | 6.17637 | 6.25756 | 5.60051 | 6.5241  | 6.1315  | 6.19732 | 6.09142 |

|            |         |         |         |         |         |         |         |         |         |
|------------|---------|---------|---------|---------|---------|---------|---------|---------|---------|
| NUDT22     | 5.39651 | 5.30039 | 5.48362 | 5.98151 | 5.62476 | 6.36525 | 6.26927 | 6.0649  | 5.97414 |
| VEGFB      | 7.66435 | 7.63621 | 7.6333  | 8.3658  | 7.32962 | 8.67375 | 8.77469 | 7.70711 | 7.71003 |
| GPR137     | 7.48271 | 7.17632 | 7.12088 | 8.22895 | 7.91431 | 8.02391 | 7.78474 | 7.67273 | 7.74039 |
| ESRRA      | 6.86572 | 6.47972 | 6.78894 | 7.09693 | 6.54456 | 7.42771 | 7.25661 | 7.27259 | 6.95997 |
| PRDX5      | 9.15979 | 9.46823 | 8.91833 | 10.7777 | 8.68914 | 10.1835 | 10.5256 | 9.60671 | 9.93395 |
| CCDC88B    | 6.06267 | 6.05136 | 5.91079 | 6.69797 | 6.7477  | 6.50099 | 6.5667  | 6.59664 | 6.38005 |
| MIR1237    | 6.7041  | 6.84638 | 6.73297 | 7.60246 | 7.22043 | 7.51122 | 7.19798 | 7.31981 | 7.69601 |
| ARL2-SNX15 | 7.15129 | 6.90716 | 7.25761 | 7.48633 | 6.63338 | 7.36052 | 7.83148 | 7.39359 | 7.61608 |
| SAC3D1     | 5.71911 | 5.90297 | 5.69449 | 6.22577 | 6.18222 | 6.31179 | 6.14437 | 6.36358 | 5.98851 |
| ZFPL1      | 7.25582 | 7.1465  | 7.15215 | 7.36321 | 6.54008 | 7.36029 | 7.25456 | 7.14042 | 7.28109 |
| VPS51      | 7.49196 | 7.44722 | 7.54118 | 7.6674  | 6.73511 | 7.8121  | 7.55706 | 7.25892 | 7.04481 |
| TM7SF2     | 7.95426 | 7.48614 | 7.29407 | 8.25372 | 7.66791 | 7.44838 | 7.90257 | 7.94623 | 7.93116 |
| MRPL49     | 7.5698  | 7.24786 | 7.21757 | 6.96793 | 5.96896 | 7.06681 | 7.28254 | 7.45709 | 7.00832 |
| SPDYC      | 6.2863  | 6.6072  | 6.25517 | 7.27778 | 7.18379 | 7.22759 | 6.92811 | 6.61606 | 6.68603 |
| CDC42EP2   | 6.31153 | 6.00937 | 6.35127 | 6.60947 | 6.70628 | 7.39528 | 6.79273 | 6.71391 | 6.91162 |
| tigd3      | 5.49629 | 5.67345 | 5.54751 | 6.10084 | 5.85546 | 5.83687 | 5.85879 | 5.94738 | 5.78953 |
| FRMD8      | 6.86816 | 6.65448 | 6.58624 | 7.2179  | 7.46202 | 7.19783 | 7.44836 | 8.01959 | 6.94828 |
| MALAT1     | 11.4266 | 11.1916 | 11.014  | 11.4095 | 11.6385 | 11.0841 | 11.0458 | 12.3412 | 11.8272 |
| SCYL1      | 8.02708 | 7.915   | 7.8848  | 7.94917 | 7.5353  | 8.32677 | 8.326   | 8.11388 | 8.14905 |
| SSSCA1     | 8.08511 | 7.22636 | 7.95631 | 8.46872 | 6.50971 | 8.2236  | 9.15698 | 8.14518 | 8.66837 |
| EHBP1L1    | 7.09621 | 6.97976 | 6.73268 | 7.32646 | 5.39534 | 8.63139 | 7.98368 | 7.75821 | 7.96297 |
| PCNX3      | 8.59481 | 8.14731 | 8.60669 | 8.89311 | 7.41105 | 8.36901 | 9.00707 | 8.48577 | 8.50447 |
| SIPA1      | 6.57754 | 6.42623 | 6.33401 | 7.03762 | 7.24971 | 7.47285 | 6.45884 | 7.13933 | 6.82453 |
| KAT5       | 7.9412  | 8.09712 | 7.96076 | 8.05356 | 7.94113 | 9.07241 | 8.27638 | 8.869   | 8.39514 |
| OVOL1      | 8.64815 | 8.79965 | 7.77792 | 10.226  | 9.27583 | 11.1741 | 9.86323 | 9.49066 | 9.89783 |
| SNX32      | 5.40397 | 5.34664 | 5.6602  | 6.38393 | 6.02746 | 6.51358 | 5.74962 | 6.25814 | 5.84696 |

|              |         |         |         |         |         |         |         |         |         |
|--------------|---------|---------|---------|---------|---------|---------|---------|---------|---------|
| MUS81        | 6.95273 | 7.00035 | 6.81668 | 7.53801 | 7.3008  | 7.45132 | 7.38171 | 7.03418 | 7.34448 |
| CTSW         | 6.18576 | 6.21117 | 6.18786 | 6.44931 | 7.35702 | 6.64837 | 6.32242 | 6.59427 | 6.93091 |
| CCDC85B      | 6.07443 | 6.21051 | 6.36551 | 7.33764 | 6.41855 | 7.39173 | 7.08821 | 7.13461 | 7.3803  |
| DRAP1        | 7.60609 | 7.67932 | 7.41685 | 8.90168 | 8.27974 | 9.78452 | 8.55435 | 8.86676 | 8.76659 |
| SART1        | 6.99053 | 7.00025 | 7.08845 | 7.51334 | 7.38577 | 7.7373  | 7.7466  | 7.51514 | 7.43467 |
| BANF1        | 7.99373 | 8.16282 | 8.20406 | 8.61383 | 7.30908 | 7.95089 | 8.92185 | 7.60171 | 8.10844 |
| CST6         | 9.50085 | 9.109   | 8.60081 | 9.09093 | 8.67693 | 9.19162 | 8.59245 | 8.66188 | 9.27299 |
| PACS1        | 7.65961 | 7.73926 | 7.79454 | 7.53865 | 6.10957 | 7.77553 | 7.83683 | 7.82714 | 7.78177 |
| KLC2         | 6.89999 | 6.92167 | 7.12187 | 7.93332 | 6.89169 | 8.04763 | 8.02097 | 7.85524 | 7.87288 |
| CNIH2        | 6.90526 | 6.83029 | 6.93916 | 7.14848 | 7.40341 | 6.92613 | 6.61991 | 6.91965 | 7.12712 |
| TMEM151A     | 5.10137 | 5.43861 | 5.52845 | 6.22153 | 5.63676 | 6.35458 | 5.7462  | 5.80412 | 5.74966 |
| NPAS4        | 5.04902 | 4.96564 | 4.68424 | 4.99601 | 5.80247 | 5.28424 | 4.64827 | 5.19969 | 5.27875 |
| PELI3        | 6.52215 | 6.5425  | 6.50529 | 6.30042 | 6.7446  | 6.91028 | 6.98673 | 7.31431 | 6.82184 |
| DPP3         | 7.38722 | 6.63109 | 7.33957 | 6.71802 | 5.38426 | 7.1724  | 7.55401 | 6.93439 | 7.03051 |
| BBS1         | 7.57141 | 7.59622 | 7.67558 | 6.65113 | 6.67786 | 6.74237 | 7.12385 | 6.733   | 7.10111 |
| CCS          | 6.80435 | 6.95328 | 6.99193 | 7.27941 | 6.65899 | 7.19944 | 7.45195 | 7.25535 | 7.04878 |
| RBM14        | 9.07009 | 8.42549 | 8.60845 | 8.1848  | 7.73358 | 7.90499 | 8.34889 | 7.95323 | 8.38022 |
| C11orf80     | 9.40913 | 9.21346 | 8.69826 | 8.43283 | 7.96479 | 8.77294 | 8.81601 | 8.80828 | 8.91564 |
| LRFN4        | 6.09145 | 6.01118 | 6.10222 | 7.00508 | 6.97356 | 6.76041 | 6.75292 | 6.3719  | 6.86432 |
| SYT12        | 6.12199 | 5.95217 | 6.11698 | 6.94225 | 6.44426 | 6.75734 | 6.20152 | 6.65625 | 6.35503 |
| RHOD         | 9.76677 | 9.36735 | 9.48982 | 11.4722 | 11.2147 | 11.7525 | 11.5399 | 11.2033 | 11.4751 |
| KDM2A        | 9.62976 | 9.57648 | 9.48941 | 9.17095 | 8.15781 | 9.8598  | 9.21753 | 9.8291  | 9.65429 |
| SSH3         | 7.89369 | 7.20653 | 7.26452 | 7.43571 | 6.433   | 7.76067 | 8.10521 | 7.15003 | 7.78411 |
| LOC100130987 | 6.7738  | 6.83813 | 6.55398 | 6.29688 | 6.76009 | 6.75276 | 6.97786 | 6.14277 | 6.61336 |
| RAD9A        | 7.61119 | 7.09976 | 7.19843 | 7.36702 | 6.45281 | 7.5365  | 7.53602 | 7.34866 | 7.12453 |
| CARNS1       | 6.95397 | 6.94071 | 6.9008  | 7.23046 | 7.43927 | 6.99792 | 7.06009 | 7.06004 | 7.19991 |



|            |         |         |         |         |         |         |         |         |         |
|------------|---------|---------|---------|---------|---------|---------|---------|---------|---------|
| CABP4      | 6.57141 | 6.44425 | 6.88096 | 7.06653 | 6.78966 | 7.36354 | 6.61816 | 7.28531 | 7.36136 |
| AIP        | 6.25417 | 6.53279 | 6.7021  | 6.9004  | 6.64499 | 6.94314 | 7.08271 | 7.04191 | 6.70365 |
| GSTP1      | 9.13862 | 9.20251 | 9.24269 | 9.94798 | 9.69235 | 9.89651 | 10.086  | 9.99376 | 10.1329 |
| MIR5481I   | 7.95933 | 9.01988 | 8.41475 | 6.4841  | 10.0202 | 6.62978 | 6.64142 | 6.29099 | 6.5719  |
| LRP5       | 7.49775 | 7.47013 | 7.56793 | 7.59362 | 6.36522 | 7.40426 | 7.8171  | 7.14501 | 6.72372 |
| GAL        | 5.97663 | 6.06327 | 6.07015 | 7.11162 | 7.10486 | 6.97645 | 7.0715  | 7.09218 | 7.03532 |
| IGHMBP2    | 6.53226 | 6.67665 | 6.54385 | 7.2414  | 6.42846 | 6.79055 | 6.98488 | 6.71379 | 6.78861 |
| TPCN2      | 6.83634 | 7.05104 | 7.20417 | 7.05858 | 6.32126 | 7.05087 | 7.35133 | 6.94471 | 6.92839 |
| MIR3164    | 6.19547 | 6.23233 | 6.33065 | 6.18798 | 6.51445 | 6.69941 | 6.28485 | 6.38045 | 6.41413 |
| MYEOV      | 4.98131 | 4.90349 | 5.67854 | 5.52216 | 5.13706 | 5.22372 | 4.79722 | 5.41075 | 4.77435 |
| CCND1      | 9.36749 | 9.86058 | 9.19294 | 8.0184  | 7.30871 | 8.05954 | 8.37881 | 8.35326 | 8.33621 |
| FADD       | 6.9336  | 6.65826 | 6.69917 | 7.41879 | 6.69168 | 7.56258 | 7.34431 | 6.97936 | 7.00744 |
| MIR548K    | 7.52818 | 7.11304 | 7.31352 | 4.59793 | 4.63044 | 3.68069 | 4.96537 | 8.90108 | 7.46205 |
| CTTN       | 8.98986 | 9.00937 | 8.6892  | 9.20751 | 7.0651  | 9.5331  | 9.49708 | 9.23921 | 9.49604 |
| SHANK2-AS1 | 5.69709 | 6.1111  | 5.9186  | 6.50986 | 5.98149 | 6.5995  | 6.05414 | 6.24875 | 6.43979 |
| NADSYN1    | 7.30949 | 7.55496 | 7.17784 | 7.58685 | 6.34554 | 7.35158 | 7.70378 | 7.13647 | 7.88552 |
| KRTAP5-7   | 8.77163 | 8.73067 | 8.84316 | 9.84965 | 10.6072 | 9.41337 | 8.76837 | 9.00245 | 9.14316 |
| KRTAP5-8   | 6.64519 | 7.32993 | 6.24905 | 6.60176 | 7.69149 | 6.10019 | 5.83172 | 6.04813 | 5.86093 |
| KRTAP5-9   | 5.59445 | 5.79227 | 5.8127  | 5.69195 | 7.03799 | 5.56442 | 5.21314 | 5.86247 | 5.46021 |
| KRTAP5-10  | 4.75446 | 5.05998 | 4.45171 | 5.01286 | 6.09619 | 5.20933 | 5.0789  | 5.36902 | 5.52056 |
| RNF121     | 7.45236 | 7.45326 | 7.18179 | 6.34176 | 5.80029 | 6.33266 | 6.40844 | 6.18452 | 6.64769 |
| IL18BP     | 6.83524 | 6.87447 | 7.04287 | 6.24983 | 6.41416 | 6.11512 | 5.9852  | 6.43367 | 6.50928 |
| LRTOMT     | 6.06782 | 6.12212 | 5.80123 | 5.73022 | 6.11458 | 5.54836 | 5.94887 | 5.63493 | 6.04773 |
| FOLR3      | 5.29452 | 4.89108 | 4.99273 | 5.57804 | 6.14679 | 5.90964 | 5.55544 | 6.43042 | 5.83654 |
| folr1      | 6.791   | 6.92065 | 6.79642 | 6.74125 | 7.67531 | 6.9555  | 6.39835 | 6.81168 | 6.75318 |
| FOLR2      | 5.71424 | 6.02182 | 6.47043 | 6.18946 | 5.53444 | 5.89007 | 6.25857 | 6.03136 | 5.74951 |

|          |         |         |         |         |         |         |         |         |         |
|----------|---------|---------|---------|---------|---------|---------|---------|---------|---------|
| INPPL1   | 7.60406 | 7.46114 | 7.34255 | 7.25024 | 6.56999 | 6.50239 | 7.12666 | 6.81849 | 6.47916 |
| MIR4692  | 6.96048 | 6.85247 | 6.96777 | 8.06379 | 8.8622  | 7.34346 | 7.72852 | 7.90294 | 7.49559 |
| atg16l2  | 8.08488 | 7.89098 | 7.41583 | 7.46442 | 6.8269  | 7.42203 | 7.16375 | 7.89715 | 7.58666 |
| ARHGEF17 | 6.57038 | 6.53053 | 6.51658 | 6.64007 | 6.00761 | 6.28139 | 6.09001 | 6.26216 | 6.27415 |
| RELT     | 6.52636 | 6.52101 | 6.29725 | 6.94146 | 6.84315 | 8.18753 | 7.1271  | 7.47903 | 7.05049 |
| MRPL48   | 7.38212 | 7.71648 | 7.28924 | 7.59034 | 6.49303 | 7.10359 | 8.24781 | 7.1748  | 7.69774 |
| PAAF1    | 6.44079 | 6.69703 | 6.56245 | 6.19228 | 6.3258  | 5.91058 | 6.27233 | 5.8109  | 5.80245 |
| PPME1    | 9.05825 | 8.86734 | 9.29796 | 8.25714 | 7.4601  | 8.8787  | 8.0709  | 8.22235 | 8.64317 |
| MIR548AL | 7.65443 | 6.66118 | 7.54236 | 5.33814 | 7.51101 | 4.09678 | 4.67173 | 5.45412 | 6.20576 |
| RNF169   | 8.95531 | 8.57612 | 8.83244 | 8.20348 | 6.69259 | 7.94256 | 8.73239 | 8.98355 | 8.8337  |
| SPCS2    | 7.74742 | 7.70124 | 8.29975 | 5.95613 | 6.44552 | 5.61879 | 5.94173 | 7.34395 | 7.5546  |
| NEU3     | 6.30428 | 6.30282 | 6.5188  | 5.46512 | 6.19269 | 5.56984 | 5.72243 | 6.02281 | 5.72604 |
| TPBGL    | 5.9689  | 6.25517 | 6.31255 | 7.10195 | 7.34387 | 7.04051 | 6.67186 | 6.75402 | 6.45106 |
| RPS3     | 8.4767  | 8.40897 | 8.4044  | 8.4304  | 7.43646 | 8.51167 | 8.36593 | 7.79606 | 8.12065 |
| MOGAT2   | 5.23026 | 5.23491 | 5.33998 | 5.21656 | 6.16377 | 5.20939 | 5.66758 | 5.22412 | 5.56849 |
| DGAT2    | 7.87853 | 8.15801 | 7.72718 | 7.75408 | 6.92404 | 7.38718 | 7.0488  | 7.07541 | 7.07055 |
| UVRAG    | 8.98158 | 8.59418 | 8.97785 | 7.44731 | 6.56915 | 7.08888 | 7.89254 | 7.8339  | 7.26575 |
| EMSY     | 8.1176  | 7.87748 | 7.96853 | 6.63042 | 5.31172 | 6.19391 | 7.01901 | 7.1933  | 6.869   |
| TSKU     | 7.00969 | 7.46811 | 7.63218 | 7.16645 | 6.3641  | 6.51705 | 7.62379 | 6.4501  | 6.46457 |
| ACER3    | 7.93747 | 7.41016 | 7.65877 | 7.68378 | 5.77122 | 7.31603 | 7.76721 | 8.08909 | 8.26822 |
| CAPN5    | 7.10489 | 7.1685  | 7.2877  | 7.07512 | 7.32706 | 7.29612 | 6.9532  | 7.21423 | 6.94608 |
| OMP      | 6.4415  | 6.46759 | 6.27055 | 6.99689 | 7.14704 | 7.20101 | 6.73339 | 7.42536 | 7.2276  |
| MYO7A    | 5.5432  | 5.8688  | 5.82102 | 6.00165 | 6.54703 | 6.35392 | 6.04588 | 6.27066 | 6.10085 |
| AQP11    | 6.49197 | 6.30999 | 6.37529 | 7.17133 | 7.17131 | 6.89381 | 6.60326 | 6.53908 | 6.70563 |
| KCTD14   | 2.96349 | 3.07644 | 3.55626 | 3.40909 | 4.22044 | 4.34054 | 3.39446 | 3.16947 | 3.6303  |
| THRSP    | 4.38342 | 4.26793 | 4.94373 | 5.15543 | 4.97002 | 5.2984  | 5.06869 | 5.28954 | 5.12628 |

|              |         |         |         |         |         |         |         |         |         |
|--------------|---------|---------|---------|---------|---------|---------|---------|---------|---------|
| USP35        | 6.51127 | 6.37128 | 6.40156 | 7.22591 | 6.86332 | 7.20135 | 7.36329 | 8.34229 | 7.88613 |
| RPS28        | 13.0139 | 13.1078 | 12.8181 | 12.8932 | 12.5727 | 12.7684 | 13.0896 | 12.3553 | 12.7254 |
| DDIAS        | 6.27436 | 5.88015 | 6.17474 | 5.68395 | 5.99028 | 6.11824 | 5.79278 | 5.82064 | 5.85529 |
| RAB30-AS1    | 6.44041 | 6.67906 | 6.40522 | 6.53834 | 5.98325 | 6.49465 | 6.11501 | 6.26543 | 6.31553 |
| ANKRD42      | 6.83875 | 6.88211 | 6.98388 | 6.06846 | 6.09479 | 6.44801 | 6.57097 | 6.81746 | 5.83904 |
| TMEM126B     | 7.52605 | 7.72015 | 7.3776  | 6.92845 | 5.59917 | 6.10946 | 7.55962 | 6.45661 | 6.48585 |
| TMEM126A     | 6.62475 | 6.44699 | 6.48514 | 7.42399 | 5.10047 | 6.99586 | 7.8748  | 6.19296 | 6.53857 |
| ccdc83       | 4.005   | 4.00882 | 3.8354  | 3.96244 | 4.57959 | 3.69297 | 4.35457 | 3.53692 | 4.11069 |
| EED          | 6.87934 | 7.01354 | 7.03744 | 5.91399 | 5.56333 | 5.3282  | 5.5066  | 6.3417  | 5.91908 |
| HIKESHI      | 6.2765  | 6.31626 | 6.33893 | 5.97748 | 4.94858 | 5.99208 | 6.35833 | 5.51093 | 6.02739 |
| CCDC81       | 4.46507 | 4.80336 | 4.72119 | 4.68013 | 5.13889 | 4.80009 | 4.74016 | 5.3973  | 4.74355 |
| LOC100506368 | 5.24514 | 5.48335 | 5.58326 | 5.96009 | 6.11005 | 5.93264 | 5.7388  | 5.06044 | 5.68396 |
| TMEM135      | 7.53587 | 7.73078 | 7.30365 | 6.40697 | 6.51017 | 6.01732 | 6.86425 | 5.89487 | 6.31053 |
| MIR3166      | 3.42152 | 3.70602 | 4.01158 | 3.9151  | 3.12097 | 4.42256 | 3.94168 | 4.07682 | 4.03847 |
| GRM5-AS1     | 2.71865 | 2.80422 | 3.17199 | 2.87554 | 3.91291 | 3.29001 | 3.31413 | 3.18621 | 3.23709 |
| TYR          | 8.69273 | 6.74781 | 7.01944 | 5.84802 | 6.39321 | 5.51432 | 5.87421 | 5.24613 | 5.41759 |
| FOLH1B       | 3.57205 | 2.80158 | 3.07122 | 3.31404 | 3.57882 | 3.0275  | 3.43536 | 2.97748 | 2.91959 |
| TRIM64       | 4.27662 | 4.25992 | 4.25486 | 5.00537 | 4.49196 | 4.90548 | 4.4162  | 5.30714 | 4.43765 |
| NAALAD2      | 4.9682  | 4.38758 | 4.55915 | 3.89509 | 4.80362 | 4.54352 | 3.33878 | 3.99253 | 3.57579 |
| FAT3         | 5.37944 | 5.26204 | 5.58802 | 5.50079 | 5.7872  | 5.75419 | 5.38208 | 5.57374 | 5.51806 |
| MTNR1B       | 6.26828 | 6.79209 | 5.92638 | 6.45675 | 6.39122 | 6.83003 | 6.29212 | 6.92769 | 6.64295 |
| DEUP1        | 3.92427 | 4.32811 | 4.11208 | 4.34929 | 4.51891 | 4.34224 | 4.29245 | 4.25533 | 4.19951 |
| CEP295       | 6.67544 | 7.06833 | 6.75882 | 5.38799 | 4.8408  | 4.94087 | 5.84235 | 5.6936  | 5.50602 |
| Scarna9      | 8.00606 | 8.75963 | 8.18371 | 7.69161 | 4.63895 | 7.72131 | 8.78853 | 7.78241 | 7.98334 |
| C11orf54     | 7.66447 | 8.36506 | 7.6126  | 6.9903  | 5.73115 | 6.75377 | 7.14242 | 6.54658 | 6.83961 |
| MED17        | 6.76816 | 7.04723 | 6.9023  | 6.79032 | 5.29095 | 6.49103 | 6.9765  | 6.50045 | 6.37296 |

|          |         |         |         |         |         |         |         |         |         |
|----------|---------|---------|---------|---------|---------|---------|---------|---------|---------|
| HEPHL1   | 5.81151 | 5.30784 | 5.77342 | 9.35408 | 11.7441 | 12.0285 | 11.6394 | 12.5822 | 12.0329 |
| PANX1    | 7.78455 | 7.23615 | 7.55957 | 8.78579 | 6.63291 | 8.80658 | 9.20833 | 7.95098 | 9.20592 |
| IZUMO1R  | 5.74734 | 5.79946 | 5.9373  | 6.39076 | 7.12978 | 6.3944  | 6.18269 | 6.25768 | 6.52248 |
| ANKRD49  | 7.64355 | 8.44764 | 8.03349 | 6.27    | 4.83634 | 5.53945 | 6.45264 | 6.00973 | 6.56223 |
| C11orf97 | 3.26139 | 3.74051 | 3.57897 | 3.84027 | 5.38283 | 3.77883 | 4.26269 | 3.23043 | 3.12712 |
| PIWIL4   | 6.24598 | 6.06348 | 6.4521  | 5.42585 | 6.7161  | 5.59717 | 4.95309 | 5.67934 | 5.38435 |
| AMOTL1   | 8.77648 | 8.16485 | 8.09989 | 8.60525 | 7.48767 | 8.70223 | 8.78639 | 8.50616 | 9.00447 |
| KDM4D    | 5.51208 | 5.88253 | 5.82973 | 5.51569 | 5.29738 | 5.01298 | 5.20883 | 5.02609 | 4.88944 |
| KDM4E    | 4.50423 | 4.56528 | 4.67099 | 5.44139 | 5.69812 | 5.23773 | 4.75721 | 5.32491 | 5.02595 |
| SRSF8    | 9.38107 | 9.20102 | 9.38293 | 9.18497 | 7.69266 | 8.20192 | 9.87423 | 7.75491 | 8.84267 |
| ENDOD1   | 9.56255 | 9.79376 | 9.71038 | 10.0158 | 8.6891  | 10.6353 | 10.3994 | 10.5267 | 10.8307 |
| CEP57    | 7.77516 | 7.69547 | 8.23727 | 6.91042 | 6.46936 | 6.53267 | 6.98064 | 7.31234 | 6.48316 |
| MAML2    | 3.97875 | 3.62966 | 3.94921 | 4.37308 | 4.40326 | 4.46036 | 5.08793 | 4.31102 | 3.59452 |
| JRKL     | 5.87039 | 6.14371 | 5.7725  | 5.78237 | 5.8234  | 6.59181 | 6.31211 | 5.71048 | 5.90514 |
| CNTN5    | 4.26058 | 4.27272 | 3.88957 | 4.3055  | 4.72572 | 4.94222 | 3.56682 | 4.29908 | 4.28311 |
| ARHGAP42 | 8.13192 | 8.12927 | 8.3391  | 6.78748 | 6.0002  | 5.4389  | 6.79865 | 5.67802 | 6.10021 |
| TMEM133  | 8.13503 | 7.96122 | 8.23156 | 6.72061 | 5.86115 | 4.63215 | 6.56997 | 5.92    | 5.56849 |
| CEP126   | 6.89513 | 7.68305 | 7.5585  | 5.93623 | 5.6801  | 5.1153  | 6.06476 | 5.89135 | 5.5744  |
| c11orf70 | 4.96352 | 4.90176 | 5.07722 | 4.55046 | 5.45684 | 4.85697 | 4.48513 | 4.23692 | 4.79642 |
| YAP1     | 9.14515 | 9.0616  | 8.95726 | 9.53046 | 7.01172 | 9.69871 | 9.51552 | 9.44668 | 9.68191 |
| BIRC3    | 6.12693 | 6.17684 | 6.69938 | 4.72708 | 5.50575 | 6.82763 | 6.14836 | 6.49656 | 6.48372 |
| BIRC2    | 8.0091  | 8.24678 | 8.20023 | 8.00396 | 6.09507 | 7.29826 | 7.93367 | 7.61226 | 7.89616 |
| TMEM123  | 5.83247 | 5.54665 | 5.57472 | 6.02145 | 6.11468 | 6.07384 | 6.80986 | 6.01644 | 6.02976 |
| WTAPP1   | 4.7703  | 4.9516  | 5.10484 | 5.43523 | 6.12162 | 6.03742 | 5.34467 | 6.10723 | 6.19445 |
| MIR4693  | 1.97821 | 2.23835 | 1.75744 | 2.6083  | 2.34505 | 2.86815 | 2.22587 | 2.01835 | 1.70311 |
| DDI1     | 4.22829 | 4.00881 | 4.37564 | 4.80563 | 4.97966 | 5.69191 | 4.87397 | 5.27471 | 4.65304 |

|                |         |         |         |         |         |         |         |         |         |
|----------------|---------|---------|---------|---------|---------|---------|---------|---------|---------|
| AASDHPPT       | 7.63089 | 7.49808 | 7.63492 | 7.62337 | 5.17675 | 6.77485 | 7.9904  | 6.72415 | 6.80873 |
| ELMOD1         | 9.51274 | 9.71096 | 8.97283 | 9.06614 | 6.7685  | 6.33294 | 7.32581 | 7.04823 | 8.2024  |
| CUL5           | 8.62575 | 8.55285 | 8.62355 | 7.6962  | 4.61862 | 6.88522 | 8.16338 | 7.57511 | 7.74152 |
| ACAT1          | 7.0935  | 7.25441 | 6.90387 | 6.39267 | 5.67793 | 5.8962  | 6.34879 | 5.6741  | 5.93541 |
| DDX10          | 7.4103  | 7.02416 | 7.20743 | 6.54489 | 6.20081 | 5.61982 | 6.4028  | 5.90304 | 5.94966 |
| C11orf87       | 5.65613 | 6.02375 | 6.52638 | 6.44557 | 7.30357 | 6.79497 | 6.17041 | 6.7152  | 6.16148 |
| ZC3H12C        | 7.57085 | 7.21915 | 7.32637 | 6.42139 | 6.04999 | 6.04511 | 6.97138 | 6.16265 | 6.52224 |
| FDX1           | 7.99    | 8.48407 | 7.78462 | 8.48598 | 7.15042 | 7.87442 | 8.61216 | 7.68036 | 7.49959 |
| COLCA2         | 5.49029 | 6.18384 | 5.94397 | 5.6391  | 6.59246 | 6.08846 | 5.60624 | 5.8082  | 5.64363 |
| MIR4491        | 2.91399 | 2.54011 | 2.57149 | 2.74155 | 2.24961 | 2.48489 | 3.37    | 2.36148 | 2.58527 |
| mir34b         | 3.48833 | 3.77523 | 3.27535 | 3.47642 | 3.48591 | 3.57774 | 2.97086 | 3.51984 | 3.19763 |
| C11orf88       | 3.46613 | 2.92115 | 3.11677 | 4.06644 | 4.76154 | 3.79096 | 3.93908 | 3.57164 | 3.49638 |
| LAYN           | 6.85734 | 6.71451 | 6.80505 | 7.07109 | 6.41277 | 7.03555 | 6.92208 | 7.1406  | 6.83671 |
| SIK2           | 8.79598 | 8.64651 | 8.88868 | 8.2807  | 7.2559  | 7.51504 | 8.39677 | 8.41574 | 8.23283 |
| c11orf1        | 6.64768 | 6.774   | 6.75409 | 5.84624 | 5.79201 | 6.14271 | 6.72821 | 5.54981 | 5.74224 |
| HSPB2-C11orf52 | 5.84551 | 5.88464 | 5.67666 | 6.09327 | 5.66919 | 5.8722  | 6.21218 | 6.07623 | 5.53139 |
| DIXDC1         | 6.44911 | 6.44556 | 6.97361 | 5.98693 | 6.32799 | 5.7076  | 6.2348  | 6.15037 | 5.97542 |
| DLAT           | 7.90974 | 8.2354  | 8.38096 | 8.18965 | 6.25301 | 7.33102 | 8.20119 | 7.42886 | 7.72082 |
| C11orf57       | 6.8742  | 7.39442 | 7.23064 | 6.04476 | 4.50584 | 5.39877 | 6.53843 | 6.12278 | 6.30567 |
| TEX12          | 5.01042 | 5.07478 | 5.23629 | 4.68424 | 4.86006 | 4.41067 | 4.331   | 4.75727 | 4.17233 |
| BCO2           | 6.64399 | 6.97892 | 6.99789 | 5.60164 | 6.03134 | 5.9782  | 5.54496 | 5.77701 | 6.10637 |
| PTS            | 7.81839 | 7.19012 | 7.68644 | 6.48418 | 6.84317 | 6.61714 | 7.12854 | 6.81158 | 7.1969  |
| NCAM1          | 5.12581 | 5.08102 | 5.50273 | 5.43348 | 6.52636 | 5.47983 | 5.30102 | 5.27854 | 5.09191 |
| TTC12          | 7.31513 | 7.10841 | 6.98089 | 6.28225 | 6.2512  | 6.1308  | 6.65869 | 6.26023 | 5.78031 |
| ANKK1          | 6.96663 | 6.86506 | 6.7362  | 7.10956 | 7.02351 | 6.85832 | 7.10574 | 6.86562 | 6.77841 |
| CLDN25         | 6.40212 | 6.38947 | 6.48756 | 6.45852 | 8.35507 | 6.7525  | 6.03102 | 6.7808  | 6.50902 |

|           |         |         |         |         |         |         |         |         |         |
|-----------|---------|---------|---------|---------|---------|---------|---------|---------|---------|
| ZBTB16    | 5.80805 | 6.85859 | 8.93548 | 5.92209 | 6.03173 | 6.13343 | 6.08648 | 5.73707 | 5.71941 |
| NNMT      | 7.19907 | 6.75616 | 8.30532 | 7.32459 | 6.75532 | 6.22786 | 7.0474  | 6.18391 | 6.96878 |
| RBM7      | 7.67501 | 7.68294 | 7.45293 | 7.60645 | 6.75108 | 7.78085 | 7.72783 | 7.39474 | 7.72877 |
| CADM1     | 3.5925  | 3.82831 | 3.76251 | 4.21347 | 5.75641 | 3.23389 | 4.51595 | 3.63988 | 3.26323 |
| LINC00900 | 4.33056 | 4.94546 | 4.576   | 4.6347  | 5.48005 | 5.41106 | 4.97692 | 4.68773 | 4.71225 |
| Apoc3     | 6.08506 | 6.2047  | 6.23076 | 6.91815 | 6.94902 | 6.98062 | 6.47294 | 6.72342 | 6.65161 |
| TAGLN     | 7.88623 | 7.42901 | 8.283   | 7.94038 | 7.30309 | 7.4415  | 7.33186 | 7.47247 | 7.46428 |
| RNF214    | 7.4001  | 7.75029 | 7.3803  | 6.6164  | 6.20406 | 6.91007 | 7.07943 | 6.43195 | 6.66646 |
| BACE1-AS  | 8.09139 | 8.51378 | 7.63881 | 7.28711 | 7.02198 | 6.85079 | 7.38024 | 6.41122 | 6.94026 |
| CEP164    | 6.93722 | 6.93536 | 7.02907 | 6.84176 | 6.7225  | 6.47197 | 7.06667 | 6.79129 | 6.7475  |
| FXYD6     | 5.54559 | 5.46646 | 5.55956 | 6.10617 | 6.08717 | 6.21595 | 5.56743 | 6.11575 | 5.9934  |
| UBE4A     | 10.4104 | 10.4325 | 10.3959 | 9.54525 | 8.44045 | 9.25181 | 9.8429  | 9.49942 | 10.0492 |
| TTC36     | 6.76216 | 6.40938 | 6.42    | 6.0662  | 6.75379 | 6.22512 | 6.03386 | 5.9887  | 6.49942 |
| TMEM25    | 6.57293 | 6.70502 | 6.55381 | 6.68854 | 7.23217 | 6.30202 | 6.08472 | 6.52268 | 6.20047 |
| ARCN1     | 10.2836 | 9.88842 | 10.2364 | 9.63425 | 6.76148 | 9.23097 | 9.81868 | 9.30724 | 10.0509 |
| CXCR5     | 4.34349 | 4.67607 | 4.46096 | 5.64186 | 5.27744 | 5.63527 | 5.70252 | 5.20951 | 5.13169 |
| BCL9L     | 6.67781 | 7.44904 | 6.78957 | 7.42711 | 7.14411 | 7.74558 | 7.42914 | 7.56243 | 7.77804 |
| UPK2      | 6.17095 | 5.90963 | 5.9926  | 6.34349 | 7.27057 | 6.62894 | 5.68812 | 6.40143 | 6.20521 |
| FOXR1     | 4.99985 | 5.2587  | 5.18798 | 5.70266 | 5.94709 | 5.46813 | 5.13572 | 5.81045 | 5.87108 |
| CCDC84    | 8.79825 | 9.00345 | 8.86089 | 7.51359 | 6.34902 | 6.51486 | 6.89882 | 8.90871 | 8.63302 |
| TRAPPC4   | 7.11858 | 6.65056 | 6.99535 | 6.9997  | 6.53626 | 6.45733 | 7.12121 | 6.98961 | 6.95048 |
| HYOU1     | 4.70057 | 4.71385 | 4.87826 | 6.09029 | 5.11829 | 6.34944 | 5.81889 | 5.04862 | 5.56272 |
| VPS11     | 7.58476 | 7.43455 | 7.5978  | 6.88637 | 5.91675 | 6.67546 | 7.36563 | 6.97636 | 7.07487 |
| HMBS      | 6.89018 | 6.02645 | 6.55867 | 6.83827 | 5.60183 | 6.17896 | 6.79946 | 6.13031 | 6.30272 |
| C2CD2L    | 7.4131  | 7.50407 | 7.23506 | 7.69249 | 6.82677 | 7.27013 | 7.57976 | 7.48233 | 7.245   |
| HINFP     | 7.07466 | 7.27497 | 7.2302  | 6.87579 | 6.38987 | 6.62819 | 6.89701 | 7.38143 | 6.42737 |

|           |         |         |         |         |         |         |         |         |         |
|-----------|---------|---------|---------|---------|---------|---------|---------|---------|---------|
| NLRX1     | 8.07599 | 7.87164 | 7.65137 | 9.02975 | 7.79067 | 9.43887 | 8.72917 | 7.99742 | 8.5862  |
| PDZD3     | 5.81168 | 5.69002 | 6.09584 | 6.38672 | 6.44848 | 6.48351 | 6.05208 | 6.3587  | 6.06341 |
| RNF26     | 7.98215 | 7.96757 | 8.16827 | 8.1706  | 6.79379 | 7.25303 | 8.86578 | 7.59564 | 7.74261 |
| USP2      | 5.17852 | 4.64346 | 5.49438 | 7.30951 | 4.7529  | 8.63727 | 8.06291 | 6.36947 | 8.49414 |
| USP2-AS1  | 5.67867 | 5.99121 | 5.69084 | 5.93609 | 6.25737 | 6.30976 | 5.93905 | 6.19922 | 6.24099 |
| OAF       | 7.19657 | 7.02466 | 7.35952 | 7.81004 | 7.49736 | 8.01875 | 7.34578 | 7.49599 | 7.75799 |
| POU2F3    | 9.70123 | 8.29105 | 8.85535 | 7.55373 | 6.90765 | 8.05324 | 8.08852 | 7.18219 | 7.22127 |
| TMEM136   | 5.21817 | 5.36213 | 5.40291 | 5.36639 | 5.52819 | 5.26842 | 5.21729 | 5.10984 | 5.40707 |
| ARHGEF12  | 10.8462 | 10.838  | 10.7279 | 9.86139 | 8.33784 | 10.2679 | 10.2419 | 10.6052 | 10.5067 |
| TBCEL     | 7.46466 | 7.70274 | 7.61541 | 6.26454 | 5.69144 | 6.53982 | 7.36176 | 6.20329 | 6.55196 |
| TECTA     | 4.90781 | 4.93978 | 4.97033 | 4.99764 | 5.06644 | 4.76614 | 5.21002 | 5.09385 | 4.88329 |
| UBASH3B   | 7.93486 | 8.30749 | 7.78801 | 7.8121  | 6.65019 | 7.58572 | 8.03447 | 7.42211 | 8.31825 |
| CRTAM     | 3.71223 | 3.96544 | 3.88196 | 4.14855 | 4.37116 | 4.04691 | 3.85882 | 3.98928 | 3.93106 |
| C11orf63  | 6.93688 | 6.84189 | 6.46863 | 6.90414 | 5.82218 | 7.26196 | 8.04414 | 7.30129 | 7.71602 |
| LOC341056 | 5.09578 | 5.2846  | 5.34947 | 6.01713 | 6.00952 | 5.86523 | 5.88015 | 5.64986 | 6.04562 |
| GRAMD1B   | 5.81945 | 6.42704 | 6.0735  | 6.45502 | 6.73452 | 6.39087 | 7.00791 | 6.64922 | 6.74822 |
| VWA5A     | 8.43009 | 7.75582 | 8.13041 | 7.477   | 6.51426 | 6.99587 | 8.05232 | 8.46573 | 8.00637 |
| PANX3     | 5.30318 | 5.38707 | 5.42028 | 5.91412 | 6.69731 | 6.50247 | 5.88609 | 6.02569 | 5.80931 |
| TBRG1     | 8.46831 | 8.25867 | 8.57521 | 7.45908 | 6.65475 | 6.4912  | 7.57449 | 7.31578 | 7.52919 |
| SIAE      | 4.85728 | 4.90182 | 5.30173 | 5.4799  | 4.06188 | 4.33173 | 4.50894 | 4.52377 | 4.83709 |
| SPA17     | 6.57733 | 6.38162 | 7.19052 | 7.28486 | 6.21288 | 6.6824  | 7.46613 | 6.43771 | 7.05581 |
| ccdc15    | 6.7819  | 6.59098 | 6.4126  | 5.66493 | 5.46957 | 5.03098 | 5.95227 | 5.58604 | 5.58327 |
| PKNOX2    | 5.49976 | 5.59243 | 5.55516 | 5.47919 | 5.80821 | 5.50903 | 5.38897 | 5.57385 | 5.49061 |
| EI24      | 9.90692 | 9.66306 | 10.161  | 9.57078 | 8.53538 | 9.12055 | 10.1558 | 9.0678  | 9.66214 |
| CHEK1     | 6.60433 | 6.26981 | 6.4538  | 6.76368 | 5.75787 | 5.51904 | 6.01722 | 6.05055 | 5.9407  |
| PATE1     | 4.86765 | 5.03317 | 4.94052 | 4.9744  | 5.60204 | 5.60523 | 4.96943 | 5.28321 | 5.09144 |

|             |         |         |         |         |         |         |         |         |         |
|-------------|---------|---------|---------|---------|---------|---------|---------|---------|---------|
| PATE3       | 3.16396 | 3.5729  | 3.29538 | 3.24388 | 4.72868 | 4.03996 | 3.45749 | 3.6537  | 3.58909 |
| PATE4       | 3.95155 | 4.12037 | 4.08307 | 4.459   | 4.79428 | 4.48645 | 4.39956 | 4.59376 | 4.43391 |
| HYLS1       | 6.01272 | 5.63885 | 5.6787  | 6.00504 | 5.55297 | 5.9349  | 6.01921 | 5.14358 | 5.70236 |
| DDX25       | 4.81194 | 4.95038 | 5.04327 | 4.99539 | 5.53208 | 5.27507 | 4.65353 | 5.16277 | 4.97746 |
| FOXRED1     | 7.10311 | 7.29902 | 7.12168 | 6.29474 | 8.02808 | 6.6999  | 6.60467 | 6.96985 | 6.98026 |
| TIRAP       | 6.87941 | 6.89229 | 6.91946 | 6.6057  | 6.54361 | 6.48718 | 6.64502 | 6.16886 | 6.11738 |
| KIRREL3-AS2 | 3.95605 | 3.95644 | 3.66051 | 4.37444 | 6.50694 | 4.55615 | 4.13423 | 4.11461 | 4.29067 |
| KIRREL3-AS3 | 5.46708 | 5.46378 | 5.50124 | 6.22416 | 6.75311 | 6.36087 | 6.24212 | 6.16293 | 5.70906 |
| FLI1        | 7.34024 | 6.74014 | 7.58259 | 7.03192 | 6.53401 | 6.55713 | 7.01647 | 6.77111 | 6.82954 |
| barx2       | 8.32463 | 6.86004 | 7.49771 | 7.4119  | 6.83175 | 7.39542 | 7.69178 | 7.27988 | 7.3651  |
| TMEM45B     | 9.75131 | 9.51978 | 9.55567 | 9.68286 | 10.3634 | 10.8938 | 10.3752 | 10.9054 | 11.0639 |
| LINC00167   | 5.4191  | 5.16718 | 5.14151 | 5.52014 | 5.91746 | 5.07803 | 5.12187 | 5.79427 | 5.45154 |
| APLP2       | 10.5596 | 10.3501 | 10.5387 | 10.4966 | 7.75896 | 10.6086 | 10.5628 | 10.735  | 10.9215 |
| ST14        | 9.40537 | 9.15589 | 9.05487 | 10.304  | 8.74127 | 10.4024 | 10.1367 | 10.1974 | 10.0379 |
| NTM         | 6.34923 | 6.48672 | 6.1548  | 6.40944 | 6.95006 | 6.64021 | 6.61411 | 6.80333 | 6.52776 |
| JAM3        | 7.18928 | 6.81177 | 7.09653 | 6.51306 | 6.60744 | 6.10647 | 6.58286 | 6.73859 | 6.52315 |
| VPS26B      | 8.31929 | 8.43373 | 8.35267 | 7.72671 | 6.70077 | 7.35051 | 7.93657 | 7.76612 | 7.22298 |
| LOC283177   | 5.19315 | 5.02141 | 5.59634 | 6.03312 | 7.03038 | 5.64986 | 5.02634 | 5.767   | 5.54361 |
| SIRT3       | 6.98225 | 6.82961 | 6.86368 | 6.82774 | 6.34981 | 6.6371  | 6.80632 | 6.33625 | 6.79402 |
| ifitm5      | 5.01061 | 5.18383 | 5.11118 | 5.65977 | 5.72832 | 5.60255 | 5.49    | 5.43116 | 5.5418  |
| IFITM3      | 7.24781 | 6.81065 | 7.30939 | 7.77274 | 6.08189 | 6.68002 | 7.86242 | 7.33853 | 7.20856 |
| SIGIRR      | 6.68709 | 6.41554 | 6.89184 | 7.18777 | 6.88372 | 7.20681 | 7.06749 | 7.05716 | 6.88803 |
| ANO9        | 8.67453 | 8.80214 | 8.17825 | 8.0004  | 8.3815  | 8.37605 | 8.53762 | 8.93585 | 8.81311 |
| RNH1        | 8.1407  | 8.08981 | 7.85281 | 9.28823 | 8.06375 | 9.8813  | 9.61692 | 8.56263 | 9.11419 |
| HRAS        | 7.85751 | 7.89575 | 7.92134 | 8.367   | 6.57042 | 9.29812 | 8.56781 | 8.23755 | 8.38329 |
| LMNTD2      | 7.09796 | 6.97229 | 7.04209 | 7.24151 | 7.12521 | 7.40707 | 7.26092 | 6.99477 | 7.37919 |



|            |         |         |         |         |         |         |         |         |         |
|------------|---------|---------|---------|---------|---------|---------|---------|---------|---------|
| MIR210HG   | 8.30282 | 7.47463 | 7.7968  | 8.38607 | 7.66018 | 8.62107 | 8.18488 | 8.13091 | 7.8927  |
| mir210     | 7.58359 | 7.54155 | 7.50428 | 8.30141 | 9.12553 | 8.48257 | 7.86027 | 8.19037 | 8.39119 |
| LOC143666  | 5.50411 | 5.50094 | 5.6727  | 6.0509  | 5.95949 | 5.98952 | 6.13677 | 5.87757 | 5.66162 |
| IRF7       | 6.66549 | 6.14066 | 6.02686 | 6.99557 | 6.15861 | 7.6433  | 7.35301 | 7.74272 | 7.35438 |
| CDHR5      | 5.66276 | 6.0674  | 6.08389 | 6.43459 | 6.42845 | 6.83142 | 6.34466 | 6.46999 | 6.53193 |
| SCT        | 5.92382 | 5.97253 | 5.81397 | 6.6394  | 6.2313  | 6.68737 | 6.29708 | 6.50091 | 6.29667 |
| DEAF1      | 6.86276 | 7.10959 | 6.87021 | 6.75273 | 6.62464 | 7.2183  | 7.08994 | 6.64631 | 6.87884 |
| PDDC1      | 7.1832  | 7.53529 | 7.33905 | 7.94244 | 7.30153 | 7.89366 | 7.90107 | 7.61644 | 7.82784 |
| CEND1      | 6.175   | 6.15121 | 6.38358 | 6.79785 | 6.41163 | 6.79355 | 6.83307 | 6.76545 | 6.71562 |
| PIDD1      | 6.69721 | 6.50989 | 6.81444 | 6.77076 | 6.86093 | 7.0171  | 6.76515 | 6.67849 | 6.53498 |
| CHID1      | 7.44313 | 7.31679 | 7.55819 | 8.18946 | 6.5045  | 7.5055  | 8.21216 | 7.26042 | 7.80093 |
| TOLLIP     | 7.62881 | 7.28014 | 7.47356 | 8.46473 | 7.25886 | 8.82367 | 8.63304 | 8.5488  | 8.04431 |
| MOB2       | 6.77172 | 7.04765 | 6.89086 | 7.15479 | 6.51487 | 8.24212 | 7.29374 | 8.10973 | 7.58379 |
| DUSP8      | 6.97248 | 6.58726 | 6.61735 | 7.92251 | 6.13282 | 7.91896 | 7.61277 | 7.29339 | 7.50883 |
| Krtap5-1   | 7.22755 | 7.68068 | 7.47987 | 7.70112 | 9.22621 | 7.42058 | 6.93589 | 7.71574 | 7.7389  |
| KRTAP5-2   | 5.65962 | 5.84642 | 5.59038 | 6.28945 | 6.58718 | 5.78536 | 6.02564 | 6.43226 | 6.29177 |
| KRTAP5-3   | 4.61425 | 4.32384 | 4.90176 | 5.59496 | 5.54431 | 5.38768 | 5.15994 | 4.52838 | 4.61956 |
| KRTAP5-4   | 4.28828 | 4.87855 | 4.54793 | 4.38604 | 6.68867 | 5.00077 | 3.78996 | 4.40191 | 4.67775 |
| IFITM10    | 7.06154 | 7.2172  | 7.06122 | 7.03352 | 6.7999  | 7.0759  | 6.94577 | 6.85012 | 6.75331 |
| CTSD       | 11.5022 | 10.8299 | 11.5049 | 11.1554 | 9.87985 | 10.9751 | 11.0499 | 10.5042 | 10.3563 |
| MIR4298    | 5.96425 | 5.80495 | 5.7358  | 5.69862 | 6.73203 | 6.10378 | 5.75385 | 6.32198 | 5.88184 |
| MRPL23-AS1 | 5.91158 | 6.11111 | 6.08418 | 6.5609  | 6.93454 | 6.76961 | 6.17167 | 6.52454 | 6.8268  |
| INS-IGF2   | 6.14803 | 6.05036 | 6.09792 | 6.3205  | 6.26129 | 6.36286 | 5.82017 | 6.47594 | 6.49683 |
| MIR483     | 6.55711 | 6.67579 | 6.45645 | 7.08707 | 8.47532 | 7.27801 | 7.13868 | 6.76782 | 7.00729 |
| TH         | 6.49271 | 6.57674 | 6.67231 | 7.38416 | 7.24349 | 7.56654 | 7.19571 | 7.087   | 7.11207 |
| ASCL2      | 6.49373 | 6.75809 | 6.25394 | 6.75388 | 6.00198 | 7.36033 | 7.21467 | 6.55472 | 6.84155 |

|           |         |         |         |         |         |         |         |         |         |
|-----------|---------|---------|---------|---------|---------|---------|---------|---------|---------|
| KCNQ1OT1  | 6.81758 | 6.49545 | 6.74582 | 6.11447 | 6.10118 | 5.89344 | 5.47041 | 6.81364 | 6.53492 |
| CARS      | 7.7689  | 7.94439 | 7.41584 | 7.68138 | 6.61875 | 8.07411 | 8.14764 | 8.10992 | 7.8065  |
| osbpI5    | 7.39109 | 7.35559 | 7.47231 | 6.90338 | 7.25217 | 7.10755 | 7.47621 | 7.21333 | 7.014   |
| ZNF195    | 6.47737 | 6.40668 | 6.12885 | 5.03464 | 5.28578 | 4.53365 | 5.26768 | 5.35932 | 6.39735 |
| ART5      | 4.84251 | 5.25204 | 5.0573  | 5.73221 | 5.69165 | 6.10014 | 5.90604 | 5.14967 | 5.52662 |
| NUP98     | 9.38464 | 9.292   | 9.46012 | 8.87777 | 6.93166 | 8.26613 | 9.08904 | 9.23069 | 9.20232 |
| RHOG      | 6.30091 | 6.20148 | 6.10569 | 7.23581 | 6.73491 | 7.17601 | 7.2298  | 6.50853 | 7.23545 |
| TRIM21    | 6.68437 | 6.60936 | 6.09784 | 6.1961  | 5.50035 | 5.53868 | 6.38185 | 5.5514  | 5.93176 |
| TRIM68    | 7.11873 | 7.63123 | 7.41759 | 6.50822 | 6.93751 | 6.36779 | 7.14633 | 6.54057 | 6.58127 |
| UBQLN3    | 5.7107  | 5.73152 | 5.7419  | 6.10449 | 6.76826 | 6.4176  | 6.02904 | 6.60159 | 6.12045 |
| UBQLNL    | 6.02381 | 5.88687 | 6.07227 | 5.59953 | 6.19394 | 5.5094  | 4.75727 | 5.83605 | 6.05786 |
| TRIM5     | 6.75991 | 6.21631 | 6.43251 | 5.57063 | 5.87839 | 5.92239 | 5.6517  | 5.90008 | 5.9072  |
| HPX       | 6.25013 | 6.43766 | 6.05865 | 5.90787 | 6.8507  | 6.26775 | 5.83613 | 6.15986 | 6.12498 |
| TRIM3     | 6.27162 | 6.46404 | 6.45982 | 5.91842 | 6.47781 | 6.33309 | 6.23485 | 6.46032 | 6.44068 |
| ARFIP2    | 8.20011 | 8.29277 | 8.32304 | 7.77097 | 8.12475 | 8.54746 | 8.28    | 8.74252 | 8.6063  |
| TPP1      | 7.46625 | 7.24418 | 7.83905 | 7.05951 | 7.09111 | 7.21311 | 7.2383  | 7.31315 | 7.39003 |
| MRPL17    | 7.28164 | 7.30323 | 7.42147 | 7.86392 | 6.5599  | 7.20943 | 7.82327 | 7.39374 | 7.19805 |
| ZNF214    | 4.2339  | 4.28663 | 4.33613 | 4.26755 | 4.37517 | 4.67454 | 4.38999 | 3.91352 | 4.10662 |
| CYB5R2    | 7.46025 | 7.06574 | 7.54817 | 7.70185 | 8.14822 | 8.43155 | 8.23761 | 7.62865 | 8.57787 |
| OVCH2     | 7.47201 | 6.15603 | 7.01627 | 6.48834 | 5.87134 | 4.45927 | 5.09517 | 4.4624  | 5.61433 |
| LOC283299 | 6.84858 | 5.81057 | 6.58673 | 6.54877 | 4.61375 | 3.98083 | 4.3443  | 3.94868 | 4.16322 |
| RIC3      | 8.10822 | 8.1808  | 8.142   | 5.71742 | 6.46314 | 6.20096 | 5.8321  | 5.69459 | 5.77247 |
| LMO1      | 5.60015 | 5.18042 | 5.42146 | 6.07009 | 5.24832 | 6.30224 | 5.82103 | 5.44282 | 5.74419 |
| STK33     | 4.03847 | 4.42214 | 4.3009  | 5.13026 | 5.7146  | 4.57959 | 4.10578 | 4.44219 | 4.19785 |
| TRIM66    | 7.34271 | 6.91818 | 7.5658  | 6.72882 | 6.99541 | 6.02051 | 6.24401 | 6.32674 | 6.60284 |
| C11ORF16  | 5.91777 | 5.78032 | 5.77412 | 6.35294 | 6.73681 | 6.37544 | 5.64676 | 6.18227 | 6.0032  |

|           |         |         |         |         |         |         |         |         |         |
|-----------|---------|---------|---------|---------|---------|---------|---------|---------|---------|
| ASCL3     | 4.45574 | 4.73272 | 4.57165 | 4.6745  | 5.85362 | 4.75163 | 4.91882 | 4.50343 | 4.76241 |
| NRIP3     | 6.29075 | 5.67336 | 5.95683 | 6.47354 | 6.45917 | 6.73628 | 6.88334 | 9.78229 | 6.28331 |
| DENND5A   | 8.02941 | 7.94482 | 7.87155 | 7.25332 | 6.23727 | 6.7426  | 7.00718 | 7.19425 | 7.0978  |
| TMEM41B   | 8.79323 | 8.52292 | 8.17804 | 8.21329 | 4.97159 | 8.14299 | 8.92189 | 8.86286 | 8.92124 |
| LOC644656 | 5.64223 | 4.59621 | 5.11622 | 5.55436 | 5.38444 | 5.62321 | 5.1419  | 4.85906 | 5.32247 |
| LOC440028 | 5.17334 | 4.82608 | 5.121   | 5.41813 | 5.82026 | 5.79823 | 5.06462 | 5.22404 | 5.68166 |
| SBF2      | 9.53963 | 9.54185 | 9.44551 | 7.93662 | 6.7629  | 7.82148 | 7.97581 | 8.54312 | 8.54293 |
| MTRNR2L8  | 11.8629 | 11.8908 | 12.2377 | 12.0427 | 12.5497 | 12.156  | 12.0078 | 12.6191 | 12.3128 |
| RNF141    | 8.78374 | 8.79406 | 8.78556 | 8.57766 | 8.52385 | 9.06399 | 8.79078 | 8.83525 | 8.99272 |
| LYVE1     | 7.48495 | 7.5379  | 9.69551 | 6.28141 | 6.70601 | 6.38582 | 7.96738 | 7.79741 | 8.03834 |
| MRVI1     | 6.82696 | 6.4552  | 7.27256 | 6.16198 | 6.45099 | 6.33411 | 5.57883 | 6.44702 | 6.57855 |
| GALNT18   | 6.81602 | 7.26257 | 7.37768 | 7.24482 | 7.35117 | 8.07729 | 7.73988 | 7.85912 | 7.69761 |
| MIR4299   | 5.40508 | 6.15887 | 4.93678 | 5.30599 | 6.37321 | 5.87611 | 5.37949 | 5.05651 | 5.44979 |
| DKK3      | 6.87751 | 6.82004 | 6.94524 | 6.86456 | 6.25825 | 6.50529 | 6.93805 | 6.96242 | 6.50745 |
| LINC00958 | 6.37168 | 7.48598 | 7.05128 | 7.56522 | 6.39629 | 6.84811 | 6.58824 | 6.48689 | 6.64191 |
| BTBD10    | 7.19487 | 7.50129 | 7.38123 | 7.61729 | 6.18226 | 8.0647  | 7.92765 | 7.76344 | 8.37309 |
| PTH       | 2.64322 | 2.75302 | 2.73651 | 3.60269 | 3.67634 | 2.60115 | 2.85417 | 2.82857 | 3.34746 |
| RRAS2     | 7.52287 | 7.67508 | 7.50253 | 8.49162 | 7.13914 | 8.9167  | 8.31468 | 9.62124 | 8.95051 |
| CALCA     | 4.15736 | 4.58074 | 4.12134 | 3.73686 | 6.7162  | 4.81921 | 4.80585 | 4.58149 | 4.72502 |
| SOX6      | 7.34099 | 7.00487 | 6.40513 | 6.20492 | 4.90626 | 5.45614 | 6.10977 | 5.17834 | 4.83912 |
| SERGEF    | 6.57385 | 6.50252 | 6.22439 | 6.36317 | 6.39998 | 6.17299 | 6.35997 | 6.01236 | 6.04567 |
| TPH1      | 5.10221 | 5.3968  | 5.59629 | 4.31888 | 4.80827 | 4.29882 | 3.72358 | 4.58231 | 4.26172 |
| SAAL1     | 5.77705 | 5.91649 | 6.2     | 5.04319 | 4.99694 | 4.97925 | 5.68893 | 4.86281 | 4.95096 |
| SAA3P     | 3.50836 | 3.59485 | 3.84733 | 4.63936 | 4.10386 | 4.41362 | 4.22697 | 3.9553  | 3.96824 |
| hps5      | 7.81153 | 7.61096 | 7.62216 | 7.12778 | 7.12204 | 7.02117 | 7.36422 | 7.40716 | 7.15601 |
| TSG101    | 9.21578 | 9.18974 | 9.26394 | 9.36136 | 8.90383 | 9.3917  | 9.68475 | 9.84596 | 9.83182 |

|              |         |         |         |         |         |         |         |         |         |
|--------------|---------|---------|---------|---------|---------|---------|---------|---------|---------|
| UEVLD        | 8.98274 | 8.95252 | 8.99183 | 7.82831 | 5.50525 | 7.77868 | 8.47829 | 7.99917 | 8.09511 |
| CSRP3        | 4.55903 | 4.67306 | 5.00798 | 5.40265 | 6.09801 | 4.90778 | 5.02646 | 4.894   | 5.36541 |
| E2F8         | 7.60753 | 7.2707  | 7.0367  | 7.23403 | 6.72213 | 7.58156 | 6.96957 | 7.27857 | 7.13845 |
| NAV2-AS5     | 4.38575 | 4.67882 | 4.37581 | 5.09542 | 5.98815 | 5.219   | 4.73203 | 4.55857 | 5.04004 |
| NAV2-AS4     | 5.18354 | 5.19298 | 5.09689 | 5.67987 | 6.46344 | 6.00527 | 5.83899 | 5.71635 | 5.74438 |
| LOC100126784 | 5.50899 | 5.73268 | 5.68093 | 6.01035 | 5.83538 | 6.09166 | 6.43269 | 6.56599 | 6.10423 |
| MIR4694      | 2.74707 | 2.38383 | 2.3235  | 2.97172 | 2.18698 | 2.64229 | 3.05322 | 2.79625 | 2.98264 |
| DBX1         | 5.35427 | 4.93951 | 5.18452 | 6.1985  | 6.56888 | 5.95704 | 5.94187 | 5.81253 | 6.13046 |
| SVIP         | 6.20204 | 5.69293 | 6.69864 | 5.29841 | 5.27859 | 5.01674 | 5.1566  | 5.10813 | 5.0529  |
| CCDC179      | 3.52448 | 3.37646 | 3.35997 | 4.26896 | 4.89535 | 3.56416 | 3.28451 | 3.40559 | 3.34146 |
| CCDC34       | 5.8902  | 6.35228 | 5.91195 | 5.64059 | 5.22572 | 5.99766 | 5.99381 | 5.4479  | 5.12451 |
| LGR4         | 8.56674 | 9.3015  | 8.72256 | 7.48704 | 5.62927 | 9.65512 | 7.73146 | 7.84672 | 7.97962 |
| LIN7C        | 10.6023 | 11.0243 | 10.7239 | 10.075  | 5.74119 | 9.36032 | 10.4575 | 9.93879 | 10.3899 |
| BDNF         | 5.66146 | 5.86383 | 5.55129 | 5.59003 | 6.04227 | 6.0647  | 5.86383 | 5.67143 | 5.81297 |
| KIF18A       | 6.72771 | 5.71913 | 5.92695 | 5.69012 | 4.81038 | 5.72486 | 6.09444 | 6.24578 | 5.57418 |
| MPPED2       | 5.32574 | 5.7454  | 5.64793 | 4.61341 | 5.53638 | 4.83733 | 5.2396  | 5.33624 | 5.09825 |
| DCDC5        | 4.9823  | 5.36154 | 5.24912 | 5.53631 | 5.88848 | 5.61724 | 5.32863 | 5.41545 | 5.2652  |
| DCDC1        | 4.48062 | 4.59263 | 4.53416 | 4.49673 | 4.67526 | 4.48869 | 4.45194 | 4.57907 | 4.66186 |
| IMMP1L       | 6.42606 | 6.55195 | 6.68146 | 5.46764 | 5.32993 | 5.04935 | 6.12128 | 5.19879 | 5.57393 |
| PAX6         | 4.24433 | 3.98888 | 4.59035 | 4.8802  | 5.32611 | 5.29912 | 4.99234 | 5.06201 | 4.66603 |
| WT1          | 4.70265 | 4.73223 | 4.55991 | 5.41093 | 6.17617 | 5.31711 | 5.34588 | 5.47073 | 5.46522 |
| CCDC73       | 3.15874 | 3.04702 | 3.23529 | 3.54232 | 3.47557 | 3.86063 | 3.47339 | 3.43404 | 3.32321 |
| FBXO3        | 8.87745 | 9.01911 | 8.7865  | 8.63923 | 6.8038  | 8.70745 | 9.11979 | 9.89725 | 9.48978 |
| LMO2         | 6.57795 | 6.53418 | 6.59572 | 6.93856 | 7.30499 | 7.12519 | 7.13934 | 7.14834 | 6.75489 |
| ABTB2        | 6.99602 | 7.09866 | 6.68634 | 7.10964 | 6.74417 | 7.35843 | 7.37703 | 8.3725  | 7.05428 |
| ELF5         | 6.71303 | 6.84321 | 6.66873 | 5.90395 | 6.10898 | 6.24708 | 5.7287  | 6.03199 | 5.78088 |

|              |         |         |         |         |         |         |         |         |         |
|--------------|---------|---------|---------|---------|---------|---------|---------|---------|---------|
| APIP         | 6.30809 | 6.68345 | 6.89987 | 6.25295 | 5.66233 | 5.58012 | 6.45    | 5.73428 | 5.80541 |
| PAMR1        | 5.92163 | 7.21    | 6.21234 | 5.42065 | 6.28957 | 5.10051 | 5.56071 | 5.48503 | 5.65229 |
| COMMD9       | 8.06714 | 7.8206  | 8.12473 | 7.86092 | 7.2388  | 7.53128 | 7.95073 | 7.76423 | 7.75691 |
| RAG2         | 3.70714 | 3.9571  | 3.81361 | 4.26757 | 5.27139 | 4.44915 | 4.07178 | 4.37317 | 4.54858 |
| LRRC4C       | 3.68434 | 4.122   | 4.25443 | 4.14539 | 5.38593 | 4.52615 | 4.63171 | 3.71179 | 4.06007 |
| LOC100507205 | 3.31278 | 3.23167 | 3.12603 | 3.46971 | 3.87853 | 4.32625 | 3.73777 | 3.41075 | 4.14774 |
| HNRNPKP3     | 5.41801 | 4.93734 | 5.47235 | 6.0218  | 6.12461 | 5.61862 | 5.76719 | 5.68066 | 6.17905 |
| ALKBH3-AS1   | 4.22958 | 4.13875 | 4.32647 | 4.30294 | 4.73569 | 4.54104 | 4.2215  | 4.08231 | 4.69378 |
| ALX4         | 5.50786 | 5.52508 | 5.67398 | 6.45151 | 6.45468 | 6.54455 | 6.06196 | 6.35852 | 6.02251 |
| TP53I11      | 7.22737 | 6.93032 | 7.3566  | 7.22602 | 6.7467  | 8.08609 | 7.19789 | 7.52872 | 8.13935 |
| SYT13        | 5.47536 | 5.44927 | 5.69558 | 6.16652 | 6.41861 | 6.20761 | 5.84308 | 5.91282 | 5.85464 |
| CHST1        | 5.70053 | 5.89049 | 5.71437 | 6.45452 | 6.48284 | 6.44893 | 6.35901 | 6.79019 | 5.85853 |
| C11orf94     | 5.31877 | 5.37561 | 5.1635  | 5.81813 | 5.4511  | 5.49098 | 5.37281 | 5.33831 | 5.37908 |
| PEX16        | 7.48512 | 7.72826 | 7.37491 | 7.89357 | 7.94371 | 7.82234 | 7.89101 | 7.81415 | 7.82774 |
| PHF21A       | 8.46814 | 8.55729 | 8.27352 | 6.91456 | 6.8289  | 6.74378 | 7.59401 | 7.5331  | 7.17109 |
| AMBRA1       | 8.06    | 7.66307 | 7.82631 | 7.57475 | 7.2796  | 7.17442 | 7.5726  | 7.96821 | 7.76292 |
| HARBI1       | 5.87994 | 6.11334 | 5.8584  | 6.66944 | 5.86069 | 6.9086  | 6.87588 | 6.56101 | 6.66168 |
| ARHGAP1      | 10.0672 | 9.79205 | 10.0193 | 10.4471 | 9.12904 | 10.1712 | 10.534  | 10.1568 | 10.1839 |
| CKAP5        | 9.06208 | 8.7682  | 8.84325 | 8.46016 | 5.58541 | 8.40427 | 8.75581 | 8.89471 | 8.78258 |
| LRP4         | 8.78732 | 9.62607 | 9.43071 | 7.66963 | 6.56605 | 7.11151 | 7.67922 | 6.84152 | 7.43772 |
| ARFGAP2      | 8.05361 | 8.23026 | 7.73031 | 7.81889 | 7.02234 | 7.79562 | 8.11206 | 7.6052  | 7.96247 |
| PACSIN3      | 7.54783 | 7.37516 | 7.40798 | 7.46053 | 6.62821 | 7.3836  | 8.02858 | 7.39306 | 7.46261 |
| SPI1         | 6.91613 | 6.70567 | 6.9713  | 7.42901 | 7.54841 | 7.82444 | 7.28361 | 7.45344 | 7.25407 |
| RAPSN        | 6.54616 | 6.74439 | 6.50286 | 6.84654 | 6.91473 | 6.80374 | 6.67917 | 6.85888 | 7.11072 |
| C1QTNF4      | 5.77258 | 6.21985 | 5.9043  | 6.67135 | 5.46282 | 6.72349 | 6.01711 | 5.86811 | 6.17753 |
| MTCH2        | 9.94991 | 9.98951 | 10.1122 | 10.1703 | 8.63434 | 9.9461  | 10.3474 | 9.86033 | 9.83433 |

|           |         |         |         |         |         |         |         |         |         |
|-----------|---------|---------|---------|---------|---------|---------|---------|---------|---------|
| AGBL2     | 5.45831 | 5.49977 | 5.25208 | 5.17725 | 5.55725 | 4.77369 | 5.35616 | 4.3942  | 4.87171 |
| FNBP4     | 9.87086 | 10.1347 | 10.0824 | 8.18322 | 7.15381 | 7.84782 | 8.14459 | 9.35946 | 8.81406 |
| NUP160    | 8.17152 | 8.08817 | 8.32779 | 7.8005  | 5.08149 | 6.69481 | 7.79209 | 7.09478 | 7.43207 |
| OR4C45    | 4.19435 | 4.56051 | 4.48519 | 5.48812 | 7.52295 | 4.52926 | 5.27075 | 4.55787 | 4.34512 |
| TRIM64C   | 5.38244 | 5.2789  | 5.07924 | 5.9154  | 6.95015 | 6.19924 | 5.47374 | 5.73859 | 5.51993 |
| folh1     | 6.08598 | 4.73735 | 5.09771 | 4.32077 | 5.07899 | 4.46737 | 5.0467  | 5.07613 | 4.98572 |
| LOC441601 | 5.5284  | 6.00792 | 6.07124 | 6.25473 | 7.43983 | 6.71369 | 6.24117 | 6.4409  | 6.1902  |
| APLNR     | 7.43887 | 6.51403 | 6.96467 | 7.4943  | 6.13292 | 6.05789 | 6.48009 | 6.52477 | 5.98929 |
| SSRP1     | 8.37413 | 8.59986 | 8.49513 | 8.84844 | 6.36854 | 8.30436 | 8.89417 | 8.00394 | 8.23434 |
| PRG3      | 4.98414 | 4.64405 | 5.30784 | 5.75109 | 6.27429 | 5.84082 | 5.58523 | 5.90898 | 6.05168 |
| TIMM10    | 7.61775 | 7.75176 | 7.80947 | 8.67061 | 7.38134 | 8.0299  | 9.00077 | 7.41437 | 7.64235 |
| UBE2L6    | 6.55635 | 6.50696 | 6.38693 | 6.57561 | 5.82187 | 6.29292 | 6.64033 | 6.19686 | 6.3026  |
| YPEL4     | 5.05278 | 5.38478 | 5.44223 | 5.86356 | 6.34676 | 5.83804 | 5.46391 | 5.81786 | 5.81071 |
| MED19     | 6.82988 | 6.81911 | 6.69413 | 6.6113  | 5.93823 | 6.84031 | 6.67298 | 6.73901 | 6.76987 |
| Btd18     | 4.82273 | 4.35487 | 4.8654  | 4.58005 | 5.01316 | 4.3049  | 4.61627 | 4.5279  | 5.03762 |
| LPXN      | 7.19502 | 7.02367 | 7.76645 | 6.28549 | 6.3395  | 6.07816 | 6.53841 | 7.11717 | 6.92163 |
| GLYAT     | 4.3253  | 4.52019 | 4.23549 | 4.49651 | 6.37923 | 4.75386 | 4.66869 | 4.86155 | 4.67466 |
| GLYATL2   | 8.01995 | 5.58757 | 7.09034 | 4.44962 | 5.04559 | 4.84537 | 5.35728 | 4.36741 | 3.8256  |
| LOC283194 | 5.03344 | 4.76216 | 4.84186 | 4.64233 | 5.81066 | 4.61112 | 4.72948 | 4.78581 | 4.53401 |
| MPEG1     | 8.24534 | 7.51077 | 8.92517 | 7.41832 | 7.32724 | 6.75364 | 7.42524 | 6.38388 | 7.05285 |
| OSBP      | 9.69974 | 9.81521 | 9.75725 | 8.96449 | 6.98708 | 8.71816 | 9.21724 | 8.84188 | 8.66817 |
| MIR3162   | 3.58797 | 3.19804 | 3.47063 | 4.03557 | 4.21439 | 4.64524 | 5.01896 | 3.94093 | 4.17728 |
| patl1     | 9.91264 | 10.0521 | 10.3814 | 9.25602 | 8.11528 | 9.29538 | 9.54203 | 9.44217 | 9.73946 |
| MRPL16    | 7.18441 | 7.1367  | 7.2383  | 7.4044  | 5.81143 | 6.64065 | 7.53002 | 6.75745 | 6.64223 |
| GIF       | 4.29582 | 4.45063 | 4.10166 | 4.96205 | 5.06339 | 5.15688 | 4.22449 | 4.91561 | 4.79664 |
| PTGDR2    | 6.74893 | 6.77299 | 6.76588 | 6.83714 | 7.54407 | 7.35055 | 7.21153 | 6.90736 | 7.10256 |

|              |         |         |         |         |         |         |         |         |         |
|--------------|---------|---------|---------|---------|---------|---------|---------|---------|---------|
| PRPF19       | 7.91959 | 7.96642 | 8.01202 | 8.28181 | 5.84872 | 7.29291 | 8.37031 | 6.88879 | 7.05623 |
| VPS37C       | 7.19683 | 7.29639 | 6.91737 | 6.74549 | 6.25334 | 6.74795 | 7.24497 | 6.97142 | 7.18674 |
| VWCE         | 6.34189 | 6.79686 | 6.90154 | 7.0213  | 7.07952 | 7.30733 | 6.80578 | 6.53902 | 6.63223 |
| SYT7         | 6.12585 | 5.95508 | 5.43552 | 5.68773 | 6.12996 | 7.12892 | 6.52953 | 6.07633 | 6.17599 |
| TMEM258      | 6.52778 | 6.7254  | 6.79972 | 7.96183 | 7.67677 | 7.93521 | 8.3167  | 7.17527 | 7.43178 |
| FADS1        | 6.61617 | 6.48642 | 6.51866 | 7.1237  | 6.90667 | 6.74229 | 7.21971 | 7.23392 | 6.96755 |
| FADS3        | 6.90839 | 6.61521 | 7.16226 | 7.02272 | 6.33199 | 7.03874 | 7.0669  | 7.1407  | 7.0685  |
| RAB31L1      | 6.37398 | 6.57419 | 6.46685 | 6.56526 | 6.71539 | 6.76806 | 6.62265 | 6.66815 | 6.5348  |
| LOC100507521 | 4.51408 | 5.07213 | 4.7732  | 5.58867 | 5.78515 | 5.52388 | 5.14526 | 5.44033 | 5.09385 |
| AHNAK        | 10.6659 | 10.7594 | 10.8529 | 10.3526 | 8.63132 | 10.6344 | 10.6291 | 10.667  | 10.5857 |
| EEF1G        | 10.6362 | 10.6544 | 10.7021 | 10.6462 | 10.2006 | 10.7362 | 10.5563 | 10.5006 | 10.5196 |
| EML3         | 7.86394 | 7.54424 | 7.61191 | 7.63079 | 6.63392 | 7.67297 | 7.5615  | 7.33375 | 7.5964  |
| INTS5        | 6.29647 | 5.94166 | 5.79984 | 6.77624 | 5.50687 | 5.95293 | 7.05751 | 6.05571 | 5.84407 |
| LBHD1        | 6.81423 | 6.78137 | 6.86052 | 6.87764 | 6.91365 | 6.32954 | 7.02024 | 7.11913 | 6.88396 |
| UBXN1        | 7.29356 | 7.26193 | 7.23375 | 6.73316 | 6.42448 | 7.34127 | 6.92634 | 7.08428 | 6.78778 |
| LRRN4CL      | 6.0208  | 6.46774 | 6.65031 | 6.71509 | 6.53581 | 7.09962 | 6.13157 | 6.44261 | 6.07813 |
| HNRNPUL2     | 7.67698 | 7.71098 | 7.7879  | 7.28081 | 6.54989 | 7.43932 | 7.7073  | 7.373   | 7.27614 |
| zbtb3        | 6.07839 | 6.12905 | 5.73324 | 5.82082 | 5.6096  | 5.7938  | 6.27201 | 5.63692 | 5.9179  |
| TMEM223      | 6.74718 | 6.86767 | 6.66066 | 6.38271 | 6.15332 | 6.47731 | 6.88314 | 6.4384  | 6.56844 |
| NXF1         | 10.2694 | 9.75673 | 9.69755 | 9.53947 | 7.95327 | 8.67212 | 9.58531 | 9.18856 | 9.55552 |
| STX5         | 8.31154 | 7.97229 | 8.24076 | 8.1899  | 6.85058 | 8.36048 | 8.02649 | 8.56832 | 8.38596 |
| WDR74        | 8.16988 | 7.83012 | 8.26237 | 7.75722 | 6.89232 | 6.98665 | 8.00145 | 7.26705 | 7.16716 |
| HRASLS2      | 5.04385 | 5.3594  | 5.10554 | 5.41992 | 5.41189 | 6.45847 | 5.3388  | 5.35907 | 5.53157 |
| ATL3         | 9.69984 | 9.36737 | 9.89561 | 9.49882 | 7.0075  | 9.54539 | 10.0615 | 9.4558  | 9.89034 |
| c11orf95     | 5.94096 | 5.96459 | 6.06421 | 6.33122 | 6.1522  | 6.62616 | 6.59716 | 6.63601 | 6.67946 |
| rcor2        | 5.60988 | 5.73269 | 5.52827 | 6.44314 | 6.04192 | 6.51254 | 6.36802 | 6.32491 | 6.07739 |

|            |         |         |         |         |         |         |         |         |         |
|------------|---------|---------|---------|---------|---------|---------|---------|---------|---------|
| MACROD1    | 6.33028 | 6.35758 | 6.20392 | 6.47676 | 6.5947  | 6.78936 | 6.45426 | 6.49151 | 6.50387 |
| TRPT1      | 6.75992 | 7.01918 | 6.74642 | 7.26292 | 6.78543 | 7.96225 | 7.50771 | 7.44793 | 7.44715 |
| BAD        | 7.36206 | 7.51429 | 7.58052 | 8.0537  | 7.18    | 8.20036 | 7.93178 | 7.86571 | 7.76905 |
| TRMT112    | 7.25519 | 6.91853 | 7.25902 | 8.14298 | 6.8163  | 7.84601 | 8.12704 | 7.38464 | 7.5743  |
| NRXN2      | 5.12749 | 5.55877 | 5.2883  | 5.55938 | 5.71319 | 5.44089 | 5.56525 | 5.14025 | 5.74956 |
| RASGRP2    | 5.6609  | 5.30221 | 5.51661 | 5.32858 | 5.55086 | 5.64809 | 5.67453 | 6.29166 | 5.62025 |
| SF1        | 9.79292 | 9.68792 | 9.81078 | 9.51273 | 7.66443 | 8.76206 | 9.28615 | 8.98329 | 9.37287 |
| MAP4K2     | 6.82888 | 6.68203 | 6.92398 | 6.71523 | 6.38448 | 6.7007  | 7.02217 | 7.7215  | 7.10186 |
| MEN1       | 7.90357 | 7.7193  | 7.77976 | 8.23595 | 7.33656 | 7.97306 | 8.10812 | 7.57067 | 7.57154 |
| CDC42BPG   | 7.54362 | 7.35626 | 7.32647 | 7.42111 | 6.81059 | 7.52533 | 7.34113 | 7.59401 | 7.35236 |
| EHD1       | 6.53995 | 6.19083 | 6.23261 | 6.75222 | 6.21553 | 7.14346 | 6.65217 | 7.28575 | 7.19281 |
| mir192     | 5.01356 | 4.86037 | 4.73001 | 5.4142  | 5.88245 | 5.72104 | 5.222   | 5.19196 | 5.27368 |
| ATG2A      | 7.84267 | 7.48292 | 7.45403 | 7.82276 | 6.94003 | 8.19452 | 7.87504 | 8.47768 | 7.97547 |
| GPHA2      | 6.33288 | 6.57554 | 6.49576 | 6.823   | 7.40964 | 6.88485 | 6.75508 | 6.63077 | 7.01779 |
| NAALADL1   | 6.14044 | 6.24625 | 6.0782  | 6.73822 | 6.80266 | 6.62854 | 6.89143 | 6.48103 | 6.46617 |
| CDCA5      | 6.41727 | 6.51235 | 6.50786 | 7.19873 | 7.27425 | 7.12901 | 6.78472 | 7.16201 | 6.74346 |
| TMEM262    | 5.09788 | 4.94276 | 5.10207 | 5.64348 | 6.02798 | 5.77621 | 5.25212 | 5.81136 | 5.53123 |
| FAU        | 7.41956 | 6.6012  | 7.02893 | 7.3135  | 6.35724 | 7.0189  | 7.34797 | 7.23473 | 7.15838 |
| LTBP3      | 7.19596 | 7.04071 | 7.32607 | 7.36942 | 6.62172 | 7.29722 | 7.1721  | 6.78733 | 6.59688 |
| SSSCA1-AS1 | 7.43131 | 7.18262 | 6.95106 | 7.13178 | 6.88499 | 7.34538 | 6.89701 | 7.048   | 6.98136 |
| MAP3K11    | 7.28154 | 6.96452 | 7.11065 | 7.38093 | 6.93936 | 7.84761 | 7.74449 | 7.47988 | 7.85762 |
| RELA       | 8.73141 | 8.42345 | 8.39764 | 9.28331 | 8.6974  | 9.84749 | 9.3487  | 9.06812 | 9.2858  |
| CFL1       | 5.52254 | 5.66049 | 5.65423 | 6.06906 | 5.50625 | 6.35337 | 6.09584 | 6.03785 | 6.02399 |
| EFEMP2     | 7.3186  | 6.82746 | 7.34378 | 7.36454 | 6.94554 | 7.48062 | 6.8499  | 7.35295 | 7.09816 |
| FIBP       | 7.59065 | 7.57533 | 7.69574 | 8.30625 | 7.38236 | 7.87408 | 8.61178 | 7.66864 | 7.74341 |
| fosl1      | 8.02828 | 6.31066 | 6.58021 | 10.0202 | 9.88673 | 11.2347 | 9.98953 | 10.3355 | 11.0648 |



|          |         |         |         |         |         |         |         |         |         |
|----------|---------|---------|---------|---------|---------|---------|---------|---------|---------|
| c11orf68 | 6.74101 | 6.47009 | 6.41555 | 6.93525 | 6.49104 | 7.87918 | 7.89163 | 7.7106  | 7.48885 |
| EIF1AD   | 8.18513 | 8.25807 | 8.29105 | 8.0343  | 6.89818 | 8.2881  | 8.79719 | 8.31693 | 8.52375 |
| GAL3ST3  | 6.34424 | 6.6542  | 6.59033 | 6.80464 | 7.00434 | 7.23542 | 6.94161 | 6.81876 | 6.87624 |
| YIF1A    | 7.50492 | 7.32289 | 7.50953 | 8.03448 | 7.39402 | 7.83798 | 8.37695 | 7.52766 | 8.0291  |
| RIN1     | 7.49143 | 7.54374 | 7.43173 | 7.45618 | 7.51592 | 7.53501 | 8.23106 | 7.35096 | 7.23269 |
| brms1    | 7.15205 | 7.27325 | 7.20045 | 7.96405 | 6.78697 | 7.62892 | 8.32218 | 7.84273 | 7.6289  |
| MRPL11   | 8.87592 | 8.60874 | 9.04567 | 8.65725 | 6.38481 | 8.15694 | 8.76428 | 7.25501 | 8.36708 |
| CTSF     | 6.81784 | 6.80329 | 6.7444  | 6.59011 | 6.29485 | 5.7208  | 6.57829 | 6.25738 | 6.67288 |
| CCDC87   | 4.71338 | 4.70773 | 4.69991 | 4.52748 | 5.3803  | 5.28957 | 4.49217 | 5.20945 | 5.26709 |
| RBM4B    | 7.46533 | 7.44414 | 7.10935 | 6.8344  | 7.49767 | 6.61787 | 6.9804  | 6.58859 | 6.89037 |
| RBM4     | 3.54142 | 3.61484 | 3.38245 | 2.7155  | 2.63718 | 2.90057 | 2.7522  | 3.21074 | 3.06158 |
| PC       | 6.44859 | 6.25635 | 6.15558 | 7.14988 | 5.99657 | 7.69674 | 7.19549 | 7.23177 | 7.25037 |
| MIR3163  | 7.35186 | 7.28511 | 7.25922 | 6.83271 | 8.57984 | 7.51626 | 7.1348  | 7.66857 | 7.82524 |
| CLCF1    | 7.04002 | 7.00389 | 7.2303  | 8.20134 | 7.29136 | 8.39487 | 7.84204 | 7.99955 | 8.51482 |
| GPR152   | 6.28248 | 5.88411 | 6.07749 | 6.17626 | 7.34419 | 6.4543  | 6.36194 | 6.34425 | 6.4316  |
| TMEM134  | 7.69492 | 8.03691 | 7.72206 | 7.33261 | 7.52097 | 7.24412 | 7.37121 | 7.77183 | 7.31179 |
| CDK2AP2  | 6.30775 | 5.32688 | 6.17268 | 6.7686  | 5.67568 | 6.39247 | 7.33665 | 6.27589 | 6.47959 |
| CABP2    | 5.33885 | 5.63083 | 5.69523 | 6.39649 | 6.11515 | 6.47564 | 5.75352 | 6.44072 | 6.25251 |
| NUDT8    | 8.20223 | 8.24041 | 8.39539 | 8.9121  | 9.15739 | 9.06577 | 9.28961 | 8.54563 | 8.4709  |
| TBX10    | 6.41    | 6.55903 | 6.56713 | 6.69217 | 7.34247 | 6.70865 | 6.62609 | 6.67642 | 6.57085 |
| ACY3     | 5.5601  | 5.5627  | 5.83366 | 6.54504 | 6.5339  | 6.53299 | 6.44939 | 6.44087 | 6.51147 |
| unc93b1  | 7.2485  | 6.97025 | 7.35207 | 7.41364 | 7.56519 | 7.81278 | 7.90709 | 7.21835 | 7.49741 |
| CHKA     | 6.63543 | 6.52407 | 6.76963 | 5.72577 | 5.5622  | 5.77556 | 5.87597 | 5.69072 | 5.91549 |
| KMT5B    | 8.82186 | 9.74303 | 8.79996 | 8.81851 | 8.21339 | 9.11163 | 9.25216 | 8.51351 | 8.79501 |
| C11orf24 | 6.95651 | 6.56478 | 7.01721 | 7.60639 | 6.61281 | 7.43003 | 7.60449 | 7.21393 | 7.43854 |
| CPT1A    | 7.72824 | 8.1622  | 8.21788 | 7.84011 | 6.96254 | 7.5007  | 8.15409 | 8.1585  | 7.55852 |

|           |         |         |         |         |         |         |         |         |         |
|-----------|---------|---------|---------|---------|---------|---------|---------|---------|---------|
| MRPL21    | 7.36256 | 7.19984 | 7.27625 | 7.62013 | 6.87642 | 7.72709 | 7.77169 | 7.12139 | 7.08146 |
| ORAOV1    | 5.86415 | 6.45993 | 5.88941 | 5.86075 | 5.5568  | 5.44829 | 5.81121 | 5.48644 | 5.39371 |
| FGF19     | 5.29534 | 5.60322 | 5.37039 | 6.48671 | 5.58759 | 6.61439 | 5.85036 | 6.17459 | 6.10837 |
| FGF4      | 5.90135 | 6.30621 | 6.17307 | 6.76143 | 6.23139 | 6.75963 | 6.54127 | 6.83077 | 6.53816 |
| FGF3      | 5.52302 | 5.82418 | 5.70226 | 6.07302 | 5.66585 | 6.61789 | 5.66464 | 5.89565 | 6.10572 |
| SHANK2    | 6.57037 | 6.68711 | 6.66693 | 7.13115 | 6.72408 | 7.96194 | 7.45145 | 8.16016 | 7.99072 |
| MIR3664   | 3.57608 | 4.50559 | 4.16624 | 4.57103 | 3.77894 | 5.38944 | 5.15758 | 4.39094 | 4.33193 |
| FLJ42102  | 6.58173 | 6.36014 | 6.56504 | 7.00393 | 7.34969 | 7.03889 | 6.74915 | 7.14432 | 6.62312 |
| DHCR7     | 9.03544 | 8.84645 | 9.1793  | 8.66827 | 7.86897 | 8.51084 | 9.43232 | 8.48833 | 9.16755 |
| KRTAP5-11 | 5.31353 | 5.44711 | 5.3369  | 5.64582 | 5.78959 | 5.76133 | 5.36588 | 5.87769 | 5.74061 |
| NUMA1     | 8.55185 | 8.50274 | 8.45822 | 8.0867  | 7.58549 | 7.86247 | 8.19522 | 8.1808  | 8.2966  |
| MIR3165   | 4.61412 | 4.78949 | 4.63032 | 5.14407 | 5.23721 | 5.1718  | 4.8654  | 4.7791  | 4.90317 |
| ANAPC15   | 7.126   | 6.90615 | 7.38228 | 6.95473 | 6.67705 | 6.93985 | 7.67247 | 6.60965 | 7.16677 |
| PHOX2A    | 5.6592  | 5.81418 | 5.8308  | 6.56252 | 6.90347 | 6.94134 | 6.27228 | 6.22327 | 6.46701 |
| CLPB      | 7.32262 | 7.09209 | 7.21227 | 7.29816 | 6.7404  | 7.43079 | 7.66313 | 7.11875 | 7.36193 |
| mir139    | 5.68395 | 5.58783 | 5.63191 | 5.61958 | 6.21568 | 6.22859 | 5.49989 | 5.61242 | 5.62885 |
| STARD10   | 7.24256 | 6.98511 | 6.81155 | 7.84763 | 7.65086 | 7.92112 | 7.95032 | 7.82577 | 7.99713 |
| FCHSD2    | 7.83043 | 7.79697 | 7.9643  | 6.61618 | 5.75691 | 5.97612 | 7.18686 | 6.43845 | 6.95367 |
| COA4      | 7.06481 | 7.47564 | 7.56111 | 6.87265 | 6.45913 | 6.36355 | 6.39557 | 6.63202 | 6.5995  |
| C2CD3     | 7.54644 | 7.52488 | 7.54976 | 6.66092 | 6.75868 | 5.94675 | 6.54233 | 6.41018 | 6.49359 |
| PGM2L1    | 6.39949 | 6.5519  | 6.40338 | 6.5621  | 6.19188 | 6.36509 | 6.7824  | 6.76036 | 6.57244 |
| LIPT2     | 6.8884  | 7.35314 | 7.24074 | 6.82797 | 6.53235 | 6.7294  | 7.48176 | 6.12735 | 6.08601 |
| CHRD2     | 7.07254 | 6.93639 | 6.82495 | 6.75492 | 6.97549 | 7.04711 | 7.06347 | 7.08063 | 6.96717 |
| MIR4696   | 1.90938 | 2.10099 | 1.69521 | 2.11805 | 2.01204 | 2.4717  | 2.74848 | 1.95008 | 2.0762  |
| XRR1      | 7.00728 | 6.91405 | 6.93272 | 6.32672 | 6.23996 | 6.68642 | 6.51346 | 5.86462 | 5.98214 |
| MIR326    | 7.02651 | 7.43203 | 6.93124 | 7.6818  | 8.42339 | 8.29729 | 7.47524 | 7.75775 | 7.82534 |

|           |         |         |         |         |         |         |         |         |         |
|-----------|---------|---------|---------|---------|---------|---------|---------|---------|---------|
| KLHL35    | 6.24865 | 5.79074 | 5.88221 | 6.72222 | 6.31013 | 6.54839 | 6.20894 | 6.16893 | 6.43277 |
| GDPD5     | 6.68112 | 6.49463 | 6.82304 | 6.52818 | 6.70996 | 7.02661 | 6.35432 | 6.83518 | 6.57454 |
| MAP6      | 6.57409 | 6.26707 | 6.86823 | 6.67314 | 6.65623 | 6.8811  | 6.52817 | 6.69797 | 6.4581  |
| LOC283214 | 5.34798 | 5.41191 | 5.52527 | 6.31888 | 7.33666 | 6.31551 | 6.18063 | 6.00199 | 6.31098 |
| LRRC32    | 6.71532 | 6.82363 | 7.50183 | 6.61803 | 6.23462 | 6.5102  | 6.77499 | 7.45269 | 7.22734 |
| GDPD4     | 4.8785  | 5.02058 | 4.84001 | 5.30332 | 6.61651 | 5.25038 | 4.55189 | 5.29908 | 5.2443  |
| PAK1      | 7.98096 | 7.94206 | 7.5577  | 8.06414 | 7.47244 | 8.13593 | 8.03971 | 8.38401 | 8.44507 |
| RSF1      | 7.68577 | 7.81867 | 7.61982 | 6.89384 | 5.56144 | 7.006   | 6.78147 | 6.8184  | 6.66583 |
| INTS4     | 8.48721 | 8.3427  | 8.73927 | 6.81218 | 5.63732 | 5.77943 | 7.4099  | 7.04892 | 7.18507 |
| KCTD21    | 6.88883 | 6.94736 | 6.9833  | 7.65824 | 7.34098 | 7.78753 | 7.73921 | 8.21583 | 7.76712 |
| GAB2      | 7.22717 | 7.34165 | 7.05221 | 6.69312 | 5.56067 | 7.36851 | 7.00064 | 7.02108 | 7.8208  |
| MIR708    | 6.55672 | 6.54072 | 6.06468 | 4.57922 | 5.80391 | 3.4442  | 3.9744  | 3.90147 | 3.84714 |
| MIR4300   | 4.78172 | 4.77836 | 4.95977 | 4.97731 | 6.19579 | 5.05938 | 4.54178 | 5.335   | 5.20164 |
| PRCP      | 7.39235 | 6.99268 | 7.33746 | 6.65912 | 6.6728  | 6.7019  | 6.84954 | 6.95458 | 6.44733 |
| CCDC90B   | 7.3164  | 7.0359  | 7.54075 | 6.94333 | 5.45364 | 6.45791 | 7.42732 | 6.65472 | 6.90356 |
| CREBZF    | 7.87484 | 8.40605 | 7.73216 | 7.30241 | 6.24211 | 6.8482  | 7.36726 | 7.32029 | 7.44366 |
| CCDC89    | 5.27606 | 5.15483 | 4.9691  | 4.80388 | 4.84278 | 5.32621 | 5.17521 | 4.59071 | 4.89404 |
| SYTL2     | 7.46395 | 7.31291 | 7.08562 | 6.82835 | 5.9705  | 5.58764 | 6.31929 | 5.49327 | 5.68447 |
| PICALM    | 10.3331 | 10.0776 | 10.2948 | 9.56725 | 8.01933 | 9.86787 | 9.61446 | 10.433  | 10.0718 |
| FZD4      | 7.39097 | 7.87694 | 8.18466 | 6.68081 | 6.32965 | 6.48785 | 6.85853 | 7.07255 | 6.55563 |
| CTSC      | 10.1796 | 9.83355 | 9.84523 | 10.194  | 7.34492 | 9.75254 | 10.1122 | 8.65635 | 9.6746  |
| NOX4      | 5.48466 | 5.19375 | 5.85823 | 6.01118 | 5.1463  | 5.56454 | 5.53653 | 5.95617 | 5.812   |
| TRIM49    | 5.64793 | 5.45037 | 5.56919 | 5.81813 | 7.48276 | 5.42872 | 6.07812 | 5.10533 | 5.08371 |
| TRIM64B   | 5.61749 | 5.28568 | 5.16743 | 5.66808 | 6.7971  | 5.10248 | 5.36388 | 5.80539 | 5.67817 |
| CHORDC1   | 6.51766 | 6.93353 | 6.96475 | 6.41207 | 5.70132 | 6.15116 | 6.31434 | 6.81077 | 6.87299 |
| MIR4490   | 2.21472 | 2.28296 | 1.98133 | 2.85834 | 2.12119 | 2.08062 | 2.7405  | 2.75651 | 2.04297 |

|          |         |         |         |         |         |         |         |         |         |
|----------|---------|---------|---------|---------|---------|---------|---------|---------|---------|
| MIR1261  | 2.9567  | 2.50927 | 2.60699 | 2.34133 | 5.24591 | 2.73177 | 3.2586  | 2.68096 | 2.76899 |
| SMCO4    | 5.54249 | 5.20712 | 5.6822  | 5.7722  | 5.72602 | 5.43716 | 6.20997 | 5.39372 | 5.62691 |
| VSTM5    | 5.66309 | 5.17762 | 5.43866 | 5.59564 | 6.34764 | 6.05603 | 5.83165 | 5.73116 | 5.94734 |
| GPR83    | 5.42279 | 5.57136 | 5.39094 | 6.07864 | 6.74855 | 6.21828 | 5.76847 | 6.06278 | 5.62114 |
| MRE11    | 7.769   | 7.58664 | 7.94619 | 6.61669 | 5.55978 | 5.93954 | 6.4237  | 6.22182 | 6.10059 |
| MIR548L  | 6.78338 | 7.3497  | 7.55689 | 4.40493 | 5.86465 | 3.34138 | 4.17728 | 5.13012 | 3.85304 |
| CWC15    | 7.57976 | 7.77306 | 7.59385 | 7.94705 | 6.24531 | 7.49384 | 8.34183 | 7.31979 | 7.34074 |
| SESN3    | 8.29842 | 8.5321  | 8.429   | 7.9709  | 5.48893 | 7.23321 | 8.29886 | 7.34005 | 6.90635 |
| MTMR2    | 8.55331 | 8.37348 | 8.3571  | 8.47393 | 6.03481 | 7.95218 | 8.38653 | 7.99824 | 8.60421 |
| CCDC82   | 7.71468 | 7.44177 | 7.79821 | 6.76706 | 5.87897 | 6.10783 | 6.73167 | 6.88427 | 6.61204 |
| JRKL-AS1 | 4.77692 | 4.52082 | 4.73996 | 4.81625 | 5.27697 | 5.20772 | 4.82069 | 4.7985  | 4.76392 |
| PGR      | 4.47909 | 5.01164 | 4.91809 | 4.49308 | 4.91232 | 4.66282 | 4.69368 | 4.59054 | 4.5889  |
| MIR3920  | 1.95248 | 1.92654 | 2.08598 | 2.59896 | 1.80293 | 2.5553  | 2.30044 | 2.1916  | 2.05032 |
| ANGPTL5  | 3.50665 | 3.82885 | 4.55046 | 4.01274 | 3.71337 | 3.99626 | 3.99725 | 3.84999 | 4.0496  |
| MMP20    | 4.66593 | 5.11204 | 5.1634  | 5.54466 | 6.23357 | 5.82582 | 5.30972 | 5.60939 | 5.51156 |
| MMP27    | 5.48575 | 5.40944 | 6.35811 | 5.06026 | 5.87839 | 5.26133 | 5.57743 | 5.02618 | 4.60423 |
| MMP8     | 4.53681 | 4.70719 | 4.56494 | 4.88491 | 6.19815 | 5.09293 | 4.84374 | 4.77652 | 5.42499 |
| MMP10    | 3.57963 | 3.65904 | 3.45639 | 5.01705 | 4.063   | 6.41731 | 4.25853 | 6.57477 | 6.1476  |
| MMP1     | 3.18646 | 3.78109 | 3.63158 | 10.211  | 5.43564 | 11.0003 | 8.76029 | 11.2845 | 11.1841 |
| MMP12    | 4.43908 | 4.27017 | 4.21068 | 4.59753 | 4.9622  | 6.02781 | 5.91986 | 7.4011  | 8.21728 |
| MMP13    | 3.4737  | 3.73399 | 3.76962 | 5.348   | 4.49884 | 4.69157 | 4.79959 | 4.10375 | 4.94404 |
| PDGFD    | 7.09316 | 7.08589 | 7.48462 | 5.37469 | 5.97937 | 5.34582 | 5.64424 | 5.94709 | 5.82576 |
| CASP12   | 5.53634 | 5.76352 | 6.17661 | 5.42683 | 6.0514  | 5.0666  | 5.1227  | 5.18953 | 4.926   |
| MSANTD4  | 6.17452 | 6.48916 | 6.54614 | 5.69446 | 5.37519 | 5.39341 | 6.09876 | 5.11142 | 5.41274 |
| kbtbd3   | 6.57098 | 6.78332 | 6.62947 | 5.27853 | 5.53433 | 4.9575  | 5.98928 | 5.72048 | 5.02809 |
| SLN      | 5.84112 | 4.9857  | 5.81479 | 5.44699 | 6.35321 | 5.4061  | 5.67814 | 5.57626 | 7.3209  |

|              |         |         |         |         |         |         |         |         |         |
|--------------|---------|---------|---------|---------|---------|---------|---------|---------|---------|
| c11orf65     | 5.58817 | 5.19461 | 5.04192 | 4.90999 | 5.10675 | 4.82834 | 4.30116 | 4.05211 | 4.44718 |
| KDELC2       | 8.05756 | 8.1609  | 8.02925 | 8.3123  | 6.34652 | 7.48058 | 7.99633 | 7.07464 | 6.93978 |
| EXPH5        | 8.73492 | 9.06369 | 8.9776  | 7.47951 | 6.73022 | 8.12622 | 7.57362 | 8.42009 | 8.63054 |
| RDX          | 6.07138 | 5.66513 | 6.33544 | 5.69539 | 3.86789 | 5.12068 | 5.73935 | 5.87625 | 5.92309 |
| ARHGAP20     | 6.33713 | 5.96117 | 6.54098 | 6.10256 | 6.4809  | 5.61643 | 5.96677 | 5.58676 | 5.82302 |
| POU2AF1      | 5.27904 | 5.36831 | 5.26499 | 5.39356 | 6.32169 | 5.9083  | 5.49274 | 5.46775 | 5.788   |
| LOC100132078 | 4.23467 | 4.2941  | 3.62066 | 4.29907 | 4.31429 | 4.40765 | 4.52264 | 4.70498 | 4.18651 |
| BTG4         | 3.70024 | 3.77001 | 4.10189 | 4.0796  | 4.26046 | 4.10102 | 4.33268 | 4.07564 | 4.37232 |
| PIH1D2       | 4.53788 | 4.26299 | 4.60852 | 4.03003 | 4.19165 | 4.14314 | 4.52467 | 3.70256 | 4.1168  |
| TIMM8B       | 7.25631 | 7.48206 | 7.11434 | 8.05029 | 7.3425  | 7.69894 | 8.66099 | 6.32251 | 7.4104  |
| IL18         | 9.28603 | 9.04836 | 8.48003 | 8.59926 | 5.20148 | 6.63243 | 7.8796  | 8.70681 | 7.66618 |
| PLET1        | 5.09054 | 4.62431 | 5.10612 | 5.20648 | 6.69883 | 4.75457 | 5.54431 | 5.15624 | 5.36521 |
| NCAM1-AS1    | 5.46821 | 5.37447 | 5.48023 | 5.73642 | 6.57218 | 5.916   | 5.80466 | 6.12618 | 5.83754 |
| DRD2         | 6.22665 | 5.86391 | 6.05224 | 5.95678 | 6.77418 | 6.31618 | 6.17974 | 6.04749 | 5.62273 |
| MIR4301      | 3.41359 | 3.84842 | 2.91952 | 3.66266 | 4.27191 | 4.03374 | 3.4264  | 3.20791 | 3.22129 |
| USP28        | 7.76259 | 7.85571 | 7.51338 | 6.66635 | 5.99697 | 6.61211 | 6.80059 | 6.84395 | 6.2443  |
| BUD13        | 7.17162 | 7.38914 | 7.38478 | 7.15057 | 5.73748 | 6.51177 | 7.14832 | 7.11664 | 7.09991 |
| ZPR1         | 7.89727 | 7.97575 | 7.82445 | 8.34266 | 6.95431 | 7.95635 | 8.70894 | 8.01971 | 8.56089 |
| APOA5        | 7.30097 | 7.06404 | 7.37233 | 7.8449  | 8.48945 | 7.55159 | 7.45604 | 7.64316 | 7.43886 |
| APOA4        | 5.54563 | 5.72891 | 5.64882 | 6.32802 | 6.47553 | 6.18228 | 6.10088 | 5.97286 | 6.18548 |
| APOA1        | 5.71721 | 5.55359 | 5.81169 | 6.16798 | 7.12031 | 6.66945 | 5.78979 | 6.37328 | 6.22815 |
| SIK3         | 8.49585 | 8.35009 | 8.42896 | 8.18268 | 7.29331 | 8.70696 | 8.50623 | 8.80186 | 8.86117 |
| SIK3-IT1     | 7.4838  | 6.96428 | 7.45683 | 5.08122 | 5.42127 | 4.38749 | 4.98238 | 6.42944 | 7.25469 |
| LOC100652768 | 6.65476 | 6.70134 | 6.9821  | 7.21666 | 6.61906 | 6.85853 | 6.77461 | 7.04867 | 7.04134 |
| pcsk7        | 8.50621 | 8.42434 | 8.42723 | 8.05584 | 7.45356 | 8.12517 | 8.38442 | 7.96516 | 8.20267 |
| BACE1        | 8.24095 | 8.40503 | 8.29558 | 8.09027 | 6.64668 | 7.58693 | 8.22632 | 6.98533 | 7.62295 |

|             |         |         |         |         |         |         |         |         |         |
|-------------|---------|---------|---------|---------|---------|---------|---------|---------|---------|
| dscaml1     | 5.69136 | 5.71004 | 5.95217 | 6.26792 | 6.35797 | 6.54039 | 5.79397 | 6.15719 | 6.1993  |
| TMPRSS4-AS1 | 5.71684 | 5.90013 | 5.67583 | 5.73831 | 6.73889 | 5.85899 | 5.85545 | 6.10663 | 5.92677 |
| MPZL3       | 10.9993 | 10.6254 | 10.2927 | 10.8056 | 11.0457 | 11.7628 | 10.7542 | 12.1388 | 11.6542 |
| MPZL2       | 10.3981 | 9.81237 | 10.1357 | 9.92762 | 9.1195  | 8.75759 | 9.86576 | 9.31462 | 10.4418 |
| IFT46       | 6.9941  | 7.01319 | 6.44021 | 7.05196 | 5.81702 | 6.24578 | 7.16119 | 6.09274 | 6.31585 |
| TREH        | 5.57092 | 5.62373 | 5.74184 | 6.16255 | 6.27063 | 6.56421 | 5.72544 | 6.16074 | 5.9078  |
| DDX6        | 10.0062 | 10.0064 | 9.89614 | 9.93935 | 7.49804 | 9.94026 | 10.1911 | 9.71981 | 10.1341 |
| RPL23AP64   | 5.2971  | 5.36685 | 5.50247 | 6.18706 | 5.23033 | 5.85623 | 5.81137 | 5.95021 | 5.64403 |
| DPAGT1      | 7.87871 | 7.16885 | 7.43042 | 7.63107 | 6.93746 | 6.80645 | 7.50458 | 6.9814  | 7.50944 |
| CCDC153     | 5.98138 | 6.24512 | 6.3966  | 6.41964 | 7.3561  | 6.64348 | 6.47167 | 6.58268 | 6.66319 |
| MCAM        | 7.15553 | 6.47468 | 6.93856 | 7.34034 | 6.08328 | 7.11817 | 7.70153 | 7.20911 | 7.75333 |
| C1QTNF5     | 6.20494 | 6.16032 | 6.3259  | 6.65556 | 6.91643 | 6.50218 | 6.49688 | 6.7362  | 6.7127  |
| THY1        | 7.4455  | 7.2322  | 6.96872 | 8.1633  | 7.234   | 7.56772 | 7.57563 | 7.72566 | 7.44899 |
| NECTIN1     | 7.14674 | 6.50682 | 6.75679 | 6.98262 | 5.71755 | 7.36921 | 7.41774 | 7.01588 | 7.40418 |
| TRIM29      | 9.42741 | 9.14761 | 9.14638 | 8.79447 | 8.17054 | 9.00745 | 8.92574 | 8.8149  | 9.15615 |
| LOC649133   | 5.3194  | 5.23634 | 5.2834  | 5.33439 | 6.78736 | 5.62169 | 5.30988 | 5.46221 | 5.5916  |
| MIR100HG    | 6.00154 | 6.31888 | 6.13866 | 5.88229 | 6.28167 | 5.65425 | 5.75496 | 6.23186 | 5.78871 |
| Mir125b1    | 3.02495 | 3.16314 | 3.19281 | 3.52398 | 2.91528 | 4.44763 | 4.09427 | 3.31858 | 3.06195 |
| MIRLET7A2   | 2.52762 | 3.45695 | 3.03194 | 2.65591 | 3.20562 | 2.52455 | 2.74687 | 3.45439 | 2.2949  |
| MIR100      | 2.9889  | 2.89989 | 2.45217 | 2.87979 | 3.57871 | 3.63087 | 2.98726 | 3.18526 | 2.73457 |
| BSX         | 6.08276 | 6.01048 | 6.13924 | 6.73381 | 7.34935 | 6.77432 | 6.36483 | 6.72498 | 6.22262 |
| CLMP        | 7.11008 | 7.07743 | 7.84484 | 7.75525 | 6.44358 | 7.91103 | 7.71951 | 8.23781 | 7.98086 |
| MIR4493     | 4.61944 | 4.62919 | 4.26818 | 4.78348 | 5.0915  | 4.76681 | 5.13364 | 5.02169 | 4.8784  |
| ZNF202      | 7.09753 | 7.22798 | 6.87909 | 6.65069 | 6.81738 | 6.09901 | 6.33456 | 6.25095 | 6.4217  |
| TMEM225     | 3.46348 | 3.40107 | 3.39863 | 3.94228 | 4.70144 | 4.12892 | 3.85259 | 3.84717 | 3.67223 |
| VSIG2       | 7.00139 | 7.12677 | 6.86506 | 6.74205 | 7.70093 | 7.45627 | 6.86828 | 7.28516 | 7.1255  |

|             |         |         |         |         |         |         |         |         |         |
|-------------|---------|---------|---------|---------|---------|---------|---------|---------|---------|
| ESAM        | 8.35293 | 7.71468 | 8.46539 | 8.3798  | 7.24353 | 8.46289 | 8.0272  | 9.13575 | 8.61826 |
| MSANTD2     | 8.09672 | 8.09629 | 8.20084 | 7.58328 | 7.50365 | 7.00477 | 7.35109 | 7.09679 | 7.81267 |
| TMEM218     | 6.32725 | 6.57292 | 6.31162 | 6.86525 | 5.66302 | 5.91376 | 6.60281 | 6.18041 | 6.1963  |
| FEZ1        | 6.2459  | 6.11123 | 6.18185 | 7.20398 | 6.64971 | 6.50832 | 7.02452 | 6.71257 | 6.90213 |
| ACRV1       | 4.77283 | 4.20686 | 4.39778 | 5.46129 | 5.79454 | 5.49593 | 5.36847 | 4.85162 | 4.90899 |
| PATE2       | 4.06155 | 4.09113 | 4.13603 | 4.09836 | 5.53505 | 4.76801 | 4.12016 | 4.26768 | 4.17728 |
| PUS3        | 6.65689 | 6.91322 | 6.48372 | 6.25682 | 5.24889 | 5.65801 | 6.89336 | 6.77137 | 6.5438  |
| CDON        | 8.30207 | 7.86983 | 7.90652 | 5.94006 | 6.09156 | 5.62839 | 6.11541 | 5.47062 | 5.17898 |
| RPUSD4      | 6.93294 | 6.72378 | 6.83661 | 6.82756 | 6.82275 | 6.49035 | 6.96481 | 6.26498 | 6.78594 |
| SRPRA       | 9.82314 | 9.48308 | 10.0008 | 9.51331 | 8.04792 | 9.14602 | 9.87976 | 9.48104 | 9.69401 |
| ST3GAL4-AS1 | 5.666   | 5.97725 | 5.94645 | 6.49142 | 7.15625 | 6.87398 | 6.37948 | 6.89984 | 6.48546 |
| KIRREL3     | 5.32195 | 5.31185 | 5.28827 | 5.83766 | 6.69684 | 5.74178 | 5.29704 | 5.86726 | 5.66433 |
| MIR3167     | 2.33663 | 1.90604 | 2.03941 | 2.36329 | 2.12034 | 2.14217 | 2.2786  | 2.01891 | 2.03079 |
| ETS1        | 7.89586 | 7.35169 | 7.81894 | 8.44488 | 6.63554 | 8.95292 | 8.41573 | 8.93665 | 9.42943 |
| SENCR       | 5.49889 | 5.52017 | 5.77285 | 5.96442 | 6.00845 | 6.04544 | 6.06596 | 6.0592  | 5.74616 |
| C11orf45    | 5.64993 | 6.04522 | 5.3869  | 5.23917 | 5.75416 | 5.76656 | 5.53166 | 5.69164 | 5.96141 |
| TP53AIP1    | 8.6274  | 8.59663 | 8.1638  | 8.15424 | 6.98276 | 7.17615 | 8.06927 | 7.45385 | 7.74994 |
| ARHGAP32    | 10.3966 | 10.3283 | 10.3237 | 9.30471 | 7.96101 | 9.76913 | 9.74547 | 10.3822 | 10.4734 |
| NFRKB       | 7.30579 | 7.36207 | 7.10492 | 6.82763 | 5.96657 | 6.45318 | 7.17161 | 6.93547 | 6.36607 |
| PRDM10      | 8.06607 | 8.18257 | 7.70908 | 7.28779 | 6.14962 | 7.11555 | 7.15907 | 6.95664 | 7.6127  |
| ZBTB44      | 9.12124 | 9.51808 | 9.37867 | 8.31814 | 6.84799 | 7.43715 | 8.66955 | 7.53481 | 7.80011 |
| SNX19       | 8.0898  | 7.96462 | 8.37047 | 6.7868  | 6.19479 | 6.41705 | 7.30314 | 7.12768 | 7.45804 |
| OPCML       | 5.52714 | 5.58144 | 5.61872 | 6.11095 | 6.77946 | 6.35446 | 5.62881 | 6.14955 | 5.83565 |
| SPATA19     | 5.44093 | 5.74666 | 5.66792 | 5.729   | 6.2879  | 5.77075 | 5.58325 | 5.35544 | 5.76983 |
| MIR4697HG   | 4.63826 | 4.84378 | 5.01277 | 4.54944 | 5.26552 | 5.14776 | 4.342   | 4.80487 | 4.7958  |
| THYN1       | 7.0039  | 7.25949 | 7.36512 | 6.67187 | 6.16584 | 5.42617 | 6.62828 | 5.83136 | 5.89412 |

|             |         |         |         |         |         |         |         |         |         |
|-------------|---------|---------|---------|---------|---------|---------|---------|---------|---------|
| iqsec3      | 5.90452 | 6.29224 | 6.12064 | 6.51018 | 6.99562 | 6.93151 | 6.32465 | 6.65026 | 6.62427 |
| CCDC77      | 6.0872  | 6.21027 | 6.23887 | 5.93716 | 5.33407 | 5.89805 | 5.82484 | 5.49056 | 5.83727 |
| WNK1        | 11.1914 | 11.096  | 11.2973 | 10.4134 | 8.633   | 9.96091 | 10.5951 | 10.7755 | 10.9259 |
| ERC1        | 9.47068 | 9.32931 | 9.01671 | 8.66356 | 7.02951 | 8.80802 | 8.88455 | 9.59449 | 9.67774 |
| LINC00942   | 4.77071 | 4.56324 | 4.72688 | 4.76604 | 5.30685 | 5.11235 | 5.08544 | 5.28471 | 5.34341 |
| ADIPOR2     | 7.7151  | 8.00804 | 7.66309 | 8.00594 | 6.7527  | 7.8533  | 8.01701 | 8.60025 | 8.91675 |
| LRTM2       | 5.71569 | 6.05147 | 6.16432 | 6.70729 | 6.58418 | 6.63275 | 6.31052 | 6.64095 | 6.35862 |
| CACNA1C-IT3 | 5.19672 | 4.89366 | 5.01931 | 4.15424 | 5.49703 | 4.62189 | 4.21804 | 4.5541  | 4.96709 |
| ITFG2       | 8.39098 | 8.12429 | 8.47895 | 7.33225 | 6.3754  | 7.16162 | 7.5225  | 6.69847 | 7.12772 |
| RHNO1       | 7.05858 | 7.36098 | 7.25176 | 7.20993 | 6.40651 | 6.93001 | 7.04821 | 6.20844 | 6.4793  |
| TULP3       | 9.28038 | 9.21383 | 8.81957 | 8.31758 | 6.62709 | 8.70538 | 8.09711 | 8.181   | 8.42975 |
| TEAD4       | 7.7317  | 7.55063 | 7.6223  | 8.33511 | 7.5068  | 7.94009 | 8.52218 | 7.74214 | 8.13625 |
| TSPAN9      | 7.84105 | 7.45563 | 7.40543 | 7.02951 | 6.20559 | 7.1377  | 7.21824 | 7.18952 | 6.85439 |
| PRMT8       | 5.40443 | 5.80289 | 5.59823 | 5.88425 | 6.76848 | 6.08854 | 6.04409 | 6.10472 | 6.30006 |
| CCND2       | 7.61139 | 8.08267 | 7.49166 | 8.49885 | 7.05313 | 7.8139  | 8.33694 | 7.85462 | 7.78115 |
| TIGAR       | 7.18762 | 6.89611 | 6.77451 | 7.42651 | 7.08976 | 7.99017 | 8.52985 | 8.05687 | 7.87801 |
| RAD51AP1    | 5.57928 | 5.60216 | 5.65375 | 5.61969 | 5.44101 | 5.00771 | 5.17861 | 4.90527 | 5.2372  |
| DYRK4       | 5.05474 | 4.97617 | 5.09019 | 5.22676 | 5.46199 | 5.19626 | 5.18306 | 4.81353 | 5.08861 |
| GALNT8      | 5.28112 | 5.18458 | 5.14047 | 5.64373 | 5.86483 | 5.58851 | 5.6998  | 5.57952 | 5.44243 |
| NTF3        | 5.97223 | 5.77191 | 6.01838 | 6.02216 | 6.42663 | 6.44073 | 6.31575 | 6.07208 | 5.80733 |
| CD9         | 7.31246 | 7.25229 | 7.51313 | 7.45123 | 6.02527 | 7.38233 | 7.89394 | 7.55806 | 7.71029 |
| CD27        | 6.44302 | 6.34506 | 6.67941 | 6.5912  | 6.59556 | 6.81341 | 6.97461 | 6.64317 | 6.36049 |
| TAPBPL      | 7.41537 | 7.47169 | 7.60982 | 6.96682 | 6.75444 | 6.52624 | 7.13793 | 6.65145 | 6.67582 |
| Scarna10    | 8.66387 | 10.0162 | 8.70204 | 9.03215 | 9.0307  | 9.37913 | 9.47218 | 8.23888 | 7.54368 |
| GAPDH       | 7.92551 | 7.59381 | 8.08224 | 8.29436 | 8.06792 | 8.32237 | 7.95628 | 8.26396 | 8.17117 |
| ZNF384      | 6.09897 | 5.98524 | 6.16008 | 7.31082 | 6.73532 | 7.31236 | 7.53382 | 6.67227 | 7.03306 |



|          |         |         |         |         |         |         |         |         |         |
|----------|---------|---------|---------|---------|---------|---------|---------|---------|---------|
| COPS7A   | 8.97381 | 8.71233 | 8.88362 | 9.09685 | 8.0661  | 8.35399 | 9.32102 | 7.98941 | 8.94376 |
| PTMS     | 9.08605 | 8.46559 | 8.76923 | 9.04947 | 7.8252  | 8.51928 | 9.06436 | 8.21218 | 8.9941  |
| LAG3     | 5.92064 | 6.12111 | 5.801   | 6.45007 | 6.76378 | 6.56189 | 6.0736  | 6.45527 | 6.22509 |
| CD4      | 6.44465 | 6.37786 | 6.69463 | 6.68067 | 6.94663 | 6.65353 | 6.70077 | 6.39123 | 6.54968 |
| GPR162   | 5.80058 | 5.7011  | 5.86631 | 6.54181 | 6.71103 | 6.43282 | 6.60705 | 6.23345 | 6.04705 |
| P3H3     | 6.38826 | 6.50863 | 6.62655 | 6.62009 | 6.10172 | 6.37897 | 6.23846 | 6.82327 | 6.15187 |
| USP5     | 8.48941 | 8.26248 | 8.34406 | 8.37941 | 6.86791 | 7.86695 | 8.82771 | 7.11473 | 8.02524 |
| TPI1     | 7.88757 | 7.34445 | 7.66749 | 8.01006 | 7.45562 | 8.91733 | 7.84853 | 8.32191 | 8.00039 |
| LRRC23   | 5.70157 | 6.03679 | 5.78462 | 6.00201 | 6.03575 | 6.36434 | 6.07514 | 5.75201 | 6.01932 |
| RPL13P5  | 6.46592 | 6.10844 | 6.08415 | 6.82064 | 5.00538 | 6.03728 | 6.51488 | 6.21145 | 6.90316 |
| DSTNP2   | 6.23897 | 5.91221 | 6.00617 | 5.58776 | 5.60196 | 5.17519 | 6.26045 | 6.31991 | 5.96507 |
| ATN1     | 8.8132  | 8.45929 | 9.06111 | 8.19954 | 6.96967 | 8.24576 | 8.46474 | 7.9958  | 8.38175 |
| C12orf57 | 7.47289 | 7.578   | 7.78538 | 7.7616  | 6.74085 | 7.49742 | 7.81817 | 6.94946 | 7.12872 |
| mir200c  | 5.51745 | 4.38054 | 4.85231 | 4.66314 | 5.67654 | 5.73106 | 4.43667 | 4.90208 | 4.94365 |
| MIR141   | 4.39729 | 4.68552 | 4.58961 | 5.26478 | 4.86271 | 4.66798 | 4.88189 | 4.64751 | 4.71084 |
| EMG1     | 6.24362 | 6.59024 | 6.36014 | 6.5429  | 6.27232 | 6.11517 | 6.86416 | 5.87696 | 6.23247 |
| C1RL-AS1 | 6.07478 | 6.04003 | 6.01483 | 5.72515 | 6.05759 | 5.97529 | 6.10318 | 5.5323  | 6.21919 |
| clstn3   | 7.36804 | 6.59091 | 6.96084 | 6.57876 | 6.65044 | 6.52053 | 6.24822 | 6.50389 | 6.68699 |
| PEX5     | 7.08927 | 6.97693 | 6.79353 | 7.05163 | 6.99982 | 6.76972 | 7.3208  | 6.7239  | 6.53678 |
| ACSM4    | 5.44381 | 5.42185 | 5.27416 | 5.92006 | 7.1003  | 5.86467 | 5.70761 | 5.99222 | 5.99911 |
| DPPA3    | 5.20884 | 5.4517  | 5.52366 | 6.0969  | 6.58793 | 5.9439  | 5.6011  | 5.20456 | 5.32142 |
| NANOGNB  | 4.18471 | 4.24729 | 4.43785 | 4.85148 | 5.63044 | 4.98456 | 4.36636 | 4.49893 | 4.55744 |
| NECAP1   | 8.13602 | 8.38282 | 8.19382 | 7.2048  | 6.67589 | 6.49543 | 7.22301 | 7.29364 | 7.48304 |
| NANOG    | 4.90386 | 6.33742 | 4.43249 | 4.6526  | 5.03701 | 4.45501 | 4.05137 | 4.58119 | 4.07114 |
| FOXJ2    | 8.73832 | 9.04528 | 8.78602 | 8.68943 | 7.51263 | 8.30813 | 8.4688  | 8.40556 | 8.36656 |
| ZNF705A  | 3.28542 | 3.53136 | 3.04045 | 3.57885 | 3.84424 | 3.52989 | 3.58261 | 3.40934 | 3.08904 |

|           |         |         |         |         |         |         |         |         |         |
|-----------|---------|---------|---------|---------|---------|---------|---------|---------|---------|
| RIMKLB    | 8.36153 | 8.4221  | 8.52757 | 8.4483  | 6.84412 | 8.69617 | 7.84317 | 8.48727 | 9.17233 |
| A2ML1     | 10.9976 | 10.8691 | 11.2047 | 11.2627 | 11.4122 | 11.8318 | 11.7113 | 12.491  | 12.2941 |
| PHC1      | 8.21102 | 7.3417  | 7.41677 | 7.35645 | 7.31345 | 7.34397 | 7.50829 | 7.71993 | 7.5189  |
| LINC00987 | 6.309   | 6.25085 | 6.53959 | 6.32205 | 5.8479  | 6.02338 | 6.77933 | 5.79274 | 5.84204 |
| LOC642846 | 6.42447 | 6.87388 | 6.71226 | 7.14305 | 6.60417 | 7.28897 | 7.21346 | 6.61643 | 6.76445 |
| TMEM52B   | 4.66726 | 4.89254 | 4.83819 | 4.89457 | 5.62048 | 5.58202 | 4.94208 | 4.95046 | 5.22124 |
| GABARAPL1 | 8.22427 | 7.1647  | 7.48257 | 6.33781 | 6.35017 | 6.45528 | 6.05305 | 7.10907 | 6.73767 |
| PRH2      | 4.52057 | 3.87035 | 4.31605 | 4.29978 | 4.81683 | 4.22287 | 4.35366 | 5.02557 | 4.40718 |
| LINC01252 | 6.02176 | 6.68075 | 5.98525 | 6.38862 | 6.51026 | 6.58863 | 5.98108 | 6.04763 | 6.08786 |
| ETV6      | 10.3996 | 9.94223 | 10.0736 | 8.43296 | 6.61261 | 7.48198 | 8.50834 | 8.51503 | 8.65003 |
| BCL2L14   | 4.84919 | 4.87581 | 4.85107 | 4.9522  | 5.76561 | 5.09506 | 4.90571 | 4.87201 | 5.00851 |
| CREBL2    | 9.08287 | 9.09994 | 9.0061  | 8.06662 | 6.77315 | 7.50108 | 8.49872 | 7.58604 | 8.02024 |
| APOLD1    | 6.9646  | 6.41281 | 7.12824 | 7.2919  | 6.44638 | 7.05689 | 6.81458 | 7.2281  | 7.17904 |
| MIR613    | 4.17034 | 4.27937 | 3.93458 | 3.91031 | 4.586   | 5.27402 | 4.29746 | 4.50409 | 4.60195 |
| DDX47     | 9.14749 | 8.61734 | 8.74996 | 8.04856 | 7.13202 | 7.0616  | 7.79834 | 7.34634 | 7.70426 |
| RPL13AP20 | 11.7159 | 11.9421 | 12.0762 | 11.6349 | 11.471  | 11.7482 | 11.9901 | 11.2722 | 11.4093 |
| HTR7P1    | 5.92341 | 5.68949 | 6.48198 | 5.89559 | 6.56552 | 5.98196 | 5.89352 | 5.74162 | 5.92276 |
| FAM234B   | 7.53402 | 7.427   | 7.33041 | 7.22967 | 6.36583 | 7.17632 | 6.78692 | 6.87529 | 6.33703 |
| EMP1      | 10.9975 | 10.4961 | 10.7206 | 10.1831 | 7.33652 | 11.502  | 10.5388 | 11.8332 | 11.1352 |
| ATF7IP    | 9.00809 | 8.87428 | 8.64512 | 7.26803 | 5.43178 | 6.14881 | 7.17975 | 7.78429 | 7.20938 |
| C12orf60  | 5.08475 | 4.51107 | 4.982   | 4.97959 | 4.53962 | 4.48965 | 5.01778 | 4.5478  | 4.32961 |
| STRAP     | 8.96277 | 9.08046 | 9.12614 | 9.5864  | 6.4664  | 9.29347 | 9.91445 | 9.55182 | 9.53756 |
| DERA      | 8.16038 | 7.81227 | 8.29662 | 8.44819 | 7.57472 | 8.79283 | 8.65867 | 8.63766 | 8.50484 |
| MGST1     | 6.13879 | 5.82258 | 7.32603 | 7.15231 | 6.50048 | 6.54603 | 7.21666 | 6.04936 | 7.42303 |
| SKP1P2    | 5.33833 | 5.52293 | 5.46363 | 5.9485  | 6.35    | 5.55312 | 5.75533 | 5.40511 | 5.17458 |
| MIR3974   | 4.49391 | 4.11516 | 3.90216 | 5.00705 | 4.29956 | 4.75068 | 3.33579 | 3.59445 | 4.07678 |

|              |         |         |         |         |         |         |         |         |         |
|--------------|---------|---------|---------|---------|---------|---------|---------|---------|---------|
| AEBP2        | 9.06014 | 8.52743 | 8.52371 | 8.44652 | 7.24124 | 8.21893 | 8.69899 | 7.67853 | 8.04927 |
| LOC100506393 | 5.49321 | 5.17357 | 5.04918 | 5.31999 | 5.50117 | 5.404   | 5.09567 | 5.52227 | 5.42055 |
| IAPP         | 3.85045 | 4.13509 | 3.70573 | 4.1584  | 4.4362  | 4.13537 | 4.3654  | 4.21    | 3.93426 |
| PYROXD1      | 8.01979 | 7.7658  | 7.8435  | 7.01423 | 4.48557 | 6.77699 | 7.86703 | 6.88078 | 7.39771 |
| GOLT1B       | 7.15068 | 7.08178 | 7.41016 | 7.41512 | 5.47972 | 6.87203 | 7.91989 | 7.0902  | 7.51476 |
| SPX          | 4.78801 | 4.74368 | 5.33683 | 5.47206 | 6.33275 | 6.04042 | 5.17462 | 5.16101 | 5.44844 |
| CMAS         | 9.0086  | 8.44616 | 8.85714 | 8.87394 | 6.36307 | 9.62536 | 9.58091 | 9.26147 | 9.22292 |
| ETNK1        | 8.09776 | 7.50022 | 7.80169 | 7.24636 | 5.98172 | 7.0289  | 7.06311 | 8.32991 | 7.62357 |
| MIR920       | 5.15283 | 5.25547 | 4.94639 | 5.03357 | 5.08592 | 5.25957 | 5.05455 | 5.14322 | 5.25971 |
| LRMP         | 5.03864 | 4.46035 | 4.80488 | 4.753   | 5.5022  | 5.06284 | 4.86934 | 4.84045 | 4.95814 |
| ETFRF1       | 7.56745 | 7.68462 | 7.5959  | 7.32283 | 5.42967 | 6.43591 | 7.84385 | 7.09622 | 6.8234  |
| RASSF8       | 6.0875  | 6.54771 | 6.67307 | 5.912   | 6.0436  | 6.28041 | 6.44351 | 6.31364 | 6.1862  |
| SSPN         | 5.75387 | 5.78111 | 5.63945 | 5.83217 | 6.14873 | 6.024   | 5.8958  | 5.75422 | 6.15513 |
| FGFR1OP2     | 6.6862  | 6.32844 | 6.37587 | 5.87049 | 5.28083 | 5.13759 | 6.06276 | 7.07763 | 6.18655 |
| TM7SF3       | 4.67369 | 5.05582 | 4.59513 | 4.37659 | 4.93535 | 4.60052 | 5.12595 | 4.59488 | 4.59967 |
| MED21        | 8.45925 | 8.82151 | 8.42512 | 8.76988 | 7.58798 | 8.24828 | 8.68931 | 9.02499 | 8.99613 |
| STK38L       | 8.35889 | 8.25932 | 8.26494 | 8.2769  | 6.92161 | 8.4966  | 7.73706 | 8.97383 | 8.77655 |
| ARNTL2       | 8.508   | 8.19149 | 7.91391 | 9.18475 | 8.1064  | 10.7661 | 9.8164  | 10.15   | 10.355  |
| Smco2        | 4.93051 | 5.11219 | 4.63384 | 4.84831 | 5.02646 | 5.04739 | 4.84349 | 5.18443 | 5.74266 |
| REP15        | 4.27962 | 3.69507 | 4.02394 | 4.0457  | 4.12538 | 3.44289 | 4.52962 | 3.9673  | 4.01292 |
| MRPS35       | 8.04091 | 8.08818 | 8.42111 | 8.03525 | 5.34077 | 7.82143 | 9.07617 | 7.06236 | 7.69478 |
| KLHL42       | 7.07966 | 7.14196 | 7.05218 | 6.95006 | 6.55788 | 6.55303 | 6.99834 | 6.64834 | 6.87179 |
| PTHLH        | 4.8325  | 4.60062 | 4.13463 | 7.45771 | 4.89816 | 6.72787 | 6.56041 | 5.61097 | 6.53334 |
| CCDC91       | 7.66612 | 7.74224 | 7.88562 | 6.67722 | 6.06004 | 7.38093 | 7.43481 | 7.73847 | 7.69505 |
| FAR2         | 6.80933 | 6.08063 | 6.70511 | 6.09617 | 5.98116 | 5.34385 | 6.3881  | 6.04822 | 6.20165 |
| LINC00941    | 5.19737 | 4.80329 | 4.93433 | 5.82113 | 5.50623 | 5.78    | 5.35971 | 5.33499 | 5.52131 |

|             |         |         |         |         |         |         |         |         |         |
|-------------|---------|---------|---------|---------|---------|---------|---------|---------|---------|
| TSPAN11     | 6.97947 | 6.80385 | 7.1299  | 7.41956 | 7.75886 | 7.84766 | 7.84716 | 7.17093 | 7.6603  |
| FLJ13224    | 6.30193 | 6.09567 | 6.07098 | 7.05605 | 6.64658 | 7.52652 | 6.75186 | 6.95633 | 6.84594 |
| DENND5B-AS1 | 4.40224 | 4.26813 | 4.25104 | 4.92552 | 4.6501  | 5.0384  | 4.66135 | 5.25874 | 5.00767 |
| ETFBKMT     | 5.59898 | 5.69604 | 5.56061 | 5.67598 | 5.12575 | 5.5859  | 5.46575 | 5.35008 | 5.07748 |
| KIAA1551    | 7.41689 | 7.48172 | 7.54184 | 5.94979 | 5.44833 | 7.77951 | 6.93204 | 6.99311 | 7.04211 |
| BICD1       | 7.05314 | 6.63851 | 7.15582 | 6.86423 | 6.74516 | 6.54168 | 6.7683  | 6.82575 | 7.70663 |
| DNM1L       | 7.88988 | 7.85364 | 7.99784 | 7.45728 | 5.2483  | 7.11338 | 7.81176 | 7.36106 | 7.89831 |
| C12orf40    | 3.86249 | 4.38138 | 4.22675 | 4.19168 | 4.75154 | 3.96585 | 4.3518  | 4.03297 | 3.98023 |
| LRRK2       | 7.25937 | 7.55032 | 7.09921 | 6.46987 | 4.75149 | 5.42445 | 6.31915 | 5.23611 | 5.06024 |
| CNTN1       | 7.52567 | 7.99602 | 5.56642 | 8.83734 | 6.35405 | 7.83694 | 8.50848 | 6.89941 | 9.25178 |
| PDZRN4      | 5.26048 | 4.98007 | 5.46027 | 4.96211 | 5.38382 | 5.13387 | 4.84259 | 4.75727 | 4.70614 |
| PPHLN1      | 7.79675 | 7.73312 | 7.89973 | 7.16654 | 5.87092 | 6.25407 | 7.32847 | 6.75124 | 6.96808 |
| IRAK4       | 8.03431 | 7.80898 | 7.90102 | 6.78971 | 5.42602 | 6.90123 | 7.25628 | 7.27223 | 7.06836 |
| TMEM117     | 9.49231 | 9.06587 | 9.17618 | 8.38861 | 7.21738 | 8.16796 | 8.63775 | 8.49355 | 9.0486  |
| NELL2       | 5.49833 | 5.27683 | 5.70496 | 8.20202 | 5.25537 | 8.28664 | 8.31162 | 6.26967 | 7.12581 |
| ANO6        | 10.6309 | 10.2429 | 10.8208 | 10.2489 | 8.14073 | 10.2729 | 9.95889 | 11.1095 | 10.3313 |
| PCED1B      | 6.01344 | 5.90197 | 6.18063 | 6.16268 | 6.109   | 6.06561 | 6.49032 | 6.2957  | 6.14228 |
| MIR4698     | 6.10809 | 6.905   | 6.47178 | 6.84388 | 7.34262 | 7.00022 | 6.31058 | 6.78453 | 6.77601 |
| TMEM106C    | 7.4192  | 7.3181  | 7.15385 | 7.95159 | 7.28233 | 7.82956 | 7.94664 | 8.06683 | 7.7778  |
| CCDC184     | 6.67888 | 7.21743 | 7.02592 | 7.59229 | 7.66776 | 7.52309 | 7.277   | 7.45454 | 7.36541 |
| C12orf54    | 4.7966  | 4.9143  | 4.73772 | 4.78168 | 5.81223 | 5.21571 | 5.47591 | 4.7966  | 5.15629 |
| LINC00935   | 3.89833 | 4.05489 | 4.24485 | 4.18042 | 4.566   | 5.04148 | 4.72802 | 4.62253 | 4.46914 |
| ADCY6       | 6.13985 | 6.3457  | 6.05682 | 6.51473 | 6.65237 | 6.40796 | 6.09308 | 5.95289 | 5.92179 |
| CCDC65      | 4.92791 | 4.77696 | 4.87469 | 4.95699 | 5.33009 | 5.01217 | 5.09619 | 5.13916 | 4.8417  |
| DDN         | 6.31258 | 6.4938  | 6.24941 | 6.34468 | 9.48422 | 6.62523 | 6.3679  | 7.1513  | 6.7536  |
| PRPH        | 5.18098 | 5.86651 | 5.90189 | 6.11347 | 6.58928 | 6.38515 | 5.94614 | 6.25613 | 6.02011 |

|              |         |         |         |         |         |         |         |         |         |
|--------------|---------|---------|---------|---------|---------|---------|---------|---------|---------|
| TROAP        | 6.30308 | 5.925   | 5.82609 | 6.67462 | 6.31353 | 6.27523 | 6.28199 | 6.61824 | 6.18385 |
| LOC100335030 | 5.86823 | 5.93573 | 6.14235 | 5.99934 | 6.14155 | 4.76614 | 5.54471 | 6.26474 | 5.95216 |
| PRPF40B      | 6.78029 | 6.73029 | 6.81415 | 7.21496 | 6.3953  | 7.20084 | 6.87061 | 7.34467 | 7.10181 |
| TMBIM6       | 7.12874 | 6.74734 | 7.22646 | 6.80373 | 5.53857 | 6.76463 | 6.85364 | 6.6045  | 7.16952 |
| BCDIN3D-AS1  | 5.41127 | 5.43925 | 5.39499 | 5.37106 | 5.75852 | 5.35628 | 5.53052 | 5.58746 | 5.33993 |
| AQP2         | 5.36585 | 5.87997 | 5.76063 | 6.57354 | 6.15226 | 6.19601 | 5.93716 | 6.44167 | 6.33423 |
| AQP5         | 10.4631 | 10.0095 | 10.1768 | 11.0281 | 9.66646 | 9.6272  | 10.5717 | 10.5903 | 11.5662 |
| asic1        | 5.01575 | 5.1515  | 5.37745 | 5.25028 | 5.55963 | 5.79099 | 5.47813 | 5.58228 | 5.40682 |
| GPD1         | 4.8653  | 4.95939 | 5.39496 | 5.35837 | 5.79209 | 5.61635 | 4.61269 | 5.06276 | 5.03395 |
| COX14        | 6.53656 | 6.03969 | 6.66583 | 5.75261 | 5.75693 | 5.80219 | 6.50224 | 5.8435  | 5.94507 |
| DIP2B        | 10.0528 | 9.73296 | 9.69242 | 9.80129 | 7.56897 | 10.4182 | 9.71932 | 9.95707 | 10.2493 |
| ATF1         | 9.33145 | 9.26468 | 9.23117 | 8.68532 | 8.12627 | 7.67587 | 8.79508 | 8.01886 | 8.74831 |
| METTL7A      | 8.48934 | 8.02436 | 8.66634 | 7.91732 | 5.99568 | 6.19902 | 8.10446 | 6.00585 | 6.71065 |
| LETMD1       | 8.07007 | 8.71965 | 8.39565 | 6.64535 | 6.51857 | 7.10819 | 7.17268 | 6.94527 | 7.07153 |
| DAZAP2       | 9.42107 | 9.21572 | 9.7994  | 8.95479 | 7.65122 | 8.89968 | 9.17383 | 9.00558 | 9.38546 |
| ANKRD33      | 5.54298 | 5.44781 | 5.62637 | 6.04243 | 6.30424 | 5.97572 | 5.47278 | 5.83588 | 5.58372 |
| ACVRL1       | 6.88689 | 6.79478 | 7.74718 | 6.83988 | 5.99414 | 6.36626 | 6.83222 | 7.11902 | 7.27887 |
| GRASP        | 7.05124 | 6.61802 | 7.13787 | 6.77584 | 6.43217 | 6.95174 | 6.71927 | 6.7425  | 6.85941 |
| ATG101       | 6.77686 | 6.92186 | 6.39088 | 7.46956 | 6.98677 | 8.10179 | 8.1701  | 7.50146 | 7.40411 |
| LINC00592    | 6.45835 | 6.58887 | 6.2475  | 6.97189 | 7.11808 | 7.03933 | 6.68647 | 7.48644 | 7.20933 |
| KRT7         | 6.11388 | 6.10943 | 6.2063  | 6.41666 | 6.05346 | 6.2276  | 6.17128 | 5.97512 | 5.98579 |
| KRT86        | 5.4956  | 5.53839 | 5.26181 | 6.09976 | 6.58244 | 5.89816 | 6.04159 | 6.02098 | 5.67554 |
| KRT18        | 6.07894 | 6.3719  | 6.67788 | 7.27535 | 6.79679 | 7.82078 | 7.40634 | 7.54359 | 7.36269 |
| EIF4B        | 10.848  | 10.4062 | 10.9306 | 9.63414 | 8.85159 | 9.83389 | 9.8716  | 9.6295  | 9.77129 |
| TNS2         | 7.07605 | 7.20354 | 8.00087 | 6.43207 | 6.51534 | 6.78198 | 6.64898 | 6.63506 | 6.91285 |
| IGFBP6       | 6.93455 | 7.02732 | 7.71988 | 8.40955 | 7.94468 | 8.91114 | 9.1543  | 9.07189 | 8.74069 |

|              |         |         |         |         |         |         |         |         |         |
|--------------|---------|---------|---------|---------|---------|---------|---------|---------|---------|
| SOAT2        | 5.73182 | 5.97509 | 6.04396 | 6.61184 | 6.89662 | 6.48091 | 6.17491 | 6.10528 | 6.07294 |
| ZNF740       | 7.14578 | 7.40458 | 7.19446 | 6.37089 | 5.56384 | 5.69979 | 6.57538 | 5.89979 | 6.19382 |
| MFSD5        | 8.43918 | 8.22667 | 8.03367 | 8.694   | 7.49322 | 7.57617 | 8.39512 | 7.53566 | 8.30731 |
| ESPL1        | 6.686   | 6.50888 | 6.49012 | 6.37625 | 6.21719 | 6.43419 | 6.34099 | 6.56031 | 6.49012 |
| PFDN5        | 7.69306 | 7.65624 | 7.67424 | 7.87507 | 7.56408 | 8.28059 | 7.63396 | 7.7056  | 7.4199  |
| C12ORF10     | 8.17722 | 7.98571 | 8.38431 | 7.55305 | 6.90329 | 7.03316 | 7.97966 | 7.36511 | 7.63006 |
| SP1          | 9.90249 | 9.62064 | 9.62837 | 8.80148 | 7.59197 | 8.76149 | 8.84126 | 8.59556 | 8.98997 |
| PRR13        | 5.83494 | 6.01111 | 5.90647 | 5.87767 | 5.47584 | 5.38007 | 6.01932 | 5.8366  | 6.10091 |
| PCBP2        | 9.38655 | 9.17339 | 9.29566 | 8.74253 | 7.46927 | 8.57701 | 8.68207 | 8.49747 | 8.7782  |
| TARBP2       | 7.36383 | 7.27352 | 7.25779 | 7.55351 | 7.32732 | 7.37861 | 7.7403  | 7.33711 | 7.44629 |
| ATF7         | 6.43669 | 5.99323 | 6.37779 | 5.91595 | 4.88392 | 5.39532 | 6.91325 | 5.65178 | 5.72109 |
| HOXC13       | 6.21996 | 6.60812 | 6.26573 | 6.50634 | 6.26727 | 6.63518 | 6.54988 | 6.3126  | 6.173   |
| HOXC12       | 6.24833 | 6.49755 | 6.28872 | 6.52495 | 5.94788 | 6.82233 | 6.81707 | 6.07577 | 6.33412 |
| HOXC11       | 6.90592 | 6.74691 | 6.36348 | 6.83523 | 6.47871 | 6.65358 | 7.2541  | 6.26316 | 6.08402 |
| HOXC10       | 6.79836 | 6.64412 | 6.47666 | 6.98899 | 6.20096 | 7.25751 | 6.80626 | 6.3316  | 6.1001  |
| HOXC4        | 6.75905 | 6.83379 | 6.79691 | 6.21785 | 5.96257 | 6.09966 | 6.21596 | 6.05433 | 6.07712 |
| MIR196A2     | 5.05901 | 6.05653 | 5.22321 | 5.37749 | 5.41411 | 5.93452 | 4.78933 | 5.34897 | 5.65379 |
| hoxc9        | 6.89451 | 6.73679 | 6.75657 | 5.85524 | 5.621   | 6.57556 | 6.57321 | 6.17759 | 6.3717  |
| hoxc8        | 6.51396 | 6.7491  | 6.53692 | 7.30504 | 6.02682 | 7.09419 | 7.09524 | 6.61192 | 6.99443 |
| MIR615       | 6.23099 | 5.05375 | 5.96949 | 5.68597 | 5.03298 | 6.24002 | 5.34479 | 6.13875 | 5.96146 |
| FLJ12825     | 6.36487 | 6.4966  | 6.36879 | 6.39945 | 7.20152 | 6.46563 | 6.00377 | 6.09619 | 5.99863 |
| LOC100240734 | 5.50815 | 5.84952 | 5.44014 | 5.2515  | 8.78016 | 5.37086 | 5.33212 | 5.38885 | 5.40491 |
| LOC400043    | 6.14857 | 5.77966 | 5.9806  | 6.06919 | 5.53345 | 6.29856 | 5.44349 | 5.81649 | 5.69996 |
| HNRNPA1      | 9.54927 | 9.5602  | 9.0781  | 7.68293 | 6.60125 | 6.93058 | 7.5341  | 7.70626 | 8.10566 |
| Mir148b      | 4.40274 | 5.08089 | 4.88197 | 3.57173 | 4.10704 | 3.84055 | 4.11483 | 3.88195 | 4.12873 |
| NCKAP1L      | 6.47846 | 6.22488 | 7.04699 | 6.36701 | 5.96421 | 5.71423 | 5.99169 | 6.6476  | 6.0207  |

|         |         |         |         |         |         |         |         |         |         |
|---------|---------|---------|---------|---------|---------|---------|---------|---------|---------|
| MUCL1   | 10.6827 | 8.83902 | 11.1396 | 11.2598 | 10.8116 | 9.22708 | 10.8629 | 10.7846 | 9.52317 |
| NEUROD4 | 5.10735 | 5.46837 | 5.02711 | 5.56451 | 6.26316 | 5.59467 | 5.56761 | 5.62288 | 5.60578 |
| METTL7B | 5.41992 | 5.89984 | 5.49689 | 6.05067 | 5.94123 | 6.5159  | 6.11699 | 5.95698 | 6.25295 |
| GDF11   | 5.50833 | 5.29581 | 5.46103 | 5.42435 | 5.94556 | 5.60205 | 5.79718 | 5.58633 | 5.43641 |
| ORMDL2  | 10.6741 | 10.5777 | 10.4292 | 11.4917 | 11.4036 | 11.1724 | 11.5558 | 11.5462 | 11.7592 |
| CDK2    | 8.68317 | 8.29845 | 8.36585 | 8.20837 | 7.2495  | 7.86618 | 7.99323 | 8.55904 | 8.42723 |
| SUOX    | 6.33877 | 6.1192  | 6.12465 | 5.80481 | 5.95015 | 5.48186 | 5.41372 | 5.74873 | 6.66674 |
| IKZF4   | 6.46408 | 6.10434 | 6.22926 | 5.73102 | 5.72959 | 5.75692 | 5.69538 | 5.1331  | 5.77605 |
| RPS26   | 6.36264 | 6.26277 | 6.65244 | 6.1875  | 6.10964 | 5.83821 | 7.20878 | 6.27018 | 6.26404 |
| ERBB3   | 9.22327 | 9.47535 | 9.07477 | 8.56024 | 7.10758 | 8.67485 | 8.58562 | 9.01266 | 8.67503 |
| RPL41   | 7.53784 | 7.1508  | 7.15156 | 8.09591 | 7.70821 | 8.17147 | 7.93426 | 7.62862 | 7.75039 |
| ZC3H10  | 6.36894 | 6.25805 | 6.15199 | 6.04594 | 6.88733 | 6.2032  | 6.04084 | 6.49888 | 6.336   |
| ESYT1   | 8.32319 | 7.83511 | 8.26553 | 8.9626  | 6.12749 | 8.28219 | 8.89089 | 8.65649 | 8.5029  |
| NABP2   | 8.66261 | 8.71511 | 8.8981  | 8.82614 | 7.78853 | 8.08776 | 8.65098 | 8.48176 | 8.74333 |
| COQ10A  | 7.03814 | 6.89065 | 6.93792 | 6.75527 | 6.56665 | 5.83138 | 6.22744 | 5.99051 | 6.0834  |
| CNPY2   | 6.80321 | 6.56713 | 6.79988 | 6.63654 | 6.15056 | 6.41912 | 6.56501 | 5.32604 | 6.20211 |
| spryd4  | 7.98126 | 8.04897 | 7.90274 | 8.39108 | 7.77625 | 7.63107 | 8.42309 | 7.18284 | 8.5288  |
| HSD17B6 | 4.6707  | 4.87667 | 5.08816 | 5.07944 | 5.56306 | 5.04962 | 5.0527  | 5.30419 | 5.14041 |
| GPR182  | 5.0705  | 5.30096 | 5.16255 | 5.57503 | 6.17208 | 6.01676 | 5.52109 | 5.46539 | 5.59781 |
| nab2    | 7.24889 | 7.2662  | 7.1761  | 8.35868 | 5.85769 | 8.81224 | 7.55324 | 7.61956 | 7.01115 |
| LRP1    | 9.39093 | 9.80731 | 9.54403 | 9.41094 | 7.19058 | 10.3632 | 9.58051 | 9.05262 | 9.32448 |
| NXPH4   | 7.05786 | 6.75024 | 6.54184 | 7.75342 | 7.34957 | 7.93991 | 7.48753 | 6.77166 | 7.08125 |
| SHMT2   | 6.82478 | 6.27807 | 6.6287  | 7.20095 | 5.98606 | 6.89841 | 7.45189 | 6.94983 | 6.88791 |
| GLI1    | 5.00583 | 5.31848 | 5.23496 | 5.59681 | 5.88984 | 5.46252 | 5.52983 | 5.33499 | 5.37457 |
| MARS    | 8.17053 | 8.18403 | 8.00868 | 8.69518 | 6.63817 | 8.14073 | 8.69849 | 8.20042 | 8.80243 |
| mbd6    | 7.87854 | 7.56044 | 7.8387  | 7.72999 | 6.59821 | 7.92248 | 7.75387 | 7.75104 | 7.78228 |

|          |         |         |         |         |         |         |         |         |         |
|----------|---------|---------|---------|---------|---------|---------|---------|---------|---------|
| KIF5A    | 4.9732  | 4.75365 | 4.75975 | 5.50262 | 5.65037 | 5.281   | 4.37268 | 5.10111 | 5.11971 |
| DTX3     | 6.23974 | 6.43379 | 5.90507 | 5.52511 | 6.34768 | 5.62142 | 5.52152 | 5.81811 | 5.759   |
| ARHGEF25 | 6.51254 | 5.70776 | 6.51359 | 6.0367  | 5.41469 | 5.82108 | 5.12075 | 5.73286 | 4.71482 |
| TSPAN31  | 6.33383 | 6.22589 | 5.8965  | 6.80969 | 5.88707 | 6.37912 | 6.65584 | 6.60924 | 6.62177 |
| 44264    | 6.41518 | 6.2541  | 6.25998 | 6.78979 | 6.33464 | 6.77976 | 6.92087 | 6.44867 | 6.52516 |
| METTL21B | 7.03539 | 6.87058 | 6.83541 | 6.92755 | 7.35109 | 7.14344 | 6.91913 | 6.79583 | 6.93133 |
| ATP23    | 9.28963 | 9.15257 | 9.00131 | 7.89355 | 7.27057 | 7.35448 | 8.62495 | 7.91345 | 7.81088 |
| USP15    | 9.43979 | 9.22855 | 9.30638 | 8.86905 | 7.0608  | 8.83322 | 8.82637 | 9.04148 | 9.15625 |
| MON2     | 9.38944 | 9.50409 | 9.46698 | 8.34803 | 5.48624 | 8.23059 | 8.49498 | 8.39386 | 8.87775 |
| mirlet7i | 5.28488 | 5.02874 | 5.27212 | 5.40147 | 4.84168 | 5.58269 | 5.27066 | 5.35595 | 5.41627 |
| TMEM5    | 6.85651 | 7.27604 | 6.9474  | 6.8767  | 5.81141 | 6.36751 | 6.85126 | 6.23877 | 6.54568 |
| SRGAP1   | 7.35286 | 6.84506 | 7.50153 | 6.63439 | 5.42103 | 6.65165 | 7.47835 | 8.00335 | 8.57772 |
| TBK1     | 7.78483 | 8.27812 | 8.00093 | 7.07523 | 5.3104  | 7.40641 | 8.04273 | 7.51181 | 8.01302 |
| RASSF3   | 7.91574 | 7.71574 | 8.03701 | 8.21995 | 6.78181 | 8.61306 | 8.72245 | 9.05759 | 8.91358 |
| MIR548C  | 3.50831 | 3.19227 | 3.69088 | 3.52243 | 2.95257 | 3.49479 | 2.41008 | 5.14442 | 5.69538 |
| FLJ41278 | 4.87441 | 4.89784 | 4.9695  | 4.80173 | 6.1083  | 5.05478 | 5.41107 | 4.92618 | 5.30245 |
| lemd3    | 8.06191 | 7.8006  | 8.14121 | 7.83602 | 5.96425 | 7.54216 | 8.10251 | 8.03819 | 8.1854  |
| MSRB3    | 7.03436 | 7.03418 | 7.26093 | 6.79405 | 7.04783 | 6.09398 | 6.3659  | 6.65381 | 6.82697 |
| hmgga2   | 5.96315 | 5.56894 | 5.74025 | 6.88663 | 6.58943 | 6.23619 | 5.77334 | 6.87163 | 7.21687 |
| IRAK3    | 7.10066 | 6.90346 | 8.5645  | 5.92728 | 4.75753 | 6.01845 | 6.42052 | 5.99504 | 6.2628  |
| HELB     | 6.50054 | 6.21625 | 5.56487 | 5.17798 | 5.06803 | 4.7889  | 5.16719 | 6.84556 | 5.38038 |
| CAND1    | 9.07038 | 9.06534 | 9.09984 | 8.9282  | 6.65804 | 8.31563 | 8.98833 | 8.87507 | 8.83975 |
| DYRK2    | 7.23455 | 7.16714 | 7.12217 | 7.29388 | 6.76025 | 6.88857 | 7.35357 | 7.14899 | 7.12856 |
| NUP107   | 7.16646 | 7.87241 | 7.42627 | 7.14436 | 5.01885 | 6.22184 | 6.95864 | 6.29013 | 6.0447  |
| LYZ      | 8.2593  | 6.89123 | 8.96779 | 7.68625 | 5.50628 | 7.16696 | 6.9939  | 6.41846 | 7.09864 |
| YEATS4   | 7.94525 | 8.29666 | 8.10466 | 7.79671 | 3.85529 | 6.04307 | 7.69603 | 6.12611 | 6.47367 |



|           |         |         |         |         |         |         |         |         |         |
|-----------|---------|---------|---------|---------|---------|---------|---------|---------|---------|
| FRS2      | 8.74394 | 8.58415 | 8.60932 | 7.81287 | 6.15772 | 7.24838 | 8.17408 | 7.74582 | 7.86088 |
| MIR3913-1 | 3.88339 | 4.79729 | 4.21965 | 5.31366 | 5.14515 | 4.52561 | 4.976   | 4.48836 | 4.67289 |
| RAB3IP    | 5.95306 | 6.58562 | 5.97199 | 5.8746  | 6.51616 | 5.81075 | 5.79173 | 6.29785 | 5.85442 |
| LGR5      | 5.62643 | 6.25415 | 5.63303 | 5.35784 | 6.28772 | 5.71744 | 5.51134 | 5.28953 | 5.042   |
| TMEM19    | 8.07181 | 8.34193 | 8.29427 | 7.40074 | 5.66991 | 6.23923 | 8.01479 | 6.31476 | 6.55478 |
| TPH2      | 3.45208 | 3.82668 | 3.85024 | 4.11823 | 4.53889 | 4.25575 | 4.03058 | 3.93605 | 4.28719 |
| TRHDE     | 5.45583 | 5.9403  | 5.27727 | 5.12938 | 6.01975 | 5.09386 | 5.33531 | 5.0053  | 5.27925 |
| ATXN7L3B  | 8.16563 | 8.04726 | 7.93644 | 7.91649 | 5.94693 | 7.11715 | 8.51286 | 7.06288 | 7.48167 |
| GLIPR1L1  | 4.98073 | 4.96048 | 5.07326 | 5.37159 | 6.12629 | 5.39713 | 5.28579 | 5.24667 | 5.32808 |
| GLIPR1L2  | 7.15006 | 6.55257 | 6.6027  | 6.22319 | 6.54117 | 6.18748 | 6.6341  | 6.42564 | 6.30388 |
| GLIPR1    | 8.0751  | 6.36982 | 8.40147 | 9.84925 | 8.33686 | 9.31601 | 9.70922 | 9.88803 | 10.1686 |
| NAV3      | 7.45213 | 7.47527 | 7.27846 | 7.25438 | 6.40299 | 8.95186 | 7.78727 | 7.9079  | 8.9746  |
| SYT1      | 5.30659 | 5.25095 | 5.31289 | 5.52543 | 6.28938 | 5.17396 | 5.50519 | 5.78977 | 5.38398 |
| MIR1252   | 2.16866 | 2.05601 | 1.82016 | 2.27717 | 2.20355 | 2.02402 | 2.34346 | 1.79898 | 1.98304 |
| OTOGL     | 4.24657 | 4.25925 | 4.34562 | 4.47465 | 5.25537 | 4.58181 | 4.49055 | 4.66706 | 4.37137 |
| MYF6      | 4.65806 | 4.64371 | 4.21082 | 4.98644 | 5.44682 | 4.93707 | 4.61976 | 4.47793 | 4.85721 |
| MYF5      | 4.83835 | 4.94697 | 5.09958 | 6.27938 | 5.92485 | 6.10991 | 5.58942 | 5.59267 | 5.64945 |
| ACSS3     | 6.15776 | 6.53996 | 7.01728 | 4.72868 | 6.27583 | 5.147   | 5.16728 | 5.69214 | 5.22888 |
| MIR4699   | 2.32756 | 1.7625  | 2.09474 | 2.39055 | 1.81913 | 2.31198 | 2.75275 | 1.79981 | 1.79792 |
| METTL25   | 6.78026 | 7.0302  | 6.99521 | 5.96127 | 5.31988 | 5.61713 | 6.33262 | 5.33118 | 5.70639 |
| TMTC2     | 7.47954 | 7.83373 | 6.79235 | 6.52049 | 6.09256 | 6.33962 | 6.35038 | 5.84112 | 6.00029 |
| LRRIQ1    | 4.21002 | 4.47763 | 4.61366 | 4.49412 | 4.47    | 4.54284 | 4.33271 | 4.09095 | 4.59859 |
| ALX1      | 6.05758 | 5.8221  | 5.25537 | 5.27274 | 4.7666  | 5.41141 | 5.60781 | 5.07368 | 5.40239 |
| NTS       | 3.03961 | 2.93025 | 3.30114 | 3.32939 | 3.52266 | 3.45644 | 3.60496 | 3.09103 | 3.60146 |
| C12ORF29  | 8.8163  | 8.5933  | 8.68629 | 8.55757 | 7.4246  | 8.63414 | 8.85892 | 8.66399 | 8.91825 |
| TMTC3     | 10.6418 | 10.361  | 10.6781 | 10.2233 | 7.25744 | 8.96757 | 10.199  | 9.16302 | 9.85022 |

|           |         |         |         |         |         |         |         |         |         |
|-----------|---------|---------|---------|---------|---------|---------|---------|---------|---------|
| LINC00936 | 6.14872 | 5.74927 | 6.24811 | 6.01092 | 5.68091 | 6.54853 | 6.25583 | 6.1572  | 6.31001 |
| LINC00615 | 4.47937 | 4.73228 | 4.86477 | 5.24213 | 6.82094 | 5.18517 | 4.94338 | 5.4269  | 5.40174 |
| CLLU1     | 4.70023 | 4.74007 | 4.7231  | 4.62698 | 5.29764 | 4.34487 | 4.58693 | 4.7202  | 4.59186 |
| C12orf74  | 4.16716 | 4.15975 | 4.04859 | 4.65865 | 5.84334 | 4.33592 | 4.34999 | 4.43121 | 4.76952 |
| NUDT4     | 5.88197 | 5.56599 | 5.88887 | 5.49333 | 5.61424 | 5.06146 | 5.49044 | 5.42438 | 5.4428  |
| MRPL42    | 7.84929 | 7.76774 | 7.73573 | 6.67745 | 4.88533 | 6.18383 | 6.86501 | 6.90723 | 6.23868 |
| SOCS2     | 5.67769 | 5.78766 | 6.31131 | 6.14422 | 6.66499 | 6.52919 | 6.37139 | 6.36167 | 6.47264 |
| CRADD     | 6.8819  | 6.31015 | 6.48118 | 6.2446  | 6.18614 | 6.24164 | 6.21628 | 6.2663  | 6.24184 |
| PLXNC1    | 8.17367 | 7.08316 | 7.18198 | 6.74885 | 6.44347 | 6.64486 | 6.76797 | 5.91103 | 6.36608 |
| CEP83-AS1 | 5.26027 | 5.05625 | 5.10773 | 5.74309 | 5.91063 | 5.35485 | 5.09095 | 5.23829 | 5.33857 |
| KRT19P2   | 5.10261 | 5.17623 | 5.28353 | 5.88464 | 5.88231 | 6.33721 | 5.66178 | 5.87233 | 5.63905 |
| MIR331    | 5.77983 | 5.6813  | 5.8636  | 6.19531 | 5.22767 | 6.00285 | 5.401   | 5.13271 | 5.79388 |
| MIR3685   | 5.77969 | 5.89041 | 6.85085 | 4.1819  | 2.39967 | 2.66815 | 3.92869 | 3.19766 | 4.66882 |
| METAP2    | 8.4961  | 8.81487 | 8.31505 | 8.19233 | 5.8838  | 7.28531 | 8.40899 | 7.31451 | 7.71754 |
| SNRPF     | 5.99504 | 6.24117 | 6.31143 | 6.25715 | 4.33011 | 5.48728 | 6.70285 | 4.88209 | 5.5477  |
| AMDHD1    | 6.23153 | 6.03467 | 6.05188 | 5.64763 | 6.46414 | 6.20023 | 5.37651 | 5.9864  | 6.12125 |
| MIR1251   | 5.07178 | 5.34039 | 4.97882 | 5.41597 | 5.52356 | 5.32765 | 5.34938 | 5.06028 | 5.21273 |
| MIR135A2  | 2.34077 | 2.33836 | 2.32819 | 2.70438 | 3.83054 | 2.83491 | 2.74923 | 2.52977 | 2.32771 |
| TMPO      | 7.53519 | 7.66111 | 7.47628 | 7.10906 | 5.73847 | 6.52821 | 7.22432 | 6.35159 | 6.06551 |
| APAF1     | 6.75279 | 6.71969 | 6.7046  | 6.39602 | 4.90665 | 6.33796 | 6.16226 | 6.36865 | 5.89227 |
| MIR1827   | 3.34608 | 3.45418 | 2.91032 | 2.69095 | 3.24701 | 2.53004 | 3.8134  | 3.88911 | 3.24277 |
| ACTR6     | 5.5462  | 5.75317 | 5.90606 | 5.48025 | 4.6129  | 5.23345 | 5.79628 | 5.63633 | 4.97141 |
| SCYL2     | 7.91709 | 8.33751 | 7.8958  | 7.4488  | 5.985   | 7.74779 | 7.72981 | 8.56998 | 8.40342 |
| GAS2L3    | 7.31608 | 6.50581 | 6.90498 | 6.43777 | 6.03305 | 6.83384 | 5.98853 | 8.46942 | 7.35907 |
| ANO4      | 4.30148 | 4.63767 | 4.46775 | 4.70753 | 5.06624 | 5.0918  | 4.96185 | 5.667   | 5.21234 |
| SPIC      | 3.26928 | 3.29337 | 3.19822 | 3.47217 | 5.32074 | 3.29405 | 3.20822 | 3.44051 | 3.50653 |

|          |         |         |         |         |         |         |         |         |         |
|----------|---------|---------|---------|---------|---------|---------|---------|---------|---------|
| CHPT1    | 7.88638 | 7.99722 | 8.22736 | 6.427   | 6.23401 | 5.92632 | 5.98882 | 6.06446 | 6.097   |
| DRAM1    | 6.20103 | 6.30186 | 6.23209 | 6.56187 | 5.25537 | 5.68483 | 6.84943 | 6.16685 | 6.62098 |
| PARPBP   | 6.3143  | 6.0575  | 6.11298 | 6.02304 | 5.10434 | 5.38531 | 5.59533 | 5.43063 | 5.4239  |
| ASCL1    | 5.42348 | 5.74209 | 5.61139 | 6.16405 | 6.56095 | 6.70551 | 6.40884 | 6.2122  | 6.36681 |
| STAB2    | 5.59999 | 5.22906 | 5.1647  | 5.30262 | 6.43263 | 5.49743 | 5.47945 | 5.32619 | 5.35722 |
| TTC41P   | 5.753   | 6.10357 | 6.42901 | 6.60563 | 8.28035 | 6.62229 | 6.2971  | 6.89828 | 6.80058 |
| TDG      | 7.18175 | 7.12919 | 7.19196 | 7.65961 | 6.01821 | 7.1027  | 7.67364 | 7.12021 | 7.31059 |
| HCFC2    | 8.30302 | 8.56454 | 8.31022 | 8.05666 | 5.9551  | 7.37338 | 7.96175 | 7.94728 | 7.81023 |
| TXNRD1   | 7.09318 | 6.88651 | 6.59574 | 6.7313  | 5.79773 | 5.98313 | 5.94683 | 7.66716 | 6.6517  |
| EID3     | 7.52093 | 6.77722 | 6.4163  | 6.37164 | 5.46966 | 6.08401 | 6.08429 | 7.47548 | 5.95469 |
| CHST11   | 6.58279 | 5.98564 | 6.67899 | 6.76441 | 6.25265 | 6.2969  | 6.39276 | 7.29084 | 7.15438 |
| MIR3922  | 6.92671 | 6.61613 | 6.80959 | 6.43636 | 7.92948 | 6.19863 | 6.39058 | 6.89424 | 6.76101 |
| c12orf45 | 6.33846 | 6.69581 | 6.45555 | 6.56006 | 5.065   | 6.43138 | 6.85383 | 5.45711 | 5.90218 |
| KIAA1033 | 9.41894 | 9.35184 | 9.52535 | 9.19108 | 6.28645 | 8.89541 | 9.51239 | 9.64436 | 9.63547 |
| C12orf75 | 7.8053  | 7.48182 | 7.90519 | 8.09694 | 7.78924 | 7.80999 | 8.47004 | 8.74976 | 8.30662 |
| TCP11L2  | 8.84889 | 8.89747 | 8.84052 | 8.13077 | 7.80806 | 8.70401 | 8.11175 | 9.56133 | 8.84384 |
| POLR3B   | 8.51658 | 8.73094 | 8.56642 | 7.69528 | 6.19908 | 7.33058 | 8.00432 | 7.33749 | 7.63291 |
| RIC8B    | 6.54294 | 6.57775 | 6.74536 | 6.06425 | 5.61485 | 6.02259 | 6.137   | 5.73731 | 6.19186 |
| TMEM263  | 8.12807 | 7.56341 | 7.43134 | 7.44738 | 6.24995 | 6.49453 | 7.02054 | 6.83453 | 6.93107 |
| BTBD11   | 7.82925 | 7.72716 | 7.77591 | 7.53306 | 6.88933 | 8.76887 | 8.53762 | 8.67459 | 8.74208 |
| PWP1     | 8.91082 | 8.87481 | 9.13733 | 8.92619 | 6.55531 | 8.25557 | 9.00979 | 8.55885 | 8.72642 |
| ASCL4    | 5.45101 | 6.25468 | 5.78134 | 6.16779 | 6.18575 | 6.67188 | 6.30544 | 6.33132 | 5.96555 |
| WSCD2    | 5.28572 | 5.379   | 5.80264 | 5.62503 | 6.00264 | 5.59741 | 5.38009 | 5.43372 | 5.47806 |
| FICD     | 6.24116 | 6.1604  | 6.53725 | 6.68308 | 6.70314 | 7.34645 | 6.50667 | 6.62865 | 6.9857  |
| ISCU     | 6.94056 | 7.28138 | 7.34502 | 6.46691 | 5.57076 | 5.88823 | 6.6897  | 6.37183 | 6.60654 |
| DAO      | 4.93279 | 4.7859  | 4.49522 | 4.82519 | 5.83552 | 5.23832 | 4.69261 | 5.1155  | 4.99249 |

|           |         |         |         |         |         |         |         |         |         |
|-----------|---------|---------|---------|---------|---------|---------|---------|---------|---------|
| USP30     | 8.29654 | 8.48321 | 8.01047 | 7.28208 | 6.9425  | 7.18897 | 7.1852  | 7.2242  | 7.24876 |
| UNG       | 7.88873 | 7.80668 | 7.81165 | 7.60059 | 6.85632 | 6.73042 | 7.68573 | 6.6658  | 7.38839 |
| ACACB     | 7.07359 | 7.32585 | 7.91261 | 5.88104 | 6.43331 | 5.75842 | 6.2151  | 5.77424 | 5.88087 |
| MYO1H     | 4.82763 | 4.98426 | 4.91234 | 5.45126 | 5.78303 | 5.27792 | 5.37686 | 5.15329 | 5.44497 |
| UBE3B     | 8.78027 | 8.76898 | 8.33052 | 8.22544 | 7.07586 | 8.20448 | 8.39393 | 7.77705 | 8.65948 |
| MVK       | 7.50803 | 7.73485 | 7.49509 | 7.91455 | 7.34128 | 8.93865 | 8.21755 | 8.4931  | 8.62667 |
| ANKRD13A  | 10.0758 | 10.298  | 9.93032 | 9.83613 | 9.27949 | 9.90217 | 9.5483  | 11.0316 | 10.4084 |
| IFT81     | 5.93579 | 6.06462 | 6.16807 | 5.45661 | 4.13974 | 5.28977 | 5.33528 | 4.93597 | 4.91629 |
| RAD9B     | 4.82096 | 4.3953  | 4.23489 | 4.41747 | 4.80385 | 4.54542 | 4.33437 | 4.41596 | 4.55183 |
| tctn1     | 7.33518 | 7.90343 | 7.29411 | 6.56713 | 6.90054 | 6.45457 | 6.72549 | 6.29759 | 6.02345 |
| CCDC63    | 5.61972 | 5.92179 | 5.38839 | 5.1187  | 5.91134 | 5.64707 | 5.39701 | 5.19462 | 5.70556 |
| CUX2      | 4.97727 | 5.2386  | 5.08287 | 5.54278 | 5.78444 | 5.95744 | 5.61295 | 5.74048 | 5.73241 |
| SH2B3     | 6.83152 | 6.46874 | 6.78369 | 7.17968 | 6.44797 | 6.94043 | 6.88998 | 7.15469 | 7.12992 |
| ALDH2     | 10.7741 | 10.7677 | 10.6308 | 10.2686 | 7.85745 | 10.1588 | 11.1763 | 8.18372 | 9.70901 |
| MAPKAPK5  | 9.04747 | 9.34846 | 9.21163 | 8.59162 | 7.21019 | 7.54768 | 8.67634 | 7.95158 | 8.21791 |
| ERP29     | 7.41694 | 7.28604 | 7.29778 | 7.30284 | 6.86922 | 7.16754 | 6.91236 | 6.55125 | 6.42186 |
| TRAFD1    | 8.36889 | 8.45634 | 8.17284 | 7.71544 | 6.37825 | 7.29368 | 7.93615 | 7.97081 | 7.84127 |
| RPH3A     | 4.53821 | 4.30878 | 4.67264 | 5.13194 | 5.4353  | 5.0634  | 4.9488  | 4.91709 | 4.82547 |
| DTX1      | 5.6505  | 5.73148 | 5.90835 | 6.50731 | 5.77228 | 6.7634  | 6.53715 | 6.52458 | 6.23209 |
| cfap73    | 5.0581  | 5.2351  | 5.59273 | 5.7496  | 5.33126 | 5.80002 | 5.56711 | 5.6307  | 5.93735 |
| RITA1     | 7.30331 | 7.08352 | 7.3422  | 7.47247 | 6.52187 | 7.41102 | 7.54824 | 7.28835 | 7.19951 |
| TPCN1     | 7.79555 | 7.63893 | 7.96109 | 7.34676 | 6.52452 | 6.58633 | 7.58961 | 8.06406 | 7.21761 |
| PLBD2     | 8.0305  | 7.8834  | 8.01816 | 8.02693 | 6.43705 | 7.85042 | 8.27445 | 7.972   | 7.99471 |
| SDSL      | 6.09385 | 5.97864 | 6.12471 | 6.88751 | 6.9385  | 6.56187 | 6.27583 | 6.46722 | 6.3884  |
| TBX5-AS1  | 4.67072 | 5.14281 | 5.03825 | 5.77785 | 6.10136 | 5.92274 | 5.42882 | 6.12235 | 5.50381 |
| LINC00173 | 6.29882 | 6.58889 | 6.94663 | 7.56024 | 7.97728 | 7.83017 | 6.85924 | 7.52153 | 7.57423 |

|           |         |         |         |         |         |         |         |         |         |
|-----------|---------|---------|---------|---------|---------|---------|---------|---------|---------|
| MAP1LC3B2 | 7.3464  | 7.23524 | 7.63136 | 7.82276 | 8.42879 | 8.2007  | 7.61733 | 8.35867 | 7.8161  |
| FBXW8     | 8.39873 | 8.32145 | 8.30488 | 7.43125 | 7.1693  | 7.22468 | 7.89861 | 7.11346 | 7.44761 |
| KSR2      | 3.57796 | 3.41717 | 3.39053 | 4.07819 | 4.82091 | 3.98586 | 3.89472 | 3.90318 | 3.85681 |
| PEBP1     | 9.83928 | 9.97771 | 10.1426 | 9.99611 | 7.91187 | 9.10154 | 10.2834 | 8.87122 | 9.03027 |
| SUDS3     | 8.23959 | 8.34892 | 8.31683 | 7.36576 | 5.48086 | 7.30553 | 7.93641 | 7.62299 | 7.47738 |
| SRRM4     | 5.52594 | 5.53933 | 5.41917 | 6.29815 | 6.5341  | 5.7965  | 5.76945 | 5.72284 | 5.7408  |
| HSPB8     | 5.1717  | 4.65312 | 4.27    | 5.87521 | 5.9998  | 4.74272 | 5.63418 | 5.12965 | 5.87545 |
| CCDC60    | 5.20592 | 5.29691 | 5.26714 | 5.46996 | 6.63785 | 5.6744  | 5.1888  | 5.48465 | 5.22915 |
| TMEM233   | 5.99449 | 5.56849 | 6.03201 | 5.91842 | 6.83987 | 6.40726 | 6.20127 | 5.88498 | 6.52381 |
| BICDL1    | 7.41015 | 6.98188 | 7.0116  | 6.34435 | 6.32559 | 6.37963 | 6.71294 | 6.20221 | 6.22557 |
| PXN-AS1   | 6.57277 | 7.01752 | 6.68528 | 6.5429  | 6.49975 | 6.77179 | 7.01884 | 6.48281 | 6.39022 |
| SIRT4     | 4.70702 | 4.88265 | 4.61468 | 5.36839 | 5.97565 | 5.32681 | 5.20271 | 5.09176 | 5.18438 |
| Cox6a1    | 5.60609 | 5.36555 | 5.94559 | 4.71583 | 4.95275 | 4.10146 | 5.57857 | 4.79027 | 4.77232 |
| RNF10     | 8.92689 | 8.69263 | 8.65017 | 9.30256 | 8.46005 | 9.92716 | 9.46756 | 9.60756 | 9.43782 |
| CABP1     | 5.03006 | 4.90984 | 5.1743  | 5.43667 | 6.05701 | 5.53933 | 5.18122 | 5.22632 | 5.68063 |
| MLEC      | 8.66575 | 8.74594 | 8.98412 | 9.18592 | 6.6151  | 7.98311 | 8.8629  | 8.23399 | 8.12812 |
| UNC119B   | 6.34543 | 6.16688 | 6.4194  | 6.40435 | 5.74785 | 6.50615 | 6.76103 | 6.58887 | 6.38715 |
| HNF1A     | 6.05314 | 6.17779 | 6.14281 | 6.79424 | 7.04561 | 6.67675 | 6.36276 | 6.82536 | 6.5585  |
| ORAI1     | 7.75486 | 7.39673 | 7.91737 | 7.38854 | 6.61356 | 7.22222 | 7.90388 | 7.12171 | 7.04939 |
| TMEM120B  | 6.67591 | 6.28288 | 6.37706 | 6.74455 | 6.37263 | 6.8661  | 6.59301 | 7.21928 | 6.5598  |
| SETD1B    | 8.67743 | 8.30052 | 8.50307 | 8.43804 | 6.43167 | 7.82024 | 8.26833 | 7.44251 | 8.10982 |
| WDR66     | 5.68094 | 5.87865 | 5.85027 | 6.31541 | 6.54647 | 7.16077 | 6.96423 | 7.44825 | 6.71378 |
| BCL7A     | 6.44413 | 6.49069 | 6.46345 | 6.70809 | 5.69221 | 6.9128  | 6.54484 | 6.59931 | 6.48342 |
| MLXIP     | 7.80749 | 7.31822 | 7.47236 | 7.78693 | 6.85674 | 7.69934 | 7.80002 | 8.20701 | 7.91323 |
| LRRC43    | 4.92069 | 4.6728  | 4.99411 | 5.33391 | 5.96879 | 5.58298 | 5.20335 | 5.34883 | 5.51174 |
| CLIP1-AS1 | 5.68219 | 5.31851 | 5.48551 | 5.96657 | 5.86974 | 6.09273 | 6.02242 | 5.7569  | 6.09564 |

|              |         |         |         |         |         |         |         |         |         |
|--------------|---------|---------|---------|---------|---------|---------|---------|---------|---------|
| KNTC1        | 7.80031 | 7.92705 | 7.95602 | 6.5431  | 5.56893 | 5.81193 | 6.55783 | 6.52369 | 6.01335 |
| hcar3        | 4.92106 | 4.57928 | 4.84134 | 5.48987 | 5.63427 | 6.7128  | 5.50111 | 5.66377 | 5.5138  |
| DENR         | 7.40679 | 7.53012 | 7.07209 | 7.72925 | 5.34415 | 8.39555 | 7.74502 | 7.55668 | 7.47478 |
| CCDC62       | 4.43263 | 4.27532 | 4.44551 | 4.87703 | 4.5495  | 4.45008 | 4.5326  | 4.45459 | 4.45459 |
| HIP1R        | 8.3141  | 8.01219 | 7.99446 | 8.2802  | 7.85502 | 8.78008 | 8.56415 | 9.55196 | 8.48544 |
| VPS37B       | 7.72519 | 7.36413 | 7.30817 | 8.05478 | 7.71211 | 7.99066 | 7.96348 | 7.95922 | 7.92025 |
| OGFOD2       | 6.79616 | 6.8332  | 7.01578 | 6.80449 | 6.8429  | 6.9104  | 6.88859 | 7.04782 | 6.70547 |
| ARL6IP4      | 8.86458 | 9.1001  | 9.15997 | 9.85464 | 8.19901 | 9.82462 | 10.1432 | 9.40232 | 9.185   |
| LOC100507091 | 5.41024 | 5.4445  | 5.40293 | 5.39158 | 5.73085 | 5.26609 | 5.39141 | 5.78033 | 5.58986 |
| C12orf65     | 6.49704 | 6.46925 | 6.50767 | 6.22006 | 6.705   | 6.603   | 6.44056 | 6.51729 | 6.45327 |
| KMT5A        | 8.1937  | 8.2506  | 7.9712  | 8.11713 | 6.42807 | 7.71697 | 8.08253 | 7.53519 | 7.50245 |
| SNRNP35      | 6.19934 | 6.76632 | 6.3696  | 6.84235 | 6.47216 | 6.32974 | 6.83637 | 6.20789 | 6.37354 |
| MIR3908      | 2.04541 | 2.14452 | 1.52727 | 2.02473 | 2.35358 | 2.26891 | 2.76149 | 2.33853 | 2.29221 |
| TMED2        | 11.8158 | 11.5732 | 11.9014 | 11.7593 | 11.2661 | 11.4571 | 11.7013 | 11.5071 | 11.7072 |
| DDX55        | 6.93714 | 7.34911 | 6.7981  | 6.73497 | 5.83737 | 6.52893 | 6.74102 | 6.37674 | 6.49714 |
| TCTN2        | 7.93889 | 7.89948 | 7.97803 | 7.04447 | 7.00526 | 6.41852 | 7.47347 | 6.67706 | 6.9128  |
| UBC          | 7.59944 | 7.67297 | 7.93783 | 11.0894 | 10.5308 | 10.9409 | 10.2367 | 9.90045 | 9.68647 |
| BRI3BP       | 8.46322 | 8.36653 | 8.84459 | 8.41702 | 7.59035 | 8.25973 | 8.97072 | 8.2876  | 8.55371 |
| AACS         | 9.15362 | 9.13576 | 9.04459 | 9.05937 | 8.04168 | 9.2906  | 9.07585 | 9.13829 | 8.89077 |
| TMEM132B     | 6.34711 | 6.54612 | 6.07334 | 6.84122 | 7.43487 | 6.46798 | 6.63162 | 6.70929 | 6.56495 |
| LOC100128554 | 5.61179 | 5.87211 | 5.75517 | 5.83518 | 6.71394 | 6.16464 | 6.06365 | 5.88886 | 5.93511 |
| LINC00943    | 5.00854 | 5.14438 | 5.19319 | 5.66592 | 5.98878 | 5.83909 | 5.36064 | 5.94119 | 5.92546 |
| FLJ37505     | 4.74892 | 4.49824 | 4.9324  | 5.10313 | 5.93874 | 5.45418 | 4.78936 | 4.92473 | 5.01181 |
| LINC00507    | 3.48054 | 3.36456 | 3.06592 | 3.26804 | 4.33214 | 3.93557 | 3.11492 | 3.40272 | 3.34748 |
| TMEM132C     | 5.68854 | 5.93217 | 5.9487  | 6.26538 | 6.45494 | 6.54125 | 5.69689 | 6.33728 | 6.30439 |
| MIR3612      | 2.57215 | 3.19682 | 2.96933 | 2.8818  | 2.64807 | 2.76022 | 3.20286 | 2.55212 | 2.60675 |

|              |         |         |         |         |         |         |         |         |         |
|--------------|---------|---------|---------|---------|---------|---------|---------|---------|---------|
| GLT1D1       | 6.26362 | 6.07064 | 5.6634  | 5.68151 | 6.68369 | 6.27366 | 5.41689 | 6.15105 | 6.18144 |
| FZD10        | 7.71848 | 6.66389 | 7.34987 | 7.14972 | 6.43301 | 10.0575 | 7.44879 | 6.86957 | 6.61056 |
| PIWIL1       | 4.85407 | 5.05984 | 5.04243 | 5.26479 | 5.74811 | 4.51428 | 5.4101  | 5.24312 | 5.08727 |
| ADGRD1       | 5.88641 | 5.90682 | 6.52922 | 5.61668 | 5.89475 | 5.91343 | 5.73199 | 5.71017 | 5.70134 |
| LINC01257    | 6.01917 | 5.87187 | 5.94661 | 6.20349 | 6.85139 | 6.35134 | 6.21958 | 6.36978 | 6.77137 |
| MMP17        | 6.11476 | 6.02321 | 5.86547 | 6.46906 | 6.44276 | 7.1319  | 6.45542 | 6.79149 | 6.44893 |
| ULK1         | 8.03019 | 8.2029  | 8.15454 | 8.44417 | 7.95717 | 9.64534 | 8.61182 | 8.91279 | 8.55849 |
| PUS1         | 7.49092 | 7.61104 | 7.49558 | 7.89873 | 8.10316 | 8.28093 | 7.69154 | 7.86042 | 7.83145 |
| EP400        | 8.84154 | 8.71328 | 8.70582 | 8.04311 | 6.17653 | 7.57356 | 8.43034 | 8.09212 | 8.00523 |
| EP400NL      | 6.82714 | 6.57615 | 6.81871 | 6.40787 | 6.10798 | 5.81975 | 6.37991 | 6.33786 | 6.31148 |
| NOC4L        | 6.45031 | 6.50921 | 6.65225 | 7.33153 | 6.19186 | 7.088   | 7.44935 | 6.55901 | 6.81778 |
| LOC100130238 | 5.41644 | 5.25705 | 5.33575 | 5.71215 | 6.67929 | 6.30216 | 5.74134 | 6.41439 | 5.84227 |
| FBRSL1       | 7.10211 | 6.96328 | 7.04587 | 7.40206 | 6.96002 | 7.55809 | 7.51696 | 7.17016 | 7.52287 |
| ZNF26        | 7.54302 | 7.65774 | 7.74131 | 5.76612 | 5.51456 | 5.66835 | 6.46992 | 6.0798  | 6.58465 |
| ZNF140       | 6.73818 | 7.34299 | 6.72715 | 6.02275 | 5.15942 | 6.28577 | 6.16699 | 5.34002 | 5.53662 |
| ZNF10        | 6.31208 | 6.57611 | 6.37538 | 4.76505 | 5.83686 | 4.64736 | 4.58948 | 4.7643  | 5.10227 |
| znf268       | 6.77674 | 7.3127  | 7.11539 | 5.67951 | 5.85244 | 5.74212 | 6.52261 | 6.02615 | 6.06883 |
| LOC574538    | 3.83037 | 4.12623 | 3.81699 | 4.41251 | 4.8541  | 3.94481 | 4.27312 | 4.58183 | 4.58082 |
| KDM5A        | 8.00719 | 8.1912  | 8.02304 | 7.27385 | 6.22898 | 7.62195 | 7.79664 | 7.87023 | 7.68384 |
| NINJ2        | 6.74397 | 7.3122  | 7.57728 | 7.58937 | 6.90691 | 7.44902 | 7.17328 | 7.17595 | 7.12926 |
| RAD52        | 6.72641 | 6.84765 | 6.69882 | 6.17003 | 6.51425 | 6.09537 | 6.10172 | 6.1843  | 6.1872  |
| FBXL14       | 7.26069 | 7.36165 | 7.57453 | 7.54273 | 7.55954 | 6.54158 | 7.51549 | 7.25059 | 7.43041 |
| MIR3649      | 2.64827 | 3.18714 | 2.50628 | 3.12598 | 2.77979 | 2.83634 | 2.40051 | 2.47006 | 2.82575 |
| LINC00940    | 4.54994 | 4.74713 | 4.72221 | 5.3171  | 5.56595 | 5.6611  | 5.19889 | 4.97621 | 4.82352 |
| DCP1B        | 7.06161 | 7.08918 | 7.36506 | 5.86586 | 6.24496 | 6.24574 | 6.18985 | 5.62454 | 6.27834 |
| CACNA1C-AS4  | 3.3964  | 3.55975 | 3.81156 | 4.10055 | 4.60246 | 4.52925 | 4.20609 | 3.70291 | 3.49896 |

|           |         |         |         |         |         |         |         |         |         |
|-----------|---------|---------|---------|---------|---------|---------|---------|---------|---------|
| LOC283440 | 5.49537 | 5.30993 | 5.18248 | 5.23595 | 5.18139 | 5.10467 | 5.35276 | 4.96769 | 4.86554 |
| NRIP2     | 6.71058 | 6.83796 | 6.56995 | 7.18716 | 7.63781 | 7.23389 | 6.97209 | 7.13325 | 7.05423 |
| FOXM1     | 6.54559 | 6.23685 | 6.17545 | 6.93226 | 6.02788 | 6.19413 | 6.50605 | 6.68159 | 6.2515  |
| RPS27     | 11.8861 | 12.5354 | 12.3838 | 12.643  | 12.4978 | 12.3923 | 12.623  | 11.9756 | 11.9465 |
| CRACR2A   | 6.72928 | 6.26763 | 6.7458  | 5.57185 | 6.21236 | 6.17025 | 5.6538  | 5.74986 | 5.89757 |
| FGF23     | 5.00307 | 4.36404 | 4.84481 | 5.20728 | 5.87625 | 6.1188  | 5.41745 | 5.60119 | 5.52337 |
| FGF6      | 4.68733 | 4.79978 | 4.34421 | 4.90884 | 5.44022 | 5.49092 | 5.28096 | 4.75084 | 4.97956 |
| AKAP3     | 4.65168 | 4.63839 | 4.6809  | 4.95611 | 5.14556 | 4.91322 | 4.94921 | 4.87844 | 4.38283 |
| ANO2      | 6.67521 | 6.56432 | 6.60074 | 6.02843 | 6.50843 | 6.60215 | 6.40511 | 6.56215 | 6.51508 |
| VWF       | 8.07482 | 7.88229 | 8.58273 | 7.36733 | 6.80532 | 7.09798 | 7.15217 | 7.63475 | 7.07496 |
| CD27-AS1  | 5.92035 | 6.1337  | 5.91607 | 6.03565 | 6.25146 | 6.39587 | 6.0772  | 6.0984  | 6.0868  |
| VAMP1     | 7.64498 | 7.62536 | 7.51118 | 6.53755 | 6.99667 | 6.40733 | 6.68806 | 7.19698 | 6.59532 |
| MRPL51    | 7.80656 | 7.49584 | 7.55783 | 8.58661 | 7.05116 | 7.86934 | 8.77583 | 7.5067  | 7.82954 |
| IFFO1     | 6.26166 | 6.17983 | 6.46882 | 6.61279 | 6.98665 | 6.92763 | 5.94988 | 6.63163 | 6.47483 |
| NOP2      | 7.55887 | 7.01116 | 7.16248 | 7.66005 | 6.65222 | 7.24066 | 7.9157  | 6.77347 | 7.21981 |
| CHD4      | 8.92035 | 9.07675 | 8.70767 | 8.5908  | 6.42127 | 7.85469 | 8.52846 | 8.51824 | 8.31482 |
| SCARNA11  | 5.92506 | 6.54918 | 5.87278 | 5.85588 | 6.02899 | 4.84537 | 4.54631 | 5.74987 | 5.36478 |
| LPAR5     | 7.62988 | 7.63482 | 7.76368 | 7.36927 | 5.35096 | 7.81046 | 8.05302 | 7.35204 | 7.55033 |
| ACRBP     | 5.95521 | 5.77734 | 5.82566 | 6.12881 | 6.61796 | 6.0284  | 5.7439  | 6.15007 | 6.15856 |
| PIANP     | 5.25222 | 5.19183 | 5.78019 | 6.14012 | 6.80955 | 6.25797 | 5.59438 | 6.25499 | 6.12174 |
| MLF2      | 7.45477 | 7.28675 | 7.32833 | 7.15627 | 6.61582 | 7.35999 | 7.30535 | 7.53261 | 7.4249  |
| CDCA3     | 6.04092 | 5.87805 | 6.15027 | 6.2363  | 6.1181  | 5.83118 | 5.99151 | 6.3577  | 5.9414  |
| SPSB2     | 5.86058 | 5.927   | 5.75408 | 6.71066 | 6.62386 | 6.42519 | 6.18037 | 6.49006 | 6.08028 |
| PHB2      | 9.50098 | 9.41739 | 9.64441 | 9.57271 | 8.06732 | 9.10279 | 9.69499 | 8.71082 | 8.75854 |
| LPCAT3    | 9.62735 | 9.0607  | 9.30396 | 9.43021 | 7.45645 | 8.25977 | 9.53358 | 8.52843 | 9.04789 |
| CD163L1   | 6.13665 | 5.98525 | 5.95356 | 5.85785 | 5.91501 | 5.68174 | 5.7307  | 5.60364 | 5.58424 |



|           |         |         |         |         |         |         |         |         |         |
|-----------|---------|---------|---------|---------|---------|---------|---------|---------|---------|
| CD163     | 5.51631 | 6.03216 | 7.35309 | 5.46174 | 5.17865 | 4.75407 | 5.54841 | 4.31293 | 5.26116 |
| GDF3      | 3.29737 | 3.13105 | 3.61919 | 3.50091 | 4.57596 | 3.84256 | 3.61059 | 3.47796 | 3.69714 |
| C3AR1     | 4.51314 | 4.94131 | 5.58672 | 4.81226 | 5.82267 | 5.2408  | 4.90873 | 4.25954 | 5.22479 |
| POU5F1P3  | 7.12298 | 7.40485 | 7.19591 | 8.17772 | 8.00133 | 7.47748 | 7.65611 | 7.99261 | 7.65614 |
| LINC00937 | 6.36264 | 6.50247 | 6.04682 | 6.8032  | 6.84789 | 6.11668 | 6.49737 | 6.23221 | 6.50581 |
| AICDA     | 4.05829 | 4.35799 | 4.61592 | 5.0846  | 6.1484  | 4.96461 | 4.55247 | 4.54367 | 4.28005 |
| MFAP5     | 7.72595 | 7.22017 | 9.38751 | 6.75612 | 7.38928 | 7.48493 | 6.4949  | 7.87762 | 7.62368 |
| M6PR      | 8.58523 | 8.58789 | 8.83803 | 8.21195 | 6.50386 | 7.44414 | 8.19095 | 7.57672 | 8.10917 |
| A2M       | 10.2336 | 9.28546 | 10.737  | 9.39682 | 7.17867 | 7.70409 | 8.50876 | 8.69858 | 9.21782 |
| PZP       | 4.62214 | 4.72075 | 4.72195 | 4.97185 | 5.75548 | 4.53086 | 4.59166 | 4.79071 | 4.7783  |
| A2MP1     | 3.64955 | 4.07331 | 4.09499 | 4.29242 | 4.55556 | 4.30149 | 4.13211 | 4.14514 | 4.24293 |
| CLECL1    | 3.6757  | 3.26168 | 3.80828 | 3.72768 | 4.89692 | 3.71991 | 3.524   | 4.01102 | 3.71546 |
| CD69      | 6.19645 | 4.73943 | 6.38181 | 3.9862  | 5.00634 | 6.77936 | 5.33019 | 4.99998 | 5.1748  |
| OLR1      | 3.94705 | 4.22375 | 4.00046 | 4.72127 | 5.03782 | 5.221   | 4.01671 | 5.46091 | 4.70791 |
| KLRA1P    | 7.1975  | 7.18936 | 7.69988 | 5.06747 | 5.7501  | 5.95775 | 5.51952 | 5.70977 | 5.79725 |
| MAGOHB    | 6.28178 | 6.84623 | 6.64066 | 5.11596 | 4.1968  | 4.14064 | 5.21787 | 4.60904 | 4.87159 |
| STYK1     | 5.93586 | 5.93986 | 5.94424 | 6.59731 | 6.14874 | 6.30041 | 5.95268 | 6.45787 | 6.75956 |
| YBX3      | 9.76202 | 8.33769 | 8.24631 | 7.55002 | 5.84982 | 6.30628 | 6.95271 | 6.50983 | 7.20101 |
| PRR4      | 7.52077 | 7.65701 | 7.50432 | 5.59128 | 6.13516 | 5.59141 | 5.30115 | 5.59466 | 5.58931 |
| PRB3      | 2.88672 | 2.99632 | 2.91491 | 4.14093 | 3.93749 | 3.63105 | 3.67261 | 3.39581 | 4.07309 |
| PRB4      | 3.01316 | 2.56713 | 3.05288 | 3.68979 | 3.40065 | 4.026   | 3.07567 | 3.01812 | 3.60583 |
| prb1      | 6.87442 | 6.46349 | 7.14156 | 7.08112 | 8.38956 | 7.38034 | 6.90295 | 7.1689  | 7.48818 |
| PRB2      | 6.17994 | 6.73419 | 6.83001 | 6.79264 | 7.63791 | 6.69763 | 6.6484  | 7.0098  | 7.29854 |
| lrp6      | 8.48676 | 8.80983 | 8.40292 | 7.28819 | 5.98168 | 6.34523 | 7.11232 | 7.33669 | 6.87421 |
| mansc1    | 9.34142 | 8.53772 | 8.83885 | 8.09059 | 7.03556 | 6.66031 | 8.46261 | 7.77557 | 7.96215 |
| DUSP16    | 8.4388  | 8.00463 | 7.70455 | 8.46422 | 7.89825 | 8.17605 | 8.52537 | 7.8876  | 8.34767 |

|            |         |         |         |         |         |         |         |         |         |
|------------|---------|---------|---------|---------|---------|---------|---------|---------|---------|
| GPR19      | 4.52871 | 4.58202 | 4.39479 | 5.01099 | 6.54418 | 5.10269 | 4.89845 | 4.99539 | 4.55334 |
| HEBP1      | 8.45786 | 8.44119 | 8.4662  | 8.45355 | 7.46949 | 8.48215 | 9.0133  | 8.33332 | 8.11532 |
| GSG1       | 4.70947 | 5.17306 | 5.22751 | 5.41681 | 6.47726 | 6.01144 | 4.94067 | 4.99944 | 4.96807 |
| PLBD1      | 11.1529 | 11.2429 | 11.1928 | 10.5938 | 9.6148  | 9.96545 | 10.6297 | 8.16531 | 10.1964 |
| GUCY2C     | 8.01375 | 4.5161  | 4.89834 | 5.28384 | 5.72613 | 5.4563  | 5.95057 | 4.59656 | 5.89088 |
| WBP11      | 8.17861 | 7.70275 | 8.21996 | 7.50625 | 5.78554 | 7.04648 | 7.92739 | 7.20015 | 7.36316 |
| SMCO3      | 5.01798 | 5.27521 | 5.02585 | 4.66723 | 5.79345 | 5.57573 | 4.99446 | 5.22763 | 4.93118 |
| ART4       | 5.25336 | 5.37759 | 6.19925 | 5.2209  | 6.08035 | 5.65084 | 6.00583 | 5.82984 | 5.46453 |
| MGP        | 9.25997 | 9.18186 | 10.2539 | 6.39758 | 6.78953 | 5.93048 | 7.74891 | 6.35936 | 7.56434 |
| erp27      | 7.4697  | 7.34615 | 7.00139 | 5.4279  | 7.43481 | 6.53019 | 8.35103 | 6.70158 | 8.02001 |
| ARHGDIB    | 6.88854 | 6.63647 | 7.78128 | 6.82131 | 5.19483 | 6.75666 | 6.88729 | 7.20742 | 6.77614 |
| EPS8       | 8.1996  | 7.8645  | 8.49008 | 6.65816 | 5.18581 | 5.15892 | 5.66249 | 5.67896 | 6.21101 |
| LMO3       | 5.10805 | 5.24407 | 5.10953 | 4.91496 | 5.4007  | 5.45054 | 5.28258 | 5.23215 | 5.01503 |
| RERGL      | 3.71321 | 4.01172 | 4.12221 | 3.06194 | 3.64968 | 3.67784 | 3.13715 | 3.66341 | 3.52768 |
| RECQL      | 7.38902 | 7.32748 | 7.4228  | 7.57028 | 5.77335 | 6.61482 | 7.60994 | 7.15135 | 7.01845 |
| GYS2       | 4.11237 | 4.15556 | 4.06537 | 4.5695  | 5.29137 | 5.15311 | 4.44676 | 4.80157 | 4.68094 |
| LDHB       | 6.03152 | 6.492   | 6.45046 | 7.3308  | 5.89694 | 6.77591 | 6.96573 | 6.97093 | 6.62296 |
| SOX5       | 5.75601 | 5.83429 | 5.86024 | 5.45563 | 5.61973 | 5.90143 | 5.22227 | 5.50606 | 5.53562 |
| LINC00477  | 3.78073 | 3.91053 | 4.26829 | 4.4256  | 4.48519 | 4.39894 | 4.29858 | 4.31868 | 4.02549 |
| C12orf77   | 3.4665  | 3.67994 | 3.42756 | 4.21108 | 4.65327 | 4.55199 | 3.72134 | 4.02503 | 4.09639 |
| CASC1      | 3.78812 | 4.07649 | 3.86622 | 3.35739 | 3.68464 | 3.70703 | 4.04326 | 3.69413 | 3.56425 |
| kras       | 8.24571 | 8.00771 | 8.28481 | 8.68284 | 6.4341  | 8.91633 | 8.96576 | 8.94213 | 8.73288 |
| LMNTD1     | 3.05311 | 3.3484  | 3.08513 | 3.60845 | 4.35784 | 4.08966 | 3.27413 | 3.47804 | 3.43802 |
| MIR4302    | 4.27931 | 2.47251 | 4.65807 | 5.61112 | 5.98341 | 5.97158 | 3.28859 | 6.41362 | 4.70042 |
| RASSF8-AS1 | 5.53418 | 5.59825 | 5.8792  | 5.61631 | 5.7555  | 5.74642 | 5.51917 | 5.09316 | 5.65214 |
| C12orf71   | 4.97265 | 4.7043  | 4.27023 | 4.20302 | 4.63886 | 5.38795 | 4.84012 | 4.76009 | 4.78806 |

|            |         |         |         |         |         |         |         |         |         |
|------------|---------|---------|---------|---------|---------|---------|---------|---------|---------|
| MANSC4     | 5.31597 | 8.30983 | 5.46464 | 6.09742 | 6.30568 | 5.53779 | 5.66842 | 5.57588 | 5.606   |
| ERGIC2     | 9.95898 | 9.85388 | 10.1799 | 9.23882 | 8.29541 | 8.96888 | 9.86292 | 10.0706 | 10.0836 |
| OVCH1      | 4.41463 | 4.44819 | 4.68243 | 4.80938 | 5.56411 | 4.66628 | 4.69191 | 4.51626 | 4.54708 |
| TMTC1      | 7.05257 | 7.12913 | 7.8837  | 6.21425 | 5.52381 | 7.21755 | 6.95813 | 7.0707  | 6.55206 |
| IPO8       | 8.18894 | 7.93418 | 7.73778 | 7.76749 | 5.89605 | 7.09159 | 8.00279 | 7.0133  | 7.68833 |
| CAPRIN2    | 8.43072 | 8.72854 | 8.02529 | 7.15311 | 5.94135 | 6.33221 | 6.83791 | 7.02809 | 7.35266 |
| DDX11-AS1  | 6.15582 | 6.22702 | 6.49023 | 6.32896 | 7.19767 | 6.17583 | 6.08026 | 6.76311 | 6.52085 |
| DENND5B    | 6.73202 | 7.22474 | 7.11917 | 5.69098 | 6.74022 | 5.78471 | 5.64206 | 5.90798 | 5.91176 |
| AMN1       | 6.73251 | 6.76788 | 6.44445 | 7.07872 | 7.0957  | 8.38426 | 7.20195 | 8.06061 | 6.90419 |
| PKP2       | 7.00714 | 7.04265 | 7.36933 | 8.10847 | 6.9899  | 7.60965 | 8.15534 | 8.64034 | 8.53858 |
| SYT10      | 5.34636 | 5.8469  | 5.75917 | 5.88345 | 6.6815  | 6.45334 | 5.70353 | 6.31038 | 6.07375 |
| CPNE8      | 7.26161 | 6.13612 | 7.13345 | 5.97421 | 5.6325  | 5.74833 | 6.42298 | 6.54114 | 7.15602 |
| KIF21A     | 7.10472 | 7.55282 | 7.61044 | 6.86653 | 5.50854 | 6.73197 | 7.30409 | 6.68263 | 7.74372 |
| GXYLT1     | 7.65787 | 8.4292  | 8.00018 | 7.61814 | 5.90856 | 5.66767 | 7.45665 | 7.22972 | 7.68858 |
| ZCRB1      | 9.63452 | 9.31968 | 9.82517 | 8.78242 | 8.05521 | 8.33308 | 9.16343 | 8.67061 | 8.96829 |
| PRICKLE1   | 8.0969  | 8.40474 | 7.9122  | 6.74344 | 7.25255 | 5.65279 | 7.05355 | 6.07634 | 6.30593 |
| PUS7L      | 7.48102 | 7.95266 | 7.7762  | 6.34828 | 4.49799 | 6.53381 | 7.31784 | 6.02277 | 6.1949  |
| DBX2       | 5.09283 | 5.46412 | 5.8191  | 5.70404 | 5.60338 | 5.43855 | 5.0548  | 5.66872 | 5.61979 |
| RACGAP1P   | 5.04784 | 4.9685  | 5.3058  | 4.95378 | 5.52417 | 5.81647 | 5.36053 | 5.25197 | 5.05333 |
| LINC00938  | 7.47743 | 7.5233  | 7.62799 | 7.37602 | 6.56533 | 7.14986 | 7.79156 | 6.34136 | 7.12954 |
| SCAF11     | 8.36512 | 8.57732 | 8.55281 | 7.28961 | 5.54031 | 7.1079  | 7.80263 | 8.21571 | 7.77136 |
| AMIGO2     | 5.56917 | 5.47499 | 5.5091  | 6.89065 | 5.68292 | 5.21977 | 5.76612 | 6.37502 | 5.41465 |
| PCED1B-AS1 | 5.06364 | 4.62253 | 5.70236 | 5.36367 | 6.04227 | 5.40667 | 5.38391 | 5.37599 | 5.01546 |
| MIR4494    | 6.10331 | 6.20384 | 5.93882 | 5.78129 | 6.69327 | 5.99601 | 5.67154 | 5.86961 | 5.36781 |
| RPAP3      | 7.45141 | 7.90059 | 7.50217 | 6.90678 | 4.72888 | 5.79707 | 7.01606 | 6.43282 | 6.37269 |
| RAPGEF3    | 6.42189 | 6.39898 | 6.67009 | 6.66272 | 6.76538 | 7.06699 | 6.61953 | 7.02293 | 7.3567  |

|           |         |         |         |         |         |         |         |         |         |
|-----------|---------|---------|---------|---------|---------|---------|---------|---------|---------|
| HDAC7     | 8.1337  | 8.1098  | 7.96737 | 7.58783 | 7.26007 | 8.07473 | 7.48815 | 7.53247 | 7.99175 |
| SENP1     | 9.26257 | 9.40673 | 9.24453 | 7.25611 | 7.44385 | 6.80131 | 7.709   | 7.37031 | 7.6944  |
| ASB8      | 7.20246 | 7.3366  | 7.31862 | 5.99564 | 5.83114 | 5.73046 | 6.35845 | 6.43379 | 6.35888 |
| ZNF641    | 6.98246 | 6.64173 | 7.02934 | 6.41626 | 6.03424 | 6.07155 | 6.26305 | 6.3847  | 6.19912 |
| KANSL2    | 7.5222  | 7.37065 | 7.33749 | 6.76265 | 6.37449 | 6.41109 | 6.97578 | 6.39235 | 6.70627 |
| CCNT1     | 8.64553 | 8.82739 | 8.95337 | 7.70429 | 6.20768 | 6.8929  | 7.76503 | 7.58266 | 7.74082 |
| DDX23     | 7.98836 | 8.05445 | 7.92293 | 7.46533 | 6.43017 | 7.13831 | 8.15948 | 7.16653 | 7.78058 |
| RND1      | 5.71942 | 5.19011 | 5.05389 | 5.96078 | 6.34614 | 7.20319 | 6.58083 | 8.54851 | 6.66871 |
| ARF3      | 9.50931 | 9.2291  | 9.25942 | 8.83662 | 8.00698 | 8.77382 | 8.91756 | 8.57633 | 9.02346 |
| KMT2D     | 8.69592 | 8.44208 | 8.61362 | 7.54862 | 6.20749 | 7.49594 | 7.86902 | 7.59827 | 8.19409 |
| RHEBL1    | 5.52372 | 5.41904 | 5.43178 | 5.27588 | 5.58488 | 5.58229 | 5.52466 | 5.78058 | 5.36906 |
| dhh       | 5.64745 | 5.90381 | 6.03334 | 6.28467 | 6.48869 | 6.27019 | 5.80421 | 6.09985 | 6.31714 |
| LMBR1L    | 7.44462 | 7.32668 | 6.97888 | 6.93992 | 7.12338 | 6.6539  | 6.97273 | 7.60625 | 7.22746 |
| MCRS1     | 7.60458 | 7.60282 | 7.41061 | 7.59672 | 6.07835 | 7.42104 | 7.57922 | 6.768   | 7.76616 |
| FMNL3     | 7.19537 | 6.55539 | 6.90592 | 7.4236  | 5.75087 | 6.55438 | 6.90768 | 7.1589  | 7.19805 |
| NCKAP5L   | 6.76279 | 6.2184  | 6.78584 | 6.79858 | 7.01978 | 6.83121 | 7.0248  | 6.85783 | 6.88915 |
| BCDIN3D   | 5.59226 | 6.22684 | 5.68664 | 6.04485 | 6.27742 | 6.21682 | 6.17835 | 6.06187 | 6.20444 |
| FAIM2     | 8.39216 | 8.8836  | 8.19351 | 8.88502 | 7.41282 | 6.92035 | 8.01188 | 7.25416 | 8.41503 |
| LOC283332 | 4.30909 | 4.83532 | 4.44551 | 4.8247  | 5.16721 | 5.10913 | 5.08733 | 4.90843 | 5.21681 |
| RACGAP1   | 4.88131 | 4.62066 | 4.93843 | 4.79539 | 4.65075 | 4.93271 | 5.0698  | 4.50988 | 4.79388 |
| CERS5     | 7.86992 | 7.82852 | 7.93105 | 6.81727 | 6.18743 | 6.19125 | 7.32126 | 7.25452 | 7.43494 |
| LIMA1     | 8.92666 | 8.44121 | 8.24876 | 9.07103 | 6.6602  | 8.75191 | 9.1603  | 8.66539 | 9.15549 |
| MIR1293   | 4.42971 | 4.9309  | 5.19102 | 5.23733 | 5.81353 | 5.68341 | 4.85725 | 5.1196  | 5.126   |
| csnp2     | 6.82699 | 6.41192 | 6.90101 | 6.64924 | 6.04791 | 6.80985 | 6.64183 | 6.6475  | 6.98829 |
| tfcp2     | 7.95064 | 8.22371 | 7.96692 | 7.80609 | 5.80245 | 7.09106 | 8.02002 | 7.32794 | 7.50113 |
| POU6F1    | 7.21641 | 7.36978 | 7.33289 | 6.70618 | 6.50613 | 7.01665 | 6.8462  | 6.39745 | 6.46401 |

|          |         |         |         |         |         |         |         |         |         |
|----------|---------|---------|---------|---------|---------|---------|---------|---------|---------|
| SMAGP    | 10.4381 | 10.6173 | 10.4048 | 9.97573 | 9.09107 | 8.91957 | 10.4864 | 8.98291 | 10.084  |
| BIN2     | 6.0427  | 5.75422 | 6.61017 | 6.14969 | 6.19257 | 5.89708 | 5.95917 | 5.79272 | 5.84137 |
| GALNT6   | 9.0278  | 8.52525 | 8.16568 | 9.94694 | 7.87294 | 9.69598 | 10.2179 | 9.78585 | 10.6996 |
| FIGNL2   | 5.52157 | 5.45802 | 5.41329 | 5.61402 | 5.99006 | 5.76478 | 5.49751 | 5.78383 | 5.498   |
| KRT80    | 10.6619 | 9.43323 | 10.4272 | 10.3715 | 9.97829 | 11.2255 | 10.2525 | 11.8588 | 11.6327 |
| C12orf80 | 5.31508 | 4.91897 | 5.3763  | 5.87445 | 5.9989  | 6.2592  | 5.59289 | 5.66227 | 5.81909 |
| KRT81    | 6.00029 | 6.16967 | 6.12316 | 6.20631 | 7.17954 | 6.80207 | 6.22535 | 6.63209 | 6.53254 |
| KRT83    | 4.85452 | 5.1805  | 5.18919 | 5.72112 | 6.27644 | 5.4894  | 5.54825 | 5.7911  | 5.552   |
| KRT85    | 6.34377 | 6.15887 | 6.50611 | 6.36622 | 7.48707 | 6.59587 | 6.55719 | 6.93935 | 6.93392 |
| KRT84    | 5.43688 | 5.63021 | 5.40542 | 5.8744  | 5.98551 | 6.14241 | 6.34714 | 6.26692 | 6.32324 |
| KRT82    | 4.90555 | 5.23401 | 5.29067 | 5.57248 | 5.89814 | 5.94707 | 5.45505 | 6.39594 | 5.78794 |
| KRT75    | 5.97362 | 5.20841 | 5.9115  | 10.442  | 6.65966 | 9.11359 | 9.89097 | 11.4023 | 10.4673 |
| KRT6B    | 9.50187 | 6.29306 | 8.7781  | 11.4871 | 11.1856 | 11.965  | 11.7548 | 11.8722 | 11.8114 |
| KRT6C    | 10.0808 | 5.86547 | 5.03589 | 11.4265 | 9.32294 | 10.175  | 10.7721 | 11.3537 | 12.2011 |
| KRT6A    | 9.51749 | 7.42466 | 9.04434 | 10.9782 | 10.2055 | 10.1263 | 10.1406 | 11.0425 | 11.6559 |
| KRT5     | 12.827  | 12.1787 | 12.1064 | 12.1196 | 11.1829 | 11.2092 | 12.2264 | 12.0844 | 12.4946 |
| KRT71    | 5.20657 | 5.17461 | 5.75428 | 6.03884 | 5.98554 | 6.21331 | 5.64999 | 6.17456 | 6.12133 |
| KRT74    | 4.94649 | 5.34978 | 5.02747 | 5.09591 | 5.84223 | 5.95227 | 5.49405 | 5.46748 | 5.17607 |
| KRT72    | 6.66691 | 6.60148 | 6.13331 | 6.14883 | 5.87732 | 5.9415  | 5.83252 | 6.58184 | 5.32146 |
| KRT73    | 7.35133 | 7.9341  | 6.86849 | 5.93535 | 5.90139 | 5.53689 | 4.84495 | 5.21076 | 5.38013 |
| KRT2     | 12.1845 | 12.9748 | 12.356  | 9.17416 | 5.20455 | 7.23361 | 5.72412 | 5.49128 | 6.81619 |
| KRT1     | 13.4641 | 13.4374 | 13.3663 | 13.0126 | 7.80301 | 12.4061 | 12.6839 | 7.68243 | 10.2765 |
| KRT77    | 7.16558 | 7.12472 | 8.09803 | 5.52792 | 5.17261 | 5.46835 | 5.51321 | 5.22899 | 5.43267 |
| KRT76    | 4.66111 | 4.81605 | 4.79564 | 4.14764 | 5.96906 | 5.36167 | 4.58875 | 4.6686  | 4.55711 |
| KRT3     | 5.87105 | 5.5642  | 5.7622  | 6.64354 | 5.86665 | 6.76102 | 6.09997 | 6.23085 | 7.19392 |
| KRT4     | 5.02277 | 4.99676 | 5.10273 | 5.85929 | 5.80261 | 5.7866  | 5.16839 | 5.54962 | 5.57858 |

|              |         |         |         |         |         |         |         |         |         |
|--------------|---------|---------|---------|---------|---------|---------|---------|---------|---------|
| KRT79        | 5.65211 | 5.54076 | 5.60837 | 7.13997 | 6.49693 | 6.01127 | 5.82742 | 5.68315 | 5.59785 |
| KRT78        | 8.80623 | 8.92801 | 9.01931 | 9.03419 | 7.75704 | 9.74089 | 8.7465  | 8.4484  | 9.30828 |
| KRT8         | 6.71463 | 6.96647 | 6.75538 | 6.70499 | 7.98436 | 7.17511 | 6.44012 | 6.81096 | 6.87563 |
| LOC283335    | 6.46455 | 6.48815 | 6.86453 | 6.24636 | 7.21386 | 6.41267 | 6.54548 | 6.33275 | 6.50868 |
| spryd3       | 7.89459 | 7.71826 | 7.72616 | 7.66792 | 6.7326  | 8.09704 | 8.19943 | 8.07445 | 8.14555 |
| CSAD         | 8.91111 | 9.22747 | 8.65545 | 7.59844 | 7.143   | 7.07068 | 7.03633 | 7.1369  | 7.57156 |
| SP7          | 5.82197 | 6.0074  | 5.87026 | 6.26701 | 6.97291 | 6.44616 | 6.15585 | 6.2043  | 5.83669 |
| MAP3K12      | 7.00269 | 6.63816 | 6.82406 | 6.59911 | 6.74075 | 6.35469 | 6.21375 | 6.1626  | 6.28591 |
| npff         | 6.99562 | 6.71992 | 6.85169 | 5.78784 | 6.7079  | 6.1559  | 6.39408 | 6.08644 | 6.39684 |
| CALCOCO1     | 9.1242  | 9.19046 | 8.74815 | 7.73439 | 7.21876 | 7.79201 | 7.73861 | 8.7053  | 8.26705 |
| HOXC13-AS    | 7.27717 | 7.23488 | 7.34109 | 7.47908 | 7.55412 | 7.74788 | 7.88775 | 7.08176 | 7.2842  |
| HOTAIR       | 6.43468 | 6.67839 | 6.07927 | 5.1852  | 5.00427 | 5.41886 | 5.03328 | 5.25867 | 5.09652 |
| LOC100240735 | 4.81748 | 5.22662 | 4.36073 | 4.8809  | 5.74814 | 5.34421 | 4.76627 | 5.36251 | 4.99246 |
| SMUG1        | 7.27791 | 7.28709 | 7.33467 | 7.20406 | 7.086   | 7.08985 | 7.0119  | 7.23758 | 7.21392 |
| CBX5         | 7.96487 | 8.42847 | 8.46805 | 7.38633 | 6.38055 | 6.8149  | 7.65768 | 6.88988 | 7.3628  |
| GPR84        | 5.48678 | 5.42347 | 5.18625 | 5.2501  | 6.08655 | 5.54311 | 5.5065  | 5.49487 | 5.79176 |
| ZNF385A      | 10.1076 | 10.1378 | 10.0821 | 9.91591 | 9.13328 | 11.0411 | 10.2281 | 10.1338 | 10.1495 |
| GTSF1        | 4.34497 | 4.50021 | 4.34264 | 4.48035 | 5.65596 | 4.83576 | 4.71081 | 4.67438 | 4.32473 |
| GLYCAM1      | 5.0151  | 5.06459 | 4.6476  | 5.28393 | 5.63193 | 5.12164 | 5.30636 | 5.05729 | 4.9328  |
| LACRT        | 5.73234 | 5.72073 | 5.93111 | 5.66552 | 6.26981 | 6.05423 | 5.63021 | 5.5214  | 5.62709 |
| DCD          | 9.07989 | 9.61878 | 10.8325 | 4.6744  | 5.28453 | 4.71069 | 4.04138 | 4.81885 | 4.64038 |
| CD63         | 7.99665 | 7.92949 | 8.22293 | 8.65665 | 7.71576 | 9.12528 | 8.52926 | 8.68267 | 8.5313  |
| SARNP        | 7.74876 | 7.89825 | 7.69186 | 7.82435 | 6.57156 | 7.89263 | 8.09876 | 7.74556 | 7.75581 |
| MMP19        | 6.48872 | 5.71177 | 6.48899 | 6.41203 | 6.37202 | 6.68464 | 6.4773  | 6.44388 | 6.77924 |
| PYM1         | 7.64404 | 7.9281  | 7.82192 | 7.45497 | 6.61649 | 7.12033 | 7.94695 | 6.7665  | 7.30013 |
| PMEL         | 9.48508 | 7.62542 | 7.75869 | 6.16473 | 6.47477 | 6.30261 | 7.01356 | 6.24071 | 6.59945 |

|              |         |         |         |         |         |         |         |         |         |
|--------------|---------|---------|---------|---------|---------|---------|---------|---------|---------|
| RNF41        | 8.1206  | 8.28382 | 8.23493 | 8.07499 | 7.28221 | 8.18035 | 8.6329  | 7.89506 | 8.37046 |
| ANKRD52      | 8.31585 | 8.2724  | 8.25211 | 8.4304  | 6.6434  | 7.74169 | 8.23826 | 8.34478 | 8.23079 |
| CS           | 8.93703 | 8.8786  | 9.09185 | 8.38577 | 7.03723 | 7.71069 | 8.61851 | 8.40819 | 8.77569 |
| PAN2         | 8.26715 | 8.34614 | 8.0277  | 6.75586 | 6.33577 | 5.65622 | 6.62045 | 6.04172 | 6.06212 |
| APOF         | 5.05727 | 5.20687 | 5.01965 | 5.80309 | 6.2518  | 5.70366 | 5.84715 | 6.05068 | 5.64751 |
| TIMELESS     | 6.67469 | 6.15791 | 6.3622  | 6.48617 | 6.12701 | 6.34724 | 6.49975 | 6.28154 | 6.42922 |
| MIP          | 5.59605 | 5.34875 | 5.52084 | 5.83438 | 6.71522 | 5.99994 | 5.66315 | 6.12533 | 6.07062 |
| PTGES3       | 9.90715 | 9.37479 | 9.81519 | 9.6366  | 7.50386 | 10.3195 | 10.3652 | 9.39931 | 9.50698 |
| NACA         | 8.29937 | 8.00696 | 7.70524 | 6.66507 | 7.00929 | 6.83638 | 6.73421 | 7.1807  | 7.70298 |
| RDH16        | 6.8112  | 6.76709 | 6.56663 | 6.53895 | 6.59231 | 6.23771 | 7.15507 | 5.99512 | 6.32797 |
| ZBTB39       | 7.86801 | 8.14993 | 8.22634 | 6.62182 | 5.90112 | 5.72314 | 7.37392 | 6.1253  | 6.43668 |
| TAC3         | 5.00391 | 5.38819 | 5.10555 | 5.1744  | 5.9572  | 5.07928 | 5.67312 | 5.51658 | 5.43929 |
| MYO1A        | 5.25601 | 5.08643 | 5.29494 | 5.47082 | 6.08782 | 5.48949 | 5.68476 | 5.56371 | 5.37421 |
| NEMP1        | 8.13227 | 8.26081 | 8.15029 | 7.32308 | 6.32979 | 6.05708 | 6.55713 | 7.02462 | 5.93425 |
| STAC3        | 5.74614 | 5.8441  | 5.55855 | 5.95021 | 5.62076 | 5.62895 | 5.8115  | 5.40844 | 5.33795 |
| R3HDM2       | 9.25524 | 9.27645 | 9.22348 | 7.83749 | 6.69794 | 7.83135 | 8.31441 | 7.78937 | 8.1197  |
| ARHGAP9      | 5.6112  | 5.81878 | 5.56996 | 5.84707 | 6.23972 | 6.27769 | 5.78015 | 5.96801 | 6.22791 |
| DDIT3        | 5.66453 | 5.96638 | 5.34679 | 4.73452 | 4.79233 | 7.20467 | 5.04003 | 5.43116 | 5.10469 |
| MIR616       | 4.3681  | 3.46732 | 4.11488 | 3.60555 | 3.75989 | 3.97818 | 3.66788 | 4.78194 | 3.76135 |
| DCTN2        | 7.75837 | 7.64048 | 7.61985 | 7.93357 | 6.23397 | 8.11692 | 8.19222 | 7.5172  | 7.98644 |
| CDK4         | 8.70842 | 8.56719 | 9.00125 | 8.52301 | 6.7931  | 7.78689 | 8.34566 | 7.5381  | 7.79372 |
| METTL1       | 7.61429 | 7.06262 | 7.471   | 7.76164 | 6.91126 | 7.27224 | 8.1957  | 6.85369 | 7.56143 |
| AVIL         | 6.7632  | 7.05404 | 6.79551 | 6.43594 | 6.62998 | 6.09011 | 5.95901 | 6.24057 | 6.43779 |
| MIR26A2      | 4.8077  | 3.66697 | 4.35628 | 4.34594 | 4.29608 | 3.50215 | 4.04518 | 4.2984  | 4.66728 |
| LOC100506844 | 4.72042 | 4.911   | 4.48519 | 4.63802 | 5.1717  | 5.1491  | 5.00323 | 4.7897  | 4.85181 |
| LRIG3        | 9.43935 | 9.19553 | 9.59684 | 7.03444 | 5.86554 | 6.2245  | 8.56665 | 6.40757 | 6.51701 |

|              |         |         |         |         |         |         |         |         |         |
|--------------|---------|---------|---------|---------|---------|---------|---------|---------|---------|
| AVPR1A       | 6.09758 | 5.69603 | 6.45951 | 6.4076  | 5.03848 | 5.18927 | 4.92159 | 5.02244 | 5.35359 |
| DPY19L2      | 6.12627 | 6.33815 | 6.56495 | 6.21634 | 7.07436 | 6.81776 | 5.87666 | 6.4818  | 6.28545 |
| c12orf66     | 7.36256 | 7.64034 | 7.67939 | 6.41981 | 5.48009 | 6.24574 | 7.06013 | 5.74128 | 5.67199 |
| C12orf56     | 8.17014 | 6.58958 | 6.928   | 8.04766 | 6.82676 | 9.381   | 8.94499 | 8.10431 | 9.65558 |
| GNS          | 9.00937 | 8.5818  | 9.02484 | 8.37041 | 5.98791 | 8.14952 | 8.73517 | 9.13893 | 8.55789 |
| WIF1         | 4.44612 | 5.19447 | 4.87539 | 4.89938 | 5.74429 | 5.0214  | 4.70819 | 5.10154 | 5.34834 |
| RPSAP52      | 5.36255 | 5.31937 | 5.99005 | 5.58365 | 6.42602 | 5.56018 | 5.80578 | 6.91515 | 6.50911 |
| TMBIM4       | 7.50615 | 7.91565 | 7.87793 | 7.47826 | 6.16188 | 7.11372 | 7.7189  | 6.61606 | 7.24678 |
| GRIP1        | 8.12454 | 7.83076 | 7.81866 | 7.29283 | 6.25304 | 6.37773 | 7.27762 | 6.34819 | 6.6753  |
| IL26         | 2.86907 | 2.78178 | 2.66206 | 3.21346 | 3.28928 | 3.36336 | 3.24497 | 2.94093 | 3.06551 |
| IL22         | 3.05818 | 3.8321  | 3.49709 | 4.13948 | 5.28894 | 4.74141 | 4.31027 | 3.86856 | 4.14998 |
| MDM1         | 6.0811  | 6.61291 | 6.49772 | 5.68588 | 5.41654 | 5.19174 | 5.51294 | 5.19358 | 5.16759 |
| LOC100507250 | 5.19022 | 4.77112 | 4.79742 | 5.56317 | 6.55413 | 5.62546 | 5.46622 | 5.06736 | 5.26243 |
| CPM          | 9.0255  | 9.20646 | 8.70288 | 8.63277 | 6.61808 | 6.64761 | 6.81626 | 6.71405 | 6.44673 |
| MIR1279      | 1.71737 | 2.616   | 2.43066 | 1.80518 | 2.08526 | 2.62224 | 1.72061 | 1.82603 | 1.97561 |
| LRRC10       | 6.10551 | 6.05772 | 6.04195 | 6.6669  | 7.03299 | 6.43296 | 6.20466 | 6.48641 | 6.27728 |
| BEST3        | 5.40779 | 6.34975 | 5.89368 | 5.23129 | 5.96425 | 5.32426 | 5.43353 | 5.2549  | 5.55958 |
| TSPAN8       | 4.68191 | 4.896   | 4.93882 | 4.60302 | 5.62259 | 4.60995 | 4.73191 | 4.44713 | 4.50783 |
| MRS2P2       | 4.06381 | 4.25524 | 4.24325 | 4.47009 | 4.66629 | 4.86132 | 5.17668 | 4.25676 | 4.69193 |
| TRHDE-AS1    | 4.43674 | 4.26356 | 4.36839 | 4.14933 | 4.74717 | 5.00596 | 4.79168 | 4.6847  | 4.13125 |
| CAPS2        | 5.74737 | 6.13424 | 5.76855 | 4.91221 | 5.29265 | 4.18543 | 4.95083 | 4.95083 | 4.45598 |
| NAP1L1       | 6.9178  | 7.29609 | 7.21613 | 6.12794 | 5.16722 | 5.76709 | 5.5952  | 6.30178 | 6.27913 |
| BBS10        | 7.63965 | 7.54616 | 7.63224 | 7.4133  | 6.3572  | 7.17018 | 7.36828 | 6.97995 | 7.30715 |
| OSBPL8       | 10.0502 | 10.2696 | 10.2065 | 9.19112 | 6.83771 | 9.02547 | 9.66944 | 9.35801 | 9.78534 |
| CSRP2        | 8.12267 | 10.1304 | 9.04462 | 7.87615 | 7.51412 | 7.97663 | 7.95322 | 8.49065 | 8.242   |
| E2F7         | 6.7169  | 6.36402 | 6.64226 | 6.82053 | 6.60547 | 6.21012 | 6.64875 | 6.90327 | 6.7047  |



|              |         |         |         |         |         |         |         |         |         |
|--------------|---------|---------|---------|---------|---------|---------|---------|---------|---------|
| LIN7A        | 5.47724 | 5.08584 | 5.60436 | 5.49431 | 5.41466 | 5.27476 | 5.01888 | 5.20446 | 5.67312 |
| MIR617       | 3.66573 | 3.90945 | 3.63104 | 3.24091 | 3.79883 | 4.00618 | 3.7834  | 3.86255 | 3.97543 |
| MIR618       | 2.77152 | 3.05479 | 2.56507 | 2.83764 | 2.63673 | 3.28547 | 2.80271 | 3.26545 | 3.40449 |
| CCDC59       | 7.63885 | 8.11232 | 7.68454 | 7.4785  | 5.94511 | 7.32666 | 7.74299 | 7.05105 | 7.4785  |
| TSPAN19      | 2.30355 | 2.36715 | 2.30141 | 2.54901 | 2.44744 | 2.96827 | 2.73366 | 2.44728 | 3.11593 |
| RASSF9       | 5.65249 | 6.12848 | 6.22307 | 5.66357 | 5.54708 | 5.13854 | 5.70482 | 4.66048 | 5.05303 |
| CEP290       | 7.15336 | 7.07473 | 6.90923 | 5.64183 | 4.1235  | 5.02803 | 5.93627 | 4.72657 | 5.01391 |
| KITLG        | 8.00799 | 6.98462 | 7.30079 | 7.04743 | 5.06357 | 5.48749 | 6.40117 | 5.39554 | 5.49965 |
| LOC728084    | 3.81667 | 3.96002 | 3.25101 | 4.31515 | 4.72161 | 4.12777 | 4.33737 | 4.30964 | 4.17978 |
| DUSP6        | 8.05577 | 6.55662 | 7.98975 | 8.42211 | 5.98768 | 6.89265 | 8.48474 | 7.71971 | 8.2592  |
| POC1B-GALNT4 | 6.98701 | 7.02591 | 7.08578 | 6.3207  | 5.82861 | 6.88837 | 7.49567 | 6.87053 | 6.87478 |
| CCER1        | 3.87204 | 4.28345 | 4.33303 | 4.85682 | 4.91346 | 4.64561 | 4.60666 | 4.20146 | 4.42322 |
| EPYC         | 5.18471 | 4.99401 | 4.64371 | 5.27896 | 5.64547 | 5.5376  | 5.10481 | 5.09059 | 4.79803 |
| KERA         | 3.84388 | 3.74666 | 3.55649 | 3.39837 | 4.77055 | 4.36808 | 3.6309  | 3.72173 | 3.60844 |
| LUM          | 12.1198 | 11.3473 | 11.6402 | 11.8855 | 7.0895  | 9.76302 | 10.9858 | 10.6136 | 11.0103 |
| DCN          | 8.27874 | 8.12631 | 8.66043 | 7.14708 | 4.51761 | 5.68265 | 6.47928 | 5.93329 | 5.90499 |
| CLLU1OS      | 5.40382 | 5.32289 | 5.29033 | 5.06673 | 6.55727 | 5.7408  | 5.84117 | 5.34555 | 5.88297 |
| EEA1         | 9.74317 | 9.82334 | 9.72242 | 9.51688 | 6.18243 | 9.39969 | 9.57437 | 9.43517 | 9.8656  |
| LOC643339    | 4.87126 | 4.77495 | 5.32854 | 4.95264 | 5.10088 | 5.1201  | 5.13864 | 4.59034 | 4.79359 |
| UBE2N        | 7.95285 | 6.96811 | 7.27216 | 6.09115 | 5.92938 | 6.10213 | 6.51076 | 6.83498 | 7.07477 |
| SOCS2-AS1    | 6.30242 | 6.19508 | 6.17254 | 6.33843 | 5.94123 | 6.46013 | 5.99108 | 6.05794 | 6.36219 |
| cep83        | 7.68803 | 7.35539 | 7.62178 | 5.95896 | 5.26502 | 5.66587 | 6.24471 | 5.84015 | 6.11454 |
| TMCC3        | 8.4777  | 8.6653  | 8.18616 | 8.60482 | 8.13733 | 9.97931 | 8.55884 | 9.74811 | 9.20197 |
| USP44        | 3.74852 | 3.97625 | 3.56048 | 4.1932  | 3.92567 | 4.94904 | 4.17728 | 4.55586 | 3.93002 |
| NTN4         | 7.80483 | 7.16881 | 7.41451 | 6.64505 | 6.14384 | 6.62526 | 6.66373 | 6.77884 | 6.31405 |
| CCDC38       | 3.32986 | 3.51112 | 3.4936  | 3.71667 | 4.24409 | 4.40886 | 3.7956  | 4.25969 | 3.92229 |

|              |         |         |         |         |         |         |         |         |         |
|--------------|---------|---------|---------|---------|---------|---------|---------|---------|---------|
| hal          | 11.0341 | 10.0068 | 10.0172 | 9.62226 | 5.94321 | 6.4522  | 7.76913 | 5.6721  | 5.22966 |
| LTA4H        | 8.63364 | 8.30371 | 8.28017 | 8.15908 | 6.80151 | 8.23155 | 8.21472 | 9.58013 | 8.08201 |
| CDK17        | 9.21974 | 8.76967 | 9.01953 | 8.43921 | 6.10565 | 8.13481 | 8.3994  | 8.77738 | 8.71735 |
| MIR4495      | 2.26381 | 2.55462 | 2.1818  | 2.18415 | 2.88495 | 2.93353 | 2.72414 | 2.30587 | 2.49335 |
| MIR4303      | 4.89968 | 5.13308 | 5.01809 | 3.82377 | 5.84812 | 4.79516 | 4.37554 | 5.35586 | 5.0877  |
| LOC643770    | 4.68494 | 5.05344 | 4.62712 | 4.99321 | 4.97873 | 5.67127 | 4.83429 | 4.81723 | 4.7587  |
| TMPO-AS1     | 6.26283 | 6.51165 | 6.38049 | 6.92186 | 6.48029 | 6.56276 | 6.60342 | 6.53541 | 6.3974  |
| IKBIP        | 5.41681 | 5.28898 | 5.66138 | 6.16473 | 4.66095 | 4.65065 | 6.32569 | 5.70166 | 5.72243 |
| ANKS1B       | 6.60264 | 6.6323  | 6.02073 | 5.48152 | 5.77759 | 5.29744 | 5.16826 | 5.43751 | 4.96806 |
| UHRF1BP1L    | 7.8748  | 7.98253 | 8.03632 | 7.44334 | 5.68737 | 7.75262 | 7.77085 | 8.50746 | 7.97393 |
| GOLGA2P5     | 6.23774 | 6.17791 | 6.19421 | 5.18712 | 6.41676 | 6.23489 | 5.03357 | 6.42917 | 6.1346  |
| DEPDC4       | 3.6951  | 4.04425 | 3.90148 | 3.67445 | 3.47092 | 4.02248 | 3.93403 | 3.80179 | 3.49142 |
| ARL1         | 7.85036 | 8.02774 | 7.9499  | 7.45795 | 6.68345 | 6.92572 | 7.63214 | 6.74873 | 7.37825 |
| SYCP3        | 4.51666 | 3.293   | 3.94853 | 3.48533 | 2.83204 | 3.57607 | 3.47286 | 3.01771 | 3.24662 |
| CCDC53       | 7.96514 | 7.76255 | 7.99719 | 7.83883 | 5.73548 | 7.35453 | 7.58693 | 6.8717  | 7.07647 |
| NUP37        | 7.34445 | 7.21017 | 7.1641  | 6.8963  | 6.11036 | 6.68262 | 7.34919 | 6.10005 | 6.14469 |
| pmch         | 2.94598 | 3.23323 | 3.1753  | 2.92175 | 2.99041 | 3.67728 | 3.3749  | 3.4282  | 3.28878 |
| IGF1         | 8.18868 | 8.24595 | 8.05341 | 6.05312 | 6.37468 | 6.40404 | 6.64224 | 6.13234 | 6.50488 |
| PAH          | 4.30572 | 4.32018 | 4.44857 | 4.69472 | 6.16094 | 5.56161 | 4.36253 | 5.00624 | 4.882   |
| C12orf42     | 5.10993 | 5.1605  | 5.23833 | 5.19519 | 5.95876 | 5.66619 | 5.52735 | 5.55967 | 5.50193 |
| NT5DC3       | 6.55051 | 6.08715 | 6.43816 | 7.07318 | 5.91928 | 6.12406 | 6.32726 | 5.95405 | 5.88361 |
| c12orf73     | 6.95311 | 7.73665 | 7.49621 | 6.92499 | 7.00667 | 6.5108  | 6.9111  | 7.01283 | 6.60856 |
| GLT8D2       | 7.77609 | 6.73171 | 7.3287  | 7.74895 | 5.31942 | 5.76502 | 7.16458 | 5.55294 | 6.35677 |
| PGAM1        | 7.89536 | 7.38788 | 7.89443 | 10.0869 | 7.75553 | 10.4983 | 9.91394 | 9.63986 | 9.45539 |
| CKAP4        | 6.33921 | 6.30493 | 6.12299 | 6.98672 | 6.16138 | 6.8725  | 7.35052 | 6.42498 | 6.78611 |
| LOC100287944 | 3.76572 | 3.61507 | 3.85759 | 4.11614 | 4.77561 | 4.53994 | 4.01491 | 3.851   | 4.17402 |

|              |         |         |         |         |         |         |         |         |         |
|--------------|---------|---------|---------|---------|---------|---------|---------|---------|---------|
| LOC100505978 | 6.01593 | 5.91892 | 5.82292 | 6.24732 | 6.77665 | 5.88247 | 5.58247 | 5.99072 | 5.7393  |
| MTERF2       | 7.52531 | 7.36935 | 6.77264 | 6.25102 | 5.02363 | 5.85143 | 6.33223 | 5.68926 | 5.65012 |
| CRY1         | 6.6297  | 6.57624 | 6.90034 | 6.49074 | 5.58792 | 6.17352 | 6.94698 | 6.6481  | 6.23359 |
| prdm4        | 8.69144 | 8.63235 | 8.71216 | 8.61071 | 6.20386 | 8.24262 | 8.92227 | 8.46137 | 9.06212 |
| LOC728739    | 6.66721 | 6.26425 | 6.18113 | 6.93515 | 5.91506 | 7.25749 | 7.12136 | 6.93453 | 6.68487 |
| CMKLR1       | 6.79464 | 6.41671 | 7.47919 | 6.52955 | 7.09217 | 5.94691 | 6.22452 | 6.60857 | 6.98299 |
| SART3        | 7.13562 | 7.31757 | 7.20696 | 6.87978 | 6.17603 | 6.72363 | 6.8384  | 6.5443  | 6.72075 |
| TMEM119      | 6.63526 | 6.42375 | 6.83273 | 7.1668  | 6.00934 | 7.11488 | 6.94453 | 6.81934 | 6.60315 |
| SELPLG       | 6.02816 | 6.08717 | 6.36411 | 6.45874 | 6.47664 | 6.62477 | 6.6057  | 6.4687  | 7.03512 |
| SSH1         | 7.61747 | 7.31629 | 7.51278 | 6.84091 | 5.2518  | 6.70721 | 7.12879 | 7.97522 | 7.56294 |
| MIR619       | 6.86086 | 6.38589 | 6.51531 | 6.0251  | 6.33252 | 6.33949 | 6.14261 | 6.80605 | 6.86191 |
| SVOP         | 5.51992 | 5.61637 | 5.83462 | 5.71523 | 6.91214 | 5.95962 | 5.78665 | 5.85431 | 5.90561 |
| USP30-AS1    | 5.1921  | 5.552   | 5.29864 | 5.60412 | 5.83874 | 5.32788 | 5.51767 | 5.7651  | 5.32582 |
| FOXN4        | 5.99388 | 6.06381 | 6.27875 | 6.58607 | 7.04217 | 6.85704 | 6.80401 | 6.61985 | 6.49323 |
| KCTD10       | 7.98064 | 7.90607 | 7.94339 | 7.81266 | 6.9349  | 7.22095 | 7.04968 | 8.44711 | 8.9177  |
| MMAB         | 7.97141 | 8.28978 | 8.3554  | 8.30448 | 7.94574 | 8.15805 | 8.69753 | 7.40075 | 8.47152 |
| FAM222A-AS1  | 4.6473  | 4.66768 | 4.48928 | 5.28422 | 4.67238 | 5.27414 | 4.99551 | 5.02812 | 5.24444 |
| GLTP         | 12.1665 | 11.3128 | 11.5348 | 12.0987 | 11.0271 | 12.235  | 11.8745 | 11.3307 | 12.1512 |
| GIT2         | 9.13847 | 8.90606 | 9.1462  | 7.88654 | 6.48662 | 7.0796  | 8.30021 | 8.40354 | 8.34788 |
| ANAPC7       | 9.3688  | 9.0565  | 9.24931 | 8.58391 | 6.42383 | 7.71315 | 8.7847  | 8.48603 | 8.94854 |
| gpn3         | 6.01797 | 6.17874 | 6.06916 | 5.56173 | 4.72383 | 5.67606 | 6.52243 | 5.35727 | 5.55394 |
| VPS29        | 8.67363 | 8.54095 | 8.74118 | 8.25831 | 6.07584 | 7.48183 | 7.84701 | 7.95372 | 8.01992 |
| PPTC7        | 7.99834 | 7.88876 | 8.50857 | 7.16675 | 5.95579 | 7.34322 | 7.83137 | 8.79712 | 7.65062 |
| HVCN1        | 5.98113 | 5.90965 | 5.99822 | 6.32568 | 6.31399 | 6.06099 | 6.30502 | 6.18544 | 5.76199 |
| ATXN2        | 8.41908 | 8.57402 | 8.43006 | 7.70872 | 6.19556 | 6.97296 | 7.71287 | 7.96066 | 8.11206 |
| BRAP         | 8.64297 | 9.01213 | 8.7116  | 8.27723 | 6.29306 | 8.09416 | 8.63078 | 8.28049 | 8.0097  |

|           |         |         |         |         |         |         |         |         |         |
|-----------|---------|---------|---------|---------|---------|---------|---------|---------|---------|
| TMEM116   | 9.03153 | 9.19348 | 8.57042 | 6.17548 | 6.71008 | 5.07736 | 6.22871 | 5.34536 | 5.41741 |
| MIR3657   | 3.8636  | 3.95141 | 3.69636 | 3.93854 | 3.69647 | 4.20554 | 3.9631  | 4.0591  | 3.98335 |
| HECTD4    | 9.02271 | 9.09708 | 8.83902 | 7.89212 | 6.99426 | 7.78579 | 7.97292 | 8.29135 | 8.42863 |
| RPL6      | 6.61983 | 6.65899 | 6.81944 | 6.6158  | 6.05567 | 6.75187 | 6.65701 | 6.24106 | 6.4877  |
| MIR1302-1 | 2.17587 | 2.20176 | 1.86645 | 3.2957  | 1.83749 | 2.97075 | 2.87058 | 1.77559 | 2.41197 |
| RASAL1    | 7.4979  | 7.25221 | 7.10216 | 7.42463 | 6.12507 | 7.69567 | 7.65414 | 7.71337 | 7.85055 |
| DDX54     | 7.74609 | 7.51433 | 7.88426 | 8.32568 | 7.64655 | 8.10365 | 8.41679 | 7.70324 | 7.73952 |
| IQCD      | 5.76969 | 5.76092 | 5.6709  | 5.97176 | 6.37071 | 5.83669 | 5.7445  | 5.90652 | 5.83362 |
| SDS       | 5.31894 | 4.99245 | 4.84758 | 6.01145 | 5.44642 | 5.25391 | 5.4168  | 5.68841 | 5.57533 |
| LHX5      | 4.21068 | 4.44987 | 4.0405  | 4.99178 | 4.23295 | 4.99653 | 5.13391 | 4.50156 | 4.94353 |
| RBM19     | 7.34962 | 7.40675 | 7.56712 | 6.87303 | 5.26011 | 6.86689 | 7.36275 | 6.91866 | 7.33985 |
| TBX5      | 6.43251 | 6.89721 | 6.60831 | 6.1731  | 6.32652 | 6.28013 | 5.73596 | 6.35934 | 6.10034 |
| TBX3      | 8.55682 | 9.74871 | 8.95069 | 7.70515 | 6.90249 | 7.81019 | 8.58112 | 7.77469 | 7.5727  |
| MED13L    | 10.8023 | 10.6135 | 10.6507 | 9.19704 | 7.21698 | 9.38885 | 9.41198 | 9.68025 | 9.80765 |
| MIR620    | 2.74806 | 2.49895 | 1.9852  | 2.55893 | 1.74729 | 2.79362 | 3.59663 | 2.5069  | 2.72907 |
| TESC      | 6.27655 | 6.74979 | 6.07873 | 6.67634 | 6.30147 | 7.1604  | 6.62449 | 6.9177  | 6.50063 |
| FBXO21    | 7.99177 | 8.24034 | 8.08984 | 7.53782 | 5.84086 | 7.08379 | 7.65976 | 7.81232 | 6.88059 |
| NOS1      | 7.2659  | 8.85369 | 7.22014 | 7.61884 | 6.67315 | 7.65819 | 7.16434 | 6.92356 | 7.62691 |
| WSB2      | 9.96794 | 9.98452 | 9.88144 | 10.3827 | 8.77072 | 10.128  | 10.4334 | 9.82403 | 10.3419 |
| vsig10    | 6.55397 | 6.89876 | 6.68527 | 6.00803 | 6.66986 | 6.15103 | 6.27696 | 6.66836 | 6.23655 |
| TAOK3     | 8.5501  | 8.57309 | 8.40383 | 7.3822  | 6.48906 | 7.282   | 7.89465 | 8.27997 | 7.95468 |
| LINC00934 | 4.43827 | 4.67917 | 4.70879 | 5.09723 | 6.39781 | 4.65279 | 4.15468 | 5.01839 | 4.922   |
| GCN1      | 8.8589  | 8.75597 | 8.68529 | 8.55208 | 6.98516 | 7.97405 | 8.67865 | 8.30567 | 8.43787 |
| MIR4498   | 2.95869 | 3.45426 | 3.56862 | 3.3399  | 3.22687 | 3.78995 | 3.1763  | 3.7085  | 3.74653 |
| PXN       | 7.6232  | 7.622   | 7.83672 | 8.14038 | 6.44137 | 8.8067  | 8.36163 | 8.4485  | 8.64173 |
| MSI1      | 5.40633 | 5.98895 | 5.83862 | 6.2388  | 5.57749 | 6.80348 | 5.66288 | 6.33319 | 6.14963 |

|           |         |         |         |         |         |         |         |         |         |
|-----------|---------|---------|---------|---------|---------|---------|---------|---------|---------|
| TRIAP1    | 6.77946 | 6.15206 | 6.75872 | 7.03779 | 6.05516 | 6.41216 | 7.68781 | 6.25998 | 6.57077 |
| NRAV      | 8.00354 | 8.36418 | 7.99186 | 8.71982 | 7.10752 | 9.68946 | 8.72632 | 8.57039 | 9.09252 |
| SPPL3     | 9.80033 | 9.61023 | 9.56562 | 9.20126 | 7.37587 | 8.74592 | 9.66909 | 9.35124 | 9.13722 |
| HNFA-AS1  | 4.89068 | 5.2298  | 4.9835  | 5.28836 | 5.85384 | 5.93795 | 5.18845 | 5.50533 | 5.21913 |
| OASL      | 7.16625 | 6.33571 | 6.8134  | 8.31071 | 7.91039 | 8.47461 | 7.45438 | 8.86455 | 7.51085 |
| ANAPC5    | 9.35508 | 9.27173 | 9.42951 | 8.56154 | 6.89696 | 7.68181 | 8.80997 | 7.48806 | 8.22463 |
| KDM2B     | 6.71692 | 6.51188 | 6.35459 | 6.50866 | 5.86061 | 6.62296 | 6.84563 | 6.31061 | 6.51578 |
| MORN3     | 5.31978 | 5.26676 | 5.47647 | 5.89582 | 5.66423 | 5.84356 | 5.80618 | 5.69901 | 5.62678 |
| RHOF      | 6.52084 | 6.63749 | 6.52618 | 7.06355 | 7.48701 | 8.43159 | 7.07435 | 8.90102 | 8.22878 |
| LINC01089 | 7.32815 | 7.50019 | 7.55863 | 6.82481 | 6.45893 | 6.33976 | 6.34206 | 6.57587 | 6.85025 |
| HPD       | 4.65908 | 4.64913 | 4.86327 | 5.17541 | 5.54515 | 5.85404 | 5.52948 | 5.34191 | 5.22516 |
| IL31      | 4.47784 | 4.22317 | 4.22751 | 4.85358 | 5.45336 | 4.64132 | 4.5231  | 4.65573 | 4.84699 |
| VPS33A    | 7.05111 | 6.7859  | 6.92221 | 6.67128 | 6.39979 | 5.98025 | 6.77366 | 6.37699 | 6.74305 |
| CLIP1     | 10.1663 | 10.0108 | 9.96129 | 9.90954 | 8.59403 | 10.3765 | 10.0987 | 10.3161 | 10.7904 |
| RSRC2     | 8.86411 | 8.74298 | 8.7062  | 7.41091 | 6.58052 | 7.55758 | 6.89331 | 8.83399 | 8.23191 |
| HCAR1     | 5.68544 | 5.65142 | 5.66031 | 5.70598 | 6.94746 | 5.86409 | 5.7612  | 5.85079 | 5.58793 |
| HCAR2     | 6.24278 | 5.45124 | 5.0656  | 6.7261  | 6.69092 | 8.91021 | 7.45606 | 8.46811 | 7.36274 |
| MPHOSPH9  | 7.27544 | 7.0925  | 7.21334 | 6.58321 | 5.8087  | 5.71462 | 6.45757 | 6.36915 | 6.04298 |
| CDK2AP1   | 8.19299 | 8.01751 | 8.16284 | 8.05768 | 7.91266 | 7.27762 | 8.25265 | 7.40087 | 7.90194 |
| sbno1     | 8.80717 | 8.88963 | 9.07041 | 8.39649 | 5.67993 | 8.21361 | 8.73522 | 8.88208 | 8.64462 |
| rilpl2    | 7.38642 | 7.46022 | 7.79945 | 7.61903 | 6.12951 | 7.07444 | 7.76646 | 7.12217 | 7.46482 |
| RILPL1    | 7.56905 | 7.24245 | 7.31225 | 7.10519 | 6.06891 | 7.10181 | 7.00476 | 6.84887 | 7.12527 |
| CCDC92    | 7.54347 | 7.47094 | 7.44723 | 7.88475 | 7.03488 | 7.96258 | 8.18715 | 8.25218 | 8.21342 |
| NCOR2     | 8.07638 | 7.94972 | 8.09942 | 8.04899 | 6.58826 | 8.13551 | 8.48308 | 8.09179 | 7.95483 |
| dhx37     | 7.12492 | 6.73179 | 6.92748 | 7.55418 | 6.54659 | 7.23767 | 7.48636 | 6.79768 | 7.09733 |
| LINC00939 | 4.65348 | 4.77438 | 4.70814 | 5.45058 | 5.77084 | 5.32496 | 5.0528  | 5.29812 | 5.05142 |

|              |         |         |         |         |         |         |         |         |         |
|--------------|---------|---------|---------|---------|---------|---------|---------|---------|---------|
| LOC440117    | 5.07832 | 5.41178 | 5.05355 | 5.48451 | 6.11831 | 5.39132 | 5.16476 | 5.51605 | 5.44773 |
| TMEM132D     | 4.65431 | 4.74304 | 4.84699 | 5.50405 | 5.53107 | 5.54291 | 5.56348 | 5.46786 | 5.45757 |
| LOC100190940 | 5.44148 | 5.26121 | 5.7252  | 6.41022 | 6.96577 | 6.47102 | 6.08253 | 6.32986 | 6.15065 |
| FZD10-AS1    | 5.80263 | 5.88846 | 5.5802  | 6.09886 | 6.29732 | 6.52067 | 5.72659 | 6.00658 | 6.19118 |
| RIMBP2       | 6.47711 | 6.56453 | 6.58641 | 6.04674 | 4.58366 | 6.16239 | 6.7067  | 5.94802 | 6.19695 |
| STX2         | 7.53793 | 7.46105 | 7.54358 | 7.62792 | 6.88569 | 6.65687 | 7.38902 | 7.41911 | 7.50991 |
| DDX51        | 6.32386 | 6.30398 | 6.33178 | 6.72672 | 5.94901 | 7.23632 | 6.69454 | 6.406   | 6.44114 |
| GALNT9       | 6.24847 | 5.92058 | 6.20407 | 6.29834 | 6.7409  | 6.73923 | 6.29713 | 6.73264 | 6.80265 |
| Lrco1        | 6.03132 | 5.65462 | 5.88501 | 6.14759 | 6.18854 | 6.48393 | 6.13625 | 6.56493 | 6.17393 |
| ANKLE2       | 8.16543 | 8.27792 | 7.94239 | 8.16128 | 7.15559 | 8.38434 | 8.11621 | 8.20003 | 8.61807 |
| GOLGA3       | 7.76019 | 7.92447 | 7.81214 | 7.97042 | 6.34525 | 8.30068 | 8.22537 | 7.83994 | 8.35257 |
| znf605       | 7.01537 | 7.03711 | 6.84646 | 6.42908 | 6.56724 | 6.66813 | 6.13596 | 6.37174 | 6.78529 |
| ANHX         | 6.34452 | 6.29    | 6.18892 | 6.71505 | 7.25147 | 6.77674 | 6.14027 | 6.43806 | 6.72695 |
| LINC00442    | 4.81119 | 4.72131 | 4.70889 | 4.51105 | 5.89353 | 4.92874 | 4.79769 | 4.70488 | 4.77296 |
| LINC00421    | 5.9528  | 6.11447 | 6.04288 | 6.37113 | 6.34588 | 6.32611 | 6.19735 | 6.26217 | 6.18771 |
| MPHOSPH8     | 7.87566 | 7.97737 | 7.69368 | 6.79299 | 5.77286 | 6.19023 | 7.26342 | 6.99005 | 6.93962 |
| IFT88        | 6.95345 | 6.98739 | 7.10208 | 5.78191 | 4.60941 | 5.35473 | 6.26413 | 4.76662 | 5.64727 |
| IL17D        | 6.1861  | 6.44607 | 6.30309 | 7.08317 | 7.35502 | 6.99532 | 6.69986 | 6.82591 | 6.86168 |
| MRPL57       | 6.96611 | 6.57714 | 6.72856 | 7.49917 | 6.05814 | 7.28191 | 7.79805 | 6.60916 | 7.00964 |
| FGF9         | 3.80487 | 4.27069 | 4.39046 | 4.54437 | 5.39724 | 4.51741 | 4.59865 | 4.82959 | 4.74085 |
| LINC00327    | 3.57989 | 3.60355 | 3.47326 | 3.66047 | 3.75604 | 3.82752 | 3.48327 | 3.49596 | 3.63043 |
| C1qtnf9b-as1 | 6.9617  | 7.41699 | 6.14281 | 7.20293 | 6.50053 | 6.44027 | 7.16889 | 5.61909 | 5.88191 |
| SPATA13      | 6.77044 | 7.10534 | 6.93263 | 5.88836 | 5.94492 | 6.52984 | 6.02289 | 6.45793 | 6.16475 |
| MIR2276      | 5.28245 | 5.53786 | 5.09457 | 5.55418 | 5.62455 | 6.52345 | 5.48189 | 4.88413 | 5.57942 |
| C1QTNF9      | 3.37718 | 4.15878 | 4.13107 | 4.4778  | 5.51836 | 4.02587 | 4.42959 | 5.05344 | 4.16178 |
| TPTE2P6      | 5.41069 | 4.77495 | 5.3789  | 5.10474 | 7.00429 | 5.60515 | 4.91571 | 5.70339 | 5.3694  |

|            |         |         |         |         |         |         |         |         |         |
|------------|---------|---------|---------|---------|---------|---------|---------|---------|---------|
| RNF17      | 3.49816 | 3.62957 | 3.18844 | 3.33169 | 4.28263 | 3.53941 | 4.24475 | 3.58872 | 4.41739 |
| MTMR6      | 2.67262 | 2.76846 | 2.10259 | 2.31713 | 4.13225 | 2.58184 | 3.03908 | 2.90764 | 2.27294 |
| NUP58      | 8.43679 | 8.59438 | 8.79683 | 8.74674 | 8.74775 | 9.83363 | 8.83281 | 10.0112 | 9.48346 |
| CDK8       | 8.19296 | 8.21036 | 8.10706 | 7.68034 | 6.42341 | 7.95953 | 8.48881 | 8.22841 | 8.30349 |
| GTF3A      | 7.96643 | 7.60774 | 7.8395  | 7.76242 | 7.02259 | 7.43167 | 8.03542 | 6.93506 | 6.87255 |
| GSX1       | 5.52094 | 5.87683 | 5.71961 | 6.51768 | 6.51299 | 6.72744 | 6.24512 | 6.61824 | 6.41108 |
| PDX1       | 6.07259 | 6.26575 | 6.19666 | 6.92292 | 7.02878 | 6.54146 | 6.3037  | 6.93801 | 6.56818 |
| PAN3       | 9.66311 | 9.66858 | 9.71517 | 8.41502 | 7.0051  | 8.12727 | 8.83531 | 8.3281  | 8.48779 |
| POMP       | 11.2309 | 11.0695 | 11.512  | 11.4081 | 10.1399 | 10.8995 | 11.598  | 10.8795 | 11.2517 |
| MTUS2      | 4.77441 | 4.77677 | 4.50175 | 5.02902 | 5.55551 | 5.13459 | 5.06515 | 4.86898 | 4.89444 |
| LINC00544  | 5.55221 | 5.92747 | 5.3218  | 5.96112 | 6.32277 | 6.43156 | 6.36227 | 5.85981 | 5.99455 |
| USPL1      | 7.31997 | 7.53948 | 7.45481 | 6.67856 | 6.28986 | 6.3293  | 6.73083 | 6.29599 | 6.90696 |
| ALOX5AP    | 6.44146 | 6.1637  | 7.26643 | 5.98809 | 6.93696 | 7.23106 | 6.87267 | 7.36306 | 7.02913 |
| LINC00398  | 4.85045 | 4.98403 | 4.89219 | 5.41717 | 6.52359 | 5.26116 | 5.1409  | 5.0302  | 5.10336 |
| MEDAG      | 7.27655 | 6.10901 | 8.62253 | 7.32302 | 4.80271 | 6.55701 | 8.27066 | 7.77647 | 7.56385 |
| TEX26      | 2.90278 | 3.24422 | 3.0641  | 3.37414 | 3.39941 | 3.96293 | 3.64551 | 3.44059 | 3.38443 |
| RXFP2      | 2.6346  | 2.94558 | 2.61939 | 3.29319 | 3.3826  | 3.49943 | 3.10952 | 2.97731 | 3.2988  |
| EEF1DP3    | 6.80643 | 6.47903 | 6.66403 | 6.12515 | 6.25217 | 6.33585 | 6.16813 | 6.80982 | 6.76561 |
| FRY        | 8.83127 | 7.88583 | 8.50998 | 7.23831 | 6.85415 | 7.07389 | 7.27648 | 7.47788 | 7.29302 |
| KL         | 6.14584 | 6.06431 | 6.30336 | 6.43514 | 6.75609 | 6.45293 | 5.78485 | 6.22244 | 6.11558 |
| STARD13-AS | 5.48109 | 5.70699 | 5.40344 | 5.4179  | 6.25596 | 5.49864 | 5.19803 | 5.4012  | 5.97877 |
| NBEA       | 6.70314 | 7.3764  | 7.09267 | 4.69747 | 5.75329 | 5.40967 | 5.37661 | 4.81515 | 5.47404 |
| SPG20-AS1  | 4.56161 | 4.37057 | 4.3292  | 3.7342  | 3.49131 | 3.50843 | 4.28293 | 3.67915 | 3.75744 |
| CCNA1      | 4.94887 | 5.12007 | 4.62945 | 6.13749 | 6.33031 | 6.08919 | 6.33416 | 5.59021 | 6.37137 |
| sertm1     | 5.74802 | 5.54786 | 5.48801 | 6.144   | 6.78575 | 5.72939 | 5.99261 | 5.9555  | 5.62666 |
| rfxap      | 5.74031 | 6.06762 | 5.89936 | 5.26615 | 4.63573 | 5.37825 | 5.59482 | 5.02779 | 4.96753 |

|             |         |         |         |         |         |         |         |         |         |
|-------------|---------|---------|---------|---------|---------|---------|---------|---------|---------|
| EXOSC8      | 7.83393 | 7.72607 | 8.06634 | 7.83763 | 5.13866 | 6.50145 | 7.89329 | 6.81381 | 7.10652 |
| LINC00547   | 3.39557 | 3.53163 | 3.39975 | 3.94738 | 4.85301 | 4.12824 | 4.06921 | 3.50051 | 3.68429 |
| UFM1        | 8.44083 | 8.42171 | 8.34904 | 7.89925 | 6.7699  | 8.33901 | 8.2015  | 8.36444 | 8.16008 |
| LINC00366   | 3.92973 | 3.73777 | 3.41715 | 4.31291 | 4.00448 | 4.19285 | 3.70296 | 3.85637 | 3.88537 |
| FREM2       | 6.22015 | 8.75037 | 5.61724 | 5.92329 | 5.8644  | 5.09232 | 4.7352  | 4.80157 | 5.04625 |
| NHLRC3      | 7.21958 | 7.44614 | 7.34169 | 6.0578  | 5.40946 | 5.36562 | 6.3363  | 5.372   | 5.29664 |
| COG6        | 8.04997 | 7.98102 | 7.98744 | 7.01598 | 4.91537 | 6.53305 | 7.51362 | 7.23323 | 7.16884 |
| LINC00332   | 3.20734 | 3.30064 | 3.45927 | 3.80212 | 3.6354  | 4.22293 | 3.56326 | 3.71536 | 3.78417 |
| SLC25A15    | 6.95865 | 7.08489 | 6.88832 | 7.87198 | 7.01139 | 6.98382 | 7.66761 | 6.35189 | 7.27605 |
| WBP4        | 6.94902 | 7.22791 | 7.10131 | 6.52822 | 4.86571 | 6.15103 | 7.23377 | 5.862   | 6.3326  |
| RGCC        | 7.34953 | 7.46473 | 8.16325 | 8.63713 | 5.85542 | 6.85132 | 7.93829 | 7.93165 | 7.67989 |
| VWA8-AS1    | 3.63963 | 3.62091 | 3.73516 | 4.36874 | 4.2627  | 4.73342 | 4.18386 | 4.59564 | 4.16623 |
| AKAP11      | 8.17242 | 8.27001 | 8.35827 | 7.35347 | 5.47706 | 7.27223 | 7.88365 | 8.03015 | 7.74162 |
| lacc1       | 7.34933 | 7.05876 | 6.94159 | 7.22088 | 6.5021  | 6.71381 | 7.77656 | 7.22518 | 8.12513 |
| LINC00284   | 4.53605 | 4.1178  | 4.43792 | 4.80298 | 5.61161 | 4.89917 | 4.56299 | 4.76302 | 4.98626 |
| serp2       | 5.05841 | 5.1104  | 5.09956 | 5.34683 | 5.83263 | 5.53407 | 5.37897 | 5.40729 | 5.28188 |
| TSC22D1-AS1 | 6.01311 | 6.2227  | 6.27713 | 6.92019 | 6.34397 | 6.69295 | 6.52075 | 6.53307 | 6.44551 |
| TPT1-AS1    | 8.31517 | 8.78987 | 8.17301 | 7.58549 | 7.40315 | 7.62299 | 7.50084 | 8.72879 | 8.25743 |
| COG3        | 8.74865 | 8.89858 | 8.71455 | 8.42076 | 6.77016 | 8.93692 | 8.5307  | 9.0861  | 9.23108 |
| SPERT       | 4.43428 | 4.31578 | 4.27657 | 4.59477 | 5.8711  | 5.33586 | 4.34999 | 4.70371 | 4.75011 |
| CPB2-AS1    | 4.4239  | 4.36974 | 4.35128 | 5.04626 | 5.66555 | 4.13753 | 4.3291  | 4.66551 | 4.54217 |
| LRCH1       | 9.6154  | 9.58063 | 9.49755 | 8.3012  | 6.30737 | 7.09742 | 8.20006 | 7.39152 | 7.57169 |
| NUDT15      | 6.70705 | 6.59852 | 6.70326 | 7.57596 | 5.22335 | 7.16491 | 7.76189 | 6.9541  | 7.05336 |
| MED4-AS1    | 4.89732 | 4.19985 | 4.48567 | 6.15177 | 4.9203  | 5.8031  | 6.45519 | 4.92114 | 5.0153  |
| ITM2B       | 12.8619 | 12.6572 | 12.9117 | 12.7346 | 12.3287 | 12.3606 | 12.8003 | 12.4843 | 12.71   |
| RB1         | 9.30472 | 9.16279 | 9.37619 | 9.40971 | 6.59241 | 9.36593 | 9.65398 | 9.74413 | 10.1162 |



|            |         |         |         |         |         |         |         |         |         |
|------------|---------|---------|---------|---------|---------|---------|---------|---------|---------|
| CYSLTR2    | 6.61206 | 5.41566 | 5.60768 | 4.38471 | 4.95603 | 5.22105 | 5.04397 | 4.01168 | 4.19039 |
| FNDC3A     | 8.30231 | 8.21891 | 8.49124 | 7.28775 | 5.12018 | 6.2084  | 7.28189 | 7.02304 | 7.16104 |
| MLNR       | 5.70681 | 5.71557 | 5.8489  | 6.88518 | 7.76994 | 7.03857 | 6.23536 | 6.38517 | 6.28516 |
| CDADC1     | 6.46423 | 6.55563 | 6.55637 | 5.58848 | 6.15483 | 5.3676  | 5.60399 | 5.92948 | 5.87009 |
| PHF11      | 8.1565  | 8.04036 | 8.1078  | 6.80288 | 5.64241 | 6.73599 | 7.25132 | 7.45488 | 7.70215 |
| ARL11      | 4.35331 | 4.60611 | 4.43516 | 4.87697 | 4.50786 | 4.57262 | 4.7765  | 4.59276 | 4.16534 |
| TRIM13     | 7.54229 | 7.4315  | 7.32248 | 7.45666 | 6.66588 | 7.61908 | 7.23026 | 7.10141 | 7.00472 |
| KCNRG      | 7.41016 | 7.64365 | 8.22072 | 6.08735 | 4.99043 | 5.32843 | 7.48707 | 4.98908 | 6.12244 |
| DLEU1      | 5.88912 | 5.83547 | 5.94873 | 5.21591 | 5.88137 | 5.44288 | 5.80407 | 5.60741 | 4.99924 |
| ST13P4     | 5.038   | 4.71091 | 4.93511 | 4.13378 | 5.22563 | 4.16386 | 4.33448 | 4.52136 | 4.46014 |
| DLEU7-AS1  | 3.52925 | 4.0496  | 3.77311 | 3.6646  | 4.35968 | 3.64729 | 3.68262 | 3.46722 | 3.44992 |
| FAM124A    | 5.58228 | 5.23495 | 5.01763 | 5.7057  | 5.79196 | 5.7616  | 5.57214 | 5.37611 | 5.6954  |
| MIR4703    | 1.99874 | 2.41644 | 2.30321 | 2.47722 | 2.41926 | 2.71211 | 2.36552 | 2.14366 | 2.15986 |
| WDFY2      | 9.68327 | 9.41314 | 9.60893 | 8.99762 | 7.20429 | 9.20998 | 8.92492 | 10.351  | 10.0217 |
| CCDC70     | 5.55394 | 5.80858 | 5.84544 | 6.3184  | 6.33675 | 6.28925 | 6.051   | 6.7595  | 6.24951 |
| CKAP2      | 8.41407 | 8.32626 | 8.00888 | 7.73069 | 5.68805 | 6.28556 | 7.68669 | 8.27677 | 7.18305 |
| TPTE2P3    | 3.04736 | 3.29337 | 3.24912 | 3.13969 | 3.47929 | 3.3595  | 3.00048 | 3.10695 | 3.25464 |
| HNRNPA1L2  | 6.39035 | 6.97775 | 7.15838 | 4.09876 | 3.83992 | 4.42844 | 5.57049 | 4.13194 | 5.30814 |
| MIR759     | 2.29685 | 2.26024 | 2.04799 | 2.20444 | 2.31516 | 2.15146 | 2.23922 | 2.22526 | 2.29821 |
| OLFM4      | 5.40902 | 5.2168  | 5.45153 | 5.07328 | 6.80437 | 5.82547 | 5.68366 | 5.07051 | 5.33544 |
| PRR20A     | 5.08747 | 5.10892 | 5.33597 | 6.20823 | 8.41772 | 6.02128 | 5.79398 | 5.70905 | 5.87852 |
| PCDH17     | 6.88126 | 5.90388 | 6.27421 | 7.03205 | 6.29958 | 7.25708 | 6.45321 | 7.75982 | 7.42019 |
| DIAPH3-AS1 | 6.07704 | 6.14539 | 6.02227 | 5.98988 | 6.44443 | 6.34487 | 6.12387 | 6.15811 | 6.22685 |
| DIAPH3-AS2 | 4.73193 | 5.17688 | 5.09167 | 5.56747 | 5.69724 | 5.83157 | 5.19398 | 5.60295 | 5.341   |
| TDRD3      | 8.49453 | 8.89353 | 8.54399 | 7.36256 | 6.17198 | 7.16238 | 7.86688 | 6.99533 | 7.36832 |
| MIR4704    | 4.8435  | 4.85173 | 4.68845 | 3.76324 | 4.51265 | 3.05069 | 3.11747 | 4.48129 | 4.44896 |

|            |         |         |         |         |         |         |         |         |         |
|------------|---------|---------|---------|---------|---------|---------|---------|---------|---------|
| pcdh9      | 2.38291 | 2.4207  | 2.42828 | 2.53827 | 2.59769 | 2.70184 | 2.38176 | 2.38408 | 2.77476 |
| PCDH9-AS2  | 3.06722 | 3.28447 | 2.97542 | 3.45734 | 4.18559 | 3.38806 | 3.1382  | 3.05956 | 2.92418 |
| PCDH9-AS3  | 2.41294 | 2.36846 | 2.33615 | 3.1354  | 3.50609 | 3.4076  | 3.07636 | 2.61239 | 2.7519  |
| ATXN8OS    | 4.8986  | 5.30355 | 5.32498 | 5.31868 | 6.00594 | 5.2683  | 5.15017 | 5.67026 | 5.90169 |
| LINC00348  | 3.96031 | 3.20293 | 3.87172 | 3.77297 | 4.37179 | 4.20843 | 3.56071 | 3.89824 | 3.66772 |
| PIBF1      | 8.08672 | 8.29581 | 8.11    | 6.59908 | 4.58469 | 5.28939 | 7.09305 | 6.38865 | 6.29391 |
| KLF5       | 11.1768 | 11.1364 | 10.931  | 10.3312 | 9.13897 | 10.8843 | 10.6374 | 10.8072 | 10.5572 |
| LINC00381  | 2.98533 | 2.78594 | 3.07021 | 3.08752 | 3.32675 | 3.16766 | 3.07445 | 3.16523 | 3.02155 |
| LINC00347  | 3.68988 | 3.69473 | 3.08773 | 3.61451 | 4.39364 | 4.07581 | 3.70422 | 3.51851 | 3.28402 |
| UCHL3      | 10.2854 | 10.1381 | 9.87633 | 10.4604 | 10.463  | 10.7648 | 10.9697 | 10.6582 | 10.5713 |
| LMO7       | 7.74125 | 8.46575 | 8.14328 | 7.64887 | 6.97758 | 7.94174 | 7.33975 | 7.53169 | 7.75741 |
| LMO7DN     | 4.75445 | 4.7851  | 4.5938  | 4.65519 | 6.07265 | 4.58753 | 4.30032 | 4.94195 | 4.70265 |
| BTF3P11    | 4.19099 | 4.83849 | 4.65963 | 4.24275 | 4.22011 | 5.12724 | 4.94359 | 4.77899 | 4.93756 |
| ACOD1      | 4.66247 | 4.6974  | 4.44669 | 5.3353  | 6.29849 | 5.41329 | 5.08993 | 5.0754  | 5.37846 |
| MYCBP2-AS1 | 6.24428 | 5.96858 | 5.86215 | 5.92755 | 5.6805  | 5.27292 | 6.07349 | 5.4852  | 5.24709 |
| scel       | 10.2409 | 10.4712 | 10.012  | 9.66762 | 8.10478 | 9.61306 | 9.7303  | 10.9834 | 10.0364 |
| LINC00446  | 3.1064  | 3.18939 | 3.2071  | 3.13497 | 3.37802 | 3.53294 | 3.49949 | 3.43327 | 3.30898 |
| RNF219-AS1 | 4.10707 | 4.00724 | 3.84757 | 4.67349 | 4.08383 | 4.78911 | 4.40318 | 4.27801 | 4.16136 |
| RBM26-AS1  | 6.40365 | 6.69433 | 6.65168 | 5.03662 | 5.41898 | 5.15648 | 5.15931 | 5.41724 | 5.36076 |
| NDFIP2     | 10.6711 | 10.4552 | 10.4611 | 10.6638 | 9.81315 | 10.6147 | 10.7456 | 11.0207 | 11.0675 |
| LINC00333  | 2.6973  | 2.82219 | 2.45604 | 3.01066 | 2.50012 | 2.82225 | 2.83528 | 2.39459 | 2.72852 |
| LINC00351  | 2.90987 | 2.70486 | 2.98169 | 3.28394 | 4.14787 | 3.11242 | 3.11474 | 2.87291 | 3.28945 |
| LINC00433  | 4.96716 | 4.7228  | 4.85483 | 5.02648 | 5.35139 | 5.51359 | 5.41307 | 5.12457 | 5.69523 |
| MIR622     | 5.59757 | 5.60815 | 5.51413 | 5.09246 | 5.77883 | 5.76736 | 5.95355 | 6.13674 | 6.50539 |
| MIR17HG    | 4.70196 | 4.70637 | 4.82802 | 4.75117 | 4.2592  | 4.58373 | 4.49055 | 4.66876 | 4.49646 |
| GPC5       | 4.80018 | 4.68331 | 4.60729 | 5.3163  | 5.63343 | 5.22524 | 5.08976 | 5.37598 | 5.2256  |

|           |         |         |         |         |         |         |         |         |         |
|-----------|---------|---------|---------|---------|---------|---------|---------|---------|---------|
| GPC6      | 7.01576 | 6.95557 | 6.90416 | 6.7224  | 6.17914 | 6.28057 | 6.07591 | 6.42545 | 5.91657 |
| GPR180    | 7.68336 | 7.49325 | 6.93656 | 7.37121 | 5.80456 | 6.91096 | 7.55728 | 7.40058 | 7.4097  |
| CLDN10    | 8.24794 | 7.77139 | 8.18587 | 4.8598  | 5.14007 | 4.62229 | 4.76339 | 4.64966 | 4.77514 |
| HS6ST3    | 4.74825 | 5.31824 | 4.79944 | 5.42217 | 5.16403 | 5.2404  | 5.17236 | 5.42015 | 4.99233 |
| MIR4501   | 2.79849 | 3.56796 | 3.09457 | 2.89901 | 4.70527 | 2.61072 | 3.96563 | 3.04854 | 3.30531 |
| MBNL2     | 10.8168 | 10.448  | 10.5655 | 10.2553 | 8.30553 | 9.51469 | 10.5994 | 10.4757 | 10.6818 |
| IPO5      | 6.58402 | 6.37593 | 6.62733 | 6.51868 | 6.58399 | 6.49469 | 6.37992 | 5.85414 | 6.50688 |
| MIR3170   | 4.4164  | 4.13569 | 4.03827 | 4.27301 | 3.64316 | 4.48917 | 4.99111 | 4.9187  | 4.25322 |
| UBAC2     | 8.76116 | 8.42827 | 8.61586 | 8.21346 | 7.89185 | 8.12573 | 8.45618 | 8.53698 | 8.43231 |
| FKSG29    | 9.28612 | 8.73975 | 9.02762 | 6.62804 | 6.41908 | 6.22102 | 6.79057 | 7.79039 | 7.64085 |
| MIR623    | 7.62135 | 7.37236 | 7.21067 | 5.45207 | 6.35355 | 5.35948 | 5.29734 | 6.9899  | 6.52996 |
| TM9SF2    | 11.9877 | 11.9501 | 12.0874 | 11.288  | 9.8327  | 10.993  | 11.543  | 11.4843 | 11.6431 |
| CLYBL     | 6.82737 | 6.77168 | 7.02257 | 4.49055 | 6.15624 | 5.25663 | 5.50157 | 4.49778 | 4.57835 |
| MIR4306   | 5.49628 | 5.71288 | 5.50458 | 6.31273 | 5.41225 | 6.2178  | 5.65205 | 5.462   | 5.70288 |
| ZIC2      | 5.96425 | 5.89447 | 6.35464 | 6.13426 | 6.41743 | 6.73477 | 6.05582 | 5.82866 | 5.84387 |
| NALCN-AS1 | 5.55822 | 5.9704  | 5.81206 | 5.85358 | 6.57045 | 6.19159 | 5.50481 | 5.7672  | 6.02882 |
| FGF14-AS2 | 5.79953 | 5.71803 | 6.11462 | 5.15962 | 5.26065 | 4.91728 | 5.23004 | 4.71766 | 4.66047 |
| TPP2      | 9.2962  | 9.03648 | 9.17164 | 8.12897 | 6.21903 | 7.55281 | 8.02567 | 8.03463 | 8.07888 |
| CCDC168   | 3.24248 | 2.8631  | 3.43626 | 3.09719 | 6.52491 | 3.53685 | 3.75677 | 3.52931 | 3.51115 |
| Mettl21ep | 4.34428 | 4.87571 | 4.75881 | 5.15792 | 5.15159 | 5.11063 | 4.7421  | 4.78692 | 4.97527 |
| DAOA      | 3.51795 | 3.92255 | 3.54019 | 3.82449 | 4.52534 | 4.06994 | 3.74047 | 3.60853 | 3.66625 |
| LINC00460 | 5.23657 | 5.25201 | 5.02888 | 5.60369 | 6.53981 | 5.59462 | 5.40989 | 5.27393 | 5.5823  |
| LINC00551 | 4.35027 | 4.43391 | 4.23899 | 4.23223 | 5.59523 | 4.84812 | 4.28741 | 4.47586 | 4.54889 |
| LINC00443 | 4.51477 | 4.1814  | 4.2824  | 4.93672 | 5.30702 | 4.76199 | 4.85051 | 4.7767  | 4.23255 |
| ABHD13    | 8.56637 | 8.89295 | 8.55357 | 8.7973  | 7.36141 | 8.04755 | 9.00163 | 8.61751 | 8.8973  |
| MYO16     | 5.64694 | 5.24114 | 5.22954 | 5.87313 | 5.7675  | 6.19359 | 5.47616 | 5.66922 | 5.772   |

|           |         |         |         |         |         |         |         |         |         |
|-----------|---------|---------|---------|---------|---------|---------|---------|---------|---------|
| NAXD      | 8.01937 | 8.10744 | 7.89695 | 7.83301 | 6.91297 | 8.0955  | 8.163   | 7.53224 | 8.00213 |
| ARHGEF7   | 8.41979 | 8.37529 | 8.42041 | 8.0773  | 7.12382 | 7.74927 | 7.75736 | 8.28958 | 8.32869 |
| TEX29     | 5.53627 | 5.89035 | 5.82554 | 5.71546 | 6.7768  | 5.89464 | 6.07758 | 6.19971 | 6.2797  |
| SOX1      | 5.45771 | 5.61905 | 5.57198 | 6.11549 | 5.97487 | 6.45244 | 5.60611 | 6.04348 | 6.05635 |
| SPACA7    | 4.24968 | 4.28129 | 4.2672  | 5.1663  | 5.02149 | 5.40775 | 4.7673  | 4.80216 | 5.05721 |
| ATP11AUN  | 4.92399 | 5.25434 | 5.09977 | 5.41032 | 5.44652 | 5.82604 | 5.71954 | 5.71513 | 5.93772 |
| MCF2L     | 6.2854  | 6.29854 | 6.71534 | 6.24879 | 6.77692 | 6.34408 | 5.90358 | 6.27978 | 6.24195 |
| F7        | 5.52876 | 5.44099 | 5.99948 | 5.88955 | 5.95348 | 6.93917 | 5.84039 | 6.06349 | 6.13153 |
| F10       | 6.43205 | 6.65624 | 6.67651 | 6.49866 | 6.62917 | 6.51402 | 6.42666 | 6.56705 | 6.25784 |
| CUL4A     | 8.92787 | 9.12689 | 9.11706 | 8.19595 | 5.90502 | 8.36526 | 8.85636 | 7.69987 | 8.32233 |
| LAMP1     | 10.3049 | 10.268  | 10.0344 | 10.3    | 8.36862 | 10.2586 | 10.4292 | 9.49305 | 10.2011 |
| TMCO3     | 7.3357  | 7.22513 | 7.34416 | 7.70712 | 6.66913 | 6.91291 | 8.16101 | 7.5655  | 7.64716 |
| TFDP1     | 7.62666 | 7.54981 | 7.66656 | 8.01393 | 6.7769  | 7.62148 | 8.03163 | 7.55726 | 7.68919 |
| GRK1      | 5.24796 | 5.49623 | 5.01186 | 6.30147 | 5.80756 | 6.33263 | 6.02432 | 5.72052 | 5.76276 |
| GAS6-AS1  | 6.33903 | 6.313   | 6.39807 | 5.6732  | 6.22961 | 6.43885 | 6.24487 | 6.48377 | 6.27617 |
| GAS6-AS2  | 6.33327 | 5.5184  | 5.87318 | 4.79359 | 5.99136 | 3.56442 | 4.91643 | 4.32826 | 4.83191 |
| CDC16     | 9.33434 | 9.22605 | 9.14887 | 8.84462 | 7.02893 | 8.65859 | 9.20098 | 8.5073  | 8.61949 |
| MIR4502   | 6.39624 | 6.53033 | 6.69493 | 6.38539 | 7.62384 | 6.33589 | 6.28172 | 6.05215 | 6.34381 |
| UPF3A     | 8.34    | 8.60203 | 8.41302 | 7.7425  | 6.748   | 7.97495 | 8.56432 | 7.90766 | 7.88661 |
| CHAMP1    | 7.5809  | 7.46679 | 7.95974 | 6.52793 | 5.80514 | 5.99154 | 7.42063 | 6.59354 | 6.75037 |
| ANKRD26P3 | 3.75748 | 4.32517 | 3.67652 | 4.1769  | 5.02324 | 4.1239  | 3.94733 | 3.76834 | 4.14337 |
| TPTE2     | 3.72945 | 4.19153 | 4.06231 | 4.13618 | 4.81718 | 4.74651 | 4.06164 | 4.36983 | 3.70721 |
| PSPC1     | 7.45419 | 7.3875  | 7.23219 | 6.95945 | 6.00718 | 6.36216 | 6.79056 | 6.90988 | 6.82281 |
| MIR4499   | 3.0399  | 2.68021 | 2.9754  | 2.65706 | 3.89262 | 2.65435 | 2.91522 | 2.83677 | 3.08819 |
| EEF1AKMT1 | 5.48292 | 5.62842 | 5.78196 | 5.89279 | 5.67938 | 5.49174 | 6.02206 | 5.45031 | 5.50223 |
| XPO4      | 8.71884 | 8.85837 | 9.01656 | 8.42119 | 6.0225  | 7.45747 | 8.57179 | 7.14687 | 7.97732 |

|             |         |         |         |         |         |         |         |         |         |
|-------------|---------|---------|---------|---------|---------|---------|---------|---------|---------|
| SKA3        | 7.26169 | 6.23697 | 6.61624 | 6.54187 | 5.8392  | 6.66392 | 6.92671 | 6.88527 | 6.58119 |
| LINC00424   | 5.13941 | 4.75069 | 5.14705 | 5.00822 | 5.94262 | 5.94496 | 4.90731 | 5.09057 | 5.21329 |
| SACS        | 7.15886 | 7.07182 | 7.1253  | 7.11951 | 4.76119 | 6.41563 | 7.09219 | 6.84011 | 6.89308 |
| mipep       | 7.84799 | 7.83781 | 7.67199 | 7.23218 | 5.21311 | 6.45712 | 7.15111 | 5.83639 | 5.98769 |
| SPATA13-AS1 | 5.49143 | 5.53318 | 5.44498 | 5.58184 | 6.34259 | 6.19596 | 5.54916 | 5.62311 | 5.65228 |
| CENPJ       | 6.46402 | 6.4317  | 6.30524 | 6.20225 | 5.81685 | 5.40405 | 5.91003 | 5.95669 | 6.04838 |
| TPTE2P1     | 4.16844 | 4.0725  | 3.87357 | 3.96782 | 6.47265 | 3.68962 | 4.23487 | 3.78746 | 3.72243 |
| AMER2       | 5.27182 | 5.47234 | 5.60801 | 5.7977  | 5.51188 | 6.01238 | 5.9009  | 5.97335 | 6.02902 |
| SHISA2      | 5.96201 | 6.09348 | 5.62826 | 6.51675 | 6.22855 | 6.8239  | 6.70196 | 7.06399 | 6.51542 |
| RNF6        | 7.55184 | 7.69993 | 7.59893 | 7.687   | 5.62236 | 7.09106 | 8.11414 | 8.0737  | 7.66601 |
| GPR12       | 6.17961 | 6.13    | 6.59085 | 6.43806 | 6.60721 | 6.39444 | 6.40246 | 5.77874 | 6.24965 |
| USP12       | 8.53734 | 8.92918 | 8.69357 | 8.0741  | 4.82336 | 8.16742 | 8.3727  | 9.15281 | 8.772   |
| MTIF3       | 7.05911 | 7.10003 | 6.96748 | 7.18717 | 6.58517 | 7.08215 | 7.75217 | 7.48569 | 7.15996 |
| LNX2        | 9.22416 | 9.30759 | 8.88264 | 9.71162 | 6.78405 | 10.3767 | 9.50135 | 10.1974 | 10.3037 |
| CDX2        | 6.42468 | 6.61494 | 6.49334 | 7.2175  | 7.95599 | 7.53175 | 6.95755 | 7.34391 | 6.97798 |
| URAD        | 4.62599 | 4.65063 | 4.43202 | 5.37212 | 6.37296 | 5.75128 | 5.56996 | 5.47557 | 5.24087 |
| FLT3        | 5.09832 | 5.29687 | 5.49957 | 5.02835 | 6.43673 | 5.60715 | 4.99681 | 5.30045 | 5.2258  |
| PAN3-AS1    | 5.44437 | 5.41189 | 5.50756 | 6.07549 | 5.61213 | 6.52828 | 6.39707 | 5.91768 | 5.74408 |
| FLT1        | 6.83054 | 6.84143 | 7.12829 | 6.4731  | 6.33909 | 6.15269 | 6.45247 | 7.73699 | 8.19712 |
| MTUS2-AS1   | 5.49948 | 5.61435 | 5.89416 | 6.46226 | 6.41597 | 6.24084 | 6.32055 | 6.56015 | 6.67229 |
| UBL3        | 9.41086 | 9.0563  | 9.28422 | 8.99553 | 5.4616  | 7.67811 | 8.48604 | 8.60975 | 8.17514 |
| KATNAL1     | 6.66476 | 6.85422 | 6.64743 | 6.58914 | 5.68673 | 5.62299 | 6.37983 | 6.07826 | 5.8529  |
| LINC00426   | 5.30726 | 5.34559 | 5.34439 | 5.42374 | 5.70237 | 5.46457 | 5.34641 | 5.31094 | 5.29175 |
| HMGB1       | 8.41002 | 8.1445  | 8.11619 | 6.55492 | 6.21742 | 6.25939 | 6.98841 | 6.5457  | 6.65562 |
| TEX26-AS1   | 4.13188 | 4.08785 | 3.90162 | 3.95508 | 5.22691 | 4.52937 | 4.50138 | 4.66143 | 4.2931  |
| HSPH1       | 8.24462 | 7.8758  | 7.9786  | 9.45567 | 7.13369 | 9.72257 | 9.48919 | 9.77772 | 10.4549 |

|                |         |         |         |         |         |         |         |         |         |
|----------------|---------|---------|---------|---------|---------|---------|---------|---------|---------|
| ZAR1L          | 5.13862 | 5.15257 | 4.95986 | 5.56707 | 5.53079 | 5.70355 | 5.41646 | 5.65415 | 5.57052 |
| N4BP2L1        | 6.52667 | 6.55782 | 6.65834 | 5.39498 | 6.23941 | 5.31168 | 5.23974 | 5.44557 | 4.80684 |
| N4BP2L2        | 9.68538 | 9.38499 | 9.27438 | 7.79003 | 6.98641 | 7.05057 | 8.01193 | 7.73151 | 7.87581 |
| MINOS1P1       | 6.24157 | 5.33642 | 5.88803 | 3.84862 | 4.46017 | 4.86787 | 4.27551 | 4.33567 | 4.93489 |
| N4BP2L2-IT2    | 10.4325 | 10.364  | 10.4964 | 6.90111 | 7.4657  | 4.62821 | 6.2757  | 6.96097 | 7.91281 |
| LINC00423      | 4.04342 | 4.29106 | 4.12703 | 4.42949 | 5.00129 | 4.58941 | 4.59837 | 4.63909 | 4.52277 |
| STARD13        | 6.00613 | 5.7304  | 6.33493 | 5.46305 | 5.13712 | 5.14317 | 5.35466 | 5.58143 | 5.6911  |
| LINC00457      | 3.60117 | 4.06717 | 4.12573 | 4.19362 | 5.36288 | 4.32072 | 4.0303  | 4.06147 | 4.13143 |
| MAB21L1        | 4.59107 | 4.7117  | 4.37446 | 4.44767 | 5.27736 | 4.68878 | 4.75287 | 4.52643 | 4.56503 |
| DCLK1          | 6.85732 | 7.48937 | 7.35298 | 5.15624 | 5.92587 | 4.4622  | 5.00824 | 4.69585 | 4.5194  |
| CCDC169-SOHLH2 | 4.04609 | 4.26393 | 4.14224 | 4.56855 | 5.00904 | 4.23289 | 3.799   | 4.24061 | 4.04636 |
| SPG20          | 6.5929  | 6.74691 | 6.89085 | 6.53917 | 5.1925  | 6.04245 | 6.58448 | 6.17563 | 6.35196 |
| SMAD9          | 6.44426 | 6.5102  | 6.80999 | 6.36071 | 6.46531 | 7.00743 | 6.73983 | 6.55112 | 6.53913 |
| LINC00571      | 5.51106 | 5.27368 | 5.33296 | 4.45976 | 3.89264 | 4.31843 | 4.83109 | 4.86233 | 5.12146 |
| STOML3         | 4.73466 | 4.70181 | 4.47476 | 5.3269  | 5.71795 | 5.22072 | 4.14657 | 5.08329 | 4.55625 |
| PROSER1        | 9.52598 | 9.67832 | 9.73842 | 7.85021 | 6.14578 | 7.00286 | 8.36365 | 7.68884 | 8.11692 |
| LHFP           | 9.12567 | 8.56705 | 9.33209 | 7.93933 | 7.39998 | 6.92713 | 7.47525 | 7.17324 | 8.05597 |
| MIR4305        | 2.56085 | 3.10841 | 2.62101 | 2.73927 | 2.98588 | 2.96364 | 3.07606 | 2.56588 | 2.73944 |
| LINC00548      | 4.8236  | 5.09647 | 5.04935 | 4.89766 | 5.57681 | 5.15201 | 5.01357 | 5.13895 | 4.99237 |
| LINC00598      | 4.8683  | 4.95675 | 5.07414 | 5.17679 | 6.10562 | 5.24482 | 5.0637  | 5.49089 | 5.53663 |
| FOXO1          | 8.29463 | 8.38165 | 8.60895 | 7.85245 | 7.0322  | 7.46994 | 8.13877 | 7.88441 | 7.87547 |
| MIR320D1       | 4.48417 | 4.6706  | 5.20468 | 3.57334 | 4.03587 | 4.26397 | 4.40624 | 4.37257 | 4.13154 |
| MRPS31         | 7.44895 | 7.69496 | 7.45471 | 6.56259 | 5.79221 | 6.34473 | 6.86956 | 6.55318 | 6.70537 |
| TPTE2P5        | 5.31369 | 6.2916  | 5.61674 | 4.60607 | 4.80846 | 4.12725 | 4.05206 | 4.00076 | 4.13077 |
| ELF1           | 10.9816 | 10.7092 | 10.9112 | 10.5594 | 8.04701 | 10.6135 | 10.7521 | 9.9365  | 10.4394 |
| MIR3168        | 5.47955 | 5.65879 | 5.5657  | 5.41141 | 5.85954 | 5.5741  | 6.21333 | 5.76411 | 5.73932 |

|           |         |         |         |         |         |         |         |         |         |
|-----------|---------|---------|---------|---------|---------|---------|---------|---------|---------|
| KBTBD6    | 6.45935 | 6.86098 | 6.69243 | 6.68312 | 6.71065 | 6.39883 | 6.95521 | 6.24577 | 6.03336 |
| KBTBD7    | 6.6275  | 6.54497 | 6.78214 | 5.43213 | 3.89404 | 4.38377 | 6.37252 | 5.8318  | 5.28372 |
| MTRF1     | 7.9162  | 7.68884 | 7.45115 | 6.85506 | 6.03435 | 6.38944 | 7.06457 | 6.42562 | 7.08291 |
| VWA8      | 8.71187 | 8.34662 | 8.69505 | 6.90512 | 5.46905 | 6.39487 | 7.65435 | 6.58915 | 6.74945 |
| EPSTI1    | 6.47918 | 5.93111 | 5.79278 | 5.96425 | 6.40539 | 5.74708 | 5.69044 | 5.59414 | 5.97137 |
| enox1     | 5.41625 | 5.46017 | 5.46882 | 5.45559 | 6.91473 | 5.5744  | 5.82212 | 5.38962 | 5.63639 |
| CCDC122   | 6.68642 | 6.55252 | 7.03492 | 5.89618 | 5.14692 | 5.13221 | 6.18689 | 5.66448 | 6.01556 |
| SMIM2-IT1 | 5.53468 | 5.48111 | 5.48634 | 5.89553 | 5.93058 | 6.77672 | 6.33143 | 6.25217 | 6.48638 |
| NUFIP1    | 6.97603 | 7.36744 | 7.44427 | 6.89871 | 6.29769 | 5.94042 | 7.04115 | 5.8418  | 5.5603  |
| KCTD4     | 8.0581  | 8.60963 | 6.88198 | 7.75191 | 6.00257 | 5.92694 | 6.6768  | 5.6749  | 6.07142 |
| SIAH3     | 5.35923 | 5.24248 | 5.37181 | 5.69729 | 6.13677 | 5.4204  | 5.10418 | 5.59336 | 5.40833 |
| ZC3H13    | 8.72407 | 9.20785 | 8.85689 | 7.56919 | 6.54995 | 7.26727 | 7.9818  | 7.82693 | 7.66023 |
| cpb2      | 3.91343 | 3.88777 | 4.46084 | 4.03404 | 5.35236 | 4.79673 | 4.70192 | 4.16808 | 4.28275 |
| LCP1      | 7.84478 | 7.70289 | 8.40093 | 7.10347 | 7.61194 | 8.10732 | 7.53851 | 7.69697 | 7.65024 |
| ESD       | 6.98203 | 6.96018 | 7.10803 | 7.13772 | 5.22302 | 6.69321 | 7.44939 | 6.35193 | 6.84765 |
| MED4      | 8.46388 | 8.43904 | 8.73427 | 8.32227 | 6.29059 | 7.86171 | 8.86064 | 8.33807 | 8.15427 |
| LINC00441 | 5.15241 | 4.97148 | 5.13256 | 4.82129 | 5.38459 | 5.06527 | 5.14595 | 4.69713 | 4.86862 |
| lpar6     | 6.50949 | 6.31018 | 6.3881  | 6.14619 | 5.93338 | 5.69009 | 6.17618 | 5.57521 | 5.92817 |
| RCBTB2    | 7.15196 | 6.86202 | 7.10483 | 7.49859 | 6.38519 | 6.7721  | 7.31403 | 6.98477 | 7.56627 |
| LINC00462 | 3.55669 | 3.29815 | 3.47963 | 4.35198 | 4.61209 | 4.72686 | 5.23679 | 4.3914  | 5.30525 |
| CAB39L    | 5.74775 | 6.8052  | 6.40177 | 5.22874 | 5.21028 | 5.66507 | 6.0379  | 6.12307 | 5.74897 |
| RCBTB1    | 7.38501 | 7.49093 | 7.39077 | 6.20416 | 7.01644 | 6.16122 | 6.17925 | 6.35379 | 5.93405 |
| EBPL      | 8.10577 | 8.25448 | 8.37656 | 8.38498 | 7.80958 | 7.97903 | 8.57266 | 7.16949 | 7.55218 |
| KPNA3     | 9.7271  | 9.73031 | 9.9001  | 9.3677  | 6.7659  | 8.92089 | 9.63003 | 9.62047 | 9.66202 |
| SPRYD7    | 7.96344 | 8.134   | 7.70875 | 8.77971 | 7.23042 | 8.3992  | 9.08428 | 7.8611  | 8.20489 |
| Dleu2     | 5.50923 | 4.80511 | 4.93641 | 4.9915  | 4.23677 | 4.27325 | 4.26294 | 4.86892 | 4.86065 |

|              |         |         |         |         |         |         |         |         |         |
|--------------|---------|---------|---------|---------|---------|---------|---------|---------|---------|
| MIR16-1      | 5.61321 | 5.90567 | 5.6517  | 5.54491 | 5.71414 | 6.12157 | 6.08895 | 6.17435 | 5.53732 |
| RNASEH2B-AS1 | 4.15229 | 3.90352 | 3.7692  | 4.283   | 4.42497 | 4.25226 | 4.78493 | 4.11866 | 4.03738 |
| INTS6        | 8.14219 | 7.91892 | 7.92298 | 8.03676 | 6.01597 | 7.55937 | 7.39575 | 7.84187 | 8.38302 |
| DHRS12       | 7.15553 | 7.33517 | 7.11675 | 6.79425 | 6.31137 | 6.6252  | 7.32723 | 6.35351 | 6.54099 |
| LINC00282    | 5.98706 | 6.17713 | 6.25413 | 6.65305 | 7.31157 | 6.40408 | 6.50199 | 6.63135 | 6.48168 |
| NEK5         | 4.69614 | 4.92566 | 4.48447 | 4.69384 | 4.97844 | 4.89658 | 4.61093 | 4.74067 | 4.59068 |
| NEK3         | 8.04983 | 8.2118  | 8.25014 | 6.00242 | 5.18179 | 5.55875 | 6.66809 | 6.08995 | 6.27686 |
| VPS36        | 9.15781 | 9.15852 | 8.897   | 8.08989 | 5.92773 | 7.71298 | 8.2766  | 8.0648  | 8.37839 |
| LECT1        | 5.67947 | 5.6224  | 5.29193 | 5.62446 | 6.333   | 6.01497 | 5.9991  | 6.01404 | 5.78979 |
| PCDH8        | 5.73533 | 5.92595 | 5.42291 | 6.4257  | 5.47538 | 6.63533 | 6.0646  | 6.12639 | 5.94935 |
| MIR1297      | 1.85659 | 1.75141 | 1.88444 | 1.96878 | 1.99955 | 2.15739 | 2.27371 | 1.74446 | 1.67706 |
| DIAPH3       | 6.04324 | 5.84546 | 5.64966 | 6.29674 | 5.37612 | 5.43734 | 5.7488  | 5.98402 | 5.55987 |
| MIR3169      | 2.7448  | 3.2573  | 2.70605 | 2.69197 | 3.01548 | 3.02266 | 2.72964 | 2.78852 | 2.67055 |
| pcdh20       | 4.50516 | 4.69711 | 4.39153 | 5.0965  | 5.2009  | 4.53199 | 4.65502 | 4.75193 | 4.34299 |
| MIR548X2     | 4.97118 | 5.81372 | 5.68721 | 5.11883 | 5.83833 | 6.11558 | 5.26914 | 5.63258 | 5.57989 |
| LINC00550    | 4.01298 | 4.11339 | 4.24262 | 4.82447 | 4.33453 | 3.93464 | 4.04842 | 3.9415  | 3.5603  |
| KLHL1        | 4.45834 | 4.65309 | 4.51268 | 4.84903 | 5.72703 | 5.25081 | 4.87186 | 5.15216 | 4.84772 |
| DACH1        | 7.13492 | 6.20732 | 6.69681 | 6.3133  | 5.69234 | 5.81093 | 5.72648 | 6.15607 | 5.84707 |
| MZT1         | 6.70747 | 6.7351  | 7.16723 | 6.92403 | 5.91319 | 6.52996 | 6.92917 | 6.40221 | 6.59298 |
| dis3         | 8.95612 | 8.86676 | 8.85601 | 8.36331 | 5.48774 | 8.42222 | 9.03833 | 9.18904 | 8.75365 |
| KLF12        | 8.33572 | 7.75977 | 8.00685 | 6.54957 | 6.53372 | 5.66715 | 7.1594  | 6.40509 | 6.36223 |
| COMMD6       | 5.76115 | 5.5046  | 5.91425 | 6.16238 | 5.52535 | 5.76179 | 5.91475 | 5.66228 | 5.84867 |
| KCTD12       | 8.12981 | 8.35646 | 8.97436 | 7.38494 | 5.52112 | 7.0122  | 7.73716 | 7.37872 | 6.89348 |
| FBXL3        | 8.8706  | 9.04611 | 9.06739 | 7.94093 | 6.37816 | 8.00991 | 8.57917 | 8.08904 | 8.48961 |
| EDNRB        | 8.13789 | 7.68998 | 8.72233 | 6.68067 | 6.60312 | 6.35578 | 7.68946 | 7.11866 | 7.6185  |
| POU4F1       | 6.3858  | 6.38357 | 6.23474 | 7.25711 | 7.1159  | 7.71742 | 7.26722 | 7.29638 | 6.82543 |



|            |         |         |         |         |         |         |         |         |         |
|------------|---------|---------|---------|---------|---------|---------|---------|---------|---------|
| rnf219     | 7.08174 | 7.15838 | 7.02044 | 6.56725 | 5.02695 | 5.96214 | 6.97688 | 6.31885 | 6.27989 |
| RBM26      | 8.4093  | 8.21281 | 8.6237  | 7.07604 | 4.93786 | 6.26934 | 7.2834  | 6.77011 | 7.08745 |
| NDFIP2-AS1 | 3.53278 | 3.536   | 3.69168 | 4.72096 | 4.49828 | 4.76614 | 4.29045 | 4.27606 | 4.01553 |
| SPRY2      | 8.09399 | 7.99102 | 7.59896 | 6.57743 | 5.52657 | 7.55497 | 6.94658 | 6.70065 | 6.16785 |
| MIR4500HG  | 3.61458 | 4.06985 | 3.96784 | 3.98523 | 4.48152 | 4.64698 | 4.36561 | 4.19873 | 3.96069 |
| MIR4500    | 2.48637 | 2.76181 | 2.60194 | 2.22071 | 3.8208  | 2.7515  | 3.62339 | 1.88862 | 2.36797 |
| LINC00353  | 4.06513 | 4.13628 | 4.00975 | 4.10233 | 5.32084 | 4.40824 | 4.1856  | 3.62312 | 4.15956 |
| LINC00410  | 3.99359 | 3.86525 | 3.96888 | 4.87797 | 5.80678 | 4.68412 | 4.25623 | 3.95311 | 4.06473 |
| LINC00379  | 3.29337 | 2.92516 | 2.98877 | 3.53437 | 5.18481 | 3.71144 | 3.36356 | 3.29337 | 3.65662 |
| GPC5-AS1   | 3.98297 | 3.81375 | 3.51292 | 4.20427 | 4.58153 | 3.19326 | 4.43838 | 3.80365 | 3.91387 |
| GPC6-AS2   | 2.99782 | 3.29225 | 2.65094 | 3.29688 | 3.89158 | 3.85946 | 3.64612 | 3.30629 | 3.22759 |
| SOX21      | 7.40989 | 7.23414 | 7.06806 | 7.44438 | 6.33295 | 7.4019  | 7.71768 | 6.90915 | 6.67931 |
| CLDN10-AS1 | 6.71765 | 7.12997 | 6.42373 | 4.47494 | 5.89909 | 5.25094 | 4.08017 | 4.21345 | 4.54839 |
| DZIP1      | 5.96679 | 6.28993 | 5.79992 | 6.41616 | 5.81591 | 5.20749 | 6.05411 | 6.10624 | 5.87004 |
| UGGT2      | 7.70582 | 7.55646 | 7.79898 | 5.92435 | 4.28598 | 4.87081 | 6.2958  | 5.83684 | 6.29502 |
| LINC00359  | 5.15316 | 4.63437 | 4.9121  | 5.41433 | 5.80408 | 5.24454 | 5.379   | 5.49234 | 5.35825 |
| OXGR1      | 6.61885 | 6.37045 | 6.88083 | 5.60389 | 7.07125 | 5.96069 | 6.19629 | 5.03754 | 5.40325 |
| RNF113B    | 5.96308 | 6.01886 | 6.14835 | 6.3817  | 6.41245 | 6.83166 | 6.4419  | 6.76626 | 6.46231 |
| STK24      | 9.48725 | 9.35895 | 9.47194 | 9.15612 | 8.15714 | 9.67636 | 9.20975 | 9.84435 | 9.38485 |
| DOCK9      | 10.672  | 10.6319 | 10.637  | 9.48091 | 7.21965 | 9.63204 | 9.43362 | 9.89034 | 9.75988 |
| UBAC2-AS1  | 5.83459 | 5.92907 | 5.57183 | 6.32948 | 6.19196 | 6.30767 | 6.57963 | 6.24823 | 6.31794 |
| GPR18      | 5.62754 | 5.42254 | 5.68651 | 5.39207 | 6.34458 | 5.43121 | 5.11427 | 5.31949 | 5.52538 |
| GPR183     | 6.45975 | 5.20478 | 6.80698 | 6.64022 | 5.34406 | 6.54433 | 6.53796 | 5.32306 | 6.49008 |
| ZIC5       | 6.04007 | 6.3851  | 6.58345 | 6.96732 | 7.71042 | 7.07303 | 6.29298 | 6.79413 | 6.55855 |
| PCCA-AS1   | 5.04116 | 4.85538 | 5.18798 | 5.10004 | 4.96499 | 4.99616 | 5.08759 | 5.05293 | 5.02324 |
| GGACT      | 6.32091 | 6.19468 | 6.44106 | 6.78709 | 6.62992 | 6.66979 | 7.0709  | 6.31443 | 6.43064 |

|            |         |         |         |         |         |         |         |         |         |
|------------|---------|---------|---------|---------|---------|---------|---------|---------|---------|
| TMTC4      | 7.51979 | 7.83002 | 7.53022 | 7.08725 | 7.07305 | 5.85985 | 6.44627 | 6.3198  | 6.24354 |
| FGF14      | 5.88473 | 6.16991 | 5.70468 | 5.46332 | 6.07396 | 4.8633  | 4.62538 | 4.95003 | 5.1567  |
| MIR2681    | 5.12804 | 5.16575 | 5.09014 | 5.37884 | 5.0568  | 5.87315 | 5.47986 | 5.24776 | 5.17499 |
| MIR4705    | 2.60177 | 2.82385 | 2.13526 | 2.75409 | 2.28798 | 2.56027 | 2.51481 | 2.23621 | 2.36087 |
| FGF14-IT1  | 5.64155 | 5.81658 | 5.69746 | 5.47893 | 5.78044 | 5.84988 | 4.89566 | 6.17111 | 5.68321 |
| METTL21C   | 3.75133 | 3.97537 | 3.82193 | 4.27264 | 5.29556 | 4.45547 | 4.27106 | 4.23348 | 4.53743 |
| TEX30      | 6.08114 | 5.74094 | 5.96934 | 6.10132 | 5.90466 | 5.27414 | 6.24202 | 5.74733 | 5.72832 |
| KDELC1     | 5.40815 | 4.95278 | 5.62102 | 5.78237 | 5.63738 | 4.82814 | 5.18358 | 5.41484 | 5.15174 |
| DAOA-AS1   | 3.67218 | 3.63528 | 3.77198 | 4.13416 | 5.38587 | 4.18929 | 3.82955 | 3.88575 | 4.00693 |
| EFNB2      | 7.92565 | 7.91897 | 7.94174 | 8.38245 | 4.39284 | 7.72746 | 8.307   | 8.43851 | 8.78873 |
| ARGLU1     | 9.41393 | 9.66327 | 9.21404 | 8.72514 | 6.2334  | 7.47428 | 7.80628 | 9.19934 | 8.61918 |
| MYO16-AS1  | 4.06989 | 4.46251 | 4.18084 | 4.60602 | 6.66315 | 4.37834 | 4.7489  | 5.01548 | 6.79343 |
| IRS2       | 7.86282 | 8.05209 | 8.21663 | 8.50224 | 6.48409 | 8.48386 | 7.92103 | 7.09513 | 7.25131 |
| COL4A2-AS1 | 4.59072 | 5.07041 | 4.66834 | 4.46665 | 4.87402 | 4.7235  | 4.6865  | 4.75568 | 4.62828 |
| LINC00346  | 5.82429 | 5.64186 | 5.66748 | 6.38953 | 6.06086 | 6.20877 | 6.05316 | 6.09239 | 6.61451 |
| ANKRD10    | 8.74351 | 8.3198  | 8.83358 | 7.28922 | 5.84222 | 6.08776 | 7.25079 | 8.07741 | 7.50593 |
| MCF2L-AS1  | 6.51104 | 6.42319 | 6.17078 | 5.98321 | 6.84865 | 5.9471  | 6.30747 | 6.21657 | 6.09848 |
| PCID2      | 8.28578 | 8.40586 | 8.16676 | 7.78662 | 6.45645 | 7.06206 | 7.85374 | 7.49166 | 7.44965 |
| GRTP1      | 7.62998 | 8.11353 | 7.70086 | 7.44435 | 7.15653 | 7.43041 | 7.77254 | 6.91408 | 7.0143  |
| ADPRHL1    | 6.84191 | 6.70169 | 6.90331 | 6.94204 | 7.27393 | 7.12515 | 6.74731 | 6.81853 | 6.61168 |
| LINC00552  | 4.80015 | 4.8602  | 5.04513 | 5.57573 | 5.5051  | 5.56447 | 5.33036 | 5.73483 | 5.06011 |
| GAS6       | 7.91335 | 7.85125 | 8.00142 | 7.47014 | 6.70683 | 6.78786 | 8.14197 | 7.27499 | 6.79559 |
| LINC00565  | 5.53542 | 5.55779 | 5.73669 | 5.62574 | 6.1359  | 5.94068 | 5.51208 | 5.84791 | 5.8231  |
| RASA3      | 7.10401 | 6.76277 | 7.1544  | 6.6718  | 5.8352  | 6.60011 | 6.85787 | 6.82643 | 6.7736  |
| parp2      | 7.45972 | 7.79743 | 7.83354 | 6.39659 | 5.78503 | 5.60824 | 6.73116 | 6.06404 | 5.93013 |
| APEX1      | 9.85669 | 9.51865 | 9.87687 | 8.809   | 6.10215 | 7.4628  | 8.70226 | 7.44148 | 7.93156 |

|           |         |         |         |         |         |         |         |         |         |
|-----------|---------|---------|---------|---------|---------|---------|---------|---------|---------|
| PNP       | 9.03528 | 8.41956 | 8.54585 | 9.53122 | 8.97155 | 10.2025 | 10.2101 | 10.2801 | 10.5082 |
| EDDM3A    | 3.29289 | 3.37361 | 3.15405 | 3.83662 | 5.18278 | 3.51713 | 3.64896 | 3.93357 | 3.95053 |
| EDDM3B    | 5.45322 | 5.20687 | 4.96785 | 4.87516 | 6.25077 | 4.76614 | 5.12802 | 5.1637  | 5.15464 |
| METTL17   | 8.59047 | 8.28962 | 8.78855 | 7.49213 | 7.21137 | 7.51004 | 7.11935 | 7.3864  | 7.30056 |
| TPPP2     | 4.85706 | 5.14135 | 5.03961 | 5.26986 | 5.52482 | 5.70581 | 5.11783 | 5.38817 | 5.68378 |
| ARHGEF40  | 6.28115 | 6.18013 | 6.12679 | 6.41052 | 6.72776 | 6.15794 | 6.16277 | 6.32221 | 6.11027 |
| ZNF219    | 5.69147 | 5.52556 | 5.98106 | 7.05476 | 5.51815 | 7.30175 | 6.6972  | 6.25768 | 6.75163 |
| TMEM253   | 5.39926 | 5.1992  | 4.74271 | 5.25373 | 6.37825 | 5.54703 | 5.42416 | 5.7228  | 5.40337 |
| LINC00641 | 4.58648 | 4.77152 | 4.81301 | 4.85392 | 4.31314 | 4.39666 | 4.70144 | 4.62703 | 4.58718 |
| RPGRIP1   | 5.02277 | 5.3698  | 5.08589 | 5.42839 | 5.59518 | 5.20049 | 5.04397 | 5.11883 | 5.27724 |
| TOX4      | 8.99929 | 9.06465 | 8.91353 | 9.10354 | 7.96038 | 8.9071  | 9.34469 | 9.55842 | 9.31147 |
| sall2     | 4.41049 | 4.50471 | 4.13247 | 4.27776 | 5.1869  | 4.65215 | 4.69725 | 4.50749 | 4.52685 |
| ABHD4     | 8.33091 | 8.47363 | 8.37468 | 6.97195 | 5.02484 | 7.82081 | 7.26079 | 7.57979 | 6.85323 |
| OXA1L     | 10.8669 | 10.5216 | 10.9554 | 9.32655 | 8.67403 | 8.5918  | 9.65023 | 8.89575 | 9.46428 |
| mrpl52    | 6.32639 | 5.93535 | 6.04102 | 5.95369 | 5.65827 | 6.1648  | 6.19459 | 5.90076 | 6.18672 |
| MMP14     | 8.25832 | 8.52741 | 8.41706 | 8.45166 | 6.39762 | 7.65992 | 8.43721 | 7.90136 | 8.38064 |
| LRP10     | 9.47487 | 9.19849 | 9.19759 | 10.0702 | 9.05708 | 10.2749 | 10.2096 | 9.60917 | 10.1211 |
| REM2      | 6.12514 | 6.05034 | 6.15499 | 5.89156 | 6.2639  | 6.01754 | 6.11167 | 5.67536 | 5.30248 |
| c14orf119 | 6.85928 | 6.68654 | 6.67451 | 7.35105 | 6.27415 | 6.45971 | 7.76467 | 6.68013 | 7.61686 |
| IL25      | 5.13556 | 5.04708 | 5.2082  | 5.87923 | 5.76366 | 5.26236 | 5.37166 | 5.46922 | 5.12329 |
| CMTM5     | 5.382   | 5.33718 | 5.48995 | 5.90489 | 6.6764  | 5.84424 | 5.59085 | 5.65606 | 5.55797 |
| THTPA     | 6.13289 | 6.53668 | 6.13809 | 6.14208 | 5.55216 | 5.82718 | 6.37027 | 6.26945 | 6.32085 |
| DHRS2     | 5.531   | 5.36996 | 5.59188 | 5.94491 | 7.41022 | 5.99571 | 5.58676 | 6.02251 | 6.04712 |
| DHRS4-AS1 | 5.16538 | 5.21965 | 4.89916 | 5.80051 | 5.19136 | 4.95027 | 7.02931 | 4.48326 | 4.76566 |
| DHRS4     | 5.58049 | 5.48508 | 5.35852 | 5.8186  | 5.43178 | 6.26217 | 6.1519  | 6.03229 | 5.64492 |
| DHRS4L2   | 7.48622 | 7.96576 | 7.78864 | 7.20202 | 7.89756 | 7.32501 | 6.94727 | 7.10506 | 6.79828 |

|           |         |         |         |         |         |         |         |         |         |
|-----------|---------|---------|---------|---------|---------|---------|---------|---------|---------|
| DHRS4L1   | 2.67764 | 2.89646 | 2.86444 | 2.96923 | 2.45073 | 3.26643 | 3.01173 | 2.82281 | 2.84441 |
| CARMIL3   | 7.82441 | 7.66306 | 7.241   | 6.96514 | 7.16503 | 6.81875 | 6.89289 | 6.73248 | 7.18136 |
| CPNE6     | 5.87342 | 6.14052 | 6.14915 | 6.79694 | 6.98881 | 6.49837 | 6.15388 | 6.39456 | 6.25959 |
| PCK2      | 7.29942 | 6.82224 | 7.00508 | 7.96526 | 6.6026  | 7.47038 | 7.57418 | 6.97217 | 7.57693 |
| DCAF11    | 7.12289 | 7.06389 | 6.67891 | 6.84913 | 5.95315 | 6.81646 | 7.42355 | 6.81048 | 6.1884  |
| FITM1     | 6.39144 | 6.32151 | 6.12775 | 6.63189 | 6.42305 | 7.42508 | 6.74773 | 6.95975 | 6.38162 |
| RNF31     | 7.25975 | 6.96514 | 6.87938 | 7.25392 | 6.86045 | 6.58438 | 7.34908 | 6.60341 | 6.66211 |
| IRF9      | 8.90998 | 8.04934 | 7.83575 | 7.71612 | 7.69858 | 7.46552 | 8.21376 | 8.04749 | 8.38469 |
| REC8      | 7.13793 | 6.4653  | 6.47407 | 6.38127 | 6.46035 | 6.18944 | 6.35543 | 6.54836 | 6.57008 |
| TSSK4     | 5.46922 | 5.67366 | 5.67658 | 6.10998 | 6.50621 | 5.87401 | 5.82463 | 5.38494 | 5.79629 |
| GMPR2     | 7.82965 | 7.73191 | 7.57649 | 7.7589  | 6.67003 | 7.27749 | 7.93133 | 7.92171 | 7.57758 |
| NOP9      | 7.52015 | 7.69368 | 7.49759 | 7.64548 | 7.09083 | 8.27544 | 8.02148 | 7.22468 | 8.18306 |
| LTB4R2    | 7.22545 | 7.5121  | 7.61233 | 7.70004 | 6.31201 | 8.03143 | 7.99054 | 6.97141 | 7.83978 |
| LTB4R     | 9.36661 | 9.72048 | 9.71598 | 9.70148 | 7.05555 | 9.90185 | 10.1395 | 8.81186 | 9.9959  |
| NYNRIN    | 8.35283 | 8.34678 | 7.68661 | 6.70139 | 5.96213 | 5.70103 | 6.80582 | 6.04501 | 5.74347 |
| KHNYN     | 7.33678 | 7.48256 | 7.19858 | 7.38332 | 6.16175 | 7.9676  | 7.94668 | 7.24165 | 7.53993 |
| MIR4307   | 3.29337 | 2.55683 | 1.75549 | 1.98076 | 2.65972 | 2.5548  | 2.17552 | 1.91971 | 2.38695 |
| LINC00645 | 4.78082 | 4.58389 | 5.07822 | 5.07248 | 5.00728 | 5.76681 | 5.17283 | 5.33629 | 5.27257 |
| FOXG1     | 4.53837 | 4.75557 | 4.55934 | 5.08867 | 5.54059 | 5.6484  | 4.84589 | 5.18183 | 4.94469 |
| LINC01551 | 5.13833 | 4.7556  | 5.18024 | 5.72541 | 6.33491 | 5.90649 | 5.09254 | 5.61176 | 5.48049 |
| G2E3      | 8.22876 | 8.09345 | 8.23091 | 7.17671 | 6.1937  | 6.2885  | 7.08202 | 7.36814 | 7.21089 |
| SCFD1     | 8.08205 | 8.0221  | 7.90654 | 7.50173 | 5.67744 | 7.57843 | 7.97662 | 7.68057 | 8.05048 |
| NUBPL     | 6.8573  | 6.8156  | 7.2193  | 6.02918 | 5.57294 | 5.60966 | 6.61372 | 6.14673 | 5.96832 |
| ARHGAP5   | 8.15972 | 8.21738 | 8.16419 | 8.22603 | 5.36665 | 8.52671 | 8.87109 | 9.1511  | 8.68497 |
| akap6     | 6.46016 | 6.30602 | 6.56874 | 6.1957  | 6.57088 | 5.75811 | 6.3291  | 6.28637 | 6.17393 |
| NPAS3     | 4.91443 | 4.92855 | 4.84857 | 4.88232 | 5.62678 | 5.48017 | 4.67131 | 5.17462 | 5.04248 |

|              |         |         |         |         |         |         |         |         |         |
|--------------|---------|---------|---------|---------|---------|---------|---------|---------|---------|
| IGBP1P1      | 4.13587 | 4.16678 | 4.30692 | 5.65812 | 4.8404  | 5.27649 | 5.16067 | 4.98245 | 4.60338 |
| SRP54        | 7.63872 | 7.73664 | 7.69252 | 7.82638 | 5.31959 | 7.45299 | 7.85174 | 8.01072 | 7.6412  |
| KIAA0391     | 9.09268 | 9.02417 | 9.02144 | 8.7605  | 7.60712 | 8.17515 | 8.93839 | 7.8692  | 8.56605 |
| INSM2        | 4.2984  | 4.52543 | 4.26317 | 5.17029 | 4.8803  | 4.84537 | 5.10612 | 5.17873 | 5.04691 |
| BRMS1L       | 6.27029 | 5.69949 | 5.87393 | 5.68054 | 5.54796 | 5.64737 | 6.06222 | 5.3479  | 5.46001 |
| NKX2-1       | 4.6969  | 4.99364 | 4.94639 | 5.29166 | 5.16981 | 5.37396 | 4.90615 | 4.98677 | 5.02149 |
| PAX9         | 5.02004 | 5.19088 | 5.06561 | 5.52182 | 6.26342 | 5.90131 | 5.76583 | 6.33387 | 6.15489 |
| SLC25A21-AS1 | 5.81029 | 5.4562  | 5.91588 | 6.45512 | 5.57727 | 6.54019 | 5.67493 | 6.20922 | 6.34363 |
| MIPOL1       | 6.96791 | 6.82513 | 7.00343 | 5.32937 | 5.31206 | 4.8316  | 5.33909 | 5.62403 | 5.55122 |
| SSTR1        | 4.99375 | 5.12095 | 5.57203 | 5.84015 | 5.66342 | 5.86023 | 5.17159 | 5.58315 | 5.77785 |
| GEMIN2       | 4.76373 | 4.9441  | 5.02641 | 4.66634 | 3.90586 | 4.27074 | 4.53197 | 3.91878 | 4.17653 |
| LRFN5        | 6.02616 | 6.37848 | 6.28614 | 6.16283 | 6.33872 | 6.12229 | 5.7323  | 5.89531 | 6.06017 |
| c14orf28     | 5.37287 | 6.07284 | 5.83069 | 5.26347 | 4.56885 | 5.07123 | 5.32652 | 4.93966 | 5.09203 |
| PRPF39       | 8.50531 | 8.92945 | 8.68607 | 7.68855 | 5.38464 | 5.89769 | 7.30674 | 8.04034 | 7.60544 |
| LRR1         | 6.05446 | 5.97489 | 5.84473 | 6.2576  | 5.8631  | 6.10988 | 6.59582 | 6.04791 | 6.1606  |
| KLHDC1       | 8.13524 | 8.27052 | 7.94928 | 6.52601 | 5.91069 | 6.67437 | 6.95804 | 6.01478 | 5.90698 |
| KLHDC2       | 8.51251 | 8.33089 | 8.54412 | 7.69957 | 6.07874 | 7.05439 | 8.20781 | 7.17536 | 7.29205 |
| ARF6         | 10.6269 | 10.3919 | 10.5052 | 10.2657 | 9.01919 | 10.1629 | 10.5239 | 10.2541 | 10.3177 |
| ATL1         | 7.48796 | 7.54025 | 7.41408 | 7.05005 | 5.91797 | 6.70613 | 7.1683  | 5.83324 | 6.66666 |
| ABHD12B      | 8.9822  | 9.23487 | 8.79156 | 6.7084  | 6.38891 | 5.58742 | 6.0361  | 4.68994 | 4.96075 |
| TMX1         | 9.92582 | 9.23195 | 10.0513 | 9.68362 | 6.92529 | 8.92122 | 10.0092 | 8.80476 | 9.25024 |
| LINC00640    | 7.06508 | 6.82819 | 6.63306 | 5.55378 | 6.16376 | 5.37198 | 5.50615 | 4.91792 | 4.8452  |
| FRMD6        | 9.21286 | 9.55415 | 9.08347 | 8.9014  | 6.92835 | 9.03864 | 8.82855 | 8.27425 | 8.92002 |
| c14orf166    | 8.34823 | 8.37752 | 8.44045 | 8.60318 | 6.92382 | 8.49734 | 9.03802 | 8.17303 | 8.26454 |
| PTGDR        | 5.66257 | 6.45228 | 6.28976 | 5.36625 | 6.3712  | 5.94741 | 5.12613 | 5.63968 | 5.96397 |
| GPR137C      | 5.26321 | 5.60515 | 5.07561 | 5.34333 | 5.32862 | 5.3562  | 5.00777 | 4.9071  | 5.11601 |

|           |         |         |         |         |         |         |         |         |         |
|-----------|---------|---------|---------|---------|---------|---------|---------|---------|---------|
| STYX      | 9.75602 | 9.69733 | 9.99723 | 8.9687  | 8.08022 | 9.52041 | 9.57847 | 9.25148 | 9.42882 |
| GNPNAT1   | 6.22818 | 6.7091  | 6.58232 | 5.66038 | 3.98241 | 6.44944 | 6.84113 | 7.01996 | 6.35569 |
| DDHD1     | 5.6943  | 5.38208 | 6.06503 | 5.54304 | 5.83892 | 5.57924 | 4.90537 | 5.68853 | 5.67173 |
| CDKN3     | 6.20318 | 5.94585 | 6.0933  | 6.94558 | 5.67557 | 6.04583 | 6.91317 | 6.88247 | 6.03197 |
| CGRRF1    | 6.05571 | 5.87788 | 6.15841 | 6.01478 | 5.05437 | 5.43304 | 6.46673 | 6.23292 | 6.21964 |
| SAMD4A    | 6.63954 | 6.79209 | 6.8615  | 6.84233 | 6.70033 | 6.43121 | 6.5106  | 7.03388 | 6.9185  |
| SOCS4     | 7.636   | 7.74282 | 7.49584 | 7.21047 | 5.56755 | 5.94101 | 7.15453 | 6.85118 | 7.25218 |
| MAPK1IP1L | 9.15061 | 8.86206 | 9.13806 | 9.10939 | 7.54926 | 8.87016 | 9.54055 | 8.91937 | 9.42952 |
| fbxo34    | 7.15306 | 7.087   | 7.18623 | 7.02024 | 5.83101 | 7.00153 | 7.07181 | 7.16905 | 7.34206 |
| KTN1      | 8.87318 | 8.97605 | 8.66892 | 8.74752 | 5.957   | 9.24466 | 9.20968 | 9.31268 | 8.91907 |
| RPL13AP3  | 3.09628 | 3.02174 | 2.90506 | 4.17171 | 3.67284 | 3.74579 | 3.05883 | 3.27762 | 3.09079 |
| PELI2     | 6.41426 | 6.25412 | 6.74973 | 5.78674 | 5.51583 | 5.26861 | 5.92149 | 5.70621 | 5.8196  |
| TMEM260   | 7.33647 | 7.65432 | 7.45607 | 6.52712 | 4.81614 | 5.67382 | 6.73698 | 5.72095 | 6.54543 |
| EXOC5     | 4.77865 | 4.72188 | 4.40143 | 4.71115 | 3.60593 | 4.83747 | 6.50014 | 4.95555 | 4.57225 |
| ACTR10    | 8.05649 | 8.36622 | 8.03533 | 8.37919 | 5.27419 | 8.5848  | 8.60571 | 8.37474 | 8.57955 |
| ARID4A    | 7.62766 | 7.96294 | 7.49327 | 6.05048 | 3.86761 | 5.08836 | 6.21504 | 6.3189  | 6.07231 |
| TOMM20L   | 5.30341 | 5.1827  | 5.00507 | 5.27831 | 4.86374 | 5.61691 | 5.17516 | 4.91135 | 5.06565 |
| KIAA0586  | 8.63829 | 8.70953 | 8.72416 | 7.41883 | 6.10026 | 6.38823 | 7.71158 | 6.90668 | 6.85545 |
| DAAM1     | 9.9651  | 9.84854 | 10.1307 | 9.05549 | 7.95996 | 10.3081 | 9.58263 | 10.0865 | 10.3078 |
| JKAMP     | 8.10592 | 8.10451 | 8.11421 | 8.09466 | 6.26041 | 7.22962 | 8.54158 | 7.88764 | 8.03317 |
| PCNX4     | 8.90022 | 8.78912 | 8.79344 | 8.08234 | 5.70459 | 7.67537 | 8.37234 | 8.1484  | 8.46074 |
| SIX6      | 5.54566 | 5.4153  | 5.83134 | 6.02281 | 5.83792 | 5.95058 | 6.38074 | 6.32783 | 6.0981  |
| TRMT5     | 5.5926  | 5.38269 | 5.45042 | 5.6455  | 4.96839 | 5.64603 | 4.64599 | 5.789   | 5.61355 |
| FLJ22447  | 6.29279 | 6.26442 | 6.00257 | 6.10877 | 5.71671 | 5.79131 | 5.82218 | 5.75154 | 6.27413 |
| SYT16     | 5.08596 | 5.27075 | 5.0972  | 5.67779 | 6.44181 | 5.72172 | 5.57988 | 5.6663  | 5.36213 |
| LINC00643 | 4.51463 | 4.20295 | 4.47886 | 5.06682 | 5.79295 | 5.54842 | 4.53302 | 4.99433 | 4.79763 |

|              |         |         |         |         |         |         |         |         |         |
|--------------|---------|---------|---------|---------|---------|---------|---------|---------|---------|
| RHOJ         | 8.34049 | 6.79059 | 7.97136 | 6.7114  | 6.19228 | 6.337   | 6.89624 | 7.5002  | 7.70286 |
| WDR89        | 4.53545 | 4.08847 | 3.8929  | 5.56009 | 5.15503 | 5.10793 | 5.2065  | 4.24497 | 4.57173 |
| AKAP5        | 4.60445 | 4.80715 | 4.73882 | 5.12801 | 5.25133 | 4.85445 | 4.83274 | 4.73168 | 4.825   |
| ZBTB1        | 7.64678 | 7.75074 | 7.30306 | 7.49937 | 6.0326  | 6.67187 | 7.68086 | 6.4016  | 7.08355 |
| HSPA2        | 9.30816 | 8.98609 | 9.1077  | 9.72233 | 6.59455 | 7.59503 | 9.3399  | 8.8297  | 8.68604 |
| MIR4706      | 4.26226 | 4.26607 | 4.67899 | 4.5862  | 4.53482 | 4.61133 | 3.99089 | 5.05655 | 4.77575 |
| LOC100506321 | 4.68237 | 4.79658 | 4.63365 | 5.11769 | 5.14607 | 4.69923 | 5.20894 | 4.97533 | 4.75085 |
| MIR625       | 1.88239 | 1.84531 | 1.83689 | 2.15458 | 1.63939 | 2.44256 | 2.33972 | 2.24903 | 2.00912 |
| LINC00238    | 2.98278 | 3.08476 | 3.1019  | 3.19818 | 4.09386 | 3.37235 | 3.38376 | 3.11313 | 3.25794 |
| GPHN         | 7.70565 | 7.65192 | 7.81415 | 6.62166 | 6.19743 | 6.22532 | 6.84341 | 5.90131 | 6.35128 |
| RDH12        | 10.3132 | 9.40748 | 9.49892 | 9.42094 | 7.9299  | 8.59663 | 8.92014 | 8.35662 | 8.93478 |
| RAD51B       | 6.49984 | 6.08988 | 6.00895 | 5.6278  | 5.82793 | 5.94433 | 5.86083 | 5.46622 | 5.72154 |
| EXD2         | 6.985   | 6.77084 | 6.80302 | 5.8926  | 4.99181 | 5.87732 | 6.36032 | 5.55324 | 6.31349 |
| GALNT16      | 6.06538 | 5.82406 | 6.40474 | 5.73021 | 5.9094  | 5.95543 | 5.87214 | 5.80836 | 5.85842 |
| SUSD6        | 8.74985 | 8.47829 | 8.32348 | 8.17487 | 7.30441 | 8.18373 | 8.61226 | 8.83072 | 8.11181 |
| SRSF5        | 8.85462 | 8.7221  | 8.43979 | 8.07885 | 6.93384 | 7.48769 | 8.07887 | 8.25279 | 8.1018  |
| SMOC1        | 6.0262  | 6.10328 | 6.01708 | 6.27864 | 6.65404 | 6.51252 | 6.53287 | 6.73126 | 6.38854 |
| SYNJ2BP      | 4.05345 | 3.37717 | 3.70594 | 5.18595 | 4.49811 | 4.2892  | 5.92443 | 4.19381 | 3.99866 |
| ADAM21       | 3.09892 | 3.20523 | 2.70159 | 3.22219 | 4.34816 | 3.52088 | 3.2612  | 3.19695 | 3.01603 |
| TTC9         | 8.08485 | 8.48215 | 8.328   | 9.53213 | 9.97559 | 10.9321 | 10.3763 | 10.638  | 10.6584 |
| PCNX1        | 8.98071 | 8.96132 | 9.02155 | 8.13408 | 6.71713 | 8.00204 | 8.26438 | 8.94195 | 8.59737 |
| SIPA1L1      | 8.66971 | 8.88653 | 8.56811 | 7.96305 | 7.10645 | 8.1332  | 8.22638 | 8.21527 | 8.34731 |
| LOC145474    | 6.39304 | 6.3987  | 6.16996 | 5.66059 | 6.03675 | 4.53982 | 4.55418 | 6.18465 | 6.20937 |
| RGS6         | 5.58023 | 5.50403 | 5.55831 | 5.63719 | 5.8781  | 5.82247 | 4.98592 | 5.63823 | 5.41636 |
| DCAF4        | 7.33082 | 7.60168 | 7.28008 | 6.86444 | 6.76544 | 6.64369 | 7.17764 | 7.0921  | 6.47678 |
| RBM25        | 8.71043 | 8.94753 | 8.84212 | 7.55136 | 5.12359 | 6.73141 | 7.66525 | 7.70369 | 7.71788 |

|           |         |         |         |         |         |         |         |         |         |
|-----------|---------|---------|---------|---------|---------|---------|---------|---------|---------|
| PSEN1     | 8.29023 | 8.37397 | 8.27163 | 7.7874  | 6.33442 | 7.79703 | 8.13207 | 7.83641 | 8.24889 |
| c14orf169 | 7.85845 | 7.79918 | 7.90894 | 7.57692 | 6.86557 | 7.66142 | 8.06018 | 7.14434 | 7.12275 |
| ACOT1     | 5.50535 | 5.37619 | 5.45588 | 6.0886  | 5.61954 | 5.80395 | 5.54981 | 5.30672 | 5.57677 |
| ACOT2     | 6.43747 | 5.55969 | 5.78296 | 6.1178  | 5.59383 | 5.75805 | 6.58342 | 5.52152 | 5.89374 |
| ACOT4     | 5.57546 | 5.82827 | 5.93142 | 6.34859 | 5.78373 | 5.87441 | 6.23543 | 5.8457  | 5.687   |
| ACOT6     | 5.6593  | 5.42224 | 5.8376  | 6.18388 | 6.32429 | 6.07668 | 5.81051 | 6.10975 | 6.17839 |
| MIR4505   | 5.1673  | 5.63118 | 5.1061  | 6.2323  | 6.52666 | 6.4971  | 5.9591  | 6.08984 | 5.8997  |
| PTGR2     | 6.38155 | 6.11916 | 6.12921 | 6.26883 | 5.94776 | 5.56034 | 6.39347 | 5.57344 | 5.93633 |
| ZNF410    | 7.9531  | 7.64032 | 7.66083 | 7.83936 | 6.82509 | 7.84179 | 7.79307 | 7.59808 | 8.13157 |
| BBOF1     | 5.48671 | 5.69024 | 5.84377 | 4.99623 | 4.61758 | 5.38478 | 5.61983 | 4.88855 | 5.26645 |
| LIN52     | 6.81936 | 6.95296 | 7.14458 | 5.92235 | 6.69789 | 5.94094 | 5.90419 | 6.0515  | 5.94891 |
| VSX2      | 5.1183  | 5.32642 | 5.32389 | 5.96425 | 5.64709 | 6.23303 | 5.59275 | 6.07725 | 5.34624 |
| VRTN      | 4.61915 | 4.81754 | 4.41541 | 4.69756 | 4.89122 | 5.69891 | 5.0252  | 5.22915 | 5.0955  |
| ISCA2     | 7.3345  | 7.09654 | 7.36902 | 7.30178 | 7.21668 | 7.11349 | 7.32514 | 7.00478 | 7.07313 |
| LTBP2     | 5.378   | 5.22458 | 5.62761 | 5.52654 | 4.34357 | 5.3325  | 6.02623 | 5.38038 | 5.28097 |
| FCF1      | 8.07885 | 8.53801 | 8.23438 | 8.45214 | 6.16499 | 7.72905 | 8.88961 | 7.39138 | 7.95011 |
| YLPM1     | 8.01546 | 8.40887 | 8.09887 | 6.8667  | 6.41942 | 6.04243 | 7.31957 | 6.47193 | 6.97493 |
| DLST      | 8.59404 | 8.42568 | 8.52306 | 8.00933 | 6.20757 | 8.60073 | 8.56725 | 8.36441 | 8.92683 |
| FOS       | 11.8513 | 9.40497 | 10.1507 | 10.8099 | 8.99149 | 10.681  | 10.864  | 9.89443 | 9.77099 |
| LINC01220 | 8.01422 | 6.05399 | 6.42147 | 6.94002 | 6.43996 | 6.50049 | 6.21283 | 6.32354 | 6.37759 |
| JDP2      | 7.35181 | 7.31896 | 7.37202 | 7.30293 | 7.77184 | 7.60883 | 6.96336 | 7.31458 | 7.37093 |
| IFT43     | 6.78703 | 6.49649 | 6.63271 | 6.86675 | 5.59419 | 6.28064 | 6.78637 | 6.68738 | 6.76006 |
| GPATCH2L  | 6.96148 | 7.0744  | 6.96334 | 6.40769 | 5.92647 | 6.38999 | 6.30745 | 6.9754  | 7.02383 |
| ESRRB     | 5.82787 | 6.13562 | 6.00325 | 6.21638 | 7.09633 | 6.34264 | 6.07863 | 6.38975 | 6.24962 |
| vash1     | 6.40558 | 6.0001  | 6.38357 | 6.59878 | 6.37506 | 6.50723 | 6.43727 | 6.56158 | 6.47212 |
| LRRC74A   | 4.88731 | 5.34291 | 5.3434  | 5.32993 | 5.76359 | 5.97996 | 5.32247 | 5.68834 | 5.63118 |



|           |         |         |         |         |         |         |         |         |         |
|-----------|---------|---------|---------|---------|---------|---------|---------|---------|---------|
| CIPC      | 7.22704 | 7.35613 | 7.22994 | 7.00044 | 6.4453  | 6.56958 | 6.95159 | 6.45931 | 6.7682  |
| tmem63c   | 6.75083 | 7.5662  | 8.40225 | 6.90236 | 7.5865  | 7.38845 | 7.26805 | 6.76355 | 7.35538 |
| ngb       | 5.21613 | 5.95716 | 6.12522 | 7.09732 | 6.22802 | 6.62498 | 6.469   | 6.06291 | 6.28782 |
| GSTZ1     | 6.2138  | 6.42202 | 6.5626  | 6.50158 | 6.36872 | 6.84429 | 6.77503 | 6.47819 | 6.57855 |
| SAMD15    | 5.12933 | 4.93275 | 5.02709 | 5.59801 | 5.8161  | 5.50515 | 5.19025 | 5.60179 | 4.99047 |
| SLIRP     | 6.72471 | 6.71124 | 7.09894 | 7.37529 | 6.10947 | 6.41861 | 7.40071 | 6.4415  | 6.8298  |
| C14orf178 | 4.72423 | 4.89697 | 4.72129 | 4.95801 | 7.92152 | 5.11266 | 5.54809 | 4.96421 | 4.9193  |
| ADCK1     | 6.84285 | 6.7253  | 6.66403 | 6.78841 | 6.67842 | 6.78001 | 6.93512 | 6.68522 | 6.77242 |
| NRXN3     | 5.90442 | 5.91937 | 5.67661 | 5.90442 | 6.74561 | 6.15426 | 5.76182 | 5.96854 | 5.79278 |
| DIO2-AS1  | 4.56025 | 4.41422 | 4.45278 | 4.72027 | 4.77904 | 4.99917 | 4.73554 | 4.61073 | 4.76672 |
| TSHR      | 4.97601 | 4.90948 | 4.80166 | 4.89849 | 5.70473 | 4.78151 | 4.96648 | 4.82002 | 4.76829 |
| FLRT2     | 7.85697 | 7.54676 | 7.21887 | 6.43056 | 6.50182 | 5.09806 | 6.51803 | 6.46849 | 7.27275 |
| LOC283585 | 2.81489 | 3.28624 | 2.95203 | 2.87821 | 3.76228 | 3.07605 | 3.17983 | 2.74279 | 2.76164 |
| GPR65     | 5.59732 | 5.87318 | 5.63856 | 5.89713 | 6.91104 | 6.38374 | 5.66726 | 5.69948 | 5.97853 |
| SPATA7    | 7.12709 | 7.2019  | 7.24453 | 5.7106  | 5.69912 | 5.95469 | 5.70017 | 6.07333 | 5.89967 |
| ZC3H14    | 8.99879 | 8.93114 | 8.80926 | 8.27794 | 6.41728 | 7.52714 | 8.37631 | 7.89657 | 7.83435 |
| TTC8      | 6.92363 | 7.27564 | 7.15047 | 6.13738 | 4.82568 | 5.46806 | 6.49096 | 5.20814 | 5.56242 |
| FOXN3-AS1 | 5.33538 | 4.7715  | 4.88875 | 6.13556 | 4.69811 | 5.66104 | 7.28052 | 5.32215 | 5.9072  |
| FOXN3-AS2 | 5.07907 | 4.9662  | 5.27693 | 5.49839 | 5.69672 | 5.12309 | 5.79629 | 5.0988  | 5.14294 |
| TDP1      | 7.71999 | 7.68843 | 7.49064 | 7.93872 | 6.55526 | 7.48354 | 7.91297 | 7.11622 | 7.46565 |
| LINC00642 | 3.63294 | 3.97354 | 3.85051 | 4.71884 | 4.72378 | 4.84021 | 4.44084 | 4.3549  | 4.3947  |
| c14orf159 | 7.81961 | 7.82511 | 8.10288 | 6.68475 | 6.20069 | 6.16325 | 6.93984 | 6.4011  | 6.55136 |
| rin3      | 6.55208 | 5.83385 | 6.5187  | 6.56627 | 6.54876 | 6.34468 | 6.83237 | 6.09737 | 6.48894 |
| GOLGA5    | 9.64974 | 10.0695 | 9.98318 | 9.43277 | 7.41594 | 9.61735 | 9.88674 | 9.37196 | 9.50939 |
| CHGA      | 4.91399 | 4.95379 | 5.12354 | 5.57177 | 5.4529  | 5.904   | 5.03094 | 5.473   | 5.62053 |
| ITPK1-AS1 | 4.61336 | 4.93396 | 4.70023 | 4.83062 | 5.68818 | 4.94696 | 5.03221 | 4.99925 | 5.12537 |

|            |         |         |         |         |         |         |         |         |         |
|------------|---------|---------|---------|---------|---------|---------|---------|---------|---------|
| TMEM251    | 6.42213 | 6.08573 | 6.26249 | 7.35081 | 6.27321 | 7.66405 | 7.97552 | 7.61005 | 7.11681 |
| UBR7       | 7.4185  | 7.38713 | 7.74931 | 6.53486 | 4.51932 | 6.35641 | 7.06132 | 7.1664  | 6.65609 |
| UNC79      | 4.9404  | 5.21191 | 4.97228 | 5.17375 | 6.45152 | 5.07495 | 5.04967 | 5.20483 | 5.27723 |
| COX8C      | 3.51522 | 3.42019 | 3.34809 | 3.5144  | 3.88137 | 3.81823 | 3.81882 | 3.6107  | 3.38672 |
| LINC00521  | 5.29972 | 4.93054 | 5.50256 | 5.88211 | 6.20087 | 5.99892 | 5.47516 | 5.38199 | 5.69397 |
| DICER1-AS1 | 6.31086 | 6.44957 | 6.35952 | 6.19491 | 6.35714 | 5.79118 | 5.92941 | 6.1835  | 6.18377 |
| GLRX5      | 6.49178 | 6.63242 | 6.50121 | 6.72712 | 6.2926  | 6.70594 | 7.70087 | 6.65956 | 6.36594 |
| TCL1B      | 5.17119 | 5.1978  | 4.78771 | 5.41382 | 5.01734 | 6.14806 | 5.89927 | 5.93639 | 5.86212 |
| TUNAR      | 6.14477 | 6.60149 | 6.3738  | 6.94635 | 7.23956 | 7.18409 | 6.87775 | 6.94813 | 7.0084  |
| C14orf132  | 6.37201 | 6.53979 | 6.50574 | 5.97047 | 6.26848 | 6.02766 | 6.04406 | 6.04024 | 5.88205 |
| BDKRB2     | 7.47021 | 7.33481 | 7.10427 | 7.57311 | 6.89822 | 7.32949 | 8.24125 | 7.9881  | 8.26862 |
| BDKRB1     | 5.87805 | 5.70439 | 5.30844 | 5.95845 | 5.7193  | 6.12525 | 6.61318 | 6.14482 | 6.6658  |
| GSKIP      | 8.21343 | 7.93941 | 7.91039 | 8.0642  | 6.76617 | 7.96271 | 8.31694 | 8.58568 | 8.47233 |
| AK7        | 6.2589  | 6.51615 | 6.10683 | 5.21036 | 5.57547 | 5.58949 | 5.63149 | 5.08619 | 5.3447  |
| PAPOLA     | 8.72233 | 8.19702 | 8.67758 | 7.7984  | 5.55983 | 7.56883 | 7.97118 | 7.7994  | 8.01606 |
| VRK1       | 6.96354 | 6.74252 | 7.23262 | 6.88279 | 6.20906 | 6.62187 | 6.72283 | 6.29248 | 6.45995 |
| CCNK       | 8.76907 | 8.63246 | 8.73996 | 8.47477 | 7.85135 | 8.43368 | 8.49428 | 8.46407 | 8.7049  |
| CCDC85C    | 6.41733 | 5.97622 | 6.49296 | 6.42525 | 6.18995 | 7.04509 | 6.67155 | 6.39455 | 6.33994 |
| hhip1      | 5.47255 | 5.97262 | 5.5442  | 5.7029  | 5.91774 | 6.13865 | 5.59446 | 5.92724 | 5.91742 |
| EML1       | 7.65126 | 7.88124 | 7.28552 | 8.2265  | 6.53954 | 8.59231 | 8.73761 | 8.45541 | 9.3535  |
| EVL        | 7.3316  | 6.90115 | 6.91722 | 6.69084 | 6.82739 | 6.94696 | 6.5982  | 7.13219 | 6.48269 |
| Mir342     | 7.20115 | 7.89611 | 7.83614 | 7.95128 | 8.81187 | 7.99176 | 7.50181 | 7.87561 | 8.01203 |
| YY1        | 8.25838 | 8.2786  | 8.11573 | 8.35521 | 7.29957 | 8.24199 | 8.37106 | 7.95937 | 7.98412 |
| Mir345     | 6.39738 | 6.30698 | 6.47371 | 6.09915 | 7.24459 | 6.32747 | 6.20985 | 6.50854 | 6.32425 |
| WARS       | 4.84548 | 5.38718 | 5.30454 | 5.89818 | 5.1952  | 5.85168 | 5.98336 | 5.21737 | 5.81041 |
| WDR25      | 6.25779 | 6.34611 | 6.44881 | 6.61252 | 6.33979 | 6.2508  | 6.43408 | 6.40843 | 5.97002 |

|          |         |         |         |         |         |         |         |         |         |
|----------|---------|---------|---------|---------|---------|---------|---------|---------|---------|
| DLK1     | 5.7175  | 5.99747 | 5.45337 | 6.53964 | 6.30086 | 6.72374 | 6.21681 | 6.37849 | 6.27765 |
| meg3     | 7.51494 | 7.34266 | 6.96861 | 6.62359 | 6.63009 | 6.32982 | 6.22908 | 6.47327 | 6.19479 |
| MIR2392  | 6.88451 | 7.14612 | 7.0577  | 7.17059 | 7.82435 | 7.07923 | 7.41537 | 7.30102 | 6.97784 |
| Mir770   | 6.00688 | 5.94978 | 5.96206 | 5.95533 | 6.584   | 6.3708  | 5.84606 | 6.3199  | 6.28028 |
| Mir493   | 3.82276 | 2.93161 | 3.3586  | 2.98714 | 2.50432 | 3.48151 | 3.29182 | 3.01771 | 2.92587 |
| Mir337   | 4.20591 | 3.94756 | 4.31678 | 4.25122 | 4.40346 | 4.52758 | 3.88561 | 3.87184 | 4.24389 |
| MIR665   | 6.14698 | 5.89113 | 6.35301 | 5.89818 | 7.09111 | 6.37176 | 6.25122 | 6.31562 | 6.01716 |
| MIR431   | 5.88474 | 5.87383 | 5.58789 | 6.73018 | 5.83203 | 6.81472 | 6.14513 | 6.73834 | 6.51566 |
| RTL1     | 7.38065 | 7.49049 | 7.51746 | 7.30965 | 7.39503 | 7.74018 | 7.33424 | 7.61437 | 7.63177 |
| Mir127   | 7.41246 | 7.76378 | 7.6709  | 7.91897 | 8.30031 | 8.23727 | 8.07148 | 7.97773 | 8.12672 |
| MIR432   | 3.4364  | 3.59218 | 3.59218 | 4.57576 | 4.06469 | 4.57399 | 4.50598 | 4.66406 | 3.94849 |
| MIR136   | 3.31048 | 3.45885 | 3.46177 | 3.33791 | 4.05885 | 3.59715 | 3.23541 | 3.1949  | 3.4142  |
| MEG8     | 5.51567 | 5.79981 | 5.55131 | 5.4742  | 5.57225 | 5.67757 | 5.34337 | 5.41438 | 5.81414 |
| MIR370   | 5.60985 | 5.53249 | 5.48053 | 5.40288 | 6.67763 | 5.49706 | 5.99931 | 5.60267 | 5.47721 |
| MIR379   | 2.48316 | 2.51152 | 2.32302 | 3.2609  | 2.41222 | 2.82071 | 3.32386 | 2.56269 | 2.62689 |
| Mir411   | 2.30449 | 2.50452 | 2.24687 | 3.27654 | 1.94121 | 2.70702 | 2.78978 | 2.28716 | 2.60543 |
| MIR299   | 2.73514 | 2.88982 | 2.73373 | 3.24604 | 2.51457 | 3.59232 | 2.85188 | 3.5735  | 3.04023 |
| Mir380   | 2.62396 | 2.77334 | 2.39755 | 2.6649  | 2.20459 | 3.10953 | 2.63277 | 2.54349 | 2.36911 |
| MIR1197  | 4.95434 | 4.50173 | 4.77107 | 4.71733 | 5.15047 | 5.23519 | 5.4917  | 4.88584 | 4.90174 |
| MIR323A  | 2.94333 | 2.67296 | 2.63229 | 3.34098 | 4.58543 | 4.72397 | 4.43741 | 3.34446 | 3.61293 |
| MIR758   | 5.574   | 5.50531 | 5.39035 | 5.69821 | 6.05109 | 5.40964 | 5.6443  | 5.91718 | 5.42191 |
| MIR329-1 | 5.93142 | 6.73544 | 5.52893 | 5.86256 | 6.77254 | 5.96027 | 5.47481 | 5.75901 | 5.93944 |
| MIR329-2 | 2.71783 | 3.69126 | 2.71694 | 3.31285 | 3.19822 | 2.78743 | 2.94729 | 2.48687 | 2.66894 |
| MIR494   | 5.56745 | 5.50083 | 5.86971 | 5.7756  | 6.31872 | 6.09802 | 4.90366 | 6.25054 | 5.86629 |
| MIR1193  | 3.83645 | 4.05282 | 3.76681 | 4.70123 | 4.12455 | 5.02393 | 4.76247 | 4.42551 | 4.38157 |
| MIR543   | 3.76276 | 3.70593 | 3.46192 | 4.35612 | 7.25858 | 5.09562 | 4.20932 | 4.76847 | 4.3989  |

|           |         |         |         |         |         |         |         |         |         |
|-----------|---------|---------|---------|---------|---------|---------|---------|---------|---------|
| MIR495    | 3.16881 | 3.18877 | 3.25081 | 2.87845 | 4.88508 | 3.28435 | 3.94554 | 3.41758 | 3.60801 |
| MIR376C   | 1.85224 | 2.05977 | 1.87881 | 2.03712 | 2.29966 | 2.36842 | 2.00226 | 2.1512  | 2.10805 |
| MIR376A2  | 2.55781 | 2.66116 | 2.31059 | 4.33334 | 2.51783 | 3.6711  | 2.88453 | 2.45401 | 2.48714 |
| Mir654    | 5.56164 | 5.30853 | 5.44702 | 5.55141 | 6.57071 | 5.20384 | 5.49101 | 5.7408  | 5.2334  |
| MIR376B   | 3.34872 | 2.96508 | 2.2609  | 4.13756 | 3.952   | 2.64495 | 3.15353 | 3.00155 | 2.57267 |
| MIR376A1  | 1.77261 | 1.9898  | 1.86323 | 2.22299 | 1.71283 | 2.17027 | 1.94169 | 1.75029 | 1.81115 |
| MIR300    | 3.58456 | 2.95086 | 2.80119 | 3.23605 | 3.10973 | 2.95708 | 3.29703 | 3.2676  | 3.0173  |
| MIR1185-1 | 2.81825 | 2.69645 | 2.67374 | 3.60451 | 4.24936 | 3.17228 | 3.29595 | 3.29522 | 3.14189 |
| MIR1185-2 | 2.78851 | 2.63069 | 2.10645 | 3.514   | 3.97    | 3.38697 | 2.45929 | 2.48854 | 2.71823 |
| MIR381    | 2.87242 | 3.50239 | 3.03806 | 3.27064 | 2.99189 | 3.22795 | 3.02643 | 3.0754  | 2.71865 |
| Mir487b   | 4.97633 | 5.17143 | 4.05428 | 4.06743 | 6.46859 | 3.66285 | 3.70312 | 4.25885 | 4.33642 |
| MIR539    | 5.49561 | 5.80546 | 5.52856 | 5.68441 | 5.595   | 5.73775 | 5.26329 | 6.09783 | 5.93731 |
| MIR889    | 2.75326 | 3.0787  | 2.82004 | 2.9619  | 3.27688 | 3.08436 | 2.99502 | 2.71194 | 3.06645 |
| MIR544A   | 5.14132 | 5.74508 | 5.60585 | 5.63047 | 6.60942 | 6.2393  | 5.67316 | 6.20887 | 5.3728  |
| MIR655    | 2.74905 | 2.61032 | 2.49001 | 3.47642 | 2.65143 | 3.35227 | 2.39701 | 2.6741  | 2.56927 |
| MIR487A   | 3.03941 | 3.10413 | 3.00153 | 3.29918 | 3.36277 | 4.1003  | 3.2121  | 3.70953 | 3.37638 |
| MIR382    | 5.25782 | 5.38538 | 5.68485 | 4.90129 | 6.67698 | 6.37429 | 4.84747 | 5.6894  | 5.60972 |
| MIR134    | 6.09483 | 6.79121 | 6.37912 | 7.17437 | 7.33878 | 7.42574 | 6.28729 | 6.81591 | 7.2169  |
| Mir668    | 5.20652 | 5.53446 | 5.36225 | 5.85841 | 6.13359 | 6.31805 | 5.77828 | 6.32466 | 6.25678 |
| MIR485    | 3.97667 | 4.01072 | 3.87938 | 4.29687 | 3.96681 | 4.79504 | 4.37228 | 4.02841 | 4.15156 |
| MIR323B   | 4.14562 | 4.64888 | 5.17219 | 5.49407 | 4.53735 | 5.48128 | 5.08082 | 5.14774 | 4.92729 |
| Mir154    | 3.53883 | 2.45623 | 2.32338 | 2.47625 | 3.20555 | 4.23913 | 3.52161 | 3.06342 | 2.76173 |
| MIR496    | 3.03488 | 3.15048 | 2.94525 | 3.30991 | 3.60279 | 3.80209 | 3.54132 | 3.29983 | 3.29209 |
| MIR377    | 4.36416 | 4.46358 | 4.67449 | 4.8443  | 4.96906 | 5.27261 | 4.9072  | 4.77245 | 5.03547 |
| MIR541    | 6.38517 | 6.13326 | 6.27175 | 6.66461 | 7.04767 | 6.86887 | 6.22884 | 6.68762 | 6.40105 |
| Mir409    | 3.48449 | 4.15465 | 3.5944  | 4.67761 | 3.99094 | 4.78578 | 4.45681 | 4.31392 | 4.13974 |

|           |         |         |         |         |         |         |         |         |         |
|-----------|---------|---------|---------|---------|---------|---------|---------|---------|---------|
| MIR412    | 7.05931 | 7.27146 | 6.85139 | 8.58262 | 8.82817 | 8.74218 | 8.1782  | 7.69778 | 7.9119  |
| Mir369    | 1.82342 | 1.90463 | 1.76454 | 2.13445 | 2.7179  | 2.11273 | 2.32699 | 2.01506 | 1.92654 |
| MIR410    | 2.56016 | 2.49602 | 2.45966 | 2.67579 | 2.65589 | 2.96955 | 2.73217 | 2.37341 | 2.6868  |
| MIR656    | 4.17609 | 4.4095  | 4.42453 | 4.32454 | 5.33198 | 4.69147 | 4.31851 | 4.38062 | 5.28611 |
| MEG9      | 6.14596 | 6.01819 | 6.12083 | 6.48651 | 6.81819 | 6.38988 | 6.49307 | 6.56543 | 6.63895 |
| LINC00239 | 5.55986 | 5.59426 | 5.56592 | 5.42488 | 6.01498 | 5.47212 | 5.50543 | 5.71428 | 5.65614 |
| WDR20     | 6.8468  | 7.08361 | 7.01576 | 6.82298 | 6.05874 | 6.86601 | 6.8817  | 6.96746 | 6.91132 |
| ZNF839    | 6.7854  | 6.7409  | 6.63372 | 6.47366 | 6.30726 | 6.41014 | 6.42833 | 5.8761  | 5.93676 |
| TECPR2    | 7.40645 | 7.14687 | 7.34856 | 6.90824 | 6.2198  | 6.90312 | 7.18799 | 6.82205 | 7.37043 |
| MIR4309   | 3.616   | 3.55332 | 3.86546 | 2.73552 | 3.90514 | 2.39413 | 4.13882 | 3.55332 | 3.32593 |
| RCOR1     | 9.55088 | 9.1172  | 9.03695 | 9.36806 | 7.53329 | 10.4878 | 9.69949 | 10.4121 | 10.4532 |
| TRAF3     | 8.18449 | 8.12224 | 7.86076 | 7.49776 | 6.79598 | 7.12782 | 7.73718 | 7.94747 | 7.813   |
| AMN       | 5.93449 | 5.79673 | 6.17332 | 7.1537  | 6.19247 | 7.06902 | 6.71141 | 6.59052 | 6.69231 |
| EXOC3L4   | 6.15766 | 6.41058 | 6.3449  | 6.73199 | 6.6389  | 6.99428 | 6.84543 | 6.94627 | 6.71065 |
| EIF5      | 9.56309 | 9.1904  | 9.28681 | 8.64466 | 8.08209 | 9.13857 | 8.8996  | 9.27076 | 9.39184 |
| MARK3     | 9.16613 | 9.02612 | 9.01397 | 8.71641 | 7.62938 | 9.5925  | 9.06846 | 10.0358 | 9.97636 |
| TRMT61A   | 6.33973 | 6.62771 | 6.39212 | 6.71364 | 6.64961 | 7.26174 | 7.03504 | 7.01652 | 6.77316 |
| KLC1      | 9.30101 | 9.3251  | 9.25948 | 9.0497  | 7.4847  | 9.16473 | 9.33705 | 9.57438 | 9.75783 |
| LINC00637 | 5.46922 | 5.50258 | 5.42611 | 5.95632 | 6.18653 | 5.95135 | 5.67195 | 5.64249 | 5.91331 |
| TDRD9     | 4.21817 | 4.03231 | 3.99193 | 4.45712 | 5.77337 | 4.63356 | 4.03454 | 4.5127  | 4.908   |
| ASPG      | 7.26553 | 7.19351 | 7.37854 | 7.99116 | 7.88286 | 8.11768 | 7.58744 | 7.91056 | 7.82396 |
| mir203a   | 7.89777 | 4.69941 | 4.68512 | 6.6078  | 3.45549 | 6.10409 | 5.78677 | 6.85223 | 6.07951 |
| KIF26A    | 6.7969  | 6.86758 | 7.05859 | 7.24265 | 7.68769 | 7.50451 | 6.97338 | 6.97593 | 7.20504 |
| C14orf180 | 5.92453 | 6.5259  | 6.27474 | 7.17041 | 6.673   | 7.67162 | 7.05772 | 7.08875 | 7.01558 |
| ADSSL1    | 6.74205 | 6.60778 | 6.78963 | 7.42193 | 7.71657 | 7.92888 | 7.73813 | 6.68517 | 6.78662 |
| AKT1      | 5.78331 | 5.5211  | 5.92292 | 6.64568 | 5.22364 | 6.47539 | 7.38776 | 6.01951 | 5.85102 |

|           |         |         |         |         |         |         |         |         |         |
|-----------|---------|---------|---------|---------|---------|---------|---------|---------|---------|
| ZBTB42    | 5.67139 | 5.63128 | 5.5618  | 5.92935 | 5.51398 | 6.02131 | 6.01769 | 5.70042 | 5.68224 |
| LINC00638 | 4.83327 | 4.99991 | 4.76714 | 5.61179 | 6.2724  | 5.55445 | 5.26359 | 5.65272 | 5.62885 |
| CEP170B   | 8.5389  | 8.5306  | 8.629   | 8.97071 | 7.81002 | 9.44527 | 9.43285 | 8.80757 | 9.21141 |
| C14orf79  | 6.70693 | 6.5273  | 6.5944  | 6.59098 | 6.34391 | 6.63571 | 7.15446 | 6.66546 | 6.52307 |
| BTBD6     | 8.70783 | 8.40459 | 8.78361 | 9.18566 | 8.06155 | 9.82448 | 9.34342 | 8.37445 | 9.15679 |
| PACS2     | 7.3547  | 7.13733 | 7.41731 | 7.35665 | 6.94375 | 7.35949 | 7.48937 | 7.12154 | 7.24049 |
| TEX22     | 6.42975 | 6.2575  | 6.43433 | 6.82588 | 7.22417 | 7.2706  | 7.24208 | 7.1737  | 7.01654 |
| MTA1      | 7.35767 | 7.29016 | 7.22361 | 7.40045 | 6.15782 | 7.17285 | 7.23749 | 6.93513 | 7.01767 |
| CRIP2     | 6.92218 | 5.93013 | 7.3032  | 7.21651 | 6.6696  | 7.91376 | 8.16856 | 8.00048 | 7.89919 |
| CRIP1     | 6.80826 | 6.48441 | 7.3776  | 7.28991 | 6.70214 | 8.21685 | 8.75455 | 7.38331 | 7.56538 |
| C14orf80  | 6.32418 | 6.49592 | 6.38899 | 7.35845 | 7.11344 | 6.88533 | 6.84398 | 6.77977 | 6.86069 |
| TMEM121   | 4.83849 | 4.94162 | 4.96646 | 6.09915 | 5.54194 | 5.95293 | 5.26057 | 5.80585 | 5.39895 |
| FAM30A    | 5.23853 | 5.47636 | 5.66197 | 6.12573 | 6.91307 | 5.62992 | 5.90683 | 5.83714 | 6.13293 |
| LINC00226 | 4.6621  | 5.25408 | 4.9305  | 5.23631 | 5.25408 | 4.72158 | 4.9343  | 4.88707 | 4.95093 |
| LINC00221 | 3.85894 | 4.09178 | 3.81562 | 4.28633 | 5.01322 | 4.42462 | 4.46952 | 4.04188 | 4.23047 |
| LOC642426 | 2.49024 | 2.86156 | 2.7595  | 3.95193 | 4.54129 | 3.86559 | 3.22995 | 3.73418 | 2.71401 |
| USP10     | 6.4292  | 6.32666 | 6.55004 | 7.55602 | 7.22415 | 7.19939 | 7.66704 | 6.66623 | 6.85898 |
| TTC5      | 6.7464  | 7.53574 | 7.08418 | 6.17863 | 6.55447 | 5.21494 | 6.40421 | 5.2604  | 5.8288  |
| rpph1     | 6.39567 | 7.46198 | 6.85029 | 7.47213 | 7.4939  | 7.9714  | 7.65737 | 7.20997 | 6.62739 |
| TEP1      | 7.9526  | 7.55917 | 7.72653 | 7.02708 | 7.00779 | 6.95671 | 7.61104 | 7.15756 | 7.4383  |
| KLHL33    | 5.93895 | 6.19772 | 6.26947 | 6.97021 | 7.18267 | 6.88695 | 6.55586 | 7.16073 | 6.77789 |
| OSGEP     | 6.12836 | 6.54829 | 6.49117 | 5.85353 | 5.36806 | 4.92735 | 5.66124 | 5.26937 | 5.22364 |
| TMEM55B   | 7.84139 | 7.79185 | 7.90955 | 7.84492 | 7.58621 | 8.10785 | 8.24695 | 8.43388 | 8.00865 |
| NDRG2     | 7.67614 | 7.93163 | 7.73275 | 6.65209 | 7.65136 | 8.3516  | 7.3287  | 8.63785 | 8.14677 |
| HNRNPC    | 10.0543 | 10.0504 | 9.7293  | 8.12515 | 7.31119 | 7.9119  | 8.23706 | 9.86416 | 9.53001 |
| SUPT16H   | 8.51401 | 8.61903 | 8.70732 | 7.86634 | 5.93683 | 7.00798 | 8.13681 | 7.35226 | 7.31279 |

|          |         |         |         |         |         |         |         |         |         |
|----------|---------|---------|---------|---------|---------|---------|---------|---------|---------|
| CHD8     | 9.11737 | 9.21968 | 9.01275 | 8.05776 | 6.36636 | 7.51037 | 8.40157 | 7.89001 | 8.33711 |
| mettl3   | 7.88318 | 7.83191 | 8.04583 | 7.01503 | 5.84651 | 6.63353 | 7.27887 | 6.41798 | 7.01774 |
| DAD1     | 11.4806 | 11.5724 | 12.0321 | 11.9593 | 11.4786 | 11.6366 | 12.0614 | 11.9787 | 12.0618 |
| RBM23    | 7.92291 | 7.35581 | 8.0357  | 7.30975 | 6.17803 | 6.30263 | 7.4543  | 6.70048 | 7.38363 |
| PRMT5    | 8.41468 | 8.00915 | 8.27823 | 8.56362 | 6.75558 | 7.36177 | 8.26364 | 8.23278 | 8.44979 |
| AJUBA    | 7.50754 | 8.51049 | 7.48889 | 8.38855 | 5.7806  | 7.30569 | 8.13816 | 7.1069  | 8.02013 |
| c14orf93 | 6.84797 | 6.41757 | 6.5526  | 5.8945  | 6.40758 | 5.92372 | 6.09737 | 5.62366 | 5.85003 |
| ACIN1    | 8.21692 | 8.23702 | 7.99363 | 7.66587 | 6.52426 | 7.25702 | 7.64142 | 7.46818 | 7.93659 |
| HOMEZ    | 7.09327 | 7.47431 | 7.14113 | 7.12379 | 6.8669  | 7.41719 | 7.32741 | 7.30837 | 6.81194 |
| EFS      | 8.35518 | 8.31613 | 8.08176 | 8.08146 | 7.05432 | 7.93116 | 8.44118 | 7.83616 | 7.82617 |
| MIR208A  | 2.97704 | 3.1922  | 3.03214 | 3.80735 | 2.91524 | 3.91336 | 3.92775 | 3.12369 | 3.66853 |
| Mir208b  | 1.977   | 2.03384 | 2.03354 | 2.59817 | 2.04635 | 2.18741 | 2.22682 | 1.97317 | 2.04511 |
| ZFHX2    | 6.01382 | 5.95922 | 5.87155 | 6.35159 | 6.5427  | 6.56711 | 6.1646  | 6.2778  | 6.34778 |
| JPH4     | 6.25216 | 6.50133 | 6.48531 | 6.98648 | 6.95964 | 6.87766 | 6.54548 | 6.68333 | 6.8127  |
| NRL      | 5.94449 | 6.06199 | 5.99436 | 6.75917 | 6.72776 | 6.65644 | 6.54181 | 6.38936 | 6.52631 |
| EMC9     | 6.51681 | 6.29685 | 6.32775 | 7.03073 | 6.92167 | 6.90102 | 6.85567 | 6.86581 | 6.40799 |
| IPO4     | 7.88767 | 7.65802 | 7.97677 | 8.42398 | 6.78436 | 8.0912  | 8.51898 | 7.32434 | 7.79923 |
| TM9SF1   | 8.72363 | 8.62865 | 8.56242 | 9.16717 | 7.05897 | 8.58518 | 9.57775 | 8.36321 | 9.05516 |
| CHMP4A   | 6.93041 | 7.04443 | 6.94698 | 6.84319 | 6.62252 | 7.50196 | 7.07938 | 6.71594 | 7.10648 |
| TINF2    | 9.31279 | 8.8651  | 8.94529 | 9.52533 | 9.38818 | 10.4182 | 10.0294 | 10.3887 | 10.465  |
| DHRS1    | 8.66526 | 8.47794 | 8.66585 | 9.03433 | 8.76351 | 9.39395 | 9.77542 | 9.01036 | 9.5442  |
| CIDEB    | 8.86131 | 8.76021 | 8.81883 | 7.57064 | 7.47516 | 7.61895 | 8.43048 | 7.88129 | 8.12233 |
| ADCY4    | 7.59049 | 7.22777 | 7.98683 | 7.03878 | 6.39844 | 6.17177 | 6.89427 | 6.95062 | 7.36712 |
| ripk3    | 6.80891 | 6.74807 | 6.98332 | 6.77513 | 5.87627 | 6.86215 | 7.20527 | 6.49901 | 7.45224 |
| CBLN3    | 6.20651 | 6.33434 | 6.78016 | 7.01324 | 7.52377 | 7.12871 | 6.57374 | 6.83917 | 6.85425 |
| ctsg     | 7.42679 | 6.55127 | 7.60132 | 6.10327 | 7.08302 | 7.24002 | 7.90357 | 7.06443 | 7.69358 |

|              |         |         |         |         |         |         |         |         |         |
|--------------|---------|---------|---------|---------|---------|---------|---------|---------|---------|
| STXBP6       | 7.06436 | 7.55173 | 7.08508 | 7.05472 | 7.1503  | 6.77237 | 6.12134 | 7.1508  | 6.63872 |
| NOVA1        | 3.55782 | 3.69072 | 3.66874 | 3.28602 | 3.12734 | 3.40564 | 3.02151 | 2.72847 | 2.69833 |
| PRKD1        | 6.50378 | 6.18986 | 6.13472 | 5.82991 | 5.57565 | 5.23769 | 5.29787 | 5.22306 | 5.54145 |
| LOC100506071 | 5.46699 | 5.66485 | 5.52739 | 5.14486 | 4.43899 | 4.76645 | 4.69421 | 5.06028 | 6.43417 |
| MIR624       | 4.25469 | 4.11467 | 4.35192 | 3.35085 | 2.46208 | 3.48908 | 3.70161 | 4.23353 | 5.4458  |
| hectd1       | 9.98231 | 9.91644 | 9.56282 | 9.45471 | 8.27367 | 10.2605 | 9.48209 | 9.30831 | 9.66656 |
| HEATR5A      | 9.00624 | 9.08718 | 8.77422 | 8.83531 | 6.88916 | 8.28685 | 8.78349 | 9.31389 | 9.60459 |
| DTD2         | 8.89221 | 8.85353 | 8.55445 | 9.00873 | 7.84624 | 8.27495 | 9.41237 | 8.20156 | 8.82296 |
| GPR33        | 4.29946 | 4.52569 | 4.05164 | 4.58582 | 6.50297 | 4.58903 | 4.28882 | 4.29231 | 3.99558 |
| ARHGAP5-AS1  | 6.41288 | 6.61037 | 6.31832 | 7.41514 | 7.094   | 8.18218 | 7.54347 | 7.4794  | 7.68074 |
| EGLN3        | 6.51165 | 6.68661 | 6.7495  | 6.8747  | 7.40787 | 7.09467 | 6.57211 | 6.69359 | 6.30312 |
| EAPP         | 8.05035 | 7.74125 | 8.07983 | 7.38546 | 5.42325 | 7.06073 | 8.04229 | 7.64866 | 6.98714 |
| SNX6         | 9.35852 | 9.31638 | 9.10589 | 9.18666 | 7.71757 | 9.58432 | 9.64482 | 9.14806 | 9.38912 |
| CFL2         | 6.9199  | 6.60265 | 7.18805 | 7.3021  | 4.46203 | 6.05734 | 6.78771 | 6.49719 | 6.88747 |
| PTCSC3       | 4.63347 | 4.44401 | 4.70291 | 5.28163 | 6.93655 | 5.64986 | 5.53345 | 5.0633  | 5.31049 |
| MBIP         | 8.21219 | 8.14176 | 8.12795 | 7.24249 | 5.93397 | 6.0918  | 7.63224 | 7.44291 | 6.81166 |
| SFTA3        | 4.80419 | 5.09437 | 4.8199  | 5.5157  | 5.59511 | 6.02299 | 5.49174 | 5.39428 | 4.83353 |
| NKX2-8       | 6.20066 | 5.94733 | 6.17137 | 6.89333 | 7.35431 | 6.80194 | 6.73717 | 6.97428 | 6.66219 |
| MIR4503      | 4.38471 | 3.82191 | 2.78364 | 3.19937 | 2.64969 | 3.50436 | 2.91491 | 3.5797  | 3.43916 |
| FOXA1        | 5.52712 | 5.18423 | 5.62542 | 6.03619 | 5.33609 | 6.03045 | 5.49394 | 5.50363 | 5.22578 |
| LINC00639    | 3.88064 | 3.98628 | 3.54617 | 4.04942 | 5.46752 | 4.29582 | 3.65074 | 4.52409 | 4.25252 |
| SEC23A       | 8.66041 | 8.7351  | 8.64053 | 8.90225 | 6.84873 | 8.74142 | 8.85368 | 8.64116 | 8.94604 |
| TRAPPC6B     | 8.74759 | 8.76028 | 8.89943 | 7.86499 | 5.56627 | 7.85492 | 8.69572 | 7.96308 | 8.55409 |
| LOC100288846 | 5.72762 | 5.05112 | 5.28259 | 5.92602 | 5.58049 | 6.26177 | 6.32734 | 5.47065 | 5.92512 |
| FBXO33       | 7.88785 | 8.11449 | 7.79132 | 7.91217 | 6.48049 | 8.38075 | 8.0175  | 8.93696 | 8.10973 |
| FSCB         | 4.60665 | 4.38418 | 4.55129 | 5.15757 | 4.6464  | 5.33353 | 5.04397 | 5.17262 | 4.65271 |



|           |         |         |         |         |         |         |         |         |         |
|-----------|---------|---------|---------|---------|---------|---------|---------|---------|---------|
| KLHL28    | 6.69662 | 6.88654 | 6.86414 | 6.99862 | 7.10732 | 6.89704 | 7.11737 | 7.33213 | 7.10378 |
| MIS18BP1  | 8.18444 | 8.24158 | 8.58187 | 6.80913 | 5.23835 | 5.61999 | 7.28498 | 6.74005 | 6.24529 |
| RPL10L    | 4.57941 | 4.4502  | 4.22206 | 5.1522  | 5.34267 | 4.62719 | 5.31631 | 5.11139 | 4.60623 |
| MDGA2     | 4.8341  | 4.58762 | 4.76947 | 4.73391 | 4.76985 | 5.18686 | 4.78573 | 4.68849 | 4.71498 |
| MIR548Y   | 5.77099 | 4.90119 | 5.84935 | 4.53723 | 5.85766 | 4.26152 | 4.23476 | 4.44233 | 5.41747 |
| LINC00648 | 3.21846 | 3.47716 | 2.98169 | 3.49755 | 4.24526 | 3.22359 | 3.01615 | 3.06627 | 2.89947 |
| RPS29     | 7.34151 | 7.37602 | 7.52087 | 7.41171 | 7.39071 | 7.64951 | 7.35163 | 7.21166 | 7.23184 |
| RPL36AL   | 7.04521 | 7.38706 | 7.16023 | 7.97313 | 7.21026 | 7.91388 | 8.02025 | 7.52322 | 7.5661  |
| NEMF      | 8.91701 | 9.14224 | 8.85048 | 7.76135 | 5.7106  | 7.03962 | 7.96919 | 7.68912 | 7.91745 |
| LINC01588 | 6.2993  | 6.44841 | 6.16901 | 6.12139 | 6.60192 | 6.4046  | 6.27908 | 6.16056 | 6.39694 |
| VCPKMT    | 7.732   | 7.49542 | 7.259   | 6.76437 | 5.92688 | 6.38167 | 7.33134 | 6.27552 | 6.27352 |
| SOS2      | 9.37554 | 9.26502 | 9.08669 | 7.53821 | 5.99465 | 7.77503 | 8.29943 | 8.31098 | 8.48114 |
| L2HGDH    | 6.86964 | 6.55948 | 6.80345 | 5.82939 | 5.05311 | 4.93462 | 5.71994 | 5.4898  | 5.05158 |
| MIR4504   | 6.65476 | 6.71369 | 6.25249 | 4.47919 | 5.80959 | 4.11035 | 4.0704  | 4.78313 | 4.73055 |
| CDKL1     | 6.77087 | 6.89104 | 7.21435 | 6.60235 | 6.63349 | 6.27781 | 6.31084 | 6.13565 | 6.46891 |
| MAP4K5    | 10.1012 | 10.1727 | 9.99602 | 9.02155 | 7.29146 | 8.60193 | 9.13369 | 8.97279 | 8.8338  |
| SAV1      | 7.68708 | 7.82713 | 7.60104 | 7.51686 | 5.86425 | 8.10166 | 7.82133 | 7.59651 | 7.34875 |
| NIN       | 8.74751 | 8.88342 | 8.63467 | 7.90046 | 6.06633 | 7.60447 | 8.42073 | 7.78761 | 8.16196 |
| TRIM9     | 5.4769  | 5.46135 | 5.93534 | 5.46487 | 5.93294 | 6.20693 | 5.25706 | 5.62222 | 5.64456 |
| FRMD6-AS2 | 5.19709 | 5.15244 | 4.94248 | 5.08056 | 4.43946 | 4.97686 | 5.32109 | 5.0735  | 5.00565 |
| FRMD6-AS1 | 6.36065 | 6.39708 | 6.56598 | 6.61044 | 6.80143 | 7.21228 | 6.40082 | 6.95124 | 7.05218 |
| NID2      | 7.19097 | 6.3598  | 6.60897 | 7.60688 | 6.917   | 6.35605 | 6.86973 | 6.83127 | 6.87338 |
| TXNDC16   | 6.20343 | 6.07313 | 6.14506 | 4.49033 | 3.6699  | 4.74033 | 5.20721 | 5.02489 | 5.04489 |
| ERO1A     | 8.81582 | 8.42281 | 8.98944 | 9.11959 | 11.0231 | 11.5396 | 10.8124 | 11.5525 | 10.7372 |
| FERMT2    | 7.12241 | 6.78335 | 7.35505 | 7.3571  | 6.12823 | 6.19938 | 5.97392 | 7.07854 | 7.24655 |
| BMP4      | 7.45796 | 6.8696  | 7.64883 | 6.19534 | 6.31605 | 6.54629 | 6.74237 | 6.4315  | 5.95837 |

|           |         |         |         |         |         |         |         |         |         |
|-----------|---------|---------|---------|---------|---------|---------|---------|---------|---------|
| CNIH1     | 8.36686 | 8.2747  | 8.40082 | 9.29616 | 7.69632 | 8.83465 | 8.94305 | 8.96875 | 8.80779 |
| GCH1      | 7.07523 | 6.34841 | 6.60529 | 6.90535 | 6.08965 | 6.55723 | 7.46347 | 7.56177 | 7.40884 |
| MIR4308   | 2.41876 | 2.40141 | 2.33551 | 2.34324 | 2.29096 | 2.74387 | 2.53458 | 2.46866 | 2.3198  |
| WDHD1     | 7.1837  | 7.10197 | 7.27552 | 7.17497 | 5.78987 | 6.32898 | 6.89034 | 6.12714 | 6.25732 |
| UBE2L3    | 7.12573 | 7.09838 | 7.06861 | 9.56067 | 9.41894 | 9.24011 | 9.87592 | 8.08611 | 8.38795 |
| ATG14     | 8.43503 | 8.58548 | 8.53042 | 7.25236 | 6.90097 | 8.35825 | 7.70865 | 8.10866 | 7.45662 |
| TBPL2     | 4.44098 | 4.28291 | 4.22971 | 4.97023 | 4.87917 | 4.8081  | 4.47296 | 4.42615 | 4.89332 |
| KTN1-AS1  | 6.25328 | 5.83327 | 5.71267 | 5.36089 | 5.77117 | 5.59398 | 5.99872 | 5.27635 | 5.687   |
| LINC00520 | 4.15259 | 4.54262 | 5.00397 | 5.60385 | 6.20962 | 5.79777 | 5.24982 | 7.73302 | 6.60976 |
| OTX2      | 4.70244 | 4.93311 | 5.13226 | 5.75678 | 6.06898 | 5.93287 | 5.17073 | 5.86914 | 5.78447 |
| C14orf105 | 3.58385 | 4.12098 | 3.69295 | 3.4545  | 5.64206 | 3.798   | 3.80168 | 4.05661 | 3.96005 |
| PSMA3-AS1 | 7.48323 | 7.41641 | 7.64584 | 6.05964 | 4.5729  | 4.73841 | 6.41024 | 6.42955 | 7.07519 |
| TIMM9     | 7.29614 | 7.40036 | 7.46862 | 7.0858  | 5.884   | 6.25233 | 7.90754 | 6.35039 | 7.01368 |
| GPR135    | 6.57922 | 4.70596 | 6.8443  | 4.85711 | 5.47755 | 4.60799 | 4.52531 | 5.13741 | 5.03642 |
| L3HYPDH   | 7.12537 | 5.76362 | 7.56914 | 6.52534 | 6.00687 | 5.98708 | 6.45974 | 6.21883 | 6.27692 |
| CCDC175   | 3.73979 | 3.83398 | 3.87389 | 4.13492 | 3.90963 | 4.36179 | 4.33485 | 4.33372 | 4.31633 |
| RTN1      | 5.55527 | 5.99719 | 6.00076 | 6.21264 | 6.0172  | 6.18424 | 6.16142 | 6.21627 | 6.04153 |
| DHRS7     | 7.93122 | 7.82698 | 7.94627 | 9.12877 | 7.33476 | 9.6593  | 9.38812 | 9.25813 | 9.52185 |
| c14orf39  | 3.16572 | 3.16657 | 3.32936 | 3.29299 | 3.51012 | 3.44522 | 3.53762 | 3.27539 | 3.183   |
| SIX1      | 5.00145 | 5.18177 | 5.22357 | 5.51261 | 5.49501 | 5.62716 | 5.47796 | 5.40848 | 5.39247 |
| SIX4      | 5.64176 | 5.50011 | 5.57428 | 5.48746 | 5.72735 | 5.77868 | 5.60952 | 5.97257 | 5.48828 |
| TMEM30B   | 7.92753 | 7.67362 | 7.86852 | 8.24018 | 7.88744 | 9.77836 | 8.87532 | 9.21077 | 8.77418 |
| HIF1A-AS2 | 4.65573 | 5.18386 | 4.62338 | 6.01534 | 5.18651 | 7.64955 | 7.03531 | 7.65205 | 7.02605 |
| GPHB5     | 3.50467 | 3.32819 | 3.69558 | 3.79417 | 4.62774 | 4.11804 | 3.41218 | 3.69785 | 3.96553 |
| sgpp1     | 8.20999 | 7.77598 | 7.90625 | 8.62678 | 6.91269 | 7.80729 | 8.95651 | 9.0304  | 9.28394 |
| ESR2      | 4.95853 | 5.22433 | 5.2838  | 5.30164 | 5.79484 | 5.37701 | 5.35594 | 5.44813 | 5.12644 |

|               |         |         |         |         |         |         |         |         |         |
|---------------|---------|---------|---------|---------|---------|---------|---------|---------|---------|
| MIR548H1      | 3.94849 | 3.18319 | 3.16559 | 2.6606  | 3.36909 | 2.60708 | 2.64773 | 3.01771 | 2.18797 |
| ZBTB25        | 7.46159 | 7.60665 | 7.47428 | 6.05039 | 6.50294 | 6.01146 | 6.69515 | 6.63151 | 6.06418 |
| GPX2          | 7.91424 | 7.88815 | 7.32922 | 8.33755 | 6.2781  | 7.35362 | 8.66451 | 6.61856 | 8.27044 |
| MAX           | 9.05586 | 9.25819 | 9.17575 | 8.69069 | 8.31777 | 8.5857  | 8.80659 | 8.66282 | 8.72395 |
| MIR4708       | 4.60603 | 4.87437 | 5.1456  | 6.29307 | 6.41212 | 6.79765 | 5.95914 | 6.59863 | 6.09811 |
| PLEK2         | 9.01499 | 8.90788 | 8.74052 | 9.83038 | 6.19531 | 10.6395 | 9.16235 | 9.90463 | 9.3886  |
| TMEM229B      | 5.39015 | 5.41657 | 5.3324  | 5.52379 | 6.15058 | 5.48261 | 4.79521 | 5.95984 | 5.57385 |
| VT11B         | 8.72082 | 8.94646 | 8.88796 | 8.64011 | 6.50126 | 8.58854 | 9.05449 | 8.35684 | 8.65439 |
| RDH11         | 8.0884  | 7.89855 | 7.90967 | 7.9117  | 6.43746 | 7.87977 | 8.29743 | 8.04076 | 7.95117 |
| DCAF5         | 9.47089 | 9.37302 | 9.38202 | 8.39416 | 7.89764 | 9.00498 | 8.87644 | 9.42996 | 8.77111 |
| ERH           | 10.1575 | 10.2505 | 10.2693 | 10.0886 | 8.52699 | 8.70802 | 10.385  | 9.31246 | 9.76738 |
| CCDC177       | 4.97158 | 5.13871 | 5.37994 | 5.43359 | 6.41302 | 5.24526 | 5.34123 | 5.31135 | 5.64317 |
| ADAM21P1      | 3.54056 | 3.87381 | 3.71333 | 3.67122 | 4.48225 | 4.00191 | 2.95613 | 3.38696 | 3.92968 |
| SYNJ2BP-COX16 | 9.17578 | 9.21179 | 9.44038 | 8.96034 | 8.01151 | 8.48418 | 9.25929 | 8.51535 | 8.66529 |
| ADAM20P1      | 7.22889 | 7.00141 | 7.16415 | 5.43973 | 6.45368 | 5.26896 | 4.98533 | 7.67558 | 6.93003 |
| ADAM20        | 5.47759 | 5.95843 | 5.79824 | 4.76248 | 5.33044 | 4.72392 | 4.84972 | 6.13396 | 5.94202 |
| MED6          | 6.62607 | 6.71356 | 7.03878 | 6.21931 | 6.46821 | 6.86029 | 6.80373 | 6.82571 | 6.73531 |
| MAP3K9        | 8.01626 | 8.02026 | 7.57347 | 8.33858 | 8.44716 | 9.58546 | 8.77919 | 10.098  | 9.80269 |
| NUMB          | 8.391   | 8.05581 | 8.20488 | 8.02035 | 7.92598 | 8.53662 | 7.88703 | 8.68899 | 8.84103 |
| HEATR4        | 5.59083 | 6.31572 | 5.81831 | 5.63445 | 6.83003 | 5.89991 | 5.52596 | 5.39603 | 5.50183 |
| PNMA1         | 6.30242 | 6.09527 | 6.1378  | 7.02546 | 5.61737 | 6.96756 | 7.38588 | 6.47778 | 6.50952 |
| ELMSAN1       | 7.72971 | 7.44701 | 7.71541 | 7.42017 | 6.70055 | 7.79023 | 7.55906 | 8.0307  | 7.94579 |
| ENTPD5        | 6.49406 | 6.53515 | 6.7363  | 5.82378 | 5.92448 | 5.83233 | 6.47322 | 6.54729 | 6.32938 |
| SYNDIG1L      | 4.61191 | 4.95255 | 4.93214 | 5.17231 | 5.55272 | 5.2972  | 5.6375  | 5.10337 | 5.62122 |
| AREL1         | 9.06788 | 9.28917 | 9.2913  | 8.29824 | 7.70166 | 7.96782 | 8.79052 | 8.57451 | 8.94256 |
| prox2         | 4.2163  | 4.42315 | 4.51108 | 4.63047 | 5.39219 | 5.53809 | 4.90022 | 5.20585 | 4.94622 |

|          |         |         |         |         |         |         |         |         |         |
|----------|---------|---------|---------|---------|---------|---------|---------|---------|---------|
| RPS6KL1  | 6.05478 | 5.98844 | 6.34781 | 6.33141 | 6.54602 | 6.28046 | 6.14488 | 6.30308 | 6.2981  |
| PGF      | 6.75451 | 6.52006 | 6.7171  | 7.90278 | 7.78019 | 8.64876 | 7.66809 | 9.30183 | 8.79249 |
| MLH3     | 7.54684 | 7.7538  | 7.55796 | 6.7999  | 5.63699 | 6.7899  | 6.89948 | 6.4595  | 6.66823 |
| NEK9     | 7.93214 | 7.99543 | 7.90213 | 6.92153 | 6.04819 | 6.95666 | 7.37654 | 6.87464 | 7.14817 |
| TMED10   | 8.1083  | 7.80401 | 8.36681 | 7.43739 | 6.90222 | 7.02357 | 7.61458 | 7.10971 | 7.49536 |
| C14orf1  | 11.6445 | 11.5936 | 11.7561 | 10.8267 | 10.6911 | 9.77936 | 11.2392 | 10.0994 | 11.1916 |
| ANGEL1   | 7.06946 | 6.93432 | 6.96212 | 6.53677 | 6.0409  | 6.15881 | 6.49786 | 5.97805 | 6.05205 |
| IRF2BPL  | 8.20703 | 7.9669  | 7.98282 | 7.85448 | 6.29129 | 7.3263  | 8.7491  | 7.26506 | 7.50685 |
| POMT2    | 7.14252 | 6.93751 | 7.05433 | 6.91565 | 6.61633 | 6.33044 | 7.0887  | 6.68203 | 7.09259 |
| TMED8    | 7.53111 | 7.00512 | 7.71747 | 6.94522 | 5.94563 | 6.58875 | 6.90698 | 6.58499 | 6.97117 |
| NOXRED1  | 5.99266 | 5.87484 | 6.03346 | 5.85201 | 6.54036 | 5.66771 | 5.51596 | 5.67436 | 5.66249 |
| VIPAS39  | 8.28752 | 8.22162 | 8.07757 | 7.0297  | 6.47919 | 7.2461  | 7.78726 | 6.86988 | 7.62991 |
| ISM2     | 5.83304 | 5.96841 | 6.03542 | 6.92301 | 7.41408 | 6.892   | 6.37683 | 6.65045 | 6.68061 |
| SNW1     | 7.59577 | 7.76844 | 7.67223 | 7.59087 | 5.95161 | 7.63299 | 8.06215 | 7.28149 | 7.6657  |
| CEP128   | 6.61429 | 6.72012 | 6.76839 | 5.57762 | 5.79841 | 5.59928 | 5.83599 | 5.61682 | 5.63372 |
| STON2    | 8.02541 | 7.96328 | 7.87858 | 8.49104 | 6.60886 | 8.60114 | 8.55995 | 9.48475 | 9.52827 |
| SEL1L    | 9.23582 | 9.36094 | 9.40704 | 8.80195 | 6.58724 | 9.9597  | 9.18417 | 9.06554 | 8.98119 |
| GALC     | 7.18257 | 6.83653 | 7.38227 | 6.23686 | 5.78989 | 5.65756 | 6.55908 | 5.36503 | 5.98601 |
| EML5     | 5.16413 | 5.5674  | 5.43861 | 5.68693 | 5.68786 | 6.00979 | 6.045   | 5.44258 | 5.6322  |
| FOXN3    | 9.90727 | 9.86305 | 9.93198 | 8.3874  | 7.69557 | 8.15634 | 8.818   | 8.68507 | 8.33392 |
| EFCAB11  | 6.50077 | 6.42239 | 6.31103 | 6.07072 | 6.61541 | 5.83534 | 6.02942 | 5.95972 | 5.93541 |
| NRDE2    | 6.91177 | 7.04894 | 6.70848 | 5.82743 | 5.79225 | 5.75472 | 6.00514 | 5.65747 | 5.84804 |
| TTC7B    | 7.60207 | 6.613   | 6.79328 | 7.63603 | 6.67725 | 7.54007 | 7.98036 | 7.80463 | 7.90914 |
| GPR68    | 6.31264 | 6.293   | 6.11933 | 7.15991 | 6.63418 | 7.94356 | 7.84496 | 7.11337 | 7.48079 |
| CCDC88C  | 7.03684 | 7.18557 | 7.1259  | 6.96837 | 7.04088 | 6.95407 | 7.53896 | 6.8812  | 6.77888 |
| CATSPERB | 4.9343  | 4.54034 | 4.68878 | 3.99239 | 4.11588 | 4.70653 | 6.23856 | 4.3394  | 5.26681 |

|              |         |         |         |         |         |         |         |         |         |
|--------------|---------|---------|---------|---------|---------|---------|---------|---------|---------|
| FBLN5        | 7.69737 | 7.77613 | 8.70994 | 7.05359 | 5.79929 | 6.63879 | 7.52087 | 5.87324 | 6.83238 |
| TRIP11       | 9.08382 | 9.34094 | 8.97206 | 8.0388  | 5.17455 | 8.0022  | 8.47168 | 7.78976 | 8.46728 |
| ATXN3        | 8.38284 | 8.61583 | 8.04394 | 7.47963 | 5.67597 | 7.11857 | 7.61997 | 7.40198 | 7.10835 |
| LGMN         | 9.24806 | 8.12481 | 9.14175 | 8.56981 | 7.23796 | 7.42986 | 8.82747 | 8.12022 | 8.6918  |
| ITPK1        | 7.29193 | 7.23069 | 7.53191 | 7.39781 | 7.15881 | 7.67874 | 7.92213 | 7.18646 | 7.46733 |
| MOAP1        | 7.04456 | 6.89062 | 6.9415  | 7.55528 | 7.41634 | 8.22532 | 7.60288 | 8.12488 | 7.69234 |
| GON7         | 5.95231 | 6.21832 | 6.48174 | 6.65224 | 5.9635  | 6.67529 | 7.26258 | 6.67506 | 6.58778 |
| BTBD7        | 7.94983 | 8.24078 | 7.9752  | 7.93411 | 5.85393 | 8.30387 | 8.00847 | 8.37417 | 8.60552 |
| PRIMA1       | 5.82687 | 5.81134 | 5.95318 | 6.0535  | 6.29535 | 5.86339 | 6.08574 | 6.00056 | 6.14966 |
| ASB2         | 5.60563 | 5.28269 | 5.55007 | 6.05648 | 5.85884 | 6.45754 | 5.62989 | 5.90004 | 5.93563 |
| MIR4506      | 2.29448 | 2.02463 | 2.75738 | 2.72965 | 2.21121 | 1.92871 | 2.93629 | 2.26761 | 2.10711 |
| DDX24        | 9.0277  | 9.09913 | 9.2329  | 8.81989 | 7.20854 | 8.25799 | 8.7508  | 9.02183 | 8.86098 |
| GSC          | 5.66155 | 5.63653 | 5.32713 | 6.72455 | 5.83438 | 7.05438 | 6.35783 | 6.52377 | 6.23564 |
| MIR3173      | 3.47346 | 2.91518 | 3.33493 | 3.38211 | 2.6071  | 2.82586 | 2.875   | 2.08729 | 2.57456 |
| LINC00341    | 6.42303 | 6.99147 | 7.56547 | 5.09938 | 6.09239 | 5.67028 | 5.63209 | 6.43909 | 6.34338 |
| SNHG10       | 6.96802 | 7.45356 | 7.31209 | 7.04456 | 6.90107 | 7.97991 | 7.81419 | 6.93846 | 6.99828 |
| TCL1A        | 5.39197 | 5.62234 | 5.38488 | 6.16327 | 6.42672 | 6.20023 | 5.93945 | 5.9759  | 5.61988 |
| atg2b        | 9.56992 | 9.94738 | 9.8015  | 8.17332 | 5.43502 | 7.16918 | 8.35427 | 8.14107 | 7.98907 |
| LOC100129345 | 4.51941 | 4.40132 | 4.26213 | 4.75644 | 5.49561 | 4.61668 | 4.70935 | 4.64368 | 4.48    |
| LINC01550    | 6.87217 | 6.66859 | 6.32504 | 6.07476 | 6.15715 | 5.22589 | 6.71272 | 5.4789  | 5.79621 |
| BCL11B       | 8.37144 | 7.80588 | 7.81932 | 7.66817 | 5.31577 | 7.53255 | 8.19208 | 7.07537 | 6.72153 |
| SETD3        | 9.24894 | 9.25743 | 9.26928 | 9.13309 | 7.36838 | 8.4773  | 8.90527 | 8.56264 | 8.77479 |
| Mir151b      | 7.21466 | 7.25143 | 7.39075 | 7.1253  | 7.5641  | 7.23486 | 7.0182  | 7.34071 | 7.10053 |
| BEGAIN       | 5.30098 | 5.40358 | 5.54187 | 5.81482 | 6.13298 | 6.23855 | 5.80347 | 6.39226 | 5.65119 |
| Dio3os       | 5.27264 | 5.50693 | 5.24049 | 5.62896 | 6.2038  | 5.6774  | 5.4435  | 5.63886 | 5.6731  |
| MIR1247      | 6.01756 | 6.41137 | 6.44039 | 6.60329 | 7.02845 | 6.86703 | 6.50564 | 6.56254 | 6.63482 |

|           |         |         |         |         |         |         |         |         |         |
|-----------|---------|---------|---------|---------|---------|---------|---------|---------|---------|
| MOK       | 5.74144 | 6.06754 | 6.01898 | 5.69378 | 6.15308 | 5.91899 | 5.60598 | 5.26448 | 6.01446 |
| cinp      | 7.24342 | 7.08921 | 7.47554 | 6.99574 | 6.01981 | 7.05746 | 7.76187 | 7.21982 | 7.4471  |
| ANKRD9    | 6.90012 | 6.32484 | 6.72523 | 7.62949 | 6.79432 | 8.57479 | 7.81907 | 7.2138  | 7.63604 |
| CDC42BPB  | 9.64937 | 9.64365 | 9.57776 | 9.22043 | 7.29631 | 9.87607 | 9.57539 | 10.2157 | 9.92401 |
| LINC00605 | 3.63918 | 3.58114 | 3.69267 | 4.35107 | 4.16444 | 4.6085  | 4.34677 | 3.92369 | 3.733   |
| BAG5      | 7.89383 | 8.04165 | 8.11131 | 8.15063 | 7.09001 | 7.74301 | 8.37918 | 8.05273 | 8.03385 |
| XRCC3     | 5.68487 | 5.98059 | 5.58802 | 6.16525 | 6.15388 | 6.24513 | 5.86236 | 6.16379 | 5.78992 |
| C14orf2   | 6.58975 | 6.78813 | 6.72399 | 7.01714 | 6.23447 | 6.57179 | 7.36931 | 6.54347 | 6.68319 |
| RD3L      | 4.57306 | 5.01045 | 4.14688 | 4.63802 | 4.97886 | 5.35162 | 4.30296 | 4.56254 | 4.78371 |
| TMEM179   | 5.54961 | 5.67277 | 5.43408 | 6.19524 | 6.50196 | 6.52867 | 6.10752 | 6.3545  | 6.51777 |
| MIR4710   | 6.58209 | 7.09655 | 6.73919 | 6.8372  | 6.51403 | 7.92813 | 7.17849 | 6.99636 | 6.94268 |
| AHNAK2    | 10.1246 | 10.2318 | 10.3773 | 9.66015 | 7.48002 | 10.3059 | 10.1516 | 9.92785 | 10.249  |
| CDCA4     | 7.93777 | 8.02305 | 7.87585 | 8.64497 | 7.23221 | 8.40377 | 8.51499 | 8.08049 | 7.4965  |
| GPR132    | 5.68864 | 5.75204 | 5.7105  | 5.75743 | 6.39081 | 6.37546 | 5.8707  | 5.96772 | 5.93352 |
| JAG2      | 8.07969 | 7.76274 | 7.96985 | 8.21648 | 6.92833 | 7.9903  | 8.0124  | 7.76672 | 7.58843 |
| NUDT14    | 6.55522 | 6.62027 | 6.35525 | 6.80969 | 6.08019 | 6.87348 | 6.72074 | 6.42141 | 6.68362 |
| ADAM6     | 5.828   | 6.07359 | 6.25973 | 6.3686  | 7.09141 | 6.31828 | 5.76196 | 6.09564 | 6.0074  |
| CHEK2P2   | 4.62747 | 4.63642 | 4.783   | 5.37314 | 8.81264 | 5.549   | 5.09396 | 5.20345 | 4.68447 |
| MIR3118-4 | 6.8091  | 7.13437 | 6.52027 | 4.57478 | 7.53976 | 5.04216 | 4.6521  | 7.04018 | 6.25168 |
| LINC01193 | 4.8831  | 4.37924 | 5.08595 | 5.13489 | 6.47886 | 5.05721 | 4.81952 | 5.47301 | 4.94058 |
| RERP3     | 8.08409 | 8.08685 | 8.28743 | 7.69585 | 9.60789 | 8.13434 | 8.60926 | 8.69539 | 8.21348 |
| GOLGA6L1  | 5.7762  | 6.01769 | 5.96543 | 5.9257  | 8.21409 | 6.46691 | 6.03338 | 6.55635 | 6.48648 |
| CYFIP1    | 8.66072 | 8.18567 | 8.30354 | 8.27837 | 6.90765 | 8.71339 | 8.63158 | 8.77242 | 8.81418 |
| HERC2P7   | 6.09031 | 6.31223 | 6.23997 | 5.91128 | 7.48854 | 5.47761 | 5.47341 | 5.50265 | 5.64854 |
| MKRN3     | 4.58824 | 5.19732 | 5.02599 | 5.62599 | 6.27767 | 5.47705 | 4.65302 | 5.59934 | 5.26468 |
| PWRN1     | 5.42895 | 6.80501 | 5.11357 | 5.65389 | 6.54234 | 5.86868 | 5.92663 | 6.26627 | 6.05132 |

|              |         |         |         |         |         |         |         |         |         |
|--------------|---------|---------|---------|---------|---------|---------|---------|---------|---------|
| NPAP1        | 6.07997 | 6.06088 | 6.20215 | 6.37609 | 6.2424  | 6.63956 | 5.96182 | 6.65112 | 6.51763 |
| PWAR1        | 5.55459 | 5.4753  | 4.98148 | 5.10196 | 6.83654 | 5.49813 | 5.42314 | 5.05149 | 5.55591 |
| LOC100128714 | 5.17877 | 5.29458 | 4.90655 | 5.65772 | 5.92601 | 5.67846 | 5.48558 | 5.45295 | 5.49799 |
| LINC00929    | 4.50685 | 5.04889 | 4.7383  | 4.99392 | 5.82003 | 5.32845 | 4.94649 | 5.03019 | 5.29172 |
| MIR4509-1    | 4.55768 | 4.9498  | 4.93479 | 3.85257 | 7.52846 | 5.31534 | 5.03487 | 5.53175 | 4.94932 |
| HERC2P9      | 10.0053 | 9.31996 | 10.33   | 7.82641 | 8.06264 | 7.13296 | 7.24962 | 7.44626 | 8.25751 |
| GOLGA8S      | 3.76685 | 4.23964 | 4.31718 | 3.04194 | 3.16561 | 3.13326 | 3.43577 | 2.82109 | 2.96379 |
| LOC100289656 | 2.49433 | 2.84901 | 2.47695 | 3.45526 | 2.58146 | 3.31048 | 2.9936  | 2.96491 | 3.08733 |
| PDCD6IPP2    | 6.51169 | 6.63723 | 6.84808 | 6.93437 | 7.63504 | 7.00735 | 6.54548 | 6.86507 | 6.50069 |
| ULK4P3       | 6.26553 | 4.94703 | 5.97722 | 6.2996  | 6.94153 | 5.66127 | 5.44686 | 5.63629 | 5.18753 |
| DKFZP434L187 | 2.39725 | 2.75816 | 2.53458 | 3.24408 | 3.35924 | 3.08806 | 2.91491 | 2.6511  | 2.77141 |
| Arhgap11b    | 7.74133 | 7.19525 | 6.86458 | 6.97675 | 5.76947 | 5.88798 | 6.38301 | 6.45768 | 5.96217 |
| LOC100288637 | 6.536   | 6.04292 | 5.97759 | 4.81447 | 6.91473 | 4.20657 | 5.12969 | 4.8015  | 5.41627 |
| HERC2P10     | 3.58668 | 3.78172 | 4.24578 | 5.07695 | 5.572   | 4.2366  | 4.3189  | 3.73948 | 4.37679 |
| FAN1         | 7.24945 | 7.62688 | 7.48505 | 6.65879 | 5.89278 | 5.87561 | 6.61255 | 5.95366 | 6.35735 |
| KLF13        | 7.04004 | 7.10644 | 7.15668 | 7.323   | 6.28205 | 7.60676 | 7.40006 | 6.56437 | 7.0961  |
| ARHGAP11A    | 6.99508 | 6.46001 | 6.64892 | 6.74748 | 5.19692 | 5.62292 | 6.86516 | 6.10964 | 6.09319 |
| SCG5         | 4.79928 | 4.46336 | 4.38506 | 5.25813 | 5.47125 | 4.96652 | 4.97724 | 5.59613 | 5.35535 |
| GREM1        | 7.34835 | 6.69613 | 6.76003 | 9.24852 | 7.41441 | 8.49857 | 8.38082 | 8.99691 | 8.61934 |
| RYR3         | 6.70368 | 6.23722 | 6.30878 | 6.06421 | 6.29667 | 5.898   | 6.4258  | 7.14922 | 6.34654 |
| PGBD4        | 6.46507 | 6.45758 | 6.31295 | 5.5164  | 5.68933 | 5.74567 | 6.03729 | 5.96245 | 5.88171 |
| EMC4         | 8.60007 | 7.98381 | 8.87304 | 8.66354 | 7.74771 | 8.39678 | 8.72952 | 8.8681  | 8.93917 |
| NUTM1        | 4.82127 | 4.53987 | 4.73929 | 5.23224 | 4.77055 | 6.05434 | 5.22939 | 5.38038 | 5.12515 |
| ZNF770       | 4.15732 | 3.48568 | 3.31529 | 5.50871 | 3.27861 | 5.44437 | 5.39609 | 3.8212  | 3.99241 |
| DPH6-AS1     | 5.2517  | 4.81676 | 5.04375 | 5.26676 | 5.53604 | 5.87734 | 5.68039 | 5.30846 | 5.13784 |
| MIR4510      | 2.03235 | 2.19414 | 1.80575 | 2.34687 | 2.04301 | 2.61481 | 2.26396 | 2.11918 | 2.25432 |

|           |         |         |         |         |         |         |         |         |         |
|-----------|---------|---------|---------|---------|---------|---------|---------|---------|---------|
| c15orf41  | 10.2207 | 9.90027 | 9.46604 | 8.71905 | 7.50523 | 8.21752 | 8.48913 | 8.73646 | 9.15563 |
| MEIS2     | 4.53256 | 4.57033 | 4.5391  | 4.38312 | 5.26418 | 4.92479 | 4.34289 | 4.62757 | 4.90671 |
| TMCO5A    | 4.41729 | 4.90614 | 4.77858 | 4.93394 | 5.75518 | 5.37651 | 5.01078 | 4.94536 | 5.01297 |
| C15orf53  | 5.51693 | 5.94019 | 6.01439 | 6.2999  | 6.40318 | 5.89415 | 5.84022 | 6.09214 | 5.98067 |
| C15orf54  | 4.01832 | 3.84397 | 4.17899 | 4.23411 | 5.17987 | 4.02582 | 3.26511 | 4.01986 | 3.82118 |
| THBS1     | 10.0988 | 9.31334 | 9.26424 | 10.3613 | 7.5856  | 9.66529 | 9.43319 | 10.8763 | 10.7414 |
| EIF2AK4   | 8.45836 | 8.06325 | 8.24866 | 7.87501 | 6.31723 | 6.69201 | 8.01171 | 7.10504 | 7.25549 |
| SRP14-AS1 | 5.03384 | 5.2148  | 4.93868 | 4.9653  | 5.31294 | 5.18484 | 4.91405 | 4.82242 | 4.76322 |
| BMF       | 4.1902  | 4.4133  | 4.23077 | 4.86772 | 4.92203 | 4.84109 | 4.71217 | 4.8604  | 4.47332 |
| BUB1B     | 7.067   | 6.78886 | 6.92557 | 7.16548 | 6.33234 | 6.66787 | 6.87931 | 6.74324 | 6.53438 |
| PHGR1     | 5.44443 | 5.586   | 5.52103 | 5.23392 | 5.49716 | 5.38783 | 5.39795 | 5.12965 | 5.15758 |
| DISP2     | 5.77064 | 5.67834 | 5.34667 | 6.27344 | 6.78445 | 6.08117 | 6.11731 | 6.1188  | 5.84849 |
| KNSTRN    | 7.25507 | 6.89102 | 6.94487 | 7.51741 | 5.74217 | 6.45327 | 6.76407 | 6.90028 | 6.34278 |
| IVD       | 6.40838 | 6.42196 | 6.32844 | 6.3822  | 6.2899  | 6.36035 | 5.7673  | 6.18081 | 6.38272 |
| BAHD1     | 6.83264 | 6.9201  | 6.41144 | 7.2154  | 7.08592 | 7.17525 | 7.30247 | 7.32937 | 7.11823 |
| CHST14    | 7.1975  | 7.06954 | 7.18027 | 6.83854 | 6.13543 | 6.66663 | 7.17149 | 6.62574 | 6.54269 |
| RPUSD2    | 6.97669 | 7.06841 | 6.99563 | 7.00768 | 6.483   | 6.53588 | 7.418   | 6.90594 | 6.4586  |
| KNL1      | 7.27417 | 6.92068 | 6.47612 | 7.22093 | 5.56393 | 6.29662 | 6.98646 | 7.07038 | 6.39009 |
| RAD51     | 5.59778 | 5.25316 | 5.57783 | 6.27164 | 5.66447 | 5.99434 | 6.06773 | 5.52604 | 5.65662 |
| GCHFR     | 5.9248  | 5.98929 | 5.82818 | 6.48553 | 6.21027 | 6.9154  | 6.41703 | 5.63152 | 6.35323 |
| C15orf62  | 6.65211 | 6.50909 | 6.37933 | 6.3947  | 6.6071  | 6.63743 | 6.14257 | 6.30961 | 5.98917 |
| vps18     | 6.68395 | 6.94741 | 6.98918 | 7.29726 | 6.60402 | 7.73315 | 7.84485 | 7.86228 | 7.06241 |
| DLL4      | 6.66709 | 6.2887  | 6.42267 | 6.63494 | 5.93034 | 6.38435 | 6.57813 | 7.04032 | 7.21624 |
| CHP1      | 7.15249 | 6.873   | 6.75359 | 6.93282 | 6.65804 | 6.88554 | 6.96784 | 7.43848 | 7.27357 |
| NUSAP1    | 8.32766 | 7.33343 | 7.58115 | 7.45822 | 5.53927 | 6.11812 | 7.34774 | 7.35397 | 6.4915  |
| ITPKA     | 6.10275 | 6.03388 | 5.95113 | 6.44347 | 6.49797 | 6.96674 | 6.54961 | 6.90781 | 7.03202 |



|          |         |         |         |         |         |         |         |         |         |
|----------|---------|---------|---------|---------|---------|---------|---------|---------|---------|
| TYRO3    | 7.31317 | 7.35543 | 6.8553  | 7.11946 | 6.51572 | 7.21749 | 7.05604 | 6.61521 | 7.18695 |
| MGA      | 9.06393 | 9.08782 | 8.79285 | 7.9916  | 6.23091 | 7.31751 | 7.93494 | 7.63937 | 7.85423 |
| MIR626   | 5.39883 | 5.3453  | 4.83984 | 3.32496 | 5.63871 | 2.96611 | 3.67519 | 4.17199 | 3.39243 |
| MAPKBP1  | 8.75819 | 8.19558 | 7.81054 | 7.97197 | 6.78924 | 8.24253 | 8.14056 | 8.98597 | 8.46716 |
| STARD9   | 7.69885 | 7.59263 | 8.08354 | 6.83124 | 7.29607 | 6.77945 | 6.46177 | 6.69011 | 6.99092 |
| TMEM62   | 8.36489 | 8.40236 | 8.62367 | 7.50209 | 6.49729 | 6.84795 | 8.38796 | 7.78812 | 7.93268 |
| CCNDBP1  | 8.66863 | 8.47645 | 8.54304 | 8.06309 | 6.26855 | 8.33436 | 8.50258 | 8.14791 | 8.58175 |
| ADAL     | 5.79182 | 6.53356 | 6.70268 | 6.04902 | 5.74606 | 5.70237 | 6.02385 | 5.752   | 5.15142 |
| MAP1A    | 6.22744 | 6.33108 | 6.7811  | 6.03251 | 6.59601 | 6.21202 | 6.42892 | 6.30492 | 6.2396  |
| SERF2    | 6.74186 | 6.55766 | 6.66227 | 6.734   | 6.10103 | 6.32693 | 6.36372 | 6.32828 | 6.43009 |
| WDR76    | 7.87097 | 7.8025  | 7.78615 | 7.41781 | 5.5758  | 6.56154 | 7.17827 | 6.69513 | 6.53253 |
| CASC4    | 8.32235 | 8.0423  | 8.48031 | 7.21196 | 5.25904 | 6.58914 | 7.56857 | 7.44364 | 7.12345 |
| B2M      | 9.88265 | 9.5852  | 9.86343 | 9.33777 | 7.91148 | 8.9794  | 8.78413 | 9.18275 | 8.83095 |
| TRIM69   | 5.65974 | 5.48713 | 5.18065 | 5.53099 | 5.66357 | 5.31277 | 5.35217 | 4.43067 | 5.27758 |
| TERB2    | 3.28808 | 3.34767 | 3.3285  | 3.37647 | 3.9107  | 3.85268 | 3.68178 | 4.07108 | 3.35653 |
| SORD     | 7.84696 | 7.84656 | 7.34315 | 7.71424 | 7.77156 | 8.07267 | 7.45507 | 7.58232 | 7.20773 |
| DUOXA2   | 5.01101 | 5.09491 | 4.93383 | 7.04712 | 5.0625  | 6.45812 | 6.66043 | 5.89043 | 6.17002 |
| DUOX1    | 10.2279 | 9.47824 | 9.4923  | 10.1665 | 8.72833 | 10.508  | 10.042  | 10.4919 | 10.8471 |
| SPATA5L1 | 6.40458 | 6.27456 | 6.24602 | 6.10883 | 5.62675 | 6.25499 | 6.85399 | 5.81778 | 6.13073 |
| C15ORF48 | 5.05728 | 4.82312 | 4.91718 | 5.66908 | 8.6088  | 10.0883 | 9.02997 | 9.45843 | 6.4524  |
| HMGN2P46 | 4.66932 | 4.59129 | 4.40698 | 5.49461 | 5.43317 | 5.68527 | 5.13454 | 6.04698 | 4.96287 |
| BLOC1S6  | 8.46689 | 8.21931 | 8.28026 | 7.9796  | 7.50159 | 8.77058 | 8.55535 | 8.39827 | 8.29394 |
| SQRDL    | 8.97462 | 9.04657 | 9.07398 | 9.56012 | 7.86472 | 11.176  | 10.4189 | 11.0612 | 10.4719 |
| CTXN2    | 3.59863 | 3.91166 | 3.81942 | 4.0457  | 5.67807 | 4.13518 | 4.41269 | 4.22195 | 4.17392 |
| DUT      | 5.55114 | 5.80395 | 5.6799  | 5.70566 | 4.94244 | 5.60299 | 5.51701 | 5.46545 | 5.25496 |
| EID1     | 8.14036 | 8.25675 | 8.46006 | 8.09189 | 5.14985 | 7.00667 | 7.86379 | 7.24023 | 7.24463 |

|            |         |         |         |         |         |         |         |         |         |
|------------|---------|---------|---------|---------|---------|---------|---------|---------|---------|
| GALK2      | 8.20408 | 7.86244 | 8.16421 | 7.35206 | 6.30213 | 7.2294  | 7.29212 | 7.08469 | 6.98679 |
| FGF7       | 7.58978 | 7.49686 | 7.55145 | 6.16113 | 5.6701  | 5.34188 | 6.33847 | 5.40882 | 5.18438 |
| DTWD1      | 6.909   | 7.48301 | 7.03497 | 5.9656  | 4.15422 | 5.06476 | 6.45852 | 5.53393 | 5.31613 |
| GABPB1-AS1 | 6.7979  | 8.10306 | 6.40242 | 6.42869 | 5.5203  | 4.80558 | 5.8834  | 6.00329 | 5.70383 |
| MIR4712    | 2.27805 | 2.41508 | 2.38276 | 2.54233 | 1.73877 | 2.06621 | 2.12406 | 2.18161 | 2.12192 |
| USP8       | 8.79535 | 8.58544 | 8.97802 | 7.97257 | 6.9117  | 7.29226 | 8.18504 | 8.05325 | 8.07275 |
| SPPL2A     | 6.54054 | 6.31403 | 6.25963 | 6.77472 | 6.90137 | 6.9119  | 7.20951 | 6.39775 | 6.74578 |
| DCAF13P3   | 6.23891 | 5.71104 | 5.76259 | 5.34527 | 6.22322 | 5.37989 | 4.37762 | 5.10024 | 5.43618 |
| MIR4713    | 4.24949 | 4.24104 | 4.43146 | 4.78076 | 3.5753  | 5.00923 | 4.03455 | 5.18314 | 4.64921 |
| GLDN       | 7.14445 | 6.95917 | 7.37784 | 6.02119 | 6.47598 | 6.39223 | 6.62033 | 6.22616 | 5.84553 |
| SCG3       | 3.23647 | 3.36299 | 3.77521 | 3.65669 | 4.60011 | 3.79881 | 4.47007 | 3.6096  | 3.79465 |
| TMOD2      | 7.66758 | 7.98953 | 7.38881 | 7.35975 | 5.90966 | 6.45354 | 7.2465  | 6.88468 | 6.90983 |
| TMOD3      | 9.22958 | 9.21076 | 9.39728 | 9.29547 | 8.1684  | 9.67107 | 9.38846 | 9.63785 | 10.0977 |
| MAPK6      | 9.38628 | 9.11107 | 9.22504 | 9.20841 | 8.36979 | 9.95496 | 9.50353 | 9.34565 | 9.86748 |
| UNC13C     | 4.51854 | 4.10845 | 4.44314 | 4.66316 | 5.65915 | 4.00471 | 4.01568 | 4.18213 | 3.88494 |
| C15orf65   | 8.06574 | 8.06548 | 7.16752 | 7.38721 | 7.11651 | 6.72585 | 8.5283  | 7.54149 | 7.9168  |
| TEX9       | 7.58927 | 8.53237 | 7.88295 | 4.53157 | 3.75817 | 4.64814 | 5.353   | 4.1538  | 4.71099 |
| TCF12      | 9.0279  | 8.58447 | 8.63693 | 7.59085 | 6.48594 | 6.9178  | 7.44489 | 7.23271 | 7.76304 |
| LINC00926  | 6.50598 | 6.58026 | 6.74657 | 6.15615 | 6.41669 | 6.37748 | 5.71082 | 6.09632 | 6.07508 |
| CGNL1      | 6.35148 | 6.76618 | 6.42652 | 5.75258 | 5.78359 | 6.15091 | 5.75162 | 5.63112 | 6.10075 |
| AQP9       | 8.9804  | 9.86714 | 9.09564 | 7.01102 | 6.35875 | 8.58029 | 6.38265 | 7.26482 | 8.24675 |
| RNF111     | 8.55227 | 8.7463  | 8.85596 | 8.0947  | 6.55149 | 8.64459 | 8.25112 | 7.98793 | 8.55597 |
| CCNB2      | 7.52657 | 6.96601 | 6.71683 | 7.90197 | 5.77727 | 6.48001 | 7.36507 | 6.79804 | 6.58961 |
| LDHAL6B    | 4.42369 | 5.55622 | 5.28927 | 6.23339 | 6.68008 | 5.93497 | 5.50876 | 6.25768 | 6.25295 |
| BNIP2      | 6.63436 | 6.49477 | 6.88481 | 6.80463 | 7.31984 | 6.8317  | 6.48818 | 7.12719 | 6.68384 |
| FOXB1      | 3.72361 | 3.85323 | 3.77234 | 4.42487 | 4.99967 | 4.61572 | 4.38159 | 4.17179 | 4.3436  |

|          |         |         |         |         |         |         |         |         |         |
|----------|---------|---------|---------|---------|---------|---------|---------|---------|---------|
| C2CD4A   | 5.85658 | 5.94905 | 6.06884 | 6.34822 | 6.77419 | 6.66297 | 6.67815 | 6.41018 | 6.49903 |
| TLN2     | 6.38168 | 7.31917 | 6.93381 | 5.85657 | 6.2097  | 6.09117 | 6.34692 | 6.26126 | 5.98904 |
| MIR190A  | 2.10548 | 2.71602 | 2.00382 | 3.01019 | 3.17633 | 2.99484 | 2.95358 | 2.64512 | 1.9692  |
| TPM1     | 8.48637 | 8.37855 | 8.29514 | 7.35071 | 6.80692 | 6.44702 | 6.64126 | 6.758   | 6.8924  |
| APH1B    | 6.87919 | 7.03859 | 6.99782 | 6.80564 | 7.56068 | 6.72166 | 6.42819 | 6.53442 | 6.71448 |
| USP3     | 9.66453 | 9.50907 | 9.47046 | 8.16441 | 7.52109 | 8.76193 | 8.43778 | 9.31394 | 8.68141 |
| FBXL22   | 5.35868 | 5.18942 | 5.47104 | 6.34619 | 5.55613 | 6.1725  | 5.78563 | 5.59198 | 5.56608 |
| HERC1    | 6.1766  | 6.22637 | 5.92998 | 7.36928 | 5.73478 | 6.4659  | 7.55041 | 6.32354 | 6.06748 |
| SNX1     | 8.15413 | 8.13093 | 7.97419 | 7.48736 | 5.78897 | 7.21903 | 7.81427 | 7.17894 | 7.48263 |
| SNX22    | 5.26461 | 5.14921 | 5.6082  | 6.0314  | 5.9756  | 6.17753 | 5.83897 | 5.76422 | 5.96906 |
| TRIP4    | 7.56966 | 7.52129 | 7.50724 | 7.07076 | 5.99223 | 6.94639 | 7.67417 | 7.12151 | 7.39514 |
| ZNF609   | 7.82451 | 7.98667 | 7.79789 | 7.27109 | 7.00328 | 7.3874  | 7.46004 | 7.86669 | 7.93323 |
| ANKDD1A  | 6.73056 | 6.63706 | 6.84678 | 6.97071 | 7.01913 | 6.8416  | 6.83553 | 7.01125 | 6.73103 |
| SLC51B   | 5.66387 | 5.50138 | 5.69236 | 5.72671 | 5.85053 | 5.7238  | 5.51058 | 5.45076 | 5.64423 |
| KBTBD13  | 5.25703 | 5.75772 | 5.39044 | 5.8703  | 6.61553 | 6.34516 | 5.71087 | 6.16198 | 6.04485 |
| HACD3    | 9.01616 | 8.08187 | 8.73853 | 7.31721 | 6.63893 | 6.0834  | 7.49665 | 7.01498 | 6.92147 |
| MIR4311  | 5.43229 | 5.18957 | 5.6261  | 5.45482 | 7.39572 | 6.58772 | 5.96727 | 7.42253 | 6.12038 |
| DIS3L    | 7.66463 | 7.7335  | 7.97528 | 6.20679 | 6.59918 | 5.76884 | 6.76048 | 6.2583  | 6.35623 |
| MAP2K1   | 8.51915 | 8.22329 | 8.39688 | 9.25548 | 8.22283 | 9.53229 | 8.99932 | 9.64361 | 8.88818 |
| SMAD6    | 5.95356 | 6.98717 | 5.98165 | 5.30206 | 5.3704  | 5.15009 | 5.93529 | 5.61639 | 6.70909 |
| SMAD3    | 6.84758 | 6.44194 | 6.80838 | 6.50728 | 6.35722 | 6.1308  | 6.72903 | 6.29191 | 6.4615  |
| IQCH     | 5.43498 | 5.55294 | 5.58936 | 5.36567 | 5.48179 | 5.46439 | 4.9289  | 5.16366 | 5.25874 |
| c15orf61 | 5.4716  | 5.37863 | 5.7959  | 6.09656 | 4.87428 | 5.17196 | 6.44776 | 5.47248 | 5.23705 |
| map2k5   | 8.22562 | 8.054   | 8.29578 | 6.0866  | 5.67259 | 5.84722 | 7.03378 | 5.90961 | 6.42863 |
| SKOR1    | 5.62491 | 5.35231 | 5.37638 | 5.98189 | 5.83238 | 6.28153 | 5.8772  | 6.07198 | 5.86623 |
| FEM1B    | 9.3729  | 9.06666 | 9.37141 | 9.14196 | 7.90815 | 9.60544 | 9.11547 | 9.48868 | 9.65851 |

|           |         |         |         |         |         |         |         |         |         |
|-----------|---------|---------|---------|---------|---------|---------|---------|---------|---------|
| EWSAT1    | 3.89964 | 4.00859 | 4.12474 | 4.28603 | 4.74077 | 4.01247 | 3.75552 | 4.17471 | 4.23951 |
| GLCE      | 8.17538 | 8.02442 | 8.09923 | 7.60736 | 6.21845 | 7.68377 | 8.24568 | 8.20701 | 7.85512 |
| PAQR5     | 8.48973 | 8.06528 | 8.80748 | 9.94186 | 9.65339 | 10.9549 | 10.5985 | 10.4169 | 11.1121 |
| KIF23     | 6.92621 | 6.55871 | 6.39995 | 7.00516 | 6.16695 | 6.42315 | 6.74915 | 6.77419 | 7.38342 |
| LRRC49    | 6.6044  | 6.49318 | 6.8572  | 5.82513 | 5.94071 | 5.30994 | 5.76637 | 5.20775 | 5.74424 |
| SENP8     | 6.11597 | 6.08399 | 6.09436 | 5.87724 | 5.56828 | 5.71977 | 5.95317 | 5.86078 | 5.95029 |
| HEXA-AS1  | 5.57543 | 5.26829 | 4.93579 | 5.19924 | 5.04889 | 4.82833 | 5.04098 | 5.16311 | 4.95292 |
| TMEM202   | 4.24123 | 4.53115 | 4.52378 | 4.77368 | 5.87175 | 5.13722 | 4.56159 | 5.04021 | 4.64044 |
| BBS4      | 7.59576 | 7.34573 | 7.64804 | 6.29475 | 5.62953 | 5.92752 | 6.74892 | 5.13905 | 5.7553  |
| ADPGK-AS1 | 4.91238 | 4.36647 | 4.86467 | 4.49638 | 5.54149 | 4.48255 | 4.52745 | 4.39656 | 4.38242 |
| NEO1      | 9.86358 | 10.0223 | 9.84688 | 7.86176 | 6.17506 | 6.94286 | 8.34865 | 7.02154 | 7.16479 |
| REC114    | 4.4146  | 4.53433 | 4.33146 | 5.29393 | 4.15682 | 5.33353 | 4.49598 | 4.76054 | 4.78806 |
| CD276     | 6.79086 | 6.97018 | 7.01897 | 7.50484 | 6.49019 | 6.63584 | 6.77418 | 7.18898 | 7.28839 |
| LOXL1-AS1 | 5.01464 | 5.06256 | 5.1184  | 4.85427 | 5.34528 | 4.30311 | 5.06803 | 4.39149 | 4.18897 |
| LOXL1     | 7.28627 | 7.59057 | 7.53537 | 7.7226  | 6.85568 | 7.28491 | 7.97017 | 7.16897 | 7.22358 |
| PML       | 7.67933 | 7.2222  | 7.57679 | 7.33275 | 6.20755 | 7.22365 | 7.9174  | 7.63465 | 7.40383 |
| ISLR2     | 5.65442 | 5.58986 | 5.70077 | 5.94951 | 5.64384 | 6.16826 | 5.90098 | 6.07018 | 6.07609 |
| ISLR      | 7.01142 | 7.10691 | 7.54738 | 7.51122 | 6.8987  | 6.82944 | 7.71043 | 7.62183 | 6.99872 |
| CCDC33    | 5.57243 | 5.49087 | 5.73965 | 6.08451 | 6.46533 | 5.69484 | 5.97825 | 5.73965 | 5.68166 |
| LOC729739 | 7.68929 | 8.15433 | 7.60044 | 7.83043 | 8.09842 | 7.37206 | 7.5713  | 7.72287 | 7.98197 |
| UBL7-AS1  | 7.14689 | 7.35918 | 6.97411 | 6.32192 | 5.64068 | 5.48067 | 6.26388 | 5.30691 | 5.22429 |
| ARID3B    | 6.94747 | 7.00937 | 6.8569  | 7.07294 | 6.95454 | 7.42603 | 7.17428 | 7.55795 | 7.4224  |
| CLK3      | 8.95263 | 9.08828 | 8.71259 | 9.30364 | 9.40299 | 10.2269 | 9.30188 | 10.0288 | 9.44508 |
| CSK       | 7.46309 | 7.38141 | 7.37455 | 8.09638 | 6.52411 | 8.81973 | 8.21152 | 7.36416 | 7.84737 |
| CPLX3     | 6.60765 | 6.52592 | 6.42718 | 6.81342 | 7.03413 | 6.6594  | 5.94128 | 6.22394 | 6.43688 |
| MPI       | 8.71916 | 8.46227 | 8.1724  | 8.93056 | 7.90165 | 9.35241 | 8.79987 | 8.76159 | 8.8196  |

|            |         |         |         |         |         |         |         |         |         |
|------------|---------|---------|---------|---------|---------|---------|---------|---------|---------|
| SCAMP5     | 6.65174 | 6.66505 | 6.90494 | 7.2287  | 7.57988 | 7.35044 | 7.04193 | 7.12289 | 7.29401 |
| PPCDC      | 6.72369 | 6.97053 | 6.67544 | 6.77554 | 6.76724 | 7.09682 | 7.13792 | 6.92575 | 7.10364 |
| c15orf39   | 6.93703 | 6.80928 | 7.15057 | 7.33162 | 7.10575 | 7.79097 | 7.68006 | 7.9719  | 7.80253 |
| COMMD4     | 6.62734 | 6.89567 | 6.52441 | 6.94014 | 6.83461 | 6.08942 | 6.96075 | 5.87455 | 6.67292 |
| NEIL1      | 7.3631  | 6.71326 | 7.17552 | 6.10548 | 5.98617 | 6.57423 | 6.1766  | 6.09316 | 5.92818 |
| snx33      | 8.29517 | 8.58524 | 8.27649 | 8.32161 | 6.78781 | 9.71369 | 8.82717 | 8.1642  | 8.66152 |
| ODF3L1     | 5.65643 | 5.70593 | 5.58929 | 5.8858  | 6.68928 | 5.95938 | 6.30229 | 5.88021 | 5.81137 |
| UBE2Q2     | 8.25381 | 7.21437 | 7.65033 | 9.34993 | 5.94877 | 9.90322 | 9.18754 | 9.38567 | 10.0795 |
| FBXO22     | 8.73131 | 9.03243 | 8.8021  | 8.26326 | 7.2825  | 7.86454 | 8.06932 | 8.67178 | 9.05786 |
| TMEM266    | 5.45245 | 5.47232 | 5.49416 | 5.58205 | 5.69859 | 5.85712 | 5.8225  | 5.96188 | 5.76504 |
| ISL2       | 5.46177 | 5.88695 | 5.74791 | 6.8866  | 6.81153 | 6.98708 | 6.63788 | 6.53601 | 6.65493 |
| PSTPIP1    | 5.89666 | 5.5838  | 5.80845 | 6.29071 | 5.73844 | 6.70224 | 6.47334 | 6.18514 | 6.19694 |
| TSPAN3     | 4.27486 | 4.33407 | 5.66416 | 4.37356 | 5.04959 | 4.86437 | 4.9858  | 4.38869 | 4.99083 |
| HMG20A     | 7.58315 | 7.98755 | 7.70814 | 6.52021 | 5.80819 | 6.53888 | 7.39964 | 6.61105 | 6.89533 |
| LINGO1-AS1 | 4.49228 | 4.82915 | 4.46375 | 4.79049 | 5.44883 | 5.59796 | 4.78869 | 4.94022 | 4.82426 |
| SH2D7      | 5.3375  | 5.57216 | 5.52186 | 5.90147 | 6.41288 | 6.32425 | 6.05384 | 5.76335 | 5.95841 |
| IDH3A      | 7.88372 | 7.75467 | 7.92646 | 7.78582 | 6.66645 | 7.36414 | 7.74955 | 8.48681 | 7.91109 |
| CRABP1     | 5.7408  | 5.95851 | 5.45837 | 6.06919 | 5.65333 | 6.2774  | 6.68095 | 6.10409 | 6.18742 |
| IREB2      | 8.37747 | 8.8229  | 8.46961 | 7.98    | 5.96674 | 7.76378 | 8.24585 | 7.55695 | 7.91654 |
| HYKK       | 7.16391 | 7.23524 | 7.46207 | 6.06241 | 5.42828 | 5.87493 | 6.80575 | 5.6594  | 5.86012 |
| MORF4L1    | 7.06061 | 6.24319 | 6.88147 | 6.72317 | 5.87671 | 6.65948 | 6.47835 | 6.63204 | 6.79839 |
| mir184     | 4.72846 | 4.86526 | 4.96177 | 5.41629 | 6.0337  | 4.97319 | 5.14536 | 4.69982 | 4.81272 |
| ANKRD34C   | 5.47031 | 5.60993 | 4.84322 | 5.19025 | 6.35868 | 6.13301 | 5.46976 | 5.76236 | 5.09672 |
| TMED3      | 7.30914 | 7.21837 | 6.96962 | 7.7517  | 7.43183 | 7.72136 | 7.70841 | 7.7748  | 7.50957 |
| KIAA1024   | 5.99171 | 5.89729 | 5.76186 | 5.95272 | 6.07546 | 5.94185 | 5.98505 | 5.90131 | 5.94185 |
| ST20-AS1   | 6.07314 | 6.18841 | 6.25406 | 6.94029 | 6.21251 | 7.06197 | 7.31277 | 6.62869 | 6.91355 |

|           |         |         |         |         |         |         |         |         |         |
|-----------|---------|---------|---------|---------|---------|---------|---------|---------|---------|
| FAH       | 7.22241 | 7.40308 | 7.02149 | 7.48518 | 6.35361 | 7.04316 | 7.62054 | 6.91826 | 6.76807 |
| ARNT2     | 6.39802 | 5.93995 | 5.93142 | 6.303   | 6.24873 | 6.018   | 5.70117 | 5.98918 | 5.88842 |
| cemip     | 7.75961 | 7.04681 | 6.57106 | 7.59317 | 6.12114 | 9.97473 | 8.1917  | 7.64617 | 8.88977 |
| mesdc1    | 7.21513 | 7.26314 | 7.3135  | 8.57782 | 8.01798 | 8.45506 | 8.14808 | 7.57104 | 8.32899 |
| IL16      | 6.747   | 6.45777 | 7.15776 | 6.2156  | 6.93319 | 6.41222 | 5.884   | 6.54938 | 6.2561  |
| MEX3B     | 6.7147  | 6.7424  | 7.03214 | 7.64639 | 8.57574 | 7.69149 | 7.18486 | 7.32439 | 7.10364 |
| ADAMTS7P1 | 6.7796  | 7.06954 | 6.85991 | 7.2142  | 7.0453  | 7.58774 | 7.15385 | 7.23627 | 7.42825 |
| UBE2Q2P2  | 7.83137 | 7.43072 | 7.9557  | 6.7601  | 6.00253 | 7.70399 | 7.77289 | 8.22425 | 7.74307 |
| GOLGA6L9  | 7.88426 | 8.08629 | 7.98184 | 6.68795 | 7.50103 | 7.5266  | 7.12563 | 8.00326 | 7.82144 |
| GOLGA2P10 | 8.40118 | 8.2006  | 8.38216 | 7.92616 | 7.96248 | 8.20252 | 8.14782 | 8.34084 | 8.06183 |
| CPEB1-AS1 | 5.22721 | 5.04641 | 4.72627 | 4.89531 | 5.2536  | 5.95098 | 4.97078 | 5.45028 | 5.23673 |
| SCARNA15  | 2.68112 | 4.0306  | 3.62339 | 2.70453 | 2.86914 | 3.0427  | 4.52122 | 1.98955 | 3.24062 |
| TM6SF1    | 6.41193 | 5.9417  | 6.74608 | 5.92347 | 5.86597 | 5.13426 | 6.19216 | 5.44603 | 5.58123 |
| ADAMTSL3  | 6.50892 | 6.48941 | 6.47554 | 5.3635  | 5.72766 | 5.26309 | 5.20411 | 6.25423 | 5.93974 |
| EFTUD1P1  | 5.50542 | 5.56094 | 5.47139 | 6.14522 | 5.61239 | 6.92547 | 6.08091 | 6.66295 | 6.07766 |
| UBE2Q2L   | 6.07769 | 6.12145 | 6.14181 | 5.93558 | 6.30698 | 6.26246 | 5.90791 | 6.44702 | 6.07769 |
| LOC440300 | 5.48032 | 5.09784 | 5.72514 | 3.59754 | 4.87963 | 3.332   | 3.69402 | 3.90475 | 4.98579 |
| GOLGA6L4  | 3.4299  | 3.16064 | 4.25624 | 3.49723 | 4.97189 | 4.06989 | 4.16216 | 4.56623 | 3.77896 |
| LINC00933 | 5.76914 | 5.99471 | 5.78626 | 6.21999 | 6.02314 | 5.31276 | 5.4322  | 5.13677 | 5.50909 |
| ZSCAN2    | 6.14233 | 5.78309 | 5.76259 | 5.73021 | 7.1456  | 5.89421 | 5.95405 | 5.78427 | 5.95468 |
| SCAND2P   | 6.42535 | 6.74483 | 6.67157 | 6.391   | 6.64464 | 5.71393 | 5.8014  | 5.67524 | 5.49874 |
| ZNF592    | 9.07852 | 9.13769 | 9.25921 | 8.68307 | 7.10597 | 8.60149 | 9.06438 | 8.52095 | 9.17272 |
| ALPK3     | 5.68388 | 5.1977  | 5.64429 | 5.91394 | 5.38827 | 5.85826 | 6.12478 | 5.93767 | 5.85597 |
| PDE8A     | 8.56268 | 8.47989 | 8.6409  | 7.49033 | 6.23413 | 7.36163 | 8.00476 | 7.5759  | 8.00424 |
| AKAP13    | 8.97928 | 8.6827  | 8.87518 | 7.59338 | 6.89478 | 7.66333 | 8.0001  | 9.20543 | 8.57262 |
| GOLGA6L5P | 8.30129 | 8.57362 | 8.50536 | 7.32834 | 7.9191  | 8.07048 | 7.57091 | 8.31907 | 8.2954  |

|           |         |         |         |         |         |         |         |         |         |
|-----------|---------|---------|---------|---------|---------|---------|---------|---------|---------|
| AGBL1     | 5.24215 | 5.2116  | 4.87405 | 5.64249 | 6.14036 | 5.55329 | 5.58633 | 5.3917  | 5.64458 |
| LINC00052 | 4.8569  | 4.95847 | 4.93353 | 5.12914 | 5.47499 | 5.19103 | 5.12362 | 5.71215 | 5.57674 |
| NTRK3-AS1 | 4.28315 | 4.40185 | 4.62522 | 4.36644 | 5.48654 | 4.50972 | 4.4543  | 4.47356 | 4.38633 |
| MRPS11    | 8.4093  | 8.47478 | 8.44406 | 8.43279 | 7.98577 | 8.0441  | 8.5616  | 7.6415  | 8.055   |
| MIR1179   | 4.20494 | 4.27069 | 4.28154 | 4.42539 | 6.15205 | 4.16886 | 4.21477 | 4.4817  | 4.3094  |
| MIR7-2    | 3.61929 | 3.66382 | 3.72786 | 4.11669 | 3.44264 | 3.17156 | 3.21934 | 4.27582 | 4.59407 |
| AEN       | 7.2     | 7.07198 | 7.03702 | 7.70275 | 7.36493 | 7.74071 | 7.7471  | 7.54125 | 7.72311 |
| ISG20     | 5.78382 | 5.4535  | 6.01812 | 6.62257 | 6.5603  | 7.80127 | 6.61978 | 7.35649 | 7.25825 |
| ACAN      | 5.64569 | 5.21398 | 4.90218 | 5.91726 | 5.44009 | 5.69399 | 5.58716 | 5.61893 | 5.46968 |
| ABHD2     | 8.56421 | 8.47544 | 9.15494 | 8.33373 | 7.2785  | 8.01382 | 8.93423 | 9.34858 | 8.8476  |
| Mir9-3hg  | 5.51545 | 5.71505 | 5.61023 | 5.98547 | 6.4605  | 6.46891 | 5.76724 | 5.97856 | 6.05833 |
| mir9-3    | 4.03158 | 4.37692 | 4.38617 | 5.01622 | 5.20237 | 5.47937 | 5.30576 | 5.26165 | 4.85086 |
| TICRR     | 6.82222 | 6.20121 | 6.01853 | 6.57498 | 5.52801 | 5.8891  | 5.98268 | 6.19111 | 6.18464 |
| WDR93     | 5.08033 | 4.92388 | 5.19333 | 5.22387 | 6.45952 | 6.02948 | 5.39997 | 5.23092 | 5.52159 |
| MESP2     | 7.04325 | 6.85876 | 6.72736 | 6.9951  | 6.75044 | 7.09297 | 7.08382 | 6.95624 | 6.94885 |
| ZNF710    | 6.89839 | 6.82961 | 6.51713 | 7.07748 | 6.16937 | 7.49205 | 7.33833 | 6.92408 | 7.4975  |
| MIR3174   | 4.58966 | 5.32607 | 5.19921 | 4.66789 | 4.11483 | 5.04555 | 4.3571  | 5.30997 | 5.52838 |
| GDPGP1    | 6.77955 | 6.31134 | 6.18495 | 6.80694 | 6.0106  | 6.83337 | 6.95066 | 6.80179 | 6.8792  |
| ZNF774    | 7.20168 | 7.6493  | 7.07297 | 5.63575 | 6.8599  | 6.21581 | 6.15131 | 5.92853 | 5.84995 |
| iqgap1    | 11.3628 | 11.1763 | 11.2586 | 10.8878 | 8.54148 | 11.1948 | 11.2809 | 11.4648 | 11.6575 |
| CRTC3     | 7.68198 | 7.76573 | 7.98679 | 6.6505  | 6.97455 | 6.27861 | 7.03465 | 6.54854 | 6.94325 |
| FURIN     | 8.94792 | 8.63751 | 8.80251 | 10.053  | 7.67769 | 10.315  | 10.1133 | 9.87945 | 10.2197 |
| FES       | 5.8193  | 5.55691 | 6.13465 | 6.27868 | 5.74405 | 6.35009 | 5.97938 | 6.39068 | 6.57362 |
| UNC45A    | 7.7522  | 7.51211 | 7.35242 | 7.77942 | 6.73051 | 7.74223 | 8.19697 | 7.77132 | 7.85121 |
| RCCD1     | 6.55653 | 6.51348 | 6.3575  | 6.18651 | 6.23037 | 6.20925 | 6.46159 | 6.1568  | 6.1362  |
| PRC1-AS1  | 6.70122 | 7.21376 | 6.8855  | 6.29984 | 6.20716 | 6.47052 | 5.74009 | 6.49999 | 6.2416  |

|           |         |         |         |         |         |         |         |         |         |
|-----------|---------|---------|---------|---------|---------|---------|---------|---------|---------|
| SV2B      | 6.01397 | 5.43185 | 6.11341 | 5.98525 | 6.6353  | 5.93385 | 5.6557  | 5.78748 | 5.72796 |
| ASB9P1    | 5.1952  | 4.95143 | 5.11312 | 5.12254 | 5.37093 | 5.50761 | 5.49397 | 5.16359 | 4.98963 |
| LINC01578 | 10.4276 | 9.56435 | 9.87946 | 8.30773 | 5.98934 | 8.14062 | 8.71427 | 8.65955 | 8.60588 |
| CHD2      | 9.08764 | 9.25077 | 8.88842 | 7.61556 | 6.23231 | 8.29026 | 8.11993 | 8.54463 | 8.55409 |
| MIR3175   | 7.62119 | 7.22709 | 7.42845 | 7.709   | 6.38826 | 7.91879 | 7.45856 | 7.42064 | 7.86345 |
| LINC00924 | 5.32578 | 5.00167 | 5.41267 | 5.04655 | 5.7627  | 5.31043 | 5.0388  | 5.37111 | 5.24922 |
| SPATA8    | 4.43861 | 4.65227 | 4.25874 | 4.73216 | 5.30614 | 4.3128  | 4.55614 | 4.17412 | 5.10774 |
| ARRDC4    | 9.66678 | 9.65255 | 9.58247 | 9.88451 | 11.3973 | 11.5571 | 11.4165 | 12.6087 | 10.961  |
| IGF1R     | 9.35573 | 8.75094 | 8.8585  | 8.30809 | 6.83872 | 7.53254 | 8.59242 | 8.75911 | 8.69939 |
| MIR4714   | 2.83486 | 2.82408 | 2.8378  | 3.11169 | 2.5115  | 3.33528 | 2.76309 | 3.33828 | 3.34658 |
| LRRC28    | 7.65677 | 7.42234 | 7.5047  | 6.50972 | 6.3154  | 6.36389 | 7.05059 | 6.61682 | 6.59538 |
| MEF2A     | 9.50356 | 9.48751 | 9.58378 | 8.04265 | 5.9685  | 7.79479 | 8.59902 | 8.51313 | 8.88006 |
| SPATA41   | 5.66545 | 5.55124 | 5.31532 | 6.07594 | 6.09091 | 6.12298 | 5.69394 | 5.74402 | 5.95146 |
| ASB7      | 7.56175 | 7.65158 | 7.65447 | 7.29214 | 6.97384 | 7.51338 | 7.66072 | 7.72251 | 7.51574 |
| LRRK1     | 7.72857 | 7.56581 | 7.58586 | 7.03437 | 6.56757 | 6.99089 | 7.23866 | 7.02797 | 7.11557 |
| WASH3P    | 7.09282 | 7.06072 | 6.61489 | 7.59206 | 6.62955 | 7.67551 | 7.46442 | 7.11471 | 7.01948 |
| HERC2P3   | 9.93902 | 9.50003 | 9.56986 | 8.50301 | 8.73518 | 7.51184 | 8.27927 | 7.81009 | 8.50562 |
| GOLGA6L6  | 5.15604 | 5.19363 | 5.51091 | 5.94601 | 7.0803  | 5.53908 | 5.43782 | 5.13148 | 5.35563 |
| NBEAP1    | 6.40267 | 4.71794 | 4.19582 | 4.85775 | 5.1386  | 3.2229  | 4.72041 | 4.59749 | 4.70615 |
| LOC646214 | 7.26378 | 8.02332 | 6.65653 | 5.99522 | 7.21985 | 5.81188 | 5.87722 | 6.65728 | 5.55475 |
| CXADRP2   | 4.8027  | 4.98148 | 4.7231  | 4.82645 | 6.92956 | 4.67221 | 4.45968 | 4.84363 | 5.20997 |
| NF1P2     | 6.22914 | 6.31888 | 6.5103  | 6.19053 | 8.62045 | 7.01465 | 6.01609 | 6.6037  | 7.28581 |
| NIPA2     | 7.69877 | 6.8004  | 7.26505 | 7.53017 | 6.50164 | 7.14717 | 7.41973 | 7.72635 | 7.50884 |
| NIPA1     | 5.78171 | 5.84439 | 5.69338 | 5.56745 | 5.23009 | 6.6668  | 5.90086 | 6.12644 | 5.88018 |
| LOC283683 | 4.41447 | 4.4447  | 4.25151 | 4.19259 | 6.95995 | 5.31222 | 4.99829 | 4.9112  | 4.46446 |
| HERC2P2   | 9.59108 | 8.28215 | 8.67452 | 8.00933 | 6.99905 | 7.12036 | 7.96239 | 7.22313 | 7.77539 |



|           |         |         |         |         |         |         |         |         |         |
|-----------|---------|---------|---------|---------|---------|---------|---------|---------|---------|
| MAGEL2    | 5.33683 | 5.64753 | 5.4151  | 5.71165 | 6.05269 | 5.84796 | 5.77754 | 5.91845 | 6.05552 |
| NDN       | 5.26951 | 6.12784 | 5.57977 | 6.34495 | 5.10074 | 6.51287 | 6.16786 | 5.67723 | 5.81913 |
| PWRN2     | 4.15689 | 4.44201 | 4.34499 | 4.42675 | 5.5715  | 4.10615 | 4.91581 | 4.58951 | 4.43916 |
| UBE3A     | 8.99767 | 8.92032 | 8.96411 | 8.01281 | 6.45422 | 8.221   | 8.60941 | 8.41423 | 8.42952 |
| MIR4715   | 4.77121 | 5.0478  | 5.03161 | 5.3057  | 4.99739 | 5.61374 | 5.02473 | 5.37579 | 5.38319 |
| OCA2      | 7.03187 | 6.67491 | 6.83231 | 6.02251 | 6.28207 | 5.57229 | 6.31552 | 5.87993 | 6.03096 |
| HERC2     | 8.13091 | 8.15643 | 7.93666 | 7.4428  | 6.51264 | 6.91232 | 7.67711 | 6.90084 | 7.19154 |
| NSMCE3    | 6.38329 | 6.62397 | 6.86615 | 6.81088 | 5.6348  | 6.69756 | 7.16471 | 6.81801 | 6.2486  |
| TJP1      | 10.5438 | 10.4694 | 10.327  | 9.74905 | 7.99693 | 10.2498 | 9.83687 | 10.6    | 10.8166 |
| MTMR10    | 9.80119 | 9.73751 | 9.61258 | 8.89993 | 6.80503 | 8.42621 | 9.15684 | 9.17897 | 9.00251 |
| MIR211    | 6.2948  | 6.17386 | 6.27673 | 6.34138 | 7.52851 | 6.31485 | 5.72157 | 6.16932 | 6.15605 |
| LOC283710 | 4.95191 | 5.13058 | 4.87435 | 5.41307 | 6.20073 | 5.59903 | 6.1163  | 5.33579 | 5.38038 |
| OTUD7A    | 6.0566  | 6.02132 | 6.17912 | 6.33359 | 6.42801 | 6.14828 | 5.51344 | 6.26385 | 6.07734 |
| FMN1      | 7.47642 | 8.01921 | 7.70884 | 6.43645 | 6.50541 | 6.90751 | 6.8307  | 7.48244 | 7.36456 |
| EMC7      | 9.67233 | 9.18197 | 9.58729 | 9.78087 | 7.313   | 9.39091 | 9.87698 | 9.3686  | 9.75462 |
| KATNB1    | 8.39759 | 8.36487 | 8.22434 | 7.61657 | 6.60016 | 8.29223 | 6.91538 | 10.2763 | 9.74047 |
| NOP10     | 8.69024 | 8.39405 | 8.31948 | 10.2162 | 9.18121 | 9.87776 | 9.95534 | 9.7389  | 9.6425  |
| LPCAT4    | 7.93518 | 7.57125 | 7.67198 | 8.06536 | 7.96797 | 8.10141 | 7.62718 | 9.07642 | 7.72389 |
| AQR       | 9.58512 | 9.49306 | 9.48246 | 9.12436 | 7.00166 | 8.53661 | 8.91575 | 9.03465 | 9.2319  |
| DPH6      | 8.17341 | 8.0382  | 8.12583 | 6.27946 | 5.47298 | 6.26777 | 6.72373 | 5.63471 | 6.06315 |
| MIR3942   | 8.13641 | 8.37448 | 7.70206 | 4.20418 | 4.4822  | 3.67391 | 4.88898 | 3.22887 | 4.18167 |
| LOC145845 | 4.56813 | 4.35457 | 4.27926 | 4.15067 | 4.71735 | 4.15597 | 4.29496 | 4.45382 | 4.20185 |
| RASGRP1   | 7.87623 | 8.52477 | 7.77702 | 7.1969  | 7.3144  | 7.87525 | 8.23648 | 6.12252 | 7.48248 |
| FSIP1     | 5.15225 | 4.58132 | 5.27084 | 5.15916 | 5.78343 | 5.43549 | 5.25183 | 5.05532 | 5.36609 |
| GPR176    | 6.03665 | 5.18693 | 5.89507 | 5.99575 | 5.88681 | 5.04543 | 6.60859 | 6.37432 | 6.49934 |
| SRP14     | 8.58666 | 8.59189 | 8.51361 | 8.70254 | 8.24602 | 8.65739 | 9.02703 | 8.59706 | 8.78563 |

|           |         |         |         |         |         |         |         |         |         |
|-----------|---------|---------|---------|---------|---------|---------|---------|---------|---------|
| C15orf56  | 6.61254 | 6.64011 | 6.90548 | 7.76961 | 7.73149 | 8.34557 | 7.63054 | 7.8614  | 7.85895 |
| ANKRD63   | 6.94444 | 7.25324 | 6.93972 | 8.11801 | 8.10166 | 8.39439 | 7.94262 | 8.03183 | 7.96404 |
| C15orf52  | 6.41304 | 6.54384 | 6.36477 | 6.75192 | 6.44298 | 7.18971 | 7.03712 | 6.8863  | 6.66344 |
| c15orf57  | 7.22203 | 7.20786 | 7.44897 | 5.93554 | 6.1245  | 5.94511 | 6.32149 | 6.28467 | 6.40363 |
| MRPL42P5  | 5.17194 | 6.0859  | 5.47223 | 3.82298 | 4.47442 | 4.35219 | 3.78335 | 3.82905 | 3.88619 |
| RAD51-AS1 | 6.2851  | 6.17777 | 5.74852 | 5.49903 | 4.90005 | 5.96244 | 5.44722 | 5.31609 | 5.10723 |
| rhov      | 8.00741 | 7.82418 | 7.58914 | 8.11611 | 6.89086 | 8.76965 | 8.82798 | 7.94514 | 7.91953 |
| INO80     | 8.90609 | 8.83104 | 8.8634  | 7.67127 | 7.06582 | 7.21941 | 8.19388 | 7.34981 | 8.17189 |
| EXD1      | 4.93046 | 5.05754 | 4.47912 | 5.07227 | 6.24156 | 4.87574 | 4.62078 | 5.09579 | 4.98754 |
| OIP5      | 5.58505 | 5.11838 | 4.99274 | 6.18932 | 4.97412 | 5.64584 | 5.58758 | 5.24271 | 5.05513 |
| LTK       | 5.71313 | 5.7303  | 5.63533 | 5.8999  | 6.40445 | 6.15233 | 6.04615 | 6.14909 | 6.01543 |
| RPAP1     | 7.46636 | 7.16256 | 7.32323 | 7.28919 | 6.24873 | 7.05801 | 7.62753 | 6.5331  | 6.68976 |
| MIR4310   | 4.78558 | 4.76529 | 5.46608 | 4.93391 | 4.99263 | 5.45056 | 4.99822 | 4.71133 | 5.49571 |
| EHD4      | 8.61901 | 8.52713 | 8.27464 | 9.0217  | 7.64917 | 10.1403 | 9.27536 | 9.83944 | 9.59225 |
| VPS39     | 9.94747 | 10.0904 | 9.90617 | 9.02364 | 6.77399 | 8.53199 | 9.05703 | 8.78365 | 8.95374 |
| MIR627    | 2.64498 | 2.83566 | 2.57279 | 2.70139 | 2.26666 | 2.96934 | 3.04902 | 2.87467 | 2.63612 |
| TMEM87A   | 9.26598 | 9.30299 | 9.40428 | 9.33893 | 6.27332 | 9.16948 | 8.87685 | 9.29236 | 9.65178 |
| ZNF106    | 8.31148 | 8.33958 | 8.69726 | 7.59347 | 6.1252  | 6.91765 | 7.76167 | 7.94692 | 7.28088 |
| LRRC57    | 7.77708 | 7.85633 | 7.65536 | 7.65795 | 6.41064 | 7.27539 | 8.09054 | 7.64961 | 7.72697 |
| CDAN1     | 6.86595 | 6.84774 | 6.95147 | 6.74155 | 7.07401 | 6.77588 | 6.67652 | 6.77574 | 6.95317 |
| TTBK2     | 7.94681 | 7.50106 | 7.53463 | 7.3412  | 6.69744 | 6.46954 | 7.26432 | 7.73948 | 7.07506 |
| UBR1      | 8.51878 | 8.59421 | 8.51069 | 8.12207 | 5.65682 | 7.1154  | 8.28119 | 8.47284 | 8.43444 |
| EPB42     | 5.88453 | 5.92672 | 5.95627 | 6.1891  | 6.86993 | 5.95134 | 6.05319 | 6.1188  | 6.21887 |
| TGM5      | 9.76032 | 9.92994 | 9.78636 | 8.9913  | 8.35482 | 10.1369 | 9.40747 | 10.4627 | 9.44663 |
| TGM7      | 4.55515 | 5.03418 | 5.28391 | 5.84182 | 5.63257 | 5.66427 | 5.55262 | 5.73292 | 5.35905 |
| lcmt2     | 7.09882 | 7.04458 | 7.30799 | 7.30696 | 6.57954 | 6.95587 | 7.55962 | 6.66361 | 7.15908 |

|           |         |         |         |         |         |         |         |         |         |
|-----------|---------|---------|---------|---------|---------|---------|---------|---------|---------|
| ZSCAN29   | 7.06852 | 6.99812 | 6.96868 | 6.51316 | 6.16726 | 6.47503 | 7.32847 | 6.36877 | 6.80914 |
| TP53BP1   | 7.62047 | 7.71883 | 7.53303 | 7.24778 | 6.42242 | 6.44727 | 7.16142 | 7.12827 | 6.73125 |
| PPIP5K1   | 8.64519 | 8.6323  | 8.40625 | 8.07257 | 8.3696  | 7.2209  | 8.21675 | 7.71996 | 7.97377 |
| STRC      | 6.28169 | 6.10158 | 6.13807 | 6.19597 | 7.45076 | 6.14841 | 6.04115 | 6.12338 | 6.05665 |
| ELL3      | 7.84823 | 7.40587 | 6.80122 | 6.72229 | 6.31484 | 6.48725 | 6.95463 | 6.70168 | 6.59719 |
| SERINC4   | 5.3093  | 5.41086 | 5.08745 | 5.66444 | 6.00612 | 5.59812 | 5.51266 | 5.4003  | 5.33281 |
| MFAP1     | 7.28807 | 7.42328 | 7.20767 | 7.56024 | 5.91654 | 7.94484 | 7.57515 | 7.15131 | 7.56628 |
| FRMD5     | 5.31722 | 5.41589 | 5.51586 | 5.50504 | 6.32118 | 5.63735 | 5.56407 | 5.28628 | 5.1938  |
| EIF3J-AS1 | 7.55413 | 7.55219 | 7.3021  | 6.31389 | 5.61675 | 5.38638 | 6.62106 | 5.7264  | 6.72338 |
| SPG11     | 9.40241 | 9.31696 | 9.04114 | 7.6828  | 5.80326 | 7.37719 | 8.34854 | 7.58029 | 7.95918 |
| PATL2     | 5.43375 | 5.86022 | 5.61636 | 5.78005 | 6.35994 | 5.85587 | 5.20117 | 5.91699 | 5.74109 |
| DUOX2     | 6.68638 | 6.79932 | 6.20918 | 6.79104 | 6.46783 | 7.0847  | 6.48405 | 6.53284 | 6.95115 |
| DUOXA1    | 10.6252 | 10.0807 | 9.9588  | 10.373  | 8.65463 | 10.5734 | 10.3388 | 10.4502 | 10.9703 |
| SHF       | 6.34944 | 6.22421 | 6.36984 | 6.71637 | 5.96227 | 6.38937 | 6.50078 | 6.40706 | 6.60053 |
| GATM      | 8.78876 | 7.51382 | 7.67354 | 6.95209 | 5.30959 | 6.31885 | 7.35808 | 5.31011 | 5.35142 |
| MYEF2     | 6.12851 | 5.88544 | 6.26984 | 4.89186 | 6.02356 | 4.67332 | 4.60717 | 5.323   | 4.89132 |
| FBN1      | 8.7012  | 8.20214 | 9.41255 | 7.2203  | 6.48556 | 6.74589 | 7.82053 | 6.9745  | 7.01267 |
| CEP152    | 5.89543 | 6.06591 | 5.58413 | 5.41554 | 5.26715 | 5.17708 | 5.30446 | 5.99132 | 5.02782 |
| SECISBP2L | 8.79512 | 9.35836 | 8.83497 | 8.11671 | 6.5241  | 7.71134 | 7.99886 | 8.60248 | 8.50812 |
| COPS2     | 11.0649 | 10.6756 | 11.165  | 10.2027 | 9.94462 | 10.2557 | 10.7586 | 10.7034 | 10.3694 |
| HDC       | 5.73672 | 5.05964 | 6.13107 | 5.576   | 5.74826 | 6.00839 | 5.45213 | 5.42247 | 5.38123 |
| USP50     | 6.0985  | 5.78062 | 5.99395 | 4.92037 | 5.80143 | 5.04454 | 4.88717 | 4.50801 | 5.06433 |
| DMXL2     | 7.73965 | 8.08626 | 8.03009 | 6.94989 | 6.01634 | 6.22439 | 6.80637 | 6.50443 | 7.04257 |
| BCL2L10   | 7.8993  | 7.52391 | 7.11579 | 8.10672 | 5.91068 | 7.22423 | 8.61515 | 5.22136 | 6.40519 |
| MYO5C     | 8.22477 | 8.18078 | 8.17818 | 6.35251 | 5.78121 | 7.28019 | 7.10321 | 6.63587 | 7.14553 |
| MIR1266   | 5.85426 | 5.17159 | 5.48645 | 5.35791 | 6.10467 | 5.95837 | 5.6228  | 5.53598 | 5.37886 |

|              |         |         |         |         |         |         |         |         |         |
|--------------|---------|---------|---------|---------|---------|---------|---------|---------|---------|
| ONECUT1      | 4.57695 | 4.6209  | 4.50982 | 5.00745 | 5.34237 | 5.02716 | 4.65248 | 4.81507 | 4.78765 |
| WDR72        | 5.56896 | 5.5004  | 7.06966 | 5.04732 | 5.56327 | 5.07415 | 4.67454 | 4.92156 | 5.18309 |
| RSL24D1      | 8.44252 | 8.96676 | 8.91255 | 8.74678 | 7.46487 | 8.80698 | 9.11911 | 8.48695 | 8.66149 |
| DYX1C1-CCPG1 | 6.52802 | 6.41651 | 6.61832 | 5.62241 | 5.59393 | 5.2109  | 6.01454 | 5.13011 | 5.78551 |
| MIR628       | 4.29409 | 4.75159 | 4.88425 | 3.56383 | 3.1359  | 3.78446 | 3.2099  | 3.26874 | 3.50397 |
| PYGO1        | 6.09657 | 6.07578 | 6.17566 | 5.7607  | 5.31516 | 4.8679  | 6.10687 | 5.88821 | 5.78183 |
| PRTG         | 5.68827 | 5.47855 | 5.70956 | 5.84928 | 6.07645 | 5.91611 | 6.02604 | 6.01917 | 5.81413 |
| MNS1         | 7.24002 | 6.94862 | 7.23335 | 5.56073 | 5.29352 | 5.61087 | 6.09298 | 5.6173  | 5.74293 |
| ZNF280D      | 8.28849 | 8.14318 | 8.43333 | 6.24469 | 5.36854 | 5.20543 | 6.94041 | 5.83213 | 6.01837 |
| LOC145783    | 7.29366 | 7.03013 | 7.27031 | 6.38771 | 6.79302 | 5.72548 | 6.78229 | 6.30616 | 6.50603 |
| ADAM10       | 9.74373 | 9.79308 | 9.63737 | 9.78084 | 6.78717 | 9.91067 | 10.162  | 10.1171 | 10.122  |
| MYO1E        | 9.27107 | 9.19098 | 9.06547 | 9.63643 | 8.34133 | 10.2361 | 9.77239 | 10.8553 | 10.4624 |
| MIR2116      | 5.9551  | 5.41722 | 5.35532 | 5.57929 | 3.99481 | 4.40051 | 5.09003 | 6.79286 | 6.77118 |
| ANXA2        | 9.36843 | 8.18045 | 8.67733 | 8.13807 | 6.83569 | 7.81959 | 8.1618  | 9.57632 | 9.39973 |
| ice2         | 8.63023 | 8.51396 | 8.50571 | 7.85058 | 6.24065 | 6.66085 | 7.91401 | 6.92611 | 7.19848 |
| RORA         | 8.3829  | 8.71894 | 8.29599 | 7.27484 | 7.84901 | 7.67432 | 7.04891 | 7.69489 | 7.10713 |
| VPS13C       | 8.62858 | 8.62583 | 8.67554 | 7.31633 | 5.14613 | 6.74963 | 7.97806 | 7.34021 | 7.37571 |
| C2CD4B       | 7.27623 | 5.27388 | 5.41223 | 6.0789  | 5.75579 | 5.52704 | 6.34879 | 6.23842 | 5.59598 |
| RPS27L       | 5.71686 | 6.1784  | 6.14187 | 5.78993 | 5.65866 | 5.55916 | 5.90721 | 5.58922 | 5.49042 |
| CA12         | 10.6974 | 10.136  | 10.3529 | 9.70048 | 8.30231 | 9.67255 | 9.77696 | 9.15722 | 9.44282 |
| USP3-AS1     | 5.78643 | 5.71897 | 5.66982 | 6.00211 | 5.88975 | 6.195   | 5.80934 | 6.15483 | 5.78832 |
| MIR422A      | 6.61532 | 6.53326 | 6.83321 | 6.93763 | 7.61392 | 7.09108 | 6.84559 | 7.01398 | 6.941   |
| DAPK2        | 7.3376  | 6.99628 | 7.24887 | 6.03422 | 6.42754 | 6.87065 | 6.28123 | 6.33531 | 5.84821 |
| PPIB         | 10.9526 | 10.7947 | 11.1611 | 11.3991 | 10.0815 | 11.1002 | 11.1362 | 10.5726 | 11.245  |
| KIAA0101     | 6.48405 | 6.2887  | 6.12165 | 7.67781 | 6.10666 | 6.93798 | 6.85045 | 6.46356 | 6.69595 |
| OAZ2         | 7.33278 | 7.24781 | 7.08499 | 6.70638 | 6.11632 | 6.78072 | 7.26588 | 7.53361 | 6.70999 |

|            |         |         |         |         |         |         |         |         |         |
|------------|---------|---------|---------|---------|---------|---------|---------|---------|---------|
| RBPMS2     | 6.72499 | 6.74094 | 6.59762 | 6.68509 | 6.80071 | 6.51378 | 6.44869 | 6.41911 | 6.53784 |
| MIR1272    | 3.36519 | 3.35121 | 3.27667 | 3.12698 | 3.50952 | 2.98809 | 3.38675 | 3.1882  | 3.06864 |
| PIF1       | 5.89383 | 5.88145 | 5.69905 | 6.06499 | 5.92794 | 6.50804 | 6.11964 | 6.24369 | 6.12774 |
| MTFMT      | 7.4402  | 7.65433 | 7.38372 | 6.97568 | 5.92163 | 6.13712 | 7.63378 | 6.6475  | 6.80673 |
| UBAP1L     | 6.01427 | 6.10331 | 6.174   | 5.36604 | 6.07266 | 6.19805 | 6.04764 | 6.40477 | 6.48465 |
| PDCD7      | 7.29715 | 7.48669 | 7.47972 | 7.14123 | 7.27861 | 7.16046 | 7.31182 | 7.13265 | 6.91908 |
| CLPX       | 8.25418 | 8.79421 | 8.3898  | 8.30983 | 5.48949 | 8.57678 | 8.70173 | 8.11326 | 8.7312  |
| DPP8       | 8.27944 | 8.32085 | 8.69791 | 7.28938 | 5.4671  | 7.17598 | 7.94367 | 7.66256 | 7.58026 |
| VWA9       | 9.0874  | 8.8154  | 9.21219 | 8.44642 | 6.54267 | 7.32755 | 8.51882 | 7.305   | 7.95585 |
| DENND4A    | 8.64963 | 8.62074 | 8.76949 | 7.66625 | 6.4488  | 6.48136 | 7.82964 | 7.67946 | 7.51743 |
| MIR4511    | 3.18316 | 3.04144 | 3.08097 | 3.05949 | 3.1573  | 3.07782 | 2.94979 | 3.01604 | 3.29956 |
| MEGF11     | 5.44496 | 5.32053 | 5.56035 | 5.76638 | 6.30826 | 5.80826 | 5.47327 | 5.51239 | 5.6693  |
| TIPIN      | 5.68856 | 6.04616 | 5.66416 | 6.37554 | 4.61758 | 5.80094 | 6.41242 | 5.30735 | 5.7473  |
| SCARNA14   | 4.63635 | 5.04297 | 4.39011 | 5.98429 | 4.69264 | 5.44106 | 5.26128 | 4.71674 | 4.16085 |
| LCTL       | 4.42502 | 4.54967 | 4.24825 | 5.58887 | 4.69217 | 5.38995 | 5.18398 | 5.08515 | 4.93265 |
| AAGAB      | 7.04401 | 6.95822 | 6.82504 | 7.56146 | 5.49372 | 6.74279 | 7.65167 | 7.04227 | 7.40297 |
| IQCH-AS1   | 5.98488 | 5.52158 | 5.98863 | 5.94422 | 5.86095 | 5.81735 | 5.66791 | 5.86724 | 5.45001 |
| CALML4     | 6.36016 | 6.65069 | 6.6056  | 5.67912 | 5.71786 | 4.97352 | 6.00448 | 5.35583 | 5.07096 |
| MIR4312    | 6.46942 | 6.21789 | 6.49047 | 6.52977 | 6.96556 | 7.17627 | 6.85913 | 6.35146 | 6.80201 |
| ANP32A-IT1 | 6.65464 | 6.93916 | 7.1532  | 6.09915 | 6.24425 | 6.29951 | 5.95352 | 6.71048 | 6.2667  |
| UACA       | 9.035   | 8.82231 | 8.73063 | 8.00184 | 6.28513 | 7.37304 | 8.08967 | 8.53151 | 8.09297 |
| THAP10     | 6.01493 | 5.92325 | 6.30504 | 6.16933 | 5.39927 | 5.64055 | 5.82289 | 5.77689 | 5.70074 |
| CT62       | 5.24376 | 4.96592 | 4.99756 | 5.44466 | 6.25653 | 5.37355 | 5.54001 | 5.52938 | 5.18852 |
| MYO9A      | 8.99825 | 9.09891 | 8.87287 | 8.05476 | 5.90205 | 8.09628 | 8.32074 | 8.12374 | 8.61326 |
| GRAMD2     | 6.64518 | 6.58774 | 6.48795 | 6.72814 | 6.64599 | 6.6742  | 6.6392  | 6.32045 | 6.39298 |
| HEXA       | 7.92031 | 7.9423  | 8.12492 | 7.463   | 6.53212 | 6.50968 | 7.48279 | 7.08198 | 6.89085 |

|           |         |         |         |         |         |         |         |         |         |
|-----------|---------|---------|---------|---------|---------|---------|---------|---------|---------|
| ADPGK     | 7.99481 | 7.9709  | 7.92625 | 7.28453 | 6.66064 | 6.78624 | 7.49102 | 6.7209  | 7.24072 |
| HCN4      | 6.64018 | 6.99509 | 7.10978 | 7.33492 | 7.62123 | 7.57423 | 7.19161 | 7.53805 | 7.42737 |
| NPTN      | 10.0805 | 10.2534 | 10.2926 | 10.3849 | 8.80144 | 9.86013 | 10.3964 | 10.5067 | 10.4223 |
| STOML1    | 6.23248 | 6.50684 | 6.4585  | 6.89221 | 7.1535  | 6.94348 | 6.92379 | 6.78589 | 6.82774 |
| LOC283731 | 5.24992 | 5.42412 | 5.46215 | 6.18712 | 6.2887  | 6.31977 | 5.91986 | 5.96541 | 6.02172 |
| STRA6     | 5.9881  | 5.75695 | 6.04297 | 6.52514 | 6.34993 | 6.55094 | 5.94936 | 6.3887  | 6.39658 |
| UBL7      | 9.46348 | 9.69389 | 9.27017 | 9.60148 | 8.16825 | 8.3811  | 9.34879 | 8.50531 | 9.03828 |
| EDC3      | 7.329   | 7.95734 | 6.94795 | 7.29529 | 6.76762 | 7.33225 | 7.61239 | 7.01546 | 7.48189 |
| MIR4513   | 5.17475 | 4.85869 | 5.02525 | 5.7332  | 4.93047 | 6.18836 | 6.31517 | 6.03912 | 5.67578 |
| ULK3      | 8.87408 | 8.92395 | 8.7052  | 8.43692 | 6.84717 | 9.05558 | 8.75417 | 8.22924 | 8.50052 |
| SCAMP2    | 8.70631 | 8.56941 | 8.42343 | 9.13259 | 7.55845 | 9.33941 | 9.3992  | 8.52086 | 9.58366 |
| Cox5a     | 9.68019 | 9.49577 | 9.82973 | 10.8235 | 10.1005 | 10.6876 | 10.7552 | 10.0474 | 10.1316 |
| rpp25     | 7.31173 | 7.24069 | 7.28444 | 6.93297 | 7.11377 | 6.67531 | 7.26    | 6.81061 | 6.56302 |
| MIR631    | 6.84655 | 6.75707 | 7.01415 | 6.86092 | 7.70999 | 6.95539 | 6.7173  | 6.90234 | 6.8657  |
| SIN3A     | 9.71749 | 9.71032 | 9.72736 | 8.65744 | 7.10384 | 7.95109 | 9.04939 | 8.76691 | 8.46015 |
| SNUPN     | 7.45454 | 7.26755 | 7.25658 | 6.90884 | 5.18102 | 6.32804 | 7.0665  | 6.29366 | 6.31475 |
| CSPG4     | 6.87473 | 7.16174 | 6.96184 | 7.61116 | 6.99906 | 7.33739 | 7.84053 | 7.91459 | 7.78863 |
| DNM1P35   | 5.56236 | 5.95342 | 5.81375 | 6.17801 | 6.59057 | 6.00459 | 6.15229 | 7.06384 | 6.50412 |
| NRG4      | 6.59707 | 5.24615 | 5.23449 | 5.34921 | 5.05252 | 5.27265 | 5.53843 | 5.34266 | 4.92901 |
| TYRO3P    | 6.61946 | 6.75081 | 6.1668  | 5.51168 | 4.65657 | 5.35629 | 5.85768 | 5.36183 | 5.50098 |
| SCAPER    | 9.17286 | 9.35141 | 8.82557 | 7.90817 | 6.74104 | 9.16356 | 9.11277 | 8.20801 | 8.89738 |
| PEAK1     | 8.57038 | 8.77444 | 8.56282 | 7.56269 | 5.67587 | 7.12597 | 7.84261 | 7.55859 | 8.22009 |
| LINC00597 | 6.25852 | 6.18538 | 6.17008 | 4.85969 | 4.43399 | 4.19688 | 4.87172 | 5.66521 | 6.31317 |
| LINGO1    | 5.61791 | 5.59191 | 5.86229 | 6.12954 | 6.5484  | 6.2241  | 5.73466 | 6.06844 | 6.0161  |
| LOC91450  | 6.41483 | 6.19359 | 6.26654 | 6.58639 | 7.05282 | 6.68394 | 6.47694 | 6.73568 | 7.01216 |
| CIB2      | 6.80172 | 6.58057 | 6.3105  | 8.04865 | 7.33584 | 8.06615 | 8.28445 | 7.95835 | 8.24344 |

|              |         |         |         |         |         |         |         |         |         |
|--------------|---------|---------|---------|---------|---------|---------|---------|---------|---------|
| acsbg1       | 6.63306 | 6.26693 | 6.07301 | 5.91448 | 5.42023 | 6.43987 | 5.81844 | 6.47571 | 6.36715 |
| WDR61        | 6.89755 | 7.11651 | 6.97718 | 6.93551 | 6.30111 | 6.49327 | 7.12441 | 5.9525  | 6.17883 |
| CTSH         | 7.18227 | 6.19103 | 6.89287 | 6.36347 | 5.37999 | 4.92874 | 6.04408 | 5.33237 | 5.62612 |
| RASGRF1      | 5.65674 | 5.58154 | 5.68703 | 6.07587 | 5.99688 | 6.28524 | 5.44152 | 6.07696 | 6.07098 |
| ANKRD34C-AS1 | 4.3783  | 4.6927  | 4.76218 | 5.16612 | 6.30305 | 5.40964 | 4.31068 | 5.14896 | 4.90083 |
| BCL2A1       | 6.21019 | 5.76899 | 5.75506 | 5.89775 | 5.93284 | 8.43005 | 6.93839 | 7.64326 | 7.49462 |
| LINC00927    | 4.32683 | 4.26257 | 4.44207 | 4.6443  | 5.4962  | 4.43298 | 4.2973  | 4.366   | 4.71071 |
| MIR549A      | 3.07258 | 3.60321 | 2.98169 | 3.46794 | 3.19334 | 3.53503 | 3.04072 | 2.58692 | 2.98488 |
| MESDC2       | 7.37505 | 7.33921 | 7.62279 | 6.59126 | 6.69656 | 6.79536 | 6.56965 | 7.23775 | 6.89977 |
| STARD5       | 10.0331 | 9.83612 | 9.24048 | 9.1055  | 8.60704 | 8.33961 | 8.74242 | 9.1447  | 8.9064  |
| TMC3         | 5.52036 | 5.76225 | 5.47907 | 5.87768 | 6.74899 | 6.25872 | 5.76649 | 5.84367 | 6.01951 |
| EFL1         | 6.51169 | 6.42916 | 6.09716 | 6.38615 | 4.98163 | 7.16517 | 6.92105 | 7.28335 | 7.43846 |
| GOLGA6L10    | 7.92704 | 8.01837 | 8.02029 | 6.97633 | 7.88279 | 7.67295 | 7.0866  | 8.0847  | 7.88892 |
| RPS17        | 7.09527 | 6.96747 | 7.00034 | 7.18232 | 6.85791 | 7.0827  | 6.89154 | 6.49949 | 6.70706 |
| CPEB1        | 5.92458 | 6.30474 | 6.3261  | 6.32373 | 6.40577 | 6.24973 | 6.06843 | 6.35313 | 6.19519 |
| LOC338963    | 5.37561 | 5.39968 | 5.42619 | 6.10178 | 7.01249 | 5.71662 | 5.57567 | 6.07978 | 5.69696 |
| FSD2         | 5.17475 | 4.97503 | 5.26584 | 5.47825 | 5.43561 | 5.65474 | 5.12359 | 5.46258 | 5.20484 |
| HOMER2       | 9.41037 | 9.19167 | 9.23719 | 8.91955 | 7.5356  | 10.0862 | 9.702   | 10.174  | 10.5422 |
| C15orf40     | 7.61817 | 7.85724 | 7.81593 | 7.53508 | 6.80151 | 6.67129 | 7.90171 | 7.20478 | 7.18246 |
| BTBD1        | 8.23641 | 7.95337 | 8.49489 | 8.07018 | 5.16565 | 8.29652 | 8.8419  | 7.83582 | 7.76879 |
| BNC1         | 8.86253 | 8.14641 | 8.87378 | 9.41117 | 6.54094 | 9.15583 | 9.90586 | 8.6097  | 9.54643 |
| DNM1P41      | 6.90518 | 6.88027 | 6.78125 | 6.82303 | 8.50879 | 6.8298  | 7.05067 | 6.76713 | 7.27018 |
| UBE2Q2P1     | 6.44287 | 5.77465 | 6.02227 | 5.68794 | 5.20933 | 5.6497  | 5.51609 | 5.60267 | 6.0889  |
| WDR73        | 6.67492 | 6.39301 | 6.64277 | 6.00894 | 5.71826 | 5.82668 | 6.53758 | 6.05698 | 6.17042 |
| NMB          | 5.83176 | 5.97027 | 5.95325 | 7.71652 | 5.44584 | 7.17155 | 8.4502  | 7.03355 | 6.89916 |
| SEC11A       | 7.21582 | 7.54534 | 7.43582 | 7.82406 | 6.25281 | 7.39931 | 7.80697 | 7.20061 | 7.25107 |

|           |         |         |         |         |         |         |         |         |         |
|-----------|---------|---------|---------|---------|---------|---------|---------|---------|---------|
| KLHL25    | 6.56656 | 6.69937 | 6.28044 | 7.00202 | 6.25036 | 6.91574 | 6.66206 | 6.6914  | 6.62165 |
| MIR1276   | 4.50378 | 4.20245 | 4.06687 | 3.66678 | 3.65261 | 3.00364 | 4.77268 | 3.94837 | 4.23906 |
| MRPL46    | 7.86839 | 7.88276 | 7.93804 | 7.42547 | 6.31349 | 6.5781  | 7.94878 | 7.14805 | 7.26641 |
| DET1      | 7.0879  | 7.48541 | 7.23379 | 6.14325 | 6.37333 | 6.04729 | 6.31355 | 6.05396 | 5.98563 |
| HAPLN3    | 7.28479 | 6.90048 | 7.03289 | 7.07484 | 6.34447 | 7.03038 | 7.04358 | 6.93607 | 7.30849 |
| MFGE8     | 8.71329 | 8.36546 | 8.63161 | 8.28281 | 7.31631 | 9.01385 | 8.68403 | 9.14537 | 9.60946 |
| RLBP1     | 5.01078 | 5.31353 | 5.23891 | 5.62531 | 5.78226 | 5.88716 | 5.62274 | 5.80292 | 5.57929 |
| LINC00928 | 5.18971 | 5.47826 | 5.06967 | 5.52444 | 6.42917 | 5.52451 | 5.6534  | 5.22545 | 5.29958 |
| KIF7      | 6.40517 | 6.52152 | 6.76139 | 6.93747 | 6.71488 | 7.27267 | 6.82586 | 6.73582 | 6.8875  |
| PLIN1     | 5.7445  | 6.17913 | 7.10197 | 5.87692 | 6.56467 | 6.04207 | 5.85896 | 5.9007  | 6.07605 |
| PEX11A    | 5.94762 | 5.90688 | 5.86084 | 6.11836 | 5.68367 | 6.44744 | 5.91693 | 6.05598 | 6.27827 |
| MESP1     | 7.52698 | 7.24974 | 7.48572 | 8.01153 | 8.33717 | 7.63694 | 7.22014 | 7.7625  | 7.57081 |
| ANPEP     | 7.61982 | 7.47948 | 8.47683 | 7.50688 | 6.82832 | 7.33371 | 7.82106 | 8.35166 | 8.38285 |
| CIB1      | 7.28945 | 6.3969  | 6.97869 | 7.71392 | 5.69019 | 7.52084 | 8.02945 | 7.61871 | 7.34769 |
| HDDC3     | 7.0148  | 7.01111 | 6.97258 | 6.95862 | 7.12328 | 7.5049  | 6.97813 | 6.71791 | 6.98128 |
| PRC1      | 7.99371 | 7.59786 | 7.51713 | 8.33041 | 6.7437  | 7.28167 | 7.7996  | 7.27622 | 7.24493 |
| VPS33B    | 7.55168 | 7.40337 | 7.49886 | 6.83759 | 6.2707  | 6.8805  | 7.36334 | 7.25951 | 7.26945 |
| LINC00930 | 4.47897 | 4.61698 | 4.54287 | 5.67766 | 5.52602 | 5.75556 | 5.62577 | 4.99514 | 5.12774 |
| LINC01197 | 6.25566 | 5.8533  | 6.33111 | 5.3366  | 5.94142 | 5.05667 | 5.23214 | 5.44028 | 5.55054 |
| LINC00923 | 2.99411 | 3.20524 | 2.63968 | 3.53574 | 3.97849 | 3.29488 | 3.34184 | 3.52013 | 3.2488  |
| PGPEP1L   | 4.13398 | 4.40541 | 4.74122 | 5.26089 | 5.3053  | 5.02657 | 4.64218 | 4.91987 | 4.82868 |
| TTC23     | 7.95903 | 8.22131 | 7.77448 | 7.03992 | 6.51153 | 6.52736 | 6.83685 | 6.56429 | 6.92895 |
| DNM1P46   | 5.88129 | 5.94386 | 6.32163 | 6.96696 | 6.9013  | 7.63022 | 6.89638 | 7.16384 | 6.37591 |
| CERS3     | 12.0365 | 11.8352 | 11.8273 | 11.3143 | 11.1061 | 11.5522 | 11.4032 | 11.7517 | 11.9257 |
| LINS1     | 7.24259 | 7.80568 | 7.41784 | 6.81578 | 7.27984 | 7.68763 | 7.63034 | 7.39367 | 7.75125 |
| CHSY1     | 8.32959 | 8.35562 | 8.31844 | 7.87997 | 6.88171 | 7.28795 | 7.99635 | 7.0127  | 7.4645  |



|              |         |         |         |         |         |         |         |         |         |
|--------------|---------|---------|---------|---------|---------|---------|---------|---------|---------|
| SELENOS      | 6.37976 | 6.45332 | 6.4031  | 7.0106  | 5.79289 | 6.97124 | 6.99351 | 6.25553 | 6.75872 |
| SNRPA1       | 7.88147 | 7.76245 | 7.77404 | 7.1072  | 6.3165  | 6.95395 | 7.25956 | 7.57678 | 6.77923 |
| PCSK6        | 7.23638 | 7.04185 | 7.0471  | 7.6144  | 7.1791  | 7.77736 | 7.61312 | 7.56206 | 7.81316 |
| TM2D3        | 7.60226 | 7.41519 | 7.52687 | 6.89508 | 6.33356 | 6.0341  | 6.8731  | 7.02594 | 6.83098 |
| TARSL2       | 6.20466 | 6.4382  | 6.2456  | 5.27884 | 5.077   | 5.44443 | 5.93933 | 6.59927 | 5.29408 |
| DDX11L9      | 6.15143 | 6.38149 | 6.38746 | 6.83029 | 8.50558 | 6.92374 | 7.01438 | 6.80702 | 7.08676 |
| DDX11L10     | 6.25841 | 5.89578 | 6.7553  | 6.29069 | 9.38304 | 6.39004 | 6.93315 | 6.75043 | 6.97282 |
| SNRNP25      | 6.66134 | 6.37495 | 6.27152 | 7.42573 | 6.91301 | 7.13449 | 7.81095 | 6.1645  | 6.38725 |
| MPG          | 5.92916 | 6.0353  | 5.9516  | 6.52171 | 6.70712 | 7.10268 | 6.39405 | 6.42812 | 6.4768  |
| FAM234A      | 7.16799 | 7.34161 | 7.48096 | 7.71612 | 6.742   | 6.80148 | 7.7206  | 7.1178  | 7.21382 |
| ARHGDIG      | 5.77818 | 6.1372  | 6.04108 | 6.56604 | 6.82367 | 7.20526 | 6.58123 | 6.48624 | 6.46867 |
| LOC100134368 | 5.24963 | 5.3317  | 5.50441 | 6.09809 | 5.83198 | 6.95788 | 5.9529  | 6.88873 | 6.4084  |
| NME4         | 7.00697 | 6.77208 | 6.96712 | 7.74316 | 7.29907 | 7.10949 | 7.5565  | 7.27899 | 6.85155 |
| RAB11FIP3    | 6.87841 | 6.88703 | 6.44166 | 6.89232 | 6.70032 | 7.03741 | 6.96005 | 7.14371 | 6.93872 |
| CAPN15       | 7.507   | 7.17095 | 7.54088 | 7.75723 | 7.31467 | 8.53223 | 8.04041 | 7.41898 | 7.49414 |
| PRR35        | 6.82481 | 7.0307  | 6.84742 | 7.49909 | 7.51218 | 7.97464 | 7.32706 | 7.84695 | 7.30164 |
| MSLN         | 6.19539 | 6.5174  | 6.43999 | 7.33328 | 6.78412 | 7.53565 | 6.77047 | 6.94145 | 7.07214 |
| WDR90        | 6.83892 | 6.87374 | 6.87727 | 7.05216 | 7.0087  | 7.0589  | 6.8121  | 6.83351 | 6.85962 |
| RHOT2        | 7.94295 | 7.78119 | 7.76017 | 8.47578 | 7.3365  | 8.69127 | 8.2646  | 7.89444 | 7.901   |
| HAGHL        | 6.68224 | 6.53073 | 6.68606 | 7.29353 | 6.80505 | 7.56487 | 6.91074 | 6.95984 | 7.1051  |
| MIR662       | 6.18996 | 6.64116 | 6.38728 | 7.43149 | 7.39058 | 7.4135  | 7.17684 | 7.30348 | 7.04428 |
| PRR25        | 6.5041  | 6.61539 | 6.64532 | 7.24134 | 6.83844 | 7.67108 | 7.02361 | 7.2595  | 6.88226 |
| SOX8         | 6.55789 | 6.659   | 6.67087 | 7.43541 | 6.52202 | 7.06585 | 6.973   | 6.91994 | 7.22576 |
| SSTR5        | 6.36184 | 6.49397 | 6.58206 | 6.93663 | 7.04364 | 7.5398  | 6.70747 | 6.90487 | 6.85329 |
| Tpsab1       | 5.95753 | 4.95082 | 5.54784 | 6.23614 | 6.11526 | 6.14862 | 6.0742  | 5.99657 | 6.44423 |
| TPSD1        | 6.18336 | 5.80534 | 6.46052 | 6.93313 | 6.93057 | 7.10602 | 6.49741 | 6.59381 | 6.69894 |

|           |         |         |         |         |         |         |         |         |         |
|-----------|---------|---------|---------|---------|---------|---------|---------|---------|---------|
| UBE2I     | 6.69131 | 6.71198 | 6.75216 | 7.47629 | 6.6941  | 7.296   | 7.64183 | 7.23924 | 6.92723 |
| BAIAP3    | 6.66691 | 6.36137 | 6.57968 | 6.85886 | 7.37541 | 7.04232 | 6.75651 | 7.01757 | 7.08257 |
| TMEM204   | 8.01373 | 7.48974 | 8.55561 | 7.53583 | 6.22347 | 7.05815 | 7.59711 | 7.64968 | 8.07621 |
| HN1L      | 8.43352 | 7.8771  | 8.01375 | 9.12226 | 7.33214 | 8.48404 | 9.2655  | 8.7044  | 9.07739 |
| MAPK8IP3  | 8.03846 | 7.73042 | 7.78742 | 7.55118 | 7.79518 | 8.2125  | 8.28408 | 8.83906 | 7.99017 |
| MIR3177   | 4.26107 | 3.74843 | 4.23854 | 4.80819 | 4.12265 | 5.16651 | 4.52926 | 4.98723 | 4.69908 |
| EME2      | 7.79271 | 7.76851 | 7.79738 | 8.20667 | 8.94341 | 8.37841 | 7.89498 | 8.32467 | 8.56489 |
| NUBP2     | 7.11935 | 6.83477 | 7.32861 | 7.945   | 6.84734 | 7.77827 | 8.10629 | 7.29724 | 7.33909 |
| FAHD1     | 7.09767 | 7.10084 | 6.90619 | 7.11279 | 6.49317 | 7.00413 | 7.64218 | 6.78802 | 6.8375  |
| rnf151    | 6.38592 | 6.50835 | 6.42662 | 7.66808 | 7.53114 | 7.59235 | 6.88542 | 7.0231  | 6.90215 |
| TBL3      | 7.24504 | 7.19935 | 7.15135 | 7.67538 | 6.95868 | 7.72945 | 8.02956 | 7.39464 | 7.58459 |
| SYNGR3    | 6.59729 | 6.54121 | 6.73614 | 7.75609 | 7.22046 | 7.49889 | 7.19511 | 7.46992 | 7.03464 |
| NPW       | 6.6633  | 6.71766 | 6.86268 | 7.57618 | 6.72692 | 7.8046  | 7.2166  | 7.5031  | 7.36512 |
| TSC2      | 7.90388 | 7.79253 | 7.7626  | 7.98134 | 7.2211  | 7.98793 | 8.12093 | 8.09413 | 8.01576 |
| MIR4516   | 7.28434 | 7.26176 | 7.32856 | 7.7934  | 9.54189 | 7.51612 | 7.44272 | 8.64891 | 7.28864 |
| E4F1      | 6.81028 | 6.96358 | 6.63042 | 6.81917 | 6.61756 | 7.56    | 7.29891 | 7.25122 | 6.83623 |
| DNASE1L2  | 7.12369 | 7.44872 | 6.79265 | 7.63249 | 7.16078 | 7.39738 | 7.20001 | 7.34975 | 7.01267 |
| MIR4717   | 4.75042 | 4.66928 | 4.82054 | 5.78943 | 4.54177 | 5.81839 | 5.78707 | 5.34422 | 8.75045 |
| CCNF      | 6.92106 | 6.75249 | 6.24757 | 6.94681 | 6.53054 | 8.05143 | 7.29705 | 7.9089  | 7.01872 |
| c16orf59  | 5.94382 | 5.98246 | 5.77621 | 6.91152 | 6.4098  | 7.04023 | 6.53286 | 6.55087 | 6.29311 |
| NTN3      | 6.15306 | 5.90821 | 6.07305 | 6.96266 | 6.14545 | 6.97969 | 6.8013  | 6.63678 | 6.68979 |
| AMDHD2    | 7.92121 | 7.82005 | 7.68157 | 8.01392 | 7.60486 | 7.97892 | 7.97379 | 7.90823 | 7.82827 |
| PDPK1     | 8.39568 | 7.96418 | 8.07845 | 7.01931 | 6.97699 | 7.25213 | 7.37796 | 7.97003 | 7.55647 |
| LOC652276 | 7.19924 | 7.15377 | 7.27694 | 7.14399 | 7.08945 | 7.85203 | 7.44381 | 8.04398 | 7.38593 |
| FLJ42627  | 6.74491 | 6.69162 | 6.4868  | 6.23332 | 5.61717 | 5.6259  | 6.43734 | 6.69454 | 7.02355 |
| KCTD5     | 8.75985 | 8.6119  | 8.68488 | 9.40087 | 8.53007 | 9.96147 | 9.69078 | 9.92416 | 9.87579 |

|              |         |         |         |         |         |         |         |         |         |
|--------------|---------|---------|---------|---------|---------|---------|---------|---------|---------|
| SRRM2        | 11.2164 | 11.0606 | 11.0612 | 10.2139 | 8.57346 | 9.92798 | 10.4209 | 10.2275 | 10.5097 |
| ZG16B        | 9.54011 | 6.3384  | 6.98205 | 6.39018 | 6.37438 | 5.90301 | 5.86162 | 5.79253 | 5.27277 |
| FLYWCH2      | 7.8108  | 7.50717 | 7.79614 | 8.49829 | 7.79218 | 7.94448 | 8.63107 | 7.91472 | 7.65157 |
| FLYWCH1      | 7.62161 | 7.34899 | 7.73445 | 7.60512 | 7.42358 | 7.6828  | 7.4767  | 7.72431 | 7.78992 |
| KREMEN2      | 6.74596 | 6.99413 | 6.86917 | 7.54104 | 7.38911 | 7.75574 | 7.17283 | 7.2567  | 7.48215 |
| PAQR4        | 7.41158 | 6.62284 | 7.35944 | 7.84282 | 7.23859 | 7.88862 | 8.18258 | 8.12514 | 7.62975 |
| LINC00514    | 5.50645 | 5.72628 | 5.8674  | 6.40321 | 5.89834 | 6.56296 | 6.16146 | 6.11844 | 6.19801 |
| CLDN9        | 6.04346 | 6.03449 | 6.34159 | 6.53334 | 6.89283 | 7.12431 | 6.21885 | 6.70144 | 6.56187 |
| thoc6        | 8.53296 | 8.22649 | 8.43613 | 8.87577 | 7.27269 | 7.7965  | 8.96923 | 7.9076  | 7.89992 |
| LOC100128770 | 5.17756 | 5.21312 | 5.59217 | 6.10519 | 5.53625 | 5.49149 | 5.35672 | 5.55375 | 5.79514 |
| MMP25        | 5.05686 | 5.43927 | 5.47592 | 6.08321 | 5.55219 | 6.4198  | 6.18826 | 6.18166 | 6.07758 |
| IL32         | 6.21478 | 6.1079  | 6.25553 | 6.33059 | 6.42973 | 6.55553 | 6.46591 | 6.66766 | 6.55634 |
| ZNF205       | 5.70395 | 5.43147 | 5.61381 | 5.49174 | 5.69635 | 6.60309 | 5.5652  | 6.09079 | 5.90303 |
| ZNF213       | 6.62196 | 6.48274 | 6.47842 | 6.87841 | 6.73428 | 7.26728 | 6.85927 | 6.79086 | 6.9205  |
| LINC00921    | 6.24987 | 6.05796 | 6.65844 | 5.55913 | 5.98325 | 6.28937 | 6.0018  | 6.04184 | 5.882   |
| ZNF263       | 7.1108  | 6.59942 | 6.89193 | 6.36154 | 5.98175 | 6.52191 | 6.79671 | 6.39675 | 6.3049  |
| ZNF75A       | 8.34039 | 8.30234 | 8.12301 | 7.05497 | 6.55027 | 7.20564 | 7.36927 | 6.42861 | 7.05723 |
| ZNF174       | 7.2404  | 7.40667 | 7.05683 | 6.14462 | 6.25954 | 6.05476 | 6.82926 | 5.70477 | 6.15853 |
| CLUAP1       | 6.05835 | 6.15191 | 6.28181 | 5.10918 | 5.55855 | 5.03239 | 5.48531 | 5.00634 | 5.01923 |
| DNASE1       | 6.24043 | 5.97616 | 6.02896 | 5.83804 | 5.69475 | 6.40404 | 5.98209 | 6.04996 | 6.02771 |
| GLIS2        | 6.83061 | 6.49557 | 6.95523 | 6.94819 | 6.64567 | 7.3127  | 7.1311  | 7.12615 | 6.98573 |
| VASN         | 6.4961  | 6.48345 | 6.55956 | 7.44462 | 6.19226 | 8.43224 | 7.297   | 8.45891 | 7.55922 |
| HMOX2        | 7.86191 | 7.54674 | 7.71673 | 8.71614 | 8.61276 | 9.83438 | 9.30094 | 9.96682 | 9.78297 |
| C16orf96     | 5.37209 | 5.35267 | 5.11053 | 5.23998 | 5.45743 | 5.92601 | 5.85591 | 5.56268 | 5.53342 |
| NUDT16L1     | 7.40766 | 7.18709 | 7.32017 | 7.68451 | 7.7772  | 7.89338 | 7.46491 | 7.70526 | 7.72387 |
| C16orf71     | 5.29582 | 5.59029 | 5.33687 | 6.06678 | 6.41758 | 6.31049 | 5.59039 | 6.00478 | 5.99881 |

|           |         |         |         |         |         |         |         |         |         |
|-----------|---------|---------|---------|---------|---------|---------|---------|---------|---------|
| SMIM22    | 5.25089 | 5.30408 | 5.35936 | 6.20965 | 5.30572 | 5.40102 | 5.70561 | 5.37209 | 5.4145  |
| UBN1      | 7.93799 | 7.80424 | 7.95028 | 7.81116 | 6.8955  | 7.74555 | 7.87837 | 8.40395 | 7.78872 |
| SEC14L5   | 5.91998 | 5.87122 | 6.05144 | 6.52317 | 7.27971 | 7.02684 | 5.97026 | 6.85038 | 6.5698  |
| METTL22   | 7.88379 | 7.88972 | 7.84672 | 7.50747 | 6.29754 | 8.50574 | 7.40642 | 7.43054 | 7.11553 |
| ABAT      | 6.32329 | 6.26834 | 6.37934 | 5.9092  | 6.3805  | 6.30507 | 6.33552 | 6.80343 | 6.09904 |
| PMM2      | 8.00587 | 7.70757 | 8.14561 | 7.67626 | 5.45679 | 7.38766 | 8.12262 | 7.83714 | 8.14714 |
| C16orf72  | 8.70496 | 8.50448 | 8.51069 | 8.99498 | 7.12128 | 9.40019 | 9.03272 | 9.4409  | 9.57305 |
| atf7ip2   | 5.69242 | 6.37305 | 6.93464 | 5.51741 | 5.43954 | 5.76044 | 6.1306  | 5.59194 | 5.42693 |
| EMP2      | 6.75584 | 6.67918 | 7.0184  | 8.19244 | 5.39335 | 6.67498 | 9.15437 | 6.2764  | 6.02781 |
| NUBP1     | 7.61959 | 7.22444 | 7.54742 | 8.08069 | 6.41314 | 7.36407 | 8.21845 | 6.94084 | 7.48091 |
| SNN       | 7.53957 | 7.19591 | 7.24778 | 7.99283 | 7.04165 | 7.04517 | 8.50765 | 7.1344  | 7.66761 |
| SNX29     | 9.45014 | 9.04868 | 9.12078 | 8.71587 | 7.94286 | 8.85399 | 9.1217  | 9.44484 | 9.33825 |
| MIR4718   | 4.6686  | 4.83532 | 4.71737 | 4.59346 | 5.44982 | 4.0776  | 4.37112 | 4.69338 | 5.52489 |
| SHISA9    | 5.98565 | 8.75729 | 7.37481 | 7.61386 | 6.73448 | 6.76894 | 6.46413 | 6.56806 | 6.70205 |
| MKL2      | 10.3823 | 10.4268 | 10.4691 | 7.9822  | 6.39242 | 7.35954 | 8.41674 | 7.99438 | 8.49926 |
| mir193b   | 6.13256 | 6.03798 | 5.90935 | 6.72303 | 6.67883 | 7.13706 | 6.43419 | 6.39657 | 6.61628 |
| MIR365A   | 6.44794 | 6.41412 | 6.50362 | 6.36074 | 9.23779 | 6.17612 | 5.28843 | 6.47997 | 7.04211 |
| BFAR      | 7.96061 | 7.81743 | 8.13142 | 7.86732 | 5.76617 | 6.58581 | 7.88771 | 7.00142 | 7.20079 |
| NPIPA1    | 10.3635 | 9.98596 | 10.1625 | 8.35207 | 8.9628  | 7.89197 | 8.40938 | 7.88715 | 8.19356 |
| nomo1     | 9.51389 | 9.24115 | 9.79007 | 9.31447 | 7.23497 | 8.85655 | 9.45864 | 9.11955 | 9.23431 |
| MIR3670-1 | 6.92986 | 6.58528 | 6.85404 | 6.92488 | 9.27842 | 6.89905 | 6.63344 | 7.33868 | 7.21073 |
| PDXDC1    | 8.30509 | 7.76009 | 7.86142 | 7.65464 | 8.05917 | 7.21543 | 7.62844 | 8.00547 | 7.82759 |
| MPV17L    | 5.85229 | 5.59119 | 7.3251  | 5.73313 | 5.49874 | 5.84174 | 5.66178 | 5.43959 | 5.82176 |
| c16orf45  | 6.45013 | 6.58622 | 6.56644 | 6.4839  | 5.96464 | 6.49109 | 6.21447 | 6.42723 | 6.39667 |
| NDE1      | 8.94149 | 8.06602 | 8.7529  | 8.25681 | 5.9261  | 8.63367 | 8.51087 | 8.91537 | 8.43968 |
| nomo3     | 11.0203 | 10.8634 | 11.0924 | 11.0494 | 9.40268 | 10.4858 | 10.7658 | 10.6718 | 10.7595 |

|              |         |         |         |         |         |         |         |         |         |
|--------------|---------|---------|---------|---------|---------|---------|---------|---------|---------|
| MIR3179-1    | 4.60814 | 5.01069 | 4.97518 | 4.99623 | 5.71811 | 5.1169  | 5.35007 | 5.094   | 4.90745 |
| TMC7         | 6.86454 | 6.06383 | 6.35178 | 7.16924 | 6.58912 | 7.75926 | 7.63647 | 8.54157 | 8.74741 |
| syt17        | 7.38236 | 7.439   | 6.58021 | 6.37865 | 6.38329 | 6.11892 | 6.12169 | 5.97198 | 6.00843 |
| TMC5         | 6.52283 | 5.4793  | 5.45917 | 5.81005 | 6.13323 | 5.56466 | 6.19807 | 5.65833 | 5.65512 |
| CCP110       | 8.05587 | 8.22045 | 8.27561 | 6.97843 | 5.11093 | 6.3012  | 7.89685 | 7.31592 | 6.52556 |
| c16orf62     | 8.20601 | 7.99966 | 8.14327 | 8.27338 | 6.58933 | 7.63228 | 8.18924 | 7.633   | 8.39355 |
| IQCK         | 8.20288 | 7.7951  | 8.52466 | 7.48707 | 6.45563 | 6.88554 | 7.92049 | 6.58036 | 7.14786 |
| ACSM5        | 5.86672 | 6.05135 | 6.58722 | 6.0856  | 7.25862 | 6.44653 | 6.15507 | 6.33436 | 6.4407  |
| ACSM2A       | 3.20218 | 4.63256 | 4.37402 | 4.62255 | 5.36733 | 5.07134 | 3.50038 | 4.79609 | 4.57165 |
| acsm3        | 6.09246 | 6.21557 | 5.94758 | 5.08867 | 4.92464 | 4.59356 | 5.08877 | 4.45799 | 4.79756 |
| LOC81691     | 6.48638 | 6.36711 | 6.31163 | 6.05987 | 6.27178 | 6.24302 | 6.05023 | 6.10763 | 6.16438 |
| LYRM1        | 7.88239 | 7.92126 | 7.80609 | 7.91577 | 7.98696 | 9.07281 | 8.45324 | 8.419   | 8.25628 |
| TMEM159      | 8.18086 | 7.72744 | 7.9093  | 7.30721 | 7.83634 | 8.90539 | 8.27431 | 8.92731 | 7.88506 |
| ANKS4B       | 5.9576  | 5.89038 | 5.66589 | 6.49746 | 7.79027 | 6.49929 | 5.50153 | 6.48918 | 5.84151 |
| CRYM-AS1     | 6.27712 | 6.1501  | 6.84154 | 6.01578 | 5.36018 | 6.14672 | 6.71789 | 6.1486  | 5.97443 |
| SNX29P1      | 6.71252 | 6.61916 | 6.7107  | 6.74765 | 5.70558 | 6.82802 | 6.88185 | 7.16052 | 6.75138 |
| NPIP3        | 8.58216 | 9.10515 | 8.93562 | 10.3917 | 10.8855 | 9.63704 | 9.6304  | 9.83547 | 9.81907 |
| METTL9       | 10.0224 | 10.0766 | 9.79292 | 9.95886 | 9.05446 | 9.94258 | 10.3162 | 10.0347 | 10.108  |
| OTOA         | 4.59129 | 4.6863  | 4.64774 | 5.36512 | 5.51016 | 5.18644 | 5.07207 | 4.79987 | 5.13754 |
| Uqcrc2       | 11.1093 | 10.8624 | 11.3366 | 10.8768 | 9.14596 | 10.3982 | 10.9559 | 10.5449 | 10.5544 |
| c16orf52     | 6.46795 | 7.1129  | 6.77729 | 6.27905 | 5.19966 | 5.93781 | 6.61494 | 6.87523 | 6.796   |
| VWA3A        | 5.99539 | 6.13291 | 5.81923 | 6.33011 | 6.13488 | 5.90408 | 5.9115  | 6.05858 | 5.99361 |
| EEF2K        | 9.05008 | 9.60332 | 9.63888 | 7.16137 | 5.24566 | 6.66371 | 8.0425  | 6.18439 | 6.21617 |
| POLR3E       | 8.01607 | 7.99929 | 7.87856 | 8.13778 | 6.43503 | 7.47316 | 8.44366 | 6.93875 | 7.36804 |
| LOC100190986 | 11.8542 | 11.5656 | 11.8666 | 9.17798 | 10.3264 | 7.43824 | 8.4769  | 10.6433 | 10.8978 |
| LOC653786    | 4.94451 | 5.52598 | 5.58775 | 5.7509  | 6.58317 | 5.55934 | 5.56371 | 5.03659 | 5.70123 |

|           |         |         |         |         |         |         |         |         |         |
|-----------|---------|---------|---------|---------|---------|---------|---------|---------|---------|
| HS3ST2    | 5.12258 | 5.38603 | 5.90303 | 6.00493 | 6.05305 | 5.79677 | 5.5333  | 5.7825  | 5.61467 |
| UBFD1     | 8.02165 | 7.89267 | 8.01406 | 7.63177 | 6.34789 | 6.49139 | 7.51402 | 7.15887 | 7.0649  |
| DCTN5     | 10.3146 | 10.2761 | 10.147  | 10.1751 | 8.49575 | 9.35251 | 10.1219 | 9.78745 | 10.3621 |
| PLK1      | 7.43674 | 6.60415 | 6.9922  | 7.88968 | 6.76164 | 7.00104 | 7.77782 | 7.55116 | 7.03322 |
| CHP2      | 9.40969 | 8.41626 | 7.999   | 7.27771 | 5.46352 | 7.24132 | 6.68617 | 6.79219 | 6.29425 |
| RBBP6     | 10.3475 | 10.2355 | 10.0182 | 9.03747 | 8.32187 | 10.0825 | 9.20573 | 9.48015 | 10.0638 |
| TNRC6A    | 8.56505 | 9.13963 | 8.89515 | 7.62046 | 6.19207 | 6.87959 | 7.39025 | 7.833   | 7.53225 |
| LOC554206 | 5.28073 | 5.51127 | 5.14935 | 5.00742 | 4.32215 | 5.1933  | 5.92767 | 5.5498  | 5.24327 |
| LCMT1     | 9.44502 | 8.9618  | 9.21106 | 9.113   | 7.7219  | 9.28151 | 9.80802 | 9.6149  | 9.65913 |
| AQP8      | 5.7088  | 5.30067 | 5.64627 | 6.03265 | 5.98501 | 6.24643 | 5.49881 | 5.94977 | 5.69586 |
| HS3ST4    | 6.48506 | 6.89287 | 6.83893 | 6.98296 | 6.75457 | 6.79986 | 6.67109 | 6.80694 | 6.62879 |
| MIR548W   | 2.25989 | 2.76625 | 2.42446 | 2.45006 | 2.5457  | 2.49443 | 2.09412 | 1.92636 | 2.02118 |
| C16orf82  | 5.37788 | 5.16822 | 5.18483 | 5.88253 | 5.65279 | 5.44759 | 5.18683 | 5.75693 | 5.56505 |
| KDM8      | 6.58493 | 6.2295  | 6.61561 | 6.59887 | 6.86362 | 6.63275 | 6.68658 | 6.53587 | 6.45195 |
| FLJ21408  | 4.35692 | 4.48073 | 4.52035 | 4.81563 | 5.69535 | 4.79305 | 4.68528 | 4.56371 | 4.45439 |
| IL4R      | 8.69595 | 7.61444 | 8.1767  | 9.3625  | 7.99288 | 9.4388  | 10.0004 | 9.5694  | 10.1744 |
| IL21R     | 5.02072 | 5.363   | 5.11772 | 5.96625 | 5.81038 | 6.1876  | 5.67023 | 5.7106  | 5.51321 |
| KIAA0556  | 7.72885 | 7.66465 | 7.56621 | 7.51405 | 6.33466 | 7.69011 | 7.698   | 7.64856 | 7.60359 |
| SBK1      | 6.15898 | 6.25663 | 5.97512 | 5.41007 | 5.4959  | 6.15096 | 5.94916 | 6.04339 | 5.89958 |
| APOBR     | 5.89437 | 5.78972 | 6.28299 | 6.13635 | 6.28405 | 6.71315 | 6.56554 | 6.55434 | 6.82747 |
| SGF29     | 7.98314 | 7.97051 | 7.98533 | 8.18262 | 6.95914 | 7.37244 | 7.88511 | 7.02356 | 7.19216 |
| ATXN2L    | 8.58852 | 8.21225 | 8.66434 | 8.466   | 6.59301 | 8.73859 | 8.68642 | 8.78822 | 8.8799  |
| SH2B1     | 7.17795 | 6.70964 | 6.77113 | 6.76629 | 5.73639 | 6.74225 | 6.85017 | 6.46815 | 6.4599  |
| CD19      | 5.12895 | 5.3577  | 5.43529 | 5.72694 | 6.05721 | 6.03109 | 5.98985 | 5.65576 | 5.84426 |
| SPNS1     | 8.24095 | 8.04007 | 8.1211  | 8.56451 | 7.56943 | 8.24848 | 9.024   | 8.29749 | 7.98723 |
| LAT       | 6.64042 | 6.72675 | 6.52241 | 6.25345 | 6.30671 | 6.46043 | 6.518   | 6.51864 | 6.48596 |

|           |         |         |         |         |         |         |         |         |         |
|-----------|---------|---------|---------|---------|---------|---------|---------|---------|---------|
| RRN3P2    | 6.13252 | 6.53636 | 6.2223  | 6.58388 | 7.46146 | 7.26541 | 6.78189 | 6.59255 | 6.89666 |
| SNX29P2   | 6.73919 | 6.92935 | 6.85584 | 7.05801 | 7.32678 | 6.98044 | 6.65685 | 7.247   | 7.128   |
| SPN       | 5.75973 | 5.97116 | 6.09218 | 5.37762 | 6.86578 | 5.44971 | 6.58129 | 5.80676 | 5.807   |
| QPRT      | 5.88197 | 5.91126 | 5.85261 | 6.21205 | 6.02042 | 5.98113 | 5.68944 | 6.19274 | 5.77676 |
| ZG16      | 4.74815 | 4.65752 | 4.90345 | 5.15936 | 6.22916 | 5.54833 | 5.1134  | 5.34747 | 5.45043 |
| KIF22     | 8.48246 | 8.2472  | 8.73351 | 7.81958 | 6.83103 | 7.67415 | 7.88576 | 7.25408 | 7.71407 |
| MAZ       | 8.15503 | 7.46818 | 8.20604 | 8.51594 | 7.69475 | 8.44254 | 8.7685  | 7.928   | 7.75483 |
| PRRT2     | 5.1281  | 5.20237 | 5.36898 | 5.56248 | 5.76371 | 5.31629 | 5.08204 | 5.24339 | 5.07463 |
| PAGR1     | 6.57035 | 6.798   | 6.66764 | 6.67117 | 6.10321 | 6.97727 | 6.9465  | 6.60529 | 6.53817 |
| MVP       | 7.18727 | 6.93723 | 7.02978 | 7.878   | 6.52105 | 7.64462 | 8.34133 | 7.35574 | 7.81756 |
| CDIPT-AS1 | 5.26497 | 5.43235 | 5.07738 | 6.08143 | 5.96894 | 6.59369 | 6.53654 | 6.11754 | 6.19926 |
| ASPHD1    | 5.88114 | 5.76093 | 5.79003 | 6.47925 | 6.93429 | 6.68469 | 6.35649 | 6.27865 | 6.14423 |
| TMEM219   | 7.78439 | 7.92386 | 7.67783 | 7.39653 | 6.81343 | 7.35304 | 7.58526 | 6.92842 | 7.0566  |
| TAOK2     | 8.34271 | 8.09843 | 8.19431 | 8.13189 | 7.00113 | 7.59224 | 8.34023 | 7.72355 | 7.84624 |
| INO80E    | 7.43661 | 7.28146 | 7.38579 | 8.43728 | 7.43918 | 8.14378 | 8.23996 | 7.6808  | 7.8975  |
| ZNF48     | 5.90944 | 6.04119 | 6.16981 | 6.79355 | 6.85244 | 6.47971 | 6.27431 | 6.37063 | 6.91473 |
| ZNF771    | 5.28494 | 5.85337 | 5.66102 | 6.47037 | 5.39781 | 6.91434 | 6.32354 | 6.35234 | 6.43095 |
| MIR4518   | 5.97635 | 6.32803 | 6.72723 | 6.22458 | 8.74204 | 6.7525  | 6.13166 | 7.69798 | 6.92369 |
| ZNF785    | 5.03088 | 5.24222 | 5.14829 | 5.73004 | 5.36511 | 5.44449 | 5.69295 | 5.09647 | 5.61062 |
| prr14     | 8.7502  | 8.46463 | 8.66411 | 8.93014 | 8.30605 | 8.42935 | 8.69195 | 8.39063 | 8.46463 |
| FBRS      | 7.98751 | 7.48751 | 7.84399 | 8.44712 | 7.3115  | 8.88454 | 8.31874 | 7.98901 | 8.42166 |
| SRCAP     | 9.07887 | 8.78183 | 9.04381 | 7.95739 | 6.24837 | 7.88867 | 8.62132 | 7.6507  | 8.49113 |
| CTF1      | 6.60058 | 6.4119  | 6.45867 | 7.11611 | 6.92176 | 7.02784 | 6.95245 | 6.5487  | 6.70035 |
| FBXL19    | 7.61151 | 6.96498 | 7.12438 | 7.46571 | 7.26342 | 8.14929 | 7.96051 | 7.37039 | 7.74267 |
| ORAI3     | 7.49146 | 7.60021 | 7.39855 | 7.26739 | 6.9753  | 6.88764 | 7.49669 | 6.7247  | 6.56423 |
| SETD1A    | 6.94851 | 6.76904 | 7.04291 | 6.97919 | 5.94465 | 6.38949 | 7.21552 | 6.7232  | 6.65044 |

|           |         |         |         |         |         |         |         |         |         |
|-----------|---------|---------|---------|---------|---------|---------|---------|---------|---------|
| STX4      | 7.7985  | 7.60156 | 7.53006 | 8.19578 | 7.93968 | 8.74616 | 8.76011 | 8.19131 | 8.22756 |
| ZNF668    | 5.73343 | 5.71076 | 5.63019 | 6.81128 | 5.91901 | 7.11527 | 6.4465  | 6.43606 | 6.31401 |
| ZNF646    | 7.12948 | 7.08084 | 7.40987 | 7.65077 | 6.77272 | 7.4932  | 7.57939 | 7.36464 | 7.75315 |
| BCKDK     | 8.44944 | 8.5563  | 8.2747  | 9.65661 | 9.15211 | 10.1022 | 9.62471 | 8.95743 | 9.1055  |
| kat8      | 7.69018 | 7.67011 | 7.61771 | 7.22832 | 7.21458 | 7.23586 | 7.39911 | 7.29115 | 6.97029 |
| FUS       | 9.12589 | 9.37674 | 9.176   | 9.14816 | 7.58728 | 9.24624 | 9.25288 | 9.58221 | 8.98741 |
| TRIM72    | 6.18008 | 6.26834 | 6.28782 | 7.07133 | 6.75632 | 7.5603  | 6.63372 | 6.71179 | 6.93478 |
| ARMC5     | 7.19178 | 6.14448 | 6.01713 | 7.07675 | 6.21072 | 7.08733 | 7.19599 | 6.54244 | 7.18441 |
| TGFB111   | 8.24433 | 7.36592 | 8.01277 | 8.34791 | 7.25837 | 7.54003 | 8.37953 | 7.2688  | 7.93059 |
| AHSP      | 4.48072 | 4.91333 | 4.46822 | 5.05287 | 5.84625 | 5.20289 | 4.91333 | 4.95736 | 4.8147  |
| ZNF720    | 6.64036 | 6.77436 | 6.55597 | 5.42059 | 5.98122 | 6.10886 | 6.34396 | 6.46106 | 6.51559 |
| ZNF267    | 6.78692 | 6.38042 | 6.93143 | 5.96966 | 4.71052 | 6.995   | 6.84071 | 6.91684 | 6.29036 |
| TP53TG3   | 6.00503 | 6.20023 | 6.38566 | 6.5589  | 8.25501 | 6.89274 | 6.48827 | 6.74941 | 6.50973 |
| LINC00273 | 6.11336 | 6.82019 | 6.27935 | 7.79943 | 7.06936 | 8.07601 | 7.23089 | 7.13674 | 6.90054 |
| GPT2      | 7.59128 | 7.44269 | 6.93961 | 7.63592 | 6.61265 | 7.95988 | 7.66441 | 7.53733 | 7.8614  |
| CNEP1R1   | 8.77513 | 8.75947 | 8.65053 | 8.89452 | 6.71848 | 8.71334 | 9.25679 | 9.43218 | 9.16629 |
| HEATR3    | 7.55079 | 7.52276 | 7.18902 | 7.79513 | 6.37574 | 7.32774 | 7.57491 | 7.05207 | 7.17932 |
| PAPD5     | 8.41124 | 8.65152 | 8.52328 | 7.90212 | 6.12763 | 7.25243 | 8.58075 | 8.96563 | 8.02825 |
| ADCY7     | 7.02413 | 6.92327 | 6.72823 | 7.54902 | 5.39427 | 8.64222 | 8.14743 | 7.9428  | 8.33783 |
| NKD1      | 6.58434 | 7.03514 | 6.85425 | 7.00552 | 6.69043 | 7.48199 | 7.00257 | 7.09691 | 7.02939 |
| NOD2      | 7.85244 | 7.75021 | 7.88808 | 7.62951 | 7.35898 | 8.73286 | 8.26557 | 7.66807 | 8.37451 |
| CYLD      | 8.53319 | 8.85039 | 8.50175 | 8.25389 | 7.00963 | 8.74725 | 8.79587 | 9.4355  | 8.5274  |
| CHD9      | 9.8181  | 10.2788 | 10.002  | 8.50185 | 6.06581 | 7.82678 | 8.7627  | 8.31767 | 8.46585 |
| RBL2      | 8.71937 | 8.61967 | 8.78208 | 7.60762 | 5.92852 | 6.78178 | 7.68658 | 7.87776 | 7.46675 |
| FTO       | 9.33701 | 9.19688 | 9.28169 | 8.32636 | 7.7012  | 7.64722 | 8.4249  | 8.14992 | 8.04388 |
| IRX5      | 7.85539 | 7.94248 | 7.69351 | 7.28389 | 6.82321 | 7.40808 | 7.46688 | 7.3341  | 7.56385 |



|          |         |         |         |         |         |         |         |         |         |
|----------|---------|---------|---------|---------|---------|---------|---------|---------|---------|
| IRX6     | 5.75127 | 5.85467 | 6.25921 | 6.12962 | 6.11298 | 5.80139 | 5.12931 | 5.88663 | 5.99765 |
| LPCAT2   | 10.3197 | 9.80931 | 10.1521 | 9.07197 | 7.58411 | 8.53983 | 9.39454 | 9.5074  | 9.30338 |
| CES1P2   | 5.65634 | 5.54938 | 5.48139 | 6.22088 | 6.56068 | 6.70547 | 5.9581  | 5.78834 | 6.33632 |
| CES1P1   | 6.33609 | 5.97949 | 5.95425 | 6.65331 | 6.86117 | 6.85088 | 6.38562 | 6.7428  | 6.62033 |
| CES1     | 6.63565 | 7.17109 | 6.80491 | 6.21111 | 5.39024 | 6.65934 | 6.62417 | 6.94491 | 6.59696 |
| MIR3935  | 7.90351 | 8.02039 | 7.58484 | 8.16686 | 8.89003 | 8.15534 | 8.19659 | 8.10537 | 8.36099 |
| OGFOD1   | 8.85492 | 9.35212 | 8.96976 | 8.6202  | 6.71035 | 7.85004 | 8.89618 | 8.07092 | 8.48781 |
| MT4      | 6.98062 | 8.81139 | 7.57409 | 7.78006 | 8.45912 | 7.52203 | 7.19361 | 7.95977 | 7.4562  |
| MT3      | 5.50033 | 5.52157 | 5.3708  | 5.9506  | 6.44871 | 5.98325 | 6.0414  | 5.93972 | 6.15665 |
| MT2A     | 8.60138 | 9.16352 | 10.0951 | 10.5303 | 8.1686  | 10.1185 | 10.0325 | 9.90182 | 9.80076 |
| MT1L     | 4.88057 | 4.5605  | 5.29195 | 4.99293 | 5.55141 | 4.61149 | 6.31422 | 4.80128 | 4.64132 |
| MT1E     | 7.66516 | 5.90388 | 7.01635 | 7.44724 | 7.11472 | 7.16812 | 7.15466 | 7.14028 | 6.98102 |
| Mt1m     | 6.70465 | 5.36751 | 6.90841 | 5.79107 | 6.04183 | 6.06899 | 7.13719 | 5.77169 | 5.197   |
| MT1A     | 5.44071 | 4.27157 | 5.57117 | 5.40077 | 5.62168 | 5.65988 | 5.41939 | 4.44455 | 4.98866 |
| MT1B     | 4.21362 | 4.55804 | 3.98451 | 4.19962 | 4.71755 | 4.07538 | 3.76246 | 3.34515 | 4.29245 |
| Mt1f     | 8.98559 | 8.33927 | 8.79731 | 9.11511 | 8.8866  | 8.80176 | 8.91232 | 8.03857 | 8.04223 |
| MT1H     | 5.17628 | 4.85356 | 6.10288 | 4.93351 | 7.78165 | 5.37661 | 5.29527 | 4.25255 | 5.00306 |
| MT1X     | 11.5691 | 11.6659 | 12.7061 | 11.6005 | 10.8591 | 10.7067 | 11.9465 | 11.1734 | 9.98182 |
| NUP93    | 8.13669 | 8.01787 | 8.13192 | 8.38198 | 6.37874 | 7.34048 | 8.24211 | 7.51152 | 7.71452 |
| Mir138-2 | 6.07626 | 6.22238 | 6.35963 | 6.45665 | 6.48674 | 6.70983 | 6.76469 | 6.87912 | 6.69287 |
| CPNE2    | 8.26954 | 7.48818 | 8.13773 | 7.94053 | 6.35409 | 6.88094 | 8.1123  | 7.07065 | 7.62937 |
| RSPRY1   | 8.72342 | 8.7904  | 8.7364  | 8.35474 | 5.84069 | 7.2873  | 8.16108 | 7.59504 | 7.93451 |
| ARL2BP   | 10.2603 | 9.68646 | 10.4442 | 10.567  | 7.84447 | 9.34781 | 10.716  | 9.16599 | 10.0601 |
| CCL22    | 6.30233 | 6.98837 | 6.84593 | 6.86188 | 7.5286  | 7.74788 | 6.49461 | 6.99789 | 7.11071 |
| CX3CL1   | 8.03255 | 8.10485 | 7.92858 | 7.78327 | 7.28641 | 7.45945 | 7.56701 | 7.55877 | 7.8058  |
| CCL17    | 5.31433 | 5.5243  | 5.41276 | 5.82632 | 7.02064 | 6.66558 | 5.66358 | 5.85528 | 6.0199  |

|           |         |         |         |         |         |         |         |         |         |
|-----------|---------|---------|---------|---------|---------|---------|---------|---------|---------|
| COQ9      | 8.63517 | 8.42676 | 8.66714 | 8.47887 | 7.19926 | 8.0886  | 8.65166 | 7.71124 | 8.15475 |
| ADGRG5    | 5.89251 | 5.8803  | 5.99575 | 6.42832 | 7.12513 | 6.25903 | 5.87026 | 6.23644 | 6.03606 |
| ADGRG1    | 9.73744 | 9.3945  | 9.65531 | 10.0351 | 8.8653  | 9.94476 | 10.184  | 10.7313 | 10.1087 |
| ADGRG3    | 5.55586 | 5.89165 | 6.22735 | 6.41648 | 6.62085 | 6.65596 | 6.42106 | 6.72403 | 6.60251 |
| DRC7      | 5.43714 | 5.32564 | 5.40534 | 6.16418 | 6.45798 | 5.63017 | 5.68711 | 5.91621 | 5.75811 |
| KATNB1    | 8.46073 | 8.3017  | 8.26406 | 8.48465 | 7.55678 | 7.89182 | 8.42181 | 7.62708 | 7.65025 |
| USB1      | 7.5861  | 6.96972 | 7.34481 | 7.8     | 6.86184 | 8.0585  | 8.45898 | 8.45235 | 8.4334  |
| MMP15     | 6.4769  | 6.38445 | 6.73307 | 7.02845 | 5.68222 | 6.66531 | 7.55085 | 6.69461 | 6.64715 |
| CCDC113   | 7.48974 | 7.09577 | 7.09794 | 6.89239 | 5.75423 | 6.1495  | 6.34586 | 5.30461 | 5.77413 |
| GINS3     | 8.24727 | 7.56914 | 7.68598 | 7.47369 | 6.9221  | 7.43854 | 7.92221 | 6.94504 | 6.68462 |
| NDRG4     | 9.5386  | 9.10168 | 9.02434 | 9.67229 | 8.21189 | 9.70863 | 9.77411 | 9.51036 | 9.47521 |
| SETD6     | 7.19966 | 7.52864 | 7.36199 | 7.11928 | 5.80667 | 7.10261 | 7.35645 | 6.84804 | 6.94097 |
| LINC00920 | 6.27847 | 6.23712 | 6.3126  | 6.04082 | 6.3659  | 6.40342 | 6.38882 | 5.91755 | 5.67377 |
| Cmtm1     | 5.63846 | 6.07973 | 5.58595 | 6.03016 | 5.63401 | 5.63747 | 5.90674 | 5.64014 | 5.5024  |
| CMTM2     | 4.6801  | 5.303   | 4.92208 | 5.28479 | 6.37684 | 5.47143 | 4.87431 | 5.53247 | 5.17991 |
| CMTM3     | 7.26233 | 6.71917 | 7.37728 | 7.3127  | 5.31717 | 6.09767 | 6.97373 | 6.34632 | 6.60052 |
| CA7       | 3.23913 | 3.80908 | 3.89513 | 3.80346 | 4.02883 | 4.7776  | 3.87664 | 4.37221 | 4.12997 |
| PDP2      | 6.88084 | 7.37752 | 7.19033 | 6.91479 | 5.74831 | 6.62295 | 6.87807 | 6.69611 | 6.92674 |
| CES2      | 8.1974  | 8.1777  | 8.45452 | 8.92643 | 7.85722 | 10.0939 | 9.42678 | 9.5512  | 9.80534 |
| CES3      | 5.94398 | 6.19371 | 6.23992 | 5.87861 | 6.3292  | 6.54932 | 5.76581 | 6.2526  | 6.46932 |
| CES4A     | 8.87896 | 9.41276 | 7.98866 | 7.31508 | 5.7341  | 5.8077  | 7.14094 | 5.93384 | 6.57855 |
| c16orf70  | 10.9305 | 10.6832 | 10.509  | 9.5676  | 8.21605 | 8.0926  | 9.57634 | 9.47078 | 8.94139 |
| FBXL8     | 6.94875 | 6.92822 | 6.84663 | 7.29977 | 6.88431 | 7.31028 | 7.35808 | 7.02273 | 7.03083 |
| HSF4      | 7.39904 | 6.85007 | 6.70938 | 6.82523 | 6.83832 | 6.54747 | 6.25869 | 6.51304 | 6.50189 |
| NOL3      | 8.1904  | 7.76057 | 7.72177 | 8.22576 | 7.90522 | 8.11661 | 8.00638 | 7.68758 | 7.8535  |
| ELMO3     | 7.08503 | 7.08659 | 7.06265 | 7.3825  | 6.41238 | 7.74885 | 7.73094 | 7.19643 | 7.58086 |

|           |         |         |         |         |         |         |         |         |         |
|-----------|---------|---------|---------|---------|---------|---------|---------|---------|---------|
| TMEM208   | 7.8591  | 7.65089 | 8.11241 | 7.28481 | 6.6699  | 6.98492 | 7.45732 | 7.03738 | 7.19852 |
| LRRC36    | 4.19471 | 5.12953 | 5.11989 | 4.97989 | 5.70964 | 4.76614 | 4.12693 | 4.47982 | 4.87594 |
| HSD11B2   | 8.2283  | 8.0526  | 9.05243 | 6.8577  | 7.25272 | 7.10635 | 7.89735 | 7.35704 | 7.48985 |
| CTCF      | 8.87122 | 9.14584 | 8.91075 | 8.42745 | 6.08425 | 8.28982 | 8.76113 | 7.8021  | 8.28756 |
| PARD6A    | 6.318   | 6.29948 | 6.47474 | 7.18575 | 7.0315  | 7.25886 | 7.06424 | 6.99113 | 7.14554 |
| C16orf86  | 6.03685 | 6.49331 | 6.22124 | 6.44288 | 6.3056  | 7.09792 | 6.06378 | 6.80217 | 6.69797 |
| TSNAXIP1  | 5.3064  | 5.19241 | 4.86899 | 5.39758 | 5.15502 | 5.46964 | 5.31822 | 5.63253 | 5.27902 |
| THAP11    | 8.31382 | 8.02575 | 8.12406 | 8.36898 | 7.07115 | 8.27376 | 8.49528 | 8.07419 | 8.09953 |
| NUTF2     | 6.15335 | 5.33512 | 5.80963 | 6.74237 | 5.96423 | 6.27014 | 7.27259 | 5.96386 | 6.56511 |
| EDC4      | 8.33588 | 8.16902 | 8.20058 | 7.80198 | 6.84255 | 7.56801 | 8.12374 | 7.7626  | 7.91877 |
| NRN1L     | 6.58511 | 6.67251 | 6.55018 | 6.60005 | 7.12396 | 7.04778 | 6.70501 | 7.10141 | 6.74192 |
| PSKH1     | 7.11167 | 7.08211 | 7.04499 | 7.63105 | 6.45783 | 7.5697  | 7.75738 | 7.24847 | 7.46331 |
| PRMT7     | 6.79196 | 6.82762 | 6.40627 | 6.5268  | 5.91151 | 6.476   | 6.30469 | 6.2827  | 6.30198 |
| ZFP90     | 8.15272 | 8.11368 | 7.96996 | 6.82627 | 5.29738 | 5.87138 | 7.65824 | 6.08177 | 6.86257 |
| TANGO6    | 7.2347  | 7.30774 | 7.22749 | 6.78347 | 5.76976 | 6.33013 | 6.85185 | 6.04525 | 6.48325 |
| HAS3      | 7.29272 | 7.10934 | 6.63705 | 9.00613 | 7.03644 | 8.20886 | 8.98128 | 8.54323 | 8.4969  |
| VPS4A     | 8.39104 | 8.56474 | 8.65134 | 8.36784 | 6.70629 | 8.34414 | 8.87209 | 8.46201 | 8.58939 |
| NIP7      | 8.85588 | 8.88165 | 8.93577 | 9.43927 | 7.02864 | 8.66017 | 9.47501 | 8.53101 | 9.06695 |
| CYB5B     | 9.16259 | 9.37052 | 9.25968 | 9.44677 | 7.03523 | 8.69922 | 9.48249 | 8.98564 | 9.14553 |
| WWP2      | 7.96039 | 7.85449 | 8.17051 | 7.45672 | 6.41542 | 7.75507 | 7.75721 | 8.02719 | 7.85408 |
| mir140    | 3.87345 | 4.22653 | 3.96045 | 4.50551 | 3.93155 | 4.9928  | 4.52535 | 4.0533  | 4.24743 |
| MIR1972-1 | 5.68352 | 5.72141 | 6.84821 | 4.66836 | 4.44293 | 4.77095 | 4.49592 | 5.83574 | 4.92315 |
| PDPR      | 8.24691 | 7.358   | 7.84397 | 6.36657 | 6.87331 | 6.65709 | 7.38366 | 5.96959 | 6.63703 |
| DDX19B    | 8.7345  | 8.8465  | 8.65797 | 8.45269 | 6.1802  | 8.43666 | 8.59846 | 8.46735 | 8.44273 |
| DDX19A    | 8.29681 | 8.76162 | 8.32817 | 8.02697 | 6.68347 | 7.61291 | 8.46916 | 7.65761 | 7.67855 |
| FUK       | 6.75737 | 6.64494 | 6.79002 | 6.73521 | 6.86477 | 7.04428 | 7.32269 | 6.81709 | 6.80269 |

|           |         |         |         |         |         |         |         |         |         |
|-----------|---------|---------|---------|---------|---------|---------|---------|---------|---------|
| IL34      | 8.31189 | 7.529   | 7.7441  | 7.18138 | 6.95107 | 6.3827  | 6.40234 | 6.66734 | 6.71501 |
| VAC14-AS1 | 6.36989 | 6.55675 | 6.79141 | 7.3798  | 7.78488 | 7.53301 | 7.51509 | 7.18226 | 7.07995 |
| CALB2     | 5.2607  | 5.6288  | 6.02493 | 7.91779 | 6.89094 | 8.30351 | 8.46265 | 10.039  | 9.63283 |
| CHST4     | 4.84568 | 5.34989 | 4.89373 | 5.567   | 5.62717 | 5.33195 | 5.35558 | 5.66867 | 5.39224 |
| MARVELD3  | 6.33292 | 5.99009 | 6.00969 | 7.02503 | 4.81358 | 6.70798 | 6.90166 | 6.16006 | 6.90532 |
| ATXN1L    | 8.74656 | 8.81312 | 8.76929 | 8.14541 | 6.58179 | 8.44476 | 8.62796 | 7.89241 | 8.58594 |
| IST1      | 8.87903 | 8.61259 | 8.71742 | 8.06285 | 7.00285 | 8.50313 | 8.16354 | 8.78804 | 8.86106 |
| DHODH     | 6.44137 | 6.57827 | 6.79945 | 6.47988 | 6.72559 | 6.43962 | 6.3832  | 6.26112 | 5.93773 |
| HP        | 5.26381 | 5.29594 | 5.16868 | 4.75712 | 5.41701 | 5.28937 | 5.1144  | 5.49829 | 5.37357 |
| HPR       | 4.41897 | 4.04341 | 4.22382 | 4.46625 | 5.37276 | 5.06489 | 4.35691 | 4.56857 | 5.29042 |
| DHX38     | 7.49509 | 7.71739 | 7.67972 | 7.83269 | 6.03807 | 7.94151 | 8.04044 | 7.35913 | 7.70604 |
| HCCAT5    | 5.57043 | 5.97443 | 5.86164 | 6.53092 | 7.77647 | 6.89593 | 6.33786 | 6.51896 | 6.66569 |
| LINC01568 | 4.61736 | 4.51306 | 4.60139 | 5.54795 | 6.80657 | 5.25123 | 4.93231 | 5.14448 | 5.14609 |
| ZFP1      | 7.11854 | 7.46117 | 6.73851 | 6.79307 | 4.59587 | 5.83059 | 6.64522 | 5.65055 | 5.72091 |
| CTRB1     | 5.55881 | 5.59746 | 5.70474 | 6.58607 | 6.52996 | 6.31038 | 6.08302 | 5.98551 | 6.23773 |
| CHST6     | 5.61841 | 5.65001 | 6.15733 | 6.64647 | 6.81204 | 6.27659 | 6.18597 | 6.50666 | 6.1923  |
| GABARAPL2 | 10.1414 | 9.74144 | 9.58233 | 10.2062 | 10.5637 | 10.8726 | 10.5103 | 11.2995 | 10.4327 |
| CNTNAP4   | 3.92289 | 4.10474 | 3.99103 | 4.01961 | 5.12157 | 4.7053  | 4.10707 | 4.41713 | 4.19782 |
| MON1B     | 7.604   | 7.16574 | 7.56038 | 7.59769 | 5.58835 | 7.01997 | 8.02215 | 7.3446  | 7.65511 |
| SYCE1L    | 5.00523 | 4.28556 | 5.01089 | 5.32208 | 4.85323 | 5.7415  | 5.56717 | 4.9511  | 5.20142 |
| NUDT7     | 8.02386 | 8.13265 | 8.07073 | 7.30692 | 6.80143 | 7.22138 | 7.6744  | 6.69592 | 6.64741 |
| VAT1L     | 4.99749 | 4.76628 | 5.03807 | 5.78537 | 6.29572 | 5.79914 | 5.51435 | 5.52536 | 5.54235 |
| WVOX      | 7.34644 | 7.11709 | 7.22347 | 6.86296 | 7.26968 | 7.27486 | 7.18689 | 6.79619 | 6.7446  |
| CENPN     | 6.48575 | 5.96256 | 6.22056 | 7.27874 | 5.44464 | 5.73931 | 6.81397 | 6.22329 | 6.52803 |
| ATMIN     | 10.583  | 10.5665 | 10.6882 | 10.1472 | 9.05659 | 10.0765 | 10.3298 | 10.2854 | 10.3609 |
| GAN       | 10.5997 | 11.3086 | 10.7126 | 9.05044 | 6.90168 | 8.33845 | 9.18264 | 8.69399 | 9.10481 |

|              |         |         |         |         |         |         |         |         |         |
|--------------|---------|---------|---------|---------|---------|---------|---------|---------|---------|
| MIR4720      | 6.10018 | 5.30638 | 5.93168 | 5.37477 | 2.09371 | 4.57681 | 5.47572 | 4.73707 | 5.0316  |
| CMIP         | 9.34258 | 9.51052 | 9.23817 | 9.74412 | 8.91962 | 10.9863 | 10.2277 | 10.7346 | 10.7013 |
| LOC100129617 | 7.54454 | 7.33777 | 6.9334  | 6.81198 | 6.41528 | 6.7072  | 6.09106 | 8.89394 | 8.75948 |
| HSD17B2      | 5.9693  | 7.1049  | 5.47305 | 5.79481 | 5.90932 | 6.09173 | 5.98899 | 5.88616 | 5.89233 |
| MIR3182      | 7.41735 | 8.45586 | 7.69035 | 7.62013 | 7.84498 | 8.09426 | 7.10194 | 7.48527 | 7.35466 |
| HSBP1        | 8.28867 | 8.07706 | 8.19267 | 9.12361 | 7.29375 | 9.56868 | 9.77327 | 9.71381 | 9.57774 |
| MLYCD        | 6.77914 | 6.71752 | 6.87618 | 6.34002 | 6.32257 | 6.21347 | 6.69414 | 6.49201 | 6.28685 |
| OSGIN1       | 6.64697 | 6.64173 | 6.42769 | 7.33327 | 7.19796 | 7.62059 | 7.33692 | 7.01754 | 7.18921 |
| NECAB2       | 6.08688 | 6.00259 | 6.08016 | 6.55281 | 6.45918 | 6.68356 | 6.11251 | 6.49103 | 6.6187  |
| ADAD2        | 5.36959 | 5.69283 | 5.5882  | 6.42228 | 6.08197 | 6.38422 | 6.26215 | 6.45358 | 6.37647 |
| WFDC1        | 6.19496 | 5.9286  | 5.79813 | 6.66363 | 6.57214 | 6.40073 | 6.59835 | 6.64033 | 6.54777 |
| KLHL36       | 8.05714 | 8.1591  | 8.23476 | 7.74865 | 6.70151 | 8.06868 | 8.31318 | 7.95901 | 8.19557 |
| CRISPLD2     | 8.15837 | 7.89061 | 8.93171 | 8.62419 | 7.30079 | 9.22906 | 9.19017 | 9.37657 | 10.023  |
| KIAA0513     | 7.36651 | 7.75628 | 7.19118 | 8.00226 | 6.65441 | 7.35223 | 7.84288 | 7.93017 | 7.50237 |
| LOC400548    | 6.03982 | 5.97956 | 6.18245 | 6.55572 | 7.22116 | 6.45663 | 6.3431  | 6.42114 | 6.45894 |
| GSE1         | 7.78624 | 7.89473 | 7.60319 | 7.95966 | 7.81928 | 9.20279 | 7.72637 | 8.05067 | 8.20203 |
| Cox4I1       | 12.0414 | 11.9948 | 12.2345 | 11.7241 | 10.6722 | 11.7823 | 12.023  | 11.4333 | 11.7096 |
| IRF8         | 6.73558 | 6.17452 | 7.29684 | 7.03803 | 6.53798 | 6.66938 | 6.86973 | 6.34056 | 6.63478 |
| LOC146513    | 5.11334 | 5.69692 | 5.42307 | 5.85238 | 6.14238 | 5.54428 | 5.63997 | 5.59386 | 5.56067 |
| FOXF1        | 6.35584 | 6.36418 | 6.64948 | 6.81947 | 7.21408 | 6.77958 | 6.94605 | 7.03524 | 6.83159 |
| FLJ30679     | 6.18536 | 6.02973 | 5.89038 | 6.61765 | 6.74026 | 6.91974 | 6.21368 | 6.41885 | 6.01019 |
| FOXL1        | 4.90876 | 5.53039 | 5.75232 | 6.05205 | 5.42755 | 5.95549 | 6.1681  | 5.82177 | 5.73094 |
| MAP1LC3B     | 7.96775 | 6.99773 | 7.36735 | 7.12054 | 7.27909 | 7.94615 | 7.61268 | 8.41468 | 7.33792 |
| JPH3         | 5.27169 | 5.49009 | 5.40709 | 5.86689 | 5.7351  | 6.01839 | 5.61879 | 5.74791 | 5.8752  |
| BANP         | 6.59847 | 6.84039 | 6.79322 | 6.81719 | 7.10758 | 7.31396 | 6.56799 | 7.3075  | 6.805   |
| ZNF469       | 5.91032 | 5.79684 | 6.17728 | 6.53903 | 6.80926 | 6.51522 | 6.21678 | 6.73394 | 6.5771  |

|              |         |         |         |         |         |         |         |         |         |
|--------------|---------|---------|---------|---------|---------|---------|---------|---------|---------|
| ZC3H18       | 7.9836  | 7.6512  | 7.67088 | 8.12666 | 5.85073 | 7.59265 | 7.97624 | 7.52627 | 7.40606 |
| IL17C        | 5.89676 | 6.15742 | 6.1322  | 6.64207 | 6.40415 | 6.92824 | 7.20776 | 6.37668 | 6.59376 |
| SNAI3-AS1    | 5.63528 | 5.2584  | 5.4843  | 5.93574 | 6.35729 | 6.24439 | 5.56754 | 5.98313 | 5.82749 |
| CTU2         | 6.89219 | 6.50694 | 6.61197 | 7.13151 | 6.8291  | 7.40869 | 7.16719 | 7.17455 | 7.13216 |
| CDT1         | 6.65629 | 6.37303 | 6.55415 | 7.52357 | 6.25367 | 7.63342 | 7.18811 | 7.15554 | 6.94393 |
| TRAPPC2L     | 7.63843 | 8.31953 | 7.79873 | 8.64983 | 7.71129 | 8.98452 | 8.5524  | 7.5466  | 7.62639 |
| ACSF3        | 6.54001 | 6.71708 | 6.83657 | 7.05265 | 6.92542 | 6.83935 | 6.88056 | 6.69716 | 6.7444  |
| LINC00304    | 5.64624 | 5.8618  | 5.68289 | 5.889   | 6.86834 | 5.53304 | 5.9171  | 5.75524 | 5.91065 |
| LOC400558    | 6.56062 | 6.60552 | 6.81819 | 7.6158  | 7.99866 | 7.79843 | 7.15226 | 7.21612 | 7.39151 |
| ZNF778       | 5.97071 | 5.88651 | 5.97999 | 5.79047 | 5.60629 | 5.7738  | 5.96789 | 5.62985 | 5.55832 |
| LOC100287036 | 5.67739 | 5.66416 | 5.72072 | 6.27944 | 6.63327 | 6.23129 | 6.03529 | 6.00836 | 5.59624 |
| SPG7         | 8.55886 | 8.01526 | 8.34464 | 7.41633 | 6.59776 | 7.24205 | 7.50606 | 7.87304 | 7.37236 |
| CPNE7        | 5.9904  | 6.19674 | 6.45779 | 6.63776 | 6.86322 | 6.70817 | 6.55157 | 6.69077 | 6.53361 |
| DPEP1        | 6.12465 | 6.02575 | 6.04002 | 6.84363 | 6.58444 | 6.73434 | 6.17167 | 6.7684  | 6.76058 |
| CDK10        | 6.90108 | 6.64368 | 6.3616  | 6.58089 | 5.98221 | 6.09598 | 6.62999 | 6.12451 | 6.00541 |
| VPS9D1-AS1   | 6.21708 | 6.04719 | 6.45107 | 6.83708 | 6.4353  | 6.59388 | 6.35391 | 6.33272 | 6.29596 |
| ZNF276       | 7.25989 | 7.61229 | 7.5759  | 7.24205 | 6.29654 | 7.72828 | 7.34632 | 7.25856 | 7.10807 |
| SPIRE2       | 6.58795 | 6.59948 | 6.4341  | 6.71648 | 6.86405 | 6.82676 | 6.71293 | 6.58469 | 6.87702 |
| TCF25        | 8.59968 | 8.68952 | 8.47552 | 8.85811 | 6.84484 | 8.70445 | 9.133   | 7.98458 | 8.22359 |
| MC1R         | 6.38074 | 6.2887  | 6.30921 | 6.317   | 6.46344 | 6.61742 | 6.27625 | 6.25326 | 6.18784 |
| DEF8         | 7.08932 | 7.34707 | 7.00293 | 7.63015 | 6.96175 | 7.77852 | 7.65214 | 7.29789 | 7.5948  |
| GAS8         | 7.14317 | 6.9999  | 6.99749 | 6.99645 | 6.70274 | 7.34846 | 7.26148 | 6.9315  | 7.01049 |
| RHBDF1       | 7.86524 | 7.90028 | 7.87729 | 7.96082 | 6.57447 | 8.50212 | 8.00135 | 8.34406 | 8.17584 |
| NPRL3        | 7.68303 | 7.12042 | 7.38743 | 7.23389 | 6.89325 | 6.72988 | 7.57965 | 6.88051 | 6.96684 |
| LUC7L        | 8.31919 | 7.97345 | 7.85692 | 6.84223 | 5.139   | 6.11181 | 6.86475 | 6.12459 | 6.68981 |
| RGS11        | 6.24713 | 6.30398 | 6.00053 | 6.32638 | 5.96483 | 6.66486 | 6.55797 | 6.10911 | 6.68586 |

|           |         |         |         |         |         |         |         |         |         |
|-----------|---------|---------|---------|---------|---------|---------|---------|---------|---------|
| AXIN1     | 6.66592 | 6.38499 | 6.68333 | 7.26563 | 6.80595 | 7.14252 | 7.41144 | 7.11669 | 7.11905 |
| MRPL28    | 6.9958  | 6.82435 | 7.07562 | 7.31714 | 6.29215 | 7.10258 | 7.27809 | 7.13075 | 7.50219 |
| TMEM8A    | 7.25575 | 6.90493 | 7.26547 | 8.08932 | 7.63748 | 8.13046 | 8.04187 | 7.86249 | 7.73537 |
| LINC00235 | 4.16498 | 4.12912 | 4.17728 | 4.69408 | 4.29231 | 4.68806 | 4.39068 | 4.63135 | 4.59484 |
| METTL26   | 7.7617  | 7.75442 | 8.09227 | 8.08045 | 7.52794 | 7.78514 | 8.16675 | 7.51631 | 7.78334 |
| JMJD8     | 8.44907 | 8.3737  | 8.5354  | 8.94832 | 7.30418 | 8.49319 | 9.03732 | 7.69509 | 8.65314 |
| WDR24     | 6.86953 | 6.8331  | 6.96336 | 7.30004 | 6.39577 | 6.91681 | 7.27051 | 6.8424  | 6.89176 |
| FBXL16    | 5.97557 | 6.07431 | 5.68691 | 6.54633 | 5.76161 | 6.69699 | 6.23285 | 6.07556 | 5.91654 |
| CCDC78    | 6.24454 | 6.14513 | 6.05615 | 6.53666 | 6.83328 | 6.63335 | 6.38864 | 6.76953 | 6.62724 |
| NARFL     | 6.54893 | 6.74369 | 6.61213 | 6.82832 | 5.34884 | 6.65674 | 7.10782 | 6.58898 | 6.61905 |
| RPUSD1    | 6.56295 | 6.66497 | 6.35181 | 6.87918 | 5.9928  | 6.33078 | 7.17804 | 6.84898 | 6.41437 |
| LMF1      | 7.28372 | 6.98342 | 7.18304 | 7.33562 | 6.22881 | 6.61986 | 7.32392 | 6.45547 | 6.597   |
| SSTR5-AS1 | 5.33153 | 5.21496 | 4.80761 | 5.97153 | 5.29474 | 6.01025 | 5.67408 | 5.34024 | 5.40943 |
| C1QTNF8   | 6.01822 | 6.10008 | 6.51515 | 6.59224 | 6.28089 | 7.36734 | 6.32307 | 6.62175 | 6.74225 |
| TPSG1     | 5.73067 | 5.79681 | 6.13493 | 6.54806 | 6.6679  | 6.4913  | 6.17685 | 6.78862 | 6.53807 |
| TPSB2     | 9.25754 | 8.52304 | 8.03501 | 7.41523 | 8.26448 | 8.32615 | 10.245  | 7.81333 | 8.70673 |
| UNKL      | 6.87988 | 6.52244 | 6.83237 | 6.96126 | 6.86462 | 7.33939 | 6.69028 | 7.05758 | 7.19444 |
| C16orf91  | 6.67613 | 6.8438  | 7.03847 | 7.44611 | 7.73273 | 7.78515 | 7.37594 | 7.33939 | 7.37648 |
| CCDC154   | 6.02782 | 5.84529 | 5.97296 | 7.05707 | 6.42063 | 6.89907 | 6.65027 | 6.85418 | 6.81772 |
| IFT140    | 6.89174 | 6.84897 | 6.802   | 6.79184 | 6.40852 | 6.62036 | 6.95503 | 6.86452 | 6.59385 |
| NME3      | 7.28041 | 7.03273 | 7.31241 | 7.687   | 6.70053 | 8.05186 | 8.25155 | 7.83225 | 7.41887 |
| MRPS34    | 8.34422 | 8.20223 | 8.25144 | 8.58477 | 6.61505 | 8.47491 | 8.8292  | 8.13965 | 8.3286  |
| SPSB3     | 8.24192 | 8.20522 | 8.0239  | 8.04811 | 7.50731 | 8.04341 | 8.3005  | 8.98797 | 8.03335 |
| HAGH      | 8.93602 | 9.05765 | 8.88453 | 9.13072 | 8.23476 | 9.44438 | 9.20901 | 9.51205 | 9.0128  |
| MEIOB     | 3.36584 | 3.5523  | 3.54488 | 3.88627 | 3.98338 | 3.73376 | 3.66401 | 3.52269 | 3.634   |
| LINC00254 | 3.63778 | 3.82916 | 3.60827 | 3.65908 | 4.47247 | 4.2422  | 3.9001  | 3.82086 | 3.70829 |

|            |         |         |         |         |         |         |         |         |         |
|------------|---------|---------|---------|---------|---------|---------|---------|---------|---------|
| HS3ST6     | 7.99737 | 8.23694 | 7.55576 | 8.34578 | 5.72592 | 6.56299 | 6.67741 | 6.13109 | 5.36549 |
| MSRB1      | 7.09063 | 6.98828 | 6.86792 | 7.24007 | 5.75103 | 7.49201 | 7.77291 | 6.98779 | 7.16814 |
| RPL3L      | 5.53017 | 5.86907 | 5.75346 | 6.60837 | 6.15042 | 6.30001 | 5.97629 | 6.14243 | 6.30638 |
| NOXO1      | 6.4375  | 6.68623 | 6.43057 | 7.42718 | 6.95058 | 7.60293 | 7.17259 | 7.24147 | 7.18216 |
| ZNF598     | 7.5351  | 7.04545 | 7.32199 | 7.81265 | 7.33808 | 8.40627 | 8.37738 | 8.35957 | 8.17282 |
| nthl1      | 6.3104  | 6.30436 | 6.42245 | 6.61093 | 6.67241 | 7.12784 | 6.86089 | 7.07423 | 7.12018 |
| PKD1       | 7.35688 | 7.5284  | 7.48265 | 7.00554 | 7.32183 | 7.6615  | 7.00089 | 7.64285 | 7.09779 |
| MIR3180-4  | 7.20438 | 7.75934 | 7.34008 | 7.68169 | 7.65179 | 8.47264 | 7.77325 | 8.17652 | 7.86898 |
| CASKIN1    | 6.19206 | 6.44947 | 6.41364 | 7.03094 | 6.5934  | 7.82482 | 6.88964 | 7.21688 | 6.82891 |
| BRICD5     | 6.53572 | 6.58042 | 6.60367 | 7.18261 | 7.02286 | 7.54203 | 7.10869 | 7.16429 | 6.95338 |
| PGP        | 7.46695 | 7.30376 | 7.45592 | 7.85237 | 6.46721 | 7.75778 | 8.34432 | 7.43293 | 7.5601  |
| ECI1       | 7.32009 | 7.67373 | 7.61548 | 8.1075  | 7.48557 | 8.70521 | 8.38374 | 8.33332 | 8.33056 |
| CEMP1      | 7.46991 | 7.45    | 7.44147 | 7.16813 | 8.25668 | 7.6755  | 7.15843 | 7.44941 | 7.29603 |
| MIR3178    | 6.73481 | 7.04769 | 6.88852 | 7.59116 | 7.88052 | 7.76011 | 7.51484 | 7.10727 | 7.53737 |
| SRRM2-AS1  | 5.2417  | 4.96937 | 5.00008 | 5.51309 | 5.08489 | 5.82422 | 5.00729 | 4.98799 | 5.2563  |
| CLDN6      | 4.72716 | 4.76121 | 4.44858 | 5.61734 | 5.8715  | 5.76303 | 5.3015  | 5.65308 | 5.40538 |
| HCFC1R1    | 7.75134 | 7.9199  | 7.63574 | 8.30312 | 8.03944 | 8.05128 | 8.56557 | 7.85931 | 7.98646 |
| BICDL2     | 7.74927 | 7.56715 | 7.62909 | 7.93816 | 7.2391  | 8.57856 | 8.09865 | 8.06478 | 8.01295 |
| ZSCAN10    | 6.24544 | 6.15778 | 6.21487 | 6.80188 | 7.18782 | 6.8299  | 6.63086 | 6.42233 | 6.61315 |
| ZNF205-AS1 | 5.61179 | 5.92576 | 5.74144 | 5.93535 | 6.88544 | 5.95891 | 5.95653 | 5.86549 | 6.07353 |
| ZNF200     | 6.07239 | 6.32164 | 6.32774 | 6.60033 | 6.42883 | 6.40069 | 6.74675 | 6.39459 | 6.62108 |
| MEFV       | 4.55768 | 5.0587  | 5.02125 | 6.17226 | 5.67841 | 6.47498 | 6.15178 | 5.91941 | 5.87809 |
| TIGD7      | 4.7028  | 4.70171 | 4.65891 | 4.27145 | 4.58676 | 4.56787 | 4.77229 | 4.20426 | 4.503   |
| MTRNR2L4   | 3.3697  | 3.72275 | 4.00545 | 3.57615 | 3.66266 | 3.90813 | 3.44188 | 3.17362 | 3.52993 |
| ZSCAN32    | 6.80877 | 7.28438 | 7.06712 | 7.06335 | 7.06965 | 6.69748 | 6.90695 | 6.76028 | 6.91895 |
| ZNF597     | 6.85549 | 7.34561 | 7.49212 | 6.7549  | 6.23678 | 6.34037 | 7.23678 | 6.75805 | 6.8517  |



|             |         |         |         |         |         |         |         |         |         |
|-------------|---------|---------|---------|---------|---------|---------|---------|---------|---------|
| C16orf90    | 6.30187 | 6.27089 | 6.27241 | 6.97351 | 7.20992 | 7.27001 | 6.82373 | 6.89683 | 6.80015 |
| SLX4        | 6.31486 | 6.09709 | 6.19153 | 6.35995 | 6.39765 | 6.2566  | 6.41485 | 6.37263 | 6.361   |
| TRAP1       | 8.54593 | 8.28268 | 9.00256 | 8.4203  | 5.70949 | 8.05853 | 9.03226 | 7.39587 | 7.92791 |
| CREBBP      | 10.5463 | 10.4341 | 10.398  | 9.09469 | 7.07842 | 9.42222 | 9.42418 | 8.50373 | 9.63505 |
| ADCY9       | 7.50672 | 7.2712  | 7.06588 | 7.36266 | 6.47353 | 7.53237 | 7.51813 | 7.33935 | 7.5329  |
| SRL         | 5.13936 | 5.36582 | 5.31575 | 6.33411 | 6.0349  | 6.16544 | 5.58001 | 6.23641 | 6.00937 |
| LINC01569   | 4.67637 | 4.57513 | 4.85332 | 4.28679 | 5.82437 | 4.72424 | 4.72945 | 4.4068  | 4.58782 |
| TFAP4       | 7.12138 | 7.4596  | 7.44527 | 7.24671 | 6.57155 | 6.98595 | 7.50134 | 6.78209 | 7.01699 |
| CORO7-PAM16 | 6.8141  | 6.82657 | 6.78848 | 7.45978 | 6.89986 | 7.57618 | 7.41063 | 7.12069 | 7.32457 |
| NMRAL1      | 8.40198 | 8.22457 | 8.01291 | 8.95581 | 8.16997 | 9.73951 | 9.49189 | 10.0231 | 9.28897 |
| CDIP1       | 6.89699 | 6.90716 | 6.73    | 7.07397 | 6.81586 | 7.68697 | 7.26933 | 8.03537 | 7.20211 |
| ANKS3       | 7.0614  | 7.04774 | 6.94162 | 7.66374 | 7.65868 | 7.54497 | 7.26002 | 7.2778  | 7.29268 |
| ZNF500      | 7.52786 | 7.1051  | 7.34499 | 7.04872 | 7.62484 | 7.03433 | 7.08943 | 7.40702 | 6.77925 |
| 44451       | 5.49322 | 5.43452 | 5.7896  | 5.96239 | 5.77958 | 6.16873 | 5.6687  | 5.84929 | 6.13849 |
| ROGDI       | 7.02923 | 6.63933 | 6.5437  | 7.32709 | 6.42919 | 7.34551 | 7.17748 | 7.35851 | 7.4137  |
| GLYR1       | 9.66196 | 9.03828 | 9.58527 | 8.45506 | 7.22281 | 8.20867 | 8.72836 | 9.06071 | 9.09753 |
| PPL         | 10.0841 | 9.83659 | 9.72056 | 10.2585 | 8.30624 | 11.2464 | 10.4437 | 11.2649 | 10.6861 |
| NAGPA       | 6.55788 | 6.7715  | 6.52636 | 6.90189 | 5.96115 | 6.81707 | 7.12935 | 6.45891 | 6.48619 |
| C16orf89    | 5.67678 | 5.82035 | 5.99603 | 6.08957 | 6.41148 | 6.17403 | 5.89242 | 6.13462 | 5.9356  |
| TMEM114     | 5.84453 | 6.16931 | 5.9994  | 6.35492 | 7.03202 | 6.89554 | 6.38021 | 6.46497 | 6.49099 |
| TMEM186     | 6.16243 | 6.35887 | 6.23488 | 6.13277 | 5.67037 | 6.14169 | 6.16439 | 6.19642 | 6.25598 |
| USP7        | 10.2554 | 10.4413 | 10.0808 | 9.93303 | 7.11179 | 9.75831 | 10.077  | 9.724   | 9.92724 |
| TEKT5       | 5.19348 | 5.44375 | 5.03924 | 5.78796 | 5.89833 | 5.41182 | 4.98789 | 5.231   | 5.67417 |
| DEXI        | 7.86582 | 8.0326  | 8.04046 | 9.00692 | 7.49422 | 8.52965 | 9.51003 | 8.25152 | 8.23592 |
| SOCS1       | 5.97848 | 5.63171 | 5.76538 | 7.36176 | 5.7239  | 8.34215 | 6.60939 | 7.39115 | 7.03751 |
| TNP2        | 4.40899 | 4.27035 | 4.43719 | 4.9001  | 4.81305 | 4.56413 | 4.3958  | 4.50217 | 4.67502 |

|          |         |         |         |         |         |         |         |         |         |
|----------|---------|---------|---------|---------|---------|---------|---------|---------|---------|
| PRM3     | 5.99736 | 6.21092 | 6.12724 | 6.67516 | 6.75422 | 7.02252 | 7.05693 | 6.71493 | 6.67924 |
| PRM2     | 6.1347  | 6.11676 | 5.93635 | 6.88206 | 6.29057 | 6.85472 | 6.78038 | 6.64983 | 6.69563 |
| PRM1     | 4.57286 | 4.8028  | 4.65237 | 5.01931 | 6.46476 | 5.83251 | 5.11734 | 4.87487 | 5.22415 |
| MIR548H2 | 7.10847 | 6.98786 | 7.23326 | 5.24724 | 9.40689 | 6.2675  | 6.41159 | 6.90095 | 5.68215 |
| LITAF    | 9.0525  | 8.94446 | 9.02339 | 9.26156 | 8.14049 | 9.06261 | 9.62093 | 9.50562 | 9.59872 |
| TXNDC11  | 8.30826 | 7.99803 | 8.3317  | 8.63505 | 7.12962 | 7.73838 | 8.82663 | 8.43301 | 8.55512 |
| ZC3H7A   | 8.91808 | 8.9837  | 8.88326 | 8.18068 | 5.98049 | 7.28374 | 8.66916 | 8.30934 | 8.21321 |
| BCAR4    | 5.70138 | 5.24515 | 5.65925 | 5.72231 | 6.81517 | 6.23271 | 5.65015 | 5.89581 | 5.85546 |
| RSL1D1   | 10.4947 | 10.253  | 10.6405 | 8.69325 | 5.50248 | 8.34765 | 9.64349 | 8.29062 | 8.70696 |
| GSPT1    | 9.35619 | 9.29462 | 9.63396 | 9.43361 | 7.28518 | 9.23856 | 9.66439 | 9.39857 | 9.85743 |
| CPPED1   | 8.43451 | 8.47361 | 8.92586 | 8.46898 | 6.64584 | 8.20663 | 8.84311 | 7.48046 | 7.98344 |
| PARN     | 9.00438 | 9.29872 | 9.05807 | 8.49542 | 6.50589 | 7.65867 | 8.66867 | 7.92533 | 7.89513 |
| NTAN1    | 8.69232 | 8.26033 | 8.47384 | 9.56819 | 8.21481 | 9.72614 | 9.91531 | 9.90499 | 9.75862 |
| RRN3     | 8.17818 | 7.99625 | 7.69282 | 8.29082 | 6.18232 | 7.04734 | 8.24571 | 6.82863 | 7.62215 |
| KIAA0430 | 9.17229 | 9.34819 | 9.18984 | 8.17569 | 6.77474 | 7.86282 | 8.28891 | 9.23824 | 8.44971 |
| FOPNL    | 9.56079 | 9.57092 | 9.7086  | 9.23585 | 6.7969  | 8.38806 | 9.44123 | 8.72963 | 8.56815 |
| XYLT1    | 9.07793 | 8.58064 | 8.84854 | 8.26848 | 7.72626 | 9.64353 | 9.07223 | 8.92313 | 9.1701  |
| NOMO2    | 11.0433 | 10.9011 | 11.1164 | 11.0613 | 9.74795 | 10.5091 | 10.8019 | 10.7545 | 10.7758 |
| rps15a   | 6.76983 | 6.67188 | 6.7205  | 6.94349 | 6.08201 | 7.74065 | 6.95217 | 7.30543 | 7.10197 |
| ARL6IP1  | 11.1117 | 10.9435 | 11.0086 | 11.3805 | 9.983   | 11.2139 | 11.1538 | 10.8684 | 11.2305 |
| GDE1     | 9.55523 | 9.14356 | 9.53769 | 9.49459 | 7.45428 | 8.33785 | 9.35608 | 10.1273 | 8.92555 |
| KNOP1    | 7.02631 | 7.39834 | 6.86273 | 7.05503 | 6.52294 | 6.63305 | 7.89072 | 6.36278 | 6.49472 |
| GPR139   | 5.44601 | 5.61436 | 5.74758 | 5.88861 | 6.94797 | 6.35659 | 6.09799 | 6.03899 | 5.74979 |
| GP2      | 5.2131  | 5.43706 | 5.52473 | 5.81898 | 6.8292  | 5.62236 | 5.74986 | 5.61609 | 5.75433 |
| UMOD     | 5.93498 | 6.12539 | 5.94178 | 6.40951 | 7.11962 | 7.00325 | 6.46748 | 6.09371 | 6.65564 |
| ACSM2B   | 4.36381 | 4.21736 | 4.14407 | 5.04202 | 6.19844 | 4.71463 | 5.30311 | 4.41058 | 4.47661 |

|            |         |         |         |         |         |         |         |         |         |
|------------|---------|---------|---------|---------|---------|---------|---------|---------|---------|
| ACSM1      | 5.2122  | 5.27938 | 5.33439 | 5.31788 | 6.52781 | 5.63065 | 5.4806  | 5.33659 | 5.44897 |
| THUMPD1    | 7.64197 | 7.80876 | 7.69442 | 7.0201  | 6.06108 | 6.71773 | 7.32854 | 7.06625 | 6.95822 |
| ERI2       | 8.33659 | 7.3888  | 7.57965 | 7.07179 | 5.67246 | 6.52957 | 7.10263 | 6.21004 | 7.13191 |
| ZP2        | 4.26966 | 4.33165 | 3.81802 | 4.24302 | 5.54617 | 4.81646 | 4.54565 | 4.51528 | 4.75287 |
| RRN3P1     | 4.75699 | 3.89164 | 5.31866 | 4.76276 | 4.6445  | 3.34383 | 3.59586 | 4.01238 | 4.24374 |
| PDZD9      | 4.44104 | 4.8235  | 4.51879 | 4.71009 | 5.11946 | 5.28242 | 4.50336 | 4.87207 | 4.96783 |
| RRN3P3     | 7.47913 | 7.3426  | 7.50546 | 7.41472 | 6.58002 | 6.8302  | 6.8256  | 7.11659 | 7.4012  |
| USP31      | 9.01851 | 8.8966  | 8.91479 | 8.5579  | 6.42221 | 7.21687 | 8.28384 | 8.26013 | 8.16565 |
| COG7       | 8.1411  | 8.08441 | 7.8752  | 7.75552 | 6.58875 | 7.21343 | 8.04923 | 7.28643 | 7.5648  |
| PALB2      | 8.18275 | 8.74954 | 8.55148 | 8.21962 | 6.20899 | 7.0077  | 8.4383  | 7.20726 | 7.59238 |
| ERN2       | 6.02981 | 6.17256 | 5.96424 | 6.95434 | 7.20434 | 6.78176 | 6.61897 | 6.66146 | 6.60399 |
| ARHGAP17   | 8.75341 | 8.55122 | 8.64227 | 8.27975 | 6.7448  | 8.33427 | 8.77113 | 9.26954 | 9.2785  |
| LCMT1-AS2  | 5.10956 | 5.10522 | 5.13101 | 5.60582 | 6.32073 | 5.69399 | 5.43172 | 5.94923 | 5.63795 |
| ZKSCAN2    | 6.07493 | 6.42698 | 6.25536 | 6.0639  | 6.45003 | 6.0812  | 6.20359 | 6.13743 | 5.56405 |
| NSMCE1     | 7.97399 | 7.16031 | 7.67157 | 8.26532 | 5.24198 | 8.07229 | 8.51039 | 7.47287 | 7.85846 |
| IL21R-AS1  | 4.93658 | 5.33419 | 4.8526  | 5.39453 | 6.08767 | 5.47501 | 5.34017 | 5.69568 | 5.41956 |
| GSG1L      | 6.62223 | 6.55227 | 6.08151 | 6.93181 | 6.93971 | 7.17325 | 6.65371 | 7.16896 | 6.57153 |
| XPO6       | 10.534  | 10.4691 | 10.4261 | 10.1897 | 7.93108 | 10.1052 | 10.4573 | 9.77654 | 10.5743 |
| IL27       | 6.07639 | 6.06061 | 6.30056 | 6.79546 | 6.83453 | 6.82373 | 6.78238 | 6.4825  | 6.83383 |
| ATP2A1-AS1 | 5.5895  | 5.50972 | 5.74924 | 6.12902 | 6.1346  | 5.91759 | 6.06119 | 5.76568 | 5.78297 |
| NPIP5      | 12.7692 | 12.7989 | 12.7321 | 10.3898 | 11.066  | 9.6951  | 9.82095 | 11.4822 | 11.8149 |
| LOC388242  | 6.15794 | 6.11493 | 6.21525 | 6.52459 | 6.73777 | 6.33145 | 5.99702 | 6.15864 | 6.19161 |
| C16orf54   | 6.56548 | 6.50311 | 6.60377 | 7.0889  | 7.25218 | 7.6715  | 7.41625 | 7.26217 | 7.01076 |
| CDIPT      | 8.1721  | 8.18799 | 8.21633 | 8.83913 | 7.36193 | 7.8268  | 9.20613 | 7.75023 | 8.24102 |
| SEZ6L2     | 6.9954  | 6.75405 | 6.71585 | 7.39847 | 6.6542  | 6.96874 | 7.18922 | 7.04631 | 7.01799 |
| kctd13     | 8.7054  | 8.72932 | 8.77234 | 8.89629 | 8.04915 | 8.58934 | 8.54991 | 8.34221 | 8.42728 |

|            |         |         |         |         |         |         |         |         |         |
|------------|---------|---------|---------|---------|---------|---------|---------|---------|---------|
| hirip3     | 6.1185  | 6.46987 | 6.2733  | 6.612   | 5.67812 | 6.63662 | 6.60036 | 5.63327 | 5.70521 |
| TBX6       | 6.04581 | 5.92405 | 5.8149  | 6.06357 | 6.14403 | 6.16227 | 5.85977 | 6.10688 | 6.2426  |
| YPEL3      | 8.45165 | 8.35343 | 8.18456 | 8.81266 | 8.35743 | 8.6093  | 8.8209  | 8.76695 | 8.59352 |
| GDPD3      | 9.8538  | 9.66979 | 9.85684 | 10.1574 | 10.2    | 10.4854 | 10.0454 | 10.2726 | 10.713  |
| MAPK3      | 8.76648 | 8.70987 | 8.73356 | 9.61238 | 9.29682 | 10.2367 | 9.79037 | 9.96387 | 10.0586 |
| LOC613038  | 5.3554  | 5.07238 | 5.31595 | 5.7037  | 5.90817 | 5.54739 | 5.30154 | 5.22548 | 5.34171 |
| CD2BP2     | 7.28687 | 7.45613 | 7.31592 | 7.8686  | 7.00505 | 8.43928 | 7.93024 | 8.59101 | 8.24036 |
| 44440      | 6.49646 | 6.10556 | 6.50465 | 6.91933 | 7.37618 | 7.13116 | 6.87677 | 6.72832 | 6.78149 |
| DCTPP1     | 8.16622 | 7.92221 | 8.49521 | 8.41681 | 6.82358 | 7.51043 | 8.21544 | 7.6053  | 7.50194 |
| SEPHS2     | 8.02238 | 7.75863 | 8.4002  | 7.39341 | 6.61491 | 7.66333 | 8.26447 | 7.71477 | 7.24076 |
| ZNF768     | 6.27019 | 5.92276 | 6.32368 | 5.56791 | 5.53706 | 5.847   | 6.24285 | 5.69666 | 5.58791 |
| ZNF747     | 7.44223 | 7.63525 | 7.63805 | 8.16182 | 8.07728 | 8.306   | 7.87088 | 8.12102 | 8.14613 |
| ZNF764     | 6.84863 | 6.93425 | 6.79269 | 6.81763 | 6.97755 | 7.12662 | 6.92544 | 6.86122 | 6.85794 |
| ZNF688     | 6.79835 | 6.8214  | 6.77112 | 6.54217 | 5.32512 | 6.37936 | 6.91287 | 6.18893 | 5.82508 |
| ZNF689     | 5.64905 | 5.34033 | 5.85541 | 5.75478 | 5.4042  | 5.74872 | 5.69374 | 5.53147 | 5.7021  |
| LOC730183  | 7.22204 | 7.13175 | 7.08389 | 6.88432 | 6.56312 | 7.07605 | 6.93053 | 6.27392 | 6.79636 |
| CCDC189    | 5.55447 | 4.93676 | 5.53883 | 5.91098 | 5.85978 | 5.49337 | 5.69394 | 5.77614 | 5.24273 |
| ZNF629     | 6.8143  | 7.37572 | 7.10404 | 7.13409 | 8.19278 | 7.64937 | 7.25197 | 7.10837 | 7.21928 |
| BCL7C      | 7.56004 | 7.29959 | 7.86526 | 7.99424 | 6.79892 | 8.17206 | 8.51707 | 7.74057 | 7.65297 |
| MIR4519    | 8.29522 | 8.50228 | 8.59728 | 9.85732 | 10.7753 | 10.0972 | 9.09995 | 9.91251 | 9.32661 |
| FBXL19-AS1 | 5.18242 | 5.15528 | 4.81128 | 5.31917 | 5.21656 | 5.6354  | 6.09194 | 5.4326  | 5.51045 |
| STX1B      | 6.0491  | 6.39346 | 5.68305 | 5.92083 | 5.91515 | 6.20542 | 5.58827 | 5.62663 | 5.77016 |
| pycard     | 8.87718 | 9.31567 | 9.2269  | 9.11202 | 7.86462 | 8.26101 | 9.56781 | 7.34788 | 8.50051 |
| PYDC1      | 8.17296 | 6.69367 | 7.01585 | 7.77196 | 6.33077 | 6.4958  | 7.53492 | 5.97612 | 5.89611 |
| COX6A2     | 5.64064 | 5.49176 | 5.63251 | 5.79076 | 6.27505 | 6.19671 | 6.31422 | 5.98923 | 5.73619 |
| ZNF843     | 5.74625 | 5.88099 | 5.8231  | 6.49622 | 6.16305 | 6.90674 | 6.0209  | 6.52058 | 6.20132 |

|              |         |         |         |         |         |         |         |         |         |
|--------------|---------|---------|---------|---------|---------|---------|---------|---------|---------|
| c16orf58     | 7.99851 | 8.23367 | 8.2849  | 8.1122  | 6.69251 | 7.78452 | 8.38785 | 7.69945 | 7.85991 |
| YBX3P1       | 9.91997 | 10.027  | 9.91739 | 9.87355 | 8.93849 | 9.76663 | 10.0329 | 9.54653 | 9.61187 |
| LOC100505948 | 5.0847  | 5.5097  | 5.45167 | 5.48634 | 5.85588 | 5.6596  | 4.95065 | 5.57851 | 5.68115 |
| UBE2MP1      | 6.24687 | 6.41425 | 6.0974  | 6.98627 | 5.71028 | 7.7581  | 7.92659 | 6.94738 | 7.12691 |
| TP53TG3HP    | 6.33739 | 6.21989 | 6.1851  | 6.9833  | 7.36363 | 7.06488 | 6.62955 | 6.81195 | 6.92529 |
| ANKRD26P1    | 3.47162 | 3.40883 | 3.32484 | 3.89139 | 3.50504 | 3.57373 | 3.84652 | 3.46913 | 3.17263 |
| SHCBP1       | 6.5615  | 6.43937 | 5.99159 | 6.2409  | 5.55393 | 5.60419 | 5.76585 | 5.49908 | 5.34559 |
| VPS35        | 9.89429 | 9.93721 | 9.91925 | 9.85518 | 7.25891 | 9.73167 | 9.96295 | 9.55736 | 9.59873 |
| MYLK3        | 5.56876 | 5.64585 | 5.71285 | 5.91364 | 6.28001 | 5.88678 | 5.62034 | 6.22974 | 5.93984 |
| NETO2        | 9.48154 | 7.29689 | 7.78038 | 9.3235  | 6.48062 | 7.87948 | 9.11873 | 7.51851 | 8.45933 |
| ITFG1        | 9.54307 | 9.50631 | 9.60023 | 8.88063 | 6.98822 | 8.39344 | 8.85817 | 8.42444 | 8.45663 |
| SIAH1        | 8.63371 | 8.36253 | 8.05258 | 8.52345 | 8.15974 | 8.51754 | 8.39394 | 7.63545 | 7.527   |
| N4BP1        | 8.58088 | 8.45904 | 8.27585 | 8.4463  | 7.20985 | 8.77447 | 8.98528 | 8.34897 | 8.7987  |
| CBLN1        | 5.7182  | 5.83616 | 5.86481 | 6.5658  | 6.29046 | 6.39598 | 5.76983 | 5.93904 | 5.97903 |
| ZNF423       | 6.49975 | 6.59985 | 6.74413 | 6.30372 | 6.40778 | 6.39772 | 6.52405 | 6.45464 | 6.16752 |
| BRD7         | 8.26382 | 8.66866 | 8.41263 | 8.06872 | 6.31801 | 7.89532 | 8.31232 | 7.75311 | 7.72291 |
| SNX20        | 5.15981 | 4.94832 | 5.50855 | 5.26042 | 5.86556 | 5.59074 | 5.49534 | 5.3151  | 5.29751 |
| SALL1        | 5.68679 | 6.25891 | 5.78614 | 5.948   | 6.11451 | 5.78453 | 6.1531  | 5.79377 | 5.95186 |
| C16orf97     | 4.98779 | 4.91399 | 4.86069 | 5.22358 | 6.57892 | 5.12754 | 4.75244 | 5.10852 | 4.93804 |
| LINC00919    | 3.13667 | 3.20504 | 3.23931 | 3.90446 | 4.33474 | 4.30324 | 4.14012 | 3.53496 | 4.01471 |
| TOX3         | 6.15352 | 6.76258 | 6.10166 | 5.98203 | 5.9376  | 6.22057 | 5.60586 | 6.05618 | 6.07707 |
| CASC16       | 4.2407  | 3.87016 | 3.84484 | 4.73484 | 5.10608 | 4.89603 | 4.73269 | 4.19722 | 4.4713  |
| LOC643802    | 2.79773 | 1.94523 | 2.19192 | 3.43692 | 3.6083  | 3.03982 | 2.57831 | 2.95647 | 2.45178 |
| AKTIP        | 9.60979 | 9.7724  | 9.17125 | 9.40714 | 8.08119 | 8.8247  | 9.4553  | 9.58853 | 9.4916  |
| RPGRIP1L     | 6.97044 | 6.71424 | 6.43021 | 5.67321 | 4.49909 | 4.6364  | 4.94436 | 4.93731 | 4.22752 |
| IRX3         | 8.45848 | 8.08299 | 8.50654 | 8.92472 | 7.78123 | 8.43777 | 8.6348  | 7.79589 | 7.7943  |

|           |         |         |         |         |         |         |         |         |         |
|-----------|---------|---------|---------|---------|---------|---------|---------|---------|---------|
| CRNDE     | 7.98714 | 7.73694 | 7.76209 | 6.78638 | 5.73154 | 5.80069 | 6.95291 | 6.53852 | 5.78248 |
| CES5A     | 5.00364 | 5.00596 | 5.07148 | 5.63487 | 6.5388  | 5.8909  | 5.26203 | 5.56125 | 5.15246 |
| LOC283856 | 6.04409 | 5.89528 | 5.9505  | 6.1674  | 6.11438 | 6.32823 | 5.66994 | 6.32847 | 5.93528 |
| NUDT21    | 10.0947 | 10.4228 | 10.3388 | 9.97669 | 7.89718 | 8.96576 | 9.98633 | 9.39307 | 9.42983 |
| BBS2      | 8.65364 | 9.48776 | 9.36831 | 7.6293  | 6.21111 | 6.45363 | 7.72813 | 6.61564 | 7.04899 |
| MT1G      | 8.92683 | 6.72088 | 8.94898 | 6.3521  | 5.757   | 7.38846 | 7.19627 | 5.92917 | 5.80601 |
| PLLP      | 9.4319  | 9.79414 | 9.70242 | 7.35671 | 6.2498  | 6.55297 | 6.82748 | 6.20571 | 6.87584 |
| CIAPIN1   | 8.93485 | 9.23552 | 9.1467  | 8.98291 | 6.93067 | 8.83628 | 9.49935 | 8.47289 | 9.24782 |
| DOK4      | 8.6519  | 8.55641 | 8.32325 | 8.53787 | 6.67396 | 8.6354  | 9.1978  | 8.78253 | 9.45104 |
| CCDC102A  | 6.60931 | 6.26651 | 6.34801 | 6.74922 | 6.51369 | 7.18046 | 7.02679 | 6.81543 | 6.72164 |
| KIFC3     | 7.37165 | 7.27739 | 6.73362 | 8.48561 | 6.87937 | 8.81873 | 8.17927 | 8.62733 | 8.9827  |
| CNGB1     | 5.81076 | 5.6863  | 5.97819 | 7.05576 | 6.47826 | 7.27653 | 7.31256 | 6.69797 | 6.86893 |
| ZNF319    | 6.57111 | 6.64743 | 6.55997 | 7.68453 | 6.37156 | 7.38041 | 8.31597 | 6.69699 | 7.23518 |
| CFAP20    | 8.51292 | 8.31268 | 8.53741 | 8.32433 | 7.34168 | 7.65931 | 8.51106 | 9.9947  | 8.08739 |
| APOOP5    | 4.43463 | 4.68209 | 4.14784 | 5.52731 | 5.07013 | 5.47069 | 4.65268 | 5.19097 | 4.57627 |
| LINC00922 | 4.83945 | 4.35666 | 5.00609 | 4.7887  | 6.05382 | 5.18061 | 4.94038 | 4.91435 | 5.19972 |
| CMTM4     | 7.90962 | 7.91355 | 7.9277  | 7.28538 | 6.73965 | 6.70185 | 7.73496 | 6.71515 | 7.11698 |
| TERB1     | 4.41358 | 4.73081 | 4.60956 | 4.70951 | 4.86271 | 4.31585 | 4.44669 | 4.64009 | 4.3476  |
| NAE1      | 8.9695  | 9.41436 | 9.14372 | 9.09228 | 6.37542 | 7.98188 | 9.37405 | 8.20821 | 8.51182 |
| RRAD      | 4.8996  | 5.21017 | 5.06781 | 6.16747 | 4.97651 | 7.79523 | 5.92978 | 6.67289 | 6.97012 |
| TRADD     | 7.4574  | 6.88376 | 7.07379 | 7.59505 | 6.62962 | 8.16803 | 8.30658 | 7.88159 | 7.55406 |
| KIAA0895L | 7.32844 | 6.97663 | 7.17339 | 7.12371 | 7.00174 | 7.20628 | 7.03481 | 7.07173 | 7.14346 |
| EXOC3L1   | 6.34065 | 6.34391 | 6.25157 | 7.08828 | 6.91486 | 7.03722 | 6.80418 | 7.02672 | 6.84745 |
| MIR328    | 7.07845 | 6.9908  | 7.41904 | 7.2884  | 8.81067 | 7.64493 | 6.78837 | 7.62012 | 7.21879 |
| LRRC29    | 6.19927 | 6.33905 | 6.23145 | 6.58955 | 7.06499 | 6.73547 | 6.57112 | 6.4962  | 6.36201 |
| FHOD1     | 7.0311  | 6.39241 | 6.71696 | 7.166   | 6.04357 | 6.96833 | 7.85296 | 6.92026 | 7.12391 |

|              |         |         |         |         |         |         |         |         |         |
|--------------|---------|---------|---------|---------|---------|---------|---------|---------|---------|
| KCTD19       | 4.88048 | 5.18627 | 5.05344 | 5.13207 | 5.53486 | 5.66042 | 5.13451 | 5.49862 | 5.52636 |
| TPPP3        | 10.5405 | 9.09167 | 10.6426 | 7.92843 | 10.2604 | 10.5124 | 11.5197 | 10.8335 | 10.4555 |
| AGRP         | 6.07253 | 5.60013 | 5.72402 | 6.21705 | 6.77693 | 7.23157 | 6.11763 | 6.08866 | 6.66289 |
| ACD          | 6.25765 | 6.63952 | 6.35358 | 6.98537 | 6.40938 | 6.43556 | 6.79119 | 6.64976 | 6.55357 |
| GFOD2        | 8.14383 | 7.51853 | 7.27541 | 8.36298 | 7.17757 | 9.34963 | 8.59002 | 8.63422 | 8.97677 |
| RANBP10      | 8.58065 | 8.10798 | 8.16099 | 8.45907 | 8.59949 | 8.97531 | 8.90461 | 9.30542 | 8.80582 |
| CENPT        | 8.70873 | 7.97487 | 7.94983 | 8.22515 | 7.95158 | 8.77501 | 8.21708 | 8.26458 | 8.98778 |
| CTRL         | 6.36203 | 6.52949 | 6.4761  | 6.71888 | 7.40486 | 6.72907 | 6.60255 | 6.66628 | 6.67231 |
| LCAT         | 8.86078 | 7.82273 | 7.81971 | 7.62026 | 6.44891 | 7.41757 | 7.3768  | 7.70035 | 7.88994 |
| DPEP3        | 4.9549  | 5.08852 | 5.30096 | 5.45192 | 5.73697 | 6.11844 | 5.69015 | 5.84448 | 5.45618 |
| DPEP2        | 5.08727 | 4.76522 | 5.67546 | 5.47799 | 5.73527 | 5.73527 | 5.66103 | 5.91968 | 5.6894  |
| DDX28        | 6.10993 | 5.59482 | 5.80669 | 6.94745 | 5.88803 | 6.65927 | 6.71184 | 6.16822 | 6.47078 |
| ESRP2        | 9.41335 | 9.0761  | 8.77313 | 9.24931 | 7.16176 | 9.72495 | 9.39598 | 8.67412 | 9.39418 |
| COG8         | 8.11193 | 8.03201 | 7.99477 | 7.69357 | 6.20464 | 7.25382 | 7.98395 | 7.03952 | 7.50164 |
| TMED6        | 4.79498 | 5.10412 | 5.40587 | 4.73206 | 5.46078 | 5.33512 | 4.89606 | 5.01496 | 4.41213 |
| TERF2        | 8.77531 | 8.99789 | 9.00025 | 8.43918 | 7.39207 | 8.08463 | 8.71245 | 7.90463 | 8.18431 |
| MIR1538      | 8.19059 | 8.33435 | 8.84582 | 8.47363 | 8.61057 | 8.52295 | 8.28292 | 8.97649 | 9.04549 |
| NOB1         | 10.056  | 10.0212 | 9.96066 | 9.0004  | 7.97583 | 8.65338 | 9.39528 | 8.3221  | 8.9961  |
| EXOSC6       | 8.49909 | 8.27754 | 8.41264 | 8.56557 | 7.43431 | 7.71802 | 8.52032 | 7.38178 | 8.07042 |
| AARS         | 9.12811 | 8.88947 | 8.78424 | 9.00417 | 6.56434 | 8.90884 | 9.09857 | 8.47788 | 8.82991 |
| LOC100506083 | 5.37147 | 6.07267 | 4.99107 | 4.15809 | 4.17857 | 4.82349 | 4.42454 | 4.40929 | 4.55548 |
| COG4         | 8.19671 | 7.88939 | 8.04956 | 7.93067 | 6.60979 | 8.11129 | 8.50949 | 7.66057 | 7.7608  |
| MTSS1L       | 8.11267 | 7.29394 | 7.3533  | 7.29742 | 4.89847 | 7.008   | 7.42019 | 6.7672  | 6.76425 |
| VAC14        | 8.43993 | 8.45106 | 8.55008 | 8.29346 | 7.2924  | 8.04831 | 8.6976  | 7.80983 | 8.04515 |
| CMTR2        | 7.57383 | 7.66319 | 7.31316 | 8.35194 | 6.15379 | 8.49882 | 8.63249 | 7.95881 | 8.52616 |
| ZNF23        | 5.91563 | 6.23747 | 5.86045 | 5.52571 | 4.67862 | 5.52828 | 5.04604 | 5.32489 | 5.27787 |

|           |         |         |         |         |         |         |         |         |         |
|-----------|---------|---------|---------|---------|---------|---------|---------|---------|---------|
| ZNF19     | 6.29764 | 6.20544 | 6.47792 | 6.18015 | 5.62386 | 6.04069 | 5.90337 | 5.91019 | 6.28697 |
| TAT       | 4.20981 | 4.10513 | 4.38083 | 4.16784 | 6.03388 | 4.52783 | 4.01871 | 4.71417 | 4.17225 |
| PHLPP2    | 6.94808 | 7.33116 | 7.08734 | 6.87693 | 6.12232 | 5.86468 | 6.93164 | 6.3055  | 6.75884 |
| ZNF821    | 6.29325 | 5.99063 | 6.02083 | 5.96774 | 6.25577 | 6.11347 | 6.10145 | 6.1422  | 5.68767 |
| PKD1L3    | 5.86283 | 5.48775 | 5.60921 | 5.21328 | 6.09217 | 5.42095 | 5.22433 | 5.7613  | 5.63558 |
| TXNL4B    | 7.99044 | 7.8247  | 7.85164 | 7.32861 | 5.986   | 7.4999  | 7.85217 | 7.40251 | 8.16261 |
| PMFBP1    | 6.85568 | 5.15879 | 5.80422 | 5.44902 | 6.77027 | 6.57007 | 5.89717 | 7.44474 | 7.06492 |
| ZFH3      | 7.72436 | 7.76033 | 7.78229 | 7.29021 | 6.85643 | 7.01324 | 7.50241 | 7.6112  | 7.41407 |
| LOC283922 | 4.19619 | 3.84956 | 4.51298 | 2.92991 | 2.89045 | 2.92161 | 2.52204 | 2.99456 | 3.20115 |
| GLG1      | 9.32387 | 9.21174 | 9.42163 | 8.91871 | 6.20789 | 8.63473 | 8.88253 | 9.18928 | 8.60602 |
| RFWD3     | 8.68726 | 8.60623 | 8.83582 | 8.14975 | 6.64853 | 7.38166 | 8.02553 | 7.70965 | 7.90711 |
| MLKL      | 7.41838 | 6.80569 | 6.95571 | 6.95258 | 5.81794 | 6.70872 | 7.13849 | 6.92101 | 7.0119  |
| FA2H      | 6.65252 | 6.33777 | 7.11535 | 7.89083 | 6.50197 | 7.19959 | 6.42971 | 7.09852 | 6.06319 |
| WDR59     | 9.1384  | 9.04742 | 8.71273 | 8.05889 | 7.20021 | 7.61774 | 8.04275 | 7.88557 | 7.94958 |
| LDHD      | 7.02675 | 7.04722 | 6.87179 | 7.04189 | 6.645   | 7.26595 | 7.09086 | 6.97182 | 7.22115 |
| CTRB2     | 5.60958 | 5.28257 | 5.64699 | 5.97684 | 7.06403 | 5.89362 | 5.20974 | 5.90176 | 6.039   |
| BCAR1     | 6.65665 | 6.3908  | 6.47703 | 7.33221 | 6.90811 | 7.22243 | 7.58756 | 6.89019 | 6.77166 |
| CFDP1     | 6.62828 | 6.7831  | 5.9007  | 6.51184 | 5.02148 | 7.36847 | 6.93342 | 6.33006 | 5.88807 |
| TMEM170A  | 8.62386 | 8.53352 | 8.40005 | 8.21758 | 6.68561 | 7.83799 | 8.08827 | 8.45809 | 8.60681 |
| CHST5     | 5.44334 | 5.97843 | 6.09386 | 6.48576 | 6.88045 | 6.49179 | 6.39232 | 6.19918 | 6.22442 |
| KARS      | 8.92594 | 9.09    | 9.10547 | 9.348   | 7.1971  | 9.16103 | 9.48354 | 8.82356 | 9.05326 |
| MAF       | 9.71892 | 9.31412 | 9.2752  | 8.79118 | 7.43081 | 8.22635 | 9.79741 | 7.74631 | 7.89394 |
| CMC2      | 10.0611 | 9.72056 | 9.89131 | 10.1798 | 8.44641 | 9.03093 | 9.94925 | 10.174  | 9.98446 |
| C16orf46  | 5.10134 | 4.75125 | 4.94956 | 5.08298 | 5.38435 | 4.73353 | 5.32784 | 5.38038 | 5.28709 |
| GCSH      | 4.91905 | 3.45935 | 4.40645 | 3.3701  | 3.15341 | 3.18994 | 5.03235 | 4.58825 | 3.49853 |
| PKD1L2    | 5.61485 | 5.8934  | 6.02436 | 6.02436 | 6.47703 | 6.41528 | 5.98844 | 6.15433 | 6.01091 |



|           |         |         |         |         |         |         |         |         |         |
|-----------|---------|---------|---------|---------|---------|---------|---------|---------|---------|
| MPHOSPH6  | 7.87915 | 8.14526 | 7.90758 | 7.96441 | 6.18544 | 8.00086 | 8.51354 | 7.63548 | 7.94355 |
| HSDL1     | 7.51514 | 7.34954 | 7.65303 | 7.41389 | 5.20057 | 7.70954 | 7.18227 | 7.63752 | 6.92889 |
| TLDC1     | 7.94405 | 7.46927 | 7.44338 | 8.37288 | 6.30777 | 8.38362 | 8.63658 | 8.27677 | 8.18001 |
| COTL1     | 6.93032 | 6.81851 | 7.31978 | 8.25886 | 7.07093 | 7.68996 | 7.76802 | 7.95134 | 7.89403 |
| GINS2     | 6.6268  | 5.8149  | 6.78887 | 6.38244 | 5.35013 | 5.66976 | 6.09325 | 5.70025 | 6.11246 |
| C16orf74  | 7.54976 | 7.04878 | 7.14571 | 8.53859 | 7.49376 | 8.02184 | 8.80712 | 7.93333 | 8.32062 |
| MIR1910   | 8.50093 | 8.64716 | 8.53492 | 9.51063 | 10.3503 | 9.60345 | 8.81265 | 9.26861 | 9.32072 |
| EMC8      | 7.50368 | 7.61307 | 7.58153 | 7.71886 | 7.21369 | 7.41015 | 8.33459 | 7.62508 | 7.83566 |
| LINC00917 | 4.83577 | 5.13897 | 5.19802 | 5.69586 | 5.76332 | 5.70518 | 5.81185 | 5.3878  | 5.48945 |
| Fendrr    | 4.84801 | 4.6283  | 4.63477 | 5.20198 | 5.89588 | 5.23746 | 4.57033 | 5.04766 | 4.75989 |
| MTHFSD    | 7.11187 | 7.21175 | 6.9529  | 6.6271  | 6.19637 | 6.79112 | 6.6264  | 6.76902 | 6.56913 |
| C16orf95  | 6.32439 | 6.23255 | 6.28926 | 6.8987  | 6.54592 | 6.69945 | 6.24512 | 6.60811 | 6.41881 |
| KLHDC4    | 6.40783 | 6.61593 | 6.37734 | 6.7669  | 6.25559 | 6.422   | 6.61077 | 6.34413 | 6.48624 |
| MVD       | 7.32017 | 7.04176 | 6.99843 | 8.13797 | 7.04    | 8.59228 | 8.6901  | 7.62647 | 8.26049 |
| SNAI3     | 6.16786 | 6.32992 | 6.36015 | 6.86369 | 7.16706 | 7.39014 | 6.5721  | 6.65226 | 6.65209 |
| RNF166    | 7.28943 | 7.15722 | 7.31094 | 7.33426 | 7.04905 | 7.88681 | 7.3144  | 7.39814 | 7.28385 |
| PIEZO1    | 8.39586 | 8.31209 | 8.21249 | 9.16125 | 7.21142 | 9.57925 | 9.22775 | 8.88027 | 9.57521 |
| APRT      | 7.95771 | 7.79216 | 8.17061 | 9.2405  | 6.81823 | 9.07664 | 9.64243 | 7.51411 | 8.55225 |
| GALNS     | 7.81786 | 7.57138 | 7.69773 | 8.41509 | 7.61332 | 8.46399 | 8.26523 | 8.35231 | 8.22263 |
| ANKRD11   | 8.18056 | 8.02817 | 7.90505 | 7.23324 | 5.70871 | 7.45721 | 7.49663 | 7.45517 | 7.43197 |
| CHMP1A    | 7.80201 | 7.58549 | 7.70736 | 8.2776  | 7.7254  | 8.81776 | 8.57066 | 8.02259 | 8.43005 |
| spata2l   | 6.35888 | 6.32733 | 6.57627 | 6.73575 | 6.78265 | 7.39468 | 7.14608 | 7.05283 | 6.78575 |
| VPS9D1    | 6.66192 | 6.72044 | 6.70903 | 7.16273 | 6.24121 | 7.30557 | 7.54235 | 6.78265 | 7.01384 |
| CENPBD1   | 6.58356 | 6.89062 | 6.93146 | 6.76476 | 6.14583 | 7.29621 | 7.11593 | 6.73579 | 6.75842 |
| DBNDD1    | 6.59993 | 6.66478 | 6.4022  | 7.17459 | 7.1295  | 7.69972 | 7.59288 | 6.74109 | 7.8033  |
| GAS8-AS1  | 5.83174 | 5.89465 | 6.1618  | 6.0912  | 6.91277 | 6.01284 | 6.30438 | 6.07253 | 6.09804 |

|              |         |         |         |         |         |         |         |         |         |
|--------------|---------|---------|---------|---------|---------|---------|---------|---------|---------|
| PRDM7        | 4.44482 | 4.45012 | 4.56083 | 5.05668 | 4.09899 | 5.17409 | 4.74766 | 4.56903 | 4.76738 |
| LOC100506388 | 6.46459 | 6.2902  | 6.41574 | 7.00382 | 7.83449 | 6.797   | 6.82661 | 6.78041 | 6.64715 |
| C17orf97     | 7.076   | 6.11343 | 6.34701 | 6.61463 | 6.14691 | 6.82199 | 7.16382 | 6.50917 | 6.34103 |
| MRM3         | 6.92126 | 6.5931  | 6.69421 | 6.6965  | 6.38663 | 6.88245 | 7.14297 | 6.79193 | 6.9659  |
| TIMM22       | 8.75194 | 8.21758 | 8.80611 | 8.63268 | 7.04927 | 7.64801 | 9.17064 | 8.19861 | 8.49436 |
| TUSC5        | 5.68027 | 5.84248 | 6.23682 | 6.13214 | 6.71733 | 6.73631 | 6.33495 | 6.6499  | 6.26401 |
| PITPNA-AS1   | 7.81729 | 7.89783 | 8.18997 | 8.26131 | 8.36988 | 7.94329 | 8.26752 | 7.81061 | 8.329   |
| WDR81        | 7.03787 | 6.89574 | 7.08484 | 6.93683 | 6.61396 | 6.84604 | 7.07055 | 6.91523 | 6.64892 |
| DPH1         | 7.80219 | 7.79233 | 7.80987 | 8.09905 | 7.07432 | 7.3271  | 7.83287 | 7.57462 | 7.50647 |
| HIC1         | 5.89467 | 5.85999 | 5.8007  | 6.93598 | 5.31244 | 6.57658 | 6.27952 | 5.51322 | 6.72311 |
| SRR          | 8.00609 | 7.93148 | 7.83791 | 7.60781 | 7.23725 | 7.28912 | 7.95045 | 6.54242 | 7.27552 |
| SGSM2        | 7.81849 | 7.35798 | 7.23369 | 7.30526 | 6.47295 | 7.69557 | 7.4258  | 6.56496 | 6.86287 |
| RAP1GAP2     | 6.86484 | 6.68176 | 7.03718 | 7.20565 | 6.52285 | 7.8517  | 6.94656 | 7.26378 | 7.33441 |
| ASPA         | 6.51619 | 5.99745 | 6.03749 | 4.40832 | 5.60371 | 4.1885  | 4.3635  | 4.12048 | 4.97957 |
| EMC6         | 7.36816 | 7.20408 | 7.05823 | 8.07683 | 5.90392 | 8.29233 | 8.69818 | 8.45893 | 7.76526 |
| GSG2         | 6.06043 | 5.63275 | 5.75106 | 6.18313 | 5.83424 | 6.05174 | 6.40022 | 5.78266 | 6.02972 |
| CYB5D2       | 7.60047 | 7.57582 | 7.53041 | 7.43848 | 6.82714 | 7.36112 | 7.63099 | 7.17352 | 7.34738 |
| SPNS3        | 6.19795 | 6.06381 | 6.20488 | 6.9376  | 6.84113 | 6.75623 | 6.46964 | 6.62997 | 6.52528 |
| SPNS2        | 8.8183  | 9.01279 | 8.55759 | 9.91193 | 10.1995 | 10.6461 | 9.45826 | 10.8056 | 9.75667 |
| SMTNL2       | 5.89292 | 5.88288 | 6.08371 | 6.34762 | 6.28921 | 6.56666 | 6.12912 | 6.57865 | 6.45707 |
| MED11        | 7.71789 | 7.73801 | 7.40885 | 7.66891 | 5.26078 | 7.48924 | 8.42131 | 7.15411 | 7.22711 |
| TM4SF5       | 5.13064 | 5.22364 | 5.31928 | 6.05158 | 6.84131 | 6.09437 | 5.52594 | 5.83162 | 5.6303  |
| GLTPD2       | 5.36843 | 5.43053 | 5.1587  | 6.55635 | 6.59769 | 6.70745 | 6.55253 | 6.0904  | 6.04243 |
| PLD2         | 8.90797 | 8.75608 | 8.55638 | 9.41067 | 8.43314 | 10.5002 | 9.91178 | 10.9456 | 10.7675 |
| MINK1        | 9.6692  | 9.45214 | 9.45102 | 9.64389 | 8.90408 | 10.6116 | 10.0133 | 10.3285 | 10.4053 |
| C17orf107    | 5.97697 | 6.03634 | 6.27035 | 6.65259 | 7.10866 | 7.10459 | 6.27254 | 6.56049 | 7.03982 |

|              |         |         |         |         |         |         |         |         |         |
|--------------|---------|---------|---------|---------|---------|---------|---------|---------|---------|
| RNF167       | 8.87719 | 8.61887 | 8.82299 | 8.99368 | 7.55508 | 8.67857 | 9.14277 | 8.38423 | 9.07664 |
| CAMTA2       | 5.65187 | 5.76562 | 5.74823 | 6.31458 | 6.05006 | 6.82616 | 6.56788 | 6.24172 | 6.09986 |
| KIF1C        | 9.15103 | 9.20558 | 8.82301 | 9.46198 | 7.35873 | 10.2769 | 10.0052 | 10.0095 | 10.3388 |
| ZFP3         | 7.8828  | 8.23454 | 8.33368 | 6.35679 | 6.67082 | 6.67642 | 7.17335 | 6.99408 | 6.86518 |
| USP6         | 5.01497 | 5.01739 | 4.9311  | 4.94775 | 5.12963 | 5.45726 | 4.5827  | 5.43862 | 5.22515 |
| LOC100130950 | 6.45935 | 6.25304 | 6.31992 | 5.59793 | 5.96489 | 5.77988 | 5.84653 | 5.91572 | 5.99989 |
| RPAIN        | 7.7055  | 7.864   | 7.68669 | 7.10265 | 5.82875 | 6.06561 | 6.71304 | 6.39345 | 6.62002 |
| LOC339166    | 5.51925 | 5.27312 | 5.28052 | 6.05238 | 7.13734 | 5.96813 | 5.44999 | 5.8314  | 5.85937 |
| WSCD1        | 6.17576 | 6.21222 | 6.10269 | 6.42521 | 6.4907  | 6.49096 | 6.03993 | 6.35633 | 6.38251 |
| TXNDC17      | 7.28221 | 7.33001 | 7.32676 | 9.56597 | 6.72619 | 8.80645 | 9.42603 | 7.98097 | 8.15971 |
| C17orf100    | 7.09232 | 6.69592 | 6.51063 | 7.01321 | 7.0611  | 6.85982 | 6.85528 | 6.56481 | 6.75968 |
| MIR4520-1    | 2.28126 | 2.01317 | 2.12766 | 2.0563  | 1.89825 | 2.67079 | 2.67726 | 2.04284 | 2.1052  |
| ALOX15P1     | 6.52996 | 6.60502 | 6.53808 | 6.11235 | 7.04785 | 6.83435 | 6.02943 | 7.04766 | 6.36504 |
| XAF1         | 9.09188 | 7.90229 | 8.37889 | 6.83188 | 7.64149 | 6.70547 | 7.22179 | 7.37322 | 7.3284  |
| FBXO39       | 5.51029 | 5.45666 | 5.34703 | 5.74497 | 6.23192 | 5.62454 | 5.46207 | 5.22892 | 5.29577 |
| ALOX12P2     | 5.53541 | 6.06624 | 5.94732 | 6.02846 | 5.61869 | 5.65888 | 5.88989 | 6.06273 | 5.49995 |
| ALOX12       | 8.27115 | 7.05677 | 7.73538 | 8.27853 | 7.21324 | 10.1295 | 9.99003 | 9.92854 | 9.91149 |
| ELP5         | 8.0936  | 7.38605 | 8.03029 | 7.66263 | 6.77774 | 7.33215 | 7.89588 | 7.11987 | 7.51013 |
| EIF5A        | 7.61615 | 7.61109 | 7.59627 | 7.72663 | 7.13243 | 7.52068 | 7.27601 | 7.78884 | 7.68182 |
| KCTD11       | 8.76856 | 8.3906  | 8.13591 | 9.59635 | 10.0765 | 11.8754 | 9.78884 | 9.56047 | 10.201  |
| TMEM95       | 5.425   | 5.062   | 5.04749 | 5.77737 | 5.74145 | 5.59416 | 5.11589 | 5.50161 | 5.40259 |
| NLGN2        | 7.06464 | 6.73222 | 6.68911 | 6.72741 | 6.88229 | 6.78938 | 6.85092 | 7.14745 | 6.34731 |
| SPEM1        | 4.8388  | 5.12703 | 5.09836 | 5.83514 | 5.71146 | 5.63763 | 5.36023 | 5.8081  | 5.57732 |
| C17orf74     | 4.71373 | 5.02748 | 4.70494 | 5.03524 | 6.26818 | 5.59176 | 5.51188 | 5.33591 | 5.54485 |
| TMEM102      | 6.43441 | 6.47041 | 6.23573 | 7.5606  | 6.38267 | 6.9435  | 7.63372 | 7.13718 | 7.02774 |
| FGF11        | 8.67124 | 8.18851 | 7.51139 | 9.62878 | 9.18797 | 10.0018 | 9.45115 | 10.2594 | 10.2259 |

|              |         |         |         |         |         |         |         |         |         |
|--------------|---------|---------|---------|---------|---------|---------|---------|---------|---------|
| SENP3-EIF4A1 | 9.45337 | 9.25118 | 9.36163 | 9.47755 | 8.30629 | 9.05793 | 9.56657 | 9.4324  | 9.2031  |
| CD68         | 8.79534 | 8.76129 | 10.3037 | 10.3249 | 12.3221 | 12.5417 | 11.325  | 12.5006 | 11.7709 |
| MPDU1        | 7.2959  | 7.27525 | 7.59034 | 8.29599 | 7.37105 | 7.72822 | 8.35229 | 6.86203 | 7.62001 |
| SHBG         | 5.55352 | 5.79759 | 5.515   | 6.06494 | 6.90019 | 5.98313 | 5.84802 | 5.93809 | 5.97664 |
| EFNB3        | 5.70951 | 5.84935 | 5.89859 | 6.40435 | 5.98561 | 6.31621 | 6.12262 | 6.1162  | 6.07231 |
| RPL29P2      | 8.9933  | 9.11937 | 9.03329 | 9.36604 | 9.52305 | 9.40322 | 9.48713 | 9.16446 | 9.21746 |
| KDM6B        | 8.17705 | 7.45933 | 7.52571 | 7.95133 | 6.28289 | 8.4816  | 7.78915 | 7.83128 | 8.09168 |
| TMEM88       | 6.88189 | 6.20577 | 6.71378 | 6.96145 | 7.18302 | 6.77666 | 6.84638 | 6.84806 | 6.66512 |
| CYB5D1       | 7.14532 | 7.41978 | 7.17517 | 6.7936  | 6.83441 | 7.3323  | 7.12465 | 6.38615 | 6.46607 |
| CHD3         | 8.49109 | 8.37075 | 7.81358 | 7.61847 | 6.68627 | 7.99929 | 8.24106 | 7.61573 | 8.10327 |
| SCARNA21     | 5.92019 | 6.65212 | 5.9703  | 6.50829 | 6.77832 | 6.88099 | 6.84264 | 5.81975 | 6.38921 |
| MIR4314      | 6.46428 | 6.89356 | 6.45293 | 6.71662 | 8.09607 | 6.84985 | 6.52536 | 6.96263 | 6.96863 |
| MIR4521      | 1.99025 | 2.06602 | 2.08573 | 3.23356 | 1.88711 | 2.27493 | 2.05293 | 1.93708 | 2.10204 |
| PFAS         | 7.36229 | 7.26898 | 7.54587 | 7.0213  | 6.97254 | 6.97223 | 6.98653 | 6.885   | 6.97341 |
| RANGRF       | 6.78247 | 6.80698 | 6.67494 | 7.84956 | 6.23867 | 6.75952 | 7.72238 | 6.78287 | 6.79654 |
| ARHGEF15     | 6.93486 | 6.79335 | 7.01044 | 7.3016  | 7.1546  | 7.23696 | 7.07159 | 7.13891 | 7.48256 |
| ODF4         | 5.14668 | 4.92725 | 5.17247 | 5.76804 | 6.0659  | 5.48782 | 6.26017 | 5.35195 | 5.90335 |
| NDEL1        | 11.2557 | 10.7885 | 10.9552 | 11.1038 | 10.5595 | 11.8084 | 11.5432 | 12.165  | 12.165  |
| NTN1         | 6.42786 | 6.38508 | 6.99169 | 6.30876 | 6.61003 | 6.66329 | 7.22139 | 6.66144 | 6.71196 |
| CFAP52       | 4.76504 | 5.0459  | 5.06737 | 5.40478 | 6.43422 | 5.67836 | 5.24657 | 5.64529 | 5.46862 |
| USP43        | 6.47026 | 6.04632 | 6.12726 | 7.55864 | 6.39283 | 8.51841 | 7.69882 | 8.95406 | 9.17847 |
| GLP2R        | 4.93716 | 5.12125 | 5.12963 | 5.50209 | 6.35062 | 5.04408 | 5.07815 | 5.39741 | 5.12709 |
| ADPRM        | 5.61543 | 6.36161 | 6.19783 | 5.32306 | 4.80075 | 4.80668 | 5.97251 | 5.22264 | 5.21506 |
| SHISA6       | 7.12237 | 5.80882 | 5.66035 | 6.93724 | 6.57417 | 7.3042  | 7.45933 | 6.96111 | 7.13767 |
| MAP2K4       | 7.06284 | 7.43017 | 7.2736  | 7.82783 | 6.319   | 8.27868 | 7.64069 | 7.78495 | 7.92184 |
| MIR744       | 6.43608 | 6.76383 | 6.46165 | 6.60676 | 7.11022 | 5.96143 | 6.07429 | 6.72169 | 6.54909 |

|           |         |         |         |         |         |         |         |         |         |
|-----------|---------|---------|---------|---------|---------|---------|---------|---------|---------|
| LINC00670 | 5.94798 | 5.6431  | 6.12849 | 5.46295 | 6.59089 | 5.76221 | 5.38437 | 5.38038 | 5.25264 |
| MYOCD     | 5.99164 | 5.76317 | 6.49677 | 5.63666 | 5.45384 | 5.67508 | 5.31407 | 5.47552 | 5.54527 |
| ARHGAP44  | 6.16297 | 5.9042  | 5.84808 | 5.68424 | 6.02009 | 5.94639 | 5.75774 | 5.58878 | 5.75297 |
| CDRT15P1  | 4.56932 | 4.72222 | 4.66553 | 5.44553 | 7.89459 | 4.86728 | 5.61956 | 5.38131 | 5.73151 |
| HS3ST3B1  | 6.40165 | 6.00466 | 6.66766 | 6.31271 | 6.39773 | 6.58508 | 6.97541 | 6.72583 | 6.58935 |
| MGC12916  | 6.12602 | 5.97424 | 5.93731 | 6.39088 | 6.26764 | 6.25535 | 6.78584 | 6.6449  | 6.34057 |
| CDRT7     | 3.77322 | 3.45559 | 3.55957 | 3.70832 | 4.69352 | 4.07259 | 4.16427 | 3.59776 | 3.87596 |
| ZNF286A   | 6.42055 | 6.91962 | 6.29813 | 6.29315 | 4.81411 | 5.42292 | 5.48306 | 5.94721 | 5.13362 |
| CDRT15P2  | 5.76428 | 6.2164  | 5.79339 | 5.61602 | 7.24479 | 6.35634 | 5.67608 | 5.97895 | 6.29844 |
| MEIS3P1   | 6.6301  | 6.1748  | 6.70116 | 6.02093 | 5.3242  | 5.65789 | 6.56564 | 5.56179 | 5.74573 |
| ADORA2B   | 7.93702 | 7.79839 | 7.78475 | 8.70619 | 7.24224 | 7.49965 | 8.56417 | 7.67548 | 7.56233 |
| MIR1288   | 5.64729 | 5.45568 | 5.0884  | 5.43304 | 5.00692 | 4.8608  | 4.5886  | 4.64577 | 4.67113 |
| UBB       | 6.74267 | 5.49404 | 5.81561 | 6.6781  | 5.08468 | 7.09817 | 6.26409 | 6.18062 | 5.81433 |
| USP32P1   | 6.48914 | 6.12932 | 6.91753 | 5.83555 | 5.63326 | 5.34149 | 4.94423 | 5.04154 | 5.86736 |
| MPRIP     | 8.64296 | 8.75039 | 8.71652 | 8.62439 | 7.54551 | 9.69578 | 8.83305 | 9.71324 | 9.81017 |
| MED9      | 6.4786  | 6.56963 | 6.53429 | 7.3203  | 6.79942 | 7.42895 | 7.49816 | 6.82412 | 7.06578 |
| RAI1      | 7.36365 | 7.50913 | 7.33462 | 7.48004 | 6.65302 | 7.96241 | 8.19721 | 7.17574 | 7.32507 |
| DRC3      | 5.9508  | 6.15893 | 6.28065 | 5.89341 | 6.37911 | 6.17876 | 5.84999 | 6.06113 | 5.88484 |
| GID4      | 7.50745 | 7.68552 | 7.4722  | 7.67657 | 7.31496 | 8.21974 | 8.08967 | 7.79267 | 7.77479 |
| DRG2      | 8.34519 | 8.1473  | 8.20389 | 8.4302  | 7.30816 | 8.3389  | 8.67603 | 8.16207 | 8.39264 |
| MYO15A    | 5.72289 | 5.89863 | 6.03516 | 6.33853 | 6.3406  | 6.52358 | 6.219   | 6.29904 | 6.28469 |
| LLGL1     | 7.27086 | 6.97627 | 7.01738 | 7.70096 | 6.68159 | 7.30193 | 8.05002 | 7.45688 | 7.34882 |
| evpll     | 6.46976 | 6.32129 | 6.02516 | 6.19531 | 5.80432 | 6.81897 | 6.39806 | 5.87665 | 6.78878 |
| KRT17P5   | 6.14672 | 6.15598 | 6.1489  | 6.3929  | 7.91969 | 6.63967 | 6.43683 | 6.64809 | 6.65962 |
| FOXO3     | 6.4615  | 6.36998 | 6.47881 | 7.05973 | 6.85728 | 7.43292 | 7.23983 | 6.92955 | 6.87958 |
| TRIM16L   | 8.26445 | 7.87745 | 7.51165 | 7.06054 | 7.45365 | 7.48432 | 7.45013 | 7.76536 | 8.12045 |

|           |         |         |         |         |         |         |         |         |         |
|-----------|---------|---------|---------|---------|---------|---------|---------|---------|---------|
| FBXW10    | 5.29429 | 4.28731 | 4.89742 | 4.84321 | 5.55278 | 5.16645 | 4.72687 | 5.25144 | 6.04405 |
| PRPSAP2   | 7.57113 | 7.95535 | 7.25677 | 7.66276 | 6.32872 | 8.11844 | 8.18279 | 7.84001 | 8.10768 |
| GRAPL     | 6.75594 | 6.44462 | 6.97034 | 6.76546 | 7.6656  | 7.13439 | 6.71229 | 7.31646 | 6.98542 |
| EPN2      | 9.57605 | 9.48552 | 9.29537 | 8.94381 | 6.61754 | 8.63427 | 8.93806 | 8.88858 | 8.93282 |
| EPN2-IT1  | 8.5353  | 8.48842 | 8.04472 | 7.18899 | 6.37329 | 6.68683 | 6.56974 | 7.56141 | 7.43966 |
| MAPK7     | 7.79704 | 7.70058 | 7.70834 | 8.5555  | 7.26418 | 9.01353 | 8.39169 | 8.06813 | 8.28274 |
| RNF112    | 5.98328 | 5.59435 | 5.82146 | 6.70812 | 6.57283 | 6.31681 | 5.92341 | 6.14698 | 5.89489 |
| SPECC1    | 7.57385 | 7.09292 | 7.17896 | 7.71463 | 6.9469  | 7.21314 | 7.62181 | 7.29993 | 7.51305 |
| CCDC144CP | 6.02648 | 6.50341 | 6.47239 | 5.17623 | 5.32686 | 4.62483 | 4.92626 | 5.91167 | 5.19977 |
| CDRT15L2  | 3.15361 | 3.64956 | 3.65755 | 4.65746 | 6.19875 | 4.60626 | 4.24581 | 3.91134 | 3.94546 |
| DHRS7B    | 8.50176 | 8.72567 | 8.6165  | 8.42978 | 7.34307 | 8.49959 | 8.86727 | 7.50648 | 8.29644 |
| MAP2K3    | 7.12777 | 6.62066 | 6.6271  | 7.30491 | 7.81325 | 7.99691 | 7.83284 | 8.87997 | 7.37598 |
| FAM27E5   | 5.26757 | 5.51878 | 5.54136 | 5.51259 | 6.01658 | 5.91563 | 5.5493  | 5.82896 | 5.68845 |
| FLJ36000  | 5.39015 | 5.1789  | 5.0521  | 5.82772 | 7.5769  | 6.25337 | 5.48756 | 5.80304 | 5.66791 |
| MTRNR2L1  | 3.66114 | 4.80406 | 3.99003 | 4.80206 | 5.26892 | 3.99568 | 4.29079 | 4.45859 | 3.76031 |
| WSB1      | 10.9597 | 10.796  | 10.6845 | 10.6805 | 10.5038 | 11.6367 | 10.0378 | 12.0364 | 11.2598 |
| KSR1      | 9.12885 | 8.72174 | 8.73325 | 7.35444 | 7.21696 | 8.83857 | 7.70786 | 7.98913 | 7.4736  |
| NLK       | 9.07697 | 9.01146 | 8.80812 | 8.35148 | 6.12282 | 7.57035 | 8.19056 | 7.78993 | 8.55777 |
| PPY2P     | 4.91401 | 5.37032 | 5.23917 | 5.52064 | 5.43214 | 5.61558 | 5.50881 | 5.38953 | 5.98209 |
| TMEM97    | 7.60873 | 8.08879 | 7.63499 | 7.37497 | 7.62097 | 6.59323 | 7.58546 | 6.97626 | 6.95921 |
| tmem199   | 7.02805 | 6.61915 | 7.01015 | 6.44869 | 6.56742 | 6.11582 | 6.43754 | 6.49171 | 6.89172 |
| SARM1     | 5.96047 | 6.03405 | 5.99934 | 5.99311 | 5.66006 | 6.00087 | 5.79876 | 5.71468 | 5.92166 |
| FOXN1     | 8.58907 | 8.33333 | 8.16232 | 7.79003 | 7.79866 | 7.62892 | 8.63728 | 7.32083 | 7.91642 |
| SPAG5-AS1 | 5.44419 | 5.31073 | 5.70251 | 6.07851 | 6.27083 | 6.32288 | 6.02252 | 6.06878 | 6.05152 |
| SUPT6H    | 9.73958 | 10.192  | 10.019  | 9.20987 | 6.78083 | 9.34396 | 9.46282 | 9.50813 | 9.5178  |
| NEK8      | 6.7572  | 6.73639 | 6.92268 | 7.07696 | 6.76754 | 6.80871 | 6.81876 | 6.75983 | 6.89693 |

|              |         |         |         |         |         |         |         |         |         |
|--------------|---------|---------|---------|---------|---------|---------|---------|---------|---------|
| TRAF4        | 7.16452 | 7.13452 | 6.74738 | 7.55736 | 7.06872 | 6.88555 | 7.28281 | 7.21415 | 7.60475 |
| ERAL1        | 7.95037 | 7.7239  | 7.93263 | 7.95589 | 6.28064 | 7.13772 | 8.10082 | 7.21553 | 7.92529 |
| mir451a      | 1.94886 | 2.86799 | 2.0012  | 2.54365 | 1.86223 | 2.91493 | 2.27146 | 2.27683 | 1.87683 |
| PIPOX        | 5.33876 | 5.08494 | 5.23259 | 5.54971 | 5.62833 | 5.88822 | 5.85178 | 5.88822 | 5.7408  |
| TAOK1        | 9.95282 | 10.1583 | 9.92129 | 9.69844 | 8.21435 | 9.80166 | 9.93137 | 9.82571 | 10.6052 |
| tp53i13      | 5.90814 | 6.13481 | 5.91561 | 6.6694  | 6.17789 | 6.43534 | 7.31778 | 6.29682 | 6.59281 |
| ANKRD13B     | 6.9786  | 6.85861 | 6.70789 | 6.92595 | 6.24253 | 7.23164 | 6.90078 | 7.13725 | 6.79964 |
| EFCAB5       | 4.68219 | 4.5691  | 4.93895 | 5.02533 | 4.99985 | 5.08082 | 5.03038 | 5.13347 | 4.76182 |
| NSRP1        | 8.37881 | 8.94337 | 8.6211  | 6.3179  | 5.1871  | 6.86391 | 7.43185 | 7.3276  | 7.41458 |
| CPD          | 8.76924 | 8.57255 | 8.70676 | 8.33377 | 5.37666 | 7.66372 | 8.87844 | 8.6649  | 8.38696 |
| gosr1        | 9.3407  | 9.21079 | 9.54509 | 8.3461  | 6.57617 | 7.85314 | 8.69971 | 7.43917 | 8.27192 |
| LOC107133515 | 7.55847 | 7.93238 | 7.81532 | 6.76874 | 6.17149 | 6.22527 | 7.7838  | 6.76489 | 6.97903 |
| SH3GL1P2     | 6.66914 | 6.82454 | 6.45641 | 6.64657 | 4.15001 | 6.25965 | 6.37885 | 6.27602 | 6.44279 |
| ADAP2        | 9.35181 | 8.70656 | 8.85273 | 10.4909 | 9.77773 | 10.6501 | 10.7796 | 10.8049 | 11.1707 |
| RNF135       | 8.82901 | 9.28177 | 8.89076 | 8.60913 | 7.35645 | 8.67246 | 8.88642 | 8.01806 | 8.28802 |
| DPRXP4       | 7.33974 | 7.0554  | 6.78445 | 5.59636 | 5.10306 | 5.17926 | 6.41245 | 6.23489 | 6.86934 |
| NF1          | 9.13015 | 9.40279 | 9.1611  | 8.0144  | 5.94274 | 7.72898 | 7.92682 | 8.14149 | 8.1328  |
| RAB11FIP4    | 7.16732 | 7.42749 | 6.74507 | 6.71628 | 6.0687  | 6.68649 | 7.21731 | 6.53885 | 5.89192 |
| MIR193A      | 4.93482 | 4.9933  | 4.44799 | 5.40173 | 5.32725 | 6.02845 | 5.75488 | 5.80125 | 5.82283 |
| MIR365B      | 6.38656 | 6.56518 | 6.31527 | 6.20605 | 6.98508 | 6.67574 | 6.20827 | 6.62781 | 6.61476 |
| MIR4725      | 5.19745 | 5.82968 | 5.56886 | 6.08124 | 6.70376 | 6.4768  | 6.04759 | 6.29677 | 6.03709 |
| SUZ12        | 9.24883 | 9.5484  | 9.24763 | 9.37054 | 8.81315 | 9.15066 | 9.51254 | 10.0501 | 8.8437  |
| LRRC37B      | 7.82558 | 7.94588 | 7.51643 | 5.927   | 4.59848 | 5.27987 | 6.20025 | 5.33746 | 6.5314  |
| SH3GL1P1     | 6.06503 | 6.26445 | 6.20418 | 6.46617 | 6.03059 | 6.58167 | 6.57878 | 6.66182 | 6.56771 |
| RHOT1        | 9.82793 | 9.76752 | 9.68907 | 8.83945 | 6.85915 | 7.89606 | 8.75351 | 9.08836 | 8.21465 |
| ZNF207       | 10.4063 | 10.2226 | 10.4678 | 10.071  | 8.87391 | 9.87212 | 9.87276 | 10.2153 | 10.2143 |

|          |         |         |         |         |         |         |         |         |         |
|----------|---------|---------|---------|---------|---------|---------|---------|---------|---------|
| TMEM98   | 6.77042 | 6.77771 | 6.74095 | 6.69777 | 6.87142 | 6.45487 | 6.74202 | 6.15071 | 6.08095 |
| SPACA3   | 5.50957 | 5.6013  | 5.30434 | 5.73327 | 6.07264 | 6.28909 | 5.85191 | 6.10187 | 6.08866 |
| CCL2     | 11.3734 | 9.71795 | 9.22667 | 8.98605 | 5.59187 | 7.73336 | 9.1711  | 10.258  | 10.5984 |
| CCL7     | 4.40281 | 3.87492 | 3.57911 | 4.4243  | 5.11669 | 4.74876 | 4.53625 | 4.75869 | 4.51183 |
| CCL11    | 3.88741 | 4.80295 | 4.08341 | 5.5581  | 5.32646 | 4.67332 | 4.05058 | 4.75666 | 4.7033  |
| CCL8     | 4.6111  | 4.10638 | 4.05358 | 4.64188 | 5.34756 | 4.42921 | 4.55216 | 4.57455 | 4.83533 |
| CCL13    | 5.99971 | 6.21069 | 6.52937 | 5.29101 | 6.49375 | 5.61187 | 5.55645 | 5.99955 | 6.26425 |
| TMEM132E | 5.79983 | 5.88155 | 5.81488 | 6.29466 | 6.82329 | 6.54658 | 6.15595 | 6.25696 | 6.52543 |
| ZNF830   | 7.30187 | 7.6033  | 7.5002  | 7.65287 | 6.54855 | 6.98383 | 7.25562 | 6.68161 | 7.21029 |
| FNDC8    | 5.64808 | 5.07665 | 5.23411 | 5.7302  | 6.19531 | 6.1947  | 5.79656 | 5.83137 | 5.9487  |
| UNC45B   | 5.35282 | 5.33068 | 4.96716 | 5.46432 | 5.68709 | 5.46875 | 5.28986 | 5.81233 | 5.51753 |
| SLFN5    | 9.58161 | 9.11244 | 9.45713 | 8.96413 | 6.48419 | 8.45807 | 8.75693 | 8.99888 | 8.77447 |
| C17orf50 | 5.16159 | 5.62231 | 5.73401 | 6.39601 | 6.44457 | 6.93039 | 6.05526 | 5.78577 | 6.26326 |
| CCL18    | 6.71495 | 6.54527 | 7.25313 | 6.58289 | 7.81072 | 7.10389 | 7.28979 | 6.88491 | 7.30191 |
| CCL4     | 4.95469 | 5.16406 | 5.16406 | 5.11777 | 5.52057 | 6.30089 | 5.6167  | 5.20113 | 6.10091 |
| Ccl4l2   | 6.16138 | 5.89595 | 5.93574 | 6.02734 | 6.85149 | 7.77975 | 6.51393 | 7.08482 | 8.38125 |
| GGNBP2   | 9.38379 | 9.53572 | 9.15658 | 8.57904 | 6.88173 | 8.56517 | 9.0536  | 8.60458 | 8.66904 |
| DHRS11   | 7.99664 | 7.61552 | 7.62175 | 8.22633 | 8.28312 | 7.59043 | 8.46794 | 8.79553 | 8.50499 |
| MRM1     | 6.42185 | 6.14064 | 6.5514  | 6.41816 | 6.27651 | 6.32183 | 6.23958 | 6.23561 | 6.415   |
| LHX1     | 5.71621 | 5.95299 | 5.90682 | 6.54783 | 6.69727 | 6.88133 | 6.14318 | 6.42528 | 6.14217 |
| AATF     | 8.73058 | 8.93225 | 8.80754 | 8.69981 | 7.20526 | 8.19116 | 9.0006  | 7.89575 | 8.4121  |
| MIR2909  | 9.39154 | 9.04339 | 9.13832 | 8.54775 | 9.99664 | 8.72909 | 8.5961  | 9.64449 | 9.3683  |
| C17orf78 | 4.28292 | 4.29344 | 4.22319 | 4.36209 | 5.2575  | 4.6755  | 4.33497 | 4.39969 | 4.39914 |
| TADA2A   | 7.89885 | 8.18847 | 8.20384 | 7.32884 | 5.52851 | 6.7343  | 7.63522 | 6.53988 | 7.14366 |
| DUSP14   | 10.7458 | 10.9999 | 10.4139 | 11.6381 | 11.0406 | 11.3992 | 11.7485 | 11.249  | 12.4338 |
| MRPL45   | 10.3279 | 10.6983 | 10.2994 | 10.0914 | 7.45989 | 9.38893 | 10.2884 | 9.56816 | 9.59855 |



|              |         |         |         |         |         |         |         |         |         |
|--------------|---------|---------|---------|---------|---------|---------|---------|---------|---------|
| SOCS7        | 7.92947 | 7.98554 | 7.86462 | 7.94059 | 6.98568 | 7.20513 | 7.85305 | 7.49328 | 7.73347 |
| ARHGAP23     | 7.63219 | 7.49354 | 7.53258 | 7.93693 | 5.76421 | 8.24298 | 8.50307 | 7.93387 | 7.94313 |
| CISD3        | 6.47337 | 6.63077 | 6.94089 | 7.25198 | 6.08708 | 6.83694 | 7.37397 | 6.47797 | 6.52274 |
| MIR4727      | 3.76369 | 3.57503 | 3.87117 | 4.60966 | 4.78539 | 4.1104  | 4.08654 | 4.28444 | 3.42865 |
| LASP1        | 8.66712 | 8.37925 | 8.51042 | 8.82883 | 7.19408 | 8.72414 | 8.56562 | 8.4963  | 8.8996  |
| LINC00672    | 6.18265 | 6.58665 | 6.54299 | 5.96947 | 6.33256 | 5.8762  | 5.89319 | 5.81454 | 6.09195 |
| LOC100131347 | 4.9254  | 4.7781  | 5.25649 | 5.55836 | 5.28674 | 5.34038 | 5.20004 | 5.34012 | 5.1056  |
| RPL19        | 12.2849 | 12.4184 | 12.5919 | 12.1638 | 11.8371 | 12.0327 | 12.4712 | 11.6982 | 12.0381 |
| CDK12        | 8.9561  | 8.92121 | 8.77556 | 7.57817 | 6.46564 | 7.33696 | 7.92926 | 7.31688 | 7.96971 |
| STARD3       | 7.9521  | 7.9479  | 8.0869  | 8.37606 | 7.35697 | 8.20683 | 8.64633 | 8.35106 | 8.44905 |
| TCAP         | 6.51093 | 6.44983 | 6.58859 | 6.80046 | 7.26389 | 6.61996 | 6.08732 | 6.65461 | 6.74994 |
| PNMT         | 5.48752 | 5.58731 | 5.85999 | 6.38681 | 5.98533 | 6.83541 | 6.06895 | 5.96216 | 6.01975 |
| GRB7         | 7.77502 | 7.63609 | 7.42699 | 7.84466 | 6.96569 | 8.25594 | 7.71073 | 8.07721 | 7.81869 |
| IKZF3        | 3.37732 | 3.89151 | 3.38943 | 4.06616 | 3.60732 | 4.4371  | 3.95364 | 3.61236 | 3.47396 |
| ZPBP2        | 4.46951 | 4.59976 | 4.11603 | 4.78366 | 5.27584 | 5.35838 | 4.77596 | 4.53645 | 4.58821 |
| LRRC3C       | 5.50881 | 5.96139 | 6.419   | 6.23155 | 7.01003 | 5.39981 | 5.08355 | 5.4345  | 5.30302 |
| GSDMA        | 11.0422 | 10.6186 | 10.4461 | 10.7955 | 10.3072 | 10.966  | 10.804  | 11.2154 | 11.2206 |
| CSF3         | 6.04724 | 6.00921 | 6.1612  | 6.88827 | 6.77802 | 6.73003 | 6.2776  | 6.88946 | 6.76136 |
| MSL1         | 8.45278 | 8.89346 | 8.29332 | 8.11825 | 6.52555 | 7.91059 | 8.40249 | 7.31275 | 8.18514 |
| CASC3        | 9.27231 | 9.04246 | 9.2862  | 8.82739 | 6.82021 | 8.53911 | 9.13808 | 9.0694  | 8.66852 |
| RAPGEFL1     | 9.58338 | 9.8426  | 9.28521 | 9.32671 | 7.35477 | 8.35117 | 8.91563 | 8.60395 | 8.68702 |
| CDC6         | 5.65625 | 5.57685 | 5.82796 | 5.98461 | 5.133   | 5.66393 | 5.38321 | 5.72999 | 6.09399 |
| IGFBP4       | 10.3066 | 9.33709 | 10.7755 | 9.42382 | 7.76909 | 8.41238 | 9.6956  | 8.64834 | 8.91681 |
| TMEM99       | 5.95278 | 5.61823 | 5.70469 | 6.13179 | 5.31264 | 4.86845 | 6.19509 | 5.35172 | 5.48565 |
| KRTAP4-7     | 2.19676 | 2.76086 | 3.02443 | 3.19987 | 5.43048 | 3.61192 | 3.09391 | 2.89282 | 3.55798 |
| KRTAP4-9     | 2.99501 | 3.55073 | 3.34782 | 4.23923 | 4.4545  | 4.49236 | 3.89481 | 3.92029 | 4.11163 |

|              |         |         |         |         |         |         |         |         |         |
|--------------|---------|---------|---------|---------|---------|---------|---------|---------|---------|
| KRTAP9-1     | 4.86398 | 5.36189 | 4.67701 | 5.02888 | 7.75657 | 3.69649 | 4.9868  | 5.17809 | 4.77818 |
| KRTAP9-2     | 7.09739 | 7.16208 | 7.27501 | 7.65678 | 10.4402 | 7.74235 | 7.27776 | 7.67494 | 7.53758 |
| Krtap9-3     | 3.12239 | 3.13065 | 3.32962 | 3.04535 | 4.13772 | 3.10529 | 3.22358 | 3.02707 | 3.51579 |
| KRTAP9-8     | 5.69399 | 5.53604 | 5.6572  | 6.01401 | 7.17552 | 6.51695 | 6.86197 | 6.58332 | 6.23948 |
| KRTAP9-4     | 6.04614 | 5.81382 | 6.11802 | 5.77831 | 7.89837 | 5.90686 | 5.47411 | 5.94286 | 6.08906 |
| KRTAP9-9     | 2.08717 | 2.66259 | 2.13133 | 2.34052 | 2.32663 | 2.29654 | 2.86801 | 2.38712 | 2.09786 |
| LOC100505782 | 6.36182 | 6.41508 | 6.50474 | 7.07427 | 7.04727 | 6.92243 | 6.84142 | 7.03408 | 6.71025 |
| EIF1         | 11.1998 | 10.6155 | 10.8351 | 11.0103 | 10.9212 | 11.2748 | 11.14   | 11.2126 | 11.3104 |
| GAST         | 6.79774 | 6.75887 | 6.83221 | 7.30949 | 7.64133 | 8.13462 | 7.22076 | 8.02368 | 7.66099 |
| KLHL10       | 5.48758 | 5.32545 | 5.32362 | 5.6155  | 6.7894  | 6.26288 | 5.68909 | 5.90055 | 5.74366 |
| TTC25        | 4.64668 | 4.80996 | 4.9155  | 4.96478 | 4.79645 | 5.43605 | 5.12325 | 5.08016 | 4.94133 |
| NKIRAS2      | 7.63316 | 7.31074 | 7.34618 | 7.52589 | 6.89888 | 7.75697 | 7.5181  | 7.64492 | 7.78009 |
| STAT5A       | 7.18814 | 6.98152 | 7.36138 | 7.39757 | 6.35737 | 7.97007 | 7.43503 | 7.16211 | 7.72256 |
| HSD17B1      | 7.16811 | 7.18113 | 7.04004 | 7.83158 | 7.7945  | 8.35522 | 8.00725 | 7.78807 | 7.58626 |
| COASY        | 8.04287 | 7.55027 | 7.66883 | 8.40568 | 7.13736 | 8.0804  | 8.63122 | 8.12595 | 7.86189 |
| MLX          | 10.097  | 9.83755 | 9.63846 | 9.98041 | 8.73722 | 9.74382 | 10.0057 | 9.44002 | 10.0437 |
| CNTNAP1      | 5.83528 | 5.77214 | 5.8922  | 6.01881 | 5.78011 | 5.8481  | 5.76889 | 5.67527 | 5.98449 |
| RAMP2        | 7.30014 | 7.2345  | 8.67015 | 7.35633 | 6.08034 | 6.6701  | 6.99418 | 6.33543 | 7.46442 |
| VPS25        | 9.24333 | 9.19535 | 9.27791 | 9.88754 | 7.54565 | 9.16937 | 10.0948 | 8.61131 | 9.42583 |
| WNK4         | 4.87588 | 5.04003 | 4.62519 | 5.31105 | 5.79064 | 5.10398 | 5.3729  | 5.31877 | 5.23912 |
| CNTD1        | 5.3289  | 5.29594 | 5.21788 | 5.76334 | 6.21207 | 5.76058 | 5.23343 | 5.11082 | 5.47681 |
| RUNDC1       | 7.0201  | 7.38275 | 6.97327 | 7.33958 | 7.05342 | 7.33514 | 7.41482 | 7.60282 | 7.32292 |
| RPL27        | 10.0249 | 10.4411 | 10.3713 | 10.4292 | 10.168  | 10.3369 | 10.6045 | 10.0656 | 10.1319 |
| IFI35        | 7.02882 | 6.66074 | 6.74659 | 6.89847 | 6.44399 | 6.19122 | 6.68253 | 6.59957 | 6.4111  |
| RND2         | 6.54531 | 6.25951 | 6.28823 | 6.43246 | 6.3089  | 6.58728 | 5.79261 | 5.91121 | 6.15341 |
| NBR2         | 7.21874 | 7.61365 | 7.57486 | 5.85569 | 6.6019  | 5.71326 | 6.6646  | 5.35755 | 6.45488 |

|             |         |         |         |         |         |         |         |         |         |
|-------------|---------|---------|---------|---------|---------|---------|---------|---------|---------|
| NBR1        | 9.3058  | 9.34754 | 9.07384 | 8.5478  | 6.43224 | 7.93127 | 8.8217  | 8.31919 | 8.07723 |
| TMEM106A    | 7.08568 | 6.95792 | 7.09701 | 6.7136  | 6.59018 | 6.50919 | 6.33679 | 6.42212 | 6.8599  |
| ARL4D       | 7.61961 | 8.54051 | 8.06389 | 9.58778 | 7.45693 | 8.92704 | 9.76563 | 8.40662 | 8.56412 |
| MIR2117     | 9.16198 | 5.5484  | 5.55239 | 5.98407 | 6.61518 | 5.92159 | 5.70633 | 5.79789 | 5.8008  |
| DHX8        | 8.79384 | 8.54168 | 8.66298 | 7.89486 | 7.09085 | 8.13507 | 8.54046 | 8.20962 | 8.21304 |
| CD300LG     | 6.30711 | 6.59368 | 6.50504 | 6.95796 | 7.58152 | 7.15553 | 6.18931 | 7.25103 | 6.98255 |
| NAGS        | 6.32558 | 6.43634 | 6.49823 | 7.78969 | 7.49762 | 9.31225 | 8.26805 | 7.93216 | 8.12023 |
| c17orf53    | 6.16521 | 6.10301 | 6.07625 | 6.53021 | 6.4198  | 6.1474  | 6.39408 | 6.29323 | 6.10251 |
| ASB16       | 6.42666 | 6.53468 | 6.67071 | 6.78853 | 7.00833 | 6.90325 | 7.07253 | 6.84911 | 6.93093 |
| TMUB2       | 8.03244 | 7.34259 | 7.85715 | 8.09342 | 6.89971 | 7.67913 | 8.04302 | 7.47846 | 7.70527 |
| RUNDC3A     | 7.79356 | 7.38996 | 7.2588  | 8.00498 | 7.06611 | 8.7979  | 8.41379 | 8.60326 | 8.68949 |
| GRN         | 11.2381 | 10.4821 | 10.7397 | 11.7393 | 9.7046  | 11.0448 | 12.0951 | 11.0712 | 11.5211 |
| FZD2        | 5.74548 | 5.3737  | 5.71252 | 6.29201 | 5.99645 | 6.02806 | 5.75486 | 5.7701  | 5.61693 |
| MEIOC       | 3.8521  | 4.11576 | 3.93997 | 4.0457  | 4.5747  | 4.54479 | 4.17728 | 4.31588 | 4.16635 |
| DBF4B       | 6.28067 | 6.26173 | 6.29389 | 6.33175 | 6.28762 | 6.42364 | 5.7689  | 6.11223 | 6.2158  |
| ADAM11      | 5.78754 | 5.95321 | 5.8673  | 6.66313 | 6.46132 | 6.52712 | 5.95092 | 6.36977 | 6.41263 |
| NMT1        | 9.04154 | 8.72442 | 8.77351 | 8.82838 | 7.32103 | 8.1164  | 8.92548 | 8.3812  | 8.66456 |
| ACBD4       | 6.08366 | 6.41926 | 5.7568  | 6.28344 | 6.21717 | 6.13153 | 5.99078 | 5.86396 | 5.79199 |
| HEXIM1      | 8.43947 | 8.06023 | 7.84703 | 7.99859 | 6.81748 | 7.92772 | 8.55049 | 8.06309 | 7.4765  |
| HEXIM2      | 5.48804 | 5.59116 | 5.58259 | 6.06821 | 5.80956 | 6.30861 | 5.77024 | 5.95199 | 5.86089 |
| FMNL1       | 6.43847 | 6.26707 | 6.50298 | 6.61004 | 6.27076 | 6.73618 | 6.76582 | 6.43342 | 6.33199 |
| MAP3K14-AS1 | 6.53852 | 6.7368  | 6.63432 | 7.14403 | 7.33248 | 7.24313 | 6.77668 | 7.08889 | 7.13482 |
| ARL17A      | 8.97201 | 8.5037  | 8.59345 | 7.81052 | 8.91307 | 8.22496 | 7.45259 | 7.36055 | 8.03717 |
| CRHR1-IT1   | 7.84943 | 7.85206 | 7.37159 | 7.84421 | 8.154   | 8.74296 | 7.9667  | 8.08632 | 8.22003 |
| SPPL2C      | 4.88493 | 5.03116 | 4.82522 | 4.95777 | 6.72035 | 5.4785  | 5.12104 | 5.12649 | 5.19439 |
| MAPT        | 6.47404 | 6.7775  | 6.41014 | 6.52622 | 6.41543 | 7.1878  | 6.5431  | 6.6819  | 6.67817 |

|            |         |         |         |         |         |         |         |         |         |
|------------|---------|---------|---------|---------|---------|---------|---------|---------|---------|
| MAPT-IT1   | 5.6819  | 6.35596 | 5.63428 | 5.82342 | 6.47569 | 6.32928 | 5.17017 | 5.79642 | 5.684   |
| STH        | 5.05871 | 5.24857 | 5.89818 | 5.84003 | 6.11043 | 6.76834 | 5.61197 | 6.032   | 5.7905  |
| KANSL1-AS1 | 5.81984 | 5.62217 | 5.69489 | 5.55439 | 5.31431 | 5.72424 | 5.97423 | 5.6179  | 5.91077 |
| NSFP1      | 10.5149 | 9.85676 | 9.98975 | 10.7365 | 8.51507 | 10.0966 | 9.88442 | 10.8571 | 10.6195 |
| NSF        | 9.12998 | 8.84223 | 8.97623 | 8.98213 | 7.09315 | 9.10493 | 8.97475 | 9.33309 | 9.10648 |
| GOSR2      | 8.36939 | 8.65885 | 8.59964 | 8.00882 | 6.78244 | 8.30485 | 8.80109 | 8.51749 | 8.88022 |
| CDC27      | 5.22578 | 3.93186 | 4.67002 | 3.18378 | 4.42029 | 3.48975 | 2.61629 | 4.50237 | 3.97812 |
| NPEPPS     | 9.55272 | 9.4287  | 9.33529 | 9.40655 | 7.83844 | 10.1173 | 9.41821 | 10.1765 | 10.4018 |
| KPNB1      | 10.3026 | 10.5709 | 10.5427 | 10.2482 | 7.75097 | 10.3694 | 10.5009 | 10.3983 | 10.4352 |
| TBKBP1     | 6.7081  | 6.494   | 6.79399 | 7.67343 | 7.47177 | 7.53509 | 7.29366 | 7.26448 | 6.81927 |
| TBX21      | 6.29976 | 6.20773 | 6.52171 | 7.19973 | 6.40552 | 6.96958 | 6.76604 | 7.18642 | 6.97071 |
| LRRC46     | 4.64882 | 4.50022 | 4.81916 | 5.25267 | 6.49063 | 4.98516 | 5.11563 | 4.99994 | 4.73675 |
| SP2        | 7.91765 | 7.72776 | 8.03864 | 7.34185 | 6.95777 | 7.61585 | 8.00199 | 8.08322 | 7.91914 |
| PNPO       | 8.37292 | 7.77617 | 8.27467 | 7.73669 | 6.35569 | 7.34042 | 8.38759 | 7.32426 | 7.79476 |
| CDK5RAP3   | 7.94394 | 7.80441 | 7.50134 | 7.57625 | 7.03604 | 7.64302 | 7.66019 | 7.61095 | 7.46147 |
| NFE2L1     | 9.39931 | 9.41522 | 9.40749 | 9.42461 | 6.93869 | 9.19476 | 9.59472 | 9.23765 | 9.58031 |
| SNX11      | 7.6232  | 7.47982 | 7.47392 | 7.78178 | 6.66154 | 8.15313 | 8.30826 | 7.72906 | 8.2712  |
| HOXB-AS3   | 5.36876 | 5.28031 | 5.37936 | 5.97094 | 6.19471 | 6.12796 | 5.65253 | 5.84921 | 6.06513 |
| CALCOCO2   | 8.39763 | 8.31565 | 8.56406 | 7.3118  | 6.48147 | 7.71249 | 7.78731 | 8.20473 | 8.01741 |
| UBE2Z      | 9.02219 | 8.55318 | 8.89161 | 8.76003 | 5.69975 | 7.80565 | 8.91429 | 8.14943 | 8.79428 |
| IGF2BP1    | 5.06845 | 5.19988 | 5.1175  | 5.7899  | 6.28632 | 5.98149 | 5.48664 | 5.62403 | 5.62377 |
| FLJ40194   | 4.70809 | 5.27683 | 5.06718 | 5.27491 | 5.7123  | 5.57003 | 5.32024 | 5.39968 | 5.58314 |
| NGFR       | 6.19529 | 6.44975 | 6.66995 | 6.85682 | 6.10751 | 7.01188 | 6.92852 | 6.84336 | 6.72826 |
| NXPH3      | 6.61352 | 6.58528 | 6.91288 | 6.9455  | 7.63293 | 7.01756 | 6.58475 | 6.87879 | 6.84271 |
| KAT7       | 8.87473 | 8.8636  | 8.85855 | 7.37664 | 5.84796 | 6.70843 | 7.82239 | 6.607   | 7.1265  |
| FLJ45513   | 6.99345 | 6.69957 | 7.28956 | 5.67757 | 6.12119 | 6.14914 | 5.22359 | 6.08326 | 5.93945 |

|           |         |         |         |         |         |         |         |         |         |
|-----------|---------|---------|---------|---------|---------|---------|---------|---------|---------|
| DLX4      | 5.97864 | 6.7969  | 6.30268 | 6.86826 | 7.08424 | 7.08036 | 6.77988 | 6.9446  | 6.7201  |
| TMEM92    | 6.0518  | 5.99547 | 5.83517 | 6.44061 | 7.04332 | 6.69548 | 5.94485 | 6.71544 | 6.49115 |
| XYLT2     | 7.55058 | 7.49144 | 7.33571 | 6.98753 | 5.9218  | 6.96489 | 7.42407 | 7.38244 | 6.9723  |
| EME1      | 5.94135 | 5.54873 | 5.80857 | 6.21938 | 6.11693 | 5.92757 | 5.86058 | 5.8788  | 5.91906 |
| ACSF2     | 6.15496 | 6.51499 | 6.28387 | 5.99331 | 5.51744 | 5.64344 | 5.975   | 5.5674  | 5.48713 |
| RSAD1     | 6.8588  | 7.16763 | 6.9714  | 7.19627 | 6.79696 | 7.146   | 7.03859 | 7.44038 | 6.869   |
| mycbpap   | 5.58033 | 5.49142 | 5.42898 | 5.88238 | 5.8204  | 6.1777  | 5.81172 | 6.0144  | 6.1481  |
| EPN3      | 8.46934 | 8.10949 | 7.96598 | 9.28222 | 7.54725 | 9.28692 | 9.43277 | 9.50653 | 9.61215 |
| SPATA20   | 6.74185 | 6.92231 | 7.17092 | 7.15984 | 7.06011 | 6.82454 | 7.22638 | 6.75167 | 6.86805 |
| LUC7L3    | 8.71791 | 9.41882 | 8.83909 | 7.74877 | 5.20031 | 6.42377 | 7.11143 | 8.32119 | 7.52481 |
| TOB1-AS1  | 7.32674 | 6.76594 | 6.647   | 7.40631 | 7.2733  | 6.43126 | 6.90597 | 7.55035 | 7.30607 |
| NME1-NME2 | 7.32688 | 7.52267 | 7.49343 | 8.53535 | 7.65938 | 8.23699 | 8.46063 | 7.61081 | 7.84252 |
| UTP18     | 7.7143  | 7.67227 | 7.54839 | 7.45984 | 5.40983 | 6.83398 | 7.8431  | 7.70992 | 6.98226 |
| C17orf112 | 2.90132 | 3.17178 | 3.19254 | 3.27832 | 4.50728 | 4.31523 | 3.45176 | 3.32674 | 3.40923 |
| KIF2B     | 5.79851 | 5.952   | 5.86168 | 6.53447 | 6.9554  | 6.95391 | 6.51731 | 6.923   | 6.59404 |
| TOM1L1    | 10.7059 | 10.6138 | 10.5624 | 9.86345 | 8.94508 | 10.186  | 10.6706 | 10.3031 | 10.5406 |
| STXBP4    | 7.04102 | 7.08693 | 7.3229  | 5.86503 | 4.85148 | 5.40014 | 6.03598 | 5.33642 | 5.75255 |
| HLF       | 8.79942 | 9.27209 | 9.00563 | 7.00059 | 7.63285 | 7.12005 | 7.83797 | 6.99847 | 6.67991 |
| PCTP      | 7.79718 | 7.36156 | 7.9146  | 7.95154 | 6.24168 | 7.08708 | 7.8796  | 7.68594 | 7.59103 |
| ANKFN1    | 6.11947 | 6.20733 | 5.66045 | 5.21361 | 5.36733 | 5.08149 | 4.77046 | 4.96651 | 5.19745 |
| NOG       | 5.57242 | 6.10024 | 6.08121 | 6.51744 | 6.47308 | 6.60718 | 6.06585 | 6.15573 | 6.19166 |
| SCPEP1    | 8.76866 | 9.26425 | 9.23111 | 7.73923 | 6.5082  | 7.05924 | 8.19617 | 7.18481 | 6.15362 |
| RNF126P1  | 5.42158 | 5.83789 | 5.83933 | 6.27272 | 7.00455 | 6.8797  | 6.56524 | 6.79841 | 6.54963 |
| AKAP1     | 8.1574  | 8.42693 | 8.50193 | 7.80182 | 6.51565 | 6.9031  | 7.90115 | 7.34091 | 7.21786 |
| MSI2      | 7.6393  | 7.6828  | 7.63024 | 6.85894 | 6.72441 | 6.11115 | 7.02526 | 6.41039 | 6.41129 |
| MSX2P1    | 5.93929 | 6.28959 | 5.68859 | 6.2504  | 6.30698 | 6.31623 | 5.72841 | 5.81732 | 5.70238 |

|             |         |         |         |         |         |         |         |         |         |
|-------------|---------|---------|---------|---------|---------|---------|---------|---------|---------|
| EPX         | 5.315   | 5.51611 | 5.35234 | 5.63042 | 5.56325 | 5.44231 | 5.09273 | 5.55246 | 5.47947 |
| LPO         | 4.95909 | 5.09177 | 5.2673  | 5.48565 | 5.71757 | 5.87998 | 5.77418 | 5.71687 | 5.61686 |
| TSPOAP1-AS1 | 5.61313 | 5.69775 | 5.73529 | 6.06113 | 5.80143 | 6.3053  | 5.75044 | 5.95545 | 5.85539 |
| RAD51C      | 6.50387 | 6.23155 | 6.63431 | 6.1818  | 5.13819 | 5.37368 | 6.19593 | 5.80115 | 5.44124 |
| PRR11       | 7.78407 | 6.81137 | 6.62495 | 7.92959 | 5.72612 | 6.72808 | 7.34046 | 7.57498 | 7.02823 |
| GDPD1       | 7.11156 | 7.74621 | 6.85386 | 5.98358 | 5.90658 | 6.40312 | 5.99508 | 6.76129 | 6.28659 |
| YPEL2       | 7.8224  | 8.06542 | 7.90002 | 6.86545 | 6.79518 | 8.21305 | 8.1345  | 8.65221 | 7.55248 |
| MIR4729     | 4.6976  | 4.57204 | 4.70316 | 4.7993  | 4.68522 | 4.32282 | 4.39762 | 4.93148 | 4.74817 |
| DHX40       | 8.22814 | 8.1193  | 7.93456 | 7.44975 | 6.36661 | 8.49891 | 7.78569 | 7.91903 | 6.60017 |
| VMP1        | 11.6244 | 11.0145 | 11.475  | 11.4466 | 10.1096 | 11.0443 | 11.2125 | 11.5681 | 11.3668 |
| MIR21       | 9.34161 | 7.78654 | 7.03098 | 10.2689 | 7.79602 | 8.69902 | 8.51167 | 11.316  | 10.6827 |
| CA4         | 5.91402 | 5.86579 | 5.97582 | 6.4146  | 6.7487  | 6.62979 | 6.44912 | 6.43119 | 6.31113 |
| C17orf64    | 4.94017 | 4.94133 | 4.7168  | 5.17304 | 5.13715 | 5.25793 | 4.92915 | 4.90897 | 4.94479 |
| BCAS3       | 9.87732 | 10.0037 | 9.39682 | 8.51642 | 7.32377 | 8.03494 | 9.07005 | 8.36805 | 8.45778 |
| TBX2        | 6.71447 | 6.73038 | 6.85508 | 7.34531 | 7.07724 | 7.10576 | 6.97014 | 6.88029 | 6.87201 |
| TBX4        | 6.14729 | 6.44755 | 6.13865 | 6.49371 | 6.51385 | 6.11063 | 6.77411 | 6.555   | 6.60772 |
| EFCAB3      | 4.23419 | 4.91756 | 4.52193 | 4.8239  | 5.42537 | 4.93691 | 4.72319 | 4.63318 | 4.51205 |
| mettl2a     | 8.40167 | 8.5507  | 8.24952 | 7.18031 | 6.08144 | 6.88554 | 8.24767 | 7.59413 | 7.77931 |
| TLK2        | 8.45348 | 8.5777  | 8.40215 | 7.25244 | 5.68497 | 7.70347 | 8.08231 | 7.50501 | 7.63081 |
| MIR633      | 2.07372 | 2.16727 | 1.90844 | 2.40168 | 1.90146 | 2.47786 | 2.33115 | 2.09266 | 2.41451 |
| ACE         | 6.57133 | 6.15863 | 6.5054  | 6.42648 | 6.84854 | 6.56925 | 6.20296 | 6.61629 | 6.61997 |
| DCAF7       | 8.61491 | 8.17344 | 8.51045 | 8.57998 | 6.692   | 7.622   | 8.79053 | 7.8812  | 8.15952 |
| taco1       | 6.92619 | 6.94695 | 6.91992 | 7.02269 | 6.21801 | 6.92638 | 7.78575 | 6.8914  | 6.76445 |
| MAP3K3      | 7.94537 | 7.71033 | 8.0052  | 7.17666 | 6.09999 | 6.99041 | 7.79054 | 7.41448 | 7.6114  |
| DDX42       | 8.54691 | 8.96038 | 8.71252 | 8.0955  | 6.12988 | 7.80391 | 8.4051  | 8.87365 | 8.03096 |
| PRR29       | 6.05123 | 6.01074 | 6.23625 | 6.5851  | 6.8875  | 6.84308 | 6.11992 | 6.35123 | 6.16803 |

|           |         |         |         |         |         |         |         |         |         |
|-----------|---------|---------|---------|---------|---------|---------|---------|---------|---------|
| CEP95     | 8.98448 | 9.33163 | 9.17206 | 7.73972 | 6.17949 | 7.06601 | 8.15571 | 8.1626  | 7.82553 |
| RGS9      | 5.54635 | 6.24316 | 5.71528 | 6.06919 | 6.58088 | 5.95796 | 5.99334 | 6.00667 | 6.14501 |
| MIR634    | 5.74223 | 5.76995 | 5.58327 | 5.43421 | 6.33206 | 4.65114 | 4.8334  | 5.24568 | 4.87396 |
| NOL11     | 8.97724 | 8.87676 | 9.22965 | 8.49968 | 5.27129 | 7.77861 | 9.1634  | 7.50391 | 8.23135 |
| BPTF      | 10.3002 | 10.4011 | 10.2524 | 9.02474 | 7.29872 | 8.59181 | 9.20571 | 8.72663 | 9.39697 |
| LINC00674 | 7.83758 | 7.09956 | 7.60111 | 6.97553 | 7.25168 | 6.92864 | 6.86507 | 7.74285 | 7.36691 |
| LOC440461 | 5.56712 | 5.63068 | 5.23963 | 5.67439 | 6.44095 | 5.79353 | 5.62308 | 5.84713 | 5.62641 |
| AMZ2      | 9.70161 | 9.61274 | 9.51827 | 9.84888 | 8.10935 | 8.72951 | 9.73303 | 8.59199 | 8.768   |
| ARSG      | 8.06235 | 8.26666 | 8.29117 | 6.50363 | 6.68901 | 6.14669 | 6.57432 | 6.18354 | 6.26763 |
| MAP2K6    | 6.57167 | 6.59339 | 6.22124 | 5.20933 | 5.43857 | 5.24784 | 5.44454 | 4.49056 | 4.50817 |
| SOX9      | 8.48959 | 8.14683 | 8.68113 | 9.50676 | 7.88076 | 9.58864 | 9.27867 | 9.83985 | 9.25539 |
| SSTR2     | 5.88384 | 5.5289  | 5.55453 | 5.72173 | 6.35273 | 5.95053 | 5.98273 | 5.88351 | 5.63891 |
| COG1      | 8.64573 | 8.7744  | 8.84394 | 8.26466 | 6.14304 | 7.11561 | 8.49392 | 7.50764 | 7.81629 |
| c17orf80  | 6.61017 | 6.91019 | 6.57509 | 6.31426 | 5.88303 | 5.7219  | 6.21042 | 5.72735 | 5.91017 |
| LOC400620 | 5.04263 | 4.8593  | 5.13889 | 5.66381 | 5.95971 | 5.4596  | 5.25225 | 5.28982 | 5.07234 |
| RPL38     | 6.82088 | 6.86775 | 6.97192 | 6.92151 | 6.88178 | 6.96807 | 7.11529 | 6.67896 | 6.74613 |
| TTYH2     | 6.33618 | 6.3903  | 6.40981 | 6.46637 | 6.47581 | 6.35944 | 6.19722 | 6.23831 | 6.29058 |
| KIF19     | 6.26014 | 6.51982 | 6.35528 | 6.92304 | 7.00515 | 6.94232 | 6.89247 | 6.72378 | 6.7105  |
| gpr142    | 5.76698 | 5.96997 | 5.99249 | 6.31888 | 6.53007 | 6.4237  | 5.82417 | 6.26229 | 6.40646 |
| CD300A    | 5.40169 | 5.65055 | 5.64633 | 6.10129 | 6.17923 | 6.2911  | 6.1411  | 6.10141 | 5.89645 |
| C17orf77  | 4.84094 | 5.02665 | 4.82734 | 5.85092 | 5.97183 | 5.29195 | 5.2878  | 5.28896 | 5.21213 |
| TMEM104   | 7.25689 | 7.2967  | 7.23276 | 7.48695 | 6.93053 | 7.20859 | 7.89974 | 7.37127 | 7.27824 |
| OTOP2     | 6.66199 | 6.41698 | 6.29479 | 7.54049 | 7.33022 | 7.13105 | 7.1488  | 6.87239 | 7.13502 |
| OTOP3     | 7.60873 | 8.99324 | 7.92333 | 8.64224 | 6.72275 | 7.84463 | 8.30963 | 7.62151 | 8.61934 |
| CDR2L     | 7.20772 | 7.00814 | 7.04463 | 7.66559 | 6.68579 | 7.71514 | 7.46088 | 7.82084 | 7.24145 |
| MRPL58    | 8.99126 | 8.75348 | 8.96231 | 9.04302 | 7.07952 | 8.60342 | 9.64833 | 7.88305 | 8.6797  |

|              |         |         |         |         |         |         |         |         |         |
|--------------|---------|---------|---------|---------|---------|---------|---------|---------|---------|
| KCTD2        | 8.60759 | 8.55121 | 8.36051 | 8.36551 | 6.76803 | 7.27085 | 8.46904 | 7.41073 | 7.84936 |
| ARMC7        | 6.33052 | 6.60088 | 6.39297 | 6.5621  | 6.59753 | 6.71637 | 7.03549 | 6.74763 | 6.82487 |
| NUP85        | 8.46072 | 8.33019 | 8.32764 | 8.00239 | 6.51325 | 7.17179 | 8.00988 | 7.5898  | 7.69558 |
| MRPS7        | 8.72448 | 8.23232 | 8.79654 | 9.00918 | 7.57899 | 8.92121 | 9.01187 | 8.85617 | 9.50197 |
| LOC100287042 | 5.82431 | 5.93585 | 5.93427 | 6.10483 | 6.31375 | 6.86945 | 6.12955 | 6.61177 | 6.31298 |
| MIR3678      | 3.64416 | 3.92302 | 3.90492 | 3.6335  | 3.67878 | 3.93769 | 3.73621 | 3.75784 | 3.88871 |
| TMEM94       | 7.98646 | 7.61524 | 7.86659 | 7.75635 | 7.50656 | 7.27438 | 7.84454 | 7.30847 | 7.53813 |
| TSEN54       | 7.73433 | 7.57892 | 7.31284 | 7.90338 | 7.35958 | 7.63829 | 8.34699 | 8.08534 | 7.66042 |
| LLGL2        | 8.16124 | 7.85259 | 7.95037 | 8.1815  | 6.84717 | 8.92823 | 8.55865 | 9.33344 | 9.06309 |
| MYO15B       | 7.35073 | 6.96184 | 6.97149 | 6.67776 | 6.96558 | 6.75373 | 6.59247 | 6.86931 | 6.91498 |
| SMIM5        | 5.9556  | 6.13721 | 5.6365  | 5.89734 | 5.88183 | 6.77628 | 6.60287 | 5.91986 | 6.02857 |
| SMIM6        | 5.27616 | 5.36037 | 5.39753 | 5.405   | 6.14793 | 5.9423  | 5.85478 | 6.1348  | 5.57836 |
| SAP30BP      | 7.76645 | 7.83646 | 7.76607 | 8.37571 | 6.74691 | 8.98376 | 8.71194 | 8.41211 | 8.69066 |
| UNK          | 8.34747 | 8.36677 | 8.31923 | 7.69845 | 6.08221 | 8.54993 | 8.27345 | 7.11195 | 7.52876 |
| TEN1-CDK3    | 6.74633 | 6.84542 | 6.45007 | 6.7301  | 6.2382  | 6.91955 | 6.89478 | 6.70051 | 6.91653 |
| GALR2        | 6.49537 | 6.62323 | 6.28388 | 6.20472 | 6.92357 | 6.89044 | 6.3781  | 6.33856 | 6.69256 |
| ZACN         | 6.30699 | 6.31744 | 6.37373 | 6.81652 | 7.00896 | 7.06739 | 6.72792 | 6.91236 | 6.99568 |
| RNF157-AS1   | 5.06108 | 5.08499 | 4.96559 | 5.59862 | 5.21096 | 5.45019 | 5.00262 | 5.37499 | 5.48408 |
| SPHK1        | 7.02813 | 6.82789 | 6.83277 | 8.5393  | 6.96917 | 9.35787 | 8.84461 | 9.05199 | 8.94575 |
| AANAT        | 5.41222 | 5.41063 | 5.5507  | 5.98371 | 5.69798 | 6.34209 | 5.82793 | 6.25567 | 5.98859 |
| PRCD         | 5.82347 | 5.84939 | 5.99617 | 6.95209 | 7.1084  | 7.31971 | 6.39744 | 6.85398 | 6.86073 |
| SNHG16       | 9.84272 | 9.73907 | 10.2644 | 9.58871 | 8.14314 | 9.01941 | 10.0361 | 9.25993 | 9.77874 |
| METTL23      | 7.42175 | 7.03651 | 7.42472 | 6.94365 | 5.19694 | 7.13392 | 7.54618 | 6.86614 | 6.75037 |
| MFSD11       | 8.47885 | 8.15702 | 8.29415 | 8.25023 | 6.27872 | 7.75931 | 8.61102 | 7.72209 | 8.15919 |
| SNHG20       | 7.09377 | 7.27367 | 7.25238 | 7.33748 | 6.74691 | 7.70084 | 7.23476 | 7.57125 | 7.59405 |
| 44448        | 8.12649 | 7.97989 | 8.18404 | 8.99774 | 6.9773  | 9.46527 | 9.42128 | 9.29586 | 9.45289 |



|              |         |         |         |         |         |         |         |         |         |
|--------------|---------|---------|---------|---------|---------|---------|---------|---------|---------|
| LOC100507351 | 5.90187 | 5.79458 | 5.86238 | 5.80126 | 6.23004 | 5.44844 | 5.46885 | 5.34504 | 5.19237 |
| TNRC6C       | 7.60426 | 7.47821 | 7.87613 | 6.56176 | 6.27792 | 6.56059 | 6.95285 | 6.25924 | 6.61215 |
| tmc8         | 6.10532 | 6.0315  | 6.23869 | 6.40935 | 6.31507 | 6.60745 | 6.51638 | 6.44571 | 6.12403 |
| C17orf99     | 6.23826 | 6.11952 | 6.03652 | 6.65076 | 7.10832 | 6.26533 | 6.43587 | 6.49891 | 6.77663 |
| SYNGR2       | 10.0211 | 9.83848 | 9.9451  | 10.9223 | 9.35643 | 10.3487 | 11.2009 | 9.56532 | 10.2973 |
| AFMID        | 6.39613 | 6.06288 | 6.13104 | 6.39961 | 6.21801 | 5.96346 | 6.29097 | 6.08784 | 5.90766 |
| BIRC5        | 6.00491 | 5.59041 | 5.67694 | 6.67084 | 5.46564 | 6.61928 | 6.49938 | 6.68081 | 6.2594  |
| TMEM235      | 5.60098 | 5.73108 | 5.61745 | 6.07473 | 6.68659 | 6.11811 | 5.90421 | 6.11528 | 6.02845 |
| PGS1         | 7.81381 | 7.90241 | 7.90709 | 7.67124 | 6.40543 | 7.80295 | 8.36016 | 8.42319 | 8.29058 |
| C1QTNF1      | 7.0499  | 6.67215 | 7.27459 | 7.35152 | 6.80652 | 6.67533 | 7.16729 | 6.97909 | 7.22388 |
| ENGASE       | 6.91644 | 7.04201 | 7.23794 | 6.9518  | 6.72776 | 6.94587 | 6.97322 | 6.97528 | 6.74638 |
| ENPP7        | 5.36959 | 5.60649 | 5.75564 | 6.44799 | 6.30117 | 6.48309 | 5.9653  | 6.38241 | 6.22824 |
| CBX2         | 6.79601 | 6.62336 | 6.66484 | 7.53038 | 6.86529 | 7.55208 | 7.44141 | 6.8881  | 6.6719  |
| CCDC40       | 5.7142  | 5.45199 | 5.96141 | 6.09844 | 6.08793 | 6.5574  | 6.35522 | 6.14652 | 6.0589  |
| RNF213       | 9.03176 | 8.57091 | 8.36259 | 7.71174 | 6.78458 | 7.41323 | 7.74848 | 8.14297 | 7.72503 |
| ENDOV        | 6.56129 | 7.04477 | 6.74617 | 6.62048 | 6.32724 | 6.62027 | 6.72225 | 6.51187 | 6.64376 |
| MIR4730      | 6.43196 | 6.53429 | 6.78206 | 6.67204 | 6.84154 | 6.29212 | 5.84426 | 6.53259 | 6.23685 |
| CHMP6        | 7.40662 | 7.20868 | 7.20172 | 7.71213 | 6.54421 | 8.17978 | 8.62589 | 7.57602 | 7.96812 |
| BAIAP2       | 7.78431 | 7.80511 | 8.31482 | 8.46869 | 7.80332 | 9.2384  | 8.93956 | 9.26528 | 8.88621 |
| MIR338       | 6.70351 | 6.56693 | 6.86799 | 7.05778 | 7.0857  | 7.21475 | 6.84798 | 7.21597 | 7.04881 |
| AATK-AS1     | 6.21499 | 6.09378 | 5.85342 | 6.51158 | 6.62698 | 6.66316 | 6.20548 | 6.63356 | 6.42107 |
| ndufaf8      | 6.07165 | 6.31433 | 6.14257 | 6.81639 | 4.62047 | 6.45252 | 7.55678 | 5.29044 | 6.00981 |
| BAHCC1       | 6.44737 | 6.31387 | 6.49378 | 6.28482 | 6.07585 | 6.48537 | 6.43212 | 6.40235 | 6.46446 |
| TSPAN10      | 6.74074 | 6.34325 | 6.33315 | 6.58316 | 6.72596 | 7.02207 | 7.11329 | 7.01313 | 6.832   |
| CCDC137      | 6.82977 | 6.46186 | 6.73076 | 6.81995 | 6.46772 | 7.11627 | 7.52943 | 6.92531 | 6.77803 |
| HGS          | 8.57079 | 8.29895 | 8.36882 | 9.27234 | 6.92008 | 9.40986 | 9.44754 | 8.91914 | 9.318   |

|          |         |         |         |         |         |         |         |         |         |
|----------|---------|---------|---------|---------|---------|---------|---------|---------|---------|
| GCGR     | 5.7702  | 6.10251 | 5.48761 | 6.08266 | 6.24683 | 6.49759 | 6.11125 | 6.2294  | 6.0854  |
| ANAPC11  | 6.75685 | 6.72162 | 6.8274  | 8.09405 | 6.66299 | 8.29096 | 8.32769 | 7.87236 | 7.7093  |
| NPB      | 5.75972 | 5.96215 | 5.90521 | 6.65424 | 5.76131 | 7.05231 | 6.8106  | 7.08129 | 6.48525 |
| MAFG-AS1 | 6.12887 | 6.07655 | 6.07042 | 6.5702  | 6.40003 | 6.64478 | 6.19461 | 6.79315 | 6.33482 |
| LRRC45   | 6.34062 | 6.11572 | 6.30765 | 7.3836  | 6.01072 | 7.40902 | 6.9201  | 6.9645  | 7.05346 |
| GPS1     | 8.40979 | 8.15173 | 8.3877  | 8.86607 | 7.83    | 8.40595 | 8.98508 | 8.37853 | 8.45641 |
| TEX19    | 5.75751 | 6.14761 | 5.95023 | 6.02833 | 7.03537 | 6.19749 | 6.08053 | 6.19902 | 5.96716 |
| UTS2R    | 6.28009 | 6.80187 | 6.51723 | 7.79868 | 7.82435 | 7.81889 | 7.38355 | 7.32106 | 7.71301 |
| NARF     | 8.2781  | 7.75764 | 7.86162 | 7.91984 | 7.60643 | 8.01018 | 8.03762 | 8.16298 | 8.09711 |
| FOXK2    | 8.36261 | 7.73719 | 8.00345 | 7.97448 | 6.85824 | 8.00306 | 8.14139 | 8.08383 | 8.06307 |
| FN3KRP   | 7.6374  | 7.6619  | 7.62779 | 8.00481 | 6.94899 | 7.54835 | 8.20903 | 7.67223 | 7.31647 |
| FN3K     | 6.20944 | 6.06866 | 5.90304 | 6.25895 | 6.29085 | 6.40259 | 6.00564 | 6.1919  | 6.14712 |
| TBCD     | 8.38224 | 8.11957 | 8.47692 | 8.32808 | 7.13069 | 8.26066 | 8.47927 | 8.06655 | 8.04936 |
| RPH3AL   | 6.31798 | 6.8144  | 6.42182 | 6.66954 | 6.68006 | 6.96441 | 6.65419 | 6.73819 | 6.64083 |
| VPS53    | 10.4836 | 10.161  | 10.2118 | 9.46057 | 8.15782 | 9.60424 | 9.85202 | 10.0719 | 9.94161 |
| GEMIN4   | 7.2599  | 7.39611 | 6.9543  | 7.25791 | 6.75964 | 6.87829 | 7.48944 | 6.81863 | 7.00745 |
| GLOD4    | 7.39998 | 7.1747  | 7.25959 | 7.36902 | 5.82875 | 7.27886 | 7.591   | 6.95595 | 6.94564 |
| NXN      | 8.27866 | 8.15193 | 8.04413 | 9.0572  | 8.38489 | 9.84072 | 9.74151 | 10.0607 | 9.3466  |
| ABR      | 8.71775 | 8.73763 | 8.43909 | 9.14155 | 7.98174 | 9.47009 | 9.47903 | 9.01026 | 9.57633 |
| MIR3183  | 6.18703 | 6.38776 | 6.41521 | 6.87719 | 5.93331 | 6.78046 | 6.83294 | 7.08287 | 6.84809 |
| CRK      | 8.50374 | 8.10221 | 8.57359 | 8.53587 | 5.89756 | 8.6899  | 9.02846 | 9.07568 | 9.00074 |
| MYO1C    | 9.8818  | 9.32661 | 9.74146 | 10.2713 | 7.81838 | 10.2833 | 10.6537 | 9.93552 | 10.457  |
| INPP5K   | 8.05926 | 7.95974 | 7.55812 | 7.68846 | 7.28161 | 7.08085 | 7.92355 | 7.99993 | 7.59005 |
| rilp     | 6.32199 | 6.2837  | 6.55424 | 6.9625  | 6.5278  | 7.20506 | 7.42284 | 6.47818 | 6.80543 |
| PRPF8    | 10.7832 | 10.6408 | 10.9087 | 10.2216 | 7.25884 | 9.2518  | 10.2896 | 9.81384 | 10.2227 |
| TLCD2    | 7.15732 | 6.99546 | 6.78847 | 6.66471 | 6.90786 | 7.47202 | 7.44463 | 7.43872 | 7.38196 |

|         |         |         |         |         |         |         |         |         |         |
|---------|---------|---------|---------|---------|---------|---------|---------|---------|---------|
| Mir22hg | 7.8224  | 7.64086 | 7.69815 | 7.83302 | 6.41492 | 7.02981 | 8.34273 | 7.45764 | 8.53343 |
| SMYD4   | 6.63234 | 6.96461 | 6.80913 | 6.81729 | 6.40603 | 6.76946 | 7.12744 | 6.52916 | 6.68595 |
| RTN4RL1 | 6.58074 | 6.91281 | 6.78011 | 6.97174 | 5.69367 | 6.76185 | 6.90213 | 6.24992 | 6.84638 |
| MIR132  | 3.92704 | 3.53208 | 4.26665 | 4.54468 | 3.6332  | 4.68322 | 3.94479 | 4.67758 | 4.58416 |
| mir212  | 6.51233 | 6.80111 | 5.93821 | 6.85068 | 6.67116 | 7.61573 | 6.7222  | 6.78028 | 6.8524  |
| MNT     | 7.57036 | 7.47341 | 7.50614 | 8.75359 | 6.66351 | 7.99534 | 8.29887 | 7.75054 | 8.40846 |
| METTL16 | 7.43791 | 7.41562 | 7.56946 | 6.94446 | 5.51491 | 6.25215 | 7.46894 | 6.15433 | 6.55796 |
| CLUH    | 7.9514  | 7.91207 | 8.08506 | 8.24787 | 5.68667 | 8.03983 | 8.69338 | 7.44923 | 7.49813 |
| MIR1253 | 2.52572 | 2.92553 | 3.38311 | 3.37818 | 3.43918 | 4.57075 | 3.83459 | 3.31763 | 3.64342 |
| SPATA22 | 4.01038 | 3.71601 | 3.82899 | 4.46284 | 4.04246 | 4.53447 | 4.52049 | 4.03292 | 3.98806 |
| NCBP3   | 9.32363 | 9.22488 | 8.93744 | 8.73312 | 7.4403  | 8.89657 | 8.78154 | 8.52603 | 8.50502 |
| ANKFY1  | 8.88098 | 8.68456 | 8.5722  | 8.01521 | 6.35518 | 7.66179 | 8.36933 | 8.39491 | 8.16873 |
| UBE2G1  | 11.5486 | 10.9282 | 11.2224 | 11.3121 | 10.6262 | 11.7789 | 11.3796 | 11.5518 | 11.6898 |
| MYBBP1A | 7.80782 | 7.46909 | 7.83059 | 8.02813 | 6.36466 | 7.42911 | 8.0221  | 7.14027 | 7.13127 |
| GGT6    | 8.79041 | 8.86159 | 8.70808 | 8.43314 | 8.53838 | 9.35453 | 8.8239  | 9.17234 | 8.59938 |
| ALOX15  | 5.37835 | 5.42995 | 5.26638 | 6.04689 | 6.13889 | 6.33892 | 5.75663 | 5.55154 | 5.94773 |
| CXCL16  | 8.52382 | 7.64384 | 8.12448 | 8.44607 | 7.96482 | 9.32532 | 9.17603 | 9.32996 | 8.98506 |
| VMO1    | 5.45853 | 5.42246 | 5.68303 | 6.54163 | 5.57258 | 6.84716 | 6.12799 | 6.28951 | 6.22501 |
| PFN1    | 11.6486 | 11.4141 | 11.7109 | 11.8344 | 10.9173 | 11.5571 | 11.9019 | 11.399  | 11.9514 |
| SPAG7   | 7.28784 | 7.50148 | 7.4731  | 8.00287 | 6.62376 | 8.21812 | 8.24314 | 7.05964 | 7.63257 |
| ZNF232  | 5.51438 | 5.81698 | 5.37349 | 5.38328 | 5.6868  | 5.85009 | 5.54595 | 5.18617 | 5.47765 |
| ZNF594  | 5.55094 | 5.40479 | 5.45501 | 5.13458 | 4.77195 | 5.22296 | 5.57059 | 4.90775 | 4.92469 |
| SCIMP   | 5.62586 | 5.75207 | 5.95588 | 6.23688 | 6.88403 | 5.94013 | 6.10308 | 6.2939  | 5.97084 |
| NUP88   | 9.65193 | 9.64255 | 9.55795 | 9.37459 | 6.39766 | 8.51782 | 9.29506 | 8.33062 | 9.10311 |
| DHX33   | 8.16826 | 8.1158  | 8.14825 | 8.04138 | 6.63775 | 7.23077 | 8.26228 | 7.32792 | 7.29497 |
| DERL2   | 9.27181 | 9.31651 | 9.35367 | 9.52898 | 7.31192 | 9.06231 | 9.63108 | 9.13453 | 9.61419 |

|                |         |         |         |         |         |         |         |         |         |
|----------------|---------|---------|---------|---------|---------|---------|---------|---------|---------|
| AIPL1          | 6.1088  | 5.80697 | 6.15257 | 6.61688 | 6.93196 | 6.86518 | 6.5696  | 6.40641 | 6.80426 |
| PITPNM3        | 7.59379 | 7.78776 | 7.61086 | 7.60159 | 5.98212 | 7.81262 | 8.26766 | 7.26906 | 7.45402 |
| KIAA0753       | 7.97697 | 8.04979 | 7.76368 | 7.07769 | 6.33817 | 6.31119 | 6.95896 | 6.67384 | 7.02319 |
| MED31          | 8.9805  | 8.89287 | 8.74879 | 8.84141 | 7.16627 | 7.88926 | 9.28099 | 8.63213 | 8.51917 |
| TEKT1          | 5.20753 | 4.99477 | 4.95958 | 5.60081 | 5.20277 | 6.12931 | 5.65098 | 5.33105 | 5.14842 |
| ALOX12-AS1     | 6.74396 | 7.32037 | 6.91652 | 5.70305 | 6.44963 | 5.30687 | 6.40283 | 6.84438 | 6.68508 |
| MIR497HG       | 5.45193 | 5.62733 | 5.73302 | 5.86852 | 6.38389 | 5.93776 | 6.1494  | 5.44344 | 5.99175 |
| MIR195         | 5.50081 | 5.37121 | 5.5953  | 5.52974 | 6.00919 | 5.35209 | 4.97316 | 5.54889 | 5.5967  |
| MIR497         | 4.76656 | 4.79487 | 5.10926 | 5.27937 | 4.88937 | 5.12535 | 5.31129 | 5.05834 | 4.93802 |
| ASGR2          | 6.60226 | 6.46124 | 6.77269 | 6.43975 | 7.34806 | 6.74939 | 6.19295 | 6.60198 | 6.57853 |
| ASGR1          | 6.07241 | 6.48451 | 6.14668 | 6.78391 | 7.00545 | 7.20687 | 6.63572 | 6.91491 | 7.11147 |
| MIR324         | 7.35494 | 6.68874 | 7.22458 | 7.50077 | 8.6284  | 7.12946 | 7.22712 | 7.39386 | 7.26539 |
| PHF23          | 7.35243 | 7.24538 | 6.96886 | 9.03969 | 6.53119 | 8.87735 | 8.58355 | 8.02824 | 8.54585 |
| GABARAP        | 11.7398 | 11.5703 | 11.6441 | 11.5522 | 11.6596 | 11.4927 | 11.5944 | 11.2097 | 11.694  |
| CTDNEP1        | 9.28648 | 9.11059 | 9.29244 | 10.0066 | 8.61402 | 9.85668 | 10.2274 | 9.30319 | 9.82468 |
| CLDN7          | 6.74653 | 6.62487 | 6.83891 | 7.8307  | 6.89727 | 9.41884 | 7.68285 | 10.3465 | 8.11735 |
| YBX2           | 5.99036 | 5.74711 | 5.73632 | 5.32572 | 5.56455 | 6.2303  | 5.66278 | 5.69756 | 5.64877 |
| GPS2           | 8.1764  | 8.23416 | 8.40272 | 8.58393 | 8.87603 | 8.97426 | 9.12764 | 9.36896 | 8.79523 |
| neur14         | 6.57649 | 6.61962 | 6.37881 | 6.415   | 5.88979 | 6.50674 | 6.6064  | 6.41322 | 6.17416 |
| TMEM256-PLSCR3 | 8.12054 | 7.93323 | 7.7909  | 9.14972 | 8.09974 | 9.55628 | 9.51913 | 9.26904 | 9.24917 |
| ZBTB4          | 8.15878 | 7.87968 | 7.84812 | 8.07041 | 6.24081 | 7.95392 | 8.23027 | 7.16277 | 7.46249 |
| SOX15          | 7.85658 | 7.61167 | 7.42624 | 8.56546 | 7.03633 | 8.57845 | 9.088   | 8.53662 | 8.83776 |
| SAT2           | 7.52092 | 7.26331 | 6.88841 | 7.6881  | 5.48414 | 7.66356 | 8.40668 | 7.33154 | 7.12908 |
| TP53           | 8.86589 | 8.48151 | 8.70828 | 8.38745 | 6.70298 | 6.34979 | 8.3103  | 6.4606  | 6.86891 |
| NAA38          | 8.5884  | 8.89373 | 8.72029 | 9.2307  | 7.85443 | 8.7379  | 9.21266 | 8.13071 | 8.42615 |
| LOC284023      | 8.3423  | 8.67668 | 7.83012 | 8.0953  | 6.17577 | 7.27514 | 6.83633 | 7.01184 | 6.43769 |

|              |         |         |         |         |         |         |         |         |         |
|--------------|---------|---------|---------|---------|---------|---------|---------|---------|---------|
| TRAPPC1      | 9.70496 | 9.62478 | 9.40204 | 10.0732 | 8.25682 | 9.43308 | 10.2059 | 9.2037  | 9.74012 |
| ALOXE3       | 9.73388 | 10.1632 | 9.61309 | 9.37732 | 9.75943 | 10.0049 | 9.69991 | 9.99235 | 10.3253 |
| HES7         | 5.29088 | 5.32644 | 5.304   | 6.09408 | 5.87018 | 6.72316 | 6.11461 | 6.31976 | 5.90237 |
| PER1         | 9.10278 | 8.9361  | 9.69252 | 9.00578 | 8.69522 | 9.66309 | 9.40125 | 10.0483 | 9.109   |
| VAMP2        | 8.41986 | 8.3268  | 8.43377 | 8.50796 | 8.22099 | 8.44735 | 8.97277 | 8.7888  | 8.83989 |
| TMEM107      | 6.4361  | 6.70316 | 6.17475 | 6.68465 | 5.91918 | 6.65861 | 6.78087 | 6.39771 | 6.55769 |
| BORCS6       | 6.55519 | 6.59071 | 6.36791 | 6.85541 | 5.89725 | 7.21412 | 7.15006 | 7.28149 | 6.79654 |
| AURKB        | 7.30357 | 7.12269 | 6.88564 | 7.97031 | 6.99704 | 7.37113 | 7.72292 | 7.2872  | 7.14986 |
| LINC00324    | 5.31917 | 5.59534 | 5.38229 | 5.8959  | 5.61872 | 5.85678 | 5.61191 | 5.53015 | 5.5403  |
| CTC1         | 8.14223 | 8.16157 | 7.76176 | 7.52175 | 7.37586 | 7.13682 | 7.71799 | 7.68109 | 7.56569 |
| LOC100128288 | 6.92866 | 7.39061 | 6.3753  | 6.25169 | 6.40253 | 5.13733 | 5.38355 | 5.65457 | 5.85367 |
| KRBA2        | 5.34557 | 6.0009  | 5.21565 | 5.88001 | 5.2319  | 5.5249  | 5.22181 | 5.09338 | 5.2509  |
| RPL26        | 9.24667 | 9.35718 | 9.69748 | 9.68133 | 9.53447 | 10.14   | 10.1088 | 9.22462 | 9.31537 |
| RNF222       | 7.6058  | 7.10691 | 7.41105 | 8.61458 | 8.23639 | 9.34993 | 8.33394 | 9.07469 | 9.22176 |
| CCDC42       | 5.71962 | 5.67874 | 5.72975 | 6.16497 | 6.0281  | 6.01182 | 5.58299 | 6.28805 | 5.91224 |
| SPDYE4       | 4.81063 | 4.42611 | 5.23602 | 5.74788 | 5.78605 | 5.86068 | 5.83242 | 5.55931 | 5.5589  |
| MFSD6L       | 5.77331 | 6.01895 | 5.758   | 6.23519 | 5.83425 | 5.96269 | 5.89678 | 6.08999 | 5.77024 |
| STX8         | 8.64801 | 8.54164 | 8.5419  | 8.66197 | 7.30373 | 8.44324 | 9.12909 | 8.79358 | 8.67305 |
| DHRS7C       | 5.53029 | 4.90781 | 5.07558 | 6.09039 | 6.4271  | 6.60196 | 5.79322 | 5.6289  | 6.25329 |
| RCVRN        | 5.94596 | 5.95895 | 5.61707 | 5.58008 | 5.56727 | 5.93395 | 5.34648 | 5.44963 | 5.33905 |
| GAS7         | 8.38501 | 8.31975 | 8.27197 | 8.36643 | 6.21404 | 8.7887  | 7.99669 | 8.75792 | 8.13508 |
| SCO1         | 7.66342 | 7.79185 | 8.05035 | 7.12776 | 6.04739 | 6.37354 | 7.71855 | 6.49777 | 6.59226 |
| TMEM220      | 7.33117 | 7.42544 | 7.86963 | 7.09931 | 7.21664 | 6.86088 | 6.87866 | 6.07725 | 6.75766 |
| LINC00675    | 7.31302 | 6.79404 | 6.064   | 7.32106 | 6.87688 | 11.0002 | 6.91577 | 9.00535 | 9.61315 |
| PIRT         | 5.4084  | 5.57969 | 5.78781 | 6.44675 | 6.41984 | 7.4289  | 6.81194 | 6.25381 | 7.27318 |
| ZNF18        | 7.08317 | 7.33833 | 7.24167 | 6.60111 | 6.23535 | 5.72468 | 6.77851 | 5.59545 | 6.15631 |

|           |         |         |         |         |         |         |         |         |         |
|-----------|---------|---------|---------|---------|---------|---------|---------|---------|---------|
| MIR1269B  | 6.15668 | 6.4737  | 6.26596 | 6.46152 | 8.44628 | 6.5246  | 6.17424 | 6.65598 | 6.71517 |
| ELAC2     | 8.69089 | 8.56836 | 8.703   | 8.71478 | 6.94494 | 8.16572 | 8.9649  | 7.9293  | 8.37276 |
| HS3ST3A1  | 6.41684 | 5.95069 | 5.60559 | 7.48013 | 6.57731 | 7.75022 | 7.69623 | 7.94468 | 8.781   |
| MIR548H3  | 5.26821 | 3.05817 | 3.09677 | 4.39454 | 3.34219 | 3.33089 | 2.9628  | 6.35445 | 7.32743 |
| COX10-AS1 | 8.88818 | 8.30069 | 8.36541 | 7.63328 | 7.2472  | 6.5439  | 8.04383 | 7.08698 | 7.74835 |
| CDRT15    | 6.99245 | 6.79811 | 7.09305 | 7.35421 | 7.17694 | 7.29249 | 6.9165  | 7.46138 | 7.6004  |
| PMP22     | 8.24885 | 7.6304  | 9.26727 | 7.03759 | 5.82623 | 8.72714 | 7.6906  | 7.76715 | 8.77696 |
| MIR4731   | 5.93431 | 6.60308 | 5.69857 | 5.84715 | 6.64544 | 5.25861 | 5.10004 | 5.33064 | 6.23304 |
| TEKT3     | 5.00526 | 5.80497 | 4.86612 | 4.79954 | 5.07835 | 4.92176 | 4.59466 | 4.5331  | 4.50586 |
| CDRT1     | 6.23031 | 6.18992 | 6.43926 | 6.45174 | 6.50236 | 5.91616 | 6.11017 | 7.04908 | 7.82586 |
| TRIM16    | 7.42096 | 7.71971 | 6.92204 | 7.34798 | 7.07833 | 7.39173 | 6.5213  | 7.86256 | 7.78074 |
| NCOR1     | 9.76068 | 9.92427 | 9.78789 | 8.81955 | 6.33698 | 7.9819  | 8.91401 | 8.36719 | 8.90597 |
| cenpv     | 5.56227 | 5.5209  | 6.04593 | 5.81813 | 5.90597 | 5.60515 | 5.71155 | 5.2595  | 5.13452 |
| ZNF287    | 6.49113 | 7.02259 | 6.72694 | 6.3883  | 5.66521 | 5.53707 | 6.38337 | 5.51645 | 5.77245 |
| znf624    | 7.45469 | 7.67148 | 7.37488 | 7.06175 | 6.68796 | 7.82494 | 7.22777 | 6.82863 | 6.84252 |
| KRT16P2   | 9.80952 | 9.62102 | 9.77266 | 11.7444 | 11.2302 | 12.0255 | 11.5731 | 12.4951 | 11.9477 |
| FLCN      | 7.4656  | 7.04182 | 7.22795 | 7.40945 | 7.1718  | 7.9455  | 7.04291 | 7.75041 | 7.73803 |
| COPS3     | 8.6613  | 8.28576 | 8.5367  | 8.46547 | 7.31682 | 7.5608  | 8.57018 | 7.65828 | 8.33758 |
| PENT      | 7.46204 | 7.39476 | 7.57016 | 7.7234  | 7.13935 | 6.71762 | 7.69092 | 6.94329 | 6.93397 |
| SREBF1    | 7.35347 | 6.83308 | 7.0248  | 7.41214 | 6.1483  | 7.78995 | 7.96374 | 6.96819 | 7.29975 |
| MIR33B    | 7.02302 | 7.10249 | 6.83934 | 7.43336 | 6.92785 | 7.27196 | 6.55124 | 7.18747 | 7.27911 |
| TOM1L2    | 9.2043  | 8.96791 | 9.14136 | 8.9823  | 8.21609 | 9.32307 | 9.1056  | 9.5035  | 9.19194 |
| ATPAF2    | 6.86195 | 6.82774 | 6.79116 | 6.86393 | 6.36507 | 6.81104 | 7.08989 | 6.83692 | 6.59092 |
| FLII      | 8.81755 | 8.62342 | 8.59685 | 9.27257 | 7.35108 | 9.66681 | 9.6781  | 8.80526 | 9.56781 |
| TOP3A     | 6.93493 | 6.67257 | 6.64542 | 6.05515 | 6.21453 | 5.8803  | 6.52915 | 6.34831 | 6.28979 |
| SHMT1     | 8.21587 | 7.6443  | 7.74788 | 7.02717 | 6.47154 | 6.88553 | 7.12669 | 6.4186  | 6.96432 |

|          |         |         |         |         |         |         |         |         |         |
|----------|---------|---------|---------|---------|---------|---------|---------|---------|---------|
| Ccdc144b | 5.74092 | 6.43574 | 5.80759 | 5.52679 | 5.10119 | 5.02272 | 5.36804 | 4.8721  | 5.20474 |
| ZNF286B  | 6.95958 | 7.14192 | 6.84235 | 7.49747 | 6.97661 | 7.1979  | 6.94384 | 6.97798 | 6.80301 |
| GRAP     | 5.84495 | 5.19776 | 5.33945 | 5.81635 | 5.17596 | 6.24226 | 5.98118 | 6.07004 | 6.27469 |
| EPN2-AS1 | 5.45148 | 5.76972 | 5.37726 | 5.88131 | 5.69417 | 5.14675 | 5.03542 | 5.62564 | 5.6547  |
| B9D1     | 7.0451  | 7.08816 | 6.9668  | 7.19137 | 7.32966 | 6.77546 | 7.24021 | 6.95921 | 7.04952 |
| MIR1180  | 6.37795 | 6.54022 | 6.43998 | 6.78203 | 6.74148 | 7.39824 | 6.668   | 6.8414  | 6.91368 |
| MFAP4    | 9.40108 | 9.05019 | 10.1156 | 7.76075 | 6.28227 | 6.86225 | 8.33725 | 7.21178 | 6.79219 |
| ULK2     | 8.36047 | 8.28989 | 8.00187 | 7.99401 | 6.73658 | 6.93093 | 8.16867 | 7.31845 | 7.71895 |
| AKAP10   | 7.924   | 8.03709 | 7.98511 | 7.57023 | 6.56251 | 7.71186 | 7.814   | 7.8199  | 7.48402 |
| KRT16P3  | 7.10319 | 7.43112 | 7.29412 | 9.68887 | 9.67786 | 10.2812 | 10.2511 | 11.1672 | 10.1337 |
| USP22    | 9.93779 | 9.81954 | 9.75889 | 9.71435 | 7.47729 | 9.2326  | 9.84159 | 9.40707 | 9.32985 |
| natd1    | 6.64833 | 6.63418 | 6.5966  | 7.05978 | 6.84308 | 7.95382 | 7.3435  | 8.2403  | 7.45488 |
| C17orf51 | 5.89971 | 5.46232 | 5.99032 | 5.93735 | 6.18231 | 5.52593 | 5.76497 | 5.80505 | 5.80386 |
| MIR4522  | 7.11821 | 7.43365 | 7.59901 | 8.00862 | 9.09894 | 7.95486 | 7.335   | 8.09069 | 7.89211 |
| LYRM9    | 5.53063 | 6.13751 | 5.67732 | 5.61109 | 5.62497 | 5.34336 | 5.1785  | 5.60267 | 5.3738  |
| KRT18P55 | 5.53006 | 5.63204 | 5.92293 | 6.47235 | 6.04281 | 6.6516  | 6.05825 | 5.98138 | 6.24505 |
| IFT20    | 7.60647 | 7.9185  | 7.70585 | 7.42811 | 6.87822 | 6.5187  | 7.47941 | 7.68689 | 6.97359 |
| SEBOX    | 6.4462  | 6.39872 | 6.62977 | 6.86363 | 7.8185  | 7.27088 | 6.71149 | 7.10448 | 6.96783 |
| VTN      | 5.86286 | 5.86725 | 5.80599 | 6.0627  | 6.17427 | 6.11953 | 5.73436 | 6.09958 | 5.9967  |
| UNC119   | 6.59684 | 6.6841  | 6.97201 | 6.67654 | 6.69866 | 6.89804 | 7.2809  | 7.41059 | 6.42197 |
| SPAG5    | 7.03597 | 6.82854 | 6.62212 | 6.54402 | 5.66079 | 6.26963 | 6.24436 | 6.23138 | 6.18475 |
| SGK494   | 7.71704 | 8.14774 | 7.89956 | 6.11894 | 6.35159 | 5.76628 | 5.98525 | 6.28546 | 7.15073 |
| KIAA0100 | 9.89468 | 9.84303 | 9.83059 | 9.79941 | 7.03326 | 8.95477 | 10.0062 | 9.29381 | 9.79501 |
| SDF2     | 7.26012 | 7.21205 | 7.12598 | 7.1447  | 6.09975 | 7.73272 | 7.73505 | 7.74585 | 7.59055 |
| PROCA1   | 5.6007  | 5.37646 | 5.44347 | 5.94934 | 5.66276 | 5.80593 | 5.77107 | 5.97206 | 5.78245 |
| TLCD1    | 8.05293 | 8.00873 | 7.66022 | 8.27577 | 7.32917 | 7.22535 | 8.51225 | 7.07201 | 7.62673 |

|          |         |         |         |         |         |         |         |         |         |
|----------|---------|---------|---------|---------|---------|---------|---------|---------|---------|
| mir144   | 2.81841 | 2.80232 | 2.68427 | 2.63652 | 2.43294 | 2.96948 | 2.60481 | 2.76087 | 2.83911 |
| MIR4732  | 8.43346 | 8.38735 | 8.35868 | 9.02547 | 10.3387 | 8.3658  | 8.81888 | 8.76058 | 8.70273 |
| FLOT2    | 7.75372 | 7.3673  | 7.74692 | 8.34224 | 7.14362 | 8.1238  | 8.46315 | 7.55163 | 7.92988 |
| DHRS13   | 6.44557 | 6.30321 | 6.27925 | 6.40434 | 5.5725  | 7.02903 | 6.8427  | 6.31077 | 5.75427 |
| PHF12    | 8.30737 | 8.26439 | 8.56105 | 7.23949 | 5.66707 | 6.80521 | 7.27188 | 6.85783 | 6.96235 |
| SEZ6     | 4.10779 | 4.70954 | 4.59169 | 4.66347 | 5.16965 | 5.21762 | 4.55767 | 5.11662 | 4.70294 |
| MYO18A   | 8.32122 | 8.45133 | 8.13563 | 8.24676 | 7.7776  | 8.98443 | 8.58397 | 8.57434 | 8.77305 |
| NUFIP2   | 9.17033 | 9.06269 | 9.36792 | 9.16808 | 6.00118 | 8.76959 | 8.92236 | 9.59594 | 9.22104 |
| ABHD15   | 6.18373 | 6.25482 | 6.26818 | 6.6181  | 5.68966 | 6.40519 | 7.32959 | 6.31238 | 6.65374 |
| GIT1     | 7.85955 | 7.93658 | 7.8787  | 7.60411 | 6.14705 | 7.08674 | 7.83289 | 7.29576 | 7.16225 |
| CORO6    | 7.02927 | 6.6843  | 6.87354 | 7.40018 | 6.76443 | 7.30987 | 6.83543 | 7.84297 | 7.04894 |
| SSH2     | 8.05139 | 8.14454 | 8.34337 | 7.43957 | 5.85321 | 7.36411 | 7.69947 | 7.61382 | 7.52677 |
| Mir423   | 4.50302 | 4.8007  | 4.67465 | 6.00471 | 5.27767 | 6.31142 | 5.34321 | 5.3977  | 5.66092 |
| BLMH     | 11.5594 | 11.1121 | 10.5219 | 10.7655 | 7.22364 | 8.69528 | 8.94393 | 8.42291 | 8.54638 |
| TMIGD1   | 3.83518 | 4.14886 | 4.11309 | 4.73159 | 5.94028 | 5.72992 | 4.6322  | 4.97959 | 4.78457 |
| CRLF3    | 7.76594 | 7.58821 | 7.38209 | 8.17133 | 6.80423 | 8.92511 | 8.26783 | 9.14783 | 8.80396 |
| MIR4733  | 5.29256 | 5.48696 | 5.34747 | 6.22814 | 5.77328 | 6.17291 | 5.95301 | 5.69334 | 6.25631 |
| OMG      | 4.57259 | 4.86921 | 4.37327 | 4.56335 | 4.78376 | 4.83621 | 3.95357 | 4.68052 | 4.82543 |
| EVI2B    | 6.25739 | 5.93668 | 7.09773 | 5.4935  | 5.37617 | 5.03271 | 5.52013 | 5.41139 | 5.22006 |
| EVI2A    | 5.04138 | 4.7006  | 4.71648 | 5.1036  | 4.12622 | 4.41138 | 5.02804 | 5.10214 | 4.35348 |
| COPRS    | 5.9828  | 6.33723 | 5.88267 | 7.03067 | 6.848   | 6.20028 | 7.22024 | 6.71069 | 6.64211 |
| ARGFXP2  | 3.16008 | 3.593   | 3.34612 | 3.78367 | 3.06614 | 3.51662 | 3.5172  | 3.71801 | 3.7804  |
| c17orf75 | 7.31781 | 7.56869 | 7.49466 | 7.04998 | 6.13204 | 6.15755 | 7.4176  | 6.48599 | 6.29777 |
| MYO1D    | 10.2062 | 9.75946 | 10.1092 | 9.97545 | 8.3211  | 10.5    | 10.5599 | 10.3767 | 10.4511 |
| ASIC2    | 4.52986 | 4.90349 | 4.88113 | 5.44112 | 5.35002 | 5.57109 | 4.94458 | 5.25817 | 5.35345 |
| AA06     | 4.19628 | 4.00695 | 3.79011 | 4.4683  | 4.96107 | 5.12689 | 4.16989 | 4.39444 | 4.33158 |



|             |         |         |         |         |         |         |         |         |         |
|-------------|---------|---------|---------|---------|---------|---------|---------|---------|---------|
| CCL1        | 4.76673 | 4.63134 | 4.39281 | 4.82253 | 5.11703 | 5.30548 | 4.77483 | 4.8533  | 5.07097 |
| C17orf102   | 5.18151 | 5.03687 | 4.91873 | 5.63837 | 5.55887 | 5.77757 | 5.37322 | 5.77563 | 5.40208 |
| RFFL        | 6.81503 | 6.97448 | 6.97806 | 6.82603 | 6.52133 | 6.91921 | 6.69748 | 6.90623 | 7.06422 |
| NLE1        | 7.04143 | 7.50233 | 7.3236  | 7.47646 | 7.8252  | 7.19835 | 7.46919 | 6.94068 | 7.15328 |
| SLFN11      | 7.22996 | 6.13554 | 6.69654 | 6.09644 | 5.64393 | 5.70553 | 6.2311  | 6.19856 | 6.16952 |
| SLFN12      | 5.89533 | 5.99059 | 6.32118 | 5.67334 | 5.78995 | 5.13213 | 5.6462  | 5.59822 | 5.61441 |
| SLFN13      | 6.57119 | 6.58795 | 6.60247 | 6.40885 | 7.07101 | 5.97385 | 5.92404 | 6.25003 | 6.16464 |
| SLFN12L     | 5.90548 | 5.81116 | 5.7804  | 5.18804 | 6.69119 | 5.79214 | 5.69177 | 5.35508 | 5.55485 |
| SLFN14      | 4.47727 | 3.91405 | 4.15687 | 5.25912 | 6.14527 | 4.78584 | 4.88899 | 4.51438 | 4.42708 |
| PEX12       | 6.63267 | 6.70764 | 6.71469 | 6.29968 | 7.32017 | 5.77513 | 6.3837  | 5.33651 | 5.96335 |
| GAS2L2      | 5.38935 | 4.93945 | 5.50305 | 5.76465 | 5.4391  | 6.06407 | 6.00041 | 5.52922 | 5.72585 |
| mmp28       | 7.60309 | 7.10562 | 7.623   | 7.09085 | 6.40548 | 7.06074 | 7.54601 | 6.79539 | 7.06378 |
| HEATR9      | 4.54656 | 4.73303 | 4.87247 | 5.31738 | 5.66353 | 5.75623 | 4.98506 | 5.13618 | 5.46111 |
| CCL5        | 6.9897  | 6.84173 | 7.48749 | 7.15818 | 7.96246 | 7.51335 | 7.25704 | 7.38791 | 7.5157  |
| RDM1        | 4.75495 | 4.49415 | 4.75094 | 5.06244 | 5.3011  | 4.86585 | 4.72615 | 5.42198 | 5.14279 |
| LYZL6       | 3.79273 | 3.9201  | 3.96364 | 4.08327 | 4.6438  | 4.43771 | 3.84323 | 4.41395 | 4.21812 |
| CCL16       | 5.86587 | 5.88283 | 5.89823 | 5.58502 | 6.07975 | 5.8135  | 5.62367 | 5.95105 | 6.10139 |
| CCL15-CCL14 | 6.21574 | 6.01526 | 5.65212 | 5.09146 | 5.55115 | 5.11717 | 5.1198  | 4.70425 | 5.37438 |
| CCL23       | 5.24472 | 5.84184 | 6.05705 | 5.53291 | 5.32944 | 5.07767 | 5.39479 | 5.15371 | 5.21972 |
| CCL3        | 5.83003 | 5.65508 | 5.64214 | 6.18505 | 6.78602 | 7.77032 | 6.26169 | 6.44494 | 6.48663 |
| CCL3L1      | 6.92371 | 6.78247 | 6.96349 | 6.95468 | 8.18923 | 8.90829 | 6.95408 | 8.16369 | 8.09547 |
| MYO19       | 8.70059 | 8.77228 | 8.99226 | 8.60997 | 6.76489 | 8.46163 | 8.43198 | 8.05866 | 8.67063 |
| ACACA       | 9.36428 | 9.23618 | 8.80071 | 8.97391 | 6.70908 | 8.51713 | 8.91259 | 8.97927 | 9.42382 |
| DDX52       | 9.47536 | 9.23946 | 9.32833 | 8.61272 | 6.52676 | 8.26336 | 9.20397 | 8.60265 | 9.24199 |
| HNF1B       | 4.47731 | 4.69038 | 4.83387 | 5.34834 | 5.86167 | 5.82103 | 4.98864 | 5.34446 | 5.14939 |
| GPR179      | 5.9407  | 6.14704 | 5.98813 | 6.49591 | 6.76479 | 6.37624 | 6.0377  | 6.36425 | 6.34335 |

|          |         |         |         |         |         |         |         |         |         |
|----------|---------|---------|---------|---------|---------|---------|---------|---------|---------|
| SRCIN1   | 6.60841 | 6.90237 | 6.57205 | 6.76151 | 6.42922 | 6.98092 | 6.75417 | 6.91139 | 6.84681 |
| C17orf96 | 6.2291  | 5.80815 | 5.84664 | 7.08625 | 6.1192  | 7.17651 | 7.28179 | 6.6041  | 6.79812 |
| PCGF2    | 8.05421 | 7.78122 | 7.91467 | 7.99995 | 7.03396 | 8.12311 | 8.01333 | 7.6905  | 7.52974 |
| CWC25    | 8.42101 | 8.21534 | 8.27882 | 7.27354 | 6.66395 | 7.45853 | 7.80939 | 8.18544 | 8.14616 |
| c17orf98 | 6.31736 | 6.38419 | 6.21415 | 6.5346  | 7.7153  | 6.31255 | 6.6345  | 6.50777 | 6.78257 |
| FBXO47   | 2.96107 | 2.91615 | 3.18272 | 3.28512 | 4.12829 | 3.75082 | 3.2401  | 3.12792 | 3.59468 |
| PLXDC1   | 8.22201 | 7.32204 | 7.95278 | 8.41295 | 7.70214 | 7.41586 | 7.77611 | 7.2749  | 7.90784 |
| ARL5C    | 4.95535 | 5.16215 | 4.97688 | 5.56595 | 6.08555 | 5.70538 | 5.38734 | 5.43739 | 5.64504 |
| STAC2    | 7.48839 | 7.64344 | 7.56453 | 7.27588 | 6.42546 | 7.4694  | 7.0929  | 7.17699 | 7.35297 |
| FBXL20   | 9.91318 | 9.93478 | 9.73861 | 8.66618 | 7.68894 | 9.13894 | 9.01468 | 9.97848 | 9.83326 |
| MED1     | 10.0042 | 10.0726 | 10.1525 | 8.58157 | 6.06189 | 7.83898 | 8.97852 | 8.58569 | 8.9234  |
| NEUROD2  | 5.29866 | 5.57462 | 5.74729 | 6.12741 | 6.22168 | 6.97777 | 6.00704 | 6.13632 | 6.28302 |
| PGAP3    | 7.70266 | 7.93313 | 8.02826 | 7.55529 | 5.92847 | 6.58642 | 7.94163 | 6.06614 | 7.21422 |
| MIEN1    | 8.08394 | 8.04804 | 7.8856  | 8.83953 | 8.29124 | 8.67454 | 8.84076 | 9.25282 | 9.00229 |
| GSDMB    | 7.63944 | 7.77293 | 6.95956 | 6.79823 | 6.44106 | 5.91276 | 6.03354 | 7.02691 | 6.3115  |
| ORMDL3   | 7.00723 | 7.21662 | 6.75356 | 7.25963 | 6.54838 | 6.6279  | 7.11377 | 7.36066 | 6.60367 |
| MED24    | 8.23771 | 7.94047 | 8.05334 | 8.33794 | 7.45392 | 7.78214 | 8.51841 | 7.61422 | 8.04716 |
| TOP2A    | 8.227   | 7.57463 | 7.43922 | 8.07742 | 5.40319 | 6.5973  | 7.46072 | 7.47035 | 6.84169 |
| TNS4     | 10.1989 | 10.1703 | 10.8592 | 10.5608 | 7.75116 | 9.78263 | 10.786  | 10.0719 | 10.4826 |
| CCR7     | 6.09422 | 5.96533 | 6.39385 | 6.51327 | 6.81593 | 7.42036 | 6.78229 | 6.48606 | 6.75139 |
| KRT24    | 4.78123 | 4.64952 | 5.06343 | 5.35712 | 6.20275 | 6.95579 | 4.96326 | 7.66762 | 5.64444 |
| KRT25    | 4.47622 | 5.10464 | 4.3892  | 5.02974 | 5.98646 | 4.60519 | 5.36561 | 4.60846 | 4.89508 |
| KRT26    | 2.97214 | 3.1285  | 2.83834 | 3.65293 | 3.45507 | 3.73211 | 3.71535 | 3.21048 | 3.65057 |
| KRT27    | 4.65339 | 5.09707 | 4.70688 | 4.86929 | 5.52885 | 4.85618 | 4.99777 | 5.23938 | 4.90302 |
| KRT28    | 3.65798 | 3.90979 | 3.97645 | 4.24394 | 4.25998 | 4.25073 | 4.06181 | 3.9648  | 4.07129 |
| KRT10    | 14.0325 | 13.7854 | 14.0148 | 13.5493 | 11.9164 | 13.1519 | 13.2147 | 10.4035 | 12.5732 |

|           |         |         |         |         |         |         |         |         |         |
|-----------|---------|---------|---------|---------|---------|---------|---------|---------|---------|
| KRT12     | 3.06607 | 3.23471 | 3.16984 | 3.96868 | 4.50062 | 3.15411 | 3.0404  | 3.80079 | 3.41551 |
| KRT20     | 4.76791 | 3.99412 | 4.67757 | 4.68949 | 6.11519 | 4.87836 | 4.51016 | 4.65593 | 4.91991 |
| KRT23     | 10.8817 | 11.1224 | 10.3865 | 10.5224 | 10.8652 | 9.12912 | 10.2634 | 10.9302 | 8.76966 |
| KRT39     | 4.86225 | 5.49767 | 5.17625 | 5.39638 | 5.98993 | 5.103   | 5.61539 | 5.43193 | 5.25623 |
| KRT40     | 5.28028 | 5.13054 | 5.27746 | 6.02256 | 6.05325 | 5.86659 | 5.82924 | 6.28069 | 5.59895 |
| KRTAP3-3  | 3.07559 | 3.46691 | 3.38951 | 3.5124  | 4.13135 | 3.74922 | 3.63948 | 4.07261 | 3.1987  |
| KRTAP3-2  | 4.94485 | 5.23147 | 4.92329 | 5.10781 | 6.56823 | 5.51142 | 5.22673 | 5.38882 | 5.48123 |
| KRTAP3-1  | 4.36337 | 4.98723 | 4.51202 | 5.29414 | 6.00673 | 5.05726 | 4.70242 | 4.6847  | 4.89627 |
| Krtap1-5  | 6.21101 | 5.59652 | 6.26546 | 6.03722 | 7.028   | 5.61214 | 5.91692 | 5.54833 | 5.86387 |
| KRTAP1-3  | 5.32494 | 4.95208 | 5.31743 | 5.48875 | 7.50715 | 6.00215 | 5.40803 | 5.77859 | 6.03189 |
| KRTAP1-1  | 5.22898 | 5.18909 | 5.30094 | 5.90301 | 5.90377 | 6.03471 | 5.86962 | 5.23054 | 5.23562 |
| Krtap2-1  | 4.82341 | 5.04397 | 5.02277 | 5.25543 | 5.67209 | 5.15815 | 4.88841 | 4.96763 | 5.06799 |
| KRTAP2-2  | 4.97146 | 4.36375 | 4.76121 | 4.81411 | 5.59481 | 5.28658 | 5.11381 | 5.0706  | 5.03317 |
| KRTAP2-3  | 3.35913 | 3.62816 | 3.5127  | 3.71274 | 6.12823 | 4.55635 | 3.50952 | 6.41277 | 3.69281 |
| Krtap2-4  | 3.72795 | 4.23233 | 4.04512 | 4.18357 | 5.08297 | 4.14058 | 4.68849 | 4.19982 | 4.14773 |
| Krtap4-8  | 3.79961 | 4.59498 | 4.09846 | 4.81858 | 6.36377 | 5.39121 | 4.31466 | 4.76638 | 4.71116 |
| KRTAP4-11 | 4.67918 | 4.74874 | 4.72763 | 4.67645 | 8.88325 | 4.42525 | 4.54784 | 5.03739 | 5.13432 |
| KRTAP4-12 | 3.29337 | 3.1385  | 3.10091 | 2.94805 | 4.34323 | 3.27873 | 3.57191 | 3.42516 | 2.87429 |
| Krtap4-6  | 2.77383 | 2.76688 | 2.67645 | 2.51677 | 4.11442 | 3.74875 | 3.11474 | 2.67101 | 2.99581 |
| KRTAP4-5  | 2.64711 | 3.372   | 2.54347 | 3.73446 | 3.60966 | 3.13053 | 2.88941 | 3.00421 | 2.9747  |
| KRTAP4-4  | 4.13575 | 4.2377  | 4.11363 | 4.5143  | 4.00969 | 3.89284 | 4.09241 | 4.22317 | 4.26324 |
| KRTAP4-3  | 4.69898 | 4.84725 | 4.83698 | 4.85809 | 6.14036 | 4.87715 | 4.62241 | 4.93505 | 4.82965 |
| KRTAP4-2  | 4.48353 | 4.14536 | 4.44551 | 5.02438 | 7.06297 | 6.37852 | 6.21949 | 5.3685  | 4.96034 |
| KRTAP4-1  | 4.86746 | 4.3422  | 4.73832 | 5.17767 | 5.54755 | 5.10238 | 4.88012 | 5.38184 | 5.45328 |
| Krtap16-1 | 5.767   | 5.87678 | 6.11977 | 5.96074 | 8.1851  | 6.24151 | 5.7888  | 5.96147 | 6.40258 |
| KRTAP17-1 | 6.06713 | 6.18409 | 6.15641 | 6.70037 | 7.32397 | 7.12182 | 6.26123 | 6.44683 | 6.36397 |

|           |         |         |         |         |         |         |         |         |         |
|-----------|---------|---------|---------|---------|---------|---------|---------|---------|---------|
| KRT33A    | 5.83215 | 5.30068 | 4.78656 | 4.74361 | 6.13462 | 4.65277 | 4.73146 | 4.57686 | 4.48771 |
| KRT33B    | 4.66491 | 5.1862  | 5.02064 | 5.50647 | 6.60445 | 6.5008  | 7.12924 | 5.54888 | 6.66873 |
| KRT31     | 7.89003 | 6.01023 | 6.56009 | 7.47004 | 7.95414 | 7.66602 | 7.68247 | 8.53006 | 7.67913 |
| KRT37     | 8.2514  | 6.18525 | 6.25903 | 8.03093 | 10.7224 | 7.93173 | 9.02784 | 10.1223 | 9.09457 |
| KRT38     | 4.90288 | 5.41239 | 4.93406 | 6.05329 | 6.14177 | 6.0069  | 5.28753 | 5.25835 | 5.03334 |
| KRT32     | 5.06762 | 4.76684 | 4.7748  | 4.82754 | 5.49315 | 4.67397 | 4.48864 | 5.0999  | 4.86733 |
| KRT35     | 5.23803 | 5.33372 | 5.48485 | 5.70321 | 6.19231 | 6.01123 | 5.42708 | 5.74475 | 5.54793 |
| KRT36     | 6.38673 | 6.37927 | 6.26462 | 6.59861 | 7.3127  | 6.56365 | 6.51364 | 6.89317 | 6.8029  |
| KRT13     | 5.30957 | 5.17113 | 4.74364 | 6.33948 | 6.31106 | 6.14538 | 5.56899 | 5.88448 | 5.96242 |
| KRT15     | 9.15868 | 6.64529 | 6.90526 | 7.24667 | 6.74847 | 6.99293 | 6.2455  | 7.27545 | 6.96097 |
| KRT19     | 6.79997 | 6.75225 | 7.05975 | 6.75202 | 7.03869 | 6.99416 | 6.72784 | 6.43855 | 6.39674 |
| LINC00974 | 5.19364 | 5.93517 | 5.48479 | 5.97637 | 6.21197 | 5.4811  | 5.19267 | 5.66393 | 5.40327 |
| KRT9      | 9.41499 | 12.7299 | 10.1449 | 11.1352 | 5.90302 | 8.22434 | 10.2612 | 5.31558 | 6.59239 |
| KRT14     | 11.9702 | 11.6997 | 11.6467 | 12.7902 | 12.2551 | 12.8813 | 12.9977 | 12.6866 | 13.2146 |
| KRT16     | 10.7123 | 10.5811 | 10.0977 | 12.7113 | 12.7857 | 13.1983 | 12.7714 | 12.8951 | 13.1613 |
| krt17     | 6.45509 | 6.20663 | 5.78988 | 8.12537 | 6.92718 | 8.88008 | 8.157   | 8.37405 | 7.99491 |
| KRT42P    | 5.48867 | 5.37385 | 5.63924 | 5.90528 | 7.28763 | 6.12295 | 5.99848 | 6.00469 | 6.16307 |
| HAP1      | 5.83452 | 6.0503  | 5.91572 | 6.38468 | 6.75015 | 6.48612 | 6.25872 | 7.72146 | 6.42304 |
| JUP       | 12.3639 | 12.2663 | 12.3537 | 12.7277 | 12.0732 | 13.1053 | 12.8859 | 12.6411 | 12.9256 |
| P3H4      | 6.64282 | 6.44577 | 6.67537 | 7.03444 | 6.17642 | 7.20198 | 7.24871 | 7.23618 | 7.01536 |
| KLHL11    | 7.49421 | 7.3991  | 7.52891 | 7.59548 | 6.21649 | 7.52666 | 7.70594 | 7.56366 | 7.11485 |
| ACLY      | 9.28454 | 8.73549 | 9.00475 | 9.61015 | 7.64961 | 9.75746 | 10.0455 | 9.50965 | 9.97334 |
| ZNF385C   | 5.81555 | 6.00013 | 6.13139 | 6.27976 | 6.59309 | 6.31792 | 6.40144 | 6.56425 | 6.55767 |
| DHX58     | 6.22177 | 6.1943  | 6.29692 | 6.58041 | 5.70178 | 6.81416 | 6.31939 | 6.57052 | 6.3994  |
| KAT2A     | 9.17981 | 8.82703 | 9.05138 | 7.70907 | 6.73251 | 7.23817 | 7.86297 | 7.21372 | 7.50481 |
| HCRT      | 5.95994 | 6.20471 | 6.2535  | 7.18671 | 6.65933 | 6.8918  | 7.34645 | 6.56128 | 7.32881 |

|                |         |         |         |         |         |         |         |         |         |
|----------------|---------|---------|---------|---------|---------|---------|---------|---------|---------|
| GHDC           | 6.14067 | 5.75691 | 6.02182 | 6.87682 | 6.04038 | 6.1248  | 6.36102 | 6.32902 | 6.26384 |
| STAT5B         | 7.27132 | 7.53164 | 7.55637 | 6.40519 | 7.26118 | 6.17546 | 7.07175 | 6.99745 | 7.25034 |
| STAT3          | 10.7928 | 10.4779 | 10.8027 | 10.6249 | 7.80115 | 11.1848 | 11.097  | 11.3132 | 11.2786 |
| PTRF           | 8.32615 | 8.19306 | 8.6541  | 8.71264 | 5.45134 | 8.80202 | 8.79257 | 8.61313 | 9.0899  |
| PSMC3IP        | 5.87603 | 5.64904 | 5.86233 | 5.83822 | 6.27746 | 6.24557 | 6.08168 | 5.92728 | 6.10332 |
| CCR10          | 5.19768 | 5.3627  | 5.10297 | 6.02828 | 5.5301  | 5.7605  | 5.73448 | 5.40738 | 5.40654 |
| EZH1           | 9.1118  | 9.75515 | 9.32393 | 7.78923 | 7.15887 | 8.6834  | 7.99977 | 8.83427 | 8.62206 |
| RAMP2-AS1      | 5.9664  | 5.73689 | 6.33909 | 6.06653 | 6.55809 | 6.24644 | 5.97554 | 6.14026 | 6.21369 |
| COA3           | 8.44175 | 7.88032 | 7.62739 | 9.13216 | 6.80639 | 8.23224 | 9.63627 | 7.95253 | 8.62534 |
| LINC00671      | 6.06784 | 5.93427 | 5.51922 | 6.01277 | 7.40138 | 6.80824 | 5.8866  | 6.17164 | 6.49373 |
| PTGES3L-AARSD1 | 5.90796 | 6.16583 | 6.39747 | 6.25568 | 6.30874 | 5.98679 | 6.23307 | 6.14443 | 6.08368 |
| VAT1           | 9.00658 | 8.49621 | 8.61199 | 9.04813 | 7.61454 | 8.13069 | 8.94753 | 9.20676 | 8.96082 |
| LINC00910      | 6.48973 | 6.84405 | 6.48554 | 5.94998 | 6.71716 | 6.09845 | 6.13448 | 5.72747 | 6.17095 |
| ETV4           | 6.38437 | 6.38588 | 7.76638 | 7.15622 | 6.0612  | 6.92884 | 7.63871 | 7.44374 | 7.10085 |
| MEOX1          | 6.82665 | 6.77782 | 6.44878 | 7.23057 | 7.58127 | 7.20455 | 7.16252 | 7.33827 | 7.33858 |
| sost           | 6.25874 | 6.01882 | 6.06574 | 7.19173 | 7.1392  | 6.75585 | 6.73511 | 7.80192 | 7.79097 |
| DUSP3          | 7.78272 | 7.61611 | 7.5967  | 8.30379 | 7.24838 | 8.5726  | 8.19057 | 7.98741 | 8.22389 |
| PPY            | 4.70199 | 5.32893 | 5.29263 | 4.96379 | 5.13651 | 4.66802 | 4.39941 | 5.34548 | 5.6667  |
| PYY            | 6.92023 | 7.12553 | 6.75425 | 7.56537 | 8.24257 | 7.77204 | 7.75869 | 7.37492 | 7.61426 |
| TMEM101        | 6.81428 | 7.01168 | 6.61317 | 7.18769 | 6.48434 | 7.36974 | 7.61061 | 7.41509 | 7.23589 |
| LSM12          | 8.75376 | 8.5507  | 9.00569 | 8.06107 | 8.42125 | 8.58313 | 8.70068 | 8.51367 | 8.53671 |
| HDAC5          | 8.30205 | 8.55494 | 8.02977 | 8.18991 | 7.14887 | 8.65961 | 8.33337 | 8.66623 | 7.84073 |
| ASB16-AS1      | 7.61084 | 7.7976  | 7.72868 | 7.16806 | 6.36625 | 7.20148 | 6.91074 | 6.49795 | 7.00523 |
| ATXN7L3        | 8.20341 | 7.92389 | 7.86484 | 8.70381 | 6.07491 | 8.85361 | 9.02388 | 8.17321 | 8.83583 |
| CCDC43         | 7.69723 | 7.64303 | 7.56807 | 7.68267 | 5.87233 | 7.09334 | 8.05381 | 7.24953 | 7.24359 |
| EFTUD2         | 10.0638 | 9.68069 | 10.1432 | 9.49486 | 6.74822 | 8.90562 | 9.67076 | 8.98409 | 9.25534 |

|           |         |         |         |         |         |         |         |         |         |
|-----------|---------|---------|---------|---------|---------|---------|---------|---------|---------|
| GFAP      | 5.79061 | 5.82931 | 5.83694 | 6.64464 | 7.15308 | 6.99423 | 6.21171 | 7.00745 | 6.52487 |
| KIF18B    | 7.25537 | 6.78314 | 6.62862 | 7.23028 | 6.89824 | 7.42343 | 7.17558 | 7.14284 | 7.20311 |
| DCAKD     | 9.08695 | 8.78927 | 8.81265 | 7.26406 | 6.73125 | 6.67053 | 7.55215 | 6.78475 | 7.34175 |
| SPATA32   | 4.51389 | 4.81818 | 4.71778 | 5.14999 | 5.13571 | 5.22209 | 5.25998 | 5.29219 | 5.45478 |
| MAP3K14   | 7.2006  | 6.38446 | 6.86208 | 6.59338 | 5.95781 | 6.26113 | 6.47703 | 6.12121 | 5.92655 |
| ARHGAP27  | 7.70202 | 7.44494 | 7.50287 | 7.72062 | 6.90947 | 7.98287 | 7.73241 | 7.53071 | 8.18056 |
| LOC644172 | 4.26408 | 4.04631 | 4.14266 | 4.48266 | 5.53224 | 5.82364 | 5.09269 | 4.7926  | 5.05738 |
| MAPT-AS1  | 4.8214  | 4.61862 | 5.25282 | 4.042   | 4.68119 | 3.51875 | 4.02047 | 3.49669 | 4.06917 |
| KANSL1    | 9.45376 | 9.20824 | 9.33773 | 8.21481 | 7.20295 | 9.33972 | 8.83607 | 8.5598  | 8.52216 |
| RPRML     | 5.93321 | 5.53376 | 5.78036 | 6.4516  | 6.17134 | 6.83688 | 6.10794 | 6.07124 | 6.37831 |
| MRPL45P2  | 7.14247 | 7.47731 | 7.06517 | 6.68855 | 5.88063 | 6.95465 | 7.10416 | 6.83032 | 7.04577 |
| OSBPL7    | 5.13277 | 4.77495 | 5.38882 | 5.43588 | 5.18395 | 5.61497 | 5.11656 | 5.45504 | 4.87987 |
| MRPL10    | 6.39784 | 6.28238 | 6.44686 | 6.54494 | 6.67907 | 6.76479 | 6.90626 | 6.58334 | 6.57811 |
| SCRN2     | 6.27618 | 6.61441 | 6.36926 | 6.74524 | 6.18142 | 6.83916 | 7.20077 | 6.44595 | 6.25048 |
| SP6       | 7.16646 | 7.3419  | 7.12619 | 7.64683 | 6.68462 | 7.73677 | 7.17086 | 7.37447 | 7.76533 |
| PRR15L    | 6.14945 | 6.21893 | 6.80947 | 5.72601 | 5.87246 | 5.69872 | 5.58741 | 6.2348  | 5.7166  |
| mir152    | 6.80999 | 6.65589 | 6.63089 | 7.71539 | 6.36811 | 7.77188 | 7.43124 | 6.92464 | 7.38339 |
| CBX1      | 7.11859 | 6.74105 | 6.83714 | 6.86448 | 5.82875 | 5.99323 | 6.96624 | 6.48212 | 6.26239 |
| SKAP1     | 5.34978 | 5.26032 | 5.45682 | 5.2798  | 5.43581 | 5.26958 | 5.50562 | 5.29089 | 5.00568 |
| MIR1203   | 4.93957 | 5.21434 | 5.67867 | 5.45137 | 5.46086 | 6.05205 | 5.26316 | 5.91513 | 5.80955 |
| HOXB1     | 4.55529 | 4.58825 | 4.81018 | 5.58785 | 5.17767 | 5.48814 | 5.02971 | 5.25251 | 5.53795 |
| HOXB2     | 6.4187  | 5.92949 | 6.35283 | 6.44646 | 7.47972 | 6.09195 | 6.53529 | 5.82552 | 5.86387 |
| HOXB3     | 6.67043 | 6.25712 | 6.37286 | 6.48943 | 6.35612 | 5.50459 | 6.0844  | 6.54134 | 6.29664 |
| HOXB4     | 5.31464 | 5.16353 | 4.77926 | 5.7888  | 5.0466  | 5.81015 | 6.39876 | 6.0927  | 5.60275 |
| HOXB5     | 5.14413 | 4.49364 | 4.6686  | 4.50673 | 5.34852 | 5.21513 | 5.0372  | 5.18868 | 4.7557  |
| HOXB6     | 5.50279 | 5.5261  | 5.44531 | 6.14605 | 5.74195 | 6.0093  | 5.75888 | 5.84984 | 5.84059 |

|             |         |         |         |         |         |         |         |         |         |
|-------------|---------|---------|---------|---------|---------|---------|---------|---------|---------|
| HOXB7       | 5.60832 | 5.26099 | 5.31542 | 6.09133 | 6.31082 | 6.59248 | 6.2208  | 6.00724 | 5.64952 |
| HOXB8       | 5.39212 | 5.471   | 5.46871 | 6.47502 | 6.72678 | 6.42173 | 5.97514 | 6.27076 | 6.09651 |
| HOXB9       | 5.82402 | 5.61352 | 5.6935  | 6.26185 | 6.40275 | 6.6921  | 6.45997 | 6.72511 | 6.63383 |
| MIR196A1    | 4.17113 | 4.24564 | 3.96178 | 4.76437 | 3.91222 | 4.67332 | 4.05778 | 4.68571 | 5.14807 |
| PRAC1       | 4.55874 | 4.88062 | 4.32685 | 4.33436 | 5.19586 | 5.00947 | 4.9835  | 4.62663 | 4.56523 |
| HOXB13      | 5.69687 | 5.53604 | 5.6164  | 6.32058 | 6.60347 | 6.91817 | 6.20088 | 6.30378 | 6.05992 |
| gip         | 4.89274 | 4.98146 | 5.17301 | 4.90049 | 5.77034 | 5.35439 | 5.21681 | 5.24882 | 4.93236 |
| ZNF652      | 9.77332 | 11.0119 | 10.0018 | 7.65656 | 6.81517 | 6.90257 | 7.80344 | 6.94145 | 7.01089 |
| PHB         | 7.37808 | 7.46719 | 7.54028 | 7.59595 | 7.53045 | 7.04264 | 7.79958 | 6.91472 | 7.27823 |
| spop        | 7.72771 | 7.23131 | 7.43967 | 6.51554 | 6.58205 | 6.82768 | 6.69255 | 6.42859 | 6.62095 |
| TAC4        | 6.60974 | 6.77431 | 6.44156 | 6.86443 | 7.94729 | 6.64658 | 6.77225 | 7.14386 | 6.82245 |
| DLX3        | 8.52416 | 9.56619 | 8.51863 | 9.24873 | 9.32956 | 8.86395 | 9.367   | 9.02811 | 8.08183 |
| LOC284080   | 5.19773 | 5.60121 | 5.82447 | 5.78666 | 5.92218 | 6.18699 | 5.50288 | 5.59439 | 5.37179 |
| SAMD14      | 5.61029 | 5.57872 | 5.83681 | 6.02238 | 6.40092 | 6.67701 | 6.23602 | 5.86691 | 6.31816 |
| MRPL27      | 6.768   | 6.83587 | 6.66627 | 7.23493 | 6.85451 | 7.12481 | 7.29748 | 6.69309 | 7.18927 |
| LRRC59      | 9.02879 | 8.31591 | 9.18104 | 10.0881 | 7.27535 | 9.70857 | 10.246  | 9.41086 | 9.66571 |
| CHAD        | 6.49756 | 6.80951 | 7.18895 | 7.32145 | 7.64356 | 6.69299 | 6.59954 | 6.86449 | 6.60018 |
| CACNA1G-AS1 | 6.07353 | 5.99555 | 6.03727 | 7.14553 | 6.79846 | 6.85767 | 7.01463 | 6.56915 | 6.84038 |
| ankrd40     | 7.78599 | 7.82541 | 8.06675 | 7.2617  | 5.12183 | 6.58783 | 7.13666 | 6.92232 | 6.75127 |
| SPAG9       | 9.59348 | 9.67443 | 9.65635 | 9.54585 | 9.13442 | 10.407  | 9.89885 | 11.012  | 10.4689 |
| MBTD1       | 8.53442 | 8.6469  | 8.44524 | 6.84241 | 5.60776 | 6.18855 | 6.97649 | 7.29906 | 6.66354 |
| CA10        | 4.31804 | 4.50718 | 4.36408 | 5.70824 | 5.80214 | 5.28388 | 4.96504 | 4.96259 | 5.05194 |
| cox11       | 6.85767 | 6.65462 | 7.15298 | 7.04111 | 5.4528  | 6.74882 | 7.28674 | 6.46901 | 6.65045 |
| MMD         | 7.46813 | 6.51286 | 7.27837 | 7.34623 | 5.20236 | 6.10339 | 7.51971 | 7.52815 | 7.12266 |
| TMEM100     | 5.37101 | 5.91255 | 6.12222 | 5.28813 | 5.24361 | 5.3421  | 5.26763 | 5.01233 | 5.19775 |
| c17orf67    | 6.05553 | 6.30327 | 5.92554 | 5.45779 | 5.7099  | 5.59234 | 5.61559 | 5.64995 | 5.63971 |

|                  |         |         |         |         |         |         |         |         |         |
|------------------|---------|---------|---------|---------|---------|---------|---------|---------|---------|
| MTVR2            | 6.79312 | 6.5519  | 7.04511 | 6.18044 | 6.46575 | 6.07572 | 5.70408 | 6.70281 | 6.27351 |
| TRIM25           | 9.57725 | 9.46687 | 9.48995 | 8.97535 | 7.71922 | 8.29965 | 8.96786 | 9.14012 | 8.61398 |
| COIL             | 6.77013 | 7.01359 | 6.81709 | 6.40919 | 4.8543  | 5.85031 | 7.25055 | 6.78986 | 6.04773 |
| MRPS23           | 6.72913 | 6.60072 | 6.74739 | 7.62126 | 4.91028 | 6.71739 | 7.80381 | 6.1937  | 5.99903 |
| VEZF1            | 8.39967 | 8.42991 | 8.60482 | 7.92088 | 5.84974 | 6.47667 | 7.96504 | 7.40159 | 7.33698 |
| SRSF1            | 9.73631 | 9.5278  | 9.87166 | 9.40281 | 6.12657 | 8.51115 | 9.11511 | 8.71489 | 9.11638 |
| MPO              | 5.34317 | 5.20076 | 5.38056 | 6.13262 | 5.92386 | 6.41782 | 5.60775 | 5.97602 | 5.89362 |
| TSPOAP1          | 6.18842 | 6.3513  | 6.46879 | 6.70912 | 5.94123 | 6.6588  | 6.5844  | 6.36872 | 6.23667 |
| MIR142           | 3.723   | 3.92721 | 4.17583 | 4.15847 | 3.48141 | 4.53083 | 3.85206 | 4.43808 | 4.03922 |
| SUPT4H1          | 10.1946 | 10.2236 | 10.3131 | 10.405  | 9.28568 | 10.0338 | 10.4947 | 10.0574 | 10.2963 |
| RNF43            | 7.7306  | 7.7529  | 7.2729  | 7.14652 | 6.97722 | 6.59658 | 7.01133 | 6.65418 | 6.54699 |
| hsf5             | 5.20039 | 5.5063  | 5.4112  | 5.74141 | 6.25086 | 5.77496 | 5.36478 | 5.65571 | 5.74342 |
| MTMR4            | 8.55658 | 8.68772 | 8.77876 | 7.88973 | 6.4137  | 7.36536 | 7.82182 | 8.49214 | 7.78572 |
| 44443            | 6.15088 | 5.54222 | 5.90797 | 6.64659 | 5.50116 | 6.1039  | 6.30867 | 5.5592  | 5.35539 |
| C17orf47         | 4.27402 | 4.21599 | 4.34187 | 4.35219 | 5.39897 | 5.1348  | 4.64518 | 5.19008 | 4.50977 |
| TEX14            | 4.93411 | 4.86836 | 4.99213 | 5.61564 | 5.9363  | 5.17984 | 5.30726 | 5.3197  | 5.60816 |
| TRIM37           | 8.13288 | 8.10962 | 7.85856 | 7.80528 | 6.15972 | 7.20352 | 7.63774 | 7.33082 | 7.77004 |
| SKA2             | 7.12745 | 7.07831 | 6.99754 | 7.12228 | 6.85256 | 5.94519 | 7.29156 | 7.55774 | 7.31339 |
| MIR454           | 3.88969 | 4.64581 | 3.72397 | 4.05417 | 3.70276 | 3.69829 | 3.98688 | 4.75555 | 3.78536 |
| MIR301A          | 3.45164 | 2.81401 | 2.71054 | 2.76884 | 4.03956 | 3.17689 | 2.8027  | 3.10863 | 2.88057 |
| PTRH2            | 6.96575 | 7.06854 | 6.9876  | 7.70446 | 5.49767 | 6.32327 | 7.53084 | 6.4208  | 6.66395 |
| TBC1D3P1-DHX40P1 | 7.22537 | 6.85901 | 6.82874 | 6.65268 | 6.27638 | 6.80247 | 6.60614 | 6.80153 | 6.54485 |
| MIR4737          | 9.88447 | 10.3338 | 10.1446 | 9.78933 | 10.9925 | 10.331  | 9.87432 | 10.7297 | 10.2346 |
| HEATR6           | 9.12928 | 8.81287 | 9.0283  | 7.41813 | 6.97639 | 6.78854 | 8.34497 | 7.6913  | 7.68636 |
| WFDC21P          | 6.52527 | 7.53583 | 6.62256 | 5.99549 | 5.20448 | 5.22718 | 5.80224 | 4.1609  | 4.86796 |
| USP32            | 9.09121 | 9.0346  | 8.87337 | 8.43062 | 6.32372 | 9.39939 | 8.95618 | 9.08061 | 9.67981 |



|           |         |         |         |         |         |         |         |         |         |
|-----------|---------|---------|---------|---------|---------|---------|---------|---------|---------|
| SCARNA20  | 6.63245 | 7.12502 | 6.34043 | 6.70197 | 6.26238 | 7.22356 | 6.67207 | 6.93646 | 7.03073 |
| APPBP2    | 8.11899 | 7.78988 | 8.03678 | 7.6369  | 4.82848 | 7.06477 | 7.58378 | 7.12066 | 7.5148  |
| NACA2     | 6.35234 | 6.41685 | 6.39215 | 6.24941 | 7.60695 | 7.55816 | 6.50294 | 6.3789  | 6.74204 |
| BRIP1     | 7.53392 | 7.58549 | 7.69397 | 8.00364 | 5.9429  | 5.54042 | 6.67345 | 6.5348  | 6.74744 |
| INTS2     | 7.92794 | 8.0972  | 8.09823 | 7.26258 | 6.01285 | 7.01509 | 7.53852 | 7.20182 | 7.33486 |
| MED13     | 10.1874 | 10.4105 | 10.1651 | 9.59625 | 6.68885 | 9.96916 | 9.5674  | 9.63277 | 10.278  |
| CYB561    | 7.23921 | 7.11108 | 7.07939 | 7.21214 | 6.17282 | 7.36158 | 7.89535 | 7.01893 | 7.42281 |
| LIMD2     | 7.7756  | 8.26174 | 7.72231 | 8.13637 | 7.91771 | 7.75626 | 7.57732 | 7.86668 | 7.76039 |
| STRADA    | 7.56257 | 7.47374 | 7.62569 | 6.88682 | 5.92236 | 6.44524 | 7.09612 | 6.81346 | 6.81181 |
| CCDC47    | 9.784   | 9.84009 | 9.70045 | 9.57504 | 6.79148 | 9.91863 | 10.0655 | 9.77716 | 9.63141 |
| FTSJ3     | 7.65178 | 7.94416 | 7.59338 | 7.70181 | 6.39131 | 7.10434 | 8.3686  | 7.12669 | 7.37955 |
| CSH2      | 6.57098 | 6.84446 | 6.52185 | 7.67646 | 7.66281 | 7.53335 | 7.05334 | 7.47766 | 7.29045 |
| gh2       | 5.92121 | 6.31942 | 6.15108 | 6.65626 | 6.36617 | 6.76375 | 6.83053 | 6.80625 | 6.69787 |
| CSH1      | 5.96616 | 6.3554  | 6.50756 | 6.64431 | 8.27479 | 6.64917 | 5.79869 | 6.46389 | 6.64936 |
| CSHL1     | 4.02287 | 4.55823 | 4.12854 | 5.04927 | 5.02679 | 4.69125 | 4.54042 | 4.67385 | 4.52468 |
| GH1       | 4.15966 | 4.03227 | 3.80256 | 5.01465 | 4.90479 | 5.4318  | 4.90935 | 4.57812 | 5.24357 |
| ICAM2     | 7.67469 | 7.335   | 7.96938 | 7.51634 | 8.06338 | 7.46446 | 7.46368 | 7.83324 | 8.03137 |
| ERN1      | 8.06105 | 7.90575 | 7.91592 | 7.01155 | 6.30256 | 8.02044 | 7.64823 | 8.34106 | 7.29902 |
| TEX2      | 9.44996 | 9.45202 | 9.25653 | 9.42893 | 7.84231 | 9.58474 | 9.37233 | 9.43971 | 9.35503 |
| DDX5      | 11.585  | 11.2378 | 11.2446 | 11.2869 | 8.18013 | 10.5467 | 10.9792 | 10.6796 | 11.2058 |
| MIR5047   | 10.2358 | 9.90347 | 9.95431 | 8.69    | 5.36694 | 7.19246 | 7.93397 | 9.37444 | 9.20252 |
| SMURF2    | 9.4654  | 9.00102 | 8.96922 | 9.30998 | 5.52852 | 7.96602 | 8.37332 | 9.61286 | 9.59253 |
| LOC146880 | 8.36632 | 7.99554 | 7.98769 | 7.91302 | 6.20505 | 7.72415 | 7.54879 | 8.17868 | 8.72926 |
| AMZ2P1    | 6.0424  | 6.55246 | 5.95267 | 5.36921 | 5.43178 | 5.19253 | 5.6167  | 5.26195 | 4.9697  |
| AXIN2     | 7.55241 | 8.28978 | 7.5042  | 6.75033 | 6.93992 | 6.56041 | 7.16386 | 6.9409  | 6.67365 |
| CEP112    | 6.69662 | 6.94106 | 6.90099 | 6.01263 | 5.4529  | 6.20608 | 6.35677 | 5.81186 | 6.00253 |

|           |         |         |         |         |         |         |         |         |         |
|-----------|---------|---------|---------|---------|---------|---------|---------|---------|---------|
| APOH      | 4.34877 | 4.56061 | 4.06426 | 4.73348 | 5.28292 | 4.63646 | 4.58188 | 4.75687 | 4.54749 |
| HELZ      | 9.11188 | 9.09413 | 9.25702 | 8.03732 | 5.85319 | 7.46079 | 7.88685 | 8.1004  | 8.09604 |
| C17orf58  | 5.8703  | 5.50807 | 5.54941 | 5.8714  | 4.66064 | 6.12    | 6.32638 | 5.2663  | 5.59028 |
| MIR635    | 5.66926 | 5.64754 | 6.32801 | 5.81846 | 6.13879 | 4.66943 | 5.94054 | 5.13066 | 5.53596 |
| MIR4524A  | 5.47896 | 6.20177 | 5.7981  | 3.27898 | 2.87132 | 2.76237 | 3.12882 | 2.79402 | 3.72733 |
| KCNJ2-AS1 | 5.8522  | 6.1798  | 5.77833 | 5.85902 | 5.93001 | 5.99796 | 5.82299 | 5.58248 | 5.46855 |
| LINC00673 | 7.73207 | 7.34792 | 7.12458 | 7.31894 | 6.39799 | 7.35376 | 7.71274 | 7.67098 | 7.47286 |
| LINC00511 | 4.87636 | 5.07406 | 4.93007 | 5.2617  | 5.36055 | 5.54259 | 5.19268 | 5.26635 | 4.88325 |
| CPSF4L    | 5.76117 | 6.14537 | 5.66139 | 6.53446 | 7.2524  | 6.52432 | 6.35702 | 6.17007 | 6.33426 |
| CDC42EP4  | 7.66278 | 7.46557 | 7.48518 | 8.22748 | 6.79167 | 7.92001 | 7.8607  | 7.83578 | 7.60349 |
| SDK2      | 6.51589 | 6.39113 | 6.6976  | 6.98834 | 5.72727 | 6.48804 | 7.53795 | 6.72169 | 6.86563 |
| MGC16275  | 5.5773  | 5.37718 | 5.43233 | 6.00284 | 6.23178 | 6.28501 | 5.99188 | 5.65496 | 5.89342 |
| BTBD17    | 4.99006 | 5.0687  | 5.43503 | 6.05226 | 5.67889 | 6.53509 | 5.93961 | 6.01987 | 5.94257 |
| CD300LB   | 5.48986 | 5.92124 | 5.76717 | 6.0748  | 6.82698 | 6.47119 | 6.25215 | 6.24903 | 5.98623 |
| CD300C    | 6.71067 | 6.69476 | 7.17434 | 7.15979 | 7.57597 | 7.44516 | 6.80893 | 7.14801 | 7.04146 |
| CD300LD   | 4.90045 | 4.94644 | 4.9389  | 5.38492 | 5.83283 | 5.33506 | 4.75244 | 5.52706 | 5.10943 |
| CD300E    | 5.6087  | 5.76409 | 5.68012 | 6.62657 | 7.12915 | 7.01388 | 6.1119  | 6.47201 | 6.75875 |
| CD300LF   | 5.37443 | 5.14514 | 5.44189 | 5.63212 | 6.39488 | 5.68927 | 4.9693  | 6.16712 | 5.72986 |
| FDXR      | 6.53965 | 6.52386 | 6.4745  | 6.83306 | 7.07857 | 7.09899 | 6.93416 | 7.01945 | 7.05197 |
| USH1G     | 6.85211 | 6.79234 | 6.70572 | 7.76451 | 6.47739 | 7.45186 | 7.35501 | 6.56086 | 7.29814 |
| HID1      | 6.74007 | 6.99561 | 6.9148  | 6.67989 | 6.46338 | 7.10277 | 6.94038 | 7.29477 | 6.87682 |
| HN1       | 7.29434 | 6.44971 | 6.38383 | 8.66661 | 6.22933 | 8.17692 | 8.97479 | 8.38289 | 8.38248 |
| SUMO2     | 8.83243 | 8.50902 | 9.01896 | 8.30953 | 6.15017 | 8.19032 | 9.03426 | 8.31588 | 7.97841 |
| MIF4GD    | 7.81421 | 7.85854 | 8.00646 | 7.42558 | 6.12916 | 7.03928 | 8.20017 | 6.92584 | 7.46939 |
| GRB2      | 8.7195  | 8.31263 | 8.63916 | 8.8574  | 6.79822 | 8.87551 | 9.06227 | 9.2396  | 9.00479 |
| CASKIN2   | 7.31341 | 7.06918 | 7.3354  | 7.59921 | 6.98999 | 7.50365 | 7.92828 | 7.33414 | 7.79642 |

|            |         |         |         |         |         |         |         |         |         |
|------------|---------|---------|---------|---------|---------|---------|---------|---------|---------|
| RECQL5     | 6.94552 | 6.99643 | 6.73753 | 6.65204 | 6.54809 | 7.17243 | 6.89927 | 7.03017 | 7.01496 |
| GALK1      | 7.3711  | 7.51335 | 7.08249 | 8.02983 | 8.08697 | 8.5475  | 8.26972 | 8.26465 | 7.87915 |
| MIR4738    | 3.05173 | 2.26111 | 1.93675 | 2.71504 | 2.64326 | 2.39058 | 2.43801 | 2.6571  | 3.41589 |
| UNC13D     | 6.97192 | 6.75368 | 6.96494 | 8.55311 | 7.63169 | 9.75846 | 8.89781 | 8.36127 | 8.77681 |
| WBP2       | 8.39967 | 8.44625 | 8.46573 | 8.83548 | 8.0683  | 9.3578  | 9.21737 | 9.4186  | 9.15878 |
| TRIM47     | 7.80821 | 7.46988 | 7.72093 | 7.98021 | 7.16547 | 7.56497 | 9.07824 | 7.81861 | 7.53031 |
| TRIM65     | 7.23416 | 7.50619 | 7.24368 | 7.09787 | 7.02752 | 7.69707 | 7.61962 | 6.97045 | 6.73436 |
| MRPL38     | 6.44991 | 6.06845 | 6.49688 | 6.39939 | 5.77527 | 6.24422 | 6.34616 | 6.58188 | 6.21691 |
| FBF1       | 6.90477 | 6.75596 | 6.60462 | 6.97727 | 7.12192 | 6.95883 | 6.75487 | 6.69133 | 7.01498 |
| EVPL       | 8.75492 | 8.69773 | 8.6729  | 9.23233 | 7.69145 | 10.0895 | 9.49569 | 8.98279 | 9.45645 |
| SRP68      | 9.64875 | 9.18602 | 9.34123 | 9.38678 | 6.86423 | 9.72707 | 9.7295  | 9.27996 | 9.59492 |
| FOXJ1      | 5.46946 | 5.88363 | 5.94681 | 6.42621 | 5.92205 | 5.74495 | 5.93731 | 6.36235 | 6.05034 |
| RNF157     | 5.94425 | 6.13585 | 6.23617 | 6.27475 | 6.68147 | 6.45702 | 6.00499 | 6.3241  | 6.07586 |
| QRICH2     | 6.6423  | 6.38191 | 6.32438 | 6.91667 | 6.52665 | 6.78886 | 6.64431 | 6.99649 | 7.94506 |
| PRPSAP1    | 7.47647 | 7.42741 | 7.3046  | 8.07284 | 6.55494 | 8.34052 | 8.13934 | 8.59137 | 8.72616 |
| UBE2O      | 7.90846 | 7.95274 | 7.77854 | 7.97723 | 7.23495 | 7.90014 | 8.03821 | 8.37878 | 7.53025 |
| RHBDF2     | 7.49272 | 7.18208 | 7.36446 | 7.7598  | 6.39046 | 8.12341 | 8.3443  | 7.73419 | 8.00268 |
| CYGB       | 7.32557 | 7.54057 | 7.72901 | 7.55755 | 7.63319 | 7.31908 | 7.37012 | 7.27987 | 7.59773 |
| MXRA7      | 8.29448 | 7.55656 | 8.24122 | 8.01556 | 6.71418 | 7.71594 | 8.11738 | 7.66918 | 7.9999  |
| JMJD6      | 7.04911 | 6.85568 | 6.88976 | 8.1919  | 6.71035 | 8.95582 | 8.11905 | 8.04264 | 8.30436 |
| SRSF2      | 9.89977 | 9.35775 | 9.84312 | 9.41643 | 7.38759 | 8.46769 | 9.22266 | 8.84971 | 9.01603 |
| MIR4316    | 6.11199 | 5.94522 | 6.1193  | 6.89859 | 6.96768 | 7.16464 | 7.01981 | 6.68142 | 6.8677  |
| FLJ45079   | 5.14193 | 5.41748 | 5.25204 | 5.33964 | 5.42562 | 5.43724 | 5.05055 | 5.48182 | 5.42225 |
| TNRC6C-AS1 | 6.36963 | 6.02481 | 5.88978 | 5.74566 | 6.46243 | 5.66186 | 5.8896  | 5.65133 | 6.06777 |
| TMC6       | 6.89682 | 6.67981 | 6.59805 | 7.47583 | 6.85091 | 7.43021 | 7.38404 | 7.21444 | 7.32028 |
| SOCS3      | 8.85017 | 6.59831 | 6.88604 | 8.8846  | 6.45479 | 9.90598 | 9.50581 | 9.17613 | 9.01593 |

|              |         |         |         |         |         |         |         |         |         |
|--------------|---------|---------|---------|---------|---------|---------|---------|---------|---------|
| CYTH1        | 7.97401 | 8.14757 | 7.80248 | 7.45133 | 7.1007  | 8.38157 | 7.79111 | 8.80556 | 8.51874 |
| USP36        | 8.41083 | 8.65316 | 8.70798 | 8.62978 | 8.48326 | 8.06379 | 8.45974 | 8.18906 | 8.26155 |
| TIMP2        | 9.50978 | 9.42199 | 10.1665 | 9.49187 | 8.35231 | 8.186   | 9.56298 | 9.18863 | 8.77539 |
| CEP295NL     | 6.5579  | 6.39358 | 6.4039  | 6.27889 | 6.70982 | 6.48223 | 6.14434 | 6.59098 | 6.42494 |
| CANT1        | 7.53598 | 7.15689 | 7.38612 | 7.82784 | 6.23968 | 8.24784 | 8.20202 | 8.50109 | 8.6347  |
| C1QTNF1-AS1  | 4.376   | 4.25695 | 4.29594 | 4.38134 | 4.84235 | 4.06035 | 4.18421 | 4.40105 | 4.3916  |
| MIR4739      | 6.59476 | 7.02192 | 6.94249 | 7.21306 | 9.61541 | 7.95218 | 7.2913  | 7.93745 | 8.02613 |
| CBX8         | 5.78618 | 5.89273 | 5.51964 | 6.59924 | 6.37793 | 6.78002 | 6.49854 | 6.08387 | 6.33328 |
| CBX4         | 7.83394 | 7.26701 | 7.57435 | 7.93555 | 6.6445  | 8.01938 | 8.02686 | 7.60916 | 7.73863 |
| EIF4A3       | 9.29461 | 8.6419  | 8.83872 | 9.43522 | 9.14558 | 10.971  | 10.3296 | 11.1988 | 9.5668  |
| SGSH         | 8.15939 | 7.65695 | 8.02555 | 8.15592 | 7.35387 | 8.07825 | 8.66301 | 8.10517 | 7.93153 |
| LOC100294362 | 5.76981 | 5.7242  | 5.90828 | 6.5616  | 6.48768 | 6.76736 | 6.50475 | 5.85117 | 6.42334 |
| NPTX1        | 5.32069 | 5.95113 | 5.63005 | 8.68799 | 6.66806 | 9.92733 | 7.28593 | 7.02435 | 8.76829 |
| BAIAP2-AS1   | 5.56062 | 5.24271 | 5.13941 | 5.8578  | 5.3839  | 5.86468 | 5.64243 | 5.78515 | 5.74299 |
| AATK         | 6.60776 | 6.51625 | 6.65883 | 7.01103 | 6.6653  | 7.69122 | 6.82834 | 7.25411 | 7.13241 |
| MIR657       | 6.21052 | 6.17252 | 6.35653 | 6.85873 | 7.37244 | 7.17601 | 6.83789 | 6.46072 | 7.28187 |
| MIR1250      | 7.67226 | 7.56881 | 7.81329 | 7.01109 | 8.66893 | 6.91426 | 6.95947 | 7.98252 | 7.6924  |
| CEP131       | 6.9529  | 6.70635 | 6.8252  | 7.73149 | 7.13705 | 7.73375 | 7.38199 | 7.45974 | 7.6039  |
| TEPSIN       | 7.15525 | 6.7554  | 6.88749 | 7.20746 | 7.16958 | 6.9415  | 7.38265 | 7.18753 | 7.10997 |
| LINC00482    | 6.67647 | 6.84152 | 6.54145 | 7.32094 | 7.81392 | 7.30976 | 7.35876 | 7.65949 | 7.62329 |
| TMEM105      | 6.3279  | 6.53661 | 6.5021  | 6.89833 | 7.30068 | 6.65686 | 6.38999 | 6.52821 | 6.58543 |
| MIR3186      | 5.7784  | 5.88206 | 5.93135 | 6.36662 | 6.03877 | 6.87599 | 6.61736 | 6.10256 | 6.38968 |
| FAAP100      | 7.43441 | 6.81012 | 7.37839 | 7.32952 | 6.79427 | 7.21149 | 7.13562 | 7.18209 | 7.22197 |
| NPLOC4       | 10.3689 | 10.0039 | 10.2087 | 10.0352 | 7.95801 | 9.72545 | 10.4133 | 10.9184 | 10.4977 |
| ARL16        | 7.19774 | 6.93564 | 7.19132 | 6.60924 | 5.80287 | 6.73638 | 7.39664 | 6.99167 | 6.93548 |
| ARHGDI1A     | 8.95265 | 8.38215 | 9.00564 | 9.86349 | 6.9168  | 10.3207 | 10.0896 | 10.3549 | 9.93844 |

|          |         |         |         |         |         |         |         |         |         |
|----------|---------|---------|---------|---------|---------|---------|---------|---------|---------|
| ALYREF   | 6.29936 | 6.21103 | 6.38433 | 7.42854 | 4.91052 | 7.38581 | 7.59426 | 6.45076 | 6.80649 |
| SIRT7    | 7.44575 | 7.31671 | 7.0189  | 7.68441 | 7.50531 | 8.69096 | 8.5405  | 8.56936 | 7.86977 |
| MAFG     | 6.14904 | 5.64742 | 6.29713 | 7.13169 | 6.57362 | 7.08193 | 6.62771 | 7.20058 | 6.91627 |
| PYCR1    | 6.85518 | 6.75661 | 7.08393 | 7.51088 | 7.09125 | 7.6533  | 7.44986 | 7.21241 | 7.26979 |
| MYADML2  | 6.25162 | 6.66492 | 6.50365 | 6.95404 | 8.02912 | 7.02443 | 6.75379 | 7.10612 | 6.86046 |
| NOTUM    | 5.66895 | 5.67561 | 6.05274 | 6.69125 | 6.20778 | 6.74562 | 6.41919 | 6.13563 | 6.09974 |
| CENPX    | 8.26501 | 7.59025 | 7.89227 | 8.14855 | 7.21117 | 8.4319  | 8.73819 | 8.19847 | 8.00923 |
| DCXR     | 10.2607 | 9.98279 | 10.1054 | 9.54422 | 8.43834 | 8.76793 | 9.89188 | 8.24623 | 9.3193  |
| RFNG     | 7.33085 | 7.42228 | 7.20162 | 8.4684  | 7.89096 | 8.6678  | 8.64828 | 7.58139 | 7.57205 |
| DUS1L    | 8.0535  | 7.73192 | 8.07462 | 8.06644 | 6.24516 | 7.95926 | 8.50733 | 7.20664 | 7.62192 |
| FASN     | 8.60494 | 8.32204 | 8.27635 | 8.58434 | 6.71902 | 8.62716 | 8.86632 | 7.7903  | 8.4655  |
| CCDC57   | 6.283   | 6.0547  | 6.30218 | 6.47787 | 6.96077 | 5.86545 | 6.56072 | 6.72292 | 6.11489 |
| CD7      | 5.95108 | 5.93296 | 6.30872 | 7.0337  | 7.15612 | 6.96777 | 6.71288 | 6.64451 | 6.65712 |
| SECTM1   | 7.23884 | 7.09457 | 7.10178 | 7.31045 | 7.34632 | 7.28384 | 7.45933 | 7.56722 | 7.28126 |
| OGFOD3   | 7.32711 | 7.25268 | 7.4559  | 7.93912 | 7.85846 | 7.58788 | 7.84456 | 7.68161 | 7.28227 |
| c17orf62 | 7.35826 | 7.2197  | 7.33244 | 7.38536 | 6.95337 | 7.72929 | 7.40446 | 7.52253 | 7.43741 |
| WDR45B   | 9.18218 | 9.44488 | 9.4229  | 9.66934 | 8.82416 | 11.0496 | 10.2309 | 10.3854 | 9.99323 |
| MIR4525  | 9.9637  | 9.62577 | 10.1822 | 8.85926 | 12.2882 | 8.7618  | 8.65039 | 10.0829 | 11.0303 |
| ZNF750   | 11.4418 | 11.2192 | 10.9062 | 11.2604 | 10.1844 | 11.1394 | 11.0924 | 10.4219 | 11.0832 |
| ARL17B   | 8.87441 | 7.70843 | 8.09414 | 7.63594 | 7.88648 | 7.3677  | 6.60673 | 7.2343  | 7.56438 |
| MGC70870 | 5.2647  | 5.58318 | 5.72467 | 6.03083 | 7.57165 | 5.95051 | 5.5258  | 5.75198 | 6.05055 |
| USP14    | 9.81025 | 9.70762 | 9.84356 | 9.22437 | 5.94073 | 8.94154 | 9.92983 | 8.9407  | 9.33039 |
| CLUL1    | 5.13474 | 5.42286 | 5.42838 | 5.18074 | 5.79582 | 5.85305 | 5.42838 | 5.7251  | 5.73099 |
| TYMS     | 6.95344 | 6.95218 | 6.81823 | 7.57759 | 5.31825 | 6.96187 | 7.51904 | 6.54941 | 6.66669 |
| ADCYAP1  | 6.07295 | 5.5179  | 6.00507 | 6.27047 | 5.96834 | 6.46468 | 6.55669 | 6.10808 | 6.20514 |
| NDC80    | 5.68845 | 5.65513 | 5.17195 | 6.14579 | 4.72574 | 5.35705 | 5.65836 | 5.80977 | 5.31753 |

|            |         |         |         |         |         |         |         |         |         |
|------------|---------|---------|---------|---------|---------|---------|---------|---------|---------|
| SMCHD1     | 8.94536 | 9.12035 | 9.08516 | 8.33595 | 5.60403 | 7.42962 | 8.17528 | 8.51301 | 8.06785 |
| EMILIN2    | 6.87609 | 7.02879 | 7.52873 | 7.47286 | 6.91315 | 7.55849 | 7.23604 | 7.43258 | 7.45183 |
| TGIF1      | 7.23674 | 6.76409 | 6.90012 | 7.58147 | 6.93379 | 6.68261 | 7.0504  | 6.63102 | 7.00881 |
| DLGAP1-AS1 | 6.41852 | 6.17384 | 6.53954 | 6.28541 | 5.91389 | 5.97392 | 6.17988 | 5.83086 | 6.23273 |
| DLGAP1-AS3 | 4.57352 | 4.494   | 4.22057 | 4.07261 | 6.37907 | 4.64966 | 4.47674 | 4.86042 | 4.47417 |
| DLGAP1-AS5 | 5.10277 | 5.08571 | 5.48733 | 5.81812 | 7.62096 | 5.48843 | 4.96625 | 5.42801 | 5.31317 |
| LINC00667  | 7.52548 | 7.0687  | 7.32676 | 6.70182 | 5.66791 | 6.16049 | 7.44243 | 6.07316 | 6.8026  |
| MIR3976HG  | 3.22134 | 3.41606 | 3.31688 | 3.33702 | 4.50455 | 3.76968 | 3.43089 | 3.92742 | 3.30089 |
| MIR3976    | 2.81652 | 2.55815 | 2.7641  | 3.45816 | 3.70413 | 2.94446 | 2.72334 | 2.30025 | 2.94483 |
| LINC01387  | 5.32783 | 5.35278 | 5.34979 | 5.84464 | 6.93775 | 6.05856 | 5.91204 | 5.84636 | 5.74226 |
| ARHGAP28   | 6.93429 | 6.85779 | 6.779   | 6.41094 | 6.49855 | 6.06254 | 6.4168  | 5.92545 | 5.71244 |
| LRRC30     | 6.29373 | 6.5788  | 6.36944 | 6.52518 | 7.93082 | 7.19341 | 6.62416 | 6.40439 | 6.78075 |
| MTCL1      | 7.5978  | 8.32003 | 7.6039  | 7.40691 | 7.23824 | 6.25762 | 7.16473 | 6.81335 | 6.97374 |
| ANKRD12    | 9.95145 | 10.3081 | 10.2001 | 8.56938 | 7.03906 | 9.11633 | 9.27094 | 9.69461 | 9.40469 |
| TWSG1      | 8.33524 | 8.03633 | 8.10157 | 8.80577 | 6.1987  | 9.65478 | 8.69762 | 8.79983 | 8.19331 |
| RALBP1     | 9.94593 | 9.87687 | 10.0112 | 9.62274 | 7.5272  | 9.86826 | 10.3289 | 10.0977 | 9.93495 |
| TXNDC2     | 4.78495 | 4.73025 | 4.94147 | 5.02347 | 6.48088 | 5.22725 | 5.20017 | 5.19913 | 5.15493 |
| APCDD1     | 11.1707 | 10.8062 | 11.0649 | 10.4001 | 8.25069 | 8.82288 | 10.707  | 8.8334  | 9.4416  |
| CHMP1B     | 10.0468 | 9.54689 | 9.73273 | 10.426  | 7.95916 | 10.5593 | 10.6078 | 10.6528 | 10.3186 |
| IMPA2      | 9.49939 | 9.56426 | 9.82829 | 9.8906  | 7.95636 | 9.95619 | 10.082  | 9.761   | 9.4716  |
| C18orf61   | 4.38751 | 4.13112 | 4.4273  | 4.33999 | 5.31891 | 4.89838 | 4.35004 | 4.78983 | 4.47269 |
| CIDEA      | 7.40404 | 6.60352 | 7.24254 | 7.6016  | 6.43231 | 7.64707 | 6.86166 | 7.67038 | 6.87319 |
| PRELID3A   | 5.00326 | 5.18533 | 4.88217 | 4.7025  | 4.73357 | 4.72017 | 5.24623 | 4.98527 | 5.10573 |
| SEH1L      | 9.40617 | 9.09848 | 9.55586 | 9.2966  | 6.16908 | 8.39536 | 9.30487 | 7.95825 | 8.69569 |
| CEP192     | 8.00301 | 8.07687 | 7.92472 | 6.80076 | 5.68832 | 6.85956 | 7.21558 | 7.03265 | 6.60485 |
| LDLRAD4    | 6.75644 | 6.54721 | 6.8276  | 6.52358 | 6.65447 | 6.37635 | 6.63566 | 6.54232 | 6.50783 |

|            |         |         |         |         |         |         |         |         |         |
|------------|---------|---------|---------|---------|---------|---------|---------|---------|---------|
| RNMT       | 7.69267 | 7.61844 | 7.66754 | 7.70957 | 6.59638 | 9.05928 | 8.38657 | 8.51523 | 7.38268 |
| MC5R       | 4.59147 | 4.44497 | 5.22089 | 5.0843  | 6.8638  | 5.29118 | 5.00205 | 4.98971 | 5.53272 |
| ANKRD30B   | 2.99664 | 3.49133 | 3.39426 | 3.44362 | 3.90102 | 3.38274 | 3.61153 | 3.23084 | 3.26644 |
| MIR3156-2  | 4.35825 | 4.59146 | 4.19847 | 4.77123 | 4.63345 | 4.88713 | 4.58642 | 4.50493 | 4.36166 |
| greb1l     | 5.34783 | 5.41803 | 5.69417 | 5.27003 | 5.642   | 5.3749  | 5.1872  | 5.20855 | 4.95129 |
| SNRPD1     | 6.09144 | 6.94984 | 6.41936 | 7.55559 | 3.8397  | 6.56866 | 7.61023 | 5.94873 | 6.50836 |
| MIR320C1   | 6.0102  | 5.64168 | 5.71582 | 5.7408  | 6.11635 | 6.38944 | 6.11749 | 6.06831 | 5.69631 |
| MIB1       | 8.1446  | 8.24201 | 7.99747 | 7.99859 | 6.27837 | 8.10815 | 8.3251  | 8.09829 | 8.15649 |
| GATA6      | 6.71871 | 6.85846 | 7.18546 | 6.66849 | 6.24303 | 6.76445 | 6.22685 | 6.51446 | 6.52587 |
| RBBP8      | 9.07421 | 9.34027 | 9.29025 | 8.55139 | 5.83767 | 7.98002 | 8.8708  | 8.0408  | 8.37428 |
| CABLES1    | 8.03569 | 6.75147 | 7.14937 | 5.85747 | 6.05419 | 6.15921 | 6.76582 | 5.7408  | 6.27718 |
| RIOK3      | 10.4146 | 10.573  | 10.4046 | 10.0287 | 10.1688 | 11.6342 | 10.7577 | 11.6089 | 10.5531 |
| c18orf8    | 8.2885  | 8.15138 | 8.40652 | 7.99407 | 6.47644 | 8.06296 | 8.26849 | 8.87018 | 8.20259 |
| TTC39C     | 9.0334  | 8.96675 | 8.80592 | 8.21397 | 7.14115 | 7.48343 | 8.45501 | 6.13552 | 7.00378 |
| CABYR      | 5.67312 | 5.7621  | 5.3743  | 5.50315 | 5.39099 | 5.57713 | 5.61277 | 5.5823  | 5.40801 |
| MIR320C2   | 4.4641  | 4.25859 | 4.19365 | 4.15024 | 3.4673  | 4.99554 | 5.10035 | 4.16092 | 3.59873 |
| IMPACT     | 8.69402 | 9.10365 | 9.08152 | 8.32221 | 6.24709 | 7.7721  | 9.14109 | 7.89083 | 8.0892  |
| HRH4       | 3.59501 | 3.23327 | 3.60059 | 3.35072 | 5.09752 | 3.24196 | 3.13733 | 3.43224 | 3.80681 |
| LOC729950  | 4.65374 | 4.67734 | 4.74953 | 4.70309 | 4.97606 | 5.11624 | 4.57797 | 4.70562 | 4.74778 |
| MIR302F    | 1.86808 | 1.74544 | 1.58976 | 2.64481 | 1.71283 | 2.08004 | 1.92932 | 1.89558 | 1.72107 |
| DSG1       | 13.3145 | 13.3099 | 13.3285 | 12.9527 | 12.6194 | 13.1518 | 12.9654 | 13.1219 | 13.2898 |
| DSG4       | 5.15063 | 5.29233 | 5.10758 | 4.87328 | 5.84248 | 5.64116 | 5.58229 | 5.40575 | 5.38038 |
| DSG3       | 11.4985 | 10.4821 | 11.5566 | 12.5189 | 12.3189 | 13.1079 | 12.7149 | 13.1345 | 13.2417 |
| DSG2       | 7.15927 | 7.11694 | 7.70174 | 7.31775 | 4.78263 | 6.84821 | 7.13865 | 7.36264 | 7.12867 |
| TTR        | 6.25327 | 6.47249 | 6.58304 | 7.04455 | 8.23101 | 7.09006 | 7.00457 | 6.82486 | 6.81373 |
| HNRNPA1P10 | 8.20647 | 8.32435 | 8.43317 | 8.94337 | 9.60822 | 8.61516 | 8.93424 | 8.3697  | 8.39883 |

|           |         |         |         |         |         |         |         |         |         |
|-----------|---------|---------|---------|---------|---------|---------|---------|---------|---------|
| WBP11P1   | 4.93894 | 4.63104 | 4.46634 | 5.57868 | 5.81935 | 4.94605 | 5.5544  | 5.36804 | 5.51112 |
| ASXL3     | 5.60191 | 6.50893 | 5.78682 | 5.4096  | 5.53797 | 5.59306 | 5.00558 | 4.86091 | 4.77951 |
| ZNF397    | 6.56063 | 6.91932 | 6.60403 | 5.9723  | 6.35308 | 5.61628 | 6.10711 | 5.70625 | 6.14176 |
| ZNF271P   | 7.06364 | 7.00338 | 6.91558 | 7.30579 | 5.81808 | 7.32658 | 7.52556 | 7.63876 | 7.6877  |
| GALNT1    | 9.96371 | 9.30377 | 9.48556 | 9.63359 | 8.87702 | 10.0099 | 10.2599 | 10.3547 | 10.1576 |
| MIR3975   | 4.57063 | 3.16134 | 4.33574 | 3.08424 | 2.28851 | 2.42163 | 2.86211 | 4.50658 | 4.93596 |
| c18orf21  | 7.85839 | 7.91895 | 8.1663  | 7.55368 | 6.33734 | 7.54192 | 8.09358 | 7.76269 | 7.35407 |
| ELP2      | 8.13422 | 8.23665 | 8.00854 | 7.01345 | 6.38745 | 6.30397 | 7.6215  | 7.36726 | 6.55271 |
| MOCOS     | 7.03239 | 7.58601 | 7.15267 | 7.29857 | 6.48139 | 7.31843 | 7.69174 | 6.853   | 7.11668 |
| FHOD3     | 6.8517  | 8.18588 | 6.81891 | 6.75545 | 6.70267 | 6.02635 | 6.69321 | 6.27094 | 6.03673 |
| KIAA1328  | 8.70402 | 8.78822 | 8.54665 | 7.34207 | 6.89242 | 7.29235 | 7.50036 | 7.76181 | 7.15892 |
| MIR4318   | 3.56542 | 3.75695 | 3.91126 | 4.29651 | 3.35862 | 4.20586 | 3.69103 | 3.98853 | 3.70332 |
| SETBP1    | 8.1171  | 8.37764 | 8.00254 | 7.24377 | 7.18973 | 7.41034 | 7.70756 | 7.29881 | 7.88358 |
| SIGLEC15  | 5.91561 | 6.26151 | 6.12873 | 6.68788 | 6.64474 | 6.80998 | 6.92347 | 6.95321 | 6.9999  |
| C18orf25  | 8.50026 | 8.28138 | 8.7093  | 8.05662 | 6.58167 | 7.98767 | 8.21939 | 8.61232 | 8.28062 |
| RNF165    | 6.37412 | 5.83802 | 6.25812 | 6.12663 | 6.31078 | 6.579   | 5.93343 | 6.08219 | 5.86356 |
| KATNAL2   | 6.22877 | 6.34352 | 6.30947 | 5.63616 | 5.81163 | 5.6077  | 5.77327 | 5.71681 | 5.66114 |
| MIR4527   | 4.02525 | 4.12725 | 3.4093  | 4.34333 | 4.17694 | 4.42346 | 4.28587 | 4.30284 | 3.47421 |
| CTIF      | 7.31307 | 7.21917 | 7.38301 | 6.89689 | 6.52436 | 7.65174 | 7.58243 | 7.96695 | 7.89532 |
| MIR1539   | 5.98053 | 6.40551 | 6.14259 | 6.84792 | 6.31499 | 7.52895 | 7.07561 | 6.96999 | 6.95674 |
| Scarna17  | 10.0798 | 11.3755 | 10.5171 | 10.1703 | 9.51336 | 11.2014 | 10.8945 | 11.0703 | 10.4565 |
| SKA1      | 6.97025 | 5.87516 | 6.08696 | 7.0033  | 4.75578 | 5.70415 | 6.59719 | 6.24532 | 6.32543 |
| MAPK4     | 5.87392 | 5.91946 | 5.92452 | 5.52492 | 6.37293 | 5.60869 | 5.87996 | 5.48869 | 5.63489 |
| ELAC1     | 6.71065 | 7.0115  | 6.65382 | 6.66313 | 6.53514 | 5.85188 | 6.94908 | 5.92304 | 5.7147  |
| SMAD4     | 9.82835 | 9.78714 | 9.96738 | 9.29489 | 6.30001 | 7.80505 | 9.25125 | 8.36445 | 9.07248 |
| LINC01630 | 4.73178 | 4.58264 | 4.71224 | 5.30714 | 5.96794 | 5.30836 | 5.50358 | 5.10973 | 5.08635 |



|              |         |         |         |         |         |         |         |         |         |
|--------------|---------|---------|---------|---------|---------|---------|---------|---------|---------|
| DCC          | 4.49295 | 4.90893 | 5.25124 | 4.88638 | 6.15028 | 5.10974 | 4.88363 | 5.11121 | 4.86492 |
| POLI         | 8.01931 | 8.24068 | 7.75066 | 7.05192 | 5.74392 | 6.49127 | 7.52513 | 6.66817 | 6.76964 |
| c18orf54     | 6.47059 | 6.27997 | 5.54267 | 6.02779 | 4.88283 | 5.0272  | 5.79607 | 6.03025 | 5.54413 |
| DYNAP        | 5.34092 | 5.37324 | 5.16342 | 5.62849 | 6.79823 | 5.1192  | 5.39768 | 4.93842 | 5.17122 |
| MIR4529      | 3.78839 | 3.32418 | 3.92479 | 4.52076 | 4.41881 | 5.67094 | 5.41426 | 6.36936 | 6.28305 |
| WDR7         | 8.91066 | 8.84355 | 8.77315 | 7.74306 | 5.76172 | 6.70885 | 7.87372 | 7.25789 | 7.39018 |
| BOD1L2       | 5.25193 | 4.94016 | 5.3252  | 5.73692 | 6.6324  | 6.1821  | 5.93463 | 5.77146 | 5.43513 |
| onecut2      | 6.94368 | 7.20979 | 6.86867 | 7.39519 | 7.57713 | 7.31897 | 7.32498 | 7.33192 | 7.57729 |
| LOC100505549 | 6.67156 | 6.56125 | 6.71367 | 5.77906 | 6.6298  | 6.03832 | 6.33673 | 6.09017 | 5.80513 |
| mir122       | 2.78808 | 3.08682 | 2.65649 | 3.00048 | 3.346   | 3.23115 | 2.94944 | 2.51568 | 2.91708 |
| MALT1        | 8.42615 | 8.61607 | 8.40081 | 8.99664 | 6.71412 | 9.5791  | 9.21864 | 8.971   | 9.06995 |
| ZNF532       | 10.0456 | 10.0497 | 9.84174 | 9.58647 | 8.52307 | 8.64655 | 9.79196 | 8.53066 | 9.23501 |
| OACYLP       | 4.36652 | 4.03344 | 4.29705 | 4.28542 | 5.55691 | 5.28779 | 4.27112 | 4.6902  | 4.2225  |
| SEC11C       | 7.17444 | 8.27745 | 7.43926 | 7.63295 | 6.16007 | 7.85375 | 8.35248 | 6.52886 | 7.4252  |
| GRP          | 6.36547 | 6.14791 | 6.34435 | 6.72943 | 7.46159 | 7.08351 | 6.46805 | 6.99289 | 6.54761 |
| PMAIP1       | 8.6008  | 6.04794 | 6.17858 | 7.17842 | 6.08703 | 9.30944 | 7.61975 | 9.34483 | 7.1131  |
| KIAA1468     | 9.63684 | 9.99006 | 9.49103 | 9.45864 | 7.69824 | 9.6631  | 9.37838 | 9.67578 | 9.84233 |
| PHLPP1       | 8.92559 | 8.73277 | 8.77647 | 8.46247 | 6.67232 | 8.24235 | 8.12334 | 8.51936 | 8.59734 |
| HMSD         | 4.73417 | 4.9603  | 4.66846 | 4.96628 | 4.71123 | 4.30417 | 4.92159 | 4.59727 | 4.91728 |
| LOC284294    | 3.94676 | 3.9766  | 3.78123 | 4.53073 | 4.76677 | 4.13833 | 3.49173 | 4.02454 | 4.36696 |
| LOC643542    | 4.20834 | 4.20732 | 4.0264  | 4.97716 | 4.78079 | 4.6994  | 4.51405 | 4.50964 | 4.56524 |
| CCDC102B     | 6.49764 | 6.41914 | 6.78918 | 6.0783  | 5.25826 | 5.18368 | 5.21381 | 4.24318 | 5.37283 |
| DOK6         | 6.64428 | 5.90718 | 6.29427 | 6.60076 | 6.17711 | 7.05552 | 6.22213 | 6.53375 | 6.50988 |
| SOCS6        | 8.42347 | 8.44969 | 8.43746 | 9.1197  | 8.008   | 8.29653 | 9.15652 | 8.55665 | 9.07488 |
| LOC100505817 | 3.20029 | 3.05599 | 3.22643 | 3.25317 | 3.49603 | 3.20778 | 3.35259 | 4.64898 | 3.35151 |
| TIMM21       | 7.42158 | 7.43827 | 7.85991 | 7.17161 | 5.42154 | 6.73033 | 7.60512 | 6.44986 | 6.86677 |

|            |         |         |         |         |         |         |         |         |         |
|------------|---------|---------|---------|---------|---------|---------|---------|---------|---------|
| C18orf63   | 3.92374 | 3.65365 | 3.63721 | 4.13233 | 4.44201 | 4.7244  | 4.1782  | 4.01102 | 4.61629 |
| CNDP2      | 7.98489 | 7.51916 | 7.36643 | 8.56981 | 6.9884  | 9.58904 | 8.79765 | 9.5017  | 8.89611 |
| CNDP1      | 5.07145 | 5.44234 | 5.78776 | 5.36067 | 6.49958 | 5.66103 | 5.44858 | 5.61091 | 5.17651 |
| ZNF407     | 7.53277 | 7.71566 | 7.84143 | 7.18914 | 5.77654 | 7.10467 | 7.07479 | 7.3286  | 7.90514 |
| TSHZ1      | 7.80726 | 7.70498 | 7.92427 | 6.7783  | 6.16513 | 6.95733 | 7.18197 | 7.07159 | 7.22629 |
| LOC339298  | 3.97757 | 4.39226 | 4.27164 | 4.21403 | 5.16876 | 4.84789 | 4.02663 | 4.67812 | 4.28038 |
| LINC00908  | 6.00863 | 5.79448 | 5.79525 | 5.93086 | 7.0527  | 6.31019 | 5.85135 | 6.3193  | 6.20479 |
| ZNF236     | 8.26494 | 8.45939 | 8.08551 | 7.13276 | 6.07159 | 7.12203 | 7.6227  | 7.1965  | 7.55197 |
| GALR1      | 3.87444 | 4.04274 | 4.05195 | 5.18026 | 4.40696 | 4.83739 | 4.5031  | 4.60395 | 3.81576 |
| SALL3      | 5.24497 | 5.10432 | 5.51863 | 6.11547 | 5.882   | 6.59618 | 5.46012 | 6.44083 | 6.03198 |
| Hsbp1l1    | 9.59534 | 9.23699 | 8.82015 | 9.32829 | 8.49892 | 9.83975 | 9.2145  | 9.55135 | 9.86784 |
| RBFA       | 7.19071 | 6.83531 | 6.99089 | 7.09801 | 6.2587  | 6.73975 | 7.43296 | 6.59276 | 6.90139 |
| ADNP2      | 8.23287 | 8.05097 | 8.09241 | 7.18005 | 5.51798 | 7.88002 | 7.74087 | 8.2938  | 7.92279 |
| PARD6G-AS1 | 5.71643 | 5.70081 | 5.95092 | 6.0831  | 6.5432  | 6.5523  | 5.88093 | 6.23877 | 6.54838 |
| THOC1      | 8.44302 | 8.47335 | 8.47477 | 7.4323  | 5.68063 | 6.06727 | 7.91011 | 6.39494 | 7.03335 |
| COLEC12    | 7.12143 | 7.24291 | 8.0896  | 7.32444 | 4.81682 | 5.82198 | 7.21183 | 5.96795 | 6.08767 |
| TYMSOS     | 5.01275 | 4.92038 | 5.00158 | 5.71377 | 5.27375 | 5.80985 | 5.66704 | 5.38932 | 5.36899 |
| ENOSF1     | 9.2289  | 9.27957 | 9.16162 | 7.99903 | 6.75374 | 7.34815 | 8.20334 | 7.66229 | 7.7911  |
| YES1       | 9.28277 | 9.21091 | 9.41723 | 9.33741 | 6.61503 | 10.0383 | 9.97965 | 9.86782 | 9.7829  |
| LINC00470  | 3.13785 | 3.06512 | 2.86983 | 3.29422 | 4.31265 | 3.73663 | 3.60767 | 3.17645 | 3.42267 |
| METTL4     | 7.46233 | 7.3711  | 7.45444 | 7.03847 | 6.11058 | 5.80968 | 7.28242 | 6.5768  | 6.88007 |
| CBX3P2     | 5.07591 | 5.47224 | 5.15158 | 5.64771 | 5.2545  | 5.58924 | 5.70634 | 5.48439 | 5.05814 |
| LPIN2      | 6.651   | 6.45671 | 6.62912 | 6.64451 | 6.94317 | 8.98258 | 8.10058 | 7.26553 | 6.55394 |
| LOC727896  | 8.93473 | 9.12745 | 9.07397 | 9.80318 | 7.33527 | 9.08365 | 9.37933 | 9.02163 | 9.65366 |
| AKAIN1     | 4.66521 | 4.79311 | 4.53102 | 5.24065 | 5.88659 | 5.84881 | 5.56791 | 5.18925 | 5.27627 |
| LINC00526  | 5.66172 | 5.51768 | 5.3883  | 6.16959 | 6.1006  | 6.17654 | 6.09537 | 5.7509  | 5.73741 |

|              |         |         |         |         |         |         |         |         |         |
|--------------|---------|---------|---------|---------|---------|---------|---------|---------|---------|
| ZBTB14       | 7.9112  | 7.87505 | 7.74159 | 6.78466 | 5.54937 | 6.04731 | 7.296   | 6.37217 | 6.5248  |
| EPB41L3      | 7.20962 | 7.59233 | 7.42278 | 8.09031 | 7.54894 | 8.02861 | 8.09605 | 7.89834 | 8.65802 |
| tmem200c     | 5.68552 | 6.08296 | 5.8836  | 6.18426 | 6.2744  | 6.38074 | 6.46997 | 6.19088 | 6.24646 |
| L3MBTL4      | 7.6264  | 8.46239 | 7.79574 | 6.21485 | 6.12799 | 6.23184 | 6.53187 | 5.56928 | 5.5035  |
| MIR4317      | 4.15553 | 4.44837 | 3.89671 | 3.15975 | 2.37218 | 3.31905 | 2.729   | 2.30738 | 2.35345 |
| LINC00668    | 5.54904 | 5.70436 | 5.59476 | 5.9146  | 6.63803 | 6.27155 | 5.8085  | 5.91451 | 5.89973 |
| LOC100192426 | 6.64316 | 6.56949 | 6.58225 | 7.37534 | 7.55243 | 7.16667 | 7.02112 | 6.97344 | 6.6175  |
| PIEZO2       | 5.64869 | 5.88788 | 5.44145 | 5.51719 | 6.1785  | 6.10033 | 6.00971 | 5.83021 | 6.0832  |
| MPPE1        | 8.47752 | 8.63021 | 8.45373 | 7.6392  | 6.30491 | 6.96032 | 7.95932 | 8.11035 | 7.31135 |
| AFG3L2       | 8.34187 | 8.52456 | 8.51359 | 8.16721 | 6.85271 | 7.74016 | 8.65769 | 7.58377 | 7.78389 |
| SPIRE1       | 9.18228 | 9.13974 | 8.97482 | 8.78077 | 8.51648 | 9.41663 | 8.58923 | 9.72052 | 9.43387 |
| CEP76        | 7.99856 | 8.32635 | 7.8102  | 7.76138 | 5.49041 | 6.19983 | 7.02642 | 5.78396 | 5.98287 |
| LDLRAD4-AS1  | 5.83579 | 6.00307 | 5.93445 | 6.14971 | 7.17    | 6.46429 | 5.8276  | 6.35589 | 6.16339 |
| MC2R         | 4.95354 | 5.18927 | 5.10618 | 5.35943 | 6.34625 | 5.09449 | 5.28962 | 5.01806 | 5.33279 |
| znf519       | 5.66862 | 5.94496 | 5.89161 | 4.46598 | 5.84363 | 5.13277 | 5.08224 | 4.96721 | 4.31882 |
| CXADRP3      | 5.91994 | 6.20527 | 5.8808  | 6.06174 | 6.18859 | 5.57912 | 6.30841 | 5.47804 | 5.71125 |
| LOC644669    | 4.45736 | 4.97918 | 5.13396 | 5.52996 | 7.08382 | 5.18545 | 4.40808 | 5.41175 | 5.54094 |
| ESCO1        | 8.31514 | 8.35598 | 8.29877 | 7.47358 | 6.93266 | 8.19828 | 8.04272 | 7.79168 | 7.47022 |
| ABHD3        | 8.15696 | 7.75839 | 6.55705 | 7.6329  | 5.49898 | 6.82735 | 6.86608 | 8.12467 | 7.50571 |
| MIR133A1     | 3.02544 | 2.62415 | 3.44967 | 4.66476 | 3.63178 | 4.18572 | 3.28709 | 4.13826 | 3.94903 |
| mir1-2       | 1.7565  | 2.03803 | 1.70533 | 1.8492  | 1.65295 | 2.50295 | 2.22256 | 1.8639  | 1.89238 |
| CTAGE1       | 4.67739 | 4.11252 | 4.37798 | 4.99302 | 5.61858 | 5.18571 | 4.72274 | 4.68069 | 4.84181 |
| TMEM241      | 7.45179 | 7.16566 | 7.15569 | 6.50772 | 6.68378 | 6.19029 | 6.93086 | 6.36222 | 6.60856 |
| ANKRD29      | 8.8075  | 8.13334 | 8.43566 | 8.87346 | 7.03097 | 7.74953 | 9.3483  | 7.24596 | 8.21113 |
| OSBPL1A      | 8.10398 | 8.68744 | 8.13693 | 8.07139 | 7.10511 | 8.05684 | 7.86462 | 8.46804 | 8.15451 |
| ZNF521       | 8.33862 | 7.31004 | 8.20161 | 6.44454 | 6.02786 | 6.00766 | 6.94761 | 6.46506 | 6.66483 |

|          |         |         |         |         |         |         |         |         |         |
|----------|---------|---------|---------|---------|---------|---------|---------|---------|---------|
| KCTD1    | 9.4074  | 9.30107 | 9.38324 | 9.17162 | 7.38089 | 8.51863 | 9.59857 | 7.83617 | 9.10188 |
| PCAT18   | 4.59392 | 4.93392 | 4.77067 | 4.55621 | 5.27323 | 4.89316 | 4.24208 | 4.39642 | 4.18843 |
| AQP4     | 4.54362 | 4.59974 | 4.52275 | 4.89155 | 5.56943 | 5.27514 | 4.85501 | 4.99034 | 4.87458 |
| CHST9    | 4.96606 | 4.51822 | 4.75973 | 5.44009 | 5.04158 | 5.31826 | 5.29113 | 5.06478 | 5.06552 |
| DSC3     | 12.7933 | 12.5367 | 12.6267 | 12.4094 | 10.1463 | 12.384  | 12.5073 | 12.4499 | 12.4853 |
| DSC2     | 11.555  | 9.97472 | 10.8752 | 12.8061 | 12.6949 | 13.432  | 13.081  | 13.481  | 13.6228 |
| DSC1     | 13.3633 | 13.5476 | 13.5502 | 13.0793 | 12.2317 | 12.0291 | 12.7559 | 10.8442 | 12.2568 |
| DSG2-AS1 | 5.42223 | 5.01214 | 5.20538 | 5.95663 | 5.94779 | 5.93044 | 5.59622 | 5.82795 | 5.59934 |
| TRAPPC8  | 9.19691 | 8.9982  | 8.86512 | 8.45356 | 6.29575 | 8.59854 | 8.69021 | 9.30601 | 8.75789 |
| KLHL14   | 5.17829 | 4.88511 | 5.1684  | 5.1559  | 6.03382 | 5.33018 | 4.83532 | 5.2871  | 5.30873 |
| CCDC178  | 4.0568  | 4.20798 | 3.83596 | 3.28349 | 3.74439 | 3.7752  | 3.44852 | 3.3006  | 3.54264 |
| NOL4     | 4.5432  | 4.7897  | 4.5075  | 5.29675 | 5.62162 | 5.38173 | 5.00533 | 5.0574  | 5.34921 |
| ZSCAN30  | 6.6541  | 6.27002 | 6.35118 | 5.55561 | 5.80927 | 5.90963 | 5.63981 | 6.36252 | 6.16897 |
| ZNF24    | 7.98135 | 8.09889 | 8.30161 | 7.736   | 5.61481 | 6.91319 | 7.76737 | 6.89923 | 7.42275 |
| ZNF396   | 5.84568 | 6.16692 | 5.61773 | 6.03554 | 5.81104 | 5.99071 | 5.72702 | 5.3762  | 6.17315 |
| INO80C   | 6.75584 | 6.40938 | 6.66915 | 7.48052 | 6.48314 | 7.57254 | 7.83604 | 7.43081 | 7.92239 |
| mir187   | 6.27282 | 6.35819 | 6.60527 | 7.22542 | 7.20465 | 7.03038 | 6.53661 | 7.20295 | 6.97801 |
| RPRD1A   | 8.73441 | 8.90421 | 8.60674 | 8.69261 | 6.10855 | 7.53584 | 8.70397 | 8.51575 | 8.2431  |
| TPGS2    | 10.6146 | 10.3345 | 10.2018 | 10.6884 | 10.1269 | 10.421  | 11.0089 | 11.0463 | 11.0268 |
| MIR924HG | 5.94161 | 6.10666 | 5.78953 | 5.18338 | 5.21049 | 4.21841 | 5.02589 | 4.15884 | 4.63714 |
| MIR924   | 5.43719 | 6.01247 | 5.60396 | 4.91481 | 7.87612 | 5.27917 | 5.60581 | 5.48217 | 5.34978 |
| KC6      | 6.46333 | 3.61714 | 4.03794 | 4.40481 | 4.27602 | 4.0061  | 3.22673 | 3.51723 | 4.16769 |
| RIT2     | 3.99241 | 4.32559 | 4.18027 | 4.75768 | 5.16673 | 4.85057 | 4.647   | 4.48293 | 4.34772 |
| SYT4     | 4.02653 | 4.15611 | 3.9492  | 4.5925  | 5.20422 | 4.47426 | 4.1599  | 4.55204 | 4.19792 |
| MIR4319  | 4.51925 | 4.15065 | 4.23563 | 4.31807 | 4.33296 | 4.79272 | 3.8537  | 4.18745 | 4.41812 |
| EPG5     | 8.59465 | 8.59333 | 8.23102 | 7.96437 | 6.823   | 7.70291 | 7.95418 | 9.65232 | 8.69999 |

|           |         |         |         |         |         |         |         |         |         |
|-----------|---------|---------|---------|---------|---------|---------|---------|---------|---------|
| PSTPIP2   | 7.73496 | 7.90013 | 7.39533 | 6.84448 | 5.37657 | 5.88962 | 8.03139 | 8.37122 | 7.33088 |
| LOXHD1    | 5.72785 | 6.20402 | 6.07693 | 6.24683 | 6.2023  | 6.25499 | 5.90544 | 6.35335 | 6.2081  |
| TCEB3CL2  | 5.13795 | 5.20049 | 4.92394 | 5.68336 | 5.7623  | 5.5304  | 6.00883 | 5.69547 | 5.95848 |
| TCEB3C    | 5.8505  | 5.98885 | 6.00797 | 6.89467 | 7.73719 | 6.97718 | 6.54592 | 6.65562 | 6.67425 |
| TCEB3B    | 4.31067 | 4.14421 | 4.30661 | 4.46808 | 4.86567 | 5.00136 | 4.52151 | 4.2682  | 4.50064 |
| HDHD2     | 8.17753 | 7.95455 | 7.85055 | 8.04198 | 6.74822 | 7.26093 | 8.35513 | 6.40282 | 7.51076 |
| IER3IP1   | 8.53221 | 8.40105 | 8.68255 | 8.67477 | 6.35115 | 8.37757 | 9.21585 | 8.06788 | 7.89716 |
| SMAD2     | 9.5081  | 9.7539  | 9.78421 | 9.61051 | 6.93147 | 9.43064 | 9.76984 | 9.44234 | 9.37929 |
| ZBTB7C    | 8.28174 | 7.56231 | 7.69804 | 6.90705 | 5.5295  | 5.78456 | 6.40312 | 5.39156 | 4.69231 |
| SMAD7     | 7.46659 | 7.33023 | 7.272   | 8.13004 | 6.48506 | 8.14453 | 7.50466 | 8.42603 | 8.13395 |
| DYM       | 9.99316 | 9.94706 | 10.1416 | 9.05698 | 7.78563 | 8.98393 | 9.56199 | 9.43813 | 9.52837 |
| MIR4744   | 5.84891 | 4.90781 | 4.79236 | 3.5669  | 4.3055  | 4.08051 | 3.9868  | 4.40694 | 4.80886 |
| RPL17     | 8.38608 | 8.83899 | 8.64883 | 8.83221 | 8.00902 | 8.94721 | 9.19577 | 8.669   | 8.59236 |
| ACAA2     | 7.66685 | 8.80614 | 9.06095 | 7.92493 | 5.54466 | 7.79387 | 8.02161 | 9.48358 | 7.76406 |
| MYO5B     | 9.22869 | 9.16766 | 9.07573 | 9.25361 | 9.59343 | 10.5282 | 10.0717 | 10.6966 | 10.2963 |
| MIR4320   | 8.15012 | 7.93485 | 7.39374 | 5.53097 | 7.3723  | 6.46533 | 5.24029 | 8.82013 | 9.36267 |
| CFAP53    | 4.28561 | 4.7065  | 4.69026 | 4.5471  | 5.17513 | 4.88686 | 4.80431 | 5.5088  | 5.20665 |
| MBD1      | 7.79872 | 7.50833 | 7.81093 | 8.1718  | 7.54656 | 9.19185 | 8.80407 | 9.99459 | 9.44438 |
| CXXC1     | 8.44321 | 8.61593 | 8.26212 | 8.56944 | 8.23371 | 9.1568  | 9.3594  | 9.92256 | 9.37392 |
| MRO       | 5.5739  | 5.96181 | 5.68666 | 5.75405 | 6.93403 | 5.96584 | 5.47553 | 6.13383 | 6.08537 |
| MEX3C     | 9.43959 | 9.34883 | 9.44273 | 9.79971 | 6.61295 | 9.02788 | 9.92158 | 8.58237 | 9.30694 |
| MBD2      | 10.4492 | 10.8872 | 10.8741 | 10.6097 | 9.62989 | 10.5997 | 10.6929 | 10.5829 | 10.7254 |
| STARD6    | 3.22491 | 3.26277 | 2.93985 | 3.3369  | 3.70147 | 3.99208 | 2.9728  | 3.03792 | 3.01567 |
| CCDC68    | 5.58494 | 5.30308 | 5.19632 | 4.58719 | 4.88231 | 5.62288 | 5.18618 | 6.1888  | 6.10645 |
| TCF4      | 10.3692 | 9.85325 | 9.96798 | 8.8843  | 6.74327 | 6.99929 | 8.62025 | 8.53746 | 8.58328 |
| LINC01539 | 4.1767  | 4.21175 | 4.11491 | 4.11294 | 4.70855 | 4.40014 | 4.24443 | 4.34184 | 4.23388 |

|           |         |         |         |         |         |         |         |         |         |
|-----------|---------|---------|---------|---------|---------|---------|---------|---------|---------|
| TXNL1     | 9.5778  | 9.22632 | 9.46977 | 9.7838  | 8.13436 | 9.39042 | 9.93979 | 9.36109 | 9.70626 |
| FECH      | 7.71097 | 7.50947 | 7.57293 | 7.03117 | 6.63572 | 6.75391 | 8.12304 | 6.67836 | 6.87027 |
| NARS      | 10.1326 | 9.84898 | 10.2124 | 9.47189 | 7.32328 | 9.05723 | 9.646   | 9.14174 | 9.33241 |
| ALPK2     | 5.48655 | 5.06778 | 5.31473 | 5.72344 | 5.6763  | 5.73853 | 5.71878 | 5.52786 | 5.48936 |
| RAX       | 5.90611 | 6.03108 | 6.24663 | 7.12953 | 7.09055 | 7.50925 | 6.98343 | 7.40892 | 7.0134  |
| CPLX4     | 3.33304 | 3.23702 | 3.24632 | 2.91391 | 4.17149 | 3.3995  | 3.14354 | 3.55282 | 3.20087 |
| CCBE1     | 5.9919  | 6.35627 | 6.29602 | 6.26338 | 5.9373  | 6.10474 | 6.11465 | 5.99528 | 5.98749 |
| MC4R      | 4.37288 | 4.3253  | 4.44239 | 4.99766 | 6.66518 | 5.12012 | 4.70027 | 4.64085 | 4.73772 |
| RNF152    | 7.88134 | 7.74928 | 8.01957 | 7.52828 | 7.23714 | 6.76744 | 7.30459 | 7.47766 | 7.12662 |
| BCL2      | 6.56326 | 6.7887  | 6.98456 | 5.58176 | 5.87491 | 5.19888 | 5.50425 | 4.88345 | 5.29393 |
| KDSR      | 9.08463 | 9.10897 | 9.34834 | 9.14534 | 6.67826 | 8.88209 | 9.337   | 9.76163 | 9.12162 |
| VPS4B     | 8.60907 | 8.688   | 8.61797 | 8.89694 | 7.0575  | 9.81941 | 9.39892 | 10.2644 | 9.84105 |
| LINC01538 | 4.17365 | 4.79144 | 4.5024  | 4.61379 | 5.80422 | 4.92813 | 4.55568 | 5.01467 | 4.46971 |
| DSEL      | 6.95017 | 6.58058 | 7.24166 | 6.36929 | 6.14325 | 5.99754 | 5.81566 | 6.01087 | 5.68936 |
| TMX3      | 7.985   | 7.62816 | 7.88539 | 7.10171 | 5.2472  | 6.1173  | 7.2561  | 7.00763 | 7.13303 |
| CD226     | 5.37944 | 5.50377 | 6.04891 | 5.248   | 6.68718 | 5.51846 | 5.488   | 4.94253 | 5.04758 |
| RTTN      | 7.77749 | 7.77925 | 8.18109 | 6.91747 | 6.32217 | 6.17061 | 6.68679 | 6.8411  | 6.46296 |
| LINC01541 | 4.07702 | 4.36468 | 3.72933 | 4.52707 | 4.69529 | 5.14123 | 4.42548 | 4.05848 | 4.16681 |
| cbln2     | 6.21697 | 6.53672 | 6.55121 | 7.0496  | 6.99642 | 6.7247  | 6.26282 | 6.8655  | 7.1769  |
| NETO1     | 4.70931 | 4.68633 | 4.73201 | 5.536   | 6.48325 | 5.15635 | 4.96764 | 5.38779 | 5.54706 |
| LOC400655 | 3.86058 | 3.95689 | 3.58443 | 4.13691 | 5.34762 | 4.66823 | 4.54784 | 4.08022 | 4.22738 |
| FBXO15    | 5.24882 | 4.95041 | 5.02779 | 5.43905 | 5.84497 | 5.92236 | 5.32707 | 5.36048 | 5.47124 |
| CYB5A     | 11.1921 | 10.3489 | 10.6882 | 10.8213 | 9.77976 | 9.80695 | 11.4283 | 9.53813 | 10.4059 |
| LINC00909 | 5.81585 | 5.53762 | 6.00418 | 6.15582 | 5.45062 | 5.3354  | 5.79986 | 5.25482 | 5.5087  |
| ZADH2     | 8.01214 | 8.25126 | 8.27989 | 8.00202 | 7.71313 | 8.48805 | 8.28573 | 7.33003 | 7.95741 |
| znf516    | 7.21212 | 7.64986 | 7.21231 | 7.00652 | 6.2705  | 7.69284 | 7.39006 | 7.08907 | 7.11225 |

|              |         |         |         |         |         |         |         |         |         |
|--------------|---------|---------|---------|---------|---------|---------|---------|---------|---------|
| LOC100131655 | 5.92861 | 5.99393 | 6.03862 | 6.40846 | 6.23767 | 5.8984  | 5.96563 | 6.28044 | 6.37518 |
| MBP          | 7.03782 | 7.12177 | 7.35683 | 7.19509 | 7.10399 | 7.78139 | 7.26291 | 7.39516 | 7.53148 |
| PQLC1        | 7.76111 | 7.4075  | 7.562   | 8.39534 | 8.41952 | 8.98892 | 8.50559 | 8.66957 | 8.17657 |
| TXNL4A       | 9.18752 | 8.75205 | 9.23853 | 9.33906 | 6.50556 | 8.81844 | 10.1074 | 9.09453 | 9.19048 |
| PAR6G        | 9.07902 | 9.02528 | 8.79003 | 8.76025 | 6.57688 | 8.64693 | 9.22657 | 8.04245 | 8.40757 |
| MIR1302-3    | 2.65348 | 3.68707 | 2.73098 | 3.06174 | 3.64939 | 3.37914 | 2.98787 | 2.83856 | 2.58069 |
| MADCAM1      | 5.68432 | 6.13328 | 6.05538 | 6.65627 | 6.46344 | 6.71391 | 6.58968 | 6.44575 | 6.44077 |
| TPGS1        | 5.70206 | 5.6512  | 6.12289 | 7.21183 | 6.15077 | 8.02565 | 7.07316 | 7.15565 | 7.16574 |
| CDC34        | 8.76685 | 8.91784 | 8.27301 | 8.99233 | 8.15187 | 9.16623 | 9.13289 | 9.26484 | 9.07283 |
| GZMM         | 6.60616 | 6.22068 | 6.37128 | 7.44258 | 7.10262 | 7.41213 | 6.94737 | 7.04618 | 7.02742 |
| BSG          | 9.11772 | 9.34975 | 9.37181 | 10.3527 | 8.99003 | 10.2762 | 10.3659 | 9.99505 | 10.0249 |
| HCN2         | 5.31147 | 5.4593  | 5.58075 | 6.57164 | 5.63904 | 7.11622 | 6.55628 | 6.76605 | 6.21    |
| fgf22        | 6.16205 | 6.43715 | 6.16047 | 6.44808 | 5.81757 | 6.76782 | 5.61642 | 5.93382 | 6.13396 |
| FSTL3        | 7.1232  | 7.0935  | 7.08252 | 8.44666 | 7.28027 | 8.17767 | 8.34554 | 8.2098  | 8.51475 |
| PALM         | 6.96591 | 6.90265 | 7.53635 | 7.29066 | 7.34238 | 7.70458 | 7.19943 | 7.53956 | 7.419   |
| PTBP1        | 10.8275 | 10.5911 | 11.0976 | 11.2005 | 8.07322 | 10.5088 | 11.2325 | 10.395  | 10.8539 |
| MIR3187      | 6.45314 | 5.70769 | 6.51476 | 6.29386 | 6.34116 | 6.61734 | 6.55351 | 6.622   | 6.69235 |
| AZU1         | 5.80584 | 5.77869 | 6.11255 | 6.83531 | 6.44613 | 6.89642 | 6.54327 | 6.70152 | 6.64729 |
| PRTN3        | 6.17802 | 6.08371 | 6.17064 | 6.54328 | 6.21005 | 6.08103 | 6.22125 | 6.5641  | 6.73852 |
| CFD          | 7.79897 | 8.61707 | 9.54315 | 7.72989 | 6.89664 | 8.30237 | 7.94486 | 7.77066 | 7.45849 |
| KISS1R       | 6.1772  | 6.06514 | 6.16151 | 7.02866 | 7.3634  | 7.78634 | 6.7754  | 6.61306 | 6.67865 |
| ARID3A       | 6.87841 | 6.83017 | 7.11397 | 7.57999 | 7.17738 | 8.63936 | 7.55781 | 7.62333 | 7.59099 |
| WDR18        | 7.78436 | 7.84585 | 7.96975 | 8.13956 | 6.46745 | 8.12413 | 8.65995 | 8.07569 | 8.12145 |
| CNN2         | 9.63388 | 9.23596 | 9.09112 | 10.7644 | 8.95418 | 10.7391 | 10.9508 | 10.2673 | 10.5782 |
| ARHGAP45     | 6.15534 | 6.52375 | 6.67062 | 6.96971 | 6.56013 | 7.58953 | 6.99156 | 7.20897 | 7.19532 |
| GPX4         | 8.82483 | 8.35751 | 9.05691 | 9.47708 | 8.46787 | 8.76956 | 9.93861 | 9.19054 | 8.82799 |

|              |         |         |         |         |         |         |         |         |         |
|--------------|---------|---------|---------|---------|---------|---------|---------|---------|---------|
| STK11        | 7.07798 | 7.49411 | 6.9591  | 7.81133 | 6.14725 | 8.02473 | 7.71022 | 7.63023 | 7.3317  |
| MIDN         | 8.92168 | 8.13941 | 8.53958 | 9.72942 | 7.52874 | 9.80483 | 9.80813 | 9.50151 | 10.0139 |
| CIRBP        | 9.72467 | 9.95771 | 10.0974 | 9.36738 | 7.22336 | 9.45585 | 9.81943 | 9.00151 | 8.84225 |
| C19orf24     | 7.15619 | 6.9011  | 7.30895 | 8.36187 | 7.01186 | 8.07069 | 8.82139 | 7.50231 | 7.31256 |
| MUM1         | 7.80063 | 7.3325  | 7.1526  | 7.32286 | 6.19662 | 6.98356 | 7.23309 | 6.49547 | 6.93432 |
| EFNA2        | 5.44011 | 5.45275 | 5.45656 | 6.58392 | 5.87602 | 6.84429 | 6.47881 | 6.15129 | 6.15202 |
| DAZAP1       | 8.75284 | 8.57215 | 8.78508 | 9.29446 | 7.18173 | 9.30978 | 9.49989 | 8.81131 | 8.835   |
| RPS15        | 11.1853 | 11.1391 | 11.4695 | 11.8054 | 10.8015 | 11.4801 | 11.8236 | 10.7695 | 11.3718 |
| APC2         | 5.98121 | 5.78852 | 5.64216 | 6.72513 | 6.63101 | 7.02375 | 6.53253 | 6.40083 | 6.27141 |
| REEP6        | 7.23802 | 7.06066 | 6.60382 | 7.46353 | 6.58971 | 7.68081 | 8.15759 | 7.33025 | 7.09908 |
| PLK5         | 5.23944 | 5.42591 | 5.1075  | 6.32125 | 5.78062 | 6.3772  | 5.26173 | 5.58102 | 5.66278 |
| MEX3D        | 8.11917 | 8.5507  | 7.98638 | 9.22874 | 9.58322 | 8.91335 | 8.68552 | 8.8165  | 8.55816 |
| ONECUT3      | 5.59948 | 5.51217 | 5.87112 | 5.98282 | 6.38136 | 6.26262 | 6.24118 | 6.24581 | 6.1564  |
| LOC100288123 | 6.4205  | 6.12795 | 6.56471 | 7.29183 | 6.69219 | 7.17555 | 6.88572 | 7.38322 | 7.24105 |
| SCAMP4       | 6.79262 | 6.89256 | 6.79329 | 7.16855 | 6.24126 | 7.22037 | 7.30555 | 6.86027 | 7.1284  |
| IZUMO4       | 6.95225 | 6.84505 | 7.04192 | 7.81155 | 8.33483 | 8.09581 | 7.34889 | 9.58691 | 7.37875 |
| AMH          | 5.67079 | 6.18866 | 5.92781 | 6.46795 | 5.97083 | 6.69899 | 6.27422 | 6.65558 | 6.40888 |
| OAZ1         | 12.4388 | 11.6718 | 12.42   | 12.6133 | 12.2364 | 12.4389 | 12.758  | 12.5123 | 12.5176 |
| SPPL2B       | 7.82612 | 7.58338 | 7.34621 | 8.17801 | 6.65602 | 7.48886 | 8.26535 | 7.50896 | 7.63072 |
| THOP1        | 6.55168 | 6.55449 | 6.47266 | 7.40709 | 6.22322 | 7.4236  | 7.52337 | 6.90479 | 7.09155 |
| ZNF554       | 6.94671 | 7.10541 | 6.25025 | 5.92012 | 6.32022 | 6.09616 | 5.53789 | 5.4839  | 5.3122  |
| ZNF555       | 6.4112  | 6.9872  | 6.6049  | 6.02866 | 5.49315 | 6.44276 | 6.52685 | 6.04021 | 5.972   |
| ZNF556       | 4.78129 | 5.00749 | 4.85943 | 5.52266 | 5.20497 | 6.20732 | 5.09698 | 5.16604 | 5.84208 |
| ZNF57        | 8.11822 | 7.81139 | 7.8068  | 7.12066 | 5.8082  | 6.81958 | 6.93186 | 5.4078  | 6.39531 |
| S1PR4        | 5.81644 | 5.76259 | 6.08875 | 6.75699 | 6.95652 | 7.10141 | 6.32767 | 6.42568 | 6.46049 |
| NCLN         | 7.63234 | 7.29013 | 7.69547 | 8.30855 | 5.96083 | 8.47194 | 8.78937 | 7.86156 | 8.03786 |



|          |         |         |         |         |         |         |         |         |         |
|----------|---------|---------|---------|---------|---------|---------|---------|---------|---------|
| nfic     | 10.1412 | 9.89494 | 10.2036 | 8.74149 | 7.15189 | 8.1116  | 9.50662 | 8.19226 | 8.57394 |
| FZR1     | 8.03346 | 7.79022 | 7.60294 | 8.79691 | 7.7516  | 9.82772 | 9.03727 | 9.18775 | 9.01065 |
| C19orf71 | 6.80374 | 6.73273 | 6.76366 | 7.48267 | 7.67667 | 7.37876 | 7.17291 | 7.29604 | 7.33022 |
| HMG20B   | 7.90688 | 7.18102 | 7.37389 | 7.74613 | 7.32276 | 8.40031 | 8.32777 | 7.75244 | 7.52688 |
| TJP3     | 6.78908 | 6.89728 | 6.34133 | 6.58287 | 5.85639 | 5.89604 | 6.04893 | 7.06331 | 5.84622 |
| MRPL54   | 6.00776 | 6.48659 | 6.12937 | 6.8985  | 6.78184 | 7.28797 | 7.17351 | 6.64039 | 6.76973 |
| NMRK2    | 5.33761 | 5.4234  | 5.63115 | 6.15181 | 5.87456 | 6.56301 | 6.24196 | 5.74341 | 6.19604 |
| CREB3L3  | 6.15964 | 5.99638 | 5.90827 | 6.64117 | 6.63737 | 6.33932 | 5.97573 | 6.24724 | 6.09127 |
| ANKRD24  | 5.2472  | 5.11858 | 5.2232  | 5.60176 | 6.54415 | 5.8745  | 5.26996 | 5.41015 | 5.53754 |
| EBI3     | 5.04982 | 5.54136 | 5.74935 | 5.64314 | 5.89296 | 6.5547  | 5.99504 | 6.10168 | 5.98223 |
| CCDC94   | 8.11919 | 7.99614 | 8.01254 | 8.05522 | 6.76532 | 7.37252 | 8.57277 | 7.34253 | 7.90572 |
| SHD      | 5.48289 | 5.40643 | 5.49506 | 6.29764 | 6.03251 | 6.75933 | 6.31948 | 6.42031 | 6.47659 |
| FSD1     | 5.98863 | 6.24254 | 6.235   | 6.94549 | 6.4465  | 7.01584 | 6.05079 | 6.81224 | 6.72111 |
| MPND     | 6.06401 | 6.01418 | 5.9503  | 6.1404  | 5.98933 | 6.45281 | 7.14092 | 6.51146 | 6.24571 |
| MIR4746  | 6.22726 | 6.13461 | 6.53804 | 7.10847 | 6.97925 | 6.96223 | 7.65028 | 6.84364 | 6.72897 |
| HDGFRP2  | 6.90065 | 7.05169 | 7.06485 | 7.39741 | 6.68664 | 7.39364 | 7.5682  | 7.19651 | 7.06794 |
| DPP9-AS1 | 6.28579 | 6.04722 | 6.03131 | 6.14786 | 6.17927 | 6.48914 | 6.55683 | 6.13702 | 6.38581 |
| MIR7-3HG | 5.69873 | 5.61713 | 5.72087 | 6.13213 | 6.43561 | 6.55233 | 6.08655 | 6.20262 | 6.49443 |
| MIR7-3   | 4.55819 | 4.46318 | 4.23081 | 4.95372 | 4.97302 | 5.07189 | 4.73933 | 4.09212 | 4.64552 |
| FEM1A    | 8.29051 | 8.46433 | 8.19701 | 8.19968 | 6.49207 | 7.92206 | 8.87536 | 7.6625  | 7.8712  |
| UHRF1    | 6.8452  | 6.31508 | 6.86215 | 7.60831 | 6.41358 | 7.25391 | 7.54356 | 7.52965 | 7.16221 |
| KDM4B    | 7.58913 | 7.71787 | 7.52485 | 7.39927 | 6.5406  | 8.07734 | 7.80105 | 8.49514 | 7.87663 |
| ZNRF4    | 5.39956 | 5.06634 | 5.26592 | 5.85909 | 5.65167 | 5.98806 | 5.81612 | 5.9445  | 5.67742 |
| SAFB     | 8.26109 | 8.33205 | 8.12178 | 7.74275 | 6.0871  | 7.62301 | 8.37548 | 7.78352 | 7.55993 |
| hsd11b1l | 6.63189 | 6.36379 | 6.54691 | 7.07913 | 6.27313 | 6.77003 | 6.96315 | 6.64971 | 6.59904 |
| RPL36    | 10.1652 | 10.368  | 10.4276 | 11.089  | 9.90182 | 11.0504 | 11.2365 | 10.2395 | 10.6071 |

|          |         |         |         |         |         |         |         |         |         |
|----------|---------|---------|---------|---------|---------|---------|---------|---------|---------|
| CATSPERD | 5.39496 | 5.27505 | 5.16401 | 5.89253 | 6.0123  | 6.43744 | 6.04644 | 5.89439 | 5.60511 |
| NRTN     | 6.3378  | 6.78762 | 6.36354 | 6.51186 | 6.35106 | 6.91157 | 6.52386 | 6.833   | 6.30613 |
| VMAC     | 6.40902 | 6.55848 | 6.30089 | 6.13671 | 5.56639 | 6.30089 | 6.29178 | 6.0574  | 5.90148 |
| CAPS     | 6.70592 | 6.608   | 6.8496  | 6.91142 | 6.55414 | 6.64272 | 6.54395 | 6.63837 | 6.69141 |
| ACSBG2   | 4.43847 | 4.7585  | 4.67952 | 4.98307 | 5.86398 | 4.22867 | 4.31293 | 5.01465 | 4.96521 |
| CRB3     | 6.99166 | 7.28166 | 6.85886 | 8.17052 | 7.64011 | 9.29517 | 8.46104 | 8.16898 | 7.87595 |
| TRIP10   | 8.34019 | 7.89025 | 7.80033 | 8.59799 | 7.99541 | 10.0972 | 8.91589 | 10.0374 | 9.42212 |
| VAV1     | 5.77282 | 5.89956 | 5.98559 | 6.12212 | 6.18694 | 6.52793 | 6.20747 | 6.74915 | 6.06814 |
| MBD3L5   | 5.77035 | 5.82555 | 6.00095 | 5.84995 | 8.106   | 5.69846 | 5.71345 | 5.82938 | 6.1564  |
| MBD3L2   | 5.84436 | 5.6568  | 5.81932 | 5.89639 | 7.19428 | 6.40423 | 5.91638 | 5.93574 | 6.19878 |
| ZNF557   | 6.35566 | 6.64597 | 6.29863 | 5.52034 | 4.7476  | 5.10856 | 6.46944 | 5.09841 | 5.42027 |
| ARHGEF18 | 7.68303 | 7.41089 | 7.46587 | 8.11644 | 7.5914  | 9.3634  | 8.40433 | 8.89427 | 8.38695 |
| C19orf45 | 5.52931 | 5.57013 | 5.37222 | 6.04639 | 5.69115 | 6.21409 | 5.69657 | 5.55449 | 5.97476 |
| ZNF358   | 7.78589 | 7.85332 | 7.93763 | 7.90171 | 7.02323 | 7.18683 | 7.90354 | 7.20893 | 6.50338 |
| MCOLN1   | 9.15026 | 8.80347 | 8.83222 | 9.0733  | 8.71585 | 8.78386 | 9.03826 | 8.54835 | 8.64976 |
| PNPLA6   | 7.44312 | 6.78896 | 6.74865 | 7.4788  | 6.73096 | 7.50738 | 7.77947 | 7.3843  | 7.12219 |
| PET100   | 6.2363  | 6.71113 | 6.52392 | 7.86535 | 6.8158  | 7.57899 | 7.6241  | 7.75263 | 7.04598 |
| STXBP2   | 7.56651 | 7.48488 | 7.4367  | 8.407   | 7.58742 | 8.77619 | 8.57243 | 7.8844  | 8.27373 |
| RETN     | 6.31201 | 6.34684 | 6.50351 | 6.74001 | 7.2744  | 7.3417  | 6.50371 | 6.60595 | 7.27095 |
| MCEMP1   | 4.85518 | 4.68589 | 4.87275 | 5.10688 | 5.14689 | 5.83554 | 5.46445 | 5.12677 | 5.022   |
| TRAPPC5  | 9.35494 | 8.75291 | 8.71164 | 9.89269 | 7.98306 | 9.95056 | 10.4662 | 8.76865 | 9.27706 |
| EVI5L    | 6.85275 | 6.77792 | 6.78808 | 7.05491 | 6.07645 | 7.62543 | 7.36141 | 7.49686 | 7.23557 |
| MAP2K7   | 7.10887 | 7.09809 | 7.08289 | 7.47272 | 6.82796 | 7.85364 | 7.66866 | 7.21178 | 7.28964 |
| CCL25    | 5.66178 | 5.73114 | 5.52625 | 6.07268 | 6.23763 | 5.99546 | 5.71474 | 5.89913 | 5.50821 |
| CERS4    | 7.80559 | 7.59059 | 7.26635 | 7.49386 | 7.07211 | 7.52007 | 7.88799 | 7.50842 | 7.8026  |
| ANGPTL4  | 7.72645 | 6.93439 | 7.11665 | 8.97079 | 9.14877 | 10.3682 | 8.93721 | 10.4511 | 8.94203 |

|            |         |         |         |         |         |         |         |         |         |
|------------|---------|---------|---------|---------|---------|---------|---------|---------|---------|
| HNRNPM     | 9.14159 | 9.18184 | 9.07862 | 9.5662  | 6.25154 | 9.11007 | 9.72845 | 9.29722 | 8.63818 |
| MBD3L1     | 2.2986  | 2.49655 | 2.36197 | 2.60683 | 2.82024 | 3.15042 | 2.59531 | 2.72509 | 3.05882 |
| ZNF317     | 8.69714 | 8.60735 | 8.8003  | 7.62189 | 6.82321 | 7.77299 | 8.51752 | 8.02921 | 8.20538 |
| ZNF559     | 6.39419 | 6.44984 | 6.38654 | 4.76912 | 6.47675 | 5.0608  | 5.50242 | 4.85107 | 5.3953  |
| ZNF561-AS1 | 7.20815 | 6.97459 | 6.1907  | 6.40174 | 5.77086 | 6.06424 | 7.37181 | 5.79823 | 6.38592 |
| UBL5       | 7.49943 | 7.33647 | 7.65974 | 8.47732 | 7.11646 | 8.16663 | 8.72221 | 8.38995 | 8.32513 |
| RDH8       | 5.49121 | 5.18898 | 5.67128 | 6.04918 | 6.77345 | 6.40437 | 5.53432 | 5.94333 | 6.19577 |
| c3p1       | 6.04228 | 5.9287  | 6.12701 | 6.34119 | 6.69078 | 6.89714 | 6.43794 | 6.63003 | 6.59993 |
| c19orf66   | 7.90461 | 7.59079 | 7.22224 | 7.85175 | 6.83563 | 7.38845 | 7.61934 | 7.08434 | 7.05396 |
| MRPL4      | 7.62021 | 7.23036 | 7.66179 | 7.80299 | 6.73829 | 7.18899 | 8.63466 | 6.97452 | 7.48715 |
| ICAM1      | 7.36482 | 6.82298 | 7.22018 | 6.93071 | 6.07018 | 7.57239 | 7.11604 | 8.04003 | 8.72521 |
| ICAM4      | 5.30609 | 5.26849 | 5.01724 | 6.05523 | 5.91921 | 5.87392 | 6.00531 | 6.05445 | 6.12452 |
| MIR1238    | 8.85338 | 8.94144 | 8.98701 | 10.5935 | 11.1559 | 11.289  | 10.186  | 10.3523 | 10.1978 |
| QTRT1      | 7.42848 | 7.69623 | 7.53175 | 7.55911 | 6.48866 | 7.0549  | 7.69368 | 7.11501 | 6.77062 |
| DNM2       | 8.31175 | 8.22783 | 8.20678 | 8.23927 | 7.26345 | 8.35652 | 8.19449 | 8.38099 | 8.28099 |
| MIR4748    | 7.72318 | 7.76332 | 7.52523 | 7.68554 | 7.72125 | 7.82187 | 7.57164 | 7.52954 | 7.59088 |
| C19orf38   | 5.66919 | 5.74814 | 5.68723 | 5.96738 | 6.93874 | 6.32114 | 6.23945 | 6.00042 | 6.00313 |
| CARM1      | 8.63823 | 8.13563 | 8.43946 | 9.05813 | 7.17955 | 9.2053  | 9.51801 | 8.88789 | 9.04435 |
| LDLR       | 9.52885 | 8.58599 | 8.95726 | 9.99346 | 8.11835 | 10.2666 | 10.0646 | 10.7039 | 10.9548 |
| Angptl8    | 6.71988 | 6.33288 | 6.75755 | 7.29469 | 7.12867 | 7.43489 | 7.14957 | 7.27483 | 7.01898 |
| TSPAN16    | 4.74938 | 5.0876  | 4.99497 | 5.42559 | 5.51175 | 5.57337 | 5.15756 | 5.36736 | 5.0529  |
| CCDC159    | 6.21209 | 6.19191 | 6.01277 | 5.99856 | 5.91357 | 5.65205 | 6.54145 | 5.96427 | 6.58673 |
| PLPPR2     | 8.35637 | 7.66255 | 8.08016 | 8.88543 | 8.04787 | 9.12764 | 9.14942 | 9.17999 | 9.04276 |
| SWSAP1     | 6.65678 | 6.48491 | 6.36922 | 6.84679 | 6.43045 | 6.87364 | 7.42731 | 6.53095 | 6.8172  |
| PRKCSH     | 9.75293 | 9.27559 | 9.41607 | 9.60858 | 7.31548 | 9.46155 | 9.84045 | 8.91603 | 9.03233 |
| ZNF627     | 7.04997 | 6.68603 | 6.49427 | 6.6485  | 4.93117 | 6.4693  | 6.87591 | 6.38518 | 5.86184 |

|          |         |         |         |         |         |         |         |         |         |
|----------|---------|---------|---------|---------|---------|---------|---------|---------|---------|
| ZNF441   | 5.36419 | 5.70826 | 5.90066 | 4.39849 | 4.08527 | 4.47245 | 5.0216  | 4.8806  | 4.67016 |
| ZNF491   | 4.90904 | 4.90575 | 5.2914  | 5.36568 | 5.35688 | 5.77961 | 5.38382 | 5.9087  | 5.80005 |
| ZNF440   | 8.85118 | 8.2584  | 9.21212 | 7.12464 | 5.85032 | 7.59854 | 8.40723 | 7.8807  | 7.88771 |
| ZNF439   | 6.46557 | 6.8295  | 5.88249 | 6.67262 | 6.33992 | 6.76648 | 6.42894 | 6.7216  | 5.96532 |
| ZNF69    | 5.21853 | 4.85264 | 5.23347 | 4.47614 | 4.59565 | 4.78635 | 4.92601 | 4.6145  | 4.54373 |
| ZNF700   | 7.36753 | 7.26338 | 7.13135 | 6.52741 | 5.8     | 6.15123 | 6.4527  | 6.76872 | 6.71491 |
| Znf763   | 5.72695 | 5.93547 | 6.27443 | 3.86522 | 5.54811 | 3.77504 | 4.87255 | 4.63667 | 4.91226 |
| ZNF844   | 7.69439 | 7.47938 | 7.08517 | 6.59602 | 6.49409 | 7.23735 | 6.49305 | 6.45341 | 6.57399 |
| ZNF788   | 5.4833  | 7.05505 | 6.67244 | 6.25627 | 6.32294 | 5.80364 | 6.24344 | 5.94001 | 5.70037 |
| ZNF136   | 6.2898  | 6.19065 | 6.30199 | 4.77624 | 5.45928 | 5.24508 | 5.20028 | 4.72445 | 5.35049 |
| ZNF791   | 8.53252 | 8.53913 | 8.46241 | 6.46375 | 5.50609 | 6.48667 | 7.36573 | 7.10856 | 7.2333  |
| WDR83    | 6.58551 | 6.38318 | 6.51216 | 6.68222 | 6.45665 | 6.69362 | 6.76574 | 6.77642 | 6.59387 |
| BEST2    | 5.10306 | 5.12959 | 5.11692 | 5.54062 | 5.37307 | 6.13902 | 5.50192 | 5.74128 | 5.48038 |
| JUNB     | 10.8532 | 9.14242 | 9.13761 | 11.1727 | 10.7261 | 12.0323 | 11.2695 | 11.6184 | 11.276  |
| MAST1    | 5.77591 | 5.83916 | 5.56283 | 6.42123 | 5.73125 | 6.64387 | 5.67428 | 6.23399 | 6.09961 |
| GCDH     | 6.92006 | 6.79226 | 6.83393 | 7.16364 | 6.07098 | 7.23642 | 7.00179 | 7.07815 | 6.93145 |
| CALR     | 11.9668 | 11.6754 | 12.005  | 12.1817 | 10.6963 | 12.3297 | 12.1399 | 11.8346 | 12.2851 |
| RAD23A   | 8.66619 | 8.42827 | 8.81572 | 9.31448 | 7.12682 | 8.57831 | 9.29869 | 8.31641 | 8.40184 |
| NFIX     | 10.3365 | 10.1817 | 10.1174 | 7.91564 | 6.20265 | 6.91189 | 8.91569 | 6.82616 | 6.94045 |
| IER2     | 8.44551 | 7.24226 | 6.82282 | 8.82036 | 7.35006 | 9.55361 | 9.03083 | 8.92919 | 8.67745 |
| CCDC130  | 8.98681 | 8.94936 | 8.93563 | 8.68618 | 7.98968 | 8.95932 | 8.68547 | 8.57472 | 8.67804 |
| mri1     | 8.72939 | 8.62493 | 8.54295 | 8.06811 | 6.29936 | 7.85866 | 8.06996 | 7.91679 | 7.75562 |
| c19orf53 | 11.1984 | 11.519  | 11.2246 | 11.4659 | 11.0084 | 10.7259 | 11.4838 | 10.7714 | 11.4215 |
| mir181c  | 5.83064 | 6.25551 | 6.21133 | 6.49734 | 7.32207 | 6.68116 | 6.03045 | 6.7687  | 6.55683 |
| Mir181d  | 6.51674 | 6.6577  | 6.77423 | 6.88804 | 7.29964 | 7.57259 | 6.76031 | 7.46159 | 6.97737 |
| NANOS3   | 6.16592 | 6.00166 | 6.16142 | 6.60601 | 7.09028 | 6.93701 | 6.59674 | 6.92269 | 6.81792 |

|           |         |         |         |         |         |         |         |         |         |
|-----------|---------|---------|---------|---------|---------|---------|---------|---------|---------|
| cc2d1a    | 7.65937 | 7.35605 | 7.33514 | 8.11008 | 6.86737 | 8.32088 | 8.25156 | 8.05132 | 7.9199  |
| DCAF15    | 7.54007 | 7.87424 | 7.87107 | 8.31695 | 6.69977 | 8.66144 | 8.26829 | 8.13076 | 8.13095 |
| RLN3      | 5.29439 | 5.74707 | 5.55883 | 6.2921  | 6.54123 | 6.51414 | 5.85638 | 6.48185 | 6.21868 |
| ADGRL1    | 5.70857 | 5.95095 | 5.93063 | 6.47357 | 5.8925  | 6.55929 | 6.3957  | 6.63928 | 5.87295 |
| ADGRE5    | 7.09276 | 6.60363 | 7.3717  | 6.35436 | 6.12526 | 6.96583 | 7.12789 | 7.55874 | 6.7046  |
| PKN1      | 6.49349 | 6.322   | 6.60087 | 6.73398 | 6.28553 | 6.88294 | 6.59899 | 6.72962 | 6.77811 |
| ZNF333    | 6.30825 | 6.55692 | 6.36954 | 6.14884 | 5.98932 | 6.11128 | 5.90861 | 6.38656 | 6.054   |
| CCDC105   | 4.72578 | 4.74628 | 5.17952 | 5.67534 | 5.25319 | 5.71505 | 5.25008 | 5.26974 | 5.25008 |
| UCA1      | 6.44153 | 5.94507 | 5.80138 | 6.99969 | 6.86189 | 7.63094 | 6.70755 | 8.96089 | 8.73515 |
| LINC00905 | 5.57051 | 5.6472  | 5.83569 | 6.24149 | 6.94451 | 6.64411 | 6.10291 | 6.34677 | 6.51489 |
| LINC00661 | 4.73563 | 4.99793 | 4.9575  | 5.30699 | 5.58538 | 5.41441 | 5.01696 | 5.12694 | 5.03482 |
| TPM4      | 10.1885 | 9.49903 | 9.83316 | 10.2876 | 8.87588 | 10.6209 | 10.5607 | 10.9116 | 10.9983 |
| KLF2      | 7.83416 | 7.8323  | 8.36465 | 8.47661 | 7.78845 | 9.22462 | 8.42736 | 9.52042 | 9.04153 |
| c19orf44  | 6.12646 | 6.21912 | 6.07544 | 6.50463 | 6.17905 | 6.78131 | 6.16938 | 6.14466 | 6.00795 |
| TMEM38A   | 5.6629  | 5.45492 | 5.57791 | 5.70233 | 6.00249 | 5.73787 | 5.86701 | 5.99244 | 5.72825 |
| NWD1      | 5.14255 | 5.20387 | 5.49737 | 5.9875  | 5.40295 | 5.63098 | 5.57492 | 5.35577 | 5.18029 |
| SIN3B     | 8.31995 | 7.88763 | 7.82282 | 8.23275 | 6.57265 | 7.92571 | 7.98609 | 9.0198  | 8.20196 |
| F2RL3     | 5.43481 | 5.7285  | 5.47255 | 6.39568 | 5.60086 | 6.60745 | 6.28236 | 6.67846 | 6.2527  |
| MYO9B     | 8.53119 | 8.2379  | 8.38833 | 8.42267 | 7.22161 | 10.313  | 8.91903 | 9.62416 | 9.39071 |
| USE1      | 8.03574 | 7.66908 | 7.60303 | 8.5462  | 6.53467 | 7.95446 | 8.57978 | 7.47414 | 7.93556 |
| OCEL1     | 7.74338 | 7.37325 | 7.32317 | 7.74931 | 7.41834 | 7.51896 | 7.78214 | 7.45613 | 7.33857 |
| BABAM1    | 8.16081 | 8.23715 | 8.17568 | 8.55038 | 5.92761 | 8.15198 | 8.62992 | 7.72612 | 8.05247 |
| ANKLE1    | 6.25676 | 5.90275 | 6.17435 | 7.3923  | 6.84429 | 7.41824 | 6.79882 | 6.96513 | 6.97373 |
| MRPL34    | 9.39299 | 8.93215 | 9.09996 | 8.88087 | 7.13389 | 8.42808 | 9.12671 | 8.24128 | 8.11324 |
| DDA1      | 9.00684 | 9.13694 | 8.54803 | 9.51402 | 8.94194 | 9.21664 | 9.59976 | 9.73826 | 9.78705 |
| GTPBP3    | 7.30922 | 7.22124 | 7.55415 | 7.15679 | 6.92537 | 7.23972 | 7.02081 | 6.94382 | 7.00924 |

|          |         |         |         |         |         |         |         |         |         |
|----------|---------|---------|---------|---------|---------|---------|---------|---------|---------|
| PGLS     | 7.01715 | 7.325   | 6.89971 | 8.25985 | 6.98087 | 8.1866  | 8.83326 | 7.90403 | 7.95633 |
| COLGALT1 | 8.66599 | 8.52673 | 8.64973 | 9.21312 | 6.43036 | 8.28779 | 9.20209 | 8.62978 | 8.74849 |
| MAP1S    | 6.86606 | 6.9147  | 6.85611 | 7.60918 | 6.78869 | 7.26566 | 7.43411 | 7.10505 | 7.25984 |
| FCHO1    | 7.20268 | 7.07729 | 6.80476 | 7.30573 | 6.1663  | 6.27224 | 6.38736 | 6.56418 | 6.67229 |
| RPL18A   | 12.4627 | 12.4754 | 12.7621 | 12.3284 | 12.2519 | 12.2817 | 12.5516 | 12.1231 | 12.3483 |
| CCDC124  | 9.05469 | 9.16752 | 8.69451 | 10.2067 | 9.3998  | 11.0614 | 11.0147 | 10.4836 | 10.0466 |
| ARRDC2   | 6.9416  | 6.73783 | 7.26796 | 7.29275 | 6.58405 | 7.59461 | 7.38091 | 7.19159 | 7.11177 |
| MAST3    | 8.55011 | 8.13297 | 7.72944 | 7.35507 | 5.72551 | 6.48963 | 7.58157 | 7.0269  | 7.15385 |
| MPV17L2  | 7.13572 | 7.02554 | 7.32141 | 7.49546 | 6.92196 | 7.31831 | 8.24121 | 7.0206  | 6.99909 |
| MIR3188  | 6.01002 | 5.43882 | 5.84765 | 5.72906 | 4.94159 | 5.17191 | 5.54036 | 5.11584 | 5.43873 |
| GDF15    | 6.01051 | 6.18284 | 6.37277 | 6.81742 | 6.71562 | 6.79389 | 6.67883 | 6.54239 | 6.79607 |
| MIR3189  | 2.68771 | 3.16799 | 3.05556 | 4.08021 | 3.32703 | 3.96487 | 3.34291 | 3.82894 | 3.39238 |
| SSBP4    | 7.16176 | 6.94209 | 7.41011 | 7.48656 | 6.63794 | 7.27647 | 7.64815 | 7.45376 | 7.46292 |
| KXD1     | 8.43826 | 8.3684  | 8.55694 | 9.03163 | 7.64128 | 8.92253 | 9.08897 | 8.58597 | 8.82005 |
| UBA52    | 12.4022 | 12.451  | 12.6343 | 12.7529 | 12.5953 | 12.7829 | 12.9948 | 12.4595 | 12.6456 |
| c19orf60 | 7.2788  | 7.63884 | 7.86344 | 7.73943 | 7.1988  | 8.17691 | 7.82494 | 7.21478 | 7.3495  |
| TMEM59L  | 6.11713 | 6.12892 | 6.00741 | 6.63168 | 6.83746 | 7.12938 | 6.58651 | 6.86791 | 6.69234 |
| KLHL26   | 6.59215 | 6.63118 | 6.58183 | 6.829   | 5.98835 | 7.25526 | 7.22142 | 7.05195 | 6.70034 |
| CRTC1    | 7.24075 | 7.0546  | 7.09944 | 7.55674 | 7.15979 | 7.42566 | 7.50418 | 6.88916 | 7.1856  |
| UPF1     | 8.65986 | 8.64328 | 8.34209 | 8.50333 | 7.05565 | 8.09812 | 8.78032 | 8.45858 | 8.30453 |
| DDX49    | 7.35218 | 7.35951 | 7.40235 | 8.00555 | 7.21918 | 7.50233 | 7.86239 | 7.3297  | 7.28045 |
| ARMC6    | 7.10892 | 7.24476 | 7.22951 | 7.56334 | 6.92285 | 7.27557 | 8.00655 | 7.25385 | 7.17496 |
| RFXANK   | 7.49895 | 7.69729 | 7.61938 | 8.1814  | 7.42108 | 7.91707 | 8.02197 | 7.64894 | 7.60313 |
| NCAN     | 5.61971 | 5.8748  | 5.80427 | 6.10519 | 6.73708 | 6.53664 | 5.98232 | 6.41194 | 6.106   |
| MAU2     | 8.91574 | 9.00179 | 8.96238 | 8.76089 | 7.50141 | 8.92279 | 8.8309  | 8.90898 | 8.53101 |
| GATAD2A  | 8.12567 | 8.04207 | 7.85077 | 8.17225 | 6.59099 | 8.37366 | 8.53708 | 8.61866 | 8.41149 |

|           |         |         |         |         |         |         |         |         |         |
|-----------|---------|---------|---------|---------|---------|---------|---------|---------|---------|
| MIR640    | 6.12132 | 5.94076 | 5.82793 | 5.92723 | 5.45372 | 5.64573 | 5.66432 | 6.44026 | 5.74046 |
| CILP2     | 6.271   | 6.24477 | 6.33481 | 7.27275 | 6.58276 | 7.42897 | 6.72288 | 7.41073 | 6.76901 |
| ZNF101    | 6.1178  | 6.48213 | 6.36025 | 5.90195 | 6.01794 | 6.39688 | 6.32526 | 5.74435 | 5.6637  |
| LINC00663 | 4.82604 | 4.93141 | 4.52843 | 5.3472  | 6.41251 | 5.39205 | 5.32176 | 5.01632 | 5.04478 |
| ZNF253    | 7.7004  | 8.23459 | 8.33859 | 5.96465 | 4.84847 | 4.59382 | 6.69283 | 5.14382 | 5.6854  |
| ZNF93     | 7.03962 | 7.79337 | 7.01845 | 5.97106 | 5.56157 | 5.96451 | 6.5518  | 6.1151  | 6.10022 |
| ZNF90     | 6.1465  | 6.0468  | 6.35479 | 5.60511 | 5.96471 | 5.20665 | 5.34645 | 5.27052 | 5.47254 |
| ZNF486    | 5.88171 | 6.96943 | 6.23176 | 6.00201 | 6.09564 | 5.57934 | 6.54433 | 4.99497 | 5.78007 |
| ZNF85     | 6.97532 | 7.25048 | 7.18946 | 6.96948 | 6.96048 | 6.64881 | 6.61525 | 6.70152 | 6.50261 |
| ZNF430    | 6.60421 | 6.3863  | 6.72663 | 4.81739 | 3.09697 | 6.33553 | 6.72383 | 6.32354 | 5.91868 |
| ZNF714    | 5.79825 | 5.85403 | 5.61086 | 3.42864 | 4.49985 | 3.80047 | 5.07038 | 4.09675 | 4.92274 |
| ZNF431    | 8.90337 | 8.54836 | 8.44629 | 8.20721 | 8.05555 | 9.09155 | 8.17274 | 9.56008 | 9.16405 |
| ZNF738    | 7.52743 | 7.54798 | 8.21286 | 7.06492 | 6.90615 | 6.31765 | 6.72679 | 6.37637 | 6.39364 |
| ZNF493    | 6.81625 | 7.54694 | 7.16861 | 4.08132 | 5.20385 | 4.3813  | 4.35387 | 5.18935 | 4.98309 |
| LINC00664 | 4.79576 | 5.06963 | 5.12993 | 5.07965 | 6.08539 | 5.34577 | 4.92707 | 5.18332 | 7.28347 |
| ZNF429    | 6.4117  | 7.71742 | 6.63577 | 5.45688 | 4.43063 | 6.51332 | 6.59952 | 4.74191 | 5.50886 |
| LOC641367 | 5.03413 | 4.73674 | 4.83403 | 5.05436 | 4.73031 | 4.90756 | 4.57474 | 5.14168 | 5.2054  |
| ZNF257    | 4.91942 | 5.28704 | 5.38232 | 4.08819 | 4.39773 | 4.6967  | 4.29153 | 4.60421 | 4.43818 |
| Znf729    | 3.8535  | 3.79149 | 3.95526 | 3.94767 | 3.85015 | 3.85665 | 3.96352 | 3.72595 | 3.93776 |
| GOLGA2P9  | 3.10453 | 2.88427 | 2.61324 | 3.50536 | 2.89261 | 3.21906 | 2.92157 | 2.64147 | 2.85119 |
| ZNF492    | 5.36814 | 5.59934 | 5.3106  | 5.19955 | 5.87076 | 5.07038 | 5.72755 | 5.03227 | 5.13828 |
| RPSAP58   | 8.01313 | 8.86899 | 7.94038 | 7.78412 | 6.80891 | 7.89049 | 7.27407 | 7.98375 | 9.03639 |
| ZNF254    | 8.38488 | 8.06063 | 8.20169 | 7.16177 | 5.65356 | 7.3051  | 7.65991 | 8.57954 | 10.1845 |
| LINC00906 | 5.06613 | 5.24938 | 5.06557 | 4.97275 | 5.88344 | 5.51593 | 4.99711 | 5.21156 | 4.94327 |
| LINC01532 | 4.34391 | 4.66923 | 4.46428 | 4.62474 | 5.15963 | 4.71778 | 4.69783 | 4.71853 | 4.96413 |
| VSTM2B    | 6.04271 | 6.11553 | 6.07163 | 6.66356 | 6.72735 | 7.44922 | 6.66855 | 6.84874 | 6.65508 |

|           |         |         |         |         |         |         |         |         |         |
|-----------|---------|---------|---------|---------|---------|---------|---------|---------|---------|
| CCNE1     | 6.18539 | 5.99227 | 6.16146 | 7.59974 | 6.39576 | 8.60363 | 8.19971 | 9.45378 | 7.74911 |
| ZNF536    | 5.09068 | 5.47544 | 5.42111 | 4.83677 | 5.16958 | 5.47907 | 4.94683 | 5.06569 | 5.10605 |
| ZNF507    | 7.9965  | 8.47553 | 8.47345 | 6.21841 | 5.42517 | 5.81367 | 7.3082  | 5.9913  | 6.23288 |
| DPY19L3   | 8.44974 | 8.28995 | 8.68766 | 7.59529 | 5.21099 | 6.2992  | 8.0345  | 6.61746 | 7.03062 |
| PDCD5     | 7.57916 | 7.99311 | 7.97154 | 8.2027  | 6.43787 | 7.79515 | 8.4125  | 7.38867 | 7.56281 |
| RGS9BP    | 5.98194 | 5.78814 | 5.60246 | 6.80994 | 5.80011 | 7.18802 | 6.34895 | 6.58871 | 6.4789  |
| NUDT19    | 7.70957 | 7.76324 | 7.96791 | 7.43091 | 5.65759 | 6.93426 | 8.00837 | 7.22846 | 7.26851 |
| TDRD12    | 4.39755 | 4.51012 | 4.56517 | 4.43691 | 4.81411 | 4.51042 | 4.73848 | 4.66479 | 4.72589 |
| FAAP24    | 5.54364 | 5.19658 | 5.72692 | 5.93253 | 5.53969 | 6.03513 | 5.74396 | 5.82558 | 5.41784 |
| GPATCH1   | 7.68116 | 8.00042 | 7.68918 | 7.41562 | 6.45611 | 7.08927 | 7.48367 | 6.69506 | 6.97346 |
| WDR88     | 5.18557 | 5.26876 | 5.37225 | 5.52879 | 5.98434 | 5.50495 | 5.25928 | 5.62994 | 5.4249  |
| LRP3      | 6.14633 | 6.20116 | 6.31134 | 6.30938 | 5.43067 | 6.76407 | 6.75389 | 6.10291 | 6.14526 |
| CEBPA-AS1 | 5.52224 | 5.55594 | 5.33208 | 6.11479 | 6.21676 | 6.00711 | 5.99983 | 6.12278 | 6.31619 |
| CHST8     | 5.57096 | 5.65518 | 5.76281 | 5.94454 | 6.20488 | 6.55122 | 6.34204 | 6.28944 | 5.96345 |
| KCTD15    | 7.6108  | 7.44902 | 7.39368 | 7.65805 | 5.48842 | 7.50967 | 8.18383 | 6.72927 | 7.2747  |
| KIAA0355  | 8.89671 | 8.61569 | 8.69015 | 8.59347 | 6.96218 | 9.46113 | 8.4329  | 9.17115 | 9.41406 |
| GPI       | 9.77322 | 9.25622 | 10.1827 | 10.0973 | 8.45991 | 10.499  | 10.0682 | 10.0609 | 10.1349 |
| PDCD2L    | 7.32544 | 7.28728 | 7.45215 | 8.04574 | 7.23243 | 7.91411 | 8.27031 | 7.40864 | 7.5803  |
| UBA2      | 9.91935 | 10.0742 | 10.1638 | 10.0175 | 7.73431 | 9.88839 | 10.4402 | 9.60697 | 9.83142 |
| WTIP      | 7.53119 | 7.64478 | 7.43196 | 7.79642 | 8.34701 | 7.80707 | 7.64663 | 7.71816 | 7.72101 |
| ZNF302    | 6.95329 | 7.20978 | 7.41712 | 5.45626 | 4.59388 | 4.89663 | 6.19961 | 5.69399 | 6.10696 |
| ZNF181    | 6.57439 | 6.80361 | 7.11572 | 6.57857 | 6.89859 | 6.05949 | 6.53737 | 6.16868 | 6.26701 |
| ZNF30     | 5.00168 | 5.12127 | 5.06923 | 4.86587 | 5.48254 | 5.28214 | 5.25892 | 4.31351 | 4.56279 |
| GRAMD1A   | 7.17471 | 6.89779 | 7.04441 | 7.42353 | 6.76371 | 7.25727 | 7.16507 | 7.43814 | 7.22144 |
| HPN       | 6.28472 | 6.33611 | 6.59402 | 7.239   | 7.617   | 7.30314 | 6.83282 | 7.06142 | 6.85251 |
| FXD3      | 8.17866 | 8.62721 | 8.25824 | 8.23674 | 7.96968 | 8.18334 | 8.69986 | 7.57786 | 8.27084 |



|           |         |         |         |         |         |         |         |         |         |
|-----------|---------|---------|---------|---------|---------|---------|---------|---------|---------|
| FXYD1     | 6.85064 | 7.11951 | 7.06937 | 6.99994 | 6.69665 | 7.07393 | 6.9547  | 6.87963 | 6.59171 |
| fyd7      | 5.93381 | 5.91571 | 5.83984 | 6.17181 | 6.32783 | 5.99996 | 6.02959 | 6.09154 | 6.1499  |
| FXYD5     | 6.47159 | 6.23989 | 7.1034  | 7.69878 | 6.45638 | 7.37373 | 7.30311 | 8.07944 | 8.16123 |
| LSR       | 8.32174 | 8.08205 | 8.13219 | 9.24849 | 7.85829 | 8.68294 | 9.19469 | 8.55816 | 8.94063 |
| hamp      | 7.01104 | 7.20529 | 6.98281 | 7.31849 | 8.73826 | 7.30511 | 7.04303 | 7.09994 | 7.0908  |
| MAG       | 5.1905  | 5.40298 | 5.19676 | 5.71844 | 6.00088 | 5.79236 | 5.91986 | 6.0195  | 5.92301 |
| CD22      | 5.25679 | 5.26664 | 5.71687 | 5.87468 | 6.36369 | 5.45321 | 5.81566 | 5.70163 | 5.81446 |
| FFAR1     | 6.74935 | 6.88522 | 6.82236 | 7.48279 | 6.72709 | 7.90655 | 7.48773 | 7.22014 | 7.12311 |
| FFAR3     | 7.49014 | 7.28182 | 7.19456 | 7.51017 | 7.74336 | 7.80048 | 7.53694 | 7.60492 | 7.46675 |
| LINC01531 | 5.29273 | 5.35057 | 5.17198 | 5.32971 | 6.29568 | 5.8602  | 5.06891 | 5.41596 | 5.25011 |
| FFAR2     | 4.88761 | 4.72356 | 4.13448 | 5.12843 | 4.77055 | 5.8721  | 5.19874 | 5.23742 | 5.2091  |
| TMEM147   | 9.97243 | 10.1538 | 9.86974 | 10.6922 | 10.2282 | 10.1824 | 10.8429 | 10.0769 | 10.2278 |
| RBM42     | 7.88642 | 7.86313 | 7.67276 | 9.02992 | 7.67895 | 8.49236 | 8.83916 | 8.34119 | 8.32109 |
| ETV2      | 5.52425 | 5.70021 | 5.66986 | 6.56112 | 6.40328 | 6.70609 | 6.25124 | 6.30052 | 6.15108 |
| Cox6b1    | 6.94501 | 6.83484 | 7.2772  | 8.39636 | 7.38236 | 8.76856 | 8.4201  | 7.7862  | 7.65342 |
| UPK1A     | 8.24845 | 10.3933 | 7.46746 | 9.51991 | 11.6867 | 8.61863 | 5.60754 | 7.36701 | 6.00856 |
| ZBTB32    | 5.55967 | 5.78716 | 5.974   | 6.06614 | 6.60269 | 6.45264 | 6.39426 | 5.88875 | 5.71694 |
| KMT2B     | 8.00669 | 7.86467 | 7.80432 | 7.34963 | 6.32596 | 7.64478 | 7.51715 | 7.32244 | 7.22851 |
| PSENN     | 10.8712 | 10.5573 | 10.63   | 11.4375 | 10.5599 | 11.5537 | 11.6878 | 11.5474 | 12.068  |
| LIN37     | 8.17061 | 8.34353 | 8.14007 | 8.82258 | 7.32444 | 8.52286 | 8.92937 | 8.67826 | 9.15091 |
| PROSER3   | 7.09685 | 6.76133 | 7.22476 | 7.32182 | 7.16701 | 7.54195 | 7.34738 | 7.26928 | 7.50899 |
| arhgap33  | 6.94984 | 6.43733 | 6.47632 | 6.89771 | 7.33825 | 6.74295 | 6.78962 | 7.29348 | 6.7038  |
| KIRREL2   | 5.57073 | 5.75079 | 5.69236 | 6.42    | 5.97873 | 6.26159 | 5.9126  | 5.92321 | 6.09256 |
| APLP1     | 6.01329 | 6.19457 | 6.21247 | 6.73087 | 6.56792 | 7.21005 | 6.54269 | 6.81292 | 6.50522 |
| HCST      | 6.44277 | 6.6042  | 6.78601 | 6.46576 | 6.96784 | 6.76247 | 6.69115 | 7.01792 | 6.87387 |
| LRFN3     | 6.38214 | 6.3903  | 6.21952 | 6.5089  | 5.405   | 6.84778 | 7.10262 | 6.67516 | 6.81124 |

|            |         |         |         |         |         |         |         |         |         |
|------------|---------|---------|---------|---------|---------|---------|---------|---------|---------|
| SDHAF1     | 5.9248  | 5.60955 | 6.05032 | 6.52474 | 6.19105 | 6.59027 | 6.49864 | 6.16414 | 6.33911 |
| WDR62      | 6.85094 | 7.05814 | 6.90084 | 7.30037 | 7.23552 | 7.15189 | 7.58436 | 7.10641 | 7.32706 |
| TBCB       | 8.37003 | 8.1207  | 8.3868  | 8.83247 | 6.45588 | 8.38218 | 9.0555  | 8.56629 | 9.09222 |
| ZNF146     | 8.17312 | 8.11069 | 8.04322 | 7.31819 | 4.79467 | 6.77083 | 7.6065  | 6.91265 | 7.03351 |
| LOC644189  | 5.30061 | 5.67782 | 5.66608 | 6.14885 | 6.29356 | 6.51132 | 6.19426 | 6.2827  | 6.41604 |
| LOC728752  | 5.02399 | 4.96432 | 4.79159 | 5.11403 | 5.89151 | 5.72406 | 5.33716 | 5.47544 | 4.92417 |
| ZNF382     | 6.12851 | 6.21255 | 5.80665 | 6.4073  | 6.18087 | 6.7525  | 6.57869 | 6.35925 | 6.5299  |
| ZNF567     | 6.52441 | 6.45395 | 6.45434 | 4.69082 | 3.90783 | 4.48327 | 5.55751 | 5.16575 | 5.10503 |
| ZNF790-AS1 | 7.11602 | 7.64713 | 7.24473 | 5.18489 | 6.49557 | 5.29006 | 5.96728 | 5.70523 | 5.01324 |
| ZNF345     | 6.56833 | 6.55157 | 6.72883 | 4.84849 | 4.84328 | 5.2007  | 5.43206 | 5.40429 | 5.33691 |
| ZNF568     | 6.01267 | 5.85174 | 5.97825 | 5.5858  | 5.85216 | 4.69159 | 5.1589  | 5.50568 | 5.23895 |
| ZNF420     | 6.07173 | 6.63546 | 5.98571 | 5.86748 | 6.51732 | 5.63247 | 5.5468  | 5.36107 | 5.12823 |
| ZNF383     | 7.74342 | 7.88632 | 8.04734 | 5.16923 | 5.59204 | 5.29828 | 6.34323 | 5.5753  | 5.37894 |
| ZNF527     | 6.20159 | 6.65014 | 6.57447 | 5.54293 | 6.13575 | 5.5089  | 6.02831 | 5.33545 | 5.36896 |
| ZNF570     | 6.96831 | 7.4569  | 7.17645 | 5.65969 | 5.66856 | 5.25664 | 6.16051 | 5.09938 | 5.36441 |
| ZNF793     | 6.76305 | 6.07686 | 6.66936 | 5.83127 | 5.87762 | 5.65951 | 5.29893 | 5.45728 | 5.55798 |
| ZNF540     | 5.5194  | 5.97458 | 5.69056 | 5.14648 | 6.18762 | 5.59345 | 5.34216 | 5.56681 | 5.28867 |
| LOC644554  | 4.45302 | 4.82951 | 4.57266 | 4.00249 | 4.56711 | 4.71322 | 4.31797 | 4.07737 | 4.31362 |
| SIPA1L3    | 8.64435 | 8.8192  | 8.6095  | 8.02691 | 7.40821 | 7.49851 | 8.08185 | 8.23172 | 7.75399 |
| C19orf33   | 10.3132 | 10.102  | 10.2163 | 11.3429 | 10.9863 | 11.4518 | 10.9032 | 10.34   | 10.7323 |
| CATSPERG   | 5.65544 | 5.70054 | 5.34855 | 5.6084  | 5.68953 | 5.84046 | 5.66137 | 5.74706 | 5.91271 |
| RYR1       | 5.79883 | 6.00878 | 5.77824 | 6.56893 | 6.11073 | 6.5957  | 6.31095 | 6.39288 | 6.23045 |
| MRPS12     | 6.19998 | 6.20494 | 6.23101 | 7.12221 | 6.59875 | 6.59603 | 7.1839  | 6.56055 | 6.58885 |
| ACP7       | 8.20369 | 7.63726 | 7.04041 | 9.20072 | 10.0236 | 10.6119 | 9.73512 | 9.46478 | 10.1782 |
| PAK4       | 7.45608 | 7.09949 | 7.41721 | 8.37885 | 7.64557 | 8.83079 | 7.86121 | 8.25964 | 8.07217 |
| NCCRP1     | 12.4094 | 11.7132 | 11.8748 | 12.3025 | 12.7338 | 12.4586 | 12.5347 | 12.5322 | 12.1391 |

|          |         |         |         |         |         |         |         |         |         |
|----------|---------|---------|---------|---------|---------|---------|---------|---------|---------|
| SAMD4B   | 9.02777 | 8.60489 | 8.83414 | 9.23936 | 8.23475 | 10.3246 | 9.46278 | 9.94868 | 9.99802 |
| MED29    | 8.55159 | 8.63097 | 8.50153 | 8.8449  | 8.45484 | 10.2461 | 9.30631 | 10.3171 | 9.40596 |
| SUPT5H   | 8.5777  | 8.27003 | 8.44308 | 8.68761 | 7.53617 | 9.24591 | 9.1491  | 9.6093  | 9.08028 |
| TIMM50   | 8.7121  | 8.45255 | 8.852   | 8.98142 | 6.8688  | 8.19042 | 8.86894 | 8.166   | 8.70619 |
| DLL3     | 5.06294 | 5.48218 | 5.16923 | 5.84494 | 6.02339 | 6.15233 | 5.87142 | 6.31427 | 5.9934  |
| SELENOV  | 5.15281 | 5.48815 | 5.58465 | 5.80363 | 6.24069 | 6.26964 | 5.89969 | 5.84953 | 5.87813 |
| LGALS17A | 3.83777 | 4.02941 | 4.08142 | 5.04302 | 5.67134 | 4.81924 | 4.78443 | 4.85934 | 4.82452 |
| LEUTX    | 5.65072 | 5.8268  | 5.78627 | 6.09668 | 7.3569  | 6.19921 | 5.74834 | 6.2237  | 6.02406 |
| ZNF546   | 4.8719  | 4.69212 | 4.82826 | 5.40007 | 6.04439 | 5.37412 | 4.64962 | 4.35004 | 4.63983 |
| MAP3K10  | 6.80573 | 6.89149 | 6.58308 | 6.98242 | 6.87323 | 7.41923 | 7.44781 | 6.99268 | 7.12915 |
| SHKBP1   | 8.09815 | 7.90131 | 7.96245 | 8.80577 | 7.22254 | 8.74692 | 9.08091 | 8.8285  | 8.69931 |
| LTBP4    | 7.78137 | 7.87516 | 7.9139  | 7.43205 | 7.03281 | 7.48958 | 8.08178 | 7.36963 | 7.37543 |
| ITPKC    | 8.40735 | 7.87571 | 7.71641 | 8.31622 | 7.77218 | 10.754  | 8.94573 | 9.87644 | 9.52267 |
| SNRPA    | 9.31989 | 9.38064 | 9.63686 | 9.91277 | 7.5991  | 9.21098 | 9.72963 | 9.15175 | 9.36495 |
| AXL      | 7.90318 | 7.62504 | 8.77087 | 7.24745 | 6.50981 | 7.42121 | 7.83024 | 7.52937 | 7.55335 |
| HNRNPUL1 | 10.4941 | 10.0402 | 10.5306 | 9.97022 | 7.78876 | 9.70586 | 10.2341 | 9.44761 | 9.85993 |
| CCDC97   | 8.6578  | 8.44375 | 8.74563 | 8.22999 | 6.21648 | 8.19342 | 8.75175 | 8.09026 | 8.48567 |
| Tmem91   | 7.44578 | 7.07921 | 7.07257 | 7.91217 | 6.93619 | 8.06077 | 7.55311 | 7.24052 | 6.93014 |
| ERICH4   | 4.65636 | 4.80899 | 5.07703 | 4.66812 | 5.49775 | 4.82559 | 4.54236 | 4.88057 | 4.76412 |
| CEACAM21 | 5.25936 | 5.36473 | 5.26404 | 5.70539 | 5.73408 | 6.01618 | 5.68012 | 5.5205  | 5.91296 |
| CEACAM5  | 8.19569 | 7.80684 | 8.8889  | 8.19244 | 7.25871 | 10.8065 | 9.39794 | 10.6788 | 9.38761 |
| Ceacam6  | 7.39148 | 7.22807 | 8.55613 | 8.83191 | 7.85221 | 11.3619 | 10.5151 | 11.2921 | 11.4079 |
| CEACAM3  | 5.74185 | 5.65255 | 6.23297 | 6.39261 | 6.59945 | 6.74012 | 6.22961 | 6.69797 | 6.22818 |
| DMRTC2   | 6.47141 | 6.50272 | 6.80834 | 6.90488 | 7.90192 | 7.10464 | 6.67084 | 7.12574 | 7.04042 |
| RPS19    | 11.7929 | 12.0199 | 11.9495 | 12.0495 | 10.9367 | 12.1084 | 12.1885 | 11.0777 | 11.2931 |
| arhgef1  | 7.69091 | 7.33289 | 7.79881 | 7.97974 | 6.21321 | 7.94727 | 8.20503 | 7.73692 | 8.28995 |

|              |         |         |         |         |         |         |         |         |         |
|--------------|---------|---------|---------|---------|---------|---------|---------|---------|---------|
| ZNF574       | 7.37339 | 7.56116 | 7.43789 | 8.11022 | 7.2221  | 6.91084 | 7.83901 | 6.80187 | 7.45076 |
| LOC100505622 | 6.27531 | 6.53286 | 6.24608 | 7.13969 | 6.98143 | 7.216   | 6.906   | 6.94291 | 7.27029 |
| znf526       | 7.32991 | 7.97717 | 7.57334 | 7.97846 | 7.89119 | 7.69271 | 7.77523 | 7.56684 | 7.59877 |
| CIC          | 7.41135 | 7.06545 | 7.25681 | 7.76602 | 7.25407 | 7.9071  | 7.77864 | 7.37671 | 7.51384 |
| PRR19        | 4.03393 | 4.40044 | 4.14177 | 4.65746 | 4.82732 | 5.03903 | 4.46228 | 4.3656  | 4.41506 |
| TMEM145      | 6.01421 | 6.10375 | 5.79953 | 6.27904 | 6.36469 | 6.71735 | 6.23589 | 6.58867 | 6.23335 |
| MEGF8        | 7.1159  | 7.05569 | 6.96681 | 7.06135 | 6.4765  | 7.22153 | 7.0571  | 7.00998 | 6.84591 |
| LOC100289650 | 4.09013 | 4.1791  | 4.44911 | 4.88771 | 4.71162 | 5.19221 | 4.15213 | 4.39761 | 4.27219 |
| PRG1         | 3.75559 | 4.1995  | 3.82044 | 3.33314 | 4.75104 | 3.57921 | 3.48786 | 3.41758 | 3.59811 |
| CD177        | 6.34392 | 6.49167 | 6.73405 | 6.81125 | 7.36545 | 8.95247 | 7.54233 | 7.11962 | 6.7285  |
| TEX101       | 4.49107 | 5.08602 | 5.04898 | 5.13838 | 5.82551 | 6.31532 | 5.21906 | 5.74828 | 5.6788  |
| ZNF575       | 6.11514 | 5.89919 | 6.09051 | 6.47827 | 6.93784 | 6.44702 | 6.25686 | 6.61954 | 6.829   |
| PINLYP       | 6.4312  | 6.5681  | 6.47497 | 7.15814 | 6.42896 | 6.46978 | 7.31037 | 6.37521 | 6.47839 |
| ZNF576       | 6.08361 | 6.13879 | 5.94331 | 6.13709 | 6.29549 | 6.47415 | 6.42931 | 6.46665 | 6.13912 |
| SRRM5        | 6.39757 | 6.39918 | 6.3911  | 6.28691 | 6.57687 | 6.6609  | 5.84177 | 6.29268 | 6.13412 |
| ZNF283       | 6.06355 | 6.14449 | 5.57989 | 4.60926 | 5.03147 | 4.64901 | 5.50818 | 5.78842 | 4.67489 |
| ZNF221       | 4.29303 | 4.77712 | 4.10802 | 4.21171 | 4.5351  | 3.80531 | 3.9647  | 4.28559 | 4.22356 |
| ZNF155       | 5.98049 | 6.34588 | 5.8923  | 5.97586 | 5.37987 | 5.86026 | 6.16075 | 5.79168 | 5.76136 |
| ZNF230       | 5.38564 | 6.0261  | 5.93142 | 4.55896 | 4.51903 | 4.25874 | 5.26093 | 4.54758 | 4.88597 |
| ZNF222       | 3.65333 | 3.37438 | 3.78545 | 4.27119 | 4.11106 | 4.00721 | 3.68651 | 4.28946 | 3.79056 |
| ZNF223       | 5.75738 | 5.72747 | 5.74267 | 4.55059 | 5.60958 | 5.26963 | 4.98944 | 4.65827 | 5.02945 |
| ZNF284       | 6.71493 | 7.1881  | 6.61315 | 5.84966 | 6.42613 | 4.42255 | 5.30115 | 5.33488 | 5.10794 |
| ZNF224       | 6.64339 | 6.83098 | 6.56602 | 5.37996 | 5.29738 | 5.56874 | 5.90134 | 6.12131 | 5.63921 |
| ZNF225       | 6.28655 | 6.54162 | 6.60027 | 5.39372 | 5.92324 | 5.62284 | 5.66178 | 5.4536  | 5.43313 |
| ZNF234       | 6.71481 | 6.9713  | 6.73549 | 7.07413 | 6.60806 | 6.17463 | 6.61913 | 6.23711 | 6.47877 |
| ZNF226       | 6.50803 | 6.53434 | 6.55819 | 6.47729 | 6.29189 | 6.88369 | 6.18873 | 6.28536 | 5.9737  |

|             |         |         |         |         |         |         |         |         |         |
|-------------|---------|---------|---------|---------|---------|---------|---------|---------|---------|
| ZNF227      | 6.70165 | 6.51351 | 6.87145 | 5.63482 | 4.88442 | 5.54572 | 6.12279 | 5.45586 | 5.61915 |
| ZNF233      | 3.91184 | 3.7082  | 3.79136 | 3.867   | 3.83219 | 4.34913 | 4.18955 | 3.80438 | 3.85128 |
| PVR         | 7.39769 | 7.11525 | 7.24351 | 8.15637 | 7.10836 | 7.94537 | 8.29226 | 8.30714 | 8.5833  |
| ceacam19    | 7.79111 | 7.73333 | 7.49551 | 8.09902 | 8.9577  | 9.36513 | 8.80678 | 9.3361  | 9.17606 |
| CEACAM16    | 5.75789 | 5.65956 | 5.60655 | 6.23475 | 6.00981 | 6.16136 | 5.93525 | 6.10905 | 6.13681 |
| BCL3        | 8.4177  | 7.78478 | 7.72394 | 8.76042 | 7.14359 | 8.57977 | 9.01478 | 8.19496 | 9.13152 |
| bcam        | 7.40504 | 7.76098 | 7.6007  | 7.86217 | 6.28253 | 7.21179 | 8.03865 | 8.53348 | 7.99849 |
| NECTIN2     | 7.50721 | 7.09047 | 7.12817 | 8.28473 | 6.2505  | 8.14612 | 8.11587 | 8.03039 | 8.329   |
| TOMM40      | 8.04029 | 7.86968 | 8.31174 | 9.03966 | 7.59292 | 8.50434 | 9.30119 | 8.16037 | 8.14133 |
| APOE        | 5.4802  | 5.27021 | 5.61069 | 5.58755 | 5.55166 | 5.72896 | 5.25398 | 5.23543 | 5.40893 |
| apoc1       | 5.5235  | 5.55352 | 5.49468 | 5.93082 | 5.47195 | 6.2767  | 6.15017 | 6.02969 | 5.65703 |
| APOC1P1     | 3.82898 | 4.29021 | 3.92105 | 4.07775 | 4.46429 | 4.55682 | 3.89394 | 4.21696 | 4.69258 |
| APOC4-APOC2 | 5.67725 | 5.70991 | 6.17524 | 6.25722 | 7.14487 | 6.2717  | 6.6463  | 6.1927  | 6.08455 |
| RELB        | 6.93161 | 6.89711 | 6.65734 | 7.58853 | 7.14054 | 7.94755 | 7.83229 | 7.6629  | 7.48236 |
| CLASRP      | 7.5211  | 7.16841 | 7.30954 | 7.38644 | 7.01279 | 7.83224 | 7.37249 | 7.6674  | 7.48642 |
| GEMIN7      | 6.63449 | 6.56813 | 6.49468 | 7.12335 | 6.33569 | 7.66862 | 7.6428  | 6.85986 | 6.74129 |
| MARK4       | 8.57563 | 7.99717 | 8.07274 | 8.76913 | 7.91471 | 9.34063 | 9.09848 | 8.85547 | 8.81593 |
| KLC3        | 6.92422 | 7.13845 | 6.86301 | 7.74507 | 7.33304 | 8.81991 | 8.33524 | 8.67583 | 7.94927 |
| FOSB        | 11.0681 | 8.00195 | 7.98924 | 9.19467 | 8.20398 | 10.3511 | 9.02714 | 8.81256 | 9.01659 |
| VASP        | 7.8904  | 8.07652 | 7.7671  | 8.74263 | 7.47966 | 9.20203 | 8.66049 | 8.73566 | 8.73747 |
| EML2-AS1    | 6.27152 | 5.90007 | 6.42231 | 6.61075 | 6.50547 | 7.21228 | 6.56965 | 6.86506 | 6.64325 |
| GIPR        | 6.7936  | 6.68867 | 6.47272 | 7.66697 | 7.87463 | 8.89656 | 7.44547 | 9.16966 | 8.87132 |
| MIR642A     | 6.19551 | 6.0845  | 6.14825 | 6.59174 | 7.10763 | 6.86483 | 6.58329 | 7.01499 | 6.66574 |
| QPCTL       | 6.74047 | 6.55701 | 6.92755 | 7.43634 | 6.99159 | 6.95363 | 7.36331 | 7.05062 | 7.11467 |
| BHMG1       | 5.77816 | 5.89477 | 5.55531 | 5.89162 | 6.0331  | 6.41782 | 6.06485 | 5.85003 | 6.21289 |
| SIX5        | 6.54478 | 6.34606 | 6.65324 | 7.63295 | 7.05254 | 7.19417 | 7.28671 | 7.10915 | 7.06014 |

|           |         |         |         |         |         |         |         |         |         |
|-----------|---------|---------|---------|---------|---------|---------|---------|---------|---------|
| FOXA3     | 6.36514 | 6.37453 | 6.5169  | 6.76938 | 6.80467 | 7.72732 | 6.63131 | 7.01297 | 7.04541 |
| CCDC61    | 5.79378 | 6.13682 | 5.95108 | 6.52605 | 5.88038 | 6.20573 | 6.59789 | 5.99565 | 6.21506 |
| MIR769    | 5.04385 | 5.29985 | 5.50335 | 5.31999 | 5.22945 | 5.16189 | 5.35266 | 5.52279 | 5.31815 |
| IGFL2     | 7.59725 | 8.33743 | 8.08779 | 11.1924 | 10.6176 | 8.75776 | 11.3516 | 9.88378 | 10.8778 |
| LOC93429  | 6.9817  | 6.36847 | 6.96489 | 6.28119 | 6.73818 | 6.18222 | 6.30089 | 6.46677 | 6.37849 |
| IGFL1     | 8.29567 | 4.96971 | 8.78057 | 12.0968 | 7.33166 | 8.92968 | 11.6644 | 8.0661  | 9.96419 |
| PNMAL2    | 6.22431 | 6.03155 | 6.16934 | 6.55978 | 7.14073 | 6.46886 | 6.23161 | 6.3186  | 6.58155 |
| DACT3-AS1 | 5.41238 | 5.41343 | 5.48654 | 6.1053  | 6.54051 | 6.11253 | 6.16812 | 6.05808 | 5.98725 |
| FKRP      | 6.87905 | 6.83312 | 6.91877 | 7.08101 | 7.22364 | 7.19018 | 7.01804 | 6.86209 | 6.9221  |
| arhgap35  | 8.82394 | 8.89719 | 8.87697 | 8.37678 | 6.05419 | 8.43466 | 8.88139 | 8.44632 | 8.39782 |
| NPAS1     | 5.28097 | 5.80703 | 5.52    | 6.11078 | 6.08887 | 6.46931 | 6.0195  | 6.27665 | 6.08554 |
| SAE1      | 6.47576 | 6.23673 | 5.75822 | 6.24579 | 5.90105 | 5.71074 | 6.41634 | 6.17909 | 6.13601 |
| MIR3190   | 6.01914 | 5.98627 | 6.2972  | 6.07055 | 6.47782 | 5.71194 | 5.95316 | 5.86322 | 6.03305 |
| CCDC9     | 7.4192  | 6.64287 | 6.755   | 7.49905 | 6.18131 | 8.25195 | 7.85249 | 8.0387  | 7.83843 |
| Inafm1    | 7.77181 | 7.05001 | 7.04766 | 7.92138 | 6.30274 | 7.57821 | 8.45032 | 7.86827 | 7.33404 |
| c5ar1     | 6.41764 | 5.41935 | 6.27687 | 6.76198 | 5.91389 | 6.20003 | 6.5448  | 6.94912 | 6.96443 |
| C5AR2     | 6.6162  | 6.17094 | 6.73476 | 6.51913 | 5.18481 | 6.39556 | 7.35153 | 8.65288 | 6.2224  |
| DHX34     | 6.73886 | 6.73499 | 6.71506 | 7.19161 | 6.63379 | 6.97135 | 6.93282 | 7.31019 | 7.15522 |
| NAPA-AS1  | 5.6631  | 5.8765  | 5.4977  | 6.141   | 6.4546  | 6.32969 | 6.08104 | 6.12784 | 6.07743 |
| GLTSCR1   | 7.25324 | 7.01811 | 6.75223 | 7.06327 | 6.67133 | 7.32183 | 7.12232 | 6.86211 | 7.00076 |
| EHD2      | 9.1351  | 8.77652 | 8.97032 | 9.39262 | 7.33086 | 10.1261 | 9.7097  | 9.52688 | 9.55145 |
| GLTSCR2   | 9.55898 | 9.99032 | 9.85153 | 9.60223 | 7.62935 | 9.72535 | 9.8832  | 8.97543 | 8.70434 |
| CRX       | 5.32226 | 5.27362 | 5.22386 | 5.67719 | 6.27017 | 6.01076 | 5.3749  | 5.91374 | 5.71626 |
| SNAR-C1   | 6.39311 | 6.82523 | 6.5693  | 7.5751  | 7.45738 | 7.50385 | 6.99823 | 7.72291 | 7.76188 |
| ELSPBP1   | 3.95727 | 3.2982  | 3.73666 | 4.43795 | 4.06572 | 4.91639 | 4.19469 | 4.25539 | 4.43795 |
| ZNF114    | 6.04955 | 6.08293 | 6.51218 | 7.071   | 6.82999 | 7.19437 | 6.54385 | 6.87634 | 6.86833 |

|         |         |         |         |         |         |         |         |         |         |
|---------|---------|---------|---------|---------|---------|---------|---------|---------|---------|
| EMP3    | 8.16682 | 8.25971 | 9.71121 | 9.50571 | 6.64643 | 7.79143 | 8.7872  | 8.24021 | 8.68753 |
| SYNGR4  | 5.9356  | 6.00307 | 6.21679 | 6.72409 | 7.10184 | 6.87094 | 6.68344 | 6.38945 | 6.53921 |
| GRWD1   | 6.6564  | 6.28726 | 6.63014 | 7.37087 | 6.45947 | 6.53543 | 7.26852 | 6.33421 | 6.60648 |
| CYTH2   | 7.01898 | 6.75704 | 6.91121 | 6.9092  | 6.33087 | 6.59377 | 6.56179 | 7.00515 | 7.29941 |
| SPACA4  | 6.58762 | 5.96749 | 5.99535 | 6.77916 | 6.28105 | 6.90621 | 6.74949 | 6.55814 | 6.7863  |
| SPHK2   | 6.31906 | 6.42617 | 6.21967 | 6.37902 | 6.72857 | 6.7184  | 6.35598 | 6.58593 | 6.61547 |
| FUT2    | 6.59796 | 5.96342 | 6.58747 | 7.46541 | 6.88682 | 9.30936 | 9.00511 | 7.76702 | 8.0315  |
| FGF21   | 5.51963 | 5.71251 | 5.74944 | 5.86681 | 7.13758 | 6.28361 | 6.33463 | 6.15777 | 6.31214 |
| NUCB1   | 8.0243  | 7.90366 | 8.20183 | 8.39599 | 7.59945 | 8.88141 | 8.52934 | 8.66426 | 8.25793 |
| DHDH    | 5.94238 | 5.41723 | 5.82672 | 6.75926 | 6.54903 | 7.24232 | 6.27192 | 6.83815 | 6.75138 |
| BAX     | 6.24064 | 6.38809 | 6.0567  | 7.11354 | 6.35528 | 6.84003 | 7.3204  | 6.39644 | 6.45506 |
| RUVBL2  | 8.02214 | 7.69955 | 8.06406 | 8.71668 | 6.45071 | 8.47836 | 9.09026 | 7.92855 | 8.1443  |
| SNAR-G1 | 6.42972 | 6.99011 | 6.70183 | 7.73597 | 7.86285 | 7.56217 | 6.70919 | 8.04728 | 7.25829 |
| SNRNP70 | 8.72599 | 8.99243 | 8.66839 | 8.75638 | 6.85757 | 8.29467 | 8.30162 | 8.41723 | 8.52102 |
| LIN7B   | 6.51202 | 6.54015 | 6.12563 | 6.49435 | 6.20155 | 6.90303 | 6.74234 | 6.66772 | 6.23073 |
| CD37    | 6.49745 | 6.34373 | 6.77257 | 6.89011 | 7.07529 | 7.01147 | 6.46744 | 7.02951 | 6.64894 |
| DKKL1   | 5.37148 | 5.45776 | 5.82875 | 5.9557  | 5.91794 | 6.47291 | 5.798   | 5.98766 | 6.12467 |
| CCDC155 | 5.63317 | 5.80555 | 5.72325 | 6.50613 | 6.68294 | 6.88233 | 6.33272 | 6.26846 | 6.34808 |
| Gfy     | 4.54009 | 4.97199 | 4.73391 | 5.32722 | 5.50206 | 5.84149 | 5.49621 | 5.34667 | 5.59886 |
| FLT3LG  | 7.29694 | 7.62538 | 7.82021 | 7.1853  | 7.11182 | 6.84429 | 7.22712 | 6.99338 | 7.05693 |
| RPS11   | 12.8416 | 12.8936 | 13.0535 | 13.1095 | 12.7439 | 13.1286 | 13.3157 | 12.5216 | 12.6252 |
| prrg2   | 6.47493 | 6.48538 | 6.08399 | 6.74296 | 5.39094 | 6.57961 | 6.62849 | 6.47454 | 6.53572 |
| PRR12   | 8.07394 | 7.95531 | 8.11854 | 7.39052 | 6.45481 | 6.9042  | 7.89495 | 6.89729 | 6.7426  |
| SCAF1   | 6.896   | 6.75539 | 6.57848 | 7.83022 | 6.28208 | 7.38261 | 7.56069 | 7.10566 | 6.99684 |
| BCL2L12 | 6.39906 | 6.25863 | 6.2887  | 7.09906 | 6.38368 | 6.90525 | 6.85008 | 6.59103 | 6.61842 |
| PRMT1   | 5.98676 | 6.10611 | 6.15381 | 6.86157 | 5.51984 | 6.74361 | 6.57454 | 6.45631 | 6.22717 |

|              |         |         |         |         |         |         |         |         |         |
|--------------|---------|---------|---------|---------|---------|---------|---------|---------|---------|
| ADM5         | 5.95484 | 6.14344 | 6.39029 | 6.53876 | 7.01426 | 6.95279 | 6.39484 | 6.61582 | 6.44772 |
| CPT1C        | 6.37908 | 6.38406 | 6.1776  | 6.9313  | 6.81598 | 6.89126 | 6.77709 | 6.68278 | 6.61442 |
| MED25        | 7.33676 | 6.9298  | 6.87887 | 7.42529 | 6.40858 | 7.33596 | 7.42644 | 7.26637 | 7.41977 |
| PTOV1        | 7.47951 | 7.17711 | 7.36942 | 7.99259 | 7.90489 | 7.92643 | 7.80483 | 7.79025 | 7.77069 |
| ATF5         | 6.50881 | 6.38423 | 6.77043 | 7.42089 | 6.52605 | 7.27256 | 7.69163 | 6.89881 | 7.31744 |
| SIGLEC16     | 6.36636 | 6.18201 | 6.58583 | 6.58472 | 7.63859 | 6.46271 | 6.28947 | 6.37854 | 6.5464  |
| ZNF473       | 6.72781 | 6.93866 | 6.85509 | 6.89458 | 5.83002 | 7.37778 | 7.00444 | 6.97301 | 7.20206 |
| spib         | 5.97363 | 6.17968 | 5.86421 | 7.19857 | 7.32442 | 7.06574 | 7.04554 | 7.01869 | 6.76991 |
| EMC10        | 7.65896 | 7.4467  | 7.7654  | 8.37982 | 6.90268 | 8.56115 | 8.67222 | 7.47384 | 8.07413 |
| SNAR-F       | 5.99541 | 6.01116 | 6.15257 | 6.12925 | 6.14137 | 5.9221  | 4.81241 | 7.00577 | 6.71483 |
| C19orf81     | 5.33733 | 4.59366 | 4.91624 | 5.90291 | 5.52146 | 6.5954  | 5.84755 | 5.79056 | 5.69675 |
| GPR32        | 5.44678 | 5.52724 | 5.40602 | 5.76031 | 7.28136 | 6.3601  | 5.13572 | 5.8831  | 5.97374 |
| MGC45922     | 5.73854 | 5.80659 | 6.07753 | 6.08232 | 5.90092 | 6.58367 | 5.99336 | 6.02593 | 6.19449 |
| KLK3         | 6.35009 | 6.12496 | 6.08453 | 6.31906 | 8.05634 | 6.69677 | 6.27322 | 6.65389 | 6.66686 |
| KLK2         | 5.89117 | 6.37451 | 6.08739 | 6.08045 | 7.27339 | 6.47309 | 6.27974 | 6.48339 | 5.87334 |
| SIGLEC9      | 5.49781 | 5.29153 | 5.86305 | 6.33212 | 6.16643 | 5.69648 | 5.98624 | 6.04486 | 5.88091 |
| SIGLEC7      | 5.88926 | 5.53664 | 5.53824 | 6.48985 | 6.57654 | 6.44015 | 5.96346 | 6.23318 | 6.39588 |
| CD33         | 6.83763 | 6.63634 | 7.29777 | 6.77992 | 7.02401 | 7.21048 | 6.61663 | 6.89374 | 6.81637 |
| SIGLECL1     | 5.2615  | 5.05069 | 5.08606 | 5.26166 | 6.41476 | 5.58348 | 5.63679 | 5.55048 | 5.74503 |
| IGLON5       | 5.9485  | 6.22117 | 5.95503 | 6.80895 | 6.58498 | 6.87353 | 6.77656 | 6.55762 | 6.6631  |
| LOC100129083 | 5.40375 | 5.39041 | 5.76915 | 6.18961 | 6.93679 | 6.20308 | 5.84405 | 5.96568 | 6.08807 |
| CEACAM18     | 5.62598 | 5.5673  | 5.25406 | 5.57782 | 6.11925 | 6.25457 | 5.59066 | 5.99951 | 5.63332 |
| ZNF175       | 6.34904 | 5.82311 | 6.26712 | 5.52877 | 5.40147 | 5.9258  | 6.00254 | 5.60687 | 5.23257 |
| MIR99B       | 6.9268  | 7.13624 | 6.92268 | 7.73397 | 8.89614 | 7.74305 | 7.33001 | 7.42499 | 7.46095 |
| MIRLET7E     | 5.51378 | 5.34462 | 5.33145 | 6.34422 | 6.50454 | 6.48484 | 6.55632 | 6.14161 | 6.36103 |
| Mir125a      | 4.4454  | 4.385   | 4.7066  | 4.30306 | 5.55678 | 5.25918 | 4.976   | 4.47982 | 4.81095 |



|          |         |         |         |         |         |         |         |         |         |
|----------|---------|---------|---------|---------|---------|---------|---------|---------|---------|
| SPACA6   | 6.18818 | 6.33504 | 6.0296  | 6.51411 | 6.12438 | 6.41401 | 6.24797 | 6.54214 | 6.53513 |
| FPR2     | 3.76638 | 4.04853 | 3.93609 | 4.60453 | 4.9219  | 5.15415 | 4.90493 | 5.14377 | 5.28959 |
| FPR3     | 6.60841 | 6.06589 | 6.92253 | 6.50924 | 6.08419 | 5.37358 | 6.79196 | 5.72593 | 6.60329 |
| ZNF613   | 6.3363  | 6.68704 | 6.37964 | 6.17603 | 5.59853 | 5.84318 | 6.54413 | 6.16893 | 6.74012 |
| ZNF766   | 7.6062  | 7.84265 | 7.69637 | 6.0122  | 5.39817 | 6.33837 | 7.40399 | 5.67932 | 5.43593 |
| MIR643   | 5.28101 | 6.30804 | 5.3528  | 3.44688 | 3.43389 | 3.47613 | 2.53521 | 3.44642 | 3.00788 |
| ZNF480   | 7.40716 | 7.73013 | 7.53698 | 5.64177 | 5.03313 | 4.90699 | 6.60033 | 4.64932 | 5.96297 |
| ZNF610   | 5.17032 | 5.33418 | 4.90088 | 5.10672 | 6.09211 | 4.12674 | 4.87249 | 5.12318 | 5.01679 |
| ZNF880   | 6.47278 | 6.49868 | 7.10075 | 6.41553 | 6.33252 | 6.26094 | 6.06401 | 6.20805 | 6.30415 |
| ZNF528   | 6.90632 | 6.46693 | 6.77536 | 5.71763 | 6.01619 | 5.91148 | 5.59499 | 5.15957 | 5.78871 |
| ZNF534   | 6.66799 | 6.6751  | 6.29177 | 7.31228 | 7.18041 | 7.60434 | 7.06223 | 7.20022 | 7.45277 |
| ZNF578   | 4.47324 | 4.9488  | 3.90003 | 4.51107 | 5.07799 | 4.47677 | 4.24927 | 4.10682 | 4.84671 |
| ZNF808   | 7.71778 | 7.81943 | 7.42356 | 6.53972 | 6.98929 | 6.97291 | 7.11861 | 6.68517 | 6.73515 |
| ZNF701   | 5.86987 | 5.91556 | 6.09332 | 6.01444 | 6.82255 | 6.67338 | 5.89453 | 5.90745 | 5.91978 |
| VN1R2    | 5.74836 | 5.43107 | 5.40958 | 5.92873 | 6.45073 | 5.702   | 5.13841 | 5.95309 | 5.74836 |
| ZNF845   | 6.63021 | 6.79633 | 6.52094 | 6.25687 | 5.05569 | 6.06864 | 6.85688 | 5.92618 | 6.88573 |
| ZNF525   | 6.22363 | 6.50596 | 6.95249 | 5.56857 | 7.89401 | 5.09729 | 5.28702 | 5.15415 | 5.60616 |
| Znf765   | 6.49512 | 6.94062 | 6.29828 | 6.62339 | 7.14031 | 6.72095 | 6.55329 | 6.63737 | 6.3549  |
| TPM3P9   | 6.86921 | 6.43603 | 6.85298 | 6.0889  | 6.47135 | 6.05991 | 6.30704 | 6.9537  | 7.18054 |
| ZNF331   | 7.01833 | 7.21189 | 7.02861 | 6.90746 | 6.35518 | 6.57995 | 6.79227 | 6.61156 | 6.28439 |
| DPRX     | 3.71317 | 3.47602 | 3.47562 | 4.59126 | 5.53345 | 4.20399 | 3.96007 | 3.45429 | 3.32291 |
| MIR512-2 | 5.62191 | 5.09957 | 5.25306 | 5.17584 | 5.80839 | 5.7675  | 4.54577 | 5.19556 | 4.95539 |
| MIR1323  | 4.14566 | 4.06112 | 4.39047 | 3.92748 | 4.62855 | 4.48949 | 4.01356 | 4.61696 | 4.45687 |
| MIR498   | 3.18709 | 2.89126 | 3.20706 | 3.16748 | 3.22087 | 3.94307 | 2.8013  | 3.0611  | 3.15563 |
| MIR520E  | 4.60254 | 6.25753 | 5.68296 | 7.32128 | 7.54731 | 8.17822 | 6.59548 | 7.56539 | 6.78804 |
| MIR515-1 | 3.53616 | 3.76217 | 3.73666 | 3.80293 | 4.37643 | 3.79072 | 4.52738 | 4.28566 | 4.179   |

|           |         |         |         |         |         |         |         |         |         |
|-----------|---------|---------|---------|---------|---------|---------|---------|---------|---------|
| MIR519E   | 2.696   | 2.15271 | 2.03767 | 2.18337 | 2.82611 | 2.14301 | 2.02322 | 2.47095 | 2.62501 |
| MIR520F   | 5.26151 | 4.98929 | 5.08104 | 4.83519 | 5.70891 | 5.19896 | 4.80548 | 4.73556 | 4.32999 |
| MIR519C   | 1.90213 | 1.99877 | 1.87523 | 1.98689 | 1.9779  | 2.35801 | 2.58204 | 1.95242 | 2.60384 |
| MIR1283-1 | 2.18323 | 2.43791 | 2.44129 | 2.61396 | 2.00622 | 2.62651 | 2.38424 | 2.75567 | 2.46598 |
| MIR520A   | 2.99743 | 3.34482 | 3.13028 | 3.72939 | 2.79688 | 4.19508 | 4.30559 | 4.14037 | 3.79685 |
| MIR526B   | 3.16791 | 3.25291 | 2.88995 | 2.84442 | 2.90448 | 2.63973 | 3.18126 | 3.38635 | 2.96231 |
| MIR519B   | 1.8706  | 1.79453 | 1.69622 | 2.27733 | 1.86318 | 1.91944 | 2.03724 | 2.09627 | 1.89625 |
| MIR525    | 2.72744 | 2.61554 | 3.29649 | 2.8344  | 3.71974 | 3.87152 | 2.72071 | 2.68139 | 3.47736 |
| MIR523    | 1.91514 | 2.70619 | 1.94423 | 4.06841 | 2.85601 | 4.02393 | 3.40762 | 3.29967 | 3.528   |
| MIR518F   | 1.71151 | 1.91285 | 1.76919 | 2.33976 | 1.64793 | 2.52896 | 2.17941 | 1.91361 | 2.14623 |
| MIR519A2  | 3.76292 | 4.66391 | 2.90308 | 3.37159 | 4.00565 | 4.01233 | 3.54374 | 3.98838 | 4.08252 |
| MIR518B   | 4.82824 | 4.84544 | 5.16409 | 5.93507 | 5.33812 | 6.87408 | 6.03837 | 5.63989 | 5.90328 |
| MIR526A1  | 2.18077 | 2.52928 | 2.41714 | 2.44728 | 2.00565 | 2.71767 | 2.14534 | 2.15989 | 2.27406 |
| MIR520C   | 3.89277 | 3.89423 | 3.67172 | 3.94931 | 2.88421 | 4.83289 | 4.70159 | 4.20167 | 3.76592 |
| MIR518C   | 4.76171 | 5.24588 | 5.37539 | 4.65746 | 5.33198 | 5.18855 | 5.20506 | 4.92914 | 5.09045 |
| MIR524    | 3.0532  | 3.29708 | 3.5607  | 3.59578 | 4.54981 | 3.76805 | 4.02865 | 3.7648  | 3.19098 |
| MIR517A   | 2.30085 | 2.87153 | 2.67017 | 2.97156 | 2.36904 | 3.50795 | 2.81289 | 2.54092 | 3.22424 |
| MIR519D   | 4.3614  | 4.00926 | 4.25826 | 5.05647 | 4.95693 | 5.52611 | 4.64768 | 5.26612 | 5.81806 |
| MIR521-2  | 5.06171 | 5.04394 | 4.77683 | 4.95706 | 6.38076 | 4.55158 | 4.75656 | 4.91124 | 5.46616 |
| MIR520D   | 2.90759 | 2.91499 | 2.8836  | 2.65504 | 3.1836  | 2.58897 | 2.75172 | 2.63709 | 3.0319  |
| MIR517B   | 4.45134 | 4.8295  | 4.47722 | 5.48307 | 5.19932 | 4.98853 | 4.976   | 5.17985 | 4.89365 |
| MIR520G   | 3.88455 | 4.50496 | 4.23528 | 4.81411 | 4.27952 | 4.98576 | 3.85519 | 4.79223 | 4.59776 |
| MIR516B2  | 2.3485  | 3.02396 | 3.08596 | 3.2551  | 3.78142 | 2.43671 | 2.43428 | 3.23357 | 2.41169 |
| MIR526A2  | 2.28469 | 2.71456 | 2.22629 | 2.28911 | 3.33113 | 2.91501 | 2.61641 | 2.48492 | 2.60516 |
| MIR518E   | 2.49683 | 2.50863 | 2.04352 | 3.10192 | 2.13945 | 3.53514 | 3.46865 | 2.30606 | 2.21066 |
| MIR518A1  | 3.30962 | 3.31874 | 3.19191 | 4.94322 | 4.28069 | 4.07587 | 3.82305 | 3.70914 | 4.47464 |

|           |         |         |         |         |         |         |         |         |         |
|-----------|---------|---------|---------|---------|---------|---------|---------|---------|---------|
| MIR518D   | 3.02992 | 3.4506  | 2.63652 | 4.54741 | 3.09392 | 4.45419 | 4.0892  | 3.35928 | 3.05031 |
| MIR516B1  | 3.76042 | 3.39597 | 4.40864 | 3.52946 | 4.34821 | 3.61744 | 3.48843 | 3.77561 | 3.5839  |
| MIR518A2  | 5.42408 | 5.19401 | 5.22666 | 5.50504 | 6.30881 | 5.20984 | 5.56287 | 5.82102 | 5.95532 |
| MIR517C   | 1.82197 | 1.8733  | 1.78223 | 2.30874 | 3.22743 | 2.56685 | 2.20232 | 2.15389 | 2.70054 |
| MIR520H   | 3.94664 | 4.42723 | 4.32577 | 4.81411 | 3.95171 | 4.95166 | 3.7909  | 4.68036 | 4.55806 |
| MIR521-1  | 4.27067 | 4.04173 | 4.57003 | 5.18282 | 5.6151  | 5.6584  | 5.45057 | 5.39282 | 6.1064  |
| MIR522    | 3.45309 | 4.16256 | 3.47739 | 3.81817 | 3.13327 | 4.00971 | 3.48206 | 3.567   | 3.7398  |
| MIR519A1  | 3.33824 | 3.38468 | 3.39692 | 3.12428 | 3.98422 | 3.59038 | 3.05727 | 3.60052 | 3.40603 |
| MIR527    | 3.93943 | 4.15006 | 3.89374 | 4.37843 | 4.91872 | 4.92204 | 4.40625 | 4.45269 | 4.06375 |
| MIR516A1  | 3.93723 | 4.08814 | 3.93301 | 4.45528 | 4.02738 | 4.53113 | 4.2906  | 7.04039 | 5.48829 |
| MIR1283-2 | 3.02637 | 3.35643 | 2.53921 | 2.76115 | 2.7182  | 3.65434 | 2.67143 | 3.43638 | 3.05483 |
| MIR516A2  | 2.7548  | 2.65861 | 2.54923 | 3.26274 | 2.99432 | 3.2997  | 2.51026 | 2.67177 | 2.55462 |
| MIR371A   | 5.78509 | 5.8275  | 5.82461 | 6.06605 | 6.67737 | 5.73129 | 5.68543 | 5.96967 | 6.28874 |
| MIR372    | 3.1039  | 3.49825 | 3.45386 | 3.58671 | 4.10954 | 3.63001 | 3.33334 | 3.83559 | 3.49692 |
| MIR373    | 3.96783 | 4.86785 | 4.55991 | 4.56074 | 5.32281 | 4.23327 | 4.05473 | 4.07596 | 4.49612 |
| MYADM     | 7.31261 | 7.44374 | 7.76456 | 7.92318 | 6.35098 | 8.21398 | 8.35119 | 8.10336 | 8.64087 |
| PRPF31    | 7.90618 | 7.93258 | 8.00797 | 8.02332 | 7.03384 | 7.98551 | 8.10043 | 7.58851 | 7.82115 |
| TSEN34    | 6.5036  | 6.47327 | 6.5342  | 6.97733 | 6.40828 | 7.03261 | 6.94592 | 6.99387 | 6.85807 |
| RPS9      | 6.55501 | 6.97102 | 6.59612 | 6.93253 | 6.38385 | 7.23316 | 6.59922 | 6.2146  | 6.36576 |
| MIR4752   | 3.41506 | 3.66137 | 3.90436 | 3.73395 | 4.529   | 3.21718 | 4.39046 | 4.37904 | 3.38732 |
| TTYH1     | 6.34942 | 6.30851 | 6.40463 | 6.71252 | 7.24109 | 6.83032 | 5.89132 | 6.75716 | 6.90326 |
| LENG8     | 9.84252 | 9.5603  | 9.76085 | 8.56595 | 7.44285 | 7.77896 | 8.47448 | 9.36697 | 9.64411 |
| LAIR2     | 3.92838 | 2.73919 | 3.56508 | 3.65022 | 3.76102 | 3.07655 | 2.91853 | 2.62488 | 2.92692 |
| LILRP2    | 4.95095 | 4.86078 | 4.49462 | 5.56449 | 4.94509 | 5.95293 | 5.48699 | 5.44956 | 5.04164 |
| NCR1      | 5.55779 | 6.04951 | 5.97078 | 6.40137 | 7.29101 | 6.68481 | 6.23637 | 6.24756 | 6.38508 |
| EPS8L1    | 8.08856 | 8.02719 | 7.72438 | 8.33991 | 8.39903 | 10.2893 | 8.9782  | 10.065  | 9.35033 |

|            |         |         |         |         |         |         |         |         |         |
|------------|---------|---------|---------|---------|---------|---------|---------|---------|---------|
| BRSK1      | 6.52497 | 6.42385 | 6.45169 | 7.18144 | 7.53835 | 7.06662 | 6.96798 | 6.88636 | 7.07229 |
| KMT5C      | 6.49827 | 6.8589  | 6.79581 | 7.83494 | 6.81066 | 7.70776 | 7.3164  | 7.56872 | 7.29366 |
| TMEM190    | 6.55979 | 6.98949 | 6.90614 | 7.55671 | 7.62581 | 7.92762 | 7.04568 | 7.55828 | 7.27195 |
| RPL28      | 6.26608 | 6.17992 | 6.27874 | 6.41111 | 5.96238 | 6.41725 | 6.59952 | 6.14334 | 6.0173  |
| ZNF628     | 5.65579 | 5.65878 | 5.56521 | 5.89038 | 5.55488 | 6.26015 | 6.1386  | 6.12669 | 6.04574 |
| SSC5D      | 6.12041 | 6.40328 | 5.63749 | 6.65819 | 5.74718 | 6.80489 | 6.52731 | 6.46937 | 6.39537 |
| ZNF524     | 7.68374 | 7.68333 | 7.42465 | 7.47599 | 8.1548  | 8.08693 | 8.15996 | 7.82727 | 7.67514 |
| znf865     | 5.6592  | 5.86964 | 6.12966 | 5.56544 | 4.84673 | 5.20659 | 5.91412 | 5.62503 | 5.21381 |
| ZNF580     | 6.69421 | 6.74049 | 6.74549 | 7.27481 | 5.82614 | 6.84114 | 7.49468 | 7.28282 | 6.64011 |
| ZNF581     | 7.07838 | 6.77069 | 6.94307 | 7.15827 | 7.06415 | 7.74049 | 7.34028 | 7.43177 | 6.96279 |
| CCDC106    | 5.50484 | 5.38619 | 5.54981 | 5.77623 | 5.71491 | 5.95904 | 6.13905 | 5.72124 | 5.66879 |
| U2AF2      | 9.19652 | 8.8628  | 9.19674 | 9.48004 | 6.88675 | 9.33425 | 9.73346 | 8.78547 | 9.55387 |
| EPN1       | 8.00486 | 7.92941 | 7.83457 | 9.73131 | 8.78592 | 10.5159 | 10.0347 | 9.61809 | 10.0193 |
| ZNF444     | 6.04799 | 6.40896 | 6.09058 | 6.67401 | 6.45035 | 7.3664  | 6.81911 | 7.0233  | 6.73001 |
| GALP       | 5.34089 | 5.41708 | 5.72828 | 5.91512 | 6.68411 | 6.30828 | 5.76926 | 6.4164  | 5.68876 |
| ZNF542P    | 5.37101 | 5.182   | 5.21114 | 5.20452 | 4.40208 | 5.20045 | 5.26253 | 5.54078 | 5.65582 |
| ZNF582-AS1 | 6.05141 | 5.85341 | 6.19423 | 5.62095 | 6.4422  | 5.75484 | 5.97641 | 5.7065  | 5.97122 |
| ZNF583     | 5.64956 | 5.792   | 5.52805 | 5.84355 | 6.28849 | 5.91389 | 6.01092 | 5.8217  | 5.86293 |
| ZNF667-AS1 | 8.07549 | 7.84426 | 8.1953  | 5.73758 | 6.8672  | 5.54559 | 7.38359 | 6.08969 | 6.42627 |
| ZNF471     | 6.15227 | 5.94102 | 5.29129 | 4.1035  | 5.09304 | 5.29745 | 3.74152 | 4.60842 | 5.40291 |
| ZFP28      | 6.61425 | 6.50024 | 6.28547 | 6.12807 | 5.5852  | 5.71474 | 5.75604 | 5.94318 | 6.28374 |
| ZNF470     | 5.28688 | 5.30678 | 5.44591 | 4.69342 | 5.76219 | 6.47181 | 5.17165 | 5.0603  | 5.83148 |
| ZNF71      | 7.06142 | 7.05973 | 6.93651 | 7.20883 | 6.405   | 6.92748 | 7.42809 | 6.44262 | 7.1144  |
| Smim17     | 6.10306 | 6.17395 | 5.91299 | 6.30396 | 6.73717 | 6.48485 | 6.09321 | 6.30891 | 6.03841 |
| PEG3-AS1   | 4.51033 | 4.39507 | 4.35489 | 4.54379 | 5.23079 | 4.74739 | 4.80751 | 4.62002 | 4.64743 |
| MIMT1      | 2.62774 | 2.7178  | 2.8351  | 2.79942 | 3.13229 | 2.94152 | 2.58818 | 2.92566 | 3.17736 |

|         |         |         |         |         |         |         |         |         |         |
|---------|---------|---------|---------|---------|---------|---------|---------|---------|---------|
| USP29   | 5.07321 | 5.41992 | 5.2353  | 5.28081 | 6.16447 | 5.49767 | 5.46268 | 5.61425 | 5.83412 |
| ZNF264  | 8.08049 | 8.03329 | 8.19507 | 7.60464 | 6.5928  | 7.59079 | 8.02928 | 7.77486 | 8.01223 |
| AURKC   | 6.27502 | 6.27326 | 6.34985 | 6.22124 | 6.40006 | 6.38103 | 6.91303 | 6.67412 | 6.36768 |
| ZNF805  | 7.7718  | 8.12959 | 7.59342 | 7.86304 | 7.32737 | 7.39945 | 7.68991 | 7.5313  | 7.42681 |
| ZNF460  | 9.39372 | 9.15382 | 9.00304 | 9.27587 | 6.89191 | 9.8239  | 9.34932 | 9.28364 | 9.92898 |
| ZNF543  | 7.65534 | 7.79542 | 7.51806 | 7.16813 | 5.65496 | 6.90784 | 7.09028 | 6.74795 | 7.27248 |
| ZNF304  | 6.5379  | 7.01196 | 6.84039 | 6.91233 | 6.76938 | 7.07662 | 6.88708 | 6.74389 | 6.45632 |
| ZNF547  | 6.28766 | 6.32651 | 6.31184 | 6.33772 | 6.18863 | 6.88235 | 6.27966 | 6.29987 | 6.34479 |
| ZNF548  | 7.58538 | 7.6429  | 7.85538 | 6.5946  | 6.28963 | 6.90753 | 7.50325 | 6.95556 | 7.12488 |
| ZNF17   | 6.70613 | 6.68245 | 6.72816 | 6.07102 | 6.28055 | 5.54674 | 6.08766 | 6.05894 | 6.12748 |
| ZNF749  | 7.03035 | 6.82774 | 6.4413  | 6.17991 | 6.02304 | 5.05975 | 6.25344 | 5.78857 | 5.70044 |
| ZNF419  | 6.78905 | 7.03142 | 6.95451 | 6.67548 | 6.93722 | 6.11652 | 6.086   | 6.31328 | 6.25375 |
| ZNF773  | 6.92026 | 6.89917 | 6.92395 | 6.92782 | 7.01059 | 7.05568 | 6.93483 | 6.89731 | 6.72658 |
| ZNF549  | 6.51108 | 6.42961 | 6.67932 | 6.92144 | 6.78386 | 6.70002 | 6.79055 | 6.82772 | 6.7368  |
| ZIK1    | 6.10949 | 6.33137 | 6.39462 | 5.53124 | 6.6807  | 6.42367 | 5.71539 | 6.36203 | 6.32705 |
| ZNF530  | 5.59435 | 6.04998 | 6.53774 | 5.71558 | 6.00528 | 5.82926 | 5.84987 | 5.72374 | 5.57792 |
| ZNF134  | 7.85052 | 8.06281 | 7.96173 | 7.3653  | 6.19692 | 7.06839 | 8.01562 | 7.05533 | 7.63959 |
| ZNF211  | 6.55751 | 6.38029 | 6.53502 | 5.71518 | 5.61988 | 5.25504 | 5.4318  | 6.1265  | 5.98674 |
| ZSCAN4  | 4.22688 | 4.05954 | 4.16083 | 4.18617 | 4.36616 | 4.84408 | 4.21755 | 4.30906 | 4.15008 |
| ZNF551  | 6.84629 | 7.04133 | 7.29213 | 5.6119  | 4.57976 | 5.60904 | 6.60107 | 5.96271 | 6.11021 |
| ZNF776  | 7.10091 | 7.21399 | 7.45136 | 6.70015 | 6.46441 | 6.34251 | 7.45745 | 6.52082 | 7.1225  |
| ZNF586  | 7.82551 | 7.98437 | 8.19952 | 7.45039 | 7.21985 | 8.41392 | 7.53483 | 8.43827 | 8.23396 |
| ZNF587  | 5.26407 | 5.38208 | 5.6758  | 4.75487 | 3.94849 | 5.13131 | 5.11578 | 4.99262 | 5.47721 |
| ZNF587B | 6.51164 | 6.78162 | 6.80595 | 6.15589 | 5.92896 | 6.20023 | 5.79928 | 6.67398 | 6.85445 |
| ZSCAN1  | 6.09051 | 6.18252 | 5.91637 | 6.83411 | 6.81221 | 6.98854 | 6.48875 | 6.70164 | 6.44679 |
| ZNF135  | 6.92139 | 7.03253 | 7.14819 | 6.38347 | 6.8988  | 7.04575 | 6.11401 | 6.39843 | 6.66877 |

|           |         |         |         |         |         |         |         |         |         |
|-----------|---------|---------|---------|---------|---------|---------|---------|---------|---------|
| ZNF274    | 7.09632 | 7.56702 | 6.77051 | 7.32824 | 6.51616 | 8.45001 | 7.72803 | 7.62777 | 8.11815 |
| ZNF544    | 7.33521 | 7.39395 | 7.2876  | 6.79985 | 6.02979 | 7.03617 | 7.47993 | 6.5543  | 6.76582 |
| ZNF8      | 7.70514 | 7.62268 | 7.59224 | 6.86993 | 6.34845 | 6.87581 | 7.04681 | 6.84739 | 7.02962 |
| ZSCAN22   | 6.38546 | 6.70109 | 6.48624 | 6.83477 | 6.32838 | 6.7998  | 6.8497  | 6.57656 | 6.70153 |
| A1BG-AS1  | 5.2617  | 5.46484 | 5.18595 | 5.90839 | 5.69852 | 5.56809 | 5.75664 | 6.11363 | 5.91153 |
| RPS5      | 11.6115 | 11.9795 | 11.9968 | 11.9351 | 11.3767 | 11.9021 | 12.2887 | 11.0913 | 11.5269 |
| RNF225    | 9.14708 | 8.36955 | 8.37633 | 10.0999 | 9.32449 | 9.96785 | 9.58869 | 9.21111 | 10.0632 |
| ZNF584    | 7.97081 | 7.54667 | 7.48285 | 7.39716 | 7.07401 | 6.4969  | 7.24546 | 6.23401 | 7.1432  |
| ZNF324B   | 5.767   | 5.72754 | 5.93529 | 6.56544 | 6.99472 | 6.70248 | 6.29439 | 6.4621  | 6.66602 |
| ZNF324    | 6.78409 | 6.47566 | 6.55054 | 6.54176 | 5.52214 | 7.08186 | 7.25925 | 6.97704 | 7.10312 |
| ZNF446    | 5.99721 | 6.47347 | 6.2111  | 6.4666  | 6.81615 | 6.8019  | 6.55401 | 6.54821 | 6.92295 |
| TRIM28    | 9.34352 | 8.85173 | 8.86132 | 9.3102  | 7.70412 | 8.98588 | 9.56412 | 8.89845 | 8.66957 |
| MZF1-AS1  | 5.79636 | 6.11275 | 5.81906 | 6.5621  | 6.13795 | 6.1919  | 6.11376 | 6.09564 | 6.0267  |
| CENPBD1P1 | 6.81316 | 6.6185  | 6.61582 | 7.21913 | 6.12101 | 8.07378 | 7.14147 | 7.66087 | 6.9114  |
| WASH5P    | 8.76303 | 8.80523 | 9.62269 | 7.50545 | 8.3533  | 7.09186 | 7.48779 | 8.43805 | 8.8171  |
| LINC01002 | 8.68085 | 9.19353 | 9.38336 | 9.58754 | 10.6297 | 9.88907 | 8.14208 | 11.4523 | 10.0786 |
| PLPP2     | 8.22649 | 8.62304 | 8.4107  | 8.34271 | 7.73831 | 7.99046 | 9.44444 | 8.02054 | 8.44544 |
| THEG      | 4.93491 | 4.58961 | 5.13556 | 5.05052 | 5.47581 | 5.94521 | 5.40923 | 5.05569 | 5.70436 |
| C2CD4C    | 5.93323 | 6.27168 | 6.01631 | 6.67462 | 6.57018 | 7.52304 | 6.97708 | 6.97417 | 6.7355  |
| SHC2      | 6.48195 | 6.46959 | 6.47364 | 6.35143 | 5.78368 | 6.78852 | 6.60519 | 6.50962 | 6.88596 |
| ODF3L2    | 6.36187 | 6.38766 | 6.36628 | 7.41361 | 7.33224 | 7.37202 | 7.10992 | 7.05976 | 7.25074 |
| POLRMT    | 6.52168 | 6.64155 | 6.58894 | 7.13686 | 6.08199 | 6.87894 | 7.27044 | 6.40465 | 6.15899 |
| rnf126    | 8.7456  | 8.70271 | 8.8575  | 9.59669 | 8.57621 | 9.81363 | 9.98181 | 9.20514 | 9.34445 |
| PLPPR3    | 5.68214 | 5.84314 | 5.69843 | 5.95502 | 6.41367 | 6.90104 | 6.45616 | 6.51355 | 6.4745  |
| MED16     | 7.89888 | 7.75403 | 7.5911  | 8.56318 | 7.09296 | 9.36308 | 9.12817 | 8.04143 | 8.06218 |
| R3HDM4    | 7.65575 | 7.75122 | 7.6043  | 8.31617 | 7.53582 | 9.95111 | 9.16357 | 8.79908 | 8.53512 |

|             |         |         |         |         |         |         |         |         |         |
|-------------|---------|---------|---------|---------|---------|---------|---------|---------|---------|
| TMEM259     | 10.6154 | 10.3471 | 10.4635 | 10.4229 | 8.87203 | 10.1425 | 10.7108 | 10.6253 | 10.5049 |
| SBNO2       | 7.47145 | 7.16356 | 7.23645 | 7.75888 | 6.89308 | 9.34583 | 8.77172 | 8.61017 | 8.56608 |
| CBARP       | 5.65187 | 5.72381 | 5.47993 | 6.4804  | 5.85577 | 6.75863 | 6.34195 | 6.36926 | 6.23609 |
| CIRBP-AS1   | 5.31288 | 5.65868 | 5.4237  | 6.52681 | 5.3377  | 6.3318  | 5.93529 | 6.08895 | 5.57116 |
| GAMT        | 8.05991 | 8.36428 | 7.10958 | 8.49927 | 8.44811 | 8.07116 | 8.73746 | 7.26426 | 7.42863 |
| C19orf25    | 6.33771 | 6.80201 | 6.67026 | 7.31615 | 6.60461 | 7.52161 | 7.11967 | 6.98039 | 6.95604 |
| PCSK4       | 6.5233  | 6.25493 | 6.12921 | 7.09974 | 6.8541  | 7.13374 | 6.64365 | 6.73834 | 6.81448 |
| ADAMTSL5    | 6.46676 | 6.19649 | 6.00946 | 6.84223 | 6.61725 | 7.47799 | 7.73991 | 7.71533 | 7.5546  |
| MBD3        | 6.96149 | 7.32595 | 7.15244 | 7.9344  | 6.92099 | 7.78646 | 8.00134 | 7.22435 | 7.21305 |
| TCF3        | 8.25619 | 8.01643 | 8.18053 | 8.54144 | 8.23007 | 8.48797 | 8.60043 | 8.2841  | 8.27728 |
| KLF16       | 8.55497 | 8.40549 | 8.23313 | 9.60406 | 8.05006 | 8.82452 | 9.41878 | 8.45457 | 8.62253 |
| CSNK1G2-AS1 | 5.83631 | 6.12599 | 6.02323 | 6.47737 | 6.31302 | 6.76777 | 6.18488 | 6.24402 | 6.62562 |
| BTBD2       | 9.93065 | 9.43526 | 9.55286 | 9.14272 | 7.56616 | 9.53704 | 9.51719 | 8.79473 | 8.63914 |
| MKNK2       | 9.48113 | 9.28131 | 9.6113  | 10.3289 | 10.2405 | 11.7071 | 10.5808 | 11.6348 | 9.87606 |
| MOB3A       | 9.61576 | 9.07898 | 9.54827 | 9.93818 | 9.38951 | 11.093  | 10.0075 | 9.69331 | 9.68211 |
| MIR1227     | 6.75422 | 6.77025 | 7.19522 | 7.3427  | 7.60651 | 7.45214 | 6.97122 | 7.15851 | 7.07283 |
| JSRP1       | 6.81583 | 6.90183 | 7.05134 | 7.34608 | 7.26834 | 7.62344 | 6.83431 | 7.51807 | 7.29492 |
| C19orf35    | 6.08368 | 6.1502  | 6.03336 | 6.18341 | 6.86019 | 6.56891 | 6.28999 | 6.51658 | 6.27084 |
| lingo3      | 5.49888 | 5.89505 | 6.01469 | 6.13674 | 6.19061 | 7.12992 | 5.86637 | 6.59003 | 6.44111 |
| TIMM13      | 7.62004 | 7.87827 | 7.85471 | 8.81866 | 7.01104 | 8.63346 | 8.65467 | 8.12285 | 8.13148 |
| LMNB2       | 7.84332 | 7.48134 | 7.70145 | 8.35776 | 6.28636 | 8.04558 | 8.30805 | 7.95728 | 7.84986 |
| ZNF77       | 6.45304 | 6.26316 | 6.39755 | 6.63568 | 5.75606 | 6.14983 | 6.72787 | 6.31411 | 6.07362 |
| AES         | 9.13265 | 9.35963 | 9.31946 | 9.79798 | 8.61891 | 9.69259 | 10.0869 | 9.13492 | 9.33411 |
| Smim24      | 4.97543 | 5.68991 | 5.44828 | 5.94887 | 6.28885 | 5.92407 | 5.73728 | 5.76562 | 5.94381 |
| DOHH        | 5.89863 | 6.13476 | 5.87419 | 6.67525 | 5.87284 | 6.944   | 6.59821 | 6.59    | 6.38943 |
| MFSD12      | 7.25716 | 6.89052 | 7.01631 | 8.55034 | 7.43544 | 9.25492 | 8.74053 | 8.17252 | 8.18155 |

|          |         |         |         |         |         |         |         |         |         |
|----------|---------|---------|---------|---------|---------|---------|---------|---------|---------|
| TBXA2R   | 6.20298 | 6.15365 | 6.16156 | 6.38546 | 7.23885 | 6.64133 | 6.51605 | 6.68628 | 6.69661 |
| RAX2     | 5.65023 | 5.93445 | 5.59126 | 6.35191 | 6.01164 | 6.38214 | 5.8066  | 6.24    | 6.44077 |
| MATK     | 5.90994 | 6.35961 | 6.41342 | 7.03614 | 6.80391 | 7.26199 | 6.73116 | 6.96055 | 6.95533 |
| ZFR2     | 5.65878 | 5.79306 | 5.88778 | 6.33322 | 6.20661 | 6.2185  | 6.1173  | 6.45024 | 6.35446 |
| DAPK3    | 6.97001 | 7.01388 | 6.73214 | 8.184   | 6.51131 | 8.9691  | 8.31331 | 8.76547 | 8.22354 |
| MIR637   | 7.88707 | 7.64096 | 7.79667 | 7.87212 | 8.76942 | 7.63432 | 7.60256 | 9.03146 | 8.01104 |
| EEF2     | 12.4353 | 12.1222 | 12.4126 | 12.3151 | 11.2182 | 12.5191 | 12.4677 | 12.165  | 12.0279 |
| ZBTB7A   | 9.32037 | 9.36389 | 9.24216 | 9.77984 | 7.5956  | 9.93137 | 9.86959 | 8.85506 | 9.80739 |
| MAP2K2   | 6.29336 | 5.83775 | 6.29422 | 6.25897 | 7.13719 | 5.74667 | 5.86626 | 6.84959 | 6.59654 |
| SIRT6    | 7.39085 | 7.28944 | 7.21391 | 7.58054 | 7.15744 | 7.70038 | 8.15331 | 7.93921 | 7.80355 |
| TMIGD2   | 4.66921 | 4.93958 | 4.61753 | 4.85274 | 5.04531 | 5.6413  | 5.14785 | 4.86094 | 5.30591 |
| STAP2    | 8.83647 | 8.69987 | 8.22434 | 9.19264 | 8.02156 | 9.96242 | 9.77712 | 8.91878 | 9.33815 |
| SH3GL1   | 8.17433 | 7.93238 | 7.7084  | 8.87713 | 8.26933 | 9.54334 | 9.11732 | 8.52443 | 8.39496 |
| UBXN6    | 8.74061 | 8.44299 | 8.606   | 9.33485 | 8.074   | 9.5988  | 9.34378 | 8.7622  | 8.65269 |
| PLIN4    | 5.82678 | 6.60618 | 6.69165 | 6.83891 | 6.30214 | 6.98144 | 6.54211 | 7.11314 | 6.63614 |
| PLIN5    | 6.96936 | 7.03443 | 6.95285 | 7.35904 | 7.99451 | 7.82548 | 7.43607 | 7.90287 | 7.51756 |
| LRG1     | 7.15676 | 7.06435 | 7.06016 | 7.34616 | 7.46893 | 7.96762 | 7.14113 | 7.56512 | 7.34687 |
| MYDGF    | 6.48509 | 6.44052 | 6.57854 | 7.85743 | 6.15126 | 7.88767 | 7.73143 | 7.35699 | 7.21043 |
| DPP9     | 8.30902 | 7.51326 | 8.03934 | 8.27967 | 5.45399 | 8.18542 | 8.37999 | 8.04419 | 8.27946 |
| TICAM1   | 6.77305 | 6.71094 | 6.43539 | 8.10788 | 6.3779  | 8.6739  | 7.78128 | 8.96097 | 8.37824 |
| PLIN3    | 8.53396 | 8.05579 | 8.19509 | 9.17329 | 6.66612 | 9.68478 | 9.72131 | 10.2431 | 9.96522 |
| ARRDC5   | 5.14107 | 5.29466 | 5.18029 | 5.29571 | 6.02643 | 5.2789  | 4.59181 | 5.30078 | 5.07587 |
| SAFB2    | 7.08069 | 7.42667 | 7.41253 | 6.5722  | 6.21912 | 6.15503 | 7.10531 | 6.95592 | 6.61612 |
| c19orf70 | 6.34667 | 6.80556 | 6.89855 | 8.09261 | 6.51813 | 7.6279  | 8.4429  | 6.71783 | 6.96942 |
| PRR22    | 5.70287 | 6.06336 | 6.25302 | 6.38079 | 6.42968 | 6.51456 | 6.30536 | 6.10617 | 6.30679 |
| DUS3L    | 7.11774 | 7.02486 | 7.35681 | 6.99663 | 6.21475 | 7.18583 | 7.33346 | 6.49792 | 6.76188 |



|              |         |         |         |         |         |         |         |         |         |
|--------------|---------|---------|---------|---------|---------|---------|---------|---------|---------|
| RANBP3       | 8.26278 | 8.37531 | 8.34765 | 8.36686 | 7.30543 | 8.09392 | 8.18703 | 7.94972 | 8.21701 |
| ACER1        | 11.4813 | 11.3339 | 10.9581 | 10.3955 | 9.06875 | 8.24022 | 9.52559 | 7.57457 | 9.31816 |
| PSPN         | 5.70663 | 5.91508 | 5.94288 | 6.08778 | 6.10184 | 6.13492 | 5.96018 | 6.21642 | 5.92809 |
| KHSRP        | 8.11876 | 7.75561 | 8.11375 | 8.32881 | 6.72178 | 8.01949 | 8.5246  | 7.70447 | 7.8593  |
| DENND1C      | 6.28983 | 6.16286 | 6.07098 | 6.42162 | 6.40704 | 7.18771 | 7.05829 | 6.50221 | 6.68283 |
| CD70         | 5.63187 | 5.55011 | 5.73841 | 6.07068 | 6.58222 | 6.651   | 5.89292 | 6.02879 | 6.0649  |
| C3           | 7.95041 | 8.47356 | 9.65299 | 6.3293  | 6.84615 | 7.14776 | 6.75454 | 7.08971 | 6.20559 |
| GPR108       | 7.92644 | 7.72169 | 7.97133 | 7.97362 | 7.72613 | 9.09239 | 8.52896 | 8.67765 | 8.10031 |
| SH2D3A       | 7.83787 | 7.5784  | 7.38933 | 7.98586 | 7.18953 | 8.74944 | 8.57157 | 8.47606 | 8.07613 |
| FLJ25758     | 3.56957 | 4.12386 | 3.65957 | 4.73388 | 4.99564 | 4.31465 | 4.40672 | 4.58404 | 4.4065  |
| MBD3L3       | 5.44055 | 5.39267 | 5.65007 | 5.51939 | 8.06195 | 5.36543 | 5.51007 | 5.51305 | 5.91382 |
| INSR         | 8.23013 | 8.11409 | 7.89393 | 7.44069 | 5.96934 | 7.06106 | 7.60274 | 8.00348 | 8.30666 |
| LOC100128573 | 5.13659 | 5.18856 | 4.92708 | 4.86485 | 5.27785 | 4.61246 | 4.78908 | 4.81677 | 4.34205 |
| PEX11G       | 6.52031 | 6.15268 | 6.53586 | 6.94674 | 7.45665 | 7.41144 | 7.07872 | 7.29396 | 7.01329 |
| XAB2         | 8.55944 | 8.42821 | 8.59454 | 8.18154 | 6.76781 | 8.2728  | 8.50173 | 8.24951 | 7.65142 |
| PCP2         | 6.16633 | 6.5288  | 6.43498 | 6.87826 | 6.98995 | 7.48894 | 6.89474 | 7.33985 | 7.06579 |
| CD209        | 6.14456 | 6.22098 | 6.7098  | 7.03878 | 6.96544 | 7.27368 | 5.98762 | 7.12054 | 6.76446 |
| PRR36        | 6.05546 | 6.21907 | 6.27181 | 7.17806 | 7.41562 | 7.02515 | 6.73778 | 6.84505 | 6.79755 |
| LYPLA2P2     | 4.26053 | 4.47253 | 4.86122 | 5.33891 | 5.2606  | 4.94375 | 4.68993 | 5.33765 | 5.22934 |
| CTXN1        | 6.56349 | 6.79281 | 6.80954 | 7.85991 | 6.7777  | 7.5454  | 7.53318 | 7.63738 | 7.48778 |
| TIMM44       | 7.68983 | 7.24562 | 7.48004 | 7.38549 | 5.47086 | 6.73268 | 7.47171 | 7.09267 | 7.55064 |
| FBN3         | 5.99517 | 6.07418 | 6.15818 | 6.64218 | 6.69394 | 6.60256 | 6.18087 | 6.56836 | 6.51026 |
| CD320        | 6.57674 | 6.9364  | 6.9472  | 7.88704 | 6.49019 | 7.17872 | 7.26071 | 7.12384 | 7.11673 |
| KANK3        | 6.87506 | 6.94082 | 7.17563 | 7.32237 | 7.29206 | 7.44018 | 7.12818 | 7.22809 | 7.0329  |
| RAB11B-AS1   | 6.12957 | 6.0635  | 6.0431  | 5.97814 | 4.52878 | 5.80293 | 6.1732  | 5.02811 | 5.58619 |
| PRAM1        | 5.7408  | 5.32183 | 5.80834 | 5.54782 | 6.06811 | 6.29877 | 5.70034 | 5.97706 | 5.78117 |

|          |         |         |         |         |         |         |         |         |         |
|----------|---------|---------|---------|---------|---------|---------|---------|---------|---------|
| ZNF414   | 7.74755 | 7.69909 | 7.94474 | 8.39762 | 8.15457 | 8.54158 | 8.53724 | 8.29039 | 8.191   |
| MYO1F    | 5.85334 | 6.20803 | 6.73002 | 6.52584 | 6.55131 | 6.78814 | 6.42694 | 6.53927 | 6.53979 |
| ACTL9    | 5.64654 | 5.699   | 5.82051 | 6.10205 | 5.79616 | 6.35398 | 5.92523 | 6.10132 | 6.29609 |
| ZNF558   | 7.20096 | 6.98449 | 6.96952 | 6.74669 | 6.32722 | 6.32645 | 6.83142 | 5.96975 | 6.61709 |
| ZNF699   | 6.36267 | 6.75568 | 6.51923 | 6.36717 | 5.41737 | 6.66092 | 6.76278 | 6.04459 | 6.37135 |
| ZNF266   | 8.40587 | 8.50862 | 8.10338 | 7.91289 | 6.13891 | 6.81559 | 7.46772 | 6.9092  | 7.11073 |
| ZNF560   | 3.32935 | 3.43337 | 3.75377 | 3.78586 | 4.39874 | 4.10494 | 3.87651 | 3.74515 | 4.15314 |
| ZNF426   | 8.02702 | 8.33531 | 7.85192 | 9.81598 | 9.56096 | 11.1131 | 9.54777 | 10.8077 | 10.9076 |
| ZNF121   | 9.9454  | 10.0345 | 9.97167 | 8.63204 | 7.36052 | 9.02618 | 9.76807 | 9.8053  | 9.7027  |
| ZNF561   | 6.95338 | 6.80839 | 6.55577 | 6.91903 | 5.81074 | 6.95285 | 6.95108 | 7.03504 | 7.14141 |
| ZNF562   | 7.35994 | 6.72316 | 6.52063 | 7.66431 | 6.69859 | 8.01654 | 7.87209 | 7.44494 | 8.088   |
| ZNF812P  | 6.13485 | 5.06718 | 5.32666 | 6.29779 | 6.87184 | 6.51893 | 6.71236 | 6.73603 | 7.56769 |
| ZNF846   | 6.95356 | 7.29135 | 6.72832 | 6.53994 | 4.6412  | 6.84853 | 6.90748 | 6.07356 | 7.20417 |
| FBXL12   | 7.26778 | 6.69883 | 6.94976 | 7.08317 | 5.2083  | 7.18514 | 7.3746  | 7.22161 | 6.80973 |
| OLFM2    | 10.5426 | 10.1848 | 10.5711 | 8.67542 | 7.57056 | 8.45358 | 9.16233 | 8.45762 | 8.62799 |
| ANGPTL6  | 5.80685 | 5.46753 | 5.82841 | 6.4695  | 5.89173 | 6.37868 | 6.18998 | 6.35923 | 5.65871 |
| DNMT1    | 8.7276  | 8.22869 | 8.46735 | 8.61155 | 6.51565 | 7.69176 | 8.46292 | 8.12651 | 8.04007 |
| S1PR2    | 7.31731 | 7.35417 | 7.46531 | 7.36532 | 7.16967 | 6.65355 | 7.6133  | 6.79716 | 6.92236 |
| FDX1L    | 6.25464 | 6.417   | 6.39532 | 6.75786 | 6.69696 | 6.73419 | 6.75152 | 6.43515 | 6.41071 |
| ICAM3    | 6.84891 | 6.96575 | 7.16306 | 7.40563 | 7.21854 | 7.52865 | 7.41862 | 7.57643 | 7.21674 |
| TYK2     | 7.58667 | 7.32959 | 7.4386  | 7.4506  | 7.27857 | 7.46028 | 7.56983 | 7.50093 | 7.3615  |
| CDC37    | 8.47609 | 8.39126 | 8.51075 | 9.41868 | 7.23402 | 9.7046  | 9.84332 | 9.54169 | 9.34052 |
| KEAP1    | 7.91278 | 7.65018 | 7.71583 | 8.43686 | 5.55182 | 8.17107 | 8.77936 | 7.35144 | 7.61339 |
| S1PR5    | 7.16919 | 6.57056 | 6.56487 | 7.41298 | 5.6912  | 7.32677 | 7.30047 | 6.83341 | 6.83509 |
| KRI1     | 6.76683 | 6.59455 | 6.80191 | 6.70978 | 5.56029 | 7.2     | 7.24287 | 6.52656 | 6.36234 |
| ILF3-AS1 | 6.46312 | 6.56295 | 6.521   | 6.46366 | 6.171   | 6.56974 | 6.46053 | 5.94098 | 6.13336 |

|              |         |         |         |         |         |         |         |         |         |
|--------------|---------|---------|---------|---------|---------|---------|---------|---------|---------|
| MIR199A1     | 4.3284  | 3.33965 | 4.25874 | 3.36772 | 3.34916 | 3.7575  | 3.73125 | 3.72762 | 3.29852 |
| TMED1        | 6.05037 | 6.16411 | 6.07452 | 7.09092 | 5.93796 | 7.40719 | 6.78229 | 6.66217 | 6.78496 |
| KANK2        | 7.87159 | 8.02675 | 8.39202 | 7.14036 | 6.76405 | 6.95315 | 7.08389 | 7.46542 | 7.49034 |
| DOCK6        | 8.72111 | 8.28146 | 8.31147 | 8.81735 | 8.66192 | 9.78569 | 9.09968 | 10.199  | 9.32714 |
| TMEM205      | 7.61799 | 8.04818 | 7.89173 | 8.29386 | 7.42879 | 7.7968  | 8.298   | 7.43587 | 7.48752 |
| EPOR         | 6.60975 | 6.50955 | 6.4542  | 6.72165 | 6.75676 | 6.88309 | 6.4801  | 6.72057 | 6.69876 |
| RGL3         | 5.99116 | 6.08753 | 6.18218 | 6.32984 | 5.97368 | 6.90254 | 6.68091 | 6.76998 | 6.4165  |
| CCDC151      | 5.57235 | 5.40753 | 5.52996 | 5.98939 | 5.91799 | 6.04714 | 5.60699 | 5.6581  | 5.98052 |
| ZNF653       | 6.45658 | 6.08175 | 6.40991 | 6.96304 | 5.92114 | 6.79495 | 7.23812 | 6.50628 | 6.60693 |
| ECSIT        | 7.13281 | 6.9376  | 7.1278  | 7.32423 | 7.1481  | 7.14857 | 7.50745 | 7.18072 | 7.13746 |
| ELOF1        | 9.16761 | 8.39139 | 9.00039 | 9.27844 | 8.51336 | 9.34682 | 9.52381 | 10.058  | 9.59244 |
| ZNF823       | 6.3462  | 6.91263 | 6.58227 | 6.18569 | 6.04263 | 5.71288 | 6.99761 | 6.31514 | 6.31716 |
| ZNF433       | 6.58161 | 6.27431 | 6.38868 | 5.45484 | 6.13542 | 5.85245 | 6.18094 | 6.59785 | 6.65949 |
| ZNF878       | 5.23031 | 5.12133 | 5.25652 | 6.24704 | 6.23561 | 6.54874 | 7.06262 | 7.02124 | 8.84838 |
| ZNF625-ZNF20 | 6.25332 | 6.51001 | 5.99192 | 5.94534 | 6.02586 | 6.00463 | 5.69414 | 5.70025 | 5.88023 |
| ZNF44        | 6.7325  | 6.74941 | 6.76544 | 5.81395 | 5.42398 | 5.64403 | 6.10136 | 5.57938 | 5.76381 |
| ZNF563       | 5.71367 | 5.73068 | 5.49308 | 5.37184 | 5.76008 | 4.49467 | 5.47852 | 5.06794 | 4.48218 |
| ZNF442       | 6.97093 | 7.103   | 7.08508 | 6.72084 | 7.07776 | 6.89623 | 6.97733 | 7.16844 | 7.59879 |
| ZNF799       | 5.31706 | 6.16305 | 5.64336 | 5.93535 | 6.0045  | 5.74579 | 5.66175 | 5.85559 | 5.5645  |
| ZNF443       | 5.83937 | 5.99214 | 5.83828 | 6.02649 | 6.16289 | 5.87545 | 5.37694 | 5.54061 | 5.64788 |
| ZNF709       | 5.88768 | 5.84779 | 6.09456 | 5.83034 | 5.81552 | 6.05488 | 5.64481 | 6.08194 | 5.75388 |
| ZNF564       | 6.03105 | 6.09935 | 6.00458 | 5.45379 | 5.73049 | 5.4013  | 5.71406 | 5.12976 | 5.60317 |
| ZNF490       | 7.22156 | 7.29716 | 7.15261 | 6.7865  | 6.6392  | 6.25965 | 6.53377 | 6.55993 | 6.72341 |
| WDR83OS      | 7.86697 | 8.12661 | 7.85287 | 9.06763 | 7.19532 | 8.11299 | 9.02452 | 7.71846 | 8.25645 |
| DHPS         | 8.7179  | 8.52143 | 8.45286 | 8.20827 | 6.17553 | 7.97564 | 8.65254 | 8.24142 | 8.30566 |
| FBXW9        | 6.14536 | 6.62202 | 6.5633  | 6.66332 | 6.22266 | 6.67898 | 6.77358 | 6.59712 | 6.73292 |

|         |         |         |         |         |         |         |         |         |         |
|---------|---------|---------|---------|---------|---------|---------|---------|---------|---------|
| TNPO2   | 8.73637 | 8.88492 | 8.7614  | 8.30214 | 7.4724  | 8.33656 | 8.70365 | 7.95141 | 8.56012 |
| HOOK2   | 8.17914 | 7.81342 | 7.63492 | 8.12373 | 6.59303 | 8.52328 | 7.99113 | 7.67543 | 8.30773 |
| PRDX2   | 7.99106 | 8.56039 | 8.09014 | 8.76842 | 7.71552 | 7.96193 | 8.54768 | 7.3605  | 7.98731 |
| RTBDN   | 5.71015 | 5.70766 | 5.81536 | 6.41216 | 6.76514 | 6.69454 | 6.13419 | 6.40367 | 6.50098 |
| KLF1    | 6.09815 | 6.34887 | 6.08727 | 7.20093 | 7.2931  | 7.44887 | 6.87871 | 7.01668 | 7.05433 |
| SYCE2   | 5.47261 | 5.99588 | 5.72772 | 5.33922 | 5.72452 | 5.74052 | 5.60759 | 5.47827 | 5.27137 |
| LYL1    | 6.62278 | 6.516   | 6.73575 | 7.25164 | 6.94034 | 7.8171  | 7.29365 | 7.17649 | 7.09462 |
| TRMT1   | 7.72472 | 7.34473 | 7.66054 | 8.04021 | 6.71778 | 7.76025 | 8.114   | 7.28124 | 7.68599 |
| STX10   | 8.64684 | 8.40124 | 8.36294 | 8.98406 | 8.16665 | 9.35765 | 9.22176 | 10.1448 | 9.15751 |
| mir24-2 | 8.08162 | 7.65504 | 7.70795 | 7.751   | 6.52333 | 6.60997 | 7.56742 | 7.75408 | 7.85886 |
| mir27a  | 8.30039 | 6.73667 | 7.43418 | 6.63137 | 6.50276 | 6.21046 | 6.86552 | 6.49216 | 7.21873 |
| MIR23A  | 7.15702 | 6.3469  | 6.46783 | 6.60774 | 5.47186 | 4.87975 | 6.74564 | 7.01872 | 6.56016 |
| PODNL1  | 7.66846 | 7.2474  | 7.13238 | 8.60019 | 7.88384 | 8.41348 | 9.01122 | 7.76946 | 8.40306 |
| PALM3   | 5.62179 | 5.69478 | 6.00318 | 6.40687 | 5.23703 | 6.69734 | 5.83233 | 5.80501 | 6.26142 |
| SAMD1   | 7.18474 | 6.81213 | 6.77425 | 7.30957 | 6.35936 | 7.61573 | 7.8266  | 7.04849 | 7.14235 |
| ASF1B   | 6.44416 | 5.98882 | 6.39815 | 7.12054 | 6.23223 | 6.54501 | 6.68905 | 6.60567 | 6.78514 |
| DDX39A  | 7.29172 | 7.16771 | 6.8502  | 7.83359 | 5.41326 | 7.61274 | 7.59361 | 7.46653 | 7.30411 |
| ILVBL   | 6.98596 | 6.89078 | 7.02567 | 7.25542 | 7.27369 | 8.61031 | 7.22197 | 7.50375 | 7.40299 |
| NOTCH3  | 9.85692 | 9.29602 | 9.4351  | 9.62555 | 7.87087 | 10.4187 | 9.93456 | 9.33528 | 9.63972 |
| EPHX3   | 10.5887 | 9.86787 | 10.1273 | 10.9889 | 10.1794 | 10.5709 | 11.1186 | 9.95077 | 10.3929 |
| BRD4    | 9.51184 | 9.39513 | 9.33041 | 8.66144 | 7.10559 | 9.26659 | 8.90259 | 9.31741 | 9.32083 |
| AKAP8   | 8.4257  | 8.66707 | 8.28281 | 8.26545 | 7.59934 | 8.19238 | 8.62    | 7.97841 | 7.83632 |
| AKAP8L  | 9.23207 | 9.32094 | 8.91612 | 9.00906 | 8.00226 | 9.36532 | 9.16807 | 9.41622 | 8.92196 |
| WIZ     | 7.16236 | 7.00105 | 7.0285  | 7.5232  | 6.80849 | 7.69426 | 8.0667  | 7.22916 | 7.26846 |
| RASAL3  | 6.85361 | 6.49353 | 6.78455 | 6.85766 | 7.05165 | 7.30755 | 6.81691 | 7.10698 | 6.92677 |
| PGLYRP2 | 5.77462 | 5.80087 | 5.80721 | 6.21592 | 6.04853 | 6.04167 | 6.19531 | 5.97611 | 6.03337 |

|           |         |         |         |         |         |         |         |         |         |
|-----------|---------|---------|---------|---------|---------|---------|---------|---------|---------|
| CIB3      | 6.29169 | 6.04538 | 6.2086  | 6.57085 | 6.73788 | 6.26846 | 6.05503 | 6.51527 | 6.33847 |
| EPS15L1   | 9.05719 | 9.25256 | 9.04538 | 8.98032 | 7.2725  | 9.21841 | 9.42927 | 9.76565 | 9.48781 |
| CALR3     | 4.12509 | 4.20728 | 4.002   | 4.37402 | 4.51635 | 5.00062 | 4.46601 | 4.07453 | 4.34468 |
| CHERP     | 7.41573 | 7.45912 | 7.45739 | 7.55609 | 6.80696 | 7.59316 | 7.79426 | 7.55617 | 7.3246  |
| MED26     | 7.57116 | 7.5039  | 7.67047 | 7.98469 | 6.89814 | 8.31502 | 8.25529 | 8.19125 | 7.78118 |
| SMIM7     | 7.46229 | 7.76665 | 7.41865 | 6.82973 | 6.51008 | 6.47236 | 7.23141 | 6.55572 | 6.63063 |
| USHBP1    | 5.8304  | 5.47643 | 5.98419 | 6.29804 | 6.69727 | 6.03995 | 6.0184  | 6.54281 | 6.26082 |
| ABHD8     | 7.20015 | 6.54211 | 6.60681 | 7.59037 | 6.85985 | 7.36481 | 7.0023  | 7.64808 | 7.1124  |
| ANO8      | 8.9232  | 8.85215 | 8.22823 | 8.17465 | 6.96381 | 8.99357 | 8.12143 | 7.54584 | 8.19098 |
| PLVAP     | 8.36079 | 7.71074 | 8.98383 | 7.92122 | 7.50451 | 7.14229 | 7.64129 | 8.60053 | 9.03384 |
| BST2      | 4.28673 | 4.71848 | 4.97235 | 4.87692 | 3.72458 | 5.05351 | 4.79908 | 4.22719 | 5.07334 |
| TMEM221   | 5.65314 | 5.37078 | 5.49587 | 5.98966 | 6.34683 | 5.76118 | 5.72524 | 5.66156 | 5.78223 |
| NXNL1     | 6.167   | 6.0371  | 6.2292  | 6.88408 | 6.15548 | 6.78768 | 6.61266 | 6.9227  | 6.37971 |
| UNC13A    | 5.78882 | 5.99254 | 5.9818  | 6.34783 | 7.05727 | 6.46449 | 6.09441 | 6.42937 | 6.54407 |
| INSL3     | 6.13495 | 6.39207 | 6.18411 | 6.45179 | 7.81353 | 7.03185 | 6.37966 | 6.84343 | 6.60506 |
| JAK3      | 5.64815 | 5.56908 | 5.40914 | 5.52533 | 5.97594 | 5.92458 | 5.7782  | 5.68604 | 6.01709 |
| LOC729966 | 6.2368  | 5.86417 | 5.86723 | 6.11171 | 7.12064 | 6.49554 | 6.13648 | 6.26473 | 6.52278 |
| KIAA1683  | 7.4062  | 6.47814 | 6.79038 | 6.24293 | 6.67324 | 6.64343 | 6.15521 | 6.40549 | 6.52938 |
| jund      | 10.0216 | 8.65695 | 9.04012 | 9.4149  | 7.97203 | 9.96108 | 10.0294 | 8.87861 | 9.56024 |
| LRRC25    | 4.49624 | 4.61675 | 4.93166 | 5.68162 | 5.4047  | 5.29615 | 5.15081 | 5.4601  | 5.20933 |
| ISYNA1    | 6.14055 | 6.1843  | 6.46227 | 6.86777 | 5.59084 | 7.13317 | 6.80418 | 6.81415 | 6.61238 |
| ELL       | 7.71437 | 7.48506 | 7.61605 | 7.91847 | 7.25398 | 8.96482 | 8.40943 | 8.49747 | 8.39679 |
| CRLF1     | 7.07161 | 7.31128 | 7.98434 | 8.39421 | 6.82416 | 7.99029 | 8.90788 | 7.75231 | 8.34003 |
| COMP      | 8.14148 | 8.58733 | 7.85686 | 6.66071 | 6.5475  | 7.35803 | 8.89004 | 6.85271 | 7.34307 |
| GDF1      | 6.38351 | 6.34461 | 6.09086 | 6.8461  | 6.62182 | 7.15109 | 6.53226 | 6.36294 | 6.80719 |
| HOMER3    | 6.77491 | 6.90173 | 6.86088 | 7.65561 | 6.07985 | 7.8223  | 8.0368  | 7.50176 | 7.89395 |

|              |         |         |         |         |         |         |         |         |         |
|--------------|---------|---------|---------|---------|---------|---------|---------|---------|---------|
| SUGP2        | 8.59595 | 8.17447 | 8.40747 | 7.7386  | 6.29342 | 6.727   | 7.45644 | 7.79071 | 7.73504 |
| TMEM161A     | 7.25594 | 7.13068 | 7.10953 | 7.59826 | 6.87575 | 7.56119 | 7.9728  | 7.02273 | 7.31786 |
| BORCS8-MEF2B | 6.40995 | 6.42158 | 6.38436 | 7.01537 | 6.25273 | 6.62845 | 6.86328 | 6.69539 | 6.7555  |
| NR2C2AP      | 7.01049 | 7.09842 | 6.9776  | 7.19396 | 6.61247 | 6.59028 | 7.02467 | 6.67147 | 6.66089 |
| HAPLN4       | 5.85766 | 6.01171 | 6.16964 | 6.9961  | 6.67726 | 6.92509 | 6.57689 | 6.78144 | 6.89338 |
| TM6SF2       | 5.80593 | 5.81813 | 5.9162  | 6.47432 | 6.80998 | 6.39662 | 6.17735 | 6.29971 | 6.35353 |
| SUGP1        | 6.91427 | 7.2872  | 6.86751 | 6.85201 | 6.65935 | 7.03711 | 7.22259 | 7.2392  | 6.87088 |
| TSSK6        | 5.7862  | 5.84337 | 5.9278  | 6.64331 | 5.89077 | 6.44605 | 6.28231 | 6.17653 | 6.3115  |
| PBX4         | 6.13393 | 6.25925 | 6.60374 | 6.44033 | 6.25178 | 6.81439 | 5.86624 | 7.13874 | 6.47484 |
| LPAR2        | 6.9765  | 6.50698 | 6.52569 | 7.33287 | 6.85992 | 7.45126 | 7.53601 | 6.5668  | 6.97122 |
| GMIP         | 6.87932 | 6.58187 | 6.51192 | 6.8391  | 6.27797 | 7.43237 | 7.38042 | 7.60948 | 7.25871 |
| ATP13A1      | 8.01906 | 7.66123 | 7.84155 | 7.669   | 7.11318 | 7.85336 | 8.41585 | 7.38553 | 7.76857 |
| ZNF14        | 5.32819 | 6.06892 | 5.92774 | 4.27631 | 5.09653 | 4.15667 | 5.51872 | 4.52791 | 4.36864 |
| ZNF506       | 7.8247  | 7.89093 | 7.97386 | 5.78237 | 5.7927  | 5.34582 | 6.78255 | 6.02837 | 6.57159 |
| ZNF682       | 6.08859 | 6.03849 | 6.51227 | 4.94841 | 5.15983 | 5.17552 | 5.45662 | 5.03928 | 5.10912 |
| MIR1270      | 5.62987 | 5.87821 | 6.45439 | 3.39205 | 5.44554 | 3.96544 | 3.87453 | 4.18058 | 4.02953 |
| ZNF737       | 6.98736 | 7.76634 | 6.79132 | 5.22349 | 6.14495 | 5.40441 | 6.52786 | 5.36269 | 5.74833 |
| ZNF626       | 8.17005 | 8.48059 | 8.36812 | 7.05368 | 6.93989 | 6.44471 | 7.04092 | 6.31233 | 6.3755  |
| ZNF708       | 6.33267 | 6.72837 | 7.08578 | 5.02431 | 4.94133 | 4.33568 | 5.27758 | 4.83841 | 5.29607 |
| ZNF100       | 7.92827 | 8.35247 | 8.27007 | 5.75651 | 5.18508 | 5.1677  | 5.31865 | 6.18408 | 4.98693 |
| ZNF43        | 7.74236 | 8.25094 | 7.78114 | 6.46562 | 6.87963 | 5.81164 | 6.07654 | 6.02025 | 6.27115 |
| znf208       | 6.04038 | 6.59116 | 6.30058 | 5.18949 | 5.55133 | 5.64012 | 4.96411 | 5.22266 | 5.45063 |
| ZNF676       | 4.08704 | 4.92836 | 3.92713 | 3.83873 | 4.37161 | 4.53555 | 4.15712 | 3.95234 | 4.19825 |
| ZNF98        | 7.16916 | 7.10004 | 7.21594 | 7.74868 | 7.61208 | 7.64879 | 7.1531  | 7.54173 | 7.7886  |
| ZNF99        | 1.77913 | 2.51914 | 2.24434 | 2.34495 | 2.6749  | 2.4654  | 2.99503 | 2.71129 | 2.52637 |
| ZNF728       | 4.2205  | 4.2731  | 4.31687 | 5.46946 | 4.40986 | 5.85296 | 5.02397 | 4.98734 | 4.51752 |

|             |         |         |         |         |         |         |         |         |         |
|-------------|---------|---------|---------|---------|---------|---------|---------|---------|---------|
| znf91       | 7.68008 | 7.5003  | 7.88114 | 6.38243 | 3.94466 | 6.54614 | 5.77796 | 5.74992 | 6.88321 |
| ZNF675      | 6.43144 | 7.47923 | 6.22448 | 5.10909 | 5.55478 | 6.07571 | 5.58557 | 5.77296 | 6.15448 |
| ZNF681      | 6.60801 | 7.5012  | 7.13763 | 5.7643  | 6.92834 | 7.43063 | 7.50219 | 7.87644 | 9.60637 |
| HAVCR1P1    | 5.57043 | 5.11609 | 5.51513 | 5.65554 | 6.93851 | 6.04435 | 6.48412 | 6.31003 | 6.63186 |
| LOC284395   | 5.74569 | 5.84463 | 5.81287 | 5.95138 | 7.10949 | 5.85388 | 5.95653 | 5.93262 | 5.80534 |
| TSHZ3       | 6.821   | 6.3662  | 6.54933 | 6.65881 | 6.39542 | 5.60321 | 6.46455 | 6.33279 | 6.30439 |
| LOC400684   | 5.3683  | 5.62667 | 5.42177 | 5.45943 | 4.94337 | 5.25511 | 4.45917 | 5.35613 | 5.55718 |
| ANKRD27     | 8.12764 | 8.41707 | 7.81536 | 7.94459 | 7.19424 | 8.06796 | 8.0019  | 8.43699 | 8.40348 |
| CEP89       | 6.93865 | 7.20258 | 6.4987  | 6.78469 | 6.24191 | 6.3918  | 7.15421 | 6.38839 | 6.7676  |
| PEPD        | 8.56897 | 8.30168 | 8.35199 | 9.14458 | 6.57502 | 8.69456 | 9.11133 | 8.50229 | 8.72867 |
| ZNF599      | 5.15166 | 5.11155 | 5.56139 | 3.3394  | 4.53734 | 3.97975 | 4.27429 | 3.86585 | 3.83987 |
| LOC400685   | 6.07981 | 5.91456 | 6.12592 | 6.2174  | 6.71798 | 6.34317 | 5.96037 | 6.32917 | 6.34737 |
| ZNF792      | 6.58082 | 6.56259 | 6.53294 | 6.46064 | 6.94281 | 6.94455 | 6.31306 | 6.58452 | 6.07375 |
| HPN-AS1     | 4.57924 | 5.05397 | 4.69269 | 4.98962 | 4.69386 | 5.71279 | 5.35687 | 5.69281 | 5.79653 |
| KRTDAP      | 12.9213 | 12.7107 | 12.7954 | 13.167  | 13.2685 | 13.0525 | 13.1228 | 12.5222 | 13.0428 |
| DMKN        | 12.3363 | 12.2402 | 11.9728 | 12.041  | 11.619  | 11.3635 | 11.8793 | 12.5189 | 11.9965 |
| SBSN        | 12.5611 | 12.6939 | 12.5277 | 13.1676 | 13.2164 | 13.5907 | 13.2718 | 13.4009 | 13.1043 |
| TMEM147-AS1 | 7.52984 | 8.08589 | 7.67591 | 6.38549 | 7.09994 | 6.15204 | 6.83992 | 6.65715 | 6.42475 |
| UPK1A-AS1   | 6.17522 | 6.87137 | 5.57236 | 7.51839 | 8.18324 | 6.67536 | 5.7573  | 5.99547 | 6.0035  |
| IGFLR1      | 6.71065 | 6.19732 | 6.53967 | 7.03607 | 6.67773 | 6.69227 | 7.03141 | 6.38092 | 6.66033 |
| U2AF1L4     | 6.91392 | 6.14848 | 6.54537 | 6.29909 | 5.68832 | 6.09008 | 6.4816  | 5.60854 | 6.22202 |
| PRODH2      | 5.23434 | 5.43374 | 5.46618 | 6.07772 | 6.20665 | 5.81791 | 5.74039 | 5.88362 | 6.17142 |
| TYROBP      | 7.5576  | 7.24043 | 8.26524 | 8.75598 | 7.52412 | 8.90641 | 9.01954 | 8.01905 | 8.02677 |
| CLIP3       | 7.09961 | 7.084   | 6.86169 | 7.21241 | 7.36911 | 7.01283 | 6.81293 | 6.92022 | 6.78933 |
| THAP8       | 6.84718 | 7.03865 | 6.85952 | 7.47508 | 7.13477 | 7.69372 | 7.66913 | 7.61594 | 7.37265 |
| Cox7a1      | 6.77905 | 6.75723 | 7.15352 | 6.71978 | 5.90706 | 6.29243 | 6.9264  | 6.4289  | 6.3941  |

|              |         |         |         |         |         |         |         |         |         |
|--------------|---------|---------|---------|---------|---------|---------|---------|---------|---------|
| ZNF565       | 6.53804 | 6.60501 | 6.46436 | 6.43334 | 6.18941 | 6.40182 | 6.69195 | 6.24131 | 6.49842 |
| LINC00665    | 6.6352  | 7.06706 | 7.02436 | 6.55076 | 7.3212  | 6.16717 | 6.29076 | 6.35941 | 6.8145  |
| ZFP14        | 6.15372 | 6.97609 | 6.54805 | 5.31771 | 5.34146 | 5.62399 | 5.10202 | 4.9691  | 5.26496 |
| ZFP82        | 5.3774  | 5.78754 | 5.99105 | 5.72407 | 6.04872 | 6.06775 | 5.3325  | 5.77441 | 5.75027 |
| ZNF566       | 6.42066 | 6.72566 | 6.48859 | 4.61556 | 5.10304 | 5.53551 | 5.67566 | 4.78289 | 5.03455 |
| ZNF260       | 8.54115 | 8.70661 | 8.40931 | 6.78422 | 6.28409 | 6.01082 | 7.23739 | 7.12757 | 7.13485 |
| ZNF529       | 7.02648 | 7.29216 | 7.21222 | 6.49956 | 6.98185 | 6.71323 | 6.74479 | 6.01367 | 6.33694 |
| ZNF461       | 6.11716 | 6.26234 | 6.04195 | 4.70927 | 5.31175 | 4.56267 | 5.17665 | 4.78457 | 4.7013  |
| ZNF850       | 7.47174 | 7.94018 | 8.01944 | 7.1053  | 7.37921 | 6.2644  | 6.31514 | 6.89513 | 6.9004  |
| ZNF790       | 6.6674  | 6.817   | 6.72351 | 6.7153  | 6.87714 | 6.70958 | 6.39524 | 6.43458 | 6.43424 |
| ZNF829       | 6.19737 | 6.6159  | 6.72284 | 5.59692 | 7.26041 | 5.75543 | 5.70416 | 5.79405 | 5.90875 |
| ZNF585A      | 7.29893 | 7.70317 | 7.56257 | 7.01089 | 7.13724 | 6.78546 | 7.72023 | 6.9936  | 7.19926 |
| ZNF585B      | 6.22173 | 6.60273 | 6.66754 | 6.25573 | 5.3887  | 5.7046  | 5.93241 | 5.55069 | 5.94117 |
| LOC284412    | 5.15205 | 5.08364 | 5.32924 | 5.41537 | 5.85925 | 5.69654 | 4.98155 | 5.07066 | 5.22315 |
| ZNF569       | 5.42106 | 5.48321 | 5.79799 | 5.72975 | 5.1331  | 5.86028 | 5.76548 | 5.72861 | 5.76905 |
| ZNF571       | 6.0565  | 6.2327  | 6.46146 | 5.73104 | 5.30432 | 5.34575 | 5.73078 | 5.62257 | 5.35914 |
| ZFP30        | 6.6641  | 6.88635 | 7.07326 | 5.32619 | 5.77939 | 5.68422 | 5.68245 | 5.01254 | 5.957   |
| ZNF781       | 4.73276 | 4.7572  | 4.74104 | 4.76881 | 4.55976 | 4.6268  | 4.78342 | 4.16316 | 4.53217 |
| ZNF607       | 6.34383 | 6.79211 | 6.39531 | 5.79713 | 5.76477 | 6.02171 | 5.83086 | 6.24586 | 5.60244 |
| ZNF573       | 4.54216 | 4.92347 | 4.46088 | 4.70363 | 4.25538 | 4.29799 | 4.02535 | 3.87381 | 4.4202  |
| LOC100631378 | 4.23886 | 4.27744 | 3.59946 | 3.51701 | 5.19113 | 4.40414 | 3.74538 | 4.26734 | 4.08266 |
| WDR87        | 4.30153 | 4.42029 | 3.95385 | 4.8698  | 5.83583 | 4.99523 | 4.62175 | 4.85083 | 4.69117 |
| YIF1B        | 7.28321 | 6.90092 | 7.08371 | 7.93287 | 6.53507 | 8.35243 | 7.85802 | 8.22677 | 7.53445 |
| GGN          | 5.21808 | 5.03584 | 5.07864 | 6.09726 | 6.01678 | 6.49413 | 6.37931 | 6.06995 | 6.00444 |
| RASGRP4      | 6.55791 | 6.3544  | 6.30575 | 6.69806 | 7.02193 | 6.76803 | 6.69233 | 6.73499 | 6.88209 |
| MAP4K1       | 5.35593 | 5.58175 | 5.97268 | 5.59675 | 6.70548 | 5.91837 | 5.98434 | 5.53959 | 6.03533 |



|          |         |         |         |         |         |         |         |         |         |
|----------|---------|---------|---------|---------|---------|---------|---------|---------|---------|
| CAPN12   | 6.50455 | 6.50264 | 6.16301 | 6.96414 | 6.64058 | 7.12661 | 6.75917 | 6.80527 | 6.46089 |
| HNRNPL   | 10.2766 | 10.0735 | 10.1926 | 10.6191 | 8.12479 | 10.3491 | 10.5729 | 9.79832 | 10.0748 |
| RINL     | 5.66708 | 6.31954 | 6.01743 | 6.35686 | 6.51185 | 6.08663 | 6.82866 | 6.01465 | 6.51213 |
| SIRT2    | 7.86606 | 7.52716 | 7.50166 | 8.27585 | 8.2402  | 8.43898 | 8.42339 | 8.76207 | 8.55233 |
| CCER2    | 6.65095 | 7.12591 | 6.97087 | 7.40028 | 7.2917  | 7.08444 | 6.65693 | 7.25834 | 6.82718 |
| FBXO27   | 8.80443 | 8.37543 | 8.17153 | 9.22538 | 7.50282 | 9.48497 | 9.41881 | 8.62655 | 8.68028 |
| SYCN     | 6.18943 | 6.47385 | 6.14852 | 6.8383  | 6.3462  | 6.88664 | 6.76507 | 6.66111 | 6.96422 |
| LRFN1    | 5.79538 | 5.75436 | 5.77008 | 6.29655 | 5.83729 | 6.73003 | 6.08881 | 6.39945 | 6.33615 |
| MIR4530  | 6.51018 | 6.74974 | 6.70967 | 7.21275 | 7.04894 | 7.43884 | 6.62812 | 7.17803 | 7.16681 |
| RPS16    | 8.82279 | 8.35963 | 8.23865 | 8.51036 | 8.12492 | 8.09091 | 8.49028 | 8.31998 | 8.62785 |
| EID2B    | 4.97228 | 4.73492 | 5.13866 | 5.46427 | 5.72881 | 4.93804 | 4.93436 | 5.12342 | 4.80936 |
| EID2     | 5.92162 | 5.86995 | 5.59214 | 6.72607 | 5.7408  | 6.88398 | 6.96721 | 6.36801 | 6.01883 |
| CLC      | 4.82979 | 4.46358 | 4.6716  | 4.62771 | 5.50775 | 4.74681 | 4.65228 | 4.83532 | 4.55456 |
| DYRK1B   | 7.16791 | 7.12954 | 7.21463 | 7.4352  | 6.87202 | 7.78972 | 7.90944 | 6.88923 | 6.81596 |
| FBL      | 9.93771 | 10.0466 | 10.1965 | 10.2416 | 7.04474 | 9.94274 | 10.2859 | 8.86486 | 9.14593 |
| FCGBP    | 6.86941 | 7.2946  | 6.92918 | 6.97951 | 6.57446 | 6.63448 | 6.9414  | 6.26284 | 6.45489 |
| ZNF780B  | 6.90823 | 6.64899 | 7.42068 | 6.25876 | 6.4985  | 6.2441  | 6.42374 | 6.20024 | 6.65209 |
| ZNF780A  | 6.32543 | 6.86384 | 6.13085 | 5.35033 | 5.66414 | 4.69767 | 5.99904 | 5.80705 | 5.82242 |
| TTC9B    | 3.68933 | 4.04806 | 3.84493 | 4.60599 | 4.34584 | 4.9367  | 4.66716 | 4.01147 | 4.56293 |
| CNTD2    | 5.65827 | 5.44376 | 5.73292 | 6.45159 | 6.1072  | 6.9072  | 6.04079 | 6.32936 | 6.42012 |
| AKT2     | 7.66821 | 7.21958 | 7.39347 | 7.19514 | 6.97272 | 7.55965 | 7.51612 | 7.37641 | 7.59758 |
| MIR641   | 4.34782 | 4.35051 | 4.05318 | 4.49875 | 3.89019 | 4.37317 | 4.99266 | 4.37332 | 4.29674 |
| C19orf47 | 7.36602 | 6.95452 | 7.17976 | 7.70874 | 6.29398 | 7.50674 | 7.87755 | 7.23471 | 7.41557 |
| HIPK4    | 4.9662  | 5.37475 | 5.23091 | 6.09559 | 5.84118 | 6.21328 | 5.66923 | 5.98444 | 5.93858 |
| PRX      | 5.94709 | 5.84349 | 6.23919 | 6.50144 | 6.16726 | 6.8344  | 5.95151 | 6.45849 | 6.57578 |
| SERTAD1  | 8.0325  | 7.16529 | 7.17563 | 9.00421 | 7.36588 | 9.93249 | 9.04138 | 8.15175 | 8.75388 |

|          |         |         |         |         |         |         |         |         |         |
|----------|---------|---------|---------|---------|---------|---------|---------|---------|---------|
| SERTAD3  | 7.29076 | 6.77107 | 6.57906 | 7.37095 | 6.71857 | 6.34061 | 7.1698  | 7.19628 | 7.23884 |
| BLVRB    | 7.47303 | 7.66292 | 7.39357 | 8.16366 | 7.83002 | 9.18275 | 8.1072  | 8.71459 | 7.98751 |
| NUMBL    | 7.68997 | 7.48014 | 7.66676 | 7.91887 | 6.81819 | 9.52463 | 7.89541 | 9.7876  | 8.62093 |
| COQ8B    | 7.30379 | 7.1199  | 7.22075 | 6.80655 | 6.39997 | 6.74931 | 7.1939  | 7.09086 | 6.55567 |
| c19orf54 | 6.67574 | 6.66145 | 6.69966 | 6.64806 | 6.25377 | 6.57618 | 6.45216 | 5.68692 | 6.16557 |
| B9D2     | 6.26802 | 6.08017 | 6.33091 | 6.37599 | 6.658   | 6.27546 | 6.29657 | 6.16893 | 6.1573  |
| EXOSC5   | 7.49509 | 7.51711 | 7.60537 | 7.64316 | 6.00046 | 6.4449  | 7.66709 | 6.31508 | 6.54518 |
| ATP5SL   | 7.61807 | 7.52958 | 7.6544  | 7.67516 | 5.81978 | 7.39397 | 7.65597 | 7.44789 | 7.51409 |
| PCAT19   | 7.26541 | 6.3458  | 7.85613 | 6.21638 | 6.38729 | 5.37914 | 6.26471 | 6.34327 | 6.94452 |
| CEACAM4  | 5.09636 | 4.75591 | 4.94915 | 5.26944 | 5.59648 | 5.42843 | 5.37758 | 5.98313 | 5.35243 |
| CEACAM7  | 5.14571 | 5.62157 | 7.24923 | 3.91234 | 4.42784 | 5.03868 | 5.33003 | 4.32416 | 4.74508 |
| LYPD4    | 5.14214 | 5.36537 | 5.30808 | 5.49551 | 6.41269 | 5.81137 | 5.76167 | 5.74317 | 5.68236 |
| RABAC1   | 7.86671 | 8.12294 | 8.02268 | 9.37834 | 8.13971 | 9.62733 | 9.79198 | 8.97857 | 8.94121 |
| POU2F2   | 5.65711 | 5.66296 | 5.47765 | 5.87197 | 6.05647 | 6.15095 | 6.04475 | 6.24376 | 6.06125 |
| DEDD2    | 7.65977 | 6.96602 | 7.55114 | 7.4967  | 7.47951 | 9.58748 | 8.19732 | 8.96015 | 8.15826 |
| GSK3A    | 8.80032 | 8.72555 | 8.74563 | 8.87931 | 8.35874 | 9.14542 | 9.35972 | 9.29037 | 9.22578 |
| ERF      | 7.3371  | 7.09397 | 7.3124  | 8.34314 | 7.0697  | 7.63046 | 7.90106 | 7.85263 | 7.69307 |
| CNFN     | 12.8052 | 12.8508 | 12.7705 | 13.6374 | 14.024  | 13.9082 | 13.9873 | 14.0276 | 14.0303 |
| CXCL17   | 7.34054 | 6.82982 | 7.08809 | 6.92787 | 7.37976 | 8.12357 | 7.48128 | 6.47054 | 7.19243 |
| CEACAM1  | 6.70136 | 6.33248 | 6.68832 | 6.51307 | 7.17685 | 8.45947 | 6.83263 | 8.07155 | 7.25931 |
| ceacam8  | 3.94456 | 3.53871 | 4.1228  | 4.43722 | 5.28368 | 4.8864  | 4.15813 | 4.35042 | 4.31905 |
| psg3     | 3.77079 | 4.33072 | 3.97588 | 5.17009 | 5.127   | 4.56346 | 4.885   | 4.76119 | 5.03949 |
| PSG8     | 4.05181 | 4.18077 | 4.18042 | 5.13445 | 5.53213 | 4.26253 | 4.68257 | 4.39738 | 4.52828 |
| PSG1     | 2.92781 | 2.44249 | 2.96392 | 2.64348 | 5.35792 | 2.09366 | 2.80122 | 3.8592  | 3.68542 |
| PSG6     | 5.1815  | 4.89121 | 4.70937 | 5.84201 | 9.24205 | 5.42691 | 5.30977 | 5.98683 | 5.72992 |
| PSG7     | 4.01801 | 3.42345 | 4.25843 | 6.2576  | 3.39144 | 4.47448 | 5.63502 | 2.85965 | 3.87398 |

|              |         |         |         |         |         |         |         |         |         |
|--------------|---------|---------|---------|---------|---------|---------|---------|---------|---------|
| PSG11        | 2.5171  | 2.36896 | 2.10234 | 3.38489 | 3.47776 | 2.84663 | 3.26733 | 3.17973 | 2.2321  |
| PSG2         | 3.45377 | 3.25593 | 3.35531 | 3.84861 | 4.73376 | 3.79329 | 3.24447 | 4.06216 | 4.07493 |
| PSG5         | 5.3613  | 5.60515 | 5.27903 | 5.64291 | 6.33299 | 5.93221 | 5.89892 | 5.53555 | 5.83681 |
| psg4         | 4.71217 | 4.9688  | 4.75708 | 5.30812 | 5.89298 | 6.61366 | 5.52241 | 6.81779 | 8.18646 |
| Psg9         | 4.53162 | 4.66505 | 4.90562 | 4.82555 | 5.45166 | 5.07297 | 5.03564 | 6.08646 | 4.99875 |
| LYPD3        | 12.3615 | 11.7188 | 12.0799 | 12.7206 | 11.7607 | 12.8385 | 12.7095 | 12.3555 | 13.1072 |
| ETHE1        | 8.59139 | 7.74738 | 8.51491 | 9.47192 | 8.99722 | 10.4587 | 10.4576 | 11.0768 | 10.6507 |
| XRCC1        | 8.50036 | 8.16061 | 8.34499 | 7.69613 | 6.60174 | 7.40627 | 7.86699 | 7.72753 | 7.64016 |
| ZNF428       | 5.49229 | 5.88099 | 5.72979 | 6.36523 | 5.01574 | 5.82807 | 6.55691 | 5.43255 | 5.84999 |
| CADM4        | 6.90509 | 7.28265 | 6.87647 | 7.5773  | 6.85055 | 8.6075  | 8.36012 | 8.95246 | 8.13217 |
| LYPD5        | 10.7129 | 10.1409 | 9.99348 | 11.385  | 12.2798 | 12.636  | 11.8687 | 12.811  | 12.4267 |
| ZNF404       | 4.50744 | 4.63216 | 4.21443 | 3.79152 | 4.86934 | 4.85233 | 4.47915 | 4.79075 | 4.25178 |
| LOC100505715 | 4.0803  | 5.36452 | 4.5629  | 4.66637 | 5.88715 | 4.84209 | 4.51685 | 4.66824 | 4.74317 |
| ZNF45        | 7.01082 | 7.18174 | 7.08346 | 6.0333  | 6.04752 | 5.83109 | 6.17098 | 6.17904 | 5.81242 |
| ZNF235       | 6.99357 | 7.12915 | 6.2003  | 5.99303 | 5.764   | 5.85307 | 6.40333 | 6.50557 | 6.72729 |
| ZNF112       | 6.97997 | 7.16228 | 6.99605 | 6.16434 | 6.80036 | 6.02421 | 6.33691 | 6.55748 | 6.19279 |
| ZNF285       | 3.8266  | 4.66387 | 2.97308 | 3.22274 | 5.12096 | 4.75559 | 3.71543 | 4.15879 | 4.66083 |
| ZNF229       | 5.09837 | 5.65204 | 4.6686  | 5.29782 | 5.82904 | 4.70645 | 5.4181  | 4.75472 | 4.79332 |
| ZNF180       | 6.26397 | 5.90194 | 6.03732 | 5.73693 | 5.55147 | 5.77483 | 6.34251 | 5.46285 | 5.5398  |
| CEACAM20     | 5.73317 | 6.04064 | 5.92422 | 5.93164 | 7.30263 | 6.06762 | 6.11039 | 6.02364 | 6.06781 |
| ZNF296       | 6.26392 | 5.99493 | 5.91067 | 7.1261  | 5.67514 | 6.77641 | 6.78427 | 6.37642 | 6.43053 |
| TRAPPC6A     | 6.61756 | 7.50021 | 6.54849 | 6.79186 | 5.24751 | 6.57982 | 7.00337 | 5.80203 | 6.01462 |
| EXOC3L2      | 6.73379 | 6.50999 | 6.642   | 7.32582 | 6.99278 | 7.78184 | 7.08469 | 7.3642  | 7.38747 |
| RTN2         | 6.16124 | 5.98231 | 6.10029 | 6.93158 | 6.48963 | 7.47191 | 6.95214 | 6.91139 | 6.68424 |
| GPR4         | 5.81677 | 5.94724 | 5.68673 | 6.82046 | 6.79394 | 6.57195 | 6.46935 | 6.77153 | 7.27971 |
| EML2         | 6.4996  | 6.54101 | 6.12076 | 7.09827 | 6.14187 | 7.30919 | 7.2142  | 6.76736 | 6.85155 |

|         |         |         |         |         |         |         |         |         |         |
|---------|---------|---------|---------|---------|---------|---------|---------|---------|---------|
| MIR330  | 6.67521 | 6.91093 | 6.80613 | 6.91913 | 7.01008 | 6.48928 | 6.65711 | 6.73369 | 6.73633 |
| SNRPD2  | 7.42169 | 7.64509 | 7.34528 | 8.87345 | 7.88915 | 8.51649 | 8.32738 | 7.50651 | 7.80095 |
| FBXO46  | 7.37666 | 7.24748 | 6.93538 | 8.40908 | 7.17606 | 8.15397 | 8.47896 | 7.80996 | 8.35249 |
| DMPK    | 7.54234 | 7.3333  | 7.41546 | 7.61098 | 6.89891 | 7.67651 | 7.53388 | 7.82026 | 7.62944 |
| RSPH6A  | 5.71707 | 6.02559 | 5.77252 | 6.2081  | 6.4031  | 6.77413 | 6.2616  | 6.29715 | 5.98295 |
| SYMPK   | 8.54956 | 8.54848 | 8.48002 | 8.47572 | 6.98627 | 7.95104 | 8.46693 | 8.19247 | 8.28807 |
| IRF2BP1 | 6.05614 | 5.9065  | 5.60294 | 6.20773 | 6.15606 | 6.68367 | 6.35859 | 5.92934 | 6.21047 |
| NANOS2  | 6.03208 | 5.73404 | 5.55214 | 6.25479 | 6.13121 | 6.58356 | 5.83934 | 6.26263 | 6.4022  |
| NOVA2   | 6.14753 | 5.79315 | 6.09165 | 6.4917  | 5.85681 | 6.72595 | 6.13375 | 6.53768 | 6.05084 |
| PGLYRP1 | 5.11465 | 5.52531 | 5.33801 | 5.82311 | 6.64773 | 5.59217 | 5.78857 | 5.79494 | 5.6875  |
| IGFL4   | 7.3076  | 7.75871 | 7.94002 | 5.23441 | 5.27326 | 4.81591 | 6.61148 | 4.89062 | 5.89073 |
| IGFL3   | 7.98621 | 6.83464 | 8.18436 | 8.26878 | 7.01633 | 6.18553 | 8.18169 | 6.94856 | 7.12035 |
| CCDC8   | 6.72424 | 6.75395 | 6.69035 | 6.98563 | 7.01888 | 7.27439 | 6.47775 | 7.07054 | 6.57146 |
| PNMAL1  | 5.88696 | 6.11383 | 6.21809 | 6.33294 | 6.30993 | 6.76755 | 6.18986 | 6.44875 | 6.38299 |
| PPP5D1  | 5.90613 | 5.63471 | 5.36792 | 5.99655 | 5.94275 | 6.35078 | 5.67772 | 5.58144 | 5.48903 |
| PTGIR   | 6.47718 | 6.42611 | 6.55334 | 6.7454  | 6.88667 | 6.92542 | 6.45596 | 6.82606 | 7.00922 |
| prkd2   | 8.62689 | 8.28134 | 8.06502 | 7.74654 | 6.70775 | 7.80489 | 8.37174 | 8.06723 | 7.74156 |
| MIR320E | 5.68367 | 5.27787 | 5.44919 | 5.54359 | 5.11341 | 5.75552 | 5.331   | 6.5408  | 5.33036 |
| SNAR-B1 | 6.72635 | 6.75055 | 6.72795 | 7.48861 | 9.94564 | 7.58321 | 6.75266 | 7.27561 | 7.16764 |
| TMEM160 | 8.21494 | 7.7377  | 7.8756  | 9.52172 | 7.09281 | 8.631   | 9.55034 | 7.97878 | 8.20385 |
| ZC3H4   | 7.80784 | 8.0332  | 7.73013 | 7.8588  | 5.52767 | 7.78352 | 7.85636 | 7.04271 | 7.52935 |
| BBC3    | 6.65056 | 6.3907  | 6.26674 | 6.85328 | 6.16658 | 6.9426  | 6.51959 | 6.57505 | 6.55294 |
| MEIS3   | 5.41652 | 5.41107 | 5.6571  | 6.21618 | 6.20393 | 6.05661 | 5.55991 | 5.64834 | 5.85658 |
| KPTN    | 6.01706 | 5.57633 | 5.93324 | 6.63903 | 5.89494 | 6.67862 | 6.42291 | 6.42161 | 6.37108 |
| znf541  | 5.21051 | 5.12164 | 5.10914 | 5.56279 | 5.34501 | 5.81518 | 5.74954 | 5.45075 | 5.39389 |
| TPRX1   | 5.56049 | 5.83541 | 5.50159 | 5.74865 | 6.24157 | 6.58698 | 5.77148 | 6.11368 | 6.13857 |

|          |         |         |         |         |         |         |         |         |         |
|----------|---------|---------|---------|---------|---------|---------|---------|---------|---------|
| BSPH1    | 4.81168 | 4.79785 | 4.67821 | 5.41304 | 5.68327 | 5.73713 | 5.04558 | 5.21379 | 4.68395 |
| CABP5    | 5.09201 | 5.38208 | 5.35147 | 5.42464 | 6.5406  | 5.77994 | 5.36413 | 5.47792 | 5.38038 |
| CCDC114  | 6.00347 | 5.92976 | 5.97533 | 6.54498 | 6.5982  | 6.9266  | 6.40305 | 6.55673 | 6.50871 |
| TMEM143  | 6.13063 | 5.97934 | 6.10474 | 6.43163 | 5.54423 | 6.37282 | 6.34879 | 6.02976 | 5.50802 |
| KDELR1   | 9.32209 | 8.9431  | 9.5202  | 9.55649 | 7.42518 | 9.83567 | 9.78532 | 9.5271  | 9.75843 |
| lmtk3    | 6.87869 | 6.71488 | 6.5888  | 7.52419 | 7.40671 | 7.72862 | 7.24109 | 7.4034  | 7.35245 |
| RPL18    | 8.68339 | 8.59363 | 8.80777 | 8.61807 | 8.51583 | 8.43204 | 8.55327 | 8.56879 | 8.42544 |
| DBP      | 8.48575 | 8.15112 | 7.77078 | 8.60936 | 7.45655 | 8.36588 | 8.20961 | 7.74609 | 7.58991 |
| CA11     | 7.64811 | 7.18858 | 6.45682 | 6.96649 | 7.03645 | 6.75864 | 7.73623 | 6.78014 | 6.11504 |
| NTN5     | 5.70991 | 5.75313 | 5.36784 | 6.15376 | 5.64733 | 6.26094 | 5.81769 | 6.13188 | 5.88807 |
| MAMSTR   | 6.69935 | 6.56155 | 6.67306 | 6.8835  | 6.7762  | 7.22468 | 6.80521 | 6.65697 | 6.67306 |
| RASIP1   | 7.16349 | 6.66753 | 7.03878 | 7.80589 | 6.16855 | 7.39406 | 7.80467 | 7.59912 | 7.85495 |
| IZUMO1   | 4.88666 | 5.04932 | 4.6937  | 5.84609 | 5.16883 | 5.05831 | 5.84953 | 5.35877 | 5.50996 |
| HSD17B14 | 4.89829 | 5.21084 | 5.0558  | 5.4718  | 5.01947 | 5.18903 | 4.83533 | 5.4253  | 4.99368 |
| TULP2    | 5.72419 | 5.72545 | 5.41861 | 6.21183 | 6.09254 | 6.3862  | 6.23626 | 6.26444 | 6.16651 |
| GYS1     | 7.50389 | 7.26373 | 7.21742 | 8.13603 | 6.60283 | 9.11978 | 8.51619 | 7.65196 | 8.00369 |
| LHB      | 6.76885 | 6.87487 | 7.11182 | 7.227   | 7.6952  | 7.07127 | 7.20735 | 7.31527 | 7.2109  |
| SNAR-G2  | 6.42595 | 6.97362 | 6.50961 | 6.7968  | 7.99825 | 6.7594  | 6.49538 | 7.50056 | 8.03136 |
| NTF4     | 6.24639 | 6.32862 | 5.90311 | 6.71243 | 6.96254 | 7.04256 | 7.07729 | 6.41527 | 6.40072 |
| C19orf73 | 7.63747 | 7.96704 | 7.25955 | 7.81868 | 7.02402 | 6.99944 | 7.77251 | 6.71441 | 7.13527 |
| HRC      | 6.09442 | 6.43896 | 6.20853 | 6.44355 | 7.18194 | 7.15796 | 6.7748  | 6.89568 | 6.8372  |
| MIR4324  | 6.57416 | 7.08771 | 7.31906 | 7.15807 | 7.64544 | 7.81957 | 6.82555 | 7.11465 | 7.77687 |
| TEAD2    | 6.71142 | 6.49785 | 6.28203 | 7.25855 | 6.24741 | 6.10878 | 6.94004 | 6.38493 | 6.33824 |
| PTH2     | 6.79742 | 6.82436 | 6.72386 | 7.72505 | 7.53621 | 7.50633 | 7.58728 | 7.37365 | 7.3923  |
| PIH1D1   | 7.20892 | 7.19858 | 7.18488 | 8.12416 | 6.70488 | 8.11395 | 8.05167 | 7.45305 | 7.63863 |
| mir150   | 5.24894 | 5.4712  | 5.30386 | 6.39127 | 6.09501 | 6.15372 | 5.67749 | 5.55862 | 5.5635  |

|              |         |         |         |         |         |         |         |         |         |
|--------------|---------|---------|---------|---------|---------|---------|---------|---------|---------|
| NOSIP        | 7.15578 | 7.6021  | 6.91001 | 8.71822 | 7.63614 | 9.39338 | 9.25186 | 9.62845 | 8.61594 |
| RRAS         | 8.96217 | 8.31969 | 8.57411 | 8.55723 | 7.30846 | 8.02678 | 9.25854 | 9.25692 | 8.86164 |
| IRF3         | 6.84315 | 7.05538 | 6.77589 | 7.38921 | 6.36423 | 7.17931 | 7.25887 | 7.11034 | 6.93273 |
| TSKS         | 6.07239 | 5.99393 | 5.60686 | 6.22064 | 6.04128 | 6.05895 | 5.97113 | 5.89372 | 6.06945 |
| FUZ          | 5.86175 | 5.60818 | 5.74074 | 6.32305 | 6.30268 | 6.33105 | 6.38492 | 6.17897 | 6.02113 |
| PTOV1-AS1    | 6.02272 | 6.31849 | 6.16498 | 6.58296 | 7.04686 | 6.28191 | 6.3527  | 6.34059 | 6.24035 |
| PNKP         | 8.24691 | 7.67387 | 8.11612 | 8.64939 | 6.79376 | 8.55401 | 8.43278 | 9.15594 | 8.65314 |
| AKT1S1       | 7.13018 | 6.76932 | 6.82559 | 7.734   | 6.37413 | 7.10693 | 7.68391 | 6.97062 | 7.09329 |
| IL4I1        | 7.96046 | 7.75976 | 7.73034 | 7.94888 | 7.7867  | 7.60636 | 8.28335 | 7.47621 | 7.68255 |
| SIGLEC11     | 5.82164 | 5.83087 | 5.82907 | 6.47181 | 6.71071 | 6.48837 | 6.05609 | 6.45818 | 5.9168  |
| VRK3         | 7.43664 | 7.23005 | 7.21163 | 7.62629 | 6.9769  | 7.88254 | 7.91297 | 7.87931 | 8.00305 |
| SNAR-D       | 5.50011 | 5.51095 | 5.13681 | 4.88645 | 7.18313 | 5.47867 | 5.84292 | 6.55231 | 5.87689 |
| IZUMO2       | 5.44295 | 5.51683 | 5.27638 | 5.87887 | 6.14347 | 6.19536 | 5.71499 | 5.84373 | 5.5141  |
| NAPSB        | 5.04404 | 5.0073  | 4.89803 | 5.11858 | 6.01322 | 5.61242 | 5.52761 | 5.67565 | 5.12109 |
| NAPSA        | 5.40779 | 5.53604 | 5.52458 | 6.12469 | 6.16528 | 5.76966 | 5.78745 | 5.42362 | 5.48987 |
| LOC100506114 | 5.41274 | 5.27304 | 5.24002 | 6.17705 | 5.16944 | 6.2798  | 5.96517 | 6.22218 | 5.94832 |
| josd2        | 6.62021 | 6.62695 | 6.69039 | 7.7301  | 6.98665 | 8.35537 | 7.80676 | 7.26041 | 7.63701 |
| ASPDH        | 5.64361 | 5.99099 | 5.7777  | 6.53724 | 6.77241 | 6.45134 | 6.19408 | 6.4931  | 6.08942 |
| Irrc4b       | 5.70376 | 5.85684 | 5.70651 | 6.69674 | 6.13323 | 7.13446 | 6.09573 | 6.23892 | 6.45909 |
| syt3         | 4.95625 | 5.31566 | 4.92906 | 5.62094 | 5.74625 | 6.06302 | 5.87958 | 5.3156  | 5.33927 |
| SHANK1       | 5.54607 | 5.61718 | 5.32914 | 6.19412 | 5.86147 | 5.94288 | 5.72054 | 5.91366 | 5.59301 |
| C19orf48     | 6.95856 | 7.05272 | 7.05847 | 7.37097 | 6.44009 | 7.26343 | 7.53961 | 6.78042 | 6.52562 |
| KLK1         | 7.42265 | 7.71427 | 7.22333 | 7.08195 | 6.44568 | 7.13947 | 6.50489 | 6.50491 | 6.62714 |
| KLK15        | 5.469   | 5.3824  | 5.46118 | 6.0525  | 6.08601 | 6.17312 | 5.39258 | 6.01502 | 5.84333 |
| KLKP1        | 4.57618 | 4.78153 | 5.04873 | 5.03715 | 6.46154 | 5.22543 | 4.61864 | 5.05866 | 5.15584 |
| KLK4         | 5.3105  | 5.34409 | 5.44937 | 6.20752 | 6.1016  | 6.16842 | 5.88521 | 6.43069 | 5.81412 |

|           |         |         |         |         |         |         |         |         |         |
|-----------|---------|---------|---------|---------|---------|---------|---------|---------|---------|
| KLK5      | 10.814  | 10.0475 | 9.95496 | 11.1183 | 11.1015 | 10.5264 | 10.2343 | 11.6265 | 11.429  |
| KLK6      | 7.08615 | 6.44327 | 6.71856 | 9.2061  | 7.8352  | 10.4203 | 7.62097 | 9.57089 | 10.9178 |
| KLK7      | 12.4729 | 12.316  | 12.3316 | 12.4639 | 11.0608 | 12.0079 | 11.9582 | 11.6355 | 12.247  |
| KLK8      | 10.3633 | 10.082  | 9.60024 | 11.3352 | 10.546  | 10.9401 | 11.0906 | 10.6872 | 11.0839 |
| KLK9      | 7.90205 | 6.81987 | 6.82922 | 9.68025 | 9.41484 | 10.1808 | 10.2217 | 7.92748 | 8.57514 |
| KLK10     | 9.42857 | 8.82637 | 8.99157 | 10.8383 | 11.408  | 11.8981 | 11.0682 | 11.5737 | 11.4846 |
| KLK11     | 10.2603 | 10.6525 | 10.1994 | 10.9683 | 11.1564 | 11.5466 | 10.8804 | 11.2352 | 11.4706 |
| KLK12     | 5.53676 | 5.53507 | 5.26111 | 9.06526 | 7.84916 | 9.8668  | 9.24259 | 10.3985 | 7.7743  |
| KLK13     | 8.18144 | 8.12072 | 7.27896 | 8.70905 | 7.1663  | 9.5577  | 8.10445 | 8.54245 | 8.26773 |
| KLK14     | 6.51111 | 7.09156 | 6.84115 | 6.93004 | 7.35658 | 8.05459 | 7.5152  | 7.51074 | 6.25873 |
| CTU1      | 6.58318 | 6.71582 | 6.89119 | 6.95017 | 7.71665 | 7.46047 | 6.96753 | 6.99756 | 7.34349 |
| VSIG10L   | 8.95551 | 8.44038 | 8.35976 | 9.50346 | 9.435   | 9.06615 | 9.22007 | 9.7691  | 10.1017 |
| CLDND2    | 6.13029 | 6.02219 | 6.30429 | 6.57767 | 6.88938 | 6.85221 | 6.41815 | 6.09933 | 6.66873 |
| NKG7      | 6.6458  | 6.56228 | 6.64797 | 6.73072 | 7.38137 | 6.74263 | 6.75353 | 6.98639 | 6.66481 |
| C19orf84  | 3.9693  | 4.29706 | 4.40379 | 4.53766 | 4.44575 | 5.17926 | 4.7097  | 4.72724 | 4.83682 |
| siglec10  | 6.06405 | 5.91664 | 5.9963  | 6.15675 | 6.91008 | 6.41891 | 6.16791 | 6.18778 | 6.2577  |
| SIGLEC8   | 4.78295 | 4.92704 | 5.00713 | 5.63697 | 6.07856 | 5.32233 | 5.09577 | 5.06042 | 5.2809  |
| SIGLEC12  | 5.97879 | 5.77371 | 5.75455 | 6.19953 | 6.49089 | 6.23225 | 6.15066 | 6.16197 | 6.41787 |
| SIGLEC6   | 5.92127 | 5.53223 | 6.32079 | 6.08936 | 6.32938 | 6.0527  | 6.464   | 5.78939 | 7.00197 |
| LINC01530 | 5.19607 | 5.47554 | 5.37523 | 5.82185 | 6.35488 | 5.87214 | 5.44347 | 5.74461 | 6.04439 |
| SIGLEC5   | 4.57464 | 5.3891  | 5.30924 | 5.15676 | 5.57015 | 5.82964 | 5.22702 | 5.21843 | 5.20699 |
| SIGLEC14  | 5.66032 | 5.93036 | 5.81186 | 6.0773  | 6.54521 | 6.50089 | 5.29554 | 6.16893 | 6.12924 |
| HAS1      | 5.20533 | 5.07955 | 5.22464 | 6.15573 | 5.43178 | 6.20023 | 6.33167 | 5.97131 | 6.2545  |
| FPR1      | 5.21444 | 5.47899 | 5.27866 | 5.4266  | 6.35034 | 6.25274 | 5.7617  | 5.91664 | 5.8918  |
| ZNF577    | 7.51047 | 7.82292 | 7.48107 | 6.84306 | 6.51228 | 6.32476 | 6.86842 | 6.53146 | 6.38574 |
| ZNF649    | 7.73824 | 7.39197 | 7.87569 | 6.24028 | 5.95858 | 5.94081 | 6.87705 | 5.40906 | 6.37017 |

|        |         |         |         |         |         |         |         |         |         |
|--------|---------|---------|---------|---------|---------|---------|---------|---------|---------|
| ZNF350 | 6.70321 | 7.31113 | 6.99523 | 5.4457  | 4.87993 | 5.32644 | 6.41122 | 5.02817 | 5.6909  |
| ZNF615 | 6.04337 | 6.26304 | 6.24983 | 5.03203 | 4.03198 | 4.31844 | 5.50359 | 4.57543 | 4.62278 |
| ZNF614 | 7.43287 | 8.03716 | 7.56457 | 6.62773 | 5.94316 | 5.84134 | 7.097   | 5.9951  | 6.4752  |
| znf432 | 7.64456 | 7.28427 | 7.40852 | 6.29341 | 6.0215  | 6.97274 | 7.04206 | 8.10888 | 8.75175 |
| ZNF841 | 9.54848 | 9.38275 | 9.2874  | 8.73271 | 10.6247 | 9.44672 | 8.44286 | 11.1084 | 10.5474 |
| ZNF616 | 5.21581 | 5.34235 | 5.78019 | 5.32114 | 4.97013 | 5.50371 | 4.85311 | 5.15309 | 4.88563 |
| ZNF836 | 6.48499 | 6.62841 | 6.28999 | 6.37161 | 6.00912 | 6.3523  | 6.13752 | 6.61077 | 6.1971  |
| ZNF83  | 7.72489 | 8.15313 | 7.79324 | 6.65526 | 6.61171 | 7.12837 | 7.10956 | 8.68298 | 8.60264 |
| ZNF611 | 7.70345 | 8.30185 | 7.64228 | 6.8534  | 7.61723 | 7.89367 | 7.82409 | 7.4857  | 7.49043 |
| ZNF600 | 6.36382 | 6.66873 | 6.59056 | 6.57788 | 6.70345 | 6.31869 | 6.44012 | 6.3728  | 5.99514 |
| ZNF468 | 7.60192 | 8.05459 | 7.3627  | 6.94079 | 6.82525 | 6.00208 | 7.09847 | 6.10343 | 6.20264 |
| ZNF320 | 6.39374 | 6.48652 | 6.36201 | 5.56595 | 5.07672 | 5.95293 | 6.16558 | 5.88279 | 5.27724 |
| ZNF160 | 7.83389 | 8.16434 | 7.88231 | 6.83559 | 7.24417 | 7.33117 | 7.4452  | 6.64147 | 6.93953 |
| ZNF415 | 6.35714 | 6.51482 | 6.1979  | 5.00159 | 6.2048  | 6.00499 | 6.63688 | 6.47237 | 6.30791 |
| znf347 | 6.19205 | 6.33857 | 6.3904  | 4.57584 | 4.96687 | 5.14434 | 4.9072  | 4.25874 | 4.96476 |
| ZNF665 | 5.41686 | 5.41451 | 5.22133 | 4.73585 | 5.15588 | 4.92853 | 4.92734 | 5.04827 | 4.65152 |
| ZNF677 | 5.19908 | 5.41334 | 5.29864 | 4.76676 | 5.29543 | 5.17998 | 4.87041 | 4.45079 | 4.6505  |
| VN1R4  | 4.2441  | 4.31737 | 4.12873 | 4.67508 | 5.40879 | 4.41809 | 4.44279 | 4.36665 | 4.14707 |
| BIRC8  | 6.0419  | 6.07965 | 5.75765 | 6.22995 | 7.14798 | 6.80193 | 6.42059 | 6.26062 | 6.19193 |
| Vstm1  | 4.82527 | 5.19449 | 4.72158 | 5.00187 | 5.3804  | 5.34458 | 5.68448 | 5.12901 | 5.18793 |
| TFPT   | 6.17529 | 6.28601 | 6.03502 | 6.73387 | 6.14847 | 6.50859 | 6.86889 | 6.60595 | 6.46456 |
| LENG1  | 5.55481 | 5.63866 | 5.80168 | 6.31521 | 5.76393 | 6.23371 | 6.31536 | 6.07677 | 6.10812 |
| TMC4   | 6.50609 | 6.72753 | 6.59735 | 7.13889 | 8.00101 | 6.42625 | 6.35761 | 6.82521 | 6.8765  |
| MBOAT7 | 7.03911 | 7.09208 | 7.10608 | 8.09303 | 7.36366 | 7.60095 | 7.88138 | 7.33774 | 7.20693 |
| LAIR1  | 6.23399 | 6.06403 | 6.31622 | 6.35962 | 6.65881 | 6.60342 | 6.64925 | 6.30417 | 6.3956  |
| LENG9  | 6.52306 | 6.16378 | 6.35236 | 6.69401 | 6.08776 | 6.77277 | 7.39242 | 6.81443 | 6.66982 |



|          |         |         |         |         |         |         |         |         |         |
|----------|---------|---------|---------|---------|---------|---------|---------|---------|---------|
| CDC42EP5 | 6.08411 | 6.0344  | 6.023   | 7.06625 | 6.85742 | 7.00566 | 7.08734 | 6.62364 | 6.46831 |
| GP6      | 7.51297 | 7.4353  | 6.40749 | 6.93243 | 6.62243 | 6.74652 | 6.62836 | 6.59192 | 6.80904 |
| RDH13    | 9.02703 | 8.89512 | 8.48589 | 9.19423 | 9.08097 | 10.2896 | 8.86839 | 10.8484 | 9.7195  |
| TNNI3    | 4.16616 | 4.62062 | 4.22525 | 5.44593 | 4.66798 | 5.10893 | 4.59933 | 5.08127 | 4.87764 |
| SYT5     | 6.45053 | 6.81035 | 6.63795 | 6.96301 | 7.47083 | 7.4265  | 6.95405 | 7.08383 | 6.96536 |
| TMEM86B  | 6.23399 | 6.37746 | 6.35032 | 6.70389 | 6.74691 | 7.15365 | 6.69447 | 6.70974 | 6.78576 |
| TMEM150B | 5.38537 | 5.50294 | 5.21179 | 6.11004 | 6.13408 | 5.81354 | 5.4573  | 5.86325 | 5.41425 |
| COX6B2   | 5.53119 | 5.06637 | 5.35672 | 6.28271 | 5.47993 | 6.37563 | 6.28538 | 6.12136 | 5.90553 |
| IL11     | 5.98462 | 6.1646  | 6.0037  | 7.41357 | 6.75331 | 6.84387 | 6.25843 | 7.90391 | 7.16482 |
| TMEM238  | 8.37899 | 8.23756 | 8.59203 | 9.03489 | 7.87025 | 9.134   | 10.0532 | 7.3448  | 8.3176  |
| UBE2S    | 5.14082 | 5.35437 | 5.06014 | 6.87812 | 5.08804 | 7.00805 | 6.63158 | 6.60595 | 6.56134 |
| SHISA7   | 6.81504 | 6.76737 | 6.53639 | 7.13012 | 7.27316 | 7.37653 | 7.01767 | 7.18712 | 7.10309 |
| ISOC2    | 7.51718 | 7.43881 | 7.44568 | 8.26955 | 8.13706 | 7.76352 | 8.07083 | 7.72818 | 7.9283  |
| sbk3     | 6.39957 | 6.76207 | 6.7259  | 7.22687 | 7.22365 | 7.58377 | 7.15408 | 7.34868 | 7.36817 |
| ZNF579   | 6.74392 | 6.89784 | 6.70359 | 7.09291 | 7.01339 | 7.43781 | 7.22625 | 7.33756 | 7.0999  |
| FIZ1     | 5.94388 | 6.21592 | 5.80567 | 6.77316 | 5.55754 | 6.63398 | 6.63845 | 5.8923  | 5.68711 |
| ZNF784   | 6.54253 | 6.64531 | 6.69639 | 7.23297 | 6.88857 | 7.18745 | 7.03126 | 6.72727 | 7.15861 |
| ZNF787   | 6.22181 | 6.74931 | 6.5206  | 7.43023 | 6.64492 | 7.21884 | 7.57663 | 6.89521 | 7.22363 |
| ZSCAN5B  | 3.97518 | 4.43901 | 4.07856 | 4.5769  | 5.40878 | 4.47001 | 4.32119 | 4.47412 | 4.15462 |
| ZSCAN5A  | 5.51052 | 5.77924 | 5.62919 | 5.78688 | 5.39096 | 5.88395 | 6.04309 | 5.51814 | 5.44874 |
| ZNF582   | 5.41015 | 5.62582 | 5.23023 | 4.23776 | 4.53395 | 5.18815 | 4.60056 | 4.47758 | 4.12587 |
| ZNF835   | 4.72806 | 4.64588 | 4.68144 | 5.07336 | 4.82652 | 5.35508 | 5.15662 | 5.0147  | 4.86391 |
| DUXA     | 4.10286 | 3.95557 | 4.29542 | 4.73038 | 5.16289 | 4.7461  | 4.54033 | 4.65515 | 4.49223 |
| VN1R1    | 5.27665 | 5.67426 | 5.71216 | 5.08805 | 5.92832 | 4.91129 | 4.26    | 4.46699 | 4.87091 |
| ZNF772   | 5.52172 | 5.98109 | 5.89701 | 5.60713 | 5.79741 | 5.81822 | 5.63531 | 5.80744 | 5.80211 |
| ZNF550   | 6.41947 | 6.44239 | 6.2609  | 5.71923 | 5.5876  | 5.61236 | 5.5036  | 5.75953 | 5.8403  |

|             |         |         |         |         |         |         |         |         |         |
|-------------|---------|---------|---------|---------|---------|---------|---------|---------|---------|
| ZNF416      | 7.12012 | 7.48895 | 7.06363 | 7.80147 | 6.40988 | 7.54225 | 7.87551 | 6.70752 | 7.9237  |
| ZNF154      | 5.95504 | 5.94503 | 6.16751 | 5.97267 | 6.3479  | 5.86828 | 5.60193 | 6.02762 | 5.71325 |
| ZNF671      | 5.04122 | 4.25573 | 4.9793  | 4.97149 | 5.04432 | 5.12142 | 5.02568 | 5.52424 | 5.16667 |
| ZNF552      | 4.8027  | 4.94445 | 4.77055 | 5.43838 | 4.13537 | 5.29181 | 5.99633 | 4.86865 | 5.32382 |
| ZNF814      | 6.82385 | 6.75634 | 7.02748 | 5.71117 | 5.71043 | 5.52442 | 5.72055 | 5.76524 | 5.78967 |
| ZNF417      | 6.67461 | 6.85966 | 6.72366 | 6.10317 | 6.18993 | 6.01358 | 6.34077 | 6.43243 | 6.58514 |
| ZNF418      | 5.4336  | 6.11123 | 5.94377 | 4.77545 | 5.99194 | 4.71174 | 4.60377 | 4.51441 | 5.21819 |
| ZNF256      | 7.17218 | 7.72    | 7.59772 | 6.3313  | 6.11041 | 5.77286 | 6.4843  | 5.55515 | 5.41883 |
| ZNF606      | 6.97197 | 7.05975 | 7.2001  | 6.90532 | 7.05009 | 6.75285 | 6.80748 | 6.56635 | 6.94162 |
| ZSCAN18     | 6.72465 | 7.08665 | 6.97615 | 7.04357 | 7.24892 | 7.24719 | 6.90351 | 7.06411 | 6.94976 |
| ZNF329      | 6.84618 | 7.13925 | 6.94785 | 6.92187 | 6.94374 | 6.15939 | 6.89307 | 6.49751 | 6.38175 |
| A1BG        | 5.83845 | 6.35282 | 6.13882 | 6.73647 | 6.8978  | 6.60275 | 6.09348 | 6.74915 | 6.60879 |
| ZNF497      | 6.24484 | 6.29803 | 6.00366 | 6.79655 | 6.8233  | 7.3984  | 6.92714 | 6.51965 | 6.8256  |
| ZNF837      | 6.11629 | 6.33261 | 6.24155 | 6.97714 | 6.66113 | 7.03396 | 6.73114 | 6.55768 | 6.66138 |
| ZNF132      | 6.24145 | 6.23927 | 6.16728 | 6.17011 | 6.28981 | 5.99736 | 6.23283 | 5.8261  | 6.7851  |
| ZBTB45      | 6.73167 | 6.68062 | 6.52661 | 7.32489 | 5.91204 | 7.18719 | 7.36683 | 6.62309 | 6.48785 |
| CHMP2A      | 10.7526 | 10.4029 | 10.6073 | 10.9383 | 9.30344 | 11.2665 | 11.2641 | 10.5912 | 10.9042 |
| UBE2M       | 6.0565  | 5.81532 | 6.11349 | 6.66946 | 5.90148 | 7.46516 | 7.03457 | 7.06351 | 6.63181 |
| MZF1        | 6.8334  | 6.47393 | 6.74971 | 7.04232 | 6.52482 | 7.40601 | 6.69818 | 6.77993 | 7.12495 |
| TPO         | 5.18776 | 5.28691 | 6.07459 | 5.62513 | 6.2578  | 5.8672  | 5.61883 | 5.77936 | 5.85551 |
| MYT1L-AS1   | 5.11032 | 5.00874 | 5.1547  | 5.25463 | 6.15926 | 5.64106 | 5.37454 | 5.76191 | 5.81877 |
| TRAPPC12    | 7.55929 | 7.52956 | 7.41352 | 6.84335 | 5.92878 | 6.88074 | 7.32706 | 6.85979 | 6.92739 |
| RNASEH1-AS1 | 6.66245 | 6.06532 | 6.65648 | 6.64663 | 5.96143 | 6.49243 | 6.80258 | 6.61901 | 6.61837 |
| RPS7        | 6.02196 | 6.01304 | 5.73903 | 6.45558 | 6.20453 | 6.13765 | 6.10128 | 6.01439 | 6.09671 |
| COLEC11     | 5.72161 | 6.10908 | 6.01193 | 6.22577 | 6.8342  | 6.70408 | 5.97063 | 6.51003 | 6.22838 |
| ALLC        | 4.98239 | 5.02324 | 4.92107 | 5.32738 | 5.82483 | 5.50069 | 5.37891 | 5.12646 | 5.29656 |

|              |         |         |         |         |         |         |         |         |         |
|--------------|---------|---------|---------|---------|---------|---------|---------|---------|---------|
| SOX11        | 5.0243  | 5.63358 | 5.28726 | 5.65022 | 5.69117 | 6.31495 | 5.47675 | 5.81615 | 5.64343 |
| LINC01105    | 3.94744 | 4.51081 | 4.08939 | 4.19344 | 5.04057 | 4.28964 | 4.70613 | 4.58134 | 4.48546 |
| LOC400940    | 3.89584 | 4.25166 | 3.87212 | 4.29849 | 4.64154 | 4.68489 | 3.77006 | 4.36409 | 4.39844 |
| RSAD2        | 5.8872  | 5.91233 | 5.85459 | 5.698   | 5.93052 | 7.64909 | 6.02238 | 7.72436 | 6.05748 |
| RNF144A      | 7.06784 | 6.92418 | 7.09508 | 7.49052 | 6.67743 | 7.97243 | 7.66677 | 7.86921 | 7.56603 |
| LOC100506274 | 4.21993 | 4.29648 | 4.2141  | 4.48516 | 5.21596 | 4.70688 | 4.38954 | 4.6253  | 4.65352 |
| IAH1         | 7.43804 | 7.53698 | 7.64259 | 7.46716 | 6.94847 | 7.35325 | 7.80301 | 7.52887 | 7.39075 |
| GRHL1        | 11.0402 | 10.6898 | 10.0267 | 10.6431 | 8.95425 | 11.2376 | 10.3863 | 11.1535 | 11.4804 |
| KLF11        | 9.33824 | 9.29236 | 9.51158 | 9.36046 | 7.13014 | 10.1701 | 9.31775 | 7.99237 | 8.40972 |
| RRM2         | 6.94041 | 6.31078 | 6.46475 | 7.83083 | 5.92475 | 7.40506 | 7.36724 | 7.08567 | 7.50929 |
| HPCAL1       | 6.31105 | 6.16697 | 6.15183 | 7.0213  | 6.80597 | 7.02685 | 6.90304 | 7.19926 | 7.0585  |
| NOL10        | 5.20448 | 5.09629 | 4.80133 | 6.49084 | 5.19599 | 6.55161 | 6.23586 | 5.18785 | 5.13359 |
| c2orf50      | 5.77572 | 5.72462 | 5.69317 | 5.74775 | 6.31408 | 6.2782  | 5.87537 | 5.94704 | 5.85208 |
| PQLC3        | 8.01486 | 8.22095 | 8.20632 | 7.97237 | 6.44292 | 7.09365 | 8.2764  | 6.58584 | 7.5871  |
| LINC00570    | 5.08286 | 5.13412 | 4.80821 | 4.97008 | 5.76095 | 5.30768 | 5.57597 | 5.17729 | 5.60201 |
| GREB1        | 5.49157 | 5.22845 | 5.51486 | 5.28657 | 5.64506 | 5.52727 | 5.52513 | 5.39915 | 5.46729 |
| LPIN1        | 7.11835 | 7.11948 | 6.98848 | 6.94174 | 6.63967 | 7.89732 | 6.92071 | 7.77755 | 7.3533  |
| MIR548S      | 2.40867 | 2.23599 | 2.52148 | 2.69576 | 2.07451 | 2.78323 | 2.44187 | 2.98895 | 2.82175 |
| MIR3681      | 4.96981 | 4.59081 | 5.2491  | 5.7427  | 4.66222 | 4.76779 | 5.39677 | 5.15689 | 5.55053 |
| TRIB2        | 7.92577 | 6.95554 | 7.68639 | 6.85834 | 6.50527 | 6.7873  | 7.02185 | 6.6686  | 6.33798 |
| MIR3125      | 6.67707 | 6.92547 | 6.68979 | 6.70012 | 8.19613 | 6.80309 | 6.56932 | 6.97877 | 7.29766 |
| DDX1         | 9.11714 | 9.14374 | 9.22077 | 9.34029 | 6.42063 | 8.85828 | 9.68077 | 8.65502 | 9.08205 |
| VSNL1        | 6.36168 | 6.0572  | 6.12249 | 5.69711 | 4.94467 | 5.07153 | 6.13948 | 5.31316 | 6.32364 |
| GEN1         | 8.06928 | 7.98046 | 7.9317  | 6.94107 | 4.96854 | 5.60399 | 6.95266 | 5.56576 | 6.6283  |
| MSGN1        | 4.76797 | 5.35568 | 5.38132 | 5.61944 | 5.66713 | 5.4758  | 5.41006 | 5.41292 | 5.88814 |
| MIR4757      | 5.49975 | 5.6228  | 5.58565 | 6.23992 | 5.90656 | 6.02144 | 5.64345 | 5.94096 | 5.73069 |

|             |         |         |         |         |         |         |         |         |         |
|-------------|---------|---------|---------|---------|---------|---------|---------|---------|---------|
| LINC00954   | 5.99969 | 5.96779 | 5.85333 | 6.00978 | 6.15725 | 6.60293 | 5.88366 | 6.15226 | 6.06863 |
| RHOB        | 8.72367 | 8.1573  | 8.6798  | 8.81324 | 7.67392 | 9.05206 | 9.02838 | 9.55779 | 8.73148 |
| GDF7        | 6.34363 | 6.34879 | 6.44962 | 7.03942 | 6.76892 | 7.26629 | 6.74076 | 6.85986 | 6.735   |
| KLHL29      | 6.58642 | 5.9929  | 6.56485 | 6.33503 | 6.14452 | 6.25645 | 6.12677 | 7.46873 | 6.8876  |
| UBXN2A      | 7.13917 | 7.34212 | 7.04645 | 7.32028 | 6.97098 | 7.58324 | 7.50003 | 7.52197 | 7.44667 |
| MFSD2B      | 4.70533 | 5.23471 | 5.05543 | 6.10405 | 5.52022 | 5.8928  | 5.28454 | 5.44495 | 5.58883 |
| NCOA1       | 9.87593 | 9.8989  | 9.93252 | 8.79834 | 6.87786 | 9.17905 | 9.00748 | 8.40947 | 9.18104 |
| CENPO       | 7.29108 | 7.11522 | 7.22384 | 7.35097 | 6.74403 | 6.52485 | 7.39871 | 6.59413 | 6.85753 |
| DNAJC27-AS1 | 4.89552 | 5.0055  | 4.73772 | 5.47261 | 5.4419  | 5.35487 | 4.59935 | 4.59941 | 4.93868 |
| EFR3B       | 6.72216 | 6.26255 | 6.18773 | 7.40425 | 6.73819 | 8.42962 | 7.52979 | 8.36063 | 9.83236 |
| SELENOI     | 9.35506 | 9.28078 | 9.13199 | 9.19752 | 6.96585 | 8.56896 | 9.0949  | 8.87448 | 9.28833 |
| DRC1        | 4.74834 | 4.32145 | 4.49008 | 5.03206 | 5.61201 | 5.09582 | 4.86622 | 4.99986 | 5.02293 |
| c2orf70     | 4.87014 | 5.11334 | 5.28244 | 5.30572 | 5.78665 | 5.69009 | 5.2968  | 5.94353 | 5.87672 |
| SLC35F6     | 9.42024 | 8.94992 | 9.47663 | 9.54837 | 8.09768 | 8.97011 | 9.99365 | 9.23243 | 9.62921 |
| CENPA       | 7.27759 | 6.74567 | 6.97402 | 7.96109 | 7.74175 | 7.36791 | 7.50333 | 7.37253 | 7.21939 |
| DPYSL5      | 5.01704 | 4.99946 | 4.9582  | 5.74573 | 5.84004 | 6.06306 | 5.79496 | 5.72397 | 5.69461 |
| TMEM214     | 8.42209 | 8.49072 | 8.54164 | 8.41074 | 7.66639 | 8.41441 | 8.47324 | 8.10104 | 8.79316 |
| AGBL5       | 6.37179 | 6.8269  | 6.46563 | 6.41392 | 6.48395 | 6.47435 | 6.56247 | 6.12161 | 6.16094 |
| EMILIN1     | 5.81133 | 5.71013 | 5.95715 | 6.09226 | 5.89228 | 6.16871 | 6.03479 | 6.03052 | 6.09821 |
| KHK         | 5.68864 | 5.9239  | 5.82832 | 5.96953 | 6.18204 | 5.48162 | 5.83966 | 5.73314 | 6.02728 |
| ABHD1       | 5.02084 | 4.85737 | 5.18173 | 5.33057 | 5.71492 | 5.35334 | 4.68143 | 5.34244 | 5.35615 |
| tcf23       | 5.97512 | 5.78289 | 5.81576 | 6.43487 | 6.7663  | 6.19011 | 6.13323 | 6.41862 | 6.11393 |
| ATRAID      | 8.5967  | 8.77622 | 8.86028 | 8.60358 | 7.45342 | 7.41901 | 8.51562 | 7.2825  | 7.56869 |
| TRIM54      | 5.18315 | 5.19141 | 5.09101 | 5.85766 | 5.48234 | 5.44574 | 5.64443 | 5.60509 | 5.71127 |
| SNX17       | 8.12326 | 8.07869 | 8.18608 | 7.98476 | 7.77516 | 7.66098 | 8.22872 | 7.29508 | 7.53391 |
| NRBP1       | 7.62829 | 7.04991 | 7.61054 | 7.58107 | 6.87976 | 7.80906 | 7.58972 | 8.04795 | 8.11534 |

|           |         |         |         |         |         |         |         |         |         |
|-----------|---------|---------|---------|---------|---------|---------|---------|---------|---------|
| KRTCAP3   | 6.78106 | 6.79425 | 6.98305 | 6.98905 | 6.28006 | 6.20892 | 6.53838 | 6.12276 | 6.16945 |
| GCKR      | 5.1473  | 5.13782 | 5.13557 | 5.64349 | 6.28836 | 5.74194 | 5.32154 | 5.78312 | 5.58103 |
| C2orf16   | 4.18836 | 3.64211 | 3.91122 | 4.63955 | 4.74754 | 5.03783 | 4.58623 | 4.62887 | 4.34377 |
| ZNF512    | 7.46465 | 7.61881 | 7.39403 | 6.66604 | 6.41009 | 6.17614 | 6.56513 | 6.97937 | 7.17562 |
| GPN1      | 7.39761 | 7.38046 | 7.44772 | 7.74552 | 6.31135 | 7.63376 | 7.8331  | 7.48614 | 7.52659 |
| MRPL33    | 7.20036 | 7.27911 | 7.34988 | 7.5528  | 6.7569  | 6.97998 | 7.74445 | 7.26379 | 7.19063 |
| BRE       | 8.95448 | 8.77294 | 8.87315 | 8.38786 | 7.92818 | 7.93969 | 8.79278 | 7.80083 | 8.53027 |
| MIR4263   | 4.99737 | 5.76117 | 4.47439 | 3.53295 | 4.608   | 3.4611  | 4.46231 | 3.04245 | 4.01088 |
| FOSL2     | 9.39099 | 8.70841 | 9.26197 | 9.07741 | 7.90839 | 9.08476 | 9.05803 | 8.48298 | 8.68783 |
| PLB1      | 7.97631 | 7.68445 | 6.93136 | 7.18129 | 6.5653  | 6.27613 | 6.51721 | 6.60477 | 6.56898 |
| spdya     | 4.81956 | 4.88864 | 4.66516 | 5.48192 | 4.85557 | 5.26169 | 5.06353 | 5.55368 | 5.58379 |
| WDR43     | 8.30751 | 8.42664 | 8.4971  | 8.18388 | 4.97084 | 7.18909 | 8.51564 | 7.26262 | 7.55613 |
| YPEL5     | 7.92926 | 7.71146 | 7.28275 | 7.74987 | 6.5247  | 8.30076 | 8.09196 | 8.11641 | 7.82506 |
| LBH       | 6.99501 | 6.93485 | 6.84637 | 6.73587 | 6.68316 | 7.58348 | 7.1012  | 7.37088 | 6.86346 |
| LCLAT1    | 8.256   | 7.98961 | 8.33795 | 7.48569 | 6.02465 | 7.42812 | 7.95374 | 7.4223  | 7.57184 |
| EHD3      | 7.06082 | 6.66621 | 6.35719 | 6.26235 | 5.32849 | 5.66028 | 6.66689 | 6.41613 | 6.10738 |
| SPAST     | 7.85757 | 7.92623 | 7.95347 | 7.6397  | 4.81663 | 7.07137 | 8.06244 | 7.16699 | 7.06636 |
| BIRC6     | 10.0277 | 10.1686 | 10.0907 | 9.02347 | 6.34427 | 8.57607 | 9.14337 | 9.18397 | 9.38446 |
| MIR558    | 4.53639 | 4.2344  | 4.36909 | 4.12501 | 4.19465 | 3.37535 | 4.07908 | 4.0378  | 4.13548 |
| TTC27     | 8.1442  | 8.13957 | 8.17662 | 8.04055 | 6.67778 | 6.95987 | 7.94556 | 6.27582 | 7.54883 |
| MIR4765   | 5.35199 | 5.46165 | 5.43285 | 4.36206 | 4.92104 | 4.77004 | 5.07021 | 6.53562 | 6.13509 |
| LINC00486 | 5.05001 | 4.78289 | 5.1352  | 5.08824 | 6.17538 | 5.15017 | 4.81362 | 5.28274 | 4.92709 |
| LTBP1     | 8.28326 | 7.40682 | 7.8359  | 9.43993 | 6.44551 | 8.18086 | 9.52252 | 9.10971 | 9.26114 |
| RASGRP3   | 6.77694 | 5.86725 | 6.42801 | 5.75149 | 6.41685 | 5.21506 | 5.7211  | 6.34448 | 6.59307 |
| MIR548AD  | 3.14381 | 3.28507 | 2.59535 | 2.59029 | 2.46719 | 4.39931 | 2.71898 | 3.43405 | 3.10045 |
| CRIM1     | 9.49845 | 9.36546 | 9.67135 | 8.8628  | 6.43757 | 8.18901 | 8.57668 | 9.58364 | 9.58229 |

|            |         |         |         |         |         |         |         |         |         |
|------------|---------|---------|---------|---------|---------|---------|---------|---------|---------|
| VIT        | 6.4377  | 6.49389 | 7.15719 | 5.1011  | 6.38157 | 5.12976 | 5.16526 | 5.54782 | 5.47161 |
| GPATCH11   | 6.95421 | 6.91196 | 7.01175 | 5.7844  | 5.83019 | 5.64103 | 6.38945 | 6.48066 | 5.52395 |
| NDUFAF7    | 7.15455 | 7.06874 | 7.17774 | 6.22205 | 5.62273 | 5.95678 | 6.82059 | 6.21016 | 6.37254 |
| QPCT       | 7.51373 | 7.22179 | 7.29949 | 6.09048 | 5.7564  | 4.97428 | 6.33691 | 5.72309 | 5.45917 |
| GALM       | 6.38762 | 6.31441 | 6.2393  | 5.42059 | 5.07878 | 5.51117 | 5.84073 | 5.52431 | 5.6157  |
| gemin6     | 4.7424  | 4.89108 | 4.73628 | 5.078   | 5.25538 | 5.25829 | 5.33738 | 5.06195 | 5.01163 |
| MORN2      | 7.3275  | 7.53678 | 8.0105  | 7.80147 | 5.87675 | 7.48781 | 8.80638 | 7.57589 | 7.82967 |
| ARHGEF33   | 5.64688 | 5.81546 | 5.56849 | 5.47423 | 6.71954 | 5.56898 | 5.95028 | 5.60375 | 5.67909 |
| LOC728730  | 6.37306 | 6.52082 | 6.55078 | 6.49797 | 7.27547 | 6.42444 | 6.31667 | 6.22521 | 6.11986 |
| TMEM178A   | 6.75566 | 7.43487 | 6.91586 | 6.58992 | 6.89992 | 6.32843 | 6.08573 | 6.27603 | 6.49825 |
| SLC8A1-AS1 | 3.5992  | 3.33804 | 3.65793 | 4.02358 | 4.7772  | 4.12009 | 4.33867 | 3.93906 | 4.25926 |
| LOC388942  | 4.98941 | 5.16381 | 5.4183  | 5.54061 | 6.22648 | 5.73549 | 5.58334 | 5.67273 | 5.48975 |
| EML4       | 10.2599 | 10.3808 | 10.2793 | 9.07996 | 6.56904 | 8.12366 | 9.01777 | 8.11803 | 8.82691 |
| LINC01126  | 5.96616 | 5.7223  | 5.72975 | 5.67268 | 5.60659 | 5.45607 | 5.53958 | 5.55306 | 5.29507 |
| CAMKMT     | 8.16385 | 7.91968 | 7.85921 | 6.78791 | 6.84918 | 6.42732 | 7.06505 | 7.09497 | 7.00123 |
| SIX3       | 5.34581 | 5.49444 | 5.62906 | 6.57506 | 6.5357  | 6.21193 | 6.62327 | 5.93901 | 6.06056 |
| EPAS1      | 9.61101 | 9.7256  | 9.70751 | 9.52559 | 6.57526 | 9.39163 | 9.9258  | 9.71122 | 9.99728 |
| TMEM247    | 3.9449  | 4.36244 | 3.86909 | 4.47442 | 4.76918 | 4.8934  | 4.2779  | 4.94687 | 4.52423 |
| RHOQ       | 7.15068 | 7.42179 | 7.40419 | 6.99786 | 5.78136 | 6.61867 | 7.13225 | 7.45528 | 7.2119  |
| CRIP1      | 8.24221 | 7.82647 | 7.91775 | 7.12636 | 6.17384 | 6.75369 | 7.23327 | 7.31406 | 6.81836 |
| SOCS5      | 7.8834  | 7.76794 | 7.88492 | 7.7851  | 7.24764 | 7.92547 | 7.83753 | 7.88841 | 7.94854 |
| LINC01119  | 5.34627 | 5.36201 | 5.59036 | 5.66457 | 5.27892 | 5.71897 | 5.423   | 5.53769 | 5.42304 |
| LINC01118  | 5.78061 | 5.87445 | 5.85521 | 6.08109 | 6.41428 | 6.27413 | 5.57306 | 6.08191 | 6.12518 |
| TTC7A      | 7.45798 | 7.03477 | 7.36511 | 7.00737 | 7.39995 | 7.52106 | 7.89878 | 8.4831  | 8.09295 |
| EPCAM      | 6.69384 | 6.65436 | 6.94328 | 7.05881 | 6.05861 | 7.49095 | 7.55232 | 7.01159 | 7.4726  |
| MIR559     | 2.34925 | 2.44779 | 2.14595 | 2.31269 | 2.07003 | 3.06438 | 2.25112 | 2.14052 | 2.06799 |

|           |         |         |         |         |         |         |         |         |         |
|-----------|---------|---------|---------|---------|---------|---------|---------|---------|---------|
| MSH6      | 7.41033 | 7.06826 | 7.35449 | 7.19891 | 5.99854 | 6.59778 | 7.23517 | 7.35223 | 6.84383 |
| FOXN2     | 8.0459  | 7.96087 | 8.12919 | 8.68182 | 6.37506 | 8.10155 | 8.12712 | 8.4548  | 8.75229 |
| ERLEC1    | 8.85183 | 8.83479 | 9.00178 | 8.90947 | 6.48874 | 8.36004 | 9.1455  | 8.38758 | 8.61654 |
| c2orf73   | 4.06332 | 4.53671 | 4.26935 | 4.44585 | 4.85164 | 4.59535 | 3.90278 | 4.7703  | 4.47329 |
| RPL23AP32 | 7.91728 | 7.79825 | 8.70027 | 5.21546 | 6.08775 | 4.0041  | 4.79853 | 7.14379 | 6.94919 |
| eml6      | 7.47955 | 6.34251 | 6.46459 | 6.81344 | 6.04203 | 6.27488 | 6.70692 | 7.18938 | 7.14602 |
| RPS27A    | 6.16578 | 5.42442 | 5.63635 | 5.78048 | 5.79271 | 5.57631 | 5.72679 | 5.54499 | 5.66559 |
| CFAP36    | 6.66837 | 7.02641 | 6.98327 | 6.49837 | 5.53807 | 6.3308  | 6.60294 | 6.41686 | 6.21141 |
| CCDC85A   | 6.1198  | 6.21457 | 6.01353 | 5.87959 | 5.76265 | 6.50182 | 6.12514 | 5.95056 | 5.83841 |
| LINC01122 | 4.55639 | 4.34064 | 4.75546 | 4.65095 | 5.96436 | 5.38783 | 4.7893  | 4.99065 | 4.96793 |
| PAPOLG    | 8.40336 | 8.91057 | 8.33796 | 7.54334 | 5.55376 | 6.72255 | 7.81497 | 7.15212 | 7.47528 |
| REL       | 10.1076 | 10.0906 | 10.0218 | 9.27896 | 7.91793 | 8.79368 | 8.99136 | 9.81201 | 8.52202 |
| PEX13     | 7.385   | 6.76544 | 6.79873 | 7.1035  | 6.97147 | 6.75539 | 7.28596 | 6.87368 | 6.89293 |
| KIAA1841  | 7.28035 | 6.96983 | 6.82684 | 6.45304 | 5.80271 | 6.31353 | 6.84332 | 6.36521 | 6.53629 |
| C2orf74   | 5.86628 | 6.79944 | 5.41415 | 5.44526 | 4.85582 | 5.04395 | 5.3343  | 4.89338 | 5.06334 |
| COMMD1    | 7.61875 | 7.63963 | 7.40847 | 7.18228 | 6.34192 | 7.44215 | 7.59569 | 6.83941 | 7.3724  |
| EHBP1     | 8.55113 | 8.24878 | 8.54813 | 8.07573 | 5.28732 | 7.29454 | 8.12533 | 7.95432 | 8.20673 |
| OTX1      | 6.98939 | 6.98529 | 7.0266  | 6.70993 | 6.12329 | 6.5435  | 6.88981 | 6.77769 | 6.39793 |
| UGP2      | 6.07397 | 6.412   | 6.25052 | 6.58056 | 6.01096 | 6.72346 | 6.80486 | 6.10562 | 6.51973 |
| MIR4433A  | 3.46276 | 3.35387 | 3.07374 | 3.28112 | 3.29337 | 4.97605 | 4.40121 | 3.45415 | 3.45934 |
| AFTPH     | 9.21146 | 9.24931 | 8.99221 | 8.77652 | 7.62583 | 8.95652 | 9.18176 | 8.96683 | 8.92163 |
| LOC339807 | 6.27167 | 5.32228 | 5.18927 | 6.03695 | 6.65688 | 5.78249 | 5.86247 | 5.52576 | 5.7816  |
| CEP68     | 8.01013 | 7.59241 | 8.19794 | 6.72099 | 6.78279 | 6.61332 | 7.0482  | 6.9537  | 6.77196 |
| ACTR2     | 10.4544 | 10.5307 | 10.3648 | 10.7316 | 9.12112 | 10.8075 | 10.5681 | 10.8095 | 11.0176 |
| MEIS1     | 7.64997 | 8.40055 | 7.363   | 6.46287 | 6.37446 | 6.03854 | 6.15362 | 7.17954 | 6.45405 |
| ETAA1     | 7.08876 | 6.74471 | 7.29671 | 6.13116 | 5.0271  | 5.49109 | 6.54732 | 6.19781 | 5.87378 |

|           |         |         |         |         |         |         |         |         |         |
|-----------|---------|---------|---------|---------|---------|---------|---------|---------|---------|
| PNO1      | 7.31052 | 7.30874 | 7.461   | 7.47874 | 6.27334 | 6.35876 | 8.35778 | 6.62408 | 7.07129 |
| PLEK      | 5.83983 | 5.98998 | 6.26196 | 6.02808 | 5.9788  | 8.02466 | 5.65502 | 7.38181 | 7.19616 |
| APLF      | 6.72299 | 7.40419 | 6.62698 | 6.09333 | 6.1743  | 6.06953 | 6.67281 | 6.23402 | 6.10157 |
| PROKR1    | 5.69632 | 6.06381 | 5.79591 | 6.06608 | 6.18601 | 6.06868 | 6.05808 | 5.89818 | 5.7213  |
| ARHGAP25  | 6.19836 | 6.72452 | 6.45511 | 6.17141 | 6.3248  | 5.4488  | 6.85499 | 6.29843 | 6.31148 |
| GKN1      | 3.21471 | 3.09154 | 3.21892 | 3.40946 | 3.73586 | 3.28119 | 3.11048 | 3.02021 | 3.32347 |
| ANTXR1    | 10.388  | 9.83185 | 10.1673 | 8.23378 | 6.06685 | 6.95274 | 9.01966 | 8.54651 | 8.31377 |
| MIR3126   | 4.44302 | 4.75054 | 4.10375 | 3.79928 | 3.88836 | 4.11532 | 3.7537  | 3.77248 | 3.92381 |
| ANXA4     | 9.83523 | 9.79283 | 9.90314 | 8.8942  | 7.80156 | 8.16238 | 9.4074  | 7.7643  | 8.81406 |
| GMCL1     | 6.06172 | 5.83991 | 6.0011  | 5.05595 | 5.10355 | 4.39581 | 5.40011 | 6.20187 | 5.08101 |
| SNRNP27   | 8.53831 | 8.37475 | 8.95956 | 7.70195 | 7.09788 | 7.40412 | 8.11224 | 7.92902 | 8.27462 |
| MXD1      | 9.88726 | 9.18526 | 9.00067 | 10.2538 | 10.4445 | 11.8261 | 10.6651 | 12.2425 | 11.736  |
| PCBP1     | 10.4645 | 9.76416 | 10.1232 | 11.0812 | 8.79644 | 11.8213 | 11.1596 | 10.3151 | 11.1382 |
| PCYOX1    | 10.0219 | 9.6867  | 9.73113 | 9.29757 | 7.65466 | 8.97238 | 9.41432 | 9.08361 | 9.30656 |
| VAX2      | 6.61773 | 6.73995 | 6.97978 | 7.35179 | 7.60102 | 7.39226 | 7.37374 | 7.54583 | 7.34183 |
| ANKRD53   | 5.47322 | 5.377   | 5.57535 | 6.17171 | 6.46195 | 6.24692 | 5.8915  | 6.02498 | 6.00968 |
| NAGK      | 8.9115  | 8.64173 | 8.3771  | 8.69855 | 6.75818 | 7.97073 | 8.81101 | 8.11705 | 8.60386 |
| MPHOSPH10 | 7.5215  | 7.5456  | 7.54856 | 7.17058 | 6.79193 | 7.33082 | 7.79656 | 6.68441 | 6.99957 |
| ZNF638    | 8.83372 | 9.01242 | 8.87509 | 7.76244 | 6.4681  | 6.78358 | 7.58762 | 7.90488 | 7.89151 |
| emx1      | 6.26041 | 6.09438 | 6.1894  | 6.91831 | 6.90909 | 7.1414  | 6.79611 | 6.87252 | 6.78278 |
| NOTO      | 5.38907 | 5.63322 | 5.40116 | 5.75371 | 5.84962 | 6.37417 | 5.71475 | 5.53525 | 5.62203 |
| SMYD5     | 6.6359  | 6.55938 | 6.93303 | 6.31884 | 5.50406 | 5.86873 | 6.5645  | 5.74423 | 5.92947 |
| ALMS1     | 7.63862 | 7.78529 | 7.82936 | 6.3436  | 5.57349 | 6.52333 | 6.57719 | 5.96563 | 6.4247  |
| ALMS1P1   | 6.20779 | 6.01299 | 5.9426  | 6.25021 | 6.23518 | 6.07852 | 6.30836 | 6.43604 | 6.80875 |
| C2orf78   | 4.80582 | 5.27351 | 5.07925 | 5.34826 | 6.43197 | 5.45997 | 5.18569 | 5.75103 | 5.60706 |
| STAMPB    | 7.9313  | 8.08718 | 7.81638 | 7.28544 | 6.38145 | 7.54349 | 7.70426 | 7.11927 | 7.47119 |



|           |         |         |         |         |         |         |         |         |         |
|-----------|---------|---------|---------|---------|---------|---------|---------|---------|---------|
| dguok     | 8.18132 | 8.28955 | 8.45622 | 8.01508 | 6.08813 | 7.88364 | 8.35514 | 7.35597 | 8.09918 |
| BOLA3-AS1 | 6.32055 | 5.79816 | 6.09088 | 6.82389 | 6.16211 | 6.73452 | 6.23419 | 6.05794 | 6.31948 |
| DCTN1-AS1 | 5.02518 | 5.30344 | 4.90303 | 5.5804  | 5.55478 | 5.67635 | 5.29483 | 5.3206  | 5.3914  |
| WDR54     | 6.15587 | 6.02343 | 6.05171 | 6.53278 | 6.41551 | 6.12914 | 6.08734 | 6.36764 | 6.15829 |
| INO80B    | 7.53943 | 7.5808  | 7.37226 | 7.21776 | 6.75056 | 7.05626 | 7.41218 | 7.51915 | 6.95418 |
| TTC31     | 6.78655 | 6.6107  | 6.74467 | 6.44043 | 6.1018  | 6.39694 | 6.4379  | 6.33065 | 6.73991 |
| LBX2-AS1  | 4.98462 | 5.26476 | 5.31558 | 5.88329 | 5.61314 | 6.06892 | 5.61481 | 5.6955  | 5.50134 |
| TLX2      | 6.42448 | 6.57596 | 6.67563 | 7.44871 | 7.49029 | 7.4591  | 7.04805 | 7.03371 | 7.22986 |
| HTRA2     | 7.76727 | 7.1436  | 7.36149 | 7.3371  | 6.37692 | 6.90497 | 7.6979  | 7.19033 | 7.41777 |
| HK2       | 8.93542 | 8.76067 | 8.5206  | 10.5175 | 11.2202 | 12.5951 | 10.9952 | 12.3301 | 11.4177 |
| MRPL19    | 7.76356 | 7.63164 | 7.68647 | 7.24441 | 7.01392 | 7.44719 | 8.23837 | 6.80035 | 7.22121 |
| REG3G     | 5.69443 | 5.1917  | 5.79009 | 6.17959 | 7.49485 | 6.28344 | 6.27789 | 5.98191 | 5.9526  |
| REG1A     | 3.07147 | 3.12486 | 3.39655 | 3.66625 | 4.86334 | 3.85672 | 3.40908 | 3.21439 | 3.27016 |
| DHFRP3    | 4.74876 | 4.61008 | 4.62148 | 5.21243 | 5.80076 | 4.60917 | 4.36385 | 4.5312  | 4.49966 |
| FUNDC2P2  | 3.29337 | 2.98875 | 3.35141 | 2.91338 | 3.75885 | 3.41307 | 3.33754 | 3.1587  | 3.51567 |
| TMSB10    | 11.3484 | 11.3988 | 11.5886 | 13.2689 | 12.6177 | 13.3576 | 13.2571 | 12.9964 | 13.0149 |
| KCMF1     | 10.189  | 10.0666 | 10.3783 | 10.184  | 10.2396 | 11.0772 | 10.68   | 10.9615 | 10.6911 |
| ELMOD3    | 6.66303 | 6.64579 | 6.62317 | 6.25496 | 6.21352 | 6.04506 | 6.17921 | 6.00573 | 6.10108 |
| SH2D6     | 6.01349 | 5.89317 | 5.97701 | 6.08041 | 6.48951 | 6.16435 | 5.82326 | 6.15668 | 6.05123 |
| VAMP8     | 10.8213 | 11.0182 | 10.6212 | 11.5871 | 10.5886 | 11.3321 | 11.8007 | 11.0325 | 11.6186 |
| VAMP5     | 7.94477 | 7.60901 | 7.46101 | 8.13419 | 7.05424 | 8.03354 | 8.1087  | 7.37193 | 7.51372 |
| RNF181    | 7.70822 | 7.39672 | 7.58951 | 8.06557 | 7.27591 | 8.4475  | 8.36273 | 8.56384 | 7.99501 |
| USP39     | 7.5007  | 7.83135 | 7.62615 | 7.52775 | 6.17398 | 7.05746 | 7.77364 | 7.30221 | 7.02128 |
| GNLY      | 5.38171 | 5.68255 | 5.44744 | 5.8197  | 6.19634 | 5.9032  | 5.65095 | 5.69518 | 5.85031 |
| ATOH8     | 5.21794 | 5.63668 | 5.58104 | 5.34193 | 5.83377 | 5.88345 | 5.65834 | 5.58312 | 5.61932 |
| LOC284950 | 5.59094 | 5.92934 | 5.81093 | 6.07412 | 7.00183 | 6.41752 | 5.80291 | 6.29975 | 5.7776  |

|            |         |         |         |         |         |         |         |         |         |
|------------|---------|---------|---------|---------|---------|---------|---------|---------|---------|
| PTCD3      | 8.68049 | 8.65727 | 8.53691 | 7.88139 | 5.70403 | 6.63848 | 7.77478 | 7.10418 | 7.58363 |
| MRPL35     | 8.16891 | 8.42737 | 8.33041 | 8.06644 | 6.41012 | 7.41612 | 8.81035 | 7.41887 | 7.57223 |
| KDM3A      | 9.32058 | 9.37795 | 9.18324 | 8.45564 | 8.37812 | 9.56168 | 8.54069 | 9.09751 | 8.24988 |
| RMND5A     | 9.91182 | 10.2023 | 9.45839 | 9.35257 | 7.42665 | 9.04017 | 9.1681  | 9.2061  | 8.6054  |
| ANAPC1P1   | 5.13953 | 5.24977 | 5.54238 | 4.70343 | 5.91638 | 5.00015 | 5.23092 | 4.89756 | 5.24273 |
| RGPD2      | 9.47401 | 9.51717 | 9.4945  | 8.45511 | 8.38545 | 8.37764 | 8.49469 | 9.1924  | 8.68829 |
| MIR4771-1  | 5.21069 | 5.67978 | 5.35622 | 4.8801  | 6.51935 | 4.8279  | 4.88387 | 4.29831 | 5.08284 |
| MIR4435-1  | 4.61895 | 4.60089 | 4.48339 | 4.77605 | 4.61023 | 4.25727 | 4.64658 | 4.65922 | 4.68826 |
| SMYD1      | 4.37709 | 4.67374 | 4.69562 | 5.36329 | 6.04397 | 5.53058 | 5.10875 | 4.79434 | 5.08897 |
| THNSL2     | 7.29143 | 7.91812 | 6.26257 | 6.43975 | 7.12192 | 7.60032 | 7.54723 | 6.76577 | 6.28889 |
| TEX37      | 5.03034 | 5.39104 | 4.80453 | 5.76157 | 5.83095 | 5.09927 | 4.86808 | 5.32692 | 4.93054 |
| RPIA       | 7.25681 | 7.53509 | 6.97213 | 6.58924 | 6.44226 | 5.79046 | 6.49933 | 5.75181 | 5.57797 |
| MIR4436A   | 4.60998 | 4.68153 | 4.42913 | 5.02277 | 5.00017 | 5.20808 | 5.17894 | 4.81535 | 4.72154 |
| GGT8P      | 5.50771 | 5.66175 | 5.39226 | 6.08807 | 6.92286 | 5.87554 | 5.96738 | 7.37903 | 7.08197 |
| ACTR3BP2   | 3.92522 | 3.92022 | 3.68246 | 4.11707 | 5.05688 | 3.98643 | 3.68905 | 4.08611 | 3.58237 |
| TEKT4      | 6.85386 | 7.31625 | 7.0185  | 7.07425 | 8.12929 | 7.47636 | 6.91649 | 7.28967 | 7.20046 |
| ZNF2       | 6.43116 | 6.62725 | 6.39001 | 6.84977 | 7.04114 | 6.56717 | 6.77215 | 6.88386 | 6.70115 |
| PROM2      | 9.0409  | 8.99542 | 8.63723 | 9.23496 | 7.49972 | 9.49021 | 9.23843 | 9.1183  | 9.60675 |
| FAHD2A     | 6.35155 | 6.55152 | 6.37119 | 6.66558 | 5.80116 | 6.56797 | 6.40618 | 5.93493 | 5.89656 |
| TRIM43     | 4.60782 | 4.66165 | 4.15403 | 4.37105 | 5.99071 | 4.97093 | 4.13487 | 4.21405 | 4.26681 |
| STARD7-AS1 | 7.21883 | 7.05958 | 7.27149 | 6.92738 | 6.86602 | 6.93034 | 7.07835 | 6.56685 | 6.7923  |
| CIAO1      | 8.65002 | 8.42956 | 8.52619 | 7.77237 | 6.46075 | 7.25681 | 8.14254 | 7.64941 | 7.8811  |
| ARID5A     | 7.10925 | 6.68529 | 7.08341 | 7.4983  | 6.96614 | 7.64183 | 7.17227 | 7.35434 | 7.23944 |
| FER1L5     | 5.4711  | 5.52872 | 5.61026 | 5.84564 | 6.19769 | 6.09103 | 5.83021 | 6.03954 | 5.82812 |
| CNNM4      | 8.01225 | 8.12495 | 7.32769 | 8.16497 | 6.05756 | 6.49448 | 6.87455 | 6.70177 | 6.39103 |
| CNNM3      | 6.89161 | 7.17435 | 6.80965 | 6.7107  | 6.27525 | 7.09493 | 7.00959 | 6.18436 | 6.28233 |

|           |         |         |         |         |         |         |         |         |         |
|-----------|---------|---------|---------|---------|---------|---------|---------|---------|---------|
| ANKRD36   | 7.37087 | 7.99163 | 8.1706  | 5.29308 | 6.44402 | 4.59366 | 5.2725  | 5.56943 | 5.38046 |
| Cox5b     | 7.44889 | 7.51837 | 7.67293 | 7.44478 | 6.75746 | 6.82616 | 7.70237 | 6.45677 | 6.80958 |
| LINC01125 | 5.66841 | 5.75274 | 4.92163 | 4.68349 | 4.58635 | 4.63694 | 4.34935 | 4.8167  | 4.74957 |
| ZAP70     | 6.12965 | 6.25709 | 6.47333 | 6.47091 | 6.45339 | 6.67077 | 6.44872 | 6.6233  | 6.39211 |
| VWA3B     | 4.94166 | 4.92392 | 5.02744 | 5.18136 | 6.05249 | 5.59533 | 5.20912 | 5.4302  | 5.35865 |
| CNGA3     | 5.38038 | 5.09655 | 4.89916 | 4.88722 | 5.46927 | 5.11613 | 5.11734 | 5.44393 | 5.0982  |
| UNC50     | 7.37668 | 7.70055 | 7.54912 | 7.11481 | 6.06989 | 6.17389 | 7.05586 | 6.65056 | 6.81716 |
| LIPT1     | 5.68413 | 5.51341 | 6.05016 | 5.28452 | 5.72352 | 4.85502 | 5.42687 | 4.33595 | 4.93558 |
| MRPL30    | 9.14757 | 8.92801 | 9.04661 | 8.47314 | 7.42407 | 8.11935 | 8.90066 | 8.63659 | 8.25618 |
| EIF5B     | 9.2099  | 9.48425 | 9.36685 | 8.7262  | 6.05518 | 8.0642  | 9.44584 | 8.93021 | 9.13552 |
| nms       | 5.75422 | 5.88052 | 5.64818 | 6.22489 | 7.3939  | 6.52207 | 6.36401 | 6.65342 | 6.33662 |
| NPAS2     | 8.70749 | 9.25769 | 9.65508 | 8.12616 | 7.78959 | 9.14122 | 8.54556 | 9.11594 | 8.46588 |
| CNOT11    | 8.69522 | 8.36443 | 8.34276 | 8.50455 | 7.42136 | 8.08982 | 8.97645 | 8.8613  | 8.56584 |
| map4k4    | 8.22709 | 8.41506 | 8.05268 | 8.18497 | 6.40438 | 9.47733 | 8.92653 | 9.11089 | 9.20338 |
| IL1RL2    | 6.56314 | 7.00686 | 6.21899 | 6.24469 | 6.31811 | 8.01627 | 7.02319 | 7.37628 | 7.49879 |
| IL1RL1    | 6.40423 | 6.38806 | 6.61591 | 7.37528 | 6.774   | 10.6721 | 6.92636 | 10.4017 | 9.64825 |
| IL18R1    | 7.48959 | 8.06729 | 6.98759 | 6.32145 | 6.14419 | 6.27048 | 6.94456 | 6.71907 | 7.19219 |
| IL18RAP   | 5.04002 | 4.93895 | 5.13428 | 4.80785 | 5.46063 | 5.09167 | 4.1442  | 5.14739 | 4.62695 |
| MIR4772   | 4.92257 | 5.07932 | 4.84499 | 5.6163  | 6.12688 | 5.37897 | 5.29384 | 5.0659  | 5.34705 |
| TMEM182   | 5.48447 | 5.17854 | 5.36741 | 5.32607 | 5.94207 | 5.73386 | 5.52123 | 5.37862 | 5.56146 |
| LINC01102 | 4.77347 | 4.87167 | 4.84037 | 4.65149 | 5.97569 | 5.09563 | 4.64753 | 4.94572 | 4.94558 |
| POU3F3    | 5.75715 | 5.47056 | 5.4892  | 5.96962 | 6.39802 | 6.07538 | 5.73255 | 6.05386 | 5.80805 |
| MRPS9     | 6.88626 | 7.02036 | 6.93214 | 6.90894 | 6.11577 | 6.3264  | 7.18733 | 6.60193 | 6.35276 |
| GPR45     | 6.04899 | 5.96137 | 5.8782  | 6.19165 | 7.19964 | 6.42827 | 6.38577 | 5.80627 | 5.92455 |
| c2orf49   | 7.55331 | 7.8028  | 7.68698 | 7.13935 | 5.21325 | 7.20853 | 7.38041 | 6.79263 | 6.78551 |
| NCK2      | 8.575   | 7.88218 | 8.43256 | 8.59507 | 7.51924 | 9.02002 | 8.53526 | 9.0551  | 8.6396  |

|           |         |         |         |         |         |         |         |         |         |
|-----------|---------|---------|---------|---------|---------|---------|---------|---------|---------|
| c2orf40   | 5.58465 | 6.2578  | 5.89998 | 5.67741 | 5.45944 | 5.31861 | 4.87917 | 5.2975  | 4.72758 |
| PLGLA     | 5.37302 | 5.39653 | 5.83988 | 4.55077 | 5.70252 | 4.44216 | 4.38244 | 4.45603 | 4.86108 |
| RGPD4     | 7.42695 | 7.97523 | 7.69732 | 6.61399 | 6.94273 | 6.45158 | 6.85041 | 7.86607 | 6.84273 |
| GCC2      | 7.87754 | 8.0231  | 7.79256 | 6.58006 | 5.3893  | 6.46002 | 6.81882 | 7.36859 | 7.01555 |
| LIMS1     | 7.43807 | 7.73968 | 7.21445 | 7.58163 | 6.69104 | 7.41352 | 7.1852  | 6.80871 | 7.81407 |
| RANBP2    | 9.05057 | 9.36031 | 9.1876  | 8.54812 | 6.97906 | 8.55887 | 8.90321 | 8.69051 | 8.47285 |
| CCDC138   | 6.09799 | 6.14437 | 5.91897 | 5.39728 | 4.19732 | 5.02451 | 5.81375 | 4.69201 | 4.68335 |
| SH3RF3    | 7.25842 | 7.17586 | 7.56034 | 6.87431 | 6.76441 | 7.36016 | 7.20197 | 7.08828 | 7.40961 |
| SOWAHC    | 8.13462 | 8.02233 | 8.04276 | 9.24684 | 7.36176 | 9.60667 | 8.90159 | 9.26608 | 9.50471 |
| RGPD6     | 10.1365 | 10.3805 | 10.3032 | 8.94588 | 9.32232 | 8.48684 | 9.02652 | 9.91891 | 9.26743 |
| LIMS3     | 7.41027 | 7.11605 | 7.21019 | 7.12867 | 7.78434 | 7.10396 | 7.03954 | 7.15001 | 7.237   |
| LINC01123 | 7.63236 | 7.16324 | 7.99029 | 7.57147 | 6.88538 | 7.22401 | 7.8204  | 7.4448  | 7.45645 |
| LOC440895 | 5.73207 | 5.30896 | 5.61127 | 5.33471 | 5.86874 | 4.93296 | 5.38054 | 5.24537 | 5.47721 |
| ACOXL     | 4.43321 | 4.22426 | 4.07994 | 4.92228 | 5.3157  | 4.79134 | 4.93984 | 4.94177 | 4.73581 |
| BCL2L11   | 7.36722 | 6.35763 | 6.94814 | 6.43519 | 6.07238 | 5.89521 | 6.3463  | 6.52677 | 6.02298 |
| MERTK     | 6.66216 | 7.24417 | 7.55913 | 6.48533 | 6.70844 | 5.34416 | 6.4113  | 6.17808 | 6.02714 |
| TMEM87B   | 8.45275 | 8.52619 | 8.32957 | 8.15831 | 4.96179 | 7.46098 | 8.51976 | 7.76667 | 8.08022 |
| fbIn7     | 6.74935 | 6.45447 | 6.97515 | 6.88134 | 7.45143 | 7.19323 | 6.77927 | 7.1771  | 6.83402 |
| ZC3H6     | 8.89709 | 9.27587 | 9.06022 | 6.24691 | 6.33633 | 6.6     | 7.09449 | 6.94321 | 6.6868  |
| TTL       | 8.33303 | 7.35642 | 7.8867  | 8.07477 | 6.32539 | 7.38638 | 8.10453 | 7.41638 | 7.80581 |
| chchd5    | 6.89701 | 6.97497 | 7.09877 | 7.6123  | 7.47013 | 7.16003 | 7.12966 | 7.27045 | 7.34039 |
| IL37      | 9.5193  | 11.2275 | 10.5047 | 9.91873 | 6.354   | 5.46615 | 6.92421 | 5.30157 | 5.71555 |
| IL36RN    | 8.86302 | 8.86351 | 8.11849 | 9.06086 | 9.96901 | 9.90832 | 9.5968  | 10.5738 | 10.2147 |
| IL1RN     | 8.62409 | 8.23052 | 8.3498  | 9.64173 | 10.0834 | 10.9364 | 10.1384 | 11.0484 | 11.0927 |
| PSD4      | 7.45265 | 7.8644  | 7.26942 | 7.79294 | 6.76637 | 8.07979 | 8.08073 | 7.13434 | 7.71041 |
| PAX8-AS1  | 7.76699 | 6.8727  | 7.02141 | 7.55556 | 7.32131 | 7.63753 | 6.95132 | 8.39449 | 9.0059  |

|           |         |         |         |         |         |         |         |         |         |
|-----------|---------|---------|---------|---------|---------|---------|---------|---------|---------|
| CBWD1     | 9.49632 | 9.52416 | 9.84996 | 8.67429 | 8.03976 | 6.98313 | 8.94795 | 8.28448 | 8.48917 |
| FOXD4L1   | 5.53693 | 5.83612 | 5.85623 | 5.86886 | 7.34594 | 6.19592 | 6.24896 | 5.8143  | 5.8773  |
| WASH2P    | 8.20597 | 8.95664 | 8.90201 | 8.41438 | 8.01859 | 8.32224 | 8.79505 | 8.81955 | 8.54717 |
| ACTR3     | 10.9077 | 10.3351 | 10.5291 | 11.0607 | 9.27947 | 11.2553 | 11.1223 | 11.2008 | 11.509  |
| LINC01191 | 4.72176 | 4.98126 | 5.33146 | 5.42059 | 5.49678 | 5.71828 | 5.59399 | 5.66107 | 6.49973 |
| DPP10     | 4.74744 | 5.04638 | 4.549   | 4.74699 | 5.63864 | 5.25826 | 4.83022 | 4.86043 | 4.79912 |
| DDX18     | 8.67993 | 8.67514 | 9.03803 | 8.00286 | 6.6453  | 7.4244  | 8.18608 | 7.07959 | 7.61199 |
| INSIG2    | 6.83933 | 7.33782 | 7.06613 | 6.80795 | 5.63563 | 7.99245 | 6.55597 | 8.15898 | 7.02765 |
| MARCO     | 5.21787 | 5.61947 | 5.68285 | 5.84368 | 6.91453 | 5.93153 | 5.65199 | 5.94205 | 5.62492 |
| TMEM37    | 5.91695 | 6.38667 | 6.80283 | 5.65367 | 6.94799 | 6.50432 | 6.44511 | 6.2835  | 5.91389 |
| CFAP221   | 4.47876 | 4.83592 | 5.03328 | 5.03061 | 6.13839 | 5.07681 | 4.28028 | 4.82107 | 4.57467 |
| TMEM177   | 7.59958 | 7.38535 | 7.67704 | 7.39554 | 6.83678 | 6.65125 | 7.82403 | 6.53244 | 6.61908 |
| EPB41L5   | 8.4552  | 8.65573 | 8.60827 | 8.57836 | 7.16469 | 9.21694 | 8.45266 | 9.16379 | 8.959   |
| RALB      | 8.99802 | 8.26921 | 8.70508 | 8.68757 | 7.60342 | 10.1443 | 9.35328 | 8.93056 | 9.43283 |
| GLI2      | 6.57567 | 7.15552 | 6.63142 | 6.94895 | 7.09303 | 6.86757 | 6.78399 | 6.68367 | 6.63391 |
| NIFK-AS1  | 6.77057 | 6.77938 | 6.71794 | 6.32209 | 7.12056 | 7.03013 | 6.71167 | 6.59085 | 7.03845 |
| TSN       | 7.5512  | 7.30932 | 7.57732 | 7.33889 | 6.63629 | 7.12054 | 7.82079 | 6.76795 | 7.0008  |
| CNTNAP5   | 4.04231 | 4.72734 | 4.70057 | 5.33773 | 5.61856 | 4.84231 | 4.54659 | 4.8141  | 4.62578 |
| GYPC      | 6.32951 | 6.13823 | 7.08749 | 5.69872 | 5.92246 | 6.04732 | 6.19288 | 6.18286 | 6.25214 |
| PROC      | 5.94423 | 5.73005 | 5.97649 | 7.0271  | 6.54518 | 6.43994 | 6.34797 | 6.30761 | 6.30873 |
| MYO7B     | 5.14089 | 5.17735 | 5.31746 | 5.96028 | 5.90742 | 5.8095  | 5.70018 | 5.68775 | 5.49321 |
| gpr17     | 5.23244 | 5.11291 | 5.22907 | 5.92497 | 5.78597 | 5.67506 | 5.51701 | 5.62305 | 5.41594 |
| SFT2D3    | 6.57312 | 6.7986  | 6.79821 | 6.67429 | 6.58042 | 6.95961 | 7.32525 | 6.76891 | 6.62229 |
| UGGT1     | 9.07076 | 9.13352 | 9.24004 | 8.75757 | 6.8783  | 8.36478 | 8.79438 | 8.51581 | 8.86833 |
| MED15P9   | 6.40464 | 6.56455 | 6.48429 | 7.09189 | 7.57372 | 7.10109 | 6.3534  | 7.00596 | 6.75138 |
| FAR2P2    | 2.60942 | 2.73538 | 2.35885 | 2.69878 | 8.10754 | 2.67176 | 3.06062 | 2.2339  | 2.2026  |

|              |         |         |         |         |         |         |         |         |         |
|--------------|---------|---------|---------|---------|---------|---------|---------|---------|---------|
| GPR148       | 5.0303  | 5.10037 | 4.91116 | 5.3189  | 5.638   | 5.55928 | 5.09435 | 5.64672 | 5.45752 |
| AMER3        | 5.05998 | 5.28062 | 5.03522 | 5.6801  | 5.81731 | 6.26536 | 5.71414 | 5.81217 | 5.53899 |
| ARHGEF4      | 8.4286  | 8.27448 | 8.07218 | 7.99493 | 6.96403 | 8.59344 | 8.74012 | 9.17098 | 8.86397 |
| LOC440910    | 5.86427 | 5.73879 | 5.57791 | 5.86388 | 7.15344 | 6.93482 | 6.03658 | 5.97635 | 6.16903 |
| LINC01120    | 5.31675 | 5.34506 | 5.36861 | 5.5746  | 6.23881 | 5.52042 | 5.89223 | 5.57833 | 5.62033 |
| GPR39        | 4.66958 | 4.77639 | 4.76667 | 4.9957  | 5.29061 | 4.56154 | 4.63551 | 4.85942 | 4.98702 |
| ACMSD        | 4.65821 | 4.57025 | 4.60995 | 4.55023 | 6.0366  | 4.66027 | 4.77288 | 4.78879 | 4.94045 |
| CCNT2        | 8.11941 | 8.29407 | 8.17914 | 7.2287  | 5.30409 | 6.8919  | 7.271   | 7.12404 | 7.77618 |
| RAB3GAP1     | 8.47506 | 8.6727  | 8.4404  | 8.15019 | 5.9769  | 8.39132 | 8.68129 | 8.61628 | 8.68963 |
| R3HDM1       | 7.86706 | 7.88752 | 8.0466  | 7.68517 | 6.12852 | 6.60572 | 7.66582 | 6.93595 | 7.16776 |
| mir128-1     | 3.05909 | 2.68064 | 2.97208 | 3.12143 | 3.22209 | 2.78179 | 3.33661 | 2.76508 | 2.9455  |
| UBXN4        | 9.9956  | 9.7277  | 10.0839 | 9.07126 | 7.14447 | 9.00172 | 9.30899 | 8.99481 | 9.33867 |
| LOC100507600 | 4.75698 | 4.49142 | 4.44977 | 4.95319 | 5.33116 | 4.80349 | 4.32381 | 5.0629  | 4.78891 |
| HNMT         | 7.72703 | 7.13573 | 7.47123 | 6.53516 | 7.37522 | 6.40716 | 6.93764 | 5.89426 | 6.36434 |
| SPOPL        | 8.32353 | 8.27526 | 8.19457 | 8.46102 | 6.8032  | 8.96226 | 8.87144 | 8.80194 | 9.03663 |
| YY1P2        | 2.58967 | 2.34382 | 2.6779  | 2.68837 | 3.18655 | 4.08371 | 3.24955 | 2.83584 | 2.8639  |
| KYNU         | 6.25694 | 5.94206 | 6.41336 | 7.92535 | 6.31448 | 7.73354 | 8.94331 | 6.86321 | 7.6445  |
| arhgap15     | 5.35867 | 4.94708 | 5.86829 | 4.98364 | 5.31987 | 5.18411 | 4.84724 | 4.85942 | 5.1411  |
| ZEB2-AS1     | 4.04276 | 4.19022 | 3.97665 | 4.38008 | 4.65622 | 4.83359 | 4.11721 | 4.16637 | 4.25434 |
| TEX41        | 5.38708 | 5.22771 | 4.98901 | 4.58518 | 5.54736 | 4.8215  | 4.52585 | 4.52138 | 4.83185 |
| mbd5         | 7.9971  | 8.02215 | 7.91076 | 6.62935 | 6.22719 | 6.30003 | 6.89445 | 6.65133 | 6.69495 |
| EPC2         | 9.06344 | 9.18656 | 9.15281 | 8.06862 | 5.49556 | 7.47736 | 8.24338 | 6.97673 | 8.15674 |
| KIF5C        | 4.62869 | 4.75756 | 4.99741 | 4.98612 | 4.91628 | 5.00833 | 4.85747 | 5.04793 | 5.09864 |
| LYPD6B       | 7.95023 | 8.28714 | 8.01496 | 6.14454 | 6.3557  | 5.76561 | 6.66371 | 6.64681 | 6.56651 |
| LYPD6        | 5.0465  | 5.32429 | 5.25432 | 5.63149 | 5.52427 | 5.93424 | 5.34856 | 5.52001 | 5.30509 |
| MIR4773-1    | 4.5869  | 4.28161 | 4.46368 | 4.07573 | 4.5216  | 4.24464 | 4.0235  | 4.25874 | 4.21821 |

|             |         |         |         |         |         |         |         |         |         |
|-------------|---------|---------|---------|---------|---------|---------|---------|---------|---------|
| RIF1        | 9.0244  | 9.19826 | 9.02751 | 8.27929 | 6.21371 | 7.19171 | 8.00374 | 7.68524 | 7.66626 |
| FMNL2       | 9.12455 | 8.7739  | 9.02029 | 8.8008  | 6.00425 | 8.44556 | 9.00454 | 9.27874 | 9.19848 |
| ARL6IP6     | 7.37151 | 7.77115 | 7.41149 | 7.32502 | 6.698   | 6.61756 | 7.18886 | 6.61511 | 6.78447 |
| GALNT13     | 4.99508 | 6.51794 | 5.23625 | 5.22736 | 5.6833  | 5.81617 | 5.17215 | 5.47018 | 5.6115  |
| GPD2        | 7.66444 | 8.28005 | 8.19167 | 7.45376 | 5.4623  | 7.28539 | 7.53032 | 7.23157 | 7.16394 |
| GALNT5      | 5.63397 | 4.99015 | 5.44931 | 5.76292 | 6.01733 | 5.14929 | 5.47961 | 4.95645 | 4.97516 |
| UPP2        | 4.2357  | 4.27016 | 4.37145 | 4.8263  | 5.62739 | 4.8431  | 4.5846  | 4.77273 | 4.5822  |
| CCDC148-AS1 | 3.15279 | 3.69863 | 3.35256 | 3.79907 | 3.61385 | 4.37656 | 4.47959 | 3.69126 | 3.60428 |
| PKP4        | 8.72458 | 8.48115 | 8.53167 | 7.87917 | 6.12557 | 7.3723  | 7.84548 | 7.49512 | 7.82234 |
| DAPL1       | 10.5174 | 10.5042 | 10.6989 | 9.91088 | 6.8726  | 8.32742 | 9.98573 | 5.61059 | 6.8767  |
| TANK        | 8.026   | 7.83144 | 7.85206 | 7.15759 | 5.9581  | 7.21988 | 7.13784 | 7.5288  | 7.63349 |
| CSRNP3      | 6.77387 | 6.70645 | 6.58613 | 5.37747 | 6.04023 | 5.40534 | 5.25604 | 5.8826  | 5.49375 |
| TTC21B-AS1  | 4.2701  | 4.13886 | 4.32485 | 4.38667 | 4.92466 | 4.36678 | 4.36784 | 4.43556 | 4.25645 |
| XIRP2       | 3.89752 | 4.06375 | 3.95165 | 4.72694 | 5.42883 | 4.35106 | 3.94661 | 4.43232 | 4.5753  |
| CERS6       | 9.61382 | 9.09666 | 9.49827 | 8.99384 | 6.52779 | 7.85388 | 8.78594 | 8.61154 | 8.40934 |
| MIR4774     | 3.63313 | 3.01499 | 3.81304 | 2.95255 | 2.29554 | 2.31126 | 2.78716 | 2.56641 | 2.7744  |
| NOSTRIN     | 7.12666 | 6.9849  | 7.74766 | 5.78195 | 6.06824 | 4.68414 | 5.43628 | 5.80265 | 5.47387 |
| DHRS9       | 5.49785 | 5.33801 | 5.42962 | 5.78108 | 6.79442 | 8.61905 | 7.34682 | 9.31138 | 8.49658 |
| BBS5        | 7.93737 | 7.26893 | 7.54672 | 6.16421 | 5.88993 | 5.45579 | 6.57027 | 5.69738 | 5.2745  |
| KLHL41      | 4.63019 | 4.45547 | 4.82374 | 4.16742 | 4.54169 | 4.19313 | 4.2522  | 4.13498 | 3.95376 |
| PPIG        | 8.0607  | 8.28965 | 8.23142 | 6.67462 | 4.81831 | 6.16472 | 7.60484 | 6.47152 | 7.03503 |
| SSB         | 7.367   | 7.69514 | 7.53182 | 7.34567 | 5.7448  | 6.62288 | 7.40601 | 7.03641 | 7.18558 |
| UBR3        | 9.11524 | 9.21983 | 9.39239 | 8.08182 | 5.62251 | 7.7011  | 8.4663  | 8.40833 | 8.13454 |
| MYO3B       | 4.67577 | 4.55759 | 4.66386 | 5.22981 | 5.6938  | 4.63319 | 5.7132  | 6.20737 | 5.38242 |
| SP5         | 5.40129 | 5.22307 | 5.30129 | 5.97862 | 6.20829 | 6.39585 | 5.85781 | 6.00291 | 6.04893 |
| DCAF17      | 8.06651 | 7.8811  | 8.05166 | 6.94064 | 5.75571 | 6.22611 | 7.67395 | 6.37842 | 7.00344 |

|           |         |         |         |         |         |         |         |         |         |
|-----------|---------|---------|---------|---------|---------|---------|---------|---------|---------|
| CYBRD1    | 9.57428 | 9.53928 | 10.6109 | 7.88348 | 7.53621 | 6.85388 | 8.73575 | 7.38548 | 7.30698 |
| HAT1      | 8.34035 | 8.20439 | 8.3839  | 7.8338  | 5.15954 | 7.37801 | 8.1732  | 7.547   | 7.54211 |
| METAP1D   | 6.3693  | 6.4121  | 6.50675 | 5.90296 | 5.6826  | 5.68836 | 5.6479  | 5.71457 | 5.40542 |
| DLX1      | 5.7231  | 6.22702 | 5.86107 | 6.60289 | 6.74691 | 6.41188 | 6.64129 | 6.12532 | 6.00229 |
| RAPGEF4   | 8.73761 | 9.02029 | 8.43836 | 7.9892  | 7.32605 | 7.08704 | 7.96376 | 7.10761 | 8.17129 |
| ZAK       | 8.5941  | 8.09721 | 8.59559 | 9.09272 | 7.65016 | 9.99057 | 9.45264 | 9.552   | 10.2704 |
| CDCA7     | 7.07103 | 6.65989 | 7.13224 | 6.11961 | 5.60017 | 5.32588 | 6.15366 | 5.45623 | 4.80657 |
| LINC01305 | 4.83916 | 5.55682 | 4.95611 | 5.20933 | 5.67425 | 4.91434 | 4.83931 | 4.79227 | 4.97091 |
| SP9       | 5.43445 | 5.98153 | 5.34801 | 5.96773 | 5.6942  | 5.93399 | 6.04326 | 5.46601 | 6.00777 |
| SCRN3     | 7.74604 | 8.15287 | 7.50011 | 6.85867 | 5.53142 | 6.15576 | 7.22344 | 6.67127 | 7.11733 |
| HOXD13    | 4.64321 | 4.96793 | 4.75867 | 5.25308 | 5.80275 | 5.64872 | 4.82985 | 5.22082 | 5.40195 |
| HOXD12    | 5.71643 | 6.07313 | 5.42969 | 5.93535 | 6.04777 | 6.43051 | 6.30858 | 5.97847 | 6.34737 |
| HOXD11    | 6.63261 | 6.73828 | 6.53275 | 6.7455  | 7.31146 | 6.95366 | 6.73104 | 6.67125 | 6.87876 |
| HOXD10    | 7.39393 | 7.36853 | 7.07489 | 6.6916  | 7.13564 | 6.86156 | 6.83605 | 7.1838  | 7.23596 |
| HOXD9     | 6.03855 | 5.6766  | 6.07987 | 5.48776 | 5.44817 | 6.26998 | 6.12814 | 6.044   | 5.63791 |
| HOXD8     | 6.03787 | 5.83352 | 6.54899 | 6.57087 | 6.30453 | 6.73068 | 6.2593  | 6.80552 | 6.63608 |
| HOXD3     | 6.31518 | 5.71267 | 6.18992 | 6.32163 | 6.24192 | 6.51125 | 6.09311 | 6.1548  | 6.10122 |
| HOXD4     | 7.05568 | 6.89001 | 7.06326 | 7.4504  | 6.75841 | 7.94283 | 7.41049 | 7.77626 | 7.63647 |
| HOXD1     | 5.8413  | 5.45775 | 5.99994 | 6.2946  | 5.99071 | 6.39924 | 6.18193 | 6.30109 | 6.12577 |
| HNRNPA3   | 6.268   | 6.73765 | 6.24121 | 6.04574 | 2.56651 | 5.983   | 6.80663 | 6.45283 | 5.64647 |
| AGPS      | 7.75144 | 7.75274 | 7.65172 | 7.76583 | 4.54755 | 7.09556 | 8.41296 | 7.31128 | 7.47039 |
| ttc30a    | 5.59728 | 5.45238 | 5.53993 | 6.18501 | 6.26345 | 6.66624 | 6.11893 | 6.16448 | 5.84217 |
| RBM45     | 7.40842 | 7.52091 | 7.81421 | 6.4984  | 4.80031 | 6.16057 | 7.02699 | 6.12897 | 6.17945 |
| osbp16    | 8.38505 | 8.06196 | 8.1509  | 7.49229 | 6.59906 | 7.04534 | 7.76758 | 8.44747 | 7.04972 |
| TTN       | 7.45788 | 7.40091 | 6.9109  | 6.5055  | 5.93007 | 5.15498 | 6.39745 | 6.44843 | 6.5038  |
| UBE2E3    | 7.66021 | 7.52178 | 7.59014 | 7.51513 | 5.82145 | 7.15982 | 7.71155 | 7.12194 | 7.49528 |



|           |         |         |         |         |         |         |         |         |         |
|-----------|---------|---------|---------|---------|---------|---------|---------|---------|---------|
| SSFA2     | 10.4377 | 10.5698 | 10.463  | 9.97038 | 8.04239 | 10.3285 | 9.86896 | 10.3877 | 10.535  |
| DUSP19    | 6.39575 | 6.02981 | 5.72111 | 4.77286 | 5.90963 | 4.212   | 5.50637 | 5.02586 | 4.22743 |
| NUP35     | 6.8504  | 6.99829 | 7.34114 | 6.57735 | 5.14999 | 6.18406 | 6.83553 | 5.98183 | 6.18274 |
| ZNF804A   | 4.3832  | 4.32791 | 4.62445 | 4.98967 | 4.75774 | 4.71733 | 4.56274 | 4.58847 | 4.75019 |
| FSIP2     | 4.87001 | 5.96042 | 4.83023 | 4.70594 | 4.72164 | 5.25893 | 4.63558 | 4.71576 | 4.4018  |
| ZC3H15    | 9.20597 | 8.90493 | 8.65894 | 8.31644 | 6.5722  | 7.84327 | 8.37318 | 8.68707 | 8.09518 |
| MIR561    | 2.39636 | 1.97141 | 2.14958 | 3.14738 | 1.85698 | 2.40127 | 2.83159 | 2.53694 | 2.36917 |
| MIR1245A  | 2.52326 | 2.0764  | 2.36764 | 2.43801 | 1.91882 | 2.26178 | 2.24052 | 1.98566 | 1.9024  |
| WDR75     | 9.20769 | 9.44559 | 9.70059 | 8.1506  | 5.35621 | 7.20026 | 8.58432 | 7.47497 | 7.852   |
| ASNSD1    | 6.94446 | 7.10967 | 6.91072 | 7.15335 | 4.51253 | 6.60359 | 7.25434 | 6.23708 | 6.75058 |
| ANKAR     | 6.17894 | 6.29031 | 6.65945 | 5.2451  | 5.03824 | 5.07803 | 5.58374 | 5.14511 | 4.80984 |
| OSGEPL1   | 6.12231 | 5.97938 | 6.29444 | 6.21243 | 6.67661 | 6.6244  | 6.17563 | 5.82024 | 6.19406 |
| PMS1      | 6.42569 | 6.44106 | 6.3805  | 5.36098 | 4.98488 | 4.94069 | 5.49761 | 4.86565 | 4.87371 |
| C2orf88   | 6.36613 | 5.98486 | 5.88793 | 5.39281 | 5.75868 | 5.78905 | 5.64458 | 5.63409 | 5.71549 |
| INPP1     | 7.52646 | 7.0646  | 6.91921 | 7.21767 | 5.99857 | 6.69066 | 7.15822 | 6.39945 | 6.80049 |
| MFSD6     | 8.70517 | 8.75451 | 8.73765 | 8.28662 | 6.60819 | 7.72345 | 8.599   | 7.97956 | 8.72072 |
| NAB1      | 7.96983 | 8.44003 | 8.187   | 6.85661 | 4.63757 | 7.27899 | 7.91262 | 7.68564 | 7.64674 |
| GLS       | 8.38484 | 8.63309 | 8.64577 | 8.55515 | 5.36535 | 8.37377 | 8.1024  | 9.67284 | 8.96961 |
| MYO1B     | 10.1616 | 10.0238 | 9.81809 | 10.8713 | 8.73996 | 11.0422 | 10.4281 | 11.3516 | 11.1128 |
| NABP1     | 7.34585 | 6.38719 | 6.74528 | 8.52933 | 7.38894 | 8.30556 | 7.93947 | 9.29462 | 9.2951  |
| PCGEM1    | 5.05132 | 5.03    | 4.95178 | 5.54242 | 6.1654  | 5.43996 | 5.38214 | 5.20259 | 5.04418 |
| CCDC150   | 4.9225  | 4.76475 | 5.04812 | 4.73813 | 4.74892 | 4.90807 | 4.62527 | 4.81427 | 4.47106 |
| COQ10B    | 8.77114 | 8.24121 | 8.78479 | 8.58245 | 6.90747 | 9.01047 | 8.91772 | 9.0168  | 9.15353 |
| PLCL1     | 5.72758 | 5.55369 | 5.48966 | 4.72868 | 5.58765 | 5.23293 | 4.90813 | 5.34164 | 5.3006  |
| SATB2-AS1 | 4.19358 | 4.06185 | 4.00013 | 4.91405 | 5.49234 | 4.62755 | 4.5741  | 4.42753 | 4.61532 |
| C2orf69   | 7.06042 | 6.96257 | 6.96019 | 6.95745 | 5.64307 | 6.94325 | 7.56216 | 6.97383 | 6.7246  |

|           |         |         |         |         |         |         |         |         |         |
|-----------|---------|---------|---------|---------|---------|---------|---------|---------|---------|
| MAIP1     | 8.06475 | 7.77162 | 8.35307 | 7.47949 | 5.58558 | 6.91606 | 7.95696 | 6.24458 | 7.17191 |
| SGO2      | 6.29284 | 5.89149 | 6.23812 | 6.42666 | 6.01112 | 6.35312 | 6.29414 | 6.00707 | 5.8973  |
| AOX1      | 6.06147 | 6.24267 | 6.81721 | 5.01358 | 4.96199 | 5.18298 | 5.30336 | 4.80054 | 4.95159 |
| BZW1      | 9.33376 | 8.96423 | 9.45906 | 10.2231 | 8.93635 | 11.0879 | 10.578  | 10.7786 | 10.7464 |
| NIF3L1    | 8.79372 | 8.90789 | 8.88017 | 8.73269 | 7.09665 | 7.51008 | 8.76634 | 7.29298 | 7.68636 |
| CFLAR     | 8.67836 | 8.49037 | 8.74522 | 8.56391 | 7.98202 | 9.16393 | 9.01361 | 9.45704 | 9.61666 |
| STRADB    | 6.47822 | 6.98527 | 6.72911 | 5.81762 | 5.50581 | 5.21114 | 5.94939 | 6.13729 | 5.50135 |
| CDK15     | 6.02681 | 5.30313 | 6.03523 | 5.51468 | 6.23316 | 4.94437 | 5.27002 | 5.41052 | 5.26391 |
| FZD7      | 7.39796 | 7.03954 | 7.47743 | 6.87041 | 6.66873 | 6.47511 | 6.98421 | 6.18944 | 5.25356 |
| NOP58     | 9.66707 | 9.48936 | 9.69379 | 8.81023 | 6.39227 | 7.90753 | 8.87044 | 8.05741 | 8.39619 |
| NBEAL1    | 8.71458 | 8.94789 | 8.15189 | 7.77955 | 5.22126 | 7.40963 | 7.74818 | 7.74927 | 8.0004  |
| ABI2      | 8.33223 | 8.59307 | 8.45809 | 7.97395 | 5.95122 | 7.1613  | 7.75052 | 7.80336 | 7.21975 |
| CD28      | 5.17212 | 5.29747 | 5.73564 | 5.54846 | 5.62005 | 5.62849 | 5.22227 | 5.5316  | 5.50715 |
| CTLA4     | 3.64496 | 3.86288 | 4.4122  | 4.51254 | 4.58416 | 5.01795 | 4.41478 | 4.63084 | 4.57197 |
| ICOS      | 3.99366 | 3.9281  | 4.36243 | 4.38588 | 4.29681 | 3.7978  | 4.28599 | 4.13503 | 4.13531 |
| PARD3B    | 7.39745 | 7.56431 | 7.61611 | 6.39799 | 6.58802 | 6.34333 | 6.31032 | 6.24527 | 6.62026 |
| NRP2      | 7.12124 | 6.55762 | 7.32767 | 7.6056  | 6.26582 | 7.48235 | 7.84004 | 8.33688 | 7.94616 |
| INO80D    | 6.01542 | 5.83961 | 5.98488 | 6.10319 | 6.86321 | 5.93551 | 6.62429 | 5.6313  | 6.1375  |
| GCSHP3    | 6.14625 | 6.00747 | 5.78097 | 6.2942  | 5.68631 | 5.93282 | 6.48024 | 5.44745 | 6.07595 |
| ADAM23    | 8.17625 | 9.06347 | 6.7427  | 9.62151 | 7.26645 | 9.50207 | 10.2668 | 8.79949 | 10.2568 |
| LOC200726 | 3.9104  | 3.92596 | 4.30332 | 4.80231 | 4.71759 | 4.61905 | 4.67087 | 4.72529 | 4.236   |
| FASTKD2   | 7.68431 | 7.57187 | 7.81551 | 7.36646 | 5.98373 | 6.50858 | 7.78033 | 6.37794 | 7.00994 |
| MIR3130-1 | 6.20473 | 6.36632 | 6.53778 | 6.70618 | 6.87835 | 6.85028 | 6.41959 | 6.88974 | 6.81017 |
| cpo       | 5.05966 | 4.60192 | 5.13119 | 4.9805  | 5.5776  | 4.86189 | 4.71279 | 5.0573  | 4.27751 |
| CREB1     | 8.01893 | 7.74074 | 7.74102 | 7.39999 | 6.33479 | 7.73796 | 7.48724 | 8.27012 | 8.16633 |
| CCNYL1    | 5.40204 | 4.87442 | 5.65889 | 5.667   | 3.74379 | 6.30781 | 6.34095 | 6.74286 | 6.05318 |

|              |         |         |         |         |         |         |         |         |         |
|--------------|---------|---------|---------|---------|---------|---------|---------|---------|---------|
| LOC100507443 | 5.90687 | 5.45911 | 5.72397 | 6.36475 | 7.41377 | 6.43699 | 5.96941 | 6.0381  | 6.23908 |
| IDH1-AS1     | 4.57603 | 4.66941 | 4.91964 | 5.26559 | 5.03572 | 5.35602 | 5.03753 | 4.82892 | 5.30982 |
| PTH2R        | 4.98362 | 5.39622 | 4.944   | 4.75413 | 6.14818 | 5.2665  | 5.1123  | 5.51555 | 5.29058 |
| MAP2         | 9.01793 | 8.80188 | 8.33003 | 8.62781 | 8.40661 | 8.25849 | 8.25571 | 9.94298 | 9.75148 |
| UNC80        | 5.06957 | 4.89013 | 4.87318 | 5.43722 | 5.62121 | 5.39735 | 5.22458 | 5.08771 | 5.23214 |
| RPE          | 7.18298 | 7.22549 | 6.94041 | 5.95892 | 4.376   | 5.23899 | 6.43295 | 5.09385 | 5.89034 |
| CPS1-IT1     | 4.82258 | 4.84195 | 4.42113 | 4.3473  | 5.96712 | 4.67849 | 4.44637 | 4.43617 | 4.61899 |
| MIR4776-1    | 3.66747 | 3.54359 | 3.9825  | 5.1958  | 3.91722 | 4.57503 | 5.24346 | 4.37011 | 5.04101 |
| SPAG16       | 7.217   | 7.38162 | 7.03856 | 6.60093 | 5.79395 | 6.60739 | 6.37372 | 5.80918 | 6.04952 |
| MIR4438      | 4.11861 | 4.27111 | 4.20153 | 2.81445 | 4.1659  | 3.35133 | 3.55669 | 4.00054 | 4.07579 |
| VWC2L        | 4.2055  | 4.42258 | 4.09062 | 4.75882 | 5.73068 | 4.99412 | 4.4855  | 4.55582 | 4.75067 |
| VWC2L-IT1    | 3.42313 | 3.62644 | 3.21807 | 3.71933 | 4.61685 | 3.2975  | 3.48607 | 3.47991 | 3.01552 |
| ATIC         | 8.47899 | 8.51833 | 8.90982 | 8.95296 | 6.78991 | 7.68551 | 8.91371 | 7.47103 | 8.06841 |
| TMEM169      | 4.41094 | 4.03987 | 4.48489 | 4.41889 | 5.81336 | 4.74607 | 4.43798 | 4.77094 | 4.69061 |
| XRCC5        | 10.8898 | 10.9164 | 11.1104 | 10.4559 | 7.35584 | 9.61133 | 10.2283 | 9.89052 | 10.2163 |
| PKI55        | 6.89717 | 7.51061 | 7.46321 | 6.29203 | 7.20249 | 6.32816 | 6.78399 | 6.80076 | 6.75655 |
| RPL37A       | 6.99141 | 7.0151  | 6.72416 | 6.42851 | 6.5768  | 5.99893 | 6.41675 | 6.15277 | 6.39878 |
| RUFY4        | 6.0375  | 6.05627 | 6.05449 | 6.0518  | 6.64172 | 6.90542 | 6.06598 | 6.71899 | 6.52388 |
| CXCR2        | 5.43168 | 4.96339 | 4.92546 | 5.49557 | 5.91539 | 5.7491  | 5.41222 | 5.33755 | 5.18918 |
| GPBAR1       | 6.03765 | 5.75652 | 5.69255 | 6.33958 | 6.34576 | 6.24692 | 6.04424 | 5.9115  | 5.9663  |
| pnkd         | 5.94393 | 6.0084  | 5.86194 | 6.41836 | 6.04678 | 6.51647 | 6.45657 | 6.22052 | 6.20688 |
| mir26b       | 6.65911 | 6.72763 | 6.6545  | 6.8545  | 7.56563 | 6.99161 | 6.7296  | 7.35598 | 7.18576 |
| VIL1         | 5.73615 | 5.61586 | 5.676   | 5.98412 | 5.94123 | 6.18018 | 5.79417 | 6.074   | 6.02849 |
| CNOT9        | 8.58353 | 8.77074 | 8.72641 | 8.47018 | 7.20361 | 7.61774 | 8.56442 | 8.31284 | 8.12248 |
| Bcs1l        | 7.73797 | 7.20175 | 7.45436 | 6.75332 | 5.843   | 6.01143 | 7.07387 | 6.27226 | 6.63967 |
| STK36        | 7.98815 | 7.40243 | 7.50143 | 6.84478 | 7.02093 | 6.14765 | 6.73728 | 6.4979  | 6.74245 |

|              |         |         |         |         |         |         |         |         |         |
|--------------|---------|---------|---------|---------|---------|---------|---------|---------|---------|
| LINC00608    | 4.58442 | 4.74877 | 4.79887 | 5.1529  | 5.86635 | 5.18524 | 4.88604 | 4.82858 | 5.3004  |
| LOC100129175 | 3.60186 | 3.54877 | 3.86652 | 4.15322 | 4.02949 | 4.50374 | 3.97878 | 4.29444 | 4.31706 |
| ANKZF1       | 7.2573  | 7.08743 | 7.46197 | 6.02199 | 6.48614 | 6.93376 | 6.38618 | 7.42168 | 6.40014 |
| STK16        | 6.18897 | 6.52981 | 6.12367 | 6.1603  | 5.75858 | 6.27808 | 6.30737 | 5.97028 | 6.35045 |
| DES          | 6.09275 | 6.41206 | 6.85618 | 6.50785 | 6.76568 | 6.80875 | 6.43078 | 6.72826 | 6.53736 |
| SPEG         | 6.03166 | 5.94729 | 6.09273 | 6.6554  | 6.22049 | 6.62155 | 6.18336 | 6.08559 | 6.41898 |
| GMPPA        | 7.37442 | 7.45137 | 7.23444 | 7.56899 | 6.99994 | 7.61117 | 7.58041 | 7.15912 | 7.36298 |
| ASIC4        | 5.25671 | 5.16079 | 5.1327  | 5.63368 | 5.73812 | 5.84375 | 5.54516 | 5.85258 | 5.45437 |
| TMEM198      | 5.15831 | 5.1826  | 5.35976 | 5.77807 | 5.58599 | 6.32322 | 5.86963 | 5.82438 | 5.69294 |
| STK11IP      | 6.47683 | 6.24859 | 6.12051 | 6.61139 | 6.03612 | 6.80524 | 6.97    | 6.38682 | 6.49058 |
| CCDC140      | 4.91127 | 5.04397 | 5.18776 | 5.44526 | 5.89243 | 5.84782 | 5.04053 | 5.32926 | 5.35652 |
| SGPP2        | 9.86176 | 10.036  | 9.50271 | 10.1866 | 8.64434 | 9.58301 | 10.2769 | 10.0371 | 10.5364 |
| MOGAT1       | 4.14186 | 4.09762 | 4.18419 | 4.79656 | 4.81176 | 4.67721 | 3.85022 | 4.13066 | 3.85635 |
| ACSL3        | 8.07594 | 8.23039 | 8.275   | 8.39524 | 6.08084 | 7.83378 | 8.46684 | 8.9384  | 8.47631 |
| MRPL44       | 7.4737  | 7.41625 | 7.54758 | 7.30054 | 5.44861 | 7.31122 | 8.13181 | 7.11576 | 6.85675 |
| NYAP2        | 5.03611 | 4.89385 | 4.64155 | 5.31999 | 5.66147 | 5.28445 | 5.24027 | 5.46381 | 5.42196 |
| RHBDD1       | 7.07712 | 7.10556 | 7.08658 | 6.6704  | 6.02147 | 6.59803 | 7.02323 | 6.18515 | 6.61165 |
| MFF          | 7.46666 | 7.83073 | 7.79072 | 7.35456 | 6.2808  | 6.73315 | 7.314   | 7.56444 | 7.59843 |
| AGFG1        | 9.93036 | 9.85306 | 9.95064 | 9.73044 | 9.02743 | 9.63984 | 9.77554 | 10.1376 | 10.2708 |
| CCL20        | 4.42943 | 4.44472 | 4.3922  | 5.42731 | 5.58453 | 7.3996  | 7.45079 | 7.90124 | 7.57756 |
| DAW1         | 4.9105  | 4.4789  | 4.94077 | 4.96    | 5.81545 | 5.35483 | 4.92237 | 5.69396 | 4.95012 |
| FBXO36       | 7.48087 | 7.52191 | 7.91761 | 6.79992 | 6.15487 | 6.99776 | 7.52272 | 7.17792 | 7.24881 |
| SP140        | 5.57362 | 5.45603 | 5.47289 | 5.25216 | 6.39111 | 5.15507 | 5.0774  | 5.52208 | 5.13644 |
| SP140L       | 6.84175 | 5.73404 | 6.5293  | 5.63178 | 5.4834  | 4.98511 | 5.93189 | 5.48993 | 5.80017 |
| SP100        | 9.25306 | 8.94843 | 9.28157 | 7.36099 | 7.48338 | 6.75233 | 7.33113 | 7.47186 | 7.45707 |
| CAB39        | 8.66927 | 8.5631  | 8.84388 | 8.7704  | 6.65378 | 8.93684 | 9.16835 | 9.54599 | 9.50308 |

|           |         |         |         |         |         |         |         |         |         |
|-----------|---------|---------|---------|---------|---------|---------|---------|---------|---------|
| ITM2C     | 7.05116 | 6.97545 | 6.87502 | 8.41931 | 6.47453 | 7.3405  | 7.55507 | 7.23421 | 7.14599 |
| LOC151484 | 4.81654 | 4.76219 | 4.62706 | 5.24663 | 4.76705 | 6.11756 | 4.91857 | 5.23878 | 5.07107 |
| GPR55     | 6.15822 | 6.10714 | 5.97391 | 6.38449 | 7.41603 | 6.57081 | 6.81918 | 6.67285 | 6.59686 |
| SPATA3    | 4.46314 | 3.88097 | 4.2439  | 4.58731 | 5.08621 | 4.50997 | 4.78975 | 4.71166 | 4.7703  |
| C2orf72   | 5.89064 | 6.04815 | 5.78918 | 6.65607 | 6.82769 | 6.71038 | 6.17357 | 6.32347 | 6.33379 |
| armac9    | 7.05841 | 6.88242 | 6.31149 | 6.37162 | 6.07818 | 5.95428 | 5.99433 | 6.38366 | 6.35861 |
| MIR4777   | 1.94016 | 1.76502 | 1.61739 | 2.29487 | 1.68985 | 2.68761 | 2.18341 | 1.73519 | 1.70927 |
| C2orf57   | 5.70787 | 5.83207 | 5.9451  | 6.02223 | 6.06248 | 6.03624 | 5.96571 | 6.1007  | 6.13394 |
| COPS7B    | 7.67111 | 7.97544 | 7.7055  | 7.20061 | 6.46107 | 6.61286 | 7.28537 | 7.07086 | 7.11506 |
| DIS3L2    | 8.00107 | 8.08359 | 7.88903 | 7.35433 | 7.01526 | 7.18481 | 7.45409 | 7.32436 | 7.44072 |
| MIR562    | 2.60886 | 2.60533 | 2.16094 | 2.28627 | 2.15964 | 2.48566 | 2.34128 | 2.48088 | 2.72793 |
| EIF4E2    | 7.0692  | 7.13206 | 7.17375 | 7.14319 | 6.36145 | 6.92609 | 7.50737 | 6.86553 | 7.13822 |
| GIGYF2    | 8.07963 | 8.11168 | 8.04857 | 6.8175  | 5.77216 | 6.39849 | 7.01147 | 6.89295 | 7.01977 |
| NEU2      | 7.71702 | 7.99739 | 7.79846 | 8.69181 | 8.03029 | 9.76884 | 8.45318 | 8.45961 | 8.96177 |
| ATG16L1   | 7.52688 | 8.00149 | 7.5665  | 6.75647 | 6.07925 | 8.31371 | 7.27328 | 7.79934 | 7.55734 |
| SCARNA5   | 9.54078 | 11.6702 | 8.61256 | 8.70712 | 7.96101 | 9.90065 | 9.54491 | 9.20044 | 7.13635 |
| Scarna6   | 8.09314 | 9.38325 | 8.37957 | 8.06148 | 6.81271 | 9.37483 | 8.54047 | 8.16872 | 7.57257 |
| SAG       | 5.79309 | 5.67938 | 5.81973 | 6.23597 | 6.93888 | 6.34318 | 5.92444 | 5.95177 | 6.14217 |
| SH3BP4    | 7.50639 | 7.29811 | 7.81141 | 7.35173 | 6.43684 | 6.9945  | 7.44397 | 7.08617 | 7.04342 |
| IQCA1     | 2.63312 | 3.07482 | 3.04827 | 4.29743 | 3.96189 | 3.55509 | 3.73283 | 3.42475 | 3.19266 |
| ACKR3     | 7.66502 | 6.82192 | 8.14946 | 7.80095 | 7.55183 | 8.72328 | 7.98955 | 8.52261 | 8.03476 |
| COPS8     | 8.69169 | 8.6515  | 8.69945 | 7.76758 | 6.9727  | 6.82683 | 8.13351 | 7.28324 | 7.21853 |
| MLPH      | 6.43447 | 6.64999 | 6.4482  | 6.19961 | 6.55478 | 6.33837 | 6.11777 | 6.43737 | 6.26786 |
| PRLH      | 6.14782 | 6.30673 | 6.51963 | 7.05058 | 7.18747 | 7.30904 | 6.7463  | 6.68782 | 6.81654 |
| LRRFIP1   | 8.57815 | 8.23744 | 8.80267 | 7.49846 | 6.82565 | 7.56    | 7.49965 | 8.40976 | 8.61176 |
| RBM44     | 5.41902 | 5.35632 | 5.98802 | 4.9757  | 4.77009 | 5.20038 | 5.39044 | 5.059   | 5.16153 |

|           |         |         |         |         |         |         |         |         |         |
|-----------|---------|---------|---------|---------|---------|---------|---------|---------|---------|
| RAMP1     | 6.48215 | 6.56754 | 6.77023 | 7.79992 | 7.07099 | 7.70024 | 7.00079 | 7.2268  | 7.26443 |
| SCLY      | 6.48436 | 6.12072 | 6.26453 | 6.83283 | 6.14905 | 6.63865 | 6.57151 | 6.84077 | 7.04545 |
| ESPNL     | 5.91937 | 5.79892 | 6.12544 | 6.86201 | 6.81066 | 7.31303 | 6.61641 | 6.90189 | 6.74465 |
| KLHL30    | 6.23399 | 6.09501 | 6.36926 | 6.86572 | 7.13401 | 7.07178 | 6.60193 | 6.59495 | 6.66555 |
| LOC643387 | 5.04194 | 5.26246 | 5.14809 | 5.37833 | 5.61451 | 5.74231 | 5.54033 | 5.87955 | 5.65882 |
| TRAF3IP1  | 7.43475 | 7.44744 | 7.38784 | 7.18096 | 6.42698 | 7.02336 | 7.53673 | 6.70425 | 6.8266  |
| ASB1      | 6.78011 | 7.10292 | 6.91094 | 7.59096 | 7.2876  | 7.7842  | 7.79603 | 7.52074 | 7.64785 |
| TWIST2    | 6.62601 | 6.92615 | 6.34944 | 6.50125 | 5.07424 | 6.684   | 6.54979 | 6.07987 | 6.63467 |
| MIR4269   | 5.78426 | 5.61113 | 5.9933  | 5.73887 | 6.09462 | 6.27618 | 6.03301 | 6.23178 | 5.8455  |
| LOC150935 | 4.84905 | 5.01    | 5.01238 | 5.24292 | 6.1474  | 5.52036 | 5.41783 | 5.40704 | 5.48036 |
| GPC1      | 8.34234 | 8.30974 | 8.26031 | 8.71146 | 7.99296 | 8.56904 | 8.80945 | 8.33302 | 8.56114 |
| MIR149    | 7.01623 | 7.17608 | 7.01551 | 7.33147 | 7.61256 | 7.96879 | 7.36987 | 7.95832 | 7.72185 |
| dusp28    | 6.24367 | 6.18796 | 6.48256 | 6.20095 | 6.08277 | 6.11311 | 6.24512 | 5.96515 | 6.023   |
| RNPEPL1   | 7.68339 | 7.55164 | 7.52648 | 8.08427 | 7.03014 | 8.94549 | 8.82318 | 8.26031 | 8.22132 |
| CAPN10    | 6.53209 | 6.41224 | 6.26643 | 6.70726 | 6.0756  | 7.21355 | 6.81176 | 7.1369  | 6.59692 |
| GPR35     | 6.26991 | 6.28725 | 6.29268 | 6.30339 | 6.47228 | 6.16718 | 6.0598  | 6.42264 | 6.55226 |
| AQP12A    | 6.67038 | 6.4522  | 6.62591 | 7.13772 | 7.51212 | 7.42895 | 7.16866 | 6.66092 | 6.71092 |
| AGXT      | 5.8952  | 5.81519 | 6.11443 | 6.59075 | 6.94669 | 7.01499 | 6.57531 | 6.6424  | 6.61959 |
| ANO7      | 5.85976 | 6.05941 | 6.29774 | 6.55448 | 6.64253 | 6.72328 | 6.45241 | 6.22553 | 6.50738 |
| 44441     | 9.87479 | 9.55765 | 9.87829 | 8.85294 | 6.865   | 8.42036 | 9.11287 | 9.50795 | 9.11131 |
| BOK       | 8.2875  | 8.0892  | 7.76123 | 9.23144 | 7.74843 | 9.3284  | 9.33239 | 8.73358 | 9.01542 |
| D2HGDH    | 7.0231  | 7.32483 | 7.02475 | 6.80765 | 6.9261  | 6.75851 | 7.15661 | 6.93468 | 6.70934 |
| GAL3ST2   | 6.83486 | 6.82392 | 7.08219 | 8.01206 | 6.86756 | 7.91854 | 7.41144 | 7.71013 | 7.41989 |
| NEU4      | 6.3041  | 6.25205 | 6.19774 | 6.59936 | 6.45702 | 6.89008 | 6.40352 | 6.88867 | 6.72963 |
| RTP5      | 5.44179 | 5.7982  | 5.87699 | 5.96839 | 6.7889  | 6.84153 | 6.17833 | 6.27843 | 5.87931 |
| LOC728323 | 8.75396 | 9.15729 | 8.9111  | 7.63795 | 6.28636 | 8.13568 | 7.87264 | 8.33971 | 7.59935 |

|              |         |         |         |         |         |         |         |         |         |
|--------------|---------|---------|---------|---------|---------|---------|---------|---------|---------|
| TMEM18       | 8.1475  | 7.68551 | 7.6991  | 7.44699 | 6.34553 | 7.30994 | 7.44836 | 7.26891 | 7.39845 |
| LINC01115    | 5.69006 | 4.98645 | 5.56723 | 5.14438 | 5.88003 | 5.43254 | 5.8587  | 5.31052 | 5.82971 |
| PXDN         | 7.24126 | 6.59119 | 6.81728 | 7.44279 | 6.29516 | 6.47129 | 7.06093 | 7.2274  | 7.0034  |
| MYT1L        | 5.49483 | 5.78126 | 5.46654 | 6.03128 | 6.54092 | 6.13444 | 5.7251  | 5.96377 | 6.17793 |
| TSSC1        | 6.89874 | 6.51148 | 6.77893 | 6.61043 | 6.93824 | 6.56499 | 7.05893 | 6.54148 | 6.80458 |
| ADI1         | 8.22431 | 8.12391 | 8.23325 | 8.22865 | 6.85994 | 8.14717 | 8.52873 | 7.97995 | 8.06354 |
| RNASEH1      | 6.56054 | 6.67679 | 6.78471 | 6.28469 | 6.5286  | 6.34647 | 6.5109  | 6.51896 | 6.20852 |
| LINC01304    | 4.98799 | 5.16359 | 4.85172 | 5.65268 | 6.15324 | 5.88624 | 5.3211  | 5.34097 | 5.17999 |
| LINC01249    | 5.21793 | 5.30905 | 5.21486 | 5.26475 | 6.04383 | 5.49309 | 5.02747 | 5.22548 | 5.30852 |
| LINC00487    | 4.79321 | 5.06213 | 4.76403 | 5.37693 | 6.83384 | 5.05186 | 4.90776 | 5.0465  | 4.84735 |
| RNF144A-AS1  | 4.4532  | 4.46542 | 4.71852 | 4.96211 | 5.15178 | 5.17223 | 5.01061 | 4.9719  | 4.93839 |
| LINC00298    | 4.94256 | 5.334   | 5.42031 | 5.27572 | 6.91924 | 5.57772 | 5.59164 | 5.59329 | 5.59629 |
| LINC00299    | 5.41661 | 5.39878 | 5.26971 | 5.81473 | 6.09615 | 5.70293 | 5.43479 | 5.65463 | 5.61336 |
| MBOAT2       | 10.2209 | 10.2764 | 9.93439 | 10.6074 | 10.308  | 10.8998 | 10.6147 | 11.1634 | 11.3287 |
| ITGB1BP1     | 6.50012 | 6.67509 | 6.81183 | 7.3161  | 5.75751 | 7.36838 | 7.37054 | 7.8053  | 7.36346 |
| ADAM17       | 9.21554 | 8.85938 | 8.73864 | 8.40658 | 7.33137 | 8.90066 | 9.0087  | 9.26693 | 8.78704 |
| cys1         | 6.17559 | 6.2553  | 6.35582 | 7.20791 | 6.7171  | 7.62506 | 7.14364 | 6.87118 | 6.88168 |
| MIR4261      | 3.99047 | 3.84865 | 3.86508 | 3.97446 | 3.34028 | 4.37044 | 4.24486 | 3.88453 | 3.46482 |
| ODC1         | 7.64465 | 7.17292 | 7.96788 | 11.3167 | 7.66906 | 12.6312 | 11.2618 | 10.863  | 12.159  |
| FLJ33534     | 4.76047 | 4.53988 | 4.73485 | 5.22851 | 5.61288 | 5.3248  | 5.10995 | 5.21608 | 5.38466 |
| MIR4429      | 4.89869 | 5.06226 | 4.95396 | 4.46992 | 5.30398 | 5.40822 | 5.4334  | 4.62463 | 5.09605 |
| NTSR2        | 4.93151 | 4.92667 | 5.2319  | 5.34782 | 5.0004  | 6.04114 | 5.17652 | 5.74494 | 5.43717 |
| LOC100506474 | 4.81164 | 4.31313 | 4.79998 | 4.5098  | 5.14397 | 4.73155 | 4.36922 | 4.18651 | 4.46906 |
| NBAS         | 9.08685 | 9.09452 | 8.99164 | 8.21868 | 6.41825 | 8.23768 | 8.30898 | 8.08782 | 8.13754 |
| MYCNOS       | 4.72903 | 4.87348 | 4.70156 | 4.97444 | 5.14664 | 5.50226 | 4.70168 | 5.2351  | 5.1674  |
| RAD51AP2     | 3.91103 | 3.95647 | 3.91929 | 3.59728 | 4.20832 | 3.90665 | 3.81291 | 3.47963 | 3.64625 |

|           |         |         |         |         |         |         |         |         |         |
|-----------|---------|---------|---------|---------|---------|---------|---------|---------|---------|
| SMC6      | 7.85689 | 8.09978 | 8.02668 | 7.04763 | 4.7238  | 6.29133 | 7.36153 | 6.83319 | 6.99993 |
| OSR1      | 5.95085 | 6.46122 | 6.20503 | 6.09119 | 6.26134 | 6.34932 | 5.90999 | 5.99997 | 5.98502 |
| ttc32     | 5.63902 | 6.03954 | 5.7918  | 5.44647 | 4.57316 | 4.5597  | 5.85159 | 4.65604 | 4.60964 |
| WDR35     | 6.55889 | 6.61628 | 6.80746 | 5.6192  | 5.06806 | 5.67955 | 5.76311 | 4.69664 | 5.34529 |
| MATN3     | 5.57947 | 5.72989 | 5.70207 | 5.91523 | 6.00544 | 5.78925 | 5.53515 | 5.35842 | 5.88982 |
| laptm4a   | 12.7139 | 12.4572 | 12.7906 | 12.2778 | 11.9793 | 11.6863 | 12.364  | 12.287  | 12.2214 |
| sdc1      | 9.28477 | 9.28028 | 9.12321 | 10.5517 | 9.1021  | 10.7797 | 10.4663 | 10.3243 | 10.6679 |
| PUM2      | 10.2663 | 10.1241 | 10.108  | 8.95072 | 6.43865 | 9.20059 | 9.20544 | 10.1011 | 9.51268 |
| HS1BP3    | 6.64386 | 6.6249  | 6.5965  | 6.96663 | 6.7836  | 6.92265 | 7.33869 | 7.15814 | 6.81421 |
| APOB      | 6.78445 | 7.35273 | 6.0222  | 6.45086 | 6.18135 | 6.28837 | 6.01384 | 5.76361 | 5.95436 |
| LOC645949 | 3.93816 | 4.13402 | 3.97923 | 4.73225 | 5.45203 | 4.29037 | 4.26477 | 4.34698 | 3.9821  |
| WDCP      | 6.64672 | 6.78634 | 6.95364 | 6.18806 | 6.54679 | 6.04341 | 6.35421 | 6.13725 | 6.20973 |
| TP53I3    | 6.66196 | 6.11315 | 6.38819 | 7.56159 | 6.19683 | 8.18155 | 8.29138 | 6.87581 | 8.31109 |
| ITSN2     | 9.34296 | 9.46706 | 9.33082 | 8.69536 | 7.9151  | 9.86019 | 9.01119 | 9.99219 | 9.76742 |
| PTRHD1    | 6.3204  | 6.50943 | 5.9926  | 6.73592 | 6.24048 | 7.13901 | 7.51606 | 6.11594 | 6.42139 |
| ADCY3     | 8.04908 | 7.91814 | 8.23235 | 7.60548 | 6.71524 | 7.2615  | 7.8809  | 7.19717 | 7.24692 |
| POMC      | 5.43684 | 5.41528 | 5.58391 | 6.02656 | 5.55619 | 5.13499 | 5.54235 | 5.2222  | 5.11493 |
| DNMT3A    | 7.07741 | 6.89023 | 6.78848 | 6.52921 | 6.6106  | 6.96426 | 6.93992 | 6.65049 | 6.78497 |
| MIR1301   | 7.9535  | 7.85672 | 7.72647 | 7.57659 | 8.74699 | 7.37386 | 7.31098 | 7.51349 | 7.30548 |
| ASXL2     | 9.42125 | 9.3145  | 9.34408 | 8.66235 | 5.73424 | 8.21617 | 8.94483 | 8.152   | 8.84063 |
| KIF3C     | 7.03238 | 6.79624 | 6.70426 | 7.40639 | 6.86841 | 6.83218 | 7.16649 | 7.21246 | 7.24549 |
| ADGRF3    | 5.55491 | 5.97812 | 5.80842 | 6.27232 | 6.45578 | 6.45518 | 5.75026 | 6.19749 | 5.99904 |
| OTOF      | 5.51055 | 5.9619  | 5.94478 | 6.38886 | 6.3775  | 6.3547  | 6.12364 | 6.45021 | 6.13759 |
| CIB4      | 5.16397 | 4.99396 | 5.02006 | 5.3466  | 6.2424  | 5.95931 | 5.2665  | 5.08644 | 5.6273  |
| OST4      | 8.86109 | 8.69824 | 9.00199 | 9.14153 | 8.67083 | 8.97981 | 9.39136 | 8.49356 | 9.1079  |
| CGREF1    | 6.16436 | 6.22871 | 6.25895 | 6.41064 | 6.38999 | 6.60125 | 6.2677  | 6.16202 | 6.33664 |



|              |         |         |         |         |         |         |         |         |         |
|--------------|---------|---------|---------|---------|---------|---------|---------|---------|---------|
| PREB         | 7.81648 | 7.78128 | 7.77708 | 8.28683 | 7.84262 | 7.75627 | 8.51562 | 7.4605  | 8.00916 |
| PRR30        | 5.51658 | 5.91562 | 5.75163 | 6.05346 | 6.39617 | 6.17939 | 5.95605 | 6.00738 | 5.88807 |
| UCN          | 5.30881 | 5.47731 | 5.80377 | 6.09604 | 5.82938 | 6.37985 | 5.88293 | 6.43961 | 5.81798 |
| MPV17        | 7.45962 | 6.90895 | 7.29732 | 6.59223 | 6.19035 | 6.10002 | 6.6498  | 6.37296 | 6.90108 |
| ZNF513       | 7.50979 | 7.20602 | 7.3608  | 8.27173 | 7.00197 | 8.21014 | 8.09593 | 8.13467 | 7.8607  |
| IFT172       | 7.43231 | 7.12101 | 7.42996 | 6.02898 | 6.59622 | 6.16086 | 6.30612 | 6.09517 | 5.90357 |
| FNDC4        | 6.91794 | 6.71227 | 7.10926 | 7.97205 | 7.16724 | 8.1162  | 7.08373 | 8.91616 | 7.51351 |
| CCDC121      | 5.63571 | 6.09455 | 5.87347 | 5.54349 | 6.20686 | 6.43827 | 5.76542 | 5.74703 | 5.93732 |
| SUPT7L       | 9.07395 | 8.84138 | 8.91136 | 8.3431  | 6.72712 | 7.61925 | 8.46146 | 8.13994 | 8.68466 |
| BRE-AS1      | 6.16796 | 5.95287 | 6.23448 | 6.38897 | 5.84109 | 6.79305 | 6.20241 | 6.11123 | 6.21801 |
| LOC100505716 | 6.03448 | 5.75939 | 5.60597 | 5.71815 | 6.28053 | 6.15758 | 5.89684 | 5.96493 | 5.91191 |
| trmt61b      | 7.4745  | 7.41148 | 7.45098 | 6.56493 | 4.8084  | 5.16564 | 7.20282 | 5.78609 | 5.7408  |
| C2orf71      | 5.53011 | 5.74571 | 5.86703 | 6.03874 | 6.35805 | 6.64879 | 6.27959 | 6.03257 | 6.03577 |
| ALK          | 5.35195 | 5.88563 | 5.59566 | 6.01387 | 6.65938 | 6.02358 | 5.59325 | 5.75593 | 5.75809 |
| CAPN13       | 5.89104 | 5.39682 | 5.86579 | 5.98494 | 6.68854 | 6.07781 | 5.90055 | 6.14759 | 6.27333 |
| GALNT14      | 6.72056 | 6.29635 | 6.41563 | 6.5745  | 6.49693 | 5.95464 | 6.14677 | 6.01421 | 6.07012 |
| CAPN14       | 5.03398 | 5.45061 | 4.79146 | 5.17981 | 5.45966 | 4.71306 | 4.92145 | 4.78924 | 5.05979 |
| XDH          | 7.37396 | 7.5013  | 6.51673 | 6.483   | 6.6899  | 7.09166 | 7.52631 | 8.1832  | 7.67573 |
| MEMO1        | 7.67597 | 7.69802 | 7.11332 | 7.89918 | 6.35822 | 8.01652 | 8.40177 | 7.76911 | 8.08217 |
| DPY30        | 9.43877 | 9.53619 | 9.1987  | 9.77944 | 7.83841 | 9.07186 | 10.1427 | 9.81385 | 9.78996 |
| MYADML       | 5.41757 | 5.4851  | 5.32901 | 5.74591 | 7.52156 | 6.35236 | 5.89852 | 5.91168 | 5.93281 |
| LOC100288911 | 5.53352 | 5.60515 | 5.15441 | 5.43696 | 6.30394 | 5.74894 | 5.08593 | 5.4931  | 5.20437 |
| FEZ2         | 7.66085 | 7.49998 | 7.49572 | 6.84803 | 5.86938 | 6.92419 | 6.88225 | 6.65267 | 7.15768 |
| HEATR5B      | 9.22239 | 9.57998 | 9.23214 | 8.61354 | 6.89429 | 7.9494  | 8.42226 | 8.46818 | 8.48009 |
| eif2ak2      | 8.49746 | 8.11922 | 8.62344 | 7.09949 | 4.8936  | 6.45214 | 7.62953 | 7.24995 | 7.00007 |
| PRKD3        | 8.15889 | 7.91481 | 8.19772 | 6.53405 | 5.67636 | 5.99688 | 6.53037 | 6.36529 | 6.15818 |

|            |         |         |         |         |         |         |         |         |         |
|------------|---------|---------|---------|---------|---------|---------|---------|---------|---------|
| CDC42EP3   | 6.24624 | 5.8004  | 6.3015  | 6.59747 | 6.13741 | 6.25299 | 6.14798 | 7.1601  | 6.44081 |
| ATL2       | 8.85755 | 8.71501 | 8.72648 | 7.60329 | 6.25909 | 7.60783 | 8.07058 | 7.20534 | 7.5111  |
| HNRNPLL    | 6.81511 | 7.10688 | 6.94893 | 6.88563 | 5.14602 | 6.03103 | 6.98902 | 6.00077 | 6.65121 |
| SRSF7      | 9.32014 | 8.67176 | 8.573   | 8.48761 | 6.3121  | 7.69225 | 8.10184 | 8.10878 | 8.10507 |
| DHX57      | 7.61594 | 7.98647 | 7.59111 | 7.17067 | 6.34055 | 6.30845 | 6.99615 | 6.8364  | 6.75175 |
| LOC375196  | 5.82078 | 5.65364 | 5.59184 | 6.4153  | 6.08    | 6.72978 | 6.21811 | 5.94708 | 6.01613 |
| SOS1       | 9.06482 | 9.11761 | 8.93232 | 8.03008 | 5.69752 | 7.72863 | 8.13079 | 8.06158 | 8.42369 |
| CDKL4      | 4.32734 | 4.36948 | 4.2386  | 3.78489 | 4.30613 | 3.7811  | 4.23266 | 3.82968 | 3.62143 |
| MAP4K3     | 9.69818 | 9.78002 | 9.37557 | 7.2964  | 5.51472 | 6.81163 | 7.78874 | 7.99893 | 7.38275 |
| THUMPD2    | 7.92836 | 7.85493 | 8.21682 | 6.33343 | 5.18114 | 5.63041 | 7.00547 | 6.38331 | 6.33173 |
| C2orf91    | 5.51561 | 5.99987 | 5.90595 | 6.16008 | 6.84091 | 6.22875 | 5.93991 | 6.05134 | 6.02672 |
| COX7A2L    | 7.1353  | 7.44823 | 7.48093 | 7.29984 | 6.96342 | 7.24432 | 7.29978 | 7.19883 | 6.93084 |
| OXER1      | 6.61389 | 7.25545 | 6.79169 | 6.52218 | 7.34227 | 5.9162  | 6.01461 | 6.63163 | 6.26147 |
| THADA      | 8.16562 | 7.82719 | 7.74613 | 6.76133 | 6.2523  | 6.29438 | 7.1017  | 5.89208 | 6.92146 |
| C1GALT1C1L | 4.37319 | 4.32948 | 4.07741 | 4.46276 | 4.60626 | 5.0553  | 4.49055 | 4.14893 | 4.3554  |
| LRPPRC     | 9.35052 | 9.31577 | 9.5346  | 8.58045 | 5.38077 | 8.24903 | 8.881   | 7.88289 | 8.42301 |
| PREPL      | 8.94079 | 9.0475  | 8.63844 | 7.6337  | 6.60594 | 6.70204 | 7.5419  | 7.62642 | 8.05107 |
| SIX2       | 6.11273 | 6.12035 | 6.23861 | 6.8264  | 6.77329 | 7.14356 | 6.5819  | 6.83832 | 6.52111 |
| LINC01121  | 4.05445 | 4.91235 | 4.62563 | 5.00182 | 5.40972 | 5.00524 | 4.69929 | 5.07257 | 4.68602 |
| SRBD1      | 7.90885 | 8.16189 | 7.51797 | 7.33744 | 6.25538 | 7.29241 | 7.67389 | 6.47655 | 6.73729 |
| MCFD2      | 6.8651  | 6.92529 | 7.1775  | 7.31456 | 6.8235  | 7.46397 | 7.48213 | 7.99334 | 7.81581 |
| FBXO11     | 9.25751 | 9.37857 | 9.2686  | 9.00658 | 7.0402  | 9.236   | 9.0711  | 9.17477 | 9.63576 |
| LHCGR      | 5.45944 | 6.02183 | 5.62226 | 5.74192 | 6.70891 | 5.80575 | 5.81582 | 5.70373 | 5.78432 |
| FSHR       | 4.93335 | 5.00661 | 5.02657 | 5.70296 | 6.07098 | 5.59196 | 5.24967 | 5.08997 | 5.1542  |
| NRXN1      | 5.12117 | 5.00114 | 5.17922 | 4.96527 | 5.39215 | 5.15977 | 4.67461 | 5.04936 | 5.02342 |
| MIR4431    | 2.44607 | 2.43774 | 2.5961  | 2.8407  | 3.31838 | 3.87656 | 2.66618 | 2.50142 | 2.83385 |

|              |         |         |         |         |         |         |         |         |         |
|--------------|---------|---------|---------|---------|---------|---------|---------|---------|---------|
| GPR75        | 7.57706 | 7.84569 | 7.66551 | 6.94321 | 6.76041 | 6.27448 | 6.90606 | 6.95919 | 7.15306 |
| MIR3682      | 2.49764 | 2.23828 | 2.79042 | 2.11805 | 1.91306 | 2.60459 | 2.2337  | 2.15335 | 2.09358 |
| TSPYL6       | 5.04082 | 5.48767 | 5.20636 | 6.07294 | 6.42063 | 5.94157 | 5.5979  | 5.98729 | 6.00877 |
| RTN4         | 8.72683 | 8.53935 | 8.4241  | 8.74915 | 6.80253 | 8.65226 | 8.64875 | 8.82513 | 8.74598 |
| CLHC1        | 6.37369 | 6.36424 | 5.67895 | 5.518   | 4.41444 | 4.88798 | 5.32898 | 4.90332 | 5.13537 |
| MTIF2        | 7.6028  | 7.72684 | 7.758   | 7.31177 | 6.21239 | 6.6419  | 7.79862 | 6.55001 | 6.8028  |
| CCDC88A      | 7.45671 | 7.21298 | 7.59734 | 6.77449 | 5.46372 | 5.64796 | 6.77045 | 6.60458 | 6.56463 |
| PNPT1        | 7.67704 | 7.71729 | 7.73736 | 6.83823 | 5.98502 | 6.16761 | 7.48155 | 6.20637 | 6.36724 |
| EFEMP1       | 9.17044 | 9.42875 | 9.7817  | 9.17785 | 6.98858 | 8.57482 | 9.1614  | 8.97268 | 8.94484 |
| MIR217       | 3.28355 | 3.11242 | 3.15894 | 2.82147 | 2.15546 | 2.8546  | 3.46475 | 3.7398  | 3.60129 |
| MIR216A      | 3.60482 | 3.41041 | 3.65436 | 3.62134 | 4.29262 | 3.59078 | 3.35946 | 3.59628 | 3.97976 |
| MIR216B      | 3.07315 | 3.29142 | 3.13931 | 3.30149 | 3.46593 | 4.46009 | 3.41529 | 3.67266 | 3.49828 |
| MIR4432      | 3.83499 | 3.64263 | 3.48026 | 4.58917 | 4.87041 | 4.73201 | 4.77222 | 4.57688 | 5.0007  |
| BCL11A       | 8.94669 | 8.35056 | 8.49115 | 6.57046 | 5.59523 | 6.22473 | 7.5265  | 6.5621  | 6.248   |
| LINC01185    | 4.86038 | 5.1037  | 5.20237 | 5.62103 | 6.30378 | 5.92505 | 5.43375 | 5.7131  | 5.28259 |
| PUS10        | 8.07223 | 6.21305 | 6.31468 | 6.54618 | 5.44359 | 5.89484 | 6.26491 | 5.22101 | 5.23233 |
| LOC339803    | 6.44678 | 6.37588 | 6.22074 | 6.4122  | 6.5559  | 5.67488 | 6.68012 | 6.19144 | 6.12286 |
| USP34        | 10.1215 | 10.2098 | 10.1024 | 9.0921  | 6.18268 | 8.86368 | 9.30986 | 9.45589 | 9.55212 |
| TMEM17       | 6.71592 | 6.24763 | 6.58916 | 6.7139  | 5.90203 | 5.98376 | 6.83146 | 5.49747 | 5.91198 |
| LOC100132215 | 6.25219 | 5.90801 | 6.27942 | 6.88631 | 6.38235 | 6.47756 | 6.80241 | 6.14661 | 6.59063 |
| DBIL5P2      | 4.69595 | 5.22763 | 4.94155 | 4.74658 | 5.91438 | 5.44114 | 4.70405 | 5.03232 | 5.18626 |
| WDPCP        | 6.72255 | 6.65077 | 6.82205 | 5.70615 | 5.19798 | 5.03207 | 5.57852 | 5.31833 | 5.34624 |
| VPS54        | 7.10589 | 7.33035 | 7.27576 | 6.62055 | 5.1798  | 5.91531 | 7.30377 | 5.98652 | 6.60197 |
| PELI1        | 10.0357 | 10.0119 | 9.51148 | 9.89328 | 8.6366  | 10.69   | 9.47922 | 10.8804 | 10.1597 |
| LINC00309    | 4.42977 | 4.56245 | 4.5334  | 4.91867 | 5.425   | 4.74546 | 4.89113 | 4.75859 | 4.76479 |
| SERTAD2      | 8.25477 | 8.05195 | 7.97756 | 8.49371 | 7.06939 | 9.71543 | 8.47269 | 9.20754 | 8.98022 |

|           |         |         |         |         |         |         |         |         |         |
|-----------|---------|---------|---------|---------|---------|---------|---------|---------|---------|
| LOC400958 | 4.40743 | 4.809   | 4.42585 | 4.46281 | 5.89812 | 5.17204 | 5.13465 | 5.11794 | 4.99874 |
| MIR4778   | 5.0948  | 5.49666 | 4.88408 | 5.41891 | 5.31989 | 5.69533 | 5.90832 | 5.17504 | 5.54109 |
| MEIS1-AS3 | 5.20078 | 5.24727 | 5.0301  | 5.71448 | 6.04761 | 5.72971 | 5.78889 | 5.48398 | 5.69602 |
| LOC644838 | 4.29566 | 4.75294 | 4.40612 | 4.72928 | 5.48005 | 5.26444 | 4.70523 | 4.54034 | 4.60239 |
| C1D       | 6.50767 | 6.45636 | 6.79734 | 6.54435 | 6.23864 | 6.05726 | 6.89154 | 6.53115 | 6.61233 |
| CNRIP1    | 6.17161 | 6.0789  | 6.65655 | 6.14187 | 5.65558 | 5.95805 | 5.86591 | 6.12043 | 6.36407 |
| FBXO48    | 6.84638 | 7.2768  | 6.68146 | 6.13876 | 5.67358 | 6.48526 | 6.68781 | 6.51618 | 6.36347 |
| BMP10     | 4.6744  | 4.76798 | 4.43484 | 5.15222 | 6.03877 | 5.42883 | 4.82559 | 4.90936 | 5.2391  |
| GKN2      | 3.35708 | 3.6869  | 3.18267 | 3.43188 | 5.0995  | 3.31746 | 3.57942 | 3.51645 | 3.55301 |
| GFPT1     | 8.31243 | 8.42616 | 8.49336 | 8.21475 | 6.01749 | 8.97026 | 8.13228 | 9.13094 | 9.19796 |
| NFU1      | 6.73573 | 6.80583 | 6.99201 | 7.10895 | 6.03178 | 7.55032 | 7.1609  | 7.12509 | 7.11854 |
| AAK1      | 8.91665 | 8.59934 | 8.66897 | 8.05366 | 6.37192 | 7.77415 | 8.0941  | 9.0715  | 8.47884 |
| TIA1      | 8.27565 | 8.27384 | 8.25147 | 7.0193  | 4.33146 | 6.09823 | 6.75228 | 6.81088 | 6.60484 |
| SNRPG     | 5.25272 | 4.66081 | 5.30499 | 4.56246 | 4.3582  | 5.0623  | 4.33985 | 5.02121 | 4.82607 |
| ADD2      | 5.6151  | 5.71341 | 5.71589 | 5.57774 | 6.42189 | 6.27309 | 5.78945 | 6.11471 | 6.18072 |
| FIGLA     | 4.9329  | 5.02872 | 5.13556 | 4.98356 | 5.26989 | 5.38032 | 4.78442 | 5.18881 | 4.95137 |
| TEX261    | 8.89402 | 8.47966 | 8.73893 | 8.85138 | 7.26161 | 8.11083 | 8.97781 | 8.08161 | 8.62866 |
| MCEE      | 7.59602 | 7.54332 | 7.42521 | 6.75578 | 5.61942 | 6.54661 | 7.46856 | 6.37958 | 6.33929 |
| PAIP2B    | 8.74185 | 8.76885 | 7.85793 | 7.60344 | 5.83813 | 6.50033 | 7.70909 | 6.47038 | 6.36431 |
| EXOC6B    | 10.5041 | 10.0898 | 9.99675 | 9.32582 | 7.44123 | 9.29459 | 9.72906 | 9.91885 | 10.0935 |
| SFXN5     | 6.6844  | 6.51533 | 6.51616 | 6.54922 | 6.54762 | 6.28548 | 6.59865 | 6.38681 | 6.66174 |
| rab11fip5 | 6.93765 | 7.20181 | 7.08739 | 7.48869 | 7.29473 | 8.11214 | 7.74515 | 8.36174 | 7.91868 |
| PRADC1    | 6.74313 | 6.60516 | 6.67083 | 7.17931 | 7.69464 | 7.31648 | 7.21286 | 7.16951 | 7.10617 |
| FBXO41    | 6.218   | 6.19591 | 6.11068 | 6.6198  | 6.21732 | 7.07784 | 6.4895  | 6.75343 | 6.31004 |
| EGR4      | 5.62572 | 5.68617 | 5.53687 | 5.76649 | 6.24008 | 6.46761 | 5.70478 | 5.84632 | 6.54139 |
| TPRKB     | 6.43325 | 6.29823 | 6.43898 | 6.31708 | 4.90317 | 6.29684 | 7.04293 | 6.09308 | 6.24541 |

|         |         |         |         |         |         |         |         |         |         |
|---------|---------|---------|---------|---------|---------|---------|---------|---------|---------|
| DUSP11  | 9.46611 | 9.29687 | 9.39825 | 8.77822 | 7.19038 | 8.35776 | 8.87542 | 8.51099 | 9.18116 |
| BOLA3   | 6.34692 | 6.23588 | 6.63577 | 7.62595 | 6.63042 | 6.80544 | 6.95113 | 6.88551 | 6.59067 |
| mob1a   | 9.37381 | 9.16663 | 9.3112  | 8.99677 | 6.99628 | 8.61141 | 8.95078 | 9.1295  | 9.20198 |
| DCTN1   | 7.95964 | 8.07134 | 7.93422 | 8.27962 | 7.27558 | 8.47187 | 8.4733  | 7.86972 | 8.39241 |
| C2orf81 | 6.12715 | 6.26695 | 6.12474 | 7.04308 | 6.2754  | 6.94184 | 6.4607  | 6.68481 | 6.47618 |
| RTKN    | 7.35729 | 6.84334 | 7.07276 | 7.08563 | 6.29734 | 6.95037 | 7.48066 | 7.17133 | 7.62926 |
| MOGS    | 7.21974 | 6.66873 | 7.02491 | 6.99538 | 6.15889 | 6.87621 | 6.91092 | 6.64917 | 7.08752 |
| MRPL53  | 8.19927 | 7.69552 | 8.19053 | 8.77176 | 8.15716 | 8.68074 | 8.89593 | 8.07927 | 8.58427 |
| CCDC142 | 7.01377 | 7.0861  | 6.99781 | 7.13578 | 7.02333 | 6.67519 | 6.85621 | 6.97521 | 7.14113 |
| LBX2    | 5.31028 | 5.5862  | 5.70414 | 6.46164 | 5.85197 | 6.0059  | 6.12304 | 6.55012 | 5.88357 |
| PCGF1   | 6.82234 | 6.61453 | 6.37415 | 6.99742 | 6.61117 | 6.55233 | 7.09062 | 6.40874 | 6.93743 |
| dqx1    | 7.50597 | 6.9505  | 6.33712 | 6.67071 | 6.60184 | 6.89183 | 6.41781 | 6.09259 | 6.56227 |
| AUP1    | 9.15322 | 8.73974 | 8.89216 | 8.77066 | 7.8121  | 8.54891 | 8.81234 | 8.42713 | 8.89986 |
| LOXL3   | 5.9753  | 6.27335 | 6.02508 | 6.51185 | 6.35419 | 6.56031 | 6.50838 | 6.50044 | 6.81336 |
| TACR1   | 7.29239 | 7.05268 | 7.51599 | 6.03343 | 7.05661 | 5.71335 | 5.9698  | 6.19219 | 6.5604  |
| GCFC2   | 7.66865 | 7.83667 | 7.63965 | 7.12022 | 5.27795 | 6.27779 | 7.646   | 6.25669 | 6.86128 |
| LRRTM4  | 4.91863 | 4.38493 | 4.50491 | 4.83919 | 6.66749 | 4.8046  | 5.0497  | 4.70754 | 4.79696 |
| SNAR-H  | 5.2157  | 4.27576 | 4.85294 | 4.24747 | 7.31836 | 4.04582 | 4.48593 | 5.01963 | 5.16004 |
| REG1B   | 4.1528  | 4.01118 | 3.88021 | 5.00737 | 5.633   | 4.83293 | 4.50732 | 4.46934 | 4.55266 |
| REG1CP  | 4.30511 | 4.23487 | 4.25874 | 3.97865 | 5.64643 | 4.71619 | 4.84924 | 4.59951 | 4.13115 |
| REG3A   | 3.43338 | 3.83483 | 3.67514 | 3.40401 | 4.71718 | 3.8719  | 3.02968 | 4.14827 | 3.86891 |
| MIR4264 | 2.28693 | 2.21075 | 2.45124 | 2.19419 | 3.04837 | 2.93556 | 2.28778 | 2.42926 | 1.97504 |
| LRRTM1  | 4.16624 | 4.39849 | 4.5106  | 5.05487 | 5.59469 | 4.83385 | 4.37482 | 5.08058 | 4.78174 |
| TRABD2A | 5.65748 | 5.90407 | 5.77306 | 6.10209 | 6.49992 | 6.54578 | 6.08854 | 5.85864 | 6.0156  |
| TGOLN2  | 9.0211  | 9.13583 | 9.01942 | 8.15475 | 6.08246 | 7.79657 | 8.51873 | 9.05387 | 8.73777 |
| PARTICL | 5.42912 | 5.24935 | 5.19489 | 5.80041 | 5.72835 | 5.32855 | 5.79226 | 5.77142 | 6.0074  |

|           |         |         |         |         |         |         |         |         |         |
|-----------|---------|---------|---------|---------|---------|---------|---------|---------|---------|
| GGCX      | 7.96583 | 7.87856 | 7.92494 | 7.83522 | 7.31595 | 7.89909 | 7.97539 | 8.16631 | 7.84949 |
| TMEM150A  | 6.30321 | 6.24264 | 6.49152 | 6.87458 | 6.5976  | 6.67861 | 6.44755 | 6.60621 | 6.54838 |
| c2orf68   | 8.32272 | 7.91223 | 7.89828 | 7.94051 | 7.61726 | 7.43069 | 7.96893 | 7.1073  | 7.71111 |
| SFTPB     | 5.97439 | 5.77135 | 5.68827 | 6.25333 | 6.87557 | 6.16362 | 5.92478 | 6.23099 | 6.21665 |
| MIR4779   | 2.42346 | 2.51968 | 2.28857 | 2.82717 | 2.5215  | 3.17119 | 2.67514 | 2.7488  | 3.12665 |
| REEP1     | 5.31114 | 5.51496 | 5.14912 | 4.94635 | 6.11903 | 5.87763 | 6.45466 | 7.23852 | 6.73946 |
| RNF103    | 8.45217 | 8.53137 | 8.53062 | 7.86826 | 6.26786 | 7.79143 | 8.13182 | 7.88447 | 8.08427 |
| CD8A      | 6.08272 | 6.48583 | 6.3837  | 7.36906 | 7.03667 | 7.49399 | 6.76677 | 6.73976 | 6.95599 |
| CD8B      | 4.85958 | 5.05521 | 5.27704 | 5.6724  | 5.48975 | 5.78853 | 5.28101 | 5.25282 | 5.3132  |
| PLGLB1    | 5.80054 | 6.13353 | 6.37015 | 5.34781 | 7.2876  | 5.06533 | 4.6686  | 5.323   | 5.03136 |
| LOC285074 | 9.35921 | 9.40688 | 9.48638 | 8.01716 | 8.11427 | 7.53192 | 8.11239 | 8.64302 | 8.00716 |
| KRCC1     | 8.36066 | 8.64794 | 8.28784 | 7.55433 | 6.64791 | 7.47586 | 8.27567 | 7.11806 | 8.13668 |
| MIR4780   | 6.96391 | 7.05209 | 6.89315 | 7.96483 | 8.11081 | 8.02315 | 7.69953 | 7.6155  | 7.9286  |
| FOXI3     | 5.25776 | 5.38344 | 5.29673 | 5.99916 | 6.32814 | 6.74975 | 6.37063 | 6.09061 | 6.17296 |
| EIF2AK3   | 7.731   | 7.86765 | 7.93738 | 7.08239 | 7.23606 | 7.76708 | 7.00789 | 7.85241 | 7.52423 |
| LOC654342 | 9.21212 | 7.72778 | 9.38913 | 9.35688 | 7.94199 | 9.39881 | 9.58444 | 10.4072 | 10.2497 |
| FAM95A    | 5.88693 | 5.47663 | 5.52602 | 6.41005 | 6.28707 | 6.37963 | 5.84769 | 6.39537 | 5.96499 |
| LOC442028 | 5.57253 | 5.33853 | 5.6394  | 6.01677 | 6.04546 | 6.33958 | 5.5796  | 6.17484 | 5.88885 |
| MRPS5     | 8.08119 | 8.35174 | 7.95872 | 8.6285  | 5.93399 | 8.44412 | 8.69414 | 9.10604 | 8.59769 |
| ZNF514    | 7.42953 | 7.459   | 7.41784 | 6.28662 | 6.01078 | 6.43347 | 7.19869 | 7.05792 | 7.02807 |
| TRIM43B   | 5.01186 | 5.16585 | 5.14382 | 5.29831 | 6.37766 | 5.05292 | 5.44281 | 5.1962  | 5.15259 |
| ADRA2B    | 5.90723 | 5.6372  | 5.5007  | 6.03034 | 5.81822 | 6.13564 | 6.07962 | 5.96293 | 5.781   |
| ASTL      | 6.34591 | 5.75673 | 5.69603 | 6.16    | 5.98385 | 6.8927  | 6.38838 | 6.46541 | 6.49052 |
| DUSP2     | 7.74463 | 6.52748 | 6.95264 | 7.31008 | 7.63463 | 7.55676 | 7.22461 | 7.26041 | 7.17346 |
| STARD7    | 9.83596 | 9.66253 | 10.1676 | 8.93311 | 7.23188 | 7.94409 | 8.74504 | 8.58781 | 8.07888 |
| TMEM127   | 8.91209 | 8.32524 | 8.66308 | 8.5436  | 7.24782 | 8.03834 | 8.73659 | 8.53765 | 8.68037 |

|              |         |         |         |         |         |         |         |         |         |
|--------------|---------|---------|---------|---------|---------|---------|---------|---------|---------|
| SNRNP200     | 9.30696 | 9.27664 | 9.45089 | 8.58999 | 6.11469 | 8.15211 | 8.7881  | 8.37546 | 8.59584 |
| NEURL3       | 5.88904 | 6.09614 | 5.97283 | 6.80213 | 6.44386 | 6.62602 | 6.40487 | 6.60247 | 6.2763  |
| KANSL3       | 8.14849 | 8.4333  | 8.16948 | 7.48746 | 6.33211 | 7.47943 | 7.0509  | 7.13118 | 7.36215 |
| ANKRD23      | 6.737   | 6.56063 | 6.48453 | 6.2968  | 6.34963 | 6.67038 | 6.29181 | 6.1919  | 6.36102 |
| ankrd39      | 8.21332 | 7.76484 | 8.02425 | 7.92826 | 7.65158 | 8.01325 | 8.60877 | 8.03804 | 8.06208 |
| ANKRD36B     | 8.86864 | 9.52014 | 8.58499 | 6.5935  | 5.76854 | 5.19417 | 6.06376 | 6.30648 | 7.05994 |
| TMEM131      | 10.5227 | 10.3152 | 10.2314 | 9.7188  | 7.96507 | 9.54022 | 9.82066 | 9.45308 | 9.91461 |
| COA5         | 7.4195  | 7.37549 | 7.58093 | 5.91978 | 5.04431 | 5.96686 | 6.20958 | 5.5225  | 5.97594 |
| KIAA1211L    | 6.99838 | 7.04608 | 7.07296 | 6.39323 | 6.53272 | 6.89881 | 6.78572 | 6.3214  | 6.39814 |
| LYG2         | 3.91124 | 4.09858 | 3.88926 | 4.42444 | 4.51467 | 4.72615 | 4.25754 | 4.32746 | 4.1969  |
| LYG1         | 5.74322 | 5.92749 | 5.75751 | 6.03341 | 5.8834  | 6.1567  | 5.73907 | 5.58002 | 5.46158 |
| TXNDC9       | 5.97646 | 6.07684 | 5.94611 | 5.7617  | 5.36732 | 5.8486  | 6.34813 | 5.67683 | 5.93884 |
| LONRF2       | 5.06187 | 5.9201  | 6.2454  | 5.60929 | 6.13605 | 6.10091 | 5.75617 | 5.45315 | 5.63301 |
| CHST10       | 6.29099 | 6.15719 | 6.32891 | 6.68953 | 6.35229 | 6.40533 | 6.4726  | 6.37286 | 6.33693 |
| CREG2        | 5.10277 | 5.25295 | 5.0872  | 5.73794 | 5.44793 | 6.20102 | 7.04053 | 6.54071 | 5.97937 |
| MFS9         | 6.55137 | 6.74397 | 6.43506 | 6.50804 | 6.06595 | 6.92763 | 7.16178 | 7.14393 | 6.9859  |
| LOC100287010 | 4.32535 | 4.71754 | 4.23285 | 4.33899 | 5.13497 | 4.22763 | 3.81534 | 4.07105 | 4.42637 |
| LINC01114    | 3.53302 | 3.92606 | 3.90574 | 4.22214 | 4.64815 | 4.17474 | 3.96876 | 3.94583 | 4.31791 |
| LINC01158    | 5.15898 | 5.38537 | 5.48128 | 5.84211 | 7.11381 | 5.81223 | 5.25973 | 5.99752 | 5.72735 |
| FHL2         | 8.07435 | 8.27863 | 8.08346 | 8.72983 | 7.89653 | 9.32978 | 8.89637 | 9.00505 | 8.70677 |
| LOC285000    | 4.62016 | 4.43284 | 4.21607 | 4.81456 | 5.34926 | 3.69626 | 5.01469 | 4.80558 | 4.36661 |
| UXS1         | 8.40614 | 8.37338 | 8.69787 | 8.32351 | 7.00699 | 7.51511 | 8.52751 | 8.75063 | 8.01464 |
| RGPD3        | 7.72324 | 8.0859  | 8.3339  | 6.86289 | 6.22232 | 7.33579 | 7.04179 | 8.2247  | 6.76431 |
| RGPD4-AS1    | 4.59046 | 4.49078 | 4.36871 | 4.52276 | 5.51171 | 4.9883  | 4.72022 | 4.43412 | 4.73812 |
| EDAR         | 6.37751 | 6.55294 | 6.65825 | 5.96973 | 5.75989 | 6.25561 | 6.58492 | 6.18165 | 6.24452 |
| SH3RF3-AS1   | 5.4746  | 5.20895 | 5.41329 | 5.91982 | 6.10161 | 6.12861 | 5.9405  | 5.86112 | 5.61758 |

|              |         |         |         |         |         |         |         |         |         |
|--------------|---------|---------|---------|---------|---------|---------|---------|---------|---------|
| MIR4265      | 4.21541 | 4.16029 | 4.05373 | 4.23297 | 4.67212 | 4.13537 | 4.35539 | 3.96005 | 4.14075 |
| MIR4266      | 3.7065  | 3.97278 | 3.73533 | 3.7441  | 3.55271 | 5.04815 | 4.10028 | 3.85488 | 3.78405 |
| 44449        | 9.87493 | 9.82643 | 9.77527 | 9.28352 | 7.62888 | 9.28801 | 9.68606 | 10.2883 | 10.1708 |
| MIR4267      | 6.39172 | 6.86007 | 6.9375  | 7.1085  | 7.73811 | 7.23401 | 6.30757 | 6.63137 | 6.86824 |
| nphp1        | 5.21167 | 5.36213 | 5.37454 | 5.20325 | 5.42468 | 5.21275 | 4.76594 | 5.17245 | 5.15139 |
| LINC01106    | 6.38224 | 6.4747  | 6.52639 | 6.08387 | 6.87634 | 5.91821 | 6.56783 | 6.4405  | 6.95121 |
| LOC100288570 | 6.54161 | 6.14996 | 6.05198 | 5.79462 | 6.31641 | 5.12106 | 6.05321 | 5.89612 | 5.93777 |
| BUB1         | 6.51359 | 5.92743 | 5.95688 | 6.46389 | 5.3463  | 5.52964 | 6.15921 | 5.9329  | 5.63234 |
| ANAPC1       | 8.06744 | 8.06779 | 8.26538 | 7.42142 | 6.56858 | 6.93703 | 7.55189 | 6.9195  | 6.96256 |
| ZC3H8        | 6.77543 | 7.07617 | 6.97138 | 6.0727  | 5.04586 | 5.40051 | 6.48378 | 5.40952 | 5.91177 |
| RGPD8        | 10.4526 | 10.7434 | 10.5709 | 9.33812 | 9.54041 | 8.8357  | 9.41414 | 10.2647 | 9.62892 |
| FLJ42351     | 4.68843 | 5.12382 | 4.64217 | 5.49988 | 5.54763 | 5.42781 | 4.39046 | 4.98588 | 4.95167 |
| CKAP2L       | 6.49828 | 6.02034 | 6.01338 | 6.79102 | 4.89889 | 6.07695 | 6.57036 | 6.62295 | 6.3534  |
| PAX8         | 5.70989 | 5.5785  | 5.78848 | 6.21621 | 6.67819 | 6.40701 | 6.23159 | 6.42295 | 6.84486 |
| DDX11L2      | 5.39212 | 5.73287 | 6.22003 | 6.2844  | 6.65115 | 6.14606 | 6.47777 | 5.83391 | 6.39802 |
| RPL23AP7     | 5.76833 | 5.9333  | 6.45169 | 5.85858 | 5.64244 | 6.14806 | 5.93317 | 5.77567 | 6.08179 |
| MIR4782      | 2.63225 | 2.06758 | 2.23705 | 3.02838 | 2.30985 | 2.84791 | 1.9318  | 2.98119 | 2.43451 |
| LOC100499194 | 4.61458 | 4.53088 | 4.58713 | 5.49531 | 6.2448  | 5.52776 | 5.24455 | 4.90383 | 4.90821 |
| DPP10-AS1    | 4.77166 | 4.61363 | 4.467   | 5.25779 | 5.83629 | 5.09418 | 4.50583 | 4.49784 | 4.34282 |
| CCDC93       | 8.48309 | 8.78464 | 8.79847 | 8.42197 | 7.02801 | 8.42287 | 8.47874 | 9.40987 | 8.85886 |
| EN1          | 7.32171 | 7.9555  | 7.32562 | 7.26362 | 6.42886 | 7.54804 | 8.26944 | 6.5187  | 6.42055 |
| SCTR         | 5.13375 | 5.04263 | 5.37992 | 5.71857 | 6.20778 | 5.89221 | 5.75848 | 5.709   | 5.79117 |
| TMEM185B     | 7.08517 | 6.97935 | 7.3994  | 7.24003 | 5.28535 | 7.15076 | 7.94626 | 6.45531 | 7.28549 |
| LINC01101    | 4.98065 | 5.61177 | 5.20277 | 5.52677 | 5.71992 | 5.67914 | 5.55481 | 5.69909 | 5.36983 |
| TFCP2L1      | 9.16402 | 9.28303 | 10.4358 | 9.07994 | 6.95581 | 8.39353 | 8.71661 | 8.00518 | 7.71365 |
| CLASP1       | 9.43871 | 9.38194 | 9.32665 | 8.95161 | 7.30512 | 8.75065 | 8.60161 | 9.017   | 9.2972  |



|           |         |         |         |         |         |         |         |         |         |
|-----------|---------|---------|---------|---------|---------|---------|---------|---------|---------|
| NIFK      | 9.62944 | 9.63183 | 9.65715 | 9.44401 | 7.8858  | 8.86232 | 9.83818 | 9.24015 | 9.51577 |
| BIN1      | 6.67184 | 6.82306 | 7.1575  | 7.68262 | 7.16556 | 7.75034 | 7.79468 | 7.77605 | 7.45844 |
| MAP3K2    | 8.20212 | 7.52388 | 8.24955 | 6.39986 | 4.74984 | 7.0045  | 7.10752 | 7.33769 | 6.32643 |
| MIR4783   | 5.91279 | 5.393   | 4.73563 | 6.72538 | 5.99774 | 7.21935 | 6.29599 | 7.06154 | 6.4785  |
| IWS1      | 7.0679  | 7.08139 | 6.87379 | 7.18632 | 6.53946 | 6.90733 | 7.41809 | 7.67767 | 7.01371 |
| LIMS2     | 6.24361 | 6.3727  | 6.81155 | 6.6582  | 6.60651 | 6.81087 | 6.77347 | 6.89587 | 6.8227  |
| WDR33     | 9.54335 | 9.53599 | 9.52274 | 8.7084  | 6.71541 | 8.83349 | 9.00809 | 8.58494 | 8.6778  |
| POLR2D    | 8.48114 | 8.28922 | 8.80567 | 8.61274 | 6.09916 | 7.33295 | 8.60955 | 6.90932 | 8.27262 |
| AMMECR1L  | 8.07368 | 8.16061 | 8.09528 | 8.36259 | 6.57726 | 7.60465 | 8.36147 | 8.24153 | 8.35092 |
| HS6ST1    | 7.6301  | 7.0244  | 7.10296 | 7.30236 | 6.65041 | 8.06683 | 7.26501 | 7.87569 | 7.69089 |
| LOC389033 | 5.51046 | 5.57248 | 5.49225 | 5.99143 | 5.53122 | 6.66627 | 5.99861 | 6.09564 | 6.37199 |
| CCDC74B   | 6.44349 | 6.59858 | 6.62313 | 6.60386 | 7.12203 | 6.82645 | 6.96993 | 7.07238 | 6.7729  |
| CCDC115   | 6.0492  | 6.06549 | 6.20875 | 5.83626 | 5.75886 | 5.5616  | 6.05406 | 5.83341 | 5.69355 |
| WTH3DI    | 2.76935 | 2.38926 | 2.4197  | 2.5749  | 2.61659 | 2.71097 | 2.30509 | 2.30755 | 2.3113  |
| NOC2LP2   | 7.01748 | 7.29639 | 6.88919 | 7.0233  | 8.54685 | 7.05262 | 6.78914 | 7.24339 | 7.66317 |
| ANKRD30BL | 4.59103 | 4.60257 | 4.41243 | 5.4406  | 5.96055 | 5.6394  | 4.39046 | 4.8138  | 4.52452 |
| MIR663B   | 8.18577 | 8.13661 | 8.57008 | 9.54419 | 9.57617 | 9.76534 | 9.02879 | 9.13939 | 9.04101 |
| LYPD1     | 5.59204 | 5.46434 | 5.3244  | 6.13298 | 5.61242 | 6.02848 | 5.78388 | 6.01701 | 5.42739 |
| NCKAP5    | 8.2636  | 8.40123 | 8.05465 | 7.77612 | 6.29004 | 6.88846 | 7.65524 | 7.41322 | 7.98534 |
| TMEM163   | 5.09043 | 5.28565 | 5.72366 | 6.20237 | 6.66755 | 6.35177 | 5.89608 | 5.72175 | 5.95676 |
| CCNT2-AS1 | 5.75923 | 5.95225 | 6.05574 | 6.58567 | 6.73414 | 6.08196 | 6.21503 | 6.34681 | 6.82574 |
| MAP3K19   | 4.06904 | 4.27794 | 4.17996 | 4.50903 | 4.89144 | 4.97729 | 4.3064  | 4.32762 | 4.16401 |
| LCT       | 4.77049 | 5.13817 | 5.03919 | 5.44157 | 6.11894 | 5.52056 | 5.19101 | 5.14868 | 5.50495 |
| MCM6      | 7.33594 | 7.09143 | 7.75693 | 7.60737 | 5.47787 | 6.08169 | 7.15134 | 6.45677 | 6.55449 |
| DARS      | 9.81759 | 9.70557 | 9.80088 | 8.73963 | 7.68791 | 9.36339 | 9.18004 | 8.7782  | 9.22342 |
| CXCR4     | 6.9956  | 6.56996 | 7.92696 | 7.22872 | 7.46572 | 10.212  | 7.08679 | 7.10203 | 7.00922 |

|              |         |         |         |         |         |         |         |         |         |
|--------------|---------|---------|---------|---------|---------|---------|---------|---------|---------|
| NXPB2        | 4.76986 | 4.87456 | 4.63711 | 5.56581 | 6.24937 | 4.79385 | 5.20223 | 5.17796 | 5.14353 |
| LRP1B        | 5.02291 | 6.08917 | 5.35147 | 5.15581 | 5.46738 | 5.2706  | 5.04397 | 5.08459 | 4.9972  |
| GTDC1        | 7.95239 | 7.74337 | 7.80705 | 6.8646  | 6.18781 | 6.77508 | 7.63248 | 6.68737 | 7.25896 |
| ZEB2         | 7.43731 | 7.15678 | 7.37086 | 5.90398 | 5.96753 | 5.72661 | 5.82024 | 5.96289 | 6.32302 |
| RND3         | 8.44729 | 9.08899 | 8.24445 | 9.85009 | 8.84965 | 9.42758 | 9.24069 | 10.6775 | 10.029  |
| RBM43        | 7.10641 | 6.91279 | 7.07637 | 5.88858 | 6.50137 | 6.00139 | 6.44116 | 5.68324 | 5.98502 |
| NMI          | 7.64319 | 6.86793 | 6.9793  | 6.92627 | 4.642   | 6.55315 | 7.6962  | 5.81525 | 6.86734 |
| NEB          | 9.44889 | 8.1024  | 7.11784 | 7.18186 | 6.26445 | 5.88209 | 5.58604 | 5.83085 | 5.75847 |
| ARL5A        | 10.2092 | 9.83871 | 9.64429 | 9.29898 | 8.26062 | 7.56482 | 8.4489  | 7.77276 | 8.19471 |
| STAM2        | 10.0474 | 9.70802 | 9.791   | 9.0099  | 6.90767 | 9.11883 | 8.9737  | 9.64544 | 9.68279 |
| PRPF40A      | 8.75802 | 8.83351 | 8.72138 | 8.25377 | 5.5645  | 7.62173 | 8.84873 | 7.65961 | 7.93162 |
| LOC100144595 | 2.912   | 3.0438  | 3.03769 | 3.46434 | 3.52214 | 4.26055 | 3.70737 | 3.2874  | 3.61348 |
| CYTIP        | 5.91797 | 5.59537 | 6.04715 | 5.83061 | 5.69949 | 6.19178 | 6.02699 | 5.86913 | 5.767   |
| CCDC148      | 4.37329 | 4.49376 | 3.96517 | 4.05338 | 4.34042 | 3.83897 | 3.67725 | 3.92768 | 3.94769 |
| LY75-CD302   | 7.90465 | 8.13145 | 8.87393 | 6.46913 | 5.57749 | 5.20343 | 6.9538  | 5.68793 | 6.11695 |
| DPP4         | 7.37178 | 7.30132 | 8.83461 | 5.94216 | 6.38189 | 5.71202 | 6.62312 | 5.45815 | 5.54612 |
| GCG          | 4.3322  | 4.18838 | 4.09543 | 4.52437 | 4.70494 | 4.48315 | 4.13706 | 4.26321 | 4.19899 |
| IFIH1        | 7.63287 | 6.88907 | 6.50584 | 6.07143 | 5.4916  | 5.94816 | 7.00555 | 8.10583 | 6.17479 |
| FIGN         | 5.84705 | 5.77143 | 6.02893 | 5.29431 | 5.57202 | 5.282   | 5.54165 | 5.3925  | 5.32416 |
| GRB14        | 5.44688 | 5.84882 | 5.43933 | 4.89083 | 5.58115 | 4.85246 | 4.34138 | 5.05066 | 4.62748 |
| COBLL1       | 8.56245 | 8.3479  | 8.30744 | 8.15127 | 6.17429 | 6.82575 | 7.78749 | 7.25756 | 8.35286 |
| GALNT3       | 7.01014 | 7.36128 | 6.55965 | 8.30506 | 5.72112 | 8.0859  | 7.98683 | 8.46962 | 8.57084 |
| LOC100506124 | 7.49767 | 7.16798 | 7.15933 | 5.51763 | 5.39165 | 4.8602  | 5.13472 | 5.65145 | 5.2242  |
| TTC21B       | 8.71615 | 8.88132 | 8.61409 | 6.39627 | 4.8702  | 5.46775 | 6.22634 | 6.03188 | 5.87325 |
| STK39        | 10.0332 | 10.052  | 9.84509 | 10.0163 | 8.37098 | 10.2968 | 10.2603 | 10.2124 | 10.3932 |
| LRP2         | 4.24728 | 4.29417 | 4.3735  | 4.76205 | 5.93719 | 4.97794 | 4.71005 | 4.85335 | 4.75554 |

|              |         |         |         |         |         |         |         |         |         |
|--------------|---------|---------|---------|---------|---------|---------|---------|---------|---------|
| FASTKD1      | 7.16801 | 7.11034 | 7.08601 | 6.93659 | 5.77669 | 6.51937 | 7.15882 | 6.21315 | 6.12509 |
| CCDC173      | 4.12246 | 4.36629 | 4.05305 | 4.20886 | 4.66684 | 4.49786 | 4.37927 | 4.21613 | 4.55703 |
| METTL5       | 6.46795 | 6.87465 | 7.10868 | 6.94847 | 6.3623  | 6.35615 | 7.59303 | 6.62283 | 6.45816 |
| LINC01124    | 5.72474 | 5.51937 | 5.94262 | 6.43212 | 6.31539 | 7.17972 | 6.36084 | 6.59483 | 6.6826  |
| TLK1         | 10.0883 | 9.86067 | 9.98239 | 9.53421 | 7.7894  | 9.42761 | 9.72829 | 8.9485  | 9.70007 |
| METTL8       | 8.61805 | 8.31396 | 8.41858 | 7.51615 | 6.91395 | 6.88269 | 8.1783  | 6.50287 | 6.82632 |
| DLX2         | 6.43508 | 6.9535  | 6.20218 | 7.14951 | 6.34103 | 6.7838  | 7.46084 | 6.72392 | 6.42661 |
| RAPGEF4-AS1  | 4.80079 | 4.68037 | 4.92936 | 5.1767  | 5.2081  | 5.09231 | 5.03475 | 4.76787 | 4.96999 |
| MLK7-AS1     | 4.15475 | 4.33279 | 4.3054  | 4.73602 | 4.71449 | 5.42632 | 4.88381 | 5.11336 | 5.37195 |
| SP3          | 8.30705 | 8.39511 | 8.4236  | 7.84248 | 6.24644 | 7.83584 | 7.97625 | 7.4504  | 7.74098 |
| OLA1         | 9.16677 | 9.05892 | 9.46352 | 8.39808 | 7.35669 | 8.20968 | 8.5194  | 8.56468 | 8.6229  |
| GPR155       | 8.77293 | 8.80586 | 9.16995 | 7.5936  | 6.44865 | 6.90742 | 8.5987  | 8.08298 | 6.62534 |
| CHN1         | 6.94677 | 5.90509 | 6.59006 | 6.6052  | 6.02042 | 5.77563 | 6.16321 | 5.8728  | 6.07571 |
| atf2         | 9.29729 | 9.32053 | 9.29763 | 8.43471 | 6.92241 | 7.39326 | 8.11206 | 7.93224 | 8.16737 |
| MIR933       | 6.16401 | 5.49778 | 6.24006 | 6.60064 | 6.74917 | 6.74215 | 6.42865 | 6.22728 | 6.81726 |
| LNPk         | 8.95906 | 9.30623 | 9.15313 | 8.87479 | 7.91874 | 9.53388 | 9.22289 | 9.21558 | 8.91188 |
| EVX2         | 5.84561 | 5.72904 | 6.08619 | 6.90433 | 7.1169  | 7.28808 | 6.72953 | 6.7639  | 6.47156 |
| HOXD-AS2     | 5.26113 | 5.15485 | 5.45647 | 5.84621 | 6.25897 | 6.13131 | 5.50508 | 5.62775 | 5.82998 |
| Haglr        | 5.78349 | 5.47667 | 5.8514  | 5.97658 | 6.50105 | 5.99184 | 5.73553 | 5.74666 | 5.70498 |
| MIR1246      | 4.6177  | 4.64431 | 4.66241 | 4.96313 | 6.07176 | 5.40673 | 4.74778 | 5.89226 | 5.45704 |
| LINC01116    | 5.08455 | 5.19324 | 5.61693 | 5.73609 | 4.97273 | 5.38238 | 5.22491 | 5.323   | 5.01163 |
| NFE2L2       | 9.73796 | 9.271   | 9.23536 | 8.18571 | 6.71031 | 7.88423 | 8.61651 | 8.41494 | 8.52816 |
| LOC100130691 | 6.02444 | 6.31197 | 6.13373 | 6.14885 | 6.46299 | 5.21904 | 5.94599 | 5.48453 | 5.86416 |
| TTC30B       | 6.08133 | 5.40697 | 5.45975 | 5.00589 | 4.52297 | 5.06964 | 5.91597 | 4.89291 | 4.66188 |
| PDE11A       | 3.90536 | 4.09951 | 4.12857 | 4.36674 | 4.74762 | 4.19705 | 4.18847 | 4.01437 | 3.80918 |
| FKBP7        | 6.92132 | 6.59701 | 7.08641 | 6.75814 | 5.28096 | 4.88734 | 6.28365 | 5.62163 | 5.92675 |

|              |         |         |         |         |         |         |         |         |         |
|--------------|---------|---------|---------|---------|---------|---------|---------|---------|---------|
| CCDC141      | 4.16377 | 4.27791 | 4.52583 | 4.6276  | 5.3862  | 4.46633 | 4.84285 | 4.74044 | 4.58307 |
| SESTD1       | 8.09243 | 7.56677 | 8.02326 | 7.16569 | 4.76303 | 6.09752 | 6.96184 | 8.59714 | 6.98153 |
| ZNF385B      | 4.45621 | 6.3313  | 4.90617 | 5.53515 | 5.66799 | 5.86095 | 5.93134 | 6.62072 | 7.49569 |
| MIR1258      | 5.07518 | 5.43804 | 5.16522 | 4.96342 | 5.11822 | 5.16562 | 5.05528 | 5.29308 | 4.87571 |
| CWC22        | 7.70209 | 8.028   | 7.67793 | 7.15037 | 4.39968 | 7.92898 | 7.69231 | 7.36004 | 7.63082 |
| CERKL        | 4.08987 | 3.91766 | 3.75666 | 4.69734 | 4.85377 | 4.9296  | 4.36888 | 4.67478 | 4.40659 |
| NEUROD1      | 4.63057 | 4.89401 | 4.89807 | 5.82933 | 5.4462  | 5.53094 | 5.7147  | 5.45594 | 5.44948 |
| FRZB         | 7.38617 | 7.52574 | 7.9723  | 5.85359 | 5.51388 | 5.52389 | 5.27202 | 5.39735 | 5.28018 |
| NCKAP1       | 11.1359 | 11.0277 | 11.3031 | 10.8331 | 8.84444 | 10.8066 | 11.0461 | 11.1185 | 11.012  |
| CALCRL       | 8.74674 | 8.41699 | 9.32987 | 7.97192 | 5.64174 | 7.08067 | 8.40102 | 8.44524 | 8.03644 |
| TFPI         | 6.49921 | 6.36148 | 7.57769 | 6.08198 | 5.67835 | 5.47429 | 6.20353 | 5.81253 | 6.00142 |
| DIRC1        | 3.20018 | 3.54624 | 3.24154 | 3.6817  | 4.86428 | 3.41937 | 3.29528 | 3.37992 | 3.29337 |
| MIR3129      | 3.4229  | 2.86041 | 2.75262 | 3.49823 | 2.52784 | 2.86553 | 2.28045 | 2.88375 | 3.2341  |
| ORMDL1       | 9.63604 | 9.82202 | 9.34495 | 8.3187  | 6.09862 | 6.54091 | 7.9915  | 7.46767 | 7.40242 |
| MSTN         | 5.07843 | 5.04986 | 4.9617  | 4.69171 | 5.27747 | 3.8854  | 4.29746 | 4.14092 | 4.12857 |
| HIBCH        | 8.45453 | 8.02391 | 7.96514 | 7.07922 | 5.86299 | 5.52297 | 7.29383 | 6.37714 | 6.01377 |
| NEMP2        | 7.77763 | 7.33544 | 7.99125 | 6.26912 | 6.91993 | 5.81239 | 6.61836 | 6.85631 | 6.43919 |
| STAT4        | 6.18714 | 6.00185 | 6.37553 | 5.41429 | 5.40904 | 5.06349 | 5.05103 | 5.33078 | 5.92981 |
| SDPR         | 6.23495 | 6.72197 | 7.40922 | 5.892   | 6.0558  | 5.49709 | 6.12338 | 5.77693 | 5.42322 |
| TMEFF2       | 3.44546 | 4.30791 | 4.24003 | 4.26706 | 4.70226 | 4.8102  | 4.04699 | 4.29744 | 4.10546 |
| STK17B       | 7.79189 | 7.61678 | 7.64872 | 6.61003 | 4.66104 | 5.90834 | 7.36654 | 7.85343 | 6.90538 |
| LOC100130452 | 3.7205  | 3.58138 | 3.53463 | 4.01118 | 4.79616 | 4.09882 | 3.82416 | 3.59882 | 3.54933 |
| C2orf66      | 6.7616  | 6.26948 | 6.17186 | 5.64464 | 6.50043 | 5.15179 | 5.63105 | 5.77972 | 5.50723 |
| PGAP1        | 9.51151 | 9.67059 | 9.47792 | 7.49184 | 5.16071 | 6.94818 | 7.9777  | 7.69353 | 7.08291 |
| ANKRD44      | 6.9606  | 7.19224 | 7.05006 | 5.20717 | 5.09401 | 4.74172 | 5.375   | 5.2967  | 4.94213 |
| HSPD1        | 8.4522  | 8.5766  | 8.56292 | 8.67546 | 7.96626 | 8.39898 | 8.41605 | 8.30714 | 8.28207 |

|              |         |         |         |         |         |         |         |         |         |
|--------------|---------|---------|---------|---------|---------|---------|---------|---------|---------|
| RFTN2        | 7.19505 | 6.54716 | 6.76993 | 5.65703 | 4.9902  | 6.24336 | 5.55014 | 5.36252 | 6.40442 |
| SATB2        | 6.87461 | 6.94197 | 6.81235 | 6.56039 | 6.70613 | 6.57075 | 6.74205 | 6.96003 | 6.74006 |
| FTCDNL1      | 5.8812  | 5.81397 | 6.22935 | 5.75237 | 5.83868 | 5.7042  | 5.78808 | 5.77902 | 5.31866 |
| TYW5         | 7.29599 | 7.07161 | 7.25407 | 6.73114 | 5.76373 | 5.64202 | 6.94383 | 6.22744 | 6.51941 |
| KCTD18       | 7.40424 | 7.15086 | 7.48638 | 7.12356 | 5.67697 | 7.27667 | 7.45681 | 6.86387 | 6.5132  |
| LOC100507140 | 5.25805 | 5.05296 | 4.78787 | 5.53118 | 5.72769 | 5.32636 | 5.47835 | 5.65338 | 5.72207 |
| CLK1         | 9.55389 | 9.17702 | 9.22087 | 8.72396 | 7.77701 | 9.61217 | 8.70927 | 9.9682  | 9.211   |
| PPIL3        | 7.27797 | 7.2781  | 7.0976  | 6.21172 | 4.98566 | 6.20117 | 7.00259 | 5.43526 | 6.11764 |
| CFLAR-AS1    | 4.69523 | 4.7133  | 4.68268 | 5.1101  | 5.08632 | 5.99337 | 5.29867 | 5.4367  | 5.05912 |
| TMEM237      | 9.10706 | 9.51773 | 9.33491 | 8.04508 | 6.18417 | 7.12586 | 8.31442 | 7.37637 | 7.59475 |
| ALS2         | 7.48748 | 7.61309 | 7.29004 | 6.48166 | 6.35521 | 5.58833 | 6.75504 | 6.88032 | 6.66241 |
| SUMO1        | 5.91149 | 6.38336 | 5.64336 | 5.43671 | 6.0371  | 6.10617 | 5.76579 | 5.85559 | 5.4517  |
| WDR12        | 6.92037 | 6.98002 | 7.05347 | 6.97868 | 5.01841 | 6.27959 | 7.28378 | 6.00678 | 6.02192 |
| RAPH1        | 9.31628 | 9.29743 | 9.65493 | 8.078   | 6.00256 | 9.70595 | 8.72729 | 9.44311 | 9.76736 |
| gpr1         | 7.20815 | 6.56831 | 6.72302 | 6.91577 | 5.27455 | 5.8871  | 6.92285 | 4.79626 | 5.9598  |
| DYTN         | 4.42017 | 4.91133 | 4.6279  | 5.06531 | 5.50637 | 5.23116 | 4.52623 | 5.03779 | 5.09035 |
| KLF7         | 9.1707  | 8.40892 | 9.45993 | 9.28399 | 6.82777 | 8.86384 | 8.78637 | 9.44329 | 9.81748 |
| MIR2355      | 5.06144 | 4.35614 | 4.99506 | 5.50269 | 4.39582 | 4.39582 | 3.9995  | 5.72366 | 5.75873 |
| MIR1302-4    | 2.416   | 2.82143 | 2.89096 | 2.18128 | 4.97768 | 2.32943 | 2.52483 | 2.72437 | 3.3573  |
| METTL21A     | 5.93876 | 5.64861 | 6.2023  | 5.93732 | 6.15875 | 5.85119 | 6.00002 | 5.49948 | 5.9522  |
| FZD5         | 6.87689 | 7.18362 | 6.83545 | 7.57864 | 6.79358 | 7.77716 | 8.48495 | 7.10724 | 7.76118 |
| C2orf80      | 4.06507 | 4.44004 | 4.39404 | 4.7038  | 4.79224 | 4.9481  | 4.45931 | 4.56406 | 4.75547 |
| KANSL1L      | 7.3016  | 7.71458 | 7.23583 | 6.02539 | 5.76035 | 5.92189 | 6.15861 | 5.40184 | 6.17895 |
| LANCL1       | 9.12545 | 9.04242 | 8.98359 | 8.26347 | 6.16234 | 7.37689 | 8.63417 | 7.17729 | 8.16575 |
| ERBB4        | 5.64853 | 5.57399 | 5.4925  | 5.62154 | 6.10005 | 5.7729  | 5.16526 | 5.5918  | 5.6144  |
| MIR548F2     | 3.59109 | 3.98903 | 4.32003 | 3.23895 | 2.88945 | 3.25216 | 3.1779  | 3.95793 | 3.2711  |

|              |         |         |         |         |         |         |         |         |         |
|--------------|---------|---------|---------|---------|---------|---------|---------|---------|---------|
| IKZF2        | 7.15416 | 5.36032 | 6.29126 | 5.29285 | 6.16258 | 7.13035 | 5.82265 | 5.50252 | 5.67946 |
| LOC100130451 | 4.39399 | 4.74768 | 4.22971 | 4.59448 | 5.54909 | 5.00327 | 4.56636 | 5.26998 | 5.0037  |
| BARD1        | 7.37966 | 7.44168 | 7.89597 | 7.0308  | 5.1952  | 7.15785 | 6.74726 | 7.5486  | 6.54268 |
| FN1          | 10.6831 | 8.47785 | 10.1079 | 10.2051 | 7.23884 | 8.46213 | 9.35735 | 11.9046 | 10.0907 |
| LINC00607    | 5.45833 | 5.00687 | 5.52462 | 5.55485 | 6.03317 | 5.49767 | 5.0187  | 5.8143  | 5.38468 |
| MREG         | 7.84412 | 7.85915 | 7.4893  | 7.85833 | 6.53506 | 8.52297 | 7.80448 | 7.06374 | 8.08177 |
| PECR         | 5.9256  | 5.94116 | 5.65866 | 5.28605 | 4.98938 | 4.81202 | 5.12334 | 5.22878 | 5.12137 |
| IGFBP5       | 9.20091 | 9.32751 | 9.70059 | 7.66411 | 8.47918 | 7.29751 | 7.91368 | 8.46279 | 7.9773  |
| TNP1         | 4.84841 | 4.91288 | 4.99127 | 5.47832 | 4.46944 | 6.19603 | 5.3117  | 5.72053 | 5.72089 |
| DIRC3        | 5.51659 | 5.32499 | 5.65315 | 5.82646 | 6.09386 | 5.44165 | 5.04077 | 5.70731 | 5.2704  |
| TNS1         | 7.9742  | 7.78728 | 8.43913 | 6.33619 | 6.04076 | 6.26982 | 6.65893 | 6.73938 | 6.96617 |
| CXCR2P1      | 5.81443 | 5.66543 | 5.59437 | 5.57336 | 6.44709 | 6.17782 | 5.78595 | 5.89526 | 5.76699 |
| CXCR1        | 6.71397 | 6.90384 | 6.57459 | 7.56519 | 7.52809 | 6.8991  | 8.01696 | 7.65022 | 7.88156 |
| TMBIM1       | 7.97071 | 7.8673  | 7.99065 | 8.1427  | 7.45851 | 8.54998 | 8.34768 | 8.85217 | 8.7113  |
| USP37        | 7.993   | 8.0381  | 8.07572 | 7.09204 | 6.45018 | 7.94322 | 7.46044 | 7.97651 | 7.32476 |
| ZNF142       | 8.2955  | 8.14326 | 8.22995 | 7.84094 | 6.63526 | 7.0692  | 8.0821  | 7.33369 | 7.58542 |
| rnf25        | 7.64497 | 8.10345 | 7.59831 | 7.95882 | 7.49814 | 7.41815 | 7.90581 | 7.17346 | 7.6243  |
| FEV          | 5.30313 | 5.45459 | 5.54928 | 6.61979 | 5.76967 | 6.83152 | 5.79454 | 5.9593  | 6.16572 |
| MIR375       | 6.27864 | 6.14253 | 6.33334 | 8.06808 | 6.18301 | 7.75496 | 7.88068 | 7.26228 | 6.93046 |
| CFAP65       | 5.74106 | 5.98522 | 5.77474 | 6.46035 | 6.7377  | 6.72408 | 6.1711  | 6.38332 | 6.56667 |
| IHH          | 5.00861 | 5.21786 | 5.55834 | 5.57456 | 5.45584 | 5.97765 | 5.38208 | 5.7671  | 5.62755 |
| CNPPD1       | 8.12672 | 8.11787 | 7.99545 | 8.77726 | 7.37366 | 9.11545 | 9.22299 | 8.35149 | 8.96987 |
| atg9a        | 8.79801 | 8.52921 | 8.73328 | 8.83329 | 7.73396 | 9.42419 | 9.3144  | 9.34378 | 9.11737 |
| MIR153-1     | 3.71969 | 3.49794 | 3.4585  | 4.087   | 4.32214 | 4.48493 | 4.12589 | 3.75093 | 3.91237 |
| RESP18       | 4.95757 | 4.8632  | 4.76385 | 5.10891 | 4.70971 | 5.6707  | 5.07635 | 5.14758 | 4.95679 |
| DNPEP        | 7.85765 | 8.03574 | 8.00105 | 8.06557 | 7.25593 | 8.0661  | 8.25219 | 7.32168 | 7.50851 |

|            |         |         |         |         |         |         |         |         |         |
|------------|---------|---------|---------|---------|---------|---------|---------|---------|---------|
| CHPF       | 6.95998 | 6.66809 | 7.13974 | 7.71317 | 7.06828 | 8.05634 | 8.36825 | 7.87234 | 7.7239  |
| MIR3132    | 5.88798 | 5.81813 | 6.11079 | 5.96425 | 7.73681 | 6.83934 | 6.43739 | 6.89574 | 6.41584 |
| OBSL1      | 6.70478 | 6.55896 | 6.62761 | 6.84838 | 5.778   | 7.01684 | 6.87788 | 6.27623 | 6.32448 |
| MIR4268    | 6.58554 | 6.37691 | 6.72295 | 7.60063 | 7.00319 | 7.53677 | 7.06688 | 7.21942 | 6.84935 |
| EPHA4      | 8.74943 | 8.5601  | 8.30232 | 7.38794 | 6.60131 | 7.14791 | 7.35187 | 6.38645 | 6.96009 |
| PAX3       | 6.57435 | 6.41045 | 6.47803 | 6.07833 | 6.9785  | 5.92533 | 5.66485 | 5.7397  | 6.03373 |
| SCG2       | 4.69269 | 5.19725 | 5.4795  | 5.65703 | 5.1701  | 5.23069 | 4.99701 | 4.81489 | 5.12304 |
| WDFY1      | 8.44933 | 8.26919 | 8.16879 | 8.02327 | 6.82041 | 7.80633 | 8.36345 | 8.12679 | 7.66391 |
| FAM124B    | 6.9453  | 6.01305 | 6.23793 | 6.28488 | 6.99705 | 6.14562 | 5.62137 | 5.83181 | 6.55922 |
| CUL3       | 9.90567 | 9.67616 | 9.3998  | 9.09805 | 7.8997  | 8.71277 | 9.2429  | 9.38833 | 9.02973 |
| dock10     | 7.96579 | 7.42393 | 7.98435 | 7.03385 | 5.90274 | 5.89082 | 6.33268 | 5.93702 | 6.14327 |
| MIR4439    | 3.04736 | 2.64917 | 3.22621 | 2.47393 | 3.23722 | 2.7885  | 2.63501 | 1.97198 | 2.33886 |
| IRS1       | 6.09728 | 5.81266 | 6.03694 | 6.67536 | 6.13344 | 6.60735 | 6.61231 | 6.32054 | 6.26462 |
| TM4SF20    | 3.15442 | 3.41433 | 2.56265 | 4.16254 | 3.40029 | 3.90356 | 3.34056 | 3.52171 | 2.79857 |
| C2orf83    | 3.71296 | 4.09371 | 4.07723 | 4.4809  | 4.85419 | 4.43211 | 4.00094 | 4.80823 | 4.64134 |
| PID1       | 5.24921 | 6.26098 | 5.87179 | 4.59584 | 4.96191 | 5.33203 | 5.20927 | 5.10931 | 5.60805 |
| DNER       | 6.75273 | 8.2902  | 7.6961  | 6.7814  | 6.53404 | 6.03983 | 8.11197 | 6.51055 | 6.86776 |
| TRIP12     | 9.87594 | 9.60681 | 9.72692 | 9.28917 | 7.29345 | 9.68855 | 9.66453 | 9.9999  | 9.96844 |
| SP110      | 7.98022 | 7.40594 | 7.23714 | 6.45835 | 6.38148 | 6.16893 | 7.02183 | 6.6573  | 6.77232 |
| LOC151475  | 5.12133 | 5.01389 | 5.07895 | 5.46358 | 5.45156 | 5.62416 | 5.02518 | 5.72156 | 5.34263 |
| SPATA3-AS1 | 4.59114 | 5.12174 | 4.77254 | 5.13618 | 5.74053 | 5.04548 | 4.91323 | 4.98    | 4.82674 |
| NCL        | 9.14264 | 9.2406  | 9.38746 | 8.72626 | 6.46912 | 8.0345  | 8.59203 | 7.85638 | 8.2366  |
| NMUR1      | 6.29608 | 6.51025 | 6.41099 | 6.53412 | 6.95493 | 6.69866 | 6.37109 | 6.6967  | 6.63441 |
| MIR1471    | 3.25827 | 2.78235 | 3.55756 | 3.83313 | 4.00594 | 4.193   | 3.82114 | 4.71258 | 4.14057 |
| NPPC       | 7.12897 | 6.30232 | 5.77218 | 6.10766 | 5.47332 | 6.14969 | 5.86786 | 5.71986 | 5.59383 |
| ECEL1      | 6.05111 | 6.25428 | 6.44811 | 6.75047 | 6.60573 | 6.90268 | 6.35363 | 6.58441 | 6.73835 |

|           |         |         |         |         |         |         |         |         |         |
|-----------|---------|---------|---------|---------|---------|---------|---------|---------|---------|
| TIGD1     | 8.19854 | 8.29383 | 8.65527 | 7.24644 | 5.99435 | 6.32255 | 7.34781 | 6.0691  | 6.37692 |
| NGEF      | 7.10119 | 7.17677 | 7.21421 | 7.12934 | 7.30697 | 8.2718  | 6.86732 | 7.18495 | 7.27417 |
| USP40     | 7.72481 | 7.68905 | 7.87506 | 6.32356 | 5.83941 | 5.98971 | 6.53201 | 5.8567  | 6.44871 |
| HJURP     | 6.85718 | 6.43024 | 6.52573 | 6.76061 | 6.93187 | 6.92106 | 6.74474 | 6.81073 | 6.68166 |
| MSL3P1    | 4.92594 | 5.69101 | 4.91683 | 5.0164  | 5.12396 | 4.01725 | 4.85242 | 4.24771 | 4.07599 |
| ARL4C     | 8.02388 | 8.96747 | 8.75413 | 9.01365 | 5.64225 | 6.90653 | 8.58996 | 7.39111 | 6.75486 |
| GBX2      | 5.77611 | 5.85888 | 5.79407 | 6.73091 | 5.96258 | 6.91002 | 6.30266 | 6.39362 | 6.24526 |
| ASB18     | 4.5592  | 4.97283 | 5.19953 | 5.41839 | 6.41299 | 5.61046 | 5.39631 | 5.34239 | 5.34759 |
| ILKAP     | 7.73995 | 7.50669 | 7.46719 | 6.49911 | 5.86046 | 6.8225  | 7.04542 | 7.1859  | 6.95004 |
| LOC151174 | 5.02775 | 5.21117 | 4.97542 | 5.53104 | 5.60226 | 6.04076 | 5.71172 | 5.5361  | 5.62986 |
| HES6      | 5.64274 | 5.63731 | 5.6807  | 6.72132 | 5.97757 | 6.74743 | 6.68442 | 6.64616 | 6.56146 |
| PER2      | 8.21192 | 7.67487 | 8.61644 | 8.07896 | 5.97089 | 8.42778 | 8.46817 | 7.53879 | 7.87379 |
| LINC01107 | 5.84859 | 5.28177 | 5.86414 | 6.30481 | 6.77738 | 6.44146 | 5.95304 | 5.86876 | 6.04479 |
| FLJ43879  | 5.02332 | 5.36714 | 5.13399 | 5.91284 | 6.31374 | 6.02168 | 5.80031 | 5.83062 | 5.58692 |
| HDAC4     | 7.18137 | 6.78372 | 6.88377 | 6.95806 | 6.24492 | 7.25691 | 7.03109 | 6.78012 | 7.29528 |
| MIR4440   | 8.38045 | 7.9857  | 8.07759 | 7.82058 | 10.1561 | 7.34383 | 7.61136 | 7.91452 | 8.39773 |
| MIR4441   | 6.69889 | 6.3833  | 6.00156 | 5.58023 | 7.47851 | 5.35553 | 5.62894 | 5.57316 | 5.98053 |
| MGC16025  | 6.18463 | 6.08742 | 6.19695 | 6.2555  | 6.38707 | 6.57027 | 6.08536 | 6.83513 | 6.80105 |
| MIR2467   | 6.75698 | 6.85054 | 6.95557 | 6.9915  | 8.32707 | 7.16045 | 6.4747  | 7.61021 | 7.23817 |
| MIR4786   | 6.78218 | 6.94284 | 6.86752 | 7.29212 | 7.77766 | 7.39047 | 6.87555 | 6.72984 | 6.79619 |
| PRR21     | 4.55758 | 4.98219 | 4.73069 | 5.32175 | 6.90713 | 5.32271 | 5.20014 | 5.08589 | 5.22332 |
| COPS9     | 6.84176 | 7.00506 | 6.79984 | 7.45879 | 7.11263 | 7.39864 | 7.02592 | 7.31422 | 7.45297 |
| OTOS      | 5.39082 | 5.61951 | 5.56849 | 6.13181 | 5.8631  | 6.30089 | 5.44458 | 6.00454 | 6.45344 |
| ankmy1    | 6.50833 | 6.90837 | 6.57569 | 6.00813 | 6.27911 | 6.32309 | 6.1235  | 6.1778  | 6.26892 |
| AQP12B    | 6.02828 | 6.00567 | 6.06353 | 6.28821 | 7.29285 | 6.71926 | 6.56464 | 5.9701  | 6.18919 |
| KIF1A     | 5.77769 | 5.77062 | 5.64344 | 6.13886 | 6.09778 | 6.00693 | 5.86635 | 6.05835 | 5.73089 |



|            |         |         |         |         |         |         |         |         |         |
|------------|---------|---------|---------|---------|---------|---------|---------|---------|---------|
| C2ORF54    | 7.11501 | 6.94971 | 6.94036 | 7.42624 | 7.10501 | 6.91271 | 7.49578 | 7.45195 | 6.76973 |
| MTERF4     | 6.45981 | 6.70228 | 6.53371 | 5.41726 | 5.49223 | 5.74778 | 6.06071 | 6.10554 | 5.87308 |
| PASK       | 7.30112 | 6.90594 | 6.95141 | 6.88635 | 7.01448 | 6.51353 | 6.45696 | 6.76042 | 5.97199 |
| HDLBP      | 9.74696 | 9.94289 | 9.69038 | 9.64474 | 8.57271 | 9.51035 | 9.53264 | 9.77669 | 9.97558 |
| STK25      | 7.43221 | 7.09505 | 7.24305 | 7.76988 | 7.26249 | 7.64001 | 7.67986 | 7.34527 | 7.77707 |
| BOK-AS1    | 6.21931 | 6.21107 | 6.17568 | 7.0435  | 7.15814 | 6.99522 | 6.71924 | 7.01398 | 6.41613 |
| THAP4      | 7.45268 | 7.50669 | 7.46017 | 7.72584 | 6.43355 | 7.44022 | 8.17268 | 7.19932 | 7.682   |
| DTYMK      | 6.8805  | 6.33898 | 6.68626 | 6.64775 | 6.07575 | 6.23534 | 6.92344 | 6.10207 | 5.98895 |
| PDCD1      | 6.70952 | 6.5054  | 6.81616 | 7.23172 | 7.23632 | 7.81762 | 6.98684 | 7.20636 | 7.27961 |
| SOX12      | 6.89052 | 6.99796 | 6.68249 | 6.8224  | 6.79892 | 6.28    | 6.14019 | 7.04266 | 6.6712  |
| NRSN2      | 6.69026 | 6.60506 | 6.66199 | 6.71979 | 6.3879  | 6.62034 | 6.67789 | 6.79618 | 6.74988 |
| TRIB3      | 6.92422 | 6.68141 | 6.83754 | 7.09965 | 6.5967  | 8.42094 | 7.33157 | 7.26062 | 7.29726 |
| RBCK1      | 8.61725 | 8.23254 | 8.30111 | 7.95696 | 8.29572 | 8.68562 | 8.4285  | 8.19667 | 7.88968 |
| C20orf202  | 6.13127 | 6.43275 | 6.44394 | 6.61765 | 6.56685 | 6.84049 | 6.39517 | 6.32354 | 6.37643 |
| RAD21L1    | 3.51667 | 3.57393 | 3.55418 | 3.91719 | 3.91419 | 3.79277 | 3.51708 | 3.70255 | 4.02889 |
| SNPH       | 5.42865 | 5.69727 | 5.32204 | 6.23326 | 6.1338  | 5.89023 | 6.39705 | 6.26604 | 5.77791 |
| SDCBP2-AS1 | 6.39646 | 5.98382 | 6.35272 | 6.74517 | 6.7244  | 6.65735 | 6.51901 | 6.62227 | 6.26496 |
| SIRPA      | 8.84516 | 8.67231 | 8.62609 | 9.01523 | 8.08779 | 9.52126 | 9.43301 | 8.63541 | 9.16347 |
| STK35      | 7.0447  | 7.10616 | 7.22279 | 7.37162 | 6.93535 | 7.69702 | 7.61567 | 7.8566  | 7.66809 |
| TGM6       | 5.70244 | 5.96088 | 5.67971 | 6.31838 | 6.5549  | 6.26655 | 5.94418 | 6.23741 | 6.00417 |
| TMC2       | 5.199   | 5.26791 | 5.12775 | 5.18968 | 6.96118 | 5.77698 | 5.62765 | 5.60728 | 5.68164 |
| EBF4       | 5.97837 | 5.87788 | 5.66158 | 5.69376 | 5.60699 | 6.36383 | 5.96494 | 5.767   | 5.89127 |
| C20orf141  | 6.38102 | 6.35692 | 6.14074 | 6.63895 | 7.22615 | 7.03412 | 6.65596 | 7.11222 | 6.61712 |
| TMEM239    | 5.87063 | 6.0163  | 5.97386 | 6.84716 | 7.2095  | 6.66004 | 6.57179 | 6.47305 | 6.48203 |
| gnrh2      | 6.76013 | 6.82065 | 6.88092 | 7.3125  | 7.84774 | 7.26567 | 6.90344 | 7.22412 | 7.06775 |
| MRPS26     | 7.31391 | 7.3771  | 7.47208 | 7.93123 | 7.31885 | 8.12385 | 7.9388  | 7.93769 | 7.56177 |

|           |         |         |         |         |         |         |         |         |         |
|-----------|---------|---------|---------|---------|---------|---------|---------|---------|---------|
| UBOX5-AS1 | 5.57275 | 5.71812 | 5.80017 | 5.8582  | 7.26386 | 6.22004 | 5.76164 | 5.76892 | 5.92513 |
| ITPA      | 7.71959 | 7.65209 | 7.5898  | 7.49531 | 7.18299 | 7.18299 | 7.71849 | 6.89159 | 7.43219 |
| ATRN      | 8.71929 | 8.71448 | 8.9549  | 8.43268 | 6.77509 | 8.15095 | 8.49104 | 9.2455  | 8.8696  |
| HSPA12B   | 6.56412 | 6.64179 | 6.73538 | 7.10271 | 6.86825 | 7.54352 | 7.26778 | 7.20836 | 6.85601 |
| cdc25b    | 8.71539 | 8.54589 | 8.31007 | 9.04463 | 7.32788 | 8.03598 | 8.81161 | 8.02497 | 8.26413 |
| MAVS      | 8.42535 | 8.75011 | 8.42851 | 7.71852 | 6.79616 | 7.81827 | 8.32617 | 7.90976 | 7.91746 |
| PANK2     | 7.33336 | 7.40122 | 7.38513 | 7.95847 | 6.61175 | 8.1384  | 7.97731 | 8.1746  | 7.73148 |
| Mir103a2  | 4.92443 | 4.44792 | 5.09161 | 4.7751  | 4.9193  | 4.61703 | 5.3866  | 4.6209  | 5.19924 |
| SMOX      | 8.44243 | 7.36102 | 7.28142 | 8.8409  | 7.33024 | 10.5767 | 9.10023 | 9.60294 | 9.56935 |
| LINC01433 | 6.70737 | 5.98245 | 6.28837 | 6.48993 | 6.88115 | 6.45035 | 6.17006 | 6.94969 | 6.97572 |
| PRNP      | 9.60274 | 9.12195 | 9.45441 | 10.9212 | 8.95886 | 10.6201 | 10.3958 | 10.2026 | 10.1798 |
| PRND      | 5.99613 | 5.51601 | 5.70226 | 6.66909 | 6.52103 | 5.98637 | 6.0267  | 6.46745 | 5.858   |
| PCNA-AS1  | 6.0468  | 5.9632  | 6.25217 | 7.62141 | 6.98744 | 7.16469 | 7.20591 | 6.95269 | 7.14802 |
| CDS2      | 8.24163 | 8.14876 | 8.49596 | 8.28121 | 6.84033 | 7.65622 | 8.32212 | 7.96642 | 7.97972 |
| LOC643406 | 4.80123 | 4.91137 | 4.58461 | 5.77272 | 5.76303 | 4.77267 | 4.91207 | 4.74409 | 5.02995 |
| CHGB      | 5.18627 | 5.16559 | 5.02768 | 5.6837  | 5.92031 | 5.4984  | 5.24886 | 5.62117 | 4.93875 |
| MCM8      | 7.69256 | 7.949   | 8.07897 | 6.37767 | 5.0187  | 5.3306  | 6.14621 | 6.31085 | 5.9055  |
| CRSL1     | 7.57594 | 7.82038 | 7.87053 | 8.05624 | 6.58964 | 7.31956 | 8.23396 | 7.42231 | 7.05407 |
| BMP2      | 7.02595 | 7.34355 | 6.48216 | 7.66375 | 7.80212 | 10.6812 | 9.81057 | 8.87479 | 7.92504 |
| ANKEF1    | 6.61975 | 6.81915 | 6.86699 | 6.49175 | 5.06646 | 6.45031 | 7.06185 | 5.57817 | 6.27006 |
| slx4ip    | 8.13007 | 7.80644 | 7.47496 | 6.8563  | 6.80185 | 6.18296 | 6.58148 | 6.17877 | 6.99469 |
| BTBD3     | 7.53623 | 7.94286 | 7.55162 | 6.48109 | 5.74377 | 6.26563 | 6.63058 | 6.55469 | 6.64789 |
| ISM1      | 7.91349 | 8.30328 | 8.68169 | 7.60493 | 7.48536 | 7.66088 | 8.30937 | 8.15805 | 7.52607 |
| MACROD2   | 5.75578 | 6.07712 | 5.57341 | 4.90005 | 5.35353 | 5.02051 | 4.39541 | 4.64971 | 4.53211 |
| SNRPB2    | 8.96595 | 9.15275 | 9.40417 | 9.22466 | 7.91622 | 8.9974  | 9.26602 | 9.16231 | 9.4717  |
| OTOR      | 3.92866 | 4.12828 | 4.09274 | 4.3916  | 5.59203 | 4.46725 | 4.47138 | 4.39747 | 4.19172 |

|              |         |         |         |         |         |         |         |         |         |
|--------------|---------|---------|---------|---------|---------|---------|---------|---------|---------|
| pcsk2        | 7.67538 | 7.18317 | 7.05865 | 6.75776 | 6.98884 | 6.18592 | 6.52947 | 6.47703 | 6.41676 |
| DSTN         | 8.6324  | 8.06975 | 8.23959 | 8.47785 | 7.43389 | 8.60061 | 9.02634 | 8.96021 | 8.80586 |
| BANF2        | 4.81854 | 5.08995 | 4.99833 | 5.21795 | 6.02811 | 4.87554 | 4.89345 | 5.17346 | 5.31199 |
| Pet117       | 5.69568 | 6.19505 | 6.11059 | 5.66567 | 6.03637 | 6.26772 | 6.10128 | 6.12113 | 6.16375 |
| KAT14        | 7.3292  | 7.95745 | 7.7032  | 6.56281 | 6.21037 | 6.19183 | 7.00644 | 6.00232 | 5.80032 |
| ZNF133       | 5.98066 | 6.6115  | 6.18673 | 5.3285  | 5.1606  | 5.22677 | 5.63141 | 5.54948 | 5.91791 |
| LINC00851    | 4.79426 | 5.08799 | 5.1336  | 5.30907 | 5.60335 | 5.27774 | 4.95839 | 5.15249 | 5.14275 |
| MIR3192      | 7.15424 | 7.51025 | 7.51219 | 5.80327 | 6.60887 | 6.90798 | 6.74896 | 6.79829 | 6.31846 |
| SEC23B       | 8.84521 | 8.80882 | 8.72455 | 9.17354 | 7.24544 | 9.41405 | 9.73352 | 9.36076 | 9.75522 |
| LINC00493    | 6.24914 | 6.28145 | 6.31065 | 7.40865 | 5.18351 | 7.3429  | 7.87369 | 6.70681 | 6.56777 |
| DTD1         | 7.99749 | 8.15195 | 8.51561 | 8.47931 | 7.04891 | 8.94552 | 8.88154 | 8.29161 | 8.7044  |
| LOC100270804 | 5.0555  | 5.28648 | 5.06283 | 4.21243 | 6.05123 | 5.37785 | 4.84982 | 4.71055 | 4.7486  |
| SCP2D1       | 3.4947  | 3.38948 | 3.7242  | 3.95075 | 4.11002 | 3.71987 | 3.68952 | 3.98634 | 3.38605 |
| rin2         | 9.66049 | 9.23603 | 9.7239  | 8.67308 | 6.82161 | 7.94667 | 9.41853 | 8.56527 | 8.66076 |
| cfap61       | 6.08627 | 5.683   | 5.73654 | 5.65067 | 6.23074 | 5.63566 | 5.68246 | 5.63008 | 5.75755 |
| INSM1        | 6.34474 | 6.39395 | 6.2198  | 6.97722 | 7.12263 | 7.05637 | 6.7106  | 6.97825 | 6.93252 |
| KIZ          | 8.20904 | 8.08018 | 7.95861 | 6.95131 | 5.99897 | 6.13866 | 7.1324  | 7.14936 | 6.98521 |
| XRN2         | 8.67184 | 8.08731 | 8.51922 | 8.02866 | 4.76269 | 7.10638 | 8.12494 | 7.3191  | 7.81528 |
| NKX2-2       | 4.99259 | 4.82275 | 4.71868 | 5.6745  | 5.51531 | 5.84254 | 5.22492 | 5.22462 | 5.49644 |
| PAX1         | 5.87091 | 5.69301 | 5.84226 | 6.49466 | 5.97621 | 6.70763 | 6.03665 | 6.51964 | 6.37217 |
| LINC01432    | 5.30929 | 5.44508 | 5.19876 | 5.47649 | 5.9872  | 5.4547  | 5.37631 | 5.07088 | 5.26967 |
| SSTR4        | 5.78061 | 6.05301 | 6.02725 | 6.34119 | 6.25177 | 6.90674 | 6.38871 | 6.77048 | 6.50913 |
| NXT1         | 6.60163 | 6.64645 | 6.54858 | 7.3957  | 6.28272 | 6.82611 | 7.41125 | 6.65882 | 6.62255 |
| GZF1         | 6.42384 | 6.37041 | 6.15634 | 6.52507 | 5.61461 | 7.06647 | 6.33878 | 7.05062 | 6.04447 |
| CSTL1        | 4.18199 | 4.9389  | 4.26456 | 4.39275 | 5.5781  | 4.65349 | 4.38524 | 4.67449 | 4.54853 |
| CST8         | 5.40083 | 5.4234  | 5.63496 | 5.1216  | 6.53678 | 5.50265 | 5.17841 | 5.49869 | 5.62777 |

|              |         |         |         |         |         |         |         |         |         |
|--------------|---------|---------|---------|---------|---------|---------|---------|---------|---------|
| CST13P       | 4.30188 | 4.82264 | 4.35042 | 4.86159 | 5.4107  | 4.70067 | 4.76201 | 4.42367 | 4.5337  |
| FLJ33581     | 5.01075 | 5.1746  | 5.2395  | 4.91176 | 5.92888 | 5.23525 | 4.94581 | 5.46531 | 5.12458 |
| SYNDIG1      | 6.02078 | 6.18185 | 5.7798  | 5.97613 | 6.56308 | 6.59504 | 6.36359 | 6.08469 | 6.09928 |
| CST7         | 6.2685  | 6.66151 | 6.62349 | 6.84981 | 7.19927 | 7.36924 | 7.1654  | 6.87679 | 7.02558 |
| ENTPD6       | 6.9059  | 6.61624 | 6.84376 | 6.96999 | 6.10995 | 7.00951 | 6.79602 | 6.65646 | 6.8343  |
| GINS1        | 6.95188 | 6.8604  | 6.86506 | 6.92493 | 6.23261 | 5.89659 | 6.83655 | 5.88936 | 5.95223 |
| LOC100134868 | 6.81018 | 6.71216 | 7.61465 | 6.38705 | 8.12285 | 6.49022 | 6.96226 | 6.10235 | 6.33516 |
| REM1         | 6.42774 | 6.11203 | 6.27971 | 5.70662 | 6.08973 | 6.28034 | 5.8835  | 5.97157 | 6.21514 |
| LINC00028    | 4.89335 | 5.28483 | 5.21016 | 5.28257 | 4.95965 | 5.27414 | 4.95617 | 5.57033 | 5.26224 |
| HM13         | 8.32726 | 7.98295 | 8.23    | 8.32715 | 8.17125 | 8.31814 | 8.26282 | 9.48326 | 9.1031  |
| MCTS2P       | 6.52433 | 6.42148 | 6.23673 | 6.3481  | 4.28199 | 3.92827 | 6.13941 | 7.34313 | 6.34572 |
| MIR3193      | 5.17475 | 5.13412 | 5.23652 | 5.66762 | 4.83316 | 5.71161 | 5.41371 | 5.12965 | 5.68306 |
| COX4I2       | 6.12847 | 5.85105 | 6.16254 | 6.91755 | 6.55737 | 6.80776 | 6.56017 | 6.6634  | 6.44633 |
| MYLK2        | 5.7572  | 5.58362 | 5.16597 | 6.21126 | 6.19027 | 6.41499 | 6.38092 | 6.06091 | 6.0797  |
| CCM2L        | 6.32827 | 6.43716 | 6.67153 | 6.60217 | 6.27789 | 6.89379 | 6.7612  | 6.73908 | 6.6525  |
| HCK          | 6.49566 | 6.27561 | 6.49992 | 7.24162 | 6.22165 | 7.38563 | 7.15386 | 7.34401 | 7.16816 |
| TM9SF4       | 10.2428 | 10.126  | 10.0083 | 9.99447 | 7.63366 | 9.43616 | 10.1192 | 9.27665 | 9.91474 |
| POFUT1       | 7.09032 | 7.12915 | 7.3125  | 7.15474 | 6.0944  | 6.27307 | 7.26084 | 7.03741 | 6.34732 |
| KIF3B        | 7.76224 | 7.90823 | 7.80437 | 7.60924 | 6.71362 | 7.38282 | 7.93433 | 7.44024 | 7.40526 |
| ASXL1        | 7.50521 | 7.04741 | 7.46308 | 7.12602 | 6.80374 | 6.81866 | 7.253   | 6.86664 | 7.17954 |
| LOC149950    | 5.6226  | 5.69905 | 5.84167 | 6.04136 | 6.40928 | 6.19069 | 6.10554 | 5.80131 | 5.96074 |
| DNMT3B       | 7.89593 | 6.94204 | 6.9223  | 7.2554  | 6.52731 | 6.8645  | 7.21627 | 7.39557 | 6.63011 |
| C20orf144    | 6.3154  | 6.43712 | 5.98988 | 7.22798 | 6.09575 | 7.54773 | 7.18365 | 6.85204 | 6.80219 |
| ACTL10       | 6.16045 | 6.22066 | 6.00438 | 6.76235 | 6.41206 | 6.56278 | 5.83342 | 6.12264 | 6.46782 |
| ZNF341       | 6.78816 | 6.84638 | 6.58983 | 6.96509 | 6.79939 | 6.57962 | 6.94563 | 6.57001 | 6.67403 |
| CHMP4B       | 11.1264 | 11.1306 | 11.1076 | 11.388  | 10.1557 | 11.5396 | 11.9542 | 10.9985 | 11.3194 |

|              |         |         |         |         |         |         |         |         |         |
|--------------|---------|---------|---------|---------|---------|---------|---------|---------|---------|
| MIR4755      | 4.5904  | 4.32355 | 4.63354 | 3.27569 | 3.32047 | 3.66114 | 4.63329 | 4.59698 | 4.39775 |
| ASIP         | 5.04798 | 5.59588 | 5.80663 | 5.76921 | 6.1576  | 5.96654 | 5.75832 | 5.96039 | 5.63693 |
| ITCH         | 9.74038 | 9.42764 | 9.70103 | 8.85448 | 8.02445 | 9.37635 | 9.42456 | 9.82644 | 9.7071  |
| MIR644A      | 9.38294 | 9.12601 | 9.16324 | 6.77284 | 5.37949 | 4.16397 | 5.59213 | 8.29161 | 8.13506 |
| MAP1LC3A     | 7.74901 | 8.0986  | 7.1637  | 8.03684 | 7.44994 | 7.75458 | 8.15709 | 8.7422  | 7.71924 |
| TP53INP2     | 8.51078 | 7.87526 | 8.0461  | 8.57326 | 7.68648 | 8.45845 | 8.60256 | 8.33108 | 8.84344 |
| ACSS2        | 7.33874 | 7.61891 | 7.49323 | 7.34363 | 7.29469 | 7.52424 | 7.62101 | 7.5789  | 7.6036  |
| mir499a      | 4.85711 | 4.98776 | 4.65046 | 4.8086  | 5.14185 | 5.36198 | 5.06394 | 5.10356 | 5.35617 |
| MMP24        | 5.21079 | 5.19684 | 5.39887 | 5.74716 | 6.07244 | 6.29424 | 5.61147 | 5.60405 | 6.11811 |
| GDF5         | 5.16944 | 5.40401 | 5.36664 | 5.6818  | 6.28907 | 6.05641 | 5.91451 | 5.52194 | 5.67731 |
| CEP250       | 6.13192 | 6.12488 | 6.05605 | 5.59919 | 5.77272 | 6.22789 | 5.79962 | 5.81456 | 6.00148 |
| ERGIC3       | 7.98356 | 7.78075 | 8.07045 | 8.00913 | 6.35747 | 8.04774 | 8.03206 | 7.78516 | 7.90965 |
| SPAG4        | 5.01764 | 4.99084 | 5.05001 | 5.91559 | 5.74647 | 6.39292 | 4.74662 | 5.74588 | 5.63077 |
| ROMO1        | 7.74269 | 7.65717 | 7.89942 | 8.86989 | 7.85195 | 8.6621  | 8.48054 | 7.93669 | 8.42092 |
| PHF20        | 7.09023 | 7.19498 | 6.94231 | 7.0844  | 6.09032 | 7.18625 | 7.17111 | 7.57426 | 7.02243 |
| CNBD2        | 5.25307 | 5.39929 | 5.23889 | 5.34456 | 5.66632 | 5.45161 | 5.07484 | 5.17537 | 5.51618 |
| EPB41L1      | 7.18092 | 6.7905  | 7.00728 | 6.71128 | 6.19167 | 6.84588 | 6.68684 | 6.44551 | 6.48566 |
| c20orf24     | 7.95193 | 7.40456 | 7.80575 | 7.85123 | 7.25874 | 7.97799 | 7.94135 | 7.89153 | 8.24183 |
| RPN2         | 9.6635  | 9.36353 | 9.68881 | 9.63055 | 8.33514 | 9.69458 | 9.80292 | 9.38324 | 9.6836  |
| SRC          | 7.0326  | 6.89418 | 7.07395 | 7.29456 | 7.3638  | 8.2706  | 7.32492 | 7.77346 | 7.87718 |
| NNAT         | 6.27141 | 6.15573 | 6.30634 | 6.29823 | 6.1137  | 6.37358 | 6.40469 | 5.90548 | 6.09023 |
| LOC100287792 | 4.46262 | 4.88167 | 4.50432 | 5.07726 | 5.63801 | 5.48177 | 4.92219 | 5.13658 | 5.53755 |
| VSTM2L       | 7.30813 | 7.44053 | 7.67499 | 8.1728  | 8.31355 | 8.14019 | 7.9195  | 7.99367 | 7.83722 |
| RPRD1B       | 8.85032 | 8.51016 | 8.56954 | 7.59388 | 6.21612 | 7.03251 | 7.88743 | 7.39789 | 8.0346  |
| BPI          | 4.44453 | 4.37291 | 4.35188 | 4.99935 | 5.69579 | 5.3495  | 4.91789 | 4.91022 | 5.17291 |
| LBP          | 5.35906 | 5.07643 | 5.43863 | 5.68141 | 6.31556 | 5.84022 | 5.63136 | 5.76184 | 5.69476 |

|           |         |         |         |         |         |         |         |         |         |
|-----------|---------|---------|---------|---------|---------|---------|---------|---------|---------|
| MIR548O2  | 6.23458 | 6.34964 | 6.49311 | 4.07452 | 5.4146  | 4.57959 | 4.37257 | 4.70777 | 5.33419 |
| ADIG      | 6.39371 | 6.73297 | 6.42767 | 6.43337 | 7.81628 | 6.73373 | 6.10702 | 6.53456 | 6.60812 |
| ARHGAP40  | 7.96692 | 8.39342 | 7.34714 | 7.16189 | 7.16577 | 7.30819 | 7.07378 | 6.65696 | 7.04424 |
| ACTR5     | 7.37763 | 7.16307 | 7.11742 | 6.87832 | 6.35766 | 6.37158 | 6.83986 | 6.65263 | 6.71199 |
| DHX35     | 7.52894 | 7.52514 | 7.47448 | 6.36551 | 6.08667 | 5.46003 | 6.74165 | 6.06639 | 6.00609 |
| TOP1      | 10.2777 | 10.2783 | 10.2126 | 10.1411 | 8.91254 | 11.3672 | 10.6173 | 11.1298 | 11.1578 |
| ZHX3      | 5.93847 | 6.07637 | 6.37646 | 5.81944 | 4.44193 | 5.22704 | 5.49194 | 5.78425 | 5.68763 |
| LPIN3     | 8.75565 | 8.28753 | 7.97483 | 8.7924  | 8.12559 | 8.60567 | 8.23821 | 8.16058 | 8.61742 |
| SRSF6     | 10.28   | 9.61988 | 9.90813 | 9.92564 | 6.88395 | 9.2285  | 10.0864 | 8.62224 | 9.2375  |
| L3MBTL1   | 6.17362 | 6.60573 | 6.51017 | 5.9686  | 6.1676  | 6.00404 | 5.82277 | 6.38448 | 5.95647 |
| SGK2      | 6.11601 | 6.30475 | 6.03857 | 6.37503 | 5.7985  | 5.62856 | 5.87192 | 5.79375 | 6.45526 |
| IFT52     | 7.17492 | 7.37036 | 7.75026 | 6.8958  | 5.70065 | 6.27001 | 7.29114 | 6.33002 | 6.31648 |
| MYBL2     | 7.00841 | 6.95792 | 7.1455  | 7.99169 | 7.10752 | 7.9322  | 7.71129 | 7.62316 | 7.72256 |
| TOX2      | 6.05391 | 6.34052 | 6.35797 | 6.57432 | 6.70833 | 6.90747 | 6.616   | 6.80884 | 6.70283 |
| OSER1-AS1 | 5.92913 | 6.14462 | 5.5566  | 6.31072 | 6.22161 | 6.42499 | 5.95031 | 6.91838 | 6.52399 |
| GDAP1L1   | 5.58901 | 5.69184 | 5.59004 | 6.34041 | 6.39959 | 6.26659 | 6.14636 | 5.91696 | 6.14666 |
| R3HDML    | 4.54553 | 4.60082 | 4.83755 | 5.24817 | 5.59523 | 5.24042 | 4.86167 | 5.09834 | 5.24694 |
| MIR3646   | 2.73959 | 2.65287 | 2.47228 | 3.58404 | 2.8422  | 2.95873 | 3.14713 | 2.6725  | 3.06877 |
| TTPAL     | 8.5874  | 8.82194 | 8.14181 | 8.39471 | 7.62475 | 8.94272 | 8.81304 | 9.61822 | 9.37271 |
| wisp2     | 7.35214 | 8.53839 | 9.16929 | 7.12584 | 7.97503 | 7.63439 | 6.80741 | 7.15515 | 7.45608 |
| STK4      | 8.73063 | 8.72852 | 8.49843 | 7.85224 | 6.65336 | 7.78196 | 7.92038 | 9.06861 | 8.57841 |
| SEMG1     | 3.54399 | 3.28943 | 2.99869 | 3.64171 | 3.73514 | 3.20686 | 3.23466 | 3.75882 | 3.62093 |
| SEMG2     | 3.77803 | 4.15047 | 3.82627 | 4.02519 | 5.36647 | 4.05882 | 4.28444 | 3.79168 | 3.72468 |
| RBPJL     | 6.0442  | 5.97246 | 6.10511 | 6.73596 | 6.29112 | 7.12879 | 6.92833 | 6.49956 | 6.54218 |
| DBNDD2    | 7.82707 | 7.51721 | 7.71819 | 7.92891 | 7.57654 | 8.4755  | 8.43236 | 8.22206 | 8.44241 |
| WFDC2     | 6.03105 | 6.02258 | 5.97285 | 6.16391 | 6.4081  | 6.267   | 6.10122 | 6.08039 | 6.02781 |

|              |         |         |         |         |         |         |         |         |         |
|--------------|---------|---------|---------|---------|---------|---------|---------|---------|---------|
| WFDC10A      | 5.23542 | 5.48059 | 5.65373 | 5.64099 | 5.86906 | 5.59512 | 5.22612 | 5.9673  | 5.43547 |
| WFDC13       | 6.04575 | 6.28139 | 6.05637 | 6.25532 | 7.52542 | 5.9945  | 6.24878 | 6.44198 | 6.23508 |
| UBE2C        | 6.44327 | 6.18312 | 6.32231 | 7.44746 | 6.97263 | 6.71489 | 6.83758 | 6.6461  | 6.66327 |
| SNX21        | 7.44033 | 7.44121 | 7.27594 | 6.76784 | 5.87204 | 7.04532 | 6.95989 | 6.95832 | 6.8913  |
| CTSA         | 10.9496 | 10.6405 | 10.4923 | 11.059  | 10.5998 | 10.4441 | 10.9273 | 11.105  | 10.9523 |
| PCIF1        | 7.67938 | 7.81244 | 8.01017 | 7.77781 | 6.67691 | 7.84384 | 8.16631 | 6.9756  | 7.10883 |
| EYA2         | 7.65962 | 7.83028 | 7.34051 | 7.01663 | 7.43573 | 7.39179 | 7.59922 | 6.6716  | 5.98076 |
| MIR3616      | 4.2163  | 4.12451 | 4.18238 | 3.81447 | 3.83298 | 4.569   | 4.09231 | 3.86527 | 3.59662 |
| LOC100131496 | 5.29798 | 4.89998 | 5.35107 | 6.3359  | 6.07721 | 6.03191 | 5.86233 | 6.23111 | 5.96045 |
| NCOA3        | 10.175  | 9.99549 | 10.0162 | 8.73529 | 6.54293 | 8.78376 | 9.05058 | 9.49486 | 9.47087 |
| SULF2        | 5.77985 | 5.78447 | 5.98422 | 6.78383 | 6.66717 | 7.05018 | 7.08923 | 6.53915 | 6.82109 |
| LINC00494    | 5.22516 | 5.07108 | 4.72723 | 6.03918 | 5.74644 | 5.72458 | 5.34773 | 5.26162 | 5.8549  |
| ARFGEF2      | 8.83149 | 8.99294 | 8.86525 | 8.29513 | 5.9532  | 7.83636 | 8.75308 | 7.89404 | 8.09388 |
| CSE1L        | 10.5324 | 10.3656 | 10.5686 | 10.0162 | 6.46574 | 9.19316 | 10.1584 | 8.97379 | 9.64066 |
| ZFAS1        | 10.0746 | 9.98165 | 10.0074 | 9.63187 | 8.57263 | 9.72573 | 10.1212 | 9.35292 | 9.72801 |
| RNF114       | 8.73235 | 8.50155 | 8.77894 | 8.77185 | 7.17173 | 8.47538 | 9.2494  | 9.55798 | 8.2414  |
| SNAI1        | 5.99331 | 5.48423 | 5.7704  | 6.63068 | 6.23089 | 6.31588 | 6.57236 | 7.65555 | 7.27615 |
| MIR645       | 7.31704 | 7.33663 | 7.19629 | 5.80869 | 6.20471 | 5.27414 | 6.21008 | 6.92739 | 6.69797 |
| PARD6B       | 8.42586 | 8.26204 | 7.85756 | 7.88438 | 7.0122  | 8.99757 | 7.96652 | 9.12859 | 8.79863 |
| BCAS4        | 5.57853 | 5.12403 | 5.14774 | 5.90807 | 5.41347 | 6.58107 | 6.07563 | 6.24817 | 5.58392 |
| MOCS3        | 6.65333 | 6.49312 | 6.85467 | 6.51459 | 5.79589 | 5.98629 | 7.18431 | 5.87293 | 6.00494 |
| TSHZ2        | 8.15379 | 9.17026 | 8.30413 | 6.89092 | 6.18667 | 6.85508 | 6.90109 | 7.20564 | 7.28688 |
| PFDN4        | 5.93244 | 6.37534 | 5.84277 | 6.26468 | 5.5095  | 5.63328 | 6.30175 | 6.0672  | 6.16987 |
| DOK5         | 4.88241 | 4.01239 | 4.91949 | 4.59805 | 4.8027  | 4.09814 | 3.5661  | 4.18007 | 4.51843 |
| MC3R         | 5.01941 | 4.72734 | 5.34856 | 5.81813 | 7.09752 | 5.4143  | 5.34856 | 5.26889 | 5.36832 |
| cass4        | 5.69294 | 5.41563 | 5.5416  | 5.84242 | 6.0269  | 5.87395 | 5.47652 | 5.77393 | 5.85382 |

|              |         |         |         |         |         |         |         |         |         |
|--------------|---------|---------|---------|---------|---------|---------|---------|---------|---------|
| RTFDC1       | 7.35509 | 6.89354 | 7.10588 | 7.2636  | 6.39592 | 7.07028 | 7.28354 | 7.35783 | 7.32688 |
| TFAP2C       | 9.47733 | 9.67308 | 9.16981 | 9.25462 | 6.98343 | 9.17505 | 9.66911 | 8.89295 | 8.9852  |
| SPO11        | 3.6412  | 3.68528 | 3.56531 | 4.29594 | 4.82357 | 4.11616 | 3.84782 | 3.91465 | 3.8753  |
| RAE1         | 7.09903 | 6.91352 | 6.98496 | 7.28503 | 5.95005 | 7.28951 | 8.06615 | 7.05672 | 7.77494 |
| RBM38        | 6.51601 | 6.5523  | 6.37097 | 7.68722 | 7.38049 | 7.33731 | 7.31067 | 8.01387 | 7.59602 |
| PCK1         | 4.97892 | 4.38063 | 4.91943 | 5.36842 | 5.25146 | 4.79605 | 5.20633 | 5.15312 | 5.01447 |
| MIR4532      | 6.85567 | 6.41955 | 7.69188 | 6.67058 | 7.4598  | 7.32686 | 6.75183 | 6.88152 | 6.52414 |
| c20orf85     | 5.22233 | 5.54458 | 5.97832 | 6.28824 | 6.55231 | 6.13    | 5.83095 | 6.26456 | 6.11977 |
| VAPB         | 8.34557 | 8.59263 | 8.54954 | 8.42777 | 7.17037 | 8.63688 | 8.35942 | 8.58676 | 9.11138 |
| APCDD1L-AS1  | 5.73536 | 5.86155 | 5.78306 | 6.03336 | 6.53748 | 7.60266 | 6.05699 | 7.90305 | 8.35777 |
| STX16-NPEPL1 | 7.44665 | 7.65136 | 7.46385 | 6.92669 | 6.0834  | 7.42103 | 7.06528 | 7.19773 | 7.01238 |
| GNAS         | 7.21879 | 6.95554 | 7.00517 | 7.19207 | 6.60348 | 7.33708 | 7.29572 | 7.22506 | 7.31524 |
| NELFCD       | 8.98247 | 8.8743  | 9.01956 | 8.61122 | 7.2822  | 7.76379 | 8.96849 | 7.77767 | 8.3067  |
| ZNF831       | 4.76171 | 5.51845 | 5.29274 | 6.00521 | 5.94518 | 6.06143 | 5.7408  | 5.56619 | 5.50241 |
| EDN3         | 5.69774 | 6.09084 | 6.16684 | 6.65949 | 6.42913 | 6.81346 | 6.20068 | 6.32    | 6.49237 |
| PHACTR3      | 5.62708 | 5.49182 | 5.40348 | 5.89121 | 5.8679  | 5.94264 | 5.65679 | 5.77337 | 6.02005 |
| CDH26        | 6.95807 | 6.31868 | 6.57407 | 7.36501 | 7.46866 | 7.44759 | 7.79204 | 7.69739 | 8.18697 |
| MIR646HG     | 5.80445 | 6.06206 | 5.97019 | 5.92319 | 6.31123 | 6.3519  | 5.64359 | 5.96676 | 6.13437 |
| MIR646       | 6.91951 | 7.48122 | 6.84152 | 6.28754 | 8.80927 | 6.10157 | 6.07399 | 6.67675 | 6.9714  |
| MIR4533      | 8.54497 | 8.70841 | 8.47768 | 9.54236 | 10.4222 | 9.49834 | 8.74283 | 9.28887 | 9.23605 |
| MIR548AG2    | 2.99276 | 2.85162 | 2.80984 | 3.33778 | 2.4911  | 2.70793 | 2.32887 | 2.09705 | 2.99877 |
| SS18L1       | 7.61777 | 7.47541 | 7.40535 | 7.65214 | 7.47138 | 7.5976  | 7.48588 | 7.50569 | 7.51016 |
| mtg2         | 7.05143 | 6.95396 | 6.97105 | 6.84623 | 6.74691 | 7.1421  | 7.42694 | 6.64177 | 6.91253 |
| OSBPL2       | 9.1868  | 9.40279 | 8.93248 | 9.00483 | 6.98012 | 9.61624 | 9.33255 | 9.53203 | 9.5132  |
| ADRM1        | 8.39854 | 8.4283  | 8.47498 | 9.14567 | 8.17854 | 9.30056 | 9.23855 | 8.96465 | 8.96252 |
| RPS21        | 7.50833 | 7.81648 | 8.02641 | 8.80199 | 8.01072 | 8.82239 | 8.92834 | 7.67163 | 8.08112 |



|           |         |         |         |         |         |         |         |         |         |
|-----------|---------|---------|---------|---------|---------|---------|---------|---------|---------|
| MIR1-1HG  | 5.22923 | 5.25961 | 5.04313 | 5.97312 | 5.66508 | 5.98015 | 5.60727 | 6.01915 | 6.03454 |
| MIR1-1    | 2.74114 | 3.05908 | 3.02415 | 3.78042 | 3.45536 | 4.43062 | 4.30209 | 3.07657 | 3.62724 |
| NTSR1     | 6.30242 | 6.30341 | 6.2089  | 7.04486 | 6.27377 | 6.88554 | 6.66707 | 7.07061 | 6.84329 |
| MRGBP     | 7.48937 | 7.59616 | 7.63444 | 8.01192 | 7.57768 | 8.45558 | 8.56196 | 7.96617 | 7.99932 |
| OGFR      | 6.72884 | 7.60681 | 6.95582 | 7.53875 | 6.23356 | 8.27138 | 7.71309 | 7.4247  | 7.01891 |
| GID8      | 9.67637 | 9.60771 | 9.65672 | 9.99448 | 9.04799 | 10.5325 | 10.4735 | 10.0188 | 10.3567 |
| LOC63930  | 5.46043 | 5.27549 | 5.62787 | 5.47122 | 6.25148 | 6.56048 | 5.59015 | 5.80885 | 5.80755 |
| LINC00029 | 5.13838 | 5.16084 | 5.32406 | 5.98432 | 5.23885 | 6.30235 | 5.81538 | 6.02291 | 5.8744  |
| HAR1A     | 5.43035 | 5.42286 | 5.38151 | 5.74906 | 5.83768 | 6.48311 | 5.98291 | 5.86297 | 5.5532  |
| mir124-3  | 1.81865 | 1.86285 | 2.0425  | 1.76143 | 1.96989 | 2.79413 | 2.47112 | 2.11586 | 2.14479 |
| BIRC7     | 6.90641 | 6.57165 | 6.85044 | 7.49294 | 7.71475 | 7.35267 | 7.26669 | 7.65868 | 7.32855 |
| FLJ16779  | 5.67121 | 5.62182 | 5.82    | 5.95062 | 6.71708 | 6.36414 | 5.76787 | 6.09891 | 6.17102 |
| ARFGAP1   | 6.79827 | 6.78318 | 6.67073 | 7.42992 | 6.65476 | 7.08376 | 7.24955 | 7.08085 | 6.98572 |
| MIR4326   | 5.59865 | 5.33618 | 5.71395 | 6.98789 | 6.91308 | 7.19547 | 7.32521 | 6.82877 | 6.58144 |
| ppdpf     | 9.94566 | 9.64049 | 9.85999 | 11.0167 | 11.0129 | 11.1574 | 11.0738 | 10.5442 | 10.8318 |
| SLC2A4RG  | 8.15682 | 8.39196 | 8.53624 | 8.48771 | 6.9523  | 8.27371 | 8.77465 | 7.78189 | 8.13397 |
| ZBTB46    | 6.72868 | 6.54239 | 7.00971 | 7.49784 | 7.85383 | 7.36777 | 6.92983 | 6.963   | 6.84037 |
| ABHD16B   | 6.22634 | 6.33608 | 5.99504 | 6.71448 | 6.42792 | 6.88393 | 6.61842 | 6.66871 | 6.63893 |
| TPD52L2   | 9.28043 | 8.98472 | 9.18676 | 9.53232 | 8.22118 | 10.5131 | 10.1262 | 10.0657 | 10.1806 |
| MIR941-1  | 8.89914 | 8.7671  | 8.83533 | 8.86404 | 9.39095 | 8.93606 | 8.80482 | 9.72193 | 9.19658 |
| UCKL1-AS1 | 5.48016 | 5.5209  | 5.55649 | 5.56963 | 5.34354 | 6.07305 | 5.26967 | 5.99529 | 6.1806  |
| PRPF6     | 8.52165 | 8.7997  | 8.59389 | 8.25648 | 6.4636  | 8.10158 | 8.55814 | 8.23451 | 8.10766 |
| LINC00176 | 6.31819 | 6.16839 | 6.06238 | 6.84683 | 6.80447 | 6.63364 | 6.14108 | 6.43951 | 6.37989 |
| OPRL1     | 5.66319 | 5.66876 | 5.79607 | 5.83704 | 6.62765 | 6.3736  | 5.9247  | 6.00053 | 5.82308 |
| MYT1      | 6.40507 | 6.36072 | 6.77686 | 6.60906 | 6.72207 | 6.95226 | 6.8479  | 7.00509 | 7.05853 |
| PCMTD2    | 10.475  | 10.7236 | 10.2856 | 9.15787 | 7.15796 | 8.24026 | 9.06668 | 8.22912 | 8.51871 |

|              |         |         |         |         |         |         |         |         |         |
|--------------|---------|---------|---------|---------|---------|---------|---------|---------|---------|
| C20orf96     | 7.32118 | 6.90453 | 6.58932 | 6.24975 | 5.46167 | 5.91563 | 6.11386 | 5.9106  | 6.01409 |
| TCF15        | 5.31672 | 5.94504 | 5.84206 | 6.47539 | 6.93014 | 6.72997 | 6.54715 | 6.32724 | 6.13853 |
| SRXN1        | 8.48642 | 8.24582 | 8.21481 | 9.13754 | 7.69997 | 9.2594  | 9.49362 | 9.61209 | 9.27731 |
| ANGPT4       | 5.92125 | 6.32814 | 6.59563 | 6.55179 | 6.94513 | 6.6825  | 6.43259 | 6.80996 | 6.68614 |
| RSPO4        | 6.46327 | 6.44859 | 6.46259 | 6.81083 | 6.77533 | 6.67982 | 6.52586 | 6.81862 | 6.55505 |
| TMEM74B      | 6.28994 | 6.86656 | 5.95277 | 6.53258 | 6.68017 | 6.23534 | 6.20684 | 6.42756 | 5.99252 |
| NSFL1C       | 9.0555  | 8.65078 | 8.81768 | 8.8772  | 6.66962 | 8.91731 | 9.18876 | 9.20424 | 9.09692 |
| SIRPB2       | 5.41081 | 5.66435 | 5.63855 | 5.40504 | 5.96885 | 5.62401 | 5.23238 | 5.37406 | 5.62427 |
| Sirpd        | 5.17865 | 5.10605 | 5.01639 | 5.48059 | 6.54428 | 5.3149  | 5.1649  | 5.36129 | 5.28405 |
| SIRPB1       | 5.39357 | 5.21935 | 5.78675 | 5.7408  | 6.55554 | 5.77545 | 5.62332 | 5.92983 | 5.72001 |
| SIRPG        | 5.42787 | 5.41633 | 5.28718 | 5.61004 | 6.87531 | 5.56814 | 5.06311 | 5.51541 | 5.61594 |
| LOC100289473 | 6.45681 | 6.86447 | 6.48456 | 6.65897 | 6.37321 | 6.86476 | 6.77021 | 6.55488 | 6.77774 |
| PDYN         | 4.57825 | 5.06575 | 4.6569  | 5.05513 | 5.36621 | 5.43634 | 4.92151 | 4.99881 | 5.17582 |
| SNRPB        | 9.18732 | 9.02245 | 9.74132 | 10.0407 | 7.34831 | 9.35655 | 10.0889 | 9.6474  | 9.9504  |
| ZNF343       | 6.74068 | 7.06915 | 7.10494 | 6.37946 | 6.82177 | 6.14274 | 6.78229 | 6.24041 | 6.51625 |
| IDH3B        | 8.08369 | 8.04683 | 8.31785 | 8.06352 | 6.647   | 8.07007 | 8.47737 | 7.57731 | 7.95684 |
| PCED1A       | 7.81397 | 7.16678 | 7.30675 | 7.82677 | 6.58763 | 6.83294 | 7.61655 | 7.14203 | 7.52619 |
| AVP          | 5.72288 | 6.00777 | 5.60527 | 6.80931 | 6.09316 | 6.66907 | 6.58379 | 6.46022 | 6.59085 |
| UBOX5        | 7.61312 | 7.9077  | 7.53248 | 7.75302 | 6.82615 | 7.62404 | 7.68015 | 7.66067 | 7.45776 |
| LZTS3        | 6.51418 | 6.58442 | 6.48603 | 6.76855 | 7.24256 | 6.98396 | 6.81231 | 6.72481 | 6.64024 |
| DDRKG1       | 7.33236 | 7.62551 | 7.23692 | 7.4865  | 6.54603 | 7.54975 | 7.55747 | 7.42753 | 7.39913 |
| c20orf194    | 8.92535 | 8.54327 | 8.77398 | 8.32016 | 6.95427 | 7.37299 | 7.96439 | 8.21167 | 8.60609 |
| GFRA4        | 6.05733 | 6.15345 | 6.16627 | 7.01139 | 6.82651 | 7.14231 | 6.75818 | 6.97891 | 6.88527 |
| ADAM33       | 6.73879 | 6.99913 | 7.03889 | 6.90808 | 7.23292 | 6.9704  | 6.9965  | 6.78803 | 6.76505 |
| C20orf27     | 6.31632 | 6.32184 | 6.48349 | 6.90392 | 6.51797 | 6.70407 | 6.39333 | 6.58299 | 6.8438  |
| SPEF1        | 5.20257 | 5.31031 | 5.32359 | 5.53877 | 5.39322 | 6.4047  | 5.49249 | 5.67753 | 5.99605 |

|             |         |         |         |         |         |         |         |         |         |
|-------------|---------|---------|---------|---------|---------|---------|---------|---------|---------|
| RNF24       | 8.51    | 8.80223 | 8.82484 | 8.5241  | 7.90332 | 9.44474 | 8.50023 | 8.81858 | 8.64324 |
| ADRA1D      | 6.12688 | 6.21009 | 6.0184  | 6.81743 | 7.11489 | 6.68967 | 6.52385 | 6.27359 | 6.5005  |
| PRNT        | 4.17427 | 4.5604  | 4.80015 | 5.00668 | 5.73407 | 4.82106 | 4.4436  | 5.04869 | 4.89537 |
| RASSF2      | 8.3863  | 7.77359 | 9.50322 | 7.66906 | 6.28021 | 7.92091 | 7.44065 | 7.24699 | 7.56103 |
| TMEM230     | 8.83777 | 8.87324 | 8.65929 | 8.97297 | 7.67329 | 7.89264 | 9.07879 | 8.50373 | 8.73916 |
| PCNA        | 8.01047 | 7.74092 | 8.16772 | 8.95929 | 6.21971 | 7.9263  | 8.61168 | 7.68461 | 7.70772 |
| PROKR2      | 5.90871 | 5.77551 | 5.73582 | 6.4756  | 6.52264 | 6.79691 | 6.54815 | 6.18537 | 6.30013 |
| LINC00658   | 4.92993 | 5.10736 | 5.16502 | 5.39339 | 6.38964 | 5.28371 | 5.564   | 5.53792 | 5.3659  |
| LINC00654   | 5.40131 | 5.62499 | 5.59351 | 5.47638 | 6.45921 | 5.77217 | 5.29737 | 5.71766 | 5.75    |
| GPCPD1      | 9.726   | 9.06847 | 9.09133 | 8.34872 | 7.16344 | 8.93468 | 9.35404 | 9.98896 | 8.53494 |
| TRMT6       | 8.41843 | 8.74076 | 8.72018 | 8.50715 | 6.93354 | 8.03335 | 8.9538  | 7.79153 | 8.29805 |
| LRRN4       | 5.73582 | 5.42768 | 5.77576 | 6.02808 | 6.35153 | 6.37839 | 5.8184  | 6.44496 | 5.90782 |
| FERMT1      | 9.28563 | 9.55606 | 9.3282  | 9.61063 | 6.17714 | 9.84905 | 9.07894 | 9.3385  | 10.2819 |
| HAO1        | 4.41946 | 4.21433 | 4.15165 | 4.44483 | 4.63213 | 4.67176 | 4.23611 | 4.28277 | 4.39065 |
| TMX4        | 7.46083 | 7.38771 | 7.83432 | 6.75143 | 5.96171 | 7.04773 | 7.62328 | 6.71981 | 6.87084 |
| PAK5        | 4.84889 | 4.82845 | 4.96376 | 5.21769 | 5.49908 | 4.93786 | 5.09737 | 4.99497 | 4.57074 |
| SNAP25-AS1  | 5.04159 | 5.20406 | 5.11742 | 5.30696 | 6.34235 | 5.54574 | 5.49624 | 5.48791 | 5.67318 |
| MKKS        | 7.42219 | 7.30885 | 7.43213 | 7.15735 | 5.85161 | 6.47601 | 7.25822 | 6.42398 | 6.54204 |
| JAG1        | 11.4824 | 11.6658 | 11.4322 | 10.4901 | 7.73228 | 10.0172 | 10.7066 | 10.9744 | 11.2343 |
| LOC339593   | 4.43081 | 4.57248 | 4.55934 | 4.72868 | 5.30132 | 4.25198 | 4.74644 | 4.41379 | 4.61072 |
| ISM1-AS1    | 5.89264 | 5.88963 | 5.86057 | 5.52248 | 6.74197 | 5.21086 | 5.54526 | 5.43343 | 5.4864  |
| SEL1L2      | 4.75702 | 5.03337 | 4.68327 | 5.30129 | 6.00467 | 5.27466 | 4.80445 | 4.81907 | 5.18654 |
| FLRT3       | 7.19396 | 6.28986 | 7.22362 | 7.46985 | 5.41624 | 7.55363 | 8.39425 | 7.77884 | 8.98989 |
| MACROD2-AS1 | 4.87152 | 5.04956 | 4.76163 | 4.71477 | 6.09382 | 4.7197  | 5.1094  | 4.90551 | 4.42009 |
| KIF16B      | 9.06749 | 8.92209 | 8.66912 | 7.76588 | 6.8801  | 8.08368 | 8.28301 | 8.32845 | 8.42986 |
| RRBP1       | 7.82732 | 7.6812  | 7.59628 | 8.11667 | 7.0136  | 8.6078  | 8.36319 | 8.50435 | 8.04723 |

|           |         |         |         |         |         |         |         |         |         |
|-----------|---------|---------|---------|---------|---------|---------|---------|---------|---------|
| SNX5      | 8.43221 | 8.36951 | 8.45494 | 8.41456 | 6.64139 | 7.96034 | 8.33634 | 8.04603 | 8.34774 |
| OVOL2     | 6.77952 | 6.65046 | 6.41684 | 6.52031 | 5.28066 | 6.5046  | 7.08655 | 6.21433 | 6.53145 |
| DZANK1    | 6.06362 | 6.30548 | 6.654   | 6.23261 | 6.3113  | 6.11881 | 5.81576 | 5.73071 | 5.75088 |
| RBBP9     | 10.0159 | 9.9068  | 10.4605 | 8.42973 | 6.58742 | 7.93205 | 9.2756  | 8.7001  | 9.1233  |
| LINC00652 | 4.36192 | 4.65669 | 4.39545 | 5.23327 | 5.18928 | 4.83184 | 4.61133 | 4.69231 | 4.69739 |
| C20orf78  | 4.81533 | 4.92067 | 4.60131 | 5.32629 | 4.9159  | 4.94125 | 4.86177 | 5.28188 | 4.91508 |
| CRNKL1    | 7.75592 | 8.04957 | 7.83871 | 7.8145  | 6.25183 | 8.02742 | 8.02409 | 7.64841 | 7.71435 |
| NKX2-4    | 5.79774 | 6.11048 | 5.87207 | 6.18051 | 5.85609 | 6.91886 | 6.20986 | 6.33545 | 6.56378 |
| LINC00261 | 3.84788 | 3.89103 | 3.82238 | 4.48737 | 4.34616 | 4.65659 | 4.29892 | 3.92465 | 3.99639 |
| FOXA2     | 6.38782 | 6.74988 | 6.65245 | 7.11346 | 7.0095  | 7.28677 | 6.88505 | 7.15315 | 6.99371 |
| THBD      | 9.17805 | 7.842   | 8.40851 | 9.56396 | 6.31213 | 8.52887 | 9.43793 | 8.091   | 7.88373 |
| CD93      | 8.76698 | 7.53368 | 8.6526  | 7.97584 | 6.81481 | 7.26354 | 7.57286 | 8.46472 | 8.22575 |
| LINC00656 | 5.42787 | 5.3486  | 5.12345 | 5.74596 | 5.45299 | 5.82852 | 5.72668 | 5.62919 | 5.82713 |
| CST11     | 4.25383 | 3.94489 | 4.12857 | 4.99128 | 5.0411  | 5.22797 | 4.81685 | 4.6209  | 4.74423 |
| CST9L     | 5.51941 | 5.12126 | 5.35147 | 5.88112 | 6.40854 | 5.7356  | 5.40575 | 5.64814 | 5.73779 |
| CST9      | 5.75639 | 5.64416 | 5.81722 | 6.01944 | 6.24698 | 6.19259 | 5.78884 | 5.76606 | 5.91622 |
| CST3      | 9.58204 | 9.48956 | 9.66492 | 10.8102 | 10.4852 | 11.0594 | 10.9127 | 10.3399 | 10.5561 |
| CST4      | 7.19865 | 6.75284 | 6.88353 | 6.00464 | 7.30439 | 6.52613 | 6.10927 | 6.84545 | 6.32204 |
| CST1      | 2.39728 | 2.40028 | 2.69671 | 2.58879 | 2.76866 | 3.2096  | 3.06779 | 2.77807 | 3.06821 |
| CST2      | 7.21283 | 7.13634 | 7.29866 | 7.33381 | 7.51466 | 8.55086 | 7.26494 | 8.3026  | 8.08459 |
| CST5      | 4.87939 | 4.89911 | 5.05313 | 5.26466 | 5.65777 | 5.10069 | 5.85254 | 5.1533  | 5.05484 |
| GGTLC1    | 6.82629 | 6.76637 | 6.83273 | 6.69991 | 7.1495  | 6.96756 | 6.73402 | 7.1545  | 6.80447 |
| APMAP     | 7.50652 | 7.29694 | 7.15368 | 7.86488 | 6.13019 | 7.04563 | 7.61534 | 7.32205 | 6.89154 |
| ACSS1     | 6.83102 | 6.31181 | 6.51429 | 6.68368 | 6.98369 | 6.25288 | 6.27823 | 6.37462 | 6.27175 |
| vsx1      | 5.53416 | 5.39551 | 5.63217 | 5.58904 | 7.19911 | 6.59418 | 5.44929 | 6.2879  | 5.92818 |
| LOC284798 | 5.55832 | 5.81624 | 5.64986 | 6.24155 | 6.71452 | 6.13575 | 5.78019 | 6.38363 | 6.19996 |

|           |         |         |         |         |         |         |         |         |         |
|-----------|---------|---------|---------|---------|---------|---------|---------|---------|---------|
| ABHD12    | 7.91102 | 7.85526 | 7.93595 | 8.13897 | 7.14764 | 7.74866 | 7.98886 | 8.08001 | 7.79812 |
| NINL      | 6.19475 | 6.38757 | 6.24881 | 6.41682 | 6.04209 | 6.31248 | 6.42114 | 6.29753 | 6.2279  |
| NANP      | 6.19085 | 6.26999 | 6.32806 | 6.54807 | 5.7704  | 6.20589 | 6.67886 | 6.35122 | 6.5259  |
| ZNF337    | 6.49683 | 6.60955 | 6.51541 | 6.34921 | 5.98692 | 6.24567 | 6.64407 | 6.28253 | 6.37016 |
| NCOR1P1   | 1.80236 | 2.03291 | 1.68101 | 2.10635 | 1.78582 | 2.49122 | 2.52288 | 1.84082 | 2.27406 |
| MIR663AHG | 4.53884 | 4.34561 | 4.71317 | 5.38311 | 6.43131 | 5.27881 | 4.68258 | 4.64948 | 4.66122 |
| HM13-AS1  | 5.40662 | 5.07446 | 5.3583  | 5.59295 | 5.87798 | 5.50834 | 5.08793 | 5.86679 | 5.81623 |
| BCL2L1    | 8.64272 | 8.58162 | 8.81599 | 8.64676 | 7.16752 | 9.07849 | 8.58181 | 8.98178 | 9.58919 |
| FOXS1     | 6.50496 | 6.42115 | 6.63282 | 7.43419 | 7.85828 | 7.52044 | 7.28129 | 7.03088 | 7.24306 |
| DUSP15    | 6.22552 | 6.39081 | 6.16277 | 6.96086 | 6.6497  | 7.00582 | 6.7501  | 6.74991 | 6.66489 |
| PDRG1     | 6.34778 | 6.41758 | 6.31085 | 7.07662 | 5.98386 | 7.92177 | 7.48791 | 7.44561 | 7.07506 |
| PLAGL2    | 8.0132  | 7.93215 | 8.39301 | 8.00837 | 6.92814 | 7.70058 | 7.9789  | 8.00562 | 8.27437 |
| NOL4L     | 5.61506 | 5.34978 | 5.4336  | 5.86928 | 6.52674 | 6.09166 | 5.64377 | 5.72072 | 5.95795 |
| C20orf203 | 5.20669 | 5.42145 | 5.32776 | 5.51589 | 5.61436 | 5.67146 | 5.50375 | 5.47154 | 5.50022 |
| COMMD7    | 8.70932 | 8.24072 | 8.55034 | 8.54345 | 7.62884 | 8.10812 | 8.93547 | 7.78275 | 8.52469 |
| SUN5      | 4.9348  | 5.22261 | 5.02403 | 5.35548 | 5.71584 | 5.91525 | 5.5812  | 5.91936 | 5.72972 |
| CDK5RAP1  | 7.47556 | 7.07628 | 7.39283 | 6.8641  | 6.13241 | 6.01334 | 7.08117 | 6.04584 | 6.34512 |
| NECAB3    | 7.45208 | 7.51688 | 7.34075 | 7.6177  | 7.40736 | 7.80127 | 7.05993 | 7.35597 | 7.40077 |
| E2F1      | 6.94376 | 6.85145 | 6.89033 | 7.43177 | 6.56312 | 6.97351 | 6.93032 | 6.8601  | 6.6559  |
| AHCY      | 7.33845 | 7.56874 | 7.43265 | 8.26416 | 6.79794 | 8.56839 | 8.19218 | 7.32033 | 7.75765 |
| NCOA6     | 9.01105 | 9.21923 | 8.99    | 7.77538 | 6.37864 | 8.01773 | 8.14528 | 7.73815 | 8.57967 |
| HMGB3P1   | 4.51731 | 4.61016 | 4.27417 | 4.40355 | 7.25639 | 4.65169 | 4.63019 | 4.43516 | 5.03526 |
| GGT7      | 6.945   | 6.64375 | 6.44206 | 6.58503 | 5.9815  | 6.22587 | 6.32251 | 6.12437 | 6.38522 |
| GSS       | 8.2542  | 8.10773 | 8.15055 | 8.57832 | 6.96379 | 8.32682 | 8.74707 | 7.28256 | 7.88791 |
| EIF6      | 9.12118 | 9.02725 | 9.23986 | 9.96556 | 8.63815 | 10.2574 | 10.2303 | 9.2733  | 9.98196 |
| UQCC1     | 7.98238 | 7.98548 | 7.99411 | 7.00879 | 6.86633 | 6.82478 | 6.79319 | 6.54752 | 6.95196 |

|           |         |         |         |         |         |         |         |         |         |
|-----------|---------|---------|---------|---------|---------|---------|---------|---------|---------|
| MIR1289-1 | 2.47459 | 2.9785  | 2.73306 | 3.40487 | 3.80119 | 3.48411 | 3.02549 | 3.09415 | 2.87507 |
| FER1L4    | 5.70914 | 5.83833 | 5.99586 | 6.11941 | 6.3566  | 6.61372 | 6.02407 | 6.74931 | 6.43979 |
| rbm12     | 9.16395 | 9.07154 | 9.24889 | 8.60697 | 7.19733 | 8.35805 | 8.85143 | 8.72717 | 8.9145  |
| NFS1      | 8.11828 | 7.89136 | 7.85918 | 7.49234 | 5.89597 | 6.85488 | 7.58358 | 6.89059 | 6.96527 |
| RBM39     | 9.31807 | 9.26642 | 9.01046 | 8.60775 | 7.06097 | 8.39876 | 8.19156 | 8.84773 | 8.91504 |
| SCAND1    | 4.74081 | 4.72815 | 5.02353 | 5.95721 | 5.63986 | 6.27709 | 6.1413  | 5.3955  | 5.65801 |
| NORAD     | 11.2877 | 10.7009 | 11.5106 | 10.5364 | 7.68428 | 10.2745 | 11.1583 | 10.9237 | 11.0869 |
| SLA2      | 5.44271 | 5.43968 | 5.59215 | 5.75606 | 5.71414 | 6.05935 | 5.35004 | 5.99524 | 5.36657 |
| NDRG3     | 8.92579 | 8.37002 | 8.3915  | 7.72878 | 6.27939 | 7.15144 | 8.00725 | 8.03682 | 7.97718 |
| SAMHD1    | 7.4021  | 6.95033 | 8.73581 | 6.53954 | 5.56106 | 5.35577 | 6.97675 | 5.84163 | 6.22416 |
| RBL1      | 7.12882 | 6.72871 | 7.4503  | 6.9367  | 5.27934 | 6.01687 | 6.72371 | 6.29024 | 5.63152 |
| MROH8     | 6.56446 | 6.62435 | 6.69814 | 6.15434 | 6.75553 | 6.04838 | 6.26997 | 6.50396 | 5.94233 |
| GHRH      | 5.46511 | 5.54505 | 5.86192 | 5.90589 | 5.88847 | 6.53373 | 5.78056 | 5.84733 | 5.71314 |
| BLCAP     | 6.39904 | 6.71502 | 6.6749  | 6.43794 | 5.92283 | 5.98594 | 6.23963 | 6.00253 | 6.5697  |
| LINC00489 | 6.1832  | 6.30242 | 6.08731 | 6.53059 | 6.61251 | 6.434   | 6.20867 | 6.30267 | 6.3543  |
| TTI1      | 7.89213 | 7.83764 | 7.82298 | 7.06124 | 6.69218 | 6.67475 | 7.36527 | 6.92922 | 7.17831 |
| KIAA1755  | 5.85965 | 5.91967 | 6.09289 | 6.20951 | 7.29867 | 6.73003 | 6.3838  | 6.45569 | 6.41827 |
| SNHG17    | 7.15774 | 6.84308 | 7.26198 | 6.84001 | 6.75519 | 6.73629 | 7.2405  | 7.00812 | 6.80405 |
| LOC339568 | 4.23114 | 3.98158 | 3.83154 | 4.34627 | 4.88585 | 4.07716 | 4.29277 | 4.16907 | 4.27495 |
| MAFB      | 8.82619 | 9.58371 | 9.54972 | 10.0392 | 7.89858 | 10.5421 | 10.3082 | 10.1755 | 10.6065 |
| EMILIN3   | 5.11297 | 5.47397 | 5.23322 | 6.63042 | 5.77777 | 6.12425 | 5.53898 | 5.45565 | 5.4188  |
| CHD6      | 8.62362 | 9.09421 | 8.70922 | 6.85575 | 6.20998 | 6.84232 | 7.25483 | 6.53462 | 6.6504  |
| GTSF1L    | 4.59565 | 4.8564  | 4.8134  | 4.8716  | 5.49762 | 5.48391 | 4.42207 | 4.71885 | 5.30363 |
| JPH2      | 5.71643 | 5.67334 | 5.9171  | 6.26626 | 6.24927 | 5.84482 | 6.03293 | 6.17982 | 6.12127 |
| OSER1     | 7.63966 | 7.78007 | 7.26268 | 7.36157 | 7.2861  | 9.3664  | 8.09422 | 9.97876 | 8.34485 |
| FITM2     | 8.46745 | 8.32381 | 7.76915 | 8.37004 | 6.94501 | 7.53209 | 7.94695 | 7.48662 | 7.44124 |

|           |         |         |         |         |         |         |         |         |         |
|-----------|---------|---------|---------|---------|---------|---------|---------|---------|---------|
| SERINC3   | 12.0844 | 12.1004 | 12.0486 | 11.7813 | 11.4576 | 11.6862 | 11.8696 | 12.1357 | 12.086  |
| ADA       | 6.42642 | 6.31463 | 6.55146 | 7.08338 | 6.60331 | 7.20436 | 7.51749 | 6.99062 | 6.87153 |
| LINC01260 | 5.26507 | 5.37701 | 5.20366 | 5.45163 | 5.87668 | 5.62618 | 5.76625 | 5.60476 | 5.31209 |
| RIMS4     | 6.54759 | 6.93842 | 7.03756 | 7.74146 | 7.33066 | 7.89544 | 7.58672 | 7.58625 | 7.69509 |
| TOMM34    | 7.42851 | 7.15878 | 7.50404 | 7.52965 | 5.13056 | 7.53971 | 7.52965 | 7.37198 | 7.9691  |
| STK4-AS1  | 4.95878 | 4.57596 | 4.36398 | 5.06777 | 6.27814 | 5.16769 | 5.54139 | 5.11797 | 5.06856 |
| WFDC5     | 11.9462 | 11.7724 | 11.8176 | 11.7048 | 12.4554 | 12.3105 | 11.5894 | 10.3124 | 11.368  |
| WFDC12    | 12.5035 | 12.5346 | 11.9102 | 12.4637 | 13.5433 | 11.993  | 12.8365 | 13.7692 | 13.1984 |
| SLPI      | 10.6898 | 11.0052 | 11.1382 | 13.1209 | 13.6244 | 13.8184 | 13.17   | 13.9774 | 13.6976 |
| MATN4     | 5.8305  | 6.25769 | 6.06649 | 6.06357 | 7.09133 | 6.82927 | 6.05417 | 6.49014 | 6.38812 |
| SDC4      | 9.45952 | 10.0274 | 10.2484 | 9.60167 | 7.63454 | 10.7113 | 9.96566 | 10.5235 | 10.9998 |
| TP53TG5   | 5.43395 | 5.65042 | 5.64274 | 6.15215 | 6.0819  | 6.45141 | 5.80947 | 5.85234 | 6.10426 |
| WFDC8     | 4.80694 | 4.6395  | 4.65476 | 5.05988 | 5.55601 | 4.48519 | 4.67175 | 4.88318 | 4.78028 |
| WFDC9     | 3.9434  | 4.05233 | 3.41742 | 3.78042 | 5.74007 | 4.06685 | 3.91369 | 4.26684 | 3.60733 |
| WFDC11    | 3.39277 | 3.74698 | 3.10898 | 3.19438 | 4.03925 | 3.42155 | 3.40109 | 3.52932 | 3.39302 |
| WFDC10B   | 5.02861 | 5.07712 | 5.33734 | 4.83974 | 5.17081 | 4.84737 | 4.39982 | 4.83532 | 4.63781 |
| MIR3617   | 2.78132 | 2.83115 | 2.83597 | 2.63283 | 2.96281 | 2.42459 | 2.56512 | 2.31113 | 2.76988 |
| WFDC3     | 6.48577 | 6.46687 | 7.1672  | 5.71793 | 6.77431 | 5.98642 | 5.78186 | 5.79459 | 6.08563 |
| TNNC2     | 5.2817  | 5.427   | 5.52248 | 6.05392 | 6.32879 | 6.18689 | 5.86087 | 6.03003 | 5.95388 |
| ACOT8     | 7.05548 | 7.32309 | 7.07595 | 7.29317 | 6.49253 | 6.88377 | 7.42996 | 7.04933 | 6.92562 |
| SPATA25   | 6.70361 | 7.24747 | 6.95279 | 6.05999 | 6.35458 | 6.30303 | 5.8537  | 6.17313 | 5.97063 |
| NEURL2    | 6.0488  | 6.21047 | 6.15224 | 6.41719 | 5.8809  | 6.29825 | 6.41059 | 5.86339 | 5.85346 |
| PLTP      | 8.21732 | 7.92314 | 9.49133 | 9.09704 | 7.28907 | 8.99097 | 8.0528  | 8.49561 | 8.06942 |
| ZNF335    | 7.79429 | 7.78075 | 7.43352 | 7.64289 | 7.34087 | 7.73714 | 7.78063 | 7.62773 | 8.08993 |
| NCOA5     | 8.80393 | 8.61899 | 8.70743 | 8.11442 | 6.61807 | 7.53651 | 8.0155  | 7.00189 | 8.23812 |
| elmo2     | 8.36397 | 8.6628  | 8.22913 | 7.64481 | 6.37074 | 7.30085 | 7.81061 | 8.18993 | 7.70435 |

|           |         |         |         |         |         |         |         |         |         |
|-----------|---------|---------|---------|---------|---------|---------|---------|---------|---------|
| ZNF334    | 5.67888 | 6.21253 | 6.15993 | 6.31091 | 5.64227 | 5.76851 | 5.67542 | 5.73952 | 5.71978 |
| OCSTAMP   | 4.94698 | 5.17018 | 4.97125 | 5.11887 | 6.24131 | 5.1606  | 4.89913 | 5.38363 | 5.35183 |
| TP53RK    | 6.89327 | 6.58285 | 6.78973 | 6.8873  | 5.36484 | 6.48718 | 7.20504 | 6.06682 | 6.49822 |
| PTGIS     | 6.99635 | 7.11353 | 9.26034 | 6.49042 | 6.13213 | 6.60756 | 5.82313 | 6.16788 | 6.42774 |
| SPATA2    | 6.07118 | 5.36923 | 6.36149 | 5.79994 | 5.06326 | 5.30107 | 6.15953 | 5.68343 | 5.47163 |
| TRERNA1   | 5.91597 | 5.67331 | 5.82724 | 5.93537 | 6.69465 | 5.92043 | 5.95632 | 5.96132 | 6.04573 |
| UBE2V1    | 10.5398 | 10.4739 | 10.4152 | 10.5582 | 9.63813 | 10.0492 | 10.4932 | 10.4372 | 10.4254 |
| MIR1302-5 | 4.39858 | 4.42867 | 3.24954 | 3.02082 | 2.72111 | 2.50176 | 1.93754 | 2.55557 | 2.7897  |
| ADNP      | 9.46245 | 9.36683 | 9.34899 | 8.22197 | 6.74347 | 7.80109 | 8.38813 | 8.27417 | 8.6293  |
| SALL4     | 5.96634 | 6.11996 | 5.92949 | 6.59082 | 6.41369 | 6.49774 | 6.04901 | 6.17954 | 6.08525 |
| zfp64     | 7.3864  | 7.60761 | 7.42533 | 7.21484 | 7.07898 | 6.78506 | 7.15353 | 6.77962 | 6.52811 |
| ZNF217    | 7.9402  | 8.04731 | 7.38431 | 7.65372 | 6.15098 | 7.84669 | 7.8039  | 7.5795  | 7.55472 |
| SUMO1P1   | 2.16294 | 2.34248 | 2.38623 | 2.21577 | 3.03431 | 2.20875 | 2.36298 | 2.32996 | 2.88306 |
| BCAS1     | 5.71172 | 5.80487 | 5.80081 | 5.5021  | 6.3861  | 5.95575 | 5.71947 | 5.83196 | 5.3755  |
| MIR4756   | 7.60399 | 7.79051 | 7.48564 | 9.69579 | 8.54275 | 8.54732 | 8.36502 | 8.09478 | 8.14332 |
| CBLN4     | 4.37887 | 4.7534  | 4.7884  | 5.65706 | 5.38865 | 5.97802 | 5.34828 | 5.87685 | 5.38783 |
| AURKA     | 5.88536 | 6.23523 | 5.70207 | 6.98769 | 6.3779  | 5.62405 | 6.47704 | 6.32354 | 6.1573  |
| GCNT7     | 4.69352 | 4.51512 | 4.48852 | 5.07435 | 5.40212 | 5.01172 | 4.88421 | 4.7271  | 4.59629 |
| BMP7      | 8.06067 | 8.19184 | 7.81119 | 7.32258 | 7.07651 | 7.49978 | 7.61127 | 7.39549 | 6.76716 |
| MIR4325   | 4.1474  | 4.50522 | 4.08376 | 4.35557 | 5.21744 | 4.16428 | 4.28303 | 4.55141 | 4.19286 |
| MTRNR2L3  | 5.43664 | 5.55402 | 5.49347 | 5.40221 | 6.06438 | 5.65166 | 5.48327 | 5.74201 | 5.37174 |
| CTCFL     | 5.27425 | 5.50229 | 5.73394 | 5.94148 | 5.99375 | 5.33901 | 5.58473 | 5.85697 | 5.54846 |
| ZBP1      | 5.20061 | 5.66435 | 5.23836 | 5.59614 | 5.93165 | 6.1441  | 5.69555 | 5.45433 | 5.47194 |
| apcdd1l   | 6.28193 | 5.87661 | 6.08551 | 6.23681 | 7.18432 | 8.61539 | 6.6733  | 7.05115 | 7.18448 |
| MIR296    | 3.90547 | 4.0446  | 3.43045 | 3.82996 | 2.73959 | 3.61123 | 4.58461 | 3.54762 | 3.27856 |
| MIR298    | 6.43639 | 6.79832 | 6.16349 | 6.8657  | 6.65718 | 6.88985 | 6.70044 | 6.83004 | 7.07906 |



|               |         |         |         |         |         |         |         |         |         |
|---------------|---------|---------|---------|---------|---------|---------|---------|---------|---------|
| GNAS-AS1      | 5.04491 | 5.50418 | 4.93679 | 5.21419 | 5.212   | 5.42468 | 5.06262 | 4.9379  | 4.83015 |
| CTSZ          | 7.08341 | 7.08229 | 7.43812 | 7.71229 | 7.03682 | 7.27597 | 7.64513 | 8.15729 | 7.53685 |
| LOC100506384  | 4.879   | 5.21535 | 4.85615 | 5.46539 | 5.81646 | 5.60604 | 5.22227 | 5.33479 | 5.62458 |
| SYCP2         | 6.01749 | 5.68606 | 5.92918 | 3.97987 | 4.15125 | 3.75375 | 3.8906  | 4.58671 | 4.4549  |
| HRH3          | 5.92894 | 6.31877 | 6.18332 | 6.6346  | 6.93832 | 6.91942 | 6.35567 | 6.84901 | 6.76649 |
| CABLES2       | 7.13937 | 6.8331  | 6.77073 | 6.91473 | 7.09834 | 7.57311 | 6.88272 | 7.45763 | 7.02338 |
| RBBP8NL       | 6.61847 | 6.52002 | 6.64231 | 6.79128 | 7.17765 | 7.25189 | 6.53006 | 6.83114 | 6.77939 |
| GATA5         | 5.79185 | 6.10104 | 6.04991 | 6.30547 | 6.56686 | 6.30744 | 5.86325 | 6.55537 | 6.41314 |
| C20orf166-AS1 | 6.25041 | 6.56064 | 6.64361 | 6.71594 | 7.35521 | 6.62573 | 6.46663 | 6.81829 | 6.72629 |
| SLCO4A1-AS1   | 5.31261 | 5.19434 | 5.5812  | 6.14205 | 6.14234 | 6.0097  | 5.58599 | 7.25377 | 6.51416 |
| LINC00659     | 5.10072 | 5.14142 | 4.9269  | 5.18587 | 5.48717 | 5.69928 | 5.49285 | 5.35593 | 5.51846 |
| DIDO1         | 9.30264 | 9.1851  | 9.12895 | 8.42473 | 6.58683 | 7.6886  | 8.53555 | 7.92764 | 8.47605 |
| HAR1B         | 5.24936 | 5.04509 | 4.87566 | 5.61902 | 5.81639 | 5.77498 | 5.65935 | 5.60246 | 5.32656 |
| nkain4        | 5.20118 | 5.45633 | 5.24235 | 5.75154 | 5.02158 | 6.25405 | 6.13769 | 6.10016 | 6.12064 |
| EEF1A2        | 6.69896 | 7.01873 | 6.81761 | 8.3604  | 9.21725 | 10.1396 | 8.47456 | 9.51195 | 8.99144 |
| PTK6          | 8.09545 | 7.77578 | 7.93959 | 9.44806 | 8.08098 | 10.0361 | 9.67231 | 8.64474 | 8.85665 |
| SRMS          | 6.3122  | 6.32463 | 6.30754 | 6.99689 | 6.69115 | 7.7563  | 6.74736 | 6.91633 | 7.31325 |
| HELZ2         | 6.64358 | 6.30527 | 6.51435 | 7.34895 | 6.35065 | 8.80969 | 7.98309 | 8.20102 | 7.95103 |
| GMEB2         | 7.89263 | 7.75844 | 7.75844 | 8.30339 | 7.68635 | 8.62526 | 8.25296 | 8.03226 | 8.2454  |
| STMN3         | 7.9203  | 8.09839 | 7.88244 | 8.54309 | 8.869   | 8.28123 | 7.87381 | 8.03637 | 7.82658 |
| ARFRP1        | 6.96122 | 7.44151 | 7.04471 | 7.66613 | 7.2603  | 7.73317 | 7.58567 | 7.6859  | 7.61986 |
| UCKL1         | 6.69568 | 6.83974 | 6.6922  | 6.712   | 6.16571 | 6.97688 | 6.86669 | 6.71178 | 6.68073 |
| MIR647        | 8.44784 | 8.703   | 8.68162 | 9.06687 | 11.0365 | 9.37374 | 8.41216 | 9.80653 | 9.35997 |
| ZNF512B       | 7.84251 | 7.91168 | 7.87464 | 7.91906 | 6.30745 | 7.64676 | 7.72714 | 7.10157 | 7.0624  |
| SAMD10        | 7.37519 | 7.50345 | 7.63271 | 7.78342 | 8.39877 | 7.87021 | 8.03596 | 7.61348 | 7.81022 |
| SOX18         | 7.08077 | 6.73028 | 7.29886 | 7.95606 | 7.12725 | 8.03628 | 7.91601 | 7.58873 | 7.78769 |

|            |         |         |         |         |         |         |         |         |         |
|------------|---------|---------|---------|---------|---------|---------|---------|---------|---------|
| RGS19      | 7.23444 | 7.33592 | 7.45013 | 7.1953  | 7.40148 | 7.44541 | 7.51431 | 6.93614 | 7.19942 |
| NPBWR2     | 5.67068 | 5.66181 | 5.49539 | 6.23505 | 7.09114 | 6.34746 | 6.10031 | 6.09166 | 5.92142 |
| ANKRD30BP2 | 3.27394 | 3.46955 | 3.72736 | 3.84959 | 7.14518 | 4.45087 | 3.56024 | 4.58222 | 4.46751 |
| RBM11      | 4.8334  | 4.78305 | 5.14397 | 4.15381 | 4.20849 | 5.23664 | 4.24683 | 4.25958 | 4.42309 |
| SAMSN1-AS1 | 3.57219 | 3.67929 | 3.28082 | 3.62194 | 4.63293 | 4.01352 | 3.78159 | 3.72452 | 3.64389 |
| NRIP1      | 5.57429 | 5.79533 | 5.4539  | 7.69098 | 5.56252 | 8.76883 | 8.94152 | 5.72104 | 6.64769 |
| USP25      | 9.33757 | 9.41256 | 9.41705 | 8.12698 | 6.31384 | 7.46452 | 8.74855 | 8.34862 | 8.59165 |
| MIR99AHG   | 7.34771 | 7.26792 | 6.86055 | 5.06946 | 4.88851 | 4.01478 | 5.52502 | 5.05698 | 5.07032 |
| Mir99a     | 7.12176 | 7.20397 | 6.58619 | 5.9085  | 6.07214 | 6.4187  | 6.14842 | 6.16485 | 5.9692  |
| MIRLET7C   | 6.46079 | 5.90899 | 6.02429 | 4.12337 | 5.24248 | 4.19896 | 3.74644 | 4.20968 | 4.64612 |
| MIR125B2   | 5.35361 | 5.33602 | 5.50085 | 5.58645 | 5.20303 | 5.38387 | 5.53505 | 5.60246 | 5.09358 |
| LINC01549  | 3.51031 | 3.38205 | 3.54401 | 3.24335 | 4.8231  | 3.70938 | 3.45891 | 3.17071 | 3.14982 |
| CHODL      | 7.7256  | 5.69348 | 6.36201 | 5.59093 | 5.50514 | 5.86532 | 6.13843 | 5.32642 | 5.5934  |
| NCAM2      | 4.82643 | 4.5681  | 4.5088  | 4.84292 | 5.20201 | 4.93017 | 4.89252 | 4.98238 | 4.51577 |
| LINC00308  | 3.37679 | 3.36493 | 3.63058 | 3.64745 | 4.80794 | 4.05481 | 3.7486  | 3.53128 | 3.56603 |
| LOC339622  | 4.24582 | 4.69146 | 4.03491 | 4.59655 | 4.91476 | 4.89441 | 4.29313 | 4.69979 | 4.49728 |
| mir155     | 5.3184  | 5.13892 | 5.27044 | 5.5266  | 5.46841 | 6.34832 | 5.50356 | 5.84531 | 5.46592 |
| JAM2       | 7.44061 | 7.26499 | 8.16243 | 6.42674 | 5.2971  | 4.9174  | 6.38684 | 5.74538 | 6.33074 |
| MIR4759    | 2.24612 | 2.70183 | 2.1979  | 2.3896  | 1.85619 | 2.17971 | 2.06342 | 2.12139 | 2.49629 |
| LINC00113  | 4.09256 | 4.45385 | 5.35147 | 3.69474 | 4.61617 | 4.26192 | 4.39046 | 4.52048 | 4.66017 |
| LINC00314  | 3.05209 | 3.04882 | 3.09854 | 3.21375 | 3.6644  | 3.36554 | 3.1244  | 3.06542 | 3.01503 |
| LINC00161  | 3.69245 | 3.55178 | 3.54469 | 3.26589 | 3.65942 | 3.52774 | 3.75785 | 3.43347 | 3.17676 |
| USP16      | 9.20796 | 9.34663 | 9.45354 | 8.5394  | 6.56299 | 7.9836  | 8.92654 | 8.3821  | 8.68383 |
| MAP3K7CL   | 7.67924 | 7.6894  | 7.11311 | 6.34983 | 7.22403 | 7.05607 | 7.26948 | 6.89776 | 6.52505 |
| Krtap13-1  | 5.26323 | 4.78968 | 4.92626 | 5.46909 | 6.27261 | 5.38296 | 4.92458 | 5.34993 | 4.95924 |
| KRTAP13-4  | 4.02377 | 4.52246 | 4.48613 | 4.91363 | 5.1138  | 4.53721 | 4.28587 | 4.16922 | 4.20922 |

|              |         |         |         |         |         |         |         |         |         |
|--------------|---------|---------|---------|---------|---------|---------|---------|---------|---------|
| KRTAP15-1    | 3.90559 | 3.71819 | 3.70562 | 4.28247 | 5.8416  | 4.34565 | 3.52318 | 4.25728 | 3.61359 |
| Krtap6-3     | 3.90566 | 4.39497 | 4.60247 | 4.22572 | 6.44522 | 4.58834 | 4.82593 | 4.72577 | 5.07892 |
| KRTAP22-1    | 3.2177  | 3.25817 | 3.29134 | 3.85087 | 5.26639 | 4.31552 | 3.97294 | 3.73844 | 3.34678 |
| KRTAP20-1    | 6.20921 | 7.33543 | 6.46153 | 7.54408 | 6.01029 | 8.05935 | 8.15154 | 7.55122 | 7.43564 |
| KRTAP20-4    | 4.98275 | 4.83109 | 5.01017 | 5.60326 | 5.52265 | 4.83923 | 5.15067 | 5.34993 | 5.23548 |
| KRTAP20-2    | 5.23545 | 5.60495 | 5.64355 | 6.12812 | 6.31837 | 5.84153 | 5.91677 | 5.79408 | 5.60936 |
| KRTAP20-3    | 4.61334 | 4.50951 | 4.20007 | 5.05556 | 5.53394 | 5.49085 | 4.43608 | 4.57479 | 5.30285 |
| HUNK         | 6.24821 | 6.79286 | 5.99145 | 6.91375 | 5.95751 | 6.15521 | 6.71154 | 6.13741 | 6.33963 |
| mrp          | 5.54643 | 5.52764 | 5.43453 | 5.70003 | 6.22868 | 6.04707 | 5.92118 | 5.92052 | 5.55175 |
| URB1-AS1     | 6.94426 | 7.25787 | 6.88809 | 6.98763 | 6.75704 | 6.68892 | 6.98591 | 6.41327 | 6.90366 |
| PAXBP1-AS1   | 4.95749 | 5.42495 | 5.41884 | 4.85207 | 4.97335 | 4.44455 | 4.93598 | 4.67212 | 4.40605 |
| C21orf62-AS1 | 4.71682 | 4.66387 | 4.60691 | 4.09098 | 4.65395 | 4.38415 | 3.91146 | 4.4017  | 4.06039 |
| OLIG2        | 5.32154 | 5.39567 | 5.4753  | 6.29244 | 6.216   | 6.07091 | 6.17154 | 5.71553 | 5.85803 |
| olig1        | 5.4561  | 5.40203 | 5.81822 | 5.90717 | 6.43827 | 6.18177 | 6.18167 | 6.01935 | 6.02237 |
| IFNGR2       | 8.18513 | 7.90318 | 8.06703 | 8.56553 | 8.08079 | 8.50918 | 9.01905 | 8.03843 | 8.59274 |
| SON          | 8.9916  | 8.76611 | 8.76063 | 8.32942 | 5.76953 | 8.07037 | 8.64946 | 8.04255 | 8.76173 |
| ITSN1        | 8.35915 | 8.2829  | 8.14945 | 7.64588 | 7.35746 | 7.17954 | 7.85959 | 7.97109 | 7.77082 |
| LINC00649    | 6.062   | 5.8329  | 5.79997 | 5.42092 | 6.46519 | 6.22549 | 6.60913 | 6.01713 | 5.96906 |
| LINC00310    | 6.0948  | 6.15926 | 5.93661 | 5.99535 | 6.4581  | 6.07664 | 5.96157 | 5.92411 | 5.72009 |
| CLIC6        | 6.01841 | 5.58498 | 7.25124 | 4.43384 | 5.30521 | 4.38776 | 4.94271 | 4.59296 | 5.16697 |
| LINC00160    | 4.2025  | 4.32001 | 4.02278 | 5.28939 | 5.52877 | 5.09296 | 4.54099 | 4.9226  | 4.96437 |
| LINC01426    | 4.72608 | 4.46526 | 4.62896 | 4.69724 | 5.27805 | 4.95109 | 5.18851 | 5.06697 | 5.15525 |
| Mir802       | 4.8212  | 5.02027 | 4.62775 | 4.38471 | 6.37506 | 4.8908  | 4.90016 | 4.86241 | 4.88091 |
| CBR1         | 8.60355 | 8.68698 | 8.1841  | 7.95201 | 6.68982 | 6.96471 | 8.27779 | 7.42729 | 7.5887  |
| cbr3         | 7.50594 | 7.45894 | 7.46737 | 7.69295 | 7.56297 | 7.96997 | 8.58044 | 7.42196 | 8.08942 |
| DOPEY2       | 8.77381 | 8.58673 | 8.41144 | 8.8799  | 7.3693  | 8.60256 | 8.96282 | 9.16446 | 9.02854 |

|            |         |         |         |         |         |         |         |         |         |
|------------|---------|---------|---------|---------|---------|---------|---------|---------|---------|
| MORC3      | 8.64111 | 8.50379 | 8.23753 | 8.10479 | 6.09138 | 9.36961 | 8.44652 | 9.3222  | 8.98114 |
| SIM2       | 5.70566 | 5.79447 | 5.80705 | 6.1398  | 6.82302 | 6.52274 | 6.07499 | 6.40069 | 6.19386 |
| RIPPLY3    | 5.37781 | 5.49043 | 5.40162 | 5.51973 | 5.31164 | 5.8718  | 5.4348  | 5.65473 | 5.74551 |
| TTC3       | 9.79818 | 9.7262  | 9.76604 | 8.84753 | 7.11648 | 7.94256 | 8.50308 | 8.28805 | 8.76368 |
| DSCR9      | 4.79553 | 5.18707 | 4.92874 | 5.14717 | 5.56153 | 5.34204 | 4.57467 | 5.50115 | 5.42108 |
| DYRK1A     | 9.69549 | 9.71436 | 9.69249 | 8.36256 | 6.99087 | 8.55379 | 8.73127 | 8.1779  | 8.78644 |
| DSCR8      | 3.87649 | 4.13179 | 4.11947 | 4.61824 | 5.08682 | 4.23007 | 4.03041 | 4.18497 | 4.28117 |
| DSCR10     | 4.55439 | 4.62611 | 5.00854 | 5.24278 | 5.80819 | 5.17477 | 5.3497  | 5.37898 | 5.08808 |
| ETS2       | 11.2071 | 10.2932 | 10.9306 | 11.0661 | 9.44337 | 10.8736 | 10.9434 | 11.1682 | 11.082  |
| BRWD1-AS1  | 3.96936 | 4.18364 | 4.21912 | 4.8773  | 4.53433 | 5.2798  | 4.36461 | 5.01153 | 4.83515 |
| WRB        | 6.15628 | 6.38302 | 6.25128 | 6.502   | 5.52885 | 5.0564  | 5.89111 | 6.13288 | 5.44503 |
| SH3BGR     | 4.57004 | 4.56833 | 4.61722 | 4.70294 | 5.47939 | 5.45992 | 4.68136 | 4.74047 | 4.86765 |
| PCP4       | 4.95958 | 5.3829  | 5.00477 | 4.78762 | 5.55502 | 5.1589  | 5.38776 | 5.45938 | 5.05707 |
| DSCAM-AS1  | 3.3215  | 3.71453 | 3.54521 | 4.07319 | 4.02332 | 3.71926 | 3.77245 | 3.66437 | 3.76335 |
| BACE2      | 7.84888 | 7.09525 | 8.04735 | 7.33389 | 7.1562  | 8.24177 | 7.60641 | 8.61175 | 7.2862  |
| PLAC4      | 5.92503 | 6.394   | 6.0438  | 5.3471  | 5.63705 | 5.977   | 5.38208 | 8.06036 | 5.96798 |
| MX2        | 6.30533 | 6.02779 | 6.48372 | 5.78237 | 6.20267 | 5.11005 | 5.8014  | 5.77288 | 5.80343 |
| LINC00111  | 5.12748 | 5.98938 | 5.34077 | 5.69685 | 6.18077 | 5.44863 | 5.46071 | 5.88294 | 5.44277 |
| LINC00112  | 4.6993  | 5.23587 | 4.87181 | 5.37652 | 5.00062 | 5.43182 | 5.67482 | 5.32395 | 5.50671 |
| ZNF295-AS1 | 4.84439 | 4.54579 | 4.69673 | 5.30884 | 5.13587 | 5.72208 | 5.37374 | 5.38089 | 5.23976 |
| UMODL1     | 4.98137 | 4.89766 | 5.11631 | 5.37788 | 5.76936 | 5.51626 | 5.2774  | 5.44007 | 5.65716 |
| UBASH3A    | 5.31786 | 5.59634 | 5.59458 | 6.18406 | 6.01615 | 6.05163 | 6.01273 | 6.18899 | 5.92367 |
| PDE9A      | 7.10628 | 7.19476 | 7.00424 | 6.59049 | 7.3666  | 6.23496 | 6.70227 | 6.50291 | 6.64364 |
| PKNOX1     | 6.82292 | 6.8806  | 6.78545 | 7.18938 | 6.25056 | 7.00682 | 7.01806 | 6.85349 | 7.09895 |
| LINC00319  | 5.68926 | 5.32231 | 5.87126 | 6.31838 | 6.41952 | 6.63756 | 6.21264 | 6.7641  | 6.29814 |
| RRP1B      | 7.94601 | 7.84936 | 7.9779  | 7.40735 | 6.03362 | 7.05963 | 7.87116 | 7.51229 | 7.01463 |

|            |         |         |         |         |         |         |         |         |         |
|------------|---------|---------|---------|---------|---------|---------|---------|---------|---------|
| RRP1       | 7.26037 | 7.2514  | 7.30603 | 7.1519  | 7.20977 | 7.22873 | 7.79023 | 7.22582 | 7.36327 |
| AGPAT3     | 7.86573 | 7.84162 | 7.58136 | 7.64079 | 6.91249 | 7.45286 | 8.03631 | 7.29067 | 7.54254 |
| TRAPPC10   | 8.45132 | 8.57555 | 8.58543 | 8.23576 | 7.03561 | 7.72462 | 8.6098  | 8.30092 | 8.58056 |
| PWP2       | 6.57809 | 6.85762 | 6.44601 | 7.36148 | 6.13197 | 7.2491  | 7.13485 | 7.07149 | 6.82415 |
| c21orf33   | 7.18287 | 7.28603 | 7.18824 | 7.00553 | 7.08782 | 7.2531  | 7.02966 | 7.25954 | 6.96416 |
| aire       | 5.69421 | 5.69139 | 5.97325 | 6.45857 | 6.34291 | 6.7039  | 6.02163 | 6.66957 | 6.46471 |
| lrrc3      | 6.6064  | 6.23454 | 6.25637 | 7.07278 | 6.45932 | 6.7829  | 7.1488  | 6.57155 | 6.64241 |
| TSPEAR-AS2 | 6.26634 | 6.09146 | 6.21807 | 5.69861 | 6.70546 | 6.84713 | 6.32107 | 6.28395 | 6.5917  |
| Krtap10-4  | 5.03313 | 4.90279 | 4.9403  | 5.61875 | 6.4475  | 5.21345 | 5.41515 | 4.97923 | 5.3797  |
| KRTAP10-7  | 5.38038 | 5.27878 | 5.30221 | 6.34356 | 5.72435 | 6.39275 | 5.91986 | 5.99764 | 6.05229 |
| KRTAP10-8  | 5.35454 | 5.44787 | 5.59851 | 6.02104 | 6.16887 | 5.62835 | 5.83901 | 5.73238 | 6.02326 |
| KRTAP10-9  | 7.27243 | 7.19765 | 7.26012 | 7.74061 | 9.53857 | 8.02133 | 7.61106 | 7.93212 | 7.80875 |
| KRTAP10-10 | 6.92693 | 7.39086 | 6.82557 | 8.2096  | 8.76877 | 7.81658 | 7.73562 | 7.74744 | 7.33388 |
| KRTAP10-11 | 5.26351 | 5.5978  | 5.49378 | 5.79727 | 6.32842 | 5.57167 | 5.97453 | 5.60935 | 5.48521 |
| KRTAP12-3  | 5.84308 | 6.05663 | 5.68735 | 6.61452 | 7.39107 | 6.78232 | 6.37715 | 6.42307 | 6.50112 |
| KRTAP10-12 | 8.03284 | 8.42358 | 8.15984 | 8.86448 | 9.93416 | 8.67237 | 8.166   | 8.48911 | 8.3742  |
| ITGB2-AS1  | 5.68216 | 5.83867 | 5.98049 | 6.10022 | 6.67199 | 6.46276 | 6.19832 | 6.23937 | 6.0496  |
| LOC642852  | 5.8985  | 6.03338 | 5.94927 | 6.42583 | 5.85147 | 6.25056 | 6.2381  | 6.2233  | 6.26277 |
| PCBP3      | 6.07633 | 5.89916 | 5.79838 | 6.61509 | 6.13414 | 6.2382  | 5.89192 | 6.65377 | 6.15552 |
| MCM3AP-AS1 | 5.94266 | 6.1412  | 5.86087 | 6.1223  | 6.51569 | 5.99273 | 5.97545 | 5.84148 | 5.79781 |
| YBEY       | 7.21348 | 7.59573 | 7.23237 | 7.3965  | 6.68867 | 7.26031 | 7.72503 | 6.95822 | 7.17222 |
| PCNT       | 7.58867 | 7.78341 | 7.1899  | 7.10409 | 6.70639 | 7.52421 | 7.1709  | 6.90486 | 7.08634 |
| DIP2A      | 8.05876 | 7.93247 | 7.73491 | 7.715   | 7.11006 | 8.08246 | 7.80968 | 7.86625 | 8.03984 |
| DIP2A-IT1  | 6.78939 | 6.29521 | 6.84166 | 4.08965 | 5.23043 | 3.70667 | 4.57113 | 5.81057 | 6.28975 |
| PRMT2      | 7.71876 | 8.13749 | 7.96447 | 7.43587 | 6.7949  | 7.77686 | 7.53157 | 7.33131 | 7.57588 |
| TEKT4P2    | 6.76122 | 7.57276 | 6.78989 | 6.0113  | 6.48591 | 6.05152 | 6.50214 | 5.61558 | 6.61978 |

|              |         |         |         |         |         |         |         |         |         |
|--------------|---------|---------|---------|---------|---------|---------|---------|---------|---------|
| TPTE         | 5.36128 | 5.68137 | 5.78019 | 5.33184 | 7.12298 | 5.76979 | 5.73863 | 5.51237 | 5.89375 |
| BAGE         | 4.44563 | 4.205   | 3.9133  | 5.06449 | 6.92238 | 4.50762 | 4.23913 | 4.83104 | 4.38978 |
| MIR3156-3    | 4.51464 | 4.63297 | 4.22294 | 4.82073 | 4.58804 | 5.16098 | 4.47754 | 4.58932 | 4.53016 |
| C21orf91-OT1 | 4.21837 | 4.29321 | 4.54459 | 4.2646  | 4.78554 | 4.4111  | 4.29983 | 4.18607 | 4.07525 |
| c21orf91     | 8.07115 | 8.26233 | 8.15459 | 7.48444 | 6.42804 | 6.90631 | 8.24134 | 6.79676 | 7.12724 |
| CHODL-AS1    | 4.08471 | 4.05243 | 4.0176  | 4.38716 | 5.29294 | 4.58751 | 4.47427 | 4.12906 | 4.26618 |
| MIR548X      | 1.91833 | 2.12543 | 3.65932 | 1.92958 | 1.9619  | 1.82057 | 2.00443 | 1.94108 | 2.05439 |
| LINC00320    | 5.29345 | 5.41451 | 4.99053 | 5.17488 | 5.92422 | 5.30923 | 5.50003 | 5.0791  | 5.29379 |
| LINC00317    | 3.79239 | 4.52527 | 3.69367 | 4.25358 | 4.05968 | 4.13379 | 4.49644 | 4.59137 | 4.26517 |
| D21S2088E    | 3.56213 | 3.84411 | 3.64827 | 3.95849 | 4.26043 | 3.96389 | 3.29517 | 3.6309  | 3.88563 |
| LINC00158    | 5.04808 | 5.17569 | 5.48358 | 5.08867 | 5.66254 | 4.50349 | 5.0437  | 4.4151  | 4.94701 |
| MRPL39       | 7.15214 | 7.60164 | 7.82182 | 7.28624 | 6.01686 | 7.28475 | 7.91171 | 6.51245 | 7.07167 |
| APP          | 11.4146 | 11.0077 | 11.3138 | 11.0372 | 8.70332 | 10.6736 | 11.1583 | 11.2748 | 11.4242 |
| CYYR1        | 8.1801  | 7.28115 | 8.55532 | 7.41425 | 7.48675 | 6.54792 | 7.40997 | 7.46726 | 7.51366 |
| N6AMT1       | 6.69932 | 6.86724 | 6.50351 | 6.37817 | 5.22163 | 5.86436 | 6.25642 | 5.37976 | 6.13952 |
| LTN1         | 8.59306 | 8.68038 | 8.71045 | 8.05511 | 6.09331 | 7.86203 | 8.1928  | 8.30847 | 8.16107 |
| RWDD2B       | 7.68966 | 7.14342 | 7.77232 | 5.8581  | 5.29395 | 5.65228 | 6.77775 | 5.64345 | 5.72479 |
| cldn17       | 4.18657 | 4.43001 | 5.20278 | 6.94869 | 7.73923 | 9.4812  | 8.42716 | 10.2202 | 10.7714 |
| LINC00307    | 4.34706 | 4.19934 | 4.48841 | 4.64006 | 4.86794 | 5.10026 | 5.0489  | 4.37392 | 4.57008 |
| CLDN8        | 6.44745 | 5.646   | 7.11202 | 4.94734 | 4.78843 | 4.68116 | 4.60779 | 4.25719 | 4.43486 |
| Krtap24-1    | 4.1509  | 4.15868 | 4.07381 | 4.53402 | 5.57896 | 4.67046 | 4.27481 | 4.50976 | 4.12424 |
| KRTAP25-1    | 5.06959 | 5.65917 | 5.30507 | 5.73619 | 7.06905 | 5.96432 | 5.31424 | 5.51167 | 5.31505 |
| KRTAP26-1    | 4.69217 | 4.65603 | 4.52499 | 4.65516 | 6.1946  | 5.37479 | 5.02204 | 5.04967 | 4.93099 |
| KRTAP27-1    | 4.27618 | 4.597   | 4.44538 | 4.92149 | 5.35388 | 5.55477 | 5.32942 | 5.25456 | 5.03684 |
| KRTAP23-1    | 5.67098 | 5.86248 | 5.45758 | 5.93429 | 7.3645  | 6.39231 | 5.99652 | 5.98306 | 6.27086 |
| KRTAP13-2    | 3.5768  | 3.54307 | 3.67509 | 3.91888 | 4.61107 | 3.7647  | 4.64349 | 3.58116 | 3.66145 |

|           |         |         |         |         |         |         |         |         |         |
|-----------|---------|---------|---------|---------|---------|---------|---------|---------|---------|
| MIR4327   | 3.40951 | 3.9378  | 3.77249 | 4.25255 | 4.32231 | 4.79883 | 3.95433 | 4.71522 | 4.01619 |
| KRTAP13-3 | 3.93335 | 4.1441  | 3.95468 | 4.41203 | 5.93622 | 4.68933 | 3.82987 | 4.01732 | 4.43128 |
| Krtap19-2 | 3.69005 | 4.38459 | 3.41825 | 4.46986 | 4.86156 | 3.43069 | 3.71326 | 3.89069 | 4.00664 |
| KRTAP19-3 | 2.32099 | 2.24064 | 2.41365 | 3.14819 | 3.914   | 3.88857 | 2.84107 | 3.37838 | 3.04766 |
| Krtap19-4 | 3.32761 | 3.25143 | 3.3711  | 4.13254 | 5.43935 | 4.2643  | 4.46292 | 3.60519 | 3.84568 |
| KRTAP19-5 | 5.48491 | 5.10694 | 5.33715 | 5.63359 | 5.98931 | 5.96765 | 5.43815 | 5.3025  | 5.2426  |
| KRTAP19-6 | 3.44489 | 2.90927 | 3.06176 | 3.10066 | 3.94849 | 3.17489 | 3.73351 | 3.7023  | 3.58834 |
| KRTAP22-2 | 2.90916 | 3.33679 | 2.86103 | 3.65822 | 3.32422 | 4.19822 | 3.6552  | 3.30655 | 3.39005 |
| Krtap6-2  | 4.87051 | 5.16543 | 5.17187 | 5.72561 | 5.93276 | 5.7408  | 5.78179 | 5.67711 | 5.82517 |
| KRTAP6-1  | 3.54692 | 4.18212 | 3.82699 | 3.47176 | 5.29675 | 4.16819 | 4.00496 | 4.11278 | 4.23107 |
| KRTAP21-3 | 3.70207 | 3.96162 | 3.43274 | 3.47741 | 4.66977 | 4.09845 | 4.05262 | 3.86629 | 3.23532 |
| KRTAP21-2 | 4.12198 | 3.86289 | 3.99077 | 4.2947  | 4.97782 | 4.95809 | 4.58772 | 4.60693 | 4.36514 |
| Krtap21-1 | 4.73694 | 5.31635 | 4.50638 | 4.9896  | 6.047   | 5.49882 | 4.40541 | 4.20142 | 4.78879 |
| Krtap8-1  | 4.41285 | 4.57157 | 4.68065 | 5.01638 | 5.29625 | 5.46402 | 4.9794  | 5.0603  | 4.78118 |
| KRTAP7-1  | 5.59627 | 5.48385 | 5.52476 | 5.76914 | 6.73326 | 5.73365 | 5.51416 | 6.06196 | 5.92693 |
| Krtap11-1 | 5.15115 | 5.20961 | 5.07666 | 5.28143 | 7.39968 | 5.22395 | 5.26432 | 6.13261 | 5.62578 |
| TIAM1     | 10.1273 | 10.4949 | 9.93367 | 9.81648 | 8.54747 | 10.3936 | 9.93603 | 10.905  | 10.5771 |
| KRTAP19-8 | 3.61081 | 4.69695 | 4.22908 | 3.76516 | 5.20368 | 4.41374 | 3.97283 | 3.63849 | 4.13733 |
| SCAF4     | 9.73318 | 9.5319  | 9.87325 | 9.05772 | 7.58484 | 8.60858 | 9.10947 | 9.91959 | 9.46896 |
| LINC00159 | 5.30737 | 5.12232 | 5.33813 | 5.40011 | 5.63192 | 5.30727 | 5.14847 | 5.00119 | 5.29427 |
| MIS18A    | 6.94217 | 6.84099 | 6.54233 | 6.87742 | 6.18001 | 6.41353 | 6.57909 | 6.13268 | 6.094   |
| URB1      | 8.20724 | 7.91633 | 7.83489 | 7.2776  | 6.33205 | 6.53463 | 7.42527 | 7.14588 | 7.24225 |
| TCP10L    | 5.60375 | 5.73404 | 5.68426 | 5.15826 | 6.16022 | 5.53921 | 5.27156 | 5.74172 | 5.77564 |
| c21orf59  | 7.05972 | 7.0576  | 6.90268 | 7.07472 | 5.0326  | 6.63047 | 7.43516 | 6.4336  | 6.46434 |
| SYNJ1     | 7.40193 | 7.30379 | 7.17201 | 7.03274 | 6.13104 | 6.6516  | 6.88279 | 7.17262 | 6.81941 |
| PAXBP1    | 8.63744 | 8.86027 | 8.6591  | 7.37593 | 5.32129 | 5.92426 | 7.01806 | 7.61595 | 7.07355 |

|              |         |         |         |         |         |         |         |         |         |
|--------------|---------|---------|---------|---------|---------|---------|---------|---------|---------|
| c21orf62     | 4.89655 | 5.13074 | 5.19113 | 5.03071 | 5.94458 | 5.44821 | 4.81254 | 5.28638 | 5.44473 |
| LINC01548    | 5.30427 | 5.04963 | 5.09545 | 6.02554 | 6.6198  | 5.73259 | 5.65968 | 5.74966 | 6.10827 |
| IL10RB-AS1   | 4.76936 | 5.08862 | 4.70992 | 5.07777 | 5.43982 | 4.96667 | 4.89093 | 4.46338 | 4.80276 |
| TMEM50B      | 8.2123  | 8.37748 | 8.31754 | 6.78438 | 6.35166 | 6.19981 | 6.8957  | 6.02814 | 6.28272 |
| DONSON       | 7.57406 | 7.39269 | 7.18471 | 7.40724 | 5.55893 | 6.42405 | 7.34565 | 7.10306 | 7.05559 |
| RCAN1        | 7.53638 | 6.61055 | 6.72708 | 8.03578 | 8.50897 | 8.62289 | 8.23789 | 8.4725  | 8.03065 |
| RUNX1        | 6.94936 | 6.61721 | 6.99984 | 6.80309 | 6.83646 | 6.6991  | 6.18131 | 6.45106 | 6.63937 |
| RUNX1-IT1    | 7.14105 | 6.62665 | 7.33325 | 5.51619 | 6.18099 | 5.70172 | 5.45622 | 5.04591 | 5.85079 |
| LOC100133286 | 4.19718 | 3.85832 | 4.34107 | 4.3968  | 5.28879 | 4.68681 | 5.3741  | 4.30497 | 4.60319 |
| CBR3-AS1     | 8.41669 | 8.82348 | 8.57088 | 8.37806 | 8.1377  | 8.19505 | 7.87849 | 8.20445 | 8.98248 |
| CLDN14       | 5.52485 | 5.67343 | 5.46015 | 5.89232 | 6.80721 | 5.99493 | 5.87883 | 6.20708 | 6.02785 |
| HLCS         | 7.35203 | 6.8684  | 7.09182 | 6.9252  | 5.97142 | 5.97863 | 7.04464 | 6.29197 | 6.57508 |
| DSCR3        | 7.12758 | 6.95326 | 7.09118 | 6.73338 | 5.51178 | 6.7478  | 7.0331  | 7.12672 | 7.03812 |
| DSCR4        | 4.94054 | 5.03759 | 5.2368  | 5.34648 | 5.87054 | 5.77    | 5.17734 | 5.58776 | 5.06006 |
| ERG          | 7.79805 | 7.03915 | 8.00735 | 7.2876  | 7.5596  | 6.88618 | 7.45499 | 7.72742 | 8.17794 |
| LINC00114    | 5.09678 | 5.3556  | 5.51695 | 5.38955 | 6.1753  | 5.62756 | 4.90506 | 5.49234 | 5.72491 |
| BRWD1        | 8.87287 | 9.27513 | 8.97474 | 8.2149  | 6.35557 | 7.94115 | 8.21204 | 8.66734 | 8.31843 |
| HMG1         | 7.54236 | 7.08515 | 6.89934 | 6.91686 | 5.20764 | 6.75421 | 6.73996 | 6.69675 | 6.28002 |
| LCA5L        | 4.5951  | 5.12887 | 4.84801 | 4.97662 | 5.36295 | 4.97374 | 4.95111 | 4.48697 | 4.91124 |
| B3GALT5-AS1  | 5.90068 | 5.53446 | 5.17835 | 5.25022 | 5.50835 | 5.71262 | 4.90064 | 5.18443 | 4.97362 |
| DSCAM        | 4.59925 | 4.65446 | 4.99061 | 5.48377 | 5.57647 | 6.12722 | 5.01082 | 6.13908 | 6.32362 |
| DSCAM-IT1    | 3.97088 | 4.2064  | 3.89844 | 4.893   | 5.26197 | 4.95264 | 4.2973  | 5.84988 | 7.73472 |
| LINC00479    | 5.35649 | 5.14228 | 5.1459  | 5.91539 | 5.30077 | 6.08173 | 5.3954  | 5.4596  | 5.91038 |
| RIPK4        | 8.0141  | 8.06588 | 7.79979 | 8.59517 | 7.30025 | 10.7837 | 9.46763 | 9.77463 | 9.36921 |
| PRDM15       | 6.9186  | 7.53962 | 6.99608 | 6.70562 | 6.06334 | 6.9178  | 6.73842 | 7.64587 | 7.33826 |
| C2CD2        | 8.12855 | 8.67001 | 8.11245 | 8.46401 | 6.82937 | 8.5521  | 8.24655 | 8.63132 | 8.76062 |



|            |         |         |         |         |         |         |         |         |         |
|------------|---------|---------|---------|---------|---------|---------|---------|---------|---------|
| ZBTB21     | 8.53929 | 8.36751 | 8.26818 | 8.21646 | 7.41156 | 8.70481 | 7.87614 | 7.88777 | 8.57314 |
| UMODL1-AS1 | 5.93788 | 6.14049 | 6.0974  | 6.2584  | 7.51661 | 7.20085 | 6.28683 | 6.84279 | 6.57293 |
| TFF3       | 6.83018 | 6.66952 | 7.01519 | 7.72529 | 8.02438 | 7.96823 | 7.43169 | 7.41949 | 7.51446 |
| TFF2       | 4.77455 | 4.60269 | 4.95122 | 5.54076 | 4.90167 | 5.03433 | 4.90869 | 4.77298 | 5.00998 |
| tff1       | 5.84444 | 6.13776 | 5.89777 | 6.75695 | 6.65741 | 7.04467 | 6.64129 | 6.42205 | 6.73014 |
| rsph1      | 5.69273 | 6.24915 | 5.45446 | 5.27472 | 5.51257 | 5.75522 | 5.60848 | 5.30965 | 5.10707 |
| WDR4       | 6.57569 | 6.32396 | 6.79135 | 6.27729 | 5.77727 | 6.72394 | 6.62612 | 6.0786  | 6.39075 |
| CBS        | 5.32276 | 5.59229 | 5.54667 | 6.01323 | 6.15799 | 6.0891  | 5.6198  | 5.71887 | 6.04924 |
| U2AF1      | 8.57626 | 8.65621 | 8.66919 | 8.26146 | 6.89704 | 7.81426 | 8.36549 | 8.1684  | 8.23795 |
| SIK1       | 9.73174 | 8.31615 | 8.78267 | 9.63546 | 8.76677 | 10.8278 | 9.22056 | 10.4008 | 9.41911 |
| HSF2BP     | 5.79716 | 5.60515 | 5.64093 | 5.76247 | 5.61764 | 5.80445 | 5.73384 | 5.68622 | 5.38364 |
| CSTB       | 11.1089 | 10.7767 | 10.7262 | 12.1044 | 12.3131 | 12.5719 | 12.0424 | 12.2652 | 12.3617 |
| AATBC      | 6.32549 | 6.2964  | 5.953   | 6.27982 | 6.04125 | 6.12024 | 6.05562 | 6.09882 | 6.07836 |
| ICOSLG     | 6.76095 | 7.22822 | 6.60312 | 6.92144 | 6.67073 | 7.31992 | 6.9687  | 6.53859 | 6.53863 |
| DNMT3L     | 5.51597 | 5.64426 | 5.68439 | 5.99893 | 6.09042 | 6.33631 | 6.29324 | 6.18993 | 6.27175 |
| c21orf2    | 6.51327 | 6.27745 | 6.44656 | 6.45339 | 6.77707 | 6.86501 | 6.57402 | 6.76135 | 6.6141  |
| LRRC3-AS1  | 5.48291 | 5.57691 | 5.38025 | 5.82531 | 6.11377 | 6.30098 | 5.80748 | 5.87993 | 5.84348 |
| TSPEAR     | 5.49542 | 5.9766  | 5.53797 | 6.38466 | 6.5427  | 6.37451 | 6.06038 | 6.21338 | 6.44889 |
| KRTAP10-1  | 6.38219 | 6.77852 | 6.81803 | 7.97457 | 7.55022 | 8.43509 | 7.58766 | 8.03201 | 7.50359 |
| KRTAP10-2  | 5.6702  | 5.72822 | 6.13153 | 6.35828 | 7.9142  | 6.23757 | 5.79897 | 6.4071  | 6.3832  |
| KRTAP10-5  | 5.24985 | 5.42463 | 5.06844 | 5.63267 | 5.80393 | 5.67929 | 5.18179 | 5.73022 | 5.89534 |
| KRTAP10-6  | 7.57504 | 7.71025 | 7.63133 | 7.82096 | 9.80297 | 7.73795 | 7.61858 | 7.82502 | 7.82205 |
| KRTAP12-4  | 6.14833 | 6.3025  | 6.24963 | 7.20437 | 6.9003  | 7.05267 | 6.6243  | 6.52938 | 6.61966 |
| Krtap12-2  | 4.9358  | 4.92488 | 4.47644 | 4.80177 | 5.81944 | 5.10089 | 5.03696 | 4.8444  | 4.74425 |
| KRTAP12-1  | 3.78412 | 3.6896  | 3.54488 | 4.11736 | 3.88172 | 3.97774 | 3.92393 | 4.24966 | 3.84692 |
| UBE2G2     | 7.67016 | 7.92858 | 7.70157 | 7.17175 | 5.77203 | 6.62703 | 7.14993 | 6.87094 | 6.97429 |

|              |         |         |         |         |         |         |         |         |         |
|--------------|---------|---------|---------|---------|---------|---------|---------|---------|---------|
| sumo3        | 8.07351 | 8.08865 | 8.1451  | 8.60838 | 8.73479 | 7.96772 | 8.16725 | 8.12621 | 8.18016 |
| PTTG1IP      | 9.1506  | 8.38526 | 8.88544 | 8.79605 | 7.20135 | 9.25126 | 9.22157 | 10.0645 | 9.50762 |
| LINC01547    | 6.3653  | 6.27529 | 6.72659 | 6.72402 | 7.1133  | 6.81637 | 6.81648 | 6.84763 | 6.92328 |
| LINC00163    | 6.41071 | 6.58971 | 6.47163 | 7.16681 | 7.6876  | 6.79838 | 6.93263 | 7.04842 | 6.68969 |
| PICRAR       | 5.40779 | 5.33826 | 5.46889 | 6.22088 | 5.83911 | 6.10156 | 6.04336 | 6.27379 | 5.74762 |
| POFUT2       | 6.04593 | 6.07922 | 5.93731 | 5.91985 | 6.11629 | 5.93733 | 5.63249 | 6.15585 | 6.02084 |
| COL18A1-AS2  | 5.21581 | 5.28251 | 5.42248 | 5.24089 | 5.64357 | 5.28728 | 5.26021 | 5.69031 | 5.61688 |
| COL18A1-AS1  | 5.90861 | 5.84001 | 5.81644 | 6.2987  | 6.2651  | 6.75697 | 6.21231 | 6.30848 | 6.26099 |
| LOC100129027 | 6.75313 | 6.93488 | 6.82704 | 7.52718 | 7.99612 | 7.66612 | 7.26683 | 7.39367 | 7.2346  |
| FTCD         | 5.36652 | 5.61843 | 5.56204 | 6.37949 | 5.9511  | 6.59397 | 5.93323 | 6.26959 | 6.31706 |
| SPATC1L      | 6.13839 | 5.91345 | 6.14892 | 6.82556 | 6.04049 | 7.02164 | 6.68274 | 6.08089 | 6.18224 |
| MCM3AP       | 7.72423 | 7.37207 | 7.53752 | 6.95597 | 6.2582  | 7.06977 | 7.267   | 6.74955 | 6.95277 |
| C21orf58     | 5.8544  | 5.89143 | 5.83804 | 6.20711 | 6.19828 | 6.75862 | 6.19652 | 6.55454 | 6.11591 |
| S100B        | 6.71247 | 6.20921 | 6.76643 | 6.02512 | 6.62415 | 6.40349 | 6.74    | 6.05855 | 5.70222 |
| TPTEP1       | 8.27592 | 8.12607 | 7.55076 | 6.49992 | 7.518   | 6.70112 | 7.33702 | 7.04255 | 7.11457 |
| IL17RA       | 8.88732 | 8.77786 | 8.91093 | 8.77645 | 7.79834 | 8.7123  | 9.01697 | 8.78363 | 9.10696 |
| CECR5-AS1    | 6.18216 | 6.2091  | 6.19883 | 6.60764 | 6.11118 | 6.6018  | 6.24965 | 6.36578 | 6.41379 |
| BCL2L13      | 8.01334 | 7.84292 | 8.26636 | 7.24781 | 6.51193 | 7.21856 | 7.58304 | 7.64413 | 7.61471 |
| FLJ41941     | 4.9183  | 5.17401 | 5.02589 | 5.72045 | 6.19354 | 5.44817 | 5.68885 | 5.70126 | 5.39839 |
| PEX26        | 8.16357 | 7.92255 | 7.86909 | 8.16999 | 7.10677 | 7.73626 | 8.68753 | 7.80109 | 7.88871 |
| USP18        | 7.49903 | 7.15871 | 7.42938 | 6.9095  | 7.88078 | 7.31968 | 7.42895 | 7.32693 | 7.5197  |
| dgcr6        | 5.53865 | 5.36856 | 5.02944 | 5.31999 | 4.82656 | 5.70373 | 5.25107 | 5.45066 | 5.26677 |
| Dgcr5        | 5.2177  | 5.61851 | 5.35772 | 4.77316 | 6.00928 | 5.25397 | 5.47587 | 5.50178 | 5.22792 |
| DGCR9        | 4.9922  | 4.70111 | 5.36359 | 5.36231 | 5.17262 | 5.52856 | 5.44911 | 5.83051 | 4.64169 |
| DGCR10       | 3.88532 | 4.09257 | 4.07773 | 4.17686 | 4.33121 | 5.07803 | 4.37858 | 4.37627 | 4.5457  |
| DGCR14       | 3.88636 | 4.08545 | 4.08018 | 4.7659  | 5.58963 | 4.41723 | 4.71515 | 4.86705 | 4.47989 |

|           |         |         |         |         |         |         |         |         |         |
|-----------|---------|---------|---------|---------|---------|---------|---------|---------|---------|
| MRPL40    | 7.31259 | 6.80573 | 7.11986 | 6.7521  | 5.02042 | 5.80256 | 6.92638 | 5.77309 | 6.43385 |
| CDC45     | 5.75664 | 5.83052 | 6.0351  | 7.00976 | 6.0325  | 5.99126 | 6.30754 | 6.34667 | 6.23977 |
| TBX1      | 7.40748 | 7.60827 | 7.56926 | 7.36441 | 5.96117 | 6.54243 | 7.46404 | 7.27017 | 6.72659 |
| COMT      | 6.75505 | 6.84587 | 6.93462 | 7.27795 | 6.31958 | 7.08503 | 7.43979 | 6.65499 | 6.95806 |
| TANGO2    | 6.62447 | 6.31674 | 6.56351 | 6.53665 | 5.55008 | 6.45413 | 7.0597  | 6.71796 | 6.598   |
| MIR185    | 7.75458 | 7.66037 | 7.88726 | 8.5182  | 9.74929 | 8.9115  | 7.96444 | 8.50689 | 8.37824 |
| DGCR8     | 7.4736  | 7.31797 | 7.25717 | 6.94951 | 5.7784  | 6.14688 | 7.30197 | 6.54079 | 6.81725 |
| RANBP1    | 5.99992 | 6.10631 | 6.07786 | 6.73563 | 5.91693 | 6.06752 | 6.53191 | 6.13905 | 6.24434 |
| LINC00896 | 6.12058 | 6.14046 | 6.54974 | 6.91942 | 6.70729 | 6.56555 | 6.43968 | 6.72712 | 6.7626  |
| TMEM191B  | 6.82537 | 7.01077 | 6.9276  | 7.53146 | 7.69031 | 7.76394 | 7.34424 | 7.43442 | 7.36034 |
| ZNF74     | 5.8677  | 6.11801 | 6.0519  | 6.39822 | 6.53444 | 6.79956 | 6.54912 | 6.55075 | 6.17134 |
| MED15     | 7.37442 | 7.051   | 7.23156 | 7.3017  | 6.42309 | 7.90712 | 7.40886 | 8.12938 | 7.85916 |
| POM121L4P | 3.36266 | 3.54021 | 3.43129 | 3.94785 | 4.35048 | 3.88631 | 4.05778 | 4.27062 | 4.28448 |
| CRKL      | 8.50319 | 8.62634 | 8.44078 | 9.18627 | 7.17975 | 9.3219  | 9.04589 | 9.32505 | 9.22439 |
| LZTR1     | 7.35299 | 7.0355  | 6.99996 | 7.19792 | 6.24853 | 7.52508 | 6.97712 | 7.25675 | 7.28424 |
| THAP7-AS1 | 6.16051 | 5.99834 | 6.3467  | 6.25892 | 6.72938 | 6.4261  | 6.19777 | 6.21664 | 6.1777  |
| Irrc74b   | 5.20017 | 5.18571 | 5.15841 | 5.95312 | 6.49834 | 5.88109 | 5.75386 | 5.95276 | 5.79655 |
| BCRP2     | 5.29341 | 5.14731 | 5.4075  | 5.73153 | 6.21801 | 6.27307 | 5.46201 | 5.43028 | 5.96686 |
| POM121L8P | 5.03539 | 5.58364 | 5.17493 | 5.79981 | 6.37326 | 6.16002 | 5.75536 | 6.46565 | 5.93497 |
| RIMBP3B   | 5.46915 | 5.18451 | 4.87499 | 5.15191 | 4.8298  | 6.38495 | 5.64751 | 5.39183 | 6.05073 |
| HIC2      | 6.07064 | 6.40469 | 6.18902 | 6.61638 | 6.84752 | 6.59136 | 6.08631 | 6.61475 | 6.75782 |
| TMEM191C  | 5.15112 | 5.84964 | 5.47042 | 5.44334 | 6.88443 | 5.24147 | 5.19569 | 5.40512 | 5.05861 |
| CCDC116   | 5.74991 | 5.86358 | 6.13472 | 6.62853 | 6.36201 | 6.27062 | 6.09348 | 6.35732 | 6.1455  |
| SDF2L1    | 5.18834 | 6.10928 | 5.80553 | 6.36251 | 6.2642  | 7.3554  | 6.12806 | 6.17941 | 6.58741 |
| PPIL2     | 8.27599 | 8.14611 | 8.03577 | 7.9033  | 6.59842 | 7.53881 | 7.80271 | 7.69622 | 7.87563 |
| mir301b   | 4.11714 | 3.77001 | 3.84519 | 4.56467 | 4.08163 | 4.13714 | 4.12122 | 4.30964 | 4.03847 |

|           |         |         |         |         |         |         |         |         |         |
|-----------|---------|---------|---------|---------|---------|---------|---------|---------|---------|
| mir130b   | 6.12323 | 6.90951 | 6.56317 | 7.05896 | 7.59654 | 7.61834 | 6.73732 | 7.63622 | 6.94193 |
| VPREB1    | 5.84745 | 5.95289 | 5.87649 | 6.09562 | 6.37658 | 6.77224 | 6.00276 | 6.22374 | 5.82547 |
| GGTLC2    | 6.42956 | 6.64858 | 6.85988 | 6.71572 | 6.10003 | 7.15338 | 6.86335 | 6.88197 | 6.53394 |
| IGLL5     | 5.85479 | 5.83506 | 6.9229  | 6.48144 | 6.52109 | 7.0718  | 6.84082 | 6.32525 | 6.15394 |
| BCR       | 7.77962 | 7.45874 | 7.59678 | 7.70114 | 7.20545 | 7.90022 | 8.34135 | 8.54462 | 8.19474 |
| FBXW4P1   | 6.18639 | 6.0769  | 6.29708 | 6.23612 | 5.88066 | 5.98453 | 6.35163 | 7.18    | 6.66211 |
| RGL4      | 6.25681 | 6.71064 | 6.66987 | 6.69431 | 6.63042 | 6.92289 | 6.30804 | 6.74451 | 6.79938 |
| C22orf15  | 5.30407 | 5.37417 | 5.49254 | 6.09507 | 5.95064 | 5.77908 | 5.81944 | 6.02506 | 5.83792 |
| MMP11     | 6.15253 | 6.3377  | 6.064   | 7.50226 | 6.71584 | 6.83266 | 6.38888 | 6.53805 | 6.57536 |
| MIF       | 9.1094  | 9.02976 | 9.32116 | 10.7141 | 9.89429 | 10.8183 | 10.2818 | 9.99989 | 10.1098 |
| DDTL      | 6.44533 | 6.3133  | 6.12713 | 5.70384 | 5.60555 | 5.613   | 5.84231 | 6.1527  | 6.29339 |
| GstT2     | 10.2066 | 9.57695 | 7.9748  | 6.20051 | 4.4894  | 5.00976 | 5.73475 | 5.79866 | 6.0184  |
| LOC391322 | 4.96916 | 5.03827 | 4.461   | 5.19855 | 5.33718 | 5.30656 | 3.87    | 5.14428 | 4.79643 |
| CABIN1    | 7.88154 | 7.65357 | 7.75104 | 7.4482  | 7.2552  | 7.70064 | 7.48904 | 7.75331 | 7.39774 |
| SUSD2     | 7.03964 | 6.86532 | 7.28889 | 7.05249 | 7.18264 | 7.08179 | 6.6561  | 6.7244  | 6.94601 |
| SPECC1L   | 8.37284 | 8.51437 | 8.34386 | 8.25593 | 6.49572 | 8.53247 | 8.2851  | 8.54392 | 8.49521 |
| ADORA2A   | 6.28385 | 6.03187 | 6.1812  | 7.00802 | 6.67433 | 7.38294 | 6.52187 | 6.71532 | 6.51926 |
| SNRPD3    | 7.5873  | 7.69498 | 7.65076 | 8.53407 | 7.01328 | 7.94985 | 8.99227 | 7.35988 | 8.06018 |
| GGT1      | 5.76158 | 6.06779 | 6.1715  | 6.39917 | 7.04867 | 6.81384 | 6.32761 | 6.98929 | 6.70313 |
| BCRP3     | 4.386   | 5.04375 | 4.97471 | 4.80404 | 7.19728 | 4.94859 | 5.42243 | 4.46209 | 4.92148 |
| TOP1P2    | 4.00361 | 4.01649 | 3.70916 | 3.73828 | 5.85856 | 4.36805 | 3.61886 | 3.9051  | 3.82339 |
| SGSM1     | 5.79049 | 5.88888 | 5.64315 | 5.82491 | 6.36134 | 6.70369 | 5.90051 | 6.1727  | 6.09196 |
| KIAA1671  | 8.12941 | 7.91129 | 8.15316 | 7.78554 | 7.17905 | 8.24995 | 8.23979 | 7.87761 | 8.19752 |
| MYO18B    | 6.03897 | 5.84567 | 6.32844 | 6.37033 | 7.21877 | 6.89009 | 6.21439 | 6.7879  | 6.44213 |
| SEZ6L     | 5.19602 | 5.4045  | 5.22225 | 5.96188 | 5.83142 | 5.80452 | 5.47855 | 5.93213 | 5.64729 |
| ASPHD2    | 6.72017 | 7.19536 | 7.52226 | 6.5222  | 6.64111 | 6.81917 | 6.96765 | 6.46258 | 6.56389 |

|           |         |         |         |         |         |         |         |         |         |
|-----------|---------|---------|---------|---------|---------|---------|---------|---------|---------|
| SRRD      | 8.01485 | 8.09028 | 7.83007 | 7.92095 | 5.4165  | 8.29941 | 8.67565 | 7.93239 | 7.97615 |
| Miat      | 6.61182 | 6.45152 | 6.44191 | 5.38184 | 6.0053  | 5.75509 | 5.8294  | 5.77829 | 5.98127 |
| TTC28-AS1 | 6.2074  | 6.14459 | 5.90368 | 5.97037 | 6.09228 | 5.91912 | 5.71804 | 5.96701 | 5.9297  |
| MIR3199-1 | 2.97763 | 3.12336 | 3.23486 | 2.94172 | 2.24264 | 2.37618 | 3.05451 | 3.01771 | 2.8122  |
| HSCB      | 6.18754 | 6.67732 | 6.1868  | 7.01926 | 6.10597 | 6.16549 | 6.81403 | 6.45222 | 6.43456 |
| CCDC117   | 7.18156 | 7.46607 | 7.4754  | 7.54833 | 7.0059  | 7.64174 | 7.51325 | 7.1749  | 7.57128 |
| ZNRF3     | 7.42371 | 8.16214 | 7.89474 | 7.30067 | 5.77029 | 6.75425 | 7.26299 | 6.45628 | 6.47293 |
| KREMEN1   | 9.4752  | 9.40901 | 9.58715 | 9.36169 | 8.02343 | 9.00184 | 9.33148 | 8.71839 | 9.15354 |
| EMID1     | 5.89433 | 5.69445 | 6.04869 | 5.49125 | 5.94091 | 6.05939 | 5.71494 | 5.79906 | 6.10745 |
| EWSR1     | 8.52781 | 8.56641 | 8.31339 | 7.85991 | 6.38991 | 7.79495 | 8.10123 | 7.9839  | 8.10662 |
| GAS2L1    | 6.91624 | 6.82901 | 6.98605 | 7.79121 | 5.80894 | 7.1321  | 8.21193 | 6.97028 | 7.20286 |
| RFPL1     | 3.85069 | 3.05753 | 2.92138 | 3.48732 | 3.81967 | 3.20379 | 3.64857 | 2.9721  | 3.80879 |
| NF2       | 7.94276 | 7.82874 | 8.07308 | 7.58564 | 6.31056 | 7.03409 | 8.11453 | 7.478   | 7.77542 |
| CABP7     | 5.79799 | 6.07687 | 5.89338 | 6.47792 | 6.44426 | 6.81793 | 6.65246 | 6.89214 | 6.50182 |
| MTMR3     | 9.04912 | 9.05258 | 8.80279 | 8.71352 | 7.69117 | 8.99172 | 8.53793 | 9.26327 | 8.96982 |
| HORMAD2   | 4.4509  | 4.5473  | 4.22482 | 4.89657 | 4.95529 | 4.58524 | 4.39694 | 4.50759 | 4.72878 |
| CCDC157   | 5.66927 | 5.61122 | 5.73103 | 6.03558 | 5.95923 | 6.62281 | 6.12699 | 6.15043 | 6.4838  |
| SEC14L2   | 6.72836 | 6.49355 | 5.78293 | 7.2595  | 5.9087  | 7.99031 | 7.2558  | 7.34827 | 7.00402 |
| MTFP1     | 5.99455 | 6.16282 | 6.0419  | 6.76408 | 5.88786 | 6.97928 | 6.63604 | 6.57366 | 6.82374 |
| TCN2      | 6.48011 | 6.67554 | 7.03288 | 6.58497 | 6.92531 | 6.53143 | 6.62921 | 7.02097 | 6.60389 |
| OSBP2     | 6.89755 | 6.00923 | 6.2509  | 6.21073 | 5.61501 | 7.50874 | 6.41255 | 6.5449  | 6.61493 |
| MIR3200   | 4.97941 | 4.84904 | 4.56604 | 4.36023 | 4.25874 | 3.00496 | 3.23004 | 4.33421 | 4.27926 |
| MORC2-AS1 | 5.3594  | 5.27037 | 5.51951 | 6.18645 | 5.49609 | 6.12047 | 5.94961 | 5.48158 | 5.95903 |
| Tug1      | 11.0612 | 11.1701 | 10.8656 | 10.4839 | 9.81114 | 9.96467 | 10.0748 | 10.6506 | 11.1699 |
| SMTN      | 6.72626 | 6.8202  | 6.77471 | 7.5323  | 7.15777 | 7.91341 | 7.09961 | 8.20768 | 7.89909 |
| INPP5J    | 6.60304 | 6.47991 | 6.3115  | 6.58112 | 6.35799 | 6.43854 | 6.16387 | 6.58696 | 6.44588 |

|                 |         |         |         |         |         |         |         |         |         |
|-----------------|---------|---------|---------|---------|---------|---------|---------|---------|---------|
| RNF185          | 8.17302 | 7.89078 | 7.72187 | 7.95584 | 6.78155 | 8.60634 | 7.88777 | 7.9205  | 8.31634 |
| LIMK2           | 8.95833 | 8.90798 | 8.69948 | 9.28054 | 7.74675 | 8.53089 | 9.16567 | 9.1893  | 9.18928 |
| DRG1            | 9.38761 | 9.18476 | 9.26488 | 9.19189 | 7.29939 | 8.34084 | 9.40872 | 8.52484 | 8.88447 |
| DEPDC5          | 7.76333 | 7.83331 | 7.45913 | 7.03651 | 6.87459 | 6.41988 | 7.00828 | 7.00046 | 7.07001 |
| RFPL3           | 1.73277 | 2.07719 | 1.64208 | 1.88503 | 2.50873 | 2.76043 | 1.86468 | 1.83584 | 2.14623 |
| LOC339666       | 4.98199 | 4.84619 | 4.9568  | 5.43364 | 5.97039 | 5.40216 | 5.22251 | 5.52705 | 5.45413 |
| FBXO7           | 10.1162 | 9.58107 | 10.0781 | 9.28748 | 8.26299 | 8.89959 | 9.81536 | 9.27835 | 9.27077 |
| TIMP3           | 9.7543  | 9.67143 | 11.0901 | 8.62848 | 7.78692 | 9.27535 | 8.67966 | 9.19966 | 9.20711 |
| LARGE-AS1       | 4.16858 | 3.8884  | 3.9173  | 4.24259 | 5.51201 | 4.29882 | 4.1118  | 4.31236 | 4.37505 |
| ISX             | 5.09737 | 5.40816 | 5.6958  | 6.29008 | 5.90763 | 5.75845 | 5.35138 | 5.80818 | 5.84815 |
| HMGXB4          | 7.93806 | 8.00921 | 7.95807 | 7.23606 | 6.63398 | 7.40506 | 7.25629 | 7.5112  | 7.729   |
| TOM1            | 8.18923 | 8.29529 | 7.99412 | 8.44798 | 7.77921 | 9.48438 | 8.59213 | 9.13422 | 8.94687 |
| MIR3909         | 5.78081 | 5.04975 | 5.30569 | 5.20229 | 4.9677  | 5.22187 | 5.13524 | 6.36741 | 5.95949 |
| HMOX1           | 9.51891 | 9.32976 | 8.9101  | 10.1816 | 9.86592 | 10.2787 | 9.72306 | 10.7484 | 10.3619 |
| MCM5            | 7.26689 | 6.78417 | 7.54687 | 7.69211 | 6.23977 | 7.38501 | 7.36847 | 7.15786 | 6.86686 |
| LL22NC01-81G9.3 | 4.28253 | 4.34387 | 4.30144 | 4.62146 | 5.26969 | 5.00696 | 4.77101 | 4.52535 | 4.99105 |
| MPST            | 5.42404 | 5.87648 | 5.52924 | 6.13892 | 5.14214 | 6.62754 | 6.32409 | 6.14272 | 5.75169 |
| KCTD17          | 6.41477 | 6.55219 | 6.31153 | 7.01482 | 7.16454 | 6.99074 | 6.37759 | 6.86033 | 6.86588 |
| C1QTNF6         | 7.36557 | 7.29097 | 7.44901 | 8.18255 | 8.63258 | 7.96376 | 7.78663 | 7.73782 | 7.66259 |
| CYTH4           | 6.5854  | 6.61326 | 6.52024 | 6.79928 | 6.43731 | 7.05584 | 7.14666 | 6.68711 | 6.71725 |
| CDC42EP1        | 6.74124 | 6.59805 | 6.71908 | 7.47277 | 6.65344 | 7.61378 | 7.53625 | 6.71144 | 7.21161 |
| sh3bp1          | 7.32752 | 7.23669 | 6.90978 | 7.7079  | 7.30307 | 7.95733 | 8.14185 | 7.82245 | 7.41818 |
| NOL12           | 7.12448 | 6.9509  | 7.20966 | 7.47684 | 6.9212  | 7.05826 | 7.85596 | 6.80525 | 7.07588 |
| TRIOBP          | 7.53625 | 7.37728 | 7.77979 | 7.73256 | 6.52609 | 7.59585 | 7.56776 | 7.27302 | 7.6922  |
| GCAT            | 6.6171  | 6.31976 | 6.50778 | 7.3019  | 7.26519 | 7.49467 | 6.9617  | 7.06393 | 6.60672 |
| GALR3           | 5.5732  | 6.29012 | 6.11755 | 6.46558 | 6.62445 | 6.49243 | 5.96796 | 6.53637 | 6.71846 |

|              |         |         |         |         |         |         |         |         |         |
|--------------|---------|---------|---------|---------|---------|---------|---------|---------|---------|
| MICALL1      | 8.95666 | 8.44723 | 8.44118 | 9.14223 | 7.27559 | 8.8124  | 9.16968 | 8.44744 | 8.9629  |
| POLR2F       | 5.94078 | 6.1845  | 5.98274 | 6.50317 | 6.91738 | 6.06373 | 6.23105 | 5.84353 | 6.02237 |
| MIR4534      | 6.24835 | 6.49163 | 6.76602 | 6.68148 | 6.92427 | 6.8201  | 6.50448 | 6.95689 | 6.72865 |
| PICK1        | 7.56789 | 7.26557 | 7.31892 | 7.18662 | 5.51658 | 7.08105 | 7.5454  | 7.1343  | 7.07685 |
| MAFF         | 6.33806 | 5.89259 | 5.95248 | 7.63992 | 7.08871 | 7.92828 | 7.42413 | 7.22699 | 6.91495 |
| KDELR3       | 7.56984 | 6.13489 | 7.00104 | 7.32444 | 6.20033 | 6.58308 | 6.78965 | 6.20165 | 6.54546 |
| CBY1         | 7.1926  | 7.083   | 7.27334 | 7.03517 | 5.87264 | 6.59132 | 6.92522 | 6.70065 | 6.65838 |
| TOMM22       | 8.76175 | 8.94395 | 9.12836 | 9.02891 | 6.53584 | 8.39873 | 9.40387 | 7.93665 | 8.6784  |
| GTPBP1       | 8.58373 | 7.93113 | 8.45432 | 8.0049  | 8.24544 | 8.92409 | 8.3951  | 9.0544  | 8.68146 |
| SUN2         | 7.56394 | 6.92049 | 7.37104 | 7.2545  | 4.96952 | 7.52888 | 7.7695  | 7.12557 | 7.06504 |
| SYNGR1       | 7.51996 | 7.23841 | 7.42241 | 7.83858 | 7.52299 | 7.70741 | 7.65155 | 6.96366 | 7.65781 |
| TAB1         | 6.97654 | 7.02487 | 6.86881 | 7.08664 | 6.69791 | 6.63932 | 7.05736 | 6.62929 | 6.72762 |
| LOC100506472 | 4.87832 | 4.92766 | 5.501   | 5.82066 | 5.59523 | 5.28504 | 4.72707 | 4.55935 | 5.55654 |
| ATF4         | 9.82259 | 9.69634 | 9.70828 | 9.94666 | 8.86583 | 10.2109 | 9.76139 | 9.81565 | 9.97081 |
| GRAP2        | 5.80322 | 6.43639 | 6.46898 | 5.85714 | 6.41933 | 6.04751 | 6.16493 | 6.13411 | 5.75811 |
| LOC100130899 | 7.69327 | 7.92087 | 7.82917 | 6.64143 | 5.67912 | 6.73373 | 7.53677 | 6.46052 | 6.8952  |
| TNRC6B       | 8.97354 | 9.26805 | 9.23834 | 7.70485 | 6.04389 | 6.52359 | 7.63498 | 7.67185 | 7.41052 |
| ADSL         | 7.38562 | 7.25339 | 7.26873 | 7.06031 | 6.98929 | 6.78364 | 7.38351 | 6.60136 | 7.06287 |
| SGSM3        | 7.26387 | 6.99021 | 7.12213 | 7.29485 | 6.19769 | 7.25785 | 7.24269 | 7.49284 | 7.27698 |
| MCHR1        | 6.20708 | 6.15234 | 6.05784 | 6.55563 | 6.86197 | 6.78475 | 6.6706  | 6.36297 | 6.57234 |
| EP300        | 10.0615 | 10.075  | 10.1467 | 8.88209 | 6.5704  | 9.21172 | 9.28738 | 9.08105 | 9.72459 |
| L3MBTL2      | 6.64453 | 6.90522 | 6.73609 | 6.55476 | 7.16458 | 6.67266 | 6.82234 | 6.77746 | 6.93734 |
| ZC3H7B       | 8.09971 | 8.00649 | 8.02639 | 8.31973 | 7.1497  | 7.51053 | 8.54444 | 7.68524 | 7.69575 |
| TEF          | 6.71346 | 6.68609 | 6.78832 | 6.31755 | 7.00956 | 6.56906 | 6.82864 | 6.34569 | 6.77964 |
| DES11        | 6.39712 | 5.74168 | 6.17133 | 7.36037 | 5.7562  | 6.88329 | 8.07834 | 5.95851 | 6.68854 |
| XRCC6        | 8.58245 | 8.46522 | 8.50853 | 8.36708 | 6.19202 | 7.95153 | 8.14603 | 7.65471 | 8.2938  |

|              |         |         |         |         |         |         |         |         |         |
|--------------|---------|---------|---------|---------|---------|---------|---------|---------|---------|
| C22orf46     | 5.78328 | 6.03679 | 5.66511 | 6.1411  | 6.54688 | 5.84632 | 5.82928 | 5.79061 | 5.82647 |
| MEI1         | 5.04665 | 4.98945 | 5.17535 | 5.5595  | 5.59275 | 6.04395 | 5.09737 | 5.52261 | 5.55194 |
| CCDC134      | 7.80318 | 8.05124 | 7.68227 | 7.21738 | 7.47766 | 7.49262 | 7.67044 | 8.18746 | 7.62867 |
| SREBF2       | 9.11783 | 8.73649 | 9.07315 | 8.87569 | 6.4723  | 8.67574 | 9.39129 | 8.95706 | 9.28126 |
| MIR33A       | 3.4109  | 3.01513 | 3.2197  | 3.77898 | 3.30573 | 3.59708 | 3.72218 | 4.14231 | 3.40493 |
| LINC00634    | 6.22719 | 6.12587 | 6.38384 | 7.25894 | 7.02641 | 7.24695 | 6.65959 | 7.07938 | 6.99829 |
| 44442        | 6.89753 | 6.83883 | 6.89901 | 6.60654 | 7.01988 | 6.15125 | 6.42717 | 6.94901 | 5.92906 |
| WBP2NL       | 5.47354 | 5.58634 | 5.92335 | 4.99256 | 5.39702 | 5.40637 | 5.08344 | 5.51506 | 5.48996 |
| SMDT1        | 8.98719 | 9.14541 | 8.84105 | 9.10019 | 8.24898 | 8.80403 | 9.51663 | 8.46642 | 8.99887 |
| NDUFA6-AS1   | 5.6824  | 5.46616 | 6.15834 | 5.17936 | 5.65217 | 5.50286 | 4.9526  | 5.30751 | 5.30155 |
| OGFRP1       | 5.37289 | 5.59092 | 5.65381 | 5.87324 | 6.57576 | 5.14491 | 5.64947 | 6.25032 | 5.98106 |
| serhl        | 6.29907 | 6.78735 | 6.32231 | 7.04577 | 6.49135 | 6.83308 | 6.48318 | 6.14838 | 6.85583 |
| SERHL2       | 4.11597 | 4.2312  | 4.56066 | 3.98971 | 3.71368 | 4.70006 | 4.52414 | 4.18481 | 4.06309 |
| BIK          | 5.21529 | 5.26191 | 5.36844 | 6.16312 | 5.27759 | 6.21283 | 6.17511 | 5.63032 | 5.5319  |
| TSPO         | 9.52438 | 8.82484 | 9.40918 | 9.56148 | 7.91041 | 9.34733 | 10.0615 | 8.3764  | 9.17593 |
| MPPED1       | 5.32054 | 6.29832 | 5.56959 | 5.85716 | 6.18067 | 6.01202 | 5.58377 | 5.90098 | 5.62571 |
| PNPLA3       | 8.18425 | 9.31899 | 7.84573 | 7.34746 | 5.66501 | 5.90735 | 7.18104 | 7.06066 | 6.3245  |
| SAMM50       | 9.43061 | 9.05721 | 9.59442 | 8.73468 | 6.41782 | 7.75584 | 9.01864 | 7.77785 | 8.3686  |
| LINC00207    | 5.19399 | 5.58292 | 5.40548 | 5.7476  | 6.77607 | 5.99667 | 5.57511 | 5.93575 | 5.67422 |
| PRR5-ARHGAP8 | 6.31936 | 6.4353  | 6.76137 | 6.6543  | 5.86179 | 6.61863 | 7.29063 | 6.94298 | 7.13848 |
| NUP50        | 7.44632 | 7.41678 | 7.20974 | 6.87754 | 6.27933 | 7.4182  | 7.01776 | 7.74015 | 7.72114 |
| UPK3A        | 5.33976 | 5.55609 | 5.25132 | 6.11513 | 6.03843 | 6.17737 | 6.17184 | 5.73644 | 6.02192 |
| RIBC2        | 5.72807 | 5.66435 | 5.68246 | 5.49701 | 5.33686 | 5.8931  | 6.03842 | 5.63665 | 5.85002 |
| FBLN1        | 7.98993 | 8.04973 | 8.3252  | 7.95015 | 7.32355 | 7.70301 | 7.95296 | 7.35936 | 7.07793 |
| ATXN10       | 8.13484 | 7.79799 | 8.10513 | 7.72905 | 5.79608 | 7.17917 | 8.07793 | 6.74882 | 7.56321 |
| MIR4762      | 3.56304 | 3.85739 | 2.97643 | 3.00859 | 2.5368  | 2.93058 | 3.16475 | 2.67509 | 2.70546 |



|                   |         |         |         |         |         |         |         |         |         |
|-------------------|---------|---------|---------|---------|---------|---------|---------|---------|---------|
| LOC730668         | 5.52331 | 4.79488 | 5.32792 | 5.66926 | 6.05064 | 5.84908 | 4.993   | 5.59155 | 5.43962 |
| PRR34-AS1         | 8.20238 | 8.20825 | 7.92528 | 7.2708  | 6.59608 | 6.83248 | 6.82482 | 6.41642 | 6.5914  |
| MIRLET7A3         | 7.71719 | 7.2168  | 7.49476 | 6.95262 | 6.45892 | 7.02016 | 7.15764 | 6.77395 | 7.41784 |
| MIR3619           | 8.63778 | 8.34775 | 8.73721 | 9.36377 | 10.7354 | 9.16567 | 9.01412 | 8.99521 | 9.06179 |
| PPARA             | 7.42303 | 7.42384 | 7.20622 | 6.66811 | 5.44372 | 6.79585 | 6.91439 | 7.48793 | 6.97533 |
| TTC38             | 7.28532 | 6.87268 | 7.03126 | 7.35298 | 7.41282 | 7.23481 | 7.59771 | 7.3763  | 7.26872 |
| GTSE1             | 5.94027 | 5.692   | 5.35131 | 6.0126  | 5.38775 | 6.13866 | 6.01917 | 5.89719 | 5.85775 |
| TRMU              | 6.39005 | 6.7162  | 6.52222 | 6.70563 | 6.85438 | 7.01111 | 6.7458  | 6.75566 | 6.70043 |
| GRAMD4            | 7.98373 | 7.57198 | 7.52797 | 7.43224 | 6.31867 | 7.58496 | 7.73202 | 7.30312 | 7.13831 |
| MIR3201           | 2.4561  | 2.25637 | 2.18233 | 4.16011 | 2.19954 | 3.55613 | 2.67154 | 3.28873 | 2.36406 |
| MIR4535           | 4.20258 | 4.05041 | 3.84429 | 5.42116 | 5.08837 | 4.873   | 4.62829 | 5.48848 | 4.97662 |
| LINC01310         | 5.54345 | 5.56773 | 5.68595 | 5.94871 | 6.57761 | 6.05393 | 6.00617 | 6.16249 | 5.69572 |
| CRELD2            | 6.37851 | 6.2629  | 6.20136 | 6.98878 | 6.90847 | 7.17297 | 6.80892 | 6.76655 | 6.59124 |
| PIM3              | 7.09113 | 6.98609 | 7.17908 | 8.24987 | 7.50455 | 8.94692 | 8.06473 | 8.11846 | 7.9172  |
| PANX2             | 6.3636  | 6.93042 | 6.54025 | 7.6987  | 7.21569 | 7.53458 | 6.81968 | 7.00569 | 7.19653 |
| TRABD             | 8.15984 | 7.8362  | 8.1137  | 8.16447 | 7.91387 | 8.29401 | 8.27297 | 8.34953 | 8.14845 |
| SELENOO           | 8.28804 | 8.15372 | 8.29606 | 8.16416 | 6.0645  | 8.1183  | 8.54877 | 7.97086 | 7.91852 |
| adm2              | 5.83132 | 6.1913  | 6.06852 | 6.41629 | 6.73123 | 7.10314 | 6.37949 | 6.61658 | 6.69413 |
| MIOX              | 5.96066 | 5.96369 | 6.05721 | 6.24444 | 6.51361 | 6.84498 | 6.33131 | 6.53377 | 6.38799 |
| KLHDC7B           | 5.61501 | 5.47483 | 5.71363 | 6.00504 | 6.16938 | 6.35383 | 6.16793 | 6.21742 | 6.23119 |
| CHKB-AS1          | 6.21917 | 5.94904 | 5.95055 | 6.08297 | 6.24991 | 6.35414 | 6.17244 | 6.11155 | 6.41081 |
| MAPK8IP2          | 6.58199 | 6.31622 | 6.1904  | 6.9504  | 6.4802  | 7.44245 | 7.04662 | 6.8691  | 6.96524 |
| SHANK3            | 7.33389 | 6.83776 | 7.53157 | 7.04667 | 5.88649 | 6.81069 | 7.26605 | 7.40203 | 7.49646 |
| ACR               | 6.41249 | 6.16154 | 6.51416 | 6.20888 | 6.4272  | 6.18871 | 5.7951  | 6.07936 | 6.26931 |
| RPL23AP82         | 7.43189 | 7.07507 | 7.23619 | 7.16074 | 9.44206 | 7.75791 | 7.2145  | 7.54623 | 7.4723  |
| ANKRD62P1-PARP4P3 | 3.54253 | 3.55763 | 3.70254 | 3.62348 | 3.82383 | 2.54698 | 3.38628 | 3.31488 | 3.60258 |

|           |         |         |         |         |         |         |         |         |         |
|-----------|---------|---------|---------|---------|---------|---------|---------|---------|---------|
| BID       | 6.81731 | 6.70849 | 7.03591 | 7.62287 | 6.29884 | 7.16669 | 7.52129 | 6.95472 | 7.06975 |
| MIR3198-1 | 6.14747 | 6.76356 | 6.59632 | 5.73602 | 4.53629 | 4.86879 | 6.43398 | 5.4139  | 5.71283 |
| MIR648    | 5.56332 | 5.56616 | 5.75348 | 5.95657 | 6.10651 | 6.67542 | 6.39369 | 6.29803 | 6.95888 |
| GGT3P     | 6.3557  | 6.8125  | 6.59084 | 7.00377 | 7.67114 | 6.94475 | 7.29083 | 7.33588 | 6.90496 |
| PRODH     | 6.37527 | 6.87368 | 6.7367  | 6.39212 | 5.94619 | 6.54783 | 6.65198 | 6.29159 | 6.00433 |
| DGCR2     | 8.77761 | 8.5102  | 8.48104 | 8.86765 | 6.9655  | 8.39576 | 8.62809 | 8.53506 | 8.56834 |
| DGCR11    | 7.90457 | 7.83618 | 7.62655 | 7.07463 | 6.78051 | 6.80806 | 7.09975 | 7.47136 | 7.77781 |
| GSC2      | 5.12599 | 5.04391 | 5.04099 | 5.75146 | 5.56198 | 6.32453 | 5.81019 | 5.97611 | 5.67281 |
| HIRA      | 7.95826 | 7.77431 | 7.81121 | 8.02626 | 6.69758 | 7.53193 | 7.85259 | 7.47638 | 7.70406 |
| c22orf39  | 6.85548 | 6.88157 | 6.775   | 6.58745 | 6.19409 | 6.28779 | 6.86155 | 6.62755 | 6.45386 |
| UFD1L     | 7.1375  | 6.94537 | 7.36065 | 7.25215 | 6.24453 | 7.32732 | 7.48353 | 7.53985 | 7.64222 |
| CLDN5     | 6.26296 | 6.38992 | 6.78914 | 6.58948 | 7.01316 | 7.03314 | 7.29759 | 7.24181 | 7.01447 |
| LINC00895 | 5.13563 | 5.20038 | 5.22534 | 5.5548  | 5.98242 | 5.83009 | 5.70441 | 5.76233 | 5.54921 |
| TXNRD2    | 6.61835 | 6.61764 | 6.66351 | 7.3077  | 6.6139  | 7.08597 | 7.13969 | 6.73722 | 6.72901 |
| arvcf     | 6.2719  | 6.51278 | 6.28853 | 7.04461 | 6.7864  | 7.28096 | 6.93799 | 6.78817 | 6.84475 |
| TRMT2A    | 6.31185 | 6.35778 | 6.06595 | 6.34311 | 5.84609 | 5.99639 | 6.59585 | 6.37311 | 6.31628 |
| CCDC188   | 6.00619 | 6.28854 | 6.58582 | 6.60984 | 7.13672 | 7.13057 | 6.40549 | 6.65529 | 6.30933 |
| RTN4R     | 6.8742  | 6.65484 | 6.65627 | 7.0465  | 7.08053 | 6.61565 | 7.01922 | 6.75443 | 6.98343 |
| MIR1286   | 5.87055 | 6.53567 | 6.5088  | 6.95521 | 7.20456 | 7.09096 | 6.32117 | 6.7896  | 6.98195 |
| DGCR6L    | 7.43695 | 7.38277 | 7.46273 | 7.91829 | 7.9345  | 7.82182 | 7.61278 | 7.43194 | 7.57743 |
| RIMBP3    | 7.1804  | 7.11265 | 7.30528 | 7.91947 | 7.71114 | 8.71837 | 7.79061 | 7.77948 | 8.07316 |
| KLHL22    | 5.91198 | 5.57046 | 5.57464 | 5.56892 | 5.49054 | 5.62764 | 5.66606 | 5.5301  | 5.33885 |
| thap7     | 6.93345 | 6.55309 | 7.11403 | 7.09938 | 6.37398 | 7.12298 | 7.38707 | 6.74116 | 6.76175 |
| MIR649    | 1.84756 | 1.57911 | 2.30426 | 2.87678 | 3.47005 | 2.06243 | 3.6238  | 2.64181 | 2.08047 |
| RIMBP3C   | 6.30946 | 6.45184 | 6.6339  | 6.90548 | 6.99819 | 7.36104 | 6.99953 | 7.10163 | 6.50088 |
| YDJC      | 7.43049 | 7.07337 | 7.39085 | 7.58688 | 7.29352 | 7.86703 | 7.56172 | 7.40978 | 7.3484  |

|              |         |         |         |         |         |         |         |         |         |
|--------------|---------|---------|---------|---------|---------|---------|---------|---------|---------|
| YPEL1        | 6.16448 | 5.95665 | 6.24947 | 6.78606 | 5.93836 | 6.94474 | 6.18836 | 6.71622 | 6.26144 |
| MAPK1        | 11.0848 | 10.9996 | 10.9756 | 10.884  | 9.71702 | 10.515  | 10.9423 | 11.0093 | 11.1975 |
| TOP3B        | 7.37138 | 7.26175 | 7.34332 | 7.12665 | 6.46164 | 7.17751 | 6.99913 | 7.24995 | 7.29645 |
| ZNF280B      | 5.61545 | 5.72647 | 5.71842 | 5.46088 | 7.30951 | 5.18051 | 5.64643 | 6.19234 | 6.02652 |
| ZNF280A      | 4.20037 | 4.49514 | 4.42093 | 4.52847 | 5.36752 | 4.47525 | 4.94759 | 4.57455 | 4.94111 |
| PRAME        | 5.12115 | 4.99676 | 5.20019 | 5.14594 | 5.96793 | 5.71726 | 5.03587 | 5.64208 | 5.57311 |
| RSPH14       | 5.8011  | 5.71211 | 5.8468  | 5.99868 | 6.00799 | 6.62822 | 5.90609 | 6.15432 | 6.12395 |
| CES5AP1      | 3.85234 | 3.83328 | 4.21554 | 4.59598 | 5.60164 | 4.42332 | 4.38267 | 5.0428  | 4.73349 |
| IGLL1        | 5.34212 | 5.61789 | 5.61487 | 6.26324 | 6.48933 | 6.59822 | 6.07841 | 6.11212 | 6.34402 |
| DRICH1       | 5.22588 | 5.84694 | 5.14055 | 5.01957 | 6.0043  | 5.64986 | 4.97999 | 5.26835 | 5.23594 |
| ZNF70        | 7.93103 | 7.94256 | 7.65349 | 6.89609 | 6.32013 | 6.96756 | 6.98018 | 6.29367 | 6.25619 |
| VPREB3       | 5.17867 | 5.06184 | 5.10972 | 5.52462 | 6.28753 | 5.96076 | 5.75227 | 5.24296 | 5.41551 |
| CHCHD10      | 7.78054 | 7.89287 | 7.83167 | 8.25484 | 7.33803 | 8.24273 | 8.15879 | 8.05267 | 8.15089 |
| DERL3        | 6.46558 | 6.30608 | 6.69231 | 7.09864 | 7.39037 | 7.10153 | 6.87406 | 6.98495 | 6.87217 |
| MIF-AS1      | 5.62849 | 7.02803 | 6.11588 | 6.48777 | 6.64911 | 6.96859 | 6.2721  | 6.77943 | 6.90286 |
| GSTT2B       | 10.2053 | 9.73772 | 8.4465  | 6.75729 | 7.35513 | 6.64206 | 6.85516 | 7.20078 | 7.03325 |
| DDT          | 7.6277  | 7.42744 | 7.73412 | 7.58123 | 6.94365 | 7.56495 | 7.45059 | 7.5332  | 7.49177 |
| GSTTP1       | 6.56084 | 6.3768  | 6.26494 | 6.64883 | 7.44012 | 6.73998 | 6.5825  | 6.99557 | 6.86855 |
| GstT1        | 7.15077 | 6.91568 | 5.87957 | 7.4674  | 7.29325 | 7.04196 | 6.64129 | 6.66446 | 7.04647 |
| GSTTP2       | 3.39557 | 3.4295  | 3.36403 | 4.716   | 4.00552 | 4.09296 | 4.25543 | 4.09164 | 3.84285 |
| GGT5         | 7.26255 | 6.84776 | 7.52453 | 7.58202 | 6.67973 | 7.80035 | 7.60313 | 7.29745 | 7.5986  |
| ADORA2A-AS1  | 5.74135 | 5.86451 | 5.91135 | 6.2485  | 7.43216 | 6.84698 | 5.93133 | 6.52084 | 6.3944  |
| GUCD1        | 7.5762  | 7.5597  | 7.5602  | 7.53894 | 6.869   | 7.61117 | 7.88679 | 7.54442 | 7.64429 |
| PIWIL3       | 4.53181 | 4.7662  | 4.54385 | 4.59963 | 6.05896 | 5.36093 | 4.83475 | 5.88487 | 5.28961 |
| tmem211      | 6.22871 | 6.163   | 6.10404 | 6.33674 | 7.41015 | 6.40218 | 6.26608 | 6.2798  | 6.31094 |
| LOC100128531 | 5.87977 | 6.31867 | 6.38799 | 7.10716 | 7.05142 | 7.67823 | 7.22292 | 7.38752 | 7.18465 |

|           |         |         |         |         |         |         |         |         |         |
|-----------|---------|---------|---------|---------|---------|---------|---------|---------|---------|
| LRP5L     | 7.00396 | 6.75764 | 6.84458 | 6.35855 | 7.2458  | 6.81974 | 6.31607 | 7.01318 | 6.47591 |
| HPS4      | 8.41151 | 8.33294 | 8.08724 | 7.13419 | 6.79554 | 6.86154 | 7.41165 | 6.9349  | 6.92715 |
| TFIP11    | 7.23012 | 7.16956 | 6.91162 | 7.08601 | 5.97435 | 6.73003 | 7.30923 | 7.06062 | 6.9756  |
| TPST2     | 6.80248 | 6.514   | 6.66506 | 6.72459 | 6.89739 | 6.40642 | 6.68722 | 6.89207 | 7.20231 |
| MIR548J   | 3.90596 | 3.27787 | 3.47438 | 3.6694  | 4.06618 | 3.61506 | 3.65386 | 4.24816 | 4.20356 |
| MN1       | 7.2864  | 6.38224 | 6.80283 | 7.80165 | 7.4002  | 7.23347 | 7.89607 | 6.97509 | 7.27385 |
| TTC28     | 7.88299 | 7.67171 | 7.65214 | 6.61259 | 6.13273 | 6.57049 | 6.55911 | 6.4443  | 6.47106 |
| CHEK2     | 5.98761 | 5.85813 | 5.65962 | 5.85598 | 5.92822 | 6.38793 | 6.17032 | 5.6829  | 5.43562 |
| XBP1      | 9.32588 | 9.05163 | 9.60067 | 8.95962 | 7.75869 | 9.16699 | 9.02048 | 8.01087 | 9.1898  |
| ZNRF3-AS1 | 5.5428  | 5.77594 | 5.12403 | 4.81221 | 5.18007 | 4.92164 | 5.09849 | 4.69874 | 5.04611 |
| RHBDD3    | 6.01998 | 6.0029  | 6.24747 | 6.80982 | 6.0271  | 6.85808 | 6.25223 | 6.20332 | 6.33415 |
| RFPL1S    | 4.2238  | 4.02868 | 4.03758 | 4.93312 | 5.08561 | 4.42925 | 4.26594 | 4.46829 | 4.15617 |
| THOC5     | 8.00387 | 7.96049 | 7.82519 | 6.92889 | 5.82875 | 6.63132 | 7.35045 | 6.67863 | 7.05631 |
| NIPSNAP1  | 7.72706 | 7.75493 | 7.43288 | 7.576   | 7.93739 | 7.05644 | 7.65948 | 7.20078 | 7.2821  |
| ASCC2     | 9.12341 | 8.99037 | 8.95996 | 9.00561 | 7.15992 | 8.52782 | 9.15802 | 9.74202 | 9.19853 |
| LIF       | 5.43934 | 5.3315  | 5.24341 | 5.4697  | 5.6158  | 5.44014 | 5.735   | 5.73025 | 5.70445 |
| OSM       | 5.34598 | 4.92489 | 5.32681 | 6.01901 | 5.96437 | 6.70594 | 5.77305 | 6.17583 | 5.77843 |
| GATSL3    | 7.65921 | 7.50855 | 7.31002 | 7.92522 | 6.5499  | 7.44289 | 8.05929 | 7.3485  | 6.80612 |
| RNF215    | 6.07358 | 5.76782 | 5.69454 | 6.26465 | 5.90319 | 6.49577 | 6.39661 | 6.25134 | 6.31313 |
| sec14I3   | 4.76259 | 4.90674 | 4.83398 | 5.48022 | 6.13423 | 5.52448 | 5.29011 | 5.39773 | 5.21016 |
| SDC4P     | 3.778   | 4.13    | 3.80349 | 4.28797 | 4.23174 | 4.78341 | 4.70501 | 4.15757 | 4.11296 |
| SEC14L4   | 5.72015 | 5.39596 | 5.35445 | 6.33107 | 6.23148 | 6.42992 | 6.37174 | 6.06499 | 6.16296 |
| SEC14L6   | 7.02038 | 6.97797 | 6.31848 | 7.24819 | 6.89915 | 6.71545 | 6.94096 | 6.52174 | 6.42264 |
| GAL3ST1   | 5.77837 | 5.74189 | 5.69807 | 6.14713 | 7.11671 | 6.13574 | 5.84626 | 6.3986  | 6.37833 |
| DUSP18    | 7.58507 | 7.23992 | 7.27018 | 8.08809 | 7.22934 | 8.18078 | 8.5354  | 7.56384 | 8.62393 |
| MORC2     | 8.91251 | 8.79335 | 8.57103 | 8.61521 | 7.01557 | 8.23452 | 8.23682 | 7.94877 | 8.53444 |

|           |         |         |         |         |         |         |         |         |         |
|-----------|---------|---------|---------|---------|---------|---------|---------|---------|---------|
| SELENOM   | 6.49771 | 6.53791 | 7.03213 | 7.45028 | 6.92279 | 7.639   | 7.29129 | 8.26228 | 7.56701 |
| PIK3IP1   | 6.66966 | 6.303   | 6.4159  | 5.76385 | 5.71521 | 6.1395  | 6.83748 | 6.51014 | 5.37398 |
| PATZ1     | 7.04816 | 7.08171 | 7.30572 | 6.38702 | 6.57115 | 6.30798 | 6.97749 | 6.97618 | 6.7581  |
| EIF4ENIF1 | 8.09286 | 8.35249 | 8.07172 | 7.44535 | 7.30803 | 7.08869 | 7.78706 | 6.8132  | 7.4141  |
| PISD      | 6.79468 | 7.10545 | 6.79506 | 7.22827 | 5.1197  | 6.67914 | 6.84299 | 6.71636 | 6.71012 |
| PRR14L    | 7.92821 | 8.12537 | 7.85831 | 7.79943 | 6.29882 | 7.33825 | 7.88243 | 7.67057 | 7.89298 |
| C22orf42  | 4.92193 | 5.05052 | 5.06545 | 5.48272 | 6.93819 | 5.64892 | 4.89141 | 5.28393 | 5.27148 |
| RFPL2     | 5.51358 | 5.81434 | 5.73769 | 6.02874 | 6.16726 | 6.66187 | 6.27175 | 5.8384  | 6.19695 |
| RFPL3S    | 4.63472 | 4.36353 | 4.17082 | 4.27119 | 5.23321 | 4.58995 | 4.04086 | 4.39058 | 4.41507 |
| RTCB      | 9.24252 | 9.15778 | 8.77315 | 9.12745 | 6.70459 | 8.57719 | 9.19205 | 9.10852 | 8.57282 |
| BPIFC     | 11.602  | 11.4997 | 11.0605 | 10.3325 | 10.7138 | 9.83393 | 10.3086 | 8.56712 | 10.6483 |
| SYN3      | 5.45185 | 5.90429 | 5.55513 | 5.70148 | 6.83798 | 6.0692  | 6.18989 | 5.7814  | 5.95004 |
| LARGE1    | 7.1939  | 6.9013  | 7.07413 | 7.06745 | 6.04458 | 7.76556 | 7.00645 | 7.78695 | 7.36478 |
| MIR4764   | 4.17728 | 3.77376 | 3.79168 | 3.75695 | 3.76482 | 4.23519 | 4.03246 | 3.72762 | 4.26778 |
| MB        | 4.9401  | 4.69273 | 5.14644 | 4.9559  | 5.55805 | 5.72366 | 5.02016 | 5.17818 | 4.85647 |
| TXN2      | 8.53038 | 8.68102 | 8.41508 | 8.58566 | 8.06924 | 8.24101 | 8.85817 | 7.86849 | 8.47717 |
| FOXRED2   | 7.37839 | 7.56005 | 7.59918 | 7.69049 | 6.3118  | 6.80816 | 7.52916 | 6.577   | 6.61573 |
| IFT27     | 6.62896 | 6.81232 | 6.44266 | 6.51604 | 6.48801 | 6.62086 | 6.55774 | 6.27601 | 6.53872 |
| PVALB     | 4.93167 | 4.75841 | 4.65544 | 4.78179 | 5.63482 | 5.21483 | 5.22826 | 5.31101 | 5.43614 |
| TEX33     | 5.9582  | 5.88799 | 5.79461 | 6.04966 | 6.53126 | 6.24988 | 5.6452  | 6.07655 | 6.04846 |
| TST       | 8.08256 | 8.43469 | 8.09536 | 9.2154  | 7.45828 | 9.00001 | 9.57676 | 8.55422 | 8.58415 |
| SSTR3     | 4.96399 | 4.58433 | 4.89661 | 5.37296 | 5.01275 | 5.41885 | 5.5355  | 5.83708 | 5.42549 |
| ELFN2     | 5.65946 | 5.826   | 5.65868 | 6.22447 | 5.96913 | 6.49702 | 6.21236 | 6.12287 | 6.23438 |
| MFNG      | 6.01433 | 5.96178 | 6.19645 | 6.40516 | 6.18238 | 6.21661 | 6.23009 | 6.4537  | 6.27407 |
| ANKRD54   | 6.94074 | 6.64171 | 6.87764 | 7.00902 | 7.10144 | 6.76592 | 7.10732 | 6.95295 | 6.73923 |
| MIR659    | 5.23231 | 5.75052 | 5.47749 | 5.96343 | 5.52502 | 5.77407 | 5.93784 | 5.90534 | 5.87601 |

|           |         |         |         |         |         |         |         |         |         |
|-----------|---------|---------|---------|---------|---------|---------|---------|---------|---------|
| C22orf23  | 5.49241 | 5.79624 | 5.71659 | 6.26027 | 6.30459 | 6.46105 | 6.45737 | 5.98424 | 6.09323 |
| SOX10     | 6.78862 | 6.536   | 6.98986 | 6.94301 | 7.26338 | 7.33385 | 7.16561 | 7.31746 | 7.61676 |
| BAIAP2L2  | 6.68883 | 6.49817 | 6.59649 | 7.21737 | 7.26497 | 7.21878 | 6.73057 | 7.0875  | 6.75439 |
| TMEM184B  | 7.58766 | 7.03456 | 7.42563 | 8.41827 | 7.71999 | 8.37621 | 8.54308 | 8.57013 | 8.54303 |
| LOC400927 | 7.69422 | 7.63545 | 7.55469 | 7.94113 | 9.75935 | 7.80018 | 7.64677 | 8.02655 | 8.12871 |
| DDX17     | 10.4983 | 10.3958 | 10.1881 | 9.49008 | 7.34759 | 9.57812 | 9.24646 | 9.12378 | 9.97069 |
| JOSD1     | 8.14243 | 7.93885 | 8.09943 | 8.55331 | 6.86475 | 8.56745 | 8.36803 | 8.40512 | 8.322   |
| nptxr     | 6.10954 | 6.18656 | 6.16981 | 6.83931 | 6.98848 | 6.55451 | 5.91981 | 6.31207 | 6.28249 |
| CBX6      | 6.4944  | 6.70596 | 6.31291 | 6.58366 | 5.43219 | 7.88507 | 6.15915 | 7.43149 | 6.71212 |
| CBX7      | 7.05458 | 7.14952 | 7.03128 | 7.12281 | 6.72415 | 6.94239 | 7.06183 | 6.80774 | 7.13587 |
| PDGFB     | 6.52987 | 6.59278 | 6.31703 | 7.23479 | 6.08397 | 6.97857 | 6.81527 | 7.06915 | 7.03268 |
| rps19bp1  | 7.19448 | 7.19951 | 7.16133 | 7.64069 | 6.45898 | 7.89436 | 8.14691 | 7.5077  | 7.46811 |
| ENTHD1    | 4.12008 | 4.02688 | 4.05721 | 4.18539 | 5.2642  | 4.72583 | 4.06592 | 4.17833 | 4.0652  |
| MKL1      | 8.28352 | 8.12625 | 7.98822 | 8.2251  | 7.76073 | 8.1853  | 8.37274 | 8.82587 | 8.39099 |
| MIR4766   | 2.52927 | 2.21155 | 2.33641 | 2.39599 | 1.80471 | 2.48691 | 1.94691 | 2.11081 | 1.86838 |
| ST13      | 5.72625 | 6.1041  | 6.06765 | 5.40226 | 5.31741 | 5.2328  | 5.71561 | 5.82064 | 5.58207 |
| CHADL     | 6.54087 | 6.73624 | 6.68667 | 7.68002 | 7.14823 | 7.60143 | 6.9653  | 7.08902 | 7.06056 |
| RANGAP1   | 9.18693 | 9.01554 | 8.57693 | 8.83179 | 6.81766 | 8.3989  | 9.30023 | 8.54169 | 8.81296 |
| PHF5A     | 7.38195 | 7.47414 | 7.26249 | 7.93897 | 6.63152 | 7.17968 | 8.06709 | 7.39059 | 7.42277 |
| POLR3H    | 7.54651 | 7.37914 | 7.448   | 7.74726 | 6.5966  | 7.57414 | 7.83604 | 7.05639 | 7.60245 |
| PMM1      | 7.02456 | 6.85151 | 6.90357 | 7.18921 | 6.76031 | 7.28732 | 7.11718 | 7.7114  | 7.00358 |
| SNU13     | 6.67317 | 6.82977 | 6.80715 | 7.12966 | 5.45319 | 6.95642 | 7.40277 | 6.47151 | 6.50001 |
| SHISA8    | 6.46709 | 6.45891 | 6.28457 | 7.18328 | 7.10099 | 7.56629 | 7.12966 | 6.76902 | 6.92952 |
| MIR378I   | 7.31805 | 7.50703 | 6.9728  | 7.10385 | 7.5156  | 6.67421 | 6.28991 | 7.03915 | 6.31001 |
| CENPM     | 6.58047 | 6.67643 | 6.32623 | 6.78485 | 7.12052 | 6.62358 | 6.55594 | 6.5282  | 6.39903 |
| tcf20     | 8.46915 | 8.58624 | 8.43234 | 7.46962 | 7.07987 | 7.64573 | 8.03711 | 7.96838 | 8.14664 |

|           |         |         |         |         |         |         |         |         |         |
|-----------|---------|---------|---------|---------|---------|---------|---------|---------|---------|
| NFAM1     | 6.21385 | 6.45113 | 6.72914 | 6.87817 | 7.55313 | 6.92971 | 6.78973 | 7.38239 | 6.92213 |
| RRP7A     | 7.52573 | 7.10962 | 7.43202 | 7.72722 | 7.82435 | 7.6735  | 7.79452 | 7.41272 | 7.76545 |
| RRP7BP    | 7.18901 | 7.03522 | 7.0475  | 5.90606 | 6.76793 | 5.70629 | 6.30977 | 5.93559 | 6.57354 |
| cyb5r3    | 9.36255 | 9.52492 | 9.69311 | 9.46476 | 8.19171 | 9.47544 | 9.66682 | 9.46938 | 9.24447 |
| ARFGAP3   | 8.28638 | 8.05849 | 8.43611 | 7.98218 | 6.14047 | 8.13855 | 8.11283 | 8.02172 | 8.02969 |
| PACSIN2   | 7.99252 | 7.87264 | 8.03303 | 7.6218  | 7.34908 | 7.45076 | 7.85159 | 8.14016 | 7.38376 |
| MCAT      | 6.61541 | 6.31325 | 6.26741 | 6.91136 | 5.59314 | 5.86582 | 7.35658 | 5.84074 | 6.09982 |
| EFCAB6    | 5.58527 | 5.58215 | 5.71344 | 4.97701 | 5.85798 | 5.02849 | 5.02306 | 5.48449 | 5.02852 |
| PNPLA5    | 5.608   | 5.42267 | 5.12405 | 5.85205 | 5.88727 | 6.22764 | 5.97192 | 6.05749 | 5.70672 |
| LINC00229 | 5.14239 | 5.27414 | 5.5707  | 5.46012 | 5.88383 | 6.10752 | 5.63123 | 5.8794  | 5.516   |
| PHF21B    | 5.56469 | 5.69862 | 5.67039 | 6.30337 | 6.30026 | 6.5074  | 6.07953 | 6.25415 | 6.17865 |
| NUP50-AS1 | 6.86771 | 7.55973 | 7.77099 | 6.65767 | 4.8194  | 5.97884 | 6.69487 | 7.34047 | 6.84896 |
| KIAA0930  | 9.12575 | 8.55939 | 8.69092 | 8.7883  | 7.0599  | 8.33493 | 8.99336 | 8.78667 | 8.68646 |
| MIR1249   | 6.07049 | 5.85567 | 5.96232 | 6.46653 | 6.42898 | 6.8416  | 6.415   | 6.22991 | 6.1573  |
| SMC1B     | 3.9574  | 3.96454 | 4.15382 | 4.22676 | 5.20456 | 4.79182 | 4.29179 | 4.8915  | 4.25876 |
| LINC00899 | 5.69399 | 6.04255 | 5.71573 | 5.50584 | 6.23524 | 5.66484 | 5.74422 | 5.47008 | 5.68358 |
| PRR34     | 5.70502 | 5.87662 | 5.83058 | 5.30977 | 6.37726 | 5.74228 | 5.90965 | 5.78177 | 5.83037 |
| CDPF1     | 6.02319 | 5.92832 | 5.86218 | 6.3032  | 5.73381 | 6.93258 | 6.31813 | 5.84832 | 6.31883 |
| GTSE1-AS1 | 4.27615 | 4.49042 | 4.72977 | 5.40903 | 5.14373 | 4.93971 | 4.87141 | 5.24923 | 4.65374 |
| CERK      | 8.28116 | 8.51587 | 8.22579 | 8.09156 | 7.00119 | 9.23882 | 8.10428 | 8.90751 | 8.65799 |
| LINC00898 | 5.17475 | 5.43218 | 5.38404 | 6.12754 | 6.1034  | 5.8721  | 5.1924  | 5.78948 | 5.73717 |
| LOC284933 | 5.76017 | 6.12616 | 5.68121 | 6.19102 | 7.02505 | 6.17438 | 6.02359 | 6.2243  | 5.79525 |
| MIR3667   | 7.39578 | 7.38984 | 7.46969 | 7.6416  | 8.04052 | 7.61442 | 7.30707 | 7.54569 | 7.73784 |
| BRD1      | 7.85655 | 7.8891  | 7.71062 | 7.50477 | 6.55704 | 7.62901 | 7.64943 | 7.26382 | 7.62518 |
| IL17REL   | 6.44077 | 6.59101 | 6.52368 | 7.51868 | 6.71926 | 7.31755 | 7.02199 | 6.86321 | 6.81608 |
| MLC1      | 5.98714 | 6.18737 | 6.16094 | 6.58017 | 6.95265 | 6.76524 | 6.44282 | 6.35892 | 6.63647 |

|            |         |         |         |         |         |         |         |         |         |
|------------|---------|---------|---------|---------|---------|---------|---------|---------|---------|
| HDAC10     | 6.85232 | 6.47724 | 6.6696  | 6.6446  | 7.25205 | 7.30076 | 6.83025 | 6.85311 | 6.78051 |
| MAPK12     | 6.54435 | 6.49973 | 6.61946 | 6.99737 | 7.44543 | 7.26075 | 6.65382 | 6.94677 | 6.96627 |
| MAPK11     | 5.73497 | 5.74627 | 5.69885 | 6.56212 | 5.47266 | 6.59043 | 6.4873  | 6.25096 | 6.23492 |
| PLXNB2     | 9.05961 | 9.17792 | 9.01359 | 8.9982  | 7.00696 | 9.48803 | 9.3793  | 9.06218 | 9.20772 |
| SBF1       | 8.01643 | 7.72179 | 7.67315 | 8.25695 | 7.68583 | 8.80146 | 8.18938 | 8.36272 | 8.16484 |
| LMF2       | 7.55216 | 7.26044 | 7.58788 | 8.18019 | 6.5481  | 7.75362 | 7.86705 | 7.51772 | 7.48577 |
| SCO2       | 7.52982 | 7.14134 | 6.94517 | 8.39744 | 7.72325 | 8.48205 | 8.69562 | 8.26812 | 8.70635 |
| ODF3B      | 6.65964 | 5.93227 | 6.14792 | 6.40936 | 6.03048 | 7.20367 | 6.69254 | 6.63701 | 6.47831 |
| SYCE3      | 3.63381 | 3.96107 | 3.90765 | 4.34186 | 4.17314 | 4.44473 | 4.15992 | 4.53938 | 4.22794 |
| CHKB-CPT1B | 8.25813 | 7.43585 | 7.32458 | 7.12916 | 6.86783 | 6.88551 | 6.94052 | 7.16902 | 7.06269 |
| ARSA       | 6.96861 | 6.49725 | 6.32345 | 8.08733 | 6.53596 | 8.37355 | 8.15314 | 8.63945 | 8.01119 |
| CHL1       | 8.87605 | 9.91246 | 9.46868 | 7.37711 | 6.21753 | 6.31674 | 7.48387 | 5.9711  | 6.42965 |
| CNTN6      | 4.5474  | 4.50535 | 3.96728 | 4.66965 | 5.35426 | 5.22138 | 4.78464 | 4.67712 | 4.50397 |
| CNTN4      | 4.8027  | 5.22008 | 5.35873 | 5.22115 | 5.83446 | 5.22115 | 5.32379 | 5.0929  | 4.97692 |
| LRRN1      | 7.12973 | 7.34914 | 7.56117 | 6.55463 | 6.27445 | 6.58707 | 7.08735 | 7.05954 | 6.81336 |
| setmar     | 7.09824 | 7.53802 | 7.41773 | 6.19987 | 6.42136 | 6.30255 | 6.68366 | 5.72392 | 6.12668 |
| ARL8B      | 10.3854 | 10.1013 | 10.3057 | 9.96083 | 8.86993 | 10.5268 | 10.3727 | 10.5801 | 10.3689 |
| LMCD1      | 8.57739 | 8.06618 | 8.80429 | 7.37832 | 7.67008 | 7.08942 | 7.31828 | 8.2856  | 7.59795 |
| LINC00312  | 7.0982  | 6.30883 | 7.54841 | 4.75986 | 4.99293 | 4.8063  | 5.0847  | 6.17553 | 5.27257 |
| CAV3       | 5.53691 | 5.42923 | 5.26217 | 5.77095 | 5.67369 | 6.17869 | 5.4419  | 5.97752 | 6.02898 |
| THUMPD3    | 7.63625 | 7.77668 | 7.76926 | 7.16558 | 5.91248 | 7.00059 | 7.70148 | 7.00065 | 6.99136 |
| SETD5      | 9.50425 | 9.45707 | 9.3961  | 8.15227 | 6.46096 | 7.83873 | 8.20904 | 8.84442 | 8.64771 |
| MTMR14     | 7.82911 | 7.55924 | 7.44788 | 7.26432 | 6.81692 | 7.53375 | 7.61    | 7.92711 | 7.54062 |
| CPNE9      | 5.88618 | 5.96039 | 5.84982 | 6.20139 | 6.62864 | 6.30384 | 6.26497 | 5.87982 | 6.07075 |
| OGG1       | 6.55408 | 6.67684 | 6.62345 | 6.41489 | 5.81777 | 6.07747 | 6.49674 | 6.2989  | 6.28058 |
| JAGN1      | 6.9118  | 6.97948 | 7.12186 | 7.57308 | 6.52602 | 7.63881 | 8.07632 | 7.31806 | 7.32734 |



|            |         |         |         |         |         |         |         |         |         |
|------------|---------|---------|---------|---------|---------|---------|---------|---------|---------|
| IL17RE     | 7.73505 | 8.18388 | 8.15727 | 7.62247 | 6.84402 | 7.32804 | 8.26367 | 7.60414 | 7.86926 |
| IL17RC     | 7.88001 | 7.75326 | 7.68217 | 8.04373 | 7.322   | 8.2838  | 8.38698 | 8.00484 | 8.26701 |
| creld1     | 6.60411 | 6.08709 | 6.05238 | 6.56877 | 6.5288  | 6.4962  | 6.14608 | 6.34045 | 6.46855 |
| PRRT3-AS1  | 7.58989 | 7.68884 | 7.42296 | 6.90061 | 6.89851 | 7.10052 | 7.43745 | 7.03217 | 7.47439 |
| IRAK2      | 7.64989 | 7.1508  | 6.82851 | 7.43586 | 8.05127 | 9.1432  | 8.22495 | 8.88436 | 8.228   |
| TATDN2     | 7.9622  | 8.21409 | 8.02974 | 7.4059  | 6.88789 | 7.10504 | 8.09011 | 7.18787 | 7.4787  |
| LINC00852  | 7.57922 | 7.53583 | 7.80367 | 6.46854 | 6.74971 | 6.61939 | 6.78991 | 6.81587 | 6.94714 |
| GHRLOS     | 7.10566 | 6.68197 | 6.73419 | 5.45854 | 6.14448 | 5.79391 | 5.69129 | 5.90953 | 6.38922 |
| HRH1       | 6.28822 | 5.91587 | 5.76728 | 6.19742 | 6.87621 | 6.21363 | 6.27035 | 6.55436 | 6.88126 |
| ATG7       | 7.57044 | 7.59865 | 7.6634  | 6.81178 | 6.63959 | 7.00485 | 7.01368 | 7.11149 | 7.17201 |
| SYN2       | 6.05628 | 5.28512 | 6.20841 | 5.3228  | 5.19193 | 5.63598 | 5.53345 | 5.40779 | 5.54109 |
| PPARG      | 6.58306 | 6.06624 | 7.45994 | 5.90407 | 6.13957 | 6.45393 | 5.67392 | 5.3873  | 4.9249  |
| TSEN2      | 7.75612 | 7.58458 | 7.88473 | 6.76694 | 5.92677 | 6.68431 | 7.16378 | 6.35912 | 6.67789 |
| MKRN2      | 8.9108  | 8.58908 | 8.88918 | 8.11631 | 6.52755 | 7.83784 | 8.741   | 8.75482 | 8.14744 |
| CAND2      | 6.31497 | 6.51436 | 6.56394 | 6.88153 | 6.94473 | 7.48166 | 6.88496 | 6.86722 | 6.77504 |
| HDAC11     | 6.95151 | 7.31288 | 6.55973 | 6.64096 | 6.33213 | 7.01814 | 6.78459 | 7.04016 | 6.66392 |
| FBLN2      | 8.19639 | 8.30802 | 8.73934 | 7.38618 | 6.71753 | 6.88259 | 7.79484 | 6.98168 | 7.27739 |
| TPRXL      | 6.55684 | 6.17166 | 6.15219 | 5.8431  | 6.32379 | 6.76981 | 6.40213 | 6.00923 | 6.3548  |
| TMEM43     | 9.94769 | 9.79362 | 10.1777 | 9.41308 | 6.0242  | 8.53911 | 9.54606 | 8.79726 | 9.25588 |
| CCDC174    | 6.73096 | 7.00389 | 6.85033 | 6.20677 | 5.15827 | 6.81655 | 6.56613 | 6.43369 | 6.60153 |
| C3orf20    | 5.48033 | 5.392   | 5.21845 | 5.49055 | 6.35797 | 5.55642 | 5.61329 | 5.29463 | 5.70672 |
| CAPN7      | 8.94981 | 9.13534 | 9.17453 | 7.80358 | 6.05338 | 7.20755 | 8.0035  | 7.95123 | 7.71201 |
| SH3BP5-AS1 | 8.30151 | 8.01344 | 9.15158 | 5.81602 | 5.12925 | 4.72232 | 6.62303 | 5.84851 | 6.58466 |
| EAF1       | 9.30729 | 9.80365 | 9.61294 | 9.82695 | 8.60956 | 9.72913 | 10.18   | 10.0053 | 10.519  |
| BTD        | 6.39917 | 6.10413 | 6.1147  | 5.82339 | 5.13666 | 5.73303 | 6.02639 | 6.06937 | 5.93557 |
| MIR563     | 5.05303 | 5.35453 | 5.0033  | 4.93466 | 5.65003 | 5.27315 | 4.58993 | 5.16593 | 4.98221 |

|             |         |         |         |         |         |         |         |         |         |
|-------------|---------|---------|---------|---------|---------|---------|---------|---------|---------|
| GALNT15     | 5.82235 | 6.44402 | 7.0026  | 5.26478 | 6.00898 | 5.99151 | 6.00781 | 6.29562 | 5.60349 |
| OXNAD1      | 8.05021 | 8.55428 | 8.36677 | 7.43337 | 7.52679 | 7.39874 | 7.96777 | 7.53033 | 7.80359 |
| PLCL2       | 5.80501 | 5.91887 | 5.91356 | 6.57303 | 6.50703 | 6.16599 | 6.02719 | 5.89429 | 5.9165  |
| KAT2B       | 9.82237 | 9.94162 | 9.45613 | 9.76644 | 8.66578 | 10.281  | 9.78045 | 9.98947 | 10.4474 |
| SGO1-AS1    | 5.96863 | 5.93515 | 5.39927 | 6.10046 | 6.61631 | 6.23149 | 5.96419 | 6.2273  | 6.42431 |
| VENTXP7     | 4.56734 | 4.7566  | 4.43128 | 5.589   | 4.78715 | 5.17597 | 5.34642 | 5.12289 | 5.29838 |
| UBE2E2      | 8.35987 | 8.34751 | 8.75972 | 8.01436 | 7.10242 | 8.6562  | 8.75181 | 8.37064 | 8.92933 |
| UBE2E1      | 6.81852 | 6.60848 | 6.74567 | 6.16518 | 6.38739 | 6.55806 | 6.26054 | 6.59903 | 6.41984 |
| RPL15       | 7.14547 | 6.90703 | 7.26263 | 7.35272 | 6.76935 | 6.96548 | 7.10085 | 6.85122 | 7.02163 |
| THRB-AS1    | 4.47707 | 4.40563 | 4.77936 | 4.60292 | 5.09541 | 4.77257 | 4.19833 | 5.00336 | 4.70597 |
| LRRC3B      | 5.30018 | 5.37594 | 5.56157 | 6.16653 | 6.38042 | 5.85394 | 5.30663 | 5.97367 | 5.79512 |
| CMC1        | 6.99374 | 7.29762 | 6.92395 | 4.85766 | 5.93442 | 4.59759 | 5.05372 | 4.9299  | 5.37819 |
| LINC00693   | 6.36272 | 6.17025 | 6.33181 | 6.77293 | 7.63752 | 6.923   | 6.50308 | 6.32279 | 6.44981 |
| OSBPL10-AS1 | 5.86484 | 6.24783 | 5.8368  | 6.64142 | 6.72803 | 6.38366 | 6.18601 | 6.05059 | 5.95882 |
| ZNF860      | 6.68629 | 6.80659 | 6.1056  | 6.47641 | 4.9622  | 6.19984 | 6.19789 | 6.74779 | 6.96554 |
| GPD1L       | 8.25485 | 8.40203 | 8.27427 | 7.446   | 6.6679  | 7.01835 | 7.30233 | 7.08322 | 6.56137 |
| CMTM8       | 7.21916 | 6.89245 | 6.73885 | 7.54963 | 6.71133 | 7.03585 | 7.2332  | 7.07043 | 6.61797 |
| CMTM7       | 6.6324  | 6.37681 | 7.2272  | 7.20864 | 6.77873 | 6.33415 | 6.34361 | 6.35279 | 6.50823 |
| CCR4        | 5.50344 | 5.68197 | 5.89381 | 5.66606 | 6.43161 | 6.06112 | 5.91204 | 5.745   | 5.82062 |
| CRTAP       | 10.5075 | 10.4132 | 11.0371 | 9.3656  | 6.8674  | 8.1824  | 9.47191 | 8.6678  | 8.9909  |
| FBXL2       | 6.41096 | 6.40946 | 6.43783 | 6.51559 | 6.35431 | 6.2072  | 6.42956 | 6.92018 | 7.6102  |
| PDCD6IP     | 10.3357 | 10.1965 | 10.2872 | 9.91445 | 8.52548 | 10.0686 | 10.1061 | 10.1126 | 10.4673 |
| mir128-2    | 3.68375 | 3.71029 | 3.69601 | 4.28235 | 4.1679  | 3.81873 | 4.16323 | 3.85037 | 3.56777 |
| stac        | 3.87382 | 4.10291 | 3.98098 | 4.23118 | 4.66366 | 4.37916 | 3.99359 | 3.99537 | 4.3157  |
| GOLGA4      | 10.1109 | 10.3563 | 10.2461 | 9.15687 | 6.65438 | 9.32413 | 9.14124 | 9.75117 | 9.43146 |
| C3orf35     | 9.48339 | 9.28091 | 9.31152 | 6.52248 | 6.20634 | 5.09174 | 5.82333 | 6.71639 | 6.71339 |

|         |         |         |         |         |         |         |         |         |         |
|---------|---------|---------|---------|---------|---------|---------|---------|---------|---------|
| MIR26A1 | 5.57908 | 5.37712 | 5.47809 | 4.96183 | 4.53596 | 4.51    | 4.6686  | 5.28755 | 4.71488 |
| VILL    | 6.31039 | 6.33744 | 6.12188 | 6.22124 | 6.02342 | 6.68238 | 6.53535 | 6.60712 | 7.08671 |
| DLEC1   | 5.50616 | 5.69562 | 5.51588 | 5.7529  | 6.20131 | 5.88071 | 5.78537 | 6.25398 | 6.16879 |
| MYD88   | 7.91593 | 7.06674 | 7.50163 | 8.53759 | 6.91643 | 8.71273 | 8.6862  | 7.99308 | 8.78421 |
| OXSRI   | 9.2133  | 9.06593 | 9.1019  | 9.62207 | 8.28547 | 10.8153 | 9.8745  | 10.4386 | 10.8849 |
| XYLB    | 7.10864 | 6.90573 | 7.5182  | 7.01651 | 7.06737 | 6.16754 | 6.78498 | 6.3763  | 6.77946 |
| WDR48   | 8.37231 | 8.22043 | 8.21796 | 7.17801 | 5.46245 | 6.96559 | 7.56092 | 7.74171 | 7.50779 |
| ttc21a  | 6.41233 | 6.16082 | 6.21059 | 5.95385 | 6.50112 | 6.13927 | 6.08286 | 5.98978 | 6.18234 |
| CCR8    | 4.48942 | 4.57801 | 3.98442 | 4.42452 | 5.27155 | 4.87883 | 4.60265 | 4.07154 | 4.94385 |
| MOBP    | 4.67588 | 4.56869 | 4.11736 | 4.881   | 6.09936 | 4.78455 | 4.95133 | 5.03707 | 4.93862 |
| MYRIP   | 6.70082 | 6.63413 | 6.79602 | 6.16744 | 6.30698 | 6.71516 | 6.46688 | 6.45829 | 6.35799 |
| EIF1B   | 5.2674  | 5.50973 | 5.43656 | 5.08495 | 4.47282 | 5.43146 | 5.75485 | 6.75697 | 5.47274 |
| entpd3  | 8.19269 | 9.45247 | 9.28421 | 8.99675 | 7.66164 | 8.92607 | 9.31112 | 9.48907 | 9.0995  |
| RPL14   | 7.28475 | 7.26036 | 7.33206 | 6.90756 | 6.3602  | 6.61105 | 7.15414 | 6.76703 | 6.73225 |
| ZNF619  | 6.32798 | 6.74118 | 6.61966 | 5.66276 | 5.69164 | 5.972   | 5.44743 | 5.74395 | 5.86506 |
| ZNF620  | 5.75091 | 5.884   | 5.86504 | 5.72562 | 6.38986 | 5.76245 | 5.56771 | 5.61305 | 5.36852 |
| ZNF621  | 7.7627  | 7.90493 | 7.94847 | 6.60718 | 6.27882 | 5.90149 | 6.61692 | 6.64478 | 6.53122 |
| VIPR1   | 8.26398 | 8.51667 | 8.37377 | 7.64346 | 8.3121  | 8.20236 | 8.81486 | 9.22949 | 8.47762 |
| SS18L2  | 8.22462 | 7.65404 | 7.51911 | 8.73587 | 7.68778 | 7.76717 | 8.82684 | 9.31749 | 8.78271 |
| NKTR    | 9.16193 | 9.58675 | 9.55914 | 7.04928 | 5.25054 | 6.16979 | 6.76048 | 8.76083 | 7.75594 |
| ZBTB47  | 6.53642 | 6.85738 | 6.98276 | 6.83415 | 5.97988 | 6.92453 | 7.10073 | 7.12428 | 6.99778 |
| KLHL40  | 5.7726  | 5.84543 | 5.9275  | 6.67907 | 5.75456 | 6.58993 | 6.56013 | 6.23705 | 6.29941 |
| ACKR2   | 5.53152 | 5.89327 | 5.96259 | 5.33859 | 5.96425 | 6.05896 | 5.68969 | 6.87462 | 6.55861 |
| ZNF662  | 7.45385 | 7.1742  | 6.92678 | 7.29984 | 6.75196 | 6.82953 | 6.89219 | 6.6201  | 7.24904 |
| KRBOX1  | 5.34458 | 4.86902 | 5.34463 | 4.86409 | 5.10218 | 5.32269 | 4.9704  | 4.48162 | 4.83312 |
| SNRK    | 8.47141 | 8.29829 | 9.10656 | 8.02272 | 6.53216 | 9.2326  | 8.40014 | 9.29967 | 9.4772  |

|              |         |         |         |         |         |         |         |         |         |
|--------------|---------|---------|---------|---------|---------|---------|---------|---------|---------|
| ABHD5        | 10.0519 | 9.6624  | 9.79432 | 9.96002 | 10.3089 | 10.1045 | 9.8501  | 10.5854 | 10.0784 |
| MIR138-1     | 5.43775 | 6.329   | 5.48915 | 6.22823 | 7.67319 | 7.56978 | 6.54423 | 8.45695 | 6.94492 |
| TOPAZ1       | 3.5561  | 3.67541 | 3.58325 | 3.81807 | 4.10583 | 4.17675 | 3.78136 | 3.82071 | 3.65666 |
| TCAIM        | 7.94537 | 8.06871 | 7.82721 | 7.31164 | 5.77963 | 6.88555 | 7.61066 | 6.58499 | 7.40573 |
| ZNF445       | 5.19872 | 5.38208 | 5.41381 | 5.85253 | 6.00901 | 5.5366  | 6.07812 | 5.3189  | 5.48421 |
| ZKSCAN7      | 5.72501 | 5.9255  | 5.59202 | 5.64176 | 6.16899 | 5.9601  | 6.00344 | 5.69322 | 5.94326 |
| ZNF660       | 6.08435 | 5.83376 | 6.07747 | 5.63072 | 6.30222 | 5.75263 | 5.56984 | 4.92859 | 5.21717 |
| ZNF197       | 6.6919  | 6.98125 | 6.869   | 6.163   | 5.86429 | 5.91316 | 6.63948 | 6.05024 | 6.22197 |
| ZNF35        | 6.82947 | 7.22878 | 6.9398  | 6.04585 | 5.13824 | 6.16143 | 6.91137 | 6.14288 | 6.30021 |
| ZNF502       | 6.77831 | 6.77448 | 6.72432 | 5.86717 | 5.6911  | 5.27148 | 5.9434  | 5.14956 | 5.73274 |
| ZNF501       | 5.19967 | 5.59594 | 4.7488  | 4.90854 | 4.98397 | 5.38674 | 4.78728 | 5.03147 | 4.51832 |
| KIF15        | 6.41762 | 6.17818 | 6.07712 | 5.90617 | 5.28859 | 4.91605 | 6.06171 | 5.75468 | 5.20077 |
| TMEM42       | 5.66477 | 5.75868 | 6.12548 | 6.29678 | 5.9847  | 6.03757 | 6.04302 | 5.69761 | 5.93222 |
| TGM4         | 5.57326 | 5.60011 | 5.81205 | 6.25595 | 6.9175  | 6.31787 | 6.0031  | 6.70536 | 6.8255  |
| EXOSC7       | 7.98695 | 7.86883 | 7.97228 | 7.00333 | 6.34377 | 6.39081 | 7.19624 | 6.6451  | 6.48645 |
| LIMD1        | 8.05434 | 7.75846 | 8.25157 | 6.85133 | 7.82143 | 7.50956 | 7.71633 | 7.47994 | 7.7034  |
| SACM1L       | 8.75333 | 8.79016 | 8.8883  | 7.55449 | 5.62642 | 7.0261  | 7.87946 | 7.76316 | 7.93656 |
| CCR9         | 5.44088 | 5.08779 | 5.20707 | 5.73343 | 6.96165 | 5.48869 | 5.80459 | 5.7187  | 5.86877 |
| Cxcr6        | 4.67074 | 4.89767 | 4.9931  | 5.10599 | 5.39986 | 5.23569 | 5.25967 | 5.48047 | 5.38307 |
| CCR3         | 3.74275 | 4.03383 | 3.97496 | 4.27212 | 5.1441  | 4.08293 | 4.14877 | 4.50812 | 4.10781 |
| CCR2         | 4.8958  | 4.94232 | 4.93301 | 4.975   | 5.68533 | 5.40126 | 4.97283 | 5.08914 | 5.19737 |
| CCR5         | 3.29423 | 3.61224 | 3.56868 | 3.87107 | 4.64342 | 4.25832 | 3.75034 | 3.72036 | 3.94245 |
| CCRL2        | 5.71947 | 5.70073 | 5.57727 | 5.68651 | 6.63914 | 6.16295 | 5.85975 | 5.91207 | 5.72974 |
| RTP3         | 5.75867 | 5.64059 | 5.68714 | 5.96028 | 6.15794 | 5.98643 | 5.70664 | 5.68528 | 5.76557 |
| LOC100132146 | 4.45429 | 4.50632 | 4.80591 | 4.79754 | 5.49152 | 5.21909 | 4.9086  | 4.93193 | 5.08077 |
| TMIE         | 5.767   | 5.63641 | 5.86557 | 6.763   | 6.03352 | 6.90648 | 6.25526 | 6.39413 | 5.96919 |

|          |         |         |         |         |         |         |         |         |         |
|----------|---------|---------|---------|---------|---------|---------|---------|---------|---------|
| PTH1R    | 5.43019 | 5.26475 | 5.47887 | 5.45625 | 5.39901 | 5.65539 | 5.7505  | 5.34884 | 5.94392 |
| NBEAL2   | 9.27152 | 8.62376 | 9.09916 | 9.12835 | 7.58188 | 9.51609 | 9.33367 | 9.38798 | 9.38107 |
| KIF9-AS1 | 5.08285 | 4.85576 | 5.26362 | 5.22424 | 5.24467 | 5.04974 | 5.60554 | 5.16217 | 5.4469  |
| KLHL18   | 8.35104 | 8.16753 | 7.86049 | 8.20206 | 7.59899 | 7.78759 | 8.18038 | 8.26605 | 8.68619 |
| DHX30    | 7.89202 | 8.09297 | 7.91807 | 7.64965 | 6.94169 | 7.14248 | 8.11254 | 7.36612 | 7.35765 |
| MIR1226  | 6.37469 | 6.31065 | 6.47732 | 7.53165 | 7.7234  | 7.84246 | 7.58952 | 7.5302  | 7.43664 |
| CAMP     | 5.87962 | 6.26709 | 6.1275  | 6.20639 | 6.36646 | 6.70958 | 6.1546  | 6.32303 | 6.15303 |
| ZNF589   | 7.1595  | 6.68837 | 6.82343 | 6.61401 | 5.55569 | 6.34769 | 6.59159 | 6.78573 | 6.88986 |
| FBXW12   | 4.2393  | 4.66423 | 4.73397 | 4.76821 | 4.81293 | 4.82378 | 4.57491 | 4.85001 | 4.62117 |
| ATRIP    | 6.67455 | 6.46362 | 6.04243 | 6.48294 | 5.14998 | 5.97411 | 6.42654 | 6.27119 | 6.06153 |
| TREX1    | 6.95533 | 7.03253 | 7.04299 | 7.07727 | 7.01212 | 6.83001 | 7.36773 | 7.01225 | 6.73042 |
| ARIH2    | 8.4592  | 8.45285 | 8.39375 | 8.14364 | 6.54319 | 7.57491 | 8.30639 | 7.87328 | 8.23451 |
| wdr6     | 7.1126  | 6.84848 | 6.97186 | 6.60519 | 6.36567 | 6.25083 | 6.84582 | 6.57928 | 6.76482 |
| KLHDC8B  | 8.00704 | 6.88167 | 7.58184 | 7.18865 | 6.29009 | 6.76284 | 7.58557 | 6.74859 | 6.31296 |
| CCDC36   | 5.69279 | 6.26368 | 5.87176 | 5.26744 | 6.10379 | 5.15497 | 5.52882 | 5.89077 | 5.55527 |
| C3orf62  | 4.97622 | 5.81809 | 4.9316  | 4.43477 | 4.87893 | 3.26908 | 4.57586 | 3.45026 | 3.92337 |
| TCTA     | 6.96016 | 7.37415 | 7.00121 | 7.17128 | 6.36714 | 6.90588 | 7.63774 | 6.86281 | 7.47053 |
| NICN1    | 4.39992 | 5.07724 | 4.87469 | 5.06905 | 3.9299  | 4.76434 | 4.95331 | 4.79574 | 4.84563 |
| DAG1     | 7.87298 | 7.5092  | 7.84888 | 6.84173 | 6.72844 | 6.70688 | 7.57039 | 7.12466 | 7.66781 |
| BSN      | 5.4342  | 5.52928 | 5.76537 | 6.33098 | 6.08199 | 6.15833 | 6.23561 | 6.15938 | 6.06842 |
| APEH     | 8.16003 | 8.16361 | 8.04557 | 8.96177 | 7.01711 | 8.34862 | 9.05881 | 8.05854 | 8.27905 |
| RNF123   | 7.00983 | 7.02757 | 6.76935 | 7.19405 | 6.70244 | 7.07347 | 7.35815 | 7.14885 | 7.29277 |
| MST1R    | 6.2547  | 6.47453 | 6.43901 | 7.03961 | 6.95413 | 7.22335 | 6.89387 | 6.78981 | 6.88303 |
| RBM6     | 8.21896 | 8.33567 | 8.04386 | 7.59387 | 6.68888 | 7.13943 | 7.65379 | 7.56462 | 7.72448 |
| RBM5     | 9.82319 | 9.73865 | 9.57125 | 8.68773 | 7.19544 | 8.76082 | 8.50517 | 8.67221 | 9.20674 |
| CYB561D2 | 6.40429 | 6.08401 | 6.30824 | 6.88732 | 6.36974 | 6.62675 | 6.79256 | 6.57351 | 6.62483 |

|              |         |         |         |         |         |         |         |         |         |
|--------------|---------|---------|---------|---------|---------|---------|---------|---------|---------|
| HEMK1        | 6.80233 | 6.56546 | 6.46812 | 6.53076 | 6.49363 | 6.76046 | 6.53646 | 6.4405  | 6.54818 |
| MAPKAPK3     | 7.89104 | 7.99879 | 7.91122 | 8.19439 | 7.96108 | 7.88449 | 8.48989 | 8.12048 | 8.06559 |
| DOCK3        | 6.9084  | 7.23632 | 7.0051  | 6.6516  | 6.88308 | 6.66691 | 6.81636 | 6.85693 | 7.07832 |
| MANF         | 7.5336  | 7.69817 | 7.54649 | 8.32077 | 7.56109 | 8.60281 | 8.38367 | 8.07094 | 8.27378 |
| RBM15B       | 7.19641 | 7.14952 | 7.08054 | 7.65209 | 6.18534 | 7.42479 | 7.87456 | 7.17289 | 7.23965 |
| RAD54L2      | 7.49316 | 7.52969 | 7.60846 | 7.02888 | 6.17221 | 6.94306 | 7.65542 | 8.19311 | 7.44405 |
| TEX264       | 6.29966 | 6.47621 | 6.28637 | 6.60709 | 6.52357 | 6.26176 | 6.4857  | 6.29284 | 6.55511 |
| IQCF4        | 4.65132 | 3.94728 | 4.09865 | 4.54735 | 4.82806 | 4.48604 | 4.71245 | 4.25753 | 3.95637 |
| IQCF3        | 4.83952 | 5.22527 | 4.8209  | 4.98399 | 5.32351 | 5.33783 | 5.16396 | 5.2218  | 5.23568 |
| IQCF2        | 2.83249 | 2.69284 | 2.5452  | 3.36383 | 4.00398 | 3.52654 | 3.90021 | 2.93364 | 2.89147 |
| GPR62        | 5.09776 | 5.29674 | 5.39389 | 5.692   | 6.10312 | 6.1576  | 5.53345 | 6.09564 | 5.92551 |
| ABHD14A-ACY1 | 6.52409 | 6.3561  | 6.68598 | 7.30542 | 6.52871 | 6.88295 | 7.5258  | 6.54215 | 6.64072 |
| GLYCTK       | 5.83497 | 6.12011 | 6.28929 | 6.66419 | 6.39681 | 6.86038 | 6.383   | 6.6214  | 6.5707  |
| PHF7         | 7.54481 | 7.44961 | 7.43194 | 6.83121 | 6.64034 | 6.44364 | 7.35533 | 6.27083 | 6.21893 |
| NISCH        | 7.97406 | 8.34758 | 7.87774 | 7.40046 | 7.27057 | 7.417   | 7.52316 | 7.79733 | 7.34016 |
| STAB1        | 6.90355 | 6.78427 | 7.0781  | 7.02067 | 6.50678 | 6.82578 | 6.76929 | 6.97964 | 6.91964 |
| smim4        | 6.84183 | 6.86098 | 6.89193 | 7.58849 | 6.52852 | 6.80587 | 7.31278 | 6.53878 | 6.73892 |
| SPCS1        | 8.52971 | 8.48683 | 8.78827 | 8.61667 | 8.10812 | 7.90576 | 9.06298 | 8.27194 | 8.58845 |
| ITIH1        | 5.61165 | 5.77328 | 5.62712 | 5.88715 | 6.22283 | 6.12946 | 6.1677  | 6.32186 | 6.2408  |
| ITIH3        | 5.79674 | 5.90388 | 6.00652 | 6.1149  | 6.61828 | 5.86005 | 6.09639 | 6.1381  | 6.0068  |
| IL17RB       | 5.15089 | 5.20183 | 5.02005 | 5.32066 | 4.98609 | 5.45887 | 5.84281 | 5.12818 | 5.34318 |
| CCDC66       | 6.46784 | 7.29641 | 6.84997 | 5.71021 | 4.68777 | 4.82505 | 6.10271 | 5.92954 | 5.38235 |
| ARHGEF3-AS1  | 4.94989 | 4.81528 | 5.13818 | 5.03206 | 5.29876 | 5.8197  | 4.98596 | 4.76696 | 4.94154 |
| SPATA12      | 5.38064 | 5.53972 | 5.82937 | 6.25991 | 7.19789 | 6.17858 | 5.70325 | 6.23361 | 5.86038 |
| PDE12        | 6.95986 | 6.81191 | 7.08183 | 6.93309 | 3.87972 | 6.11795 | 7.61258 | 6.37659 | 6.61441 |
| SLMAP        | 9.03765 | 8.84966 | 8.87711 | 8.41166 | 6.48103 | 8.6187  | 8.86587 | 9.1238  | 9.26561 |

|              |         |         |         |         |         |         |         |         |         |
|--------------|---------|---------|---------|---------|---------|---------|---------|---------|---------|
| ABHD6        | 8.12023 | 8.41466 | 7.98954 | 8.2001  | 7.84089 | 7.58736 | 8.01632 | 7.82131 | 7.75419 |
| RPP14        | 8.199   | 8.11392 | 8.13043 | 7.6552  | 5.93037 | 7.45401 | 7.8698  | 7.59493 | 7.92067 |
| PXK          | 8.63863 | 8.85255 | 8.64948 | 7.50608 | 6.40429 | 7.07948 | 8.06665 | 7.59783 | 7.55314 |
| KCTD6        | 5.1717  | 4.96256 | 5.18228 | 4.62106 | 4.40646 | 4.60183 | 4.82233 | 5.2156  | 4.88764 |
| SYNPR        | 4.02477 | 4.19552 | 4.07554 | 3.86885 | 4.73433 | 4.81516 | 4.45259 | 4.39792 | 4.24214 |
| c3orf49      | 4.8411  | 4.38411 | 4.494   | 4.83123 | 5.17608 | 4.78848 | 4.86899 | 5.06548 | 4.89157 |
| atxn7        | 9.31907 | 9.67743 | 9.42255 | 8.46385 | 7.23113 | 7.40438 | 8.1356  | 7.98865 | 8.33519 |
| PSMD6-AS2    | 8.57575 | 8.95251 | 8.84158 | 6.31485 | 5.94298 | 5.42271 | 5.87156 | 6.43886 | 7.12804 |
| PRICKLE2     | 4.38289 | 3.79835 | 3.95    | 4.17965 | 5.27777 | 4.62863 | 4.70055 | 4.21977 | 4.63019 |
| PRICKLE2-AS2 | 3.65441 | 3.17649 | 3.67218 | 3.16799 | 4.16582 | 3.68071 | 3.75974 | 3.43178 | 3.87295 |
| PRICKLE2-AS3 | 3.86847 | 3.59034 | 3.73237 | 3.72428 | 4.80261 | 4.13295 | 4.06213 | 3.97065 | 4.15939 |
| ADAMTS9-AS2  | 6.96612 | 7.45766 | 7.37268 | 5.21539 | 7.02259 | 6.25214 | 5.54768 | 6.03147 | 5.51514 |
| MAGI1-AS1    | 4.62536 | 4.58742 | 4.84999 | 5.202   | 5.39797 | 4.85537 | 4.61354 | 5.41095 | 5.14908 |
| KBTBD8       | 5.2528  | 5.52202 | 5.42531 | 6.08318 | 5.6243  | 6.27939 | 6.21371 | 6.03063 | 5.96295 |
| MIR4272      | 1.74978 | 1.97445 | 1.68314 | 1.97992 | 1.85645 | 1.85758 | 1.85656 | 2.21187 | 2.19757 |
| TMF1         | 5.13371 | 4.95462 | 5.19539 | 6.72731 | 6.37506 | 6.74311 | 6.2504  | 5.60356 | 5.78622 |
| ARL6IP5      | 10.2942 | 9.66186 | 10.6248 | 8.38206 | 7.04871 | 7.42004 | 9.29177 | 8.5013  | 8.00522 |
| MITF         | 7.57061 | 7.05091 | 7.04278 | 5.75304 | 6.28085 | 5.21556 | 5.66944 | 6.23944 | 5.70308 |
| GPR27        | 6.34116 | 6.351   | 6.34511 | 6.04279 | 6.20161 | 6.65674 | 6.11028 | 6.4052  | 6.3446  |
| LINC00870    | 5.31867 | 5.5153  | 5.029   | 5.63947 | 6.207   | 5.80305 | 5.46399 | 5.68478 | 5.53795 |
| GXYLT2       | 7.6609  | 7.53035 | 7.60957 | 6.95991 | 5.96741 | 5.79094 | 6.96973 | 5.23826 | 4.98834 |
| EBLN2        | 6.33575 | 6.83957 | 6.78649 | 5.73941 | 4.59609 | 5.54343 | 5.71599 | 6.06081 | 6.03777 |
| MIR4273      | 3.02741 | 2.90648 | 2.75832 | 4.22603 | 7.08885 | 3.22371 | 4.49762 | 2.82602 | 3.02814 |
| MIR3923      | 1.90241 | 2.08731 | 1.72154 | 1.95798 | 1.82169 | 2.6198  | 2.0098  | 1.80877 | 2.18592 |
| CADM2        | 4.52042 | 4.86087 | 4.79867 | 4.88087 | 5.28722 | 5.33639 | 5.54101 | 4.87116 | 5.02416 |
| CHMP2B       | 8.5823  | 8.29823 | 8.79996 | 8.62037 | 6.162   | 9.40546 | 8.9752  | 9.13781 | 8.93381 |

|            |         |         |         |         |         |         |         |         |         |
|------------|---------|---------|---------|---------|---------|---------|---------|---------|---------|
| ZNF654     | 7.99114 | 8.39991 | 8.0462  | 7.56554 | 5.69408 | 8.46791 | 7.81599 | 8.14168 | 7.65525 |
| C3orf38    | 7.9178  | 7.82381 | 7.89002 | 7.1796  | 5.61821 | 6.67609 | 7.81754 | 7.32398 | 7.43451 |
| EPHA3      | 5.70255 | 5.69819 | 6.10776 | 5.68811 | 5.45232 | 4.87476 | 5.31869 | 4.30795 | 5.17465 |
| ARL13B     | 7.08207 | 7.21596 | 7.50084 | 6.77486 | 4.9275  | 6.23223 | 6.91212 | 6.17828 | 5.91926 |
| LINC00879  | 2.52085 | 2.41675 | 2.2053  | 2.87242 | 2.87938 | 3.10402 | 2.76684 | 2.58672 | 2.82527 |
| epha6      | 4.9236  | 5.13308 | 5.15708 | 5.5205  | 5.96112 | 5.36659 | 5.28386 | 5.26913 | 5.27724 |
| ARL6       | 6.09425 | 6.29817 | 6.42987 | 4.90566 | 5.12757 | 5.69327 | 5.14847 | 5.59916 | 4.80592 |
| CRYBG3     | 9.52562 | 9.61138 | 9.3655  | 8.75911 | 7.39184 | 9.44156 | 8.84415 | 9.59943 | 9.24164 |
| CLDND1     | 6.53325 | 6.54804 | 6.57959 | 8.45435 | 7.4797  | 8.22008 | 7.8209  | 7.5773  | 7.386   |
| GPR15      | 5.32931 | 5.78023 | 5.80143 | 5.40859 | 5.49881 | 5.55614 | 5.85097 | 5.45908 | 5.51098 |
| CMSS1      | 7.30824 | 7.05842 | 7.61411 | 6.48451 | 6.10101 | 5.80666 | 6.95889 | 5.91955 | 6.27271 |
| TMEM30CP   | 2.61977 | 2.61095 | 3.02295 | 3.04663 | 3.02363 | 2.71971 | 2.7683  | 2.80534 | 2.66921 |
| LNP1       | 6.22435 | 6.16407 | 6.17462 | 6.25291 | 6.47965 | 6.24026 | 6.29433 | 5.83784 | 6.20598 |
| TMEM45A    | 12.2646 | 11.6933 | 11.8304 | 11.5554 | 10.1952 | 10.6672 | 11.289  | 7.82584 | 9.91833 |
| ADGRG7     | 4.43492 | 4.08412 | 3.99263 | 4.95151 | 5.55521 | 9.04954 | 4.31997 | 4.53253 | 4.512   |
| TFG        | 9.65497 | 9.37491 | 9.59906 | 9.29113 | 8.20212 | 9.89236 | 9.68587 | 10.0406 | 10.1342 |
| TRMT10C    | 7.77417 | 7.97053 | 7.67586 | 7.77921 | 6.49324 | 6.9552  | 8.19748 | 7.13409 | 7.62037 |
| PCNP       | 9.15161 | 9.12013 | 9.21549 | 8.25205 | 7.57667 | 8.15898 | 8.69907 | 8.66133 | 8.64318 |
| ZBTB11-AS1 | 6.5868  | 5.987   | 6.54503 | 6.69457 | 5.99683 | 7.1589  | 7.07619 | 6.6153  | 6.42041 |
| PDCL3      | 8.47035 | 8.53431 | 8.10525 | 9.34461 | 6.49171 | 8.69572 | 9.54879 | 8.26833 | 8.82295 |
| CEP97      | 8.06402 | 7.89624 | 7.86018 | 6.64356 | 5.97484 | 6.30113 | 6.62005 | 7.41352 | 6.78854 |
| LOC152225  | 3.73019 | 3.5935  | 4.1123  | 4.06772 | 4.22695 | 4.41872 | 4.06322 | 5.34813 | 4.75658 |
| ZPLD1      | 5.43401 | 5.49767 | 5.59129 | 5.52109 | 6.59917 | 5.703   | 5.1738  | 5.78588 | 5.64123 |
| ALCAM      | 7.30322 | 6.52027 | 7.63544 | 5.99619 | 5.81369 | 6.16092 | 6.48835 | 7.2016  | 6.09896 |
| DUBR       | 6.18975 | 6.09324 | 6.1676  | 5.88789 | 6.60854 | 5.76127 | 5.4218  | 5.52274 | 5.59295 |
| CCDC54     | 4.36288 | 4.28866 | 4.03998 | 4.13756 | 5.43648 | 4.13905 | 4.37862 | 4.22505 | 3.88627 |



|            |         |         |         |         |         |         |         |         |         |
|------------|---------|---------|---------|---------|---------|---------|---------|---------|---------|
| bbx        | 8.23927 | 8.06753 | 8.073   | 7.33814 | 6.17597 | 6.52524 | 7.29311 | 7.55059 | 7.12049 |
| LINC00636  | 5.44011 | 5.44427 | 5.69693 | 6.21909 | 6.60828 | 6.4676  | 6.82543 | 6.33448 | 6.66348 |
| HHLA2      | 2.91013 | 2.82697 | 3.02578 | 3.52835 | 3.38756 | 3.03201 | 3.0987  | 3.12283 | 3.53458 |
| trat1      | 5.08328 | 5.01002 | 5.41604 | 4.2049  | 4.60478 | 4.63875 | 4.75178 | 4.29503 | 4.35384 |
| FLJ22763   | 4.63579 | 4.92018 | 4.58748 | 5.18808 | 5.71543 | 5.44974 | 4.69755 | 5.04094 | 5.28979 |
| LINC00488  | 4.3705  | 4.51282 | 4.71202 | 4.77657 | 5.63903 | 5.191   | 4.80526 | 4.71484 | 5.17112 |
| LINC01205  | 3.50496 | 3.28133 | 3.63186 | 4.42347 | 4.65529 | 4.06493 | 4.77267 | 3.95626 | 3.78203 |
| MIR4445    | 2.53145 | 1.81297 | 1.90297 | 2.49699 | 1.98465 | 1.73314 | 2.17084 | 2.34599 | 2.21654 |
| NECTIN3    | 6.92689 | 6.86403 | 7.17563 | 6.6739  | 6.65091 | 6.63897 | 6.48237 | 6.78067 | 6.54534 |
| CD96       | 5.25684 | 5.56576 | 5.88958 | 4.81549 | 5.22839 | 4.36783 | 5.23954 | 4.89922 | 4.57567 |
| ABHD10     | 7.07162 | 7.07422 | 7.06133 | 6.4906  | 5.52941 | 6.24438 | 6.57807 | 6.96897 | 6.01264 |
| TAGLN3     | 5.21145 | 5.2453  | 5.27497 | 6.20866 | 5.74591 | 6.51032 | 5.66594 | 6.18825 | 6.26851 |
| c3orf52    | 9.31606 | 9.4994  | 8.66376 | 7.43607 | 6.37583 | 6.79495 | 7.32693 | 8.01807 | 8.0247  |
| MIR567     | 5.59512 | 5.37617 | 5.08427 | 4.19938 | 3.48802 | 3.38244 | 3.20503 | 4.21855 | 4.02752 |
| CD200      | 7.54268 | 6.96733 | 7.35327 | 6.39531 | 7.21154 | 6.04879 | 6.98007 | 7.17255 | 7.41986 |
| GTPBP8     | 6.56034 | 6.47567 | 6.42602 | 6.35853 | 5.05905 | 6.35091 | 6.84362 | 6.11819 | 6.0883  |
| BOC        | 8.63769 | 8.89131 | 8.66652 | 6.4712  | 6.01699 | 6.23443 | 6.47872 | 6.07297 | 6.10174 |
| CFAP44-AS1 | 5.17112 | 4.89982 | 4.98574 | 5.12011 | 5.03896 | 5.21034 | 5.09657 | 4.97022 | 5.06607 |
| MIR4446    | 4.94901 | 4.48792 | 5.03049 | 5.40067 | 6.04227 | 5.47405 | 5.01534 | 5.08603 | 5.10186 |
| GRAMD1C    | 9.0472  | 9.29465 | 8.28634 | 8.03097 | 6.2138  | 6.67084 | 7.53061 | 7.08698 | 8.11972 |
| QTRT2      | 7.14739 | 7.10687 | 7.39585 | 6.48023 | 6.24612 | 6.13866 | 6.75726 | 5.93458 | 6.37143 |
| Tigit      | 5.04989 | 5.20448 | 5.18139 | 5.03118 | 5.69932 | 5.20609 | 4.94086 | 5.32546 | 5.23531 |
| ZBTB20-AS1 | 4.76837 | 4.81678 | 4.69809 | 5.14969 | 5.79812 | 5.38286 | 5.8399  | 5.40328 | 5.50018 |
| GAP43      | 5.57223 | 5.83374 | 5.98542 | 6.18969 | 6.52475 | 6.33961 | 6.05288 | 6.15143 | 6.17253 |
| TUSC7      | 3.94822 | 4.07796 | 3.76271 | 4.68715 | 4.45343 | 4.65077 | 4.84688 | 4.24494 | 4.13201 |
| IGSF11-AS1 | 4.44081 | 4.57908 | 4.53922 | 4.84045 | 4.92699 | 5.0427  | 4.65589 | 4.70401 | 5.0656  |

|              |         |         |         |         |         |         |         |         |         |
|--------------|---------|---------|---------|---------|---------|---------|---------|---------|---------|
| C3orf30      | 3.33793 | 3.59548 | 3.14474 | 3.38052 | 3.49686 | 3.94782 | 3.63102 | 3.41381 | 3.63729 |
| UPK1B        | 6.27889 | 5.97065 | 6.13188 | 8.09395 | 8.22157 | 8.13245 | 9.65586 | 12.115  | 10.6425 |
| ARHGAP31     | 8.04473 | 8.12927 | 8.51591 | 6.85591 | 6.47111 | 6.51128 | 6.61057 | 6.78523 | 7.13968 |
| POGLUT1      | 7.36162 | 7.3     | 7.57281 | 5.9519  | 5.81448 | 5.35995 | 6.8082  | 5.20218 | 6.48417 |
| TIMMDC1      | 10.9138 | 10.3281 | 10.6245 | 9.56001 | 7.23612 | 8.89642 | 9.98791 | 9.12621 | 10.0018 |
| ADPRH        | 5.54527 | 5.83118 | 5.78039 | 5.96337 | 6.50446 | 5.79223 | 5.84006 | 5.91612 | 5.91416 |
| PLA1A        | 5.19684 | 4.9863  | 5.74292 | 4.72158 | 5.95649 | 5.53495 | 5.19322 | 5.12632 | 5.19892 |
| MAATS1       | 4.95245 | 5.72281 | 5.42965 | 5.49206 | 5.95162 | 5.27427 | 5.20056 | 5.14026 | 5.36186 |
| STXBPL       | 3.73555 | 4.08748 | 4.20947 | 4.09472 | 4.55189 | 4.86672 | 4.53252 | 4.29592 | 3.84746 |
| ARGFX        | 4.82573 | 4.65637 | 4.87613 | 5.14957 | 5.69568 | 6.27405 | 5.86387 | 5.62496 | 5.89236 |
| FBXO40       | 5.09045 | 5.32633 | 5.07258 | 5.5226  | 7.07087 | 5.34249 | 5.6167  | 5.50866 | 5.33018 |
| EAF2         | 6.04171 | 5.58921 | 5.96771 | 4.80874 | 5.73692 | 5.03272 | 5.06481 | 4.91754 | 4.83807 |
| CD86         | 6.11494 | 5.57752 | 6.39132 | 6.20707 | 7.199   | 6.60048 | 5.67583 | 5.63563 | 6.13431 |
| CASR         | 5.39359 | 5.81075 | 5.57941 | 6.326   | 6.33575 | 5.70602 | 6.09065 | 6.02431 | 6.21226 |
| CSTA         | 11.5422 | 11.5496 | 11.7708 | 12.526  | 12.6677 | 12.517  | 12.6376 | 12.7169 | 12.8825 |
| DTX3L        | 8.84592 | 8.10772 | 8.16064 | 7.9051  | 7.36392 | 7.74207 | 8.50778 | 7.53584 | 7.77531 |
| DIRC2        | 10.9086 | 11.1201 | 10.7357 | 9.8639  | 9.89635 | 9.26394 | 10.6503 | 10.42   | 9.88043 |
| LOC100129550 | 8.08399 | 8.36413 | 7.86801 | 6.67208 | 6.89818 | 5.88325 | 7.42626 | 6.49923 | 6.81497 |
| MYLK-AS1     | 6.2631  | 6.02917 | 6.24403 | 6.36246 | 7.15711 | 6.72419 | 6.64419 | 6.15224 | 6.29515 |
| UMPS         | 7.58471 | 7.62841 | 7.51788 | 7.67412 | 5.92552 | 7.14355 | 8.41664 | 6.66277 | 7.33255 |
| MIR544B      | 3.92103 | 5.40742 | 5.18727 | 3.99776 | 3.58666 | 3.19377 | 3.98824 | 3.72693 | 3.92444 |
| ROPN1B       | 4.84351 | 5.37121 | 4.3936  | 6.16212 | 5.16473 | 6.06495 | 5.50112 | 4.59609 | 4.97856 |
| ALDH1L1-AS2  | 5.38866 | 5.78724 | 5.41984 | 6.23757 | 6.53083 | 6.11066 | 6.04669 | 6.38062 | 6.12311 |
| CFAP100      | 5.25338 | 5.45214 | 5.67236 | 6.17446 | 6.12306 | 6.63945 | 5.9088  | 6.51868 | 6.12871 |
| CHST13       | 6.20539 | 6.14387 | 6.00624 | 6.58869 | 5.83944 | 7.24095 | 7.01286 | 6.96393 | 6.72894 |
| NUP210P1     | 4.28168 | 4.69717 | 4.36329 | 5.00193 | 6.00611 | 5.19329 | 4.80729 | 4.93513 | 4.81842 |

|           |         |         |         |         |         |         |         |         |         |
|-----------|---------|---------|---------|---------|---------|---------|---------|---------|---------|
| CHCHD6    | 5.68055 | 5.6115  | 5.5354  | 5.66351 | 5.73804 | 5.62349 | 5.47798 | 5.43055 | 5.51372 |
| plxna1    | 8.54911 | 8.77375 | 8.6449  | 8.48392 | 6.12732 | 8.24166 | 8.8333  | 8.04005 | 8.72524 |
| MCM2      | 6.82428 | 6.62771 | 6.85019 | 7.12766 | 6.9219  | 6.97224 | 6.90505 | 6.97094 | 6.873   |
| PODXL2    | 6.78992 | 7.02061 | 7.26891 | 7.21155 | 6.68554 | 6.79727 | 7.13001 | 6.80824 | 6.59891 |
| ABTB1     | 6.20238 | 6.25195 | 6.15779 | 6.92589 | 5.99606 | 7.03335 | 6.77329 | 7.01025 | 6.92901 |
| KBTBD12   | 3.37724 | 3.35596 | 3.26002 | 3.44762 | 3.51113 | 3.50048 | 3.72282 | 3.44006 | 3.23709 |
| SEC61A1   | 10.6439 | 10.3595 | 10.5775 | 10.6827 | 9.28009 | 10.17   | 10.5266 | 10.3657 | 10.6533 |
| LOC90246  | 5.5411  | 5.57461 | 5.77365 | 5.62335 | 6.34765 | 5.66349 | 5.65117 | 5.64354 | 5.64846 |
| efcc1     | 6.73616 | 6.13977 | 6.78702 | 7.10464 | 7.26186 | 7.03797 | 6.93713 | 7.37164 | 6.9755  |
| GP9       | 5.20859 | 5.96827 | 5.81644 | 6.145   | 6.21571 | 6.79426 | 6.04978 | 6.34911 | 6.53629 |
| HMCES     | 8.83028 | 8.87972 | 8.64517 | 9.00211 | 5.92203 | 8.74886 | 9.04185 | 8.82859 | 8.90106 |
| H1FX-AS1  | 5.62708 | 5.46196 | 5.72859 | 6.29317 | 6.38197 | 6.3434  | 5.95708 | 6.2851  | 5.98475 |
| IFT122    | 7.39647 | 7.55052 | 7.36463 | 6.64894 | 6.08504 | 6.29515 | 6.39384 | 6.56087 | 6.46454 |
| RHO       | 5.86789 | 5.91132 | 5.99606 | 6.31378 | 7.05539 | 6.53153 | 6.44139 | 6.44499 | 6.50904 |
| TMCC1-AS1 | 5.8278  | 5.95602 | 6.04558 | 6.42388 | 6.73051 | 6.49143 | 5.69416 | 6.23818 | 6.46742 |
| TRH       | 5.98484 | 6.36877 | 6.25467 | 6.20066 | 7.18475 | 6.75133 | 6.23667 | 6.39697 | 6.51105 |
| ALG1L2    | 6.37847 | 6.36925 | 6.74658 | 5.79671 | 7.20966 | 6.69005 | 6.45478 | 6.04101 | 6.32526 |
| NEK11     | 7.21667 | 6.73246 | 6.786   | 5.67456 | 6.666   | 6.41782 | 6.76119 | 5.75439 | 6.29499 |
| NUDT16P1  | 6.867   | 7.0213  | 7.23074 | 7.8356  | 7.84334 | 7.59111 | 7.13846 | 7.98215 | 7.32076 |
| NUDT16    | 6.20309 | 6.54095 | 6.67614 | 6.53498 | 6.35635 | 6.32329 | 6.55386 | 6.1297  | 6.22576 |
| ACKR4     | 6.90595 | 5.8598  | 5.8981  | 6.34748 | 4.83747 | 5.0787  | 5.51404 | 4.05447 | 5.06242 |
| UBA5      | 7.21937 | 7.57726 | 7.48175 | 6.65473 | 4.69013 | 6.1112  | 7.12667 | 6.60798 | 6.10348 |
| TMEM108   | 4.69125 | 4.83233 | 5.01997 | 5.34265 | 5.17865 | 5.25729 | 4.94741 | 4.94818 | 4.92446 |
| CDV3      | 10.6807 | 10.3557 | 10.7588 | 10.7194 | 9.43313 | 10.6932 | 11.0674 | 10.8018 | 11.2923 |
| TF        | 5.13164 | 5.29182 | 5.57311 | 5.32402 | 5.48084 | 5.33461 | 5.06544 | 5.38412 | 5.39193 |
| MIR4788   | 3.85542 | 4.13684 | 3.9823  | 4.61533 | 4.44597 | 4.89191 | 4.4707  | 4.39135 | 4.57336 |

|              |         |         |         |         |         |         |         |         |         |
|--------------|---------|---------|---------|---------|---------|---------|---------|---------|---------|
| CEP63        | 7.21291 | 7.55581 | 7.35936 | 6.48018 | 5.8706  | 6.27081 | 7.21244 | 6.30967 | 6.324   |
| EPHB1        | 5.95039 | 6.72223 | 6.30094 | 6.19697 | 6.25086 | 6.5806  | 5.90499 | 6.22868 | 6.1451  |
| NCK1         | 8.88718 | 9.04465 | 8.79765 | 8.26177 | 6.86276 | 7.00946 | 8.6798  | 7.17721 | 7.24554 |
| IL20RB       | 11.7541 | 11.4987 | 11.2621 | 9.95797 | 8.92039 | 9.06008 | 10.1487 | 9.72213 | 10.5414 |
| SOX14        | 5.03171 | 5.20783 | 4.92945 | 5.58323 | 5.41562 | 5.68066 | 5.47927 | 5.29264 | 5.33159 |
| CLDN18       | 4.89752 | 4.72565 | 4.86473 | 5.82965 | 6.47366 | 5.84994 | 5.33315 | 5.50776 | 5.67796 |
| ARMC8        | 8.31273 | 8.56159 | 8.41745 | 7.7705  | 6.34432 | 6.95864 | 7.95082 | 7.71329 | 7.9123  |
| MRAS         | 5.65506 | 6.58434 | 6.06505 | 5.29357 | 6.13076 | 5.52301 | 5.47874 | 6.28568 | 5.89065 |
| ESYT3        | 8.94521 | 9.20635 | 8.65763 | 8.57523 | 8.75183 | 9.61942 | 8.39199 | 9.6414  | 9.26324 |
| FAIM         | 6.88821 | 6.52434 | 6.61832 | 6.01669 | 4.57644 | 5.59154 | 6.95123 | 5.04133 | 6.49141 |
| FOXL2NB      | 5.74936 | 5.89562 | 5.92832 | 6.24001 | 6.32022 | 6.54458 | 6.24085 | 6.31655 | 6.71701 |
| MRPS22       | 7.49984 | 7.55762 | 7.62407 | 7.8771  | 7.67817 | 7.90547 | 8.37926 | 7.8365  | 7.86338 |
| CLSTN2       | 6.46513 | 7.59371 | 8.10684 | 5.85135 | 7.10094 | 5.92142 | 6.34669 | 5.86452 | 6.01278 |
| TRIM42       | 4.78088 | 4.91992 | 4.61229 | 5.48989 | 5.89889 | 5.25932 | 5.31978 | 4.88214 | 4.87585 |
| SPSB4        | 5.89166 | 6.08471 | 5.90491 | 6.3664  | 6.53155 | 6.29675 | 6.57173 | 6.44606 | 6.13819 |
| PXYLP1       | 6.55577 | 6.64749 | 6.3052  | 5.8799  | 6.40286 | 6.05919 | 6.02188 | 5.83964 | 5.26832 |
| ZBTB38       | 7.31274 | 7.35627 | 7.3991  | 6.89957 | 7.19995 | 6.59762 | 6.86082 | 7.38262 | 7.75393 |
| RASA2        | 8.63523 | 8.75314 | 8.60758 | 8.20214 | 6.26226 | 7.31641 | 8.19961 | 9.33936 | 9.06189 |
| RNF7         | 8.6583  | 8.03429 | 8.62986 | 7.46397 | 6.05384 | 7.01368 | 8.52749 | 7.15613 | 7.8169  |
| GRK7         | 5.65867 | 5.81773 | 5.8679  | 5.79158 | 6.73005 | 6.94608 | 6.01737 | 6.06228 | 6.14543 |
| PLS1         | 6.38759 | 5.56666 | 6.40149 | 6.00949 | 6.23042 | 5.87551 | 6.30098 | 6.60373 | 5.84442 |
| LOC100507389 | 4.32728 | 4.56216 | 4.40013 | 5.23897 | 6.02783 | 5.14932 | 4.92187 | 4.652   | 4.84042 |
| U2SURP       | 9.29533 | 9.26514 | 9.29467 | 8.13297 | 5.76838 | 7.34763 | 8.57967 | 8.03662 | 8.15705 |
| CHST2        | 4.4394  | 5.09365 | 4.44466 | 5.53701 | 5.58875 | 5.6103  | 6.28194 | 5.59572 | 6.38889 |
| SLC9A9-AS1   | 3.26148 | 3.43439 | 3.12805 | 3.77229 | 3.20236 | 4.42879 | 3.85846 | 8.41327 | 6.36413 |
| c3orf58      | 7.15606 | 7.25532 | 6.97502 | 6.76735 | 7.3965  | 7.59926 | 7.00362 | 6.73756 | 7.3729  |

|           |         |         |         |         |         |         |         |         |         |
|-----------|---------|---------|---------|---------|---------|---------|---------|---------|---------|
| ZIC4      | 3.63377 | 3.41791 | 3.60901 | 4.27261 | 4.79378 | 3.83088 | 3.83248 | 3.55316 | 4.04531 |
| ZIC1      | 5.16479 | 4.85442 | 4.81718 | 5.21178 | 5.48955 | 5.50432 | 4.98068 | 5.23929 | 4.74053 |
| CPB1      | 4.207   | 4.30952 | 4.19721 | 4.3016  | 5.41297 | 4.78786 | 4.52915 | 4.38498 | 4.43113 |
| CPA3      | 9.01889 | 5.9483  | 8.81298 | 4.45225 | 4.87757 | 6.82081 | 8.47028 | 5.93759 | 8.11685 |
| GYG1      | 6.11274 | 5.70789 | 6.11727 | 6.13777 | 5.39304 | 5.98703 | 6.82932 | 5.12819 | 6.00317 |
| HLTF      | 5.47603 | 5.88243 | 5.63598 | 6.98109 | 6.17623 | 6.81408 | 6.65156 | 6.04543 | 6.40526 |
| HPS3      | 8.99833 | 8.98791 | 9.23303 | 7.52799 | 6.86831 | 7.04486 | 7.89916 | 7.85228 | 7.52966 |
| TM4SF4    | 4.06569 | 4.18976 | 4.2514  | 4.69119 | 5.79856 | 4.78643 | 4.31349 | 4.2966  | 4.65914 |
| WWTR1-AS1 | 5.08118 | 5.09898 | 5.4521  | 5.56846 | 5.67721 | 6.39857 | 6.37089 | 6.07789 | 6.00123 |
| RNF13     | 9.67893 | 9.67905 | 9.97533 | 8.80077 | 7.29773 | 9.00283 | 9.29701 | 8.92381 | 8.64924 |
| LOC646903 | 4.89817 | 4.79539 | 4.76738 | 4.05162 | 5.00104 | 4.38336 | 4.44882 | 4.57964 | 4.74767 |
| SELENOT   | 8.53429 | 8.0544  | 8.58481 | 8.43136 | 8.36261 | 8.43174 | 8.62159 | 9.01669 | 8.79651 |
| CLRN1-AS1 | 4.33683 | 4.72297 | 4.64448 | 4.88367 | 5.46713 | 4.94716 | 4.80088 | 5.31676 | 4.98301 |
| MED12L    | 5.80383 | 5.79686 | 5.65929 | 5.99884 | 6.31833 | 6.00415 | 5.89515 | 5.88976 | 5.98502 |
| AADACL2   | 9.92156 | 9.56286 | 9.25922 | 8.76813 | 5.49407 | 6.40111 | 6.55827 | 4.93461 | 5.60892 |
| AADACP1   | 3.46372 | 3.36569 | 3.47458 | 3.84094 | 3.4553  | 3.63723 | 3.44298 | 3.64698 | 3.40514 |
| aadac     | 8.96738 | 9.49112 | 7.07443 | 7.12256 | 5.47169 | 5.60525 | 5.31327 | 5.04197 | 5.02229 |
| SUCNR1    | 4.67313 | 4.43076 | 4.75802 | 3.58001 | 5.05439 | 3.85904 | 4.03012 | 4.36831 | 4.0226  |
| MBNL1     | 11.5908 | 11.4118 | 11.736  | 10.8975 | 9.47048 | 10.1611 | 11.1782 | 10.8463 | 11.207  |
| ARHGEF26  | 8.23325 | 8.27732 | 8.03285 | 6.73133 | 5.8387  | 5.82559 | 6.43111 | 6.14433 | 5.0529  |
| MME       | 6.8023  | 6.30467 | 6.93621 | 6.78601 | 5.80625 | 6.12761 | 5.86799 | 6.01321 | 6.0163  |
| GMPS      | 9.35398 | 9.35638 | 9.6838  | 8.56121 | 5.53916 | 7.77849 | 8.84379 | 8.02386 | 8.38416 |
| TIPARP    | 9.84535 | 9.04911 | 8.73134 | 9.5016  | 8.8921  | 10.888  | 9.50197 | 10.0918 | 9.39883 |
| LINC00881 | 4.13701 | 4.79408 | 4.45157 | 4.88342 | 5.67257 | 5.12941 | 4.92523 | 4.71209 | 4.74784 |
| PQLC2L    | 4.3347  | 5.00395 | 5.53357 | 4.94727 | 5.39927 | 4.62655 | 4.52094 | 4.68298 | 4.31297 |
| RSRC1     | 7.17351 | 7.50833 | 7.57554 | 6.70062 | 6.15743 | 6.48408 | 7.00971 | 6.28924 | 6.26537 |

|           |         |         |         |         |         |         |         |         |         |
|-----------|---------|---------|---------|---------|---------|---------|---------|---------|---------|
| MLF1      | 6.21155 | 5.82815 | 5.52454 | 5.73814 | 5.32517 | 6.87781 | 7.08536 | 5.41254 | 5.72841 |
| MFSD1     | 5.61712 | 5.3609  | 5.69504 | 5.88069 | 5.00227 | 5.64768 | 5.71661 | 5.26685 | 5.6368  |
| IQCJ      | 5.25025 | 5.19469 | 5.17939 | 5.38359 | 6.08831 | 5.23647 | 5.32946 | 5.42933 | 5.24997 |
| MIR3919   | 2.47329 | 2.16144 | 2.19233 | 2.16715 | 1.98466 | 2.50168 | 2.0826  | 2.35151 | 2.575   |
| c3orf80   | 5.77871 | 5.33887 | 5.65643 | 6.43046 | 5.52139 | 5.89585 | 5.62756 | 5.45757 | 5.44689 |
| SMC4      | 7.89079 | 7.81117 | 7.61717 | 6.94416 | 4.67141 | 5.68559 | 6.67075 | 6.92275 | 6.46901 |
| mir15b    | 4.58265 | 4.27713 | 3.94378 | 3.6309  | 3.15423 | 3.79508 | 4.11758 | 3.74443 | 3.70489 |
| MIR16-2   | 5.14256 | 5.20898 | 4.89967 | 4.9248  | 4.70967 | 4.78772 | 5.04769 | 5.32304 | 4.85894 |
| ARL14     | 3.79738 | 3.51279 | 3.4541  | 4.26672 | 3.94223 | 4.37493 | 5.28819 | 4.83687 | 5.11281 |
| NMD3      | 8.39739 | 8.14879 | 8.23476 | 8.25161 | 5.85243 | 7.76019 | 8.21329 | 7.68608 | 7.80285 |
| OTOL1     | 4.61781 | 4.62677 | 4.70127 | 5.16834 | 4.20143 | 5.33455 | 4.85047 | 4.94662 | 4.84679 |
| LINC01330 | 3.76517 | 3.64412 | 3.86559 | 3.81573 | 4.16984 | 3.86559 | 3.61272 | 3.46515 | 4.00547 |
| MIR551B   | 6.18679 | 6.07792 | 6.31591 | 6.57853 | 6.86436 | 6.42982 | 6.44126 | 6.82911 | 6.7364  |
| MYNN      | 7.85789 | 7.3659  | 7.38398 | 7.02949 | 5.24483 | 7.25133 | 7.56653 | 7.10531 | 6.7634  |
| LRRIQ4    | 2.42403 | 2.46388 | 2.53998 | 2.8262  | 4.41424 | 3.29599 | 2.71227 | 3.01325 | 3.11952 |
| SAMD7     | 3.37501 | 3.36864 | 3.24622 | 3.76837 | 4.25893 | 4.0147  | 3.73699 | 3.50546 | 3.7152  |
| SEC62     | 7.71752 | 8.00674 | 7.73072 | 7.33504 | 5.92203 | 6.96293 | 7.63659 | 7.56352 | 7.34237 |
| gpr160    | 5.31918 | 4.94891 | 5.20652 | 5.01282 | 5.19861 | 6.16475 | 5.45838 | 5.85951 | 5.23416 |
| SKIL      | 8.49444 | 7.92107 | 8.409   | 8.86329 | 6.53277 | 8.74234 | 8.55992 | 8.45844 | 8.98985 |
| CLDN11    | 5.2666  | 5.2798  | 5.67229 | 5.6728  | 6.26164 | 5.46475 | 5.06929 | 5.57363 | 5.65957 |
| TMEM212   | 4.65656 | 4.84655 | 4.88591 | 4.78941 | 5.75754 | 5.04702 | 4.8794  | 4.44478 | 4.81759 |
| FNDC3B    | 9.13836 | 8.70813 | 8.9739  | 8.59015 | 6.64524 | 8.13488 | 8.80935 | 8.94544 | 8.91532 |
| ECT2      | 7.64448 | 6.93694 | 7.02931 | 7.59672 | 5.12578 | 7.27675 | 7.86845 | 7.76789 | 7.59662 |
| nlg1      | 4.26892 | 4.71701 | 4.7508  | 4.46079 | 4.83926 | 4.46941 | 4.49747 | 4.00419 | 4.40671 |
| NAALADL2  | 6.01451 | 6.01363 | 6.49008 | 4.82252 | 5.13348 | 4.61204 | 4.92878 | 4.42084 | 4.28112 |
| MIR4789   | 4.47905 | 4.8539  | 4.44722 | 2.91903 | 3.8803  | 3.16454 | 3.81033 | 4.1644  | 4.27582 |

|             |         |         |         |         |         |         |         |         |         |
|-------------|---------|---------|---------|---------|---------|---------|---------|---------|---------|
| LINC00578   | 4.42932 | 4.64837 | 4.77891 | 4.77601 | 4.93694 | 4.79385 | 4.54084 | 4.95432 | 4.81993 |
| ZNF639      | 6.59919 | 6.39164 | 6.69337 | 5.85033 | 3.97078 | 5.354   | 6.59849 | 5.61113 | 5.57538 |
| MFN1        | 9.59062 | 9.66004 | 9.34293 | 9.47498 | 6.83046 | 9.20538 | 9.69312 | 9.53831 | 9.64487 |
| ACTL6A      | 7.83099 | 7.13926 | 7.93652 | 7.49842 | 6.15354 | 6.58582 | 7.89752 | 6.58244 | 6.90706 |
| USP13       | 6.27019 | 7.03188 | 7.09068 | 6.13828 | 6.09615 | 6.01239 | 5.66635 | 5.76647 | 6.05108 |
| PEX5L       | 2.82591 | 2.89468 | 2.4775  | 3.41251 | 4.70652 | 3.62468 | 2.95472 | 3.18831 | 3.40003 |
| TTC14       | 7.72543 | 8.21616 | 7.81393 | 6.53848 | 5.72658 | 5.89755 | 6.57844 | 6.21767 | 6.79095 |
| SOX2-OT     | 4.10871 | 4.10486 | 4.4047  | 4.23346 | 5.02863 | 4.16862 | 4.18312 | 4.17188 | 4.07864 |
| SOX2        | 5.61603 | 5.61588 | 6.1161  | 5.87213 | 5.57221 | 5.89544 | 5.71745 | 5.38104 | 5.68046 |
| LINC00888   | 5.25222 | 5.35842 | 5.341   | 6.03679 | 5.69265 | 5.64986 | 5.64699 | 6.07176 | 5.7342  |
| KLHL24      | 7.97412 | 7.96631 | 7.91894 | 7.04747 | 5.79728 | 6.58501 | 7.48645 | 7.34399 | 6.58492 |
| YEATS2      | 8.64283 | 8.64707 | 8.57625 | 8.20395 | 7.44042 | 9.32069 | 8.32991 | 9.25884 | 8.36365 |
| ABCC5-AS1   | 4.65707 | 4.70162 | 4.46782 | 4.5137  | 6.47988 | 4.42809 | 4.64655 | 4.59906 | 4.56798 |
| VWA5B2      | 6.01276 | 5.61986 | 5.85367 | 6.1344  | 7.03118 | 6.19996 | 6.1076  | 6.44668 | 6.1198  |
| MIR1224     | 5.14777 | 4.82125 | 5.40294 | 6.46984 | 5.98866 | 7.10349 | 5.94433 | 6.68208 | 6.61177 |
| ECE2        | 5.90956 | 5.73404 | 5.95387 | 6.09501 | 6.6571  | 6.00756 | 6.13413 | 5.93412 | 5.98336 |
| POLR2H      | 8.14197 | 8.06479 | 8.03948 | 8.18791 | 6.39737 | 7.28728 | 8.13946 | 7.4262  | 7.94567 |
| CHRD        | 5.88928 | 6.01871 | 6.00723 | 6.5187  | 6.24949 | 6.41142 | 6.16176 | 6.3896  | 6.42556 |
| EPHB3       | 8.34878 | 8.44477 | 8.09113 | 9.08053 | 7.75946 | 10.6373 | 8.96073 | 9.86186 | 9.62751 |
| VPS8        | 7.70653 | 7.65534 | 7.52022 | 6.76884 | 5.80729 | 6.47194 | 7.06475 | 7.30659 | 7.15916 |
| EHHADH-AS1  | 4.60354 | 4.88327 | 4.47375 | 4.82862 | 5.88491 | 5.34663 | 4.94834 | 5.23982 | 5.08034 |
| MAP3K13     | 7.17587 | 7.38884 | 7.1914  | 6.94764 | 6.37052 | 7.00677 | 6.88785 | 7.27811 | 6.94272 |
| SENP2       | 6.55143 | 6.53846 | 6.89857 | 6.59567 | 4.98494 | 6.34711 | 6.60826 | 6.51344 | 6.29382 |
| IGF2BP2-AS1 | 4.63137 | 4.65252 | 4.89362 | 4.82908 | 5.82448 | 5.37954 | 4.73799 | 5.5902  | 5.6605  |
| NMRAL2P     | 7.94488 | 8.66618 | 7.43973 | 6.57501 | 5.67519 | 5.90459 | 6.44288 | 6.16004 | 6.94972 |
| AHSG        | 5.19908 | 5.27693 | 4.99298 | 5.38483 | 6.76648 | 5.48357 | 5.0111  | 5.64317 | 4.99828 |

|              |         |         |         |         |         |         |         |         |         |
|--------------|---------|---------|---------|---------|---------|---------|---------|---------|---------|
| FETUB        | 9.60606 | 8.88476 | 8.11681 | 9.71001 | 8.42624 | 6.90638 | 8.50732 | 5.36275 | 7.02851 |
| HRG          | 4.02485 | 4.04383 | 5.24616 | 4.07792 | 5.27525 | 4.00971 | 4.07237 | 4.74894 | 3.89954 |
| kng1         | 4.12572 | 4.24613 | 4.25431 | 4.36026 | 5.45757 | 4.57235 | 4.15204 | 4.78056 | 4.67348 |
| RTP1         | 4.75136 | 5.0241  | 5.04122 | 5.14679 | 5.97238 | 5.61923 | 5.15143 | 5.42095 | 5.5327  |
| RTP4         | 5.65857 | 5.28793 | 5.46081 | 5.5992  | 5.79835 | 5.88148 | 5.85968 | 5.86563 | 5.52198 |
| LOC100131635 | 5.09429 | 5.16258 | 5.10044 | 5.32826 | 5.76152 | 5.88016 | 5.38567 | 5.45619 | 4.75568 |
| LPP          | 8.23535 | 7.97478 | 8.1736  | 6.63821 | 6.03024 | 6.73849 | 6.79801 | 7.49445 | 7.74785 |
| FLJ42393     | 6.99972 | 6.77714 | 7.05714 | 6.79515 | 7.04262 | 5.8223  | 6.2514  | 6.81539 | 6.9419  |
| MIR28        | 4.8027  | 5.92335 | 4.8056  | 4.97438 | 4.72868 | 5.02372 | 4.421   | 4.50476 | 5.00812 |
| TPRG1        | 6.69044 | 7.18683 | 6.99164 | 5.92583 | 6.51837 | 6.232   | 6.11362 | 6.14195 | 5.8608  |
| TP63         | 11.1342 | 10.8539 | 11.0723 | 10.4664 | 8.18849 | 9.92447 | 10.8138 | 10.3    | 11.0113 |
| MIR944       | 5.36973 | 4.47059 | 5.74576 | 3.8262  | 3.10101 | 2.83063 | 2.78009 | 5.12806 | 5.71695 |
| CLDN16       | 6.237   | 5.8617  | 5.54423 | 5.63689 | 6.80542 | 5.73004 | 5.5239  | 6.22849 | 5.9395  |
| IL1RAP       | 7.85385 | 7.46394 | 7.56661 | 7.56834 | 5.96425 | 7.12881 | 7.82199 | 8.25036 | 7.94395 |
| SNAR-I       | 6.99909 | 7.02291 | 7.3532  | 7.51505 | 9.02669 | 7.5458  | 7.31206 | 7.8444  | 7.5533  |
| OSTN         | 3.56148 | 4.04551 | 3.43069 | 3.64942 | 4.0086  | 3.6065  | 3.41522 | 3.46416 | 3.30378 |
| CCDC50       | 9.01716 | 9.10018 | 9.31154 | 8.62749 | 6.47432 | 8.28691 | 8.50045 | 8.84198 | 8.52842 |
| PYDC2        | 4.34275 | 4.39474 | 4.40426 | 5.14348 | 5.01153 | 4.93102 | 5.30606 | 4.8766  | 4.84557 |
| HRASLS       | 6.79096 | 6.38225 | 6.424   | 5.42651 | 5.30756 | 5.91809 | 5.01351 | 5.04888 | 5.09816 |
| MGC2889      | 5.99403 | 6.34402 | 5.15809 | 4.32274 | 5.50367 | 4.55818 | 3.94347 | 3.97184 | 4.53317 |
| OPA1         | 8.43729 | 8.64852 | 8.63474 | 7.95477 | 6.17495 | 7.94564 | 8.40994 | 8.48708 | 7.94544 |
| LINC00884    | 5.53984 | 5.86584 | 5.6066  | 5.82562 | 6.89965 | 6.27447 | 5.96988 | 6.05748 | 5.72652 |
| TMEM44-AS1   | 6.21731 | 5.61834 | 6.09817 | 6.0461  | 6.04796 | 5.98879 | 5.50281 | 5.50519 | 5.50402 |
| LOC100507391 | 4.48388 | 4.19612 | 4.4584  | 4.77577 | 5.71358 | 4.63514 | 4.57186 | 4.65759 | 4.59844 |
| MIR570       | 7.18756 | 9.64116 | 9.65816 | 7.70522 | 6.45726 | 6.4977  | 6.54792 | 7.36971 | 7.54872 |
| LINC00885    | 6.12733 | 6.37777 | 5.90445 | 6.39289 | 6.06322 | 6.05567 | 5.84717 | 6.02374 | 6.1869  |



|             |         |         |         |         |         |         |         |         |         |
|-------------|---------|---------|---------|---------|---------|---------|---------|---------|---------|
| SLC51A      | 5.96509 | 6.2012  | 5.87468 | 6.39964 | 6.32566 | 6.48784 | 5.97919 | 6.19876 | 5.57323 |
| FBXO45      | 8.11137 | 7.81605 | 7.8874  | 8.20376 | 7.13172 | 9.08208 | 9.16844 | 8.39534 | 8.6067  |
| NRROS       | 5.7782  | 5.6167  | 5.86131 | 5.45892 | 5.82984 | 5.96607 | 5.90211 | 5.76476 | 5.80446 |
| PAK2        | 8.35305 | 8.2725  | 8.40229 | 8.43207 | 4.53343 | 8.58602 | 8.63342 | 8.33017 | 8.40998 |
| SENP5       | 7.82652 | 8.18057 | 7.89135 | 7.73292 | 6.55044 | 7.42366 | 7.60857 | 8.00853 | 8.13217 |
| NCBP2-AS2   | 7.17457 | 7.30097 | 7.3851  | 6.98552 | 5.59788 | 6.91921 | 7.4804  | 6.69905 | 6.47295 |
| MELTF-AS1   | 5.51908 | 5.99513 | 5.80169 | 6.67662 | 6.0791  | 6.47835 | 6.10303 | 6.0902  | 6.22614 |
| DLG1-AS1    | 4.58052 | 4.73027 | 4.70285 | 5.52474 | 5.41312 | 6.09587 | 5.62188 | 5.50885 | 5.5774  |
| FYTTD1      | 8.77832 | 9.05749 | 8.96118 | 9.34537 | 7.37403 | 9.70265 | 9.50306 | 9.25859 | 9.1894  |
| LRCH3       | 8.5754  | 8.30142 | 8.34194 | 7.65373 | 6.39888 | 7.30743 | 7.87288 | 7.69677 | 8.19461 |
| RPL35A      | 8.34912 | 8.35994 | 8.45067 | 8.50155 | 8.28787 | 8.38495 | 8.03436 | 8.14334 | 8.29448 |
| LMLN        | 7.643   | 7.89131 | 7.54508 | 6.19461 | 6.21518 | 6.13331 | 5.91686 | 6.01974 | 6.21221 |
| CNTN4-AS2   | 3.82912 | 3.63852 | 3.4111  | 3.898   | 5.06521 | 4.23081 | 4.25585 | 3.60381 | 4.07998 |
| CRBN        | 8.45494 | 8.80374 | 8.59568 | 7.22023 | 7.0058  | 6.95318 | 7.75149 | 7.26612 | 7.0535  |
| SUMF1       | 6.22136 | 6.31184 | 6.49503 | 5.86128 | 4.78364 | 6.10192 | 6.88998 | 5.91271 | 5.9401  |
| EGOT        | 5.64955 | 4.6832  | 4.72634 | 4.79428 | 5.87501 | 5.52554 | 5.10102 | 5.32467 | 5.38528 |
| BHLHE40-AS1 | 5.36151 | 4.58844 | 4.83218 | 4.77201 | 4.84227 | 5.16404 | 4.56131 | 4.68121 | 5.01063 |
| MIR4790     | 1.9558  | 1.80633 | 1.65904 | 1.8232  | 1.79901 | 1.77725 | 2.45184 | 1.80733 | 1.94759 |
| SSUH2       | 4.63026 | 4.81018 | 4.79043 | 4.98149 | 5.24781 | 4.89217 | 4.76679 | 4.79499 | 4.74403 |
| oxtr        | 5.47532 | 5.75002 | 5.74517 | 5.99263 | 6.30994 | 6.67409 | 6.00285 | 6.12621 | 6.29419 |
| RAD18       | 7.79158 | 7.58506 | 7.84028 | 7.40418 | 6.13255 | 6.17021 | 6.98521 | 6.33779 | 6.25575 |
| SRGAP3      | 6.4744  | 6.83749 | 7.01553 | 6.15333 | 5.84111 | 6.20002 | 5.86901 | 6.31714 | 5.74142 |
| Thumpd3-as1 | 7.18809 | 7.21052 | 7.27199 | 6.83413 | 5.87636 | 5.47126 | 6.43999 | 6.33463 | 6.8409  |
| LHFPL4      | 5.85529 | 6.18044 | 6.03413 | 6.36583 | 7.10336 | 6.13358 | 6.1811  | 6.25524 | 6.31366 |
| CAMK1       | 6.9183  | 7.09232 | 7.18054 | 6.52851 | 6.76132 | 6.26701 | 7.06897 | 6.75603 | 6.578   |
| TADA3       | 8.5669  | 8.34384 | 8.38398 | 8.3888  | 6.67673 | 8.33432 | 8.21586 | 7.68491 | 8.38316 |

|            |         |         |         |         |         |         |         |         |         |
|------------|---------|---------|---------|---------|---------|---------|---------|---------|---------|
| RPUSD3     | 7.24697 | 7.23049 | 7.23012 | 7.30261 | 6.61496 | 7.20948 | 7.57578 | 6.88565 | 7.06043 |
| CIDEC      | 5.2393  | 5.54743 | 6.17613 | 5.26392 | 5.97668 | 6.24589 | 5.74211 | 5.79275 | 5.81295 |
| PRRT3      | 5.08596 | 5.32104 | 4.9798  | 4.95611 | 4.91344 | 5.12069 | 5.12377 | 5.45385 | 5.28103 |
| EMC3       | 9.06645 | 8.86473 | 9.23459 | 9.60106 | 8.34944 | 9.65219 | 10.0741 | 9.77017 | 9.60049 |
| LOC401052  | 5.55564 | 5.72049 | 5.83753 | 6.35922 | 7.50884 | 6.38001 | 6.0248  | 6.74579 | 6.35239 |
| CIDECP     | 6.5686  | 6.43248 | 6.13222 | 7.03863 | 6.21649 | 6.85526 | 6.92723 | 6.67964 | 6.81804 |
| FANCD2OS   | 4.06663 | 3.98867 | 4.06319 | 4.95375 | 5.41756 | 4.99941 | 4.82596 | 4.28852 | 4.68284 |
| MIR885     | 6.12279 | 6.03324 | 6.47978 | 6.23421 | 6.92645 | 6.81006 | 7.22752 | 6.82929 | 6.6439  |
| LINC00606  | 4.9889  | 4.59683 | 5.23484 | 4.90453 | 5.54603 | 5.27025 | 4.80469 | 5.17265 | 5.11835 |
| SLC6A1-AS1 | 3.74944 | 3.53801 | 3.8334  | 4.45837 | 4.21562 | 4.10564 | 4.26803 | 3.43038 | 3.48276 |
| VGLL4      | 7.93576 | 7.60691 | 7.51221 | 7.51979 | 6.23226 | 6.86335 | 7.60872 | 7.11055 | 7.05452 |
| TIMP4      | 5.29342 | 5.74597 | 7.51792 | 5.67199 | 6.39421 | 5.76024 | 5.22025 | 5.74614 | 5.79074 |
| MKRN2OS    | 6.13996 | 5.96039 | 5.96399 | 5.88489 | 5.97119 | 5.74086 | 6.3623  | 5.67685 | 5.55373 |
| RAF1       | 9.6707  | 9.59441 | 9.62611 | 8.84289 | 7.85369 | 8.69518 | 9.03422 | 8.80275 | 9.06606 |
| TMEM40     | 9.39986 | 9.01238 | 8.91347 | 9.75829 | 10.5894 | 10.6149 | 10.1591 | 11.1758 | 10.8037 |
| RPL32      | 6.77264 | 6.65511 | 6.82925 | 6.44914 | 5.24389 | 6.06475 | 6.33455 | 6.14597 | 6.36066 |
| IQSEC1     | 8.53473 | 8.50716 | 8.60654 | 8.33197 | 7.14033 | 8.12771 | 8.57864 | 8.27297 | 8.47675 |
| NUP210     | 6.8048  | 6.45344 | 6.65766 | 6.6134  | 5.56596 | 6.1624  | 7.05866 | 6.2948  | 6.46373 |
| CHCHD4     | 5.69598 | 5.81485 | 6.17783 | 6.60931 | 5.32334 | 6.28384 | 6.87274 | 6.00252 | 5.62625 |
| GRIP2      | 6.12851 | 5.49767 | 5.42252 | 5.99366 | 6.18445 | 6.52897 | 6.12514 | 6.56387 | 6.57136 |
| FGD5-AS1   | 8.2013  | 8.15312 | 8.25585 | 8.09909 | 5.58358 | 6.93084 | 8.43985 | 6.90789 | 7.83406 |
| MRPS25     | 7.9859  | 8.03196 | 8.36962 | 7.41108 | 6.07156 | 6.83031 | 7.23302 | 6.76611 | 7.16778 |
| SH3BP5     | 7.06839 | 6.87576 | 7.26198 | 6.42216 | 7.00455 | 6.99442 | 6.83495 | 6.85788 | 6.87399 |
| METTL6     | 6.99435 | 7.45094 | 6.73729 | 6.57493 | 6.45514 | 6.60211 | 7.19623 | 6.23428 | 6.84417 |
| COLQ       | 6.04462 | 6.15036 | 6.49171 | 6.64244 | 6.50062 | 6.90078 | 6.08623 | 6.39512 | 6.39571 |
| HACL1      | 8.22607 | 8.2378  | 8.57745 | 7.40037 | 6.32332 | 6.87559 | 7.28811 | 7.58223 | 7.27557 |

|           |         |         |         |         |         |         |         |         |         |
|-----------|---------|---------|---------|---------|---------|---------|---------|---------|---------|
| ANKRD28   | 8.73142 | 9.00572 | 8.8828  | 7.94301 | 5.74217 | 7.20769 | 8.20991 | 8.15426 | 7.96089 |
| MIR3134   | 3.89191 | 4.41253 | 3.44378 | 3.01594 | 2.91934 | 2.77603 | 3.17166 | 2.39879 | 3.4307  |
| DAZL      | 5.7232  | 5.6417  | 5.38596 | 6.14115 | 7.02469 | 6.31165 | 5.70445 | 6.24207 | 6.16607 |
| SATB1     | 7.58768 | 6.75316 | 6.26444 | 5.9055  | 6.27583 | 5.89755 | 6.33376 | 5.8274  | 5.57221 |
| MIR4791   | 2.47956 | 3.34244 | 2.69188 | 2.94902 | 2.87084 | 3.64345 | 2.66429 | 2.48701 | 2.36617 |
| PP2D1     | 4.31111 | 4.33856 | 4.38299 | 4.52604 | 4.55983 | 4.88035 | 5.19203 | 5.20642 | 4.72441 |
| SGO1      | 6.9333  | 5.64991 | 6.19053 | 6.54724 | 5.18139 | 5.91944 | 6.11073 | 5.68664 | 5.88508 |
| ZNF385D   | 4.8442  | 4.91209 | 4.96375 | 4.80522 | 4.97376 | 4.77306 | 4.82884 | 4.57525 | 4.47536 |
| nkiras1   | 5.70515 | 5.63128 | 5.21651 | 5.95923 | 4.28027 | 5.38223 | 5.93986 | 6.41945 | 5.687   |
| LINC00691 | 4.36324 | 3.89978 | 4.21162 | 4.83608 | 4.76384 | 5.26234 | 4.47545 | 5.24167 | 4.68051 |
| TOP2B     | 9.5386  | 9.53376 | 9.59964 | 8.22742 | 4.95893 | 7.80423 | 8.62837 | 7.9757  | 7.90574 |
| MIR4442   | 8.6043  | 8.82992 | 8.68991 | 8.50713 | 11.3757 | 8.55869 | 8.52369 | 8.98053 | 8.94843 |
| NGLY1     | 7.43762 | 7.31015 | 7.43422 | 7.33002 | 6.6207  | 8.12743 | 7.05859 | 7.80277 | 7.07364 |
| LINC00692 | 4.46303 | 4.33827 | 4.55287 | 4.73549 | 5.02646 | 5.00617 | 4.63771 | 4.4789  | 4.43338 |
| NEK10     | 4.74172 | 4.92513 | 4.8204  | 5.32989 | 5.67962 | 5.19459 | 5.01558 | 5.06222 | 5.16598 |
| EOMES     | 4.97407 | 4.80381 | 5.16421 | 5.65037 | 5.66611 | 5.07704 | 5.89596 | 5.31841 | 5.38038 |
| AZI2      | 7.30898 | 7.19546 | 7.15684 | 6.93034 | 6.33932 | 7.60268 | 7.16513 | 7.05957 | 6.9839  |
| GADL1     | 5.51502 | 5.33162 | 5.68531 | 6.05056 | 7.07041 | 6.461   | 5.91736 | 6.35765 | 6.14942 |
| OSBPL10   | 7.33684 | 7.23892 | 7.03795 | 6.77617 | 6.72401 | 7.00562 | 6.72898 | 7.79524 | 7.38153 |
| CMTM6     | 8.4377  | 8.25249 | 8.36102 | 7.97437 | 7.03878 | 7.48444 | 8.5036  | 8.09601 | 7.65707 |
| SUSD5     | 6.09013 | 6.32079 | 6.26985 | 6.00055 | 6.17881 | 6.6883  | 6.15877 | 6.18195 | 6.24896 |
| UBP1      | 7.36909 | 7.40351 | 7.39417 | 7.25036 | 6.26576 | 6.83051 | 7.46101 | 6.95921 | 7.12608 |
| CLASP2    | 7.96282 | 7.70544 | 7.89336 | 7.08209 | 5.50232 | 6.744   | 7.06965 | 7.15022 | 7.41106 |
| DCLK3     | 4.52845 | 4.84881 | 4.58632 | 4.43741 | 4.77493 | 4.8233  | 4.68924 | 4.49218 | 4.67038 |
| TRANK1    | 6.69231 | 6.32661 | 6.36646 | 5.6981  | 5.59832 | 5.09998 | 5.6448  | 5.29367 | 5.05963 |
| EPM2AIP1  | 7.86196 | 8.01159 | 7.96009 | 7.10683 | 6.83808 | 6.392   | 7.55664 | 6.66307 | 6.93994 |

|            |         |         |         |         |         |         |         |         |         |
|------------|---------|---------|---------|---------|---------|---------|---------|---------|---------|
| LRRFIP2    | 8.71839 | 8.77597 | 8.74058 | 7.86686 | 7.00068 | 8.49431 | 7.94308 | 9.19512 | 9.01092 |
| ACAA1      | 6.61286 | 6.25907 | 6.18089 | 7.3084  | 6.34887 | 8.35456 | 7.52906 | 8.46303 | 7.96079 |
| ACVR2B-AS1 | 5.19847 | 5.71581 | 5.14346 | 5.06351 | 5.05092 | 5.89505 | 5.59189 | 5.69449 | 5.41414 |
| CSRNP1     | 7.6426  | 6.33777 | 6.75791 | 7.70667 | 7.14024 | 9.74733 | 7.99303 | 8.10475 | 7.75858 |
| XIRP1      | 5.60907 | 5.65084 | 5.93454 | 5.96425 | 6.20829 | 6.34969 | 6.34879 | 6.15142 | 6.14517 |
| CX3CR1     | 5.88037 | 5.76115 | 5.86898 | 5.93654 | 5.60549 | 5.92482 | 5.44267 | 5.7645  | 5.72609 |
| EIF1B-AS1  | 5.93383 | 5.40156 | 5.76182 | 5.824   | 5.8246  | 5.4804  | 5.47194 | 5.51052 | 5.45704 |
| ENTPD3-AS1 | 5.46154 | 5.31568 | 6.00852 | 5.34135 | 5.4325  | 5.10269 | 5.3225  | 5.27547 | 5.49075 |
| ULK4       | 7.24904 | 7.06274 | 7.45719 | 5.913   | 5.70805 | 5.96444 | 5.65768 | 6.18488 | 5.83873 |
| CCK        | 5.64591 | 5.58085 | 5.57128 | 6.11232 | 6.60666 | 6.66675 | 6.33086 | 6.22624 | 6.07098 |
| LYZL4      | 5.07011 | 4.88383 | 4.93984 | 5.39367 | 5.9735  | 6.02781 | 5.37243 | 5.50438 | 5.46922 |
| SEC22C     | 7.37691 | 7.47711 | 7.67419 | 7.43036 | 6.59007 | 7.13895 | 7.67289 | 7.2143  | 6.88883 |
| HHATL      | 5.21793 | 5.5136  | 5.80559 | 6.11895 | 6.5019  | 6.09518 | 5.65125 | 5.83477 | 5.81932 |
| CCDC13     | 6.00566 | 6.22134 | 6.25304 | 6.46372 | 6.76017 | 6.93319 | 6.57748 | 7.11736 | 7.13862 |
| POMGNT2    | 6.16439 | 6.28998 | 6.31272 | 6.2733  | 5.39402 | 6.48961 | 6.85764 | 6.39939 | 6.51284 |
| ANO10      | 8.04485 | 7.89356 | 7.91335 | 7.51725 | 6.12425 | 7.8478  | 7.7984  | 8.25662 | 7.85365 |
| KIAA1143   | 7.62098 | 8.14078 | 7.96875 | 7.25633 | 6.36755 | 6.96333 | 7.7773  | 6.70383 | 6.86962 |
| CDCP1      | 9.30689 | 9.32393 | 8.8331  | 9.96289 | 8.52316 | 11.521  | 10.3069 | 11.0176 | 10.74   |
| TMEM158    | 6.52429 | 6.44318 | 5.99715 | 7.76271 | 6.2222  | 9.32574 | 7.74587 | 8.11527 | 7.52483 |
| LARS2-AS1  | 5.66785 | 5.67924 | 5.48674 | 5.734   | 6.22389 | 5.26435 | 5.63587 | 5.06549 | 5.44654 |
| LIMD1-AS1  | 5.07667 | 5.39361 | 5.28637 | 4.8863  | 5.82713 | 5.74309 | 5.82433 | 5.46676 | 5.5337  |
| LZTFL1     | 6.87482 | 6.95229 | 6.88389 | 5.88094 | 6.11039 | 5.6758  | 6.40799 | 5.59576 | 5.73563 |
| FYCO1      | 9.16627 | 9.23627 | 8.68245 | 8.54961 | 7.91051 | 8.50833 | 8.69614 | 8.0568  | 8.70246 |
| XCR1       | 6.6649  | 7.37389 | 7.02973 | 6.41035 | 8.37156 | 7.09073 | 6.47601 | 7.1998  | 7.26256 |
| CCR1       | 5.06268 | 4.73224 | 5.70347 | 5.12676 | 5.09096 | 5.38545 | 5.24481 | 5.02261 | 5.34033 |
| LTF        | 6.43436 | 6.48119 | 6.67753 | 5.60242 | 5.837   | 5.66273 | 5.53191 | 5.29265 | 5.65153 |

|         |         |         |         |         |         |         |         |         |         |
|---------|---------|---------|---------|---------|---------|---------|---------|---------|---------|
| LRRC2   | 5.06537 | 5.65573 | 5.95333 | 5.28046 | 5.75668 | 5.38777 | 4.90386 | 5.02342 | 5.21051 |
| ALS2CL  | 8.34927 | 8.23475 | 8.09992 | 8.31044 | 6.95811 | 8.73076 | 8.44821 | 8.71218 | 9.05079 |
| CCDC12  | 7.74096 | 7.23822 | 7.79257 | 7.91887 | 7.31359 | 7.61445 | 7.84978 | 7.54004 | 7.78114 |
| SETD2   | 9.05881 | 9.26149 | 9.08396 | 7.78526 | 6.27821 | 7.34947 | 8.07152 | 7.95393 | 8.10918 |
| KIF9    | 5.75826 | 5.66788 | 6.10515 | 5.91273 | 5.79566 | 5.68919 | 6.05178 | 5.70437 | 5.7943  |
| SCAP    | 8.46527 | 8.51336 | 8.38819 | 8.91123 | 7.09536 | 8.19666 | 8.63134 | 8.35629 | 8.31574 |
| ELP6    | 6.72917 | 7.03407 | 6.5384  | 6.53757 | 6.30858 | 6.31784 | 6.76934 | 6.31992 | 6.25737 |
| CSPG5   | 6.16936 | 6.15764 | 6.28656 | 6.8116  | 7.44529 | 6.78158 | 6.49914 | 6.68393 | 6.65351 |
| MAP4    | 9.32982 | 9.22015 | 9.30613 | 8.95554 | 8.2264  | 9.17858 | 9.29365 | 9.54593 | 10.3688 |
| CDC25A  | 5.89407 | 5.63249 | 5.74559 | 6.2844  | 5.90622 | 6.00784 | 5.96771 | 6.03656 | 5.88872 |
| NME6    | 6.3283  | 6.61968 | 6.58732 | 6.77366 | 6.07056 | 6.52202 | 6.92346 | 6.58701 | 7.14128 |
| MIR2115 | 3.28744 | 3.21873 | 2.73005 | 3.05388 | 3.68602 | 3.62087 | 2.55586 | 2.82702 | 3.156   |
| PLXNB1  | 8.54742 | 8.32944 | 8.4959  | 8.12478 | 6.80358 | 7.95358 | 8.49189 | 7.43453 | 8.36978 |
| CCDC51  | 6.06891 | 5.72933 | 5.86958 | 6.14446 | 5.81092 | 6.27199 | 6.93049 | 5.90266 | 6.22823 |
| SHISA5  | 6.36926 | 6.12554 | 6.48268 | 6.53415 | 6.12162 | 6.37042 | 6.70881 | 6.09447 | 6.38172 |
| ucn2    | 6.88101 | 7.0311  | 6.07937 | 6.77155 | 6.41484 | 6.38944 | 7.1264  | 7.45551 | 6.89648 |
| UQCRC1  | 8.07525 | 8.11557 | 8.21881 | 8.93928 | 7.28107 | 8.8724  | 9.13217 | 8.55348 | 8.45481 |
| TMEM89  | 7.13437 | 7.3095  | 7.27063 | 7.49414 | 8.18072 | 7.23548 | 6.95813 | 7.59848 | 7.66315 |
| nckipsd | 7.19531 | 7.18888 | 6.74562 | 7.34809 | 6.48849 | 7.86733 | 7.46253 | 7.27398 | 7.08174 |
| IP6K2   | 8.58101 | 8.58833 | 8.36759 | 8.13439 | 7.17843 | 7.6798  | 8.13226 | 8.06754 | 8.0894  |
| Arih2os | 5.97661 | 5.96639 | 5.5951  | 5.78229 | 5.45599 | 6.22819 | 6.40786 | 5.55731 | 5.82306 |
| DALRD3  | 7.76141 | 7.23094 | 7.4607  | 8.06127 | 7.49347 | 7.58504 | 7.90213 | 7.26758 | 7.19208 |
| MIR425  | 5.85766 | 5.68212 | 4.9577  | 6.47537 | 6.25103 | 6.92763 | 6.66608 | 6.41636 | 6.43103 |
| MIR191  | 6.05377 | 5.8154  | 6.3053  | 6.65017 | 6.59458 | 7.42228 | 6.7841  | 7.33778 | 6.54464 |
| IMPDH2  | 9.27846 | 9.50225 | 9.59918 | 8.90404 | 7.12623 | 8.44668 | 9.10446 | 7.91328 | 8.57015 |
| QRICH1  | 9.33042 | 9.23243 | 9.1529  | 8.70343 | 6.51513 | 7.63555 | 8.59978 | 7.86415 | 8.44547 |

|          |         |         |         |         |         |         |         |         |         |
|----------|---------|---------|---------|---------|---------|---------|---------|---------|---------|
| QARS     | 11.0932 | 10.7196 | 10.8606 | 10.2976 | 9.1046  | 9.99465 | 10.5769 | 9.85717 | 10.1992 |
| USP19    | 8.34535 | 8.3542  | 8.24038 | 7.69127 | 6.80043 | 7.1999  | 8.16854 | 7.38204 | 7.20106 |
| CCDC71   | 7.76739 | 7.85452 | 7.69697 | 7.49853 | 6.42907 | 6.97705 | 8.00646 | 7.02587 | 7.26576 |
| C3orf84  | 5.06012 | 4.70633 | 5.051   | 5.1724  | 6.17566 | 5.52763 | 4.67332 | 5.35733 | 4.96283 |
| USP4     | 9.21563 | 9.3021  | 9.26746 | 8.633   | 7.9493  | 8.71264 | 8.85019 | 9.04265 | 9.06936 |
| GPX1     | 7.31887 | 6.79749 | 7.33587 | 7.21088 | 6.80542 | 7.07468 | 7.68798 | 7.11885 | 7.20992 |
| RHOA     | 11.845  | 11.5152 | 11.8174 | 11.6761 | 11.374  | 11.8711 | 12.1591 | 11.8482 | 11.9931 |
| AMT      | 7.25246 | 7.26948 | 7.10205 | 6.57413 | 6.67479 | 6.30595 | 6.17681 | 6.27726 | 6.33107 |
| BSN-AS2  | 3.80199 | 3.72451 | 4.18579 | 5.13302 | 5.01643 | 4.84877 | 4.64318 | 5.06731 | 4.89993 |
| MST1     | 6.29747 | 6.52277 | 6.47557 | 6.74847 | 7.66261 | 7.41214 | 6.91674 | 7.34928 | 6.85459 |
| amigo3   | 6.23308 | 6.44262 | 6.27262 | 6.3643  | 5.60898 | 6.71179 | 6.16617 | 5.90822 | 6.21349 |
| GMPPB    | 6.3798  | 6.60197 | 6.45396 | 7.13513 | 7.01528 | 8.01898 | 7.1353  | 6.83038 | 6.76997 |
| IP6K1    | 7.84105 | 7.77091 | 7.81928 | 7.9261  | 6.29138 | 8.18734 | 7.91924 | 7.88621 | 7.85607 |
| CDHR4    | 5.38706 | 5.38917 | 5.51965 | 5.96825 | 5.84453 | 5.83372 | 6.06154 | 6.00248 | 5.85462 |
| uba7     | 7.51635 | 6.95766 | 6.97346 | 6.5624  | 7.04804 | 6.61425 | 6.3712  | 6.4036  | 6.02937 |
| TRAIP    | 6.21761 | 6.17345 | 6.0878  | 6.21634 | 6.61322 | 6.32901 | 6.57504 | 6.27564 | 6.20302 |
| CAMKV    | 5.69049 | 5.79754 | 5.8104  | 6.1235  | 5.96177 | 6.0133  | 5.87533 | 6.16365 | 6.0194  |
| MON1A    | 4.73889 | 4.8182  | 5.02262 | 5.33489 | 5.09443 | 5.68106 | 5.88632 | 4.97622 | 5.07335 |
| RBM5-AS1 | 5.07825 | 5.36452 | 5.1133  | 5.33687 | 5.02971 | 5.46045 | 5.70853 | 4.83733 | 4.82671 |
| IFRD2    | 6.87782 | 6.76736 | 6.83826 | 7.42837 | 7.31316 | 7.14613 | 7.53254 | 7.07994 | 7.46188 |
| NAT6     | 7.17623 | 7.18601 | 7.21843 | 7.82748 | 7.62244 | 7.65457 | 8.04297 | 7.41915 | 7.64275 |
| HYAL1    | 8.94925 | 8.38413 | 8.55307 | 8.33133 | 7.34628 | 7.90977 | 8.03818 | 9.39148 | 9.5101  |
| HYAL2    | 6.22166 | 6.14301 | 6.62364 | 6.96948 | 5.96972 | 6.77161 | 7.08334 | 6.41301 | 6.86489 |
| TUSC2    | 8.20141 | 8.22893 | 8.30662 | 8.37158 | 6.98632 | 8.01328 | 8.48525 | 7.87864 | 8.09724 |
| RASSF1   | 6.33728 | 6.3872  | 6.02705 | 6.20778 | 5.32641 | 6.37751 | 6.40927 | 6.80773 | 6.34478 |
| NPRL2    | 7.31412 | 7.31599 | 7.12709 | 6.80643 | 5.82735 | 6.60632 | 6.91151 | 6.61809 | 6.56592 |

|           |         |         |         |         |         |         |         |         |         |
|-----------|---------|---------|---------|---------|---------|---------|---------|---------|---------|
| TMEM115   | 7.2435  | 7.12915 | 7.00657 | 7.26943 | 6.03247 | 6.684   | 7.63774 | 6.85203 | 7.19359 |
| C3orf18   | 5.87714 | 6.11903 | 5.95042 | 6.63359 | 7.159   | 6.68692 | 6.5635  | 6.23131 | 6.25284 |
| CISH      | 6.66877 | 6.38942 | 6.43432 | 7.41128 | 7.01786 | 7.88931 | 7.58727 | 7.83904 | 7.32975 |
| DCAF1     | 8.55224 | 8.66521 | 8.48226 | 7.7654  | 6.23754 | 7.21285 | 7.71445 | 7.45785 | 7.63291 |
| lqcf6     | 4.21759 | 4.33511 | 4.1172  | 4.45422 | 4.71468 | 4.72926 | 4.68541 | 4.66129 | 4.07843 |
| IQCF1     | 3.46403 | 3.79579 | 3.85714 | 4.21872 | 4.42733 | 4.61479 | 4.11895 | 4.19595 | 4.15583 |
| IQCF5     | 4.8267  | 4.4488  | 4.52048 | 5.64159 | 5.91659 | 5.81564 | 4.976   | 5.22383 | 5.2851  |
| PCBP4     | 6.88532 | 7.36771 | 7.12618 | 8.18539 | 7.59014 | 8.44999 | 8.48105 | 8.12564 | 8.63592 |
| ABHD14B   | 6.87839 | 6.66657 | 6.94762 | 7.04027 | 6.51347 | 6.83331 | 7.12499 | 6.56057 | 6.50264 |
| RPL29     | 7.49183 | 8.0252  | 7.63066 | 8.31013 | 7.69049 | 7.67759 | 7.80124 | 7.4464  | 7.98865 |
| DUSP7     | 8.81715 | 8.35688 | 8.69716 | 9.20895 | 7.67828 | 9.18103 | 9.54164 | 8.96239 | 9.89943 |
| LINC00696 | 6.21433 | 5.93407 | 6.21763 | 6.2002  | 6.84854 | 6.49533 | 6.35033 | 6.22456 | 6.59475 |
| POC1A     | 5.85918 | 5.77598 | 5.91789 | 6.4507  | 5.86805 | 6.02209 | 6.47319 | 6.39775 | 6.20573 |
| TLR9      | 6.49724 | 6.55337 | 6.67934 | 6.92719 | 7.42773 | 7.22255 | 6.88742 | 7.30725 | 6.9359  |
| WDR82     | 9.24843 | 8.85827 | 9.26434 | 8.92713 | 6.72011 | 8.39096 | 9.42242 | 8.43251 | 8.8028  |
| MIRLET7G  | 7.48102 | 6.91642 | 7.54043 | 6.36043 | 5.08219 | 6.61256 | 5.99173 | 6.11875 | 6.49973 |
| MIR135A1  | 3.58278 | 3.74537 | 3.59612 | 3.91608 | 3.86554 | 4.24166 | 3.74301 | 3.91769 | 3.8515  |
| BAP1      | 8.64921 | 8.11737 | 8.44461 | 8.5626  | 6.2998  | 8.79109 | 8.76173 | 8.23062 | 8.69187 |
| TNNC1     | 6.74656 | 6.65222 | 6.85766 | 7.43869 | 7.39301 | 7.77157 | 7.37963 | 7.53982 | 7.22662 |
| NT5DC2    | 8.71334 | 8.82851 | 8.86758 | 8.26671 | 7.45955 | 7.55896 | 8.30473 | 8.26737 | 8.44796 |
| PBRM1     | 9.25543 | 9.42548 | 9.29323 | 8.77918 | 6.33407 | 8.35831 | 8.9309  | 7.96883 | 9.12978 |
| GLT8D1    | 7.13961 | 7.3345  | 7.36048 | 7.00072 | 6.46513 | 6.31895 | 7.25785 | 6.19997 | 6.39895 |
| NEK4      | 8.17234 | 8.22161 | 8.51096 | 7.93036 | 6.27455 | 7.44459 | 8.02563 | 7.27901 | 7.59596 |
| sfmbt1    | 7.39375 | 7.44793 | 7.44522 | 6.77561 | 6.61855 | 6.54353 | 6.78815 | 6.19037 | 6.14444 |
| RFT1      | 8.34743 | 8.18709 | 8.28153 | 7.51915 | 6.46344 | 6.92438 | 7.72642 | 6.56589 | 7.1675  |
| TKT       | 8.09475 | 8.44696 | 8.40269 | 9.47488 | 6.90948 | 8.84056 | 9.79663 | 8.85034 | 8.98636 |

|           |         |         |         |         |         |         |         |         |         |
|-----------|---------|---------|---------|---------|---------|---------|---------|---------|---------|
| DCP1A     | 8.54976 | 8.52709 | 8.55265 | 7.64653 | 6.69651 | 6.95656 | 7.61549 | 7.6165  | 7.9932  |
| CHDH      | 5.93372 | 6.26396 | 6.40656 | 6.24296 | 5.93696 | 6.12695 | 6.34279 | 6.28109 | 6.09169 |
| ACTR8     | 7.80537 | 7.89373 | 8.11276 | 7.68845 | 6.44154 | 7.15329 | 8.09651 | 7.65862 | 7.28456 |
| SELENOK   | 6.56602 | 6.52577 | 6.48479 | 6.89724 | 6.52403 | 7.24612 | 6.99798 | 6.82109 | 6.98385 |
| ESRG      | 5.49113 | 4.74692 | 5.61933 | 4.89541 | 5.41592 | 5.07314 | 5.08525 | 4.71549 | 4.93879 |
| Lrtm1     | 5.86761 | 5.76192 | 5.65312 | 6.17759 | 7.14212 | 6.311   | 5.89532 | 6.25374 | 6.12206 |
| ERC2      | 5.09495 | 5.08446 | 5.3191  | 5.21152 | 6.30751 | 5.38888 | 4.61649 | 5.38562 | 5.20731 |
| ERC2-IT1  | 4.59545 | 4.39839 | 4.60658 | 4.61468 | 5.96048 | 4.26725 | 4.52546 | 4.84574 | 4.51935 |
| MIR3938   | 1.80157 | 1.95453 | 1.78248 | 1.97699 | 1.91512 | 2.12141 | 2.05829 | 2.04223 | 1.9431  |
| ARHGEF3   | 7.81736 | 7.07296 | 7.67373 | 6.80183 | 5.48347 | 6.61813 | 7.42533 | 7.5541  | 7.3692  |
| IL17RD    | 7.24361 | 6.99598 | 6.90672 | 6.87234 | 6.89746 | 6.71016 | 7.12371 | 7.90551 | 7.22779 |
| HESX1     | 4.6948  | 5.49217 | 4.96618 | 4.59763 | 4.42802 | 4.74204 | 5.29447 | 4.40901 | 4.72909 |
| ASB14     | 4.76347 | 5.03933 | 5.16637 | 4.93985 | 6.27335 | 5.46768 | 5.33012 | 4.97864 | 5.09132 |
| ARF4      | 10.1295 | 9.26297 | 10.1195 | 9.80883 | 9.5617  | 10.1446 | 10.2674 | 10.5294 | 10.5182 |
| DNASE1L3  | 5.85963 | 5.9018  | 5.73685 | 5.67633 | 5.90551 | 5.59084 | 6.02773 | 5.72333 | 5.71965 |
| PDHB      | 8.03451 | 8.14    | 8.26059 | 8.09526 | 6.88588 | 7.88284 | 8.36084 | 7.8828  | 7.90158 |
| c3orf67   | 5.42362 | 5.0386  | 5.19565 | 6.29333 | 5.78331 | 7.42503 | 6.19531 | 7.32235 | 7.03326 |
| FHIT      | 6.93385 | 7.36238 | 7.01194 | 6.42109 | 7.22062 | 5.54787 | 5.94835 | 6.13181 | 5.79798 |
| PTPRG-AS1 | 3.9963  | 4.05511 | 4.23658 | 4.31741 | 4.3107  | 4.05921 | 3.9527  | 4.0217  | 3.64998 |
| FEZF2     | 5.19281 | 5.2714  | 5.04696 | 5.66187 | 6.64779 | 5.56738 | 5.57205 | 5.77936 | 5.66795 |
| CADPS     | 5.64825 | 5.07606 | 4.76588 | 4.60743 | 5.59029 | 5.05523 | 4.95203 | 4.92294 | 4.766   |
| SYNPR-AS1 | 3.43918 | 3.38294 | 3.80681 | 4.68528 | 5.33729 | 3.69429 | 3.94852 | 3.71151 | 3.90085 |
| THOC7     | 7.99879 | 8.00311 | 8.19939 | 8.26097 | 6.13427 | 8.06757 | 8.72483 | 7.41796 | 7.71029 |
| LINC00994 | 4.25186 | 4.48262 | 4.38399 | 5.21963 | 5.44069 | 5.34805 | 4.43855 | 4.82222 | 4.75616 |
| LRIG1     | 8.6497  | 7.78854 | 8.60477 | 7.34636 | 7.4952  | 6.94498 | 7.80652 | 7.00981 | 7.0438  |
| EOGT      | 8.71545 | 8.31961 | 8.7073  | 8.11677 | 5.8497  | 6.92338 | 8.28015 | 8.26603 | 7.97686 |



|             |         |         |         |         |         |         |         |         |         |
|-------------|---------|---------|---------|---------|---------|---------|---------|---------|---------|
| MIR3136     | 4.41177 | 4.66659 | 4.46425 | 2.95279 | 4.07195 | 3.60351 | 3.16325 | 5.52339 | 4.13931 |
| UBA3        | 9.65484 | 9.37535 | 9.59473 | 8.82665 | 5.99634 | 7.81954 | 9.03316 | 8.65526 | 8.78033 |
| LMOD3       | 4.99258 | 5.05677 | 5.00595 | 5.62737 | 5.2062  | 5.69399 | 5.25286 | 5.31043 | 5.44997 |
| FRMD4B      | 8.02051 | 7.93501 | 8.02441 | 6.39222 | 5.49909 | 5.9752  | 6.73764 | 7.22885 | 7.34773 |
| FOXP1       | 8.63662 | 8.52544 | 8.90174 | 7.76098 | 6.44233 | 6.92867 | 7.77461 | 7.12711 | 7.36998 |
| MIR1284     | 4.86053 | 4.89108 | 5.777   | 3.6309  | 3.82573 | 3.16168 | 3.30449 | 4.11067 | 3.58683 |
| EIF4E3      | 8.39869 | 7.59774 | 8.49008 | 8.10399 | 7.28836 | 8.38391 | 8.6467  | 7.78681 | 8.53744 |
| prok2       | 5.54579 | 4.95325 | 5.76023 | 5.9942  | 6.84429 | 6.74761 | 5.55343 | 6.49743 | 6.15494 |
| RYBP        | 9.01115 | 9.2372  | 9.07014 | 9.42591 | 9.9691  | 11.0996 | 9.78611 | 10.9529 | 9.60763 |
| SHQ1        | 7.8206  | 7.6345  | 7.79635 | 7.11867 | 6.26682 | 6.87095 | 7.35626 | 6.50392 | 6.66161 |
| PDZRN3      | 7.14424 | 6.68818 | 6.90852 | 6.3717  | 6.42722 | 6.36717 | 5.87841 | 5.85419 | 5.96104 |
| CNTN3       | 5.6378  | 6.45119 | 5.40931 | 4.72767 | 5.93333 | 5.56917 | 4.84668 | 4.82649 | 5.34978 |
| LINC00971   | 3.72467 | 4.31029 | 3.83165 | 4.26385 | 5.52066 | 4.48123 | 4.39046 | 4.0309  | 4.96773 |
| CADM2-AS2   | 3.27976 | 3.37956 | 3.01526 | 3.50843 | 3.73392 | 3.60939 | 3.90957 | 3.39103 | 3.42499 |
| VGLL3       | 8.25395 | 7.95841 | 8.23602 | 7.77275 | 6.68325 | 5.88329 | 6.91414 | 7.07169 | 6.69249 |
| MIR4795     | 2.65386 | 3.42017 | 2.1625  | 2.74195 | 2.07624 | 3.59908 | 3.46858 | 2.59114 | 3.17277 |
| POU1F1      | 4.03655 | 3.99213 | 3.81721 | 3.95254 | 5.66284 | 4.57109 | 3.74731 | 4.13615 | 3.70498 |
| CGGBP1      | 7.97337 | 7.77237 | 7.92155 | 7.49381 | 5.73401 | 6.82614 | 7.58598 | 7.09631 | 7.61464 |
| PROS1       | 8.87942 | 9.00606 | 8.81114 | 7.38611 | 5.99378 | 7.04806 | 7.96243 | 6.6179  | 6.61472 |
| STX19       | 7.06616 | 6.82389 | 6.77309 | 6.65857 | 5.43675 | 6.44921 | 6.86087 | 5.67612 | 6.04368 |
| DHFR2       | 5.12761 | 4.87914 | 4.76921 | 5.12693 | 4.72308 | 5.09658 | 5.17111 | 4.81481 | 4.64395 |
| MINA        | 7.97303 | 8.04134 | 8.07778 | 7.69412 | 6.4684  | 7.43529 | 7.68416 | 7.07551 | 7.19302 |
| CPOX        | 6.83857 | 6.43083 | 6.74857 | 6.34425 | 6.52722 | 6.48608 | 6.78605 | 6.7701  | 6.68208 |
| ST3GAL6-AS1 | 4.926   | 5.10939 | 5.45804 | 5.37749 | 4.79228 | 5.11685 | 5.10215 | 5.10749 | 4.94843 |
| filip1l     | 7.15645 | 6.3588  | 6.68659 | 6.40559 | 6.09497 | 5.7576  | 6.18736 | 5.96665 | 6.5348  |
| MIR3921     | 2.32613 | 2.04512 | 1.97668 | 2.57844 | 1.82387 | 2.40013 | 3.04925 | 2.65111 | 2.49458 |

|           |         |         |         |         |         |         |         |         |         |
|-----------|---------|---------|---------|---------|---------|---------|---------|---------|---------|
| TOMM70    | 8.27589 | 8.31518 | 8.39077 | 7.89312 | 5.67958 | 7.55186 | 8.33484 | 7.2713  | 7.6171  |
| IMPG2     | 5.60112 | 5.44988 | 5.25188 | 5.41685 | 6.13429 | 5.02885 | 5.60131 | 4.96102 | 5.30424 |
| SENP7     | 7.93484 | 7.73679 | 7.45817 | 6.53931 | 4.57959 | 6.82062 | 6.86539 | 7.2948  | 6.81763 |
| RPS18     | 9.17738 | 9.6955  | 9.59575 | 9.72394 | 8.90693 | 10.1726 | 9.85564 | 9.42838 | 9.0132  |
| ZBTB11    | 8.25045 | 8.45314 | 8.12168 | 7.57813 | 5.55325 | 7.45096 | 7.6998  | 8.80338 | 8.04876 |
| RPL24     | 7.49044 | 7.57425 | 7.6562  | 8.0588  | 7.51027 | 8.16417 | 7.93064 | 7.86324 | 7.88709 |
| MIR548AB  | 4.70796 | 5.07394 | 4.28372 | 5.70552 | 6.04443 | 5.50432 | 5.59716 | 5.02002 | 5.00786 |
| LINC00882 | 4.55338 | 4.68482 | 4.71024 | 4.79228 | 4.92908 | 4.99909 | 4.26893 | 4.10444 | 4.46068 |
| LINC00635 | 3.59596 | 3.74423 | 3.73126 | 4.06132 | 4.64902 | 4.71449 | 3.82452 | 4.08504 | 4.04465 |
| CD47      | 10.5601 | 10.0561 | 10.5424 | 10.3141 | 8.06133 | 10.5121 | 10.7194 | 11.1299 | 10.6503 |
| IFT57     | 7.56927 | 7.8699  | 7.77425 | 7.24836 | 5.63888 | 7.34951 | 7.75902 | 7.24245 | 6.92885 |
| KIAA1524  | 6.83123 | 6.28353 | 6.79528 | 6.46174 | 4.80822 | 6.11408 | 5.81638 | 5.52581 | 5.97864 |
| RETNLB    | 4.33442 | 4.4893  | 4.167   | 4.6578  | 6.20624 | 4.79835 | 4.88827 | 4.28353 | 4.48027 |
| GUCA1C    | 3.03578 | 3.42952 | 3.30346 | 3.08499 | 4.55361 | 3.36797 | 3.17341 | 3.65892 | 3.18769 |
| MORC1     | 4.55314 | 4.29679 | 4.59851 | 5.07634 | 5.80677 | 4.87988 | 5.17205 | 5.05757 | 5.01708 |
| DPPA2     | 3.49662 | 3.29633 | 3.45125 | 3.47642 | 4.42812 | 4.25874 | 4.15988 | 4.19293 | 3.63519 |
| DPPA4     | 4.50217 | 4.66169 | 5.18139 | 5.02086 | 5.69578 | 5.03956 | 5.19989 | 4.89012 | 5.25872 |
| PVRL3-AS1 | 4.38973 | 4.45353 | 4.59409 | 4.45171 | 4.62866 | 4.68496 | 4.35081 | 4.67022 | 4.51703 |
| GCSAM     | 5.70465 | 5.20966 | 5.69808 | 5.55833 | 5.43958 | 5.61293 | 5.25097 | 5.06059 | 5.09122 |
| BTLA      | 4.54341 | 4.88895 | 4.65987 | 4.70886 | 5.84899 | 5.19051 | 4.32273 | 5.06221 | 4.8604  |
| ATG3      | 9.39938 | 9.32999 | 9.55006 | 8.87876 | 6.8758  | 8.55594 | 9.32568 | 8.20942 | 8.63658 |
| CCDC80    | 8.60049 | 7.67928 | 8.64354 | 6.44725 | 5.54124 | 6.76681 | 6.70651 | 6.1935  | 6.09694 |
| CD200R1L  | 3.238   | 3.00345 | 3.07752 | 3.31937 | 3.46689 | 3.48442 | 3.65384 | 3.1053  | 3.36409 |
| CD200R1   | 5.44645 | 4.63474 | 5.46063 | 4.16622 | 4.62144 | 4.35693 | 4.70193 | 4.39325 | 4.45879 |
| NEPRO     | 8.07208 | 8.6518  | 8.5413  | 7.00795 | 5.87705 | 6.09625 | 7.08375 | 6.57605 | 6.10019 |
| CFAP44    | 7.16018 | 7.48691 | 7.04368 | 5.81717 | 5.79748 | 5.65189 | 5.76801 | 5.69306 | 5.66559 |

|         |         |         |         |         |         |         |         |         |         |
|---------|---------|---------|---------|---------|---------|---------|---------|---------|---------|
| SPICE1  | 7.65382 | 7.77566 | 7.59356 | 6.69403 | 6.16324 | 5.94539 | 6.38408 | 6.24974 | 6.29696 |
| USF3    | 9.34694 | 9.42587 | 9.43439 | 8.05431 | 6.72685 | 7.76203 | 8.17904 | 8.28163 | 8.5051  |
| CCDC191 | 6.82149 | 6.92953 | 6.4846  | 5.6161  | 5.44062 | 5.33214 | 5.7408  | 4.6746  | 5.46725 |
| DRD3    | 5.09949 | 5.13805 | 5.71936 | 6.03491 | 6.20646 | 6.20003 | 5.83668 | 5.68034 | 5.47001 |
| ZNF80   | 4.20002 | 4.69215 | 4.5065  | 4.97192 | 5.49183 | 4.68407 | 4.80527 | 4.91816 | 4.73615 |
| Mir568  | 5.22597 | 4.97723 | 6.1817  | 2.42901 | 2.05346 | 3.92796 | 3.65699 | 3.17478 | 3.32718 |
| ZBTB20  | 8.59247 | 8.48818 | 8.56013 | 6.32857 | 6.0061  | 5.9034  | 6.93394 | 6.56555 | 6.66654 |
| MIR4796 | 6.89444 | 4.96087 | 6.20971 | 3.97048 | 4.6153  | 3.3885  | 4.14581 | 3.44786 | 4.2761  |
| LSAMP   | 7.06211 | 6.3187  | 6.38359 | 6.89942 | 6.0054  | 6.23467 | 6.04256 | 6.43369 | 6.15052 |
| MIR4447 | 2.27125 | 2.75455 | 2.18446 | 2.64425 | 5.41436 | 2.39753 | 2.53458 | 2.36859 | 2.54361 |
| TMEM39A | 8.56505 | 8.75132 | 8.7409  | 8.48907 | 7.45098 | 7.88867 | 8.02452 | 8.16982 | 8.63355 |
| CD80    | 4.22338 | 4.68421 | 4.6507  | 4.89304 | 6.15135 | 5.57568 | 5.09206 | 4.98135 | 5.81841 |
| POPDC2  | 5.83935 | 5.6005  | 5.88421 | 5.83378 | 5.90188 | 5.44288 | 5.29032 | 5.34832 | 5.44008 |
| COX17   | 5.79988 | 5.90599 | 6.02951 | 5.92136 | 4.90099 | 5.71825 | 5.96323 | 6.10164 | 5.80497 |
| GSK3B   | 10.4701 | 10.2084 | 10.3959 | 10.1278 | 8.42684 | 9.84035 | 10.6213 | 10.1728 | 10.4613 |
| GPR156  | 5.82894 | 5.73432 | 6.15452 | 6.14146 | 7.31681 | 6.2794  | 6.03059 | 6.31024 | 6.19638 |
| LRRC58  | 9.7826  | 9.79512 | 10.0527 | 9.04335 | 6.31826 | 8.49721 | 9.27475 | 8.7256  | 8.3281  |
| FSTL1   | 8.51709 | 8.07914 | 8.95336 | 7.82529 | 7.08985 | 7.2935  | 7.90145 | 7.66637 | 7.92162 |
| HCLS1   | 5.55045 | 5.55714 | 6.04351 | 5.3171  | 5.86938 | 5.97563 | 5.12774 | 6.15616 | 5.95651 |
| GOLGB1  | 9.45032 | 9.54388 | 9.47159 | 8.36337 | 6.49292 | 8.73729 | 9.04393 | 9.07486 | 8.96932 |
| IQCB1   | 7.82445 | 7.80802 | 7.83137 | 5.89316 | 4.72579 | 5.59007 | 6.88041 | 6.15306 | 6.32467 |
| ILDR1   | 6.64519 | 6.50033 | 6.77888 | 6.48854 | 7.46606 | 6.82502 | 6.74255 | 6.4286  | 6.29102 |
| CCDC58  | 6.67594 | 6.68347 | 6.69762 | 6.45185 | 4.85    | 6.14108 | 6.89603 | 5.88848 | 6.35982 |
| WDR5B   | 6.74873 | 6.76256 | 6.75826 | 6.35305 | 6.30874 | 6.14042 | 5.96977 | 5.90046 | 6.07082 |
| KPNA1   | 8.56349 | 8.31567 | 8.57556 | 7.88851 | 5.62023 | 7.90763 | 8.44586 | 8.72569 | 8.5341  |
| HSPBAP1 | 7.89144 | 8.01783 | 7.89217 | 6.34616 | 6.13118 | 5.1     | 6.52422 | 5.89829 | 6.23382 |

|           |         |         |         |         |         |         |         |         |         |
|-----------|---------|---------|---------|---------|---------|---------|---------|---------|---------|
| ADCY5     | 6.02989 | 6.37659 | 6.5282  | 6.04    | 6.48172 | 6.36696 | 5.9485  | 6.58104 | 6.6463  |
| MYLK      | 6.19684 | 6.19106 | 6.36514 | 6.5333  | 6.31552 | 5.61695 | 6.58275 | 5.93524 | 6.03709 |
| CCDC14    | 9.40987 | 9.1454  | 9.1435  | 8.37716 | 7.12153 | 6.8504  | 8.04346 | 7.53921 | 7.81706 |
| ROPN1     | 3.45448 | 3.78579 | 3.16578 | 3.43021 | 5.83717 | 4.40791 | 3.43657 | 3.0755  | 3.40745 |
| HEG1      | 8.99959 | 8.3907  | 9.33191 | 7.84524 | 6.46452 | 6.96382 | 8.03565 | 8.55902 | 8.62624 |
| ZNF148    | 8.67032 | 8.83706 | 8.59994 | 7.50484 | 5.97277 | 7.80947 | 7.9402  | 7.69208 | 7.88265 |
| SNX4      | 7.66585 | 7.6412  | 7.6478  | 7.51098 | 4.44464 | 7.01489 | 8.30549 | 7.39507 | 7.4384  |
| OSBPL11   | 8.51407 | 8.63381 | 8.37164 | 7.87588 | 5.67299 | 7.6483  | 8.4564  | 7.68334 | 7.74626 |
| ALG1L     | 5.91606 | 5.56491 | 5.87281 | 7.2797  | 6.80077 | 7.62131 | 6.91892 | 7.30056 | 7.47405 |
| KLF15     | 5.3092  | 5.49333 | 5.48285 | 5.37886 | 5.33198 | 5.97691 | 5.53345 | 6.01919 | 5.9653  |
| ZXDC      | 8.27336 | 8.39665 | 8.50619 | 7.84192 | 7.22179 | 8.11518 | 8.03659 | 8.13527 | 7.83639 |
| UROC1     | 5.61013 | 5.87221 | 5.74106 | 6.32543 | 6.75921 | 6.68164 | 6.05342 | 6.29599 | 6.30367 |
| TXNRD3    | 6.97726 | 7.30409 | 6.92745 | 6.69656 | 6.17438 | 6.27447 | 7.13885 | 5.54366 | 6.26918 |
| MGLL      | 7.17791 | 7.82787 | 7.32341 | 6.95662 | 6.51595 | 7.56509 | 7.46242 | 7.14553 | 7.44972 |
| RUVBL1    | 6.88807 | 6.85779 | 6.82195 | 7.57464 | 6.58853 | 6.90066 | 7.71589 | 6.70525 | 6.97282 |
| GATA2     | 6.32173 | 5.96177 | 6.34604 | 6.20155 | 6.14325 | 6.52996 | 6.55423 | 6.54094 | 6.36068 |
| LINC01565 | 5.62943 | 5.61    | 5.58841 | 6.20158 | 6.45645 | 5.82769 | 5.77407 | 5.40663 | 5.73791 |
| RPN1      | 9.62593 | 9.25251 | 9.66812 | 9.76611 | 8.57675 | 9.83867 | 9.94674 | 9.68808 | 10.0213 |
| LOC653712 | 5.71717 | 5.34138 | 5.50689 | 5.53985 | 5.7505  | 5.28973 | 5.55928 | 5.46536 | 5.06912 |
| RPL32P3   | 7.59956 | 8.07349 | 7.90674 | 6.51081 | 6.44072 | 5.96121 | 5.97784 | 6.64981 | 6.66805 |
| EFCAB12   | 4.4299  | 4.21004 | 4.68238 | 4.9761  | 5.37517 | 4.94871 | 4.25228 | 4.88434 | 4.79723 |
| MBD4      | 8.06378 | 8.5247  | 8.26097 | 8.02396 | 5.64619 | 6.81798 | 7.99652 | 6.91852 | 7.04769 |
| PLXND1    | 7.90544 | 7.55093 | 7.92065 | 7.47447 | 6.51689 | 7.00798 | 7.48421 | 7.31255 | 7.39954 |
| TMCC1     | 8.2968  | 8.32551 | 8.13958 | 8.01579 | 6.69776 | 7.42971 | 7.75564 | 7.91402 | 8.09122 |
| aste1     | 6.65458 | 6.63305 | 6.78609 | 6.13181 | 6.60771 | 6.02693 | 6.28802 | 6.06686 | 6.20062 |
| LOC339874 | 5.21082 | 5.24422 | 5.38941 | 5.35208 | 5.41299 | 5.74078 | 5.02807 | 5.49232 | 5.17437 |

|         |         |         |         |         |         |         |         |         |         |
|---------|---------|---------|---------|---------|---------|---------|---------|---------|---------|
| MRPL3   | 8.83923 | 8.63987 | 9.08803 | 8.58879 | 6.01242 | 8.09968 | 8.91065 | 7.53593 | 8.23849 |
| CPNE4   | 4.12374 | 4.92274 | 4.32415 | 5.14099 | 6.14232 | 5.64018 | 5.37337 | 4.95383 | 4.71018 |
| TOPBP1  | 8.77499 | 9.04617 | 8.92825 | 7.99885 | 6.237   | 6.75127 | 7.84717 | 7.20959 | 7.12159 |
| C3orf36 | 5.20402 | 5.11605 | 4.98776 | 5.73093 | 5.42643 | 6.05918 | 5.84494 | 6.83477 | 6.68249 |
| RYK     | 10.0028 | 10.1259 | 10.0389 | 9.22881 | 7.00268 | 8.46908 | 9.52746 | 9.38803 | 9.13847 |
| AMOTL2  | 7.11003 | 7.60647 | 7.44444 | 8.08584 | 7.0834  | 8.07984 | 7.84143 | 7.83621 | 8.25383 |
| ANAPC13 | 7.66462 | 7.46744 | 7.88763 | 7.4066  | 7.00869 | 6.876   | 7.94792 | 7.21667 | 7.1642  |
| KY      | 6.19052 | 7.20904 | 7.44969 | 6.21371 | 6.45146 | 6.38822 | 6.33717 | 6.18588 | 6.25664 |
| MSL2    | 8.46181 | 8.47793 | 8.38722 | 7.65552 | 6.647   | 7.3004  | 8.08347 | 7.75583 | 7.69972 |
| STAG1   | 7.81298 | 8.11929 | 8.11872 | 6.95163 | 4.96993 | 6.625   | 7.17068 | 6.66707 | 6.9194  |
| DZIP1L  | 6.52314 | 6.22741 | 6.67254 | 6.31936 | 5.96425 | 6.44126 | 5.68406 | 6.22355 | 6.20285 |
| DBR1    | 6.90149 | 6.57858 | 6.94191 | 6.79674 | 5.50406 | 6.16935 | 7.43738 | 6.30575 | 6.26185 |
| NME9    | 5.41825 | 5.5771  | 5.68922 | 5.7625  | 5.94165 | 6.05778 | 5.82481 | 5.97147 | 6.27864 |
| CEP70   | 6.90059 | 6.59821 | 6.48649 | 5.60533 | 4.75838 | 6.20804 | 6.45973 | 6.27233 | 6.21272 |
| FOXL2   | 5.55189 | 5.63727 | 5.26378 | 6.28497 | 5.83664 | 6.47699 | 6.05749 | 6.40142 | 6.11268 |
| PRR23A  | 4.31322 | 4.50424 | 4.10962 | 4.60185 | 5.42192 | 4.29988 | 4.11327 | 4.68579 | 4.59581 |
| PRR23B  | 4.38345 | 4.46192 | 3.8972  | 4.81921 | 4.80448 | 5.09348 | 4.74923 | 4.64241 | 4.2294  |
| PRR23C  | 4.74942 | 4.56056 | 5.01921 | 5.54811 | 6.40797 | 5.6833  | 5.28159 | 4.94448 | 5.11189 |
| PISRT1  | 4.86365 | 4.9342  | 4.90419 | 4.94963 | 6.49853 | 5.0148  | 5.00885 | 4.84203 | 5.0774  |
| NMNAT3  | 7.47049 | 8.12969 | 7.58573 | 5.70198 | 6.28359 | 5.52538 | 6.15318 | 5.53871 | 5.62231 |
| TFDP2   | 8.58616 | 9.05323 | 8.83544 | 6.52907 | 6.13226 | 6.44289 | 7.37885 | 7.62983 | 6.48354 |
| GK5     | 8.03251 | 8.48558 | 8.1469  | 7.11714 | 5.63487 | 6.70707 | 7.27117 | 6.8533  | 7.27181 |
| XRN1    | 9.6831  | 9.97004 | 9.6332  | 8.63046 | 6.71489 | 8.65341 | 8.5822  | 8.96816 | 8.89104 |
| ATR     | 7.63383 | 7.7721  | 7.76966 | 6.76751 | 5.21389 | 6.06954 | 7.02205 | 6.19731 | 6.23655 |
| PCOLCE2 | 5.7524  | 5.68966 | 6.50574 | 5.11807 | 5.89224 | 5.5554  | 5.33057 | 5.40155 | 5.36486 |
| PAQR9   | 3.65893 | 4.03201 | 3.79921 | 3.46356 | 5.65271 | 4.3442  | 4.00506 | 3.9533  | 4.07309 |

|              |         |         |         |         |         |         |         |         |         |
|--------------|---------|---------|---------|---------|---------|---------|---------|---------|---------|
| LOC100289361 | 4.43511 | 4.38534 | 4.25161 | 4.79814 | 4.6706  | 5.14288 | 4.91462 | 4.68255 | 4.5394  |
| PLSCR4       | 8.78001 | 8.47617 | 9.20913 | 6.01142 | 5.39211 | 5.69908 | 6.99464 | 6.14554 | 6.72672 |
| PLSCR2       | 4.01553 | 4.09724 | 4.06053 | 4.30455 | 4.61165 | 3.99434 | 4.30986 | 4.23722 | 3.80877 |
| PLSCR1       | 7.73992 | 6.96522 | 7.49477 | 6.64872 | 5.69373 | 6.40432 | 6.65499 | 6.67933 | 6.68585 |
| CP           | 5.03125 | 6.01001 | 6.63021 | 4.21727 | 4.89462 | 4.40161 | 4.53869 | 4.37648 | 4.61628 |
| TM4SF18      | 7.674   | 6.28528 | 6.88721 | 7.12458 | 6.74515 | 6.3616  | 6.5305  | 6.93539 | 6.95998 |
| TM4SF1       | 9.46625 | 8.20778 | 9.4047  | 10.4734 | 10.9324 | 11.6638 | 11.1726 | 12.1192 | 12.1196 |
| WWTR1        | 8.10069 | 7.92301 | 8.14009 | 7.83496 | 8.03526 | 8.41816 | 8.10729 | 8.31336 | 8.13644 |
| COMMD2       | 7.08204 | 7.28382 | 7.22417 | 6.84744 | 5.37547 | 6.38525 | 7.5169  | 6.58901 | 6.92225 |
| ANKUB1       | 3.44565 | 3.74174 | 3.66404 | 4.28198 | 4.58243 | 4.25874 | 3.73768 | 3.94849 | 3.98686 |
| PFN2         | 6.86222 | 6.37891 | 6.6366  | 7.82153 | 7.07949 | 7.38698 | 7.50901 | 7.22648 | 7.56373 |
| TMEM183B     | 7.88549 | 7.90661 | 8.17244 | 7.51012 | 6.48555 | 7.39292 | 8.1588  | 7.63279 | 7.46224 |
| SERP1        | 8.10644 | 7.83973 | 7.98798 | 8.28618 | 8.05758 | 8.165   | 8.59858 | 8.85541 | 8.68581 |
| SIAH2        | 9.13195 | 8.85462 | 8.90768 | 10.1463 | 8.30279 | 10.4619 | 9.5809  | 9.58042 | 9.8167  |
| GPR171       | 5.15458 | 5.58445 | 5.42888 | 5.81239 | 5.4152  | 6.2384  | 5.81437 | 5.59455 | 5.31035 |
| GPR87        | 9.71755 | 9.90196 | 9.36158 | 10.3058 | 8.8833  | 10.6075 | 10.561  | 9.4529  | 9.92763 |
| TMEM14EP     | 4.84236 | 4.647   | 5.06413 | 5.51302 | 5.73812 | 3.93643 | 5.18364 | 4.80646 | 4.74432 |
| ARHGEF26-AS1 | 4.98794 | 4.64851 | 4.55686 | 4.63748 | 5.98694 | 5.46521 | 4.8813  | 5.20434 | 4.66489 |
| DHX36        | 8.49474 | 8.38597 | 8.54494 | 7.36147 | 5.35235 | 6.81026 | 7.89488 | 8.30032 | 7.49132 |
| GPR149       | 5.25716 | 5.0562  | 5.40583 | 5.77058 | 6.06419 | 6.02274 | 5.70676 | 5.57711 | 5.51797 |
| LOC100507537 | 4.77482 | 4.70862 | 4.74059 | 4.65746 | 5.14429 | 4.97698 | 4.49648 | 4.51972 | 4.59511 |
| C3orf33      | 4.50119 | 4.6995  | 4.64845 | 4.70181 | 4.11745 | 4.53239 | 4.90315 | 4.29279 | 4.33012 |
| KCNAB1-AS2   | 3.76844 | 3.43665 | 3.63118 | 4.74158 | 4.4482  | 4.68627 | 4.31177 | 3.9056  | 3.99965 |
| KCNAB1-AS1   | 4.03508 | 4.28086 | 4.19698 | 4.29739 | 4.68235 | 4.64067 | 3.95007 | 4.07795 | 4.24715 |
| TIPARP-AS1   | 5.05956 | 4.8289  | 4.91588 | 4.9701  | 5.12784 | 5.39586 | 5.13749 | 5.09975 | 4.84399 |
| LINC00886    | 5.54632 | 6.66914 | 5.72929 | 5.89818 | 6.1841  | 6.21191 | 5.70046 | 6.03169 | 6.04363 |

|              |         |         |         |         |         |         |         |         |         |
|--------------|---------|---------|---------|---------|---------|---------|---------|---------|---------|
| PA2G4P4      | 5.38616 | 6.81092 | 5.98185 | 3.74822 | 5.1015  | 4.60018 | 4.07782 | 3.89841 | 4.11319 |
| LINC00880    | 4.06363 | 4.27746 | 4.20843 | 4.75248 | 5.67685 | 4.69256 | 4.59492 | 4.91321 | 4.69001 |
| CCNL1        | 10.1794 | 8.82638 | 8.89178 | 8.8164  | 7.609   | 8.77342 | 8.25024 | 9.73646 | 9.10765 |
| VEPH1        | 5.70544 | 5.95229 | 5.84164 | 5.52844 | 5.88123 | 5.08361 | 5.3421  | 4.99598 | 5.17185 |
| SHOX2        | 6.46273 | 6.49561 | 6.32621 | 6.57044 | 6.68812 | 6.30912 | 6.4731  | 6.19809 | 5.88793 |
| LXN          | 6.71955 | 7.29361 | 7.10653 | 7.15647 | 5.49261 | 6.12989 | 7.18316 | 6.3412  | 6.20806 |
| RARRES1      | 5.05267 | 5.21044 | 5.16406 | 5.33838 | 4.97977 | 5.40627 | 5.08413 | 4.89341 | 4.72868 |
| IFT80        | 7.63828 | 7.65842 | 7.22884 | 6.4593  | 5.13861 | 5.324   | 6.1707  | 6.16702 | 5.85961 |
| trim59       | 5.95469 | 6.09422 | 5.8548  | 6.42756 | 6.17909 | 5.79162 | 6.09181 | 5.65911 | 5.58719 |
| KPNA4        | 9.4286  | 9.40962 | 9.62767 | 9.34503 | 6.48897 | 9.12452 | 9.66131 | 9.30299 | 9.99829 |
| SCARNA7      | 9.54937 | 10.3185 | 9.68491 | 11.2662 | 9.31284 | 11.0708 | 11.2661 | 9.90609 | 9.76097 |
| LINC01192    | 3.43138 | 3.40772 | 3.36951 | 3.50872 | 3.65291 | 3.65615 | 3.54552 | 3.59487 | 4.17728 |
| MIR1263      | 4.03847 | 4.09258 | 3.8684  | 3.6422  | 4.52365 | 4.12285 | 4.27405 | 3.36058 | 4.0645  |
| SI           | 3.80379 | 4.10095 | 3.9069  | 4.22436 | 4.14322 | 4.63893 | 4.06897 | 4.03984 | 3.94216 |
| BCHE         | 6.4574  | 4.70802 | 4.95262 | 4.23235 | 4.18481 | 4.16694 | 4.18635 | 4.0288  | 4.29868 |
| WDR49        | 4.38321 | 4.30557 | 4.52256 | 4.61539 | 5.43318 | 4.2665  | 4.56078 | 4.48034 | 4.44371 |
| PDCD10       | 6.48597 | 6.61766 | 6.72531 | 6.88198 | 5.1078  | 7.72347 | 7.30324 | 7.37844 | 7.2572  |
| GOLIM4       | 8.74757 | 9.23723 | 9.07328 | 7.86491 | 4.1528  | 6.90308 | 8.37189 | 7.92131 | 7.89392 |
| MECOM        | 6.35027 | 5.73108 | 6.10386 | 5.3495  | 5.62713 | 5.37024 | 5.49127 | 5.65161 | 5.48212 |
| TERC         | 7.10791 | 6.93435 | 6.97071 | 7.28202 | 6.30108 | 8.09493 | 7.84972 | 7.27179 | 7.11883 |
| ACTRT3       | 5.14106 | 4.77493 | 4.88145 | 6.05564 | 5.60151 | 5.93025 | 6.1447  | 5.64557 | 5.93001 |
| LRRC34       | 3.74344 | 3.74187 | 4.17902 | 3.91996 | 3.76168 | 4.03564 | 3.81286 | 3.46269 | 3.64986 |
| LRRC31       | 4.40903 | 4.55818 | 4.68955 | 4.89916 | 5.48135 | 4.68955 | 5.01384 | 5.15066 | 4.77032 |
| LOC100128164 | 5.09737 | 5.31085 | 5.20327 | 5.12144 | 6.27807 | 5.31521 | 5.33353 | 5.33024 | 5.36701 |
| PHC3         | 9.19157 | 9.38711 | 9.47148 | 7.37443 | 6.09641 | 7.34678 | 7.88616 | 7.7509  | 7.7524  |
| RPL22L1      | 6.51559 | 6.98913 | 6.89606 | 8.28151 | 6.43497 | 8.27012 | 8.70201 | 7.1937  | 7.87119 |

|              |         |         |         |         |         |         |         |         |         |
|--------------|---------|---------|---------|---------|---------|---------|---------|---------|---------|
| EIF5A2       | 6.36826 | 6.31573 | 6.37308 | 6.82996 | 4.10299 | 4.97041 | 6.89649 | 5.3083  | 5.34484 |
| TNIK         | 5.76843 | 5.57478 | 5.66009 | 5.37569 | 6.05831 | 5.02426 | 5.01104 | 4.80311 | 5.07608 |
| MIR569       | 1.85738 | 1.74046 | 1.9717  | 2.31591 | 1.74525 | 2.27827 | 1.80735 | 1.83662 | 1.88221 |
| GHSR         | 5.50788 | 5.5649  | 5.53779 | 5.86715 | 6.7726  | 5.49796 | 5.58542 | 5.59389 | 5.43717 |
| NCEH1        | 6.60722 | 6.44173 | 7.17392 | 6.80934 | 6.45139 | 6.41858 | 6.78656 | 7.21955 | 6.74551 |
| SPATA16      | 3.67123 | 3.48306 | 3.81709 | 4.12628 | 4.81836 | 4.63847 | 4.03818 | 4.09325 | 4.36867 |
| NAALADL2-AS3 | 3.48851 | 3.55506 | 3.28428 | 3.8499  | 3.96659 | 3.72096 | 3.41841 | 3.53757 | 3.50722 |
| TBL1XR1      | 9.61968 | 9.23431 | 9.38575 | 8.87745 | 5.8258  | 8.48981 | 8.93875 | 8.67287 | 8.67572 |
| MRPL47       | 7.83693 | 8.52011 | 8.24094 | 8.39585 | 6.21438 | 8.08389 | 8.67028 | 7.77712 | 8.05132 |
| CCDC39       | 3.98774 | 4.6892  | 4.57469 | 3.83043 | 3.78817 | 3.70848 | 3.83128 | 3.48286 | 3.53737 |
| FLJ46066     | 5.40809 | 4.88802 | 4.62975 | 5.0889  | 5.29872 | 4.73595 | 4.60473 | 4.99614 | 4.95551 |
| MCCC1        | 8.13672 | 8.51828 | 8.09012 | 7.35671 | 5.87886 | 7.06403 | 7.31611 | 6.68194 | 6.83484 |
| lamp3        | 6.94596 | 6.08556 | 5.91121 | 6.02022 | 6.13402 | 6.45178 | 6.35753 | 5.98266 | 6.26747 |
| MCF2L2       | 4.96964 | 4.40386 | 4.93649 | 4.9551  | 5.60387 | 5.5812  | 4.79766 | 4.82194 | 4.83077 |
| KLHL6        | 5.61228 | 5.42478 | 5.83858 | 6.02191 | 6.61204 | 6.53219 | 6.02296 | 6.18656 | 6.00629 |
| MAP6D1       | 5.84095 | 5.99343 | 6.18181 | 6.33221 | 5.92081 | 6.59379 | 6.54769 | 6.30565 | 5.90133 |
| CAMK2N2      | 5.65016 | 5.68743 | 5.6774  | 6.32722 | 5.8569  | 6.14446 | 6.08687 | 6.02558 | 6.4426  |
| THPO         | 6.54311 | 6.56964 | 6.72267 | 7.04364 | 7.74446 | 6.52337 | 6.49221 | 6.68099 | 7.00644 |
| TMEM41A      | 7.89976 | 7.96854 | 7.72667 | 7.49525 | 7.37388 | 7.47463 | 7.49306 | 7.96367 | 7.29363 |
| IGF2BP2      | 7.97609 | 6.31968 | 7.34552 | 7.58402 | 6.1817  | 8.50948 | 7.98871 | 8.92828 | 9.28374 |
| TRA2B        | 9.91547 | 9.21024 | 9.50263 | 9.28129 | 7.33858 | 8.67403 | 9.06635 | 9.30649 | 9.24718 |
| ETV5         | 7.16217 | 7.06175 | 7.4643  | 6.46259 | 6.59348 | 5.64804 | 5.888   | 5.97507 | 5.97285 |
| LOC253573    | 5.13623 | 5.2076  | 5.4378  | 5.27883 | 6.62123 | 5.86041 | 5.59896 | 5.68386 | 5.78311 |
| TBCCD1       | 7.13776 | 6.73742 | 7.16067 | 6.44492 | 5.33615 | 5.4646  | 6.43845 | 5.68145 | 6.00238 |
| RPL39L       | 5.70902 | 5.46749 | 5.32652 | 7.18798 | 5.51645 | 6.31921 | 6.17735 | 5.67796 | 5.08274 |
| masp1        | 6.03501 | 6.45715 | 6.75875 | 7.1194  | 6.26411 | 6.56614 | 7.14284 | 6.78426 | 7.02965 |



|           |         |         |         |         |         |         |         |         |         |
|-----------|---------|---------|---------|---------|---------|---------|---------|---------|---------|
| SST       | 6.04276 | 5.71253 | 5.80899 | 7.4926  | 6.94882 | 6.3248  | 6.96253 | 6.16838 | 6.49145 |
| RTP2      | 5.47784 | 5.82074 | 5.6415  | 5.5662  | 6.56822 | 5.88493 | 5.68286 | 5.91322 | 5.7526  |
| BCL6      | 9.76529 | 9.24713 | 9.93297 | 7.97712 | 6.95787 | 8.44363 | 8.53736 | 9.27727 | 7.95676 |
| LPP-AS2   | 6.7065  | 6.57519 | 6.7067  | 5.66708 | 6.77741 | 6.39439 | 6.70112 | 5.69484 | 6.76046 |
| TPRG1-AS2 | 4.47857 | 4.23154 | 4.47572 | 4.68289 | 4.2689  | 5.02938 | 4.6781  | 4.05039 | 4.33355 |
| P3H2      | 7.92802 | 7.48888 | 8.87281 | 7.85497 | 6.23209 | 7.47857 | 7.18337 | 7.60795 | 8.25465 |
| CLDN1     | 11.8465 | 11.6497 | 11.8629 | 11.3378 | 10.691  | 11.0909 | 11.1731 | 11.3209 | 11.7571 |
| Tmem207   | 4.75188 | 4.80838 | 4.67319 | 5.14174 | 5.70571 | 5.22129 | 4.95136 | 4.93225 | 5.11949 |
| GMNC      | 4.78248 | 5.09033 | 4.66069 | 4.67191 | 5.54166 | 5.13375 | 5.00681 | 4.64563 | 4.67093 |
| UTS2B     | 4.35484 | 4.22988 | 3.92132 | 3.79179 | 5.25575 | 4.57046 | 4.29264 | 4.06741 | 4.2298  |
| FGF12     | 5.05668 | 5.37017 | 5.14417 | 5.80527 | 6.16641 | 5.74452 | 5.96459 | 5.60296 | 5.86387 |
| MB21D2    | 7.88691 | 8.04731 | 7.99706 | 8.87768 | 7.43377 | 7.98924 | 7.67644 | 8.15664 | 8.0068  |
| ATP13A5   | 6.01437 | 6.72646 | 6.96965 | 5.42814 | 6.44855 | 5.69639 | 4.87026 | 5.36127 | 5.53746 |
| ATP13A4   | 8.56091 | 9.59682 | 8.45546 | 7.3123  | 6.328   | 6.63124 | 6.27175 | 6.9101  | 5.82841 |
| OPA1-AS1  | 2.99252 | 2.48387 | 2.80454 | 3.00004 | 2.46878 | 3.57595 | 3.58819 | 2.62992 | 2.87064 |
| LOC647323 | 3.5325  | 3.93722 | 3.55204 | 3.86307 | 4.07738 | 4.12014 | 4.13761 | 3.8311  | 3.53245 |
| DPPA2P3   | 4.54307 | 4.62627 | 4.81832 | 4.81676 | 5.32375 | 4.13537 | 4.75612 | 4.4901  | 5.09554 |
| LINC00887 | 4.79813 | 5.28071 | 5.28321 | 5.5482  | 5.84191 | 6.73014 | 6.10459 | 6.7904  | 6.333   |
| LRRC15    | 8.48342 | 7.16481 | 7.75581 | 6.12002 | 6.36476 | 6.32515 | 9.12756 | 7.35179 | 7.65373 |
| GP5       | 6.43463 | 6.12308 | 5.92887 | 6.44003 | 6.91067 | 6.56539 | 6.36285 | 6.16804 | 6.46767 |
| ATP13A3   | 7.72868 | 7.50455 | 7.99965 | 8.355   | 6.67154 | 9.05856 | 8.46655 | 9.36033 | 9.28966 |
| TMEM44    | 6.1387  | 6.10607 | 6.37982 | 5.80858 | 6.73455 | 5.87381 | 6.16209 | 6.35428 | 6.12042 |
| LSG1      | 8.85711 | 8.84289 | 9.07755 | 7.95665 | 6.40021 | 7.63605 | 8.3229  | 7.31612 | 7.52627 |
| XXYLT1    | 6.68081 | 6.58454 | 6.60228 | 6.52906 | 6.66713 | 7.15274 | 6.49976 | 6.52825 | 6.28225 |
| MIR3137   | 8.67134 | 8.27889 | 8.59513 | 7.69505 | 8.33499 | 7.98403 | 7.59857 | 6.51886 | 7.17519 |
| APOD      | 8.3745  | 9.91018 | 10.6156 | 6.81677 | 5.64284 | 5.63103 | 6.51891 | 4.67833 | 5.69782 |

|           |         |         |         |         |         |         |         |         |         |
|-----------|---------|---------|---------|---------|---------|---------|---------|---------|---------|
| TM4SF19   | 7.07094 | 7.11041 | 6.67958 | 8.43175 | 7.90566 | 8.86705 | 8.37288 | 7.80509 | 9.05474 |
| UBXN7     | 9.88883 | 10.0854 | 9.95278 | 9.30569 | 8.20031 | 10.0787 | 9.54776 | 10.3035 | 9.85017 |
| SMCO1     | 4.84827 | 5.0112  | 4.9838  | 5.72139 | 5.39182 | 5.52209 | 5.1967  | 5.34002 | 5.91773 |
| WDR53     | 7.96365 | 8.05865 | 7.85879 | 8.1527  | 8.2358  | 8.62766 | 8.67619 | 7.83497 | 8.51702 |
| CEP19     | 4.21808 | 4.24189 | 4.34701 | 4.20282 | 4.91812 | 4.34791 | 4.52854 | 4.32948 | 3.99592 |
| MELTF     | 6.65591 | 6.70871 | 6.57679 | 5.90891 | 6.4282  | 5.97715 | 6.26416 | 6.20426 | 6.51753 |
| MIR4797   | 2.88602 | 2.76555 | 1.9183  | 2.266   | 1.92774 | 2.32122 | 2.6371  | 2.27976 | 2.74498 |
| rubcn     | 7.54726 | 7.45256 | 7.48728 | 7.91378 | 6.6213  | 7.75373 | 7.98584 | 8.01124 | 8.42378 |
| IQCG      | 6.30334 | 6.38169 | 6.19549 | 5.95191 | 5.84015 | 6.1843  | 6.21733 | 5.99921 | 5.93838 |
| ZNF718    | 7.982   | 7.80339 | 8.09975 | 6.09249 | 6.24272 | 5.62341 | 5.95567 | 5.79339 | 6.4565  |
| ZNF141    | 7.55525 | 8.16677 | 8.27726 | 5.50258 | 6.24999 | 4.78853 | 6.07352 | 5.94549 | 5.41789 |
| MIR571    | 7.99877 | 8.83185 | 8.4311  | 6.71178 | 9.6503  | 5.56503 | 6.80071 | 7.17168 | 7.19436 |
| PCGF3     | 9.11717 | 9.60059 | 9.68834 | 8.75987 | 7.20546 | 8.86869 | 8.81981 | 8.863   | 9.02039 |
| tmem175   | 8.13086 | 7.97567 | 7.74577 | 7.95218 | 7.83966 | 7.38931 | 8.133   | 7.37127 | 7.74804 |
| FGFRL1    | 6.39378 | 6.50125 | 6.43356 | 6.75125 | 6.78573 | 6.94642 | 6.61491 | 6.7002  | 6.27892 |
| CTBP1-AS2 | 6.87825 | 6.78067 | 6.81321 | 7.05906 | 6.02522 | 7.22386 | 7.03871 | 6.63609 | 6.73093 |
| MAEA      | 7.80383 | 7.56591 | 7.77301 | 8.28909 | 7.04443 | 8.01272 | 8.34231 | 7.845   | 8.25931 |
| UVSSA     | 6.87392 | 6.65231 | 6.81558 | 6.30028 | 5.54132 | 6.23526 | 6.49763 | 6.78661 | 6.83116 |
| CRIPAK    | 7.74572 | 8.44752 | 8.43486 | 7.19581 | 6.50292 | 6.86907 | 7.21009 | 7.15769 | 6.77891 |
| FGFR3     | 9.44798 | 8.68108 | 9.20596 | 7.98582 | 5.95749 | 9.26593 | 8.6328  | 7.69415 | 8.01428 |
| whsc1     | 7.09335 | 6.5837  | 6.65754 | 6.71513 | 5.6167  | 6.3004  | 6.53152 | 6.51849 | 6.16843 |
| SCARNA22  | 7.30834 | 8.54802 | 7.45504 | 7.1099  | 7.77484 | 8.53425 | 8.30899 | 7.42979 | 7.47336 |
| c4orf48   | 4.05703 | 5.07934 | 4.89661 | 6.06919 | 7.35722 | 6.04542 | 5.01517 | 6.11861 | 5.62569 |
| CFAP99    | 5.4665  | 5.5918  | 5.64479 | 6.20866 | 6.61707 | 6.4609  | 6.25542 | 6.13819 | 6.40237 |
| RNF4      | 7.84514 | 7.6435  | 7.98717 | 7.16813 | 5.9984  | 6.94592 | 7.59372 | 7.16952 | 7.48377 |
| SH3BP2    | 6.91822 | 6.54738 | 6.8464  | 6.77637 | 6.95934 | 8.01538 | 7.04805 | 7.97233 | 7.19357 |

|           |         |         |         |         |         |         |         |         |         |
|-----------|---------|---------|---------|---------|---------|---------|---------|---------|---------|
| ADD1      | 7.90842 | 7.82333 | 7.82756 | 7.49159 | 6.83555 | 7.48781 | 7.76967 | 7.74591 | 7.83303 |
| GRK4      | 5.96178 | 5.87088 | 5.68524 | 5.43488 | 5.73026 | 6.17386 | 6.17533 | 5.72938 | 6.21793 |
| HTT       | 8.99302 | 8.69084 | 8.80563 | 8.25524 | 6.43529 | 7.95239 | 8.29184 | 8.40653 | 8.27942 |
| MSANTD1   | 5.46922 | 4.96624 | 5.50668 | 6.04321 | 6.37235 | 5.72211 | 5.80475 | 5.96067 | 6.11258 |
| RGS12     | 6.42002 | 6.33888 | 6.09959 | 6.5428  | 6.25738 | 7.48651 | 6.52031 | 7.38952 | 6.98251 |
| HGFAC     | 5.60418 | 5.78134 | 5.5142  | 6.55826 | 6.47703 | 6.80553 | 6.37961 | 6.42777 | 6.56499 |
| DOK7      | 6.6859  | 6.54599 | 6.59172 | 6.76714 | 7.19662 | 7.47013 | 6.79869 | 7.05398 | 7.18624 |
| LINC00955 | 5.03896 | 4.53433 | 5.00457 | 4.8801  | 5.58538 | 5.07967 | 4.62288 | 4.83533 | 5.06261 |
| ADRA2C    | 6.20643 | 6.33418 | 6.60183 | 6.43175 | 5.89931 | 6.77354 | 6.70505 | 6.17158 | 5.98762 |
| zbtb49    | 6.791   | 6.8888  | 7.07448 | 6.39088 | 6.18769 | 6.10787 | 6.60409 | 6.32387 | 6.47713 |
| NSG1      | 6.48309 | 6.79893 | 6.46    | 6.96996 | 5.29743 | 6.60787 | 6.78616 | 6.21733 | 6.72014 |
| STX18-AS1 | 6.8246  | 6.8241  | 7.13484 | 6.23146 | 6.52183 | 6.3392  | 5.41632 | 6.23861 | 6.14693 |
| MSX1      | 6.2978  | 5.90593 | 6.2222  | 6.93027 | 6.91111 | 7.19214 | 6.37509 | 6.79885 | 6.6729  |
| STK32B    | 4.90096 | 4.174   | 5.385   | 5.17517 | 5.57198 | 4.96839 | 5.35134 | 5.21819 | 5.31554 |
| LINC01587 | 5.43205 | 5.29084 | 5.33797 | 5.21721 | 6.13347 | 6.09464 | 5.73221 | 5.62103 | 5.46227 |
| EVC       | 7.825   | 7.85511 | 7.8499  | 6.71069 | 6.68058 | 6.79939 | 7.19874 | 7.08595 | 7.11421 |
| LOC285484 | 5.62023 | 5.94464 | 5.53533 | 6.05989 | 6.40328 | 6.31177 | 5.72624 | 6.3838  | 6.04308 |
| WFS1      | 7.22981 | 7.50764 | 7.55395 | 6.95758 | 5.80683 | 6.93996 | 7.16995 | 7.07303 | 6.22316 |
| MRFAP1    | 7.95028 | 7.90476 | 7.77247 | 8.32921 | 6.39348 | 7.914   | 8.37568 | 7.95141 | 7.86609 |
| LOC93622  | 6.09646 | 6.3383  | 6.37861 | 5.69281 | 4.5828  | 5.37991 | 6.37724 | 6.01849 | 5.14378 |
| S100P     | 6.60491 | 6.28019 | 6.64597 | 6.25717 | 8.83755 | 8.47456 | 8.15533 | 8.21063 | 7.57933 |
| BLOC1S4   | 5.63122 | 5.67073 | 5.72147 | 5.89863 | 5.16476 | 6.79398 | 6.75656 | 5.98057 | 6.02099 |
| KIAA0232  | 7.59334 | 7.58549 | 7.65233 | 7.39323 | 5.95895 | 7.58666 | 7.40443 | 7.77451 | 8.08407 |
| TADA2B    | 7.35538 | 7.09666 | 7.28907 | 7.77741 | 7.25041 | 7.91265 | 7.66347 | 7.57998 | 7.59327 |
| SORCS2    | 6.49516 | 8.16373 | 6.94031 | 7.77991 | 6.49152 | 8.26756 | 8.50194 | 8.54397 | 8.38203 |
| MIR4798   | 5.8849  | 6.82191 | 6.00272 | 5.78314 | 4.10447 | 4.93207 | 4.88308 | 5.93686 | 6.72419 |

|           |         |         |         |         |         |         |         |         |         |
|-----------|---------|---------|---------|---------|---------|---------|---------|---------|---------|
| MIR4274   | 5.17812 | 5.31587 | 5.51951 | 5.9218  | 6.2106  | 6.37085 | 5.42533 | 6.04174 | 5.90347 |
| AFAP1-AS1 | 5.06012 | 5.01234 | 5.41876 | 5.72599 | 6.40457 | 5.75443 | 5.42774 | 5.41032 | 5.47993 |
| SH3TC1    | 6.22412 | 5.94907 | 6.20962 | 6.92353 | 6.67519 | 7.36298 | 6.75137 | 7.36296 | 7.35472 |
| HTRA3     | 6.64788 | 6.51495 | 7.84161 | 7.14022 | 7.03585 | 7.09431 | 7.63968 | 7.49898 | 6.89988 |
| TRMT44    | 7.38979 | 7.71846 | 7.30539 | 7.274   | 6.97701 | 6.71479 | 6.92403 | 6.64695 | 7.03142 |
| GPR78     | 5.8636  | 5.65886 | 5.46659 | 6.46751 | 6.46743 | 6.33867 | 6.14566 | 7.50486 | 6.96421 |
| CPZ       | 6.20983 | 5.80819 | 6.13248 | 6.57135 | 6.26899 | 6.68718 | 6.38855 | 6.88586 | 6.71025 |
| LOC650293 | 3.08941 | 3.28504 | 3.92596 | 2.98229 | 7.00756 | 3.43507 | 3.11474 | 3.01155 | 2.49297 |
| USP17L10  | 4.78775 | 4.89611 | 4.61045 | 5.75537 | 6.77764 | 5.78073 | 5.60459 | 5.97717 | 6.04663 |
| USP17L12  | 6.0925  | 6.24386 | 6.28098 | 5.85794 | 11.4045 | 6.79858 | 6.03618 | 6.64365 | 6.38642 |
| USP17L15  | 4.39125 | 4.2106  | 4.0269  | 4.72996 | 11.1954 | 5.1601  | 4.976   | 4.3412  | 4.19224 |
| USP17L9P  | 6.0925  | 6.24386 | 6.28098 | 5.85794 | 11.4045 | 6.79858 | 6.03618 | 6.64365 | 6.38642 |
| DRD5      | 5.72848 | 6.09856 | 6.10142 | 6.58324 | 7.55182 | 6.94128 | 6.45766 | 6.39906 | 6.5356  |
| LINC01085 | 4.51605 | 4.70775 | 4.63487 | 4.7073  | 6.2343  | 5.20493 | 4.87493 | 5.06953 | 4.77622 |
| CPEB2     | 10.2786 | 10.3346 | 9.85138 | 9.76748 | 8.65019 | 10.9693 | 9.97866 | 10.6878 | 10.4111 |
| C1QTNF7   | 5.17472 | 5.33547 | 5.84384 | 5.46691 | 6.46772 | 5.56736 | 5.66211 | 5.50593 | 5.86647 |
| CC2D2A    | 6.72607 | 7.22036 | 6.84925 | 5.91811 | 5.61858 | 5.41039 | 6.17346 | 6.04201 | 5.85482 |
| BST1      | 6.1775  | 6.34752 | 6.6415  | 6.18303 | 6.68891 | 6.32068 | 6.27254 | 6.11234 | 6.03672 |
| CD38      | 4.83349 | 4.60282 | 5.2618  | 5.63212 | 5.64399 | 5.69721 | 5.28487 | 4.88374 | 5.00718 |
| TAPT1-AS1 | 6.57681 | 6.25705 | 5.78051 | 5.5961  | 5.72807 | 6.11782 | 5.86742 | 5.2277  | 4.96889 |
| CLRN2     | 5.49924 | 5.23676 | 5.48188 | 6.57745 | 7.2637  | 6.16777 | 6.12416 | 5.91683 | 6.06954 |
| LAP3      | 7.72534 | 7.46549 | 7.71416 | 7.51401 | 6.09526 | 6.81211 | 7.52031 | 6.01215 | 6.66142 |
| MED28     | 8.72661 | 8.42035 | 8.64001 | 7.50105 | 5.68523 | 7.01496 | 8.08208 | 7.55574 | 7.57211 |
| SLIT2     | 7.71363 | 7.38037 | 7.4383  | 6.96521 | 5.83224 | 6.02781 | 6.34879 | 5.97978 | 6.26609 |
| SLIT2-IT1 | 6.00066 | 5.90162 | 5.89845 | 6.06596 | 6.7392  | 6.16642 | 6.01903 | 6.15095 | 6.11832 |
| MIR218-1  | 6.50176 | 5.64341 | 6.25104 | 6.19822 | 7.45908 | 6.21219 | 5.86777 | 6.00261 | 5.90407 |

|             |         |         |         |         |         |         |         |         |         |
|-------------|---------|---------|---------|---------|---------|---------|---------|---------|---------|
| PACRGL      | 7.54001 | 7.75334 | 7.84933 | 6.23815 | 5.36059 | 5.27904 | 6.23723 | 5.76165 | 5.95908 |
| SEPSECS-AS1 | 7.32359 | 7.27438 | 7.41119 | 5.29243 | 6.34589 | 5.38597 | 6.37637 | 5.29102 | 5.71454 |
| PI4K2B      | 7.48284 | 7.75479 | 7.82131 | 7.58486 | 4.959   | 7.28039 | 8.21263 | 7.12054 | 6.95313 |
| ANAPC4      | 7.77883 | 7.60955 | 7.51898 | 6.38621 | 4.80343 | 5.43144 | 6.92084 | 5.80168 | 6.16496 |
| SMIM20      | 6.66043 | 6.67137 | 6.72936 | 6.87799 | 6.52338 | 6.71648 | 6.76021 | 6.3539  | 6.39269 |
| RBPJ        | 7.78739 | 7.38605 | 7.80185 | 7.09972 | 7.02239 | 8.03445 | 6.93423 | 7.90403 | 7.45388 |
| STIM2       | 7.7758  | 7.8075  | 7.52982 | 7.3713  | 5.82553 | 6.85765 | 7.59511 | 7.83822 | 7.21662 |
| MIR4275     | 2.59075 | 2.92143 | 3.11484 | 3.66867 | 4.63292 | 2.86839 | 3.19583 | 3.47034 | 2.99356 |
| PCDH7       | 8.84513 | 9.42886 | 8.30695 | 8.0613  | 5.12768 | 7.35872 | 8.71363 | 7.97037 | 8.48954 |
| DTHD1       | 3.81365 | 3.78873 | 4.01603 | 4.01813 | 4.11915 | 4.26626 | 4.86429 | 3.95477 | 4.14179 |
| NWD2        | 5.00855 | 5.49709 | 5.18926 | 5.35342 | 5.88606 | 6.63033 | 5.66162 | 5.6097  | 5.64574 |
| C4ORF19     | 5.89131 | 6.30482 | 6.12084 | 5.38457 | 6.02818 | 5.98216 | 5.24505 | 6.06331 | 5.82629 |
| PGM2        | 10.6671 | 10.5193 | 10.4185 | 10.9668 | 10.1669 | 11.0652 | 11.2013 | 10.7832 | 10.8645 |
| PTTG2       | 5.70733 | 5.79272 | 5.65444 | 5.97267 | 5.80098 | 6.14399 | 5.64855 | 5.97133 | 5.71184 |
| KLF3        | 10.9726 | 11.0253 | 10.876  | 10.4744 | 9.41287 | 10.9929 | 10.2341 | 9.88466 | 10.6942 |
| Mir574      | 10.6178 | 11.1324 | 10.6731 | 10.7515 | 11.1158 | 10.305  | 10.2171 | 10.0883 | 10.7812 |
| KLHL5       | 7.58314 | 6.69978 | 7.38468 | 7.0304  | 5.68766 | 5.89101 | 6.85823 | 7.26898 | 6.75525 |
| WDR19       | 7.92155 | 8.01618 | 7.78824 | 6.63298 | 5.86583 | 5.46522 | 6.43995 | 6.73936 | 5.90838 |
| KLB         | 5.02229 | 5.06797 | 4.70241 | 5.08221 | 4.91633 | 5.40769 | 4.70335 | 5.02692 | 4.75096 |
| LIAS        | 8.54032 | 8.55892 | 8.2106  | 6.82885 | 5.20808 | 6.22884 | 7.46163 | 6.41112 | 6.69205 |
| LOC401127   | 6.1938  | 6.62655 | 5.88515 | 7.44476 | 7.64147 | 7.43434 | 6.80161 | 7.1453  | 7.09628 |
| UGDH-AS1    | 5.67987 | 5.63383 | 5.99703 | 5.73971 | 6.10139 | 6.15087 | 6.2625  | 6.22098 | 6.41254 |
| UBE2K       | 11.3778 | 11.6029 | 11.1881 | 11.5343 | 10.1474 | 11.2092 | 11.6746 | 11.2233 | 11.4669 |
| N4BP2       | 7.83354 | 8.32729 | 7.92171 | 6.81743 | 4.79598 | 7.20111 | 7.61644 | 7.28803 | 7.38704 |
| RHOH        | 5.13324 | 4.97745 | 5.23266 | 5.25907 | 5.51335 | 5.56711 | 5.31877 | 5.25587 | 4.87271 |
| UCHL1       | 5.59621 | 5.58455 | 5.82053 | 6.25821 | 6.18624 | 6.21216 | 5.72186 | 5.95781 | 5.66328 |

|           |         |         |         |         |         |         |         |         |         |
|-----------|---------|---------|---------|---------|---------|---------|---------|---------|---------|
| LIMCH1    | 8.10208 | 7.60655 | 7.45544 | 7.48671 | 6.61853 | 6.91346 | 7.90058 | 6.95848 | 6.79853 |
| TMEM33    | 9.17179 | 9.07005 | 9.17852 | 9.05648 | 6.3413  | 8.48865 | 9.14391 | 8.71047 | 9.09297 |
| DCAF4L1   | 4.49522 | 4.9641  | 4.89424 | 4.94111 | 4.92086 | 4.74389 | 5.16608 | 4.98144 | 5.24273 |
| SHISA3    | 6.21096 | 6.28999 | 6.44713 | 6.95284 | 6.97453 | 6.94725 | 6.49388 | 6.72549 | 6.61403 |
| GUF1      | 8.84607 | 9.04554 | 9.11871 | 8.06553 | 4.84256 | 7.54165 | 8.58107 | 7.59145 | 7.89641 |
| NIPAL1    | 8.01864 | 7.77571 | 7.96279 | 7.34508 | 5.68955 | 7.42005 | 7.80152 | 6.77601 | 7.46371 |
| ZAR1      | 5.19888 | 5.214   | 5.25117 | 6.02852 | 5.8317  | 5.81224 | 5.65519 | 5.92758 | 5.47886 |
| OCIAD1    | 7.96008 | 8.32077 | 8.10233 | 7.92264 | 6.42549 | 7.68219 | 8.23393 | 7.47483 | 7.81041 |
| CWH43     | 10.0214 | 10.0461 | 9.62959 | 10.0538 | 8.94959 | 10.7351 | 10.3487 | 10.7191 | 10.6473 |
| SPATA18   | 7.99205 | 8.20075 | 8.04349 | 7.4548  | 6.78268 | 7.06262 | 7.93254 | 6.50789 | 7.18404 |
| DANCR     | 7.57832 | 7.5974  | 7.5969  | 7.30531 | 6.20786 | 6.63021 | 7.57022 | 6.58978 | 7.19754 |
| LINC01618 | 3.07559 | 3.06679 | 3.07235 | 3.15894 | 3.12127 | 3.24385 | 2.95426 | 3.16942 | 3.12506 |
| FIP1L1    | 9.47863 | 9.62861 | 9.49406 | 8.6065  | 7.20948 | 8.12805 | 9.19519 | 8.68774 | 8.84043 |
| LNX1-AS1  | 4.58687 | 5.2634  | 5.16422 | 5.61547 | 5.81592 | 5.50148 | 4.87339 | 5.87518 | 5.22684 |
| LNX1-AS2  | 4.96022 | 5.11391 | 5.05791 | 5.29416 | 5.84969 | 5.43561 | 5.36482 | 5.62014 | 5.30542 |
| GSX2      | 6.31189 | 6.26089 | 6.18242 | 6.83315 | 7.19206 | 7.16105 | 6.77982 | 6.86323 | 7.15281 |
| KIT       | 8.59776 | 7.65413 | 8.61728 | 4.86828 | 4.97766 | 5.39811 | 6.61624 | 5.4557  | 6.50579 |
| SRD5A3    | 8.84557 | 8.37698 | 8.72441 | 7.97398 | 7.98898 | 8.32366 | 8.57239 | 7.25794 | 7.60939 |
| TMEM165   | 9.35459 | 9.63071 | 9.70507 | 9.21239 | 7.59998 | 8.26907 | 8.48851 | 9.59594 | 8.90721 |
| LOC644145 | 2.63069 | 2.61791 | 2.43583 | 2.8212  | 3.74599 | 3.50101 | 2.59465 | 2.77761 | 2.79842 |
| EXOC1     | 9.20358 | 9.05467 | 9.15867 | 8.58385 | 6.97044 | 8.43741 | 8.59822 | 8.44758 | 8.73001 |
| CEP135    | 6.98971 | 7.22241 | 7.13361 | 6.07035 | 5.58611 | 5.27578 | 6.68635 | 6.46348 | 6.38755 |
| KIAA1211  | 4.7211  | 4.53981 | 4.77811 | 5.22914 | 5.364   | 5.29475 | 4.69083 | 5.12475 | 5.05294 |
| SRP72     | 10.3727 | 10.3366 | 10.5816 | 9.94723 | 7.52134 | 9.69997 | 10.0926 | 9.90544 | 10.1687 |
| ARL9      | 4.92165 | 5.0388  | 5.10766 | 4.0069  | 4.17777 | 4.84218 | 6.14353 | 4.38375 | 4.62106 |
| THEGL     | 5.30745 | 5.11461 | 4.82646 | 4.98656 | 6.05879 | 5.76492 | 4.9507  | 5.14526 | 5.48198 |

|            |         |         |         |         |         |         |         |         |         |
|------------|---------|---------|---------|---------|---------|---------|---------|---------|---------|
| REST       | 7.9457  | 8.11516 | 8.17267 | 7.12047 | 5.16251 | 6.86187 | 7.83571 | 7.42013 | 7.5819  |
| IGFBP7-AS1 | 5.21896 | 5.21882 | 5.11605 | 5.74442 | 5.97842 | 5.21082 | 5.38003 | 5.3035  | 5.27521 |
| ADGRL3     | 6.95441 | 7.98985 | 7.00163 | 7.38788 | 5.60957 | 6.11805 | 6.74915 | 5.38184 | 5.36951 |
| EPHA5-AS1  | 5.66772 | 5.81813 | 5.39617 | 5.50077 | 6.09449 | 6.22847 | 5.53001 | 5.65068 | 5.64269 |
| MIR1269A   | 6.28308 | 6.78441 | 6.88124 | 6.89572 | 8.27033 | 6.6415  | 6.51355 | 6.36095 | 6.52785 |
| STAP1      | 4.44604 | 4.36917 | 4.55883 | 4.26952 | 4.34488 | 4.44113 | 4.69051 | 4.01592 | 4.31591 |
| LOC550113  | 5.89709 | 5.69394 | 5.61248 | 5.32217 | 5.98988 | 5.76103 | 5.49242 | 5.21769 | 5.581   |
| CSN1S1     | 3.47618 | 4.33502 | 4.20298 | 4.16723 | 4.95131 | 4.86438 | 5.26022 | 4.64234 | 4.61349 |
| STATH      | 2.71519 | 2.85346 | 2.68503 | 3.34162 | 3.39443 | 3.11827 | 3.07036 | 3.1305  | 2.87182 |
| HTN3       | 2.86238 | 2.85222 | 2.84516 | 2.79361 | 4.35184 | 3.18341 | 3.35289 | 2.40454 | 2.65034 |
| HTN1       | 2.28314 | 2.10023 | 2.13515 | 2.29028 | 3.58076 | 2.01813 | 2.23185 | 1.9241  | 2.02049 |
| PRR27      | 4.60843 | 4.96613 | 4.85514 | 4.68708 | 5.35975 | 4.90596 | 5.02827 | 4.77924 | 4.545   |
| FDCSP      | 3.86989 | 4.61865 | 4.44551 | 5.20933 | 4.79727 | 4.78023 | 4.76125 | 4.39868 | 4.02071 |
| CSN3       | 4.59141 | 4.62245 | 4.70338 | 5.39782 | 5.47721 | 5.32523 | 5.44307 | 5.39472 | 5.20047 |
| SMR3A      | 4.8893  | 4.8146  | 4.03134 | 4.27069 | 5.46806 | 4.96053 | 5.13219 | 4.60683 | 4.83187 |
| SMR3B      | 3.3345  | 3.23448 | 2.80092 | 3.33879 | 4.44862 | 3.84863 | 3.17404 | 3.18299 | 3.3379  |
| AMTN       | 3.42396 | 4.09272 | 3.62845 | 3.87732 | 4.29805 | 4.71878 | 3.87447 | 3.45251 | 3.75501 |
| AMBN       | 4.74331 | 4.77676 | 4.90261 | 4.73616 | 6.35441 | 4.54602 | 4.86663 | 4.96514 | 5.16943 |
| ENAM       | 4.87168 | 4.86052 | 4.54038 | 5.17542 | 5.67775 | 5.483   | 4.93814 | 5.52722 | 5.26417 |
| RUFY3      | 9.24942 | 9.47159 | 8.95177 | 7.61451 | 6.89595 | 7.32652 | 7.66012 | 7.39991 | 8.39229 |
| MOB1B      | 7.28658 | 7.27723 | 7.51128 | 6.13492 | 5.3504  | 5.38012 | 6.42143 | 5.43485 | 5.99889 |
| DCK        | 8.03836 | 8.02326 | 8.04382 | 7.17249 | 6.23089 | 6.85711 | 7.1386  | 6.44792 | 6.94016 |
| NPFFR2     | 4.15303 | 4.44978 | 4.12439 | 4.50726 | 4.57682 | 4.8149  | 4.55119 | 4.35029 | 4.60856 |
| ALB        | 4.27661 | 4.7739  | 4.20092 | 4.35252 | 6.27832 | 5.04495 | 4.28962 | 4.47889 | 4.53612 |
| AFP        | 4.02615 | 4.27037 | 3.78329 | 4.47991 | 4.15407 | 4.13473 | 4.39522 | 3.881   | 3.60033 |
| AFM        | 3.258   | 3.56851 | 2.81851 | 4.02799 | 4.47101 | 4.04165 | 3.66825 | 3.67102 | 3.71011 |

|           |         |         |         |         |         |         |         |         |         |
|-----------|---------|---------|---------|---------|---------|---------|---------|---------|---------|
| LOC728040 | 3.55385 | 3.24299 | 3.35574 | 3.4191  | 4.30786 | 3.50503 | 3.65952 | 3.78208 | 3.61505 |
| CXCL8     | 5.94094 | 3.94088 | 4.9325  | 6.08967 | 7.297   | 10.5815 | 7.29456 | 10.1654 | 9.4856  |
| CXCL6     | 3.67975 | 4.07068 | 3.70569 | 4.45697 | 4.58054 | 4.73852 | 4.23396 | 4.72736 | 3.89266 |
| PF4V1     | 5.53805 | 5.37172 | 5.53238 | 5.92792 | 6.07128 | 5.68832 | 5.16526 | 5.64931 | 6.22497 |
| MTHFD2L   | 6.58139 | 7.37252 | 6.86341 | 6.42977 | 6.52198 | 6.22115 | 6.91218 | 6.26333 | 6.64961 |
| epgn      | 6.34515 | 8.45938 | 7.10885 | 11.1331 | 9.49951 | 11.3764 | 11.4434 | 11.4126 | 12.4341 |
| EREG      | 10.3182 | 10.3759 | 10.0965 | 10.8971 | 10.9795 | 11.3497 | 11.2871 | 11.9023 | 12.0037 |
| AREG      | 8.06276 | 7.16763 | 6.68808 | 10.5918 | 8.9761  | 10.5507 | 9.96219 | 12.2228 | 10.7022 |
| PARM1     | 8.76259 | 8.75237 | 9.53867 | 7.12346 | 7.26349 | 7.08646 | 7.08345 | 6.29967 | 7.82425 |
| LOC441025 | 4.2623  | 4.06031 | 4.13626 | 4.15525 | 6.04005 | 4.66811 | 4.55591 | 4.42461 | 4.56166 |
| THAP6     | 6.30646 | 6.11136 | 6.2037  | 4.90335 | 4.26502 | 4.39966 | 4.73908 | 4.59705 | 5.13496 |
| C4orf26   | 3.7055  | 4.08039 | 4.17441 | 4.44488 | 4.862   | 4.80094 | 4.76831 | 5.00233 | 4.15319 |
| USO1      | 9.40936 | 9.54646 | 9.50207 | 8.88311 | 7.602   | 9.26734 | 9.31205 | 9.40289 | 9.50239 |
| ART3      | 3.52352 | 3.99434 | 3.8519  | 4.34192 | 4.56229 | 4.34504 | 4.29293 | 4.09183 | 4.09594 |
| SHROOM3   | 6.44953 | 6.80763 | 6.88842 | 6.08737 | 6.81589 | 6.3208  | 5.85715 | 7.06313 | 6.94106 |
| MIR4450   | 6.95498 | 7.5678  | 6.90766 | 6.83022 | 8.27871 | 7.37713 | 6.74154 | 6.92857 | 7.20996 |
| 44450     | 7.31344 | 7.18183 | 7.25094 | 6.86621 | 6.03865 | 5.51147 | 6.15553 | 6.3283  | 6.29756 |
| CCNG2     | 7.06518 | 7.10248 | 6.89505 | 7.10779 | 6.30293 | 8.62784 | 6.9481  | 6.94862 | 7.51227 |
| CXCL13    | 4.34823 | 4.37559 | 4.16842 | 5.75642 | 5.71858 | 4.99195 | 4.97558 | 4.82476 | 4.54051 |
| MRPL1     | 7.102   | 7.06738 | 7.19349 | 6.20418 | 5.31478 | 6.27361 | 7.59839 | 5.89643 | 6.69089 |
| FRAS1     | 5.52823 | 6.45525 | 5.65828 | 5.92492 | 6.08532 | 5.7189  | 5.5675  | 5.58432 | 5.60528 |
| ANXA3     | 7.83601 | 6.66494 | 7.41803 | 9.81897 | 7.90753 | 10.8675 | 9.78783 | 10.8013 | 10.8942 |
| LINC01094 | 7.4206  | 8.01211 | 6.77637 | 7.21337 | 6.65576 | 7.70657 | 7.21106 | 7.04926 | 9.06015 |
| BMP2K     | 10.4457 | 10.065  | 10.0032 | 10.2932 | 9.13823 | 10.7551 | 10.2783 | 11.0548 | 11.0531 |
| LINC01088 | 5.19829 | 5.85435 | 5.97534 | 5.02618 | 5.2285  | 4.10145 | 5.21172 | 4.30269 | 4.8321  |
| LINC00989 | 6.07517 | 6.1484  | 6.60038 | 6.25439 | 7.05989 | 6.18555 | 4.8817  | 5.84751 | 6.08653 |



|            |         |         |         |         |         |         |         |         |         |
|------------|---------|---------|---------|---------|---------|---------|---------|---------|---------|
| PCAT4      | 3.64824 | 4.00724 | 3.7586  | 4.42139 | 5.14732 | 4.31519 | 4.25625 | 3.83122 | 3.86968 |
| PRDM8      | 5.60359 | 5.91737 | 5.9861  | 6.06919 | 6.60008 | 6.23749 | 5.71511 | 5.77858 | 5.77772 |
| FGF5       | 5.51745 | 5.61626 | 6.26539 | 6.1245  | 6.45197 | 6.06786 | 5.87903 | 6.29649 | 6.06307 |
| c4orf22    | 3.51916 | 3.46158 | 3.45365 | 3.54328 | 3.29244 | 3.79992 | 3.71595 | 3.80886 | 3.69241 |
| BMP3       | 5.87861 | 5.58279 | 5.83641 | 6.22581 | 6.66789 | 6.21245 | 6.11654 | 6.15956 | 6.15789 |
| ENOPH1     | 8.03421 | 8.25924 | 7.96114 | 8.15129 | 6.63976 | 7.72084 | 8.37734 | 7.89769 | 7.65494 |
| THAP9      | 4.97599 | 5.36144 | 5.30924 | 4.44082 | 4.48506 | 5.09977 | 4.89461 | 5.0567  | 4.61039 |
| COPS4      | 7.60679 | 7.07844 | 7.33476 | 7.20582 | 5.55598 | 7.63489 | 7.89495 | 7.42867 | 7.35065 |
| GPAT3      | 6.19768 | 6.06013 | 6.25168 | 6.81437 | 6.91094 | 8.9502  | 7.76108 | 9.04098 | 8.49979 |
| cds1       | 9.66764 | 9.55923 | 9.46375 | 9.87158 | 9.04928 | 9.73535 | 9.83404 | 10.9156 | 10.2949 |
| arhgap24   | 8.03347 | 7.77133 | 7.42473 | 6.13881 | 6.71928 | 5.574   | 6.14961 | 5.79578 | 6.51363 |
| MIR4451    | 7.77658 | 8.80223 | 7.75013 | 4.34217 | 6.16585 | 5.29066 | 5.01519 | 5.41211 | 5.96146 |
| NUDT9      | 6.64202 | 7.22549 | 7.02851 | 7.16697 | 6.65377 | 7.11788 | 7.45658 | 6.62449 | 6.89942 |
| DSPP       | 5.00443 | 5.14308 | 5.35881 | 5.05682 | 5.84963 | 5.22386 | 5.65288 | 5.45657 | 5.32224 |
| DMP1       | 3.28532 | 3.21917 | 3.33218 | 3.47405 | 4.02555 | 3.62522 | 3.50766 | 3.52364 | 3.32902 |
| IBSP       | 3.17334 | 3.60244 | 3.22185 | 3.79215 | 4.13638 | 3.55319 | 3.42135 | 3.83193 | 3.57934 |
| MEPE       | 3.64417 | 3.49142 | 3.21088 | 3.38924 | 5.14116 | 3.76626 | 3.59266 | 3.44179 | 3.59785 |
| SPP1       | 5.57286 | 5.66697 | 7.05485 | 6.48119 | 6.2537  | 7.02343 | 6.95984 | 6.63866 | 6.46179 |
| PKD2       | 7.9     | 7.98664 | 7.89511 | 6.62251 | 6.63695 | 5.76729 | 6.87048 | 6.34069 | 6.12872 |
| HERC6      | 8.02562 | 8.94374 | 7.60691 | 6.59249 | 6.39987 | 5.90594 | 6.90172 | 5.71457 | 6.24018 |
| HERC5      | 5.63145 | 5.69359 | 5.62442 | 5.90401 | 5.60258 | 5.36316 | 5.18968 | 4.88605 | 5.10522 |
| herc3      | 8.47918 | 8.95587 | 8.98982 | 8.33728 | 6.82995 | 8.97632 | 8.53623 | 8.85392 | 9.49624 |
| FAM13A-AS1 | 7.50532 | 7.86654 | 7.9393  | 6.87625 | 6.39132 | 5.66018 | 6.23016 | 7.05057 | 8.02604 |
| TIGD2      | 4.52093 | 5.28765 | 4.98084 | 5.61503 | 4.52497 | 4.86737 | 5.69705 | 4.82659 | 4.55356 |
| SNCA-AS1   | 4.36145 | 4.25352 | 4.42722 | 4.56724 | 5.15864 | 4.48739 | 4.59823 | 4.80236 | 4.38019 |
| MMRN1      | 7.54887 | 6.71884 | 8.91452 | 5.64074 | 5.82361 | 5.57316 | 7.23455 | 6.0557  | 6.2978  |

|              |         |         |         |         |         |         |         |         |         |
|--------------|---------|---------|---------|---------|---------|---------|---------|---------|---------|
| ATOH1        | 6.03176 | 6.51746 | 6.79965 | 6.55402 | 6.98615 | 7.51962 | 6.83618 | 7.11113 | 7.32248 |
| PDLIM5       | 8.33849 | 8.22079 | 8.19601 | 8.66943 | 7.27989 | 8.67485 | 8.85628 | 9.65698 | 9.73892 |
| PDHA2        | 4.01756 | 4.24264 | 4.24169 | 4.90415 | 5.59623 | 5.01009 | 4.92284 | 4.50536 | 4.4704  |
| METAP1       | 8.60417 | 8.40454 | 8.23392 | 8.22516 | 5.70393 | 7.49865 | 8.41404 | 8.3097  | 8.18506 |
| MIR3684      | 4.43692 | 3.65953 | 3.31282 | 2.46621 | 1.5706  | 2.29458 | 2.97778 | 3.31945 | 3.15929 |
| LOC100507053 | 6.05784 | 5.72124 | 5.2977  | 5.11075 | 5.25886 | 4.92057 | 4.94418 | 4.82499 | 4.48108 |
| C4ORF17      | 4.80744 | 4.51096 | 4.99844 | 4.84097 | 5.7805  | 4.7503  | 4.75775 | 4.80987 | 4.6601  |
| MTTP         | 5.22009 | 4.84981 | 4.88966 | 4.81678 | 5.65905 | 5.52705 | 4.98848 | 5.05827 | 4.96175 |
| DAPP1        | 8.12674 | 8.60081 | 7.70343 | 8.97766 | 7.24028 | 9.69405 | 8.23773 | 9.47452 | 9.72241 |
| LOC256880    | 4.98461 | 4.88452 | 4.6596  | 4.90571 | 5.86932 | 4.84537 | 4.56581 | 5.21797 | 4.84322 |
| FLJ20021     | 7.25896 | 6.4776  | 6.9714  | 7.03611 | 6.96529 | 7.02957 | 7.34992 | 7.15129 | 6.97741 |
| BANK1        | 4.74658 | 4.73706 | 5.02811 | 4.844   | 5.34212 | 4.94752 | 5.30368 | 5.2299  | 5.02299 |
| NFKB1        | 9.01511 | 8.87407 | 8.79767 | 8.84045 | 7.47013 | 8.79298 | 9.36287 | 9.22852 | 9.42305 |
| CISD2        | 8.28853 | 7.67804 | 8.26295 | 8.16517 | 8.38465 | 8.30459 | 8.57488 | 8.56663 | 7.96728 |
| TET2         | 10.0107 | 10.0347 | 9.76811 | 8.60725 | 7.20863 | 8.78112 | 8.58232 | 8.89712 | 9.13171 |
| ARHGEF38     | 4.84798 | 5.02603 | 4.79288 | 4.71955 | 4.99701 | 4.74679 | 4.79955 | 4.41377 | 4.60143 |
| ARHGEF38-IT1 | 4.89997 | 5.12886 | 5.19457 | 5.42567 | 5.34504 | 5.00556 | 4.50307 | 5.0912  | 5.04051 |
| NPNT         | 6.62269 | 6.20367 | 6.41793 | 6.18621 | 5.97558 | 5.93456 | 5.92218 | 5.4806  | 6.23386 |
| AIMP1        | 8.52072 | 8.46414 | 8.85243 | 8.65358 | 6.69046 | 7.61457 | 9.04723 | 7.42523 | 8.38679 |
| SGMS2        | 7.34152 | 7.34358 | 7.5469  | 8.14126 | 7.80711 | 8.1216  | 8.54803 | 8.87025 | 9.08384 |
| HADH         | 7.75082 | 7.8832  | 7.97546 | 7.45084 | 6.9006  | 6.86002 | 7.63816 | 6.91712 | 6.73325 |
| LEF1-AS1     | 4.88754 | 5.2286  | 5.1798  | 4.92653 | 5.36993 | 5.37804 | 4.89927 | 5.19002 | 5.27905 |
| RPL34        | 7.48759 | 7.59286 | 7.59889 | 7.35538 | 7.24405 | 7.41081 | 7.14355 | 6.6911  | 7.18789 |
| OSTC         | 6.57888 | 6.44927 | 6.73506 | 6.74741 | 5.82256 | 5.39676 | 6.12586 | 5.92098 | 6.35648 |
| MIR576       | 6.26894 | 5.39    | 5.72448 | 3.99563 | 2.08897 | 2.9866  | 4.00371 | 5.01742 | 5.10333 |
| MCUB         | 8.69797 | 8.57357 | 8.92642 | 8.56652 | 7.28649 | 8.80196 | 9.34525 | 8.89321 | 8.77231 |

|           |         |         |         |         |         |         |         |         |         |
|-----------|---------|---------|---------|---------|---------|---------|---------|---------|---------|
| GAR1      | 6.51006 | 6.56273 | 6.47352 | 7.1834  | 6.20531 | 6.66385 | 7.28508 | 6.71081 | 6.74859 |
| RRH       | 5.35895 | 6.34656 | 6.1437  | 5.2017  | 6.13203 | 5.43082 | 4.88705 | 5.2576  | 5.19375 |
| EGF       | 5.55537 | 5.44246 | 5.1156  | 5.60769 | 5.88796 | 5.32709 | 4.87551 | 5.29882 | 5.21071 |
| ENPEP     | 6.22699 | 4.62933 | 5.2338  | 6.97662 | 5.62398 | 4.87926 | 6.46922 | 4.75627 | 6.35838 |
| C4orf32   | 8.83214 | 8.36133 | 9.04466 | 8.84175 | 7.015   | 7.91169 | 9.00552 | 7.38093 | 8.68692 |
| AP1AR     | 7.47208 | 7.36866 | 7.44897 | 7.25727 | 5.57206 | 7.5578  | 7.55227 | 7.64256 | 7.24459 |
| alpk1     | 8.07973 | 8.25655 | 7.84025 | 6.53781 | 6.89762 | 6.1383  | 6.71298 | 6.37681 | 6.83426 |
| MIR1243   | 4.857   | 5.2141  | 5.11336 | 4.9804  | 6.0187  | 5.25019 | 5.29191 | 4.89717 | 5.00858 |
| UGT8      | 6.36136 | 6.88212 | 7.66308 | 6.01442 | 5.9844  | 5.70968 | 5.5424  | 5.57907 | 5.85545 |
| MIR577    | 4.04512 | 3.87466 | 3.8239  | 4.07487 | 4.83688 | 3.85772 | 4.11292 | 3.8857  | 3.8453  |
| NDST3     | 4.24935 | 4.17395 | 4.31257 | 4.40476 | 4.87539 | 4.58169 | 4.20989 | 4.38234 | 4.5043  |
| SNHG8     | 7.8288  | 8.07942 | 8.38602 | 8.88836 | 6.52097 | 8.38881 | 8.92364 | 7.29064 | 8.08733 |
| CEP170P1  | 7.24439 | 7.10857 | 7.30905 | 6.36006 | 5.24135 | 4.47546 | 5.89808 | 6.13598 | 5.6536  |
| METTL14   | 8.70957 | 8.81897 | 8.68125 | 7.68958 | 6.1424  | 6.96139 | 8.17601 | 7.8015  | 7.46251 |
| SYNPO2    | 8.80189 | 8.53305 | 8.84836 | 6.25295 | 4.10527 | 5.03178 | 5.61596 | 4.73269 | 5.45748 |
| MYOZ2     | 4.33822 | 4.25074 | 4.39975 | 4.58103 | 5.24417 | 4.55914 | 4.07942 | 4.51373 | 4.42213 |
| USP53     | 8.7833  | 9.27748 | 9.22953 | 8.57698 | 7.75401 | 9.20835 | 8.63043 | 10.3351 | 9.3706  |
| LINC01061 | 6.25206 | 6.08271 | 6.15523 | 5.86558 | 6.98681 | 4.29577 | 5.98482 | 6.10562 | 6.53084 |
| LOC645513 | 7.14051 | 7.35859 | 7.91563 | 5.15092 | 3.96215 | 3.97505 | 5.40865 | 5.28497 | 5.10406 |
| PP12613   | 4.53313 | 4.55942 | 4.4689  | 4.51062 | 4.97846 | 5.04461 | 5.09072 | 4.82401 | 4.85891 |
| EXOSC9    | 7.71732 | 7.88561 | 8.0022  | 7.2599  | 6.41636 | 6.21928 | 7.34289 | 6.67769 | 6.77401 |
| KIAA1109  | 9.39234 | 9.66719 | 9.31178 | 8.29099 | 6.08205 | 8.24812 | 8.15998 | 8.60312 | 8.74887 |
| ADAD1     | 3.81976 | 3.90059 | 3.86334 | 4.17167 | 4.98844 | 4.34602 | 4.45465 | 4.18271 | 4.08038 |
| BBS12     | 4.98269 | 5.19088 | 5.37672 | 5.57639 | 5.34785 | 5.41059 | 5.11221 | 5.57365 | 4.96756 |
| FGF2      | 8.01634 | 7.12043 | 8.15821 | 5.34584 | 5.82776 | 6.107   | 6.80525 | 6.69263 | 6.99484 |
| SPATA5    | 8.20274 | 8.31728 | 8.40065 | 6.74182 | 5.26748 | 6.18651 | 6.98893 | 6.71516 | 6.5314  |

|             |         |         |         |         |         |         |         |         |         |
|-------------|---------|---------|---------|---------|---------|---------|---------|---------|---------|
| LINC01091   | 5.82192 | 5.07722 | 6.13627 | 5.07722 | 5.44331 | 4.63558 | 5.00984 | 4.79386 | 4.80324 |
| FAT4        | 8.01026 | 7.66857 | 7.7643  | 6.74938 | 6.40654 | 6.13124 | 6.94136 | 6.65229 | 6.72514 |
| intu        | 6.84352 | 7.29332 | 6.76601 | 5.98159 | 5.43097 | 5.01244 | 5.98453 | 5.26776 | 5.48914 |
| HSPA4L      | 10.0623 | 9.67157 | 9.34406 | 10.1186 | 6.73878 | 9.56039 | 9.74971 | 9.21852 | 10.0138 |
| PLK4        | 6.57889 | 6.42939 | 6.14056 | 6.13075 | 4.94766 | 4.7049  | 5.44759 | 5.67308 | 4.73428 |
| JADE1       | 7.34081 | 7.56459 | 7.62018 | 6.9199  | 6.50864 | 6.6288  | 6.65768 | 7.09643 | 6.9161  |
| C4orf33     | 6.96763 | 6.63647 | 6.56773 | 6.03679 | 6.36939 | 5.89909 | 6.415   | 6.02536 | 6.53209 |
| PCDH10      | 5.62146 | 5.48293 | 5.2319  | 6.15197 | 6.66524 | 6.64676 | 6.06706 | 5.92498 | 6.00239 |
| SLC7A11-AS1 | 3.39113 | 3.73877 | 3.32582 | 4.14707 | 4.06719 | 3.7782  | 4.17647 | 3.428   | 3.57751 |
| LINC00499   | 4.09237 | 4.15539 | 4.01316 | 4.31003 | 5.59214 | 4.51757 | 4.14968 | 3.97536 | 3.95455 |
| NOCT        | 7.97063 | 6.5078  | 6.92845 | 9.33457 | 7.11008 | 9.46608 | 9.36528 | 10.9281 | 9.98754 |
| MGST2       | 8.76336 | 8.62152 | 8.8892  | 7.80849 | 6.68752 | 7.51834 | 8.54906 | 7.1793  | 6.95855 |
| SCOC        | 6.90489 | 6.745   | 6.97117 | 7.09923 | 5.49259 | 7.02084 | 7.33501 | 7.15743 | 6.59162 |
| ELMOD2      | 6.42288 | 6.548   | 6.68013 | 6.38385 | 4.73203 | 6.03458 | 6.61627 | 5.77792 | 5.86946 |
| ZNF330      | 7.66075 | 7.62213 | 7.74622 | 7.46575 | 5.99644 | 6.66705 | 7.95901 | 6.71432 | 7.21443 |
| IL15        | 5.01336 | 4.85627 | 4.75657 | 4.32561 | 4.63345 | 4.44597 | 4.37023 | 4.31402 | 4.53597 |
| USP38       | 9.30224 | 9.12654 | 9.00293 | 9.0839  | 8.25091 | 9.50006 | 9.53939 | 9.89376 | 9.95389 |
| GAB1        | 8.95367 | 8.95873 | 8.65372 | 7.96075 | 6.21232 | 7.73703 | 8.06188 | 8.30196 | 8.94186 |
| MIR3139     | 6.34162 | 5.56496 | 5.39927 | 5.08508 | 2.87864 | 5.0153  | 5.00808 | 6.12087 | 6.69394 |
| HHIP        | 3.52601 | 3.85821 | 3.77702 | 3.72659 | 4.96065 | 3.9081  | 3.88275 | 3.88272 | 3.7539  |
| SMAD1       | 7.5466  | 6.87267 | 7.17275 | 6.40637 | 5.99261 | 5.64686 | 6.3413  | 6.05328 | 6.52724 |
| MMAA        | 7.18904 | 6.96588 | 6.87472 | 6.866   | 6.39292 | 6.19304 | 6.91067 | 6.1422  | 6.14384 |
| C4orf51     | 4.35563 | 4.97651 | 5.14441 | 5.03197 | 6.50725 | 5.33727 | 5.12454 | 5.05141 | 5.12519 |
| POU4F2      | 5.23106 | 5.42696 | 5.36743 | 5.89311 | 5.74952 | 7.33426 | 6.51541 | 6.0744  | 6.49574 |
| EDNRA       | 9.26915 | 8.81039 | 9.20491 | 8.78054 | 6.50984 | 7.48319 | 8.28895 | 7.78889 | 8.30857 |
| TMEM184C    | 9.39426 | 9.04083 | 9.3561  | 8.09869 | 5.77818 | 7.02684 | 8.52486 | 7.69752 | 8.33382 |

|               |         |         |         |         |         |         |         |         |         |
|---------------|---------|---------|---------|---------|---------|---------|---------|---------|---------|
| ARHGAP10      | 7.73981 | 7.44115 | 7.70151 | 6.82524 | 6.2751  | 6.64462 | 6.97081 | 7.32449 | 7.34961 |
| MIR4799       | 5.50512 | 5.70072 | 5.90707 | 6.72152 | 6.52501 | 6.24702 | 5.98177 | 6.09267 | 5.77517 |
| DCLK2         | 5.57248 | 5.47533 | 5.27346 | 4.59119 | 4.75902 | 4.62929 | 5.03626 | 4.86215 | 5.1467  |
| MAB21L2       | 4.99682 | 4.77495 | 4.77388 | 5.62969 | 5.91639 | 5.69301 | 4.81036 | 5.56464 | 5.16327 |
| DKFZP434I0714 | 6.53027 | 6.50367 | 6.93416 | 6.44313 | 6.15307 | 5.11489 | 5.93222 | 6.24295 | 6.57693 |
| arfp1         | 7.94354 | 7.92881 | 7.75929 | 7.46865 | 5.61539 | 7.12054 | 7.78407 | 7.16342 | 7.4637  |
| FHDC1         | 8.55388 | 8.34562 | 8.1285  | 7.992   | 6.04794 | 7.89019 | 8.56336 | 7.4659  | 8.0877  |
| TRIM2         | 7.76295 | 7.63601 | 8.073   | 6.21807 | 6.82267 | 6.46238 | 6.9708  | 7.9483  | 6.82774 |
| MND1          | 5.6129  | 4.84885 | 4.94956 | 4.91175 | 4.77069 | 5.18462 | 5.31465 | 4.18272 | 4.56283 |
| KIAA0922      | 8.7503  | 8.65261 | 8.34027 | 8.44304 | 6.55004 | 7.66951 | 8.45584 | 8.04826 | 8.21755 |
| TLR2          | 6.52054 | 5.98875 | 6.6258  | 6.08712 | 6.63721 | 6.91746 | 7.09975 | 6.47586 | 6.59203 |
| FGB           | 4.14825 | 4.53345 | 4.18953 | 4.45465 | 5.44952 | 5.05917 | 4.63011 | 4.43194 | 4.46832 |
| LRAT          | 5.00375 | 5.38986 | 5.20462 | 5.80164 | 6.05388 | 8.2205  | 6.08192 | 6.53286 | 6.01216 |
| RBM46         | 4.23794 | 4.30964 | 4.63345 | 4.97115 | 5.05429 | 5.27629 | 4.75529 | 4.82977 | 4.76802 |
| npv2r         | 5.06766 | 5.04265 | 5.2732  | 5.30945 | 5.63025 | 5.55405 | 5.06873 | 5.24652 | 5.35067 |
| LOC340017     | 4.44505 | 4.21732 | 4.17728 | 4.60569 | 5.01649 | 4.94669 | 4.95965 | 4.5468  | 4.39612 |
| TMEM144       | 6.65978 | 6.89535 | 6.60718 | 5.66956 | 6.13999 | 5.85476 | 5.73334 | 5.39065 | 5.93519 |
| RXFP1         | 4.67361 | 3.27949 | 3.49229 | 3.60403 | 4.24155 | 3.73576 | 3.71675 | 3.88984 | 4.33794 |
| ETFDH         | 8.96682 | 9.07424 | 9.01409 | 8.39881 | 5.49171 | 7.74833 | 8.217   | 8.15193 | 8.16651 |
| FNIP2         | 8.46918 | 9.48837 | 8.98877 | 8.37221 | 6.93162 | 9.2888  | 8.62231 | 8.2837  | 9.02558 |
| RAPGEF2       | 9.00446 | 8.82275 | 8.72329 | 8.06937 | 6.32332 | 7.8281  | 7.79747 | 9.26903 | 8.57815 |
| MIR3688-1     | 1.79171 | 2.02581 | 1.8985  | 2.13178 | 1.80553 | 2.50834 | 2.64081 | 2.51067 | 1.96367 |
| NPY5R         | 4.38849 | 4.70407 | 4.84925 | 4.48859 | 5.11139 | 5.23682 | 4.50274 | 4.83226 | 4.63414 |
| TMA16         | 7.27789 | 7.93135 | 7.6492  | 6.68638 | 5.20921 | 5.97996 | 6.84454 | 6.04371 | 6.2229  |
| LINC01207     | 4.37043 | 4.66962 | 4.62288 | 4.99225 | 6.01458 | 5.64608 | 5.24678 | 4.78453 | 4.6025  |
| Apela         | 6.80306 | 5.94383 | 4.82457 | 5.21228 | 5.26245 | 5.13991 | 6.11    | 5.12959 | 4.79332 |

|              |         |         |         |         |         |         |         |         |         |
|--------------|---------|---------|---------|---------|---------|---------|---------|---------|---------|
| TRIM60       | 4.35021 | 4.37383 | 4.42397 | 4.76482 | 5.0276  | 4.78976 | 4.71435 | 4.57206 | 4.57456 |
| MSMO1        | 11.4101 | 10.8328 | 11.2997 | 10.5154 | 9.39887 | 10.1874 | 11.1287 | 11.1948 | 11.5229 |
| CPE          | 6.77181 | 6.75251 | 6.93583 | 6.21422 | 4.97126 | 4.8556  | 6.53032 | 5.1836  | 5.04414 |
| MIR578       | 4.41326 | 4.49637 | 3.85601 | 3.26094 | 4.08406 | 4.49245 | 3.93788 | 3.15599 | 4.03847 |
| TLL1         | 6.50495 | 7.77312 | 7.1314  | 6.15561 | 6.32042 | 6.33102 | 5.73342 | 6.00758 | 5.767   |
| ANXA10       | 4.51437 | 4.31002 | 4.47149 | 4.57599 | 4.77234 | 4.49435 | 4.44045 | 4.49752 | 4.54432 |
| LOC100506122 | 2.99412 | 3.335   | 3.08409 | 3.35238 | 4.50931 | 4.30796 | 3.89455 | 4.08297 | 3.29066 |
| GALNTL6      | 5.01468 | 4.99415 | 4.88871 | 5.34256 | 5.63209 | 5.19571 | 4.97325 | 5.41704 | 5.13942 |
| GALNT7       | 6.93429 | 6.84674 | 7.02799 | 7.91473 | 5.97333 | 6.73953 | 7.8273  | 6.2588  | 7.80332 |
| MIR548T      | 4.11118 | 4.87772 | 4.62009 | 5.65166 | 3.74899 | 6.08948 | 3.86064 | 6.3032  | 6.0123  |
| HAND2-AS1    | 4.94361 | 4.98484 | 4.98484 | 4.76919 | 5.01891 | 5.10822 | 4.53366 | 4.99838 | 5.31818 |
| CEP44        | 7.12613 | 7.34466 | 7.05945 | 5.60827 | 4.96474 | 5.08924 | 5.97101 | 5.48751 | 5.06346 |
| MIR4276      | 2.77736 | 2.40224 | 3.01031 | 2.81287 | 2.72291 | 3.84297 | 4.44208 | 3.25936 | 2.86638 |
| ADAM29       | 4.212   | 4.17262 | 3.7935  | 4.40284 | 5.06811 | 4.07015 | 4.19674 | 4.24805 | 4.64868 |
| WDR17        | 4.58599 | 5.10765 | 4.8242  | 4.37067 | 5.02018 | 4.87502 | 4.45909 | 4.76367 | 4.55732 |
| SPCS3        | 9.01878 | 9.53182 | 9.20286 | 8.69292 | 7.33623 | 8.86085 | 9.05611 | 8.77359 | 8.76617 |
| NEIL3        | 6.48532 | 5.94967 | 5.92922 | 5.51554 | 5.73412 | 5.36042 | 5.74115 | 6.08743 | 5.84907 |
| LINC01098    | 3.19277 | 3.25817 | 3.05208 | 3.35218 | 3.28772 | 3.78009 | 3.15731 | 3.44978 | 3.17754 |
| MIR1305      | 3.05213 | 1.68897 | 2.53458 | 2.59604 | 2.41104 | 2.14006 | 2.80975 | 2.73959 | 4.77697 |
| WWC2         | 7.53758 | 7.51369 | 7.59522 | 7.14286 | 6.43961 | 7.7908  | 7.34264 | 9.0217  | 8.01678 |
| CDKN2AIP     | 7.50625 | 7.0795  | 7.15505 | 6.85179 | 5.40178 | 7.34113 | 7.53923 | 7.63639 | 7.20614 |
| TRAPPC11     | 8.92048 | 9.10104 | 9.02368 | 8.68858 | 6.97758 | 8.79708 | 8.67612 | 9.0243  | 8.68158 |
| STOX2        | 7.83515 | 7.52672 | 7.43453 | 6.691   | 6.39173 | 7.14681 | 6.87876 | 7.34039 | 7.2009  |
| PRIMPOL      | 6.91103 | 6.53801 | 6.73234 | 6.25463 | 5.90862 | 6.0546  | 6.54589 | 5.69993 | 5.25062 |
| MIR3945HG    | 4.47385 | 4.64163 | 4.42724 | 4.91789 | 5.81514 | 5.23714 | 4.90818 | 4.43189 | 4.49407 |
| LINC01093    | 4.85492 | 4.85636 | 5.32606 | 5.60659 | 6.39559 | 5.93856 | 5.55783 | 5.80315 | 5.38866 |

|              |         |         |         |         |         |         |         |         |         |
|--------------|---------|---------|---------|---------|---------|---------|---------|---------|---------|
| HELT         | 5.88018 | 5.96837 | 5.89893 | 6.66067 | 5.69123 | 6.97049 | 6.41325 | 6.32175 | 6.42973 |
| SNX25        | 7.9467  | 8.3032  | 7.97046 | 7.71978 | 7.17537 | 8.38269 | 8.08861 | 9.32255 | 8.5098  |
| ANKRD37      | 6.86788 | 6.79401 | 6.94226 | 7.43208 | 10.3285 | 10.0624 | 8.5718  | 11.0445 | 8.46024 |
| TLR3         | 7.12746 | 6.96991 | 6.92574 | 4.79783 | 5.33353 | 4.81781 | 5.74239 | 4.64522 | 4.49792 |
| F11          | 4.04351 | 3.88717 | 3.92634 | 4.10533 | 5.20076 | 4.32492 | 4.03603 | 4.1864  | 4.52576 |
| ZFP42        | 4.27621 | 4.46358 | 4.36853 | 5.70992 | 4.41913 | 6.27652 | 5.23497 | 5.07693 | 6.60026 |
| TRIML1       | 4.98415 | 5.27539 | 5.20373 | 5.49923 | 5.94115 | 5.57842 | 5.32567 | 5.45375 | 5.34313 |
| LINC01060    | 4.91904 | 4.38309 | 4.48935 | 5.77812 | 5.05268 | 5.23147 | 4.95016 | 6.4472  | 5.90784 |
| FRG1         | 6.86745 | 7.31478 | 7.51709 | 6.54108 | 6.18    | 5.57125 | 7.55943 | 6.09839 | 6.9502  |
| DUX4L8       | 6.88986 | 7.04057 | 7.22385 | 7.84166 | 10.4365 | 7.93778 | 7.54886 | 7.78718 | 7.66109 |
| DUX4L1       | 6.688   | 6.87483 | 6.89292 | 7.41104 | 10.7874 | 7.34407 | 6.98184 | 7.31823 | 7.46095 |
| ZNF732       | 5.85397 | 7.74229 | 6.94494 | 6.10772 | 5.52597 | 5.08064 | 6.03379 | 4.98888 | 5.49338 |
| MFSD7        | 7.03482 | 6.68148 | 6.86765 | 7.19461 | 7.11935 | 7.27115 | 6.62751 | 7.11055 | 6.86839 |
| LOC100129917 | 6.69299 | 7.55261 | 7.28927 | 6.85503 | 5.60419 | 6.72226 | 6.93979 | 6.9222  | 7.16865 |
| CPLX1        | 5.62322 | 6.08797 | 5.96775 | 6.65917 | 6.40425 | 6.82209 | 6.45957 | 6.57297 | 6.11591 |
| GAK          | 7.70185 | 7.43112 | 7.71833 | 7.70753 | 6.66385 | 7.63692 | 8.12239 | 8.30189 | 7.87813 |
| RNF212       | 6.47236 | 6.42483 | 6.24797 | 5.9272  | 5.968   | 5.50972 | 5.97834 | 6.44054 | 5.88763 |
| CTBP1        | 7.33822 | 6.9291  | 7.05689 | 7.5223  | 6.81473 | 7.11601 | 7.22215 | 7.13808 | 7.11783 |
| SLBP         | 9.09991 | 9.15319 | 9.35001 | 9.3488  | 7.16056 | 8.74846 | 9.50454 | 9.20598 | 8.4957  |
| TMEM129      | 7.09429 | 7.10827 | 7.09326 | 7.11489 | 6.72524 | 7.08467 | 7.5794  | 6.89839 | 7.04207 |
| LETM1        | 7.60057 | 7.49198 | 7.27708 | 7.84134 | 7.43366 | 7.49957 | 7.72828 | 7.22158 | 7.65222 |
| NELFA        | 7.94013 | 7.85127 | 7.81572 | 8.48167 | 8.65353 | 8.6794  | 8.3319  | 8.53996 | 8.49112 |
| POLN         | 6.66638 | 6.47043 | 6.31209 | 5.76166 | 5.91163 | 5.28232 | 5.69136 | 5.86486 | 5.69398 |
| MXD4         | 7.12055 | 7.23368 | 7.12413 | 7.43954 | 6.67756 | 7.17825 | 7.32616 | 7.18023 | 7.11951 |
| TNIP2        | 7.15805 | 7.3013  | 6.98801 | 7.44275 | 7.51227 | 7.57158 | 6.92644 | 7.83794 | 7.60074 |
| MFSD10       | 8.14482 | 7.61149 | 7.97821 | 9.37861 | 9.09473 | 9.7662  | 9.30534 | 9.52201 | 9.23156 |

|              |         |         |         |         |         |         |         |         |         |
|--------------|---------|---------|---------|---------|---------|---------|---------|---------|---------|
| NOP14        | 8.53191 | 8.60482 | 8.88643 | 8.48946 | 6.09058 | 7.97049 | 8.90609 | 7.81324 | 8.07871 |
| HTT-AS       | 5.96144 | 6.05979 | 6.38824 | 6.85943 | 7.28491 | 7.25215 | 6.71672 | 6.94695 | 6.43298 |
| LRPAP1       | 7.57983 | 7.43101 | 7.61995 | 7.5373  | 6.39493 | 7.25456 | 8.00401 | 7.45047 | 7.65279 |
| OTOP1        | 6.40698 | 6.36654 | 6.40704 | 6.25493 | 6.77706 | 6.03518 | 6.18215 | 6.37751 | 6.24018 |
| TMEM128      | 8.17699 | 8.36928 | 8.84783 | 7.30635 | 6.38904 | 6.49813 | 7.6812  | 6.84506 | 6.6877  |
| LYAR         | 6.00621 | 6.63217 | 6.5301  | 6.82813 | 4.63176 | 6.35082 | 7.03354 | 6.31676 | 6.64538 |
| STX18        | 8.94468 | 8.69393 | 8.79412 | 7.97816 | 6.78475 | 7.84634 | 8.14199 | 8.61377 | 7.84758 |
| CYTL1        | 6.36777 | 6.68148 | 7.10604 | 6.68424 | 7.20331 | 6.58726 | 6.53366 | 6.87654 | 5.7025  |
| EVC2         | 6.20719 | 6.18784 | 6.08549 | 6.06316 | 6.03781 | 5.95527 | 5.86482 | 6.14325 | 5.71215 |
| CRMP1        | 5.07795 | 5.23493 | 5.21202 | 5.54958 | 5.85285 | 5.97489 | 5.76092 | 5.54625 | 5.41317 |
| MIR378D1     | 2.53251 | 2.08202 | 1.96256 | 2.29689 | 4.95221 | 2.62635 | 3.56572 | 2.66312 | 2.49695 |
| JAKMIP1      | 4.34986 | 4.2824  | 4.51835 | 4.90428 | 5.58312 | 5.62755 | 4.6879  | 4.88172 | 5.03196 |
| MRFAP1L1     | 6.13137 | 6.1623  | 6.47862 | 5.83872 | 5.5013  | 5.39346 | 6.55497 | 5.48672 | 5.64468 |
| LOC100129931 | 6.07527 | 5.63588 | 5.77065 | 6.34872 | 5.74345 | 6.37315 | 6.28646 | 6.10758 | 6.23504 |
| CCDC96       | 5.19219 | 4.88558 | 4.95566 | 5.62537 | 5.20178 | 6.04924 | 5.69721 | 5.32373 | 5.1547  |
| FLJ36777     | 4.93176 | 5.62396 | 5.14779 | 5.71599 | 5.20777 | 5.23272 | 5.10432 | 5.39407 | 5.19429 |
| PSAPL1       | 8.50301 | 8.67023 | 8.33037 | 8.14391 | 7.58455 | 7.74635 | 7.55637 | 7.79072 | 7.42988 |
| AFAP1        | 6.79224 | 6.93595 | 7.07278 | 6.76109 | 6.24233 | 6.4318  | 6.44774 | 6.10509 | 6.38808 |
| MIR95        | 5.21552 | 6.93654 | 5.33621 | 2.39292 | 3.03647 | 2.46622 | 2.50886 | 3.96306 | 4.71611 |
| HMX1         | 6.36678 | 6.59238 | 6.66316 | 7.66157 | 6.9964  | 8.37073 | 7.44422 | 7.70785 | 7.4691  |
| MIR548I2     | 8.65583 | 9.98805 | 9.13481 | 4.78352 | 10.5764 | 5.03863 | 4.78888 | 5.47536 | 5.43406 |
| WDR1         | 9.19162 | 8.52596 | 8.77621 | 9.49027 | 7.50427 | 9.74962 | 9.64121 | 9.56366 | 9.80358 |
| MIR3138      | 5.69345 | 5.53164 | 5.42059 | 6.32986 | 6.56324 | 6.44369 | 5.93225 | 6.49922 | 6.24272 |
| ZNF518B      | 7.78325 | 7.48807 | 7.40112 | 8.25523 | 7.16033 | 6.88146 | 7.97439 | 7.43458 | 7.57147 |
| CLNK         | 4.80012 | 5.00828 | 4.71343 | 4.9115  | 5.11217 | 4.87338 | 4.69686 | 4.69485 | 4.78325 |
| HS3ST1       | 6.08326 | 5.94399 | 6.01215 | 7.26619 | 6.55865 | 7.78562 | 7.21522 | 7.29719 | 7.1077  |



|              |         |         |         |         |         |         |         |         |         |
|--------------|---------|---------|---------|---------|---------|---------|---------|---------|---------|
| LINC01097    | 6.09976 | 6.309   | 5.78651 | 6.72245 | 7.38332 | 6.81602 | 6.37805 | 6.47333 | 6.43619 |
| NKX3-2       | 5.85455 | 6.15555 | 6.09225 | 6.6915  | 6.479   | 6.78401 | 6.64288 | 6.68211 | 6.5417  |
| LINC01096    | 4.43035 | 4.30964 | 4.73597 | 5.1347  | 5.38249 | 5.15055 | 4.976   | 5.08634 | 5.24301 |
| BOD1L1       | 8.63211 | 8.86609 | 8.89194 | 7.3713  | 5.85913 | 7.23185 | 7.89225 | 8.38489 | 7.58987 |
| CPEB2-AS1    | 4.93488 | 5.14288 | 4.92874 | 4.90016 | 4.67105 | 4.79018 | 4.57725 | 4.41025 | 4.59977 |
| FBXL5        | 10.3358 | 9.98055 | 10.3873 | 9.70193 | 7.66992 | 8.94524 | 9.7478  | 9.87032 | 9.95193 |
| fgfbp1       | 8.0635  | 7.03578 | 7.48449 | 10.0198 | 7.50044 | 9.52332 | 10.0318 | 9.13199 | 10.1544 |
| FGFBP2       | 5.97014 | 5.97092 | 6.30912 | 5.93996 | 6.46701 | 6.11219 | 5.87847 | 5.89182 | 5.89664 |
| PROM1        | 6.34487 | 6.72894 | 6.39785 | 5.44783 | 6.4561  | 5.55706 | 5.84822 | 5.51484 | 5.48462 |
| TAPT1        | 7.41107 | 7.5823  | 7.57353 | 6.4174  | 5.88036 | 5.96738 | 6.87259 | 6.61353 | 6.80442 |
| LDB2         | 7.18216 | 7.18362 | 7.46882 | 6.99315 | 6.50438 | 6.22351 | 6.4016  | 6.65354 | 6.55996 |
| QDPR         | 6.8264  | 7.12539 | 7.22719 | 7.57963 | 6.75905 | 7.19739 | 7.58161 | 6.95571 | 7.09917 |
| DCAF16       | 9.45974 | 9.75802 | 9.77217 | 8.23585 | 6.35097 | 7.0207  | 8.65345 | 8.18153 | 7.9262  |
| LCORL        | 7.97221 | 7.60886 | 7.59137 | 6.76618 | 5.50524 | 7.43864 | 7.37608 | 7.56731 | 7.37592 |
| KCNIP4       | 4.56747 | 4.61345 | 4.75731 | 4.86194 | 6.10374 | 5.1204  | 5.02763 | 4.68394 | 4.74361 |
| LOC100505912 | 5.86453 | 6.03352 | 6.18475 | 6.32197 | 7.72234 | 6.23481 | 5.81147 | 5.94273 | 6.0535  |
| adgra3       | 6.96599 | 6.78486 | 6.9271  | 6.73734 | 6.29822 | 5.90102 | 6.63958 | 6.02234 | 6.38337 |
| DHX15        | 9.08736 | 8.99652 | 8.96117 | 9.06001 | 6.44426 | 8.5685  | 8.97097 | 8.93695 | 8.80983 |
| MIR573       | 7.22315 | 7.20385 | 7.49746 | 3.86763 | 5.19704 | 4.03594 | 4.39952 | 5.0015  | 5.31412 |
| CCDC149      | 6.74615 | 6.632   | 6.7307  | 6.36719 | 6.17877 | 6.41599 | 6.39593 | 6.57573 | 6.60051 |
| SEPSECS      | 8.3931  | 8.22339 | 8.37949 | 7.13688 | 6.43903 | 6.61578 | 7.373   | 6.23877 | 6.59416 |
| SEL1L3       | 6.81926 | 6.19437 | 6.72281 | 6.92818 | 5.79352 | 6.39682 | 7.09149 | 7.59023 | 7.26866 |
| CCKAR        | 5.08195 | 5.11301 | 4.88287 | 5.42721 | 5.49556 | 5.81511 | 5.34187 | 5.90485 | 5.33946 |
| MIR1255B1    | 2.163   | 2.28954 | 2.09687 | 2.81218 | 1.78853 | 2.91357 | 4.01437 | 1.8562  | 2.23384 |
| RELL1        | 9.0389  | 8.46971 | 8.81761 | 8.218   | 7.94529 | 8.87979 | 9.04367 | 9.39438 | 8.97371 |
| KLF3-AS1     | 6.03042 | 6.63983 | 5.89957 | 5.75167 | 6.10062 | 6.74889 | 5.7408  | 5.98094 | 5.69767 |

|           |         |         |         |         |         |         |         |         |         |
|-----------|---------|---------|---------|---------|---------|---------|---------|---------|---------|
| TLR10     | 5.29453 | 5.18837 | 4.98525 | 5.03378 | 5.65855 | 4.86035 | 5.26934 | 5.03959 | 4.81835 |
| TLR1      | 5.31248 | 5.04867 | 5.95227 | 4.65781 | 4.70356 | 4.56315 | 5.09234 | 4.93752 | 4.80548 |
| TLR6      | 5.74738 | 5.79521 | 5.79909 | 5.48228 | 5.52713 | 5.11105 | 6.23041 | 5.46497 | 4.9871  |
| TMEM156   | 3.64109 | 3.72476 | 3.67245 | 3.73296 | 4.58031 | 3.62477 | 3.90564 | 3.78279 | 3.77945 |
| RPL9      | 7.8369  | 7.73467 | 7.77716 | 8.01805 | 7.44011 | 8.0791  | 8.25508 | 7.5668  | 7.73937 |
| UGDH      | 9.52274 | 10.1274 | 9.87619 | 10.3892 | 7.07042 | 9.14457 | 10.6353 | 9.67426 | 10.3503 |
| LOC344967 | 5.77839 | 5.79847 | 5.46719 | 6.48259 | 5.74064 | 6.98475 | 6.44311 | 6.83442 | 6.6982  |
| RBM47     | 6.77643 | 6.77078 | 6.70584 | 6.98889 | 6.39805 | 7.44479 | 7.01465 | 6.85964 | 7.21868 |
| MIR4802   | 4.78189 | 4.21416 | 3.72    | 3.41401 | 2.5723  | 3.70599 | 2.72907 | 4.09426 | 5.48623 |
| PHOX2B    | 5.91193 | 5.72665 | 5.74821 | 6.33038 | 6.91091 | 6.29807 | 6.37735 | 6.23902 | 6.30233 |
| BEND4     | 4.70438 | 4.81828 | 5.0954  | 5.62178 | 6.03951 | 6.21902 | 5.51395 | 5.67649 | 5.83421 |
| KCTD8     | 4.83381 | 4.86235 | 4.4201  | 5.08672 | 4.99001 | 5.41539 | 4.76829 | 4.75737 | 4.89053 |
| GNPDA2    | 8.31197 | 8.50597 | 8.69633 | 7.21123 | 4.34752 | 5.89274 | 8.03106 | 6.07275 | 7.07412 |
| Cox7b2    | 3.37291 | 3.74453 | 3.46688 | 3.49876 | 4.39969 | 3.4182  | 3.79895 | 3.48378 | 3.24103 |
| COMMD8    | 7.54236 | 7.51948 | 7.27473 | 8.18571 | 5.79204 | 7.8471  | 8.37795 | 7.31615 | 7.87604 |
| CNGA1     | 5.18751 | 5.26438 | 4.98442 | 4.54137 | 4.6358  | 5.10146 | 5.14648 | 5.25422 | 4.75877 |
| TXK       | 6.32484 | 6.20227 | 5.75514 | 5.21474 | 5.88312 | 5.00302 | 4.9485  | 4.92051 | 5.57322 |
| TEC       | 8.08912 | 8.33539 | 7.87844 | 7.04197 | 6.34369 | 7.74111 | 7.52309 | 9.2212  | 7.65231 |
| FRYL      | 9.43361 | 9.40715 | 9.17861 | 8.35019 | 6.11289 | 8.08435 | 8.27175 | 9.2376  | 8.96671 |
| OCIAD2    | 6.73679 | 6.74715 | 6.65561 | 7.84133 | 6.49484 | 7.32917 | 8.08546 | 7.76026 | 7.34846 |
| LRRC66    | 4.58866 | 4.74788 | 4.51189 | 4.59244 | 4.76418 | 4.84886 | 4.4764  | 4.68984 | 4.76415 |
| USP46     | 7.56347 | 7.8589  | 7.49872 | 7.23504 | 5.93423 | 6.59893 | 7.05397 | 7.78248 | 7.01761 |
| SCFD2     | 9.44796 | 9.2722  | 9.60451 | 8.9556  | 6.66829 | 7.69575 | 8.84819 | 7.30571 | 8.34383 |
| RPL21P44  | 6.06165 | 6.25126 | 6.44855 | 4.69891 | 4.54623 | 4.41082 | 4.4689  | 6.85346 | 6.45004 |
| CHIC2     | 10.788  | 11.1858 | 11.0571 | 10.2998 | 9.47337 | 10.5972 | 10.118  | 10.9078 | 10.7057 |
| KDR       | 8.56602 | 7.97612 | 8.60254 | 7.93758 | 6.84617 | 6.76374 | 7.23243 | 8.53979 | 8.71055 |

|             |         |         |         |         |         |         |         |         |         |
|-------------|---------|---------|---------|---------|---------|---------|---------|---------|---------|
| SRD5A3-AS1  | 5.13991 | 4.93777 | 5.29628 | 5.47093 | 5.71793 | 5.64986 | 5.44018 | 5.34029 | 5.20933 |
| CLOCK       | 9.77781 | 9.60399 | 9.78474 | 8.69563 | 7.09658 | 8.39396 | 9.29522 | 8.8783  | 9.58932 |
| PDCL2       | 5.27862 | 5.63299 | 4.8302  | 3.9186  | 4.3708  | 3.75148 | 4.51043 | 4.3958  | 4.19418 |
| NMU         | 8.57772 | 8.8386  | 8.67793 | 9.15433 | 7.67325 | 8.35438 | 8.46001 | 7.0783  | 7.55273 |
| AASDH       | 7.77485 | 7.93718 | 7.80166 | 7.00567 | 6.3201  | 6.37436 | 7.19203 | 7.24213 | 7.29768 |
| PPAT        | 6.92142 | 6.92569 | 6.71148 | 6.97575 | 5.80611 | 6.48607 | 6.866   | 5.99188 | 6.309   |
| HOPX        | 9.03647 | 8.77264 | 8.44361 | 8.06803 | 8.53617 | 8.44776 | 8.33145 | 9.84584 | 8.86098 |
| NOA1        | 9.44629 | 9.36657 | 9.69398 | 8.61641 | 7.6702  | 8.48161 | 9.39307 | 8.79668 | 8.51837 |
| IGFBP7      | 10.616  | 8.83689 | 10.4752 | 9.01814 | 6.80787 | 7.20393 | 8.83014 | 8.93323 | 9.36053 |
| LOC401134   | 5.80821 | 5.78722 | 5.60011 | 5.57    | 5.68726 | 5.66685 | 5.75291 | 5.83102 | 5.53403 |
| EPHA5       | 5.33955 | 5.2029  | 5.47544 | 5.27836 | 6.20355 | 5.46881 | 5.42789 | 5.41543 | 5.76326 |
| CENPC       | 8.10777 | 8.64387 | 8.38606 | 6.22515 | 5.59402 | 5.71977 | 7.0546  | 7.00782 | 6.27082 |
| UBA6        | 8.91594 | 8.45852 | 8.48567 | 8.72209 | 5.94771 | 9.29352 | 8.78441 | 9.08737 | 8.63925 |
| GNRHR       | 4.66347 | 4.03215 | 4.07918 | 6.11857 | 5.77541 | 5.07114 | 6.80571 | 5.0383  | 6.21752 |
| SYT14P1     | 4.75166 | 4.77084 | 3.93611 | 3.46734 | 5.17866 | 3.80683 | 3.55818 | 3.49134 | 3.4775  |
| TMPRSS11BNL | 3.06909 | 3.08317 | 3.04408 | 3.44749 | 4.66204 | 3.42495 | 3.69014 | 3.36619 | 3.399   |
| CSN2        | 2.8644  | 3.13568 | 2.86805 | 3.02583 | 4.34891 | 3.53246 | 3.40621 | 3.1264  | 3.27678 |
| GRSF1       | 8.74311 | 8.78399 | 8.93314 | 8.58386 | 6.37714 | 8.67393 | 9.04255 | 8.31902 | 8.43023 |
| GC          | 4.77276 | 4.95279 | 4.8098  | 4.73648 | 5.26196 | 4.87441 | 4.75704 | 5.06651 | 4.64005 |
| cox18       | 7.71309 | 7.82635 | 8.10575 | 7.41501 | 6.21753 | 6.20024 | 7.81361 | 6.79911 | 6.68232 |
| ANKRD17     | 9.97788 | 10.0142 | 9.87697 | 9.266   | 7.06862 | 8.60625 | 9.10339 | 9.13499 | 9.3494  |
| RASSF6      | 5.47966 | 5.69441 | 4.99096 | 4.67092 | 2.68506 | 4.28073 | 4.59599 | 4.27687 | 4.36693 |
| PF4         | 6.32439 | 6.39479 | 6.31532 | 6.48524 | 7.83235 | 6.63284 | 6.65419 | 6.28353 | 6.55159 |
| PPBP        | 3.50774 | 3.50659 | 4.33378 | 4.58561 | 5.27599 | 6.1335  | 4.71414 | 6.41695 | 5.95277 |
| CXCL5       | 5.61818 | 5.57708 | 5.81061 | 5.8725  | 6.73991 | 8.93169 | 6.47039 | 7.75699 | 7.27774 |
| CXCL3       | 4.43076 | 4.48081 | 4.54213 | 5.4238  | 5.28879 | 5.45096 | 4.83996 | 5.26726 | 5.57902 |

|           |         |         |         |         |         |         |         |         |         |
|-----------|---------|---------|---------|---------|---------|---------|---------|---------|---------|
| PPBPP2    | 4.55983 | 4.30818 | 4.41692 | 4.67165 | 5.09132 | 4.6044  | 4.07709 | 4.3375  | 4.40425 |
| CXCL2     | 6.45925 | 6.18341 | 6.17521 | 6.78153 | 7.29786 | 7.88258 | 6.89669 | 7.10141 | 6.92853 |
| BTC       | 5.86139 | 7.84578 | 7.38404 | 4.97687 | 5.96425 | 4.94114 | 5.09737 | 5.27353 | 5.19666 |
| CDKL2     | 4.91286 | 4.63901 | 4.2595  | 4.09319 | 5.18015 | 4.60275 | 4.9021  | 4.46189 | 4.69327 |
| G3BP2     | 7.4193  | 7.33048 | 7.16619 | 6.796   | 5.8955  | 6.35316 | 6.96637 | 6.23151 | 6.21984 |
| NAAA      | 8.48552 | 8.7011  | 8.21553 | 8.04591 | 7.09824 | 6.90042 | 7.89224 | 7.18522 | 7.12705 |
| SDAD1     | 8.44531 | 8.59855 | 8.47834 | 8.11988 | 5.2959  | 7.30638 | 8.7317  | 6.887   | 7.63445 |
| CXCL9     | 8.28064 | 5.42143 | 6.36751 | 3.9525  | 5.09637 | 5.05541 | 4.73628 | 4.24075 | 5.42705 |
| CXCL10    | 8.54332 | 5.50089 | 5.7777  | 5.62793 | 6.66725 | 4.49168 | 5.89175 | 4.48731 | 6.21326 |
| CXCL11    | 6.46275 | 4.81988 | 5.15788 | 5.00679 | 5.64761 | 5.24914 | 4.56713 | 4.56795 | 4.77696 |
| NUP54     | 6.57373 | 6.02079 | 6.57826 | 5.6901  | 4.61701 | 4.93915 | 5.93249 | 5.44832 | 5.64811 |
| CCDC158   | 4.30753 | 4.95231 | 4.40705 | 4.63535 | 5.12544 | 4.17667 | 4.35732 | 4.38222 | 4.36352 |
| SOWAHB    | 5.4958  | 5.27862 | 5.72504 | 6.20687 | 6.17504 | 7.02816 | 6.65517 | 6.80414 | 6.80407 |
| CCNI      | 11.3001 | 11.212  | 11.4378 | 10.8189 | 10.67   | 11.6478 | 10.937  | 11.7711 | 11.4607 |
| PAQR3     | 7.3948  | 7.84737 | 7.41044 | 7.06884 | 6.21643 | 5.94401 | 6.97235 | 8.17391 | 6.73982 |
| GK2       | 3.73494 | 3.30488 | 3.80093 | 4.32524 | 5.28191 | 3.73266 | 3.93171 | 3.57705 | 3.74021 |
| ANTXR2    | 8.73638 | 8.79458 | 9.23675 | 7.14376 | 6.39105 | 6.93447 | 6.96023 | 8.64573 | 7.98504 |
| HNRNPDL   | 9.96717 | 10.434  | 10.6566 | 9.58384 | 7.6175  | 9.43861 | 9.72854 | 9.80453 | 9.48722 |
| tmem150c  | 7.3143  | 6.89894 | 8.24065 | 5.86782 | 6.14036 | 4.61222 | 6.6144  | 6.12006 | 5.80564 |
| LINC00575 | 4.24471 | 4.28496 | 4.62377 | 4.55494 | 5.65684 | 4.41693 | 4.58714 | 4.68168 | 5.00685 |
| SCD5      | 7.27968 | 7.21926 | 7.2067  | 7.29238 | 6.86689 | 6.89369 | 6.79514 | 7.35259 | 7.04499 |
| MIR575    | 5.91414 | 5.86299 | 5.94278 | 6.03518 | 6.16865 | 6.53092 | 5.77389 | 6.3838  | 6.23232 |
| SEC31A    | 10.6235 | 10.4771 | 10.6644 | 10.0702 | 8.86136 | 9.84108 | 9.81359 | 10.4507 | 10.7276 |
| THAP9-AS1 | 7.73317 | 7.545   | 8.1133  | 6.34612 | 5.6073  | 5.52135 | 6.24481 | 7.35723 | 6.36575 |
| LIN54     | 7.88481 | 7.71324 | 7.87321 | 7.84322 | 6.83585 | 7.94261 | 7.724   | 8.39633 | 7.94871 |
| PLAC8     | 5.70214 | 5.87759 | 5.8943  | 6.0884  | 6.58596 | 5.97869 | 6.08694 | 5.65068 | 6.05703 |

|              |         |         |         |         |         |         |         |         |         |
|--------------|---------|---------|---------|---------|---------|---------|---------|---------|---------|
| HPSE         | 7.95859 | 7.73601 | 7.58659 | 8.58652 | 7.01687 | 8.83316 | 8.88025 | 9.25563 | 8.54485 |
| NKX6-1       | 5.3316  | 5.63786 | 5.33683 | 5.8379  | 5.19982 | 6.63178 | 5.93113 | 5.90527 | 5.76297 |
| WDFY3        | 10.0161 | 9.95583 | 9.63324 | 8.9598  | 7.23735 | 8.86863 | 8.99824 | 9.20521 | 9.44902 |
| MAPK10       | 5.37883 | 5.34312 | 4.87546 | 5.26523 | 5.53848 | 5.25055 | 5.03149 | 5.55432 | 5.16526 |
| MIR4452      | 4.06345 | 3.93061 | 4.21548 | 3.07312 | 3.91374 | 4.61018 | 4.0933  | 3.94586 | 4.04219 |
| C4orf36      | 7.15213 | 6.63875 | 6.65319 | 7.19516 | 5.8417  | 6.77536 | 6.94041 | 6.29252 | 6.7368  |
| LOC100506746 | 7.00752 | 7.27141 | 7.25149 | 6.15658 | 6.10435 | 5.76021 | 6.09921 | 6.78047 | 6.69239 |
| KLHL8        | 6.66721 | 6.6783  | 6.84076 | 6.1938  | 6.38173 | 6.07839 | 6.16834 | 6.41578 | 5.65751 |
| HSD17B13     | 3.96264 | 3.81632 | 4.18546 | 4.12589 | 4.15964 | 4.45747 | 4.14457 | 3.90468 | 4.14546 |
| HSD17B11     | 7.50749 | 7.27771 | 8.34388 | 6.77021 | 5.84374 | 6.28902 | 7.31137 | 6.4537  | 6.77047 |
| SPARCL1      | 9.02357 | 9.0789  | 10.316  | 7.65119 | 5.62294 | 6.09264 | 7.39764 | 7.15325 | 8.19335 |
| NAP1L5       | 6.70653 | 6.63754 | 6.86672 | 6.75271 | 6.40441 | 6.16024 | 7.31264 | 6.49634 | 7.1294  |
| GPRIN3       | 6.21801 | 6.05247 | 6.43565 | 5.78237 | 5.96633 | 5.28259 | 6.11119 | 5.34933 | 5.63396 |
| HPGDS        | 6.95198 | 6.08055 | 7.1477  | 4.84929 | 5.48087 | 5.71267 | 6.18961 | 5.0787  | 5.63899 |
| UNC5C        | 5.41058 | 5.64773 | 5.33829 | 5.25573 | 5.89222 | 5.93627 | 5.06741 | 5.40987 | 5.36617 |
| STPG2        | 5.11838 | 4.7482  | 4.60296 | 4.47243 | 4.49296 | 4.25874 | 4.39533 | 4.27957 | 4.60144 |
| TSPAN5       | 7.83878 | 7.11453 | 7.22178 | 6.90224 | 5.66868 | 6.54984 | 6.48318 | 6.4526  | 5.92135 |
| EIF4E        | 7.17336 | 6.95592 | 7.01062 | 7.27112 | 6.90098 | 7.32509 | 7.35773 | 7.50678 | 7.33898 |
| PCNAP1       | 2.44648 | 2.34294 | 2.17517 | 2.65199 | 3.38542 | 3.02805 | 2.70706 | 2.75427 | 2.35482 |
| ADH6         | 4.19019 | 4.81929 | 4.40513 | 4.7494  | 4.69376 | 4.47316 | 4.24841 | 4.43137 | 4.25313 |
| TRMT10A      | 5.13553 | 5.32746 | 5.11129 | 5.42852 | 4.4992  | 5.64986 | 5.55224 | 5.06022 | 4.89131 |
| DDIT4L       | 5.68828 | 5.53635 | 5.58861 | 5.85853 | 5.91389 | 6.35785 | 5.77267 | 5.90847 | 6.16268 |
| EMCN         | 7.91468 | 7.13793 | 7.74471 | 6.61762 | 5.57912 | 5.00317 | 5.94566 | 6.15485 | 6.55364 |
| LINC01216    | 2.9995  | 3.2049  | 2.95651 | 3.12598 | 4.41983 | 3.40969 | 3.25474 | 3.00472 | 3.39728 |
| MIR1255A     | 5.18518 | 5.221   | 5.2621  | 3.89395 | 5.48271 | 3.51904 | 4.00842 | 4.39745 | 4.33319 |
| UBE2D3       | 9.64616 | 9.53125 | 9.45148 | 9.26648 | 8.64061 | 9.68233 | 9.52074 | 10.247  | 10.0348 |

|            |         |         |         |         |         |         |         |         |         |
|------------|---------|---------|---------|---------|---------|---------|---------|---------|---------|
| TACR3      | 4.92633 | 6.39122 | 5.23549 | 4.81601 | 5.71164 | 5.45233 | 5.22187 | 4.87524 | 5.12379 |
| cxxc4      | 4.53269 | 4.70639 | 4.37343 | 4.72835 | 5.28321 | 5.61449 | 4.90487 | 4.96911 | 4.79274 |
| PPA2       | 7.58543 | 7.42504 | 7.7414  | 6.8974  | 4.53464 | 6.11574 | 7.28719 | 5.61848 | 6.06555 |
| INTS12     | 7.39032 | 7.19207 | 7.356   | 6.37606 | 5.52591 | 5.93871 | 6.78557 | 6.59044 | 6.70219 |
| TBCK       | 8.9434  | 8.55355 | 8.16275 | 7.27133 | 5.35643 | 6.49443 | 7.74894 | 6.38139 | 6.71793 |
| GIMD1      | 4.41615 | 4.68655 | 4.91107 | 5.00011 | 4.83617 | 5.49831 | 4.90194 | 4.83876 | 5.23748 |
| DKK2       | 6.68564 | 5.01193 | 5.24677 | 4.90955 | 5.97049 | 5.32683 | 5.15907 | 4.98316 | 5.1543  |
| PAPSS1     | 8.65681 | 8.66795 | 8.47353 | 8.09594 | 6.85017 | 7.49677 | 8.57853 | 8.28262 | 7.94867 |
| LEF1       | 7.53703 | 7.25223 | 6.46598 | 6.00069 | 5.54162 | 4.94579 | 5.80805 | 5.81273 | 6.03348 |
| RPL34-AS1  | 5.85923 | 5.71173 | 6.18717 | 5.44694 | 6.27139 | 5.75756 | 5.47835 | 5.98658 | 5.72367 |
| ETNPPL     | 4.73765 | 4.84767 | 4.82744 | 5.11641 | 5.71272 | 5.18995 | 5.17405 | 4.97803 | 5.11946 |
| SEC24B-AS1 | 6.38537 | 6.12278 | 6.17882 | 5.17078 | 6.05563 | 5.38735 | 5.60362 | 5.18464 | 5.31659 |
| CFI        | 6.36353 | 5.73681 | 6.51606 | 5.50269 | 5.77904 | 5.44686 | 6.07192 | 5.61599 | 5.66291 |
| ELOVL6     | 8.39106 | 8.53527 | 8.2827  | 7.67327 | 7.02529 | 6.60005 | 7.75985 | 7.43311 | 7.86977 |
| PITX2      | 4.99675 | 5.12933 | 5.02711 | 5.84963 | 6.05445 | 6.12058 | 5.83522 | 6.0804  | 5.89691 |
| TIFA       | 7.97872 | 7.51053 | 7.29903 | 7.36703 | 7.2177  | 7.06555 | 7.22549 | 7.59049 | 7.02975 |
| NEUROG2    | 4.78369 | 5.00256 | 4.77298 | 5.7328  | 5.98467 | 5.5825  | 5.44808 | 5.03372 | 5.10479 |
| ZGRF1      | 6.50108 | 6.63647 | 6.50079 | 6.13036 | 5.72283 | 5.64853 | 5.6136  | 5.8915  | 5.8848  |
| MIR302B    | 4.31804 | 4.48254 | 4.38388 | 4.745   | 5.00945 | 4.85932 | 4.77447 | 4.61261 | 4.39296 |
| MIR367     | 2.14172 | 2.24522 | 1.77513 | 2.00009 | 2.85168 | 2.5811  | 2.11395 | 1.84361 | 1.89233 |
| MIR302D    | 4.13964 | 4.54448 | 5.03071 | 4.0377  | 4.66713 | 3.88535 | 3.25342 | 3.92037 | 3.87152 |
| MIR302A    | 2.15171 | 2.79568 | 2.28606 | 2.58948 | 2.22765 | 2.75521 | 2.90976 | 2.75759 | 2.45459 |
| MIR302C    | 2.66982 | 3.11885 | 2.5022  | 3.26372 | 3.52909 | 3.00884 | 4.00123 | 2.78784 | 3.05996 |
| CAMK2D     | 8.09341 | 7.72425 | 7.75336 | 8.12816 | 6.35354 | 8.77469 | 8.4254  | 8.71678 | 8.79948 |
| NDST4      | 3.7323  | 4.02035 | 3.66534 | 3.99136 | 4.70736 | 4.22056 | 3.88911 | 3.86226 | 3.98402 |
| TRAM1L1    | 5.38283 | 5.61541 | 5.38165 | 4.9917  | 5.04246 | 5.29205 | 5.18031 | 4.82789 | 5.2156  |

|           |         |         |         |         |         |         |         |         |         |
|-----------|---------|---------|---------|---------|---------|---------|---------|---------|---------|
| C4orf3    | 6.06245 | 6.30698 | 6.13914 | 7.33986 | 6.96246 | 7.80712 | 7.15741 | 7.09984 | 7.14845 |
| MAD2L1    | 6.30213 | 5.85167 | 6.35693 | 6.8666  | 5.4295  | 5.42033 | 6.6523  | 6.27175 | 6.02768 |
| PRDM5     | 6.11413 | 6.63255 | 6.4728  | 6.25936 | 5.96039 | 5.23103 | 6.06908 | 5.5167  | 5.84359 |
| NDNF      | 5.80624 | 6.96808 | 6.27517 | 6.01367 | 6.11994 | 5.51037 | 5.35191 | 5.69073 | 5.9352  |
| TNIP3     | 4.01135 | 3.92794 | 4.08264 | 4.51702 | 4.71132 | 5.03063 | 4.66678 | 4.48439 | 4.86164 |
| QRFPR     | 4.85362 | 4.8882  | 4.75604 | 5.76127 | 5.55158 | 5.48675 | 5.63626 | 5.57518 | 5.37501 |
| ANXA5     | 9.91321 | 9.4522  | 10.1383 | 10.0143 | 7.11857 | 9.66537 | 9.7433  | 9.9897  | 9.8432  |
| TMEM155   | 4.57179 | 4.62833 | 4.84765 | 4.97539 | 5.66054 | 5.07162 | 5.07072 | 4.86414 | 4.99884 |
| CCNA2     | 8.22327 | 7.65635 | 7.5296  | 8.55074 | 5.97366 | 7.39572 | 8.35304 | 7.70542 | 7.04903 |
| BBS7      | 8.72713 | 8.76012 | 8.57527 | 8.15045 | 6.32119 | 7.75659 | 8.53701 | 7.65663 | 8.43869 |
| IL2       | 2.65076 | 2.57967 | 2.61649 | 2.7141  | 2.57791 | 2.77012 | 2.8102  | 2.77584 | 2.59988 |
| IL21      | 2.56024 | 2.6476  | 2.73491 | 2.77139 | 2.6783  | 3.32712 | 2.66441 | 2.82934 | 2.81997 |
| NUDT6     | 5.10814 | 5.58808 | 5.04114 | 5.14815 | 4.83689 | 4.60374 | 5.451   | 4.89915 | 4.75175 |
| ANKRD50   | 8.86816 | 8.92313 | 8.77978 | 8.4403  | 6.19588 | 9.06939 | 8.95969 | 9.11167 | 8.72534 |
| MFSD8     | 8.75187 | 9.04114 | 9.03451 | 7.982   | 6.8359  | 6.88796 | 7.82784 | 7.65391 | 7.71423 |
| PGRMC2    | 7.5811  | 7.75699 | 7.50455 | 7.03971 | 6.39122 | 7.02886 | 7.20834 | 7.04991 | 6.70322 |
| SCLT1     | 7.25075 | 7.25428 | 7.11727 | 6.06203 | 4.98019 | 6.30043 | 6.74507 | 6.0671  | 6.37645 |
| PCDH18    | 8.62625 | 7.89265 | 8.53779 | 8.16222 | 6.38421 | 5.78316 | 6.15621 | 6.36043 | 6.73835 |
| LINC00616 | 4.24765 | 3.76338 | 3.38879 | 4.10233 | 4.77948 | 4.61035 | 4.31772 | 3.903   | 3.93158 |
| ELF2      | 8.15973 | 8.47902 | 8.37851 | 6.87997 | 5.95118 | 7.23185 | 7.09988 | 7.22568 | 7.4863  |
| SETD7     | 8.19694 | 8.33116 | 8.37604 | 7.63956 | 6.2832  | 6.98824 | 7.91144 | 7.16599 | 7.38304 |
| MAML3     | 8.77037 | 8.51003 | 8.74568 | 7.74045 | 7.3609  | 7.93886 | 8.42545 | 8.00049 | 8.24355 |
| SCOC-AS1  | 4.75341 | 4.89108 | 5.46801 | 4.30026 | 4.42293 | 4.55324 | 4.27618 | 4.79838 | 4.53314 |
| CLGN      | 3.38899 | 3.38453 | 3.85631 | 4.00059 | 4.11581 | 4.28275 | 3.68408 | 3.77387 | 3.57609 |
| RNF150    | 5.9176  | 5.66744 | 6.20044 | 5.41745 | 6.20321 | 5.30976 | 5.33997 | 4.94238 | 5.46196 |
| FREM3     | 4.73267 | 4.75322 | 4.53712 | 4.97262 | 5.71285 | 5.30231 | 5.04397 | 5.10701 | 5.01291 |

|           |         |         |         |         |         |         |         |         |         |
|-----------|---------|---------|---------|---------|---------|---------|---------|---------|---------|
| GYPE      | 5.92026 | 5.30768 | 5.76556 | 5.84122 | 7.46158 | 5.88632 | 5.90637 | 5.85104 | 5.57805 |
| GYPB      | 3.64575 | 3.84325 | 3.8761  | 3.9354  | 5.25017 | 3.73138 | 4.06123 | 3.77096 | 3.53475 |
| GYPA      | 3.74021 | 3.80648 | 3.65027 | 3.89935 | 4.32311 | 3.64596 | 3.90106 | 4.14016 | 3.73682 |
| HHIP-AS1  | 4.92631 | 4.91381 | 4.70621 | 5.67299 | 5.30672 | 5.61473 | 5.18457 | 5.47667 | 5.31106 |
| ANAPC10   | 6.60031 | 6.45342 | 6.72615 | 5.94378 | 5.22368 | 5.43518 | 6.28997 | 5.40115 | 5.28906 |
| OTUD4     | 8.23498 | 8.03701 | 8.15912 | 7.61442 | 6.19103 | 6.71705 | 7.78991 | 7.20966 | 7.65767 |
| ZNF827    | 8.16298 | 8.00898 | 7.66969 | 7.18178 | 6.59876 | 6.31653 | 6.94156 | 6.56543 | 6.52148 |
| LINC01095 | 4.52556 | 4.52165 | 4.7071  | 5.01021 | 5.56271 | 4.98824 | 4.42627 | 4.82626 | 4.63938 |
| TTC29     | 3.42326 | 3.59265 | 3.2686  | 3.46374 | 3.83768 | 3.73701 | 3.86635 | 3.44186 | 3.4099  |
| MIR548G   | 2.63069 | 2.76017 | 1.94372 | 3.03259 | 2.66383 | 2.55963 | 2.26986 | 2.00932 | 2.08989 |
| PRMT9     | 7.6443  | 7.94102 | 7.53185 | 6.92082 | 5.60625 | 6.69567 | 7.07157 | 6.52504 | 6.4741  |
| SH3D19    | 9.46406 | 9.12954 | 9.3173  | 8.38979 | 7.09149 | 8.35966 | 8.78332 | 8.46979 | 8.84644 |
| GATB      | 6.55465 | 6.59148 | 6.48238 | 6.59162 | 6.78819 | 6.42322 | 6.89168 | 6.1752  | 6.90789 |
| MIR3140   | 5.18431 | 5.41049 | 4.27034 | 3.58433 | 2.35159 | 1.7134  | 2.93099 | 5.08728 | 4.34344 |
| TMEM154   | 10.5797 | 9.93129 | 10.325  | 9.89037 | 8.79638 | 9.86783 | 10.0432 | 10.3505 | 10.7027 |
| TIGD4     | 4.54832 | 4.26689 | 4.55166 | 5.06126 | 4.72264 | 4.92177 | 4.51148 | 4.49163 | 4.71984 |
| ANXA2P1   | 6.31472 | 6.21785 | 7.03313 | 7.26889 | 5.55454 | 7.70242 | 7.3709  | 7.69709 | 7.38645 |
| RNF175    | 4.72274 | 4.32688 | 4.96806 | 4.41154 | 5.67494 | 4.94632 | 4.56132 | 4.9834  | 4.73655 |
| SFRP2     | 11.0881 | 9.45189 | 9.862   | 8.20991 | 5.99116 | 7.16938 | 8.58806 | 7.20489 | 7.69075 |
| dchs2     | 4.57154 | 4.70147 | 4.59734 | 4.94055 | 5.19726 | 5.3091  | 4.74917 | 4.95508 | 4.98643 |
| plrg1     | 8.56492 | 8.11839 | 8.52072 | 8.2727  | 6.2544  | 7.38246 | 8.16374 | 7.59559 | 7.7941  |
| FGA       | 4.25589 | 4.33909 | 4.1791  | 4.50194 | 5.2919  | 4.86333 | 4.5061  | 4.61355 | 4.63312 |
| FGG       | 3.17363 | 3.24856 | 3.16895 | 3.4277  | 4.05108 | 3.29603 | 3.4095  | 3.40523 | 3.20617 |
| MAP9      | 6.06474 | 6.24797 | 5.73201 | 5.66662 | 5.2107  | 5.15775 | 5.45439 | 5.01874 | 5.40109 |
| ASIC5     | 3.25789 | 3.27459 | 3.31782 | 3.72717 | 4.3183  | 3.51488 | 3.5377  | 3.43924 | 3.58882 |
| CTSO      | 8.38509 | 7.59456 | 8.75985 | 6.42935 | 5.03861 | 5.379   | 7.0429  | 5.03584 | 6.32139 |



|              |         |         |         |         |         |         |         |         |         |
|--------------|---------|---------|---------|---------|---------|---------|---------|---------|---------|
| PDGFC        | 7.1403  | 6.51438 | 6.66844 | 6.99291 | 6.49349 | 6.31089 | 6.42443 | 6.51938 | 6.43896 |
| c4orf46      | 7.2908  | 7.3119  | 7.29523 | 7.72706 | 7.38318 | 7.22377 | 7.33577 | 7.14725 | 6.77625 |
| PPID         | 7.55551 | 7.41589 | 6.8841  | 7.17607 | 4.52523 | 6.92682 | 7.24723 | 6.59393 | 6.96296 |
| c4orf45      | 3.35373 | 3.2407  | 3.11837 | 3.29871 | 3.66309 | 3.43384 | 3.38922 | 3.42316 | 3.49    |
| FSTL5        | 3.55508 | 3.23745 | 3.59249 | 3.75412 | 4.42457 | 4.02957 | 3.43827 | 3.7211  | 3.397   |
| MIR4454      | 7.76593 | 8.08934 | 7.40123 | 7.3543  | 10.2714 | 7.46964 | 7.43862 | 7.66852 | 7.77723 |
| NAF1         | 8.08548 | 7.83167 | 8.2476  | 6.08198 | 5.52027 | 5.72855 | 6.76931 | 6.40863 | 6.22274 |
| NPY1R        | 7.23156 | 6.46083 | 6.37158 | 4.79438 | 6.24018 | 5.00058 | 5.27845 | 5.17299 | 4.72485 |
| TKTL2        | 4.48978 | 4.48087 | 4.07021 | 4.85567 | 4.53857 | 5.11755 | 4.44039 | 4.71326 | 4.53972 |
| TRIM61       | 6.92468 | 6.2444  | 6.6342  | 6.2827  | 6.10987 | 5.7263  | 5.50067 | 6.17821 | 6.22056 |
| TMEM192      | 6.93108 | 6.88585 | 6.89158 | 6.76649 | 5.41236 | 6.10555 | 7.38277 | 6.86522 | 6.49081 |
| GK3P         | 4.97089 | 4.84907 | 5.0042  | 5.86936 | 5.05077 | 5.43191 | 5.90962 | 5.22512 | 5.74619 |
| DDX60        | 7.71417 | 7.25979 | 7.09829 | 6.35229 | 5.97204 | 5.88508 | 6.56012 | 5.58734 | 5.78461 |
| DDX60L       | 7.43852 | 6.60886 | 7.03707 | 6.40412 | 4.62277 | 6.39592 | 6.75053 | 6.23606 | 6.67218 |
| CBR4         | 8.16065 | 7.9804  | 8.14608 | 7.27444 | 7.08118 | 5.86551 | 7.23234 | 6.93412 | 6.66601 |
| SH3RF1       | 7.30413 | 6.6294  | 6.9642  | 7.64533 | 5.69895 | 6.11771 | 7.28606 | 7.24978 | 7.13023 |
| NEK1         | 7.85768 | 7.7032  | 7.59177 | 7.29305 | 5.78595 | 6.33727 | 7.30434 | 6.77515 | 7.09807 |
| Hpf1         | 5.82375 | 6.36926 | 5.83514 | 5.85565 | 5.59862 | 4.96717 | 5.66478 | 5.85559 | 4.4923  |
| LOC100506085 | 4.40474 | 4.16149 | 4.35831 | 4.83991 | 5.05452 | 4.47021 | 4.29417 | 4.40617 | 4.26545 |
| MFAP3L       | 7.83695 | 7.58042 | 7.52716 | 7.75817 | 6.02264 | 6.29702 | 6.58706 | 5.34987 | 4.92131 |
| AADAT        | 6.91409 | 6.66429 | 6.81413 | 6.31534 | 5.74268 | 5.61998 | 5.59237 | 5.51485 | 5.85838 |
| HMGB2        | 6.74806 | 6.956   | 7.00686 | 6.44357 | 5.38931 | 5.99882 | 6.75754 | 6.67152 | 6.17412 |
| SCRG1        | 4.37357 | 4.61546 | 4.36334 | 4.58996 | 5.44782 | 4.89215 | 4.63084 | 4.29387 | 4.32229 |
| HAND2        | 6.10461 | 6.35545 | 6.19695 | 6.97949 | 6.66154 | 7.14062 | 6.53073 | 6.97495 | 6.32457 |
| FBXO8        | 8.18546 | 8.07495 | 8.1376  | 7.79867 | 6.1523  | 8.00553 | 8.15599 | 7.32961 | 7.87737 |
| HPGD         | 9.34864 | 9.078   | 8.74267 | 8.55785 | 5.48127 | 6.43327 | 6.04861 | 5.98789 | 5.69931 |

|           |         |         |         |         |         |         |         |         |         |
|-----------|---------|---------|---------|---------|---------|---------|---------|---------|---------|
| GPM6A     | 4.87116 | 4.87622 | 5.35221 | 5.09128 | 6.19015 | 5.11031 | 4.54942 | 4.87172 | 5.10243 |
| SPATA4    | 4.32544 | 4.48498 | 4.31333 | 5.24135 | 4.78129 | 4.67863 | 4.91992 | 4.64749 | 4.76853 |
| ASB5      | 3.94849 | 4.57949 | 4.128   | 4.72096 | 5.40936 | 4.38191 | 4.91439 | 4.50193 | 4.13277 |
| VEGFC     | 6.45533 | 6.23732 | 6.23221 | 7.20028 | 6.59123 | 6.13341 | 6.88411 | 7.19745 | 7.04413 |
| AGA       | 8.53131 | 8.30715 | 8.59905 | 8.5977  | 7.31369 | 8.57684 | 9.11448 | 7.29871 | 8.96966 |
| LINC00290 | 2.7461  | 2.80065 | 2.62439 | 2.58836 | 2.88577 | 3.24562 | 2.66007 | 2.76691 | 2.73771 |
| LOC90768  | 5.0338  | 5.17144 | 5.20933 | 6.31091 | 6.38695 | 6.17956 | 6.14764 | 6.00995 | 5.92441 |
| DCTD      | 8.56287 | 8.08183 | 8.70467 | 8.5221  | 7.01142 | 8.50104 | 8.69365 | 7.95732 | 8.67105 |
| WWC2-AS2  | 5.0782  | 4.79761 | 5.07243 | 5.55207 | 5.18422 | 5.91261 | 5.4822  | 5.44144 | 5.42392 |
| CLDN22    | 4.8388  | 4.92749 | 4.89992 | 4.96994 | 5.41768 | 5.0879  | 5.64114 | 5.59899 | 5.06114 |
| Cldn24    | 4.05144 | 4.03331 | 4.03541 | 4.3413  | 4.83661 | 4.69662 | 4.7338  | 3.57135 | 4.49478 |
| LOC389247 | 4.5596  | 4.97445 | 4.93581 | 5.09398 | 4.94309 | 5.51273 | 4.97316 | 5.04921 | 5.2997  |
| RWDD4     | 7.38488 | 7.44765 | 7.42373 | 7.60326 | 6.19197 | 7.47879 | 7.84185 | 7.58322 | 7.713   |
| ENPP6     | 4.54201 | 4.8839  | 4.75621 | 5.39531 | 5.33918 | 5.52712 | 4.70715 | 5.20113 | 5.34986 |
| LOC728175 | 6.48383 | 6.19981 | 6.61152 | 7.04288 | 7.81156 | 7.17443 | 6.73903 | 6.64809 | 7.05195 |
| IRF2      | 8.6571  | 8.62697 | 8.61714 | 7.95342 | 7.39535 | 7.72304 | 8.02078 | 7.40501 | 7.83657 |
| CENPU     | 7.70973 | 8.30473 | 8.45797 | 6.91187 | 6.16914 | 6.68471 | 7.58179 | 6.77864 | 6.99695 |
| ACSL1     | 10.5554 | 10.7076 | 10.311  | 9.2515  | 6.5537  | 8.37201 | 9.62877 | 8.30289 | 9.04705 |
| SLED1     | 6.65755 | 6.10302 | 5.75158 | 4.65765 | 5.38097 | 5.73132 | 5.37566 | 5.35665 | 4.90464 |
| MIR3945   | 3.71186 | 4.0839  | 3.59377 | 3.76368 | 4.52997 | 3.95773 | 4.72351 | 3.65406 | 4.27507 |
| CFAP97    | 9.05061 | 9.42496 | 9.40501 | 8.35946 | 7.20827 | 7.69361 | 9.0155  | 7.68494 | 8.29169 |
| LRP2BP    | 5.60451 | 5.6179  | 5.43961 | 5.48959 | 5.40682 | 5.28828 | 5.05208 | 5.56007 | 5.46591 |
| UFSP2     | 8.15749 | 8.02886 | 8.57724 | 7.62834 | 6.29684 | 8.26556 | 8.6119  | 7.91433 | 8.05107 |
| CCDC110   | 5.53607 | 5.62055 | 5.4987  | 5.26741 | 5.58256 | 5.44288 | 5.33496 | 5.42325 | 5.25459 |
| PDLIM3    | 6.92756 | 6.41206 | 6.93273 | 5.77383 | 6.33018 | 5.65225 | 6.14571 | 5.75263 | 6.45946 |
| SORBS2    | 6.578   | 6.91614 | 7.32296 | 5.63691 | 6.27153 | 5.59044 | 5.60138 | 5.89115 | 5.77535 |

|           |         |         |         |         |         |         |         |         |         |
|-----------|---------|---------|---------|---------|---------|---------|---------|---------|---------|
| F11-AS1   | 4.29377 | 4.49786 | 4.25043 | 4.30073 | 5.47768 | 4.85234 | 4.62054 | 4.94135 | 4.77431 |
| MTNR1A    | 5.73852 | 5.67945 | 5.561   | 6.27695 | 6.66165 | 6.35537 | 5.7356  | 6.42914 | 6.35067 |
| FAT1      | 9.81647 | 9.2833  | 9.30755 | 9.84845 | 7.50422 | 9.19481 | 9.85756 | 9.95152 | 10.9389 |
| LOC339975 | 4.03518 | 4.54569 | 4.42874 | 5.43656 | 5.6385  | 4.63864 | 4.50989 | 4.47773 | 4.44433 |
| TRIML2    | 4.28704 | 4.32339 | 4.22806 | 4.84188 | 5.90392 | 5.54938 | 4.79846 | 5.33647 | 5.47525 |
| YTHDC1    | 9.4308  | 9.74085 | 9.51404 | 8.89375 | 7.93684 | 9.17418 | 9.42879 | 10.2896 | 9.31682 |
| MAFIP     | 6.12148 | 6.98157 | 6.43157 | 6.38113 | 6.61291 | 7.15869 | 6.70028 | 6.57133 | 6.64563 |
| LRRC14B   | 6.17355 | 6.4918  | 6.38258 | 6.52972 | 7.46956 | 7.12748 | 6.99143 | 6.9243  | 6.93595 |
| AHRR      | 6.80725 | 7.19813 | 6.92593 | 7.49025 | 6.91674 | 7.93249 | 7.66896 | 7.49241 | 7.39688 |
| EXOC3     | 7.82574 | 7.92763 | 7.51626 | 7.22902 | 6.07035 | 7.72065 | 7.65221 | 7.55272 | 7.27174 |
| CEP72     | 6.78767 | 7.0789  | 6.82956 | 6.85517 | 7.1303  | 7.51047 | 7.14298 | 7.46432 | 7.02609 |
| TRIP13    | 5.88467 | 5.68752 | 5.92272 | 7.04806 | 5.99    | 6.5233  | 6.55525 | 6.31881 | 6.24472 |
| NKD2      | 6.57765 | 6.80509 | 6.4936  | 6.84334 | 6.68303 | 6.80159 | 6.8948  | 6.58466 | 6.68266 |
| C5orf38   | 6.64231 | 6.50247 | 6.66084 | 7.31911 | 7.29805 | 7.65036 | 7.24534 | 7.05164 | 7.1104  |
| LINC01019 | 5.89619 | 5.84875 | 5.74843 | 6.06177 | 7.05158 | 6.66016 | 6.0943  | 6.11222 | 6.20882 |
| IRX1      | 6.32034 | 5.83888 | 6.47372 | 7.32902 | 6.58553 | 7.36868 | 6.84157 | 6.95399 | 6.86447 |
| LINC01020 | 4.08032 | 4.35036 | 4.14932 | 4.64955 | 5.78167 | 4.76115 | 4.62864 | 4.40037 | 4.40918 |
| ICE1      | 7.58475 | 7.66851 | 7.67165 | 6.69886 | 4.74534 | 5.62784 | 7.26062 | 6.757   | 6.71001 |
| UBE2QL1   | 6.55366 | 6.03814 | 6.21975 | 6.59318 | 6.91431 | 6.93036 | 6.51569 | 6.45034 | 6.43423 |
| LINC01018 | 5.36372 | 5.27614 | 5.47944 | 5.88248 | 6.16037 | 6.3377  | 5.94887 | 5.87201 | 6.33653 |
| PAPD7     | 8.72456 | 9.0992  | 8.85727 | 8.15203 | 6.58578 | 6.99062 | 7.88652 | 7.91228 | 8.10172 |
| ADCY2     | 5.61923 | 5.75495 | 5.68104 | 4.80326 | 5.14657 | 5.32734 | 4.81271 | 4.99239 | 4.90033 |
| MTRR      | 6.28931 | 6.53925 | 6.42127 | 6.00435 | 5.79563 | 5.843   | 5.99156 | 5.63492 | 5.94616 |
| MIR4458   | 6.39079 | 6.53502 | 6.13503 | 6.71445 | 6.1178  | 6.73384 | 7.12945 | 6.32801 | 6.74686 |
| SNHG18    | 6.59411 | 6.75365 | 6.16478 | 6.42365 | 6.94029 | 6.60289 | 6.15    | 5.93083 | 5.9273  |
| ROPN1L    | 5.52151 | 5.69154 | 5.64135 | 6.18774 | 6.34359 | 6.09375 | 5.72673 | 5.84062 | 5.69823 |

|           |         |         |         |         |         |         |         |         |         |
|-----------|---------|---------|---------|---------|---------|---------|---------|---------|---------|
| ANKRD33B  | 6.68875 | 6.73279 | 6.55055 | 7.0246  | 6.99969 | 6.88837 | 6.78289 | 6.62078 | 6.87959 |
| TRIO      | 8.00805 | 7.81064 | 7.91807 | 7.45981 | 6.04648 | 7.39802 | 7.51329 | 7.80679 | 8.25368 |
| FBXL7     | 7.7804  | 7.40188 | 7.73421 | 7.2245  | 6.75292 | 6.37632 | 6.75258 | 7.09427 | 7.15619 |
| MIR887    | 5.50369 | 5.02039 | 5.20123 | 6.04449 | 6.10996 | 6.25939 | 5.6821  | 5.76628 | 5.32355 |
| prdm9     | 4.7607  | 5.18133 | 4.71538 | 5.13533 | 5.96547 | 5.09129 | 4.66734 | 5.57007 | 5.4628  |
| LINC01021 | 4.05791 | 4.10737 | 3.89168 | 4.08579 | 4.74744 | 4.29043 | 3.79665 | 3.96629 | 4.13933 |
| LSP1P3    | 4.67547 | 4.70008 | 4.03008 | 5.13423 | 4.44436 | 5.29781 | 5.28185 | 4.84176 | 5.15013 |
| C5ORF22   | 8.67387 | 8.59597 | 8.98936 | 7.7502  | 6.68018 | 6.86109 | 8.21957 | 7.39522 | 7.67515 |
| PDZD2     | 8.47329 | 8.90349 | 8.14583 | 7.18844 | 6.25163 | 6.54119 | 6.72281 | 6.54841 | 6.00387 |
| SUB1      | 7.40722 | 6.97053 | 7.16696 | 7.00321 | 7.08024 | 6.80343 | 7.30916 | 7.53159 | 7.44558 |
| NPR3      | 7.40399 | 8.95925 | 8.38606 | 6.60668 | 6.96822 | 6.88236 | 7.73799 | 6.52048 | 6.71742 |
| TARS      | 8.02128 | 7.89915 | 7.69844 | 9.13921 | 5.83064 | 9.43563 | 9.26766 | 8.91338 | 9.43499 |
| RXFP3     | 5.49331 | 5.6562  | 5.47837 | 5.71031 | 6.16257 | 5.83    | 5.92738 | 5.6328  | 5.52807 |
| RAI14     | 7.5919  | 7.19193 | 6.92596 | 6.20349 | 6.25492 | 5.39396 | 6.1142  | 6.79964 | 6.80925 |
| TTC23L    | 5.20489 | 5.33753 | 5.18106 | 5.35788 | 5.71652 | 5.65219 | 5.01951 | 5.34478 | 5.22745 |
| SPEF2     | 5.33389 | 5.54922 | 5.53453 | 4.89255 | 5.49882 | 5.09987 | 5.17295 | 4.94267 | 4.86851 |
| IL7R      | 5.60205 | 6.06764 | 7.0955  | 6.39088 | 6.03096 | 7.02808 | 6.69949 | 6.51071 | 7.18324 |
| NIPBL     | 9.74389 | 9.77507 | 9.5521  | 8.71047 | 6.23146 | 9.04591 | 8.82691 | 8.97483 | 9.21425 |
| WDR70     | 7.76208 | 7.84338 | 8.07898 | 7.13332 | 6.59379 | 6.91683 | 7.57038 | 6.33321 | 6.78748 |
| OSMR      | 9.89041 | 9.43589 | 9.73442 | 9.77376 | 8.32899 | 10.6831 | 9.56095 | 10.7378 | 10.8494 |
| PTGER4    | 6.79576 | 6.66159 | 6.49867 | 6.07224 | 5.94205 | 6.02979 | 6.34615 | 7.37245 | 6.3017  |
| C7        | 6.20078 | 6.96015 | 8.76197 | 4.91006 | 6.17062 | 4.87037 | 5.03994 | 5.44941 | 4.88326 |
| OXCT1     | 6.10235 | 6.30104 | 6.47491 | 6.91822 | 6.76655 | 6.90537 | 6.52739 | 6.81564 | 6.61646 |
| C5orf51   | 8.37704 | 8.31175 | 8.57468 | 7.60236 | 6.15747 | 7.36632 | 7.72764 | 7.55423 | 7.97355 |
| FBXO4     | 7.50177 | 7.66792 | 7.99028 | 7.46369 | 5.30286 | 6.04623 | 7.36859 | 5.6837  | 6.40821 |
| GHR       | 6.89272 | 6.67906 | 6.57527 | 5.79    | 6.00155 | 5.05596 | 5.51171 | 4.8996  | 5.27679 |

|          |         |         |         |         |         |         |         |         |         |
|----------|---------|---------|---------|---------|---------|---------|---------|---------|---------|
| Ccdc152  | 2.69012 | 2.91914 | 3.16508 | 3.0031  | 2.47822 | 2.90888 | 3.24399 | 2.6466  | 2.70642 |
| ZNF131   | 7.24724 | 7.33559 | 7.37997 | 6.26944 | 6.00948 | 6.24233 | 6.45238 | 6.44669 | 6.55722 |
| NIM1K    | 5.10448 | 5.03923 | 4.80733 | 5.08355 | 5.92173 | 5.63035 | 5.17191 | 5.33079 | 5.16859 |
| NNT      | 9.01707 | 8.46863 | 8.67925 | 8.26607 | 6.75206 | 7.34654 | 8.54636 | 7.29543 | 7.46973 |
| MRPS30   | 7.83496 | 8.12911 | 7.96874 | 7.52034 | 6.68611 | 6.82383 | 7.69654 | 6.7171  | 7.17088 |
| ISL1     | 4.76161 | 4.84899 | 5.16426 | 5.63228 | 5.78284 | 5.85439 | 5.1928  | 5.33071 | 5.1948  |
| FST      | 6.93467 | 7.41425 | 7.2563  | 9.35551 | 7.05289 | 7.16879 | 7.1322  | 8.6245  | 8.24521 |
| HSPB3    | 4.59883 | 4.49814 | 4.70257 | 4.84563 | 4.97119 | 5.23946 | 5.38402 | 4.56462 | 4.65267 |
| SNX18    | 7.54987 | 7.16753 | 7.33533 | 7.50974 | 7.53936 | 7.43901 | 7.31759 | 6.95987 | 7.26333 |
| GZMK     | 4.8541  | 4.23547 | 5.32914 | 4.6828  | 5.15512 | 5.16527 | 5.21228 | 4.6895  | 4.84133 |
| GPX8     | 7.30227 | 6.11627 | 6.61298 | 6.19617 | 4.70557 | 5.81138 | 6.15421 | 5.53904 | 5.88993 |
| SKIV2L2  | 9.42281 | 9.71014 | 9.42329 | 8.78078 | 6.51795 | 8.19622 | 9.25008 | 8.22944 | 8.756   |
| DDX4     | 3.32259 | 3.56025 | 3.3615  | 3.79226 | 4.0073  | 3.75872 | 3.60777 | 3.73426 | 3.65565 |
| IL31RA   | 5.33715 | 5.20017 | 5.07649 | 5.6846  | 5.95245 | 5.82102 | 6.024   | 6.50815 | 5.84639 |
| SETD9    | 5.62161 | 5.57859 | 5.49533 | 5.73851 | 5.17647 | 5.6282  | 6.22056 | 4.97818 | 4.95274 |
| GPBP1    | 8.6849  | 8.98189 | 8.86069 | 8.00946 | 6.08406 | 8.24001 | 8.30819 | 8.58545 | 8.30823 |
| PART1    | 6.02652 | 6.64871 | 5.6423  | 6.22377 | 6.79114 | 6.24786 | 6.60757 | 6.32526 | 6.40222 |
| C5orf64  | 4.76171 | 4.54057 | 4.79138 | 5.15266 | 6.03446 | 5.50761 | 4.6416  | 5.17331 | 5.50011 |
| KIF2A    | 8.65819 | 8.79186 | 8.86628 | 8.95928 | 6.91503 | 8.72601 | 8.66393 | 9.92269 | 8.93984 |
| IPO11    | 8.04446 | 7.98642 | 8.03287 | 7.3699  | 5.45979 | 6.41647 | 7.69826 | 6.58989 | 6.97119 |
| LRRC70   | 6.24232 | 5.92897 | 6.39625 | 5.45021 | 5.22632 | 4.91318 | 5.40284 | 5.6401  | 5.28173 |
| RNF180   | 7.83492 | 7.04497 | 7.79437 | 5.95785 | 6.37793 | 5.47771 | 5.52011 | 5.5327  | 5.35225 |
| RGS7BP   | 5.62628 | 5.366   | 5.59698 | 5.78849 | 6.37612 | 6.06053 | 5.69821 | 5.58238 | 6.06917 |
| CWC27    | 7.99703 | 7.7216  | 7.98484 | 6.99654 | 5.40509 | 6.7323  | 7.68632 | 7.82815 | 7.545   |
| ppwd1    | 9.0647  | 9.02672 | 8.9123  | 7.87063 | 5.63368 | 7.00113 | 7.56529 | 7.66102 | 7.2391  |
| TRAPPC13 | 7.16567 | 7.25794 | 7.25066 | 6.1058  | 4.81554 | 5.60527 | 6.71725 | 5.19021 | 5.80303 |

|          |         |         |         |         |         |         |         |         |         |
|----------|---------|---------|---------|---------|---------|---------|---------|---------|---------|
| NLN      | 7.48775 | 7.40263 | 7.6525  | 7.39392 | 5.74002 | 6.75646 | 7.86508 | 6.11635 | 6.93457 |
| ERBIN    | 10.4012 | 10.3238 | 10.4895 | 9.05769 | 7.8852  | 9.25146 | 9.22262 | 9.12472 | 9.30972 |
| SREK1    | 7.96201 | 8.06599 | 7.66807 | 7.09856 | 6.04526 | 6.3819  | 6.57626 | 6.20311 | 6.72528 |
| MAST4    | 8.96686 | 8.66432 | 8.90769 | 9.06626 | 8.21704 | 9.19585 | 9.14826 | 10.0349 | 10.5124 |
| CCNB1    | 6.36612 | 5.96363 | 5.78446 | 7.30213 | 4.76418 | 6.62745 | 6.65719 | 6.62984 | 5.86097 |
| CENPH    | 5.28974 | 5.73031 | 5.71021 | 5.56059 | 4.78757 | 4.58537 | 5.452   | 4.95989 | 4.3822  |
| MRPS36   | 6.93258 | 7.0306  | 7.00029 | 7.51106 | 6.0801  | 7.137   | 7.86468 | 7.36137 | 7.33852 |
| CDK7     | 7.77236 | 7.91982 | 7.81804 | 8.28703 | 6.90984 | 8.16015 | 8.02385 | 8.50509 | 8.26172 |
| RAD17    | 7.59259 | 7.80762 | 7.52132 | 6.90116 | 4.52421 | 5.49671 | 7.11721 | 6.25435 | 6.28572 |
| MARVELD2 | 7.81176 | 7.98204 | 7.56769 | 7.88515 | 6.60635 | 7.2404  | 8.01885 | 6.68569 | 7.75012 |
| OCLN     | 8.91362 | 9.39215 | 8.94925 | 8.20337 | 7.50647 | 9.27563 | 8.48664 | 9.43659 | 9.28364 |
| SERF1A   | 7.67996 | 7.95012 | 7.97589 | 7.70188 | 7.79219 | 7.43221 | 7.8557  | 6.80167 | 7.71391 |
| MCCC2    | 8.15982 | 8.0073  | 8.07138 | 7.49644 | 5.47695 | 7.24597 | 7.63801 | 6.81365 | 7.09986 |
| CARTPT   | 4.65234 | 4.6419  | 4.50652 | 5.40778 | 5.76804 | 5.36935 | 5.12973 | 5.20113 | 5.03648 |
| MAP1B    | 8.59753 | 9.08649 | 9.32899 | 7.84061 | 6.03799 | 7.18122 | 7.01372 | 7.43626 | 7.71791 |
| MIR4803  | 5.55284 | 6.36739 | 5.14009 | 4.88442 | 5.31449 | 5.24187 | 5.16361 | 5.27762 | 5.26859 |
| PTCD2    | 7.13282 | 7.10623 | 6.90826 | 5.89344 | 5.72658 | 5.18528 | 6.66853 | 6.02371 | 5.39994 |
| TNPO1    | 9.43369 | 9.4078  | 9.44481 | 9.04476 | 6.30996 | 7.98419 | 9.10098 | 9.21232 | 8.95343 |
| MIR4804  | 5.59912 | 5.29748 | 4.24188 | 4.86246 | 4.74742 | 4.51126 | 4.56098 | 4.59333 | 5.49088 |
| FCHO2    | 9.41925 | 9.36421 | 9.41995 | 8.72723 | 7.85003 | 9.71188 | 9.48183 | 9.88672 | 10.0718 |
| TMEM171  | 6.34711 | 6.00508 | 5.8337  | 6.72415 | 5.82531 | 6.27086 | 6.65127 | 5.59161 | 6.01374 |
| tmem174  | 4.6111  | 4.66247 | 4.25828 | 5.08867 | 4.86936 | 5.37186 | 4.99972 | 4.65674 | 4.72118 |
| FOXD1    | 5.2771  | 5.39416 | 5.22089 | 5.32781 | 6.51016 | 5.92926 | 5.81385 | 5.24339 | 5.52087 |
| BTF3     | 8.09016 | 8.24244 | 8.20926 | 8.08476 | 7.40656 | 8.02468 | 8.21429 | 7.62207 | 8.02506 |
| ARHGEF28 | 8.27841 | 8.54232 | 8.06212 | 7.58025 | 6.29538 | 7.7965  | 7.19945 | 8.16223 | 7.60383 |
| HEXB     | 9.22567 | 9.61177 | 9.34417 | 9.56829 | 7.02817 | 9.07783 | 9.31088 | 9.86239 | 9.26475 |

|           |         |         |         |         |         |         |         |         |         |
|-----------|---------|---------|---------|---------|---------|---------|---------|---------|---------|
| NSA2      | 10.2578 | 10.5952 | 10.2293 | 10.4113 | 9.12225 | 9.70001 | 10.5558 | 10.0147 | 10.002  |
| HMGCR     | 10.5022 | 10.4593 | 10.3305 | 10.5438 | 8.52428 | 10.2776 | 10.3978 | 10.464  | 10.677  |
| POLK      | 7.23645 | 7.37241 | 7.28203 | 5.92694 | 4.01537 | 5.1388  | 6.24364 | 5.84779 | 6.01557 |
| SV2C      | 4.41338 | 4.36166 | 4.27374 | 4.72253 | 5.28711 | 4.58204 | 4.6738  | 4.62833 | 4.73248 |
| IQGAP2    | 6.95775 | 6.70088 | 7.49462 | 5.12946 | 5.56906 | 5.88691 | 6.06939 | 5.23413 | 5.52103 |
| F2R       | 8.9056  | 8.05033 | 8.47783 | 8.50586 | 6.77315 | 7.73825 | 8.42031 | 7.79885 | 8.29219 |
| F2RL1     | 8.12346 | 7.77403 | 7.37952 | 8.88455 | 6.75972 | 8.20271 | 8.73332 | 8.9165  | 8.16588 |
| S100Z     | 6.12187 | 5.94354 | 5.70343 | 5.72872 | 6.65319 | 5.95372 | 6.31395 | 6.52943 | 6.44992 |
| CRHBP     | 4.87682 | 4.94395 | 5.21761 | 5.28316 | 5.43488 | 5.10502 | 5.25314 | 5.15692 | 4.85902 |
| AGGF1     | 8.41151 | 8.68832 | 8.41822 | 7.78544 | 5.66056 | 7.38182 | 8.29549 | 7.06857 | 7.34189 |
| ZBED3-AS1 | 5.36919 | 5.30213 | 5.62633 | 5.33255 | 6.14036 | 5.48774 | 4.92798 | 5.4663  | 5.58779 |
| PDE8B     | 5.93556 | 5.54059 | 5.73382 | 5.54886 | 6.07052 | 5.80801 | 5.74516 | 5.87065 | 5.64833 |
| SCAMP1    | 9.76661 | 9.5528  | 9.55202 | 9.53246 | 7.13355 | 9.64336 | 9.58245 | 9.2284  | 9.75422 |
| BHMT2     | 5.57133 | 5.62312 | 6.02598 | 4.76838 | 5.81301 | 5.56731 | 5.09166 | 4.71217 | 5.05131 |
| BHMT      | 4.60063 | 4.53682 | 4.90471 | 5.00025 | 5.43225 | 5.27097 | 4.95488 | 4.99055 | 4.99059 |
| PAPD4     | 10.1322 | 10.0823 | 10.1488 | 8.99714 | 6.50355 | 8.43647 | 9.24546 | 8.95957 | 9.20433 |
| CMYA5     | 6.76853 | 6.99572 | 5.78875 | 5.79979 | 6.02148 | 5.71638 | 5.80641 | 5.29211 | 5.86898 |
| THBS4     | 5.79257 | 6.30141 | 6.50698 | 5.33863 | 6.14269 | 5.60166 | 5.3655  | 5.38958 | 5.14289 |
| SPZ1      | 3.87405 | 4.18462 | 4.14996 | 4.33971 | 5.56879 | 4.47461 | 4.08845 | 4.90489 | 4.52969 |
| MSH3      | 9.01779 | 8.95487 | 8.78048 | 8.25925 | 5.82888 | 7.87108 | 8.47262 | 7.1237  | 7.56966 |
| RASGRF2   | 6.88007 | 6.14463 | 6.76697 | 6.02759 | 6.35482 | 5.75307 | 5.71957 | 6.38034 | 6.39278 |
| ATG10     | 6.94033 | 6.30793 | 6.50467 | 5.96547 | 5.42417 | 6.22154 | 5.9418  | 5.09811 | 5.87377 |
| XRCC4     | 7.33726 | 7.35448 | 7.25436 | 7.45567 | 5.2907  | 7.45281 | 8.00844 | 7.45946 | 7.09427 |
| VCAN      | 9.73363 | 7.82562 | 9.29992 | 8.95528 | 5.98644 | 6.63851 | 7.61295 | 6.37622 | 7.20798 |
| COX7C     | 6.08576 | 6.52254 | 6.28397 | 6.89819 | 6.3028  | 6.64281 | 6.97214 | 6.17407 | 6.14372 |
| RASA1     | 9.1838  | 9.09171 | 9.06457 | 8.94328 | 6.28661 | 8.95716 | 8.92278 | 9.43782 | 9.26701 |

|              |         |         |         |         |         |         |         |         |         |
|--------------|---------|---------|---------|---------|---------|---------|---------|---------|---------|
| TMEM161B-AS1 | 5.72964 | 5.96848 | 5.61711 | 5.70696 | 5.70559 | 5.4364  | 5.27476 | 5.15952 | 5.31155 |
| MEF2C        | 4.25638 | 4.33201 | 4.14908 | 5.04674 | 5.12249 | 5.14196 | 5.12394 | 5.09122 | 4.72437 |
| polr3g       | 8.04145 | 7.96528 | 8.15555 | 8.98455 | 7.15621 | 8.82302 | 9.69274 | 7.78855 | 8.82446 |
| ADGRV1       | 4.38095 | 4.55411 | 4.49467 | 4.93647 | 5.73229 | 5.24703 | 4.77752 | 5.59747 | 4.78632 |
| ARRDC3-AS1   | 5.88306 | 5.91101 | 5.97169 | 5.15701 | 5.39705 | 5.17776 | 5.95366 | 4.98791 | 5.43569 |
| SLF1         | 6.67494 | 6.58576 | 6.87952 | 5.74076 | 4.55466 | 4.66108 | 5.35086 | 4.76841 | 4.41736 |
| GPR150       | 5.9232  | 5.749   | 5.87703 | 6.47317 | 6.36228 | 6.44017 | 5.86438 | 6.22419 | 6.10798 |
| RFESD        | 5.68707 | 6.16429 | 6.27104 | 4.74924 | 5.95852 | 5.35983 | 5.24321 | 4.97188 | 4.36945 |
| RHOBTB3      | 6.57242 | 6.72248 | 6.47455 | 6.18859 | 6.00965 | 5.49278 | 5.38578 | 5.32083 | 5.2409  |
| LINC01554    | 8.37346 | 8.83276 | 8.35981 | 6.63828 | 6.28355 | 5.57405 | 6.32537 | 5.83223 | 6.46136 |
| MIR583       | 3.96402 | 3.82939 | 3.67162 | 4.38239 | 4.12997 | 4.83292 | 4.22305 | 4.27012 | 4.39899 |
| CAST         | 10.2743 | 10.1863 | 10.2931 | 9.6077  | 9.66891 | 10.2767 | 10.0281 | 10.7416 | 10.2904 |
| ERAP2        | 6.89817 | 6.42554 | 6.9092  | 6.08636 | 6.13059 | 6.09827 | 5.25954 | 5.51236 | 5.11886 |
| LNPEP        | 10.2165 | 10.0435 | 9.87569 | 9.26115 | 6.86982 | 8.50348 | 9.7187  | 9.66712 | 9.58594 |
| LOC100289230 | 5.40888 | 5.48146 | 5.40699 | 5.9439  | 6.10322 | 5.60013 | 4.62238 | 5.58127 | 5.5686  |
| PAM          | 8.88054 | 8.82774 | 9.31211 | 9.25243 | 7.54978 | 9.44265 | 9.21469 | 9.85781 | 9.53078 |
| PIIP5K2      | 8.92399 | 8.85317 | 8.79982 | 8.13515 | 4.74244 | 5.96339 | 8.05092 | 6.56804 | 7.25534 |
| c5orf30      | 7.35935 | 7.44396 | 7.53127 | 7.29167 | 6.95824 | 6.92283 | 7.68924 | 7.43173 | 7.06775 |
| LINC01023    | 5.98661 | 6.13003 | 6.13915 | 6.71288 | 6.12827 | 6.98674 | 6.54214 | 6.37365 | 6.46443 |
| FER          | 8.27645 | 7.74078 | 7.93565 | 7.63938 | 5.36185 | 7.77477 | 7.67385 | 8.28134 | 8.41743 |
| LOC100289673 | 5.29239 | 5.60542 | 5.3605  | 5.62801 | 6.12081 | 5.80639 | 5.67107 | 5.56062 | 5.84113 |
| TSLP         | 5.37603 | 5.46899 | 5.04668 | 5.97208 | 6.36061 | 6.03712 | 6.0199  | 5.91437 | 7.73134 |
| WDR36        | 8.77709 | 8.50428 | 9.01192 | 8.45507 | 5.86659 | 7.47486 | 8.24161 | 7.21231 | 7.71262 |
| CAMK4        | 4.74885 | 4.78538 | 4.86473 | 5.26894 | 5.1662  | 5.27263 | 5.24879 | 5.37183 | 5.00867 |
| STARD4-AS1   | 5.9671  | 5.82745 | 5.92106 | 6.37134 | 6.0939  | 6.10415 | 6.16383 | 5.5137  | 5.89801 |
| NREP-AS1     | 3.65063 | 3.66627 | 3.56327 | 4.2474  | 4.09497 | 4.31244 | 4.14576 | 3.75922 | 4.30504 |



|              |         |         |         |         |         |         |         |         |         |
|--------------|---------|---------|---------|---------|---------|---------|---------|---------|---------|
| EPB41L4A-AS1 | 6.45537 | 7.06341 | 6.91516 | 6.06816 | 5.34495 | 5.7064  | 6.59216 | 5.74342 | 5.83387 |
| EPB41L4A-AS2 | 5.80053 | 5.5747  | 5.67495 | 6.24897 | 6.23275 | 6.41607 | 5.94308 | 6.26444 | 6.16009 |
| APC          | 7.7271  | 7.34207 | 7.75211 | 6.83492 | 5.79262 | 6.51084 | 7.03125 | 6.78339 | 7.22284 |
| SRP19        | 6.6957  | 6.72165 | 7.13974 | 6.54777 | 5.35005 | 6.52482 | 7.62124 | 6.69945 | 7.04496 |
| DCP2         | 7.56385 | 7.53416 | 7.34909 | 7.07445 | 5.94054 | 6.80011 | 6.91157 | 7.31945 | 6.94297 |
| YTHDC2       | 8.71668 | 8.92965 | 8.89896 | 8.20274 | 5.32605 | 7.4198  | 7.97755 | 7.56539 | 8.04927 |
| LVRN         | 4.75468 | 5.04013 | 5.45175 | 5.00502 | 5.56782 | 5.53559 | 5.14552 | 5.21923 | 5.00666 |
| ARL14EPL     | 3.75126 | 3.44064 | 3.47735 | 3.60911 | 3.92323 | 4.40217 | 3.98401 | 3.66165 | 3.79728 |
| COMMD10      | 7.73142 | 7.65903 | 7.69718 | 7.11472 | 5.46176 | 6.82358 | 7.62163 | 6.65872 | 7.20308 |
| LINC00992    | 5.26395 | 5.31929 | 5.38398 | 5.22707 | 5.90906 | 5.2899  | 5.6349  | 5.18549 | 5.35278 |
| DMXL1        | 9.25662 | 9.52704 | 9.01807 | 8.36162 | 6.41787 | 8.38198 | 8.8804  | 8.938   | 8.86635 |
| HSD17B4      | 10.0394 | 9.61269 | 9.73273 | 9.27318 | 6.88349 | 9.01529 | 9.72984 | 8.57243 | 9.16757 |
| PRR16        | 5.5491  | 4.8945  | 5.42118 | 4.95785 | 5.15416 | 4.95297 | 4.75089 | 4.84898 | 4.66496 |
| FTMT         | 4.05883 | 4.18591 | 4.0509  | 4.12403 | 5.48078 | 3.8027  | 4.05615 | 4.22968 | 4.51353 |
| SRFBP1       | 8.54452 | 8.67163 | 8.61306 | 7.82203 | 5.54577 | 6.46764 | 8.28349 | 6.99035 | 7.56396 |
| ZNF474       | 5.11975 | 5.31437 | 5.30455 | 5.18922 | 5.80143 | 5.40491 | 5.02161 | 5.19488 | 5.20571 |
| LOC100505841 | 4.14343 | 4.28343 | 4.31181 | 4.4776  | 5.14048 | 4.25204 | 4.40323 | 4.45811 | 4.12259 |
| SNX2         | 8.82579 | 8.33791 | 8.89215 | 7.2655  | 5.25643 | 7.0709  | 7.88729 | 8.21941 | 7.6826  |
| SNX24        | 7.8788  | 8.52966 | 8.1629  | 7.59543 | 6.51125 | 7.6857  | 7.95358 | 7.99326 | 7.56561 |
| PRDM6        | 5.62919 | 5.70641 | 5.50527 | 5.56502 | 5.98483 | 5.78595 | 5.33363 | 5.7538  | 5.66119 |
| GRAMD3       | 8.49605 | 8.85187 | 8.14962 | 8.14603 | 8.74864 | 8.66925 | 8.40308 | 9.075   | 8.39706 |
| PHAX         | 8.45772 | 9.11337 | 8.67091 | 8.53016 | 5.83687 | 8.07749 | 9.01129 | 7.86417 | 8.19327 |
| LMNB1        | 6.30075 | 6.31615 | 6.31687 | 6.88966 | 6.04471 | 6.49956 | 6.56823 | 6.14778 | 5.86531 |
| MEGF10       | 6.00356 | 5.83883 | 5.97096 | 6.13502 | 6.61372 | 6.12596 | 6.39613 | 6.59268 | 6.40826 |
| PRRC1        | 10.5367 | 10.4351 | 10.5178 | 9.70941 | 8.15297 | 9.0708  | 9.75251 | 9.62318 | 9.90987 |
| CTXN3        | 4.50519 | 4.25586 | 4.53914 | 4.81528 | 5.96982 | 4.84614 | 4.69299 | 4.92098 | 4.74591 |

|           |         |         |         |         |         |         |         |         |         |
|-----------|---------|---------|---------|---------|---------|---------|---------|---------|---------|
| ISOC1     | 9.11949 | 8.4651  | 8.8436  | 8.54085 | 6.69263 | 8.58568 | 9.05905 | 8.47547 | 8.37799 |
| MIR4633   | 5.09926 | 5.2589  | 5.07743 | 5.49989 | 5.45494 | 5.7638  | 5.02716 | 5.16753 | 5.60944 |
| KIAA1024L | 4.14817 | 4.05134 | 4.12041 | 4.001   | 6.18534 | 4.33624 | 3.63211 | 4.28492 | 4.08502 |
| CHSY3     | 6.6767  | 5.91247 | 6.0527  | 6.16957 | 6.2371  | 6.31024 | 5.98373 | 5.60602 | 6.13594 |
| lyrm7     | 6.58499 | 6.5946  | 6.84703 | 6.08415 | 4.84108 | 4.724   | 6.51294 | 5.38682 | 5.50498 |
| CDC42SE2  | 7.14772 | 7.05889 | 7.13238 | 6.40686 | 5.51542 | 6.0789  | 6.94714 | 6.25639 | 6.12502 |
| CSF2      | 3.10792 | 3.62766 | 3.59533 | 3.24668 | 3.98273 | 4.04093 | 4.0698  | 4.74466 | 4.26132 |
| PDLIM4    | 6.98826 | 7.32671 | 7.53724 | 7.4884  | 6.85005 | 8.33854 | 7.95555 | 7.37216 | 7.34681 |
| C5orf56   | 7.03391 | 7.31924 | 7.4666  | 6.52425 | 7.20526 | 6.50216 | 6.19667 | 6.39737 | 6.54933 |
| RAD50     | 9.48985 | 9.67834 | 9.57199 | 8.15053 | 5.76018 | 7.7236  | 8.61079 | 7.46723 | 7.86015 |
| IL13      | 5.3103  | 4.94968 | 5.34121 | 5.78978 | 5.57839 | 5.99783 | 5.67088 | 5.60911 | 5.87746 |
| IL4       | 3.62375 | 3.6336  | 3.27609 | 4.35308 | 4.82773 | 4.5919  | 4.27309 | 4.23977 | 4.40755 |
| SOWAHA    | 5.45252 | 5.94909 | 5.83709 | 6.17585 | 6.081   | 6.33801 | 6.11604 | 6.05903 | 5.99457 |
| LEAP2     | 5.66901 | 6.4194  | 5.78431 | 4.83573 | 6.16384 | 4.54745 | 4.36786 | 5.35774 | 5.55048 |
| HSPA4     | 8.99028 | 8.6023  | 8.74182 | 9.17349 | 6.21389 | 8.82074 | 9.42963 | 8.92692 | 8.95355 |
| UBE2B     | 6.50398 | 6.53361 | 6.30076 | 6.2186  | 6.0292  | 6.51777 | 6.77147 | 8.13456 | 6.68252 |
| JADE2     | 6.71022 | 6.78812 | 6.7705  | 6.12307 | 5.72812 | 6.298   | 6.39135 | 6.08472 | 6.15692 |
| CAMLG     | 8.37428 | 8.47123 | 8.28032 | 7.97217 | 6.01712 | 8.079   | 8.59798 | 8.06413 | 7.66947 |
| DDX46     | 8.61915 | 8.89441 | 8.84177 | 7.662   | 5.52594 | 7.0027  | 8.10383 | 7.75657 | 7.84505 |
| C5orf24   | 8.028   | 7.62425 | 7.90341 | 7.58792 | 6.52246 | 7.37124 | 7.80627 | 7.37504 | 7.42007 |
| TXNDC15   | 7.70374 | 7.5773  | 7.95945 | 7.61838 | 6.83887 | 6.78838 | 7.78636 | 6.58102 | 7.56023 |
| PCBD2     | 6.90092 | 6.86756 | 6.94437 | 5.82186 | 6.54592 | 5.55781 | 5.78032 | 5.88279 | 6.15293 |
| MIR4461   | 6.21261 | 6.44319 | 6.22412 | 9.49611 | 9.67077 | 9.06349 | 9.35794 | 8.70357 | 8.20969 |
| FBXL21    | 3.67195 | 3.6598  | 3.82205 | 4.04134 | 4.09891 | 4.17426 | 3.96916 | 4.03564 | 3.74527 |
| SMAD5     | 8.76157 | 8.55272 | 8.70287 | 7.80082 | 6.11363 | 6.78289 | 8.12679 | 7.07339 | 7.30297 |
| NPY6R     | 3.57866 | 3.72713 | 4.4917  | 3.49274 | 4.63561 | 4.30045 | 3.84258 | 3.80379 | 3.73771 |

|                 |         |         |         |         |         |         |         |         |         |
|-----------------|---------|---------|---------|---------|---------|---------|---------|---------|---------|
| MYOT            | 4.84954 | 4.90682 | 5.03828 | 4.78695 | 4.74649 | 4.64782 | 4.7837  | 4.88968 | 4.87844 |
| PKD2L2          | 3.46131 | 3.63648 | 3.35198 | 3.49859 | 3.54825 | 3.68669 | 3.62036 | 3.30834 | 3.50577 |
| KIF20A          | 7.0654  | 6.1435  | 5.96731 | 7.29181 | 6.08485 | 6.27155 | 6.39759 | 6.41991 | 6.10847 |
| KDM3B           | 9.09721 | 9.10738 | 9.02567 | 7.89509 | 6.63422 | 7.58046 | 8.34704 | 7.6334  | 7.81085 |
| REEP2           | 5.25883 | 5.37914 | 5.56114 | 5.95965 | 6.14385 | 6.3443  | 6.23506 | 6.12472 | 6.04617 |
| EGR1            | 11.8993 | 9.3361  | 10.3191 | 10.4043 | 10.1271 | 11.7954 | 10.986  | 11.153  | 10.2488 |
| MATR3           | 8.48897 | 8.54742 | 8.46134 | 7.69617 | 6.43526 | 7.25058 | 8.02021 | 7.40452 | 7.25573 |
| PAIP2           | 8.67159 | 8.47217 | 8.70841 | 8.30034 | 8.40502 | 8.9549  | 8.53768 | 9.01814 | 8.67998 |
| UBE2D2          | 8.45365 | 8.32167 | 8.37937 | 8.76389 | 8.06636 | 8.3528  | 9.01101 | 8.2917  | 8.70459 |
| CXXC5           | 8.20083 | 8.27361 | 8.2713  | 8.34855 | 7.80897 | 9.04761 | 8.64276 | 8.05347 | 8.22354 |
| PSD2            | 5.74055 | 5.83791 | 5.96643 | 6.38136 | 6.54703 | 6.31112 | 6.25643 | 6.40702 | 6.61276 |
| NRG2            | 6.17796 | 6.26328 | 5.97873 | 6.52679 | 6.74691 | 6.65215 | 6.48775 | 6.60343 | 6.17116 |
| PURA            | 7.79495 | 8.13265 | 7.74517 | 7.51297 | 7.27641 | 7.80118 | 7.73302 | 8.12    | 7.90828 |
| IGIP            | 7.07668 | 6.98655 | 7.06613 | 5.90073 | 6.01388 | 5.8337  | 6.28682 | 6.40618 | 6.01772 |
| CYSTM1          | 7.05475 | 7.00206 | 7.46885 | 7.26592 | 7.52579 | 7.46861 | 7.23642 | 6.98781 | 7.28105 |
| ANKHD1-EIF4EBP3 | 9.23132 | 9.30126 | 9.26151 | 8.13149 | 6.96395 | 8.0635  | 8.39458 | 8.64263 | 8.63581 |
| TMCO6           | 6.89787 | 6.85953 | 7.02075 | 6.53061 | 6.79273 | 6.44769 | 6.46313 | 6.33428 | 6.65576 |
| WDR55           | 7.42878 | 7.10202 | 7.50418 | 7.12724 | 6.34385 | 7.1161  | 7.40962 | 6.96226 | 7.02038 |
| VTRNA1-1        | 7.24747 | 9.21692 | 7.43203 | 9.12857 | 9.76962 | 11.3114 | 9.53187 | 11.0885 | 9.58823 |
| VTRNA1-2        | 3.15472 | 3.68184 | 4.01352 | 10.5412 | 4.17423 | 8.5357  | 5.60725 | 4.62749 | 4.92709 |
| VTRNA1-3        | 6.07337 | 6.60794 | 5.79403 | 8.29249 | 9.34636 | 8.05295 | 8.12853 | 9.15914 | 8.84904 |
| PCDHB1          | 3.7257  | 3.7844  | 3.55389 | 4.32952 | 4.21813 | 4.67989 | 4.11375 | 4.22369 | 4.03847 |
| PCDHB2          | 5.67783 | 5.63849 | 5.77607 | 5.50938 | 5.34339 | 6.01657 | 5.89455 | 5.31155 | 5.96343 |
| PCDHB3          | 6.16697 | 5.49607 | 6.28629 | 4.56868 | 5.35848 | 4.22651 | 6.35197 | 3.89346 | 5.2155  |
| PCDHB4          | 7.0705  | 7.54355 | 8.19674 | 5.44344 | 5.20355 | 4.83045 | 5.48935 | 5.24006 | 5.38512 |
| PCDHB5          | 5.77188 | 5.80927 | 6.03393 | 4.67154 | 5.70823 | 4.92061 | 5.04878 | 3.98665 | 4.45506 |

|              |         |         |         |         |         |         |         |         |         |
|--------------|---------|---------|---------|---------|---------|---------|---------|---------|---------|
| PCDHB6       | 5.89258 | 4.89705 | 6.10397 | 4.35217 | 4.51355 | 4.86656 | 4.99265 | 3.90174 | 4.49746 |
| PCDHB17P     | 3.21407 | 2.88343 | 3.14055 | 3.61907 | 3.99024 | 3.58291 | 3.31681 | 3.33543 | 3.32102 |
| PCDHB7       | 4.52348 | 4.74235 | 5.25509 | 3.69879 | 4.55661 | 4.59803 | 4.65131 | 3.9846  | 4.39046 |
| PCDHB8       | 3.1404  | 3.80812 | 3.47849 | 3.19415 | 3.67384 | 3.25373 | 5.08438 | 2.69902 | 2.9563  |
| PCDHB16      | 5.51647 | 6.03447 | 6.38056 | 5.21045 | 5.16583 | 5.40622 | 6.81685 | 4.60784 | 5.1075  |
| PCDHB9       | 5.71873 | 5.80127 | 5.96232 | 5.91954 | 6.44259 | 5.89908 | 5.93185 | 5.54808 | 5.71012 |
| PCDHB10      | 6.18821 | 6.59992 | 6.48233 | 5.43642 | 4.97514 | 5.86478 | 6.8786  | 5.33534 | 5.89887 |
| PCDHB11      | 4.89103 | 5.24811 | 6.28523 | 4.89206 | 4.79257 | 4.54577 | 4.17058 | 4.6916  | 4.19212 |
| PCDHB12      | 6.70937 | 6.59283 | 6.69275 | 5.73476 | 5.65427 | 5.75081 | 6.12822 | 5.77463 | 5.8991  |
| PCDHB13      | 7.69489 | 8.93219 | 7.54001 | 5.51703 | 3.80956 | 5.58924 | 6.76059 | 4.66548 | 6.36108 |
| PCDHB14      | 9.11202 | 9.24675 | 8.61888 | 6.75917 | 5.85391 | 5.59241 | 8.17525 | 5.19441 | 7.22856 |
| PCDHB18P     | 7.01168 | 6.8919  | 7.15124 | 5.71159 | 6.71479 | 4.4909  | 6.23458 | 5.51205 | 5.99628 |
| PCDHB19P     | 6.32726 | 6.73013 | 5.85407 | 5.7343  | 6.84324 | 5.34736 | 6.08921 | 5.6928  | 5.72063 |
| PCDHB15      | 6.47077 | 6.56194 | 6.06576 | 4.38905 | 5.79565 | 4.51396 | 5.28829 | 4.54519 | 4.75138 |
| LOC100505658 | 3.77133 | 3.70442 | 3.68717 | 4.79453 | 4.23369 | 4.24278 | 3.55012 | 3.94304 | 4.43617 |
| RELL2        | 6.68528 | 6.62007 | 6.62381 | 7.73633 | 7.58035 | 8.24605 | 7.79031 | 8.64859 | 7.57753 |
| KIAA0141     | 7.73128 | 7.7828  | 7.79627 | 6.92504 | 6.36626 | 6.86453 | 7.33639 | 6.82041 | 7.12969 |
| RNF14        | 8.12613 | 8.28922 | 8.16592 | 8.00886 | 6.9108  | 7.94025 | 8.15151 | 7.87219 | 7.99089 |
| NDFIP1       | 8.35966 | 8.55835 | 8.53188 | 8.41005 | 6.54415 | 8.68132 | 9.12586 | 8.69236 | 8.52223 |
| ARHGAP26     | 7.83893 | 7.36215 | 7.03507 | 6.74949 | 6.509   | 5.82129 | 6.40143 | 6.72189 | 6.60928 |
| HMHB1        | 5.68645 | 5.96817 | 5.79503 | 5.84783 | 7.64972 | 6.45455 | 5.9508  | 6.16436 | 6.15395 |
| KCTD16       | 4.40718 | 4.86435 | 4.73258 | 4.67087 | 6.009   | 4.85407 | 4.76088 | 4.90793 | 4.87004 |
| SH3RF2       | 11.1697 | 11.0499 | 10.9439 | 9.93351 | 8.03879 | 9.00541 | 9.66068 | 9.37098 | 9.73092 |
| RBM27        | 8.81486 | 8.99502 | 9.00769 | 7.8121  | 5.85973 | 6.87183 | 8.1429  | 8.05523 | 8.06617 |
| POU4F3       | 6.34792 | 6.13397 | 6.51308 | 7.42917 | 7.58657 | 7.87209 | 6.98765 | 7.12951 | 7.48146 |
| TCERG1       | 8.65372 | 8.7233  | 8.58606 | 7.39794 | 6.12289 | 6.57468 | 7.32556 | 6.83253 | 7.52449 |

|             |         |         |         |         |         |         |         |         |         |
|-------------|---------|---------|---------|---------|---------|---------|---------|---------|---------|
| STK32A      | 6.64558 | 7.03012 | 6.32467 | 5.15102 | 6.02506 | 5.10472 | 5.14302 | 4.75713 | 5.41986 |
| JAKMIP2-AS1 | 4.53066 | 5.1072  | 5.05244 | 4.87191 | 6.7507  | 5.41604 | 5.33607 | 5.10882 | 5.13663 |
| FBXO38      | 8.86633 | 9.22268 | 9.08033 | 8.27422 | 7.14166 | 8.05    | 8.34327 | 7.95265 | 8.83642 |
| AFAP1L1     | 6.663   | 6.58898 | 6.89458 | 7.25121 | 6.65109 | 8.19904 | 7.46358 | 8.68502 | 8.68191 |
| PCYOX1L     | 8.19941 | 7.51933 | 7.55548 | 7.86048 | 8.01054 | 8.25162 | 8.07947 | 8.46794 | 8.52279 |
| MIR143      | 6.22712 | 6.41529 | 7.35581 | 5.27975 | 5.14437 | 5.23269 | 4.89212 | 5.01123 | 5.76312 |
| ARHGEF37    | 9.38243 | 9.60169 | 9.00274 | 8.23731 | 7.31321 | 8.55649 | 8.47715 | 8.19562 | 8.40573 |
| MIR378A     | 2.52255 | 2.70388 | 2.76415 | 2.19736 | 2.13331 | 2.21074 | 1.99397 | 1.9912  | 2.48754 |
| HMGXB3      | 8.24323 | 8.14805 | 8.11667 | 7.59586 | 5.58853 | 7.45923 | 8.18011 | 7.54402 | 7.7868  |
| CDX1        | 5.86212 | 6.0253  | 5.61124 | 6.90797 | 6.50462 | 7.17262 | 6.67841 | 6.60967 | 6.49317 |
| TCOF1       | 6.941   | 6.9091  | 6.89704 | 7.114   | 6.88273 | 6.83173 | 6.7838  | 7.21609 | 7.20437 |
| NDST1       | 9.65988 | 9.47552 | 9.32423 | 9.3664  | 7.70262 | 8.77235 | 9.60027 | 8.50529 | 9.45238 |
| SYNPO       | 7.20177 | 6.88652 | 7.3074  | 6.91809 | 6.9612  | 6.59087 | 7.16541 | 7.35469 | 7.33567 |
| MYOZ3       | 6.46686 | 6.56186 | 6.60442 | 7.3649  | 6.89489 | 7.3277  | 6.814   | 6.94305 | 7.07947 |
| SMIM3       | 5.75084 | 5.62214 | 5.87212 | 7.44059 | 6.26471 | 6.1921  | 7.50177 | 6.83307 | 6.78071 |
| GPX3        | 7.39489 | 6.59674 | 6.99256 | 8.25068 | 8.15374 | 8.94272 | 8.05365 | 9.44833 | 9.03294 |
| GM2A        | 9.79309 | 9.74576 | 9.86881 | 10.2789 | 10.6596 | 10.4815 | 10.7234 | 10.9321 | 10.268  |
| G3BP1       | 9.16613 | 9.12823 | 9.45913 | 8.90489 | 6.47231 | 8.48681 | 9.13978 | 8.52007 | 8.77293 |
| MFAP3       | 7.76297 | 7.67371 | 7.75715 | 7.63195 | 6.69056 | 6.89792 | 7.84366 | 7.51132 | 7.63292 |
| GALNT10     | 7.01633 | 6.89062 | 7.40743 | 7.03359 | 6.62941 | 6.69173 | 7.2213  | 7.01945 | 6.76772 |
| MIR1294     | 5.21109 | 5.62866 | 5.59453 | 5.14365 | 6.02889 | 5.47684 | 4.95702 | 5.40822 | 5.65188 |
| SAP30L      | 7.15091 | 7.59885 | 7.31455 | 6.78885 | 6.05308 | 7.09928 | 7.08794 | 6.75034 | 6.76387 |
| MIR378H     | 5.94704 | 6.36093 | 6.14984 | 5.65869 | 6.78338 | 5.65872 | 4.62354 | 5.57559 | 6.00529 |
| MRPL22      | 6.47122 | 6.11512 | 6.28794 | 6.21847 | 4.53822 | 5.74339 | 6.43854 | 6.10471 | 5.95773 |
| KIF4B       | 5.69536 | 5.58432 | 5.10859 | 5.96212 | 6.18484 | 5.55243 | 5.99725 | 6.12572 | 5.94003 |
| ITK         | 4.70222 | 4.76203 | 5.99665 | 4.62849 | 5.65944 | 4.5371  | 4.85576 | 4.677   | 4.90842 |

|           |         |         |         |         |         |         |         |         |         |
|-----------|---------|---------|---------|---------|---------|---------|---------|---------|---------|
| cyfip2    | 6.69413 | 6.27369 | 6.41657 | 7.2317  | 7.23404 | 6.67968 | 7.24023 | 7.12324 | 6.67942 |
| NIPAL4    | 9.56423 | 8.96378 | 8.95878 | 10.0205 | 9.99613 | 9.88586 | 10.2629 | 9.46663 | 10.319  |
| C5orf52   | 3.72024 | 4.19642 | 4.05324 | 4.9154  | 5.33915 | 5.30642 | 5.2574  | 4.89944 | 4.88679 |
| THG1L     | 7.21104 | 7.45756 | 6.93002 | 6.90711 | 6.224   | 6.99856 | 7.31122 | 6.43603 | 6.43552 |
| UBLCP1    | 8.54346 | 8.63093 | 8.71455 | 8.39017 | 6.21283 | 8.21177 | 8.53242 | 8.94321 | 8.75087 |
| LOC285626 | 4.7603  | 4.89108 | 4.79262 | 5.59434 | 6.04366 | 5.382   | 5.02441 | 5.22012 | 5.51685 |
| ADRA1B    | 6.06378 | 6.07749 | 6.15253 | 7.0145  | 6.84898 | 7.31519 | 6.78895 | 7.19665 | 7.14396 |
| TTC1      | 7.74138 | 7.57059 | 7.92268 | 7.84227 | 6.25099 | 7.53413 | 8.3887  | 7.47758 | 7.20714 |
| PTTG1     | 5.53335 | 5.32336 | 5.46736 | 5.98185 | 6.07794 | 6.13206 | 5.86041 | 5.97845 | 5.50234 |
| MIR146A   | 5.18072 | 5.51495 | 4.98484 | 4.93715 | 6.36763 | 5.1248  | 4.79474 | 5.38192 | 5.2908  |
| MIR3142   | 3.60408 | 4.72486 | 4.05148 | 3.6309  | 3.81564 | 5.05192 | 4.16461 | 5.19015 | 3.99571 |
| CCNG1     | 8.64575 | 8.40595 | 8.8185  | 7.73701 | 5.05665 | 7.47251 | 8.20226 | 7.33921 | 7.59565 |
| HMMR      | 6.5632  | 5.79061 | 5.75414 | 6.41905 | 5.28446 | 5.63391 | 6.52605 | 5.60854 | 5.30255 |
| WWC1      | 8.03061 | 7.86682 | 7.61124 | 8.06085 | 7.20834 | 8.04067 | 7.94375 | 8.87108 | 8.98049 |
| RARS      | 9.62882 | 9.84088 | 9.5962  | 9.82795 | 7.19351 | 9.46825 | 9.95459 | 9.31662 | 9.71726 |
| FBLL1     | 6.86832 | 7.15673 | 6.92349 | 7.66519 | 6.82891 | 8.02252 | 7.31755 | 7.41693 | 7.26514 |
| Mir103a1  | 3.07358 | 3.1479  | 2.87095 | 2.73959 | 2.73959 | 2.82443 | 2.8363  | 4.1159  | 2.94172 |
| SPDL1     | 6.86561 | 7.29986 | 7.53331 | 6.82125 | 5.86943 | 5.9846  | 6.14218 | 6.65792 | 6.23232 |
| DOCK2     | 6.07701 | 5.85732 | 6.34774 | 5.48922 | 5.99163 | 5.56029 | 5.57772 | 5.56523 | 5.69804 |
| MIR378E   | 5.69106 | 5.89469 | 5.93588 | 6.49124 | 6.41073 | 6.6447  | 5.46784 | 6.52511 | 6.42873 |
| FOXI1     | 5.94709 | 6.29571 | 6.00083 | 5.55294 | 5.99535 | 5.70499 | 5.86884 | 6.01041 | 5.91941 |
| C5orf58   | 3.94433 | 3.97445 | 4.48519 | 3.91638 | 4.51978 | 4.39352 | 4.21386 | 4.20541 | 4.29408 |
| KCNIP1    | 5.58185 | 5.61469 | 5.84036 | 5.53156 | 6.44452 | 5.84822 | 5.80975 | 5.74418 | 5.39773 |
| RANBP17   | 5.47124 | 5.7097  | 5.66173 | 5.23308 | 5.78754 | 5.13736 | 5.13914 | 5.28972 | 4.83707 |
| TLX3      | 5.58609 | 5.83419 | 6.27662 | 6.71854 | 6.1193  | 7.2587  | 6.98453 | 6.66985 | 6.85399 |
| FGF18     | 6.09708 | 5.8811  | 6.20696 | 6.05451 | 5.94787 | 6.62369 | 6.08988 | 6.26422 | 6.01179 |

|              |         |         |         |         |         |         |         |         |         |
|--------------|---------|---------|---------|---------|---------|---------|---------|---------|---------|
| EFCAB9       | 2.55052 | 2.46162 | 2.13925 | 2.67429 | 2.48335 | 3.04563 | 2.80258 | 2.59772 | 2.54001 |
| NEURL1B      | 6.94583 | 6.68158 | 7.10667 | 7.61919 | 7.03983 | 7.74253 | 7.21225 | 7.39249 | 7.42978 |
| ERGIC1       | 7.60325 | 7.25242 | 7.72382 | 7.23054 | 6.91032 | 7.87282 | 7.53552 | 7.94154 | 7.93412 |
| LOC100268168 | 5.40862 | 5.21393 | 5.11781 | 5.83574 | 4.88406 | 5.58612 | 4.80701 | 5.26468 | 5.61919 |
| RPL26L1      | 6.3719  | 6.63201 | 6.39796 | 7.2273  | 7.1945  | 7.17845 | 7.32591 | 6.49727 | 7.17596 |
| CREBRF       | 7.8952  | 8.37049 | 8.33713 | 5.76288 | 5.66659 | 6.31617 | 6.37853 | 6.39869 | 6.0692  |
| BNIP1        | 6.65154 | 6.64835 | 6.31286 | 6.32825 | 5.97368 | 6.02781 | 7.01456 | 6.58583 | 6.67153 |
| LOC285593    | 4.62771 | 4.7298  | 4.57488 | 4.37875 | 5.2388  | 5.06194 | 4.60741 | 4.73914 | 5.05962 |
| CPEB4        | 8.97462 | 8.77723 | 8.42201 | 8.60599 | 8.28369 | 9.63499 | 8.74221 | 10.2793 | 9.96456 |
| C5orf47      | 5.14114 | 5.34936 | 5.60656 | 6.00846 | 6.22452 | 6.25186 | 5.99617 | 5.81701 | 5.78812 |
| HMP19        | 5.59528 | 5.79913 | 5.7408  | 6.07534 | 6.55297 | 6.36201 | 6.32522 | 6.19924 | 6.58231 |
| MSX2         | 6.70039 | 7.23839 | 6.94149 | 7.50589 | 7.38407 | 7.38121 | 7.41339 | 7.34029 | 7.62337 |
| SFXN1        | 6.33252 | 6.57928 | 6.28433 | 6.25496 | 5.24353 | 6.41278 | 6.77819 | 6.37597 | 6.07825 |
| HRH2         | 5.98368 | 6.07628 | 6.14048 | 6.48382 | 6.40392 | 6.19732 | 6.18022 | 6.3305  | 6.17747 |
| CPLX2        | 6.23036 | 6.17373 | 6.5457  | 6.83181 | 6.88789 | 7.27712 | 6.88316 | 6.73295 | 6.76593 |
| LOC643201    | 4.1535  | 4.59272 | 4.43414 | 4.92211 | 5.2547  | 4.67213 | 4.69763 | 4.97652 | 4.67351 |
| SIMC1        | 6.29761 | 6.33129 | 6.56723 | 6.48039 | 6.29599 | 5.89932 | 6.01769 | 6.24268 | 6.18834 |
| ARL10        | 5.62824 | 5.83237 | 5.45958 | 6.13859 | 5.44362 | 6.01527 | 6.04351 | 5.52412 | 5.83117 |
| MIR1271      | 4.24186 | 4.0424  | 4.91645 | 4.44745 | 4.64811 | 4.30992 | 4.22972 | 4.43152 | 4.82684 |
| FAF2         | 9.47081 | 9.19985 | 9.34266 | 8.87293 | 7.8425  | 8.95543 | 8.88132 | 9.41227 | 9.28663 |
| CDHR2        | 5.30193 | 5.95131 | 5.712   | 5.95187 | 6.12115 | 5.91689 | 6.01052 | 6.10037 | 6.20747 |
| EIF4E1B      | 6.02416 | 6.22963 | 6.07021 | 6.45664 | 6.58382 | 6.38687 | 6.49481 | 6.45592 | 6.68621 |
| TSPAN17      | 7.46374 | 7.49169 | 7.34572 | 8.35041 | 7.09639 | 9.35794 | 8.8075  | 8.54556 | 8.81313 |
| UNC5A        | 6.34865 | 6.34082 | 6.1899  | 7.0281  | 7.02648 | 7.0976  | 6.76893 | 6.93363 | 6.62752 |
| ZNF346       | 8.14106 | 8.00961 | 8.25398 | 7.1051  | 6.57377 | 6.98936 | 7.91968 | 7.87644 | 7.37174 |
| fgfr4        | 5.10199 | 5.51575 | 5.98002 | 5.79426 | 5.98777 | 5.91672 | 5.63687 | 6.00679 | 5.87597 |

|           |         |         |         |         |         |         |         |         |         |
|-----------|---------|---------|---------|---------|---------|---------|---------|---------|---------|
| NSD1      | 8.6545  | 8.6801  | 8.433   | 7.60013 | 5.84839 | 7.26649 | 7.90957 | 7.13752 | 7.68977 |
| MXD3      | 7.16244 | 6.41362 | 6.97014 | 7.46662 | 7.41424 | 7.53878 | 7.93269 | 7.15348 | 7.86274 |
| RGS14     | 7.17348 | 6.9948  | 7.09611 | 7.36972 | 7.5266  | 7.60408 | 7.59166 | 7.19082 | 7.16884 |
| GRK6      | 7.08803 | 6.74719 | 6.82119 | 7.73663 | 6.62646 | 7.01245 | 7.42928 | 7.14111 | 6.8591  |
| PRR7      | 6.6674  | 6.7408  | 6.82347 | 7.2107  | 7.57112 | 7.12185 | 7.30491 | 7.25811 | 7.11398 |
| TMED9     | 7.80519 | 7.93117 | 7.67844 | 8.78392 | 7.13162 | 9.21288 | 8.85136 | 8.8016  | 8.81314 |
| N4BP3     | 6.3528  | 6.62401 | 6.55299 | 7.66768 | 6.29581 | 7.83666 | 7.24895 | 7.40062 | 7.12602 |
| RMND5B    | 7.73834 | 7.7831  | 7.41712 | 7.33765 | 6.43317 | 6.94624 | 7.45533 | 7.14261 | 7.2664  |
| HNRNPAB   | 9.89451 | 9.16919 | 9.53293 | 9.45611 | 6.78041 | 8.85854 | 9.87883 | 8.81127 | 9.11706 |
| ZNF354B   | 5.90807 | 6.33956 | 5.95957 | 5.93541 | 5.58543 | 5.68324 | 6.0106  | 5.65856 | 5.68171 |
| ZFP2      | 6.3875  | 6.33158 | 6.2524  | 5.57475 | 6.58951 | 5.75927 | 5.92627 | 4.99142 | 5.79406 |
| ZNF454    | 6.00445 | 5.85361 | 5.86169 | 5.71348 | 5.97193 | 6.01265 | 5.42177 | 5.59228 | 5.78554 |
| ZNF879    | 5.76886 | 5.89743 | 5.80428 | 5.87145 | 6.75594 | 6.14983 | 5.60004 | 5.951   | 6.08239 |
| ZNF354C   | 5.71623 | 5.53257 | 5.81894 | 5.2382  | 4.66078 | 5.64023 | 5.99873 | 5.55481 | 5.46847 |
| RUFY1     | 8.69303 | 8.39096 | 8.25621 | 7.78198 | 6.23877 | 7.79853 | 8.12606 | 7.21976 | 7.63907 |
| CANX      | 11.181  | 11.3919 | 11.4193 | 10.8049 | 9.52646 | 10.7757 | 10.8181 | 10.7707 | 10.8447 |
| MAML1     | 6.93649 | 7.13788 | 7.22402 | 6.64891 | 6.14702 | 6.90992 | 6.95316 | 6.84529 | 6.83298 |
| LTC4S     | 6.89449 | 7.17548 | 6.95475 | 7.95477 | 7.41512 | 7.97568 | 7.34686 | 7.56927 | 7.56935 |
| SQSTM1    | 8.02696 | 7.6648  | 8.12785 | 7.97358 | 8.31066 | 8.59734 | 8.44372 | 9.27311 | 8.30582 |
| LINC00847 | 6.43265 | 6.49206 | 6.45931 | 6.75759 | 6.6068  | 6.71757 | 6.32113 | 6.50704 | 6.38337 |
| btnl8     | 5.01051 | 5.08317 | 4.85922 | 5.44141 | 6.60934 | 5.99951 | 5.04397 | 5.45839 | 5.37602 |
| BTNL3     | 4.69121 | 4.917   | 4.75003 | 4.75243 | 5.00735 | 5.40704 | 5.22601 | 4.71986 | 4.23163 |
| BTNL9     | 5.64191 | 6.03387 | 6.35173 | 6.0593  | 6.18905 | 5.95432 | 5.94907 | 5.84827 | 5.80447 |
| TRIM41    | 6.92083 | 6.83408 | 6.66823 | 6.57082 | 6.07782 | 6.51814 | 6.88595 | 6.3517  | 6.56605 |
| CCDC127   | 6.07964 | 6.47697 | 5.98317 | 6.52377 | 6.35421 | 6.2414  | 6.44601 | 6.01991 | 6.09476 |
| EXOC3-AS1 | 6.58958 | 6.84208 | 6.54743 | 7.00758 | 6.6175  | 7.58341 | 6.70972 | 7.05113 | 7.20513 |



|              |         |         |         |         |         |         |         |         |         |
|--------------|---------|---------|---------|---------|---------|---------|---------|---------|---------|
| PP7080       | 7.53583 | 7.80351 | 7.62988 | 7.02811 | 6.44086 | 6.76373 | 7.66951 | 6.86911 | 7.01019 |
| TPPP         | 6.73164 | 6.59591 | 6.44487 | 7.19565 | 6.77711 | 7.64383 | 7.76925 | 7.53212 | 7.37585 |
| LOC100506688 | 4.84954 | 4.70845 | 4.84617 | 5.31595 | 6.90568 | 5.31222 | 5.00023 | 5.0162  | 5.07306 |
| MIR4635      | 6.11752 | 5.83597 | 6.24517 | 6.88446 | 7.07265 | 7.18634 | 6.53616 | 6.36458 | 6.52093 |
| TERT         | 6.18151 | 6.20569 | 6.07338 | 6.76332 | 6.81363 | 6.93478 | 6.66905 | 6.8225  | 6.61167 |
| MIR4457      | 2.95479 | 2.59817 | 3.09824 | 2.87925 | 2.93929 | 2.62228 | 2.89842 | 4.07529 | 2.5602  |
| CLPTM1L      | 7.57816 | 7.84096 | 7.60213 | 7.99947 | 6.43903 | 7.81453 | 8.14077 | 7.6394  | 7.78153 |
| LPCAT1       | 6.93736 | 6.54236 | 6.57668 | 7.47068 | 6.48536 | 7.15298 | 7.38231 | 8.24162 | 7.36588 |
| LOC728613    | 5.97481 | 6.21528 | 5.55684 | 4.56785 | 4.21758 | 3.99685 | 5.15398 | 3.87881 | 4.02653 |
| MIR4277      | 4.6268  | 4.90342 | 5.09721 | 5.61761 | 5.35693 | 6.35465 | 5.60948 | 5.21513 | 5.46282 |
| mrpl36       | 7.26353 | 7.44089 | 7.04978 | 8.16903 | 7.47496 | 7.77218 | 8.42502 | 7.65872 | 7.50892 |
| IRX4         | 7.92908 | 7.03322 | 8.10495 | 7.87673 | 6.5768  | 8.05774 | 8.37678 | 7.04715 | 7.45784 |
| IRX2         | 8.01164 | 7.22916 | 7.74098 | 7.63039 | 6.51302 | 8.42769 | 7.59288 | 7.04456 | 6.93146 |
| FLJ33360     | 6.05106 | 5.66305 | 5.98008 | 5.85961 | 6.94954 | 6.17595 | 5.28119 | 5.76892 | 6.36935 |
| MED10        | 8.18827 | 8.23216 | 8.37042 | 9.01311 | 7.52727 | 9.07444 | 9.67586 | 8.29218 | 8.46872 |
| MIR4278      | 3.07559 | 2.90206 | 2.81076 | 3.05803 | 2.94771 | 4.21381 | 2.91713 | 2.55457 | 3.08615 |
| LOC442132    | 4.8027  | 5.2952  | 5.0779  | 5.44306 | 7.22056 | 5.55749 | 5.36077 | 6.22677 | 5.65703 |
| C5orf49      | 4.77768 | 5.07103 | 4.89189 | 5.33091 | 5.36339 | 5.09071 | 4.96576 | 5.07932 | 5.3781  |
| fastkd3      | 6.3887  | 6.97215 | 6.64521 | 6.1686  | 4.80241 | 5.38679 | 6.55978 | 5.63018 | 5.78259 |
| LOC729506    | 3.87533 | 3.85973 | 3.94927 | 4.09885 | 4.61475 | 4.00768 | 3.79127 | 4.08915 | 3.71049 |
| MIR4636      | 4.60398 | 4.81999 | 4.67924 | 4.70198 | 5.34267 | 4.72611 | 4.6504  | 5.12219 | 4.75313 |
| CMBL         | 5.94055 | 5.72055 | 5.76832 | 5.59817 | 5.86918 | 5.35757 | 5.31038 | 4.97698 | 5.34372 |
| DAP          | 8.65837 | 8.60364 | 8.91823 | 8.68213 | 8.21434 | 7.97645 | 8.71178 | 8.52316 | 8.13166 |
| 44266        | 4.92685 | 5.09733 | 5.20393 | 5.16187 | 6.09203 | 5.29139 | 5.37795 | 5.39934 | 5.71361 |
| ZNF622       | 6.95458 | 7.20818 | 6.92517 | 7.84144 | 6.46184 | 8.71437 | 8.23421 | 9.31137 | 8.59188 |
| MYO10        | 9.07526 | 8.71805 | 8.81264 | 8.6892  | 7.42196 | 8.93393 | 8.48057 | 8.91822 | 8.9756  |

|               |         |         |         |         |         |         |         |         |         |
|---------------|---------|---------|---------|---------|---------|---------|---------|---------|---------|
| LOC285696     | 4.96066 | 4.7534  | 4.94123 | 4.85068 | 5.35876 | 4.59045 | 4.96171 | 4.789   | 5.01742 |
| LOC401177     | 4.86472 | 4.86632 | 4.76632 | 5.02838 | 5.50118 | 5.54816 | 5.09505 | 5.9634  | 5.68535 |
| LOC340107     | 3.48239 | 3.39547 | 2.94682 | 3.54992 | 3.64046 | 3.39382 | 3.9214  | 3.31835 | 3.27956 |
| MIR4279       | 5.8603  | 5.92514 | 4.72892 | 5.0499  | 5.40381 | 5.73889 | 5.35574 | 5.16996 | 4.84018 |
| GOLPH3        | 10.5601 | 10.4233 | 10.5698 | 10.2708 | 9.20251 | 9.97822 | 10.7729 | 9.9389  | 10.4251 |
| MTMR12        | 9.65737 | 9.90773 | 9.75204 | 8.49899 | 6.42036 | 8.52737 | 9.14515 | 9.31629 | 8.86693 |
| ZFR           | 9.6983  | 9.69487 | 9.52591 | 9.05151 | 6.91539 | 8.46391 | 9.27868 | 8.97742 | 9.15491 |
| MIR579        | 5.71874 | 4.51334 | 5.30222 | 6.28546 | 4.77282 | 5.26386 | 5.83    | 6.72522 | 7.31066 |
| C1QTNF3-AMACR | 8.05538 | 7.57714 | 7.40063 | 6.74952 | 6.40435 | 5.9003  | 6.5879  | 6.10206 | 5.97381 |
| RAD1          | 7.28607 | 7.43738 | 7.2867  | 7.20522 | 6.03937 | 6.50155 | 7.62161 | 6.41433 | 6.93943 |
| AGXT2         | 4.98829 | 5.43921 | 5.18601 | 5.51316 | 6.51811 | 5.56072 | 5.03958 | 5.65051 | 5.81791 |
| PRLR          | 6.72548 | 6.15858 | 7.24431 | 5.87778 | 5.49468 | 5.28669 | 6.01866 | 5.63    | 5.18115 |
| CAPSL         | 4.16143 | 4.13179 | 4.02773 | 4.54252 | 4.75921 | 4.78396 | 4.22369 | 4.38982 | 4.62744 |
| LMBRD2        | 8.30548 | 8.42751 | 8.47319 | 7.77038 | 5.4712  | 7.61362 | 7.85724 | 7.25617 | 7.66308 |
| MIR580        | 5.53159 | 3.93627 | 5.36447 | 2.81583 | 2.31431 | 2.69222 | 2.92445 | 2.92301 | 3.18578 |
| NADK2         | 7.63323 | 7.53096 | 7.74541 | 6.58602 | 6.27391 | 6.07381 | 6.53176 | 6.3855  | 6.20349 |
| RANBP3L       | 4.34332 | 4.72131 | 4.96047 | 4.46465 | 3.95404 | 4.77035 | 4.81694 | 4.33386 | 4.25315 |
| NIPBL-AS1     | 7.23725 | 7.17316 | 7.5122  | 6.20909 | 6.17068 | 6.22346 | 6.56737 | 6.25096 | 6.43003 |
| c5orf42       | 7.63999 | 7.71454 | 7.47861 | 6.4246  | 5.83249 | 6.11717 | 6.74508 | 5.73914 | 6.74428 |
| NUP155        | 9.16686 | 9.20331 | 9.39407 | 8.75404 | 6.46097 | 7.41741 | 8.74645 | 7.87185 | 8.04254 |
| GDNF          | 5.39191 | 5.21173 | 5.37646 | 5.55679 | 5.53872 | 5.45057 | 5.35885 | 6.04708 | 5.62031 |
| EGFLAM-AS4    | 3.7402  | 3.56694 | 3.68954 | 3.73151 | 5.03896 | 4.16972 | 3.74838 | 3.81019 | 3.84474 |
| LIFR          | 6.98348 | 7.97812 | 8.55499 | 5.41984 | 5.15109 | 4.41757 | 5.10324 | 4.63225 | 4.72303 |
| MIR3650       | 7.65344 | 7.61212 | 7.60896 | 8.43396 | 8.45542 | 8.1141  | 8.19211 | 8.08522 | 7.84815 |
| FYB           | 6.23098 | 5.70595 | 6.75362 | 5.29623 | 5.43218 | 5.22338 | 5.95696 | 5.86231 | 5.48597 |
| C9            | 3.67011 | 3.74975 | 3.86241 | 4.07338 | 5.31693 | 4.20712 | 4.03881 | 3.78352 | 3.74831 |

|              |         |         |         |         |         |         |         |         |         |
|--------------|---------|---------|---------|---------|---------|---------|---------|---------|---------|
| TTC33        | 7.24567 | 7.55257 | 7.25727 | 7.09073 | 6.17425 | 6.79858 | 7.70822 | 6.81594 | 6.79648 |
| LOC100506548 | 8.00776 | 8.29345 | 8.3496  | 6.95722 | 6.6881  | 7.05847 | 7.52607 | 6.72247 | 7.00408 |
| MROH2B       | 4.15337 | 4.33451 | 3.98379 | 4.55595 | 5.66702 | 4.89085 | 4.54332 | 4.97932 | 4.4597  |
| C6           | 4.53486 | 4.64513 | 5.33205 | 5.40198 | 5.83787 | 5.45736 | 4.96832 | 4.60802 | 4.9735  |
| LOC648987    | 5.78532 | 5.26371 | 5.39445 | 5.69568 | 5.463   | 5.83696 | 5.87818 | 5.59561 | 5.52998 |
| ANXA2R       | 6.13732 | 6.13626 | 6.16803 | 6.08068 | 6.10301 | 6.01174 | 5.67175 | 6.18262 | 6.53911 |
| HMGCS1       | 8.60511 | 8.07304 | 8.42715 | 8.19338 | 6.27161 | 8.5289  | 9.25559 | 8.7073  | 9.1184  |
| CCL28        | 7.09072 | 6.86798 | 7.15555 | 5.94454 | 6.19316 | 6.93985 | 6.15265 | 5.3604  | 5.6071  |
| TMEM267      | 6.9378  | 7.02014 | 6.98654 | 6.56954 | 5.43417 | 5.11231 | 7.05274 | 5.31713 | 5.89733 |
| C5orf34      | 4.97682 | 5.43523 | 5.11604 | 4.76957 | 4.62685 | 5.01166 | 4.99525 | 4.60456 | 3.97756 |
| PAIP1        | 8.59564 | 8.56358 | 8.64603 | 8.47769 | 6.45008 | 8.23919 | 8.97255 | 8.0311  | 8.1683  |
| FGF10        | 5.48812 | 5.74931 | 5.3832  | 4.59451 | 5.61007 | 5.03548 | 5.06265 | 4.86266 | 5.11673 |
| HCN1         | 5.88077 | 4.93095 | 6.04946 | 5.17935 | 6.53578 | 5.57745 | 5.10099 | 5.47715 | 5.32976 |
| EMB          | 8.39404 | 9.18452 | 8.3122  | 7.43637 | 6.87942 | 6.77942 | 6.89625 | 5.92931 | 6.19607 |
| LOC642366    | 3.7006  | 4.07707 | 3.69824 | 4.55038 | 4.73783 | 4.85543 | 4.2512  | 3.95806 | 4.21862 |
| mocs2        | 8.31228 | 8.02043 | 8.6125  | 7.82533 | 5.72146 | 7.21172 | 8.18182 | 6.99799 | 7.59887 |
| ARL15        | 8.02427 | 7.68723 | 7.86101 | 7.50334 | 6.5333  | 6.73988 | 7.98861 | 6.65689 | 7.36657 |
| MIR581       | 6.95958 | 6.68039 | 7.54596 | 4.63795 | 3.69015 | 2.87598 | 5.25044 | 5.38038 | 5.05274 |
| ESM1         | 4.79968 | 4.77707 | 4.84051 | 6.22395 | 5.71543 | 6.18877 | 5.19881 | 7.11703 | 5.89607 |
| CDC20B       | 4.90084 | 4.47306 | 4.99732 | 5.38377 | 6.0188  | 5.50371 | 4.6802  | 5.56616 | 5.40807 |
| MIR449A      | 4.60755 | 4.35622 | 4.36467 | 4.24502 | 5.04397 | 4.49924 | 4.51254 | 4.67681 | 4.50287 |
| Mir449b      | 7.95169 | 7.89937 | 8.13036 | 8.36299 | 9.00858 | 8.22073 | 7.73827 | 8.2351  | 8.02442 |
| MIR449C      | 5.85134 | 5.87139 | 5.56734 | 5.8281  | 6.39777 | 6.31371 | 6.17089 | 6.20435 | 6.06147 |
| MCIDAS       | 5.38594 | 5.44786 | 5.67035 | 6.03121 | 6.07416 | 6.68299 | 5.99586 | 6.02091 | 6.02604 |
| CCNO         | 5.7787  | 5.29958 | 5.36467 | 6.0302  | 5.63688 | 6.56976 | 6.08685 | 6.00422 | 6.2254  |
| DHX29        | 8.63542 | 9.24615 | 9.15896 | 8.55311 | 6.26155 | 8.0183  | 9.27623 | 8.80564 | 8.63782 |

|           |         |         |         |         |         |         |         |         |         |
|-----------|---------|---------|---------|---------|---------|---------|---------|---------|---------|
| PLPP1     | 10.5019 | 10.3745 | 10.7409 | 9.61864 | 7.74307 | 8.85071 | 10.0988 | 9.28387 | 9.98381 |
| ankrd55   | 4.26325 | 4.51939 | 4.78411 | 5.26486 | 5.73509 | 5.14063 | 4.88582 | 5.17157 | 5.10369 |
| PLK2      | 9.32909 | 8.09601 | 8.78962 | 9.95624 | 7.59374 | 8.90765 | 9.47842 | 9.85303 | 9.91968 |
| Mir582    | 4.48191 | 4.32617 | 4.54842 | 3.97184 | 3.14292 | 3.26886 | 3.31475 | 3.74796 | 3.17575 |
| depdc1b   | 6.95445 | 5.46423 | 5.89063 | 6.80602 | 5.89035 | 6.0201  | 6.14889 | 6.33969 | 6.16055 |
| ELOVL7    | 10.7148 | 10.2993 | 10.3335 | 10.1154 | 8.25067 | 9.93817 | 9.62006 | 9.54043 | 10.2374 |
| SMIM15    | 8.34434 | 8.26804 | 8.33389 | 8.6996  | 5.77436 | 8.4524  | 9.12115 | 8.3639  | 8.44674 |
| DIMT1     | 8.12542 | 7.56193 | 7.98482 | 7.74586 | 6.37714 | 6.4377  | 7.90031 | 6.39845 | 6.92199 |
| SREK1IP1  | 7.51957 | 7.54759 | 7.34155 | 7.62307 | 6.95269 | 8.64893 | 8.11199 | 8.39987 | 8.76725 |
| CENPK     | 5.95029 | 5.40088 | 6.26892 | 6.20095 | 4.42085 | 4.66721 | 6.01293 | 4.78041 | 4.65172 |
| TRIM23    | 6.26529 | 6.80248 | 6.51177 | 6.13751 | 5.28932 | 5.86814 | 5.90868 | 5.96837 | 5.79361 |
| CD180     | 5.23926 | 5.42218 | 6.12851 | 5.08702 | 6.21144 | 5.58033 | 5.66025 | 5.33469 | 5.36778 |
| CCDC125   | 8.60368 | 8.61407 | 8.23677 | 7.0689  | 6.54456 | 5.91233 | 7.5638  | 6.44852 | 6.7828  |
| LOC647859 | 9.10148 | 9.18625 | 9.48571 | 8.33972 | 7.50456 | 8.91681 | 8.58933 | 9.26657 | 8.95813 |
| MRPS27    | 8.16101 | 8.19228 | 8.17647 | 7.28903 | 6.34111 | 6.38392 | 7.45767 | 6.415   | 6.76483 |
| ZNF366    | 5.49623 | 5.63182 | 5.8144  | 5.64747 | 5.84937 | 6.03321 | 5.69916 | 5.97168 | 5.89015 |
| ENC1      | 6.87712 | 7.12869 | 6.95774 | 7.70859 | 6.6389  | 6.7265  | 7.0105  | 7.32756 | 8.44371 |
| ANKRD31   | 5.85901 | 5.8568  | 5.76511 | 7.49796 | 6.77297 | 8.82484 | 7.53461 | 8.01477 | 8.61159 |
| POC5      | 7.56452 | 7.3322  | 7.58239 | 6.37321 | 5.70647 | 6.25011 | 6.64129 | 6.08119 | 6.07298 |
| f2r12     | 9.28151 | 6.85431 | 8.02352 | 8.18646 | 7.12705 | 6.85408 | 8.4977  | 6.59556 | 7.25772 |
| WDR41     | 9.08491 | 8.69513 | 8.53674 | 8.75357 | 6.57836 | 7.94707 | 8.85458 | 8.10054 | 8.90973 |
| OTP       | 6.00756 | 6.4058  | 6.07197 | 6.94958 | 7.1906  | 7.10313 | 6.79345 | 6.6701  | 6.57397 |
| TBCA      | 6.92198 | 7.9242  | 7.28734 | 7.7636  | 5.71025 | 8.08486 | 7.83616 | 7.36787 | 7.54269 |
| LHFPL2    | 6.72193 | 6.59702 | 6.86014 | 6.76098 | 7.39747 | 7.30766 | 7.76559 | 7.07357 | 7.66503 |
| ARSB      | 6.51293 | 6.02816 | 6.64176 | 6.09915 | 6.01384 | 6.35728 | 6.64878 | 6.36424 | 6.18954 |
| DMGDH     | 5.34678 | 5.68525 | 5.55136 | 5.40173 | 5.88908 | 5.34507 | 5.19523 | 4.54694 | 4.80336 |

|           |         |         |         |         |         |         |         |         |         |
|-----------|---------|---------|---------|---------|---------|---------|---------|---------|---------|
| HOMER1    | 7.69098 | 7.42004 | 7.54965 | 8.48193 | 6.64031 | 8.64085 | 8.87536 | 8.12344 | 8.73465 |
| MTX3      | 7.48445 | 8.01564 | 7.47831 | 6.76525 | 5.79003 | 5.78686 | 7.27952 | 6.08275 | 5.9654  |
| SERINC5   | 9.87306 | 9.39525 | 9.53571 | 8.79042 | 7.49644 | 9.15344 | 9.27413 | 9.15718 | 9.33105 |
| CRSP8P    | 3.39381 | 3.39221 | 3.24609 | 4.16641 | 4.48077 | 4.15658 | 4.01181 | 4.57365 | 4.13741 |
| ANKRD34B  | 3.55823 | 3.53503 | 3.99599 | 3.89364 | 5.42834 | 4.71638 | 4.65481 | 4.53459 | 4.29398 |
| DHFR      | 5.60775 | 5.44967 | 5.37172 | 5.29797 | 4.83475 | 4.88163 | 5.2172  | 4.78843 | 4.97163 |
| MTRNR2L2  | 6.18174 | 7.46684 | 6.78164 | 5.98697 | 6.51838 | 5.51807 | 5.77982 | 6.91885 | 5.89003 |
| CKMT2-AS1 | 6.91027 | 7.05771 | 6.67079 | 6.26185 | 6.90475 | 6.14336 | 6.19774 | 6.37728 | 6.56942 |
| ACOT12    | 4.40627 | 4.09158 | 4.43144 | 4.40752 | 5.09208 | 4.53557 | 4.37757 | 4.56061 | 4.41698 |
| SSBP2     | 9.01632 | 8.39389 | 8.73362 | 7.11611 | 6.71755 | 7.27687 | 7.7158  | 7.30688 | 7.81742 |
| rps23     | 8.49999 | 8.80467 | 9.35518 | 7.82246 | 8.11039 | 8.91819 | 9.07346 | 8.08097 | 8.82449 |
| TMEM167A  | 6.22431 | 6.33545 | 6.32956 | 6.53806 | 5.54579 | 5.72818 | 6.32504 | 6.01627 | 6.43669 |
| SCARNA18  | 5.59746 | 6.39538 | 5.59048 | 5.7492  | 4.16819 | 6.23776 | 6.50641 | 5.53688 | 5.32107 |
| HAPLN1    | 4.17427 | 3.51656 | 3.70566 | 4.51855 | 5.36087 | 4.15052 | 4.10973 | 4.24591 | 4.44759 |
| EDIL3     | 7.90167 | 7.92063 | 8.08528 | 7.84527 | 5.77985 | 7.12547 | 8.55705 | 7.8805  | 7.67876 |
| MIR4280   | 2.48053 | 2.63533 | 2.63969 | 3.26036 | 3.00249 | 3.27287 | 2.68617 | 2.39787 | 2.97839 |
| CCNH      | 8.21044 | 8.15248 | 8.05093 | 7.34676 | 5.90203 | 6.41475 | 7.4332  | 7.4562  | 7.37966 |
| TMEM161B  | 7.70549 | 7.60933 | 7.59098 | 6.59423 | 5.01189 | 5.92619 | 6.48992 | 6.19488 | 6.71235 |
| LINC00461 | 5.13409 | 5.38183 | 4.99004 | 5.22593 | 6.15105 | 5.70674 | 5.00301 | 5.54834 | 5.33124 |
| MIR3660   | 2.78094 | 2.50415 | 2.56666 | 2.798   | 2.19715 | 2.62716 | 2.61088 | 2.64159 | 2.30282 |
| MBLAC2    | 7.41147 | 7.28216 | 7.61116 | 6.4371  | 6.76727 | 6.43921 | 7.04922 | 6.2696  | 6.39035 |
| ARRDC3    | 10.6344 | 10.9811 | 10.7544 | 9.62917 | 9.20028 | 10.1875 | 10.5457 | 8.61621 | 8.43766 |
| NR2F1-AS1 | 5.12299 | 5.22807 | 5.14837 | 5.21376 | 5.27936 | 5.62383 | 5.3926  | 5.59087 | 4.97042 |
| KIAA0825  | 7.80546 | 7.59176 | 8.08706 | 5.78805 | 5.76501 | 5.44607 | 6.45176 | 5.52544 | 5.40165 |
| TTC37     | 9.50168 | 9.47947 | 9.15529 | 8.7001  | 5.7408  | 7.93523 | 8.94654 | 8.85506 | 8.33494 |
| SPATA9    | 3.67215 | 3.76544 | 3.97032 | 3.94352 | 5.03255 | 4.25423 | 3.99644 | 3.60479 | 3.82664 |

|          |         |         |         |         |         |         |         |         |         |
|----------|---------|---------|---------|---------|---------|---------|---------|---------|---------|
| GLRX     | 8.13997 | 7.22152 | 6.85193 | 7.83764 | 6.61094 | 5.78468 | 6.74314 | 6.84758 | 6.85904 |
| pcsk1    | 5.77991 | 5.59634 | 6.13411 | 6.04356 | 6.41139 | 5.62149 | 6.09879 | 5.7334  | 5.89498 |
| ERAP1    | 8.39499 | 8.28059 | 8.21546 | 7.3977  | 6.04149 | 6.05206 | 7.76802 | 6.70223 | 6.97256 |
| LIX1     | 4.75427 | 4.94211 | 4.78418 | 5.15194 | 5.28694 | 4.91691 | 4.73865 | 5.09132 | 4.81436 |
| RIOK2    | 6.88889 | 6.32108 | 6.68546 | 5.80781 | 5.86467 | 5.70118 | 6.32436 | 5.12595 | 5.8634  |
| RGMB-AS1 | 4.98523 | 5.36593 | 4.85453 | 5.50077 | 6.09249 | 5.22866 | 5.34243 | 5.1361  | 5.38531 |
| CHD1     | 8.59418 | 8.82502 | 8.5246  | 8.29745 | 5.59523 | 8.68894 | 8.4644  | 8.84805 | 9.16336 |
| GIN1     | 5.95972 | 6.24281 | 6.33626 | 5.41896 | 3.79689 | 4.44951 | 6.14596 | 4.42879 | 5.05672 |
| NUDT12   | 6.79688 | 6.82752 | 6.71508 | 6.07586 | 4.62415 | 5.5244  | 6.33249 | 5.18778 | 5.48725 |
| EFNA5    | 9.54526 | 9.4496  | 9.22264 | 8.6907  | 6.26514 | 8.39756 | 9.17969 | 8.53828 | 9.08262 |
| FBXL17   | 8.43141 | 8.12145 | 8.28425 | 7.38755 | 5.611   | 7.39665 | 7.66817 | 6.83149 | 7.55113 |
| TMEM232  | 4.94672 | 4.92648 | 4.70983 | 4.00224 | 4.16399 | 4.49779 | 4.52184 | 4.47994 | 4.16391 |
| MIR548F3 | 2.52895 | 2.78625 | 2.09009 | 1.99807 | 2.38675 | 2.72167 | 2.4683  | 2.29884 | 1.82317 |
| STARD4   | 6.52218 | 5.98281 | 6.17728 | 7.03753 | 5.61793 | 7.14186 | 7.59204 | 7.73212 | 7.45258 |
| NREP     | 7.89084 | 7.29987 | 7.12266 | 7.22482 | 6.79652 | 5.8721  | 7.07502 | 6.38517 | 6.68412 |
| EPB41L4A | 8.35999 | 8.37259 | 8.04613 | 6.59253 | 5.74323 | 7.06043 | 7.34407 | 7.45128 | 7.18308 |
| REEP5    | 9.66767 | 9.64432 | 9.81364 | 9.27517 | 7.94023 | 8.80985 | 9.32873 | 8.45134 | 8.97582 |
| MCC      | 9.26947 | 9.00868 | 8.83348 | 8.095   | 6.1966  | 7.92376 | 8.0736  | 7.53112 | 7.70533 |
| TSSK1B   | 5.55042 | 5.1471  | 5.4238  | 5.2396  | 4.97436 | 5.44238 | 4.97403 | 4.56004 | 5.15939 |
| TRIM36   | 5.56622 | 5.53825 | 5.27012 | 5.69275 | 6.04317 | 6.22722 | 5.75735 | 5.87416 | 5.72404 |
| CCDC112  | 5.78525 | 6.23855 | 6.06985 | 4.90415 | 3.78561 | 3.9572  | 5.56725 | 4.55959 | 3.82262 |
| FEM1C    | 8.3188  | 8.33147 | 8.42938 | 8.62637 | 8.46106 | 10.013  | 9.15632 | 10.1854 | 9.36243 |
| TMED7    | 8.34711 | 7.91095 | 8.44072 | 8.23452 | 6.67896 | 8.28347 | 8.51121 | 8.29165 | 8.52773 |
| ATG12    | 6.61388 | 6.75975 | 7.08343 | 6.16963 | 5.72492 | 6.31426 | 6.36926 | 6.44851 | 6.44376 |
| DTWD2    | 7.76425 | 8.00686 | 8.05576 | 7.74671 | 6.86499 | 7.64442 | 8.41272 | 7.19446 | 7.56974 |
| LOX      | 7.87381 | 7.46441 | 7.94938 | 7.91298 | 6.67285 | 7.04442 | 8.00149 | 6.79693 | 6.76577 |

|            |         |         |         |         |         |         |         |         |         |
|------------|---------|---------|---------|---------|---------|---------|---------|---------|---------|
| MGC32805   | 4.00654 | 7.06847 | 5.02336 | 3.77004 | 4.52335 | 4.31492 | 3.89047 | 3.96341 | 3.87381 |
| PPIC       | 7.73382 | 7.7108  | 7.27904 | 8.08925 | 6.57269 | 8.23983 | 8.07448 | 7.7298  | 7.90834 |
| CEP120     | 7.25531 | 7.725   | 7.71758 | 6.04202 | 5.6947  | 5.14439 | 6.0598  | 5.93016 | 6.00674 |
| ZNF608     | 6.51327 | 7.56381 | 6.52479 | 6.12244 | 5.39297 | 5.83039 | 6.38891 | 5.65374 | 5.59696 |
| c5orf63    | 6.48306 | 6.03811 | 6.25327 | 5.73624 | 5.6092  | 4.99825 | 6.23494 | 5.59643 | 6.08387 |
| FBN2       | 5.24762 | 5.27114 | 5.25921 | 6.80467 | 6.08515 | 7.73172 | 6.43664 | 8.06547 | 6.76775 |
| MIR4460    | 3.05215 | 3.57616 | 3.22312 | 3.30515 | 3.6504  | 3.13503 | 3.48364 | 3.72456 | 3.29337 |
| HINT1      | 7.70324 | 7.84959 | 7.91415 | 8.06051 | 7.58169 | 8.11006 | 8.03196 | 7.78577 | 8.27493 |
| RAPGEF6    | 7.86267 | 7.85136 | 7.81723 | 6.46497 | 5.66106 | 6.25642 | 6.88476 | 7.11116 | 6.56946 |
| FNIP1      | 8.94769 | 8.89583 | 9.19877 | 8.36308 | 6.46532 | 8.87562 | 8.33261 | 8.94292 | 8.92577 |
| ACSL6      | 4.34887 | 4.32328 | 4.42561 | 4.75923 | 5.35885 | 4.77153 | 4.76341 | 4.66374 | 4.50697 |
| MIR3936    | 5.70847 | 8.2067  | 5.35565 | 5.44108 | 4.76942 | 5.90573 | 5.54945 | 5.35729 | 5.60986 |
| IRF1       | 7.59264 | 6.38196 | 6.15332 | 6.45965 | 5.61337 | 6.5701  | 7.12263 | 6.54851 | 6.62362 |
| KIF3A      | 6.83649 | 7.27636 | 6.73157 | 6.68007 | 4.90055 | 5.96295 | 6.72579 | 6.84117 | 6.80699 |
| 44447      | 7.84682 | 8.04308 | 7.57424 | 7.83462 | 6.90401 | 7.64059 | 7.81076 | 7.21398 | 7.88958 |
| SHROOM1    | 6.52825 | 6.68835 | 6.44198 | 7.11466 | 6.93814 | 7.19105 | 7.22952 | 6.80981 | 7.0672  |
| GDF9       | 5.70274 | 5.28422 | 4.96143 | 5.33288 | 5.32043 | 4.68782 | 4.13417 | 4.62353 | 5.04475 |
| FSTL4      | 6.1318  | 6.3745  | 6.97939 | 6.71004 | 6.00471 | 6.44532 | 6.74808 | 6.45505 | 6.02147 |
| MIR1289-2  | 2.90527 | 3.31943 | 3.07504 | 2.96517 | 3.47987 | 3.41226 | 3.53691 | 2.90042 | 3.08528 |
| c5orf15    | 8.07673 | 8.27997 | 7.87224 | 7.95084 | 6.30212 | 7.37633 | 7.93455 | 7.36241 | 7.63113 |
| VDAC1      | 9.38942 | 9.33201 | 9.52884 | 9.84493 | 9.24397 | 10.0276 | 10.0107 | 9.77048 | 9.78313 |
| SKP1       | 8.3441  | 7.31827 | 7.19988 | 5.75447 | 5.52942 | 5.47766 | 5.95599 | 7.80117 | 7.01989 |
| CDKL3      | 4.90243 | 4.95192 | 5.05179 | 4.73251 | 4.76397 | 4.88006 | 4.53649 | 4.80228 | 4.9417  |
| CDKN2AIPNL | 5.9344  | 5.95744 | 6.02555 | 5.92045 | 5.87593 | 5.7283  | 6.25136 | 6.02221 | 5.36336 |
| SAR1B      | 8.00308 | 8.17928 | 7.714   | 8.01366 | 7.05517 | 7.8235  | 8.37451 | 7.70989 | 7.89279 |
| PITX1      | 6.6385  | 6.42315 | 6.56135 | 7.26643 | 6.84984 | 8.04767 | 7.44675 | 7.04324 | 7.29923 |

|             |         |         |         |         |         |         |         |         |         |
|-------------|---------|---------|---------|---------|---------|---------|---------|---------|---------|
| C5orf66-AS2 | 5.50033 | 5.83258 | 5.74827 | 6.13181 | 6.90271 | 6.55701 | 6.29727 | 6.14951 | 6.39216 |
| NEUROG1     | 5.16808 | 5.55837 | 5.5793  | 6.17775 | 5.81471 | 6.5426  | 6.17807 | 5.90412 | 6.14127 |
| CXCL14      | 12.8984 | 12.4027 | 12.7085 | 12.3526 | 11.2661 | 11.2998 | 12.4529 | 10.8721 | 11.7887 |
| LOC340074   | 4.31247 | 4.51297 | 4.59429 | 4.87366 | 5.75484 | 4.9869  | 4.30161 | 4.52392 | 4.62527 |
| IL9         | 4.75741 | 5.1304  | 4.65354 | 4.86184 | 5.00573 | 5.11074 | 4.90344 | 4.83965 | 4.85153 |
| LECT2       | 3.55442 | 3.44107 | 4.05435 | 4.116   | 4.58618 | 4.17537 | 3.46659 | 3.71142 | 3.63758 |
| VTRNA2-1    | 6.64631 | 8.23002 | 5.99331 | 8.53704 | 8.52252 | 9.93306 | 7.8137  | 6.79559 | 8.11506 |
| SMAD5-AS1   | 5.20678 | 5.20754 | 4.5392  | 5.34927 | 6.04358 | 5.38031 | 5.66179 | 5.40779 | 5.00866 |
| LOC389332   | 6.00718 | 5.84315 | 6.05457 | 6.27045 | 6.52338 | 6.61882 | 6.73143 | 6.45127 | 6.45425 |
| KLHL3       | 6.80078 | 6.78678 | 7.16506 | 5.75935 | 6.13978 | 5.60677 | 5.76518 | 5.83541 | 5.71396 |
| Mir874      | 3.80447 | 3.87715 | 4.08229 | 4.9961  | 4.35475 | 4.82149 | 4.72106 | 4.79186 | 4.24915 |
| HNRNPA0     | 8.45614 | 8.2506  | 8.64122 | 8.60564 | 6.13586 | 7.74578 | 9.08466 | 7.63988 | 7.99109 |
| NME5        | 4.42703 | 4.15847 | 4.71234 | 4.50917 | 4.55327 | 4.00498 | 4.39586 | 3.97303 | 3.83015 |
| BRD8        | 6.6753  | 6.60318 | 6.49773 | 6.25305 | 6.13694 | 5.78398 | 6.20391 | 6.30123 | 5.80292 |
| CDC23       | 8.42323 | 8.03747 | 8.34916 | 7.4091  | 5.66874 | 7.08439 | 7.85171 | 6.82442 | 7.13028 |
| GFRA3       | 6.18447 | 5.68465 | 6.13633 | 6.04779 | 6.468   | 5.45546 | 5.76359 | 5.79184 | 5.86387 |
| CDC25C      | 5.22338 | 4.51562 | 4.72876 | 5.17197 | 5.56849 | 5.28408 | 5.16031 | 5.10499 | 5.08684 |
| HSPA9       | 10.0529 | 10.1783 | 10.3106 | 10.2383 | 8.25348 | 10.5339 | 10.3995 | 10.307  | 10.2589 |
| MZB1        | 6.2553  | 6.11962 | 6.36201 | 6.30231 | 6.63682 | 5.60961 | 5.92566 | 6.6513  | 6.46903 |
| PROB1       | 4.92873 | 4.76234 | 5.08828 | 5.46313 | 4.5052  | 5.84923 | 6.02042 | 5.36109 | 5.52926 |
| SPATA24     | 4.8421  | 5.14161 | 4.83217 | 4.59027 | 4.84856 | 5.1568  | 5.27175 | 5.05326 | 5.03788 |
| ECSCR       | 4.85752 | 5.47147 | 5.92818 | 4.75163 | 4.51549 | 5.09971 | 5.06767 | 5.34884 | 5.23128 |
| TMEM173     | 7.42789 | 7.06371 | 7.55402 | 7.57059 | 7.12218 | 7.86737 | 7.98899 | 7.66711 | 7.82068 |
| PFDN1       | 9.39922 | 9.03623 | 9.31642 | 8.74202 | 6.92669 | 8.5903  | 8.94226 | 8.74789 | 9.02704 |
| HBEGF       | 9.16533 | 6.69545 | 6.86708 | 9.16502 | 8.47907 | 11.2879 | 8.5835  | 10.5203 | 10.3985 |
| SRA1        | 7.05844 | 6.82696 | 6.95786 | 7.7906  | 7.37139 | 8.29809 | 7.94604 | 8.11094 | 7.92938 |



|             |         |         |         |         |         |         |         |         |         |
|-------------|---------|---------|---------|---------|---------|---------|---------|---------|---------|
| CD14        | 6.3661  | 6.55461 | 7.24089 | 6.54674 | 6.27586 | 6.10354 | 6.84128 | 6.13382 | 6.3851  |
| DND1        | 5.92543 | 6.0117  | 6.4484  | 7.43886 | 6.79701 | 7.23908 | 6.94983 | 7.08066 | 7.21961 |
| HARS        | 7.90813 | 7.82104 | 7.97932 | 7.4737  | 6.58923 | 7.51556 | 7.88093 | 7.5851  | 7.86156 |
| SLC25A2     | 5.99604 | 6.56139 | 6.26135 | 6.26569 | 6.22696 | 6.89235 | 6.25478 | 6.42015 | 6.78098 |
| DIAPH1      | 9.03389 | 8.78631 | 9.27466 | 9.17793 | 7.60675 | 9.78389 | 9.55618 | 9.89146 | 10.0027 |
| HDAC3       | 8.76809 | 8.83495 | 8.74946 | 8.86344 | 8.57204 | 10.0398 | 9.10889 | 10.4245 | 9.25929 |
| FCHSD1      | 8.23328 | 7.89049 | 7.53199 | 9.35001 | 10.0533 | 10.2444 | 9.6308  | 11.8165 | 10.6788 |
| PCDH1       | 7.76439 | 8.07251 | 7.96266 | 7.91068 | 7.37768 | 8.30683 | 7.84946 | 7.90495 | 8.05431 |
| LOC729080   | 2.57162 | 1.92502 | 2.26338 | 1.94759 | 3.53462 | 1.93017 | 2.00191 | 1.88089 | 2.14854 |
| PCDH12      | 5.10231 | 5.26554 | 5.14526 | 5.4025  | 6.1651  | 5.5484  | 5.22591 | 5.41882 | 5.43559 |
| GNPDA1      | 6.063   | 5.97456 | 5.89899 | 6.23006 | 5.94899 | 6.45725 | 6.33148 | 6.34151 | 5.86491 |
| SPRY4       | 6.61479 | 6.22001 | 6.30647 | 7.88089 | 6.7859  | 8.1039  | 7.74837 | 8.33113 | 8.96444 |
| FGF1        | 4.83622 | 5.24586 | 4.84544 | 5.47823 | 5.49039 | 5.87946 | 5.60332 | 5.56333 | 5.58329 |
| PRELID2     | 5.51317 | 5.43091 | 5.11034 | 4.81649 | 5.06047 | 5.10167 | 4.81855 | 4.81413 | 4.93918 |
| PLAC8L1     | 5.56154 | 5.39266 | 5.55002 | 5.33095 | 5.60402 | 5.24481 | 4.96958 | 5.16359 | 5.26608 |
| LARS        | 8.92228 | 9.1097  | 8.97205 | 8.73544 | 6.36885 | 8.02547 | 8.68573 | 7.50766 | 8.41519 |
| GPR151      | 4.70663 | 4.93496 | 4.87308 | 5.26526 | 5.48208 | 5.45477 | 5.19287 | 5.06701 | 5.53266 |
| PPP2R2B-IT1 | 3.82227 | 3.83054 | 4.22069 | 3.67147 | 5.62642 | 4.16143 | 3.85194 | 3.85348 | 3.80975 |
| DPYSL3      | 7.44459 | 7.15907 | 8.00644 | 6.05399 | 5.74427 | 6.24687 | 7.91873 | 7.49102 | 6.70397 |
| JAKMIP2     | 4.74439 | 5.26261 | 4.81972 | 4.58387 | 4.26201 | 4.35381 | 4.3108  | 4.16939 | 4.27209 |
| C5orf46     | 7.58428 | 7.84412 | 7.78128 | 7.2142  | 5.5868  | 5.84279 | 6.05531 | 5.4873  | 5.65836 |
| SH3TC2      | 5.07182 | 5.5975  | 5.52257 | 5.89252 | 6.44621 | 5.85293 | 5.80416 | 6.05989 | 6.32248 |
| MIR584      | 6.44202 | 6.21464 | 6.6374  | 6.10997 | 7.75834 | 6.66604 | 6.77793 | 6.59071 | 6.58754 |
| IL17B       | 5.97574 | 6.28559 | 6.23058 | 6.66874 | 7.06606 | 6.94725 | 6.13865 | 6.64679 | 6.70712 |
| TIGD6       | 7.01482 | 7.08759 | 7.04997 | 6.48155 | 7.24668 | 6.79032 | 7.09586 | 6.63521 | 6.67201 |
| CSF1R       | 7.71145 | 7.71004 | 7.91037 | 7.3156  | 6.61651 | 7.74393 | 7.72946 | 7.37893 | 7.68116 |

|            |         |         |         |         |         |         |         |         |         |
|------------|---------|---------|---------|---------|---------|---------|---------|---------|---------|
| CAMK2A     | 6.10101 | 6.03958 | 5.95271 | 6.09193 | 6.72124 | 6.17894 | 6.10307 | 6.39077 | 6.25159 |
| RPS14      | 7.72061 | 7.61321 | 7.77793 | 7.7795  | 7.73839 | 7.69599 | 7.86375 | 6.8966  | 7.33382 |
| RBM22      | 7.91996 | 7.81007 | 7.67326 | 7.48515 | 6.23851 | 7.34127 | 7.77622 | 7.48055 | 7.62191 |
| DCTN4      | 9.07484 | 8.93506 | 9.06004 | 8.65893 | 7.71712 | 8.89284 | 8.82064 | 9.13874 | 8.7718  |
| ZNF300     | 5.86683 | 6.19586 | 5.55767 | 6.17897 | 5.35065 | 5.98248 | 5.58684 | 5.70022 | 6.02717 |
| ZNF300P1   | 4.88802 | 5.11041 | 5.4416  | 6.22686 | 4.96263 | 5.885   | 5.50852 | 5.85559 | 7.10254 |
| TNIP1      | 7.02864 | 7.33043 | 7.16335 | 7.39564 | 6.62444 | 9.08852 | 8.20794 | 8.35473 | 8.23185 |
| ANXA6      | 8.959   | 9.01464 | 9.44737 | 8.90106 | 7.6491  | 8.19169 | 8.05948 | 8.19826 | 8.42685 |
| CCDC69     | 6.1111  | 5.91    | 6.57736 | 6.42184 | 6.00753 | 6.61178 | 6.73877 | 6.71437 | 6.70603 |
| FAT2       | 9.96058 | 9.39816 | 9.5462  | 8.63567 | 5.89868 | 7.54777 | 9.20056 | 8.0657  | 8.07431 |
| ATOX1      | 7.66939 | 7.72905 | 7.93978 | 7.31598 | 7.37673 | 7.20362 | 7.35081 | 7.75139 | 7.11576 |
| NMUR2      | 4.89909 | 4.82777 | 4.78648 | 5.13075 | 6.11151 | 5.56132 | 5.15548 | 4.82129 | 5.09788 |
| SAP30L-AS1 | 5.38837 | 5.74025 | 5.81759 | 5.0699  | 5.8794  | 5.13608 | 5.33496 | 5.37015 | 4.95571 |
| HAND1      | 5.65572 | 5.86979 | 5.82679 | 6.51824 | 6.99765 | 6.93961 | 6.27257 | 6.73767 | 6.42771 |
| FAXDC2     | 7.95232 | 7.21245 | 8.11514 | 5.73637 | 6.1992  | 5.87471 | 5.25796 | 5.86485 | 6.41882 |
| GEMIN5     | 7.87561 | 8.05407 | 8.11913 | 7.71316 | 6.64803 | 6.91103 | 7.73173 | 6.97916 | 7.06962 |
| timd4      | 3.95813 | 3.94712 | 3.92964 | 4.38927 | 4.77442 | 4.26381 | 4.2606  | 3.9366  | 4.15101 |
| HAVCR1     | 4.19721 | 4.40431 | 4.32348 | 3.7039  | 4.56591 | 4.25874 | 4.03077 | 4.13204 | 3.95921 |
| HAVCR2     | 5.44348 | 4.81578 | 6.02431 | 5.45055 | 5.89859 | 5.36884 | 5.46597 | 5.18477 | 5.391   |
| MED7       | 5.42889 | 5.53506 | 5.36044 | 5.78237 | 5.39763 | 5.46345 | 5.8926  | 5.48445 | 5.67943 |
| FNDC9      | 5.30781 | 5.632   | 5.52964 | 6.3062  | 6.32169 | 6.33102 | 5.76968 | 6.04793 | 6.12488 |
| ADAM19     | 7.15015 | 7.09826 | 6.87231 | 7.43787 | 6.85473 | 6.86251 | 6.77009 | 6.70609 | 6.89319 |
| SOX30      | 5.29721 | 5.17927 | 5.46762 | 5.56174 | 7.03708 | 5.88057 | 5.38283 | 5.53685 | 5.65346 |
| CLINT1     | 10.7515 | 10.4635 | 10.134  | 9.99252 | 7.8155  | 9.77773 | 9.81521 | 10.3606 | 9.97783 |
| EBF1       | 8.2605  | 8.16139 | 9.00876 | 6.80866 | 6.55099 | 6.35076 | 6.32042 | 6.22461 | 6.61525 |
| RNF145     | 8.03096 | 8.05944 | 7.89965 | 9.04086 | 7.30113 | 8.77715 | 9.01067 | 8.19864 | 8.69846 |

|           |         |         |         |         |         |         |         |         |         |
|-----------|---------|---------|---------|---------|---------|---------|---------|---------|---------|
| LOC285627 | 3.73427 | 3.68058 | 3.66051 | 3.598   | 4.68785 | 4.09199 | 3.50911 | 4.21164 | 3.63551 |
| PWWP2A    | 6.42623 | 6.78328 | 6.48187 | 6.39995 | 4.98212 | 6.23718 | 6.06455 | 5.66543 | 5.97445 |
| ccnjl     | 6.11064 | 5.87583 | 5.82875 | 6.88289 | 6.51995 | 6.65265 | 6.44898 | 6.44007 | 6.47467 |
| C1QTNF2   | 5.89959 | 5.23419 | 5.89106 | 5.87335 | 5.43438 | 5.13788 | 6.08123 | 5.20114 | 5.46008 |
| ZBED8     | 4.94469 | 4.86852 | 4.60035 | 3.64371 | 4.64585 | 4.11147 | 4.31975 | 3.92476 | 3.79394 |
| SLU7      | 7.90832 | 7.77085 | 7.72171 | 7.02091 | 6.26215 | 8.20794 | 7.64562 | 7.71909 | 7.00922 |
| LOC285629 | 5.8082  | 5.93476 | 5.59817 | 6.63209 | 5.80143 | 4.0717  | 5.58755 | 4.89849 | 4.9773  |
| NUDCD2    | 6.30822 | 6.96859 | 6.35063 | 6.009   | 4.40144 | 6.0311  | 7.06662 | 5.49153 | 5.56521 |
| PANK3     | 10.1109 | 10.4256 | 10.6247 | 9.96686 | 7.68755 | 9.18074 | 10.1511 | 9.41506 | 9.93059 |
| SLIT3     | 9.18599 | 8.44545 | 9.42179 | 6.7324  | 6.70526 | 6.70223 | 7.57995 | 6.90873 | 6.88016 |
| Mir218-2  | 5.40277 | 4.9609  | 4.5687  | 5.42059 | 4.9912  | 5.38783 | 4.45027 | 4.76591 | 5.06119 |
| MIR585    | 5.911   | 5.97787 | 5.94451 | 6.13222 | 6.49924 | 6.52996 | 5.75407 | 6.00328 | 6.37721 |
| LCP2      | 7.0018  | 6.92362 | 7.41974 | 6.95573 | 6.71836 | 8.14334 | 6.79985 | 7.68537 | 7.92136 |
| MIR3912   | 1.88271 | 2.16694 | 1.89897 | 2.1864  | 1.88005 | 2.36642 | 2.17747 | 1.89692 | 2.00128 |
| FBXW11    | 8.12219 | 7.68598 | 7.94271 | 7.93676 | 6.33348 | 8.5098  | 8.11602 | 8.6967  | 8.32176 |
| STK10     | 8.67661 | 8.73585 | 8.12579 | 7.89273 | 6.70573 | 8.39821 | 7.56658 | 7.46996 | 7.63967 |
| UBTD2     | 7.84857 | 7.58984 | 7.56862 | 7.75667 | 6.50294 | 8.81085 | 8.24348 | 7.84759 | 8.1964  |
| SH3PXD2B  | 8.58997 | 7.99581 | 8.81064 | 7.80632 | 7.05406 | 8.04375 | 8.23146 | 7.92219 | 8.13817 |
| DUSP1     | 11.9558 | 9.87318 | 10.4339 | 11.2175 | 10.0773 | 11.743  | 11.1443 | 11.1228 | 10.7431 |
| NKX2-5    | 4.88398 | 4.95502 | 5.2036  | 6.65645 | 5.5015  | 5.86139 | 6.18554 | 5.96069 | 6.0708  |
| STC2      | 5.80115 | 6.38469 | 6.44443 | 6.02094 | 6.74226 | 6.91761 | 5.72886 | 6.74435 | 6.05006 |
| BOD1      | 6.92987 | 7.05662 | 7.2007  | 6.58831 | 5.46237 | 5.60691 | 6.24567 | 6.00508 | 6.28794 |
| FLJ16171  | 4.1221  | 4.3032  | 4.90603 | 4.5722  | 6.14173 | 4.70744 | 4.03201 | 4.65616 | 4.37881 |
| DRD1      | 5.41103 | 5.88831 | 5.79946 | 5.80909 | 6.433   | 6.12041 | 5.57507 | 6.24051 | 5.92848 |
| KIAA1191  | 8.82643 | 8.74798 | 8.75462 | 8.34388 | 7.76806 | 9.13393 | 8.92354 | 9.33121 | 8.81813 |
| NOP16     | 7.45199 | 7.17844 | 7.54558 | 7.68174 | 5.67362 | 7.32674 | 7.61156 | 6.3842  | 7.44856 |

|              |         |         |         |         |         |         |         |         |         |
|--------------|---------|---------|---------|---------|---------|---------|---------|---------|---------|
| RNF44        | 7.32248 | 7.26235 | 7.42942 | 7.55877 | 7.18275 | 7.31515 | 7.82963 | 7.25445 | 7.45702 |
| GPRIN1       | 6.15826 | 6.03755 | 6.00071 | 7.3875  | 6.23185 | 8.27673 | 7.91454 | 7.34905 | 7.7342  |
| HK3          | 4.68788 | 4.70595 | 4.89778 | 4.86345 | 5.10437 | 5.47895 | 4.89836 | 5.22561 | 5.25852 |
| UIMC1        | 7.49226 | 7.62287 | 7.57367 | 6.76085 | 5.29317 | 6.20322 | 7.36943 | 7.04114 | 6.95453 |
| PFN3         | 5.36888 | 5.96799 | 5.42372 | 6.72273 | 6.28304 | 6.93635 | 6.35111 | 6.49541 | 6.052   |
| F12          | 6.35723 | 6.51229 | 6.40347 | 7.31727 | 6.83289 | 7.20895 | 7.07284 | 6.90884 | 6.97816 |
| PRR7-AS1     | 5.70268 | 5.66286 | 5.7083  | 5.80103 | 6.43057 | 5.87516 | 5.42179 | 5.62166 | 5.81646 |
| DBN1         | 6.73802 | 6.65448 | 7.0754  | 7.05983 | 6.81164 | 7.3523  | 6.96431 | 7.48929 | 7.55229 |
| PDLIM7       | 7.05017 | 6.67419 | 6.88963 | 8.11924 | 7.28213 | 8.10055 | 8.24891 | 8.38965 | 8.568   |
| DOK3         | 6.39586 | 6.36688 | 6.5466  | 6.88122 | 6.48802 | 6.98521 | 7.01846 | 6.99667 | 6.8882  |
| DDX41        | 8.86534 | 8.80957 | 9.07716 | 9.14439 | 7.71481 | 9.22897 | 9.52233 | 8.77303 | 9.09957 |
| LOC202181    | 7.99428 | 8.02852 | 8.22299 | 6.69751 | 6.19998 | 6.25125 | 6.19173 | 5.99682 | 6.63839 |
| prop1        | 6.02517 | 5.79511 | 5.63509 | 6.71886 | 7.12099 | 6.405   | 6.00153 | 6.04613 | 6.04151 |
| LOC100507387 | 3.89581 | 3.56493 | 3.90768 | 3.67113 | 4.28711 | 4.19754 | 4.20285 | 4.0611  | 3.93607 |
| nhp2         | 7.77743 | 7.77491 | 8.05431 | 8.93246 | 6.18701 | 8.05455 | 8.8464  | 7.46684 | 7.7826  |
| GMCL1P1      | 3.03797 | 3.57703 | 3.87906 | 3.77732 | 3.96591 | 4.40001 | 4.80987 | 4.27664 | 3.40885 |
| PHYKPL       | 7.16816 | 7.56823 | 6.93303 | 6.62264 | 5.34889 | 6.30838 | 7.16249 | 6.67375 | 7.15197 |
| CLK4         | 8.26336 | 8.68838 | 8.14857 | 7.08169 | 6.13994 | 6.51892 | 6.55813 | 7.101   | 6.70104 |
| ZNF354A      | 7.02845 | 7.34253 | 6.86885 | 6.63999 | 6.94402 | 5.51878 | 7.22049 | 6.03869 | 6.27012 |
| AACSP1       | 5.9211  | 5.91279 | 6.30248 | 5.98815 | 6.08343 | 6.14235 | 5.55323 | 5.64577 | 5.92916 |
| HNRNPH1      | 8.58626 | 8.7518  | 8.16799 | 7.94079 | 5.99538 | 7.63697 | 7.89031 | 7.69941 | 7.82747 |
| C5orf60      | 5.31077 | 4.9832  | 4.77939 | 5.64519 | 6.37785 | 5.79889 | 5.64797 | 5.52425 | 5.57024 |
| CBY3         | 5.10094 | 5.17692 | 5.20933 | 6.0684  | 5.34574 | 6.07044 | 5.96172 | 5.68946 | 5.12716 |
| MIR1229      | 6.80267 | 6.46966 | 6.41589 | 7.23182 | 8.67409 | 6.86586 | 7.40813 | 6.60835 | 7.41309 |
| MRNIP        | 6.3754  | 6.50192 | 6.4154  | 6.25418 | 6.11861 | 6.8089  | 6.36403 | 6.52503 | 6.26707 |
| RNF130       | 7.33486 | 7.0301  | 7.66957 | 6.55022 | 5.71998 | 6.24535 | 7.02846 | 6.48703 | 6.61828 |

|              |         |         |         |         |         |         |         |         |         |
|--------------|---------|---------|---------|---------|---------|---------|---------|---------|---------|
| MIR340       | 5.37423 | 5.11281 | 5.27892 | 4.2726  | 5.29732 | 5.00714 | 4.23557 | 4.35942 | 4.75062 |
| MAPK9        | 7.9418  | 7.89177 | 8.1414  | 7.53535 | 7.00858 | 7.00536 | 7.71762 | 7.84075 | 7.51372 |
| GFPT2        | 6.55019 | 6.38289 | 7.20785 | 6.87417 | 7.52408 | 7.35211 | 7.06785 | 7.68992 | 7.31907 |
| FLT4         | 5.97937 | 5.81516 | 5.89385 | 6.26057 | 6.11404 | 6.13411 | 6.02888 | 6.32731 | 5.96535 |
| HEIH         | 6.02018 | 6.0287  | 6.20494 | 5.53817 | 5.33669 | 6.41187 | 5.67676 | 5.64831 | 5.44368 |
| ZFP62        | 7.10316 | 7.8219  | 7.24352 | 6.24018 | 5.42118 | 6.01055 | 6.61701 | 5.80943 | 6.10539 |
| TRIM7        | 6.98186 | 7.027   | 6.81747 | 6.27669 | 5.57518 | 6.60521 | 6.89306 | 6.10502 | 6.17778 |
| MIR4638      | 7.9524  | 7.75653 | 8.03416 | 7.88738 | 8.15231 | 7.94149 | 8.02867 | 8.065   | 8.08219 |
| TRIM52       | 6.62822 | 6.89414 | 6.87844 | 5.87366 | 5.49896 | 5.67368 | 5.81363 | 5.61412 | 5.48069 |
| DUSP22       | 8.8417  | 8.93702 | 8.73348 | 8.85817 | 8.35199 | 9.28573 | 9.25126 | 9.22256 | 9.33794 |
| IRF4         | 5.63181 | 5.97926 | 5.65446 | 5.58944 | 5.80583 | 6.24284 | 5.91299 | 5.65474 | 5.52968 |
| FOXQ1        | 7.25367 | 7.19281 | 7.48597 | 7.18811 | 5.9213  | 9.61064 | 7.80807 | 6.5244  | 8.8513  |
| FOXF2        | 6.32299 | 6.06707 | 6.26398 | 6.58607 | 6.59274 | 6.63457 | 7.64833 | 6.09575 | 6.63692 |
| FOXC1        | 8.92751 | 8.63243 | 9.66316 | 8.68432 | 7.17536 | 8.67474 | 8.83346 | 8.67829 | 8.35402 |
| GMDS-AS1     | 6.51474 | 6.29624 | 6.41465 | 5.39024 | 6.49207 | 5.49079 | 5.36709 | 5.33457 | 5.21114 |
| WRNIP1       | 8.45712 | 8.53244 | 8.44298 | 8.70519 | 6.65398 | 8.51682 | 9.01466 | 8.21195 | 8.53514 |
| RIPK1        | 8.71878 | 8.89326 | 8.74312 | 8.2623  | 6.4534  | 8.45334 | 8.87797 | 8.14567 | 9.05101 |
| PRPF4B       | 8.97889 | 9.05617 | 9.15034 | 7.81346 | 6.12447 | 6.83124 | 7.88954 | 7.98196 | 7.8572  |
| C6orf201     | 5.07424 | 4.47711 | 4.99756 | 5.2025  | 5.43403 | 5.49537 | 5.25309 | 5.71234 | 4.93083 |
| LY86         | 6.31899 | 5.97109 | 6.83965 | 6.5053  | 7.01923 | 5.88053 | 6.33742 | 5.62574 | 6.11826 |
| RREB1        | 9.33116 | 8.57366 | 9.0399  | 8.60688 | 7.15989 | 9.20236 | 9.02822 | 8.76772 | 9.162   |
| RIOK1        | 8.02106 | 7.95903 | 8.29438 | 7.84032 | 5.71261 | 6.91243 | 8.02123 | 7.23796 | 7.46999 |
| DSP          | 13.3586 | 13.3834 | 13.3594 | 13.072  | 11.9012 | 13.1754 | 13.1183 | 13.18   | 13.3525 |
| SNRNP48      | 7.53627 | 7.32884 | 7.77825 | 6.56961 | 5.34417 | 6.10641 | 7.12932 | 8.17959 | 6.82426 |
| BMP6         | 6.46005 | 5.71476 | 6.61087 | 5.9354  | 5.61774 | 6.82471 | 6.38281 | 6.76177 | 6.12371 |
| LOC100506207 | 6.18233 | 6.46982 | 5.94782 | 4.99171 | 6.25354 | 5.15094 | 5.36976 | 5.26292 | 4.71042 |

|            |         |         |         |         |         |         |         |         |         |
|------------|---------|---------|---------|---------|---------|---------|---------|---------|---------|
| HULC       | 5.87926 | 6.50099 | 6.31855 | 5.14608 | 5.11117 | 4.71406 | 4.70912 | 3.95451 | 5.0228  |
| TFAP2A-AS1 | 5.72069 | 5.22572 | 5.64116 | 5.95611 | 5.98666 | 5.935   | 6.0645  | 6.51736 | 5.93846 |
| PAK1IP1    | 9.37076 | 8.87553 | 9.38292 | 8.84194 | 5.60016 | 7.70272 | 9.20593 | 7.46084 | 8.00474 |
| TMEM14C    | 8.91774 | 8.81986 | 9.18008 | 8.73699 | 8.24218 | 8.14848 | 8.72285 | 8.6814  | 8.69472 |
| TMEM14B    | 7.03878 | 6.93716 | 7.42407 | 6.36172 | 6.41508 | 6.07181 | 6.52698 | 6.18694 | 6.09005 |
| SYCP2L     | 4.87809 | 5.53889 | 5.14726 | 4.36776 | 5.29288 | 5.00949 | 4.77989 | 4.501   | 4.57307 |
| ELOVL2-AS1 | 4.82578 | 4.75089 | 4.49471 | 4.89918 | 6.01464 | 4.8919  | 4.92794 | 5.01924 | 5.05795 |
| SMIM13     | 7.36086 | 7.40361 | 7.38432 | 7.68716 | 6.14508 | 6.72875 | 7.64446 | 7.73729 | 7.54521 |
| tmem170b   | 5.54744 | 6.21317 | 5.87191 | 5.95268 | 5.05218 | 5.82684 | 5.72214 | 5.63589 | 5.14154 |
| hivep1     | 8.70038 | 8.50564 | 8.51738 | 7.8436  | 6.13415 | 7.24291 | 7.67063 | 7.85647 | 8.75828 |
| EDN1       | 7.84865 | 6.68746 | 8.07478 | 7.68581 | 6.52703 | 8.01747 | 6.69332 | 9.02907 | 8.0438  |
| PHACTR1    | 5.90689 | 5.92449 | 6.19376 | 5.89484 | 6.24882 | 5.47296 | 6.19046 | 6.00461 | 6.1239  |
| GFOD1      | 5.24451 | 5.45134 | 5.59588 | 6.97689 | 6.33252 | 6.73518 | 7.13804 | 5.69994 | 6.42288 |
| SIRT5      | 6.2495  | 6.48135 | 6.09222 | 5.74564 | 5.30239 | 6.07053 | 6.3868  | 5.63668 | 6.08082 |
| RNF182     | 5.27979 | 5.18874 | 5.04598 | 5.86367 | 6.59172 | 5.6794  | 5.6348  | 5.6853  | 5.49606 |
| CD83       | 6.90853 | 6.7114  | 6.46986 | 6.62608 | 6.79781 | 7.86304 | 6.82995 | 7.19278 | 7.11902 |
| MYLIP      | 8.29679 | 8.24505 | 8.33763 | 6.65976 | 5.84183 | 6.63478 | 7.55439 | 6.90923 | 6.61676 |
| GMPR       | 7.38403 | 6.65415 | 7.61098 | 6.29886 | 5.97286 | 6.03695 | 6.54518 | 6.21852 | 5.90856 |
| STMND1     | 3.579   | 4.61918 | 3.9085  | 4.61252 | 5.49448 | 4.38807 | 4.33624 | 4.34096 | 4.21128 |
| RBM24      | 4.19269 | 4.40322 | 4.89447 | 4.54851 | 4.63933 | 4.56717 | 4.34179 | 4.7064  | 4.10746 |
| KDM1B      | 8.20507 | 7.96591 | 7.93457 | 8.26672 | 6.89996 | 8.6627  | 8.79034 | 8.81332 | 8.925   |
| RNF144B    | 8.78637 | 8.54887 | 8.9595  | 8.17639 | 6.90887 | 8.92365 | 9.05812 | 8.09978 | 8.97372 |
| MIR548A1   | 3.88913 | 3.52361 | 4.05831 | 3.85172 | 4.27603 | 3.08234 | 2.41817 | 4.11477 | 3.42653 |
| E2F3       | 6.97628 | 6.75963 | 6.68763 | 7.3231  | 6.31561 | 7.55386 | 7.4785  | 7.13712 | 7.01038 |
| CDKAL1     | 9.22382 | 8.97663 | 9.29537 | 7.41576 | 5.92123 | 6.6474  | 7.50338 | 6.91841 | 7.44048 |
| SOX4       | 8.1707  | 8.08735 | 7.51775 | 8.25716 | 6.48274 | 8.04839 | 8.07087 | 7.33295 | 7.08241 |

|              |         |         |         |         |         |         |         |         |         |
|--------------|---------|---------|---------|---------|---------|---------|---------|---------|---------|
| CASC15       | 5.58333 | 4.98534 | 5.10959 | 5.26181 | 5.08734 | 5.03698 | 5.1823  | 5.13006 | 5.06631 |
| HDGFL1       | 5.4041  | 5.32277 | 5.40793 | 6.56932 | 6.28915 | 6.5531  | 5.97671 | 6.22408 | 5.86035 |
| NRSN1        | 4.48099 | 4.60563 | 4.26368 | 4.80967 | 5.59784 | 4.66957 | 4.47966 | 4.4143  | 4.84838 |
| KAAG1        | 5.41108 | 5.84923 | 5.79739 | 6.43709 | 5.75778 | 6.85501 | 5.73206 | 6.74704 | 6.27986 |
| MRS2         | 7.96695 | 7.95102 | 8.15967 | 7.87835 | 6.85517 | 7.78955 | 8.38827 | 8.22549 | 8.35206 |
| ACOT13       | 8.64224 | 8.09137 | 7.79893 | 8.17327 | 6.95745 | 7.12807 | 8.38984 | 8.20894 | 8.45833 |
| CARMIL1      | 9.68877 | 9.67056 | 9.7566  | 9.22811 | 7.21859 | 9.09611 | 9.30878 | 9.69304 | 9.50551 |
| TRIM38       | 9.18353 | 9.11581 | 8.74755 | 8.29044 | 6.06441 | 6.64856 | 8.014   | 7.77789 | 8.1327  |
| HFE          | 5.78719 | 6.01672 | 5.57964 | 6.01846 | 5.86085 | 5.52026 | 5.84865 | 5.50634 | 5.61225 |
| HCG11        | 6.24561 | 5.86754 | 5.92988 | 5.90576 | 4.21106 | 4.25004 | 6.17688 | 5.17447 | 5.59227 |
| HMGN4        | 8.1533  | 7.63464 | 8.09126 | 7.64354 | 6.20564 | 6.79675 | 7.71688 | 7.29987 | 7.51139 |
| ABT1         | 8.32548 | 7.89648 | 8.45969 | 7.68294 | 6.52821 | 7.81439 | 8.68277 | 8.04549 | 8.16975 |
| LINC00240    | 5.09722 | 5.22227 | 4.68551 | 4.60059 | 6.68998 | 4.48519 | 5.09457 | 4.11959 | 5.11053 |
| MIR3143      | 7.30698 | 7.655   | 7.40957 | 8.33867 | 8.72675 | 8.22755 | 8.52916 | 8.08602 | 7.89316 |
| VN1R10P      | 3.28442 | 3.27622 | 3.46411 | 3.28537 | 6.03111 | 3.30228 | 3.42968 | 3.50358 | 3.27682 |
| ZNF391       | 6.01407 | 6.73292 | 5.87804 | 4.96987 | 6.11127 | 5.09752 | 5.79829 | 5.65741 | 5.42151 |
| LINC01012    | 4.87577 | 4.92688 | 4.927   | 4.79775 | 5.16217 | 4.89023 | 5.02359 | 4.79679 | 4.87098 |
| LOC100131289 | 6.05946 | 6.28655 | 5.76821 | 5.92462 | 6.31161 | 5.75783 | 5.71582 | 5.79672 | 5.72062 |
| ZNF165       | 5.20118 | 4.04865 | 4.53436 | 6.15458 | 4.79889 | 7.38609 | 5.33415 | 5.91986 | 7.37351 |
| ZSCAN12P1    | 4.93381 | 4.54898 | 4.83969 | 5.76943 | 5.57699 | 5.99294 | 5.37395 | 5.84105 | 6.21916 |
| ZSCAN16      | 6.02202 | 6.21005 | 6.27456 | 5.49206 | 5.29878 | 4.9106  | 5.2617  | 4.96287 | 5.01305 |
| ZKSCAN8      | 7.32226 | 7.75022 | 8.04197 | 5.65023 | 5.07356 | 5.36425 | 5.77477 | 5.66513 | 5.66429 |
| ZSCAN9       | 5.61798 | 5.88794 | 6.23158 | 5.63636 | 6.05252 | 5.33019 | 5.64349 | 5.60762 | 5.34527 |
| NKAPL        | 5.42782 | 5.28349 | 5.67415 | 6.15281 | 6.19644 | 6.09045 | 6.46164 | 6.01235 | 5.99153 |
| ZSCAN26      | 7.5784  | 7.67819 | 7.65724 | 6.13255 | 6.32123 | 5.63629 | 6.73756 | 6.17473 | 6.66003 |
| PGBD1        | 5.28381 | 5.91125 | 5.81011 | 5.70083 | 5.48189 | 6.11121 | 5.78703 | 6.02777 | 5.84043 |

|              |         |         |         |         |         |         |         |         |         |
|--------------|---------|---------|---------|---------|---------|---------|---------|---------|---------|
| ZKSCAN3      | 6.41978 | 6.65695 | 6.26468 | 5.88572 | 6.33983 | 5.94186 | 6.09985 | 5.86037 | 6.45012 |
| LOC100129636 | 4.55311 | 4.49473 | 4.66793 | 4.84372 | 5.84141 | 4.53936 | 4.73967 | 4.61231 | 4.73915 |
| LINC01015    | 4.97843 | 4.77495 | 4.47878 | 5.03851 | 5.25818 | 4.97327 | 5.09919 | 4.87844 | 4.88629 |
| HCG9         | 6.40907 | 6.28876 | 6.68174 | 6.64028 | 7.33176 | 6.65548 | 6.36422 | 6.69551 | 6.84948 |
| ZNRD1        | 6.81086 | 6.80032 | 6.90801 | 7.16157 | 7.07471 | 7.62377 | 7.79755 | 7.94847 | 7.6759  |
| TRIM40       | 6.13815 | 6.24185 | 6.23778 | 6.2806  | 7.06568 | 6.46929 | 5.89325 | 6.33672 | 6.7422  |
| TRIM15       | 6.18308 | 5.8268  | 6.03421 | 6.26435 | 6.64297 | 6.02074 | 6.33016 | 6.7477  | 6.63443 |
| RPP21        | 9.70952 | 9.58534 | 9.66292 | 10.5641 | 8.23133 | 9.68073 | 10.5109 | 9.46716 | 9.55154 |
| PRR3         | 6.71445 | 6.98686 | 7.16158 | 6.51424 | 7.24832 | 6.32448 | 6.63351 | 6.11123 | 6.09388 |
| Mir877       | 7.16331 | 7.30323 | 7.10523 | 7.90333 | 8.44967 | 8.30218 | 7.47578 | 8.10838 | 7.74061 |
| MRPS18B      | 7.62345 | 8.23416 | 7.76124 | 7.66587 | 6.54048 | 7.03139 | 8.02714 | 6.94836 | 7.2246  |
| ATAT1        | 8.12854 | 8.10911 | 7.76145 | 7.02769 | 6.87483 | 6.44577 | 6.62368 | 6.61736 | 7.16844 |
| C6orf136     | 7.86187 | 7.89196 | 8.07504 | 7.74073 | 7.72352 | 7.47709 | 8.10461 | 7.52084 | 7.58758 |
| IER3         | 6.40528 | 5.98334 | 5.89916 | 6.98806 | 6.53236 | 7.93594 | 7.60669 | 7.11749 | 7.45376 |
| DPCR1        | 4.97884 | 5.39665 | 4.87421 | 5.46955 | 6.47233 | 5.7635  | 5.31535 | 5.55685 | 5.6996  |
| MUC22        | 5.62295 | 5.82165 | 5.44382 | 5.45182 | 5.63376 | 5.77505 | 5.39414 | 5.54203 | 5.51021 |
| HCG22        | 5.17224 | 4.61656 | 4.92755 | 5.09368 | 5.73259 | 5.66899 | 5.31186 | 5.51248 | 6.03596 |
| TCF19        | 6.85584 | 6.92    | 6.97276 | 6.88407 | 7.17438 | 7.6345  | 6.72896 | 7.38239 | 7.29715 |
| MICA         | 8.09423 | 7.59835 | 8.67583 | 7.70608 | 7.28035 | 7.3765  | 8.25191 | 7.90258 | 7.68252 |
| HCG26        | 2.87149 | 5.31878 | 4.46615 | 3.41069 | 2.44116 | 3.69411 | 3.28921 | 3.01627 | 2.90227 |
| MICB         | 7.23327 | 7.16026 | 7.38345 | 7.41443 | 7.21974 | 6.88709 | 7.39944 | 7.53903 | 7.23046 |
| MCCD1        | 6.64336 | 6.51214 | 6.67822 | 7.03686 | 7.34278 | 6.86501 | 6.9903  | 6.96876 | 6.84301 |
| NFKBIL1      | 6.10412 | 6.5608  | 6.02028 | 6.49134 | 6.79156 | 7.02409 | 6.68301 | 6.68261 | 6.43077 |
| TNF          | 6.7665  | 6.86151 | 6.53765 | 6.75221 | 6.93357 | 7.99633 | 7.23596 | 7.55682 | 7.73439 |
| LST1         | 6.60547 | 6.55624 | 6.81808 | 6.84166 | 7.41635 | 6.95711 | 6.64053 | 7.0825  | 6.91858 |
| AIF1         | 6.05387 | 5.87199 | 6.26966 | 6.01498 | 5.26844 | 5.75925 | 6.2018  | 5.62979 | 5.94578 |



|              |         |         |         |         |         |         |         |         |         |
|--------------|---------|---------|---------|---------|---------|---------|---------|---------|---------|
| PRRC2A       | 8.82803 | 8.51524 | 8.54133 | 8.82555 | 7.31127 | 8.13436 | 8.88521 | 8.28669 | 8.63591 |
| APOM         | 6.32767 | 6.26543 | 6.17311 | 6.03837 | 6.56476 | 6.46488 | 6.50482 | 6.01579 | 6.3927  |
| C6orf47      | 6.06219 | 6.09023 | 5.91765 | 6.96747 | 7.0049  | 7.19696 | 6.8213  | 6.67175 | 6.7423  |
| C6orf25      | 6.08159 | 5.98207 | 6.01699 | 6.22738 | 5.88946 | 6.71959 | 6.50296 | 6.19217 | 6.38573 |
| SAPCD1       | 7.23232 | 7.93971 | 7.53807 | 6.40726 | 7.54828 | 6.73538 | 5.48876 | 6.69205 | 5.86415 |
| HSPA1A       | 10.7022 | 9.89915 | 9.86182 | 9.87872 | 8.50747 | 10.7905 | 10.3334 | 10.4961 | 10.5803 |
| hspa1b       | 10.4016 | 9.58975 | 9.63763 | 9.75864 | 8.17509 | 10.6207 | 10.1844 | 10.2163 | 10.3448 |
| C2           | 6.07751 | 5.99519 | 6.28299 | 6.2444  | 6.29805 | 6.26412 | 6.20955 | 6.20955 | 6.1144  |
| CFB          | 6.73514 | 6.35358 | 6.66251 | 6.54644 | 6.7808  | 6.81918 | 6.55548 | 6.42157 | 6.59532 |
| SKIV2L       | 7.70832 | 7.53059 | 7.55887 | 7.80957 | 7.46953 | 7.56948 | 7.65577 | 7.45863 | 7.71351 |
| STK19        | 7.19498 | 7.41907 | 7.07752 | 7.19072 | 6.98443 | 7.67609 | 7.55529 | 7.22366 | 7.19321 |
| c4a          | 6.63959 | 6.48935 | 6.62941 | 6.69858 | 6.89915 | 6.69422 | 6.5781  | 6.68357 | 6.60549 |
| c4b          | 6.60199 | 6.48862 | 6.62179 | 6.72362 | 6.94001 | 6.68297 | 6.57437 | 6.64224 | 6.6304  |
| LOC100294145 | 6.68992 | 7.44106 | 6.96679 | 6.75843 | 6.15989 | 6.60419 | 6.81704 | 6.34671 | 6.54981 |
| BRD2         | 7.92643 | 7.08028 | 7.42526 | 7.66468 | 6.71609 | 6.991   | 7.65215 | 7.7065  | 7.5172  |
| HSD17B8      | 7.23358 | 7.30219 | 7.22957 | 7.1574  | 7.07442 | 7.15369 | 7.36625 | 6.59775 | 7.23441 |
| MIR219A1     | 4.39653 | 4.35604 | 4.70383 | 5.55135 | 4.53433 | 5.38291 | 5.41084 | 5.1005  | 5.0609  |
| ring1        | 8.69061 | 8.53388 | 8.44186 | 8.87012 | 8.03011 | 8.69081 | 9.14527 | 8.78627 | 8.66208 |
| PFDN6        | 7.21244 | 7.46379 | 7.30667 | 7.34131 | 6.55771 | 7.09151 | 7.54767 | 7.26695 | 7.3891  |
| KIFC1        | 7.11153 | 6.82189 | 6.96581 | 7.55618 | 7.08694 | 7.15132 | 7.11324 | 7.26349 | 7.21828 |
| PHF1         | 7.63796 | 7.54418 | 7.61861 | 7.45618 | 7.6405  | 7.56808 | 7.24356 | 7.60466 | 7.58082 |
| SYNGAP1      | 7.46088 | 7.29193 | 7.23632 | 6.99306 | 7.69267 | 6.80246 | 6.88727 | 7.06325 | 7.13263 |
| ZBTB9        | 7.33463 | 7.33024 | 7.30881 | 7.33024 | 7.04439 | 6.79704 | 7.38989 | 6.42789 | 6.76912 |
| GGNBP1       | 5.24758 | 5.07006 | 5.08737 | 5.70833 | 5.99434 | 5.82809 | 5.35105 | 6.02299 | 5.80411 |
| MIR3934      | 7.60601 | 7.59729 | 8.05589 | 5.6402  | 7.36222 | 5.53802 | 5.67741 | 7.39833 | 7.24319 |
| HMGA1        | 8.77035 | 8.41883 | 8.64438 | 9.14732 | 8.42371 | 9.51156 | 8.79069 | 9.43582 | 8.99559 |

|          |         |         |         |         |         |         |         |         |         |
|----------|---------|---------|---------|---------|---------|---------|---------|---------|---------|
| PACSLIN1 | 6.07058 | 5.98836 | 5.75882 | 6.28969 | 6.62146 | 7.02456 | 6.17837 | 6.97146 | 6.34338 |
| SNRPC    | 6.45412 | 6.59656 | 6.57636 | 7.63743 | 6.29919 | 6.59496 | 7.61165 | 6.60318 | 6.74653 |
| UHRF1BP1 | 7.27359 | 7.06027 | 7.34475 | 6.52544 | 6.84758 | 6.54081 | 7.96992 | 7.17887 | 7.25548 |
| ANKS1A   | 8.7712  | 8.36301 | 8.51098 | 8.42461 | 6.84429 | 7.88867 | 8.70956 | 8.53215 | 8.49201 |
| ZNF76    | 7.05994 | 7.10002 | 6.97974 | 6.5621  | 6.57093 | 6.81443 | 6.74205 | 7.01199 | 6.39063 |
| DEF6     | 7.59404 | 7.39993 | 7.66084 | 6.52117 | 6.1506  | 7.16798 | 6.85945 | 6.23908 | 6.70852 |
| PPARD    | 9.59898 | 8.84764 | 9.38561 | 10.2048 | 9.73797 | 11.5202 | 10.2962 | 11.0396 | 11.2116 |
| RPL10A   | 9.67207 | 9.44517 | 9.8298  | 9.6922  | 8.95294 | 9.79354 | 9.83904 | 8.92372 | 9.24922 |
| ARMC12   | 5.09486 | 5.26753 | 5.4951  | 5.61916 | 6.20567 | 5.95613 | 5.03793 | 5.75368 | 5.67638 |
| CLPSL2   | 5.64133 | 5.54405 | 5.73087 | 6.15648 | 5.98517 | 6.66451 | 5.94655 | 6.32107 | 6.18982 |
| CLPSL1   | 5.35313 | 5.45723 | 5.59626 | 6.22775 | 6.80505 | 6.42712 | 6.13658 | 6.15305 | 6.07908 |
| LHFPL5   | 5.39704 | 5.89118 | 5.22687 | 6.31952 | 5.82141 | 6.58356 | 6.11893 | 5.80273 | 5.77799 |
| MAPK14   | 9.75782 | 9.67544 | 9.80877 | 9.05473 | 7.63475 | 9.99149 | 9.34528 | 9.71148 | 9.77502 |
| mapk13   | 9.14464 | 8.73792 | 8.64825 | 10.0749 | 8.63691 | 10.735  | 10.1868 | 9.16982 | 10.2521 |
| PNPLA1   | 8.87899 | 8.38541 | 7.86344 | 8.13579 | 6.73175 | 7.82635 | 7.47092 | 6.93006 | 8.12783 |
| KCTD20   | 8.46841 | 8.4234  | 8.25802 | 7.86169 | 6.01621 | 7.72346 | 7.76424 | 8.23659 | 8.50881 |
| PI16     | 8.75506 | 7.32198 | 8.39423 | 7.17596 | 7.39105 | 6.72262 | 7.05334 | 6.69608 | 7.02854 |
| SRSF3    | 10.7825 | 10.2903 | 10.5386 | 10.3496 | 9.78097 | 10.8145 | 10.5506 | 10.521  | 10.3973 |
| C6orf89  | 8.01027 | 8.35649 | 8.0216  | 8.17356 | 6.20335 | 8.43947 | 8.6477  | 8.43652 | 8.29431 |
| PIM1     | 9.84769 | 8.82345 | 9.10493 | 10.0233 | 9.55924 | 10.9996 | 9.79686 | 10.1073 | 9.93772 |
| CMTR1    | 7.63664 | 7.66584 | 7.35774 | 7.12721 | 6.16766 | 6.42785 | 7.30341 | 6.65822 | 6.93922 |
| GLP1R    | 6.19859 | 6.0574  | 6.08859 | 6.35883 | 6.75579 | 6.55316 | 6.28555 | 6.14961 | 6.4113  |
| DAAM2    | 6.50281 | 6.42135 | 6.6292  | 6.13351 | 6.00885 | 6.10098 | 6.26979 | 5.95922 | 5.9477  |
| TSPO2    | 5.82905 | 5.82122 | 5.9248  | 6.32572 | 6.76937 | 6.1322  | 5.76483 | 6.2224  | 6.14518 |
| ADCY10P1 | 6.63081 | 6.30335 | 5.79387 | 5.44713 | 6.13258 | 5.50658 | 5.12368 | 5.78482 | 5.89917 |
| TREML4   | 4.67395 | 5.41099 | 5.00202 | 5.91426 | 5.48243 | 5.17893 | 5.61786 | 5.691   | 5.60621 |

|           |         |         |         |         |         |         |         |         |         |
|-----------|---------|---------|---------|---------|---------|---------|---------|---------|---------|
| NCR2      | 6.19342 | 6.47246 | 6.48856 | 6.68578 | 7.4072  | 6.8888  | 6.44073 | 6.62816 | 6.78348 |
| FOXP4     | 7.24302 | 7.21528 | 7.30763 | 7.89123 | 7.41391 | 7.70491 | 8.07776 | 7.70706 | 7.55898 |
| MDFI      | 6.35351 | 6.06381 | 6.2887  | 7.6784  | 6.33898 | 7.61655 | 7.8616  | 7.48957 | 7.99617 |
| PRICKLE4  | 6.50739 | 6.15596 | 6.25124 | 5.76349 | 6.08286 | 5.92934 | 6.0549  | 6.2184  | 5.74745 |
| tomm6     | 10.2547 | 10.1398 | 10.3701 | 10.1579 | 9.31948 | 9.56212 | 10.611  | 9.17877 | 10.0419 |
| BYSL      | 6.93829 | 7.04312 | 6.98353 | 7.52355 | 6.11549 | 7.09928 | 7.72391 | 6.77119 | 6.82163 |
| GUCA1A    | 6.53475 | 5.93607 | 6.31837 | 6.55742 | 6.33237 | 6.83504 | 6.40577 | 6.81646 | 6.44883 |
| UBR2      | 9.79391 | 9.91422 | 9.78787 | 8.62022 | 6.0138  | 7.73146 | 9.10236 | 8.70725 | 8.6292  |
| GLTSCR1L  | 8.72911 | 8.7197  | 8.7178  | 7.28169 | 6.54805 | 6.95007 | 7.80319 | 7.03514 | 7.10328 |
| RPL7L1    | 7.50378 | 7.4765  | 7.25334 | 7.73188 | 7.35419 | 7.33003 | 7.48302 | 7.09123 | 7.25796 |
| PTCRA     | 6.75175 | 6.59366 | 6.88023 | 7.51579 | 8.17758 | 7.75146 | 7.35651 | 7.58013 | 7.19278 |
| CNPY3     | 8.2113  | 8.217   | 8.4037  | 8.14573 | 6.27289 | 7.88808 | 8.20505 | 7.25375 | 7.84144 |
| GNMT      | 5.44002 | 5.70416 | 5.52496 | 6.22758 | 5.84325 | 5.83947 | 5.66218 | 5.64602 | 6.17328 |
| KLHDC3    | 9.00964 | 8.82183 | 8.85102 | 9.26821 | 7.45986 | 8.66479 | 9.39201 | 8.89082 | 8.73835 |
| RRP36     | 8.58869 | 8.50379 | 8.64737 | 9.07964 | 6.62289 | 8.68115 | 9.54214 | 8.58529 | 9.05167 |
| KLC4      | 6.01033 | 6.03568 | 6.18224 | 5.99829 | 5.88081 | 6.26292 | 5.98879 | 5.99161 | 6.05737 |
| PTK7      | 7.52319 | 7.37465 | 7.0831  | 7.40847 | 6.51263 | 7.3836  | 7.77178 | 7.30771 | 7.2497  |
| SRF       | 8.74329 | 8.8453  | 8.57392 | 10.0619 | 7.78028 | 9.45401 | 9.6218  | 9.22997 | 9.93228 |
| CUL9      | 7.94642 | 8.0127  | 7.83117 | 6.913   | 6.96637 | 6.87586 | 7.12903 | 6.72045 | 6.87347 |
| TTBK1     | 5.83985 | 6.05692 | 5.86968 | 6.52418 | 6.92028 | 6.41806 | 6.57883 | 6.29538 | 6.61661 |
| TJAP1     | 6.68435 | 6.75893 | 7.12176 | 5.8574  | 5.80203 | 5.90376 | 6.34297 | 6.15041 | 6.10556 |
| MAD2L1BP  | 7.38438 | 7.30639 | 7.17005 | 7.66168 | 7.32085 | 7.42453 | 7.97012 | 7.2092  | 7.5819  |
| RSPH9     | 4.76831 | 5.30766 | 5.36771 | 6.18698 | 5.75278 | 6.05158 | 5.88615 | 6.15293 | 6.01659 |
| VEGFA     | 7.27408 | 7.31023 | 7.41742 | 7.95708 | 8.51999 | 9.61048 | 7.9794  | 8.94237 | 8.43612 |
| LINC01512 | 5.50847 | 5.6631  | 5.44397 | 5.82707 | 7.92381 | 5.4494  | 5.83435 | 6.0276  | 6.23584 |
| C6orf223  | 5.98164 | 6.01113 | 6.13893 | 6.43033 | 5.92019 | 6.55856 | 6.3981  | 6.16118 | 6.33243 |

|           |         |         |         |         |         |         |         |         |         |
|-----------|---------|---------|---------|---------|---------|---------|---------|---------|---------|
| TMEM63B   | 8.55577 | 8.57777 | 8.29818 | 8.66872 | 7.59432 | 8.64107 | 8.70105 | 8.6033  | 8.96053 |
| CAPN11    | 5.33807 | 5.28906 | 5.21126 | 5.38878 | 6.00813 | 5.29108 | 5.14256 | 5.53133 | 5.3268  |
| TMEM151B  | 5.5631  | 5.74607 | 5.78128 | 6.25689 | 6.33931 | 6.50856 | 5.74252 | 6.15911 | 5.88437 |
| CDC5L     | 8.88468 | 9.14263 | 8.97046 | 8.64275 | 5.98399 | 8.1323  | 8.83197 | 8.30085 | 8.51803 |
| MIR4642   | 5.90984 | 6.31899 | 6.08657 | 6.61792 | 7.06054 | 5.98467 | 6.3275  | 6.09935 | 6.04536 |
| RUNX2     | 7.08162 | 6.12981 | 6.90576 | 6.50703 | 6.44303 | 5.94031 | 6.44476 | 5.78561 | 5.89233 |
| ENPP4     | 5.7142  | 5.47831 | 6.66728 | 4.84347 | 5.3879  | 5.57388 | 4.83071 | 5.03755 | 5.48384 |
| TDRD6     | 5.54686 | 5.72805 | 5.5343  | 5.79688 | 5.614   | 5.63672 | 5.7627  | 5.59591 | 5.6166  |
| ANKRD66   | 5.03796 | 4.69802 | 4.72799 | 5.2783  | 6.16825 | 5.81571 | 5.67334 | 4.48462 | 4.96042 |
| CD2AP     | 10.1926 | 10.0802 | 10.1392 | 9.62886 | 8.1062  | 10.1434 | 10.0609 | 10.6165 | 10.508  |
| ADGRF2    | 7.27532 | 7.57678 | 7.38887 | 6.48467 | 7.11356 | 6.63045 | 7.46454 | 8.66279 | 6.63777 |
| ADGRF4    | 9.67436 | 10.0222 | 9.12067 | 9.17089 | 7.25328 | 9.39799 | 9.38223 | 8.70906 | 9.25718 |
| OPN5      | 5.53139 | 5.02948 | 4.87198 | 5.08865 | 6.63927 | 5.60559 | 4.65231 | 6.17284 | 5.07005 |
| CENPQ     | 6.41196 | 6.17646 | 6.41892 | 6.13181 | 4.37317 | 5.91874 | 6.45077 | 5.55813 | 5.6759  |
| GLYATL3   | 4.59471 | 4.89457 | 4.84232 | 5.4732  | 5.94003 | 4.72258 | 4.51204 | 4.54569 | 4.49064 |
| C6orf141  | 6.32992 | 5.4589  | 5.88084 | 6.70736 | 5.30026 | 6.61754 | 6.45875 | 7.22411 | 7.09496 |
| TFAP2D    | 4.1791  | 4.22319 | 4.05861 | 4.78303 | 5.52217 | 5.01541 | 4.64015 | 4.49401 | 4.81837 |
| TFAP2B    | 8.09348 | 9.18605 | 7.7608  | 6.26842 | 6.20854 | 5.87252 | 5.85174 | 5.52567 | 5.80174 |
| MIR206    | 5.12223 | 5.17451 | 5.14951 | 5.19884 | 6.86263 | 5.87323 | 5.41445 | 5.67858 | 5.08597 |
| mir133b   | 6.15003 | 6.38709 | 6.50405 | 6.92049 | 6.44243 | 7.18843 | 6.64324 | 6.90807 | 6.70581 |
| IL17A     | 4.58406 | 4.63295 | 4.41074 | 4.98591 | 5.86165 | 5.7408  | 4.96216 | 4.76182 | 4.6131  |
| PAQR8     | 5.54155 | 5.50022 | 5.73967 | 5.30534 | 6.04883 | 5.96798 | 5.14685 | 6.0949  | 5.43477 |
| EFHC1     | 8.13445 | 7.60047 | 7.68966 | 6.98377 | 6.8199  | 6.30699 | 6.37319 | 6.71083 | 6.58043 |
| LOC730101 | 5.56886 | 5.55142 | 5.27081 | 5.81178 | 6.08934 | 5.6869  | 5.52724 | 5.59419 | 5.56457 |
| TMEM14A   | 8.0783  | 8.17769 | 8.13909 | 8.62088 | 6.78558 | 7.7738  | 8.75234 | 8.04508 | 8.15251 |
| FBXO9     | 7.95248 | 8.2821  | 8.09872 | 7.42651 | 6.22553 | 6.59139 | 7.63917 | 7.10141 | 6.79094 |

|              |         |         |         |         |         |         |         |         |         |
|--------------|---------|---------|---------|---------|---------|---------|---------|---------|---------|
| LRRC1        | 9.27684 | 8.79086 | 9.35523 | 8.19851 | 6.18319 | 8.66731 | 8.86522 | 8.8542  | 8.24381 |
| MLIP         | 6.33272 | 6.41735 | 6.11411 | 6.38564 | 6.91188 | 7.12945 | 6.34086 | 5.91067 | 6.63114 |
| MLIP-IT1     | 7.67304 | 7.84082 | 7.75588 | 5.97414 | 5.16483 | 6.43574 | 6.24992 | 6.05162 | 7.8268  |
| TINAG        | 3.60853 | 3.83247 | 3.56833 | 3.76919 | 4.71833 | 3.68126 | 4.13959 | 3.85594 | 3.86434 |
| HCRTR2       | 5.0947  | 5.59823 | 5.64639 | 5.78122 | 5.92102 | 5.66407 | 5.61324 | 6.07905 | 6.04174 |
| GFRAL        | 3.97836 | 4.22344 | 3.89406 | 4.48772 | 4.79087 | 4.40707 | 4.20666 | 4.19886 | 4.23499 |
| BEND6        | 6.18045 | 5.66416 | 5.62869 | 5.64579 | 5.19071 | 5.40423 | 5.73066 | 5.39566 | 5.0652  |
| KIAA1586     | 8.09856 | 7.7475  | 7.93171 | 7.12054 | 5.61561 | 6.78275 | 7.50922 | 6.65446 | 6.6287  |
| ZNF451       | 7.13573 | 7.02988 | 6.92916 | 6.32653 | 4.91875 | 5.86527 | 6.44626 | 6.43314 | 6.10199 |
| BAG2         | 6.00997 | 5.86861 | 6.16421 | 6.75288 | 6.07194 | 6.02834 | 6.11785 | 6.04152 | 6.1926  |
| PHF3         | 8.71049 | 9.24393 | 8.84875 | 6.64313 | 4.80314 | 6.33561 | 7.39933 | 6.99164 | 6.23807 |
| ADGRB3       | 4.51211 | 4.33548 | 4.31632 | 4.27119 | 4.98573 | 5.62927 | 4.42943 | 4.29357 | 4.31189 |
| SDHAF4       | 6.57254 | 6.41938 | 6.47397 | 6.56391 | 5.6065  | 5.88493 | 6.57223 | 5.71871 | 5.91996 |
| SMAP1        | 8.67491 | 8.6052  | 8.71987 | 8.68005 | 8.27792 | 9.49308 | 8.92202 | 8.9668  | 9.08224 |
| OGFRL1       | 9.94205 | 9.89108 | 10.4822 | 8.56736 | 6.78058 | 8.24928 | 9.44878 | 9.01274 | 8.79412 |
| RIMS1        | 4.94645 | 5.09096 | 4.94706 | 4.7198  | 5.45026 | 5.1316  | 4.37323 | 5.00379 | 4.77772 |
| Ddx43        | 3.26979 | 5.9694  | 4.03494 | 5.05198 | 4.53652 | 4.67645 | 4.86983 | 3.63305 | 5.4321  |
| mto1         | 7.70112 | 7.35346 | 7.52068 | 7.27317 | 5.84516 | 6.37646 | 7.42727 | 6.51718 | 7.18382 |
| CD109        | 9.17798 | 9.02772 | 9.56355 | 7.86101 | 5.2302  | 8.19579 | 9.13807 | 8.9749  | 8.58617 |
| LOC100506804 | 5.54169 | 5.89738 | 5.96149 | 5.89349 | 5.93734 | 5.40804 | 5.98227 | 5.47995 | 5.66173 |
| MIR4463      | 3.0713  | 2.74341 | 2.73815 | 3.42327 | 3.11774 | 3.21218 | 3.70262 | 3.37875 | 3.11781 |
| SENP6        | 9.02075 | 9.4062  | 9.10101 | 7.52421 | 5.22018 | 7.24134 | 8.28974 | 7.30129 | 7.70865 |
| MYO6         | 10.3373 | 10.6429 | 10.2351 | 10.0695 | 9.94754 | 10.4329 | 10.2446 | 11.5534 | 10.8705 |
| IRAK1BP1     | 6.89793 | 6.36806 | 6.90754 | 5.45943 | 4.44667 | 5.05137 | 5.91855 | 4.77571 | 4.69545 |
| HMGN3-AS1    | 5.49141 | 5.56689 | 5.68377 | 5.39745 | 5.19104 | 5.7829  | 5.78732 | 5.45352 | 5.29219 |
| SH3BGRL2     | 8.78886 | 9.11872 | 8.81995 | 8.33668 | 7.00632 | 6.98623 | 7.56747 | 7.15208 | 7.17805 |

|           |         |         |         |         |         |         |         |         |         |
|-----------|---------|---------|---------|---------|---------|---------|---------|---------|---------|
| TTK       | 6.32004 | 5.83734 | 5.84689 | 6.25522 | 4.82041 | 5.71102 | 6.01184 | 5.72597 | 5.60001 |
| TPBG      | 7.66472 | 6.91772 | 7.20391 | 7.7589  | 6.80505 | 7.36337 | 7.8087  | 7.20509 | 7.58505 |
| DOPEY1    | 8.75406 | 8.89461 | 8.98348 | 7.61827 | 6.07779 | 7.07018 | 7.46571 | 7.4712  | 7.74624 |
| RWDD2A    | 5.95808 | 5.62873 | 5.85815 | 5.12674 | 4.93758 | 4.94978 | 5.33472 | 5.00422 | 5.13832 |
| RIPPLY2   | 5.51116 | 6.10161 | 5.50926 | 6.90321 | 7.42808 | 6.63026 | 5.89918 | 6.24828 | 6.34058 |
| CYB5R4    | 7.68566 | 7.36485 | 8.21642 | 7.35538 | 6.04171 | 7.89525 | 8.33389 | 8.4339  | 7.965   |
| MRAP2     | 5.33351 | 5.08901 | 6.10111 | 4.76023 | 5.73055 | 5.09747 | 4.75291 | 4.52319 | 4.70183 |
| ZNF292    | 8.66202 | 8.63185 | 8.85627 | 7.12325 | 6.50932 | 8.30212 | 7.21685 | 8.30472 | 7.68417 |
| SMIM8     | 7.27994 | 7.59611 | 7.12829 | 6.03679 | 5.00451 | 5.03035 | 6.76053 | 5.70339 | 5.69726 |
| C6orf163  | 6.07556 | 6.08511 | 6.6436  | 5.02653 | 4.6956  | 4.84537 | 4.78371 | 4.24899 | 4.97829 |
| LINC01590 | 5.2798  | 5.09033 | 5.13308 | 4.89142 | 5.17752 | 4.67217 | 4.35035 | 4.46233 | 5.04566 |
| CFAP206   | 4.5116  | 4.20341 | 4.28895 | 4.31236 | 4.75247 | 5.04022 | 4.83706 | 4.75982 | 4.58636 |
| SPACA1    | 4.99839 | 4.77059 | 4.90662 | 5.12969 | 6.10235 | 5.66137 | 5.4929  | 5.41955 | 5.34817 |
| PNRC1     | 11.0728 | 10.7834 | 11.1076 | 10.754  | 11.0514 | 11.5222 | 11.0976 | 10.5379 | 10.9486 |
| PM20D2    | 8.21891 | 8.32316 | 8.24981 | 6.80137 | 5.02229 | 6.21839 | 7.50795 | 6.26762 | 5.84539 |
| ANKRD6    | 6.0053  | 6.78709 | 5.91978 | 5.49755 | 6.15248 | 5.99076 | 6.23572 | 6.02539 | 6.46727 |
| CASP8AP2  | 7.44803 | 7.76135 | 7.45847 | 6.44908 | 5.48051 | 5.40548 | 6.50479 | 6.44967 | 6.12194 |
| MIR4464   | 2.3476  | 2.64738 | 2.50781 | 2.82399 | 2.51685 | 2.77769 | 2.93779 | 2.70888 | 2.50658 |
| MIR4643   | 2.57261 | 2.66258 | 2.14675 | 2.71226 | 2.65127 | 2.55101 | 3.27193 | 2.41336 | 2.6186  |
| UFL1      | 9.28422 | 9.22713 | 9.39218 | 8.57723 | 6.15579 | 8.19781 | 8.57758 | 7.77546 | 8.28581 |
| FHL5      | 7.15862 | 7.06244 | 8.10623 | 5.30889 | 5.38152 | 5.01657 | 4.968   | 4.77469 | 5.23246 |
| klhl32    | 5.20607 | 5.12672 | 5.32821 | 5.37365 | 6.44705 | 5.30637 | 5.21631 | 5.60553 | 5.56641 |
| MIR2113   | 5.976   | 6.11871 | 6.08167 | 5.9271  | 6.56466 | 5.47884 | 5.58086 | 6.0654  | 5.99466 |
| POU3F2    | 6.45879 | 6.31225 | 6.11186 | 7.33643 | 6.87252 | 6.99257 | 6.80189 | 7.17803 | 6.81974 |
| TSTD3     | 7.12335 | 6.79752 | 7.2657  | 5.25354 | 5.02964 | 4.87399 | 6.87189 | 4.29605 | 5.68799 |
| PRDM13    | 4.907   | 4.65091 | 4.67452 | 5.6972  | 5.17387 | 5.41209 | 5.36413 | 5.38331 | 5.23832 |

|              |         |         |         |         |         |         |         |         |         |
|--------------|---------|---------|---------|---------|---------|---------|---------|---------|---------|
| MCHR2-AS1    | 5.02429 | 5.05732 | 4.68393 | 5.57377 | 5.7048  | 5.88415 | 5.45304 | 5.14135 | 5.3454  |
| LIN28B       | 3.61885 | 3.81278 | 3.7257  | 4.37294 | 4.58519 | 4.25966 | 4.38405 | 4.35639 | 4.16802 |
| BVES-AS1     | 4.1974  | 4.65117 | 4.38887 | 4.46056 | 5.43969 | 4.55499 | 4.08311 | 4.78275 | 4.23944 |
| AIM1         | 10.3989 | 10.5735 | 9.78519 | 9.75653 | 7.32484 | 9.68066 | 9.84649 | 9.55945 | 9.8388  |
| QRSL1        | 8.10664 | 8.0918  | 7.939   | 7.296   | 6.27608 | 6.83997 | 7.76352 | 6.71348 | 6.94658 |
| MIR587       | 6.57786 | 6.77769 | 6.81547 | 6.64826 | 8.46772 | 6.9869  | 6.47857 | 7.4592  | 7.05439 |
| C6orf203     | 6.68045 | 7.09053 | 7.18481 | 5.93175 | 5.79595 | 5.19622 | 6.42383 | 5.39015 | 5.65703 |
| SOBP         | 6.55079 | 6.47175 | 6.78896 | 6.28299 | 6.79042 | 6.55987 | 6.30385 | 5.97439 | 6.12215 |
| LACE1        | 6.18332 | 5.69655 | 5.88414 | 5.82536 | 5.32855 | 5.59598 | 5.88343 | 5.20543 | 5.67401 |
| LINC00222    | 4.37216 | 4.8836  | 4.60838 | 4.79924 | 5.09942 | 4.7649  | 4.77638 | 4.73766 | 4.84503 |
| ARMC2        | 6.60002 | 6.62401 | 6.47057 | 6.21214 | 6.44729 | 6.38695 | 6.16903 | 6.11441 | 5.82804 |
| CEP57L1      | 5.36096 | 5.54704 | 5.51409 | 4.79017 | 4.71411 | 3.86235 | 4.94457 | 5.16359 | 4.37451 |
| GPR6         | 7.17776 | 7.35793 | 7.34105 | 7.47491 | 8.2936  | 8.26875 | 7.45855 | 7.83569 | 7.61952 |
| CDC40        | 7.78675 | 7.81706 | 8.00037 | 6.73783 | 6.02556 | 6.25212 | 7.25368 | 6.70067 | 6.38808 |
| AMD1         | 9.71585 | 9.42301 | 9.91617 | 9.81036 | 6.94384 | 9.46071 | 10.1778 | 9.67682 | 9.91929 |
| RPF2         | 8.45736 | 8.52303 | 8.86487 | 8.55526 | 5.63249 | 7.90681 | 8.65154 | 7.69197 | 8.43149 |
| MFSD4B       | 8.65454 | 8.36672 | 8.00097 | 7.99113 | 6.75313 | 7.97339 | 7.9252  | 8.3947  | 7.95159 |
| TRAF3IP2-AS1 | 6.10605 | 6.40046 | 6.2172  | 5.50248 | 6.37375 | 5.64214 | 5.51216 | 5.96929 | 5.90496 |
| WISP3        | 6.53283 | 6.03161 | 6.88327 | 7.22518 | 7.65207 | 7.34174 | 7.79265 | 7.2431  | 5.56173 |
| FAM229B      | 5.81129 | 6.14647 | 6.14176 | 5.13379 | 5.6189  | 5.34806 | 5.86783 | 5.54663 | 5.83151 |
| RFPL4B       | 3.76421 | 4.02634 | 3.84822 | 3.79757 | 5.71764 | 4.06749 | 3.98308 | 4.27657 | 3.88547 |
| MARCKS       | 8.44618 | 8.26747 | 8.07093 | 8.91246 | 7.43472 | 8.66962 | 9.38073 | 8.27434 | 8.91434 |
| HDAC2        | 4.02251 | 3.92888 | 3.73911 | 3.76528 | 3.94849 | 4.29427 | 3.97715 | 3.59132 | 3.9072  |
| TPI1P3       | 5.3916  | 5.33311 | 5.31619 | 6.39042 | 5.64318 | 6.70199 | 6.87542 | 6.55961 | 6.81584 |
| NT5DC1       | 8.49695 | 8.10087 | 8.82746 | 7.25613 | 5.33929 | 7.36705 | 8.39381 | 6.30962 | 7.08624 |
| DSE          | 5.98167 | 5.88762 | 5.86876 | 5.86354 | 5.85566 | 5.38757 | 6.15911 | 5.83303 | 6.08705 |

|              |         |         |         |         |         |         |         |         |         |
|--------------|---------|---------|---------|---------|---------|---------|---------|---------|---------|
| RWDD1        | 7.37249 | 7.86939 | 7.69656 | 7.19577 | 5.77346 | 6.85999 | 7.90238 | 7.38589 | 7.11029 |
| RSPH4A       | 6.02701 | 6.35998 | 6.43954 | 5.68375 | 6.53583 | 5.55709 | 5.39956 | 5.26414 | 5.53009 |
| KPNA5        | 7.50099 | 7.92812 | 7.85275 | 6.66961 | 5.35851 | 6.14727 | 7.24411 | 6.00455 | 6.04558 |
| VGLL2        | 6.17147 | 6.18387 | 6.19969 | 7.07164 | 7.68727 | 7.30029 | 6.70705 | 7.05346 | 6.56008 |
| NUS1         | 9.99675 | 10.1154 | 10.2341 | 10.1851 | 8.79143 | 9.92002 | 10.2722 | 10.2975 | 10.5106 |
| BRD7P3       | 3.01697 | 2.74712 | 2.61847 | 2.91157 | 3.10186 | 2.81403 | 3.29337 | 3.55884 | 2.59198 |
| PLN          | 6.8223  | 6.89492 | 7.79527 | 5.98303 | 5.24171 | 5.33168 | 4.99154 | 5.19053 | 5.4705  |
| LOC100287632 | 3.00556 | 3.11784 | 2.90035 | 3.47207 | 3.99674 | 3.10752 | 3.35826 | 3.44554 | 3.05278 |
| ASF1A        | 8.94    | 8.95397 | 8.94142 | 8.38779 | 7.39742 | 6.99093 | 8.42123 | 7.45865 | 7.50013 |
| MIR3144      | 3.28793 | 2.10861 | 2.52746 | 2.70927 | 2.51857 | 3.57829 | 2.90209 | 2.50921 | 2.92474 |
| HSF2         | 7.78166 | 7.65425 | 7.8511  | 7.19153 | 5.54348 | 5.84522 | 7.54439 | 7.71995 | 6.50343 |
| CLVS2        | 4.27614 | 4.80019 | 4.21688 | 4.42833 | 5.329   | 4.5263  | 4.27878 | 4.56937 | 4.42861 |
| NKAIN2       | 4.70794 | 4.61725 | 5.07096 | 5.38551 | 6.48103 | 5.40605 | 5.44993 | 4.87165 | 4.86519 |
| RNF217       | 8.33407 | 8.26895 | 8.02179 | 8.35124 | 6.86517 | 7.7208  | 8.32147 | 7.7361  | 8.58408 |
| TPD52L1      | 7.43349 | 7.7522  | 7.32703 | 7.35514 | 6.5263  | 6.92268 | 7.80082 | 7.37903 | 7.41907 |
| LOC643623    | 4.00875 | 4.23156 | 4.20101 | 4.2239  | 5.12025 | 3.87589 | 4.23949 | 4.31834 | 4.3256  |
| HEY2         | 7.36849 | 6.49419 | 7.35589 | 6.22731 | 6.04021 | 5.47585 | 6.66961 | 5.60494 | 5.58504 |
| NCOA7        | 8.33292 | 7.155   | 7.41099 | 7.28834 | 5.90814 | 6.46111 | 7.04829 | 7.35906 | 6.5769  |
| HINT3        | 7.26615 | 7.49751 | 7.51274 | 6.81901 | 5.86311 | 7.38466 | 7.69775 | 7.85632 | 7.44394 |
| TRMT11       | 7.23258 | 7.06916 | 7.20151 | 6.49912 | 5.3194  | 5.57543 | 6.27642 | 5.35507 | 5.86058 |
| CENPW        | 5.25581 | 4.5348  | 5.19483 | 6.14796 | 4.28749 | 5.32778 | 5.47623 | 5.16389 | 4.8022  |
| MIR588       | 2.21547 | 2.57923 | 1.99635 | 2.97389 | 2.27915 | 2.96629 | 2.75985 | 2.36154 | 2.39245 |
| rspo3        | 5.31483 | 5.45067 | 5.54843 | 5.68784 | 6.06373 | 5.98852 | 4.98566 | 5.6832  | 5.19476 |
| RNF146       | 8.18304 | 8.12281 | 8.17525 | 7.23051 | 6.29523 | 6.88846 | 7.22178 | 6.81554 | 7.33276 |
| L3MBTL3      | 7.02586 | 6.89708 | 6.95599 | 6.8987  | 6.02305 | 5.26783 | 6.7997  | 6.58887 | 6.09236 |
| TMEM200A     | 5.9446  | 5.85748 | 5.90857 | 5.67387 | 6.45572 | 6.47795 | 6.85367 | 6.26911 | 6.73721 |



|              |         |         |         |         |         |         |         |         |         |
|--------------|---------|---------|---------|---------|---------|---------|---------|---------|---------|
| SMLR1        | 5.11224 | 5.32618 | 5.17469 | 5.50621 | 6.57661 | 5.57541 | 5.3492  | 5.78818 | 5.60048 |
| AKAP7        | 6.23367 | 5.53096 | 5.96695 | 5.26681 | 6.00749 | 5.29702 | 5.37952 | 4.74768 | 5.04924 |
| ENPP3        | 5.66348 | 5.60006 | 6.04674 | 5.00185 | 5.49654 | 5.54742 | 5.15465 | 5.47449 | 5.58547 |
| ENPP1        | 5.21194 | 6.83833 | 6.67377 | 5.72739 | 5.44773 | 4.43525 | 5.80357 | 5.91626 | 6.98308 |
| LINC01013    | 5.03378 | 5.18703 | 4.93476 | 5.21434 | 5.43834 | 5.32505 | 5.23678 | 4.93613 | 5.33586 |
| TAAR9        | 4.25653 | 4.77823 | 4.53069 | 5.02225 | 6.32413 | 5.64664 | 5.21134 | 4.4921  | 5.3938  |
| TAAR8        | 3.97152 | 3.83187 | 3.59942 | 3.95837 | 6.32305 | 4.73598 | 3.77195 | 4.77247 | 4.01953 |
| TAAR6        | 3.67929 | 3.79896 | 3.73746 | 4.36605 | 5.88071 | 4.93578 | 4.37807 | 4.22224 | 3.89271 |
| LINC00326    | 3.68713 | 4.07654 | 3.61137 | 3.94363 | 3.93553 | 3.38676 | 3.82302 | 3.96866 | 3.80443 |
| EYA4         | 4.98418 | 5.24379 | 5.11061 | 3.79107 | 5.14393 | 4.52253 | 4.46606 | 4.37435 | 4.69089 |
| TCF21        | 5.2504  | 4.92332 | 5.25936 | 5.00609 | 5.25562 | 5.21994 | 5.11525 | 5.84634 | 5.0955  |
| TBPL1        | 7.11829 | 7.0226  | 6.96085 | 6.98445 | 5.97052 | 6.44278 | 7.30795 | 6.67411 | 6.59909 |
| LINC01010    | 5.23623 | 5.15719 | 4.85996 | 5.69558 | 5.51926 | 5.64952 | 5.10514 | 5.37315 | 5.39522 |
| MYB          | 6.27047 | 6.73202 | 7.37377 | 5.57303 | 6.15293 | 5.42514 | 5.75463 | 5.51686 | 4.96844 |
| MIR548A2     | 4.32108 | 3.71192 | 4.28062 | 3.37935 | 5.24113 | 4.17863 | 2.58733 | 3.86052 | 4.8532  |
| LINC00271    | 6.3654  | 6.71523 | 6.60481 | 6.04109 | 6.4592  | 6.03125 | 5.70203 | 6.25768 | 5.687   |
| PDE7B        | 7.00854 | 6.67746 | 6.73294 | 6.90804 | 6.54894 | 6.07446 | 6.51798 | 6.51886 | 6.3325  |
| PEX7         | 7.4231  | 7.35149 | 7.10391 | 7.56015 | 5.86655 | 6.67908 | 7.9009  | 6.49618 | 6.9005  |
| ARFGEF3      | 7.17778 | 7.51217 | 7.44987 | 6.97195 | 6.94554 | 7.40559 | 7.05203 | 6.94445 | 7.0387  |
| HEBP2        | 10.6231 | 11.0632 | 10.889  | 10.6222 | 10.6045 | 10.8519 | 10.8962 | 10.9705 | 10.717  |
| FLJ46906     | 6.32268 | 6.20761 | 5.91744 | 6.61419 | 5.98347 | 7.16252 | 6.26052 | 5.78311 | 6.43605 |
| CCDC28A      | 7.47109 | 7.49616 | 7.46957 | 6.98919 | 6.35202 | 7.44969 | 6.90877 | 7.66701 | 6.2043  |
| ECT2L        | 4.7696  | 5.22367 | 5.07717 | 5.3796  | 5.88455 | 5.69263 | 5.00813 | 5.33914 | 5.00952 |
| ABRACL       | 6.67926 | 5.68203 | 6.22709 | 6.51724 | 4.50871 | 5.39107 | 6.96211 | 5.82011 | 5.87342 |
| HECA         | 8.62193 | 8.06165 | 8.44923 | 8.55397 | 7.25353 | 9.49683 | 8.86534 | 9.02088 | 8.6899  |
| LOC100132735 | 4.59899 | 4.44884 | 4.63836 | 4.44062 | 5.78785 | 4.94424 | 4.66187 | 4.5196  | 4.98051 |

|              |         |         |         |         |         |         |         |         |         |
|--------------|---------|---------|---------|---------|---------|---------|---------|---------|---------|
| MIR3668      | 1.72444 | 1.71996 | 1.77194 | 1.85858 | 2.07537 | 2.28517 | 2.0316  | 1.93783 | 1.65586 |
| MIR4465      | 2.05888 | 2.19716 | 1.98774 | 2.73959 | 1.9953  | 2.60968 | 2.69199 | 2.37698 | 2.43146 |
| VTA1         | 9.94991 | 9.56017 | 9.90166 | 9.26998 | 7.38186 | 9.09133 | 9.96065 | 9.37677 | 9.83249 |
| ADGRG6       | 8.40744 | 7.77219 | 8.03792 | 8.28168 | 6.81753 | 8.76361 | 7.77632 | 8.81337 | 9.26879 |
| HIVEP2       | 3.76285 | 3.53466 | 3.70632 | 4.62691 | 4.68299 | 4.77811 | 4.15934 | 3.99096 | 4.26522 |
| AIG1         | 6.98696 | 6.58314 | 6.52694 | 6.33961 | 5.25047 | 6.50267 | 6.90919 | 6.65055 | 6.41936 |
| PEX3         | 9.01114 | 9.17172 | 9.22693 | 8.71647 | 5.84048 | 7.96253 | 8.58458 | 7.88727 | 7.25241 |
| PHACTR2      | 8.02446 | 8.28515 | 8.0636  | 8.30117 | 7.30914 | 8.07117 | 8.38184 | 8.78432 | 8.49538 |
| LTV1         | 7.99736 | 8.24436 | 8.25364 | 7.7049  | 5.18888 | 6.65359 | 8.29324 | 6.37137 | 6.84068 |
| Hymai        | 4.24648 | 4.51806 | 4.33229 | 4.26055 | 4.05539 | 4.24899 | 4.25798 | 4.35335 | 4.34368 |
| STX11        | 7.73668 | 7.47547 | 8.02498 | 8.06845 | 7.47749 | 9.08219 | 8.85098 | 8.45393 | 8.89755 |
| UTRN         | 9.64354 | 9.86052 | 9.71959 | 8.03203 | 6.08451 | 7.54142 | 8.2962  | 8.09858 | 8.19654 |
| LOC100507557 | 5.55069 | 5.80929 | 5.56181 | 5.61955 | 5.68357 | 6.40595 | 5.58443 | 5.93455 | 6.08172 |
| ADGB         | 4.03722 | 4.00204 | 3.95754 | 3.77767 | 4.75081 | 4.1309  | 3.76924 | 4.27263 | 4.04677 |
| STXBP5       | 9.63081 | 9.80493 | 9.60515 | 8.46995 | 5.35555 | 8.30893 | 8.87015 | 7.57611 | 8.52988 |
| SAMD5        | 5.9515  | 6.26766 | 5.75417 | 6.29437 | 6.91978 | 6.35976 | 6.42074 | 6.13313 | 6.41979 |
| SASH1        | 9.95874 | 9.62749 | 9.67902 | 8.9256  | 7.26578 | 8.8874  | 9.27607 | 9.56558 | 9.49033 |
| UST          | 8.27071 | 7.99288 | 7.9692  | 7.34915 | 6.79993 | 7.39019 | 7.56117 | 6.82719 | 6.67632 |
| TAB2         | 8.00544 | 8.04114 | 8.09974 | 7.25486 | 6.8026  | 7.51316 | 7.53735 | 8.11414 | 8.15555 |
| SUMO4        | 7.98827 | 7.97767 | 7.80645 | 5.79875 | 6.10764 | 5.27249 | 5.95607 | 7.44435 | 7.10425 |
| PCMT1        | 7.81747 | 7.76149 | 7.83347 | 7.96536 | 5.43584 | 7.58021 | 8.2631  | 8.3757  | 8.17337 |
| RAET1E-AS1   | 5.22405 | 5.45674 | 4.95523 | 6.04859 | 5.70199 | 6.2955  | 5.90062 | 5.7278  | 5.66928 |
| ULBP2        | 6.23035 | 5.85125 | 6.16298 | 7.48715 | 7.20644 | 8.18557 | 7.30048 | 8.05991 | 7.56101 |
| ULBP1        | 3.89095 | 3.74183 | 3.83774 | 6.24742 | 4.05797 | 6.52251 | 6.45277 | 6.71351 | 6.92023 |
| IYD          | 5.43996 | 5.27524 | 5.61109 | 5.57004 | 6.54238 | 5.85124 | 5.98379 | 6.17782 | 5.91816 |
| MTHFD1L      | 7.75856 | 7.16226 | 7.31506 | 8.4171  | 8.0892  | 8.40587 | 8.26282 | 8.40856 | 8.33252 |

|           |         |         |         |         |         |         |         |         |         |
|-----------|---------|---------|---------|---------|---------|---------|---------|---------|---------|
| AKAP12    | 6.30097 | 6.15101 | 6.41041 | 6.74841 | 5.77641 | 6.50711 | 6.73894 | 6.48674 | 6.56476 |
| CCDC170   | 4.91589 | 4.86778 | 4.86868 | 4.99562 | 5.24624 | 4.36834 | 4.67352 | 4.44203 | 4.55221 |
| ESR1      | 5.36241 | 5.3386  | 5.28241 | 5.56572 | 5.88175 | 5.494   | 5.05972 | 5.36537 | 5.32775 |
| MYCT1     | 8.1022  | 7.22146 | 8.43109 | 6.43369 | 5.3499  | 5.42598 | 6.61797 | 6.74245 | 6.74163 |
| VIP       | 4.23157 | 4.09763 | 3.95965 | 4.03402 | 4.4935  | 4.76015 | 4.09905 | 4.50883 | 4.27646 |
| MTRF1L    | 6.39565 | 6.73017 | 7.05054 | 6.03526 | 6.08381 | 5.86023 | 7.04584 | 5.36756 | 5.77133 |
| scaf8     | 7.80402 | 7.75898 | 7.83297 | 6.37265 | 5.74018 | 5.88508 | 6.71672 | 6.26613 | 6.6857  |
| TIAM2     | 5.46922 | 5.6327  | 5.76368 | 5.69538 | 5.93182 | 5.62887 | 5.91752 | 5.52766 | 5.62083 |
| CLDN20    | 4.29737 | 4.23328 | 4.28894 | 4.48251 | 5.03571 | 3.81753 | 4.17728 | 4.53259 | 4.09341 |
| MIR1202   | 7.541   | 7.78015 | 7.74149 | 8.35147 | 9.05838 | 8.1982  | 7.62598 | 8.36661 | 8.03039 |
| ARID1B    | 9.80685 | 9.72583 | 9.67366 | 8.90362 | 7.74523 | 8.30552 | 8.85105 | 7.877   | 8.38514 |
| MIR3692   | 4.27731 | 4.59426 | 3.88706 | 4.54492 | 5.86013 | 4.71714 | 3.87661 | 4.03258 | 3.8518  |
| SNX9      | 10.4639 | 10.3742 | 10.7609 | 9.64317 | 9.22876 | 10.913  | 10.4587 | 10.5072 | 10.4953 |
| SYNJ2     | 6.91132 | 6.56716 | 7.09307 | 7.02668 | 6.53481 | 8.38338 | 7.14671 | 7.72312 | 7.46287 |
| SYNJ2-IT1 | 5.67352 | 5.03237 | 5.12442 | 5.29336 | 5.53535 | 5.49032 | 4.89541 | 5.94123 | 5.91389 |
| TULP4     | 9.68482 | 9.69552 | 9.44543 | 9.09935 | 7.68688 | 9.22765 | 9.32172 | 9.41817 | 9.29463 |
| TMEM181   | 9.13626 | 9.33291 | 9.18181 | 8.98783 | 6.36602 | 8.19402 | 9.10123 | 8.49796 | 8.81275 |
| SYTL3     | 6.2456  | 7.37058 | 6.69317 | 6.10303 | 6.55405 | 6.48021 | 6.45404 | 6.69317 | 6.36784 |
| C6orf99   | 4.63005 | 4.31617 | 4.32708 | 4.93975 | 5.50865 | 5.40801 | 4.66111 | 5.39113 | 4.97352 |
| FNDC1     | 7.56112 | 6.89435 | 6.89571 | 6.72111 | 5.75542 | 5.63524 | 7.37483 | 5.40232 | 5.35328 |
| WTAP      | 9.40895 | 9.15936 | 9.50415 | 9.06687 | 7.11559 | 9.07677 | 9.59296 | 8.99035 | 9.48548 |
| ACAT2     | 7.24931 | 7.07508 | 7.50471 | 7.57853 | 6.2175  | 7.84626 | 7.94897 | 6.93869 | 7.8491  |
| MRPL18    | 6.94999 | 6.81068 | 6.93992 | 7.60158 | 5.77182 | 7.06839 | 7.72247 | 6.35468 | 6.904   |
| PNLDC1    | 4.89546 | 4.80894 | 5.1765  | 5.15858 | 6.08451 | 5.39109 | 5.84947 | 5.24577 | 5.2954  |
| MAS1      | 5.38357 | 5.46789 | 5.21554 | 5.3606  | 6.5057  | 5.22455 | 4.88035 | 5.34937 | 5.45141 |
| IGF2R     | 8.6955  | 8.92584 | 8.87063 | 8.89163 | 6.86122 | 8.56492 | 8.4743  | 9.66237 | 9.36914 |

|              |         |         |         |         |         |         |         |         |         |
|--------------|---------|---------|---------|---------|---------|---------|---------|---------|---------|
| LOC729603    | 7.07745 | 6.95694 | 7.23063 | 6.36315 | 6.58479 | 6.41187 | 5.95483 | 7.56159 | 7.36023 |
| PLG          | 4.44854 | 4.82447 | 4.49037 | 4.65005 | 5.92912 | 5.62175 | 4.95201 | 4.34271 | 4.73772 |
| MAP3K4       | 9.01563 | 9.0165  | 8.68393 | 8.12837 | 7.2769  | 8.19339 | 8.54088 | 9.13594 | 8.80487 |
| PACRG        | 5.74222 | 5.36917 | 5.77512 | 5.42484 | 6.2177  | 5.66563 | 5.5813  | 5.55459 | 5.73132 |
| LINC00602    | 6.09223 | 5.96566 | 6.07689 | 6.60846 | 6.60027 | 7.0006  | 6.69442 | 6.91751 | 6.66796 |
| LOC100289495 | 6.24975 | 6.20575 | 6.20824 | 6.02336 | 6.13058 | 6.48272 | 6.29573 | 6.35252 | 6.3488  |
| FGFR1OP      | 6.92252 | 7.47491 | 6.75901 | 6.76157 | 5.82875 | 6.6097  | 7.06115 | 6.46434 | 6.58278 |
| CCR6         | 4.9006  | 4.54031 | 5.07096 | 5.47237 | 5.848   | 5.82823 | 5.27366 | 4.73209 | 5.2033  |
| UNC93A       | 8.42776 | 8.28668 | 8.29709 | 8.3077  | 8.21024 | 6.58632 | 7.49709 | 7.68454 | 8.09296 |
| KIF25        | 5.2515  | 5.24592 | 5.3966  | 5.66148 | 6.15162 | 5.89267 | 5.8945  | 5.88439 | 5.93596 |
| SMOC2        | 7.36859 | 6.54657 | 7.42111 | 6.32871 | 6.5402  | 6.29131 | 6.10622 | 5.92868 | 6.30323 |
| ERMARD       | 7.8167  | 8.22545 | 7.9826  | 7.29753 | 5.53903 | 6.76164 | 7.61272 | 6.54104 | 7.05997 |
| LINC00574    | 5.55183 | 5.1204  | 5.28187 | 5.50812 | 5.44244 | 5.78398 | 5.7223  | 5.32262 | 6.06361 |
| FAM120B      | 8.04659 | 8.214   | 8.12028 | 7.94724 | 6.9429  | 7.46741 | 7.69096 | 7.57943 | 7.61436 |
| MIR4644      | 6.88716 | 7.14387 | 7.16145 | 7.12881 | 7.47721 | 6.88969 | 6.4244  | 6.58727 | 6.69467 |
| TBP          | 8.95141 | 9.26605 | 9.24313 | 8.51791 | 7.71093 | 8.07907 | 8.76313 | 8.18949 | 8.50293 |
| exoc2        | 8.61029 | 8.73136 | 8.40819 | 8.39569 | 6.18895 | 8.18861 | 8.28381 | 8.45458 | 8.77996 |
| HUS1B        | 5.14572 | 4.90035 | 4.51425 | 4.39591 | 4.24693 | 4.83439 | 4.53547 | 4.86355 | 5.53621 |
| LINC01622    | 4.83452 | 4.75069 | 4.72585 | 5.17295 | 6.18345 | 5.31439 | 5.48692 | 5.54393 | 5.31439 |
| LINC01600    | 4.98183 | 5.32808 | 5.14332 | 5.45899 | 5.94063 | 6.07117 | 5.56157 | 5.59096 | 5.50902 |
| MIR4645      | 3.00831 | 3.7259  | 3.35047 | 4.06436 | 2.58051 | 3.38739 | 3.031   | 3.48309 | 3.39213 |
| LINC01011    | 4.66216 | 5.44745 | 4.40688 | 6.48697 | 5.63026 | 6.23441 | 6.19674 | 5.28361 | 5.98489 |
| LOC100507194 | 4.67747 | 4.14178 | 4.55934 | 4.38471 | 5.82875 | 5.22567 | 4.43974 | 4.73092 | 4.37407 |
| PXDC1        | 7.41875 | 7.5644  | 7.60917 | 8.9056  | 7.0443  | 8.0555  | 8.70371 | 7.85671 | 8.14902 |
| ECI2         | 6.75641 | 6.57282 | 6.89394 | 6.70175 | 5.1441  | 6.09919 | 6.47914 | 6.47075 | 6.23154 |
| RPP40        | 6.71531 | 6.71722 | 6.5567  | 7.11237 | 4.82794 | 6.26599 | 7.67939 | 6.01672 | 6.46816 |

|           |         |         |         |         |         |         |         |         |         |
|-----------|---------|---------|---------|---------|---------|---------|---------|---------|---------|
| LYRM4     | 6.65734 | 6.42615 | 6.86567 | 6.5876  | 6.65942 | 6.33322 | 6.98781 | 6.24296 | 6.55552 |
| MIR3691   | 7.5046  | 7.3907  | 7.33155 | 7.12681 | 6.806   | 7.21486 | 6.48119 | 6.97839 | 6.90067 |
| NRN1      | 8.36282 | 7.99474 | 8.67013 | 6.99473 | 6.92536 | 6.58433 | 7.10313 | 6.41749 | 6.92096 |
| LY86-AS1  | 4.94432 | 5.07092 | 4.95703 | 5.15982 | 6.15145 | 5.36286 | 5.08929 | 5.22927 | 5.43772 |
| CAGE1     | 3.93759 | 3.96481 | 3.814   | 3.89434 | 4.58078 | 4.29436 | 4.33185 | 3.78109 | 4.36793 |
| BLOC1S5   | 7.885   | 7.89944 | 7.96042 | 7.68629 | 6.05525 | 7.12319 | 7.68614 | 7.48295 | 7.37507 |
| SCARNA27  | 6.56225 | 7.21361 | 6.88159 | 6.85693 | 7.45647 | 7.02547 | 7.17601 | 6.80023 | 6.68612 |
| TFAP2A    | 9.14814 | 8.83945 | 8.79974 | 8.76849 | 8.16887 | 8.86122 | 8.54284 | 9.47859 | 9.21425 |
| LINC00518 | 4.99379 | 4.99964 | 4.76751 | 4.89138 | 6.29638 | 5.50835 | 5.10389 | 5.08997 | 5.95687 |
| C6orf52   | 5.33088 | 5.2452  | 5.31452 | 5.16436 | 5.22099 | 4.9484  | 4.71909 | 5.25745 | 5.51974 |
| MAK       | 5.01489 | 4.9626  | 4.92576 | 4.81355 | 5.55884 | 5.4663  | 5.60675 | 5.31382 | 5.00667 |
| GCM2      | 4.48465 | 4.77108 | 4.60622 | 5.10662 | 5.12986 | 4.96241 | 4.85659 | 4.64966 | 4.97325 |
| ELOVL2    | 4.71366 | 4.78876 | 4.78791 | 5.49292 | 5.9857  | 4.63952 | 5.41505 | 4.75007 | 4.84798 |
| ADTRP     | 6.55126 | 6.0025  | 6.65428 | 6.11272 | 5.92663 | 6.46883 | 5.34063 | 5.85774 | 6.828   |
| RANBP9    | 10.8927 | 10.607  | 10.7315 | 10.1012 | 7.80144 | 10.6755 | 10.06   | 10.0775 | 10.2227 |
| MCUR1     | 9.00993 | 8.78715 | 9.02434 | 8.7986  | 7.27333 | 8.58958 | 9.02043 | 8.52074 | 8.47347 |
| DTNBP1    | 6.75094 | 6.47952 | 6.61388 | 6.08982 | 6.62837 | 5.98307 | 6.3515  | 5.99041 | 5.8886  |
| ATXN1     | 8.49002 | 8.07046 | 8.10723 | 7.92286 | 6.60294 | 8.11755 | 8.01798 | 9.08324 | 9.18863 |
| NUP153    | 10.4222 | 10.6133 | 10.7613 | 10.1835 | 6.90368 | 9.17382 | 9.92305 | 10.0887 | 10.4859 |
| KIF13A    | 9.32953 | 9.24523 | 9.08856 | 9.16233 | 6.04165 | 9.55805 | 9.26694 | 9.4746  | 10.1544 |
| NHLRC1    | 5.99852 | 5.63907 | 6.14077 | 5.62854 | 5.16654 | 5.17074 | 6.31381 | 5.67333 | 5.10768 |
| TPMT      | 8.83902 | 8.48499 | 8.70535 | 9.30714 | 7.17463 | 10.2415 | 9.92167 | 10.9309 | 10.1722 |
| DEK       | 8.70931 | 8.73328 | 9.1132  | 8.33985 | 5.76882 | 7.99935 | 8.767   | 8.46765 | 8.08853 |
| MBOAT1    | 7.83325 | 8.13555 | 7.68556 | 7.02543 | 5.74908 | 6.56973 | 7.24428 | 7.20949 | 6.66832 |
| NBAT1     | 6.20175 | 5.97118 | 6.0936  | 6.46171 | 7.22193 | 6.93119 | 6.64987 | 6.94421 | 6.39241 |
| PRL       | 3.19875 | 2.87892 | 3.44466 | 4.06645 | 4.09893 | 4.4753  | 3.51239 | 3.89935 | 3.93185 |

|              |         |         |         |         |         |         |         |         |         |
|--------------|---------|---------|---------|---------|---------|---------|---------|---------|---------|
| DCDC2        | 4.9194  | 5.102   | 4.97743 | 5.51651 | 5.47175 | 5.71807 | 5.31249 | 5.74051 | 5.60492 |
| GPLD1        | 8.06833 | 9.12736 | 7.00456 | 6.63557 | 6.66543 | 6.04472 | 6.33637 | 5.51914 | 5.84859 |
| KIAA0319     | 5.37491 | 6.16629 | 5.21214 | 5.88583 | 5.94042 | 6.24208 | 5.32023 | 5.63804 | 5.36229 |
| TDP2         | 8.67132 | 9.46274 | 8.12221 | 9.1598  | 7.63212 | 8.08007 | 8.83894 | 8.83257 | 8.96668 |
| c6orf62      | 9.69966 | 9.62918 | 9.59602 | 9.86241 | 6.50957 | 9.30768 | 9.9243  | 9.16419 | 9.73691 |
| LOC285819    | 4.58266 | 4.89253 | 4.5939  | 4.52405 | 5.61717 | 5.30533 | 4.15567 | 5.02673 | 5.05413 |
| ZNF322       | 6.18024 | 6.8065  | 6.04899 | 5.00555 | 4.75829 | 4.70432 | 5.69604 | 4.8232  | 5.57892 |
| LOC100270746 | 4.82942 | 5.01284 | 4.94499 | 5.35444 | 5.46019 | 5.96141 | 5.57873 | 5.46994 | 5.36379 |
| POM121L2     | 5.10471 | 4.82571 | 5.05558 | 5.2512  | 5.96947 | 5.34975 | 4.86947 | 5.43023 | 5.15113 |
| ZNF184       | 8.08941 | 8.30079 | 7.67381 | 6.62353 | 6.32837 | 5.89741 | 6.70826 | 6.05841 | 6.35192 |
| ZKSCAN4      | 6.30553 | 6.10554 | 6.42715 | 6.26984 | 6.63459 | 5.95575 | 5.97925 | 6.19368 | 6.1821  |
| ZSCAN31      | 7.23744 | 7.03997 | 5.48402 | 7.01619 | 5.8699  | 6.14644 | 6.13275 | 6.51485 | 7.21551 |
| ZSCAN12      | 5.51698 | 6.02539 | 6.04142 | 5.33413 | 5.41343 | 5.34741 | 5.58119 | 5.00849 | 5.0732  |
| ZSCAN23      | 4.88709 | 5.60952 | 5.00167 | 4.86746 | 5.99683 | 4.81167 | 5.07542 | 4.92015 | 5.11401 |
| GPX6         | 4.81673 | 5.03936 | 4.92642 | 5.84701 | 6.65632 | 5.82663 | 5.32438 | 6.01033 | 5.89104 |
| LINC01623    | 4.92885 | 4.6138  | 4.68816 | 5.63452 | 6.24032 | 5.45033 | 5.18282 | 5.40895 | 5.24209 |
| TRIM27       | 7.54518 | 7.56068 | 7.65658 | 7.14105 | 6.74339 | 6.27815 | 7.58093 | 6.8558  | 6.85783 |
| ZNF311       | 5.82285 | 5.80771 | 5.5913  | 5.47624 | 6.37712 | 5.97341 | 5.23835 | 5.12705 | 5.27876 |
| MAS1L        | 5.71434 | 5.53465 | 5.76776 | 6.18399 | 6.78977 | 5.80793 | 5.53071 | 5.71538 | 5.42422 |
| ZFP57        | 5.90937 | 5.19097 | 5.5707  | 6.2606  | 5.91524 | 5.64766 | 6.66461 | 6.22877 | 5.53561 |
| HLA-F-AS1    | 5.08945 | 4.49367 | 4.30551 | 4.25744 | 4.43617 | 3.79498 | 3.89905 | 4.84799 | 4.58546 |
| IFITM4P      | 7.56465 | 7.04595 | 7.96564 | 7.96275 | 7.30218 | 7.36689 | 8.09965 | 7.57383 | 7.69937 |
| HCG4         | 6.12534 | 6.218   | 6.03777 | 6.06336 | 6.99474 | 8.85419 | 7.57145 | 6.1463  | 6.02997 |
| HCG4B        | 5.57358 | 5.7322  | 5.53694 | 5.31318 | 6.09966 | 5.23505 | 5.62478 | 4.94776 | 4.90109 |
| RNF39        | 10.1762 | 9.61666 | 9.51904 | 10.024  | 11.8699 | 11.719  | 10.6368 | 11.6729 | 11.0116 |
| TRIM31       | 5.06098 | 5.191   | 5.08862 | 5.48523 | 6.4272  | 5.79885 | 5.55319 | 5.38614 | 5.44413 |

|          |         |         |         |         |         |         |         |         |         |
|----------|---------|---------|---------|---------|---------|---------|---------|---------|---------|
| TRIM10   | 5.43474 | 5.20211 | 5.44775 | 5.60194 | 6.03836 | 5.79778 | 5.33496 | 5.49981 | 5.48809 |
| TRIM26   | 8.0443  | 7.81897 | 7.67909 | 7.42466 | 6.1854  | 7.03757 | 7.7269  | 7.60764 | 7.27771 |
| HCG18    | 6.64525 | 6.60757 | 6.37549 | 6.31783 | 6.11319 | 7.26725 | 6.15262 | 6.67219 | 6.96615 |
| GNL1     | 7.32106 | 7.21188 | 7.2721  | 7.18045 | 6.69575 | 7.22979 | 7.20958 | 7.2376  | 7.16293 |
| DHX16    | 7.50098 | 7.81449 | 7.63035 | 7.67423 | 6.80065 | 7.55474 | 7.72577 | 7.55489 | 7.47939 |
| NRM      | 6.86984 | 6.32014 | 6.77301 | 6.76242 | 6.26706 | 6.29548 | 6.76543 | 6.72068 | 6.56269 |
| MDC1     | 7.6333  | 7.62962 | 7.58388 | 6.88147 | 7.27522 | 6.70812 | 7.17729 | 7.01446 | 6.75795 |
| FLOT1    | 8.37015 | 7.9515  | 7.86983 | 8.26023 | 7.39718 | 8.03435 | 8.23641 | 8.3606  | 8.68783 |
| SFTA2    | 6.35454 | 6.41682 | 6.42413 | 6.23839 | 6.54211 | 6.27479 | 6.26633 | 6.03565 | 6.02573 |
| C6orf15  | 7.34729 | 7.3771  | 7.50206 | 7.54245 | 7.90809 | 7.51938 | 7.2542  | 7.54937 | 7.04516 |
| CDSN     | 6.96925 | 6.96666 | 7.68825 | 7.80764 | 7.36179 | 7.42581 | 7.56091 | 8.30591 | 7.85842 |
| PSORS1C2 | 7.82677 | 8.16577 | 7.84515 | 8.25305 | 6.90726 | 7.43654 | 7.5828  | 6.86993 | 7.9728  |
| CCHCR1   | 6.42986 | 6.42601 | 6.10032 | 6.43015 | 6.49112 | 5.93468 | 5.86073 | 6.34389 | 5.21573 |
| POU5F1   | 6.21354 | 6.21012 | 6.19669 | 6.4033  | 6.29648 | 5.94177 | 5.97494 | 5.97507 | 6.04296 |
| NCR3     | 5.77761 | 5.77416 | 6.1047  | 6.39439 | 6.7003  | 6.54971 | 6.19395 | 6.55548 | 6.15932 |
| BAG6     | 8.1992  | 8.10046 | 7.98588 | 8.77746 | 7.6348  | 8.78238 | 8.70785 | 8.44345 | 8.41747 |
| GPANK1   | 6.27649 | 6.06381 | 6.03862 | 6.03395 | 5.85025 | 5.8595  | 6.25177 | 6.10772 | 6.00919 |
| MIR4646  | 5.70307 | 5.67309 | 5.89124 | 5.77721 | 6.63143 | 5.56204 | 5.6109  | 5.89369 | 5.31227 |
| DDAH2    | 8.01699 | 8.47048 | 8.39804 | 8.97539 | 7.70858 | 9.23441 | 9.11311 | 8.72091 | 8.83105 |
| VWA7     | 5.77451 | 5.84935 | 5.98084 | 6.26327 | 6.67004 | 6.66115 | 6.06862 | 6.49618 | 6.16227 |
| VARS     | 7.23432 | 7.07799 | 7.00331 | 7.8114  | 6.17179 | 7.33637 | 7.80869 | 7.19322 | 7.51655 |
| HSPA1L   | 6.60859 | 6.30036 | 6.52203 | 6.85921 | 6.32261 | 7.23124 | 6.79352 | 6.95989 | 6.74211 |
| NEU1     | 7.54658 | 7.08828 | 7.10608 | 7.29308 | 7.62893 | 7.11597 | 7.42018 | 7.54532 | 7.18472 |
| EHMT2    | 7.6452  | 7.18115 | 7.55124 | 7.19453 | 7.00837 | 7.28465 | 7.43035 | 7.06982 | 7.05858 |
| ZBTB12   | 5.44491 | 5.7411  | 5.55083 | 5.33884 | 5.64008 | 5.83763 | 5.37606 | 5.68808 | 5.53406 |
| NELFE    | 7.48141 | 7.31185 | 7.33502 | 7.75836 | 6.60179 | 7.3945  | 7.92511 | 7.26683 | 7.52977 |

|              |         |         |         |         |         |         |         |         |         |
|--------------|---------|---------|---------|---------|---------|---------|---------|---------|---------|
| MIR1236      | 5.6417  | 5.37717 | 5.43601 | 5.46853 | 5.77183 | 5.38568 | 5.10392 | 5.37581 | 5.74932 |
| DXO          | 6.85087 | 6.88489 | 6.67018 | 6.80522 | 6.66349 | 6.49503 | 6.80568 | 6.35795 | 6.75015 |
| Tnxa         | 6.97414 | 7.23095 | 8.01866 | 6.94198 | 7.2609  | 7.05333 | 7.71952 | 7.24444 | 7.03929 |
| TNXB         | 6.90163 | 7.49341 | 8.53843 | 6.88211 | 7.17408 | 7.22445 | 7.42534 | 7.55473 | 7.16457 |
| ATF6B        | 9.86389 | 9.77443 | 9.62036 | 9.17628 | 7.82099 | 9.00287 | 9.67857 | 9.39577 | 9.78689 |
| FKBPL        | 6.69281 | 6.74771 | 6.28147 | 7.55692 | 6.49969 | 7.46733 | 7.5016  | 6.92268 | 6.74811 |
| PRRT1        | 6.13367 | 6.22471 | 6.03967 | 6.34538 | 6.73059 | 6.61296 | 6.56185 | 6.21077 | 6.51039 |
| LOC100507547 | 5.7462  | 5.69468 | 5.56297 | 5.639   | 5.66941 | 5.95237 | 6.06277 | 5.95162 | 5.85599 |
| AGER         | 7.08373 | 6.81855 | 7.04083 | 6.61175 | 6.57562 | 6.71891 | 6.5054  | 7.23026 | 6.7835  |
| GPSM3        | 6.33109 | 6.28994 | 6.39537 | 6.73022 | 7.00929 | 6.75422 | 6.43422 | 6.84229 | 6.8028  |
| NOTCH4       | 6.85036 | 6.70174 | 6.92384 | 7.13211 | 7.14065 | 6.91161 | 6.68439 | 7.26302 | 7.16651 |
| BTNL2        | 5.04399 | 5.57502 | 5.81222 | 5.30689 | 6.23309 | 5.54391 | 5.6181  | 5.70907 | 5.74183 |
| MIR3135B     | 7.00835 | 6.42518 | 7.22729 | 6.93675 | 8.03043 | 6.65304 | 6.39563 | 6.83832 | 6.80264 |
| VPS52        | 9.53981 | 9.2448  | 9.39057 | 8.61687 | 7.22582 | 7.83268 | 8.87817 | 7.73212 | 8.61856 |
| WDR46        | 6.70873 | 6.85549 | 6.81003 | 6.98113 | 5.83074 | 6.49476 | 7.04451 | 6.78827 | 6.97896 |
| RGL2         | 8.81479 | 8.07993 | 8.33124 | 8.38406 | 7.39734 | 9.03688 | 8.88861 | 7.8006  | 8.48179 |
| TAPBP        | 8.93526 | 8.38486 | 8.61501 | 8.53304 | 7.33694 | 8.32073 | 8.87733 | 8.02856 | 8.90855 |
| ZBTB22       | 6.71276 | 7.15845 | 6.80032 | 7.22264 | 7.08736 | 7.41847 | 7.55098 | 6.91444 | 6.97299 |
| DAXX         | 6.65833 | 6.65769 | 6.31868 | 6.94704 | 6.64915 | 6.79006 | 7.33677 | 6.70889 | 6.93483 |
| CUTA         | 7.07871 | 7.33538 | 7.15533 | 7.8534  | 6.63512 | 6.93322 | 8.077   | 7.4268  | 7.27433 |
| BAK1         | 7.9257  | 7.54869 | 7.41878 | 8.28867 | 6.41053 | 8.43163 | 9.36399 | 9.26971 | 8.52462 |
| LINC00336    | 5.57723 | 5.49927 | 5.53504 | 5.98262 | 5.97631 | 5.95695 | 6.01254 | 6.15259 | 6.11827 |
| UQCC2        | 9.51026 | 9.62206 | 8.77211 | 10.7293 | 8.20981 | 9.35977 | 10.5469 | 9.15806 | 9.7447  |
| IP6K3        | 5.28187 | 5.1409  | 5.27573 | 5.69451 | 6.241   | 5.85331 | 5.36948 | 5.54441 | 5.95456 |
| LEMD2        | 7.41037 | 7.43936 | 7.30617 | 6.87039 | 6.04885 | 7.15785 | 7.2029  | 7.05399 | 7.05099 |
| MLN          | 4.76419 | 4.99066 | 4.92708 | 5.31568 | 5.85797 | 5.77978 | 5.12033 | 5.66429 | 5.47721 |



|              |         |         |         |         |         |         |         |         |         |
|--------------|---------|---------|---------|---------|---------|---------|---------|---------|---------|
| LINC01016    | 4.99827 | 4.84947 | 5.26363 | 5.36913 | 6.3639  | 5.76878 | 5.47988 | 5.55672 | 5.4114  |
| MIR1275      | 2.17136 | 2.54119 | 2.11549 | 2.51766 | 3.1206  | 3.53227 | 2.44618 | 2.26307 | 2.55623 |
| C6orf1       | 6.68922 | 7.22464 | 7.01945 | 7.24385 | 6.81363 | 7.25083 | 7.15457 | 7.43168 | 7.1136  |
| NUDT3        | 8.55129 | 7.95739 | 8.2678  | 8.34339 | 7.96571 | 7.9747  | 8.30087 | 8.06206 | 8.28124 |
| spdef        | 6.47941 | 6.39809 | 6.84872 | 6.90846 | 6.80314 | 6.84197 | 6.36325 | 6.47779 | 6.40877 |
| c6orf106     | 9.12606 | 8.20154 | 8.80874 | 8.76908 | 8.0145  | 9.99696 | 9.23728 | 10.1086 | 9.66265 |
| TCP11        | 4.66012 | 4.67737 | 4.75542 | 5.0393  | 5.29342 | 4.97084 | 4.77032 | 5.08565 | 5.2488  |
| TEAD3        | 8.16316 | 8.20403 | 8.20743 | 8.73226 | 7.0347  | 9.07367 | 8.61131 | 8.21011 | 8.52395 |
| TULP1        | 5.61062 | 5.65867 | 5.7888  | 6.52099 | 6.54555 | 6.60718 | 6.17779 | 6.2213  | 6.42089 |
| FKBP5        | 7.35868 | 7.50201 | 8.42331 | 6.93195 | 6.42733 | 6.43058 | 7.17433 | 6.26404 | 6.38036 |
| SRPK1        | 10.6226 | 10.6042 | 9.9053  | 9.60169 | 8.15081 | 8.8162  | 9.20514 | 9.25864 | 9.38656 |
| C6orf222     | 3.91654 | 4.09396 | 4.15229 | 4.4502  | 5.209   | 4.11552 | 4.5471  | 4.38006 | 4.40933 |
| etv7         | 6.76133 | 6.76181 | 6.14957 | 6.75948 | 6.54501 | 6.44943 | 6.53595 | 5.98313 | 6.17777 |
| STK38        | 9.38647 | 9.17506 | 9.09418 | 8.63811 | 5.96818 | 8.08343 | 8.62678 | 8.37296 | 9.08427 |
| MIR3925      | 8.31421 | 8.1853  | 8.67455 | 7.28418 | 7.18803 | 6.92188 | 7.00995 | 7.16833 | 7.06747 |
| CPNE5        | 6.22253 | 5.61426 | 6.00908 | 6.60017 | 6.28473 | 6.50191 | 6.54748 | 6.20508 | 6.75711 |
| PPIL1        | 7.26545 | 7.34278 | 7.18926 | 8.5515  | 6.47113 | 7.92559 | 8.62637 | 7.56317 | 7.95087 |
| MTCH1        | 9.35868 | 9.48434 | 9.53055 | 9.42147 | 8.04563 | 9.47174 | 9.58097 | 9.8235  | 9.46902 |
| TMEM217      | 6.15093 | 5.6964  | 6.0671  | 6.72717 | 6.75901 | 6.88438 | 7.59619 | 6.1567  | 7.11035 |
| CCDC167      | 6.96079 | 7.10578 | 6.75138 | 8.29816 | 6.20212 | 8.49399 | 8.19162 | 7.96874 | 8.17495 |
| MIR4462      | 5.57503 | 5.20816 | 5.71686 | 6.66872 | 4.69671 | 6.32383 | 7.2493  | 6.21813 | 5.89565 |
| MDGA1        | 6.62893 | 6.28121 | 6.16587 | 6.48534 | 6.15284 | 6.76744 | 6.54178 | 6.17088 | 6.19382 |
| BTBD9        | 7.84588 | 7.74695 | 7.44093 | 7.26486 | 5.87292 | 8.05901 | 7.69835 | 7.96317 | 8.25082 |
| GLO1         | 11.4505 | 11.0793 | 11.0362 | 11.2687 | 10.4045 | 11.0828 | 11.4821 | 11.6322 | 11.6714 |
| LOC100131047 | 4.79193 | 4.86328 | 4.91441 | 5.246   | 6.00842 | 5.6977  | 5.25196 | 5.0172  | 5.3411  |
| SAYSD1       | 6.88713 | 7.09575 | 7.11818 | 7.16266 | 6.21624 | 7.11104 | 7.389   | 6.69505 | 6.65295 |

|           |         |         |         |         |         |         |         |         |         |
|-----------|---------|---------|---------|---------|---------|---------|---------|---------|---------|
| KIF6      | 3.92208 | 3.90698 | 4.09279 | 4.14249 | 5.16678 | 5.09826 | 4.1415  | 4.40843 | 4.67102 |
| MOCS1     | 6.02922 | 6.04298 | 6.43735 | 6.1784  | 6.48444 | 6.24291 | 6.18342 | 6.02612 | 6.23881 |
| LINC00951 | 4.87957 | 4.75146 | 5.16994 | 5.46329 | 5.95522 | 6.14331 | 5.16081 | 5.74358 | 5.63995 |
| LRFN2     | 5.01747 | 5.36209 | 5.28335 | 5.64113 | 5.48918 | 5.88079 | 5.75959 | 5.84465 | 5.8697  |
| UNC5CL    | 6.34423 | 6.58519 | 6.59975 | 6.44879 | 6.88439 | 6.63851 | 5.81923 | 6.40105 | 6.39398 |
| OARD1     | 6.72606 | 6.81676 | 6.86079 | 5.97988 | 6.2634  | 6.00285 | 6.02383 | 5.72471 | 6.07276 |
| TREML1    | 6.20528 | 5.79886 | 6.5738  | 6.5421  | 6.79394 | 6.73343 | 6.29294 | 6.77695 | 6.27759 |
| TREM2     | 5.84372 | 5.76602 | 6.18578 | 5.9428  | 6.43852 | 6.70568 | 6.84641 | 7.35507 | 6.37607 |
| TREML2    | 5.49066 | 5.29109 | 5.33401 | 5.64324 | 6.12271 | 6.30783 | 5.6436  | 6.08746 | 5.84706 |
| TREM1     | 5.68843 | 5.4582  | 5.63785 | 6.90482 | 7.71997 | 10.2106 | 7.77067 | 11.0132 | 7.58007 |
| TFEB      | 5.89447 | 6.09297 | 5.92022 | 6.30473 | 6.41444 | 6.86535 | 6.54333 | 6.80596 | 6.67749 |
| PGC       | 4.77047 | 5.13075 | 5.26723 | 5.90024 | 6.17967 | 5.8721  | 5.79992 | 5.77028 | 5.70947 |
| FRS3      | 6.42792 | 6.23973 | 6.2408  | 6.32781 | 6.20026 | 6.45154 | 6.3356  | 6.1752  | 6.19592 |
| USP49     | 5.60077 | 6.02075 | 5.60397 | 4.73812 | 4.97641 | 4.9749  | 5.35704 | 6.86202 | 5.46258 |
| MED20     | 6.67475 | 6.69899 | 6.63658 | 6.48859 | 6.61034 | 6.57319 | 6.74331 | 7.62244 | 6.6594  |
| CCND3     | 6.47384 | 6.34931 | 6.89667 | 6.83037 | 6.51468 | 6.50989 | 6.72459 | 6.80134 | 6.84502 |
| C6orf132  | 9.50884 | 9.09853 | 9.08338 | 9.67826 | 8.59011 | 10.1666 | 10.0662 | 10.6659 | 10.4951 |
| guca1b    | 5.2288  | 5.12571 | 5.65755 | 5.71752 | 5.04635 | 5.35407 | 5.15303 | 5.62941 | 5.22026 |
| MRPS10    | 8.32375 | 8.23422 | 8.35578 | 8.305   | 6.54995 | 8.08445 | 9.04428 | 8.83971 | 8.96439 |
| TRERF1    | 8.12374 | 7.5158  | 7.59865 | 6.66606 | 6.40726 | 6.42538 | 7.38293 | 7.29299 | 6.13916 |
| TBCC      | 6.28056 | 6.44296 | 5.98027 | 6.83939 | 6.50425 | 6.48768 | 7.00758 | 6.5024  | 6.18628 |
| C6orf226  | 7.36813 | 7.48738 | 7.60366 | 7.55836 | 5.2967  | 6.61514 | 7.93428 | 6.20637 | 7.25217 |
| PEX6      | 6.60809 | 6.65948 | 6.22117 | 6.50175 | 7.10775 | 6.50877 | 6.46467 | 6.62604 | 6.5994  |
| MEA1      | 10.2663 | 10.161  | 10.2165 | 10.718  | 10.8765 | 10.7176 | 10.8872 | 10.7662 | 10.5629 |
| CUL7      | 7.33791 | 7.00835 | 7.22486 | 7.49021 | 6.8599  | 7.39501 | 6.91579 | 6.52008 | 7.25563 |
| MRPL2     | 7.19222 | 7.53388 | 7.42101 | 7.74396 | 6.68558 | 7.30409 | 7.95255 | 7.12284 | 7.22787 |

|         |         |         |         |         |         |         |         |         |         |
|---------|---------|---------|---------|---------|---------|---------|---------|---------|---------|
| DNPH1   | 7.76511 | 7.93552 | 7.97358 | 8.42212 | 7.09487 | 7.71224 | 8.85414 | 7.16386 | 7.92965 |
| CRIP3   | 5.93792 | 5.79305 | 6.04975 | 6.37398 | 6.98888 | 6.31982 | 6.09313 | 6.34762 | 6.49346 |
| ZNF318  | 8.18307 | 8.1624  | 8.37728 | 6.5618  | 6.54086 | 6.39076 | 6.84049 | 6.89859 | 6.69599 |
| DLK2    | 7.45699 | 7.6728  | 7.65282 | 7.62072 | 8.23865 | 7.50049 | 7.41751 | 7.56142 | 7.38085 |
| LRRC73  | 6.2563  | 6.19255 | 6.06227 | 6.68659 | 7.30138 | 6.96933 | 6.654   | 6.75371 | 6.59277 |
| XPO5    | 8.51188 | 8.69435 | 8.55171 | 8.51275 | 6.3185  | 7.73195 | 8.47485 | 7.85946 | 8.23686 |
| GTPBP2  | 7.66556 | 7.35293 | 7.37053 | 8.16558 | 7.36621 | 8.84533 | 8.26407 | 8.76768 | 8.80048 |
| MRPS18A | 9.41064 | 9.44492 | 9.43569 | 9.96323 | 8.99149 | 9.82077 | 10.1576 | 9.63068 | 9.95939 |
| MRPL14  | 6.80528 | 7.46119 | 6.56648 | 8.10583 | 6.60681 | 7.01554 | 8.07028 | 7.0231  | 6.90364 |
| TCTE1   | 5.7312  | 6.3981  | 6.33939 | 6.33555 | 7.04569 | 6.74419 | 6.15838 | 6.24448 | 6.27924 |
| SUPT3H  | 7.21401 | 6.69932 | 7.23339 | 5.72325 | 5.76094 | 5.77384 | 6.19825 | 5.57115 | 6.02086 |
| MIR586  | 2.95161 | 2.89209 | 2.80665 | 3.56733 | 2.57201 | 3.43911 | 3.20358 | 2.93802 | 2.98526 |
| CLIC5   | 4.59025 | 4.46722 | 4.77022 | 4.66111 | 5.62822 | 4.41284 | 4.25165 | 4.84736 | 4.69317 |
| ENPP5   | 6.06986 | 6.18411 | 6.26073 | 5.15901 | 5.2761  | 5.06949 | 5.27465 | 4.78128 | 4.75338 |
| RCAN2   | 8.14996 | 7.72225 | 8.73601 | 7.58681 | 6.53956 | 6.16968 | 6.92176 | 6.73017 | 6.90768 |
| ADGRF5  | 8.3443  | 7.68067 | 8.38629 | 7.35217 | 6.31689 | 6.67411 | 7.03044 | 8.07932 | 8.55505 |
| ADGRF1  | 5.72739 | 5.69862 | 6.03778 | 6.42628 | 6.71863 | 7.14708 | 6.13238 | 8.12787 | 7.95341 |
| PTCHD4  | 4.65745 | 4.78047 | 4.76383 | 5.61512 | 5.7408  | 4.99848 | 5.32379 | 5.07101 | 5.09834 |
| MUT     | 8.69543 | 8.58226 | 8.34647 | 8.19292 | 6.41385 | 8.28331 | 8.29977 | 8.29212 | 8.50617 |
| RHAG    | 4.99261 | 5.01596 | 5.15903 | 5.34782 | 6.19822 | 5.26762 | 5.255   | 5.55477 | 5.32306 |
| CRISP2  | 4.05374 | 3.92017 | 3.68934 | 3.71341 | 4.27775 | 4.6081  | 4.5592  | 3.93783 | 4.55609 |
| CRISP3  | 6.96249 | 6.00118 | 5.64375 | 5.99661 | 5.66202 | 5.96551 | 5.61335 | 5.89022 | 6.00956 |
| PGK2    | 4.13312 | 4.01304 | 3.6336  | 4.35981 | 4.81279 | 4.89543 | 4.44405 | 4.26478 | 4.59841 |
| CRISP1  | 4.00514 | 4.39471 | 4.36177 | 5.4081  | 6.15817 | 5.23078 | 4.98054 | 4.388   | 4.54925 |
| PKHD1   | 5.1149  | 5.13153 | 5.16329 | 4.98264 | 6.21753 | 5.46257 | 4.96342 | 5.14937 | 4.95861 |
| IL17F   | 4.2458  | 4.1943  | 4.27116 | 5.09153 | 5.2725  | 5.16725 | 4.69314 | 5.06468 | 4.5473  |

|           |         |         |         |         |         |         |         |         |         |
|-----------|---------|---------|---------|---------|---------|---------|---------|---------|---------|
| MCM3      | 8.0304  | 7.57391 | 8.47766 | 7.78877 | 6.17833 | 7.01746 | 7.64552 | 7.33143 | 7.30671 |
| TRAM2     | 8.96923 | 8.3552  | 9.34292 | 8.28096 | 6.08814 | 6.66396 | 7.97036 | 7.86403 | 7.7866  |
| GSTA2     | 3.22458 | 2.80018 | 3.60982 | 4.53173 | 4.78447 | 4.2912  | 3.44692 | 3.55754 | 3.41386 |
| GSTA1     | 6.17745 | 6.38759 | 6.67726 | 6.77118 | 7.07957 | 7.07403 | 6.54716 | 6.16056 | 6.74051 |
| GSTA5     | 6.08816 | 5.76534 | 6.1352  | 6.39088 | 7.98894 | 6.35888 | 5.96876 | 6.54539 | 6.38181 |
| GSTA3     | 7.03552 | 4.33091 | 6.79792 | 5.1205  | 5.51922 | 4.3777  | 5.23209 | 5.28646 | 5.22189 |
| GSTA4     | 9.46929 | 9.34111 | 9.2075  | 9.45969 | 8.0435  | 8.87456 | 9.35399 | 7.80775 | 8.54373 |
| ICK       | 9.16012 | 9.06276 | 9.42891 | 7.69871 | 6.2887  | 6.74811 | 8.19471 | 6.99589 | 6.89346 |
| GCM1      | 4.50682 | 4.49193 | 4.4292  | 4.99612 | 5.61892 | 4.9536  | 4.61733 | 5.11162 | 4.91695 |
| ELOVL5    | 7.46853 | 7.57921 | 7.61368 | 7.48272 | 5.70326 | 6.83228 | 7.41761 | 7.23333 | 7.4018  |
| KLHL31    | 6.73778 | 5.97756 | 5.90858 | 5.10065 | 5.33174 | 5.44521 | 4.30579 | 5.34298 | 5.19595 |
| HMGCLL1   | 5.02361 | 5.08624 | 4.91823 | 5.5185  | 6.12412 | 5.44644 | 5.07658 | 5.11707 | 5.32971 |
| BMP5      | 4.31286 | 4.74932 | 4.74695 | 4.79379 | 5.0594  | 4.76586 | 4.02486 | 4.73373 | 4.36625 |
| DST       | 8.76179 | 8.90666 | 8.60243 | 7.87532 | 5.95901 | 6.5605  | 7.5528  | 7.59802 | 7.62259 |
| EYS       | 4.69262 | 4.87438 | 4.66989 | 4.8268  | 5.65526 | 4.6999  | 4.42994 | 4.77517 | 4.82331 |
| LMBRD1    | 9.98981 | 9.7407  | 10.1154 | 8.89966 | 6.3735  | 9.07288 | 9.52333 | 9.40676 | 8.99904 |
| LINC00472 | 5.62084 | 6.21869 | 6.03862 | 5.05187 | 4.93762 | 5.40306 | 4.41356 | 5.24757 | 5.27724 |
| Mir30c2   | 4.81649 | 5.48618 | 5.90931 | 4.86832 | 5.80202 | 4.98931 | 4.46061 | 5.37539 | 4.85201 |
| MIR30A    | 5.89736 | 5.84935 | 5.729   | 5.38828 | 6.34464 | 5.56138 | 4.87169 | 5.52741 | 5.68917 |
| MIR4282   | 2.2889  | 2.6253  | 2.02323 | 2.62435 | 2.26872 | 2.23964 | 2.29862 | 2.26259 | 1.98388 |
| KCNQ5-AS1 | 2.83217 | 2.4823  | 2.89263 | 3.58664 | 3.69378 | 3.35489 | 3.48839 | 2.86637 | 3.40688 |
| KHDC1L    | 5.40641 | 5.58977 | 5.60055 | 6.64534 | 6.48965 | 6.59915 | 6.2382  | 5.81202 | 6.34173 |
| KHDC1     | 5.12564 | 5.39953 | 5.23323 | 5.53008 | 5.82015 | 5.80911 | 5.66299 | 5.7587  | 5.64061 |
| DPPA5     | 5.26079 | 5.49098 | 5.1685  | 6.51559 | 5.97614 | 6.87617 | 5.85027 | 6.04392 | 6.14842 |
| OOEP      | 5.39518 | 6.11787 | 5.44377 | 6.51329 | 7.03907 | 6.18309 | 6.10556 | 5.77382 | 6.22502 |
| MB21D1    | 5.71241 | 5.24607 | 5.42968 | 6.38886 | 4.84    | 5.61236 | 6.52463 | 5.88714 | 5.50401 |

|           |         |         |         |         |         |         |         |         |         |
|-----------|---------|---------|---------|---------|---------|---------|---------|---------|---------|
| EEF1A1    | 7.14074 | 7.09747 | 7.17043 | 7.44129 | 6.63914 | 7.02692 | 7.0068  | 6.9161  | 7.05208 |
| COX7A2    | 7.33925 | 7.12637 | 7.27806 | 8.43522 | 7.69665 | 8.46867 | 8.63196 | 8.04233 | 7.85739 |
| TMEM30A   | 9.56055 | 9.54904 | 9.79676 | 9.79847 | 7.50053 | 9.74686 | 9.89568 | 10.6718 | 10.0539 |
| FILIP1    | 6.35027 | 5.87788 | 6.38973 | 5.89773 | 6.71135 | 6.21609 | 5.24884 | 6.32646 | 5.69211 |
| IMPG1     | 4.295   | 4.60229 | 4.29877 | 4.5689  | 4.69987 | 5.02804 | 4.49575 | 4.52917 | 4.48883 |
| PHIP      | 9.3713  | 9.61228 | 9.3668  | 8.50623 | 6.1302  | 8.18459 | 8.10042 | 8.2867  | 8.03103 |
| HMGN3     | 8.54327 | 9.18975 | 8.13848 | 8.25801 | 6.97179 | 7.36698 | 8.27061 | 7.59419 | 7.36076 |
| LCA5      | 5.36313 | 5.54607 | 5.42271 | 5.20497 | 4.8409  | 5.26056 | 5.72951 | 5.20267 | 5.07068 |
| LINC01621 | 6.52619 | 6.92601 | 6.239   | 5.6387  | 5.68181 | 5.65178 | 4.86107 | 6.12365 | 6.07408 |
| ELOVL4    | 11.3537 | 11.136  | 10.8908 | 11.4105 | 10.9548 | 11.6702 | 11.2331 | 11.8861 | 11.2922 |
| IBTK      | 8.5437  | 8.75254 | 8.63853 | 8.17367 | 6.17469 | 7.8376  | 8.09174 | 7.86624 | 8.32279 |
| UBE3D     | 6.895   | 6.83155 | 7.07322 | 5.7901  | 5.91749 | 5.88632 | 6.29259 | 5.81308 | 5.71881 |
| PGM3      | 7.72851 | 7.76101 | 7.99314 | 7.93531 | 6.54677 | 8.10645 | 7.63623 | 7.85211 | 8.11748 |
| CEP162    | 6.48105 | 6.82109 | 6.50472 | 4.51762 | 4.10966 | 4.88133 | 5.54797 | 5.13407 | 4.51319 |
| TBX18     | 7.46483 | 7.98735 | 7.95385 | 6.59004 | 7.17137 | 6.4502  | 6.4669  | 7.7467  | 7.60712 |
| SNHG5     | 7.83084 | 7.26046 | 7.91016 | 7.85164 | 6.15145 | 7.78995 | 7.79259 | 8.00158 | 7.1471  |
| AKIRIN2   | 8.55266 | 8.23962 | 8.47047 | 9.58328 | 7.12822 | 10.5305 | 10.1118 | 9.6199  | 9.83776 |
| CNR1      | 4.61719 | 4.96323 | 5.74151 | 4.85059 | 5.76531 | 5.36922 | 4.98453 | 4.88456 | 4.96217 |
| RNGTT     | 7.84921 | 7.93904 | 7.60261 | 7.54769 | 5.50661 | 7.43397 | 7.78264 | 7.72751 | 7.59851 |
| SRSF12    | 4.82394 | 4.8299  | 5.41454 | 4.85659 | 4.85901 | 4.98597 | 5.04381 | 5.1446  | 5.08815 |
| RRAGD     | 7.87067 | 8.96238 | 8.35272 | 7.93864 | 7.77404 | 10.0773 | 8.74266 | 9.28548 | 8.44357 |
| LYRM2     | 6.319   | 6.20176 | 6.27508 | 6.35609 | 6.495   | 6.4587  | 6.79009 | 6.14237 | 6.34806 |
| MAP3K7    | 9.16964 | 9.09202 | 9.05666 | 8.95903 | 6.77952 | 8.63546 | 9.37611 | 9.50235 | 8.61983 |
| EPHA7     | 5.36319 | 5.53655 | 5.18316 | 5.14439 | 5.53344 | 5.14817 | 5.3132  | 5.0949  | 5.11186 |
| GPR63     | 5.22312 | 5.21379 | 5.75101 | 4.90817 | 5.51643 | 4.83649 | 5.29832 | 5.10877 | 4.83042 |
| FBXL4     | 8.99006 | 9.27199 | 8.99995 | 8.01545 | 6.42527 | 7.28509 | 8.40796 | 7.2651  | 7.66579 |

|            |         |         |         |         |         |         |         |         |         |
|------------|---------|---------|---------|---------|---------|---------|---------|---------|---------|
| FAXC       | 4.96973 | 4.9715  | 5.12563 | 5.24058 | 5.2421  | 5.64504 | 6.10657 | 5.18573 | 5.20266 |
| PNISR      | 9.72276 | 9.98574 | 9.57599 | 8.14512 | 7.04887 | 7.3034  | 7.93384 | 8.47945 | 8.51476 |
| USP45      | 7.61723 | 7.80627 | 7.55815 | 6.76186 | 5.42863 | 6.46303 | 7.34344 | 6.76303 | 6.95864 |
| CCNC       | 6.91272 | 6.98245 | 7.00303 | 6.55848 | 5.25537 | 7.05841 | 7.02176 | 7.0855  | 6.97031 |
| MCHR2      | 4.44592 | 4.33429 | 4.314   | 4.88827 | 5.52208 | 4.52806 | 4.34815 | 4.46146 | 4.56233 |
| SIM1       | 5.81632 | 5.14755 | 4.93898 | 5.54822 | 5.49058 | 5.29335 | 5.47579 | 5.48431 | 5.56085 |
| ASCC3      | 8.32722 | 8.73515 | 8.25918 | 8.03882 | 5.44556 | 7.74561 | 8.22258 | 7.76718 | 8.03056 |
| HACE1      | 8.20695 | 8.25374 | 8.16091 | 6.87447 | 6.01383 | 6.96994 | 7.25647 | 7.90149 | 7.47497 |
| LIN28B-AS1 | 5.26463 | 5.14104 | 5.15503 | 5.93298 | 6.71664 | 5.37824 | 5.73706 | 5.4713  | 5.86249 |
| BVES       | 7.2327  | 6.72907 | 7.15092 | 6.47142 | 6.6412  | 6.30704 | 6.4522  | 8.31348 | 6.56739 |
| POPDC3     | 4.02652 | 4.30399 | 4.92393 | 5.37085 | 5.38776 | 4.95977 | 5.18185 | 5.92551 | 5.02337 |
| PREP       | 9.01938 | 8.7541  | 8.76293 | 9.25236 | 7.05912 | 9.44751 | 9.25346 | 8.98327 | 9.12638 |
| ATG5       | 8.43249 | 8.09195 | 8.32874 | 7.72493 | 6.07847 | 8.45954 | 8.55749 | 8.02592 | 7.67748 |
| RTN4IP1    | 6.48506 | 6.53627 | 6.77453 | 6.17617 | 6.22527 | 5.69403 | 5.76406 | 5.85056 | 5.3257  |
| BEND3      | 5.63812 | 5.54319 | 5.81715 | 5.98564 | 5.53169 | 5.82597 | 6.23794 | 5.45254 | 5.84195 |
| SCML4      | 4.96343 | 5.37505 | 5.30449 | 5.20029 | 5.38593 | 5.66862 | 5.42659 | 5.23007 | 5.23806 |
| SEC63      | 8.62678 | 8.52257 | 8.8118  | 7.99847 | 5.88492 | 8.05519 | 8.30488 | 8.59869 | 8.16293 |
| OSTM1      | 7.42883 | 7.33707 | 7.16567 | 7.52143 | 5.86618 | 7.35945 | 7.60425 | 8.13064 | 7.74817 |
| SNX3       | 10.4718 | 9.83445 | 10.5527 | 10.6201 | 9.60118 | 10.7717 | 10.9514 | 10.5915 | 10.8864 |
| SESN1      | 8.07591 | 7.96103 | 8.27341 | 5.94942 | 5.6453  | 5.68701 | 6.94144 | 5.75599 | 5.67797 |
| PPIL6      | 5.99659 | 6.03763 | 6.1754  | 4.62995 | 5.26109 | 5.05256 | 5.69687 | 5.41529 | 4.87814 |
| ZBTB24     | 7.63582 | 8.03277 | 7.9945  | 7.12461 | 5.89602 | 5.87862 | 7.61265 | 6.81817 | 6.84445 |
| AK9        | 6.05839 | 5.89327 | 5.7297  | 5.31702 | 5.31312 | 5.06522 | 5.43083 | 5.22901 | 5.19305 |
| mettl24    | 6.07069 | 6.02674 | 6.29196 | 6.34664 | 5.73211 | 6.23772 | 6.26187 | 6.40499 | 6.23216 |
| DDO        | 5.45558 | 5.48341 | 5.28309 | 5.59468 | 5.96181 | 5.70253 | 5.78626 | 5.98174 | 5.5408  |
| CDK19      | 8.89798 | 8.64826 | 8.32329 | 8.19553 | 6.61535 | 9.02057 | 8.33066 | 8.78979 | 8.76633 |

|            |         |         |         |         |         |         |         |         |         |
|------------|---------|---------|---------|---------|---------|---------|---------|---------|---------|
| GSTM2P1    | 5.0171  | 5.49672 | 5.03347 | 5.63739 | 6.58732 | 5.34821 | 4.90975 | 5.7164  | 5.89786 |
| TRAF3IP2   | 8.52867 | 8.32343 | 8.29534 | 8.01008 | 7.2922  | 8.56987 | 8.5104  | 8.96096 | 8.83838 |
| LINC01268  | 3.77227 | 3.80813 | 3.67548 | 3.91751 | 4.37317 | 4.38228 | 3.7335  | 3.78868 | 3.92427 |
| HS3ST5     | 4.3933  | 4.67123 | 4.3489  | 4.88077 | 6.01396 | 5.54122 | 5.26951 | 5.19991 | 5.22561 |
| FRK        | 6.76779 | 7.10386 | 6.72706 | 5.96049 | 5.16774 | 5.4661  | 6.27994 | 5.13343 | 5.10948 |
| TSPYL4     | 7.71147 | 7.65584 | 7.72058 | 6.98996 | 6.61704 | 7.10049 | 7.227   | 7.4458  | 7.44828 |
| TSPYL1     | 8.68719 | 8.32129 | 8.66382 | 8.81365 | 7.27682 | 8.74334 | 8.90575 | 8.9511  | 9.3158  |
| TRAPPC3L   | 3.58026 | 3.92727 | 4.11481 | 4.19099 | 4.20075 | 4.49537 | 4.15825 | 4.26844 | 4.13552 |
| ZUFSP      | 6.28226 | 6.34173 | 6.5065  | 6.30078 | 4.87758 | 5.99308 | 6.05061 | 5.62413 | 5.86751 |
| GOPC       | 8.53611 | 8.31109 | 8.39274 | 7.93157 | 5.32122 | 6.68367 | 8.11517 | 7.25003 | 7.30286 |
| CEP85L     | 4.94653 | 5.03573 | 5.62611 | 4.56585 | 4.9892  | 4.92149 | 4.61205 | 4.82829 | 4.67273 |
| MCM9       | 7.52079 | 7.68225 | 7.72285 | 7.07021 | 6.04471 | 6.17182 | 7.226   | 6.61753 | 6.66873 |
| MIR548B    | 4.5065  | 4.15556 | 4.40729 | 4.1974  | 5.1735  | 3.66546 | 4.80842 | 4.14346 | 4.35341 |
| LOC285762  | 3.82066 | 3.84044 | 3.74803 | 4.0902  | 4.9765  | 4.13555 | 4.0266  | 3.74871 | 3.67702 |
| TBC1D32    | 7.03036 | 7.43912 | 7.04495 | 5.3523  | 4.98749 | 4.31069 | 5.16874 | 4.4152  | 4.66851 |
| SERINC1    | 10.1144 | 10.0385 | 10.3167 | 9.44092 | 7.51297 | 10.3616 | 10.0045 | 10.3625 | 9.9863  |
| TRDN       | 3.51021 | 3.7974  | 3.65768 | 3.89636 | 4.12011 | 4.11762 | 3.67416 | 4.02347 | 4.05959 |
| RNF217-AS1 | 6.35217 | 6.14176 | 6.07499 | 5.74936 | 5.84439 | 5.43091 | 5.99564 | 5.77016 | 5.52409 |
| HDDC2      | 9.43852 | 9.78322 | 9.91659 | 9.92852 | 7.95606 | 9.12095 | 10.462  | 8.67161 | 9.41387 |
| ECHDC1     | 7.32469 | 6.95328 | 7.33411 | 6.33984 | 5.03487 | 5.58778 | 6.8211  | 5.97757 | 5.99911 |
| SOGA3      | 5.14323 | 5.36803 | 5.41114 | 5.2758  | 5.48614 | 4.8796  | 4.84861 | 5.0404  | 5.24548 |
| THEMIS     | 4.02184 | 4.77364 | 4.97531 | 4.15983 | 4.76772 | 4.77364 | 4.99777 | 4.73949 | 4.60584 |
| arhgap18   | 7.18387 | 6.97906 | 7.37644 | 6.59863 | 5.1799  | 5.61759 | 6.53215 | 6.20804 | 6.07615 |
| TMEM244    | 4.5373  | 4.8103  | 4.51314 | 4.87055 | 5.88093 | 5.04745 | 4.86132 | 4.8     | 4.71039 |
| SAMD3      | 4.78924 | 5.0074  | 4.99948 | 5.01271 | 5.82537 | 5.09957 | 5.00047 | 4.93666 | 4.88415 |
| EPB41L2    | 7.96263 | 7.50125 | 8.06898 | 6.35777 | 5.64554 | 5.79085 | 6.38795 | 6.22599 | 6.62157 |

|              |         |         |         |         |         |         |         |         |         |
|--------------|---------|---------|---------|---------|---------|---------|---------|---------|---------|
| MED23        | 9.37399 | 9.24267 | 9.54479 | 8.11596 | 6.3677  | 7.18235 | 8.09449 | 7.71387 | 8.18816 |
| CTGF         | 9.76282 | 9.07372 | 9.80454 | 10.866  | 7.16844 | 8.4963  | 9.92332 | 10.3486 | 9.73438 |
| MIR548AJ1    | 2.37217 | 1.81114 | 1.80428 | 1.99413 | 2.20123 | 2.5314  | 3.08425 | 2.10893 | 2.5003  |
| STX7         | 8.53286 | 8.73518 | 8.76396 | 8.24793 | 6.64651 | 8.63961 | 8.69919 | 9.20359 | 8.55514 |
| TAAR5        | 5.15347 | 5.51188 | 5.162   | 5.46123 | 7.28523 | 5.94609 | 5.33135 | 5.80664 | 5.63698 |
| TAAR3        | 4.27708 | 4.14562 | 3.99457 | 4.86412 | 7.32089 | 4.89117 | 4.88317 | 4.81066 | 4.44681 |
| TAAR2        | 3.17029 | 3.44154 | 3.33505 | 3.84019 | 5.33763 | 3.57942 | 3.51494 | 3.68792 | 3.42887 |
| TAAR1        | 3.60481 | 3.66227 | 3.70292 | 3.52809 | 5.70233 | 4.57934 | 3.48385 | 3.61392 | 4.12514 |
| VNN1         | 5.44347 | 4.56668 | 5.27444 | 4.74095 | 5.37521 | 5.88108 | 5.75001 | 5.35577 | 5.50264 |
| VNN2         | 4.4087  | 4.16249 | 4.56586 | 4.67052 | 4.99635 | 5.23258 | 4.81054 | 4.92494 | 5.03854 |
| HMGA1P7      | 6.66534 | 6.69288 | 6.88875 | 7.21049 | 7.912   | 7.46511 | 7.18937 | 7.28467 | 7.35904 |
| SGK1         | 8.47045 | 7.59262 | 8.23615 | 8.684   | 7.42756 | 8.00461 | 8.16079 | 9.08735 | 8.73381 |
| HBS1L        | 9.10523 | 8.96115 | 9.14135 | 8.67268 | 7.71865 | 8.35712 | 8.99892 | 8.85421 | 8.76376 |
| MIR3662      | 5.37218 | 5.47023 | 5.39319 | 3.57642 | 3.6417  | 3.66809 | 4.8495  | 3.99076 | 3.8457  |
| AHI1         | 7.88287 | 8.35663 | 8.03854 | 6.47613 | 5.07076 | 5.70029 | 6.36424 | 7.05945 | 7.00836 |
| BCLAF1       | 9.02186 | 9.11089 | 9.17527 | 8.23077 | 6.81643 | 7.29823 | 8.39237 | 7.74245 | 8.28042 |
| MAP7         | 9.72214 | 9.79121 | 9.58512 | 10.0349 | 8.98779 | 9.99911 | 10.4752 | 9.82402 | 10.3148 |
| MAP3K5       | 8.65177 | 8.44124 | 8.19835 | 7.77124 | 6.08986 | 7.34427 | 8.87581 | 8.58915 | 8.28602 |
| IFNGR1       | 8.83825 | 8.66704 | 8.82934 | 8.38601 | 6.58331 | 8.41236 | 8.82164 | 8.39619 | 8.81884 |
| OLIG3        | 5.02587 | 5.01326 | 4.84532 | 5.08073 | 5.58185 | 6.06703 | 5.06398 | 5.60598 | 5.41802 |
| LOC100130476 | 9.22116 | 9.37155 | 8.06063 | 7.87768 | 7.48508 | 6.71042 | 7.99944 | 8.08345 | 8.90031 |
| PBOV1        | 3.43689 | 3.54981 | 3.01396 | 3.502   | 4.90418 | 3.13036 | 2.95079 | 3.24353 | 3.29029 |
| NHSL1        | 8.89926 | 8.72204 | 8.62772 | 8.0513  | 7.14886 | 8.49738 | 8.04402 | 8.17332 | 8.80026 |
| MIR3145      | 4.69348 | 4.66387 | 4.09647 | 2.86779 | 2.39983 | 2.53378 | 3.12997 | 3.50419 | 4.37176 |
| REPS1        | 9.81434 | 10.1893 | 9.78885 | 9.10066 | 7.88898 | 9.25428 | 9.49787 | 9.49259 | 8.95968 |
| TXLNB        | 5.6189  | 5.45013 | 5.63128 | 4.97973 | 5.77591 | 5.12184 | 5.30184 | 5.2074  | 5.12629 |



|             |         |         |         |         |         |         |         |         |         |
|-------------|---------|---------|---------|---------|---------|---------|---------|---------|---------|
| LINC01625   | 4.59491 | 4.53238 | 4.29542 | 4.8642  | 5.04639 | 4.83592 | 4.58431 | 3.80542 | 4.39372 |
| NMBR        | 5.16203 | 4.94977 | 4.75293 | 4.84729 | 5.61082 | 4.73691 | 4.97128 | 4.95387 | 5.12827 |
| LOC153910   | 4.7687  | 4.65178 | 4.59299 | 4.90233 | 5.17951 | 4.63216 | 4.52048 | 4.66681 | 4.87401 |
| LINC01277   | 5.01159 | 5.3044  | 4.97151 | 5.20933 | 5.84953 | 4.79586 | 4.63237 | 5.10168 | 5.07812 |
| PHACTR2-AS1 | 4.80005 | 4.99558 | 5.23662 | 5.53926 | 6.43682 | 5.69104 | 5.12    | 5.7809  | 5.42749 |
| PLAGL1      | 10.0486 | 10.0841 | 9.70288 | 8.33121 | 7.79259 | 8.45837 | 8.30344 | 7.9774  | 8.83508 |
| FBXO30      | 8.75176 | 9.07808 | 8.72207 | 9.17703 | 5.92981 | 8.16922 | 9.30154 | 8.50648 | 9.49505 |
| KATNBL1P6   | 2.53048 | 2.62381 | 2.33662 | 2.97609 | 3.52696 | 3.23664 | 2.9479  | 3.1478  | 2.43475 |
| STXBP5-AS1  | 5.73276 | 5.67088 | 4.84829 | 5.63417 | 5.28593 | 5.17467 | 5.34988 | 5.64303 | 5.99049 |
| UST-AS1     | 5.21888 | 5.1188  | 4.93495 | 5.00894 | 5.75336 | 5.40691 | 5.19256 | 5.55218 | 5.10771 |
| ZC3H12D     | 5.93797 | 5.54935 | 5.8972  | 6.10848 | 6.34353 | 6.10005 | 5.96725 | 5.74716 | 6.0301  |
| PPIL4       | 8.05395 | 7.60972 | 8.15334 | 6.47782 | 4.89831 | 6.67025 | 6.86156 | 6.52674 | 6.66402 |
| KATNA1      | 7.78494 | 8.03871 | 7.70119 | 8.03045 | 6.37549 | 8.53522 | 8.14129 | 8.11667 | 8.03747 |
| NUP43       | 8.12987 | 8.48849 | 8.00452 | 7.39285 | 6.54665 | 6.93573 | 7.39111 | 6.95839 | 6.99769 |
| LRP11       | 7.68567 | 7.46423 | 7.40396 | 8.06144 | 6.20767 | 8.44692 | 8.52017 | 8.97867 | 8.72892 |
| RAET1E      | 8.75053 | 8.80236 | 7.84431 | 8.6747  | 7.54818 | 9.24097 | 9.4687  | 8.7124  | 9.65631 |
| RAET1K      | 2.84912 | 2.62014 | 2.65513 | 2.84237 | 2.45136 | 2.95474 | 2.78938 | 3.05396 | 2.59653 |
| RAET1L      | 4.07113 | 3.65622 | 3.03474 | 5.07461 | 4.39684 | 6.36313 | 7.21589 | 5.91986 | 7.09242 |
| ULBP3       | 5.12654 | 5.34443 | 5.36984 | 6.27077 | 5.84162 | 6.65687 | 7.50203 | 6.66892 | 6.84246 |
| ZBTB2       | 8.416   | 8.05061 | 8.26649 | 7.30682 | 6.65276 | 6.74585 | 7.96518 | 6.79268 | 6.91647 |
| RMND1       | 6.91737 | 6.62734 | 7.04523 | 6.21459 | 4.04306 | 4.45777 | 6.27136 | 5.22119 | 4.87948 |
| FBXO5       | 6.73133 | 6.84638 | 6.58131 | 6.92435 | 5.0902  | 6.23845 | 7.38793 | 6.22175 | 6.57314 |
| RGS17       | 5.59716 | 5.11027 | 5.58728 | 6.16948 | 5.2735  | 6.73785 | 6.62879 | 7.76424 | 7.08989 |
| IPCEF1      | 6.27479 | 6.24069 | 6.46122 | 5.25175 | 6.426   | 5.19135 | 5.43209 | 5.00876 | 5.39856 |
| cnksr3      | 7.61377 | 7.80893 | 7.52711 | 7.07046 | 6.28183 | 8.20147 | 8.19042 | 6.82534 | 7.34169 |
| NOX3        | 4.32556 | 4.69666 | 4.60442 | 5.03455 | 6.36678 | 5.30886 | 5.03954 | 5.27183 | 5.0849  |

|              |         |         |         |         |         |         |         |         |         |
|--------------|---------|---------|---------|---------|---------|---------|---------|---------|---------|
| TMEM242      | 7.505   | 7.0577  | 7.51652 | 7.00352 | 5.39844 | 7.08078 | 7.51705 | 7.57613 | 6.88826 |
| SERAC1       | 7.9202  | 7.85739 | 7.65816 | 7.48183 | 6.94458 | 8.38558 | 8.03274 | 8.77449 | 8.17186 |
| MIR3918      | 7.24484 | 6.74846 | 6.73296 | 5.63381 | 6.29679 | 6.02195 | 6.22571 | 7.06652 | 7.07865 |
| EZR          | 11.1762 | 11.0735 | 11.0061 | 11.4753 | 10.1964 | 12.5006 | 11.5554 | 12.1935 | 12.0263 |
| OSTCP1       | 4.81982 | 4.10761 | 4.88808 | 5.01658 | 5.1365  | 5.717   | 5.62998 | 5.51273 | 5.01312 |
| RSPH3        | 7.77045 | 7.92178 | 7.48076 | 7.60825 | 5.94394 | 7.68174 | 8.0807  | 7.94328 | 7.8137  |
| TAGAP        | 6.34779 | 5.75637 | 6.69062 | 6.16379 | 6.2415  | 7.1508  | 6.13328 | 6.24295 | 6.0843  |
| AGPAT4-IT1   | 6.22819 | 5.92689 | 6.35059 | 6.82599 | 6.93364 | 6.32065 | 6.32665 | 7.45009 | 7.15161 |
| PACRG-AS1    | 4.84333 | 4.84915 | 4.5578  | 4.59042 | 4.94994 | 5.09677 | 5.15567 | 4.81761 | 5.18627 |
| DKFZp451B082 | 4.38943 | 4.75612 | 4.56216 | 4.92018 | 5.55347 | 5.6567  | 4.66223 | 5.21066 | 5.09956 |
| Cahm         | 6.49937 | 5.88527 | 6.42056 | 6.11732 | 6.01119 | 6.47568 | 6.31009 | 5.9854  | 6.23854 |
| C6orf118     | 3.67536 | 3.5105  | 3.76803 | 4.01848 | 4.24755 | 4.21825 | 4.13109 | 4.12983 | 4.38524 |
| PDE10A       | 6.43085 | 5.41908 | 6.03714 | 5.82583 | 6.33626 | 6.23014 | 5.85762 | 6.36006 | 6.27821 |
| LINC00473    | 5.71594 | 5.28116 | 4.9998  | 5.20016 | 5.80008 | 5.57861 | 5.35691 | 5.2903  | 5.25481 |
| PRR18        | 5.66445 | 5.96658 | 5.78328 | 6.63163 | 6.67675 | 6.55669 | 6.40522 | 6.22501 | 6.06525 |
| SFT2D1       | 7.58811 | 7.70174 | 7.67694 | 8.16994 | 5.74111 | 7.31643 | 8.21767 | 7.36349 | 7.77091 |
| MPC1         | 8.28435 | 8.48082 | 8.8181  | 8.10755 | 6.92444 | 7.4063  | 8.43022 | 7.63633 | 7.92339 |
| RPS6KA2-IT1  | 6.23262 | 6.38494 | 6.67619 | 5.36892 | 6.41611 | 6.10861 | 5.62395 | 6.2395  | 5.94739 |
| MIR1913      | 7.19905 | 7.16563 | 7.53031 | 6.5639  | 8.44135 | 6.63715 | 6.84537 | 7.322   | 7.43947 |
| RNASET2      | 6.82581 | 6.48926 | 7.14436 | 5.50223 | 5.29027 | 5.84229 | 6.31322 | 5.05715 | 5.54688 |
| MIR3939      | 6.93877 | 7.8701  | 7.23222 | 6.22887 | 6.05731 | 6.32105 | 6.23494 | 6.3747  | 6.54805 |
| GPR31        | 4.22357 | 4.2785  | 4.71399 | 5.24061 | 5.51531 | 5.41421 | 4.95406 | 5.139   | 5.16648 |
| AFDN-AS1     | 4.33499 | 4.33208 | 4.75095 | 4.77394 | 5.40206 | 4.80575 | 4.75189 | 5.18281 | 5.39404 |
| HGC6.3       | 4.85229 | 5.36306 | 5.15594 | 5.64464 | 6.03832 | 6.65178 | 5.94748 | 6.17342 | 6.31041 |
| FRMD1        | 4.70645 | 5.12577 | 5.15269 | 5.12781 | 5.73567 | 5.67681 | 5.08413 | 5.37668 | 5.48281 |
| THBS2        | 10.6584 | 8.35978 | 9.74522 | 10.1375 | 6.17334 | 9.14989 | 9.87512 | 9.71207 | 8.89067 |

|              |         |         |         |         |         |         |         |         |         |
|--------------|---------|---------|---------|---------|---------|---------|---------|---------|---------|
| WDR27        | 6.86158 | 6.89703 | 6.65022 | 6.19197 | 6.27646 | 6.16161 | 6.00376 | 6.52865 | 6.22823 |
| PHF10        | 8.95541 | 8.6774  | 8.73994 | 8.19095 | 6.07951 | 8.00986 | 8.8191  | 7.73357 | 8.19871 |
| TCTE3        | 3.60418 | 3.98267 | 4.02796 | 4.17003 | 4.43024 | 4.77647 | 4.45412 | 4.17733 | 4.79838 |
| LINC00242    | 4.48659 | 4.75816 | 4.5038  | 4.90842 | 5.56905 | 5.32909 | 5.03256 | 5.2045  | 4.67234 |
| LOC154449    | 5.76655 | 5.91345 | 5.7374  | 5.78237 | 6.19094 | 5.87546 | 5.74186 | 6.1634  | 6.02367 |
| DLL1         | 8.23927 | 8.26899 | 8.07067 | 7.99537 | 6.30772 | 7.23385 | 7.90736 | 7.83041 | 7.72108 |
| PDCD2        | 7.35111 | 7.88966 | 7.6388  | 7.73818 | 6.50237 | 6.81474 | 7.79243 | 6.93001 | 6.94122 |
| RPL23AP53    | 8.1295  | 8.19511 | 8.15072 | 8.01836 | 8.14545 | 8.83714 | 8.16718 | 9.24586 | 8.31452 |
| MSH5-SAPCD1  | 7.19911 | 9.26163 | 8.13587 | 6.77525 | 7.44285 | 6.8497  | 6.23899 | 7.44228 | 6.46196 |
| HCG23        | 5.02108 | 5.15357 | 4.88647 | 4.92649 | 5.62203 | 5.20968 | 4.56793 | 5.30164 | 5.11916 |
| HCG17        | 4.65212 | 4.53562 | 4.16401 | 4.40188 | 5.22891 | 4.44437 | 4.6233  | 4.14273 | 4.20618 |
| PBX2         | 7.61532 | 7.26894 | 7.57618 | 6.69961 | 6.82047 | 6.90953 | 7.18509 | 7.86889 | 7.23485 |
| GPX5         | 5.38668 | 5.47079 | 5.21977 | 5.64594 | 6.40966 | 5.47097 | 5.72778 | 6.07996 | 5.87949 |
| ddr1         | 8.83621 | 8.39564 | 8.44349 | 8.83077 | 7.66941 | 8.68489 | 9.18314 | 8.28964 | 8.56742 |
| MIR4640      | 6.12144 | 5.5611  | 6.07071 | 6.24907 | 6.00934 | 6.32316 | 5.83306 | 6.19303 | 6.07759 |
| HCG27        | 6.80861 | 6.9502  | 7.10277 | 6.98329 | 7.78294 | 6.86116 | 7.09828 | 7.07072 | 6.9874  |
| HCP5         | 7.97561 | 7.61224 | 7.69275 | 7.07369 | 6.69739 | 6.71629 | 6.66227 | 7.13472 | 7.17791 |
| C6orf48      | 7.77825 | 7.35485 | 7.49467 | 7.80782 | 6.29022 | 7.40633 | 7.63488 | 7.16947 | 6.94348 |
| PSMB8-AS1    | 6.12697 | 6.10828 | 6.19638 | 6.31049 | 6.68736 | 6.56215 | 6.35619 | 6.29457 | 6.12023 |
| ZBED9        | 4.75696 | 5.23345 | 4.89649 | 4.97125 | 6.07691 | 5.74152 | 5.42699 | 5.86042 | 5.44946 |
| C6orf10      | 4.27482 | 4.88665 | 4.62475 | 4.4046  | 5.26893 | 4.53212 | 4.44308 | 4.52894 | 4.45441 |
| CLIC1        | 10.2106 | 10.3268 | 10.2318 | 10.8577 | 9.55829 | 10.7937 | 10.7621 | 10.5342 | 10.8466 |
| MSH5         | 8.39589 | 8.50205 | 8.31318 | 6.70278 | 7.1421  | 6.25539 | 6.30916 | 6.73998 | 6.49483 |
| WI2-2373I1.2 | 5.89809 | 6.19322 | 5.85814 | 6.66634 | 6.75276 | 6.81848 | 6.57935 | 6.03843 | 6.22541 |
| LOC442497    | 5.61179 | 5.53519 | 5.38038 | 5.96217 | 5.64485 | 5.82663 | 5.36608 | 6.21491 | 5.90597 |
| HRAT92       | 5.36463 | 5.22744 | 5.57106 | 5.92951 | 6.05006 | 6.3703  | 5.3203  | 5.89974 | 5.97428 |

|           |         |         |         |         |         |         |         |         |         |
|-----------|---------|---------|---------|---------|---------|---------|---------|---------|---------|
| DNAAF5    | 7.81563 | 7.67201 | 7.5609  | 7.95797 | 7.06312 | 7.36787 | 8.15715 | 7.54349 | 7.24252 |
| SUN1      | 8.81015 | 8.85669 | 8.77812 | 8.12803 | 7.13505 | 8.27584 | 8.22803 | 9.3389  | 8.50204 |
| GET4      | 7.10395 | 6.95776 | 6.83911 | 7.63078 | 6.40963 | 8.23933 | 7.66009 | 7.27111 | 7.36783 |
| GPR146    | 6.67405 | 6.67857 | 6.79053 | 6.62584 | 7.25441 | 7.32732 | 6.77765 | 6.87549 | 6.86836 |
| GPFR1     | 6.1717  | 6.27014 | 6.21808 | 6.41104 | 7.33523 | 6.51959 | 6.81337 | 6.57459 | 6.42842 |
| UNCX      | 6.93048 | 6.62872 | 6.89997 | 7.18713 | 7.25503 | 7.59046 | 7.13812 | 7.28479 | 7.19116 |
| MAFK      | 6.41524 | 6.16915 | 6.26476 | 6.69596 | 5.66651 | 6.82065 | 7.02056 | 7.56848 | 6.90355 |
| PSMG3-AS1 | 5.24232 | 5.67871 | 5.75273 | 6.07926 | 5.75456 | 6.23879 | 5.79946 | 5.89901 | 6.23229 |
| ELFN1     | 6.73467 | 6.11497 | 6.40016 | 6.89996 | 6.47273 | 6.62583 | 6.7169  | 6.53474 | 6.71706 |
| NUDT1     | 6.27301 | 6.18491 | 6.59761 | 6.46223 | 5.62671 | 6.37101 | 6.4007  | 6.24867 | 5.81374 |
| CHST12    | 6.82856 | 6.94189 | 6.90866 | 7.2772  | 5.32895 | 6.70447 | 6.93922 | 6.22781 | 5.78342 |
| LFNG      | 6.86658 | 7.36066 | 7.11858 | 7.0686  | 6.7014  | 6.6741  | 6.74533 | 6.85423 | 6.74245 |
| IQCE      | 6.69419 | 6.49623 | 6.6771  | 6.47241 | 6.35119 | 6.55624 | 7.19637 | 6.43855 | 6.34868 |
| TTYH3     | 7.36777 | 6.83177 | 7.3189  | 8.19956 | 7.91231 | 8.5564  | 8.49233 | 8.80447 | 8.37888 |
| AMZ1      | 5.50131 | 5.60143 | 5.763   | 6.23974 | 6.75035 | 6.32156 | 5.96548 | 5.92618 | 5.97174 |
| SDK1      | 6.83673 | 7.63336 | 7.22577 | 6.79558 | 6.55985 | 6.66897 | 7.00753 | 6.8402  | 6.85188 |
| FOXK1     | 8.32411 | 7.75763 | 8.23181 | 7.79986 | 7.14802 | 7.56596 | 8.51188 | 7.82552 | 7.46693 |
| RNF216P1  | 6.09164 | 5.57881 | 5.9633  | 5.24705 | 4.76395 | 5.43829 | 5.90387 | 5.38813 | 5.62069 |
| RBAK      | 8.06666 | 8.15085 | 8.02392 | 7.97173 | 6.90063 | 7.84915 | 7.95462 | 7.56563 | 7.49279 |
| FBXL18    | 5.85213 | 6.05758 | 5.98949 | 6.25799 | 5.94919 | 6.38319 | 6.29579 | 6.35237 | 6.39156 |
| Ocm       | 5.20771 | 5.31306 | 5.27331 | 5.23495 | 5.7472  | 5.9647  | 5.19503 | 5.03886 | 5.86305 |
| CCZ1      | 7.77487 | 7.96502 | 7.6277  | 5.76981 | 5.61938 | 6.25873 | 6.48452 | 6.03765 | 6.73193 |
| AIMP2     | 8.68938 | 8.7477  | 8.88548 | 9.5289  | 7.39182 | 8.64243 | 9.88609 | 7.9395  | 8.99084 |
| USP42     | 7.94495 | 7.68739 | 7.88923 | 7.45173 | 5.60381 | 6.49556 | 7.06568 | 6.68536 | 7.04002 |
| ZNF853    | 5.93674 | 6.06021 | 6.20646 | 6.6461  | 5.96425 | 6.83767 | 5.97232 | 6.36214 | 6.46593 |
| PMS2CL    | 7.25245 | 7.00567 | 6.61276 | 6.32189 | 4.37716 | 6.71271 | 7.10954 | 5.99182 | 5.89387 |

|              |         |         |         |         |         |         |         |         |         |
|--------------|---------|---------|---------|---------|---------|---------|---------|---------|---------|
| RSPH10B2     | 3.78956 | 3.79294 | 3.45008 | 4.13386 | 4.2295  | 4.49723 | 3.45675 | 3.91601 | 4.07093 |
| GLCCI1       | 7.34854 | 7.35744 | 7.03694 | 5.97827 | 5.55802 | 5.24373 | 5.27539 | 5.84263 | 5.25023 |
| NXPH1        | 4.18653 | 3.9365  | 3.93041 | 4.88627 | 5.41665 | 4.25846 | 4.51903 | 4.49542 | 4.51542 |
| PER4         | 3.7123  | 3.55276 | 3.55695 | 4.1557  | 4.56942 | 3.81032 | 3.7834  | 3.90771 | 4.13676 |
| PHF14        | 8.11119 | 8.49434 | 7.98476 | 6.90913 | 5.744   | 5.44403 | 7.18091 | 5.97838 | 6.10056 |
| TMEM106B     | 8.63298 | 8.61626 | 8.75291 | 7.64406 | 6.48671 | 6.49857 | 8.01459 | 7.30497 | 7.57846 |
| SCIN         | 5.87897 | 6.41135 | 6.51682 | 5.47441 | 5.68525 | 5.43957 | 5.40892 | 5.53184 | 5.51876 |
| ARL4A        | 7.35969 | 6.68509 | 7.12488 | 7.10194 | 6.05227 | 6.9916  | 7.2874  | 6.8237  | 6.7901  |
| ISPD-AS1     | 4.89447 | 4.97109 | 4.90998 | 4.91448 | 5.56051 | 4.93393 | 4.71404 | 5.42496 | 4.40565 |
| LRRC72       | 4.59829 | 4.71789 | 4.6577  | 5.24014 | 5.04883 | 5.14557 | 5.05602 | 4.80269 | 4.83105 |
| BZW2         | 8.58827 | 8.44525 | 8.44674 | 8.0041  | 5.42214 | 7.40096 | 8.19642 | 6.82969 | 7.11991 |
| TSPAN13      | 7.44566 | 7.7192  | 7.88536 | 8.38783 | 6.56827 | 9.0877  | 7.45734 | 10.2061 | 8.34823 |
| AHR          | 11.4567 | 10.5191 | 11.3075 | 10.0763 | 6.62957 | 8.94107 | 10.1148 | 10.0274 | 10.0023 |
| HDAC9        | 5.63055 | 5.48222 | 5.52487 | 5.39475 | 6.11088 | 5.3146  | 5.06934 | 5.39476 | 5.25997 |
| MACC1-AS1    | 3.05284 | 2.79738 | 2.76115 | 2.70832 | 3.76611 | 3.48989 | 2.82241 | 2.88561 | 2.90894 |
| RPL23P8      | 5.16946 | 5.35476 | 5.23819 | 5.53449 | 6.45864 | 5.68701 | 5.58947 | 5.42919 | 5.01163 |
| SP4          | 7.79296 | 8.1275  | 7.85718 | 6.11644 | 6.07877 | 5.33808 | 6.3482  | 6.29024 | 6.09216 |
| MIR1183      | 3.09881 | 3.51129 | 3.60144 | 2.83922 | 3.9535  | 4.10535 | 3.51872 | 3.00343 | 3.4397  |
| LOC100506178 | 4.40858 | 4.75542 | 5.01996 | 4.63823 | 5.47465 | 5.21449 | 5.1071  | 5.37741 | 5.44008 |
| KLHL7        | 7.61146 | 7.69986 | 7.51727 | 7.42734 | 6.10363 | 7.3293  | 7.74917 | 7.82445 | 7.44869 |
| NUPL2        | 7.17596 | 7.40773 | 7.14158 | 6.76218 | 5.7198  | 6.27254 | 6.98602 | 6.72549 | 6.49382 |
| GPNMB        | 11.2002 | 10.7764 | 11.2232 | 10.518  | 7.49206 | 9.56965 | 10.5815 | 9.17598 | 9.8435  |
| MALSU1       | 6.81043 | 7.15524 | 6.78715 | 6.77717 | 5.82385 | 5.67404 | 6.88028 | 6.02821 | 6.10945 |
| RPS2P32      | 5.6957  | 5.53112 | 5.60521 | 6.18376 | 5.71076 | 6.38295 | 6.13506 | 5.76077 | 5.55016 |
| CCDC126      | 6.74327 | 6.86875 | 6.65658 | 6.94273 | 5.58235 | 6.4439  | 6.68537 | 6.69702 | 6.35003 |
| STK31        | 4.53035 | 4.30631 | 4.28387 | 4.82214 | 5.52584 | 4.48073 | 4.48232 | 4.42203 | 4.18506 |

|               |         |         |         |         |         |         |         |         |         |
|---------------|---------|---------|---------|---------|---------|---------|---------|---------|---------|
| NPY           | 5.68441 | 6.08503 | 5.71839 | 6.31779 | 6.1035  | 7.4522  | 6.20454 | 6.63432 | 6.27505 |
| nfe2l3        | 9.0075  | 7.73053 | 9.05596 | 6.63597 | 4.89311 | 4.99978 | 6.48593 | 4.99403 | 4.93998 |
| CBX3          | 7.41772 | 7.75925 | 7.6704  | 7.58751 | 5.35306 | 6.56666 | 7.24162 | 7.27057 | 6.97858 |
| LOC441204     | 5.83587 | 5.75803 | 5.98    | 5.74695 | 6.4545  | 5.85465 | 5.74084 | 5.5914  | 5.48078 |
| C7orf71       | 4.82463 | 4.67889 | 4.79344 | 5.10765 | 5.41638 | 5.47302 | 4.84736 | 4.93469 | 5.25878 |
| HOXA-AS3      | 5.34839 | 5.29281 | 5.7811  | 6.06347 | 5.63094 | 6.11473 | 5.80992 | 5.68907 | 6.04811 |
| HOXA10-AS     | 6.86723 | 6.93256 | 7.25418 | 7.1577  | 6.58732 | 6.96949 | 7.35294 | 6.94627 | 6.92512 |
| HOXA11-AS     | 4.84095 | 4.85566 | 5.10967 | 5.65212 | 5.84849 | 5.7878  | 5.4978  | 5.51037 | 5.49375 |
| HOTTIP        | 5.0904  | 5.17097 | 5.20897 | 5.77919 | 6.08853 | 6.00988 | 5.56608 | 5.4359  | 5.58773 |
| EVX1          | 6.09    | 5.88951 | 6.04484 | 6.87175 | 6.24764 | 6.61041 | 6.32597 | 6.52888 | 6.85036 |
| TAX1BP1       | 9.88822 | 9.62119 | 9.51526 | 9.20125 | 7.46096 | 9.88912 | 9.44273 | 9.64005 | 9.47317 |
| JAZF1-AS1     | 4.89916 | 5.23758 | 4.92931 | 5.49256 | 5.89875 | 5.38783 | 4.91452 | 5.29714 | 5.15079 |
| CREB5         | 7.22087 | 6.27012 | 6.7199  | 7.11613 | 6.44624 | 7.06814 | 6.7786  | 7.45749 | 7.06503 |
| TRIL          | 6.34762 | 6.438   | 6.28684 | 7.02954 | 6.84342 | 7.37705 | 7.08684 | 6.91729 | 6.82889 |
| LOC100506497  | 4.77493 | 4.87857 | 5.05167 | 5.07617 | 4.68242 | 4.73686 | 3.51069 | 4.47302 | 4.29505 |
| CHN2          | 6.81285 | 7.20653 | 6.91139 | 7.04368 | 7.07587 | 6.4673  | 6.63276 | 6.83523 | 6.72375 |
| PRR15         | 5.04572 | 5.13573 | 5.06389 | 5.75799 | 5.42456 | 5.84708 | 5.4277  | 5.23252 | 5.41238 |
| DPY19L2P3     | 4.72336 | 4.91231 | 4.82694 | 5.17472 | 5.68613 | 5.38637 | 4.83101 | 4.99763 | 4.67332 |
| MTURN         | 7.2784  | 7.32626 | 7.23295 | 6.82456 | 6.60962 | 6.45536 | 7.24696 | 7.78997 | 6.93769 |
| ZNRF2         | 8.06194 | 8.32761 | 8.32128 | 6.64362 | 5.63243 | 6.67161 | 6.29964 | 7.56211 | 8.12492 |
| MIR550A1      | 5.21968 | 4.47608 | 4.77055 | 3.6595  | 3.9204  | 4.46121 | 3.93788 | 6.86229 | 5.25663 |
| DKFZP586I1420 | 8.32719 | 8.47816 | 8.1528  | 6.76467 | 5.37765 | 6.64327 | 7.65756 | 8.84664 | 8.04083 |
| LOC401320     | 5.45029 | 5.17791 | 5.23345 | 4.98292 | 6.04645 | 5.55573 | 5.22823 | 4.39997 | 4.76462 |
| GARS          | 9.81358 | 9.5075  | 9.50952 | 9.71898 | 8.53492 | 10.5106 | 9.81399 | 10.4094 | 10.2512 |
| AQP1          | 9.07684 | 8.83138 | 10.0613 | 8.71738 | 7.56711 | 7.92587 | 9.09282 | 9.0608  | 9.43229 |
| GHRHR         | 5.84031 | 6.11606 | 5.68346 | 6.34258 | 6.92314 | 6.48167 | 6.1304  | 6.20098 | 6.317   |

|           |         |         |         |         |         |         |         |         |         |
|-----------|---------|---------|---------|---------|---------|---------|---------|---------|---------|
| ADCYAP1R1 | 5.31887 | 5.86702 | 5.60962 | 5.94328 | 6.05178 | 5.8931  | 5.62927 | 5.78062 | 5.79477 |
| CCDC129   | 6.51311 | 6.61926 | 6.81725 | 5.48244 | 6.55017 | 5.15295 | 5.09874 | 6.15906 | 5.6459  |
| AVL9      | 8.25659 | 8.30342 | 8.33353 | 7.60377 | 5.95355 | 8.02907 | 8.31299 | 7.80889 | 7.8001  |
| ZNRF2P1   | 7.89873 | 7.66322 | 7.42967 | 5.96818 | 5.77485 | 5.73978 | 5.68112 | 7.92206 | 6.54278 |
| MIR550A2  | 4.44097 | 4.58129 | 4.87328 | 5.2896  | 4.62106 | 5.02377 | 4.53528 | 4.91805 | 4.85072 |
| LINC00997 | 7.6974  | 6.59174 | 6.9193  | 5.7377  | 5.40274 | 5.21864 | 6.63703 | 6.42448 | 6.12757 |
| BBS9      | 6.99546 | 7.28372 | 6.6073  | 5.44539 | 4.67124 | 5.55588 | 5.5324  | 5.35401 | 5.18573 |
| BMPER     | 5.81898 | 5.96039 | 5.95357 | 6.27327 | 6.81928 | 6.28114 | 6.04773 | 5.93123 | 5.92273 |
| NPSR1     | 4.73743 | 4.7801  | 4.7991  | 5.35827 | 6.18543 | 5.29549 | 5.19998 | 5.14131 | 5.21118 |
| LOC401324 | 4.59132 | 4.63983 | 5.01626 | 5.14931 | 6.62824 | 5.41536 | 4.53161 | 5.09111 | 4.98826 |
| 44446     | 8.22437 | 8.12212 | 7.96354 | 7.6044  | 6.53491 | 7.30172 | 7.72764 | 7.8657  | 7.68787 |
| EEPD1     | 8.02992 | 8.18274 | 7.78444 | 7.60766 | 7.94027 | 7.0137  | 7.9249  | 8.05465 | 6.86739 |
| gpr141    | 4.88485 | 4.81664 | 5.04174 | 4.97057 | 6.1394  | 5.38258 | 5.3359  | 5.0402  | 4.89109 |
| nme8      | 3.31364 | 3.41185 | 3.5566  | 3.75945 | 4.48733 | 3.85025 | 3.85991 | 3.59374 | 3.89581 |
| EPDR1     | 5.20411 | 5.10844 | 5.41495 | 5.29592 | 4.71991 | 5.56354 | 5.30465 | 5.02819 | 4.92456 |
| STARD3NL  | 5.84408 | 5.73728 | 6.07238 | 6.34964 | 5.06777 | 5.61324 | 6.27182 | 5.88369 | 6.03154 |
| TRG-AS1   | 4.99399 | 4.90731 | 4.83414 | 4.55775 | 5.79359 | 5.55482 | 5.28482 | 5.35147 | 5.53604 |
| pou6f2    | 5.68675 | 5.60634 | 5.78174 | 5.60884 | 6.70205 | 5.90423 | 5.67111 | 5.76451 | 5.99871 |
| YAE1D1    | 9.06251 | 9.42274 | 9.31478 | 8.39671 | 7.18297 | 7.33302 | 9.09754 | 7.91207 | 8.55181 |
| LOC646999 | 3.89633 | 3.76008 | 3.96356 | 4.04014 | 4.16532 | 4.32556 | 4.11296 | 4.23831 | 4.39046 |
| RALA      | 7.28071 | 7.25063 | 7.31398 | 7.70964 | 6.32659 | 8.34889 | 8.22245 | 8.67817 | 8.65273 |
| LINC00265 | 8.04586 | 7.90849 | 7.88795 | 7.21662 | 7.46795 | 6.68176 | 7.14205 | 7.78827 | 7.80802 |
| CDK13     | 9.83326 | 9.82102 | 9.73203 | 8.68431 | 6.49193 | 8.56651 | 9.04878 | 8.69881 | 9.44052 |
| SUGCT     | 5.90047 | 5.71782 | 5.99633 | 5.01165 | 6.49431 | 5.56115 | 5.96069 | 5.79688 | 5.81608 |
| INHBA-AS1 | 4.92804 | 4.95783 | 4.72739 | 4.95756 | 6.20854 | 4.88465 | 4.75779 | 5.04598 | 4.96535 |
| MRPL32    | 6.94964 | 6.86524 | 6.67937 | 7.30969 | 6.54326 | 7.06416 | 7.25322 | 6.71264 | 7.07378 |

|           |         |         |         |         |         |         |         |         |         |
|-----------|---------|---------|---------|---------|---------|---------|---------|---------|---------|
| MIR3943   | 3.3057  | 3.68271 | 3.68861 | 4.04613 | 4.08075 | 4.32903 | 4.07498 | 3.94294 | 4.55783 |
| STK17A    | 8.06456 | 7.42133 | 7.58649 | 10.2714 | 7.98973 | 10.3952 | 10.234  | 11.1701 | 11.1987 |
| BLVRA     | 7.28638 | 7.20659 | 6.96775 | 7.1331  | 6.4713  | 7.43296 | 7.65724 | 6.85829 | 6.87118 |
| ube2d4    | 6.62677 | 7.16276 | 6.77853 | 6.21279 | 6.40894 | 6.0644  | 6.64005 | 6.05987 | 6.13642 |
| Spdye1    | 6.47027 | 6.12851 | 6.15622 | 6.72272 | 8.79185 | 6.47812 | 6.59684 | 6.484   | 7.21751 |
| LINC00957 | 6.1919  | 6.20751 | 6.50789 | 6.366   | 6.45433 | 5.7897  | 6.71699 | 6.61277 | 6.366   |
| DBNL      | 7.90085 | 7.9068  | 7.83407 | 8.41679 | 7.07234 | 8.40683 | 8.72909 | 8.67952 | 8.81487 |
| AEBP1     | 7.74426 | 7.90849 | 7.82868 | 7.83153 | 8.01301 | 7.66048 | 7.6156  | 7.75113 | 7.45992 |
| YKT6      | 7.45326 | 7.67338 | 7.42315 | 8.09546 | 6.47372 | 8.35329 | 8.14432 | 8.14609 | 8.48056 |
| OGDH      | 9.86275 | 9.39635 | 9.4945  | 9.67058 | 7.10586 | 9.30642 | 10.2406 | 9.71844 | 10.3114 |
| PPIA      | 7.69434 | 7.86212 | 8.07377 | 7.11028 | 5.80137 | 6.81098 | 8.03783 | 6.82174 | 6.89371 |
| CCM2      | 6.30373 | 6.07437 | 5.67514 | 5.82677 | 5.49218 | 5.46715 | 5.72224 | 5.99437 | 7.00388 |
| RAMP3     | 6.46571 | 6.84545 | 7.11421 | 6.79294 | 7.2072  | 7.0056  | 6.75142 | 6.85318 | 7.07077 |
| ADCY1     | 5.97954 | 6.09069 | 6.24588 | 6.49491 | 6.84429 | 6.72627 | 6.52132 | 6.31262 | 6.3733  |
| IGFBP1    | 4.28768 | 4.46819 | 4.41265 | 5.41326 | 4.85425 | 5.44063 | 4.73677 | 5.17369 | 5.1504  |
| C7orf65   | 7.08274 | 6.85006 | 6.90705 | 7.2358  | 7.60427 | 7.35563 | 7.08761 | 7.12669 | 7.19436 |
| LINC00525 | 4.8083  | 5.3091  | 5.216   | 4.81411 | 6.45311 | 4.80032 | 4.53318 | 5.35068 | 4.93703 |
| C7orf69   | 3.01591 | 3.14759 | 2.91899 | 3.83086 | 3.85444 | 3.3984  | 3.54314 | 3.83598 | 3.29188 |
| c7orf57   | 5.68232 | 5.79529 | 5.48023 | 6.51925 | 6.65948 | 7.18952 | 6.49318 | 6.94009 | 6.48221 |
| UPP1      | 6.22506 | 5.68387 | 5.70516 | 9.58927 | 9.13347 | 11.0257 | 9.51313 | 11.1817 | 10.8432 |
| CDC14C    | 4.12121 | 4.11615 | 3.88529 | 4.71443 | 5.11085 | 5.21446 | 5.00156 | 4.85315 | 4.93196 |
| VWC2      | 7.34585 | 6.01854 | 6.59244 | 6.1062  | 5.70411 | 5.84881 | 5.99749 | 5.69727 | 6.07892 |
| C7orf72   | 3.40409 | 3.35282 | 3.44822 | 3.88993 | 4.02525 | 4.40058 | 3.79568 | 3.57135 | 3.4141  |
| IKZF1     | 5.81813 | 5.61032 | 6.59432 | 5.72139 | 6.14552 | 5.94406 | 5.79512 | 5.62209 | 5.72666 |
| DDC-AS1   | 6.32403 | 6.68857 | 6.48571 | 6.88738 | 8.02463 | 7.06007 | 6.3784  | 6.89957 | 6.99289 |
| POM121L12 | 5.53859 | 5.67533 | 5.81319 | 6.33626 | 6.63128 | 6.87481 | 5.91593 | 6.5159  | 6.316   |



|              |         |         |         |         |         |         |         |         |         |
|--------------|---------|---------|---------|---------|---------|---------|---------|---------|---------|
| VSTM2A       | 5.10984 | 5.19166 | 5.61275 | 5.6822  | 6.56668 | 6.16532 | 5.94479 | 5.85241 | 6.14777 |
| VSTM2A-OT1   | 4.25208 | 4.53681 | 4.35519 | 4.33857 | 4.60092 | 5.00444 | 4.16282 | 4.26627 | 4.52921 |
| EGFR         | 10.8384 | 10.5901 | 11.013  | 9.47404 | 7.59815 | 9.7616  | 9.88073 | 10.2279 | 10.0646 |
| LANCL2       | 7.75379 | 7.59991 | 7.83552 | 7.36172 | 5.7506  | 7.00815 | 7.95352 | 6.26973 | 7.15357 |
| ZNF713       | 6.1814  | 6.56069 | 5.97707 | 5.44487 | 5.92552 | 5.38783 | 5.23119 | 5.19863 | 5.40204 |
| GBAS         | 7.83507 | 7.36882 | 7.91851 | 6.53689 | 5.34523 | 6.45821 | 7.13464 | 6.4074  | 6.15428 |
| MRPS17       | 7.17284 | 7.00843 | 6.9613  | 8.21849 | 6.28013 | 7.48398 | 8.19955 | 7.09712 | 7.2122  |
| SUMF2        | 9.72499 | 9.57126 | 9.65022 | 9.44232 | 7.8897  | 8.55184 | 9.62519 | 8.7344  | 8.89251 |
| DKFZp434L192 | 5.00597 | 4.94762 | 4.97027 | 4.97275 | 5.43585 | 5.52661 | 5.17909 | 5.24967 | 5.13661 |
| MIR3147      | 5.86613 | 6.15933 | 5.47177 | 7.81343 | 7.73606 | 7.27925 | 7.17665 | 7.81826 | 7.42451 |
| ZNF716       | 3.28505 | 2.97423 | 2.83771 | 3.89558 | 4.1399  | 3.4179  | 3.67637 | 3.19822 | 3.33613 |
| MIR4283-1    | 5.21082 | 5.21074 | 5.41284 | 5.86025 | 7.08172 | 5.87614 | 5.73892 | 5.74418 | 5.85214 |
| ZNF727       | 6.81092 | 6.87819 | 6.5193  | 5.37022 | 6.24161 | 6.11072 | 5.10451 | 5.1522  | 5.07148 |
| ZNF735       | 3.52522 | 3.21583 | 2.80057 | 4.01718 | 4.06257 | 4.22277 | 3.47758 | 4.22377 | 4.22803 |
| ZNF679       | 3.63539 | 3.28742 | 3.24984 | 3.93674 | 4.76762 | 3.48651 | 3.3459  | 3.90522 | 3.92833 |
| ZNF736       | 7.41687 | 7.42672 | 7.32458 | 6.6863  | 6.4454  | 6.47199 | 6.70344 | 7.36919 | 7.3658  |
| LOC641746    | 3.94306 | 4.26689 | 4.00561 | 4.41128 | 4.40588 | 4.22617 | 4.87734 | 4.23145 | 5.06441 |
| ZNF107       | 7.75584 | 8.22572 | 8.10413 | 7.16711 | 7.34504 | 6.86124 | 7.08663 | 5.93278 | 6.30508 |
| ZNF138       | 8.73663 | 8.65329 | 8.72705 | 6.88081 | 7.80399 | 6.07478 | 7.46047 | 7.50541 | 6.69348 |
| ZNF273       | 7.06558 | 7.35969 | 7.40275 | 6.81832 | 6.51115 | 5.88529 | 6.7719  | 6.90072 | 6.21531 |
| ZNF92        | 5.62305 | 5.22793 | 4.99395 | 3.93095 | 3.68392 | 4.12484 | 5.29561 | 4.24779 | 4.36655 |
| LOC441242    | 5.8531  | 6.11665 | 6.08328 | 6.54228 | 7.93285 | 6.71421 | 6.45083 | 6.65509 | 6.63252 |
| INTS4P2      | 8.06041 | 7.92147 | 8.3145  | 8.03469 | 8.84337 | 7.3315  | 8.18429 | 8.05163 | 7.8137  |
| ASL          | 6.82257 | 6.66312 | 7.04283 | 7.69397 | 6.55032 | 8.18622 | 7.84597 | 7.6033  | 7.53788 |
| CRCP         | 7.69983 | 7.24902 | 7.40328 | 6.90392 | 5.54978 | 7.38486 | 7.57054 | 6.97025 | 7.30061 |
| TPST1        | 7.51287 | 7.42851 | 7.6271  | 7.36864 | 6.71625 | 6.7915  | 7.37054 | 7.43406 | 7.28845 |

|            |         |         |         |         |         |         |         |         |         |
|------------|---------|---------|---------|---------|---------|---------|---------|---------|---------|
| KCTD7      | 7.38538 | 7.22365 | 7.26648 | 6.80499 | 7.07401 | 7.03423 | 6.61675 | 7.79503 | 7.36412 |
| RABGEF1    | 8.86483 | 8.82627 | 8.90086 | 9.13604 | 7.62976 | 9.3589  | 8.93781 | 9.34856 | 9.71224 |
| TMEM248    | 8.89664 | 8.90375 | 9.18663 | 8.82813 | 7.7761  | 8.4133  | 8.88755 | 8.74032 | 8.95384 |
| TYW1       | 7.72773 | 7.43174 | 7.67643 | 6.57645 | 6.19232 | 6.92904 | 6.43974 | 6.95024 | 6.97525 |
| STAG3L4    | 6.61544 | 7.44844 | 7.05274 | 6.35754 | 6.00659 | 4.77753 | 5.55045 | 7.52752 | 6.41615 |
| AUTS2      | 7.48927 | 7.40606 | 7.1628  | 6.60092 | 5.64869 | 6.09679 | 5.87836 | 6.0968  | 5.98232 |
| WBSCR17    | 5.80675 | 5.96364 | 5.94376 | 6.06346 | 6.36202 | 6.51882 | 5.84895 | 6.16987 | 6.10344 |
| MIR3914-1  | 2.20534 | 2.26112 | 1.89496 | 2.59565 | 1.87458 | 2.32628 | 2.28548 | 2.02705 | 2.27099 |
| MIR4650-1  | 3.74383 | 3.87381 | 4.2322  | 3.95145 | 4.67448 | 4.28455 | 4.12657 | 3.82124 | 4.07754 |
| SBDSP1     | 6.07572 | 6.418   | 6.18368 | 6.43061 | 7.14343 | 6.67531 | 6.64932 | 5.90488 | 6.1378  |
| pom121     | 8.60104 | 8.44079 | 8.48324 | 7.83712 | 8.19793 | 7.10182 | 7.77054 | 7.56534 | 7.60496 |
| PMS2P2     | 11.3099 | 11.2174 | 11.3868 | 9.21381 | 9.30918 | 8.58557 | 9.47818 | 8.83027 | 9.1672  |
| NCF1B      | 4.98361 | 5.45136 | 5.3178  | 5.50674 | 5.94123 | 5.24179 | 5.38208 | 5.99618 | 6.41905 |
| FZD9       | 4.68171 | 4.95401 | 5.06922 | 5.31648 | 4.99222 | 5.38797 | 4.89961 | 4.86585 | 4.87618 |
| VPS37D     | 5.41915 | 5.8047  | 5.49798 | 6.53903 | 6.04604 | 6.25569 | 6.67914 | 5.87279 | 6.28446 |
| WBSCR22    | 7.28763 | 7.14135 | 7.21176 | 7.04166 | 7.08369 | 7.2402  | 7.22229 | 7.23568 | 7.37342 |
| ABHD11-AS1 | 6.05792 | 6.10896 | 5.82875 | 6.82686 | 5.91076 | 6.46955 | 6.10067 | 6.40585 | 6.26882 |
| ABHD11     | 4.78136 | 4.81195 | 4.77462 | 4.91137 | 4.17    | 4.99497 | 5.30485 | 4.83407 | 4.53661 |
| CLDN4      | 5.93593 | 6.35758 | 5.86556 | 7.55025 | 8.03183 | 7.89858 | 7.55018 | 8.03704 | 7.63767 |
| WBSCR28    | 4.99039 | 5.3562  | 5.30924 | 5.42059 | 5.65703 | 5.52005 | 4.86972 | 5.30175 | 5.65703 |
| ELN        | 6.22384 | 6.37959 | 6.50917 | 6.01657 | 6.14668 | 6.32668 | 6.09154 | 6.11188 | 6.1592  |
| LIMK1      | 6.86026 | 6.69912 | 6.79267 | 7.82276 | 6.61667 | 8.13653 | 7.81714 | 7.56298 | 7.30021 |
| EIF4H      | 11.1868 | 11.0623 | 10.815  | 10.9231 | 9.94523 | 11.0541 | 10.8277 | 11.1521 | 10.8407 |
| Mir590     | 9.26514 | 8.60974 | 8.57946 | 6.80732 | 4.05514 | 4.37134 | 5.60328 | 8.07327 | 7.66604 |
| CLIP2      | 7.19111 | 6.85909 | 7.14473 | 6.98938 | 6.95822 | 7.28633 | 6.8889  | 7.21326 | 6.99029 |
| GTF2IRD1   | 8.43561 | 8.35184 | 8.16789 | 8.26115 | 6.7597  | 9.15576 | 8.58264 | 7.73367 | 8.52718 |

|                            |         |         |         |         |         |         |         |         |         |
|----------------------------|---------|---------|---------|---------|---------|---------|---------|---------|---------|
| GTF2I                      | 9.44653 | 9.4048  | 9.29456 | 7.95937 | 5.9952  | 7.36647 | 8.28125 | 7.91451 | 7.49523 |
| PMS2P5                     | 6.60841 | 6.61618 | 6.4677  | 6.87016 | 6.25874 | 6.56149 | 6.38782 | 6.33721 | 6.27848 |
| SPDYE5                     | 4.89957 | 4.71886 | 4.51357 | 4.38719 | 5.34058 | 4.1135  | 4.4649  | 4.69706 | 4.55691 |
| RCC1L                      | 7.40397 | 7.40021 | 7.45856 | 7.60051 | 7.45594 | 7.48005 | 7.69086 | 7.40815 | 7.40428 |
| STAG3L1                    | 7.14458 | 7.28157 | 7.18096 | 5.93996 | 6.85929 | 6.34762 | 6.42541 | 6.48172 | 6.37353 |
| rhbdd2                     | 7.55979 | 7.67959 | 7.68481 | 8.01952 | 7.75135 | 8.17898 | 8.54054 | 7.85342 | 8.12041 |
| POR                        | 6.9114  | 6.92611 | 6.53657 | 7.20609 | 6.82591 | 8.2515  | 7.37279 | 8.14637 | 7.40853 |
| SRRM3                      | 6.5387  | 6.55505 | 6.48706 | 7.1245  | 6.84629 | 7.52453 | 6.97078 | 7.21997 | 7.06501 |
| HSPB1                      | 13.5431 | 12.7536 | 13.0636 | 13.4527 | 13.298  | 13.1606 | 13.4783 | 13.3737 | 13.4208 |
| ZP3                        | 6.29029 | 6.52058 | 6.3779  | 6.65935 | 6.33252 | 6.67068 | 7.03787 | 6.26971 | 6.44484 |
| DTX2                       | 7.5795  | 7.60252 | 7.47363 | 7.07367 | 7.252   | 7.01041 | 7.14512 | 7.27801 | 6.96067 |
| upk3b                      | 6.45331 | 6.64167 | 6.71257 | 6.69525 | 6.76848 | 6.57503 | 6.19413 | 6.29155 | 6.14128 |
| LOC100133091               | 9.69381 | 9.59281 | 9.52083 | 7.29989 | 9.2196  | 6.99273 | 7.08432 | 9.19422 | 9.07457 |
| DTX2P1-UPK3BP1-<br>PMS2P11 | 8.83144 | 9.0162  | 8.92479 | 8.37592 | 8.60874 | 8.43839 | 8.42449 | 8.4548  | 8.55199 |
| PMS2P9                     | 8.42678 | 8.16404 | 8.73204 | 5.85978 | 6.31895 | 4.55516 | 5.45532 | 6.66399 | 6.68576 |
| CCDC146                    | 8.33878 | 8.96402 | 8.45709 | 5.83231 | 5.71733 | 5.68864 | 6.20687 | 5.0779  | 5.35662 |
| RSBN1L                     | 6.69847 | 6.77138 | 6.77829 | 6.35067 | 5.35442 | 5.74189 | 6.19276 | 6.45644 | 6.0015  |
| PHTF2                      | 7.54957 | 7.81013 | 7.73571 | 6.85459 | 5.47499 | 6.3506  | 7.09117 | 7.90042 | 6.93428 |
| RPL13AP17                  | 3.77499 | 3.99706 | 3.98142 | 4.40839 | 4.64303 | 4.51493 | 4.12735 | 4.3303  | 4.23272 |
| MAGI2-AS2                  | 2.76679 | 2.90623 | 2.66941 | 2.99104 | 3.72581 | 3.01497 | 2.92414 | 2.97958 | 2.98551 |
| MAGI2-AS3                  | 6.30272 | 6.22568 | 6.55757 | 5.56446 | 5.73087 | 5.48523 | 5.45553 | 6.20268 | 6.18673 |
| CD36                       | 9.57232 | 9.1218  | 8.68032 | 8.53877 | 7.2703  | 7.39912 | 7.48928 | 4.87844 | 5.29375 |
| DMTF1                      | 9.33467 | 9.40018 | 9.04071 | 7.80186 | 6.44256 | 7.13914 | 7.53004 | 8.17455 | 8.64122 |
| CROT                       | 8.72931 | 7.73187 | 8.70612 | 6.76731 | 5.57064 | 5.86662 | 7.56973 | 6.80217 | 6.64502 |
| RUNDC3B                    | 6.1065  | 5.83271 | 6.42611 | 6.05582 | 5.85394 | 5.83028 | 5.95041 | 5.60096 | 6.2151  |

|           |         |         |         |         |         |         |         |         |         |
|-----------|---------|---------|---------|---------|---------|---------|---------|---------|---------|
| DBF4      | 6.59414 | 6.42164 | 6.6686  | 5.90119 | 5.16285 | 5.33385 | 6.1675  | 5.43759 | 5.13917 |
| ADAM22    | 4.65725 | 4.3783  | 4.3988  | 4.43377 | 5.10924 | 4.43091 | 4.42888 | 4.38847 | 4.21861 |
| ZNF804B   | 5.7121  | 5.7293  | 5.8475  | 6.39936 | 6.28947 | 6.06427 | 6.31069 | 6.14406 | 5.94411 |
| DPY19L2P4 | 3.82277 | 3.89048 | 3.89092 | 4.18476 | 3.77394 | 3.58731 | 3.89955 | 3.74984 | 3.69937 |
| STEAP1    | 4.22978 | 3.24515 | 4.43331 | 3.40144 | 3.59008 | 3.69297 | 3.93788 | 4.01677 | 4.49816 |
| CFAP69    | 5.68235 | 5.22042 | 6.03619 | 4.72299 | 4.54124 | 4.62678 | 4.85067 | 4.59393 | 4.70858 |
| GTPBP10   | 8.44701 | 8.57461 | 8.59582 | 7.14861 | 6.50302 | 6.84828 | 8.14002 | 7.40019 | 7.23573 |
| CLDN12    | 5.84587 | 5.69802 | 5.84537 | 5.61782 | 6.57758 | 5.27471 | 6.18237 | 6.80272 | 6.41226 |
| CDK14     | 7.18553 | 6.89793 | 7.03027 | 7.10332 | 6.41501 | 6.76253 | 7.30391 | 7.17354 | 7.49769 |
| FZD1      | 8.70733 | 8.35811 | 9.08661 | 8.3701  | 6.76437 | 7.67013 | 8.50642 | 7.45728 | 6.94989 |
| AKAP9     | 9.20018 | 9.33929 | 9.1676  | 7.36059 | 5.73053 | 6.91909 | 7.60907 | 8.60168 | 7.84104 |
| ANKIB1    | 10.1756 | 10.2537 | 9.98307 | 9.0453  | 7.04549 | 8.57263 | 9.2233  | 8.99786 | 9.12761 |
| GATAD1    | 8.3908  | 8.77446 | 8.31041 | 7.34305 | 5.99133 | 6.72253 | 7.39631 | 6.78991 | 6.84535 |
| RBM48     | 6.32078 | 6.12761 | 6.27094 | 5.69862 | 4.6161  | 5.38072 | 5.60835 | 5.61499 | 6.19216 |
| VPS50     | 7.56109 | 7.41119 | 7.48332 | 6.8284  | 4.9912  | 6.58133 | 7.32276 | 6.51294 | 7.03342 |
| CASD1     | 8.26725 | 8.13375 | 8.20153 | 6.97348 | 5.79584 | 6.01163 | 7.36175 | 6.39921 | 6.6686  |
| PEG10     | 6.09416 | 6.10981 | 5.92562 | 6.1413  | 6.72373 | 5.88812 | 6.17418 | 5.81009 | 5.91557 |
| ASB4      | 4.63533 | 5.24056 | 4.64652 | 5.1224  | 5.9496  | 5.55865 | 5.03297 | 5.23005 | 5.04642 |
| DLX6      | 6.37561 | 6.86185 | 6.78178 | 6.82146 | 6.24799 | 6.84517 | 6.57792 | 6.64319 | 6.51546 |
| SDHAF3    | 6.25862 | 6.36499 | 6.51468 | 6.10976 | 4.21927 | 5.40448 | 6.8845  | 5.63428 | 5.80072 |
| LMTK2     | 8.77904 | 8.32861 | 8.56696 | 8.44118 | 6.54252 | 9.26987 | 8.74306 | 10.2764 | 9.40349 |
| bri3      | 6.33036 | 6.31718 | 6.19611 | 6.27494 | 5.99639 | 6.29294 | 6.86624 | 6.2217  | 6.21333 |
| NPTX2     | 5.95152 | 6.40269 | 6.56046 | 6.99008 | 6.88509 | 6.782   | 6.81538 | 6.82619 | 7.05712 |
| TRRAP     | 8.72195 | 8.79549 | 8.74215 | 7.66363 | 6.1861  | 7.24155 | 7.65031 | 7.56341 | 7.75101 |
| MIR3609   | 3.14711 | 3.05378 | 3.46235 | 3.1861  | 2.56576 | 2.93973 | 2.88073 | 2.93423 | 2.63441 |
| BUD31     | 7.79257 | 7.77318 | 7.29823 | 8.17177 | 7.36207 | 8.75294 | 8.52626 | 8.79168 | 8.08047 |

|                            |         |         |         |         |         |         |         |         |         |
|----------------------------|---------|---------|---------|---------|---------|---------|---------|---------|---------|
| ZNF789                     | 6.47024 | 6.56846 | 6.63599 | 5.69979 | 5.78437 | 5.05179 | 5.69804 | 5.70592 | 5.76906 |
| ZKSCAN5                    | 6.13134 | 6.42079 | 6.11531 | 5.93113 | 5.50136 | 5.63488 | 6.1928  | 5.9933  | 6.28281 |
| ZNF655                     | 8.54908 | 8.06492 | 8.3125  | 8.04577 | 6.99615 | 7.75542 | 8.00481 | 7.35052 | 8.39562 |
| GS1-259H13.2               | 6.48219 | 6.49754 | 6.81936 | 6.08906 | 7.05926 | 6.03359 | 6.6555  | 6.71547 | 6.18952 |
| ZSCAN25                    | 6.79318 | 6.86671 | 7.00411 | 6.41528 | 6.67312 | 6.5283  | 6.67701 | 6.21432 | 6.19362 |
| ZKSCAN1                    | 9.55785 | 9.64442 | 9.51828 | 8.45927 | 6.95114 | 9.47512 | 8.75066 | 9.50057 | 8.85083 |
| ZSCAN21                    | 7.64687 | 7.64461 | 7.30103 | 7.37853 | 6.56059 | 7.03939 | 7.2989  | 6.72491 | 7.02768 |
| COPS6                      | 8.95733 | 8.94996 | 8.87418 | 9.39207 | 8.20021 | 8.80057 | 9.15172 | 9.3185  | 9.02218 |
| CNPY4                      | 5.87987 | 5.89904 | 5.70882 | 6.26264 | 5.85038 | 5.81195 | 6.03323 | 5.93838 | 5.92639 |
| MBLAC1                     | 5.1856  | 5.35392 | 5.38896 | 5.76012 | 6.07823 | 5.90691 | 5.66461 | 5.79061 | 5.77215 |
| LAMTOR4                    | 7.02051 | 7.05194 | 7.01338 | 7.35733 | 7.18772 | 7.04162 | 7.19358 | 6.64605 | 6.77795 |
| STAG3                      | 5.64502 | 5.5872  | 5.71558 | 5.97434 | 7.10752 | 6.06463 | 5.62576 | 5.77903 | 5.76062 |
| PVRIG                      | 5.70759 | 5.21337 | 5.62806 | 5.30111 | 5.61314 | 5.15405 | 5.23731 | 5.7372  | 5.40769 |
| SPDYE3                     | 3.5788  | 3.92389 | 4.00242 | 4.06197 | 4.28812 | 4.25906 | 4.60835 | 3.53307 | 3.70061 |
| STAG3L5P-PVRIG2P-<br>PILRB | 8.01111 | 7.8665  | 7.96584 | 7.93149 | 6.92997 | 6.38413 | 6.95513 | 7.7438  | 7.02606 |
| PILRA                      | 5.02121 | 5.23866 | 5.72716 | 5.65703 | 5.88284 | 5.83032 | 5.59152 | 4.91062 | 5.25452 |
| MEPCE                      | 8.08214 | 7.81591 | 8.02214 | 8.27337 | 6.38507 | 7.5957  | 8.35249 | 7.26491 | 7.62433 |
| NYAP1                      | 6.0953  | 6.22397 | 6.15423 | 6.9285  | 6.79655 | 6.99183 | 7.0663  | 6.76456 | 6.64269 |
| AGFG2                      | 8.10474 | 7.76797 | 7.84442 | 7.20207 | 6.97679 | 6.52724 | 7.02081 | 7.00481 | 6.43569 |
| FBXO24                     | 5.44966 | 5.79032 | 5.72557 | 5.98638 | 6.04313 | 6.15354 | 6.15163 | 6.09602 | 5.95048 |
| PCOLCE                     | 8.3565  | 7.73872 | 7.91974 | 9.09175 | 7.8629  | 7.47058 | 8.39528 | 7.40459 | 7.50222 |
| MOSPD3                     | 8.50106 | 8.01386 | 8.13471 | 8.80645 | 8.43239 | 8.6778  | 8.81586 | 7.60434 | 8.08268 |
| EPO                        | 6.43027 | 6.49845 | 6.36363 | 7.04028 | 6.84857 | 7.37749 | 6.4194  | 6.82342 | 6.64617 |
| ZAN                        | 5.60072 | 5.83478 | 5.82478 | 6.11493 | 5.89943 | 6.02326 | 6.1249  | 6.21809 | 6.18343 |
| TRIP6                      | 8.64385 | 8.01917 | 8.22631 | 9.10666 | 6.68306 | 7.88872 | 9.16616 | 7.63055 | 8.08039 |

|         |         |         |         |         |         |         |         |         |         |
|---------|---------|---------|---------|---------|---------|---------|---------|---------|---------|
| SRRT    | 7.26035 | 6.93492 | 6.97954 | 6.88626 | 5.95659 | 6.68194 | 7.06582 | 6.72962 | 6.81321 |
| TRIM56  | 7.08813 | 7.52209 | 7.03448 | 6.74414 | 6.35641 | 6.53502 | 6.56114 | 6.59496 | 6.67153 |
| MIR4653 | 7.36539 | 7.38359 | 6.93256 | 6.65816 | 6.33252 | 5.94445 | 5.92426 | 7.01628 | 7.56429 |
| COL26A1 | 6.35904 | 6.38313 | 6.44918 | 7.63169 | 7.18261 | 7.71078 | 6.91938 | 7.40321 | 7.29279 |
| CUX1    | 8.12406 | 8.13754 | 8.13956 | 8.13868 | 6.39891 | 8.89797 | 8.90949 | 8.4893  | 8.81989 |
| SH2B2   | 5.92436 | 5.67172 | 5.68839 | 6.25683 | 6.10735 | 6.37112 | 5.90733 | 6.12899 | 5.98664 |
| MIR4285 | 2.39946 | 2.89095 | 2.44231 | 3.01908 | 2.09765 | 4.29496 | 3.61075 | 2.98248 | 3.07024 |
| PRKRIP1 | 9.02091 | 8.7643  | 8.41107 | 8.26044 | 6.83925 | 8.16399 | 7.94328 | 8.02551 | 7.88397 |
| ORAI2   | 6.62684 | 6.48217 | 6.7352  | 6.68903 | 7.24291 | 7.21373 | 6.86506 | 6.9331  | 6.74185 |
| LRWD1   | 6.60566 | 6.30653 | 6.43556 | 7.1922  | 6.79125 | 7.1378  | 7.19008 | 6.89656 | 6.91611 |
| SPDYE2  | 7.0213  | 6.95373 | 7.31679 | 6.66353 | 9.07646 | 6.35961 | 6.54956 | 6.63296 | 7.23291 |
| LRRC17  | 5.01326 | 4.78212 | 5.11615 | 5.6815  | 4.01513 | 4.18278 | 4.00439 | 4.35691 | 4.47216 |
| NFE4    | 3.99192 | 3.99547 | 3.62578 | 3.9151  | 4.94835 | 4.75227 | 3.78006 | 3.43901 | 3.80232 |
| ARMC10  | 8.05162 | 8.41737 | 8.37788 | 7.28393 | 5.90449 | 6.52832 | 7.94134 | 6.48144 | 7.03297 |
| PMPCB   | 9.84208 | 9.65084 | 9.93449 | 8.86948 | 6.83373 | 8.62441 | 9.1623  | 8.80537 | 8.83305 |
| LHFPL3  | 4.0197  | 4.05261 | 3.91244 | 4.44963 | 5.46878 | 4.59442 | 3.99924 | 4.08188 | 4.26512 |
| RINT1   | 8.45206 | 8.36084 | 8.38362 | 7.40679 | 6.31654 | 7.15975 | 8.06311 | 7.95959 | 7.8703  |
| CDHR3   | 5.71094 | 5.59591 | 5.70406 | 4.99417 | 6.06681 | 4.9638  | 5.18457 | 5.14706 | 5.47664 |
| HBP1    | 7.90817 | 7.6196  | 7.62938 | 7.0039  | 5.88249 | 7.49471 | 7.20617 | 7.37377 | 7.2242  |
| GPR22   | 4.33214 | 4.64753 | 4.60342 | 4.59588 | 4.31969 | 4.4099  | 4.34211 | 4.61812 | 4.34523 |
| DUS4L   | 7.19615 | 7.30076 | 7.34631 | 6.22351 | 5.89592 | 6.27993 | 6.75669 | 6.23422 | 6.13382 |
| BCAP29  | 6.93528 | 7.01748 | 7.10462 | 6.60698 | 5.34242 | 6.75436 | 6.99936 | 7.16028 | 7.2887  |
| DLD     | 8.0676  | 7.92954 | 8.20151 | 7.87131 | 6.13283 | 7.49462 | 8.44098 | 7.448   | 7.28073 |
| LRRN3   | 5.75443 | 5.00821 | 5.64701 | 5.59756 | 5.67318 | 5.13343 | 5.28448 | 5.84475 | 6.14237 |
| ZNF277  | 7.81772 | 7.65366 | 8.06036 | 6.4331  | 5.57599 | 7.17272 | 7.24416 | 7.54089 | 6.92647 |
| IFRD1   | 8.3592  | 7.77138 | 7.11799 | 7.4658  | 7.30181 | 7.40135 | 6.87167 | 9.84045 | 7.91186 |

|              |         |         |         |         |         |         |         |         |         |
|--------------|---------|---------|---------|---------|---------|---------|---------|---------|---------|
| LSMEM1       | 6.86145 | 6.20023 | 5.91733 | 5.83966 | 5.62525 | 5.60837 | 5.38522 | 8.10721 | 6.34677 |
| FOXP2        | 8.04387 | 8.16576 | 7.93694 | 6.87641 | 6.07055 | 6.05283 | 7.09076 | 5.94517 | 6.5073  |
| MIR3666      | 7.19006 | 7.4373  | 7.25591 | 6.94179 | 7.44485 | 7.14373 | 6.70138 | 7.05316 | 6.94711 |
| MDFIC        | 6.54424 | 6.617   | 6.58042 | 6.24247 | 5.23247 | 6.13374 | 6.82308 | 5.82891 | 6.64152 |
| TES          | 8.8932  | 8.45195 | 8.58372 | 9.52607 | 6.95278 | 9.65376 | 9.46899 | 9.49883 | 9.66239 |
| MET          | 8.32424 | 7.36955 | 7.95824 | 8.5752  | 6.61643 | 9.16916 | 8.39069 | 8.90422 | 8.92391 |
| ST7          | 7.39014 | 7.37689 | 7.31399 | 6.84562 | 7.2995  | 6.12453 | 7.03101 | 6.62137 | 7.14516 |
| ST7-OT4      | 8.01091 | 7.17028 | 7.38613 | 6.11591 | 6.06686 | 5.35209 | 5.8437  | 6.82209 | 6.85336 |
| ANKRD7       | 4.09571 | 4.13097 | 4.0719  | 3.71696 | 4.63606 | 4.07766 | 3.9406  | 4.16389 | 4.15725 |
| CPED1        | 7.17917 | 7.35791 | 7.31961 | 5.78925 | 6.83737 | 5.33639 | 5.77297 | 6.0894  | 6.05877 |
| FEZF1-AS1    | 4.83364 | 4.75371 | 4.51912 | 5.30245 | 5.32148 | 5.23225 | 5.01591 | 5.13785 | 5.28664 |
| ASB15        | 3.13769 | 3.26331 | 3.28544 | 3.17062 | 4.15702 | 3.56593 | 3.27473 | 3.24459 | 3.26846 |
| LMOD2        | 4.73159 | 5.03597 | 4.83836 | 5.67089 | 5.71135 | 5.82948 | 5.57508 | 5.54852 | 6.12236 |
| HYALP1       | 2.62585 | 2.55197 | 2.8604  | 2.54869 | 2.98101 | 3.22881 | 3.13684 | 2.58928 | 2.57044 |
| hyal4        | 5.78368 | 6.37742 | 5.63813 | 6.25623 | 5.72465 | 5.14512 | 5.51442 | 5.3274  | 5.0873  |
| ARF5         | 8.26458 | 7.98157 | 8.32548 | 8.44729 | 7.75685 | 8.46263 | 8.52157 | 7.87602 | 8.43769 |
| SND1         | 8.74902 | 8.03781 | 8.48159 | 8.31877 | 7.57379 | 8.32708 | 8.38042 | 8.24025 | 8.51136 |
| MIR593       | 7.79084 | 7.76814 | 7.9686  | 8.21555 | 9.62548 | 8.72305 | 8.23593 | 8.42355 | 8.37101 |
| mir129-1     | 4.85203 | 4.961   | 4.83903 | 5.12638 | 5.79967 | 5.80947 | 5.81428 | 4.92162 | 4.61443 |
| LEP          | 5.02937 | 5.13912 | 5.42086 | 5.26258 | 6.23834 | 7.4916  | 5.82279 | 5.79315 | 5.91231 |
| HILPDA       | 7.94227 | 8.2946  | 7.20987 | 8.42377 | 10.3241 | 11.4889 | 8.52917 | 11.5451 | 9.38905 |
| CALU         | 8.61148 | 8.22359 | 8.88988 | 8.72291 | 6.03277 | 8.43657 | 8.84849 | 10.2023 | 9.72309 |
| CCDC136      | 5.53815 | 5.68419 | 5.3745  | 5.95053 | 6.32972 | 6.48165 | 5.99521 | 6.30933 | 5.83177 |
| LOC100130705 | 5.66583 | 6.07324 | 5.63998 | 6.20344 | 5.59693 | 6.02421 | 5.53345 | 5.67809 | 5.79555 |
| IRF5         | 5.95894 | 6.36328 | 6.02792 | 6.8013  | 6.20139 | 7.0795  | 7.17981 | 6.56459 | 6.61271 |
| TPI1P2       | 6.19463 | 6.64827 | 6.01845 | 6.26675 | 6.18532 | 6.24893 | 6.36678 | 5.74832 | 5.92262 |

|              |         |         |         |         |         |         |         |         |         |
|--------------|---------|---------|---------|---------|---------|---------|---------|---------|---------|
| LOC407835    | 7.10871 | 7.31176 | 7.08064 | 8.11023 | 8.1722  | 8.1691  | 8.18508 | 7.64702 | 8.10745 |
| TSPAN33      | 6.26907 | 6.29765 | 6.16952 | 5.96567 | 6.63274 | 6.07484 | 6.02585 | 5.98434 | 5.96807 |
| AHCYL2       | 9.10679 | 9.41503 | 9.1632  | 7.71457 | 6.89869 | 6.87595 | 8.0313  | 7.634   | 8.1831  |
| NRF1         | 7.18503 | 7.29735 | 7.23329 | 6.64305 | 6.03267 | 7.28259 | 7.12707 | 7.7817  | 7.10536 |
| KLHDC10      | 9.14784 | 9.13618 | 9.15378 | 8.92473 | 7.08144 | 9.64506 | 9.13255 | 9.50874 | 9.15201 |
| SSMEM1       | 3.31555 | 3.22054 | 3.50063 | 3.57141 | 4.18298 | 3.36204 | 3.69821 | 3.36138 | 3.61118 |
| CPA2         | 4.20274 | 4.31254 | 4.15022 | 4.52607 | 5.06438 | 4.86739 | 4.52912 | 4.20833 | 4.49747 |
| CPA4         | 10.3727 | 10.0824 | 9.17326 | 10.3911 | 9.82939 | 9.09023 | 9.16599 | 11.255  | 10.4061 |
| CPA5         | 4.81457 | 4.85622 | 4.50564 | 5.15344 | 5.54107 | 5.01031 | 4.85035 | 4.88995 | 5.04225 |
| CPA1         | 5.49544 | 5.59718 | 5.74953 | 5.88147 | 6.40771 | 6.05874 | 5.84504 | 6.31521 | 5.85149 |
| MEST         | 6.04096 | 6.1823  | 6.8108  | 6.87701 | 6.49815 | 6.52366 | 6.42114 | 5.9464  | 6.3136  |
| MIR335       | 3.36171 | 3.74144 | 3.16147 | 3.45871 | 3.56644 | 4.03708 | 3.59449 | 3.55769 | 3.52977 |
| FLJ40288     | 5.85889 | 5.97231 | 6.05333 | 6.52109 | 7.04256 | 6.60009 | 6.2972  | 6.63435 | 6.61847 |
| EXOC4        | 8.42436 | 8.16074 | 8.18777 | 7.24277 | 6.08282 | 6.94556 | 7.44703 | 6.85617 | 7.39439 |
| LRGUK        | 6.00959 | 6.76283 | 6.63116 | 5.86787 | 5.9654  | 4.47786 | 5.80154 | 5.29201 | 5.42688 |
| CALD1        | 7.63263 | 7.10526 | 7.68238 | 7.01814 | 5.09383 | 6.14344 | 6.94714 | 6.98884 | 7.04149 |
| AGBL3        | 4.95505 | 5.23212 | 4.99779 | 4.8161  | 5.46671 | 4.6353  | 4.54766 | 4.55259 | 4.64295 |
| TMEM140      | 7.50174 | 6.62681 | 7.53337 | 6.69556 | 6.5625  | 6.33102 | 6.97119 | 6.89898 | 6.30347 |
| STRA8        | 4.48065 | 4.19682 | 4.44811 | 4.89762 | 4.98792 | 5.14639 | 4.62693 | 4.68679 | 4.66444 |
| NUP205       | 8.36359 | 8.50519 | 8.58282 | 8.25741 | 5.74194 | 7.90615 | 8.27324 | 7.91398 | 8.06515 |
| LUZP6        | 6.01699 | 5.79484 | 5.60903 | 7.45589 | 4.26705 | 7.35553 | 8.60207 | 6.75284 | 6.46227 |
| MIR490       | 4.04754 | 4.72439 | 4.51499 | 4.65706 | 5.25765 | 5.12016 | 4.82054 | 4.44827 | 4.73187 |
| LOC100130880 | 4.12218 | 3.96264 | 3.97636 | 4.27119 | 5.12358 | 4.40357 | 4.19955 | 4.11359 | 4.13543 |
| MIR4468      | 6.64273 | 6.39021 | 6.4753  | 6.83161 | 6.93854 | 7.25959 | 7.18995 | 6.76231 | 6.73399 |
| TRIM24       | 7.77307 | 7.9315  | 7.86768 | 7.12355 | 6.31003 | 6.14123 | 7.4798  | 6.21227 | 6.6593  |
| TMEM213      | 5.84766 | 5.89901 | 5.72837 | 6.06555 | 5.79699 | 5.76627 | 5.72507 | 5.88632 | 5.67605 |



|                |         |         |         |         |         |         |         |         |         |
|----------------|---------|---------|---------|---------|---------|---------|---------|---------|---------|
| TTC26          | 6.2274  | 6.45695 | 6.49328 | 6.26531 | 6.10543 | 5.90818 | 6.40619 | 5.7241  | 5.6483  |
| UBN2           | 9.12444 | 9.2766  | 9.02093 | 7.36868 | 5.66175 | 7.00808 | 7.6387  | 7.85344 | 7.46427 |
| C7orf55-LUC7L2 | 7.42628 | 7.58933 | 7.58987 | 6.79446 | 6.16803 | 6.69453 | 7.12241 | 6.17774 | 6.73386 |
| TBXAS1         | 5.95564 | 5.60075 | 6.28486 | 5.6977  | 6.39752 | 6.05351 | 5.66886 | 5.78826 | 5.91172 |
| JHDM1D-AS1     | 7.29664 | 6.94181 | 7.15052 | 8.23416 | 6.90132 | 9.86672 | 9.32326 | 9.66679 | 10.23   |
| ADCK2          | 8.0701  | 8.13989 | 7.89385 | 7.94341 | 6.99093 | 7.45479 | 7.55514 | 7.19886 | 7.66611 |
| TMEM178B       | 6.02148 | 6.41303 | 6.40756 | 6.67133 | 6.30606 | 6.35308 | 6.01696 | 6.43883 | 6.43866 |
| AGK            | 8.04982 | 7.81352 | 8.04768 | 7.32063 | 6.63795 | 6.58399 | 7.68974 | 6.89312 | 7.23203 |
| WEE2           | 5.06628 | 5.42792 | 4.95749 | 5.81043 | 6.70749 | 5.25154 | 5.34696 | 5.1697  | 5.30938 |
| WEE2-AS1       | 6.67031 | 6.81395 | 6.68229 | 7.28168 | 8.60497 | 7.34442 | 6.75619 | 6.90903 | 6.81459 |
| MGAM           | 3.43827 | 3.87194 | 3.51699 | 4.09734 | 5.10209 | 4.12866 | 3.82713 | 4.77492 | 4.47424 |
| MGAM2          | 4.88291 | 4.87484 | 4.74727 | 5.05896 | 6.02457 | 5.11989 | 4.85426 | 5.1497  | 4.83683 |
| MTRNR2L6       | 6.415   | 6.28378 | 6.23257 | 6.25059 | 6.25589 | 5.95293 | 6.17901 | 6.84307 | 7.21905 |
| EPHB6          | 8.8033  | 8.67789 | 8.44411 | 8.30733 | 6.63703 | 6.63731 | 7.89966 | 6.40749 | 6.46646 |
| C7orf34        | 5.14455 | 5.37588 | 5.29711 | 5.67663 | 6.38069 | 5.54808 | 5.15563 | 5.46595 | 5.54238 |
| pip            | 7.9518  | 8.67219 | 10.1657 | 4.5193  | 5.50694 | 4.72864 | 4.22636 | 4.43854 | 5.35542 |
| GSTK1          | 9.05503 | 8.74256 | 9.21495 | 8.90714 | 7.81517 | 8.32938 | 9.13645 | 7.98858 | 8.63937 |
| TMEM139        | 5.48169 | 5.44412 | 5.36398 | 5.57069 | 6.28486 | 5.08358 | 5.16795 | 6.00307 | 5.71761 |
| ZYX            | 7.55925 | 7.45569 | 7.4767  | 9.16442 | 7.33722 | 8.77043 | 8.68757 | 8.89463 | 8.80002 |
| EPHA1-AS1      | 4.23246 | 4.18632 | 4.66694 | 4.51529 | 5.58034 | 5.00419 | 4.79312 | 4.91903 | 4.81243 |
| ARHGEF5        | 7.78923 | 8.1382  | 7.31064 | 8.26561 | 5.42955 | 8.7497  | 8.24836 | 8.52602 | 8.23396 |
| CNTNAP2        | 4.77473 | 5.05749 | 4.96321 | 5.89356 | 5.59237 | 5.85372 | 5.40658 | 5.51839 | 5.03345 |
| CUL1           | 9.99072 | 9.72788 | 9.95999 | 9.89333 | 6.78918 | 9.32725 | 10.1877 | 9.46517 | 10.2926 |
| ZNF398         | 7.86189 | 7.98939 | 7.76596 | 7.22221 | 6.27996 | 8.32197 | 7.60977 | 7.74993 | 8.17614 |
| ZNF282         | 7.44638 | 7.18376 | 7.29232 | 7.6002  | 6.31176 | 8.66888 | 7.9267  | 8.49092 | 8.27545 |
| ZNF212         | 7.5151  | 7.73296 | 7.20134 | 7.81665 | 7.81634 | 9.4635  | 7.78524 | 8.85959 | 8.8246  |

|            |         |         |         |         |         |         |         |         |         |
|------------|---------|---------|---------|---------|---------|---------|---------|---------|---------|
| ZNF783     | 6.37372 | 6.83301 | 6.62249 | 7.30009 | 6.14814 | 6.68582 | 6.64369 | 6.70519 | 6.64766 |
| LOC155060  | 6.49973 | 6.47129 | 6.01076 | 6.30515 | 6.61362 | 6.55225 | 6.24218 | 6.95198 | 6.44062 |
| KRBA1      | 6.2462  | 5.80155 | 6.09226 | 6.26464 | 6.07554 | 6.94898 | 6.34712 | 6.67604 | 6.7878  |
| SSPO       | 6.33534 | 6.36635 | 6.44472 | 6.85423 | 7.10503 | 6.98709 | 6.57524 | 6.84768 | 6.87884 |
| ZNF862     | 7.18431 | 7.25474 | 7.19142 | 7.39789 | 7.04558 | 7.15688 | 7.15974 | 7.30389 | 7.11125 |
| LRRC61     | 6.51072 | 6.04526 | 6.3153  | 6.80601 | 6.41056 | 7.08481 | 6.98276 | 6.14988 | 6.4985  |
| ZBED6CL    | 6.38873 | 6.38369 | 6.45485 | 6.26694 | 6.20739 | 6.29615 | 6.66533 | 6.37253 | 6.48078 |
| REPIN1     | 7.28875 | 6.91381 | 7.22407 | 7.06694 | 6.47805 | 7.00507 | 7.50511 | 7.1859  | 6.66235 |
| ZNF775     | 5.28806 | 5.32268 | 5.45846 | 5.65237 | 5.54079 | 5.49499 | 5.72238 | 5.88242 | 5.89926 |
| LINC00996  | 5.18395 | 5.15248 | 5.00212 | 5.3554  | 5.53788 | 5.38015 | 5.20692 | 5.30318 | 5.52512 |
| TMEM176A   | 6.82957 | 6.99059 | 7.45104 | 7.58451 | 7.33475 | 7.22923 | 7.38518 | 6.99079 | 7.69781 |
| AOC1       | 4.80418 | 5.10062 | 5.15841 | 5.32226 | 5.31664 | 5.19682 | 5.46612 | 5.11922 | 4.87164 |
| NOS3       | 6.38061 | 6.18678 | 6.49919 | 6.86034 | 6.43517 | 6.53098 | 6.57374 | 6.80773 | 6.79853 |
| chpf2      | 7.0252  | 6.84849 | 7.03075 | 7.26237 | 7.02853 | 7.15557 | 7.53706 | 7.02764 | 6.96044 |
| NUB1       | 8.0408  | 8.39935 | 8.21721 | 8.04625 | 6.50243 | 7.54027 | 8.30622 | 7.50816 | 6.85412 |
| WDR86-AS1  | 5.2259  | 5.38125 | 5.48171 | 5.7408  | 6.18474 | 5.58936 | 5.11287 | 5.75758 | 5.58294 |
| PRKAG2-AS1 | 4.14968 | 3.93641 | 4.03328 | 4.74092 | 4.12471 | 4.5961  | 4.30735 | 4.11321 | 4.80773 |
| GALNTL5    | 4.44052 | 4.41915 | 4.3114  | 4.41257 | 4.82601 | 4.64243 | 4.69662 | 4.57583 | 4.66385 |
| GALNT11    | 8.34857 | 8.57764 | 8.10762 | 8.04304 | 6.45935 | 6.96044 | 8.14775 | 7.24324 | 7.676   |
| FABP5P3    | 5.65358 | 5.88003 | 5.53077 | 6.58302 | 6.2578  | 6.96749 | 6.53954 | 6.28039 | 6.35703 |
| LINC01003  | 6.37434 | 6.19616 | 6.19389 | 6.21138 | 5.71708 | 5.97147 | 6.11932 | 5.21262 | 5.81664 |
| ACTR3B     | 6.99372 | 6.98346 | 7.085   | 6.16012 | 6.81462 | 5.68312 | 6.55343 | 6.3316  | 6.05356 |
| DPP6       | 5.12069 | 5.11419 | 5.19752 | 5.29029 | 5.6476  | 5.63932 | 4.91559 | 5.32573 | 5.36673 |
| PAXIP1-AS2 | 7.14218 | 6.91506 | 7.11669 | 6.19444 | 6.99196 | 6.05427 | 6.52746 | 5.67877 | 6.37507 |
| PAXIP1-AS1 | 7.18119 | 7.28059 | 7.67575 | 6.72506 | 7.57908 | 7.4303  | 7.17857 | 6.79856 | 6.87976 |
| INSIG1     | 8.17225 | 8.1813  | 8.12904 | 8.09052 | 6.86983 | 9.74662 | 8.94991 | 9.36533 | 8.57306 |

|              |         |         |         |         |         |         |         |         |         |
|--------------|---------|---------|---------|---------|---------|---------|---------|---------|---------|
| EN2          | 5.86121 | 5.93038 | 5.83461 | 6.46017 | 6.32881 | 7.14098 | 6.49035 | 6.71919 | 6.5984  |
| RBM33        | 8.43962 | 8.53846 | 8.6656  | 7.16783 | 5.98852 | 8.3085  | 7.66537 | 7.96588 | 8.30245 |
| LINC00244    | 4.2724  | 4.27743 | 4.43825 | 4.53003 | 5.18779 | 4.93563 | 4.58552 | 4.63123 | 4.51402 |
| RNF32        | 5.60897 | 5.56252 | 5.64151 | 5.59003 | 5.56497 | 5.49417 | 5.43622 | 5.75938 | 5.38835 |
| NOM1         | 7.36828 | 7.44335 | 7.62409 | 6.5551  | 6.03324 | 6.03507 | 6.92801 | 6.46111 | 6.55077 |
| MNX1-AS1     | 5.71919 | 5.62466 | 5.59931 | 6.18556 | 5.96035 | 6.40585 | 5.7397  | 5.89969 | 5.84154 |
| UBE3C        | 8.93366 | 9.00801 | 8.84169 | 8.59031 | 6.04227 | 7.87471 | 8.95303 | 8.29812 | 8.64771 |
| LOC100506585 | 5.50527 | 5.48926 | 5.51898 | 6.13079 | 6.4703  | 6.32502 | 5.88947 | 5.99766 | 5.97831 |
| WDR60        | 7.46662 | 8.03054 | 7.88342 | 6.84277 | 5.86147 | 7.00575 | 7.38197 | 7.22292 | 6.73543 |
| LINC00689    | 5.02131 | 4.76301 | 4.72441 | 5.28884 | 6.48028 | 5.63671 | 5.24353 | 5.44011 | 5.18847 |
| PDGFA        | 7.64231 | 7.08288 | 7.11248 | 7.35712 | 6.16067 | 7.13859 | 7.56723 | 7.1319  | 7.31693 |
| ADAP1        | 6.41707 | 6.20393 | 6.63243 | 7.04369 | 6.91976 | 7.48943 | 7.19836 | 6.89943 | 7.34556 |
| cox19        | 6.08813 | 5.9713  | 6.00335 | 6.05492 | 5.26245 | 5.87588 | 6.03647 | 6.4777  | 5.93928 |
| C7ORF50      | 5.82386 | 5.90832 | 5.94827 | 6.61962 | 6.19719 | 6.67671 | 6.50548 | 6.00349 | 6.02657 |
| Mir339       | 7.76039 | 7.9849  | 8.04781 | 8.69781 | 9.38381 | 8.94177 | 8.18145 | 8.43684 | 8.41102 |
| MICALL2      | 6.91938 | 6.41593 | 6.85379 | 6.99264 | 6.58794 | 6.92106 | 7.00237 | 6.74317 | 6.91329 |
| INTS1        | 7.64385 | 7.33646 | 7.59395 | 7.67338 | 7.54226 | 7.931   | 7.77663 | 7.79636 | 7.56615 |
| TMEM184A     | 7.98978 | 7.70484 | 7.42066 | 8.40728 | 8.37611 | 9.53652 | 8.37853 | 8.68894 | 8.80546 |
| MAD1L1       | 6.78919 | 6.89997 | 6.64841 | 7.10812 | 7.12828 | 7.02451 | 6.81583 | 7.19141 | 6.97481 |
| MIR4655      | 5.59227 | 6.2673  | 5.43359 | 6.50603 | 5.61962 | 6.41709 | 6.30577 | 5.70969 | 5.95724 |
| MRM2         | 6.70434 | 6.40638 | 6.48113 | 6.38793 | 6.16008 | 6.07491 | 6.60471 | 6.1086  | 6.2093  |
| SNX8         | 6.73663 | 6.54577 | 6.79021 | 6.77688 | 6.71184 | 7.26483 | 6.77485 | 6.73783 | 6.66627 |
| BRAT1        | 7.28054 | 7.2339  | 7.21223 | 7.29877 | 7.68659 | 7.42141 | 7.26764 | 7.30491 | 7.22379 |
| GNA12        | 7.24629 | 6.8592  | 7.44089 | 7.24569 | 6.97444 | 6.47357 | 7.15389 | 7.20636 | 7.38461 |
| RADIL        | 5.35721 | 5.77803 | 5.5467  | 5.78128 | 5.99951 | 6.42984 | 5.97126 | 6.28207 | 5.97855 |
| PAPOLB       | 4.76096 | 4.31457 | 5.04869 | 4.24889 | 4.82583 | 4.74102 | 4.12182 | 5.02208 | 4.24008 |

|              |         |         |         |         |         |         |         |         |         |
|--------------|---------|---------|---------|---------|---------|---------|---------|---------|---------|
| MMD2         | 4.2254  | 4.46226 | 4.34963 | 5.09619 | 4.79625 | 5.30265 | 4.81376 | 4.68366 | 4.90915 |
| TNRC18       | 7.08599 | 7.16388 | 7.18884 | 7.31158 | 6.27578 | 7.08379 | 7.16254 | 6.91443 | 6.88215 |
| MIR589       | 7.02912 | 6.87025 | 6.82208 | 6.84516 | 7.26199 | 7.18165 | 6.85079 | 7.04829 | 6.84974 |
| RNF216       | 8.38319 | 8.49741 | 8.30737 | 7.3504  | 6.23901 | 7.34157 | 7.75904 | 7.18347 | 7.83669 |
| RNF216-IT1   | 6.49984 | 6.22516 | 6.12833 | 6.20176 | 5.67999 | 6.30421 | 6.07572 | 6.45418 | 6.46314 |
| RSPH10B      | 4.03248 | 4.15855 | 4.00208 | 4.16148 | 4.09168 | 4.09604 | 4.03684 | 3.92382 | 4.4317  |
| PMS2         | 7.5495  | 7.78949 | 7.30907 | 6.41236 | 5.54785 | 5.17718 | 7.03652 | 6.17863 | 5.769   |
| EIF2AK1      | 8.94796 | 9.14374 | 9.13575 | 8.32866 | 6.82442 | 7.76105 | 8.81099 | 8.05837 | 8.1101  |
| CYTH3        | 7.02169 | 6.88131 | 6.78974 | 6.74647 | 5.60599 | 6.62107 | 7.05921 | 7.77251 | 7.1927  |
| KDELR2       | 10.0948 | 9.71078 | 10.273  | 10.1794 | 9.16509 | 9.79682 | 10.2029 | 9.9455  | 10.1876 |
| ZNF12        | 8.67072 | 8.89876 | 8.82246 | 7.67876 | 7.04124 | 7.85093 | 8.26485 | 7.64349 | 7.75122 |
| MIR3683      | 3.41782 | 3.80453 | 3.61093 | 4.03821 | 3.56064 | 3.98603 | 4.37668 | 3.93245 | 4.09539 |
| LOC100131257 | 4.96635 | 5.2617  | 4.93018 | 5.05989 | 6.23248 | 5.6707  | 4.72706 | 5.25992 | 5.36234 |
| VWDE         | 5.04441 | 5.06754 | 5.26335 | 5.04288 | 6.1037  | 5.2268  | 5.16369 | 4.89389 | 4.99819 |
| ETV1         | 6.31819 | 5.79902 | 6.35764 | 5.77339 | 6.90802 | 5.63886 | 5.87997 | 5.49038 | 5.76425 |
| AGMO         | 5.50385 | 5.35972 | 5.96585 | 5.02277 | 5.98214 | 5.4511  | 5.33862 | 5.12719 | 5.00309 |
| MEOX2        | 7.54996 | 7.79722 | 8.37933 | 6.36347 | 6.12162 | 5.68413 | 5.59379 | 5.73022 | 5.43627 |
| ISPD         | 7.10164 | 5.5989  | 5.655   | 5.6452  | 4.59161 | 5.00877 | 5.97524 | 4.9122  | 5.3269  |
| SOSTDC1      | 7.3914  | 6.34356 | 6.2465  | 5.94057 | 5.65933 | 5.37314 | 5.21158 | 5.32767 | 5.08663 |
| ANKMY2       | 7.57473 | 7.47104 | 7.21815 | 5.91642 | 4.94789 | 5.54477 | 6.6657  | 5.84533 | 5.1382  |
| AGR2         | 3.74713 | 3.91767 | 3.78217 | 4.3076  | 5.58802 | 4.71921 | 4.57771 | 4.0276  | 4.40293 |
| AGR3         | 2.48797 | 2.79016 | 2.3299  | 2.55485 | 2.86158 | 3.31112 | 2.57473 | 2.90797 | 2.74625 |
| SNX13        | 8.50773 | 8.54384 | 8.42733 | 7.95711 | 6.33699 | 7.05175 | 8.01495 | 7.61113 | 7.77274 |
| PRPS1L1      | 5.77681 | 5.51346 | 5.90066 | 6.15203 | 5.93625 | 6.87322 | 6.26803 | 6.3361  | 6.16689 |
| MIR1302-6    | 4.34659 | 4.62739 | 3.88105 | 5.18127 | 4.25669 | 5.61371 | 4.40316 | 4.04563 | 4.32448 |
| TWIST1       | 5.25222 | 5.57825 | 5.12104 | 5.38068 | 4.63345 | 4.43095 | 4.84211 | 4.38523 | 3.90254 |

|           |         |         |         |         |         |         |         |         |         |
|-----------|---------|---------|---------|---------|---------|---------|---------|---------|---------|
| FERD3L    | 5.67408 | 5.90681 | 6.21785 | 6.69848 | 6.62005 | 7.00389 | 6.28359 | 6.75995 | 6.52213 |
| TWISTNB   | 6.77908 | 6.44366 | 6.95253 | 6.13395 | 5.29621 | 5.82663 | 6.19028 | 5.89714 | 5.62885 |
| MIR3146   | 2.56953 | 2.77383 | 2.16465 | 2.08771 | 1.67369 | 2.33417 | 2.2153  | 2.26019 | 2.00035 |
| TMEM196   | 5.07009 | 5.35908 | 5.37502 | 5.95903 | 6.24732 | 6.09397 | 5.39866 | 5.85519 | 5.9425  |
| MACC1     | 6.07826 | 6.39852 | 6.12385 | 5.41758 | 5.50725 | 5.64986 | 5.30598 | 6.04356 | 5.9759  |
| SP8       | 5.92068 | 6.02728 | 5.40195 | 5.37868 | 5.31081 | 5.93487 | 5.64415 | 5.62154 | 5.54013 |
| CDCA7L    | 7.47656 | 7.25687 | 7.52359 | 6.69617 | 5.90867 | 5.63688 | 6.97316 | 5.98999 | 6.14024 |
| RAPGEF5   | 8.5288  | 8.72917 | 8.34327 | 7.76507 | 7.7986  | 10.029  | 8.01087 | 10.1133 | 9.38152 |
| STEAP1B   | 5.86581 | 5.50178 | 5.40787 | 6.53499 | 6.04296 | 6.92628 | 6.43653 | 6.8402  | 6.74209 |
| TOMM7     | 6.9689  | 7.36854 | 7.13992 | 7.30087 | 7.0157  | 7.55314 | 7.13697 | 7.01496 | 6.87846 |
| KLHL7-AS1 | 5.25164 | 5.8036  | 5.59017 | 5.67919 | 6.2508  | 5.79182 | 5.34402 | 5.41678 | 5.71903 |
| IGF2BP3   | 4.5652  | 4.44768 | 4.31141 | 5.34549 | 5.40888 | 5.21702 | 4.63027 | 5.45346 | 4.20968 |
| TRA2A     | 10.2024 | 9.9348  | 9.7436  | 9.23618 | 7.4441  | 9.136   | 8.99351 | 9.92281 | 9.67702 |
| OSBPL3    | 8.70577 | 8.79949 | 8.42927 | 8.20577 | 7.14614 | 7.73192 | 8.48177 | 8.87119 | 8.90501 |
| C7orf31   | 7.49969 | 7.39405 | 7.27972 | 6.75155 | 5.83282 | 6.64586 | 7.0373  | 6.0222  | 6.10102 |
| npvf      | 3.90838 | 3.65455 | 3.88771 | 4.5274  | 5.06142 | 4.40125 | 3.85036 | 3.99534 | 4.17956 |
| MIR148A   | 2.67055 | 2.65219 | 2.61959 | 2.76109 | 2.8591  | 3.26815 | 3.51652 | 2.92234 | 2.45304 |
| HNRNPA2B1 | 10.0681 | 10.3333 | 9.99295 | 9.46157 | 5.8747  | 9.07996 | 9.52773 | 9.61689 | 9.46876 |
| KIAA0087  | 4.63655 | 4.66166 | 4.8193  | 5.44414 | 6.04332 | 5.38783 | 5.50578 | 4.84989 | 5.1909  |
| SKAP2     | 7.20516 | 5.68316 | 6.66036 | 6.88292 | 5.82373 | 6.6293  | 6.69431 | 6.69106 | 7.05348 |
| HOXA1     | 6.9296  | 6.77553 | 7.01925 | 6.94252 | 6.38161 | 6.51618 | 7.04424 | 7.06051 | 6.75138 |
| HOXA2     | 5.84975 | 5.63743 | 5.93254 | 5.4673  | 6.73762 | 5.87656 | 5.41697 | 5.4179  | 4.65858 |
| HOXA3     | 5.38509 | 5.07201 | 5.53246 | 5.57522 | 4.88165 | 5.62977 | 5.87124 | 5.49818 | 5.68822 |
| HOXA4     | 6.55163 | 6.33782 | 6.61453 | 5.61424 | 5.19229 | 6.32008 | 6.6145  | 5.22803 | 5.55843 |
| HOXA5     | 6.95653 | 6.76139 | 7.19288 | 6.29336 | 5.80887 | 6.684   | 6.65123 | 5.9837  | 5.48458 |
| HOXA6     | 6.52081 | 5.8495  | 6.36335 | 6.35022 | 5.84575 | 6.52476 | 6.16113 | 5.8869  | 5.90239 |

|              |         |         |         |         |         |         |         |         |         |
|--------------|---------|---------|---------|---------|---------|---------|---------|---------|---------|
| HOXA7        | 7.15063 | 6.84416 | 7.12974 | 7.33813 | 6.40407 | 6.77792 | 7.29965 | 6.64084 | 6.88923 |
| HOXA10       | 6.99588 | 7.25219 | 7.24496 | 7.18993 | 6.97328 | 7.62581 | 7.22553 | 7.07936 | 7.16335 |
| HOXA11       | 4.78742 | 5.1285  | 5.02175 | 5.75117 | 6.19135 | 5.509   | 4.89436 | 5.44704 | 6.0801  |
| HOXA13       | 5.81836 | 6.39729 | 6.30462 | 6.36797 | 6.00754 | 6.7622  | 6.34304 | 6.71493 | 6.19734 |
| HIBADH       | 7.97034 | 7.65414 | 8.08203 | 7.46348 | 6.89429 | 6.57711 | 7.57702 | 7.49159 | 6.76444 |
| JAZF1        | 6.07997 | 5.77276 | 6.08985 | 5.54583 | 5.25686 | 5.51726 | 5.70665 | 5.12132 | 4.89049 |
| LOC646762    | 6.30865 | 6.43087 | 6.52298 | 6.53444 | 6.9861  | 6.41782 | 6.21962 | 6.37756 | 6.11123 |
| MIR550A3     | 4.21727 | 4.96893 | 4.83479 | 3.20648 | 2.87095 | 3.48234 | 3.80993 | 4.58424 | 3.89704 |
| SCRN1        | 7.82945 | 7.66924 | 7.72754 | 8.1875  | 7.002   | 8.39161 | 8.69024 | 7.86793 | 8.04498 |
| NOD1         | 7.95807 | 7.41966 | 7.56048 | 6.53885 | 6.14175 | 6.32059 | 6.70676 | 6.65643 | 6.85706 |
| GGCT         | 8.47074 | 8.30726 | 7.46402 | 7.44283 | 5.59769 | 7.28599 | 7.13337 | 6.40446 | 6.21968 |
| crhr2        | 6.08141 | 6.05191 | 6.34539 | 6.69572 | 6.32228 | 6.67811 | 6.24853 | 6.67089 | 6.68245 |
| NEUROD6      | 3.86782 | 4.297   | 3.99786 | 4.20625 | 5.21928 | 4.87877 | 4.32861 | 3.96892 | 4.20552 |
| LOC100130673 | 4.65889 | 4.5723  | 4.84596 | 4.7549  | 5.90957 | 4.78753 | 4.7113  | 4.80688 | 5.19332 |
| DPY19L1P1    | 5.23659 | 5.15999 | 5.47167 | 6.29873 | 5.1455  | 6.17353 | 5.61464 | 5.13022 | 5.30483 |
| KBTBD2       | 8.02908 | 7.66204 | 7.94508 | 7.56124 | 6.18714 | 7.62026 | 7.91369 | 7.81218 | 7.71088 |
| RP9P         | 7.13407 | 8.23999 | 7.26643 | 6.73243 | 6.56125 | 7.05575 | 7.28786 | 7.4733  | 6.98829 |
| RP9          | 6.39222 | 6.76721 | 6.73454 | 5.54782 | 7.06964 | 4.83301 | 5.3279  | 6.29037 | 5.91527 |
| NPSR1-AS1    | 3.89611 | 4.12175 | 3.87764 | 4.03401 | 4.8557  | 4.82282 | 4.48443 | 4.2846  | 4.19873 |
| DPY19L1      | 6.56192 | 6.15117 | 5.89034 | 5.71776 | 4.67108 | 4.92208 | 6.28905 | 5.74825 | 5.89091 |
| TBX20        | 5.73331 | 5.89592 | 6.01682 | 6.40132 | 6.64753 | 7.22979 | 6.27651 | 7.44899 | 6.21863 |
| HERPUD2      | 9.36573 | 9.22933 | 9.27588 | 8.84246 | 8.93204 | 9.44671 | 9.34876 | 9.47416 | 9.72937 |
| KIAA0895     | 6.00065 | 5.83418 | 5.91522 | 6.39958 | 4.99859 | 5.86675 | 6.00444 | 6.68967 | 6.16211 |
| AOAH         | 6.05788 | 5.97497 | 6.19399 | 5.43706 | 6.44649 | 5.76762 | 5.62052 | 5.52499 | 4.8159  |
| AOAH-IT1     | 4.24338 | 4.33663 | 4.07154 | 4.7552  | 5.1208  | 4.84585 | 4.37501 | 4.30884 | 4.48199 |
| ELMO1        | 7.35747 | 6.84332 | 7.95944 | 5.535   | 5.83402 | 5.3398  | 6.3129  | 6.53949 | 6.32437 |

|              |         |         |         |         |         |         |         |         |         |
|--------------|---------|---------|---------|---------|---------|---------|---------|---------|---------|
| MIR1200      | 5.83221 | 5.62146 | 5.78067 | 5.38416 | 5.77576 | 5.49716 | 5.46978 | 5.44844 | 5.58136 |
| SFRP4        | 6.6066  | 6.49337 | 7.36345 | 6.09623 | 6.34585 | 6.26912 | 5.51442 | 6.04664 | 6.11789 |
| TARP         | 4.2005  | 3.94584 | 4.326   | 3.90442 | 4.78625 | 3.82847 | 3.80092 | 4.24454 | 3.63215 |
| AMPH         | 5.49739 | 5.13055 | 5.55775 | 5.8537  | 6.36151 | 5.67445 | 5.21137 | 5.76393 | 5.15409 |
| VPS41        | 7.83492 | 7.83825 | 7.55934 | 6.99243 | 6.09564 | 7.02095 | 7.31516 | 7.61278 | 7.27491 |
| POU6F2-AS1   | 4.51971 | 4.84966 | 4.50883 | 5.36701 | 5.24468 | 5.15679 | 5.04521 | 4.83901 | 4.87552 |
| mplkip       | 6.94046 | 6.89224 | 6.5964  | 6.99657 | 5.37405 | 6.71768 | 7.47006 | 6.64847 | 6.27648 |
| GLI3         | 9.16974 | 8.67524 | 8.88777 | 8.31752 | 6.79513 | 7.33049 | 8.43879 | 7.42406 | 7.42287 |
| LOC100506895 | 4.32765 | 4.83231 | 4.63335 | 5.43728 | 5.46844 | 5.62946 | 4.71591 | 5.32669 | 5.30986 |
| coa1         | 8.25034 | 8.2848  | 8.31555 | 7.23356 | 6.19423 | 5.90703 | 7.84373 | 7.35104 | 7.34483 |
| URGCP        | 6.60762 | 6.74387 | 6.57225 | 6.62003 | 6.19618 | 6.59249 | 7.09903 | 6.46101 | 6.62176 |
| PGAM2        | 5.94403 | 6.18816 | 6.10748 | 6.42207 | 6.05905 | 6.64689 | 7.15273 | 6.58103 | 6.75619 |
| GCK          | 6.2683  | 5.95304 | 5.93581 | 6.55284 | 6.71713 | 6.68462 | 6.69888 | 6.40426 | 6.72179 |
| CAMK2B       | 5.63502 | 5.90563 | 5.80575 | 6.05502 | 6.75757 | 6.14276 | 5.84707 | 6.2265  | 5.88041 |
| NUDCD3       | 7.33282 | 7.13638 | 7.35405 | 6.4106  | 6.07351 | 6.64213 | 6.78605 | 6.91908 | 7.10369 |
| DDX56        | 8.02243 | 7.63988 | 7.79213 | 7.71761 | 5.84613 | 6.97392 | 8.03662 | 7.10333 | 7.66509 |
| TMED4        | 9.35121 | 9.24612 | 9.2029  | 8.83927 | 7.47924 | 8.45815 | 8.97763 | 8.83792 | 8.9269  |
| PURB         | 8.81149 | 8.75702 | 8.54007 | 8.59902 | 6.22247 | 7.98307 | 9.04963 | 8.43663 | 8.74488 |
| MYO1G        | 5.56208 | 5.76928 | 5.59339 | 6.19177 | 5.57978 | 6.23906 | 6.37763 | 6.21841 | 6.46263 |
| Snhg15       | 8.79694 | 8.54118 | 8.21804 | 9.28424 | 8.00659 | 8.17807 | 9.53442 | 9.05584 | 9.67003 |
| NACAD        | 6.26347 | 6.39276 | 6.49637 | 6.82717 | 7.40164 | 6.97057 | 6.79679 | 7.31252 | 6.61689 |
| SEPT7P2      | 8.08614 | 8.12224 | 8.71662 | 5.73441 | 5.66643 | 6.02354 | 5.76405 | 6.38392 | 6.03206 |
| IGFBP3       | 5.95306 | 7.34768 | 6.2195  | 6.68065 | 6.46366 | 8.22229 | 7.0319  | 7.69588 | 7.78032 |
| TNS3         | 7.30815 | 7.07311 | 7.33706 | 6.81527 | 6.6939  | 6.34123 | 6.84899 | 6.52873 | 6.40786 |
| HUS1         | 8.11793 | 8.44559 | 8.46446 | 7.68961 | 6.91625 | 8.49807 | 8.028   | 7.88099 | 8.27612 |
| PKD1L1       | 6.07904 | 5.95851 | 6.07571 | 6.1867  | 6.6623  | 6.44795 | 5.95218 | 6.63839 | 6.39941 |

|              |         |         |         |         |         |         |         |         |         |
|--------------|---------|---------|---------|---------|---------|---------|---------|---------|---------|
| SUN3         | 3.74555 | 4.16701 | 3.98981 | 4.05616 | 5.15613 | 5.24563 | 4.04872 | 4.62211 | 4.3957  |
| ZBPB         | 4.53876 | 4.70991 | 4.65709 | 4.36432 | 4.72202 | 4.45565 | 4.56052 | 4.38845 | 4.35472 |
| FIGNL1       | 7.01036 | 6.70628 | 6.95579 | 6.29061 | 4.58297 | 5.94319 | 6.38986 | 8.17922 | 5.44753 |
| DDC          | 5.59368 | 5.71764 | 5.56279 | 6.14577 | 6.83562 | 6.44419 | 6.19686 | 6.16733 | 6.23189 |
| GRB10        | 7.30186 | 6.65373 | 7.05743 | 6.40685 | 6.4167  | 6.0398  | 6.36179 | 7.13729 | 6.86571 |
| COBL         | 7.92332 | 8.55875 | 8.06322 | 7.19944 | 7.21907 | 8.16443 | 8.03096 | 8.54926 | 8.54812 |
| LINC01446    | 4.6111  | 4.83216 | 4.86307 | 5.06347 | 6.21868 | 5.3506  | 5.49762 | 4.8988  | 5.08896 |
| Hpvc1        | 2.63711 | 2.58563 | 2.80193 | 3.14211 | 3.92527 | 2.73933 | 3.01806 | 2.7451  | 3.11919 |
| SEC61G       | 6.627   | 6.61354 | 6.75801 | 6.94837 | 6.24181 | 7.79384 | 6.83891 | 7.39039 | 6.90074 |
| EGFR-AS1     | 5.18951 | 5.35588 | 5.13482 | 5.42253 | 5.42623 | 5.68826 | 5.77549 | 5.35835 | 5.27821 |
| FKBP9P1      | 5.07377 | 5.32185 | 5.52321 | 4.863   | 5.7515  | 5.33522 | 5.56525 | 5.35633 | 4.93121 |
| 44453        | 3.72325 | 3.86327 | 3.91299 | 3.70605 | 4.78956 | 4.05713 | 3.88175 | 3.94643 | 3.81556 |
| PSPH         | 7.99834 | 7.45548 | 6.96867 | 7.79925 | 7.16789 | 7.00398 | 7.70285 | 7.47984 | 6.74833 |
| CHCHD2       | 7.2327  | 7.19077 | 7.36916 | 8.33125 | 7.24116 | 8.94008 | 8.72505 | 8.08589 | 7.75751 |
| LOC650226    | 3.58921 | 3.48049 | 3.75152 | 4.06486 | 4.66703 | 4.94434 | 4.05921 | 3.80084 | 4.65915 |
| ZNF479       | 4.53346 | 4.21458 | 4.12857 | 5.12463 | 4.94303 | 4.60534 | 4.76653 | 4.48373 | 4.45812 |
| ZNF733P      | 4.05752 | 3.99947 | 4.05611 | 4.28168 | 7.11296 | 4.53774 | 3.91479 | 4.23411 | 4.47382 |
| LOC100287834 | 5.61433 | 5.21673 | 5.62861 | 6.59275 | 5.64433 | 6.23512 | 5.96668 | 5.39611 | 6.01131 |
| LINC01005    | 3.28265 | 3.5705  | 3.32433 | 3.6309  | 4.69605 | 3.47681 | 3.81221 | 3.87381 | 3.8364  |
| ZNF680       | 7.62761 | 7.67462 | 7.64611 | 6.21974 | 6.81104 | 5.28676 | 6.25141 | 6.17346 | 5.54097 |
| ZNF117       | 7.65423 | 7.11836 | 7.70431 | 6.81892 | 5.46921 | 6.27082 | 6.03513 | 7.91637 | 7.38867 |
| LINC00174    | 6.61467 | 6.3877  | 6.30655 | 4.80552 | 5.25577 | 4.88029 | 4.66068 | 5.65009 | 5.41518 |
| GS1-124K5.11 | 8.82929 | 8.56817 | 8.18518 | 7.79047 | 7.54939 | 7.26169 | 7.41059 | 8.78641 | 8.91989 |
| GTF2IRD1P1   | 5.73831 | 6.05331 | 5.69401 | 6.31916 | 6.33511 | 5.88763 | 6.54816 | 6.09152 | 6.06364 |
| SBDS         | 10.0378 | 10.3451 | 9.94668 | 10.9367 | 9.52264 | 10.7976 | 11.0108 | 10.4547 | 11.124  |
| PMS2P4       | 8.49    | 8.35704 | 8.27109 | 6.99679 | 6.01752 | 6.61438 | 7.38027 | 6.75263 | 6.93933 |



|            |         |         |         |         |         |         |         |         |         |
|------------|---------|---------|---------|---------|---------|---------|---------|---------|---------|
| CALN1      | 5.06797 | 6.0605  | 5.50316 | 5.37923 | 5.50042 | 6.68926 | 5.45123 | 5.74514 | 6.08608 |
| TYW1B      | 7.41442 | 7.28515 | 7.22164 | 6.6228  | 7.2684  | 6.52987 | 6.80198 | 6.56546 | 6.73412 |
| TRIM74     | 6.89322 | 6.77999 | 7.06759 | 7.4558  | 7.51585 | 7.15766 | 6.96699 | 7.17509 | 6.78949 |
| STAG3L3    | 8.65979 | 8.55829 | 8.43793 | 7.70635 | 8.46865 | 7.41698 | 7.0676  | 8.04758 | 8.05671 |
| GTF2IRD2P1 | 7.88351 | 8.12571 | 8.34686 | 6.50257 | 6.04294 | 5.825   | 7.20683 | 5.49946 | 6.49296 |
| TRIM50     | 4.67095 | 4.74281 | 4.51404 | 5.15286 | 5.06283 | 4.87069 | 4.77346 | 5.00089 | 4.93425 |
| BCL7B      | 8.47163 | 8.38172 | 8.49912 | 8.58864 | 7.96475 | 8.67475 | 9.06032 | 8.65031 | 8.92614 |
| TBL2       | 6.55352 | 6.46025 | 6.53021 | 7.25874 | 6.17019 | 6.88375 | 7.05534 | 7.02776 | 6.55004 |
| MLXIPL     | 5.60494 | 5.56849 | 5.7519  | 5.8351  | 6.33905 | 5.57531 | 5.7408  | 5.97475 | 6.26983 |
| stx1a      | 5.97423 | 6.10684 | 6.15889 | 6.9657  | 6.02234 | 6.80336 | 6.71259 | 7.06381 | 7.03527 |
| CLDN3      | 7.14558 | 7.32445 | 6.99175 | 8.07098 | 8.12938 | 8.33968 | 7.68416 | 7.7413  | 7.58583 |
| WBSCR27    | 5.92116 | 6.18179 | 6.06678 | 6.41646 | 6.22864 | 6.66012 | 6.40145 | 6.53167 | 6.37539 |
| STAG3L2    | 6.54343 | 7.12301 | 7.12866 | 5.93804 | 5.46662 | 4.85777 | 5.70374 | 6.63924 | 6.71436 |
| GTF2IRD2   | 8.16879 | 8.18923 | 8.16479 | 6.23586 | 6.35321 | 6.26161 | 7.07545 | 5.60369 | 6.20382 |
| NCF1C      | 5.78352 | 6.20983 | 5.66416 | 6.64203 | 6.53431 | 6.71234 | 6.43197 | 7.14028 | 6.72927 |
| POM121C    | 8.06479 | 7.92608 | 8.0363  | 7.27888 | 6.36038 | 6.99125 | 6.82032 | 6.92529 | 7.13916 |
| PMS2P3     | 7.28389 | 7.2254  | 7.42075 | 7.32246 | 6.22271 | 7.80243 | 7.65536 | 7.61998 | 7.58229 |
| HIP1       | 8.23472 | 7.76112 | 7.89483 | 6.97713 | 5.78934 | 6.79513 | 7.09905 | 7.07073 | 7.27908 |
| CCL26      | 5.22771 | 5.19779 | 5.30327 | 5.79487 | 5.95222 | 5.8684  | 5.31331 | 5.78154 | 5.4814  |
| CCL24      | 6.20957 | 7.31655 | 6.94735 | 5.19651 | 5.97948 | 6.48859 | 6.06811 | 5.53417 | 5.63587 |
| tmem120a   | 7.72918 | 7.61298 | 7.58533 | 8.45824 | 7.69405 | 9.00536 | 8.96589 | 8.52166 | 8.60548 |
| STYXL1     | 8.13678 | 7.35106 | 7.23352 | 8.88236 | 7.48252 | 8.83062 | 8.83158 | 8.24041 | 8.74511 |
| FDPSP2     | 3.77003 | 3.7797  | 3.77363 | 3.95698 | 4.80352 | 3.95389 | 3.59769 | 4.86421 | 3.88059 |
| pomzp3     | 7.9339  | 7.8486  | 7.88688 | 7.95885 | 8.21889 | 8.11636 | 7.99305 | 8.50844 | 8.19555 |
| FGL2       | 7.96548 | 8.10427 | 8.74593 | 6.85993 | 6.47303 | 7.08098 | 7.59194 | 6.70275 | 6.32291 |
| GSAP       | 7.38151 | 7.61824 | 7.37311 | 6.38274 | 6.60541 | 6.65549 | 7.12183 | 6.84585 | 7.47399 |

|              |         |         |         |         |         |         |         |         |         |
|--------------|---------|---------|---------|---------|---------|---------|---------|---------|---------|
| TMEM60       | 7.03204 | 7.17398 | 7.02303 | 7.62206 | 7.39931 | 6.73745 | 7.81738 | 7.038   | 7.22036 |
| HGF          | 5.14279 | 4.92377 | 4.87115 | 4.67531 | 4.95088 | 4.59392 | 4.89778 | 5.23008 | 4.62817 |
| PCLO         | 6.09074 | 6.94317 | 6.9876  | 5.02617 | 5.23063 | 4.97046 | 5.59495 | 5.39884 | 4.83691 |
| KIAA1324L    | 6.96422 | 6.54611 | 7.15444 | 5.99706 | 6.73669 | 6.315   | 7.25778 | 6.16186 | 5.84371 |
| TMEM243      | 7.44932 | 7.82781 | 7.84484 | 6.94898 | 6.75627 | 6.24713 | 7.03138 | 6.63491 | 6.68605 |
| SRI          | 9.20896 | 9.3538  | 9.28721 | 9.42496 | 7.70275 | 8.43515 | 9.5488  | 8.84282 | 9.08988 |
| STEAP4       | 8.84715 | 8.68722 | 9.29968 | 9.46126 | 9.59632 | 10.3922 | 10.4583 | 11.3393 | 11.0773 |
| C7orf62      | 2.94011 | 2.58616 | 2.87162 | 3.07936 | 3.77814 | 3.2828  | 2.54036 | 2.91657 | 2.94655 |
| MTERF1       | 6.24422 | 6.54566 | 6.70276 | 5.5138  | 5.41981 | 5.3982  | 6.03323 | 5.05376 | 5.89795 |
| LRRD1        | 3.43955 | 3.63379 | 3.33493 | 3.40524 | 3.80815 | 3.58132 | 3.62757 | 3.27035 | 3.41872 |
| PEX1         | 8.48986 | 8.49102 | 8.39792 | 6.97223 | 5.8022  | 5.72336 | 7.31539 | 6.50081 | 6.55052 |
| CDK6         | 8.61249 | 8.53736 | 8.59877 | 8.02484 | 6.04104 | 7.27173 | 8.26689 | 8.17438 | 8.07135 |
| SAMD9        | 8.30288 | 7.30496 | 7.28805 | 8.79602 | 7.64196 | 9.05499 | 9.79927 | 11.4406 | 11.217  |
| SAMD9L       | 7.57467 | 7.42009 | 7.23545 | 5.57499 | 5.68416 | 5.51871 | 6.21434 | 5.50939 | 5.81023 |
| HEPACAM2     | 3.2078  | 3.52131 | 3.55095 | 2.97826 | 4.72627 | 3.93039 | 3.44032 | 3.60234 | 3.08436 |
| CALCR        | 4.10744 | 4.32973 | 4.10181 | 4.33194 | 5.65985 | 4.71372 | 4.30988 | 4.64502 | 4.66215 |
| Mir653       | 2.85706 | 3.40212 | 2.28116 | 3.27717 | 2.45066 | 2.70969 | 2.90431 | 2.67833 | 2.92436 |
| mir489       | 4.35721 | 4.71911 | 4.3608  | 3.82864 | 5.3721  | 3.88931 | 4.02705 | 4.0214  | 4.27637 |
| TFPI2        | 4.82495 | 4.54321 | 4.86041 | 5.16364 | 4.48233 | 5.08402 | 5.02661 | 5.495   | 4.78018 |
| BET1         | 5.59525 | 5.29512 | 5.50445 | 5.04705 | 5.35727 | 5.14865 | 4.98162 | 5.22049 | 5.21017 |
| PON1         | 4.5065  | 4.46207 | 4.66332 | 4.64671 | 5.29738 | 5.01331 | 4.2361  | 4.47291 | 4.31451 |
| PON3         | 7.41224 | 6.45317 | 7.31791 | 5.33099 | 5.42062 | 5.1985  | 6.13651 | 4.9158  | 4.33226 |
| PON2         | 10.1485 | 9.97147 | 10.2904 | 9.06873 | 6.22881 | 7.85472 | 9.45989 | 7.7531  | 8.34401 |
| MIR591       | 5.56975 | 5.60855 | 6.16615 | 4.41667 | 4.39173 | 3.76891 | 4.4966  | 4.9855  | 5.29643 |
| C7orf76      | 4.68529 | 4.58961 | 4.68549 | 4.70285 | 5.40156 | 4.85416 | 4.90705 | 4.92338 | 5.03584 |
| LOC100506136 | 4.62935 | 4.95621 | 4.4283  | 4.67424 | 5.26432 | 4.81569 | 4.27496 | 4.62322 | 4.33808 |

|            |         |         |         |         |         |         |         |         |         |
|------------|---------|---------|---------|---------|---------|---------|---------|---------|---------|
| SHFM1      | 7.0352  | 7.26276 | 6.92407 | 7.30383 | 5.97543 | 6.5295  | 6.94144 | 6.46239 | 6.76803 |
| DLX6-AS1   | 4.79743 | 5.68864 | 4.85873 | 4.45462 | 5.64358 | 4.64958 | 4.75884 | 4.58614 | 4.47054 |
| DLX5       | 8.60792 | 9.17697 | 8.98841 | 8.83423 | 9.13668 | 8.63545 | 9.12714 | 8.85357 | 8.2523  |
| ASNS       | 6.93831 | 6.9392  | 6.89786 | 6.83398 | 6.67898 | 7.20273 | 6.85622 | 6.68062 | 7.30505 |
| MGC72080   | 10.1073 | 10.1826 | 10.1992 | 10.214  | 11.1638 | 9.62998 | 9.99556 | 9.74339 | 10.2945 |
| OCM2       | 4.95435 | 5.33263 | 5.16651 | 5.36334 | 5.73971 | 5.40052 | 5.36253 | 5.66263 | 5.33385 |
| TECPR1     | 6.65085 | 6.60691 | 6.43684 | 6.8196  | 6.26014 | 6.65761 | 6.5486  | 6.98423 | 6.65346 |
| BAIAP2L1   | 8.57393 | 8.30882 | 8.21226 | 8.35647 | 6.91849 | 9.40092 | 8.91692 | 9.5341  | 9.11511 |
| TMEM130    | 6.16259 | 6.5506  | 6.12851 | 6.47415 | 7.52706 | 6.58899 | 6.63883 | 7.02862 | 6.62318 |
| SMURF1     | 9.07433 | 8.75567 | 9.10444 | 9.11834 | 7.78071 | 10.3831 | 9.33205 | 9.99569 | 9.99082 |
| KPNA7      | 4.94378 | 4.99497 | 4.69576 | 5.31999 | 6.58558 | 7.56199 | 5.73467 | 8.27275 | 7.43977 |
| PDAP1      | 6.70467 | 7.11677 | 6.92179 | 7.15642 | 6.02402 | 7.80659 | 7.89892 | 7.53482 | 7.52509 |
| ZNF394     | 8.06926 | 7.4994  | 7.93802 | 7.12733 | 6.41538 | 7.40713 | 7.22905 | 7.72819 | 7.61491 |
| TRIM4      | 8.55487 | 8.33518 | 8.55498 | 7.61684 | 6.91307 | 7.42324 | 7.45467 | 7.3665  | 7.44579 |
| ZNF3       | 7.35225 | 7.71473 | 7.57192 | 6.54394 | 6.66166 | 6.13921 | 6.35648 | 6.43388 | 6.17471 |
| MCM7       | 7.99524 | 8.22194 | 8.19211 | 7.96324 | 6.55587 | 6.98136 | 7.69746 | 7.67569 | 7.43738 |
| mir25      | 6.35354 | 6.48923 | 6.21775 | 6.80498 | 6.62723 | 6.85369 | 6.40451 | 6.61561 | 6.36142 |
| mir93      | 5.46489 | 5.39023 | 5.80656 | 5.40917 | 6.06975 | 5.34622 | 4.5181  | 5.3585  | 5.43713 |
| MIR106B    | 6.77383 | 6.53027 | 6.74608 | 7.11735 | 7.65953 | 7.27356 | 6.99324 | 6.99351 | 7.11873 |
| GAL3ST4    | 6.93343 | 7.15889 | 6.77609 | 6.08768 | 6.7562  | 6.30406 | 6.65078 | 6.11644 | 6.3224  |
| GPC2       | 5.8189  | 6.02557 | 5.98588 | 6.63432 | 6.56924 | 6.70802 | 6.21649 | 6.32354 | 6.63291 |
| PMS2P1     | 6.98077 | 6.86245 | 7.31329 | 7.1955  | 7.25366 | 7.24761 | 7.33352 | 7.44481 | 7.78186 |
| Irch4      | 6.93967 | 6.82254 | 6.82238 | 6.90054 | 7.36283 | 7.33897 | 7.08003 | 6.93257 | 6.90967 |
| PCOLCE-AS1 | 5.88382 | 6.16381 | 6.07123 | 6.38514 | 6.7992  | 6.63542 | 5.99844 | 6.10189 | 6.02914 |
| TFR2       | 6.04115 | 5.78798 | 5.98923 | 6.46086 | 6.34119 | 6.46865 | 6.27393 | 6.13626 | 6.15316 |
| ACTL6B     | 4.96051 | 5.04731 | 4.73096 | 5.57507 | 5.03715 | 5.80971 | 5.24084 | 4.89673 | 5.45707 |

|             |         |         |         |         |         |         |         |         |         |
|-------------|---------|---------|---------|---------|---------|---------|---------|---------|---------|
| gigyf1      | 7.5809  | 7.42972 | 7.42616 | 7.22993 | 6.34312 | 7.43371 | 7.29789 | 7.15642 | 7.11573 |
| EPHB4       | 8.54518 | 8.33014 | 8.49313 | 8.90689 | 7.75628 | 8.21386 | 8.73402 | 8.05023 | 8.07607 |
| ufsp1       | 7.11668 | 7.26564 | 7.28897 | 7.92668 | 7.234   | 7.818   | 7.7282  | 7.6501  | 7.79665 |
| ACHE        | 5.83538 | 6.27421 | 6.20331 | 6.80424 | 7.17532 | 6.85513 | 6.67972 | 6.85111 | 6.56741 |
| VGf         | 6.09055 | 6.1682  | 6.11462 | 6.65427 | 7.04172 | 7.21592 | 6.57974 | 6.9754  | 6.61463 |
| MOGAT3      | 5.73263 | 5.85637 | 5.53278 | 6.40479 | 6.97639 | 6.85812 | 5.92678 | 6.17611 | 6.1107  |
| CLDN15      | 6.80232 | 6.60203 | 6.83499 | 6.68116 | 6.68316 | 6.83918 | 6.37879 | 6.53176 | 6.61739 |
| FIS1        | 7.35501 | 6.90738 | 7.0249  | 7.65512 | 5.77217 | 7.73802 | 8.02347 | 7.37674 | 7.21141 |
| MIR548O     | 2.86605 | 2.79504 | 2.81166 | 3.43722 | 3.83609 | 2.72335 | 3.09514 | 2.34247 | 2.70547 |
| rasa4       | 7.06047 | 6.83209 | 7.29336 | 5.71757 | 7.21346 | 5.96944 | 6.2087  | 6.80144 | 6.40838 |
| FBXL13      | 5.75365 | 5.61707 | 5.28399 | 5.18653 | 5.23984 | 5.34776 | 5.44822 | 4.89327 | 4.70601 |
| NAPEPLD     | 7.04842 | 7.47563 | 7.06978 | 5.62073 | 5.40629 | 4.53798 | 6.23889 | 4.47889 | 4.88772 |
| RPL19P12    | 5.84741 | 5.62243 | 5.86784 | 5.27175 | 5.4744  | 4.48643 | 4.74032 | 4.7785  | 5.23817 |
| DPY19L2P2   | 6.02617 | 5.63273 | 5.57127 | 6.56196 | 5.92476 | 5.82191 | 5.55173 | 6.11474 | 5.58779 |
| RELN        | 6.27689 | 6.0787  | 6.80505 | 5.76447 | 6.69346 | 6.35862 | 6.40179 | 6.10123 | 6.12217 |
| KMT2E-AS1   | 6.87968 | 6.73147 | 6.94098 | 6.96016 | 6.92153 | 6.68833 | 6.85884 | 6.58382 | 7.05451 |
| LINC01004   | 6.61613 | 7.38278 | 7.05858 | 5.42331 | 5.29145 | 5.46944 | 5.43876 | 5.80578 | 6.6416  |
| SRPK2       | 8.71597 | 8.72654 | 8.69611 | 8.22778 | 7.08863 | 8.35605 | 8.37824 | 9.26134 | 8.75737 |
| PUS7        | 7.53997 | 7.71501 | 7.72919 | 7.46589 | 5.02646 | 6.94742 | 8.12457 | 6.64433 | 7.14264 |
| EFCAB10     | 4.43327 | 4.38997 | 4.41928 | 4.60292 | 4.41693 | 4.57959 | 4.3069  | 4.30607 | 4.21683 |
| ATXN7L1     | 8.20145 | 8.12902 | 7.79336 | 6.73582 | 7.17662 | 6.36342 | 6.87365 | 6.4936  | 6.69764 |
| SYPL1       | 10.4844 | 10.3738 | 10.5964 | 10.5914 | 8.99313 | 10.3639 | 10.8578 | 10.1514 | 10.4465 |
| CCDC71L     | 6.84359 | 6.50823 | 6.56674 | 6.62335 | 6.81139 | 8.50096 | 7.85334 | 7.18592 | 7.92334 |
| COG5        | 9.81281 | 9.42788 | 9.70075 | 8.69773 | 6.65891 | 7.94165 | 8.57505 | 8.75229 | 8.7083  |
| SLC26A4-AS1 | 5.19459 | 5.18583 | 5.54097 | 5.72142 | 6.12198 | 5.43871 | 5.67259 | 5.73881 | 5.46885 |
| NRCAM       | 4.78363 | 4.882   | 5.14419 | 5.04154 | 5.17077 | 5.13784 | 5.28997 | 5.374   | 5.18832 |

|           |         |         |         |         |         |         |         |         |         |
|-----------|---------|---------|---------|---------|---------|---------|---------|---------|---------|
| PNPLA8    | 8.30528 | 7.93289 | 8.03636 | 7.89218 | 6.93582 | 8.9131  | 8.28607 | 8.2745  | 7.99335 |
| THAP5     | 6.66207 | 6.49191 | 6.84961 | 5.96558 | 4.94835 | 5.69793 | 6.34595 | 5.86258 | 5.47471 |
| C7orf66   | 2.90327 | 3.86691 | 3.5288  | 3.71783 | 5.98624 | 3.54495 | 3.45217 | 3.61526 | 3.77867 |
| IMMP2L    | 6.54218 | 6.39271 | 6.12685 | 4.79599 | 4.79228 | 5.16356 | 5.50348 | 4.58191 | 5.06278 |
| DOCK4     | 8.11577 | 7.71054 | 7.8449  | 7.31687 | 6.5574  | 6.80446 | 6.6629  | 8.22026 | 7.8775  |
| TMEM168   | 8.67328 | 8.85207 | 8.44739 | 7.99261 | 5.72298 | 6.40334 | 7.77621 | 7.13059 | 7.4803  |
| BMT2      | 8.1639  | 8.16737 | 8.17214 | 7.53318 | 6.20151 | 8.21542 | 8.02406 | 7.63542 | 7.28265 |
| GPR85     | 4.37315 | 4.29853 | 4.88213 | 4.75591 | 5.55142 | 4.08549 | 4.69456 | 4.07694 | 4.76865 |
| LINC00998 | 6.3259  | 6.59861 | 6.45359 | 6.93482 | 6.66606 | 6.38469 | 7.15555 | 6.51833 | 6.68553 |
| TFEC      | 4.37279 | 4.36385 | 4.52349 | 4.84455 | 4.50049 | 4.20452 | 4.22589 | 4.38359 | 4.34133 |
| ST7-AS1   | 5.03537 | 5.66548 | 5.3287  | 5.68571 | 5.50534 | 6.06712 | 5.32082 | 5.05651 | 5.29036 |
| ST7-AS2   | 4.50007 | 4.12252 | 4.21912 | 4.47442 | 4.52399 | 4.4903  | 4.67046 | 4.34439 | 4.30969 |
| WNT2      | 5.40238 | 4.80107 | 5.7983  | 5.87916 | 6.43094 | 6.03983 | 5.43961 | 5.72078 | 5.72474 |
| CTTNBP2   | 6.22928 | 7.36059 | 6.9442  | 5.14773 | 6.38498 | 5.96926 | 5.14268 | 5.50947 | 5.62304 |
| TSPAN12   | 6.00482 | 5.64804 | 6.11191 | 5.67095 | 6.03314 | 5.38598 | 5.65396 | 5.94415 | 5.64872 |
| AASS      | 8.95482 | 8.27935 | 8.5196  | 7.27878 | 7.17108 | 7.08347 | 7.75271 | 6.89924 | 6.96462 |
| FEZF1     | 5.34072 | 5.08736 | 5.49051 | 5.77398 | 6.48506 | 5.53285 | 5.45853 | 5.64381 | 5.91389 |
| CADPS2    | 7.16708 | 7.3518  | 7.60313 | 5.91037 | 5.65363 | 5.55755 | 5.5594  | 5.78761 | 5.77035 |
| RNF133    | 4.18316 | 4.04539 | 4.02652 | 3.84282 | 4.35319 | 4.25821 | 3.90103 | 3.66622 | 3.97335 |
| RNF148    | 6.22306 | 5.37536 | 6.08925 | 4.6971  | 5.59865 | 4.54294 | 4.06759 | 4.39075 | 4.86675 |
| IQUB      | 4.24935 | 4.36629 | 4.65363 | 4.51259 | 5.00909 | 4.52769 | 4.25063 | 4.24619 | 4.14107 |
| WASL      | 9.47639 | 9.35125 | 9.55332 | 9.46825 | 8.25365 | 10.0232 | 9.46204 | 9.9833  | 10.1532 |
| TMEM229A  | 4.93384 | 5.35895 | 5.05227 | 5.31598 | 6.21561 | 5.81054 | 5.20856 | 5.27604 | 5.21678 |
| GPR37     | 6.65858 | 6.3772  | 6.26585 | 7.15169 | 6.77614 | 7.10474 | 8.1087  | 6.712   | 7.27296 |
| C7orf77   | 4.1262  | 3.80923 | 4.17816 | 4.64824 | 5.4852  | 4.25874 | 4.01593 | 4.25103 | 4.10995 |
| POT1      | 7.22062 | 7.21597 | 7.3611  | 6.08735 | 4.92165 | 5.11578 | 6.38148 | 5.67982 | 5.44498 |

|           |         |         |         |         |         |         |         |         |         |
|-----------|---------|---------|---------|---------|---------|---------|---------|---------|---------|
| MIR592    | 4.28868 | 4.54967 | 4.2913  | 4.60971 | 5.38537 | 4.77655 | 4.47146 | 4.97523 | 4.66455 |
| ZNF800    | 9.93314 | 9.96985 | 9.8442  | 9.07758 | 7.83591 | 8.72363 | 8.9773  | 8.7097  | 9.56731 |
| GCC1      | 5.91352 | 6.00334 | 5.85536 | 5.84724 | 5.99941 | 5.93539 | 6.10681 | 5.94121 | 6.04457 |
| PAX4      | 5.47502 | 5.74603 | 5.7408  | 6.38715 | 6.72668 | 6.50731 | 5.85266 | 6.20182 | 6.33837 |
| LRRC4     | 5.67251 | 5.75009 | 5.77025 | 6.88178 | 5.95256 | 7.66314 | 7.07304 | 6.4928  | 6.95296 |
| RBM28     | 7.48794 | 7.76011 | 7.70314 | 6.94358 | 5.44387 | 6.42433 | 7.05401 | 6.48978 | 6.63127 |
| PRRT4     | 6.68666 | 6.72091 | 6.49209 | 7.04418 | 7.07401 | 6.95444 | 6.88045 | 6.96262 | 6.87636 |
| IMPDH1    | 7.4207  | 7.63989 | 7.39894 | 8.22027 | 7.16326 | 7.97454 | 8.92187 | 8.07237 | 8.05491 |
| KCP       | 6.46119 | 6.35907 | 6.51875 | 6.90649 | 7.48408 | 7.08896 | 7.19778 | 7.00635 | 7.04854 |
| TNPO3     | 9.10779 | 8.9461  | 8.91424 | 8.77994 | 6.80208 | 8.61693 | 9.01997 | 8.98101 | 8.96807 |
| mir182    | 4.05669 | 4.47134 | 4.22372 | 4.86296 | 4.37317 | 4.94484 | 5.1612  | 4.49847 | 5.30844 |
| mir96     | 4.33442 | 4.29707 | 4.09767 | 3.60375 | 5.19262 | 4.54609 | 4.23508 | 4.37544 | 4.45054 |
| mir183    | 3.76567 | 3.63831 | 3.049   | 3.61867 | 3.67661 | 3.49845 | 3.459   | 3.55603 | 3.07275 |
| UBE2H     | 8.80144 | 8.70699 | 8.52559 | 8.59853 | 6.80361 | 9.39053 | 8.91474 | 9.83022 | 9.32327 |
| TMEM209   | 8.27247 | 8.18812 | 8.45451 | 7.1419  | 5.67501 | 6.08209 | 7.55569 | 7.16847 | 7.14375 |
| CEP41     | 6.38888 | 5.91371 | 6.09174 | 6.34339 | 5.88459 | 5.60743 | 6.356   | 5.91082 | 6.25372 |
| KLF14     | 5.47613 | 5.62565 | 5.56063 | 6.28743 | 6.508   | 6.57434 | 6.13608 | 5.69445 | 5.92866 |
| Mir29a    | 3.94009 | 4.34079 | 3.87542 | 3.60409 | 3.23084 | 3.7831  | 4.06181 | 4.41744 | 5.17108 |
| Mir29b1   | 2.28664 | 2.11325 | 2.29841 | 2.73021 | 2.41539 | 1.99405 | 2.04504 | 2.47579 | 2.82679 |
| LINC-PINT | 8.07435 | 7.42984 | 8.42498 | 7.33975 | 6.90092 | 8.24421 | 6.82388 | 9.54477 | 10.3771 |
| PODXL     | 7.13821 | 6.94975 | 7.98016 | 6.70194 | 5.86991 | 6.64336 | 6.63367 | 7.8521  | 7.71207 |
| PLXNA4    | 6.25426 | 6.37952 | 6.74531 | 6.32857 | 6.71823 | 6.70233 | 6.48215 | 6.44078 | 6.38722 |
| CHCHD3    | 6.81147 | 6.73613 | 6.87034 | 6.25686 | 5.53562 | 5.77431 | 6.83652 | 6.48294 | 6.63546 |
| C7orf49   | 7.2789  | 7.23707 | 7.34454 | 6.65708 | 6.61727 | 6.49425 | 7.53803 | 6.49487 | 6.7794  |
| WDR91     | 8.08587 | 7.70657 | 7.86386 | 7.56864 | 7.02853 | 7.10156 | 8.01833 | 7.66808 | 7.9295  |
| LOC349160 | 4.55129 | 4.41307 | 4.33862 | 5.04278 | 5.52712 | 4.8944  | 4.88368 | 4.83722 | 4.5758  |

|              |         |         |         |         |         |         |         |         |         |
|--------------|---------|---------|---------|---------|---------|---------|---------|---------|---------|
| PTN          | 6.95762 | 6.69197 | 6.11402 | 6.20373 | 6.28625 | 5.98717 | 5.47639 | 5.87633 | 5.801   |
| CREB3L2      | 7.97631 | 7.91426 | 8.33796 | 7.70655 | 6.64224 | 7.10254 | 7.80906 | 8.13525 | 8.05005 |
| SVOPL        | 4.56242 | 4.58934 | 5.23188 | 4.62204 | 5.31571 | 4.64427 | 4.90316 | 4.6886  | 4.79895 |
| KIAA1549     | 6.13016 | 5.94982 | 6.34661 | 5.93349 | 6.38503 | 6.35273 | 5.98832 | 5.89084 | 6.0702  |
| LUC7L2       | 7.44454 | 8.12333 | 7.47483 | 6.60694 | 6.25852 | 6.30043 | 6.92194 | 5.60736 | 5.84304 |
| HIPK2        | 9.77228 | 9.52125 | 9.56644 | 9.91698 | 8.08971 | 9.71277 | 9.86594 | 9.40629 | 10.1298 |
| KDM7A        | 9.07303 | 9.39625 | 9.25711 | 9.21439 | 7.43809 | 10.2161 | 8.97234 | 9.76682 | 9.94548 |
| MKRN1        | 6.26598 | 5.99266 | 6.15698 | 5.59456 | 5.6098  | 5.64851 | 5.88617 | 6.97475 | 6.11996 |
| DENND2A      | 5.09632 | 5.38569 | 5.68423 | 6.43412 | 6.13803 | 6.85512 | 6.07746 | 6.02018 | 6.18795 |
| NDUFB2-AS1   | 6.59729 | 6.61167 | 6.62141 | 6.90726 | 6.8599  | 7.16546 | 6.78625 | 6.84757 | 6.92268 |
| BRAF         | 9.85808 | 9.94498 | 9.59233 | 8.91114 | 7.68063 | 9.38092 | 8.90437 | 9.37919 | 9.36163 |
| MRPS33       | 6.41828 | 6.53153 | 5.97627 | 7.14635 | 6.96669 | 7.10272 | 7.56764 | 6.30195 | 6.36565 |
| KIAA1147     | 8.14021 | 7.93232 | 8.03519 | 7.2624  | 5.82742 | 6.87247 | 7.99729 | 6.95099 | 7.44491 |
| TRY2P        | 3.51028 | 3.38024 | 3.79518 | 4.05364 | 5.40413 | 4.50497 | 3.76027 | 3.80346 | 4.31543 |
| EPHA1        | 8.74492 | 8.73636 | 8.29136 | 8.56055 | 6.98993 | 8.55869 | 8.68824 | 8.42422 | 8.32327 |
| ARHGEF35     | 8.8249  | 10.0221 | 10.6304 | 8.70281 | 7.41282 | 8.75238 | 10.0995 | 9.8962  | 9.78047 |
| NOBOX        | 5.42917 | 4.82211 | 5.39404 | 6.11217 | 6.20292 | 5.9102  | 5.42211 | 5.47641 | 5.41137 |
| TPK1         | 5.67577 | 5.58008 | 6.04992 | 5.88442 | 6.17153 | 6.09243 | 5.77108 | 5.87183 | 5.08257 |
| EZH2         | 8.701   | 8.56766 | 8.38088 | 7.97211 | 5.99429 | 7.30195 | 8.04242 | 8.39129 | 8.08236 |
| ZNF786       | 7.41261 | 7.65973 | 7.4062  | 7.59917 | 5.7046  | 7.50044 | 7.56565 | 6.19334 | 6.87548 |
| ZNF425       | 5.35636 | 5.34928 | 5.33041 | 5.47099 | 5.1297  | 5.40992 | 5.49478 | 5.06016 | 5.29508 |
| ZNF777       | 7.35294 | 7.19669 | 7.41253 | 7.46037 | 6.95288 | 7.71078 | 7.86267 | 7.52721 | 7.57571 |
| ZNF746       | 7.629   | 7.71417 | 7.81455 | 7.80049 | 7.40927 | 7.84092 | 7.32352 | 7.94159 | 8.16944 |
| ZNF767P      | 8.70219 | 9.04564 | 8.92878 | 7.14732 | 6.39873 | 6.68602 | 7.07846 | 7.41791 | 7.67754 |
| ZNF467       | 6.44533 | 6.16086 | 6.22124 | 7.15472 | 6.91386 | 7.70393 | 7.44088 | 7.03878 | 7.02489 |
| ATP6VOE2-AS1 | 6.54545 | 6.67894 | 6.40449 | 6.84148 | 7.36477 | 7.04187 | 6.74325 | 6.67508 | 6.91273 |

|           |         |         |         |         |         |         |         |         |         |
|-----------|---------|---------|---------|---------|---------|---------|---------|---------|---------|
| ACTR3C    | 7.20394 | 6.76626 | 6.21303 | 6.06089 | 5.84506 | 5.57432 | 6.56794 | 5.33042 | 6.10834 |
| RARRES2   | 6.11512 | 6.66034 | 6.66888 | 6.85241 | 6.78557 | 6.73877 | 6.88667 | 7.1979  | 6.53572 |
| TMEM176B  | 6.8802  | 6.92833 | 7.27121 | 7.50373 | 7.81156 | 7.60517 | 7.89613 | 7.06768 | 7.32856 |
| ATG9B     | 9.59117 | 9.22726 | 8.79716 | 9.14499 | 9.18106 | 8.20889 | 8.36668 | 10.5567 | 9.76727 |
| CDK5      | 7.98239 | 7.3904  | 7.68057 | 7.94129 | 6.50581 | 7.53446 | 8.25443 | 7.10142 | 7.4808  |
| FASTK     | 7.4841  | 7.66969 | 7.68588 | 8.39957 | 7.27186 | 7.72502 | 8.17893 | 7.54678 | 7.7339  |
| TMUB1     | 7.39749 | 7.29722 | 7.54631 | 8.50432 | 7.52521 | 8.52134 | 8.24338 | 8.05493 | 7.98759 |
| GBX1      | 5.94573 | 5.72709 | 5.77363 | 6.42352 | 6.37333 | 6.49594 | 6.1061  | 6.30353 | 6.10837 |
| ASB10     | 5.61033 | 5.74088 | 5.86164 | 6.03079 | 6.3235  | 6.15459 | 5.94602 | 6.11767 | 6.06819 |
| WDR86     | 6.50727 | 6.50758 | 6.38017 | 6.97391 | 7.00866 | 7.30181 | 6.86354 | 6.99831 | 6.95635 |
| MIR3907   | 9.2486  | 9.07646 | 9.26843 | 9.62166 | 11.6062 | 10.0556 | 9.2656  | 9.89328 | 9.67307 |
| RHEB      | 7.2402  | 6.40938 | 7.18241 | 6.84715 | 6.39418 | 6.00987 | 7.17187 | 6.70319 | 7.04181 |
| KMT2C     | 10.8781 | 10.998  | 10.9004 | 9.23345 | 7.9856  | 9.60536 | 9.27074 | 10.2281 | 10.1742 |
| XRCC2     | 6.59101 | 6.66376 | 6.73034 | 6.88184 | 6.0788  | 6.03862 | 6.54049 | 6.46071 | 6.8382  |
| PAXIP1    | 7.98168 | 8.24502 | 8.11612 | 7.35225 | 6.37238 | 6.71949 | 7.71452 | 6.76154 | 6.92659 |
| CNPY1     | 4.09538 | 4.40808 | 4.21123 | 4.54229 | 5.58039 | 5.13679 | 4.89272 | 4.75208 | 4.67199 |
| SHH       | 5.86667 | 5.98451 | 6.2872  | 6.49792 | 6.69079 | 6.43188 | 6.26132 | 6.33247 | 6.43534 |
| LOC285889 | 5.08689 | 5.57337 | 5.31232 | 5.08432 | 5.9171  | 5.27134 | 5.23343 | 5.52973 | 5.62577 |
| C7orf13   | 6.06147 | 6.43873 | 6.21464 | 6.3838  | 6.16459 | 6.13519 | 5.81283 | 6.01759 | 6.05067 |
| LMBR1     | 9.6164  | 9.06916 | 9.41941 | 8.61075 | 6.90416 | 8.39809 | 9.14344 | 10.0336 | 9.31965 |
| MNX1      | 5.70767 | 5.47507 | 5.70587 | 6.50353 | 6.11935 | 6.59508 | 6.10484 | 6.13098 | 6.50157 |
| MIR153-2  | 5.27892 | 4.88419 | 4.89827 | 3.4371  | 7.95606 | 4.47287 | 4.891   | 3.01771 | 4.94562 |
| MIR595    | 3.7248  | 4.13221 | 4.35852 | 3.92286 | 4.78856 | 4.08185 | 3.56346 | 3.99105 | 3.78457 |
| ESYT2     | 10.0339 | 9.84765 | 10.4305 | 9.35366 | 8.59931 | 9.88377 | 9.78973 | 10.1305 | 9.87175 |
| VIPR2     | 5.19452 | 5.64322 | 5.62911 | 6.07054 | 6.53647 | 6.03699 | 6.19083 | 6.36855 | 6.04638 |
| ZNF596    | 6.75119 | 6.72931 | 7.15839 | 5.46099 | 6.22446 | 5.01955 | 6.04617 | 5.26073 | 5.86706 |



|             |         |         |         |         |         |         |         |         |         |
|-------------|---------|---------|---------|---------|---------|---------|---------|---------|---------|
| FBXO25      | 7.24969 | 7.41135 | 7.58987 | 7.3198  | 7.09083 | 7.90941 | 7.76441 | 7.14281 | 7.15806 |
| MIR596      | 6.94969 | 6.42134 | 6.51623 | 8.17672 | 7.25255 | 7.46479 | 7.96475 | 7.32106 | 7.10926 |
| ARHGEF10    | 7.37136 | 7.36525 | 7.55325 | 6.68075 | 6.4621  | 6.3531  | 6.24805 | 6.9641  | 6.94418 |
| KBTBD11     | 5.23954 | 5.18996 | 5.60571 | 6.0477  | 5.73329 | 6.39797 | 5.87685 | 5.97519 | 5.81538 |
| mcph1       | 7.80595 | 7.99133 | 7.82053 | 7.01441 | 5.46003 | 6.26243 | 7.14142 | 6.46039 | 6.67237 |
| MIR4659A    | 4.02697 | 3.72164 | 4.7396  | 2.56271 | 2.5853  | 2.3188  | 2.95368 | 3.33668 | 2.10878 |
| GS1-24F4.2  | 5.57851 | 5.64349 | 5.75289 | 5.99007 | 6.18488 | 6.11272 | 6.33682 | 6.34296 | 6.0474  |
| Spag11a     | 4.24283 | 4.98464 | 4.46778 | 4.75232 | 7.61104 | 4.95601 | 4.62994 | 4.7642  | 5.27788 |
| ZNF705B     | 4.34019 | 4.18511 | 4.33307 | 4.242   | 5.12387 | 4.77538 | 3.85039 | 4.13419 | 4.46082 |
| CLDN23      | 6.05196 | 5.94832 | 6.18334 | 7.10007 | 6.21254 | 6.66074 | 6.70863 | 6.49335 | 6.36322 |
| ERI1        | 6.81561 | 6.75261 | 6.72567 | 6.8496  | 6.72665 | 6.96052 | 7.18798 | 7.46138 | 7.26985 |
| MIR4660     | 6.01695 | 5.90463 | 6.16044 | 5.61842 | 6.61277 | 5.82201 | 5.99631 | 6.04947 | 5.72186 |
| LOC157273   | 5.02872 | 4.71352 | 4.5472  | 4.84564 | 6.18991 | 5.888   | 5.33525 | 4.88348 | 5.31892 |
| MIR597      | 7.75904 | 7.5164  | 7.45273 | 5.02527 | 6.1202  | 4.76909 | 5.03802 | 6.01903 | 6.27322 |
| MSRA        | 6.74931 | 6.54824 | 6.91648 | 6.53466 | 6.72943 | 6.79904 | 6.79895 | 6.58489 | 6.80055 |
| MIR4286     | 2.38546 | 2.47739 | 2.49204 | 2.45765 | 4.54717 | 3.14466 | 3.00468 | 2.60209 | 2.35148 |
| C8orf74     | 5.27447 | 5.30809 | 5.55578 | 6.0288  | 5.95302 | 5.83818 | 5.52595 | 5.73311 | 5.77501 |
| MTMR9       | 7.83976 | 7.84461 | 7.90311 | 7.51166 | 5.42896 | 7.16875 | 8.05928 | 7.49289 | 7.96851 |
| tdh         | 5.19564 | 5.22382 | 5.03438 | 5.56327 | 6.28285 | 5.65016 | 5.47901 | 5.34883 | 5.94213 |
| FAM167A-AS1 | 4.85468 | 5.14937 | 4.79823 | 5.16271 | 5.43425 | 5.35006 | 4.77721 | 5.29648 | 5.2923  |
| BLK         | 5.61663 | 5.66312 | 5.72395 | 6.1467  | 6.02226 | 6.5629  | 5.96332 | 6.1763  | 6.35072 |
| LINC00208   | 4.21274 | 4.45774 | 4.17356 | 4.29982 | 5.57552 | 4.56436 | 4.31174 | 4.47208 | 4.48675 |
| GATA4       | 5.40456 | 5.29044 | 5.46992 | 5.98076 | 6.27032 | 6.48886 | 5.82992 | 6.28782 | 6.08996 |
| NEIL2       | 6.41167 | 6.46643 | 6.46918 | 6.62384 | 6.29496 | 6.28884 | 7.00004 | 6.57575 | 6.319   |
| FDFT1       | 7.67815 | 7.07997 | 7.35176 | 6.92562 | 6.08585 | 6.90169 | 7.43602 | 7.06743 | 7.39581 |
| ZNF705D     | 5.15812 | 4.33086 | 4.9852  | 5.07062 | 6.7859  | 4.89698 | 5.02914 | 5.21851 | 4.79945 |

|              |         |         |         |         |         |         |         |         |         |
|--------------|---------|---------|---------|---------|---------|---------|---------|---------|---------|
| LOC100506990 | 9.30727 | 9.24915 | 9.22308 | 7.89462 | 9.78369 | 7.22076 | 7.32789 | 7.34086 | 7.72598 |
| MIR3926-1    | 5.78667 | 6.24693 | 5.46651 | 5.59976 | 5.99071 | 4.86939 | 6.34774 | 6.3759  | 6.13681 |
| KIAA1456     | 5.75716 | 6.13146 | 5.79903 | 5.00927 | 5.99071 | 5.67708 | 5.36869 | 5.6928  | 5.51091 |
| c8orf48      | 5.12721 | 5.84311 | 5.14251 | 5.48849 | 5.57917 | 5.6673  | 5.47007 | 5.23064 | 5.83531 |
| TUSC3        | 7.91442 | 7.65083 | 7.89953 | 7.98133 | 5.85547 | 7.40442 | 7.60699 | 8.15492 | 7.90475 |
| VPS37A       | 8.50618 | 8.68342 | 8.67088 | 7.78959 | 6.72879 | 7.45319 | 7.99521 | 8.08355 | 8.11429 |
| PDGFRL       | 7.37827 | 6.88882 | 7.50192 | 6.70245 | 6.19931 | 6.06391 | 5.91554 | 5.72188 | 5.66216 |
| PCM1         | 9.41421 | 9.64348 | 9.72327 | 8.27122 | 6.27143 | 7.73682 | 8.61636 | 8.21451 | 8.39753 |
| nat1         | 5.10794 | 4.88372 | 4.9186  | 5.04078 | 5.19392 | 5.16438 | 5.05208 | 4.70857 | 4.79797 |
| NAT2         | 3.26702 | 3.4066  | 3.15824 | 3.30329 | 4.35779 | 4.08447 | 3.25428 | 3.68031 | 3.32188 |
| SH2D4A       | 7.6244  | 8.98768 | 7.79919 | 7.7299  | 6.04821 | 7.50586 | 8.07447 | 7.79751 | 8.13336 |
| INTS10       | 8.08015 | 7.83846 | 8.13355 | 7.21933 | 6.20732 | 6.90106 | 7.646   | 6.54142 | 6.68953 |
| LPL          | 4.48308 | 4.62814 | 5.29458 | 4.5447  | 5.115   | 4.53209 | 4.5528  | 4.48974 | 4.7338  |
| LOC286114    | 4.78182 | 4.8566  | 4.71597 | 5.13886 | 5.8531  | 4.76576 | 4.84899 | 4.48167 | 4.97504 |
| XPO7         | 9.74233 | 9.59502 | 9.77673 | 9.11327 | 7.51697 | 8.54373 | 9.19537 | 9.33584 | 9.26676 |
| NPM2         | 6.3588  | 6.37716 | 6.31774 | 6.8754  | 6.81703 | 6.97769 | 6.67174 | 6.91472 | 7.0533  |
| FGF17        | 6.06738 | 6.31183 | 6.31183 | 6.33446 | 7.20015 | 6.83218 | 6.25549 | 6.74074 | 6.52202 |
| DMTN         | 6.45984 | 6.61022 | 6.925   | 6.7767  | 6.11125 | 7.3836  | 7.33825 | 7.01294 | 7.18281 |
| SFTPC        | 5.36148 | 5.93077 | 5.43188 | 6.19693 | 6.32188 | 6.48621 | 5.85286 | 6.16318 | 6.1092  |
| BMP1         | 7.11948 | 6.65051 | 6.89087 | 7.34744 | 6.30698 | 6.72039 | 6.98629 | 7.1163  | 6.98077 |
| PIWIL2       | 5.0591  | 5.60553 | 5.53797 | 4.56341 | 6.18177 | 5.72709 | 4.84225 | 5.39215 | 5.08634 |
| SORBS3       | 6.74967 | 6.99012 | 7.03388 | 7.24823 | 6.32845 | 6.94005 | 6.98724 | 7.12841 | 6.92311 |
| PDLIM2       | 8.07613 | 7.9114  | 8.05117 | 8.53711 | 7.74669 | 8.12324 | 8.25835 | 8.36378 | 8.21088 |
| C8orf58      | 6.76201 | 6.61253 | 6.65777 | 7.08525 | 6.56633 | 6.6566  | 6.85709 | 7.07255 | 6.76299 |
| CCAR2        | 7.86918 | 7.71745 | 7.88146 | 7.52202 | 6.70254 | 6.71767 | 7.73598 | 7.2046  | 7.28878 |
| RHOBTB2      | 6.4856  | 6.88351 | 6.73099 | 6.6139  | 5.83119 | 6.34694 | 6.257   | 6.38047 | 6.30624 |

|              |         |         |         |         |         |         |         |         |         |
|--------------|---------|---------|---------|---------|---------|---------|---------|---------|---------|
| LOC389641    | 6.08859 | 5.88302 | 6.07098 | 6.12241 | 6.55758 | 6.31037 | 6.50204 | 6.32684 | 5.72385 |
| CHMP7        | 7.0261  | 6.72514 | 6.78236 | 6.59106 | 6.33281 | 6.77145 | 6.87325 | 6.80565 | 6.96971 |
| R3HCC1       | 7.35119 | 7.27119 | 7.44514 | 6.9666  | 6.45737 | 7.0445  | 7.20531 | 7.11204 | 7.0024  |
| LOC100507156 | 5.50856 | 5.52067 | 5.52854 | 6.02847 | 6.64764 | 5.998   | 5.90502 | 6.12118 | 6.09526 |
| ADAM28       | 6.06586 | 5.90925 | 6.15171 | 5.53049 | 6.14613 | 5.18448 | 5.4092  | 5.35263 | 5.214   |
| ADAM7        | 4.54258 | 4.85486 | 4.83406 | 4.63621 | 6.06013 | 5.35134 | 4.97982 | 4.92484 | 5.32351 |
| DOCK5        | 7.92694 | 7.7426  | 7.98804 | 7.37267 | 6.13266 | 6.76889 | 7.25468 | 8.4777  | 8.13179 |
| CDCA2        | 6.00168 | 5.71952 | 5.36148 | 6.06052 | 5.48636 | 5.8318  | 5.9873  | 6.13631 | 5.46544 |
| BNIP3L       | 11.9519 | 11.8146 | 11.6656 | 11.6761 | 12.0703 | 12.2152 | 11.7275 | 12.161  | 11.872  |
| DPYSL2       | 7.72613 | 7.81987 | 8.84067 | 6.89497 | 6.18937 | 6.70102 | 7.5118  | 7.13022 | 7.49308 |
| PTK2B        | 7.7582  | 7.39779 | 7.69583 | 7.54187 | 6.79187 | 7.85201 | 7.52587 | 7.44429 | 7.7483  |
| MIR3622A     | 7.02615 | 7.29183 | 6.93256 | 7.49955 | 8.21345 | 7.53827 | 7.18577 | 7.24242 | 7.82162 |
| ESCO2        | 4.67174 | 3.92303 | 4.06983 | 4.67786 | 3.78241 | 4.02249 | 4.00593 | 4.21551 | 4.22073 |
| ELP3         | 7.95006 | 8.40966 | 8.28878 | 7.8231  | 6.70639 | 7.24451 | 7.90554 | 7.12336 | 7.70304 |
| PNOC         | 6.16447 | 6.25746 | 6.16038 | 6.96594 | 7.94162 | 7.11945 | 6.32983 | 6.71159 | 6.85921 |
| FZD3         | 7.3159  | 7.28435 | 7.18756 | 6.44167 | 5.72886 | 5.58231 | 6.82889 | 5.38323 | 6.00072 |
| EXTL3        | 6.46547 | 6.11732 | 6.48463 | 6.77083 | 6.48632 | 7.0378  | 6.71804 | 7.15659 | 6.67311 |
| HMBX1        | 8.55755 | 8.22917 | 8.38338 | 6.79012 | 5.79973 | 6.04394 | 6.76141 | 6.79512 | 7.35437 |
| FAM183CP     | 5.40658 | 5.43139 | 5.52555 | 6.00471 | 6.6497  | 6.19894 | 5.44011 | 5.91134 | 5.37783 |
| SARAF        | 5.83934 | 5.75041 | 5.89157 | 7.554   | 6.2135  | 7.82696 | 7.93054 | 6.60974 | 6.5823  |
| LEPROTL1     | 7.23167 | 7.08864 | 6.87268 | 7.35806 | 7.1302  | 7.49453 | 7.11669 | 6.65398 | 7.25391 |
| DCTN6        | 10.8849 | 10.5658 | 11.0193 | 10.1947 | 9.93896 | 10.3061 | 10.7174 | 10.7506 | 11.0433 |
| RBPM5        | 7.59843 | 7.36478 | 8.17971 | 6.99206 | 5.86001 | 6.6363  | 7.13649 | 7.03228 | 6.93674 |
| smim18       | 3.02876 | 3.22986 | 2.89458 | 3.26877 | 2.90324 | 3.25939 | 3.68925 | 3.09965 | 3.33256 |
| UBXN8        | 7.13348 | 7.24294 | 7.49556 | 6.99285 | 6.40302 | 6.53786 | 7.15034 | 6.70996 | 6.8632  |
| NRG1         | 7.7336  | 6.20052 | 6.83438 | 9.13276 | 6.86605 | 7.26582 | 7.79746 | 9.04124 | 9.59533 |

|              |         |         |         |         |         |         |         |         |         |
|--------------|---------|---------|---------|---------|---------|---------|---------|---------|---------|
| NRG1-IT3     | 3.55842 | 3.73532 | 3.95638 | 3.84954 | 5.32111 | 4.29534 | 4.00195 | 3.85372 | 4.30896 |
| MAK16        | 7.89169 | 7.90451 | 8.16462 | 7.32178 | 6.45122 | 6.87802 | 7.81511 | 6.79645 | 7.40603 |
| UNC5D        | 5.53397 | 5.78644 | 5.36808 | 5.59734 | 6.57893 | 6.14792 | 4.92446 | 5.62442 | 5.86387 |
| ZNF703       | 7.49219 | 6.93182 | 6.83446 | 6.85892 | 5.05743 | 7.35901 | 6.62038 | 6.27964 | 6.44229 |
| ERLIN2       | 7.26766 | 7.36842 | 7.4203  | 6.79477 | 6.74238 | 6.4863  | 7.07287 | 6.50922 | 6.90592 |
| PROSC        | 8.80655 | 8.27802 | 8.87792 | 7.75581 | 6.4463  | 7.4403  | 8.04621 | 7.41061 | 7.7128  |
| ADGRA2       | 7.66786 | 7.26638 | 7.82592 | 7.46935 | 6.30406 | 7.00735 | 7.58128 | 6.79251 | 6.90405 |
| EIF4EBP1     | 6.88093 | 6.85125 | 7.06507 | 9.41128 | 8.10399 | 9.88371 | 9.79353 | 9.49655 | 9.21167 |
| bag4         | 7.83788 | 7.93425 | 7.92676 | 7.73341 | 6.30395 | 7.19693 | 7.64348 | 7.25552 | 7.26742 |
| DDHD2        | 7.69738 | 7.95649 | 7.99574 | 7.2142  | 5.79355 | 6.73023 | 7.75128 | 6.91646 | 7.31036 |
| whsc1l1      | 5.21565 | 5.10067 | 5.23792 | 6.34972 | 5.02439 | 5.40012 | 7.10353 | 5.12867 | 5.30295 |
| letm2        | 5.74766 | 5.67933 | 5.62817 | 6.35578 | 6.22717 | 6.2236  | 6.36931 | 6.87785 | 6.74459 |
| HTRA4        | 5.74933 | 6.28901 | 6.27345 | 6.46945 | 7.29113 | 6.2788  | 5.68923 | 6.01091 | 6.18508 |
| ADAM9        | 9.40977 | 9.05825 | 9.19202 | 9.38543 | 8.94157 | 10.2342 | 9.44769 | 10.9882 | 10.2458 |
| ADAM32       | 5.45207 | 5.20819 | 5.55011 | 5.29888 | 5.41005 | 4.25489 | 5.51588 | 5.30338 | 5.32318 |
| LOC100130964 | 3.51652 | 3.6949  | 3.15157 | 3.6716  | 3.72529 | 3.69276 | 3.89027 | 3.54288 | 3.12401 |
| ADAM18       | 4.22183 | 4.30709 | 4.23911 | 4.48026 | 5.45468 | 4.73347 | 4.78175 | 4.43172 | 4.32993 |
| c8orf4       | 5.66266 | 5.52277 | 5.40637 | 5.67198 | 4.7859  | 5.01453 | 5.51629 | 5.31816 | 5.76818 |
| GOLGA7       | 10.854  | 10.8265 | 10.6993 | 10.3226 | 10.6378 | 9.95139 | 10.3285 | 11.0715 | 10.4204 |
| GINS4        | 5.26226 | 5.02196 | 5.48449 | 5.46991 | 5.42543 | 5.67818 | 5.39325 | 5.36033 | 5.52118 |
| MIR486-1     | 7.14709 | 7.21726 | 7.62023 | 7.67023 | 8.7729  | 8.29277 | 7.48082 | 8.01977 | 8.03603 |
| VDAC3        | 10.2077 | 10.0034 | 10.0217 | 9.56698 | 7.56864 | 9.3535  | 9.77272 | 9.38244 | 9.35471 |
| SMIM19       | 8.27958 | 7.99133 | 8.2431  | 7.51901 | 7.54744 | 7.25942 | 7.95717 | 7.07048 | 7.29473 |
| HOOK3        | 9.79737 | 9.77309 | 9.52459 | 9.01578 | 5.89363 | 9.38044 | 9.08818 | 8.93908 | 9.19259 |
| POMK         | 8.46069 | 8.60179 | 8.21811 | 7.67343 | 6.04496 | 6.74336 | 7.44945 | 7.39944 | 7.56163 |
| HGSNAT       | 8.79259 | 8.84986 | 8.98153 | 8.296   | 6.93515 | 7.86108 | 8.45434 | 8.33003 | 8.41556 |

|              |         |         |         |         |         |         |         |         |         |
|--------------|---------|---------|---------|---------|---------|---------|---------|---------|---------|
| LINC00293    | 3.53691 | 3.71127 | 4.26014 | 4.35496 | 5.90705 | 5.31728 | 4.18768 | 4.36968 | 4.67415 |
| LOC100287846 | 5.58936 | 5.38433 | 5.28635 | 4.64453 | 6.26726 | 5.38986 | 5.17112 | 6.15224 | 5.239   |
| SPIDR        | 7.85838 | 7.99518 | 7.91693 | 6.84284 | 6.87296 | 6.53886 | 7.32211 | 6.99888 | 7.01787 |
| MCM4         | 8.25168 | 8.24054 | 8.45535 | 8.33761 | 5.82304 | 7.07473 | 8.34589 | 6.91071 | 7.26291 |
| UBE2V2       | 6.92884 | 7.22191 | 6.92258 | 7.61466 | 6.32351 | 7.9135  | 7.75815 | 7.97346 | 7.45429 |
| C8ORF22      | 4.76064 | 4.98477 | 4.77423 | 4.97288 | 5.73343 | 5.54096 | 5.18633 | 4.87266 | 5.07218 |
| PCMTD1       | 5.12735 | 5.33248 | 4.9151  | 6.31743 | 5.69016 | 5.44288 | 6.6465  | 5.07738 | 4.96804 |
| NPBWR1       | 6.16608 | 5.95686 | 6.00613 | 6.78169 | 6.49387 | 7.04195 | 6.50371 | 6.58525 | 6.5075  |
| RGS20        | 5.85892 | 5.58106 | 5.45879 | 6.64197 | 6.43378 | 7.5421  | 7.16265 | 6.68219 | 7.08594 |
| MRPL15       | 8.49162 | 8.57141 | 8.41745 | 8.88776 | 5.97622 | 8.03799 | 8.80434 | 7.69993 | 8.19603 |
| SOX17        | 6.17106 | 5.89044 | 6.23609 | 6.38152 | 6.13276 | 6.17581 | 6.39531 | 6.16409 | 6.38539 |
| RP1          | 4.63672 | 4.74218 | 4.89505 | 5.07399 | 5.19108 | 4.97808 | 4.6702  | 4.79634 | 4.60563 |
| TGS1         | 7.62294 | 7.61647 | 7.79819 | 7.31617 | 6.36901 | 7.10839 | 8.13047 | 7.01794 | 7.30293 |
| LYN          | 7.89712 | 7.2513  | 7.8721  | 6.9032  | 6.88594 | 7.88731 | 8.04978 | 8.87975 | 8.28593 |
| CHCHD7       | 4.89551 | 4.99497 | 5.17003 | 4.70984 | 5.56595 | 4.78722 | 5.30025 | 4.5109  | 5.06152 |
| LINC01606    | 5.30752 | 5.04512 | 4.908   | 5.25058 | 6.07341 | 6.10289 | 5.39995 | 5.55589 | 5.80759 |
| LOC286177    | 4.80903 | 5.0238  | 4.95786 | 5.65751 | 5.84716 | 5.916   | 5.42332 | 5.43264 | 5.33832 |
| LINC00588    | 2.86076 | 3.11983 | 2.84033 | 3.33957 | 3.32326 | 3.59914 | 3.86361 | 3.90246 | 3.77912 |
| UBXN2B       | 6.8669  | 6.84552 | 7.11097 | 5.84281 | 5.1033  | 5.54019 | 6.11781 | 4.82701 | 5.7765  |
| SDCBP        | 7.14531 | 6.70353 | 7.30835 | 5.90533 | 5.00279 | 6.7371  | 6.17302 | 6.68782 | 6.49421 |
| CHD7         | 8.38414 | 8.30498 | 8.16303 | 7.0301  | 5.84753 | 7.43158 | 7.82276 | 7.69006 | 8.14266 |
| CLVS1        | 7.26624 | 7.786   | 7.3032  | 6.91077 | 5.9123  | 6.38893 | 6.38223 | 6.10618 | 5.97879 |
| MIR4470      | 5.77159 | 6.10344 | 6.12485 | 6.90729 | 6.75086 | 6.82259 | 6.22786 | 7.05427 | 6.6916  |
| NKAIN3       | 5.35537 | 5.80155 | 6.01144 | 6.16391 | 6.67339 | 5.76297 | 6.05227 | 5.6263  | 5.8783  |
| UG0898H09    | 5.29491 | 5.37849 | 6.0291  | 5.58856 | 6.39322 | 5.80017 | 5.48202 | 5.43533 | 5.24612 |
| LINC01289    | 4.82942 | 4.96856 | 4.80554 | 5.16998 | 6.87671 | 5.41211 | 5.14857 | 4.97527 | 5.2023  |

|            |         |         |         |         |         |         |         |         |         |
|------------|---------|---------|---------|---------|---------|---------|---------|---------|---------|
| MIR124-2HG | 4.13102 | 4.43687 | 4.31124 | 5.1312  | 4.9591  | 5.22381 | 4.6686  | 4.92741 | 4.84184 |
| mir124-2   | 6.2427  | 6.1639  | 6.0066  | 6.78087 | 7.22629 | 7.15412 | 6.74376 | 7.27374 | 6.72251 |
| MTFR1      | 8.25357 | 8.0228  | 8.08842 | 7.52868 | 6.67992 | 7.46256 | 7.81024 | 7.85925 | 7.97327 |
| TRIM55     | 4.46206 | 4.80226 | 4.61227 | 5.31395 | 5.52143 | 5.37773 | 5.22055 | 5.17632 | 5.15503 |
| LINC00967  | 5.45974 | 5.63096 | 5.31472 | 5.38668 | 6.58304 | 5.80301 | 5.51643 | 5.71717 | 5.81092 |
| RRS1       | 6.61677 | 6.66729 | 6.76694 | 6.99712 | 5.51384 | 6.80785 | 7.57995 | 6.47118 | 6.68266 |
| C8orf46    | 5.07612 | 5.1111  | 4.91488 | 5.24759 | 6.03539 | 5.6662  | 5.00208 | 5.00444 | 5.29659 |
| MCMDC2     | 5.6653  | 5.51254 | 5.47188 | 4.80129 | 4.77657 | 4.78169 | 4.81644 | 4.27398 | 4.45256 |
| CSPP1      | 7.39378 | 7.48556 | 7.35626 | 6.36628 | 5.09809 | 5.96828 | 6.84159 | 6.2436  | 6.25765 |
| c8orf34    | 5.10218 | 6.54744 | 5.85909 | 6.00466 | 5.71383 | 6.06606 | 6.28067 | 5.62362 | 6.14239 |
| SULF1      | 7.59412 | 6.53817 | 7.06782 | 6.10197 | 6.02095 | 5.14668 | 5.55297 | 5.50487 | 6.27235 |
| TRAM1      | 5.49999 | 5.6695  | 5.36123 | 5.45732 | 2.47826 | 5.13882 | 6.36049 | 4.64191 | 5.07863 |
| LACTB2-AS1 | 3.92144 | 4.20262 | 3.90176 | 4.06861 | 5.85213 | 4.20962 | 3.93788 | 3.87206 | 4.00452 |
| MSC-AS1    | 5.32933 | 5.35621 | 5.54061 | 5.15398 | 4.85214 | 5.22713 | 4.81629 | 5.40185 | 5.24255 |
| TERF1      | 7.54235 | 7.60175 | 7.60281 | 6.42644 | 5.41068 | 5.4166  | 6.63273 | 5.99293 | 6.18315 |
| RDH10      | 8.47366 | 9.19526 | 8.59785 | 8.2438  | 7.32813 | 8.62147 | 8.39775 | 9.08579 | 8.37445 |
| STAU2-AS1  | 4.76773 | 5.03247 | 4.80821 | 4.92239 | 5.55097 | 4.95921 | 5.1614  | 5.02277 | 4.77304 |
| tmem70     | 6.94169 | 6.77056 | 6.93076 | 7.16908 | 6.50661 | 6.82038 | 7.50829 | 6.78784 | 6.85942 |
| LY96       | 6.39802 | 5.84149 | 6.88767 | 6.47867 | 4.16886 | 4.94547 | 7.01495 | 5.64986 | 5.84776 |
| GDAP1      | 6.49906 | 6.34332 | 6.83701 | 6.71784 | 6.72814 | 6.65956 | 7.16624 | 6.22081 | 6.79584 |
| MIR2052HG  | 4.13516 | 4.14979 | 4.40574 | 4.38408 | 5.26988 | 4.55223 | 3.98081 | 4.1564  | 4.35811 |
| PI15       | 6.73558 | 6.16334 | 7.11947 | 6.72626 | 5.86138 | 5.53951 | 6.4704  | 6.31896 | 8.6932  |
| CRISPLD1   | 6.60121 | 6.0194  | 6.75398 | 5.25467 | 5.56053 | 5.20861 | 5.73991 | 5.08395 | 5.07051 |
| ZFHX4      | 6.92047 | 7.70184 | 7.2832  | 6.03929 | 6.60276 | 6.20571 | 6.03718 | 5.9543  | 5.88245 |
| STMN2      | 7.9159  | 6.42968 | 7.18258 | 5.43516 | 6.33541 | 5.41533 | 5.8478  | 5.57426 | 5.79387 |
| ZBTB10     | 6.17945 | 5.95802 | 6.10305 | 5.58302 | 5.54338 | 5.38491 | 5.41191 | 5.58879 | 5.43084 |

|             |         |         |         |         |         |         |         |         |         |
|-------------|---------|---------|---------|---------|---------|---------|---------|---------|---------|
| FABP5       | 9.49155 | 8.56932 | 8.59618 | 9.93695 | 8.63484 | 9.16189 | 8.98332 | 9.23217 | 9.95818 |
| CHMP4C      | 9.47862 | 10.4776 | 9.62945 | 9.32286 | 8.7649  | 9.7826  | 10.1062 | 10.3151 | 10.0845 |
| RALYL       | 4.65145 | 4.83532 | 4.668   | 5.1306  | 5.96896 | 5.20021 | 5.04257 | 4.85185 | 4.90072 |
| LRRCC1      | 6.94551 | 7.06954 | 7.51165 | 5.69594 | 3.88764 | 4.41538 | 6.01447 | 5.35698 | 4.38792 |
| CA13        | 7.62761 | 7.9662  | 8.07049 | 6.5666  | 6.3489  | 5.67383 | 6.82673 | 5.60422 | 5.84743 |
| CA2         | 9.88346 | 7.82254 | 7.83461 | 11.0108 | 7.88455 | 11.5342 | 10.2943 | 9.20083 | 9.84142 |
| WWP1        | 9.38962 | 9.77029 | 9.78572 | 8.63272 | 6.68512 | 8.74305 | 9.17177 | 9.34352 | 9.09923 |
| CPNE3       | 9.55846 | 9.63575 | 9.75507 | 8.70461 | 6.89511 | 8.9443  | 9.13737 | 9.19279 | 9.22484 |
| CNBD1       | 2.66067 | 2.69573 | 2.75399 | 3.09208 | 2.85132 | 3.09602 | 2.67391 | 2.89182 | 2.66449 |
| RIPK2       | 8.3352  | 7.64768 | 8.01864 | 8.5771  | 8.63936 | 7.65029 | 8.06525 | 8.86495 | 8.36584 |
| OSGIN2      | 6.49639 | 6.35665 | 6.67589 | 6.11934 | 5.14037 | 6.05371 | 6.49478 | 6.20067 | 5.60311 |
| LINC00534   | 4.88048 | 4.77045 | 4.79375 | 5.07749 | 5.75146 | 5.6472  | 4.65632 | 5.04519 | 5.03244 |
| NECAB1      | 4.57506 | 5.29027 | 5.00435 | 4.85061 | 5.46815 | 5.22941 | 5.08251 | 5.09386 | 4.93155 |
| OTUD6B      | 8.45935 | 8.79945 | 8.87985 | 7.80167 | 5.25612 | 6.62684 | 8.43596 | 6.9799  | 7.84823 |
| MIR4661     | 5.38227 | 5.49767 | 5.22964 | 5.55871 | 5.27581 | 6.33059 | 5.92843 | 5.87289 | 6.05555 |
| trfq        | 4.90114 | 4.76847 | 4.64642 | 5.00725 | 5.38372 | 5.23026 | 5.07444 | 4.63143 | 4.946   |
| RBM12B      | 4.83115 | 4.75478 | 4.79795 | 5.22902 | 4.95334 | 5.02912 | 5.31904 | 4.8721  | 4.929   |
| RBM12B-AS1  | 5.358   | 4.87583 | 4.90619 | 5.49613 | 6.3769  | 5.94795 | 5.20143 | 5.40767 | 5.16841 |
| TMEM67      | 6.70028 | 6.69476 | 6.7703  | 5.33385 | 5.20105 | 5.02213 | 6.05895 | 5.47202 | 4.9948  |
| PDP1        | 6.16399 | 5.86157 | 5.93779 | 6.33623 | 5.82469 | 6.14853 | 6.10319 | 6.68606 | 6.68216 |
| ESRP1       | 10.7323 | 10.58   | 10.3178 | 10.3977 | 8.78308 | 10.7184 | 10.3574 | 10.1716 | 10.7356 |
| DPY19L4     | 8.34083 | 8.5009  | 8.36561 | 7.90062 | 6.51386 | 6.71438 | 7.96552 | 7.12667 | 7.08896 |
| INTS8       | 7.42386 | 7.25401 | 7.37059 | 6.75411 | 4.99911 | 6.1314  | 7.11611 | 6.5504  | 6.14868 |
| MIR3150A    | 6.7574  | 6.85725 | 7.15553 | 7.44248 | 7.74423 | 7.69992 | 6.9963  | 7.3433  | 7.73122 |
| C8orf37-AS1 | 6.45822 | 6.51833 | 6.41757 | 5.29885 | 6.14014 | 5.59277 | 5.42361 | 5.48238 | 5.75402 |
| PTDSS1      | 9.27786 | 9.06052 | 9.43069 | 8.7351  | 7.06184 | 7.90109 | 9.02884 | 8.14428 | 8.3528  |

|          |         |         |         |         |         |         |         |         |         |
|----------|---------|---------|---------|---------|---------|---------|---------|---------|---------|
| SDC2     | 8.16256 | 7.81255 | 8.58229 | 8.49528 | 6.41347 | 7.11095 | 7.9041  | 7.15903 | 7.60938 |
| CPQ      | 7.15078 | 6.39482 | 7.05253 | 6.13925 | 6.1885  | 5.38583 | 6.16468 | 5.93943 | 5.58932 |
| MTDH     | 9.43476 | 9.52777 | 9.56244 | 9.50404 | 6.87778 | 9.05767 | 9.53607 | 9.06314 | 9.19327 |
| LAPTM4B  | 10.308  | 9.6911  | 10.0167 | 9.31722 | 7.00655 | 8.44466 | 9.74871 | 8.31662 | 8.6062  |
| MATN2    | 7.54455 | 7.80476 | 7.1679  | 6.23644 | 6.88452 | 6.42972 | 6.87419 | 6.18912 | 6.18844 |
| ERICH5   | 5.42051 | 5.83346 | 5.61111 | 5.97466 | 5.66146 | 5.806   | 5.96958 | 5.8062  | 5.34282 |
| osr2     | 6.44995 | 6.30939 | 7.08491 | 5.53381 | 6.02115 | 6.12936 | 6.15137 | 6.71331 | 5.21997 |
| VPS13B   | 9.39557 | 9.54742 | 9.4934  | 8.4493  | 6.30027 | 7.64424 | 8.30106 | 8.39889 | 8.80254 |
| SPAG1    | 6.6397  | 6.81244 | 6.13323 | 6.3366  | 5.17696 | 5.8264  | 6.16803 | 6.50075 | 6.81178 |
| MIR4471  | 2.23288 | 2.03331 | 2.00933 | 2.0918  | 2.11827 | 2.63988 | 2.20735 | 2.18773 | 2.50894 |
| FLJ42969 | 4.55529 | 5.02171 | 4.88488 | 5.2508  | 5.9456  | 5.78304 | 5.61297 | 5.34452 | 5.26305 |
| NACAP1   | 5.47722 | 5.24896 | 5.51125 | 6.88326 | 6.3399  | 6.61351 | 6.26704 | 6.01842 | 5.94167 |
| GRHL2    | 9.85594 | 9.74215 | 9.32652 | 8.92449 | 6.75751 | 7.80951 | 8.38849 | 7.67082 | 7.98567 |
| NCALD    | 4.06139 | 4.1116  | 4.03361 | 3.44783 | 3.46453 | 3.59543 | 3.72001 | 3.11302 | 3.63887 |
| ODF1     | 4.57463 | 4.86267 | 4.55767 | 4.86951 | 6.6299  | 5.29159 | 5.06971 | 4.78127 | 5.08837 |
| MIR3151  | 5.98261 | 6.08672 | 5.90778 | 7.07764 | 8.36878 | 7.02862 | 6.97169 | 6.56632 | 6.70541 |
| FZD6     | 9.55075 | 9.46941 | 9.73636 | 9.38229 | 7.09175 | 8.09453 | 9.68646 | 8.14218 | 8.78644 |
| CTHRC1   | 7.20407 | 6.80749 | 7.62334 | 7.3304  | 6.23063 | 5.7649  | 6.94483 | 5.98071 | 6.48852 |
| DCAF13   | 6.06847 | 5.78329 | 5.77889 | 6.0628  | 5.02416 | 5.53692 | 5.68287 | 5.14371 | 5.90585 |
| RIMS2    | 4.29703 | 4.08838 | 4.45824 | 4.93359 | 4.81924 | 5.33303 | 5.16911 | 4.94465 | 5.20963 |
| DCSTAMP  | 4.1391  | 4.7028  | 4.62058 | 5.01836 | 5.93143 | 5.17664 | 5.03018 | 5.32146 | 4.96858 |
| OXR1     | 7.99416 | 8.04391 | 7.93582 | 7.20763 | 5.38106 | 7.13975 | 7.42783 | 7.50582 | 6.74797 |
| EMC2     | 6.58369 | 6.78104 | 6.85765 | 6.52157 | 5.37163 | 7.33662 | 6.9368  | 7.40598 | 6.49566 |
| TRHR     | 3.87881 | 3.84644 | 3.83719 | 4.51836 | 5.46822 | 4.97855 | 4.03049 | 4.44547 | 4.17431 |
| ENY2     | 7.36246 | 7.71803 | 8.07324 | 7.44225 | 6.16041 | 6.28387 | 7.61184 | 6.56042 | 6.5814  |
| PKHD1L1  | 5.47323 | 5.8353  | 7.6103  | 4.8184  | 5.60255 | 5.07093 | 5.66    | 5.42069 | 5.19439 |



|            |         |         |         |         |         |         |         |         |         |
|------------|---------|---------|---------|---------|---------|---------|---------|---------|---------|
| MIR2053    | 2.60157 | 2.45337 | 2.57142 | 2.34809 | 2.50832 | 2.4533  | 2.56068 | 2.20966 | 2.83202 |
| RAD21-AS1  | 5.3756  | 5.56063 | 5.56526 | 5.58892 | 5.75816 | 5.66534 | 5.55097 | 6.2096  | 5.96984 |
| AARD       | 6.14894 | 6.39352 | 6.46085 | 6.34417 | 5.77571 | 6.68173 | 6.1854  | 6.31738 | 6.11123 |
| MED30      | 6.17708 | 6.36734 | 6.33827 | 5.63489 | 5.64123 | 6.1586  | 6.72169 | 6.21579 | 5.96852 |
| SAMD12-AS1 | 4.47415 | 3.71942 | 3.6923  | 4.04556 | 4.6291  | 3.86753 | 4.1159  | 3.87381 | 3.37387 |
| COLEC10    | 4.89937 | 4.60785 | 4.87357 | 5.19871 | 5.88081 | 4.78902 | 4.94535 | 4.90169 | 4.87954 |
| NOV        | 7.02792 | 6.47353 | 7.75346 | 5.4996  | 5.89917 | 6.44897 | 6.12531 | 5.57248 | 5.59644 |
| DEPTOR     | 7.57647 | 7.22142 | 7.36473 | 6.31883 | 6.83776 | 6.073   | 6.68359 | 6.28803 | 5.97765 |
| HAS2-AS1   | 5.19312 | 5.24631 | 5.46486 | 5.49733 | 5.45459 | 5.94517 | 5.37175 | 5.32481 | 5.26263 |
| ZHX2       | 7.13613 | 6.93059 | 7.00877 | 6.9842  | 6.94893 | 6.82087 | 7.42619 | 6.56837 | 6.83437 |
| TBC1D31    | 6.34677 | 6.36184 | 6.30706 | 6.02437 | 6.01395 | 5.92754 | 6.18496 | 5.44221 | 5.63601 |
| WDYHV1     | 6.36594 | 6.44546 | 6.4172  | 6.10798 | 5.15148 | 5.73991 | 6.32515 | 5.68649 | 5.53704 |
| FER1L6     | 5.37951 | 5.0328  | 5.40354 | 6.21031 | 6.51657 | 6.2763  | 6.26377 | 5.80852 | 7.0291  |
| TRMT12     | 6.08781 | 6.03377 | 5.98051 | 6.00201 | 5.57062 | 5.03937 | 6.21092 | 5.66867 | 5.92383 |
| RNF139     | 8.31699 | 8.32828 | 8.31695 | 8.36853 | 8.16159 | 8.206   | 8.50932 | 7.89582 | 8.25867 |
| MIR4662A   | 2.61657 | 2.634   | 2.14466 | 3.55581 | 1.66402 | 2.97823 | 2.54281 | 2.3292  | 2.35782 |
| LINC00964  | 6.31256 | 6.37878 | 6.24799 | 5.30504 | 6.16541 | 5.78932 | 5.49175 | 5.39147 | 5.52358 |
| ZNF572     | 4.42118 | 4.94566 | 4.57387 | 4.06538 | 4.9336  | 4.44419 | 3.97682 | 4.12487 | 3.92023 |
| SQLE       | 9.61368 | 8.98014 | 9.186   | 8.97919 | 7.10699 | 8.87653 | 9.53446 | 9.10063 | 9.74934 |
| TRIB1      | 8.61399 | 7.45744 | 7.95428 | 8.42057 | 7.09341 | 9.86462 | 9.03239 | 9.41486 | 9.40586 |
| POU5F1B    | 5.48862 | 4.97872 | 5.39129 | 4.06016 | 4.96039 | 4.89563 | 4.04176 | 4.57459 | 4.72572 |
| MYC        | 9.13929 | 8.00947 | 8.48653 | 9.1406  | 6.89996 | 8.03877 | 9.204   | 8.14334 | 8.19866 |
| MIR1205    | 6.02965 | 5.76259 | 5.65623 | 5.70117 | 6.59732 | 5.69399 | 5.50494 | 6.26561 | 5.89868 |
| MIR1206    | 4.60382 | 3.67461 | 3.72438 | 3.74934 | 3.22859 | 2.5836  | 4.19733 | 4.66626 | 2.66429 |
| MIR1207    | 3.05865 | 3.11527 | 3.15293 | 3.32921 | 3.34286 | 3.98123 | 3.61699 | 3.7355  | 3.73471 |
| MIR1208    | 5.53876 | 5.64679 | 5.86903 | 6.69722 | 6.29    | 6.51175 | 6.08574 | 6.1869  | 6.15101 |

|           |         |         |         |         |         |         |         |         |         |
|-----------|---------|---------|---------|---------|---------|---------|---------|---------|---------|
| EFR3A     | 9.46887 | 9.46598 | 9.32303 | 9.23891 | 6.17496 | 8.36489 | 9.18586 | 8.56439 | 8.83657 |
| PHF20L1   | 8.08328 | 7.82875 | 8.0081  | 7.34607 | 6.13922 | 7.15374 | 7.57114 | 7.4519  | 7.73416 |
| TG        | 6.39654 | 6.8198  | 7.33642 | 6.65367 | 6.8231  | 6.84644 | 6.30104 | 6.96673 | 6.49529 |
| WISP1     | 6.55491 | 6.54836 | 6.32055 | 7.7312  | 6.68311 | 6.96813 | 7.23112 | 7.34756 | 7.48374 |
| ZFAT-AS1  | 4.54463 | 4.01533 | 4.33137 | 4.74549 | 5.76618 | 4.75273 | 5.29484 | 4.34877 | 4.57013 |
| LINC01591 | 4.31247 | 4.45325 | 4.29984 | 4.59485 | 4.46017 | 4.55962 | 4.66038 | 4.57287 | 4.79871 |
| CHRAC1    | 6.84063 | 6.54652 | 6.73464 | 6.57057 | 6.627   | 6.29685 | 6.8979  | 6.10891 | 6.50325 |
| DENND3    | 6.15669 | 6.32949 | 6.70435 | 5.87408 | 6.2887  | 6.42638 | 6.1131  | 6.83056 | 6.4936  |
| LINC01300 | 4.17855 | 5.11699 | 4.40164 | 5.00692 | 5.72546 | 5.09125 | 4.595   | 5.15692 | 5.27427 |
| MIR4472-1 | 4.51552 | 4.3984  | 3.90832 | 5.47218 | 4.62687 | 5.10955 | 5.00574 | 5.08343 | 4.86199 |
| ADGRB1    | 6.56466 | 7.16226 | 6.30349 | 7.0299  | 7.02721 | 6.80829 | 6.71923 | 6.90419 | 6.45322 |
| PSCA      | 6.08226 | 6.29247 | 6.71945 | 6.68615 | 6.9819  | 7.06507 | 6.46018 | 6.95088 | 6.89175 |
| THEM6     | 7.10172 | 7.24072 | 7.1343  | 7.57339 | 7.38768 | 7.92776 | 7.89124 | 7.58421 | 7.22471 |
| GML       | 4.54042 | 4.32272 | 4.52984 | 4.51599 | 5.9943  | 4.70782 | 4.47085 | 5.03347 | 5.42584 |
| GPIHBP1   | 6.56238 | 6.74561 | 6.82485 | 7.0396  | 6.59197 | 7.52075 | 6.71973 | 7.08024 | 7.01894 |
| ZFP41     | 6.71738 | 6.50066 | 6.66218 | 6.65023 | 6.7116  | 6.51149 | 6.43746 | 6.79377 | 6.31652 |
| GLI4      | 5.97918 | 5.7409  | 5.96232 | 6.23888 | 5.88929 | 6.78952 | 5.93663 | 6.68188 | 6.29564 |
| ZNF696    | 5.97793 | 6.37663 | 6.17698 | 6.2154  | 6.31295 | 6.65153 | 6.46845 | 6.46652 | 6.48876 |
| GSDMD     | 5.81482 | 5.68515 | 5.91444 | 6.22243 | 6.72206 | 6.40133 | 6.40851 | 6.50647 | 6.63001 |
| TIGD5     | 6.76732 | 6.64134 | 6.54823 | 7.57826 | 6.98448 | 7.55578 | 7.93773 | 6.83999 | 7.38974 |
| ZNF623    | 7.21582 | 7.63408 | 7.6323  | 7.5054  | 7.25684 | 7.42895 | 7.09815 | 7.28989 | 7.18972 |
| ZNF707    | 5.39927 | 5.51963 | 5.59795 | 6.23402 | 5.91131 | 6.23518 | 5.55132 | 5.86668 | 5.75828 |
| BREA2     | 5.29592 | 5.27444 | 5.24795 | 6.0324  | 5.50529 | 5.68861 | 5.40843 | 5.57308 | 5.22389 |
| MAPK15    | 5.88706 | 5.91813 | 5.81743 | 6.35312 | 6.60351 | 6.60573 | 6.03434 | 6.22058 | 6.404   |
| SPATC1    | 6.76802 | 6.81352 | 6.71157 | 7.51297 | 7.66312 | 7.61516 | 6.73186 | 7.30117 | 7.16863 |
| EXOSC4    | 7.90998 | 7.62785 | 7.50976 | 8.16992 | 6.76171 | 7.94496 | 8.47671 | 8.35801 | 8.05388 |

|              |         |         |         |         |         |         |         |         |         |
|--------------|---------|---------|---------|---------|---------|---------|---------|---------|---------|
| GPAA1        | 7.71953 | 7.47738 | 7.96085 | 8.75835 | 7.78426 | 8.3876  | 8.49418 | 8.19947 | 8.08914 |
| Cyc1         | 8.5153  | 8.53749 | 8.5584  | 9.04107 | 7.85665 | 8.73729 | 9.13447 | 8.49264 | 8.82595 |
| MAF1         | 7.36187 | 7.15037 | 7.56658 | 8.2934  | 7.54188 | 8.16902 | 8.44352 | 7.69613 | 7.99712 |
| wdr97        | 6.47011 | 6.2911  | 6.39148 | 7.13841 | 6.92873 | 7.19637 | 6.45766 | 7.07386 | 6.72449 |
| MROH1        | 6.61574 | 6.59536 | 6.58482 | 6.99179 | 6.60993 | 7.42917 | 7.37064 | 7.4434  | 7.44974 |
| SCX          | 5.73336 | 6.05995 | 6.17438 | 6.27819 | 6.12295 | 6.55496 | 6.27749 | 6.50823 | 6.7129  |
| HSF1         | 7.90692 | 7.7332  | 7.77246 | 8.47368 | 6.39017 | 8.27707 | 8.53208 | 8.07747 | 8.11178 |
| adck5        | 6.9713  | 6.51674 | 6.73871 | 7.21496 | 6.47577 | 7.29061 | 7.26993 | 6.96748 | 7.12571 |
| CYHR1        | 4.9961  | 4.88622 | 4.49937 | 4.98807 | 4.63345 | 5.17262 | 5.66853 | 4.54345 | 4.68096 |
| KIFC2        | 7.99732 | 7.60617 | 7.43753 | 7.52935 | 7.40923 | 7.70093 | 7.3976  | 7.39459 | 7.70999 |
| GPT          | 6.5164  | 6.29299 | 6.43373 | 6.75526 | 6.92428 | 7.08247 | 6.9254  | 6.93453 | 6.79534 |
| MFSD3        | 7.19669 | 6.96096 | 6.64914 | 7.43762 | 6.61783 | 7.64733 | 7.89441 | 7.15992 | 7.08753 |
| LRRC14       | 6.69561 | 6.52553 | 6.54151 | 6.6198  | 6.38708 | 6.6575  | 6.67711 | 6.5668  | 6.48105 |
| ZNF517       | 6.31557 | 6.42773 | 6.50482 | 6.44274 | 6.82843 | 6.35937 | 5.97121 | 6.37947 | 6.17794 |
| ZNF7         | 7.00646 | 6.87783 | 7.01338 | 7.01016 | 7.25677 | 7.10038 | 6.9058  | 6.98174 | 6.88793 |
| TMED10P1     | 3.80822 | 3.78962 | 4.15234 | 4.35668 | 3.94889 | 4.20929 | 4.30167 | 4.14732 | 3.97265 |
| ZNF252P-AS1  | 5.38937 | 5.53378 | 5.29557 | 6.08242 | 6.6911  | 6.12176 | 5.8578  | 6.1332  | 5.63643 |
| c8orf33      | 7.73835 | 7.84841 | 8.00954 | 7.91091 | 6.99199 | 7.547   | 8.25666 | 7.47394 | 7.58048 |
| TDRP         | 6.68541 | 5.99764 | 6.57611 | 7.57254 | 6.00103 | 7.48368 | 7.79336 | 7.62087 | 7.66511 |
| erich1       | 7.89283 | 7.90988 | 7.65118 | 7.02386 | 6.95683 | 6.94033 | 7.62841 | 7.18473 | 7.41602 |
| LOC286083    | 5.22425 | 5.88523 | 5.66154 | 5.6008  | 6.91764 | 6.13069 | 5.67564 | 6.20218 | 6.14849 |
| CSMD1        | 4.66493 | 4.98181 | 4.71141 | 4.84186 | 5.68307 | 5.19364 | 5.11056 | 5.17199 | 4.85419 |
| LOC100287015 | 5.13357 | 4.88348 | 4.99684 | 5.68734 | 5.0939  | 5.69782 | 5.616   | 5.59438 | 5.21774 |
| ANGPT2       | 7.65008 | 6.3936  | 7.08355 | 7.0958  | 5.94123 | 6.36165 | 6.29222 | 8.23385 | 7.75322 |
| LINC00965    | 6.43477 | 6.58251 | 6.96262 | 5.88221 | 10.433  | 6.52298 | 6.11755 | 6.2337  | 5.92062 |
| ZNF705G      | 2.37033 | 2.57369 | 2.51232 | 2.61551 | 5.09307 | 2.54295 | 2.56692 | 2.61446 | 2.22931 |

|              |         |         |         |         |         |         |         |         |         |
|--------------|---------|---------|---------|---------|---------|---------|---------|---------|---------|
| SPAG11B      | 5.18882 | 5.44291 | 5.15569 | 6.02494 | 7.80599 | 5.09103 | 5.49422 | 5.17462 | 5.95723 |
| MIR548I3     | 6.64982 | 8.11877 | 7.14286 | 3.26642 | 6.63095 | 3.75812 | 3.52419 | 3.99659 | 3.54766 |
| SGK223       | 7.2166  | 6.84992 | 6.92045 | 8.15094 | 6.78853 | 7.70184 | 8.76254 | 8.60265 | 7.833   |
| MFHAS1       | 7.99864 | 7.65069 | 7.70876 | 7.65455 | 6.10167 | 7.56418 | 7.81424 | 7.45367 | 7.7175  |
| LINC00599    | 2.83645 | 3.13396 | 3.06738 | 3.26463 | 3.47807 | 3.58117 | 3.14065 | 3.14605 | 3.26337 |
| mir124-1     | 3.10378 | 3.20466 | 2.83604 | 3.56251 | 3.96067 | 3.5106  | 3.66515 | 4.01965 | 3.56932 |
| RP1L1        | 6.29502 | 6.02982 | 6.07292 | 6.11446 | 6.23104 | 5.96502 | 5.91986 | 6.33617 | 5.83781 |
| SOX7         | 9.31447 | 8.80051 | 8.72685 | 9.10149 | 8.27404 | 8.28507 | 8.89133 | 8.26015 | 7.72878 |
| MIR1322      | 2.95248 | 3.08817 | 2.91491 | 1.9782  | 1.9601  | 2.20123 | 3.11602 | 1.8252  | 2.0778  |
| Mir598       | 6.20293 | 7.64247 | 6.0311  | 5.85902 | 7.20811 | 5.70371 | 5.73802 | 6.00392 | 5.95133 |
| CTSB         | 7.74441 | 7.4442  | 7.93096 | 8.27484 | 7.69001 | 8.48233 | 8.12072 | 8.89041 | 8.44104 |
| LOC392196    | 5.59975 | 5.81641 | 5.68689 | 6.1656  | 8.9145  | 6.39878 | 6.21954 | 6.06934 | 5.75642 |
| LOC729732    | 6.2036  | 6.34912 | 6.51201 | 6.06919 | 6.12238 | 6.10696 | 5.87457 | 5.323   | 6.19899 |
| LONRF1       | 8.75187 | 9.87633 | 9.49074 | 7.9106  | 6.17537 | 7.06344 | 7.80719 | 6.99819 | 7.18421 |
| DLC1         | 7.1437  | 7.06754 | 6.75088 | 6.60829 | 6.07432 | 5.95357 | 6.18753 | 6.54038 | 6.54647 |
| MIR383       | 8.78149 | 8.57696 | 8.89855 | 9.58256 | 8.64474 | 9.35994 | 9.28505 | 10.1628 | 8.90944 |
| MSR1         | 4.78818 | 4.60087 | 5.87425 | 4.84639 | 5.06623 | 4.97843 | 5.16649 | 4.86475 | 5.40378 |
| FGF20        | 5.17475 | 5.24791 | 5.47005 | 5.37849 | 5.69476 | 5.93804 | 5.71125 | 5.84841 | 5.65167 |
| MTMR7        | 5.08317 | 5.51251 | 5.7091  | 4.93734 | 5.75963 | 5.20933 | 4.94571 | 5.31298 | 5.28817 |
| MTUS1        | 7.37243 | 6.99448 | 7.34496 | 5.93775 | 6.04866 | 5.83906 | 6.55829 | 5.80108 | 5.98841 |
| MIR548V      | 8.60945 | 8.15707 | 8.70154 | 5.22682 | 5.44933 | 3.80088 | 6.22033 | 5.65066 | 6.12591 |
| fgl1         | 3.94941 | 4.04806 | 3.75941 | 4.18584 | 4.36633 | 4.38096 | 4.51146 | 4.61932 | 4.03882 |
| ASAH1        | 9.18041 | 8.58747 | 9.22083 | 8.91475 | 6.99293 | 8.6363  | 8.9057  | 7.57141 | 8.34245 |
| PSD3         | 7.50636 | 7.99509 | 7.17564 | 6.66912 | 6.86263 | 5.92398 | 6.83284 | 6.45797 | 6.06863 |
| LOC100128993 | 3.90189 | 4.00105 | 3.72823 | 4.28921 | 5.58614 | 4.10869 | 4.11033 | 3.97616 | 4.29032 |
| CSGALNACT1   | 5.84154 | 5.90497 | 6.43652 | 5.73608 | 6.33514 | 5.67059 | 5.85522 | 5.95207 | 6.08376 |

|          |         |         |         |         |         |         |         |         |         |
|----------|---------|---------|---------|---------|---------|---------|---------|---------|---------|
| GFRA2    | 6.02725 | 5.79216 | 6.26073 | 6.39263 | 5.60641 | 6.2046  | 6.0116  | 5.98407 | 5.89835 |
| NUDT18   | 6.66205 | 6.58002 | 6.65297 | 7.2115  | 6.83352 | 7.83113 | 7.10129 | 7.15664 | 7.06845 |
| HR       | 8.68278 | 8.53856 | 8.46774 | 8.297   | 6.82646 | 7.71553 | 8.27201 | 8.55635 | 8.52626 |
| REEP4    | 8.06808 | 7.79712 | 7.83551 | 8.55715 | 6.82809 | 8.65114 | 8.77474 | 8.09816 | 7.90329 |
| phyhip   | 5.61276 | 6.32286 | 5.66279 | 5.83476 | 6.33894 | 6.61781 | 5.83251 | 6.20564 | 5.82954 |
| BIN3     | 6.6485  | 6.57447 | 6.52598 | 6.67805 | 6.12006 | 6.82342 | 6.89229 | 7.139   | 7.06666 |
| BIN3-IT1 | 7.67885 | 7.40344 | 7.49243 | 7.06232 | 7.29943 | 7.39697 | 6.62724 | 7.93186 | 7.8223  |
| EGR3     | 8.55951 | 7.65763 | 8.00576 | 8.59886 | 6.90456 | 7.89068 | 6.86792 | 7.31796 | 7.56103 |
| PEBP4    | 5.56515 | 5.2853  | 5.45935 | 5.80217 | 6.33306 | 6.04268 | 5.40157 | 6.03584 | 5.80739 |
| LOXL2    | 6.89608 | 6.46969 | 6.94646 | 7.44294 | 7.3267  | 7.25479 | 7.08134 | 7.65952 | 7.78411 |
| ENTPD4   | 8.90102 | 8.7929  | 8.58959 | 8.19749 | 7.45553 | 7.23638 | 7.6905  | 8.79013 | 8.09181 |
| NKX3-1   | 6.86332 | 6.82153 | 6.86264 | 6.78321 | 7.2332  | 7.10586 | 6.94716 | 7.01884 | 7.00338 |
| NKX2-6   | 5.86875 | 6.10174 | 6.06548 | 6.64678 | 6.4091  | 6.81257 | 6.77643 | 6.58951 | 6.81885 |
| STC1     | 5.21036 | 5.11219 | 6.49408 | 5.34321 | 5.64645 | 6.05061 | 6.56212 | 9.3887  | 9.20505 |
| GNRH1    | 6.79561 | 7.01033 | 7.03824 | 5.99371 | 5.43243 | 4.89825 | 5.45963 | 5.93105 | 6.35936 |
| KCTD9    | 8.61307 | 8.63867 | 8.77819 | 8.67961 | 6.25485 | 9.53605 | 8.84453 | 9.35825 | 9.28025 |
| EBF2     | 7.15068 | 6.1926  | 7.09063 | 5.94297 | 6.41867 | 5.75838 | 6.10464 | 5.78768 | 5.57331 |
| PNMA2    | 5.62025 | 5.98208 | 6.21669 | 6.52923 | 7.17162 | 6.83162 | 6.07219 | 6.23388 | 6.36448 |
| ADRA1A   | 4.43409 | 4.44169 | 4.36709 | 4.72681 | 5.22734 | 5.17109 | 4.21745 | 4.61954 | 4.70217 |
| STMN4    | 5.56121 | 5.61065 | 5.73984 | 6.27322 | 6.50252 | 6.37351 | 5.89476 | 6.20678 | 6.04214 |
| TRIM35   | 7.63289 | 7.63304 | 8.41014 | 7.61273 | 5.9694  | 7.4986  | 7.95114 | 7.08024 | 6.76502 |
| CLU      | 7.51202 | 8.04974 | 8.02284 | 5.45712 | 5.2217  | 6.66397 | 6.52475 | 6.7111  | 6.11213 |
| CCDC25   | 8.37017 | 8.62508 | 8.24617 | 7.89915 | 7.81515 | 7.1452  | 8.20851 | 7.24809 | 7.66133 |
| PBK      | 6.04653 | 5.83054 | 5.41915 | 7.0193  | 5.34419 | 5.40201 | 6.15361 | 5.84392 | 5.60559 |
| MIR4287  | 3.10131 | 4.00325 | 4.6222  | 2.69029 | 4.4105  | 3.55193 | 3.75291 | 3.20989 | 3.39921 |
| ZNF395   | 7.91387 | 8.41612 | 8.24111 | 8.24792 | 7.10168 | 9.08638 | 8.30128 | 8.01793 | 8.25337 |

|           |         |         |         |         |         |         |         |         |         |
|-----------|---------|---------|---------|---------|---------|---------|---------|---------|---------|
| FBXO16    | 5.45132 | 5.51723 | 5.42122 | 5.32394 | 5.25614 | 5.75875 | 5.38278 | 5.41097 | 5.57227 |
| MIR4288   | 7.08556 | 6.93091 | 6.85471 | 7.27081 | 7.40341 | 7.48191 | 6.58364 | 7.67025 | 7.19888 |
| INTS9     | 7.33714 | 7.23399 | 7.28531 | 7.08892 | 6.12162 | 6.26606 | 7.27894 | 6.27707 | 6.67359 |
| KIF13B    | 9.67603 | 9.35909 | 9.53048 | 9.09137 | 9.07537 | 11.2838 | 10.3975 | 11.3359 | 10.9126 |
| DUSP4     | 6.108   | 6.00012 | 5.97186 | 6.10711 | 5.525   | 6.12027 | 5.86565 | 6.51419 | 5.92635 |
| MIR3148   | 3.32406 | 3.69574 | 3.26823 | 2.9552  | 3.38455 | 3.30627 | 3.24694 | 3.38461 | 3.55717 |
| MBOAT4    | 4.15661 | 4.21765 | 4.35095 | 4.4985  | 4.53697 | 5.52651 | 4.07777 | 4.51376 | 4.63622 |
| BPMS-AS1  | 5.23007 | 5.27695 | 5.22758 | 5.86975 | 5.98272 | 6.39835 | 5.81655 | 6.17085 | 5.81879 |
| GSR       | 8.68844 | 7.94723 | 8.9425  | 7.67647 | 6.44388 | 7.06989 | 7.91794 | 7.18706 | 6.67935 |
| TEX15     | 4.03992 | 4.73667 | 4.20986 | 4.40981 | 5.10746 | 4.16125 | 4.29746 | 4.36874 | 4.28279 |
| PURG      | 4.80586 | 4.94667 | 4.97988 | 5.37235 | 5.44702 | 5.36634 | 5.3659  | 5.1638  | 5.0056  |
| TTI2      | 6.52723 | 6.77288 | 6.70525 | 6.80179 | 6.46431 | 6.26964 | 7.09265 | 7.93258 | 6.78767 |
| RNF122    | 7.33091 | 6.38799 | 7.01648 | 8.10639 | 7.44831 | 9.65291 | 8.47982 | 10.0313 | 9.60309 |
| DUSP26    | 5.8555  | 5.74969 | 5.67023 | 6.38924 | 6.69587 | 6.50429 | 6.09933 | 6.24413 | 5.9868  |
| LOC728024 | 4.46628 | 4.57591 | 4.68206 | 4.49239 | 4.04324 | 3.64369 | 4.65155 | 4.43915 | 4.36232 |
| RAB11FIP1 | 8.17587 | 7.82216 | 7.60757 | 7.80851 | 7.39611 | 8.84158 | 7.77081 | 9.85138 | 8.22846 |
| GOT1L1    | 4.83925 | 4.62794 | 4.79056 | 5.26715 | 5.7387  | 5.42778 | 5.04987 | 5.11888 | 4.81938 |
| ADRB3     | 5.75976 | 5.90798 | 5.87087 | 6.5762  | 7.53854 | 6.63783 | 6.26304 | 6.41073 | 6.47973 |
| STAR      | 5.30335 | 5.28515 | 5.54379 | 5.65949 | 5.45249 | 5.84554 | 5.51321 | 5.02072 | 5.39591 |
| PLPP5     | 7.2223  | 6.7791  | 6.91307 | 7.21507 | 6.27684 | 6.80026 | 7.10579 | 6.78178 | 7.23832 |
| FGFR1     | 6.52448 | 6.56081 | 6.85525 | 6.19097 | 5.87859 | 7.36681 | 6.4409  | 6.72556 | 6.29563 |
| TM2D2     | 7.01401 | 6.81483 | 6.9564  | 7.44101 | 6.55461 | 7.60553 | 7.38629 | 8.17135 | 7.46022 |
| ADAM3A    | 3.72283 | 3.82238 | 3.60943 | 4.18655 | 3.39085 | 4.0303  | 4.2094  | 3.51337 | 3.66621 |
| ADAM2     | 3.3031  | 3.35988 | 3.53527 | 3.76828 | 4.25874 | 4.3513  | 3.58144 | 3.6522  | 3.50852 |
| SFRP1     | 9.16912 | 8.79653 | 9.55628 | 8.51092 | 7.63892 | 7.58508 | 8.76619 | 7.4459  | 7.56475 |
| NKX6-3    | 4.53254 | 5.04534 | 4.76311 | 5.52097 | 5.796   | 5.76599 | 5.50875 | 5.5084  | 5.22295 |

|              |         |         |         |         |         |         |         |         |         |
|--------------|---------|---------|---------|---------|---------|---------|---------|---------|---------|
| KAT6A        | 9.48897 | 9.39379 | 9.31817 | 8.01595 | 7.05717 | 7.54618 | 8.06285 | 7.79993 | 8.31779 |
| DKK4         | 4.90608 | 4.51563 | 4.69132 | 5.52951 | 6.49855 | 9.79877 | 8.27407 | 6.38824 | 5.40773 |
| RNF170       | 8.30125 | 8.4922  | 8.26089 | 8.05413 | 7.13651 | 7.61529 | 8.02606 | 7.21802 | 7.91435 |
| EFCAB1       | 5.41946 | 5.8774  | 5.38696 | 4.8801  | 5.20754 | 5.61872 | 5.16021 | 5.3343  | 5.30026 |
| SNAI2        | 11.9022 | 11.7646 | 11.7315 | 11.6936 | 8.48387 | 10.2703 | 11.4589 | 10.4025 | 11.225  |
| PXDNL        | 5.85789 | 4.68631 | 4.89006 | 5.23497 | 6.16432 | 5.48196 | 5.4247  | 5.03954 | 5.07945 |
| ST18         | 4.65815 | 4.943   | 5.16659 | 5.30727 | 5.86642 | 5.45912 | 5.27571 | 5.38989 | 5.35622 |
| RB1CC1       | 8.886   | 9.13096 | 8.89161 | 8.37421 | 7.17981 | 8.64933 | 8.76396 | 9.28271 | 8.76515 |
| LYPLA1       | 9.89622 | 9.48305 | 9.5646  | 9.40206 | 8.32798 | 8.80749 | 9.15712 | 9.79793 | 9.02915 |
| SBF1P1       | 4.95721 | 5.1255  | 4.93914 | 6.18194 | 6.29997 | 6.14148 | 5.88837 | 5.51972 | 5.89094 |
| TMEM68       | 7.12765 | 6.84858 | 6.94512 | 6.36286 | 4.94199 | 5.13991 | 6.81376 | 6.02619 | 6.00818 |
| MOS          | 4.75604 | 4.48351 | 4.82924 | 5.43692 | 5.53396 | 5.76515 | 5.08061 | 5.29141 | 5.21929 |
| PLAG1        | 6.26054 | 6.72408 | 6.01041 | 5.53533 | 5.61264 | 5.94412 | 5.81211 | 6.95526 | 6.05152 |
| PENK         | 5.4719  | 5.59847 | 5.38421 | 5.9837  | 6.57579 | 6.54172 | 5.70525 | 5.94332 | 5.83995 |
| LINC00968    | 4.01932 | 4.09094 | 4.11261 | 3.87738 | 4.43512 | 4.27756 | 3.88196 | 4.62305 | 3.79849 |
| IMPAD1       | 7.86209 | 7.89478 | 8.19211 | 7.75887 | 6.60083 | 8.73826 | 8.22394 | 8.23293 | 7.75376 |
| NSMAF        | 8.41644 | 8.74895 | 8.61757 | 7.54817 | 6.10644 | 7.01097 | 8.14275 | 7.03621 | 7.35741 |
| TOX          | 5.65785 | 6.28983 | 6.16209 | 6.01063 | 6.03155 | 5.66087 | 5.98956 | 5.43328 | 5.94602 |
| CA8          | 5.17146 | 5.31056 | 5.4046  | 5.24267 | 5.56574 | 5.02502 | 5.49074 | 5.69779 | 5.55262 |
| LOC100130298 | 4.06744 | 4.32418 | 4.37308 | 4.8626  | 4.8468  | 4.5672  | 5.17318 | 4.63    | 4.72925 |
| ASPH         | 7.86506 | 8.24016 | 8.29377 | 7.20571 | 5.43139 | 6.74402 | 7.03331 | 7.89563 | 7.4887  |
| TTPA         | 4.57992 | 4.7458  | 4.70327 | 4.97528 | 5.70333 | 5.11318 | 4.7219  | 5.11199 | 4.51309 |
| LINC00251    | 5.55228 | 5.80009 | 5.63681 | 5.39022 | 7.11382 | 6.31848 | 5.14271 | 5.69027 | 5.86472 |
| LINC01299    | 5.57829 | 5.76922 | 5.40348 | 6.14694 | 7.09688 | 5.96207 | 5.91338 | 5.6896  | 5.60684 |
| ARMC1        | 7.38195 | 7.67009 | 7.56584 | 7.34411 | 6.50553 | 6.79018 | 7.3454  | 7.12946 | 7.10804 |
| PDE7A        | 7.3671  | 6.94168 | 7.19479 | 6.76964 | 6.33843 | 6.90641 | 6.75848 | 7.34826 | 6.85456 |

|             |         |         |         |         |         |         |         |         |         |
|-------------|---------|---------|---------|---------|---------|---------|---------|---------|---------|
| CRH         | 3.30371 | 3.6299  | 3.67458 | 3.68534 | 3.72163 | 3.72441 | 3.5691  | 3.49895 | 3.62025 |
| RRS1-AS1    | 5.72131 | 4.99854 | 5.45148 | 5.2686  | 6.19866 | 4.96645 | 5.16918 | 5.44599 | 5.02073 |
| MYBL1       | 5.51142 | 5.94681 | 5.66442 | 5.17048 | 4.49862 | 4.99931 | 5.06668 | 5.19446 | 4.8377  |
| VCIPI1      | 7.30106 | 7.46341 | 7.53318 | 7.73486 | 6.33911 | 6.75832 | 7.71497 | 7.18067 | 7.32585 |
| TCF24       | 5.68713 | 5.5341  | 5.76145 | 6.02658 | 5.90093 | 6.85917 | 6.10253 | 6.31616 | 6.23785 |
| COPS5       | 6.95608 | 7.03436 | 7.11698 | 6.77756 | 7.14621 | 6.38822 | 6.69823 | 6.64227 | 6.68148 |
| ARFGEF1     | 9.49279 | 9.66652 | 9.46826 | 8.97697 | 6.569   | 8.88013 | 9.12259 | 9.00747 | 9.15204 |
| cpa6        | 4.15933 | 6.64057 | 5.19571 | 5.47297 | 4.73761 | 4.97725 | 4.74393 | 4.67346 | 4.30154 |
| C8orf34-AS1 | 6.13796 | 7.68891 | 7.2295  | 6.46303 | 6.83604 | 6.6839  | 7.28769 | 6.23182 | 7.14437 |
| LINC01592   | 4.85794 | 4.65535 | 4.76952 | 4.47442 | 5.06372 | 5.03026 | 3.99338 | 4.73594 | 4.86005 |
| PRDM14      | 5.51574 | 5.47918 | 5.44857 | 6.10818 | 6.20835 | 6.09223 | 5.9555  | 6.17261 | 6.21817 |
| NCOA2       | 9.0529  | 8.97511 | 8.61017 | 7.52705 | 7.08124 | 7.28914 | 7.65168 | 8.36847 | 8.42263 |
| EYA1        | 5.84907 | 5.50818 | 6.11456 | 5.51723 | 6.46722 | 5.85333 | 5.69352 | 6.06551 | 5.39894 |
| MSC         | 5.13428 | 4.95503 | 5.23292 | 5.29296 | 5.87022 | 5.52795 | 5.90785 | 5.37081 | 5.44389 |
| C8orf89     | 4.62862 | 4.11741 | 3.62587 | 4.24872 | 4.21771 | 3.7794  | 3.56258 | 3.26006 | 3.63756 |
| UBE2W       | 8.52216 | 7.82435 | 8.08004 | 7.65906 | 6.43068 | 7.54863 | 8.07194 | 8.2292  | 7.97149 |
| JPH1        | 6.4574  | 6.28264 | 6.18174 | 7.58972 | 6.99363 | 6.69252 | 7.18245 | 6.34839 | 6.5698  |
| PEX2        | 6.76981 | 6.84188 | 6.84875 | 6.72879 | 6.12998 | 6.63402 | 6.64692 | 6.37729 | 6.18048 |
| IL7         | 6.94464 | 6.24393 | 6.59942 | 4.77396 | 4.89282 | 4.63262 | 5.06799 | 4.29248 | 4.0643  |
| HEY1        | 5.11007 | 4.6586  | 4.5056  | 5.30296 | 5.60458 | 5.09209 | 5.26989 | 5.15122 | 5.42802 |
| MRPS28      | 6.75864 | 6.61969 | 7.01694 | 6.92155 | 4.81823 | 6.39964 | 7.35422 | 5.8311  | 6.5548  |
| TPD52       | 5.78985 | 5.89119 | 5.83839 | 5.7331  | 5.9386  | 5.76988 | 5.9543  | 5.892   | 5.74216 |
| ZNF704      | 7.87839 | 8.44741 | 8.06092 | 6.58265 | 6.33887 | 5.71652 | 6.72298 | 6.40213 | 6.36467 |
| PAG1        | 8.74077 | 8.44355 | 8.64221 | 7.29833 | 6.35196 | 6.54921 | 6.90375 | 8.08123 | 7.7791  |
| PMP2        | 4.8302  | 4.65089 | 4.78833 | 4.92599 | 5.21246 | 5.07831 | 5.26987 | 5.3538  | 5.15956 |
| FABP12      | 2.66644 | 2.45387 | 2.33732 | 2.54602 | 2.63053 | 2.74807 | 2.68553 | 2.38476 | 2.59331 |



|              |         |         |         |         |         |         |         |         |         |
|--------------|---------|---------|---------|---------|---------|---------|---------|---------|---------|
| IMPA1        | 6.85886 | 6.62787 | 6.63243 | 7.016   | 5.16935 | 6.02888 | 7.32717 | 5.44234 | 6.67559 |
| SNX16        | 7.38242 | 7.67115 | 7.41017 | 7.65757 | 4.67908 | 7.3727  | 7.49993 | 8.06976 | 7.45815 |
| C8orf59      | 7.67672 | 7.53021 | 8.04461 | 7.28497 | 6.23259 | 6.51658 | 7.29295 | 6.83791 | 6.91913 |
| CA1          | 4.05416 | 4.32389 | 4.33838 | 4.83128 | 5.13143 | 4.65405 | 4.20866 | 4.42818 | 4.49335 |
| PSKH2        | 4.15761 | 4.32227 | 4.20076 | 4.52737 | 4.56452 | 4.98608 | 4.38118 | 4.73206 | 4.56668 |
| CNGB3        | 4.68993 | 4.89532 | 4.73972 | 5.13284 | 5.65776 | 5.19914 | 4.812   | 5.00251 | 5.02076 |
| DCAF4L2      | 5.32723 | 5.16752 | 5.30924 | 5.628   | 6.89578 | 5.80756 | 5.54373 | 5.94122 | 5.76493 |
| MMP16        | 6.59291 | 6.50855 | 6.12554 | 6.49576 | 6.28716 | 5.93674 | 6.17666 | 6.40815 | 6.27783 |
| NBN          | 8.36001 | 7.9906  | 8.33168 | 7.25621 | 5.52388 | 6.3716  | 7.6932  | 6.26055 | 6.93412 |
| TMEM64       | 7.56916 | 7.848   | 7.82536 | 7.67865 | 7.45163 | 7.5687  | 7.29809 | 7.33269 | 7.38581 |
| C8orf88      | 7.70037 | 7.01328 | 7.8585  | 7.17535 | 4.72063 | 7.10712 | 6.2067  | 6.28443 | 5.40766 |
| TMEM55A      | 7.16998 | 7.04551 | 7.67057 | 6.34271 | 6.06503 | 6.22322 | 6.56312 | 6.16217 | 5.92422 |
| FLJ46284     | 5.37012 | 5.28358 | 5.18139 | 5.64204 | 5.89273 | 5.54638 | 5.19222 | 5.41386 | 5.33758 |
| C8orf87      | 5.36085 | 5.85661 | 5.60354 | 5.98887 | 6.85626 | 5.87396 | 5.73475 | 5.68287 | 5.87569 |
| LINC00535    | 4.37486 | 4.48603 | 4.51541 | 4.82984 | 6.02581 | 5.47801 | 5.12535 | 4.73353 | 5.0214  |
| MIR378D2     | 6.01538 | 5.23534 | 4.90546 | 5.57335 | 6.3252  | 5.73697 | 4.95148 | 5.30646 | 5.2743  |
| GEM          | 7.10332 | 6.86628 | 6.52642 | 6.48381 | 5.98705 | 6.76135 | 5.79509 | 8.77854 | 6.73457 |
| RAD54B       | 6.99832 | 6.95792 | 6.94297 | 6.202   | 6.13753 | 5.59615 | 6.36418 | 5.97852 | 5.23017 |
| KIAA1429     | 8.23334 | 8.33296 | 8.19531 | 7.21652 | 5.76579 | 7.20147 | 7.85596 | 7.22589 | 7.55345 |
| LOC100288748 | 4.30482 | 4.86891 | 4.10532 | 4.3054  | 4.36052 | 4.48123 | 4.01124 | 4.23194 | 4.29786 |
| CCNE2        | 6.56522 | 6.79209 | 6.75415 | 6.93964 | 6.37504 | 7.53128 | 6.55998 | 6.42728 | 5.50211 |
| TP53INP1     | 9.19565 | 8.86898 | 9.0241  | 8.02926 | 6.60194 | 6.87819 | 8.35092 | 7.44715 | 7.10769 |
| MIR3150B     | 6.0539  | 6.24551 | 6.00676 | 6.38501 | 6.86901 | 5.94072 | 5.98723 | 6.17683 | 6.29254 |
| LINC01298    | 5.38583 | 5.62702 | 5.69143 | 5.87107 | 6.29858 | 5.67156 | 5.54614 | 5.55533 | 5.4521  |
| c8orf37      | 7.60454 | 7.28279 | 7.57639 | 5.55892 | 5.44631 | 5.54956 | 6.10292 | 5.65182 | 5.61247 |
| LOC100500773 | 3.36902 | 3.30781 | 3.05125 | 3.8356  | 3.52466 | 3.99426 | 4.25674 | 3.55819 | 4.21419 |

|           |         |         |         |         |         |         |         |         |         |
|-----------|---------|---------|---------|---------|---------|---------|---------|---------|---------|
| GDF6      | 4.39586 | 4.42362 | 4.35024 | 4.93983 | 5.39425 | 5.08013 | 5.36594 | 5.04354 | 4.90773 |
| Uqcrb     | 6.48164 | 6.50215 | 6.36333 | 5.7408  | 6.02011 | 5.51993 | 5.68545 | 5.78863 | 5.92969 |
| MTERF3    | 7.05778 | 6.75836 | 6.955   | 6.87666 | 5.84044 | 6.40625 | 6.59071 | 6.75759 | 6.4098  |
| TSPYL5    | 7.22544 | 7.02754 | 7.4935  | 7.3725  | 7.27327 | 6.57214 | 7.03036 | 7.26838 | 6.6863  |
| RPL30     | 7.0287  | 6.63658 | 7.18508 | 6.76758 | 6.6627  | 6.50861 | 7.06037 | 6.5902  | 6.69705 |
| RIDA      | 7.03048 | 6.92914 | 6.61146 | 7.02686 | 6.0422  | 6.65238 | 7.70723 | 6.08733 | 6.74323 |
| NIPAL2    | 11.3975 | 11.2307 | 11.1206 | 10.1893 | 10.1087 | 9.74457 | 10.3594 | 9.54718 | 10.1425 |
| stk3      | 7.00761 | 7.30732 | 6.86542 | 6.79579 | 5.80387 | 6.22329 | 6.33413 | 7.68005 | 7.17495 |
| MIR599    | 4.21755 | 4.04754 | 3.96995 | 4.59676 | 3.7859  | 4.7449  | 4.30903 | 4.25982 | 4.12557 |
| Mir875    | 3.81815 | 3.70267 | 3.62347 | 3.58557 | 3.67818 | 3.73467 | 3.64288 | 3.34388 | 3.8432  |
| COX6C     | 5.89774 | 6.0892  | 6.05603 | 6.31803 | 5.84321 | 6.52371 | 5.83856 | 6.1499  | 5.71497 |
| RGS22     | 4.34032 | 3.97207 | 4.91844 | 4.07894 | 4.33891 | 4.80569 | 4.60576 | 3.98957 | 4.27245 |
| FBXO43    | 3.38904 | 3.22012 | 3.15851 | 3.59557 | 4.03931 | 3.38013 | 3.47035 | 3.38223 | 3.34286 |
| ANKRD46   | 7.12905 | 7.31101 | 7.25454 | 6.63315 | 6.03847 | 6.88744 | 7.6034  | 6.69183 | 6.67168 |
| SNX31     | 5.03181 | 4.93793 | 4.89215 | 4.99929 | 5.67439 | 5.75291 | 5.25685 | 5.09161 | 4.87257 |
| ZNF706    | 8.46725 | 8.50631 | 8.16913 | 7.91838 | 6.58064 | 6.93326 | 7.94766 | 7.88709 | 7.996   |
| RRM2B     | 6.78098 | 6.69436 | 6.8201  | 6.50162 | 4.41893 | 5.60515 | 7.50866 | 5.86273 | 5.91465 |
| UBR5      | 9.29771 | 9.43462 | 9.24044 | 8.78952 | 6.79654 | 9.38046 | 8.93874 | 9.37429 | 9.07917 |
| KLF10     | 11.4113 | 10.2004 | 10.5686 | 10.9172 | 9.55515 | 10.6817 | 11.058  | 10.1725 | 11.1884 |
| AZIN1     | 8.39489 | 8.38063 | 8.55545 | 8.43447 | 6.6266  | 8.12236 | 8.78903 | 8.87508 | 8.10141 |
| BAALC-AS2 | 4.98385 | 5.05936 | 5.24321 | 4.95077 | 4.98726 | 5.41562 | 5.60383 | 4.94414 | 4.9875  |
| BAALC-AS1 | 5.63012 | 5.69212 | 5.96259 | 5.40452 | 6.31328 | 5.65481 | 5.83373 | 5.45421 | 5.56104 |
| DPYS      | 5.15279 | 5.32695 | 5.4872  | 5.73344 | 6.29197 | 5.95875 | 5.64843 | 5.55057 | 5.47397 |
| MIR548A3  | 5.14624 | 4.64734 | 4.53699 | 4.52606 | 5.42028 | 4.55963 | 4.64811 | 4.68141 | 5.06109 |
| LRP12     | 7.35426 | 7.46249 | 7.19492 | 7.57116 | 5.60583 | 6.84879 | 7.36866 | 7.96061 | 7.02381 |
| ABRA      | 5.58266 | 5.80147 | 5.40869 | 5.62426 | 5.84134 | 6.04966 | 5.70379 | 6.23004 | 5.78089 |

|              |         |         |         |         |         |         |         |         |         |
|--------------|---------|---------|---------|---------|---------|---------|---------|---------|---------|
| ANGPT1       | 5.42417 | 6.2989  | 5.84152 | 5.40716 | 5.59231 | 4.94738 | 5.09971 | 4.65842 | 4.89317 |
| RSPO2        | 5.02476 | 5.10964 | 5.15795 | 5.04669 | 5.47674 | 5.89462 | 5.30223 | 5.55996 | 5.69667 |
| TMEM74       | 4.81764 | 4.87811 | 4.71535 | 5.25191 | 6.17544 | 5.56469 | 4.94154 | 5.33682 | 5.1801  |
| NUDCD1       | 7.35637 | 7.33146 | 7.61545 | 7.74575 | 5.5922  | 6.53979 | 7.31279 | 6.75201 | 7.02996 |
| SYBU         | 6.07952 | 6.05344 | 6.092   | 5.20729 | 5.95097 | 5.43901 | 5.42777 | 5.51972 | 5.09586 |
| CSMD3        | 4.62978 | 4.50318 | 4.50281 | 4.68763 | 5.62849 | 5.0208  | 4.84748 | 5.12274 | 4.93624 |
| TRPS1        | 10.2449 | 10.6413 | 10.3736 | 9.39894 | 7.0929  | 9.08253 | 10.1118 | 9.18569 | 10.3657 |
| LINC00536    | 4.80599 | 4.85287 | 4.71326 | 5.36019 | 5.61867 | 4.92739 | 5.06055 | 5.33682 | 4.76821 |
| RAD21        | 6.85902 | 6.86551 | 6.91833 | 6.87138 | 4.74516 | 7.21532 | 6.88428 | 7.01353 | 7.03854 |
| EXT1         | 10.3477 | 9.6073  | 10.0036 | 9.08846 | 7.02821 | 8.68301 | 9.54286 | 9.93671 | 9.13979 |
| SAMD12       | 6.93734 | 5.94176 | 5.68055 | 5.59072 | 5.51953 | 5.7024  | 5.38372 | 4.98183 | 5.30735 |
| ENPP2        | 8.47824 | 8.05244 | 9.04277 | 7.3798  | 6.23924 | 6.2422  | 6.99798 | 6.50064 | 7.55274 |
| DSCC1        | 5.65168 | 4.97799 | 6.05336 | 4.98909 | 4.54932 | 4.80158 | 5.08615 | 4.87817 | 4.5084  |
| MRPL13       | 7.15801 | 6.96351 | 7.29748 | 7.64527 | 5.93719 | 7.51223 | 8.21275 | 7.34643 | 7.73304 |
| HAS2         | 6.91986 | 6.63369 | 7.14208 | 7.48679 | 6.56841 | 5.73997 | 5.84317 | 5.43254 | 6.18861 |
| DERL1        | 9.9685  | 9.53392 | 9.97914 | 9.67545 | 8.12486 | 9.09637 | 9.76385 | 9.27793 | 9.70173 |
| FAM83A-AS1   | 5.63612 | 5.27219 | 5.4379  | 6.48449 | 6.14036 | 7.23882 | 6.74769 | 7.13001 | 7.08803 |
| MIR4663      | 7.00398 | 7.22479 | 7.18362 | 7.09626 | 8.29512 | 7.17225 | 6.53265 | 7.36001 | 7.12862 |
| ZHX1-C8orf76 | 8.31914 | 8.32545 | 7.92548 | 8.03837 | 6.68326 | 7.40837 | 7.95316 | 7.45805 | 7.73976 |
| MIR548AA1    | 3.90705 | 4.04426 | 3.79168 | 4.01652 | 3.61641 | 3.8076  | 3.18094 | 3.7686  | 3.34664 |
| FBXO32       | 7.97252 | 8.5605  | 8.28662 | 6.97327 | 6.79984 | 6.29219 | 7.15218 | 7.43282 | 6.38475 |
| KLHL38       | 4.23862 | 4.04099 | 4.03784 | 4.63824 | 5.39441 | 4.43756 | 3.85297 | 4.2437  | 4.1368  |
| ANXA13       | 4.47115 | 4.85089 | 4.49293 | 5.11997 | 5.72024 | 5.28861 | 4.98939 | 4.95749 | 5.3282  |
| FER1L6-AS1   | 5.14669 | 5.46904 | 5.58566 | 6.18481 | 6.55822 | 6.14237 | 5.76193 | 5.74538 | 5.58912 |
| tmem65       | 8.59842 | 8.79985 | 8.36297 | 7.97459 | 6.58452 | 7.87687 | 8.63879 | 7.7281  | 7.86616 |
| TATDN1       | 6.37125 | 6.63647 | 6.77589 | 5.55936 | 4.46328 | 4.84914 | 5.98887 | 4.61396 | 5.00051 |

|           |         |         |         |         |         |         |         |         |         |
|-----------|---------|---------|---------|---------|---------|---------|---------|---------|---------|
| MTSS1     | 9.49321 | 9.06552 | 9.28724 | 8.60695 | 7.83668 | 9.21647 | 9.15073 | 8.56212 | 9.21035 |
| KIAA0196  | 8.88826 | 8.74724 | 9.00763 | 8.15689 | 5.74415 | 7.68898 | 8.5283  | 8.28641 | 8.3178  |
| LINC00861 | 4.07856 | 4.03087 | 4.11578 | 4.00363 | 5.04242 | 4.11665 | 4.22573 | 4.07935 | 4.06115 |
| CASC8     | 5.66587 | 5.4234  | 5.29463 | 5.33866 | 5.9625  | 5.77722 | 4.94975 | 5.337   | 5.20857 |
| LINC00977 | 6.13184 | 6.56424 | 6.45084 | 6.58607 | 7.77897 | 7.11858 | 6.26855 | 6.84177 | 6.64609 |
| MIR3686   | 3.18104 | 3.54589 | 3.43471 | 3.09837 | 3.59202 | 4.23154 | 3.52072 | 3.31938 | 3.57412 |
| GSDMC     | 10.2537 | 9.90581 | 9.83956 | 9.63071 | 7.7627  | 9.39302 | 10.2449 | 10.6047 | 11.159  |
| ASAP1-IT2 | 7.70184 | 7.22206 | 7.0356  | 5.7036  | 6.41314 | 4.69456 | 5.90964 | 6.70147 | 6.52304 |
| ASAP1-IT1 | 7.6715  | 6.93991 | 7.64072 | 6.33525 | 6.12492 | 5.29554 | 5.95653 | 7.27292 | 6.9291  |
| ADCY8     | 6.47557 | 6.76906 | 6.49872 | 5.41146 | 6.48339 | 5.77626 | 5.04832 | 5.36984 | 5.30428 |
| OC90      | 4.91907 | 5.17674 | 4.84752 | 5.80176 | 6.116   | 6.28356 | 5.37041 | 5.77265 | 5.09738 |
| HHLA1     | 4.46623 | 4.81373 | 4.55509 | 5.09017 | 5.67261 | 5.27029 | 4.70834 | 4.8443  | 4.8621  |
| LRRC6     | 6.58979 | 6.38813 | 6.84638 | 6.05502 | 6.05917 | 5.69125 | 6.26628 | 6.04297 | 6.052   |
| TMEM71    | 5.2887  | 5.29024 | 5.77541 | 4.80577 | 6.17934 | 5.38783 | 5.09891 | 5.8457  | 5.30102 |
| SLA       | 6.13914 | 5.69901 | 6.72723 | 6.18097 | 7.02677 | 6.56019 | 6.34595 | 6.59895 | 6.36514 |
| NDRG1     | 9.8936  | 9.58261 | 9.73416 | 10.4929 | 10.103  | 10.9546 | 10.2552 | 11.0734 | 10.7976 |
| ZFAT      | 6.92283 | 6.78826 | 6.74096 | 6.64315 | 5.8397  | 6.74496 | 6.69442 | 6.8783  | 6.6731  |
| mir30b    | 2.41156 | 2.02052 | 1.87469 | 2.37532 | 1.91062 | 2.80253 | 2.7466  | 2.19649 | 2.19883 |
| mir30d    | 2.70495 | 2.65223 | 2.98169 | 2.32794 | 2.70495 | 3.02033 | 2.4487  | 2.58846 | 2.30776 |
| TRAPPC9   | 7.94273 | 7.59048 | 7.47726 | 7.2134  | 6.65441 | 7.04517 | 7.53411 | 7.02711 | 7.57989 |
| PTK2      | 7.95061 | 7.79831 | 7.87969 | 7.02517 | 5.76228 | 6.85698 | 7.18922 | 7.96845 | 7.7007  |
| MIR151A   | 4.8027  | 5.21546 | 4.51693 | 4.13305 | 4.71293 | 5.07803 | 4.9526  | 5.28266 | 5.19358 |
| GPR20     | 6.39385 | 6.09682 | 6.01645 | 6.5892  | 7.09194 | 6.95656 | 6.68562 | 6.19242 | 6.5456  |
| MROH5     | 5.92004 | 6.29099 | 6.49211 | 6.4545  | 6.97115 | 6.4196  | 6.46726 | 6.46451 | 6.36639 |
| MIR1302-7 | 2.94047 | 3.28137 | 2.65789 | 3.88204 | 2.58842 | 4.14596 | 3.37824 | 3.58975 | 3.50721 |
| TSNARE1   | 6.91933 | 7.03705 | 7.23641 | 7.03472 | 6.54181 | 6.83656 | 7.07721 | 6.86027 | 7.10007 |

|              |         |         |         |         |         |         |         |         |         |
|--------------|---------|---------|---------|---------|---------|---------|---------|---------|---------|
| ARC          | 6.22232 | 5.8615  | 6.12228 | 6.68053 | 6.00392 | 7.34096 | 6.56584 | 6.29582 | 6.6742  |
| JRK          | 6.99107 | 7.01084 | 6.95916 | 7.10157 | 7.01777 | 7.5167  | 7.03312 | 7.00735 | 7.27411 |
| LOC100288181 | 4.7183  | 5.32186 | 5.30414 | 5.62226 | 6.34785 | 5.81165 | 5.41292 | 5.17633 | 5.35363 |
| SLURP1       | 12.468  | 12.9031 | 12.3978 | 12.2491 | 10.2984 | 10.5893 | 10.7471 | 9.75619 | 10.3687 |
| lypd2        | 6.30839 | 6.7819  | 6.35371 | 6.24787 | 6.72277 | 7.07706 | 6.56752 | 6.50786 | 6.61809 |
| LYNX1        | 7.5079  | 7.36376 | 7.19745 | 8.68566 | 8.18871 | 8.4393  | 8.81918 | 8.30335 | 8.25769 |
| LOC100133669 | 5.84208 | 5.57428 | 5.63684 | 5.81348 | 5.56592 | 6.25149 | 5.82648 | 5.91986 | 5.84208 |
| RHPN1-AS1    | 5.40161 | 5.54123 | 5.88544 | 5.82822 | 6.88963 | 6.08719 | 5.74953 | 6.06271 | 5.89791 |
| MAFA         | 6.20001 | 6.14862 | 6.47078 | 7.01215 | 6.34402 | 6.8543  | 6.70442 | 6.96858 | 6.95034 |
| ZC3H3        | 6.97791 | 7.14419 | 7.15666 | 7.59105 | 6.37134 | 7.73067 | 8.15013 | 7.69833 | 7.53536 |
| MROH6        | 7.33071 | 7.43547 | 7.19423 | 7.72255 | 7.87848 | 8.14863 | 7.79021 | 7.80848 | 7.94782 |
| NAPRT        | 7.64439 | 7.16464 | 7.58138 | 7.79661 | 7.15252 | 8.51785 | 8.15344 | 8.03978 | 8.16636 |
| EEF1D        | 6.71727 | 6.34588 | 6.72211 | 7.10079 | 6.64289 | 7.04413 | 6.49818 | 6.72136 | 6.70789 |
| PYCRL        | 6.34364 | 6.4177  | 6.26368 | 6.72515 | 6.44862 | 6.90241 | 6.75732 | 6.56367 | 6.55203 |
| TSTA3        | 8.05837 | 7.82734 | 8.23406 | 8.30365 | 7.05585 | 8.64263 | 9.02212 | 7.82116 | 8.58936 |
| CCDC166      | 5.67765 | 5.53704 | 6.05531 | 6.57523 | 5.92938 | 6.99743 | 6.43051 | 6.96956 | 6.64616 |
| MIR4664      | 5.15596 | 4.04101 | 4.54126 | 4.45839 | 3.77716 | 5.80615 | 5.3355  | 5.07733 | 5.28696 |
| SCRIB        | 7.06691 | 6.92159 | 6.87913 | 7.47583 | 7.2857  | 8.00408 | 7.77448 | 7.33702 | 7.52478 |
| PUF60        | 6.60672 | 6.68643 | 6.44887 | 7.07203 | 6.88819 | 6.82461 | 6.68057 | 6.99085 | 6.7088  |
| NRBP2        | 7.99188 | 7.80942 | 8.00107 | 8.46529 | 7.67351 | 8.36226 | 8.05551 | 8.8273  | 8.63546 |
| EPPK1        | 8.57674 | 8.94041 | 8.71011 | 9.42324 | 8.045   | 10.2543 | 10.3331 | 9.89994 | 10.6896 |
| PLEC         | 7.90683 | 8.21504 | 8.20312 | 8.30507 | 6.39076 | 8.71465 | 8.77952 | 8.1776  | 8.61126 |
| MIR661       | 8.01247 | 7.62016 | 8.21602 | 8.80928 | 10.1358 | 9.20895 | 8.26232 | 9.05682 | 8.73156 |
| OPLAH        | 6.71857 | 6.73223 | 6.48588 | 6.90302 | 6.3398  | 6.89051 | 6.85569 | 6.72549 | 6.54148 |
| SHARPIN      | 7.16184 | 7.22862 | 7.2319  | 7.82667 | 7.44522 | 8.23316 | 8.199   | 7.64296 | 7.82985 |
| BOP1         | 7.63418 | 7.38782 | 7.74979 | 8.66002 | 7.06742 | 8.26758 | 8.70949 | 7.14302 | 7.76051 |

|           |         |         |         |         |         |         |         |         |         |
|-----------|---------|---------|---------|---------|---------|---------|---------|---------|---------|
| DGAT1     | 8.35023 | 7.66118 | 7.95266 | 8.74985 | 6.57774 | 8.48405 | 8.85793 | 8.98996 | 8.63185 |
| TMEM249   | 5.62991 | 6.11032 | 5.84991 | 6.20526 | 6.39264 | 6.58738 | 6.48369 | 6.21145 | 6.38555 |
| FBXL6     | 6.76115 | 6.56286 | 6.75752 | 7.28448 | 7.04387 | 7.16282 | 7.60978 | 6.70841 | 7.21883 |
| VPS28     | 8.05416 | 7.88607 | 8.00544 | 8.76327 | 7.9879  | 9.11353 | 9.10623 | 8.46876 | 8.67041 |
| FOXH1     | 6.94027 | 6.76026 | 6.83339 | 7.5432  | 7.08206 | 7.5281  | 7.20542 | 7.30028 | 7.31848 |
| RECQL4    | 6.55314 | 6.22093 | 6.61946 | 6.87929 | 6.52662 | 7.28237 | 6.33888 | 6.7911  | 6.86803 |
| LRRC24    | 5.57983 | 5.713   | 5.72858 | 6.51867 | 5.68627 | 6.97879 | 6.0018  | 6.31034 | 6.27149 |
| ARHGAP39  | 6.4367  | 6.65448 | 6.55956 | 6.87841 | 6.94538 | 7.35303 | 6.9857  | 7.08561 | 7.06429 |
| ZNF251    | 7.3323  | 7.45969 | 7.24244 | 5.94823 | 6.34012 | 6.1843  | 6.33932 | 6.15046 | 6.10634 |
| ZNF34     | 7.05708 | 6.77353 | 6.95676 | 6.03804 | 6.72506 | 5.5758  | 6.26738 | 6.15755 | 6.10283 |
| RPL8      | 10.0836 | 10.1625 | 10.3158 | 10.2613 | 9.77088 | 10.068  | 10.1898 | 9.96918 | 9.94367 |
| COMMD5    | 6.76632 | 6.77689 | 6.87677 | 6.94485 | 6.6881  | 6.73039 | 6.86532 | 6.8763  | 7.06009 |
| ZNF250    | 8.00572 | 8.07567 | 7.79047 | 7.47435 | 6.84669 | 7.41242 | 7.60462 | 7.13431 | 8.1861  |
| ZNF16     | 6.89735 | 7.03656 | 6.77832 | 6.95643 | 7.13104 | 7.22991 | 6.79438 | 6.6001  | 6.80941 |
| DOCK8     | 6.84811 | 7.84012 | 6.65404 | 6.5028  | 6.12542 | 6.39326 | 7.32993 | 7.56301 | 8.20038 |
| KANK1     | 7.70974 | 7.39574 | 7.14914 | 7.51632 | 6.84967 | 7.49307 | 7.52838 | 6.94453 | 7.78761 |
| DMRT1     | 5.85429 | 5.66846 | 5.67363 | 6.29097 | 6.90944 | 6.68527 | 5.99964 | 6.54819 | 6.21301 |
| DMRT3     | 5.73645 | 5.74948 | 5.02566 | 6.41232 | 6.7126  | 6.00105 | 6.08804 | 5.83607 | 5.93618 |
| DMRT2     | 4.38762 | 4.85371 | 4.74721 | 5.03636 | 5.18865 | 5.26187 | 4.74307 | 4.73674 | 4.87843 |
| VLDLR     | 7.29216 | 7.49948 | 7.31058 | 8.07152 | 6.70143 | 9.22413 | 8.29794 | 7.88914 | 7.9912  |
| GLIS3-AS1 | 5.50411 | 5.77324 | 5.77883 | 5.8936  | 7.48822 | 5.89456 | 6.50302 | 5.93314 | 6.1865  |
| plpp6     | 8.15317 | 7.99075 | 8.03988 | 7.5517  | 6.82115 | 7.05446 | 8.3253  | 7.47994 | 7.66065 |
| CDC37L1   | 7.4292  | 7.58845 | 7.58776 | 6.85711 | 5.80025 | 6.76937 | 7.78918 | 7.35315 | 7.19201 |
| RCL1      | 7.22635 | 7.65163 | 7.14378 | 6.81742 | 5.49991 | 6.20334 | 6.98192 | 6.22962 | 6.29147 |
| MIR101-2  | 2.4613  | 3.10877 | 2.35232 | 2.55499 | 2.91283 | 2.58098 | 2.83786 | 2.40388 | 2.67584 |
| JAK2      | 8.12717 | 8.61676 | 8.20752 | 6.72842 | 4.70346 | 6.0935  | 7.22353 | 7.84227 | 7.0305  |

|            |         |         |         |         |         |         |         |         |         |
|------------|---------|---------|---------|---------|---------|---------|---------|---------|---------|
| INSL4      | 4.71275 | 4.4427  | 4.66881 | 4.73238 | 4.97189 | 5.02252 | 4.62847 | 4.94341 | 4.65492 |
| CD274      | 4.65975 | 4.81907 | 5.20298 | 5.49036 | 6.12785 | 5.91931 | 6.38361 | 6.31837 | 7.1134  |
| PDCD1LG2   | 6.55701 | 6.93997 | 7.20477 | 7.93205 | 5.54977 | 6.93896 | 7.01413 | 6.95021 | 7.74741 |
| RIC1       | 8.92535 | 8.85251 | 8.85958 | 8.07792 | 7.8163  | 9.34002 | 8.40528 | 9.51252 | 8.9657  |
| MLANA      | 7.80289 | 7.32424 | 6.9688  | 6.17073 | 5.72052 | 5.13971 | 5.4691  | 5.13425 | 5.58534 |
| IL33       | 9.65708 | 6.84678 | 7.90527 | 6.96422 | 4.38549 | 5.64986 | 6.58454 | 3.80251 | 4.17728 |
| TPD52L3    | 4.23279 | 4.84295 | 4.58973 | 4.25713 | 5.7789  | 4.605   | 4.58636 | 4.60679 | 4.85201 |
| KDM4C      | 7.95416 | 7.82576 | 7.877   | 7.18347 | 6.60116 | 7.34683 | 6.81573 | 7.01192 | 7.19803 |
| TYRP1      | 10.899  | 9.57199 | 9.68408 | 5.7658  | 6.41886 | 5.62284 | 6.1228  | 4.94219 | 5.18679 |
| LURAP1L    | 8.20526 | 8.03141 | 7.85554 | 8.51334 | 5.85286 | 8.59045 | 8.64484 | 8.96499 | 9.548   |
| LINC00583  | 2.3153  | 3.18683 | 2.61576 | 2.67003 | 3.59212 | 3.54118 | 2.85099 | 2.51193 | 2.48198 |
| LOC389705  | 5.25011 | 5.18023 | 5.63326 | 5.73936 | 5.54206 | 5.78469 | 5.18691 | 5.62475 | 5.57548 |
| CCDC171    | 6.66342 | 6.61896 | 5.89818 | 4.93659 | 5.51141 | 4.7222  | 4.76664 | 4.53971 | 4.94874 |
| SH3GL2     | 3.74103 | 3.29084 | 3.49495 | 4.05266 | 4.19486 | 3.75531 | 3.67618 | 4.18932 | 3.74367 |
| ADAMTSL1   | 6.17195 | 5.82018 | 5.76143 | 6.07222 | 6.50539 | 5.77996 | 5.68212 | 5.60566 | 5.83844 |
| MIR3152    | 2.80188 | 2.84605 | 2.71559 | 4.80533 | 3.2148  | 5.39995 | 5.1882  | 4.00034 | 4.04749 |
| RRAGA      | 7.83584 | 7.70031 | 7.38144 | 8.63406 | 6.25018 | 8.26214 | 8.77255 | 7.64786 | 8.25625 |
| DENND4C    | 9.16923 | 9.11168 | 8.9081  | 7.68122 | 5.59709 | 7.3836  | 7.88695 | 7.36525 | 7.19916 |
| ACER2      | 7.06743 | 7.1288  | 6.66722 | 7.00455 | 6.90943 | 6.60146 | 7.76099 | 6.94522 | 7.41008 |
| FOCAD      | 8.36899 | 8.07729 | 7.64792 | 7.53966 | 6.22186 | 6.85671 | 8.00201 | 7.63153 | 7.23686 |
| MIR491     | 3.80186 | 4.06336 | 3.47068 | 3.56539 | 3.20817 | 3.44335 | 3.17049 | 3.28837 | 3.5243  |
| MTAP       | 7.52003 | 7.30737 | 7.52348 | 7.73795 | 5.83229 | 7.18266 | 7.83523 | 7.57743 | 8.41674 |
| CDKN2A-AS1 | 4.769   | 4.97562 | 5.0544  | 5.28097 | 6.09089 | 5.8013  | 5.08987 | 5.74169 | 5.60267 |
| CDKN2B-AS1 | 4.40674 | 4.66782 | 4.34169 | 4.24427 | 5.18686 | 4.73556 | 4.43005 | 4.36092 | 4.3403  |
| DMRTA1     | 6.15714 | 7.34882 | 6.94483 | 6.98637 | 5.87164 | 7.30772 | 7.5785  | 7.03832 | 6.88698 |
| LINC01239  | 4.0051  | 4.98191 | 5.25654 | 4.10356 | 5.36571 | 4.10347 | 3.74739 | 4.54483 | 3.97264 |

|              |         |         |         |         |         |         |         |         |         |
|--------------|---------|---------|---------|---------|---------|---------|---------|---------|---------|
| LOC100506422 | 5.13751 | 5.17593 | 5.32528 | 4.71322 | 5.69828 | 5.44805 | 4.30818 | 4.9821  | 4.94053 |
| IFT74        | 7.84553 | 7.99438 | 8.2687  | 7.05048 | 4.89202 | 5.49859 | 7.61427 | 5.6544  | 6.14843 |
| TOPORS-AS1   | 5.92325 | 5.91237 | 6.00248 | 5.91213 | 6.37243 | 6.6535  | 6.32987 | 6.0806  | 6.29181 |
| TMEM215      | 6.38854 | 6.02858 | 6.31479 | 7.23658 | 7.48061 | 6.95111 | 6.49193 | 6.59597 | 6.79534 |
| CHMP5        | 9.36336 | 9.59669 | 9.43399 | 9.63362 | 8.37421 | 10.1566 | 9.82541 | 10.3726 | 9.94104 |
| ANXA2P2      | 12.5778 | 12.3144 | 12.7564 | 12.6184 | 11.3623 | 12.7965 | 12.8095 | 12.834  | 12.8126 |
| UBE2R2       | 10.9425 | 11.0531 | 10.8872 | 10.8253 | 10.6042 | 11.2558 | 10.7346 | 10.9896 | 10.909  |
| UBAP1        | 9.16022 | 8.81009 | 8.85869 | 10.1538 | 7.90075 | 11.225  | 10.1437 | 10.4222 | 10.4855 |
| NUDT2        | 6.30322 | 6.48464 | 6.3245  | 6.6976  | 6.03907 | 6.07399 | 7.01881 | 6.81019 | 6.64538 |
| CNTFR-AS1    | 6.31849 | 6.2772  | 6.28806 | 6.13961 | 7.01775 | 6.57198 | 6.19606 | 6.40431 | 6.27562 |
| GALT         | 7.42686 | 7.03604 | 7.03554 | 7.33692 | 6.05072 | 7.10333 | 6.73467 | 6.96279 | 6.99003 |
| PHF24        | 6.10466 | 5.97631 | 6.28299 | 5.94649 | 6.65898 | 7.18873 | 7.04694 | 6.54501 | 6.1701  |
| C9orf131     | 4.60735 | 4.73373 | 4.70545 | 4.27628 | 4.87268 | 4.2383  | 4.69025 | 4.69519 | 4.93556 |
| UNC13B       | 9.36103 | 9.28906 | 8.78096 | 8.49046 | 6.19196 | 8.98385 | 8.8695  | 8.28602 | 9.04431 |
| RUSC2        | 7.77123 | 8.03087 | 7.80903 | 7.72245 | 6.57846 | 8.07781 | 7.72981 | 8.34764 | 8.02565 |
| TESK1        | 7.51072 | 7.3197  | 7.4953  | 7.43957 | 7.33358 | 8.84151 | 7.67794 | 7.38522 | 7.36    |
| CCDC107      | 6.47048 | 6.58937 | 6.53476 | 7.15016 | 6.47    | 7.85985 | 7.42126 | 7.28964 | 7.28645 |
| CA9          | 6.04231 | 6.39484 | 6.36905 | 7.95111 | 8.09595 | 8.40009 | 6.60154 | 7.11755 | 7.05772 |
| CREB3        | 8.411   | 7.77812 | 8.48244 | 8.00601 | 6.89732 | 8.72274 | 8.41688 | 7.8333  | 8.14077 |
| RGP1         | 8.56163 | 8.6503  | 8.51635 | 8.68844 | 8.01859 | 9.72758 | 9.12135 | 9.35814 | 9.29229 |
| NPR2         | 8.37037 | 8.34029 | 7.39525 | 8.57025 | 8.25052 | 9.40347 | 7.93012 | 7.62323 | 9.72872 |
| TMEM8B       | 7.0137  | 7.10969 | 7.12102 | 6.95062 | 7.75584 | 7.17745 | 6.87261 | 7.43853 | 7.03983 |
| LINC00950    | 5.47193 | 5.93814 | 5.77881 | 5.47509 | 6.62545 | 5.50206 | 5.5058  | 5.73357 | 5.63935 |
| Hrct1        | 5.83572 | 6.00825 | 6.0022  | 6.18122 | 6.29379 | 6.20247 | 6.04092 | 6.17307 | 5.94093 |
| LINC00961    | 6.603   | 6.72453 | 6.9912  | 7.27212 | 7.25838 | 7.3684  | 6.71019 | 7.31887 | 7.11521 |
| RECK         | 7.65923 | 7.82628 | 7.8463  | 6.56372 | 6.85657 | 6.07734 | 6.86402 | 7.02818 | 6.45925 |



|                    |         |         |         |         |         |         |         |         |         |
|--------------------|---------|---------|---------|---------|---------|---------|---------|---------|---------|
| GLIPR2             | 7.05929 | 6.63771 | 7.64804 | 7.64252 | 6.36213 | 8.03401 | 7.82977 | 7.991   | 7.9979  |
| CCIN               | 5.5849  | 5.84935 | 5.72624 | 6.25295 | 6.43542 | 5.82663 | 5.68707 | 5.7313  | 5.87995 |
| MELK               | 6.57579 | 5.63698 | 6.05053 | 7.13341 | 5.3683  | 6.4277  | 6.98666 | 6.69069 | 6.74506 |
| EBLN3P             | 9.68772 | 9.27509 | 9.3022  | 9.02835 | 8.13148 | 9.02683 | 8.98019 | 9.37058 | 8.75631 |
| GRHPR              | 7.46558 | 7.25112 | 7.31125 | 7.51729 | 6.92826 | 7.53713 | 7.44011 | 7.36853 | 7.37348 |
| FRMPD1             | 7.38233 | 7.43705 | 6.5821  | 7.10372 | 5.46469 | 5.87851 | 6.09091 | 6.96382 | 6.95109 |
| TRMT10B            | 6.23247 | 6.71626 | 6.49632 | 5.94864 | 5.82848 | 5.93661 | 5.94585 | 5.86373 | 5.90268 |
| DCAF10             | 7.90151 | 7.96152 | 7.93482 | 7.87435 | 7.41834 | 8.39168 | 8.33424 | 8.21533 | 7.98478 |
| FOXD4L4            | 5.68998 | 5.87932 | 5.80354 | 6.28688 | 7.70232 | 6.03087 | 5.93779 | 5.8716  | 5.98192 |
| CNTNAP3B           | 7.35893 | 6.4574  | 6.55754 | 6.0266  | 5.80744 | 5.98652 | 6.33515 | 6.12337 | 6.28596 |
| FGF7P6             | 4.87756 | 5.08505 | 5.07311 | 2.78889 | 4.862   | 3.68133 | 4.07236 | 3.29337 | 3.41403 |
| PTGER4P2-CDK2AP2P2 | 5.52655 | 5.60672 | 5.38544 | 5.99283 | 6.59016 | 6.49533 | 5.82749 | 5.68061 | 5.94839 |
| MIR4477A           | 2.16474 | 2.384   | 2.46289 | 2.32794 | 1.75101 | 2.12789 | 2.86897 | 2.19005 | 1.83115 |
| FRG1HP             | 7.76035 | 8.67986 | 8.76407 | 6.05794 | 5.27744 | 5.01053 | 5.91875 | 5.94627 | 6.23747 |
| LOC100133920       | 5.66218 | 5.44467 | 6.29801 | 7.61666 | 7.97323 | 7.41248 | 6.49067 | 6.91744 | 6.97888 |
| CBWD3              | 9.31726 | 9.34868 | 9.48258 | 8.36507 | 8.10835 | 7.78514 | 8.62708 | 7.97651 | 8.29629 |
| FOXD4L6            | 6.4111  | 6.51691 | 6.53774 | 7.15547 | 8.52987 | 7.1371  | 6.95067 | 6.93596 | 6.79328 |
| PGM5               | 5.76211 | 5.26791 | 6.48095 | 5.90434 | 6.60596 | 5.96588 | 5.65492 | 5.70486 | 6.16463 |
| FAM122A            | 7.59865 | 7.90284 | 7.87982 | 7.5324  | 6.8345  | 7.32049 | 7.72417 | 7.45403 | 7.55788 |
| FXN                | 7.48931 | 7.2094  | 7.44912 | 7.22923 | 6.44119 | 6.47453 | 7.40139 | 6.63696 | 6.85448 |
| TJP2               | 8.74044 | 8.80256 | 8.44548 | 8.9331  | 8.52556 | 9.98101 | 9.17982 | 9.98133 | 10.2694 |
| c9orf135           | 3.95591 | 3.7696  | 3.59307 | 3.99099 | 4.81221 | 4.58577 | 3.96806 | 3.69946 | 3.9481  |
| MAMDC2             | 6.24272 | 7.30552 | 8.62309 | 5.35167 | 6.22298 | 5.82311 | 6.81553 | 5.29825 | 6.05493 |
| SMC5               | 8.8248  | 9.16219 | 9.14729 | 7.54448 | 5.01439 | 5.8557  | 7.61418 | 7.64485 | 7.48103 |
| C9orf85            | 7.1145  | 7.30981 | 7.23315 | 6.81797 | 5.35464 | 6.62108 | 6.41317 | 7.25705 | 6.74412 |
| GDA                | 6.62486 | 8.90275 | 7.76965 | 6.81977 | 7.78004 | 5.99361 | 7.37081 | 8.02342 | 6.99318 |

|           |         |         |         |         |         |         |         |         |         |
|-----------|---------|---------|---------|---------|---------|---------|---------|---------|---------|
| TMC1      | 4.33403 | 4.19532 | 4.39746 | 4.90124 | 5.20884 | 4.84399 | 4.70576 | 4.79279 | 4.72005 |
| ANXA1     | 12.1532 | 11.4841 | 12.3536 | 13.3032 | 12.7331 | 13.7243 | 13.1368 | 13.7316 | 13.6909 |
| RORB      | 5.20672 | 5.79742 | 5.37637 | 5.32516 | 5.91337 | 5.44938 | 5.46334 | 5.38276 | 5.41967 |
| OSTF1     | 9.32744 | 9.46205 | 9.29612 | 9.37765 | 6.52969 | 9.85805 | 9.63684 | 9.62512 | 9.66897 |
| PCSK5     | 6.21348 | 6.0058  | 6.49535 | 6.35417 | 6.43113 | 6.16318 | 6.1245  | 6.40538 | 5.7423  |
| RPSAP9    | 3.44909 | 3.94659 | 3.80304 | 4.47442 | 4.26882 | 4.85109 | 4.56895 | 4.76829 | 4.11348 |
| pca3      | 4.69816 | 4.89474 | 5.1704  | 5.37817 | 6.17175 | 5.13925 | 4.75734 | 4.9283  | 5.34832 |
| FOXB2     | 5.68002 | 6.13475 | 6.03091 | 6.54081 | 7.29357 | 6.79205 | 6.3872  | 7.04671 | 6.9536  |
| VPS13A    | 9.54813 | 9.57703 | 9.1066  | 8.52153 | 6.23909 | 7.61577 | 8.12381 | 8.69701 | 8.61718 |
| CEP78     | 7.24224 | 7.14005 | 6.92735 | 7.01008 | 5.91237 | 5.9284  | 6.88391 | 6.36403 | 5.83086 |
| PSAT1     | 9.46043 | 9.67459 | 10.0702 | 9.01722 | 7.37341 | 8.03889 | 9.62384 | 7.55448 | 7.43439 |
| KIF27     | 2.99358 | 2.78098 | 2.66447 | 3.25094 | 2.48525 | 3.36656 | 3.29026 | 2.79243 | 3.09343 |
| LOC389765 | 6.76166 | 7.40044 | 6.9447  | 5.87776 | 6.16109 | 5.77585 | 5.95043 | 5.12437 | 5.11058 |
| GAS1RR    | 6.67143 | 6.61333 | 6.45693 | 5.70996 | 5.61695 | 5.10404 | 5.27826 | 5.45184 | 5.23674 |
| C9orf170  | 5.64574 | 5.84161 | 5.8227  | 5.87442 | 6.69497 | 6.2609  | 6.18677 | 6.24633 | 6.27589 |
| DAPK1     | 7.21225 | 7.795   | 7.7417  | 6.56316 | 6.89849 | 5.94806 | 6.55734 | 6.17189 | 6.64683 |
| ctsl      | 6.98912 | 7.04186 | 7.61094 | 8.66003 | 6.22474 | 10.4263 | 8.87637 | 9.91254 | 10.098  |
| CTSL3P    | 3.94975 | 4.18506 | 3.27802 | 4.64155 | 4.37855 | 4.41161 | 3.70999 | 3.57491 | 3.91413 |
| CTSLP8    | 2.20672 | 2.35088 | 2.11035 | 2.50712 | 3.58224 | 2.24427 | 2.42072 | 2.32534 | 2.47106 |
| SPIN1     | 10.3179 | 10.1006 | 10.2025 | 9.16257 | 7.11942 | 8.64749 | 9.20881 | 8.86518 | 9.60918 |
| NXNL2     | 5.5522  | 6.18484 | 5.87459 | 5.80678 | 6.72607 | 5.77004 | 5.3746  | 5.48766 | 5.98757 |
| C9orf47   | 6.56234 | 6.87448 | 6.84047 | 7.13418 | 6.79062 | 7.13561 | 6.79038 | 7.14474 | 6.93443 |
| CKS2      | 8.19682 | 8.19914 | 7.64108 | 9.79364 | 6.84831 | 8.90764 | 9.37686 | 8.78981 | 8.34621 |
| SECISBP2  | 9.06578 | 9.09974 | 8.93159 | 8.20584 | 7.11482 | 7.5834  | 8.16486 | 7.798   | 8.26669 |
| UNQ6494   | 5.12847 | 5.45576 | 5.26428 | 5.7408  | 6.23342 | 5.86388 | 5.33771 | 5.4748  | 5.70678 |
| SYK       | 7.51495 | 7.70402 | 7.71495 | 7.51206 | 5.87865 | 7.11091 | 7.92513 | 6.51392 | 7.29305 |

|              |         |         |         |         |         |         |         |         |         |
|--------------|---------|---------|---------|---------|---------|---------|---------|---------|---------|
| MIR3910-1    | 2.1116  | 2.35815 | 1.91057 | 2.22428 | 1.82387 | 2.45228 | 2.39985 | 1.97837 | 2.42293 |
| LOC100128076 | 5.60678 | 5.74069 | 6.00497 | 6.63526 | 6.33891 | 6.82627 | 5.98918 | 6.01947 | 6.43503 |
| LINC00475    | 4.8852  | 5.09495 | 5.23365 | 5.65284 | 5.76234 | 5.34582 | 4.84917 | 5.04787 | 5.3508  |
| CENPP        | 8.99607 | 8.82073 | 8.47498 | 7.37353 | 6.33468 | 6.78015 | 7.88129 | 6.28183 | 6.87376 |
| SUSD3        | 5.79435 | 5.97331 | 6.08324 | 6.78239 | 6.92268 | 6.30669 | 6.54791 | 6.03021 | 6.38326 |
| CARD19       | 7.49789 | 7.37517 | 7.46836 | 7.77903 | 7.09517 | 7.31636 | 7.87848 | 7.95478 | 7.51524 |
| WNK2         | 6.95929 | 5.90994 | 6.31467 | 6.35971 | 5.89337 | 6.29692 | 6.09327 | 6.1228  | 6.25157 |
| FAM120A      | 8.62179 | 8.47196 | 8.56707 | 8.33094 | 6.93088 | 8.40047 | 8.58111 | 8.50834 | 8.41833 |
| PHF2         | 8.5183  | 8.33135 | 8.48595 | 7.88276 | 6.73095 | 7.85866 | 8.13736 | 7.34628 | 8.11259 |
| PTPDC1       | 7.43495 | 7.1037  | 7.08456 | 6.94768 | 6.97532 | 6.51918 | 6.95263 | 6.80109 | 6.75504 |
| Mirlet7a1    | 5.11137 | 5.42789 | 5.26513 | 6.01073 | 5.61891 | 6.63304 | 5.22903 | 5.86732 | 5.65024 |
| Mirlet7f1    | 4.21868 | 3.96079 | 4.06469 | 3.84805 | 2.48208 | 3.25537 | 3.74471 | 4.09135 | 4.40636 |
| MIRLET7D     | 5.60924 | 5.58628 | 5.46365 | 6.37709 | 5.45961 | 5.79517 | 5.63816 | 5.71014 | 5.65649 |
| ZNF169       | 5.54088 | 5.3247  | 5.50172 | 5.19113 | 5.36308 | 5.26378 | 5.40871 | 5.07163 | 4.83532 |
| LOC100132077 | 6.2519  | 6.4634  | 6.17874 | 6.22947 | 6.40596 | 6.63975 | 5.3884  | 5.83604 | 5.79553 |
| MFS14B       | 10.2739 | 9.82683 | 10.283  | 10.0027 | 8.11002 | 9.43201 | 10.0429 | 10.0034 | 9.92757 |
| c9orf3       | 8.31661 | 8.22962 | 8.08361 | 6.35256 | 5.9348  | 6.17351 | 6.8255  | 6.59849 | 6.21079 |
| MIR2278      | 6.22772 | 5.99069 | 6.50744 | 6.25278 | 6.33252 | 5.86135 | 5.66651 | 5.70098 | 5.97232 |
| mir23b       | 9.90845 | 9.48487 | 9.41682 | 6.70307 | 7.52518 | 6.4582  | 6.92265 | 7.43969 | 7.16951 |
| mir27b       | 9.50835 | 10.4956 | 9.6708  | 6.97565 | 6.23477 | 4.56936 | 7.02415 | 7.47631 | 7.14277 |
| LOC100507346 | 4.72616 | 5.08001 | 5.18705 | 5.48497 | 5.73339 | 5.45395 | 5.65566 | 4.93224 | 5.38538 |
| LOC158435    | 4.94097 | 4.71588 | 4.83836 | 5.52296 | 5.37538 | 4.94494 | 5.29951 | 5.44509 | 5.11311 |
| HABP4        | 6.32044 | 6.82044 | 6.53115 | 6.732   | 5.20466 | 6.31125 | 6.80653 | 7.08183 | 6.38534 |
| CDC14B       | 3.75814 | 3.95636 | 3.98843 | 4.01904 | 3.65852 | 3.9702  | 3.94571 | 3.89108 | 3.83578 |
| LOC441455    | 2.96304 | 2.86363 | 2.82051 | 3.24426 | 5.41584 | 2.82368 | 4.14422 | 3.26015 | 3.77496 |
| LOC100132781 | 5.5422  | 5.76029 | 4.92117 | 5.53145 | 6.16726 | 7.40716 | 5.7408  | 5.50304 | 5.84348 |

|                |         |         |         |         |         |         |         |         |         |
|----------------|---------|---------|---------|---------|---------|---------|---------|---------|---------|
| CCDC180        | 6.04356 | 6.35952 | 6.20156 | 5.7226  | 5.9625  | 5.53892 | 5.3325  | 5.77878 | 5.72649 |
| TDRD7          | 7.02978 | 7.01568 | 6.81371 | 7.26707 | 5.97866 | 7.15466 | 7.74508 | 7.14961 | 7.54285 |
| TMOD1          | 6.82325 | 7.2432  | 8.14479 | 6.47723 | 7.01338 | 6.82741 | 6.36547 | 6.21656 | 6.50827 |
| FOXE1          | 7.4107  | 6.75986 | 7.08691 | 8.20513 | 6.64623 | 7.96173 | 7.99961 | 7.46888 | 7.68272 |
| NANS           | 6.25356 | 6.1921  | 6.25555 | 6.59513 | 5.87815 | 6.62896 | 6.58619 | 7.01443 | 6.99961 |
| GALNT12        | 6.28572 | 7.91646 | 7.24041 | 6.79339 | 6.28064 | 5.81656 | 6.35659 | 6.13654 | 5.56587 |
| SEC61B         | 9.81348 | 9.68534 | 10.0677 | 10.7074 | 9.47955 | 10.3868 | 10.8625 | 9.99936 | 10.4125 |
| STX17          | 8.13916 | 8.13337 | 7.93024 | 7.25036 | 6.61888 | 7.83315 | 7.6785  | 7.20147 | 7.4675  |
| MSANTD3-TMEFF1 | 6.07891 | 6.18785 | 5.90973 | 6.25373 | 5.94424 | 7.6731  | 7.01058 | 7.51111 | 7.21432 |
| MURC           | 5.17342 | 5.35711 | 4.722   | 5.02277 | 5.86702 | 5.53229 | 4.93986 | 5.68345 | 5.20576 |
| PLPPR1         | 4.32702 | 4.7747  | 4.3889  | 5.16253 | 5.54013 | 4.9457  | 4.85173 | 4.92686 | 5.02881 |
| ZNF189         | 6.32464 | 6.10722 | 6.27882 | 6.09535 | 5.19486 | 5.93864 | 6.16732 | 6.04517 | 5.63199 |
| SMC2           | 7.48617 | 7.45836 | 7.70811 | 7.38071 | 5.30279 | 6.82324 | 7.03689 | 6.1946  | 6.18098 |
| NIPSNAP3A      | 8.44316 | 8.11879 | 8.62805 | 7.75034 | 7.63144 | 6.91555 | 8.13822 | 5.99862 | 7.49978 |
| NIPSNAP3B      | 5.2424  | 5.30163 | 4.98717 | 4.99286 | 4.63709 | 5.01261 | 5.32402 | 4.81165 | 4.45762 |
| fsd1l          | 5.7051  | 5.38799 | 5.46021 | 5.91169 | 4.40627 | 5.23314 | 5.64774 | 5.23583 | 5.88251 |
| fktn           | 7.31018 | 7.43523 | 7.6093  | 6.26108 | 4.38974 | 4.78433 | 6.52685 | 5.72214 | 6.15113 |
| TAL2           | 5.28747 | 5.15804 | 5.03273 | 5.54296 | 6.2596  | 5.78593 | 5.49327 | 5.4383  | 5.60791 |
| TMEM38B        | 7.01067 | 6.86888 | 6.90149 | 7.12864 | 6.32872 | 6.49071 | 6.80337 | 6.78987 | 6.18835 |
| ZNF462         | 8.77502 | 8.91479 | 8.22834 | 7.3175  | 6.94545 | 6.55107 | 7.48018 | 7.18327 | 6.7031  |
| RAD23B         | 10.9932 | 10.9721 | 10.8413 | 10.7712 | 9.73538 | 10.9094 | 10.9995 | 10.8433 | 10.7997 |
| ACTL7A         | 4.99768 | 5.49519 | 5.34172 | 5.43285 | 5.85441 | 5.86121 | 5.40752 | 5.75578 | 5.33238 |
| PALM2-AKAP2    | 6.91361 | 6.31116 | 6.5272  | 6.26803 | 5.77883 | 5.98144 | 6.19339 | 6.1803  | 6.8784  |
| LPAR1          | 6.18767 | 5.84567 | 6.44534 | 7.20855 | 6.26468 | 6.41444 | 7.40859 | 5.78173 | 6.17352 |
| ZNF483         | 4.78054 | 5.24479 | 5.0163  | 4.47603 | 5.18139 | 4.9331  | 4.45987 | 5.08108 | 4.79181 |
| UGCG           | 9.56947 | 9.69984 | 8.89423 | 9.81868 | 9.57136 | 11.3784 | 10.0306 | 11.2189 | 10.9215 |

|           |         |         |         |         |         |         |         |         |         |
|-----------|---------|---------|---------|---------|---------|---------|---------|---------|---------|
| MIR4668   | 6.5751  | 6.57757 | 5.32128 | 5.61485 | 2.97757 | 5.52534 | 5.26925 | 7.95819 | 6.52    |
| HSDL2     | 9.53532 | 9.35734 | 9.10555 | 9.41595 | 7.23477 | 8.89035 | 9.10751 | 8.8373  | 8.2495  |
| SNX30     | 8.34841 | 8.44063 | 8.41769 | 8.42944 | 7.35398 | 7.42228 | 8.49392 | 9.00781 | 8.41418 |
| PRPF4     | 7.89504 | 8.15353 | 7.92828 | 8.01678 | 6.8599  | 7.38089 | 8.13576 | 7.37318 | 7.79266 |
| BSPRY     | 7.96159 | 7.93375 | 7.42596 | 8.80555 | 7.08488 | 9.40856 | 9.08291 | 8.44424 | 9.17728 |
| RGS3      | 6.46012 | 6.36777 | 6.27531 | 6.73525 | 6.75586 | 6.49563 | 6.71797 | 6.69871 | 6.89262 |
| ZNF618    | 6.79286 | 7.43255 | 6.97315 | 6.09249 | 5.86861 | 5.65325 | 5.91981 | 5.59761 | 5.80767 |
| mir455    | 5.60386 | 5.91197 | 5.74868 | 6.37506 | 6.38544 | 6.08307 | 6.07233 | 6.04617 | 5.69272 |
| ORM1      | 3.29247 | 3.51915 | 3.32607 | 2.99663 | 3.58174 | 3.85881 | 3.00938 | 3.81102 | 2.93286 |
| ORM2      | 4.56965 | 4.31738 | 4.60926 | 4.39128 | 4.45758 | 4.92177 | 4.4178  | 4.68906 | 4.73565 |
| TMEM268   | 7.33401 | 7.21734 | 7.56005 | 6.86231 | 7.08346 | 6.97379 | 7.09806 | 6.64585 | 6.45921 |
| 44531     | 3.71241 | 3.79026 | 4.2424  | 5.11349 | 5.65244 | 4.49697 | 4.20679 | 4.86253 | 4.12165 |
| ASTN2-AS1 | 4.17216 | 4.28691 | 4.18981 | 4.46376 | 5.44082 | 4.74513 | 4.23868 | 4.67184 | 4.51854 |
| TRIM32    | 6.94264 | 7.38695 | 6.79655 | 6.41656 | 5.69403 | 5.9969  | 7.5623  | 6.32643 | 6.72604 |
| TLR4      | 6.89143 | 6.61088 | 7.56296 | 6.39672 | 6.58109 | 5.65361 | 6.47033 | 6.10874 | 6.07576 |
| PSMD5-AS1 | 5.93048 | 6.32811 | 6.45663 | 4.56454 | 4.7025  | 4.14056 | 4.31895 | 4.87811 | 4.68278 |
| CNTRL     | 6.90797 | 6.74267 | 6.83425 | 5.71295 | 5.52933 | 5.28798 | 5.79488 | 5.6511  | 5.63507 |
| GSN       | 8.74082 | 9.03774 | 9.39202 | 8.76337 | 7.33211 | 8.2449  | 8.73142 | 8.66525 | 8.32234 |
| DAB2IP    | 7.87274 | 7.93074 | 7.61807 | 8.18434 | 6.73462 | 8.02083 | 8.10786 | 7.33039 | 7.70108 |
| MORN5     | 4.51818 | 4.34653 | 4.19039 | 4.95519 | 5.09718 | 5.14782 | 4.79472 | 5.18376 | 4.92378 |
| MRRF      | 8.15979 | 8.21759 | 8.72838 | 7.07005 | 7.14091 | 6.62923 | 6.8481  | 6.67434 | 7.23461 |
| PTGS1     | 10.6499 | 10.0282 | 9.75539 | 9.96288 | 8.35917 | 9.09917 | 10.0164 | 9.90187 | 9.70116 |
| RABGAP1   | 9.57881 | 9.75185 | 9.62294 | 8.6055  | 6.58477 | 8.88336 | 8.71515 | 8.64647 | 8.89495 |
| GPR21     | 8.52307 | 8.66466 | 8.5566  | 7.37983 | 7.37537 | 6.47001 | 6.56464 | 7.3082  | 7.88444 |
| CRB2      | 6.36714 | 6.27097 | 6.59677 | 6.69767 | 7.1903  | 6.97739 | 6.59703 | 7.06769 | 6.84744 |
| LHX2      | 6.06115 | 6.42943 | 5.95067 | 6.99659 | 6.64413 | 6.60406 | 6.6934  | 6.81905 | 6.54433 |

|              |         |         |         |         |         |         |         |         |         |
|--------------|---------|---------|---------|---------|---------|---------|---------|---------|---------|
| NEK6         | 6.96618 | 6.85518 | 6.97439 | 6.90268 | 6.81189 | 6.86902 | 6.93111 | 6.76105 | 6.94423 |
| LOC100129034 | 7.92061 | 7.65098 | 8.04791 | 6.90673 | 6.02228 | 6.73954 | 7.02886 | 6.65801 | 6.45291 |
| ADGRD2       | 6.65169 | 6.61    | 6.51577 | 7.14434 | 6.91638 | 7.38062 | 7.05251 | 7.03368 | 7.1529  |
| MIR181A2HG   | 4.99405 | 6.54675 | 4.44957 | 4.94762 | 5.34501 | 4.10965 | 4.56642 | 4.75421 | 5.62564 |
| Mir181a2     | 4.93615 | 5.96005 | 4.24632 | 4.78792 | 5.86034 | 3.46758 | 4.61289 | 4.4601  | 5.44295 |
| Mir181b2     | 4.59015 | 5.67269 | 4.73949 | 4.5079  | 6.27064 | 5.12448 | 4.7088  | 4.71548 | 5.65687 |
| olfml2a      | 7.59223 | 7.34909 | 7.74534 | 7.18032 | 6.28314 | 6.96311 | 7.44029 | 7.11396 | 6.96786 |
| WDR38        | 5.81231 | 5.77221 | 5.96249 | 6.32719 | 6.36083 | 6.21539 | 5.99314 | 6.56773 | 6.06795 |
| RABEPK       | 6.868   | 6.58969 | 7.07074 | 6.64246 | 5.7947  | 6.37055 | 6.98535 | 5.7668  | 5.87488 |
| GAPVD1       | 8.83424 | 8.73036 | 8.52962 | 8.01585 | 6.20347 | 7.73454 | 8.16063 | 8.14795 | 8.36023 |
| PBX3         | 7.51491 | 7.47029 | 7.22832 | 7.05529 | 6.21465 | 7.09961 | 7.40615 | 6.98863 | 7.64093 |
| ZBTB43       | 8.01379 | 7.88526 | 7.65116 | 8.16893 | 6.74077 | 9.29778 | 8.13636 | 9.03312 | 8.61813 |
| zbtb34       | 6.90403 | 7.21927 | 6.99336 | 6.87352 | 6.25198 | 7.21124 | 6.65263 | 6.87752 | 7.07564 |
| RALGPS1      | 7.28703 | 7.28522 | 6.90114 | 6.76912 | 5.86834 | 6.17403 | 7.14221 | 7.38362 | 7.05183 |
| GARNL3       | 7.11129 | 7.27139 | 6.90719 | 6.16391 | 6.49044 | 6.26942 | 6.63988 | 6.13549 | 6.34108 |
| ZNF79        | 6.9317  | 6.65503 | 7.17885 | 6.54957 | 6.99573 | 6.61363 | 6.87651 | 6.85231 | 6.8301  |
| LRSAM1       | 7.52856 | 7.49716 | 6.98056 | 7.03124 | 6.00576 | 6.82109 | 7.0336  | 6.81765 | 7.12176 |
| STXBP1       | 9.30983 | 8.94183 | 8.95094 | 9.48536 | 8.80268 | 10.022  | 9.74635 | 10.535  | 10.2652 |
| TTC16        | 6.33986 | 6.25462 | 6.29585 | 7.05615 | 6.95563 | 7.04944 | 6.66129 | 6.93082 | 7.11958 |
| CDK9         | 8.86175 | 8.61376 | 8.42631 | 9.15769 | 7.42053 | 9.04489 | 9.54239 | 9.11506 | 8.9699  |
| FPGS         | 6.74437 | 6.47718 | 6.41504 | 6.5477  | 5.9277  | 7.04721 | 7.01016 | 6.66086 | 6.55317 |
| PTGES2-AS1   | 5.89081 | 5.90354 | 6.00795 | 6.79304 | 7.36575 | 6.8291  | 6.52073 | 6.78311 | 6.40134 |
| LCN2         | 6.8042  | 6.43618 | 6.93419 | 8.24463 | 9.50181 | 8.35677 | 10.4782 | 8.63171 | 8.10648 |
| c9orf16      | 6.30821 | 6.00075 | 6.45143 | 7.26504 | 6.7808  | 7.3684  | 7.04006 | 6.59461 | 6.61143 |
| DNM1         | 7.34265 | 7.53452 | 7.69447 | 7.14311 | 7.141   | 6.967   | 6.8979  | 7.34058 | 7.18631 |
| SWI5         | 6.20176 | 6.08125 | 6.11949 | 6.59867 | 6.14487 | 6.77792 | 7.06627 | 6.47321 | 6.75626 |

|              |         |         |         |         |         |         |         |         |         |
|--------------|---------|---------|---------|---------|---------|---------|---------|---------|---------|
| COQ4         | 8.14574 | 8.16723 | 8.03145 | 7.96777 | 6.44684 | 7.3182  | 8.29513 | 7.00785 | 7.13071 |
| URM1         | 7.30981 | 7.28362 | 7.28697 | 7.83294 | 6.74086 | 7.57169 | 8.07905 | 7.13453 | 7.38684 |
| MIR219A2     | 3.73877 | 3.82057 | 3.74234 | 3.9282  | 3.38541 | 3.8547  | 3.68275 | 3.5576  | 3.60864 |
| CERCAM       | 6.38421 | 6.08116 | 6.45018 | 6.91868 | 6.90346 | 7.14543 | 6.72147 | 7.21296 | 7.02619 |
| ODF2         | 7.4391  | 7.41576 | 7.35022 | 7.49058 | 6.68884 | 6.99342 | 7.47113 | 7.04176 | 7.03974 |
| GLE1         | 8.58955 | 8.74708 | 8.63673 | 8.0991  | 7.33202 | 7.94037 | 8.16408 | 7.81221 | 8.08051 |
| SET          | 7.64142 | 7.74699 | 7.60964 | 7.63901 | 7.08993 | 7.13987 | 7.66213 | 7.02007 | 7.40044 |
| PKN3         | 6.07491 | 6.00939 | 6.42516 | 6.58778 | 5.83108 | 6.39609 | 6.29435 | 6.24381 | 6.51772 |
| LOC100506100 | 5.70643 | 5.56664 | 5.5309  | 6.47438 | 6.03878 | 6.59769 | 6.92888 | 5.96483 | 5.88706 |
| endog        | 6.73755 | 6.47192 | 6.64629 | 7.31724 | 7.07845 | 7.70192 | 7.56087 | 7.18019 | 6.80142 |
| PHYHD1       | 7.75376 | 8.19534 | 8.12692 | 7.38175 | 8.10628 | 7.41345 | 7.60744 | 7.64618 | 7.20604 |
| NUP188       | 8.68493 | 8.50366 | 8.54435 | 8.35466 | 6.61081 | 7.25141 | 8.30312 | 7.6439  | 8.22679 |
| DOLPP1       | 7.73774 | 7.43289 | 7.37105 | 8.26228 | 6.40118 | 7.67132 | 8.55822 | 7.36002 | 7.48304 |
| C9orf106     | 6.33676 | 6.26334 | 6.77249 | 5.22701 | 6.55333 | 5.88489 | 5.96778 | 5.71028 | 5.77798 |
| NTMT1        | 6.28127 | 6.1331  | 6.04966 | 6.75018 | 6.0732  | 6.71273 | 6.91858 | 6.57307 | 6.42681 |
| PRRX2        | 6.85191 | 7.11603 | 6.89347 | 7.49516 | 6.997   | 8.24656 | 8.26643 | 7.51364 | 7.62624 |
| USP20        | 6.93623 | 7.05771 | 6.80339 | 7.0189  | 6.60273 | 7.48346 | 7.36191 | 8.45421 | 7.02659 |
| GPR107       | 9.26684 | 8.9096  | 9.07034 | 8.83856 | 8.02254 | 8.71253 | 9.02168 | 9.32441 | 9.1547  |
| NCS1         | 7.99474 | 8.50615 | 8.20576 | 9.18898 | 7.25314 | 8.93092 | 9.04927 | 8.33355 | 9.1504  |
| ASS1         | 8.26832 | 8.98267 | 8.58273 | 8.44319 | 8.53934 | 7.83756 | 8.73073 | 7.29809 | 7.77617 |
| FUBP3        | 8.44562 | 8.26563 | 8.57144 | 7.99682 | 6.46696 | 7.53239 | 8.25203 | 7.66231 | 8.05439 |
| PRDM12       | 6.23698 | 6.24509 | 6.35929 | 7.05072 | 6.49504 | 7.18276 | 6.7833  | 6.63999 | 6.74873 |
| EXOSC2       | 7.94322 | 8.35625 | 8.07591 | 8.07911 | 6.67601 | 6.94603 | 8.07539 | 6.98954 | 7.23658 |
| AIF1L        | 5.49957 | 5.63351 | 5.92513 | 6.67697 | 5.78142 | 7.77328 | 6.69315 | 8.12888 | 7.27542 |
| NUP214       | 9.37619 | 9.23038 | 9.37914 | 8.12708 | 6.87245 | 7.60123 | 8.37217 | 8.16226 | 8.58058 |
| PLPP7        | 6.32138 | 6.23151 | 6.42763 | 6.75908 | 7.39258 | 6.72803 | 6.84583 | 6.64905 | 6.64852 |

|             |         |         |         |         |         |         |         |         |         |
|-------------|---------|---------|---------|---------|---------|---------|---------|---------|---------|
| PRRC2B      | 9.44957 | 8.9185  | 9.06547 | 8.48306 | 6.92478 | 7.88867 | 8.53413 | 8.26073 | 8.49344 |
| POMT1       | 6.64753 | 6.87542 | 6.48326 | 6.97369 | 6.78565 | 6.83992 | 6.78668 | 6.94301 | 6.71609 |
| NTNG2       | 5.58883 | 5.81042 | 5.6411  | 6.09075 | 6.2766  | 6.13866 | 6.05269 | 6.26679 | 6.0371  |
| BARHL1      | 6.415   | 6.7487  | 6.44762 | 7.42996 | 8.21056 | 7.39864 | 7.14813 | 7.84765 | 7.35469 |
| SPACA9      | 7.39086 | 7.39548 | 7.25018 | 7.6641  | 7.27997 | 7.62568 | 8.29722 | 7.45531 | 7.81412 |
| GFI1B       | 5.58809 | 5.55707 | 5.42929 | 5.85662 | 6.51139 | 6.43768 | 5.82263 | 6.25167 | 5.88653 |
| CEL         | 5.91888 | 5.37646 | 5.5008  | 6.00419 | 5.43955 | 5.80594 | 5.23942 | 5.67367 | 5.621   |
| CELP        | 2.76597 | 3.56707 | 2.98284 | 3.66237 | 3.90562 | 3.78677 | 3.66039 | 3.50802 | 3.08097 |
| SURF2       | 7.68053 | 7.59206 | 7.55067 | 8.3348  | 7.75799 | 7.94004 | 8.53899 | 8.21491 | 7.82652 |
| STKLD1      | 5.66066 | 5.76475 | 5.5918  | 5.77722 | 6.17636 | 6.24916 | 5.72493 | 5.86954 | 5.79168 |
| CACFD1      | 6.4252  | 6.13319 | 6.63696 | 7.15789 | 7.31391 | 7.53128 | 7.0799  | 6.94911 | 6.88696 |
| ADAMTSL2    | 6.18283 | 6.53175 | 6.4911  | 6.94814 | 6.99292 | 6.98524 | 6.48999 | 7.25778 | 6.90977 |
| DBH         | 6.2735  | 6.4722  | 6.23445 | 6.73829 | 6.64473 | 6.83076 | 6.45843 | 6.12605 | 6.48376 |
| LINC00094   | 7.20433 | 6.87147 | 7.00567 | 7.35704 | 6.96973 | 7.18831 | 7.34073 | 6.79011 | 7.02204 |
| WDR5        | 7.7215  | 7.93541 | 7.6651  | 8.03332 | 7.23672 | 7.59213 | 7.85361 | 7.17678 | 7.56723 |
| FCN2        | 5.29857 | 5.94495 | 6.09583 | 6.27292 | 6.14209 | 6.72673 | 5.28589 | 6.02058 | 6.57488 |
| OLFM1       | 6.74363 | 6.54466 | 6.92099 | 6.37025 | 6.8466  | 6.57851 | 7.30335 | 6.57694 | 6.58041 |
| C9orf62     | 6.41565 | 6.14555 | 6.35293 | 6.72546 | 6.76802 | 7.15553 | 6.33623 | 7.04478 | 6.52402 |
| PPP1R26-AS1 | 5.13703 | 5.26949 | 5.28325 | 5.30729 | 6.35173 | 6.19067 | 5.34113 | 5.98381 | 5.75488 |
| MRPS2       | 7.41282 | 7.17654 | 7.4576  | 7.81593 | 7.27636 | 7.58024 | 7.84184 | 7.82393 | 7.6379  |
| LCN1        | 5.2131  | 5.6463  | 5.62036 | 6.45682 | 5.83066 | 6.63925 | 6.13756 | 5.97984 | 6.00642 |
| OBP2A       | 6.90445 | 6.67415 | 6.88865 | 7.38376 | 7.39515 | 7.79185 | 7.0572  | 7.4268  | 7.38774 |
| PAEP        | 4.97697 | 5.48826 | 5.56955 | 6.10872 | 5.40316 | 6.40447 | 6.47677 | 8.96666 | 7.65348 |
| LINC01502   | 5.03835 | 5.18154 | 5.27695 | 5.28616 | 5.25027 | 5.57095 | 5.37434 | 5.71587 | 5.42632 |
| LCN9        | 4.08979 | 4.51456 | 4.57123 | 5.45362 | 5.26584 | 5.41137 | 5.49198 | 4.91489 | 5.2039  |
| c9orf69     | 5.47994 | 5.78939 | 5.76452 | 6.22272 | 5.90779 | 6.71206 | 6.39538 | 6.38628 | 6.13343 |



|              |         |         |         |         |         |         |         |         |         |
|--------------|---------|---------|---------|---------|---------|---------|---------|---------|---------|
| GPSM1        | 7.40299 | 7.50635 | 7.35164 | 8.18453 | 8.45121 | 9.89247 | 8.24222 | 8.08123 | 9.01591 |
| PMPCA        | 7.4536  | 7.14997 | 7.0518  | 7.3427  | 6.67801 | 6.76337 | 7.48238 | 6.95142 | 7.35848 |
| C9orf163     | 5.3832  | 5.49767 | 5.19452 | 6.37981 | 6.35811 | 6.21274 | 6.08428 | 6.07958 | 6.03588 |
| mir126       | 4.06888 | 3.86242 | 4.05123 | 4.27119 | 4.12329 | 4.98495 | 4.53604 | 4.68475 | 4.6869  |
| LOC100128593 | 5.64895 | 5.9183  | 5.64883 | 6.42744 | 6.28451 | 6.56076 | 5.9174  | 6.07006 | 6.26177 |
| tmem141      | 7.63453 | 7.75793 | 7.90472 | 8.67652 | 8.56512 | 8.579   | 8.57124 | 7.90248 | 8.42738 |
| CCDC183      | 6.00403 | 6.2524  | 6.0054  | 6.28117 | 6.50626 | 5.96803 | 6.31153 | 6.09669 | 6.59013 |
| MIR4292      | 6.93175 | 7.07049 | 7.27129 | 7.54265 | 7.33093 | 7.1886  | 6.78332 | 7.1667  | 6.80411 |
| c9orf172     | 5.99802 | 6.14779 | 5.93519 | 6.83692 | 6.69528 | 7.14039 | 6.48916 | 6.91677 | 6.83383 |
| PHPT1        | 7.79375 | 7.77141 | 7.87169 | 8.96948 | 7.41404 | 8.74673 | 8.55714 | 7.8666  | 8.15092 |
| MAMDC4       | 6.19295 | 6.31339 | 6.41235 | 6.7757  | 6.62355 | 6.55916 | 6.49156 | 6.96171 | 6.87126 |
| TRAF2        | 6.2107  | 6.21087 | 6.27665 | 6.33663 | 6.16143 | 6.57547 | 6.6204  | 6.70533 | 6.44234 |
| LCN12        | 6.13158 | 6.09576 | 6.18752 | 6.8257  | 6.99148 | 7.25486 | 6.69834 | 6.8986  | 6.64296 |
| PTGDS        | 7.95041 | 7.95312 | 8.1735  | 7.55445 | 7.30388 | 7.79798 | 7.81589 | 7.48554 | 7.51789 |
| LCNL1        | 6.04183 | 6.15357 | 6.27349 | 6.81306 | 6.89383 | 6.31986 | 6.21838 | 6.46623 | 6.37695 |
| SAPCD2       | 5.61788 | 5.73674 | 5.71934 | 5.77926 | 7.01067 | 6.29331 | 5.83972 | 5.89494 | 5.95718 |
| UAP1L1       | 6.77863 | 5.9477  | 6.78897 | 7.29222 | 6.45281 | 7.69548 | 7.24506 | 7.53785 | 7.53027 |
| SSNA1        | 7.36919 | 7.52905 | 7.64443 | 8.30022 | 6.26238 | 8.89025 | 8.62759 | 7.7785  | 7.92145 |
| NDOR1        | 7.65567 | 7.51893 | 7.571   | 8.11604 | 7.7952  | 8.10123 | 7.8977  | 7.61779 | 7.6655  |
| CYSRT1       | 7.82315 | 7.64307 | 7.2199  | 8.84288 | 8.73265 | 8.56286 | 8.8025  | 8.52389 | 8.90442 |
| STPG3        | 6.39717 | 6.28591 | 6.17013 | 6.70253 | 6.48281 | 6.83889 | 6.8989  | 6.78635 | 6.73812 |
| NELFB        | 8.05684 | 7.90283 | 7.92512 | 8.1123  | 6.39176 | 8.02285 | 8.72131 | 7.85559 | 8.00492 |
| NOXA1        | 7.34436 | 7.4214  | 7.50818 | 7.85525 | 7.93834 | 8.1275  | 8.00748 | 8.09064 | 7.89902 |
| MRPL41       | 6.99129 | 7.07574 | 7.00095 | 7.52031 | 6.70795 | 7.10786 | 7.83493 | 7.19703 | 7.00396 |
| ARRDC1       | 8.00901 | 7.75878 | 7.73043 | 8.07383 | 7.52117 | 7.89408 | 8.28443 | 8.73689 | 8.56598 |
| EHMT1        | 8.34409 | 8.18639 | 8.2587  | 8.09062 | 7.55495 | 8.0868  | 8.39304 | 8.07484 | 8.2623  |

|           |         |         |         |         |         |         |         |         |         |
|-----------|---------|---------|---------|---------|---------|---------|---------|---------|---------|
| EHMT1-IT1 | 7.62823 | 7.16942 | 7.17156 | 6.02398 | 6.99332 | 6.26189 | 6.02498 | 7.04632 | 7.02072 |
| MIR602    | 5.74253 | 6.23159 | 6.002   | 6.52195 | 6.38401 | 6.89415 | 6.18514 | 6.31646 | 6.31614 |
| WASH1     | 9.61171 | 9.85622 | 9.9013  | 9.28706 | 9.36354 | 9.1312  | 9.27687 | 9.39686 | 9.54284 |
| foxd4     | 7.89391 | 8.068   | 7.79827 | 7.53368 | 8.52099 | 7.76861 | 7.85325 | 7.55948 | 8.00348 |
| C9orf66   | 5.55774 | 5.4907  | 5.38339 | 5.84404 | 5.21412 | 6.17874 | 5.81726 | 5.89666 | 6.19787 |
| VLDLR-AS1 | 5.70238 | 5.64567 | 5.83207 | 5.66612 | 6.53693 | 5.48617 | 5.70292 | 5.65378 | 6.09055 |
| PUM3      | 7.73603 | 7.51989 | 7.99122 | 7.14295 | 4.74516 | 6.61036 | 7.79896 | 6.30644 | 7.01034 |
| GLIS3     | 5.88013 | 6.1201  | 6.36554 | 6.16197 | 6.37004 | 5.72685 | 6.24936 | 6.5356  | 6.78964 |
| SPATA6L   | 7.35522 | 7.31847 | 6.88923 | 6.08025 | 6.55838 | 5.41935 | 6.06602 | 5.66474 | 5.87147 |
| AK3       | 10.3727 | 10.5141 | 10.4416 | 9.65507 | 9.1524  | 9.60101 | 10.257  | 9.87258 | 9.96007 |
| INSL6     | 5.08868 | 5.16642 | 4.88673 | 5.25416 | 5.33329 | 5.46661 | 5.17713 | 5.12953 | 5.2877  |
| RLN2      | 2.08761 | 2.56362 | 2.69042 | 2.93533 | 3.07678 | 2.78403 | 2.63254 | 2.5981  | 2.45715 |
| RLN1      | 4.18835 | 3.85295 | 4.08624 | 4.08226 | 5.10036 | 4.79052 | 4.11737 | 4.82531 | 4.81758 |
| ERMP1     | 8.17421 | 7.87212 | 7.71801 | 7.99632 | 6.36227 | 8.28729 | 8.10475 | 7.81197 | 8.1686  |
| RANBP6    | 8.80318 | 8.62231 | 8.70041 | 8.1945  | 6.66963 | 7.32672 | 9.06202 | 8.28301 | 7.94149 |
| GLDC      | 5.41451 | 5.5853  | 5.21775 | 6.7764  | 6.94785 | 6.78212 | 6.44762 | 5.93042 | 6.23505 |
| TMEM261   | 5.75533 | 6.01834 | 5.98956 | 6.21891 | 5.17032 | 5.37123 | 6.02193 | 5.64041 | 5.5527  |
| MPDZ      | 7.52707 | 7.38297 | 7.50263 | 5.99074 | 5.82691 | 5.24462 | 5.83316 | 6.04083 | 6.04466 |
| LINC01235 | 6.185   | 5.73112 | 5.78212 | 6.2626  | 6.72276 | 6.17656 | 5.92113 | 7.16075 | 6.3587  |
| NFIB      | 10.604  | 10.4293 | 10.9339 | 8.20353 | 6.50555 | 6.81039 | 8.2466  | 8.17462 | 8.10598 |
| FREM1     | 6.88321 | 6.6019  | 6.41319 | 5.28701 | 6.32526 | 5.51745 | 5.4362  | 5.54872 | 5.16638 |
| TTC39B    | 9.00665 | 8.94633 | 8.57912 | 8.60465 | 8.25332 | 8.95317 | 8.46691 | 8.98704 | 8.61026 |
| PSIP1     | 7.01228 | 7.31913 | 7.38988 | 5.60617 | 4.37144 | 5.2977  | 5.6919  | 6.03761 | 5.50012 |
| BNC2      | 7.43244 | 6.76116 | 7.27781 | 5.99354 | 6.50468 | 5.92263 | 5.84875 | 5.61154 | 5.56196 |
| Scarna8   | 7.1264  | 7.63706 | 6.83989 | 6.02288 | 6.85097 | 7.52052 | 6.8712  | 5.8323  | 5.81831 |
| PLIN2     | 6.67684 | 6.12902 | 6.69081 | 6.61231 | 5.44702 | 6.74808 | 5.94589 | 7.13854 | 6.24012 |

|         |         |         |         |         |         |         |         |         |         |
|---------|---------|---------|---------|---------|---------|---------|---------|---------|---------|
| RPS6    | 8.62681 | 8.74607 | 8.83797 | 8.73765 | 7.96722 | 8.68099 | 8.78277 | 8.16612 | 8.40286 |
| MIR4473 | 5.01173 | 4.75134 | 4.63345 | 4.2056  | 3.54901 | 4.00971 | 3.68918 | 3.7796  | 3.34015 |
| MIR4474 | 6.03022 | 6.05526 | 6.05224 | 6.61408 | 6.55175 | 6.12093 | 5.98072 | 6.19781 | 6.25296 |
| HACD4   | 7.76503 | 6.90366 | 8.00723 | 7.49032 | 5.53968 | 5.64039 | 6.87028 | 6.22772 | 6.45041 |
| KLHL9   | 8.05822 | 7.85738 | 8.22038 | 7.79981 | 6.76802 | 7.08927 | 8.16379 | 6.92602 | 7.77062 |
| MIR31HG | 6.71167 | 5.10847 | 4.45532 | 8.31003 | 6.72373 | 8.71047 | 9.63191 | 8.07908 | 9.61491 |
| mir31   | 7.0745  | 6.18927 | 5.50956 | 7.65455 | 6.76637 | 5.24169 | 7.26348 | 7.35188 | 8.83239 |
| CDKN2A  | 4.85897 | 5.56585 | 5.17391 | 5.54106 | 5.4613  | 6.09464 | 5.54994 | 5.51433 | 5.36058 |
| TUSC1   | 6.43141 | 5.87127 | 6.49345 | 7.30645 | 5.98477 | 6.71841 | 7.55153 | 6.45063 | 6.39875 |
| CAAP1   | 8.18113 | 8.14154 | 8.21731 | 7.01809 | 5.98671 | 6.08681 | 7.78609 | 6.71444 | 6.29965 |
| PLAA    | 9.24011 | 9.14025 | 9.15549 | 8.82542 | 6.81908 | 8.65642 | 9.19022 | 9.07877 | 9.06598 |
| Lrrc19  | 3.32961 | 3.42693 | 3.37432 | 3.23873 | 3.26326 | 3.60857 | 3.30115 | 3.29707 | 3.50308 |
| EQTN    | 4.23384 | 4.38753 | 4.28574 | 3.49747 | 4.4568  | 3.87675 | 4.01927 | 4.06007 | 3.69288 |
| MOB3B   | 9.02714 | 8.64497 | 9.02678 | 8.39794 | 7.17313 | 7.56235 | 8.59166 | 7.92547 | 7.76942 |
| C9orf72 | 7.22264 | 7.42153 | 7.01945 | 6.17827 | 5.45997 | 6.98741 | 6.76465 | 7.56674 | 6.95796 |
| LINGO2  | 4.58002 | 4.481   | 4.64338 | 4.72875 | 5.71428 | 5.40859 | 4.71149 | 4.99258 | 4.70797 |
| Mir876  | 2.64425 | 2.82868 | 2.43625 | 3.0578  | 2.40171 | 3.10394 | 2.55585 | 2.52908 | 2.44505 |
| MIR873  | 3.23007 | 3.71375 | 3.45837 | 3.98001 | 4.46275 | 4.28771 | 4.42256 | 4.21098 | 3.70193 |
| DDX58   | 8.97346 | 8.85361 | 8.28825 | 7.89347 | 6.87694 | 7.58363 | 8.14741 | 7.51988 | 7.28748 |
| SMU1    | 8.97778 | 8.59034 | 8.99002 | 8.43244 | 5.91891 | 8.14628 | 9.07769 | 8.06072 | 8.43177 |
| BAG1    | 7.94203 | 7.25194 | 7.55969 | 7.18029 | 6.23524 | 7.55253 | 8.03455 | 7.29154 | 6.99995 |
| AQP7    | 5.87957 | 5.72467 | 5.65142 | 5.42501 | 6.94654 | 5.73288 | 5.41265 | 5.31679 | 5.6386  |
| AQP3    | 9.68887 | 9.18509 | 9.24644 | 10.3672 | 8.27139 | 9.37568 | 9.6124  | 9.44282 | 9.81805 |
| NOL6    | 7.97959 | 7.84213 | 7.92538 | 8.2215  | 6.1461  | 7.49556 | 8.62925 | 6.92327 | 7.36203 |
| SUGT1P1 | 6.1947  | 5.37766 | 5.55231 | 6.11228 | 5.75916 | 6.86279 | 6.62934 | 5.34959 | 6.15382 |
| PTENP1  | 5.09223 | 3.86601 | 3.45788 | 3.89437 | 3.51049 | 4.41069 | 2.88824 | 3.70688 | 3.82519 |

|          |         |         |         |         |         |         |         |         |         |
|----------|---------|---------|---------|---------|---------|---------|---------|---------|---------|
| UBAP2    | 9.66077 | 9.38816 | 9.41836 | 8.97071 | 7.97509 | 8.62055 | 9.44788 | 9.55845 | 9.77936 |
| DCAF12   | 8.05727 | 7.75823 | 8.10053 | 8.14944 | 7.07726 | 8.7284  | 8.51703 | 8.95413 | 8.15767 |
| KIF24    | 6.30538 | 6.08867 | 6.17762 | 5.88372 | 5.74819 | 6.12036 | 6.26823 | 6.06254 | 5.88317 |
| KIAA1161 | 7.55403 | 7.47184 | 7.49707 | 8.16228 | 6.93651 | 8.24156 | 8.45466 | 7.82812 | 8.19798 |
| C9ORF24  | 5.78537 | 6.22372 | 6.00591 | 6.98536 | 7.16381 | 6.83285 | 6.41192 | 6.70966 | 6.62173 |
| ENHO     | 5.34976 | 5.57902 | 5.43722 | 6.4891  | 6.38993 | 6.9736  | 5.87721 | 6.08603 | 6.31895 |
| CNTFR    | 6.25219 | 7.49381 | 6.9212  | 7.66282 | 6.71959 | 7.51777 | 6.48101 | 6.73445 | 6.21658 |
| RPP25L   | 6.52184 | 6.7084  | 6.32379 | 7.06817 | 6.36861 | 6.63241 | 6.89174 | 6.19801 | 6.6473  |
| DCTN3    | 8.0793  | 8.31252 | 8.227   | 8.03726 | 7.94211 | 7.06499 | 8.02225 | 7.67241 | 7.83069 |
| ARID3C   | 5.28527 | 5.73442 | 5.46605 | 6.24242 | 6.0528  | 6.30861 | 5.98771 | 5.92802 | 5.83296 |
| SIGMAR1  | 9.43542 | 8.43839 | 9.35316 | 8.19718 | 6.62874 | 7.78502 | 8.77068 | 8.07184 | 8.43356 |
| CCL27    | 5.52317 | 5.06845 | 5.76187 | 5.82846 | 6.0833  | 6.15179 | 5.60728 | 5.84917 | 5.77596 |
| CCL19    | 7.12708 | 6.99619 | 6.92887 | 6.56623 | 7.11232 | 6.71067 | 6.48255 | 6.07819 | 6.54616 |
| CCL21    | 11.3922 | 8.60121 | 11.3389 | 7.34494 | 7.21918 | 9.48688 | 10.9441 | 10.1711 | 11.3138 |
| VCP      | 10.0723 | 9.49551 | 9.86497 | 10.2032 | 7.29656 | 10.4461 | 10.0864 | 10.4565 | 10.5443 |
| STOML2   | 9.05374 | 8.76012 | 9.10365 | 9.40524 | 7.91602 | 8.94069 | 9.56053 | 8.795   | 9.19003 |
| CD72     | 5.96658 | 5.34067 | 5.46677 | 5.82339 | 5.65703 | 5.94189 | 5.68423 | 5.71262 | 5.5344  |
| SIT1     | 5.24025 | 5.56224 | 5.59552 | 5.60695 | 5.96937 | 6.29522 | 5.91899 | 5.77484 | 5.72486 |
| RMRP     | 11.2852 | 12.1825 | 11.408  | 12.6643 | 12.0508 | 13.1137 | 12.7969 | 11.9521 | 11.9231 |
| ARHGEF39 | 6.49499 | 6.53255 | 6.40771 | 6.74142 | 7.08433 | 6.72439 | 6.70563 | 6.89224 | 6.68424 |
| TPM2     | 6.98478 | 7.06977 | 7.52149 | 7.39214 | 6.82561 | 6.99803 | 6.88295 | 7.294   | 7.00195 |
| TLN1     | 8.47497 | 8.33645 | 8.62214 | 8.10048 | 6.65682 | 8.79177 | 8.43088 | 7.9568  | 8.28707 |
| SPAG8    | 5.30482 | 5.53615 | 5.57645 | 6.22465 | 5.96336 | 5.97126 | 5.88952 | 5.94465 | 5.90232 |
| HINT2    | 7.42068 | 7.23562 | 7.68112 | 7.86101 | 6.80505 | 7.79322 | 8.39478 | 7.62805 | 7.33875 |
| GNE      | 7.2038  | 6.87219 | 6.84532 | 7.19323 | 5.94224 | 6.29061 | 6.86893 | 6.13069 | 6.47385 |
| RNF38    | 9.58222 | 9.42334 | 9.67022 | 8.68377 | 7.32512 | 7.75315 | 8.6024  | 8.49148 | 8.53292 |

|              |         |         |         |         |         |         |         |         |         |
|--------------|---------|---------|---------|---------|---------|---------|---------|---------|---------|
| MIR4475      | 2.30551 | 2.48701 | 2.18404 | 2.6231  | 2.30436 | 2.6378  | 2.84869 | 2.29696 | 2.48701 |
| PAX5         | 5.72533 | 5.7328  | 5.8345  | 6.78461 | 6.48898 | 6.98962 | 6.66032 | 6.5993  | 6.34978 |
| MIR4540      | 5.09269 | 4.98925 | 5.29004 | 4.85823 | 5.51454 | 5.76017 | 5.09823 | 5.64113 | 5.38837 |
| MIR4476      | 7.33456 | 7.24735 | 7.3483  | 7.26809 | 7.92659 | 7.79392 | 7.09848 | 7.57956 | 7.70225 |
| ZBTB5        | 6.91862 | 7.08039 | 6.90267 | 6.89904 | 5.70996 | 6.72591 | 7.25595 | 7.04754 | 7.10687 |
| FBXO10       | 7.67501 | 7.37581 | 7.07433 | 7.39314 | 7.3303  | 6.64731 | 7.25458 | 7.23148 | 7.62697 |
| TOMM5        | 8.16726 | 8.04445 | 7.95962 | 8.2241  | 6.90374 | 7.47945 | 8.23296 | 7.23797 | 7.78854 |
| EXOSC3       | 7.08777 | 7.3871  | 7.80579 | 6.24856 | 5.30963 | 6.10107 | 6.67617 | 5.94843 | 6.37634 |
| SHB          | 9.04202 | 8.5197  | 8.73763 | 8.79007 | 8.72904 | 9.86502 | 9.45044 | 9.12267 | 9.34247 |
| IGFBPL1      | 4.86998 | 5.23951 | 4.98101 | 6.31447 | 6.5916  | 6.21539 | 5.70553 | 5.57775 | 5.85298 |
| ANKRD18A     | 6.92336 | 7.08379 | 6.69668 | 6.83905 | 7.09513 | 6.82109 | 6.90481 | 6.96125 | 6.63538 |
| CNTNAP3      | 8.46616 | 7.50726 | 8.54409 | 6.68888 | 6.34253 | 6.4836  | 7.44182 | 6.29438 | 5.8359  |
| FGF7P3       | 5.07491 | 6.50309 | 6.74418 | 5.5395  | 7.01871 | 5.43574 | 5.91766 | 5.30886 | 5.25517 |
| LOC286297    | 6.41129 | 6.33569 | 6.57337 | 6.88153 | 8.16859 | 7.16852 | 6.46258 | 6.8673  | 6.87185 |
| AQP7P1       | 5.97935 | 4.8103  | 4.37916 | 4.93556 | 6.14532 | 5.57883 | 5.18839 | 5.01375 | 5.56849 |
| FRG1JP       | 5.68235 | 5.76264 | 7.10175 | 6.24229 | 5.93179 | 6.80789 | 5.71882 | 5.91633 | 5.85831 |
| MIR1299      | 8.9725  | 9.60069 | 9.1564  | 6.82928 | 10.2148 | 6.37396 | 6.93959 | 8.23778 | 8.38755 |
| CBWD6        | 7.91462 | 7.65036 | 7.8024  | 7.16963 | 7.19208 | 6.53021 | 6.86506 | 6.95348 | 6.86158 |
| FOXD4L5      | 5.19582 | 5.20112 | 5.16847 | 6.32116 | 6.08606 | 6.49851 | 5.90877 | 6.19141 | 5.81673 |
| TMEM252      | 5.08696 | 5.20129 | 5.27185 | 5.49986 | 5.69945 | 5.4901  | 5.47487 | 5.42769 | 5.2833  |
| BANCR        | 4.033   | 4.16722 | 4.0168  | 3.72124 | 5.04896 | 3.92048 | 3.69809 | 4.14492 | 3.99539 |
| PTAR1        | 9.63978 | 9.85748 | 9.7253  | 8.03623 | 6.32834 | 6.90458 | 7.85256 | 7.37387 | 7.9252  |
| C9orf135-AS1 | 4.77272 | 5.17546 | 4.72876 | 5.42797 | 5.30888 | 5.0219  | 5.13934 | 5.01079 | 5.43079 |
| MAMDC2-AS1   | 5.16189 | 5.74586 | 5.29797 | 5.36133 | 6.04402 | 5.18944 | 5.17349 | 5.27481 | 5.55627 |
| SMC5-AS1     | 7.07668 | 7.02551 | 6.54152 | 5.42907 | 6.74512 | 5.8635  | 5.95285 | 5.69977 | 6.03191 |
| KLF9         | 7.22489 | 7.27176 | 8.11559 | 6.69413 | 5.56011 | 6.70062 | 7.27315 | 6.69439 | 6.61838 |

|            |         |         |         |         |         |         |         |         |         |
|------------|---------|---------|---------|---------|---------|---------|---------|---------|---------|
| MIR204     | 3.31568 | 3.24897 | 3.0198  | 3.66128 | 3.62315 | 3.89198 | 3.63066 | 3.55139 | 3.40824 |
| TMEM2      | 7.2051  | 6.8982  | 6.86481 | 7.5947  | 6.03146 | 7.67241 | 7.37546 | 9.16078 | 8.78635 |
| C9orf57    | 3.43462 | 3.1591  | 3.73929 | 3.82375 | 4.53623 | 3.87087 | 3.72231 | 3.68714 | 3.70924 |
| C9orf40    | 5.60522 | 5.72166 | 5.36211 | 6.51064 | 5.47552 | 6.33286 | 6.0949  | 5.85585 | 5.98665 |
| NMRK1      | 6.79673 | 6.55535 | 6.97534 | 6.14959 | 4.62072 | 6.60836 | 6.62194 | 6.39908 | 6.60202 |
| RFK        | 6.98226 | 6.96215 | 7.11173 | 6.77631 | 6.34259 | 6.07299 | 7.3718  | 6.83084 | 6.50925 |
| PRUNE2     | 6.54253 | 6.52643 | 6.59649 | 4.93319 | 6.00715 | 5.67026 | 5.01669 | 5.04926 | 4.86621 |
| VPS13A-AS1 | 6.37828 | 6.45743 | 6.49422 | 6.98164 | 6.78053 | 7.21886 | 6.67815 | 6.78625 | 6.77093 |
| RASEF      | 6.9489  | 7.52387 | 6.77622 | 7.03887 | 6.07232 | 6.68547 | 6.856   | 6.72831 | 6.8019  |
| FRMD3      | 6.40441 | 6.47756 | 6.52164 | 6.55525 | 6.78796 | 6.32757 | 6.31059 | 5.72737 | 6.42399 |
| UBQLN1     | 10.5512 | 10.4793 | 10.6794 | 10.261  | 8.32147 | 10.1749 | 10.304  | 10.5131 | 10.4904 |
| GKAP1      | 3.9894  | 4.32345 | 4.21189 | 4.12923 | 3.55479 | 3.95641 | 4.17734 | 3.8471  | 3.55386 |
| c9orf64    | 6.46464 | 6.0308  | 6.5347  | 6.20559 | 5.26935 | 6.25177 | 6.33037 | 6.15154 | 5.99384 |
| HNRNPK     | 10.6579 | 10.6718 | 10.7923 | 10.5772 | 8.16584 | 10.3732 | 10.7415 | 10.2655 | 10.6063 |
| AGTPBP1    | 7.84619 | 8.11916 | 8.26764 | 7.37108 | 5.84439 | 7.3334  | 7.99779 | 8.17449 | 7.34423 |
| GOLM1      | 7.2891  | 7.33064 | 7.3362  | 6.90541 | 7.10162 | 6.5561  | 7.17436 | 9.28581 | 7.71509 |
| ISCA1      | 7.6171  | 7.48715 | 7.5156  | 7.38463 | 7.79159 | 8.51455 | 7.72793 | 7.92573 | 8.1518  |
| GAS1       | 7.57777 | 7.45011 | 7.90738 | 7.29332 | 5.93903 | 7.35884 | 7.49243 | 6.94205 | 6.78971 |
| LOC440173  | 5.31234 | 4.96131 | 4.60955 | 4.57187 | 6.20035 | 5.37719 | 6.21098 | 4.56475 | 4.62557 |
| LOC494127  | 4.67659 | 4.84136 | 4.31563 | 5.44451 | 5.082   | 5.30828 | 4.96981 | 5.06893 | 4.70491 |
| LOC392364  | 5.61023 | 5.61622 | 5.93298 | 6.25219 | 7.31994 | 7.05017 | 6.4136  | 6.27164 | 6.19741 |
| CDK20      | 6.35549 | 6.32054 | 6.37064 | 6.67925 | 7.3607  | 6.75512 | 6.66481 | 6.36617 | 6.47372 |
| LOC286238  | 4.35151 | 4.13384 | 4.28985 | 4.64361 | 5.20759 | 4.31372 | 4.72886 | 4.20561 | 4.427   |
| MIR4289    | 5.94633 | 6.09843 | 6.424   | 6.45841 | 6.87264 | 6.50734 | 7.02457 | 6.75436 | 5.95545 |
| SHC3       | 6.82332 | 7.24215 | 7.26121 | 6.31782 | 6.77317 | 6.40328 | 6.98049 | 6.57633 | 6.65249 |
| MIR4290HG  | 5.46198 | 6.18058 | 6.08539 | 6.173   | 7.4944  | 6.26192 | 6.0723  | 6.05907 | 6.36347 |

|              |         |         |         |         |         |         |         |         |         |
|--------------|---------|---------|---------|---------|---------|---------|---------|---------|---------|
| MIR4290      | 4.61642 | 5.20996 | 4.75488 | 5.68395 | 5.92455 | 6.00287 | 5.74947 | 5.48995 | 4.9895  |
| LINC01501    | 4.54216 | 4.89755 | 4.61175 | 4.68196 | 5.76589 | 5.23938 | 5.31948 | 5.15067 | 4.65224 |
| LOC100129316 | 4.67345 | 4.70473 | 4.74613 | 5.46525 | 6.08887 | 5.30942 | 5.10991 | 5.58459 | 5.72667 |
| AUH          | 7.89273 | 8.20155 | 8.16402 | 7.25986 | 5.78614 | 6.44802 | 7.72279 | 7.40751 | 6.414   |
| ROR2         | 6.70709 | 6.04041 | 6.49906 | 6.95755 | 6.99179 | 7.33883 | 6.3719  | 7.31129 | 6.43361 |
| IARS         | 10.2233 | 10.4325 | 10.4733 | 9.96252 | 7.11    | 9.08932 | 10.047  | 9.07091 | 9.69876 |
| NOL8         | 8.23435 | 8.3557  | 8.12051 | 6.82568 | 6.00591 | 6.47769 | 7.36476 | 6.74238 | 7.00173 |
| OGN          | 6.80464 | 7.66465 | 6.48722 | 5.53673 | 5.52109 | 5.4345  | 4.79601 | 5.19155 | 5.18732 |
| OMD          | 8.32275 | 6.85824 | 7.56344 | 5.0682  | 4.88454 | 4.79332 | 6.19638 | 4.23769 | 4.53823 |
| ASPN         | 9.68371 | 7.62501 | 8.63076 | 6.17095 | 5.56595 | 6.85754 | 9.25042 | 7.42725 | 7.52607 |
| MIR4670      | 3.14576 | 3.49542 | 3.41835 | 3.91306 | 3.45729 | 3.85096 | 3.97947 | 3.4183  | 3.16481 |
| BICD2        | 9.57538 | 9.56404 | 9.31017 | 9.86162 | 7.68157 | 10.0696 | 10.1087 | 10.502  | 10.5982 |
| ZNF484       | 7.62312 | 7.08531 | 7.34539 | 5.07184 | 5.22512 | 5.38783 | 6.44355 | 5.63202 | 5.39586 |
| NINJ1        | 7.63596 | 7.49294 | 7.65905 | 7.49599 | 7.358   | 7.51313 | 7.22485 | 7.49718 | 7.5067  |
| C9orf129     | 4.80236 | 5.00102 | 4.55332 | 5.59246 | 4.80637 | 6.01613 | 5.17762 | 5.62496 | 5.38368 |
| FAM120AOS    | 7.97124 | 7.41726 | 7.83801 | 7.38458 | 6.21591 | 7.72775 | 8.04414 | 7.25309 | 7.49363 |
| BARX1        | 6.09053 | 6.29703 | 6.02377 | 7.0107  | 6.66022 | 8.1924  | 7.30456 | 7.07249 | 6.85747 |
| MIRLET7DHG   | 4.3672  | 3.96874 | 4.15119 | 4.78275 | 5.21595 | 5.19539 | 4.97808 | 4.4608  | 4.66345 |
| mir24-1      | 3.38803 | 3.03517 | 3.19244 | 2.91845 | 2.95276 | 2.71065 | 3.12034 | 2.66755 | 2.82441 |
| PTCH1        | 6.83672 | 6.84868 | 7.34363 | 5.85185 | 6.39534 | 5.70725 | 5.93287 | 5.86959 | 5.85319 |
| LINC00476    | 5.60387 | 5.62897 | 5.73129 | 5.21064 | 6.48148 | 5.49133 | 5.16526 | 5.14659 | 5.33483 |
| HSD17B3      | 5.75882 | 5.62633 | 5.67732 | 5.56513 | 6.16855 | 5.6352  | 5.1468  | 5.2866  | 5.42602 |
| ZNF367       | 6.54614 | 6.73431 | 6.56243 | 6.84387 | 5.97376 | 6.63564 | 6.53346 | 6.47464 | 6.42656 |
| AAED1        | 8.08358 | 7.50017 | 8.71529 | 8.46231 | 4.24949 | 7.66238 | 8.8084  | 7.29599 | 7.98438 |
| ZNF510       | 6.82427 | 6.93488 | 7.28867 | 6.04886 | 6.41767 | 6.23202 | 6.07954 | 6.0999  | 6.33237 |
| ZNF782       | 7.14375 | 7.00571 | 7.07675 | 5.73804 | 4.97112 | 5.32573 | 4.75982 | 6.05169 | 6.18746 |

|           |         |         |         |         |         |         |         |         |         |
|-----------|---------|---------|---------|---------|---------|---------|---------|---------|---------|
| CTSV      | 8.47327 | 7.95822 | 7.77487 | 8.75315 | 7.59895 | 10.0879 | 8.07689 | 11.1656 | 8.51544 |
| GAS2L1P2  | 4.17728 | 3.76783 | 4.14425 | 3.98095 | 5.35764 | 5.02872 | 4.5415  | 4.79312 | 4.43988 |
| MIR1302-8 | 2.04656 | 2.36252 | 1.88193 | 2.28965 | 1.92484 | 2.51585 | 1.94271 | 2.04384 | 2.07327 |
| LOC286359 | 5.52482 | 5.82886 | 5.69083 | 5.8302  | 6.25817 | 5.97839 | 5.60899 | 5.8698  | 5.81489 |
| TSTD2     | 7.45657 | 7.49176 | 7.37411 | 6.49757 | 5.59919 | 5.52006 | 6.75375 | 5.95791 | 6.53268 |
| TRMO      | 7.05371 | 7.30811 | 7.55087 | 6.88827 | 6.28177 | 6.51537 | 7.19194 | 6.58216 | 6.98917 |
| HEMGN     | 3.39384 | 3.27529 | 3.37331 | 3.86719 | 4.27076 | 3.37187 | 4.0482  | 4.50009 | 3.6854  |
| TRIM14    | 7.62697 | 7.26527 | 7.77602 | 7.08405 | 6.2084  | 6.88554 | 7.82892 | 6.9051  | 6.99145 |
| ANKS6     | 6.32382 | 7.71071 | 7.21865 | 7.07075 | 6.25165 | 6.21239 | 7.13464 | 6.76842 | 6.61704 |
| STX17-AS1 | 6.96771 | 7.73518 | 7.16248 | 6.16045 | 5.56284 | 5.425   | 6.77103 | 4.57847 | 5.46203 |
| ERP44     | 10.4324 | 10.1994 | 10.5401 | 10.3507 | 10.3194 | 11.7609 | 10.7049 | 11.6642 | 11.1855 |
| TEX10     | 9.54896 | 9.58346 | 9.39546 | 9.36446 | 7.94359 | 9.23054 | 9.31223 | 9.70449 | 9.41627 |
| baat      | 5.48345 | 5.73704 | 5.86499 | 6.17186 | 6.82295 | 6.20023 | 5.97291 | 5.78223 | 6.22797 |
| MRPL50    | 7.47369 | 7.57187 | 7.60411 | 7.73554 | 6.82199 | 6.89608 | 7.88791 | 6.85281 | 7.20521 |
| TMEM246   | 5.65416 | 5.36792 | 5.28765 | 5.63245 | 5.42665 | 5.85306 | 5.74797 | 5.44454 | 5.0526  |
| KLF4      | 9.83335 | 9.24951 | 9.74662 | 9.73391 | 8.4728  | 10.4428 | 9.5765  | 9.36951 | 9.2019  |
| ACTL7B    | 5.10689 | 5.18701 | 5.4938  | 5.37388 | 6.19531 | 6.09733 | 5.5902  | 5.49229 | 5.78871 |
| tmem245   | 8.73117 | 8.62695 | 8.78584 | 7.59539 | 6.04513 | 6.95803 | 8.31402 | 7.45363 | 7.49931 |
| MIR32     | 8.47917 | 8.40141 | 8.20568 | 5.14672 | 5.38831 | 5.13271 | 5.98916 | 5.6568  | 5.04069 |
| FRRS1L    | 4.99587 | 5.24852 | 5.36103 | 5.38863 | 6.26921 | 5.65008 | 5.45257 | 5.39576 | 5.14593 |
| EPB41L4B  | 6.99648 | 7.45281 | 7.9227  | 7.68444 | 7.29193 | 8.21119 | 8.18511 | 8.64488 | 8.40124 |
| MIR3927   | 3.33737 | 4.40432 | 4.21868 | 3.78444 | 4.84589 | 4.17037 | 3.36969 | 3.6839  | 3.77487 |
| C9orf152  | 6.17789 | 6.25207 | 6.73933 | 5.85886 | 6.05902 | 6.06369 | 5.67573 | 6.07737 | 5.77243 |
| TXN       | 10.5491 | 9.41884 | 10.5399 | 11.8677 | 11.0973 | 11.956  | 12.0111 | 11.8455 | 12.2962 |
| TXNDC8    | 3.92232 | 4.16996 | 4.09526 | 4.8673  | 5.66629 | 4.83588 | 4.73756 | 4.08689 | 4.44154 |
| KIAA0368  | 9.44271 | 9.50483 | 9.62597 | 9.01254 | 6.19511 | 8.6789  | 9.38261 | 8.68185 | 9.26787 |



|              |         |         |         |         |         |         |         |         |         |
|--------------|---------|---------|---------|---------|---------|---------|---------|---------|---------|
| PTGR1        | 8.47839 | 8.2241  | 8.23367 | 7.61988 | 7.66719 | 9.11121 | 8.33561 | 9.07661 | 7.701   |
| C9orf84      | 5.15246 | 5.57937 | 4.81091 | 4.45192 | 4.71507 | 4.99796 | 5.09252 | 4.22546 | 4.31922 |
| SUSD1        | 6.83484 | 7.18936 | 6.5197  | 6.85215 | 6.22039 | 7.16811 | 7.25463 | 7.15462 | 7.37835 |
| PTBP3        | 11.5534 | 11.7186 | 11.4896 | 11.5314 | 10.513  | 11.8518 | 11.6551 | 12.0893 | 12.0484 |
| INIP         | 8.81439 | 8.8528  | 9.01735 | 8.18646 | 7.51989 | 7.79057 | 8.51526 | 8.30819 | 8.24166 |
| ZNF883       | 6.39534 | 6.80891 | 6.44571 | 6.25224 | 6.1753  | 6.14709 | 6.25522 | 5.98296 | 6.34466 |
| ZFP37        | 5.5678  | 6.14334 | 5.9337  | 5.2564  | 5.4294  | 5.91038 | 4.96213 | 5.55228 | 4.93636 |
| CDC26        | 6.05889 | 6.09344 | 6.15825 | 6.37054 | 4.97807 | 6.16893 | 6.3991  | 5.82857 | 6.24788 |
| RNF183       | 5.20513 | 5.06425 | 4.94587 | 5.37799 | 6.41726 | 5.85917 | 5.20071 | 5.28782 | 5.21904 |
| WDR31        | 6.59532 | 6.88736 | 6.26262 | 6.2018  | 6.66864 | 6.37497 | 6.55248 | 5.92128 | 6.38884 |
| HDHD3        | 7.61876 | 7.37432 | 6.98744 | 7.48749 | 6.12817 | 6.98429 | 7.52886 | 6.9734  | 6.82556 |
| ALAD         | 7.45052 | 7.44708 | 7.21254 | 7.02365 | 6.26695 | 6.69403 | 7.00922 | 6.61177 | 6.274   |
| AMBP         | 5.36673 | 5.73099 | 5.88036 | 6.27593 | 6.57784 | 6.34061 | 6.00392 | 6.15348 | 6.26652 |
| KIF12        | 6.11595 | 6.42346 | 6.56114 | 7.10207 | 6.88557 | 7.01893 | 6.85646 | 7.01383 | 6.83388 |
| AKNA         | 7.00797 | 6.75932 | 7.16681 | 6.86757 | 6.55884 | 6.79371 | 7.09226 | 7.01828 | 6.54805 |
| LOC100505478 | 5.4719  | 5.81841 | 5.45421 | 5.92609 | 6.40725 | 5.83077 | 5.088   | 5.19317 | 5.83864 |
| TNC          | 10.0828 | 7.95722 | 9.92852 | 10.9992 | 6.61394 | 9.87556 | 10.6467 | 11.3039 | 10.8889 |
| ASTN2        | 5.76577 | 5.58275 | 5.67556 | 5.82403 | 6.43343 | 6.18927 | 5.96925 | 6.06038 | 6.08956 |
| BRINP1       | 5.63541 | 5.05257 | 5.30822 | 5.80363 | 6.0563  | 5.99766 | 6.45052 | 5.79935 | 6.1361  |
| MIR147A      | 6.10217 | 6.58968 | 6.25908 | 6.09015 | 7.44996 | 5.10752 | 6.34263 | 5.91293 | 5.69717 |
| CDK5RAP2     | 7.91479 | 8.2128  | 8.00623 | 7.43935 | 6.61595 | 7.52155 | 7.32897 | 7.06508 | 7.08919 |
| MEGF9        | 10.1797 | 9.96001 | 9.87107 | 9.00532 | 8.00813 | 8.64948 | 9.25789 | 9.30978 | 9.19488 |
| FBXW2        | 9.56093 | 9.06074 | 9.46381 | 8.46777 | 6.42788 | 7.33529 | 8.82044 | 8.29131 | 8.24634 |
| PHF19        | 6.56298 | 6.23071 | 6.14152 | 6.92334 | 6.41463 | 6.69323 | 6.43833 | 6.29459 | 6.33262 |
| TRAF1        | 6.1852  | 5.73991 | 5.8475  | 5.80229 | 5.79647 | 5.97799 | 6.1421  | 5.90752 | 6.12139 |
| C5           | 6.88308 | 6.65863 | 6.42233 | 5.55249 | 5.77147 | 5.06136 | 5.73533 | 4.91117 | 5.25665 |

|              |         |         |         |         |         |         |         |         |         |
|--------------|---------|---------|---------|---------|---------|---------|---------|---------|---------|
| STOM         | 10.9517 | 10.0105 | 11.1608 | 10.1328 | 7.94398 | 9.43643 | 10.3765 | 10.2446 | 10.1063 |
| MIR4478      | 4.09036 | 3.97072 | 3.88811 | 4.54806 | 4.18525 | 5.13113 | 4.54785 | 4.32947 | 4.57507 |
| LHX6         | 5.9841  | 5.9426  | 6.14475 | 6.48065 | 6.19394 | 6.73538 | 6.36333 | 6.44049 | 6.4791  |
| RBM18        | 7.81276 | 7.67388 | 7.70633 | 7.55972 | 6.18458 | 7.08908 | 7.94746 | 7.43369 | 7.63334 |
| PDCL         | 7.02006 | 7.48172 | 7.59014 | 7.1111  | 6.20323 | 6.58487 | 7.01587 | 6.42193 | 6.74086 |
| RC3H2        | 8.59491 | 9.02209 | 8.82544 | 8.77286 | 6.30422 | 8.80548 | 8.90745 | 8.80973 | 9.04457 |
| ZBTB6        | 6.7488  | 7.30228 | 7.11392 | 6.46745 | 4.776   | 5.84686 | 6.94199 | 6.02277 | 6.4392  |
| ZBTB26       | 6.74368 | 7.40816 | 7.01336 | 6.06951 | 6.14409 | 5.07276 | 6.59074 | 5.77711 | 6.36422 |
| MIR600HG     | 6.88018 | 7.01051 | 6.44809 | 6.32137 | 6.67355 | 5.86724 | 6.05443 | 6.62666 | 6.59365 |
| STRBP        | 7.17055 | 7.16178 | 6.86453 | 7.05135 | 5.67258 | 6.67606 | 7.14645 | 7.00646 | 6.84938 |
| DENND1A      | 7.67401 | 7.6222  | 7.53258 | 7.34974 | 6.95766 | 7.13602 | 7.40968 | 7.77342 | 7.27915 |
| MIR601       | 5.20779 | 5.1246  | 5.08421 | 3.91398 | 4.42835 | 4.99497 | 3.7834  | 5.24946 | 4.82821 |
| RPL35        | 7.5797  | 7.71894 | 7.711   | 8.22989 | 7.7758  | 8.32559 | 8.27144 | 7.52157 | 7.66386 |
| GOLGA1       | 7.88616 | 8.11955 | 8.07371 | 6.8745  | 5.86248 | 7.36643 | 7.44466 | 6.78903 | 6.81754 |
| SCAI         | 7.20766 | 7.38939 | 6.76608 | 5.95299 | 5.3262  | 5.67515 | 6.16023 | 6.26844 | 5.64488 |
| MAPKAP1      | 8.93633 | 8.87693 | 8.81538 | 9.07749 | 7.50092 | 9.09073 | 9.00334 | 9.0615  | 9.1674  |
| angptl2      | 8.33703 | 7.77761 | 8.83526 | 7.28848 | 5.51661 | 6.79334 | 8.34147 | 8.12129 | 8.03682 |
| MIR3911      | 5.43491 | 5.91085 | 6.07507 | 5.57914 | 5.91967 | 5.02094 | 5.66179 | 5.75702 | 5.65257 |
| PTRH1        | 5.98349 | 5.93347 | 5.7783  | 5.88166 | 5.49412 | 6.13493 | 5.96304 | 6.2331  | 6.0233  |
| SH2D3C       | 6.50728 | 6.30698 | 6.55253 | 6.94708 | 6.6781  | 6.5018  | 6.8533  | 6.58465 | 6.86457 |
| ENG          | 8.79625 | 7.98674 | 8.92822 | 8.98524 | 7.06137 | 7.93552 | 8.86348 | 9.39336 | 9.35474 |
| AK1          | 7.52368 | 7.34098 | 7.643   | 8.82603 | 8.44573 | 8.9407  | 8.57794 | 9.22854 | 8.68131 |
| MIR4672      | 3.99679 | 4.35803 | 3.86113 | 3.95886 | 4.50069 | 4.11143 | 3.5675  | 4.02443 | 4.00571 |
| PIP5KL1      | 6.28878 | 6.24574 | 6.10472 | 6.51816 | 6.60303 | 7.66288 | 7.39138 | 7.39087 | 7.26109 |
| NAIF1        | 6.10185 | 5.98044 | 5.89117 | 6.46239 | 5.98341 | 6.81731 | 6.50315 | 6.27862 | 6.18003 |
| SLC25A25-AS1 | 7.0426  | 7.00628 | 7.19225 | 6.36717 | 6.67099 | 6.23988 | 6.59518 | 6.54427 | 6.63887 |

|              |         |         |         |         |         |         |         |         |         |
|--------------|---------|---------|---------|---------|---------|---------|---------|---------|---------|
| PTGES2       | 7.3627  | 7.29302 | 7.19158 | 7.54092 | 6.50923 | 7.63559 | 7.83098 | 7.12682 | 7.12243 |
| CIZ1         | 8.42224 | 8.33841 | 8.30402 | 8.45436 | 7.07035 | 8.49766 | 8.86058 | 8.26623 | 8.60725 |
| MIR199B      | 3.8461  | 4.07441 | 4.16402 | 4.68328 | 4.11044 | 4.33705 | 4.29438 | 4.29698 | 3.8948  |
| GOLGA2       | 8.90089 | 8.81133 | 8.77874 | 9.07132 | 7.904   | 9.26314 | 8.96167 | 9.23922 | 9.05563 |
| TRUB2        | 8.25897 | 8.08039 | 8.31465 | 7.67248 | 6.71026 | 7.36741 | 8.15827 | 6.97494 | 7.53796 |
| WDR34        | 7.32142 | 7.47786 | 7.35431 | 7.75757 | 7.55699 | 7.67651 | 8.2426  | 7.2715  | 7.46407 |
| ZER1         | 8.16785 | 7.91203 | 8.10413 | 8.00986 | 7.05195 | 8.35061 | 8.4959  | 8.28783 | 7.81881 |
| SPOUT1       | 8.59505 | 7.9474  | 8.32319 | 7.6137  | 6.7428  | 7.24602 | 7.94812 | 7.26565 | 7.70931 |
| DOLK         | 7.29674 | 7.07952 | 7.22839 | 7.59804 | 6.29189 | 6.84559 | 8.22678 | 6.76572 | 7.11137 |
| SH3GLB2      | 8.56856 | 8.58853 | 8.21698 | 8.62954 | 8.28712 | 9.34812 | 8.58724 | 9.6383  | 9.40526 |
| CRAT         | 8.23558 | 7.19305 | 7.603   | 8.28088 | 7.2499  | 7.8442  | 8.2969  | 7.95023 | 7.82774 |
| C9orf50      | 6.37292 | 6.54664 | 6.25508 | 7.03001 | 7.48273 | 7.12822 | 6.58094 | 7.01985 | 7.02376 |
| ASB6         | 8.72519 | 8.38982 | 8.34758 | 8.03472 | 5.9883  | 7.76657 | 8.91799 | 8.237   | 7.97323 |
| PTGES        | 7.46138 | 8.19711 | 7.56901 | 7.56031 | 6.95333 | 7.8115  | 8.32681 | 7.41997 | 7.75503 |
| C9orf78      | 7.56013 | 7.55612 | 7.66456 | 7.52607 | 6.06449 | 7.36308 | 8.15541 | 7.09365 | 7.07756 |
| FNBP1        | 9.10316 | 9.21396 | 9.02279 | 8.58341 | 7.52501 | 9.42006 | 8.85775 | 10.0811 | 9.3534  |
| LOC100272217 | 5.13991 | 5.01279 | 5.03126 | 4.78003 | 5.17347 | 5.44554 | 4.53262 | 4.98421 | 4.93007 |
| QRFP         | 7.36475 | 7.24113 | 7.40461 | 7.86678 | 8.21451 | 8.21726 | 7.73076 | 7.91877 | 7.94832 |
| FIBCD1       | 5.84049 | 5.95541 | 6.00228 | 6.85157 | 6.41498 | 7.27794 | 6.12434 | 6.44288 | 6.52572 |
| UCK1         | 7.29113 | 7.2223  | 7.17231 | 7.28625 | 6.67591 | 7.04605 | 7.22852 | 7.26496 | 7.36935 |
| RAPGEF1      | 8.15836 | 8.18911 | 8.43882 | 7.68561 | 6.07546 | 7.58236 | 8.04776 | 7.69498 | 8.14089 |
| MED27        | 5.11792 | 5.00645 | 4.49055 | 4.93263 | 4.39292 | 4.31473 | 4.87126 | 4.66635 | 4.49944 |
| SETX         | 8.92823 | 9.14811 | 8.99227 | 8.56519 | 6.7239  | 8.57382 | 8.78466 | 8.35319 | 8.8785  |
| DDX31        | 7.37232 | 7.48605 | 7.24841 | 6.43022 | 5.98235 | 5.78494 | 6.77626 | 6.16479 | 6.56073 |
| AK8          | 6.67626 | 6.80816 | 6.52489 | 6.4911  | 6.53733 | 6.25988 | 6.6941  | 6.17702 | 6.20397 |
| TSC1         | 9.25856 | 9.69599 | 9.25834 | 8.38023 | 7.65543 | 8.26878 | 8.16974 | 8.83467 | 8.80179 |

|              |         |         |         |         |         |         |         |         |         |
|--------------|---------|---------|---------|---------|---------|---------|---------|---------|---------|
| RALGDS       | 8.7228  | 8.43215 | 8.57581 | 8.27351 | 8.48832 | 9.55168 | 9.65359 | 9.21548 | 8.81232 |
| OBP2B        | 6.47511 | 6.34047 | 6.54291 | 6.6536  | 6.86103 | 7.39222 | 6.43198 | 6.777   | 6.70738 |
| SURF6        | 6.40487 | 6.67529 | 6.66038 | 6.58359 | 6.1167  | 6.73974 | 7.11305 | 7.06584 | 6.78035 |
| MED22        | 7.13066 | 6.96701 | 6.78039 | 7.25633 | 6.57949 | 6.88887 | 7.41556 | 7.41769 | 7.12165 |
| SURF1        | 7.45145 | 7.21133 | 7.38776 | 7.37248 | 6.51687 | 7.4317  | 7.71483 | 7.04819 | 7.087   |
| SURF4        | 8.77839 | 8.12138 | 8.66187 | 8.89722 | 7.76072 | 9.03288 | 9.27626 | 8.93246 | 9.10424 |
| TMEM8C       | 5.24298 | 5.60207 | 5.56575 | 5.84731 | 6.40677 | 5.79451 | 5.8537  | 6.06884 | 5.97994 |
| SARDH        | 5.33034 | 5.86177 | 5.59779 | 6.18347 | 6.59318 | 6.43431 | 6.35359 | 6.35578 | 6.27081 |
| VAV2         | 6.83842 | 6.57713 | 6.61362 | 6.88098 | 5.83596 | 6.73366 | 7.29924 | 7.07144 | 7.07714 |
| BRD3         | 7.01861 | 7.02214 | 7.05683 | 7.01108 | 6.29961 | 6.81917 | 7.12599 | 6.82323 | 6.80117 |
| MIR3689A     | 8.14087 | 8.02291 | 8.13075 | 7.7317  | 11.911  | 7.9817  | 7.46063 | 9.08581 | 8.70983 |
| MIR3689D1    | 7.28137 | 7.1716  | 6.93311 | 8.30211 | 9.8224  | 8.1024  | 7.36621 | 7.66162 | 7.85931 |
| MIR3689B     | 6.73138 | 6.87862 | 6.93932 | 6.72033 | 11.4626 | 7.06683 | 6.04773 | 7.02593 | 7.6208  |
| MIR3689D2    | 6.14445 | 6.04234 | 6.16544 | 6.53246 | 10.557  | 6.6216  | 5.83156 | 6.46344 | 6.49568 |
| MIR3689E     | 3.17231 | 3.38307 | 3.58948 | 3.46448 | 9.41061 | 4.6513  | 3.6241  | 3.5336  | 4.52568 |
| MIR3689F     | 7.8367  | 8.11584 | 8.30783 | 8.81103 | 10.2069 | 8.34623 | 8.20703 | 8.76201 | 8.32118 |
| FCN1         | 6.26155 | 6.51939 | 6.22744 | 6.84756 | 7.20426 | 6.43102 | 6.45698 | 6.82109 | 6.89828 |
| C9orf116     | 5.24709 | 5.93121 | 5.64614 | 6.05133 | 6.29163 | 6.00657 | 5.90754 | 5.85133 | 5.72093 |
| GLT6D1       | 4.89817 | 5.38055 | 5.34147 | 5.65217 | 6.17739 | 5.98028 | 5.4184  | 5.88395 | 6.12714 |
| SOHLH1       | 5.30224 | 5.7682  | 5.48876 | 5.88982 | 5.83905 | 6.09855 | 5.69282 | 6.01339 | 6.24553 |
| CAMSAP1      | 8.78377 | 9.02441 | 8.7747  | 8.61697 | 7.36997 | 9.36728 | 9.00802 | 9.49333 | 9.26412 |
| UBAC1        | 8.02244 | 7.92511 | 7.6826  | 7.43658 | 6.37845 | 7.28901 | 7.75822 | 7.33842 | 7.33626 |
| LHX3         | 6.47436 | 6.65189 | 6.46344 | 7.40488 | 6.93025 | 7.68001 | 6.79659 | 7.05934 | 6.91174 |
| QSOX2        | 7.23063 | 7.13163 | 6.92574 | 7.71359 | 6.98669 | 7.60336 | 7.24681 | 7.17801 | 7.20613 |
| DKFZP434A062 | 6.18819 | 6.17407 | 5.84325 | 6.09706 | 6.60472 | 6.22435 | 5.70996 | 5.8955  | 6.48493 |
| SDCCAG3      | 6.70735 | 6.67916 | 6.6102  | 6.528   | 5.87338 | 6.43396 | 7.08121 | 6.6996  | 6.59895 |

|             |         |         |         |         |         |         |         |         |         |
|-------------|---------|---------|---------|---------|---------|---------|---------|---------|---------|
| SEC16A      | 8.31805 | 8.13879 | 8.02679 | 8.13562 | 6.24023 | 7.80785 | 8.45189 | 8.00042 | 8.27832 |
| notch1      | 9.08753 | 8.97607 | 8.98932 | 8.76806 | 6.85258 | 8.52131 | 9.01915 | 8.61979 | 8.72478 |
| MIR4673     | 8.12633 | 8.17528 | 8.24681 | 8.06386 | 8.03131 | 8.09353 | 7.61565 | 7.70498 | 7.2223  |
| LCN10       | 5.0869  | 5.08486 | 5.95744 | 6.05267 | 5.93097 | 6.18958 | 5.36155 | 5.59375 | 5.21912 |
| LCN6        | 5.46972 | 5.72763 | 5.94154 | 6.38368 | 6.58543 | 6.38196 | 6.03979 | 6.52625 | 6.39858 |
| LCN8        | 5.15955 | 5.26478 | 5.06031 | 6.14331 | 6.14959 | 6.02781 | 5.35384 | 5.80729 | 5.95292 |
| LCN15       | 6.10071 | 5.9027  | 6.02353 | 6.36471 | 6.47697 | 6.5305  | 6.11505 | 6.28797 | 6.4577  |
| CCDC183-AS1 | 6.3483  | 6.24358 | 6.15347 | 6.53009 | 6.23237 | 6.68248 | 6.58552 | 6.31743 | 6.73068 |
| EDF1        | 10.6405 | 10.6754 | 10.5594 | 11.2223 | 10.5271 | 11.5978 | 11.7092 | 10.9475 | 11.4432 |
| FBXW5       | 8.31646 | 8.294   | 8.16334 | 9.38998 | 7.50613 | 9.88689 | 9.50344 | 8.72548 | 8.89401 |
| CLIC3       | 7.46951 | 7.68109 | 7.22965 | 9.72586 | 9.23962 | 9.94518 | 9.81277 | 9.36647 | 9.68027 |
| ENTPD2      | 6.69559 | 6.72172 | 7.1649  | 7.70377 | 6.7609  | 8.39648 | 7.62389 | 7.54187 | 7.44202 |
| MAN1B1-AS1  | 6.24734 | 6.18351 | 6.28616 | 6.5295  | 6.37506 | 6.48802 | 6.62004 | 6.33395 | 6.01964 |
| DPP7        | 8.46677 | 8.5425  | 8.43283 | 8.93694 | 7.60954 | 8.90975 | 8.83181 | 8.12475 | 8.49913 |
| LRRC26      | 6.06698 | 6.09245 | 6.53159 | 7.30942 | 6.52239 | 7.30749 | 6.58609 | 7.06205 | 6.81018 |
| ANAPC2      | 7.21938 | 7.38872 | 7.31174 | 7.60455 | 6.98276 | 7.36479 | 7.3865  | 7.22847 | 7.29037 |
| TPRN        | 5.93123 | 6.15653 | 6.06989 | 6.4165  | 5.97917 | 6.75642 | 6.78802 | 6.67488 | 6.27136 |
| TMEM203     | 7.83317 | 7.76183 | 7.5789  | 8.30958 | 6.21123 | 7.67212 | 8.54992 | 7.29323 | 7.77574 |
| RNF208      | 5.02058 | 4.87053 | 4.8524  | 6.0124  | 5.2053  | 6.06333 | 6.03878 | 5.31828 | 5.65    |
| NRARP       | 8.73298 | 7.17786 | 7.49215 | 8.46675 | 5.72537 | 9.5865  | 8.9006  | 8.24724 | 8.60925 |
| EXD3        | 6.44607 | 6.4137  | 6.53081 | 6.69689 | 6.62005 | 7.22995 | 6.68514 | 6.63026 | 6.74067 |
| ENTPD8      | 6.65813 | 6.79922 | 6.3865  | 7.22978 | 6.72232 | 7.08762 | 6.67208 | 7.07708 | 6.92697 |
| NSMF        | 8.16975 | 7.89095 | 7.77881 | 8.10955 | 6.67094 | 8.45489 | 8.30401 | 8.08527 | 8.27855 |
| PNPLA7      | 7.19813 | 7.17375 | 7.11657 | 6.61865 | 6.70402 | 6.83271 | 6.65652 | 6.68379 | 6.67509 |
| DPH7        | 7.22682 | 7.18523 | 7.18342 | 6.50377 | 6.1434  | 6.36147 | 6.43887 | 6.68935 | 6.7245  |
| ARRDC1-AS1  | 6.08291 | 6.25914 | 6.34762 | 6.53903 | 6.11147 | 6.29677 | 6.37027 | 6.57316 | 6.33517 |

|              |         |         |         |         |         |         |         |         |         |
|--------------|---------|---------|---------|---------|---------|---------|---------|---------|---------|
| FLJ43315     | 6.6218  | 5.55129 | 5.5481  | 4.94352 | 6.69109 | 5.84823 | 5.1835  | 5.19561 | 5.56773 |
| LOC100233156 | 6.64819 | 7.33064 | 6.59031 | 6.41401 | 7.86399 | 6.46111 | 6.84821 | 6.58832 | 6.64109 |
| LOC389834    | 5.85882 | 6.9003  | 6.27321 | 6.02588 | 5.18403 | 4.72079 | 5.72836 | 5.16958 | 5.74512 |
| LOC100507412 | 6.29618 | 6.34628 | 5.80042 | 5.24153 | 12.1115 | 6.04664 | 5.66296 | 5.78831 | 5.9151  |
| LINC00685    | 4.76451 | 4.82494 | 4.7857  | 4.95221 | 5.71199 | 4.71128 | 4.57156 | 4.91026 | 5.16825 |
| MIR3690      | 4.56463 | 3.17614 | 4.30177 | 3.3894  | 4.97011 | 4.60205 | 3.49204 | 4.20512 | 4.09749 |
| ASMTL-AS1    | 6.89015 | 6.58163 | 6.60094 | 6.78795 | 7.44423 | 6.89267 | 6.54242 | 6.89265 | 7.03549 |
| CD99P1       | 8.95807 | 9.31688 | 9.44186 | 8.68242 | 8.70803 | 9.64685 | 9.08502 | 10.0823 | 9.84472 |
| GYG2         | 6.02514 | 6.32577 | 6.05735 | 6.20673 | 7.10646 | 6.19359 | 5.96803 | 6.28928 | 6.50074 |
| ARSD         | 5.27736 | 5.24523 | 5.30897 | 4.91061 | 5.44199 | 5.06011 | 5.80868 | 5.1608  | 5.37547 |
| ARSF         | 6.68899 | 5.78729 | 5.53273 | 5.5091  | 5.54864 | 5.74807 | 5.64631 | 4.88935 | 5.2427  |
| LINC01546    | 5.46076 | 5.67775 | 5.61495 | 5.24415 | 5.83293 | 5.52351 | 5.27118 | 5.62126 | 5.44119 |
| MIR651       | 5.32608 | 3.30086 | 3.92174 | 2.59486 | 2.12022 | 2.55797 | 2.43744 | 2.26798 | 2.23484 |
| TBL1X        | 8.38524 | 8.06986 | 7.77764 | 7.74543 | 7.4097  | 7.76945 | 7.90828 | 7.60094 | 7.69087 |
| SHROOM2      | 5.97893 | 5.80635 | 6.20387 | 6.53195 | 5.168   | 6.28611 | 6.70007 | 6.51162 | 6.18792 |
| CLDN34       | 6.66508 | 5.94141 | 6.54551 | 5.3308  | 5.89072 | 5.19408 | 5.62957 | 5.26978 | 5.41885 |
| WWC3         | 7.64044 | 7.59795 | 7.56541 | 7.59698 | 5.85874 | 7.48348 | 7.65579 | 7.62501 | 7.57788 |
| HCCS         | 8.18351 | 7.78591 | 8.23661 | 8.01205 | 6.54308 | 7.76701 | 8.77554 | 8.20056 | 8.27824 |
| MSL3         | 7.84117 | 7.27778 | 7.5833  | 6.79863 | 5.7911  | 5.9635  | 7.13064 | 6.53089 | 7.2039  |
| FRMPD4       | 4.33491 | 4.53433 | 4.29554 | 4.81245 | 5.17718 | 4.67978 | 4.66198 | 4.7235  | 4.84057 |
| PRPS2        | 8.83385 | 9.26025 | 9.21403 | 9.20463 | 7.21987 | 8.83932 | 9.29756 | 8.69804 | 8.74994 |
| TLR7         | 5.33159 | 4.81403 | 5.2248  | 4.90122 | 5.51847 | 5.58782 | 5.09123 | 5.45658 | 5.12081 |
| TLR8         | 5.41789 | 5.08322 | 5.90841 | 5.49896 | 5.01764 | 5.53105 | 5.5095  | 4.96094 | 5.44652 |
| GS1-600G8.3  | 5.00534 | 4.66799 | 4.77891 | 5.36959 | 5.91636 | 5.17765 | 5.59286 | 5.18721 | 5.07872 |
| LINC01203    | 3.66412 | 3.85881 | 3.66691 | 3.77527 | 4.02738 | 3.81799 | 3.97468 | 4.20709 | 4.08531 |
| TCEANC       | 5.75269 | 6.12056 | 5.70001 | 5.87639 | 6.14666 | 5.66162 | 5.78191 | 5.64163 | 5.79584 |

|          |         |         |         |         |         |         |         |         |         |
|----------|---------|---------|---------|---------|---------|---------|---------|---------|---------|
| OFD1     | 8.67553 | 8.87402 | 8.30489 | 7.79172 | 7.39762 | 7.90771 | 8.0936  | 8.46751 | 8.4841  |
| MOSPD2   | 8.53886 | 8.35576 | 8.0011  | 7.63169 | 5.19145 | 7.83545 | 7.58691 | 7.64953 | 7.69527 |
| BMX      | 5.74297 | 5.15637 | 6.05544 | 4.62103 | 4.54378 | 4.89003 | 5.0044  | 5.02277 | 4.94618 |
| CA5BP1   | 7.87123 | 7.56834 | 7.69266 | 8.29915 | 7.3245  | 8.13336 | 8.66402 | 8.09105 | 7.96282 |
| GRPR     | 4.84644 | 4.67434 | 4.86639 | 4.92821 | 5.2388  | 5.1778  | 5.05417 | 4.78997 | 4.86366 |
| MIR548AM | 2.05273 | 1.88931 | 2.03526 | 2.35179 | 2.07038 | 2.51222 | 2.86401 | 1.92209 | 1.85129 |
| S100G    | 2.96475 | 3.22755 | 2.96528 | 3.17691 | 2.99661 | 3.233   | 3.11685 | 2.94344 | 3.56004 |
| SYAP1    | 8.47297 | 7.82201 | 8.26385 | 8.16986 | 6.19636 | 8.5906  | 8.83052 | 9.32801 | 8.62599 |
| TXLNG    | 7.79819 | 7.61374 | 7.61922 | 7.35194 | 6.0831  | 7.34033 | 7.55098 | 6.84299 | 7.51029 |
| REPS2    | 6.73979 | 6.27083 | 6.06248 | 5.39945 | 5.72276 | 6.14169 | 6.15733 | 5.80178 | 5.55726 |
| NHS      | 7.71345 | 7.26078 | 7.27256 | 5.96394 | 5.9781  | 6.37511 | 6.37549 | 6.39205 | 6.46042 |
| MIR4768  | 3.20888 | 3.44352 | 3.69097 | 3.5453  | 2.93971 | 3.57846 | 3.1857  | 3.6397  | 3.08994 |
| SCML1    | 6.50649 | 6.57611 | 6.83464 | 5.08609 | 3.76187 | 4.41804 | 5.18679 | 5.82113 | 5.45577 |
| CDKL5    | 8.1226  | 7.89148 | 7.693   | 7.482   | 7.04268 | 8.83059 | 7.74483 | 9.38527 | 8.94064 |
| PDHA1    | 7.15866 | 7.07845 | 7.11589 | 6.61643 | 5.6017  | 6.49429 | 6.93019 | 6.60662 | 6.79331 |
| CNKSR2   | 5.40296 | 6.25957 | 5.89237 | 5.14351 | 5.06969 | 5.82663 | 5.67511 | 5.5542  | 5.35182 |
| YY2      | 5.3161  | 5.32209 | 5.14373 | 4.9054  | 4.01677 | 4.86393 | 4.6686  | 4.7634  | 4.82456 |
| SMS      | 6.87158 | 7.08351 | 7.02677 | 8.0628  | 6.6241  | 9.93202 | 7.99498 | 9.25833 | 8.47928 |
| ZNF645   | 3.63963 | 3.53374 | 3.56384 | 3.0624  | 4.32655 | 3.68711 | 3.67016 | 4.0192  | 3.5903  |
| DDX53    | 3.70006 | 4.19526 | 3.95283 | 4.73788 | 4.12994 | 4.96713 | 4.53231 | 4.60247 | 4.53074 |
| PTCHD1   | 4.53216 | 5.15657 | 5.13308 | 5.54121 | 5.42897 | 6.08941 | 5.50757 | 5.62403 | 5.57708 |
| PRDX4    | 5.74736 | 5.65582 | 6.05424 | 6.66431 | 4.98756 | 6.4896  | 7.02975 | 5.59865 | 5.93336 |
| SAT1     | 9.72859 | 10.6461 | 10.1935 | 10.8277 | 8.79438 | 10.4843 | 11.0614 | 11.5698 | 10.9244 |
| cxorf58  | 3.53241 | 3.34857 | 3.45747 | 3.79471 | 3.67478 | 4.15783 | 3.60835 | 3.48698 | 3.8013  |
| SCARNA23 | 5.32304 | 5.37087 | 5.39297 | 4.66578 | 4.66405 | 5.26981 | 5.64414 | 4.77386 | 4.60851 |
| VENTXP1  | 2.00786 | 2.39097 | 2.20952 | 2.16389 | 3.15236 | 2.46608 | 2.16128 | 2.17387 | 2.26796 |

|            |         |         |         |         |         |         |         |         |         |
|------------|---------|---------|---------|---------|---------|---------|---------|---------|---------|
| DCAF8L2    | 4.08125 | 4.24035 | 4.29083 | 4.85244 | 4.2676  | 5.05794 | 4.31061 | 4.60238 | 4.05817 |
| IL1RAPL1   | 3.80638 | 3.72578 | 4.2188  | 4.12101 | 4.31065 | 4.26804 | 3.91854 | 3.7973  | 4.24896 |
| gk         | 5.83541 | 6.15824 | 5.55972 | 5.95074 | 5.81395 | 5.73189 | 5.62327 | 7.07143 | 6.38727 |
| TAB3       | 6.85849 | 6.65644 | 6.86345 | 7.77241 | 6.19347 | 8.43333 | 8.64524 | 7.99133 | 8.215   |
| CFAP47     | 3.60447 | 4.00718 | 3.86185 | 4.36794 | 4.23715 | 4.1447  | 4.20857 | 4.07496 | 3.91731 |
| PRRG1      | 7.07668 | 6.99112 | 7.07493 | 6.5693  | 5.9483  | 6.3214  | 6.44715 | 7.20105 | 6.45178 |
| LANCL3     | 6.12017 | 6.27665 | 5.94002 | 6.11039 | 5.17689 | 6.58463 | 6.17366 | 5.63405 | 5.81135 |
| XK         | 6.70154 | 6.55052 | 6.43348 | 6.90137 | 6.57631 | 6.57321 | 7.01183 | 6.17652 | 6.57214 |
| HYPM       | 4.55526 | 4.45524 | 4.71638 | 5.19412 | 4.59324 | 4.31856 | 4.39353 | 5.17091 | 4.46077 |
| SYTL5      | 4.38464 | 4.70923 | 4.55873 | 5.19688 | 5.05427 | 5.15477 | 5.12507 | 5.23578 | 4.92513 |
| OTC        | 3.60168 | 3.70618 | 3.2878  | 4.21409 | 3.98396 | 3.94154 | 3.63352 | 3.90194 | 3.98508 |
| TSPAN7     | 6.97242 | 6.82731 | 8.56201 | 4.8801  | 5.01285 | 5.61632 | 5.75666 | 4.96541 | 5.31232 |
| MID1IP1    | 7.18832 | 7.20526 | 7.25538 | 7.91981 | 6.47237 | 8.35707 | 8.61203 | 8.02122 | 8.22775 |
| MIR3937    | 5.24122 | 4.50883 | 5.27685 | 5.49566 | 5.00309 | 5.38783 | 5.37432 | 5.75657 | 5.4479  |
| MIR1587    | 6.83535 | 6.21607 | 6.91545 | 6.78492 | 7.50612 | 6.71619 | 6.94523 | 6.59795 | 6.51251 |
| MPC1L      | 5.48158 | 5.40106 | 5.62274 | 6.13645 | 6.17742 | 6.22793 | 5.924   | 6.12977 | 6.08477 |
| NYX        | 6.33735 | 6.61097 | 6.5117  | 7.09208 | 7.29962 | 6.85294 | 6.72954 | 6.83558 | 6.80014 |
| CASK       | 3.11861 | 2.92314 | 2.99611 | 3.91133 | 2.79722 | 3.66335 | 5.73323 | 3.14044 | 3.381   |
| GPR34      | 6.8958  | 6.27262 | 7.94982 | 5.85929 | 4.55409 | 4.44617 | 5.79593 | 4.2538  | 4.67824 |
| GPR82      | 3.66904 | 3.26758 | 3.10852 | 3.72009 | 3.75954 | 3.1535  | 2.7301  | 3.16825 | 2.66603 |
| MAOA       | 8.15872 | 7.88478 | 8.6757  | 7.24284 | 6.95136 | 7.53355 | 7.23744 | 7.1394  | 6.85451 |
| DUSP21     | 4.21524 | 4.5329  | 4.17768 | 5.13798 | 5.71816 | 5.439   | 5.37611 | 5.25115 | 5.0816  |
| KDM6A      | 9.58665 | 9.044   | 8.91478 | 7.57481 | 5.6394  | 7.86034 | 7.91661 | 8.67385 | 8.44215 |
| KRBOX4     | 6.87143 | 6.90568 | 7.20968 | 5.9456  | 6.57621 | 6.16207 | 6.2698  | 6.31904 | 5.90059 |
| ZNF674-AS1 | 7.1823  | 6.98313 | 6.83088 | 6.44486 | 4.0665  | 6.13941 | 6.50051 | 6.19623 | 6.08709 |
| CHST7      | 5.3884  | 5.83093 | 5.93497 | 5.93338 | 5.23779 | 5.67568 | 5.99536 | 5.92519 | 5.20839 |



|         |         |         |         |         |         |         |         |         |         |
|---------|---------|---------|---------|---------|---------|---------|---------|---------|---------|
| RP2     | 7.25829 | 6.91044 | 7.19703 | 7.54165 | 6.00633 | 9.68064 | 7.91325 | 8.23418 | 8.26411 |
| JADE3   | 7.08606 | 7.50047 | 7.19826 | 7.12228 | 5.69971 | 6.8005  | 7.01066 | 6.8273  | 6.80904 |
| RGN     | 5.12858 | 5.41929 | 5.24219 | 5.51747 | 5.59596 | 5.53269 | 5.2419  | 5.5571  | 5.34958 |
| RBM10   | 8.01622 | 7.75719 | 7.86035 | 8.41165 | 7.05229 | 8.68376 | 8.34721 | 8.6972  | 8.26119 |
| UBA1    | 10.5991 | 10.2142 | 10.2314 | 10.4955 | 7.97343 | 10.7069 | 10.5421 | 10.849  | 11.0673 |
| INE1    | 6.34945 | 5.70512 | 6.26881 | 6.01742 | 5.54742 | 5.47408 | 5.8952  | 6.41043 | 6.22914 |
| CDK16   | 8.02816 | 7.54031 | 7.85765 | 7.86734 | 6.38414 | 7.70176 | 8.19991 | 7.80595 | 7.84669 |
| USP11   | 7.39421 | 7.32189 | 7.5512  | 7.15913 | 6.12904 | 6.31908 | 6.79324 | 6.2173  | 6.42631 |
| ZNF157  | 5.0458  | 4.73231 | 4.77055 | 4.19088 | 4.66893 | 4.56157 | 4.89174 | 4.77914 | 4.72482 |
| ARAF    | 8.54418 | 8.10912 | 8.53065 | 8.47099 | 7.16637 | 8.08019 | 8.62295 | 7.8704  | 8.23595 |
| TIMP1   | 9.21905 | 8.33159 | 9.50007 | 9.43509 | 7.02761 | 8.16158 | 8.79809 | 8.85679 | 9.07729 |
| UXT-AS1 | 5.22908 | 5.55111 | 5.40543 | 5.47108 | 5.59883 | 5.70445 | 5.78457 | 5.37667 | 5.74069 |
| CXXC1P1 | 4.54669 | 4.45284 | 4.30369 | 4.69752 | 5.01891 | 5.31466 | 4.4058  | 4.78115 | 4.61791 |
| ZNF81   | 6.4628  | 6.23502 | 6.35077 | 5.29967 | 4.88376 | 5.74005 | 5.14616 | 5.44302 | 5.40445 |
| SPACA5  | 3.15829 | 3.54185 | 3.97584 | 3.8483  | 4.06849 | 4.10277 | 4.11834 | 5.06453 | 4.28249 |
| FTSJ1   | 7.83656 | 7.39294 | 7.91514 | 8.25261 | 7.53735 | 8.09696 | 8.74593 | 8.04167 | 8.28174 |
| porcn   | 7.97469 | 7.74046 | 7.66032 | 7.71309 | 8.3864  | 7.44534 | 8.30643 | 8.13008 | 7.95728 |
| EBP     | 7.72322 | 7.27799 | 7.61555 | 7.80351 | 7.65722 | 7.60192 | 8.18484 | 8.15319 | 8.22227 |
| WDR13   | 7.05136 | 6.96407 | 6.93849 | 7.29057 | 5.88218 | 7.73804 | 7.65566 | 6.97696 | 7.25456 |
| WAS     | 5.93244 | 5.52244 | 5.98532 | 6.45171 | 5.77299 | 6.13439 | 6.33697 | 6.44503 | 6.23441 |
| SUV39H1 | 6.22    | 6.1196  | 6.33972 | 6.49307 | 6.27375 | 6.18597 | 6.62247 | 6.33157 | 6.29837 |
| GLOD5   | 3.68422 | 4.07156 | 3.79892 | 4.26188 | 4.48869 | 4.80086 | 3.93788 | 3.88035 | 4.22604 |
| GATA1   | 6.87398 | 6.81751 | 6.95908 | 7.34023 | 7.42642 | 7.29487 | 7.25742 | 7.26762 | 7.37898 |
| HDAC6   | 7.32166 | 7.09638 | 7.07476 | 7.02418 | 6.45053 | 7.10268 | 7.17256 | 6.86973 | 7.11799 |
| ERAS    | 5.50055 | 5.65265 | 5.76221 | 5.7372  | 6.39802 | 5.75903 | 5.51084 | 5.76038 | 5.71102 |
| PQBP1   | 7.62376 | 7.84279 | 7.58896 | 7.90771 | 6.74305 | 7.77972 | 8.26323 | 7.53414 | 7.98619 |

|         |         |         |         |         |         |         |         |         |         |
|---------|---------|---------|---------|---------|---------|---------|---------|---------|---------|
| CCDC120 | 8.55456 | 8.35959 | 8.18716 | 8.82222 | 7.22739 | 8.54213 | 9.04325 | 8.18778 | 8.97442 |
| PLP2    | 10.7799 | 10.7946 | 11.0437 | 10.8473 | 10.5125 | 10.4731 | 11.0988 | 10.0156 | 11.0286 |
| SYP     | 5.91517 | 6.46775 | 6.02499 | 6.44288 | 6.6356  | 6.75628 | 5.82313 | 6.65993 | 6.36305 |
| CCDC22  | 6.96093 | 7.06173 | 7.06478 | 7.65529 | 7.19212 | 8.08058 | 7.45524 | 7.24397 | 7.61651 |
| GAGE10  | 4.6686  | 4.48682 | 3.58744 | 5.11157 | 4.80212 | 4.48519 | 3.95822 | 5.00186 | 5.00902 |
| GAGE12J | 6.03337 | 5.94204 | 6.00675 | 6.53293 | 8.1397  | 6.44969 | 6.5505  | 6.28566 | 6.17255 |
| GAGE13  | 4.84954 | 4.58994 | 4.83385 | 4.71843 | 6.78759 | 5.17914 | 4.97269 | 4.93609 | 5.1574  |
| GAGE12G | 4.8426  | 4.98726 | 4.98216 | 5.92306 | 7.34437 | 5.38372 | 5.37254 | 4.94523 | 5.19459 |
| GAGE2A  | 4.47243 | 4.58693 | 4.82639 | 5.01399 | 6.98647 | 5.14317 | 5.04397 | 5.1032  | 5.06999 |
| GAGE12C | 4.48395 | 4.13794 | 4.71058 | 5.15011 | 9.41033 | 4.81694 | 4.67542 | 4.83699 | 4.80217 |
| GAGE12H | 4.95623 | 4.91815 | 5.2169  | 5.65334 | 7.72257 | 5.68179 | 5.59488 | 5.49483 | 5.36289 |
| GAGE1   | 2.5361  | 3.37602 | 3.06544 | 2.48193 | 4.59516 | 3.07319 | 3.44948 | 3.43205 | 2.53148 |
| Mir532  | 4.79959 | 5.51655 | 4.75571 | 5.6217  | 5.49622 | 5.36689 | 4.71159 | 5.62095 | 6.30961 |
| MIR188  | 5.76281 | 5.63162 | 5.27823 | 5.98998 | 5.94644 | 6.17878 | 5.9299  | 6.08042 | 6.07008 |
| MIR500A | 6.29908 | 6.25713 | 6.47026 | 6.44216 | 6.58732 | 6.29816 | 5.6492  | 6.48194 | 6.75436 |
| MIR362  | 4.49099 | 4.3322  | 4.08113 | 3.98911 | 4.41113 | 4.19556 | 4.12214 | 4.99948 | 4.12894 |
| Mir501  | 6.39639 | 6.37396 | 5.98681 | 6.10743 | 6.39671 | 5.29735 | 5.37362 | 6.09819 | 6.4309  |
| MIR500B | 6.59318 | 6.60708 | 6.68541 | 7.40316 | 8.30655 | 6.73314 | 7.05294 | 6.78844 | 7.25996 |
| MIR660  | 5.00447 | 5.01762 | 4.57922 | 4.88442 | 5.20257 | 5.29759 | 4.83107 | 5.26127 | 5.43051 |
| MIR502  | 6.47481 | 6.49483 | 6.58702 | 6.69387 | 7.46315 | 6.8141  | 6.35435 | 7.43421 | 7.03032 |
| CCNB3   | 4.8929  | 4.83831 | 4.78175 | 4.72095 | 4.91582 | 5.26731 | 4.06181 | 4.79201 | 4.39956 |
| BMP15   | 4.94223 | 5.3761  | 5.15378 | 5.4291  | 6.11152 | 5.80619 | 5.51248 | 5.88995 | 5.74819 |
| NUDT10  | 5.08282 | 5.21955 | 5.30126 | 5.63029 | 5.27947 | 5.57078 | 5.64298 | 5.54321 | 4.94842 |
| CENPVL1 | 5.1766  | 5.37905 | 5.31145 | 5.57612 | 7.29918 | 5.94316 | 5.93499 | 5.87458 | 5.6358  |
| GSPT2   | 5.7589  | 6.18517 | 5.64752 | 6.09915 | 6.1531  | 6.13761 | 5.98882 | 5.79928 | 5.86271 |
| GPR173  | 5.75972 | 5.40274 | 5.58675 | 5.80639 | 5.80356 | 5.45535 | 5.06601 | 6.03743 | 5.53827 |

|           |         |         |         |         |         |         |         |         |         |
|-----------|---------|---------|---------|---------|---------|---------|---------|---------|---------|
| TSPYL2    | 7.32375 | 6.97397 | 7.84306 | 6.03389 | 4.71822 | 5.60515 | 5.37923 | 6.27661 | 5.25361 |
| RIBC1     | 5.73027 | 5.40632 | 5.63656 | 5.43449 | 5.41194 | 5.69385 | 5.63291 | 5.68429 | 5.90764 |
| GNL3L     | 8.0791  | 7.72837 | 7.92116 | 7.5327  | 6.86265 | 6.99007 | 7.92227 | 7.22152 | 7.66543 |
| TRO       | 5.25736 | 5.16576 | 5.218   | 5.5357  | 5.39066 | 5.26766 | 5.22804 | 5.41563 | 5.30395 |
| APEX2     | 7.24271 | 6.87194 | 6.96873 | 7.63913 | 6.11286 | 7.36742 | 7.81976 | 6.66208 | 7.33509 |
| MIR4536-1 | 1.5935  | 2.3997  | 1.7856  | 2.11805 | 1.56099 | 2.42021 | 1.91971 | 1.69521 | 1.80851 |
| FOXR2     | 4.66996 | 4.92875 | 4.78557 | 4.63787 | 5.7408  | 4.85937 | 5.31177 | 5.10135 | 4.70271 |
| RRAGB     | 7.04977 | 7.70706 | 7.37258 | 6.11968 | 5.36066 | 5.6579  | 5.87915 | 6.28723 | 5.94329 |
| KLF8      | 9.40821 | 9.29129 | 9.02077 | 7.9555  | 6.63564 | 7.2653  | 7.87836 | 7.69995 | 8.47474 |
| UBQLN2    | 9.34615 | 9.09531 | 9.0836  | 9.34736 | 7.35315 | 9.19685 | 9.81763 | 9.66404 | 10.2909 |
| LINC01420 | 8.09594 | 8.12948 | 8.14456 | 8.64337 | 6.15059 | 8.22448 | 8.56962 | 8.42229 | 9.07302 |
| FAAH2     | 8.01751 | 7.74291 | 7.00886 | 5.90627 | 4.71398 | 6.18915 | 6.06644 | 6.05511 | 4.95162 |
| zc3h12b   | 5.10081 | 5.75179 | 5.43837 | 5.07338 | 5.46871 | 5.07958 | 4.58367 | 5.60277 | 5.19367 |
| MSN       | 11.0686 | 10.7315 | 11.2897 | 11.4436 | 7.95509 | 11.8361 | 11.5259 | 11.5626 | 11.9895 |
| mir223    | 5.09737 | 4.95397 | 5.41879 | 5.20727 | 6.28744 | 5.40276 | 5.1219  | 5.42519 | 5.53441 |
| HEPH      | 6.2328  | 6.9806  | 6.64203 | 6.78199 | 6.23308 | 6.28025 | 6.97617 | 6.11097 | 6.46719 |
| ar        | 7.85537 | 6.58862 | 6.73998 | 5.68451 | 6.27475 | 5.71116 | 5.71551 | 5.45187 | 5.7138  |
| STARD8    | 5.51491 | 5.63783 | 5.77548 | 5.69342 | 5.7447  | 5.67937 | 6.24694 | 5.77086 | 6.1975  |
| EFNB1     | 9.07411 | 9.15207 | 9.18157 | 9.2468  | 7.34192 | 9.05455 | 9.8116  | 9.37843 | 9.64456 |
| EDA       | 6.41369 | 6.7977  | 6.61784 | 6.22732 | 6.46483 | 5.97839 | 5.94111 | 6.55054 | 6.44874 |
| MIR676    | 4.46459 | 4.1512  | 4.2139  | 4.43185 | 4.66194 | 3.83608 | 4.25809 | 4.16782 | 4.5919  |
| OTUD6A    | 5.00583 | 5.17881 | 5.33607 | 5.92088 | 5.97056 | 5.81938 | 5.94462 | 5.67905 | 6.03072 |
| IGBP1     | 6.71281 | 6.72281 | 6.69295 | 6.6872  | 5.91512 | 7.33282 | 6.78178 | 6.86935 | 6.74645 |
| DGAT2L6   | 4.06488 | 4.55487 | 4.51371 | 4.6778  | 5.0678  | 5.24851 | 4.92446 | 5.07167 | 4.98184 |
| AWAT1     | 4.81332 | 4.82001 | 4.86159 | 5.08867 | 5.70622 | 5.33802 | 5.17305 | 4.77742 | 5.20758 |
| KIF4A     | 7.17269 | 6.7726  | 6.85873 | 7.54487 | 6.78891 | 7.64201 | 6.89697 | 7.12819 | 7.60261 |

|           |         |         |         |         |         |         |         |         |         |
|-----------|---------|---------|---------|---------|---------|---------|---------|---------|---------|
| GDPD2     | 7.46708 | 8.28963 | 7.3832  | 7.25551 | 6.20674 | 7.56597 | 8.33478 | 7.45995 | 8.13693 |
| FOXO4     | 6.95894 | 7.34169 | 7.05123 | 7.21234 | 6.41989 | 7.15164 | 7.24033 | 7.18863 | 7.07763 |
| MED12     | 9.06513 | 8.74847 | 8.84954 | 8.09706 | 6.46497 | 7.78657 | 8.25524 | 7.6538  | 7.95371 |
| NLGN3     | 6.21916 | 6.04786 | 6.11869 | 6.2897  | 6.49564 | 6.40247 | 6.20713 | 6.129   | 6.00427 |
| ITGB1BP2  | 5.46922 | 5.23069 | 5.40272 | 5.00497 | 5.17303 | 4.66325 | 4.73708 | 5.07552 | 5.1117  |
| OGT       | 10.4005 | 10.2378 | 10.12   | 8.77641 | 7.29258 | 8.03148 | 8.70764 | 10.7334 | 10.2805 |
| ACRC      | 5.43068 | 5.65819 | 5.16737 | 5.35988 | 5.53841 | 5.55282 | 5.39655 | 6.72375 | 6.29528 |
| LINC00891 | 6.00003 | 5.85964 | 6.4541  | 5.90659 | 7.41423 | 5.95224 | 5.7126  | 5.98736 | 5.93845 |
| CXorf49   | 5.64895 | 5.74771 | 5.85149 | 6.68566 | 7.04367 | 7.07947 | 6.08109 | 6.40261 | 6.31275 |
| NHSL2     | 6.84247 | 6.09664 | 6.96942 | 6.02178 | 5.73423 | 6.33774 | 5.72553 | 6.38979 | 6.0031  |
| RPS26P11  | 5.68164 | 5.37239 | 5.11952 | 6.03543 | 5.51657 | 6.47009 | 6.22949 | 5.08448 | 5.98017 |
| FLJ44635  | 6.63845 | 6.40078 | 6.41555 | 6.22234 | 5.68939 | 5.16846 | 5.58264 | 5.78555 | 5.79347 |
| DMRTC1    | 6.13202 | 6.33623 | 6.28403 | 6.65263 | 7.16425 | 6.73646 | 6.32043 | 6.51381 | 6.43676 |
| LINC00684 | 6.71863 | 6.54751 | 6.59226 | 6.96766 | 7.92211 | 7.67899 | 6.87233 | 7.19216 | 7.22594 |
| CDX4      | 5.61166 | 5.03146 | 4.85228 | 5.13221 | 5.42934 | 5.13766 | 5.14576 | 4.95395 | 4.49861 |
| CHIC1     | 7.45131 | 7.38694 | 7.67579 | 6.3241  | 6.007   | 5.41204 | 6.61186 | 5.65185 | 6.555   |
| Xist      | 6.10476 | 4.32264 | 4.10911 | 4.83696 | 4.70272 | 4.93056 | 4.37003 | 4.65965 | 4.81707 |
| MIR374B   | 1.76805 | 2.11805 | 2.02648 | 2.32794 | 1.91755 | 3.57864 | 1.82994 | 2.27406 | 2.58175 |
| UPRT      | 6.20506 | 6.2151  | 6.12416 | 4.96126 | 4.35484 | 6.25451 | 5.9618  | 5.46249 | 5.04568 |
| FGF16     | 3.686   | 3.90896 | 3.76938 | 4.38023 | 4.61755 | 4.67503 | 4.13746 | 4.24872 | 3.82602 |
| COX7B     | 7.40447 | 8.17619 | 7.99893 | 9.03602 | 7.51524 | 8.62222 | 9.16175 | 8.07717 | 7.85311 |
| PGK1      | 8.92646 | 8.50721 | 9.08081 | 9.06886 | 8.47774 | 9.87414 | 8.89008 | 9.81842 | 8.96555 |
| LPAR4     | 4.83953 | 4.62413 | 4.15364 | 4.55298 | 4.84055 | 4.50891 | 4.99241 | 4.70621 | 4.33248 |
| GPR174    | 4.59067 | 4.4302  | 4.84626 | 4.36382 | 5.09267 | 4.71875 | 4.922   | 4.19604 | 4.18049 |
| TBX22     | 5.63448 | 5.74905 | 5.33518 | 5.74311 | 5.81062 | 5.76407 | 6.0205  | 5.47259 | 5.96039 |
| SH3BGRL   | 8.5787  | 7.92131 | 8.32377 | 7.18829 | 6.33006 | 6.56216 | 7.74911 | 6.12566 | 6.99332 |

|                |         |         |         |         |         |         |         |         |         |
|----------------|---------|---------|---------|---------|---------|---------|---------|---------|---------|
| POU3F4         | 3.07732 | 3.42818 | 3.1831  | 3.89824 | 3.77719 | 3.86559 | 3.61727 | 3.29777 | 3.55094 |
| UBE2DNL        | 4.75199 | 4.84089 | 4.79811 | 6.0269  | 5.34765 | 5.5397  | 5.5347  | 5.20454 | 5.29657 |
| APOOL          | 8.85131 | 8.91025 | 8.87698 | 8.08569 | 6.33489 | 8.10233 | 8.54115 | 8.00311 | 8.42613 |
| ZNF711         | 6.01738 | 6.27995 | 5.92956 | 5.39605 | 4.48279 | 4.88932 | 5.28922 | 3.96328 | 5.01531 |
| MIR1321        | 2.53007 | 3.00299 | 2.56204 | 4.16391 | 3.12581 | 3.05076 | 2.33972 | 2.37425 | 2.20431 |
| DACH2          | 4.02372 | 3.76983 | 4.12215 | 4.4466  | 4.54716 | 4.007   | 4.40157 | 4.13738 | 4.27207 |
| KLHL4          | 5.2329  | 4.67891 | 5.21686 | 5.22369 | 4.47452 | 5.19234 | 5.29797 | 5.02861 | 4.95792 |
| PCDH11X        | 3.35368 | 4.10707 | 2.86722 | 3.41347 | 2.92527 | 3.67114 | 2.72907 | 3.47642 | 2.98931 |
| DIAPH2         | 8.96743 | 9.35503 | 8.91619 | 7.49834 | 4.36841 | 7.31243 | 7.73739 | 6.83898 | 7.05457 |
| TNMD           | 4.72113 | 4.68185 | 5.12446 | 4.76529 | 5.27182 | 5.0681  | 5.01487 | 4.25654 | 4.5125  |
| TMEM35A        | 5.49402 | 5.20632 | 5.60026 | 5.62834 | 5.90997 | 5.44288 | 5.45799 | 5.20188 | 5.42826 |
| CENPI          | 6.96885 | 6.22124 | 6.31111 | 6.46029 | 5.20054 | 5.30013 | 6.05718 | 6.30561 | 6.13673 |
| DRP2           | 5.07997 | 5.06213 | 4.95127 | 5.45011 | 5.7456  | 5.0204  | 5.0173  | 5.3769  | 5.26635 |
| RPL36A-HNRNPH2 | 7.02957 | 7.38473 | 6.90134 | 6.85512 | 5.65691 | 7.26691 | 7.18945 | 6.9321  | 6.89534 |
| TCEAL2         | 5.02085 | 5.22895 | 4.79328 | 5.38797 | 5.68419 | 5.66182 | 5.8125  | 5.09164 | 5.30363 |
| Nxf2           | 4.32895 | 4.55483 | 4.51133 | 4.3923  | 5.89424 | 4.88788 | 4.46456 | 4.68351 | 4.63598 |
| nxf4           | 3.18541 | 3.87381 | 3.12135 | 3.29337 | 4.08849 | 3.86559 | 3.54993 | 3.14407 | 3.44449 |
| GPRASP1        | 5.85138 | 6.24541 | 5.97833 | 5.95689 | 5.66064 | 6.18559 | 5.22037 | 6.09684 | 6.01316 |
| LINC00630      | 7.86248 | 8.01308 | 8.06055 | 5.90081 | 5.15151 | 5.73167 | 6.64539 | 6.61402 | 6.73163 |
| Tceal7         | 5.40669 | 5.78123 | 5.46853 | 5.17208 | 5.61635 | 4.86763 | 5.34265 | 5.43615 | 5.47323 |
| TCEAL9         | 8.47493 | 8.45633 | 8.36557 | 9.428   | 7.61326 | 10.0496 | 10.0041 | 9.24373 | 9.65487 |
| BEX3           | 6.67278 | 6.75052 | 6.48088 | 7.37827 | 6.62665 | 6.80156 | 7.79775 | 7.00687 | 7.38278 |
| TCEAL4         | 6.12035 | 6.11493 | 6.09235 | 6.37899 | 6.03709 | 6.44432 | 6.32738 | 5.72975 | 6.30549 |
| TCEAL3         | 6.92139 | 6.54807 | 6.54999 | 7.09443 | 6.59495 | 7.21753 | 7.11568 | 7.67619 | 7.15135 |
| TCEAL1         | 4.94034 | 5.21573 | 5.20827 | 5.45791 | 4.98522 | 5.37377 | 5.50531 | 5.47491 | 5.29442 |
| MORF4L2-AS1    | 6.17974 | 6.65686 | 6.66371 | 5.17172 | 5.53884 | 5.59624 | 5.68081 | 5.72712 | 5.86375 |

|           |         |         |         |         |         |         |         |         |         |
|-----------|---------|---------|---------|---------|---------|---------|---------|---------|---------|
| TMEM31    | 5.71988 | 5.39482 | 5.66248 | 5.79548 | 6.66644 | 6.0167  | 5.58354 | 5.85377 | 5.76131 |
| PLP1      | 5.61515 | 6.18058 | 5.76137 | 5.7843  | 6.20457 | 5.21547 | 5.61415 | 5.75018 | 5.21063 |
| TMSB15B   | 5.2537  | 5.23541 | 5.22148 | 4.80841 | 4.99399 | 5.16851 | 4.92213 | 4.97197 | 4.92759 |
| IL1RAPL2  | 4.2695  | 4.23608 | 4.0617  | 4.49863 | 4.8937  | 4.12498 | 4.37372 | 4.38454 | 4.39046 |
| NRK       | 4.44239 | 4.97999 | 4.18989 | 4.42029 | 4.78681 | 4.53656 | 4.20426 | 4.71816 | 4.45212 |
| MUM1L1    | 4.70214 | 4.9762  | 5.09181 | 5.20839 | 5.34721 | 6.16052 | 5.58178 | 6.6495  | 5.582   |
| cxorf57   | 5.20846 | 5.56566 | 5.35173 | 4.7183  | 3.57071 | 3.8795  | 4.59988 | 4.13469 | 4.06353 |
| MIR548AN  | 5.96576 | 5.87862 | 6.29019 | 5.1018  | 7.86311 | 4.68636 | 4.92338 | 5.83086 | 5.61598 |
| CLDN2     | 5.64195 | 6.01427 | 5.95837 | 6.37855 | 7.05803 | 6.53311 | 6.22272 | 6.35674 | 6.44272 |
| PIH1D3    | 4.8586  | 4.78028 | 4.85042 | 5.24426 | 5.11487 | 5.55949 | 5.19808 | 5.06692 | 4.97982 |
| PRPS1     | 8.01883 | 7.53478 | 8.13526 | 8.20227 | 5.57917 | 7.37669 | 8.96957 | 6.95781 | 7.88777 |
| MID2      | 9.98252 | 9.69158 | 9.61741 | 9.37338 | 9.16722 | 10.0061 | 9.51245 | 9.50691 | 9.55983 |
| VSIG1     | 6.37607 | 6.16678 | 7.1317  | 6.60687 | 5.87758 | 6.36086 | 6.45904 | 6.11173 | 7.00232 |
| NXT2      | 8.02068 | 8.09851 | 8.15593 | 7.62878 | 7.21335 | 7.40926 | 7.92386 | 6.90685 | 7.60374 |
| TMEM164   | 8.56991 | 8.57104 | 8.03599 | 8.06392 | 6.96828 | 7.15377 | 7.66469 | 7.37892 | 7.41352 |
| Mir652    | 4.3519  | 4.18051 | 4.07777 | 4.30554 | 3.98599 | 4.51942 | 4.04421 | 4.21195 | 4.32297 |
| MIR3978   | 8.51093 | 9.1695  | 8.29764 | 7.31858 | 8.52633 | 6.53454 | 6.64439 | 7.48883 | 7.44748 |
| RGAG1     | 5.68307 | 5.72328 | 5.74174 | 6.08977 | 6.47963 | 6.4175  | 6.02735 | 6.18148 | 6.15161 |
| TDGF1P3   | 3.34763 | 3.6149  | 3.38779 | 3.92767 | 5.70409 | 3.93344 | 3.74188 | 3.94389 | 3.49147 |
| PAK3      | 5.38472 | 5.83131 | 6.2733  | 5.17339 | 5.33987 | 5.6356  | 5.25859 | 5.63386 | 5.48095 |
| LINC00890 | 4.07987 | 4.26637 | 4.06906 | 4.231   | 4.68252 | 4.09479 | 4.35233 | 4.28694 | 4.45249 |
| ALG13     | 8.55989 | 8.51758 | 8.30765 | 6.79545 | 5.69415 | 6.57413 | 6.81382 | 6.77546 | 7.53445 |
| TRPC5OS   | 3.30603 | 3.53402 | 3.48128 | 4.21746 | 4.40006 | 4.10541 | 4.06101 | 4.17551 | 3.8936  |
| MIR764    | 4.88258 | 4.91206 | 4.93405 | 5.24637 | 4.83636 | 5.23244 | 4.6457  | 5.11154 | 4.79209 |
| MIR1912   | 4.2654  | 4.32895 | 4.25717 | 4.31748 | 4.87092 | 4.71369 | 3.90318 | 5.03111 | 4.70514 |
| MIR1298   | 4.12101 | 3.99719 | 3.59679 | 4.57851 | 4.5272  | 4.72879 | 3.8343  | 3.97892 | 4.39148 |

|          |         |         |         |         |         |         |         |         |         |
|----------|---------|---------|---------|---------|---------|---------|---------|---------|---------|
| MIR1911  | 6.18813 | 6.24531 | 6.25755 | 6.57436 | 7.46463 | 6.4139  | 6.2892  | 6.2635  | 6.57145 |
| MIR448   | 3.98149 | 3.90803 | 3.83488 | 4.62061 | 4.60272 | 4.86689 | 4.83532 | 4.92249 | 4.45812 |
| LUZP4    | 4.0305  | 4.78511 | 4.1218  | 4.71586 | 4.37746 | 4.65789 | 4.81848 | 4.25467 | 4.72654 |
| PLS3     | 10.8055 | 10.5452 | 10.6893 | 10.97   | 9.92522 | 11.6117 | 11.3825 | 11.3526 | 11.1962 |
| WDR44    | 7.98076 | 8.02621 | 7.61454 | 7.73394 | 5.18904 | 8.12926 | 8.17273 | 8.39729 | 8.75544 |
| DOCK11   | 7.28442 | 7.26679 | 8.48682 | 8.06992 | 5.16819 | 6.70699 | 8.28896 | 6.83606 | 6.99318 |
| LONRF3   | 5.36272 | 5.64925 | 5.35672 | 5.36671 | 5.37769 | 5.35727 | 5.07608 | 5.56167 | 5.42343 |
| PGRMC1   | 10.6409 | 10.4416 | 10.9167 | 10.3013 | 8.08528 | 9.6309  | 10.2856 | 9.8331  | 9.99129 |
| UBE2A    | 9.67783 | 9.37049 | 9.60071 | 9.63531 | 8.16925 | 9.33889 | 10.1626 | 9.30082 | 9.95054 |
| SOWAHD   | 5.77327 | 5.67299 | 5.84595 | 6.29452 | 6.29887 | 7.08287 | 6.18886 | 6.31621 | 6.48799 |
| RPL39    | 8.26393 | 7.84709 | 7.85579 | 9.48017 | 11.1059 | 10.0297 | 9.6782  | 7.7787  | 8.1889  |
| AKAP14   | 3.53876 | 3.42567 | 3.47087 | 3.58196 | 4.01841 | 3.8732  | 3.67    | 3.72936 | 3.73471 |
| ZBTB33   | 8.7555  | 8.27645 | 8.12084 | 7.11168 | 5.98109 | 6.82733 | 7.60724 | 6.88156 | 7.49426 |
| MCTS1    | 5.1923  | 5.89509 | 5.27677 | 4.82176 | 4.69849 | 5.48754 | 4.75315 | 4.58572 | 5.1947  |
| GLUD2    | 5.43974 | 5.62348 | 5.67144 | 4.97054 | 4.70397 | 5.76629 | 5.38577 | 5.66288 | 5.37627 |
| MIR3672  | 2.04016 | 1.9662  | 1.8621  | 2.20484 | 1.74322 | 2.68443 | 2.40489 | 1.87087 | 2.05678 |
| XIAP     | 6.50886 | 6.44211 | 6.64831 | 6.33472 | 6.22408 | 6.91719 | 7.04645 | 6.64063 | 6.79922 |
| STAG2    | 9.04517 | 9.05935 | 8.88801 | 8.3872  | 5.52727 | 8.48377 | 8.64501 | 7.75728 | 8.1053  |
| SH2D1A   | 4.45381 | 4.57485 | 4.99527 | 4.84317 | 5.33198 | 5.59077 | 5.01037 | 4.83391 | 4.93302 |
| TEX13C   | 4.58972 | 4.94909 | 4.65658 | 5.29115 | 4.93658 | 5.26933 | 4.7486  | 4.8927  | 5.20506 |
| PRR32    | 4.99723 | 4.97558 | 4.90575 | 5.21003 | 5.01281 | 5.35559 | 4.95712 | 5.22503 | 5.02315 |
| OCRL     | 8.1925  | 8.48108 | 8.29011 | 7.38221 | 5.41117 | 7.50817 | 7.62554 | 7.57723 | 7.55155 |
| SASH3    | 5.76922 | 5.63945 | 6.0669  | 5.9941  | 6.08321 | 6.18151 | 6.00739 | 6.26433 | 6.26334 |
| BCORL1   | 6.6097  | 6.54962 | 6.08924 | 6.38124 | 5.95866 | 6.72531 | 6.53054 | 6.90908 | 7.0501  |
| ARHGAP36 | 5.0224  | 5.23786 | 5.68368 | 6.14333 | 5.95076 | 6.38126 | 5.8166  | 6.11101 | 6.47474 |
| STK26    | 8.63025 | 8.78705 | 8.59539 | 9.4737  | 6.65208 | 9.57932 | 9.57405 | 8.75618 | 9.27564 |

|             |         |         |         |         |         |         |         |         |         |
|-------------|---------|---------|---------|---------|---------|---------|---------|---------|---------|
| HS6ST2-AS1  | 5.50853 | 5.34757 | 5.29179 | 5.7307  | 5.93714 | 6.06311 | 5.53285 | 5.61088 | 5.6982  |
| CCDC160     | 3.85148 | 4.48007 | 4.29619 | 4.21894 | 5.11029 | 4.49166 | 4.34476 | 4.48398 | 3.9135  |
| PHF6        | 7.42809 | 7.53148 | 7.36619 | 6.90996 | 4.38204 | 5.78002 | 6.90189 | 6.38698 | 6.4859  |
| HPRT1       | 7.24031 | 7.08406 | 7.42892 | 8.05779 | 4.61007 | 8.06631 | 8.22008 | 6.86964 | 7.27513 |
| LINC00629   | 4.85953 | 5.16297 | 4.83484 | 5.43162 | 5.09818 | 5.14915 | 5.23383 | 5.2298  | 5.09973 |
| FAM122C     | 7.0229  | 6.92557 | 6.58846 | 6.06372 | 6.19259 | 6.14218 | 6.39018 | 6.26486 | 6.29061 |
| SMIM10      | 6.14604 | 6.42932 | 6.55159 | 6.35304 | 5.55777 | 6.31868 | 5.77978 | 6.35711 | 6.20444 |
| ZNF449      | 6.40251 | 6.46956 | 6.11284 | 5.70783 | 4.34318 | 3.935   | 5.32204 | 5.30986 | 5.569   |
| Smim10l2a   | 6.03839 | 6.23829 | 6.38797 | 5.1648  | 5.57    | 4.77104 | 5.72924 | 5.63871 | 5.43841 |
| INTS6L      | 7.8787  | 7.97326 | 7.49749 | 6.64176 | 4.80243 | 5.37913 | 6.3506  | 6.45892 | 6.51117 |
| SAGE1       | 4.44167 | 4.45957 | 4.20277 | 4.81092 | 4.88359 | 4.86646 | 4.43464 | 4.81138 | 4.72065 |
| MMGT1       | 6.29857 | 6.38622 | 6.88039 | 6.23759 | 5.44367 | 6.73721 | 6.89892 | 6.2468  | 6.64601 |
| FHL1        | 7.31166 | 6.82672 | 7.80265 | 6.91818 | 8.58558 | 6.84593 | 6.70245 | 6.85542 | 7.1553  |
| ADGRG4      | 4.39831 | 4.66384 | 4.87246 | 4.76402 | 5.18809 | 4.9351  | 4.49605 | 4.9659  | 4.85994 |
| BRS3        | 4.12384 | 4.82576 | 4.4066  | 4.34999 | 5.49745 | 5.15407 | 4.66861 | 4.84792 | 4.92736 |
| HTATSF1     | 7.54039 | 7.67391 | 7.29828 | 7.41282 | 5.17655 | 6.84816 | 7.70735 | 6.92447 | 6.93988 |
| VGLL1       | 6.09298 | 6.06452 | 6.02743 | 6.60099 | 7.28332 | 6.94893 | 6.3163  | 7.67622 | 7.28893 |
| MIR934      | 2.98354 | 3.19115 | 3.05532 | 5.61644 | 2.88074 | 4.79674 | 4.42916 | 3.57987 | 4.04498 |
| LINC00892   | 4.85024 | 4.94203 | 4.97409 | 4.54411 | 5.24428 | 5.29873 | 4.91474 | 4.60221 | 4.7835  |
| CD40LG      | 4.09749 | 4.79595 | 4.48519 | 4.57408 | 3.8062  | 4.66707 | 4.6686  | 4.53471 | 4.05419 |
| ZIC3        | 3.92138 | 4.27478 | 4.19646 | 4.8971  | 5.17231 | 4.86232 | 4.83535 | 4.47328 | 4.74412 |
| FGF13-AS1   | 4.34449 | 3.94566 | 4.12458 | 4.30007 | 5.47892 | 4.1348  | 4.47618 | 4.04182 | 4.41114 |
| F9          | 3.53384 | 4.12177 | 3.9566  | 4.79079 | 5.08789 | 4.65509 | 4.1194  | 4.38972 | 4.37227 |
| LINC00632   | 5.60155 | 5.47013 | 5.68017 | 5.41248 | 5.66182 | 5.13088 | 4.73389 | 4.98606 | 5.08346 |
| SPANXA2-OT1 | 3.84993 | 4.0692  | 4.02394 | 4.0457  | 4.41564 | 4.64944 | 3.7834  | 3.9534  | 4.28983 |
| UBE2NL      | 4.67336 | 4.83626 | 4.76717 | 5.31439 | 5.23849 | 5.6854  | 5.42868 | 5.897   | 5.35549 |



|           |         |         |         |         |         |         |         |         |         |
|-----------|---------|---------|---------|---------|---------|---------|---------|---------|---------|
| TMEM257   | 4.24077 | 4.84353 | 4.49081 | 3.91653 | 3.95335 | 4.04058 | 4.28768 | 3.79718 | 3.65953 |
| CXorf51A  | 5.91858 | 5.62407 | 5.86155 | 6.05129 | 6.48359 | 6.31566 | 5.93329 | 6.19149 | 6.107   |
| FMR1      | 8.9373  | 9.26    | 9.02273 | 8.40589 | 6.15129 | 8.47213 | 8.6164  | 9.03943 | 8.32815 |
| FMR1NB    | 4.61177 | 4.92897 | 4.85107 | 5.27251 | 5.0908  | 5.21679 | 5.06663 | 5.08064 | 4.84374 |
| cxorf40a  | 5.93943 | 5.69177 | 5.88569 | 6.02753 | 6.3327  | 6.47791 | 6.22806 | 6.29386 | 6.22877 |
| LINC00894 | 6.37243 | 6.45269 | 6.00249 | 6.02193 | 4.50656 | 5.22803 | 5.17923 | 5.45039 | 5.6487  |
| MIR2114   | 4.64797 | 4.48664 | 4.33714 | 5.8557  | 5.07383 | 5.26589 | 5.22424 | 5.57816 | 4.95835 |
| MAMLD1    | 6.64716 | 6.02406 | 6.89732 | 5.9182  | 5.30132 | 6.1261  | 6.10206 | 6.37648 | 5.9904  |
| MTM1      | 8.02488 | 8.06314 | 7.97125 | 8.14411 | 5.15101 | 8.22254 | 8.38691 | 9.385   | 8.77306 |
| MTMR1     | 8.82313 | 8.78467 | 8.60487 | 8.14299 | 6.23874 | 8.335   | 8.36181 | 7.78661 | 8.17934 |
| HMGB3     | 5.90247 | 6.44929 | 6.29345 | 6.5831  | 6.42367 | 6.60485 | 6.88141 | 6.51695 | 6.32924 |
| MIR4330   | 5.93426 | 5.72783 | 5.7641  | 6.53683 | 6.12025 | 6.1692  | 5.96534 | 5.97968 | 6.0487  |
| GPR50     | 5.02555 | 5.01163 | 5.41997 | 5.9976  | 6.532   | 6.31177 | 5.49651 | 6.56245 | 6.18729 |
| VMA21     | 7.13549 | 7.12925 | 7.13603 | 7.4291  | 5.8492  | 7.12296 | 7.33291 | 7.02833 | 7.15055 |
| PASD1     | 3.874   | 4.04654 | 4.04296 | 4.21164 | 4.24741 | 4.94843 | 4.49686 | 4.24835 | 4.3986  |
| PRRG3     | 5.45171 | 5.70457 | 5.48952 | 5.86621 | 5.6574  | 5.88765 | 5.70703 | 6.03385 | 5.73374 |
| FATE1     | 5.26804 | 5.46962 | 5.32533 | 6.03052 | 5.85867 | 5.87796 | 5.52675 | 5.82599 | 5.80786 |
| CNGA2     | 5.55431 | 5.32721 | 5.35836 | 5.69234 | 6.40501 | 6.025   | 5.9684  | 5.46792 | 5.71825 |
| CSAG1     | 5.7425  | 5.7091  | 6.10329 | 6.5688  | 6.5171  | 6.68166 | 5.77029 | 6.30164 | 6.09358 |
| NSDHL     | 9.32825 | 8.57988 | 8.86336 | 9.20703 | 8.08734 | 10.1204 | 9.88119 | 9.32786 | 9.92211 |
| ZNF185    | 9.20773 | 9.21291 | 8.92617 | 10.515  | 8.4585  | 11.4236 | 10.5169 | 10.7914 | 11.2469 |
| PNMA3     | 6.42596 | 6.77564 | 6.98589 | 7.31456 | 7.80078 | 7.79006 | 7.14053 | 7.12047 | 7.30172 |
| ZNF275    | 6.72759 | 6.743   | 7.09508 | 6.56771 | 6.18418 | 6.79904 | 6.43559 | 6.80861 | 6.43785 |
| ZFP92     | 4.75247 | 4.89179 | 4.59477 | 5.75621 | 5.35712 | 6.82248 | 5.98882 | 6.20236 | 6.19863 |
| BGN       | 10.6167 | 9.35602 | 10.0715 | 9.98845 | 7.52464 | 8.23226 | 9.47764 | 8.42968 | 9.26067 |
| DUSP9     | 5.60664 | 5.765   | 5.90695 | 6.28895 | 5.49139 | 6.47625 | 6.14152 | 6.19508 | 6.27684 |

|           |         |         |         |         |         |         |         |         |         |
|-----------|---------|---------|---------|---------|---------|---------|---------|---------|---------|
| PLXNB3    | 6.34416 | 6.47919 | 6.19386 | 6.801   | 6.01396 | 7.91016 | 6.59037 | 6.72757 | 6.48925 |
| SRPK3     | 6.00434 | 6.27607 | 6.19284 | 6.80735 | 6.69988 | 7.30008 | 6.76702 | 7.01251 | 6.63641 |
| AVPR2     | 5.52334 | 5.74188 | 5.97634 | 5.21884 | 6.2189  | 5.83167 | 5.71098 | 6.02397 | 5.82814 |
| tmem187   | 6.58221 | 6.60661 | 6.39883 | 6.53502 | 6.44402 | 6.90096 | 6.7015  | 6.46868 | 6.67088 |
| MIR3202-1 | 2.45185 | 2.19229 | 1.71736 | 1.96974 | 1.69593 | 2.14974 | 1.81816 | 1.75992 | 1.88399 |
| TKTL1     | 5.30165 | 5.76259 | 5.65325 | 5.98108 | 6.22408 | 6.01547 | 5.22146 | 5.95672 | 5.72412 |
| EMD       | 8.6358  | 7.95844 | 8.56787 | 8.75317 | 8.2357  | 9.54008 | 8.86669 | 8.91964 | 9.07095 |
| TAZ       | 7.24199 | 7.39234 | 7.24083 | 7.37009 | 6.55207 | 6.90726 | 7.06531 | 6.95962 | 6.97059 |
| GDI1      | 7.94636 | 7.70723 | 7.78822 | 8.10478 | 7.46847 | 8.40734 | 7.78184 | 8.82587 | 8.38643 |
| PLXNA3    | 7.45081 | 7.6681  | 7.14663 | 6.6678  | 6.3877  | 7.96828 | 7.22657 | 7.39447 | 7.86116 |
| CTAG1A    | 5.74445 | 5.99131 | 6.09734 | 6.49644 | 6.75323 | 6.21386 | 6.08652 | 6.37798 | 6.32113 |
| f8a1      | 10.1692 | 9.80427 | 11.2303 | 9.94279 | 8.47001 | 8.45557 | 10.5023 | 7.93683 | 9.26944 |
| FUNDC2    | 6.00669 | 6.03576 | 6.14617 | 6.62171 | 6.63454 | 6.648   | 6.22431 | 6.0658  | 5.99384 |
| VBP1      | 6.11895 | 5.99234 | 6.09909 | 6.6675  | 5.64397 | 6.48706 | 7.03644 | 5.62208 | 6.84679 |
| SPRY3     | 6.61576 | 6.35669 | 6.72975 | 6.18018 | 7.16941 | 6.60259 | 6.30377 | 6.98366 | 6.57603 |
| VAMP7     | 9.84592 | 9.4333  | 9.86859 | 9.23209 | 7.48025 | 9.57268 | 9.67776 | 9.61776 | 9.75842 |
| GTPBP6    | 7.03386 | 7.36922 | 7.13471 | 7.0691  | 5.44844 | 6.27954 | 7.39199 | 6.38063 | 6.83654 |
| CRLF2     | 5.11888 | 5.13116 | 5.47344 | 5.84718 | 5.98525 | 6.3229  | 5.26101 | 5.59779 | 5.92782 |
| LINC00102 | 3.90247 | 3.78803 | 3.55384 | 4.04752 | 3.84417 | 4.34795 | 4.46641 | 4.36106 | 3.79673 |
| ARSE      | 4.79233 | 4.81227 | 4.78522 | 5.50364 | 5.68991 | 5.30109 | 5.35242 | 5.09975 | 5.0143  |
| MXRA5     | 10.2593 | 9.44477 | 9.28028 | 7.84681 | 5.77654 | 6.48961 | 8.28354 | 6.76637 | 6.71212 |
| LOC389906 | 6.95693 | 7.35882 | 6.74705 | 5.9778  | 4.68205 | 5.22297 | 5.98919 | 5.5419  | 5.83543 |
| MIR4770   | 2.42395 | 2.15493 | 1.96271 | 2.75071 | 2.78902 | 2.6208  | 3.8616  | 3.06846 | 3.04838 |
| PUDP      | 7.4773  | 7.01544 | 6.62932 | 6.79735 | 6.12314 | 6.36022 | 6.84195 | 6.4256  | 6.89802 |
| PNPLA4    | 8.68716 | 7.95755 | 7.86573 | 8.01992 | 7.29677 | 7.56143 | 8.24434 | 7.52329 | 7.78383 |
| ANOS1     | 8.36606 | 7.09609 | 7.28517 | 7.25512 | 6.45596 | 5.77427 | 7.29967 | 6.42862 | 6.68056 |

|           |         |         |         |         |         |         |         |         |         |
|-----------|---------|---------|---------|---------|---------|---------|---------|---------|---------|
| GPR143    | 6.8628  | 5.78898 | 5.94382 | 5.37684 | 6.01901 | 6.0356  | 5.80554 | 5.76533 | 5.67555 |
| MID1      | 8.2267  | 7.77039 | 8.02493 | 7.70958 | 7.19712 | 7.15218 | 7.64327 | 7.87387 | 8.10261 |
| ARHGAP6   | 6.32514 | 6.40853 | 7.09485 | 6.2286  | 5.25851 | 6.02238 | 5.92728 | 5.33085 | 5.6494  |
| TLR8-AS1  | 4.46654 | 4.60627 | 4.37044 | 4.33758 | 5.04075 | 4.06814 | 3.78806 | 4.69926 | 4.28866 |
| ATXN3L    | 3.69297 | 4.39977 | 3.89854 | 4.19785 | 5.04135 | 4.32387 | 4.4045  | 4.79838 | 4.13955 |
| TRAPPC2   | 7.08556 | 6.81741 | 7.05721 | 6.21793 | 5.42451 | 6.27889 | 6.11218 | 6.59452 | 6.4367  |
| GPM6B     | 6.87249 | 6.59952 | 6.81456 | 6.99231 | 6.35708 | 6.65113 | 6.80684 | 6.59371 | 6.44808 |
| gemin8    | 6.87752 | 6.66812 | 6.84683 | 6.37499 | 5.60871 | 6.3391  | 6.64432 | 5.62518 | 6.24082 |
| ASB9      | 5.60748 | 5.66442 | 5.64705 | 5.5205  | 5.89697 | 5.77816 | 5.53345 | 5.47716 | 5.47721 |
| ASB11     | 3.93779 | 3.82839 | 3.82393 | 4.22578 | 3.64011 | 3.80194 | 4.06684 | 3.62438 | 3.89699 |
| PIR-FIGF  | 6.21714 | 7.00606 | 6.52605 | 5.34855 | 4.18659 | 4.68171 | 6.08692 | 4.5338  | 5.40793 |
| ACE2      | 4.74016 | 4.99453 | 4.52277 | 4.9244  | 4.64915 | 4.93149 | 5.66926 | 4.762   | 5.44248 |
| TMEM27    | 3.85407 | 4.36126 | 4.18085 | 3.98044 | 3.87782 | 3.90725 | 4.0057  | 4.1712  | 3.91567 |
| CTPS2     | 8.15967 | 7.9555  | 7.84577 | 6.62274 | 5.37234 | 5.77175 | 6.48368 | 6.0903  | 6.1695  |
| RBBP7     | 8.45092 | 8.17107 | 8.44802 | 8.22458 | 5.65493 | 7.53329 | 8.06363 | 7.24623 | 7.5547  |
| RAI2      | 6.82377 | 6.96336 | 7.08062 | 6.67124 | 6.71831 | 6.79046 | 6.64918 | 6.88158 | 6.82432 |
| BEND2     | 4.7816  | 4.72665 | 4.7816  | 5.07152 | 5.27199 | 4.89876 | 4.99799 | 5.08514 | 5.08571 |
| SCML2     | 5.70068 | 5.98882 | 5.46493 | 4.99467 | 4.96608 | 5.04338 | 5.01622 | 4.81932 | 4.96231 |
| RS1       | 3.61965 | 3.97667 | 3.97285 | 4.12463 | 4.35369 | 4.66322 | 4.15291 | 4.45294 | 4.48478 |
| ADGRG2    | 5.55551 | 5.37344 | 5.67997 | 5.42914 | 5.66412 | 5.56634 | 5.27086 | 5.22277 | 5.14785 |
| MAP3K15   | 4.71674 | 4.46239 | 4.59739 | 5.55621 | 5.23065 | 5.39434 | 5.24324 | 4.88346 | 5.19326 |
| SH3KBP1   | 7.23254 | 7.09379 | 7.3746  | 6.73213 | 6.29582 | 6.98696 | 7.37345 | 7.54189 | 7.8263  |
| cxorf23   | 7.57932 | 8.18544 | 7.53411 | 6.20841 | 5.02631 | 6.35122 | 6.69886 | 5.84026 | 6.76464 |
| LOC729609 | 5.6011  | 5.65497 | 5.6973  | 5.2197  | 5.3343  | 4.57315 | 4.85669 | 4.8454  | 5.35336 |
| MAP7D2    | 5.25494 | 6.1508  | 5.89971 | 6.47849 | 5.71842 | 5.85108 | 5.96065 | 5.53253 | 5.91748 |
| MIR23C    | 4.0732  | 4.23003 | 3.89839 | 4.15044 | 4.44706 | 3.6911  | 3.66082 | 3.60919 | 3.77727 |

|              |         |         |         |         |         |         |         |         |         |
|--------------|---------|---------|---------|---------|---------|---------|---------|---------|---------|
| SCARNA9L     | 6.9869  | 5.57841 | 5.43239 | 6.54724 | 3.00547 | 5.09767 | 6.5213  | 5.61565 | 4.62275 |
| KLHL34       | 4.75036 | 5.18476 | 4.93169 | 6.0003  | 6.01228 | 6.30566 | 5.28931 | 5.93476 | 5.41587 |
| PHEX-AS1     | 3.89375 | 4.16079 | 4.08392 | 4.58277 | 4.86829 | 4.30852 | 3.7686  | 4.06765 | 4.24785 |
| PTCHD1-AS    | 4.1194  | 4.06739 | 4.71318 | 4.26321 | 5.53048 | 4.60692 | 4.41935 | 4.21763 | 4.41192 |
| ACOT9        | 7.95098 | 8.01816 | 8.23444 | 8.28368 | 6.63801 | 8.12079 | 8.5726  | 8.46678 | 8.87165 |
| APOO         | 7.10093 | 7.49303 | 7.78401 | 7.29873 | 5.16061 | 6.53265 | 8.02441 | 6.60113 | 7.25494 |
| KLHL15       | 6.81429 | 6.75405 | 6.7947  | 6.34254 | 4.91067 | 6.21888 | 6.62724 | 5.38864 | 6.04576 |
| ZFX-AS1      | 3.53631 | 2.75998 | 3.46782 | 3.35294 | 3.36813 | 3.32736 | 3.34786 | 3.20014 | 3.80274 |
| ARX          | 7.1836  | 7.1807  | 7.26961 | 7.89516 | 7.40752 | 8.78468 | 8.11561 | 8.03194 | 8.19366 |
| DCAF8L1      | 4.59443 | 4.95422 | 4.58829 | 5.39804 | 5.10589 | 5.38431 | 5.14862 | 5.02952 | 5.22932 |
| cxorf21      | 4.26798 | 4.06181 | 4.76889 | 4.07865 | 4.17228 | 4.39936 | 4.21666 | 4.22781 | 3.81113 |
| DMD          | 7.00152 | 7.38796 | 7.13201 | 5.49472 | 5.76032 | 5.75038 | 5.59788 | 5.79539 | 5.824   |
| MIR3915      | 3.38864 | 3.23053 | 2.86106 | 3.42993 | 3.11828 | 3.62675 | 3.39725 | 3.44238 | 3.49301 |
| TMEM47       | 9.43781 | 8.45196 | 9.74301 | 7.64619 | 5.98347 | 6.19763 | 7.6248  | 7.46772 | 8.16999 |
| RPGR         | 7.84137 | 7.98259 | 8.48262 | 6.90742 | 5.95421 | 7.58125 | 7.95879 | 8.91082 | 7.72068 |
| LINC01281    | 4.86567 | 4.73259 | 4.91105 | 5.38801 | 6.11844 | 5.08423 | 5.34057 | 5.09653 | 5.21821 |
| BCOR         | 7.79065 | 8.13634 | 7.80625 | 7.00821 | 6.31992 | 7.66978 | 7.85513 | 7.65699 | 7.56122 |
| cxorf38      | 6.58097 | 6.88555 | 6.94761 | 6.17478 | 5.65358 | 6.12795 | 6.54532 | 6.96565 | 6.53469 |
| MED14        | 9.29723 | 9.39676 | 9.5362  | 8.76796 | 6.16927 | 8.3858  | 9.0402  | 9.75687 | 9.72132 |
| LOC100132831 | 6.03365 | 6.12702 | 6.32925 | 7.10733 | 6.5184  | 6.50751 | 6.53274 | 6.98141 | 6.88206 |
| MAOB         | 6.63016 | 5.28202 | 6.90483 | 5.50863 | 4.37317 | 4.76614 | 5.72554 | 4.96811 | 4.41473 |
| ndp          | 5.36754 | 5.19214 | 5.36333 | 5.42502 | 5.75665 | 5.76425 | 5.74026 | 5.61033 | 6.05439 |
| EFHC2        | 6.71639 | 5.75738 | 5.90855 | 4.75479 | 4.61461 | 4.83647 | 5.57421 | 4.41439 | 4.57759 |
| FUNDC1       | 7.28937 | 7.1748  | 6.92018 | 7.15922 | 5.72805 | 7.30111 | 7.70205 | 6.78338 | 6.94896 |
| CXorf36      | 7.33392 | 6.81842 | 7.49867 | 6.45008 | 6.57033 | 6.15184 | 6.59633 | 6.82982 | 6.93276 |
| MIR221       | 9.13428 | 9.15273 | 8.86492 | 7.11377 | 4.87653 | 4.34005 | 6.17465 | 8.22841 | 8.79159 |

|            |         |         |         |         |         |         |         |         |         |
|------------|---------|---------|---------|---------|---------|---------|---------|---------|---------|
| Mir222     | 6.93386 | 6.05655 | 5.97335 | 5.68557 | 5.75454 | 5.85425 | 5.72261 | 6.40645 | 6.00472 |
| ZNF674     | 6.15572 | 6.66651 | 6.33274 | 5.90797 | 5.68287 | 4.9443  | 5.7153  | 5.69164 | 5.83725 |
| LINC01545  | 4.36008 | 4.20918 | 4.34524 | 4.94639 | 5.13967 | 4.75893 | 4.48673 | 4.2727  | 4.27873 |
| ZNF41      | 6.80948 | 6.87245 | 6.97809 | 5.85238 | 4.96652 | 5.45261 | 6.06364 | 5.51497 | 5.7408  |
| SYN1       | 5.79284 | 5.42715 | 5.61658 | 6.05933 | 5.48204 | 6.30604 | 5.58554 | 5.93207 | 5.75063 |
| CFP        | 5.79061 | 6.08927 | 5.87184 | 6.27636 | 6.21653 | 6.64686 | 6.27619 | 6.09079 | 6.27935 |
| ZNF182     | 6.43554 | 7.05287 | 6.50772 | 6.62035 | 6.54793 | 6.28954 | 6.33612 | 6.31057 | 6.58935 |
| PCSK1N     | 6.34329 | 6.40337 | 6.52646 | 6.84163 | 6.759   | 7.0831  | 6.89236 | 6.83479 | 6.6707  |
| TIMM17B    | 6.99496 | 6.95792 | 7.34389 | 6.79438 | 5.93856 | 6.65991 | 7.18399 | 6.76175 | 6.85286 |
| PIM2       | 6.35464 | 5.62316 | 6.03393 | 5.87923 | 6.09504 | 6.21946 | 6.08212 | 6.2633  | 5.8713  |
| OTUD5      | 8.09846 | 7.82177 | 7.86194 | 8.03971 | 6.86698 | 8.18675 | 8.2113  | 8.07117 | 8.12747 |
| GRIPAP1    | 7.42433 | 7.52329 | 7.33787 | 7.06165 | 6.15858 | 6.78645 | 7.28941 | 6.8286  | 7.08481 |
| TFE3       | 8.9218  | 8.47345 | 8.60404 | 8.94967 | 7.07336 | 9.67842 | 9.20133 | 9.40934 | 9.54924 |
| WDR45      | 8.20227 | 7.64897 | 7.59089 | 7.90669 | 7.66115 | 7.78524 | 8.0604  | 8.32068 | 8.13099 |
| GPKOW      | 7.86695 | 7.94966 | 7.83391 | 7.75152 | 6.73505 | 7.72513 | 8.35109 | 7.18402 | 7.57614 |
| PRICKLE3   | 6.89695 | 6.76731 | 6.77939 | 7.26051 | 6.54618 | 7.28136 | 7.46174 | 7.10247 | 7.42431 |
| FOXP3      | 6.42966 | 6.73895 | 6.53036 | 6.89245 | 7.07434 | 6.98908 | 6.88203 | 6.82311 | 6.61428 |
| USP27X-AS1 | 4.40728 | 4.37673 | 4.37705 | 4.55911 | 4.54055 | 4.84899 | 4.26688 | 4.53473 | 4.58202 |
| AKAP4      | 5.13604 | 5.5232  | 5.08693 | 5.59737 | 5.33539 | 5.66426 | 5.50725 | 5.4805  | 5.20104 |
| SHROOM4    | 6.95064 | 6.64541 | 7.39544 | 6.32093 | 6.42729 | 6.33403 | 6.39711 | 6.71248 | 6.86736 |
| NUDT11     | 5.20591 | 5.03708 | 4.99514 | 4.83871 | 5.25132 | 4.59545 | 5.83342 | 4.59233 | 4.95793 |
| KDM5C      | 6.90393 | 6.94045 | 6.57702 | 6.52194 | 5.6355  | 6.9016  | 6.69469 | 6.65586 | 7.03444 |
| IQSEC2     | 6.27989 | 6.5862  | 6.4307  | 6.68447 | 6.25573 | 6.47107 | 6.89968 | 6.62458 | 6.58787 |
| SMC1A      | 8.74334 | 8.32114 | 8.38142 | 7.63431 | 5.79603 | 7.1597  | 7.80196 | 7.31928 | 7.72715 |
| HSD17B10   | 8.79918 | 9.02094 | 8.96689 | 9.67722 | 7.1268  | 8.77514 | 9.91338 | 7.98259 | 8.82722 |
| Mir98      | 6.53925 | 6.58762 | 6.65883 | 6.93516 | 7.68103 | 6.74297 | 6.26518 | 6.57802 | 6.65909 |

|           |         |         |         |         |         |         |         |         |         |
|-----------|---------|---------|---------|---------|---------|---------|---------|---------|---------|
| MIRLET7F2 | 1.8621  | 1.99397 | 1.9052  | 2.182   | 1.76963 | 2.04275 | 2.04597 | 1.8074  | 1.86972 |
| PHF8      | 7.33796 | 7.46974 | 7.21741 | 6.64132 | 5.67581 | 6.18439 | 6.57646 | 6.39618 | 6.07349 |
| FAM120C   | 6.90515 | 7.21256 | 7.49515 | 5.97129 | 5.36733 | 5.70307 | 5.95466 | 5.91463 | 5.89848 |
| WNK3      | 4.54653 | 4.59319 | 5.17144 | 4.29046 | 4.42047 | 3.63718 | 4.72653 | 4.91727 | 4.9141  |
| MTRNR2L10 | 4.21961 | 4.65394 | 4.31387 | 4.92791 | 5.92665 | 4.56619 | 5.32479 | 4.19878 | 5.17084 |
| USP51     | 5.46935 | 5.53611 | 5.57178 | 5.53512 | 5.27566 | 5.47636 | 5.43858 | 5.51795 | 5.32519 |
| UQCRBP1   | 5.9051  | 5.85708 | 5.64643 | 6.08253 | 6.66579 | 6.07182 | 6.27104 | 5.74051 | 6.42259 |
| LINC01278 | 8.13658 | 8.45084 | 8.06795 | 6.65685 | 5.54505 | 6.26193 | 7.25631 | 5.9598  | 6.92188 |
| ARHGEF9   | 8.36532 | 8.60969 | 8.53619 | 6.78197 | 6.62066 | 6.37464 | 7.01897 | 6.29907 | 6.44741 |
| MIR1468   | 5.98882 | 5.92482 | 5.82589 | 5.89818 | 7.38603 | 5.30466 | 5.00911 | 6.36836 | 5.94133 |
| AMER1     | 7.11516 | 6.97514 | 6.92113 | 6.14591 | 6.10683 | 6.41559 | 6.34321 | 5.69399 | 5.69221 |
| ASB12     | 4.82148 | 5.01694 | 4.9174  | 4.94006 | 5.4494  | 5.39549 | 5.15605 | 4.9991  | 5.059   |
| MTMR8     | 6.82781 | 6.72568 | 6.77623 | 5.49458 | 5.82635 | 6.01624 | 5.83504 | 5.46177 | 5.74661 |
| LAS1L     | 7.59128 | 7.66828 | 7.76808 | 7.36539 | 5.51235 | 7.07112 | 8.0127  | 6.97017 | 7.29476 |
| FRMD8P1   | 6.96925 | 6.96626 | 7.11984 | 7.56918 | 7.39948 | 8.08331 | 7.60738 | 8.12727 | 7.5367  |
| VSIG4     | 6.29968 | 6.21687 | 7.41854 | 6.06345 | 6.43804 | 5.79943 | 6.19198 | 5.84875 | 6.07271 |
| EDA2R     | 6.51374 | 6.94696 | 6.82977 | 5.59769 | 6.25641 | 6.6961  | 5.82436 | 6.27212 | 6.55835 |
| OPHN1     | 8.09683 | 8.37352 | 7.96955 | 6.50647 | 5.18778 | 6.09906 | 6.17055 | 7.34574 | 5.74574 |
| AWAT2     | 5.19926 | 5.50164 | 5.26975 | 5.67511 | 6.13204 | 5.91372 | 5.47112 | 5.73841 | 5.7509  |
| PDZD11    | 8.89606 | 8.71    | 8.66723 | 9.07904 | 7.99508 | 9.07567 | 9.39086 | 9.0226  | 9.54581 |
| TEX11     | 3.64875 | 3.64556 | 3.78349 | 3.67157 | 4.09094 | 4.01389 | 3.80519 | 4.12292 | 4.16887 |
| SNX12     | 8.41013 | 8.32599 | 8.31908 | 8.94869 | 6.75587 | 8.43688 | 9.16731 | 7.82844 | 8.55947 |
| CXorf65   | 4.79747 | 4.99633 | 5.0932  | 4.7867  | 5.14332 | 5.21268 | 5.02575 | 4.7618  | 4.74608 |
| CXCR3     | 4.92076 | 5.30621 | 4.74458 | 5.85289 | 5.23978 | 6.34282 | 5.17602 | 5.62221 | 5.61841 |
| Rgag4     | 5.33852 | 5.50955 | 5.42739 | 5.70091 | 5.37408 | 5.96893 | 5.56723 | 5.69461 | 5.50682 |
| HDAC8     | 7.44074 | 7.14875 | 7.19787 | 6.15973 | 5.01568 | 5.77646 | 6.59627 | 6.37916 | 6.52817 |

|          |         |         |         |         |         |         |         |         |         |
|----------|---------|---------|---------|---------|---------|---------|---------|---------|---------|
| NAP1L6   | 5.39686 | 5.42391 | 5.28393 | 5.5077  | 6.07754 | 6.00082 | 5.63034 | 5.68515 | 5.70808 |
| NAP1L2   | 5.6982  | 5.93208 | 5.81425 | 4.98395 | 5.38955 | 4.39322 | 5.55528 | 4.75374 | 4.77665 |
| MAP2K4P1 | 4.83509 | 4.99517 | 5.26093 | 5.11118 | 5.87565 | 5.63396 | 5.3876  | 5.74778 | 5.2185  |
| Mir421   | 8.9145  | 10.1133 | 8.56898 | 7.85076 | 5.65089 | 5.98996 | 6.90142 | 7.21662 | 8.19914 |
| MIR545   | 5.76074 | 4.96174 | 6.07752 | 3.7785  | 4.90417 | 4.41384 | 3.82803 | 4.94486 | 5.26751 |
| MIR374A  | 3.9304  | 2.85627 | 3.73021 | 2.48732 | 2.20228 | 3.33952 | 3.06478 | 2.68937 | 2.94172 |
| KIAA2022 | 5.2677  | 5.38192 | 5.46672 | 4.41078 | 5.02655 | 4.63259 | 4.79196 | 3.97138 | 4.08376 |
| TTC3P1   | 7.87589 | 7.68989 | 7.58548 | 7.03048 | 6.85333 | 7.32638 | 6.87931 | 7.47319 | 7.60299 |
| Mir384   | 1.96152 | 1.88656 | 1.8855  | 2.1241  | 1.8324  | 2.90567 | 2.16757 | 1.81462 | 1.96315 |
| Mir325   | 3.7395  | 4.29726 | 3.53467 | 4.58776 | 4.44907 | 4.84537 | 4.30237 | 4.03402 | 4.02106 |
| ATRX     | 8.51334 | 8.50512 | 8.13201 | 6.90441 | 4.67905 | 6.331   | 7.22911 | 7.13012 | 7.2032  |
| MAGT1    | 8.7699  | 8.73477 | 8.86738 | 8.85061 | 6.95835 | 9.75479 | 9.18676 | 9.51128 | 9.04767 |
| PGAM4    | 7.78721 | 7.52544 | 8.12552 | 9.12512 | 7.95477 | 9.69396 | 9.15777 | 9.78987 | 9.27798 |
| CYSLTR1  | 5.49575 | 5.85355 | 5.99117 | 4.91489 | 4.27854 | 4.79222 | 4.98719 | 5.15723 | 4.78498 |
| MIR4328  | 3.57122 | 3.73549 | 3.52305 | 3.96408 | 6.20174 | 4.25769 | 4.08378 | 3.37693 | 3.98512 |
| ITM2A    | 7.37848 | 8.01072 | 8.57695 | 7.60641 | 6.03876 | 6.22675 | 7.47141 | 6.70391 | 7.19314 |
| BRWD3    | 9.13024 | 8.97893 | 8.79209 | 7.22558 | 5.65035 | 8.5117  | 7.74352 | 9.27301 | 7.89749 |
| HMGN5    | 6.09548 | 6.06051 | 5.98208 | 4.50739 | 4.90695 | 5.30988 | 5.41914 | 4.17702 | 4.73239 |
| MIR548I4 | 4.94054 | 5.25902 | 4.95611 | 4.52711 | 4.87192 | 4.60257 | 4.74272 | 4.73372 | 4.91656 |
| HDX      | 5.71356 | 5.28238 | 5.31674 | 5.12124 | 4.72435 | 5.22158 | 5.18008 | 5.15721 | 4.78509 |
| SATL1    | 6.01589 | 5.37491 | 5.43121 | 5.52503 | 5.26995 | 6.10416 | 6.23376 | 5.42898 | 5.59833 |
| CHM      | 7.5496  | 7.30767 | 7.37129 | 6.87586 | 4.33249 | 6.67789 | 6.49571 | 6.81658 | 7.18034 |
| Mir361   | 6.41786 | 6.06776 | 6.51358 | 4.42913 | 4.32234 | 3.6327  | 5.19396 | 4.51967 | 5.04113 |
| NAP1L3   | 6.27719 | 5.81851 | 6.35437 | 5.40597 | 5.00748 | 5.02354 | 5.94689 | 5.35739 | 5.03195 |
| MIR548M  | 3.75495 | 4.14346 | 3.93416 | 4.17489 | 3.30232 | 4.37309 | 4.70257 | 3.7508  | 4.06203 |
| XRCC6P5  | 4.78242 | 4.63616 | 4.36039 | 5.10659 | 5.14017 | 5.36007 | 5.51691 | 5.20341 | 4.90331 |

|           |         |         |         |         |         |         |         |         |         |
|-----------|---------|---------|---------|---------|---------|---------|---------|---------|---------|
| PCDH19    | 5.66439 | 5.85205 | 6.48388 | 5.54461 | 5.01664 | 5.71305 | 5.06966 | 5.47876 | 5.28541 |
| TSPAN6    | 7.85989 | 7.94675 | 7.83912 | 8.26485 | 6.12137 | 8.33724 | 8.3243  | 7.981   | 8.09128 |
| SYTL4     | 5.89424 | 6.18599 | 5.98422 | 5.34677 | 6.32453 | 5.75369 | 5.37426 | 5.97964 | 5.97872 |
| NOX1      | 6.6877  | 7.04986 | 6.82738 | 5.56264 | 5.80075 | 5.69421 | 5.67538 | 5.79095 | 5.7109  |
| TRMT2B    | 8.58247 | 8.55326 | 8.45686 | 7.7191  | 6.50334 | 7.05506 | 7.90508 | 7.62899 | 7.55433 |
| TIMM8A    | 7.30843 | 7.43615 | 7.1831  | 6.41452 | 5.9958  | 6.22226 | 7.1571  | 5.64627 | 5.90687 |
| BTK       | 6.58934 | 5.81558 | 6.48547 | 5.4321  | 5.70985 | 5.59079 | 6.37367 | 5.80576 | 6.00377 |
| NXF5      | 4.55769 | 4.78344 | 4.96338 | 4.7545  | 5.11418 | 5.20188 | 4.35899 | 4.99185 | 4.80475 |
| TCEAL6    | 4.03163 | 3.985   | 4.0272  | 4.30818 | 3.73391 | 4.20789 | 4.55688 | 4.22787 | 3.84089 |
| NXF2B     | 4.64346 | 4.8966  | 4.87093 | 4.80616 | 6.22081 | 5.23846 | 4.87273 | 5.07025 | 4.97624 |
| TMSB15A   | 2.28664 | 2.04086 | 2.12508 | 2.58399 | 2.8736  | 2.66384 | 2.06168 | 2.43485 | 3.051   |
| NXF3      | 5.51125 | 5.35169 | 5.10491 | 5.67074 | 5.9842  | 5.85493 | 5.38376 | 5.42841 | 5.53197 |
| TCEAL8    | 7.45818 | 7.0724  | 7.08965 | 7.42076 | 5.5626  | 6.61989 | 7.51122 | 6.82675 | 6.63647 |
| TCEAL5    | 5.65508 | 5.64859 | 5.79278 | 5.50268 | 5.74291 | 6.04845 | 5.90951 | 5.99386 | 5.83179 |
| BEX2      | 5.83832 | 5.64637 | 5.57314 | 5.13946 | 5.01325 | 5.84254 | 5.58115 | 5.81671 | 5.52969 |
| MORF4L2   | 9.34577 | 9.13683 | 9.27508 | 8.79798 | 6.43475 | 8.79334 | 9.13765 | 9.61586 | 9.30483 |
| LOC286437 | 7.51459 | 7.91356 | 7.36855 | 6.63237 | 5.27259 | 5.43662 | 7.08751 | 5.82523 | 7.33933 |
| ESX1      | 4.58255 | 4.52179 | 4.55749 | 4.9205  | 4.87213 | 5.29405 | 5.18976 | 4.95343 | 5.13773 |
| Tex13a    | 3.95864 | 4.00011 | 3.87474 | 4.67515 | 4.38403 | 4.75066 | 3.85441 | 4.75282 | 4.85776 |
| MORC4     | 8.69638 | 8.32381 | 8.48123 | 8.0101  | 5.39094 | 7.44313 | 8.42766 | 6.94149 | 8.14325 |
| RIPPLY1   | 6.0266  | 5.65782 | 6.0562  | 6.39088 | 6.52389 | 6.53595 | 5.75955 | 6.09093 | 6.19342 |
| RBM41     | 8.01949 | 7.98567 | 7.62185 | 6.52581 | 5.44655 | 5.91005 | 7.14371 | 6.52842 | 6.42089 |
| NUP62CL   | 6.68612 | 6.503   | 6.54435 | 6.19925 | 5.29844 | 5.89494 | 6.05896 | 6.10291 | 6.2558  |
| TEX13B    | 4.83978 | 5.17484 | 5.12289 | 5.38923 | 5.64716 | 5.06053 | 5.34452 | 5.54424 | 5.84897 |
| IRS4      | 3.79168 | 3.44285 | 3.58855 | 4.38585 | 3.94061 | 4.17727 | 4.37739 | 3.92913 | 4.24873 |
| KCNE5     | 5.7464  | 5.9455  | 5.7484  | 6.76961 | 6.13331 | 6.57294 | 6.46476 | 6.05744 | 6.10087 |



|             |         |         |         |         |         |         |         |         |         |
|-------------|---------|---------|---------|---------|---------|---------|---------|---------|---------|
| ACSL4       | 7.67891 | 7.15628 | 8.02488 | 7.7995  | 4.35467 | 6.60593 | 7.93896 | 7.67105 | 7.5989  |
| CHRD1       | 7.01249 | 7.58118 | 8.28741 | 4.35409 | 5.23314 | 5.25221 | 5.56682 | 4.36563 | 4.76811 |
| CAPN6       | 5.98884 | 5.66854 | 5.96498 | 6.23105 | 6.08242 | 5.59528 | 5.37574 | 5.49234 | 5.47008 |
| DCX         | 4.8027  | 5.00063 | 4.68894 | 5.11224 | 5.36669 | 5.43327 | 4.94094 | 5.39441 | 4.87768 |
| LHFPL1      | 5.13626 | 5.40052 | 4.89968 | 5.79045 | 5.85408 | 5.6859  | 5.01451 | 5.53761 | 5.05825 |
| AMOT        | 6.39825 | 6.47639 | 6.61621 | 5.69891 | 5.13002 | 6.12353 | 5.98446 | 5.27451 | 5.68569 |
| LRCH2       | 5.30668 | 5.33758 | 5.43023 | 4.326   | 4.88398 | 4.43252 | 4.66399 | 4.98969 | 4.97472 |
| CT83        | 5.99556 | 6.25243 | 6.09398 | 6.47292 | 6.82407 | 6.5853  | 6.3098  | 6.52251 | 6.34956 |
| KLHL13      | 5.17765 | 5.86695 | 5.42781 | 5.58111 | 5.18183 | 5.33131 | 5.56946 | 5.37507 | 5.14281 |
| KIAA1210    | 4.56559 | 4.90943 | 4.80576 | 5.0068  | 5.27236 | 4.49577 | 5.09737 | 4.58642 | 5.53013 |
| SLC25A5-AS1 | 5.44478 | 5.70888 | 5.70091 | 5.68867 | 5.64875 | 6.43205 | 5.96723 | 5.96253 | 5.756   |
| cxorf56     | 6.1422  | 5.68887 | 6.10701 | 5.96707 | 4.74661 | 5.42868 | 5.66058 | 5.80823 | 5.44354 |
| NKRF        | 6.73248 | 6.84402 | 6.63237 | 6.45777 | 4.69597 | 6.07524 | 6.413   | 5.54943 | 5.61854 |
| 44445       | 7.81934 | 7.6296  | 7.94994 | 7.33458 | 6.6015  | 6.89937 | 7.44621 | 7.03436 | 7.1804  |
| MIR766      | 6.41135 | 6.38067 | 6.07308 | 7.66851 | 7.44972 | 7.81493 | 6.23054 | 8.44849 | 7.79713 |
| UPF3B       | 7.23471 | 7.43833 | 7.16694 | 6.05297 | 4.09428 | 5.83009 | 6.68884 | 5.93877 | 5.99023 |
| RNF113A     | 5.69669 | 6.24097 | 5.93063 | 6.42452 | 6.21645 | 6.3399  | 6.71612 | 6.34769 | 6.07941 |
| NKAP        | 6.07752 | 5.85125 | 5.85319 | 5.426   | 3.87818 | 5.2948  | 5.69346 | 5.17841 | 4.88953 |
| NKAPP1      | 6.44426 | 5.05198 | 5.81456 | 4.05472 | 5.03689 | 4.14416 | 3.94635 | 4.89009 | 4.40219 |
| LAMP2       | 9.49017 | 9.42022 | 9.39644 | 9.44197 | 6.80903 | 9.5749  | 10.0298 | 9.7793  | 9.86586 |
| CUL4B       | 7.91541 | 8.104   | 7.84324 | 7.95923 | 5.37648 | 7.81752 | 7.69283 | 7.77245 | 7.57353 |
| C1GALT1C1   | 6.17555 | 6.23053 | 6.18004 | 6.23957 | 5.67722 | 6.07093 | 6.53952 | 5.76023 | 5.96846 |
| THOC2       | 9.00336 | 9.02629 | 8.81783 | 7.65518 | 5.22163 | 6.88521 | 7.86181 | 8.03585 | 7.63158 |
| DCAF12L2    | 5.64188 | 5.51715 | 5.18954 | 5.42376 | 5.51746 | 5.96488 | 5.64062 | 5.57416 | 5.50942 |
| DCAF12L1    | 5.53536 | 5.52236 | 5.42749 | 6.25957 | 6.3875  | 6.29341 | 5.69171 | 6.05143 | 5.96708 |
| ACTRT1      | 3.98044 | 3.91984 | 4.18001 | 4.79507 | 4.76833 | 4.05125 | 4.57275 | 4.34943 | 4.26975 |

|          |         |         |         |         |         |         |         |         |         |
|----------|---------|---------|---------|---------|---------|---------|---------|---------|---------|
| apln     | 6.71161 | 6.38445 | 6.26276 | 7.63698 | 7.12642 | 7.32197 | 6.95567 | 7.57178 | 7.07729 |
| ELF4     | 7.37435 | 7.10438 | 7.43452 | 7.91066 | 5.68184 | 7.39429 | 7.83829 | 7.05858 | 8.19709 |
| ZNF280C  | 8.4791  | 8.58347 | 8.45197 | 6.34782 | 4.54717 | 5.70979 | 7.07175 | 6.78786 | 6.31554 |
| GPR119   | 5.25969 | 5.50053 | 5.11376 | 5.85237 | 6.81934 | 6.61813 | 6.15688 | 6.35919 | 6.38871 |
| ENOX2    | 7.67616 | 7.84388 | 7.79603 | 7.63497 | 5.06871 | 6.88575 | 7.93891 | 6.82735 | 7.32456 |
| FRMD7    | 4.37519 | 4.56874 | 4.63724 | 4.64876 | 4.74952 | 4.27804 | 4.05946 | 4.58647 | 4.134   |
| MBNL3    | 8.70568 | 8.62388 | 8.8145  | 8.22664 | 5.29367 | 7.65335 | 8.60327 | 6.87606 | 8.14606 |
| HS6ST2   | 4.08936 | 4.50827 | 4.4097  | 5.37463 | 4.52494 | 4.88734 | 4.9072  | 5.16998 | 4.92572 |
| USP26    | 3.94356 | 3.63795 | 3.68222 | 3.79061 | 3.91297 | 4.26257 | 3.76502 | 4.11158 | 3.85295 |
| GPC4     | 6.42884 | 6.43954 | 6.48427 | 6.2793  | 5.8907  | 6.41403 | 6.18988 | 5.72945 | 6.34027 |
| GPC3     | 6.61991 | 6.39594 | 8.08695 | 5.3456  | 5.63143 | 5.08818 | 5.3894  | 5.19583 | 5.2929  |
| mir363   | 2.80154 | 2.52938 | 2.5958  | 2.775   | 2.79805 | 3.55804 | 3.23754 | 2.88929 | 2.94866 |
| Mir92a2  | 1.86028 | 1.91736 | 1.88729 | 2.66615 | 2.36965 | 2.57148 | 1.84102 | 2.46597 | 2.0739  |
| Mir19b2  | 2.23794 | 2.16787 | 2.33309 | 2.32632 | 1.92863 | 2.71802 | 2.02824 | 2.25842 | 2.52932 |
| mir20b   | 2.76611 | 2.66041 | 2.68024 | 2.87589 | 3.06294 | 2.88694 | 3.53301 | 2.91935 | 2.6081  |
| mir18b   | 2.29326 | 2.24433 | 1.9706  | 2.4373  | 2.35993 | 2.37149 | 3.25528 | 2.66565 | 2.17361 |
| Mir106a  | 1.87498 | 1.98154 | 1.74658 | 2.06381 | 1.97486 | 2.33296 | 2.22351 | 1.82511 | 2.02332 |
| MIR450B  | 1.95125 | 1.93893 | 2.01122 | 2.30877 | 1.93543 | 2.43406 | 2.18069 | 2.05189 | 1.98963 |
| Mir450a1 | 2.14433 | 2.22549 | 2.1768  | 1.88414 | 1.98645 | 2.48476 | 2.41904 | 1.87954 | 1.96833 |
| MIR450A2 | 2.96798 | 2.822   | 2.7044  | 3.06015 | 2.42824 | 3.67239 | 3.22566 | 3.35385 | 3.26776 |
| Mir542   | 3.84229 | 3.73989 | 3.81244 | 4.16249 | 3.23047 | 4.28082 | 4.38676 | 4.02637 | 3.68968 |
| MIR424   | 5.34497 | 5.21588 | 5.48806 | 6.35631 | 5.38079 | 5.80135 | 5.46818 | 6.42694 | 5.78192 |
| Mir503   | 5.7699  | 5.55717 | 5.74635 | 6.30147 | 6.4078  | 6.13165 | 5.3317  | 6.10039 | 5.73498 |
| PLAC1    | 5.06104 | 5.19577 | 4.83698 | 5.64499 | 6.10063 | 5.57951 | 5.44011 | 5.43871 | 5.86906 |
| FAM122B  | 7.47991 | 7.92051 | 7.53265 | 7.2322  | 6.3379  | 7.11458 | 7.5928  | 7.70089 | 7.0747  |
| MOSPD1   | 8.74191 | 8.62116 | 8.43755 | 8.6476  | 8.14229 | 8.69301 | 9.08443 | 9.52824 | 8.71301 |

|           |         |         |         |         |         |         |         |         |         |
|-----------|---------|---------|---------|---------|---------|---------|---------|---------|---------|
| SMIM10L2B | 5.66178 | 6.25528 | 6.33401 | 6.91325 | 5.46651 | 6.21336 | 5.91986 | 6.60036 | 5.34978 |
| CT55      | 4.80116 | 4.77015 | 4.89298 | 4.62057 | 5.59946 | 4.76111 | 4.90634 | 4.82187 | 4.8746  |
| ZNF75D    | 6.75073 | 6.77005 | 6.67722 | 5.66259 | 5.39009 | 5.40462 | 6.46109 | 6.25362 | 5.98507 |
| MAP7D3    | 8.01116 | 8.206   | 8.3383  | 7.78461 | 5.50534 | 6.5913  | 7.82235 | 7.09792 | 7.63478 |
| ARHGEF6   | 7.12236 | 7.38414 | 7.68579 | 5.59096 | 4.75979 | 4.862   | 5.76105 | 5.41009 | 5.1466  |
| GPR101    | 5.97313 | 6.44065 | 6.05199 | 6.58607 | 7.21985 | 7.10062 | 6.58223 | 6.76158 | 6.6149  |
| LINC00889 | 3.78914 | 3.2734  | 3.48916 | 2.71335 | 3.95236 | 2.93643 | 2.77998 | 3.13263 | 3.1015  |
| FGF13     | 5.74554 | 5.42435 | 5.77892 | 5.84146 | 5.96433 | 5.79317 | 5.59264 | 5.78309 | 5.66529 |
| Mir504    | 5.95241 | 6.31095 | 6.26775 | 7.00723 | 6.84378 | 7.2783  | 6.33528 | 6.83365 | 6.48276 |
| MCF2      | 4.65353 | 4.56172 | 4.4957  | 4.51363 | 5.28952 | 4.7265  | 4.50366 | 4.79843 | 4.88202 |
| MIR505    | 6.56364 | 7.66904 | 6.12851 | 4.84278 | 5.38214 | 3.97924 | 4.7192  | 4.87445 | 4.77809 |
| CXorf66   | 3.01427 | 3.35852 | 2.53775 | 3.06604 | 3.09455 | 2.68493 | 3.72664 | 3.48168 | 3.36916 |
| SOX3      | 3.3416  | 3.19273 | 3.25185 | 3.69777 | 3.49069 | 4.24582 | 2.94834 | 3.8351  | 3.93281 |
| MIR320D2  | 2.85621 | 2.89394 | 3.21357 | 3.33544 | 2.75908 | 3.88374 | 3.30578 | 2.65493 | 2.65728 |
| MIR890    | 3.00942 | 2.5556  | 2.7489  | 2.97261 | 4.21174 | 3.15954 | 3.69358 | 5.09632 | 2.89141 |
| MIR888    | 4.64211 | 4.89108 | 4.26865 | 4.6526  | 4.81967 | 5.12961 | 4.97549 | 4.91127 | 4.91023 |
| MIR892A   | 3.3583  | 3.74783 | 2.71086 | 2.94332 | 4.24531 | 3.10472 | 3.32723 | 3.05552 | 3.51636 |
| MIR892B   | 1.96407 | 2.24701 | 1.78409 | 2.39064 | 1.90598 | 2.16457 | 2.11176 | 2.19352 | 2.13199 |
| MIR891B   | 2.1482  | 2.38198 | 1.97917 | 2.07373 | 2.19473 | 2.36086 | 2.37489 | 2.11313 | 1.87339 |
| MIR891A   | 6.87234 | 6.39393 | 6.50949 | 7.73884 | 7.93868 | 7.33326 | 7.28298 | 7.44036 | 7.33251 |
| MIR513C   | 3.30677 | 3.32764 | 3.61031 | 3.77138 | 4.76531 | 4.78198 | 3.64208 | 3.46215 | 3.59546 |
| MIR513B   | 2.3457  | 2.39407 | 1.88042 | 2.58661 | 2.83716 | 1.90483 | 2.47172 | 2.4506  | 2.0911  |
| MIR513A1  | 4.4178  | 5.10824 | 4.13529 | 5.80726 | 6.92894 | 5.12993 | 5.32744 | 5.94818 | 5.12754 |
| MIR513A2  | 7.13376 | 6.64463 | 6.68758 | 6.55726 | 7.77181 | 6.28687 | 5.84577 | 7.27138 | 6.39792 |
| MIR506    | 3.28077 | 3.41956 | 3.29777 | 3.39425 | 5.01907 | 3.19112 | 3.01233 | 3.82654 | 3.645   |
| MIR507    | 2.25625 | 2.22527 | 2.42607 | 2.66148 | 3.1974  | 2.56082 | 2.77977 | 1.97411 | 2.7893  |

|           |         |         |         |         |         |         |         |         |         |
|-----------|---------|---------|---------|---------|---------|---------|---------|---------|---------|
| MIR508    | 3.57638 | 3.47446 | 3.54592 | 4.22429 | 4.48709 | 3.87102 | 4.26635 | 4.07971 | 3.94248 |
| MIR514B   | 2.5227  | 2.13583 | 2.60709 | 3.10244 | 3.62731 | 2.98169 | 2.89686 | 2.23899 | 2.25697 |
| MIR509-1  | 5.42386 | 5.97702 | 5.45371 | 6.46782 | 6.66411 | 6.41027 | 4.5214  | 5.94735 | 5.90393 |
| MIR509-3  | 3.63033 | 3.59102 | 3.85105 | 4.13801 | 5.87277 | 4.17868 | 4.12851 | 4.01035 | 3.87362 |
| MIR510    | 2.3382  | 2.3879  | 2.30356 | 2.63133 | 2.22319 | 2.50267 | 2.1567  | 2.41148 | 2.14965 |
| MIR514A1  | 3.27621 | 2.47558 | 2.64025 | 3.92571 | 4.02815 | 3.1026  | 3.72092 | 2.38745 | 2.54729 |
| MIR514A2  | 2.52014 | 2.62747 | 2.619   | 3.29337 | 4.24308 | 3.39189 | 2.80349 | 2.6579  | 2.74329 |
| FMR1-AS1  | 5.11877 | 5.30034 | 5.50042 | 6.00079 | 5.58429 | 5.6236  | 5.54491 | 5.53643 | 5.15407 |
| IDS       | 9.24945 | 9.51268 | 9.47166 | 8.9578  | 8.57177 | 9.74805 | 9.77238 | 10.506  | 10.3432 |
| LINC00893 | 7.54213 | 8.54654 | 7.66925 | 6.48082 | 5.96072 | 4.92949 | 6.38972 | 6.46344 | 6.288   |
| TMEM185A  | 7.42826 | 7.56189 | 7.24722 | 7.71252 | 7.72229 | 7.87344 | 8.50109 | 8.50807 | 8.32213 |
| CXorf40B  | 6.70783 | 6.54268 | 6.85248 | 6.63325 | 6.6212  | 6.69782 | 6.65602 | 7.09379 | 6.54349 |
| CD99L2    | 7.65527 | 7.53896 | 7.67388 | 7.2135  | 7.28461 | 6.864   | 7.25077 | 7.1771  | 6.93148 |
| MIR105-1  | 5.84881 | 5.69249 | 5.66055 | 6.1815  | 7.84684 | 6.27414 | 6.18098 | 6.27977 | 6.1105  |
| MIR767    | 4.19018 | 3.75604 | 3.8756  | 4.17045 | 4.9608  | 4.82617 | 4.84012 | 3.82446 | 4.39457 |
| MIR105-2  | 4.44934 | 4.29192 | 4.75611 | 5.5639  | 5.76713 | 5.53727 | 4.72699 | 5.19597 | 4.73879 |
| PNMA5     | 7.0001  | 7.08359 | 6.93591 | 7.37716 | 7.56822 | 7.72609 | 7.03633 | 7.23411 | 7.33011 |
| PNMA6B    | 6.415   | 6.34732 | 6.42604 | 6.99335 | 6.73936 | 7.91196 | 6.98884 | 7.46213 | 7.25268 |
| TREX2     | 5.5093  | 5.4457  | 5.4382  | 7.12142 | 5.9818  | 6.78484 | 6.67333 | 6.0152  | 6.15559 |
| PNCK      | 5.14593 | 5.51253 | 5.15567 | 5.8256  | 5.76252 | 5.82663 | 5.67709 | 5.67055 | 5.97607 |
| BCAP31    | 8.54368 | 8.69603 | 8.81452 | 9.46284 | 7.21914 | 9.61175 | 9.89803 | 9.07248 | 9.44209 |
| IDH3G     | 9.1557  | 9.05027 | 9.1985  | 9.37199 | 8.30313 | 9.17953 | 9.53458 | 8.58975 | 8.96161 |
| PDZD4     | 5.37289 | 5.77473 | 5.53982 | 6.22128 | 5.31354 | 6.08145 | 5.68474 | 5.70623 | 5.81287 |
| L1CAM     | 5.95933 | 5.75603 | 6.09621 | 6.12105 | 5.87246 | 6.1606  | 6.04914 | 6.25459 | 6.62091 |
| ARHGAP4   | 6.3898  | 6.77609 | 6.80445 | 6.69655 | 7.13277 | 7.21242 | 6.59769 | 7.08798 | 6.95606 |
| RENBP     | 5.51671 | 5.86768 | 5.61491 | 6.75142 | 6.36592 | 6.51339 | 6.00308 | 6.64137 | 6.16292 |

|            |         |         |         |         |         |         |         |         |         |
|------------|---------|---------|---------|---------|---------|---------|---------|---------|---------|
| HCFC1      | 8.77168 | 8.55988 | 8.73663 | 8.8051  | 6.72492 | 8.44771 | 9.40174 | 8.03631 | 8.54721 |
| IRAK1      | 7.21985 | 7.33076 | 7.3384  | 7.67922 | 6.01945 | 8.51222 | 8.11302 | 7.75136 | 7.85427 |
| MECP2      | 7.66179 | 7.43298 | 7.75481 | 6.61358 | 6.42063 | 6.98791 | 7.03005 | 7.01819 | 7.05987 |
| TEX28      | 5.31803 | 5.41566 | 5.08073 | 5.96279 | 6.17271 | 5.9507  | 5.55973 | 5.73709 | 5.85394 |
| DNASE1L1   | 7.83218 | 8.00482 | 8.06302 | 8.41697 | 7.59482 | 8.94065 | 8.86959 | 8.39886 | 8.47012 |
| UBL4A      | 7.41243 | 7.25097 | 7.23122 | 7.3913  | 6.41109 | 7.26123 | 8.3454  | 7.40193 | 7.15894 |
| G6PD       | 8.44312 | 7.96459 | 8.3675  | 9.03686 | 7.25524 | 8.58493 | 9.28311 | 8.46422 | 9.1713  |
| CTAG2      | 6.56113 | 6.77554 | 6.75013 | 7.23325 | 6.68574 | 7.68367 | 6.90983 | 7.29771 | 7.0531  |
| GAB3       | 5.83718 | 5.69784 | 6.28172 | 5.52734 | 5.2877  | 5.46676 | 5.84067 | 5.3395  | 6.09475 |
| SMIM9      | 4.41384 | 4.02781 | 4.37055 | 4.42335 | 5.0213  | 4.58549 | 3.83418 | 4.6135  | 4.36725 |
| MTCP1      | 6.63017 | 6.78357 | 6.60137 | 6.09055 | 5.89768 | 5.25437 | 6.75204 | 5.96947 | 5.81716 |
| CLIC2      | 7.39855 | 6.90373 | 7.87006 | 6.61811 | 6.19806 | 6.06389 | 6.77848 | 6.42305 | 6.97831 |
| SHOX       | 6.061   | 6.12729 | 6.224   | 6.25278 | 6.7124  | 6.42987 | 6.36731 | 6.38487 | 6.48488 |
| ASMT       | 6.89105 | 6.90602 | 6.85202 | 7.19029 | 6.55971 | 7.52857 | 6.93314 | 7.35101 | 7.30318 |
| CD99       | 10.5842 | 10.6187 | 11.2258 | 11.2345 | 8.85078 | 10.9432 | 11.1089 | 10.6585 | 10.6843 |
| LINC00278  | 5.84396 | 8.24229 | 7.64737 | 7.97484 | 7.56896 | 7.71301 | 6.82672 | 7.36135 | 7.59373 |
| PCDH11Y    | 3.65244 | 3.9318  | 3.70959 | 4.36256 | 4.65768 | 4.51118 | 4.09644 | 4.69965 | 3.97089 |
| DAZ2       | 5.02581 | 5.41638 | 5.99043 | 4.93094 | 7.91964 | 5.14384 | 5.22527 | 4.78819 | 5.17321 |
| IL9R       | 6.40838 | 6.45504 | 6.46144 | 6.81051 | 7.38804 | 6.75916 | 6.44669 | 7.04662 | 6.79714 |
| ASMTL      | 7.27473 | 7.2657  | 7.33271 | 7.00824 | 6.42333 | 6.71901 | 7.09569 | 7.30132 | 6.57866 |
| SRY        | 4.17139 | 5.59636 | 5.14804 | 5.45582 | 5.10216 | 4.66912 | 5.82264 | 5.13131 | 5.34815 |
| GYG2P1     | 6.01109 | 6.0705  | 6.03578 | 5.84514 | 5.79074 | 5.99459 | 6.10212 | 6.08426 | 5.76528 |
| NLGN4Y-AS1 | 6.70183 | 6.52918 | 6.60432 | 7.45014 | 7.0027  | 6.98665 | 6.97044 | 7.27427 | 7.54873 |
| CD24       | 10.0945 | 10.4141 | 10.1225 | 11.8509 | 12.466  | 12.7386 | 12.2952 | 12.4687 | 12.3581 |
| BCORP1     | 4.63998 | 5.25095 | 4.84485 | 5.06886 | 5.87567 | 4.89805 | 4.73857 | 4.97833 | 4.74439 |
| KDM5D      | 4.87172 | 8.09693 | 7.97778 | 6.66218 | 4.88719 | 6.1162  | 6.76224 | 6.57859 | 6.96772 |

|           |         |         |         |         |         |         |         |         |         |
|-----------|---------|---------|---------|---------|---------|---------|---------|---------|---------|
| DAZ1      | 4.34292 | 4.80623 | 5.50159 | 4.35154 | 7.36211 | 4.51912 | 4.64928 | 4.21494 | 4.91611 |
| DAZ3      | 4.55458 | 5.01806 | 5.73607 | 4.72536 | 7.74717 | 4.7991  | 5.14824 | 4.69709 | 4.92981 |
| LOC171391 | 6.43469 | 6.89683 | 6.63778 | 7.40771 | 7.88207 | 6.75069 | 7.04479 | 6.61702 | 7.02761 |
| MAGOH2P   | 4.80337 | 5.3284  | 5.34656 | 4.83373 | 4.2079  | 4.07522 | 4.90614 | 3.98744 | 4.27609 |
| RPL12     | 11.9789 | 11.9451 | 12.2323 | 11.9831 | 12.0217 | 11.9726 | 12.2695 | 11.4484 | 11.7701 |
| KIAA1656  | 5.28135 | 5.4234  | 5.58769 | 5.79285 | 5.69645 | 5.49461 | 5.54327 | 5.44011 | 5.70655 |
| FLJ38576  | 3.77269 | 4.55123 | 3.98514 | 4.23009 | 5.30007 | 4.90491 | 5.05982 | 5.10626 | 4.77922 |
| MGC27345  | 8.18422 | 8.12994 | 8.75659 | 6.86551 | 6.7764  | 5.58362 | 7.15548 | 6.51284 | 6.58937 |
| MIR4418   | 5.48441 | 6.02089 | 5.48219 | 5.6789  | 5.96585 | 6.185   | 5.75505 | 5.92359 | 5.85359 |
| MIR1273F  | 4.56878 | 4.62674 | 4.51671 | 4.24656 | 5.20874 | 4.02629 | 5.50229 | 4.03112 | 4.50091 |
| MIR4781   | 5.00145 | 4.88289 | 4.82388 | 7.14403 | 5.56899 | 7.09581 | 6.56835 | 6.83683 | 5.99614 |
| MIR1254-2 | 5.90484 | 5.2905  | 5.29753 | 5.28723 | 5.51318 | 5.30522 | 5.83832 | 6.22403 | 5.9421  |
| MIR4296   | 7.09172 | 7.26136 | 7.1979  | 6.99447 | 9.10257 | 6.47564 | 6.614   | 7.61732 | 7.72823 |
| MIR3159   | 7.54864 | 7.60656 | 8.53486 | 8.78668 | 7.92052 | 7.92735 | 8.13104 | 7.82719 | 7.58751 |
| MIR612    | 8.78813 | 7.37626 | 8.41045 | 8.62688 | 7.30661 | 8.06145 | 8.16149 | 10.8466 | 9.79434 |
| MIR4489   | 7.76424 | 7.85968 | 7.60544 | 8.5389  | 9.69998 | 8.20817 | 8.1194  | 8.15371 | 8.26338 |
| mir34c    | 3.00519 | 2.95469 | 2.87951 | 2.83557 | 3.18792 | 2.87676 | 2.72907 | 2.93376 | 2.73283 |
| MIR1908   | 6.98065 | 7.29352 | 7.3551  | 8.78001 | 8.7263  | 8.66439 | 7.58574 | 8.58048 | 8.01673 |
| SCARNA12  | 9.26089 | 8.94502 | 9.0937  | 10.269  | 9.60516 | 10.2002 | 10.3304 | 9.19509 | 9.09809 |
| MIR4304   | 7.80224 | 7.87927 | 7.85861 | 9.48922 | 9.72772 | 8.83634 | 8.13107 | 8.27109 | 8.04875 |
| MIR15A    | 6.47144 | 6.93016 | 6.20286 | 6.30464 | 5.20515 | 6.00325 | 6.13192 | 5.92869 | 6.04508 |
| MIR4515   | 6.77346 | 6.58342 | 6.43861 | 7.5631  | 7.97402 | 7.91423 | 7.59483 | 7.18546 | 7.43094 |
| MIR4716   | 4.63557 | 4.25895 | 4.49837 | 5.51225 | 5.28387 | 5.90062 | 5.06278 | 4.25874 | 4.92709 |
| FLJ10038  | 7.18507 | 7.11643 | 6.78443 | 5.80077 | 5.64569 | 5.33896 | 5.34388 | 6.14645 | 6.00318 |
| MIR4514   | 6.20312 | 6.26396 | 6.36326 | 6.22443 | 7.35337 | 6.16806 | 5.81957 | 6.14616 | 6.23398 |
| MIR3677   | 8.37783 | 8.5836  | 8.84771 | 9.38061 | 10.5662 | 9.61565 | 9.52462 | 9.99728 | 9.47617 |

|              |         |         |         |         |         |         |         |         |         |
|--------------|---------|---------|---------|---------|---------|---------|---------|---------|---------|
| MIR4719      | 1.85551 | 1.8458  | 1.64881 | 2.26864 | 1.89735 | 1.9388  | 1.88936 | 1.77351 | 1.81444 |
| MIR451B      | 2.0469  | 2.77482 | 2.25884 | 2.60173 | 2.12628 | 2.50982 | 2.73189 | 2.57008 | 2.58204 |
| SCARNA16     | 7.71761 | 8.32689 | 8.03952 | 7.82056 | 9.37277 | 8.0403  | 8.13354 | 7.78124 | 7.86744 |
| MIR4740      | 5.47022 | 5.71633 | 5.94891 | 6.63164 | 5.81646 | 6.11303 | 6.52826 | 6.31133 | 6.45249 |
| MIR4526      | 6.90582 | 6.56255 | 7.07515 | 7.6629  | 7.60179 | 8.14062 | 7.26658 | 7.44825 | 7.63689 |
| MIR4754      | 8.23061 | 8.10612 | 8.34748 | 9.4379  | 9.64707 | 9.27285 | 8.51336 | 9.06262 | 8.9395  |
| MIR3127      | 5.0392  | 4.78993 | 4.84574 | 5.4471  | 6.02704 | 5.78164 | 5.22521 | 5.93347 | 4.78567 |
| MIR10B       | 2.50661 | 2.64781 | 2.78229 | 2.80502 | 4.42337 | 3.05107 | 3.18662 | 2.62769 | 2.20025 |
| MIR4262      | 6.35675 | 6.73388 | 6.38469 | 7.06335 | 5.59906 | 6.54095 | 6.98231 | 6.15688 | 6.46129 |
| MIR4437      | 6.46804 | 6.4685  | 6.37974 | 6.74169 | 7.55493 | 6.4537  | 6.49766 | 6.10759 | 5.93328 |
| MIR3194      | 6.86405 | 7.41377 | 6.76942 | 6.9948  | 8.07358 | 6.77792 | 7.12156 | 7.24501 | 7.62092 |
| MIR1914      | 7.22781 | 5.95838 | 6.42763 | 7.0213  | 6.57747 | 8.23868 | 7.6275  | 7.453   | 7.23414 |
| MIR4760      | 1.89277 | 2.14978 | 2.02477 | 2.20347 | 2.42835 | 2.68119 | 2.39795 | 2.14252 | 2.27406 |
| MIR1281      | 7.70398 | 7.64862 | 7.5243  | 8.37597 | 9.45028 | 8.3472  | 7.92062 | 8.04566 | 8.16484 |
| MIR3928      | 5.90604 | 5.83485 | 5.5942  | 7.89125 | 6.70267 | 8.14893 | 7.5195  | 6.69049 | 6.97196 |
| MIR4270      | 6.58293 | 6.74691 | 6.14521 | 7.35907 | 7.50527 | 7.17272 | 7.0056  | 6.86119 | 6.89492 |
| MIR3607      | 2.80965 | 3.05227 | 3.01109 | 2.88524 | 2.43974 | 2.57904 | 2.41965 | 2.57811 | 2.41744 |
| MIR4637      | 5.3498  | 4.70797 | 3.79869 | 3.17056 | 2.30555 | 2.56463 | 2.69814 | 2.42346 | 3.21202 |
| LOC100132356 | 6.49389 | 6.22124 | 6.80759 | 6.4483  | 7.05831 | 6.16028 | 6.2849  | 6.10813 | 6.14414 |
| MIR4467      | 5.98362 | 6.31846 | 5.98337 | 6.03274 | 7.04521 | 6.16893 | 6.44657 | 6.32354 | 6.13086 |
| SND1-IT1     | 7.27732 | 6.55517 | 6.90022 | 5.79622 | 5.99471 | 4.73131 | 5.36458 | 6.16155 | 6.27497 |
| mir196b      | 8.12113 | 7.32696 | 7.75978 | 7.52453 | 6.6392  | 6.6861  | 7.77422 | 6.90158 | 6.58245 |
| MIR1204      | 5.79751 | 4.25126 | 4.23855 | 3.84117 | 3.00966 | 2.67822 | 3.6467  | 3.59008 | 4.03074 |
| LOC100128361 | 7.1585  | 7.42801 | 6.87325 | 6.45567 | 6.46165 | 6.12095 | 6.05512 | 6.50309 | 6.92268 |
| MIR2861      | 5.14985 | 3.96577 | 5.0654  | 5.43213 | 3.28182 | 5.82234 | 5.54089 | 4.53683 | 4.74611 |
| MIR7-1       | 6.19425 | 5.04397 | 5.80291 | 5.26556 | 4.50674 | 4.56655 | 5.41438 | 5.09039 | 5.04166 |

|                 |         |         |         |         |         |         |         |         |         |
|-----------------|---------|---------|---------|---------|---------|---------|---------|---------|---------|
| MIR3621         | 7.07813 | 7.49179 | 7.06094 | 7.94496 | 7.94188 | 8.05181 | 7.23845 | 8.14825 | 7.9539  |
| MIR1264         | 3.20801 | 3.53503 | 3.27315 | 3.4575  | 3.30767 | 3.49972 | 3.11474 | 3.66987 | 3.86827 |
| LOC284581       | 3.34054 | 3.43766 | 5.72386 | 3.94539 | 4.64989 | 4.3625  | 3.46263 | 3.44299 | 5.50953 |
| BMS1P5          | 11.0912 | 10.7785 | 11.493  | 7.81115 | 7.85612 | 6.1778  | 7.54549 | 8.69136 | 9.30407 |
| MRPS31P5        | 5.43556 | 5.51257 | 5.52789 | 5.00605 | 4.73472 | 4.66178 | 4.68688 | 4.83653 | 4.89672 |
| RPL10           | 13.1707 | 13.144  | 13.3531 | 12.5649 | 12.6605 | 12.4474 | 12.8313 | 12.4169 | 12.8084 |
| LIMS3-LOC440895 | 6.62945 | 5.57667 | 5.76259 | 6.06386 | 6.03586 | 5.41922 | 5.75734 | 5.66695 | 5.67826 |
| MIR4435-2HG     | 5.58838 | 5.07743 | 5.41374 | 6.11121 | 5.03143 | 5.59166 | 6.03301 | 6.69383 | 6.93252 |
| CYTOR           | 8.5201  | 7.63327 | 8.63755 | 10.8898 | 9.53743 | 9.98994 | 9.91312 | 11.8988 | 10.5981 |
| FAR2P1          | 3.16653 | 3.08648 | 3.14595 | 3.83979 | 6.27031 | 3.34384 | 3.56375 | 3.44132 | 2.9547  |
| LOC646736       | 4.20819 | 4.04183 | 4.10508 | 4.35595 | 4.46851 | 5.70301 | 4.28651 | 4.48649 | 4.45517 |
| LINC00963       | 7.29147 | 7.44129 | 7.668   | 6.53314 | 6.1209  | 6.03433 | 7.36606 | 6.35801 | 6.43957 |
| AQP7P3          | 7.8072  | 6.36956 | 6.22397 | 4.96671 | 6.04163 | 4.49465 | 4.67719 | 5.88586 | 5.58418 |
| MILR1           | 6.18507 | 6.12453 | 7.0783  | 6.87441 | 6.90925 | 6.16422 | 6.36603 | 6.14409 | 6.10991 |
| LYPD8           | 5.63065 | 5.8678  | 5.77382 | 5.80275 | 6.08311 | 6.11485 | 5.44512 | 5.74242 | 5.71067 |
| RPL31           | 7.65138 | 7.75105 | 8.28219 | 7.89596 | 8.50502 | 8.17961 | 8.15725 | 7.87817 | 7.89544 |
| MIR564          | 9.12674 | 9.31493 | 8.86873 | 9.96581 | 10.1869 | 9.5588  | 8.64916 | 10.1638 | 9.66276 |
| MIR194-2        | 7.15119 | 7.3735  | 7.76681 | 7.58849 | 7.47936 | 6.90541 | 7.20519 | 7.24119 | 7.05352 |
| MIR761          | 3.47103 | 4.44475 | 3.98164 | 4.00199 | 4.75075 | 4.11569 | 3.56748 | 3.76161 | 4.34979 |
| MIR711          | 5.51678 | 5.58837 | 5.35147 | 6.0258  | 6.09564 | 5.94251 | 6.24512 | 6.58391 | 5.94561 |
| MIR3135A        | 7.28508 | 6.54144 | 6.8523  | 6.56151 | 7.86767 | 6.30089 | 5.89917 | 6.82109 | 7.48581 |
| MIR3605         | 6.47892 | 7.05478 | 6.60427 | 6.72234 | 5.7348  | 5.90184 | 6.93746 | 6.86063 | 7.55392 |
| PECAM1          | 7.52814 | 7.23708 | 8.10911 | 6.49358 | 4.69251 | 5.81945 | 6.94765 | 7.76425 | 7.35613 |
| MIR4632         | 6.71997 | 6.74071 | 6.73638 | 7.75677 | 7.38466 | 9.05337 | 7.54174 | 7.86322 | 7.7381  |
| MIR4641         | 8.57905 | 8.68119 | 8.72868 | 9.69725 | 9.82462 | 9.79764 | 8.96226 | 9.45739 | 9.3047  |
| MIR4658         | 4.97939 | 4.99225 | 5.23252 | 6.20424 | 4.23588 | 5.57835 | 5.63045 | 5.85559 | 5.30011 |



|          |         |         |         |         |         |         |         |         |         |
|----------|---------|---------|---------|---------|---------|---------|---------|---------|---------|
| MIR4417  | 6.85638 | 7.20526 | 7.28325 | 7.27221 | 9.08699 | 7.56683 | 6.85029 | 7.25097 | 7.82171 |
| MIR4747  | 4.67632 | 4.43501 | 3.81744 | 5.42059 | 5.14294 | 5.31077 | 4.64719 | 4.53431 | 3.75642 |
| MIR4453  | 7.47467 | 7.64426 | 7.94097 | 7.0213  | 6.90507 | 7.53861 | 7.19347 | 7.94168 | 7.32034 |
| MIR4469  | 5.89833 | 6.09834 | 5.73717 | 6.98818 | 6.28105 | 7.68106 | 7.78345 | 7.21943 | 7.18583 |
| MIR4793  | 6.12705 | 6.27959 | 6.01242 | 5.92399 | 7.15266 | 6.56785 | 6.19841 | 6.52849 | 6.47481 |
| DUX5     | 6.16693 | 6.57142 | 6.62456 | 7.04839 | 7.94719 | 7.16728 | 6.64212 | 6.42402 | 7.08394 |
| COPG2IT1 | 4.41745 | 4.3365  | 4.4969  | 4.14875 | 4.38971 | 3.65433 | 3.67561 | 3.78735 | 3.81583 |

DFS, diabetic foot skin; DFU, diabetic foot ulcer.

Supplementary Table 3. The Differential Gene Analysis Results of Dataset GSE80178 by NetworkAnalyst Website.

| Gene        | logFC   | abslogfc | AveExpr | t       | P.Value  | adj.P.Val | B        |
|-------------|---------|----------|---------|---------|----------|-----------|----------|
| KRT2        | -6.117  | 6.117    | 9.6658  | -11.18  | 3.29E-08 | 5.88E-06  | 9.3648   |
| DCD         | -5.374  | 5.374    | 7.382   | -16.196 | 3.05E-10 | 5.54E-07  | 13.841   |
| FLG2        | -5.2061 | 5.2061   | 9.8333  | -5.4225 | 0.000102 | 0.00091   | 1.249    |
| pip         | -4.6015 | 4.6015   | 7.0966  | -12.008 | 1.36E-08 | 3.70E-06  | 10.232   |
| TYRP1       | -4.235  | 4.235    | 7.7941  | -14.918 | 8.77E-10 | 9.75E-07  | 12.859   |
| APOD        | -4.1386 | 4.1386   | 7.9002  | -10.11  | 1.12E-07 | 1.25E-05  | 8.1519   |
| MIR3671     | -4.1372 | 4.1372   | 5.7543  | -9.4524 | 2.50E-07 | 2.08E-05  | 7.3481   |
| IL37        | -3.9935 | 3.9935   | 8.6101  | -6.1537 | 2.92E-05 | 0.000404  | 2.5204   |
| LCE1B       | -3.8856 | 3.8856   | 8.601   | -4.2517 | 0.000868 | 0.003826  | -0.92762 |
| MIR3942     | -3.8569 | 3.8569   | 6.0384  | -15.587 | 5.00E-10 | 6.85E-07  | 13.385   |
| MIR548I2    | -3.7698 | 3.7698   | 7.901   | -4.5023 | 0.000541 | 0.002766  | -0.4495  |
| MIR548I3    | -3.7317 | 3.7317   | 5.9865  | -6.9876 | 7.70E-06 | 0.000168  | 3.8783   |
| N4BP2L2-IT2 | -3.6629 | 3.6629   | 8.5222  | -8.6832 | 6.75E-07 | 3.66E-05  | 6.3466   |

|         |         |        |        |         |          |          |          |
|---------|---------|--------|--------|---------|----------|----------|----------|
| ANGPTL1 | -3.6619 | 3.6619 | 6.931  | -8.697  | 6.63E-07 | 3.64E-05 | 6.3651   |
| Lce6a   | -3.5688 | 3.5688 | 9.8231 | -4.3174 | 0.000766 | 0.00351  | -0.80171 |
| TEX9    | -3.5105 | 3.5105 | 6.2812 | -14.017 | 1.94E-09 | 1.41E-06 | 12.108   |
| LCE1C   | -3.4866 | 3.4866 | 9.6741 | -4.2378 | 0.000891 | 0.00389  | -0.9542  |
| SYNPO2  | -3.4408 | 3.4408 | 6.9198 | -11.56  | 2.18E-08 | 5.00E-06 | 9.7701   |
| LCE2B   | -3.4037 | 3.4037 | 10.575 | -3.7377 | 0.002333 | 0.007634 | -1.9211  |
| BMS1P5  | -3.3687 | 3.3687 | 9.582  | -8.3966 | 9.95E-07 | 4.63E-05 | 5.9555   |
| ABHD12B | -3.3569 | 3.3569 | 7.407  | -10.624 | 6.13E-08 | 8.75E-06 | 8.749    |
| mir27b  | -3.3157 | 3.3157 | 8.2283 | -7.9004 | 1.99E-06 | 7.06E-05 | 5.2539   |
| AADACL2 | -3.3073 | 3.3073 | 7.9478 | -6.5814 | 1.46E-05 | 0.000255 | 3.2291   |
| CLDN10  | -3.2865 | 3.2865 | 6.445  | -16.626 | 2.18E-10 | 5.27E-07 | 14.152   |
| FLG     | -3.2659 | 3.2659 | 11.862 | -4.9335 | 0.000244 | 0.001603 | 0.35889  |
| MGP     | -3.198  | 3.198  | 8.3974 | -8.8024 | 5.76E-07 | 3.33E-05 | 6.5064   |
| ZNF652  | -3.1923 | 3.1923 | 8.7845 | -12.981 | 5.13E-09 | 2.34E-06 | 11.178   |
| LIFR    | -3.173  | 3.173  | 6.4943 | -10.643 | 6.00E-08 | 8.61E-06 | 8.7705   |
| CHRD1   | -3.139  | 3.139  | 6.4928 | -8.2893 | 1.15E-06 | 5.10E-05 | 5.8065   |
| NFIX    | -3.1277 | 3.1277 | 8.8493 | -8.5617 | 7.95E-07 | 3.97E-05 | 6.182    |
| TMEM116 | -3.12   | 3.12   | 7.3857 | -10.671 | 5.81E-08 | 8.48E-06 | 8.8015   |
| CFH     | -3.1159 | 3.1159 | 7.3685 | -7.3576 | 4.39E-06 | 0.000115 | 4.4495   |
| NFIB    | -3.1096 | 3.1096 | 9.2292 | -10.092 | 1.14E-07 | 1.27E-05 | 8.1303   |
| C3orf35 | -3.0966 | 3.0966 | 7.7273 | -12.05  | 1.30E-08 | 3.62E-06 | 10.274   |
| LCE1A   | -3.0697 | 3.0697 | 10.519 | -4.3352 | 0.000741 | 0.003431 | -0.76782 |
| hal     | -3.0692 | 3.0692 | 8.316  | -4.6289 | 0.000427 | 0.00235  | -0.21018 |
| EEF2K   | -3.0602 | 3.0602 | 8.1157 | -8.3068 | 1.13E-06 | 5.02E-05 | 5.8308   |
| PLLP    | -3.0595 | 3.0595 | 8.2078 | -15.735 | 4.43E-10 | 6.28E-07 | 13.498   |
| SFRP2   | -3.0202 | 3.0202 | 8.9858 | -7.1541 | 5.97E-06 | 0.000141 | 4.1377   |

|            |         |        |        |         |          |          |          |
|------------|---------|--------|--------|---------|----------|----------|----------|
| ANKRD36B   | -3.0131 | 3.0131 | 7.6709 | -9.0409 | 4.22E-07 | 2.78E-05 | 6.8209   |
| ANXA9      | -2.9974 | 2.9974 | 8.0896 | -6.9715 | 7.89E-06 | 0.000171 | 3.853    |
| MXRA5      | -2.9848 | 2.9848 | 8.4716 | -7.7027 | 2.64E-06 | 8.50E-05 | 4.9656   |
| CCDC146    | -2.9806 | 2.9806 | 7.1369 | -14.868 | 9.16E-10 | 9.78E-07 | 12.819   |
| CACHD1     | -2.9662 | 2.9662 | 7.8696 | -13.598 | 2.85E-09 | 1.68E-06 | 11.741   |
| TTC21B     | -2.9574 | 2.9574 | 7.2896 | -13.136 | 4.41E-09 | 2.13E-06 | 11.323   |
| MIR548V    | -2.9537 | 2.9537 | 6.8892 | -8.6952 | 6.65E-07 | 3.64E-05 | 6.3628   |
| CHL1       | -2.9034 | 2.9034 | 8.0844 | -10.468 | 7.34E-08 | 9.68E-06 | 8.5698   |
| TXNIP      | -2.8811 | 2.8811 | 9.5997 | -6.7128 | 1.18E-05 | 0.000223 | 3.4417   |
| MIR4295    | -2.8727 | 2.8727 | 7.2615 | -5.0312 | 0.000204 | 0.00142  | 0.53909  |
| SH3BP5-AS1 | -2.8684 | 2.8684 | 7.2215 | -8.6964 | 6.64E-07 | 3.64E-05 | 6.3643   |
| MIR4451    | -2.8632 | 2.8632 | 6.7962 | -9.0293 | 4.28E-07 | 2.80E-05 | 6.8057   |
| MIR95      | -2.8618 | 2.8618 | 4.6115 | -6.5938 | 1.43E-05 | 0.000252 | 3.2494   |
| MIR4524A   | -2.8498 | 2.8498 | 4.5187 | -12.273 | 1.03E-08 | 3.26E-06 | 10.497   |
| MKL2       | -2.8433 | 2.8433 | 9.1957 | -9.3151 | 2.97E-07 | 2.27E-05 | 7.1742   |
| OMD        | -2.8406 | 2.8406 | 6.3733 | -7.8211 | 2.23E-06 | 7.61E-05 | 5.1389   |
| MIR32      | -2.8315 | 2.8315 | 6.8081 | -13.931 | 2.10E-09 | 1.43E-06 | 12.034   |
| NEO1       | -2.8303 | 2.8303 | 8.6676 | -9.2004 | 3.43E-07 | 2.46E-05 | 7.0275   |
| KIT        | -2.8217 | 2.8217 | 7.0478 | -8.7637 | 6.07E-07 | 3.45E-05 | 6.4547   |
| PLSCR4     | -2.8207 | 2.8207 | 7.572  | -10.159 | 1.05E-07 | 1.20E-05 | 8.21     |
| LOC645513  | -2.8159 | 2.8159 | 6.2222 | -9.6304 | 2.00E-07 | 1.85E-05 | 7.5702   |
| RPL23AP32  | -2.7999 | 2.7999 | 7.0997 | -5.7636 | 5.63E-05 | 0.000617 | 1.8513   |
| nfe2l3     | -2.7992 | 2.7992 | 6.8911 | -7.37   | 4.31E-06 | 0.000114 | 4.4684   |
| CYBRD1     | -2.7683 | 2.7683 | 9.0011 | -7.5325 | 3.39E-06 | 9.83E-05 | 4.7131   |
| IL33       | -2.7644 | 2.7644 | 6.6429 | -4.7163 | 0.000363 | 0.002101 | -0.04588 |
| SRGAP2B    | -2.7634 | 2.7634 | 8.6125 | -9.1163 | 3.83E-07 | 2.63E-05 | 6.9189   |

|            |         |        |        |         |          |          |          |
|------------|---------|--------|--------|---------|----------|----------|----------|
| GstT2      | -2.7618 | 2.7618 | 6.9228 | -4.5718 | 0.000475 | 0.002525 | -0.31798 |
| MIR553     | -2.7565 | 2.7565 | 5.003  | -11.294 | 2.90E-08 | 5.54E-06 | 9.4878   |
| ZNF253     | -2.7459 | 2.7459 | 6.8611 | -8.7406 | 6.26E-07 | 3.52E-05 | 6.4238   |
| FRG1HP     | -2.7411 | 2.7411 | 7.1119 | -10.898 | 4.50E-08 | 7.11E-06 | 9.0557   |
| HNRNPU     | -2.7351 | 2.7351 | 7.8007 | -6.9634 | 7.99E-06 | 0.000172 | 3.8404   |
| LRIG3      | -2.7346 | 2.7346 | 8.1366 | -7.5877 | 3.13E-06 | 9.35E-05 | 4.7954   |
| MFAP4      | -2.7169 | 2.7169 | 8.5662 | -7.2211 | 5.39E-06 | 0.000132 | 4.241    |
| DCN        | -2.7073 | 2.7073 | 7.2978 | -7.0978 | 6.50E-06 | 0.000149 | 4.0504   |
| CXCL9      | -2.6959 | 2.6959 | 6.0994 | -4.9254 | 0.000247 | 0.00162  | 0.34384  |
| LOR        | -2.6954 | 2.6954 | 11.93  | -3.5996 | 0.003052 | 0.009207 | -2.1894  |
| ANKRD36    | -2.6912 | 2.6912 | 6.7711 | -9.299  | 3.03E-07 | 2.29E-05 | 7.1537   |
| mir23b     | -2.6824 | 2.6824 | 8.3776 | -13.173 | 4.26E-09 | 2.13E-06 | 11.357   |
| SPARCL1    | -2.6806 | 2.6806 | 8.3588 | -6.5898 | 1.44E-05 | 0.000253 | 3.2429   |
| GPR34      | -2.6803 | 2.6803 | 6.2714 | -6.158  | 2.90E-05 | 0.000403 | 2.5277   |
| CTSK       | -2.6717 | 2.6717 | 9.9704 | -5.9017 | 4.45E-05 | 0.000531 | 2.0907   |
| ca6        | -2.6679 | 2.6679 | 7.1147 | -8.2088 | 1.29E-06 | 5.48E-05 | 5.6937   |
| LY75-CD302 | -2.6626 | 2.6626 | 7.3327 | -8.6015 | 7.53E-07 | 3.85E-05 | 6.2362   |
| PHF3       | -2.6539 | 2.6539 | 7.7288 | -7.8147 | 2.25E-06 | 7.66E-05 | 5.1296   |
| Mir568     | -2.6309 | 2.6309 | 4.4103 | -7.2797 | 4.94E-06 | 0.000124 | 4.3309   |
| aadac      | -2.6248 | 2.6248 | 6.9086 | -5.0246 | 0.000207 | 0.001432 | 0.52693  |
| MIR548L    | -2.6244 | 2.6244 | 5.7741 | -7.2622 | 5.07E-06 | 0.000126 | 4.3041   |
| ARHGAP29   | -2.6159 | 2.6159 | 7.2951 | -8.9127 | 4.99E-07 | 3.08E-05 | 6.6526   |
| BOC        | -2.61   | 2.61   | 7.5343 | -17.645 | 1.01E-10 | 3.28E-07 | 14.85    |
| CDON       | -2.5913 | 2.5913 | 7.0332 | -10.592 | 6.36E-08 | 8.97E-06 | 8.7121   |
| MIR644A    | -2.5903 | 2.5903 | 7.6844 | -4.3439 | 0.000729 | 0.003391 | -0.75117 |
| PGAP1      | -2.5877 | 2.5877 | 8.353  | -6.9215 | 8.53E-06 | 0.000179 | 3.7742   |

|           |         |        |        |         |          |          |         |
|-----------|---------|--------|--------|---------|----------|----------|---------|
| CDHR1     | -2.5851 | 2.5851 | 9.3903 | -9.3647 | 2.79E-07 | 2.21E-05 | 7.2373  |
| CCDC80    | -2.5847 | 2.5847 | 7.5844 | -6.3639 | 2.07E-05 | 0.00032  | 2.8719  |
| CD34      | -2.5771 | 2.5771 | 9.0491 | -5.3676 | 0.000112 | 0.00097  | 1.1506  |
| PMS2P9    | -2.5763 | 2.5763 | 7.2113 | -8.0148 | 1.69E-06 | 6.45E-05 | 5.4185  |
| C7        | -2.573  | 2.573  | 6.5071 | -6.2343 | 2.55E-05 | 0.000369 | 2.656   |
| DAPL1     | -2.5697 | 2.5697 | 9.2155 | -4.0272 | 0.001333 | 0.005137 | -1.3599 |
| IFI44     | -2.5658 | 2.5658 | 6.413  | -9.6071 | 2.06E-07 | 1.88E-05 | 7.5413  |
| FRZB      | -2.5591 | 2.5591 | 6.753  | -11.807 | 1.68E-08 | 4.36E-06 | 10.027  |
| CDC14A    | -2.5543 | 2.5543 | 7.402  | -9.2484 | 3.23E-07 | 2.36E-05 | 7.0891  |
| MIR573    | -2.5446 | 2.5446 | 5.9083 | -9.568  | 2.16E-07 | 1.91E-05 | 7.4927  |
| DCLK1     | -2.542  | 2.542  | 6.2323 | -9.3846 | 2.72E-07 | 2.19E-05 | 7.2625  |
| ADD3      | -2.5416 | 2.5416 | 6.7847 | -10.955 | 4.22E-08 | 6.83E-06 | 9.1194  |
| ANTXR1    | -2.5408 | 2.5408 | 9.1259 | -5.9383 | 4.18E-05 | 0.000511 | 2.1536  |
| MIR643    | -2.5386 | 2.5386 | 4.4937 | -11.669 | 1.94E-08 | 4.69E-06 | 9.884   |
| PSMD6-AS2 | -2.537  | 2.537  | 7.455  | -10.762 | 5.24E-08 | 7.90E-06 | 8.9045  |
| FGFR2     | -2.5272 | 2.5272 | 8.1539 | -9.5356 | 2.25E-07 | 1.96E-05 | 7.4523  |
| TARBP1    | -2.5146 | 2.5146 | 7.6228 | -8.8174 | 5.65E-07 | 3.30E-05 | 6.5263  |
| EPS8      | -2.5121 | 2.5121 | 7.0153 | -10.173 | 1.04E-07 | 1.19E-05 | 8.2265  |
| ZC3H6     | -2.5104 | 2.5104 | 7.9065 | -14.824 | 9.51E-10 | 9.78E-07 | 12.784  |
| PCDHB13   | -2.5044 | 2.5044 | 6.7027 | -5.7826 | 5.45E-05 | 0.000606 | 1.8844  |
| SERTAD4   | -2.5013 | 2.5013 | 7.6696 | -8.1331 | 1.43E-06 | 5.84E-05 | 5.5869  |
| NKTR      | -2.4907 | 2.4907 | 8.2032 | -5.5879 | 7.61E-05 | 0.000753 | 1.5431  |
| Mir590    | -2.4897 | 2.4897 | 7.3409 | -4.0472 | 0.001283 | 0.004994 | -1.3213 |
| GLYATL2   | -2.4855 | 2.4855 | 5.8912 | -6.6987 | 1.21E-05 | 0.000227 | 3.419   |
| MIR581    | -2.4845 | 2.4845 | 5.7235 | -6.4525 | 1.79E-05 | 0.00029  | 3.0182  |
| SLIT3     | -2.483  | 2.483  | 8.1596 | -8.7596 | 6.10E-07 | 3.46E-05 | 6.4492  |

|          |         |        |        |         |          |          |         |
|----------|---------|--------|--------|---------|----------|----------|---------|
| CTSO     | -2.4714 | 2.4714 | 7.1102 | -7.0434 | 7.07E-06 | 0.000158 | 3.9658  |
| ZNF493   | -2.4709 | 2.4709 | 5.9343 | -11.243 | 3.07E-08 | 5.63E-06 | 9.4338  |
| ZNF141   | -2.4532 | 2.4532 | 6.8896 | -10.345 | 8.46E-08 | 1.06E-05 | 8.4281  |
| MIR221   | -2.4461 | 2.4461 | 7.8105 | -3.8305 | 0.001948 | 0.006728 | -1.7409 |
| HPGD     | -2.4411 | 2.4411 | 7.5886 | -5.7588 | 5.67E-05 | 0.000619 | 1.843   |
| GAN      | -2.4405 | 2.4405 | 9.7656 | -6.9293 | 8.43E-06 | 0.000178 | 3.7866  |
| MIR3685  | -2.4398 | 2.4398 | 4.7274 | -6.3383 | 2.16E-05 | 0.000329 | 2.8295  |
| MIR99AHG | -2.4286 | 2.4286 | 6.1518 | -10.415 | 7.80E-08 | 1.00E-05 | 8.5095  |
| MAP4K3   | -2.426  | 2.426  | 8.3452 | -7.2124 | 5.46E-06 | 0.000133 | 4.2276  |
| ZNF100   | -2.42   | 2.42   | 6.6431 | -9.7333 | 1.76E-07 | 1.69E-05 | 7.697   |
| BBS2     | -2.4181 | 2.4181 | 8.1568 | -8.7847 | 5.90E-07 | 3.38E-05 | 6.4828  |
| ARHGEF26 | -2.4172 | 2.4172 | 7.2126 | -8.5997 | 7.55E-07 | 3.86E-05 | 6.2337  |
| BDNF-AS  | -2.4136 | 2.4136 | 5.9792 | -7.7207 | 2.58E-06 | 8.37E-05 | 4.992   |
| SEPT7P2  | -2.4117 | 2.4117 | 7.1399 | -14.725 | 1.04E-09 | 1.04E-06 | 12.703  |
| MIR570   | -2.4022 | 2.4022 | 8.2222 | -5.0788 | 0.000187 | 0.001342 | 0.62646 |
| ARHGEF6  | -2.3995 | 2.3995 | 6.4548 | -10.85  | 4.75E-08 | 7.31E-06 | 9.0023  |
| RIC3     | -2.3947 | 2.3947 | 7.1441 | -13.34  | 3.63E-09 | 1.91E-06 | 11.509  |
| ATP13A4  | -2.3912 | 2.3912 | 7.7426 | -8.8721 | 5.26E-07 | 3.16E-05 | 6.599   |
| PCDHB14  | -2.3909 | 2.3909 | 7.6627 | -5.6747 | 6.55E-05 | 0.000683 | 1.696   |
| OCLM     | -2.3748 | 2.3748 | 6.1588 | -5.4943 | 8.96E-05 | 0.000837 | 1.3772  |
| TFAP2B   | -2.3735 | 2.3735 | 7.1082 | -9.9801 | 1.31E-07 | 1.39E-05 | 7.9965  |
| TMEM47   | -2.3618 | 2.3618 | 8.3625 | -6.1875 | 2.76E-05 | 0.00039  | 2.5774  |
| SRSF11   | -2.3587 | 2.3587 | 9.6749 | -5.6564 | 6.76E-05 | 0.000697 | 1.6637  |
| MIR708   | -2.3533 | 2.3533 | 5.435  | -6.9482 | 8.18E-06 | 0.000175 | 3.8163  |
| MEOX2    | -2.3528 | 2.3528 | 6.998  | -10.85  | 4.74E-08 | 7.31E-06 | 9.0033  |
| ARL6IP5  | -2.3455 | 2.3455 | 9.2809 | -6.7687 | 1.08E-05 | 0.000211 | 3.5314  |

|              |         |        |        |         |          |          |          |
|--------------|---------|--------|--------|---------|----------|----------|----------|
| TBC1D32      | -2.3449 | 2.3449 | 5.9896 | -12.318 | 9.89E-09 | 3.24E-06 | 10.541   |
| ZNF280C      | -2.3448 | 2.3448 | 7.3024 | -6.9526 | 8.13E-06 | 0.000174 | 3.8233   |
| CES4A        | -2.3385 | 2.3385 | 7.5876 | -7.0731 | 6.75E-06 | 0.000153 | 4.012    |
| IGFL4        | -2.3383 | 2.3383 | 6.6219 | -8.0915 | 1.52E-06 | 6.04E-05 | 5.5278   |
| ZNF383       | -2.3371 | 2.3371 | 6.7281 | -12.649 | 7.10E-09 | 2.85E-06 | 10.863   |
| TSPAN7       | -2.3362 | 2.3362 | 6.4254 | -6.7877 | 1.05E-05 | 0.000207 | 3.5618   |
| ZNF280D      | -2.3302 | 2.3302 | 7.1    | -9.3494 | 2.84E-07 | 2.22E-05 | 7.2179   |
| Mir421       | -2.3249 | 2.3249 | 8.1306 | -5.4175 | 0.000102 | 0.000915 | 1.24     |
| LRRCC1       | -2.324  | 2.324  | 6.1217 | -7.1495 | 6.01E-06 | 0.000142 | 4.1307   |
| PTAR1        | -2.3238 | 2.3238 | 8.5654 | -8.8225 | 5.61E-07 | 3.29E-05 | 6.5331   |
| RCOR3        | -2.3233 | 2.3233 | 8.2846 | -11.941 | 1.46E-08 | 3.92E-06 | 10.164   |
| DPT          | -2.3184 | 2.3184 | 8.0581 | -5.348  | 0.000116 | 0.00099  | 1.1153   |
| ZBTB41       | -2.3059 | 2.3059 | 6.8888 | -6.7754 | 1.07E-05 | 0.000209 | 3.5421   |
| FBN1         | -2.3058 | 2.3058 | 8.1961 | -5.9275 | 4.26E-05 | 0.000516 | 2.1351   |
| SRGAP2       | -2.2927 | 2.2927 | 8.338  | -11.542 | 2.22E-08 | 5.02E-06 | 9.7514   |
| LONRF1       | -2.2914 | 2.2914 | 8.3355 | -8.0286 | 1.66E-06 | 6.36E-05 | 5.4383   |
| DIAPH2       | -2.2871 | 2.2871 | 7.9452 | -5.0955 | 0.000182 | 0.00132  | 0.65712  |
| LRRC39       | -2.2838 | 2.2838 | 5.308  | -11.094 | 3.61E-08 | 6.27E-06 | 9.2714   |
| LOC100190986 | -2.2828 | 2.2828 | 10.635 | -4.6228 | 0.000432 | 0.002367 | -0.22166 |
| SPATA6       | -2.2755 | 2.2755 | 6.8372 | -16.024 | 3.50E-10 | 5.54E-07 | 13.714   |
| HMG2         | -2.2692 | 2.2692 | 6.2222 | -11.546 | 2.21E-08 | 5.02E-06 | 9.7559   |
| LRP4         | -2.2644 | 2.2644 | 8.3498 | -9.3458 | 2.85E-07 | 2.22E-05 | 7.2133   |
| VCAN         | -2.2614 | 2.2614 | 8.2602 | -4.2418 | 0.000884 | 0.00387  | -0.94665 |
| ZBTB20       | -2.2605 | 2.2605 | 7.5309 | -12.496 | 8.27E-09 | 3.01E-06 | 10.716   |
| ZKSCAN8      | -2.2576 | 2.2576 | 6.6609 | -13.056 | 4.77E-09 | 2.25E-06 | 11.249   |
| NEK3         | -2.2538 | 2.2538 | 7.0899 | -10.352 | 8.39E-08 | 1.06E-05 | 8.4363   |

|          |         |        |        |         |          |          |          |
|----------|---------|--------|--------|---------|----------|----------|----------|
| PMS2P2   | -2.2533 | 2.2533 | 10.224 | -13.892 | 2.18E-09 | 1.43E-06 | 12       |
| RSL1D1   | -2.2522 | 2.2522 | 9.3235 | -4.4422 | 0.000605 | 0.002991 | -0.5636  |
| TMEM133  | -2.2512 | 2.2512 | 7.0043 | -7.7907 | 2.33E-06 | 7.81E-05 | 5.0945   |
| PIBF1    | -2.2449 | 2.2449 | 7.1639 | -6.4913 | 1.68E-05 | 0.000277 | 3.082    |
| GATA3    | -2.2344 | 2.2344 | 7.9221 | -6.5838 | 1.45E-05 | 0.000254 | 3.2331   |
| SMC5     | -2.232  | 2.232  | 7.9751 | -5.3743 | 0.000111 | 0.000961 | 1.1627   |
| KRT73    | -2.2302 | 2.2302 | 6.5833 | -7.3096 | 4.72E-06 | 0.00012  | 4.3765   |
| HERC2P9  | -2.2298 | 2.2298 | 8.7775 | -9.831  | 1.56E-07 | 1.58E-05 | 7.8164   |
| PROS1    | -2.2256 | 2.2256 | 8.05   | -7.7952 | 2.31E-06 | 7.78E-05 | 5.1012   |
| MIR4742  | -2.2253 | 2.2253 | 6.3081 | -4.4539 | 0.000592 | 0.002946 | -0.54149 |
| BLMH     | -2.2216 | 2.2216 | 9.8771 | -4.8092 | 0.000306 | 0.001868 | 0.12781  |
| IL7      | -2.219  | 2.219  | 5.7302 | -10.243 | 9.55E-08 | 1.14E-05 | 8.3081   |
| DLEU2L   | -2.2101 | 2.2101 | 5.0898 | -5.5488 | 8.15E-05 | 0.000788 | 1.4738   |
| IFI44L   | -2.2082 | 2.2082 | 5.9988 | -7.3605 | 4.37E-06 | 0.000115 | 4.454    |
| atg2b    | -2.2074 | 2.2074 | 8.6473 | -5.4253 | 0.000101 | 0.000907 | 1.2541   |
| ZNF507   | -2.2048 | 2.2048 | 7.2673 | -8.6568 | 7.00E-07 | 3.73E-05 | 6.311    |
| ZNF480   | -2.2047 | 2.2047 | 6.5681 | -7.7282 | 2.55E-06 | 8.33E-05 | 5.0031   |
| NAPEPLD  | -2.1964 | 2.1964 | 6.2933 | -7.8855 | 2.03E-06 | 7.14E-05 | 5.2324   |
| C3       | -2.1947 | 2.1947 | 7.8262 | -7.4083 | 4.07E-06 | 0.00011  | 4.5264   |
| MCM8     | -2.1944 | 2.1944 | 6.9455 | -9.4591 | 2.48E-07 | 2.07E-05 | 7.3564   |
| JAM2     | -2.1917 | 2.1917 | 6.9465 | -6.9596 | 8.04E-06 | 0.000173 | 3.8343   |
| ANKRD49  | -2.1907 | 2.1907 | 7.0404 | -8.0859 | 1.53E-06 | 6.06E-05 | 5.5199   |
| ORMDL1   | -2.1896 | 2.1896 | 8.3981 | -6.7808 | 1.06E-05 | 0.000208 | 3.5507   |
| ARHGAP42 | -2.1774 | 2.1774 | 7.2226 | -9.3002 | 3.02E-07 | 2.29E-05 | 7.1553   |
| DPP4     | -2.1764 | 2.1764 | 7.0321 | -5.6807 | 6.48E-05 | 0.000678 | 1.7065   |
| FHL5     | -2.1744 | 2.1744 | 6.2009 | -10.522 | 6.89E-08 | 9.43E-06 | 8.6326   |



|           |         |        |        |         |          |          |          |
|-----------|---------|--------|--------|---------|----------|----------|----------|
| CDKAL1    | -2.1718 | 2.1718 | 8.0604 | -8.6991 | 6.61E-07 | 3.64E-05 | 6.368    |
| ZNF25     | -2.1688 | 2.1688 | 6.5913 | -11.064 | 3.73E-08 | 6.38E-06 | 9.2392   |
| KLHDC1    | -2.1644 | 2.1644 | 7.414  | -8.9494 | 4.75E-07 | 2.99E-05 | 6.701    |
| IDE       | -2.1627 | 2.1627 | 11.042 | -6.1582 | 2.90E-05 | 0.000403 | 2.528    |
| CRTAP     | -2.1616 | 2.1616 | 9.6718 | -5.8967 | 4.49E-05 | 0.000533 | 2.082    |
| RPGRIP1L  | -2.1614 | 2.1614 | 5.9003 | -8.8298 | 5.56E-07 | 3.29E-05 | 6.5429   |
| LOC283299 | -2.1591 | 2.1591 | 5.6795 | -4.0843 | 0.001195 | 0.004754 | -1.2497  |
| CHD6      | -2.1569 | 2.1569 | 7.8031 | -12.347 | 9.60E-09 | 3.24E-06 | 10.57    |
| ARID4A    | -2.1566 | 2.1566 | 6.6804 | -6.0349 | 3.56E-05 | 0.00046  | 2.3189   |
| MIS18BP1  | -2.1562 | 2.1562 | 7.401  | -7.1165 | 6.32E-06 | 0.000146 | 4.0794   |
| ETV6      | -2.1501 | 2.1501 | 9.1086 | -6.9354 | 8.35E-06 | 0.000177 | 3.7962   |
| LRIG2     | -2.1492 | 2.1492 | 8.2692 | -6.644  | 1.32E-05 | 0.00024  | 3.3307   |
| ANGEL2    | -2.1459 | 2.1459 | 6.7162 | -7.7748 | 2.38E-06 | 7.92E-05 | 5.0713   |
| UTRN      | -2.1457 | 2.1457 | 8.7811 | -6.7755 | 1.07E-05 | 0.000209 | 3.5423   |
| RAD50     | -2.141  | 2.141  | 8.6659 | -5.8575 | 4.79E-05 | 0.000558 | 2.0144   |
| PIIP5K2   | -2.1403 | 2.1403 | 7.856  | -4.5346 | 0.000509 | 0.002647 | -0.38825 |
| GNPDA2    | -2.1402 | 2.1402 | 7.5084 | -4.5091 | 0.000534 | 0.00274  | -0.4367  |
| CEP290    | -2.1383 | 2.1383 | 6.1475 | -8.2079 | 1.29E-06 | 5.48E-05 | 5.6924   |
| NP1PB5    | -2.1354 | 2.1354 | 11.779 | -6.5096 | 1.63E-05 | 0.000273 | 3.112    |
| NFIA      | -2.1314 | 2.1314 | 8.4922 | -9.5636 | 2.17E-07 | 1.91E-05 | 7.4872   |
| TFDP2     | -2.1279 | 2.1279 | 7.83   | -8.8238 | 5.60E-07 | 3.29E-05 | 6.5349   |
| BCL11A    | -2.1233 | 2.1233 | 7.5162 | -8.2889 | 1.15E-06 | 5.10E-05 | 5.8058   |
| MIR5047   | -2.1231 | 2.1231 | 9.0216 | -3.9044 | 0.001689 | 0.006084 | -1.5976  |
| LINC01554 | -2.1215 | 2.1215 | 7.2465 | -8.4868 | 8.80E-07 | 4.26E-05 | 6.0797   |
| ENPP2     | -2.1193 | 2.1193 | 7.8784 | -6.9215 | 8.53E-06 | 0.000179 | 3.7743   |
| CENPC     | -2.1189 | 2.1189 | 7.3715 | -8.4661 | 9.05E-07 | 4.35E-05 | 6.0513   |

|           |         |        |        |         |          |          |         |
|-----------|---------|--------|--------|---------|----------|----------|---------|
| PCDHB4    | -2.1181 | 2.1181 | 6.3244 | -9.9725 | 1.32E-07 | 1.40E-05 | 7.9874  |
| PAN2      | -2.1164 | 2.1164 | 7.3036 | -11.052 | 3.78E-08 | 6.39E-06 | 9.2258  |
| LIAS      | -2.1159 | 2.1159 | 7.5297 | -7.2244 | 5.36E-06 | 0.000132 | 4.2461  |
| CLU       | -2.1127 | 2.1127 | 7.1715 | -5.5811 | 7.70E-05 | 0.000759 | 1.531   |
| ICK       | -2.1112 | 2.1112 | 8.1922 | -7.8668 | 2.09E-06 | 7.26E-05 | 5.2053  |
| PDCD4     | -2.1099 | 2.1099 | 8.2304 | -3.7589 | 0.002239 | 0.007415 | -1.8799 |
| PRR4      | -2.1034 | 2.1034 | 6.6855 | -12.624 | 7.27E-09 | 2.85E-06 | 10.84   |
| DBT       | -2.1034 | 2.1034 | 7.0455 | -6.593  | 1.43E-05 | 0.000252 | 3.248   |
| LINC01139 | -2.1017 | 2.1017 | 6.419  | -5.522  | 8.54E-05 | 0.00081  | 1.4263  |
| BTC       | -2.1016 | 2.1016 | 6.2924 | -6.6341 | 1.34E-05 | 0.000241 | 3.3147  |
| IFT74     | -2.1004 | 2.1004 | 7.1933 | -5.4379 | 9.89E-05 | 0.000893 | 1.2765  |
| GATM      | -2.1003 | 2.1003 | 7.1502 | -5.4037 | 0.000105 | 0.000929 | 1.2153  |
| L3MBTL4   | -2.0986 | 2.0986 | 7.0792 | -9.711  | 1.81E-07 | 1.72E-05 | 7.6696  |
| HNRNPA1L2 | -2.0984 | 2.0984 | 5.6122 | -7.1719 | 5.81E-06 | 0.000138 | 4.1652  |
| PSIP1     | -2.0973 | 2.0973 | 6.4661 | -8.3094 | 1.12E-06 | 5.02E-05 | 5.8345  |
| CHD9      | -2.0919 | 2.0919 | 9.0361 | -5.6852 | 6.43E-05 | 0.000675 | 1.7144  |
| UGGT2     | -2.0909 | 2.0909 | 6.6303 | -6.6301 | 1.35E-05 | 0.000242 | 3.3082  |
| PCDH18    | -2.0887 | 2.0887 | 7.6418 | -5.8245 | 5.07E-05 | 0.000579 | 1.9572  |
| LRCH1     | -2.0878 | 2.0878 | 8.5221 | -7.3053 | 4.75E-06 | 0.000121 | 4.3701  |
| LUC7L3    | -2.0799 | 2.0799 | 8.095  | -4.9874 | 0.000221 | 0.001499 | 0.45844 |
| CHPT1     | -2.0795 | 2.0795 | 7.1627 | -13.125 | 4.46E-09 | 2.13E-06 | 11.312  |
| KIAA0825  | -2.0744 | 2.0744 | 6.7668 | -11.462 | 2.42E-08 | 5.12E-06 | 9.6675  |
| MAP1B     | -2.0738 | 2.0738 | 8.2415 | -6.796  | 1.04E-05 | 0.000205 | 3.5751  |
| TIA1      | -2.0718 | 2.0718 | 7.3054 | -5.5272 | 8.46E-05 | 0.000806 | 1.4355  |
| DPH6      | -2.0709 | 2.0709 | 7.1091 | -10.568 | 6.54E-08 | 9.11E-06 | 8.6848  |
| EBF1      | -2.0702 | 2.0702 | 7.5136 | -12.028 | 1.33E-08 | 3.65E-06 | 10.252  |

|              |         |        |        |         |          |          |        |
|--------------|---------|--------|--------|---------|----------|----------|--------|
| MAGOHB       | -2.0702 | 2.0702 | 5.7271 | -9.4479 | 2.51E-07 | 2.09E-05 | 7.3424 |
| PM20D2       | -2.0702 | 2.0702 | 7.3123 | -6.4835 | 1.70E-05 | 0.00028  | 3.0692 |
| LOC100506124 | -2.0693 | 2.0693 | 6.3313 | -12.873 | 5.69E-09 | 2.52E-06 | 11.077 |
| ptger3       | -2.0692 | 2.0692 | 6.1723 | -8.5772 | 7.79E-07 | 3.93E-05 | 6.2031 |
| FKSG29       | -2.0633 | 2.0633 | 7.9466 | -7.9182 | 1.94E-06 | 7.00E-05 | 5.2797 |
| PROSER1      | -2.063  | 2.063  | 8.5595 | -6.6878 | 1.23E-05 | 0.000229 | 3.4015 |
| UBN2         | -2.0599 | 2.0599 | 8.1958 | -6.8125 | 1.01E-05 | 0.000202 | 3.6013 |
| NEPRO        | -2.0535 | 2.0535 | 7.4836 | -9.279  | 3.11E-07 | 2.32E-05 | 7.1282 |
| MIRLET7C     | -2.052  | 2.052  | 5.3872 | -7.4823 | 3.65E-06 | 0.000103 | 4.6378 |
| TLR3         | -2.0509 | 2.0509 | 5.9979 | -10.271 | 9.23E-08 | 1.11E-05 | 8.3416 |
| SESN1        | -2.0501 | 2.0501 | 6.9679 | -9.6147 | 2.04E-07 | 1.87E-05 | 7.5507 |
| OPHN1        | -2.049  | 2.049  | 7.2004 | -7.249  | 5.17E-06 | 0.000128 | 4.2838 |
| FGF7         | -2.0477 | 2.0477 | 6.708  | -9.3504 | 2.84E-07 | 2.22E-05 | 7.2192 |
| NYNRIN       | -2.0472 | 2.0472 | 7.1834 | -9.2955 | 3.04E-07 | 2.30E-05 | 7.1492 |
| TCF4         | -2.0411 | 2.0411 | 9.0818 | -5.8186 | 5.12E-05 | 0.000583 | 1.947  |
| PHC3         | -2.0406 | 2.0406 | 8.3882 | -7.9122 | 1.96E-06 | 7.03E-05 | 5.271  |
| PARM1        | -2.0404 | 2.0404 | 8.1337 | -8.6843 | 6.74E-07 | 3.66E-05 | 6.3481 |
| ROR1         | -2.0388 | 2.0388 | 7.1881 | -8.7194 | 6.44E-07 | 3.58E-05 | 6.3953 |
| GTF2IRD2P1   | -2.0325 | 2.0325 | 7.2779 | -8.0687 | 1.57E-06 | 6.13E-05 | 5.4954 |
| MIR4796      | -2.0305 | 2.0305 | 4.9892 | -6.6423 | 1.32E-05 | 0.00024  | 3.328  |
| MIR505       | -2.0279 | 2.0279 | 5.7766 | -7.1942 | 5.62E-06 | 0.000136 | 4.1997 |
| PAXBP1       | -2.0277 | 2.0277 | 7.7354 | -6.0755 | 3.32E-05 | 0.00044  | 2.3881 |
| CTPS2        | -2.0272 | 2.0272 | 7.0986 | -10.022 | 1.24E-07 | 1.33E-05 | 8.047  |
| GEN1         | -2.0251 | 2.0251 | 7.1226 | -6.3414 | 2.14E-05 | 0.000328 | 2.8347 |
| MIR597       | -2.0221 | 2.0221 | 6.5518 | -7.5814 | 3.15E-06 | 9.41E-05 | 4.786  |
| MDM4         | -2.0219 | 2.0219 | 8.4879 | -8.1656 | 1.37E-06 | 5.69E-05 | 5.6328 |

|           |         |        |        |         |          |          |         |
|-----------|---------|--------|--------|---------|----------|----------|---------|
| NHLRC2    | -2.0211 | 2.0211 | 8.5293 | -4.8366 | 0.000291 | 0.001805 | 0.17901 |
| NRN1      | -2.0209 | 2.0209 | 7.8348 | -7.8375 | 2.18E-06 | 7.50E-05 | 5.1627  |
| map2k5    | -2.018  | 2.018  | 7.1721 | -9.6123 | 2.04E-07 | 1.87E-05 | 7.5477  |
| ANKRD44   | -2.0175 | 2.0175 | 6.1182 | -14.241 | 1.59E-09 | 1.28E-06 | 12.3    |
| SENP6     | -2.0174 | 2.0174 | 8.2229 | -5.2251 | 0.000144 | 0.001132 | 0.8934  |
| KRT77     | -2.0167 | 2.0167 | 6.399  | -10.146 | 1.07E-07 | 1.21E-05 | 8.1946  |
| TNRC6B    | -2.0158 | 2.0158 | 8.1728 | -7.41   | 4.06E-06 | 0.00011  | 4.5289  |
| ACER1     | -2.0147 | 2.0147 | 10.028 | -5.2983 | 0.000126 | 0.001043 | 1.0259  |
| PA2G4P4   | -2.0146 | 2.0146 | 5.2638 | -6.7363 | 1.14E-05 | 0.000218 | 3.4795  |
| APEX1     | -2.0143 | 2.0143 | 8.7487 | -5.4527 | 9.63E-05 | 0.000877 | 1.3029  |
| FAXDC2    | -2.0137 | 2.0137 | 6.8988 | -9.2877 | 3.07E-07 | 2.31E-05 | 7.1394  |
| C10orf113 | -2.0107 | 2.0107 | 5.3957 | -10.785 | 5.10E-08 | 7.75E-06 | 8.9301  |
| PHF14     | -2.0078 | 2.0078 | 7.2301 | -7.5193 | 3.46E-06 | 9.97E-05 | 4.6933  |
| EML4      | -2.0049 | 2.0049 | 9.2917 | -5.7391 | 5.87E-05 | 0.000631 | 1.8087  |
| TOP2B     | -2.0019 | 2.0019 | 8.5843 | -4.2035 | 0.000951 | 0.004072 | -1.0201 |
| PNISR     | -2.0016 | 2.0016 | 8.9051 | -8.039  | 1.63E-06 | 6.32E-05 | 5.453   |
| CEP162    | -1.9984 | 1.9984 | 5.7832 | -8.8212 | 5.62E-07 | 3.29E-05 | 6.5313  |
| ZNF718    | -1.9963 | 1.9963 | 7.0255 | -11.916 | 1.50E-08 | 3.95E-06 | 10.138  |
| CREBRF    | -1.9917 | 1.9917 | 7.0945 | -11.026 | 3.90E-08 | 6.44E-06 | 9.1974  |
| TBCK      | -1.9911 | 1.9911 | 7.6573 | -6.1451 | 2.96E-05 | 0.000408 | 2.5058  |
| MBTD1     | -1.991  | 1.991  | 7.5918 | -8.2992 | 1.14E-06 | 5.06E-05 | 5.8202  |
| PCMTD2    | -1.9895 | 1.9895 | 9.3899 | -6.6994 | 1.21E-05 | 0.000227 | 3.4201  |
| ATF7IP    | -1.9893 | 1.9893 | 7.8317 | -6.0526 | 3.45E-05 | 0.000451 | 2.3491  |
| KAT6B     | -1.9864 | 1.9864 | 8.0826 | -9.5158 | 2.31E-07 | 1.98E-05 | 7.4275  |
| NAF1      | -1.9833 | 1.9833 | 7.1136 | -9.6834 | 1.87E-07 | 1.77E-05 | 7.6357  |
| CNTNAP3   | -1.9805 | 1.9805 | 7.5047 | -5.385  | 0.000109 | 0.000949 | 1.1819  |

|          |         |        |        |         |          |          |         |
|----------|---------|--------|--------|---------|----------|----------|---------|
| ZNF767P  | -1.9802 | 1.9802 | 8.0578 | -9.5311 | 2.26E-07 | 1.96E-05 | 7.4466  |
| HIBCH    | -1.9795 | 1.9795 | 7.348  | -6.8481 | 9.56E-06 | 0.000194 | 3.6581  |
| MIR1290  | -1.9763 | 1.9763 | 7.0195 | -5.6989 | 6.28E-05 | 0.000663 | 1.7383  |
| HMCN1    | -1.9758 | 1.9758 | 7.1641 | -6.0667 | 3.37E-05 | 0.000444 | 2.3731  |
| HNRNPA1  | -1.974  | 1.974  | 8.4138 | -8.5583 | 7.99E-07 | 3.98E-05 | 6.1774  |
| MCOLN3   | -1.9731 | 1.9731 | 6.5154 | -6.9716 | 7.89E-06 | 0.000171 | 3.8531  |
| DENND4C  | -1.9722 | 1.9722 | 8.1717 | -6.3093 | 2.26E-05 | 0.000339 | 2.7813  |
| GTF2IRD2 | -1.9674 | 1.9674 | 7.2727 | -9.9351 | 1.38E-07 | 1.43E-05 | 7.9425  |
| SAMD9L   | -1.9657 | 1.9657 | 6.7015 | -10.707 | 5.58E-08 | 8.19E-06 | 8.8427  |
| OLFM2    | -1.9628 | 1.9628 | 9.4726 | -8.4089 | 9.78E-07 | 4.58E-05 | 5.9724  |
| LRRC37B  | -1.9625 | 1.9625 | 6.627  | -6.9775 | 7.82E-06 | 0.00017  | 3.8625  |
| FGL2     | -1.9621 | 1.9621 | 7.8196 | -6.0991 | 3.19E-05 | 0.000429 | 2.4281  |
| CEP126   | -1.96   | 1.96   | 6.6904 | -8.8814 | 5.19E-07 | 3.14E-05 | 6.6112  |
| MED1     | -1.9583 | 1.9583 | 9.1408 | -4.8579 | 0.00028  | 0.00176  | 0.21855 |
| EMB      | -1.9576 | 1.9576 | 7.6649 | -7.8946 | 2.01E-06 | 7.09E-05 | 5.2455  |
| Irp6     | -1.9565 | 1.9565 | 7.8013 | -8.1351 | 1.43E-06 | 5.83E-05 | 5.5896  |
| CHP2     | -1.956  | 1.956  | 7.6039 | -5.9281 | 4.25E-05 | 0.000516 | 2.1361  |
| NBEA     | -1.9556 | 1.9556 | 6.2322 | -9.5428 | 2.23E-07 | 1.94E-05 | 7.4613  |
| CP       | -1.9541 | 1.9541 | 5.4846 | -5.7036 | 6.23E-05 | 0.000659 | 1.7466  |
| NHLRC3   | -1.9528 | 1.9528 | 6.6161 | -9.0672 | 4.08E-07 | 2.74E-05 | 6.8551  |
| SFPQ     | -1.9523 | 1.9523 | 8.5645 | -7.1099 | 6.38E-06 | 0.000147 | 4.0692  |
| DTWD1    | -1.9517 | 1.9517 | 6.3914 | -6.1595 | 2.89E-05 | 0.000402 | 2.5302  |
| NEB      | -1.951  | 1.951  | 7.0595 | -4.938  | 0.000242 | 0.001593 | 0.36712 |
| HSPBAP1  | -1.9508 | 1.9508 | 7.0144 | -9.3001 | 3.02E-07 | 2.29E-05 | 7.1552  |
| DCAF16   | -1.9503 | 1.9503 | 8.7032 | -6.001  | 3.76E-05 | 0.000477 | 2.2611  |
| EPB41L2  | -1.95   | 1.95   | 7.1466 | -9.1853 | 3.50E-07 | 2.48E-05 | 7.008   |

|           |         |        |        |         |          |          |         |
|-----------|---------|--------|--------|---------|----------|----------|---------|
| CLYBL     | -1.95   | 1.95   | 6.0552 | -7.1493 | 6.01E-06 | 0.000142 | 4.1303  |
| ARHGEF9   | -1.9483 | 1.9483 | 7.5646 | -13.232 | 4.03E-09 | 2.07E-06 | 11.411  |
| NVL       | -1.9472 | 1.9472 | 6.9361 | -7.9939 | 1.74E-06 | 6.55E-05 | 5.3885  |
| SPATA5    | -1.9448 | 1.9448 | 7.3776 | -8.0064 | 1.71E-06 | 6.48E-05 | 5.4064  |
| ZNF704    | -1.9434 | 1.9434 | 7.3264 | -10.431 | 7.66E-08 | 9.90E-06 | 8.527   |
| TMEM237   | -1.9432 | 1.9432 | 8.4117 | -6.6415 | 1.32E-05 | 0.00024  | 3.3266  |
| HERC6     | -1.9424 | 1.9424 | 7.2637 | -6.7979 | 1.03E-05 | 0.000205 | 3.5781  |
| CPM       | -1.942  | 1.942  | 7.9502 | -5.6758 | 6.54E-05 | 0.000682 | 1.6979  |
| ASPA      | -1.9409 | 1.9409 | 5.5811 | -5.4864 | 9.08E-05 | 0.000844 | 1.363   |
| PDGFD     | -1.94   | 1.94   | 6.6562 | -8.1432 | 1.41E-06 | 5.79E-05 | 5.6011  |
| NSRP1     | -1.9374 | 1.9374 | 7.7258 | -5.8141 | 5.16E-05 | 0.000585 | 1.9392  |
| PTBP2     | -1.9359 | 1.9359 | 7.8594 | -8.257  | 1.21E-06 | 5.26E-05 | 5.7613  |
| AQP9      | -1.9352 | 1.9352 | 8.275  | -4.8764 | 0.00027  | 0.001718 | 0.25296 |
| EFCAB7    | -1.9341 | 1.9341 | 6.0747 | -9.4078 | 2.64E-07 | 2.14E-05 | 7.2918  |
| PEX1      | -1.9339 | 1.9339 | 7.4444 | -7.5769 | 3.17E-06 | 9.45E-05 | 4.7794  |
| LINC00630 | -1.9317 | 1.9317 | 7.095  | -7.6492 | 2.86E-06 | 8.87E-05 | 4.8866  |
| PACRGL    | -1.931  | 1.931  | 6.7715 | -10.512 | 6.97E-08 | 9.47E-06 | 8.6208  |
| MIR604    | -1.9304 | 1.9304 | 8.096  | -5.5373 | 8.31E-05 | 0.000799 | 1.4535  |
| NPIPA1    | -1.9301 | 1.9301 | 9.2479 | -10.656 | 5.91E-08 | 8.56E-06 | 8.7853  |
| MIR1270   | -1.9301 | 1.9301 | 5.113  | -6.6355 | 1.34E-05 | 0.000241 | 3.317   |
| MTR       | -1.9253 | 1.9253 | 8.3292 | -9.9206 | 1.40E-07 | 1.45E-05 | 7.9249  |
| VWA8      | -1.9235 | 1.9235 | 7.5888 | -6.9686 | 7.93E-06 | 0.000171 | 3.8485  |
| MGC27345  | -1.9233 | 1.9233 | 7.5422 | -7.9569 | 1.84E-06 | 6.78E-05 | 5.3354  |
| ELMOD1    | -1.921  | 1.921  | 8.4178 | -4.97   | 0.000228 | 0.001532 | 0.42628 |
| KAT7      | -1.9204 | 1.9204 | 7.875  | -7.302  | 4.77E-06 | 0.000121 | 4.365   |
| AKAP9     | -1.9202 | 1.9202 | 8.3038 | -5.3693 | 0.000112 | 0.000968 | 1.1537  |

|            |         |        |        |         |          |          |         |
|------------|---------|--------|--------|---------|----------|----------|---------|
| IQCB1      | -1.9182 | 1.9182 | 6.887  | -6.8849 | 9.03E-06 | 0.000187 | 3.7164  |
| ZNF790-AS1 | -1.9179 | 1.9179 | 6.5683 | -7.6358 | 2.91E-06 | 8.97E-05 | 4.8668  |
| OGN        | -1.9177 | 1.9177 | 6.2367 | -5.5776 | 7.75E-05 | 0.000762 | 1.525   |
| PNPLA3     | -1.9171 | 1.9171 | 7.5396 | -5.8744 | 4.66E-05 | 0.000547 | 2.0436  |
| ZNF484     | -1.9153 | 1.9153 | 6.4837 | -8.8558 | 5.37E-07 | 3.22E-05 | 6.5773  |
| LINC00893  | -1.915  | 1.915  | 7.0429 | -7.1312 | 6.18E-06 | 0.000144 | 4.1023  |
| KIAA0586   | -1.9132 | 1.9132 | 7.8535 | -7.8746 | 2.06E-06 | 7.21E-05 | 5.2166  |
| ZNF506     | -1.9131 | 1.9131 | 7.0071 | -8.7672 | 6.04E-07 | 3.44E-05 | 6.4594  |
| NMNAT3     | -1.9128 | 1.9128 | 6.7606 | -9.5721 | 2.15E-07 | 1.91E-05 | 7.4977  |
| KAT2A      | -1.9096 | 1.9096 | 8.3317 | -9.0828 | 4.00E-07 | 2.69E-05 | 6.8754  |
| INTS4      | -1.9079 | 1.9079 | 7.5994 | -6.5399 | 1.56E-05 | 0.000266 | 3.1616  |
| CEP120     | -1.9045 | 1.9045 | 6.7652 | -10.193 | 1.01E-07 | 1.17E-05 | 8.2493  |
| TSPYL2     | -1.9037 | 1.9037 | 6.4963 | -7.3225 | 4.63E-06 | 0.000119 | 4.3961  |
| LHFP       | -1.9025 | 1.9025 | 8.4464 | -6.6861 | 1.23E-05 | 0.000229 | 3.3988  |
| BBS5       | -1.901  | 1.901  | 6.7925 | -8.6373 | 7.18E-07 | 3.77E-05 | 6.2847  |
| C5orf46    | -1.8962 | 1.8962 | 6.9222 | -7.2489 | 5.17E-06 | 0.000128 | 4.2838  |
| YBX3       | -1.8961 | 1.8961 | 7.6763 | -5.8687 | 4.70E-05 | 0.000552 | 2.0337  |
| GTF2I      | -1.8958 | 1.8958 | 8.4499 | -6.2186 | 2.62E-05 | 0.000375 | 2.6297  |
| FBLN5      | -1.8915 | 1.8915 | 7.5654 | -4.9701 | 0.000228 | 0.001532 | 0.42653 |
| SPG11      | -1.891  | 1.891  | 8.4041 | -5.7245 | 6.01E-05 | 0.000643 | 1.7832  |
| ZBTB7C     | -1.8904 | 1.8904 | 6.7299 | -5.9939 | 3.81E-05 | 0.000481 | 2.249   |
| TMEM50B    | -1.8879 | 1.8879 | 7.3677 | -11.394 | 2.60E-08 | 5.27E-06 | 9.5951  |
| POLK       | -1.8858 | 1.8858 | 6.4743 | -5.9411 | 4.16E-05 | 0.00051  | 2.1584  |
| N4BP2L2    | -1.8845 | 1.8845 | 8.5166 | -9.4045 | 2.65E-07 | 2.15E-05 | 7.2876  |
| GXYLT2     | -1.8841 | 1.8841 | 6.9278 | -5.6823 | 6.47E-05 | 0.000677 | 1.7093  |
| LOC389765  | -1.8812 | 1.8812 | 6.6073 | -6.5063 | 1.64E-05 | 0.000274 | 3.1067  |

|             |         |        |        |         |          |          |         |
|-------------|---------|--------|--------|---------|----------|----------|---------|
| ATRX        | -1.88   | 1.88   | 7.5195 | -5.1161 | 0.000175 | 0.001287 | 0.69473 |
| PRKD3       | -1.8777 | 1.8777 | 7.149  | -10.818 | 4.92E-08 | 7.51E-06 | 8.9674  |
| NKAPP1      | -1.8762 | 1.8762 | 5.3505 | -5.667  | 6.64E-05 | 0.000689 | 1.6823  |
| HLF         | -1.8734 | 1.8734 | 8.1483 | -9.4081 | 2.64E-07 | 2.14E-05 | 7.2922  |
| PPT1        | -1.8728 | 1.8728 | 8.3141 | -5.6637 | 6.68E-05 | 0.000692 | 1.6765  |
| CLDN8       | -1.8698 | 1.8698 | 5.5544 | -7.7734 | 2.39E-06 | 7.93E-05 | 5.0693  |
| VPS13C      | -1.8681 | 1.8681 | 7.9184 | -5.0606 | 0.000194 | 0.001369 | 0.59305 |
| SP100       | -1.8665 | 1.8665 | 8.2427 | -12.339 | 9.68E-09 | 3.24E-06 | 10.563  |
| RNF180      | -1.8664 | 1.8664 | 6.6363 | -9.2157 | 3.37E-07 | 2.43E-05 | 7.0472  |
| DCAKD       | -1.8654 | 1.8654 | 7.9901 | -10.468 | 7.34E-08 | 9.68E-06 | 8.5699  |
| RBM26       | -1.8634 | 1.8634 | 7.5024 | -5.6348 | 7.02E-05 | 0.000714 | 1.6259  |
| CEP44       | -1.8534 | 1.8534 | 6.2907 | -10.472 | 7.30E-08 | 9.68E-06 | 8.5752  |
| HMBOX1      | -1.8518 | 1.8518 | 7.5167 | -8.0022 | 1.72E-06 | 6.48E-05 | 5.4005  |
| LOC202181   | -1.851  | 1.851  | 7.2548 | -11.322 | 2.81E-08 | 5.48E-06 | 9.5183  |
| fktn        | -1.8507 | 1.8507 | 6.5645 | -5.707  | 6.20E-05 | 0.000656 | 1.7526  |
| TTC14       | -1.8503 | 1.8503 | 7.2167 | -8.838  | 5.50E-07 | 3.26E-05 | 6.5537  |
| VAV3        | -1.8474 | 1.8474 | 6.9947 | -8.9094 | 5.01E-07 | 3.09E-05 | 6.6483  |
| c9orf3      | -1.845  | 1.845  | 7.2718 | -11.651 | 1.98E-08 | 4.75E-06 | 9.8653  |
| SEPSECS-AS1 | -1.8445 | 1.8445 | 6.6566 | -8.0283 | 1.66E-06 | 6.36E-05 | 5.4377  |
| SENP1       | -1.8378 | 1.8378 | 8.2981 | -11.2   | 3.21E-08 | 5.80E-06 | 9.387   |
| MSH5        | -1.8354 | 1.8354 | 7.5251 | -11.614 | 2.06E-08 | 4.84E-06 | 9.8268  |
| NOSTRIN     | -1.8353 | 1.8353 | 6.4588 | -7.9536 | 1.84E-06 | 6.80E-05 | 5.3306  |
| ZNF184      | -1.8341 | 1.8341 | 7.245  | -10.092 | 1.14E-07 | 1.27E-05 | 8.1299  |
| WDR19       | -1.8332 | 1.8332 | 7.0919 | -8.612  | 7.43E-07 | 3.84E-05 | 6.2504  |
| ZNF708      | -1.8327 | 1.8327 | 5.8686 | -8.6839 | 6.75E-07 | 3.66E-05 | 6.3476  |
| RPRD2       | -1.8318 | 1.8318 | 8.4454 | -5.7344 | 5.91E-05 | 0.000635 | 1.8004  |



|            |         |        |        |         |          |          |         |
|------------|---------|--------|--------|---------|----------|----------|---------|
| LINC01278  | -1.8315 | 1.8315 | 7.3494 | -7.2842 | 4.90E-06 | 0.000124 | 4.3378  |
| NUTM2A-AS1 | -1.8313 | 1.8313 | 6.6952 | -10.055 | 1.19E-07 | 1.29E-05 | 8.0864  |
| EMCN       | -1.8307 | 1.8307 | 6.891  | -6.8135 | 1.01E-05 | 0.000202 | 3.6029  |
| RGS5       | -1.8303 | 1.8303 | 6.7195 | -9.9567 | 1.34E-07 | 1.41E-05 | 7.9684  |
| MIR4504    | -1.829  | 1.829  | 5.5784 | -6.4861 | 1.70E-05 | 0.000279 | 3.0735  |
| ZNF33A     | -1.8254 | 1.8254 | 6.7953 | -10.414 | 7.81E-08 | 1.00E-05 | 8.508   |
| ANKMY2     | -1.8254 | 1.8254 | 6.5891 | -7.4038 | 4.10E-06 | 0.00011  | 4.5197  |
| SCPEP1     | -1.8253 | 1.8253 | 8.0529 | -6.0979 | 3.20E-05 | 0.00043  | 2.4261  |
| ZNF791     | -1.8251 | 1.8251 | 7.6066 | -6.8327 | 9.79E-06 | 0.000197 | 3.6336  |
| ZNF260     | -1.8248 | 1.8248 | 7.6756 | -8.685  | 6.74E-07 | 3.66E-05 | 6.3491  |
| CDNF       | -1.8244 | 1.8244 | 7.28   | -9.9581 | 1.34E-07 | 1.41E-05 | 7.9702  |
| MED23      | -1.8239 | 1.8239 | 8.5224 | -6.564  | 1.50E-05 | 0.000259 | 3.2008  |
| CROT       | -1.8233 | 1.8233 | 7.4485 | -6.0425 | 3.51E-05 | 0.000457 | 2.3318  |
| TIGD1      | -1.8228 | 1.8228 | 7.4709 | -7.6485 | 2.86E-06 | 8.87E-05 | 4.8856  |
| tmem150c   | -1.8226 | 1.8226 | 6.7714 | -5.8354 | 4.98E-05 | 0.000572 | 1.9762  |
| FNBP4      | -1.8215 | 1.8215 | 9.1613 | -6.2462 | 2.51E-05 | 0.000363 | 2.676   |
| TOPBP1     | -1.8197 | 1.8197 | 8.1041 | -6.9852 | 7.73E-06 | 0.000168 | 3.8746  |
| SLF1       | -1.8193 | 1.8193 | 5.8252 | -7.9037 | 1.98E-06 | 7.06E-05 | 5.2588  |
| SAMHD1     | -1.8186 | 1.8186 | 6.9925 | -5.3198 | 0.000122 | 0.001019 | 1.0647  |
| ZNF302     | -1.818  | 1.818  | 6.4002 | -6.3924 | 1.97E-05 | 0.000311 | 2.9192  |
| WDR7       | -1.815  | 1.815  | 8.0301 | -6.1035 | 3.17E-05 | 0.000427 | 2.4355  |
| ZNF680     | -1.8149 | 1.8149 | 6.9547 | -7.7443 | 2.49E-06 | 8.20E-05 | 5.0266  |
| FAAH2      | -1.8141 | 1.8141 | 6.5541 | -6.2776 | 2.38E-05 | 0.000351 | 2.7285  |
| MYCT1      | -1.8133 | 1.8133 | 7.1252 | -6.227  | 2.59E-05 | 0.000372 | 2.6438  |
| ANTXR2     | -1.813  | 1.813  | 8.2499 | -5.14   | 0.000168 | 0.001253 | 0.73849 |
| NEMP1      | -1.8092 | 1.8092 | 7.4422 | -7.9297 | 1.91E-06 | 6.94E-05 | 5.2962  |

|            |         |        |        |         |          |          |         |
|------------|---------|--------|--------|---------|----------|----------|---------|
| THUMPD2    | -1.8081 | 1.8081 | 7.0483 | -7.1142 | 6.34E-06 | 0.000146 | 4.0759  |
| MTERF2     | -1.8079 | 1.8079 | 6.7036 | -6.6652 | 1.27E-05 | 0.000235 | 3.365   |
| ZBTB39     | -1.8078 | 1.8078 | 7.2676 | -7.4265 | 3.96E-06 | 0.000108 | 4.5538  |
| CLDN10-AS1 | -1.807  | 1.807  | 5.648  | -5.1264 | 0.000172 | 0.00127  | 0.7135  |
| ZNF33B     | -1.8047 | 1.8047 | 7.1672 | -8.8062 | 5.74E-07 | 3.33E-05 | 6.5115  |
| INTS6L     | -1.8027 | 1.8027 | 6.9253 | -6.1961 | 2.72E-05 | 0.000385 | 2.5919  |
| TSHZ2      | -1.8014 | 1.8014 | 7.7884 | -8.2125 | 1.28E-06 | 5.46E-05 | 5.6988  |
| AHI1       | -1.8006 | 1.8006 | 7.1801 | -6.0573 | 3.43E-05 | 0.000449 | 2.357   |
| LOC389906  | -1.8003 | 1.8003 | 6.4417 | -6.5897 | 1.44E-05 | 0.000253 | 3.2427  |
| eif2ak2    | -1.7997 | 1.7997 | 7.6206 | -4.9107 | 0.000254 | 0.001647 | 0.31662 |
| MYLIP      | -1.7986 | 1.7986 | 7.6021 | -7.1352 | 6.14E-06 | 0.000143 | 4.1085  |
| ppwd1      | -1.7984 | 1.7984 | 8.061  | -5.9017 | 4.45E-05 | 0.000531 | 2.0907  |
| KCTD12     | -1.798  | 1.798  | 7.8869 | -5.3906 | 0.000107 | 0.000944 | 1.1919  |
| NPY1R      | -1.7978 | 1.7978 | 6.1008 | -5.0502 | 0.000197 | 0.001386 | 0.57402 |
| LUC7L      | -1.7976 | 1.7976 | 7.1942 | -6.8359 | 9.74E-06 | 0.000197 | 3.6387  |
| GPC3       | -1.7975 | 1.7975 | 6.2226 | -7.0994 | 6.49E-06 | 0.000149 | 4.053   |
| c8orf37    | -1.7967 | 1.7967 | 6.552  | -10.939 | 4.29E-08 | 6.90E-06 | 9.1016  |
| CADPS2     | -1.7962 | 1.7962 | 6.6046 | -13.162 | 4.31E-09 | 2.13E-06 | 11.346  |
| KLRA1P     | -1.7947 | 1.7947 | 6.531  | -10.642 | 6.01E-08 | 8.61E-06 | 8.7688  |
| ZNF667-AS1 | -1.7879 | 1.7879 | 7.2356 | -6.316  | 2.24E-05 | 0.000336 | 2.7924  |
| ZNF521     | -1.7849 | 1.7849 | 7.3187 | -7.3632 | 4.36E-06 | 0.000115 | 4.4582  |
| PIIG       | -1.7848 | 1.7848 | 7.3539 | -5.0935 | 0.000182 | 0.001322 | 0.65336 |
| CA13       | -1.7845 | 1.7845 | 7.0369 | -7.9809 | 1.77E-06 | 6.62E-05 | 5.3698  |
| GABPB1-AS1 | -1.7842 | 1.7842 | 6.6163 | -5.2276 | 0.000143 | 0.001128 | 0.89782 |
| c3orf52    | -1.7832 | 1.7832 | 8.221  | -5.8849 | 4.58E-05 | 0.00054  | 2.0616  |
| PODN       | -1.7805 | 1.7805 | 7.4388 | -7.3762 | 4.27E-06 | 0.000114 | 4.4779  |

|           |         |        |        |         |          |          |         |
|-----------|---------|--------|--------|---------|----------|----------|---------|
| PCM1      | -1.7799 | 1.7799 | 8.8079 | -5.4767 | 9.24E-05 | 0.000853 | 1.3459  |
| ZNF766    | -1.7797 | 1.7797 | 6.9345 | -6.1356 | 3.01E-05 | 0.000413 | 2.4898  |
| ALG13     | -1.7796 | 1.7796 | 7.5877 | -7.5107 | 3.50E-06 | 0.0001   | 4.6805  |
| LYPD6B    | -1.7792 | 1.7792 | 7.2468 | -9.4131 | 2.62E-07 | 2.14E-05 | 7.2986  |
| COA5      | -1.7786 | 1.7786 | 6.6624 | -9.5672 | 2.16E-07 | 1.91E-05 | 7.4917  |
| GPR52     | -1.7777 | 1.7777 | 7.3316 | -5.9965 | 3.79E-05 | 0.00048  | 2.2533  |
| A2M       | -1.7768 | 1.7768 | 9.3392 | -4.869  | 0.000274 | 0.001736 | 0.23914 |
| cxorf23   | -1.7751 | 1.7751 | 7.0358 | -6.5917 | 1.43E-05 | 0.000252 | 3.2459  |
| MLANA     | -1.7748 | 1.7748 | 6.424  | -8.8806 | 5.20E-07 | 3.14E-05 | 6.6103  |
| BBS9      | -1.7744 | 1.7744 | 6.178  | -9.8739 | 1.48E-07 | 1.52E-05 | 7.8684  |
| THOC1     | -1.7735 | 1.7735 | 7.6399 | -5.5755 | 7.78E-05 | 0.000764 | 1.5211  |
| IQGAP2    | -1.7716 | 1.7716 | 6.4541 | -7.4448 | 3.86E-06 | 0.000107 | 4.5815  |
| PDZD2     | -1.7714 | 1.7714 | 7.4284 | -8.0744 | 1.55E-06 | 6.11E-05 | 5.5035  |
| LRRK2     | -1.771  | 1.771  | 6.429  | -6.4173 | 1.90E-05 | 0.000303 | 2.9603  |
| ZEB1      | -1.7705 | 1.7705 | 6.9388 | -6.6972 | 1.21E-05 | 0.000227 | 3.4166  |
| KITLG     | -1.7703 | 1.7703 | 6.701  | -5.6476 | 6.86E-05 | 0.000704 | 1.6484  |
| BMS1P4    | -1.7626 | 1.7626 | 6.1331 | -10.532 | 6.82E-08 | 9.40E-06 | 8.6434  |
| KNTC1     | -1.761  | 1.761  | 7.0503 | -9.4791 | 2.41E-07 | 2.03E-05 | 7.3816  |
| LINC00312 | -1.7606 | 1.7606 | 6.0623 | -6.5108 | 1.63E-05 | 0.000273 | 3.114   |
| HMGB1     | -1.7603 | 1.7603 | 7.4171 | -11.63  | 2.02E-08 | 4.80E-06 | 9.8435  |
| IGF1      | -1.7592 | 1.7592 | 7.2315 | -12.3   | 1.01E-08 | 3.24E-06 | 10.524  |
| MIR651    | -1.7567 | 1.7567 | 3.2472 | -6.164  | 2.87E-05 | 0.0004   | 2.5377  |
| ZNF570    | -1.7564 | 1.7564 | 6.4131 | -9.6722 | 1.90E-07 | 1.79E-05 | 7.6218  |
| cep83     | -1.754  | 1.754  | 6.7252 | -10.45  | 7.49E-08 | 9.74E-06 | 8.55    |
| RUFY3     | -1.7521 | 1.7521 | 8.4243 | -8.1452 | 1.41E-06 | 5.79E-05 | 5.6039  |
| nfic      | -1.7521 | 1.7521 | 9.2557 | -5.9021 | 4.45E-05 | 0.000531 | 2.0913  |

|          |         |        |        |         |          |          |         |
|----------|---------|--------|--------|---------|----------|----------|---------|
| ARSG     | -1.7518 | 1.7518 | 7.27   | -12.601 | 7.44E-09 | 2.86E-06 | 10.817  |
| ARNTL    | -1.7504 | 1.7504 | 8.0354 | -6.8862 | 9.01E-06 | 0.000187 | 3.7184  |
| HPGDS    | -1.7503 | 1.7503 | 6.3668 | -5.1386 | 0.000168 | 0.001255 | 0.73588 |
| SP4      | -1.7485 | 1.7485 | 6.9182 | -9.8262 | 1.57E-07 | 1.58E-05 | 7.8105  |
| IRAK1BP1 | -1.7476 | 1.7476 | 5.9316 | -7.3295 | 4.58E-06 | 0.000118 | 4.4068  |
| IFT80    | -1.7469 | 1.7469 | 6.7267 | -7.7766 | 2.38E-06 | 7.91E-05 | 5.0739  |
| HACD3    | -1.746  | 1.746  | 7.7851 | -6.9223 | 8.52E-06 | 0.000179 | 3.7755  |
| GLCCI1   | -1.7437 | 1.7437 | 6.3965 | -9.7797 | 1.66E-07 | 1.63E-05 | 7.7539  |
| ZNF626   | -1.7429 | 1.7429 | 7.566  | -10.217 | 9.84E-08 | 1.15E-05 | 8.2786  |
| TNS1     | -1.7429 | 1.7429 | 7.3733 | -8.7614 | 6.09E-07 | 3.46E-05 | 6.4515  |
| TCTN3    | -1.7428 | 1.7428 | 8.1726 | -5.0955 | 0.000182 | 0.00132  | 0.65706 |
| RWDD2B   | -1.7411 | 1.7411 | 6.6956 | -7.4157 | 4.03E-06 | 0.000109 | 4.5376  |
| GPR155   | -1.7406 | 1.7406 | 8.2464 | -5.1619 | 0.000161 | 0.001222 | 0.77845 |
| SLURP1   | -1.7402 | 1.7402 | 11.538 | -5.2176 | 0.000146 | 0.001144 | 0.87969 |
| FOXP2    | -1.7369 | 1.7369 | 7.2923 | -8.4126 | 9.73E-07 | 4.56E-05 | 5.9776  |
| NMRAL2P  | -1.7362 | 1.7362 | 7.1527 | -6.8584 | 9.41E-06 | 0.000192 | 3.6744  |
| CMC1     | -1.7361 | 1.7361 | 5.9933 | -7.5189 | 3.46E-06 | 9.97E-05 | 4.6928  |
| TYR      | -1.7345 | 1.7345 | 6.5828 | -5.6071 | 7.36E-05 | 0.000737 | 1.577   |
| MIR580   | -1.7325 | 1.7325 | 3.6755 | -4.9274 | 0.000246 | 0.001616 | 0.3476  |
| PHF12    | -1.7307 | 1.7307 | 7.666  | -7.1122 | 6.36E-06 | 0.000146 | 4.0728  |
| PON3     | -1.7301 | 1.7301 | 6.0875 | -5.847  | 4.88E-05 | 0.000564 | 1.9961  |
| ZNF318   | -1.7293 | 1.7293 | 7.5194 | -12.234 | 1.08E-08 | 3.31E-06 | 10.458  |
| SH3RF2   | -1.7292 | 1.7292 | 10.155 | -6.4711 | 1.74E-05 | 0.000284 | 3.0489  |
| ZNF436   | -1.7289 | 1.7289 | 7.8435 | -5.3153 | 0.000123 | 0.001024 | 1.0565  |
| POT1     | -1.7279 | 1.7279 | 6.4691 | -7.6579 | 2.82E-06 | 8.80E-05 | 4.8995  |
| ANKRD10  | -1.7261 | 1.7261 | 7.8719 | -5.2225 | 0.000145 | 0.001136 | 0.88855 |

|          |         |        |        |         |          |          |         |
|----------|---------|--------|--------|---------|----------|----------|---------|
| SCML1    | -1.7243 | 1.7243 | 5.8171 | -6.0479 | 3.48E-05 | 0.000454 | 2.3411  |
| CLK4     | -1.7236 | 1.7236 | 7.5453 | -9.5214 | 2.29E-07 | 1.98E-05 | 7.4345  |
| HPS3     | -1.7234 | 1.7234 | 8.3154 | -9.1017 | 3.90E-07 | 2.65E-05 | 6.9     |
| ZNF43    | -1.7222 | 1.7222 | 7.1152 | -9.303  | 3.01E-07 | 2.29E-05 | 7.1588  |
| PPIL4    | -1.7216 | 1.7216 | 7.2106 | -5.914  | 4.36E-05 | 0.000524 | 2.1119  |
| PAIP2B   | -1.7198 | 1.7198 | 7.6075 | -5.3877 | 0.000108 | 0.000947 | 1.1867  |
| CCDC125  | -1.7179 | 1.7179 | 7.5791 | -7.3711 | 4.30E-06 | 0.000114 | 4.4701  |
| SMIM8    | -1.7173 | 1.7173 | 6.5641 | -6.5312 | 1.58E-05 | 0.000268 | 3.1474  |
| ELMO1    | -1.7164 | 1.7164 | 6.8391 | -6.3291 | 2.19E-05 | 0.000332 | 2.8143  |
| GATAD1   | -1.7155 | 1.7155 | 7.7058 | -7.9062 | 1.97E-06 | 7.06E-05 | 5.2624  |
| STK32A   | -1.7141 | 1.7141 | 6.1238 | -7.3615 | 4.37E-06 | 0.000115 | 4.4555  |
| DMTF1    | -1.7141 | 1.7141 | 8.4786 | -5.7441 | 5.82E-05 | 0.000628 | 1.8173  |
| DST      | -1.713  | 1.713  | 8.0512 | -5.7733 | 5.53E-05 | 0.000612 | 1.8682  |
| KAT6A    | -1.7129 | 1.7129 | 8.6564 | -8.8084 | 5.72E-07 | 3.32E-05 | 6.5144  |
| MRE11    | -1.7115 | 1.7115 | 6.9994 | -8.8056 | 5.74E-07 | 3.33E-05 | 6.5106  |
| ZBTB44   | -1.7101 | 1.7101 | 8.623  | -6.5081 | 1.64E-05 | 0.000274 | 3.1096  |
| DPYD     | -1.7071 | 1.7071 | 7.092  | -5.975  | 3.93E-05 | 0.000491 | 2.2166  |
| FNDC3A   | -1.7057 | 1.7057 | 7.5332 | -5.2298 | 0.000143 | 0.001125 | 0.90178 |
| CENPP    | -1.7043 | 1.7043 | 7.773  | -6.7195 | 1.17E-05 | 0.000222 | 3.4525  |
| KANSL1L  | -1.7042 | 1.7042 | 6.7599 | -9.6606 | 1.93E-07 | 1.80E-05 | 7.6075  |
| USP33    | -1.7    | 1.7    | 6.886  | -4.9224 | 0.000249 | 0.001626 | 0.33831 |
| TMEM168  | -1.6989 | 1.6989 | 7.9338 | -5.1042 | 0.000179 | 0.001304 | 0.67297 |
| PMEL     | -1.695  | 1.695  | 7.3135 | -5.9799 | 3.90E-05 | 0.000489 | 2.2249  |
| PUS7L    | -1.6947 | 1.6947 | 7      | -4.8561 | 0.000281 | 0.001765 | 0.21517 |
| MIR3973  | -1.6899 | 1.6899 | 6.3991 | -6.5095 | 1.63E-05 | 0.000273 | 3.1119  |
| MRPL42P5 | -1.6897 | 1.6897 | 4.8695 | -8.8966 | 5.09E-07 | 3.12E-05 | 6.6314  |

|           |         |        |        |         |          |          |         |
|-----------|---------|--------|--------|---------|----------|----------|---------|
| ZNF284    | -1.6897 | 1.6897 | 6.2519 | -5.8883 | 4.55E-05 | 0.000539 | 2.0675  |
| ANAPC4    | -1.6881 | 1.6881 | 6.7621 | -5.9057 | 4.42E-05 | 0.000529 | 2.0976  |
| PLAGL1    | -1.6879 | 1.6879 | 9.1269 | -8.0783 | 1.55E-06 | 6.10E-05 | 5.5091  |
| dock10    | -1.6876 | 1.6876 | 7.0506 | -8.1184 | 1.46E-06 | 5.92E-05 | 5.566   |
| PLN       | -1.6867 | 1.6867 | 6.2115 | -6.4039 | 1.94E-05 | 0.000307 | 2.9382  |
| ZFP90     | -1.6867 | 1.6867 | 7.2763 | -5.2782 | 0.000131 | 0.001066 | 0.98953 |
| SNX27     | -1.6854 | 1.6854 | 8.0634 | -6.837  | 9.73E-06 | 0.000197 | 3.6404  |
| Mir361    | -1.6844 | 1.6844 | 5.3654 | -7.0503 | 6.99E-06 | 0.000157 | 3.9765  |
| Mir30e    | -1.6838 | 1.6838 | 7.6709 | -10.304 | 8.88E-08 | 1.08E-05 | 8.3801  |
| QSER1     | -1.6832 | 1.6832 | 8.441  | -5.8261 | 5.06E-05 | 0.000578 | 1.96    |
| ZNF326    | -1.6828 | 1.6828 | 8.0175 | -6.1673 | 2.85E-05 | 0.000399 | 2.5434  |
| ZNF462    | -1.6814 | 1.6814 | 7.8708 | -8.7688 | 6.03E-07 | 3.44E-05 | 6.4615  |
| EPC1      | -1.6811 | 1.6811 | 7.2106 | -5.842  | 4.92E-05 | 0.000568 | 1.9875  |
| IRAK3     | -1.6804 | 1.6804 | 6.7371 | -5.1312 | 0.00017  | 0.001266 | 0.72227 |
| RUNX1-IT1 | -1.6801 | 1.6801 | 6.4653 | -7.6729 | 2.76E-06 | 8.66E-05 | 4.9217  |
| CLIC6     | -1.6792 | 1.6792 | 5.6445 | -5.6026 | 7.42E-05 | 0.00074  | 1.569   |
| KLF12     | -1.6778 | 1.6778 | 7.2851 | -7.8755 | 2.06E-06 | 7.21E-05 | 5.2178  |
| CEP170P1  | -1.6777 | 1.6777 | 6.4662 | -6.2714 | 2.40E-05 | 0.000353 | 2.718   |
| IL20RB    | -1.6773 | 1.6773 | 10.564 | -6.4317 | 1.85E-05 | 0.000298 | 2.9841  |
| PREPL     | -1.6769 | 1.6769 | 8.1986 | -6.8269 | 9.88E-06 | 0.000199 | 3.6243  |
| GRHL2     | -1.6768 | 1.6768 | 8.7611 | -5.8535 | 4.83E-05 | 0.00056  | 2.0074  |
| ZBTB40    | -1.676  | 1.676  | 7.785  | -7.2362 | 5.27E-06 | 0.00013  | 4.2643  |
| TSTD3     | -1.6751 | 1.6751 | 6.1731 | -4.8928 | 0.000262 | 0.001685 | 0.28343 |
| MNS1      | -1.6744 | 1.6744 | 6.4902 | -9.5677 | 2.16E-07 | 1.91E-05 | 7.4923  |
| LINC00115 | -1.6737 | 1.6737 | 4.027  | -5.5923 | 7.55E-05 | 0.000748 | 1.5508  |
| CCAR1     | -1.6725 | 1.6725 | 9.3303 | -5.2347 | 0.000142 | 0.001117 | 0.91075 |

|            |         |        |        |         |          |          |         |
|------------|---------|--------|--------|---------|----------|----------|---------|
| BPTF       | -1.6716 | 1.6716 | 9.5432 | -5.8535 | 4.83E-05 | 0.00056  | 2.0074  |
| CCDC14     | -1.6712 | 1.6712 | 8.4604 | -7.2461 | 5.19E-06 | 0.000128 | 4.2794  |
| AHCYL2     | -1.6705 | 1.6705 | 8.3915 | -7.3901 | 4.18E-06 | 0.000112 | 4.4989  |
| CCDC18-AS1 | -1.6687 | 1.6687 | 6.3641 | -11.262 | 3.00E-08 | 5.63E-06 | 9.4535  |
| CFAP44     | -1.6683 | 1.6683 | 6.5664 | -12.277 | 1.03E-08 | 3.26E-06 | 10.501  |
| MTPAP      | -1.6679 | 1.6679 | 7.651  | -5.7423 | 5.83E-05 | 0.000629 | 1.8142  |
| RMND1      | -1.6679 | 1.6679 | 6.0152 | -4.8773 | 0.00027  | 0.001717 | 0.25454 |
| TTC8       | -1.6665 | 1.6665 | 6.4487 | -6.6598 | 1.29E-05 | 0.000236 | 3.3563  |
| THEM4      | -1.6664 | 1.6664 | 6.4759 | -5.528  | 8.45E-05 | 0.000805 | 1.437   |
| DOPEY1     | -1.6661 | 1.6661 | 8.0746 | -6.8943 | 8.90E-06 | 0.000185 | 3.7313  |
| CSAD       | -1.6657 | 1.6657 | 8.0923 | -10.483 | 7.21E-08 | 9.59E-06 | 8.5878  |
| SYCP2      | -1.6655 | 1.6655 | 4.9689 | -10.089 | 1.15E-07 | 1.27E-05 | 8.1272  |
| DIS3L      | -1.6655 | 1.6655 | 7.1577 | -9.1677 | 3.58E-07 | 2.51E-05 | 6.9854  |
| TCERG1     | -1.6644 | 1.6644 | 7.7952 | -7.5304 | 3.40E-06 | 9.85E-05 | 4.71    |
| BBS4       | -1.6639 | 1.6639 | 6.7478 | -7.3609 | 4.37E-06 | 0.000115 | 4.4546  |
| CASQ2      | -1.6635 | 1.6635 | 5.6947 | -6.019  | 3.65E-05 | 0.000467 | 2.2918  |
| OXA1L      | -1.663  | 1.663  | 9.9319 | -8.5442 | 8.14E-07 | 4.03E-05 | 6.1582  |
| SGK494     | -1.6614 | 1.6614 | 7.1071 | -8.1542 | 1.39E-06 | 5.74E-05 | 5.6167  |
| LMLN       | -1.6608 | 1.6608 | 6.9457 | -13.368 | 3.54E-09 | 1.91E-06 | 11.534  |
| ZNF567     | -1.66   | 1.66   | 5.6484 | -7.0557 | 6.93E-06 | 0.000156 | 3.9849  |
| RPE        | -1.6598 | 1.6598 | 6.3284 | -5.8705 | 4.69E-05 | 0.00055  | 2.0368  |
| POGZ       | -1.6571 | 1.6571 | 8.1914 | -5.9748 | 3.93E-05 | 0.000491 | 2.2163  |
| NF1        | -1.6569 | 1.6569 | 8.4763 | -5.1948 | 0.000152 | 0.001175 | 0.83833 |
| TTC17      | -1.6565 | 1.6565 | 8.8628 | -5.0482 | 0.000198 | 0.001389 | 0.57023 |
| CASP8AP2   | -1.6557 | 1.6557 | 6.8964 | -7.5205 | 3.45E-06 | 9.96E-05 | 4.6952  |
| USP40      | -1.6552 | 1.6552 | 6.9926 | -10.323 | 8.69E-08 | 1.08E-05 | 8.4025  |

|              |         |        |        |         |          |          |         |
|--------------|---------|--------|--------|---------|----------|----------|---------|
| MOB1B        | -1.6543 | 1.6543 | 6.6139 | -8.3616 | 1.04E-06 | 4.79E-05 | 5.907   |
| STXBP4       | -1.6528 | 1.6528 | 6.3667 | -8.6978 | 6.62E-07 | 3.64E-05 | 6.3663  |
| RIF1         | -1.6527 | 1.6527 | 8.333  | -5.8863 | 4.57E-05 | 0.000539 | 2.0641  |
| RBL2         | -1.6517 | 1.6517 | 8.0507 | -5.7085 | 6.18E-05 | 0.000655 | 1.7551  |
| ZNF138       | -1.651  | 1.651  | 7.8953 | -6.2128 | 2.65E-05 | 0.000378 | 2.6198  |
| HELZ         | -1.651  | 1.651  | 8.3979 | -5.0549 | 0.000196 | 0.001379 | 0.58261 |
| NEMF         | -1.6503 | 1.6503 | 8.173  | -5.0886 | 0.000184 | 0.00133  | 0.64441 |
| GBP4         | -1.6499 | 1.6499 | 6.4529 | -5.3983 | 0.000106 | 0.000934 | 1.2057  |
| PBX1         | -1.6495 | 1.6495 | 7.3778 | -9.0549 | 4.14E-07 | 2.77E-05 | 6.8392  |
| PRICKLE1     | -1.6492 | 1.6492 | 7.3387 | -6.697  | 1.21E-05 | 0.000227 | 3.4163  |
| MIR4480      | -1.649  | 1.649  | 6.3081 | -6.8764 | 9.15E-06 | 0.000189 | 3.703   |
| PKD2         | -1.6487 | 1.6487 | 7.2188 | -9.0381 | 4.23E-07 | 2.79E-05 | 6.8172  |
| LOC100506730 | -1.6486 | 1.6486 | 7.1918 | -9.1535 | 3.65E-07 | 2.54E-05 | 6.967   |
| IFT88        | -1.6482 | 1.6482 | 6.2281 | -6.6615 | 1.28E-05 | 0.000235 | 3.3591  |
| CAAP1        | -1.6463 | 1.6463 | 7.4718 | -6.2097 | 2.66E-05 | 0.000379 | 2.6147  |
| SLIT2        | -1.6444 | 1.6444 | 7.0589 | -6.7425 | 1.13E-05 | 0.000217 | 3.4894  |
| FBXL4        | -1.6428 | 1.6428 | 8.3322 | -6.149  | 2.94E-05 | 0.000406 | 2.5124  |
| CASD1        | -1.6413 | 1.6413 | 7.3557 | -6.9266 | 8.46E-06 | 0.000179 | 3.7823  |
| RPAP3        | -1.6404 | 1.6404 | 7.0293 | -4.9409 | 0.00024  | 0.001588 | 0.37246 |
| ARHGAP31     | -1.6386 | 1.6386 | 7.5483 | -10.313 | 8.79E-08 | 1.08E-05 | 8.3905  |
| CXCL12       | -1.6375 | 1.6375 | 7.9729 | -8.4043 | 9.84E-07 | 4.59E-05 | 5.9662  |
| CPED1        | -1.6373 | 1.6373 | 6.7994 | -6.1545 | 2.91E-05 | 0.000404 | 2.5218  |
| ZNF26        | -1.6364 | 1.6364 | 6.8321 | -8.6242 | 7.31E-07 | 3.80E-05 | 6.2669  |
| PRPF4B       | -1.6359 | 1.6359 | 8.2342 | -5.6595 | 6.73E-05 | 0.000695 | 1.6693  |
| TCF12        | -1.6347 | 1.6347 | 8.0566 | -7.6895 | 2.69E-06 | 8.63E-05 | 4.9461  |
| ZNF732       | -1.6342 | 1.6342 | 6.3555 | -5.0603 | 0.000194 | 0.00137  | 0.5925  |



|           |         |        |        |         |          |          |         |
|-----------|---------|--------|--------|---------|----------|----------|---------|
| TTC3      | -1.6303 | 1.6303 | 9.0587 | -6.4065 | 1.93E-05 | 0.000307 | 2.9426  |
| EMSY      | -1.6299 | 1.6299 | 7.3512 | -5.8957 | 4.49E-05 | 0.000533 | 2.0804  |
| FOXN3     | -1.6297 | 1.6297 | 9.1609 | -9.0518 | 4.16E-07 | 2.77E-05 | 6.835   |
| CAPRIN2   | -1.6297 | 1.6297 | 7.5891 | -7.0531 | 6.96E-06 | 0.000156 | 3.9809  |
| MPDZ      | -1.6291 | 1.6291 | 6.6447 | -10.28  | 9.14E-08 | 1.11E-05 | 8.3517  |
| STARD7    | -1.6287 | 1.6287 | 9.0678 | -6.4545 | 1.79E-05 | 0.00029  | 3.0215  |
| BCL9      | -1.6283 | 1.6283 | 8.1128 | -8.0249 | 1.67E-06 | 6.37E-05 | 5.4329  |
| TATDN1    | -1.6269 | 1.6269 | 5.8927 | -6.8126 | 1.01E-05 | 0.000202 | 3.6016  |
| YLPM1     | -1.6267 | 1.6267 | 7.4958 | -7.9723 | 1.80E-06 | 6.67E-05 | 5.3576  |
| TPTE2P5   | -1.6261 | 1.6261 | 5.1006 | -7.4839 | 3.64E-06 | 0.000103 | 4.6402  |
| ACACB     | -1.6226 | 1.6226 | 6.8018 | -8.5166 | 8.45E-07 | 4.14E-05 | 6.1205  |
| MIPOL1    | -1.6225 | 1.6225 | 6.1425 | -10.353 | 8.39E-08 | 1.06E-05 | 8.4375  |
| NAALADL2  | -1.6209 | 1.6209 | 5.5102 | -8.6323 | 7.23E-07 | 3.78E-05 | 6.2778  |
| THAP9-AS1 | -1.6187 | 1.6187 | 7.0498 | -6.1319 | 3.03E-05 | 0.000414 | 2.4836  |
| QPCT      | -1.6162 | 1.6162 | 6.5315 | -7.7974 | 2.31E-06 | 7.77E-05 | 5.1043  |
| PHIP      | -1.6161 | 1.6161 | 8.6812 | -4.9709 | 0.000228 | 0.00153  | 0.42797 |
| TMEM128   | -1.6159 | 1.6159 | 7.7092 | -7.3093 | 4.72E-06 | 0.00012  | 4.3761  |
| PTCD3     | -1.6147 | 1.6147 | 7.9218 | -5.14   | 0.000168 | 0.001253 | 0.73836 |
| RHOT1     | -1.6146 | 1.6146 | 9.0825 | -5.1745 | 0.000158 | 0.001202 | 0.80136 |
| CEP95     | -1.6134 | 1.6134 | 8.3282 | -5.4794 | 9.19E-05 | 0.000851 | 1.3505  |
| CAPN7     | -1.61   | 1.61   | 8.2602 | -5.6709 | 6.59E-05 | 0.000686 | 1.6893  |
| PMS2      | -1.6089 | 1.6089 | 6.8247 | -6.1079 | 3.15E-05 | 0.000426 | 2.443   |
| KIAA1324  | -1.6087 | 1.6087 | 7.3468 | -9.0031 | 4.43E-07 | 2.86E-05 | 6.7715  |
| TRIM44    | -1.6084 | 1.6084 | 8.081  | -5.1266 | 0.000172 | 0.00127  | 0.71394 |
| TNRC6A    | -1.6083 | 1.6083 | 8.0454 | -6.493  | 1.68E-05 | 0.000277 | 3.0848  |
| ZBTB14    | -1.608  | 1.608  | 7.2331 | -6.349  | 2.12E-05 | 0.000326 | 2.8473  |

|          |         |        |        |         |          |          |         |
|----------|---------|--------|--------|---------|----------|----------|---------|
| ZFP14    | -1.6078 | 1.6078 | 6.0738 | -7.9026 | 1.98E-06 | 7.06E-05 | 5.2572  |
| arhgap24 | -1.607  | 1.607  | 6.952  | -7.2508 | 5.16E-06 | 0.000128 | 4.2866  |
| RPL32P3  | -1.6069 | 1.6069 | 7.1715 | -9.5447 | 2.22E-07 | 1.94E-05 | 7.4637  |
| NSMCE4A  | -1.6064 | 1.6064 | 7.4296 | -5.8621 | 4.76E-05 | 0.000556 | 2.0223  |
| DMXL2    | -1.6046 | 1.6046 | 7.393  | -7.1891 | 5.66E-06 | 0.000136 | 4.1917  |
| GLTSCR1L | -1.6043 | 1.6043 | 7.9224 | -8.951  | 4.74E-07 | 2.99E-05 | 6.703   |
| CCDC66   | -1.6029 | 1.6029 | 6.2411 | -6.0728 | 3.34E-05 | 0.000441 | 2.3834  |
| ZFP3     | -1.6028 | 1.6028 | 7.5908 | -8.4234 | 9.59E-07 | 4.52E-05 | 5.9924  |
| KLF8     | -1.6014 | 1.6014 | 8.4523 | -6.3869 | 1.99E-05 | 0.000313 | 2.9101  |
| CEP76    | -1.6011 | 1.6011 | 7.1747 | -4.9    | 0.000259 | 0.001669 | 0.29684 |
| PRRX1    | -1.601  | 1.601  | 7.7939 | -5.9447 | 4.14E-05 | 0.000507 | 2.1646  |
| TRIM22   | -1.6005 | 1.6005 | 6.8689 | -8.0977 | 1.50E-06 | 6.02E-05 | 5.5367  |
| ALMS1    | -1.5999 | 1.5999 | 7.0346 | -9.0363 | 4.24E-07 | 2.79E-05 | 6.8149  |
| scaf8    | -1.5995 | 1.5995 | 7.0775 | -8.9252 | 4.90E-07 | 3.06E-05 | 6.6691  |
| ZNF638   | -1.5985 | 1.5985 | 8.199  | -6.4971 | 1.67E-05 | 0.000276 | 3.0915  |
| ERAP1    | -1.5981 | 1.5981 | 7.6214 | -5.769  | 5.57E-05 | 0.000614 | 1.8608  |
| ATR      | -1.5965 | 1.5965 | 7.0494 | -6.3733 | 2.04E-05 | 0.000317 | 2.8876  |
| DDX60    | -1.5954 | 1.5954 | 6.8213 | -7.4608 | 3.77E-06 | 0.000105 | 4.6056  |
| PCLO     | -1.5951 | 1.5951 | 5.9739 | -8.1602 | 1.38E-06 | 5.71E-05 | 5.6251  |
| TERF1    | -1.5951 | 1.5951 | 6.8079 | -7.5755 | 3.18E-06 | 9.46E-05 | 4.7772  |
| SETD2    | -1.5947 | 1.5947 | 8.3886 | -5.9224 | 4.30E-05 | 0.000519 | 2.1264  |
| POLR3C   | -1.5944 | 1.5944 | 7.8564 | -4.8662 | 0.000276 | 0.001742 | 0.23392 |
| parp2    | -1.5937 | 1.5937 | 6.8827 | -8.6212 | 7.34E-07 | 3.81E-05 | 6.2629  |
| FGF2     | -1.5931 | 1.5931 | 7.0921 | -4.8809 | 0.000268 | 0.001711 | 0.26138 |
| SEPSECS  | -1.5924 | 1.5924 | 7.5291 | -8.5752 | 7.81E-07 | 3.93E-05 | 6.2004  |
| CCND1    | -1.5886 | 1.5886 | 8.8701 | -7.6686 | 2.78E-06 | 8.69E-05 | 4.9153  |

|           |         |        |        |         |          |          |         |
|-----------|---------|--------|--------|---------|----------|----------|---------|
| ZEB2      | -1.5873 | 1.5873 | 6.7444 | -9.7198 | 1.79E-07 | 1.71E-05 | 7.6804  |
| Znf763    | -1.5873 | 1.5873 | 5.3953 | -5.583  | 7.68E-05 | 0.000757 | 1.5345  |
| SPICE1    | -1.5869 | 1.5869 | 7.0824 | -9.8159 | 1.59E-07 | 1.58E-05 | 7.798   |
| BCL2      | -1.5857 | 1.5857 | 6.1824 | -7.6226 | 2.97E-06 | 9.09E-05 | 4.8472  |
| ENOSF1    | -1.5843 | 1.5843 | 8.4184 | -7.4143 | 4.04E-06 | 0.00011  | 4.5354  |
| EPHB6     | -1.5839 | 1.5839 | 7.8512 | -5.0753 | 0.000188 | 0.001347 | 0.61997 |
| ZNF256    | -1.5826 | 1.5826 | 6.7368 | -8.0274 | 1.66E-06 | 6.36E-05 | 5.4366  |
| C6orf163  | -1.5822 | 1.5822 | 5.5542 | -9.3737 | 2.76E-07 | 2.20E-05 | 7.2487  |
| THAP6     | -1.5809 | 1.5809 | 5.4636 | -10.063 | 1.18E-07 | 1.28E-05 | 8.096   |
| TMEM19    | -1.5802 | 1.5802 | 7.4891 | -4.9242 | 0.000248 | 0.001623 | 0.34152 |
| IGFBP5    | -1.579  | 1.579  | 8.7552 | -7.5516 | 3.30E-06 | 9.67E-05 | 4.7416  |
| NBN       | -1.5789 | 1.5789 | 7.4627 | -5.2159 | 0.000146 | 0.001146 | 0.87654 |
| MGA       | -1.5765 | 1.5765 | 8.283  | -6.0335 | 3.56E-05 | 0.00046  | 2.3165  |
| RRAGB     | -1.5762 | 1.5762 | 6.6628 | -8.9608 | 4.68E-07 | 2.98E-05 | 6.716   |
| ZNF737    | -1.5758 | 1.5758 | 6.5232 | -6.3101 | 2.26E-05 | 0.000339 | 2.7826  |
| AHCTF1    | -1.5747 | 1.5747 | 8.4546 | -5.1521 | 0.000164 | 0.001237 | 0.7605  |
| znf347    | -1.5746 | 1.5746 | 5.5902 | -9.6866 | 1.87E-07 | 1.77E-05 | 7.6396  |
| TMA16     | -1.5735 | 1.5735 | 6.9512 | -6.3917 | 1.98E-05 | 0.000311 | 2.918   |
| ANKRD35   | -1.573  | 1.573  | 6.9653 | -6.3085 | 2.26E-05 | 0.00034  | 2.7799  |
| TMEM260   | -1.5722 | 1.5722 | 6.7895 | -5.5114 | 8.69E-05 | 0.000821 | 1.4076  |
| RECK      | -1.5721 | 1.5721 | 7.4276 | -6.318  | 2.23E-05 | 0.000336 | 2.7957  |
| STX17-AS1 | -1.5714 | 1.5714 | 6.4457 | -5.2919 | 0.000128 | 0.001051 | 1.0142  |
| TXNDC16   | -1.5696 | 1.5696 | 5.481  | -6.8087 | 1.02E-05 | 0.000202 | 3.5953  |
| PAPOLG    | -1.5664 | 1.5664 | 7.8269 | -4.9545 | 0.000235 | 0.001561 | 0.39772 |
| CLCC1     | -1.5662 | 1.5662 | 7.7039 | -5.2497 | 0.000138 | 0.001099 | 0.93795 |
| PMS2P4    | -1.5659 | 1.5659 | 7.5665 | -8.0993 | 1.50E-06 | 6.01E-05 | 5.539   |

|          |         |        |        |         |          |          |         |
|----------|---------|--------|--------|---------|----------|----------|---------|
| TBX3     | -1.5654 | 1.5654 | 8.5071 | -5.8624 | 4.75E-05 | 0.000556 | 2.0229  |
| POGLUT1  | -1.5635 | 1.5635 | 6.7186 | -6.2967 | 2.31E-05 | 0.000343 | 2.7602  |
| KPNA5    | -1.5621 | 1.5621 | 7.026  | -6.1322 | 3.02E-05 | 0.000414 | 2.4842  |
| CEP170   | -1.5614 | 1.5614 | 7.1614 | -7.6816 | 2.73E-06 | 8.65E-05 | 4.9344  |
| WFDC21P  | -1.5612 | 1.5612 | 5.9903 | -5.2983 | 0.000126 | 0.001043 | 1.0258  |
| ZNF782   | -1.5607 | 1.5607 | 6.286  | -6.785  | 1.06E-05 | 0.000207 | 3.5575  |
| MITF     | -1.5599 | 1.5599 | 6.5902 | -7.898  | 2.00E-06 | 7.07E-05 | 5.2504  |
| AQP7P3   | -1.558  | 1.558  | 6.054  | -4.9015 | 0.000258 | 0.001667 | 0.2995  |
| atf2     | -1.5579 | 1.5579 | 8.606  | -6.9058 | 8.74E-06 | 0.000183 | 3.7494  |
| LETMD1   | -1.5576 | 1.5576 | 7.6891 | -9.6498 | 1.95E-07 | 1.82E-05 | 7.5942  |
| STAG1    | -1.5574 | 1.5574 | 7.3293 | -5.1083 | 0.000178 | 0.001297 | 0.68043 |
| KIAA1107 | -1.5558 | 1.5558 | 5.4616 | -9.7502 | 1.73E-07 | 1.67E-05 | 7.7177  |
| ZNF345   | -1.5557 | 1.5557 | 5.9555 | -9.3316 | 2.91E-07 | 2.24E-05 | 7.1952  |
| ZNF438   | -1.554  | 1.554  | 6.3943 | -6.8003 | 1.03E-05 | 0.000204 | 3.5819  |
| EFNA4    | -1.5538 | 1.5538 | 7.7498 | -5.1    | 0.00018  | 0.001312 | 0.66537 |
| ZNF10    | -1.5511 | 1.5511 | 5.7265 | -7.6791 | 2.73E-06 | 8.65E-05 | 4.9308  |
| NEGR1    | -1.5508 | 1.5508 | 6.9104 | -8.5753 | 7.81E-07 | 3.93E-05 | 6.2006  |
| GHR      | -1.548  | 1.548  | 6.1966 | -7.3512 | 4.43E-06 | 0.000116 | 4.4399  |
| EFHC2    | -1.548  | 1.548  | 5.5693 | -6.2315 | 2.57E-05 | 0.00037  | 2.6513  |
| TPM1     | -1.5469 | 1.5469 | 7.5895 | -9.8623 | 1.51E-07 | 1.53E-05 | 7.8543  |
| R3HDM2   | -1.5467 | 1.5467 | 8.5384 | -6.8768 | 9.14E-06 | 0.000189 | 3.7035  |
| MIR143   | -1.5452 | 1.5452 | 5.9932 | -7.1693 | 5.83E-06 | 0.000139 | 4.1612  |
| CCZ1     | -1.5438 | 1.5438 | 6.9222 | -8.0673 | 1.57E-06 | 6.13E-05 | 5.4934  |
| SUMO4    | -1.5437 | 1.5437 | 7.0525 | -4.9421 | 0.00024  | 0.001585 | 0.37473 |
| UBL7-AS1 | -1.539  | 1.539  | 6.4759 | -7.3645 | 4.35E-06 | 0.000115 | 4.46    |
| RCAN2    | -1.539  | 1.539  | 7.5788 | -6.5668 | 1.49E-05 | 0.000259 | 3.2054  |

|          |         |        |        |         |          |          |         |
|----------|---------|--------|--------|---------|----------|----------|---------|
| PTGFR    | -1.538  | 1.538  | 6.8722 | -4.9914 | 0.000219 | 0.001492 | 0.46574 |
| SPCS2    | -1.5362 | 1.5362 | 7.2449 | -4.8751 | 0.000271 | 0.001721 | 0.25058 |
| ZFP62    | -1.5358 | 1.5358 | 6.8018 | -7.2506 | 5.16E-06 | 0.000128 | 4.2863  |
| CEP295   | -1.5338 | 1.5338 | 6.1355 | -8.236  | 1.24E-06 | 5.36E-05 | 5.7319  |
| c12orf66 | -1.5336 | 1.5336 | 6.87   | -6.4308 | 1.85E-05 | 0.000298 | 2.9826  |
| TRMT13   | -1.5326 | 1.5326 | 7.2542 | -7.4292 | 3.95E-06 | 0.000108 | 4.5579  |
| TTC13    | -1.5326 | 1.5326 | 7.9776 | -6.117  | 3.10E-05 | 0.000422 | 2.4584  |
| MEIS1    | -1.5324 | 1.5324 | 7.2101 | -6.7074 | 1.19E-05 | 0.000225 | 3.433   |
| TMEM67   | -1.5318 | 1.5318 | 6.113  | -8.1892 | 1.32E-06 | 5.59E-05 | 5.6661  |
| DISP1    | -1.5318 | 1.5318 | 6.3856 | -7.3267 | 4.60E-06 | 0.000118 | 4.4026  |
| ZSCAN26  | -1.5311 | 1.5311 | 7.0426 | -8.0114 | 1.70E-06 | 6.46E-05 | 5.4136  |
| SBF2     | -1.5303 | 1.5303 | 8.6956 | -6.0426 | 3.51E-05 | 0.000457 | 2.3321  |
| DENND4A  | -1.5302 | 1.5302 | 8.0356 | -6.0409 | 3.52E-05 | 0.000457 | 2.3292  |
| MFSD8    | -1.5289 | 1.5289 | 8.2481 | -7.3041 | 4.76E-06 | 0.000121 | 4.3682  |
| VPS45    | -1.5289 | 1.5289 | 8.5251 | -5.447  | 9.73E-05 | 0.000883 | 1.2928  |
| RBM45    | -1.5272 | 1.5272 | 6.8961 | -5.3367 | 0.000118 | 0.001001 | 1.0951  |
| KMT2C    | -1.5257 | 1.5257 | 10.179 | -4.9628 | 0.000231 | 0.001545 | 0.41296 |
| CCDC171  | -1.5252 | 1.5252 | 5.6668 | -7.9479 | 1.86E-06 | 6.83E-05 | 5.3225  |
| TMEM209  | -1.5245 | 1.5245 | 7.5567 | -5.3947 | 0.000107 | 0.000939 | 1.1993  |
| PXK      | -1.5244 | 1.5244 | 8.1301 | -6.4156 | 1.90E-05 | 0.000304 | 2.9576  |
| TOP1P1   | -1.5233 | 1.5233 | 4.8209 | -8.4021 | 9.87E-07 | 4.60E-05 | 5.963   |
| ANKIB1   | -1.5229 | 1.5229 | 9.4301 | -4.904  | 0.000257 | 0.001662 | 0.30425 |
| CCNT1    | -1.5221 | 1.5221 | 8.0766 | -6.1073 | 3.15E-05 | 0.000426 | 2.442   |
| DMD      | -1.5212 | 1.5212 | 6.4644 | -12.149 | 1.18E-08 | 3.39E-06 | 10.374  |
| FAM120C  | -1.5212 | 1.5212 | 6.5622 | -9.1088 | 3.86E-07 | 2.64E-05 | 6.9091  |
| HEATR6   | -1.5179 | 1.5179 | 8.2433 | -6.6892 | 1.23E-05 | 0.000229 | 3.4037  |

|           |         |        |        |         |          |          |         |
|-----------|---------|--------|--------|---------|----------|----------|---------|
| alpk1     | -1.5178 | 1.5178 | 7.3419 | -9.7928 | 1.64E-07 | 1.62E-05 | 7.7698  |
| TDRD3     | -1.5169 | 1.5169 | 7.913  | -6.6223 | 1.36E-05 | 0.000245 | 3.2956  |
| tmem245   | -1.5169 | 1.5169 | 8.0694 | -5.2139 | 0.000147 | 0.001148 | 0.87296 |
| HMGCS2    | -1.5157 | 1.5157 | 6.5265 | -5.8223 | 5.09E-05 | 0.00058  | 1.9533  |
| TPP2      | -1.5156 | 1.5156 | 8.4311 | -5.3391 | 0.000118 | 0.000999 | 1.0993  |
| VGLL3     | -1.5154 | 1.5154 | 7.594  | -5.3106 | 0.000124 | 0.00103  | 1.048   |
| UVRAG     | -1.5153 | 1.5153 | 8.1072 | -7.2533 | 5.14E-06 | 0.000128 | 4.2905  |
| MIR567    | -1.5147 | 1.5147 | 4.5108 | -6.975  | 7.85E-06 | 0.00017  | 3.8585  |
| TMEM254   | -1.5143 | 1.5143 | 7.6673 | -5.3026 | 0.000126 | 0.001038 | 1.0336  |
| CRBN      | -1.5125 | 1.5125 | 7.9646 | -9.3778 | 2.74E-07 | 2.19E-05 | 7.2539  |
| EPHA4     | -1.5121 | 1.5121 | 7.7286 | -7.1189 | 6.30E-06 | 0.000146 | 4.0832  |
| POLI      | -1.5112 | 1.5112 | 7.4639 | -5.8318 | 5.01E-05 | 0.000574 | 1.9698  |
| FAT4      | -1.5107 | 1.5107 | 7.3564 | -7.4335 | 3.92E-06 | 0.000108 | 4.5645  |
| CCDC7     | -1.5105 | 1.5105 | 5.5637 | -9.2582 | 3.19E-07 | 2.34E-05 | 7.1016  |
| dcaf8     | -1.5102 | 1.5102 | 7.0928 | -5.9361 | 4.20E-05 | 0.000512 | 2.1498  |
| PDGFRL    | -1.5102 | 1.5102 | 6.7993 | -5.401  | 0.000105 | 0.000932 | 1.2106  |
| LOC440300 | -1.509  | 1.509  | 4.8201 | -5.1596 | 0.000162 | 0.001225 | 0.77416 |
| WDR35     | -1.5071 | 1.5071 | 6.1155 | -7.4719 | 3.71E-06 | 0.000104 | 4.6222  |
| LYPLAL1   | -1.5061 | 1.5061 | 7.1154 | -7.7794 | 2.37E-06 | 7.90E-05 | 5.0781  |
| NBR2      | -1.5032 | 1.5032 | 6.8596 | -6.5718 | 1.48E-05 | 0.000258 | 3.2136  |
| SMAD5     | -1.503  | 1.503  | 7.9516 | -5.3435 | 0.000117 | 0.000994 | 1.1072  |
| RGL1      | -1.4998 | 1.4998 | 7.9251 | -9.347  | 2.85E-07 | 2.22E-05 | 7.2148  |
| ZNF614    | -1.4981 | 1.4981 | 7.079  | -6.686  | 1.23E-05 | 0.000229 | 3.3985  |
| ZNF615    | -1.497  | 1.497  | 5.4292 | -6.4321 | 1.85E-05 | 0.000297 | 2.9848  |
| ZNF649    | -1.4964 | 1.4964 | 6.8809 | -6.9157 | 8.61E-06 | 0.00018  | 3.7651  |
| C6orf203  | -1.4953 | 1.4953 | 6.4801 | -6.9494 | 8.17E-06 | 0.000175 | 3.8183  |

|           |         |        |        |         |          |          |         |
|-----------|---------|--------|--------|---------|----------|----------|---------|
| CRNDE     | -1.4907 | 1.4907 | 7.0107 | -6.5055 | 1.64E-05 | 0.000274 | 3.1053  |
| MAP4K5    | -1.4901 | 1.4901 | 9.3876 | -5.6252 | 7.14E-05 | 0.000721 | 1.6088  |
| gosr1     | -1.4901 | 1.4901 | 8.6094 | -5.0611 | 0.000193 | 0.001369 | 0.59395 |
| ZNF566    | -1.49   | 1.49   | 5.8696 | -7.0502 | 6.99E-06 | 0.000157 | 3.9763  |
| HERC2P3   | -1.4893 | 1.4893 | 8.9688 | -7.2704 | 5.01E-06 | 0.000125 | 4.3166  |
| ARMC10    | -1.4882 | 1.4882 | 7.6062 | -5.3309 | 0.000119 | 0.001007 | 1.0847  |
| LOC728613 | -1.4838 | 1.4838 | 5.0488 | -6.352  | 2.11E-05 | 0.000324 | 2.8523  |
| ZNF599    | -1.4833 | 1.4833 | 4.7144 | -7.4075 | 4.08E-06 | 0.00011  | 4.5252  |
| CDCA7     | -1.4833 | 1.4833 | 6.3187 | -6.7131 | 1.18E-05 | 0.000223 | 3.4422  |
| CBR4      | -1.4809 | 1.4809 | 7.5827 | -6.4039 | 1.94E-05 | 0.000307 | 2.9382  |
| mipep     | -1.4806 | 1.4806 | 7.0532 | -4.9229 | 0.000248 | 0.001625 | 0.33918 |
| ZNF774    | -1.48   | 1.48   | 6.8469 | -6.5421 | 1.55E-05 | 0.000266 | 3.1652  |
| RBM41     | -1.48   | 1.48   | 7.0692 | -6.2515 | 2.48E-05 | 0.000361 | 2.6848  |
| c16orf70  | -1.4798 | 1.4798 | 9.7174 | -5.2464 | 0.000139 | 0.001103 | 0.932   |
| TRAPPC13  | -1.4796 | 1.4796 | 6.446  | -5.6706 | 6.60E-05 | 0.000686 | 1.6886  |
| ZNF350    | -1.4792 | 1.4792 | 6.2033 | -6.2507 | 2.49E-05 | 0.000362 | 2.6835  |
| CCDC112   | -1.4786 | 1.4786 | 5.1721 | -5.2832 | 0.00013  | 0.00106  | 0.99846 |
| FMO4      | -1.4781 | 1.4781 | 6.5106 | -6.0972 | 3.21E-05 | 0.00043  | 2.4248  |
| ZNF266    | -1.4767 | 1.4767 | 7.7975 | -5.6787 | 6.51E-05 | 0.000679 | 1.703   |
| ice2      | -1.475  | 1.475  | 7.8693 | -5.7502 | 5.76E-05 | 0.000625 | 1.828   |
| N4BP2L1   | -1.4737 | 1.4737 | 6.1432 | -6.4934 | 1.68E-05 | 0.000277 | 3.0856  |
| TP53INP1  | -1.4728 | 1.4728 | 8.1389 | -5.4336 | 9.96E-05 | 0.000897 | 1.269   |
| c14orf159 | -1.4726 | 1.4726 | 7.2265 | -9.5467 | 2.22E-07 | 1.94E-05 | 7.4662  |
| NOL8      | -1.4725 | 1.4725 | 7.4726 | -7.5168 | 3.47E-06 | 1.00E-04 | 4.6896  |
| GIGYF2    | -1.4723 | 1.4723 | 7.3882 | -7.3017 | 4.77E-06 | 0.000121 | 4.3646  |
| TMEM161B  | -1.4723 | 1.4723 | 6.8911 | -5.9491 | 4.11E-05 | 0.000504 | 2.1722  |

|           |         |        |        |         |          |          |         |
|-----------|---------|--------|--------|---------|----------|----------|---------|
| EXOSC7    | -1.4722 | 1.4722 | 7.4137 | -8.0431 | 1.62E-06 | 6.30E-05 | 5.4589  |
| MAP2K6    | -1.4722 | 1.4722 | 5.7926 | -7.1745 | 5.79E-06 | 0.000138 | 4.1693  |
| EDRF1     | -1.4714 | 1.4714 | 7.2244 | -7.3879 | 4.20E-06 | 0.000112 | 4.4955  |
| TRMT11    | -1.4696 | 1.4696 | 6.5491 | -7.0778 | 6.70E-06 | 0.000152 | 4.0193  |
| ZNF621    | -1.4691 | 1.4691 | 7.1646 | -9.8651 | 1.50E-07 | 1.53E-05 | 7.8577  |
| MIR4317   | -1.4681 | 1.4681 | 3.4408 | -6.6053 | 1.40E-05 | 0.000249 | 3.268   |
| LINC00174 | -1.4664 | 1.4664 | 5.8445 | -7.9531 | 1.85E-06 | 6.80E-05 | 5.3299  |
| NSMAF     | -1.4654 | 1.4654 | 7.933  | -5.5499 | 8.13E-05 | 0.000787 | 1.4759  |
| HEATR1    | -1.4642 | 1.4642 | 8.2826 | -5.4754 | 9.26E-05 | 0.000854 | 1.3435  |
| HYKK      | -1.4626 | 1.4626 | 6.6798 | -6.6661 | 1.27E-05 | 0.000235 | 3.3665  |
| STAMBPL1  | -1.4624 | 1.4624 | 6.8202 | -8.4961 | 8.69E-07 | 4.22E-05 | 6.0924  |
| KIAA1328  | -1.4621 | 1.4621 | 8.0557 | -9.335  | 2.89E-07 | 2.23E-05 | 7.1996  |
| FRMD4B    | -1.4615 | 1.4615 | 7.2609 | -5.3072 | 0.000124 | 0.001033 | 1.0419  |
| MRPL42    | -1.4609 | 1.4609 | 7.0234 | -5.0461 | 0.000199 | 0.001393 | 0.56648 |
| HSD17B11  | -1.4598 | 1.4598 | 7.303  | -5.0673 | 0.000191 | 0.001359 | 0.60542 |
| MTX3      | -1.4597 | 1.4597 | 7.0082 | -5.8361 | 4.97E-05 | 0.000572 | 1.9774  |
| NOV       | -1.4591 | 1.4591 | 6.5866 | -5.7517 | 5.74E-05 | 0.000624 | 1.8307  |
| ARL5A     | -1.4584 | 1.4584 | 8.986  | -5.424  | 0.000101 | 0.000908 | 1.2517  |
| L2HGDH    | -1.4583 | 1.4583 | 6.0756 | -8.1808 | 1.34E-06 | 5.62E-05 | 5.6543  |
| C5        | -1.4579 | 1.4579 | 6.1104 | -7.3106 | 4.71E-06 | 0.00012  | 4.3781  |
| LSG1      | -1.4572 | 1.4572 | 8.255  | -5.6956 | 6.32E-05 | 0.000666 | 1.7326  |
| MAST3     | -1.4557 | 1.4557 | 7.6166 | -5.05   | 0.000197 | 0.001386 | 0.57368 |
| GSTM4     | -1.4537 | 1.4537 | 6.6769 | -7.442  | 3.87E-06 | 0.000107 | 4.5773  |
| atxn7     | -1.4535 | 1.4535 | 8.6532 | -6.8518 | 9.50E-06 | 0.000194 | 3.664   |
| ENPP5     | -1.4529 | 1.4529 | 5.7788 | -7.6617 | 2.81E-06 | 8.76E-05 | 4.9051  |
| INTS3     | -1.4525 | 1.4525 | 8.3514 | -5.9486 | 4.11E-05 | 0.000505 | 2.1714  |



|              |         |        |        |         |          |          |         |
|--------------|---------|--------|--------|---------|----------|----------|---------|
| TMEM63A      | -1.4518 | 1.4518 | 7.6194 | -10.224 | 9.76E-08 | 1.15E-05 | 8.2862  |
| c5orf42      | -1.4516 | 1.4516 | 6.9929 | -7.516  | 3.47E-06 | 1.00E-04 | 4.6883  |
| GPR89B       | -1.4498 | 1.4498 | 8.411  | -7.184  | 5.70E-06 | 0.000137 | 4.1839  |
| C11orf57     | -1.449  | 1.449  | 6.5439 | -4.9595 | 0.000232 | 0.001551 | 0.40682 |
| LOC100129550 | -1.4486 | 1.4486 | 7.4233 | -6.7446 | 1.12E-05 | 0.000216 | 3.4928  |
| TSTD2        | -1.4483 | 1.4483 | 6.8677 | -6.5693 | 1.48E-05 | 0.000258 | 3.2095  |
| ZNF518A      | -1.4479 | 1.4479 | 6.5808 | -8.6959 | 6.64E-07 | 3.64E-05 | 6.3637  |
| ANAPC5       | -1.4474 | 1.4474 | 8.6675 | -5.2756 | 0.000132 | 0.001069 | 0.98482 |
| METTL14      | -1.4474 | 1.4474 | 8.0959 | -5.1998 | 0.000151 | 0.001167 | 0.84734 |
| CDK12        | -1.4458 | 1.4458 | 8.1557 | -6.5521 | 1.53E-05 | 0.000263 | 3.1815  |
| MIR591       | -1.4453 | 1.4453 | 5.282  | -5.794  | 5.34E-05 | 0.000598 | 1.9042  |
| FCHSD2       | -1.4432 | 1.4432 | 7.2096 | -6.4869 | 1.69E-05 | 0.000279 | 3.0748  |
| ZC3H13       | -1.4408 | 1.4408 | 8.1963 | -6.6144 | 1.38E-05 | 0.000247 | 3.2827  |
| SSBP2        | -1.4403 | 1.4403 | 8.0453 | -6.9779 | 7.82E-06 | 0.00017  | 3.8631  |
| ANXA4        | -1.4385 | 1.4385 | 9.1932 | -5.532  | 8.39E-05 | 0.000804 | 1.4441  |
| MCC          | -1.4381 | 1.4381 | 8.3066 | -5.1138 | 0.000176 | 0.00129  | 0.69054 |
| PAN3         | -1.4377 | 1.4377 | 8.9186 | -5.8488 | 4.86E-05 | 0.000563 | 1.9994  |
| ACSS3        | -1.4371 | 1.4371 | 6.0918 | -5.5532 | 8.08E-05 | 0.000785 | 1.4817  |
| LINC01004    | -1.437  | 1.437  | 6.3969 | -6.3815 | 2.01E-05 | 0.000314 | 2.9011  |
| SH3BGRL2     | -1.4314 | 1.4314 | 8.0869 | -6.3684 | 2.05E-05 | 0.000319 | 2.8795  |
| CCDC191      | -1.4289 | 1.4289 | 6.0931 | -8.0025 | 1.72E-06 | 6.48E-05 | 5.4008  |
| KDM3B        | -1.427  | 1.427  | 8.3637 | -6.3161 | 2.23E-05 | 0.000336 | 2.7926  |
| ANKRD26      | -1.4267 | 1.4267 | 6.5916 | -7.4583 | 3.78E-06 | 0.000106 | 4.6018  |
| USF3         | -1.4262 | 1.4262 | 8.6313 | -5.7017 | 6.25E-05 | 0.00066  | 1.7432  |
| ADNP         | -1.4258 | 1.4258 | 8.7226 | -5.4701 | 9.34E-05 | 0.00086  | 1.334   |
| GATAD2B      | -1.4254 | 1.4254 | 9.5127 | -5.5006 | 8.86E-05 | 0.000831 | 1.3883  |

|                   |         |        |        |         |          |          |         |
|-------------------|---------|--------|--------|---------|----------|----------|---------|
| MIRLET7G          | -1.4251 | 1.4251 | 6.8235 | -5.44   | 9.85E-05 | 0.000891 | 1.2804  |
| arhgap18          | -1.4247 | 1.4247 | 6.7478 | -5.6931 | 6.35E-05 | 0.000668 | 1.7282  |
| FRK               | -1.4244 | 1.4244 | 6.2318 | -6.6665 | 1.27E-05 | 0.000234 | 3.3671  |
| EPN2-IT1          | -1.4242 | 1.4242 | 7.6821 | -6.7377 | 1.14E-05 | 0.000218 | 3.4817  |
| POU2F3            | -1.4241 | 1.4241 | 8.2132 | -4.8659 | 0.000276 | 0.001743 | 0.23348 |
| DYRK1A            | -1.4238 | 1.4238 | 8.979  | -5.5638 | 7.94E-05 | 0.000774 | 1.5004  |
| CCDC102B          | -1.4234 | 1.4234 | 5.9367 | -5.803  | 5.26E-05 | 0.000593 | 1.92    |
| EXOSC3            | -1.4233 | 1.4233 | 6.8217 | -6.5202 | 1.61E-05 | 0.000271 | 3.1294  |
| MRRF              | -1.4217 | 1.4217 | 7.6437 | -9.2137 | 3.38E-07 | 2.43E-05 | 7.0446  |
| GPHN              | -1.4217 | 1.4217 | 7.0676 | -8.6828 | 6.76E-07 | 3.66E-05 | 6.3461  |
| CSPP1             | -1.421  | 1.421  | 6.8398 | -6.0175 | 3.66E-05 | 0.000468 | 2.2893  |
| ZNF106            | -1.419  | 1.419  | 7.9804 | -5.0393 | 0.000201 | 0.001406 | 0.5539  |
| NFE2L2            | -1.4184 | 1.4184 | 8.7659 | -5.0045 | 0.000214 | 0.001467 | 0.4899  |
| ZBTB33            | -1.4181 | 1.4181 | 7.6929 | -5.5879 | 7.61E-05 | 0.000753 | 1.5431  |
| ARL14EP           | -1.4178 | 1.4178 | 7.0925 | -5.9762 | 3.92E-05 | 0.000491 | 2.2187  |
| RAPGEF6           | -1.417  | 1.417  | 7.1998 | -6.7698 | 1.08E-05 | 0.000211 | 3.5332  |
| AUTS2             | -1.4161 | 1.4161 | 6.7587 | -8.5147 | 8.47E-07 | 4.14E-05 | 6.1179  |
| ZNF461            | -1.416  | 1.416  | 5.5824 | -8.7864 | 5.89E-07 | 3.38E-05 | 6.485   |
| MYO5C             | -1.4159 | 1.4159 | 7.4244 | -6.0405 | 3.52E-05 | 0.000457 | 2.3284  |
| IMMP2L            | -1.4158 | 1.4158 | 5.6912 | -8.3866 | 1.01E-06 | 4.68E-05 | 5.9417  |
| C1QTNF3-<br>AMACR | -1.4156 | 1.4156 | 6.9941 | -7.4396 | 3.89E-06 | 0.000108 | 4.5736  |
| SIN3A             | -1.4153 | 1.4153 | 9.0391 | -5.2666 | 0.000134 | 0.001078 | 0.96847 |
| MATN2             | -1.4147 | 1.4147 | 7.1744 | -6.2828 | 2.36E-05 | 0.000349 | 2.7371  |
| MIR1284           | -1.4123 | 1.4123 | 4.3096 | -6.0849 | 3.27E-05 | 0.000435 | 2.404   |
| SOX6              | -1.4112 | 1.4112 | 6.1547 | -5.379  | 0.00011  | 0.000956 | 1.1711  |

|              |         |        |        |         |          |          |         |
|--------------|---------|--------|--------|---------|----------|----------|---------|
| TTC23        | -1.411  | 1.411  | 7.4403 | -8.8517 | 5.40E-07 | 3.22E-05 | 6.5719  |
| GPR89A       | -1.4101 | 1.4101 | 8.0224 | -7.4764 | 3.68E-06 | 0.000104 | 4.6291  |
| ELF2         | -1.4101 | 1.4101 | 7.6842 | -6.3462 | 2.13E-05 | 0.000326 | 2.8426  |
| NCK1         | -1.409  | 1.409  | 8.2439 | -4.901  | 0.000259 | 0.001667 | 0.29857 |
| THADA        | -1.4087 | 1.4087 | 7.2416 | -6.9992 | 7.56E-06 | 0.000166 | 3.8965  |
| SPATA7       | -1.4085 | 1.4085 | 6.5439 | -11.422 | 2.52E-08 | 5.15E-06 | 9.6251  |
| SREK1        | -1.408  | 1.408  | 7.2091 | -8.0087 | 1.71E-06 | 6.47E-05 | 5.4097  |
| KAT14        | -1.408  | 1.408  | 6.9997 | -7.038  | 7.13E-06 | 0.000159 | 3.9573  |
| TRRAP        | -1.4067 | 1.4067 | 8.046  | -6.025  | 3.62E-05 | 0.000465 | 2.3021  |
| USP48        | -1.4063 | 1.4063 | 7.5877 | -5.0603 | 0.000194 | 0.00137  | 0.59245 |
| SH3BGRL      | -1.4059 | 1.4059 | 7.5277 | -5.6452 | 6.89E-05 | 0.000706 | 1.6441  |
| MIR3662      | -1.4054 | 1.4054 | 4.6314 | -6.4893 | 1.69E-05 | 0.000278 | 3.0787  |
| SPRY2        | -1.4048 | 1.4048 | 7.2814 | -4.9145 | 0.000252 | 0.001641 | 0.32355 |
| CHIC1        | -1.4047 | 1.4047 | 6.796  | -6.4936 | 1.68E-05 | 0.000277 | 3.0859  |
| ANKAR        | -1.4042 | 1.4042 | 5.8521 | -8.5578 | 7.99E-07 | 3.98E-05 | 6.1767  |
| EED          | -1.404  | 1.404  | 6.4642 | -7.6724 | 2.76E-06 | 8.67E-05 | 4.9208  |
| CBWD1        | -1.4034 | 1.4034 | 8.9382 | -5.2252 | 0.000144 | 0.001132 | 0.89344 |
| GSR          | -1.4033 | 1.4033 | 7.8641 | -5.4871 | 9.07E-05 | 0.000844 | 1.3643  |
| TTC9C        | -1.403  | 1.403  | 7.0839 | -6.5493 | 1.53E-05 | 0.000263 | 3.1768  |
| HIP1         | -1.403  | 1.403  | 7.5366 | -5.6481 | 6.86E-05 | 0.000704 | 1.6492  |
| AASS         | -1.4025 | 1.4025 | 7.8929 | -8.1618 | 1.38E-06 | 5.71E-05 | 5.6274  |
| MINOS1P1     | -1.4022 | 1.4022 | 5.1549 | -6.5916 | 1.43E-05 | 0.000252 | 3.2458  |
| CYSLTR1      | -1.4015 | 1.4015 | 5.5199 | -5.5633 | 7.94E-05 | 0.000775 | 1.4995  |
| CRISPLD1     | -1.401  | 1.401  | 6.0202 | -6.8881 | 8.98E-06 | 0.000187 | 3.7215  |
| WDPCP        | -1.4007 | 1.4007 | 6.0636 | -9.7561 | 1.71E-07 | 1.67E-05 | 7.7249  |
| LOC100128288 | -1.399  | 1.399  | 6.4801 | -5.4699 | 9.35E-05 | 0.00086  | 1.3337  |

|           |         |        |        |         |          |          |         |
|-----------|---------|--------|--------|---------|----------|----------|---------|
| NUP214    | -1.3985 | 1.3985 | 8.6519 | -5.7489 | 5.77E-05 | 0.000625 | 1.8257  |
| EVI2B     | -1.3983 | 1.3983 | 6.0415 | -5.3855 | 0.000108 | 0.000949 | 1.1828  |
| METTL8    | -1.3978 | 1.3978 | 7.8356 | -5.6821 | 6.47E-05 | 0.000677 | 1.709   |
| EIF3J-AS1 | -1.3966 | 1.3966 | 6.763  | -6.153  | 2.92E-05 | 0.000405 | 2.5192  |
| PSMD5-AS1 | -1.3963 | 1.3963 | 5.2461 | -6.0044 | 3.74E-05 | 0.000475 | 2.2668  |
| ATL2      | -1.396  | 1.396  | 8.0742 | -5.721  | 6.05E-05 | 0.000646 | 1.7769  |
| GCC2      | -1.3959 | 1.3959 | 7.3033 | -5.2739 | 0.000132 | 0.001071 | 0.98176 |
| GK5       | -1.3942 | 1.3942 | 7.5063 | -5.5437 | 8.22E-05 | 0.000793 | 1.4649  |
| CEP97     | -1.394  | 1.394  | 7.3206 | -6.7907 | 1.05E-05 | 0.000206 | 3.5667  |
| ZNF449    | -1.394  | 1.394  | 5.7281 | -4.9769 | 0.000225 | 0.001519 | 0.43902 |
| CEP192    | -1.393  | 1.393  | 7.3968 | -6.3409 | 2.15E-05 | 0.000328 | 2.8338  |
| FOXP1     | -1.3908 | 1.3908 | 7.9293 | -6.3373 | 2.16E-05 | 0.000329 | 2.8279  |
| KIZ       | -1.3904 | 1.3904 | 7.4212 | -6.5677 | 1.49E-05 | 0.000258 | 3.2069  |
| TMEM106B  | -1.3902 | 1.3902 | 7.9497 | -5.614  | 7.27E-05 | 0.000731 | 1.5892  |
| KIAA1586  | -1.3891 | 1.3891 | 7.4131 | -5.2873 | 0.000129 | 0.001055 | 1.006   |
| G2E3      | -1.3889 | 1.3889 | 7.5811 | -6.2847 | 2.35E-05 | 0.000348 | 2.7402  |
| TRAF5     | -1.3877 | 1.3877 | 6.3982 | -9.1273 | 3.77E-07 | 2.61E-05 | 6.9332  |
| LINC00341 | -1.3869 | 1.3869 | 6.5729 | -4.8758 | 0.000271 | 0.00172  | 0.25178 |
| PMS1      | -1.3862 | 1.3862 | 5.7804 | -9.6523 | 1.95E-07 | 1.82E-05 | 7.5973  |
| MCCC1     | -1.3862 | 1.3862 | 7.5485 | -6.0959 | 3.21E-05 | 0.00043  | 2.4226  |
| PCDHB15   | -1.3859 | 1.3859 | 5.5735 | -5.4029 | 0.000105 | 0.00093  | 1.214   |
| LUC7L2    | -1.3853 | 1.3853 | 6.949  | -6.2472 | 2.50E-05 | 0.000363 | 2.6777  |
| intu      | -1.3845 | 1.3845 | 6.22   | -6.8619 | 9.36E-06 | 0.000192 | 3.6799  |
| BNC2      | -1.3842 | 1.3842 | 6.5993 | -7.471  | 3.71E-06 | 0.000104 | 4.6209  |
| PTER      | -1.3833 | 1.3833 | 7.8749 | -9.0211 | 4.33E-07 | 2.83E-05 | 6.795   |
| PHF21A    | -1.3832 | 1.3832 | 7.8225 | -8.0486 | 1.61E-06 | 6.27E-05 | 5.4668  |

|              |         |        |        |         |          |          |         |
|--------------|---------|--------|--------|---------|----------|----------|---------|
| MTF2         | -1.3826 | 1.3826 | 7.2261 | -5.9342 | 4.21E-05 | 0.000513 | 2.1466  |
| RABGAP1L     | -1.3825 | 1.3825 | 6.9269 | -8.4657 | 9.05E-07 | 4.35E-05 | 6.0508  |
| H6PD         | -1.3823 | 1.3823 | 7.356  | -6.1753 | 2.82E-05 | 0.000396 | 2.5569  |
| ccdc15       | -1.3819 | 1.3819 | 6.2388 | -6.5656 | 1.49E-05 | 0.000259 | 3.2035  |
| TACR1        | -1.3819 | 1.3819 | 6.9453 | -5.1892 | 0.000154 | 0.001183 | 0.82803 |
| FBLN2        | -1.3812 | 1.3812 | 7.864  | -5.5066 | 8.77E-05 | 0.000825 | 1.399   |
| MIR4659A     | -1.3811 | 1.3811 | 3.3349 | -5.4913 | 9.01E-05 | 0.00084  | 1.3718  |
| NEMP2        | -1.3803 | 1.3803 | 7.176  | -5.4569 | 9.56E-05 | 0.000873 | 1.3104  |
| POGK         | -1.379  | 1.379  | 7.3827 | -5.9527 | 4.08E-05 | 0.000503 | 2.1784  |
| MPHOSPH8     | -1.3787 | 1.3787 | 7.3475 | -5.8142 | 5.16E-05 | 0.000585 | 1.9393  |
| olfml1       | -1.3776 | 1.3776 | 6.5247 | -5.3096 | 0.000124 | 0.001031 | 1.0462  |
| SYTL2        | -1.3769 | 1.3769 | 6.669  | -6.3295 | 2.19E-05 | 0.000332 | 2.8149  |
| ST7-OT4      | -1.3769 | 1.3769 | 6.8641 | -5.3653 | 0.000112 | 0.000971 | 1.1465  |
| NRP1         | -1.3766 | 1.3766 | 8.4807 | -6.7236 | 1.16E-05 | 0.000221 | 3.459   |
| ATP23        | -1.3747 | 1.3747 | 8.4986 | -6.5984 | 1.42E-05 | 0.000251 | 3.2568  |
| RFTN2        | -1.3747 | 1.3747 | 6.3886 | -5.4772 | 9.23E-05 | 0.000853 | 1.3467  |
| CENPU        | -1.3744 | 1.3744 | 7.5411 | -6.0597 | 3.41E-05 | 0.000447 | 2.3612  |
| mbd5         | -1.3738 | 1.3738 | 7.2531 | -9.4887 | 2.39E-07 | 2.01E-05 | 7.3936  |
| DDX47        | -1.3737 | 1.3737 | 8.202  | -7.0818 | 6.66E-06 | 0.000152 | 4.0255  |
| RNF148       | -1.372  | 1.372  | 5.38   | -5.3747 | 0.00011  | 0.000961 | 1.1634  |
| PRR34-AS1    | -1.3712 | 1.3712 | 7.4409 | -8.8813 | 5.19E-07 | 3.14E-05 | 6.6112  |
| GPR21        | -1.3704 | 1.3704 | 7.849  | -6.2169 | 2.63E-05 | 0.000376 | 2.6268  |
| FLJ10038     | -1.3702 | 1.3702 | 6.3982 | -7.9789 | 1.78E-06 | 6.62E-05 | 5.3671  |
| LOC100129034 | -1.3699 | 1.3699 | 7.3197 | -7.7193 | 2.58E-06 | 8.37E-05 | 4.99    |
| TATDN3       | -1.3688 | 1.3688 | 6.7125 | -6.7094 | 1.19E-05 | 0.000224 | 3.4363  |
| RTTN         | -1.3684 | 1.3684 | 7.2511 | -8.6046 | 7.50E-07 | 3.85E-05 | 6.2403  |

|           |         |        |        |         |          |          |         |
|-----------|---------|--------|--------|---------|----------|----------|---------|
| POC5      | -1.3683 | 1.3683 | 6.8717 | -8.687  | 6.72E-07 | 3.66E-05 | 6.3518  |
| COPS8     | -1.3677 | 1.3677 | 8.0509 | -6.7099 | 1.19E-05 | 0.000224 | 3.4371  |
| TRIM24    | -1.3656 | 1.3656 | 7.3371 | -5.9838 | 3.87E-05 | 0.000486 | 2.2317  |
| CNTRL     | -1.3653 | 1.3653 | 6.2845 | -10.052 | 1.20E-07 | 1.29E-05 | 8.0829  |
| LINC00640 | -1.3637 | 1.3637 | 6.075  | -5.9629 | 4.01E-05 | 0.000498 | 2.1959  |
| TTC28     | -1.3636 | 1.3636 | 7.1468 | -10.222 | 9.78E-08 | 1.15E-05 | 8.284   |
| POMK      | -1.3622 | 1.3622 | 7.8265 | -5.4431 | 9.80E-05 | 0.000888 | 1.2859  |
| MGST2     | -1.3613 | 1.3613 | 8.1308 | -5.2411 | 0.00014  | 0.001109 | 0.92234 |
| DHX35     | -1.3578 | 1.3578 | 6.7999 | -7.3393 | 4.51E-06 | 0.000117 | 4.4218  |
| RBM26-AS1 | -1.3571 | 1.3571 | 5.9368 | -10.859 | 4.69E-08 | 7.31E-06 | 9.013   |
| ZNF322    | -1.3571 | 1.3571 | 5.7729 | -6.162  | 2.88E-05 | 0.000401 | 2.5345  |
| MADD      | -1.3564 | 1.3564 | 7.914  | -6.0639 | 3.39E-05 | 0.000445 | 2.3683  |
| CFAP97    | -1.3559 | 1.3559 | 8.7202 | -5.2385 | 0.000141 | 0.001113 | 0.91758 |
| BCAS3     | -1.3548 | 1.3548 | 8.9726 | -5.5512 | 8.11E-05 | 0.000786 | 1.4781  |
| LOC283922 | -1.3532 | 1.3532 | 3.5866 | -8.1019 | 1.50E-06 | 6.01E-05 | 5.5426  |
| cxorf57   | -1.3527 | 1.3527 | 4.8375 | -6.5375 | 1.56E-05 | 0.000266 | 3.1577  |
| DDX10     | -1.3523 | 1.3523 | 6.7797 | -7.1121 | 6.36E-06 | 0.000146 | 4.0727  |
| SEC61A2   | -1.3521 | 1.3521 | 6.1994 | -6.4844 | 1.70E-05 | 0.000279 | 3.0708  |
| MIR3916   | -1.352  | 1.352  | 8.5581 | -5.3884 | 0.000108 | 0.000946 | 1.1879  |
| HERC2P2   | -1.352  | 1.352  | 8.191  | -5.3604 | 0.000113 | 0.000977 | 1.1376  |
| BICC1     | -1.3502 | 1.3502 | 6.8893 | -5.313  | 0.000123 | 0.001027 | 1.0523  |
| ARID1B    | -1.35   | 1.35   | 9.0196 | -6.776  | 1.07E-05 | 0.000209 | 3.543   |
| FAN1      | -1.3497 | 1.3497 | 6.9    | -7.5291 | 3.41E-06 | 9.87E-05 | 4.708   |
| ATXN7L1   | -1.3477 | 1.3477 | 7.3973 | -8.7208 | 6.42E-07 | 3.58E-05 | 6.3972  |
| ULK4      | -1.3468 | 1.3468 | 6.5512 | -9.9466 | 1.36E-07 | 1.42E-05 | 7.9563  |
| BCLAF1    | -1.3457 | 1.3457 | 8.4663 | -5.4531 | 9.63E-05 | 0.000877 | 1.3037  |

|          |         |        |        |         |          |          |         |
|----------|---------|--------|--------|---------|----------|----------|---------|
| FRY      | -1.3448 | 1.3448 | 7.8747 | -7.1668 | 5.85E-06 | 0.000139 | 4.1573  |
| UBXN2B   | -1.3442 | 1.3442 | 6.2067 | -6.3478 | 2.12E-05 | 0.000326 | 2.8453  |
| DCAF17   | -1.3437 | 1.3437 | 7.3349 | -5.1371 | 0.000169 | 0.001257 | 0.73321 |
| NADK2    | -1.343  | 1.343  | 7.0139 | -9.9486 | 1.36E-07 | 1.42E-05 | 7.9587  |
| ZBTB8A   | -1.3421 | 1.3421 | 7.176  | -4.93   | 0.000245 | 0.001612 | 0.35229 |
| NUP43    | -1.3414 | 1.3414 | 7.7078 | -7.6048 | 3.05E-06 | 9.20E-05 | 4.8208  |
| PRUNE2   | -1.3404 | 1.3404 | 5.9273 | -5.8539 | 4.82E-05 | 0.00056  | 2.0081  |
| LDB1     | -1.3402 | 1.3402 | 10.045 | -5.9523 | 4.08E-05 | 0.000503 | 2.1777  |
| ZC3H8    | -1.34   | 1.34   | 6.3907 | -5.907  | 4.41E-05 | 0.000528 | 2.0998  |
| MBOAT1   | -1.3391 | 1.3391 | 7.4139 | -5.4383 | 9.88E-05 | 0.000893 | 1.2772  |
| RNF38    | -1.3386 | 1.3386 | 8.9008 | -5.9469 | 4.12E-05 | 0.000506 | 2.1685  |
| TET2     | -1.3378 | 1.3378 | 9.2036 | -5.0652 | 0.000192 | 0.001363 | 0.60157 |
| TET1     | -1.3367 | 1.3367 | 6.592  | -7.7923 | 2.32E-06 | 7.80E-05 | 5.0969  |
| MIR548O2 | -1.3348 | 1.3348 | 5.4146 | -5.5412 | 8.25E-05 | 0.000795 | 1.4605  |
| ERBIN    | -1.3347 | 1.3347 | 9.6426 | -5.8227 | 5.09E-05 | 0.00058  | 1.9541  |
| ZNF93    | -1.3341 | 1.3341 | 6.7111 | -5.8074 | 5.22E-05 | 0.00059  | 1.9276  |
| sorbs1   | -1.3341 | 1.3341 | 7.5869 | -4.9268 | 0.000247 | 0.001618 | 0.34633 |
| DDX18    | -1.334  | 1.334  | 8.1587 | -5.6237 | 7.15E-05 | 0.000722 | 1.6062  |
| ZFP30    | -1.3331 | 1.3331 | 6.2402 | -7.8641 | 2.09E-06 | 7.27E-05 | 5.2014  |
| TBRG1    | -1.3328 | 1.3328 | 7.8372 | -6.6113 | 1.39E-05 | 0.000247 | 3.2777  |
| ar       | -1.3326 | 1.3326 | 6.4249 | -6.1546 | 2.91E-05 | 0.000404 | 2.5219  |
| DPY19L4  | -1.3289 | 1.3289 | 7.8828 | -5.4332 | 9.97E-05 | 0.000898 | 1.2681  |
| FREM1    | -1.3282 | 1.3282 | 6.2109 | -6.2323 | 2.56E-05 | 0.00037  | 2.6525  |
| ZNF551   | -1.3281 | 1.3281 | 6.4098 | -4.9015 | 0.000258 | 0.001667 | 0.29944 |
| SOSTDC1  | -1.328  | 1.328  | 6.0972 | -6.1728 | 2.83E-05 | 0.000397 | 2.5527  |
| BTF3L4   | -1.3261 | 1.3261 | 7.1984 | -7.5362 | 3.37E-06 | 9.82E-05 | 4.7187  |

|         |         |        |        |         |          |          |         |
|---------|---------|--------|--------|---------|----------|----------|---------|
| RPAIN   | -1.3257 | 1.3257 | 7.1168 | -6.8354 | 9.75E-06 | 0.000197 | 3.6379  |
| RCBTB1  | -1.3255 | 1.3255 | 6.9709 | -6.9971 | 7.59E-06 | 0.000166 | 3.8933  |
| NAT10   | -1.3247 | 1.3247 | 8.1907 | -5.4843 | 9.12E-05 | 0.000846 | 1.3593  |
| TNRC6C  | -1.324  | 1.324  | 7.1994 | -7.4719 | 3.71E-06 | 0.000104 | 4.6223  |
| mcph1   | -1.3238 | 1.3238 | 7.1637 | -5.5314 | 8.40E-05 | 0.000804 | 1.4431  |
| GALC    | -1.3231 | 1.3231 | 6.5939 | -6.5784 | 1.46E-05 | 0.000256 | 3.2243  |
| ZNF75A  | -1.3228 | 1.3228 | 7.6057 | -7.7098 | 2.62E-06 | 8.45E-05 | 4.9759  |
| PAG1    | -1.3223 | 1.3223 | 7.8218 | -4.9066 | 0.000256 | 0.001657 | 0.30905 |
| NAP1L1  | -1.3221 | 1.3221 | 6.5341 | -6.7143 | 1.18E-05 | 0.000223 | 3.4442  |
| NAP1L3  | -1.321  | 1.321  | 5.956  | -5.1064 | 0.000178 | 0.0013   | 0.67709 |
| RAD18   | -1.3203 | 1.3203 | 7.2078 | -5.9112 | 4.38E-05 | 0.000526 | 2.1071  |
| ZNF14   | -1.3202 | 1.3202 | 5.3175 | -5.2252 | 0.000144 | 0.001132 | 0.8935  |
| ZNF107  | -1.3197 | 1.3197 | 7.4429 | -5.2811 | 0.00013  | 0.001062 | 0.99476 |
| EZH1    | -1.3196 | 1.3196 | 8.841  | -4.9773 | 0.000225 | 0.001518 | 0.43974 |
| RPRD1B  | -1.3194 | 1.3194 | 8.0201 | -5.0939 | 0.000182 | 0.001322 | 0.65416 |
| METTL25 | -1.3191 | 1.3191 | 6.3709 | -7.3155 | 4.68E-06 | 0.00012  | 4.3855  |
| ACAT1   | -1.3188 | 1.3188 | 6.6469 | -5.9445 | 4.14E-05 | 0.000507 | 2.1643  |
| kbtbd3  | -1.3186 | 1.3186 | 6.0773 | -7.2013 | 5.56E-06 | 0.000135 | 4.2106  |
| ITFG1   | -1.3186 | 1.3186 | 8.9929 | -4.8979 | 0.00026  | 0.001675 | 0.29295 |
| MGC2889 | -1.3182 | 1.3182 | 5.1313 | -4.9798 | 0.000224 | 0.001514 | 0.4443  |
| UGT8    | -1.3178 | 1.3178 | 6.4398 | -6.0397 | 3.53E-05 | 0.000458 | 2.3271  |
| PARG    | -1.3174 | 1.3174 | 9.4888 | -6.5478 | 1.54E-05 | 0.000264 | 3.1745  |
| HMG5    | -1.3171 | 1.3171 | 5.5007 | -6.5147 | 1.62E-05 | 0.000273 | 3.1204  |
| NIPAL3  | -1.3165 | 1.3165 | 7.1879 | -5.3798 | 0.00011  | 0.000955 | 1.1726  |
| PAPD7   | -1.3156 | 1.3156 | 8.2626 | -5.122  | 0.000173 | 0.001277 | 0.70555 |
| slx4ip  | -1.3149 | 1.3149 | 7.2568 | -7.1764 | 5.77E-06 | 0.000138 | 4.1721  |



|             |         |        |        |         |          |          |         |
|-------------|---------|--------|--------|---------|----------|----------|---------|
| CAPS2       | -1.3148 | 1.3148 | 5.4487 | -6.1427 | 2.97E-05 | 0.000409 | 2.5018  |
| LOC285074   | -1.3136 | 1.3136 | 8.7278 | -7.9007 | 1.99E-06 | 7.06E-05 | 5.2543  |
| SCAI        | -1.3125 | 1.3125 | 6.4942 | -7.0811 | 6.67E-06 | 0.000152 | 4.0245  |
| SULF1       | -1.3117 | 1.3117 | 6.4225 | -5.7467 | 5.79E-05 | 0.000626 | 1.8218  |
| CDC40       | -1.3113 | 1.3113 | 7.2153 | -6.7684 | 1.08E-05 | 0.000211 | 3.5309  |
| ZFP69       | -1.3106 | 1.3106 | 6.0734 | -6.3339 | 2.17E-05 | 0.00033  | 2.8222  |
| MRPS27      | -1.3084 | 1.3084 | 7.4295 | -6.385  | 2.00E-05 | 0.000313 | 2.9069  |
| RBBP4       | -1.3081 | 1.3081 | 8.8393 | -5.5776 | 7.75E-05 | 0.000762 | 1.525   |
| RNF146      | -1.3073 | 1.3073 | 7.6177 | -7.3273 | 4.60E-06 | 0.000118 | 4.4035  |
| CCDC144CP   | -1.3067 | 1.3067 | 5.8476 | -5.1299 | 0.000171 | 0.001268 | 0.71992 |
| ZNF678      | -1.3064 | 1.3064 | 5.201  | -6.8669 | 9.28E-06 | 0.000191 | 3.6879  |
| STMN2       | -1.3059 | 1.3059 | 6.3866 | -5.5317 | 8.39E-05 | 0.000804 | 1.4436  |
| CCDC113     | -1.3055 | 1.3055 | 6.6895 | -5.6539 | 6.79E-05 | 0.000699 | 1.6594  |
| CBX5        | -1.3054 | 1.3054 | 7.7347 | -6.2643 | 2.43E-05 | 0.000356 | 2.7061  |
| ITFG2       | -1.3047 | 1.3047 | 7.6887 | -6.9943 | 7.62E-06 | 0.000167 | 3.8889  |
| DAPK1       | -1.304  | 1.304  | 7.1163 | -6.8436 | 9.63E-06 | 0.000196 | 3.6509  |
| MED12       | -1.3038 | 1.3038 | 8.3538 | -5.1076 | 0.000178 | 0.001298 | 0.67919 |
| CREBL2      | -1.3034 | 1.3034 | 8.3927 | -5.4982 | 8.90E-05 | 0.000833 | 1.384   |
| VIM         | -1.3033 | 1.3033 | 8.9105 | -5.4904 | 9.02E-05 | 0.00084  | 1.3702  |
| GLI3        | -1.3016 | 1.3016 | 8.2723 | -5.1434 | 0.000167 | 0.001248 | 0.74468 |
| HOTAIR      | -1.3012 | 1.3012 | 5.8167 | -8.9054 | 5.03E-07 | 3.09E-05 | 6.643   |
| ADAMTS9-AS2 | -1.3008 | 1.3008 | 6.5811 | -4.8615 | 0.000278 | 0.001753 | 0.22518 |
| TLL1        | -1.3007 | 1.3007 | 6.7029 | -6.0298 | 3.59E-05 | 0.000462 | 2.3102  |
| ZNF136      | -1.2986 | 1.2986 | 5.7753 | -7.6463 | 2.87E-06 | 8.89E-05 | 4.8823  |
| CFAP69      | -1.2984 | 1.2984 | 5.3232 | -6.5867 | 1.44E-05 | 0.000253 | 3.2378  |
| HEATR5B     | -1.2967 | 1.2967 | 8.7863 | -5.0292 | 0.000205 | 0.001424 | 0.53542 |

|              |         |        |        |         |          |          |         |
|--------------|---------|--------|--------|---------|----------|----------|---------|
| RHOBTB3      | -1.2955 | 1.2955 | 6.2542 | -5.7    | 6.27E-05 | 0.000661 | 1.7404  |
| CLHC1        | -1.2948 | 1.2948 | 5.6788 | -6.0932 | 3.23E-05 | 0.000432 | 2.4181  |
| PKP4         | -1.2943 | 1.2943 | 8.0705 | -4.8847 | 0.000266 | 0.001703 | 0.26845 |
| EXOC4        | -1.2942 | 1.2942 | 7.6419 | -6.1143 | 3.12E-05 | 0.000423 | 2.4539  |
| DCLRE1C      | -1.2937 | 1.2937 | 6.6475 | -5.3289 | 0.00012  | 0.001009 | 1.0809  |
| IVNS1ABP     | -1.2923 | 1.2923 | 9.2165 | -5.1092 | 0.000177 | 0.001296 | 0.68206 |
| EIF2D        | -1.292  | 1.292  | 8.4693 | -4.8648 | 0.000276 | 0.001745 | 0.23136 |
| GNRH1        | -1.2913 | 1.2913 | 6.3247 | -5.9767 | 3.92E-05 | 0.000491 | 2.2195  |
| GAS1RR       | -1.2907 | 1.2907 | 6.045  | -8.654  | 7.02E-07 | 3.73E-05 | 6.3073  |
| MAPKAPK5     | -1.2905 | 1.2905 | 8.6778 | -5.467  | 9.40E-05 | 0.000864 | 1.3286  |
| LOC100506548 | -1.2899 | 1.2899 | 7.6377 | -7.8733 | 2.07E-06 | 7.21E-05 | 5.2146  |
| GBAS         | -1.2877 | 1.2877 | 6.9833 | -5.1579 | 0.000162 | 0.001227 | 0.77104 |
| TRIT1        | -1.2873 | 1.2873 | 7.5997 | -5.5908 | 7.57E-05 | 0.00075  | 1.5482  |
| VIT          | -1.2867 | 1.2867 | 6.1096 | -5.7643 | 5.62E-05 | 0.000617 | 1.8526  |
| mettl3       | -1.2848 | 1.2848 | 7.344  | -6.0277 | 3.60E-05 | 0.000463 | 2.3067  |
| GTPBP10      | -1.2844 | 1.2844 | 7.8549 | -5.6971 | 6.30E-05 | 0.000664 | 1.7352  |
| MYB          | -1.2835 | 1.2835 | 6.2069 | -5.6841 | 6.45E-05 | 0.000676 | 1.7124  |
| VPS52        | -1.2822 | 1.2822 | 8.7918 | -5.0597 | 0.000194 | 0.00137  | 0.59138 |
| ZNF814       | -1.2812 | 1.2812 | 6.3442 | -10.166 | 1.04E-07 | 1.20E-05 | 8.2185  |
| ZNF740       | -1.2812 | 1.2812 | 6.6912 | -7.1277 | 6.21E-06 | 0.000144 | 4.0969  |
| CCDC82       | -1.2807 | 1.2807 | 7.1373 | -6.7601 | 1.10E-05 | 0.000212 | 3.5176  |
| CCDC138      | -1.2806 | 1.2806 | 5.6083 | -5.2185 | 0.000146 | 0.001142 | 0.88139 |
| KIAA0753     | -1.2802 | 1.2802 | 7.3706 | -7.4309 | 3.94E-06 | 0.000108 | 4.5606  |
| PTCD2        | -1.2801 | 1.2801 | 6.4563 | -5.9823 | 3.88E-05 | 0.000487 | 2.2291  |
| DIEXF        | -1.2799 | 1.2799 | 7.2763 | -7.4421 | 3.87E-06 | 0.000107 | 4.5774  |
| ZNF70        | -1.2783 | 1.2783 | 7.2581 | -7.0196 | 7.33E-06 | 0.000162 | 3.9285  |

|              |         |        |        |         |          |          |         |
|--------------|---------|--------|--------|---------|----------|----------|---------|
| c1orf21      | -1.278  | 1.278  | 9.0686 | -6.3932 | 1.97E-05 | 0.000311 | 2.9204  |
| MRPS25       | -1.2773 | 1.2773 | 7.5519 | -6.156  | 2.91E-05 | 0.000404 | 2.5244  |
| MIR628       | -1.2771 | 1.2771 | 4.0497 | -7.6651 | 2.79E-06 | 8.72E-05 | 4.9101  |
| C5ORF22      | -1.2765 | 1.2765 | 8.0685 | -5.4089 | 0.000104 | 0.000924 | 1.2247  |
| EXTL2        | -1.2758 | 1.2758 | 5.9803 | -6.3238 | 2.21E-05 | 0.000334 | 2.8053  |
| ZNF608       | -1.2757 | 1.2757 | 6.4688 | -5.4825 | 9.15E-05 | 0.000848 | 1.3561  |
| CEP57        | -1.2754 | 1.2754 | 7.4192 | -7.0085 | 7.46E-06 | 0.000164 | 3.9111  |
| INO80        | -1.275  | 1.275  | 8.2495 | -6.3584 | 2.09E-05 | 0.000322 | 2.8629  |
| IFIT1        | -1.2747 | 1.2747 | 5.5096 | -5.2723 | 0.000132 | 0.001072 | 0.97885 |
| GPD1L        | -1.2742 | 1.2742 | 7.6503 | -7.8615 | 2.10E-06 | 7.29E-05 | 5.1976  |
| METTL10      | -1.2722 | 1.2722 | 7.4505 | -5.4573 | 9.56E-05 | 0.000873 | 1.3112  |
| HULC         | -1.2721 | 1.2721 | 5.4123 | -5.6144 | 7.27E-05 | 0.000731 | 1.5899  |
| S100PBP      | -1.272  | 1.272  | 6.3443 | -8.6106 | 7.44E-07 | 3.84E-05 | 6.2484  |
| HPS4         | -1.2715 | 1.2715 | 7.6466 | -9.2902 | 3.06E-07 | 2.30E-05 | 7.1425  |
| FBXO32       | -1.2711 | 1.2711 | 7.4747 | -6.1197 | 3.09E-05 | 0.000421 | 2.463   |
| ZNF362       | -1.2698 | 1.2698 | 7.4495 | -6.2829 | 2.36E-05 | 0.000349 | 2.7372  |
| LOC100130899 | -1.2683 | 1.2683 | 7.2919 | -5.2361 | 0.000141 | 0.001115 | 0.91328 |
| RNASET2      | -1.2677 | 1.2677 | 6.2258 | -5.7892 | 5.38E-05 | 0.000601 | 1.896   |
| DCAF1        | -1.2671 | 1.2671 | 7.9704 | -5.5195 | 8.57E-05 | 0.000813 | 1.4219  |
| ZNF827       | -1.267  | 1.267  | 7.3211 | -7.1893 | 5.66E-06 | 0.000136 | 4.1922  |
| ZNF230       | -1.2667 | 1.2667 | 5.3052 | -6.6298 | 1.35E-05 | 0.000242 | 3.3078  |
| TBCEL        | -1.2664 | 1.2664 | 7.0687 | -5.5936 | 7.54E-05 | 0.000747 | 1.5532  |
| PROSC        | -1.2652 | 1.2652 | 8.1013 | -5.2638 | 0.000134 | 0.001081 | 0.96345 |
| PPIEL        | -1.264  | 1.264  | 6.189  | -7.2612 | 5.07E-06 | 0.000127 | 4.3026  |
| PDCL2        | -1.2635 | 1.2635 | 4.822  | -6.3818 | 2.01E-05 | 0.000314 | 2.9017  |
| XAF1         | -1.2619 | 1.2619 | 7.8147 | -5.9547 | 4.07E-05 | 0.000502 | 2.1818  |

|             |         |        |        |         |          |          |         |
|-------------|---------|--------|--------|---------|----------|----------|---------|
| WDR76       | -1.2608 | 1.2608 | 7.2906 | -5.0087 | 0.000213 | 0.001461 | 0.49757 |
| PCGF5       | -1.2604 | 1.2604 | 7.7165 | -5.785  | 5.42E-05 | 0.000604 | 1.8886  |
| CCDC88A     | -1.2603 | 1.2603 | 6.9345 | -5.1785 | 0.000157 | 0.001196 | 0.80856 |
| KSR1        | -1.2603 | 1.2603 | 8.3936 | -5.0852 | 0.000185 | 0.001332 | 0.63815 |
| IFT172      | -1.2601 | 1.2601 | 6.8119 | -8.3445 | 1.07E-06 | 4.87E-05 | 5.8833  |
| ELP2        | -1.2594 | 1.2594 | 7.5041 | -5.7313 | 5.95E-05 | 0.000637 | 1.7949  |
| c15orf41    | -1.2589 | 1.2589 | 9.0999 | -5.1283 | 0.000171 | 0.001269 | 0.71708 |
| 44450       | -1.2566 | 1.2566 | 6.8279 | -6.1332 | 3.02E-05 | 0.000414 | 2.4857  |
| FZD4        | -1.2565 | 1.2565 | 7.2924 | -6.683  | 1.24E-05 | 0.00023  | 3.3937  |
| MDM1        | -1.256  | 1.256  | 5.9894 | -7.3871 | 4.20E-06 | 0.000112 | 4.4943  |
| TADA1       | -1.2559 | 1.2559 | 7.1    | -6.0445 | 3.50E-05 | 0.000456 | 2.3353  |
| C11orf54    | -1.2549 | 1.2549 | 7.2948 | -5.4601 | 9.51E-05 | 0.00087  | 1.3161  |
| NOB1        | -1.2548 | 1.2548 | 9.3513 | -5.9648 | 4.00E-05 | 0.000497 | 2.1991  |
| BORCS7-ASMT | -1.253  | 1.253  | 6.0041 | -6.5018 | 1.65E-05 | 0.000275 | 3.0992  |
| POLR3B      | -1.2507 | 1.2507 | 7.9919 | -5.0944 | 0.000182 | 0.001322 | 0.65503 |
| FTO         | -1.2497 | 1.2497 | 8.6737 | -7.8886 | 2.02E-06 | 7.13E-05 | 5.2369  |
| SORBS2      | -1.2482 | 1.2482 | 6.4186 | -7.4727 | 3.70E-06 | 0.000104 | 4.6234  |
| BTBD3       | -1.248  | 1.248  | 7.0113 | -7.2607 | 5.08E-06 | 0.000127 | 4.3017  |
| sufu        | -1.2477 | 1.2477 | 7.3796 | -9.1551 | 3.64E-07 | 2.54E-05 | 6.9691  |
| ST7L        | -1.2474 | 1.2474 | 6.7579 | -7.8127 | 2.26E-06 | 7.67E-05 | 5.1266  |
| IFT81       | -1.2469 | 1.2469 | 5.6357 | -5.7581 | 5.68E-05 | 0.00062  | 1.8417  |
| CDCA7L      | -1.2468 | 1.2468 | 6.8476 | -5.5528 | 8.09E-05 | 0.000785 | 1.481   |
| TM2D1       | -1.2467 | 1.2467 | 6.6832 | -5.1841 | 0.000155 | 0.00119  | 0.81875 |
| COG2        | -1.2464 | 1.2464 | 7.0532 | -6.9328 | 8.38E-06 | 0.000178 | 3.7921  |
| ASF1A       | -1.2462 | 1.2462 | 8.3158 | -5.3152 | 0.000123 | 0.001024 | 1.0562  |
| ETAA1       | -1.2456 | 1.2456 | 6.5008 | -5.3186 | 0.000122 | 0.00102  | 1.0625  |

|          |         |        |        |         |          |          |         |
|----------|---------|--------|--------|---------|----------|----------|---------|
| EPB41L4A | -1.2445 | 1.2445 | 7.518  | -4.8746 | 0.000271 | 0.001722 | 0.24969 |
| SCO1     | -1.2444 | 1.2444 | 7.3484 | -5.0785 | 0.000187 | 0.001342 | 0.62596 |
| THYN1    | -1.2436 | 1.2436 | 6.7247 | -5.8604 | 4.77E-05 | 0.000557 | 2.0194  |
| EBF3     | -1.243  | 1.243  | 6.5208 | -7.6691 | 2.78E-06 | 8.69E-05 | 4.9159  |
| setmar   | -1.2406 | 1.2406 | 6.8633 | -7.2894 | 4.86E-06 | 0.000123 | 4.3458  |
| SNX19    | -1.2405 | 1.2405 | 7.5015 | -5.6759 | 6.54E-05 | 0.000682 | 1.698   |
| TRANK1   | -1.2398 | 1.2398 | 6.019  | -7.3757 | 4.28E-06 | 0.000114 | 4.477   |
| AADAT    | -1.2377 | 1.2377 | 6.3928 | -7.1907 | 5.65E-06 | 0.000136 | 4.1943  |
| CRIPAK   | -1.2371 | 1.2371 | 7.571  | -6.8618 | 9.36E-06 | 0.000192 | 3.6798  |
| MIR3925  | -1.2367 | 1.2367 | 7.725  | -9.5175 | 2.30E-07 | 1.98E-05 | 7.4296  |
| ZNF251   | -1.2355 | 1.2355 | 6.7959 | -9.937  | 1.37E-07 | 1.43E-05 | 7.9447  |
| ZBTB25   | -1.235  | 1.235  | 6.9434 | -7.8277 | 2.21E-06 | 7.57E-05 | 5.1485  |
| CTTNBP2  | -1.2349 | 1.2349 | 6.247  | -5.1735 | 0.000158 | 0.001204 | 0.79954 |
| METTL17  | -1.2347 | 1.2347 | 7.954  | -8.7472 | 6.20E-07 | 3.50E-05 | 6.4325  |
| STARD9   | -1.2345 | 1.2345 | 7.4588 | -6.1879 | 2.76E-05 | 0.000389 | 2.578   |
| SWT1     | -1.2336 | 1.2336 | 6.3167 | -6.3922 | 1.97E-05 | 0.000311 | 2.9188  |
| ZNF738   | -1.2328 | 1.2328 | 7.2473 | -6.3945 | 1.97E-05 | 0.00031  | 2.9227  |
| RFT1     | -1.2326 | 1.2326 | 7.6775 | -5.9063 | 4.41E-05 | 0.000529 | 2.0985  |
| KLHL24   | -1.2323 | 1.2323 | 7.4237 | -5.013  | 0.000211 | 0.001452 | 0.5056  |
| Mir148b  | -1.2315 | 1.2315 | 4.5566 | -5.8177 | 5.13E-05 | 0.000583 | 1.9454  |
| CBWD3    | -1.2312 | 1.2312 | 8.8087 | -8.1254 | 1.45E-06 | 5.88E-05 | 5.576   |
| MIR4473  | -1.2297 | 1.2297 | 4.377  | -5.6725 | 6.58E-05 | 0.000685 | 1.6921  |
| IGIP     | -1.2289 | 1.2289 | 6.6909 | -7.3633 | 4.35E-06 | 0.000115 | 4.4583  |
| TMTC4    | -1.2289 | 1.2289 | 7.1194 | -5.8677 | 4.71E-05 | 0.000553 | 2.032   |
| HRASLS   | -1.2274 | 1.2274 | 5.9158 | -7.1385 | 6.11E-06 | 0.000143 | 4.1136  |
| HDAC8    | -1.2274 | 1.2274 | 6.6896 | -4.9616 | 0.000232 | 0.001548 | 0.41074 |

|          |         |        |        |         |          |          |        |
|----------|---------|--------|--------|---------|----------|----------|--------|
| INTS10   | -1.2266 | 1.2266 | 7.4808 | -5.6924 | 6.36E-05 | 0.000668 | 1.7269 |
| NAAA     | -1.226  | 1.226  | 7.9879 | -5.5276 | 8.45E-05 | 0.000806 | 1.4364 |
| HACL1    | -1.2257 | 1.2257 | 7.737  | -6.2478 | 2.50E-05 | 0.000363 | 2.6786 |
| c15orf57 | -1.2256 | 1.2256 | 6.782  | -8.6637 | 6.93E-07 | 3.72E-05 | 6.3203 |
| WDR59    | -1.2249 | 1.2249 | 8.4049 | -7.3623 | 4.36E-06 | 0.000115 | 4.4567 |
| PNPT1    | -1.2225 | 1.2225 | 7.1189 | -5.4896 | 9.03E-05 | 0.000841 | 1.3688 |
| ASB8     | -1.2203 | 1.2203 | 6.7282 | -7.7566 | 2.44E-06 | 8.08E-05 | 5.0447 |
| ZNF618   | -1.2202 | 1.2202 | 6.4333 | -7.9308 | 1.90E-06 | 6.93E-05 | 5.2978 |
| PRMT9    | -1.2183 | 1.2183 | 7.1581 | -5.6127 | 7.29E-05 | 0.000732 | 1.5869 |
| NECAP1   | -1.2174 | 1.2174 | 7.6714 | -6.9243 | 8.49E-06 | 0.000179 | 3.7787 |
| SCYL3    | -1.2173 | 1.2173 | 8.1142 | -6.5089 | 1.64E-05 | 0.000274 | 3.1108 |
| SECISBP2 | -1.2168 | 1.2168 | 8.464  | -6.295  | 2.31E-05 | 0.000344 | 2.7574 |
| FLVCR1   | -1.2161 | 1.2161 | 6.8999 | -5.6428 | 6.92E-05 | 0.000708 | 1.64   |
| PRLR     | -1.2151 | 1.2151 | 6.189  | -5.285  | 0.00013  | 0.001058 | 1.0017 |
| ZNF41    | -1.2143 | 1.2143 | 6.2057 | -6.5687 | 1.49E-05 | 0.000258 | 3.2084 |
| ZNF227   | -1.2134 | 1.2134 | 6.1505 | -6.5637 | 1.50E-05 | 0.000259 | 3.2004 |
| ATAT1    | -1.2132 | 1.2132 | 7.3996 | -7.9014 | 1.99E-06 | 7.06E-05 | 5.2554 |
| bbx      | -1.2132 | 1.2132 | 7.6072 | -5.4659 | 9.41E-05 | 0.000865 | 1.3265 |
| MTUS1    | -1.2112 | 1.2112 | 6.6345 | -7.7408 | 2.50E-06 | 8.22E-05 | 5.0215 |
| ZBTB2    | -1.2104 | 1.2104 | 7.6685 | -5.7322 | 5.94E-05 | 0.000637 | 1.7966 |
| MIR4677  | -1.2101 | 1.2101 | 6.4547 | -5.9499 | 4.10E-05 | 0.000504 | 2.1735 |
| TBX15    | -1.2097 | 1.2097 | 7.3113 | -6.7667 | 1.09E-05 | 0.000211 | 3.5281 |
| TMEM55A  | -1.2094 | 1.2094 | 6.8181 | -7.61   | 3.02E-06 | 9.17E-05 | 4.8286 |
| TRIM52   | -1.2086 | 1.2086 | 6.2634 | -9.409  | 2.64E-07 | 2.14E-05 | 7.2934 |
| CEP68    | -1.208  | 1.208  | 7.4192 | -8.2622 | 1.20E-06 | 5.25E-05 | 5.7686 |
| LHX4-AS1 | -1.208  | 1.208  | 6.4065 | -6.9895 | 7.68E-06 | 0.000168 | 3.8814 |

|             |         |        |        |         |          |          |         |
|-------------|---------|--------|--------|---------|----------|----------|---------|
| SCMH1       | -1.2067 | 1.2067 | 7.6865 | -6.3371 | 2.16E-05 | 0.000329 | 2.8276  |
| Mir99a      | -1.2063 | 1.2063 | 6.7168 | -5.7498 | 5.76E-05 | 0.000625 | 1.8273  |
| MATR3       | -1.2041 | 1.2041 | 7.9458 | -5.58   | 7.72E-05 | 0.00076  | 1.5292  |
| C2CD3       | -1.2038 | 1.2038 | 7.0706 | -7.8609 | 2.10E-06 | 7.29E-05 | 5.1967  |
| ZC3H12C     | -1.2031 | 1.2031 | 6.9637 | -6.1461 | 2.96E-05 | 0.000408 | 2.5075  |
| ZNF236      | -1.2024 | 1.2024 | 7.7175 | -5.3191 | 0.000122 | 0.00102  | 1.0633  |
| BACE1-AS    | -1.2022 | 1.2022 | 7.583  | -6.0529 | 3.45E-05 | 0.000451 | 2.3496  |
| EFHC1       | -1.2018 | 1.2018 | 7.2301 | -7.6776 | 2.74E-06 | 8.65E-05 | 4.9286  |
| SFRP1       | -1.201  | 1.201  | 8.5191 | -4.8971 | 0.00026  | 0.001676 | 0.2913  |
| ZFHX4       | -1.2003 | 1.2003 | 6.7204 | -5.9889 | 3.84E-05 | 0.000484 | 2.2405  |
| CCDC122     | -1.1984 | 1.1984 | 6.2729 | -5.4442 | 9.78E-05 | 0.000887 | 1.2878  |
| GOLGA1      | -1.1982 | 1.1982 | 7.4582 | -5.281  | 0.00013  | 0.001063 | 0.99451 |
| TMEM147-AS1 | -1.1967 | 1.1967 | 7.1916 | -6.6576 | 1.29E-05 | 0.000236 | 3.3527  |
| AGFG2       | -1.1966 | 1.1966 | 7.4595 | -6.7554 | 1.11E-05 | 0.000214 | 3.5102  |
| PDPR        | -1.193  | 1.193  | 7.2444 | -5.0988 | 0.000181 | 0.001314 | 0.66305 |
| Mir29c      | -1.192  | 1.192  | 6.6105 | -7.2338 | 5.29E-06 | 0.00013  | 4.2606  |
| EXOSC9      | -1.1917 | 1.1917 | 7.3775 | -6.0876 | 3.26E-05 | 0.000434 | 2.4086  |
| RAPGEF4     | -1.1909 | 1.1909 | 8.2029 | -5.6025 | 7.42E-05 | 0.00074  | 1.569   |
| THBS3       | -1.1898 | 1.1898 | 6.9024 | -6.8557 | 9.45E-06 | 0.000193 | 3.6702  |
| UST         | -1.1893 | 1.1893 | 7.6953 | -5.9247 | 4.28E-05 | 0.000518 | 2.1303  |
| GDPD1       | -1.1889 | 1.1889 | 6.8172 | -5.596  | 7.51E-05 | 0.000744 | 1.5574  |
| TMEM243     | -1.1883 | 1.1883 | 7.3116 | -6.9294 | 8.42E-06 | 0.000178 | 3.7868  |
| TMTC2       | -1.188  | 1.188  | 6.7848 | -6.5629 | 1.50E-05 | 0.000259 | 3.199   |
| NEXN        | -1.1878 | 1.1878 | 5.1663 | -5.5837 | 7.67E-05 | 0.000757 | 1.5357  |
| FZD3        | -1.1877 | 1.1877 | 6.5881 | -4.9879 | 0.000221 | 0.001499 | 0.45926 |
| ZNF3        | -1.1876 | 1.1876 | 6.9788 | -8.6444 | 7.11E-07 | 3.75E-05 | 6.2943  |

|           |         |        |        |         |          |          |         |
|-----------|---------|--------|--------|---------|----------|----------|---------|
| DSEL      | -1.1869 | 1.1869 | 6.5978 | -5.4887 | 9.05E-05 | 0.000842 | 1.3672  |
| ZNF682    | -1.1854 | 1.1854 | 5.7408 | -6.7193 | 1.17E-05 | 0.000222 | 3.4521  |
| STRADB    | -1.1852 | 1.1852 | 6.2797 | -6.5599 | 1.51E-05 | 0.00026  | 3.1942  |
| RBM28     | -1.1846 | 1.1846 | 7.0901 | -5.0707 | 0.00019  | 0.001354 | 0.61164 |
| COX10-AS1 | -1.1832 | 1.1832 | 7.9755 | -5.1289 | 0.000171 | 0.001268 | 0.71811 |
| CC2D2A    | -1.1825 | 1.1825 | 6.4275 | -7.4272 | 3.96E-06 | 0.000108 | 4.555   |
| DDX31     | -1.1815 | 1.1815 | 6.874  | -6.545  | 1.54E-05 | 0.000264 | 3.17    |
| EPM2AIP1  | -1.181  | 1.181  | 7.5066 | -6.3926 | 1.97E-05 | 0.000311 | 2.9195  |
| LDLRAD3   | -1.1794 | 1.1794 | 8.3846 | -5.308  | 0.000124 | 0.001032 | 1.0433  |
| PTCH1     | -1.1789 | 1.1789 | 6.5244 | -7.3557 | 4.40E-06 | 0.000115 | 4.4467  |
| PARD3B    | -1.176  | 1.176  | 7.0055 | -9.3466 | 2.85E-07 | 2.22E-05 | 7.2143  |
| ZBTB37    | -1.1747 | 1.1747 | 7.499  | -7.6167 | 3.00E-06 | 9.11E-05 | 4.8384  |
| ZNF711    | -1.1747 | 1.1747 | 5.4267 | -5.2669 | 0.000134 | 0.001078 | 0.96915 |
| ZNF12     | -1.1745 | 1.1745 | 8.2923 | -6.5795 | 1.46E-05 | 0.000256 | 3.2261  |
| HMG20A    | -1.1735 | 1.1735 | 7.2156 | -5.4138 | 0.000103 | 0.00092  | 1.2334  |
| ZNF45     | -1.1732 | 1.1732 | 6.599  | -9.3528 | 2.83E-07 | 2.22E-05 | 7.2221  |
| TSEN2     | -1.1731 | 1.1731 | 7.183  | -6.2368 | 2.54E-05 | 0.000368 | 2.6602  |
| znf208    | -1.1723 | 1.1723 | 5.9225 | -6.7483 | 1.12E-05 | 0.000216 | 3.4987  |
| NCOA2     | -1.1705 | 1.1705 | 8.3086 | -5.0542 | 0.000196 | 0.00138  | 0.58126 |
| GON4L     | -1.1698 | 1.1698 | 7.1279 | -6.4376 | 1.83E-05 | 0.000295 | 2.9937  |
| THOC5     | -1.1662 | 1.1662 | 7.3288 | -5.4748 | 9.27E-05 | 0.000855 | 1.3424  |
| RSF1      | -1.166  | 1.166  | 7.2042 | -5.3325 | 0.000119 | 0.001006 | 1.0875  |
| RNF216    | -1.1659 | 1.1659 | 7.868  | -5.0444 | 0.000199 | 0.001396 | 0.56338 |
| RUFY2     | -1.1654 | 1.1654 | 8.2319 | -5.2625 | 0.000135 | 0.001082 | 0.96118 |
| PAXIP1    | -1.1653 | 1.1653 | 7.5571 | -5.7753 | 5.51E-05 | 0.000611 | 1.8718  |
| ZBTB26    | -1.1651 | 1.1651 | 6.5856 | -5.0239 | 0.000207 | 0.001433 | 0.52563 |



|          |         |        |        |         |          |          |        |
|----------|---------|--------|--------|---------|----------|----------|--------|
| ANKS1B   | -1.1649 | 1.1649 | 5.9375 | -6.7435 | 1.13E-05 | 0.000217 | 3.491  |
| PSD3     | -1.1648 | 1.1648 | 7.0516 | -5.3346 | 0.000119 | 0.001004 | 1.0912 |
| DDX58    | -1.1632 | 1.1632 | 8.1331 | -5.5563 | 8.04E-05 | 0.000782 | 1.4872 |
| MTRF1    | -1.1625 | 1.1625 | 7.2232 | -5.9728 | 3.95E-05 | 0.000493 | 2.2129 |
| AXIN2    | -1.1611 | 1.1611 | 7.4188 | -6.3596 | 2.08E-05 | 0.000322 | 2.8649 |
| SPDL1    | -1.1611 | 1.1611 | 6.8652 | -5.6418 | 6.93E-05 | 0.000709 | 1.6382 |
| MFSD4A   | -1.1581 | 1.1581 | 6.8296 | -6.1756 | 2.81E-05 | 0.000396 | 2.5573 |
| ZNF850   | -1.1576 | 1.1576 | 7.3887 | -5.4935 | 8.97E-05 | 0.000837 | 1.3758 |
| Bcs1l    | -1.1565 | 1.1565 | 7.0105 | -5.4439 | 9.78E-05 | 0.000887 | 1.2873 |
| CAMKMT   | -1.1555 | 1.1555 | 7.4487 | -7.8298 | 2.20E-06 | 7.55E-05 | 5.1515 |
| ZNF577   | -1.1536 | 1.1536 | 7.1544 | -7.7774 | 2.37E-06 | 7.91E-05 | 5.0751 |
| HECTD4   | -1.1533 | 1.1533 | 8.4708 | -5.5102 | 8.71E-05 | 0.000821 | 1.4054 |
| DET1     | -1.1526 | 1.1526 | 6.7291 | -8.6767 | 6.81E-07 | 3.67E-05 | 6.3378 |
| PPIL6    | -1.1504 | 1.1504 | 5.7309 | -5.6041 | 7.40E-05 | 0.000739 | 1.5717 |
| QRSL1    | -1.1498 | 1.1498 | 7.5475 | -5.2879 | 0.000129 | 0.001055 | 1.007  |
| FBXO9    | -1.1496 | 1.1496 | 7.5373 | -5.2978 | 0.000127 | 0.001043 | 1.0249 |
| TBCCD1   | -1.1486 | 1.1486 | 6.4689 | -5.4972 | 8.91E-05 | 0.000834 | 1.3822 |
| YY1AP1   | -1.1484 | 1.1484 | 7.2817 | -5.4468 | 9.73E-05 | 0.000883 | 1.2925 |
| ZNF596   | -1.1479 | 1.1479 | 6.2205 | -5.5058 | 8.78E-05 | 0.000826 | 1.3976 |
| TRIM4    | -1.1469 | 1.1469 | 7.9435 | -8.1219 | 1.45E-06 | 5.89E-05 | 5.571  |
| ZNF502   | -1.1438 | 1.1438 | 6.1811 | -7.0292 | 7.22E-06 | 0.000161 | 3.9435 |
| PRPF3    | -1.1434 | 1.1434 | 7.6759 | -8.5772 | 7.79E-07 | 3.93E-05 | 6.2031 |
| MLH3     | -1.1429 | 1.1429 | 7.1138 | -5.7398 | 5.86E-05 | 0.000631 | 1.8099 |
| MPHOSPH9 | -1.1409 | 1.1409 | 6.7332 | -6.6868 | 1.23E-05 | 0.000229 | 3.3999 |
| FLJ45513 | -1.1404 | 1.1404 | 6.4359 | -6.2758 | 2.39E-05 | 0.000352 | 2.7255 |
| DCK      | -1.1395 | 1.1395 | 7.3676 | -6.2065 | 2.67E-05 | 0.00038  | 2.6093 |

|          |         |        |        |         |          |          |         |
|----------|---------|--------|--------|---------|----------|----------|---------|
| ADAMTSL3 | -1.1394 | 1.1394 | 6.1951 | -5.0659 | 0.000192 | 0.001362 | 0.60275 |
| SP1      | -1.1393 | 1.1393 | 9.1666 | -5.3789 | 0.00011  | 0.000956 | 1.1709  |
| PLXNC1   | -1.139  | 1.139  | 7.0499 | -5.3498 | 0.000115 | 0.000989 | 1.1186  |
| EXD2     | -1.1389 | 1.1389 | 6.4009 | -5.1971 | 0.000151 | 0.001171 | 0.84239 |
| LRIG1    | -1.1388 | 1.1388 | 7.8438 | -5.798  | 5.30E-05 | 0.000595 | 1.9113  |
| KLHL3    | -1.1378 | 1.1378 | 6.3723 | -7.7541 | 2.45E-06 | 8.10E-05 | 5.0411  |
| RPAP2    | -1.1378 | 1.1378 | 8.2858 | -5.0468 | 0.000198 | 0.001392 | 0.56775 |
| ATF1     | -1.1375 | 1.1375 | 8.9104 | -5.4199 | 0.000102 | 0.000912 | 1.2444  |
| acsm3    | -1.1368 | 1.1368 | 5.3936 | -7.1386 | 6.11E-06 | 0.000143 | 4.1137  |
| CALML4   | -1.1359 | 1.1359 | 6.0349 | -6.1673 | 2.85E-05 | 0.000399 | 2.5433  |
| CEP128   | -1.1352 | 1.1352 | 6.2446 | -9.3531 | 2.83E-07 | 2.22E-05 | 7.2225  |
| MRPS31   | -1.1352 | 1.1352 | 7.0389 | -6.5106 | 1.63E-05 | 0.000273 | 3.1137  |
| GALK2    | -1.1349 | 1.1349 | 7.6087 | -6.2575 | 2.46E-05 | 0.000359 | 2.6948  |
| RGPD6    | -1.1348 | 1.1348 | 9.7287 | -5.6587 | 6.73E-05 | 0.000696 | 1.6678  |
| AKAP1    | -1.1337 | 1.1337 | 7.847  | -5.1888 | 0.000154 | 0.001183 | 0.82741 |
| UQCC1    | -1.132  | 1.132  | 7.3981 | -9.3358 | 2.89E-07 | 2.23E-05 | 7.2006  |
| MACROD2  | -1.1315 | 1.1315 | 5.3743 | -6.2716 | 2.40E-05 | 0.000353 | 2.7184  |
| SCIN     | -1.1293 | 1.1293 | 6.0744 | -5.6398 | 6.96E-05 | 0.00071  | 1.6346  |
| NHS      | -1.1292 | 1.1292 | 6.8221 | -7.7917 | 2.32E-06 | 7.80E-05 | 5.0959  |
| TYRO3P   | -1.1292 | 1.1292 | 5.9388 | -5.9009 | 4.45E-05 | 0.000531 | 2.0893  |
| CEP63    | -1.1289 | 1.1289 | 6.9758 | -5.5458 | 8.19E-05 | 0.000791 | 1.4685  |
| IRF2     | -1.1273 | 1.1273 | 8.286  | -6.7888 | 1.05E-05 | 0.000206 | 3.5635  |
| USP28    | -1.1266 | 1.1266 | 7.0907 | -6.8636 | 9.33E-06 | 0.000192 | 3.6827  |
| NOM1     | -1.126  | 1.126  | 6.9902 | -6.7548 | 1.11E-05 | 0.000214 | 3.5091  |
| ZNF468   | -1.1231 | 1.1231 | 7.0903 | -5.2492 | 0.000138 | 0.001099 | 0.93699 |
| CEP57L1  | -1.1225 | 1.1225 | 5.2028 | -4.8947 | 0.000262 | 0.00168  | 0.28689 |

|                  |         |        |        |         |          |          |         |
|------------------|---------|--------|--------|---------|----------|----------|---------|
| VWF              | -1.1217 | 1.1217 | 7.7496 | -5.8018 | 5.27E-05 | 0.000594 | 1.9179  |
| ARL6             | -1.1211 | 1.1211 | 5.7739 | -6.2712 | 2.41E-05 | 0.000353 | 2.7177  |
| ANXA6            | -1.1211 | 1.1211 | 8.7983 | -5.1327 | 0.00017  | 0.001264 | 0.72502 |
| DYX1C1-<br>CCPG1 | -1.1196 | 1.1196 | 6.1193 | -6.3014 | 2.29E-05 | 0.000342 | 2.7681  |
| IFT122           | -1.1188 | 1.1188 | 6.9675 | -8.4203 | 9.63E-07 | 4.52E-05 | 5.9882  |
| CSRNP3           | -1.1188 | 1.1188 | 6.1353 | -7.2805 | 4.93E-06 | 0.000124 | 4.3321  |
| RGPD8            | -1.1174 | 1.1174 | 10.062 | -5.6538 | 6.79E-05 | 0.000699 | 1.6593  |
| DNM3OS           | -1.1172 | 1.1172 | 6.9668 | -5.3824 | 0.000109 | 0.000952 | 1.1772  |
| CPQ              | -1.117  | 1.117  | 6.4597 | -5.4466 | 9.74E-05 | 0.000883 | 1.2922  |
| TAPT1            | -1.1167 | 1.1167 | 6.9843 | -6.1035 | 3.17E-05 | 0.000427 | 2.4355  |
| TMEM135          | -1.1151 | 1.1151 | 6.8916 | -6.5017 | 1.65E-05 | 0.000275 | 3.0991  |
| ZNF441           | -1.1146 | 1.1146 | 5.1454 | -6.0925 | 3.23E-05 | 0.000432 | 2.4168  |
| DCP1A            | -1.1143 | 1.1143 | 7.9779 | -5.5297 | 8.42E-05 | 0.000805 | 1.44    |
| INTS2            | -1.1142 | 1.1142 | 7.6181 | -4.9431 | 0.000239 | 0.001584 | 0.37666 |
| SPATA6L          | -1.1136 | 1.1136 | 6.5002 | -5.2684 | 0.000133 | 0.001076 | 0.97183 |
| DCP1B            | -1.1127 | 1.1127 | 6.6312 | -7.2919 | 4.85E-06 | 0.000123 | 4.3496  |
| SPAG16           | -1.1113 | 1.1113 | 6.7614 | -5.9638 | 4.01E-05 | 0.000497 | 2.1973  |
| KANSL3           | -1.11   | 1.11   | 7.6955 | -5.858  | 4.79E-05 | 0.000558 | 2.0153  |
| ARHGAP26         | -1.1093 | 1.1093 | 7.0234 | -5.5982 | 7.48E-05 | 0.000743 | 1.5612  |
| NEK9             | -1.1087 | 1.1087 | 7.442  | -5.7752 | 5.51E-05 | 0.000611 | 1.8716  |
| NTN4             | -1.1061 | 1.1061 | 7.0815 | -6.003  | 3.75E-05 | 0.000476 | 2.2644  |
| GHRLOS           | -1.106  | 1.106  | 6.4508 | -6.0787 | 3.31E-05 | 0.000438 | 2.3935  |
| ZNF81            | -1.1059 | 1.1059 | 5.8725 | -6.9544 | 8.10E-06 | 0.000174 | 3.8262  |
| TMEM254-AS1      | -1.105  | 1.105  | 5.427  | -6.1873 | 2.76E-05 | 0.00039  | 2.577   |
| CRTC3            | -1.1038 | 1.1038 | 7.2902 | -6.9826 | 7.76E-06 | 0.000169 | 3.8704  |

|              |         |        |        |         |          |          |         |
|--------------|---------|--------|--------|---------|----------|----------|---------|
| CMSS1        | -1.1038 | 1.1038 | 6.8091 | -5.4239 | 0.000101 | 0.000908 | 1.2515  |
| PPHLN1       | -1.1025 | 1.1025 | 7.2745 | -4.8868 | 0.000265 | 0.001699 | 0.2723  |
| HSD17B7P2    | -1.101  | 1.101  | 6.7875 | -6.9057 | 8.74E-06 | 0.000183 | 3.7494  |
| RNF213       | -1.1002 | 1.1002 | 8.1378 | -5.1247 | 0.000172 | 0.001273 | 0.71045 |
| TSC1         | -1.0991 | 1.0991 | 8.9013 | -5.5498 | 8.13E-05 | 0.000787 | 1.4756  |
| USP30        | -1.0989 | 1.0989 | 7.7281 | -8.7201 | 6.43E-07 | 3.58E-05 | 6.3963  |
| NOD1         | -1.0973 | 1.0973 | 7.0856 | -6.7758 | 1.07E-05 | 0.000209 | 3.5428  |
| znf268       | -1.0968 | 1.0968 | 6.5303 | -6.5896 | 1.44E-05 | 0.000253 | 3.2426  |
| GSDMB        | -1.0961 | 1.0961 | 6.9687 | -5.2066 | 0.000149 | 0.001158 | 0.8597  |
| CFAP70       | -1.0951 | 1.0951 | 6.0289 | -5.9275 | 4.26E-05 | 0.000516 | 2.135   |
| CALCOCO1     | -1.0944 | 1.0944 | 8.4565 | -5.0812 | 0.000186 | 0.001339 | 0.63092 |
| KANK2        | -1.0941 | 1.0941 | 7.6966 | -6.3832 | 2.00E-05 | 0.000314 | 2.9041  |
| ZNF131       | -1.0935 | 1.0935 | 6.8764 | -8.0336 | 1.65E-06 | 6.33E-05 | 5.4454  |
| TCTN2        | -1.0926 | 1.0926 | 7.4682 | -6.3627 | 2.07E-05 | 0.000321 | 2.87    |
| CEP135       | -1.0925 | 1.0925 | 6.6245 | -4.9013 | 0.000258 | 0.001667 | 0.29925 |
| CEP112       | -1.0923 | 1.0923 | 6.5199 | -5.8887 | 4.55E-05 | 0.000539 | 2.0682  |
| LOC100506083 | -1.0919 | 1.0919 | 4.9708 | -5.6175 | 7.23E-05 | 0.000728 | 1.5954  |
| ANAPC1       | -1.0911 | 1.0911 | 7.6057 | -6.2544 | 2.47E-05 | 0.00036  | 2.6896  |
| LINC01125    | -1.0908 | 1.0908 | 5.1825 | -5.6537 | 6.79E-05 | 0.000699 | 1.659   |
| IMMP1L       | -1.0905 | 1.0905 | 6.0021 | -5.7215 | 6.05E-05 | 0.000646 | 1.7778  |
| MIR606       | -1.0901 | 1.0901 | 6.2355 | -5.2962 | 0.000127 | 0.001045 | 1.022   |
| TMEM144      | -1.0897 | 1.0897 | 6.3321 | -7.0827 | 6.65E-06 | 0.000152 | 4.0269  |
| ZNF140       | -1.0896 | 1.0896 | 6.2967 | -5.1079 | 0.000178 | 0.001298 | 0.6797  |
| VIPAS39      | -1.0887 | 1.0887 | 7.718  | -5.3546 | 0.000114 | 0.000984 | 1.1273  |
| NIPAL2       | -1.0854 | 1.0854 | 10.558 | -6.2945 | 2.32E-05 | 0.000344 | 2.7565  |
| PHF8         | -1.0846 | 1.0846 | 6.8003 | -6.4958 | 1.67E-05 | 0.000276 | 3.0894  |

|          |         |        |        |         |          |          |         |
|----------|---------|--------|--------|---------|----------|----------|---------|
| TFPI     | -1.0821 | 1.0821 | 6.4164 | -4.9925 | 0.000219 | 0.001491 | 0.46774 |
| ZNF485   | -1.0809 | 1.0809 | 6.6958 | -5.7564 | 5.69E-05 | 0.00062  | 1.8388  |
| TIMM8A   | -1.0805 | 1.0805 | 6.7641 | -4.988  | 0.000221 | 0.001499 | 0.45957 |
| RORA     | -1.0771 | 1.0771 | 7.9801 | -6.3168 | 2.23E-05 | 0.000336 | 2.7938  |
| PIIH     | -1.0756 | 1.0756 | 7.3178 | -4.9137 | 0.000253 | 0.001642 | 0.32217 |
| CLUAP1   | -1.0754 | 1.0754 | 5.7395 | -7.0374 | 7.13E-06 | 0.000159 | 3.9563  |
| SMAD1    | -1.0746 | 1.0746 | 6.6986 | -6.2097 | 2.66E-05 | 0.000379 | 2.6148  |
| UBE3D    | -1.0743 | 1.0743 | 6.4402 | -8.0725 | 1.56E-06 | 6.12E-05 | 5.5009  |
| SEC31B   | -1.0721 | 1.0721 | 6.4485 | -8.1856 | 1.33E-06 | 5.60E-05 | 5.6611  |
| USP8     | -1.071  | 1.071  | 8.2834 | -4.8994 | 0.000259 | 0.00167  | 0.29571 |
| ZSCAN16  | -1.0708 | 1.0708 | 5.6919 | -7.4022 | 4.11E-06 | 0.00011  | 4.5172  |
| ZNF37A   | -1.0699 | 1.0699 | 6.4946 | -7.5333 | 3.39E-06 | 9.83E-05 | 4.7143  |
| SUPT3H   | -1.0673 | 1.0673 | 6.375  | -6.2764 | 2.38E-05 | 0.000352 | 2.7265  |
| TRMT2B   | -1.0669 | 1.0669 | 7.9277 | -4.9922 | 0.000219 | 0.001491 | 0.46733 |
| GRIP1    | -1.0667 | 1.0667 | 7.2375 | -4.8837 | 0.000267 | 0.001704 | 0.26642 |
| CUL9     | -1.0664 | 1.0664 | 7.4462 | -8.6663 | 6.91E-07 | 3.71E-05 | 6.3238  |
| DENND5A  | -1.066  | 1.066  | 7.4551 | -6.1489 | 2.94E-05 | 0.000406 | 2.5124  |
| ZNF44    | -1.0655 | 1.0655 | 6.2538 | -7.9079 | 1.97E-06 | 7.06E-05 | 5.2648  |
| SHQ1     | -1.0641 | 1.0641 | 7.3284 | -5.7965 | 5.32E-05 | 0.000596 | 1.9086  |
| WDR70    | -1.0639 | 1.0639 | 7.4211 | -5.5965 | 7.50E-05 | 0.000744 | 1.5583  |
| GPATCH11 | -1.0619 | 1.0619 | 6.4726 | -6.0009 | 3.76E-05 | 0.000477 | 2.261   |
| GALM     | -1.0614 | 1.0614 | 6.0292 | -5.9256 | 4.27E-05 | 0.000518 | 2.1318  |
| BOD1     | -1.0614 | 1.0614 | 6.5634 | -5.6346 | 7.02E-05 | 0.000714 | 1.6254  |
| UNC50    | -1.0612 | 1.0612 | 7.1776 | -5.2722 | 0.000132 | 0.001072 | 0.97871 |
| NEIL1    | -1.0603 | 1.0603 | 6.6741 | -6.5656 | 1.49E-05 | 0.000259 | 3.2034  |
| BCO2     | -1.0579 | 1.0579 | 6.3689 | -7.5106 | 3.50E-06 | 0.0001   | 4.6803  |

|           |         |        |        |         |          |          |         |
|-----------|---------|--------|--------|---------|----------|----------|---------|
| RPIA      | -1.0565 | 1.0565 | 6.6368 | -5.2218 | 0.000145 | 0.001137 | 0.88739 |
| MSI2      | -1.0538 | 1.0538 | 7.1171 | -6.5173 | 1.61E-05 | 0.000272 | 3.1246  |
| C7orf31   | -1.0521 | 1.0521 | 6.9245 | -5.0962 | 0.000181 | 0.001319 | 0.65833 |
| NRDE2     | -1.0519 | 1.0519 | 6.3401 | -8.7953 | 5.82E-07 | 3.36E-05 | 6.4969  |
| MTERF1    | -1.0507 | 1.0507 | 6.0782 | -5.9458 | 4.13E-05 | 0.000506 | 2.1664  |
| CBWD6     | -1.0499 | 1.0499 | 7.4536 | -6.6527 | 1.30E-05 | 0.000237 | 3.3447  |
| NUDT7     | -1.0496 | 1.0496 | 7.5827 | -5.8535 | 4.83E-05 | 0.00056  | 2.0074  |
| DDX20     | -1.0493 | 1.0493 | 6.5865 | -5.9149 | 4.35E-05 | 0.000524 | 2.1134  |
| MSANTD4   | -1.0491 | 1.0491 | 6.0389 | -5.9288 | 4.25E-05 | 0.000516 | 2.1373  |
| MCMDC2    | -1.0478 | 1.0478 | 5.1743 | -6.2875 | 2.34E-05 | 0.000347 | 2.745   |
| PRR12     | -1.0473 | 1.0473 | 7.571  | -4.9803 | 0.000224 | 0.001514 | 0.44531 |
| EIF4B     | -1.0461 | 1.0461 | 10.122 | -5.6775 | 6.52E-05 | 0.000681 | 1.7008  |
| CMTM4     | -1.0458 | 1.0458 | 7.5719 | -5.3425 | 0.000117 | 0.000994 | 1.1055  |
| LINC00963 | -1.0446 | 1.0446 | 6.9976 | -5.0365 | 0.000202 | 0.001411 | 0.54885 |
| DNM3      | -1.0421 | 1.0421 | 6.3732 | -6.3993 | 1.95E-05 | 0.000308 | 2.9306  |
| AASDH     | -1.0421 | 1.0421 | 7.4264 | -5.3673 | 0.000112 | 0.00097  | 1.15    |
| MSL2      | -1.0419 | 1.0419 | 8.0446 | -4.9849 | 0.000222 | 0.001505 | 0.45383 |
| TYW3      | -1.0413 | 1.0413 | 7.1362 | -4.8785 | 0.000269 | 0.001714 | 0.25694 |
| UBE2G2    | -1.0403 | 1.0403 | 7.2811 | -4.8541 | 0.000282 | 0.001769 | 0.21149 |
| RNF121    | -1.0383 | 1.0383 | 6.8051 | -6.949  | 8.17E-06 | 0.000175 | 3.8176  |
| ISCU      | -1.0347 | 1.0347 | 6.783  | -5.0988 | 0.000181 | 0.001314 | 0.66309 |
| DSTYK     | -1.0338 | 1.0338 | 6.9592 | -5.5901 | 7.58E-05 | 0.00075  | 1.547   |
| DBF4      | -1.0326 | 1.0326 | 6.04   | -5.5224 | 8.53E-05 | 0.00081  | 1.427   |
| SVIP      | -1.0309 | 1.0309 | 5.6673 | -6.3817 | 2.01E-05 | 0.000314 | 2.9014  |
| RAD54B    | -1.0306 | 1.0306 | 6.4334 | -5.6298 | 7.08E-05 | 0.000718 | 1.6169  |
| SPATA25   | -1.0304 | 1.0304 | 6.6344 | -6.6136 | 1.38E-05 | 0.000247 | 3.2816  |

|              |         |        |        |         |          |          |         |
|--------------|---------|--------|--------|---------|----------|----------|---------|
| HEXA         | -1.0295 | 1.0295 | 7.5082 | -5.3765 | 0.00011  | 0.000959 | 1.1665  |
| MSS51        | -1.0294 | 1.0294 | 6.446  | -6.4041 | 1.94E-05 | 0.000307 | 2.9385  |
| LDB2         | -1.0293 | 1.0293 | 7.0707 | -5.102  | 0.00018  | 0.001309 | 0.66898 |
| ENTPD1-AS1   | -1.0281 | 1.0281 | 5.7709 | -7.6809 | 2.73E-06 | 8.65E-05 | 4.9334  |
| THAP5        | -1.0272 | 1.0272 | 6.2294 | -4.9831 | 0.000223 | 0.001508 | 0.45038 |
| BMP4         | -1.0255 | 1.0255 | 6.8777 | -5.3445 | 0.000117 | 0.000994 | 1.1092  |
| SMC5-AS1     | -1.0243 | 1.0243 | 6.4659 | -4.914  | 0.000252 | 0.001642 | 0.32274 |
| ARL1         | -1.0242 | 1.0242 | 7.6498 | -5.1293 | 0.000171 | 0.001268 | 0.71892 |
| ZNF527       | -1.0236 | 1.0236 | 6.1652 | -5.4577 | 9.55E-05 | 0.000873 | 1.3119  |
| ZNF174       | -1.0219 | 1.0219 | 6.7028 | -5.9133 | 4.36E-05 | 0.000525 | 2.1107  |
| NUBPL        | -1.0218 | 1.0218 | 6.501  | -5.6353 | 7.01E-05 | 0.000714 | 1.6267  |
| TRDMT1       | -1.0215 | 1.0215 | 6.1813 | -6.0199 | 3.65E-05 | 0.000467 | 2.2933  |
| RNF214       | -1.0215 | 1.0215 | 7.1621 | -5.9319 | 4.23E-05 | 0.000514 | 2.1426  |
| PRKD1        | -1.0206 | 1.0206 | 5.9613 | -4.9344 | 0.000243 | 0.001601 | 0.36042 |
| CDC7         | -1.0196 | 1.0196 | 6.3114 | -6.5983 | 1.42E-05 | 0.000251 | 3.2567  |
| DENND5B      | -1.0183 | 1.0183 | 6.4554 | -5.4076 | 0.000104 | 0.000925 | 1.2223  |
| LOC100506746 | -1.0176 | 1.0176 | 6.7743 | -5.6353 | 7.01E-05 | 0.000714 | 1.6268  |
| ZNF224       | -1.0174 | 1.0174 | 6.16   | -6.1996 | 2.71E-05 | 0.000384 | 2.5978  |
| AMOT         | -1.0173 | 1.0173 | 6.1582 | -5.261  | 0.000135 | 0.001084 | 0.95844 |
| NDUFAF7      | -1.0172 | 1.0172 | 6.7094 | -5.679  | 6.50E-05 | 0.000679 | 1.7035  |
| syt17        | -1.0168 | 1.0168 | 6.6722 | -5.4345 | 9.95E-05 | 0.000897 | 1.2705  |
| RPL19P12     | -1.0166 | 1.0166 | 5.5065 | -5.1933 | 0.000152 | 0.001177 | 0.83547 |
| ZNF749       | -1.0163 | 1.0163 | 6.3424 | -5.0351 | 0.000203 | 0.001414 | 0.54618 |
| GMDS-AS1     | -1.0153 | 1.0153 | 6.0553 | -4.926  | 0.000247 | 0.001619 | 0.34503 |
| ETV5         | -1.0108 | 1.0108 | 6.5954 | -5.5166 | 8.62E-05 | 0.000816 | 1.4167  |
| ANKFN1       | -1.0107 | 1.0107 | 5.6048 | -6.2019 | 2.69E-05 | 0.000382 | 2.6016  |

|             |         |        |        |         |          |          |         |
|-------------|---------|--------|--------|---------|----------|----------|---------|
| KIF22       | -1.0093 | 1.0093 | 8.0344 | -5.4109 | 0.000104 | 0.000922 | 1.2283  |
| MORF4L2-AS1 | -1.0077 | 1.0077 | 6.1002 | -6.6135 | 1.38E-05 | 0.000247 | 3.2814  |
| HSD11B2     | -1.0077 | 1.0077 | 7.8307 | -4.86   | 0.000279 | 0.001756 | 0.22253 |
| NFYC-AS1    | -1.007  | 1.007  | 5.8585 | -5.6281 | 7.10E-05 | 0.00072  | 1.614   |
| LZTFL1      | -1.0066 | 1.0066 | 6.4044 | -6.4065 | 1.93E-05 | 0.000307 | 2.9426  |
| tctn1       | -1.0066 | 1.0066 | 6.9981 | -5.9374 | 4.19E-05 | 0.000511 | 2.1522  |
| MRPS30      | -1.0063 | 1.0063 | 7.6056 | -5.0776 | 0.000188 | 0.001344 | 0.62431 |
| ADCY2       | -1.0061 | 1.0061 | 5.5002 | -5.0095 | 0.000212 | 0.001459 | 0.49907 |
| CDC42SE2    | -1.006  | 1.006  | 6.7246 | -5.0052 | 0.000214 | 0.001466 | 0.49129 |
| BTBD8       | -1.0051 | 1.0051 | 3.8931 | -7.4135 | 4.04E-06 | 0.00011  | 4.5343  |
| TMEM138     | -1.0051 | 1.0051 | 6.9875 | -5.2333 | 0.000142 | 0.001119 | 0.90824 |
| SPG7        | -1.0051 | 1.0051 | 7.8371 | -5.1519 | 0.000164 | 0.001237 | 0.76016 |
| MTMR8       | -1.0044 | 1.0044 | 6.2323 | -7.6309 | 2.93E-06 | 9.03E-05 | 4.8595  |
| G3BP2       | -1.003  | 1.003  | 6.9119 | -5.5201 | 8.56E-05 | 0.000812 | 1.423   |
| TTI1        | -1.0028 | 1.0028 | 7.4849 | -6.6346 | 1.34E-05 | 0.000241 | 3.3155  |
| GMPR        | -1.0011 | 1.0011 | 6.664  | -5.6788 | 6.51E-05 | 0.000679 | 1.7031  |
| HERC2       | -1.0004 | 1.0004 | 7.6064 | -5.4647 | 9.43E-05 | 0.000866 | 1.3245  |
| ALS2        | -1.0001 | 1.0001 | 6.9539 | -5.0773 | 0.000188 | 0.001345 | 0.62377 |
| STEAP1B     | 1.002   | 1.002  | 6.0862 | 6.0526  | 3.45E-05 | 0.000451 | 2.3491  |
| CCDC85B     | 1.0032  | 1.0032 | 6.6236 | 5.6196  | 7.21E-05 | 0.000726 | 1.599   |
| CDX1        | 1.0035  | 1.0035 | 6.226  | 6.286   | 2.35E-05 | 0.000348 | 2.7425  |
| CLCF1       | 1.0041  | 1.0041 | 7.5386 | 5.2648  | 0.000134 | 0.00108  | 0.9653  |
| C5orf52     | 1.0069  | 1.0069 | 4.5973 | 6.8745  | 9.17E-06 | 0.000189 | 3.7     |
| CXCL2       | 1.0104  | 1.0104 | 6.6429 | 5.2524  | 0.000137 | 0.001095 | 0.94279 |
| TRIML2      | 1.0114  | 1.0114 | 4.8119 | 5.1601  | 0.000162 | 0.001224 | 0.77516 |
| MIR663B     | 1.0119  | 1.0119 | 8.8432 | 5.6923  | 6.36E-05 | 0.000668 | 1.7268  |



|              |        |        |        |        |          |          |         |
|--------------|--------|--------|--------|--------|----------|----------|---------|
| tmem88b      | 1.0122 | 1.0122 | 8.5968 | 7.4323 | 3.93E-06 | 0.000108 | 4.5626  |
| KRT18        | 1.0126 | 1.0126 | 6.8613 | 5.4759 | 9.25E-05 | 0.000854 | 1.3444  |
| CST3         | 1.0134 | 1.0134 | 10.187 | 5.7045 | 6.22E-05 | 0.000658 | 1.7481  |
| URAD         | 1.0146 | 1.0146 | 5.1231 | 5.3819 | 0.000109 | 0.000953 | 1.1762  |
| mir9-3       | 1.0156 | 1.0156 | 4.6783 | 6.3829 | 2.00E-05 | 0.000314 | 2.9035  |
| NKX2-5       | 1.0162 | 1.0162 | 5.5313 | 5.7986 | 5.30E-05 | 0.000595 | 1.9123  |
| BARHL1       | 1.0162 | 1.0162 | 7.0569 | 5.7034 | 6.24E-05 | 0.000659 | 1.7462  |
| UTS2R        | 1.0187 | 1.0187 | 7.1339 | 6.7904 | 1.05E-05 | 0.000206 | 3.5661  |
| SGMS2        | 1.0216 | 1.0216 | 7.9179 | 5.003  | 0.000215 | 0.00147  | 0.48716 |
| ANKRD63      | 1.0254 | 1.0254 | 7.5794 | 7.609  | 3.03E-06 | 9.17E-05 | 4.8271  |
| NAP1L4       | 1.0287 | 1.0287 | 6.0879 | 6.021  | 3.64E-05 | 0.000466 | 2.2952  |
| ARGFX        | 1.0295 | 1.0295 | 5.2353 | 5.7813 | 5.46E-05 | 0.000606 | 1.8822  |
| ORMDL2       | 1.0297 | 1.0297 | 10.973 | 7.6445 | 2.88E-06 | 8.90E-05 | 4.8796  |
| DUSP21       | 1.0312 | 1.0312 | 4.8184 | 6.7975 | 1.03E-05 | 0.000205 | 3.5774  |
| ZSCAN12P1    | 1.0313 | 1.0313 | 5.2799 | 6.3323 | 2.18E-05 | 0.000331 | 2.8196  |
| ISL2         | 1.0315 | 1.0315 | 6.2366 | 7.5937 | 3.10E-06 | 9.29E-05 | 4.8043  |
| HCN2         | 1.0316 | 1.0316 | 5.9608 | 4.9369 | 0.000242 | 0.001594 | 0.36517 |
| LOC100128531 | 1.0337 | 1.0337 | 6.7552 | 6.5711 | 1.48E-05 | 0.000258 | 3.2124  |
| PIP5KL1      | 1.0341 | 1.0341 | 6.6208 | 5.1492 | 0.000165 | 0.00124  | 0.75527 |
| BSN-AS2      | 1.0344 | 1.0344 | 4.4176 | 6.861  | 9.37E-06 | 0.000192 | 3.6784  |
| HGC6.3       | 1.0345 | 1.0345 | 5.6104 | 6.0383 | 3.54E-05 | 0.000458 | 2.3247  |
| PQLC1        | 1.0353 | 1.0353 | 8.0083 | 6.7234 | 1.16E-05 | 0.000221 | 3.4587  |
| KLF1         | 1.0372 | 1.0372 | 6.6302 | 7.6161 | 3.00E-06 | 9.11E-05 | 4.8376  |
| CXCR1        | 1.038  | 1.038  | 7.0712 | 5.3638 | 0.000113 | 0.000972 | 1.1437  |
| PET100       | 1.0391 | 1.0391 | 6.9276 | 5.4496 | 9.69E-05 | 0.000881 | 1.2974  |
| VGLL1        | 1.0428 | 1.0428 | 6.4977 | 5.0385 | 0.000201 | 0.001407 | 0.55249 |

|             |        |        |        |        |          |          |         |
|-------------|--------|--------|--------|--------|----------|----------|---------|
| MIR4688     | 1.0448 | 1.0448 | 7.1622 | 6.4515 | 1.79E-05 | 0.00029  | 3.0167  |
| WDR66       | 1.0464 | 1.0464 | 6.3349 | 5.6677 | 6.63E-05 | 0.000688 | 1.6836  |
| GPR78       | 1.0471 | 1.0471 | 6.1245 | 4.8752 | 0.000271 | 0.001721 | 0.2508  |
| ADAM8       | 1.0518 | 1.0518 | 6.7273 | 5.5819 | 7.69E-05 | 0.000759 | 1.5325  |
| TMEM258     | 1.0537 | 1.0537 | 7.2227 | 5.7889 | 5.39E-05 | 0.000601 | 1.8954  |
| GPR50       | 1.0554 | 1.0554 | 5.6536 | 5.7624 | 5.64E-05 | 0.000618 | 1.8493  |
| LGALS17A    | 1.0564 | 1.0564 | 4.4721 | 5.2854 | 0.000129 | 0.001057 | 1.0026  |
| FOXD4L5     | 1.0569 | 1.0569 | 5.6086 | 7.1765 | 5.77E-06 | 0.000138 | 4.1723  |
| TINF2       | 1.0572 | 1.0572 | 9.5072 | 5.1198 | 0.000174 | 0.001281 | 0.70149 |
| PHF13       | 1.0606 | 1.0606 | 7.8495 | 6.8518 | 9.50E-06 | 0.000194 | 3.6639  |
| spib        | 1.0676 | 1.0676 | 6.5367 | 7.622  | 2.97E-06 | 9.09E-05 | 4.8463  |
| FPR2        | 1.0696 | 1.0696 | 4.4683 | 7.6413 | 2.89E-06 | 8.93E-05 | 4.8748  |
| PIRT        | 1.0704 | 1.0704 | 6.2372 | 5.1018 | 0.00018  | 0.001309 | 0.66858 |
| GAL         | 1.0741 | 1.0741 | 6.5283 | 9.2155 | 3.37E-07 | 2.43E-05 | 7.0469  |
| SOWAHB      | 1.0745 | 1.0745 | 6.075  | 6.2561 | 2.47E-05 | 0.00036  | 2.6924  |
| LINC00887   | 1.0748 | 1.0748 | 5.6873 | 4.8786 | 0.000269 | 0.001714 | 0.25707 |
| HLTF        | 1.076  | 1.076  | 5.9743 | 5.5522 | 8.10E-05 | 0.000785 | 1.4799  |
| MMP13       | 1.0772 | 1.0772 | 4.1924 | 5.6051 | 7.39E-05 | 0.000738 | 1.5734  |
| PCNA-AS1    | 1.0802 | 1.0802 | 6.6399 | 7.6417 | 2.89E-06 | 8.93E-05 | 4.8755  |
| POU4F3      | 1.0846 | 1.0846 | 6.8721 | 6.7771 | 1.07E-05 | 0.000209 | 3.5449  |
| FER1L6      | 1.0852 | 1.0852 | 5.8082 | 5.6802 | 6.49E-05 | 0.000678 | 1.7056  |
| VWA1        | 1.0855 | 1.0855 | 7.2017 | 6.663  | 1.28E-05 | 0.000235 | 3.3615  |
| CBLN4       | 1.0857 | 1.0857 | 5.0633 | 6.5985 | 1.42E-05 | 0.000251 | 3.2569  |
| ACOT7       | 1.0861 | 1.0861 | 6.8901 | 8.0136 | 1.69E-06 | 6.45E-05 | 5.4168  |
| ARHGAP5-AS1 | 1.0884 | 1.0884 | 7.0216 | 6.1354 | 3.01E-05 | 0.000413 | 2.4894  |
| KLK11       | 1.0907 | 1.0907 | 10.664 | 5.4929 | 8.98E-05 | 0.000838 | 1.3746  |

|           |        |        |        |        |          |          |         |
|-----------|--------|--------|--------|--------|----------|----------|---------|
| PIM3      | 1.098  | 1.098  | 7.5846 | 5.3518 | 0.000115 | 0.000987 | 1.1222  |
| BARX1     | 1.0984 | 1.0984 | 6.6338 | 4.9297 | 0.000245 | 0.001612 | 0.35174 |
| GGN       | 1.0994 | 1.0994 | 5.6273 | 8.1641 | 1.37E-06 | 5.70E-05 | 5.6306  |
| ADAMTSL5  | 1.1039 | 1.1039 | 6.7726 | 5.3464 | 0.000116 | 0.000992 | 1.1126  |
| Cox6b1    | 1.1042 | 1.1042 | 7.5158 | 4.943  | 0.000239 | 0.001584 | 0.37645 |
| BCKDK     | 1.1047 | 1.1047 | 8.8808 | 5.7451 | 5.81E-05 | 0.000627 | 1.8191  |
| SH2D5     | 1.1055 | 1.1055 | 6.5994 | 4.9485 | 0.000237 | 0.001572 | 0.38663 |
| C4orf3    | 1.1085 | 1.1085 | 6.6983 | 7.1754 | 5.78E-06 | 0.000138 | 4.1706  |
| RAX       | 1.111  | 1.111  | 6.6337 | 8.085  | 1.53E-06 | 6.06E-05 | 5.5187  |
| josd2     | 1.1157 | 1.1157 | 7.0715 | 5.4582 | 9.54E-05 | 0.000872 | 1.3128  |
| MIR4432   | 1.1165 | 1.1165 | 4.1987 | 8.568  | 7.88E-07 | 3.96E-05 | 6.1906  |
| MIR3161   | 1.1181 | 1.1181 | 6.999  | 6.4042 | 1.94E-05 | 0.000307 | 2.9387  |
| c7orf57   | 1.1184 | 1.1184 | 6.1547 | 6.9999 | 7.56E-06 | 0.000166 | 3.8976  |
| HMX1      | 1.1268 | 1.1268 | 7.0449 | 5.6339 | 7.03E-05 | 0.000715 | 1.6243  |
| KRT14     | 1.1272 | 1.1272 | 12.241 | 6.5144 | 1.62E-05 | 0.000273 | 3.1199  |
| USP17L10  | 1.1302 | 1.1302 | 5.4253 | 5.9922 | 3.82E-05 | 0.000482 | 2.246   |
| LINC00273 | 1.1374 | 1.1374 | 6.8001 | 5.034  | 0.000203 | 0.001416 | 0.54416 |
| SMIM3     | 1.1391 | 1.1391 | 6.266  | 4.9384 | 0.000242 | 0.001593 | 0.36791 |
| TMF1      | 1.1403 | 1.1403 | 5.6775 | 5.6041 | 7.40E-05 | 0.000739 | 1.5716  |
| SULF2     | 1.142  | 1.142  | 6.2541 | 7.7112 | 2.61E-06 | 8.44E-05 | 4.978   |
| LOC90768  | 1.1421 | 1.1421 | 5.5888 | 7.8518 | 2.13E-06 | 7.38E-05 | 5.1835  |
| TTYH3     | 1.1431 | 1.1431 | 7.8191 | 6.8328 | 9.79E-06 | 0.000197 | 3.6338  |
| IGF2-AS   | 1.1446 | 1.1446 | 6.6488 | 7.886  | 2.03E-06 | 7.14E-05 | 5.233   |
| TREX2     | 1.1447 | 1.1447 | 5.883  | 5.6006 | 7.45E-05 | 0.000742 | 1.5656  |
| RBM38     | 1.1457 | 1.1457 | 6.9814 | 7.6905 | 2.69E-06 | 8.62E-05 | 4.9475  |
| MIR4535   | 1.1471 | 1.1471 | 4.5058 | 6.6556 | 1.29E-05 | 0.000237 | 3.3495  |

|           |        |        |        |        |          |          |         |
|-----------|--------|--------|--------|--------|----------|----------|---------|
| CTSLP2    | 1.1487 | 1.1487 | 6.6677 | 5.9207 | 4.31E-05 | 0.00052  | 2.1234  |
| sost      | 1.1508 | 1.1508 | 6.6604 | 5.7566 | 5.69E-05 | 0.00062  | 1.8392  |
| NGF       | 1.1715 | 1.1715 | 6.1214 | 5.7144 | 6.12E-05 | 0.000652 | 1.7654  |
| MIR4632   | 1.1723 | 1.1723 | 7.3035 | 4.9783 | 0.000225 | 0.001516 | 0.44155 |
| mir92b    | 1.1763 | 1.1763 | 8.0446 | 5.117  | 0.000175 | 0.001286 | 0.69646 |
| CYSRT1    | 1.1772 | 1.1772 | 8.1396 | 8.2328 | 1.25E-06 | 5.37E-05 | 5.7274  |
| KLC3      | 1.1778 | 1.1778 | 7.5542 | 5.1326 | 0.00017  | 0.001264 | 0.725   |
| GPR68     | 1.1788 | 1.1788 | 6.7734 | 5.6337 | 7.03E-05 | 0.000715 | 1.6239  |
| MIR4486   | 1.1819 | 1.1819 | 6.6224 | 7.3179 | 4.66E-06 | 0.000119 | 4.3892  |
| GLTPD2    | 1.1825 | 1.1825 | 5.8332 | 7.6811 | 2.73E-06 | 8.65E-05 | 4.9337  |
| GLDC      | 1.1836 | 1.1836 | 5.9281 | 6.5972 | 1.42E-05 | 0.000252 | 3.2549  |
| AURKAIP1  | 1.184  | 1.184  | 7.6907 | 7.0103 | 7.44E-06 | 0.000164 | 3.914   |
| sdc1      | 1.1863 | 1.1863 | 9.7222 | 4.8523 | 0.000283 | 0.001771 | 0.2082  |
| CREG2     | 1.187  | 1.187  | 5.5644 | 4.8633 | 0.000277 | 0.001747 | 0.22863 |
| GPR119    | 1.1902 | 1.1902 | 5.7707 | 6.4367 | 1.84E-05 | 0.000296 | 2.9924  |
| SCO2      | 1.1941 | 1.1941 | 7.7817 | 6.3372 | 2.16E-05 | 0.000329 | 2.8277  |
| IRF2BP2   | 1.1956 | 1.1956 | 7.8931 | 5.4701 | 9.34E-05 | 0.00086  | 1.334   |
| LYNX1     | 1.1957 | 1.1957 | 7.8511 | 7.3499 | 4.44E-06 | 0.000116 | 4.4379  |
| LINC01011 | 1.1972 | 1.1972 | 5.3709 | 4.9835 | 0.000223 | 0.001507 | 0.45116 |
| ZFP92     | 1.2018 | 1.2018 | 5.4534 | 5.7129 | 6.13E-05 | 0.000653 | 1.7629  |
| MAPK3     | 1.2024 | 1.2024 | 9.2253 | 7.158  | 5.93E-06 | 0.00014  | 4.1438  |
| MIR412    | 1.2025 | 1.2025 | 7.7222 | 5.9808 | 3.89E-05 | 0.000488 | 2.2265  |
| KIAA0040  | 1.2033 | 1.2033 | 6.1582 | 6.6645 | 1.28E-05 | 0.000235 | 3.3639  |
| VSIG10L   | 1.2093 | 1.2093 | 8.9112 | 5.4775 | 9.23E-05 | 0.000853 | 1.3472  |
| MIR1908   | 1.2111 | 1.2111 | 7.7867 | 5.5377 | 8.31E-05 | 0.000799 | 1.4542  |
| CDH26     | 1.2122 | 1.2122 | 7.0535 | 6.4046 | 1.94E-05 | 0.000307 | 2.9393  |

|           |        |        |        |        |          |          |         |
|-----------|--------|--------|--------|--------|----------|----------|---------|
| MIR3677   | 1.2145 | 1.2145 | 9.1528 | 6.156  | 2.91E-05 | 0.000404 | 2.5243  |
| HS3ST1    | 1.2163 | 1.2163 | 6.5969 | 6.9747 | 7.85E-06 | 0.00017  | 3.8581  |
| MIF       | 1.2213 | 1.2213 | 9.6924 | 6.6672 | 1.27E-05 | 0.000234 | 3.3683  |
| MIR1224   | 1.2269 | 1.2269 | 5.8532 | 6.0474 | 3.48E-05 | 0.000454 | 2.3402  |
| MIR1226   | 1.2287 | 1.2287 | 6.9946 | 9.8492 | 1.53E-07 | 1.55E-05 | 7.8385  |
| KRTAP10-1 | 1.2288 | 1.2288 | 7.2328 | 6.1738 | 2.82E-05 | 0.000396 | 2.5542  |
| ppdpf     | 1.231  | 1.231  | 10.324 | 8.3181 | 1.11E-06 | 4.98E-05 | 5.8466  |
| C15orf56  | 1.2337 | 1.2337 | 7.2494 | 8.253  | 1.21E-06 | 5.27E-05 | 5.7557  |
| HPCA      | 1.2359 | 1.2359 | 7.3059 | 6.3782 | 2.02E-05 | 0.000315 | 2.8957  |
| IER3      | 1.2377 | 1.2377 | 6.6535 | 5.7977 | 5.31E-05 | 0.000595 | 1.9107  |
| CD274     | 1.2418 | 1.2418 | 5.6046 | 5.2901 | 0.000128 | 0.001053 | 1.0111  |
| MIR521-1  | 1.2464 | 1.2464 | 4.9445 | 7.5949 | 3.09E-06 | 9.29E-05 | 4.8061  |
| CHST2     | 1.2517 | 1.2517 | 5.2079 | 6.3987 | 1.95E-05 | 0.000309 | 2.9296  |
| NXN       | 1.2537 | 1.2537 | 8.7784 | 5.145  | 0.000166 | 0.001247 | 0.74748 |
| GFOD1     | 1.2566 | 1.2566 | 5.9226 | 5.6763 | 6.53E-05 | 0.000681 | 1.6988  |
| ULBP3     | 1.2611 | 1.2611 | 5.9999 | 5.4352 | 9.93E-05 | 0.000896 | 1.2718  |
| MIR4469   | 1.2635 | 1.2635 | 6.5581 | 5.599  | 7.47E-05 | 0.000742 | 1.5628  |
| RNF11     | 1.2672 | 1.2672 | 10.28  | 7.3004 | 4.78E-06 | 0.000122 | 4.3626  |
| GPR153    | 1.2746 | 1.2746 | 7.9536 | 5.1103 | 0.000177 | 0.001295 | 0.68407 |
| SFN       | 1.2776 | 1.2776 | 12.366 | 5.1832 | 0.000155 | 0.001191 | 0.81726 |
| HMOX1     | 1.2854 | 1.2854 | 9.5505 | 5.3717 | 0.000111 | 0.000965 | 1.158   |
| LDHAL6B   | 1.2862 | 1.2862 | 5.5015 | 5.0695 | 0.00019  | 0.001355 | 0.60949 |
| AK1       | 1.2885 | 1.2885 | 8.1391 | 8.2626 | 1.20E-06 | 5.25E-05 | 5.7691  |
| TSTD1     | 1.2901 | 1.2901 | 8.0402 | 6.0252 | 3.61E-05 | 0.000465 | 2.3024  |
| VEGFA     | 1.2963 | 1.2963 | 7.9261 | 5.0221 | 0.000207 | 0.001435 | 0.52231 |
| PDLIM7    | 1.2968 | 1.2968 | 7.4697 | 6.6974 | 1.21E-05 | 0.000227 | 3.417   |

|                    |        |        |        |        |          |          |         |
|--------------------|--------|--------|--------|--------|----------|----------|---------|
| MIR4783            | 1.301  | 1.301  | 5.9792 | 5.4568 | 9.57E-05 | 0.000873 | 1.3102  |
| KLK8               | 1.3163 | 1.3163 | 10.289 | 5.7687 | 5.58E-05 | 0.000614 | 1.8602  |
| CRB3               | 1.3181 | 1.3181 | 7.6096 | 5.5852 | 7.65E-05 | 0.000756 | 1.5383  |
| TPI1P3             | 1.3195 | 1.3195 | 5.838  | 6.0994 | 3.19E-05 | 0.000429 | 2.4286  |
| CCNA1              | 1.3219 | 1.3219 | 5.4812 | 7.9632 | 1.82E-06 | 6.73E-05 | 5.3445  |
| NOP10              | 1.3222 | 1.3222 | 9.1076 | 7.773  | 2.39E-06 | 7.93E-05 | 5.0687  |
| MAP7D1             | 1.3273 | 1.3273 | 7.878  | 5.7217 | 6.04E-05 | 0.000646 | 1.7782  |
| CNGB1              | 1.3275 | 1.3275 | 6.2846 | 7.4623 | 3.76E-06 | 0.000105 | 4.6079  |
| MFSD12             | 1.3275 | 1.3275 | 7.7255 | 5.4299 | 0.0001   | 0.000902 | 1.2623  |
| MAFF               | 1.3291 | 1.3291 | 6.706  | 7.4432 | 3.87E-06 | 0.000107 | 4.5791  |
| MIR4326            | 1.3293 | 1.3293 | 6.3073 | 6.488  | 1.69E-05 | 0.000278 | 3.0766  |
| RNF225             | 1.3333 | 1.3333 | 9.0426 | 5.5133 | 8.67E-05 | 0.000819 | 1.4109  |
| ISG20              | 1.3351 | 1.3351 | 6.3689 | 6.0716 | 3.34E-05 | 0.000442 | 2.3814  |
| TMEM45B            | 1.3352 | 1.3352 | 9.8798 | 5.0739 | 0.000189 | 0.001349 | 0.61746 |
| TMEM256-<br>PLSCR3 | 1.3364 | 1.3364 | 8.4723 | 5.9449 | 4.14E-05 | 0.000507 | 2.165   |
| c3orf67            | 1.3542 | 1.3542 | 5.9983 | 5.0567 | 0.000195 | 0.001375 | 0.58589 |
| CLDND1             | 1.3566 | 1.3566 | 7.1447 | 7.2422 | 5.22E-06 | 0.000129 | 4.2734  |
| MDFI               | 1.3672 | 1.3672 | 6.8133 | 5.676  | 6.54E-05 | 0.000682 | 1.6983  |
| CSTA               | 1.3748 | 1.3748 | 11.971 | 7.8205 | 2.23E-06 | 7.61E-05 | 5.138   |
| LINC00462          | 1.3886 | 1.3886 | 4.0764 | 7.4521 | 3.82E-06 | 0.000106 | 4.5924  |
| SARAF              | 1.3904 | 1.3904 | 6.4243 | 4.9287 | 0.000246 | 0.001614 | 0.34994 |
| DRAP1              | 1.3908 | 1.3908 | 8.1636 | 6.5285 | 1.58E-05 | 0.000269 | 3.1429  |
| RCAN1              | 1.3948 | 1.3948 | 7.6207 | 7.5566 | 3.27E-06 | 9.64E-05 | 4.7491  |
| ANXA1              | 1.4082 | 1.4082 | 12.683 | 6.0639 | 3.39E-05 | 0.000445 | 2.3683  |
| CNFN               | 1.4102 | 1.4102 | 13.231 | 7.9135 | 1.95E-06 | 7.03E-05 | 5.2729  |

|            |        |        |        |        |          |          |         |
|------------|--------|--------|--------|--------|----------|----------|---------|
| ZNF812P    | 1.4121 | 1.4121 | 6.0781 | 5.897  | 4.48E-05 | 0.000533 | 2.0826  |
| S100A2     | 1.4135 | 1.4135 | 7.9857 | 6.1234 | 3.07E-05 | 0.000419 | 2.4692  |
| IGFBP6     | 1.4135 | 1.4135 | 7.9986 | 5.886  | 4.57E-05 | 0.000539 | 2.0637  |
| SPRR2A     | 1.415  | 1.415  | 7.9272 | 5.3715 | 0.000111 | 0.000965 | 1.1576  |
| RGS20      | 1.4179 | 1.4179 | 6.2158 | 7.3509 | 4.44E-06 | 0.000116 | 4.4394  |
| SH3BGRL3   | 1.4299 | 1.4299 | 9.146  | 9.9583 | 1.34E-07 | 1.41E-05 | 7.9703  |
| PGAM4      | 1.4323 | 1.4323 | 8.4504 | 5.436  | 9.92E-05 | 0.000895 | 1.2732  |
| EREG       | 1.4334 | 1.4334 | 10.687 | 6.031  | 3.58E-05 | 0.000462 | 2.3123  |
| SPAG17     | 1.4337 | 1.4337 | 6.1367 | 7.4753 | 3.69E-06 | 0.000104 | 4.6274  |
| RELL2      | 1.4346 | 1.4346 | 7.2126 | 7.4062 | 4.09E-06 | 0.00011  | 4.5232  |
| NPIP3      | 1.4355 | 1.4355 | 9.3155 | 6.0106 | 3.70E-05 | 0.000472 | 2.2775  |
| ARTN       | 1.4399 | 1.4399 | 6.3244 | 8.1966 | 1.31E-06 | 5.54E-05 | 5.6765  |
| PDZK1IP1   | 1.4419 | 1.4419 | 9.4403 | 7.4803 | 3.66E-06 | 0.000104 | 4.6348  |
| ELOVL1     | 1.4521 | 1.4521 | 9.8057 | 7.5974 | 3.08E-06 | 9.27E-05 | 4.8098  |
| TM4SF19    | 1.4562 | 1.4562 | 7.6781 | 6.7975 | 1.03E-05 | 0.000205 | 3.5775  |
| ceacam19   | 1.4567 | 1.4567 | 8.2284 | 6.6956 | 1.21E-05 | 0.000227 | 3.4141  |
| TPGS1      | 1.461  | 1.461  | 6.4    | 5.4234 | 0.000101 | 0.000909 | 1.2507  |
| LRRC20     | 1.4775 | 1.4775 | 7.5206 | 5.3626 | 0.000113 | 0.000974 | 1.1417  |
| HAS3       | 1.4783 | 1.4783 | 7.6397 | 5.0941 | 0.000182 | 0.001322 | 0.65456 |
| ADAMTSL4   | 1.4862 | 1.4862 | 6.8211 | 5.9225 | 4.29E-05 | 0.000519 | 2.1265  |
| OASL       | 1.4864 | 1.4864 | 7.3444 | 5.7468 | 5.79E-05 | 0.000626 | 1.8221  |
| ALG1L      | 1.492  | 1.492  | 6.4865 | 8.7401 | 6.26E-07 | 3.52E-05 | 6.4231  |
| MIR4519    | 1.4933 | 1.4933 | 9.0982 | 6.1826 | 2.78E-05 | 0.000392 | 2.5692  |
| FAM83A-AS1 | 1.4996 | 1.4996 | 6.0551 | 7.6187 | 2.99E-06 | 9.09E-05 | 4.8413  |
| MIR766     | 1.5026 | 1.5026 | 6.8169 | 5.063  | 0.000193 | 0.001366 | 0.59743 |
| KRT33B     | 1.5053 | 1.5053 | 5.5738 | 5.5152 | 8.64E-05 | 0.000817 | 1.4144  |

|              |        |        |        |        |          |          |         |
|--------------|--------|--------|--------|--------|----------|----------|---------|
| OVOL1        | 1.5164 | 1.5164 | 9.2297 | 5.0231 | 0.000207 | 0.001434 | 0.52425 |
| IL36RN       | 1.5193 | 1.5193 | 9.1276 | 5.8204 | 5.11E-05 | 0.000582 | 1.9501  |
| S100A14      | 1.5214 | 1.5214 | 10.963 | 7.6869 | 2.70E-06 | 8.65E-05 | 4.9422  |
| MFSD10       | 1.5276 | 1.5276 | 8.6193 | 10.328 | 8.63E-08 | 1.07E-05 | 8.4084  |
| CIB2         | 1.5286 | 1.5286 | 7.2252 | 8.5608 | 7.96E-07 | 3.97E-05 | 6.1808  |
| RNF222       | 1.5359 | 1.5359 | 8.0373 | 7.12   | 6.29E-06 | 0.000146 | 4.0849  |
| LOC100133920 | 1.5396 | 1.5396 | 6.4618 | 6.1669 | 2.86E-05 | 0.000399 | 2.5427  |
| CCDC124      | 1.5447 | 1.5447 | 9.5965 | 5.97   | 3.96E-05 | 0.000494 | 2.2081  |
| ULBP2        | 1.5556 | 1.5556 | 6.8556 | 8.3606 | 1.05E-06 | 4.79E-05 | 5.9056  |
| SPRY4        | 1.5704 | 1.5704 | 7.1839 | 5.6373 | 6.99E-05 | 0.000712 | 1.6301  |
| GPRIN1       | 1.5755 | 1.5755 | 6.6946 | 5.6711 | 6.59E-05 | 0.000686 | 1.6896  |
| MIR3147      | 1.576  | 1.576  | 6.7533 | 8.4225 | 9.60E-07 | 4.52E-05 | 5.9912  |
| GNRHR        | 1.5804 | 1.5804 | 5.0476 | 5.3327 | 0.000119 | 0.001006 | 1.0878  |
| CSTB         | 1.5865 | 1.5865 | 11.483 | 10.601 | 6.29E-08 | 8.93E-06 | 8.7223  |
| NRBF2        | 1.5914 | 1.5914 | 9.7686 | 6.2482 | 2.50E-05 | 0.000363 | 2.6793  |
| PNP          | 1.5943 | 1.5943 | 9.1534 | 5.9394 | 4.17E-05 | 0.00051  | 2.1555  |
| PPARD        | 1.618  | 1.618  | 9.8594 | 5.5299 | 8.42E-05 | 0.000805 | 1.4404  |
| SPNS2        | 1.6197 | 1.6197 | 9.3198 | 6.2871 | 2.34E-05 | 0.000347 | 2.7443  |
| CLDN4        | 1.6206 | 1.6206 | 6.9739 | 10.302 | 8.90E-08 | 1.08E-05 | 8.3778  |
| MIR4708      | 1.6403 | 1.6403 | 5.5396 | 9.173  | 3.56E-07 | 2.51E-05 | 6.9922  |
| TMSB10       | 1.6468 | 1.6468 | 12.262 | 11.266 | 2.99E-08 | 5.63E-06 | 9.4578  |
| MIR3928      | 1.6488 | 1.6488 | 6.4964 | 6.3247 | 2.20E-05 | 0.000334 | 2.8069  |
| SPRR2D       | 1.6552 | 1.6552 | 4.9084 | 4.9724 | 0.000227 | 0.001527 | 0.43079 |
| NABP1        | 1.661  | 1.661  | 7.6283 | 5.4144 | 0.000103 | 0.00092  | 1.2345  |
| TMEM40       | 1.6842 | 1.6842 | 9.6748 | 7.0052 | 7.49E-06 | 0.000165 | 3.906   |
| LINC00520    | 1.6851 | 1.6851 | 5.3581 | 4.9041 | 0.000257 | 0.001662 | 0.30445 |



|          |        |        |        |        |          |          |         |
|----------|--------|--------|--------|--------|----------|----------|---------|
| GREM1    | 1.6854 | 1.6854 | 7.6837 | 6.4151 | 1.90E-05 | 0.000304 | 2.9568  |
| UNC13D   | 1.6903 | 1.6903 | 7.818  | 6.094  | 3.22E-05 | 0.000432 | 2.4194  |
| PGF      | 1.6943 | 1.6943 | 7.5019 | 6.5766 | 1.47E-05 | 0.000256 | 3.2214  |
| HS3ST3A1 | 1.7125 | 1.7125 | 6.8487 | 5.9253 | 4.27E-05 | 0.000518 | 2.1314  |
| RNF39    | 1.7131 | 1.7131 | 10.299 | 5.3985 | 0.000106 | 0.000934 | 1.206   |
| ARRDC4   | 1.7154 | 1.7154 | 10.446 | 5.1896 | 0.000154 | 0.001183 | 0.82876 |
| FBN2     | 1.7215 | 1.7215 | 6.1212 | 5.9178 | 4.33E-05 | 0.000522 | 2.1183  |
| MIR3152  | 1.7338 | 1.7338 | 3.5758 | 5.5305 | 8.41E-05 | 0.000805 | 1.4415  |
| GIPR     | 1.737  | 1.737  | 7.4523 | 6.1143 | 3.12E-05 | 0.000423 | 2.4538  |
| CRCT1    | 1.7402 | 1.7402 | 12.458 | 7.194  | 5.62E-06 | 0.000136 | 4.1994  |
| NOSIP    | 1.7453 | 1.7453 | 8.0013 | 6.0363 | 3.55E-05 | 0.000459 | 2.3214  |
| MIR1238  | 1.7544 | 1.7544 | 9.7519 | 8.515  | 8.47E-07 | 4.14E-05 | 6.1183  |
| NAGS     | 1.7579 | 1.7579 | 7.2744 | 7.1518 | 5.99E-06 | 0.000141 | 4.1342  |
| FGF11    | 1.7619 | 1.7619 | 8.9116 | 7.6033 | 3.05E-06 | 9.21E-05 | 4.8186  |
| MIR4529  | 1.7668 | 1.7668 | 4.5628 | 5.5101 | 8.71E-05 | 0.000821 | 1.4052  |
| SPRR3    | 1.7931 | 1.7931 | 7.1496 | 11.423 | 2.52E-08 | 5.15E-06 | 9.6257  |
| MIR4781  | 1.7943 | 1.7943 | 5.6379 | 7.0399 | 7.10E-06 | 0.000158 | 3.9602  |
| FBLIM1   | 1.8033 | 1.8033 | 6.5667 | 4.923  | 0.000248 | 0.001625 | 0.3394  |
| HMOX2    | 1.8204 | 1.8204 | 8.4588 | 7.2428 | 5.22E-06 | 0.000129 | 4.2743  |
| DSG3     | 1.8457 | 1.8457 | 11.917 | 8.0999 | 1.50E-06 | 6.01E-05 | 5.5397  |
| CCNE1    | 1.8493 | 1.8493 | 7.0756 | 4.8562 | 0.000281 | 0.001765 | 0.2154  |
| ZNF878   | 1.8672 | 1.8672 | 6.0604 | 5.1511 | 0.000164 | 0.001238 | 0.75866 |
| USP43    | 1.8733 | 1.8733 | 7.1136 | 4.8661 | 0.000276 | 0.001742 | 0.2339  |
| RAP1GAP  | 1.8735 | 1.8735 | 6.8593 | 6.2749 | 2.39E-05 | 0.000352 | 2.7239  |
| MIR520E  | 1.8745 | 1.8745 | 6.3954 | 5.6921 | 6.36E-05 | 0.000668 | 1.7264  |
| TXN      | 1.8778 | 1.8778 | 10.907 | 7.2405 | 5.24E-06 | 0.000129 | 4.2709  |

|           |        |        |        |        |          |          |         |
|-----------|--------|--------|--------|--------|----------|----------|---------|
| JUNB      | 1.8829 | 1.8829 | 10.408 | 5.5195 | 8.57E-05 | 0.000813 | 1.4219  |
| SPHK1     | 1.8836 | 1.8836 | 7.6763 | 5.7676 | 5.59E-05 | 0.000615 | 1.8583  |
| fgfbp1    | 1.8939 | 1.8939 | 8.4467 | 4.8521 | 0.000283 | 0.001771 | 0.20779 |
| UBE2L3    | 1.903  | 1.903  | 8.1435 | 7.0009 | 7.54E-06 | 0.000166 | 3.8993  |
| ADAP2     | 1.9136 | 1.9136 | 9.6555 | 7.9085 | 1.97E-06 | 7.06E-05 | 5.2656  |
| EPN1      | 1.9148 | 1.9148 | 8.8268 | 8.2529 | 1.21E-06 | 5.27E-05 | 5.7556  |
| AMPD3     | 1.9181 | 1.9181 | 7.9098 | 6.9779 | 7.82E-06 | 0.00017  | 3.8631  |
| FUT2      | 1.9217 | 1.9217 | 7.1167 | 5.0877 | 0.000184 | 0.001331 | 0.64278 |
| ETHE1     | 1.9514 | 1.9514 | 9.2098 | 6.2331 | 2.56E-05 | 0.00037  | 2.6539  |
| KCTD11    | 1.9542 | 1.9542 | 9.206  | 5.6706 | 6.60E-05 | 0.000686 | 1.6887  |
| RIMS3     | 1.9592 | 1.9592 | 8.0909 | 5.8083 | 5.21E-05 | 0.000589 | 1.9292  |
| DUSP5     | 1.9674 | 1.9674 | 8.0214 | 5.4405 | 9.84E-05 | 0.000891 | 1.2812  |
| PTHLH     | 1.9716 | 1.9716 | 5.3123 | 5.5413 | 8.25E-05 | 0.000795 | 1.4605  |
| krt17     | 1.9721 | 1.9721 | 7.0904 | 7.4427 | 3.87E-06 | 0.000107 | 4.5784  |
| GPX3      | 1.9921 | 1.9921 | 7.651  | 6.4648 | 1.76E-05 | 0.000286 | 3.0386  |
| RHOD      | 2.0087 | 2.0087 | 10.439 | 13.997 | 1.98E-09 | 1.41E-06 | 12.091  |
| TMEM54    | 2.0172 | 2.0172 | 9.3557 | 10.53  | 6.83E-08 | 9.40E-06 | 8.641   |
| SAMD9     | 2.0201 | 2.0201 | 8.6483 | 3.7033 | 0.002494 | 0.007987 | -1.9879 |
| MMP12     | 2.026  | 2.026  | 5.1746 | 4.0073 | 0.001385 | 0.005285 | -1.3983 |
| PGAM1     | 2.0826 | 2.0826 | 8.517  | 5.5291 | 8.43E-05 | 0.000805 | 1.4389  |
| RNF122    | 2.0976 | 2.0976 | 7.8381 | 5.3337 | 0.000119 | 0.001005 | 1.0897  |
| HCAR2     | 2.0994 | 2.0994 | 6.5526 | 5.4353 | 9.93E-05 | 0.000896 | 1.272   |
| MXD1      | 2.1025 | 2.1025 | 10.143 | 6.0937 | 3.22E-05 | 0.000432 | 2.4189  |
| HIF1A-AS2 | 2.1048 | 2.1048 | 5.7084 | 5.6529 | 6.80E-05 | 0.0007   | 1.6576  |
| TTC9      | 2.1154 | 2.1154 | 9.2944 | 9.5736 | 2.15E-07 | 1.91E-05 | 7.4996  |
| ZNF426    | 2.1202 | 2.1202 | 9.2321 | 7.3455 | 4.47E-06 | 0.000116 | 4.4313  |

|            |        |        |        |        |          |          |          |
|------------|--------|--------|--------|--------|----------|----------|----------|
| IL1RN      | 2.1308 | 2.1308 | 9.4248 | 8.6334 | 7.22E-07 | 3.78E-05 | 6.2794   |
| JHDM1D-AS1 | 2.1331 | 2.1331 | 7.9705 | 4.6016 | 0.000449 | 0.002428 | -0.26163 |
| DHRS9      | 2.1496 | 2.1496 | 6.6501 | 4.4476 | 0.000599 | 0.00297  | -0.55346 |
| LCN2       | 2.1584 | 2.1584 | 7.8074 | 6.1706 | 2.84E-05 | 0.000398 | 2.5489   |
| PNLIPRP3   | 2.1619 | 2.1619 | 9.6449 | 7.0678 | 6.81E-06 | 0.000153 | 4.0037   |
| VTRNA1-1   | 2.2016 | 2.2016 | 8.9689 | 5.2928 | 0.000128 | 0.00105  | 1.016    |
| PAQR5      | 2.2052 | 2.2052 | 9.3437 | 7.8386 | 2.17E-06 | 7.49E-05 | 5.1643   |
| HILPDA     | 2.2067 | 2.2067 | 8.8467 | 4.2426 | 0.000883 | 0.003866 | -0.94504 |
| ERO1A      | 2.2099 | 2.2099 | 9.6924 | 6.3186 | 2.23E-05 | 0.000336 | 2.7967   |
| SESN2      | 2.2228 | 2.2228 | 8.0731 | 5.76   | 5.66E-05 | 0.000619 | 1.8451   |
| ANKRD31    | 2.227  | 2.227  | 6.7626 | 7.5032 | 3.54E-06 | 0.000101 | 4.6692   |
| IGFL2      | 2.24   | 2.24   | 9.3268 | 5.8978 | 4.48E-05 | 0.000533 | 2.0839   |
| CD24       | 2.2694 | 2.2694 | 11.228 | 14.082 | 1.83E-09 | 1.39E-06 | 12.164   |
| CYTOR      | 2.2717 | 2.2717 | 9.3353 | 6.3465 | 2.13E-05 | 0.000326 | 2.8431   |
| CLIC3      | 2.2756 | 2.2756 | 8.4905 | 13.991 | 1.99E-09 | 1.41E-06 | 12.086   |
| EEF1A2     | 2.2851 | 2.2851 | 7.9733 | 8.6263 | 7.29E-07 | 3.80E-05 | 6.2698   |
| USP2       | 2.2938 | 2.2938 | 6.1241 | 4.1659 | 0.001022 | 0.004279 | -1.0924  |
| NOCT       | 2.3259 | 2.3259 | 8.2023 | 4.7844 | 0.00032  | 0.001924 | 0.081568 |
| DKK4       | 2.3271 | 2.3271 | 5.8193 | 3.7564 | 0.002249 | 0.007437 | -1.8847  |
| ULBP1      | 2.3344 | 2.3344 | 4.9852 | 6.008  | 3.72E-05 | 0.000474 | 2.273    |
| TM4SF1     | 2.3468 | 2.3468 | 10.24  | 7.7078 | 2.62E-06 | 8.46E-05 | 4.973    |
| S100A7     | 2.3728 | 2.3728 | 12.375 | 3.7659 | 0.002208 | 0.007343 | -1.8663  |
| ANKRD37    | 2.3779 | 2.3779 | 8.1276 | 4.7615 | 0.000334 | 0.001981 | 0.038865 |
| LYPD5      | 2.3866 | 2.3866 | 11.041 | 7.3248 | 4.61E-06 | 0.000119 | 4.3997   |
| CD68       | 2.3926 | 2.3926 | 10.601 | 5.5437 | 8.22E-05 | 0.000793 | 1.4649   |
| KRT37      | 2.3985 | 2.3985 | 7.9557 | 4.8684 | 0.000274 | 0.001737 | 0.23816  |

|          |        |        |        |        |          |          |          |
|----------|--------|--------|--------|--------|----------|----------|----------|
| NPTX1    | 2.4259 | 2.4259 | 6.8474 | 5.2403 | 0.00014  | 0.00111  | 0.92087  |
| KLK9     | 2.4342 | 2.4342 | 8.1163 | 6.386  | 1.99E-05 | 0.000313 | 2.9085   |
| PPIF     | 2.4394 | 2.4394 | 10.791 | 9.2181 | 3.36E-07 | 2.43E-05 | 7.0503   |
| ANGPTL4  | 2.4918 | 2.4918 | 8.2238 | 7.9625 | 1.82E-06 | 6.74E-05 | 5.3435   |
| qsox1    | 2.4938 | 2.4938 | 10.303 | 9.4164 | 2.61E-07 | 2.14E-05 | 7.3026   |
| CCL20    | 2.4991 | 2.4991 | 5.6406 | 6.2515 | 2.48E-05 | 0.000361 | 2.6849   |
| KRT16P2  | 2.5169 | 2.5169 | 10.578 | 9.3829 | 2.72E-07 | 2.19E-05 | 7.2604   |
| HBEGF    | 2.5185 | 2.5185 | 8.4798 | 4.5939 | 0.000456 | 0.002453 | -0.27619 |
| EIF4EBP1 | 2.5285 | 2.5285 | 8.0526 | 9.7362 | 1.76E-07 | 1.69E-05 | 7.7005   |
| ACP7     | 2.5377 | 2.5377 | 8.6002 | 9.1936 | 3.46E-07 | 2.47E-05 | 7.0187   |
| PGLYRP4  | 2.5439 | 2.5439 | 9.0491 | 6.9202 | 8.55E-06 | 0.00018  | 3.7723   |
| IVL      | 2.5491 | 2.5491 | 10.77  | 5.7764 | 5.50E-05 | 0.00061  | 1.8736   |
| STK17A   | 2.5838 | 2.5838 | 8.9179 | 5.938  | 4.18E-05 | 0.000511 | 2.1532   |
| Rnf223   | 2.5865 | 2.5865 | 8.5356 | 8.314  | 1.11E-06 | 4.99E-05 | 5.8409   |
| KLK6     | 2.5976 | 2.5976 | 7.9631 | 5.3353 | 0.000118 | 0.001003 | 1.0925   |
| LCE3C    | 2.598  | 2.598  | 7.2043 | 4.2955 | 0.000799 | 0.003609 | -0.84368 |
| FCHSD1   | 2.6014 | 2.6014 | 8.9949 | 7.2633 | 5.06E-06 | 0.000126 | 4.3057   |
| ANXA3    | 2.6071 | 2.6071 | 8.7093 | 5.8409 | 4.93E-05 | 0.000568 | 1.9856   |
| RAET1L   | 2.6193 | 2.6193 | 4.7008 | 5.9116 | 4.37E-05 | 0.000526 | 2.1076   |
| SLAMF7   | 2.6223 | 2.6223 | 8.0657 | 7.4066 | 4.08E-06 | 0.00011  | 4.5238   |
| VTRNA1-3 | 2.6675 | 2.6675 | 7.3043 | 10.493 | 7.13E-08 | 9.52E-06 | 8.5985   |
| SLPI     | 2.7118 | 2.7118 | 12.212 | 12.298 | 1.01E-08 | 3.24E-06 | 10.522   |
| BNIP3    | 2.7455 | 2.7455 | 10.388 | 12.189 | 1.13E-08 | 3.36E-06 | 10.414   |
| SPRR1B   | 2.7626 | 2.7626 | 10.698 | 7.6531 | 2.84E-06 | 8.83E-05 | 4.8923   |
| DSC2     | 2.7768 | 2.7768 | 11.798 | 9.4173 | 2.61E-07 | 2.14E-05 | 7.3038   |
| KLK10    | 2.7785 | 2.7785 | 9.9892 | 10.449 | 7.50E-08 | 9.74E-06 | 8.5479   |

|           |        |        |        |        |          |          |          |
|-----------|--------|--------|--------|--------|----------|----------|----------|
| SPRR1A    | 2.8105 | 2.8105 | 12.115 | 5.1272 | 0.000172 | 0.00127  | 0.71505  |
| CALB2     | 2.8407 | 2.8407 | 7.1208 | 6.597  | 1.42E-05 | 0.000252 | 3.2546   |
| TREM1     | 2.8873 | 2.8873 | 7.0896 | 4.8694 | 0.000274 | 0.001735 | 0.23993  |
| DDIT4     | 2.8991 | 2.8991 | 8.6143 | 6.9244 | 8.49E-06 | 0.000179 | 3.7788   |
| MIR4461   | 3.018  | 3.018  | 7.5746 | 12.714 | 6.66E-09 | 2.74E-06 | 10.925   |
| LCE3E     | 3.0186 | 3.0186 | 11.409 | 7.9869 | 1.76E-06 | 6.57E-05 | 5.3785   |
| UBC       | 3.0685 | 3.0685 | 8.8632 | 10.508 | 7.01E-08 | 9.47E-06 | 8.6162   |
| SPRR4     | 3.0883 | 3.0883 | 7.9739 | 11.352 | 2.72E-08 | 5.40E-06 | 9.5506   |
| AJAP1     | 3.1176 | 3.1176 | 7.9835 | 6.8614 | 9.36E-06 | 0.000192 | 3.6791   |
| HK2       | 3.1403 | 3.1403 | 9.9425 | 8.968  | 4.64E-07 | 2.97E-05 | 6.7255   |
| LINC00707 | 3.1432 | 3.1432 | 7.477  | 4.8559 | 0.000281 | 0.001765 | 0.21486  |
| IL24      | 3.1661 | 3.1661 | 6.5979 | 4.6905 | 0.000381 | 0.002171 | -0.09425 |
| ADM       | 3.1937 | 3.1937 | 8.0805 | 10.834 | 4.83E-08 | 7.41E-06 | 8.9851   |
| UPK1B     | 3.2201 | 3.2201 | 7.8668 | 5.3591 | 0.000114 | 0.000978 | 1.1354   |
| KRT16P3   | 3.2348 | 3.2348 | 8.5826 | 12.203 | 1.11E-08 | 3.34E-06 | 10.427   |
| KRT6A     | 3.2774 | 3.2774 | 9.0528 | 5.4201 | 0.000102 | 0.000912 | 1.2447   |
| IGFL1     | 3.2888 | 3.2888 | 8.0311 | 3.6365 | 0.00284  | 0.008749 | -2.1177  |
| ODC1      | 3.3483 | 3.3483 | 9.3093 | 5.3128 | 0.000123 | 0.001027 | 1.052    |
| C15ORF48  | 3.3891 | 3.3891 | 6.5233 | 5.3495 | 0.000116 | 0.000989 | 1.1181   |
| AREG      | 3.3962 | 3.3962 | 8.8029 | 7.812  | 2.26E-06 | 7.67E-05 | 5.1256   |
| SPRR2C    | 3.4878 | 3.4878 | 7.4006 | 11.006 | 3.98E-08 | 6.52E-06 | 9.1757   |
| PTGS2     | 3.5773 | 3.5773 | 8.577  | 3.7427 | 0.00231  | 0.007582 | -1.9114  |
| KRT16     | 3.581  | 3.581  | 11.13  | 7.1159 | 6.33E-06 | 0.000146 | 4.0785   |
| MIR31HG   | 3.653  | 3.653  | 6.6852 | 6.6468 | 1.31E-05 | 0.000239 | 3.3353   |
| fosl1     | 3.6835 | 3.6835 | 8.5802 | 11.431 | 2.50E-08 | 5.15E-06 | 9.6348   |
| KLK12     | 3.6871 | 3.6871 | 7.1892 | 9.271  | 3.14E-07 | 2.33E-05 | 7.118    |

|         |        |        |        |        |          |          |        |
|---------|--------|--------|--------|--------|----------|----------|--------|
| S100A7A | 3.7248 | 3.7248 | 7.7445 | 10.101 | 1.13E-07 | 1.26E-05 | 8.1408 |
| CDA     | 3.8504 | 3.8504 | 9.7172 | 11.133 | 3.46E-08 | 6.06E-06 | 9.3144 |
| S100A8  | 3.9076 | 3.9076 | 11.004 | 5.5996 | 7.46E-05 | 0.000742 | 1.5638 |
| KRT6B   | 3.9191 | 3.9191 | 9.7198 | 8.904  | 5.04E-07 | 3.10E-05 | 6.6411 |
| CXCL8   | 3.9211 | 3.9211 | 6.5251 | 5.5168 | 8.61E-05 | 0.000816 | 1.4172 |
| KRT75   | 3.9666 | 3.9666 | 7.6793 | 6.612  | 1.39E-05 | 0.000247 | 3.2789 |
| epgn    | 4.2933 | 4.2933 | 9.0699 | 8.0795 | 1.54E-06 | 6.09E-05 | 5.5108 |
| LCE3A   | 4.3822 | 4.3822 | 9.6826 | 7.4076 | 4.08E-06 | 0.00011  | 4.5254 |
| UPP1    | 4.4038 | 4.4038 | 8.0125 | 12.568 | 7.69E-09 | 2.93E-06 | 10.786 |
| cldn17  | 4.5538 | 4.5538 | 6.6544 | 7.9802 | 1.78E-06 | 6.62E-05 | 5.3689 |
| PRR9    | 4.653  | 4.653  | 8.5028 | 8.8834 | 5.18E-07 | 3.14E-05 | 6.6139 |
| SPRR2F  | 4.8227 | 4.8227 | 8.442  | 9.2041 | 3.42E-07 | 2.45E-05 | 7.0322 |
| S100A9  | 5.0189 | 5.0189 | 10.166 | 8.7041 | 6.57E-07 | 3.64E-05 | 6.3747 |
| Spr2b   | 5.1644 | 5.1644 | 8.7228 | 8.8258 | 5.59E-07 | 3.29E-05 | 6.5375 |
| KRT6C   | 5.5106 | 5.5106 | 8.1199 | 5.7852 | 5.42E-05 | 0.000604 | 1.8889 |
| MMP1    | 6.0366 | 6.0366 | 6.6277 | 7.4466 | 3.85E-06 | 0.000107 | 4.5841 |
| HEPHL1  | 6.2881 | 6.2881 | 8.4195 | 14.383 | 1.40E-09 | 1.22E-06 | 12.42  |
| S100A12 | 6.6922 | 6.6922 | 8.5847 | 34.135 | 1.63E-14 | 6.72E-10 | 21.645 |

LogFC, logarithm of the fold change. abslogfc, absolute value of logFC. AveExpr, average expression. adj.P.Val, adjusted p-value.

Supplementary Table 4. The Differential Gene Analysis Results of Dataset GSE134431 by NetworkAnalyst Website.

| Symbols  | logFC   | abslogfc | AveExpr | t       | P.Value  | adj.P.Val | B        | EntrezID |
|----------|---------|----------|---------|---------|----------|-----------|----------|----------|
| TXNIP    | -74.878 | 74.878   | 69.523  | -5.1392 | 0.00016  | 0.019209  | 1.1483   | 10628    |
| MT1X     | -73.066 | 73.066   | 63.965  | -3.7775 | 0.002108 | 0.046399  | -1.2851  | 4501     |
| SNORA57  | -69.35  | 69.35    | 85.442  | -4.3572 | 0.000687 | 0.031179  | -0.22474 | 692158   |
| NOP53    | -50.74  | 50.74    | 66.633  | -5.0603 | 0.000185 | 0.020979  | 1.0135   | 29997    |
| SCARNA17 | -46.931 | 46.931   | 54.108  | -4.4375 | 0.00059  | 0.02983   | -0.08038 | 677769   |
| SCGB2A2  | -44.479 | 44.479   | 23.854  | -3.6916 | 0.002494 | 0.049831  | -1.444   | 4250     |
| NFIX     | -26.436 | 26.436   | 24.73   | -5.5555 | 7.63E-05 | 0.015265  | 1.8442   | 4784     |
| FGFR3    | -23.916 | 23.916   | 24.635  | -4.9798 | 0.000214 | 0.021555  | 0.87509  | 2261     |
| PNRC1    | -23.392 | 23.392   | 53.681  | -4.1758 | 0.000973 | 0.033974  | -0.55375 | 10957    |
| SCARNA6  | -21.013 | 21.013   | 17.206  | -3.8999 | 0.00166  | 0.04144   | -1.0592  | 677772   |
| CIRBP    | -17.188 | 17.188   | 25.357  | -4.6709 | 0.00038  | 0.024927  | 0.33555  | 1153     |
| EEF2K    | -13.54  | 13.54    | 11.823  | -4.6254 | 0.000414 | 0.025503  | 0.255    | 29904    |
| SCGB1D2  | -13.219 | 13.219   | 7.0553  | -4.1877 | 0.000951 | 0.033974  | -0.53195 | 10647    |
| NFIC     | -12.501 | 12.501   | 18.417  | -3.753  | 0.002212 | 0.047421  | -1.3305  | 4782     |
| FAT2     | -11.938 | 11.938   | 22.196  | -3.8636 | 0.001782 | 0.042674  | -1.1262  | 2196     |
| NPIP3    | -10.271 | 10.271   | 13.929  | -3.828  | 0.00191  | 0.044358  | -1.1919  | 23117    |
| KRT77    | -9.5966 | 9.5966   | 5.9455  | -4.0235 | 0.001306 | 0.038682  | -0.8321  | 374454   |
| SNORD94  | -9.5751 | 9.5751   | 8.1931  | -4.2098 | 0.000912 | 0.033639  | -0.49178 | 692225   |
| SLC12A2  | -9.0117 | 9.0117   | 8.3297  | -3.9314 | 0.001562 | 0.040861  | -1.0013  | 6558     |
| NDRG2    | -8.5835 | 8.5835   | 9.264   | -8.609  | 6.70E-07 | 0.002829  | 6.1127   | 57447    |
| PTPRS    | -8.4981 | 8.4981   | 8.6889  | -5.0063 | 0.000204 | 0.021202  | 0.92076  | 5802     |

|          |         |        |        |         |          |          |          |        |
|----------|---------|--------|--------|---------|----------|----------|----------|--------|
| MLLT6    | -8.3391 | 8.3391 | 9.7006 | -4.0427 | 0.001258 | 0.038005 | -0.79688 | 4302   |
| STAC2    | -8.0865 | 8.0865 | 4.3956 | -4.8468 | 0.000274 | 0.023957 | 0.64431  | 342667 |
| FGFR2    | -7.8638 | 7.8638 | 7.0911 | -9.2124 | 3.01E-07 | 0.00254  | 6.7937   | 2263   |
| SYNE2    | -7.5343 | 7.5343 | 10.851 | -4.9    | 0.000248 | 0.023296 | 0.73692  | 23224  |
| PPP1R1B  | -7.3662 | 7.3662 | 3.9876 | -4.7218 | 0.000346 | 0.024681 | 0.42517  | 84152  |
| BCL6     | -7.1199 | 7.1199 | 10.261 | -4.6401 | 0.000403 | 0.025177 | 0.28105  | 604    |
| NFIB     | -7.0896 | 7.0896 | 8.3976 | -4.0861 | 0.001157 | 0.036621 | -0.71735 | 4781   |
| VPS13D   | -6.6226 | 6.6226 | 14.797 | -3.7348 | 0.002292 | 0.048121 | -1.3641  | 55187  |
| PLLP     | -6.4578 | 6.4578 | 4.6582 | -3.776  | 0.002114 | 0.046417 | -1.2879  | 51090  |
| PRR12    | -6.3411 | 6.3411 | 8.2142 | -4.293  | 0.000777 | 0.032558 | -0.34074 | 57479  |
| BOC      | -6.2915 | 6.2915 | 5.3766 | -6.196  | 2.55E-05 | 0.01104  | 2.8615   | 91653  |
| DCT      | -6.0525 | 6.0525 | 3.7399 | -5.0235 | 0.000198 | 0.021202 | 0.95031  | 1638   |
| SMARCA2  | -5.9191 | 5.9191 | 9.1301 | -6.0477 | 3.27E-05 | 0.012841 | 2.6317   | 6595   |
| LRIG3    | -5.7769 | 5.7769 | 8.7388 | -5.0743 | 0.00018  | 0.020943 | 1.0375   | 121227 |
| TCEA3    | -5.6954 | 5.6954 | 5.2145 | -5.4758 | 8.78E-05 | 0.016668 | 1.713    | 6920   |
| MED13L   | -5.6704 | 5.6704 | 15.434 | -3.7376 | 0.002279 | 0.048036 | -1.3589  | 23389  |
| SMARCD2  | -5.164  | 5.164  | 11.057 | -5.256  | 0.00013  | 0.018518 | 1.3463   | 6603   |
| FOXK1    | -5.1082 | 5.1082 | 9.1449 | -4.006  | 0.001351 | 0.03887  | -0.86424 | 221937 |
| PIK3IP1  | -5.102  | 5.102  | 6.853  | -6.9241 | 7.86E-06 | 0.007803 | 3.9374   | 113791 |
| ATP6V1B1 | -4.8274 | 4.8274 | 2.6921 | -3.7886 | 0.002063 | 0.045888 | -1.2647  | 525    |
| NEO1     | -4.8124 | 4.8124 | 5.9023 | -5.5574 | 7.61E-05 | 0.015265 | 1.8473   | 4756   |
| TBC1D8   | -4.6255 | 4.6255 | 5.8525 | -5.222  | 0.000138 | 0.018518 | 1.2887   | 11138  |
| KDM3B    | -4.4835 | 4.4835 | 8.8334 | -5.2803 | 0.000124 | 0.018518 | 1.3872   | 51780  |
| ACVR1B   | -4.455  | 4.455  | 7.7508 | -4.2217 | 0.000891 | 0.033639 | -0.47023 | 91     |
| F10      | -4.4526 | 4.4526 | 3.3234 | -3.8882 | 0.001698 | 0.041804 | -1.0808  | 2159   |
| KAT2A    | -4.4001 | 4.4001 | 5.9072 | -4.2885 | 0.000784 | 0.032558 | -0.34902 | 2648   |



|                            |         |        |        |         |          |          |          |        |
|----------------------------|---------|--------|--------|---------|----------|----------|----------|--------|
| GOLGA8B                    | -4.3473 | 4.3473 | 4.7897 | -4.092  | 0.001144 | 0.036431 | -0.70654 | 440270 |
| TANC1                      | -4.2515 | 4.2515 | 6.1783 | -4.292  | 0.000779 | 0.032558 | -0.34269 | 85461  |
| FAM53B                     | -4.1455 | 4.1455 | 7.262  | -3.8903 | 0.001691 | 0.041804 | -1.0769  | 9679   |
| SPRY1                      | -4.138  | 4.138  | 7.3098 | -4.7093 | 0.000354 | 0.024681 | 0.40324  | 10252  |
| DTX2                       | -4.0804 | 4.0804 | 6.5786 | -4.532  | 0.000493 | 0.027666 | 0.088828 | 113878 |
| CGNL1                      | -4.0557 | 4.0557 | 2.8404 | -6.3692 | 1.91E-05 | 0.009508 | 3.1251   | 84952  |
| LRIG1                      | -4.03   | 4.03   | 4.9364 | -4.9191 | 0.00024  | 0.023    | 0.77012  | 26018  |
| CES1                       | -4.0203 | 4.0203 | 3.2245 | -3.688  | 0.002512 | 0.049894 | -1.4508  | 1066   |
| CTSF                       | -4.0089 | 4.0089 | 5.5247 | -4.3134 | 0.000747 | 0.032252 | -0.30389 | 8722   |
| BBS2                       | -3.9681 | 3.9681 | 5.0991 | -5.066  | 0.000183 | 0.020943 | 1.0234   | 583    |
| IL11RA                     | -3.9312 | 3.9312 | 3.5573 | -3.825  | 0.001921 | 0.04443  | -1.1973  | 3590   |
| NUAK1                      | -3.9307 | 3.9307 | 4.1831 | -5.0649 | 0.000184 | 0.020943 | 1.0215   | 9891   |
| KIT                        | -3.8994 | 3.8994 | 3.8116 | -5.1923 | 0.000146 | 0.018518 | 1.2385   | 3815   |
| KCNK5                      | -3.8353 | 3.8353 | 2.8936 | -4.8471 | 0.000274 | 0.023957 | 0.64479  | 8645   |
| KAT7                       | -3.77   | 3.77   | 8.843  | -3.8151 | 0.001959 | 0.044855 | -1.2156  | 11143  |
| CBX7                       | -3.761  | 3.761  | 3.4662 | -5.6511 | 6.46E-05 | 0.015265 | 2.0002   | 23492  |
| KRT8                       | -3.7579 | 3.7579 | 2.3753 | -4.0172 | 0.001322 | 0.038682 | -0.84362 | 3856   |
| COQ8A                      | -3.7575 | 3.7575 | 3.5981 | -5.0473 | 0.00019  | 0.021198 | 0.99122  | 56997  |
| SLC25A23                   | -3.7518 | 3.7518 | 4.5934 | -4.2768 | 0.000802 | 0.032687 | -0.37009 | 79085  |
| DTX2P1-UPK3BP1-<br>PMS2P11 | -3.7183 | 3.7183 | 3.6347 | -4.6494 | 0.000396 | 0.024927 | 0.29749  | 441263 |
| YLPM1                      | -3.6936 | 3.6936 | 6.6847 | -5.2179 | 0.000139 | 0.018518 | 1.282    | 56252  |
| ETV3                       | -3.677  | 3.677  | 7.8053 | -5.6068 | 6.98E-05 | 0.015265 | 1.9281   | 2117   |
| XPC                        | -3.6694 | 3.6694 | 5.1157 | -4.9849 | 0.000212 | 0.021481 | 0.88393  | 7508   |
| VPS26B                     | -3.6605 | 3.6605 | 8.0341 | -4.7342 | 0.000338 | 0.024681 | 0.44716  | 112936 |
| ARHGEF19                   | -3.6066 | 3.6066 | 3.5799 | -4.3878 | 0.000649 | 0.030245 | -0.16961 | 128272 |

|         |         |        |        |         |          |          |          |        |
|---------|---------|--------|--------|---------|----------|----------|----------|--------|
| CHD2    | -3.6046 | 3.6046 | 9.1006 | -4.187  | 0.000952 | 0.033974 | -0.5332  | 1106   |
| MATN2   | -3.5635 | 3.5635 | 5.3779 | -4.7698 | 0.000316 | 0.024681 | 0.50955  | 4147   |
| LFNG    | -3.5261 | 3.5261 | 4.7622 | -3.7744 | 0.002121 | 0.0465   | -1.2908  | 3955   |
| MOV10   | -3.5128 | 3.5128 | 5.2696 | -4.4827 | 0.000542 | 0.028585 | 0.000738 | 4343   |
| POLR2J2 | -3.4927 | 3.4927 | 6.1534 | -3.7012 | 0.002448 | 0.049465 | -1.4263  | 246721 |
| SLC12A7 | -3.4771 | 3.4771 | 3.831  | -4.1213 | 0.001081 | 0.035215 | -0.65305 | 10723  |
| NFIA    | -3.4597 | 3.4597 | 4.8848 | -3.9462 | 0.001517 | 0.040568 | -0.97409 | 4774   |
| TBC1D4  | -3.4441 | 3.4441 | 5.3375 | -6.6727 | 1.17E-05 | 0.00898  | 3.5756   | 9882   |
| WASH8P  | -3.4423 | 3.4423 | 5.0396 | -4.8625 | 0.000266 | 0.023777 | 0.67166  | 1E+08  |
| THRA    | -3.4201 | 3.4201 | 4.4462 | -4.4171 | 0.000613 | 0.030105 | -0.11694 | 7067   |
| FAXDC2  | -3.3494 | 3.3494 | 2.9027 | -4.6681 | 0.000382 | 0.024927 | 0.33058  | 10826  |
| TMEM63A | -3.3469 | 3.3469 | 4.1468 | -4.7286 | 0.000341 | 0.024681 | 0.43721  | 9725   |
| GOSR1   | -3.3306 | 3.3306 | 9.3355 | -4.9912 | 0.00021  | 0.021481 | 0.89465  | 9527   |
| SNX1    | -3.3159 | 3.3159 | 7.0339 | -5.2162 | 0.00014  | 0.018518 | 1.279    | 6642   |
| GSTM2   | -3.3034 | 3.3034 | 2.9829 | -4.617  | 0.000421 | 0.02556  | 0.24004  | 2946   |
| DCAF8   | -3.3013 | 3.3013 | 9.9539 | -4.5992 | 0.000435 | 0.025846 | 0.20848  | 50717  |
| KMT2A   | -3.2981 | 3.2981 | 5.8318 | -4.2319 | 0.000874 | 0.033373 | -0.45167 | 4297   |
| GGA2    | -3.2221 | 3.2221 | 4.5879 | -5.2464 | 0.000132 | 0.018518 | 1.33     | 23062  |
| MAVS    | -3.2197 | 3.2197 | 7.0697 | -3.7579 | 0.00219  | 0.04731  | -1.3213  | 57506  |
| PMS2P7  | -3.181  | 3.181  | 3.1488 | -5.6759 | 6.18E-05 | 0.015265 | 2.0404   | 1E+08  |
| AKAP1   | -3.1509 | 3.1509 | 4.0523 | -6.6847 | 1.15E-05 | 0.00898  | 3.5931   | 8165   |
| SOX10   | -3.1406 | 3.1406 | 1.8182 | -5.1581 | 0.000155 | 0.019035 | 1.1806   | 6663   |
| DEF6    | -3.1116 | 3.1116 | 4.398  | -4.3234 | 0.000733 | 0.032145 | -0.28579 | 50619  |
| CEP68   | -3.0528 | 3.0528 | 3.8824 | -7.3697 | 3.96E-06 | 0.006284 | 4.5543   | 23177  |
| MDM4    | -3.0275 | 3.0275 | 5.1204 | -3.7122 | 0.002396 | 0.049051 | -1.406   | 4194   |
| CHD6    | -3.0274 | 3.0274 | 4.096  | -7.2449 | 4.78E-06 | 0.006284 | 4.3847   | 84181  |

|              |         |        |        |         |          |          |          |          |
|--------------|---------|--------|--------|---------|----------|----------|----------|----------|
| LOC100506990 | -3.0183 | 3.0183 | 2.8162 | -4.2586 | 0.00083  | 0.032807 | -0.40322 | 1.01E+08 |
| STAG3L2      | -3.0057 | 3.0057 | 5.2679 | -3.9098 | 0.001628 | 0.041076 | -1.041   | 442582   |
| DCAKD        | -2.9983 | 2.9983 | 4.2993 | -7.2227 | 4.95E-06 | 0.006284 | 4.3542   | 79877    |
| COL4A5       | -2.9946 | 2.9946 | 4.2248 | -4.2156 | 0.000901 | 0.033639 | -0.4812  | 1287     |
| PCIF1        | -2.9908 | 2.9908 | 7.0327 | -3.6922 | 0.002491 | 0.049831 | -1.4429  | 63935    |
| MCC          | -2.9801 | 2.9801 | 6.3286 | -4.7851 | 0.000307 | 0.024681 | 0.5364   | 4163     |
| TRIM35       | -2.9592 | 2.9592 | 5.6854 | -5.5516 | 7.69E-05 | 0.015265 | 1.8377   | 23087    |
| TRRAP        | -2.9248 | 2.9248 | 5.9237 | -5.2193 | 0.000139 | 0.018518 | 1.2842   | 8295     |
| SPG7         | -2.8822 | 2.8822 | 5.7098 | -4.2134 | 0.000905 | 0.033639 | -0.48523 | 6687     |
| BCL11B       | -2.8545 | 2.8545 | 4.7895 | -4.2777 | 0.0008   | 0.032687 | -0.36853 | 64919    |
| SIPA1L3      | -2.8229 | 2.8229 | 4.8647 | -3.8054 | 0.001996 | 0.045305 | -1.2336  | 23094    |
| GPRC5C       | -2.8228 | 2.8228 | 3.0966 | -4.7192 | 0.000347 | 0.024681 | 0.42061  | 55890    |
| GALT         | -2.8207 | 2.8207 | 4.4241 | -4.5637 | 0.000465 | 0.026801 | 0.14535  | 2592     |
| AUTS2        | -2.813  | 2.813  | 4.5295 | -4.6715 | 0.00038  | 0.024927 | 0.33647  | 26053    |
| HERC2        | -2.7791 | 2.7791 | 5.8321 | -4.0344 | 0.001278 | 0.038337 | -0.81198 | 8924     |
| FANCC        | -2.775  | 2.775  | 3.3085 | -4.0707 | 0.001192 | 0.037069 | -0.74551 | 2176     |
| MDN1         | -2.76   | 2.76   | 4.8889 | -5.4271 | 9.57E-05 | 0.016835 | 1.6324   | 23195    |
| VPS39        | -2.76   | 2.76   | 8.2002 | -4.0165 | 0.001324 | 0.038682 | -0.84493 | 23339    |
| CACHD1       | -2.7424 | 2.7424 | 2.6094 | -9.3882 | 2.40E-07 | 0.00254  | 6.9832   | 57685    |
| TNRC6B       | -2.7366 | 2.7366 | 5.452  | -5.3528 | 0.000109 | 0.018086 | 1.5086   | 23112    |
| THSD4        | -2.7147 | 2.7147 | 2.8751 | -5.4301 | 9.52E-05 | 0.016835 | 1.6373   | 79875    |
| HIVEP3       | -2.6939 | 2.6939 | 2.9049 | -4.9605 | 0.000222 | 0.022069 | 0.84174  | 59269    |
| SPEN         | -2.6724 | 2.6724 | 8.0553 | -3.7853 | 0.002076 | 0.045937 | -1.2707  | 23013    |
| CUL9         | -2.6696 | 2.6696 | 3.3456 | -4.6573 | 0.00039  | 0.024927 | 0.31145  | 23113    |
| EZH1         | -2.6627 | 2.6627 | 4.285  | -6.3903 | 1.85E-05 | 0.009508 | 3.1568   | 2145     |
| EP400        | -2.654  | 2.654  | 5.8223 | -4.0462 | 0.00125  | 0.037875 | -0.79036 | 57634    |

|              |         |        |        |         |          |          |          |          |
|--------------|---------|--------|--------|---------|----------|----------|----------|----------|
| CHL1         | -2.651  | 2.651  | 2.747  | -3.7511 | 0.00222  | 0.047421 | -1.3339  | 10752    |
| LINC02256    | -2.6413 | 2.6413 | 3.1118 | -3.6943 | 0.002481 | 0.049831 | -1.4391  | 1.01E+08 |
| TAF1         | -2.6204 | 2.6204 | 4.2287 | -6.3757 | 1.89E-05 | 0.009508 | 3.135    | 6872     |
| AGO1         | -2.6101 | 2.6101 | 5.4562 | -4.0537 | 0.001232 | 0.037681 | -0.77672 | 26523    |
| BCL11A       | -2.5937 | 2.5937 | 2.5412 | -6.9402 | 7.66E-06 | 0.007803 | 3.9602   | 53335    |
| PADI2        | -2.5808 | 2.5808 | 1.7807 | -5.9969 | 3.56E-05 | 0.013026 | 2.5522   | 11240    |
| VIPR1        | -2.5605 | 2.5605 | 4.7523 | -3.9147 | 0.001613 | 0.040892 | -1.0319  | 7433     |
| SIN3A        | -2.5528 | 2.5528 | 5.4755 | -4.1028 | 0.00112  | 0.036157 | -0.68681 | 25942    |
| GATAD2B      | -2.5507 | 2.5507 | 5.867  | -4.6088 | 0.000427 | 0.02575  | 0.22543  | 57459    |
| LOC100130744 | -2.5357 | 2.5357 | 3.2466 | -4.5585 | 0.000469 | 0.026801 | 0.13605  | 1E+08    |
| EVA1C        | -2.5204 | 2.5204 | 3.3853 | -4.153  | 0.001017 | 0.034679 | -0.59512 | 59271    |
| STX16        | -2.4674 | 2.4674 | 8.8555 | -3.7103 | 0.002405 | 0.049083 | -1.4095  | 8675     |
| DPH1         | -2.447  | 2.447  | 4.8348 | -3.9674 | 0.001456 | 0.039967 | -0.935   | 1801     |
| S100A1       | -2.4359 | 2.4359 | 1.4688 | -5.2021 | 0.000143 | 0.018518 | 1.2551   | 6271     |
| GLI3         | -2.4356 | 2.4356 | 5.4256 | -4.6724 | 0.000379 | 0.024927 | 0.33819  | 2737     |
| GFRA1        | -2.3862 | 2.3862 | 1.3474 | -3.8342 | 0.001887 | 0.043944 | -1.1804  | 2674     |
| WNK2         | -2.3783 | 2.3783 | 1.2856 | -4.6941 | 0.000364 | 0.024927 | 0.37643  | 65268    |
| ZG16B        | -2.3682 | 2.3682 | 1.3677 | -3.9213 | 0.001592 | 0.040861 | -1.0198  | 124220   |
| ZZEF1        | -2.3645 | 2.3645 | 6.4415 | -4.4866 | 0.000538 | 0.028585 | 0.007627 | 23140    |
| SYNGR1       | -2.3629 | 2.3629 | 2.923  | -3.978  | 0.001426 | 0.039927 | -0.91549 | 9145     |
| POLE         | -2.3567 | 2.3567 | 3.6007 | -5.2237 | 0.000138 | 0.018518 | 1.2918   | 5426     |
| RBM33        | -2.3321 | 2.3321 | 5.4851 | -4.1853 | 0.000956 | 0.033974 | -0.53642 | 155435   |
| KCNN4        | -2.3289 | 2.3289 | 2.0955 | -4.3785 | 0.00066  | 0.030358 | -0.18639 | 3783     |
| TARBP1       | -2.3213 | 2.3213 | 3.925  | -4.8189 | 0.000289 | 0.024601 | 0.59569  | 6894     |
| KCND3        | -2.316  | 2.316  | 2.7752 | -4.7128 | 0.000351 | 0.024681 | 0.40944  | 3752     |
| PNPLA7       | -2.3052 | 2.3052 | 1.6981 | -4.0832 | 0.001163 | 0.036644 | -0.72272 | 375775   |

|           |         |        |        |         |          |          |          |        |
|-----------|---------|--------|--------|---------|----------|----------|----------|--------|
| NTRK2     | -2.2689 | 2.2689 | 1.8434 | -4.563  | 0.000465 | 0.026801 | 0.14408  | 4915   |
| ABCA6     | -2.2668 | 2.2668 | 1.8666 | -3.7954 | 0.002035 | 0.045636 | -1.252   | 23460  |
| TMEM198B  | -2.255  | 2.255  | 2.81   | -4.871  | 0.000262 | 0.023603 | 0.68655  | 440104 |
| SERTAD4   | -2.2521 | 2.2521 | 2.4077 | -4.8702 | 0.000262 | 0.023603 | 0.68509  | 56256  |
| DGLUCY    | -2.2235 | 2.2235 | 2.8461 | -6.1298 | 2.85E-05 | 0.012024 | 2.7593   | 80017  |
| PHYHD1    | -2.2195 | 2.2195 | 2.1037 | -7.6665 | 2.54E-06 | 0.005368 | 4.9481   | 254295 |
| ZKSCAN1   | -2.2117 | 2.2117 | 6.7609 | -4.4151 | 0.000616 | 0.030134 | -0.12062 | 7586   |
| DNMBP     | -2.179  | 2.179  | 3.936  | -4.2624 | 0.000824 | 0.032807 | -0.3962  | 23268  |
| R3HDM2    | -2.1526 | 2.1526 | 6.3956 | -5.141  | 0.00016  | 0.019209 | 1.1515   | 22864  |
| DEPTOR    | -2.1314 | 2.1314 | 1.7147 | -7.2262 | 4.92E-06 | 0.006284 | 4.359    | 64798  |
| HTT       | -2.1006 | 2.1006 | 6.7028 | -3.9974 | 0.001374 | 0.03909  | -0.87987 | 3064   |
| BRD3      | -2.0903 | 2.0903 | 4.3428 | -3.9139 | 0.001616 | 0.040892 | -1.0335  | 8019   |
| GCHFR     | -2.0822 | 2.0822 | 1.9247 | -6.2526 | 2.32E-05 | 0.010885 | 2.9482   | 2644   |
| LYSMD4    | -2.0694 | 2.0694 | 3.3535 | -4.3763 | 0.000663 | 0.030358 | -0.19035 | 145748 |
| MLANA     | -2.0528 | 2.0528 | 1.7096 | -4.6947 | 0.000364 | 0.024927 | 0.37741  | 2315   |
| MCF2L     | -2.0052 | 2.0052 | 2.1348 | -4.4604 | 0.000565 | 0.028994 | -0.03922 | 23263  |
| C15orf62  | -2.0052 | 2.0052 | 1.9369 | -4.2563 | 0.000834 | 0.032807 | -0.40739 | 643338 |
| SETDB1    | -1.9928 | 1.9928 | 4.054  | -4.1772 | 0.00097  | 0.033974 | -0.55108 | 9869   |
| KDM5A     | -1.9785 | 1.9785 | 6.6255 | -4.1016 | 0.001123 | 0.036175 | -0.68907 | 5927   |
| PAN2      | -1.9629 | 1.9629 | 2.6147 | -5.5983 | 7.08E-05 | 0.015265 | 1.9142   | 9924   |
| SLC25A29  | -1.9573 | 1.9573 | 2.0938 | -6.4325 | 1.73E-05 | 0.0094   | 3.2203   | 123096 |
| FBXO31    | -1.9541 | 1.9541 | 3.3891 | -3.7258 | 0.002333 | 0.04856  | -1.3808  | 79791  |
| WDR59     | -1.9462 | 1.9462 | 4.6707 | -4.3217 | 0.000736 | 0.032145 | -0.28891 | 79726  |
| ZNF629    | -1.9443 | 1.9443 | 2.7087 | -4.8735 | 0.000261 | 0.023603 | 0.6908   | 23361  |
| LINC01089 | -1.9371 | 1.9371 | 2.4486 | -3.9709 | 0.001446 | 0.039927 | -0.92858 | 338799 |
| SECISBP2  | -1.9353 | 1.9353 | 5.3936 | -4.2933 | 0.000777 | 0.032558 | -0.34034 | 79048  |

|          |         |        |        |         |          |          |          |        |
|----------|---------|--------|--------|---------|----------|----------|----------|--------|
| TTC19    | -1.9255 | 1.9255 | 4.9214 | -5.2306 | 0.000136 | 0.018518 | 1.3034   | 54902  |
| PIIP5K1  | -1.9241 | 1.9241 | 4.2683 | -3.8839 | 0.001713 | 0.041804 | -1.0887  | 9677   |
| MRPS25   | -1.9239 | 1.9239 | 3.525  | -4.8796 | 0.000258 | 0.023603 | 0.7015   | 64432  |
| TENM4    | -1.9219 | 1.9219 | 2.5503 | -4.3239 | 0.000733 | 0.032145 | -0.28494 | 26011  |
| COG1     | -1.8903 | 1.8903 | 4.2427 | -4.0712 | 0.001191 | 0.037069 | -0.74457 | 9382   |
| LIG1     | -1.8729 | 1.8729 | 2.6238 | -4.3912 | 0.000644 | 0.030245 | -0.16355 | 3978   |
| FAM189A2 | -1.8679 | 1.8679 | 1.5635 | -5.5589 | 7.59E-05 | 0.015265 | 1.8496   | 9413   |
| KCNC4    | -1.8665 | 1.8665 | 1.9576 | -3.9205 | 0.001595 | 0.040861 | -1.0213  | 3749   |
| EPHA4    | -1.8645 | 1.8645 | 3.4557 | -4.4113 | 0.00062  | 0.030163 | -0.12737 | 2043   |
| GPD1L    | -1.8593 | 1.8593 | 2.2367 | -4.9527 | 0.000225 | 0.02217  | 0.82834  | 23171  |
| USP40    | -1.8567 | 1.8567 | 3.5498 | -4.298  | 0.00077  | 0.032558 | -0.33178 | 55230  |
| MAOA     | -1.8462 | 1.8462 | 1.9917 | -4.2969 | 0.000771 | 0.032558 | -0.33378 | 4128   |
| UVSSA    | -1.8416 | 1.8416 | 3.1891 | -4.2134 | 0.000905 | 0.033639 | -0.48525 | 57654  |
| MAP3K14  | -1.841  | 1.841  | 2.718  | -5.4452 | 9.27E-05 | 0.016749 | 1.6624   | 9020   |
| ZNF767P  | -1.8176 | 1.8176 | 2.5178 | -4.0426 | 0.001258 | 0.038005 | -0.79698 | 79970  |
| PP7080   | -1.8063 | 1.8063 | 4.0099 | -5.7846 | 5.12E-05 | 0.015265 | 2.2156   | 25845  |
| ABCC3    | -1.8062 | 1.8062 | 1.8438 | -4.0134 | 0.001332 | 0.038695 | -0.85055 | 8714   |
| MAP2K5   | -1.8055 | 1.8055 | 3.63   | -5.5645 | 7.51E-05 | 0.015265 | 1.8589   | 5607   |
| ACSF2    | -1.7925 | 1.7925 | 1.9687 | -5.0194 | 0.0002   | 0.021202 | 0.94325  | 80221  |
| FAM117A  | -1.789  | 1.789  | 2.5157 | -3.7939 | 0.002042 | 0.045656 | -1.2549  | 81558  |
| NBPF12   | -1.7863 | 1.7863 | 2.4105 | -4.5106 | 0.000514 | 0.028272 | 0.050541 | 149013 |
| SCUBE2   | -1.7748 | 1.7748 | 1.5276 | -5.7439 | 5.50E-05 | 0.015265 | 2.1502   | 57758  |
| ITFG2    | -1.7703 | 1.7703 | 2.4434 | -5.9762 | 3.69E-05 | 0.013026 | 2.5197   | 55846  |
| ACACB    | -1.7702 | 1.7702 | 1.6373 | -3.7515 | 0.002218 | 0.047421 | -1.3333  | 32     |
| ABCA9    | -1.7671 | 1.7671 | 1.1522 | -3.7633 | 0.002168 | 0.047076 | -1.3115  | 10350  |
| TFDP2    | -1.7634 | 1.7634 | 2.3746 | -4.1631 | 0.000997 | 0.034236 | -0.57684 | 7029   |

|            |         |        |         |         |          |          |          |          |
|------------|---------|--------|---------|---------|----------|----------|----------|----------|
| P2RX7      | -1.7469 | 1.7469 | 1.7239  | -5.1876 | 0.000147 | 0.018518 | 1.2305   | 5027     |
| NR3C2      | -1.7465 | 1.7465 | 1.1869  | -4.3079 | 0.000755 | 0.032252 | -0.31381 | 4306     |
| LINC00852  | -1.7443 | 1.7443 | 1.9782  | -4.9516 | 0.000226 | 0.02217  | 0.82642  | 84657    |
| FAN1       | -1.7434 | 1.7434 | 2.3305  | -6.8061 | 9.46E-06 | 0.007988 | 3.7689   | 22909    |
| GRTP1      | -1.7391 | 1.7391 | 2.3196  | -5.4675 | 8.91E-05 | 0.01672  | 1.6992   | 79774    |
| CRACR2B    | -1.7343 | 1.7343 | 1.1701  | -3.9483 | 0.001511 | 0.040568 | -0.97018 | 283229   |
| LRIG2      | -1.7307 | 1.7307 | 3.2434  | -4.4908 | 0.000533 | 0.028577 | 0.015245 | 9860     |
| PARD3B     | -1.7283 | 1.7283 | 1.8485  | -4.6615 | 0.000387 | 0.024927 | 0.31883  | 117583   |
| SLC11A2    | -1.7277 | 1.7277 | 4.0117  | -3.8466 | 0.001842 | 0.043483 | -1.1576  | 4891     |
| LOC284930  | -1.7157 | 1.7157 | 1.6006  | -3.7443 | 0.00225  | 0.047593 | -1.3466  | 284930   |
| LY75-CD302 | -1.7094 | 1.7094 | 1.5593  | -4.7456 | 0.000331 | 0.024681 | 0.46717  | 1.01E+08 |
| RBM15      | -1.6923 | 1.6923 | 4.199   | -3.708  | 0.002415 | 0.049155 | -1.4137  | 64783    |
| ATP6V0A4   | -1.6893 | 1.6893 | 0.91848 | -4.4541 | 0.000572 | 0.029166 | -0.05054 | 50617    |
| CAPN3      | -1.6862 | 1.6862 | 2.3597  | -4.3544 | 0.000691 | 0.031199 | -0.22984 | 825      |
| RCOR3      | -1.6708 | 1.6708 | 2.906   | -3.7179 | 0.002369 | 0.049018 | -1.3953  | 55758    |
| OTX1       | -1.6637 | 1.6637 | 2.5294  | -5.3754 | 0.000105 | 0.017543 | 1.5463   | 5013     |
| MAML3      | -1.6616 | 1.6616 | 2.7314  | -4.9336 | 0.000233 | 0.022694 | 0.79517  | 55534    |
| PLEKHH1    | -1.653  | 1.653  | 1.3539  | -4.6    | 0.000434 | 0.025846 | 0.20994  | 57475    |
| HOXA9      | -1.6516 | 1.6516 | 3.2312  | -7.0873 | 6.09E-06 | 0.006859 | 4.167    | 3205     |
| OPLAH      | -1.6471 | 1.6471 | 2.442   | -4.36   | 0.000684 | 0.031119 | -0.21979 | 26873    |
| DCAF16     | -1.6453 | 1.6453 | 3.3703  | -4.3249 | 0.000731 | 0.032145 | -0.28316 | 54876    |
| LIG3       | -1.6444 | 1.6444 | 4.1913  | -4.2527 | 0.000839 | 0.032807 | -0.41382 | 3980     |
| ACSS1      | -1.6426 | 1.6426 | 1.7572  | -5.4419 | 9.33E-05 | 0.016749 | 1.6569   | 84532    |
| MFSD4A     | -1.6389 | 1.6389 | 1.1698  | -4.3112 | 0.000751 | 0.032252 | -0.30787 | 148808   |
| SPG11      | -1.6308 | 1.6308 | 5.5275  | -4.0165 | 0.001324 | 0.038682 | -0.84486 | 80208    |
| KSR1       | -1.5821 | 1.5821 | 2.2011  | -3.9945 | 0.001381 | 0.039195 | -0.88524 | 8844     |

|           |         |        |         |         |          |          |          |          |
|-----------|---------|--------|---------|---------|----------|----------|----------|----------|
| BBS1      | -1.5628 | 1.5628 | 2.6334  | -3.7448 | 0.002248 | 0.047593 | -1.3457  | 582      |
| ENOSF1    | -1.557  | 1.557  | 3.3983  | -3.932  | 0.00156  | 0.040861 | -1.0001  | 55556    |
| PRR15L    | -1.5492 | 1.5492 | 1.0159  | -4.1937 | 0.00094  | 0.033974 | -0.52114 | 79170    |
| KANTR     | -1.5491 | 1.5491 | 1.4515  | -4.1243 | 0.001075 | 0.035091 | -0.64755 | 1.03E+08 |
| GLDN      | -1.5373 | 1.5373 | 1.2984  | -4.6179 | 0.00042  | 0.02556  | 0.24158  | 342035   |
| PHKA2     | -1.5344 | 1.5344 | 2.3215  | -8.4267 | 8.60E-07 | 0.002905 | 5.8974   | 5256     |
| HOTAIR    | -1.532  | 1.532  | 1.3513  | -4.4834 | 0.000541 | 0.028585 | 0.00197  | 1E+08    |
| IFT122    | -1.531  | 1.531  | 2.1527  | -5.5602 | 7.57E-05 | 0.015265 | 1.8518   | 55764    |
| GTF2IP20  | -1.5284 | 1.5284 | 2.4998  | -4.7195 | 0.000347 | 0.024681 | 0.42114  | 441124   |
| BTC       | -1.5127 | 1.5127 | 0.84572 | -3.845  | 0.001848 | 0.043509 | -1.1605  | 685      |
| GON4L     | -1.5104 | 1.5104 | 4.3755  | -4.0049 | 0.001354 | 0.03887  | -0.86617 | 54856    |
| NNAT      | -1.4966 | 1.4966 | 1.9097  | -4.1684 | 0.000987 | 0.034236 | -0.56705 | 4826     |
| CBFA2T2   | -1.4882 | 1.4882 | 2.6032  | -5.4756 | 8.79E-05 | 0.016668 | 1.7126   | 9139     |
| NIPAL3    | -1.4879 | 1.4879 | 2.3163  | -6.8213 | 9.24E-06 | 0.007988 | 3.7907   | 57185    |
| TKFC      | -1.4781 | 1.4781 | 2.062   | -3.9394 | 0.001537 | 0.04068  | -0.98648 | 26007    |
| HPS4      | -1.4755 | 1.4755 | 3.4192  | -4.7971 | 0.0003   | 0.024681 | 0.55753  | 89781    |
| ZNF704    | -1.4725 | 1.4725 | 1.5305  | -5.0053 | 0.000205 | 0.021202 | 0.91905  | 619279   |
| HCP5      | -1.4715 | 1.4715 | 1.6133  | -5.3353 | 0.000113 | 0.018125 | 1.4794   | 10866    |
| CYP4B1    | -1.4675 | 1.4675 | 0.94088 | -4.0147 | 0.001328 | 0.038682 | -0.84819 | 1580     |
| LOC642648 | -1.4669 | 1.4669 | 1.5142  | -3.7353 | 0.00229  | 0.048121 | -1.3632  | 642648   |
| PLP1      | -1.4651 | 1.4651 | 0.9023  | -4.6198 | 0.000418 | 0.02556  | 0.24497  | 5354     |
| PMS2P3    | -1.4637 | 1.4637 | 2.5332  | -4.1375 | 0.001048 | 0.034845 | -0.6235  | 5387     |
| PHF12     | -1.4531 | 1.4531 | 2.9778  | -3.7164 | 0.002376 | 0.049051 | -1.3982  | 57649    |
| MAN2A2    | -1.4491 | 1.4491 | 2.4397  | -3.7069 | 0.002421 | 0.049177 | -1.4158  | 4122     |
| ZNF462    | -1.4466 | 1.4466 | 3.3345  | -4.2    | 0.000929 | 0.033871 | -0.50961 | 58499    |
| L3MBTL4   | -1.4404 | 1.4404 | 1.2919  | -4.7274 | 0.000342 | 0.024681 | 0.4351   | 91133    |



|              |         |        |         |         |          |          |          |          |
|--------------|---------|--------|---------|---------|----------|----------|----------|----------|
| POGK         | -1.4395 | 1.4395 | 5.14    | -3.8945 | 0.001678 | 0.041591 | -1.0691  | 57645    |
| NDUFA6-DT    | -1.4382 | 1.4382 | 1.7273  | -4.2942 | 0.000775 | 0.032558 | -0.33871 | 1E+08    |
| TSC1         | -1.4375 | 1.4375 | 3.5559  | -5.115  | 0.000168 | 0.019929 | 1.1071   | 7248     |
| MAG11        | -1.4352 | 1.4352 | 3.2042  | -4.6278 | 0.000412 | 0.025481 | 0.25926  | 9223     |
| FAM120B      | -1.4342 | 1.4342 | 4.7977  | -3.951  | 0.001503 | 0.040496 | -0.96528 | 84498    |
| ZC3H6        | -1.4324 | 1.4324 | 1.5297  | -4.0893 | 0.00115  | 0.036553 | -0.71149 | 376940   |
| RAD51-AS1    | -1.4305 | 1.4305 | 1.3781  | -3.8825 | 0.001717 | 0.041804 | -1.0913  | 1.01E+08 |
| SCFD2        | -1.4132 | 1.4132 | 3.4911  | -5.2461 | 0.000132 | 0.018518 | 1.3295   | 152579   |
| GP1BA        | -1.4117 | 1.4117 | 1.217   | -4.7585 | 0.000323 | 0.024681 | 0.48971  | 2811     |
| JRK          | -1.408  | 1.408  | 1.9206  | -4.2017 | 0.000926 | 0.033871 | -0.50658 | 8629     |
| PARGP1       | -1.4069 | 1.4069 | 2.3688  | -3.9442 | 0.001523 | 0.040568 | -0.97764 | 728407   |
| ZNF318       | -1.3966 | 1.3966 | 2.7621  | -4.2586 | 0.00083  | 0.032807 | -0.40308 | 24149    |
| ZXDC         | -1.3959 | 1.3959 | 4.3786  | -4.523  | 0.000502 | 0.027918 | 0.072763 | 79364    |
| DIS3L2       | -1.3801 | 1.3801 | 3.128   | -5.411  | 9.85E-05 | 0.016959 | 1.6055   | 129563   |
| LOC101927699 | -1.3786 | 1.3786 | 0.99407 | -4.2702 | 0.000812 | 0.032807 | -0.38221 | 1.02E+08 |
| DDX51        | -1.3777 | 1.3777 | 2.1661  | -4.1701 | 0.000984 | 0.034236 | -0.56396 | 317781   |
| PATZ1        | -1.3744 | 1.3744 | 1.6947  | -4.0861 | 0.001157 | 0.036621 | -0.71748 | 23598    |
| LOC729218    | -1.3648 | 1.3648 | 2.1707  | -3.7789 | 0.002102 | 0.046398 | -1.2826  | 729218   |
| CNNM3        | -1.3585 | 1.3585 | 1.8901  | -5.2925 | 0.000122 | 0.018345 | 1.4076   | 26505    |
| LYRM9        | -1.3552 | 1.3552 | 1.3642  | -3.8211 | 0.001936 | 0.044467 | -1.2046  | 201229   |
| ARSD         | -1.354  | 1.354  | 2.1684  | -4.3896 | 0.000646 | 0.030245 | -0.16641 | 414      |
| LETMD1       | -1.3526 | 1.3526 | 2.5293  | -4.7374 | 0.000336 | 0.024681 | 0.45267  | 25875    |
| NVL          | -1.3502 | 1.3502 | 3.1378  | -4.7811 | 0.00031  | 0.024681 | 0.52941  | 4931     |
| GLI4         | -1.3484 | 1.3484 | 2.0054  | -4.4089 | 0.000623 | 0.030163 | -0.13176 | 2738     |
| HMBOX1       | -1.3478 | 1.3478 | 3.5333  | -3.8229 | 0.001929 | 0.044435 | -1.2012  | 79618    |
| RBM4B        | -1.3434 | 1.3434 | 3.1512  | -3.8112 | 0.001974 | 0.04509  | -1.2229  | 83759    |

|              |         |        |         |         |          |          |          |        |
|--------------|---------|--------|---------|---------|----------|----------|----------|--------|
| ZNF514       | -1.3419 | 1.3419 | 2.007   | -4.2538 | 0.000838 | 0.032807 | -0.41192 | 84874  |
| C2orf68      | -1.3418 | 1.3418 | 3.3324  | -4.0531 | 0.001233 | 0.037681 | -0.77786 | 388969 |
| KLHL36       | -1.3343 | 1.3343 | 4.3464  | -4.1789 | 0.000967 | 0.033974 | -0.54793 | 79786  |
| AASS         | -1.3279 | 1.3279 | 2.0756  | -3.7406 | 0.002266 | 0.04786  | -1.3533  | 10157  |
| RHPN2        | -1.3222 | 1.3222 | 0.81831 | -5.5614 | 7.55E-05 | 0.015265 | 1.8538   | 85415  |
| HID1         | -1.3219 | 1.3219 | 1.5231  | -4.3134 | 0.000747 | 0.032252 | -0.30396 | 283987 |
| ZFYVE26      | -1.308  | 1.308  | 3.7241  | -5.0103 | 0.000203 | 0.021202 | 0.92767  | 23503  |
| SETD6        | -1.3076 | 1.3076 | 2.3443  | -5.6304 | 6.69E-05 | 0.015265 | 1.9665   | 79918  |
| KAT14        | -1.2962 | 1.2962 | 2.3512  | -6.4391 | 1.71E-05 | 0.0094   | 3.2301   | 57325  |
| LOC440173    | -1.2945 | 1.2945 | 1.5709  | -3.7251 | 0.002336 | 0.048561 | -1.382   | 440173 |
| FAHD2B       | -1.2864 | 1.2864 | 1.1216  | -5.9622 | 3.78E-05 | 0.013026 | 2.4976   | 151313 |
| EARS2        | -1.284  | 1.284  | 3.0273  | -4.7299 | 0.00034  | 0.024681 | 0.4395   | 124454 |
| RPL32P3      | -1.2815 | 1.2815 | 1.4632  | -4.3908 | 0.000645 | 0.030245 | -0.16429 | 132241 |
| SLC16A14     | -1.2813 | 1.2813 | 1.2013  | -4.7323 | 0.000339 | 0.024681 | 0.44369  | 151473 |
| ATP6V0E2     | -1.2797 | 1.2797 | 1.0794  | -4.5996 | 0.000434 | 0.025846 | 0.20915  | 155066 |
| FUT10        | -1.2776 | 1.2776 | 2.0226  | -5.201  | 0.000143 | 0.018518 | 1.2533   | 84750  |
| ZFP41        | -1.2697 | 1.2697 | 1.5839  | -4.1103 | 0.001104 | 0.035842 | -0.67309 | 286128 |
| KIAA1324     | -1.2571 | 1.2571 | 0.81282 | -4.478  | 0.000547 | 0.028654 | -0.00771 | 57535  |
| TRIM66       | -1.2527 | 1.2527 | 1.8407  | -4.7691 | 0.000316 | 0.024681 | 0.50835  | 9866   |
| ARHGEF9      | -1.2518 | 1.2518 | 2.0145  | -4.7138 | 0.000351 | 0.024681 | 0.4111   | 23229  |
| PPP1R3E      | -1.2462 | 1.2462 | 1.26    | -4.8702 | 0.000262 | 0.023603 | 0.68508  | 90673  |
| CRACR2A      | -1.237  | 1.237  | 0.96495 | -4.3638 | 0.000679 | 0.030975 | -0.21284 | 84766  |
| LOC202181    | -1.2336 | 1.2336 | 1.3448  | -4.211  | 0.000909 | 0.033639 | -0.48966 | 202181 |
| TESK2        | -1.2317 | 1.2317 | 2.4791  | -3.9151 | 0.001612 | 0.040892 | -1.0313  | 10420  |
| PRMT7        | -1.2263 | 1.2263 | 1.8483  | -4.0051 | 0.001353 | 0.03887  | -0.86578 | 54496  |
| SLC25A25-AS1 | -1.2234 | 1.2234 | 1.1341  | -6.0822 | 3.09E-05 | 0.012404 | 2.6855   | 1E+08  |

|            |         |        |         |         |          |          |          |          |
|------------|---------|--------|---------|---------|----------|----------|----------|----------|
| IL16       | -1.2195 | 1.2195 | 1.7394  | -4.3149 | 0.000745 | 0.032252 | -0.30118 | 3603     |
| MIR29B2CHG | -1.2186 | 1.2186 | 1.2741  | -4.4284 | 0.0006   | 0.029995 | -0.0966  | 1E+08    |
| PMS2P1     | -1.2128 | 1.2128 | 2.3428  | -5.5851 | 7.25E-05 | 0.015265 | 1.8925   | 5379     |
| TFAP2B     | -1.2118 | 1.2118 | 0.88856 | -6.4495 | 1.68E-05 | 0.0094   | 3.2457   | 7021     |
| CDK5RAP1   | -1.2091 | 1.2091 | 3.4482  | -3.7463 | 0.002241 | 0.047593 | -1.3428  | 51654    |
| TRMT44     | -1.1993 | 1.1993 | 2.2745  | -3.8709 | 0.001757 | 0.042187 | -1.1127  | 152992   |
| SPDEF      | -1.1992 | 1.1992 | 0.65516 | -4.9213 | 0.000239 | 0.023    | 0.77395  | 25803    |
| CDKAL1     | -1.1985 | 1.1985 | 3.1639  | -3.746  | 0.002242 | 0.047593 | -1.3435  | 54901    |
| MIATNB     | -1.1969 | 1.1969 | 1.357   | -3.9093 | 0.00163  | 0.041076 | -1.0419  | 1.03E+08 |
| SLC25A27   | -1.1955 | 1.1955 | 1.3409  | -3.9511 | 0.001503 | 0.040496 | -0.96492 | 9481     |
| LOC171391  | -1.1922 | 1.1922 | 1.1611  | -3.7321 | 0.002304 | 0.048259 | -1.3691  | 171391   |
| ZNF256     | -1.1808 | 1.1808 | 1.4136  | -3.7212 | 0.002354 | 0.048816 | -1.3893  | 10172    |
| HEXIM2     | -1.1779 | 1.1779 | 1.4647  | -3.8212 | 0.001936 | 0.044467 | -1.2045  | 124790   |
| FAM117B    | -1.1759 | 1.1759 | 1.5359  | -5.4057 | 9.94E-05 | 0.016959 | 1.5968   | 150864   |
| TACR1      | -1.1722 | 1.1722 | 0.93826 | -6.8207 | 9.25E-06 | 0.007988 | 3.7898   | 6869     |
| ZBTB37     | -1.163  | 1.163  | 1.9232  | -5.3095 | 0.000118 | 0.018345 | 1.4361   | 84614    |
| SETD4      | -1.1614 | 1.1614 | 1.847   | -4.6837 | 0.000371 | 0.024927 | 0.35815  | 54093    |
| THADA      | -1.1613 | 1.1613 | 3.3829  | -3.8523 | 0.001822 | 0.043255 | -1.147   | 63892    |
| PMS2P5     | -1.155  | 1.155  | 1.3899  | -4.5798 | 0.000451 | 0.026434 | 0.17401  | 5383     |
| RBM12B     | -1.1485 | 1.1485 | 2.4672  | -4.1856 | 0.000955 | 0.033974 | -0.53574 | 389677   |
| ITIH4      | -1.1467 | 1.1467 | 0.96333 | -3.7003 | 0.002452 | 0.049465 | -1.4279  | 3700     |
| SCAND2P    | -1.146  | 1.146  | 1.4677  | -5.0901 | 0.000175 | 0.020704 | 1.0646   | 54581    |
| FRZB       | -1.1377 | 1.1377 | 1.1082  | -4.7098 | 0.000353 | 0.024681 | 0.40414  | 2487     |
| DIO3OS     | -1.1374 | 1.1374 | 0.73336 | -5.742  | 5.51E-05 | 0.015265 | 2.1472   | 64150    |
| ACP6       | -1.1369 | 1.1369 | 1.0006  | -7.7812 | 2.15E-06 | 0.005186 | 5.0968   | 51205    |
| ABHD11     | -1.1313 | 1.1313 | 1.6808  | -3.9714 | 0.001445 | 0.039927 | -0.92773 | 83451    |

|          |         |        |         |         |          |          |          |          |
|----------|---------|--------|---------|---------|----------|----------|----------|----------|
| ABCA3    | -1.1299 | 1.1299 | 1.3254  | -4.2543 | 0.000837 | 0.032807 | -0.41098 | 21       |
| PPARGC1B | -1.1267 | 1.1267 | 1.3706  | -4.1378 | 0.001047 | 0.034845 | -0.623   | 133522   |
| ZNF587B  | -1.1239 | 1.1239 | 2.835   | -3.7515 | 0.002218 | 0.047421 | -1.3332  | 1E+08    |
| ALPK1    | -1.1157 | 1.1157 | 2.0981  | -3.7134 | 0.00239  | 0.049051 | -1.4038  | 80216    |
| MVB12B   | -1.1156 | 1.1156 | 1.2539  | -4.5086 | 0.000516 | 0.028272 | 0.047008 | 89853    |
| TYW1     | -1.1105 | 1.1105 | 3.0828  | -5.2773 | 0.000125 | 0.018518 | 1.3821   | 55253    |
| METTL16  | -1.1063 | 1.1063 | 3.1676  | -4.2061 | 0.000918 | 0.033705 | -0.49858 | 79066    |
| ZMYM3    | -1.1058 | 1.1058 | 2.2462  | -4.4929 | 0.000531 | 0.028577 | 0.018881 | 9203     |
| ZNF3     | -1.1031 | 1.1031 | 2.6233  | -5.2947 | 0.000121 | 0.018345 | 1.4114   | 7551     |
| IFT172   | -1.103  | 1.103  | 1.6402  | -3.9208 | 0.001594 | 0.040861 | -1.0207  | 26160    |
| TRIL     | -1.1005 | 1.1005 | 0.89525 | -4.1906 | 0.000946 | 0.033974 | -0.52671 | 9865     |
| RTN4RL1  | -1.0968 | 1.0968 | 1.1113  | -4.8558 | 0.000269 | 0.023845 | 0.65997  | 146760   |
| LGR6     | -1.0873 | 1.0873 | 0.87782 | -4.0265 | 0.001298 | 0.038682 | -0.82652 | 59352    |
| ZNF317   | -1.0859 | 1.0859 | 3.6878  | -3.7507 | 0.002222 | 0.047421 | -1.3348  | 57693    |
| CLCN6    | -1.085  | 1.085  | 1.9841  | -3.7561 | 0.002198 | 0.047396 | -1.3247  | 1185     |
| FMN1     | -1.0838 | 1.0838 | 1.9229  | -4.0191 | 0.001317 | 0.038682 | -0.84007 | 342184   |
| GPHN     | -1.0795 | 1.0795 | 2.1562  | -7.5706 | 2.93E-06 | 0.005498 | 4.8224   | 10243    |
| SFI1     | -1.0785 | 1.0785 | 1.7344  | -4.1305 | 0.001062 | 0.034947 | -0.6363  | 9814     |
| MHENCRC  | -1.0778 | 1.0778 | 1.7809  | -5.5164 | 8.18E-05 | 0.016049 | 1.78     | 1.01E+08 |
| ZNF789   | -1.074  | 1.074  | 1.3128  | -4.1513 | 0.00102  | 0.034679 | -0.5984  | 285989   |
| VMAC     | -1.0739 | 1.0739 | 1.5172  | -4.4067 | 0.000626 | 0.030163 | -0.13568 | 400673   |
| PODXL2   | -1.0738 | 1.0738 | 1.3029  | -4.2547 | 0.000836 | 0.032807 | -0.41021 | 50512    |
| DSTYK    | -1.072  | 1.072  | 3.1658  | -4.4267 | 0.000602 | 0.029995 | -0.09963 | 25778    |
| PM20D2   | -1.0696 | 1.0696 | 1.6903  | -4.1914 | 0.000944 | 0.033974 | -0.52535 | 135293   |
| ERMAP    | -1.0681 | 1.0681 | 2.2188  | -4.234  | 0.00087  | 0.033373 | -0.44774 | 114625   |
| ACAD10   | -1.0661 | 1.0661 | 2.3628  | -4.6911 | 0.000366 | 0.024927 | 0.37111  | 80724    |

|              |         |        |         |         |          |          |          |          |
|--------------|---------|--------|---------|---------|----------|----------|----------|----------|
| LOC102723517 | -1.0612 | 1.0612 | 0.57414 | -4.1753 | 0.000974 | 0.033974 | -0.55451 | 1.03E+08 |
| CECR7        | -1.0554 | 1.0554 | 0.98046 | -5.6313 | 6.68E-05 | 0.015265 | 1.9679   | 1E+08    |
| MLPH         | -1.0553 | 1.0553 | 1.16    | -4.0537 | 0.001232 | 0.037681 | -0.77673 | 79083    |
| PHF8         | -1.0472 | 1.0472 | 2.8709  | -3.9981 | 0.001372 | 0.03909  | -0.87864 | 23133    |
| ADAM1A       | -1.0461 | 1.0461 | 1.1457  | -4.0467 | 0.001248 | 0.037875 | -0.78949 | 8759     |
| PPM1J        | -1.0436 | 1.0436 | 1.223   | -4.4639 | 0.000561 | 0.028934 | -0.03297 | 333926   |
| RIC3         | -1.0344 | 1.0344 | 0.91035 | -4.1774 | 0.00097  | 0.033974 | -0.55083 | 79608    |
| DCAF4        | -1.0309 | 1.0309 | 1.4595  | -8.1046 | 1.35E-06 | 0.0038   | 5.5054   | 26094    |
| LINC01315    | -1.0301 | 1.0301 | 0.83823 | -4.4922 | 0.000532 | 0.028577 | 0.017707 | 1.03E+08 |
| KDM4C        | -1.0248 | 1.0248 | 3.1976  | -4.4105 | 0.000621 | 0.030163 | -0.12882 | 23081    |
| AGAP12P      | -1.0248 | 1.0248 | 1.1963  | -3.7116 | 0.002398 | 0.049051 | -1.407   | 414224   |
| TRMT10B      | -1.0212 | 1.0212 | 1.9298  | -5.3362 | 0.000113 | 0.018125 | 1.4808   | 158234   |
| LOC105374338 | -1.0208 | 1.0208 | 0.71365 | -4.2374 | 0.000865 | 0.033304 | -0.44171 | 1.05E+08 |
| BCL2         | -1.0183 | 1.0183 | 1.071   | -4.5103 | 0.000514 | 0.028272 | 0.050047 | 596      |
| WDR73        | -1.0155 | 1.0155 | 2.5515  | -4.2615 | 0.000825 | 0.032807 | -0.39792 | 84942    |
| NBPF11       | -1.011  | 1.011  | 1.7279  | -4.0498 | 0.001241 | 0.037749 | -0.78379 | 200030   |
| WNT11        | -1.0078 | 1.0078 | 0.70093 | -4.5833 | 0.000448 | 0.026356 | 0.1801   | 7481     |
| PRKX         | -1.0031 | 1.0031 | 2.3393  | -5.0285 | 0.000196 | 0.021202 | 0.95901  | 5613     |
| APBA1        | -1.0028 | 1.0028 | 1.1625  | -4.6165 | 0.000421 | 0.02556  | 0.2392   | 320      |
| GPRASP1      | -1.0013 | 1.0013 | 0.94449 | -4.3071 | 0.000757 | 0.032252 | -0.31534 | 9737     |
| ZNF165       | 1.0266  | 1.0266 | 0.83813 | 3.9866  | 0.001403 | 0.039537 | -0.8998  | 7718     |
| LOC100288175 | 1.0387  | 1.0387 | 0.78858 | 4.4956  | 0.000529 | 0.028577 | 0.023733 | 1E+08    |
| LINC01094    | 1.0655  | 1.0655 | 1.0608  | 3.6947  | 0.002479 | 0.049831 | -1.4383  | 1.01E+08 |
| SPIN4        | 1.0805  | 1.0805 | 1.4635  | 4.269   | 0.000814 | 0.032807 | -0.38423 | 139886   |
| KRT42P       | 1.1199  | 1.1199 | 0.73479 | 4.1774  | 0.00097  | 0.033974 | -0.55067 | 284116   |
| KLHL42       | 1.1639  | 1.1639 | 3.0808  | 3.6887  | 0.002508 | 0.049877 | -1.4494  | 57542    |

|          |        |        |         |        |          |          |          |        |
|----------|--------|--------|---------|--------|----------|----------|----------|--------|
| ATG4A    | 1.2153 | 1.2153 | 1.893   | 4.9969 | 0.000208 | 0.021398 | 0.90465  | 115201 |
| SLC16A7  | 1.3026 | 1.3026 | 2.1036  | 5.3859 | 0.000103 | 0.017392 | 1.5638   | 9194   |
| DUSP18   | 1.3507 | 1.3507 | 2.3225  | 3.7776 | 0.002108 | 0.046399 | -1.2849  | 150290 |
| HS3ST3A1 | 1.4076 | 1.4076 | 0.89132 | 4.1511 | 0.001021 | 0.034679 | -0.59868 | 9955   |
| EIF4E    | 1.4195 | 1.4195 | 2.1844  | 3.7628 | 0.00217  | 0.047076 | -1.3123  | 1977   |
| AP1S3    | 1.4289 | 1.4289 | 1.1825  | 4.1407 | 0.001041 | 0.034845 | -0.61761 | 130340 |
| CYP27C1  | 1.4553 | 1.4553 | 1.6016  | 4.8443 | 0.000275 | 0.023957 | 0.63993  | 339761 |
| ZSWIM6   | 1.4733 | 1.4733 | 3.2438  | 4.8012 | 0.000298 | 0.024681 | 0.56461  | 57688  |
| GALNT7   | 1.5743 | 1.5743 | 2.4817  | 3.9753 | 0.001434 | 0.039927 | -0.92047 | 51809  |
| LRP12    | 1.6114 | 1.6114 | 2.3963  | 3.9236 | 0.001585 | 0.040861 | -1.0156  | 29967  |
| PIGA     | 1.6605 | 1.6605 | 2.4841  | 3.7635 | 0.002167 | 0.047076 | -1.311   | 5277   |
| DNAJB5   | 1.6703 | 1.6703 | 2.5245  | 4.0816 | 0.001167 | 0.036685 | -0.72554 | 25822  |
| CHORDC1  | 1.7018 | 1.7018 | 2.721   | 4.1357 | 0.001051 | 0.034845 | -0.62685 | 26973  |
| KRT16P3  | 1.7606 | 1.7606 | 1.4077  | 3.9587 | 0.001481 | 0.040254 | -0.95096 | 644945 |
| SLC6A11  | 1.9221 | 1.9221 | 1.8883  | 4.3329 | 0.00072  | 0.032078 | -0.26868 | 6538   |
| GK       | 1.9225 | 1.9225 | 2.2112  | 4.2648 | 0.00082  | 0.032807 | -0.39199 | 2710   |
| SLC12A6  | 2.0976 | 2.0976 | 4.1635  | 3.7455 | 0.002244 | 0.047593 | -1.3443  | 9990   |
| SNCB     | 2.1761 | 2.1761 | 1.0502  | 4.5484 | 0.000478 | 0.027017 | 0.11798  | 6620   |
| HOMER1   | 2.1859 | 2.1859 | 2.9762  | 5.0149 | 0.000201 | 0.021202 | 0.93556  | 9456   |
| SLC7A11  | 2.2623 | 2.2623 | 1.7805  | 5.7794 | 5.17E-05 | 0.015265 | 2.2071   | 23657  |
| ALDH1L2  | 2.3    | 2.3    | 2.4347  | 3.7402 | 0.002268 | 0.04786  | -1.3542  | 160428 |
| SREK1IP1 | 2.3168 | 2.3168 | 3.199   | 3.7123 | 0.002395 | 0.049051 | -1.4058  | 285672 |
| LSP1P4   | 2.3274 | 2.3274 | 3.3324  | 4.1661 | 0.000992 | 0.034236 | -0.57141 | 654342 |
| POLR3G   | 2.376  | 2.376  | 2.2572  | 4.3467 | 0.000701 | 0.031496 | -0.24373 | 10622  |
| PFKFB4   | 2.4613 | 2.4613 | 2.4463  | 4.2591 | 0.000829 | 0.032807 | -0.40226 | 5210   |
| ARSI     | 2.4908 | 2.4908 | 1.7209  | 6.5636 | 1.39E-05 | 0.0094   | 3.4154   | 340075 |

|          |        |        |        |        |          |          |          |        |
|----------|--------|--------|--------|--------|----------|----------|----------|--------|
| RNF122   | 2.5079 | 2.5079 | 3.1786 | 4.7426 | 0.000332 | 0.024681 | 0.46192  | 79845  |
| CMTR2    | 2.6282 | 2.6282 | 3.6394 | 3.9824 | 0.001414 | 0.039724 | -0.90743 | 55783  |
| ENC1     | 2.6697 | 2.6697 | 3.2825 | 5.3218 | 0.000115 | 0.018345 | 1.4568   | 8507   |
| CARD6    | 2.6714 | 2.6714 | 3.2722 | 4.0985 | 0.00113  | 0.036256 | -0.6948  | 84674  |
| CAMK2D   | 2.7119 | 2.7119 | 4.9666 | 4.4291 | 0.0006   | 0.029995 | -0.09539 | 817    |
| PTPRE    | 2.8579 | 2.8579 | 3.6907 | 5.2579 | 0.000129 | 0.018518 | 1.3494   | 5791   |
| PPP2R5B  | 2.9128 | 2.9128 | 4.5855 | 3.7264 | 0.00233  | 0.04856  | -1.3797  | 5526   |
| MTMR2    | 2.9304 | 2.9304 | 4.6935 | 3.8068 | 0.001991 | 0.0453   | -1.2311  | 8898   |
| UNC13D   | 3.0169 | 3.0169 | 3.4085 | 3.768  | 0.002148 | 0.046922 | -1.3026  | 201294 |
| SLC25A25 | 3.0437 | 3.0437 | 4.6659 | 3.7577 | 0.002191 | 0.04731  | -1.3218  | 114789 |
| ARL5B    | 3.2279 | 3.2279 | 3.3364 | 5.8213 | 4.81E-05 | 0.015265 | 2.2743   | 221079 |
| C12orf56 | 3.4336 | 3.4336 | 2.4238 | 6.3408 | 2.01E-05 | 0.009679 | 3.0822   | 115749 |
| IL1A     | 3.5612 | 3.5612 | 1.8064 | 4.4028 | 0.00063  | 0.030163 | -0.14273 | 3552   |
| SLC28A3  | 3.6654 | 3.6654 | 4.7793 | 4.0228 | 0.001308 | 0.038682 | -0.83339 | 64078  |
| XPOT     | 3.6756 | 3.6756 | 7.5613 | 3.7178 | 0.002369 | 0.049018 | -1.3955  | 11260  |
| ZNF562   | 3.7621 | 3.7621 | 6.1045 | 3.8534 | 0.001818 | 0.043219 | -1.1449  | 54811  |
| TDG      | 3.793  | 3.793  | 5.3606 | 3.7097 | 0.002407 | 0.049083 | -1.4106  | 6996   |
| MICAL2   | 3.8417 | 3.8417 | 8.0528 | 4.2    | 0.000929 | 0.033871 | -0.50963 | 9645   |
| TTC39A   | 3.8543 | 3.8543 | 4.0956 | 4.2097 | 0.000912 | 0.033639 | -0.49203 | 22996  |
| CSRNP1   | 4.1755 | 4.1755 | 6.74   | 4.1414 | 0.00104  | 0.034845 | -0.61637 | 64651  |
| JMJD1C   | 4.1876 | 4.1876 | 7.8113 | 5.1432 | 0.000159 | 0.019209 | 1.1551   | 221037 |
| MIR22HG  | 4.323  | 4.323  | 7.491  | 4.6877 | 0.000368 | 0.024927 | 0.36514  | 84981  |
| ITGB6    | 4.3527 | 4.3527 | 4.1934 | 3.8021 | 0.002009 | 0.045469 | -1.2397  | 3694   |
| ULBP2    | 4.8082 | 4.8082 | 2.7355 | 4.2841 | 0.000791 | 0.032687 | -0.35703 | 80328  |
| RGS20    | 4.9732 | 4.9732 | 3.5149 | 4.7243 | 0.000344 | 0.024681 | 0.42961  | 8601   |
| REEP3    | 5.1917 | 5.1917 | 6.4084 | 5.6589 | 6.37E-05 | 0.015265 | 2.0128   | 221035 |

|         |        |        |        |        |          |          |          |        |
|---------|--------|--------|--------|--------|----------|----------|----------|--------|
| MFN1    | 5.2428 | 5.2428 | 9.5353 | 4.5953 | 0.000438 | 0.025947 | 0.2015   | 55669  |
| KATNBL1 | 5.2566 | 5.2566 | 5.0691 | 4.1    | 0.001126 | 0.036216 | -0.69196 | 79768  |
| NEK7    | 5.3835 | 5.3835 | 6.578  | 3.969  | 0.001451 | 0.039927 | -0.93203 | 140609 |
| ADAM23  | 5.3947 | 5.3947 | 4.1707 | 4.4926 | 0.000532 | 0.028577 | 0.018357 | 8745   |
| SKIL    | 5.446  | 5.446  | 6.2971 | 5.007  | 0.000204 | 0.021202 | 0.9219   | 6498   |
| PTS     | 5.5802 | 5.5802 | 6.6575 | 3.8053 | 0.001997 | 0.045305 | -1.2337  | 5805   |
| CPEB4   | 5.5857 | 5.5857 | 7.4967 | 4.8163 | 0.00029  | 0.024601 | 0.59107  | 80315  |
| GLIPR1  | 5.6456 | 5.6456 | 4.4099 | 3.7014 | 0.002447 | 0.049465 | -1.426   | 11010  |
| CYCS    | 6.1053 | 6.1053 | 7.3363 | 4.6679 | 0.000382 | 0.024927 | 0.33009  | 54205  |
| B3GNT5  | 6.2731 | 6.2731 | 6.4823 | 4.3886 | 0.000648 | 0.030245 | -0.16816 | 84002  |
| FILIP1L | 6.4352 | 6.4352 | 7.419  | 3.8833 | 0.001715 | 0.041804 | -1.0898  | 11259  |
| TM4SF19 | 6.5654 | 6.5654 | 3.4852 | 6.1105 | 2.94E-05 | 0.012117 | 2.7294   | 116211 |
| DUSP5   | 6.8489 | 6.8489 | 5.8986 | 4.1433 | 0.001036 | 0.034845 | -0.61295 | 1847   |
| FAM214B | 6.8835 | 6.8835 | 7.8043 | 4.038  | 0.00127  | 0.03821  | -0.80546 | 80256  |
| FLRT3   | 6.9523 | 6.9523 | 5.2546 | 5.0136 | 0.000202 | 0.021202 | 0.93336  | 23767  |
| NOCT    | 6.9551 | 6.9551 | 6.5068 | 3.9469 | 0.001515 | 0.040568 | -0.97269 | 25819  |
| ADGRL2  | 7.0807 | 7.0807 | 7.0335 | 5.5765 | 7.36E-05 | 0.015265 | 1.8785   | 23266  |
| PLA2G3  | 7.1817 | 7.1817 | 7.8409 | 3.8322 | 0.001895 | 0.044055 | -1.1841  | 50487  |
| CLDND1  | 7.2266 | 7.2266 | 10.566 | 3.7077 | 0.002417 | 0.049155 | -1.4142  | 56650  |
| DYNLT3  | 7.5314 | 7.5314 | 7.1955 | 4.1469 | 0.001029 | 0.034739 | -0.60636 | 6990   |
| TES     | 7.6189 | 7.6189 | 9.4962 | 4.0099 | 0.001341 | 0.038777 | -0.8569  | 26136  |
| PAQR5   | 7.651  | 7.651  | 5.0837 | 4.7201 | 0.000347 | 0.024681 | 0.42218  | 54852  |
| BMP2K   | 7.7475 | 7.7475 | 9.8837 | 4.4224 | 0.000607 | 0.030072 | -0.10745 | 55589  |
| EML1    | 7.8708 | 7.8708 | 6.8515 | 7.189  | 5.21E-06 | 0.006284 | 4.3079   | 2009   |
| NRIP1   | 7.9226 | 7.9226 | 8.5305 | 3.9968 | 0.001375 | 0.03909  | -0.88111 | 8204   |
| MGST1   | 8.0211 | 8.0211 | 7.6208 | 4.0687 | 0.001196 | 0.037089 | -0.74918 | 4257   |



|         |        |        |        |        |          |          |          |        |
|---------|--------|--------|--------|--------|----------|----------|----------|--------|
| TRPV3   | 8.0936 | 8.0936 | 8.0317 | 4.7512 | 0.000327 | 0.024681 | 0.47689  | 162514 |
| STK17A  | 8.3048 | 8.3048 | 6.5754 | 4.9326 | 0.000234 | 0.022694 | 0.79354  | 9263   |
| ALOX12  | 8.3661 | 8.3661 | 6.4212 | 5.0143 | 0.000201 | 0.021202 | 0.93445  | 239    |
| OVCA2   | 8.3804 | 8.3804 | 9.7026 | 3.6915 | 0.002495 | 0.049831 | -1.4443  | 124641 |
| ENAH    | 8.5372 | 8.5372 | 11.797 | 4.3278 | 0.000727 | 0.032145 | -0.27792 | 55740  |
| LUZP6   | 8.5473 | 8.5473 | 12.614 | 3.6914 | 0.002495 | 0.049831 | -1.4445  | 767558 |
| MTPN    | 8.5473 | 8.5473 | 12.614 | 3.6914 | 0.002495 | 0.049831 | -1.4445  | 136319 |
| TSC22D2 | 8.7219 | 8.7219 | 10.635 | 3.8497 | 0.001831 | 0.043353 | -1.1518  | 9819   |
| TCEAL9  | 8.8093 | 8.8093 | 8.3556 | 3.7513 | 0.002219 | 0.047421 | -1.3336  | 51186  |
| HTATIP2 | 8.9376 | 8.9376 | 10.264 | 3.7926 | 0.002047 | 0.045712 | -1.2573  | 10553  |
| NPTX1   | 9.3997 | 9.3997 | 4.5488 | 3.9352 | 0.00155  | 0.040798 | -0.99421 | 4884   |
| ME1     | 9.4601 | 9.4601 | 8.3994 | 4.4705 | 0.000554 | 0.028794 | -0.02112 | 4199   |
| WNT5A   | 10.116 | 10.116 | 8.3047 | 6.4681 | 1.63E-05 | 0.0094   | 3.2735   | 7474   |
| MBOAT2  | 10.143 | 10.143 | 8.8234 | 4.6523 | 0.000394 | 0.024927 | 0.30263  | 129642 |
| NUAK2   | 10.158 | 10.158 | 10.573 | 3.8046 | 0.001999 | 0.045311 | -1.2351  | 81788  |
| IER3    | 10.238 | 10.238 | 6.8566 | 3.9281 | 0.001572 | 0.040861 | -1.0074  | 8870   |
| KCTD11  | 11.198 | 11.198 | 14.761 | 3.9243 | 0.001583 | 0.040861 | -1.0143  | 147040 |
| CHST2   | 11.239 | 11.239 | 8.4736 | 3.8158 | 0.001956 | 0.044855 | -1.2144  | 9435   |
| NELL2   | 12.351 | 12.351 | 15.061 | 3.9518 | 0.001501 | 0.040496 | -0.96378 | 4753   |
| VMP1    | 13.018 | 13.018 | 15.286 | 3.873  | 0.001749 | 0.042073 | -1.1088  | 81671  |
| GALNT1  | 13.322 | 13.322 | 16.069 | 3.9513 | 0.001502 | 0.040496 | -0.96463 | 2589   |
| PDLIM5  | 14.07  | 14.07  | 14.204 | 5.6314 | 6.68E-05 | 0.015265 | 1.9681   | 10611  |
| ARG2    | 14.411 | 14.411 | 8.6539 | 4.7271 | 0.000342 | 0.024681 | 0.43466  | 384    |
| ENDOD1  | 14.977 | 14.977 | 20.374 | 3.7966 | 0.002031 | 0.045594 | -1.2498  | 23052  |
| SLC39A6 | 15.039 | 15.039 | 22.742 | 3.9429 | 0.001527 | 0.040588 | -0.98015 | 25800  |
| PDLIM7  | 15.515 | 15.515 | 17.212 | 4.1604 | 0.001002 | 0.034328 | -0.58175 | 9260   |

|           |        |        |        |        |          |          |          |        |
|-----------|--------|--------|--------|--------|----------|----------|----------|--------|
| ADAP2     | 16.058 | 16.058 | 13.945 | 3.9267 | 0.001576 | 0.040861 | -1.01    | 55803  |
| PHLDA2    | 17.545 | 17.545 | 11.634 | 5.219  | 0.000139 | 0.018518 | 1.2837   | 7262   |
| KIF5B     | 18.474 | 18.474 | 22.76  | 4.3442 | 0.000705 | 0.031558 | -0.24821 | 3799   |
| KRT75     | 18.797 | 18.797 | 11.639 | 4.6454 | 0.000399 | 0.025023 | 0.29035  | 9119   |
| ATP6V1D   | 18.84  | 18.84  | 18.905 | 4.0683 | 0.001198 | 0.037089 | -0.75005 | 51382  |
| IGFL2     | 19.737 | 19.737 | 14.083 | 3.7115 | 0.002399 | 0.049051 | -1.4072  | 147920 |
| MXD1      | 20.391 | 20.391 | 14.966 | 4.2607 | 0.000827 | 0.032807 | -0.39928 | 4084   |
| ACTR3     | 20.409 | 20.409 | 22.375 | 3.9605 | 0.001476 | 0.04021  | -0.9478  | 10096  |
| EREG      | 21.613 | 21.613 | 13.243 | 3.8229 | 0.001929 | 0.044435 | -1.2013  | 2069   |
| ELL2      | 22.409 | 22.409 | 22.366 | 4.6104 | 0.000426 | 0.02575  | 0.22833  | 22936  |
| TNFRSF12A | 22.524 | 22.524 | 15.749 | 3.8105 | 0.001976 | 0.045091 | -1.2241  | 51330  |
| TMEM40    | 23.834 | 23.834 | 19.878 | 3.8857 | 0.001707 | 0.041804 | -1.0853  | 55287  |
| MCL1      | 25.446 | 25.446 | 50.398 | 4.1336 | 0.001056 | 0.034871 | -0.63056 | 4170   |
| PLK2      | 29.885 | 29.885 | 32.666 | 3.8979 | 0.001667 | 0.04144  | -1.0629  | 10769  |
| NDEL1     | 30.318 | 30.318 | 34.88  | 4.3758 | 0.000664 | 0.030358 | -0.19124 | 81565  |
| PLS3      | 32.322 | 32.322 | 43.235 | 3.8432 | 0.001854 | 0.043585 | -1.1638  | 5358   |
| EPGN      | 39.36  | 39.36  | 20.319 | 4.6625 | 0.000386 | 0.024927 | 0.32062  | 255324 |
| HK2       | 43.077 | 43.077 | 30.708 | 5.1915 | 0.000146 | 0.018518 | 1.2371   | 3099   |
| BNIP3     | 45.73  | 45.73  | 31.376 | 3.88   | 0.001726 | 0.041804 | -1.0959  | 664    |
| SERPINB2  | 53.347 | 53.347 | 35.865 | 3.7977 | 0.002026 | 0.045594 | -1.2478  | 5055   |
| CDA       | 56.449 | 56.449 | 30.496 | 4.7853 | 0.000307 | 0.024681 | 0.53675  | 978    |
| ELOVL1    | 62.66  | 62.66  | 55.981 | 3.9053 | 0.001643 | 0.041257 | -1.0493  | 64834  |
| FOS       | 70.789 | 70.789 | 85.488 | 3.9113 | 0.001624 | 0.041041 | -1.0383  | 2353   |
| CDKN1A    | 77.277 | 77.277 | 65.787 | 4.3085 | 0.000754 | 0.032252 | -0.31273 | 1026   |
| DUSP1     | 82.519 | 82.519 | 85.498 | 4.4082 | 0.000624 | 0.030163 | -0.13299 | 1843   |
| TUBA4A    | 90.769 | 90.769 | 87.7   | 3.8604 | 0.001793 | 0.04281  | -1.132   | 7277   |

|              |          |         |         |         |          |          |          |        |
|--------------|----------|---------|---------|---------|----------|----------|----------|--------|
| SPINK7       | 93.648   | 93.648  | 49.698  | 3.7337  | 0.002297 | 0.048172 | -1.3662  | 84651  |
| IVL          | 110.95   | 110.95  | 89.871  | 3.9704  | 0.001448 | 0.039927 | -0.92962 | 3713   |
| SERPINB5     | 115.33   | 115.33  | 129.79  | 3.9197  | 0.001597 | 0.040861 | -1.0227  | 5268   |
| CD24         | 116.82   | 116.82  | 85.901  | 4.5571  | 0.000471 | 0.026801 | 0.13356  | 1E+08  |
| TUBB2A       | 185.28   | 185.28  | 140.58  | 4.7935  | 0.000302 | 0.024681 | 0.55108  | 7280   |
| YWHAZ        | 187.28   | 187.28  | 181.42  | 4.2899  | 0.000782 | 0.032558 | -0.3465  | 7534   |
| DYNLL1       | 192.29   | 192.29  | 164.77  | 4.0031  | 0.001359 | 0.038942 | -0.86953 | 8655   |
| CSTB         | 279.25   | 279.25  | 185.71  | 3.914   | 0.001615 | 0.040892 | -1.0333  | 1476   |
| SPRR1A       | 875.21   | 875.21  | 473.87  | 4.0088  | 0.001344 | 0.038777 | -0.85905 | 6698   |
| CSTA         | 1010.9   | 1010.9  | 603.5   | 4.0145  | 0.001329 | 0.038682 | -0.84861 | 1475   |
| SPRR1B       | 2219.5   | 2219.5  | 1356.1  | 4.278   | 0.0008   | 0.032687 | -0.36796 | 6699   |
| KRT17        | 5469.6   | 5469.6  | 3234    | 3.7002  | 0.002452 | 0.049465 | -1.4281  | 3872   |
| ZSCAN25      | -0.81225 | 0.81225 | 1.4913  | -8.6931 | 5.98E-07 | 0.002829 | 6.2105   | 221785 |
| CNTNAP2      | 0.85945  | 0.85945 | 0.54729 | 6.6262  | 1.26E-05 | 0.009256 | 3.5075   | 26047  |
| NBR2         | -0.704   | 0.704   | 0.90015 | -6.5579 | 1.41E-05 | 0.0094   | 3.4069   | 10230  |
| ATXN7L1      | -0.76106 | 0.76106 | 1.1338  | -6.502  | 1.54E-05 | 0.0094   | 3.324    | 222255 |
| GLIDR        | -0.83694 | 0.83694 | 1.2229  | -6.459  | 1.65E-05 | 0.0094   | 3.26     | 389741 |
| ZNF18        | -0.7109  | 0.7109  | 1.6646  | -6.222  | 2.44E-05 | 0.010965 | 2.9013   | 7566   |
| LOC100133315 | -0.58411 | 0.58411 | 0.56504 | -6.2157 | 2.47E-05 | 0.010965 | 2.8917   | 1E+08  |
| DACT2        | -0.79584 | 0.79584 | 0.50494 | -5.9837 | 3.64E-05 | 0.013026 | 2.5316   | 168002 |
| COL4A6       | -0.84274 | 0.84274 | 0.96249 | -5.9749 | 3.70E-05 | 0.013026 | 2.5177   | 1288   |
| IMMP2L       | -0.59303 | 0.59303 | 0.72202 | -5.965  | 3.76E-05 | 0.013026 | 2.5021   | 83943  |
| CHRN2        | -0.45658 | 0.45658 | 0.4591  | -5.8827 | 4.33E-05 | 0.014616 | 2.3721   | 1141   |
| HOXA5        | -0.65541 | 0.65541 | 0.75247 | -5.8548 | 4.54E-05 | 0.015032 | 2.3277   | 3202   |
| PTCH1        | -0.87889 | 0.87889 | 0.79026 | -5.8172 | 4.84E-05 | 0.015265 | 2.2677   | 5727   |
| SRGAP3       | -0.77567 | 0.77567 | 0.70057 | -5.7919 | 5.06E-05 | 0.015265 | 2.2272   | 9901   |

|            |          |         |         |         |          |          |        |          |
|------------|----------|---------|---------|---------|----------|----------|--------|----------|
| AMER1      | -0.76589 | 0.76589 | 1.12    | -5.7671 | 5.28E-05 | 0.015265 | 2.1875 | 139285   |
| LINC02449  | -0.87861 | 0.87861 | 0.79265 | -5.7485 | 5.45E-05 | 0.015265 | 2.1575 | 1.02E+08 |
| BDKRB1     | 0.89822  | 0.89822 | 0.90371 | 5.7213  | 5.72E-05 | 0.015265 | 2.1138 | 623      |
| HOXA6      | -0.78251 | 0.78251 | 0.67596 | -5.6717 | 6.23E-05 | 0.015265 | 2.0336 | 3203     |
| CLYBL      | -0.50341 | 0.50341 | 0.48487 | -5.6567 | 6.39E-05 | 0.015265 | 2.0093 | 171425   |
| ZNF619     | -0.58854 | 0.58854 | 0.8967  | -5.65   | 6.47E-05 | 0.015265 | 1.9984 | 285267   |
| NRG2       | -0.74042 | 0.74042 | 0.46914 | -5.6235 | 6.78E-05 | 0.015265 | 1.9553 | 9542     |
| TAS2R4     | -0.82582 | 0.82582 | 0.67433 | -5.6031 | 7.02E-05 | 0.015265 | 1.922  | 50832    |
| DTNB       | -0.79124 | 0.79124 | 1.2416  | -5.5895 | 7.19E-05 | 0.015265 | 1.8997 | 1838     |
| TAMM41     | -0.98696 | 0.98696 | 1.7294  | -5.5557 | 7.63E-05 | 0.015265 | 1.8444 | 132001   |
| MST1P2     | -0.96883 | 0.96883 | 0.70728 | -5.4866 | 8.62E-05 | 0.016668 | 1.7307 | 11209    |
| IQCC       | -0.8     | 0.8     | 1.161   | -5.4605 | 9.02E-05 | 0.016743 | 1.6876 | 55721    |
| HOXC12     | -0.82836 | 0.82836 | 0.69567 | -5.4489 | 9.21E-05 | 0.016749 | 1.6684 | 3228     |
| SLC22A5    | -0.80663 | 0.80663 | 1.1312  | -5.4095 | 9.88E-05 | 0.016959 | 1.6032 | 6584     |
| IRX6       | -0.64978 | 0.64978 | 0.51689 | -5.338  | 0.000112 | 0.018125 | 1.4838 | 79190    |
| CLDN3      | -0.65756 | 0.65756 | 0.37232 | -5.3087 | 0.000118 | 0.018345 | 1.4348 | 1365     |
| OXER1      | -0.74961 | 0.74961 | 0.61394 | -5.3017 | 0.00012  | 0.018345 | 1.4231 | 165140   |
| ATP1A1-AS1 | -0.77802 | 0.77802 | 0.82044 | -5.2977 | 0.000121 | 0.018345 | 1.4164 | 84852    |
| FTCDNL1    | -0.3822  | 0.3822  | 0.30346 | -5.2725 | 0.000126 | 0.018518 | 1.374  | 348751   |
| PRKN       | -0.73869 | 0.73869 | 0.61859 | -5.2197 | 0.000139 | 0.018518 | 1.2849 | 5071     |
| LOC283335  | -0.67561 | 0.67561 | 0.52467 | -5.1918 | 0.000146 | 0.018518 | 1.2377 | 283335   |
| LOC730098  | -0.77025 | 0.77025 | 0.66948 | -5.1891 | 0.000147 | 0.018518 | 1.2331 | 730098   |
| ZCWPW1     | -0.49388 | 0.49388 | 0.52912 | -5.1761 | 0.00015  | 0.018766 | 1.211  | 55063    |
| ARRDC3-AS1 | -0.51413 | 0.51413 | 1.1977  | -5.1652 | 0.000153 | 0.018998 | 1.1926 | 1E+08    |
| FAM234B    | -0.87688 | 0.87688 | 1.2341  | -5.1561 | 0.000156 | 0.019035 | 1.177  | 57613    |
| C9orf152   | -0.83542 | 0.83542 | 0.46239 | -5.0697 | 0.000182 | 0.020943 | 1.0297 | 401546   |

|              |          |         |         |         |          |          |         |          |
|--------------|----------|---------|---------|---------|----------|----------|---------|----------|
| L3MBTL1      | -0.63045 | 0.63045 | 0.70332 | -5.0653 | 0.000183 | 0.020943 | 1.0222  | 26013    |
| CHAC2        | 0.71349  | 0.71349 | 0.69038 | 5.0565  | 0.000186 | 0.020982 | 1.0071  | 494143   |
| CCDC85A      | -0.43552 | 0.43552 | 0.33673 | -5.0235 | 0.000198 | 0.021202 | 0.95028 | 114800   |
| TTC28-AS1    | -0.51779 | 0.51779 | 0.55077 | -5.0131 | 0.000202 | 0.021202 | 0.93238 | 284900   |
| DDX12P       | -0.93203 | 0.93203 | 1.0737  | -4.985  | 0.000212 | 0.021481 | 0.88401 | 440081   |
| SLC24A1      | -0.65343 | 0.65343 | 1.1288  | -4.9728 | 0.000217 | 0.021704 | 0.863   | 9187     |
| UBOX5        | -0.82106 | 0.82106 | 1.5623  | -4.9076 | 0.000245 | 0.023296 | 0.75012 | 22888    |
| VWA2         | -0.94837 | 0.94837 | 0.97791 | -4.9007 | 0.000248 | 0.023296 | 0.73807 | 340706   |
| TMEM25       | -0.87243 | 0.87243 | 0.93588 | -4.9003 | 0.000248 | 0.023296 | 0.73739 | 84866    |
| MYB          | -0.4751  | 0.4751  | 0.34632 | -4.8894 | 0.000253 | 0.023603 | 0.71855 | 4602     |
| ASPA         | -0.51283 | 0.51283 | 0.38484 | -4.8754 | 0.00026  | 0.023603 | 0.69416 | 443      |
| PRR22        | -0.8279  | 0.8279  | 0.89761 | -4.8693 | 0.000263 | 0.023603 | 0.68358 | 163154   |
| HOXC4        | -0.70818 | 0.70818 | 0.84361 | -4.8552 | 0.00027  | 0.023845 | 0.65904 | 3221     |
| SYN2         | -0.47275 | 0.47275 | 0.27648 | -4.8327 | 0.000281 | 0.02435  | 0.61973 | 6854     |
| STRC         | -0.42777 | 0.42777 | 0.28912 | -4.8282 | 0.000284 | 0.024429 | 0.61184 | 161497   |
| CTC-338M12.4 | -0.89083 | 0.89083 | 1.1739  | -4.8162 | 0.00029  | 0.024601 | 0.59089 | 1.02E+08 |
| FOXI1        | -0.85366 | 0.85366 | 0.46356 | -4.8072 | 0.000295 | 0.024681 | 0.5752  | 2299     |
| MEIS2        | -0.7539  | 0.7539  | 1.283   | -4.8049 | 0.000296 | 0.024681 | 0.57116 | 4212     |
| MACROD2      | -0.46526 | 0.46526 | 0.29622 | -4.7836 | 0.000308 | 0.024681 | 0.53383 | 140733   |
| DEPDC5       | -0.64112 | 0.64112 | 1.5247  | -4.7783 | 0.000311 | 0.024681 | 0.52453 | 9681     |
| OTUD7A       | -0.50725 | 0.50725 | 0.5234  | -4.7779 | 0.000311 | 0.024681 | 0.52379 | 161725   |
| TMEM147-AS1  | -0.96045 | 0.96045 | 0.96544 | -4.7688 | 0.000317 | 0.024681 | 0.50785 | 1.01E+08 |
| ZNF418       | -0.65225 | 0.65225 | 0.65586 | -4.7576 | 0.000323 | 0.024681 | 0.48814 | 147686   |
| ZKSCAN3      | -0.49178 | 0.49178 | 0.75086 | -4.7549 | 0.000325 | 0.024681 | 0.48338 | 80317    |
| LINC00174    | -0.94224 | 0.94224 | 0.95747 | -4.7456 | 0.000331 | 0.024681 | 0.46719 | 285908   |
| TMEM213      | -0.48703 | 0.48703 | 0.27035 | -4.7401 | 0.000334 | 0.024681 | 0.45752 | 155006   |

|                  |          |         |         |         |          |          |         |          |
|------------------|----------|---------|---------|---------|----------|----------|---------|----------|
| CACNB1           | -0.99824 | 0.99824 | 0.85281 | -4.7355 | 0.000337 | 0.024681 | 0.44939 | 782      |
| SYDE2            | -0.47729 | 0.47729 | 0.39171 | -4.7351 | 0.000337 | 0.024681 | 0.44859 | 84144    |
| SDHAP3           | -0.72292 | 0.72292 | 0.83157 | -4.7188 | 0.000348 | 0.024681 | 0.41991 | 728609   |
| LRAT             | 0.60705  | 0.60705 | 0.30316 | 4.712   | 0.000352 | 0.024681 | 0.40793 | 9227     |
| LINC00680-GUSBP4 | -0.62893 | 0.62893 | 0.4639  | -4.7113 | 0.000352 | 0.024681 | 0.4068  | 1.07E+08 |
| LOC644634        | -0.67453 | 0.67453 | 0.8217  | -4.7016 | 0.000359 | 0.024927 | 0.38972 | 644634   |
| KCNJ14           | -0.40565 | 0.40565 | 0.4544  | -4.6905 | 0.000366 | 0.024927 | 0.37013 | 3770     |
| AMOT             | -0.92603 | 0.92603 | 0.87321 | -4.6742 | 0.000378 | 0.024927 | 0.34123 | 154796   |
| SGMS1-AS1        | -0.54498 | 0.54498 | 0.58213 | -4.6671 | 0.000383 | 0.024927 | 0.3287  | 1.04E+08 |
| FAM86HP          | -0.43573 | 0.43573 | 0.44929 | -4.6659 | 0.000384 | 0.024927 | 0.32664 | 729375   |
| TRIM73           | -0.60468 | 0.60468 | 0.46476 | -4.6643 | 0.000385 | 0.024927 | 0.32378 | 375593   |
| ROPN1B           | -0.49501 | 0.49501 | 0.27512 | -4.6617 | 0.000387 | 0.024927 | 0.31924 | 152015   |
| RAD52            | -0.92045 | 0.92045 | 1.2802  | -4.6586 | 0.000389 | 0.024927 | 0.31371 | 5893     |
| ZNF773           | -0.49636 | 0.49636 | 0.81371 | -4.658  | 0.000389 | 0.024927 | 0.31262 | 374928   |
| EMC3-AS1         | -0.42711 | 0.42711 | 0.60346 | -4.6502 | 0.000395 | 0.024927 | 0.2989  | 442075   |
| PDE9A            | -0.91611 | 0.91611 | 0.72866 | -4.6496 | 0.000396 | 0.024927 | 0.29782 | 5152     |
| ZNF839           | -0.69308 | 0.69308 | 1.6327  | -4.6334 | 0.000408 | 0.025404 | 0.26908 | 55778    |
| SCIN             | -0.53367 | 0.53367 | 0.48324 | -4.6285 | 0.000412 | 0.025481 | 0.26036 | 85477    |
| SETMAR           | -0.99731 | 0.99731 | 2.0469  | -4.6035 | 0.000431 | 0.025846 | 0.21599 | 6419     |
| DDX31            | -0.64926 | 0.64926 | 1.7572  | -4.5885 | 0.000444 | 0.026187 | 0.18948 | 64794    |
| TMEM139          | -0.39439 | 0.39439 | 0.40068 | -4.5748 | 0.000455 | 0.026595 | 0.165   | 135932   |
| MINCR            | -0.60974 | 0.60974 | 0.57569 | -4.5725 | 0.000457 | 0.026615 | 0.16101 | 1.01E+08 |
| NPY1R            | -0.77056 | 0.77056 | 0.44138 | -4.5656 | 0.000463 | 0.026801 | 0.14874 | 4886     |
| FBF1             | -0.89816 | 0.89816 | 1.008   | -4.5554 | 0.000472 | 0.026801 | 0.1306  | 85302    |
| ATP9B            | -0.84095 | 0.84095 | 3.3712  | -4.5551 | 0.000472 | 0.026801 | 0.13001 | 374868   |
| INTU             | -0.58602 | 0.58602 | 1.1594  | -4.5544 | 0.000473 | 0.026801 | 0.12873 | 27152    |

|            |          |         |         |         |          |          |          |          |
|------------|----------|---------|---------|---------|----------|----------|----------|----------|
| ARFGEF3    | -0.81503 | 0.81503 | 0.60007 | -4.5449 | 0.000482 | 0.0271   | 0.11189  | 57221    |
| SFXN2      | -0.49093 | 0.49093 | 0.77599 | -4.5305 | 0.000495 | 0.027666 | 0.086075 | 118980   |
| RPARP-AS1  | -0.77373 | 0.77373 | 1.1646  | -4.5215 | 0.000503 | 0.027918 | 0.070081 | 1.01E+08 |
| DCST1-AS1  | -0.75455 | 0.75455 | 1.0428  | -4.5204 | 0.000504 | 0.027918 | 0.06817  | 1.01E+08 |
| CDKL5      | 0.67351  | 0.67351 | 1.4449  | 4.5067  | 0.000518 | 0.02828  | 0.043667 | 6792     |
| FREM1      | -0.60292 | 0.60292 | 0.4137  | -4.4992 | 0.000525 | 0.028577 | 0.03021  | 158326   |
| STARD7-AS1 | -0.52339 | 0.52339 | 0.98416 | -4.4893 | 0.000535 | 0.028577 | 0.012598 | 285033   |
| COX19      | -0.77998 | 0.77998 | 1.6559  | -4.4826 | 0.000542 | 0.028585 | 0.000462 | 90639    |
| ZNF543     | -0.8719  | 0.8719  | 2.4518  | -4.4784 | 0.000546 | 0.028654 | -0.00691 | 125919   |
| METAP1D    | -0.43386 | 0.43386 | 0.67788 | -4.4721 | 0.000553 | 0.028794 | -0.0182  | 254042   |
| TTC12      | -0.85577 | 0.85577 | 1.7668  | -4.4716 | 0.000553 | 0.028794 | -0.01923 | 54970    |
| ALDH6A1    | -0.98216 | 0.98216 | 1.8907  | -4.4679 | 0.000557 | 0.028849 | -0.02581 | 4329     |
| DHRS12     | -0.82592 | 0.82592 | 1.804   | -4.4631 | 0.000562 | 0.028934 | -0.03438 | 79758    |
| CHRM1      | -0.63518 | 0.63518 | 0.34732 | -4.4548 | 0.000571 | 0.029166 | -0.04937 | 1128     |
| NRDE2      | -0.85238 | 0.85238 | 2.2342  | -4.4489 | 0.000578 | 0.029368 | -0.05993 | 55051    |
| GOLGA2P5   | -0.37527 | 0.37527 | 0.37382 | -4.4411 | 0.000586 | 0.029716 | -0.07392 | 55592    |
| BMP4       | -0.9136  | 0.9136  | 0.97885 | -4.4343 | 0.000594 | 0.029921 | -0.08607 | 652      |
| EDA        | -0.57214 | 0.57214 | 0.59327 | -4.4272 | 0.000602 | 0.029995 | -0.09887 | 1896     |
| SNHG20     | -0.79857 | 0.79857 | 1.1645  | -4.4222 | 0.000608 | 0.030072 | -0.1078  | 654434   |
| SMIM10L2A  | -0.48624 | 0.48624 | 0.34655 | -4.4198 | 0.00061  | 0.030072 | -0.11216 | 399668   |
| HHAT       | -0.87461 | 0.87461 | 1.0629  | -4.4192 | 0.000611 | 0.030072 | -0.11315 | 55733    |
| GPATCH1    | -0.55261 | 0.55261 | 1.6485  | -4.4038 | 0.000629 | 0.030163 | -0.14094 | 55094    |
| KLHL3      | -0.71423 | 0.71423 | 0.9134  | -4.4023 | 0.000631 | 0.030163 | -0.14365 | 26249    |
| ACTG1P4    | -0.45483 | 0.45483 | 0.2952  | -4.401  | 0.000632 | 0.030163 | -0.14589 | 648740   |
| ZNF397     | -0.82253 | 0.82253 | 1.8768  | -4.3978 | 0.000636 | 0.03019  | -0.15163 | 84307    |
| ZCCHC2     | -0.92086 | 0.92086 | 1.8553  | -4.3975 | 0.000637 | 0.03019  | -0.15213 | 54877    |

|              |          |         |         |         |          |          |          |          |
|--------------|----------|---------|---------|---------|----------|----------|----------|----------|
| MAP3K14-AS1  | -0.4493  | 0.4493  | 0.49044 | -4.3961 | 0.000638 | 0.03019  | -0.1547  | 1E+08    |
| LUCAT1       | 0.86094  | 0.86094 | 0.64182 | 4.384   | 0.000653 | 0.030358 | -0.17643 | 1.01E+08 |
| TCF7         | -0.73324 | 0.73324 | 1.4424  | -4.3802 | 0.000658 | 0.030358 | -0.18343 | 6932     |
| ZNF135       | -0.49586 | 0.49586 | 0.47466 | -4.3789 | 0.00066  | 0.030358 | -0.18571 | 7694     |
| LINC00663    | -0.49385 | 0.49385 | 0.5188  | -4.3779 | 0.000661 | 0.030358 | -0.18754 | 284440   |
| PLEKHA7      | -0.90848 | 0.90848 | 1.7829  | -4.3562 | 0.000689 | 0.031179 | -0.22669 | 144100   |
| LOC100132249 | -0.38806 | 0.38806 | 0.34458 | -4.3467 | 0.000701 | 0.031496 | -0.24383 | 1E+08    |
| LINC01184    | -0.764   | 0.764   | 1.096   | -4.34   | 0.00071  | 0.031727 | -0.25577 | 644873   |
| LOC100132077 | -0.85568 | 0.85568 | 1.2354  | -4.3299 | 0.000724 | 0.032145 | -0.27408 | 1E+08    |
| RNF165       | -0.38768 | 0.38768 | 0.23229 | -4.3258 | 0.00073  | 0.032145 | -0.28151 | 494470   |
| ZBTB39       | -0.60666 | 0.60666 | 1.3658  | -4.3209 | 0.000737 | 0.032145 | -0.29042 | 9880     |
| TIGD1        | -0.97519 | 0.97519 | 1.0733  | -4.313  | 0.000748 | 0.032252 | -0.3046  | 200765   |
| CCNO         | -0.40234 | 0.40234 | 0.38322 | -4.3071 | 0.000756 | 0.032252 | -0.3153  | 10309    |
| MRNIP        | -0.4919  | 0.4919  | 0.64285 | -4.3026 | 0.000763 | 0.032449 | -0.3235  | 51149    |
| CHAD         | -0.91577 | 0.91577 | 0.60648 | -4.2895 | 0.000782 | 0.032558 | -0.34711 | 1101     |
| SP5          | -0.46169 | 0.46169 | 0.31814 | -4.2878 | 0.000785 | 0.032558 | -0.3502  | 389058   |
| SH3GL1P2     | -0.38277 | 0.38277 | 0.33311 | -4.2822 | 0.000793 | 0.032687 | -0.36033 | 6459     |
| GABPB2       | -0.88772 | 0.88772 | 2.1569  | -4.2802 | 0.000796 | 0.032687 | -0.36398 | 126626   |
| GLS2         | -0.3767  | 0.3767  | 0.40543 | -4.2791 | 0.000798 | 0.032687 | -0.36602 | 27165    |
| LRRN1        | -0.5306  | 0.5306  | 0.40084 | -4.2725 | 0.000808 | 0.032807 | -0.37796 | 57633    |
| ROR1         | -0.84125 | 0.84125 | 0.87112 | -4.267  | 0.000817 | 0.032807 | -0.38786 | 4919     |
| ADPRHL1      | -0.35445 | 0.35445 | 0.3672  | -4.2666 | 0.000817 | 0.032807 | -0.38862 | 113622   |
| ANKRD61      | -0.53777 | 0.53777 | 0.52906 | -4.2626 | 0.000824 | 0.032807 | -0.39598 | 1E+08    |
| HOXA3        | -0.36338 | 0.36338 | 0.50396 | -4.2509 | 0.000842 | 0.032843 | -0.41706 | 3200     |
| ACTR3B       | -0.77275 | 0.77275 | 1.4502  | -4.2468 | 0.000849 | 0.03303  | -0.4246  | 57180    |
| TOGARAM1     | -0.88181 | 0.88181 | 2.1877  | -4.2381 | 0.000863 | 0.033304 | -0.44033 | 23116    |



|           |          |         |         |         |          |          |          |          |
|-----------|----------|---------|---------|---------|----------|----------|----------|----------|
| CYB5D1    | -0.91395 | 0.91395 | 2.0256  | -4.2371 | 0.000865 | 0.033304 | -0.44222 | 124637   |
| PLD6      | -0.54725 | 0.54725 | 0.70207 | -4.2367 | 0.000866 | 0.033304 | -0.44292 | 201164   |
| TRIM52    | -0.95687 | 0.95687 | 1.3777  | -4.2365 | 0.000866 | 0.033304 | -0.44327 | 84851    |
| KATNAL2   | -0.52151 | 0.52151 | 0.59539 | -4.2323 | 0.000873 | 0.033373 | -0.45095 | 83473    |
| PLEKHA6   | -0.45747 | 0.45747 | 0.33938 | -4.2288 | 0.000879 | 0.033472 | -0.45718 | 22874    |
| PHKG1     | -0.83503 | 0.83503 | 0.7389  | -4.228  | 0.00088  | 0.033472 | -0.45877 | 5260     |
| ZNF606    | -0.73004 | 0.73004 | 1.0263  | -4.2192 | 0.000895 | 0.033639 | -0.47475 | 80095    |
| ULBP1     | 0.37783  | 0.37783 | 0.21272 | 4.2178  | 0.000898 | 0.033639 | -0.47718 | 80329    |
| ZBTB25    | -0.65628 | 0.65628 | 1.0897  | -4.2154 | 0.000902 | 0.033639 | -0.48156 | 7597     |
| SLC29A2   | -0.52628 | 0.52628 | 0.4846  | -4.2136 | 0.000905 | 0.033639 | -0.48481 | 3177     |
| TTYH1     | -0.81721 | 0.81721 | 0.54222 | -4.2117 | 0.000908 | 0.033639 | -0.48825 | 57348    |
| SIRT5     | -0.49084 | 0.49084 | 0.98841 | -4.2116 | 0.000908 | 0.033639 | -0.48855 | 23408    |
| ANKRD31   | 0.92954  | 0.92954 | 0.63013 | 4.2092  | 0.000913 | 0.033639 | -0.49284 | 256006   |
| MBOAT1    | -0.86762 | 0.86762 | 1.3639  | -4.2059 | 0.000918 | 0.033705 | -0.49883 | 154141   |
| NAP1L2    | -0.56391 | 0.56391 | 0.45977 | -4.1988 | 0.000931 | 0.033871 | -0.51184 | 4674     |
| LINC01703 | -0.27047 | 0.27047 | 0.18314 | -4.1977 | 0.000933 | 0.033871 | -0.51371 | 1.05E+08 |
| ZNF490    | -0.51402 | 0.51402 | 1.342   | -4.1883 | 0.00095  | 0.033974 | -0.53099 | 57474    |
| CALML4    | -0.86492 | 0.86492 | 1.2056  | -4.1858 | 0.000955 | 0.033974 | -0.53552 | 91860    |
| FRA10AC1  | -0.86221 | 0.86221 | 1.0516  | -4.1826 | 0.000961 | 0.033974 | -0.54134 | 118924   |
| NSUN7     | -0.3673  | 0.3673  | 0.2878  | -4.1812 | 0.000963 | 0.033974 | -0.5438  | 79730    |
| STX18-AS1 | -0.40765 | 0.40765 | 0.38545 | -4.1803 | 0.000965 | 0.033974 | -0.54552 | 1.01E+08 |
| SPIN2A    | -0.50207 | 0.50207 | 0.45646 | -4.1773 | 0.00097  | 0.033974 | -0.55088 | 54466    |
| ZSWIM5    | -0.32606 | 0.32606 | 0.30967 | -4.167  | 0.00099  | 0.034236 | -0.56974 | 57643    |
| DNHD1     | -0.76533 | 0.76533 | 0.89518 | -4.1642 | 0.000995 | 0.034236 | -0.57487 | 144132   |
| LINC00515 | -0.35261 | 0.35261 | 0.2842  | -4.1641 | 0.000995 | 0.034236 | -0.57497 | 282566   |
| CCDC126   | 0.82598  | 0.82598 | 1.0502  | 4.1628  | 0.000998 | 0.034236 | -0.57728 | 90693    |

|              |          |         |         |         |          |          |          |          |
|--------------|----------|---------|---------|---------|----------|----------|----------|----------|
| LINC00965    | -0.35767 | 0.35767 | 0.26409 | -4.1502 | 0.001022 | 0.034679 | -0.60025 | 349196   |
| SFMBT1       | -0.89082 | 0.89082 | 1.7145  | -4.1499 | 0.001023 | 0.034679 | -0.60094 | 51460    |
| CYP4X1       | -0.89581 | 0.89581 | 0.68961 | -4.1487 | 0.001025 | 0.03469  | -0.60312 | 260293   |
| LOC100134868 | -0.43059 | 0.43059 | 0.5239  | -4.1411 | 0.00104  | 0.034845 | -0.61685 | 1E+08    |
| HOXC8        | -0.57539 | 0.57539 | 0.97171 | -4.1378 | 0.001047 | 0.034845 | -0.62294 | 3224     |
| BACE1-AS     | -0.84352 | 0.84352 | 0.92669 | -4.1368 | 0.001049 | 0.034845 | -0.6247  | 1E+08    |
| OCA2         | -0.89703 | 0.89703 | 0.59038 | -4.135  | 0.001053 | 0.034845 | -0.62798 | 4948     |
| ZXDA         | -0.62976 | 0.62976 | 0.83203 | -4.1323 | 0.001058 | 0.034889 | -0.6329  | 7789     |
| PTGES2-AS1   | -0.37195 | 0.37195 | 0.50031 | -4.1281 | 0.001067 | 0.035013 | -0.6407  | 389791   |
| NMT2         | -0.8665  | 0.8665  | 2.0591  | -4.1275 | 0.001068 | 0.035013 | -0.64178 | 9397     |
| LOC101926935 | -0.71179 | 0.71179 | 0.58353 | -4.1256 | 0.001072 | 0.035073 | -0.64523 | 1.02E+08 |
| PLEKHB1      | -0.48177 | 0.48177 | 0.38155 | -4.1205 | 0.001083 | 0.035215 | -0.65456 | 58473    |
| LRRC2        | -0.49113 | 0.49113 | 0.28082 | -4.1063 | 0.001113 | 0.036051 | -0.68041 | 79442    |
| STK32A       | -0.46539 | 0.46539 | 0.32692 | -4.1045 | 0.001117 | 0.036111 | -0.68379 | 202374   |
| GNG7         | -0.53506 | 0.53506 | 0.49322 | -4.0961 | 0.001135 | 0.036302 | -0.69912 | 2788     |
| HOXC-AS2     | -0.38597 | 0.38597 | 0.32469 | -4.0958 | 0.001135 | 0.036302 | -0.6996  | 1.01E+08 |
| SNX29P1      | -0.6627  | 0.6627  | 0.95754 | -4.093  | 0.001142 | 0.036431 | -0.70482 | 1.01E+08 |
| LOC646762    | -0.64092 | 0.64092 | 0.85835 | -4.0854 | 0.001158 | 0.036621 | -0.71859 | 646762   |
| HPSE2        | -0.59718 | 0.59718 | 0.36354 | -4.0834 | 0.001163 | 0.036644 | -0.72236 | 60495    |
| SLC13A2      | -0.98289 | 0.98289 | 0.52665 | -4.0771 | 0.001177 | 0.036944 | -0.73394 | 9058     |
| MGC16275     | -0.39459 | 0.39459 | 0.56822 | -4.0747 | 0.001183 | 0.037046 | -0.73833 | 85001    |
| LINC01138    | -0.79088 | 0.79088 | 1.0309  | -4.0725 | 0.001188 | 0.037069 | -0.7422  | 388685   |
| LRTOMT       | -0.41498 | 0.41498 | 0.66006 | -4.0705 | 0.001192 | 0.037069 | -0.74591 | 220074   |
| DDTL         | -0.58353 | 0.58353 | 0.90453 | -4.0674 | 0.0012   | 0.037089 | -0.75164 | 1E+08    |
| LINC02580    | -0.87085 | 0.87085 | 0.67342 | -4.0625 | 0.001211 | 0.037375 | -0.76063 | 1.01E+08 |
| PIGG         | -0.93035 | 0.93035 | 3.2805  | -4.0559 | 0.001226 | 0.037681 | -0.77265 | 54872    |

|              |          |         |         |         |          |          |          |          |
|--------------|----------|---------|---------|---------|----------|----------|----------|----------|
| CASTOR3      | -0.91854 | 0.91854 | 1.2239  | -4.0546 | 0.00123  | 0.037681 | -0.77506 | 352954   |
| PICART1      | -0.27188 | 0.27188 | 0.18804 | -4.0524 | 0.001235 | 0.037681 | -0.779   | 284080   |
| MAPT         | -0.5557  | 0.5557  | 0.38801 | -4.0517 | 0.001237 | 0.037681 | -0.7804  | 4137     |
| TMPRSS5      | -0.42274 | 0.42274 | 0.32171 | -4.0416 | 0.001261 | 0.038015 | -0.79894 | 80975    |
| RTN1         | -0.45627 | 0.45627 | 0.58888 | -4.0357 | 0.001275 | 0.038314 | -0.80974 | 6252     |
| DNAH1        | -0.9978  | 0.9978  | 1.1217  | -4.028  | 0.001295 | 0.038682 | -0.82381 | 25981    |
| NEIL1        | -0.94088 | 0.94088 | 1.0555  | -4.0249 | 0.001302 | 0.038682 | -0.82946 | 79661    |
| FAM182B      | -0.46236 | 0.46236 | 0.40207 | -4.0237 | 0.001305 | 0.038682 | -0.83167 | 728882   |
| TLR3         | -0.68444 | 0.68444 | 0.6856  | -4.0202 | 0.001314 | 0.038682 | -0.83815 | 7098     |
| LAMB2P1      | -0.55619 | 0.55619 | 0.45159 | -4.0199 | 0.001315 | 0.038682 | -0.83859 | 22973    |
| ADCY2        | -0.9226  | 0.9226  | 0.56782 | -4.0195 | 0.001316 | 0.038682 | -0.8393  | 108      |
| SLC2A12      | -0.68493 | 0.68493 | 0.66376 | -4.018  | 0.00132  | 0.038682 | -0.84217 | 154091   |
| ZNF174       | -0.48485 | 0.48485 | 0.93556 | -4.0145 | 0.001329 | 0.038682 | -0.84852 | 7727     |
| DET1         | -0.49282 | 0.49282 | 0.66331 | -4.0122 | 0.001335 | 0.038718 | -0.85276 | 55070    |
| GTF2IRD2B    | -0.86327 | 0.86327 | 1.1516  | -4.009  | 0.001343 | 0.038777 | -0.85857 | 389524   |
| CHRM3        | -0.88139 | 0.88139 | 1.0109  | -4.0007 | 0.001365 | 0.039053 | -0.87383 | 1131     |
| ADCY8        | -0.66009 | 0.66009 | 0.35387 | -3.9985 | 0.001371 | 0.03909  | -0.87796 | 114      |
| EIF3J-DT     | -0.6812  | 0.6812  | 1.0972  | -3.9916 | 0.001389 | 0.039349 | -0.89056 | 645212   |
| ASH1L-AS1    | -0.5729  | 0.5729  | 0.84539 | -3.9896 | 0.001395 | 0.039381 | -0.89421 | 645676   |
| RAB40AL      | -0.36621 | 0.36621 | 0.36422 | -3.9895 | 0.001395 | 0.039381 | -0.89449 | 282808   |
| GCNT2        | -0.43584 | 0.43584 | 0.44261 | -3.9836 | 0.001411 | 0.039698 | -0.90524 | 2651     |
| ZNF852       | -0.5311  | 0.5311  | 1.1155  | -3.9773 | 0.001428 | 0.039927 | -0.91688 | 285346   |
| MMP25-AS1    | -0.52986 | 0.52986 | 0.55044 | -3.9763 | 0.001431 | 0.039927 | -0.91873 | 1.01E+08 |
| NKAPP1       | -0.74552 | 0.74552 | 0.64287 | -3.9724 | 0.001442 | 0.039927 | -0.92584 | 158801   |
| LOC100129534 | -0.36345 | 0.36345 | 0.23786 | -3.9722 | 0.001442 | 0.039927 | -0.92614 | 1E+08    |
| P2RY11       | -0.87364 | 0.87364 | 0.50976 | -3.9721 | 0.001443 | 0.039927 | -0.9264  | 5032     |

|              |          |         |         |         |          |          |          |          |
|--------------|----------|---------|---------|---------|----------|----------|----------|----------|
| SNORC        | -0.9628  | 0.9628  | 0.69009 | -3.972  | 0.001443 | 0.039927 | -0.92658 | 389084   |
| KIAA1328     | -0.63146 | 0.63146 | 0.94121 | -3.9688 | 0.001452 | 0.039927 | -0.9325  | 57536    |
| HNRNPA1L2    | -0.82478 | 0.82478 | 1.4307  | -3.9638 | 0.001466 | 0.040186 | -0.9417  | 144983   |
| PCLO         | -0.73611 | 0.73611 | 0.50605 | -3.9615 | 0.001473 | 0.04021  | -0.94592 | 27445    |
| CHADL        | -0.55677 | 0.55677 | 0.41717 | -3.9612 | 0.001474 | 0.04021  | -0.94641 | 150356   |
| IGSF10       | -0.9571  | 0.9571  | 0.58074 | -3.9601 | 0.001477 | 0.04021  | -0.94839 | 285313   |
| USP49        | -0.43923 | 0.43923 | 0.67953 | -3.9539 | 0.001495 | 0.040496 | -0.95983 | 25862    |
| RPS6KL1      | -0.54213 | 0.54213 | 0.5314  | -3.9507 | 0.001504 | 0.040496 | -0.96572 | 83694    |
| TAS2R5       | -0.59986 | 0.59986 | 0.61913 | -3.9481 | 0.001512 | 0.040568 | -0.97057 | 54429    |
| CYP2D6       | -0.69098 | 0.69098 | 0.59213 | -3.9456 | 0.001519 | 0.040568 | -0.97509 | 1565     |
| DKK2         | -0.41917 | 0.41917 | 0.34207 | -3.9441 | 0.001523 | 0.040568 | -0.97791 | 27123    |
| TSEN2        | -0.6736  | 0.6736  | 1.4632  | -3.9422 | 0.001529 | 0.040588 | -0.98136 | 80746    |
| CCSER1       | -0.39203 | 0.39203 | 0.28415 | -3.9408 | 0.001533 | 0.040632 | -0.98387 | 401145   |
| TYW1B        | -0.62401 | 0.62401 | 0.9161  | -3.938  | 0.001541 | 0.040726 | -0.98901 | 441250   |
| PCDH19       | -0.51599 | 0.51599 | 0.38834 | -3.9351 | 0.00155  | 0.040798 | -0.99449 | 57526    |
| ELF5         | -0.48593 | 0.48593 | 0.28112 | -3.9347 | 0.001551 | 0.040798 | -0.99513 | 2001     |
| PASK         | -0.58735 | 0.58735 | 0.96903 | -3.9313 | 0.001562 | 0.040861 | -1.0015  | 23178    |
| DANT1        | -0.59223 | 0.59223 | 0.45078 | -3.9274 | 0.001574 | 0.040861 | -1.0086  | 1.06E+08 |
| CZ1P-ASNS    | -0.62614 | 0.62614 | 0.56474 | -3.9263 | 0.001577 | 0.040861 | -1.0107  | 1.08E+08 |
| PMS2P4       | -0.73994 | 0.73994 | 1.4002  | -3.9254 | 0.00158  | 0.040861 | -1.0122  | 5382     |
| LOC100506083 | -0.33063 | 0.33063 | 0.25622 | -3.9248 | 0.001582 | 0.040861 | -1.0134  | 1.01E+08 |
| SP8          | -0.51045 | 0.51045 | 0.3038  | -3.9236 | 0.001585 | 0.040861 | -1.0156  | 221833   |
| IGSF9B       | -0.77383 | 0.77383 | 0.68045 | -3.9231 | 0.001587 | 0.040861 | -1.0166  | 22997    |
| CYP2D7       | -0.75607 | 0.75607 | 0.80288 | -3.9209 | 0.001594 | 0.040861 | -1.0205  | 1564     |
| C4orf19      | -0.39282 | 0.39282 | 0.3314  | -3.9163 | 0.001608 | 0.040892 | -1.0291  | 55286    |
| ZNF774       | -0.31409 | 0.31409 | 0.34571 | -3.9162 | 0.001608 | 0.040892 | -1.0293  | 342132   |

|              |          |         |         |         |          |          |         |          |
|--------------|----------|---------|---------|---------|----------|----------|---------|----------|
| TIRAP        | -0.69071 | 0.69071 | 1.8283  | -3.9156 | 0.00161  | 0.040892 | -1.0303 | 114609   |
| LOC100132356 | -0.93167 | 0.93167 | 1.2384  | -3.9079 | 0.001635 | 0.04113  | -1.0446 | 1E+08    |
| UBAP1L       | -0.75884 | 0.75884 | 0.80543 | -3.9047 | 0.001645 | 0.041257 | -1.0503 | 390595   |
| TMEM8B       | -0.9853  | 0.9853  | 1.1484  | -3.8997 | 0.001661 | 0.04144  | -1.0597 | 51754    |
| ZFAND4       | -0.4537  | 0.4537  | 0.95915 | -3.8981 | 0.001666 | 0.04144  | -1.0625 | 93550    |
| IQCH-AS1     | -0.32132 | 0.32132 | 0.38361 | -3.8979 | 0.001667 | 0.04144  | -1.0628 | 1.01E+08 |
| CHRNA        | -0.45685 | 0.45685 | 0.37643 | -3.8979 | 0.001667 | 0.04144  | -1.0629 | 1146     |
| ARSG         | -0.90537 | 0.90537 | 1.3717  | -3.8959 | 0.001673 | 0.041538 | -1.0665 | 22901    |
| CPNE7        | -0.32512 | 0.32512 | 0.25169 | -3.8878 | 0.0017   | 0.041804 | -1.0815 | 27132    |
| RPS10P7      | -0.4385  | 0.4385  | 0.5316  | -3.8866 | 0.001704 | 0.041804 | -1.0838 | 376693   |
| CNTN3        | -0.32204 | 0.32204 | 0.23645 | -3.8854 | 0.001708 | 0.041804 | -1.0859 | 5067     |
| ZNF213-AS1   | -0.37358 | 0.37358 | 0.44422 | -3.883  | 0.001716 | 0.041804 | -1.0904 | 1.01E+08 |
| C2CD3        | -0.78073 | 0.78073 | 1.8933  | -3.8825 | 0.001718 | 0.041804 | -1.0913 | 26005    |
| ZFP3         | -0.71274 | 0.71274 | 1.0026  | -3.8824 | 0.001718 | 0.041804 | -1.0916 | 124961   |
| N4BP2L1      | -0.89274 | 0.89274 | 0.89942 | -3.8811 | 0.001722 | 0.041804 | -1.0938 | 90634    |
| MTERF4       | -0.9519  | 0.9519  | 1.9508  | -3.8811 | 0.001722 | 0.041804 | -1.094  | 130916   |
| TMEM266      | -0.7186  | 0.7186  | 0.51491 | -3.8806 | 0.001724 | 0.041804 | -1.0949 | 123591   |
| GMDS-DT      | -0.42872 | 0.42872 | 0.47056 | -3.8781 | 0.001732 | 0.04189  | -1.0994 | 1.01E+08 |
| GOLGA8N      | -0.74704 | 0.74704 | 0.81548 | -3.8775 | 0.001734 | 0.04189  | -1.1006 | 643699   |
| SREBF2-AS1   | -0.53996 | 0.53996 | 0.69751 | -3.8758 | 0.00174  | 0.041962 | -1.1036 | 1.13E+08 |
| SLC24A5      | -0.53745 | 0.53745 | 0.44922 | -3.875  | 0.001743 | 0.041973 | -1.1052 | 283652   |
| FOXGUT       | -0.80236 | 0.80236 | 0.53625 | -3.868  | 0.001767 | 0.042366 | -1.118  | 1.02E+08 |
| TMPRSS2      | -0.80206 | 0.80206 | 0.46426 | -3.8601 | 0.001794 | 0.04281  | -1.1326 | 7113     |
| GPR143       | -0.5255  | 0.5255  | 0.52397 | -3.8592 | 0.001797 | 0.04281  | -1.1342 | 4935     |
| NEK8         | -0.45976 | 0.45976 | 0.6009  | -3.859  | 0.001798 | 0.04281  | -1.1346 | 284086   |
| TMEM220      | -0.69097 | 0.69097 | 0.89801 | -3.8504 | 0.001828 | 0.043352 | -1.1505 | 388335   |

|              |          |         |         |         |          |          |         |          |
|--------------|----------|---------|---------|---------|----------|----------|---------|----------|
| PPIEL        | -0.88174 | 0.88174 | 0.98391 | -3.8488 | 0.001834 | 0.043366 | -1.1534 | 728448   |
| LOC100506388 | -0.31813 | 0.31813 | 0.22446 | -3.846  | 0.001844 | 0.043483 | -1.1586 | 1.01E+08 |
| LINC01144    | -0.32577 | 0.32577 | 0.28551 | -3.8427 | 0.001856 | 0.043585 | -1.1648 | 400752   |
| POU5F2       | -0.75674 | 0.75674 | 0.81357 | -3.8411 | 0.001862 | 0.043655 | -1.1676 | 134187   |
| MKS1         | -0.81544 | 0.81544 | 1.6755  | -3.8399 | 0.001866 | 0.043701 | -1.1699 | 54903    |
| ZNF304       | -0.47855 | 0.47855 | 1.7392  | -3.8385 | 0.001871 | 0.043761 | -1.1726 | 57343    |
| JHY          | 0.88765  | 0.88765 | 1.0559  | 3.8364  | 0.001879 | 0.043875 | -1.1763 | 79864    |
| SEC31B       | -0.97083 | 0.97083 | 1.1356  | -3.8352 | 0.001884 | 0.043923 | -1.1787 | 25956    |
| DCST2        | -0.6215  | 0.6215  | 0.4889  | -3.8261 | 0.001917 | 0.04443  | -1.1953 | 127579   |
| GTF2IRD2     | -0.95939 | 0.95939 | 1.4866  | -3.8257 | 0.001919 | 0.04443  | -1.1961 | 84163    |
| FAM120C      | -0.78618 | 0.78618 | 1.2032  | -3.8233 | 0.001928 | 0.044435 | -1.2005 | 54954    |
| RABL2A       | -0.63644 | 0.63644 | 0.83588 | -3.8146 | 0.001961 | 0.044855 | -1.2166 | 11159    |
| LOC554206    | -0.29801 | 0.29801 | 0.26993 | -3.807  | 0.00199  | 0.0453   | -1.2307 | 554206   |
| PMS2         | -0.90807 | 0.90807 | 2.248   | -3.8002 | 0.002017 | 0.04552  | -1.2432 | 5395     |
| LINC01061    | -0.88526 | 0.88526 | 1.0067  | -3.8002 | 0.002017 | 0.04552  | -1.2433 | 401149   |
| SPATA6       | -0.84327 | 0.84327 | 0.9645  | -3.7978 | 0.002026 | 0.045594 | -1.2477 | 54558    |
| PARTICL      | -0.57599 | 0.57599 | 0.9894  | -3.7972 | 0.002028 | 0.045594 | -1.2487 | 1.01E+08 |
| PRR26        | -0.70492 | 0.70492 | 0.78915 | -3.7944 | 0.00204  | 0.045656 | -1.254  | 414235   |
| DPF1         | 0.42462  | 0.42462 | 0.31046 | 3.7913  | 0.002052 | 0.045751 | -1.2597 | 8193     |
| FOXO6        | -0.4418  | 0.4418  | 0.30927 | -3.7908 | 0.002054 | 0.045751 | -1.2606 | 1E+08    |
| NBEA         | -0.77762 | 0.77762 | 0.63117 | -3.7868 | 0.00207  | 0.045937 | -1.2679 | 26960    |
| LINC00999    | -0.68327 | 0.68327 | 1.0832  | -3.7858 | 0.002074 | 0.045937 | -1.2698 | 399744   |
| LINC00893    | -0.80342 | 0.80342 | 0.83453 | -3.7857 | 0.002075 | 0.045937 | -1.27   | 1E+08    |
| MYRIP        | -0.74368 | 0.74368 | 0.58292 | -3.7811 | 0.002093 | 0.04626  | -1.2785 | 25924    |
| RFT1         | -0.93995 | 0.93995 | 2.0112  | -3.7764 | 0.002113 | 0.046417 | -1.2871 | 91869    |
| PROCA1       | -0.34827 | 0.34827 | 0.37008 | -3.7688 | 0.002144 | 0.046922 | -1.3013 | 147011   |

|           |          |         |         |         |          |          |         |          |
|-----------|----------|---------|---------|---------|----------|----------|---------|----------|
| CREG2     | 0.31811  | 0.31811 | 0.16688 | 3.7678  | 0.002148 | 0.046922 | -1.303  | 200407   |
| SNORA2A   | -0.53253 | 0.53253 | 0.32919 | -3.7638 | 0.002165 | 0.047076 | -1.3105 | 677793   |
| LRRC37A3  | -0.99199 | 0.99199 | 1.4366  | -3.7636 | 0.002166 | 0.047076 | -1.3109 | 374819   |
| C17orf113 | -0.27547 | 0.27547 | 0.18827 | -3.7622 | 0.002172 | 0.047076 | -1.3134 | 1.11E+08 |
| FRG1BP    | -0.68612 | 0.68612 | 1.516   | -3.7589 | 0.002186 | 0.04731  | -1.3195 | 284802   |
| CPEB3     | -0.64024 | 0.64024 | 1.2714  | -3.7554 | 0.002201 | 0.047398 | -1.3259 | 22849    |
| LINC01126 | -0.51343 | 0.51343 | 0.5636  | -3.7528 | 0.002212 | 0.047421 | -1.3308 | 1E+08    |
| SYBU      | -0.61985 | 0.61985 | 0.69506 | -3.7468 | 0.002239 | 0.047593 | -1.342  | 55638    |
| BFSP1     | 0.41605  | 0.41605 | 0.48238 | 3.7453  | 0.002245 | 0.047593 | -1.3448 | 631      |
| TSSK6     | -0.33945 | 0.33945 | 0.38122 | -3.7355 | 0.002289 | 0.048121 | -1.3628 | 83983    |
| C7orf57   | 0.27142  | 0.27142 | 0.1913  | 3.7314  | 0.002307 | 0.048271 | -1.3705 | 136288   |
| HSD17B7P2 | -0.48202 | 0.48202 | 0.69388 | -3.7274 | 0.002326 | 0.04856  | -1.3779 | 158160   |
| THSD4-AS2 | -0.58253 | 0.58253 | 0.46237 | -3.7269 | 0.002328 | 0.04856  | -1.3788 | 1.02E+08 |
| ITGB7     | -0.76206 | 0.76206 | 1.0838  | -3.7232 | 0.002345 | 0.048688 | -1.3856 | 3695     |
| ETV7      | -0.97861 | 0.97861 | 0.81615 | -3.7152 | 0.002381 | 0.049051 | -1.4003 | 51513    |
| LHFPL4    | -0.2485  | 0.2485  | 0.19072 | -3.7146 | 0.002384 | 0.049051 | -1.4015 | 375323   |
| LRFN5     | -0.42293 | 0.42293 | 0.33224 | -3.7145 | 0.002385 | 0.049051 | -1.4017 | 145581   |
| SARM1     | -0.78181 | 0.78181 | 0.96747 | -3.7113 | 0.0024   | 0.049051 | -1.4077 | 23098    |
| SLC16A8   | -0.32746 | 0.32746 | 0.31482 | -3.7017 | 0.002445 | 0.049465 | -1.4253 | 23539    |
| FAM185BP  | -0.9876  | 0.9876  | 0.83678 | -3.7013 | 0.002447 | 0.049465 | -1.4262 | 641808   |
| MYEOV     | -0.97962 | 0.97962 | 0.56856 | -3.6951 | 0.002477 | 0.049831 | -1.4377 | 26579    |
| SLC25A4   | -0.72027 | 0.72027 | 1.201   | -3.691  | 0.002497 | 0.049831 | -1.4452 | 291      |
| LOC145694 | 0.34522  | 0.34522 | 0.32613 | 3.6902  | 0.002501 | 0.049857 | -1.4468 | 145694   |
| PKIA      | -0.84494 | 0.84494 | 0.76788 | -3.6893 | 0.002505 | 0.049877 | -1.4483 | 5569     |
| ERICH1    | -0.80144 | 0.80144 | 1.7256  | -3.6828 | 0.002538 | 0.050257 | -1.4604 | 157697   |
| ZNF7      | -0.60474 | 0.60474 | 2.5327  | -3.6828 | 0.002538 | 0.050257 | -1.4604 | 7553     |

|              |          |         |         |         |          |          |         |          |
|--------------|----------|---------|---------|---------|----------|----------|---------|----------|
| TGFBR3       | -6.663   | 6.663   | 6.2909  | -3.6825 | 0.002539 | 0.050257 | -1.461  | 7049     |
| LOC392196    | -0.35377 | 0.35377 | 0.24101 | -3.6811 | 0.002546 | 0.050338 | -1.4636 | 392196   |
| SLC36A4      | 0.73661  | 0.73661 | 1.1266  | 3.679   | 0.002557 | 0.050483 | -1.4674 | 120103   |
| LOC729732    | -2.9475  | 2.9475  | 2.3709  | -3.675  | 0.002577 | 0.050823 | -1.4749 | 729732   |
| FAM66C       | -0.35566 | 0.35566 | 0.32064 | -3.6742 | 0.002581 | 0.050836 | -1.4763 | 440078   |
| GPR27        | -0.66396 | 0.66396 | 0.46207 | -3.6734 | 0.002585 | 0.050836 | -1.4778 | 2850     |
| RHCG         | 161.42   | 161.42  | 97.809  | 3.6731  | 0.002587 | 0.050836 | -1.4784 | 51458    |
| FAM186B      | -0.33319 | 0.33319 | 0.37431 | -3.6711 | 0.002596 | 0.050968 | -1.482  | 84070    |
| TP73         | -1.8352  | 1.8352  | 1.7525  | -3.6685 | 0.00261  | 0.051169 | -1.4868 | 7161     |
| SPAG17       | 1.6463   | 1.6463  | 1.0585  | 3.6672  | 0.002617 | 0.051248 | -1.4893 | 200162   |
| SOX8         | -0.38311 | 0.38311 | 0.30993 | -3.6661 | 0.002622 | 0.051295 | -1.4914 | 30812    |
| SOSTDC1      | -1.5097  | 1.5097  | 1.3479  | -3.6655 | 0.002625 | 0.051295 | -1.4924 | 25928    |
| DICER1-AS1   | -0.4585  | 0.4585  | 0.49094 | -3.6647 | 0.002629 | 0.051316 | -1.4939 | 400242   |
| SSR4P1       | -0.33205 | 0.33205 | 0.38138 | -3.6612 | 0.002648 | 0.051525 | -1.5004 | 728039   |
| FAM13A       | -1.4193  | 1.4193  | 2.0764  | -3.6611 | 0.002648 | 0.051525 | -1.5005 | 10144    |
| ZNF718       | -0.55355 | 0.55355 | 0.79047 | -3.6609 | 0.002649 | 0.051525 | -1.501  | 255403   |
| GPX3         | 82.021   | 82.021  | 68.667  | 3.66    | 0.002654 | 0.051553 | -1.5026 | 2878     |
| WRN          | -1.0037  | 1.0037  | 1.7914  | -3.6594 | 0.002657 | 0.051553 | -1.5037 | 7486     |
| PRRC2B       | -9.2016  | 9.2016  | 16.128  | -3.6557 | 0.002676 | 0.051871 | -1.5106 | 84726    |
| LOC101927377 | -0.29961 | 0.29961 | 0.38844 | -3.6548 | 0.002681 | 0.05191  | -1.5124 | 1.02E+08 |
| LDB1         | -9.5668  | 9.5668  | 18.024  | -3.6508 | 0.002702 | 0.052229 | -1.5197 | 8861     |
| CDCA7L       | -1.805   | 1.805   | 3.1832  | -3.6505 | 0.002704 | 0.052229 | -1.5203 | 55536    |
| IBA57        | -0.74719 | 0.74719 | 1.4017  | -3.6496 | 0.002708 | 0.052258 | -1.5219 | 200205   |
| ZC2HC1C      | -0.25558 | 0.25558 | 0.24376 | -3.6467 | 0.002724 | 0.052494 | -1.5272 | 79696    |
| C12orf54     | 0.34988  | 0.34988 | 0.22648 | 3.6453  | 0.002731 | 0.052581 | -1.5299 | 121273   |
| XYLB         | -0.34064 | 0.34064 | 0.49463 | -3.6442 | 0.002737 | 0.052633 | -1.5319 | 9942     |



|              |          |         |         |         |          |          |         |          |
|--------------|----------|---------|---------|---------|----------|----------|---------|----------|
| MTVR2        | -0.77833 | 0.77833 | 0.58288 | -3.6428 | 0.002745 | 0.052685 | -1.5345 | 246754   |
| RND3         | 22.938   | 22.938  | 23.372  | 3.642   | 0.002749 | 0.052685 | -1.536  | 390      |
| KY           | -1.224   | 1.224   | 0.72653 | -3.6415 | 0.002752 | 0.052685 | -1.537  | 339855   |
| SH3BP2       | -6.66    | 6.66    | 9.492   | -3.6408 | 0.002756 | 0.052685 | -1.5383 | 6452     |
| ZNF554       | -0.55655 | 0.55655 | 0.89108 | -3.6392 | 0.002764 | 0.052685 | -1.5412 | 115196   |
| SPRY4        | 3.0975   | 3.0975  | 3.1953  | 3.6391  | 0.002765 | 0.052685 | -1.5414 | 81848    |
| RNF223       | 5.3309   | 5.3309  | 4.2148  | 3.6388  | 0.002767 | 0.052685 | -1.542  | 401934   |
| LINC01605    | 1.5111   | 1.5111  | 1.4036  | 3.6374  | 0.002774 | 0.052685 | -1.5444 | 1.01E+08 |
| MALL         | 42.037   | 42.037  | 35.695  | 3.6373  | 0.002774 | 0.052685 | -1.5447 | 7851     |
| B3GALT5      | -0.42    | 0.42    | 0.24322 | -3.6361 | 0.002781 | 0.052685 | -1.5469 | 10317    |
| LOC401261    | -1.0717  | 1.0717  | 1.19    | -3.6354 | 0.002785 | 0.052685 | -1.5482 | 401261   |
| EMP2         | -9.813   | 9.813   | 18.817  | -3.6348 | 0.002788 | 0.052685 | -1.5493 | 2013     |
| AMPD3        | 4.3902   | 4.3902  | 5.7938  | 3.6344  | 0.00279  | 0.052685 | -1.5501 | 272      |
| MTR          | -1.9147  | 1.9147  | 3.5877  | -3.6343 | 0.002791 | 0.052685 | -1.5502 | 4548     |
| CNNM1        | -0.28776 | 0.28776 | 0.21264 | -3.6343 | 0.002791 | 0.052685 | -1.5502 | 26507    |
| APOBEC2      | -0.49457 | 0.49457 | 0.45805 | -3.6341 | 0.002792 | 0.052685 | -1.5506 | 10930    |
| NFYC-AS1     | -0.38222 | 0.38222 | 0.40241 | -3.6336 | 0.002795 | 0.052685 | -1.5516 | 1E+08    |
| CDK5R1       | 3.9874   | 3.9874  | 4.3152  | 3.6334  | 0.002796 | 0.052685 | -1.552  | 8851     |
| PRSS3        | 12.578   | 12.578  | 11.187  | 3.6325  | 0.002801 | 0.052686 | -1.5537 | 5646     |
| ZNF362       | -3.5321  | 3.5321  | 5.5486  | -3.6322 | 0.002802 | 0.052686 | -1.5541 | 149076   |
| LOC101927550 | -0.62701 | 0.62701 | 0.87957 | -3.6305 | 0.002812 | 0.052716 | -1.5572 | 1.02E+08 |
| TATDN2       | -2.9656  | 2.9656  | 7.0304  | -3.6297 | 0.002816 | 0.052716 | -1.5587 | 9797     |
| TAF4B        | -0.81646 | 0.81646 | 1.4533  | -3.6295 | 0.002817 | 0.052716 | -1.5591 | 6875     |
| MSTO2P       | -0.33146 | 0.33146 | 0.44006 | -3.6289 | 0.002821 | 0.052716 | -1.5603 | 1E+08    |
| TUB          | -0.91045 | 0.91045 | 1.2068  | -3.6286 | 0.002822 | 0.052716 | -1.5608 | 7275     |
| DYRK3        | 2.7882   | 2.7882  | 2.669   | 3.6285  | 0.002823 | 0.052716 | -1.5609 | 8444     |

|              |          |         |         |         |          |          |         |        |
|--------------|----------|---------|---------|---------|----------|----------|---------|--------|
| ZNF426       | 3.1354   | 3.1354  | 3.7065  | 3.6272  | 0.00283  | 0.052799 | -1.5635 | 79088  |
| LOC100131496 | -0.30953 | 0.30953 | 0.35806 | -3.6264 | 0.002835 | 0.052823 | -1.5649 | 1E+08  |
| AJAP1        | 3.6449   | 3.6449  | 1.9606  | 3.6257  | 0.002839 | 0.052837 | -1.5662 | 55966  |
| CTPS2        | -0.69715 | 0.69715 | 1.2687  | -3.6247 | 0.002844 | 0.052883 | -1.5681 | 56474  |
| ZNF516       | -1.4556  | 1.4556  | 3.9204  | -3.6236 | 0.00285  | 0.052938 | -1.5701 | 9658   |
| TSHZ1        | -1.3408  | 1.3408  | 3.0572  | -3.621  | 0.002865 | 0.053153 | -1.575  | 10194  |
| PAX3         | -0.28432 | 0.28432 | 0.20006 | -3.618  | 0.002882 | 0.05339  | -1.5804 | 5077   |
| POLR2J4      | -0.60554 | 0.60554 | 0.88029 | -3.6176 | 0.002884 | 0.05339  | -1.5813 | 84820  |
| MED8         | 7.7208   | 7.7208  | 10.842  | 3.6129  | 0.002911 | 0.053597 | -1.59   | 112950 |
| NR2C2        | -1.8821  | 1.8821  | 5.7412  | -3.6128 | 0.002911 | 0.053597 | -1.5901 | 7182   |
| HBEGF        | 14.243   | 14.243  | 8.5302  | 3.6118  | 0.002917 | 0.053597 | -1.592  | 1839   |
| ZBTB16       | -5.491   | 5.491   | 3.1195  | -3.6117 | 0.002917 | 0.053597 | -1.5921 | 7704   |
| MARK3        | 8.1134   | 8.1134  | 13.063  | 3.6115  | 0.002919 | 0.053597 | -1.5924 | 4140   |
| AR           | -0.73818 | 0.73818 | 0.65029 | -3.6115 | 0.002919 | 0.053597 | -1.5925 | 367    |
| LINC00894    | -1.3969  | 1.3969  | 1.4262  | -3.6114 | 0.002919 | 0.053597 | -1.5926 | 1E+08  |
| LOC642846    | -0.91301 | 0.91301 | 1.2453  | -3.6112 | 0.002921 | 0.053597 | -1.5932 | 642846 |
| PRPF6        | -6.7528  | 6.7528  | 13.623  | -3.6078 | 0.00294  | 0.053894 | -1.5994 | 24148  |
| UBE2F        | 5.9771   | 5.9771  | 7.4427  | 3.607   | 0.002944 | 0.053916 | -1.6008 | 140739 |
| TCF7L2       | -1.7558  | 1.7558  | 2.8646  | -3.6043 | 0.00296  | 0.054094 | -1.6059 | 6934   |
| TSPAN8       | -1.2913  | 1.2913  | 0.69889 | -3.6039 | 0.002962 | 0.054094 | -1.6066 | 7103   |
| RAP2A        | 4.8489   | 4.8489  | 5.8778  | 3.6037  | 0.002964 | 0.054094 | -1.607  | 5911   |
| CLDN10       | -1.149   | 1.149   | 0.6535  | -3.6007 | 0.002981 | 0.054356 | -1.6126 | 9071   |
| PA2G4P4      | -0.60642 | 0.60642 | 0.67381 | -3.5998 | 0.002986 | 0.054389 | -1.6142 | 647033 |
| NUDT13       | -0.66018 | 0.66018 | 0.72898 | -3.5976 | 0.002999 | 0.054551 | -1.6182 | 25961  |
| RAB11FIP4    | -1.0746  | 1.0746  | 1.4956  | -3.5972 | 0.003002 | 0.054551 | -1.619  | 84440  |
| HMGA2        | 0.45974  | 0.45974 | 0.25692 | 3.5962  | 0.003008 | 0.054604 | -1.6209 | 8091   |

|              |          |         |         |         |          |          |         |          |
|--------------|----------|---------|---------|---------|----------|----------|---------|----------|
| FDPSP2       | -1.5527  | 1.5527  | 1.5059  | -3.5937 | 0.003023 | 0.054812 | -1.6255 | 619190   |
| PLCD1        | 10.783   | 10.783  | 12.553  | 3.5922  | 0.003031 | 0.05491  | -1.6282 | 5333     |
| MAPK6        | 16.196   | 16.196  | 20.778  | 3.5915  | 0.003036 | 0.054933 | -1.6296 | 5597     |
| LOC646471    | -0.95359 | 0.95359 | 1.1446  | -3.5893 | 0.003049 | 0.055106 | -1.6336 | 646471   |
| RBP1         | 7.448    | 7.448   | 5.511   | 3.5872  | 0.003062 | 0.055217 | -1.6376 | 5947     |
| ACCS         | -1.5433  | 1.5433  | 1.8483  | -3.5864 | 0.003066 | 0.055217 | -1.6391 | 84680    |
| GOLGA8IP     | -0.27852 | 0.27852 | 0.27332 | -3.5859 | 0.00307  | 0.055217 | -1.6401 | 283796   |
| LINC01176    | -1.2247  | 1.2247  | 1.5681  | -3.5852 | 0.003073 | 0.055217 | -1.6412 | 1.01E+08 |
| MCM9         | -0.51708 | 0.51708 | 1.5651  | -3.5851 | 0.003074 | 0.055217 | -1.6415 | 254394   |
| ELL3         | -1.7713  | 1.7713  | 2.6508  | -3.5845 | 0.003077 | 0.055217 | -1.6425 | 80237    |
| LINC00173    | -0.91754 | 0.91754 | 0.59785 | -3.5845 | 0.003078 | 0.055217 | -1.6425 | 1E+08    |
| ZNF445       | -1.0473  | 1.0473  | 2.0436  | -3.5815 | 0.003096 | 0.055428 | -1.6481 | 353274   |
| HTR7         | 1.8313   | 1.8313  | 1.4562  | 3.5815  | 0.003096 | 0.055428 | -1.6482 | 3363     |
| PNMA8B       | -0.5287  | 0.5287  | 0.46206 | -3.5806 | 0.003101 | 0.055461 | -1.6498 | 57469    |
| NOS1AP       | -0.23142 | 0.23142 | 0.19112 | -3.5801 | 0.003104 | 0.055461 | -1.6507 | 9722     |
| PNPLA8       | 2.0208   | 2.0208  | 3.4896  | 3.5794  | 0.003109 | 0.05548  | -1.652  | 50640    |
| LOC100652768 | -0.69191 | 0.69191 | 0.86983 | -3.5775 | 0.00312  | 0.055554 | -1.6556 | 1.01E+08 |
| ZDHHC13      | 8.8299   | 8.8299  | 8.953   | 3.577   | 0.003123 | 0.055554 | -1.6565 | 54503    |
| LINC01145    | -0.27625 | 0.27625 | 0.35593 | -3.5762 | 0.003128 | 0.055554 | -1.6579 | 1.03E+08 |
| GUSBP4       | -0.89937 | 0.89937 | 0.8975  | -3.5754 | 0.003133 | 0.055554 | -1.6595 | 375513   |
| SNHG28       | -0.35411 | 0.35411 | 0.37852 | -3.5753 | 0.003134 | 0.055554 | -1.6597 | 284677   |
| RBL2         | -2.8505  | 2.8505  | 8.5501  | -3.5748 | 0.003137 | 0.055554 | -1.6605 | 5934     |
| ZNF276       | -2.2037  | 2.2037  | 4.0267  | -3.574  | 0.003142 | 0.055554 | -1.6621 | 92822    |
| FAM156B      | -1.5541  | 1.5541  | 2.4696  | -3.5737 | 0.003144 | 0.055554 | -1.6625 | 727866   |
| AMY2B        | -3.3385  | 3.3385  | 2.7181  | -3.5735 | 0.003145 | 0.055554 | -1.6629 | 280      |
| UBE2Q2       | 8.9595   | 8.9595  | 9.2462  | 3.5732  | 0.003147 | 0.055554 | -1.6635 | 92912    |

|           |          |         |         |         |          |          |         |          |
|-----------|----------|---------|---------|---------|----------|----------|---------|----------|
| KRT7      | -9.058   | 9.058   | 5.2288  | -3.5723 | 0.003152 | 0.055554 | -1.6651 | 3855     |
| SPAG9     | 5.2451   | 5.2451  | 11.226  | 3.5723  | 0.003152 | 0.055554 | -1.6652 | 9043     |
| RPS6KC1   | 0.7124   | 0.7124  | 2.252   | 3.5717  | 0.003156 | 0.055563 | -1.6663 | 26750    |
| TSSK4     | -0.88075 | 0.88075 | 1.0367  | -3.5704 | 0.003164 | 0.055649 | -1.6688 | 283629   |
| MTMR4     | -1.7209  | 1.7209  | 4.7058  | -3.569  | 0.003173 | 0.05574  | -1.6713 | 9110     |
| TENM3     | 1.7992   | 1.7992  | 1.349   | 3.5675  | 0.003182 | 0.055776 | -1.674  | 55714    |
| GPT       | -1.232   | 1.232   | 0.92645 | -3.5669 | 0.003186 | 0.055776 | -1.6752 | 2875     |
| NAF1      | -0.84155 | 0.84155 | 2.8057  | -3.5666 | 0.003188 | 0.055776 | -1.6758 | 92345    |
| POGZ      | -1.8394  | 1.8394  | 6.4361  | -3.5663 | 0.00319  | 0.055776 | -1.6763 | 23126    |
| TIGAR     | 1.3134   | 1.3134  | 1.4263  | 3.5661  | 0.003191 | 0.055776 | -1.6768 | 57103    |
| H6PD      | -8.2037  | 8.2037  | 10.278  | -3.5649 | 0.003199 | 0.05584  | -1.6789 | 9563     |
| EDEM3     | 1.6755   | 1.6755  | 3.9328  | 3.5644  | 0.003202 | 0.05584  | -1.6798 | 80267    |
| FAM66B    | -0.48225 | 0.48225 | 0.46684 | -3.5626 | 0.003213 | 0.055956 | -1.6832 | 1E+08    |
| DUS3L     | -2.2723  | 2.2723  | 4.8968  | -3.5619 | 0.003217 | 0.055956 | -1.6844 | 56931    |
| GSKIP     | 3.3295   | 3.3295  | 3.8973  | 3.5616  | 0.003219 | 0.055956 | -1.685  | 51527    |
| TTLL3     | -2.0631  | 2.0631  | 2.3287  | -3.5613 | 0.003222 | 0.055956 | -1.6857 | 26140    |
| SNHG4     | -0.56035 | 0.56035 | 0.80336 | -3.5588 | 0.003237 | 0.05617  | -1.6903 | 724102   |
| GNB5      | 2.1684   | 2.1684  | 3.5004  | 3.5582  | 0.003241 | 0.056174 | -1.6913 | 10681    |
| INTS6-AS1 | -0.37644 | 0.37644 | 0.62918 | -3.5563 | 0.003253 | 0.056326 | -1.6948 | 1.01E+08 |
| LINC00885 | -0.5949  | 0.5949  | 0.52631 | -3.5558 | 0.003256 | 0.05633  | -1.6958 | 401109   |
| TSPYL2    | -3.3825  | 3.3825  | 3.5357  | -3.5544 | 0.003265 | 0.056423 | -1.6984 | 64061    |
| ZNF550    | -0.49213 | 0.49213 | 0.96512 | -3.5539 | 0.003269 | 0.056425 | -1.6994 | 162972   |
| TRAPPC6A  | -3.9988  | 3.9988  | 4.7079  | -3.5532 | 0.003273 | 0.056447 | -1.7007 | 79090    |
| FAM25A    | 301.15   | 301.15  | 188     | 3.5507  | 0.003289 | 0.056667 | -1.7053 | 643161   |
| TAF13     | 10.781   | 10.781  | 11.523  | 3.5495  | 0.003297 | 0.056736 | -1.7074 | 6884     |
| SERHL2    | -0.81625 | 0.81625 | 0.76224 | -3.5463 | 0.003318 | 0.056931 | -1.7135 | 253190   |

|              |          |         |         |         |          |          |         |          |
|--------------|----------|---------|---------|---------|----------|----------|---------|----------|
| ILDR1        | -0.26755 | 0.26755 | 0.18186 | -3.5462 | 0.003318 | 0.056931 | -1.7136 | 286676   |
| TBC1D23      | 3.9111   | 3.9111  | 6.2337  | 3.546   | 0.003319 | 0.056931 | -1.7139 | 55773    |
| PCDHB13      | -0.92596 | 0.92596 | 1.6521  | -3.5455 | 0.003323 | 0.056931 | -1.7149 | 56123    |
| BLOC1S5      | -0.58227 | 0.58227 | 0.70654 | -3.5452 | 0.003325 | 0.056931 | -1.7155 | 63915    |
| EEA1         | 3.0302   | 3.0302  | 5.2269  | 3.5431  | 0.003339 | 0.056999 | -1.7193 | 8411     |
| STAM         | 4.2581   | 4.2581  | 5.0893  | 3.5429  | 0.00334  | 0.056999 | -1.7198 | 8027     |
| LOC103344931 | -0.72094 | 0.72094 | 1.4823  | -3.5428 | 0.00334  | 0.056999 | -1.7198 | 1.03E+08 |
| RGS17        | 0.61998  | 0.61998 | 0.4584  | 3.5425  | 0.003342 | 0.056999 | -1.7204 | 26575    |
| LY75         | -1.0059  | 1.0059  | 1.1187  | -3.5396 | 0.003362 | 0.057275 | -1.7259 | 4065     |
| JUNB         | 85.108   | 85.108  | 106.36  | 3.538   | 0.003373 | 0.057399 | -1.7289 | 3726     |
| SMG1         | -5.0043  | 5.0043  | 11.285  | -3.5334 | 0.003403 | 0.057857 | -1.7375 | 23049    |
| ESR2         | -0.25858 | 0.25858 | 0.24092 | -3.5324 | 0.00341  | 0.057857 | -1.7393 | 2100     |
| MAGOH2P      | -0.65445 | 0.65445 | 0.52077 | -3.5323 | 0.003411 | 0.057857 | -1.7395 | 1.01E+08 |
| AS3MT        | -0.34825 | 0.34825 | 0.25144 | -3.5314 | 0.003417 | 0.057857 | -1.7411 | 57412    |
| LOC152048    | -1.0974  | 1.0974  | 1.7295  | -3.5313 | 0.003417 | 0.057857 | -1.7412 | 152048   |
| RNF39        | 1.7608   | 1.7608  | 1.6618  | 3.5306  | 0.003422 | 0.057857 | -1.7425 | 80352    |
| SDCBP2       | 25.171   | 25.171  | 21.756  | 3.5303  | 0.003424 | 0.057857 | -1.743  | 27111    |
| ZFP36        | 97.066   | 97.066  | 107.21  | 3.5296  | 0.003428 | 0.057879 | -1.7443 | 7538     |
| ZBTB18       | -0.7023  | 0.7023  | 1.5071  | -3.5291 | 0.003432 | 0.057888 | -1.7454 | 10472    |
| PHKA2-AS1    | -0.26391 | 0.26391 | 0.2656  | -3.528  | 0.003439 | 0.057948 | -1.7474 | 1E+08    |
| CERK         | 3.6787   | 3.6787  | 7.3825  | 3.5272  | 0.003445 | 0.057954 | -1.7488 | 64781    |
| TRPM1        | -0.52675 | 0.52675 | 0.31456 | -3.527  | 0.003446 | 0.057954 | -1.7493 | 4308     |
| ZFP62        | -1.2232  | 1.2232  | 2.4125  | -3.5254 | 0.003457 | 0.058074 | -1.7522 | 643836   |
| FAHD2CP      | -0.64245 | 0.64245 | 0.64588 | -3.5228 | 0.003474 | 0.058309 | -1.757  | 729234   |
| OGA          | -6.0132  | 6.0132  | 17.151  | -3.5219 | 0.003481 | 0.058346 | -1.7587 | 10724    |
| FLJ46875     | -0.29431 | 0.29431 | 0.36672 | -3.5215 | 0.003484 | 0.058346 | -1.7594 | 440918   |

|           |          |         |         |         |          |          |         |        |
|-----------|----------|---------|---------|---------|----------|----------|---------|--------|
| JADE1     | -0.80656 | 0.80656 | 1.5259  | -3.5205 | 0.003491 | 0.058405 | -1.7614 | 79960  |
| HERC1     | -2.3179  | 2.3179  | 6.3307  | -3.52   | 0.003494 | 0.058405 | -1.7623 | 8925   |
| CDON      | -4.0393  | 4.0393  | 3.0753  | -3.519  | 0.003501 | 0.05846  | -1.7641 | 50937  |
| MIR600HG  | -0.7168  | 0.7168  | 1.0042  | -3.518  | 0.003508 | 0.058521 | -1.766  | 81571  |
| PPP1R3B   | 2.0568   | 2.0568  | 4.6641  | 3.5169  | 0.003515 | 0.058561 | -1.7679 | 79660  |
| MASP2     | -1.1078  | 1.1078  | 1.0534  | -3.5166 | 0.003517 | 0.058561 | -1.7685 | 10747  |
| LOC145783 | -0.60505 | 0.60505 | 0.86661 | -3.5147 | 0.00353  | 0.058668 | -1.772  | 145783 |
| TMEM237   | -1.842   | 1.842   | 3.3273  | -3.5145 | 0.003532 | 0.058668 | -1.7725 | 65062  |
| SBF2      | -1.9964  | 1.9964  | 5.4186  | -3.5142 | 0.003534 | 0.058668 | -1.773  | 81846  |
| MCF2L-AS1 | -0.25638 | 0.25638 | 0.14022 | -3.5134 | 0.00354  | 0.058707 | -1.7746 | 1E+08  |
| IKBKB     | -2.4622  | 2.4622  | 6.3056  | -3.5115 | 0.003553 | 0.058864 | -1.778  | 3551   |
| WWOX      | -0.72523 | 0.72523 | 1.7737  | -3.51   | 0.003564 | 0.058984 | -1.7808 | 51741  |
| COL21A1   | -0.77078 | 0.77078 | 0.90682 | -3.5091 | 0.00357  | 0.059027 | -1.7825 | 81578  |
| TREX1     | -2.5818  | 2.5818  | 4.3113  | -3.5085 | 0.003574 | 0.059031 | -1.7835 | 11277  |
| RNF11     | 14.95    | 14.95   | 20.572  | 3.5081  | 0.003577 | 0.059031 | -1.7844 | 26994  |
| METTL8    | -1.0206  | 1.0206  | 2.5363  | -3.5066 | 0.003588 | 0.059109 | -1.7872 | 79828  |
| ESPN      | -3.8612  | 3.8612  | 3.3408  | -3.5064 | 0.003589 | 0.059109 | -1.7874 | 83715  |
| RRAGB     | -0.92728 | 0.92728 | 2.0591  | -3.5047 | 0.003601 | 0.059219 | -1.7906 | 10325  |
| ASB16     | -0.3216  | 0.3216  | 0.41525 | -3.5045 | 0.003602 | 0.059219 | -1.791  | 92591  |
| PNP       | 25.517   | 25.517  | 23.244  | 3.5036  | 0.003609 | 0.059225 | -1.7927 | 4860   |
| SBK1      | -0.32268 | 0.32268 | 0.22618 | -3.503  | 0.003613 | 0.059225 | -1.7938 | 388228 |
| CTDSPL    | -2.7409  | 2.7409  | 7.2346  | -3.5028 | 0.003614 | 0.059225 | -1.7941 | 10217  |
| LOC730234 | -0.25892 | 0.25892 | 0.19971 | -3.5024 | 0.003617 | 0.059225 | -1.7948 | 730234 |
| SPINK5    | 127.77   | 127.77  | 99.062  | 3.5007  | 0.003629 | 0.059358 | -1.7981 | 11005  |
| PIP5K1A   | 4.0635   | 4.0635  | 7.912   | 3.5003  | 0.003632 | 0.059358 | -1.7987 | 8394   |
| BMS1P4    | -1.0708  | 1.0708  | 2.0924  | -3.4966 | 0.003659 | 0.059453 | -1.8056 | 729096 |

|              |          |         |         |         |          |          |         |          |
|--------------|----------|---------|---------|---------|----------|----------|---------|----------|
| ARSJ         | 1.6223   | 1.6223  | 1.4119  | 3.4963  | 0.00366  | 0.059453 | -1.8061 | 79642    |
| MAPRE1       | 13.536   | 13.536  | 23.104  | 3.4963  | 0.003661 | 0.059453 | -1.8063 | 22919    |
| LOC541473    | -0.9877  | 0.9877  | 1.0193  | -3.496  | 0.003663 | 0.059453 | -1.8067 | 541473   |
| CDNF         | -0.50878 | 0.50878 | 0.45375 | -3.4952 | 0.003669 | 0.059453 | -1.8082 | 441549   |
| TMTC2        | -0.58021 | 0.58021 | 1.4706  | -3.4944 | 0.003674 | 0.059453 | -1.8097 | 160335   |
| PLA2G6       | -1.5149  | 1.5149  | 1.882   | -3.4942 | 0.003676 | 0.059453 | -1.81   | 8398     |
| GNG4         | 0.33526  | 0.33526 | 0.19326 | 3.4938  | 0.003679 | 0.059453 | -1.8108 | 2786     |
| TAOK1        | 6.4156   | 6.4156  | 11.168  | 3.4936  | 0.00368  | 0.059453 | -1.8112 | 57551    |
| NUTM2A       | -1.0389  | 1.0389  | 1.209   | -3.4935 | 0.003681 | 0.059453 | -1.8113 | 728118   |
| WDR41        | 1.9782   | 1.9782  | 4.0598  | 3.4934  | 0.003682 | 0.059453 | -1.8116 | 55255    |
| KRT19        | -16.542  | 16.542  | 9.2445  | -3.4932 | 0.003683 | 0.059453 | -1.8119 | 3880     |
| F3           | 12.985   | 12.985  | 10.918  | 3.4928  | 0.003686 | 0.059453 | -1.8126 | 2152     |
| HMGCS2       | -1.2849  | 1.2849  | 0.69226 | -3.4927 | 0.003687 | 0.059453 | -1.8129 | 3158     |
| GRIFIN       | -0.30629 | 0.30629 | 0.17927 | -3.4919 | 0.003693 | 0.05949  | -1.8144 | 402635   |
| KAT6B        | -1.0826  | 1.0826  | 2.9101  | -3.4912 | 0.003698 | 0.059508 | -1.8156 | 23522    |
| C1orf226     | -0.49565 | 0.49565 | 0.57404 | -3.4897 | 0.003709 | 0.0596   | -1.8185 | 400793   |
| LOC101928882 | -0.43276 | 0.43276 | 0.27764 | -3.4892 | 0.003712 | 0.0596   | -1.8194 | 1.02E+08 |
| UPP1         | 40.146   | 40.146  | 26.027  | 3.489   | 0.003714 | 0.0596   | -1.8198 | 7378     |
| CCDC191      | -0.60414 | 0.60414 | 0.848   | -3.4871 | 0.003728 | 0.059764 | -1.8232 | 57577    |
| TRIB1        | 6.0354   | 6.0354  | 8.3203  | 3.4863  | 0.003734 | 0.059804 | -1.8248 | 10221    |
| LIPG         | 9.2002   | 9.2002  | 5.799   | 3.4858  | 0.003737 | 0.059806 | -1.8257 | 9388     |
| ZNF790-AS1   | -0.50178 | 0.50178 | 0.52485 | -3.485  | 0.003743 | 0.059841 | -1.8271 | 284408   |
| LOC101928336 | -0.29751 | 0.29751 | 0.34384 | -3.4842 | 0.003749 | 0.059878 | -1.8286 | 1.02E+08 |
| NTM          | 1.1169   | 1.1169  | 0.91004 | 3.4836  | 0.003753 | 0.05989  | -1.8297 | 50863    |
| SRXN1        | 8.5625   | 8.5625  | 8.9947  | 3.4829  | 0.003759 | 0.059924 | -1.8311 | 140809   |
| ZMPSTE24     | 4.8303   | 4.8303  | 7.4749  | 3.4824  | 0.003762 | 0.059924 | -1.832  | 10269    |

|            |          |         |         |         |          |          |         |          |
|------------|----------|---------|---------|---------|----------|----------|---------|----------|
| KYNU       | 4.2402   | 4.2402  | 3.1149  | 3.4803  | 0.003778 | 0.060112 | -1.8358 | 8942     |
| NSUN6      | -0.76128 | 0.76128 | 1.6527  | -3.4787 | 0.00379  | 0.06021  | -1.8389 | 221078   |
| TCIM       | 2.3507   | 2.3507  | 2.1033  | 3.4785  | 0.003791 | 0.06021  | -1.8392 | 56892    |
| LINC01311  | -0.42297 | 0.42297 | 0.46892 | -3.4771 | 0.003802 | 0.060327 | -1.8419 | 1.01E+08 |
| NEFL       | 1.2062   | 1.2062  | 1.6003  | 3.4756  | 0.003813 | 0.060421 | -1.8446 | 4747     |
| RHOD       | 41.326   | 41.326  | 37.454  | 3.4749  | 0.003818 | 0.060421 | -1.8459 | 29984    |
| NANOG      | -0.54043 | 0.54043 | 0.40487 | -3.4749 | 0.003819 | 0.060421 | -1.846  | 79923    |
| BCL9       | -1.1748  | 1.1748  | 2.0738  | -3.4742 | 0.003824 | 0.060445 | -1.8473 | 607      |
| TPMT       | 3.4181   | 3.4181  | 3.8879  | 3.4719  | 0.003841 | 0.06061  | -1.8514 | 7172     |
| SYT17      | -0.78394 | 0.78394 | 0.4994  | -3.4718 | 0.003841 | 0.06061  | -1.8516 | 51760    |
| NUTM2B     | -1.168   | 1.168   | 1.2742  | -3.4711 | 0.003847 | 0.060642 | -1.853  | 729262   |
| UBE2D4     | -0.91902 | 0.91902 | 2.1661  | -3.4703 | 0.003853 | 0.06068  | -1.8544 | 51619    |
| DSTN       | 54.15    | 54.15   | 76.854  | 3.469   | 0.003863 | 0.060781 | -1.8569 | 11034    |
| TRIM52-AS1 | -0.63181 | 0.63181 | 1.0475  | -3.4667 | 0.00388  | 0.060996 | -1.8611 | 1.01E+08 |
| NEU3       | -0.62623 | 0.62623 | 1.3138  | -3.466  | 0.003886 | 0.060996 | -1.8625 | 10825    |
| ING2       | 1.1294   | 1.1294  | 1.652   | 3.4654  | 0.003891 | 0.060996 | -1.8636 | 3622     |
| FN3K       | -1.5354  | 1.5354  | 1.502   | -3.4653 | 0.003891 | 0.060996 | -1.8637 | 64122    |
| CSRP2      | 44.827   | 44.827  | 43.176  | 3.4644  | 0.003898 | 0.061054 | -1.8655 | 1466     |
| MFGE8      | 15.695   | 15.695  | 24.655  | 3.4627  | 0.003911 | 0.061197 | -1.8685 | 4240     |
| ZNF551     | -1.2085  | 1.2085  | 1.9495  | -3.4593 | 0.003937 | 0.061551 | -1.8749 | 90233    |
| HEATR5A    | 1.3057   | 1.3057  | 3.4392  | 3.4588  | 0.003941 | 0.061551 | -1.8757 | 25938    |
| XRCC4      | 1.0324   | 1.0324  | 1.3069  | 3.4577  | 0.00395  | 0.061626 | -1.8778 | 7518     |
| CCDC18-AS1 | -1.4621  | 1.4621  | 1.4935  | -3.4568 | 0.003957 | 0.061679 | -1.8794 | 1E+08    |
| EXOSC7     | -2.9546  | 2.9546  | 6.5174  | -3.4557 | 0.003965 | 0.061758 | -1.8815 | 23016    |
| AMT        | -1.3751  | 1.3751  | 1.6863  | -3.4552 | 0.003969 | 0.061761 | -1.8824 | 275      |
| TSSK3      | -1.4603  | 1.4603  | 1.5671  | -3.4547 | 0.003973 | 0.061767 | -1.8834 | 81629    |



|                |          |         |         |         |          |          |         |          |
|----------------|----------|---------|---------|---------|----------|----------|---------|----------|
| TGM1           | 70.536   | 70.536  | 60.753  | 3.4515  | 0.003998 | 0.061946 | -1.8893 | 7051     |
| STUM           | -0.70839 | 0.70839 | 0.49907 | -3.4499 | 0.004011 | 0.061946 | -1.8923 | 375057   |
| GUSBP1         | -1.2244  | 1.2244  | 1.5542  | -3.4498 | 0.004012 | 0.061946 | -1.8925 | 728411   |
| MSI2           | -0.81449 | 0.81449 | 1.5222  | -3.4497 | 0.004012 | 0.061946 | -1.8926 | 124540   |
| C11orf45       | -0.44707 | 0.44707 | 0.70586 | -3.4493 | 0.004015 | 0.061946 | -1.8933 | 219833   |
| MAGEE1         | -0.37867 | 0.37867 | 0.44182 | -3.4493 | 0.004016 | 0.061946 | -1.8934 | 57692    |
| CUTALP         | -0.88831 | 0.88831 | 1.2777  | -3.4492 | 0.004016 | 0.061946 | -1.8935 | 253039   |
| CATSPERG       | -0.25517 | 0.25517 | 0.18991 | -3.4484 | 0.004023 | 0.061946 | -1.895  | 57828    |
| CLDN8          | -0.5981  | 0.5981  | 0.32937 | -3.4484 | 0.004023 | 0.061946 | -1.8951 | 9073     |
| ASIP           | -0.31746 | 0.31746 | 0.23124 | -3.4479 | 0.004027 | 0.061946 | -1.896  | 434      |
| LINC00612      | -0.28511 | 0.28511 | 0.2138  | -3.4477 | 0.004028 | 0.061946 | -1.8964 | 253128   |
| LOC100130373   | -0.2531  | 0.2531  | 0.17978 | -3.4476 | 0.004029 | 0.061946 | -1.8965 | 1E+08    |
| CMYA5          | -0.31995 | 0.31995 | 0.37199 | -3.4472 | 0.004032 | 0.061946 | -1.8973 | 202333   |
| INHBA          | 4.0135   | 4.0135  | 3.145   | 3.4456  | 0.004045 | 0.062078 | -1.9002 | 3624     |
| SPDYE5         | -1.4027  | 1.4027  | 1.5843  | -3.4426 | 0.004069 | 0.062392 | -1.9058 | 442590   |
| FAM126A        | 3.0367   | 3.0367  | 4.3625  | 3.4404  | 0.004086 | 0.062556 | -1.9098 | 84668    |
| MSANTD3-TMEFF1 | 0.42622  | 0.42622 | 0.36576 | 3.4404  | 0.004087 | 0.062556 | -1.91   | 1.01E+08 |
| LRP4           | -7.212   | 7.212   | 5.8594  | -3.4395 | 0.004094 | 0.062606 | -1.9116 | 4038     |
| EFL1           | 3.4705   | 3.4705  | 4.7061  | 3.4368  | 0.004116 | 0.062837 | -1.9166 | 79631    |
| HOXC9          | -0.96984 | 0.96984 | 1.5062  | -3.4367 | 0.004116 | 0.062837 | -1.9167 | 3225     |
| LOC100289511   | -0.72707 | 0.72707 | 1.4153  | -3.4357 | 0.004125 | 0.062854 | -1.9187 | 1E+08    |
| LINC01590      | -0.32807 | 0.32807 | 0.30834 | -3.4355 | 0.004126 | 0.062854 | -1.919  | 63914    |
| C9orf131       | -1.3795  | 1.3795  | 1.5437  | -3.4352 | 0.004129 | 0.062854 | -1.9195 | 138724   |
| KDM4A          | -2.068   | 2.068   | 6.3016  | -3.4347 | 0.004133 | 0.062858 | -1.9205 | 9682     |
| LUC7L2         | -3.2049  | 3.2049  | 9.9569  | -3.4338 | 0.00414  | 0.062919 | -1.9222 | 51631    |
| KRBA2          | -0.63459 | 0.63459 | 1.1456  | -3.4327 | 0.004149 | 0.062963 | -1.9242 | 124751   |

|               |          |         |         |         |          |          |         |          |
|---------------|----------|---------|---------|---------|----------|----------|---------|----------|
| HERC2P3       | -3.4056  | 3.4056  | 2.9549  | -3.4325 | 0.004151 | 0.062963 | -1.9246 | 283755   |
| SH3BGRL3      | 90.027   | 90.027  | 99.332  | 3.431   | 0.004163 | 0.063097 | -1.9274 | 83442    |
| NISCH         | -5.7621  | 5.7621  | 8.5339  | -3.4303 | 0.004169 | 0.063109 | -1.9287 | 11188    |
| NUS1          | 3.4921   | 3.4921  | 5.8187  | 3.4299  | 0.004172 | 0.063109 | -1.9294 | 116150   |
| LYPD3         | 263.72   | 263.72  | 264.29  | 3.4295  | 0.004175 | 0.063109 | -1.9301 | 27076    |
| PRKG2         | -0.53338 | 0.53338 | 0.34986 | -3.4281 | 0.004187 | 0.063213 | -1.9328 | 5593     |
| LMAN1         | 7.0932   | 7.0932  | 11.871  | 3.427   | 0.004196 | 0.063213 | -1.9348 | 3998     |
| BOLA3-AS1     | -0.27704 | 0.27704 | 0.35364 | -3.4269 | 0.004197 | 0.063213 | -1.935  | 1.01E+08 |
| PKD1P6-NPIPP1 | -5.0051  | 5.0051  | 6.6181  | -3.4267 | 0.004198 | 0.063213 | -1.9352 | 1.05E+08 |
| CYP2E1        | -0.83327 | 0.83327 | 0.87974 | -3.4261 | 0.004203 | 0.063213 | -1.9364 | 1571     |
| MTERF2        | -0.76464 | 0.76464 | 1.3083  | -3.4259 | 0.004205 | 0.063213 | -1.9367 | 80298    |
| LOC100130027  | -0.77454 | 0.77454 | 0.86842 | -3.4249 | 0.004213 | 0.06323  | -1.9386 | 1E+08    |
| QSOX1         | 49.911   | 49.911  | 49.7    | 3.4249  | 0.004213 | 0.06323  | -1.9386 | 5768     |
| SPOPL         | 1.7218   | 1.7218  | 3.1947  | 3.4243  | 0.004219 | 0.063253 | -1.9398 | 339745   |
| KRT6C         | 3251.6   | 3251.6  | 2040.8  | 3.4232  | 0.004228 | 0.063316 | -1.9419 | 286887   |
| USP2          | 11.361   | 11.361  | 8.9062  | 3.4229  | 0.00423  | 0.063316 | -1.9424 | 9099     |
| SPINK6        | 83.672   | 83.672  | 44.979  | 3.4222  | 0.004236 | 0.063344 | -1.9437 | 404203   |
| AZIN1-AS1     | -0.62064 | 0.62064 | 0.59617 | -3.4216 | 0.004241 | 0.063366 | -1.9448 | 1.01E+08 |
| SCAF8         | -2.5252  | 2.5252  | 7.7269  | -3.4202 | 0.004252 | 0.063391 | -1.9473 | 22828    |
| NLRC5         | -3.4074  | 3.4074  | 4.856   | -3.4202 | 0.004253 | 0.063391 | -1.9474 | 84166    |
| HS3ST4        | -0.38786 | 0.38786 | 0.23259 | -3.42   | 0.004254 | 0.063391 | -1.9478 | 9951     |
| ZNF862        | -1.1295  | 1.1295  | 1.3184  | -3.4196 | 0.004258 | 0.063391 | -1.9485 | 643641   |
| UNC5CL        | -0.27395 | 0.27395 | 0.29051 | -3.4186 | 0.004266 | 0.063456 | -1.9503 | 222643   |
| INMT          | -1.4538  | 1.4538  | 1.6097  | -3.4174 | 0.004277 | 0.063557 | -1.9527 | 11185    |
| PPIF          | 58.354   | 58.354  | 49.564  | 3.416   | 0.004288 | 0.063638 | -1.9551 | 10105    |
| HAUS7         | -1.1588  | 1.1588  | 1.9549  | -3.4158 | 0.00429  | 0.063638 | -1.9555 | 55559    |

|            |          |         |         |         |          |          |         |          |
|------------|----------|---------|---------|---------|----------|----------|---------|----------|
| EGFR-AS1   | -1.6913  | 1.6913  | 1.7592  | -3.4152 | 0.004295 | 0.063659 | -1.9567 | 1.01E+08 |
| FHIT       | -0.20843 | 0.20843 | 0.23563 | -3.4137 | 0.004307 | 0.063788 | -1.9594 | 2272     |
| KLF15      | -0.44317 | 0.44317 | 0.27516 | -3.4126 | 0.004317 | 0.063872 | -1.9615 | 28999    |
| C12orf66   | -0.56079 | 0.56079 | 1.2585  | -3.4114 | 0.004327 | 0.063972 | -1.9638 | 144577   |
| PALM       | -4.5954  | 4.5954  | 4.5259  | -3.4106 | 0.004334 | 0.063988 | -1.9651 | 5064     |
| ARGFXP2    | -0.64805 | 0.64805 | 0.60272 | -3.41   | 0.004339 | 0.063988 | -1.9663 | 503640   |
| LONP2      | -2.5476  | 2.5476  | 7.5662  | -3.4097 | 0.004341 | 0.063988 | -1.9668 | 83752    |
| CORO2B     | -0.84594 | 0.84594 | 0.64739 | -3.4095 | 0.004344 | 0.063988 | -1.9673 | 10391    |
| ANKMY1     | -0.8727  | 0.8727  | 1.1617  | -3.4074 | 0.004361 | 0.064032 | -1.9711 | 51281    |
| FABP5      | 1269.1   | 1269.1  | 958.42  | 3.4073  | 0.004362 | 0.064032 | -1.9714 | 2171     |
| NAGS       | 1.7773   | 1.7773  | 1.4234  | 3.4065  | 0.004369 | 0.064032 | -1.9728 | 162417   |
| RAB22A     | 3.1902   | 3.1902  | 5.6824  | 3.4064  | 0.00437  | 0.064032 | -1.973  | 57403    |
| HERC2P7    | -0.69198 | 0.69198 | 0.97736 | -3.4058 | 0.004375 | 0.064032 | -1.974  | 1E+08    |
| PPP1CB     | 27.565   | 27.565  | 36.7    | 3.4058  | 0.004375 | 0.064032 | -1.9742 | 5500     |
| GIPR       | 1.0274   | 1.0274  | 1.0374  | 3.4057  | 0.004376 | 0.064032 | -1.9742 | 2696     |
| CLDN20     | -0.4897  | 0.4897  | 0.61734 | -3.4053 | 0.004379 | 0.064032 | -1.975  | 49861    |
| AGFG2      | -2.1593  | 2.1593  | 2.5225  | -3.4052 | 0.004381 | 0.064032 | -1.9753 | 3268     |
| ZNF710-AS1 | -1.572   | 1.572   | 2.2645  | -3.404  | 0.00439  | 0.064069 | -1.9774 | 1.1E+08  |
| ZNF577     | -0.87428 | 0.87428 | 1.0188  | -3.404  | 0.004391 | 0.064069 | -1.9775 | 84765    |
| NUP214     | -1.8567  | 1.8567  | 5.4876  | -3.4035 | 0.004395 | 0.064069 | -1.9783 | 8021     |
| GDAP1L1    | -0.39352 | 0.39352 | 0.29536 | -3.4019 | 0.004409 | 0.064155 | -1.9814 | 78997    |
| TAS2R3     | -0.78613 | 0.78613 | 0.83549 | -3.4017 | 0.004411 | 0.064155 | -1.9817 | 50831    |
| SERAC1     | 1.0675   | 1.0675  | 1.681   | 3.4016  | 0.004412 | 0.064155 | -1.982  | 84947    |
| PPARA      | -0.86439 | 0.86439 | 2.3911  | -3.4    | 0.004426 | 0.064259 | -1.9849 | 5465     |
| CABLES1    | -0.86116 | 0.86116 | 1.4705  | -3.3999 | 0.004427 | 0.064259 | -1.9851 | 91768    |
| IDI1       | 5.3088   | 5.3088  | 6.0698  | 3.3987  | 0.004437 | 0.064357 | -1.9874 | 3422     |

|              |          |         |         |         |          |          |         |          |
|--------------|----------|---------|---------|---------|----------|----------|---------|----------|
| STOX2        | -0.52244 | 0.52244 | 1.1989  | -3.3966 | 0.004455 | 0.064447 | -1.9912 | 56977    |
| OVOL1        | 12.748   | 12.748  | 13.504  | 3.3965  | 0.004456 | 0.064447 | -1.9913 | 5017     |
| PRR7-AS1     | -0.47635 | 0.47635 | 0.51029 | -3.3964 | 0.004457 | 0.064447 | -1.9916 | 340037   |
| SMARCC2      | -4.1784  | 4.1784  | 11.404  | -3.3962 | 0.004459 | 0.064447 | -1.9919 | 6601     |
| ZNF623       | -0.56052 | 0.56052 | 3.1961  | -3.3957 | 0.004463 | 0.064445 | -1.9928 | 9831     |
| IGF2BP2      | 3.478    | 3.478   | 2.9282  | 3.3951  | 0.004468 | 0.064473 | -1.9939 | 10644    |
| CAPS         | -1.7586  | 1.7586  | 1.8476  | -3.3943 | 0.004475 | 0.064522 | -1.9954 | 828      |
| TXN          | 200.5    | 200.5   | 136.75  | 3.3936  | 0.004482 | 0.064561 | -1.9968 | 7295     |
| ILF3-DT      | -1.6178  | 1.6178  | 2.8592  | -3.393  | 0.004487 | 0.064574 | -1.9978 | 147727   |
| PYGB         | -13.252  | 13.252  | 17.577  | -3.3926 | 0.00449  | 0.064574 | -1.9986 | 5834     |
| LOC100505915 | -9.3241  | 9.3241  | 10.038  | -3.3903 | 0.004511 | 0.064771 | -2.0029 | 1.01E+08 |
| ZNF599       | -0.27158 | 0.27158 | 0.39536 | -3.3902 | 0.004512 | 0.064771 | -2.003  | 148103   |
| LOC652276    | -1.0748  | 1.0748  | 2.5013  | -3.3889 | 0.004523 | 0.064876 | -2.0054 | 652276   |
| SMAD3        | -3.0298  | 3.0298  | 4.6693  | -3.3881 | 0.004531 | 0.06493  | -2.007  | 4088     |
| ZNF395       | -8.3971  | 8.3971  | 9.9091  | -3.3876 | 0.004535 | 0.06493  | -2.0079 | 55893    |
| WNT3A        | -0.36985 | 0.36985 | 0.37284 | -3.3863 | 0.004546 | 0.06493  | -2.0103 | 89780    |
| GNRHR2       | -0.45848 | 0.45848 | 0.64487 | -3.3863 | 0.004547 | 0.06493  | -2.0103 | 114814   |
| SACS         | 1.3264   | 1.3264  | 1.9688  | 3.3861  | 0.004548 | 0.06493  | -2.0107 | 26278    |
| TRPV6        | -1.3637  | 1.3637  | 1.02    | -3.3854 | 0.004555 | 0.06493  | -2.012  | 55503    |
| OR2A9P       | -0.53819 | 0.53819 | 0.68454 | -3.3851 | 0.004557 | 0.06493  | -2.0125 | 441295   |
| INTS6        | 1.4187   | 1.4187  | 3.106   | 3.3847  | 0.004561 | 0.06493  | -2.0132 | 26512    |
| RGMB         | -2.3064  | 2.3064  | 3.8966  | -3.3846 | 0.004562 | 0.06493  | -2.0135 | 285704   |
| LINC00265    | -0.60956 | 0.60956 | 0.96407 | -3.3842 | 0.004565 | 0.06493  | -2.0141 | 349114   |
| NBPF1        | -2.4765  | 2.4765  | 3.9094  | -3.3828 | 0.004578 | 0.064997 | -2.0168 | 55672    |
| CFD          | -48.737  | 48.737  | 30.826  | -3.3825 | 0.004581 | 0.064997 | -2.0174 | 1675     |
| PPM1H        | -0.28368 | 0.28368 | 0.34836 | -3.3824 | 0.004581 | 0.064997 | -2.0175 | 57460    |

|            |          |         |         |         |          |          |         |          |
|------------|----------|---------|---------|---------|----------|----------|---------|----------|
| NYNRIN     | -3.0787  | 3.0787  | 3.8447  | -3.3804 | 0.004599 | 0.065197 | -2.0211 | 57523    |
| UGCG       | 13.505   | 13.505  | 15.8    | 3.3777  | 0.004624 | 0.065466 | -2.0262 | 7357     |
| SYTL3      | -0.46749 | 0.46749 | 0.9831  | -3.3775 | 0.004626 | 0.065466 | -2.0266 | 94120    |
| THOC7-AS1  | -0.30511 | 0.30511 | 0.2381  | -3.3758 | 0.004642 | 0.06563  | -2.0297 | 1.01E+08 |
| TSPOAP1    | -0.70332 | 0.70332 | 0.61632 | -3.3734 | 0.004664 | 0.06589  | -2.0342 | 9256     |
| ABCG1      | 6.6209   | 6.6209  | 7.7942  | 3.3716  | 0.00468  | 0.066026 | -2.0375 | 9619     |
| WASH5P     | -9.0727  | 9.0727  | 12.325  | -3.3709 | 0.004687 | 0.066026 | -2.0389 | 375690   |
| DDX11L2    | -0.53019 | 0.53019 | 0.66184 | -3.3707 | 0.004688 | 0.066026 | -2.0391 | 84771    |
| KAT8       | -2.208   | 2.208   | 5.3799  | -3.3706 | 0.004689 | 0.066026 | -2.0393 | 84148    |
| TUBB4A     | -0.37147 | 0.37147 | 0.21999 | -3.37   | 0.004695 | 0.066056 | -2.0405 | 10382    |
| MPZL2      | 33.524   | 33.524  | 37.611  | 3.3678  | 0.004716 | 0.066237 | -2.0446 | 10205    |
| SCGB2B2    | -0.31758 | 0.31758 | 0.25009 | -3.3677 | 0.004716 | 0.066237 | -2.0447 | 284402   |
| ZNF747     | -1.0849  | 1.0849  | 1.8876  | -3.3671 | 0.004722 | 0.066263 | -2.0458 | 65988    |
| RNF222     | 5.9943   | 5.9943  | 4.9633  | 3.3659  | 0.004733 | 0.066327 | -2.0481 | 643904   |
| FBLIM1     | 17.23    | 17.23   | 17.901  | 3.3654  | 0.004738 | 0.066327 | -2.0491 | 54751    |
| AUH        | -0.89609 | 0.89609 | 2.3915  | -3.3651 | 0.004741 | 0.066327 | -2.0496 | 549      |
| EPN2-IT1   | -1.5706  | 1.5706  | 1.6215  | -3.3648 | 0.004744 | 0.066327 | -2.0502 | 1.01E+08 |
| PTPRU      | -1.8055  | 1.8055  | 2.714   | -3.3645 | 0.004746 | 0.066327 | -2.0506 | 10076    |
| ERAP1      | -2.7627  | 2.7627  | 4.3535  | -3.362  | 0.00477  | 0.066604 | -2.0553 | 51752    |
| TPM4       | 104.5    | 104.5   | 130.55  | 3.3611  | 0.004778 | 0.066672 | -2.0571 | 7171     |
| APOD       | -50.231  | 50.231  | 30.132  | -3.3606 | 0.004783 | 0.066676 | -2.0579 | 347      |
| FAM53B-AS1 | -0.44281 | 0.44281 | 0.48309 | -3.3601 | 0.004788 | 0.066691 | -2.0589 | 1.02E+08 |
| IL1B       | 14.712   | 14.712  | 8.0309  | 3.3596  | 0.004792 | 0.066694 | -2.0597 | 3553     |
| SGMS2      | 2.2576   | 2.2576  | 2.984   | 3.3583  | 0.004804 | 0.066811 | -2.0621 | 166929   |
| VIT        | -1.4893  | 1.4893  | 0.95812 | -3.3574 | 0.004813 | 0.066875 | -2.0638 | 5212     |
| LINC00899  | -0.60669 | 0.60669 | 0.56942 | -3.3564 | 0.004823 | 0.066887 | -2.0658 | 1E+08    |

|              |          |         |         |         |          |          |         |          |
|--------------|----------|---------|---------|---------|----------|----------|---------|----------|
| ERN1         | -0.67887 | 0.67887 | 2.2846  | -3.356  | 0.004826 | 0.066887 | -2.0664 | 2081     |
| BCAN         | -0.77221 | 0.77221 | 0.49046 | -3.3559 | 0.004827 | 0.066887 | -2.0667 | 63827    |
| TMEM254-AS1  | -0.39967 | 0.39967 | 0.34718 | -3.3556 | 0.004831 | 0.066887 | -2.0673 | 219347   |
| OVGP1        | -0.72715 | 0.72715 | 0.79014 | -3.3545 | 0.00484  | 0.066887 | -2.0692 | 5016     |
| C2orf72      | -0.30969 | 0.30969 | 0.21222 | -3.3544 | 0.004842 | 0.066887 | -2.0694 | 257407   |
| CREB3L4      | -1.0317  | 1.0317  | 1.3972  | -3.3538 | 0.004847 | 0.066887 | -2.0704 | 148327   |
| CKMT2-AS1    | -0.38504 | 0.38504 | 0.77029 | -3.3536 | 0.004849 | 0.066887 | -2.0708 | 1E+08    |
| PMS2P9       | -5.6112  | 5.6112  | 6.9001  | -3.3536 | 0.004849 | 0.066887 | -2.0709 | 1E+08    |
| ING5         | -1.0065  | 1.0065  | 1.6287  | -3.353  | 0.004855 | 0.066908 | -2.072  | 84289    |
| BEND3P3      | -0.88274 | 0.88274 | 1.0818  | -3.3516 | 0.004868 | 0.067025 | -2.0745 | 650623   |
| TMEM132C     | -0.2695  | 0.2695  | 0.16293 | -3.3509 | 0.004875 | 0.067025 | -2.0759 | 92293    |
| JUN          | 19.921   | 19.921  | 28.309  | 3.3509  | 0.004875 | 0.067025 | -2.0759 | 3725     |
| AFF1         | -3.389   | 3.389   | 9.7127  | -3.3503 | 0.004881 | 0.06703  | -2.077  | 4299     |
| ARID1B       | -3.0405  | 3.0405  | 7.9093  | -3.3497 | 0.004887 | 0.06703  | -2.0782 | 57492    |
| FOXO3B       | -0.25351 | 0.25351 | 0.4522  | -3.3496 | 0.004887 | 0.06703  | -2.0783 | 2310     |
| HLF          | -3.8104  | 3.8104  | 2.7974  | -3.3483 | 0.0049   | 0.067108 | -2.0807 | 3131     |
| RIMS3        | 7.9757   | 7.9757  | 7.5677  | 3.3482  | 0.004901 | 0.067108 | -2.0809 | 9783     |
| XYLT2        | -2.3317  | 2.3317  | 3.6641  | -3.3454 | 0.004928 | 0.067374 | -2.0861 | 64132    |
| LOC101928728 | -0.28393 | 0.28393 | 0.29858 | -3.3454 | 0.004928 | 0.067374 | -2.0862 | 1.02E+08 |
| EFR3B        | 1.4386   | 1.4386  | 1.317   | 3.344   | 0.004942 | 0.067439 | -2.0887 | 22979    |
| LINC01011    | -0.28668 | 0.28668 | 0.40598 | -3.344  | 0.004942 | 0.067439 | -2.0887 | 401232   |
| STRN3        | 2.6362   | 2.6362  | 6.2145  | 3.3436  | 0.004945 | 0.067439 | -2.0893 | 29966    |
| FEM1C        | 2.1581   | 2.1581  | 4.171   | 3.3421  | 0.004961 | 0.067595 | -2.0923 | 56929    |
| FBXO21       | -1.6062  | 1.6062  | 5.0103  | -3.3404 | 0.004977 | 0.067738 | -2.0954 | 23014    |
| TFAP4        | -1.8009  | 1.8009  | 2.6292  | -3.3402 | 0.004979 | 0.067738 | -2.0958 | 7023     |
| PCDHGA6      | -0.41965 | 0.41965 | 0.76363 | -3.3381 | 0.004999 | 0.067872 | -2.0995 | 56109    |

|              |          |         |         |         |          |          |         |          |
|--------------|----------|---------|---------|---------|----------|----------|---------|----------|
| DLSTP1       | -0.539   | 0.539   | 0.65597 | -3.3381 | 0.005    | 0.067872 | -2.0997 | 1744     |
| TBC1D22A-AS1 | -0.94983 | 0.94983 | 1.1879  | -3.3379 | 0.005001 | 0.067872 | -2.0999 | 642757   |
| TMEM116      | -1.4624  | 1.4624  | 1.2365  | -3.3369 | 0.005011 | 0.067952 | -2.1018 | 89894    |
| GARNL3       | -0.54494 | 0.54494 | 1.1406  | -3.336  | 0.00502  | 0.067996 | -2.1035 | 84253    |
| LINC02035    | -0.75629 | 0.75629 | 1.7742  | -3.3358 | 0.005022 | 0.067996 | -2.1039 | 1E+08    |
| ZNF818P      | -0.5296  | 0.5296  | 0.76027 | -3.3354 | 0.005027 | 0.068001 | -2.1047 | 390963   |
| RP2          | 1.6664   | 1.6664  | 2.2531  | 3.3336  | 0.005044 | 0.068186 | -2.108  | 6102     |
| KCTD21       | 1.9596   | 1.9596  | 2.5433  | 3.3324  | 0.005056 | 0.068287 | -2.1102 | 283219   |
| DRD4         | -0.34466 | 0.34466 | 0.25833 | -3.3312 | 0.005068 | 0.06832  | -2.1124 | 1815     |
| CILP         | -6.8915  | 6.8915  | 4.0539  | -3.3312 | 0.005069 | 0.06832  | -2.1125 | 8483     |
| HCG26        | -0.31035 | 0.31035 | 0.22872 | -3.3307 | 0.005073 | 0.06832  | -2.1133 | 352961   |
| CKMT2        | -0.5255  | 0.5255  | 0.45086 | -3.3306 | 0.005075 | 0.06832  | -2.1136 | 1160     |
| IGFALS       | -0.3523  | 0.3523  | 0.24894 | -3.3295 | 0.005085 | 0.06841  | -2.1156 | 3483     |
| FAAH         | -1.2537  | 1.2537  | 1.7535  | -3.3285 | 0.005095 | 0.068486 | -2.1174 | 2166     |
| ITIH5        | -1.5471  | 1.5471  | 2.0543  | -3.3264 | 0.005117 | 0.06872  | -2.1214 | 80760    |
| MAP2K4       | 3.7458   | 3.7458  | 6.5634  | 3.3247  | 0.005134 | 0.068897 | -2.1245 | 6416     |
| PARP16       | -0.9601  | 0.9601  | 1.8121  | -3.3238 | 0.005142 | 0.068954 | -2.126  | 54956    |
| LOC100506730 | -0.63184 | 0.63184 | 0.9562  | -3.323  | 0.005151 | 0.069015 | -2.1276 | 1.01E+08 |
| CNTN1        | 2.827    | 2.827   | 2.9514  | 3.3207  | 0.005174 | 0.069271 | -2.1318 | 1272     |
| AGAP4        | -0.95519 | 0.95519 | 1.7139  | -3.3164 | 0.005218 | 0.069371 | -2.1397 | 119016   |
| STAG3L3      | -2.1068  | 2.1068  | 2.6945  | -3.3163 | 0.005219 | 0.069371 | -2.14   | 442578   |
| UCHL3        | 12.529   | 12.529  | 14.38   | 3.316   | 0.005222 | 0.069371 | -2.1405 | 7347     |
| PTPN14       | -2.5998  | 2.5998  | 7.5171  | -3.3154 | 0.005229 | 0.069371 | -2.1418 | 5784     |
| OXSR1        | 6.9011   | 6.9011  | 9.3601  | 3.3153  | 0.005229 | 0.069371 | -2.1418 | 9943     |
| EXTL1        | -0.27094 | 0.27094 | 0.15413 | -3.3152 | 0.005231 | 0.069371 | -2.1421 | 2134     |
| CFAP70       | -0.42171 | 0.42171 | 0.42845 | -3.3152 | 0.005231 | 0.069371 | -2.1421 | 118491   |

|              |          |         |         |         |          |          |         |          |
|--------------|----------|---------|---------|---------|----------|----------|---------|----------|
| CHDH         | -0.62079 | 0.62079 | 0.44676 | -3.3151 | 0.005232 | 0.069371 | -2.1422 | 55349    |
| SEC24A       | 1.8331   | 1.8331  | 3.8088  | 3.3151  | 0.005232 | 0.069371 | -2.1422 | 10802    |
| TTF2         | -0.85662 | 0.85662 | 2.2359  | -3.3148 | 0.005235 | 0.069371 | -2.1428 | 8458     |
| UBL7-AS1     | -0.79215 | 0.79215 | 1.4066  | -3.3147 | 0.005235 | 0.069371 | -2.1429 | 440288   |
| IL18BP       | -1.2032  | 1.2032  | 1.7946  | -3.3143 | 0.00524  | 0.069371 | -2.1437 | 10068    |
| ATOH8        | -0.57716 | 0.57716 | 0.57088 | -3.3142 | 0.005241 | 0.069371 | -2.1439 | 84913    |
| CCNE1        | 1.0175   | 1.0175  | 1.0458  | 3.3141  | 0.005242 | 0.069371 | -2.1441 | 898      |
| TAS2R50      | -0.2909  | 0.2909  | 0.2456  | -3.3137 | 0.005246 | 0.069371 | -2.1448 | 259296   |
| TBK1         | 2.225    | 2.225   | 3.9795  | 3.3136  | 0.005247 | 0.069371 | -2.145  | 29110    |
| CDHR5        | -0.57806 | 0.57806 | 0.46178 | -3.3123 | 0.00526  | 0.069489 | -2.1474 | 53841    |
| ABCA8        | -1.9197  | 1.9197  | 1.6487  | -3.3119 | 0.005265 | 0.069493 | -2.1482 | 10351    |
| LOC100506606 | -0.48877 | 0.48877 | 0.48225 | -3.3092 | 0.005293 | 0.069733 | -2.1532 | 1.01E+08 |
| DDB2         | -3.8354  | 3.8354  | 7.3867  | -3.3092 | 0.005293 | 0.069733 | -2.1533 | 1643     |
| STX11        | 1.6682   | 1.6682  | 2.1939  | 3.309   | 0.005295 | 0.069733 | -2.1536 | 8676     |
| AMIGO3       | -0.85919 | 0.85919 | 1.4785  | -3.3071 | 0.005315 | 0.069826 | -2.157  | 386724   |
| FAM221A      | -0.38248 | 0.38248 | 0.45327 | -3.307  | 0.005316 | 0.069826 | -2.1573 | 340277   |
| MINDY2       | 0.78687  | 0.78687 | 2.4198  | 3.3068  | 0.005317 | 0.069826 | -2.1575 | 54629    |
| LIPH         | -0.55764 | 0.55764 | 0.45951 | -3.3067 | 0.005319 | 0.069826 | -2.1578 | 200879   |
| C12orf29     | 3.581    | 3.581   | 4.6783  | 3.3058  | 0.005329 | 0.069901 | -2.1595 | 91298    |
| RABGEF1      | 4.7016   | 4.7016  | 7.6453  | 3.3031  | 0.005357 | 0.07018  | -2.1645 | 27342    |
| TP73-AS1     | -1.0177  | 1.0177  | 1.4516  | -3.3027 | 0.005361 | 0.07018  | -2.1652 | 57212    |
| RNPC3        | -3.3067  | 3.3067  | 4.2275  | -3.3026 | 0.005362 | 0.07018  | -2.1655 | 55599    |
| MROH7-TTC4   | -0.34721 | 0.34721 | 0.23768 | -3.3003 | 0.005386 | 0.07037  | -2.1696 | 1.01E+08 |
| MRE11        | -1.2518  | 1.2518  | 2.4194  | -3.3002 | 0.005387 | 0.07037  | -2.1698 | 4361     |
| EGFR         | -9.5317  | 9.5317  | 21.017  | -3.2999 | 0.00539  | 0.07037  | -2.1704 | 1956     |
| LOC389765    | -0.4956  | 0.4956  | 0.67935 | -3.2996 | 0.005394 | 0.07037  | -2.1709 | 389765   |



|              |          |         |         |         |          |          |         |          |
|--------------|----------|---------|---------|---------|----------|----------|---------|----------|
| LOC554249    | -0.60951 | 0.60951 | 0.71921 | -3.2978 | 0.005413 | 0.070566 | -2.1742 | 554249   |
| RELT         | 0.93734  | 0.93734 | 1.9342  | 3.2972  | 0.005419 | 0.070576 | -2.1754 | 84957    |
| LENG8-AS1    | -0.95983 | 0.95983 | 1.3198  | -3.2966 | 0.005426 | 0.070576 | -2.1765 | 1.04E+08 |
| MIPEP        | -1.6851  | 1.6851  | 4.3613  | -3.2966 | 0.005426 | 0.070576 | -2.1765 | 4285     |
| LOC100130207 | -0.29966 | 0.29966 | 0.23549 | -3.2953 | 0.00544  | 0.070705 | -2.179  | 1E+08    |
| MARF1        | -2.0964  | 2.0964  | 6.7402  | -3.293  | 0.005464 | 0.070951 | -2.1831 | 9665     |
| BTN3A2       | -1.8763  | 1.8763  | 2.7226  | -3.2925 | 0.00547  | 0.070951 | -2.1841 | 11118    |
| IGFBP6       | 18.009   | 18.009  | 15.165  | 3.2923  | 0.005472 | 0.070951 | -2.1844 | 3489     |
| PBX4         | -0.30778 | 0.30778 | 0.3534  | -3.2916 | 0.00548  | 0.071003 | -2.1858 | 80714    |
| LOC101929718 | -0.41386 | 0.41386 | 0.6563  | -3.2906 | 0.005491 | 0.071088 | -2.1877 | 1.02E+08 |
| TRAF1        | -0.66547 | 0.66547 | 1.1972  | -3.2896 | 0.005502 | 0.071135 | -2.1895 | 7185     |
| RALGAPA2     | -3.0509  | 3.0509  | 6.1175  | -3.2895 | 0.005503 | 0.071135 | -2.1897 | 57186    |
| KRT16        | 5483.8   | 5483.8  | 4323.2  | 3.2875  | 0.005524 | 0.071324 | -2.1933 | 3868     |
| AGAP5        | -0.69356 | 0.69356 | 1.7661  | -3.2873 | 0.005526 | 0.071324 | -2.1937 | 729092   |
| B4GALNT3     | 6.4601   | 6.4601  | 7.7609  | 3.2867  | 0.005532 | 0.071335 | -2.1948 | 283358   |
| FAM83E       | -0.3431  | 0.3431  | 0.30704 | -3.2865 | 0.005535 | 0.071335 | -2.1952 | 54854    |
| TRPC6        | 0.89888  | 0.89888 | 1.1143  | 3.2838  | 0.005564 | 0.071621 | -2.2001 | 7225     |
| KREMEN2      | -0.70325 | 0.70325 | 0.66223 | -3.2837 | 0.005566 | 0.071621 | -2.2004 | 79412    |
| ZSCAN16      | -0.35635 | 0.35635 | 0.75119 | -3.2823 | 0.005581 | 0.071701 | -2.203  | 80345    |
| CENPV        | -0.38757 | 0.38757 | 0.56985 | -3.2819 | 0.005585 | 0.071701 | -2.2037 | 201161   |
| NAA20        | 15.463   | 15.463  | 19.302  | 3.2812  | 0.005593 | 0.071701 | -2.205  | 51126    |
| CCDC113      | -0.56663 | 0.56663 | 0.741   | -3.2809 | 0.005597 | 0.071701 | -2.2056 | 29070    |
| MAN2A1       | 4.2373   | 4.2373  | 7.0415  | 3.2804  | 0.005602 | 0.071701 | -2.2065 | 4124     |
| TMEM45B      | 15.094   | 15.094  | 13.513  | 3.2803  | 0.005603 | 0.071701 | -2.2067 | 120224   |
| GRAMD2A      | -0.64382 | 0.64382 | 0.76412 | -3.2798 | 0.005608 | 0.071701 | -2.2076 | 196996   |
| CLDN10-AS1   | -0.30911 | 0.30911 | 0.16486 | -3.2796 | 0.005611 | 0.071701 | -2.208  | 1.01E+08 |

|           |          |         |         |         |          |          |         |          |
|-----------|----------|---------|---------|---------|----------|----------|---------|----------|
| ZNF557    | -0.43154 | 0.43154 | 1.306   | -3.2794 | 0.005613 | 0.071701 | -2.2084 | 79230    |
| ZNF512B   | -2.8994  | 2.8994  | 4.3549  | -3.2793 | 0.005615 | 0.071701 | -2.2086 | 57473    |
| MATN1-AS1 | -0.3143  | 0.3143  | 0.36311 | -3.2778 | 0.005631 | 0.071763 | -2.2114 | 1E+08    |
| FOXA1     | -0.60141 | 0.60141 | 0.34368 | -3.2777 | 0.005632 | 0.071763 | -2.2115 | 3169     |
| CCNL1     | 3.1945   | 3.1945  | 9.4323  | 3.2776  | 0.005633 | 0.071763 | -2.2116 | 57018    |
| CAP2      | 0.58834  | 0.58834 | 1.1551  | 3.2773  | 0.005637 | 0.071763 | -2.2123 | 10486    |
| BPGM      | 4.2008   | 4.2008  | 3.9649  | 3.2769  | 0.005641 | 0.071763 | -2.213  | 669      |
| GRPEL2    | 5.5678   | 5.5678  | 4.8765  | 3.276   | 0.005651 | 0.071843 | -2.2147 | 134266   |
| LINC01214 | 3.4918   | 3.4918  | 2.2011  | 3.2737  | 0.005677 | 0.072112 | -2.2189 | 1.02E+08 |
| HECTD4    | -2.1406  | 2.1406  | 5.0039  | -3.2731 | 0.005683 | 0.072137 | -2.22   | 283450   |
| HPX       | -0.24349 | 0.24349 | 0.19713 | -3.2724 | 0.005691 | 0.072186 | -2.2213 | 3263     |
| ALG1L9P   | -0.22217 | 0.22217 | 0.21428 | -3.2717 | 0.005699 | 0.072238 | -2.2227 | 285407   |
| RABIF     | 2.5013   | 2.5013  | 3.4291  | 3.2712  | 0.005705 | 0.07225  | -2.2235 | 5877     |
| ARF4      | 18.502   | 18.502  | 24.324  | 3.2707  | 0.00571  | 0.072261 | -2.2244 | 378      |
| SMG1P3    | -16.207  | 16.207  | 20.874  | -3.2681 | 0.00574  | 0.072587 | -2.2293 | 1E+08    |
| SLC14A1   | -0.77883 | 0.77883 | 0.45757 | -3.2676 | 0.005745 | 0.072587 | -2.2301 | 6563     |
| TTC3P1    | -0.46154 | 0.46154 | 0.60828 | -3.2673 | 0.005749 | 0.072587 | -2.2308 | 286495   |
| FAM210A   | 0.88804  | 0.88804 | 1.4496  | 3.2669  | 0.005753 | 0.072587 | -2.2314 | 125228   |
| CREBBP    | -2.9542  | 2.9542  | 8.4389  | -3.2661 | 0.005762 | 0.072629 | -2.233  | 1387     |
| ENHO      | -0.4681  | 0.4681  | 0.27517 | -3.2659 | 0.005765 | 0.072629 | -2.2334 | 375704   |
| GHR       | -0.46823 | 0.46823 | 0.6302  | -3.2646 | 0.005779 | 0.072733 | -2.2357 | 2690     |
| LINC01152 | -1.776   | 1.776   | 0.97629 | -3.2644 | 0.005781 | 0.072733 | -2.2361 | 1.03E+08 |
| RC3H2     | 1.6671   | 1.6671  | 4.4787  | 3.2634  | 0.005792 | 0.072756 | -2.2379 | 54542    |
| KLK10     | 47.526   | 47.526  | 36.238  | 3.2633  | 0.005794 | 0.072756 | -2.2381 | 5655     |
| TNNT3     | -0.41541 | 0.41541 | 0.35899 | -3.2631 | 0.005796 | 0.072756 | -2.2385 | 7140     |
| LINC01881 | -0.56375 | 0.56375 | 1.164   | -3.2613 | 0.005817 | 0.072873 | -2.2418 | 728323   |

|            |          |         |         |         |          |          |         |        |
|------------|----------|---------|---------|---------|----------|----------|---------|--------|
| USP36      | -1.8485  | 1.8485  | 5.0012  | -3.2613 | 0.005817 | 0.072873 | -2.2419 | 57602  |
| CATSPER2P1 | -0.67029 | 0.67029 | 0.78159 | -3.2612 | 0.005818 | 0.072873 | -2.2421 | 440278 |
| EFCAB6     | -0.21902 | 0.21902 | 0.20075 | -3.2604 | 0.005828 | 0.072932 | -2.2436 | 64800  |
| C3orf35    | -0.50678 | 0.50678 | 0.46165 | -3.2587 | 0.005847 | 0.073041 | -2.2467 | 339883 |
| ISCA1      | 3.8782   | 3.8782  | 6.8958  | 3.2587  | 0.005847 | 0.073041 | -2.2467 | 81689  |
| MYH14      | -8.6161  | 8.6161  | 5.9106  | -3.2583 | 0.005852 | 0.073041 | -2.2475 | 79784  |
| ADM        | 27.659   | 27.659  | 25.835  | 3.2578  | 0.005857 | 0.073041 | -2.2484 | 133    |
| DMD        | -0.76232 | 0.76232 | 0.92598 | -3.2576 | 0.00586  | 0.073041 | -2.2487 | 1756   |
| PLCB4      | -1.0854  | 1.0854  | 0.88326 | -3.2574 | 0.005862 | 0.073041 | -2.2492 | 5332   |
| AGAP1      | -1.0084  | 1.0084  | 2.4523  | -3.2567 | 0.00587  | 0.073041 | -2.2504 | 116987 |
| TNFAIP8L3  | 5.4148   | 5.4148  | 7.3062  | 3.2562  | 0.005875 | 0.073041 | -2.2512 | 388121 |
| WFIKKN1    | -0.29858 | 0.29858 | 0.31963 | -3.2557 | 0.005882 | 0.073041 | -2.2523 | 117166 |
| SYP        | -0.28889 | 0.28889 | 0.30069 | -3.2554 | 0.005885 | 0.073041 | -2.2528 | 6855   |
| S100A14    | 176.36   | 176.36  | 194.4   | 3.2546  | 0.005895 | 0.073041 | -2.2543 | 57402  |
| LOC148696  | -1.2896  | 1.2896  | 1.297   | -3.2544 | 0.005896 | 0.073041 | -2.2546 | 148696 |
| MST1       | -1.0246  | 1.0246  | 1.1735  | -3.2543 | 0.005898 | 0.073041 | -2.2548 | 4485   |
| DENND1B    | 0.91275  | 0.91275 | 1.376   | 3.2543  | 0.005898 | 0.073041 | -2.2549 | 163486 |
| FCGBP      | -10.157  | 10.157  | 6.4859  | -3.254  | 0.005901 | 0.073041 | -2.2553 | 8857   |
| ABCC5      | -2.1507  | 2.1507  | 3.1304  | -3.2528 | 0.005916 | 0.073059 | -2.2577 | 10057  |
| HSF4       | -2.7915  | 2.7915  | 2.5133  | -3.2526 | 0.005917 | 0.073059 | -2.2579 | 3299   |
| SRCIN1     | -0.50184 | 0.50184 | 0.42771 | -3.2526 | 0.005918 | 0.073059 | -2.258  | 80725  |
| DIDO1      | -1.611   | 1.611   | 4.6478  | -3.2524 | 0.00592  | 0.073059 | -2.2583 | 11083  |
| ZNF433     | -0.51845 | 0.51845 | 1.1001  | -3.2518 | 0.005928 | 0.073069 | -2.2595 | 163059 |
| PAXIP1-AS1 | -1.1057  | 1.1057  | 1.5653  | -3.2516 | 0.005929 | 0.073069 | -2.2598 | 202781 |
| CCDC24     | -1.1057  | 1.1057  | 1.2123  | -3.2495 | 0.005954 | 0.073322 | -2.2638 | 149473 |
| KANSL3     | -1.3643  | 1.3643  | 4.2956  | -3.2487 | 0.005964 | 0.073384 | -2.2652 | 55683  |

|                  |          |         |         |         |          |          |         |          |
|------------------|----------|---------|---------|---------|----------|----------|---------|----------|
| LRP6             | -1.4376  | 1.4376  | 3.2148  | -3.2481 | 0.005971 | 0.073414 | -2.2664 | 4040     |
| AREG             | 6.1548   | 6.1548  | 3.5038  | 3.2477  | 0.005975 | 0.073414 | -2.267  | 374      |
| ACBD4            | -0.76786 | 0.76786 | 0.92449 | -3.2473 | 0.00598  | 0.073429 | -2.2679 | 79777    |
| YPEL5            | 7.4708   | 7.4708  | 12.923  | 3.2456  | 0.006    | 0.073611 | -2.2709 | 51646    |
| CDK19            | 1.2073   | 1.2073  | 2.714   | 3.2448  | 0.00601  | 0.073637 | -2.2725 | 23097    |
| GNAT2            | 0.44463  | 0.44463 | 0.60994 | 3.2447  | 0.00601  | 0.073637 | -2.2726 | 2780     |
| SMOX             | 9.362    | 9.362   | 7.9155  | 3.2444  | 0.006015 | 0.073637 | -2.2732 | 54498    |
| ERVK13-1         | -1.8395  | 1.8395  | 2.1462  | -3.2439 | 0.00602  | 0.073654 | -2.2741 | 1.01E+08 |
| LOC100288069     | -4.9983  | 4.9983  | 9.8109  | -3.2434 | 0.006026 | 0.073672 | -2.275  | 1E+08    |
| OR2A20P          | -0.39903 | 0.39903 | 0.51347 | -3.2412 | 0.006052 | 0.073912 | -2.279  | 401428   |
| TNKS             | -1.2152  | 1.2152  | 3.9704  | -3.241  | 0.006055 | 0.073912 | -2.2794 | 8658     |
| SLPI             | 687.7    | 687.7   | 447.17  | 3.2388  | 0.00608  | 0.074095 | -2.2834 | 6590     |
| DPH3             | 1.6353   | 1.6353  | 2.0217  | 3.2383  | 0.006086 | 0.074095 | -2.2844 | 285381   |
| DNAJB6           | 33.321   | 33.321  | 39.057  | 3.2375  | 0.006096 | 0.074095 | -2.2858 | 10049    |
| HSPB3            | -0.40723 | 0.40723 | 0.34514 | -3.2373 | 0.006098 | 0.074095 | -2.2862 | 8988     |
| KAT2B            | 4.5789   | 4.5789  | 6.0831  | 3.2373  | 0.006099 | 0.074095 | -2.2863 | 8850     |
| LOC645513        | -1.3482  | 1.3482  | 2.4423  | -3.2371 | 0.006101 | 0.074095 | -2.2866 | 645513   |
| SLC27A1          | -2.2013  | 2.2013  | 2.719   | -3.2368 | 0.006105 | 0.074095 | -2.2872 | 376497   |
| FAM180B          | -1.2878  | 1.2878  | 0.72393 | -3.2368 | 0.006105 | 0.074095 | -2.2872 | 399888   |
| GTF2IP23         | -0.63778 | 0.63778 | 0.71509 | -3.2349 | 0.006128 | 0.074205 | -2.2907 | 1.02E+08 |
| SOCS7            | -0.99557 | 0.99557 | 2.6406  | -3.2347 | 0.00613  | 0.074205 | -2.2911 | 30837    |
| LOC100507557     | -0.29177 | 0.29177 | 0.32494 | -3.2346 | 0.006131 | 0.074205 | -2.2912 | 1.01E+08 |
| PDXDC2P-NPIPB14P | -3.4168  | 3.4168  | 4.5388  | -3.2346 | 0.006131 | 0.074205 | -2.2913 | 283970   |
| GGT7             | -1.0686  | 1.0686  | 1.5169  | -3.2333 | 0.006148 | 0.074347 | -2.2937 | 2686     |
| MALT1            | 1.9484   | 1.9484  | 3.9012  | 3.2316  | 0.006168 | 0.074536 | -2.2968 | 10892    |
| LINC01473        | -0.95516 | 0.95516 | 0.68231 | -3.2308 | 0.006178 | 0.074609 | -2.2984 | 1.02E+08 |

|              |          |         |         |         |          |          |         |          |
|--------------|----------|---------|---------|---------|----------|----------|---------|----------|
| RAD51B       | -0.35967 | 0.35967 | 0.44148 | -3.2285 | 0.006206 | 0.074861 | -2.3026 | 5890     |
| HOXC11       | -1.1324  | 1.1324  | 2.0083  | -3.2283 | 0.006208 | 0.074861 | -2.3029 | 3227     |
| POLA1        | -0.82039 | 0.82039 | 2.18    | -3.2279 | 0.006213 | 0.074875 | -2.3037 | 5422     |
| TMTC4        | -0.6099  | 0.6099  | 1.3938  | -3.2246 | 0.006253 | 0.075304 | -2.3097 | 84899    |
| ACADSB       | -1.7876  | 1.7876  | 2.0577  | -3.2235 | 0.006267 | 0.075306 | -2.3118 | 36       |
| FLVCR1       | -0.30903 | 0.30903 | 0.70859 | -3.2235 | 0.006268 | 0.075306 | -2.3119 | 28982    |
| LOC100287042 | -0.32404 | 0.32404 | 0.3668  | -3.2232 | 0.006271 | 0.075306 | -2.3123 | 1E+08    |
| STAG3L5P     | -2.2885  | 2.2885  | 2.2352  | -3.2228 | 0.006276 | 0.075306 | -2.3131 | 1.02E+08 |
| GIGYF1       | -4.7917  | 4.7917  | 6.7406  | -3.2228 | 0.006276 | 0.075306 | -2.3131 | 64599    |
| BCL7A        | -1.0771  | 1.0771  | 2.4826  | -3.2214 | 0.006293 | 0.075424 | -2.3156 | 605      |
| CADM1        | -1.2474  | 1.2474  | 1.5908  | -3.221  | 0.006299 | 0.075424 | -2.3165 | 23705    |
| FLJ45513     | -0.63268 | 0.63268 | 0.60161 | -3.2209 | 0.006299 | 0.075424 | -2.3166 | 729220   |
| POU6F1       | -0.71104 | 0.71104 | 0.97761 | -3.2198 | 0.006313 | 0.075508 | -2.3186 | 5463     |
| CBFA2T3      | -0.48154 | 0.48154 | 0.73645 | -3.2195 | 0.006316 | 0.075508 | -2.3192 | 863      |
| TMEM43       | -4.9204  | 4.9204  | 20.01   | -3.2193 | 0.00632  | 0.075508 | -2.3196 | 79188    |
| DCUN1D3      | 4.5579   | 4.5579  | 5.713   | 3.2182  | 0.006334 | 0.075579 | -2.3217 | 123879   |
| MBNL2        | 3.6512   | 3.6512  | 10.396  | 3.2181  | 0.006334 | 0.075579 | -2.3218 | 10150    |
| BICRAL       | -1.2478  | 1.2478  | 3.1607  | -3.2166 | 0.006353 | 0.075709 | -2.3245 | 23506    |
| KRT6B        | 5299.2   | 5299.2  | 3278.8  | 3.2165  | 0.006354 | 0.075709 | -2.3248 | 3854     |
| PKD1P1       | -15.039  | 15.039  | 18.611  | -3.2153 | 0.006369 | 0.075783 | -2.3269 | 339044   |
| GUSBP11      | -1.9801  | 1.9801  | 2.765   | -3.2152 | 0.006371 | 0.075783 | -2.3272 | 91316    |
| KIFAP3       | 1.9885   | 1.9885  | 4.2039  | 3.2149  | 0.006374 | 0.075783 | -2.3277 | 22920    |
| LY6G5B       | -0.4561  | 0.4561  | 0.59506 | -3.2138 | 0.006388 | 0.07589  | -2.3296 | 58496    |
| LURAP1       | -0.34591 | 0.34591 | 0.60101 | -3.2129 | 0.006399 | 0.075975 | -2.3313 | 541468   |
| AMMECR1      | 2.6089   | 2.6089  | 4.0741  | 3.2111  | 0.006423 | 0.076166 | -2.3348 | 9949     |
| ST7L         | -1.1501  | 1.1501  | 1.8563  | -3.2106 | 0.006429 | 0.076166 | -2.3357 | 54879    |

|              |          |         |         |         |          |          |         |          |
|--------------|----------|---------|---------|---------|----------|----------|---------|----------|
| CFAP44       | -0.52971 | 0.52971 | 0.71461 | -3.2106 | 0.006429 | 0.076166 | -2.3357 | 55779    |
| RAB1A        | 11.97    | 11.97   | 17.023  | 3.2095  | 0.006442 | 0.076268 | -2.3376 | 5861     |
| ZNF236       | -0.52643 | 0.52643 | 2.0603  | -3.2091 | 0.006447 | 0.076279 | -2.3384 | 7776     |
| IRX3         | -4.1117  | 4.1117  | 6.4069  | -3.2076 | 0.006467 | 0.076413 | -2.3412 | 79191    |
| ZNF711       | -1.1422  | 1.1422  | 0.97588 | -3.207  | 0.006474 | 0.076413 | -2.3423 | 7552     |
| NPIP5        | -12.73   | 12.73   | 14.295  | -3.2069 | 0.006476 | 0.076413 | -2.3425 | 1E+08    |
| CELF6        | -0.39945 | 0.39945 | 0.40814 | -3.2068 | 0.006477 | 0.076413 | -2.3427 | 60677    |
| SPIDR        | -1.4255  | 1.4255  | 4.6017  | -3.2064 | 0.006482 | 0.076416 | -2.3433 | 23514    |
| C3           | -13.957  | 13.957  | 10.104  | -3.2048 | 0.006503 | 0.076614 | -2.3464 | 718      |
| PRR34        | -1.4719  | 1.4719  | 1.4103  | -3.2043 | 0.006509 | 0.076627 | -2.3472 | 55267    |
| CADM3-AS1    | -0.42048 | 0.42048 | 0.38005 | -3.204  | 0.006513 | 0.076627 | -2.3479 | 1E+08    |
| RAB26        | -0.69798 | 0.69798 | 0.79326 | -3.2028 | 0.006528 | 0.076698 | -2.35   | 25837    |
| ATP11B       | 6.7342   | 6.7342  | 11.831  | 3.2028  | 0.006529 | 0.076698 | -2.3501 | 23200    |
| PAN3         | -1.7463  | 1.7463  | 5.1018  | -3.2024 | 0.006533 | 0.076698 | -2.3507 | 255967   |
| GIGYF2       | -1.3213  | 1.3213  | 5.1044  | -3.2019 | 0.00654  | 0.07673  | -2.3518 | 26058    |
| MRTFB        | -2.6467  | 2.6467  | 6.2077  | -3.2007 | 0.006555 | 0.076814 | -2.3539 | 57496    |
| SNX3         | 16.263   | 16.263  | 26.699  | 3.2006  | 0.006556 | 0.076814 | -2.3541 | 8724     |
| LOC100996419 | -0.23106 | 0.23106 | 0.24939 | -3.2001 | 0.006563 | 0.076845 | -2.3551 | 1.01E+08 |
| SMG1P5       | -4.5278  | 4.5278  | 7.5558  | -3.1973 | 0.0066   | 0.077213 | -2.3602 | 595101   |
| TCHP         | -1.4181  | 1.4181  | 3.3545  | -3.1962 | 0.006614 | 0.077274 | -2.3623 | 84260    |
| FGFBP3       | -0.30403 | 0.30403 | 0.26562 | -3.1962 | 0.006614 | 0.077274 | -2.3623 | 143282   |
| ZNF417       | -0.81395 | 0.81395 | 2.0091  | -3.195  | 0.006629 | 0.077274 | -2.3644 | 147687   |
| PKD1L2       | -0.23746 | 0.23746 | 0.1397  | -3.195  | 0.006629 | 0.077274 | -2.3645 | 114780   |
| AZI2         | 2.8688   | 2.8688  | 4.948   | 3.1943  | 0.006638 | 0.077274 | -2.3657 | 64343    |
| UBLCP1       | 2.9712   | 2.9712  | 4.93    | 3.1943  | 0.006639 | 0.077274 | -2.3658 | 134510   |
| ZNF740       | -1.6917  | 1.6917  | 3.9582  | -3.1935 | 0.006648 | 0.077274 | -2.3672 | 283337   |

|              |          |         |         |         |          |          |         |          |
|--------------|----------|---------|---------|---------|----------|----------|---------|----------|
| SYT15        | -1.0785  | 1.0785  | 1.6536  | -3.1931 | 0.006654 | 0.077274 | -2.368  | 83849    |
| TNFAIP2      | -6.8682  | 6.8682  | 10.302  | -3.193  | 0.006655 | 0.077274 | -2.3681 | 7127     |
| SLC20A1      | 4.7021   | 4.7021  | 5.8813  | 3.1922  | 0.006665 | 0.077274 | -2.3696 | 6574     |
| CABIN1       | -2.4171  | 2.4171  | 5.3577  | -3.192  | 0.006669 | 0.077274 | -2.3701 | 23523    |
| CNFN         | 528.76   | 528.76  | 432.46  | 3.1919  | 0.00667  | 0.077274 | -2.3701 | 84518    |
| GBP6         | 3.2379   | 3.2379  | 3.2661  | 3.1919  | 0.00667  | 0.077274 | -2.3702 | 163351   |
| SLC7A5P2     | -3.5385  | 3.5385  | 4.9839  | -3.1918 | 0.006672 | 0.077274 | -2.3705 | 387254   |
| MRPL23-AS1   | -0.3896  | 0.3896  | 0.22453 | -3.1916 | 0.006673 | 0.077274 | -2.3707 | 1E+08    |
| DUOXA1       | 16.096   | 16.096  | 21.157  | 3.1906  | 0.006687 | 0.07738  | -2.3726 | 90527    |
| ARHGAP30     | -1.5096  | 1.5096  | 4.0602  | -3.188  | 0.006721 | 0.077664 | -2.3773 | 257106   |
| STIMATE      | -1.2398  | 1.2398  | 3.7757  | -3.188  | 0.006721 | 0.077664 | -2.3773 | 375346   |
| MECP2        | -1.5917  | 1.5917  | 3.49    | -3.1858 | 0.006751 | 0.077871 | -2.3815 | 4204     |
| GPRIN2       | -3.1119  | 3.1119  | 3.0014  | -3.1858 | 0.006751 | 0.077871 | -2.3815 | 9721     |
| LINC02381    | -0.9884  | 0.9884  | 1.3912  | -3.1854 | 0.006755 | 0.077871 | -2.3821 | 400043   |
| NEURL1       | -0.40371 | 0.40371 | 0.61837 | -3.1852 | 0.006759 | 0.077871 | -2.3826 | 9148     |
| KIAA1614-AS1 | -0.53355 | 0.53355 | 0.90165 | -3.1847 | 0.006765 | 0.077871 | -2.3835 | 1.03E+08 |
| MRPS31P5     | -0.57539 | 0.57539 | 0.73573 | -3.1846 | 0.006766 | 0.077871 | -2.3837 | 1.01E+08 |
| TREM1        | 1.8662   | 1.8662  | 1.1234  | 3.1825  | 0.006795 | 0.078082 | -2.3876 | 54210    |
| UBE2V2       | 4.666    | 4.666   | 6.7498  | 3.1822  | 0.006799 | 0.078082 | -2.3881 | 7336     |
| IQCN         | -1.1267  | 1.1267  | 0.98549 | -3.1819 | 0.006803 | 0.078082 | -2.3887 | 80726    |
| GALNT3       | 4.1192   | 4.1192  | 4.2945  | 3.1816  | 0.006807 | 0.078082 | -2.3893 | 2591     |
| HIRIP3       | -0.95467 | 0.95467 | 1.4924  | -3.1815 | 0.006808 | 0.078082 | -2.3894 | 8479     |
| GAPDHS       | -0.30857 | 0.30857 | 0.34442 | -3.1804 | 0.006823 | 0.07811  | -2.3915 | 26330    |
| LAMB4        | -6.5215  | 6.5215  | 4.7315  | -3.1796 | 0.006834 | 0.07811  | -2.3929 | 22798    |
| WDR66        | 1.2051   | 1.2051  | 1.5222  | 3.1792  | 0.006839 | 0.07811  | -2.3937 | 144406   |
| TVP23B       | 2.611    | 2.611   | 4.2884  | 3.1791  | 0.006841 | 0.07811  | -2.3939 | 51030    |

|              |          |         |         |         |          |          |         |          |
|--------------|----------|---------|---------|---------|----------|----------|---------|----------|
| ZNF652       | -3.327   | 3.327   | 4.8616  | -3.179  | 0.006842 | 0.07811  | -2.394  | 22834    |
| ZNF736       | -0.62664 | 0.62664 | 1.2817  | -3.1789 | 0.006843 | 0.07811  | -2.3942 | 728927   |
| KMT2E-AS1    | -1.0548  | 1.0548  | 2.2846  | -3.1783 | 0.006852 | 0.07811  | -2.3954 | 1E+08    |
| EML4         | -2.579   | 2.579   | 7.2494  | -3.1781 | 0.006854 | 0.07811  | -2.3957 | 27436    |
| RIMBP2       | -0.33068 | 0.33068 | 0.45932 | -3.178  | 0.006856 | 0.07811  | -2.3959 | 23504    |
| SCYL2        | 2.9472   | 2.9472  | 5.1633  | 3.1779  | 0.006857 | 0.07811  | -2.3961 | 55681    |
| LOC728613    | -0.46926 | 0.46926 | 0.63746 | -3.177  | 0.006869 | 0.078202 | -2.3978 | 728613   |
| EPHB1        | -0.51436 | 0.51436 | 0.52018 | -3.1759 | 0.006884 | 0.078317 | -2.3998 | 2047     |
| MN1          | 1.0462   | 1.0462  | 1.6341  | 3.1741  | 0.006908 | 0.078502 | -2.4031 | 4330     |
| AKAP7        | -0.3535  | 0.3535  | 0.45901 | -3.174  | 0.00691  | 0.078502 | -2.4033 | 9465     |
| LINC01376    | -0.304   | 0.304   | 0.25335 | -3.1726 | 0.006929 | 0.078623 | -2.4059 | 400945   |
| SMAP1        | 3.6598   | 3.6598  | 6.2548  | 3.1725  | 0.00693  | 0.078623 | -2.406  | 60682    |
| NMNAT3       | -1.2432  | 1.2432  | 1.4905  | -3.1715 | 0.006943 | 0.078698 | -2.4078 | 349565   |
| ITPRID1      | -0.33807 | 0.33807 | 0.18599 | -3.1714 | 0.006945 | 0.078698 | -2.4081 | 223075   |
| CENPE        | 0.77885  | 0.77885 | 0.70271 | 3.1693  | 0.006973 | 0.078848 | -2.4119 | 1062     |
| SLC19A2      | 3.3516   | 3.3516  | 4.4111  | 3.169   | 0.006978 | 0.078848 | -2.4126 | 10560    |
| LOC101927516 | -0.94558 | 0.94558 | 1.0708  | -3.1689 | 0.00698  | 0.078848 | -2.4127 | 1.02E+08 |
| ODC1         | 57.024   | 57.024  | 32.128  | 3.168   | 0.006992 | 0.078848 | -2.4143 | 4953     |
| SEMA3E       | -0.27189 | 0.27189 | 0.26101 | -3.1679 | 0.006993 | 0.078848 | -2.4145 | 9723     |
| BMP2         | 3.9525   | 3.9525  | 4.6367  | 3.1679  | 0.006993 | 0.078848 | -2.4145 | 650      |
| CAPZA2       | 14.446   | 14.446  | 16.146  | 3.1677  | 0.006996 | 0.078848 | -2.4149 | 830      |
| CXCR5        | -0.38164 | 0.38164 | 0.36902 | -3.1676 | 0.006997 | 0.078848 | -2.4151 | 643      |
| BTBD18       | -1.0008  | 1.0008  | 0.95366 | -3.1673 | 0.007001 | 0.078848 | -2.4155 | 643376   |
| ATP2A1       | -0.23386 | 0.23386 | 0.21707 | -3.167  | 0.007005 | 0.078848 | -2.4162 | 487      |
| PGAP3        | -2.9363  | 2.9363  | 4.74    | -3.1661 | 0.007017 | 0.078907 | -2.4178 | 93210    |
| LOC100506124 | -0.90688 | 0.90688 | 0.8118  | -3.166  | 0.00702  | 0.078907 | -2.4181 | 1.01E+08 |



|              |          |         |         |         |          |          |         |          |
|--------------|----------|---------|---------|---------|----------|----------|---------|----------|
| NETO2        | 2.5984   | 2.5984  | 2.7689  | 3.1651  | 0.007031 | 0.078913 | -2.4196 | 81831    |
| SLC2A1       | 57.935   | 57.935  | 83.871  | 3.1649  | 0.007035 | 0.078913 | -2.4201 | 6513     |
| SLC37A1      | -0.91346 | 0.91346 | 1.1873  | -3.1644 | 0.007042 | 0.078913 | -2.421  | 54020    |
| RAB18        | 4.6702   | 4.6702  | 8.5008  | 3.1643  | 0.007043 | 0.078913 | -2.4212 | 22931    |
| FZD8         | -0.88584 | 0.88584 | 1.04    | -3.1642 | 0.007044 | 0.078913 | -2.4213 | 8325     |
| SLC4A5       | -0.48313 | 0.48313 | 0.73979 | -3.1633 | 0.007056 | 0.078967 | -2.423  | 57835    |
| EAF1         | 5.5244   | 5.5244  | 7.9428  | 3.1629  | 0.007062 | 0.078967 | -2.4237 | 85403    |
| TRIM16L      | 0.78309  | 0.78309 | 1.3708  | 3.1629  | 0.007063 | 0.078967 | -2.4238 | 147166   |
| GPRIN1       | 2.4467   | 2.4467  | 2.4199  | 3.1615  | 0.007081 | 0.079097 | -2.4262 | 114787   |
| MOSPD1       | 2.6717   | 2.6717  | 3.0132  | 3.1614  | 0.007084 | 0.079097 | -2.4266 | 56180    |
| ID1          | 24.564   | 24.564  | 39.946  | 3.1597  | 0.007107 | 0.079306 | -2.4297 | 3397     |
| ABCA11P      | -0.69741 | 0.69741 | 1.283   | -3.1584 | 0.007125 | 0.079443 | -2.432  | 79963    |
| MLLT10       | -1.1404  | 1.1404  | 3.2617  | -3.1581 | 0.007129 | 0.079443 | -2.4325 | 8028     |
| FAM118A      | -1.7122  | 1.7122  | 2.2524  | -3.1571 | 0.007144 | 0.079558 | -2.4345 | 55007    |
| LPAR3        | 3.5386   | 3.5386  | 4.1606  | 3.1565  | 0.007153 | 0.079578 | -2.4356 | 23566    |
| LOC100506258 | -0.29174 | 0.29174 | 0.23331 | -3.1563 | 0.007155 | 0.079578 | -2.436  | 1.01E+08 |
| AHSA2P       | -3.8147  | 3.8147  | 4.6514  | -3.1555 | 0.007165 | 0.079641 | -2.4373 | 130872   |
| KRT7-AS      | -0.3924  | 0.3924  | 0.21142 | -3.1552 | 0.007171 | 0.079646 | -2.438  | 1.1E+08  |
| HSD11B2      | -4.2451  | 4.2451  | 3.4671  | -3.1541 | 0.007186 | 0.07971  | -2.44   | 3291     |
| MIR3936HG    | -0.28968 | 0.28968 | 0.31243 | -3.1538 | 0.007191 | 0.07971  | -2.4406 | 553103   |
| GLRX3        | 11.812   | 11.812  | 16.112  | 3.1534  | 0.007196 | 0.07971  | -2.4413 | 10539    |
| KRAS         | 2.4143   | 2.4143  | 4.6418  | 3.1533  | 0.007197 | 0.07971  | -2.4414 | 3845     |
| LINC00667    | -1.559   | 1.559   | 3.1455  | -3.1531 | 0.0072   | 0.07971  | -2.4418 | 339290   |
| TNRC6C       | -1.1327  | 1.1327  | 1.5966  | -3.1522 | 0.007213 | 0.079805 | -2.4436 | 57690    |
| LOXL2        | 9.2547   | 9.2547  | 8.0899  | 3.1518  | 0.007218 | 0.079806 | -2.4442 | 4017     |
| AHDC1        | -3.85    | 3.85    | 8.067   | -3.1507 | 0.007234 | 0.079926 | -2.4462 | 27245    |

|           |          |         |         |         |          |          |         |          |
|-----------|----------|---------|---------|---------|----------|----------|---------|----------|
| ZBTB3     | -0.62489 | 0.62489 | 1.4638  | -3.1501 | 0.007243 | 0.079978 | -2.4474 | 79842    |
| HOMER2    | 21.183   | 21.183  | 22.722  | 3.1484  | 0.007268 | 0.080109 | -2.4506 | 9455     |
| LIFR-AS1  | -0.27207 | 0.27207 | 0.17394 | -3.1482 | 0.007269 | 0.080109 | -2.4508 | 1.01E+08 |
| UBAP1     | 8.4144   | 8.4144  | 13.145  | 3.1482  | 0.007269 | 0.080109 | -2.4508 | 51271    |
| MRAP2     | -0.27958 | 0.27958 | 0.25313 | -3.1473 | 0.007283 | 0.08012  | -2.4525 | 112609   |
| STRIP2    | 0.81513  | 0.81513 | 0.78236 | 3.1472  | 0.007284 | 0.08012  | -2.4527 | 57464    |
| INTS4     | -0.89929 | 0.89929 | 3.4064  | -3.1471 | 0.007285 | 0.08012  | -2.4528 | 92105    |
| PDZD8     | 4.9105   | 4.9105  | 7.878   | 3.1466  | 0.007293 | 0.08012  | -2.4538 | 118987   |
| TSNARE1   | -2.1579  | 2.1579  | 2.7785  | -3.1465 | 0.007295 | 0.08012  | -2.4541 | 203062   |
| KBTBD8    | 0.28784  | 0.28784 | 0.32127 | 3.1461  | 0.0073   | 0.08012  | -2.4548 | 84541    |
| ZNF517    | -0.56058 | 0.56058 | 0.65579 | -3.1459 | 0.007304 | 0.08012  | -2.4552 | 340385   |
| SERP1     | 12.431   | 12.431  | 15.953  | 3.1452  | 0.007313 | 0.080162 | -2.4564 | 27230    |
| YPEL1     | -0.399   | 0.399   | 0.55368 | -3.1449 | 0.007317 | 0.080162 | -2.4569 | 29799    |
| CMAS      | 5.5478   | 5.5478  | 9.2189  | 3.144   | 0.00733  | 0.080223 | -2.4586 | 55907    |
| BMPR1B    | 0.38772  | 0.38772 | 0.66645 | 3.1437  | 0.007334 | 0.080223 | -2.4591 | 658      |
| NOP10     | 37.201   | 37.201  | 37.094  | 3.1436  | 0.007337 | 0.080223 | -2.4594 | 55505    |
| TYR       | -2.1259  | 2.1259  | 1.3691  | -3.1429 | 0.007346 | 0.080238 | -2.4607 | 7299     |
| PRR34-AS1 | -1.5184  | 1.5184  | 2.1451  | -3.1428 | 0.007348 | 0.080238 | -2.4608 | 150381   |
| HYAL3     | 0.84543  | 0.84543 | 0.93772 | 3.142   | 0.007359 | 0.080297 | -2.4622 | 8372     |
| KAT6A     | -2.4707  | 2.4707  | 6.956   | -3.1418 | 0.007362 | 0.080297 | -2.4627 | 7994     |
| ZDHHC21   | 1.5395   | 1.5395  | 2.5134  | 3.1396  | 0.007394 | 0.08052  | -2.4667 | 340481   |
| GJB6      | 136.89   | 136.89  | 123.2   | 3.1394  | 0.007397 | 0.08052  | -2.4671 | 10804    |
| DHODH     | -0.58162 | 0.58162 | 1.0585  | -3.1394 | 0.007397 | 0.08052  | -2.4671 | 1723     |
| IPO5P1    | -0.4618  | 0.4618  | 0.94666 | -3.1389 | 0.007404 | 0.080545 | -2.468  | 1E+08    |
| SLC7A6OS  | -0.72884 | 0.72884 | 1.9261  | -3.1372 | 0.00743  | 0.08073  | -2.4712 | 84138    |
| PCDHB14   | -0.53503 | 0.53503 | 1.4455  | -3.1371 | 0.007431 | 0.08073  | -2.4714 | 56122    |

|             |          |         |         |         |          |          |         |          |
|-------------|----------|---------|---------|---------|----------|----------|---------|----------|
| EPB41L1     | -1.5722  | 1.5722  | 2.0919  | -3.1363 | 0.007442 | 0.080798 | -2.4728 | 2036     |
| RGL4        | -0.96476 | 0.96476 | 1.4429  | -3.1358 | 0.00745  | 0.080836 | -2.4738 | 266747   |
| UBE2A       | 6.519    | 6.519   | 11.097  | 3.1346  | 0.007468 | 0.080946 | -2.476  | 7319     |
| EPN2-AS1    | -1.9853  | 1.9853  | 2.0194  | -3.1343 | 0.007471 | 0.080946 | -2.4764 | 1.01E+08 |
| ARTN        | 2.1207   | 2.1207  | 1.2735  | 3.1339  | 0.007478 | 0.080946 | -2.4773 | 9048     |
| C6orf163    | -0.43113 | 0.43113 | 0.41373 | -3.1338 | 0.007479 | 0.080946 | -2.4775 | 206412   |
| ZNF717      | -0.43293 | 0.43293 | 1.0984  | -3.1329 | 0.007492 | 0.080995 | -2.479  | 1E+08    |
| SGSM1       | -0.21415 | 0.21415 | 0.20541 | -3.1328 | 0.007494 | 0.080995 | -2.4793 | 129049   |
| CYP4F12     | -4.3258  | 4.3258  | 4.0428  | -3.1325 | 0.007498 | 0.080995 | -2.4798 | 66002    |
| DAPK2       | -1.2944  | 1.2944  | 1.8014  | -3.1307 | 0.007525 | 0.08119  | -2.4831 | 23604    |
| PCAT1       | -0.29795 | 0.29795 | 0.30484 | -3.1301 | 0.007534 | 0.08119  | -2.4842 | 1.01E+08 |
| BLACAT1     | 0.67767  | 0.67767 | 0.69639 | 3.1301  | 0.007534 | 0.08119  | -2.4843 | 1.02E+08 |
| KHK         | -0.31321 | 0.31321 | 0.35947 | -3.13   | 0.007536 | 0.08119  | -2.4845 | 3795     |
| MACROD2-AS1 | -0.26087 | 0.26087 | 0.14963 | -3.1294 | 0.007544 | 0.081223 | -2.4855 | 1E+08    |
| PCDHGA7     | -0.32976 | 0.32976 | 0.59656 | -3.1283 | 0.00756  | 0.081347 | -2.4875 | 56108    |
| SERPINA5    | -0.74729 | 0.74729 | 0.4582  | -3.1272 | 0.007578 | 0.081485 | -2.4897 | 5104     |
| PWARSN      | -1.098   | 1.098   | 1.1884  | -3.1262 | 0.007592 | 0.081524 | -2.4915 | 347746   |
| PCDHGA8     | -0.24795 | 0.24795 | 0.30228 | -3.1262 | 0.007592 | 0.081524 | -2.4915 | 9708     |
| FKBP5       | -6.1738  | 6.1738  | 5.2228  | -3.126  | 0.007596 | 0.081524 | -2.4919 | 2289     |
| SPTB        | -0.45248 | 0.45248 | 0.71995 | -3.1253 | 0.007605 | 0.081525 | -2.493  | 6710     |
| INO80B-WBP1 | -1.0549  | 1.0549  | 1.6283  | -3.1253 | 0.007605 | 0.081525 | -2.4931 | 1.01E+08 |
| EIF4EBP3    | -1.4295  | 1.4295  | 1.8305  | -3.1234 | 0.007633 | 0.081731 | -2.4965 | 8637     |
| TFCP2L1     | -7.3575  | 7.3575  | 7.3827  | -3.1228 | 0.007644 | 0.081731 | -2.4978 | 29842    |
| PPP3CB-AS1  | -0.3461  | 0.3461  | 0.55671 | -3.1227 | 0.007644 | 0.081731 | -2.4978 | 1.02E+08 |
| TMC7        | 0.66298  | 0.66298 | 0.59905 | 3.1227  | 0.007644 | 0.081731 | -2.4978 | 79905    |
| SCD         | 46.701   | 46.701  | 42.024  | 3.1223  | 0.007651 | 0.081753 | -2.4987 | 6319     |

|              |          |         |         |         |          |          |         |          |
|--------------|----------|---------|---------|---------|----------|----------|---------|----------|
| MAP3K13      | -0.53377 | 0.53377 | 1.2252  | -3.1212 | 0.007667 | 0.081873 | -2.5006 | 9175     |
| PFKFB2       | 5.7872   | 5.7872  | 6.7089  | 3.1206  | 0.007676 | 0.081913 | -2.5017 | 5208     |
| RGPD6        | -0.26651 | 0.26651 | 0.30892 | -3.1192 | 0.007698 | 0.082097 | -2.5044 | 729540   |
| PRDM1        | 9.3801   | 9.3801  | 10.639  | 3.1181  | 0.007714 | 0.082224 | -2.5064 | 639      |
| WFS1         | -1.9025  | 1.9025  | 3.5318  | -3.1176 | 0.007722 | 0.082251 | -2.5073 | 7466     |
| SERPINE1     | 13.949   | 13.949  | 10.997  | 3.1171  | 0.007729 | 0.082271 | -2.5081 | 5054     |
| ITPRIP       | 4.4768   | 4.4768  | 9.4067  | 3.1168  | 0.007734 | 0.082271 | -2.5087 | 85450    |
| LOC101929882 | -0.34616 | 0.34616 | 0.38519 | -3.1145 | 0.00777  | 0.082602 | -2.5131 | 1.02E+08 |
| HAUS5        | -0.77527 | 0.77527 | 1.3707  | -3.1129 | 0.007794 | 0.082807 | -2.516  | 23354    |
| LYPD5        | 50.184   | 50.184  | 42.067  | 3.1095  | 0.007846 | 0.083259 | -2.5222 | 284348   |
| CACNA2D2     | -0.27419 | 0.27419 | 0.25322 | -3.1092 | 0.00785  | 0.083259 | -2.5227 | 9254     |
| CDK5RAP2     | -1.6013  | 1.6013  | 4.4776  | -3.1091 | 0.007852 | 0.083259 | -2.5229 | 55755    |
| FNDC8        | -0.28859 | 0.28859 | 0.30193 | -3.1088 | 0.007856 | 0.083259 | -2.5234 | 54752    |
| C8orf44      | -0.38359 | 0.38359 | 0.51128 | -3.1079 | 0.00787  | 0.083294 | -2.5251 | 56260    |
| EPB41L4A-AS1 | -4.1387  | 4.1387  | 5.8475  | -3.1079 | 0.00787  | 0.083294 | -2.5251 | 114915   |
| DGCR6        | -2.821   | 2.821   | 3.23    | -3.1077 | 0.007874 | 0.083294 | -2.5256 | 8214     |
| PRX          | -0.43303 | 0.43303 | 0.47318 | -3.1073 | 0.00788  | 0.083306 | -2.5263 | 57716    |
| MKRN2OS      | -0.3602  | 0.3602  | 0.54699 | -3.1065 | 0.007893 | 0.083388 | -2.5278 | 1E+08    |
| MSL2         | -1.0193  | 1.0193  | 3.9313  | -3.106  | 0.0079   | 0.083414 | -2.5287 | 55167    |
| SESN2        | 3.387    | 3.387   | 4.3747  | 3.1055  | 0.007908 | 0.083416 | -2.5296 | 83667    |
| NRAS         | 5.0497   | 5.0497  | 8.291   | 3.1052  | 0.007913 | 0.083416 | -2.5302 | 4893     |
| SVEP1        | -6.0672  | 6.0672  | 5.0094  | -3.1046 | 0.007921 | 0.083416 | -2.5312 | 79987    |
| ADCYAP1R1    | -0.29431 | 0.29431 | 0.34854 | -3.1045 | 0.007923 | 0.083416 | -2.5314 | 117      |
| OBP2B        | -0.27451 | 0.27451 | 0.15573 | -3.1044 | 0.007925 | 0.083416 | -2.5316 | 29989    |
| C2orf88      | -1.1251  | 1.1251  | 1.3342  | -3.104  | 0.007931 | 0.08343  | -2.5324 | 84281    |
| CRCT1        | 418.58   | 418.58  | 310.18  | 3.1028  | 0.00795  | 0.083572 | -2.5345 | 54544    |

|            |          |         |         |         |          |          |         |        |
|------------|----------|---------|---------|---------|----------|----------|---------|--------|
| LTBP4      | -8.8595  | 8.8595  | 10.889  | -3.1013 | 0.007973 | 0.083713 | -2.5372 | 8425   |
| CTC1       | -0.84327 | 0.84327 | 2.0734  | -3.1013 | 0.007974 | 0.083713 | -2.5373 | 80169  |
| NRBF2      | 10.551   | 10.551  | 9.4556  | 3.101   | 0.007979 | 0.083713 | -2.5379 | 29982  |
| SOWAHC     | 13.509   | 13.509  | 14.138  | 3.1004  | 0.007988 | 0.083713 | -2.539  | 65124  |
| FAM184B    | -0.25217 | 0.25217 | 0.28388 | -3.1002 | 0.007991 | 0.083713 | -2.5394 | 27146  |
| AK7        | -0.35018 | 0.35018 | 0.35262 | -3.1001 | 0.007993 | 0.083713 | -2.5396 | 122481 |
| TOLLIP-AS1 | -0.27806 | 0.27806 | 0.35064 | -3.0997 | 0.007999 | 0.08372  | -2.5402 | 255512 |
| SOX6       | -0.44345 | 0.44345 | 0.81866 | -3.0988 | 0.008012 | 0.083743 | -2.5418 | 55553  |
| ALDH5A1    | -0.95672 | 0.95672 | 1.2267  | -3.0984 | 0.008019 | 0.083743 | -2.5426 | 7915   |
| PPP4R4     | 0.39404  | 0.39404 | 0.28482 | 3.0984  | 0.00802  | 0.083743 | -2.5427 | 57718  |
| S100A16    | 119.47   | 119.47  | 136.4   | 3.0983  | 0.008021 | 0.083743 | -2.5429 | 140576 |
| RAB3A      | -0.37827 | 0.37827 | 0.55648 | -3.0977 | 0.00803  | 0.083743 | -2.544  | 5864   |
| GLCCI1     | -0.74219 | 0.74219 | 1.196   | -3.0975 | 0.008033 | 0.083743 | -2.5443 | 113263 |
| CARF       | -0.52802 | 0.52802 | 0.79279 | -3.0974 | 0.008036 | 0.083743 | -2.5445 | 79800  |
| PGAM1      | 80.555   | 80.555  | 94.322  | 3.097   | 0.008041 | 0.083746 | -2.5452 | 5223   |
| LIME1      | -0.99658 | 0.99658 | 1.2111  | -3.0966 | 0.008048 | 0.083768 | -2.546  | 54923  |
| PERP       | 283.43   | 283.43  | 350.86  | 3.0962  | 0.008054 | 0.083779 | -2.5467 | 64065  |
| LMO1       | -0.28722 | 0.28722 | 0.27675 | -3.0952 | 0.00807  | 0.083779 | -2.5485 | 4004   |
| ABCA10     | -0.77657 | 0.77657 | 0.71096 | -3.0946 | 0.008079 | 0.083779 | -2.5496 | 10349  |
| ASMTL      | -1.4449  | 1.4449  | 2.3808  | -3.0939 | 0.008091 | 0.083779 | -2.551  | 8623   |
| TMEM144    | -0.3828  | 0.3828  | 0.70258 | -3.0934 | 0.008099 | 0.083779 | -2.5519 | 55314  |
| BLNK       | 7.5844   | 7.5844  | 8.3839  | 3.0934  | 0.008099 | 0.083779 | -2.5519 | 29760  |
| TTC21B     | -1.4794  | 1.4794  | 1.8707  | -3.0931 | 0.008104 | 0.083779 | -2.5525 | 79809  |
| CAMSAP2    | 4.5241   | 4.5241  | 8.2282  | 3.0928  | 0.008108 | 0.083779 | -2.553  | 23271  |
| RNF152     | -2.4478  | 2.4478  | 5.1416  | -3.0927 | 0.00811  | 0.083779 | -2.5532 | 220441 |
| KBTBD7     | -0.36444 | 0.36444 | 0.98014 | -3.0926 | 0.008112 | 0.083779 | -2.5534 | 84078  |

|                  |          |         |         |         |          |          |         |          |
|------------------|----------|---------|---------|---------|----------|----------|---------|----------|
| CHCHD10          | -7.2568  | 7.2568  | 10.133  | -3.0925 | 0.008113 | 0.083779 | -2.5535 | 400916   |
| OSER1            | 4.5792   | 4.5792  | 6.6694  | 3.0925  | 0.008114 | 0.083779 | -2.5536 | 51526    |
| CCDC3            | -4.5988  | 4.5988  | 6.6775  | -3.0924 | 0.008115 | 0.083779 | -2.5538 | 83643    |
| FLT3LG           | -1.1971  | 1.1971  | 1.5903  | -3.0922 | 0.008118 | 0.083779 | -2.5541 | 2323     |
| COL28A1          | -0.24023 | 0.24023 | 0.17904 | -3.0911 | 0.008135 | 0.083855 | -2.556  | 340267   |
| RCAN1            | 17.628   | 17.628  | 14.019  | 3.0909  | 0.008138 | 0.083855 | -2.5564 | 1827     |
| SRGAP3-AS2       | -0.23065 | 0.23065 | 0.16661 | -3.0908 | 0.008141 | 0.083855 | -2.5567 | 1.02E+08 |
| DCBLD1           | 2.449    | 2.449   | 2.8913  | 3.0901  | 0.008152 | 0.083873 | -2.558  | 285761   |
| FLYWCH1          | -3.1211  | 3.1211  | 4.6234  | -3.09   | 0.008152 | 0.083873 | -2.558  | 84256    |
| B9D1             | -0.60706 | 0.60706 | 1.0898  | -3.0896 | 0.00816  | 0.083901 | -2.5589 | 27077    |
| GJB2             | 528.42   | 528.42  | 464.7   | 3.0886  | 0.008176 | 0.084011 | -2.5607 | 2706     |
| C20orf204        | -0.32856 | 0.32856 | 0.33193 | -3.0883 | 0.008181 | 0.084013 | -2.5613 | 284739   |
| ZNF571           | -0.29027 | 0.29027 | 0.57173 | -3.088  | 0.008186 | 0.084015 | -2.5619 | 51276    |
| HOOK1            | 4.8523   | 4.8523  | 6.4961  | 3.0871  | 0.0082   | 0.084105 | -2.5635 | 51361    |
| DZANK1           | -0.23266 | 0.23266 | 0.32242 | -3.0867 | 0.008207 | 0.084128 | -2.5643 | 55184    |
| LOC283922        | -2.1478  | 2.1478  | 2.9318  | -3.0852 | 0.00823  | 0.084311 | -2.5669 | 283922   |
| ATF7IP           | -2.0003  | 2.0003  | 6.0574  | -3.0846 | 0.00824  | 0.084368 | -2.5681 | 55729    |
| TM4SF19-TCTEX1D2 | 1.0279   | 1.0279  | 0.83441 | 3.0825  | 0.008275 | 0.08467  | -2.572  | 1.01E+08 |
| PIK3R1           | -7.057   | 7.057   | 7.9874  | -3.0818 | 0.008286 | 0.084721 | -2.5733 | 5295     |
| BORCS5           | -0.91996 | 0.91996 | 2.0383  | -3.0815 | 0.00829  | 0.084721 | -2.5737 | 118426   |
| ASH1L            | -2.9728  | 2.9728  | 9.0243  | -3.0801 | 0.008314 | 0.084917 | -2.5764 | 55870    |
| TP53I3           | 5.6724   | 5.6724  | 6.2774  | 3.0774  | 0.008358 | 0.085316 | -2.5814 | 9540     |
| TUBA1C           | 155.65   | 155.65  | 170.54  | 3.0767  | 0.00837  | 0.085381 | -2.5826 | 84790    |
| LRP4-AS1         | -2.4909  | 2.4909  | 1.5655  | -3.0762 | 0.008378 | 0.085412 | -2.5835 | 1.01E+08 |
| TBX3             | -3.8178  | 3.8178  | 6.0494  | -3.0751 | 0.008397 | 0.085481 | -2.5856 | 6926     |
| PKIA-AS1         | -0.43438 | 0.43438 | 0.2861  | -3.0749 | 0.008399 | 0.085481 | -2.5859 | 1.02E+08 |

|            |          |         |         |         |          |          |         |          |
|------------|----------|---------|---------|---------|----------|----------|---------|----------|
| TMPRSS9    | -0.2764  | 0.2764  | 0.24415 | -3.0748 | 0.008402 | 0.085481 | -2.5862 | 360200   |
| SERINC2    | 12.881   | 12.881  | 15.077  | 3.0744  | 0.008408 | 0.085481 | -2.5869 | 347735   |
| MIA        | -1.5903  | 1.5903  | 1.0201  | -3.0742 | 0.00841  | 0.085481 | -2.5871 | 8190     |
| SLC35F5    | 2.0534   | 2.0534  | 5.7774  | 3.0738  | 0.008418 | 0.08551  | -2.588  | 80255    |
| GNAZ       | -0.28773 | 0.28773 | 0.27129 | -3.073  | 0.00843  | 0.085536 | -2.5893 | 2781     |
| IGFBP2     | 21.927   | 21.927  | 21.434  | 3.073   | 0.00843  | 0.085536 | -2.5894 | 3485     |
| RNF125     | -0.92576 | 0.92576 | 1.1828  | -3.072  | 0.008447 | 0.085623 | -2.5913 | 54941    |
| LINC00921  | -0.79161 | 0.79161 | 1.0972  | -3.0719 | 0.008449 | 0.085623 | -2.5915 | 283876   |
| STX3       | 0.74807  | 0.74807 | 2.6859  | 3.0703  | 0.008476 | 0.085839 | -2.5944 | 6809     |
| SEMA3F-AS1 | -0.93855 | 0.93855 | 1.4693  | -3.0696 | 0.008487 | 0.085905 | -2.5957 | 1E+08    |
| UGP2       | 10.825   | 10.825  | 16.726  | 3.0688  | 0.008501 | 0.085938 | -2.5972 | 7360     |
| C14orf93   | -0.66598 | 0.66598 | 1.3327  | -3.0686 | 0.008504 | 0.085938 | -2.5975 | 60686    |
| PCSK2      | -0.72375 | 0.72375 | 0.48234 | -3.0683 | 0.008509 | 0.085938 | -2.598  | 5126     |
| TOR1AIP2   | 2.1413   | 2.1413  | 4.5503  | 3.0682  | 0.008511 | 0.085938 | -2.5983 | 163590   |
| NAPG       | 1.5702   | 1.5702  | 4.0043  | 3.0671  | 0.008529 | 0.086036 | -2.6002 | 8774     |
| CATSPER2   | -0.42438 | 0.42438 | 0.46802 | -3.067  | 0.008531 | 0.086036 | -2.6004 | 117155   |
| PPP1R15B   | 3.8704   | 3.8704  | 9.3958  | 3.0662  | 0.008545 | 0.086129 | -2.602  | 84919    |
| NSUN5P1    | -2.2814  | 2.2814  | 2.9303  | -3.0651 | 0.008562 | 0.086249 | -2.6039 | 155400   |
| FAM50B     | -0.86085 | 0.86085 | 1.311   | -3.0646 | 0.008572 | 0.086276 | -2.6049 | 26240    |
| FAM111A-DT | -0.31823 | 0.31823 | 0.56056 | -3.0644 | 0.008575 | 0.086276 | -2.6053 | 1.02E+08 |
| PAK6       | -2.5003  | 2.5003  | 3.7961  | -3.0637 | 0.008586 | 0.086337 | -2.6065 | 56924    |
| PDZD4      | -0.57972 | 0.57972 | 0.61634 | -3.0629 | 0.0086   | 0.086425 | -2.608  | 57595    |
| GSTP1      | 204.03   | 204.03  | 266.68  | 3.0625  | 0.008607 | 0.086432 | -2.6087 | 2950     |
| GSDMB      | -0.73502 | 0.73502 | 0.92043 | -3.0622 | 0.008611 | 0.086432 | -2.6092 | 55876    |
| PHLDA1     | 7.3751   | 7.3751  | 5.9875  | 3.0616  | 0.008622 | 0.086487 | -2.6103 | 22822    |
| SLC9A8     | -0.60082 | 0.60082 | 1.5332  | -3.0612 | 0.008628 | 0.08649  | -2.6111 | 23315    |

|            |          |         |         |         |          |          |         |          |
|------------|----------|---------|---------|---------|----------|----------|---------|----------|
| GTF2E2     | 2.0764   | 2.0764  | 4.3136  | 3.061   | 0.008632 | 0.08649  | -2.6115 | 2961     |
| LCLAT1     | 1.4986   | 1.4986  | 2.9738  | 3.0599  | 0.008651 | 0.086629 | -2.6135 | 253558   |
| LINC01772  | -0.65668 | 0.65668 | 0.82848 | -3.0593 | 0.008661 | 0.086675 | -2.6146 | 1.08E+08 |
| B3GNTL1    | -0.31179 | 0.31179 | 0.50792 | -3.0581 | 0.008682 | 0.086676 | -2.6168 | 146712   |
| RNF207     | -0.29931 | 0.29931 | 0.35118 | -3.0579 | 0.008685 | 0.086676 | -2.6172 | 388591   |
| RAET1L     | 6.2909   | 6.2909  | 3.6589  | 3.0574  | 0.008693 | 0.086676 | -2.618  | 154064   |
| RBFA       | -0.49738 | 0.49738 | 1.4109  | -3.0574 | 0.008694 | 0.086676 | -2.6182 | 79863    |
| HIF1AN     | -2.2061  | 2.2061  | 5.8055  | -3.0573 | 0.008696 | 0.086676 | -2.6183 | 55662    |
| PELI3      | -0.97737 | 0.97737 | 1.7595  | -3.0571 | 0.008698 | 0.086676 | -2.6186 | 246330   |
| SLC29A1    | -4.0338  | 4.0338  | 6.6417  | -3.057  | 0.0087   | 0.086676 | -2.6188 | 2030     |
| FGF11      | 6.2806   | 6.2806  | 8.01    | 3.0566  | 0.008708 | 0.086676 | -2.6196 | 2256     |
| CBY3       | -0.24616 | 0.24616 | 0.19127 | -3.0564 | 0.008711 | 0.086676 | -2.6199 | 646019   |
| FOSL1      | 16.182   | 16.182  | 9.8733  | 3.0563  | 0.008712 | 0.086676 | -2.6201 | 8061     |
| POC1B-AS1  | -0.29491 | 0.29491 | 0.50257 | -3.0557 | 0.008722 | 0.086681 | -2.6211 | 1.1E+08  |
| UBE2G1     | 5.6796   | 5.6796  | 9.7012  | 3.0555  | 0.008726 | 0.086681 | -2.6215 | 7326     |
| GATA3      | -11.644  | 11.644  | 8.6152  | -3.0554 | 0.008728 | 0.086681 | -2.6218 | 2625     |
| ACVR2B-AS1 | -0.20332 | 0.20332 | 0.18913 | -3.0548 | 0.008739 | 0.086736 | -2.6229 | 1E+08    |
| UBC        | 148.49   | 148.49  | 262.1   | 3.0543  | 0.008747 | 0.086766 | -2.6238 | 7316     |
| KLHL31     | -0.22129 | 0.22129 | 0.17553 | -3.054  | 0.008752 | 0.086766 | -2.6244 | 401265   |
| PWAR5      | -1.4036  | 1.4036  | 1.3334  | -3.0532 | 0.008766 | 0.086802 | -2.6259 | 8123     |
| PFKFB3     | 9.2342   | 9.2342  | 14.45   | 3.053   | 0.008769 | 0.086802 | -2.6262 | 5209     |
| SCFD1      | 3.6385   | 3.6385  | 7.8625  | 3.0529  | 0.008771 | 0.086802 | -2.6264 | 23256    |
| ZSWIM8-AS1 | -0.69247 | 0.69247 | 1.3432  | -3.0524 | 0.00878  | 0.086835 | -2.6273 | 1.01E+08 |
| DRAP1      | 41.073   | 41.073  | 42.453  | 3.0514  | 0.008797 | 0.086949 | -2.6291 | 10589    |
| SPRR3      | 4.265    | 4.265   | 2.6911  | 3.0508  | 0.008807 | 0.086949 | -2.6301 | 6707     |
| GPATCH2    | 0.45411  | 0.45411 | 1.5332  | 3.0508  | 0.008807 | 0.086949 | -2.6302 | 55105    |



|              |          |         |         |         |          |          |         |          |
|--------------|----------|---------|---------|---------|----------|----------|---------|----------|
| SLITRK2      | -0.33972 | 0.33972 | 0.35277 | -3.0504 | 0.008815 | 0.086949 | -2.631  | 84631    |
| PIP5K1B      | -0.37487 | 0.37487 | 0.26733 | -3.0502 | 0.008817 | 0.086949 | -2.6312 | 8395     |
| ZNF727       | -0.51995 | 0.51995 | 0.3775  | -3.0488 | 0.008842 | 0.087141 | -2.6339 | 442319   |
| LOC102724814 | -1.3087  | 1.3087  | 1.8062  | -3.0485 | 0.008847 | 0.087141 | -2.6344 | 1.03E+08 |
| SCAMP1       | 1.4324   | 1.4324  | 3.1054  | 3.0482  | 0.008852 | 0.087141 | -2.6349 | 9522     |
| ZNF141       | -0.56991 | 0.56991 | 0.84902 | -3.0468 | 0.008876 | 0.087262 | -2.6375 | 7700     |
| PRMT2        | -1.5941  | 1.5941  | 4.4536  | -3.0464 | 0.008884 | 0.087262 | -2.6383 | 3275     |
| UNKL         | -1.2968  | 1.2968  | 1.9048  | -3.0462 | 0.008888 | 0.087262 | -2.6387 | 64718    |
| POLH         | -0.55559 | 0.55559 | 1.8801  | -3.046  | 0.00889  | 0.087262 | -2.639  | 5429     |
| CEP250       | -1.2664  | 1.2664  | 1.8979  | -3.0456 | 0.008897 | 0.087262 | -2.6397 | 11190    |
| DNAJC12      | 0.58118  | 0.58118 | 0.32559 | 3.0456  | 0.008898 | 0.087262 | -2.6398 | 56521    |
| ZNF44        | -0.99776 | 0.99776 | 1.9627  | -3.0445 | 0.008917 | 0.087262 | -2.6418 | 51710    |
| SKAP1        | -0.31345 | 0.31345 | 0.3925  | -3.0444 | 0.008918 | 0.087262 | -2.6419 | 8631     |
| C21orf58     | -0.33333 | 0.33333 | 0.54961 | -3.0443 | 0.008921 | 0.087262 | -2.6422 | 54058    |
| LOC110091768 | -0.39682 | 0.39682 | 0.2989  | -3.0442 | 0.008922 | 0.087262 | -2.6423 | 1.1E+08  |
| FOXJ1        | -0.2239  | 0.2239  | 0.13909 | -3.0439 | 0.008927 | 0.087262 | -2.6429 | 2302     |
| RRP7BP       | -1.6401  | 1.6401  | 2.6373  | -3.0438 | 0.00893  | 0.087262 | -2.6431 | 91695    |
| BDKRB2       | 4.2889   | 4.2889  | 5.8587  | 3.0437  | 0.008931 | 0.087262 | -2.6433 | 624      |
| SMIM10L2B    | -0.3855  | 0.3855  | 0.56354 | -3.0428 | 0.008946 | 0.087355 | -2.6448 | 644596   |
| AFF4         | 3.4052   | 3.4052  | 11.815  | 3.0423  | 0.008955 | 0.087396 | -2.6458 | 27125    |
| MCOLN3       | -0.43254 | 0.43254 | 0.48111 | -3.0416 | 0.008969 | 0.087472 | -2.6472 | 55283    |
| EEF1A2       | 3.9782   | 3.9782  | 3.5699  | 3.0412  | 0.008975 | 0.087486 | -2.6478 | 1917     |
| SPATA18      | -0.46555 | 0.46555 | 1.5651  | -3.0408 | 0.008982 | 0.087498 | -2.6485 | 132671   |
| PRKCI        | 2.9037   | 2.9037  | 5.2196  | 3.0398  | 0.009001 | 0.087633 | -2.6505 | 5584     |
| DYNLL2       | -6.6171  | 6.6171  | 10.424  | -3.0391 | 0.009012 | 0.087693 | -2.6517 | 140735   |
| SPATA12      | -0.45455 | 0.45455 | 0.58365 | -3.0387 | 0.009019 | 0.087711 | -2.6524 | 353324   |

|              |          |         |         |         |          |          |         |          |
|--------------|----------|---------|---------|---------|----------|----------|---------|----------|
| FBXL8        | -2.0742  | 2.0742  | 2.3592  | -3.0373 | 0.009044 | 0.08788  | -2.6549 | 55336    |
| LINC01290    | -1.9039  | 1.9039  | 1.4155  | -3.037  | 0.009049 | 0.08788  | -2.6555 | 1.06E+08 |
| AFF1-AS1     | -0.28263 | 0.28263 | 0.52391 | -3.0369 | 0.009052 | 0.08788  | -2.6558 | 1.01E+08 |
| ZSCAN18      | -1.6253  | 1.6253  | 1.9043  | -3.0365 | 0.009059 | 0.087899 | -2.6565 | 65982    |
| ECM1         | 48.807   | 48.807  | 47.618  | 3.036   | 0.009067 | 0.087924 | -2.6573 | 1893     |
| LAMP5        | 0.58716  | 0.58716 | 0.43907 | 3.0353  | 0.00908  | 0.088002 | -2.6587 | 24141    |
| DYNC1I2      | 4.8608   | 4.8608  | 10.932  | 3.0338  | 0.009107 | 0.088207 | -2.6614 | 1781     |
| SLMO2-ATP5E  | 8.5855   | 8.5855  | 10.67   | 3.0333  | 0.009115 | 0.08824  | -2.6623 | 1.01E+08 |
| PI16         | -9.5608  | 9.5608  | 5.1675  | -3.033  | 0.009122 | 0.088253 | -2.663  | 221476   |
| CRLF3        | 2.0266   | 2.0266  | 4.1028  | 3.0326  | 0.009129 | 0.088273 | -2.6637 | 51379    |
| LRP5         | -3.7741  | 3.7741  | 5.1347  | -3.0314 | 0.00915  | 0.088418 | -2.6658 | 4041     |
| LINC00674    | -1.2393  | 1.2393  | 2.8852  | -3.0311 | 0.009154 | 0.088418 | -2.6663 | 1E+08    |
| JADE2        | -2.3263  | 2.3263  | 2.757   | -3.0307 | 0.009162 | 0.08844  | -2.6671 | 23338    |
| DESI2        | 2.9002   | 2.9002  | 5.0143  | 3.0298  | 0.009179 | 0.088549 | -2.6688 | 51029    |
| LOC101926889 | -0.44607 | 0.44607 | 0.67213 | -3.0256 | 0.009256 | 0.089242 | -2.6766 | 1.02E+08 |
| SYNM         | -1.7952  | 1.7952  | 1.791   | -3.0249 | 0.009268 | 0.089295 | -2.6779 | 23336    |
| MRPL45P2     | -0.55993 | 0.55993 | 1.1378  | -3.0246 | 0.009273 | 0.089295 | -2.6784 | 653479   |
| PINK1-AS     | -0.80278 | 0.80278 | 1.5579  | -3.024  | 0.009284 | 0.089295 | -2.6794 | 1.01E+08 |
| PDCD7        | -1.2571  | 1.2571  | 4.0423  | -3.0237 | 0.00929  | 0.089295 | -2.68   | 10081    |
| ADH1B        | -10.441  | 10.441  | 5.5877  | -3.0236 | 0.009291 | 0.089295 | -2.6801 | 125      |
| ADGRE3       | 0.34291  | 0.34291 | 0.18554 | 3.0235  | 0.009293 | 0.089295 | -2.6803 | 84658    |
| RIPK2        | 3.7683   | 3.7683  | 3.6337  | 3.0228  | 0.009306 | 0.089374 | -2.6817 | 8767     |
| C1orf220     | -0.26349 | 0.26349 | 0.23442 | -3.0223 | 0.009315 | 0.089402 | -2.6825 | 400798   |
| HDLBP        | 19.496   | 19.496  | 43.772  | 3.0215  | 0.009331 | 0.089505 | -2.6841 | 3069     |
| LACTB        | 1.6779   | 1.6779  | 2.8384  | 3.0192  | 0.009373 | 0.089792 | -2.6883 | 114294   |
| CCT6P1       | -0.5713  | 0.5713  | 0.89539 | -3.0191 | 0.009373 | 0.089792 | -2.6883 | 643253   |

|              |          |         |         |         |          |          |         |          |
|--------------|----------|---------|---------|---------|----------|----------|---------|----------|
| TMEM94       | -2.4708  | 2.4708  | 3.7869  | -3.019  | 0.009376 | 0.089792 | -2.6887 | 9772     |
| ATE1-AS1     | -0.35537 | 0.35537 | 0.2591  | -3.0183 | 0.009389 | 0.089862 | -2.6899 | 1E+08    |
| THBD         | 8.8692   | 8.8692  | 19.818  | 3.0165  | 0.009421 | 0.090011 | -2.6931 | 7056     |
| CA14         | -0.3733  | 0.3733  | 0.32302 | -3.0163 | 0.009425 | 0.090011 | -2.6935 | 23632    |
| BTBD10       | 2.427    | 2.427   | 4.533   | 3.0163  | 0.009425 | 0.090011 | -2.6935 | 84280    |
| PHYHIP       | -2.0507  | 2.0507  | 1.1978  | -3.0163 | 0.009426 | 0.090011 | -2.6936 | 9796     |
| ANKRD37      | 6.7038   | 6.7038  | 4.8552  | 3.015   | 0.00945  | 0.090071 | -2.6959 | 353322   |
| MFAP3        | 2.7501   | 2.7501  | 4.6076  | 3.0145  | 0.009459 | 0.090071 | -2.6968 | 4238     |
| TTN          | -0.31123 | 0.31123 | 0.42334 | -3.0139 | 0.00947  | 0.090071 | -2.6979 | 7273     |
| MOK          | -0.37673 | 0.37673 | 0.59334 | -3.0135 | 0.009477 | 0.090071 | -2.6986 | 5891     |
| GRIA2        | -0.24637 | 0.24637 | 0.1314  | -3.0124 | 0.009498 | 0.090071 | -2.7006 | 2891     |
| FUT3         | 2.3264   | 2.3264  | 1.9805  | 3.0114  | 0.009518 | 0.090071 | -2.7026 | 2525     |
| TRIM56       | -2.7347  | 2.7347  | 3.5862  | -3.0108 | 0.009528 | 0.090071 | -2.7036 | 81844    |
| IL1RN        | 51.817   | 51.817  | 40.463  | 3.0106  | 0.009531 | 0.090071 | -2.7039 | 3557     |
| PEAK3        | -0.6842  | 0.6842  | 0.80665 | -3.0106 | 0.009531 | 0.090071 | -2.7039 | 374872   |
| C3orf67      | 0.31758  | 0.31758 | 0.22702 | 3.0106  | 0.009532 | 0.090071 | -2.704  | 200844   |
| LYSMD3       | 1.2562   | 1.2562  | 2.0928  | 3.0104  | 0.009535 | 0.090071 | -2.7043 | 116068   |
| CMTR1        | -2.4753  | 2.4753  | 5.1859  | -3.01   | 0.009543 | 0.090071 | -2.7051 | 23070    |
| SLC25A2      | -0.42108 | 0.42108 | 0.33078 | -3.0098 | 0.009546 | 0.090071 | -2.7054 | 83884    |
| MAST4-AS1    | 0.79821  | 0.79821 | 1.0323  | 3.0097  | 0.009548 | 0.090071 | -2.7056 | 1.02E+08 |
| LOC103908605 | -0.50443 | 0.50443 | 0.48046 | -3.0097 | 0.009549 | 0.090071 | -2.7056 | 1.04E+08 |
| EIF2S2       | 12.663   | 12.663  | 17.703  | 3.0096  | 0.00955  | 0.090071 | -2.7058 | 8894     |
| HIF3A        | -0.89722 | 0.89722 | 0.52937 | -3.0094 | 0.009555 | 0.090071 | -2.7062 | 64344    |
| UTRN         | -5.3538  | 5.3538  | 12.295  | -3.0093 | 0.009556 | 0.090071 | -2.7064 | 7402     |
| TP53         | -5.3927  | 5.3927  | 11.268  | -3.009  | 0.009561 | 0.090071 | -2.7069 | 7157     |
| SELENBP1     | -2.448   | 2.448   | 2.8626  | -3.009  | 0.009562 | 0.090071 | -2.7069 | 8991     |

|            |          |         |         |         |          |          |         |        |
|------------|----------|---------|---------|---------|----------|----------|---------|--------|
| MMADHC     | 16.118   | 16.118  | 23.614  | 3.0089  | 0.009564 | 0.090071 | -2.7071 | 27249  |
| GRAMD4     | -3.8451  | 3.8451  | 7.0917  | -3.0086 | 0.009569 | 0.090071 | -2.7076 | 23151  |
| CHMP2B     | 3.3708   | 3.3708  | 6.6626  | 3.0086  | 0.00957  | 0.090071 | -2.7077 | 25978  |
| ANKFN1     | -0.27978 | 0.27978 | 0.17608 | -3.0084 | 0.009572 | 0.090071 | -2.708  | 162282 |
| PRSS23     | 4.3634   | 4.3634  | 4.421   | 3.0083  | 0.009576 | 0.090071 | -2.7083 | 11098  |
| SRGAP3-AS3 | -0.20506 | 0.20506 | 0.12808 | -3.0081 | 0.00958  | 0.090071 | -2.7086 | 1E+08  |
| KLF11      | -1.8039  | 1.8039  | 5.4053  | -3.0079 | 0.009582 | 0.090071 | -2.7089 | 8462   |
| OXGR1      | -0.30441 | 0.30441 | 0.23721 | -3.0078 | 0.009585 | 0.090071 | -2.7092 | 27199  |
| ULBP3      | 0.77767  | 0.77767 | 0.64957 | 3.0074  | 0.009592 | 0.090071 | -2.7099 | 79465  |
| TFAP2A-AS1 | -0.70583 | 0.70583 | 1.0633  | -3.007  | 0.0096   | 0.090071 | -2.7106 | 1E+08  |
| ORMDL2     | 7.9688   | 7.9688  | 10.001  | 3.0069  | 0.009601 | 0.090071 | -2.7107 | 29095  |
| NGF        | 1.132    | 1.132   | 1.0231  | 3.0068  | 0.009603 | 0.090071 | -2.7109 | 4803   |
| EIF4G2     | 54.007   | 54.007  | 104.95  | 3.0061  | 0.009616 | 0.090145 | -2.7122 | 1982   |
| PSMD14     | 9.5558   | 9.5558  | 14.511  | 3.0051  | 0.009636 | 0.090269 | -2.7142 | 10213  |
| FRG1HP     | -0.63211 | 0.63211 | 1.2389  | -3.0049 | 0.00964  | 0.090269 | -2.7145 | 1E+08  |
| ZP3        | -0.77358 | 0.77358 | 0.93717 | -3.0034 | 0.009668 | 0.09048  | -2.7172 | 7784   |
| GPRASP2    | -0.45082 | 0.45082 | 0.56912 | -3.003  | 0.009676 | 0.090501 | -2.718  | 114928 |
| RAB6A      | 9.2164   | 9.2164  | 19.474  | 3.0026  | 0.009683 | 0.090519 | -2.7187 | 5870   |
| ZNF573     | -0.5993  | 0.5993  | 1.0928  | -3.0021 | 0.009692 | 0.090541 | -2.7195 | 126231 |
| STAR       | -0.36883 | 0.36883 | 0.56046 | -3.0015 | 0.009704 | 0.090541 | -2.7206 | 6770   |
| AP3S2      | -0.34239 | 0.34239 | 1.1824  | -3.0015 | 0.009704 | 0.090541 | -2.7207 | 10239  |
| C10orf99   | 97.805   | 97.805  | 95.391  | 3.0014  | 0.009707 | 0.090541 | -2.7209 | 387695 |
| SULT2B1    | 42.93    | 42.93   | 47.321  | 2.9995  | 0.009743 | 0.090768 | -2.7244 | 6820   |
| MROH7      | -0.33332 | 0.33332 | 0.26655 | -2.9993 | 0.009747 | 0.090768 | -2.7248 | 374977 |
| ORAI1      | -4.1786  | 4.1786  | 7.5434  | -2.9988 | 0.009755 | 0.090768 | -2.7256 | 84876  |
| FBXW4      | -4.8708  | 4.8708  | 9.2023  | -2.9986 | 0.00976  | 0.090768 | -2.726  | 6468   |

|              |          |         |         |         |          |          |         |          |
|--------------|----------|---------|---------|---------|----------|----------|---------|----------|
| TNFAIP1      | 9.3846   | 9.3846  | 16.469  | 2.9985  | 0.009761 | 0.090768 | -2.7261 | 7126     |
| PGAP1        | -1.3564  | 1.3564  | 2.1217  | -2.9983 | 0.009765 | 0.090768 | -2.7265 | 80055    |
| ZMAT1        | -0.38489 | 0.38489 | 0.3263  | -2.9979 | 0.009774 | 0.090768 | -2.7274 | 84460    |
| NPIPB13      | -1.1459  | 1.1459  | 1.3658  | -2.9978 | 0.009774 | 0.090768 | -2.7274 | 613037   |
| PCDHB9       | -0.28656 | 0.28656 | 0.38323 | -2.9963 | 0.009805 | 0.090958 | -2.7303 | 56127    |
| CEP128       | -0.48854 | 0.48854 | 0.85629 | -2.9962 | 0.009806 | 0.090958 | -2.7304 | 145508   |
| ZNF703       | -8.1753  | 8.1753  | 9.6187  | -2.9957 | 0.009816 | 0.090958 | -2.7313 | 80139    |
| DTD2         | 1.4061   | 1.4061  | 2.6132  | 2.9957  | 0.009816 | 0.090958 | -2.7314 | 112487   |
| SLC43A1      | -1.0755  | 1.0755  | 1.4777  | -2.9952 | 0.009825 | 0.090984 | -2.7322 | 8501     |
| ZMYND8       | -1.8317  | 1.8317  | 3.9254  | -2.9949 | 0.009831 | 0.090984 | -2.7328 | 23613    |
| LOC101927708 | -0.9315  | 0.9315  | 0.86582 | -2.9947 | 0.009835 | 0.090984 | -2.7332 | 1.02E+08 |
| GSN          | -33.785  | 33.785  | 48.385  | -2.9942 | 0.009845 | 0.091027 | -2.7341 | 2934     |
| LOC729558    | -0.55148 | 0.55148 | 0.75212 | -2.9934 | 0.00986  | 0.091117 | -2.7356 | 729558   |
| SCAI         | -0.30926 | 0.30926 | 0.56418 | -2.9928 | 0.009871 | 0.091169 | -2.7366 | 286205   |
| TYRP1        | -14.095  | 14.095  | 9.3137  | -2.9923 | 0.009882 | 0.091215 | -2.7376 | 7306     |
| ZSCAN9       | -0.50753 | 0.50753 | 1.1412  | -2.9914 | 0.009898 | 0.091292 | -2.7391 | 7746     |
| KMT2C        | -3.7011  | 3.7011  | 10.232  | -2.9913 | 0.009901 | 0.091292 | -2.7394 | 58508    |
| ZNF607       | -0.40125 | 0.40125 | 0.75382 | -2.9903 | 0.00992  | 0.091415 | -2.7412 | 84775    |
| HSPA4L       | 4.472    | 4.472   | 6.4202  | 2.9897  | 0.009931 | 0.091428 | -2.7422 | 22824    |
| PMS2P2       | -0.48454 | 0.48454 | 0.62415 | -2.9897 | 0.009932 | 0.091428 | -2.7423 | 5380     |
| UPK1B        | 1.9857   | 1.9857  | 1.1488  | 2.9892  | 0.009941 | 0.091462 | -2.7432 | 7348     |
| USP30        | -0.76129 | 0.76129 | 1.6236  | -2.9888 | 0.00995  | 0.091479 | -2.744  | 84749    |
| LOC101928445 | -0.35163 | 0.35163 | 0.37977 | -2.9886 | 0.009954 | 0.091479 | -2.7444 | 1.02E+08 |
| FTO          | -1.3701  | 1.3701  | 5.3896  | -2.9872 | 0.009981 | 0.09168  | -2.7469 | 79068    |
| BNIP3L       | 24.106   | 24.106  | 27.368  | 2.9855  | 0.010014 | 0.09183  | -2.75   | 665      |
| OPHN1        | -3.6042  | 3.6042  | 5.6376  | -2.9855 | 0.010015 | 0.09183  | -2.75   | 4983     |

|           |          |         |         |         |          |          |         |        |
|-----------|----------|---------|---------|---------|----------|----------|---------|--------|
| SLC25A48  | -0.60806 | 0.60806 | 0.56102 | -2.9853 | 0.010018 | 0.09183  | -2.7504 | 153328 |
| DNAJC1    | 2.8242   | 2.8242  | 5.3213  | 2.9852  | 0.010019 | 0.09183  | -2.7505 | 64215  |
| RNF43     | -0.9641  | 0.9641  | 1.699   | -2.9847 | 0.01003  | 0.091877 | -2.7514 | 54894  |
| RRN3P3    | -0.95244 | 0.95244 | 1.5537  | -2.9838 | 0.010048 | 0.091979 | -2.7532 | 1E+08  |
| SIAH2     | 6.6781   | 6.6781  | 10.251  | 2.9833  | 0.010058 | 0.091979 | -2.754  | 6478   |
| AKIRIN1   | 3.659    | 3.659   | 7.0245  | 2.9832  | 0.010059 | 0.091979 | -2.7542 | 79647  |
| CROT      | -1.1457  | 1.1457  | 2.74    | -2.983  | 0.010063 | 0.091979 | -2.7545 | 54677  |
| MYO1B     | 19.986   | 19.986  | 19.851  | 2.9822  | 0.01008  | 0.092087 | -2.7561 | 4430   |
| SRGAP2    | -2.7606  | 2.7606  | 4.823   | -2.9808 | 0.010107 | 0.092284 | -2.7586 | 23380  |
| UGT8      | -1.6062  | 1.6062  | 1.7993  | -2.9797 | 0.010128 | 0.092428 | -2.7605 | 7368   |
| PCDHB2    | -0.66501 | 0.66501 | 0.75219 | -2.9795 | 0.010134 | 0.092431 | -2.7611 | 56133  |
| GALNT17   | -0.47259 | 0.47259 | 0.29157 | -2.9789 | 0.010145 | 0.09245  | -2.7621 | 64409  |
| LINC01000 | -4.5335  | 4.5335  | 7.0042  | -2.9788 | 0.010147 | 0.09245  | -2.7623 | 402483 |
| SHPRH     | -1.0855  | 1.0855  | 2.5182  | -2.9785 | 0.010153 | 0.092456 | -2.7628 | 257218 |
| CCDC171   | -0.35183 | 0.35183 | 0.5541  | -2.9775 | 0.010172 | 0.092538 | -2.7646 | 203238 |
| OBP2A     | -0.33995 | 0.33995 | 0.21759 | -2.9775 | 0.010173 | 0.092538 | -2.7647 | 29991  |
| C11orf52  | -0.45052 | 0.45052 | 0.71488 | -2.9757 | 0.010209 | 0.092685 | -2.768  | 91894  |
| BLOC1S2   | 3.7852   | 3.7852  | 5.5253  | 2.9756  | 0.010211 | 0.092685 | -2.7682 | 282991 |
| SUCLA2    | 3.4857   | 3.4857  | 6.4124  | 2.9753  | 0.010217 | 0.092685 | -2.7687 | 8803   |
| LRRK1     | -1.2596  | 1.2596  | 2.6603  | -2.9752 | 0.010219 | 0.092685 | -2.7689 | 79705  |
| CARNS1    | -0.3935  | 0.3935  | 0.408   | -2.975  | 0.010222 | 0.092685 | -2.7691 | 57571  |
| MYO5A     | 7.4188   | 7.4188  | 10.745  | 2.975   | 0.010222 | 0.092685 | -2.7691 | 4644   |
| CNIH1     | 7.6177   | 7.6177  | 10.846  | 2.9747  | 0.010228 | 0.092688 | -2.7697 | 10175  |
| TRMT2B    | -1.1862  | 1.1862  | 2.8273  | -2.9744 | 0.010234 | 0.092697 | -2.7703 | 79979  |
| NCALD     | -1.6513  | 1.6513  | 2.2172  | -2.9734 | 0.010255 | 0.092833 | -2.7721 | 83988  |
| ZNF446    | -0.98566 | 0.98566 | 1.4697  | -2.9722 | 0.01028  | 0.092997 | -2.7744 | 55663  |

|            |          |         |         |         |          |          |         |        |
|------------|----------|---------|---------|---------|----------|----------|---------|--------|
| LINC01347  | -1.423   | 1.423   | 2.9677  | -2.972  | 0.010284 | 0.092997 | -2.7748 | 731275 |
| CIB2       | 4.5112   | 4.5112  | 4.4741  | 2.9707  | 0.01031  | 0.093178 | -2.7771 | 10518  |
| LCE5A      | -7.7963  | 7.7963  | 5.1197  | -2.9704 | 0.010316 | 0.09319  | -2.7777 | 254910 |
| HAND2      | -0.71323 | 0.71323 | 0.57023 | -2.9696 | 0.010331 | 0.093252 | -2.779  | 9464   |
| SLC25A42   | -0.60418 | 0.60418 | 0.95079 | -2.969  | 0.010343 | 0.093252 | -2.7801 | 284439 |
| WDR7       | -0.74776 | 0.74776 | 2.4674  | -2.9689 | 0.010346 | 0.093252 | -2.7804 | 23335  |
| LOXL4      | -0.53402 | 0.53402 | 0.7722  | -2.9686 | 0.010352 | 0.093252 | -2.781  | 84171  |
| UBN2       | -1.43    | 1.43    | 2.8651  | -2.9683 | 0.010359 | 0.093252 | -2.7815 | 254048 |
| STX1A      | 0.60523  | 0.60523 | 0.75647 | 2.9678  | 0.010369 | 0.093252 | -2.7824 | 6804   |
| FAM91A1    | 2.2422   | 2.2422  | 5.6582  | 2.9674  | 0.010377 | 0.093252 | -2.7832 | 157769 |
| SART3      | -1.4612  | 1.4612  | 4.3704  | -2.9673 | 0.010379 | 0.093252 | -2.7833 | 9733   |
| OTULIN     | -1.5059  | 1.5059  | 4.5482  | -2.9672 | 0.010381 | 0.093252 | -2.7835 | 90268  |
| ITGA2      | -2.5349  | 2.5349  | 5.6877  | -2.9671 | 0.010383 | 0.093252 | -2.7837 | 3673   |
| CCND2      | 11.017   | 11.017  | 16.639  | 2.967   | 0.010384 | 0.093252 | -2.7838 | 894    |
| SNHG15     | 4.3532   | 4.3532  | 6.5785  | 2.9668  | 0.01039  | 0.093254 | -2.7843 | 285958 |
| TBX18      | -0.95795 | 0.95795 | 1.1902  | -2.9658 | 0.010409 | 0.093374 | -2.786  | 9096   |
| DENND4C    | -2.8249  | 2.8249  | 6.2007  | -2.9643 | 0.01044  | 0.093513 | -2.7888 | 55667  |
| PI4K2B     | 2.0041   | 2.0041  | 4.8739  | 2.9642  | 0.010442 | 0.093513 | -2.789  | 55300  |
| RB1        | 4.5866   | 4.5866  | 6.2572  | 2.9639  | 0.010448 | 0.093513 | -2.7895 | 5925   |
| TENM1      | -0.43064 | 0.43064 | 0.30036 | -2.9638 | 0.010449 | 0.093513 | -2.7896 | 10178  |
| GABPB1-AS1 | -1.4379  | 1.4379  | 1.8977  | -2.9637 | 0.010452 | 0.093513 | -2.7898 | 1E+08  |
| COQ10B     | 2.2738   | 2.2738  | 3.7684  | 2.9634  | 0.010459 | 0.093516 | -2.7905 | 80219  |
| ACTG1      | 553.78   | 553.78  | 718.95  | 2.9632  | 0.010463 | 0.093516 | -2.7909 | 71     |
| SPHK1      | 10.164   | 10.164  | 8.1079  | 2.9626  | 0.010476 | 0.093522 | -2.792  | 8877   |
| IRX4       | -2.1306  | 2.1306  | 3.6826  | -2.9625 | 0.010478 | 0.093522 | -2.7921 | 50805  |
| FAM89B     | 13.271   | 13.271  | 18.737  | 2.9623  | 0.010481 | 0.093522 | -2.7925 | 23625  |

|          |          |         |         |         |          |          |         |          |
|----------|----------|---------|---------|---------|----------|----------|---------|----------|
| CAND2    | -0.47494 | 0.47494 | 0.53061 | -2.9621 | 0.010486 | 0.093522 | -2.7929 | 23066    |
| GOLGA8R  | -0.4996  | 0.4996  | 0.50411 | -2.9607 | 0.010514 | 0.093719 | -2.7953 | 1.01E+08 |
| RORC     | -1.6112  | 1.6112  | 1.9087  | -2.9601 | 0.010526 | 0.09374  | -2.7964 | 6097     |
| MACROD1  | -2.4629  | 2.4629  | 3.171   | -2.9598 | 0.010533 | 0.09374  | -2.7971 | 28992    |
| CHPT1    | -2.764   | 2.764   | 3.3625  | -2.9595 | 0.010538 | 0.09374  | -2.7975 | 56994    |
| CTPS1    | 3.6855   | 3.6855  | 5.9485  | 2.9593  | 0.010544 | 0.09374  | -2.798  | 1503     |
| CX3CL1   | -4.0366  | 4.0366  | 3.068   | -2.9593 | 0.010544 | 0.09374  | -2.798  | 6376     |
| C16orf72 | 4.3201   | 4.3201  | 8.2288  | 2.9585  | 0.010559 | 0.093829 | -2.7994 | 29035    |
| MYL12B   | 75.928   | 75.928  | 98.627  | 2.9582  | 0.010565 | 0.093829 | -2.7999 | 103910   |
| WDR33    | -1.2075  | 1.2075  | 3.8695  | -2.9572 | 0.010587 | 0.093963 | -2.8018 | 55339    |
| TUBGCP3  | -0.9528  | 0.9528  | 3.0422  | -2.957  | 0.010591 | 0.093963 | -2.8022 | 10426    |
| TAS2R31  | -0.62879 | 0.62879 | 0.80134 | -2.9566 | 0.010599 | 0.093979 | -2.8029 | 259290   |
| MAP3K6   | -5.4     | 5.4     | 12.728  | -2.9562 | 0.010607 | 0.093979 | -2.8035 | 9064     |
| SPDYE18  | -0.57614 | 0.57614 | 0.48007 | -2.9557 | 0.010617 | 0.093979 | -2.8044 | 1.01E+08 |
| RBM26    | -1.4604  | 1.4604  | 4.1893  | -2.9554 | 0.010624 | 0.093979 | -2.805  | 64062    |
| WSB2     | 8.4701   | 8.4701  | 13.839  | 2.9554  | 0.010624 | 0.093979 | -2.8051 | 55884    |
| FRY-AS1  | -0.29891 | 0.29891 | 0.28101 | -2.9553 | 0.010626 | 0.093979 | -2.8053 | 1.01E+08 |
| RNF217   | 1.396    | 1.396   | 2.9944  | 2.9549  | 0.010634 | 0.093999 | -2.8059 | 154214   |
| MORF4L2  | 13.983   | 13.983  | 24.862  | 2.9535  | 0.010664 | 0.094216 | -2.8086 | 9643     |
| LIFR     | -3.1753  | 3.1753  | 2.2419  | -2.953  | 0.010674 | 0.094254 | -2.8094 | 3977     |
| ATP10D   | 2.246    | 2.246   | 8.0164  | 2.9525  | 0.010684 | 0.09429  | -2.8103 | 57205    |
| C4orf3   | 15.67    | 15.67   | 21.682  | 2.952   | 0.010696 | 0.094315 | -2.8113 | 401152   |
| METTL17  | -2.0325  | 2.0325  | 5.9708  | -2.9519 | 0.010698 | 0.094315 | -2.8115 | 64745    |
| TNFRSF18 | -0.87788 | 0.87788 | 1.1635  | -2.9508 | 0.010721 | 0.094338 | -2.8135 | 8784     |
| C1orf74  | 3.5377   | 3.5377  | 3.4543  | 2.9507  | 0.010723 | 0.094338 | -2.8137 | 148304   |
| RAB31    | 19.057   | 19.057  | 19.43   | 2.9506  | 0.010724 | 0.094338 | -2.8138 | 11031    |



|                           |          |         |         |         |          |          |         |          |
|---------------------------|----------|---------|---------|---------|----------|----------|---------|----------|
| PMAIP1                    | 1.1821   | 1.1821  | 1.7415  | 2.9504  | 0.01073  | 0.094338 | -2.8143 | 5366     |
| KRT15                     | -40.172  | 40.172  | 25.748  | -2.9504 | 0.01073  | 0.094338 | -2.8143 | 3866     |
| LOC100652999              | -0.347   | 0.347   | 0.333   | -2.9497 | 0.010743 | 0.094338 | -2.8155 | 1.01E+08 |
| STK38L                    | 2.3783   | 2.3783  | 4.5474  | 2.9497  | 0.010744 | 0.094338 | -2.8155 | 23012    |
| ZNF507                    | -0.9986  | 0.9986  | 2.1163  | -2.9496 | 0.010745 | 0.094338 | -2.8156 | 22847    |
| CA3                       | -0.23304 | 0.23304 | 0.17632 | -2.9485 | 0.010768 | 0.094492 | -2.8176 | 761      |
| TMEM271                   | -0.66969 | 0.66969 | 0.48126 | -2.9477 | 0.010785 | 0.094524 | -2.8191 | 1.12E+08 |
| SLC13A5                   | 0.29781  | 0.29781 | 0.22012 | 2.9473  | 0.010794 | 0.094524 | -2.8198 | 284111   |
| PCDHB3                    | -0.27176 | 0.27176 | 0.3403  | -2.9471 | 0.010799 | 0.094524 | -2.8202 | 56132    |
| MYLIP                     | -1.2939  | 1.2939  | 3.686   | -2.947  | 0.0108   | 0.094524 | -2.8203 | 29116    |
| FAM162A                   | 56.314   | 56.314  | 45.445  | 2.947   | 0.0108   | 0.094524 | -2.8204 | 26355    |
| KHDC1L                    | 0.29782  | 0.29782 | 0.19464 | 2.9468  | 0.010806 | 0.094524 | -2.8208 | 1E+08    |
| ANKRD20A4-<br>ANKRD20A20P | -0.33815 | 0.33815 | 0.21204 | -2.9462 | 0.010818 | 0.09456  | -2.8219 | 1.1E+08  |
| CHN1                      | 2.9287   | 2.9287  | 2.2719  | 2.9461  | 0.010821 | 0.09456  | -2.8221 | 1123     |
| NOP53-AS1                 | -0.29944 | 0.29944 | 0.32365 | -2.9448 | 0.010848 | 0.094746 | -2.8245 | 1.06E+08 |
| CLIP1                     | 20.136   | 20.136  | 31.508  | 2.9439  | 0.010868 | 0.09487  | -2.8262 | 6249     |
| TVP23C                    | -1.5562  | 1.5562  | 1.8115  | -2.9432 | 0.010881 | 0.094876 | -2.8273 | 201158   |
| PAFAH1B1                  | 8.7038   | 8.7038  | 22.143  | 2.9425  | 0.010897 | 0.094876 | -2.8287 | 5048     |
| GPR12                     | -0.47306 | 0.47306 | 0.26341 | -2.9425 | 0.010898 | 0.094876 | -2.8287 | 2835     |
| GCSAM                     | -1.8068  | 1.8068  | 1.4939  | -2.9421 | 0.010905 | 0.094876 | -2.8293 | 257144   |
| GALNT12                   | -0.50637 | 0.50637 | 0.79026 | -2.9421 | 0.010906 | 0.094876 | -2.8294 | 79695    |
| LOC100630923              | -1.2127  | 1.2127  | 2.1378  | -2.9421 | 0.010906 | 0.094876 | -2.8294 | 1.01E+08 |
| NUTM2G                    | -0.86366 | 0.86366 | 1.1834  | -2.9417 | 0.010913 | 0.094876 | -2.83   | 441457   |
| ZNF552                    | -0.95721 | 0.95721 | 2.8234  | -2.9415 | 0.010918 | 0.094876 | -2.8304 | 79818    |
| MAP2                      | 3.1915   | 3.1915  | 3.4237  | 2.9408  | 0.010934 | 0.094876 | -2.8318 | 4133     |

|              |          |         |         |         |          |          |         |          |
|--------------|----------|---------|---------|---------|----------|----------|---------|----------|
| PRNCR1       | -0.28384 | 0.28384 | 0.23602 | -2.9407 | 0.010935 | 0.094876 | -2.8319 | 1.02E+08 |
| ZNF471       | -0.38147 | 0.38147 | 0.60589 | -2.9405 | 0.01094  | 0.094876 | -2.8324 | 57573    |
| PARP10       | -3.7747  | 3.7747  | 3.5006  | -2.9404 | 0.010941 | 0.094876 | -2.8324 | 84875    |
| PCBD2        | -0.54331 | 0.54331 | 1.6421  | -2.9404 | 0.010941 | 0.094876 | -2.8324 | 84105    |
| FAM25C       | 46.751   | 46.751  | 26.228  | 2.94    | 0.010949 | 0.094896 | -2.8331 | 644054   |
| TMEM245      | -1.1686  | 1.1686  | 4.7468  | -2.9395 | 0.01096  | 0.094943 | -2.8341 | 23731    |
| ICA1L        | -0.38969 | 0.38969 | 0.36944 | -2.9392 | 0.010966 | 0.094947 | -2.8346 | 130026   |
| CAPZA1       | 20.745   | 20.745  | 29.819  | 2.9386  | 0.01098  | 0.09501  | -2.8357 | 829      |
| LOC103611081 | -0.78733 | 0.78733 | 1.3725  | -2.938  | 0.010992 | 0.09501  | -2.8368 | 1.04E+08 |
| SLCO4A1      | 3.7157   | 3.7157  | 4.5349  | 2.938   | 0.010993 | 0.09501  | -2.8368 | 28231    |
| ANKRD29      | 0.92071  | 0.92071 | 1.7898  | 2.9379  | 0.010996 | 0.09501  | -2.8371 | 147463   |
| MLLT11       | 0.70032  | 0.70032 | 0.81527 | 2.937   | 0.011016 | 0.095042 | -2.8387 | 10962    |
| PRKAG2-AS1   | -0.44808 | 0.44808 | 0.39484 | -2.9367 | 0.011021 | 0.095042 | -2.8392 | 1.01E+08 |
| VCL          | 10.496   | 10.496  | 24.837  | 2.9363  | 0.011029 | 0.095042 | -2.8399 | 7414     |
| DPH6         | -0.52123 | 0.52123 | 0.97996 | -2.9362 | 0.011032 | 0.095042 | -2.8402 | 89978    |
| PBX3         | 1.0458   | 1.0458  | 2.6391  | 2.9359  | 0.011038 | 0.095042 | -2.8407 | 5090     |
| TGFBRAP1     | -1.104   | 1.104   | 3.3599  | -2.9359 | 0.011039 | 0.095042 | -2.8407 | 9392     |
| B3GNT3       | 2.3725   | 2.3725  | 1.7514  | 2.9359  | 0.011039 | 0.095042 | -2.8407 | 10331    |
| EDAR         | -0.5836  | 0.5836  | 0.51747 | -2.9354 | 0.01105  | 0.095084 | -2.8416 | 10913    |
| FLJ12825     | -0.32652 | 0.32652 | 0.27456 | -2.9345 | 0.01107  | 0.095207 | -2.8433 | 440101   |
| WDR72        | -0.49911 | 0.49911 | 0.3271  | -2.9338 | 0.011084 | 0.095277 | -2.8445 | 256764   |
| ANP32AP1     | -0.33216 | 0.33216 | 0.27779 | -2.9325 | 0.011113 | 0.095464 | -2.8469 | 723972   |
| SLC26A5      | -0.21668 | 0.21668 | 0.13051 | -2.9323 | 0.011117 | 0.095464 | -2.8472 | 375611   |
| ZNF519       | -0.25713 | 0.25713 | 0.27621 | -2.9317 | 0.01113  | 0.095526 | -2.8483 | 162655   |
| EXOC5        | 1.6873   | 1.6873  | 3.5612  | 2.931   | 0.011145 | 0.095607 | -2.8496 | 10640    |
| LOC101241902 | -0.51892 | 0.51892 | 0.44    | -2.9296 | 0.011175 | 0.095819 | -2.8521 | 1.01E+08 |

|           |          |         |         |         |          |          |         |        |
|-----------|----------|---------|---------|---------|----------|----------|---------|--------|
| LOC220729 | -1.2248  | 1.2248  | 3.1519  | -2.9291 | 0.011188 | 0.095861 | -2.8532 | 220729 |
| PLEKHG2   | 2.4767   | 2.4767  | 3.0527  | 2.9287  | 0.011197 | 0.095861 | -2.8539 | 64857  |
| RALA      | 6.1777   | 6.1777  | 9.6067  | 2.9286  | 0.011197 | 0.095861 | -2.8539 | 5898   |
| NUP58     | 2.3528   | 2.3528  | 4.7435  | 2.9281  | 0.01121  | 0.095924 | -2.855  | 9818   |
| CYP2J2    | -1.1091  | 1.1091  | 1.0921  | -2.927  | 0.011233 | 0.096012 | -2.8569 | 1573   |
| LRFN1     | -0.31096 | 0.31096 | 0.46906 | -2.9268 | 0.011238 | 0.096012 | -2.8573 | 57622  |
| KLHL29    | -0.77604 | 0.77604 | 1.5309  | -2.9268 | 0.011238 | 0.096012 | -2.8573 | 114818 |
| OBSCN     | -1.2808  | 1.2808  | 1.0697  | -2.9266 | 0.011243 | 0.096012 | -2.8577 | 84033  |
| POM121    | -2.2056  | 2.2056  | 6.3163  | -2.926  | 0.011256 | 0.096024 | -2.8588 | 9883   |
| OSR1      | -1.642   | 1.642   | 1.3102  | -2.9259 | 0.011258 | 0.096024 | -2.859  | 130497 |
| ZNF273    | -2.0017  | 2.0017  | 1.569   | -2.9257 | 0.011261 | 0.096024 | -2.8593 | 10793  |
| FBXO30    | 1.5961   | 1.5961  | 3.4427  | 2.9245  | 0.01129  | 0.096211 | -2.8616 | 84085  |
| BLCAP     | -4.7045  | 4.7045  | 15.496  | -2.9242 | 0.011295 | 0.096211 | -2.862  | 10904  |
| ZBTB44    | -1.321   | 1.321   | 3.4555  | -2.9233 | 0.011316 | 0.096339 | -2.8637 | 29068  |
| ASB9P1    | -0.29681 | 0.29681 | 0.2687  | -2.9224 | 0.011335 | 0.096455 | -2.8653 | 728619 |
| C1QTNF4   | -0.27916 | 0.27916 | 0.26769 | -2.9213 | 0.01136  | 0.096531 | -2.8673 | 114900 |
| ZKSCAN8   | -1.3221  | 1.3221  | 2.1711  | -2.9212 | 0.011361 | 0.096531 | -2.8674 | 7745   |
| PMEPA1    | 4.9286   | 4.9286  | 7.4848  | 2.9211  | 0.011365 | 0.096531 | -2.8678 | 56937  |
| TSR2      | -1.4865  | 1.4865  | 3.5265  | -2.9205 | 0.011378 | 0.096531 | -2.8689 | 90121  |
| ZNF76     | -1.3041  | 1.3041  | 2.9351  | -2.9202 | 0.011385 | 0.096531 | -2.8694 | 7629   |
| CAP1      | 41.451   | 41.451  | 47.388  | 2.9199  | 0.01139  | 0.096531 | -2.8698 | 10487  |
| ARPC2     | 66.76    | 66.76   | 102.96  | 2.9198  | 0.011392 | 0.096531 | -2.87   | 10109  |
| LOC654780 | -0.35135 | 0.35135 | 0.45746 | -2.9198 | 0.011392 | 0.096531 | -2.87   | 654780 |
| PDCD6IP   | 7.8062   | 7.8062  | 14.743  | 2.9197  | 0.011396 | 0.096531 | -2.8703 | 10015  |
| CD58      | 1.4578   | 1.4578  | 3.4017  | 2.9194  | 0.011401 | 0.096531 | -2.8707 | 965    |
| FBLN2     | -13.938  | 13.938  | 18.247  | -2.9191 | 0.011409 | 0.096547 | -2.8713 | 2199   |

|              |          |         |         |         |          |          |         |          |
|--------------|----------|---------|---------|---------|----------|----------|---------|----------|
| LOC101928731 | -0.4692  | 0.4692  | 0.57534 | -2.9183 | 0.011426 | 0.096647 | -2.8728 | 1.02E+08 |
| B3GNT2       | 5.3245   | 5.3245  | 5.7423  | 2.9175  | 0.011444 | 0.096754 | -2.8743 | 10678    |
| GIT1         | -3.3704  | 3.3704  | 7.5018  | -2.9163 | 0.011471 | 0.096791 | -2.8764 | 28964    |
| ARPP19       | 7.6711   | 7.6711  | 12.851  | 2.9162  | 0.011474 | 0.096791 | -2.8766 | 10776    |
| PRB2         | -0.31715 | 0.31715 | 0.19857 | -2.916  | 0.011477 | 0.096791 | -2.8769 | 653247   |
| HYKK         | -0.20307 | 0.20307 | 0.25578 | -2.9157 | 0.011485 | 0.096791 | -2.8775 | 123688   |
| PLOD2        | 3.6159   | 3.6159  | 3.5656  | 2.9152  | 0.011495 | 0.096791 | -2.8784 | 5352     |
| TTC5         | -1.0238  | 1.0238  | 2.7365  | -2.915  | 0.0115   | 0.096791 | -2.8787 | 91875    |
| ZBTB20-AS4   | -0.4917  | 0.4917  | 0.4264  | -2.915  | 0.011501 | 0.096791 | -2.8789 | 1.01E+08 |
| SCGB1B2P     | -7.4957  | 7.4957  | 4.3339  | -2.9149 | 0.011504 | 0.096791 | -2.8791 | 643719   |
| PRELID1      | 52.534   | 52.534  | 62.907  | 2.9144  | 0.011514 | 0.096791 | -2.8799 | 27166    |
| CDS1         | 6.0409   | 6.0409  | 7.3183  | 2.9143  | 0.011517 | 0.096791 | -2.8801 | 1040     |
| TGFBR1       | 4.5333   | 4.5333  | 7.4442  | 2.9141  | 0.011522 | 0.096791 | -2.8805 | 7046     |
| PRODH        | -4.0637  | 4.0637  | 4.1437  | -2.9137 | 0.011529 | 0.096791 | -2.8811 | 5625     |
| NDUFA10      | -1.3257  | 1.3257  | 4.2391  | -2.9137 | 0.01153  | 0.096791 | -2.8812 | 4705     |
| TNFRSF19     | -5.9697  | 5.9697  | 6.6245  | -2.9136 | 0.011533 | 0.096791 | -2.8814 | 55504    |
| PROX2        | -0.26223 | 0.26223 | 0.27689 | -2.9134 | 0.011537 | 0.096791 | -2.8817 | 283571   |
| TRIM16       | 12.438   | 12.438  | 15.814  | 2.9126  | 0.011554 | 0.096791 | -2.8831 | 10626    |
| LINC00869    | -0.34121 | 0.34121 | 0.55502 | -2.9126 | 0.011555 | 0.096791 | -2.8832 | 57234    |
| STT3B        | 7.2742   | 7.2742  | 15.018  | 2.9125  | 0.011556 | 0.096791 | -2.8833 | 201595   |
| PPP4R1       | 20.295   | 20.295  | 26.026  | 2.9125  | 0.011558 | 0.096791 | -2.8834 | 9989     |
| HOXA10-AS    | -0.65646 | 0.65646 | 1.3965  | -2.912  | 0.011568 | 0.096827 | -2.8842 | 1.01E+08 |
| TRIM13       | 0.89299  | 0.89299 | 2.9444  | 2.9115  | 0.01158  | 0.096878 | -2.8852 | 10206    |
| CNTFR        | -0.71418 | 0.71418 | 0.58549 | -2.911  | 0.011591 | 0.096881 | -2.8861 | 1271     |
| LTO1         | -0.78228 | 0.78228 | 2.5939  | -2.9108 | 0.011596 | 0.096881 | -2.8864 | 220064   |
| ZNF564       | -1.0636  | 1.0636  | 2.13    | -2.9104 | 0.011606 | 0.096881 | -2.8873 | 163050   |

|             |          |         |         |         |          |          |         |          |
|-------------|----------|---------|---------|---------|----------|----------|---------|----------|
| ANKHD1      | -2.1988  | 2.1988  | 5.2929  | -2.9103 | 0.011607 | 0.096881 | -2.8873 | 54882    |
| BBS9        | -0.67924 | 0.67924 | 1.5804  | -2.91   | 0.011615 | 0.096881 | -2.888  | 27241    |
| KRT16P1     | 1.2636   | 1.2636  | 1.0123  | 2.9098  | 0.011618 | 0.096881 | -2.8883 | 729252   |
| GASAL1      | 0.56452  | 0.56452 | 0.80629 | 2.9097  | 0.01162  | 0.096881 | -2.8884 | 401472   |
| IRAIN       | -0.3906  | 0.3906  | 0.36951 | -2.9092 | 0.011633 | 0.096921 | -2.8894 | 1.04E+08 |
| SNTB1       | -1.2089  | 1.2089  | 2.0335  | -2.9088 | 0.011642 | 0.096921 | -2.8901 | 6641     |
| HIGD1A      | 18.266   | 18.266  | 20.478  | 2.9087  | 0.011643 | 0.096921 | -2.8903 | 25994    |
| NDUFB2-AS1  | -0.24068 | 0.24068 | 0.37742 | -2.9085 | 0.011648 | 0.096921 | -2.8906 | 1E+08    |
| CD5         | -0.53636 | 0.53636 | 0.76264 | -2.9081 | 0.011657 | 0.096951 | -2.8914 | 921      |
| ARMCX4      | -0.31243 | 0.31243 | 0.44055 | -2.907  | 0.011683 | 0.097075 | -2.8935 | 1E+08    |
| MUC20       | -1.535   | 1.535   | 1.143   | -2.9066 | 0.011692 | 0.097075 | -2.8942 | 200958   |
| PJK         | -0.25981 | 0.25981 | 0.31687 | -2.9064 | 0.011696 | 0.097075 | -2.8945 | 494513   |
| FAM166B     | -0.25492 | 0.25492 | 0.19941 | -2.9063 | 0.011698 | 0.097075 | -2.8946 | 730112   |
| FBXW2       | -0.96459 | 0.96459 | 5.1761  | -2.9062 | 0.011702 | 0.097075 | -2.8949 | 26190    |
| MRS2P2      | -0.35396 | 0.35396 | 0.39628 | -2.906  | 0.011707 | 0.097075 | -2.8953 | 729633   |
| TMEM9B-AS1  | -0.97207 | 0.97207 | 1.4297  | -2.9057 | 0.011713 | 0.09708  | -2.8958 | 493900   |
| ZNF326      | -0.89351 | 0.89351 | 1.5626  | -2.9053 | 0.011722 | 0.097107 | -2.8965 | 284695   |
| GNAI3       | 8.9693   | 8.9693  | 14.485  | 2.9049  | 0.011731 | 0.097136 | -2.8973 | 2773     |
| DAPP1       | 1.9554   | 1.9554  | 3.3017  | 2.9042  | 0.011746 | 0.097212 | -2.8984 | 27071    |
| NIPA2       | 2.4541   | 2.4541  | 3.9919  | 2.9035  | 0.011764 | 0.09726  | -2.8998 | 81614    |
| BDH1        | 3.9971   | 3.9971  | 6.0815  | 2.9035  | 0.011764 | 0.09726  | -2.8998 | 622      |
| MIR4435-2HG | 1.457    | 1.457   | 1.5467  | 2.9032  | 0.01177  | 0.097266 | -2.9003 | 541471   |
| COL4A1      | 56.976   | 56.976  | 52.626  | 2.9025  | 0.011786 | 0.097322 | -2.9015 | 1282     |
| PLAUR       | 8.6848   | 8.6848  | 7.0265  | 2.9023  | 0.011792 | 0.097322 | -2.902  | 5329     |
| EPHX2       | -4.3978  | 4.3978  | 4.9648  | -2.9021 | 0.011796 | 0.097322 | -2.9024 | 2053     |
| TAPT1-AS1   | -0.68914 | 0.68914 | 0.67057 | -2.9019 | 0.0118   | 0.097322 | -2.9027 | 202020   |

|              |          |         |         |         |          |          |         |        |
|--------------|----------|---------|---------|---------|----------|----------|---------|--------|
| YBX2         | -0.30179 | 0.30179 | 0.18621 | -2.9014 | 0.011811 | 0.097337 | -2.9035 | 51087  |
| RAVER2       | -0.79357 | 0.79357 | 1.6429  | -2.9013 | 0.011813 | 0.097337 | -2.9037 | 55225  |
| MIR4697HG    | -0.38281 | 0.38281 | 0.35237 | -2.9009 | 0.011823 | 0.097366 | -2.9045 | 283174 |
| HOXC5        | -0.44222 | 0.44222 | 0.60589 | -2.9006 | 0.011831 | 0.097381 | -2.9051 | 3222   |
| ATXN1        | 1.5205   | 1.5205  | 4.2285  | 2.9004  | 0.011836 | 0.097381 | -2.9055 | 6310   |
| FAM185A      | -0.61612 | 0.61612 | 1.2681  | -2.8991 | 0.011865 | 0.097574 | -2.9078 | 222234 |
| ZNF169       | -0.25745 | 0.25745 | 0.41484 | -2.8988 | 0.011872 | 0.097579 | -2.9083 | 169841 |
| SLC2A11      | -0.27687 | 0.27687 | 0.38473 | -2.898  | 0.01189  | 0.097687 | -2.9098 | 66035  |
| DHX58        | -1.4573  | 1.4573  | 1.5136  | -2.8975 | 0.011901 | 0.097706 | -2.9106 | 79132  |
| FER1L6       | 0.30489  | 0.30489 | 0.17833 | 2.8969  | 0.011916 | 0.097706 | -2.9118 | 654463 |
| LOC100133331 | -0.61167 | 0.61167 | 1.0141  | -2.8968 | 0.011918 | 0.097706 | -2.912  | 1E+08  |
| EIF4EBP1     | 22.112   | 22.112  | 20.893  | 2.8965  | 0.011927 | 0.097706 | -2.9126 | 1978   |
| CLDN4        | 37.864   | 37.864  | 35.681  | 2.8965  | 0.011927 | 0.097706 | -2.9126 | 1364   |
| POLR3E       | -1.3208  | 1.3208  | 4.4839  | -2.8962 | 0.011932 | 0.097706 | -2.913  | 55718  |
| ADD3         | -3.4739  | 3.4739  | 5.1093  | -2.8962 | 0.011933 | 0.097706 | -2.9131 | 120    |
| RFK          | 1.2128   | 1.2128  | 1.704   | 2.895   | 0.011962 | 0.097892 | -2.9153 | 55312  |
| HERC2P9      | -2.3929  | 2.3929  | 3.27    | -2.8946 | 0.011971 | 0.097916 | -2.916  | 440248 |
| TYRO3P       | -0.71669 | 0.71669 | 0.83311 | -2.8938 | 0.011989 | 0.098017 | -2.9174 | 7302   |
| CLTC         | 12.565   | 12.565  | 28.359  | 2.8932  | 0.012002 | 0.098061 | -2.9185 | 1213   |
| CTSW         | -0.37396 | 0.37396 | 0.44741 | -2.8929 | 0.012011 | 0.098061 | -2.9191 | 1521   |
| ZNF248       | -0.41688 | 0.41688 | 0.72215 | -2.8925 | 0.01202  | 0.098061 | -2.9198 | 57209  |
| MUTYH        | -0.48233 | 0.48233 | 1.3634  | -2.8924 | 0.012022 | 0.098061 | -2.92   | 4595   |
| GPR155       | -0.98633 | 0.98633 | 2.2477  | -2.8924 | 0.012023 | 0.098061 | -2.9201 | 151556 |
| GHRL         | -0.45718 | 0.45718 | 0.57623 | -2.8919 | 0.012033 | 0.098092 | -2.9208 | 51738  |
| GDPD3        | 12.753   | 12.753  | 10.912  | 2.8905  | 0.012068 | 0.098331 | -2.9235 | 79153  |
| SLAMF7       | 6.256    | 6.256   | 4.3355  | 2.8899  | 0.012081 | 0.098355 | -2.9246 | 57823  |

|              |          |         |         |         |          |          |         |          |
|--------------|----------|---------|---------|---------|----------|----------|---------|----------|
| ICMT         | 5.4934   | 5.4934  | 10.748  | 2.8897  | 0.012086 | 0.098355 | -2.9249 | 23463    |
| CYB5RL       | -0.36248 | 0.36248 | 0.56114 | -2.8896 | 0.012088 | 0.098355 | -2.9251 | 606495   |
| INO80        | -0.91277 | 0.91277 | 4.409   | -2.8888 | 0.012108 | 0.098466 | -2.9266 | 54617    |
| LOC101928988 | -0.49066 | 0.49066 | 0.31036 | -2.8879 | 0.012128 | 0.098544 | -2.9281 | 1.02E+08 |
| PGM2         | 12.138   | 12.138  | 17.641  | 2.8879  | 0.012129 | 0.098544 | -2.9282 | 55276    |
| AQP11        | -0.36787 | 0.36787 | 0.49464 | -2.8875 | 0.012138 | 0.09857  | -2.9289 | 282679   |
| LINC00115    | -0.96801 | 0.96801 | 1.6308  | -2.8868 | 0.012154 | 0.098655 | -2.9302 | 79854    |
| PDCL3P4      | -0.21546 | 0.21546 | 0.14422 | -2.8856 | 0.012182 | 0.098808 | -2.9323 | 285359   |
| AVIL         | -0.36892 | 0.36892 | 0.64459 | -2.8855 | 0.012185 | 0.098808 | -2.9325 | 10677    |
| AOC1         | -0.3236  | 0.3236  | 0.43757 | -2.885  | 0.012197 | 0.09886  | -2.9334 | 26       |
| RAP2C-AS1    | -0.33679 | 0.33679 | 0.45293 | -2.8848 | 0.012203 | 0.098863 | -2.9339 | 1.02E+08 |
| GRTP1-AS1    | -0.39858 | 0.39858 | 0.34928 | -2.8844 | 0.012213 | 0.098893 | -2.9346 | 1.01E+08 |
| PKD1         | -7.7291  | 7.7291  | 10.032  | -2.8832 | 0.01224  | 0.099039 | -2.9366 | 5310     |
| TMEM265      | 1.7013   | 1.7013  | 3.664   | 2.883   | 0.012246 | 0.099039 | -2.9372 | 1.01E+08 |
| DCPS         | -0.92043 | 0.92043 | 1.6799  | -2.8827 | 0.012252 | 0.099039 | -2.9376 | 28960    |
| PHF7         | -0.51802 | 0.51802 | 1.2053  | -2.8826 | 0.012255 | 0.099039 | -2.9378 | 51533    |
| GMPR         | -1.7759  | 1.7759  | 1.3602  | -2.8821 | 0.012268 | 0.099101 | -2.9388 | 2766     |
| NDUFA4L2     | 77.159   | 77.159  | 86.73   | 2.8813  | 0.012286 | 0.099196 | -2.9401 | 56901    |
| TAS2R14      | -0.43102 | 0.43102 | 0.50018 | -2.8805 | 0.012305 | 0.099197 | -2.9416 | 50840    |
| PHOSPHO2     | -0.25659 | 0.25659 | 0.49494 | -2.8804 | 0.012308 | 0.099197 | -2.9418 | 493911   |
| MTHFD2       | 6.4755   | 6.4755  | 7.074   | 2.8802  | 0.012314 | 0.099197 | -2.9423 | 10797    |
| SLMAP        | 1.8971   | 1.8971  | 5.2233  | 2.88    | 0.012317 | 0.099197 | -2.9425 | 7871     |
| CBL          | 1.4889   | 1.4889  | 4.4153  | 2.88    | 0.012317 | 0.099197 | -2.9425 | 867      |
| RNF216       | -1.4014  | 1.4014  | 4.8867  | -2.8796 | 0.012326 | 0.099197 | -2.9432 | 54476    |
| NUTM2D       | -1.1002  | 1.1002  | 1.4878  | -2.8796 | 0.012327 | 0.099197 | -2.9432 | 728130   |
| CGRRF1       | 0.84285  | 0.84285 | 1.4332  | 2.8789  | 0.012344 | 0.099284 | -2.9445 | 10668    |

|              |          |         |         |         |          |          |         |          |
|--------------|----------|---------|---------|---------|----------|----------|---------|----------|
| LOC93622     | -1.0979  | 1.0979  | 1.9166  | -2.8786 | 0.012352 | 0.099289 | -2.9452 | 93622    |
| SMAD5-AS1    | -0.39646 | 0.39646 | 0.56446 | -2.8784 | 0.012357 | 0.099289 | -2.9455 | 9597     |
| RAB40B       | -0.94954 | 0.94954 | 2.4117  | -2.8782 | 0.012362 | 0.099289 | -2.9459 | 10966    |
| DCST1        | -0.22963 | 0.22963 | 0.18797 | -2.8778 | 0.012372 | 0.099289 | -2.9466 | 149095   |
| MAP3K1       | -3.2965  | 3.2965  | 7.8335  | -2.8777 | 0.012374 | 0.099289 | -2.9468 | 4214     |
| SCEL-AS1     | -0.25082 | 0.25082 | 0.21529 | -2.877  | 0.01239  | 0.099353 | -2.948  | 1.04E+08 |
| LDLRAD4-AS1  | -0.42598 | 0.42598 | 0.3385  | -2.8767 | 0.012397 | 0.099353 | -2.9485 | 1E+08    |
| DIO3         | -0.4264  | 0.4264  | 0.25146 | -2.8765 | 0.012402 | 0.099353 | -2.9489 | 1735     |
| MACO1        | 4.1469   | 4.1469  | 6.3845  | 2.8764  | 0.012405 | 0.099353 | -2.9491 | 55219    |
| LOC100190986 | -28.862  | 28.862  | 32.927  | -2.876  | 0.012415 | 0.099371 | -2.9499 | 1E+08    |
| SFRP1        | -14.154  | 14.154  | 17.289  | -2.8758 | 0.012419 | 0.099371 | -2.9502 | 6422     |
| LNX2         | 2.0035   | 2.0035  | 3.7553  | 2.8747  | 0.012445 | 0.099442 | -2.9521 | 222484   |
| PARP6        | -2.125   | 2.125   | 6.0453  | -2.8747 | 0.012446 | 0.099442 | -2.9522 | 56965    |
| NAPA-AS1     | -0.28566 | 0.28566 | 0.45977 | -2.8747 | 0.012446 | 0.099442 | -2.9522 | 1.01E+08 |
| ECT2         | 1.9837   | 1.9837  | 2.0841  | 2.8745  | 0.012452 | 0.099442 | -2.9526 | 1894     |
| SCART1       | -0.53801 | 0.53801 | 0.53895 | -2.8739 | 0.012465 | 0.099452 | -2.9536 | 619207   |
| LOC100507373 | -0.56264 | 0.56264 | 0.87003 | -2.8739 | 0.012466 | 0.099452 | -2.9536 | 1.01E+08 |
| CLDN2        | -0.318   | 0.318   | 0.24899 | -2.8737 | 0.012471 | 0.099452 | -2.954  | 9075     |
| TFAP2A-AS2   | -0.84504 | 0.84504 | 1.2509  | -2.8726 | 0.012497 | 0.099517 | -2.9559 | 1.1E+08  |
| ZNF665       | -0.19672 | 0.19672 | 0.20553 | -2.8725 | 0.012499 | 0.099517 | -2.9561 | 79788    |
| MYOC         | -0.61817 | 0.61817 | 0.32969 | -2.8722 | 0.012507 | 0.099517 | -2.9567 | 4653     |
| RETREG2      | -3.6586  | 3.6586  | 8.7112  | -2.8722 | 0.012508 | 0.099517 | -2.9568 | 79137    |
| KDM6A        | -0.89914 | 0.89914 | 4.2375  | -2.8722 | 0.012508 | 0.099517 | -2.9568 | 7403     |
| ATP13A5      | -0.65684 | 0.65684 | 0.36551 | -2.8712 | 0.012531 | 0.099653 | -2.9585 | 344905   |
| LOC101928042 | -0.49341 | 0.49341 | 0.46196 | -2.8709 | 0.012539 | 0.099656 | -2.9591 | 1.02E+08 |
| LINC01876    | -0.51437 | 0.51437 | 0.49073 | -2.8707 | 0.012543 | 0.099656 | -2.9594 | 1.02E+08 |



|              |          |         |         |         |          |          |         |          |
|--------------|----------|---------|---------|---------|----------|----------|---------|----------|
| PRELP        | -5.3434  | 5.3434  | 4.4228  | -2.8704 | 0.01255  | 0.099666 | -2.9599 | 5549     |
| MYO1E        | 7.9712   | 7.9712  | 14.689  | 2.8694  | 0.012576 | 0.099808 | -2.9618 | 4643     |
| ARHGGEF26    | -1.7065  | 1.7065  | 1.595   | -2.8692 | 0.01258  | 0.099808 | -2.9621 | 26084    |
| ST7-AS1      | -0.33294 | 0.33294 | 0.52283 | -2.8686 | 0.012596 | 0.099887 | -2.9633 | 93653    |
| MORN3        | -0.30374 | 0.30374 | 0.32115 | -2.868  | 0.01261  | 0.099953 | -2.9643 | 283385   |
| LIMS1        | 3.7744   | 3.7744  | 6.7973  | 2.8666  | 0.012645 | 0.10013  | -2.9669 | 3987     |
| ZNF483       | -0.33337 | 0.33337 | 0.3791  | -2.8665 | 0.012647 | 0.10013  | -2.967  | 158399   |
| ITGAV        | 9.9588   | 9.9588  | 16.457  | 2.8664  | 0.01265  | 0.10013  | -2.9673 | 3685     |
| LINC01422    | -0.29848 | 0.29848 | 0.1787  | -2.8659 | 0.012664 | 0.10016  | -2.9683 | 1.02E+08 |
| MTMR8        | -0.25343 | 0.25343 | 0.32393 | -2.8656 | 0.012671 | 0.10016  | -2.9688 | 55613    |
| LOC91370     | -0.23589 | 0.23589 | 0.15896 | -2.8655 | 0.012672 | 0.10016  | -2.9689 | 91370    |
| HOXC6        | -1.3613  | 1.3613  | 2.0843  | -2.8653 | 0.012679 | 0.10017  | -2.9694 | 3223     |
| MOB4         | 2.5455   | 2.5455  | 4.7398  | 2.8645  | 0.012697 | 0.10026  | -2.9707 | 25843    |
| SLCO2A1      | 6.5238   | 6.5238  | 7.5308  | 2.8643  | 0.012703 | 0.10027  | -2.9712 | 6578     |
| MFSD13A      | -0.72192 | 0.72192 | 1.1161  | -2.864  | 0.01271  | 0.10027  | -2.9717 | 79847    |
| SNORA50C     | -0.77822 | 0.77822 | 1.2449  | -2.8629 | 0.012738 | 0.10045  | -2.9737 | 677842   |
| KLF10        | 7.4664   | 7.4664  | 19.886  | 2.861   | 0.012786 | 0.10077  | -2.9771 | 7071     |
| MTMR6        | 1.5121   | 1.5121  | 3.3673  | 2.8604  | 0.012799 | 0.10084  | -2.9782 | 9107     |
| LINC01873    | -21.968  | 21.968  | 41.531  | -2.8601 | 0.012808 | 0.10085  | -2.9788 | 729348   |
| SYT2         | -0.25882 | 0.25882 | 0.31018 | -2.8599 | 0.012813 | 0.10085  | -2.9792 | 127833   |
| C3orf36      | 0.91323  | 0.91323 | 0.62266 | 2.8589  | 0.012837 | 0.10099  | -2.9809 | 80111    |
| LOC105373064 | -0.37563 | 0.37563 | 0.3809  | -2.8579 | 0.012862 | 0.10114  | -2.9827 | 1.05E+08 |
| TOR1AIP1     | 4.035    | 4.035   | 7.8596  | 2.8575  | 0.012874 | 0.10119  | -2.9835 | 26092    |
| LIG4         | 1.3453   | 1.3453  | 1.5718  | 2.8565  | 0.012897 | 0.1013   | -2.9852 | 3981     |
| ZBTB8OS      | 1.7113   | 1.7113  | 2.6462  | 2.8564  | 0.012901 | 0.1013   | -2.9855 | 339487   |
| MPV17L       | -0.75335 | 0.75335 | 0.61261 | -2.8557 | 0.012918 | 0.10134  | -2.9867 | 255027   |

|              |          |         |         |         |          |         |         |        |
|--------------|----------|---------|---------|---------|----------|---------|---------|--------|
| FCHO2        | 1.854    | 1.854   | 4.6707  | 2.8554  | 0.012925 | 0.10134 | -2.9872 | 115548 |
| ZNF528       | -0.6614  | 0.6614  | 1.0459  | -2.8553 | 0.012929 | 0.10134 | -2.9875 | 84436  |
| FAM27E3      | -0.52587 | 0.52587 | 0.43856 | -2.8553 | 0.012929 | 0.10134 | -2.9875 | 1E+08  |
| CLIC3        | 46.552   | 46.552  | 45.911  | 2.855   | 0.012937 | 0.10135 | -2.9881 | 9022   |
| RAB5A        | 17.677   | 17.677  | 21.942  | 2.8546  | 0.012945 | 0.10137 | -2.9887 | 5868   |
| RBM20        | -0.2116  | 0.2116  | 0.16409 | -2.854  | 0.012962 | 0.1014  | -2.9899 | 282996 |
| TNFRSF11B    | 1.3102   | 1.3102  | 0.84518 | 2.8538  | 0.012966 | 0.1014  | -2.9902 | 4982   |
| BLZF1        | 3.1238   | 3.1238  | 4.4534  | 2.8538  | 0.012967 | 0.1014  | -2.9902 | 8548   |
| NRON         | -0.27894 | 0.27894 | 0.25555 | -2.8534 | 0.012976 | 0.10143 | -2.9909 | 641373 |
| MIR503HG     | 0.32784  | 0.32784 | 0.25293 | 2.8527  | 0.012995 | 0.10147 | -2.9922 | 84848  |
| LOC100288162 | -1.0754  | 1.0754  | 1.1632  | -2.8526 | 0.012997 | 0.10147 | -2.9923 | 1E+08  |
| TRIM63       | -0.23122 | 0.23122 | 0.21233 | -2.8525 | 0.013    | 0.10147 | -2.9926 | 84676  |
| YWHAQ        | 55.492   | 55.492  | 64.79   | 2.8519  | 0.013014 | 0.10154 | -2.9936 | 10971  |
| FBLN5        | -5.4813  | 5.4813  | 7.3083  | -2.8514 | 0.013028 | 0.10159 | -2.9946 | 10516  |
| ANGPTL5      | -0.45105 | 0.45105 | 0.25873 | -2.8511 | 0.013034 | 0.10159 | -2.995  | 253935 |
| MAPK3        | 21.571   | 21.571  | 30.376  | 2.8504  | 0.013053 | 0.10161 | -2.9964 | 5595   |
| HM13         | 6.2711   | 6.2711  | 11.693  | 2.8501  | 0.01306  | 0.10161 | -2.9968 | 81502  |
| TSG101       | 8.8681   | 8.8681  | 15.749  | 2.85    | 0.013063 | 0.10161 | -2.9971 | 7251   |
| MITF         | -0.86375 | 0.86375 | 1.2494  | -2.8499 | 0.013066 | 0.10161 | -2.9973 | 4286   |
| STK26        | 1.9617   | 1.9617  | 2.3434  | 2.8499  | 0.013066 | 0.10161 | -2.9973 | 51765  |
| ASB16-AS1    | -0.58678 | 0.58678 | 1.1027  | -2.8493 | 0.01308  | 0.10167 | -2.9983 | 339201 |
| LOC284009    | -0.33189 | 0.33189 | 0.33718 | -2.8488 | 0.013093 | 0.10168 | -2.9992 | 284009 |
| AKR7A3       | -0.46993 | 0.46993 | 0.51224 | -2.8488 | 0.013093 | 0.10168 | -2.9992 | 22977  |
| DYRK2        | 1.0183   | 1.0183  | 3.7602  | 2.8483  | 0.013105 | 0.10171 | -3.0001 | 8445   |
| ZFP92        | 0.24716  | 0.24716 | 0.27242 | 2.8482  | 0.013109 | 0.10171 | -3.0003 | 139735 |
| RAB10        | 21.529   | 21.529  | 36.193  | 2.8477  | 0.013123 | 0.10177 | -3.0013 | 10890  |

|              |          |         |         |         |          |         |         |          |
|--------------|----------|---------|---------|---------|----------|---------|---------|----------|
| ACOT7        | 5.984    | 5.984   | 6.6433  | 2.8469  | 0.013144 | 0.10189 | -3.0028 | 11332    |
| LYPD2        | -3.0697  | 3.0697  | 2.1662  | -2.8465 | 0.013153 | 0.10191 | -3.0034 | 137797   |
| SLC22A20P    | -0.18092 | 0.18092 | 0.18055 | -2.8456 | 0.013176 | 0.10202 | -3.005  | 440044   |
| METRNL       | 32.541   | 32.541  | 44.761  | 2.8454  | 0.013182 | 0.10202 | -3.0054 | 284207   |
| HACL1        | -0.78409 | 0.78409 | 2.4474  | -2.8451 | 0.013189 | 0.10202 | -3.006  | 26061    |
| ZMAT5        | 11.429   | 11.429  | 9.5856  | 2.845   | 0.013191 | 0.10202 | -3.0061 | 55954    |
| ZNF540       | -0.26987 | 0.26987 | 0.263   | -2.8443 | 0.013209 | 0.10211 | -3.0074 | 163255   |
| KLF6         | 14.157   | 14.157  | 33.285  | 2.8429  | 0.013246 | 0.10234 | -3.0099 | 1316     |
| SELENOS      | 5.182    | 5.182   | 8.8858  | 2.8427  | 0.013251 | 0.10234 | -3.0103 | 55829    |
| SNORA7B      | -1.3421  | 1.3421  | 1.5248  | -2.842  | 0.013268 | 0.10241 | -3.0115 | 677797   |
| FGFBP1       | 50.805   | 50.805  | 42.789  | 2.8419  | 0.013272 | 0.10241 | -3.0118 | 9982     |
| ENPEP        | 2.1873   | 2.1873  | 1.333   | 2.8411  | 0.013292 | 0.10247 | -3.0131 | 2028     |
| LIN54        | 0.81754  | 0.81754 | 2.077   | 2.8409  | 0.013297 | 0.10247 | -3.0135 | 132660   |
| CTTNBP2      | -0.43774 | 0.43774 | 0.61426 | -2.8409 | 0.013298 | 0.10247 | -3.0136 | 83992    |
| LOC100506472 | -0.31211 | 0.31211 | 0.32525 | -2.8401 | 0.013319 | 0.10257 | -3.0151 | 1.01E+08 |
| GSTA3        | -0.79321 | 0.79321 | 0.44938 | -2.8399 | 0.013323 | 0.10257 | -3.0153 | 2940     |
| TAS2R13      | -0.26286 | 0.26286 | 0.28659 | -2.8396 | 0.013331 | 0.10258 | -3.0159 | 50838    |
| PPP1R15A     | 10.072   | 10.072  | 23.405  | 2.8394  | 0.013337 | 0.10258 | -3.0163 | 23645    |
| FUT1         | 1.4654   | 1.4654  | 2.1507  | 2.8386  | 0.013357 | 0.10264 | -3.0177 | 2523     |
| FANCF        | -0.52407 | 0.52407 | 1.2785  | -2.8386 | 0.013357 | 0.10264 | -3.0177 | 2188     |
| RPH3AL       | -0.6738  | 0.6738  | 1.0271  | -2.8384 | 0.013363 | 0.10264 | -3.0181 | 9501     |
| NAALADL2     | -0.42541 | 0.42541 | 0.42701 | -2.8376 | 0.013385 | 0.10273 | -3.0196 | 254827   |
| UNK          | -1.4656  | 1.4656  | 4.44    | -2.8375 | 0.013386 | 0.10273 | -3.0197 | 85451    |
| MORN1        | -0.50999 | 0.50999 | 0.64792 | -2.8367 | 0.013408 | 0.10285 | -3.0212 | 79906    |
| TMPPE        | -0.86267 | 0.86267 | 2.1901  | -2.8364 | 0.013416 | 0.10286 | -3.0218 | 643853   |
| PYROXD1      | 1.0076   | 1.0076  | 1.9293  | 2.8357  | 0.013435 | 0.10296 | -3.0231 | 79912    |

|              |          |         |         |         |          |         |         |          |
|--------------|----------|---------|---------|---------|----------|---------|---------|----------|
| LOC107984035 | -0.58695 | 0.58695 | 1.0538  | -2.8353 | 0.013445 | 0.10299 | -3.0238 | 1.08E+08 |
| APOBEC3A     | 2.8898   | 2.8898  | 2.9799  | 2.835   | 0.013451 | 0.10299 | -3.0242 | 200315   |
| TSPY26P      | -0.30173 | 0.30173 | 0.43832 | -2.8344 | 0.013469 | 0.10307 | -3.0254 | 128854   |
| MLXIPL       | -0.28895 | 0.28895 | 0.16313 | -2.834  | 0.013479 | 0.10307 | -3.0261 | 51085    |
| MELTF-AS1    | -0.47352 | 0.47352 | 0.44325 | -2.8338 | 0.013484 | 0.10307 | -3.0265 | 1.01E+08 |
| DNTTIP2      | 4.6593   | 4.6593  | 8.3769  | 2.8337  | 0.013486 | 0.10307 | -3.0266 | 30836    |
| ERRFI1       | 13.036   | 13.036  | 14.755  | 2.8322  | 0.013525 | 0.10326 | -3.0293 | 54206    |
| N4BP2L2-IT2  | -1.7801  | 1.7801  | 1.8475  | -2.8322 | 0.013527 | 0.10326 | -3.0294 | 116828   |
| NPHP3        | -0.70294 | 0.70294 | 1.7133  | -2.8321 | 0.013529 | 0.10326 | -3.0296 | 27031    |
| THAP7-AS1    | -0.30045 | 0.30045 | 0.4458  | -2.8316 | 0.013542 | 0.10331 | -3.0304 | 439931   |
| TUBG1        | 6.0232   | 6.0232  | 10.004  | 2.8311  | 0.013556 | 0.10334 | -3.0314 | 7283     |
| CGB7         | -0.31687 | 0.31687 | 0.30482 | -2.8309 | 0.013561 | 0.10334 | -3.0317 | 94027    |
| TUT4         | -1.5653  | 1.5653  | 3.7061  | -2.8307 | 0.013566 | 0.10334 | -3.0321 | 23318    |
| RERE         | -3.8984  | 3.8984  | 7.4901  | -2.8304 | 0.013575 | 0.10334 | -3.0327 | 473      |
| ESRRG        | -0.31915 | 0.31915 | 0.17181 | -2.8302 | 0.013579 | 0.10334 | -3.0329 | 2104     |
| SLC47A1      | -0.56385 | 0.56385 | 0.62265 | -2.8301 | 0.013582 | 0.10334 | -3.0332 | 55244    |
| COL9A2       | -0.92074 | 0.92074 | 0.75309 | -2.8296 | 0.013596 | 0.10339 | -3.0341 | 1298     |
| ZNF473       | 0.48557  | 0.48557 | 1.2376  | 2.8294  | 0.013602 | 0.10339 | -3.0345 | 25888    |
| TMOD1        | -0.97782 | 0.97782 | 0.81178 | -2.8289 | 0.013614 | 0.10343 | -3.0353 | 7111     |
| TBC1D5       | -1.6474  | 1.6474  | 3.787   | -2.8287 | 0.013619 | 0.10343 | -3.0357 | 9779     |
| FYTTD1       | 3.6024   | 3.6024  | 8.5588  | 2.8283  | 0.01363  | 0.10347 | -3.0364 | 84248    |
| PTHLH        | 32.22    | 32.22   | 15.524  | 2.8276  | 0.013648 | 0.10353 | -3.0377 | 5744     |
| ERFE         | 0.62598  | 0.62598 | 0.45093 | 2.8275  | 0.01365  | 0.10353 | -3.0378 | 151176   |
| SEPSECS-AS1  | -0.21326 | 0.21326 | 0.20334 | -2.8272 | 0.01366  | 0.10354 | -3.0385 | 285540   |
| LINC01106    | -0.75775 | 0.75775 | 1.1975  | -2.8269 | 0.013667 | 0.10354 | -3.0389 | 151009   |
| DHX32        | 5.6646   | 5.6646  | 9.0084  | 2.8267  | 0.013672 | 0.10354 | -3.0393 | 55760    |

|              |          |         |         |         |          |         |         |          |
|--------------|----------|---------|---------|---------|----------|---------|---------|----------|
| C18orf15     | -0.30954 | 0.30954 | 0.25283 | -2.8266 | 0.013676 | 0.10354 | -3.0396 | 147276   |
| ATP6V1B1-AS1 | -0.50697 | 0.50697 | 0.29072 | -2.8261 | 0.013689 | 0.10356 | -3.0405 | 1.02E+08 |
| TSC22D3      | -8.0006  | 8.0006  | 9.5675  | -2.826  | 0.013691 | 0.10356 | -3.0406 | 1831     |
| LOC155060    | -0.71466 | 0.71466 | 0.90125 | -2.8256 | 0.013701 | 0.10359 | -3.0413 | 155060   |
| LINC02043    | -14.372  | 14.372  | 30.21   | -2.8247 | 0.013727 | 0.10374 | -3.043  | 1.03E+08 |
| NRG1         | 2.5882   | 2.5882  | 2.5561  | 2.8237  | 0.013753 | 0.10389 | -3.0448 | 3084     |
| GEMIN4       | -2.178   | 2.178   | 5.0846  | -2.8227 | 0.013779 | 0.10403 | -3.0465 | 50628    |
| FLJ42627     | -0.67836 | 0.67836 | 1.5726  | -2.8223 | 0.01379  | 0.10403 | -3.0473 | 645644   |
| WASHC4       | 2.6338   | 2.6338  | 6.1647  | 2.8223  | 0.01379  | 0.10403 | -3.0473 | 23325    |
| MMP28        | -2.4051  | 2.4051  | 3.2206  | -2.8217 | 0.013808 | 0.10412 | -3.0484 | 79148    |
| SEC24D       | 5.5985   | 5.5985  | 7.5518  | 2.8205  | 0.01384  | 0.10431 | -3.0506 | 9871     |
| RNFT1        | 0.86238  | 0.86238 | 2.2046  | 2.8198  | 0.013859 | 0.10441 | -3.0519 | 51136    |
| PPP1R2       | 3.9      | 3.9     | 6.2888  | 2.8191  | 0.013876 | 0.10449 | -3.053  | 5504     |
| RIT1         | 2.6545   | 2.6545  | 4.6286  | 2.8184  | 0.013897 | 0.1046  | -3.0544 | 6016     |
| BCAS3        | -1.3247  | 1.3247  | 3.834   | -2.8173 | 0.013926 | 0.10473 | -3.0563 | 54828    |
| FAM95C       | -0.48524 | 0.48524 | 0.37178 | -2.8173 | 0.013926 | 0.10473 | -3.0564 | 1E+08    |
| NMD3         | 2.5845   | 2.5845  | 5.715   | 2.8159  | 0.013964 | 0.10497 | -3.0589 | 51068    |
| ZBTB40       | -0.94813 | 0.94813 | 2.4638  | -2.8156 | 0.013973 | 0.10499 | -3.0594 | 9923     |
| FBXO44       | -1.6336  | 1.6336  | 2.2424  | -2.8153 | 0.013981 | 0.105   | -3.06   | 93611    |
| MIR570HG     | -1.869   | 1.869   | 2.2426  | -2.8149 | 0.013992 | 0.10504 | -3.0607 | 440993   |
| MSANTD3      | 3.6826   | 3.6826  | 4.4694  | 2.8146  | 0.014001 | 0.10506 | -3.0613 | 91283    |
| P2RY4        | -0.45311 | 0.45311 | 0.30752 | -2.8143 | 0.014009 | 0.10506 | -3.0618 | 5030     |
| SUFU         | -1.6891  | 1.6891  | 3.991   | -2.8138 | 0.01402  | 0.10506 | -3.0626 | 51684    |
| DLG2         | -0.77701 | 0.77701 | 0.62447 | -2.8137 | 0.014025 | 0.10506 | -3.0629 | 1740     |
| LOC284412    | -2.0171  | 2.0171  | 1.7021  | -2.8134 | 0.014032 | 0.10506 | -3.0633 | 284412   |
| LOC100129917 | -1.8513  | 1.8513  | 2.3231  | -2.8134 | 0.014032 | 0.10506 | -3.0634 | 1E+08    |

|           |          |         |         |         |          |         |         |        |
|-----------|----------|---------|---------|---------|----------|---------|---------|--------|
| KLHL26    | -0.634   | 0.634   | 1.159   | -2.8124 | 0.014061 | 0.10523 | -3.0653 | 55295  |
| UBE2J1    | 3.9335   | 3.9335  | 7.8351  | 2.8112  | 0.014093 | 0.10537 | -3.0674 | 51465  |
| SBDS      | 14.912   | 14.912  | 25.662  | 2.8111  | 0.014095 | 0.10537 | -3.0675 | 51119  |
| HDHD5-AS1 | -0.33373 | 0.33373 | 0.23124 | -2.8109 | 0.014102 | 0.10537 | -3.068  | 1E+08  |
| DIS3L     | -1.0478  | 1.0478  | 2.1956  | -2.8106 | 0.014109 | 0.10537 | -3.0684 | 115752 |
| PRPF3     | -1.6139  | 1.6139  | 6.9582  | -2.8105 | 0.014111 | 0.10537 | -3.0686 | 9129   |
| JMJD6     | 0.62936  | 0.62936 | 1.4752  | 2.8099  | 0.01413  | 0.10546 | -3.0698 | 23210  |
| IL7       | -0.74201 | 0.74201 | 0.87666 | -2.8089 | 0.014156 | 0.10558 | -3.0715 | 3574   |
| NRIP3     | 0.70262  | 0.70262 | 0.72069 | 2.8089  | 0.014158 | 0.10558 | -3.0716 | 56675  |
| USP31     | -1.17    | 1.17    | 3.0803  | -2.8078 | 0.014187 | 0.10575 | -3.0735 | 57478  |
| TRIM2     | -0.87867 | 0.87867 | 2.199   | -2.8071 | 0.014205 | 0.10582 | -3.0747 | 23321  |
| C2orf92   | -0.22026 | 0.22026 | 0.22731 | -2.8068 | 0.014214 | 0.10582 | -3.0753 | 728537 |
| NOM1      | -0.69401 | 0.69401 | 1.8733  | -2.8066 | 0.014221 | 0.10582 | -3.0757 | 64434  |
| ITGB8     | -1.5466  | 1.5466  | 3.0473  | -2.8065 | 0.014224 | 0.10582 | -3.0759 | 3696   |
| RTTN      | -0.66285 | 0.66285 | 1.309   | -2.8063 | 0.014228 | 0.10582 | -3.0762 | 25914  |
| SNX14     | 1.9609   | 1.9609  | 4.8432  | 2.8061  | 0.014234 | 0.10582 | -3.0766 | 57231  |
| KIAA1549  | -0.28458 | 0.28458 | 0.35678 | -2.805  | 0.014266 | 0.10601 | -3.0787 | 57670  |
| TRMT9B    | -0.23245 | 0.23245 | 0.38698 | -2.8042 | 0.014287 | 0.10607 | -3.0801 | 57604  |
| FGF14-AS2 | -0.44575 | 0.44575 | 0.50996 | -2.8039 | 0.014296 | 0.10607 | -3.0806 | 283481 |
| SKI       | -4.9592  | 4.9592  | 14.635  | -2.8035 | 0.014306 | 0.10607 | -3.0813 | 6497   |
| NUMA1     | -9.4431  | 9.4431  | 19.254  | -2.8035 | 0.014307 | 0.10607 | -3.0813 | 4926   |
| ADAMTS12  | 2.9344   | 2.9344  | 2.28    | 2.8032  | 0.014315 | 0.10607 | -3.0819 | 81792  |
| DSC2      | 301.17   | 301.17  | 190.71  | 2.8032  | 0.014316 | 0.10607 | -3.0819 | 1824   |
| ZNF154    | -0.71956 | 0.71956 | 0.82742 | -2.8031 | 0.014318 | 0.10607 | -3.082  | 7710   |
| FGFBP2    | -1.7124  | 1.7124  | 0.92161 | -2.8027 | 0.014329 | 0.1061  | -3.0827 | 83888  |
| KRT6A     | 4906.6   | 4906.6  | 3930.7  | 2.8024  | 0.014337 | 0.10612 | -3.0833 | 3853   |

|                             |          |         |         |         |          |         |         |          |
|-----------------------------|----------|---------|---------|---------|----------|---------|---------|----------|
| TRAPPC12                    | -3.0758  | 3.0758  | 8.0395  | -2.8012 | 0.014372 | 0.10633 | -3.0856 | 51112    |
| ARNTL                       | -1.0713  | 1.0713  | 1.8641  | -2.8    | 0.014406 | 0.10654 | -3.0877 | 406      |
| UBE2D3                      | 10.297   | 10.297  | 20.456  | 2.7997  | 0.014413 | 0.10654 | -3.0882 | 7323     |
| GABRE                       | -2.8884  | 2.8884  | 4.7728  | -2.7992 | 0.014427 | 0.10656 | -3.0891 | 2564     |
| FOLR1                       | -0.3086  | 0.3086  | 0.18786 | -2.7992 | 0.014428 | 0.10656 | -3.0891 | 2348     |
| EPN2                        | -3.5314  | 3.5314  | 9.6148  | -2.7989 | 0.014436 | 0.10657 | -3.0896 | 22905    |
| PRDM11                      | -0.26831 | 0.26831 | 0.58834 | -2.7982 | 0.014455 | 0.10664 | -3.0909 | 56981    |
| NEMP1                       | -0.74609 | 0.74609 | 1.7044  | -2.7981 | 0.014458 | 0.10664 | -3.091  | 23306    |
| SH3BP5-AS1                  | -1.9635  | 1.9635  | 2.2988  | -2.7976 | 0.014472 | 0.10665 | -3.0919 | 1.01E+08 |
| KCNK12                      | 0.56403  | 0.56403 | 0.57406 | 2.7976  | 0.014472 | 0.10665 | -3.092  | 56660    |
| PIK3C2G                     | -3.8149  | 3.8149  | 3.1479  | -2.7965 | 0.014505 | 0.10684 | -3.094  | 5288     |
| C8orf76                     | 1.4938   | 1.4938  | 2.598   | 2.796   | 0.014518 | 0.1069  | -3.0949 | 84933    |
| SLC30A4                     | 0.57031  | 0.57031 | 1.7769  | 2.7951  | 0.014542 | 0.10702 | -3.0964 | 7782     |
| SUGT1P4-STRA6LP-<br>CCDC180 | -0.2965  | 0.2965  | 0.29237 | -2.7943 | 0.014565 | 0.10714 | -3.0979 | 57653    |
| LINC00960                   | 0.71936  | 0.71936 | 0.81863 | 2.7936  | 0.014585 | 0.10725 | -3.0991 | 401074   |
| PRO1804                     | -0.4629  | 0.4629  | 0.52081 | -2.7924 | 0.014621 | 0.10747 | -3.1014 | 1E+08    |
| FBN2                        | 2.7751   | 2.7751  | 1.7248  | 2.7915  | 0.014645 | 0.10757 | -3.1029 | 2201     |
| TMEM41B                     | 1.4924   | 1.4924  | 4.1048  | 2.7914  | 0.014648 | 0.10757 | -3.1031 | 440026   |
| DCD                         | -230.13  | 230.13  | 123.04  | -2.7906 | 0.014671 | 0.10764 | -3.1046 | 117159   |
| LINC01921                   | -0.23238 | 0.23238 | 0.12394 | -2.7905 | 0.014675 | 0.10764 | -3.1048 | 1.02E+08 |
| CDAN1                       | -0.79541 | 0.79541 | 1.5997  | -2.7904 | 0.014677 | 0.10764 | -3.105  | 146059   |
| CCDC146                     | -1.0491  | 1.0491  | 1.0829  | -2.7899 | 0.014691 | 0.10769 | -3.1058 | 57639    |
| CDC42SE1                    | 13.844   | 13.844  | 29.067  | 2.7898  | 0.014696 | 0.10769 | -3.1062 | 56882    |
| ZNF431                      | 0.63711  | 0.63711 | 1.7138  | 2.7895  | 0.014703 | 0.10769 | -3.1066 | 170959   |
| CLCC1                       | -1.1787  | 1.1787  | 3.4805  | -2.7885 | 0.014732 | 0.10786 | -3.1084 | 23155    |

|              |          |         |         |         |          |         |         |          |
|--------------|----------|---------|---------|---------|----------|---------|---------|----------|
| LCAT         | -1.4029  | 1.4029  | 2.7642  | -2.7881 | 0.014743 | 0.10789 | -3.1091 | 3931     |
| HCCS         | 1.8231   | 1.8231  | 3.804   | 2.7876  | 0.014757 | 0.10795 | -3.11   | 3052     |
| KCNK1        | 2.0492   | 2.0492  | 3.4181  | 2.7873  | 0.014767 | 0.10797 | -3.1106 | 3775     |
| SNORA80B     | 0.5623   | 0.5623  | 0.32544 | 2.7871  | 0.014774 | 0.10798 | -3.111  | 1E+08    |
| KYAT1        | -0.28811 | 0.28811 | 0.44688 | -2.786  | 0.014803 | 0.10812 | -3.1129 | 883      |
| NSUN5P2      | -1.5048  | 1.5048  | 1.5437  | -2.7859 | 0.014806 | 0.10812 | -3.113  | 260294   |
| TAC4         | -0.39094 | 0.39094 | 0.41938 | -2.7855 | 0.014818 | 0.10816 | -3.1138 | 255061   |
| CSDC2        | -0.30465 | 0.30465 | 0.26194 | -2.7842 | 0.014856 | 0.10836 | -3.1162 | 27254    |
| ZNF383       | -0.44664 | 0.44664 | 1.0434  | -2.7841 | 0.014859 | 0.10836 | -3.1163 | 163087   |
| WIPF3        | -0.24584 | 0.24584 | 0.29113 | -2.7837 | 0.014872 | 0.10841 | -3.1172 | 644150   |
| LINC00342    | -2.3779  | 2.3779  | 2.6801  | -2.7825 | 0.014904 | 0.1086  | -3.1192 | 150759   |
| FAM87B       | -0.49574 | 0.49574 | 0.85586 | -2.7819 | 0.014923 | 0.10865 | -3.1204 | 400728   |
| CWH43        | 13.511   | 13.511  | 17.156  | 2.7817  | 0.014929 | 0.10865 | -3.1207 | 80157    |
| GUCA1B       | -0.30084 | 0.30084 | 0.41062 | -2.7813 | 0.014941 | 0.10865 | -3.1214 | 2979     |
| ZNF793       | -0.26509 | 0.26509 | 0.41215 | -2.7813 | 0.014942 | 0.10865 | -3.1215 | 390927   |
| FAM205A      | -0.20038 | 0.20038 | 0.14851 | -2.7811 | 0.014947 | 0.10865 | -3.1218 | 259308   |
| IFT140       | -1.033   | 1.033   | 1.5569  | -2.781  | 0.014949 | 0.10865 | -3.122  | 9742     |
| LRP5L        | -0.36693 | 0.36693 | 0.65334 | -2.7805 | 0.014964 | 0.10866 | -3.1229 | 91355    |
| LOC606724    | -0.36334 | 0.36334 | 0.50403 | -2.7805 | 0.014964 | 0.10866 | -3.1229 | 606724   |
| LOC100129148 | -0.39414 | 0.39414 | 0.38153 | -2.7801 | 0.014976 | 0.10867 | -3.1236 | 1E+08    |
| MIR762HG     | -0.27044 | 0.27044 | 0.65974 | -2.78   | 0.014979 | 0.10867 | -3.1238 | 1.02E+08 |
| BRK1         | 21.299   | 21.299  | 36.25   | 2.7772  | 0.01506  | 0.10922 | -3.1288 | 55845    |
| MLYCD        | -0.70676 | 0.70676 | 1.6462  | -2.7769 | 0.01507  | 0.10925 | -3.1294 | 23417    |
| TENT5A       | -1.5553  | 1.5553  | 4.0771  | -2.7765 | 0.015081 | 0.10925 | -3.1301 | 55603    |
| CREBZF       | -1.3607  | 1.3607  | 3.4067  | -2.7764 | 0.015085 | 0.10925 | -3.1303 | 58487    |
| NAT10        | -2.8017  | 2.8017  | 6.3719  | -2.776  | 0.015095 | 0.10925 | -3.1309 | 55226    |



|              |          |         |         |         |          |         |         |          |
|--------------|----------|---------|---------|---------|----------|---------|---------|----------|
| LONRF2       | -0.25845 | 0.25845 | 0.15386 | -2.776  | 0.015097 | 0.10925 | -3.131  | 164832   |
| SCRN1        | 2.2272   | 2.2272  | 4.2459  | 2.7755  | 0.015112 | 0.10931 | -3.132  | 9805     |
| PLEKHA8      | 0.43007  | 0.43007 | 1.2094  | 2.7751  | 0.015122 | 0.10933 | -3.1325 | 84725    |
| PSCA         | -0.52662 | 0.52662 | 0.56278 | -2.7746 | 0.015138 | 0.10939 | -3.1335 | 8000     |
| FAM174B      | -0.64507 | 0.64507 | 1.4382  | -2.7743 | 0.015147 | 0.10939 | -3.1341 | 400451   |
| USP19        | -2.8487  | 2.8487  | 6.1597  | -2.7741 | 0.015152 | 0.10939 | -3.1344 | 10869    |
| MMP27        | -0.3857  | 0.3857  | 0.36471 | -2.774  | 0.015154 | 0.10939 | -3.1346 | 64066    |
| LOC101927881 | -0.31192 | 0.31192 | 0.48233 | -2.7726 | 0.015195 | 0.10959 | -3.1371 | 1.02E+08 |
| PITX1        | 8.1771   | 8.1771  | 6.8404  | 2.7724  | 0.015202 | 0.10959 | -3.1374 | 5307     |
| BHLHB9       | -0.26041 | 0.26041 | 0.40712 | -2.7722 | 0.015209 | 0.10959 | -3.1379 | 80823    |
| NCKAP1       | 10.373   | 10.373  | 22.214  | 2.7719  | 0.015218 | 0.10959 | -3.1385 | 10787    |
| PPP2R2A      | 5.6705   | 5.6705  | 9.4341  | 2.7715  | 0.015229 | 0.10959 | -3.1391 | 5520     |
| HOOK3        | 1.3001   | 1.3001  | 4.921   | 2.7714  | 0.015231 | 0.10959 | -3.1392 | 84376    |
| FPGT-TNNI3K  | -0.33538 | 0.33538 | 0.2939  | -2.7714 | 0.015233 | 0.10959 | -3.1394 | 1.01E+08 |
| HSBP1        | 10.094   | 10.094  | 13.46   | 2.7713  | 0.015235 | 0.10959 | -3.1395 | 3281     |
| IGFL1        | 36.161   | 36.161  | 21.047  | 2.7706  | 0.015255 | 0.10961 | -3.1407 | 374918   |
| DBNDD2       | 3.5455   | 3.5455  | 5.7823  | 2.7705  | 0.015258 | 0.10961 | -3.1409 | 55861    |
| MYH3         | -0.20451 | 0.20451 | 0.20832 | -2.7705 | 0.01526  | 0.10961 | -3.141  | 4621     |
| MSS51        | -0.44306 | 0.44306 | 0.73488 | -2.7703 | 0.015264 | 0.10961 | -3.1412 | 118490   |
| UBE2E2       | 3.5416   | 3.5416  | 7.601   | 2.7701  | 0.01527  | 0.10961 | -3.1416 | 7325     |
| ARHGAP27P2   | -0.20971 | 0.20971 | 0.22138 | -2.7697 | 0.015282 | 0.10961 | -3.1423 | 440461   |
| PRRG4        | 4.0798   | 4.0798  | 5.8719  | 2.7697  | 0.015282 | 0.10961 | -3.1423 | 79056    |
| COPS2        | 3.7042   | 3.7042  | 6.8498  | 2.7694  | 0.015291 | 0.10962 | -3.1428 | 9318     |
| RAET1G       | 1.6891   | 1.6891  | 1.7253  | 2.7688  | 0.015311 | 0.10971 | -3.144  | 353091   |
| KCNJ12       | -0.46671 | 0.46671 | 0.63093 | -2.7684 | 0.015322 | 0.10975 | -3.1447 | 3768     |
| CSNK1A1      | 45.936   | 45.936  | 86.188  | 2.7673  | 0.015354 | 0.10993 | -3.1466 | 1452     |

|              |          |         |         |         |          |         |         |          |
|--------------|----------|---------|---------|---------|----------|---------|---------|----------|
| ACTR2        | 20.401   | 20.401  | 32.184  | 2.7665  | 0.015378 | 0.11003 | -3.1481 | 10097    |
| TMEM143      | -0.39875 | 0.39875 | 0.74502 | -2.7664 | 0.015381 | 0.11003 | -3.1482 | 55260    |
| HOXA7        | -0.88478 | 0.88478 | 1.9686  | -2.7656 | 0.015405 | 0.11016 | -3.1497 | 3204     |
| CDHR1        | -23.44   | 23.44   | 17.919  | -2.7648 | 0.015428 | 0.11028 | -3.1511 | 92211    |
| PPCDC        | -0.52188 | 0.52188 | 1.388   | -2.7637 | 0.015462 | 0.11047 | -3.1531 | 60490    |
| SUN1         | -3.7448  | 3.7448  | 12.711  | -2.7627 | 0.015494 | 0.11065 | -3.155  | 23353    |
| ARHGAP31-AS1 | -0.54823 | 0.54823 | 0.60478 | -2.7614 | 0.015533 | 0.11086 | -3.1574 | 1.01E+08 |
| ANP32A-IT1   | -0.47094 | 0.47094 | 0.59703 | -2.7613 | 0.015536 | 0.11086 | -3.1576 | 80035    |
| TWF1         | 14.783   | 14.783  | 16.408  | 2.7608  | 0.015552 | 0.11089 | -3.1585 | 5756     |
| ATF7IP2      | -1.0914  | 1.0914  | 1.1043  | -2.7607 | 0.015554 | 0.11089 | -3.1586 | 80063    |
| TPM3P9       | -0.69366 | 0.69366 | 1.2412  | -2.7603 | 0.015564 | 0.11092 | -3.1592 | 147804   |
| C10orf113    | -0.7068  | 0.7068  | 0.7626  | -2.7599 | 0.015576 | 0.11096 | -3.1599 | 387638   |
| RAB3IP       | -0.49607 | 0.49607 | 1.278   | -2.7594 | 0.015593 | 0.11103 | -3.1609 | 117177   |
| USP17L2      | -0.32141 | 0.32141 | 0.25384 | -2.759  | 0.015604 | 0.11106 | -3.1616 | 377630   |
| PCNT         | -1.3441  | 1.3441  | 3.2008  | -2.7584 | 0.015622 | 0.11114 | -3.1626 | 5116     |
| PCDH17       | 1.551    | 1.551   | 1.2044  | 2.7582  | 0.015629 | 0.11115 | -3.1631 | 27253    |
| ATG2B        | -1.4001  | 1.4001  | 4.2647  | -2.7579 | 0.015639 | 0.11117 | -3.1636 | 55102    |
| CD1A         | -1.8846  | 1.8846  | 1.5021  | -2.7576 | 0.015649 | 0.11119 | -3.1642 | 909      |
| ST8SIA1      | -0.21561 | 0.21561 | 0.26727 | -2.7569 | 0.015669 | 0.11129 | -3.1654 | 6489     |
| ACVR2A       | -1.5978  | 1.5978  | 2.3577  | -2.7564 | 0.015683 | 0.11131 | -3.1662 | 92       |
| LMF1         | -0.76016 | 0.76016 | 1.4258  | -2.7564 | 0.015685 | 0.11131 | -3.1663 | 64788    |
| LINC01534    | -0.38449 | 0.38449 | 0.46302 | -2.7542 | 0.015753 | 0.11174 | -3.1703 | 1.02E+08 |
| CDK17        | 1.547    | 1.547   | 5.0041  | 2.754   | 0.015759 | 0.11174 | -3.1707 | 5128     |
| FBXL17       | -0.67669 | 0.67669 | 2.5353  | -2.7532 | 0.015784 | 0.11184 | -3.1721 | 64839    |
| TFG          | 10.302   | 10.302  | 17.469  | 2.7531  | 0.015786 | 0.11184 | -3.1723 | 10342    |
| RAP2C        | 1.8119   | 1.8119  | 4.1088  | 2.7527  | 0.015798 | 0.11188 | -3.173  | 57826    |

|                 |          |         |         |         |          |         |         |          |
|-----------------|----------|---------|---------|---------|----------|---------|---------|----------|
| SPDYE17         | -0.22916 | 0.22916 | 0.19609 | -2.752  | 0.01582  | 0.11196 | -3.1742 | 1.03E+08 |
| LPIN1           | -1.1184  | 1.1184  | 1.7794  | -2.7511 | 0.015847 | 0.11196 | -3.1758 | 23175    |
| AGBL5           | -1.1519  | 1.1519  | 2.8759  | -2.751  | 0.015851 | 0.11196 | -3.1761 | 60509    |
| SLC35E1         | 4.6568   | 4.6568  | 9.7454  | 2.751   | 0.015852 | 0.11196 | -3.1761 | 79939    |
| L3MBTL4-AS1     | -0.32937 | 0.32937 | 0.22021 | -2.7507 | 0.015858 | 0.11196 | -3.1765 | 1.02E+08 |
| GATA2           | -1.2094  | 1.2094  | 2.1626  | -2.7506 | 0.015861 | 0.11196 | -3.1767 | 2624     |
| RUVBL1-AS1      | -0.23661 | 0.23661 | 0.21997 | -2.7502 | 0.015875 | 0.11196 | -3.1775 | 1.01E+08 |
| ZC3H12C         | -0.93084 | 0.93084 | 1.7121  | -2.75   | 0.015881 | 0.11196 | -3.1778 | 85463    |
| USP21           | -1.1516  | 1.1516  | 3.3808  | -2.7497 | 0.015889 | 0.11196 | -3.1783 | 27005    |
| PRIMA1          | -0.42695 | 0.42695 | 0.43604 | -2.7497 | 0.01589  | 0.11196 | -3.1784 | 145270   |
| KRT37           | 2.2812   | 2.2812  | 1.2578  | 2.7496  | 0.015895 | 0.11196 | -3.1786 | 8688     |
| FAM86EP         | -0.23401 | 0.23401 | 0.48464 | -2.7494 | 0.015901 | 0.11196 | -3.179  | 348926   |
| HOXA2           | -0.20217 | 0.20217 | 0.21628 | -2.7492 | 0.015906 | 0.11196 | -3.1793 | 3199     |
| IGFL4           | -0.34432 | 0.34432 | 0.35204 | -2.7492 | 0.015907 | 0.11196 | -3.1793 | 444882   |
| MAP3K9          | 5.18     | 5.18    | 5.4626  | 2.7491  | 0.015908 | 0.11196 | -3.1794 | 4293     |
| FAM72D          | -0.24152 | 0.24152 | 0.33917 | -2.7488 | 0.015917 | 0.11197 | -3.1799 | 728833   |
| CRY1            | 1.1569   | 1.1569  | 3.6686  | 2.7486  | 0.015924 | 0.11197 | -3.1803 | 1407     |
| SUGT1P4-STRA6LP | -0.27723 | 0.27723 | 0.26643 | -2.7483 | 0.015934 | 0.11199 | -3.1809 | 1E+08    |
| ABHD14B         | -2.3962  | 2.3962  | 5.4311  | -2.7472 | 0.015968 | 0.11219 | -3.1829 | 84836    |
| DGUOK-AS1       | 1.0311   | 1.0311  | 1.5336  | 2.7469  | 0.015979 | 0.11222 | -3.1835 | 1.01E+08 |
| RWDD4           | 2.0512   | 2.0512  | 4.2888  | 2.7465  | 0.015991 | 0.11226 | -3.1842 | 201965   |
| KIF23           | 1.3788   | 1.3788  | 1.5261  | 2.7453  | 0.016026 | 0.1124  | -3.1862 | 9493     |
| VWC2            | -0.21653 | 0.21653 | 0.17292 | -2.7452 | 0.016032 | 0.1124  | -3.1865 | 375567   |
| ZNF865          | -1.5526  | 1.5526  | 2.6451  | -2.7451 | 0.016032 | 0.1124  | -3.1866 | 1.01E+08 |
| ZFP64           | -0.48044 | 0.48044 | 1.957   | -2.7443 | 0.016057 | 0.11253 | -3.188  | 55734    |
| C1orf21         | -3.5369  | 3.5369  | 6.1237  | -2.744  | 0.016067 | 0.11256 | -3.1886 | 81563    |

|              |          |         |         |         |          |         |         |          |
|--------------|----------|---------|---------|---------|----------|---------|---------|----------|
| LOC441242    | -0.21028 | 0.21028 | 0.28066 | -2.7436 | 0.016081 | 0.11261 | -3.1894 | 441242   |
| PSMD1        | 7.9751   | 7.9751  | 15.723  | 2.7434  | 0.016088 | 0.11261 | -3.1898 | 5707     |
| PHACTR2      | 2.1689   | 2.1689  | 4.1198  | 2.7428  | 0.016106 | 0.11262 | -3.1908 | 9749     |
| C9orf85      | 1.2391   | 1.2391  | 2.303   | 2.7426  | 0.016112 | 0.11262 | -3.1912 | 138241   |
| SELE         | 9.6818   | 9.6818  | 6.9148  | 2.7425  | 0.016116 | 0.11262 | -3.1914 | 6401     |
| RAB15        | -0.78725 | 0.78725 | 1.8304  | -2.7424 | 0.016117 | 0.11262 | -3.1914 | 376267   |
| LRRC20       | 2.6872   | 2.6872  | 2.5096  | 2.7418  | 0.016136 | 0.11269 | -3.1925 | 55222    |
| BBS7         | 0.64376  | 0.64376 | 1.4641  | 2.7417  | 0.01614  | 0.11269 | -3.1927 | 55212    |
| PPARD        | 13.401   | 13.401  | 17.826  | 2.7414  | 0.016148 | 0.1127  | -3.1932 | 5467     |
| PNLIPRP3     | 9.2206   | 9.2206  | 7.185   | 2.7403  | 0.016184 | 0.11291 | -3.1953 | 119548   |
| DSG1         | 296.76   | 296.76  | 326.1   | 2.74    | 0.016195 | 0.11292 | -3.1959 | 1828     |
| MMD          | 0.91254  | 0.91254 | 1.4914  | 2.7398  | 0.016199 | 0.11292 | -3.1961 | 23531    |
| AGO4         | -1.4834  | 1.4834  | 4.0024  | -2.7391 | 0.016223 | 0.11298 | -3.1975 | 192670   |
| TRIM3        | -0.62909 | 0.62909 | 1.7511  | -2.7391 | 0.016223 | 0.11298 | -3.1975 | 10612    |
| TMEM30A      | 6.5638   | 6.5638  | 14.084  | 2.7387  | 0.016234 | 0.11298 | -3.1981 | 55754    |
| RBM26-AS1    | -0.21565 | 0.21565 | 0.23704 | -2.7387 | 0.016234 | 0.11298 | -3.1981 | 1.01E+08 |
| LOC101927560 | -0.18828 | 0.18828 | 0.15068 | -2.7381 | 0.016253 | 0.11306 | -3.1992 | 1.02E+08 |
| NODAL        | -0.26148 | 0.26148 | 0.2733  | -2.7378 | 0.016264 | 0.11309 | -3.1998 | 4838     |
| PRPSAP2      | 1.8075   | 1.8075  | 3.9289  | 2.7375  | 0.016273 | 0.11309 | -3.2003 | 5636     |
| KRT31        | -1.1485  | 1.1485  | 0.86211 | -2.7373 | 0.016278 | 0.11309 | -3.2006 | 3881     |
| TBC1D32      | -0.59035 | 0.59035 | 0.83723 | -2.7368 | 0.016294 | 0.11309 | -3.2015 | 221322   |
| ERP44        | 2.94     | 2.94    | 5.5579  | 2.7365  | 0.016304 | 0.11309 | -3.2021 | 23071    |
| SAMD12       | -0.17662 | 0.17662 | 0.18096 | -2.7364 | 0.016306 | 0.11309 | -3.2022 | 401474   |
| MGAT3        | -0.72972 | 0.72972 | 0.80287 | -2.7363 | 0.01631  | 0.11309 | -3.2024 | 4248     |
| USP38        | 2.4502   | 2.4502  | 4.1889  | 2.7363  | 0.01631  | 0.11309 | -3.2024 | 84640    |
| CEACAM7      | -0.2352  | 0.2352  | 0.19464 | -2.7355 | 0.016336 | 0.11322 | -3.2039 | 1087     |

|           |          |         |         |         |          |         |         |        |
|-----------|----------|---------|---------|---------|----------|---------|---------|--------|
| CRYM-AS1  | -0.34998 | 0.34998 | 0.52432 | -2.7349 | 0.016355 | 0.11331 | -3.205  | 400508 |
| ZDHHHC20  | 3.7678   | 3.7678  | 8.3749  | 2.7343  | 0.016373 | 0.11332 | -3.206  | 253832 |
| GUSBP3    | -2.8846  | 2.8846  | 4.125   | -2.7343 | 0.016375 | 0.11332 | -3.2061 | 653188 |
| LOC653160 | -0.34323 | 0.34323 | 0.48701 | -2.7338 | 0.01639  | 0.11332 | -3.2069 | 653160 |
| EPB41L4A  | -0.64265 | 0.64265 | 2.1889  | -2.7337 | 0.016394 | 0.11332 | -3.2072 | 64097  |
| UBTF      | -3.9964  | 3.9964  | 10.587  | -2.7336 | 0.016397 | 0.11332 | -3.2073 | 7343   |
| KCNA6     | -0.45758 | 0.45758 | 0.26998 | -2.7336 | 0.016398 | 0.11332 | -3.2074 | 3742   |
| HSPA8     | 136.37   | 136.37  | 159.97  | 2.7331  | 0.016413 | 0.11333 | -3.2082 | 3312   |
| WNT2B     | -1.4613  | 1.4613  | 1.7463  | -2.733  | 0.016416 | 0.11333 | -3.2084 | 7482   |
| SLK       | 6.406    | 6.406   | 11.96   | 2.7327  | 0.016426 | 0.11333 | -3.209  | 9748   |
| SGO2      | 0.45903  | 0.45903 | 0.54548 | 2.7326  | 0.016428 | 0.11333 | -3.2091 | 151246 |
| KRTCAP3   | -1.0789  | 1.0789  | 1.505   | -2.7325 | 0.016433 | 0.11333 | -3.2093 | 200634 |
| RNF6      | 2.6531   | 2.6531  | 5.285   | 2.7319  | 0.01645  | 0.11341 | -3.2103 | 6049   |
| CPT1B     | -1.2091  | 1.2091  | 1.5501  | -2.7308 | 0.016486 | 0.11361 | -3.2123 | 1375   |
| THBS4     | -3.8162  | 3.8162  | 2.9053  | -2.7304 | 0.016499 | 0.11361 | -3.2131 | 7060   |
| MTURN     | -1.6684  | 1.6684  | 4.4667  | -2.7304 | 0.0165   | 0.11361 | -3.2131 | 222166 |
| TSL       | -0.34415 | 0.34415 | 0.38798 | -2.7296 | 0.016526 | 0.11363 | -3.2146 | 790953 |
| KLC4      | -0.84346 | 0.84346 | 1.4261  | -2.7295 | 0.016529 | 0.11363 | -3.2148 | 89953  |
| CA13      | -0.73771 | 0.73771 | 1.1467  | -2.7294 | 0.016533 | 0.11363 | -3.2149 | 377677 |
| SPINK13   | 0.65269  | 0.65269 | 0.38424 | 2.7293  | 0.016533 | 0.11363 | -3.215  | 153218 |
| PATL2     | -0.18137 | 0.18137 | 0.17685 | -2.7292 | 0.016538 | 0.11363 | -3.2152 | 197135 |
| PPP1R32   | -0.30957 | 0.30957 | 0.39931 | -2.7289 | 0.016547 | 0.11363 | -3.2158 | 220004 |
| NPIP4     | -1.7713  | 1.7713  | 2.8678  | -2.7288 | 0.01655  | 0.11363 | -3.2159 | 440345 |
| TXNDC9    | 5.2672   | 5.2672  | 6.6537  | 2.7285  | 0.016561 | 0.11366 | -3.2165 | 10190  |
| SORCS1    | -0.16581 | 0.16581 | 0.10132 | -2.7279 | 0.016579 | 0.11371 | -3.2175 | 114815 |
| GJC1      | 1.2623   | 1.2623  | 1.3509  | 2.7278  | 0.016582 | 0.11371 | -3.2177 | 10052  |

|              |          |         |         |         |          |         |         |          |
|--------------|----------|---------|---------|---------|----------|---------|---------|----------|
| TMEM158      | 1.7827   | 1.7827  | 1.5927  | 2.7258  | 0.016647 | 0.11408 | -3.2213 | 25907    |
| KIF22        | -1.9672  | 1.9672  | 5.3872  | -2.7257 | 0.01665  | 0.11408 | -3.2214 | 3835     |
| RBM43        | -0.7447  | 0.7447  | 1.1705  | -2.725  | 0.016674 | 0.1142  | -3.2228 | 375287   |
| LRRN4        | -0.18326 | 0.18326 | 0.144   | -2.7244 | 0.016692 | 0.11428 | -3.2238 | 164312   |
| SPDYE3       | -0.34109 | 0.34109 | 0.3527  | -2.724  | 0.016705 | 0.11428 | -3.2245 | 441272   |
| MEMO1        | 4.7165   | 4.7165  | 8.7181  | 2.7238  | 0.016712 | 0.11428 | -3.2249 | 51072    |
| MMP16        | 0.53476  | 0.53476 | 0.54652 | 2.7238  | 0.016713 | 0.11428 | -3.2249 | 4325     |
| LOC100507346 | -0.23835 | 0.23835 | 0.16321 | -2.7235 | 0.016722 | 0.1143  | -3.2254 | 1.01E+08 |
| BTN3A1       | -1.7902  | 1.7902  | 2.5473  | -2.7232 | 0.016733 | 0.11433 | -3.226  | 11119    |
| PDCD10       | 5.4372   | 5.4372  | 8.0631  | 2.7227  | 0.016747 | 0.11435 | -3.2268 | 11235    |
| BMP7         | -1.9746  | 1.9746  | 3.6282  | -2.7227 | 0.01675  | 0.11435 | -3.227  | 655      |
| DANT2        | -0.61665 | 0.61665 | 0.5717  | -2.7224 | 0.016757 | 0.11435 | -3.2274 | 642776   |
| TG           | -0.63491 | 0.63491 | 0.41489 | -2.7212 | 0.016797 | 0.11458 | -3.2296 | 7038     |
| IL11         | 2.8429   | 2.8429  | 1.616   | 2.7199  | 0.016838 | 0.11482 | -3.2318 | 3589     |
| SLC6A16      | -0.25636 | 0.25636 | 0.24927 | -2.7196 | 0.016851 | 0.11485 | -3.2325 | 28968    |
| HSF2BP       | 0.50117  | 0.50117 | 0.69408 | 2.7185  | 0.016886 | 0.115   | -3.2344 | 11077    |
| COPS5        | 5.1405   | 5.1405  | 9.5944  | 2.7184  | 0.01689  | 0.115   | -3.2347 | 10987    |
| PHF21A       | -1.2319  | 1.2319  | 2.7157  | -2.7183 | 0.016892 | 0.115   | -3.2348 | 51317    |
| MTFR1L       | -1.2823  | 1.2823  | 4.2359  | -2.7175 | 0.01692  | 0.11514 | -3.2363 | 56181    |
| C11orf49     | -1.4967  | 1.4967  | 3.854   | -2.7171 | 0.016931 | 0.11514 | -3.2369 | 79096    |
| XAB2         | -2.7174  | 2.7174  | 6.9329  | -2.717  | 0.016934 | 0.11514 | -3.2371 | 56949    |
| PRDM4        | 2.3196   | 2.3196  | 6.7847  | 2.7168  | 0.016941 | 0.11514 | -3.2375 | 11108    |
| ELOC         | 3.8254   | 3.8254  | 5.2885  | 2.7159  | 0.016972 | 0.1153  | -3.2391 | 6921     |
| KIAA1211L    | -1.1516  | 1.1516  | 1.8065  | -2.7154 | 0.016987 | 0.11531 | -3.2399 | 343990   |
| ARPIN        | -1.8461  | 1.8461  | 5.1973  | -2.7153 | 0.016993 | 0.11531 | -3.2402 | 348110   |
| ENTHD1       | -0.22328 | 0.22328 | 0.13382 | -2.7152 | 0.016993 | 0.11531 | -3.2403 | 150350   |

|           |          |         |         |         |          |         |         |          |
|-----------|----------|---------|---------|---------|----------|---------|---------|----------|
| ALDH3A2   | -9.6458  | 9.6458  | 17.125  | -2.7148 | 0.017009 | 0.11537 | -3.2412 | 224      |
| ARPC1A    | 19.385   | 19.385  | 32.092  | 2.7144  | 0.017023 | 0.1154  | -3.2419 | 10552    |
| SNHG10    | -0.40215 | 0.40215 | 0.87622 | -2.7139 | 0.017037 | 0.1154  | -3.2427 | 283596   |
| DDX17     | -11.523  | 11.523  | 52.867  | -2.7138 | 0.017039 | 0.1154  | -3.2428 | 10521    |
| PGF       | 12.219   | 12.219  | 11.946  | 2.7138  | 0.017041 | 0.1154  | -3.2429 | 5228     |
| ADAT2     | -0.5639  | 0.5639  | 0.93051 | -2.7124 | 0.017088 | 0.11567 | -3.2454 | 134637   |
| UACA      | 3.816    | 3.816   | 5.4274  | 2.7118  | 0.017108 | 0.11576 | -3.2465 | 55075    |
| NOP14-AS1 | 0.85445  | 0.85445 | 1.9101  | 2.7111  | 0.017131 | 0.11585 | -3.2477 | 317648   |
| NFX1      | -1.619   | 1.619   | 6.0503  | -2.711  | 0.017135 | 0.11585 | -3.2479 | 4799     |
| BTBD7     | 1.1721   | 1.1721  | 4.1506  | 2.7098  | 0.017174 | 0.11607 | -3.25   | 55727    |
| PFKP      | 7.0274   | 7.0274  | 12.266  | 2.7089  | 0.017205 | 0.11615 | -3.2517 | 5214     |
| CLSTN2    | -1.7367  | 1.7367  | 1.1587  | -2.7089 | 0.017205 | 0.11615 | -3.2517 | 64084    |
| LINC02298 | -0.19006 | 0.19006 | 0.16918 | -2.7088 | 0.017206 | 0.11615 | -3.2518 | 1.03E+08 |
| BRSK2     | -0.21076 | 0.21076 | 0.17804 | -2.7081 | 0.01723  | 0.11626 | -3.253  | 9024     |
| TNRC6A    | -1.7367  | 1.7367  | 5.2112  | -2.7078 | 0.017242 | 0.1163  | -3.2537 | 27327    |
| ZBTB38    | 2.0485   | 2.0485  | 5.4822  | 2.707   | 0.017268 | 0.11643 | -3.255  | 253461   |
| TSSC2     | -0.36314 | 0.36314 | 0.32949 | -2.7067 | 0.017277 | 0.11644 | -3.2555 | 650368   |
| NUDCD3    | -2.4964  | 2.4964  | 7.4311  | -2.7058 | 0.017307 | 0.11656 | -3.2571 | 23386    |
| SAFB2     | -1.8835  | 1.8835  | 4.3892  | -2.7058 | 0.017308 | 0.11656 | -3.2572 | 9667     |
| CCAT1     | -0.18246 | 0.18246 | 0.12845 | -2.7053 | 0.017326 | 0.1166  | -3.2581 | 1.01E+08 |
| NHLRC1    | -0.39896 | 0.39896 | 1.0145  | -2.7052 | 0.017328 | 0.1166  | -3.2583 | 378884   |
| SHROOM3   | -0.76106 | 0.76106 | 1.1181  | -2.7047 | 0.017345 | 0.11667 | -3.2592 | 57619    |
| TCF20     | -2.3502  | 2.3502  | 7.0698  | -2.7045 | 0.017353 | 0.11668 | -3.2596 | 6942     |
| TAB1      | -1.7377  | 1.7377  | 3.0768  | -2.7035 | 0.017387 | 0.11683 | -3.2614 | 10454    |
| HOXA4     | -0.27845 | 0.27845 | 0.54874 | -2.7034 | 0.01739  | 0.11683 | -3.2616 | 3201     |
| IL36RN    | 60.529   | 60.529  | 53.299  | 2.7026  | 0.017415 | 0.11695 | -3.2629 | 26525    |

|              |          |         |         |         |          |         |         |          |
|--------------|----------|---------|---------|---------|----------|---------|---------|----------|
| SDC1         | 112.72   | 112.72  | 170.44  | 2.7017  | 0.017449 | 0.11709 | -3.2647 | 6382     |
| NCBP2-AS1    | -0.25335 | 0.25335 | 0.18885 | -2.7014 | 0.017456 | 0.11709 | -3.265  | 1.01E+08 |
| TTC36        | -0.21418 | 0.21418 | 0.20768 | -2.7014 | 0.017457 | 0.11709 | -3.2651 | 143941   |
| PRB1         | -0.28072 | 0.28072 | 0.15591 | -2.7007 | 0.017479 | 0.1171  | -3.2663 | 5542     |
| LINC01725    | -0.24234 | 0.24234 | 0.15404 | -2.7007 | 0.017482 | 0.1171  | -3.2664 | 1.02E+08 |
| CYP4V2       | -0.79249 | 0.79249 | 1.3044  | -2.7006 | 0.017483 | 0.1171  | -3.2665 | 285440   |
| POU2F3       | -3.9685  | 3.9685  | 3.4053  | -2.7006 | 0.017485 | 0.1171  | -3.2666 | 25833    |
| RSPO4        | -0.64835 | 0.64835 | 0.57635 | -2.7001 | 0.017501 | 0.11716 | -3.2674 | 343637   |
| KCTD13       | -1.4942  | 1.4942  | 2.6228  | -2.6997 | 0.017515 | 0.1172  | -3.2681 | 253980   |
| FRK          | -0.6194  | 0.6194  | 1.2865  | -2.6992 | 0.01753  | 0.11726 | -3.269  | 2444     |
| LRRC8A       | 9.1823   | 9.1823  | 12.925  | 2.6987  | 0.017549 | 0.1173  | -3.2699 | 56262    |
| DNAH17       | -0.36143 | 0.36143 | 0.34058 | -2.6987 | 0.01755  | 0.1173  | -3.27   | 8632     |
| SH3D21       | 7.0189   | 7.0189  | 11.653  | 2.6981  | 0.017569 | 0.11738 | -3.271  | 79729    |
| LOC100505716 | -0.61749 | 0.61749 | 0.73951 | -2.6979 | 0.017578 | 0.11739 | -3.2715 | 1.01E+08 |
| PAIP2B       | -1.4623  | 1.4623  | 2.1936  | -2.6968 | 0.017613 | 0.11758 | -3.2733 | 400961   |
| LOC340512    | -0.24984 | 0.24984 | 0.29503 | -2.696  | 0.017643 | 0.11773 | -3.2748 | 340512   |
| CISD2        | 0.86879  | 0.86879 | 1.4128  | 2.6954  | 0.017662 | 0.1178  | -3.2758 | 493856   |
| SLC9A4       | -0.59163 | 0.59163 | 0.73665 | -2.6952 | 0.017667 | 0.1178  | -3.2761 | 389015   |
| TUBB3        | 26.277   | 26.277  | 20.854  | 2.695   | 0.017675 | 0.11781 | -3.2765 | 10381    |
| LRP11        | 4.5688   | 4.5688  | 8.4074  | 2.694   | 0.01771  | 0.11795 | -3.2783 | 84918    |
| SP4          | -0.4344  | 0.4344  | 0.75556 | -2.6938 | 0.017716 | 0.11795 | -3.2786 | 6671     |
| C12orf49     | 2.114    | 2.114   | 4.4244  | 2.6938  | 0.017718 | 0.11795 | -3.2788 | 79794    |
| PPP1R12B     | -2.4845  | 2.4845  | 4.2835  | -2.6934 | 0.017729 | 0.11796 | -3.2794 | 4660     |
| BMS1P2       | -1.6926  | 1.6926  | 2.5377  | -2.6933 | 0.017733 | 0.11796 | -3.2796 | 642826   |
| TTY10        | -0.29444 | 0.29444 | 0.23502 | -2.693  | 0.017744 | 0.11799 | -3.2801 | 246119   |
| NEK9         | -1.6147  | 1.6147  | 5.1081  | -2.6927 | 0.017755 | 0.11801 | -3.2807 | 91754    |



|               |          |         |         |         |          |         |         |          |
|---------------|----------|---------|---------|---------|----------|---------|---------|----------|
| CSF2          | 0.40774  | 0.40774 | 0.20943 | 2.691   | 0.017814 | 0.11836 | -3.2838 | 1437     |
| ADHFE1        | -0.38689 | 0.38689 | 0.59239 | -2.6906 | 0.017829 | 0.11837 | -3.2845 | 137872   |
| LGI3          | -0.54777 | 0.54777 | 0.35046 | -2.6905 | 0.017832 | 0.11837 | -3.2847 | 203190   |
| B3GNT8        | 2.7596   | 2.7596  | 3.4072  | 2.6903  | 0.017837 | 0.11837 | -3.2849 | 374907   |
| ZADH2         | -0.61007 | 0.61007 | 2.1772  | -2.6896 | 0.017862 | 0.11849 | -3.2862 | 284273   |
| MMP12         | 5.4549   | 5.4549  | 2.8203  | 2.6888  | 0.017889 | 0.11863 | -3.2876 | 4321     |
| MAB21L2       | -0.65114 | 0.65114 | 0.9204  | -2.6885 | 0.0179   | 0.11864 | -3.2882 | 10586    |
| SPICE1        | -0.67907 | 0.67907 | 1.7662  | -2.6884 | 0.017905 | 0.11864 | -3.2884 | 152185   |
| ELOA3         | -0.45618 | 0.45618 | 0.3613  | -2.6871 | 0.01795  | 0.11889 | -3.2907 | 162699   |
| CLCA2         | 56.872   | 56.872  | 77.799  | 2.6866  | 0.017968 | 0.11896 | -3.2917 | 9635     |
| TEN1-CDK3     | -0.8032  | 0.8032  | 1.0619  | -2.6863 | 0.017978 | 0.11898 | -3.2922 | 1.01E+08 |
| MED12         | -1.5227  | 1.5227  | 3.8049  | -2.6857 | 0.017997 | 0.11906 | -3.2931 | 9968     |
| NPTN          | 6.6874   | 6.6874  | 17.865  | 2.6848  | 0.018031 | 0.1192  | -3.2949 | 27020    |
| ZDHHC18       | 3.7521   | 3.7521  | 7.7751  | 2.6847  | 0.018031 | 0.1192  | -3.2949 | 84243    |
| LOC105371485  | -0.37439 | 0.37439 | 0.30035 | -2.6841 | 0.018055 | 0.1193  | -3.2961 | 1.05E+08 |
| LIPT2         | -0.26871 | 0.26871 | 0.38479 | -2.6835 | 0.018074 | 0.11938 | -3.2971 | 387787   |
| ZXDB          | -0.44054 | 0.44054 | 1.4435  | -2.6831 | 0.01809  | 0.11944 | -3.2979 | 158586   |
| PKD1P3-NPIPA1 | -0.77038 | 0.77038 | 0.82069 | -2.6825 | 0.018109 | 0.11949 | -3.2989 | 1.1E+08  |
| POU5F1B       | -0.17672 | 0.17672 | 0.15285 | -2.6825 | 0.018111 | 0.11949 | -3.299  | 5462     |
| ZNF385C       | -0.1952  | 0.1952  | 0.18324 | -2.6814 | 0.018149 | 0.11969 | -3.3009 | 201181   |
| CD2AP         | 3.3583   | 3.3583  | 7.0769  | 2.6811  | 0.018158 | 0.1197  | -3.3014 | 23607    |
| ZNF671        | -0.64261 | 0.64261 | 0.91782 | -2.6803 | 0.018188 | 0.11985 | -3.3029 | 79891    |
| LOC100129484  | -0.86911 | 0.86911 | 1.0553  | -2.6798 | 0.018207 | 0.11993 | -3.3038 | 1E+08    |
| CDH26         | 0.997    | 0.997   | 0.96831 | 2.6795  | 0.018214 | 0.11993 | -3.3042 | 60437    |
| CRAMP1        | -1.5098  | 1.5098  | 3.5474  | -2.679  | 0.018233 | 0.11999 | -3.3052 | 57585    |
| ALAD          | -3.4226  | 3.4226  | 6.8955  | -2.6789 | 0.018236 | 0.11999 | -3.3053 | 210      |

|              |          |         |         |         |          |         |         |          |
|--------------|----------|---------|---------|---------|----------|---------|---------|----------|
| JUP          | 261.25   | 261.25  | 373.35  | 2.6783  | 0.018259 | 0.12009 | -3.3064 | 3728     |
| CACNB2       | -0.2941  | 0.2941  | 0.35452 | -2.6772 | 0.018297 | 0.12029 | -3.3084 | 783      |
| SNORA21      | -2.0101  | 2.0101  | 2.9256  | -2.6753 | 0.018364 | 0.12054 | -3.3117 | 619505   |
| LINC00887    | 0.22487  | 0.22487 | 0.13771 | 2.6753  | 0.018365 | 0.12054 | -3.3118 | 1E+08    |
| MAN2C1       | -3.8641  | 3.8641  | 7.881   | -2.6748 | 0.018382 | 0.12054 | -3.3126 | 4123     |
| ARL8B        | 8.6117   | 8.6117  | 17.046  | 2.6748  | 0.018382 | 0.12054 | -3.3127 | 55207    |
| ABL2         | 3.4736   | 3.4736  | 4.4804  | 2.6748  | 0.018383 | 0.12054 | -3.3127 | 27       |
| IDS          | 5.4854   | 5.4854  | 11.402  | 2.6746  | 0.018391 | 0.12054 | -3.3131 | 3423     |
| LOC728024    | -0.2356  | 0.2356  | 0.33279 | -2.6739 | 0.018414 | 0.12054 | -3.3142 | 728024   |
| HEMK1        | -0.60719 | 0.60719 | 1.2742  | -2.6739 | 0.018415 | 0.12054 | -3.3143 | 51409    |
| GLO1         | 20.47    | 20.47   | 25.954  | 2.6735  | 0.018429 | 0.12054 | -3.315  | 2739     |
| CRYM         | -0.26022 | 0.26022 | 0.31908 | -2.6735 | 0.01843  | 0.12054 | -3.315  | 1428     |
| FAM107A      | -1.189   | 1.189   | 1.3576  | -2.6734 | 0.018432 | 0.12054 | -3.3151 | 11170    |
| PIGO         | -0.99677 | 0.99677 | 3.2524  | -2.6733 | 0.018435 | 0.12054 | -3.3153 | 84720    |
| PRELID3B     | 3.5313   | 3.5313  | 5.3683  | 2.6733  | 0.018436 | 0.12054 | -3.3153 | 51012    |
| THAP2        | 0.20427  | 0.20427 | 0.28697 | 2.6733  | 0.018437 | 0.12054 | -3.3154 | 83591    |
| LOC105370792 | 0.57927  | 0.57927 | 1.2886  | 2.6732  | 0.018442 | 0.12054 | -3.3156 | 1.05E+08 |
| KPNA2        | 7.909    | 7.909   | 9.5883  | 2.6724  | 0.018468 | 0.12066 | -3.3169 | 3838     |
| SEC23A       | 5.0987   | 5.0987  | 8.1291  | 2.672   | 0.018485 | 0.12072 | -3.3178 | 10484    |
| SUCO         | 1.6111   | 1.6111  | 4.224   | 2.6718  | 0.018491 | 0.12072 | -3.3181 | 51430    |
| RHOQ         | 4.5685   | 4.5685  | 7.587   | 2.6714  | 0.018504 | 0.12076 | -3.3187 | 23433    |
| MAML2        | -1.2976  | 1.2976  | 4.3101  | -2.6704 | 0.01854  | 0.12094 | -3.3205 | 84441    |
| ADAMTSL3     | -0.68193 | 0.68193 | 0.51445 | -2.6703 | 0.018546 | 0.12094 | -3.3208 | 57188    |
| RAB32        | 4.6653   | 4.6653  | 5.841   | 2.6696  | 0.01857  | 0.12103 | -3.322  | 10981    |
| SELENOT      | 3.7144   | 3.7144  | 5.6391  | 2.6693  | 0.018581 | 0.12103 | -3.3225 | 51714    |
| KCNQ4        | -0.23952 | 0.23952 | 0.20909 | -2.6693 | 0.018582 | 0.12103 | -3.3226 | 9132     |

|           |          |         |         |         |          |         |         |          |
|-----------|----------|---------|---------|---------|----------|---------|---------|----------|
| DGCR5     | -0.20159 | 0.20159 | 0.22792 | -2.669  | 0.018592 | 0.12105 | -3.3231 | 26220    |
| WHRN      | -0.55118 | 0.55118 | 1.0883  | -2.6684 | 0.018614 | 0.12112 | -3.3242 | 25861    |
| LINC02108 | -3.2431  | 3.2431  | 4.8746  | -2.6681 | 0.018625 | 0.12112 | -3.3247 | 1.02E+08 |
| LRRC37A4P | -1.367   | 1.367   | 1.946   | -2.6671 | 0.018659 | 0.12112 | -3.3264 | 55073    |
| LINC00923 | -0.51357 | 0.51357 | 0.67331 | -2.667  | 0.018664 | 0.12112 | -3.3266 | 91948    |
| TWSG1     | 3.476    | 3.476   | 5.0778  | 2.6669  | 0.018669 | 0.12112 | -3.3269 | 57045    |
| ACSF3     | -0.79783 | 0.79783 | 1.7548  | -2.6668 | 0.018673 | 0.12112 | -3.3271 | 197322   |
| KMT2D     | -4.2452  | 4.2452  | 9.0583  | -2.6664 | 0.018686 | 0.12112 | -3.3277 | 8085     |
| SLC25A24  | 3.2249   | 3.2249  | 4.6401  | 2.6659  | 0.018704 | 0.12112 | -3.3286 | 29957    |
| S100A12   | 10.068   | 10.068  | 7.2516  | 2.6659  | 0.018705 | 0.12112 | -3.3287 | 6283     |
| LINC01060 | 0.37935  | 0.37935 | 0.23215 | 2.6655  | 0.018718 | 0.12112 | -3.3293 | 401164   |
| TDP2      | 7.9082   | 7.9082  | 9.0342  | 2.6655  | 0.018719 | 0.12112 | -3.3294 | 51567    |
| SERPINB13 | 31.03    | 31.03   | 33.425  | 2.6654  | 0.01872  | 0.12112 | -3.3294 | 5275     |
| ATP2A3    | -2.82    | 2.82    | 3.408   | -2.6654 | 0.018722 | 0.12112 | -3.3295 | 489      |
| TSPAN33   | -0.94779 | 0.94779 | 1.3759  | -2.6654 | 0.018723 | 0.12112 | -3.3295 | 340348   |
| ELK3      | 7.8632   | 7.8632  | 11.643  | 2.6653  | 0.018726 | 0.12112 | -3.3297 | 2004     |
| JAK2      | -1.2158  | 1.2158  | 3.4001  | -2.6651 | 0.018734 | 0.12112 | -3.3301 | 3717     |
| ADAM10    | 6.1665   | 6.1665  | 9.3383  | 2.6645  | 0.018753 | 0.12112 | -3.331  | 102      |
| ZNRF3-AS1 | -0.29885 | 0.29885 | 0.33692 | -2.6643 | 0.01876  | 0.12112 | -3.3314 | 1.01E+08 |
| APLN      | 1.9656   | 1.9656  | 1.56    | 2.6643  | 0.018761 | 0.12112 | -3.3314 | 8862     |
| TLN2      | -0.80193 | 0.80193 | 1.1213  | -2.6642 | 0.018766 | 0.12112 | -3.3316 | 83660    |
| ANKRD23   | -1.4028  | 1.4028  | 1.4359  | -2.6641 | 0.01877  | 0.12112 | -3.3319 | 200539   |
| EIF1AY    | 2.8654   | 2.8654  | 3.9703  | 2.664   | 0.018771 | 0.12112 | -3.3319 | 9086     |
| EIF2B2    | 6.3112   | 6.3112  | 8.6849  | 2.664   | 0.018774 | 0.12112 | -3.332  | 8892     |
| SP1       | -3.1492  | 3.1492  | 11.863  | -2.6638 | 0.018781 | 0.12112 | -3.3324 | 6667     |
| CDC14B    | 1.0767   | 1.0767  | 2.4443  | 2.6633  | 0.018798 | 0.12112 | -3.3332 | 8555     |

|              |          |         |         |         |          |         |         |          |
|--------------|----------|---------|---------|---------|----------|---------|---------|----------|
| ENDOV        | -0.61278 | 0.61278 | 1.1328  | -2.6632 | 0.018803 | 0.12112 | -3.3335 | 284131   |
| MCU          | 2.187    | 2.187   | 4.162   | 2.6631  | 0.018806 | 0.12112 | -3.3336 | 90550    |
| SESN1        | -1.5386  | 1.5386  | 3.2636  | -2.6631 | 0.018806 | 0.12112 | -3.3336 | 27244    |
| SMTNL1       | -0.16147 | 0.16147 | 0.11489 | -2.6629 | 0.018814 | 0.12112 | -3.334  | 219537   |
| NDRG1        | 138.77   | 138.77  | 174.42  | 2.6628  | 0.018818 | 0.12112 | -3.3342 | 10397    |
| CHP1         | 20.726   | 20.726  | 30.465  | 2.6623  | 0.018834 | 0.12118 | -3.335  | 11261    |
| CYCSP52      | -0.34123 | 0.34123 | 0.40907 | -2.662  | 0.018846 | 0.12121 | -3.3356 | 360155   |
| ITGA9-AS1    | -0.26854 | 0.26854 | 0.20995 | -2.6615 | 0.018862 | 0.12122 | -3.3364 | 1.02E+08 |
| TSPYL6       | -0.27034 | 0.27034 | 0.27258 | -2.6615 | 0.018865 | 0.12122 | -3.3365 | 388951   |
| RPRML        | -0.22388 | 0.22388 | 0.13151 | -2.6613 | 0.018871 | 0.12122 | -3.3368 | 388394   |
| MAN1C1       | -1.6142  | 1.6142  | 1.9331  | -2.661  | 0.018882 | 0.12122 | -3.3373 | 57134    |
| BEGAIN       | -0.23503 | 0.23503 | 0.23172 | -2.6608 | 0.018889 | 0.12122 | -3.3377 | 57596    |
| KCMF1        | 1.8553   | 1.8553  | 3.8711  | 2.6607  | 0.018894 | 0.12122 | -3.3379 | 56888    |
| AVEN         | 2.9425   | 2.9425  | 4.9979  | 2.6606  | 0.018898 | 0.12122 | -3.3381 | 57099    |
| PODNL1       | 1.2448   | 1.2448  | 1.8795  | 2.6597  | 0.018929 | 0.12133 | -3.3396 | 79883    |
| TBC1D24      | -0.48361 | 0.48361 | 0.97399 | -2.6597 | 0.01893  | 0.12133 | -3.3397 | 57465    |
| NME9         | -0.33691 | 0.33691 | 0.38425 | -2.6592 | 0.018947 | 0.1214  | -3.3405 | 347736   |
| PLEKHD1      | -0.1765  | 0.1765  | 0.10835 | -2.6583 | 0.018981 | 0.12157 | -3.3421 | 400224   |
| FITM1        | -0.19889 | 0.19889 | 0.19234 | -2.6569 | 0.019033 | 0.12183 | -3.3447 | 161247   |
| IL17D        | -0.5094  | 0.5094  | 0.49685 | -2.6568 | 0.019037 | 0.12183 | -3.3448 | 53342    |
| PLA2G4A      | 2.9477   | 2.9477  | 3.0003  | 2.656   | 0.019066 | 0.12196 | -3.3462 | 5321     |
| DPY19L2P2    | -0.31021 | 0.31021 | 0.58328 | -2.6559 | 0.01907  | 0.12196 | -3.3464 | 349152   |
| IRX5         | -1.8957  | 1.8957  | 4.464   | -2.6539 | 0.019144 | 0.1223  | -3.35   | 10265    |
| LINC02444    | -6.6238  | 6.6238  | 8.4952  | -2.6539 | 0.019145 | 0.1223  | -3.3501 | 1.02E+08 |
| LOC101928936 | -1.0714  | 1.0714  | 1.7092  | -2.6539 | 0.019146 | 0.1223  | -3.3501 | 1.02E+08 |
| ATP6V1B2     | 14.476   | 14.476  | 25.643  | 2.6534  | 0.019161 | 0.12235 | -3.3508 | 526      |

|              |          |         |         |         |          |         |         |          |
|--------------|----------|---------|---------|---------|----------|---------|---------|----------|
| DCAF1        | -0.749   | 0.749   | 2.8556  | -2.6528 | 0.019183 | 0.12245 | -3.3519 | 9730     |
| CCDC92B      | -0.1792  | 0.1792  | 0.13212 | -2.6526 | 0.019194 | 0.12247 | -3.3524 | 1.02E+08 |
| RPRD2        | -1.0088  | 1.0088  | 4.294   | -2.652  | 0.019215 | 0.12252 | -3.3534 | 23248    |
| LTC4S        | -0.76432 | 0.76432 | 1.0658  | -2.6518 | 0.019221 | 0.12252 | -3.3537 | 4056     |
| OR51E1       | 0.5138   | 0.5138  | 0.31375 | 2.6518  | 0.019224 | 0.12252 | -3.3538 | 143503   |
| ECRP         | -0.21132 | 0.21132 | 0.21661 | -2.6514 | 0.019237 | 0.12256 | -3.3545 | 643332   |
| PPP2CB       | 9.7724   | 9.7724  | 18.629  | 2.6508  | 0.019261 | 0.12266 | -3.3556 | 5516     |
| ACVR1        | 2.5496   | 2.5496  | 5.6315  | 2.65    | 0.019289 | 0.1228  | -3.3569 | 90       |
| AARS2        | -1.4552  | 1.4552  | 2.3501  | -2.6489 | 0.019329 | 0.123   | -3.3588 | 57505    |
| TMTC3        | 2.2173   | 2.2173  | 5.1394  | 2.6487  | 0.019339 | 0.12302 | -3.3593 | 160418   |
| SCN3B        | 1.0931   | 1.0931  | 1.0807  | 2.6483  | 0.019353 | 0.12306 | -3.36   | 55800    |
| DMAP1        | -2.0318  | 2.0318  | 4.2504  | -2.6477 | 0.019374 | 0.12315 | -3.361  | 55929    |
| ADAMTSL5     | 0.30606  | 0.30606 | 0.38704 | 2.6473  | 0.019392 | 0.1232  | -3.3618 | 339366   |
| ATG14        | -0.75007 | 0.75007 | 3.1436  | -2.6471 | 0.019397 | 0.1232  | -3.3621 | 22863    |
| LMX1B        | -0.33317 | 0.33317 | 0.53747 | -2.647  | 0.019403 | 0.1232  | -3.3624 | 4010     |
| LGALS9C      | 3.1414   | 3.1414  | 2.3783  | 2.6465  | 0.019421 | 0.12323 | -3.3632 | 654346   |
| FNBP4        | -2.3419  | 2.3419  | 7.6145  | -2.6464 | 0.019423 | 0.12323 | -3.3633 | 23360    |
| NPB          | 0.67853  | 0.67853 | 0.47576 | 2.6452  | 0.019469 | 0.12348 | -3.3655 | 256933   |
| ATP6V1A      | 5.9909   | 5.9909  | 13.268  | 2.6445  | 0.019497 | 0.12361 | -3.3668 | 523      |
| ATP6V1F      | 20.394   | 20.394  | 33.559  | 2.6442  | 0.019509 | 0.12364 | -3.3673 | 9296     |
| LOC100996740 | -1.3066  | 1.3066  | 1.5999  | -2.6431 | 0.019548 | 0.12382 | -3.3692 | 1.01E+08 |
| OR1K1        | -0.26273 | 0.26273 | 0.17353 | -2.643  | 0.019552 | 0.12382 | -3.3694 | 392392   |
| ZNF436-AS1   | -0.86443 | 0.86443 | 0.74535 | -2.6422 | 0.019582 | 0.12396 | -3.3708 | 148898   |
| TMCO4        | -0.57631 | 0.57631 | 1.1646  | -2.6398 | 0.019676 | 0.12446 | -3.3752 | 255104   |
| ATP11A       | -1.5922  | 1.5922  | 4.2639  | -2.6398 | 0.019676 | 0.12446 | -3.3752 | 23250    |
| SH3YL1       | -0.9593  | 0.9593  | 2.4131  | -2.6391 | 0.0197   | 0.12457 | -3.3763 | 26751    |

|              |          |         |         |         |          |         |         |          |
|--------------|----------|---------|---------|---------|----------|---------|---------|----------|
| PTH1R        | -0.70096 | 0.70096 | 0.8296  | -2.6388 | 0.019711 | 0.12459 | -3.3768 | 5745     |
| VAMP3        | 11.575   | 11.575  | 22.354  | 2.6378  | 0.019752 | 0.12477 | -3.3787 | 9341     |
| TADA1        | -0.62464 | 0.62464 | 1.8852  | -2.6377 | 0.019755 | 0.12477 | -3.3788 | 117143   |
| EXOSC1       | 2.7941   | 2.7941  | 5.1529  | 2.6372  | 0.019772 | 0.12484 | -3.3797 | 51013    |
| CEP72        | -0.48288 | 0.48288 | 0.91039 | -2.6359 | 0.019824 | 0.12511 | -3.382  | 55722    |
| ZNF215       | 0.27231  | 0.27231 | 0.37343 | 2.6356  | 0.019837 | 0.12515 | -3.3827 | 7762     |
| ISM1         | -1.5104  | 1.5104  | 2.4734  | -2.6346 | 0.019873 | 0.12533 | -3.3843 | 140862   |
| LRGUK        | -0.20929 | 0.20929 | 0.24055 | -2.634  | 0.019896 | 0.12543 | -3.3854 | 136332   |
| SPTY2D1      | 1.6457   | 1.6457  | 4.0446  | 2.6337  | 0.01991  | 0.12547 | -3.386  | 144108   |
| NOX4         | 0.60706  | 0.60706 | 0.57424 | 2.6327  | 0.019946 | 0.12565 | -3.3877 | 50507    |
| PI4KAP1      | -1.0063  | 1.0063  | 1.458   | -2.6323 | 0.019962 | 0.1257  | -3.3884 | 728233   |
| WASH7P       | -5.5712  | 5.5712  | 10.036  | -2.632  | 0.019973 | 0.12573 | -3.389  | 653635   |
| OSTM1        | 1.8245   | 1.8245  | 3.4981  | 2.6316  | 0.01999  | 0.12579 | -3.3897 | 28962    |
| LOC100507387 | -0.34358 | 0.34358 | 0.18681 | -2.6312 | 0.020004 | 0.12579 | -3.3904 | 1.01E+08 |
| GALNT16      | -1.524   | 1.524   | 1.4416  | -2.6312 | 0.020005 | 0.12579 | -3.3904 | 57452    |
| RAB9A        | 4.0223   | 4.0223  | 6.914   | 2.6306  | 0.020027 | 0.12584 | -3.3914 | 9367     |
| ZNRF2P2      | -0.63867 | 0.63867 | 0.51687 | -2.6306 | 0.020028 | 0.12584 | -3.3915 | 1E+08    |
| GGH          | 30.113   | 30.113  | 23.337  | 2.6296  | 0.020067 | 0.12601 | -3.3932 | 8836     |
| PEG3         | -0.45325 | 0.45325 | 0.47017 | -2.6295 | 0.020071 | 0.12601 | -3.3934 | 5178     |
| COPB1        | 6.4368   | 6.4368  | 13.012  | 2.6293  | 0.020079 | 0.12602 | -3.3938 | 1315     |
| MAP7D1       | 24.235   | 24.235  | 34.166  | 2.6285  | 0.020109 | 0.12616 | -3.3952 | 55700    |
| EPB41L3      | 5.2288   | 5.2288  | 6.1276  | 2.6278  | 0.020139 | 0.12626 | -3.3965 | 23136    |
| RRAS2        | 2.9262   | 2.9262  | 3.8295  | 2.6277  | 0.02014  | 0.12626 | -3.3966 | 22800    |
| COMMD8       | 2.4802   | 2.4802  | 3.4631  | 2.6266  | 0.020184 | 0.12649 | -3.3986 | 54951    |
| BEX2         | -0.74017 | 0.74017 | 0.99295 | -2.6249 | 0.020251 | 0.12686 | -3.4016 | 84707    |
| RSPO1        | -0.81525 | 0.81525 | 1.0796  | -2.6237 | 0.020298 | 0.12711 | -3.4038 | 284654   |

|            |          |         |         |         |          |         |         |          |
|------------|----------|---------|---------|---------|----------|---------|---------|----------|
| ADORA1     | -0.44485 | 0.44485 | 0.42963 | -2.6233 | 0.020313 | 0.12711 | -3.4045 | 134      |
| CROCCP3    | -0.48935 | 0.48935 | 0.6914  | -2.6232 | 0.020318 | 0.12711 | -3.4047 | 114819   |
| GJC3       | -0.37822 | 0.37822 | 0.40594 | -2.6231 | 0.02032  | 0.12711 | -3.4048 | 349149   |
| ADCY5      | -0.73817 | 0.73817 | 0.56939 | -2.6227 | 0.020338 | 0.12713 | -3.4056 | 111      |
| AGAP9      | -1.1429  | 1.1429  | 1.7165  | -2.6227 | 0.020339 | 0.12713 | -3.4056 | 642517   |
| EDARADD    | -0.55407 | 0.55407 | 1.0207  | -2.6222 | 0.020355 | 0.12716 | -3.4063 | 128178   |
| LENG8      | -10.007  | 10.007  | 18.835  | -2.6221 | 0.020359 | 0.12716 | -3.4065 | 114823   |
| RBM12B-AS1 | -0.78381 | 0.78381 | 1.389   | -2.6209 | 0.020408 | 0.12742 | -3.4087 | 55472    |
| DUSP14     | 56.031   | 56.031  | 45.073  | 2.6205  | 0.020425 | 0.12748 | -3.4095 | 11072    |
| INHA       | -0.25836 | 0.25836 | 0.22384 | -2.6203 | 0.020432 | 0.12748 | -3.4098 | 3623     |
| PRLR       | -0.42602 | 0.42602 | 0.45313 | -2.6196 | 0.020458 | 0.12755 | -3.411  | 5618     |
| UBXN11     | -0.82256 | 0.82256 | 1.5142  | -2.6193 | 0.02047  | 0.12755 | -3.4115 | 91544    |
| BAIAP3     | -0.22128 | 0.22128 | 0.23481 | -2.6193 | 0.020473 | 0.12755 | -3.4116 | 8938     |
| PTPRT      | -0.17186 | 0.17186 | 0.10116 | -2.6191 | 0.020479 | 0.12755 | -3.4119 | 11122    |
| NAP1L5     | -0.49283 | 0.49283 | 1.1976  | -2.6191 | 0.020481 | 0.12755 | -3.412  | 266812   |
| MAB21L1    | -0.26473 | 0.26473 | 0.27073 | -2.6178 | 0.020529 | 0.1278  | -3.4142 | 4081     |
| TMEM51     | 2.3441   | 2.3441  | 3.4993  | 2.6175  | 0.020544 | 0.12784 | -3.4148 | 55092    |
| ZNF433-AS1 | -0.27874 | 0.27874 | 0.43402 | -2.617  | 0.020563 | 0.12786 | -3.4157 | 1.02E+08 |
| ALKAL2     | -0.3731  | 0.3731  | 0.26687 | -2.6168 | 0.02057  | 0.12786 | -3.416  | 285016   |
| FAM160A2   | -1.8333  | 1.8333  | 4.9543  | -2.6168 | 0.020571 | 0.12786 | -3.416  | 84067    |
| RGS2       | 7.3907   | 7.3907  | 6.9898  | 2.6166  | 0.020577 | 0.12786 | -3.4163 | 5997     |
| AXIN2      | -1.721   | 1.721   | 2.6416  | -2.6158 | 0.02061  | 0.12802 | -3.4178 | 8313     |
| IRF4       | -0.35875 | 0.35875 | 0.52663 | -2.6153 | 0.020631 | 0.12807 | -3.4187 | 3662     |
| C6orf201   | -0.30299 | 0.30299 | 0.2497  | -2.6152 | 0.020633 | 0.12807 | -3.4188 | 404220   |
| ACAA2      | 4.0363   | 4.0363  | 6.9647  | 2.6146  | 0.02066  | 0.12808 | -3.42   | 10449    |
| PCDHB16    | -0.61091 | 0.61091 | 0.78492 | -2.6143 | 0.020672 | 0.12808 | -3.4205 | 57717    |

|              |          |         |         |         |          |         |         |          |
|--------------|----------|---------|---------|---------|----------|---------|---------|----------|
| MOCOS        | 1.2662   | 1.2662  | 2.5139  | 2.6143  | 0.020672 | 0.12808 | -3.4205 | 55034    |
| UBQLN2       | 7.3803   | 7.3803  | 10.581  | 2.6142  | 0.020673 | 0.12808 | -3.4205 | 29978    |
| TANK         | 4.4056   | 4.4056  | 7.4409  | 2.6142  | 0.020673 | 0.12808 | -3.4206 | 10010    |
| BCKDHB       | -0.56313 | 0.56313 | 1.5654  | -2.614  | 0.020682 | 0.12809 | -3.421  | 594      |
| AARD         | -0.33323 | 0.33323 | 0.22271 | -2.6135 | 0.020704 | 0.12818 | -3.4219 | 441376   |
| LINC00278    | -0.80202 | 0.80202 | 1.1816  | -2.6133 | 0.020712 | 0.12818 | -3.4223 | 1.01E+08 |
| VWA5A        | -2.9643  | 2.9643  | 5.7983  | -2.6129 | 0.020728 | 0.12823 | -3.423  | 4013     |
| PHF2         | -2.0075  | 2.0075  | 5.1737  | -2.6127 | 0.020735 | 0.12823 | -3.4233 | 5253     |
| ISM1-AS1     | -0.31553 | 0.31553 | 0.30701 | -2.6122 | 0.020756 | 0.12831 | -3.4242 | 1.01E+08 |
| EEF1DP3      | -0.6137  | 0.6137  | 0.72801 | -2.6116 | 0.020778 | 0.1284  | -3.4252 | 196549   |
| FSD2         | -0.19554 | 0.19554 | 0.17994 | -2.6113 | 0.020792 | 0.12844 | -3.4258 | 123722   |
| FAT1         | 13.15    | 13.15   | 20.878  | 2.6108  | 0.020811 | 0.12851 | -3.4266 | 2195     |
| GABPB1-IT1   | -0.39253 | 0.39253 | 1.0724  | -2.6102 | 0.020834 | 0.12857 | -3.4277 | 55056    |
| GSTM5        | -1.2275  | 1.2275  | 1.0746  | -2.61   | 0.020843 | 0.12857 | -3.4281 | 2949     |
| SPATA5       | -0.42613 | 0.42613 | 1.3359  | -2.61   | 0.020844 | 0.12857 | -3.4281 | 166378   |
| TTN-AS1      | -0.45454 | 0.45454 | 1.2119  | -2.6096 | 0.020857 | 0.1286  | -3.4287 | 1.01E+08 |
| PARD6G-AS1   | -0.802   | 0.802   | 1.0356  | -2.6095 | 0.020864 | 0.1286  | -3.429  | 1E+08    |
| MYL6         | 322.21   | 322.21  | 394.52  | 2.6092  | 0.020873 | 0.12862 | -3.4294 | 4637     |
| SCARNA28     | -58.461  | 58.461  | 54.174  | -2.6082 | 0.020916 | 0.12883 | -3.4313 | 1.07E+08 |
| UBE2N        | 6.1232   | 6.1232  | 11.153  | 2.6076  | 0.02094  | 0.12887 | -3.4323 | 7334     |
| MAPK15       | -0.37285 | 0.37285 | 0.42038 | -2.6074 | 0.020948 | 0.12887 | -3.4327 | 225689   |
| STX16-NPEPL1 | -1.0256  | 1.0256  | 0.82899 | -2.6074 | 0.020949 | 0.12887 | -3.4327 | 1.01E+08 |
| OR2A4        | -1.7638  | 1.7638  | 1.7495  | -2.6073 | 0.020953 | 0.12887 | -3.4329 | 79541    |
| SMIM13       | 0.74353  | 0.74353 | 1.5614  | 2.607   | 0.020963 | 0.12888 | -3.4333 | 221710   |
| CEACAM19     | 5.428    | 5.428   | 7.0942  | 2.6069  | 0.02097  | 0.12888 | -3.4336 | 56971    |
| SCARNA9      | -22.01   | 22.01   | 25.033  | -2.6066 | 0.02098  | 0.1289  | -3.4341 | 619383   |



|              |          |         |         |         |          |         |         |          |
|--------------|----------|---------|---------|---------|----------|---------|---------|----------|
| LOC100506207 | -0.16756 | 0.16756 | 0.20316 | -2.6064 | 0.020988 | 0.1289  | -3.4344 | 1.01E+08 |
| FLJ42969     | 0.24759  | 0.24759 | 0.18756 | 2.6053  | 0.021032 | 0.12911 | -3.4364 | 441374   |
| F2RL2        | 0.99422  | 0.99422 | 1.2995  | 2.6052  | 0.021038 | 0.12911 | -3.4366 | 2151     |
| CD207        | -6.8668  | 6.8668  | 4.7599  | -2.6049 | 0.021048 | 0.12912 | -3.437  | 50489    |
| PTPRF        | -16.917  | 16.917  | 36.025  | -2.6044 | 0.021068 | 0.1292  | -3.4379 | 5792     |
| ORAI3        | -1.7807  | 1.7807  | 3.2389  | -2.6043 | 0.021076 | 0.1292  | -3.4383 | 93129    |
| CASC9        | -0.53319 | 0.53319 | 0.74822 | -2.6035 | 0.021106 | 0.1293  | -3.4396 | 1.02E+08 |
| RNF145       | 7.1961   | 7.1961  | 14.03   | 2.6034  | 0.021111 | 0.1293  | -3.4398 | 153830   |
| FAM27B       | -0.88932 | 0.88932 | 1.0434  | -2.6033 | 0.021115 | 0.1293  | -3.44   | 1E+08    |
| CPEB2        | 3.3822   | 3.3822  | 9.0044  | 2.6029  | 0.021133 | 0.12936 | -3.4407 | 132864   |
| LINC01547    | -0.33474 | 0.33474 | 0.4668  | -2.6024 | 0.021153 | 0.12944 | -3.4416 | 84536    |
| EIF4G3       | 2.1972   | 2.1972  | 6.8595  | 2.6021  | 0.021163 | 0.12945 | -3.442  | 8672     |
| MADD         | -1.5906  | 1.5906  | 5.195   | -2.6011 | 0.021206 | 0.12956 | -3.4439 | 8567     |
| TGFB2        | 0.61715  | 0.61715 | 0.98717 | 2.601   | 0.021207 | 0.12956 | -3.444  | 7042     |
| GCGR         | -0.19248 | 0.19248 | 0.13257 | -2.601  | 0.021208 | 0.12956 | -3.444  | 2642     |
| ISG20        | 0.88756  | 0.88756 | 1.1006  | 2.601   | 0.021211 | 0.12956 | -3.4441 | 3669     |
| MAFF         | 4.784    | 4.784   | 6.7833  | 2.5999  | 0.021254 | 0.12977 | -3.446  | 23764    |
| DBNDD1       | 1.9228   | 1.9228  | 2.229   | 2.5997  | 0.021262 | 0.12978 | -3.4463 | 79007    |
| NDUFB3       | 10.094   | 10.094  | 11.902  | 2.5994  | 0.021276 | 0.12981 | -3.4469 | 4709     |
| TMEM201      | -0.73226 | 0.73226 | 1.5091  | -2.5985 | 0.02131  | 0.12991 | -3.4484 | 199953   |
| TMEM106C     | 4.0953   | 4.0953  | 6.5774  | 2.5985  | 0.021311 | 0.12991 | -3.4484 | 79022    |
| SPN          | -0.37957 | 0.37957 | 0.55145 | -2.5984 | 0.021314 | 0.12991 | -3.4486 | 6693     |
| HSPA13       | 1.7653   | 1.7653  | 2.4028  | 2.5977  | 0.021346 | 0.13006 | -3.4499 | 6782     |
| SNHG14       | -0.25032 | 0.25032 | 0.33697 | -2.5974 | 0.021356 | 0.13007 | -3.4504 | 1.04E+08 |
| RSU1         | 4.6655   | 4.6655  | 9.5624  | 2.597   | 0.021374 | 0.13007 | -3.4511 | 6251     |
| DPH7         | -0.73291 | 0.73291 | 1.6491  | -2.5969 | 0.021376 | 0.13007 | -3.4512 | 92715    |

|              |          |         |         |         |          |         |         |          |
|--------------|----------|---------|---------|---------|----------|---------|---------|----------|
| LOC100996724 | -0.56401 | 0.56401 | 0.65707 | -2.5969 | 0.021379 | 0.13007 | -3.4514 | 1.01E+08 |
| DNAJA1       | 9.4107   | 9.4107  | 15.726  | 2.596   | 0.021414 | 0.13024 | -3.4529 | 3301     |
| BZW1         | 30.902   | 30.902  | 37.082  | 2.5955  | 0.021435 | 0.13032 | -3.4538 | 9689     |
| PAXIP1-AS2   | -0.4002  | 0.4002  | 0.78182 | -2.5953 | 0.021444 | 0.13032 | -3.4541 | 1E+08    |
| UGT1A6       | -0.33005 | 0.33005 | 0.20867 | -2.595  | 0.021454 | 0.13034 | -3.4546 | 54578    |
| ZNF837       | -0.50853 | 0.50853 | 0.74136 | -2.5944 | 0.02148  | 0.13039 | -3.4557 | 116412   |
| VPS29        | 8.6789   | 8.6789  | 13.179  | 2.5944  | 0.02148  | 0.13039 | -3.4557 | 51699    |
| SFN          | 1076.2   | 1076.2  | 1191.5  | 2.594   | 0.0215   | 0.13039 | -3.4565 | 2810     |
| ADAM9        | 9.6094   | 9.6094  | 12.778  | 2.5938  | 0.021506 | 0.13039 | -3.4568 | 8754     |
| XPA          | -0.69387 | 0.69387 | 1.8097  | -2.5938 | 0.021506 | 0.13039 | -3.4568 | 7507     |
| ZNF66        | -0.43753 | 0.43753 | 0.58212 | -2.5937 | 0.02151  | 0.13039 | -3.4569 | 7617     |
| SOCS4        | 0.76143  | 0.76143 | 2.0249  | 2.5933  | 0.021526 | 0.13045 | -3.4576 | 122809   |
| ZBTB42       | -0.69246 | 0.69246 | 1.1299  | -2.593  | 0.02154  | 0.13048 | -3.4582 | 1E+08    |
| ALX4         | -0.3049  | 0.3049  | 0.31319 | -2.5928 | 0.021548 | 0.13049 | -3.4586 | 60529    |
| TNNC1        | -0.26833 | 0.26833 | 0.17052 | -2.5925 | 0.02156  | 0.13051 | -3.4591 | 7134     |
| UCA1         | 0.40685  | 0.40685 | 0.38934 | 2.5923  | 0.021569 | 0.13051 | -3.4595 | 652995   |
| WASH2P       | -1.4107  | 1.4107  | 4.0517  | -2.5921 | 0.021576 | 0.13051 | -3.4597 | 375260   |
| SLC9A3       | -0.48138 | 0.48138 | 0.87113 | -2.592  | 0.021583 | 0.13051 | -3.46   | 6550     |
| SHISAL1      | 2.2943   | 2.2943  | 1.6315  | 2.5917  | 0.021594 | 0.13053 | -3.4605 | 85352    |
| ANKZF1       | -1.9626  | 1.9626  | 4.9784  | -2.5911 | 0.021616 | 0.13062 | -3.4615 | 55139    |
| TCEA2        | -1.3276  | 1.3276  | 1.8046  | -2.5907 | 0.021636 | 0.13069 | -3.4623 | 6919     |
| SKOR1        | -0.19161 | 0.19161 | 0.16128 | -2.5898 | 0.021674 | 0.13087 | -3.4639 | 390598   |
| REXO2        | 7.6942   | 7.6942  | 13.626  | 2.5893  | 0.021693 | 0.13089 | -3.4647 | 25996    |
| HRCT1        | -0.92365 | 0.92365 | 0.76002 | -2.5891 | 0.021703 | 0.13089 | -3.4651 | 646962   |
| MRPS36       | 2.2995   | 2.2995  | 3.3789  | 2.589   | 0.021705 | 0.13089 | -3.4652 | 92259    |
| COL6A5       | -0.29265 | 0.29265 | 0.17768 | -2.5886 | 0.021725 | 0.13089 | -3.4661 | 256076   |

|              |          |         |         |         |          |         |         |          |
|--------------|----------|---------|---------|---------|----------|---------|---------|----------|
| TMCO6        | -0.67966 | 0.67966 | 1.6891  | -2.5885 | 0.021726 | 0.13089 | -3.4661 | 55374    |
| ITGAX        | 2.3512   | 2.3512  | 2.0681  | 2.5884  | 0.021732 | 0.13089 | -3.4664 | 3687     |
| ANKRD33B     | -2.3464  | 2.3464  | 1.4447  | -2.5883 | 0.021736 | 0.13089 | -3.4665 | 651746   |
| ACBD3        | 3.5914   | 3.5914  | 8.9973  | 2.5881  | 0.021742 | 0.13089 | -3.4668 | 64746    |
| RAP1B        | 11.363   | 11.363  | 19.583  | 2.5874  | 0.021772 | 0.13089 | -3.468  | 5908     |
| SPATC1L      | -0.43061 | 0.43061 | 1.0799  | -2.5874 | 0.021775 | 0.13089 | -3.4682 | 84221    |
| TMOD3        | 8.6795   | 8.6795  | 17.114  | 2.5871  | 0.021786 | 0.13089 | -3.4686 | 29766    |
| SLC46A1      | -0.46427 | 0.46427 | 0.79392 | -2.587  | 0.021791 | 0.13089 | -3.4688 | 113235   |
| ZNF571-AS1   | -0.21668 | 0.21668 | 0.21524 | -2.5869 | 0.021794 | 0.13089 | -3.469  | 1.01E+08 |
| GGT3P        | -0.20035 | 0.20035 | 0.11737 | -2.5866 | 0.021805 | 0.13089 | -3.4694 | 2679     |
| LOC651337    | -0.61247 | 0.61247 | 0.76675 | -2.5866 | 0.021806 | 0.13089 | -3.4695 | 651337   |
| CCDC88C      | -1.4009  | 1.4009  | 2.7596  | -2.5866 | 0.021807 | 0.13089 | -3.4695 | 440193   |
| LGALS9B      | 1.1964   | 1.1964  | 0.98344 | 2.5865  | 0.02181  | 0.13089 | -3.4696 | 284194   |
| SCNN1D       | 14.441   | 14.441  | 8.1437  | 2.5864  | 0.021816 | 0.13089 | -3.4699 | 6339     |
| COX17        | 8.5818   | 8.5818  | 12.383  | 2.5852  | 0.021865 | 0.13114 | -3.472  | 10063    |
| KIAA1324L    | -0.59216 | 0.59216 | 0.77717 | -2.5849 | 0.021879 | 0.13116 | -3.4725 | 222223   |
| PSME4        | 2.411    | 2.411   | 7.2636  | 2.5848  | 0.021885 | 0.13116 | -3.4728 | 23198    |
| REEP1        | 0.78342  | 0.78342 | 0.79877 | 2.584   | 0.021919 | 0.13132 | -3.4742 | 65055    |
| ASIC3        | -0.23779 | 0.23779 | 0.26965 | -2.5836 | 0.021932 | 0.13135 | -3.4748 | 9311     |
| HRH1         | 1.3523   | 1.3523  | 2.1801  | 2.5828  | 0.02197  | 0.13145 | -3.4763 | 3269     |
| THRSP        | -0.1955  | 0.1955  | 0.14146 | -2.5826 | 0.021978 | 0.13145 | -3.4767 | 7069     |
| PDCD4        | -9.2191  | 9.2191  | 18.723  | -2.5826 | 0.021978 | 0.13145 | -3.4767 | 27250    |
| LOC100506476 | -0.44541 | 0.44541 | 0.43112 | -2.5825 | 0.021979 | 0.13145 | -3.4767 | 1.01E+08 |
| ARVCF        | -0.78991 | 0.78991 | 1.2211  | -2.5816 | 0.02202  | 0.13164 | -3.4784 | 421      |
| GRM2         | -0.221   | 0.221   | 0.2441  | -2.5805 | 0.022064 | 0.13183 | -3.4802 | 2912     |
| SCUBE3       | -0.4543  | 0.4543  | 0.44481 | -2.5805 | 0.022066 | 0.13183 | -3.4803 | 222663   |

|             |          |         |         |         |          |         |         |        |
|-------------|----------|---------|---------|---------|----------|---------|---------|--------|
| CCDC115     | -2.35    | 2.35    | 4.4925  | -2.58   | 0.022087 | 0.13191 | -3.4812 | 84317  |
| ITGB1       | 39.408   | 39.408  | 51.701  | 2.5793  | 0.022115 | 0.13203 | -3.4824 | 3688   |
| ZNF204P     | -0.4742  | 0.4742  | 0.50561 | -2.5779 | 0.022179 | 0.13235 | -3.485  | 7754   |
| MCOLN2      | -0.33568 | 0.33568 | 0.37987 | -2.5775 | 0.022195 | 0.13235 | -3.4857 | 255231 |
| PPAN-P2RY11 | -0.78519 | 0.78519 | 1.7869  | -2.5773 | 0.022204 | 0.13235 | -3.486  | 692312 |
| HOXC10      | -1.6312  | 1.6312  | 3.6103  | -2.5771 | 0.022209 | 0.13235 | -3.4862 | 3226   |
| MAP4K3      | -1.1303  | 1.1303  | 3.8815  | -2.577  | 0.022214 | 0.13235 | -3.4864 | 8491   |
| ZC3H12D     | -0.23713 | 0.23713 | 0.35454 | -2.577  | 0.022216 | 0.13235 | -3.4865 | 340152 |
| ABI3BP      | -2.9962  | 2.9962  | 3.6235  | -2.5758 | 0.022266 | 0.13254 | -3.4886 | 25890  |
| TPBG        | 5.1139   | 5.1139  | 9.6495  | 2.5758  | 0.022268 | 0.13254 | -3.4887 | 7162   |
| D2HGDH      | -3.202   | 3.202   | 3.6839  | -2.5757 | 0.022272 | 0.13254 | -3.4888 | 728294 |
| GRIK5       | -0.17948 | 0.17948 | 0.12098 | -2.5753 | 0.022287 | 0.13258 | -3.4895 | 2901   |
| ERGIC2      | 3.0623   | 3.0623  | 6.6075  | 2.5751  | 0.022295 | 0.13258 | -3.4898 | 51290  |
| ABLIM1      | 16.943   | 16.943  | 30.505  | 2.5747  | 0.022314 | 0.1326  | -3.4906 | 3983   |
| BCL10       | 2.5783   | 2.5783  | 5.1616  | 2.5747  | 0.022314 | 0.1326  | -3.4906 | 8915   |
| CD34        | -9.3325  | 9.3325  | 14.663  | -2.5742 | 0.022335 | 0.13268 | -3.4914 | 947    |
| CHRD1       | -3.5838  | 3.5838  | 2.4459  | -2.5735 | 0.022365 | 0.13281 | -3.4927 | 91851  |
| LDOC1       | -2.3438  | 2.3438  | 4.6281  | -2.5732 | 0.022377 | 0.13281 | -3.4931 | 23641  |
| KIAA0355    | 0.83295  | 0.83295 | 4.6658  | 2.573   | 0.022385 | 0.13281 | -3.4935 | 9710   |
| CASC15      | 0.49184  | 0.49184 | 0.52354 | 2.5728  | 0.022396 | 0.13281 | -3.4939 | 401237 |
| FAM3B       | -0.20512 | 0.20512 | 0.11913 | -2.5728 | 0.022396 | 0.13281 | -3.4939 | 54097  |
| LOC441081   | -6.1969  | 6.1969  | 7.9358  | -2.5721 | 0.022427 | 0.13295 | -3.4952 | 441081 |
| CYSLTR2     | -0.21672 | 0.21672 | 0.27197 | -2.5718 | 0.022441 | 0.13298 | -3.4957 | 57105  |
| MGC2889     | -0.23675 | 0.23675 | 0.14016 | -2.5712 | 0.022465 | 0.13308 | -3.4967 | 84789  |
| CDSN        | 79.736   | 79.736  | 63.616  | 2.5703  | 0.022506 | 0.13327 | -3.4984 | 1041   |
| MIR99AHG    | -0.55283 | 0.55283 | 0.68893 | -2.57   | 0.022515 | 0.13327 | -3.4988 | 388815 |

|              |          |         |         |         |          |         |         |          |
|--------------|----------|---------|---------|---------|----------|---------|---------|----------|
| BPHL         | -0.73816 | 0.73816 | 2.0714  | -2.5699 | 0.022521 | 0.13327 | -3.499  | 670      |
| SLAMF9       | 0.80889  | 0.80889 | 0.40378 | 2.5697  | 0.02253  | 0.13328 | -3.4994 | 89886    |
| CHMP1B       | 7.1885   | 7.1885  | 12.723  | 2.5689  | 0.022564 | 0.13343 | -3.5008 | 57132    |
| FGD3         | 1.6132   | 1.6132  | 2.7599  | 2.5683  | 0.02259  | 0.13354 | -3.5018 | 89846    |
| PCDHB19P     | -0.1823  | 0.1823  | 0.21542 | -2.5681 | 0.0226   | 0.13355 | -3.5022 | 84054    |
| PIR-FIGF     | -0.24691 | 0.24691 | 0.14953 | -2.5679 | 0.022607 | 0.13355 | -3.5025 | 1.01E+08 |
| IGF1R        | -2.1516  | 2.1516  | 7.7416  | -2.5673 | 0.022636 | 0.13365 | -3.5037 | 3480     |
| CAB39        | 6.3475   | 6.3475  | 11.824  | 2.5672  | 0.02264  | 0.13365 | -3.5038 | 51719    |
| DCTN2        | 8.8249   | 8.8249  | 19.141  | 2.5665  | 0.022668 | 0.13374 | -3.505  | 10540    |
| SLC5A9       | -0.24959 | 0.24959 | 0.31478 | -2.5665 | 0.022671 | 0.13374 | -3.5051 | 200010   |
| TRIM68       | -0.73389 | 0.73389 | 1.227   | -2.5661 | 0.022689 | 0.13379 | -3.5058 | 55128    |
| ANKMY2       | -0.84155 | 0.84155 | 1.8541  | -2.5658 | 0.0227   | 0.13382 | -3.5063 | 57037    |
| TRAPPC3      | 7.7819   | 7.7819  | 14.161  | 2.5656  | 0.02271  | 0.13383 | -3.5067 | 27095    |
| NIPAL4       | 16.947   | 16.947  | 21.198  | 2.565   | 0.022734 | 0.13392 | -3.5076 | 348938   |
| PRKCB        | -0.35454 | 0.35454 | 0.56777 | -2.5648 | 0.022746 | 0.13395 | -3.5081 | 5579     |
| WBP2NL       | -0.19099 | 0.19099 | 0.13106 | -2.5643 | 0.022768 | 0.13403 | -3.509  | 164684   |
| PLAC8L1      | -0.21855 | 0.21855 | 0.21224 | -2.5639 | 0.022783 | 0.13407 | -3.5096 | 153770   |
| C12orf71     | -0.23173 | 0.23173 | 0.31597 | -2.5632 | 0.022816 | 0.1342  | -3.5109 | 728858   |
| L2HGDH       | -4.5225  | 4.5225  | 7.4772  | -2.5628 | 0.02283  | 0.1342  | -3.5115 | 79944    |
| WDR27        | -0.69871 | 0.69871 | 1.3071  | -2.5628 | 0.022833 | 0.1342  | -3.5116 | 253769   |
| WLS          | -3.2036  | 3.2036  | 8.2871  | -2.5627 | 0.022838 | 0.1342  | -3.5118 | 79971    |
| NCOR1        | -1.9104  | 1.9104  | 9.0167  | -2.5624 | 0.022848 | 0.13422 | -3.5122 | 9611     |
| KCNJ13       | -0.67163 | 0.67163 | 0.89015 | -2.5617 | 0.02288  | 0.13434 | -3.5135 | 3769     |
| ZNF833P      | -0.23606 | 0.23606 | 0.2605  | -2.5615 | 0.022887 | 0.13434 | -3.5138 | 401898   |
| WFDC3        | -1.3375  | 1.3375  | 0.73428 | -2.5611 | 0.022908 | 0.13434 | -3.5146 | 140686   |
| LOC105369147 | -0.24728 | 0.24728 | 0.49515 | -2.5611 | 0.022909 | 0.13434 | -3.5147 | 1.05E+08 |

|              |          |         |         |         |          |         |         |          |
|--------------|----------|---------|---------|---------|----------|---------|---------|----------|
| TXNDC16      | -0.41493 | 0.41493 | 0.85543 | -2.5609 | 0.022916 | 0.13434 | -3.5149 | 57544    |
| MCM3AP-AS1   | -0.36358 | 0.36358 | 0.65193 | -2.5608 | 0.022919 | 0.13434 | -3.515  | 114044   |
| DEFB103A     | 39.958   | 39.958  | 22.738  | 2.5604  | 0.022939 | 0.13434 | -3.5158 | 414325   |
| DEFB103B     | 39.958   | 39.958  | 22.738  | 2.5604  | 0.022939 | 0.13434 | -3.5158 | 55894    |
| A2ML1        | 49.983   | 49.983  | 55.593  | 2.56    | 0.022957 | 0.13434 | -3.5165 | 144568   |
| PLXDC2       | 3.7564   | 3.7564  | 11.763  | 2.5599  | 0.022959 | 0.13434 | -3.5166 | 84898    |
| AHCYL2       | -1.7058  | 1.7058  | 4.9924  | -2.5599 | 0.022962 | 0.13434 | -3.5167 | 23382    |
| LOC105371414 | -1.7071  | 1.7071  | 2.4128  | -2.5597 | 0.022969 | 0.13434 | -3.517  | 1.05E+08 |
| SHMT1        | -2.5426  | 2.5426  | 5.7939  | -2.5595 | 0.022976 | 0.13434 | -3.5173 | 6470     |
| DBT          | -0.39367 | 0.39367 | 1.2727  | -2.5594 | 0.022982 | 0.13434 | -3.5175 | 1629     |
| NPPA-AS1     | -0.29294 | 0.29294 | 0.41302 | -2.5593 | 0.022989 | 0.13434 | -3.5178 | 1E+08    |
| KCNK6        | 6.6753   | 6.6753  | 11.733  | 2.5587  | 0.023012 | 0.13439 | -3.5187 | 9424     |
| SCARB1       | -3.1733  | 3.1733  | 4.6024  | -2.5586 | 0.023018 | 0.13439 | -3.519  | 949      |
| DUXAP8       | 0.47557  | 0.47557 | 0.55102 | 2.5584  | 0.023028 | 0.13439 | -3.5194 | 503637   |
| ALAS1        | 5.6479   | 5.6479  | 8.6841  | 2.5582  | 0.023034 | 0.13439 | -3.5196 | 211      |
| PSMD6        | 6.2334   | 6.2334  | 13.244  | 2.5581  | 0.023039 | 0.13439 | -3.5198 | 9861     |
| HAAO         | -0.81632 | 0.81632 | 1.1446  | -2.5579 | 0.02305  | 0.13439 | -3.5202 | 23498    |
| TP53BP1      | -0.95941 | 0.95941 | 3.1424  | -2.5578 | 0.023053 | 0.13439 | -3.5204 | 7158     |
| MYEF2        | -0.24281 | 0.24281 | 0.23903 | -2.5572 | 0.023081 | 0.1345  | -3.5215 | 50804    |
| LINC01419    | -0.36994 | 0.36994 | 0.48557 | -2.557  | 0.023088 | 0.1345  | -3.5218 | 1.03E+08 |
| LOC100507551 | -0.36254 | 0.36254 | 0.29859 | -2.5566 | 0.023105 | 0.13456 | -3.5224 | 1.01E+08 |
| FAM177A1     | 2.1852   | 2.1852  | 4.9133  | 2.5559  | 0.02314  | 0.13471 | -3.5238 | 283635   |
| NHLH1        | -0.33591 | 0.33591 | 0.2405  | -2.5557 | 0.023148 | 0.13472 | -3.5241 | 4807     |
| MC1R         | -0.59565 | 0.59565 | 0.92665 | -2.5551 | 0.023174 | 0.13475 | -3.5252 | 4157     |
| TAGLN2       | 85.105   | 85.105  | 140.39  | 2.5551  | 0.023175 | 0.13475 | -3.5252 | 8407     |
| RHOF         | 0.4508   | 0.4508  | 0.81068 | 2.5549  | 0.023184 | 0.13475 | -3.5256 | 54509    |

|           |          |         |         |         |          |         |         |          |
|-----------|----------|---------|---------|---------|----------|---------|---------|----------|
| TMC4      | -0.85756 | 0.85756 | 0.80608 | -2.5546 | 0.023198 | 0.13475 | -3.5261 | 147798   |
| AQP7      | -0.31626 | 0.31626 | 0.20882 | -2.5543 | 0.023208 | 0.13475 | -3.5265 | 364      |
| LINC-ROR  | 0.24786  | 0.24786 | 0.1692  | 2.554   | 0.023222 | 0.13475 | -3.527  | 1.01E+08 |
| WASL      | 4.2026   | 4.2026  | 9.826   | 2.5539  | 0.023226 | 0.13475 | -3.5272 | 8976     |
| LGI4      | -1.9817  | 1.9817  | 2.1055  | -2.5539 | 0.023227 | 0.13475 | -3.5273 | 163175   |
| MFSD1     | 6.4175   | 6.4175  | 13.041  | 2.5538  | 0.023234 | 0.13475 | -3.5275 | 64747    |
| MEGF6     | -5.2296  | 5.2296  | 5.8245  | -2.5537 | 0.023237 | 0.13475 | -3.5277 | 1953     |
| PROSER1   | -0.92222 | 0.92222 | 3.9741  | -2.5536 | 0.023242 | 0.13475 | -3.5279 | 80209    |
| VANGL2    | -2.5875  | 2.5875  | 5.8553  | -2.5533 | 0.023255 | 0.13478 | -3.5283 | 57216    |
| PIAS2     | -0.5885  | 0.5885  | 1.0069  | -2.5529 | 0.023271 | 0.13483 | -3.529  | 9063     |
| GLUD1P3   | -0.63661 | 0.63661 | 1.0929  | -2.5519 | 0.023316 | 0.13504 | -3.5307 | 2749     |
| CCNC      | 3.7538   | 3.7538  | 6.8348  | 2.5517  | 0.023324 | 0.13504 | -3.5311 | 892      |
| CYB5R4    | 2.2517   | 2.2517  | 3.4112  | 2.5513  | 0.023346 | 0.13505 | -3.5319 | 51167    |
| PHACTR1   | -0.38946 | 0.38946 | 0.75119 | -2.5512 | 0.02335  | 0.13505 | -3.5321 | 221692   |
| CHP2      | -6.9726  | 6.9726  | 5.4222  | -2.5511 | 0.023354 | 0.13505 | -3.5322 | 63928    |
| PRH1-PRR4 | -0.49815 | 0.49815 | 0.59713 | -2.5509 | 0.023361 | 0.13505 | -3.5325 | 1.01E+08 |
| POU5F1P3  | -0.3308  | 0.3308  | 0.3833  | -2.5508 | 0.023365 | 0.13505 | -3.5327 | 642559   |
| B3GNT10   | -0.28229 | 0.28229 | 0.51708 | -2.5504 | 0.023383 | 0.13509 | -3.5334 | 1E+08    |
| FRAT2     | -1.6228  | 1.6228  | 4.0061  | -2.5503 | 0.023388 | 0.13509 | -3.5336 | 23401    |
| ANKRD16   | -0.64022 | 0.64022 | 1.3284  | -2.5493 | 0.023436 | 0.13532 | -3.5354 | 54522    |
| CYP1A1    | -0.40082 | 0.40082 | 0.2299  | -2.5489 | 0.023452 | 0.13534 | -3.5361 | 1543     |
| RAP2B     | 7.7275   | 7.7275  | 10.23   | 2.5488  | 0.023456 | 0.13534 | -3.5362 | 5912     |
| GPR78     | 0.40251  | 0.40251 | 0.2033  | 2.5484  | 0.023477 | 0.13541 | -3.537  | 27201    |
| ALPK2     | 0.47273  | 0.47273 | 0.45993 | 2.548   | 0.023492 | 0.13542 | -3.5376 | 115701   |
| STK39     | 3.7572   | 3.7572  | 7.1524  | 2.5479  | 0.023497 | 0.13542 | -3.5378 | 27347    |
| SLC9A5    | -0.27675 | 0.27675 | 0.39211 | -2.5478 | 0.023502 | 0.13542 | -3.538  | 6553     |

|             |          |         |         |         |          |         |         |          |
|-------------|----------|---------|---------|---------|----------|---------|---------|----------|
| DERL3       | -0.33913 | 0.33913 | 0.40074 | -2.5474 | 0.023522 | 0.13544 | -3.5388 | 91319    |
| NIPIA1      | -5.2805  | 5.2805  | 6.8885  | -2.5474 | 0.023522 | 0.13544 | -3.5388 | 9284     |
| IER2        | 24.491   | 24.491  | 38.452  | 2.5472  | 0.023529 | 0.13544 | -3.5391 | 9592     |
| MAP1LC3B    | 11.266   | 11.266  | 18.62   | 2.5464  | 0.023565 | 0.13549 | -3.5405 | 81631    |
| LINC01678   | -0.53784 | 0.53784 | 0.58663 | -2.5464 | 0.023567 | 0.13549 | -3.5405 | 1.05E+08 |
| STKLD1      | -0.19548 | 0.19548 | 0.19524 | -2.5463 | 0.02357  | 0.13549 | -3.5406 | 169436   |
| BEND7       | -0.30354 | 0.30354 | 0.27199 | -2.5463 | 0.023571 | 0.13549 | -3.5407 | 222389   |
| BCAS1       | -0.32408 | 0.32408 | 0.27255 | -2.5458 | 0.023593 | 0.13558 | -3.5416 | 8537     |
| HMOX2       | 9.8924   | 9.8924  | 10.427  | 2.5435  | 0.023699 | 0.13614 | -3.5456 | 3163     |
| DCTN6       | 6.3862   | 6.3862  | 9.6147  | 2.542   | 0.023766 | 0.13648 | -3.5482 | 10671    |
| BCDIN3D-AS1 | -0.15228 | 0.15228 | 0.12333 | -2.5417 | 0.023781 | 0.13652 | -3.5488 | 1E+08    |
| RGN         | -0.19277 | 0.19277 | 0.24468 | -2.5413 | 0.023799 | 0.13653 | -3.5495 | 9104     |
| RAI2        | -1.4458  | 1.4458  | 1.8807  | -2.5413 | 0.0238   | 0.13653 | -3.5495 | 10742    |
| BHMT2       | -0.34181 | 0.34181 | 0.5677  | -2.541  | 0.023813 | 0.13654 | -3.55   | 23743    |
| SNORA53     | -10.899  | 10.899  | 16.081  | -2.5409 | 0.023818 | 0.13654 | -3.5502 | 677832   |
| NREP        | 4.8988   | 4.8988  | 6.1577  | 2.5406  | 0.023828 | 0.13655 | -3.5506 | 9315     |
| CYSRT1      | 27.972   | 27.972  | 25.941  | 2.5405  | 0.023835 | 0.13655 | -3.5509 | 375791   |
| CEP95       | -1.4497  | 1.4497  | 3.3084  | -2.54   | 0.023859 | 0.13664 | -3.5518 | 90799    |
| TMX3        | 1.6155   | 1.6155  | 3.4605  | 2.5397  | 0.023873 | 0.13667 | -3.5523 | 54495    |
| SLC6A4      | -0.29165 | 0.29165 | 0.28926 | -2.5392 | 0.023894 | 0.13675 | -3.5531 | 6532     |
| ADH1A       | -0.21483 | 0.21483 | 0.13787 | -2.5386 | 0.023921 | 0.13685 | -3.5542 | 124      |
| VWA8        | -0.8542  | 0.8542  | 2.6343  | -2.5381 | 0.023946 | 0.13695 | -3.5551 | 23078    |
| TM9SF2      | 8.2094   | 8.2094  | 20.567  | 2.5368  | 0.024006 | 0.13713 | -3.5574 | 9375     |
| NFATC3      | -1.272   | 1.272   | 7.3591  | -2.5366 | 0.024016 | 0.13713 | -3.5578 | 4775     |
| IL1F10      | 1.4274   | 1.4274  | 1.5654  | 2.5365  | 0.02402  | 0.13713 | -3.5579 | 84639    |
| ZNF529      | -0.37467 | 0.37467 | 0.78872 | -2.5364 | 0.024024 | 0.13713 | -3.5581 | 57711    |



|              |          |         |         |         |          |         |         |          |
|--------------|----------|---------|---------|---------|----------|---------|---------|----------|
| ZNF185       | 29.94    | 29.94   | 30.694  | 2.5361  | 0.024037 | 0.13713 | -3.5586 | 7739     |
| WDR90        | -1.0733  | 1.0733  | 1.8722  | -2.5361 | 0.024037 | 0.13713 | -3.5586 | 197335   |
| GALNT6       | 9.0246   | 9.0246  | 10.549  | 2.536   | 0.024041 | 0.13713 | -3.5587 | 11226    |
| KNSTRN       | 1.9643   | 1.9643  | 2.2139  | 2.536   | 0.024042 | 0.13713 | -3.5588 | 90417    |
| LOC728715    | -0.85586 | 0.85586 | 1.086   | -2.5357 | 0.024054 | 0.13715 | -3.5592 | 728715   |
| RELL2        | 1.2234   | 1.2234  | 1.7675  | 2.5349  | 0.024093 | 0.13732 | -3.5607 | 285613   |
| LINC01852    | -0.2253  | 0.2253  | 0.24651 | -2.5346 | 0.024107 | 0.13736 | -3.5612 | 1.08E+08 |
| PEX13        | 1.4301   | 1.4301  | 3.3529  | 2.5343  | 0.024123 | 0.1374  | -3.5618 | 5194     |
| RNF32        | -0.32861 | 0.32861 | 0.50582 | -2.5341 | 0.02413  | 0.1374  | -3.5621 | 140545   |
| ZNF48        | -0.49177 | 0.49177 | 0.88343 | -2.5332 | 0.02417  | 0.13754 | -3.5636 | 197407   |
| ATXN7        | -1.1282  | 1.1282  | 4.6179  | -2.5331 | 0.024175 | 0.13754 | -3.5638 | 6314     |
| EGR1         | 12.97    | 12.97   | 25.994  | 2.5327  | 0.024193 | 0.13754 | -3.5645 | 1958     |
| CLASRP       | -2.3517  | 2.3517  | 6.6739  | -2.5326 | 0.024198 | 0.13754 | -3.5647 | 11129    |
| SH3GL3       | 0.43882  | 0.43882 | 0.32346 | 2.5325  | 0.024206 | 0.13754 | -3.565  | 6457     |
| LOC100287497 | -0.48787 | 0.48787 | 0.75836 | -2.5323 | 0.024213 | 0.13754 | -3.5652 | 1E+08    |
| SNX16        | 0.92705  | 0.92705 | 1.8609  | 2.5322  | 0.02422  | 0.13754 | -3.5655 | 64089    |
| ADRA2B       | -0.26577 | 0.26577 | 0.20071 | -2.5321 | 0.024225 | 0.13754 | -3.5657 | 151      |
| GAS1RR       | -0.21741 | 0.21741 | 0.16797 | -2.532  | 0.024228 | 0.13754 | -3.5658 | 1.01E+08 |
| DLEC1        | -0.16154 | 0.16154 | 0.1684  | -2.5318 | 0.024238 | 0.13755 | -3.5662 | 9940     |
| GOLGA8H      | -0.21027 | 0.21027 | 0.20776 | -2.5316 | 0.024248 | 0.13756 | -3.5666 | 728498   |
| NUDT16       | -1.0769  | 1.0769  | 1.8475  | -2.5312 | 0.024263 | 0.1376  | -3.5671 | 131870   |
| RAP1GAP      | 2.3681   | 2.3681  | 2.1384  | 2.5311  | 0.024271 | 0.1376  | -3.5674 | 5909     |
| ARHGAP19     | -0.47595 | 0.47595 | 1.2663  | -2.5309 | 0.02428  | 0.1376  | -3.5678 | 84986    |
| ZNF595       | -0.85144 | 0.85144 | 1.553   | -2.5298 | 0.024331 | 0.13784 | -3.5697 | 152687   |
| RRP8         | -0.96141 | 0.96141 | 3.5103  | -2.5292 | 0.02436  | 0.13787 | -3.5708 | 23378    |
| ZNF621       | -0.89908 | 0.89908 | 2.1443  | -2.5289 | 0.024371 | 0.13787 | -3.5712 | 285268   |

|         |          |         |         |         |          |         |         |          |
|---------|----------|---------|---------|---------|----------|---------|---------|----------|
| S100A7  | 1981.1   | 1981.1  | 1817.2  | 2.5289  | 0.024373 | 0.13787 | -3.5713 | 6278     |
| FAF1    | -1.9734  | 1.9734  | 9.0557  | -2.5289 | 0.024375 | 0.13787 | -3.5713 | 11124    |
| SREBF1  | -5.1903  | 5.1903  | 10.157  | -2.5288 | 0.024377 | 0.13787 | -3.5714 | 6720     |
| TH      | 0.19364  | 0.19364 | 0.14439 | 2.5286  | 0.024388 | 0.13788 | -3.5718 | 7054     |
| PRKAA2  | -0.2036  | 0.2036  | 0.17995 | -2.5284 | 0.024397 | 0.13788 | -3.5722 | 5563     |
| ARPC5L  | 6.1159   | 6.1159  | 9.3522  | 2.5283  | 0.024402 | 0.13788 | -3.5723 | 81873    |
| GAS6    | -13.161  | 13.161  | 24.427  | -2.5281 | 0.024411 | 0.13788 | -3.5727 | 2621     |
| DAPK1   | -1.0499  | 1.0499  | 1.5849  | -2.5277 | 0.024431 | 0.13788 | -3.5734 | 1612     |
| RAB5IF  | 15.928   | 15.928  | 22.509  | 2.5276  | 0.024431 | 0.13788 | -3.5734 | 55969    |
| RDH11   | 3.3463   | 3.3463  | 7.9558  | 2.5276  | 0.024434 | 0.13788 | -3.5736 | 51109    |
| GNPNAT1 | 3.7403   | 3.7403  | 4.202   | 2.527   | 0.024462 | 0.13796 | -3.5746 | 64841    |
| UBE2D1  | 1.3206   | 1.3206  | 2.0284  | 2.5269  | 0.024465 | 0.13796 | -3.5747 | 7321     |
| KIF21A  | 0.88569  | 0.88569 | 2.368   | 2.5267  | 0.024476 | 0.13797 | -3.5751 | 55605    |
| TBILA   | -2.8075  | 2.8075  | 2.3568  | -2.5264 | 0.024488 | 0.138   | -3.5756 | 1.13E+08 |
| SNORA22 | -0.80869 | 0.80869 | 0.60559 | -2.5248 | 0.024565 | 0.13838 | -3.5784 | 677807   |
| FAM161B | -0.32565 | 0.32565 | 0.68043 | -2.5243 | 0.024589 | 0.1384  | -3.5793 | 145483   |
| MEGF11  | -0.38759 | 0.38759 | 0.51559 | -2.5242 | 0.024592 | 0.1384  | -3.5794 | 84465    |
| NTAN1   | 6.8925   | 6.8925  | 9.4146  | 2.5242  | 0.024593 | 0.1384  | -3.5795 | 123803   |
| SOCS6   | 1.416    | 1.416   | 3.1851  | 2.5238  | 0.024615 | 0.13843 | -3.5803 | 9306     |
| TOP1    | 7.0797   | 7.0797  | 13.111  | 2.5236  | 0.024622 | 0.13843 | -3.5805 | 7150     |
| PDZK1   | -0.35304 | 0.35304 | 0.37969 | -2.5236 | 0.024623 | 0.13843 | -3.5806 | 5174     |
| SEC31A  | 5.589    | 5.589   | 18.386  | 2.5229  | 0.024657 | 0.13858 | -3.5818 | 22872    |
| SMG1P1  | -10.702  | 10.702  | 14.506  | -2.5226 | 0.024671 | 0.13861 | -3.5823 | 641298   |
| SNORD10 | -11.59   | 11.59   | 14.325  | -2.5222 | 0.024689 | 0.13866 | -3.583  | 652966   |
| EHMT1   | -1.1951  | 1.1951  | 3.9066  | -2.522  | 0.0247   | 0.13868 | -3.5834 | 79813    |
| ULK4    | -0.58788 | 0.58788 | 1.1573  | -2.5217 | 0.024711 | 0.13869 | -3.5838 | 54986    |

|              |          |         |         |         |          |         |         |          |
|--------------|----------|---------|---------|---------|----------|---------|---------|----------|
| PTBP3        | 8.6855   | 8.6855  | 16.815  | 2.5211  | 0.02474  | 0.13871 | -3.5849 | 9991     |
| PEA15        | 20.695   | 20.695  | 32.573  | 2.521   | 0.024747 | 0.13871 | -3.5852 | 8682     |
| GPSM1        | 2.8919   | 2.8919  | 5.0487  | 2.5209  | 0.024751 | 0.13871 | -3.5853 | 26086    |
| CHL1-AS1     | -0.53164 | 0.53164 | 0.43777 | -2.5207 | 0.024758 | 0.13871 | -3.5856 | 1.02E+08 |
| SEMA4F       | -0.32652 | 0.32652 | 0.61601 | -2.5207 | 0.024758 | 0.13871 | -3.5856 | 10505    |
| LOC100128288 | -0.29295 | 0.29295 | 0.42723 | -2.5205 | 0.024768 | 0.13871 | -3.5859 | 1E+08    |
| C15orf56     | -0.33989 | 0.33989 | 0.47105 | -2.5205 | 0.02477  | 0.13871 | -3.586  | 644809   |
| LOC101928673 | -0.40264 | 0.40264 | 0.55236 | -2.5201 | 0.024786 | 0.13873 | -3.5866 | 1.02E+08 |
| SH2D2A       | 1.2761   | 1.2761  | 1.125   | 2.52    | 0.024792 | 0.13873 | -3.5868 | 9047     |
| ANKRD36C     | -1.3318  | 1.3318  | 1.8511  | -2.5191 | 0.024835 | 0.13893 | -3.5884 | 400986   |
| MAL2         | 22.282   | 22.282  | 39.753  | 2.5188  | 0.024849 | 0.13894 | -3.5889 | 114569   |
| SHOC2        | 2.5605   | 2.5605  | 6.5077  | 2.5186  | 0.024858 | 0.13894 | -3.5893 | 8036     |
| CMTM4        | -0.92579 | 0.92579 | 3.6009  | -2.5186 | 0.024862 | 0.13894 | -3.5894 | 146223   |
| ACP5         | 19.732   | 19.732  | 19.139  | 2.5179  | 0.024892 | 0.13906 | -3.5905 | 54       |
| DLG1         | 2.5701   | 2.5701  | 8.1108  | 2.5176  | 0.024909 | 0.1391  | -3.5911 | 1739     |
| FBXL14       | -0.71192 | 0.71192 | 1.8509  | -2.5174 | 0.024916 | 0.1391  | -3.5913 | 144699   |
| C7           | -2.0511  | 2.0511  | 1.2153  | -2.5171 | 0.02493  | 0.13911 | -3.5919 | 730      |
| SUGT1        | 2.932    | 2.932   | 6.1815  | 2.5171  | 0.024934 | 0.13911 | -3.592  | 10910    |
| ZNF628       | -0.62818 | 0.62818 | 1.3917  | -2.5167 | 0.024953 | 0.13911 | -3.5927 | 89887    |
| MMP10        | 3.5786   | 3.5786  | 1.7269  | 2.5166  | 0.024956 | 0.13911 | -3.5928 | 4319     |
| LOC101927248 | -0.22409 | 0.22409 | 0.16557 | -2.5164 | 0.024966 | 0.13911 | -3.5932 | 1.02E+08 |
| PPOX         | -0.84947 | 0.84947 | 2.0911  | -2.5163 | 0.02497  | 0.13911 | -3.5933 | 5498     |
| NGFR         | -2.3393  | 2.3393  | 2.0025  | -2.5162 | 0.024975 | 0.13911 | -3.5935 | 4804     |
| LOC102723582 | -0.49925 | 0.49925 | 0.79668 | -2.5158 | 0.024996 | 0.13914 | -3.5943 | 1.03E+08 |
| ARPC5        | 13.024   | 13.024  | 24.649  | 2.5157  | 0.025001 | 0.13914 | -3.5945 | 10092    |
| SLC16A11     | -0.68908 | 0.68908 | 0.70999 | -2.5156 | 0.025004 | 0.13914 | -3.5946 | 162515   |

|           |          |         |         |         |          |         |         |        |
|-----------|----------|---------|---------|---------|----------|---------|---------|--------|
| CCDC17    | -0.35034 | 0.35034 | 0.53249 | -2.5153 | 0.025018 | 0.13917 | -3.5951 | 149483 |
| GHRLOS    | -0.85895 | 0.85895 | 1.0408  | -2.5149 | 0.025038 | 0.13923 | -3.5958 | 1E+08  |
| TEX9      | -0.5977  | 0.5977  | 0.88633 | -2.5145 | 0.025059 | 0.1393  | -3.5966 | 374618 |
| NR6A1     | -0.38434 | 0.38434 | 0.71626 | -2.5143 | 0.025067 | 0.1393  | -3.5969 | 2649   |
| SULF1     | 6.3891   | 6.3891  | 5.4341  | 2.5141  | 0.025077 | 0.13931 | -3.5972 | 23213  |
| DSG3      | 155.76   | 155.76  | 131.1   | 2.5139  | 0.025087 | 0.13933 | -3.5976 | 1830   |
| MB        | -0.40179 | 0.40179 | 0.29404 | -2.513  | 0.025128 | 0.1395  | -3.5991 | 4151   |
| TNFRSF10D | 2.2764   | 2.2764  | 2.2506  | 2.512   | 0.025178 | 0.13968 | -3.6009 | 8793   |
| ZC3H10    | -0.66058 | 0.66058 | 1.3167  | -2.5118 | 0.025187 | 0.13968 | -3.6012 | 84872  |
| NSD1      | -1.1192  | 1.1192  | 7.3351  | -2.5118 | 0.025187 | 0.13968 | -3.6012 | 64324  |
| TIMP3     | -16.891  | 16.891  | 21.245  | -2.5117 | 0.025193 | 0.13968 | -3.6014 | 7078   |
| TAF3      | -0.91448 | 0.91448 | 2.3417  | -2.511  | 0.025225 | 0.13976 | -3.6026 | 83860  |
| TF        | -0.49181 | 0.49181 | 0.38948 | -2.5106 | 0.025245 | 0.13976 | -3.6033 | 7018   |
| WDR60     | -0.74569 | 0.74569 | 1.9251  | -2.5106 | 0.025246 | 0.13976 | -3.6034 | 55112  |
| ADGRE4P   | -0.30698 | 0.30698 | 0.34785 | -2.5106 | 0.025247 | 0.13976 | -3.6034 | 326342 |
| PCID2     | -0.41967 | 0.41967 | 2.3984  | -2.5103 | 0.02526  | 0.13976 | -3.6039 | 55795  |
| ETFA      | 5.791    | 5.791   | 12.662  | 2.5102  | 0.025263 | 0.13976 | -3.604  | 2108   |
| INA       | 0.82108  | 0.82108 | 0.85326 | 2.5102  | 0.025265 | 0.13976 | -3.6041 | 9118   |
| NBPF10    | -1.6473  | 1.6473  | 6.0351  | -2.51   | 0.025274 | 0.13976 | -3.6044 | 1E+08  |
| TPT1      | 121.98   | 121.98  | 207.93  | 2.5095  | 0.0253   | 0.1398  | -3.6053 | 7178   |
| H19       | 26.659   | 26.659  | 22.243  | 2.5093  | 0.02531  | 0.1398  | -3.6057 | 283120 |
| HIF1A     | 29.576   | 29.576  | 39.543  | 2.5093  | 0.02531  | 0.1398  | -3.6057 | 3091   |
| KDM4A-AS1 | -0.48368 | 0.48368 | 0.72529 | -2.5092 | 0.025313 | 0.1398  | -3.6058 | 1E+08  |
| ATP5MD    | 13.839   | 13.839  | 18.24   | 2.5086  | 0.025343 | 0.1398  | -3.6069 | 84833  |
| CPSF6     | -1.6467  | 1.6467  | 4.8787  | -2.5086 | 0.025343 | 0.1398  | -3.6069 | 11052  |
| SLC22A15  | 0.29197  | 0.29197 | 1.2758  | 2.5084  | 0.02535  | 0.1398  | -3.6071 | 55356  |

|              |          |         |         |         |          |         |         |          |
|--------------|----------|---------|---------|---------|----------|---------|---------|----------|
| SLC39A11     | -1.2749  | 1.2749  | 3.231   | -2.5083 | 0.025359 | 0.1398  | -3.6074 | 201266   |
| LINC02178    | 0.37338  | 0.37338 | 0.38767 | 2.5082  | 0.025362 | 0.1398  | -3.6075 | 1.05E+08 |
| SNORA54      | -14.141  | 14.141  | 15.857  | -2.5082 | 0.025363 | 0.1398  | -3.6076 | 677833   |
| MGME1        | -1.5231  | 1.5231  | 4.6544  | -2.5079 | 0.025376 | 0.13983 | -3.6081 | 92667    |
| CHAF1A       | -1.2     | 1.2     | 2.6502  | -2.5075 | 0.025397 | 0.13984 | -3.6088 | 10036    |
| CMA1         | -1.3594  | 1.3594  | 1.9447  | -2.5075 | 0.025398 | 0.13984 | -3.6089 | 1215     |
| PITHD1       | 12.029   | 12.029  | 22.046  | 2.5074  | 0.025403 | 0.13984 | -3.609  | 57095    |
| KLRG2        | -1.0582  | 1.0582  | 1.2373  | -2.5069 | 0.025424 | 0.13989 | -3.6098 | 346689   |
| WSB1         | 4.979    | 4.979   | 13.404  | 2.5067  | 0.025433 | 0.13989 | -3.6101 | 26118    |
| CCL28        | -0.60265 | 0.60265 | 1.0111  | -2.5067 | 0.025437 | 0.13989 | -3.6102 | 56477    |
| ZNF134       | -0.62864 | 0.62864 | 1.9431  | -2.506  | 0.025467 | 0.1399  | -3.6113 | 7693     |
| PSMA5        | 4.1391   | 4.1391  | 6.3313  | 2.5059  | 0.025473 | 0.1399  | -3.6115 | 5686     |
| ZNF346       | -0.35676 | 0.35676 | 1.5714  | -2.5057 | 0.025485 | 0.1399  | -3.612  | 23567    |
| CYBRD1       | -13.567  | 13.567  | 20.083  | -2.5057 | 0.025486 | 0.1399  | -3.612  | 79901    |
| SMIM22       | -0.32622 | 0.32622 | 0.22783 | -2.5056 | 0.025491 | 0.1399  | -3.6122 | 440335   |
| TVP23C-CDRT4 | -0.5356  | 0.5356  | 1.2939  | -2.5055 | 0.025496 | 0.1399  | -3.6124 | 1.01E+08 |
| SETD1A       | -1.6973  | 1.6973  | 4.1983  | -2.5054 | 0.025497 | 0.1399  | -3.6124 | 9739     |
| TMEM132B     | -0.22965 | 0.22965 | 0.24149 | -2.5049 | 0.025521 | 0.13998 | -3.6133 | 114795   |
| ADAM19       | 1.7889   | 1.7889  | 2.068   | 2.5045  | 0.025545 | 0.14001 | -3.6141 | 8728     |
| ANKK1        | -0.32329 | 0.32329 | 0.47104 | -2.5043 | 0.025555 | 0.14001 | -3.6145 | 255239   |
| USP27X       | -0.32435 | 0.32435 | 0.53364 | -2.5042 | 0.025555 | 0.14001 | -3.6145 | 389856   |
| USP15        | 1.6474   | 1.6474  | 3.9196  | 2.5042  | 0.025558 | 0.14001 | -3.6146 | 9958     |
| CCDC180      | -0.17256 | 0.17256 | 0.11803 | -2.504  | 0.025567 | 0.14001 | -3.6149 | 1E+08    |
| AUP1         | 8.2363   | 8.2363  | 19.088  | 2.5033  | 0.025603 | 0.14011 | -3.6162 | 550      |
| ZMIZ1-AS1    | -0.34835 | 0.34835 | 0.43264 | -2.5032 | 0.025605 | 0.14011 | -3.6163 | 283050   |
| SLC25A43     | 2.4227   | 2.4227  | 5.6536  | 2.5031  | 0.02561  | 0.14011 | -3.6164 | 203427   |

|              |          |         |         |         |          |         |         |          |
|--------------|----------|---------|---------|---------|----------|---------|---------|----------|
| RGS6         | -0.1737  | 0.1737  | 0.11091 | -2.5025 | 0.025639 | 0.14022 | -3.6175 | 9628     |
| NTRK3        | -0.73684 | 0.73684 | 0.422   | -2.5022 | 0.025657 | 0.14027 | -3.6181 | 4916     |
| LINC02568    | -0.18795 | 0.18795 | 0.11048 | -2.501  | 0.025714 | 0.14054 | -3.6201 | 1.03E+08 |
| SLC52A3      | -0.57091 | 0.57091 | 0.69531 | -2.5    | 0.025762 | 0.14063 | -3.6218 | 113278   |
| PROM1        | -0.80317 | 0.80317 | 0.49813 | -2.5    | 0.025765 | 0.14063 | -3.6219 | 8842     |
| ABHD12B      | -1.4594  | 1.4594  | 1.2833  | -2.4999 | 0.025768 | 0.14063 | -3.622  | 145447   |
| TAB2         | 4.3889   | 4.3889  | 9.7098  | 2.4999  | 0.025771 | 0.14063 | -3.6221 | 23118    |
| MFS11        | 0.83058  | 0.83058 | 3.5791  | 2.4999  | 0.025771 | 0.14063 | -3.6221 | 79157    |
| PCYOX1L      | 0.99051  | 0.99051 | 2.3467  | 2.4988  | 0.025824 | 0.14087 | -3.624  | 78991    |
| VDAC2        | 15.753   | 15.753  | 30.577  | 2.4985  | 0.025838 | 0.1409  | -3.6245 | 7417     |
| MELTF        | -1.8533  | 1.8533  | 1.2241  | -2.4975 | 0.025887 | 0.14101 | -3.6262 | 4241     |
| STAG3L1      | -0.3144  | 0.3144  | 0.66641 | -2.4975 | 0.025888 | 0.14101 | -3.6263 | 54441    |
| KDM5B        | 2.4903   | 2.4903  | 8.2916  | 2.4975  | 0.02589  | 0.14101 | -3.6263 | 10765    |
| FGF7P3       | -0.26952 | 0.26952 | 0.3486  | -2.4972 | 0.025902 | 0.14101 | -3.6268 | 654466   |
| ACAA1        | 8.3892   | 8.3892  | 14.653  | 2.4971  | 0.025909 | 0.14101 | -3.627  | 30       |
| SOX5         | -0.65814 | 0.65814 | 0.63409 | -2.4968 | 0.025923 | 0.14101 | -3.6275 | 6660     |
| PHF3         | -2.1385  | 2.1385  | 4.5359  | -2.4967 | 0.025926 | 0.14101 | -3.6276 | 23469    |
| PPP2R2C      | 13.792   | 13.792  | 18.225  | 2.4966  | 0.025932 | 0.14101 | -3.6278 | 5522     |
| SUSD2        | -2.1785  | 2.1785  | 2.8702  | -2.4966 | 0.025933 | 0.14101 | -3.6279 | 56241    |
| CDYL2        | 0.97574  | 0.97574 | 1.5296  | 2.4964  | 0.025945 | 0.14101 | -3.6283 | 124359   |
| CXCL8        | 39.537   | 39.537  | 19.476  | 2.4962  | 0.025953 | 0.14101 | -3.6286 | 3576     |
| LOC101927827 | -0.46083 | 0.46083 | 0.37633 | -2.4961 | 0.025959 | 0.14101 | -3.6288 | 1.02E+08 |
| AKR7L        | -0.24998 | 0.24998 | 0.22412 | -2.4952 | 0.026003 | 0.1412  | -3.6303 | 246181   |
| VAMP2        | -4.5694  | 4.5694  | 15.102  | -2.4949 | 0.026018 | 0.14124 | -3.6308 | 6844     |
| PSMD8        | 21.492   | 21.492  | 36.199  | 2.494   | 0.026064 | 0.14137 | -3.6325 | 5714     |
| FAM149A      | -0.50643 | 0.50643 | 0.44877 | -2.4939 | 0.026068 | 0.14137 | -3.6326 | 25854    |

|            |          |         |         |         |          |         |         |          |
|------------|----------|---------|---------|---------|----------|---------|---------|----------|
| SS18L2     | 3.7418   | 3.7418  | 5.1916  | 2.4939  | 0.026068 | 0.14137 | -3.6326 | 51188    |
| STPG3-AS1  | -0.18074 | 0.18074 | 0.1497  | -2.4938 | 0.026075 | 0.14137 | -3.6328 | 1E+08    |
| PACS2      | -1.9105  | 1.9105  | 3.6887  | -2.4935 | 0.026088 | 0.14139 | -3.6333 | 23241    |
| PPP1R9A    | -0.20672 | 0.20672 | 0.14047 | -2.4932 | 0.026104 | 0.14143 | -3.6338 | 55607    |
| PRB3       | -0.25044 | 0.25044 | 0.15685 | -2.4928 | 0.026124 | 0.1415  | -3.6345 | 5544     |
| METTL24    | -0.24384 | 0.24384 | 0.30345 | -2.4919 | 0.026166 | 0.14168 | -3.636  | 728464   |
| DZIP1L     | -1.03    | 1.03    | 1.5748  | -2.4917 | 0.026178 | 0.1417  | -3.6364 | 199221   |
| CDRT3      | -0.46719 | 0.46719 | 0.45308 | -2.4903 | 0.026248 | 0.14194 | -3.6388 | 94145    |
| SRGAP2-AS1 | -0.51311 | 0.51311 | 0.72679 | -2.4903 | 0.026249 | 0.14194 | -3.6389 | 1.01E+08 |
| FAM184A    | -0.19559 | 0.19559 | 0.18869 | -2.4903 | 0.02625  | 0.14194 | -3.6389 | 79632    |
| RASSF1-AS1 | -0.9911  | 0.9911  | 0.95454 | -2.4901 | 0.026256 | 0.14194 | -3.6391 | 1.02E+08 |
| INO80C     | 2.3808   | 2.3808  | 4.3184  | 2.4898  | 0.026276 | 0.142   | -3.6398 | 125476   |
| LRRC26     | -1.7465  | 1.7465  | 0.98481 | -2.4891 | 0.026308 | 0.14213 | -3.6409 | 389816   |
| LHX4-AS1   | -0.44163 | 0.44163 | 0.71064 | -2.4887 | 0.026331 | 0.1422  | -3.6417 | 1.01E+08 |
| EXOC4      | -1.4128  | 1.4128  | 9.0879  | -2.4885 | 0.02634  | 0.1422  | -3.642  | 60412    |
| FAM83A-AS1 | 1.181    | 1.181   | 0.94738 | 2.4881  | 0.026358 | 0.1422  | -3.6427 | 1E+08    |
| SPAG1      | 1.2983   | 1.2983  | 1.6255  | 2.488   | 0.026364 | 0.1422  | -3.6429 | 6674     |
| BSPRY      | 7.0322   | 7.0322  | 8.6974  | 2.488   | 0.026366 | 0.1422  | -3.6429 | 54836    |
| KANK1      | 5.7209   | 5.7209  | 10.69   | 2.4879  | 0.026371 | 0.1422  | -3.6431 | 23189    |
| FMO6P      | -0.19983 | 0.19983 | 0.15274 | -2.4872 | 0.026406 | 0.14224 | -3.6443 | 388714   |
| BBS5       | -5.386   | 5.386   | 8.8713  | -2.4872 | 0.026407 | 0.14224 | -3.6444 | 129880   |
| ADM5       | -0.59295 | 0.59295 | 0.93386 | -2.4871 | 0.026412 | 0.14224 | -3.6445 | 199800   |
| PCDHGA4    | -0.23641 | 0.23641 | 0.45386 | -2.487  | 0.026413 | 0.14224 | -3.6446 | 56111    |
| ARHGEF38   | -0.17251 | 0.17251 | 0.10102 | -2.4868 | 0.026423 | 0.14225 | -3.6449 | 54848    |
| NEXMIF     | -0.1882  | 0.1882  | 0.15896 | -2.4867 | 0.026432 | 0.14225 | -3.6452 | 340533   |
| RNF180     | -0.30705 | 0.30705 | 0.47862 | -2.4856 | 0.026488 | 0.14243 | -3.6471 | 285671   |

|           |          |         |         |         |          |         |         |          |
|-----------|----------|---------|---------|---------|----------|---------|---------|----------|
| GGA3      | -1.5094  | 1.5094  | 4.9202  | -2.4855 | 0.02649  | 0.14243 | -3.6472 | 23163    |
| WNT10B    | -0.40231 | 0.40231 | 0.42895 | -2.4855 | 0.02649  | 0.14243 | -3.6472 | 7480     |
| FTX       | -0.9063  | 0.9063  | 2.2141  | -2.4852 | 0.026508 | 0.14247 | -3.6478 | 1E+08    |
| C3orf52   | -3.3826  | 3.3826  | 3.5313  | -2.4849 | 0.026523 | 0.14247 | -3.6483 | 79669    |
| ADCYAP1   | 0.58418  | 0.58418 | 0.57023 | 2.4847  | 0.026531 | 0.14247 | -3.6486 | 116      |
| NSUN4     | -0.40053 | 0.40053 | 1.83    | -2.4846 | 0.026535 | 0.14247 | -3.6488 | 387338   |
| MDFIC     | 1.6609   | 1.6609  | 3.3289  | 2.4845  | 0.026543 | 0.14247 | -3.649  | 29969    |
| FGFR1OP2  | 1.6049   | 1.6049  | 3.6368  | 2.4842  | 0.026558 | 0.14247 | -3.6496 | 26127    |
| LTBP1     | 11.683   | 11.683  | 13.734  | 2.484   | 0.026567 | 0.14247 | -3.6499 | 4052     |
| TMEM184B  | 5.003    | 5.003   | 8.8109  | 2.4838  | 0.026575 | 0.14247 | -3.6501 | 25829    |
| ST6GAL1   | -1.4786  | 1.4786  | 2.8102  | -2.4838 | 0.026576 | 0.14247 | -3.6502 | 6480     |
| LINC01569 | -0.20013 | 0.20013 | 0.19481 | -2.4836 | 0.026586 | 0.14247 | -3.6505 | 1.01E+08 |
| CCDC125   | -0.34448 | 0.34448 | 1.1638  | -2.4834 | 0.026597 | 0.14247 | -3.6509 | 202243   |
| SEMA6A    | -1.2105  | 1.2105  | 1.8881  | -2.4832 | 0.026606 | 0.14247 | -3.6512 | 57556    |
| HSPH1     | 10.985   | 10.985  | 9.2943  | 2.4832  | 0.026607 | 0.14247 | -3.6512 | 10808    |
| ANKAR     | -0.28556 | 0.28556 | 0.37486 | -2.4825 | 0.026645 | 0.1425  | -3.6525 | 150709   |
| LINGO3    | -0.28922 | 0.28922 | 0.35546 | -2.4825 | 0.026646 | 0.1425  | -3.6526 | 645191   |
| LY6H      | 0.5179   | 0.5179  | 0.31564 | 2.4821  | 0.026662 | 0.1425  | -3.6531 | 4062     |
| FSTL4     | -0.53842 | 0.53842 | 0.49994 | -2.4821 | 0.026665 | 0.1425  | -3.6532 | 23105    |
| DCDC2B    | -0.39448 | 0.39448 | 0.53907 | -2.482  | 0.026671 | 0.1425  | -3.6534 | 149069   |
| ZDHHC15   | -0.18218 | 0.18218 | 0.15341 | -2.4819 | 0.026675 | 0.1425  | -3.6535 | 158866   |
| C12orf4   | 1.0653   | 1.0653  | 2.2261  | 2.4819  | 0.026677 | 0.1425  | -3.6536 | 57102    |
| GRHL2     | -3.2624  | 3.2624  | 7.6739  | -2.4818 | 0.02668  | 0.1425  | -3.6537 | 79977    |
| LRIT2     | -0.38674 | 0.38674 | 0.24691 | -2.4816 | 0.02669  | 0.1425  | -3.6541 | 340745   |
| EFHC1     | -0.49802 | 0.49802 | 1.0832  | -2.4814 | 0.026698 | 0.1425  | -3.6543 | 114327   |
| LOC644090 | -0.18631 | 0.18631 | 0.18206 | -2.4812 | 0.026713 | 0.14252 | -3.6548 | 644090   |



|             |          |         |          |         |          |         |         |          |
|-------------|----------|---------|----------|---------|----------|---------|---------|----------|
| UBE2Q2L     | -0.53292 | 0.53292 | 1.2415   | -2.481  | 0.026721 | 0.14252 | -3.6551 | 1.01E+08 |
| MAP2K6      | -0.30231 | 0.30231 | 0.47614  | -2.4809 | 0.026726 | 0.14252 | -3.6553 | 5608     |
| ZNF853      | -0.48267 | 0.48267 | 0.54648  | -2.4802 | 0.026761 | 0.14266 | -3.6565 | 54753    |
| ZNF436      | -1.9345  | 1.9345  | 4.7394   | -2.4799 | 0.026776 | 0.14268 | -3.657  | 80818    |
| B4GALT1-AS1 | 0.31062  | 0.31062 | 0.34039  | 2.4798  | 0.026781 | 0.14268 | -3.6572 | 1.02E+08 |
| MLH3        | -0.72334 | 0.72334 | 1.9758   | -2.4796 | 0.026791 | 0.14268 | -3.6575 | 27030    |
| GPR18       | -0.66752 | 0.66752 | 1.2282   | -2.4793 | 0.02681  | 0.14274 | -3.6581 | 2841     |
| ACSM5       | -0.25979 | 0.25979 | 0.20418  | -2.4786 | 0.026843 | 0.14282 | -3.6593 | 54988    |
| CCAR2       | -3.7545  | 3.7545  | 9.9051   | -2.4784 | 0.026854 | 0.14282 | -3.6596 | 57805    |
| LINC02562   | -0.2804  | 0.2804  | 0.30581  | -2.4782 | 0.026862 | 0.14282 | -3.6599 | 1.05E+08 |
| PACRGL      | -0.38083 | 0.38083 | 1.0423   | -2.4781 | 0.026868 | 0.14282 | -3.6601 | 133015   |
| CAMK2G      | -0.95316 | 0.95316 | 3.2248   | -2.478  | 0.026876 | 0.14282 | -3.6604 | 818      |
| LMCD1-AS1   | -0.1591  | 0.1591  | 0.11031  | -2.4779 | 0.026882 | 0.14282 | -3.6606 | 1E+08    |
| TMEM183A    | -0.66601 | 0.66601 | 1.7754   | -2.4777 | 0.026889 | 0.14282 | -3.6608 | 92703    |
| GKAP1       | -0.22892 | 0.22892 | 0.35763  | -2.4775 | 0.026898 | 0.14282 | -3.6611 | 80318    |
| ABCA5       | -1.9057  | 1.9057  | 2.9923   | -2.4775 | 0.026901 | 0.14282 | -3.6612 | 23461    |
| MBLAC2      | -0.25798 | 0.25798 | 1.0115   | -2.4773 | 0.026911 | 0.14283 | -3.6615 | 153364   |
| SCARNA5     | -40.582  | 40.582  | 46.198   | -2.4768 | 0.026937 | 0.14289 | -3.6624 | 677775   |
| SNORA71D    | -1.2897  | 1.2897  | 1.054    | -2.4767 | 0.02694  | 0.14289 | -3.6625 | 677840   |
| C17orf100   | -0.43266 | 0.43266 | 0.93861  | -2.4764 | 0.026958 | 0.14294 | -3.6631 | 388327   |
| MS4A4E      | -0.45061 | 0.45061 | 0.55052  | -2.4758 | 0.026987 | 0.14305 | -3.6641 | 643680   |
| LAMA2       | -4.3874  | 4.3874  | 5.9822   | -2.4755 | 0.027004 | 0.1431  | -3.6647 | 3908     |
| TRABD2B     | -0.42312 | 0.42312 | 0.62468  | -2.4749 | 0.027034 | 0.14321 | -3.6657 | 388630   |
| TNP1        | -0.17424 | 0.17424 | 0.092926 | -2.4747 | 0.027045 | 0.14321 | -3.6661 | 7141     |
| TMEM86B     | -0.64028 | 0.64028 | 1.1497   | -2.4746 | 0.02705  | 0.14321 | -3.6663 | 255043   |
| UPK3B       | -1.1909  | 1.1909  | 1.1478   | -2.4743 | 0.027065 | 0.14323 | -3.6668 | 1.05E+08 |

|           |          |         |         |         |          |         |         |          |
|-----------|----------|---------|---------|---------|----------|---------|---------|----------|
| SRRM2     | -14.598  | 14.598  | 43.827  | -2.4739 | 0.027084 | 0.14323 | -3.6674 | 23524    |
| WSCD2     | -0.24998 | 0.24998 | 0.18127 | -2.4739 | 0.027087 | 0.14323 | -3.6675 | 9671     |
| NIT1      | 1.4545   | 1.4545  | 3.6508  | 2.4739  | 0.027088 | 0.14323 | -3.6675 | 4817     |
| BHLHE41   | -0.88554 | 0.88554 | 1.2219  | -2.4736 | 0.027101 | 0.14325 | -3.668  | 79365    |
| MRPL36    | 7.6653   | 7.6653  | 10.469  | 2.4733  | 0.027118 | 0.14329 | -3.6685 | 64979    |
| LINC02367 | -0.18534 | 0.18534 | 0.1534  | -2.4728 | 0.027142 | 0.14338 | -3.6694 | 1.02E+08 |
| EIF6      | 27.565   | 27.565  | 47.038  | 2.4722  | 0.027177 | 0.14352 | -3.6705 | 3692     |
| DNAJB1    | 22.738   | 22.738  | 37.874  | 2.4717  | 0.027199 | 0.14357 | -3.6712 | 3337     |
| TTPAL     | 2.1858   | 2.1858  | 5.4812  | 2.4716  | 0.027204 | 0.14357 | -3.6714 | 79183    |
| TNFRSF14  | -1.8296  | 1.8296  | 3.0552  | -2.4709 | 0.02724  | 0.14372 | -3.6726 | 8764     |
| PELI1     | 5.6986   | 5.6986  | 10.35   | 2.4701  | 0.027283 | 0.1439  | -3.6741 | 57162    |
| TRIP10    | 6.287    | 6.287   | 13.067  | 2.4699  | 0.027297 | 0.14393 | -3.6745 | 9322     |
| ZNF768    | -2.2409  | 2.2409  | 3.8116  | -2.4697 | 0.027308 | 0.14394 | -3.6749 | 79724    |
| ZNF224    | -0.80792 | 0.80792 | 1.8029  | -2.4693 | 0.027324 | 0.14398 | -3.6754 | 7767     |
| HOXC-AS1  | -0.646   | 0.646   | 0.83453 | -2.4687 | 0.027357 | 0.14409 | -3.6765 | 1.01E+08 |
| RABGAP1L  | -0.94789 | 0.94789 | 2.5562  | -2.4686 | 0.027364 | 0.14409 | -3.6768 | 9910     |
| PPP2CA    | 11.032   | 11.032  | 19.312  | 2.4682  | 0.027385 | 0.14409 | -3.6775 | 5515     |
| GRHL1     | 12.21    | 12.21   | 21.939  | 2.4681  | 0.027391 | 0.14409 | -3.6777 | 29841    |
| ABCG4     | 2.408    | 2.408   | 1.785   | 2.468   | 0.027397 | 0.14409 | -3.6778 | 64137    |
| SMARCD3   | -1.8188  | 1.8188  | 2.441   | -2.4679 | 0.027399 | 0.14409 | -3.6779 | 6604     |
| TALDO1    | 21.142   | 21.142  | 38.299  | 2.4676  | 0.027414 | 0.14409 | -3.6784 | 6888     |
| ZNF709    | -0.22366 | 0.22366 | 0.42476 | -2.4672 | 0.027438 | 0.14409 | -3.6792 | 163051   |
| MFAP4     | -19.638  | 19.638  | 23.696  | -2.467  | 0.027446 | 0.14409 | -3.6795 | 4239     |
| PCMTD2    | -1.5466  | 1.5466  | 5.0768  | -2.4667 | 0.027465 | 0.14409 | -3.6801 | 55251    |
| SLC20A2   | 6.3172   | 6.3172  | 10.483  | 2.4665  | 0.027475 | 0.14409 | -3.6804 | 6575     |
| ABCC9     | -6.7393  | 6.7393  | 12.401  | -2.4665 | 0.027475 | 0.14409 | -3.6805 | 10060    |

|             |          |         |         |         |          |         |         |          |
|-------------|----------|---------|---------|---------|----------|---------|---------|----------|
| CLEC4F      | -0.16568 | 0.16568 | 0.10124 | -2.4662 | 0.027487 | 0.14409 | -3.6808 | 165530   |
| FAM166A     | 0.48116  | 0.48116 | 0.62054 | 2.4662  | 0.027491 | 0.14409 | -3.681  | 401565   |
| VEZT        | 1.3351   | 1.3351  | 4.0581  | 2.4659  | 0.027502 | 0.14409 | -3.6813 | 55591    |
| MCCC1       | -1.0636  | 1.0636  | 2.9151  | -2.4659 | 0.027504 | 0.14409 | -3.6814 | 56922    |
| ADCK1       | -0.43217 | 0.43217 | 1.1383  | -2.4658 | 0.027508 | 0.14409 | -3.6815 | 57143    |
| SERTAD1     | 6.8245   | 6.8245  | 9.13    | 2.4658  | 0.027511 | 0.14409 | -3.6816 | 29950    |
| CCDC80      | -14.929  | 14.929  | 19.182  | -2.4658 | 0.027511 | 0.14409 | -3.6816 | 151887   |
| TDRP        | 0.55078  | 0.55078 | 1.3357  | 2.4656  | 0.027522 | 0.14409 | -3.682  | 157695   |
| PPP2R3C     | 1.3636   | 1.3636  | 2.3945  | 2.4655  | 0.027524 | 0.14409 | -3.682  | 55012    |
| PIGN        | 2.0609   | 2.0609  | 4.5547  | 2.4652  | 0.027543 | 0.14415 | -3.6827 | 23556    |
| ADAM12      | 5.1719   | 5.1719  | 3.675   | 2.4644  | 0.027582 | 0.14429 | -3.684  | 8038     |
| COPB2       | 8.2408   | 8.2408  | 17.865  | 2.4642  | 0.027594 | 0.14429 | -3.6844 | 9276     |
| C21orf62    | -0.2118  | 0.2118  | 0.23318 | -2.4642 | 0.027596 | 0.14429 | -3.6844 | 56245    |
| SSR3        | 5.7858   | 5.7858  | 11.74   | 2.4637  | 0.027623 | 0.14434 | -3.6853 | 6747     |
| ENTPD3      | 1.6979   | 1.6979  | 3.2855  | 2.4636  | 0.027625 | 0.14434 | -3.6854 | 956      |
| LAMP2       | 4.6832   | 4.6832  | 10.47   | 2.4635  | 0.027632 | 0.14434 | -3.6856 | 3920     |
| ELMOD3      | -0.65418 | 0.65418 | 2.1523  | -2.4632 | 0.027646 | 0.14434 | -3.6861 | 84173    |
| ADAMTS9-AS2 | -0.49092 | 0.49092 | 0.60974 | -2.4632 | 0.02765  | 0.14434 | -3.6862 | 1.01E+08 |
| TRIM25      | -4.2088  | 4.2088  | 9.4221  | -2.4627 | 0.027675 | 0.1444  | -3.687  | 7706     |
| LOC728673   | -0.30386 | 0.30386 | 0.61744 | -2.4625 | 0.027685 | 0.1444  | -3.6874 | 728673   |
| TPGS2       | 1.8366   | 1.8366  | 4.1903  | 2.4625  | 0.027686 | 0.1444  | -3.6874 | 25941    |
| ZCCHC9      | 1.709    | 1.709   | 3.7373  | 2.4622  | 0.027698 | 0.14441 | -3.6878 | 84240    |
| SMIM1       | -0.33118 | 0.33118 | 0.2741  | -2.4621 | 0.027705 | 0.14441 | -3.688  | 388588   |
| TAPBPL      | -1.7941  | 1.7941  | 2.876   | -2.4618 | 0.027722 | 0.14444 | -3.6886 | 55080    |
| RCL1        | -1.0725  | 1.0725  | 3.4885  | -2.4616 | 0.027733 | 0.14444 | -3.6889 | 10171    |
| AGTR1       | -0.36738 | 0.36738 | 0.35757 | -2.4615 | 0.027737 | 0.14444 | -3.6891 | 185      |

|                            |          |         |         |         |          |         |         |          |
|----------------------------|----------|---------|---------|---------|----------|---------|---------|----------|
| LINC00910                  | -0.16634 | 0.16634 | 0.20872 | -2.4613 | 0.027749 | 0.14446 | -3.6895 | 1E+08    |
| SSBP3-AS1                  | -0.42903 | 0.42903 | 0.51895 | -2.4609 | 0.027767 | 0.14449 | -3.6901 | 619518   |
| TUBA8                      | -0.17834 | 0.17834 | 0.28052 | -2.4609 | 0.027771 | 0.14449 | -3.6902 | 51807    |
| LINC00672                  | -0.24074 | 0.24074 | 0.25909 | -2.4595 | 0.027845 | 0.14482 | -3.6926 | 1.01E+08 |
| RXRA                       | -6.499   | 6.499   | 14.771  | -2.4593 | 0.027852 | 0.14482 | -3.6928 | 6256     |
| SEC14L1P1                  | -0.42667 | 0.42667 | 0.69194 | -2.459  | 0.027873 | 0.14485 | -3.6935 | 729799   |
| CHRNB1                     | 1.7291   | 1.7291  | 2.0506  | 2.4589  | 0.027874 | 0.14485 | -3.6936 | 1140     |
| GATAD1                     | -0.81852 | 0.81852 | 2.653   | -2.4586 | 0.027894 | 0.1449  | -3.6942 | 57798    |
| TMED5                      | 1.2732   | 1.2732  | 2.5096  | 2.4582  | 0.027914 | 0.14496 | -3.6949 | 50999    |
| BCLAF3                     | -0.48789 | 0.48789 | 1.1763  | -2.4575 | 0.027952 | 0.14508 | -3.6961 | 256643   |
| ADGRG3                     | 0.873    | 0.873   | 0.75506 | 2.4572  | 0.027967 | 0.14508 | -3.6966 | 222487   |
| TSHZ2                      | -0.8425  | 0.8425  | 1.6433  | -2.4571 | 0.027969 | 0.14508 | -3.6967 | 128553   |
| SNAP29                     | 4.3786   | 4.3786  | 6.638   | 2.4571  | 0.027971 | 0.14508 | -3.6967 | 9342     |
| ALDH1A1                    | -3.1963  | 3.1963  | 2.6007  | -2.4565 | 0.028003 | 0.14509 | -3.6978 | 216      |
| MRPL13                     | 7.0731   | 7.0731  | 8.3337  | 2.4564  | 0.028007 | 0.14509 | -3.6979 | 28998    |
| TPST2                      | 1.4157   | 1.4157  | 3.0662  | 2.4563  | 0.028016 | 0.14509 | -3.6982 | 8459     |
| KIF13A                     | 4.8655   | 4.8655  | 9.753   | 2.4562  | 0.028021 | 0.14509 | -3.6983 | 63971    |
| RHOXF1-AS1                 | -0.34785 | 0.34785 | 0.25159 | -2.4561 | 0.028026 | 0.14509 | -3.6985 | 1.02E+08 |
| SNORA71B                   | -0.8557  | 0.8557  | 1.1283  | -2.4559 | 0.028034 | 0.14509 | -3.6988 | 26776    |
| SPTLC1                     | 3.3813   | 3.3813  | 9.1889  | 2.4558  | 0.028042 | 0.14509 | -3.699  | 10558    |
| OSBPL5                     | -2.1295  | 2.1295  | 5.1245  | -2.4557 | 0.028046 | 0.14509 | -3.6991 | 114879   |
| STAG3L5P-PVRIG2P-<br>PILRB | -2.7549  | 2.7549  | 5.2113  | -2.4556 | 0.028054 | 0.14509 | -3.6994 | 1.02E+08 |
| CRIP2                      | 7.5956   | 7.5956  | 14.432  | 2.4555  | 0.028059 | 0.14509 | -3.6996 | 1397     |
| MAMDC2-AS1                 | -0.26765 | 0.26765 | 0.20258 | -2.4553 | 0.028069 | 0.1451  | -3.6999 | 1.01E+08 |
| FAM114A1                   | 2.4577   | 2.4577  | 5.1393  | 2.4549  | 0.028091 | 0.14513 | -3.7006 | 92689    |

|            |          |         |         |         |          |         |         |          |
|------------|----------|---------|---------|---------|----------|---------|---------|----------|
| MAMDC2     | -2.3427  | 2.3427  | 1.7913  | -2.4548 | 0.028097 | 0.14513 | -3.7008 | 256691   |
| TCTE3      | -0.1623  | 0.1623  | 0.25655 | -2.4545 | 0.02811  | 0.14513 | -3.7012 | 6991     |
| PTGDS      | -26.838  | 26.838  | 25.869  | -2.4545 | 0.028111 | 0.14513 | -3.7013 | 5730     |
| PCOLCE2    | -3.4906  | 3.4906  | 2.133   | -2.4544 | 0.028118 | 0.14513 | -3.7015 | 26577    |
| GREB1L     | -0.21994 | 0.21994 | 0.20814 | -2.4541 | 0.028133 | 0.14513 | -3.702  | 80000    |
| SNORD22    | -2.4101  | 2.4101  | 4.8715  | -2.454  | 0.028136 | 0.14513 | -3.702  | 9304     |
| IKBIP      | 1.7656   | 1.7656  | 1.5535  | 2.453   | 0.028194 | 0.14539 | -3.7039 | 121457   |
| C10orf105  | -0.1803  | 0.1803  | 0.17363 | -2.4524 | 0.028222 | 0.14549 | -3.7048 | 414152   |
| FBXO3      | 2.8351   | 2.8351  | 6.5559  | 2.4521  | 0.028239 | 0.14551 | -3.7054 | 26273    |
| OTOP1      | -0.1881  | 0.1881  | 0.15304 | -2.4519 | 0.028251 | 0.14551 | -3.7058 | 133060   |
| LCE3D      | 799.01   | 799.01  | 611.17  | 2.4519  | 0.028253 | 0.14551 | -3.7058 | 84648    |
| ZNF343     | -0.38296 | 0.38296 | 1.5456  | -2.4517 | 0.028261 | 0.14551 | -3.7061 | 79175    |
| BIRC7      | -0.18701 | 0.18701 | 0.11615 | -2.4514 | 0.028281 | 0.14557 | -3.7067 | 79444    |
| PHLPP1     | -1.3877  | 1.3877  | 4.4488  | -2.4511 | 0.028292 | 0.14558 | -3.7071 | 23239    |
| SNORA50A   | -0.97283 | 0.97283 | 0.98338 | -2.4507 | 0.028315 | 0.14566 | -3.7078 | 677830   |
| TPTE2P5    | -0.18475 | 0.18475 | 0.20878 | -2.4504 | 0.028334 | 0.14568 | -3.7084 | 1.01E+08 |
| LDHA       | 131.23   | 131.23  | 188.8   | 2.45    | 0.028352 | 0.14568 | -3.709  | 3939     |
| S100A11    | 229.85   | 229.85  | 270.84  | 2.4498  | 0.028365 | 0.14568 | -3.7094 | 6282     |
| PIGZ       | -0.54571 | 0.54571 | 1.0182  | -2.4498 | 0.028368 | 0.14568 | -3.7095 | 80235    |
| RILPL1     | -0.75845 | 0.75845 | 1.8203  | -2.4497 | 0.028368 | 0.14568 | -3.7095 | 353116   |
| CD1E       | -0.49918 | 0.49918 | 0.41338 | -2.4496 | 0.028378 | 0.14568 | -3.7098 | 913      |
| RAB36      | -0.34816 | 0.34816 | 0.74969 | -2.4495 | 0.02838  | 0.14568 | -3.7099 | 9609     |
| NAPEPLD    | -0.37148 | 0.37148 | 1.4901  | -2.4494 | 0.028388 | 0.14568 | -3.7102 | 222236   |
| CHST3      | -2.5195  | 2.5195  | 4.3925  | -2.4484 | 0.028438 | 0.14585 | -3.7118 | 9469     |
| ZNF528-AS1 | -0.28723 | 0.28723 | 0.35487 | -2.4484 | 0.028441 | 0.14585 | -3.7118 | 1.03E+08 |
| NALCN      | -0.17035 | 0.17035 | 0.10649 | -2.4483 | 0.028448 | 0.14585 | -3.7121 | 259232   |

|             |          |         |         |         |          |         |         |        |
|-------------|----------|---------|---------|---------|----------|---------|---------|--------|
| SPDYE1      | -1.2466  | 1.2466  | 1.7782  | -2.4481 | 0.028458 | 0.14586 | -3.7124 | 285955 |
| CLK1        | 2.8026   | 2.8026  | 9.8563  | 2.4472  | 0.028505 | 0.14605 | -3.7139 | 1195   |
| DDX3X       | 13.936   | 13.936  | 28.581  | 2.447   | 0.028515 | 0.14606 | -3.7142 | 1654   |
| PEX1        | -0.81915 | 0.81915 | 2.6842  | -2.4469 | 0.028522 | 0.14606 | -3.7145 | 5189   |
| CYP2C18     | -0.40213 | 0.40213 | 0.34501 | -2.4458 | 0.028581 | 0.14629 | -3.7163 | 1562   |
| MORF4L2-AS1 | -0.17269 | 0.17269 | 0.14774 | -2.4457 | 0.028586 | 0.14629 | -3.7165 | 340544 |
| GDNF        | 0.31969  | 0.31969 | 0.25841 | 2.4453  | 0.028608 | 0.14632 | -3.7172 | 2668   |
| SLC25A35    | -0.2744  | 0.2744  | 0.54064 | -2.4453 | 0.028608 | 0.14632 | -3.7172 | 399512 |
| ZSWIM9      | -0.88022 | 0.88022 | 0.96006 | -2.4448 | 0.028637 | 0.14642 | -3.7181 | 374920 |
| TMEM175     | -1.569   | 1.569   | 3.3061  | -2.4443 | 0.028665 | 0.14652 | -3.719  | 84286  |
| MAPK13      | 9.0295   | 9.0295  | 15.73   | 2.4441  | 0.028674 | 0.14652 | -3.7193 | 5603   |
| DNM3        | -0.24642 | 0.24642 | 0.38389 | -2.444  | 0.028683 | 0.14652 | -3.7196 | 26052  |
| EVI5        | 0.83087  | 0.83087 | 2.9045  | 2.4438  | 0.028693 | 0.14653 | -3.7199 | 7813   |
| ZNF8        | -0.6507  | 0.6507  | 2.4931  | -2.4436 | 0.028705 | 0.14654 | -3.7202 | 7554   |
| EXOSC6      | -2.5007  | 2.5007  | 7.8473  | -2.4433 | 0.028719 | 0.14655 | -3.7207 | 118460 |
| GABPB1      | 0.94344  | 0.94344 | 1.873   | 2.4432  | 0.028724 | 0.14655 | -3.7209 | 2553   |
| ZNF575      | -0.31329 | 0.31329 | 0.68079 | -2.4431 | 0.028731 | 0.14655 | -3.7211 | 284346 |
| KNL1        | 0.55039  | 0.55039 | 0.67601 | 2.4427  | 0.028755 | 0.14659 | -3.7218 | 57082  |
| SIMC1       | -0.32174 | 0.32174 | 1.006   | -2.4426 | 0.028757 | 0.14659 | -3.7219 | 375484 |
| MPZL3       | 13.362   | 13.362  | 12.507  | 2.4425  | 0.028766 | 0.14659 | -3.7222 | 196264 |
| APOL4       | -0.86371 | 0.86371 | 1.7046  | -2.4419 | 0.028798 | 0.14668 | -3.7232 | 80832  |
| SPATS2L     | 2.848    | 2.848   | 4.9825  | 2.4418  | 0.028802 | 0.14668 | -3.7233 | 26010  |
| XKR9        | -0.42692 | 0.42692 | 0.53629 | -2.4416 | 0.02881  | 0.14668 | -3.7236 | 389668 |
| PI4K2A      | 4.5564   | 4.5564  | 8.5175  | 2.4415  | 0.028818 | 0.14668 | -3.7238 | 55361  |
| CASP4       | 16.141   | 16.141  | 23.72   | 2.4412  | 0.028838 | 0.14673 | -3.7244 | 837    |
| CEBPG       | 3.715    | 3.715   | 8.1559  | 2.4409  | 0.028853 | 0.14675 | -3.7249 | 1054   |

|              |          |         |         |         |          |         |         |          |
|--------------|----------|---------|---------|---------|----------|---------|---------|----------|
| ZNF681       | 0.49599  | 0.49599 | 0.70033 | 2.4408  | 0.028858 | 0.14675 | -3.7251 | 148213   |
| VAMP1        | -1.0716  | 1.0716  | 1.6379  | -2.4394 | 0.028933 | 0.14709 | -3.7274 | 6843     |
| PREP         | 3.5501   | 3.5501  | 9.1315  | 2.4389  | 0.028962 | 0.14719 | -3.7283 | 5550     |
| ZNF17        | -0.49396 | 0.49396 | 1.6835  | -2.4388 | 0.02897  | 0.14719 | -3.7286 | 7565     |
| FANK1        | 0.38208  | 0.38208 | 0.85524 | 2.4379  | 0.029017 | 0.14726 | -3.7301 | 92565    |
| MIF-AS1      | -1.0815  | 1.0815  | 1.3457  | -2.4376 | 0.029033 | 0.14726 | -3.7306 | 284889   |
| TAF1C        | -2.4192  | 2.4192  | 4.7301  | -2.4376 | 0.029034 | 0.14726 | -3.7306 | 9013     |
| CD27-AS1     | -0.57709 | 0.57709 | 0.77702 | -2.4375 | 0.029039 | 0.14726 | -3.7308 | 678655   |
| SCARA5       | -6.0496  | 6.0496  | 4.8812  | -2.4372 | 0.029057 | 0.14726 | -3.7313 | 286133   |
| ASCC3        | 1.3531   | 1.3531  | 4.1844  | 2.437   | 0.029065 | 0.14726 | -3.7316 | 10973    |
| ZNF281       | 1.6913   | 1.6913  | 2.3305  | 2.437   | 0.029066 | 0.14726 | -3.7316 | 23528    |
| DHX35        | -0.52694 | 0.52694 | 1.4814  | -2.437  | 0.02907  | 0.14726 | -3.7317 | 60625    |
| GRIP1        | -0.77345 | 0.77345 | 1.547   | -2.4369 | 0.029075 | 0.14726 | -3.7319 | 23426    |
| SERPINF2     | -0.37254 | 0.37254 | 0.57569 | -2.4368 | 0.029077 | 0.14726 | -3.7319 | 5345     |
| WASH3P       | -2.2672  | 2.2672  | 4.3439  | -2.4366 | 0.029087 | 0.14726 | -3.7323 | 374666   |
| GOLGA8A      | -7.2747  | 7.2747  | 11.511  | -2.4366 | 0.029089 | 0.14726 | -3.7323 | 23015    |
| EXOSC2       | -0.95249 | 0.95249 | 3.3178  | -2.4363 | 0.029109 | 0.14731 | -3.7329 | 23404    |
| ANKRD36      | -1.5613  | 1.5613  | 2.1971  | -2.4359 | 0.029129 | 0.14737 | -3.7336 | 375248   |
| GRIA3        | 0.54411  | 0.54411 | 0.58254 | 2.4352  | 0.029167 | 0.14744 | -3.7347 | 2892     |
| SMIM6        | -0.18401 | 0.18401 | 0.23697 | -2.4352 | 0.029168 | 0.14744 | -3.7348 | 1E+08    |
| HACD1        | 0.72932  | 0.72932 | 0.8558  | 2.4352  | 0.029169 | 0.14744 | -3.7348 | 9200     |
| TERF2        | -0.87805 | 0.87805 | 3.7495  | -2.4348 | 0.029189 | 0.14748 | -3.7354 | 7014     |
| CLCF1        | 1.3681   | 1.3681  | 1.8846  | 2.4347  | 0.029193 | 0.14748 | -3.7355 | 23529    |
| TMCC3        | 1.2554   | 1.2554  | 2.9935  | 2.4332  | 0.029281 | 0.1478  | -3.7383 | 57458    |
| ZNF106       | -1.7899  | 1.7899  | 5.9449  | -2.4331 | 0.029284 | 0.1478  | -3.7384 | 64397    |
| LOC105371049 | -0.3583  | 0.3583  | 0.42903 | -2.4331 | 0.029284 | 0.1478  | -3.7384 | 1.05E+08 |

|            |          |         |          |         |          |         |         |          |
|------------|----------|---------|----------|---------|----------|---------|---------|----------|
| C11orf42   | -0.17057 | 0.17057 | 0.16884  | -2.4323 | 0.02933  | 0.14792 | -3.7398 | 160298   |
| PLXNA4     | -0.90062 | 0.90062 | 0.79071  | -2.4322 | 0.029336 | 0.14792 | -3.74   | 91584    |
| CYTOR      | 2.7665   | 2.7665  | 2.7965   | 2.4321  | 0.029342 | 0.14792 | -3.7402 | 112597   |
| HEATR4     | -0.16087 | 0.16087 | 0.123    | -2.4321 | 0.029342 | 0.14792 | -3.7402 | 399671   |
| ABI1       | 5.26     | 5.26    | 12.548   | 2.4317  | 0.029363 | 0.14798 | -3.7408 | 10006    |
| SNORD128   | -0.3972  | 0.3972  | 0.21184  | -2.4309 | 0.029406 | 0.14815 | -3.7422 | 1.07E+08 |
| EEF1AKMT2  | -0.72974 | 0.72974 | 1.9185   | -2.4307 | 0.029417 | 0.14815 | -3.7425 | 399818   |
| PDK3       | -1.9775  | 1.9775  | 4.62     | -2.4306 | 0.029427 | 0.14815 | -3.7428 | 5165     |
| CALU       | 10.637   | 10.637  | 13.336   | 2.4303  | 0.029441 | 0.14815 | -3.7432 | 813      |
| ATP6V1E2   | -0.32981 | 0.32981 | 0.58478  | -2.4302 | 0.029444 | 0.14815 | -3.7433 | 90423    |
| SNORA48    | -35.022  | 35.022  | 70.468   | -2.4301 | 0.029454 | 0.14815 | -3.7436 | 652965   |
| MRPS17     | 3.3419   | 3.3419  | 5.6314   | 2.4299  | 0.029461 | 0.14815 | -3.7439 | 51373    |
| PLIN4      | -1.7334  | 1.7334  | 1.0921   | -2.4298 | 0.029467 | 0.14815 | -3.744  | 729359   |
| ARFGEF2    | -1.0666  | 1.0666  | 6.1958   | -2.4296 | 0.029482 | 0.14818 | -3.7445 | 10564    |
| FBXO33     | 0.44707  | 0.44707 | 1.4964   | 2.4291  | 0.02951  | 0.14828 | -3.7453 | 254170   |
| UST        | -0.71214 | 0.71214 | 1.5936   | -2.4288 | 0.029524 | 0.14831 | -3.7458 | 10090    |
| MGC32805   | -0.23005 | 0.23005 | 0.30877  | -2.4282 | 0.029562 | 0.14845 | -3.7469 | 153163   |
| KLK11      | 30.863   | 30.863  | 34.028   | 2.4278  | 0.029584 | 0.14852 | -3.7476 | 11012    |
| PIP5KL1    | 1.3263   | 1.3263  | 1.8922   | 2.4269  | 0.029635 | 0.14873 | -3.7492 | 138429   |
| ZNF696     | -0.46523 | 0.46523 | 0.92083  | -2.4261 | 0.02968  | 0.14891 | -3.7506 | 79943    |
| RERGL      | -0.6027  | 0.6027  | 0.36676  | -2.4254 | 0.029719 | 0.14906 | -3.7518 | 79785    |
| SNORA8     | -0.83796 | 0.83796 | 0.91223  | -2.4245 | 0.029768 | 0.14921 | -3.7533 | 654320   |
| NLGN1      | -0.15572 | 0.15572 | 0.098746 | -2.4245 | 0.029769 | 0.14921 | -3.7533 | 22871    |
| XXYLT1-AS2 | -0.25307 | 0.25307 | 0.30354  | -2.4241 | 0.029793 | 0.14921 | -3.754  | 1.01E+08 |
| HCRTR1     | -0.18028 | 0.18028 | 0.15144  | -2.424  | 0.029797 | 0.14921 | -3.7541 | 3061     |
| DCAF13     | 3.1699   | 3.1699  | 6.1276   | 2.4239  | 0.029802 | 0.14921 | -3.7543 | 25879    |



|            |          |         |         |         |          |         |         |          |
|------------|----------|---------|---------|---------|----------|---------|---------|----------|
| NPIPA2     | -0.38624 | 0.38624 | 0.56958 | -2.4239 | 0.029805 | 0.14921 | -3.7544 | 642799   |
| AGPS       | 1.5653   | 1.5653  | 3.3738  | 2.4238  | 0.029811 | 0.14921 | -3.7546 | 8540     |
| GAN        | -11.214  | 11.214  | 13.106  | -2.4233 | 0.029835 | 0.14921 | -3.7553 | 8139     |
| SNORA10    | -0.62975 | 0.62975 | 1.2627  | -2.4233 | 0.029836 | 0.14921 | -3.7553 | 574042   |
| HUS1       | 0.76708  | 0.76708 | 3.1813  | 2.4233  | 0.029837 | 0.14921 | -3.7554 | 3364     |
| TNRC6C-AS1 | -0.58954 | 0.58954 | 0.87075 | -2.423  | 0.029857 | 0.14927 | -3.756  | 1E+08    |
| RSPH3      | 0.44247  | 0.44247 | 1.815   | 2.4225  | 0.029881 | 0.14929 | -3.7567 | 83861    |
| SNED1      | -2.6955  | 2.6955  | 3.4023  | -2.4225 | 0.029885 | 0.14929 | -3.7568 | 25992    |
| ZNF26      | -0.35944 | 0.35944 | 0.85892 | -2.4224 | 0.029887 | 0.14929 | -3.7569 | 7574     |
| CMAHP      | -1.0168  | 1.0168  | 1.9095  | -2.4213 | 0.029953 | 0.14949 | -3.7589 | 8418     |
| IFRD1      | 2.3928   | 2.3928  | 3.5951  | 2.4211  | 0.02996  | 0.14949 | -3.7591 | 3475     |
| NRAV       | 1.3988   | 1.3988  | 2.817   | 2.4211  | 0.029961 | 0.14949 | -3.7591 | 1.01E+08 |
| MBTD1      | -0.96213 | 0.96213 | 2.55    | -2.4211 | 0.029964 | 0.14949 | -3.7592 | 54799    |
| PFAS       | -1.2644  | 1.2644  | 2.2296  | -2.4205 | 0.03     | 0.14963 | -3.7603 | 5198     |
| RIC1       | 0.94512  | 0.94512 | 5.6465  | 2.4187  | 0.030102 | 0.15009 | -3.7634 | 57589    |
| CPHXL      | -0.18181 | 0.18181 | 0.10912 | -2.4182 | 0.030132 | 0.15017 | -3.7643 | 1.05E+08 |
| IFNE       | 0.7198   | 0.7198  | 0.74611 | 2.418   | 0.03014  | 0.15017 | -3.7645 | 338376   |
| WNT7A      | 0.6562   | 0.6562  | 0.59518 | 2.4179  | 0.030145 | 0.15017 | -3.7647 | 7476     |
| BCHE       | -0.70577 | 0.70577 | 0.594   | -2.4155 | 0.030282 | 0.15081 | -3.7688 | 590      |
| ANGPTL1    | -2.0676  | 2.0676  | 2.1739  | -2.415  | 0.030316 | 0.15091 | -3.7698 | 9068     |
| ZC3H7B     | -3.6855  | 3.6855  | 7.8232  | -2.4149 | 0.03032  | 0.15091 | -3.7699 | 23264    |
| GRIN2A     | -0.2667  | 0.2667  | 0.23473 | -2.4143 | 0.030352 | 0.15103 | -3.7709 | 2903     |
| FGD6       | -1.0483  | 1.0483  | 3.0031  | -2.414  | 0.030371 | 0.15107 | -3.7714 | 55785    |
| ASPHD1     | 0.31553  | 0.31553 | 0.35046 | 2.4137  | 0.03039  | 0.15112 | -3.772  | 253982   |
| FAM83A     | 12.77    | 12.77   | 10.412  | 2.4136  | 0.030397 | 0.15112 | -3.7722 | 84985    |
| FAM182A    | -0.56192 | 0.56192 | 0.55319 | -2.4128 | 0.030439 | 0.15128 | -3.7735 | 284800   |

|             |          |         |          |         |          |         |         |          |
|-------------|----------|---------|----------|---------|----------|---------|---------|----------|
| STX1B       | -0.46921 | 0.46921 | 0.59263  | -2.4127 | 0.030449 | 0.15129 | -3.7738 | 112755   |
| ALDH1L1     | -0.22309 | 0.22309 | 0.12721  | -2.4119 | 0.03049  | 0.15145 | -3.775  | 10840    |
| TESC        | -1.0114  | 1.0114  | 1.2833   | -2.4117 | 0.030503 | 0.15145 | -3.7754 | 54997    |
| ACADVL      | 12.464   | 12.464  | 32.96    | 2.4116  | 0.030511 | 0.15145 | -3.7756 | 37       |
| RPS6KA2-AS1 | -0.15409 | 0.15409 | 0.088201 | -2.4115 | 0.030518 | 0.15145 | -3.7758 | 1.01E+08 |
| RASSF3      | 2.551    | 2.551   | 5.2818   | 2.4113  | 0.030529 | 0.15146 | -3.7761 | 283349   |
| RND2        | -0.20376 | 0.20376 | 0.23236  | -2.4109 | 0.030551 | 0.15146 | -3.7768 | 8153     |
| SPRYD7      | 0.92101  | 0.92101 | 2.1641   | 2.4109  | 0.030553 | 0.15146 | -3.7768 | 57213    |
| RPL22L1     | 5.5583   | 5.5583  | 6.8217   | 2.4108  | 0.030556 | 0.15146 | -3.777  | 200916   |
| C20orf144   | -0.19926 | 0.19926 | 0.1612   | -2.4104 | 0.030582 | 0.15148 | -3.7777 | 128864   |
| LDHB        | 20.451   | 20.451  | 22.042   | 2.4104  | 0.030582 | 0.15148 | -3.7777 | 3945     |
| GPR21       | -0.5347  | 0.5347  | 1.0045   | -2.4103 | 0.030588 | 0.15148 | -3.7779 | 2844     |
| LSS         | -4.0277  | 4.0277  | 9.9797   | -2.41   | 0.030602 | 0.15151 | -3.7783 | 4047     |
| TCTN2       | -0.76999 | 0.76999 | 1.9028   | -2.4096 | 0.030624 | 0.15158 | -3.779  | 79867    |
| LOC440346   | -0.22127 | 0.22127 | 0.25657  | -2.4093 | 0.030643 | 0.15159 | -3.7795 | 440346   |
| SLC4A11     | -1.0017  | 1.0017  | 2.0132   | -2.4093 | 0.030645 | 0.15159 | -3.7796 | 83959    |
| PCCA        | -0.87016 | 0.87016 | 2.4044   | -2.4091 | 0.030657 | 0.15161 | -3.7799 | 5095     |
| ZMAT3       | 1.2971   | 1.2971  | 3.0056   | 2.4089  | 0.030669 | 0.15162 | -3.7803 | 64393    |
| CDC42BPG    | -5.6556  | 5.6556  | 7.7198   | -2.4085 | 0.030689 | 0.15168 | -3.7809 | 55561    |
| SLC27A6     | -0.43237 | 0.43237 | 0.24836  | -2.4082 | 0.030708 | 0.15172 | -3.7814 | 28965    |
| KRT72       | -0.60982 | 0.60982 | 0.43674  | -2.408  | 0.030721 | 0.15173 | -3.7818 | 140807   |
| SULT1E1     | -0.78099 | 0.78099 | 0.46791  | -2.4079 | 0.030726 | 0.15173 | -3.782  | 6783     |
| GATM        | -5.9231  | 5.9231  | 5.8552   | -2.4071 | 0.030774 | 0.15192 | -3.7834 | 2628     |
| POU2F1      | -0.58835 | 0.58835 | 1.8575   | -2.4063 | 0.03082  | 0.1521  | -3.7847 | 5451     |
| ECT2L       | -0.20972 | 0.20972 | 0.20317  | -2.4061 | 0.030833 | 0.15211 | -3.7851 | 345930   |
| EHMT2       | -0.37263 | 0.37263 | 0.61746  | -2.406  | 0.03084  | 0.15211 | -3.7853 | 10919    |

|           |          |         |          |         |          |         |         |          |
|-----------|----------|---------|----------|---------|----------|---------|---------|----------|
| CDKL1     | -0.41253 | 0.41253 | 1.1717   | -2.4053 | 0.030877 | 0.15225 | -3.7864 | 8814     |
| EIF4ENIF1 | -1.0729  | 1.0729  | 4.1752   | -2.4048 | 0.030905 | 0.15234 | -3.7872 | 56478    |
| DHRS7     | 7.4472   | 7.4472  | 11.235   | 2.4045  | 0.030924 | 0.15239 | -3.7878 | 51635    |
| OSER1-DT  | -0.4414  | 0.4414  | 0.75503  | -2.4041 | 0.03095  | 0.15244 | -3.7886 | 1.01E+08 |
| LDLRAD3   | -0.99555 | 0.99555 | 4.4925   | -2.404  | 0.030952 | 0.15244 | -3.7886 | 143458   |
| UBQLN1    | 5.19     | 5.19    | 15.051   | 2.4037  | 0.030971 | 0.15246 | -3.7892 | 29979    |
| ACTB      | 683.71   | 683.71  | 995.74   | 2.4037  | 0.030975 | 0.15246 | -3.7893 | 60       |
| NOVA1     | -0.45599 | 0.45599 | 0.36028  | -2.4027 | 0.031031 | 0.15267 | -3.7909 | 4857     |
| OSBP      | -1.9217  | 1.9217  | 8.2768   | -2.4025 | 0.031046 | 0.15267 | -3.7914 | 5007     |
| RACGAP1   | 1.6251   | 1.6251  | 3.1132   | 2.4023  | 0.031056 | 0.15267 | -3.7916 | 29127    |
| HYMAI     | -0.41412 | 0.41412 | 0.55319  | -2.4022 | 0.03106  | 0.15267 | -3.7918 | 57061    |
| CAND1     | 2.9531   | 2.9531  | 9.4533   | 2.4022  | 0.031062 | 0.15267 | -3.7918 | 55832    |
| SYNE3     | -1.4639  | 1.4639  | 2.2278   | -2.4019 | 0.031082 | 0.15272 | -3.7924 | 161176   |
| CABP4     | -0.18388 | 0.18388 | 0.1792   | -2.4016 | 0.0311   | 0.15273 | -3.7929 | 57010    |
| C10orf90  | -0.15429 | 0.15429 | 0.095762 | -2.4015 | 0.031101 | 0.15273 | -3.793  | 118611   |
| EIF1B-AS1 | -0.17494 | 0.17494 | 0.15859  | -2.4014 | 0.031111 | 0.15273 | -3.7932 | 440952   |
| KCNV2     | -0.22605 | 0.22605 | 0.29117  | -2.4011 | 0.031129 | 0.15276 | -3.7938 | 169522   |
| RABL2B    | -0.87469 | 0.87469 | 2.2305   | -2.4008 | 0.031144 | 0.15276 | -3.7942 | 11158    |
| GABARAPL2 | 21.197   | 21.197  | 30.265   | 2.4008  | 0.031144 | 0.15276 | -3.7942 | 11345    |
| LINC01238 | -0.28489 | 0.28489 | 0.25542  | -2.4003 | 0.031173 | 0.15283 | -3.7951 | 1.03E+08 |
| FAM86B1   | -0.4001  | 0.4001  | 0.71107  | -2.4002 | 0.031178 | 0.15283 | -3.7952 | 85002    |
| ANXA7     | 7.8009   | 7.8009  | 20.857   | 2.3999  | 0.0312   | 0.15283 | -3.7959 | 310      |
| WDR81     | -2.0543  | 2.0543  | 3.9974   | -2.3998 | 0.031202 | 0.15283 | -3.7959 | 124997   |
| RBMS1     | 3.5118   | 3.5118  | 9.9965   | 2.3998  | 0.031203 | 0.15283 | -3.7959 | 5937     |
| KLHDC1    | -0.41936 | 0.41936 | 0.70637  | -2.3992 | 0.031241 | 0.15295 | -3.797  | 122773   |
| VRK2      | 1.8582   | 1.8582  | 3.4069   | 2.3987  | 0.031272 | 0.15295 | -3.7979 | 7444     |

|              |          |         |         |         |          |         |         |          |
|--------------|----------|---------|---------|---------|----------|---------|---------|----------|
| MTOR-AS1     | -0.20634 | 0.20634 | 0.19817 | -2.3985 | 0.031279 | 0.15295 | -3.7981 | 1.01E+08 |
| FAM118B      | 0.73074  | 0.73074 | 2.0256  | 2.3983  | 0.031293 | 0.15295 | -3.7985 | 79607    |
| PRR36        | -0.19256 | 0.19256 | 0.20792 | -2.3981 | 0.031307 | 0.15295 | -3.799  | 80164    |
| PLAC4        | -0.68632 | 0.68632 | 1.1152  | -2.398  | 0.031312 | 0.15295 | -3.7991 | 191585   |
| NPIPB11      | -0.82913 | 0.82913 | 1.2635  | -2.3979 | 0.031319 | 0.15295 | -3.7993 | 728888   |
| TBC1D22A     | -1.0831  | 1.0831  | 4.295   | -2.3978 | 0.031325 | 0.15295 | -3.7995 | 25771    |
| ARF4-AS1     | -0.21675 | 0.21675 | 0.29948 | -2.3977 | 0.031326 | 0.15295 | -3.7995 | 1.06E+08 |
| MRPL42P5     | -0.1941  | 0.1941  | 0.17473 | -2.3977 | 0.031328 | 0.15295 | -3.7996 | 359821   |
| GARS-DT      | -0.81452 | 0.81452 | 1.4835  | -2.3977 | 0.03133  | 0.15295 | -3.7996 | 401320   |
| LOC728752    | -1.9645  | 1.9645  | 3.4719  | -2.3976 | 0.031336 | 0.15295 | -3.7998 | 728752   |
| JPH2         | -0.62822 | 0.62822 | 0.775   | -2.3972 | 0.031358 | 0.15301 | -3.8004 | 57158    |
| ATMIN        | 4.0309   | 4.0309  | 8.2662  | 2.3967  | 0.031385 | 0.15305 | -3.8012 | 23300    |
| CSNK1G3      | 1.2666   | 1.2666  | 3.3161  | 2.3965  | 0.031402 | 0.15305 | -3.8017 | 1456     |
| LOC100132781 | -0.30675 | 0.30675 | 0.28249 | -2.3964 | 0.031408 | 0.15305 | -3.8019 | 1E+08    |
| FAM218A      | -0.17759 | 0.17759 | 0.14732 | -2.3963 | 0.03141  | 0.15305 | -3.8019 | 152756   |
| EDC4         | -1.5779  | 1.5779  | 4.9118  | -2.3963 | 0.03141  | 0.15305 | -3.8019 | 23644    |
| ZNF467       | 1.4808   | 1.4808  | 2.9853  | 2.3962  | 0.03142  | 0.15305 | -3.8022 | 168544   |
| SPTBN1       | -7.1934  | 7.1934  | 18.447  | -2.396  | 0.031431 | 0.15306 | -3.8025 | 6711     |
| C1orf115     | -1.5055  | 1.5055  | 2.5716  | -2.3952 | 0.031475 | 0.15316 | -3.8038 | 79762    |
| CACNB4       | -0.5153  | 0.5153  | 0.35932 | -2.3952 | 0.031478 | 0.15316 | -3.8039 | 785      |
| GPR35        | -0.20472 | 0.20472 | 0.31656 | -2.3952 | 0.031479 | 0.15316 | -3.8039 | 2859     |
| PTPN12       | 9.5499   | 9.5499  | 14.395  | 2.3942  | 0.031538 | 0.1534  | -3.8056 | 5782     |
| MYZAP        | 5.9252   | 5.9252  | 6.4732  | 2.3934  | 0.031584 | 0.15358 | -3.8069 | 1.01E+08 |
| SDR9C7       | 16.781   | 16.781  | 21.095  | 2.3931  | 0.031606 | 0.15364 | -3.8075 | 121214   |
| HS3ST1       | 2.1315   | 2.1315  | 1.6331  | 2.3927  | 0.031626 | 0.1537  | -3.8081 | 9957     |
| SNCA         | -0.4498  | 0.4498  | 0.77031 | -2.3924 | 0.031644 | 0.15374 | -3.8086 | 6622     |

|           |          |         |          |         |          |         |         |          |
|-----------|----------|---------|----------|---------|----------|---------|---------|----------|
| SEZ6L2    | 1.246    | 1.246   | 1.6436   | 2.3917  | 0.031691 | 0.15392 | -3.81   | 26470    |
| C17orf50  | -0.31689 | 0.31689 | 0.23605  | -2.3901 | 0.031788 | 0.15435 | -3.8127 | 146853   |
| PKP4      | -1.7054  | 1.7054  | 7.0871   | -2.3886 | 0.031878 | 0.15473 | -3.8153 | 8502     |
| LINC00476 | -0.24695 | 0.24695 | 0.41811  | -2.3881 | 0.031903 | 0.15473 | -3.816  | 1E+08    |
| PCDHB11   | -0.53114 | 0.53114 | 0.6485   | -2.388  | 0.031911 | 0.15473 | -3.8162 | 56125    |
| SNX6      | 4.2139   | 4.2139  | 8.5185   | 2.3878  | 0.031924 | 0.15473 | -3.8166 | 58533    |
| OR2A7     | -1.2068  | 1.2068  | 1.1288   | -2.3878 | 0.031924 | 0.15473 | -3.8166 | 401427   |
| RSPH4A    | -0.19764 | 0.19764 | 0.22249  | -2.3877 | 0.031928 | 0.15473 | -3.8167 | 345895   |
| OR7E47P   | -0.16031 | 0.16031 | 0.095018 | -2.3877 | 0.03193  | 0.15473 | -3.8168 | 26628    |
| HSBP1L1   | 3.1444   | 3.1444  | 6.0272   | 2.3874  | 0.031948 | 0.15476 | -3.8173 | 440498   |
| TIMM23B   | -1.2808  | 1.2808  | 3.394    | -2.3873 | 0.031955 | 0.15476 | -3.8175 | 1.01E+08 |
| ORC2      | -0.92418 | 0.92418 | 2.794    | -2.3871 | 0.031967 | 0.15476 | -3.8178 | 4999     |
| ACADL     | -0.29671 | 0.29671 | 0.29159  | -2.387  | 0.031974 | 0.15476 | -3.818  | 33       |
| CYB5R2    | 3.4525   | 3.4525  | 6.2348   | 2.3868  | 0.031985 | 0.15476 | -3.8183 | 51700    |
| ZNF790    | -0.4248  | 0.4248  | 1.0941   | -2.3867 | 0.031992 | 0.15476 | -3.8185 | 388536   |
| GDF7      | -0.27363 | 0.27363 | 0.39214  | -2.3862 | 0.03202  | 0.15485 | -3.8193 | 151449   |
| OR7E37P   | -0.24193 | 0.24193 | 0.38712  | -2.386  | 0.032035 | 0.15488 | -3.8198 | 1.01E+08 |
| SIPA1L2   | 5.402    | 5.402   | 9.859    | 2.3856  | 0.032059 | 0.15495 | -3.8204 | 57568    |
| LOC649133 | -0.50872 | 0.50872 | 0.33234  | -2.3853 | 0.032075 | 0.15498 | -3.8209 | 649133   |
| ABCC2     | -0.15888 | 0.15888 | 0.26132  | -2.385  | 0.032096 | 0.155   | -3.8215 | 1244     |
| FRMD6-AS1 | -1.5352  | 1.5352  | 2.1663   | -2.385  | 0.032097 | 0.155   | -3.8215 | 145438   |
| PLXNA3    | -1.4667  | 1.4667  | 3.0014   | -2.3848 | 0.032105 | 0.155   | -3.8217 | 55558    |
| BAZ2A     | -2.9226  | 2.9226  | 10.567   | -2.3837 | 0.032174 | 0.15523 | -3.8237 | 11176    |
| ASPN      | 17.173   | 17.173  | 10.417   | 2.3836  | 0.032182 | 0.15523 | -3.8239 | 54829    |
| SNORA59A  | -0.36531 | 0.36531 | 0.57529  | -2.3831 | 0.032209 | 0.15523 | -3.8247 | 677885   |
| SNORA59B  | -0.36531 | 0.36531 | 0.57529  | -2.3831 | 0.032209 | 0.15523 | -3.8247 | 677882   |

|              |          |         |         |         |          |         |         |          |
|--------------|----------|---------|---------|---------|----------|---------|---------|----------|
| LINC02188    | -0.23609 | 0.23609 | 0.12916 | -2.383  | 0.032219 | 0.15523 | -3.8249 | 1.03E+08 |
| BEST2        | -0.27435 | 0.27435 | 0.18238 | -2.3828 | 0.032228 | 0.15523 | -3.8252 | 54831    |
| P4HA2        | 3.0999   | 3.0999  | 6.9831  | 2.3827  | 0.032238 | 0.15523 | -3.8255 | 8974     |
| NNT-AS1      | -0.28798 | 0.28798 | 0.64113 | -2.3826 | 0.032242 | 0.15523 | -3.8256 | 1.01E+08 |
| PIK3C2B      | -3.2507  | 3.2507  | 7.2903  | -2.3826 | 0.032243 | 0.15523 | -3.8256 | 5287     |
| ESRG         | 1.0611   | 1.0611  | 1.4351  | 2.3825  | 0.032249 | 0.15523 | -3.8258 | 790952   |
| SLC9A2       | -0.31076 | 0.31076 | 0.19126 | -2.3824 | 0.032257 | 0.15523 | -3.826  | 6549     |
| RAB25        | 47.204   | 47.204  | 75.169  | 2.3821  | 0.032272 | 0.15523 | -3.8264 | 57111    |
| STPG3        | -0.16234 | 0.16234 | 0.10495 | -2.3821 | 0.032274 | 0.15523 | -3.8265 | 441476   |
| ST3GAL6-AS1  | -0.22279 | 0.22279 | 0.30733 | -2.3819 | 0.032284 | 0.15523 | -3.8268 | 1.01E+08 |
| MTRF1L       | 0.95998  | 0.95998 | 3.1472  | 2.3818  | 0.032291 | 0.15523 | -3.827  | 54516    |
| GPC2         | -0.48101 | 0.48101 | 0.48735 | -2.3808 | 0.032353 | 0.15548 | -3.8287 | 221914   |
| TGFA         | 9.6056   | 9.6056  | 8.0457  | 2.3803  | 0.032384 | 0.15559 | -3.8295 | 7039     |
| CRABP1       | -1.1883  | 1.1883  | 1.0304  | -2.3798 | 0.032413 | 0.15566 | -3.8304 | 1381     |
| ITPR2        | -2.9986  | 2.9986  | 9.4891  | -2.3797 | 0.032417 | 0.15566 | -3.8305 | 3709     |
| LHFPL2       | 4.2182   | 4.2182  | 5.3446  | 2.3795  | 0.032432 | 0.15569 | -3.8309 | 10184    |
| AEN          | 2.373    | 2.373   | 4.1813  | 2.3791  | 0.032457 | 0.15576 | -3.8316 | 64782    |
| PYROXD2      | -0.59802 | 0.59802 | 0.65053 | -2.3788 | 0.032476 | 0.15581 | -3.8321 | 84795    |
| TCAF1        | -1.9511  | 1.9511  | 4.3196  | -2.3783 | 0.032504 | 0.1559  | -3.8329 | 9747     |
| LCMT1        | 7.1285   | 7.1285  | 11.931  | 2.3781  | 0.032518 | 0.15592 | -3.8333 | 51451    |
| ZC3H15       | 3.8526   | 3.8526  | 10.069  | 2.3779  | 0.032528 | 0.15592 | -3.8336 | 55854    |
| MAFB         | 43.044   | 43.044  | 65.544  | 2.3774  | 0.032564 | 0.15599 | -3.8346 | 9935     |
| NUBPL        | -0.49314 | 0.49314 | 1.1617  | -2.3773 | 0.032566 | 0.15599 | -3.8346 | 80224    |
| LOC100240734 | -0.43002 | 0.43002 | 0.2929  | -2.3773 | 0.03257  | 0.15599 | -3.8347 | 1E+08    |
| GTF2A2       | 2.5864   | 2.5864  | 4.1115  | 2.3756  | 0.032671 | 0.15644 | -3.8375 | 2958     |
| FUT11        | 2.6926   | 2.6926  | 5.6775  | 2.3753  | 0.03269  | 0.15644 | -3.8381 | 170384   |

|                |          |         |          |         |          |         |         |          |
|----------------|----------|---------|----------|---------|----------|---------|---------|----------|
| WDR44          | 1.6467   | 1.6467  | 3.2796   | 2.3753  | 0.032691 | 0.15644 | -3.8381 | 54521    |
| MAPK14         | 3.9891   | 3.9891  | 11.736   | 2.3751  | 0.032705 | 0.15646 | -3.8385 | 1432     |
| SEMA7A         | 1.5458   | 1.5458  | 2.4427   | 2.3741  | 0.032764 | 0.1567  | -3.8401 | 8482     |
| TPI1           | 74.166   | 74.166  | 116.21   | 2.3739  | 0.032779 | 0.1567  | -3.8405 | 7167     |
| SNX29          | 1.7431   | 1.7431  | 5.7523   | 2.3737  | 0.032789 | 0.1567  | -3.8408 | 92017    |
| PRRT3-AS1      | -0.23781 | 0.23781 | 0.42883  | -2.3737 | 0.032791 | 0.1567  | -3.8408 | 1.01E+08 |
| TMEM256-PLSCR3 | 4.2818   | 4.2818  | 5.8124   | 2.3734  | 0.032813 | 0.15676 | -3.8414 | 1.01E+08 |
| HDGFL3         | 2.5164   | 2.5164  | 3.6964   | 2.373   | 0.032837 | 0.15678 | -3.8421 | 50810    |
| ZNF443         | -0.49747 | 0.49747 | 0.97037  | -2.3728 | 0.032845 | 0.15678 | -3.8423 | 10224    |
| TMEM211        | -0.17253 | 0.17253 | 0.092016 | -2.3728 | 0.032849 | 0.15678 | -3.8425 | 255349   |
| ID4            | -4.1052  | 4.1052  | 6.4463   | -2.3726 | 0.032862 | 0.15678 | -3.8428 | 3400     |
| CD300LG        | -0.24674 | 0.24674 | 0.23789  | -2.3724 | 0.032873 | 0.15678 | -3.8431 | 146894   |
| SEC61G         | 16.908   | 16.908  | 21.715   | 2.3724  | 0.032873 | 0.15678 | -3.8431 | 23480    |
| LOC101928068   | -0.21805 | 0.21805 | 0.20576  | -2.3722 | 0.032886 | 0.1568  | -3.8435 | 1.02E+08 |
| MIA2           | 0.49908  | 0.49908 | 1.6009   | 2.3716  | 0.032924 | 0.15693 | -3.8445 | 4253     |
| USP32          | 3.4339   | 3.4339  | 7.2001   | 2.3714  | 0.032934 | 0.15693 | -3.8448 | 84669    |
| TUT1           | -1.383   | 1.383   | 2.9024   | -2.3713 | 0.032942 | 0.15693 | -3.845  | 64852    |
| ADGRD1         | -1.1733  | 1.1733  | 1.0353   | -2.3708 | 0.03297  | 0.15701 | -3.8458 | 283383   |
| LINC00964      | -0.21556 | 0.21556 | 0.21381  | -2.3707 | 0.032977 | 0.15701 | -3.846  | 157381   |
| S100A8         | 2721.1   | 2721.1  | 2278.8   | 2.3704  | 0.033    | 0.15703 | -3.8466 | 6279     |
| PCDHGB1        | -0.16164 | 0.16164 | 0.34559  | -2.3703 | 0.033006 | 0.15703 | -3.8468 | 56104    |
| ZBTB12         | -0.21228 | 0.21228 | 0.20854  | -2.3702 | 0.03301  | 0.15703 | -3.8469 | 221527   |
| PCBP1-AS1      | -0.33531 | 0.33531 | 0.63087  | -2.3693 | 0.033064 | 0.15724 | -3.8483 | 400960   |
| PCP2           | -0.48048 | 0.48048 | 0.38913  | -2.369  | 0.033088 | 0.15731 | -3.849  | 126006   |
| UVRAG          | -0.70512 | 0.70512 | 2.5527   | -2.3685 | 0.033116 | 0.1574  | -3.8498 | 7405     |
| KTN1           | 14.041   | 14.041  | 23.269   | 2.3678  | 0.033163 | 0.15754 | -3.851  | 3895     |

|              |          |         |         |         |          |         |         |        |
|--------------|----------|---------|---------|---------|----------|---------|---------|--------|
| EIF1         | 70.309   | 70.309  | 161.39  | 2.3676  | 0.033172 | 0.15754 | -3.8513 | 10209  |
| NTF4         | -1.2798  | 1.2798  | 1.6168  | -2.3676 | 0.033174 | 0.15754 | -3.8513 | 4909   |
| LOC100288203 | -0.24408 | 0.24408 | 0.4746  | -2.3675 | 0.033182 | 0.15754 | -3.8516 | 1E+08  |
| TLL4         | -0.61945 | 0.61945 | 2.6814  | -2.3671 | 0.033203 | 0.15759 | -3.8521 | 9654   |
| TMEM65       | 0.68099  | 0.68099 | 2.9741  | 2.3665  | 0.033242 | 0.15773 | -3.8532 | 157378 |
| FRS3         | -0.458   | 0.458   | 0.72701 | -2.3664 | 0.033251 | 0.15773 | -3.8534 | 10817  |
| MEF2B        | -0.67594 | 0.67594 | 1.1184  | -2.3662 | 0.033263 | 0.15773 | -3.8538 | 1E+08  |
| MAST4        | 5.2114   | 5.2114  | 12.658  | 2.3661  | 0.033269 | 0.15773 | -3.8539 | 375449 |
| ASL          | 2.9794   | 2.9794  | 4.8194  | 2.3649  | 0.033342 | 0.158   | -3.8559 | 435    |
| AMIGO1       | -0.33011 | 0.33011 | 0.41464 | -2.3649 | 0.033345 | 0.158   | -3.856  | 57463  |
| ATP6V0E1     | 24.976   | 24.976  | 38.426  | 2.3644  | 0.033376 | 0.1581  | -3.8568 | 8992   |
| NHLRC3       | -1.018   | 1.018   | 2.091   | -2.3638 | 0.03341  | 0.15822 | -3.8578 | 387921 |
| DDX5         | 11.75    | 11.75   | 51.159  | 2.3633  | 0.033444 | 0.1583  | -3.8587 | 1655   |
| ST8SIA2      | 0.18209  | 0.18209 | 0.12753 | 2.3632  | 0.033453 | 0.1583  | -3.8589 | 8128   |
| FRG1JP       | -0.22361 | 0.22361 | 0.20679 | -2.3631 | 0.033456 | 0.1583  | -3.859  | 642236 |
| PLPPR2       | 4.9603   | 4.9603  | 9.3875  | 2.3624  | 0.033502 | 0.15843 | -3.8602 | 64748  |
| FAM229A      | -0.75529 | 0.75529 | 1.0786  | -2.3622 | 0.033515 | 0.15843 | -3.8606 | 1E+08  |
| RUNDC3A      | 1.444    | 1.444   | 2.2831  | 2.3621  | 0.033521 | 0.15843 | -3.8607 | 10900  |
| TLL1         | -0.31355 | 0.31355 | 0.44248 | -2.3619 | 0.033537 | 0.15843 | -3.8612 | 7092   |
| CAB39L       | -0.90801 | 0.90801 | 1.6518  | -2.3618 | 0.033543 | 0.15843 | -3.8613 | 81617  |
| SPDYE7P      | -1.3085  | 1.3085  | 1.8084  | -2.3617 | 0.033545 | 0.15843 | -3.8614 | 441251 |
| OTUD7B       | -0.90543 | 0.90543 | 2.7921  | -2.3617 | 0.033547 | 0.15843 | -3.8615 | 56957  |
| C2CD5        | -1.0076  | 1.0076  | 2.9344  | -2.361  | 0.033592 | 0.15859 | -3.8627 | 9847   |
| CYP4A11      | -0.17091 | 0.17091 | 0.11606 | -2.3606 | 0.033614 | 0.15865 | -3.8632 | 1579   |
| ACTR1A       | 9.5717   | 9.5717  | 22.844  | 2.3605  | 0.033625 | 0.15866 | -3.8635 | 10121  |
| ARPC3        | 29.047   | 29.047  | 45.533  | 2.3599  | 0.033658 | 0.15877 | -3.8644 | 10094  |



|              |          |         |         |         |          |         |         |          |
|--------------|----------|---------|---------|---------|----------|---------|---------|----------|
| TOM1L1       | 2.088    | 2.088   | 4.5899  | 2.3597  | 0.033677 | 0.15882 | -3.8649 | 10040    |
| LOC101928279 | -0.17136 | 0.17136 | 0.12376 | -2.3593 | 0.033697 | 0.15882 | -3.8655 | 1.02E+08 |
| LINC00537    | -0.7484  | 0.7484  | 0.79143 | -2.3591 | 0.033712 | 0.15882 | -3.8659 | 203274   |
| TAX1BP1      | 5.096    | 5.096   | 12.836  | 2.3591  | 0.033714 | 0.15882 | -3.8659 | 8887     |
| ZFP42        | 0.63263  | 0.63263 | 0.32705 | 2.3588  | 0.033733 | 0.15882 | -3.8664 | 132625   |
| TRAPPC9      | -0.98333 | 0.98333 | 2.9282  | -2.3587 | 0.033737 | 0.15882 | -3.8665 | 83696    |
| CDC14A       | -0.37026 | 0.37026 | 0.85884 | -2.3587 | 0.033738 | 0.15882 | -3.8666 | 8556     |
| CA9          | 0.96699  | 0.96699 | 0.97088 | 2.3586  | 0.033743 | 0.15882 | -3.8667 | 768      |
| PRPH         | -0.29361 | 0.29361 | 0.19083 | -2.3581 | 0.033777 | 0.15892 | -3.8676 | 5630     |
| BTG3         | 5.3551   | 5.3551  | 11.037  | 2.3578  | 0.033793 | 0.15892 | -3.868  | 10950    |
| ZNF782       | -0.6353  | 0.6353  | 1.3413  | -2.3578 | 0.033796 | 0.15892 | -3.8681 | 158431   |
| WDR19        | -0.66154 | 0.66154 | 1.7877  | -2.3577 | 0.033803 | 0.15892 | -3.8683 | 57728    |
| IGBP1P1      | -0.21734 | 0.21734 | 0.16392 | -2.3576 | 0.033811 | 0.15892 | -3.8685 | 280655   |
| JPT1         | 4.4363   | 4.4363  | 6.7961  | 2.3571  | 0.033838 | 0.159   | -3.8692 | 51155    |
| FBXO5        | 0.63825  | 0.63825 | 1.0112  | 2.3566  | 0.033871 | 0.15911 | -3.8701 | 26271    |
| PPARGC1A     | -0.79592 | 0.79592 | 0.79017 | -2.3565 | 0.03388  | 0.15911 | -3.8704 | 10891    |
| UBE2E1       | 6.7881   | 6.7881  | 12.519  | 2.356   | 0.033913 | 0.15922 | -3.8712 | 7324     |
| MDM2         | 1.5402   | 1.5402  | 6.4584  | 2.3558  | 0.033924 | 0.15922 | -3.8715 | 4193     |
| GUCY1A2      | 1.0502   | 1.0502  | 1.0213  | 2.3557  | 0.033932 | 0.15922 | -3.8717 | 2977     |
| ZFYVE27      | -1.3299  | 1.3299  | 3.6305  | -2.3546 | 0.033999 | 0.15949 | -3.8735 | 118813   |
| SUOX         | -0.79595 | 0.79595 | 1.9034  | -2.3543 | 0.034023 | 0.15956 | -3.8742 | 6821     |
| ASTN2        | -0.34426 | 0.34426 | 0.59932 | -2.354  | 0.034042 | 0.1596  | -3.8747 | 23245    |
| RB1CC1       | 2.5631   | 2.5631  | 6.5478  | 2.3536  | 0.034064 | 0.1596  | -3.8753 | 9821     |
| S100A9       | 4105.2   | 4105.2  | 3872.1  | 2.3536  | 0.034067 | 0.1596  | -3.8753 | 6280     |
| GRHL3        | 6.7855   | 6.7855  | 13.581  | 2.3534  | 0.034078 | 0.1596  | -3.8756 | 57822    |
| ANKFY1       | -1.5912  | 1.5912  | 6.1174  | -2.3534 | 0.034078 | 0.1596  | -3.8756 | 51479    |

|              |          |         |         |         |          |         |         |          |
|--------------|----------|---------|---------|---------|----------|---------|---------|----------|
| DISP1        | -0.31105 | 0.31105 | 0.55717 | -2.353  | 0.034104 | 0.15967 | -3.8763 | 84976    |
| ZNF682       | -0.40759 | 0.40759 | 0.58942 | -2.3528 | 0.034116 | 0.15968 | -3.8766 | 91120    |
| ZFP28        | -0.24711 | 0.24711 | 0.5962  | -2.3526 | 0.034128 | 0.1597  | -3.877  | 140612   |
| SVIL         | -4.2776  | 4.2776  | 10.938  | -2.3525 | 0.034139 | 0.1597  | -3.8773 | 6840     |
| LINC01160    | -0.23392 | 0.23392 | 0.24582 | -2.3521 | 0.034166 | 0.15978 | -3.8779 | 1E+08    |
| ITGA1        | 3.2199   | 3.2199  | 3.8953  | 2.3517  | 0.034186 | 0.15978 | -3.8785 | 3672     |
| RAD54L2      | -0.9688  | 0.9688  | 3.2041  | -2.3515 | 0.034199 | 0.15978 | -3.8788 | 23132    |
| CWC25        | -0.79102 | 0.79102 | 3.9757  | -2.3515 | 0.034204 | 0.15978 | -3.8789 | 54883    |
| SLF2         | -0.94117 | 0.94117 | 2.8306  | -2.3514 | 0.034206 | 0.15978 | -3.879  | 55719    |
| LOC100996664 | -0.16563 | 0.16563 | 0.12523 | -2.3513 | 0.034213 | 0.15978 | -3.8792 | 1.01E+08 |
| LINC01719    | -0.19884 | 0.19884 | 0.17206 | -2.351  | 0.034236 | 0.15985 | -3.8798 | 1.02E+08 |
| GRIK2        | -0.15149 | 0.15149 | 0.12388 | -2.3504 | 0.034272 | 0.15993 | -3.8807 | 2898     |
| MON2         | -1.0286  | 1.0286  | 4.742   | -2.3504 | 0.034273 | 0.15993 | -3.8808 | 23041    |
| P3H4         | 1.6046   | 1.6046  | 3.0457  | 2.3497  | 0.034319 | 0.1601  | -3.882  | 10609    |
| RNF31        | -2.7141  | 2.7141  | 5.9611  | -2.3496 | 0.034327 | 0.1601  | -3.8822 | 55072    |
| SEPSECS      | -0.44575 | 0.44575 | 1.0163  | -2.3488 | 0.034376 | 0.16028 | -3.8835 | 51091    |
| NFRKB        | -1.1244  | 1.1244  | 3.8501  | -2.3486 | 0.034387 | 0.16029 | -3.8838 | 4798     |
| MPHOSPH8     | -1.2216  | 1.2216  | 4.2444  | -2.3485 | 0.034397 | 0.16029 | -3.884  | 54737    |
| LMBR1        | 1.1848   | 1.1848  | 4.0433  | 2.3482  | 0.034416 | 0.16033 | -3.8845 | 64327    |
| LOC105374297 | -0.33215 | 0.33215 | 0.39058 | -2.3479 | 0.034433 | 0.16034 | -3.885  | 1.05E+08 |
| SFSWAP       | -1.6861  | 1.6861  | 7.2156  | -2.3479 | 0.034436 | 0.16034 | -3.885  | 6433     |
| PIWIL2       | -0.16795 | 0.16795 | 0.1412  | -2.3473 | 0.034473 | 0.16046 | -3.886  | 55124    |
| TMED2        | 17.936   | 17.936  | 38.402  | 2.3464  | 0.034531 | 0.16069 | -3.8876 | 10959    |
| LINC01814    | -3.1955  | 3.1955  | 5.1034  | -2.3459 | 0.034564 | 0.1608  | -3.8884 | 1.02E+08 |
| C16orf58     | -3.7436  | 3.7436  | 8.2569  | -2.3454 | 0.034597 | 0.1609  | -3.8893 | 64755    |
| CKAP4        | 13.566   | 13.566  | 26.103  | 2.3453  | 0.034604 | 0.1609  | -3.8894 | 10970    |

|           |          |         |         |         |          |         |         |          |
|-----------|----------|---------|---------|---------|----------|---------|---------|----------|
| FBXO45    | 8.7392   | 8.7392  | 8.4257  | 2.345   | 0.034625 | 0.16095 | -3.89   | 200933   |
| SNRNP200  | -5.9341  | 5.9341  | 16.506  | -2.3445 | 0.034656 | 0.16101 | -3.8908 | 23020    |
| PVR       | 2.4743   | 2.4743  | 3.3093  | 2.3442  | 0.034675 | 0.16101 | -3.8913 | 5817     |
| TSPAN7    | -3.3677  | 3.3677  | 3.8761  | -2.3442 | 0.034678 | 0.16101 | -3.8914 | 7102     |
| RAC1      | 22.948   | 22.948  | 55.03   | 2.3441  | 0.034684 | 0.16101 | -3.8915 | 5879     |
| SOWAHB    | 0.66042  | 0.66042 | 0.66064 | 2.344   | 0.034688 | 0.16101 | -3.8916 | 345079   |
| THSD1     | 0.77568  | 0.77568 | 2.6918  | 2.3439  | 0.034695 | 0.16101 | -3.8918 | 55901    |
| FBXO32    | -2.9398  | 2.9398  | 2.8975  | -2.343  | 0.034755 | 0.1612  | -3.8934 | 114907   |
| RBSN      | -0.70173 | 0.70173 | 3.6106  | -2.3429 | 0.034764 | 0.1612  | -3.8936 | 64145    |
| ZNF766    | -0.82842 | 0.82842 | 2.0412  | -2.3428 | 0.034769 | 0.1612  | -3.8937 | 90321    |
| EEF1AKMT3 | -0.67414 | 0.67414 | 1.6247  | -2.3426 | 0.034781 | 0.1612  | -3.8941 | 25895    |
| ZNF107    | -0.83499 | 0.83499 | 1.3307  | -2.3425 | 0.034787 | 0.1612  | -3.8942 | 51427    |
| TIMM17A   | 4.6373   | 4.6373  | 7.1261  | 2.3423  | 0.034805 | 0.1612  | -3.8947 | 10440    |
| CTNS      | 1.2408   | 1.2408  | 3.4487  | 2.3422  | 0.034808 | 0.1612  | -3.8948 | 1497     |
| C18orf12  | -0.20612 | 0.20612 | 0.21741 | -2.3422 | 0.034811 | 0.1612  | -3.8948 | 84322    |
| FAM201A   | -0.16434 | 0.16434 | 0.11497 | -2.3413 | 0.034867 | 0.1614  | -3.8963 | 158228   |
| FAM90A1   | -0.17842 | 0.17842 | 0.15789 | -2.3412 | 0.034874 | 0.1614  | -3.8965 | 55138    |
| TJP2      | 6.9297   | 6.9297  | 12.317  | 2.3409  | 0.034895 | 0.16145 | -3.897  | 9414     |
| UBE2L3    | 5.0803   | 5.0803  | 10.612  | 2.3406  | 0.034916 | 0.16146 | -3.8975 | 7332     |
| KIF13B    | 5.9249   | 5.9249  | 10.81   | 2.3406  | 0.034916 | 0.16146 | -3.8975 | 23303    |
| ZNF559    | -0.63508 | 0.63508 | 1.2244  | -2.3397 | 0.034972 | 0.16168 | -3.899  | 84527    |
| ATP6V0B   | 8.5485   | 8.5485  | 14.572  | 2.3394  | 0.034991 | 0.16172 | -3.8995 | 533      |
| PCF11-AS1 | -0.32931 | 0.32931 | 0.4226  | -2.3393 | 0.035002 | 0.16172 | -3.8998 | 1.07E+08 |
| LNPK      | 1.2192   | 1.2192  | 3.6926  | 2.3375  | 0.035117 | 0.16221 | -3.9027 | 80856    |
| TMEM87A   | 2.1296   | 2.1296  | 7.5713  | 2.3369  | 0.035163 | 0.16238 | -3.9039 | 25963    |
| CLEC2A    | -4.7564  | 4.7564  | 2.661   | -2.3364 | 0.035195 | 0.16248 | -3.9047 | 387836   |

|                     |          |         |         |         |          |         |         |          |
|---------------------|----------|---------|---------|---------|----------|---------|---------|----------|
| NBR1                | -3.1426  | 3.1426  | 9.8902  | -2.3362 | 0.03521  | 0.16251 | -3.9051 | 4077     |
| TMEM18              | -0.37528 | 0.37528 | 1.4651  | -2.3359 | 0.03523  | 0.16255 | -3.9056 | 129787   |
| ZNF687              | -1.0894  | 1.0894  | 3.477   | -2.3357 | 0.035238 | 0.16255 | -3.9058 | 57592    |
| TXNDC5              | 18.905   | 18.905  | 25.217  | 2.3354  | 0.035259 | 0.16256 | -3.9064 | 81567    |
| PLEKHM1             | 1.956    | 1.956   | 4.8734  | 2.3354  | 0.035261 | 0.16256 | -3.9064 | 9842     |
| TMF1                | 1.4205   | 1.4205  | 4.2548  | 2.3352  | 0.035272 | 0.16257 | -3.9067 | 7110     |
| KDEL2               | 12.637   | 12.637  | 22.251  | 2.3347  | 0.035307 | 0.16266 | -3.9076 | 11014    |
| MAPK4               | -0.28839 | 0.28839 | 0.16316 | -2.3346 | 0.03531  | 0.16266 | -3.9077 | 5596     |
| SAMD9               | 8.4284   | 8.4284  | 6.0161  | 2.3344  | 0.035329 | 0.16268 | -3.9082 | 54809    |
| FOXQ1               | -1.5629  | 1.5629  | 2.6642  | -2.3343 | 0.035335 | 0.16268 | -3.9083 | 94234    |
| RPAP1               | -0.89192 | 0.89192 | 2.4186  | -2.3329 | 0.035429 | 0.16302 | -3.9107 | 26015    |
| TBC1D7-LOC100130357 | -0.29812 | 0.29812 | 0.32242 | -2.3329 | 0.035429 | 0.16302 | -3.9107 | 1.07E+08 |
| GRPEL1              | 3.034    | 3.034   | 5.35    | 2.3327  | 0.035438 | 0.16302 | -3.9109 | 80273    |
| KCTD9               | 4.1249   | 4.1249  | 7.1226  | 2.3326  | 0.035449 | 0.16303 | -3.9112 | 54793    |
| MMS19               | -1.5047  | 1.5047  | 6.3583  | -2.3324 | 0.035462 | 0.16305 | -3.9115 | 64210    |
| TNFRSF14-AS1        | -0.2572  | 0.2572  | 0.32605 | -2.3314 | 0.035529 | 0.16331 | -3.9132 | 115110   |
| OGFRL1              | -2.0338  | 2.0338  | 4.0163  | -2.3311 | 0.03555  | 0.16334 | -3.9138 | 79627    |
| LINC00900           | -0.36564 | 0.36564 | 0.63661 | -2.331  | 0.035556 | 0.16334 | -3.9139 | 283143   |
| LINC00472           | -0.339   | 0.339   | 0.43387 | -2.3304 | 0.035594 | 0.16347 | -3.9149 | 79940    |
| PIK3R6              | -0.30002 | 0.30002 | 0.37733 | -2.3302 | 0.035606 | 0.16348 | -3.9152 | 146850   |
| NICN1               | -1.1024  | 1.1024  | 2.306   | -2.3301 | 0.035615 | 0.16348 | -3.9154 | 84276    |
| LOC105374344        | -0.22562 | 0.22562 | 0.22816 | -2.3294 | 0.035665 | 0.16367 | -3.9167 | 1.05E+08 |
| ZNF160              | -0.94467 | 0.94467 | 2.6546  | -2.3286 | 0.035715 | 0.16385 | -3.9179 | 90338    |
| SMG1P7              | -3.2607  | 3.2607  | 5.4937  | -2.3283 | 0.035736 | 0.16391 | -3.9185 | 1.01E+08 |
| ZNF286B             | -0.16549 | 0.16549 | 0.25213 | -2.3279 | 0.035767 | 0.16397 | -3.9193 | 729288   |
| LOC103908604        | -0.21232 | 0.21232 | 0.12989 | -2.3278 | 0.03577  | 0.16397 | -3.9193 | 1.04E+08 |

|           |          |         |         |         |          |         |         |          |
|-----------|----------|---------|---------|---------|----------|---------|---------|----------|
| DLK2      | -1.0571  | 1.0571  | 1.5833  | -2.3276 | 0.035785 | 0.16397 | -3.9197 | 65989    |
| TJP1      | 5.7169   | 5.7169  | 14.755  | 2.3275  | 0.03579  | 0.16397 | -3.9198 | 7082     |
| IL24      | 7.8287   | 7.8287  | 5.2354  | 2.3266  | 0.035854 | 0.16422 | -3.9215 | 11009    |
| TMEM167A  | 2.2152   | 2.2152  | 6.4759  | 2.3264  | 0.035868 | 0.16423 | -3.9218 | 153339   |
| GPR15     | -0.24058 | 0.24058 | 0.20981 | -2.3262 | 0.035879 | 0.16423 | -3.9221 | 2838     |
| WFDC2     | -1.3015  | 1.3015  | 0.93451 | -2.3261 | 0.035886 | 0.16423 | -3.9222 | 10406    |
| YRDC      | 2.3383   | 2.3383  | 4.3191  | 2.324   | 0.036029 | 0.16483 | -3.9258 | 79693    |
| PYGL      | 16.721   | 16.721  | 18.852  | 2.3239  | 0.036036 | 0.16483 | -3.926  | 5836     |
| MISP      | 0.87771  | 0.87771 | 0.52378 | 2.3234  | 0.036068 | 0.16488 | -3.9268 | 126353   |
| LINC00691 | -0.17994 | 0.17994 | 0.14868 | -2.3232 | 0.036081 | 0.16488 | -3.9271 | 152024   |
| BMS1P1    | -1.0676  | 1.0676  | 1.9763  | -2.3232 | 0.036085 | 0.16488 | -3.9272 | 399761   |
| ZFY       | 0.76342  | 0.76342 | 1.8913  | 2.3232  | 0.036086 | 0.16488 | -3.9272 | 7544     |
| RNH1      | 30.382   | 30.382  | 56.749  | 2.3228  | 0.036109 | 0.16494 | -3.9278 | 6050     |
| LINC01023 | -0.42197 | 0.42197 | 0.67078 | -2.3224 | 0.036138 | 0.16501 | -3.9286 | 1.01E+08 |
| DNAJB7    | -0.20825 | 0.20825 | 0.21616 | -2.3223 | 0.036144 | 0.16501 | -3.9287 | 150353   |
| SLC25A12  | -1.3736  | 1.3736  | 3.2316  | -2.3219 | 0.036171 | 0.16505 | -3.9294 | 8604     |
| DLGAP3    | 0.6125   | 0.6125  | 0.41108 | 2.3219  | 0.036172 | 0.16505 | -3.9294 | 58512    |
| GAS8-AS1  | -0.43207 | 0.43207 | 0.51746 | -2.3217 | 0.036188 | 0.16508 | -3.9298 | 750      |
| ADAM22    | -0.17187 | 0.17187 | 0.1736  | -2.3213 | 0.036214 | 0.16508 | -3.9304 | 53616    |
| APOE      | -11.896  | 11.896  | 16.279  | -2.3213 | 0.036215 | 0.16508 | -3.9305 | 348      |
| CP        | -1.8352  | 1.8352  | 1.1074  | -2.3212 | 0.036217 | 0.16508 | -3.9305 | 1356     |
| PFN2      | 5.1504   | 5.1504  | 6.5849  | 2.321   | 0.036236 | 0.16512 | -3.931  | 5217     |
| DDX6      | 5.8626   | 5.8626  | 18.533  | 2.3208  | 0.03625  | 0.16514 | -3.9313 | 1656     |
| LYPD6B    | -1.9742  | 1.9742  | 2.6067  | -2.3206 | 0.036264 | 0.16516 | -3.9317 | 130576   |
| TMEM107   | 1.3209   | 1.3209  | 2.3559  | 2.3195  | 0.036338 | 0.16544 | -3.9335 | 84314    |
| PIM1      | 31.452   | 31.452  | 40.799  | 2.3194  | 0.036345 | 0.16544 | -3.9337 | 5292     |

|              |          |         |         |         |          |         |         |          |
|--------------|----------|---------|---------|---------|----------|---------|---------|----------|
| CORIN        | -0.67704 | 0.67704 | 0.64386 | -2.3191 | 0.036366 | 0.16549 | -3.9342 | 10699    |
| RNF213       | -3.7343  | 3.7343  | 7.8367  | -2.3187 | 0.036389 | 0.16554 | -3.9348 | 57674    |
| LOC286437    | -0.19086 | 0.19086 | 0.78948 | -2.3185 | 0.036403 | 0.16554 | -3.9351 | 286437   |
| PCP4L1       | -1.8424  | 1.8424  | 2.1346  | -2.3185 | 0.036406 | 0.16554 | -3.9352 | 654790   |
| TMEM163      | 0.26039  | 0.26039 | 0.22451 | 2.3183  | 0.036415 | 0.16554 | -3.9354 | 81615    |
| KLK12        | 11.602   | 11.602  | 6.2723  | 2.3175  | 0.036475 | 0.16572 | -3.9369 | 43849    |
| ABCA2        | -1.3182  | 1.3182  | 2.5816  | -2.3174 | 0.036482 | 0.16572 | -3.9371 | 20       |
| CADM3        | -2.5614  | 2.5614  | 2.3593  | -2.3173 | 0.036485 | 0.16572 | -3.9372 | 57863    |
| RASL11B      | -0.30765 | 0.30765 | 0.56537 | -2.3171 | 0.036503 | 0.16575 | -3.9376 | 65997    |
| CLUAP1       | -0.54861 | 0.54861 | 1.1802  | -2.3168 | 0.036522 | 0.1658  | -3.9381 | 23059    |
| MYH7B        | -0.20948 | 0.20948 | 0.20095 | -2.3163 | 0.036556 | 0.16591 | -3.9389 | 57644    |
| PLPPR4       | 1.0598   | 1.0598  | 1.2116  | 2.3161  | 0.036569 | 0.16592 | -3.9392 | 9890     |
| LOC101929767 | -0.37369 | 0.37369 | 0.76859 | -2.3158 | 0.036589 | 0.16596 | -3.9397 | 1.02E+08 |
| LSAMP        | -0.23912 | 0.23912 | 0.40038 | -2.3157 | 0.036598 | 0.16596 | -3.9399 | 4045     |
| SCO2         | 2.5859   | 2.5859  | 3.7612  | 2.3155  | 0.036609 | 0.16597 | -3.9402 | 9997     |
| SORT1        | 10.987   | 10.987  | 14.677  | 2.3151  | 0.036642 | 0.16603 | -3.941  | 6272     |
| MTFR1        | 0.84608  | 0.84608 | 2.8638  | 2.315   | 0.036646 | 0.16603 | -3.9411 | 9650     |
| CARD9        | -0.32848 | 0.32848 | 0.51491 | -2.3149 | 0.036652 | 0.16603 | -3.9413 | 64170    |
| AMD1         | 8.4594   | 8.4594  | 16.529  | 2.3146  | 0.036674 | 0.16609 | -3.9418 | 262      |
| CHMP5        | 6.1119   | 6.1119  | 9.7236  | 2.3142  | 0.036701 | 0.16616 | -3.9425 | 51510    |
| DCUN1D2      | -0.60702 | 0.60702 | 1.7752  | -2.314  | 0.036718 | 0.16619 | -3.9429 | 55208    |
| NAPB         | -0.33661 | 0.33661 | 1.3424  | -2.3135 | 0.036749 | 0.16629 | -3.9436 | 63908    |
| CARHSP1      | 10.555   | 10.555  | 12.833  | 2.3129  | 0.036792 | 0.16643 | -3.9447 | 23589    |
| NDUFAF7      | -0.41875 | 0.41875 | 0.84142 | -2.3128 | 0.036799 | 0.16643 | -3.9449 | 55471    |
| AP4B1        | -0.4629  | 0.4629  | 1.5528  | -2.3123 | 0.036837 | 0.16656 | -3.9458 | 10717    |
| ANXA1        | 1231.6   | 1231.6  | 677.94  | 2.3121  | 0.036849 | 0.16656 | -3.9461 | 301      |

|              |          |         |         |         |          |         |         |          |
|--------------|----------|---------|---------|---------|----------|---------|---------|----------|
| PGM5P2       | -0.74133 | 0.74133 | 1.2738  | -2.3116 | 0.036885 | 0.16666 | -3.947  | 595135   |
| CCZ1         | 3.6942   | 3.6942  | 9.8279  | 2.3115  | 0.036893 | 0.16666 | -3.9472 | 51622    |
| LONRF1       | -5.5864  | 5.5864  | 6.5841  | -2.3112 | 0.036908 | 0.16666 | -3.9475 | 91694    |
| RORA-AS1     | -1.7702  | 1.7702  | 1.9154  | -2.3111 | 0.036916 | 0.16666 | -3.9477 | 1.02E+08 |
| CDH19        | -0.22466 | 0.22466 | 0.14532 | -2.3109 | 0.036934 | 0.16666 | -3.9482 | 28513    |
| BEX5         | -0.21387 | 0.21387 | 0.21254 | -2.3108 | 0.036937 | 0.16666 | -3.9482 | 340542   |
| TRPM4        | -4.5404  | 4.5404  | 8.2833  | -2.3108 | 0.036939 | 0.16666 | -3.9483 | 54795    |
| CPAMD8       | -0.1859  | 0.1859  | 0.24807 | -2.3103 | 0.036974 | 0.16677 | -3.9491 | 27151    |
| MYO5B        | 4.0459   | 4.0459  | 6.8685  | 2.3098  | 0.037007 | 0.16688 | -3.9499 | 4645     |
| HPSE         | 3.9166   | 3.9166  | 3.5743  | 2.3094  | 0.037035 | 0.16693 | -3.9506 | 10855    |
| SCN9A        | -0.18199 | 0.18199 | 0.20891 | -2.3094 | 0.037038 | 0.16693 | -3.9507 | 6335     |
| PRR4         | -6.1458  | 6.1458  | 3.3412  | -2.3091 | 0.037057 | 0.16694 | -3.9512 | 11272    |
| CROCCP2      | -3.2904  | 3.2904  | 3.4416  | -2.309  | 0.037062 | 0.16694 | -3.9513 | 84809    |
| EML5         | 0.28943  | 0.28943 | 0.52458 | 2.3086  | 0.037089 | 0.16696 | -3.9519 | 161436   |
| RABGGTA      | 3.5891   | 3.5891  | 7.2881  | 2.3083  | 0.037115 | 0.16696 | -3.9526 | 5875     |
| LOC100270746 | -0.25176 | 0.25176 | 0.24716 | -2.3082 | 0.037119 | 0.16696 | -3.9527 | 1E+08    |
| LVRN         | -0.34419 | 0.34419 | 0.26439 | -2.3081 | 0.037128 | 0.16696 | -3.9529 | 206338   |
| NPPA         | -0.15527 | 0.15527 | 0.16612 | -2.308  | 0.037131 | 0.16696 | -3.953  | 4878     |
| SNAI1        | 1.7733   | 1.7733  | 1.7443  | 2.3078  | 0.037148 | 0.16696 | -3.9534 | 6615     |
| XGY2         | -0.67635 | 0.67635 | 0.91875 | -2.3077 | 0.037155 | 0.16696 | -3.9535 | 1E+08    |
| FAM157B      | -0.7505  | 0.7505  | 1.6188  | -2.3076 | 0.03716  | 0.16696 | -3.9537 | 1E+08    |
| ENPP5        | -0.23127 | 0.23127 | 0.19634 | -2.3075 | 0.037168 | 0.16696 | -3.9539 | 59084    |
| SCARA3       | -2.196   | 2.196   | 3.0277  | -2.3075 | 0.037171 | 0.16696 | -3.9539 | 51435    |
| PITRM1-AS1   | -0.37056 | 0.37056 | 0.75061 | -2.3073 | 0.03718  | 0.16696 | -3.9541 | 1.01E+08 |
| USP6NL       | 1.9904   | 1.9904  | 3.9449  | 2.3073  | 0.037184 | 0.16696 | -3.9542 | 9712     |
| TEDDM1       | -0.17155 | 0.17155 | 0.14945 | -2.306  | 0.03727  | 0.16731 | -3.9563 | 127670   |

|              |          |         |         |         |          |         |         |          |
|--------------|----------|---------|---------|---------|----------|---------|---------|----------|
| CORO1C       | 13.086   | 13.086  | 24.268  | 2.3058  | 0.037289 | 0.16732 | -3.9568 | 23603    |
| ZNF691       | -0.48652 | 0.48652 | 0.99378 | -2.3056 | 0.0373   | 0.16732 | -3.957  | 51058    |
| VSNL1        | 6.2408   | 6.2408  | 8.5419  | 2.3056  | 0.037305 | 0.16732 | -3.9572 | 7447     |
| CAND1.11     | 0.3363   | 0.3363  | 0.36312 | 2.3053  | 0.037321 | 0.16732 | -3.9576 | 1E+08    |
| LOC100507599 | -0.19758 | 0.19758 | 0.33801 | -2.3053 | 0.037322 | 0.16732 | -3.9576 | 1.01E+08 |
| MMACHC       | -0.49684 | 0.49684 | 1.2179  | -2.3052 | 0.037333 | 0.16732 | -3.9578 | 25974    |
| ABCD4        | -1.1121  | 1.1121  | 2.9469  | -2.3045 | 0.037382 | 0.16744 | -3.959  | 5826     |
| EFNB3        | -0.50781 | 0.50781 | 0.96659 | -2.3044 | 0.037387 | 0.16744 | -3.9591 | 1949     |
| NPTN-IT1     | -1.2021  | 1.2021  | 2.2113  | -2.3043 | 0.03739  | 0.16744 | -3.9592 | 1.01E+08 |
| TM4SF18      | 0.90595  | 0.90595 | 1.062   | 2.3038  | 0.037431 | 0.16755 | -3.9602 | 116441   |
| TRPS1        | 4.3592   | 4.3592  | 12.487  | 2.3037  | 0.037434 | 0.16755 | -3.9603 | 7227     |
| FH           | 3.7971   | 3.7971  | 10.181  | 2.3028  | 0.037497 | 0.16779 | -3.9618 | 2271     |
| C2CD4D       | -0.40572 | 0.40572 | 0.32982 | -2.3027 | 0.03751  | 0.1678  | -3.9621 | 1E+08    |
| FOXP1-AS1    | -0.2763  | 0.2763  | 0.25748 | -2.3025 | 0.037523 | 0.16781 | -3.9624 | 1.05E+08 |
| PHC3         | -1.4414  | 1.4414  | 3.6603  | -2.3022 | 0.037545 | 0.16787 | -3.9629 | 80012    |
| ATP6V0D1     | 12.366   | 12.366  | 29.196  | 2.3018  | 0.037572 | 0.16794 | -3.9636 | 9114     |
| DUSP10       | 0.62357  | 0.62357 | 1.6249  | 2.3015  | 0.037589 | 0.16797 | -3.964  | 11221    |
| FOLR3        | 0.18153  | 0.18153 | 0.15685 | 2.3014  | 0.037598 | 0.16797 | -3.9642 | 2352     |
| CALM1        | 24.034   | 24.034  | 38.461  | 2.3008  | 0.037641 | 0.16812 | -3.9652 | 801      |
| PLEKHH2      | -0.95633 | 0.95633 | 1.6643  | -2.3006 | 0.037658 | 0.16815 | -3.9656 | 130271   |
| P2RX1        | -1.1889  | 1.1889  | 0.97502 | -2.3    | 0.037696 | 0.16828 | -3.9665 | 5023     |
| LOC102723769 | -0.8704  | 0.8704  | 1.2565  | -2.2996 | 0.037726 | 0.16833 | -3.9673 | 1.03E+08 |
| TNK1         | -1.0419  | 1.0419  | 1.9771  | -2.2996 | 0.037728 | 0.16833 | -3.9673 | 8711     |
| WWP2         | -1.3882  | 1.3882  | 4.3608  | -2.2991 | 0.037759 | 0.16838 | -3.968  | 11060    |
| CNIH2        | -0.2154  | 0.2154  | 0.40417 | -2.2991 | 0.03776  | 0.16838 | -3.9681 | 254263   |
| PSMC6        | 7.4122   | 7.4122  | 13.488  | 2.2984  | 0.037809 | 0.16852 | -3.9692 | 5706     |



|              |          |         |         |         |          |         |         |          |
|--------------|----------|---------|---------|---------|----------|---------|---------|----------|
| SLC38A3      | 0.35793  | 0.35793 | 0.24966 | 2.2983  | 0.037817 | 0.16852 | -3.9694 | 10991    |
| PSMA4        | 11.936   | 11.936  | 18.528  | 2.2983  | 0.037821 | 0.16852 | -3.9695 | 5685     |
| EFCAB2       | -0.23322 | 0.23322 | 0.39618 | -2.2978 | 0.037857 | 0.16862 | -3.9704 | 84288    |
| LOC101930421 | -0.61678 | 0.61678 | 0.87887 | -2.2975 | 0.037874 | 0.16862 | -3.9708 | 1.02E+08 |
| LACC1        | 0.55784  | 0.55784 | 1.1977  | 2.2975  | 0.037874 | 0.16862 | -3.9708 | 144811   |
| COX15        | -0.56547 | 0.56547 | 2.2165  | -2.2974 | 0.037885 | 0.16863 | -3.971  | 1355     |
| FAM83B       | 10.57    | 10.57   | 21.783  | 2.297   | 0.03791  | 0.16865 | -3.9716 | 222584   |
| SOX21-AS1    | -1.6344  | 1.6344  | 1.8288  | -2.2969 | 0.037919 | 0.16865 | -3.9718 | 1.01E+08 |
| FAM156A      | -0.37008 | 0.37008 | 0.58435 | -2.2969 | 0.03792  | 0.16865 | -3.9719 | 29057    |
| RASL10A      | -0.19411 | 0.19411 | 0.29982 | -2.2968 | 0.037929 | 0.16865 | -3.9721 | 10633    |
| XRCC3        | -1.8061  | 1.8061  | 3.5379  | -2.2966 | 0.037942 | 0.16866 | -3.9724 | 7517     |
| WDR6         | -3.2156  | 3.2156  | 6.4971  | -2.2964 | 0.037957 | 0.16867 | -3.9727 | 11180    |
| FOXN3        | -3.8405  | 3.8405  | 12.629  | -2.296  | 0.037984 | 0.16867 | -3.9734 | 1112     |
| SNORA77B     | -0.48269 | 0.48269 | 0.46824 | -2.2959 | 0.037992 | 0.16867 | -3.9736 | 1.1E+08  |
| MAML1        | -1.3364  | 1.3364  | 6.3615  | -2.2958 | 0.037995 | 0.16867 | -3.9736 | 9794     |
| USP16        | 2.2512   | 2.2512  | 6.2746  | 2.2958  | 0.037995 | 0.16867 | -3.9736 | 10600    |
| LGR5         | -0.28086 | 0.28086 | 0.20327 | -2.2955 | 0.038022 | 0.16872 | -3.9743 | 8549     |
| CDYL         | 1.736    | 1.736   | 6.4628  | 2.2954  | 0.038025 | 0.16872 | -3.9743 | 9425     |
| SH3BP4       | -1.6482  | 1.6482  | 4.9511  | -2.2952 | 0.038043 | 0.16875 | -3.9748 | 23677    |
| PHF1         | -1.4299  | 1.4299  | 2.6166  | -2.2949 | 0.038063 | 0.1688  | -3.9752 | 5252     |
| VSIG2        | -0.21317 | 0.21317 | 0.33774 | -2.2947 | 0.038074 | 0.1688  | -3.9755 | 23584    |
| LOC102031319 | -0.20533 | 0.20533 | 0.18382 | -2.2944 | 0.0381   | 0.16887 | -3.9761 | 1.02E+08 |
| ERCC5        | -1.729   | 1.729   | 5.5113  | -2.2941 | 0.03812  | 0.1689  | -3.9766 | 2073     |
| MGA          | -0.70525 | 0.70525 | 3.6597  | -2.294  | 0.038125 | 0.1689  | -3.9767 | 23269    |
| RAPGEF6      | -0.65322 | 0.65322 | 2.1161  | -2.2937 | 0.038149 | 0.16894 | -3.9773 | 51735    |
| RGPD5        | -0.92139 | 0.92139 | 1.8498  | -2.2935 | 0.038164 | 0.16894 | -3.9776 | 84220    |

|              |          |         |         |         |          |         |         |          |
|--------------|----------|---------|---------|---------|----------|---------|---------|----------|
| LCMT1-AS2    | -0.50134 | 0.50134 | 0.82562 | -2.2933 | 0.038176 | 0.16894 | -3.9779 | 1.01E+08 |
| VAMP7        | 1.0576   | 1.0576  | 2.5454  | 2.2933  | 0.038176 | 0.16894 | -3.9779 | 6845     |
| SH3PXD2A-AS1 | 1.6493   | 1.6493  | 3.6722  | 2.2932  | 0.038185 | 0.16894 | -3.9781 | 1.01E+08 |
| ST3GAL5-AS1  | -0.17469 | 0.17469 | 0.10901 | -2.293  | 0.038198 | 0.16895 | -3.9784 | 1.02E+08 |
| ATF7         | -1.9701  | 1.9701  | 5.9567  | -2.2926 | 0.038229 | 0.16902 | -3.9792 | 11016    |
| ZFYVE16      | 0.89639  | 0.89639 | 2.6749  | 2.2925  | 0.038233 | 0.16902 | -3.9793 | 9765     |
| ZC2HC1A      | -1.2561  | 1.2561  | 1.7943  | -2.2919 | 0.03828  | 0.16918 | -3.9804 | 51101    |
| TMEM117      | 1.3394   | 1.3394  | 4.2108  | 2.2917  | 0.038291 | 0.16919 | -3.9806 | 84216    |
| RMC1         | 1.1998   | 1.1998  | 3.3338  | 2.2912  | 0.038327 | 0.1693  | -3.9815 | 29919    |
| ZNRF3        | -0.79078 | 0.79078 | 1.8041  | -2.291  | 0.038346 | 0.16934 | -3.9819 | 84133    |
| EFHC2        | -0.30628 | 0.30628 | 0.38772 | -2.2906 | 0.038375 | 0.16942 | -3.9826 | 80258    |
| SELENOK      | 4.7714   | 4.7714  | 8.3678  | 2.2903  | 0.03839  | 0.16945 | -3.9829 | 58515    |
| SDHAP2       | -2.9567  | 2.9567  | 5.9727  | -2.2899 | 0.03842  | 0.16953 | -3.9836 | 727956   |
| CAPZA3       | -0.27265 | 0.27265 | 0.1607  | -2.2894 | 0.03846  | 0.16967 | -3.9846 | 93661    |
| AKAP6        | -0.2972  | 0.2972  | 0.47225 | -2.2887 | 0.038508 | 0.16979 | -3.9857 | 9472     |
| FAP          | 7.0199   | 7.0199  | 5.6434  | 2.2886  | 0.038517 | 0.16979 | -3.9859 | 2191     |
| MRPL47       | 5.2127   | 5.2127  | 7.0391  | 2.2885  | 0.038522 | 0.16979 | -3.986  | 57129    |
| SYAP1        | 2.1377   | 2.1377  | 5.3093  | 2.2882  | 0.038544 | 0.16979 | -3.9865 | 94056    |
| CENPN        | 0.71461  | 0.71461 | 1.0727  | 2.2882  | 0.038548 | 0.16979 | -3.9866 | 55839    |
| ABHD13       | 0.58809  | 0.58809 | 1.5114  | 2.2881  | 0.038553 | 0.16979 | -3.9867 | 84945    |
| VPS4B        | 5.7907   | 5.7907  | 12.499  | 2.288   | 0.038558 | 0.16979 | -3.9869 | 9525     |
| GUSBP2       | -0.55102 | 0.55102 | 0.98506 | -2.2877 | 0.038582 | 0.16983 | -3.9874 | 387036   |
| CDK5RAP3     | -4.5397  | 4.5397  | 8.7816  | -2.2876 | 0.038592 | 0.16983 | -3.9877 | 80279    |
| RHOA         | 44.829   | 44.829  | 102.07  | 2.2873  | 0.038612 | 0.16983 | -3.9881 | 387      |
| GTF3C4       | -0.78728 | 0.78728 | 3.6096  | -2.2872 | 0.038617 | 0.16983 | -3.9882 | 9329     |
| LINC00412    | -0.19127 | 0.19127 | 0.10873 | -2.2872 | 0.03862  | 0.16983 | -3.9883 | 1.03E+08 |

|          |          |         |         |         |          |         |         |        |
|----------|----------|---------|---------|---------|----------|---------|---------|--------|
| ABAT     | -0.20601 | 0.20601 | 0.34842 | -2.2871 | 0.038627 | 0.16983 | -3.9885 | 18     |
| YWHAH    | 12.405   | 12.405  | 24.034  | 2.2867  | 0.038657 | 0.16991 | -3.9892 | 7533   |
| SPTLC2   | 3.9786   | 3.9786  | 7.6593  | 2.2863  | 0.038682 | 0.16995 | -3.9897 | 9517   |
| DDX52    | 1.1499   | 1.1499  | 2.8654  | 2.2863  | 0.038687 | 0.16995 | -3.9898 | 11056  |
| ZNF197   | -0.34782 | 0.34782 | 1.1713  | -2.2861 | 0.038695 | 0.16995 | -3.99   | 10168  |
| ENTPD7   | 2.0428   | 2.0428  | 4.112   | 2.2856  | 0.038732 | 0.17003 | -3.9909 | 57089  |
| TTC9     | 4.6237   | 4.6237  | 4.2459  | 2.2856  | 0.038734 | 0.17003 | -3.991  | 23508  |
| SGPP1    | 1.6951   | 1.6951  | 2.5053  | 2.2855  | 0.038744 | 0.17003 | -3.9912 | 81537  |
| KPNA6    | 3.6272   | 3.6272  | 11.348  | 2.2853  | 0.038759 | 0.17005 | -3.9915 | 23633  |
| SLIT2    | -0.83339 | 0.83339 | 1.7516  | -2.2852 | 0.038767 | 0.17005 | -3.9917 | 9353   |
| ZNF271P  | 0.64143  | 0.64143 | 1.5226  | 2.285   | 0.038779 | 0.17005 | -3.992  | 10778  |
| SUPT6H   | -3.3005  | 3.3005  | 11.558  | -2.2843 | 0.038831 | 0.17017 | -3.9932 | 6830   |
| SERPINA9 | -0.19253 | 0.19253 | 0.13506 | -2.2842 | 0.038838 | 0.17017 | -3.9933 | 327657 |
| PHF20L1  | 0.90528  | 0.90528 | 2.9585  | 2.2841  | 0.038842 | 0.17017 | -3.9935 | 51105  |
| IKZF2    | -0.54043 | 0.54043 | 0.66981 | -2.2841 | 0.038846 | 0.17017 | -3.9935 | 22807  |
| RPLP0P2  | 0.37744  | 0.37744 | 0.22422 | 2.2835  | 0.038889 | 0.17032 | -3.9945 | 113157 |
| COX7B    | 8.0198   | 8.0198  | 9.8703  | 2.283   | 0.038926 | 0.17037 | -3.9954 | 1349   |
| TSPAN14  | -3.3432  | 3.3432  | 11.475  | -2.2828 | 0.038938 | 0.17037 | -3.9957 | 81619  |
| KANSL1L  | -0.68699 | 0.68699 | 1.6977  | -2.2828 | 0.038938 | 0.17037 | -3.9957 | 151050 |
| E2F2     | -1.0205  | 1.0205  | 1.3714  | -2.2828 | 0.038942 | 0.17037 | -3.9957 | 1870   |
| TMEM61   | 0.25113  | 0.25113 | 0.40119 | 2.2823  | 0.038977 | 0.17048 | -3.9966 | 199964 |
| SPESP1   | 0.51817  | 0.51817 | 0.48994 | 2.282   | 0.039    | 0.17053 | -3.9971 | 246777 |
| ARHGAP12 | -1.3262  | 1.3262  | 3.6496  | -2.2815 | 0.039033 | 0.17064 | -3.9979 | 94134  |
| BAG2     | 1.7995   | 1.7995  | 1.8773  | 2.2814  | 0.039044 | 0.17064 | -3.9981 | 9532   |
| PCDHGA2  | -0.17994 | 0.17994 | 0.3563  | -2.2811 | 0.039067 | 0.17067 | -3.9986 | 56113  |
| PLSCR3   | 6.7022   | 6.7022  | 11.287  | 2.281   | 0.039071 | 0.17067 | -3.9987 | 57048  |

|              |          |         |          |         |          |         |         |          |
|--------------|----------|---------|----------|---------|----------|---------|---------|----------|
| MAP6         | -0.3151  | 0.3151  | 0.34471  | -2.2805 | 0.039112 | 0.1708  | -3.9997 | 4135     |
| CCND1        | -10.443  | 10.443  | 19.157   | -2.28   | 0.039148 | 0.17092 | -4.0005 | 595      |
| YWHAG        | 14.178   | 14.178  | 25.043   | 2.2792  | 0.039202 | 0.17111 | -4.0017 | 7532     |
| TPCN2        | -0.80293 | 0.80293 | 2.3043   | -2.2789 | 0.039225 | 0.17112 | -4.0022 | 219931   |
| ANKRD18A     | -0.40089 | 0.40089 | 0.24938  | -2.2788 | 0.039231 | 0.17112 | -4.0024 | 253650   |
| C8orf44-SGK3 | -0.27349 | 0.27349 | 0.32851  | -2.2788 | 0.039236 | 0.17112 | -4.0025 | 1.01E+08 |
| CIAO2B       | 5.5592   | 5.5592  | 10.392   | 2.2786  | 0.039249 | 0.17114 | -4.0028 | 51647    |
| ARHGEF26-AS1 | -0.23997 | 0.23997 | 0.32523  | -2.2781 | 0.039288 | 0.17124 | -4.0037 | 1.01E+08 |
| HDAC11       | -1.1916  | 1.1916  | 2.2074   | -2.278  | 0.039294 | 0.17124 | -4.0038 | 79885    |
| NKD1         | -0.61857 | 0.61857 | 0.91755  | -2.2778 | 0.039305 | 0.17125 | -4.0041 | 85407    |
| USP17L4      | -0.14731 | 0.14731 | 0.081517 | -2.2771 | 0.039355 | 0.1714  | -4.0052 | 645402   |
| BCOR         | -1.278   | 1.278   | 3.7732   | -2.2771 | 0.039359 | 0.1714  | -4.0053 | 54880    |
| SDHAP1       | -1.8454  | 1.8454  | 3.6275   | -2.2764 | 0.039408 | 0.17143 | -4.0064 | 255812   |
| RPS6KB2      | 14.308   | 14.308  | 30.398   | 2.2764  | 0.039409 | 0.17143 | -4.0064 | 6199     |
| PALLD        | 9.2977   | 9.2977  | 25.499   | 2.2761  | 0.039431 | 0.17143 | -4.007  | 23022    |
| RFTN1        | 5.0841   | 5.0841  | 9.1982   | 2.276   | 0.03944  | 0.17143 | -4.0072 | 23180    |
| CEBPA-DT     | -0.41847 | 0.41847 | 0.52158  | -2.276  | 0.039441 | 0.17143 | -4.0072 | 80054    |
| RBM5-AS1     | -2.4953  | 2.4953  | 5.0943   | -2.2759 | 0.039451 | 0.17143 | -4.0074 | 1.01E+08 |
| USP17L7      | -0.2231  | 0.2231  | 0.20172  | -2.2758 | 0.039452 | 0.17143 | -4.0074 | 392197   |
| STRN         | 2.1964   | 2.1964  | 4.8486   | 2.2758  | 0.039455 | 0.17143 | -4.0075 | 6801     |
| NCAPD3       | -0.65796 | 0.65796 | 2.2721   | -2.2757 | 0.039459 | 0.17143 | -4.0076 | 23310    |
| C6orf62      | 6.3915   | 6.3915  | 14.708   | 2.2753  | 0.039495 | 0.17154 | -4.0084 | 81688    |
| CFAP410      | -1.3374  | 1.3374  | 2.7013   | -2.2749 | 0.039525 | 0.17158 | -4.0091 | 755      |
| UFC1         | 10.279   | 10.279  | 21.962   | 2.2749  | 0.039525 | 0.17158 | -4.0091 | 51506    |
| NXPH3        | -0.42421 | 0.42421 | 0.46121  | -2.2747 | 0.039538 | 0.17158 | -4.0094 | 11248    |
| PSMD6-AS2    | -1.1523  | 1.1523  | 1.7286   | -2.2746 | 0.039545 | 0.17158 | -4.0095 | 1.01E+08 |

|              |          |         |         |         |          |         |         |          |
|--------------|----------|---------|---------|---------|----------|---------|---------|----------|
| cGLRX2       | 0.72328  | 0.72328 | 1.6889  | 2.2737  | 0.039611 | 0.17177 | -4.011  | 51022    |
| WDR53        | 3.373    | 3.373   | 3.6675  | 2.2737  | 0.039611 | 0.17177 | -4.011  | 348793   |
| FAM83F       | -4.5417  | 4.5417  | 9.3122  | -2.2735 | 0.039627 | 0.17177 | -4.0114 | 113828   |
| ZNF880       | -0.78479 | 0.78479 | 1.403   | -2.2735 | 0.039628 | 0.17177 | -4.0114 | 400713   |
| C1orf229     | -0.22512 | 0.22512 | 0.27005 | -2.2731 | 0.039656 | 0.1718  | -4.0121 | 388759   |
| LOC101928402 | -0.28506 | 0.28506 | 0.18384 | -2.2731 | 0.039657 | 0.1718  | -4.0121 | 1.02E+08 |
| PTEN         | 3.6291   | 3.6291  | 9.8499  | 2.2728  | 0.039676 | 0.17184 | -4.0125 | 5728     |
| DAPK3        | 5.4156   | 5.4156  | 10.658  | 2.2726  | 0.039694 | 0.17188 | -4.0129 | 1613     |
| ANKRD50      | 1.5224   | 1.5224  | 4.7616  | 2.2717  | 0.039759 | 0.17208 | -4.0144 | 57182    |
| NRN1L        | -0.18162 | 0.18162 | 0.21143 | -2.2716 | 0.039767 | 0.17208 | -4.0146 | 123904   |
| CNTRL        | -0.53165 | 0.53165 | 1.2289  | -2.2714 | 0.039781 | 0.17208 | -4.0149 | 11064    |
| ANXA3        | 11.993   | 11.993  | 8.0314  | 2.2714  | 0.039782 | 0.17208 | -4.0149 | 306      |
| ZAP70        | -0.38305 | 0.38305 | 0.48463 | -2.2709 | 0.039819 | 0.17216 | -4.0158 | 7535     |
| MYLK-AS1     | -0.24508 | 0.24508 | 0.30094 | -2.2708 | 0.039827 | 0.17216 | -4.0159 | 1.01E+08 |
| MYD88        | 7.9023   | 7.9023  | 12.953  | 2.2708  | 0.039831 | 0.17216 | -4.016  | 4615     |
| WFDC1        | 1.3853   | 1.3853  | 1.4846  | 2.2696  | 0.039921 | 0.17239 | -4.018  | 58189    |
| LINC01451    | -0.24007 | 0.24007 | 0.31231 | -2.2694 | 0.039936 | 0.17239 | -4.0184 | 401561   |
| CEP126       | -0.3398  | 0.3398  | 0.43926 | -2.2692 | 0.039949 | 0.17239 | -4.0187 | 57562    |
| ARF6         | 10.756   | 10.756  | 23.862  | 2.2691  | 0.039957 | 0.17239 | -4.0188 | 382      |
| WDR88        | -0.142   | 0.142   | 0.12963 | -2.2689 | 0.039973 | 0.17239 | -4.0192 | 126248   |
| FREM2        | -0.35202 | 0.35202 | 0.27326 | -2.2686 | 0.039989 | 0.17239 | -4.0196 | 341640   |
| CRK          | 4.3016   | 4.3016  | 12.025  | 2.2686  | 0.039996 | 0.17239 | -4.0197 | 1398     |
| UIMC1        | -0.66956 | 0.66956 | 3.381   | -2.2685 | 0.040004 | 0.17239 | -4.0199 | 51720    |
| ZNF219       | -4.276   | 4.276   | 7.6932  | -2.2684 | 0.040007 | 0.17239 | -4.02   | 51222    |
| AFF3         | -0.41121 | 0.41121 | 0.33128 | -2.2684 | 0.040009 | 0.17239 | -4.02   | 3899     |
| GNRH1        | -0.46738 | 0.46738 | 0.83373 | -2.2681 | 0.040031 | 0.17239 | -4.0205 | 2796     |

|           |          |         |         |         |          |         |         |        |
|-----------|----------|---------|---------|---------|----------|---------|---------|--------|
| VEGFA     | 6.7174   | 6.7174  | 11.718  | 2.2681  | 0.040034 | 0.17239 | -4.0206 | 7422   |
| AMIGO2    | 0.61774  | 0.61774 | 1.1088  | 2.268   | 0.040038 | 0.17239 | -4.0207 | 347902 |
| CCNYL1    | 1.5992   | 1.5992  | 3.0433  | 2.2679  | 0.040045 | 0.17239 | -4.0208 | 151195 |
| RNASE3    | -0.17936 | 0.17936 | 0.13571 | -2.2679 | 0.040045 | 0.17239 | -4.0208 | 6037   |
| LINC01235 | 0.49058  | 0.49058 | 0.43057 | 2.2677  | 0.040064 | 0.17239 | -4.0213 | 401492 |
| UBASH3B   | 1.0646   | 1.0646  | 2.1906  | 2.2675  | 0.040074 | 0.17239 | -4.0215 | 84959  |
| KPNA3     | 2.3312   | 2.3312  | 5.7966  | 2.2675  | 0.040078 | 0.17239 | -4.0216 | 3839   |
| PAAF1     | -0.77301 | 0.77301 | 1.9864  | -2.2674 | 0.040081 | 0.17239 | -4.0216 | 80227  |
| ZMIZ2     | -3.0374  | 3.0374  | 8.9021  | -2.2673 | 0.040088 | 0.17239 | -4.0218 | 83637  |
| EIF4A1    | 72.511   | 72.511  | 131.06  | 2.2667  | 0.040136 | 0.17249 | -4.0228 | 1973   |
| NDUFAF6   | -0.17193 | 0.17193 | 0.41932 | -2.2666 | 0.040147 | 0.17249 | -4.0231 | 137682 |
| COPS7B    | -1.0538  | 1.0538  | 3.1726  | -2.2665 | 0.04015  | 0.17249 | -4.0232 | 64708  |
| BRD9      | -1.0926  | 1.0926  | 3.7551  | -2.2665 | 0.040152 | 0.17249 | -4.0232 | 65980  |
| ADAMTS17  | -0.36544 | 0.36544 | 0.85491 | -2.2661 | 0.040181 | 0.17257 | -4.0239 | 170691 |
| RRP36     | 4.7946   | 4.7946  | 11.006  | 2.2655  | 0.040224 | 0.1727  | -4.0248 | 88745  |
| DNAJB9    | 1.0194   | 1.0194  | 2.1336  | 2.2654  | 0.040232 | 0.1727  | -4.025  | 4189   |
| FAM241B   | -0.31418 | 0.31418 | 0.31797 | -2.2651 | 0.040258 | 0.1727  | -4.0256 | 219738 |
| KRT14     | 6151     | 6151    | 6685.1  | 2.265   | 0.040267 | 0.1727  | -4.0258 | 3861   |
| ANXA8L1   | 22.207   | 22.207  | 43.282  | 2.2647  | 0.040285 | 0.1727  | -4.0262 | 728113 |
| FAM155A   | 0.22078  | 0.22078 | 0.18252 | 2.2645  | 0.040305 | 0.1727  | -4.0266 | 728215 |
| SPOUT1    | -1.1061  | 1.1061  | 2.642   | -2.2644 | 0.04031  | 0.1727  | -4.0267 | 51490  |
| SLC6A17   | -0.59764 | 0.59764 | 0.7001  | -2.2644 | 0.040312 | 0.1727  | -4.0268 | 388662 |
| USO1      | 4.0986   | 4.0986  | 10.74   | 2.2644  | 0.040312 | 0.1727  | -4.0268 | 8615   |
| JAG2      | -3.4442  | 3.4442  | 7.0838  | -2.2643 | 0.040314 | 0.1727  | -4.0268 | 3714   |
| GGPS1     | 1.2087   | 1.2087  | 3.3337  | 2.264   | 0.040338 | 0.17276 | -4.0274 | 9453   |
| C20orf203 | -0.15486 | 0.15486 | 0.10549 | -2.2635 | 0.040376 | 0.17288 | -4.0282 | 284805 |

|              |          |         |         |         |          |         |         |          |
|--------------|----------|---------|---------|---------|----------|---------|---------|----------|
| FBXO17       | -0.87065 | 0.87065 | 1.881   | -2.2623 | 0.04047  | 0.17319 | -4.0303 | 115290   |
| ZNF324B      | -0.5544  | 0.5544  | 1.22    | -2.262  | 0.040488 | 0.17319 | -4.0307 | 388569   |
| LINC01278    | -0.54092 | 0.54092 | 2.024   | -2.2619 | 0.040497 | 0.17319 | -4.0309 | 92249    |
| LOC105372069 | -0.21029 | 0.21029 | 0.18789 | -2.2618 | 0.040509 | 0.17319 | -4.0311 | 1.05E+08 |
| ZSCAN12P1    | 0.20998  | 0.20998 | 0.20456 | 2.2618  | 0.04051  | 0.17319 | -4.0312 | 221584   |
| MFSD14C      | -0.79678 | 0.79678 | 2.0981  | -2.2617 | 0.040511 | 0.17319 | -4.0312 | 84278    |
| NUCB2        | 2.1586   | 2.1586  | 4.1194  | 2.2615  | 0.040531 | 0.17319 | -4.0316 | 4925     |
| C22orf39     | -0.68186 | 0.68186 | 2.4004  | -2.2614 | 0.040535 | 0.17319 | -4.0317 | 128977   |
| IRAK1BP1     | -0.21863 | 0.21863 | 0.51999 | -2.2614 | 0.04054  | 0.17319 | -4.0318 | 134728   |
| MAMDC4       | -0.58546 | 0.58546 | 0.66779 | -2.2612 | 0.04055  | 0.17319 | -4.0321 | 158056   |
| BCAR3        | -0.68758 | 0.68758 | 1.793   | -2.2608 | 0.040581 | 0.17322 | -4.0327 | 8412     |
| SDHC         | 4.5272   | 4.5272  | 11.803  | 2.2608  | 0.040586 | 0.17322 | -4.0329 | 6391     |
| PLEKHB2      | 3.4299   | 3.4299  | 9.132   | 2.2605  | 0.040603 | 0.17322 | -4.0332 | 55041    |
| CLEC2B       | -3.0122  | 3.0122  | 4.9896  | -2.2604 | 0.040616 | 0.17322 | -4.0335 | 9976     |
| FAM89A       | 12.122   | 12.122  | 15.817  | 2.2604  | 0.040617 | 0.17322 | -4.0335 | 375061   |
| CACNA1D      | -0.18525 | 0.18525 | 0.20778 | -2.2603 | 0.040618 | 0.17322 | -4.0336 | 776      |
| CHRND        | -0.16409 | 0.16409 | 0.1009  | -2.2599 | 0.040652 | 0.17331 | -4.0343 | 1144     |
| PRKAG2       | -0.71269 | 0.71269 | 1.8271  | -2.2594 | 0.040689 | 0.17343 | -4.0351 | 51422    |
| PMEL         | -11.144  | 11.144  | 8.1585  | -2.259  | 0.040719 | 0.17349 | -4.0358 | 6490     |
| ZNF808       | -0.93805 | 0.93805 | 2.1841  | -2.259  | 0.040723 | 0.17349 | -4.0359 | 388558   |
| CCT5         | 8.7672   | 8.7672  | 15.449  | 2.2587  | 0.040747 | 0.17355 | -4.0364 | 22948    |
| ASNSD1       | 2.0423   | 2.0423  | 4.9556  | 2.2582  | 0.040784 | 0.17363 | -4.0372 | 54529    |
| ATG7         | -0.62594 | 0.62594 | 3.3852  | -2.2581 | 0.040788 | 0.17363 | -4.0373 | 10533    |
| MYO5C        | -1.0535  | 1.0535  | 1.9468  | -2.2579 | 0.040804 | 0.17366 | -4.0377 | 55930    |
| LOC101929679 | -0.16905 | 0.16905 | 0.20599 | -2.2575 | 0.040837 | 0.17375 | -4.0384 | 1.02E+08 |
| LCE3E        | 189.79   | 189.79  | 148.17  | 2.257   | 0.040877 | 0.17385 | -4.0392 | 353145   |

|             |          |         |         |         |          |         |         |          |
|-------------|----------|---------|---------|---------|----------|---------|---------|----------|
| AJM1        | -0.37931 | 0.37931 | 0.43061 | -2.2569 | 0.040881 | 0.17385 | -4.0394 | 389813   |
| ZNF37A      | -0.47751 | 0.47751 | 1.1407  | -2.2565 | 0.040914 | 0.17394 | -4.0401 | 7587     |
| PXDN        | 10.086   | 10.086  | 10.39   | 2.2564  | 0.040922 | 0.17394 | -4.0403 | 7837     |
| ZNF138      | -0.66814 | 0.66814 | 1.0418  | -2.2552 | 0.041008 | 0.17426 | -4.0421 | 7697     |
| PGK1        | 44.016   | 44.016  | 71.424  | 2.2551  | 0.041022 | 0.17428 | -4.0424 | 5230     |
| EVC2        | -0.56669 | 0.56669 | 1.0754  | -2.2548 | 0.041045 | 0.17433 | -4.0429 | 132884   |
| ETF1        | 8.6294   | 8.6294  | 20.116  | 2.2544  | 0.041075 | 0.17441 | -4.0436 | 2107     |
| MMP24OS     | 12.472   | 12.472  | 21.59   | 2.2536  | 0.041136 | 0.1746  | -4.0449 | 1.01E+08 |
| UBOX5-AS1   | -0.20021 | 0.20021 | 0.23272 | -2.2535 | 0.04114  | 0.1746  | -4.045  | 1E+08    |
| SLC26A1     | -0.38745 | 0.38745 | 0.50766 | -2.2531 | 0.041175 | 0.17471 | -4.0458 | 10861    |
| IQCJ-SCHIP1 | 1.1733   | 1.1733  | 1.5496  | 2.2528  | 0.041193 | 0.17474 | -4.0462 | 1.01E+08 |
| EPS8L1      | 18.097   | 18.097  | 27.445  | 2.2524  | 0.04123  | 0.17485 | -4.047  | 54869    |
| SURF6       | -2.6971  | 2.6971  | 4.5741  | -2.2523 | 0.041239 | 0.17485 | -4.0472 | 6838     |
| KCNK10      | 0.23882  | 0.23882 | 0.25529 | 2.2518  | 0.041272 | 0.17493 | -4.0479 | 54207    |
| LUM         | 99.924   | 99.924  | 71.847  | 2.2516  | 0.041289 | 0.17493 | -4.0483 | 4060     |
| COPS4       | 2.8175   | 2.8175  | 5.3122  | 2.2512  | 0.041317 | 0.17493 | -4.0489 | 51138    |
| PRKCZ-AS1   | -0.32088 | 0.32088 | 0.52533 | -2.2511 | 0.041327 | 0.17493 | -4.0491 | 1.01E+08 |
| ANKRD36B    | -0.92705 | 0.92705 | 1.5712  | -2.2511 | 0.041332 | 0.17493 | -4.0492 | 57730    |
| SMAD1-AS2   | -0.25483 | 0.25483 | 0.33601 | -2.251  | 0.041335 | 0.17493 | -4.0492 | 1.02E+08 |
| SF3B6       | 16.943   | 16.943  | 23.187  | 2.2509  | 0.041347 | 0.17493 | -4.0495 | 51639    |
| PRRT3       | -0.67924 | 0.67924 | 0.88274 | -2.2507 | 0.041359 | 0.17493 | -4.0498 | 285368   |
| HCFC2       | 0.57685  | 0.57685 | 2.0674  | 2.2507  | 0.041362 | 0.17493 | -4.0498 | 29915    |
| FBXW8       | -0.83931 | 0.83931 | 2.2088  | -2.2507 | 0.041362 | 0.17493 | -4.0498 | 26259    |
| HSPB1       | 467.62   | 467.62  | 659.98  | 2.2503  | 0.041392 | 0.17501 | -4.0505 | 3315     |
| ADCY10P1    | -0.15998 | 0.15998 | 0.1725  | -2.2499 | 0.04142  | 0.17507 | -4.0511 | 221442   |
| TRIM14      | -3.6367  | 3.6367  | 5.5601  | -2.2498 | 0.041428 | 0.17507 | -4.0512 | 9830     |



|              |          |         |         |         |          |         |         |          |
|--------------|----------|---------|---------|---------|----------|---------|---------|----------|
| CYP3A5       | -1.5753  | 1.5753  | 1.88    | -2.2487 | 0.041511 | 0.17537 | -4.0531 | 1577     |
| MCFD2        | 3.674    | 3.674   | 8.8595  | 2.2486  | 0.041521 | 0.17537 | -4.0533 | 90411    |
| MTA1         | -2.5032  | 2.5032  | 7.77    | -2.2485 | 0.041531 | 0.17537 | -4.0535 | 9112     |
| CEL          | -0.17118 | 0.17118 | 0.19237 | -2.2484 | 0.041539 | 0.17537 | -4.0537 | 1056     |
| LOC101928837 | -0.28887 | 0.28887 | 0.21959 | -2.2482 | 0.041557 | 0.17538 | -4.054  | 1.02E+08 |
| ZNF586       | -0.93253 | 0.93253 | 2.9016  | -2.2481 | 0.041561 | 0.17538 | -4.0541 | 54807    |
| CCDC84       | -0.99208 | 0.99208 | 2.8412  | -2.2479 | 0.041577 | 0.1754  | -4.0545 | 338657   |
| LOC101927143 | -0.61224 | 0.61224 | 0.3713  | -2.2477 | 0.041589 | 0.17541 | -4.0547 | 1.02E+08 |
| PRAC2        | -0.37785 | 0.37785 | 0.32941 | -2.2474 | 0.041616 | 0.17548 | -4.0553 | 360205   |
| DHX29        | 1.4957   | 1.4957  | 4.7413  | 2.2466  | 0.041676 | 0.17566 | -4.0566 | 54505    |
| CXCR1        | 2.634    | 2.634   | 1.8126  | 2.2466  | 0.041682 | 0.17566 | -4.0567 | 3577     |
| NRG4         | -0.2653  | 0.2653  | 0.40595 | -2.2459 | 0.041735 | 0.17585 | -4.0579 | 145957   |
| LRRC4B       | -0.34135 | 0.34135 | 0.36304 | -2.2448 | 0.041821 | 0.17616 | -4.0597 | 94030    |
| ZNF337       | -0.66892 | 0.66892 | 1.9725  | -2.2445 | 0.041843 | 0.17621 | -4.0602 | 26152    |
| ZNF266       | -1.0044  | 1.0044  | 3.5773  | -2.2436 | 0.041911 | 0.17638 | -4.0616 | 10781    |
| TMEM255A     | -0.24129 | 0.24129 | 0.23802 | -2.2435 | 0.041918 | 0.17638 | -4.0618 | 55026    |
| AATBC        | -0.86349 | 0.86349 | 1.3095  | -2.2434 | 0.041929 | 0.17638 | -4.062  | 284837   |
| GCLC         | -0.7912  | 0.7912  | 3.4989  | -2.2434 | 0.04193  | 0.17638 | -4.062  | 2729     |
| ASB14        | -0.34235 | 0.34235 | 0.47855 | -2.2431 | 0.041953 | 0.17638 | -4.0625 | 142686   |
| HDAC2        | 1.4621   | 1.4621  | 3.6804  | 2.2431  | 0.041953 | 0.17638 | -4.0625 | 3066     |
| DNAJC3       | 2.5983   | 2.5983  | 6.9494  | 2.2431  | 0.041955 | 0.17638 | -4.0626 | 5611     |
| LOC100129203 | -0.484   | 0.484   | 0.5406  | -2.2427 | 0.041987 | 0.17647 | -4.0633 | 1E+08    |
| STARD4       | 0.81194  | 0.81194 | 1.2252  | 2.2422  | 0.042024 | 0.17657 | -4.064  | 134429   |
| PPP1R26-AS1  | -0.14863 | 0.14863 | 0.19552 | -2.2421 | 0.042031 | 0.17657 | -4.0642 | 1.01E+08 |
| SUCLG1       | 10.582   | 10.582  | 16.806  | 2.2412  | 0.042104 | 0.17683 | -4.0657 | 8802     |
| ATP5MGL      | -0.24427 | 0.24427 | 0.2538  | -2.2407 | 0.04214  | 0.17693 | -4.0665 | 267020   |

|           |          |         |         |         |          |         |         |          |
|-----------|----------|---------|---------|---------|----------|---------|---------|----------|
| TRUB1     | 0.83926  | 0.83926 | 2.0806  | 2.2404  | 0.042168 | 0.177   | -4.0671 | 142940   |
| FSD1L     | 0.21324  | 0.21324 | 0.32201 | 2.2403  | 0.042176 | 0.177   | -4.0673 | 83856    |
| ENGASE    | -1.9745  | 1.9745  | 2.8482  | -2.2401 | 0.04219  | 0.17701 | -4.0676 | 64772    |
| MANEAL    | -0.71964 | 0.71964 | 1.2109  | -2.2394 | 0.042245 | 0.1772  | -4.0687 | 149175   |
| CKS2      | 6.3567   | 6.3567  | 5.7829  | 2.239   | 0.042275 | 0.17724 | -4.0694 | 1164     |
| FBXL22    | -0.26007 | 0.26007 | 0.35881 | -2.239  | 0.042276 | 0.17724 | -4.0694 | 283807   |
| URB1      | -1.1491  | 1.1491  | 3.4271  | -2.2387 | 0.042302 | 0.17728 | -4.0699 | 9875     |
| REPS2     | -0.18372 | 0.18372 | 0.31817 | -2.2386 | 0.04231  | 0.17728 | -4.0701 | 9185     |
| TMEM217   | 0.26692  | 0.26692 | 0.35066 | 2.2384  | 0.042324 | 0.17728 | -4.0704 | 221468   |
| XPNPEP2   | -1.1919  | 1.1919  | 0.93397 | -2.2383 | 0.042328 | 0.17728 | -4.0705 | 7512     |
| PBX1      | -1.3319  | 1.3319  | 3.9622  | -2.2378 | 0.042369 | 0.17741 | -4.0714 | 5087     |
| MRPS15    | 7.7574   | 7.7574  | 15.166  | 2.2375  | 0.042394 | 0.17746 | -4.0719 | 64960    |
| FAM85A    | -0.19406 | 0.19406 | 0.18481 | -2.2374 | 0.042401 | 0.17746 | -4.072  | 619423   |
| GABRP     | -4.0593  | 4.0593  | 2.3178  | -2.2371 | 0.04243  | 0.17753 | -4.0726 | 2568     |
| UBE2D2    | 4.4388   | 4.4388  | 12.314  | 2.2369  | 0.042445 | 0.17755 | -4.073  | 7322     |
| TPRG1-AS1 | -0.28048 | 0.28048 | 0.49231 | -2.2363 | 0.04249  | 0.17769 | -4.0739 | 1.01E+08 |
| PCDHGB2   | -0.25209 | 0.25209 | 0.68003 | -2.2362 | 0.042498 | 0.17769 | -4.0741 | 56103    |
| KCNJ2-AS1 | -0.21336 | 0.21336 | 0.28767 | -2.2359 | 0.042525 | 0.17773 | -4.0746 | 400617   |
| RAMAC     | 2.8074   | 2.8074  | 6.6611  | 2.2358  | 0.042531 | 0.17773 | -4.0748 | 83640    |
| NBDY      | 1.3589   | 1.3589  | 3.0082  | 2.2351  | 0.042587 | 0.17787 | -4.0759 | 550643   |
| PUSL1     | 2.2528   | 2.2528  | 5.1431  | 2.2351  | 0.042588 | 0.17787 | -4.076  | 126789   |
| SLC1A6    | -0.22235 | 0.22235 | 0.17742 | -2.2349 | 0.042599 | 0.17787 | -4.0762 | 6511     |
| TSPO2     | -0.17427 | 0.17427 | 0.13128 | -2.2349 | 0.042605 | 0.17787 | -4.0763 | 222642   |
| C11orf91  | 0.88209  | 0.88209 | 0.87169 | 2.2346  | 0.042626 | 0.17791 | -4.0768 | 1E+08    |
| MISP3     | -0.60762 | 0.60762 | 1.0761  | -2.2343 | 0.042653 | 0.17798 | -4.0773 | 113230   |
| PHAX      | 1.5367   | 1.5367  | 4.3815  | 2.2337  | 0.0427   | 0.17813 | -4.0783 | 51808    |

|              |          |         |         |         |          |         |         |          |
|--------------|----------|---------|---------|---------|----------|---------|---------|----------|
| FUT2         | 3.8212   | 3.8212  | 4.1814  | 2.233   | 0.042756 | 0.17818 | -4.0795 | 2524     |
| TIGD7        | -0.26552 | 0.26552 | 0.50591 | -2.2329 | 0.042759 | 0.17818 | -4.0796 | 91151    |
| AGAP6        | -1.2184  | 1.2184  | 2.7005  | -2.2328 | 0.042772 | 0.17818 | -4.0798 | 414189   |
| CCAT2        | -0.16397 | 0.16397 | 0.11694 | -2.2328 | 0.042774 | 0.17818 | -4.0799 | 1.02E+08 |
| WDR25        | -0.39152 | 0.39152 | 1.0898  | -2.2326 | 0.042784 | 0.17818 | -4.0801 | 79446    |
| ZWILCH       | 1.0148   | 1.0148  | 1.756   | 2.2325  | 0.042794 | 0.17818 | -4.0803 | 55055    |
| SHISA9       | -6.1967  | 6.1967  | 10.465  | -2.2325 | 0.042797 | 0.17818 | -4.0803 | 729993   |
| C11orf72     | -2.6423  | 2.6423  | 7.0414  | -2.2325 | 0.042797 | 0.17818 | -4.0804 | 1.01E+08 |
| FOXF2        | 0.8715   | 0.8715  | 0.92934 | 2.2323  | 0.042807 | 0.17818 | -4.0806 | 2295     |
| AIF1L        | 2.3783   | 2.3783  | 5.1353  | 2.2318  | 0.042851 | 0.17826 | -4.0815 | 83543    |
| CCDC57       | -0.77267 | 0.77267 | 1.3097  | -2.2318 | 0.042854 | 0.17826 | -4.0815 | 284001   |
| PI3          | 1191.7   | 1191.7  | 812.18  | 2.2317  | 0.042857 | 0.17826 | -4.0816 | 5266     |
| LOC100132686 | -0.41871 | 0.41871 | 0.43458 | -2.2315 | 0.042872 | 0.17828 | -4.0819 | 1E+08    |
| ABHD17B      | 5.0203   | 5.0203  | 5.571   | 2.2313  | 0.042889 | 0.1783  | -4.0823 | 51104    |
| RNF144A      | 1.565    | 1.565   | 2.7925  | 2.2307  | 0.042938 | 0.17837 | -4.0833 | 9781     |
| LOC100130357 | -0.19619 | 0.19619 | 0.24459 | -2.2307 | 0.042939 | 0.17837 | -4.0833 | 1E+08    |
| OR7E12P      | -0.319   | 0.319   | 0.40566 | -2.2306 | 0.042944 | 0.17837 | -4.0834 | 10821    |
| TM4SF1       | 56.393   | 56.393  | 46.979  | 2.2306  | 0.042947 | 0.17837 | -4.0835 | 4071     |
| RRAGC        | 5.6788   | 5.6788  | 10.336  | 2.2301  | 0.042986 | 0.17848 | -4.0843 | 64121    |
| ZNF561       | 2.3117   | 2.3117  | 4.9672  | 2.23    | 0.042994 | 0.17848 | -4.0845 | 93134    |
| SLC16A3      | 5.1798   | 5.1798  | 5.0098  | 2.2297  | 0.043017 | 0.17853 | -4.0849 | 9123     |
| APOL3        | -1.7789  | 1.7789  | 2.0584  | -2.2296 | 0.043029 | 0.17853 | -4.0852 | 80833    |
| PTGIS        | -5.6881  | 5.6881  | 4.3363  | -2.2295 | 0.043038 | 0.17853 | -4.0854 | 5740     |
| CCDC124      | 11.696   | 11.696  | 19.874  | 2.2285  | 0.043117 | 0.17879 | -4.087  | 115098   |
| CARD8-AS1    | 0.54498  | 0.54498 | 0.74459 | 2.2284  | 0.043123 | 0.17879 | -4.0871 | 1.01E+08 |
| CKAP2L       | 0.68781  | 0.68781 | 0.74379 | 2.2278  | 0.043174 | 0.17893 | -4.0882 | 150468   |

|              |          |         |         |         |          |         |         |          |
|--------------|----------|---------|---------|---------|----------|---------|---------|----------|
| LINC01614    | 0.73441  | 0.73441 | 0.3909  | 2.2277  | 0.043178 | 0.17893 | -4.0883 | 1.05E+08 |
| DUOX1        | 17.655   | 17.655  | 29.756  | 2.2274  | 0.043207 | 0.17893 | -4.0889 | 53905    |
| ATP13A2      | 3.6611   | 3.6611  | 7.9677  | 2.2273  | 0.043209 | 0.17893 | -4.0889 | 23400    |
| LSM8         | -0.393   | 0.393   | 0.76804 | -2.2273 | 0.04321  | 0.17893 | -4.0889 | 51691    |
| TMEM50A      | 6.4973   | 6.4973  | 16.699  | 2.2269  | 0.043241 | 0.17902 | -4.0896 | 23585    |
| CRYBB2P1     | -0.60458 | 0.60458 | 2.3292  | -2.2266 | 0.043268 | 0.17908 | -4.0901 | 1416     |
| SAPCD1       | -0.30833 | 0.30833 | 0.18771 | -2.2265 | 0.043279 | 0.17909 | -4.0904 | 401251   |
| SNORA49      | -18.597  | 18.597  | 15.95   | -2.2261 | 0.043313 | 0.17913 | -4.0911 | 677829   |
| SPOCD1       | 0.34282  | 0.34282 | 0.2649  | 2.226   | 0.043317 | 0.17913 | -4.0912 | 90853    |
| ANKRD22      | 3.6608   | 3.6608  | 5.2826  | 2.226   | 0.04332  | 0.17913 | -4.0912 | 118932   |
| CHUK         | 1.2386   | 1.2386  | 3.1099  | 2.2258  | 0.043336 | 0.17915 | -4.0915 | 1147     |
| PARP15       | -5.8199  | 5.8199  | 9.0482  | -2.2244 | 0.043447 | 0.17956 | -4.0938 | 165631   |
| ACVR2B       | -0.25173 | 0.25173 | 0.55139 | -2.2238 | 0.043498 | 0.17964 | -4.0949 | 93       |
| PTPN4        | -0.37704 | 0.37704 | 1.174   | -2.2237 | 0.0435   | 0.17964 | -4.0949 | 5775     |
| SETD1B       | -2.5021  | 2.5021  | 6.1621  | -2.2237 | 0.043504 | 0.17964 | -4.095  | 23067    |
| HILPDA       | 5.8022   | 5.8022  | 8.0425  | 2.2236  | 0.043508 | 0.17964 | -4.0951 | 29923    |
| NPIPA3       | -0.24445 | 0.24445 | 0.36048 | -2.2231 | 0.043555 | 0.17979 | -4.096  | 642778   |
| ZNF331       | -0.39937 | 0.39937 | 1.475   | -2.2224 | 0.043613 | 0.17999 | -4.0972 | 55422    |
| GPC3         | -2.7018  | 2.7018  | 2.5378  | -2.2222 | 0.043628 | 0.18    | -4.0975 | 2719     |
| SENP8        | -0.22912 | 0.22912 | 0.65117 | -2.2221 | 0.043637 | 0.18    | -4.0977 | 123228   |
| SPC25        | -4.1564  | 4.1564  | 7.4414  | -2.2215 | 0.043685 | 0.18015 | -4.0987 | 57405    |
| LOC101928323 | -0.23845 | 0.23845 | 0.2743  | -2.2206 | 0.043755 | 0.18039 | -4.1001 | 1.02E+08 |
| FBXO38       | 1.2758   | 1.2758  | 4.6519  | 2.2202  | 0.043788 | 0.18049 | -4.1008 | 81545    |
| PIGL         | -0.99369 | 0.99369 | 3.1972  | -2.2198 | 0.043822 | 0.18057 | -4.1015 | 9487     |
| KCNJ2        | -0.70341 | 0.70341 | 1.2197  | -2.2197 | 0.043829 | 0.18057 | -4.1017 | 3759     |
| PPP4R2       | 1.3754   | 1.3754  | 4.0861  | 2.2192  | 0.043872 | 0.1807  | -4.1025 | 151987   |

|              |          |         |          |         |          |         |         |          |
|--------------|----------|---------|----------|---------|----------|---------|---------|----------|
| S100A2       | 254.93   | 254.93  | 255.95   | 2.2186  | 0.043922 | 0.18086 | -4.1035 | 6273     |
| CYP20A1      | -0.45857 | 0.45857 | 1.9052   | -2.2183 | 0.043941 | 0.1809  | -4.1039 | 57404    |
| MYH11        | -15.202  | 15.202  | 13.448   | -2.2177 | 0.043998 | 0.18108 | -4.1051 | 4629     |
| SERPIND1     | -0.1767  | 0.1767  | 0.27587  | -2.217  | 0.04405  | 0.18123 | -4.1061 | 3053     |
| OCIAD2       | 6.3563   | 6.3563  | 9.6709   | 2.2168  | 0.044067 | 0.18123 | -4.1065 | 132299   |
| PPP1R3F      | -0.50327 | 0.50327 | 0.82172  | -2.2168 | 0.04407  | 0.18123 | -4.1065 | 89801    |
| GPRC5A       | 20.879   | 20.879  | 11.752   | 2.2167  | 0.044075 | 0.18123 | -4.1066 | 9052     |
| LOC101929719 | -0.32154 | 0.32154 | 0.32326  | -2.2166 | 0.044089 | 0.18124 | -4.1069 | 1.02E+08 |
| KHDC1        | -0.20301 | 0.20301 | 0.45347  | -2.2163 | 0.044106 | 0.18125 | -4.1073 | 80759    |
| NR4A2        | 1.1165   | 1.1165  | 1.4885   | 2.2163  | 0.044114 | 0.18125 | -4.1074 | 4929     |
| SGK1         | 7.5623   | 7.5623  | 17.706   | 2.2158  | 0.044149 | 0.18136 | -4.1082 | 6446     |
| NPAS1        | -0.30642 | 0.30642 | 0.36931  | -2.2155 | 0.044172 | 0.18137 | -4.1086 | 4861     |
| PDZK1P1      | -0.14861 | 0.14861 | 0.11905  | -2.2154 | 0.044186 | 0.18137 | -4.1089 | 1E+08    |
| SIDT1        | -0.17438 | 0.17438 | 0.2202   | -2.2153 | 0.04419  | 0.18137 | -4.109  | 54847    |
| LOC101927374 | -4.6863  | 4.6863  | 7.216    | -2.2153 | 0.044195 | 0.18137 | -4.1091 | 1.02E+08 |
| FN1          | 81.547   | 81.547  | 75.438   | 2.2145  | 0.044261 | 0.18157 | -4.1104 | 2335     |
| TBX19        | -0.17842 | 0.17842 | 0.48117  | -2.2144 | 0.044266 | 0.18157 | -4.1105 | 9095     |
| PELP1        | -2.8803  | 2.8803  | 5.7875   | -2.214  | 0.044296 | 0.18165 | -4.1111 | 27043    |
| NRN1         | -1.3151  | 1.3151  | 2.3135   | -2.2135 | 0.044343 | 0.1818  | -4.1121 | 51299    |
| EPM2AIP1     | -0.7138  | 0.7138  | 2.6072   | -2.2133 | 0.044355 | 0.1818  | -4.1123 | 9852     |
| OR52N4       | -0.15548 | 0.15548 | 0.086523 | -2.2132 | 0.044369 | 0.18181 | -4.1126 | 390072   |
| CDK7         | 4.1185   | 4.1185  | 7.7093   | 2.2129  | 0.044392 | 0.18187 | -4.113  | 1022     |
| ZNF430       | 0.83418  | 0.83418 | 2.2597   | 2.2127  | 0.044406 | 0.18188 | -4.1133 | 80264    |
| LOC101927296 | -0.31237 | 0.31237 | 0.43285  | -2.2126 | 0.044419 | 0.18189 | -4.1136 | 1.02E+08 |
| NRIP2        | -1.0105  | 1.0105  | 1.4715   | -2.2122 | 0.044446 | 0.18194 | -4.1141 | 83714    |
| NUP62CL      | -0.24461 | 0.24461 | 0.45617  | -2.2121 | 0.044459 | 0.18194 | -4.1144 | 54830    |

|              |          |         |          |         |          |         |         |          |
|--------------|----------|---------|----------|---------|----------|---------|---------|----------|
| FAM66A       | -0.30653 | 0.30653 | 0.17865  | -2.212  | 0.044463 | 0.18194 | -4.1145 | 1E+08    |
| NCBP3        | -0.51265 | 0.51265 | 3.3699   | -2.2118 | 0.044485 | 0.18198 | -4.1149 | 55421    |
| ADAM20       | -0.24495 | 0.24495 | 0.41706  | -2.2111 | 0.04454  | 0.18216 | -4.116  | 8748     |
| CCNL2        | -4.1332  | 4.1332  | 12.006   | -2.2109 | 0.04456  | 0.1822  | -4.1164 | 81669    |
| ZFP14        | -0.2839  | 0.2839  | 0.50865  | -2.2107 | 0.04457  | 0.1822  | -4.1166 | 57677    |
| MTDH         | 2.7267   | 2.7267  | 9.6417   | 2.2106  | 0.044585 | 0.1822  | -4.1169 | 92140    |
| MAGED4B      | 0.44042  | 0.44042 | 0.41617  | 2.2105  | 0.044593 | 0.1822  | -4.1171 | 81557    |
| WAC          | 3.2832   | 3.2832  | 9.0708   | 2.2101  | 0.044623 | 0.18225 | -4.1177 | 51322    |
| C6orf141     | 1.0984   | 1.0984  | 1.3245   | 2.2101  | 0.044627 | 0.18225 | -4.1178 | 135398   |
| PGM3         | 1.0163   | 1.0163  | 2.6101   | 2.2099  | 0.044643 | 0.18225 | -4.1181 | 5238     |
| TMEM229B     | -0.31229 | 0.31229 | 0.32804  | -2.2098 | 0.044648 | 0.18225 | -4.1182 | 161145   |
| LOC101926898 | -22.97   | 22.97   | 39.267   | -2.2095 | 0.044677 | 0.18232 | -4.1188 | 1.02E+08 |
| RNF2         | 0.94229  | 0.94229 | 2.2028   | 2.2093  | 0.044689 | 0.18233 | -4.119  | 6045     |
| EXD3         | -0.54311 | 0.54311 | 1.1581   | -2.2082 | 0.044783 | 0.18267 | -4.1209 | 54932    |
| KRT73        | -2.4383  | 2.4383  | 1.4957   | -2.208  | 0.044801 | 0.1827  | -4.1212 | 319101   |
| LOC101928307 | -0.14683 | 0.14683 | 0.095247 | -2.2077 | 0.044823 | 0.18271 | -4.1217 | 1.02E+08 |
| LINC00592    | 1.1499   | 1.1499  | 0.95404  | 2.2077  | 0.044826 | 0.18271 | -4.1217 | 283404   |
| LINC00681    | -0.15442 | 0.15442 | 0.08236  | -2.2071 | 0.044871 | 0.1828  | -4.1226 | 1.01E+08 |
| TMEM225B     | -0.44108 | 0.44108 | 0.46548  | -2.2069 | 0.044891 | 0.1828  | -4.123  | 1E+08    |
| GPR153       | 4.8891   | 4.8891  | 7.7447   | 2.2069  | 0.044894 | 0.1828  | -4.1231 | 387509   |
| SAP25        | -1.1216  | 1.1216  | 1.1404   | -2.2068 | 0.044897 | 0.1828  | -4.1231 | 1E+08    |
| MYOM2        | -0.20756 | 0.20756 | 0.22102  | -2.2067 | 0.04491  | 0.1828  | -4.1234 | 9172     |
| ADRA2C       | -1.1207  | 1.1207  | 0.76079  | -2.2066 | 0.044919 | 0.1828  | -4.1236 | 152      |
| BTNL9        | -0.67215 | 0.67215 | 0.64732  | -2.2065 | 0.044922 | 0.1828  | -4.1236 | 153579   |
| HSD17B8      | -0.28456 | 0.28456 | 0.73314  | -2.2062 | 0.04495  | 0.18287 | -4.1242 | 7923     |
| OSM          | 2.3037   | 2.3037  | 1.29     | 2.206   | 0.044969 | 0.1829  | -4.1246 | 5008     |

|            |          |         |         |         |          |         |         |          |
|------------|----------|---------|---------|---------|----------|---------|---------|----------|
| GEMIN8     | -0.34992 | 0.34992 | 2.1235  | -2.2051 | 0.045039 | 0.18314 | -4.126  | 54960    |
| NPIP89     | -0.41817 | 0.41817 | 0.30523 | -2.2049 | 0.045061 | 0.18318 | -4.1264 | 1.01E+08 |
| MAGED4     | 0.43185  | 0.43185 | 0.40818 | 2.2048  | 0.04507  | 0.18318 | -4.1266 | 728239   |
| PPP1R1A    | -0.47127 | 0.47127 | 0.27755 | -2.2044 | 0.045099 | 0.18322 | -4.1271 | 5502     |
| DNASE1L1   | 1.3094   | 1.3094  | 2.5001  | 2.2043  | 0.04511  | 0.18322 | -4.1274 | 1774     |
| ZNF337-AS1 | -0.18463 | 0.18463 | 0.28918 | -2.2042 | 0.045114 | 0.18322 | -4.1274 | 1.03E+08 |
| IGSF11     | -0.16151 | 0.16151 | 0.12158 | -2.2039 | 0.045145 | 0.18328 | -4.128  | 152404   |
| DELE1      | -1.3097  | 1.3097  | 4.1848  | -2.2037 | 0.045161 | 0.18328 | -4.1284 | 9812     |
| LONRF3     | -0.19505 | 0.19505 | 0.2989  | -2.2037 | 0.045161 | 0.18328 | -4.1284 | 79836    |
| MAP1LC3C   | -0.28189 | 0.28189 | 0.45543 | -2.2032 | 0.045202 | 0.1834  | -4.1292 | 440738   |
| ARL6IP1    | 8.2452   | 8.2452  | 17.446  | 2.203   | 0.045219 | 0.18343 | -4.1295 | 23204    |
| ANKRD11    | -2.2963  | 2.2963  | 6.9092  | -2.2025 | 0.045258 | 0.18353 | -4.1303 | 29123    |
| ZNF229     | 0.23129  | 0.23129 | 0.32547 | 2.2021  | 0.045293 | 0.18353 | -4.131  | 7772     |
| NET1       | 4.7808   | 4.7808  | 12.897  | 2.2021  | 0.045293 | 0.18353 | -4.131  | 10276    |
| PGR        | -0.15403 | 0.15403 | 0.10771 | -2.202  | 0.045301 | 0.18353 | -4.1311 | 5241     |
| DEPDC1     | 0.38761  | 0.38761 | 0.4146  | 2.2019  | 0.045308 | 0.18353 | -4.1313 | 55635    |
| HERC2P10   | -0.17577 | 0.17577 | 0.10829 | -2.2018 | 0.045318 | 0.18353 | -4.1315 | 390561   |
| RAP1GDS1   | 1.5993   | 1.5993  | 4.273   | 2.2018  | 0.045321 | 0.18353 | -4.1315 | 5910     |
| CDV3       | 9.0834   | 9.0834  | 18.535  | 2.2016  | 0.045337 | 0.18353 | -4.1319 | 55573    |
| BUD31      | 5.9525   | 5.9525  | 10.637  | 2.2015  | 0.045342 | 0.18353 | -4.1319 | 8896     |
| TIMM10B    | -1.6681  | 1.6681  | 5.3215  | -2.2014 | 0.045353 | 0.18353 | -4.1322 | 26515    |
| VAMP4      | 0.44959  | 0.44959 | 1.5553  | 2.2011  | 0.045379 | 0.18359 | -4.1327 | 8674     |
| WIPI1      | 4.4825   | 4.4825  | 7.8727  | 2.2007  | 0.04541  | 0.18366 | -4.1333 | 55062    |
| RBBP6      | 3.1091   | 3.1091  | 7.7905  | 2.2006  | 0.045418 | 0.18366 | -4.1334 | 5930     |
| FEM1B      | 2.6258   | 2.6258  | 9.104   | 2.2004  | 0.04544  | 0.18371 | -4.1339 | 10116    |
| PDZD11     | 4.0332   | 4.0332  | 6.9399  | 2.1996  | 0.045506 | 0.18389 | -4.1352 | 51248    |

|               |          |         |         |         |          |         |         |          |
|---------------|----------|---------|---------|---------|----------|---------|---------|----------|
| LOC100506551  | -0.28601 | 0.28601 | 0.45908 | -2.1996 | 0.045507 | 0.18389 | -4.1352 | 1.01E+08 |
| NDUFB1        | 14.426   | 14.426  | 23.366  | 2.1994  | 0.045525 | 0.18392 | -4.1355 | 4707     |
| LOC729867     | -0.27125 | 0.27125 | 0.54769 | -2.1982 | 0.045623 | 0.1842  | -4.1374 | 729867   |
| SLC36A1       | 1.1531   | 1.1531  | 3.1459  | 2.1982  | 0.045625 | 0.1842  | -4.1375 | 206358   |
| TOMM5         | 9.3995   | 9.3995  | 14.014  | 2.1981  | 0.045635 | 0.1842  | -4.1377 | 401505   |
| LOXL3         | 0.82318  | 0.82318 | 1.0461  | 2.198   | 0.045638 | 0.1842  | -4.1377 | 84695    |
| LOC101927189  | 1.7793   | 1.7793  | 2.681   | 2.1974  | 0.045694 | 0.18438 | -4.1388 | 1.02E+08 |
| LOC101927572  | -0.15122 | 0.15122 | 0.18137 | -2.1971 | 0.045719 | 0.18444 | -4.1393 | 1.02E+08 |
| GVQW3         | -0.13686 | 0.13686 | 0.12782 | -2.1967 | 0.045751 | 0.18452 | -4.1399 | 1.01E+08 |
| WDR70         | -1.2724  | 1.2724  | 5.3467  | -2.1966 | 0.045765 | 0.18453 | -4.1402 | 55100    |
| EPHA2         | 11.511   | 11.511  | 13.856  | 2.1963  | 0.045783 | 0.18457 | -4.1406 | 1969     |
| ZNF502        | -0.31718 | 0.31718 | 0.84632 | -2.1961 | 0.045804 | 0.18459 | -4.141  | 91392    |
| SLC35E4       | 0.71877  | 0.71877 | 1.2884  | 2.196   | 0.04581  | 0.18459 | -4.1411 | 339665   |
| AMZ2P1        | -0.27498 | 0.27498 | 0.52208 | -2.1956 | 0.04585  | 0.18469 | -4.1419 | 201283   |
| SLC27A3       | -2.0515  | 2.0515  | 4.5699  | -2.1955 | 0.045858 | 0.18469 | -4.142  | 11000    |
| EPN1          | 21.958   | 21.958  | 32.23   | 2.1942  | 0.045969 | 0.18509 | -4.1442 | 29924    |
| FGF7P6        | -0.43393 | 0.43393 | 0.61823 | -2.194  | 0.045981 | 0.1851  | -4.1444 | 387628   |
| ZBED3         | -0.37752 | 0.37752 | 0.51352 | -2.1936 | 0.046021 | 0.18518 | -4.1452 | 84327    |
| ZNF770        | 6.3741   | 6.3741  | 13.402  | 2.1935  | 0.046024 | 0.18518 | -4.1453 | 54989    |
| DPM1          | 4.1312   | 4.1312  | 8.5206  | 2.1932  | 0.046049 | 0.1852  | -4.1457 | 8813     |
| ZFYVE9        | -0.90524 | 0.90524 | 4.8673  | -2.193  | 0.046065 | 0.1852  | -4.146  | 9372     |
| DKFZP586I1420 | -1.1569  | 1.1569  | 3.4901  | -2.193  | 0.04607  | 0.1852  | -4.1461 | 222161   |
| ADAMTSL4      | 6.6463   | 6.6463  | 10.252  | 2.193   | 0.046073 | 0.1852  | -4.1462 | 54507    |
| ADAMTS6       | 0.52784  | 0.52784 | 0.55084 | 2.1928  | 0.046089 | 0.18522 | -4.1465 | 11174    |
| MTMR7         | -0.3033  | 0.3033  | 0.47244 | -2.1924 | 0.046123 | 0.1853  | -4.1472 | 9108     |
| C1QTNF9B      | -0.17359 | 0.17359 | 0.14951 | -2.1923 | 0.04613  | 0.1853  | -4.1473 | 387911   |



|              |          |         |          |         |          |         |         |          |
|--------------|----------|---------|----------|---------|----------|---------|---------|----------|
| FNIP2        | 1.2646   | 1.2646  | 5.273    | 2.192   | 0.046152 | 0.18532 | -4.1477 | 57600    |
| G6PD         | 6.056    | 6.056   | 11.391   | 2.1919  | 0.046165 | 0.18532 | -4.148  | 2539     |
| CSRNP2       | 0.79169  | 0.79169 | 3.5333   | 2.1918  | 0.046169 | 0.18532 | -4.1481 | 81566    |
| LOC100101148 | -0.58163 | 0.58163 | 0.39058  | -2.1915 | 0.046199 | 0.1854  | -4.1486 | 1E+08    |
| ORMDL3       | -1.3277  | 1.3277  | 4.0363   | -2.1912 | 0.046224 | 0.18545 | -4.1491 | 94103    |
| ARPC4-TTLL3  | -0.63046 | 0.63046 | 0.99599  | -2.1905 | 0.046282 | 0.18564 | -4.1502 | 1.01E+08 |
| PRKAR2B      | -0.56985 | 0.56985 | 0.83912  | -2.1903 | 0.046304 | 0.18569 | -4.1507 | 5577     |
| VPS51        | -6.5921  | 6.5921  | 15.235   | -2.1899 | 0.04634  | 0.1857  | -4.1513 | 738      |
| LOC101927854 | -0.38794 | 0.38794 | 0.47632  | -2.1897 | 0.046357 | 0.1857  | -4.1517 | 1.02E+08 |
| EIF2S1       | 3.996    | 3.996   | 9.6086   | 2.1896  | 0.046359 | 0.1857  | -4.1517 | 1965     |
| SUZ12P1      | -0.45751 | 0.45751 | 1.0341   | -2.1896 | 0.04636  | 0.1857  | -4.1517 | 440423   |
| PSMB6        | 18.859   | 18.859  | 36.905   | 2.1894  | 0.046379 | 0.1857  | -4.1521 | 5694     |
| GAB1         | 2.0416   | 2.0416  | 6.0711   | 2.1893  | 0.046388 | 0.1857  | -4.1523 | 2549     |
| LOC388282    | 0.17044  | 0.17044 | 0.20278  | 2.1892  | 0.046393 | 0.1857  | -4.1524 | 388282   |
| METTL9       | 7.0797   | 7.0797  | 13.241   | 2.1891  | 0.046406 | 0.1857  | -4.1526 | 51108    |
| LGALSL       | 23.378   | 23.378  | 30.088   | 2.1891  | 0.046407 | 0.1857  | -4.1526 | 29094    |
| INTS13       | 1.5772   | 1.5772  | 3.5059   | 2.1882  | 0.046481 | 0.18593 | -4.1541 | 55726    |
| EFS          | -4.4438  | 4.4438  | 12.159   | -2.1881 | 0.046487 | 0.18593 | -4.1542 | 10278    |
| KRT39        | -0.18019 | 0.18019 | 0.099871 | -2.188  | 0.046497 | 0.18593 | -4.1544 | 390792   |
| LRRC59       | 9.7352   | 9.7352  | 15.485   | 2.1874  | 0.046548 | 0.18609 | -4.1553 | 55379    |
| C2CD2        | 1.6166   | 1.6166  | 4.1704   | 2.1873  | 0.046564 | 0.18611 | -4.1557 | 25966    |
| SMYD4        | -0.42919 | 0.42919 | 1.9      | -2.187  | 0.046587 | 0.18613 | -4.1561 | 114826   |
| YBEY         | -0.65411 | 0.65411 | 1.4868   | -2.187  | 0.046589 | 0.18613 | -4.1561 | 54059    |
| COX10-AS1    | -0.33437 | 0.33437 | 1.9297   | -2.1866 | 0.046625 | 0.18622 | -4.1568 | 1.01E+08 |
| SPCS3        | 3.835    | 3.835   | 9.0454   | 2.1862  | 0.046655 | 0.18627 | -4.1574 | 60559    |
| RIMKLB       | -0.63298 | 0.63298 | 2.6326   | -2.1859 | 0.04668  | 0.18627 | -4.1579 | 57494    |

|            |          |         |         |         |          |         |         |          |
|------------|----------|---------|---------|---------|----------|---------|---------|----------|
| ZNF786     | -0.46411 | 0.46411 | 1.3988  | -2.1859 | 0.046682 | 0.18627 | -4.1579 | 136051   |
| DIP2A      | -1.0659  | 1.0659  | 4.0155  | -2.1859 | 0.046682 | 0.18627 | -4.1579 | 23181    |
| BMP8B      | 0.56977  | 0.56977 | 0.81977 | 2.1858  | 0.046691 | 0.18627 | -4.1581 | 656      |
| SRPK3      | -0.16031 | 0.16031 | 0.15268 | -2.1852 | 0.046743 | 0.1864  | -4.1591 | 26576    |
| FBXL4      | -0.53042 | 0.53042 | 1.8196  | -2.1852 | 0.046747 | 0.1864  | -4.1591 | 26235    |
| TOR1B      | 1.3405   | 1.3405  | 3.5139  | 2.1848  | 0.046775 | 0.18644 | -4.1597 | 27348    |
| NIPSNAP3B  | -0.16501 | 0.16501 | 0.2043  | -2.1848 | 0.046779 | 0.18644 | -4.1598 | 55335    |
| DDX11L9    | -0.21748 | 0.21748 | 0.20553 | -2.1841 | 0.046836 | 0.18663 | -4.1608 | 1E+08    |
| PRKD2      | -3.5741  | 3.5741  | 9.3952  | -2.1839 | 0.04686  | 0.18664 | -4.1613 | 25865    |
| SMAD4      | -1.028   | 1.028   | 3.9477  | -2.1838 | 0.046868 | 0.18664 | -4.1615 | 4089     |
| CRIP1      | -0.6037  | 0.6037  | 1.7406  | -2.1837 | 0.046874 | 0.18664 | -4.1616 | 9419     |
| MIR3936    | -0.23157 | 0.23157 | 0.13921 | -2.1834 | 0.0469   | 0.1867  | -4.1621 | 1.01E+08 |
| CDRT1      | 0.49731  | 0.49731 | 0.89668 | 2.1817  | 0.047045 | 0.18724 | -4.1648 | 374286   |
| GPRC5D-AS1 | -0.2834  | 0.2834  | 0.50859 | -2.1812 | 0.047092 | 0.18738 | -4.1657 | 1.01E+08 |
| MANF       | 9.4531   | 9.4531  | 15.834  | 2.1811  | 0.047103 | 0.18738 | -4.1659 | 7873     |
| CLDN12     | 1.4377   | 1.4377  | 2.8729  | 2.1809  | 0.047117 | 0.18739 | -4.1662 | 9069     |
| ZNF510     | -0.40527 | 0.40527 | 1.1664  | -2.1806 | 0.047146 | 0.18746 | -4.1667 | 22869    |
| GTPBP2     | 5.2784   | 5.2784  | 10.23   | 2.1796  | 0.04723  | 0.18775 | -4.1683 | 54676    |
| S100B      | -1.2779  | 1.2779  | 1.5221  | -2.1793 | 0.04726  | 0.18783 | -4.1689 | 6285     |
| SMIM15     | 2.3513   | 2.3513  | 5.1539  | 2.1789  | 0.047298 | 0.18793 | -4.1696 | 643155   |
| SMYD2      | 3.879    | 3.879   | 6.8289  | 2.1783  | 0.047349 | 0.18809 | -4.1705 | 56950    |
| RAB2A      | 3.9127   | 3.9127  | 10.687  | 2.1779  | 0.047381 | 0.18812 | -4.1711 | 5862     |
| RALGPS1    | -0.42551 | 0.42551 | 1.0802  | -2.1778 | 0.047393 | 0.18812 | -4.1714 | 9649     |
| ROCR       | -0.51281 | 0.51281 | 0.2735  | -2.1778 | 0.047394 | 0.18812 | -4.1714 | 1.03E+08 |
| LEPROTL1   | 1.5583   | 1.5583  | 4.3452  | 2.1776  | 0.047404 | 0.18812 | -4.1716 | 23484    |
| ATP11A-AS1 | -0.26207 | 0.26207 | 0.38722 | -2.1776 | 0.047412 | 0.18812 | -4.1717 | 1.01E+08 |

|              |          |         |         |         |          |         |         |          |
|--------------|----------|---------|---------|---------|----------|---------|---------|----------|
| ZNF667-AS1   | -0.41998 | 0.41998 | 0.81897 | -2.1769 | 0.047467 | 0.18829 | -4.1727 | 1E+08    |
| ZNF749       | -0.34508 | 0.34508 | 1.1431  | -2.1768 | 0.047482 | 0.18831 | -4.173  | 388567   |
| RBM28        | -1.391   | 1.391   | 4.4477  | -2.1763 | 0.04752  | 0.18842 | -4.1737 | 55131    |
| IMPAD1       | 2.4685   | 2.4685  | 7.749   | 2.1762  | 0.047535 | 0.18843 | -4.174  | 54928    |
| MMP23B       | -1.36    | 1.36    | 1.1333  | -2.1758 | 0.047564 | 0.1885  | -4.1746 | 8510     |
| ENO3         | -0.21518 | 0.21518 | 0.30717 | -2.1756 | 0.047582 | 0.18853 | -4.1749 | 2027     |
| MICAL3       | -1.0058  | 1.0058  | 2.5604  | -2.1753 | 0.047613 | 0.18861 | -4.1755 | 57553    |
| LINC01550    | -0.32365 | 0.32365 | 0.50534 | -2.1749 | 0.047644 | 0.18865 | -4.1761 | 388011   |
| ZNF33B       | -0.49655 | 0.49655 | 1.3552  | -2.1749 | 0.047645 | 0.18865 | -4.1761 | 7582     |
| LAMC1-AS1    | -0.21484 | 0.21484 | 0.19208 | -2.1747 | 0.047668 | 0.18869 | -4.1765 | 1.11E+08 |
| NLE1         | -0.856   | 0.856   | 1.8138  | -2.174  | 0.047724 | 0.18882 | -4.1776 | 54475    |
| KLK5         | 127.01   | 127.01  | 98.004  | 2.174   | 0.047729 | 0.18882 | -4.1777 | 25818    |
| ABCA12       | 11.872   | 11.872  | 15.433  | 2.1739  | 0.047733 | 0.18882 | -4.1777 | 26154    |
| NCOA4        | 9.6643   | 9.6643  | 28.252  | 2.1737  | 0.047753 | 0.18885 | -4.1781 | 8031     |
| CSF1         | -2.0537  | 2.0537  | 3.1641  | -2.1735 | 0.047768 | 0.18887 | -4.1784 | 1435     |
| WWC2         | 0.80471  | 0.80471 | 2.0282  | 2.1731  | 0.047807 | 0.18898 | -4.1791 | 80014    |
| ANLN         | 2.236    | 2.236   | 3.0292  | 2.1729  | 0.047828 | 0.18902 | -4.1795 | 54443    |
| LINC00462    | 0.21984  | 0.21984 | 0.19622 | 2.1725  | 0.047859 | 0.18908 | -4.1801 | 1E+08    |
| CDK14        | 0.88976  | 0.88976 | 1.4495  | 2.1724  | 0.047868 | 0.18908 | -4.1802 | 5218     |
| ANKS1B       | -0.16166 | 0.16166 | 0.16796 | -2.1723 | 0.047878 | 0.18908 | -4.1804 | 56899    |
| MT1H         | -0.47357 | 0.47357 | 0.48345 | -2.1721 | 0.047898 | 0.1891  | -4.1808 | 4496     |
| LPCAT2       | 1.1364   | 1.1364  | 3.4108  | 2.172   | 0.047906 | 0.1891  | -4.1809 | 54947    |
| LOC105378047 | -0.23927 | 0.23927 | 0.25966 | -2.1715 | 0.047947 | 0.18916 | -4.1817 | 1.05E+08 |
| TNFRSF21     | 6.5276   | 6.5276  | 10.156  | 2.1715  | 0.047951 | 0.18916 | -4.1818 | 27242    |
| GNRHR        | 0.15037  | 0.15037 | 0.17808 | 2.1714  | 0.047955 | 0.18916 | -4.1818 | 2798     |
| LMF1-AS1     | -0.2972  | 0.2972  | 0.44097 | -2.171  | 0.047992 | 0.18927 | -4.1825 | 1.02E+08 |

|              |          |         |         |         |          |         |         |          |
|--------------|----------|---------|---------|---------|----------|---------|---------|----------|
| PLA2G2A      | -12.545  | 12.545  | 9.9735  | -2.1703 | 0.048058 | 0.18947 | -4.1838 | 5320     |
| RCOR1        | 4.1278   | 4.1278  | 8.2349  | 2.1702  | 0.048067 | 0.18947 | -4.1839 | 23186    |
| CCL19        | -5.9044  | 5.9044  | 4.311   | -2.1694 | 0.048138 | 0.18971 | -4.1852 | 6363     |
| TXNL1        | 5.5341   | 5.5341  | 13.081  | 2.169   | 0.048174 | 0.18979 | -4.1859 | 9352     |
| HIPK3        | 4.9119   | 4.9119  | 16.676  | 2.1689  | 0.048181 | 0.18979 | -4.186  | 10114    |
| IRX2         | -1.2148  | 1.2148  | 3.6512  | -2.1687 | 0.0482   | 0.18982 | -4.1864 | 153572   |
| EIF3I        | 13.011   | 13.011  | 28.075  | 2.1683  | 0.04823  | 0.18984 | -4.1869 | 8668     |
| GPR37L1      | -0.15654 | 0.15654 | 0.16863 | -2.1683 | 0.048235 | 0.18984 | -4.187  | 9283     |
| NOTCH1       | -8.0054  | 8.0054  | 13.586  | -2.1683 | 0.048239 | 0.18984 | -4.1871 | 4851     |
| MRGPRX2      | -0.24379 | 0.24379 | 0.1579  | -2.1677 | 0.048288 | 0.18999 | -4.188  | 117194   |
| USP43        | 1.449    | 1.449   | 1.6039  | 2.1676  | 0.0483   | 0.18999 | -4.1882 | 124739   |
| LAMTOR5      | 8.6799   | 8.6799  | 13.537  | 2.1668  | 0.048365 | 0.19019 | -4.1894 | 10542    |
| MOB1A        | 5.1475   | 5.1475  | 14.361  | 2.1668  | 0.048372 | 0.19019 | -4.1896 | 55233    |
| ATP6V0C      | 37.404   | 37.404  | 78.969  | 2.1661  | 0.048434 | 0.19039 | -4.1907 | 527      |
| MTHFSD       | -0.58178 | 0.58178 | 1.455   | -2.1658 | 0.048457 | 0.19043 | -4.1911 | 64779    |
| MLX          | 3.2059   | 3.2059  | 7.9789  | 2.1654  | 0.048494 | 0.19053 | -4.1918 | 6945     |
| PIP4K2B      | -2.185   | 2.185   | 6.0561  | -2.1652 | 0.048511 | 0.19056 | -4.1921 | 8396     |
| LOC102725121 | -0.13998 | 0.13998 | 0.10993 | -2.1649 | 0.048537 | 0.19061 | -4.1926 | 1.03E+08 |
| LHX4         | -0.22667 | 0.22667 | 0.40739 | -2.1647 | 0.04856  | 0.19064 | -4.193  | 89884    |
| ERI3-IT1     | -0.33835 | 0.33835 | 0.49967 | -2.1646 | 0.048565 | 0.19064 | -4.1931 | 1.01E+08 |
| CSNK1E       | 6.7738   | 6.7738  | 19.331  | 2.1643  | 0.048598 | 0.19072 | -4.1937 | 1454     |
| ZFAND6       | 5.3153   | 5.3153  | 7.783   | 2.1641  | 0.04861  | 0.19072 | -4.1939 | 54469    |
| LOC100128398 | -0.27766 | 0.27766 | 0.45116 | -2.1634 | 0.048671 | 0.19091 | -4.195  | 1E+08    |
| IQSEC2       | -0.62977 | 0.62977 | 1.6826  | -2.1634 | 0.048679 | 0.19091 | -4.1952 | 23096    |
| RASA4        | -3.2492  | 3.2492  | 6.8564  | -2.1632 | 0.048691 | 0.19091 | -4.1954 | 10156    |
| SPRN         | -0.57051 | 0.57051 | 0.62025 | -2.1631 | 0.048707 | 0.19093 | -4.1957 | 503542   |

|              |          |         |          |         |          |         |         |          |
|--------------|----------|---------|----------|---------|----------|---------|---------|----------|
| BTBD2        | -5.4362  | 5.4362  | 12.492   | -2.1626 | 0.048744 | 0.19103 | -4.1964 | 55643    |
| BATF3        | 0.49934  | 0.49934 | 0.62548  | 2.1621  | 0.048791 | 0.19115 | -4.1972 | 55509    |
| LYPLA1       | 9.5959   | 9.5959  | 13.177   | 2.1618  | 0.04882  | 0.19115 | -4.1978 | 10434    |
| SCARNA2      | -287.7   | 287.7   | 646.24   | -2.1617 | 0.048826 | 0.19115 | -4.1979 | 677766   |
| NRBP1        | 6.5065   | 6.5065  | 16.973   | 2.1617  | 0.048833 | 0.19115 | -4.198  | 29959    |
| PLA2G4B      | 10.992   | 10.992  | 13.851   | 2.1617  | 0.048833 | 0.19115 | -4.198  | 1E+08    |
| RNF150       | -0.44626 | 0.44626 | 0.4534   | -2.1614 | 0.04886  | 0.19122 | -4.1985 | 57484    |
| TRMT61A      | -1.3338  | 1.3338  | 2.7732   | -2.1612 | 0.048876 | 0.19123 | -4.1988 | 115708   |
| TMEM238L     | 0.51922  | 0.51922 | 0.45273  | 2.1607  | 0.048918 | 0.19135 | -4.1995 | 1E+08    |
| NUDT17       | -0.222   | 0.222   | 0.45784  | -2.1602 | 0.048962 | 0.19148 | -4.2003 | 200035   |
| RAB7A        | 23.784   | 23.784  | 50.835   | 2.1598  | 0.049004 | 0.1916  | -4.2011 | 7879     |
| KIF12        | -0.13934 | 0.13934 | 0.17254  | -2.1596 | 0.049016 | 0.1916  | -4.2013 | 113220   |
| CCNE2        | 0.52046  | 0.52046 | 0.919    | 2.1587  | 0.049098 | 0.19188 | -4.2028 | 9134     |
| KIF18A       | 0.35419  | 0.35419 | 0.47821  | 2.1579  | 0.04917  | 0.19204 | -4.2041 | 81930    |
| CTDSP1       | -8.2145  | 8.2145  | 19.607   | -2.1579 | 0.049176 | 0.19204 | -4.2042 | 58190    |
| NRARP        | 3.8388   | 3.8388  | 8.3215   | 2.1578  | 0.049182 | 0.19204 | -4.2043 | 441478   |
| DENND2C      | 4.5723   | 4.5723  | 8.9889   | 2.1578  | 0.049185 | 0.19204 | -4.2044 | 163259   |
| LINC01819    | -0.15329 | 0.15329 | 0.090384 | -2.1571 | 0.049247 | 0.19217 | -4.2055 | 1.03E+08 |
| GDPD1        | -0.15319 | 0.15319 | 0.33661  | -2.157  | 0.049253 | 0.19217 | -4.2056 | 284161   |
| EMC6         | 3.7055   | 3.7055  | 6.9673   | 2.1569  | 0.049268 | 0.19217 | -4.2059 | 83460    |
| ITGB1BP1     | 3.0828   | 3.0828  | 6.2912   | 2.1567  | 0.049281 | 0.19217 | -4.2061 | 9270     |
| HOXC-AS3     | -0.15825 | 0.15825 | 0.17696  | -2.1565 | 0.049298 | 0.19217 | -4.2064 | 1.01E+08 |
| LOC101929165 | -0.27793 | 0.27793 | 0.42266  | -2.1562 | 0.049327 | 0.19217 | -4.2069 | 1.02E+08 |
| UBTD2        | 1.3615   | 1.3615  | 3.582    | 2.1562  | 0.049328 | 0.19217 | -4.2069 | 92181    |
| LOC105378269 | -0.21079 | 0.21079 | 0.15071  | -2.1562 | 0.049333 | 0.19217 | -4.207  | 1.05E+08 |
| CREBRF       | -0.67388 | 0.67388 | 1.8006   | -2.1562 | 0.049333 | 0.19217 | -4.207  | 153222   |

|              |          |         |         |         |          |         |         |          |
|--------------|----------|---------|---------|---------|----------|---------|---------|----------|
| TNPO2        | -2.3148  | 2.3148  | 8.3746  | -2.156  | 0.049349 | 0.19217 | -4.2073 | 30000    |
| LOC105377102 | -0.31251 | 0.31251 | 0.58123 | -2.1559 | 0.049355 | 0.19217 | -4.2074 | 1.05E+08 |
| MICU2        | 1.8928   | 1.8928  | 4.9569  | 2.1558  | 0.049367 | 0.19217 | -4.2077 | 221154   |
| USP54        | -1.0854  | 1.0854  | 3.3249  | -2.1558 | 0.049367 | 0.19217 | -4.2077 | 159195   |
| GPS2         | 4.5101   | 4.5101  | 13.74   | 2.1556  | 0.049386 | 0.19217 | -4.208  | 2874     |
| SLC10A1      | -0.18967 | 0.18967 | 0.27579 | -2.1556 | 0.049388 | 0.19217 | -4.208  | 6554     |
| IKZF4        | -0.30703 | 0.30703 | 0.70204 | -2.1552 | 0.049425 | 0.19223 | -4.2087 | 64375    |
| DEDD2        | 3.6501   | 3.6501  | 6.7721  | 2.1552  | 0.049426 | 0.19223 | -4.2087 | 162989   |
| TMED7        | 3.1259   | 3.1259  | 6.7852  | 2.1549  | 0.049446 | 0.19226 | -4.2091 | 51014    |
| VPS26A       | 2.5983   | 2.5983  | 6.723   | 2.1546  | 0.049478 | 0.1923  | -4.2097 | 9559     |
| WDPCP        | -0.29078 | 0.29078 | 0.72765 | -2.1546 | 0.049479 | 0.1923  | -4.2097 | 51057    |
| DDX60        | -2.139   | 2.139   | 2.511   | -2.1541 | 0.049523 | 0.19243 | -4.2105 | 55601    |
| SLC16A1-AS1  | -0.3785  | 0.3785  | 0.78384 | -2.1537 | 0.049559 | 0.19249 | -4.2111 | 1.01E+08 |
| ZBED2        | 2.2142   | 2.2142  | 2.5098  | 2.1537  | 0.049562 | 0.19249 | -4.2111 | 79413    |
| GNA15        | 15.114   | 15.114  | 21.085  | 2.1535  | 0.049581 | 0.19252 | -4.2115 | 2769     |
| GPR180       | 0.32789  | 0.32789 | 0.68904 | 2.1533  | 0.049595 | 0.19253 | -4.2117 | 160897   |
| CPT1C        | 0.28472  | 0.28472 | 0.53809 | 2.153   | 0.049621 | 0.19259 | -4.2122 | 126129   |
| KIF14        | 0.36438  | 0.36438 | 0.43826 | 2.1525  | 0.049671 | 0.19271 | -4.2131 | 9928     |
| SLC9A9       | -0.72762 | 0.72762 | 2.2794  | -2.1524 | 0.049675 | 0.19271 | -4.2132 | 285195   |
| KRTDAP       | 710.1    | 710.1   | 840.55  | 2.1521  | 0.049711 | 0.19276 | -4.2138 | 388533   |
| CDRT15P1     | -0.43801 | 0.43801 | 0.70417 | -2.152  | 0.049716 | 0.19276 | -4.2139 | 94158    |
| HAS1         | 1.3838   | 1.3838  | 0.81355 | 2.1519  | 0.049729 | 0.19276 | -4.2141 | 3036     |
| CUL1         | 4.1299   | 4.1299  | 11.036  | 2.1517  | 0.049744 | 0.19276 | -4.2144 | 8454     |
| SEMA3B       | -0.70028 | 0.70028 | 1.0119  | -2.1515 | 0.049763 | 0.19276 | -4.2147 | 7869     |
| RCBTB2       | 0.84811  | 0.84811 | 1.9045  | 2.1515  | 0.049764 | 0.19276 | -4.2148 | 1102     |
| ANKRD13A     | 4.369    | 4.369   | 12.722  | 2.1514  | 0.049769 | 0.19276 | -4.2149 | 88455    |

|              |          |         |         |         |          |         |         |        |
|--------------|----------|---------|---------|---------|----------|---------|---------|--------|
| TMEM212      | -0.93204 | 0.93204 | 1.4959  | -2.1506 | 0.049842 | 0.193   | -4.2162 | 389177 |
| PTPRCAP      | -1.5611  | 1.5611  | 2.4337  | -2.1503 | 0.049869 | 0.19304 | -4.2166 | 5790   |
| YES1         | 4.0959   | 4.0959  | 8.9832  | 2.1503  | 0.049874 | 0.19304 | -4.2167 | 7525   |
| PCDHGB7      | -0.75679 | 0.75679 | 2.3418  | -2.15   | 0.049896 | 0.19308 | -4.2171 | 56099  |
| UBE2O        | -1.2782  | 1.2782  | 4.1977  | -2.1491 | 0.049982 | 0.19334 | -4.2186 | 63893  |
| UBE3C        | 3.6765   | 3.6765  | 12.417  | 2.1491  | 0.049987 | 0.19334 | -4.2187 | 9690   |
| EFR3A        | 1.3335   | 1.3335  | 6.0152  | 2.1486  | 0.050029 | 0.19346 | -4.2195 | 23167  |
| SPRY2        | -1.4321  | 1.4321  | 2.7409  | -2.1483 | 0.050062 | 0.19354 | -4.2201 | 10253  |
| SIRPB1       | 0.40699  | 0.40699 | 0.37633 | 2.1479  | 0.050094 | 0.19362 | -4.2206 | 10326  |
| LOC100288123 | -0.50718 | 0.50718 | 0.73392 | -2.1477 | 0.050111 | 0.19362 | -4.2209 | 1E+08  |
| PDZD2        | -3.6011  | 3.6011  | 4.9578  | -2.1476 | 0.050119 | 0.19362 | -4.2211 | 23037  |
| LOC100130370 | -0.1831  | 0.1831  | 0.14891 | -2.1475 | 0.050129 | 0.19362 | -4.2212 | 1E+08  |
| SNORA37      | -7.8906  | 7.8906  | 8.3433  | -2.1473 | 0.050153 | 0.19364 | -4.2217 | 677819 |
| KCTD12       | -3.9744  | 3.9744  | 8.2282  | -2.1472 | 0.050156 | 0.19364 | -4.2217 | 115207 |
| YKT6         | 8.7016   | 8.7016  | 16.945  | 2.1464  | 0.05023  | 0.19388 | -4.223  | 10652  |
| IRX1         | -0.64624 | 0.64624 | 0.94274 | -2.1463 | 0.050245 | 0.1939  | -4.2233 | 79192  |
| CHD1         | 1.3831   | 1.3831  | 4.2877  | 2.1458  | 0.050289 | 0.19398 | -4.2241 | 1105   |
| MFSD14B      | 4.4741   | 4.4741  | 12.473  | 2.1458  | 0.05029  | 0.19398 | -4.2241 | 84641  |
| WNT9A        | 0.20334  | 0.20334 | 0.36173 | 2.1452  | 0.050342 | 0.19413 | -4.225  | 7483   |
| PER1         | -11.535  | 11.535  | 16.486  | -2.1447 | 0.050393 | 0.19426 | -4.2259 | 5187   |
| CCT6A        | 10.45    | 10.45   | 22.873  | 2.1447  | 0.050396 | 0.19426 | -4.226  | 908    |
| MYL12A       | 30.173   | 30.173  | 52.859  | 2.1444  | 0.050421 | 0.19431 | -4.2264 | 10627  |
| ADH4         | -0.23211 | 0.23211 | 0.15136 | -2.1439 | 0.050466 | 0.19443 | -4.2272 | 127    |
| P4HB         | 64.115   | 64.115  | 149.09  | 2.1437  | 0.050488 | 0.19448 | -4.2276 | 5034   |
| FSIP2        | -0.295   | 0.295   | 0.22758 | -2.143  | 0.050548 | 0.19466 | -4.2286 | 401024 |
| NEPRO        | -1.0085  | 1.0085  | 2.975   | -2.1429 | 0.050561 | 0.19467 | -4.2289 | 25871  |

|            |          |         |          |         |          |         |         |          |
|------------|----------|---------|----------|---------|----------|---------|---------|----------|
| ZBTB20-AS3 | -0.1775  | 0.1775  | 0.14237  | -2.1418 | 0.050662 | 0.19499 | -4.2306 | 1.04E+08 |
| ANK2       | -1.0716  | 1.0716  | 1.3305   | -2.1417 | 0.050668 | 0.19499 | -4.2307 | 287      |
| STRADA     | -0.86273 | 0.86273 | 3.2121   | -2.1414 | 0.050705 | 0.19507 | -4.2314 | 92335    |
| GOLGA1     | -0.53784 | 0.53784 | 2.9761   | -2.1412 | 0.050717 | 0.19507 | -4.2316 | 2800     |
| TMEM135    | -0.33916 | 0.33916 | 0.94025  | -2.1412 | 0.050723 | 0.19507 | -4.2317 | 65084    |
| VEGFD      | -0.27956 | 0.27956 | 0.18024  | -2.1409 | 0.050744 | 0.19508 | -4.2321 | 2277     |
| PLEKHA5    | 0.60612  | 0.60612 | 2.296    | 2.1409  | 0.05075  | 0.19508 | -4.2322 | 54477    |
| MSMB       | -0.87723 | 0.87723 | 0.78174  | -2.1406 | 0.050779 | 0.19515 | -4.2327 | 4477     |
| TMEM253    | -0.15045 | 0.15045 | 0.22753  | -2.1402 | 0.050809 | 0.19522 | -4.2332 | 643382   |
| CYP4F22    | 17.464   | 17.464  | 21.747   | 2.1396  | 0.050866 | 0.19538 | -4.2342 | 126410   |
| UBL5       | 32.55    | 32.55   | 49.573   | 2.1396  | 0.050873 | 0.19538 | -4.2343 | 59286    |
| DRC3       | -0.19781 | 0.19781 | 0.3302   | -2.1391 | 0.050919 | 0.19551 | -4.2351 | 83450    |
| SLC31A2    | 8.9577   | 8.9577  | 12.921   | 2.1389  | 0.050935 | 0.19553 | -4.2354 | 1318     |
| SPECC1     | 1.2389   | 1.2389  | 2.5727   | 2.1386  | 0.050965 | 0.19556 | -4.2359 | 92521    |
| EDIL3      | 4.1855   | 4.1855  | 3.5217   | 2.1386  | 0.050965 | 0.19556 | -4.2359 | 10085    |
| TRIP11     | 0.7781   | 0.7781  | 3.0743   | 2.1375  | 0.051067 | 0.1959  | -4.2377 | 9321     |
| LENEP      | -0.1634  | 0.1634  | 0.13877  | -2.1368 | 0.051138 | 0.19613 | -4.2389 | 55891    |
| SPRR4      | 0.99803  | 0.99803 | 1.2015   | 2.1366  | 0.051152 | 0.19614 | -4.2392 | 163778   |
| RCBTB1     | -0.51865 | 0.51865 | 1.3275   | -2.1355 | 0.051261 | 0.1965  | -4.2411 | 55213    |
| LINC00685  | -0.21633 | 0.21633 | 0.29853  | -2.1354 | 0.05127  | 0.1965  | -4.2412 | 283981   |
| RIMS1      | -0.1391  | 0.1391  | 0.079445 | -2.135  | 0.051308 | 0.19655 | -4.2419 | 22999    |
| LINC01128  | 0.27159  | 0.27159 | 1.1222   | 2.1349  | 0.051312 | 0.19655 | -4.2419 | 643837   |
| SERPINB7   | 40.883   | 40.883  | 41.173   | 2.1349  | 0.051318 | 0.19655 | -4.242  | 8710     |
| ZNF213     | -1.1846  | 1.1846  | 2.8453   | -2.1345 | 0.051348 | 0.19662 | -4.2426 | 7760     |
| RBM6       | -2.3546  | 2.3546  | 7.5824   | -2.1344 | 0.051366 | 0.19664 | -4.2429 | 10180    |
| TRERF1     | -0.93606 | 0.93606 | 2.318    | -2.1342 | 0.051377 | 0.19664 | -4.2431 | 55809    |



|            |          |         |          |         |          |         |         |          |
|------------|----------|---------|----------|---------|----------|---------|---------|----------|
| RNF214     | -0.83902 | 0.83902 | 3.1643   | -2.134  | 0.051396 | 0.19667 | -4.2434 | 257160   |
| C19orf71   | -0.4537  | 0.4537  | 0.89112  | -2.1338 | 0.051416 | 0.19671 | -4.2437 | 1E+08    |
| ALDH3A1    | -8.9682  | 8.9682  | 8.9238   | -2.1333 | 0.051471 | 0.19682 | -4.2447 | 218      |
| GTF3C2-AS1 | -0.18835 | 0.18835 | 0.2402   | -2.1332 | 0.051475 | 0.19682 | -4.2448 | 1.01E+08 |
| SLC35E2B   | -1.6972  | 1.6972  | 5.9607   | -2.1331 | 0.051481 | 0.19682 | -4.2449 | 728661   |
| CD8B       | -0.23254 | 0.23254 | 0.29475  | -2.1327 | 0.051525 | 0.19694 | -4.2456 | 926      |
| GRB14      | -0.15304 | 0.15304 | 0.12818  | -2.1312 | 0.051664 | 0.19743 | -4.248  | 2888     |
| HSP90B2P   | -0.16411 | 0.16411 | 0.26415  | -2.1311 | 0.051679 | 0.19744 | -4.2483 | 7190     |
| CASS4      | 0.4313   | 0.4313  | 0.51459  | 2.1304  | 0.051746 | 0.19766 | -4.2494 | 57091    |
| HMCN2      | -1.8186  | 1.8186  | 1.1959   | -2.1302 | 0.051759 | 0.19766 | -4.2496 | 256158   |
| LRRN4CL    | -1.4999  | 1.4999  | 1.7767   | -2.1299 | 0.051796 | 0.19775 | -4.2503 | 221091   |
| CCDC102B   | 0.8943   | 0.8943  | 1.208    | 2.1297  | 0.051812 | 0.19777 | -4.2505 | 79839    |
| CRTAC1     | -1.0258  | 1.0258  | 1.3358   | -2.1294 | 0.051839 | 0.19783 | -4.251  | 55118    |
| SGO1-AS1   | 0.14008  | 0.14008 | 0.068364 | 2.1286  | 0.05192  | 0.19809 | -4.2524 | 1.01E+08 |
| CCL27      | -10.902  | 10.902  | 5.9151   | -2.1281 | 0.051967 | 0.19822 | -4.2532 | 10850    |
| TRNP1      | 1.293    | 1.293   | 3.1149   | 2.1278  | 0.051992 | 0.19822 | -4.2536 | 388610   |
| EDN3       | -0.12591 | 0.12591 | 0.071005 | -2.1277 | 0.052002 | 0.19822 | -4.2538 | 1908     |
| HEATR5B    | -0.81539 | 0.81539 | 4.5188   | -2.1275 | 0.052023 | 0.19822 | -4.2541 | 54497    |
| ARF1       | 25.981   | 25.981  | 63.332   | 2.1275  | 0.052025 | 0.19822 | -4.2542 | 375      |
| SLC30A9    | 2.4923   | 2.4923  | 7.4212   | 2.1273  | 0.052039 | 0.19822 | -4.2544 | 10463    |
| LSG1       | -1.4934  | 1.4934  | 5.5341   | -2.1271 | 0.052056 | 0.19822 | -4.2547 | 55341    |
| SAMD4B     | 4.9195   | 4.9195  | 14.035   | 2.1271  | 0.052059 | 0.19822 | -4.2548 | 55095    |
| PRDX1      | 35.235   | 35.235  | 70.425   | 2.1271  | 0.05206  | 0.19822 | -4.2548 | 5052     |
| MAP3K21    | -0.19591 | 0.19591 | 0.64869  | -2.1265 | 0.052122 | 0.19837 | -4.2558 | 84451    |
| NINJ1      | -5.8682  | 5.8682  | 10.864   | -2.1263 | 0.052132 | 0.19837 | -4.256  | 4814     |
| C9orf106   | -0.25249 | 0.25249 | 0.28715  | -2.1263 | 0.052134 | 0.19837 | -4.256  | 414318   |

|           |          |         |          |         |          |         |         |          |
|-----------|----------|---------|----------|---------|----------|---------|---------|----------|
| LOC340357 | -0.16638 | 0.16638 | 0.091967 | -2.1255 | 0.052218 | 0.19865 | -4.2574 | 340357   |
| NPAS3     | -0.13583 | 0.13583 | 0.11326  | -2.1252 | 0.052245 | 0.1987  | -4.2579 | 64067    |
| SEC14L2   | 1.215    | 1.215   | 2.6073   | 2.1251  | 0.052254 | 0.1987  | -4.2581 | 23541    |
| PAXBP1    | -0.7793  | 0.7793  | 2.8923   | -2.1248 | 0.052279 | 0.19875 | -4.2585 | 94104    |
| NDUFAF1   | 1.2216   | 1.2216  | 3.056    | 2.1245  | 0.052313 | 0.19883 | -4.2591 | 51103    |
| ASPSCR1   | -1.4588  | 1.4588  | 2.7831   | -2.1242 | 0.052344 | 0.1989  | -4.2596 | 79058    |
| PCDHGB8P  | -0.49443 | 0.49443 | 0.82691  | -2.1239 | 0.052369 | 0.19895 | -4.26   | 56120    |
| ZBTB47    | -1.591   | 1.591   | 3.6144   | -2.1237 | 0.052388 | 0.19898 | -4.2603 | 92999    |
| COL5A2    | 39.165   | 39.165  | 36.078   | 2.1234  | 0.05242  | 0.19906 | -4.2609 | 1290     |
| RNF141    | 3.4305   | 3.4305  | 11.038   | 2.1228  | 0.052474 | 0.19906 | -4.2618 | 50862    |
| ZNF264    | -0.58635 | 0.58635 | 3.3388   | -2.1227 | 0.052484 | 0.19906 | -4.262  | 9422     |
| PNISR     | -1.6698  | 1.6698  | 4.3832   | -2.1227 | 0.052486 | 0.19906 | -4.262  | 25957    |
| PLEKHG1   | 1.0085   | 1.0085  | 3.2792   | 2.1226  | 0.052494 | 0.19906 | -4.2621 | 57480    |
| PDE8A     | 1.2884   | 1.2884  | 4.7551   | 2.1226  | 0.052496 | 0.19906 | -4.2622 | 5151     |
| CEP85     | -0.61728 | 0.61728 | 1.9141   | -2.1224 | 0.05251  | 0.19906 | -4.2624 | 64793    |
| LINC01659 | -0.1418  | 0.1418  | 0.10585  | -2.1224 | 0.052513 | 0.19906 | -4.2624 | 1.02E+08 |
| COL12A1   | 55.289   | 55.289  | 39.234   | 2.1224  | 0.052514 | 0.19906 | -4.2625 | 1303     |
| CFAP126   | -0.33707 | 0.33707 | 1.0723   | -2.1221 | 0.05254  | 0.19911 | -4.2629 | 257177   |
| ABCB9     | -0.25612 | 0.25612 | 0.46522  | -2.1215 | 0.052596 | 0.19924 | -4.2638 | 23457    |
| SLC34A2   | -1.7201  | 1.7201  | 0.99005  | -2.1215 | 0.052598 | 0.19924 | -4.2639 | 10568    |
| SPON2     | 10.555   | 10.555  | 14.37    | 2.1213  | 0.052624 | 0.19929 | -4.2643 | 10417    |
| PCDHGB3   | -0.25909 | 0.25909 | 0.68917  | -2.121  | 0.052645 | 0.19933 | -4.2647 | 56102    |
| POMT1     | -0.60189 | 0.60189 | 2.2019   | -2.1209 | 0.052663 | 0.19935 | -4.265  | 10585    |
| SIGLEC12  | 0.20643  | 0.20643 | 0.16171  | 2.1204  | 0.052703 | 0.19937 | -4.2656 | 89858    |
| GTF2B     | 2.7727   | 2.7727  | 5.7288   | 2.1204  | 0.052708 | 0.19937 | -4.2657 | 2959     |
| GHITM     | 9.7872   | 9.7872  | 22.416   | 2.1204  | 0.052712 | 0.19937 | -4.2658 | 27069    |

|         |          |         |         |         |          |         |         |        |
|---------|----------|---------|---------|---------|----------|---------|---------|--------|
| RYR2    | -0.21073 | 0.21073 | 0.2428  | -2.1203 | 0.052717 | 0.19937 | -4.2659 | 6262   |
| CENPC   | -1.0223  | 1.0223  | 2.2627  | -2.1202 | 0.052726 | 0.19937 | -4.266  | 1060   |
| DPY30   | 2.8716   | 2.8716  | 5.1898  | 2.12    | 0.05275  | 0.19937 | -4.2664 | 84661  |
| GGT8P   | 0.3919   | 0.3919  | 0.38987 | 2.12    | 0.052751 | 0.19937 | -4.2665 | 645367 |
| ATN1    | -8.5459  | 8.5459  | 18.712  | -2.1195 | 0.052798 | 0.19946 | -4.2672 | 1822   |
| PRPF19  | -6.3441  | 6.3441  | 15.218  | -2.1195 | 0.052799 | 0.19946 | -4.2673 | 27339  |
| BCAT2   | -1.1545  | 1.1545  | 2.8691  | -2.1192 | 0.052825 | 0.19948 | -4.2677 | 587    |
| PTPRN   | 1.1132   | 1.1132  | 0.54682 | 2.1192  | 0.052829 | 0.19948 | -4.2678 | 5798   |
| EFHD1   | -1.2312  | 1.2312  | 1.5615  | -2.1189 | 0.052856 | 0.19948 | -4.2682 | 80303  |
| TUBGCP6 | -2.4956  | 2.4956  | 4.7167  | -2.1188 | 0.05286  | 0.19948 | -4.2683 | 85378  |
| RBM19   | -1.2701  | 1.2701  | 3.8046  | -2.1188 | 0.052862 | 0.19948 | -4.2683 | 9904   |
| ESM1    | 0.22434  | 0.22434 | 0.15247 | 2.1185  | 0.052894 | 0.19956 | -4.2688 | 11082  |
| LAMTOR3 | 1.5012   | 1.5012  | 3.3381  | 2.1177  | 0.052973 | 0.19981 | -4.2702 | 8649   |
| COPA    | 5.5957   | 5.5957  | 18.979  | 2.1174  | 0.053005 | 0.19986 | -4.2707 | 1314   |
| PIDD1   | -1.5739  | 1.5739  | 2.2327  | -2.1173 | 0.053012 | 0.19986 | -4.2708 | 55367  |
| TRMT10C | 1.5644   | 1.5644  | 3.5439  | 2.1167  | 0.053065 | 0.2     | -4.2717 | 54931  |
| ZNF582  | -0.16918 | 0.16918 | 0.29668 | -2.1167 | 0.053071 | 0.2     | -4.2718 | 147948 |
| TPH1    | -0.16681 | 0.16681 | 0.16137 | -2.1165 | 0.053086 | 0.20001 | -4.272  | 7166   |
| AFG3L1P | -0.42521 | 0.42521 | 1.5924  | -2.1161 | 0.053122 | 0.2001  | -4.2727 | 172    |
| GPRC5B  | -1.5398  | 1.5398  | 2.4418  | -2.1159 | 0.053146 | 0.20015 | -4.273  | 51704  |
| EDNRA   | 2.7012   | 2.7012  | 3.5133  | 2.1156  | 0.053179 | 0.20023 | -4.2736 | 1909   |
| TEP1    | -1.0945  | 1.0945  | 2.9963  | -2.1151 | 0.053224 | 0.20033 | -4.2744 | 7011   |
| HEATR3  | 0.65856  | 0.65856 | 1.8234  | 2.1151  | 0.05323  | 0.20033 | -4.2744 | 55027  |
| ZNF641  | -0.71419 | 0.71419 | 1.8502  | -2.1146 | 0.05327  | 0.20044 | -4.2751 | 121274 |
| PIPOX   | -0.14679 | 0.14679 | 0.1387  | -2.1139 | 0.053345 | 0.20061 | -4.2764 | 51268  |
| GLCE    | 0.71643  | 0.71643 | 2.3617  | 2.1139  | 0.053347 | 0.20061 | -4.2764 | 26035  |

|           |          |         |         |         |          |         |         |          |
|-----------|----------|---------|---------|---------|----------|---------|---------|----------|
| ARHGAP45  | -0.66214 | 0.66214 | 1.5261  | -2.1138 | 0.053353 | 0.20061 | -4.2765 | 23526    |
| ZSCAN2    | -0.28538 | 0.28538 | 0.60571 | -2.1137 | 0.053363 | 0.20061 | -4.2767 | 54993    |
| YIPF4     | 3.1407   | 3.1407  | 7.1685  | 2.1132  | 0.05341  | 0.20074 | -4.2774 | 84272    |
| GPR87     | 5.9505   | 5.9505  | 10.031  | 2.1131  | 0.053425 | 0.20075 | -4.2777 | 53836    |
| DTX4      | -0.6633  | 0.6633  | 1.1455  | -2.1128 | 0.05345  | 0.2008  | -4.2781 | 23220    |
| CNEP1R1   | 1.0238   | 1.0238  | 2.5416  | 2.1122  | 0.05351  | 0.20098 | -4.2791 | 255919   |
| FKSG29    | -0.69916 | 0.69916 | 1.1893  | -2.112  | 0.053534 | 0.20103 | -4.2795 | 1E+08    |
| GJB4      | -1.8083  | 1.8083  | 1.6967  | -2.1115 | 0.053579 | 0.20115 | -4.2802 | 127534   |
| SLC5A10   | 0.93456  | 0.93456 | 1.3686  | 2.1111  | 0.053619 | 0.20126 | -4.2809 | 125206   |
| BTBD16    | -0.34416 | 0.34416 | 0.28218 | -2.1109 | 0.053642 | 0.2013  | -4.2813 | 118663   |
| RCCD1     | -0.78629 | 0.78629 | 1.5769  | -2.1102 | 0.053705 | 0.20144 | -4.2823 | 91433    |
| SOX21     | -2.6503  | 2.6503  | 4.0974  | -2.1101 | 0.053717 | 0.20144 | -4.2825 | 11166    |
| EFNA4     | -2.3468  | 2.3468  | 5.6138  | -2.1101 | 0.053719 | 0.20144 | -4.2825 | 1945     |
| SNX25     | 0.58588  | 0.58588 | 2.5532  | 2.11    | 0.053731 | 0.20144 | -4.2827 | 83891    |
| RBX1      | 12.125   | 12.125  | 18.183  | 2.1099  | 0.053739 | 0.20144 | -4.2829 | 9978     |
| TMEM54    | 32.082   | 32.082  | 50.334  | 2.1097  | 0.05376  | 0.20144 | -4.2832 | 113452   |
| HDAC6     | -1.0279  | 1.0279  | 3.135   | -2.1096 | 0.053765 | 0.20144 | -4.2833 | 10013    |
| TAS2R30   | -0.61031 | 0.61031 | 0.90257 | -2.1095 | 0.053776 | 0.20144 | -4.2835 | 259293   |
| AACSP1    | -0.4459  | 0.4459  | 0.31021 | -2.1093 | 0.053798 | 0.20148 | -4.2838 | 729522   |
| PCDHGA5   | -0.23827 | 0.23827 | 0.53458 | -2.1087 | 0.053859 | 0.20166 | -4.2848 | 56110    |
| LINC01058 | -0.15387 | 0.15387 | 0.1309  | -2.1084 | 0.053888 | 0.20171 | -4.2853 | 1.04E+08 |
| NALT1     | -0.18057 | 0.18057 | 0.255   | -2.1083 | 0.053896 | 0.20171 | -4.2854 | 1.02E+08 |
| RNVU1-8   | 0.31556  | 0.31556 | 0.31314 | 2.1079  | 0.05394  | 0.20183 | -4.2862 | 1.01E+08 |
| RSBN1     | -0.51615 | 0.51615 | 2.0348  | -2.1076 | 0.053967 | 0.20186 | -4.2866 | 54665    |
| PRDM8     | -0.25389 | 0.25389 | 0.39572 | -2.1075 | 0.053972 | 0.20186 | -4.2867 | 56978    |
| TMEM183B  | 4.3851   | 4.3851  | 11.099  | 2.1069  | 0.054041 | 0.20208 | -4.2878 | 653659   |

|           |          |         |          |         |          |         |         |          |
|-----------|----------|---------|----------|---------|----------|---------|---------|----------|
| MFSD12    | 3.9339   | 3.9339  | 8.6312   | 2.1064  | 0.054086 | 0.20215 | -4.2886 | 126321   |
| KCTD10    | 6.3651   | 6.3651  | 14.246   | 2.1064  | 0.054086 | 0.20215 | -4.2886 | 83892    |
| LINC01389 | -0.19945 | 0.19945 | 0.24711  | -2.1062 | 0.054108 | 0.20219 | -4.2889 | 1.03E+08 |
| VAV3      | -2.7508  | 2.7508  | 7.3351   | -2.1051 | 0.054215 | 0.20255 | -4.2907 | 10451    |
| CDC42     | 16.598   | 16.598  | 40.714   | 2.1048  | 0.054245 | 0.20261 | -4.2911 | 998      |
| TMEM72    | -0.13638 | 0.13638 | 0.093988 | -2.1046 | 0.054263 | 0.20264 | -4.2915 | 643236   |
| CYP2A6    | -0.17406 | 0.17406 | 0.16899  | -2.1045 | 0.054278 | 0.20265 | -4.2917 | 1548     |
| FOXN2     | 0.85432  | 0.85432 | 2.1041   | 2.1041  | 0.054314 | 0.20274 | -4.2923 | 3344     |
| CAPG      | 18.982   | 18.982  | 33.24    | 2.104   | 0.05433  | 0.20275 | -4.2925 | 822      |
| PAF1      | 4.1694   | 4.1694  | 8.6061   | 2.1032  | 0.054402 | 0.20293 | -4.2937 | 54623    |
| LINC00963 | -1.1806  | 1.1806  | 2.2058   | -2.1031 | 0.054412 | 0.20293 | -4.2939 | 1.01E+08 |
| VSIG10L   | 12.546   | 12.546  | 13.162   | 2.1031  | 0.054415 | 0.20293 | -4.2939 | 147645   |
| WDSUB1    | -0.3919  | 0.3919  | 1.489    | -2.1026 | 0.054463 | 0.20307 | -4.2947 | 151525   |
| GRASP-AS1 | -0.51783 | 0.51783 | 0.77908  | -2.1024 | 0.054486 | 0.20311 | -4.2951 | 692159   |
| SMIM17    | -0.28637 | 0.28637 | 0.51261  | -2.1021 | 0.054521 | 0.20319 | -4.2956 | 147670   |
| CHPF      | 6.5442   | 6.5442  | 11.106   | 2.1019  | 0.054539 | 0.20319 | -4.2959 | 79586    |
| TGFBI     | 53.141   | 53.141  | 69.141   | 2.1018  | 0.054542 | 0.20319 | -4.296  | 7045     |
| ADGRF5    | 2.9002   | 2.9002  | 4.251    | 2.1016  | 0.054562 | 0.20321 | -4.2963 | 221395   |
| FAM66D    | -0.27854 | 0.27854 | 0.22687  | -2.1014 | 0.054585 | 0.20326 | -4.2967 | 1E+08    |
| BRD1      | -2.2382  | 2.2382  | 7.0034   | -2.101  | 0.054627 | 0.20337 | -4.2974 | 23774    |
| MYO6      | 3.4242   | 3.4242  | 7.0661   | 2.1007  | 0.054654 | 0.20342 | -4.2978 | 4646     |
| RAB17     | -0.30814 | 0.30814 | 0.28397  | -2.1005 | 0.054679 | 0.20347 | -4.2982 | 64284    |
| SH2B1     | -2.2567  | 2.2567  | 3.9878   | -2.1002 | 0.054708 | 0.20353 | -4.2987 | 25970    |
| IL15RA    | -0.87759 | 0.87759 | 1.4533   | -2.1    | 0.054727 | 0.20356 | -4.299  | 3601     |
| GPD1      | -0.63394 | 0.63394 | 0.37143  | -2.0992 | 0.054805 | 0.20381 | -4.3002 | 2819     |
| TMEM205   | -3.4713  | 3.4713  | 7.1998   | -2.0981 | 0.05492  | 0.20419 | -4.3021 | 374882   |

|              |          |         |          |         |          |         |         |          |
|--------------|----------|---------|----------|---------|----------|---------|---------|----------|
| USP24        | -1.2637  | 1.2637  | 5.6629   | -2.0976 | 0.054965 | 0.20429 | -4.3028 | 23358    |
| LLPH         | 3.3201   | 3.3201  | 6.0351   | 2.0975  | 0.05498  | 0.20429 | -4.303  | 84298    |
| LINC01004    | -0.65385 | 0.65385 | 1.547    | -2.0975 | 0.054984 | 0.20429 | -4.3031 | 1E+08    |
| MAFG         | 1.1124   | 1.1124  | 3.6984   | 2.097   | 0.055034 | 0.20441 | -4.3039 | 4097     |
| PHF14        | -0.45616 | 0.45616 | 2.2629   | -2.0969 | 0.055042 | 0.20441 | -4.3041 | 9678     |
| GPR75        | -0.40455 | 0.40455 | 0.89962  | -2.0968 | 0.055052 | 0.20441 | -4.3042 | 10936    |
| MBD1         | 4.7552   | 4.7552  | 10.378   | 2.0962  | 0.055111 | 0.20456 | -4.3052 | 4152     |
| SRSF11       | -2.1142  | 2.1142  | 8.2895   | -2.0961 | 0.055122 | 0.20456 | -4.3053 | 9295     |
| POC1B        | 0.38039  | 0.38039 | 1.6926   | 2.096   | 0.055128 | 0.20456 | -4.3054 | 282809   |
| GCNT4        | 1.1536   | 1.1536  | 1.5739   | 2.0959  | 0.055141 | 0.20456 | -4.3056 | 51301    |
| TIMM23       | 5.4751   | 5.4751  | 11.725   | 2.0951  | 0.055222 | 0.20481 | -4.3069 | 1E+08    |
| LINC00638    | -0.19997 | 0.19997 | 0.16617  | -2.095  | 0.055235 | 0.20481 | -4.3071 | 196872   |
| AK4          | -2.0523  | 2.0523  | 5.6868   | -2.0947 | 0.055268 | 0.20481 | -4.3077 | 205      |
| TACC2        | -6.4642  | 6.4642  | 10.8     | -2.0946 | 0.055276 | 0.20481 | -4.3078 | 10579    |
| AQP3         | 133.4    | 133.4   | 243.24   | 2.0946  | 0.055277 | 0.20481 | -4.3078 | 360      |
| C16orf96     | -0.12839 | 0.12839 | 0.074456 | -2.0945 | 0.055288 | 0.20481 | -4.308  | 342346   |
| LRRC4        | 0.92997  | 0.92997 | 1.569    | 2.0943  | 0.055299 | 0.20481 | -4.3082 | 64101    |
| ZNF555       | -0.19239 | 0.19239 | 0.47624  | -2.0942 | 0.055318 | 0.20481 | -4.3085 | 148254   |
| RTCA         | 1.9283   | 1.9283  | 4.689    | 2.094   | 0.055329 | 0.20481 | -4.3086 | 8634     |
| CNOT6        | 1.5828   | 1.5828  | 4.3182   | 2.0938  | 0.055352 | 0.20481 | -4.309  | 57472    |
| CLUHP3       | -0.85173 | 0.85173 | 1.5943   | -2.0938 | 0.055353 | 0.20481 | -4.309  | 1E+08    |
| NBPF26       | -2.9159  | 2.9159  | 6.605    | -2.0938 | 0.05536  | 0.20481 | -4.3091 | 1.01E+08 |
| MPPED1       | -0.14993 | 0.14993 | 0.081123 | -2.0937 | 0.055368 | 0.20481 | -4.3093 | 758      |
| LOC102723809 | -0.26342 | 0.26342 | 0.28273  | -2.0935 | 0.055381 | 0.20482 | -4.3095 | 1.03E+08 |
| RYR1         | -0.24509 | 0.24509 | 0.36956  | -2.0929 | 0.055451 | 0.20503 | -4.3106 | 6261     |
| PCGF3        | -1.1924  | 1.1924  | 7.7933   | -2.0927 | 0.055471 | 0.20506 | -4.3109 | 10336    |

|              |          |         |         |         |          |         |         |          |
|--------------|----------|---------|---------|---------|----------|---------|---------|----------|
| PLET1        | -0.39966 | 0.39966 | 0.39426 | -2.092  | 0.055543 | 0.20528 | -4.312  | 349633   |
| NUDT7        | -0.35778 | 0.35778 | 0.72785 | -2.0915 | 0.055593 | 0.20542 | -4.3128 | 283927   |
| LOC105373876 | -0.19167 | 0.19167 | 0.10223 | -2.0913 | 0.055614 | 0.20542 | -4.3132 | 1.05E+08 |
| BRWD1-AS2    | -0.177   | 0.177   | 0.28518 | -2.0912 | 0.055617 | 0.20542 | -4.3132 | 1.03E+08 |
| PSAT1        | -2.9997  | 2.9997  | 9.1222  | -2.0907 | 0.05567  | 0.20554 | -4.3141 | 29968    |
| MXD3         | -0.34923 | 0.34923 | 1.2104  | -2.0907 | 0.055674 | 0.20554 | -4.3141 | 83463    |
| SPPL2B       | -1.9072  | 1.9072  | 3.8947  | -2.0903 | 0.055711 | 0.2056  | -4.3147 | 56928    |
| SBSPON       | -0.91329 | 0.91329 | 0.68844 | -2.0901 | 0.055736 | 0.2056  | -4.3151 | 157869   |
| SLC25A21-AS1 | -0.17682 | 0.17682 | 0.17697 | -2.09   | 0.055744 | 0.2056  | -4.3152 | 1E+08    |
| PIK3IP1-AS1  | -0.24436 | 0.24436 | 0.23975 | -2.0899 | 0.05575  | 0.2056  | -4.3153 | 1.02E+08 |
| TRMT12       | -0.41422 | 0.41422 | 1.9198  | -2.0899 | 0.055751 | 0.2056  | -4.3153 | 55039    |
| LRRFIP1      | 4.5848   | 4.5848  | 11.384  | 2.0897  | 0.055777 | 0.20565 | -4.3158 | 9208     |
| CMC2         | 1.4999   | 1.4999  | 2.5821  | 2.0891  | 0.055832 | 0.20579 | -4.3166 | 56942    |
| HCAR3        | 2.0566   | 2.0566  | 2.3255  | 2.0891  | 0.055839 | 0.20579 | -4.3167 | 8843     |
| RNF44        | -2.9163  | 2.9163  | 7.9755  | -2.0875 | 0.055995 | 0.20632 | -4.3192 | 22838    |
| C11orf65     | -0.14561 | 0.14561 | 0.17926 | -2.0872 | 0.05603  | 0.20641 | -4.3198 | 160140   |
| HPGDS        | -0.64787 | 0.64787 | 0.83122 | -2.0868 | 0.056073 | 0.20649 | -4.3204 | 27306    |
| ZNF850       | -0.2795  | 0.2795  | 0.48569 | -2.0866 | 0.056089 | 0.20649 | -4.3207 | 342892   |
| CEBPB-AS1    | -0.14592 | 0.14592 | 0.15836 | -2.0866 | 0.056091 | 0.20649 | -4.3207 | 1.02E+08 |
| LAD1         | 60.462   | 60.462  | 101.12  | 2.0865  | 0.056101 | 0.20649 | -4.3209 | 3898     |
| KIAA2026     | -1.2184  | 1.2184  | 4.9757  | -2.0862 | 0.056135 | 0.20657 | -4.3214 | 158358   |
| ERI1         | 0.68958  | 0.68958 | 1.4326  | 2.0858  | 0.056173 | 0.20665 | -4.322  | 90459    |
| ADAMTS14     | 1.169    | 1.169   | 1.1972  | 2.0857  | 0.056183 | 0.20665 | -4.3222 | 140766   |
| RGS4         | 0.4568   | 0.4568  | 0.41334 | 2.0851  | 0.05625  | 0.20684 | -4.3232 | 5999     |
| INAFM2       | 1.2639   | 1.2639  | 2.8233  | 2.0849  | 0.056264 | 0.20684 | -4.3234 | 1.01E+08 |
| KIAA0556     | -0.7999  | 0.7999  | 3.2059  | -2.0849 | 0.05627  | 0.20684 | -4.3235 | 23247    |

|              |          |         |          |         |          |         |         |          |
|--------------|----------|---------|----------|---------|----------|---------|---------|----------|
| KRT3         | 0.8474   | 0.8474  | 0.55328  | 2.0844  | 0.056316 | 0.20694 | -4.3242 | 3850     |
| PKHD1L1      | -0.35539 | 0.35539 | 0.34609  | -2.0842 | 0.056338 | 0.20694 | -4.3246 | 93035    |
| CTBP1-AS     | -0.66038 | 0.66038 | 0.97352  | -2.0841 | 0.056347 | 0.20694 | -4.3247 | 285463   |
| ELFN1        | 0.62614  | 0.62614 | 0.75254  | 2.0841  | 0.056347 | 0.20694 | -4.3247 | 392617   |
| ZNF664       | 3.4851   | 3.4851  | 8.5272   | 2.0835  | 0.056409 | 0.20712 | -4.3257 | 144348   |
| FAM193A      | -0.96301 | 0.96301 | 3.6537   | -2.0829 | 0.056479 | 0.20734 | -4.3268 | 8603     |
| SALL2        | -0.27525 | 0.27525 | 0.47516  | -2.0825 | 0.056516 | 0.2074  | -4.3274 | 6297     |
| FOXS1        | 0.81541  | 0.81541 | 0.78596  | 2.0825  | 0.056521 | 0.2074  | -4.3275 | 2307     |
| HERC4        | 1.5125   | 1.5125  | 4.7702   | 2.0822  | 0.05655  | 0.20745 | -4.3279 | 26091    |
| FAM86C2P     | -0.32231 | 0.32231 | 0.66771  | -2.0821 | 0.056559 | 0.20745 | -4.328  | 645332   |
| EEF1E1       | 1.2745   | 1.2745  | 2.0754   | 2.0819  | 0.056581 | 0.20748 | -4.3284 | 9521     |
| ATP5PB       | 10.792   | 10.792  | 20.692   | 2.0815  | 0.056618 | 0.20754 | -4.329  | 515      |
| BORCS7-ASMT  | -0.31755 | 0.31755 | 0.56847  | -2.0815 | 0.056622 | 0.20754 | -4.329  | 1.01E+08 |
| FAM86FP      | -0.23623 | 0.23623 | 0.5012   | -2.0813 | 0.056646 | 0.20759 | -4.3294 | 653113   |
| TOR1A        | 2.3445   | 2.3445  | 6.0818   | 2.081   | 0.05667  | 0.20763 | -4.3298 | 1861     |
| HOXD4        | -0.32365 | 0.32365 | 0.60726  | -2.0808 | 0.056689 | 0.20763 | -4.3301 | 3233     |
| GSPT1        | 3.5085   | 3.5085  | 9.354    | 2.0808  | 0.056696 | 0.20763 | -4.3302 | 2935     |
| DOC2B        | -1.2336  | 1.2336  | 1.6957   | -2.0804 | 0.056738 | 0.20774 | -4.3308 | 8447     |
| RNF103-CHMP3 | -0.33028 | 0.33028 | 0.61922  | -2.0802 | 0.056758 | 0.20777 | -4.3311 | 1.01E+08 |
| STK3         | 0.9895   | 0.9895  | 3.3045   | 2.0798  | 0.056799 | 0.20788 | -4.3318 | 6788     |
| ARHGAP20     | -0.25289 | 0.25289 | 0.33886  | -2.0793 | 0.056847 | 0.20801 | -4.3325 | 57569    |
| POLDIP3      | -2.9995  | 2.9995  | 9.7347   | -2.0788 | 0.056906 | 0.2081  | -4.3334 | 84271    |
| COL4A2       | 42.01    | 42.01   | 52.913   | 2.0787  | 0.056907 | 0.2081  | -4.3334 | 1284     |
| RSPH14       | -0.13861 | 0.13861 | 0.083118 | -2.0787 | 0.056908 | 0.2081  | -4.3335 | 27156    |
| PCDHB10      | -0.23788 | 0.23788 | 0.57296  | -2.0785 | 0.056934 | 0.20815 | -4.3339 | 56126    |
| MMP13        | 1.3955   | 1.3955  | 0.80316  | 2.0783  | 0.056952 | 0.20817 | -4.3341 | 4322     |



|              |          |         |         |         |          |         |         |          |
|--------------|----------|---------|---------|---------|----------|---------|---------|----------|
| LINC00847    | -0.57943 | 0.57943 | 1.2221  | -2.0781 | 0.056971 | 0.20817 | -4.3344 | 729678   |
| NID2         | 4.0747   | 4.0747  | 4.3658  | 2.0781  | 0.056979 | 0.20817 | -4.3346 | 22795    |
| NEDD4        | 1.2217   | 1.2217  | 3.5265  | 2.0774  | 0.057044 | 0.20832 | -4.3356 | 4734     |
| RGMB-AS1     | -0.15479 | 0.15479 | 0.16983 | -2.0774 | 0.057049 | 0.20832 | -4.3357 | 503569   |
| POSTN        | 85.857   | 85.857  | 56.957  | 2.0773  | 0.057057 | 0.20832 | -4.3358 | 10631    |
| CARNMT1      | 0.59436  | 0.59436 | 1.9338  | 2.0772  | 0.057069 | 0.20832 | -4.336  | 138199   |
| APBA2        | 0.55383  | 0.55383 | 0.66718 | 2.0759  | 0.05721  | 0.20879 | -4.3381 | 321      |
| ZNF525       | -0.49227 | 0.49227 | 1.0826  | -2.0756 | 0.057233 | 0.20883 | -4.3385 | 170958   |
| LINC00346    | 0.44211  | 0.44211 | 0.56402 | 2.0755  | 0.057245 | 0.20883 | -4.3387 | 283487   |
| CD55         | 5.5175   | 5.5175  | 12.369  | 2.0749  | 0.05731  | 0.20902 | -4.3397 | 1604     |
| MECR         | -0.69837 | 0.69837 | 1.9458  | -2.0736 | 0.057445 | 0.20947 | -4.3418 | 51102    |
| GOLGA8M      | -0.14252 | 0.14252 | 0.10076 | -2.0732 | 0.057489 | 0.20958 | -4.3424 | 653720   |
| SLAIN1       | -0.14061 | 0.14061 | 0.16335 | -2.0728 | 0.05753  | 0.20968 | -4.343  | 122060   |
| CYP4F35P     | -0.39419 | 0.39419 | 0.26935 | -2.0727 | 0.057543 | 0.20968 | -4.3432 | 284233   |
| PBXIP1       | -3.4723  | 3.4723  | 6.9709  | -2.0726 | 0.057556 | 0.20968 | -4.3435 | 57326    |
| AKTIP        | 2.9979   | 2.9979  | 5.1719  | 2.0725  | 0.057565 | 0.20968 | -4.3436 | 64400    |
| MYRF         | -0.15447 | 0.15447 | 0.19416 | -2.0723 | 0.057589 | 0.20972 | -4.344  | 745      |
| ZNF548       | -0.41005 | 0.41005 | 1.8125  | -2.072  | 0.057615 | 0.20977 | -4.3443 | 147694   |
| RALGAPA1     | -1.3933  | 1.3933  | 5.1925  | -2.0718 | 0.057635 | 0.2098  | -4.3447 | 253959   |
| MLLT3        | -0.23991 | 0.23991 | 0.65615 | -2.0716 | 0.057658 | 0.20984 | -4.345  | 4300     |
| LOC101927950 | -0.24013 | 0.24013 | 0.34674 | -2.0714 | 0.057678 | 0.20987 | -4.3453 | 1.02E+08 |
| USP30-AS1    | -0.14672 | 0.14672 | 0.18046 | -2.0712 | 0.057699 | 0.2099  | -4.3456 | 1E+08    |
| KCNIP2       | -0.25184 | 0.25184 | 0.3744  | -2.0711 | 0.057711 | 0.2099  | -4.3458 | 30819    |
| CLEC3B       | -13.099  | 13.099  | 13.15   | -2.0709 | 0.057735 | 0.20994 | -4.3462 | 7123     |
| DGCR8        | -1.412   | 1.412   | 5.4281  | -2.0706 | 0.057759 | 0.20997 | -4.3466 | 54487    |
| ZNF253       | -0.4464  | 0.4464  | 0.99174 | -2.0705 | 0.05777  | 0.20997 | -4.3467 | 56242    |

|               |          |         |         |         |          |         |         |          |
|---------------|----------|---------|---------|---------|----------|---------|---------|----------|
| TPTEP2-CSNK1E | -0.54123 | 0.54123 | 0.86145 | -2.0702 | 0.05781  | 0.21007 | -4.3473 | 1.03E+08 |
| IL36G         | 26.138   | 26.138  | 26.573  | 2.07    | 0.057823 | 0.21008 | -4.3475 | 56300    |
| ZNF529-AS1    | -0.15119 | 0.15119 | 0.27257 | -2.0692 | 0.057913 | 0.21032 | -4.3489 | 1.02E+08 |
| SLC25A39      | 15.433   | 15.433  | 33.248  | 2.0692  | 0.057915 | 0.21032 | -4.3489 | 51629    |
| C5orf38       | -0.67732 | 0.67732 | 1.3337  | -2.069  | 0.057934 | 0.21034 | -4.3492 | 153571   |
| ZNF423        | -0.57046 | 0.57046 | 0.98282 | -2.0686 | 0.057972 | 0.21044 | -4.3498 | 23090    |
| PPIAP30       | -0.234   | 0.234   | 0.33753 | -2.0676 | 0.058084 | 0.2108  | -4.3515 | 1E+08    |
| LINC00707     | 2.1683   | 2.1683  | 1.1062  | 2.0668  | 0.058165 | 0.21105 | -4.3527 | 1.01E+08 |
| RNVU1-19      | 0.4198   | 0.4198  | 0.43475 | 2.0664  | 0.058205 | 0.21105 | -4.3533 | 1.02E+08 |
| KIAA0586      | -0.34431 | 0.34431 | 0.99954 | -2.0664 | 0.058213 | 0.21105 | -4.3535 | 9786     |
| ZNF75D        | -0.34931 | 0.34931 | 1.2758  | -2.0664 | 0.058213 | 0.21105 | -4.3535 | 7626     |
| RAB23         | 1.672    | 1.672   | 2.5171  | 2.0663  | 0.058222 | 0.21105 | -4.3536 | 51715    |
| DDX1          | 7.0032   | 7.0032  | 17.843  | 2.066   | 0.058252 | 0.21105 | -4.354  | 1653     |
| LINC00649     | -0.84192 | 0.84192 | 1.6597  | -2.066  | 0.058256 | 0.21105 | -4.3541 | 1.01E+08 |
| IDNK          | -0.36032 | 0.36032 | 0.94612 | -2.0659 | 0.058262 | 0.21105 | -4.3542 | 414328   |
| SBSN          | 268.78   | 268.78  | 415.07  | 2.0659  | 0.058267 | 0.21105 | -4.3543 | 374897   |
| DNAJC27       | -0.20755 | 0.20755 | 0.61449 | -2.0657 | 0.058284 | 0.21107 | -4.3545 | 51277    |
| SMIM30        | 4.3857   | 4.3857  | 5.562   | 2.0655  | 0.058306 | 0.21111 | -4.3549 | 401397   |
| PSMB5         | 9.8591   | 9.8591  | 20.818  | 2.0652  | 0.058334 | 0.21116 | -4.3553 | 5693     |
| DPP9-AS1      | -0.32087 | 0.32087 | 0.74066 | -2.0646 | 0.058401 | 0.21136 | -4.3563 | 1E+08    |
| PTK7          | 7.1564   | 7.1564  | 14.408  | 2.0644  | 0.05842  | 0.21136 | -4.3566 | 5754     |
| OR7E91P       | 0.4875   | 0.4875  | 0.61575 | 2.0643  | 0.058432 | 0.21136 | -4.3568 | 79315    |
| CHKA          | -0.61081 | 0.61081 | 1.3188  | -2.0642 | 0.05844  | 0.21136 | -4.3569 | 1119     |
| ACR           | -0.21816 | 0.21816 | 0.26573 | -2.0635 | 0.05852  | 0.21161 | -4.3581 | 49       |
| ZNF844        | -0.54996 | 0.54996 | 1.7096  | -2.0634 | 0.058533 | 0.21161 | -4.3583 | 284391   |
| AP3B1         | 2.4265   | 2.4265  | 9.1403  | 2.0631  | 0.058558 | 0.21165 | -4.3587 | 8546     |

|           |          |         |         |         |          |         |         |        |
|-----------|----------|---------|---------|---------|----------|---------|---------|--------|
| GPLD1     | -0.82165 | 0.82165 | 0.96707 | -2.0628 | 0.058594 | 0.21174 | -4.3592 | 2822   |
| PFDN2     | 6.8679   | 6.8679  | 13.133  | 2.062   | 0.058677 | 0.21199 | -4.3604 | 5202   |
| TNRC18    | -6.1498  | 6.1498  | 11.609  | -2.0619 | 0.058695 | 0.21201 | -4.3607 | 84629  |
| CALB2     | 2.5204   | 2.5204  | 1.9655  | 2.0616  | 0.058726 | 0.21208 | -4.3612 | 794    |
| ARHGEF10  | -1.3172  | 1.3172  | 3.2004  | -2.0612 | 0.058771 | 0.21218 | -4.3618 | 9639   |
| RAET1E    | 4.2096   | 4.2096  | 5.8856  | 2.0611  | 0.058781 | 0.21218 | -4.362  | 135250 |
| GPIHBP1   | -0.93921 | 0.93921 | 0.8057  | -2.061  | 0.058792 | 0.21218 | -4.3622 | 338328 |
| CXCR2     | 2.4979   | 2.4979  | 2.2561  | 2.0607  | 0.058816 | 0.21222 | -4.3625 | 3579   |
| FHOD1     | 1.8242   | 1.8242  | 4.1704  | 2.0604  | 0.05885  | 0.2123  | -4.363  | 29109  |
| NDC80     | 1.0005   | 1.0005  | 1.179   | 2.0603  | 0.058866 | 0.21231 | -4.3633 | 10403  |
| COL25A1   | -0.12837 | 0.12837 | 0.09198 | -2.0599 | 0.058909 | 0.21242 | -4.3639 | 84570  |
| UBA7      | -1.584   | 1.584   | 2.7478  | -2.0594 | 0.058961 | 0.21257 | -4.3647 | 7318   |
| LOC643406 | -1.2252  | 1.2252  | 2.0547  | -2.0592 | 0.058985 | 0.21258 | -4.365  | 643406 |
| GTPBP6    | -1.569   | 1.569   | 4.3203  | -2.0591 | 0.058991 | 0.21258 | -4.3651 | 8225   |
| C5orf24   | 1.5751   | 1.5751  | 4.0261  | 2.0586  | 0.059052 | 0.21276 | -4.366  | 134553 |
| CLCN3     | 5.7089   | 5.7089  | 11.591  | 2.0582  | 0.059096 | 0.21284 | -4.3667 | 1182   |
| WNT2      | 1.2921   | 1.2921  | 0.90289 | 2.0581  | 0.059099 | 0.21284 | -4.3667 | 7472   |
| HDAC10    | -1.9742  | 1.9742  | 3.2079  | -2.058  | 0.059117 | 0.21285 | -4.367  | 83933  |
| SAR1B     | 1.4      | 1.4     | 5.0305  | 2.0577  | 0.059148 | 0.21291 | -4.3675 | 51128  |
| KLF13     | -3.3009  | 3.3009  | 15.295  | -2.0576 | 0.059159 | 0.21291 | -4.3676 | 51621  |
| ZNF608    | -0.77874 | 0.77874 | 1.42    | -2.0572 | 0.0592   | 0.21302 | -4.3682 | 57507  |
| DGKE      | -0.34261 | 0.34261 | 0.64417 | -2.0567 | 0.059252 | 0.21315 | -4.369  | 8526   |
| CCT6B     | -0.29797 | 0.29797 | 0.52543 | -2.0565 | 0.059271 | 0.21315 | -4.3693 | 10693  |
| ASPM      | 0.69155  | 0.69155 | 0.99859 | 2.0565  | 0.059276 | 0.21315 | -4.3694 | 259266 |
| LRRC47    | -2.5645  | 2.5645  | 7.6287  | -2.0563 | 0.059292 | 0.21316 | -4.3696 | 57470  |
| CAPS2     | -0.1368  | 0.1368  | 0.15152 | -2.0562 | 0.059304 | 0.21316 | -4.3698 | 84698  |

|          |          |         |         |         |          |         |         |        |
|----------|----------|---------|---------|---------|----------|---------|---------|--------|
| PSMD12   | 2.219    | 2.219   | 5.7115  | 2.0559  | 0.059339 | 0.21324 | -4.3703 | 5718   |
| UST-AS1  | -0.1907  | 0.1907  | 0.17972 | -2.0557 | 0.059356 | 0.21324 | -4.3706 | 1E+08  |
| CAPZB    | 12.466   | 12.466  | 31.8    | 2.0557  | 0.059363 | 0.21324 | -4.3707 | 832    |
| GORASP2  | 4.1292   | 4.1292  | 12.094  | 2.0551  | 0.059427 | 0.21343 | -4.3716 | 26003  |
| OSTC     | 10.246   | 10.246  | 14.303  | 2.0543  | 0.059516 | 0.21364 | -4.3729 | 58505  |
| IL17RD   | -0.44033 | 0.44033 | 1.2485  | -2.0542 | 0.05952  | 0.21364 | -4.373  | 54756  |
| KLRA1P   | -0.32137 | 0.32137 | 0.44044 | -2.0541 | 0.059535 | 0.21364 | -4.3732 | 10748  |
| ADAMTS13 | -0.21633 | 0.21633 | 0.26513 | -2.0541 | 0.059539 | 0.21364 | -4.3733 | 11093  |
| RRAGA    | 7.784    | 7.784   | 18.349  | 2.0538  | 0.059564 | 0.21369 | -4.3736 | 10670  |
| MPP5     | 1.1289   | 1.1289  | 3.287   | 2.053   | 0.05965  | 0.21395 | -4.3749 | 64398  |
| TIAL1    | 1.521    | 1.521   | 7.872   | 2.0529  | 0.059665 | 0.21396 | -4.3751 | 7073   |
| CCBE1    | -0.29456 | 0.29456 | 0.45585 | -2.0524 | 0.059726 | 0.21413 | -4.376  | 147372 |
| CD69     | 0.81517  | 0.81517 | 1.0257  | 2.0522  | 0.059744 | 0.21415 | -4.3763 | 969    |
| DOK7     | -0.19432 | 0.19432 | 0.15588 | -2.052  | 0.059764 | 0.21418 | -4.3766 | 285489 |
| CALCRL   | 3.034    | 3.034   | 3.9834  | 2.0512  | 0.059847 | 0.21443 | -4.3778 | 10203  |
| KLHL21   | 5.6956   | 5.6956  | 13.321  | 2.0511  | 0.059863 | 0.21444 | -4.378  | 9903   |
| KLHL2    | 1.3712   | 1.3712  | 3.103   | 2.0509  | 0.05988  | 0.21445 | -4.3783 | 11275  |
| REGG     | -1.0686  | 1.0686  | 1.5811  | -2.0508 | 0.0599   | 0.21445 | -4.3786 | 85004  |
| MAB21L3  | -2.4352  | 2.4352  | 5.1941  | -2.0506 | 0.059913 | 0.21445 | -4.3788 | 126868 |
| NKTR     | -3.8457  | 3.8457  | 7.4889  | -2.0506 | 0.059917 | 0.21445 | -4.3788 | 4820   |
| FXD1     | -1.9512  | 1.9512  | 2.8337  | -2.0505 | 0.059928 | 0.21445 | -4.379  | 5348   |
| ENPP4    | -0.44551 | 0.44551 | 0.57103 | -2.0502 | 0.059962 | 0.21452 | -4.3795 | 22875  |
| KMT2B    | -2.6542  | 2.6542  | 6.4138  | -2.0498 | 0.060008 | 0.21463 | -4.3802 | 9757   |
| KIF27    | -0.28574 | 0.28574 | 0.6748  | -2.0497 | 0.060016 | 0.21463 | -4.3803 | 55582  |
| MAP4     | 15.465   | 15.465  | 38.905  | 2.0492  | 0.060073 | 0.21478 | -4.3811 | 4134   |
| HDC      | -0.76133 | 0.76133 | 1.1852  | -2.049  | 0.060094 | 0.2148  | -4.3814 | 3067   |

|          |          |         |          |         |          |         |         |          |
|----------|----------|---------|----------|---------|----------|---------|---------|----------|
| BTN2A2   | -0.42299 | 0.42299 | 1.135    | -2.0489 | 0.060101 | 0.2148  | -4.3815 | 10385    |
| CDIP1    | -1.782   | 1.782   | 4.426    | -2.0483 | 0.060169 | 0.21499 | -4.3825 | 29965    |
| PRKX-AS1 | -0.33641 | 0.33641 | 0.36122  | -2.0478 | 0.060224 | 0.21514 | -4.3833 | 1.01E+08 |
| MYADM    | 11.427   | 11.427  | 17.819   | 2.0477  | 0.06024  | 0.21515 | -4.3836 | 91663    |
| RDX      | 2.2069   | 2.2069  | 5.1503   | 2.0475  | 0.060259 | 0.21518 | -4.3838 | 5962     |
| ANKRD35  | -5.085   | 5.085   | 5.487    | -2.0471 | 0.0603   | 0.21524 | -4.3844 | 148741   |
| SRRM1    | -3.1849  | 3.1849  | 12.087   | -2.0471 | 0.060301 | 0.21524 | -4.3845 | 10250    |
| CYP4A22  | -0.14555 | 0.14555 | 0.092913 | -2.047  | 0.060317 | 0.21524 | -4.3847 | 284541   |
| KLRK1    | -0.19888 | 0.19888 | 0.27109  | -2.0469 | 0.060328 | 0.21524 | -4.3849 | 22914    |
| CLDN11   | -1.2546  | 1.2546  | 1.137    | -2.0462 | 0.060403 | 0.21539 | -4.3859 | 5010     |
| ACOX1    | -1.9293  | 1.9293  | 6.6079   | -2.0461 | 0.060407 | 0.21539 | -4.386  | 51       |
| TSHR     | -0.13347 | 0.13347 | 0.11281  | -2.0461 | 0.060407 | 0.21539 | -4.386  | 7253     |
| ABHD18   | -0.33119 | 0.33119 | 1.026    | -2.0459 | 0.060435 | 0.21541 | -4.3864 | 80167    |
| PDE10A   | 0.37786  | 0.37786 | 0.46737  | 2.0458  | 0.060441 | 0.21541 | -4.3865 | 10846    |
| DLG5     | -3.88    | 3.88    | 10.761   | -2.0454 | 0.060494 | 0.21554 | -4.3873 | 9231     |
| FHL2     | 5.4983   | 5.4983  | 9.5948   | 2.0453  | 0.060501 | 0.21554 | -4.3874 | 2274     |
| FKBP14   | 1.7772   | 1.7772  | 2.498    | 2.0451  | 0.060519 | 0.21556 | -4.3876 | 55033    |
| FABP3    | -0.46759 | 0.46759 | 0.81217  | -2.045  | 0.060538 | 0.21558 | -4.3879 | 2170     |
| LAMC2    | 8.4282   | 8.4282  | 9.2193   | 2.0443  | 0.060608 | 0.21571 | -4.3889 | 3918     |
| S1PR5    | -1.5629  | 1.5629  | 2.4966   | -2.0443 | 0.060612 | 0.21571 | -4.389  | 53637    |
| NEIL2    | -0.92056 | 0.92056 | 2.4109   | -2.0443 | 0.060612 | 0.21571 | -4.389  | 252969   |
| DERL1    | 2.4256   | 2.4256  | 7.6475   | 2.0439  | 0.060655 | 0.21573 | -4.3896 | 79139    |
| AP4E1    | 0.85204  | 0.85204 | 2.6614   | 2.0439  | 0.060655 | 0.21573 | -4.3896 | 23431    |
| GRAMD1B  | 0.30656  | 0.30656 | 0.49154  | 2.0439  | 0.060656 | 0.21573 | -4.3896 | 57476    |
| PTAFR    | 2.5726   | 2.5726  | 3.6697   | 2.0428  | 0.060775 | 0.2161  | -4.3913 | 5724     |
| PRKY     | -2.7982  | 2.7982  | 4.231    | -2.0425 | 0.060806 | 0.21617 | -4.3918 | 5616     |

|              |          |         |         |         |          |         |         |          |
|--------------|----------|---------|---------|---------|----------|---------|---------|----------|
| LOC102723709 | -0.20346 | 0.20346 | 0.13497 | -2.0423 | 0.060828 | 0.2162  | -4.3921 | 1.03E+08 |
| MAGT1        | 3.3741   | 3.3741  | 9.1468  | 2.0422  | 0.060843 | 0.2162  | -4.3923 | 84061    |
| TINF2        | 5.5384   | 5.5384  | 13.935  | 2.0421  | 0.060852 | 0.2162  | -4.3924 | 26277    |
| DYNC1LI1     | 3.4597   | 3.4597  | 9.7288  | 2.0415  | 0.06092  | 0.21639 | -4.3934 | 51143    |
| KCNK7        | -3.2676  | 3.2676  | 3.931   | -2.0412 | 0.060954 | 0.21646 | -4.3939 | 10089    |
| LEAP2        | -0.28288 | 0.28288 | 0.37445 | -2.0411 | 0.060965 | 0.21646 | -4.3941 | 116842   |
| SFPQ         | -8.1425  | 8.1425  | 34.098  | -2.0408 | 0.060999 | 0.21654 | -4.3946 | 6421     |
| UGDH-AS1     | -33.815  | 33.815  | 63.575  | -2.0402 | 0.061071 | 0.21675 | -4.3956 | 1.01E+08 |
| FKBP1A       | 26.686   | 26.686  | 49.946  | 2.04    | 0.061091 | 0.21677 | -4.3959 | 2280     |
| PPP4R1L      | -0.31762 | 0.31762 | 0.89839 | -2.0397 | 0.061126 | 0.21685 | -4.3964 | 55370    |
| IL34         | -4.0046  | 4.0046  | 4.3419  | -2.0393 | 0.061162 | 0.21686 | -4.3969 | 146433   |
| ZNF227       | -0.43058 | 0.43058 | 1.8628  | -2.0393 | 0.061171 | 0.21686 | -4.397  | 7770     |
| SCNN1B       | 7.0311   | 7.0311  | 10.153  | 2.039   | 0.0612   | 0.21686 | -4.3975 | 6338     |
| SUGT1P3      | -0.20188 | 0.20188 | 0.2938  | -2.039  | 0.061202 | 0.21686 | -4.3975 | 283507   |
| KLK8         | 59.482   | 59.482  | 53.183  | 2.0389  | 0.061213 | 0.21686 | -4.3976 | 11202    |
| CCT2         | 9.2811   | 9.2811  | 18.528  | 2.0388  | 0.061217 | 0.21686 | -4.3977 | 10576    |
| TMEM234      | -0.60088 | 0.60088 | 1.8851  | -2.0388 | 0.061219 | 0.21686 | -4.3977 | 56063    |
| RBM5         | -2.291   | 2.291   | 13.133  | -2.0382 | 0.061289 | 0.21706 | -4.3987 | 10181    |
| CGN          | -1.2633  | 1.2633  | 2.1248  | -2.0379 | 0.061328 | 0.21716 | -4.3993 | 57530    |
| SOST         | 0.52959  | 0.52959 | 0.32988 | 2.0376  | 0.061355 | 0.21721 | -4.3997 | 50964    |
| DENND1A      | -0.8198  | 0.8198  | 2.0536  | -2.0372 | 0.061399 | 0.21731 | -4.4003 | 57706    |
| BEND5        | -0.26    | 0.26    | 0.37439 | -2.0371 | 0.06141  | 0.21731 | -4.4005 | 79656    |
| PDIA3P1      | -0.19458 | 0.19458 | 0.51458 | -2.0366 | 0.061468 | 0.21747 | -4.4013 | 171423   |
| HMOX1        | 34.033   | 34.033  | 35.721  | 2.0361  | 0.061528 | 0.21764 | -4.4021 | 3162     |
| PNMA5        | -0.198   | 0.198   | 0.17169 | -2.0357 | 0.061571 | 0.21774 | -4.4028 | 114824   |
| LOC100130950 | -0.18692 | 0.18692 | 0.26753 | -2.0355 | 0.061588 | 0.21774 | -4.403  | 1E+08    |

|           |          |         |         |         |          |         |         |          |
|-----------|----------|---------|---------|---------|----------|---------|---------|----------|
| BRF1      | -0.90984 | 0.90984 | 2.3688  | -2.0355 | 0.061597 | 0.21774 | -4.4031 | 2972     |
| GLYATL2   | -0.22266 | 0.22266 | 0.20657 | -2.0349 | 0.061666 | 0.21794 | -4.4041 | 219970   |
| NPEPPS    | 11.034   | 11.034  | 23.868  | 2.0347  | 0.061685 | 0.21796 | -4.4044 | 9520     |
| CNOT6L    | -1.0471  | 1.0471  | 4.5521  | -2.0344 | 0.061719 | 0.21804 | -4.4049 | 246175   |
| HSPB7     | -0.86842 | 0.86842 | 0.85774 | -2.0341 | 0.061745 | 0.21807 | -4.4052 | 27129    |
| DPP6      | -0.20494 | 0.20494 | 0.11777 | -2.034  | 0.06176  | 0.21807 | -4.4054 | 1804     |
| ZNF812P   | 0.28051  | 0.28051 | 0.38697 | 2.034   | 0.061767 | 0.21807 | -4.4055 | 729648   |
| TTBK2     | -0.45146 | 0.45146 | 1.7897  | -2.0337 | 0.061792 | 0.21811 | -4.4059 | 146057   |
| TMC5      | -0.24629 | 0.24629 | 0.2821  | -2.0335 | 0.061815 | 0.21815 | -4.4062 | 79838    |
| ZNF500    | -0.4687  | 0.4687  | 1.1366  | -2.0334 | 0.061828 | 0.21815 | -4.4064 | 26048    |
| MORN4     | -0.26786 | 0.26786 | 0.55549 | -2.0331 | 0.061865 | 0.21819 | -4.4069 | 118812   |
| DESI1     | 2.1714   | 2.1714  | 6.8958  | 2.0331  | 0.061867 | 0.21819 | -4.407  | 27351    |
| ZNF764    | -0.54238 | 0.54238 | 1.43    | -2.0328 | 0.061892 | 0.21819 | -4.4073 | 92595    |
| STK24-AS1 | -0.14023 | 0.14023 | 0.27631 | -2.0328 | 0.061892 | 0.21819 | -4.4073 | 1.01E+08 |
| TMEM251   | 1.019    | 1.019   | 2.3296  | 2.0324  | 0.061947 | 0.21834 | -4.4081 | 26175    |
| SCARNA21  | -2.3733  | 2.3733  | 4.7486  | -2.0322 | 0.061965 | 0.21836 | -4.4084 | 677763   |
| LINC01359 | -0.18224 | 0.18224 | 0.14087 | -2.0317 | 0.062024 | 0.21852 | -4.4092 | 1.02E+08 |
| LINC01091 | -0.21162 | 0.21162 | 0.22085 | -2.0313 | 0.062067 | 0.21862 | -4.4098 | 285419   |
| SEL1L3    | 0.89166  | 0.89166 | 1.5704  | 2.0312  | 0.062082 | 0.21862 | -4.41   | 23231    |
| PROCR     | 2.7292   | 2.7292  | 4.5681  | 2.0311  | 0.06209  | 0.21862 | -4.4101 | 10544    |
| ZNF461    | -0.19648 | 0.19648 | 0.54322 | -2.0302 | 0.062186 | 0.21884 | -4.4115 | 92283    |
| ECHDC1    | 2.692    | 2.692   | 6.2334  | 2.0301  | 0.062206 | 0.21884 | -4.4118 | 55862    |
| SAP30L    | -0.8636  | 0.8636  | 3.5353  | -2.03   | 0.062211 | 0.21884 | -4.4118 | 79685    |
| C1QTNF7   | -0.30371 | 0.30371 | 0.35543 | -2.0299 | 0.062223 | 0.21884 | -4.412  | 114905   |
| RPL23AP64 | -1.3445  | 1.3445  | 2.7117  | -2.0299 | 0.06223  | 0.21884 | -4.4121 | 649946   |
| ASPHD2    | -0.51398 | 0.51398 | 0.79578 | -2.0298 | 0.062237 | 0.21884 | -4.4122 | 57168    |

|              |          |         |          |         |          |         |         |          |
|--------------|----------|---------|----------|---------|----------|---------|---------|----------|
| CHRM4        | -0.20232 | 0.20232 | 0.15546  | -2.0297 | 0.062245 | 0.21884 | -4.4123 | 1132     |
| IDH3A        | 3.9342   | 3.9342  | 9.3893   | 2.0296  | 0.062262 | 0.21886 | -4.4126 | 3419     |
| HULC         | -0.17211 | 0.17211 | 0.10514  | -2.0293 | 0.062294 | 0.21892 | -4.413  | 728655   |
| YJEFN3       | -0.30272 | 0.30272 | 0.45606  | -2.0292 | 0.062307 | 0.21893 | -4.4132 | 374887   |
| NRBP2        | -2.0374  | 2.0374  | 5.9359   | -2.029  | 0.062332 | 0.21896 | -4.4135 | 340371   |
| TUBA3D       | -0.14233 | 0.14233 | 0.15667  | -2.0286 | 0.062377 | 0.21896 | -4.4142 | 113457   |
| ABLIM3       | 2.0421   | 2.0421  | 3.1091   | 2.0285  | 0.062379 | 0.21896 | -4.4142 | 22885    |
| ZNRF1        | -0.96092 | 0.96092 | 3.0242   | -2.0285 | 0.062387 | 0.21896 | -4.4143 | 84937    |
| RHEX         | -0.36184 | 0.36184 | 0.57826  | -2.0284 | 0.06239  | 0.21896 | -4.4144 | 440712   |
| ZNF493       | -0.45295 | 0.45295 | 0.89565  | -2.0283 | 0.062405 | 0.21896 | -4.4146 | 284443   |
| THTPA        | -0.65077 | 0.65077 | 1.8575   | -2.0283 | 0.062407 | 0.21896 | -4.4146 | 79178    |
| LOC374443    | -0.46517 | 0.46517 | 1.1554   | -2.0281 | 0.062425 | 0.21897 | -4.4148 | 374443   |
| LINC01229    | -0.14787 | 0.14787 | 0.097566 | -2.0279 | 0.062449 | 0.21901 | -4.4152 | 1.02E+08 |
| CCT8         | 8.5745   | 8.5745  | 18.207   | 2.0275  | 0.062495 | 0.21913 | -4.4158 | 10694    |
| LTBP3        | -4.5128  | 4.5128  | 7.3977   | -2.0273 | 0.062521 | 0.21917 | -4.4162 | 4054     |
| EP400P1      | -0.28974 | 0.28974 | 0.64203  | -2.0267 | 0.062583 | 0.21935 | -4.4171 | 347918   |
| HDGFL2       | -2.1136  | 2.1136  | 3.9891   | -2.0266 | 0.062606 | 0.21938 | -4.4174 | 84717    |
| AGAP1-IT1    | -0.62617 | 0.62617 | 0.86983  | -2.0264 | 0.062622 | 0.21939 | -4.4176 | 1.01E+08 |
| LINC01801    | -0.14459 | 0.14459 | 0.15455  | -2.026  | 0.062671 | 0.21949 | -4.4183 | 400685   |
| PRR5-ARHGAP8 | -0.28485 | 0.28485 | 0.24452  | -2.0259 | 0.062675 | 0.21949 | -4.4184 | 553158   |
| SRPX2        | 1.9202   | 1.9202  | 2.9952   | 2.0254  | 0.062734 | 0.21965 | -4.4192 | 27286    |
| ST8SIA6      | -0.1711  | 0.1711  | 0.18755  | -2.0251 | 0.062772 | 0.2197  | -4.4197 | 338596   |
| SERPINB6     | 4.1532   | 4.1532  | 7.3229   | 2.025   | 0.062779 | 0.2197  | -4.4198 | 5269     |
| CFL1         | 99.996   | 99.996  | 186.87   | 2.0249  | 0.062799 | 0.2197  | -4.4201 | 1072     |
| EXOC2        | 0.74072  | 0.74072 | 4.0989   | 2.0248  | 0.062802 | 0.2197  | -4.4201 | 55770    |
| DYNC111      | -0.23593 | 0.23593 | 0.29604  | -2.0243 | 0.062866 | 0.21986 | -4.421  | 1780     |



|           |          |         |          |         |          |         |         |          |
|-----------|----------|---------|----------|---------|----------|---------|---------|----------|
| DNAJA2    | 4.108    | 4.108   | 11.337   | 2.0242  | 0.062872 | 0.21986 | -4.4211 | 10294    |
| SOX12     | -1.5     | 1.5     | 2.4933   | -2.0237 | 0.062929 | 0.21993 | -4.4219 | 6666     |
| PITPNC1   | 1.5853   | 1.5853  | 2.251    | 2.0237  | 0.062937 | 0.21993 | -4.422  | 26207    |
| TENT5B    | 25.073   | 25.073  | 41.985   | 2.0234  | 0.062971 | 0.21993 | -4.4225 | 115572   |
| GNG3      | -0.24731 | 0.24731 | 0.45965  | -2.0232 | 0.062984 | 0.21993 | -4.4227 | 2785     |
| ARNTL2    | 6.4836   | 6.4836  | 7.1457   | 2.0232  | 0.062989 | 0.21993 | -4.4227 | 56938    |
| LINC02257 | 0.17073  | 0.17073 | 0.096132 | 2.0231  | 0.063003 | 0.21993 | -4.4229 | 1.05E+08 |
| C11orf24  | 4.0309   | 4.0309  | 7.1372   | 2.023   | 0.063007 | 0.21993 | -4.423  | 53838    |
| SZT2      | -1.2791  | 1.2791  | 4.2511   | -2.0229 | 0.063019 | 0.21993 | -4.4231 | 23334    |
| CHM       | 0.42723  | 0.42723 | 1.314    | 2.0229  | 0.06302  | 0.21993 | -4.4232 | 1121     |
| MIR31HG   | 2.0603   | 2.0603  | 2.47     | 2.0229  | 0.063022 | 0.21993 | -4.4232 | 554202   |
| PPP2R1B   | 0.91882  | 0.91882 | 3.846    | 2.0227  | 0.06305  | 0.21998 | -4.4236 | 5519     |
| GCOM1     | 1.867    | 1.867   | 3.1375   | 2.0221  | 0.063113 | 0.22015 | -4.4245 | 145781   |
| DPY19L1   | 1.0977   | 1.0977  | 1.8603   | 2.0219  | 0.063138 | 0.22019 | -4.4248 | 23333    |
| GOLPH3    | 3.571    | 3.571   | 13.634   | 2.0214  | 0.063191 | 0.22031 | -4.4255 | 64083    |
| SLC25A13  | 1.7361   | 1.7361  | 4.9635   | 2.0214  | 0.063197 | 0.22031 | -4.4256 | 10165    |
| FPR2      | 1.7891   | 1.7891  | 1.2516   | 2.021   | 0.063242 | 0.2204  | -4.4262 | 2358     |
| F5        | -0.64178 | 0.64178 | 0.53786  | -2.0209 | 0.063249 | 0.2204  | -4.4263 | 2153     |
| TMEM165   | 12.264   | 12.264  | 22.386   | 2.0206  | 0.063285 | 0.22048 | -4.4268 | 55858    |
| QTRT1     | -2.8509  | 2.8509  | 6.4837   | -2.0202 | 0.063328 | 0.22058 | -4.4274 | 81890    |
| UBL4B     | -0.34099 | 0.34099 | 0.39318  | -2.0201 | 0.063343 | 0.22059 | -4.4276 | 164153   |
| DZIP3     | -0.31791 | 0.31791 | 0.68014  | -2.0196 | 0.063404 | 0.22064 | -4.4285 | 9666     |
| VEGFC     | 1.2213   | 1.2213  | 1.893    | 2.0195  | 0.06341  | 0.22064 | -4.4286 | 7424     |
| TIPARP    | 2.7848   | 2.7848  | 8.208    | 2.0195  | 0.063412 | 0.22064 | -4.4286 | 25976    |
| GOLT1B    | 1.3898   | 1.3898  | 2.7682   | 2.0195  | 0.063414 | 0.22064 | -4.4286 | 51026    |
| LINC01465 | -0.579   | 0.579   | 1.3803   | -2.0194 | 0.063423 | 0.22064 | -4.4288 | 283416   |

|            |          |         |         |         |          |         |         |          |
|------------|----------|---------|---------|---------|----------|---------|---------|----------|
| MRPL15     | 4.5577   | 4.5577  | 8.4806  | 2.019   | 0.063471 | 0.22073 | -4.4294 | 29088    |
| TMEM95     | 0.26428  | 0.26428 | 0.27278 | 2.0188  | 0.063492 | 0.22073 | -4.4297 | 339168   |
| CNBP       | 17.415   | 17.415  | 47.238  | 2.0188  | 0.063493 | 0.22073 | -4.4297 | 7555     |
| GAL3ST4    | -1.4039  | 1.4039  | 2.6957  | -2.0187 | 0.063501 | 0.22073 | -4.4298 | 79690    |
| STARD10    | 7.0507   | 7.0507  | 14.549  | 2.0184  | 0.063539 | 0.2208  | -4.4304 | 10809    |
| CHFR       | 1.683    | 1.683   | 6.2465  | 2.0183  | 0.063548 | 0.2208  | -4.4305 | 55743    |
| RNF212B    | -0.13605 | 0.13605 | 0.12668 | -2.0181 | 0.063581 | 0.22085 | -4.4309 | 1.01E+08 |
| SNORA94    | -2.4277  | 2.4277  | 7.1518  | -2.018  | 0.063589 | 0.22085 | -4.431  | 1.07E+08 |
| DHRS3      | -4.0149  | 4.0149  | 9.0277  | -2.0177 | 0.063623 | 0.22093 | -4.4315 | 9249     |
| LRRFIP2    | 1.8529   | 1.8529  | 5.6987  | 2.0175  | 0.063645 | 0.22096 | -4.4318 | 9209     |
| CROCC      | -1.3352  | 1.3352  | 1.6799  | -2.017  | 0.063698 | 0.2211  | -4.4325 | 9696     |
| LINC01530  | -0.45822 | 0.45822 | 0.84914 | -2.0169 | 0.06372  | 0.22113 | -4.4328 | 729975   |
| ZNF37BP    | -0.45972 | 0.45972 | 0.82098 | -2.0167 | 0.063737 | 0.22114 | -4.4331 | 1E+08    |
| PGPEP1     | -0.51362 | 0.51362 | 0.91944 | -2.0165 | 0.063757 | 0.22116 | -4.4333 | 54858    |
| RETSAT     | -2.6736  | 2.6736  | 9.7623  | -2.0162 | 0.063792 | 0.22116 | -4.4338 | 54884    |
| MTCH2      | 4.1942   | 4.1942  | 11.609  | 2.0162  | 0.063801 | 0.22116 | -4.434  | 23788    |
| TTC7B      | 1.0541   | 1.0541  | 2.924   | 2.0162  | 0.063801 | 0.22116 | -4.434  | 145567   |
| DMRTA1     | 0.36517  | 0.36517 | 0.61776 | 2.016   | 0.063818 | 0.22116 | -4.4342 | 63951    |
| HLA-F      | -0.76383 | 0.76383 | 1.4294  | -2.016  | 0.063821 | 0.22116 | -4.4342 | 3134     |
| YEATS2-AS1 | -0.31977 | 0.31977 | 0.67376 | -2.0155 | 0.063878 | 0.22131 | -4.435  | 1.01E+08 |
| FLJ13224   | -0.34227 | 0.34227 | 0.64044 | -2.0151 | 0.063927 | 0.22144 | -4.4357 | 79857    |
| CSGALNACT2 | 2.0462   | 2.0462  | 4.4709  | 2.0149  | 0.063943 | 0.22144 | -4.4359 | 55454    |
| C11orf98   | 3.8221   | 3.8221  | 8.0715  | 2.0147  | 0.063965 | 0.22148 | -4.4362 | 1.02E+08 |
| TUBB4B     | 55.271   | 55.271  | 107.98  | 2.0142  | 0.064025 | 0.22164 | -4.437  | 10383    |
| STRAP      | 7.9471   | 7.9471  | 20.447  | 2.0137  | 0.06409  | 0.22182 | -4.4379 | 11171    |
| TSKU       | -3.2041  | 3.2041  | 8.0986  | -2.0135 | 0.064106 | 0.22183 | -4.4381 | 25987    |

|           |          |         |          |         |          |         |         |          |
|-----------|----------|---------|----------|---------|----------|---------|---------|----------|
| NUP43     | -0.75662 | 0.75662 | 3.2538   | -2.0129 | 0.064175 | 0.22202 | -4.4391 | 348995   |
| FAM241A   | 1.0679   | 1.0679  | 2.6778   | 2.0127  | 0.064199 | 0.22206 | -4.4394 | 132720   |
| TTC23L    | -0.13591 | 0.13591 | 0.11362  | -2.0125 | 0.064223 | 0.2221  | -4.4397 | 153657   |
| TAF15     | -4.1449  | 4.1449  | 12.523   | -2.0116 | 0.06433  | 0.22237 | -4.4412 | 8148     |
| COLQ      | -0.29732 | 0.29732 | 0.39619  | -2.0116 | 0.064335 | 0.22237 | -4.4413 | 8292     |
| SUMO2     | 17.302   | 17.302  | 42.896   | 2.0115  | 0.06434  | 0.22237 | -4.4413 | 6613     |
| CYP27B1   | 1.1325   | 1.1325  | 1.146    | 2.0113  | 0.06437  | 0.2224  | -4.4417 | 1594     |
| MYO1D     | 3.9429   | 3.9429  | 15.223   | 2.0112  | 0.064377 | 0.2224  | -4.4418 | 4642     |
| METTL3    | -1.4961  | 1.4961  | 6.0219   | -2.0108 | 0.064421 | 0.22251 | -4.4424 | 56339    |
| LINC01805 | -1.4093  | 1.4093  | 1.1969   | -2.0105 | 0.064464 | 0.22261 | -4.443  | 1.05E+08 |
| AP4S1     | -0.21339 | 0.21339 | 0.82683  | -2.0101 | 0.064506 | 0.22265 | -4.4436 | 11154    |
| TMEM79    | 27.094   | 27.094  | 46.93    | 2.0101  | 0.06451  | 0.22265 | -4.4436 | 84283    |
| ETNK2     | -0.6916  | 0.6916  | 0.96795  | -2.01   | 0.064514 | 0.22265 | -4.4437 | 55224    |
| PSMG3-AS1 | -0.35615 | 0.35615 | 0.51172  | -2.0099 | 0.064528 | 0.22265 | -4.4439 | 114796   |
| PSMD2     | 12.498   | 12.498  | 28.894   | 2.0097  | 0.06455  | 0.22268 | -4.4442 | 5708     |
| CDC20     | 4.1557   | 4.1557  | 4.9462   | 2.0095  | 0.064576 | 0.22272 | -4.4445 | 991      |
| FAM95B1   | -0.12269 | 0.12269 | 0.088281 | -2.009  | 0.06464  | 0.2229  | -4.4454 | 1E+08    |
| ETDC      | -0.22328 | 0.22328 | 0.16457  | -2.0088 | 0.064656 | 0.2229  | -4.4456 | 1.11E+08 |
| RENBP     | -0.80631 | 0.80631 | 1.2386   | -2.0087 | 0.064674 | 0.2229  | -4.4459 | 5973     |
| ELOVL4    | 14.861   | 14.861  | 17.234   | 2.0086  | 0.064679 | 0.2229  | -4.4459 | 6785     |
| GABPA     | 1.0333   | 1.0333  | 3.2907   | 2.0084  | 0.064707 | 0.22295 | -4.4463 | 2551     |
| MTG1      | -1.3537  | 1.3537  | 3.8395   | -2.0078 | 0.064776 | 0.22308 | -4.4472 | 92170    |
| PTPN20    | -0.22141 | 0.22141 | 0.31331  | -2.0078 | 0.064782 | 0.22308 | -4.4473 | 26095    |
| PKP3      | 50.082   | 50.082  | 84.901   | 2.0078  | 0.064783 | 0.22308 | -4.4473 | 11187    |
| ZNF410    | 2.4732   | 2.4732  | 7.3145   | 2.0076  | 0.064799 | 0.22308 | -4.4475 | 57862    |
| TMCC1     | 0.73565  | 0.73565 | 3.0506   | 2.0075  | 0.064815 | 0.22309 | -4.4478 | 23023    |

|           |          |         |          |         |          |         |         |          |
|-----------|----------|---------|----------|---------|----------|---------|---------|----------|
| LINC00680 | -0.58493 | 0.58493 | 1.2447   | -2.0074 | 0.064827 | 0.22309 | -4.4479 | 1.07E+08 |
| F2RL1     | 4.4341   | 4.4341  | 9.3824   | 2.0073  | 0.064841 | 0.22309 | -4.4481 | 2150     |
| LOC728743 | -0.36284 | 0.36284 | 0.63239  | -2.0069 | 0.064887 | 0.22321 | -4.4487 | 728743   |
| GOLGA5    | 2.4995   | 2.4995  | 7.1845   | 2.0062  | 0.064963 | 0.22342 | -4.4498 | 9950     |
| FXVD6     | -1.1441  | 1.1441  | 1.8674   | -2.0054 | 0.065055 | 0.22369 | -4.451  | 53826    |
| ORC4      | -7.915   | 7.915   | 15.88    | -2.005  | 0.065109 | 0.22383 | -4.4517 | 5000     |
| MRPL32    | 4.588    | 4.588   | 7.877    | 2.0049  | 0.065123 | 0.22383 | -4.4519 | 64983    |
| ALG10B    | -0.28833 | 0.28833 | 0.57094  | -2.0042 | 0.065207 | 0.22408 | -4.453  | 144245   |
| ATF3      | 2.2218   | 2.2218  | 2.9535   | 2.004   | 0.065221 | 0.22408 | -4.4532 | 467      |
| KLHDC4    | -0.92757 | 0.92757 | 2.9229   | -2.0038 | 0.065255 | 0.22414 | -4.4537 | 54758    |
| PMS2CL    | -0.39831 | 0.39831 | 1.7288   | -2.0037 | 0.065264 | 0.22414 | -4.4538 | 441194   |
| CD300LB   | 0.23035  | 0.23035 | 0.19459  | 2.0031  | 0.065333 | 0.22426 | -4.4547 | 124599   |
| PDLIM1    | 18.955   | 18.955  | 46.757   | 2.003   | 0.065346 | 0.22426 | -4.4549 | 9124     |
| FCAR      | 0.68866  | 0.68866 | 0.53442  | 2.0028  | 0.065371 | 0.22426 | -4.4552 | 2204     |
| STARD9    | -1.3349  | 1.3349  | 1.9777   | -2.0027 | 0.065379 | 0.22426 | -4.4553 | 57519    |
| MED18     | 2.1409   | 2.1409  | 4.1446   | 2.0027  | 0.065382 | 0.22426 | -4.4554 | 54797    |
| ATOX1     | 11.654   | 11.654  | 20.238   | 2.0026  | 0.065392 | 0.22426 | -4.4555 | 475      |
| SNRPG     | 5.3465   | 5.3465  | 7.556    | 2.0026  | 0.065398 | 0.22426 | -4.4556 | 6637     |
| QRFPR     | 0.13431  | 0.13431 | 0.087532 | 2.0025  | 0.065407 | 0.22426 | -4.4557 | 84109    |
| PFN1      | 82.334   | 82.334  | 151.76   | 2.0018  | 0.065486 | 0.22448 | -4.4568 | 5216     |
| MIER3     | 0.5744   | 0.5744  | 2.0839   | 2.0017  | 0.065503 | 0.22448 | -4.457  | 166968   |
| NCCRP1    | 107.4    | 107.4   | 110.37   | 2.0015  | 0.065521 | 0.22448 | -4.4572 | 342897   |
| WDR1      | 25.247   | 25.247  | 49.474   | 2.0015  | 0.065523 | 0.22448 | -4.4573 | 9948     |
| OSTF1     | 7.3234   | 7.3234  | 20.035   | 2.0009  | 0.0656   | 0.22468 | -4.4583 | 26578    |
| ALX3      | -0.6106  | 0.6106  | 1.0524   | -2.0008 | 0.065609 | 0.22468 | -4.4584 | 257      |
| TUBB2B    | 5.0195   | 5.0195  | 4.1337   | 2.0006  | 0.065633 | 0.22469 | -4.4587 | 347733   |

|             |          |         |         |         |          |         |         |        |
|-------------|----------|---------|---------|---------|----------|---------|---------|--------|
| EDRF1       | -0.46248 | 0.46248 | 1.8954  | -2.0004 | 0.06565  | 0.22469 | -4.459  | 26098  |
| ZNF814      | -0.64797 | 0.64797 | 1.5676  | -2.0004 | 0.065659 | 0.22469 | -4.4591 | 730051 |
| TAS2R19     | -0.45612 | 0.45612 | 0.75284 | -2.0002 | 0.065673 | 0.22469 | -4.4593 | 259294 |
| NDUFA6      | 9.522    | 9.522   | 17.738  | 2.0002  | 0.065681 | 0.22469 | -4.4594 | 4700   |
| ZNF783      | -0.87476 | 0.87476 | 2.1877  | -2      | 0.065701 | 0.22469 | -4.4596 | 1E+08  |
| BLOC1S6     | 2.1351   | 2.1351  | 4.6219  | 2       | 0.065707 | 0.22469 | -4.4597 | 26258  |
| GNL1        | -0.16801 | 0.16801 | 0.43423 | -1.9999 | 0.065719 | 0.22469 | -4.4599 | 2794   |
| CIAO1       | -1.2569  | 1.2569  | 6.537   | -1.9995 | 0.065763 | 0.2248  | -4.4605 | 9391   |
| OR7E14P     | 0.23372  | 0.23372 | 0.38236 | 1.9993  | 0.065779 | 0.22481 | -4.4607 | 10819  |
| TMEM129     | -2.1933  | 2.1933  | 4.7632  | -1.9986 | 0.065872 | 0.22501 | -4.4619 | 92305  |
| UBE2J2      | 3.0498   | 3.0498  | 8.5014  | 1.9986  | 0.065874 | 0.22501 | -4.4619 | 118424 |
| IFT20       | 2.2476   | 2.2476  | 3.6131  | 1.9985  | 0.065878 | 0.22501 | -4.462  | 90410  |
| LUC7L3      | -1.9396  | 1.9396  | 5.3051  | -1.9984 | 0.065892 | 0.22501 | -4.4622 | 51747  |
| STK38       | 1.6846   | 1.6846  | 7.2943  | 1.9983  | 0.065909 | 0.22502 | -4.4624 | 11329  |
| ERLEC1      | 2.7998   | 2.7998  | 6.6446  | 1.9975  | 0.065995 | 0.22527 | -4.4635 | 27248  |
| ZBTB14      | -0.50498 | 0.50498 | 1.7234  | -1.9972 | 0.066039 | 0.22529 | -4.4641 | 7541   |
| MTIF3       | 2.3892   | 2.3892  | 5.6556  | 1.9971  | 0.066046 | 0.22529 | -4.4642 | 219402 |
| SNRNP70     | -8.9415  | 8.9415  | 19.665  | -1.9971 | 0.066053 | 0.22529 | -4.4643 | 6625   |
| MAU2        | -1.4392  | 1.4392  | 5.9023  | -1.997  | 0.066057 | 0.22529 | -4.4644 | 23383  |
| SH2D5       | 3.5103   | 3.5103  | 2.0802  | 1.9969  | 0.066068 | 0.22529 | -4.4645 | 400745 |
| PCBP1       | 30.93    | 30.93   | 72.512  | 1.9968  | 0.06608  | 0.22529 | -4.4647 | 5093   |
| KLF8        | -0.87433 | 0.87433 | 2.6855  | -1.9965 | 0.066125 | 0.22536 | -4.4653 | 11279  |
| TNNC2       | -0.27805 | 0.27805 | 0.33899 | -1.9964 | 0.066135 | 0.22536 | -4.4654 | 7125   |
| FAM198B-AS1 | -0.21304 | 0.21304 | 0.3488  | -1.9963 | 0.066142 | 0.22536 | -4.4655 | 285505 |
| INHBB       | -2.4973  | 2.4973  | 2.7318  | -1.9962 | 0.066154 | 0.22536 | -4.4657 | 3625   |
| DDR1        | -1.9582  | 1.9582  | 4.6014  | -1.9956 | 0.066232 | 0.22558 | -4.4667 | 780    |

|           |          |         |         |         |          |         |         |        |
|-----------|----------|---------|---------|---------|----------|---------|---------|--------|
| RBM34     | 1.8229   | 1.8229  | 5.0435  | 1.9949  | 0.066313 | 0.22581 | -4.4677 | 23029  |
| TBCA      | 3.146    | 3.146   | 6.2437  | 1.9946  | 0.066344 | 0.22583 | -4.4682 | 6902   |
| ERV3-1    | 0.90002  | 0.90002 | 3.2268  | 1.9946  | 0.066346 | 0.22583 | -4.4682 | 2086   |
| CASZ1     | -4.0744  | 4.0744  | 8.4883  | -1.9944 | 0.066369 | 0.22586 | -4.4685 | 54897  |
| NCAPG     | 0.86888  | 0.86888 | 1.0885  | 1.9943  | 0.066382 | 0.22586 | -4.4687 | 64151  |
| LAMA5     | -6.173   | 6.173   | 13.765  | -1.994  | 0.066416 | 0.22593 | -4.4691 | 3911   |
| TMPRSS13  | 7.6      | 7.6     | 11.307  | 1.9937  | 0.06646  | 0.226   | -4.4697 | 84000  |
| UCKL1-AS1 | -0.56627 | 0.56627 | 0.84479 | -1.9937 | 0.066462 | 0.226   | -4.4697 | 1E+08  |
| TRAM1L1   | -0.27132 | 0.27132 | 0.49416 | -1.9935 | 0.066481 | 0.226   | -4.47   | 133022 |
| AKR1E2    | -0.45518 | 0.45518 | 1.0263  | -1.9934 | 0.06649  | 0.226   | -4.4701 | 83592  |
| TAS2R43   | -0.20073 | 0.20073 | 0.21955 | -1.9929 | 0.066547 | 0.22615 | -4.4708 | 259289 |
| UAP1      | 3.5839   | 3.5839  | 6.7419  | 1.9924  | 0.066617 | 0.22634 | -4.4717 | 6675   |
| RUNDC1    | -0.38212 | 0.38212 | 1.7589  | -1.9916 | 0.066706 | 0.22657 | -4.4729 | 146923 |
| STAT5A    | -1.808   | 1.808   | 3.7208  | -1.9916 | 0.06671  | 0.22657 | -4.473  | 6776   |
| RNF10     | 7.4719   | 7.4719  | 20.176  | 1.9915  | 0.066725 | 0.22657 | -4.4732 | 9921   |
| MDC1      | -0.1484  | 0.1484  | 0.28045 | -1.9913 | 0.066748 | 0.22657 | -4.4735 | 9656   |
| PSMA2     | 9.2884   | 9.2884  | 16.11   | 1.9911  | 0.066765 | 0.22657 | -4.4737 | 5683   |
| GPRC5D    | -0.26782 | 0.26782 | 0.51496 | -1.9911 | 0.066765 | 0.22657 | -4.4737 | 55507  |
| NF1       | -1.3668  | 1.3668  | 4.6553  | -1.9907 | 0.066814 | 0.22665 | -4.4743 | 4763   |
| TMEM131L  | 1.2776   | 1.2776  | 3.7217  | 1.9907  | 0.066816 | 0.22665 | -4.4744 | 23240  |
| LSM1      | 3.1878   | 3.1878  | 6.6731  | 1.9896  | 0.066949 | 0.22706 | -4.4761 | 27257  |
| CXADR     | -7.6313  | 7.6313  | 14.879  | -1.9894 | 0.066976 | 0.22711 | -4.4764 | 1525   |
| EGFLAM    | 0.78123  | 0.78123 | 1.331   | 1.9885  | 0.06709  | 0.22743 | -4.4779 | 133584 |
| REC8      | -0.61548 | 0.61548 | 1.1467  | -1.9884 | 0.0671   | 0.22743 | -4.4781 | 9985   |
| ST3GAL5   | -0.36249 | 0.36249 | 0.85922 | -1.9882 | 0.067116 | 0.22744 | -4.4783 | 8869   |
| GUCY1A1   | 2.3112   | 2.3112  | 2.6968  | 1.988   | 0.067149 | 0.22751 | -4.4787 | 2982   |

|               |          |         |          |         |          |         |         |          |
|---------------|----------|---------|----------|---------|----------|---------|---------|----------|
| ATG3          | 2.2241   | 2.2241  | 6.2729   | 1.9874  | 0.067225 | 0.22772 | -4.4797 | 64422    |
| FAM98A        | 3.0946   | 3.0946  | 6.6216   | 1.987   | 0.06727  | 0.22781 | -4.4803 | 25940    |
| YTHDF3        | 1.8133   | 1.8133  | 5.7916   | 1.9869  | 0.067277 | 0.22781 | -4.4804 | 253943   |
| SLC52A1       | -1.9229  | 1.9229  | 1.1341   | -1.9862 | 0.067363 | 0.22805 | -4.4815 | 55065    |
| TAF8          | -0.46203 | 0.46203 | 2.2945   | -1.9855 | 0.067456 | 0.22832 | -4.4827 | 129685   |
| LRRC29        | -0.34216 | 0.34216 | 0.60341  | -1.9853 | 0.067469 | 0.22832 | -4.4828 | 26231    |
| CYP4Z2P       | -0.13825 | 0.13825 | 0.074908 | -1.9848 | 0.067538 | 0.22851 | -4.4837 | 163720   |
| DNAJB3        | -0.18843 | 0.18843 | 0.10423  | -1.9836 | 0.067678 | 0.22893 | -4.4855 | 414061   |
| ADAMTSL2      | 0.25146  | 0.25146 | 0.43     | 1.9835  | 0.067699 | 0.22895 | -4.4858 | 9719     |
| TTC39C        | -0.91995 | 0.91995 | 3.393    | -1.9834 | 0.067709 | 0.22895 | -4.4859 | 125488   |
| CSAD          | -2.4718  | 2.4718  | 3.7719   | -1.9828 | 0.067778 | 0.22897 | -4.4868 | 51380    |
| FKBP1B        | 0.82151  | 0.82151 | 1.2978   | 1.9828  | 0.067779 | 0.22897 | -4.4868 | 2281     |
| KRI1          | -1.9902  | 1.9902  | 4.3118   | -1.9828 | 0.06778  | 0.22897 | -4.4869 | 65095    |
| GCNT7         | -0.18515 | 0.18515 | 0.31519  | -1.9826 | 0.067801 | 0.22897 | -4.4871 | 140687   |
| PPIA          | 76.753   | 76.753  | 152.83   | 1.9825  | 0.067815 | 0.22897 | -4.4873 | 5478     |
| SLC27A5       | -0.16846 | 0.16846 | 0.28018  | -1.9824 | 0.067829 | 0.22897 | -4.4875 | 10998    |
| EGFL6         | 1.1534   | 1.1534  | 1.0056   | 1.9824  | 0.067835 | 0.22897 | -4.4876 | 25975    |
| RBM7          | 0.84236  | 0.84236 | 2.1396   | 1.9823  | 0.067847 | 0.22897 | -4.4877 | 10179    |
| SGSH          | -2.1378  | 2.1378  | 5.3776   | -1.9822 | 0.067849 | 0.22897 | -4.4877 | 6448     |
| LOC101926943  | -0.37606 | 0.37606 | 0.72766  | -1.9822 | 0.067853 | 0.22897 | -4.4878 | 1.02E+08 |
| CENPK         | 0.40901  | 0.40901 | 0.59593  | 1.9821  | 0.067865 | 0.22897 | -4.4879 | 64105    |
| WFDC13        | -0.22688 | 0.22688 | 0.121    | -1.982  | 0.067878 | 0.22897 | -4.4881 | 164237   |
| CTD-2350J17.1 | -0.14143 | 0.14143 | 0.10025  | -1.9819 | 0.067893 | 0.22897 | -4.4883 | 1.02E+08 |
| NRTN          | -0.64068 | 0.64068 | 0.89924  | -1.9812 | 0.067982 | 0.22923 | -4.4895 | 4902     |
| CINP          | 2.9603   | 2.9603  | 6.4472   | 1.9807  | 0.068041 | 0.22938 | -4.4902 | 51550    |
| TAF12         | 1.3813   | 1.3813  | 3.6944   | 1.9799  | 0.068137 | 0.22966 | -4.4914 | 6883     |

|           |          |         |          |         |          |         |         |          |
|-----------|----------|---------|----------|---------|----------|---------|---------|----------|
| DROSHA    | -1.0662  | 1.0662  | 4.0395   | -1.9798 | 0.068155 | 0.22967 | -4.4917 | 29102    |
| NIPA1     | 0.4496   | 0.4496  | 1.2788   | 1.9796  | 0.068176 | 0.2297  | -4.4919 | 123606   |
| B3GLCT    | 0.85345  | 0.85345 | 1.6302   | 1.9793  | 0.068214 | 0.22978 | -4.4924 | 145173   |
| CTSC      | 5.1138   | 5.1138  | 9.4058   | 1.979   | 0.068255 | 0.22987 | -4.4929 | 1075     |
| SNX11     | 1.0728   | 1.0728  | 3.1446   | 1.9783  | 0.068334 | 0.23007 | -4.494  | 29916    |
| LOC646214 | -2.1188  | 2.1188  | 3.9119   | -1.9783 | 0.068341 | 0.23007 | -4.494  | 646214   |
| NSF       | 1.676    | 1.676   | 4.6663   | 1.9779  | 0.068379 | 0.23015 | -4.4945 | 4905     |
| NOD1      | -0.64453 | 0.64453 | 2.462    | -1.9777 | 0.068406 | 0.2302  | -4.4949 | 10392    |
| HTATSF1P2 | 0.83022  | 0.83022 | 1.4173   | 1.9775  | 0.068433 | 0.2302  | -4.4952 | 401233   |
| ZNF572    | -0.14674 | 0.14674 | 0.2477   | -1.9775 | 0.068438 | 0.2302  | -4.4953 | 137209   |
| PRSS8     | 25.116   | 25.116  | 37.595   | 1.9772  | 0.068467 | 0.2302  | -4.4957 | 5652     |
| ZNF589    | -0.78369 | 0.78369 | 3.2077   | -1.9772 | 0.068469 | 0.2302  | -4.4957 | 51385    |
| ZBTB48    | -1.0096  | 1.0096  | 2.556    | -1.9772 | 0.068476 | 0.2302  | -4.4958 | 3104     |
| ERLIN2    | -0.72837 | 0.72837 | 2.6084   | -1.977  | 0.068492 | 0.23021 | -4.496  | 11160    |
| PGGT1B    | 1.1609   | 1.1609  | 3.8724   | 1.9768  | 0.068523 | 0.23027 | -4.4964 | 5229     |
| LINC00630 | -0.18285 | 0.18285 | 0.32022  | -1.9764 | 0.068575 | 0.23039 | -4.497  | 1E+08    |
| PGLYRP4   | 4.4864   | 4.4864  | 6.6944   | 1.9763  | 0.068585 | 0.23039 | -4.4972 | 57115    |
| PPP2R5C   | 2.2241   | 2.2241  | 8.2172   | 1.976   | 0.068614 | 0.23044 | -4.4975 | 5527     |
| TSPAN11   | 3.5404   | 3.5404  | 3.6318   | 1.9759  | 0.068634 | 0.23046 | -4.4978 | 441631   |
| ADH6      | -0.12572 | 0.12572 | 0.095079 | -1.9754 | 0.068696 | 0.23062 | -4.4986 | 130      |
| PARD3-AS1 | -0.30455 | 0.30455 | 0.22473  | -1.9752 | 0.068713 | 0.23063 | -4.4988 | 1.01E+08 |
| METAP2    | 3.1853   | 3.1853  | 9.5731   | 1.9751  | 0.068738 | 0.23065 | -4.4991 | 10988    |
| LINC01237 | -0.16543 | 0.16543 | 0.11593  | -1.9749 | 0.068757 | 0.23065 | -4.4993 | 1.02E+08 |
| LINC00506 | -6.8119  | 6.8119  | 13.307   | -1.9749 | 0.06876  | 0.23065 | -4.4994 | 1.01E+08 |
| STMN3     | -1.9525  | 1.9525  | 3.9488   | -1.9747 | 0.068785 | 0.23069 | -4.4997 | 50861    |
| ZNF506    | -1.0049  | 1.0049  | 2.5963   | -1.9742 | 0.06884  | 0.23078 | -4.5004 | 440515   |



|              |          |         |         |         |          |         |         |          |
|--------------|----------|---------|---------|---------|----------|---------|---------|----------|
| LOC100128361 | -1.5121  | 1.5121  | 3.0106  | -1.9742 | 0.068844 | 0.23078 | -4.5004 | 1E+08    |
| ERO1A        | 14.931   | 14.931  | 16.17   | 1.9741  | 0.068853 | 0.23078 | -4.5006 | 30001    |
| ZNF347       | -0.39889 | 0.39889 | 1.0885  | -1.974  | 0.068874 | 0.23081 | -4.5008 | 84671    |
| KRT34        | 0.41514  | 0.41514 | 0.56826 | 1.9737  | 0.068906 | 0.23087 | -4.5012 | 3885     |
| ERVFRD-1     | -0.328   | 0.328   | 0.60217 | -1.9736 | 0.068923 | 0.23088 | -4.5014 | 405754   |
| DNPEP        | -1.7515  | 1.7515  | 4.9576  | -1.9732 | 0.06897  | 0.23099 | -4.502  | 23549    |
| CACNA1C-AS2  | -0.12966 | 0.12966 | 0.12029 | -1.973  | 0.068995 | 0.23099 | -4.5024 | 1.01E+08 |
| ZNF251       | -0.79684 | 0.79684 | 2.0749  | -1.973  | 0.068998 | 0.23099 | -4.5024 | 90987    |
| POLM         | -1.221   | 1.221   | 2.7973  | -1.9725 | 0.069051 | 0.231   | -4.5031 | 27434    |
| SCPEP1       | -4.0309  | 4.0309  | 11.059  | -1.9724 | 0.06907  | 0.231   | -4.5033 | 59342    |
| CWF19L2      | -0.98118 | 0.98118 | 2.7579  | -1.9723 | 0.069078 | 0.231   | -4.5034 | 143884   |
| FAM3D        | -0.33603 | 0.33603 | 0.27563 | -1.9723 | 0.069085 | 0.231   | -4.5035 | 131177   |
| AFMID        | -0.91752 | 0.91752 | 2.267   | -1.9722 | 0.069091 | 0.231   | -4.5036 | 125061   |
| RAMP2-AS1    | -0.17939 | 0.17939 | 0.2735  | -1.9721 | 0.0691   | 0.231   | -4.5037 | 1E+08    |
| FAM243A      | -0.15739 | 0.15739 | 0.21128 | -1.9721 | 0.069109 | 0.231   | -4.5038 | 1.02E+08 |
| FAM243B      | -0.15739 | 0.15739 | 0.21128 | -1.9721 | 0.069109 | 0.231   | -4.5038 | 1.03E+08 |
| HCG11        | -0.26409 | 0.26409 | 0.87563 | -1.9719 | 0.069128 | 0.231   | -4.504  | 493812   |
| ZSCAN31      | 1.2729   | 1.2729  | 1.5607  | 1.9718  | 0.069144 | 0.231   | -4.5042 | 64288    |
| LRRC37A      | -0.24468 | 0.24468 | 0.46936 | -1.9717 | 0.069161 | 0.231   | -4.5044 | 9884     |
| NPRL2        | -0.56235 | 0.56235 | 1.8438  | -1.9716 | 0.069167 | 0.231   | -4.5045 | 10641    |
| NABP1        | 3.0026   | 3.0026  | 4.8375  | 1.9715  | 0.069178 | 0.231   | -4.5047 | 64859    |
| SNX7         | 2.5131   | 2.5131  | 5.6619  | 1.9713  | 0.069202 | 0.23103 | -4.505  | 51375    |
| AOX1         | -4.0849  | 4.0849  | 3.5649  | -1.9709 | 0.06925  | 0.23115 | -4.5056 | 316      |
| AP3S1        | 4.1416   | 4.1416  | 9.1419  | 1.9708  | 0.069272 | 0.23115 | -4.5059 | 1176     |
| MELK         | 1.3474   | 1.3474  | 1.7684  | 1.9706  | 0.069287 | 0.23115 | -4.506  | 9833     |
| VDAC1        | 13.04    | 13.04   | 28.914  | 1.9706  | 0.069292 | 0.23115 | -4.5061 | 7416     |

|                |          |         |         |         |          |         |         |          |
|----------------|----------|---------|---------|---------|----------|---------|---------|----------|
| LLPH-DT        | -0.7672  | 0.7672  | 1.0646  | -1.9704 | 0.069324 | 0.23118 | -4.5065 | 1.04E+08 |
| PAXBP1-AS1     | -0.2848  | 0.2848  | 0.52936 | -1.9703 | 0.069329 | 0.23118 | -4.5066 | 1.01E+08 |
| RASSF8         | 1.6338   | 1.6338  | 2.1566  | 1.97    | 0.069369 | 0.2312  | -4.5071 | 11228    |
| ZNF470         | -0.1789  | 0.1789  | 0.43549 | -1.97   | 0.06937  | 0.2312  | -4.5071 | 388566   |
| RTEL1-TNFRSF6B | -0.28237 | 0.28237 | 0.63356 | -1.9699 | 0.069386 | 0.2312  | -4.5073 | 1.01E+08 |
| RER1           | 5.3461   | 5.3461  | 15.694  | 1.9698  | 0.06939  | 0.2312  | -4.5073 | 11079    |
| HSPBAP1        | -0.38467 | 0.38467 | 1.7817  | -1.9687 | 0.069531 | 0.23153 | -4.5091 | 79663    |
| CPSF2          | 1.5843   | 1.5843  | 5.3695  | 1.9686  | 0.069539 | 0.23153 | -4.5092 | 53981    |
| CMIP           | 7.9883   | 7.9883  | 18.777  | 1.9686  | 0.069545 | 0.23153 | -4.5093 | 80790    |
| CRTC1          | -0.80076 | 0.80076 | 1.5215  | -1.9685 | 0.069554 | 0.23153 | -4.5094 | 23373    |
| CLIC6          | -1.4131  | 1.4131  | 1.4248  | -1.9685 | 0.069556 | 0.23153 | -4.5094 | 54102    |
| RFX7           | -1.13    | 1.13    | 3.3485  | -1.9683 | 0.069584 | 0.23155 | -4.5098 | 64864    |
| ITSN2          | 2.4194   | 2.4194  | 6.6566  | 1.9682  | 0.069591 | 0.23155 | -4.5099 | 50618    |
| NUP50          | 2.4353   | 2.4353  | 7.5272  | 1.968   | 0.069617 | 0.23159 | -4.5102 | 10762    |
| CPSF1          | -2.7844  | 2.7844  | 7.0981  | -1.9679 | 0.06963  | 0.23159 | -4.5103 | 29894    |
| ALKBH2         | -1.0019  | 1.0019  | 2.788   | -1.9678 | 0.069648 | 0.23161 | -4.5106 | 121642   |
| ADRB2          | 5.7735   | 5.7735  | 8.9935  | 1.9675  | 0.069683 | 0.23168 | -4.511  | 154      |
| CTAGE4         | -0.4662  | 0.4662  | 0.70966 | -1.967  | 0.069747 | 0.23183 | -4.5118 | 1E+08    |
| HAUS4          | -1.7855  | 1.7855  | 5.38    | -1.9669 | 0.069756 | 0.23183 | -4.5119 | 54930    |
| ASTE1          | -0.37384 | 0.37384 | 1.0956  | -1.9666 | 0.069795 | 0.23191 | -4.5124 | 28990    |
| CSGALNACT1     | 3.1682   | 3.1682  | 4.1723  | 1.9663  | 0.069838 | 0.23201 | -4.5129 | 55790    |
| MAP3K8         | 2.3748   | 2.3748  | 5.1805  | 1.9657  | 0.069907 | 0.23212 | -4.5138 | 1326     |
| ZNF365         | 0.35631  | 0.35631 | 0.30817 | 1.9657  | 0.069909 | 0.23212 | -4.5138 | 22891    |
| ZBTB20-AS1     | -0.16734 | 0.16734 | 0.18012 | -1.9656 | 0.069918 | 0.23212 | -4.5139 | 1E+08    |
| TEX53          | -0.15481 | 0.15481 | 0.09378 | -1.9656 | 0.069926 | 0.23212 | -4.514  | 1.05E+08 |
| GJA1           | 70.106   | 70.106  | 119.71  | 1.9652  | 0.06997  | 0.23222 | -4.5146 | 2697     |

|           |          |         |          |         |          |         |         |        |
|-----------|----------|---------|----------|---------|----------|---------|---------|--------|
| GP6       | -0.15573 | 0.15573 | 0.24779  | -1.9649 | 0.070014 | 0.23226 | -4.5151 | 51206  |
| CYP4Z1    | -0.13591 | 0.13591 | 0.077465 | -1.9648 | 0.070026 | 0.23226 | -4.5153 | 199974 |
| ZC3H4     | -2.8353  | 2.8353  | 6.0755   | -1.9647 | 0.070033 | 0.23226 | -4.5154 | 23211  |
| TLE1      | -1.0102  | 1.0102  | 4.002    | -1.9647 | 0.07004  | 0.23226 | -4.5155 | 7088   |
| ADIPOQ    | -0.9841  | 0.9841  | 0.52566  | -1.9643 | 0.070081 | 0.23226 | -4.516  | 9370   |
| CRY2      | -3.8601  | 3.8601  | 6.8827   | -1.9643 | 0.070081 | 0.23226 | -4.516  | 1408   |
| CDCP1     | 8.5994   | 8.5994  | 12.393   | 1.9643  | 0.070083 | 0.23226 | -4.516  | 64866  |
| ADCY7     | 2.268    | 2.268   | 6.0552   | 1.9642  | 0.070093 | 0.23226 | -4.5161 | 113    |
| PFDN4     | 0.99888  | 0.99888 | 1.8228   | 1.9637  | 0.070162 | 0.23245 | -4.517  | 5203   |
| KDM1B     | 1.7871   | 1.7871  | 4.6031   | 1.9632  | 0.070223 | 0.23255 | -4.5177 | 221656 |
| FAM126B   | 0.66205  | 0.66205 | 2.5529   | 1.9631  | 0.070235 | 0.23255 | -4.5179 | 285172 |
| LIPT1     | -0.27292 | 0.27292 | 0.63934  | -1.9631 | 0.07024  | 0.23255 | -4.5179 | 51601  |
| CYSLTR1   | -0.19977 | 0.19977 | 0.33677  | -1.963  | 0.07025  | 0.23255 | -4.5181 | 10800  |
| XIAP      | 0.84881  | 0.84881 | 3.9005   | 1.9629  | 0.070265 | 0.23256 | -4.5182 | 331    |
| TAF9      | 3.3218   | 3.3218  | 7.3008   | 1.9624  | 0.07032  | 0.23268 | -4.5189 | 6880   |
| GAS6-AS1  | -0.36997 | 0.36997 | 0.42258  | -1.9624 | 0.070328 | 0.23268 | -4.519  | 650669 |
| SH3D19    | 2.8016   | 2.8016  | 10.992   | 1.9621  | 0.070365 | 0.23275 | -4.5195 | 152503 |
| ATP6V1E1  | 9.0463   | 9.0463  | 23.574   | 1.9616  | 0.070427 | 0.23286 | -4.5202 | 529    |
| MAOB      | -5.8779  | 5.8779  | 4.0769   | -1.9615 | 0.070437 | 0.23286 | -4.5204 | 4129   |
| TRIP4     | 1.926    | 1.926   | 5.5674   | 1.9614  | 0.070453 | 0.23286 | -4.5206 | 9325   |
| RNF220    | -1.439   | 1.439   | 4.7048   | -1.9614 | 0.070455 | 0.23286 | -4.5206 | 55182  |
| ITGA4     | 0.62651  | 0.62651 | 0.83091  | 1.9612  | 0.070477 | 0.23286 | -4.5209 | 3676   |
| EMID1     | -1.6482  | 1.6482  | 1.6401   | -1.9612 | 0.070481 | 0.23286 | -4.5209 | 129080 |
| LINC02603 | -0.87214 | 0.87214 | 2.0905   | -1.9604 | 0.070575 | 0.23313 | -4.5221 | 158257 |
| MAP2K3    | 6.1347   | 6.1347  | 13.882   | 1.9595  | 0.070692 | 0.23346 | -4.5235 | 5606   |
| PIP       | -22.864  | 22.864  | 12.269   | -1.9594 | 0.070704 | 0.23346 | -4.5237 | 5304   |

|              |          |         |         |         |          |         |         |          |
|--------------|----------|---------|---------|---------|----------|---------|---------|----------|
| ADPRM        | -0.51495 | 0.51495 | 1.5007  | -1.9591 | 0.070743 | 0.23355 | -4.5242 | 56985    |
| LGALS7       | 455.5    | 455.5   | 281.67  | 1.9585  | 0.070823 | 0.23376 | -4.5251 | 3963     |
| PACRG        | -0.14235 | 0.14235 | 0.16833 | -1.9582 | 0.070856 | 0.23383 | -4.5255 | 135138   |
| SS18L1       | -0.59911 | 0.59911 | 2.5023  | -1.958  | 0.070886 | 0.23385 | -4.5259 | 26039    |
| TMEM159      | -2.6899  | 2.6899  | 8.8689  | -1.958  | 0.07089  | 0.23385 | -4.5259 | 57146    |
| C1orf116     | 9.3273   | 9.3273  | 15.392  | 1.9578  | 0.070916 | 0.23389 | -4.5263 | 79098    |
| SEMA3C       | 5.6912   | 5.6912  | 12.779  | 1.9569  | 0.071024 | 0.2342  | -4.5276 | 10512    |
| LOC102723313 | -0.2081  | 0.2081  | 0.48522 | -1.9568 | 0.071042 | 0.23421 | -4.5278 | 1.03E+08 |
| PSENE1       | 5.1707   | 5.1707  | 10.273  | 1.9564  | 0.071086 | 0.23431 | -4.5284 | 55851    |
| NEURL4       | -1.1966  | 1.1966  | 2.622   | -1.956  | 0.071143 | 0.23445 | -4.5291 | 84461    |
| ZNF414       | -1.0721  | 1.0721  | 3.195   | -1.9558 | 0.071166 | 0.23448 | -4.5293 | 84330    |
| LEMD1        | 0.38131  | 0.38131 | 0.39107 | 1.9557  | 0.071184 | 0.23448 | -4.5296 | 93273    |
| STYX         | 1.0255   | 1.0255  | 3.2421  | 1.9556  | 0.071194 | 0.23448 | -4.5297 | 6815     |
| METAP1       | 2.4989   | 2.4989  | 8.6019  | 1.955   | 0.071271 | 0.23465 | -4.5306 | 23173    |
| ZNF677       | -0.13504 | 0.13504 | 0.27337 | -1.9549 | 0.071282 | 0.23465 | -4.5308 | 342926   |
| SAMD8        | 0.8512   | 0.8512  | 3.0942  | 1.9548  | 0.071296 | 0.23465 | -4.5309 | 142891   |
| GPM6B        | 1.2904   | 1.2904  | 1.7327  | 1.9548  | 0.071301 | 0.23465 | -4.531  | 2824     |
| EID2         | 1.2916   | 1.2916  | 3.1225  | 1.9541  | 0.071391 | 0.23491 | -4.5321 | 163126   |
| TMEM99       | -0.69016 | 0.69016 | 1.3576  | -1.9538 | 0.071425 | 0.23493 | -4.5325 | 147184   |
| MYH10        | 2.1689   | 2.1689  | 6.2918  | 1.9538  | 0.071427 | 0.23493 | -4.5325 | 4628     |
| RAB43        | -1.4745  | 1.4745  | 2.3677  | -1.9531 | 0.071513 | 0.23517 | -4.5336 | 339122   |
| HACD2        | 1.7232   | 1.7232  | 5.5535  | 1.953   | 0.071531 | 0.23518 | -4.5338 | 201562   |
| ZNF441       | -0.47827 | 0.47827 | 0.89765 | -1.9528 | 0.071554 | 0.23521 | -4.5341 | 126068   |
| ENO4         | -0.1456  | 0.1456  | 0.14503 | -1.9525 | 0.071587 | 0.23527 | -4.5345 | 387712   |
| COX5A        | 14.015   | 14.015  | 28.094  | 1.9523  | 0.071619 | 0.23529 | -4.5349 | 9377     |
| PLSCR4       | -2.2689  | 2.2689  | 4.1143  | -1.9523 | 0.071621 | 0.23529 | -4.5349 | 57088    |

|              |          |         |         |         |          |         |         |          |
|--------------|----------|---------|---------|---------|----------|---------|---------|----------|
| PCSK6        | 2.9556   | 2.9556  | 3.6108  | 1.9522  | 0.071632 | 0.23529 | -4.535  | 5046     |
| SNORD15B     | -1.8382  | 1.8382  | 3.0985  | -1.9515 | 0.07172  | 0.2355  | -4.5361 | 114599   |
| TMEM268      | -0.68578 | 0.68578 | 1.4935  | -1.9515 | 0.071727 | 0.2355  | -4.5362 | 203197   |
| HIC2         | -0.22922 | 0.22922 | 0.58345 | -1.9508 | 0.071812 | 0.23573 | -4.5372 | 23119    |
| OSR2         | -2.1141  | 2.1141  | 2.6789  | -1.9507 | 0.071823 | 0.23573 | -4.5373 | 116039   |
| TRIM41       | -1.9784  | 1.9784  | 4.616   | -1.9505 | 0.071851 | 0.23578 | -4.5377 | 90933    |
| ETV6         | -2.5054  | 2.5054  | 7.2053  | -1.9503 | 0.07188  | 0.23583 | -4.538  | 2120     |
| SLC2A9       | 2.1337   | 2.1337  | 3.3022  | 1.9499  | 0.071932 | 0.23594 | -4.5386 | 56606    |
| CALCOCO1     | -7.4908  | 7.4908  | 16.619  | -1.9498 | 0.071944 | 0.23594 | -4.5388 | 57658    |
| TUBB6        | 20.927   | 20.927  | 29.747  | 1.9495  | 0.071977 | 0.23596 | -4.5392 | 84617    |
| PVRIG        | -0.79998 | 0.79998 | 1.0637  | -1.9494 | 0.071991 | 0.23596 | -4.5394 | 79037    |
| TXNDC17      | 7.9859   | 7.9859  | 10.506  | 1.9493  | 0.07201  | 0.23596 | -4.5396 | 84817    |
| CTTNBP2NL    | 2.1284   | 2.1284  | 7.9058  | 1.9493  | 0.072011 | 0.23596 | -4.5396 | 55917    |
| MPND         | -1.065   | 1.065   | 2.5863  | -1.9491 | 0.07203  | 0.23596 | -4.5398 | 84954    |
| SLC38A2      | 20.304   | 20.304  | 51.583  | 1.9491  | 0.072035 | 0.23596 | -4.5399 | 54407    |
| CPZ          | -1.688   | 1.688   | 1.7873  | -1.9488 | 0.072068 | 0.23596 | -4.5403 | 8532     |
| SCGB2A1      | -0.36967 | 0.36967 | 0.22034 | -1.9487 | 0.072079 | 0.23596 | -4.5404 | 4246     |
| ZHX1-C8orf76 | -0.49622 | 0.49622 | 0.94065 | -1.9487 | 0.072087 | 0.23596 | -4.5405 | 1.01E+08 |
| HIF1A-AS2    | 0.25543  | 0.25543 | 0.32448 | 1.9487  | 0.072089 | 0.23596 | -4.5405 | 1.01E+08 |
| SNORA80A     | -1.2336  | 1.2336  | 1.4356  | -1.9482 | 0.072148 | 0.23611 | -4.5412 | 677846   |
| HSD17B1      | 1.0077   | 1.0077  | 1.8038  | 1.9478  | 0.072196 | 0.23617 | -4.5418 | 3292     |
| CHCHD1       | 3.9286   | 3.9286  | 7.0973  | 1.9478  | 0.072199 | 0.23617 | -4.5419 | 118487   |
| TIMM8B       | 9.0935   | 9.0935  | 12.212  | 1.9477  | 0.07221  | 0.23617 | -4.542  | 26521    |
| SLC44A1      | 2.1083   | 2.1083  | 7.1115  | 1.9474  | 0.072255 | 0.23627 | -4.5425 | 23446    |
| VPS37C       | -2.0001  | 2.0001  | 6.7774  | -1.947  | 0.072306 | 0.23634 | -4.5432 | 55048    |
| CNTNAP3B     | -0.68475 | 0.68475 | 1.2785  | -1.947  | 0.072308 | 0.23634 | -4.5432 | 728577   |

|              |          |         |         |         |          |         |         |          |
|--------------|----------|---------|---------|---------|----------|---------|---------|----------|
| LOC107984974 | -0.15834 | 0.15834 | 0.37177 | -1.9468 | 0.072327 | 0.23634 | -4.5434 | 1.08E+08 |
| PRELID2      | -0.19661 | 0.19661 | 0.42665 | -1.9468 | 0.072332 | 0.23634 | -4.5435 | 153768   |
| CYP2T1P      | -0.61668 | 0.61668 | 1.0236  | -1.9466 | 0.072356 | 0.23638 | -4.5438 | 171523   |
| CFTR         | -0.58768 | 0.58768 | 0.42028 | -1.9462 | 0.072408 | 0.2365  | -4.5444 | 1080     |
| B4GALT4      | 1.0063   | 1.0063  | 3.4662  | 1.9458  | 0.072456 | 0.23661 | -4.545  | 8702     |
| LOC101928446 | -0.16989 | 0.16989 | 0.22355 | -1.9454 | 0.072512 | 0.2367  | -4.5456 | 1.02E+08 |
| BMP7-AS1     | -0.19514 | 0.19514 | 0.1793  | -1.9454 | 0.072513 | 0.2367  | -4.5456 | 1.03E+08 |
| LINC00641    | -1.0707  | 1.0707  | 2.2892  | -1.9448 | 0.072595 | 0.23693 | -4.5466 | 283624   |
| MTPAP        | -0.60512 | 0.60512 | 2.546   | -1.9444 | 0.072648 | 0.23705 | -4.5473 | 55149    |
| SKA2         | 1.1114   | 1.1114  | 2.1507  | 1.944   | 0.072694 | 0.23716 | -4.5478 | 348235   |
| ARGLU1       | -4.5826  | 4.5826  | 18.171  | -1.9437 | 0.072739 | 0.23726 | -4.5483 | 55082    |
| RTN2         | 0.77912  | 0.77912 | 1.8893  | 1.9434  | 0.072767 | 0.23729 | -4.5487 | 6253     |
| ACOT9        | 1.3175   | 1.3175  | 3.1152  | 1.9434  | 0.072778 | 0.23729 | -4.5488 | 23597    |
| CD81-AS1     | -0.15977 | 0.15977 | 0.1738  | -1.9432 | 0.072806 | 0.23729 | -4.5491 | 1.02E+08 |
| LOC101928119 | -0.39842 | 0.39842 | 0.73286 | -1.943  | 0.072822 | 0.23729 | -4.5493 | 1.02E+08 |
| SEC16B       | -0.20676 | 0.20676 | 0.34003 | -1.943  | 0.072823 | 0.23729 | -4.5493 | 89866    |
| CENPP        | -0.70584 | 0.70584 | 1.7935  | -1.9429 | 0.072833 | 0.23729 | -4.5495 | 401541   |
| ZNF34        | -0.31562 | 0.31562 | 0.94918 | -1.9427 | 0.072861 | 0.2373  | -4.5498 | 80778    |
| SPIRE2       | -0.28396 | 0.28396 | 0.49601 | -1.9425 | 0.072886 | 0.2373  | -4.5501 | 84501    |
| PRKAR2A      | 2.5164   | 2.5164  | 8.3626  | 1.9425  | 0.072891 | 0.2373  | -4.5502 | 5576     |
| LOC100286922 | -0.17598 | 0.17598 | 0.10075 | -1.9423 | 0.072917 | 0.2373  | -4.5505 | 1E+08    |
| CLMP         | 2.9953   | 2.9953  | 4.5192  | 1.9421  | 0.07294  | 0.2373  | -4.5507 | 79827    |
| RAI14        | 2.8521   | 2.8521  | 4.3994  | 1.9421  | 0.072943 | 0.2373  | -4.5508 | 26064    |
| WDR92        | -0.36426 | 0.36426 | 1.4206  | -1.9421 | 0.07295  | 0.2373  | -4.5509 | 116143   |
| LRRC56       | -0.60294 | 0.60294 | 0.80929 | -1.942  | 0.072955 | 0.2373  | -4.5509 | 115399   |
| TLK1         | 1.3898   | 1.3898  | 5.9425  | 1.9417  | 0.072996 | 0.2373  | -4.5514 | 9874     |

|              |          |         |         |         |          |         |         |          |
|--------------|----------|---------|---------|---------|----------|---------|---------|----------|
| SRF          | 3.9746   | 3.9746  | 9.0654  | 1.9417  | 0.073002 | 0.2373  | -4.5515 | 6722     |
| MAD1L1       | -1.162   | 1.162   | 2.6554  | -1.9416 | 0.073003 | 0.2373  | -4.5515 | 8379     |
| TP53RK       | 0.77459  | 0.77459 | 2.8693  | 1.9416  | 0.073014 | 0.2373  | -4.5516 | 112858   |
| TRIOBP       | -1.0264  | 1.0264  | 3.6429  | -1.9415 | 0.073017 | 0.2373  | -4.5517 | 11078    |
| NRF1         | -0.36329 | 0.36329 | 2.105   | -1.9411 | 0.07307  | 0.23742 | -4.5523 | 4899     |
| ZBTB4        | -3.253   | 3.253   | 12.436  | -1.941  | 0.073088 | 0.23743 | -4.5525 | 57659    |
| RNF139-AS1   | -0.1594  | 0.1594  | 0.21737 | -1.9402 | 0.073197 | 0.23769 | -4.5538 | 1.02E+08 |
| PHACTR4      | 1.6979   | 1.6979  | 6.8749  | 1.9399  | 0.073239 | 0.23769 | -4.5543 | 65979    |
| CAPN14       | -0.13302 | 0.13302 | 0.13858 | -1.9397 | 0.073258 | 0.23769 | -4.5545 | 440854   |
| MRGPRX3      | -0.99315 | 0.99315 | 1.4939  | -1.9397 | 0.073259 | 0.23769 | -4.5545 | 117195   |
| GALNT14      | -0.38753 | 0.38753 | 0.71653 | -1.9397 | 0.073262 | 0.23769 | -4.5546 | 79623    |
| BCKDK        | 9.1939   | 9.1939  | 15.391  | 1.9397  | 0.073263 | 0.23769 | -4.5546 | 10295    |
| LOC91450     | -0.45103 | 0.45103 | 0.61907 | -1.9395 | 0.073292 | 0.23769 | -4.5549 | 91450    |
| MSX2         | 1.0231   | 1.0231  | 1.7951  | 1.9394  | 0.073299 | 0.23769 | -4.555  | 4488     |
| C21orf62-AS1 | -0.16389 | 0.16389 | 0.17007 | -1.9393 | 0.073315 | 0.23769 | -4.5552 | 54067    |
| SDC4         | -10.235  | 10.235  | 25.659  | -1.9392 | 0.073319 | 0.23769 | -4.5552 | 6385     |
| TLDC2        | -0.21257 | 0.21257 | 0.303   | -1.9392 | 0.073323 | 0.23769 | -4.5553 | 140711   |
| ZNF354A      | 0.58175  | 0.58175 | 1.7644  | 1.9385  | 0.073415 | 0.23795 | -4.5564 | 6940     |
| RAMP1        | -0.74617 | 0.74617 | 0.94198 | -1.9381 | 0.073464 | 0.238   | -4.557  | 10267    |
| HLA-E        | -6.9968  | 6.9968  | 17.071  | -1.938  | 0.073481 | 0.238   | -4.5572 | 3133     |
| CLDN17       | 2.8889   | 2.8889  | 2.2676  | 1.9378  | 0.073505 | 0.238   | -4.5574 | 26285    |
| RHOJ         | 1.9277   | 1.9277  | 3.0865  | 1.9378  | 0.07351  | 0.238   | -4.5575 | 57381    |
| AHNAK        | -58.998  | 58.998  | 223.83  | -1.9378 | 0.073513 | 0.238   | -4.5575 | 79026    |
| OLR1         | 0.36812  | 0.36812 | 0.19725 | 1.9377  | 0.073525 | 0.238   | -4.5577 | 4973     |
| TET3         | -2.7189  | 2.7189  | 7.5124  | -1.9375 | 0.07355  | 0.238   | -4.558  | 200424   |
| FAM83C-AS1   | 0.31257  | 0.31257 | 0.35739 | 1.9375  | 0.073552 | 0.238   | -4.558  | 140846   |

|            |          |         |         |         |          |         |         |          |
|------------|----------|---------|---------|---------|----------|---------|---------|----------|
| EVA1A      | 0.98733  | 0.98733 | 0.93999 | 1.9374  | 0.073558 | 0.238   | -4.5581 | 84141    |
| NDUFB4     | 7.4386   | 7.4386  | 16.268  | 1.9372  | 0.073584 | 0.238   | -4.5584 | 4710     |
| ZSWIM4     | 1.774    | 1.774   | 4.1222  | 1.9371  | 0.073601 | 0.238   | -4.5586 | 65249    |
| RCAN2      | -1.4376  | 1.4376  | 1.9664  | -1.9371 | 0.073602 | 0.238   | -4.5586 | 10231    |
| TGFB1      | 8.2468   | 8.2468  | 16.24   | 1.937   | 0.073615 | 0.238   | -4.5587 | 7040     |
| MAPK1      | 4.0573   | 4.0573  | 14.277  | 1.9366  | 0.073664 | 0.23811 | -4.5593 | 5594     |
| TMEM19     | -1.6102  | 1.6102  | 4.7437  | -1.9363 | 0.073703 | 0.23814 | -4.5598 | 55266    |
| PHTF2      | 0.64276  | 0.64276 | 1.7143  | 1.9363  | 0.073707 | 0.23814 | -4.5598 | 57157    |
| ATP6V1H    | 2.6992   | 2.6992  | 7.5035  | 1.9362  | 0.073717 | 0.23814 | -4.5599 | 51606    |
| KIAA0232   | 0.95814  | 0.95814 | 3.8478  | 1.9361  | 0.073731 | 0.23814 | -4.5601 | 9778     |
| MFN2       | -5.1016  | 5.1016  | 16.594  | -1.936  | 0.073744 | 0.23814 | -4.5603 | 9927     |
| SOGA1      | -1.4806  | 1.4806  | 4.5029  | -1.9359 | 0.073757 | 0.23814 | -4.5604 | 140710   |
| FAAH2      | -1.2711  | 1.2711  | 2.2528  | -1.9357 | 0.073784 | 0.23818 | -4.5607 | 158584   |
| MAP3K20    | 2.1237   | 2.1237  | 4.7955  | 1.9342  | 0.073984 | 0.23878 | -4.5631 | 51776    |
| REEP2      | -0.2209  | 0.2209  | 0.23674 | -1.9339 | 0.07402  | 0.23885 | -4.5635 | 51308    |
| AK6        | 1.1732   | 1.1732  | 2.2196  | 1.9337  | 0.07405  | 0.23887 | -4.5638 | 1.02E+08 |
| DKK4       | 0.49831  | 0.49831 | 0.33739 | 1.9337  | 0.074053 | 0.23887 | -4.5639 | 27121    |
| PTER       | -0.54512 | 0.54512 | 1.384   | -1.9336 | 0.074073 | 0.23888 | -4.5641 | 9317     |
| PURA       | -0.54946 | 0.54946 | 3.7375  | -1.9334 | 0.074098 | 0.23888 | -4.5644 | 5813     |
| SNRK-AS1   | -0.31568 | 0.31568 | 0.50988 | -1.9333 | 0.0741   | 0.23888 | -4.5644 | 1.01E+08 |
| AASDHPPT   | 1.2788   | 1.2788  | 4.1187  | 1.9331  | 0.074131 | 0.23894 | -4.5648 | 60496    |
| SDR42E1    | -2.4352  | 2.4352  | 5.5282  | -1.9326 | 0.074198 | 0.23911 | -4.5656 | 93517    |
| SCAF4      | -1.2466  | 1.2466  | 6.3059  | -1.9321 | 0.074269 | 0.23929 | -4.5664 | 57466    |
| TJAP1      | -1.0888  | 1.0888  | 2.3925  | -1.9318 | 0.074301 | 0.23929 | -4.5668 | 93643    |
| FAM13A-AS1 | -0.92264 | 0.92264 | 1.3826  | -1.9318 | 0.074301 | 0.23929 | -4.5668 | 285512   |
| ZDHHC24    | -0.63993 | 0.63993 | 1.7869  | -1.9318 | 0.07431  | 0.23929 | -4.5669 | 254359   |



|              |          |         |          |         |          |         |         |          |
|--------------|----------|---------|----------|---------|----------|---------|---------|----------|
| C1QTNF6      | 6.9429   | 6.9429  | 6.435    | 1.9315  | 0.07434  | 0.23934 | -4.5672 | 114904   |
| TMEM185A     | 2.2431   | 2.2431  | 5.8678   | 1.9313  | 0.074369 | 0.23938 | -4.5676 | 84548    |
| KLHL12       | -1.0956  | 1.0956  | 3.5868   | -1.9309 | 0.074422 | 0.23942 | -4.5682 | 59349    |
| C5           | -0.19856 | 0.19856 | 0.37406  | -1.9309 | 0.074427 | 0.23942 | -4.5683 | 727      |
| CD300LF      | 0.33419  | 0.33419 | 0.25552  | 1.9308  | 0.074435 | 0.23942 | -4.5683 | 146722   |
| HINT1        | 22.349   | 22.349  | 37.436   | 1.9308  | 0.074437 | 0.23942 | -4.5684 | 3094     |
| PRR9         | 16.967   | 16.967  | 8.7046   | 1.9307  | 0.074456 | 0.23944 | -4.5686 | 574414   |
| SLC22A3      | -0.78778 | 0.78778 | 2.3787   | -1.9304 | 0.074491 | 0.23945 | -4.569  | 6581     |
| LCNL1        | -0.31146 | 0.31146 | 0.22585  | -1.9304 | 0.074493 | 0.23945 | -4.569  | 401562   |
| RYBP         | 1.4081   | 1.4081  | 4.0096   | 1.9302  | 0.074515 | 0.23945 | -4.5693 | 23429    |
| MTF1         | 1.8134   | 1.8134  | 4.8166   | 1.9302  | 0.074518 | 0.23945 | -4.5693 | 4520     |
| LOC105373338 | -0.14579 | 0.14579 | 0.13596  | -1.9296 | 0.074599 | 0.23963 | -4.5703 | 1.05E+08 |
| DUSP28       | -0.46274 | 0.46274 | 0.9518   | -1.9296 | 0.074603 | 0.23963 | -4.5703 | 285193   |
| DSG1-AS1     | 1.3631   | 1.3631  | 2.6097   | 1.9281  | 0.0748   | 0.24016 | -4.5726 | 1.02E+08 |
| FIBIN        | -1.0796  | 1.0796  | 1.7487   | -1.928  | 0.074809 | 0.24016 | -4.5727 | 387758   |
| TTC28        | -1.0489  | 1.0489  | 2.1344   | -1.9279 | 0.074832 | 0.24016 | -4.573  | 23331    |
| CNTROB       | -1.1622  | 1.1622  | 3.0374   | -1.9277 | 0.074849 | 0.24016 | -4.5732 | 116840   |
| SVOPL        | -0.14163 | 0.14163 | 0.095904 | -1.9273 | 0.07491  | 0.24016 | -4.5739 | 136306   |
| RRNAD1       | -1.5792  | 1.5792  | 3.1851   | -1.9272 | 0.074919 | 0.24016 | -4.574  | 51093    |
| IPCEF1       | -0.16885 | 0.16885 | 0.27715  | -1.9271 | 0.07493  | 0.24016 | -4.5741 | 26034    |
| SLC22A23     | 5.3      | 5.3     | 12.444   | 1.9271  | 0.07494  | 0.24016 | -4.5742 | 63027    |
| CDH1         | 22.842   | 22.842  | 47.161   | 1.927   | 0.074942 | 0.24016 | -4.5742 | 999      |
| PARP3        | -0.84826 | 0.84826 | 1.8682   | -1.927  | 0.074952 | 0.24016 | -4.5744 | 10039    |
| TTLL1        | -0.52158 | 0.52158 | 1.2756   | -1.9269 | 0.074963 | 0.24016 | -4.5745 | 25809    |
| PCSK1N       | -0.7386  | 0.7386  | 0.67767  | -1.9268 | 0.074974 | 0.24016 | -4.5746 | 27344    |
| PDGFD        | -1.7849  | 1.7849  | 2.1468   | -1.9268 | 0.074976 | 0.24016 | -4.5746 | 80310    |

|              |          |         |         |         |          |         |         |          |
|--------------|----------|---------|---------|---------|----------|---------|---------|----------|
| ICA1         | -0.54667 | 0.54667 | 1.1917  | -1.9267 | 0.074988 | 0.24016 | -4.5748 | 3382     |
| TMPRSS11D    | 6.5379   | 6.5379  | 5.6753  | 1.9266  | 0.074999 | 0.24016 | -4.5749 | 9407     |
| CDK8         | 0.65941  | 0.65941 | 2.6909  | 1.9266  | 0.075004 | 0.24016 | -4.575  | 1024     |
| RGS1         | 1.3584   | 1.3584  | 1.3492  | 1.9266  | 0.075007 | 0.24016 | -4.575  | 5996     |
| NT5M         | -0.31954 | 0.31954 | 0.36168 | -1.9258 | 0.075113 | 0.24042 | -4.5762 | 56953    |
| CYP2W1       | -0.61463 | 0.61463 | 0.43228 | -1.9257 | 0.075119 | 0.24042 | -4.5763 | 54905    |
| STRIP1       | 1.7668   | 1.7668  | 6.9087  | 1.9254  | 0.075163 | 0.24046 | -4.5768 | 85369    |
| STEAP1B      | 0.86084  | 0.86084 | 0.89965 | 1.9254  | 0.075169 | 0.24046 | -4.5769 | 256227   |
| SCAMP2       | 7.1883   | 7.1883  | 21.629  | 1.9253  | 0.075172 | 0.24046 | -4.5769 | 10066    |
| LANCL1-AS1   | -0.15452 | 0.15452 | 0.18046 | -1.9251 | 0.075203 | 0.24051 | -4.5773 | 1.03E+08 |
| PPP1R16A     | -1.1086  | 1.1086  | 2.8288  | -1.9249 | 0.075228 | 0.24054 | -4.5775 | 84988    |
| LOC100130075 | -0.14323 | 0.14323 | 0.09524 | -1.9248 | 0.075251 | 0.24057 | -4.5778 | 1E+08    |
| ANGPT2       | 0.78659  | 0.78659 | 1.3289  | 1.9235  | 0.075424 | 0.24105 | -4.5798 | 285      |
| PAK3         | -0.13968 | 0.13968 | 0.13848 | -1.9234 | 0.075429 | 0.24105 | -4.5799 | 5063     |
| RPUSD4       | -0.91555 | 0.91555 | 3.272   | -1.9231 | 0.075476 | 0.24115 | -4.5804 | 84881    |
| MLLT1        | -3.2189  | 3.2189  | 8.3682  | -1.9227 | 0.075527 | 0.24127 | -4.581  | 4298     |
| SPEF2        | -0.13461 | 0.13461 | 0.1541  | -1.9224 | 0.075575 | 0.24138 | -4.5815 | 79925    |
| INTS3        | -1.7516  | 1.7516  | 5.8157  | -1.9221 | 0.075608 | 0.24144 | -4.5819 | 65123    |
| DBI          | 38.459   | 38.459  | 49.649  | 1.9219  | 0.075634 | 0.24146 | -4.5822 | 1622     |
| MRPL50       | 2.329    | 2.329   | 4.8401  | 1.9219  | 0.075643 | 0.24146 | -4.5823 | 54534    |
| RBP4         | -0.66415 | 0.66415 | 0.47994 | -1.9217 | 0.075669 | 0.2415  | -4.5826 | 5950     |
| TRAM1        | 4.7033   | 4.7033  | 11.711  | 1.9214  | 0.075702 | 0.24154 | -4.583  | 23471    |
| LOC101928118 | -0.15441 | 0.15441 | 0.21993 | -1.9214 | 0.07571  | 0.24154 | -4.5831 | 1.02E+08 |
| FAM193B      | -3.2222  | 3.2222  | 7.8039  | -1.9211 | 0.075739 | 0.24158 | -4.5834 | 54540    |
| USP20        | -1.0719  | 1.0719  | 2.9418  | -1.921  | 0.075754 | 0.24159 | -4.5836 | 10868    |
| STX12        | 5.0522   | 5.0522  | 9.4012  | 1.9208  | 0.075783 | 0.24163 | -4.5839 | 23673    |

|                 |          |         |         |         |          |         |         |          |
|-----------------|----------|---------|---------|---------|----------|---------|---------|----------|
| TRIM44          | -2.0859  | 2.0859  | 6.3806  | -1.9207 | 0.075804 | 0.24165 | -4.5841 | 54765    |
| GLIPR1L2        | -0.12169 | 0.12169 | 0.1233  | -1.9202 | 0.075873 | 0.24181 | -4.5849 | 144321   |
| LOC100289230    | -0.20663 | 0.20663 | 0.38423 | -1.9201 | 0.075883 | 0.24181 | -4.585  | 1E+08    |
| DUSP6           | 5.5909   | 5.5909  | 9.4476  | 1.9198  | 0.075918 | 0.24188 | -4.5854 | 1848     |
| LIN28A          | -0.14522 | 0.14522 | 0.13051 | -1.9196 | 0.075949 | 0.24193 | -4.5858 | 79727    |
| MT1G            | -4.9792  | 4.9792  | 3.9386  | -1.9189 | 0.076038 | 0.24217 | -4.5868 | 4495     |
| ANKRD53         | -0.13028 | 0.13028 | 0.15948 | -1.9185 | 0.076101 | 0.24233 | -4.5875 | 79998    |
| FOXC2           | -0.23987 | 0.23987 | 0.30619 | -1.9184 | 0.076116 | 0.24233 | -4.5877 | 2303     |
| ZNF8-ERVK3-1    | -0.26744 | 0.26744 | 0.58734 | -1.9181 | 0.07615  | 0.24239 | -4.5881 | 1.09E+08 |
| PTK2B           | -1.0701  | 1.0701  | 4.0981  | -1.9161 | 0.076423 | 0.24311 | -4.5912 | 2185     |
| UBXN2A          | 1.7952   | 1.7952  | 4.7963  | 1.9161  | 0.076423 | 0.24311 | -4.5912 | 165324   |
| TTY14           | 0.60887  | 0.60887 | 1.2843  | 1.916   | 0.076439 | 0.24311 | -4.5914 | 83869    |
| GREM1           | 9.3857   | 9.3857  | 8.1488  | 1.916   | 0.076446 | 0.24311 | -4.5915 | 26585    |
| DERA            | 3.247    | 3.247   | 7.367   | 1.916   | 0.076447 | 0.24311 | -4.5915 | 51071    |
| SNORA87         | -0.46785 | 0.46785 | 0.71252 | -1.9151 | 0.076569 | 0.24345 | -4.5928 | 1.07E+08 |
| VTA1            | 1.7944   | 1.7944  | 4.6681  | 1.9147  | 0.076624 | 0.24358 | -4.5935 | 51534    |
| LAT2            | 0.88071  | 0.88071 | 1.67    | 1.9141  | 0.0767   | 0.24377 | -4.5943 | 7462     |
| PSMC4           | 4.8021   | 4.8021  | 14.325  | 1.914   | 0.07672  | 0.24379 | -4.5945 | 5704     |
| SCGB2B3P        | -0.17829 | 0.17829 | 0.15434 | -1.9137 | 0.076758 | 0.24383 | -4.595  | 1E+08    |
| ZNF530          | -0.1745  | 0.1745  | 0.40728 | -1.9137 | 0.076761 | 0.24383 | -4.595  | 348327   |
| OASL            | 7.2263   | 7.2263  | 4.8768  | 1.9136  | 0.076774 | 0.24383 | -4.5952 | 8638     |
| TNFAIP8L2-SCNM1 | 0.40693  | 0.40693 | 0.80457 | 1.9134  | 0.0768   | 0.24386 | -4.5954 | 1.01E+08 |
| LINC01410       | -0.14964 | 0.14964 | 0.21977 | -1.9132 | 0.076825 | 0.24389 | -4.5957 | 1.03E+08 |
| LOC100289561    | -1.0201  | 1.0201  | 2.2246  | -1.9131 | 0.07684  | 0.2439  | -4.5959 | 1E+08    |
| GFPT2           | 2.0591   | 2.0591  | 2.7668  | 1.9126  | 0.076906 | 0.24406 | -4.5966 | 9945     |
| MYCL            | -2.3861  | 2.3861  | 4.2094  | -1.9116 | 0.077048 | 0.24447 | -4.5982 | 4610     |

|              |          |         |         |         |          |         |         |          |
|--------------|----------|---------|---------|---------|----------|---------|---------|----------|
| SEC61A2      | -0.35582 | 0.35582 | 0.91699 | -1.9113 | 0.077089 | 0.24448 | -4.5987 | 55176    |
| KRCC1        | 1.8989   | 1.8989  | 3.7821  | 1.9112  | 0.077096 | 0.24448 | -4.5988 | 51315    |
| LINC00863    | -0.50061 | 0.50061 | 2.0874  | -1.911  | 0.077133 | 0.24448 | -4.5992 | 439994   |
| FXN          | -0.1855  | 0.1855  | 0.50501 | -1.911  | 0.077133 | 0.24448 | -4.5992 | 2395     |
| GIPC1        | 23.33    | 23.33   | 46.193  | 1.9109  | 0.077136 | 0.24448 | -4.5992 | 10755    |
| KRT73-AS1    | -0.55601 | 0.55601 | 0.36281 | -1.9108 | 0.077148 | 0.24448 | -4.5994 | 1E+08    |
| NMNAT1       | 0.31146  | 0.31146 | 1.0785  | 1.9108  | 0.077154 | 0.24448 | -4.5994 | 64802    |
| MPPE1        | -0.63775 | 0.63775 | 3.102   | -1.9106 | 0.07718  | 0.24452 | -4.5997 | 65258    |
| ARHGAP33     | -0.64933 | 0.64933 | 1.0761  | -1.9103 | 0.077226 | 0.24462 | -4.6002 | 115703   |
| SGPL1        | 5.1084   | 5.1084  | 14.114  | 1.9101  | 0.077246 | 0.24463 | -4.6005 | 8879     |
| INSYN2B      | -0.21829 | 0.21829 | 0.37493 | -1.9099 | 0.077279 | 0.24469 | -4.6008 | 1E+08    |
| NECTIN2      | 3.3155   | 3.3155  | 8.6302  | 1.9091  | 0.077391 | 0.24496 | -4.6021 | 5819     |
| LOC100133050 | -0.15514 | 0.15514 | 0.19662 | -1.9091 | 0.077394 | 0.24496 | -4.6021 | 1E+08    |
| NMB          | 1.9337   | 1.9337  | 2.7382  | 1.9087  | 0.077451 | 0.2451  | -4.6028 | 4828     |
| PLPP2        | -2.7459  | 2.7459  | 6.7651  | -1.9084 | 0.077491 | 0.24515 | -4.6032 | 8612     |
| HTR7P1       | -0.2407  | 0.2407  | 0.60956 | -1.9083 | 0.077497 | 0.24515 | -4.6033 | 93164    |
| NARS2        | -0.57068 | 0.57068 | 2.1648  | -1.9082 | 0.077514 | 0.24516 | -4.6035 | 79731    |
| STX2         | 0.83231  | 0.83231 | 1.629   | 1.9078  | 0.077564 | 0.24524 | -4.604  | 2054     |
| LOC100129931 | -0.13824 | 0.13824 | 0.19474 | -1.9077 | 0.077579 | 0.24524 | -4.6042 | 1E+08    |
| EIF5         | 7.2741   | 7.2741  | 17.667  | 1.9077  | 0.077583 | 0.24524 | -4.6042 | 1983     |
| SLC44A2      | 9.2688   | 9.2688  | 27.578  | 1.9074  | 0.07762  | 0.24528 | -4.6046 | 57153    |
| LOC102724064 | -0.39658 | 0.39658 | 0.76822 | -1.9074 | 0.077624 | 0.24528 | -4.6047 | 1.03E+08 |
| AMH          | -0.15162 | 0.15162 | 0.1606  | -1.9072 | 0.077653 | 0.24531 | -4.605  | 268      |
| FOXN3-AS2    | -0.63836 | 0.63836 | 0.71834 | -1.9071 | 0.077664 | 0.24531 | -4.6051 | 29018    |
| HAS3         | 7.8688   | 7.8688  | 8.8963  | 1.9069  | 0.077694 | 0.24536 | -4.6055 | 3038     |
| MST1R        | -1.9721  | 1.9721  | 4.478   | -1.9067 | 0.077727 | 0.24539 | -4.6058 | 4486     |

|              |          |         |          |         |          |         |         |          |
|--------------|----------|---------|----------|---------|----------|---------|---------|----------|
| SCARNA4      | -0.15139 | 0.15139 | 0.080741 | -1.9066 | 0.077732 | 0.24539 | -4.6059 | 677771   |
| DOP1A        | -1.4566  | 1.4566  | 4.0299   | -1.9064 | 0.077766 | 0.24544 | -4.6063 | 23033    |
| MTM1         | 0.95204  | 0.95204 | 3.0382   | 1.9063  | 0.077776 | 0.24544 | -4.6064 | 4534     |
| PSMA1        | 5.2469   | 5.2469  | 12.755   | 1.9061  | 0.077812 | 0.24551 | -4.6068 | 5682     |
| MBD5         | -0.37786 | 0.37786 | 1.305    | -1.9058 | 0.077843 | 0.24556 | -4.6071 | 55777    |
| KPNA4        | 2.2722   | 2.2722  | 6.8539   | 1.9055  | 0.077887 | 0.24565 | -4.6076 | 3840     |
| LOC101928417 | -0.18752 | 0.18752 | 0.29482  | -1.905  | 0.077965 | 0.2457  | -4.6085 | 1.02E+08 |
| LINC01551    | -4.7291  | 4.7291  | 8.4658   | -1.9048 | 0.077991 | 0.2457  | -4.6088 | 387978   |
| PLPP3        | -8.8995  | 8.8995  | 17.956   | -1.9047 | 0.078006 | 0.2457  | -4.6089 | 8613     |
| LOC100130548 | -0.34521 | 0.34521 | 0.46198  | -1.9046 | 0.078009 | 0.2457  | -4.609  | 1E+08    |
| CXCL3        | 1.7394   | 1.7394  | 1.3786   | 1.9046  | 0.078019 | 0.2457  | -4.6091 | 2921     |
| SURF4        | 11.614   | 11.614  | 28.122   | 1.9045  | 0.078025 | 0.2457  | -4.6091 | 6836     |
| TACR2        | -0.16482 | 0.16482 | 0.26768  | -1.9044 | 0.07804  | 0.2457  | -4.6093 | 6865     |
| ADGRL1       | -1.1864  | 1.1864  | 3.836    | -1.9043 | 0.078054 | 0.2457  | -4.6095 | 22859    |
| ZCCHC4       | -0.25824 | 0.25824 | 1.1431   | -1.9043 | 0.078061 | 0.2457  | -4.6095 | 29063    |
| HRAT92       | -0.13012 | 0.13012 | 0.13091  | -1.904  | 0.078091 | 0.2457  | -4.6099 | 441307   |
| IKZF5        | -0.49752 | 0.49752 | 1.798    | -1.904  | 0.078095 | 0.2457  | -4.6099 | 64376    |
| GUCY1B1      | 1.6957   | 1.6957  | 1.8389   | 1.904   | 0.078105 | 0.2457  | -4.61   | 2983     |
| LOC100240735 | -0.15586 | 0.15586 | 0.14612  | -1.9039 | 0.078107 | 0.2457  | -4.6101 | 1E+08    |
| BEX3         | 11.193   | 11.193  | 17.566   | 1.9039  | 0.078119 | 0.2457  | -4.6102 | 27018    |
| LIN7C        | 1.6485   | 1.6485  | 5.3973   | 1.9037  | 0.078135 | 0.2457  | -4.6104 | 55327    |
| NIFK         | 3.0429   | 3.0429  | 6.6106   | 1.9037  | 0.078136 | 0.2457  | -4.6104 | 84365    |
| SP2-AS1      | -0.20217 | 0.20217 | 0.45475  | -1.9033 | 0.078191 | 0.24575 | -4.611  | 1.01E+08 |
| HES5         | 2.7772   | 2.7772  | 3.4916   | 1.9033  | 0.078193 | 0.24575 | -4.611  | 388585   |
| NPNT         | 0.48513  | 0.48513 | 1.556    | 1.9033  | 0.078195 | 0.24575 | -4.611  | 255743   |
| ARL15        | 0.94529  | 0.94529 | 2.7717   | 1.9028  | 0.078272 | 0.24595 | -4.6119 | 54622    |

|              |          |         |          |         |          |         |         |          |
|--------------|----------|---------|----------|---------|----------|---------|---------|----------|
| MST1L        | -0.16404 | 0.16404 | 0.13386  | -1.902  | 0.078373 | 0.24622 | -4.613  | 11223    |
| SLC9A7       | -0.31988 | 0.31988 | 0.81865  | -1.9018 | 0.078409 | 0.24628 | -4.6134 | 84679    |
| VPS37B       | 4.9904   | 4.9904  | 10.64    | 1.9016  | 0.078439 | 0.24633 | -4.6137 | 79720    |
| KIAA1522     | -5.8843  | 5.8843  | 18.574   | -1.9013 | 0.078472 | 0.24639 | -4.6141 | 57648    |
| GALNT5       | 0.76521  | 0.76521 | 0.63908  | 1.9011  | 0.078503 | 0.24644 | -4.6144 | 11227    |
| CBLC         | 5.1514   | 5.1514  | 12.593   | 1.9005  | 0.078593 | 0.24668 | -4.6154 | 23624    |
| TRIM23       | 0.51223  | 0.51223 | 1.8004   | 1.9003  | 0.078617 | 0.24671 | -4.6157 | 373      |
| RBM14-RBM4   | -0.80154 | 0.80154 | 2.2867   | -1.9001 | 0.078645 | 0.24674 | -4.616  | 1.01E+08 |
| NPFF         | -0.61844 | 0.61844 | 1.2327   | -1.9    | 0.078657 | 0.24674 | -4.6161 | 8620     |
| EPB41L4B     | 1.613    | 1.613   | 2.5946   | 1.8998  | 0.078681 | 0.24677 | -4.6164 | 54566    |
| NDFIP2       | 4.2207   | 4.2207  | 10.362   | 1.8994  | 0.078741 | 0.24691 | -4.617  | 54602    |
| CIDEC        | -0.5458  | 0.5458  | 0.29109  | -1.8991 | 0.078785 | 0.24701 | -4.6175 | 63924    |
| MGST2        | -2.8387  | 2.8387  | 8.1078   | -1.899  | 0.078801 | 0.24701 | -4.6177 | 4258     |
| LOC102467081 | -0.45493 | 0.45493 | 0.65041  | -1.8986 | 0.078849 | 0.24712 | -4.6182 | 1.02E+08 |
| CLDN18       | -0.20396 | 0.20396 | 0.25029  | -1.8983 | 0.078893 | 0.24714 | -4.6187 | 51208    |
| UCN2         | 1.6398   | 1.6398  | 2.5732   | 1.8983  | 0.078898 | 0.24714 | -4.6188 | 90226    |
| CDH22        | -0.16377 | 0.16377 | 0.12567  | -1.8982 | 0.078916 | 0.24714 | -4.619  | 64405    |
| SLC12A9-AS1  | -0.20022 | 0.20022 | 0.28694  | -1.8982 | 0.078917 | 0.24714 | -4.619  | 1.05E+08 |
| ILF3         | -3.7373  | 3.7373  | 14.444   | -1.8979 | 0.07895  | 0.2472  | -4.6193 | 3609     |
| ABCC10       | -0.86216 | 0.86216 | 2.3577   | -1.8976 | 0.078991 | 0.24726 | -4.6198 | 89845    |
| FLRT1        | -0.63293 | 0.63293 | 0.55076  | -1.8976 | 0.078998 | 0.24726 | -4.6198 | 23769    |
| PPIE         | -0.64727 | 0.64727 | 2.4353   | -1.8962 | 0.079195 | 0.24783 | -4.622  | 10450    |
| C1orf43      | 6.9894   | 6.9894  | 19.946   | 1.896   | 0.079228 | 0.24789 | -4.6224 | 25912    |
| SNORA52      | -0.83061 | 0.83061 | 1.693    | -1.8958 | 0.079251 | 0.24791 | -4.6226 | 619565   |
| CALD1        | 12.525   | 12.525  | 22.006   | 1.8957  | 0.079266 | 0.24792 | -4.6228 | 800      |
| LOC105378933 | -0.14733 | 0.14733 | 0.097404 | -1.8952 | 0.079331 | 0.24807 | -4.6235 | 1.05E+08 |

|           |          |         |          |         |          |         |         |          |
|-----------|----------|---------|----------|---------|----------|---------|---------|----------|
| PDK2      | -0.9893  | 0.9893  | 3.1033   | -1.895  | 0.07936  | 0.24812 | -4.6238 | 5164     |
| TTYH3     | 9.0214   | 9.0214  | 14.125   | 1.8947  | 0.079409 | 0.24818 | -4.6243 | 80727    |
| FAM172A   | -0.58511 | 0.58511 | 2.5779   | -1.8944 | 0.079441 | 0.24818 | -4.6247 | 83989    |
| RASA2     | 0.86473  | 0.86473 | 2.9188   | 1.8944  | 0.079449 | 0.24818 | -4.6248 | 5922     |
| SYNPO2    | -2.7122  | 2.7122  | 4.3807   | -1.8943 | 0.079459 | 0.24818 | -4.6249 | 171024   |
| ERMARD    | -0.71223 | 0.71223 | 2.9436   | -1.8943 | 0.079469 | 0.24818 | -4.625  | 55780    |
| ZNF316    | -1.8829  | 1.8829  | 3.2198   | -1.8941 | 0.079484 | 0.24818 | -4.6251 | 1E+08    |
| LINC00092 | -0.14203 | 0.14203 | 0.141    | -1.8941 | 0.079487 | 0.24818 | -4.6252 | 1E+08    |
| CLIC5     | -0.21175 | 0.21175 | 0.21463  | -1.8939 | 0.079513 | 0.24818 | -4.6255 | 53405    |
| NYAP1     | -0.13752 | 0.13752 | 0.1371   | -1.8939 | 0.079522 | 0.24818 | -4.6256 | 222950   |
| CTXND1    | -0.11801 | 0.11801 | 0.073951 | -1.8938 | 0.079528 | 0.24818 | -4.6256 | 1.01E+08 |
| SUPV3L1   | -0.74723 | 0.74723 | 2.8052   | -1.8934 | 0.079591 | 0.24829 | -4.6263 | 6832     |
| FPR3      | 3.8455   | 3.8455  | 4.1149   | 1.8934  | 0.079592 | 0.24829 | -4.6263 | 2359     |
| SUB1      | 5.8465   | 5.8465  | 10.191   | 1.8932  | 0.079623 | 0.24829 | -4.6267 | 10923    |
| JKAMP     | 1.623    | 1.623   | 3.5361   | 1.8931  | 0.079634 | 0.24829 | -4.6268 | 51528    |
| MSL1      | -1.2556  | 1.2556  | 7.7608   | -1.8931 | 0.079636 | 0.24829 | -4.6268 | 339287   |
| IGIP      | -0.68024 | 0.68024 | 2.2011   | -1.8927 | 0.079683 | 0.24839 | -4.6273 | 492311   |
| LRRC14    | -1.0828  | 1.0828  | 2.6257   | -1.8923 | 0.079749 | 0.24847 | -4.628  | 9684     |
| KRT2      | -720.29  | 720.29  | 517.84   | -1.8922 | 0.079758 | 0.24847 | -4.6281 | 3849     |
| COPS9     | 5.3885   | 5.3885  | 11.386   | 1.8922  | 0.079763 | 0.24847 | -4.6282 | 150678   |
| PELO      | 1.1428   | 1.1428  | 3.4462   | 1.8921  | 0.079768 | 0.24847 | -4.6282 | 53918    |
| ZNF333    | -0.28853 | 0.28853 | 0.72159  | -1.8917 | 0.079826 | 0.24852 | -4.6289 | 84449    |
| ARHGEF34P | -2.5308  | 2.5308  | 5.3976   | -1.8917 | 0.079837 | 0.24852 | -4.629  | 728377   |
| FKBP1AP1  | -0.69702 | 0.69702 | 1.231    | -1.8916 | 0.07984  | 0.24852 | -4.629  | 2282     |
| LINC00520 | 0.17297  | 0.17297 | 0.12469  | 1.8916  | 0.079848 | 0.24852 | -4.6291 | 645687   |
| TACSTD2   | 63.772   | 63.772  | 104.71   | 1.8915  | 0.079858 | 0.24852 | -4.6292 | 4070     |

|           |          |         |         |         |          |         |         |        |
|-----------|----------|---------|---------|---------|----------|---------|---------|--------|
| RIPK3     | 1.0695   | 1.0695  | 3.3348  | 1.8912  | 0.079903 | 0.24861 | -4.6297 | 11035  |
| SLC6A10P  | -0.27254 | 0.27254 | 0.22807 | -1.8911 | 0.079917 | 0.24861 | -4.6298 | 386757 |
| OR5P3     | -0.38024 | 0.38024 | 0.5343  | -1.8905 | 0.080007 | 0.24885 | -4.6308 | 120066 |
| PAMR1     | -1.3107  | 1.3107  | 1.0089  | -1.8899 | 0.080086 | 0.24905 | -4.6317 | 25891  |
| SCOC      | 1.694    | 1.694   | 4.2673  | 1.8898  | 0.080108 | 0.24907 | -4.6319 | 60592  |
| C5orf63   | -0.15642 | 0.15642 | 0.28134 | -1.8897 | 0.080121 | 0.24907 | -4.632  | 401207 |
| MORN2     | 1.1468   | 1.1468  | 2.5143  | 1.8892  | 0.080181 | 0.24921 | -4.6327 | 729967 |
| SMYD5     | -1.5341  | 1.5341  | 3.715   | -1.8889 | 0.080233 | 0.24932 | -4.6333 | 10322  |
| UBE2S     | 5.9803   | 5.9803  | 8.8224  | 1.8886  | 0.080279 | 0.24942 | -4.6337 | 27338  |
| MAGI1-IT1 | -0.68811 | 0.68811 | 1.0729  | -1.8882 | 0.080335 | 0.24955 | -4.6343 | 151877 |
| AP2S1     | 18.105   | 18.105  | 35.011  | 1.8877  | 0.080406 | 0.24969 | -4.6351 | 1175   |
| CIRBP-AS1 | -0.43018 | 0.43018 | 1.0837  | -1.8875 | 0.080426 | 0.24969 | -4.6353 | 148046 |
| AGPAT4    | 0.95922  | 0.95922 | 1.6309  | 1.8875  | 0.08043  | 0.24969 | -4.6354 | 56895  |
| TET1      | -0.32977 | 0.32977 | 0.5628  | -1.8874 | 0.080446 | 0.24969 | -4.6355 | 80312  |
| ZBTB21    | 0.72456  | 0.72456 | 2.568   | 1.8873  | 0.080455 | 0.24969 | -4.6356 | 49854  |
| ELMOD2    | 0.77752  | 0.77752 | 2.1586  | 1.887   | 0.080508 | 0.24981 | -4.6362 | 255520 |
| KIAA1191  | 3.538    | 3.538   | 13.34   | 1.8867  | 0.080541 | 0.24987 | -4.6366 | 57179  |
| ZNF594    | -0.26074 | 0.26074 | 0.51225 | -1.8866 | 0.080567 | 0.24987 | -4.6368 | 84622  |
| IRF2BP1   | -1.7685  | 1.7685  | 4.6099  | -1.8865 | 0.080572 | 0.24987 | -4.6369 | 26145  |
| HDAC5     | -3.6195  | 3.6195  | 7.2665  | -1.8862 | 0.080614 | 0.24995 | -4.6373 | 10014  |
| C5AR1     | 4.6819   | 4.6819  | 4.2793  | 1.8858  | 0.080668 | 0.25001 | -4.6379 | 728    |
| TBC1D16   | -1.5141  | 1.5141  | 3.6513  | -1.8858 | 0.080669 | 0.25001 | -4.6379 | 125058 |
| FICD      | -0.24638 | 0.24638 | 1.0859  | -1.8858 | 0.080677 | 0.25001 | -4.638  | 11153  |
| CCM2      | 4.7545   | 4.7545  | 8.5876  | 1.8851  | 0.080777 | 0.25028 | -4.6391 | 83605  |
| NFU1      | 2.1193   | 2.1193  | 4.208   | 1.8846  | 0.080854 | 0.25047 | -4.6399 | 27247  |
| TOPORS    | 0.92328  | 0.92328 | 3.6876  | 1.8844  | 0.080875 | 0.25049 | -4.6401 | 10210  |



|                 |          |         |         |         |          |         |         |          |
|-----------------|----------|---------|---------|---------|----------|---------|---------|----------|
| LOC105378367    | -0.23142 | 0.23142 | 0.36338 | -1.8842 | 0.080906 | 0.25054 | -4.6405 | 1.05E+08 |
| MANEA-DT        | -0.17977 | 0.17977 | 0.25473 | -1.8835 | 0.081013 | 0.25082 | -4.6416 | 1.02E+08 |
| UBE2V1          | 4.1724   | 4.1724  | 12.752  | 1.8831  | 0.081068 | 0.25095 | -4.6422 | 7335     |
| SMCO4           | 0.87036  | 0.87036 | 1.8707  | 1.8828  | 0.081107 | 0.25102 | -4.6426 | 56935    |
| NCOR2           | -6.544   | 6.544   | 15.671  | -1.8824 | 0.081172 | 0.25118 | -4.6433 | 9612     |
| PSMA6           | 13.639   | 13.639  | 27.34   | 1.8818  | 0.081258 | 0.2514  | -4.6442 | 5687     |
| PLPP4           | 0.32101  | 0.32101 | 0.30105 | 1.8816  | 0.081282 | 0.25143 | -4.6445 | 196051   |
| DNAJB11         | 4.0117   | 4.0117  | 9.8784  | 1.8814  | 0.081307 | 0.25146 | -4.6447 | 51726    |
| RNASEK-C17orf49 | -0.64533 | 0.64533 | 1.1269  | -1.8812 | 0.081345 | 0.25153 | -4.6451 | 1.01E+08 |
| WDR31           | -0.16556 | 0.16556 | 0.5201  | -1.8808 | 0.081395 | 0.25164 | -4.6456 | 114987   |
| LOC101929234    | -0.14148 | 0.14148 | 0.2033  | -1.8807 | 0.081417 | 0.25164 | -4.6459 | 1.02E+08 |
| LURAP1L         | 1.7958   | 1.7958  | 3.1667  | 1.8805  | 0.081443 | 0.25164 | -4.6462 | 286343   |
| RPL21P44        | -0.34462 | 0.34462 | 0.71955 | -1.8804 | 0.08145  | 0.25164 | -4.6462 | 402176   |
| GMFB            | 1.6826   | 1.6826  | 3.7278  | 1.8803  | 0.081464 | 0.25164 | -4.6464 | 2764     |
| GNAI1           | 3.1583   | 3.1583  | 8.6008  | 1.8802  | 0.081481 | 0.25164 | -4.6466 | 2770     |
| CYP2S1          | 1.291    | 1.291   | 1.5501  | 1.8801  | 0.081496 | 0.25164 | -4.6467 | 29785    |
| MTMR9           | 0.54741  | 0.54741 | 1.9209  | 1.8801  | 0.0815   | 0.25164 | -4.6468 | 66036    |
| OSGEPL1-AS1     | -0.1374  | 0.1374  | 0.183   | -1.8798 | 0.081546 | 0.25174 | -4.6472 | 1.01E+08 |
| FRY             | -1.3484  | 1.3484  | 2.8564  | -1.8788 | 0.081691 | 0.25214 | -4.6488 | 10129    |
| FAM107B         | 1.3895   | 1.3895  | 3.7146  | 1.8782  | 0.08178  | 0.25237 | -4.6497 | 83641    |
| TRMO            | -0.59798 | 0.59798 | 3.0211  | -1.8777 | 0.08184  | 0.25249 | -4.6503 | 51531    |
| IMPA1           | 0.71175  | 0.71175 | 1.4324  | 1.8775  | 0.081877 | 0.25249 | -4.6507 | 3612     |
| PRPSAP1         | 2.5271   | 2.5271  | 5.9848  | 1.8775  | 0.081877 | 0.25249 | -4.6507 | 5635     |
| KLK7            | 63.993   | 63.993  | 58.534  | 1.8775  | 0.081881 | 0.25249 | -4.6508 | 5650     |
| PANX1           | 4.2114   | 4.2114  | 8.1098  | 1.8771  | 0.081929 | 0.25256 | -4.6513 | 24145    |
| ZFP36L2         | -8.7098  | 8.7098  | 32.994  | -1.8771 | 0.081934 | 0.25256 | -4.6513 | 678      |

|               |          |         |         |         |          |         |         |          |
|---------------|----------|---------|---------|---------|----------|---------|---------|----------|
| ERP29         | -4.5523  | 4.5523  | 16.984  | -1.8766 | 0.082013 | 0.25276 | -4.6522 | 10961    |
| FABP7         | -0.33593 | 0.33593 | 0.19388 | -1.8764 | 0.082037 | 0.25279 | -4.6524 | 2173     |
| LINC01343     | 0.16238  | 0.16238 | 0.22895 | 1.8759  | 0.082104 | 0.25291 | -4.6531 | 339442   |
| MAPKAPK2      | 7.0617   | 7.0617  | 20.152  | 1.8759  | 0.082107 | 0.25291 | -4.6531 | 9261     |
| DHRS13        | -1.0222  | 1.0222  | 1.9687  | -1.8756 | 0.082156 | 0.25302 | -4.6537 | 147015   |
| RNF112        | -0.19052 | 0.19052 | 0.26588 | -1.8753 | 0.082189 | 0.25306 | -4.654  | 7732     |
| EGLN1         | -1.6937  | 1.6937  | 6.7268  | -1.8753 | 0.082199 | 0.25306 | -4.6541 | 54583    |
| RPP40         | 0.96034  | 0.96034 | 1.6167  | 1.8751  | 0.08223  | 0.25309 | -4.6544 | 10799    |
| AKIRIN2       | 2.9763   | 2.9763  | 7.947   | 1.875   | 0.082242 | 0.25309 | -4.6546 | 55122    |
| ARMT1         | 1.2929   | 1.2929  | 2.0138  | 1.8749  | 0.082253 | 0.25309 | -4.6547 | 79624    |
| CLTB          | 21.714   | 21.714  | 42.919  | 1.8745  | 0.082308 | 0.25321 | -4.6553 | 1212     |
| CLU           | -26.757  | 26.757  | 18.103  | -1.8741 | 0.08237  | 0.25335 | -4.6559 | 1191     |
| NUTM2B-AS1    | -1.2905  | 1.2905  | 3.1722  | -1.8732 | 0.082509 | 0.25362 | -4.6574 | 1.01E+08 |
| ZNF876P       | -0.24797 | 0.24797 | 0.35718 | -1.8732 | 0.082509 | 0.25362 | -4.6574 | 642280   |
| TCF4-AS1      | -0.22634 | 0.22634 | 0.37827 | -1.8732 | 0.082509 | 0.25362 | -4.6574 | 1.05E+08 |
| BRAT1         | -2.1003  | 2.1003  | 4.6353  | -1.8731 | 0.082518 | 0.25362 | -4.6575 | 221927   |
| LOC100130449  | -0.28329 | 0.28329 | 0.44864 | -1.8724 | 0.082614 | 0.25387 | -4.6585 | 1E+08    |
| AAGAB         | 1.662    | 1.662   | 4.5904  | 1.8721  | 0.082667 | 0.25399 | -4.659  | 79719    |
| PKD1P4-NPIPA8 | -0.33812 | 0.33812 | 0.41449 | -1.8713 | 0.082778 | 0.25428 | -4.6602 | 1.1E+08  |
| COQ4          | -2.7856  | 2.7856  | 9.0867  | -1.871  | 0.082828 | 0.25439 | -4.6607 | 51117    |
| UBR1          | 0.61869  | 0.61869 | 2.8549  | 1.8707  | 0.082868 | 0.25447 | -4.6611 | 197131   |
| KDM7A-DT      | 4.474    | 4.474   | 5.254   | 1.8705  | 0.082905 | 0.25449 | -4.6615 | 1E+08    |
| SNX29P2       | -0.46218 | 0.46218 | 0.76207 | -1.8704 | 0.082922 | 0.25449 | -4.6617 | 440352   |
| SLC4A7        | 1.0973   | 1.0973  | 3.1051  | 1.8703  | 0.082936 | 0.25449 | -4.6618 | 9497     |
| TSPAN17       | 3.5      | 3.5     | 6.2461  | 1.8701  | 0.082954 | 0.25449 | -4.662  | 26262    |
| TSSK1B        | -0.15889 | 0.15889 | 0.2488  | -1.8701 | 0.082956 | 0.25449 | -4.662  | 83942    |

|              |          |         |         |         |          |         |         |          |
|--------------|----------|---------|---------|---------|----------|---------|---------|----------|
| CASP10       | -0.52031 | 0.52031 | 1.4394  | -1.8699 | 0.082981 | 0.25449 | -4.6623 | 843      |
| LOC100507053 | -0.18538 | 0.18538 | 0.3776  | -1.8699 | 0.082987 | 0.25449 | -4.6623 | 1.01E+08 |
| PRTFDC1      | 0.65273  | 0.65273 | 0.83207 | 1.8698  | 0.082997 | 0.25449 | -4.6624 | 56952    |
| YOD1         | 23.439   | 23.439  | 19.284  | 1.8697  | 0.083015 | 0.2545  | -4.6626 | 55432    |
| GTF2F2       | 4.53     | 4.53    | 9.596   | 1.8695  | 0.083042 | 0.25454 | -4.6629 | 2963     |
| EIF3J        | 3.6173   | 3.6173  | 9.5186  | 1.8692  | 0.083089 | 0.25463 | -4.6634 | 8669     |
| SMG6         | -1.0559  | 1.0559  | 4.8357  | -1.8689 | 0.08313  | 0.25471 | -4.6638 | 23293    |
| CCL21        | 28.134   | 28.134  | 37.801  | 1.8689  | 0.083143 | 0.25471 | -4.664  | 6366     |
| PGM2L1       | 0.78749  | 0.78749 | 0.97486 | 1.8686  | 0.083185 | 0.25479 | -4.6644 | 283209   |
| C3orf38      | 1.2393   | 1.2393  | 3.3221  | 1.8683  | 0.083223 | 0.25485 | -4.6648 | 285237   |
| XPNPEP3      | -0.28559 | 0.28559 | 1.6874  | -1.8682 | 0.083234 | 0.25485 | -4.6649 | 63929    |
| AP2A1        | 6.121    | 6.121   | 18.534  | 1.8677  | 0.083312 | 0.25498 | -4.6657 | 160      |
| SEL1L        | 1.7467   | 1.7467  | 6.9464  | 1.8677  | 0.083319 | 0.25498 | -4.6658 | 6400     |
| TXNL4A       | 3.4145   | 3.4145  | 8.8938  | 1.8676  | 0.083323 | 0.25498 | -4.6658 | 10907    |
| SH3TC1       | 1.5939   | 1.5939  | 2.6597  | 1.8673  | 0.08337  | 0.25508 | -4.6663 | 54436    |
| ZNF544       | -0.52707 | 0.52707 | 2.2391  | -1.8669 | 0.083429 | 0.25514 | -4.6669 | 27300    |
| KCND3-AS1    | -0.15429 | 0.15429 | 0.1534  | -1.8669 | 0.08343  | 0.25514 | -4.6669 | 1.01E+08 |
| TMEM9B       | 2.6093   | 2.6093  | 9.0074  | 1.8668  | 0.083441 | 0.25514 | -4.667  | 56674    |
| TPT1-AS1     | -0.87852 | 0.87852 | 2.3953  | -1.8668 | 0.08345  | 0.25514 | -4.6671 | 1E+08    |
| PRR11        | 0.6412   | 0.6412  | 0.9106  | 1.8664  | 0.0835   | 0.25516 | -4.6676 | 55771    |
| HARBI1       | 0.34126  | 0.34126 | 1.1721  | 1.8664  | 0.083509 | 0.25516 | -4.6677 | 283254   |
| ZDHHC3       | -0.92338 | 0.92338 | 4.9055  | -1.8663 | 0.083526 | 0.25516 | -4.6679 | 51304    |
| TYSND1       | -1.4638  | 1.4638  | 3.1792  | -1.8662 | 0.083542 | 0.25516 | -4.6681 | 219743   |
| RPL23AP87    | -0.20896 | 0.20896 | 0.57484 | -1.8661 | 0.083547 | 0.25516 | -4.6681 | 388574   |
| TREX2        | 17.261   | 17.261  | 15.841  | 1.866   | 0.083563 | 0.25516 | -4.6683 | 11219    |
| SLC25A38     | -0.83106 | 0.83106 | 2.5253  | -1.866  | 0.083569 | 0.25516 | -4.6684 | 54977    |

|              |          |         |         |         |          |         |         |        |
|--------------|----------|---------|---------|---------|----------|---------|---------|--------|
| STIP1        | 4.5676   | 4.5676  | 11.425  | 1.8659  | 0.083576 | 0.25516 | -4.6684 | 10963  |
| CASC3        | -2.3057  | 2.3057  | 11.83   | -1.8654 | 0.083648 | 0.25531 | -4.6692 | 22794  |
| NFE2L2       | 8.1143   | 8.1143  | 23.989  | 1.8652  | 0.083681 | 0.25531 | -4.6695 | 4780   |
| CNN2         | 20.222   | 20.222  | 41.32   | 1.8652  | 0.083684 | 0.25531 | -4.6695 | 1265   |
| BTA1F1       | -2.8903  | 2.8903  | 8.3668  | -1.8652 | 0.083687 | 0.25531 | -4.6696 | 9044   |
| PTTG1        | 3.9774   | 3.9774  | 6.4714  | 1.8648  | 0.083741 | 0.25543 | -4.6701 | 9232   |
| RASEF        | 0.35062  | 0.35062 | 0.67428 | 1.8644  | 0.0838   | 0.25549 | -4.6707 | 158158 |
| PLIN1        | -1.5067  | 1.5067  | 0.83466 | -1.8642 | 0.083826 | 0.25549 | -4.671  | 5346   |
| PSMA7        | 21.948   | 21.948  | 46.156  | 1.8642  | 0.083827 | 0.25549 | -4.671  | 5688   |
| DAAM1        | 4.2921   | 4.2921  | 12.867  | 1.864   | 0.083858 | 0.25549 | -4.6713 | 23002  |
| MPL          | 1.0513   | 1.0513  | 0.65474 | 1.8639  | 0.083882 | 0.25549 | -4.6716 | 4352   |
| PRND         | 0.35224  | 0.35224 | 0.23079 | 1.8636  | 0.083924 | 0.25549 | -4.672  | 23627  |
| HIKESHI      | 2.6575   | 2.6575  | 5.1667  | 1.8634  | 0.083948 | 0.25549 | -4.6722 | 51501  |
| CAPN2        | 13.275   | 13.275  | 26.713  | 1.8634  | 0.083958 | 0.25549 | -4.6723 | 824    |
| RAN          | 19.246   | 19.246  | 37.719  | 1.8633  | 0.083967 | 0.25549 | -4.6724 | 5901   |
| APOBEC3B     | 0.65223  | 0.65223 | 0.78629 | 1.8632  | 0.083975 | 0.25549 | -4.6725 | 9582   |
| MBL1P        | -0.25284 | 0.25284 | 0.30662 | -1.8631 | 0.083998 | 0.25549 | -4.6728 | 8512   |
| AMBRA1       | -0.79356 | 0.79356 | 4.7777  | -1.863  | 0.084018 | 0.25549 | -4.673  | 55626  |
| FAM25BP      | 5.5619   | 5.5619  | 4.6728  | 1.8628  | 0.084039 | 0.25549 | -4.6732 | 1E+08  |
| TRAF3IP2-AS1 | -0.23715 | 0.23715 | 0.62717 | -1.8627 | 0.084049 | 0.25549 | -4.6733 | 643749 |
| MAPKAPK5-AS1 | -0.40927 | 0.40927 | 1.3085  | -1.8627 | 0.084051 | 0.25549 | -4.6733 | 51275  |
| TINCR        | -3.0388  | 3.0388  | 5.8242  | -1.8627 | 0.084054 | 0.25549 | -4.6733 | 257000 |
| CCDC39       | -0.14231 | 0.14231 | 0.1407  | -1.8627 | 0.084056 | 0.25549 | -4.6733 | 339829 |
| IL17RE       | -1.8484  | 1.8484  | 4.562   | -1.8627 | 0.084057 | 0.25549 | -4.6734 | 132014 |
| HTRA3        | 3.4797   | 3.4797  | 4.8459  | 1.8627  | 0.08406  | 0.25549 | -4.6734 | 94031  |
| ZNF302       | -0.6177  | 0.6177  | 1.916   | -1.8626 | 0.084063 | 0.25549 | -4.6734 | 55900  |

|           |          |         |         |         |          |         |         |          |
|-----------|----------|---------|---------|---------|----------|---------|---------|----------|
| CRX       | -0.14564 | 0.14564 | 0.24844 | -1.8621 | 0.08414  | 0.25564 | -4.6742 | 1406     |
| VPS11     | -1.1131  | 1.1131  | 4.5706  | -1.8621 | 0.084142 | 0.25564 | -4.6742 | 55823    |
| IRF2BPL   | -4.2455  | 4.2455  | 10.169  | -1.8619 | 0.084169 | 0.25567 | -4.6745 | 64207    |
| DPYD      | -1.2249  | 1.2249  | 2.9119  | -1.8617 | 0.084198 | 0.25571 | -4.6748 | 1806     |
| NUP210    | -0.49684 | 0.49684 | 1.3128  | -1.8615 | 0.084228 | 0.25576 | -4.6751 | 23225    |
| NEURL2    | -0.13719 | 0.13719 | 0.24182 | -1.8607 | 0.084348 | 0.25606 | -4.6763 | 140825   |
| ZNF263    | -0.94619 | 0.94619 | 3.552   | -1.8606 | 0.084366 | 0.25606 | -4.6765 | 10127    |
| ANXA2P1   | -0.17047 | 0.17047 | 0.17804 | -1.8606 | 0.084371 | 0.25606 | -4.6766 | 303      |
| TIGD6     | -0.2096  | 0.2096  | 0.62821 | -1.8603 | 0.084417 | 0.25615 | -4.677  | 81789    |
| ZNF772    | -0.31344 | 0.31344 | 0.89583 | -1.8599 | 0.084472 | 0.25624 | -4.6776 | 400720   |
| HLA-DQB2  | -0.73852 | 0.73852 | 0.90268 | -1.8597 | 0.084498 | 0.25624 | -4.6779 | 3120     |
| LEPROT    | 4.1753   | 4.1753  | 10.584  | 1.8597  | 0.084506 | 0.25624 | -4.6779 | 54741    |
| PRXL2C    | 2.1701   | 2.1701  | 3.8708  | 1.8596  | 0.084522 | 0.25624 | -4.6781 | 195827   |
| DOC2GP    | -0.16361 | 0.16361 | 0.1069  | -1.8594 | 0.084556 | 0.25624 | -4.6784 | 390213   |
| HPCAL1    | 1.6892   | 1.6892  | 4.0295  | 1.8594  | 0.084556 | 0.25624 | -4.6784 | 3241     |
| CNIH4     | 2.5038   | 2.5038  | 5.4925  | 1.8592  | 0.084573 | 0.25624 | -4.6786 | 29097    |
| ZNF321P   | -0.17518 | 0.17518 | 0.39836 | -1.8591 | 0.08459  | 0.25624 | -4.6788 | 399669   |
| CXCL5     | 9.2029   | 9.2029  | 5.4724  | 1.8591  | 0.084597 | 0.25624 | -4.6789 | 6374     |
| ZFP2      | -0.13282 | 0.13282 | 0.20629 | -1.859  | 0.084605 | 0.25624 | -4.6789 | 80108    |
| REPIN1    | -2.8938  | 2.8938  | 6.9447  | -1.859  | 0.084614 | 0.25624 | -4.679  | 29803    |
| LRBA      | -2.3077  | 2.3077  | 9.6956  | -1.8587 | 0.084654 | 0.25631 | -4.6794 | 987      |
| LINC01770 | -0.1836  | 0.1836  | 0.3259  | -1.8584 | 0.084701 | 0.25641 | -4.6799 | 1.03E+08 |
| PTGFRN    | 7.2693   | 7.2693  | 19.398  | 1.8582  | 0.084734 | 0.25646 | -4.6803 | 5738     |
| TH2LCRR   | -0.14454 | 0.14454 | 0.17519 | -1.8578 | 0.084785 | 0.25657 | -4.6808 | 1.02E+08 |
| LRRC75B   | -0.54875 | 0.54875 | 1.5382  | -1.8574 | 0.084856 | 0.25674 | -4.6815 | 388886   |
| TOR4A     | 2.4608   | 2.4608  | 2.6147  | 1.8567  | 0.084961 | 0.25697 | -4.6826 | 54863    |

|             |          |         |         |         |          |         |         |          |
|-------------|----------|---------|---------|---------|----------|---------|---------|----------|
| LGR4        | -1.1437  | 1.1437  | 5.1111  | -1.8566 | 0.084963 | 0.25697 | -4.6826 | 55366    |
| TSPOAP1-AS1 | -0.12698 | 0.12698 | 0.1769  | -1.8565 | 0.084985 | 0.25699 | -4.6828 | 1.01E+08 |
| PCGF1       | 1.3568   | 1.3568  | 4.21    | 1.8562  | 0.085028 | 0.25708 | -4.6832 | 84759    |
| ZNF625      | -0.35634 | 0.35634 | 1.0812  | -1.8552 | 0.085185 | 0.25751 | -4.6848 | 90589    |
| ILK         | 5.7267   | 5.7267  | 14.987  | 1.8547  | 0.085253 | 0.25762 | -4.6855 | 3611     |
| ALKBH3-AS1  | -0.19208 | 0.19208 | 0.23882 | -1.8547 | 0.085254 | 0.25762 | -4.6855 | 1.01E+08 |
| SPARC       | 194.78   | 194.78  | 216.83  | 1.8543  | 0.085311 | 0.25775 | -4.6861 | 6678     |
| LINC01372   | -0.24412 | 0.24412 | 0.4454  | -1.8541 | 0.085344 | 0.2578  | -4.6864 | 1.02E+08 |
| PNN         | -2.113   | 2.113   | 6.7509  | -1.8538 | 0.085384 | 0.25788 | -4.6868 | 5411     |
| FLJ37453    | -0.23524 | 0.23524 | 0.77936 | -1.8533 | 0.085462 | 0.25799 | -4.6876 | 729614   |
| ARMCX5      | -0.51381 | 0.51381 | 1.9617  | -1.8533 | 0.085472 | 0.25799 | -4.6877 | 64860    |
| CLINT1      | 4.0167   | 4.0167  | 11.715  | 1.8532  | 0.08548  | 0.25799 | -4.6878 | 9685     |
| TMED9       | 8.0217   | 8.0217  | 17.894  | 1.8532  | 0.085481 | 0.25799 | -4.6878 | 54732    |
| MEF2A       | -2.0933  | 2.0933  | 7.7307  | -1.8529 | 0.085524 | 0.25807 | -4.6882 | 4205     |
| SEMA3D      | -0.23962 | 0.23962 | 0.29925 | -1.8525 | 0.085581 | 0.25818 | -4.6888 | 223117   |
| CCL5        | -4.4148  | 4.4148  | 8.0991  | -1.8525 | 0.085592 | 0.25818 | -4.6889 | 6352     |
| BRICD5      | -0.31598 | 0.31598 | 0.40272 | -1.8522 | 0.085631 | 0.25824 | -4.6893 | 283870   |
| PPIC        | 6.8199   | 6.8199  | 11.961  | 1.8521  | 0.085652 | 0.25824 | -4.6895 | 5480     |
| POLRMT      | -1.9942  | 1.9942  | 4.7522  | -1.852  | 0.085664 | 0.25824 | -4.6896 | 5442     |
| UBE2B       | 1.7479   | 1.7479  | 4.7233  | 1.8519  | 0.085672 | 0.25824 | -4.6897 | 7320     |
| PPP1R16B    | -0.68212 | 0.68212 | 1.2486  | -1.8517 | 0.085707 | 0.2583  | -4.6901 | 26051    |
| FBL         | -12.739  | 12.739  | 32.549  | -1.8514 | 0.085757 | 0.25838 | -4.6906 | 2091     |
| SOCS3       | 19.127   | 19.127  | 27.345  | 1.8513  | 0.085763 | 0.25838 | -4.6906 | 9021     |
| AIG1        | 0.5663   | 0.5663  | 2.0207  | 1.8507  | 0.085868 | 0.25863 | -4.6917 | 51390    |
| LZTS2       | -3.2733  | 3.2733  | 6.5698  | -1.8505 | 0.085892 | 0.25863 | -4.6919 | 84445    |
| COQ2        | 0.99809  | 0.99809 | 3.2772  | 1.8505  | 0.085892 | 0.25863 | -4.6919 | 27235    |

|              |          |         |         |         |          |         |         |          |
|--------------|----------|---------|---------|---------|----------|---------|---------|----------|
| SNHG5        | 39.21    | 39.21   | 52.521  | 1.8501  | 0.085952 | 0.25876 | -4.6925 | 387066   |
| COL24A1      | 0.26343  | 0.26343 | 0.36254 | 1.8498  | 0.086006 | 0.25888 | -4.6931 | 255631   |
| ZNF292       | -1.3409  | 1.3409  | 3.7102  | -1.8492 | 0.086086 | 0.25907 | -4.6939 | 23036    |
| RHOG         | 13.317   | 13.317  | 23.732  | 1.849   | 0.086119 | 0.25911 | -4.6942 | 391      |
| GPATCH8      | -0.95389 | 0.95389 | 5.4064  | -1.8489 | 0.086129 | 0.25911 | -4.6943 | 23131    |
| ZNF646       | -1.176   | 1.176   | 3.6702  | -1.8487 | 0.086162 | 0.25916 | -4.6946 | 9726     |
| PEG13        | -0.27848 | 0.27848 | 0.48774 | -1.8478 | 0.086304 | 0.25948 | -4.696  | 359809   |
| LOC100506639 | -0.58532 | 0.58532 | 1.2395  | -1.8477 | 0.086317 | 0.25948 | -4.6961 | 1.01E+08 |
| SNORA23      | -1.7046  | 1.7046  | 3.6075  | -1.8477 | 0.08632  | 0.25948 | -4.6962 | 677808   |
| MED28        | -1.4355  | 1.4355  | 5.8444  | -1.8476 | 0.08633  | 0.25948 | -4.6963 | 80306    |
| GRAP2        | -0.15957 | 0.15957 | 0.33065 | -1.8475 | 0.086355 | 0.2595  | -4.6965 | 9402     |
| NDUFB2       | 28.088   | 28.088  | 38.517  | 1.8474  | 0.08637  | 0.2595  | -4.6967 | 4708     |
| LOC100129434 | -26.006  | 26.006  | 50.846  | -1.8473 | 0.086384 | 0.2595  | -4.6968 | 1E+08    |
| SRP54        | 2.3057   | 2.3057  | 7.5849  | 1.8471  | 0.086418 | 0.25956 | -4.6972 | 6729     |
| SKP1         | 9.1043   | 9.1043  | 25.376  | 1.8468  | 0.086459 | 0.25962 | -4.6976 | 6500     |
| RAE1         | 1.7846   | 1.7846  | 5.7098  | 1.8467  | 0.086469 | 0.25962 | -4.6977 | 8480     |
| FURIN        | 13.645   | 13.645  | 28.104  | 1.8464  | 0.086518 | 0.2597  | -4.6981 | 5045     |
| PEX5         | -1.3871  | 1.3871  | 3.6685  | -1.8464 | 0.086525 | 0.2597  | -4.6982 | 5830     |
| ACER2        | -0.45684 | 0.45684 | 1.372   | -1.8457 | 0.086618 | 0.25993 | -4.6991 | 340485   |
| LOC105371592 | -0.17735 | 0.17735 | 0.28202 | -1.8454 | 0.086674 | 0.26001 | -4.6997 | 1.05E+08 |
| PILRB        | -0.78385 | 0.78385 | 1.7863  | -1.8454 | 0.086676 | 0.26001 | -4.6997 | 29990    |
| PGM5P4       | -0.1292  | 0.1292  | 0.10684 | -1.8451 | 0.086712 | 0.26007 | -4.7001 | 729468   |
| UBXN10       | -0.12385 | 0.12385 | 0.14313 | -1.8448 | 0.08677  | 0.2602  | -4.7006 | 127733   |
| DBIL5P2      | -0.12481 | 0.12481 | 0.12111 | -1.8446 | 0.086787 | 0.26021 | -4.7008 | 1E+08    |
| SDC2         | 5.6229   | 5.6229  | 5.9639  | 1.8443  | 0.086847 | 0.26032 | -4.7014 | 6383     |
| ATXN7L3      | 5.3843   | 5.3843  | 13.855  | 1.8442  | 0.086856 | 0.26032 | -4.7015 | 56970    |

|          |          |         |         |         |          |         |         |        |
|----------|----------|---------|---------|---------|----------|---------|---------|--------|
| RUNX2    | 1.0795   | 1.0795  | 1.5012  | 1.8437  | 0.086929 | 0.26043 | -4.7022 | 860    |
| WNT6     | -0.37955 | 0.37955 | 0.31005 | -1.8437 | 0.08693  | 0.26043 | -4.7022 | 7475   |
| CXCL14   | -42.511  | 42.511  | 149.27  | -1.8437 | 0.086937 | 0.26043 | -4.7023 | 9547   |
| C20orf96 | -0.37342 | 0.37342 | 0.6234  | -1.8434 | 0.086972 | 0.26043 | -4.7026 | 140680 |
| BMPR2    | 1.9209   | 1.9209  | 8.2383  | 1.8434  | 0.086978 | 0.26043 | -4.7027 | 659    |
| SPDYE6   | -1.3114  | 1.3114  | 2.3247  | -1.8434 | 0.086984 | 0.26043 | -4.7028 | 729597 |
| PROS1    | -3.2153  | 3.2153  | 6.6407  | -1.8432 | 0.087005 | 0.26044 | -4.703  | 5627   |
| GJA5     | 1.507    | 1.507   | 1.6858  | 1.8429  | 0.087048 | 0.26053 | -4.7034 | 2702   |
| PICALM   | 5.1128   | 5.1128  | 17.791  | 1.8426  | 0.087099 | 0.26063 | -4.7039 | 8301   |
| WNT16    | -1.0633  | 1.0633  | 1.2253  | -1.8423 | 0.087153 | 0.26075 | -4.7044 | 51384  |
| NKD2     | -1.011   | 1.011   | 1.9456  | -1.842  | 0.087198 | 0.26084 | -4.7049 | 85409  |
| CHST11   | 1.2835   | 1.2835  | 1.8616  | 1.8417  | 0.087235 | 0.2609  | -4.7052 | 50515  |
| SNORA80E | -0.22716 | 0.22716 | 0.12115 | -1.8414 | 0.087284 | 0.261   | -4.7057 | 677823 |
| SLC17A7  | -0.26902 | 0.26902 | 0.3419  | -1.8413 | 0.087306 | 0.26101 | -4.7059 | 57030  |
| ALG10    | -0.41281 | 0.41281 | 1.0678  | -1.8412 | 0.087318 | 0.26101 | -4.706  | 84920  |
| VAX2     | -0.15042 | 0.15042 | 0.18642 | -1.8411 | 0.087335 | 0.26102 | -4.7062 | 25806  |
| S100A5   | -0.11799 | 0.11799 | 0.09512 | -1.8404 | 0.087439 | 0.26128 | -4.7072 | 6276   |
| AMMECR1L | 0.57236  | 0.57236 | 3.3596  | 1.8399  | 0.087509 | 0.26137 | -4.7079 | 83607  |
| C19orf18 | -0.19425 | 0.19425 | 0.28482 | -1.8399 | 0.087511 | 0.26137 | -4.7079 | 147685 |
| MIR1248  | -0.36807 | 0.36807 | 0.35169 | -1.8399 | 0.087516 | 0.26137 | -4.708  | 1E+08  |
| METTL2B  | 1.0592   | 1.0592  | 4.0714  | 1.8397  | 0.087546 | 0.26141 | -4.7083 | 55798  |
| CDH20    | -0.14049 | 0.14049 | 0.1178  | -1.8395 | 0.087582 | 0.26144 | -4.7086 | 28316  |
| ARCN1    | 4.7532   | 4.7532  | 15.95   | 1.8394  | 0.087589 | 0.26144 | -4.7087 | 372    |
| PCP4     | -0.21379 | 0.21379 | 0.14037 | -1.8393 | 0.087602 | 0.26144 | -4.7088 | 5121   |
| ARHGAP5  | 3.1641   | 3.1641  | 8.5502  | 1.8389  | 0.087665 | 0.26154 | -4.7094 | 394    |
| TBC1D17  | -3.2854  | 3.2854  | 7.9873  | -1.8388 | 0.087689 | 0.26154 | -4.7097 | 79735  |



|            |          |         |         |         |          |         |         |        |
|------------|----------|---------|---------|---------|----------|---------|---------|--------|
| CELF2-AS1  | -0.40047 | 0.40047 | 0.64849 | -1.8387 | 0.087703 | 0.26154 | -4.7098 | 414196 |
| TCP1       | 9.4308   | 9.4308  | 24.31   | 1.8387  | 0.087707 | 0.26154 | -4.7099 | 6950   |
| NFE2L3     | -1.5531  | 1.5531  | 3.4871  | -1.8385 | 0.087735 | 0.26154 | -4.7101 | 9603   |
| KDM7A      | 1.7822   | 1.7822  | 5.8533  | 1.8384  | 0.087742 | 0.26154 | -4.7102 | 80853  |
| DUSP11     | 2.291    | 2.291   | 8.5082  | 1.8384  | 0.087755 | 0.26154 | -4.7103 | 8446   |
| FAM111B    | 0.84237  | 0.84237 | 0.95941 | 1.8383  | 0.087757 | 0.26154 | -4.7103 | 374393 |
| CES3       | -0.15279 | 0.15279 | 0.19642 | -1.8381 | 0.087793 | 0.26159 | -4.7107 | 23491  |
| POPDC3     | 0.28758  | 0.28758 | 0.19461 | 1.838   | 0.087807 | 0.26159 | -4.7108 | 64208  |
| KMT5C      | -0.58124 | 0.58124 | 1.3866  | -1.8379 | 0.087829 | 0.26161 | -4.711  | 84787  |
| SLC38A9    | 0.50647  | 0.50647 | 1.5719  | 1.8373  | 0.087912 | 0.26177 | -4.7119 | 153129 |
| RALGAPA1P1 | 0.31747  | 0.31747 | 0.67856 | 1.8373  | 0.087915 | 0.26177 | -4.7119 | 26134  |
| PPM1N      | -0.18328 | 0.18328 | 0.32267 | -1.8371 | 0.087954 | 0.26185 | -4.7123 | 147699 |
| ARHGAP40   | -1.5408  | 1.5408  | 2.3371  | -1.8369 | 0.087986 | 0.26189 | -4.7126 | 343578 |
| RCN2       | 2.6256   | 2.6256  | 5.7807  | 1.8367  | 0.088011 | 0.26189 | -4.7128 | 5955   |
| GNG12      | 5.6661   | 5.6661  | 21.624  | 1.8365  | 0.088041 | 0.26189 | -4.7131 | 55970  |
| PAQR3      | 0.93789  | 0.93789 | 2.181   | 1.8364  | 0.088052 | 0.26189 | -4.7132 | 152559 |
| SNORA2C    | -2.1528  | 2.1528  | 4.0407  | -1.8364 | 0.08806  | 0.26189 | -4.7133 | 677815 |
| LINC01750  | -0.13454 | 0.13454 | 0.13233 | -1.8364 | 0.088063 | 0.26189 | -4.7133 | 643355 |
| RAP1A      | 1.433    | 1.433   | 3.8174  | 1.836   | 0.088126 | 0.26204 | -4.7139 | 5906   |
| DHFR2      | -0.33228 | 0.33228 | 0.86842 | -1.8357 | 0.088162 | 0.26209 | -4.7143 | 200895 |
| PRRT2      | -0.44319 | 0.44319 | 0.64355 | -1.8355 | 0.0882   | 0.26216 | -4.7147 | 112476 |
| ADIPOR1    | 25.208   | 25.208  | 40.771  | 1.8353  | 0.088234 | 0.26218 | -4.715  | 51094  |
| TNS1       | -12.713  | 12.713  | 17.284  | -1.8353 | 0.088236 | 0.26218 | -4.715  | 7145   |
| ELANE      | -0.49349 | 0.49349 | 0.332   | -1.8351 | 0.088262 | 0.26218 | -4.7153 | 1991   |
| TENT4B     | 0.27389  | 0.27389 | 1.2767  | 1.8351  | 0.088268 | 0.26218 | -4.7153 | 64282  |
| CALHM5     | 0.44208  | 0.44208 | 0.60089 | 1.8348  | 0.08831  | 0.26226 | -4.7157 | 254228 |

|            |          |         |         |         |          |         |         |          |
|------------|----------|---------|---------|---------|----------|---------|---------|----------|
| PLEKHG3    | -3.1891  | 3.1891  | 8.5228  | -1.8346 | 0.088332 | 0.26228 | -4.7159 | 26030    |
| CCT3       | 12.163   | 12.163  | 29.902  | 1.8341  | 0.08841  | 0.26246 | -4.7167 | 7203     |
| GLI2       | -0.30221 | 0.30221 | 0.43372 | -1.8338 | 0.088465 | 0.26256 | -4.7172 | 2736     |
| ANKRD20A5P | -0.19726 | 0.19726 | 0.15961 | -1.8337 | 0.088487 | 0.26256 | -4.7174 | 440482   |
| GTF3C6     | 5.1685   | 5.1685  | 10.369  | 1.8336  | 0.088488 | 0.26256 | -4.7175 | 112495   |
| UQCR10     | 6.7025   | 6.7025  | 13.364  | 1.8333  | 0.088536 | 0.26258 | -4.7179 | 29796    |
| FGFR1OP    | 0.44149  | 0.44149 | 1.5156  | 1.8332  | 0.088562 | 0.26258 | -4.7182 | 11116    |
| PPP1R21    | 1.0314   | 1.0314  | 4.2719  | 1.8331  | 0.088578 | 0.26258 | -4.7183 | 129285   |
| CNDP2      | 4.7373   | 4.7373  | 9.7791  | 1.8331  | 0.088579 | 0.26258 | -4.7183 | 55748    |
| LAMA4      | 6.7729   | 6.7729  | 10.226  | 1.8329  | 0.088606 | 0.26258 | -4.7186 | 3910     |
| KIAA1109   | -1.3761  | 1.3761  | 6.2409  | -1.8329 | 0.08861  | 0.26258 | -4.7186 | 84162    |
| MFSD9      | 0.43353  | 0.43353 | 1.3216  | 1.8328  | 0.088618 | 0.26258 | -4.7187 | 84804    |
| ROR1-AS1   | -0.13485 | 0.13485 | 0.13855 | -1.8327 | 0.088635 | 0.26258 | -4.7189 | 1.02E+08 |
| NAA25      | -0.72336 | 0.72336 | 3.196   | -1.8326 | 0.088654 | 0.26258 | -4.7191 | 80018    |
| MOSPD2     | 0.44073  | 0.44073 | 1.8356  | 1.8325  | 0.08866  | 0.26258 | -4.7191 | 158747   |
| LHB        | -0.14195 | 0.14195 | 0.18591 | -1.8325 | 0.088666 | 0.26258 | -4.7192 | 3972     |
| YIPF5      | 1.8745   | 1.8745  | 4.9725  | 1.8323  | 0.088702 | 0.26264 | -4.7195 | 81555    |
| PRNP       | 13.812   | 13.812  | 32.656  | 1.8322  | 0.088718 | 0.26264 | -4.7197 | 5621     |
| HDAC1      | 5.4136   | 5.4136  | 14.506  | 1.8319  | 0.088755 | 0.26266 | -4.72   | 3065     |
| ACIN1      | -2.9563  | 2.9563  | 11.599  | -1.8318 | 0.08877  | 0.26266 | -4.7202 | 22985    |
| SMTN       | 9.9687   | 9.9687  | 18.163  | 1.8318  | 0.088772 | 0.26266 | -4.7202 | 6525     |
| KIN        | -0.22042 | 0.22042 | 1.0654  | -1.8316 | 0.088809 | 0.26272 | -4.7206 | 22944    |
| TGIF2      | -0.79237 | 0.79237 | 1.8641  | -1.8315 | 0.088823 | 0.26272 | -4.7207 | 60436    |
| TIMP4      | -0.57564 | 0.57564 | 0.47586 | -1.8313 | 0.088855 | 0.26273 | -4.721  | 7079     |
| STYXL1     | 2.5112   | 2.5112  | 4.842   | 1.8313  | 0.088859 | 0.26273 | -4.721  | 51657    |
| CFL2       | 0.75379  | 0.75379 | 1.6576  | 1.8311  | 0.088887 | 0.26277 | -4.7213 | 1073     |

|               |          |         |          |         |          |         |         |          |
|---------------|----------|---------|----------|---------|----------|---------|---------|----------|
| MED23         | -0.74666 | 0.74666 | 3.7487   | -1.8307 | 0.08895  | 0.26291 | -4.7219 | 9439     |
| LINC-PINT     | -0.77651 | 0.77651 | 1.7363   | -1.8302 | 0.089023 | 0.26308 | -4.7226 | 378805   |
| ENKUR         | 0.39058  | 0.39058 | 0.25264  | 1.8299  | 0.089082 | 0.26321 | -4.7232 | 219670   |
| NQO1          | 2.1207   | 2.1207  | 2.8059   | 1.8297  | 0.089104 | 0.26323 | -4.7234 | 1728     |
| SLC37A3       | 1.1571   | 1.1571  | 3.7372   | 1.8295  | 0.089137 | 0.26328 | -4.7237 | 84255    |
| SH3GL1        | 13.188   | 13.188  | 32.431   | 1.8292  | 0.089181 | 0.26336 | -4.7241 | 6455     |
| TNFAIP3       | 2.8473   | 2.8473  | 7.2139   | 1.829   | 0.089216 | 0.26342 | -4.7245 | 7128     |
| GOLPH3L       | -1.2127  | 1.2127  | 3.1685   | -1.8288 | 0.089246 | 0.26346 | -4.7248 | 55204    |
| GLIS3         | 2.1245   | 2.1245  | 1.9179   | 1.8286  | 0.089281 | 0.26352 | -4.7251 | 169792   |
| JMJD7-PLA2G4B | -0.87213 | 0.87213 | 2.4764   | -1.8284 | 0.089319 | 0.26358 | -4.7255 | 8681     |
| ARHGAP1       | 9.8386   | 9.8386  | 29.594   | 1.828   | 0.089375 | 0.2637  | -4.726  | 392      |
| HS1BP3-IT1    | -0.16192 | 0.16192 | 0.11498  | -1.8276 | 0.08944  | 0.26385 | -4.7266 | 1.01E+08 |
| FBXL5         | 3.2156   | 3.2156  | 11.381   | 1.8273  | 0.089482 | 0.26393 | -4.727  | 26234    |
| SORCS2        | 1.386    | 1.386   | 2.1652   | 1.827   | 0.089532 | 0.26403 | -4.7275 | 57537    |
| TMCO1         | 1.7548   | 1.7548  | 4.9499   | 1.8269  | 0.089553 | 0.26404 | -4.7277 | 54499    |
| LOC285097     | -0.12103 | 0.12103 | 0.079932 | -1.8266 | 0.089589 | 0.26407 | -4.728  | 285097   |
| LINC00665     | -0.57359 | 0.57359 | 1.0285   | -1.8266 | 0.089599 | 0.26407 | -4.7281 | 1.01E+08 |
| GLTP          | 76.997   | 76.997  | 107.17   | 1.8265  | 0.089609 | 0.26407 | -4.7282 | 51228    |
| APTR          | -0.25435 | 0.25435 | 0.66823  | -1.8263 | 0.089641 | 0.26412 | -4.7285 | 1.01E+08 |
| SNORA75       | -0.18773 | 0.18773 | 0.16986  | -1.8261 | 0.089674 | 0.26415 | -4.7288 | 654321   |
| DNAJC7        | 4.9209   | 4.9209  | 14.14    | 1.826   | 0.089683 | 0.26415 | -4.7289 | 7266     |
| SNX4          | 1.9017   | 1.9017  | 3.861    | 1.8259  | 0.089713 | 0.26419 | -4.7292 | 8723     |
| FMO4          | -0.37522 | 0.37522 | 0.74599  | -1.8256 | 0.089758 | 0.26428 | -4.7296 | 2329     |
| MRM3          | -0.64436 | 0.64436 | 3.0087   | -1.8255 | 0.089773 | 0.26428 | -4.7298 | 55178    |
| SLC49A3       | -0.54058 | 0.54058 | 1.5084   | -1.8253 | 0.089801 | 0.26428 | -4.7301 | 84179    |
| ESCO2         | 0.31586  | 0.31586 | 0.3643   | 1.8253  | 0.089804 | 0.26428 | -4.7301 | 157570   |

|              |          |         |         |         |          |         |         |          |
|--------------|----------|---------|---------|---------|----------|---------|---------|----------|
| ST8SIA4      | 0.78731  | 0.78731 | 0.96328 | 1.8249  | 0.089862 | 0.26432 | -4.7306 | 7903     |
| DLL1         | -2.0833  | 2.0833  | 4.5972  | -1.8249 | 0.089863 | 0.26432 | -4.7306 | 28514    |
| ZNF587       | -0.67626 | 0.67626 | 3.6     | -1.8248 | 0.089872 | 0.26432 | -4.7307 | 84914    |
| PDZD9        | -0.15272 | 0.15272 | 0.18204 | -1.8248 | 0.089885 | 0.26432 | -4.7309 | 255762   |
| SMIM8        | -0.26873 | 0.26873 | 0.7663  | -1.8247 | 0.089896 | 0.26432 | -4.731  | 57150    |
| TMEM120A     | 2.1516   | 2.1516  | 5.3721  | 1.8242  | 0.089974 | 0.26445 | -4.7317 | 83862    |
| C2orf15      | -0.13817 | 0.13817 | 0.3056  | -1.8241 | 0.089988 | 0.26445 | -4.7318 | 150590   |
| KCNAB1       | -0.44027 | 0.44027 | 0.64701 | -1.8239 | 0.090019 | 0.26445 | -4.7321 | 7881     |
| LYRM1        | 0.9375   | 0.9375  | 2.4064  | 1.8239  | 0.090023 | 0.26445 | -4.7322 | 57149    |
| POLN         | -0.13049 | 0.13049 | 0.2888  | -1.8238 | 0.090035 | 0.26445 | -4.7323 | 353497   |
| ZBTB22       | -0.27588 | 0.27588 | 0.87775 | -1.8238 | 0.090041 | 0.26445 | -4.7323 | 9278     |
| LINC01252    | -0.14376 | 0.14376 | 0.14457 | -1.8237 | 0.090054 | 0.26445 | -4.7325 | 338817   |
| MPP2         | -0.15091 | 0.15091 | 0.19031 | -1.8236 | 0.090066 | 0.26445 | -4.7326 | 4355     |
| DPH3P1       | -0.19328 | 0.19328 | 0.74356 | -1.8235 | 0.090089 | 0.26447 | -4.7328 | 1E+08    |
| ZNF791       | -1.0622  | 1.0622  | 4.0533  | -1.823  | 0.09016  | 0.26459 | -4.7335 | 163049   |
| ACYP2        | -0.14511 | 0.14511 | 0.64385 | -1.823  | 0.090168 | 0.26459 | -4.7335 | 98       |
| LOC100128882 | -0.19333 | 0.19333 | 0.13505 | -1.8229 | 0.090177 | 0.26459 | -4.7336 | 1E+08    |
| SLC45A4      | -0.43439 | 0.43439 | 0.87502 | -1.8226 | 0.090234 | 0.26471 | -4.7342 | 57210    |
| LOC100506321 | -0.26143 | 0.26143 | 0.55183 | -1.8224 | 0.090255 | 0.26473 | -4.7344 | 1.01E+08 |
| CCDC134      | -0.7537  | 0.7537  | 1.7123  | -1.8223 | 0.090271 | 0.26473 | -4.7345 | 79879    |
| KLHL18       | 3.617    | 3.617   | 6.9156  | 1.822   | 0.090319 | 0.26482 | -4.735  | 23276    |
| HGF          | 0.7708   | 0.7708  | 0.80719 | 1.8219  | 0.090333 | 0.26482 | -4.7351 | 3082     |
| CDC27        | 1.6586   | 1.6586  | 4.8319  | 1.8214  | 0.090411 | 0.265   | -4.7359 | 996      |
| GDF10        | -1.0473  | 1.0473  | 0.68879 | -1.8209 | 0.090492 | 0.26512 | -4.7366 | 2662     |
| LOC100128494 | -0.42777 | 0.42777 | 0.85541 | -1.8209 | 0.090495 | 0.26512 | -4.7366 | 1E+08    |
| IGSF6        | 1.8541   | 1.8541  | 2.0782  | 1.8208  | 0.090508 | 0.26512 | -4.7368 | 10261    |

|              |          |         |         |         |          |         |         |          |
|--------------|----------|---------|---------|---------|----------|---------|---------|----------|
| HMGCR        | 13.417   | 13.417  | 22.471  | 1.8206  | 0.090541 | 0.26512 | -4.7371 | 3156     |
| PPP1CA       | 16.171   | 16.171  | 40.226  | 1.8205  | 0.090565 | 0.26512 | -4.7373 | 5499     |
| NR3C1        | -1.1668  | 1.1668  | 6.6828  | -1.8205 | 0.09057  | 0.26512 | -4.7374 | 2908     |
| TNXB         | -2.2718  | 2.2718  | 1.789   | -1.8204 | 0.090571 | 0.26512 | -4.7374 | 7148     |
| SSBP2        | -0.86963 | 0.86963 | 1.9068  | -1.8204 | 0.090577 | 0.26512 | -4.7374 | 23635    |
| ACTR10       | 2.3779   | 2.3779  | 7.9018  | 1.8203  | 0.090594 | 0.26512 | -4.7376 | 55860    |
| UGT1A4       | -0.16887 | 0.16887 | 0.10409 | -1.82   | 0.090635 | 0.2652  | -4.738  | 54657    |
| NUP133       | -1.1788  | 1.1788  | 5.3851  | -1.8198 | 0.090669 | 0.26525 | -4.7383 | 55746    |
| CCDC36       | -0.18033 | 0.18033 | 0.32451 | -1.8196 | 0.090708 | 0.26532 | -4.7387 | 339834   |
| PRDM15       | -0.23813 | 0.23813 | 1.0183  | -1.8193 | 0.090761 | 0.26543 | -4.7392 | 63977    |
| CCDC6        | 4.9052   | 4.9052  | 15.539  | 1.8191  | 0.09079  | 0.26546 | -4.7394 | 8030     |
| BTG3-AS1     | -0.66343 | 0.66343 | 1.0046  | -1.819  | 0.090808 | 0.26546 | -4.7396 | 1.11E+08 |
| MTAP         | 0.95977  | 0.95977 | 3.6666  | 1.8188  | 0.090826 | 0.26546 | -4.7398 | 4507     |
| LOC105369911 | -0.14313 | 0.14313 | 0.12677 | -1.8186 | 0.09086  | 0.26546 | -4.7401 | 1.05E+08 |
| SCRN2        | -1.6714  | 1.6714  | 4.1205  | -1.8186 | 0.090861 | 0.26546 | -4.7401 | 90507    |
| PCF11        | -1.4787  | 1.4787  | 7.0457  | -1.8185 | 0.090878 | 0.26546 | -4.7403 | 51585    |
| GFOD2        | 4.2958   | 4.2958  | 6.4246  | 1.8184  | 0.090897 | 0.26546 | -4.7404 | 81577    |
| RECQL        | 2.5511   | 2.5511  | 4.8218  | 1.8184  | 0.090897 | 0.26546 | -4.7404 | 5965     |
| CCR2         | 0.52804  | 0.52804 | 0.64248 | 1.818   | 0.090961 | 0.26556 | -4.741  | 729230   |
| CEP44        | -0.35205 | 0.35205 | 1.1468  | -1.818  | 0.090963 | 0.26556 | -4.7411 | 80817    |
| EML2         | -1.6182  | 1.6182  | 4.8562  | -1.8176 | 0.091029 | 0.26563 | -4.7417 | 24139    |
| ZNF707       | -0.62046 | 0.62046 | 1.3877  | -1.8176 | 0.091031 | 0.26563 | -4.7417 | 286075   |
| DVL2         | -1.5899  | 1.5899  | 6.1413  | -1.8175 | 0.091036 | 0.26563 | -4.7417 | 1856     |
| WDR5B        | -0.31586 | 0.31586 | 1.0508  | -1.8171 | 0.091112 | 0.26581 | -4.7425 | 54554    |
| TMEM178A     | -0.2147  | 0.2147  | 0.27473 | -1.8168 | 0.091147 | 0.26587 | -4.7428 | 130733   |
| TMEM11       | 1.7893   | 1.7893  | 5.6704  | 1.8167  | 0.091164 | 0.26587 | -4.7429 | 8834     |

|              |          |         |         |         |          |         |         |          |
|--------------|----------|---------|---------|---------|----------|---------|---------|----------|
| PAIP2        | 5.022    | 5.022   | 12.811  | 1.8166  | 0.091188 | 0.26589 | -4.7432 | 51247    |
| CLIC4        | 9.6036   | 9.6036  | 18.224  | 1.8164  | 0.091222 | 0.26592 | -4.7435 | 25932    |
| SLC17A9      | 0.68486  | 0.68486 | 0.79023 | 1.8163  | 0.09124  | 0.26592 | -4.7437 | 63910    |
| KIAA1549L    | 0.35659  | 0.35659 | 0.52275 | 1.8162  | 0.091243 | 0.26592 | -4.7437 | 25758    |
| SERPINH1     | 19.818   | 19.818  | 29.44   | 1.8159  | 0.09129  | 0.26601 | -4.7441 | 871      |
| ZFHX2        | -0.13858 | 0.13858 | 0.19487 | -1.8156 | 0.091352 | 0.26613 | -4.7447 | 85446    |
| ADPGK-AS1    | -0.22095 | 0.22095 | 0.41313 | -1.8155 | 0.091363 | 0.26613 | -4.7448 | 1E+08    |
| HSPB8        | 12.449   | 12.449  | 14.591  | 1.8153  | 0.091397 | 0.26618 | -4.7451 | 26353    |
| PCDHGB4      | -0.26759 | 0.26759 | 0.71823 | -1.8151 | 0.09142  | 0.2662  | -4.7453 | 8641     |
| ANXA8        | 8.8404   | 8.8404  | 17.062  | 1.8143  | 0.091562 | 0.26648 | -4.7467 | 653145   |
| AK1          | 1.7744   | 1.7744  | 4.3719  | 1.8143  | 0.091562 | 0.26648 | -4.7467 | 203      |
| CCDC183      | -0.29403 | 0.29403 | 0.37214 | -1.8142 | 0.091566 | 0.26648 | -4.7467 | 84960    |
| CEMP1        | -2.5669  | 2.5669  | 3.3236  | -1.8141 | 0.091591 | 0.26648 | -4.7469 | 752014   |
| GPB1         | -0.30904 | 0.30904 | 0.68763 | -1.8141 | 0.091595 | 0.26648 | -4.747  | 2852     |
| LOC101928861 | -0.20578 | 0.20578 | 0.27423 | -1.814  | 0.091609 | 0.26648 | -4.7471 | 1.02E+08 |
| GPR52        | -0.33967 | 0.33967 | 0.80708 | -1.8138 | 0.09163  | 0.26649 | -4.7473 | 9293     |
| DLGAP5       | 0.96698  | 0.96698 | 1.1885  | 1.8136  | 0.091675 | 0.26653 | -4.7477 | 9787     |
| RNF185       | 5.0988   | 5.0988  | 11.182  | 1.8135  | 0.091682 | 0.26653 | -4.7478 | 91445    |
| SNX18        | 1.3682   | 1.3682  | 4.2243  | 1.8135  | 0.091691 | 0.26653 | -4.7479 | 112574   |
| SUSD1        | 0.68839  | 0.68839 | 1.6873  | 1.813   | 0.09176  | 0.26668 | -4.7485 | 64420    |
| IKBKE        | -0.86502 | 0.86502 | 2.3338  | -1.8129 | 0.09178  | 0.26668 | -4.7487 | 9641     |
| GSE1         | -1.3586  | 1.3586  | 6.2705  | -1.8128 | 0.091797 | 0.26668 | -4.7489 | 23199    |
| UQCRH        | 19.194   | 19.194  | 32.202  | 1.8128  | 0.091804 | 0.26668 | -4.7489 | 7388     |
| GLT8D2       | 2.7806   | 2.7806  | 2.9985  | 1.8126  | 0.091833 | 0.26671 | -4.7492 | 83468    |
| ACER3        | 0.96853  | 0.96853 | 2.0499  | 1.8122  | 0.091888 | 0.26677 | -4.7497 | 55331    |
| IPO13        | 1.9756   | 1.9756  | 5.5405  | 1.8121  | 0.091905 | 0.26677 | -4.7499 | 9670     |

|            |          |         |         |         |          |         |         |          |
|------------|----------|---------|---------|---------|----------|---------|---------|----------|
| MIPOL1     | -0.17713 | 0.17713 | 0.36145 | -1.8119 | 0.091938 | 0.26677 | -4.7502 | 145282   |
| LOC285638  | -0.19994 | 0.19994 | 0.36632 | -1.8119 | 0.09195  | 0.26677 | -4.7503 | 285638   |
| ZFPM2      | -0.3221  | 0.3221  | 0.56041 | -1.8118 | 0.091957 | 0.26677 | -4.7503 | 23414    |
| GPX7       | 3.0489   | 3.0489  | 3.2699  | 1.8118  | 0.091961 | 0.26677 | -4.7504 | 2882     |
| PRG4       | -1.0615  | 1.0615  | 0.80185 | -1.8118 | 0.091962 | 0.26677 | -4.7504 | 10216    |
| BCL7B      | 2.6737   | 2.6737  | 6.9123  | 1.8117  | 0.091982 | 0.26678 | -4.7506 | 9275     |
| WFDC12     | 126.55   | 126.55  | 98.377  | 1.8113  | 0.092034 | 0.26688 | -4.7511 | 128488   |
| PIN4P1     | -0.17037 | 0.17037 | 0.19592 | -1.811  | 0.092093 | 0.26698 | -4.7516 | 728758   |
| NDE1       | -1.0016  | 1.0016  | 5.3511  | -1.8109 | 0.092103 | 0.26698 | -4.7517 | 54820    |
| CSNK1A1P1  | -0.14004 | 0.14004 | 0.14008 | -1.8108 | 0.092114 | 0.26698 | -4.7518 | 161635   |
| COL5A3     | 7.6124   | 7.6124  | 13.179  | 1.8105  | 0.092165 | 0.26706 | -4.7523 | 50509    |
| TICAM1     | 3.0385   | 3.0385  | 5.5119  | 1.8105  | 0.092174 | 0.26706 | -4.7524 | 148022   |
| TPRG1L     | 5.3458   | 5.3458  | 15.03   | 1.8102  | 0.092209 | 0.26712 | -4.7527 | 127262   |
| ZBTB11-AS1 | -0.34759 | 0.34759 | 1.119   | -1.8093 | 0.092355 | 0.2675  | -4.754  | 1E+08    |
| GAPDH      | 313.58   | 313.58  | 537.46  | 1.8088  | 0.092436 | 0.26754 | -4.7548 | 2597     |
| CACUL1     | 1.5627   | 1.5627  | 6.152   | 1.8088  | 0.092448 | 0.26754 | -4.7549 | 143384   |
| CDC42EP4   | -3.3156  | 3.3156  | 9.6151  | -1.8088 | 0.09245  | 0.26754 | -4.7549 | 23580    |
| MIR497HG   | -0.63071 | 0.63071 | 1.0747  | -1.8087 | 0.092458 | 0.26754 | -4.755  | 1.01E+08 |
| CEP55      | 1.0692   | 1.0692  | 1.3271  | 1.8087  | 0.092464 | 0.26754 | -4.755  | 55165    |
| CAV1       | 11.12    | 11.12   | 23.516  | 1.8087  | 0.092464 | 0.26754 | -4.755  | 857      |
| ETS1       | 5.9559   | 5.9559  | 11.102  | 1.8083  | 0.092526 | 0.26767 | -4.7556 | 2113     |
| UCN        | -0.16867 | 0.16867 | 0.23399 | -1.8077 | 0.092621 | 0.2679  | -4.7565 | 7349     |
| GPX8       | 2.9081   | 2.9081  | 3.1178  | 1.8074  | 0.092678 | 0.26798 | -4.757  | 493869   |
| FAM220A    | 2.2231   | 2.2231  | 4.0444  | 1.8073  | 0.09268  | 0.26798 | -4.757  | 84792    |
| EIF2B5     | -1.2662  | 1.2662  | 6.0101  | -1.8071 | 0.092724 | 0.26806 | -4.7574 | 8893     |
| DLGAP4     | 3.9197   | 3.9197  | 12.128  | 1.8069  | 0.092755 | 0.2681  | -4.7577 | 22839    |

|              |          |         |          |         |          |         |         |          |
|--------------|----------|---------|----------|---------|----------|---------|---------|----------|
| SLC25A14     | 0.29971  | 0.29971 | 1.1734   | 1.8064  | 0.092839 | 0.2683  | -4.7585 | 9016     |
| SSR1         | 2.3273   | 2.3273  | 7.7586   | 1.806   | 0.092904 | 0.26844 | -4.7591 | 6745     |
| SPTSSA       | 3.5918   | 3.5918  | 6.2818   | 1.8054  | 0.093003 | 0.26862 | -4.76   | 171546   |
| SNAPC4       | -0.7501  | 0.7501  | 1.6036   | -1.8053 | 0.093009 | 0.26862 | -4.7601 | 6621     |
| ATP2B1       | 1.6908   | 1.6908  | 5.2726   | 1.8053  | 0.093013 | 0.26862 | -4.7601 | 490      |
| LINC00504    | -10.83   | 10.83   | 20.511   | -1.805  | 0.093068 | 0.26873 | -4.7606 | 201853   |
| ALK          | -0.13079 | 0.13079 | 0.17397  | -1.8049 | 0.093085 | 0.26873 | -4.7607 | 238      |
| IPO11-LRRC70 | 0.2961   | 0.2961  | 0.22354  | 1.8042  | 0.09319  | 0.26895 | -4.7617 | 1.01E+08 |
| SNORA31      | 1.2431   | 1.2431  | 1.5235   | 1.8042  | 0.093193 | 0.26895 | -4.7617 | 677814   |
| FOXF1        | 0.59121  | 0.59121 | 0.55909  | 1.8039  | 0.093241 | 0.26904 | -4.7622 | 2294     |
| CNOT11       | 2.1183   | 2.1183  | 7.3      | 1.8038  | 0.093262 | 0.26906 | -4.7624 | 55571    |
| ARRDC1-AS1   | -0.74471 | 0.74471 | 2.0482   | -1.8035 | 0.093312 | 0.26914 | -4.7628 | 85026    |
| ZNF732       | -0.18438 | 0.18438 | 0.3255   | -1.8034 | 0.093322 | 0.26914 | -4.7629 | 654254   |
| OSGEPL1      | -0.26635 | 0.26635 | 0.82036  | -1.8032 | 0.093359 | 0.26916 | -4.7633 | 64172    |
| YWHAB        | 13.638   | 13.638  | 40.145   | 1.8032  | 0.09336  | 0.26916 | -4.7633 | 7529     |
| ZBED6        | 2.3011   | 2.3011  | 12.412   | 1.8027  | 0.093434 | 0.26925 | -4.7639 | 1E+08    |
| MYOM1        | -0.25789 | 0.25789 | 0.35618  | -1.8027 | 0.093438 | 0.26925 | -4.764  | 8736     |
| AGA          | 1.4148   | 1.4148  | 4.298    | 1.8027  | 0.093441 | 0.26925 | -4.764  | 175      |
| RGS22        | -0.13321 | 0.13321 | 0.099222 | -1.8024 | 0.093489 | 0.26934 | -4.7644 | 26166    |
| AP4B1-AS1    | -0.18655 | 0.18655 | 0.25754  | -1.8023 | 0.093502 | 0.26934 | -4.7646 | 1E+08    |
| ZRANB1       | 3.7903   | 3.7903  | 7.798    | 1.802   | 0.093548 | 0.2694  | -4.765  | 54764    |
| SPRNP1       | -0.16643 | 0.16643 | 0.1947   | -1.802  | 0.093555 | 0.2694  | -4.765  | 399833   |
| ZNF385B      | 0.18232  | 0.18232 | 0.19233  | 1.8019  | 0.093573 | 0.2694  | -4.7652 | 151126   |
| TFB1M        | -0.24844 | 0.24844 | 0.81144  | -1.8015 | 0.093632 | 0.26953 | -4.7657 | 51106    |
| NPHP4        | -0.60068 | 0.60068 | 1.691    | -1.8011 | 0.093696 | 0.26965 | -4.7663 | 261734   |
| DUXAP10      | 0.1424   | 0.1424  | 0.12124  | 1.8011  | 0.093707 | 0.26965 | -4.7664 | 503639   |



|              |          |         |          |         |          |         |         |          |
|--------------|----------|---------|----------|---------|----------|---------|---------|----------|
| ZER1         | -1.5957  | 1.5957  | 6.3422   | -1.8008 | 0.093754 | 0.2697  | -4.7669 | 10444    |
| DDX55        | -0.51243 | 0.51243 | 2.8456   | -1.8008 | 0.093755 | 0.2697  | -4.7669 | 57696    |
| CUL3         | 1.991    | 1.991   | 5.8313   | 1.8007  | 0.093774 | 0.26971 | -4.767  | 8452     |
| RAPSN        | -0.14615 | 0.14615 | 0.25225  | -1.8004 | 0.093815 | 0.26978 | -4.7674 | 5913     |
| OMG          | -0.39645 | 0.39645 | 0.66074  | -1.7996 | 0.093943 | 0.2701  | -4.7686 | 4974     |
| SULF2        | 8.9233   | 8.9233  | 22.601   | 1.7993  | 0.093998 | 0.27021 | -4.7691 | 55959    |
| SNX27        | -0.78181 | 0.78181 | 3.8543   | -1.7991 | 0.094029 | 0.27026 | -4.7694 | 81609    |
| CEACAM5      | 0.81948  | 0.81948 | 1.4947   | 1.7989  | 0.094058 | 0.27029 | -4.7696 | 1048     |
| HEIH         | -1.8403  | 1.8403  | 4.7735   | -1.7984 | 0.094139 | 0.27033 | -4.7704 | 1.01E+08 |
| VCP          | 15.498   | 15.498  | 42.638   | 1.7983  | 0.094155 | 0.27033 | -4.7705 | 7415     |
| RXFP4        | -0.1589  | 0.1589  | 0.2237   | -1.7983 | 0.094155 | 0.27033 | -4.7705 | 339403   |
| UFD1         | 3.8468   | 3.8468  | 9.1248   | 1.7983  | 0.094157 | 0.27033 | -4.7705 | 7353     |
| AIFM2        | -0.58279 | 0.58279 | 1.1152   | -1.7983 | 0.094163 | 0.27033 | -4.7706 | 84883    |
| LOC101927855 | -0.12618 | 0.12618 | 0.098094 | -1.7983 | 0.094166 | 0.27033 | -4.7706 | 1.02E+08 |
| ZBTB20       | -1.4782  | 1.4782  | 3.1362   | -1.7979 | 0.094231 | 0.27044 | -4.7712 | 26137    |
| SHISA2       | 0.21197  | 0.21197 | 0.30569  | 1.7978  | 0.094246 | 0.27044 | -4.7713 | 387914   |
| OGFOD3       | -0.94065 | 0.94065 | 2.313    | -1.7978 | 0.094251 | 0.27044 | -4.7714 | 79701    |
| ZNF345       | -0.30042 | 0.30042 | 0.73023  | -1.7975 | 0.094291 | 0.27049 | -4.7717 | 25850    |
| BTG2         | 7.1178   | 7.1178  | 20.664   | 1.7975  | 0.094301 | 0.27049 | -4.7718 | 7832     |
| CHST6        | 0.28723  | 0.28723 | 0.2438   | 1.7973  | 0.09432  | 0.27049 | -4.772  | 4166     |
| SMAGP        | 3.5263   | 3.5263  | 9.5203   | 1.7968  | 0.094405 | 0.27069 | -4.7728 | 57228    |
| SCARNA16     | -0.74204 | 0.74204 | 1.6394   | -1.7963 | 0.0945   | 0.27088 | -4.7736 | 677781   |
| TCTE1        | -0.11644 | 0.11644 | 0.069389 | -1.7962 | 0.094503 | 0.27088 | -4.7736 | 202500   |
| LINC01433    | 0.11351  | 0.11351 | 0.075961 | 1.7961  | 0.094531 | 0.27092 | -4.7739 | 728228   |
| DIP2C        | -0.91606 | 0.91606 | 2.7837   | -1.7958 | 0.094584 | 0.27102 | -4.7744 | 22982    |
| LIMD1        | -0.81735 | 0.81735 | 3.4088   | -1.7954 | 0.094642 | 0.27114 | -4.7749 | 8994     |

|              |          |         |         |         |          |         |         |          |
|--------------|----------|---------|---------|---------|----------|---------|---------|----------|
| SLC25A15     | 0.47961  | 0.47961 | 1.6217  | 1.7949  | 0.094726 | 0.27134 | -4.7757 | 10166    |
| TRAP1        | -3.2767  | 3.2767  | 11.197  | -1.7946 | 0.09477  | 0.27142 | -4.776  | 10131    |
| TEX30        | 0.70412  | 0.70412 | 1.1315  | 1.7945  | 0.0948   | 0.27143 | -4.7763 | 93081    |
| PLEKHF2      | 1.8889   | 1.8889  | 6.2574  | 1.7944  | 0.094809 | 0.27143 | -4.7764 | 79666    |
| RNF167       | 6.1911   | 6.1911  | 18.764  | 1.7942  | 0.094838 | 0.27143 | -4.7767 | 26001    |
| COL17A1      | -46.388  | 46.388  | 125.79  | -1.7942 | 0.094839 | 0.27143 | -4.7767 | 1308     |
| SYT12        | -0.13425 | 0.13425 | 0.17006 | -1.794  | 0.09487  | 0.27144 | -4.7769 | 91683    |
| PLA2G7       | 1.3105   | 1.3105  | 1.2289  | 1.794   | 0.094874 | 0.27144 | -4.777  | 7941     |
| TRIM17       | -0.41193 | 0.41193 | 0.73626 | -1.7927 | 0.095098 | 0.27196 | -4.779  | 51127    |
| TYK2         | -2.6032  | 2.6032  | 7.0707  | -1.7926 | 0.095102 | 0.27196 | -4.779  | 7297     |
| COL6A6       | -0.69296 | 0.69296 | 0.44757 | -1.7926 | 0.095105 | 0.27196 | -4.7791 | 131873   |
| LINC01515    | -0.23593 | 0.23593 | 0.3178  | -1.7925 | 0.09513  | 0.27199 | -4.7793 | 1.02E+08 |
| LOC100130992 | -0.1446  | 0.1446  | 0.16603 | -1.7922 | 0.095182 | 0.27207 | -4.7797 | 1E+08    |
| COBLL1       | 0.76975  | 0.76975 | 4.0102  | 1.7921  | 0.095191 | 0.27207 | -4.7798 | 22837    |
| CLIC1        | 4.467    | 4.467   | 9.2374  | 1.7919  | 0.09522  | 0.27207 | -4.7801 | 1192     |
| CLEC4A       | 0.95111  | 0.95111 | 1.1572  | 1.7918  | 0.095248 | 0.27207 | -4.7803 | 50856    |
| RIOK3        | 3.785    | 3.785   | 13.72   | 1.7917  | 0.095258 | 0.27207 | -4.7804 | 8780     |
| CHSY3        | 1.1647   | 1.1647  | 1.3582  | 1.7915  | 0.095294 | 0.27207 | -4.7807 | 337876   |
| POLR2K       | 4.6212   | 4.6212  | 9.4152  | 1.7914  | 0.095302 | 0.27207 | -4.7808 | 5440     |
| ATP6AP1L     | -0.18553 | 0.18553 | 0.37933 | -1.7914 | 0.095305 | 0.27207 | -4.7808 | 92270    |
| HES4         | 2.1545   | 2.1545  | 4.3615  | 1.7914  | 0.095306 | 0.27207 | -4.7808 | 57801    |
| ARRDC4       | 14.893   | 14.893  | 20.384  | 1.7903  | 0.095484 | 0.27254 | -4.7824 | 91947    |
| AK9          | -0.13    | 0.13    | 0.28824 | -1.7891 | 0.095687 | 0.27304 | -4.7842 | 221264   |
| CTSA         | 12.461   | 12.461  | 22.073  | 1.7891  | 0.095693 | 0.27304 | -4.7843 | 5476     |
| SKA1         | 0.44119  | 0.44119 | 1.0002  | 1.7886  | 0.095783 | 0.27325 | -4.7851 | 220134   |
| TP53INP2     | 3.9093   | 3.9093  | 7.3356  | 1.788   | 0.095881 | 0.27348 | -4.786  | 58476    |

|              |          |         |         |         |          |         |         |          |
|--------------|----------|---------|---------|---------|----------|---------|---------|----------|
| GPATCH2L     | -0.34155 | 0.34155 | 1.7464  | -1.7877 | 0.095927 | 0.27352 | -4.7864 | 55668    |
| NDUFV2       | 13.662   | 13.662  | 30.057  | 1.7876  | 0.095943 | 0.27352 | -4.7865 | 4729     |
| DYRK1A       | -0.79245 | 0.79245 | 5.9689  | -1.7876 | 0.095943 | 0.27352 | -4.7865 | 1859     |
| FAM171B      | 0.65134  | 0.65134 | 1.3385  | 1.7875  | 0.095966 | 0.27352 | -4.7867 | 165215   |
| ZNF496       | -0.66816 | 0.66816 | 2.0517  | -1.7874 | 0.095973 | 0.27352 | -4.7868 | 84838    |
| IFT74        | -0.27882 | 0.27882 | 0.74869 | -1.7872 | 0.096002 | 0.27355 | -4.787  | 80173    |
| LOC283028    | -0.12291 | 0.12291 | 0.11428 | -1.787  | 0.096042 | 0.27355 | -4.7874 | 283028   |
| ZNF658       | -0.5932  | 0.5932  | 1.5866  | -1.787  | 0.096044 | 0.27355 | -4.7874 | 26149    |
| PDCL3        | 4.2781   | 4.2781  | 9.3772  | 1.787   | 0.096051 | 0.27355 | -4.7875 | 79031    |
| BCAT1        | 1.0614   | 1.0614  | 1.1496  | 1.7867  | 0.096096 | 0.27364 | -4.7879 | 586      |
| NPC1         | 2.3663   | 2.3663  | 8.5569  | 1.7866  | 0.096113 | 0.27364 | -4.788  | 4864     |
| MTHFD1L      | 1.6999   | 1.6999  | 2.7499  | 1.7862  | 0.096183 | 0.27372 | -4.7886 | 25902    |
| ATP2A2       | 11.792   | 11.792  | 29.268  | 1.7861  | 0.096187 | 0.27372 | -4.7887 | 488      |
| LSM12        | 4.2102   | 4.2102  | 10.506  | 1.7861  | 0.09619  | 0.27372 | -4.7887 | 124801   |
| PRCD         | -0.1473  | 0.1473  | 0.14367 | -1.7857 | 0.096265 | 0.27389 | -4.7894 | 768206   |
| EVC          | -1.6455  | 1.6455  | 3.8708  | -1.7854 | 0.096315 | 0.27397 | -4.7898 | 2121     |
| SLC36A3      | -0.12987 | 0.12987 | 0.09921 | -1.7852 | 0.096345 | 0.27397 | -4.7901 | 285641   |
| RAD51D       | -0.4431  | 0.4431  | 1.2189  | -1.7851 | 0.096361 | 0.27397 | -4.7902 | 5892     |
| PLCH2        | -2.8413  | 2.8413  | 4.6492  | -1.7851 | 0.096362 | 0.27397 | -4.7902 | 9651     |
| MRPL53       | 5.7521   | 5.7521  | 11.722  | 1.785   | 0.096376 | 0.27397 | -4.7904 | 116540   |
| LOC102723996 | -0.43423 | 0.43423 | 1.0008  | -1.7847 | 0.096436 | 0.27406 | -4.7909 | 1.03E+08 |
| C16orf87     | 0.16188  | 0.16188 | 0.4296  | 1.7846  | 0.096442 | 0.27406 | -4.7909 | 388272   |
| PDE6A        | -0.1114  | 0.1114  | 0.10811 | -1.7844 | 0.096482 | 0.27406 | -4.7913 | 5145     |
| SCMH1        | -1.1551  | 1.1551  | 3.094   | -1.7844 | 0.096488 | 0.27406 | -4.7913 | 22955    |
| NPRL3        | -1.287   | 1.287   | 3.6697  | -1.7843 | 0.096497 | 0.27406 | -4.7914 | 8131     |
| LYZ          | 17.973   | 17.973  | 21.488  | 1.7843  | 0.096504 | 0.27406 | -4.7915 | 4069     |

|            |          |         |         |         |          |         |         |        |
|------------|----------|---------|---------|---------|----------|---------|---------|--------|
| CDK2AP1    | 6.6183   | 6.6183  | 11.166  | 1.7841  | 0.096538 | 0.27411 | -4.7918 | 8099   |
| ZNF706     | 3.753    | 3.753   | 8.712   | 1.7839  | 0.096564 | 0.27414 | -4.792  | 51123  |
| POMZP3     | -1.2326  | 1.2326  | 3.1074  | -1.7835 | 0.096626 | 0.27427 | -4.7926 | 22932  |
| FAM43B     | 0.32672  | 0.32672 | 0.31848 | 1.7831  | 0.096696 | 0.27442 | -4.7932 | 163933 |
| PHF23      | 2.96     | 2.96    | 7.1799  | 1.7824  | 0.096817 | 0.27472 | -4.7942 | 79142  |
| TRIM26     | -0.28377 | 0.28377 | 0.94683 | -1.7823 | 0.096835 | 0.27472 | -4.7944 | 7726   |
| LMOD1      | -4.1474  | 4.1474  | 4.2466  | -1.7822 | 0.096854 | 0.27473 | -4.7946 | 25802  |
| ANKRD42    | -0.1825  | 0.1825  | 0.80227 | -1.782  | 0.096886 | 0.27477 | -4.7948 | 338699 |
| TRIM59     | 0.39056  | 0.39056 | 0.77583 | 1.7815  | 0.096973 | 0.27496 | -4.7956 | 286827 |
| MCUB       | 4.2937   | 4.2937  | 7.7224  | 1.7814  | 0.096997 | 0.27496 | -4.7958 | 55013  |
| HSPA14     | 0.58268  | 0.58268 | 2.335   | 1.7813  | 0.097002 | 0.27496 | -4.7959 | 51182  |
| RNF149     | 4.5006   | 4.5006  | 16.828  | 1.7812  | 0.097018 | 0.27496 | -4.796  | 284996 |
| VILL       | -0.47976 | 0.47976 | 1.3522  | -1.7808 | 0.097094 | 0.27513 | -4.7967 | 50853  |
| ATP6AP2    | 7.4525   | 7.4525  | 23.012  | 1.78    | 0.097219 | 0.27544 | -4.7978 | 10159  |
| SGSM2      | -2.6357  | 2.6357  | 6.3038  | -1.7797 | 0.097269 | 0.27554 | -4.7982 | 9905   |
| TTC9C      | -0.72772 | 0.72772 | 2.9561  | -1.7795 | 0.09731  | 0.27561 | -4.7986 | 283237 |
| OLMALINC   | -0.27804 | 0.27804 | 0.65048 | -1.7792 | 0.097357 | 0.27569 | -4.799  | 90271  |
| C14orf132  | -0.87215 | 0.87215 | 2.2356  | -1.7786 | 0.097471 | 0.27597 | -4.8    | 56967  |
| CMBL       | -0.32187 | 0.32187 | 0.6486  | -1.7784 | 0.097501 | 0.276   | -4.8002 | 134147 |
| FAS-AS1    | -0.19604 | 0.19604 | 0.30058 | -1.7783 | 0.097515 | 0.276   | -4.8003 | 1E+08  |
| EMC4       | 6.1827   | 6.1827  | 19.07   | 1.7778  | 0.097592 | 0.27613 | -4.801  | 51234  |
| PTGS2      | 28.202   | 28.202  | 13.857  | 1.7778  | 0.097603 | 0.27613 | -4.8011 | 5743   |
| DIAPH2-AS1 | -0.14414 | 0.14414 | 0.28917 | -1.7777 | 0.097614 | 0.27613 | -4.8012 | 10824  |
| CASP2      | -0.99213 | 0.99213 | 5.1042  | -1.7776 | 0.097631 | 0.27613 | -4.8014 | 835    |
| ASIC1      | -0.20255 | 0.20255 | 0.34847 | -1.7776 | 0.097642 | 0.27613 | -4.8014 | 41     |
| TENM2      | 6.1816   | 6.1816  | 8.3293  | 1.7771  | 0.097723 | 0.27628 | -4.8021 | 57451  |

|           |          |         |         |         |          |         |         |          |
|-----------|----------|---------|---------|---------|----------|---------|---------|----------|
| SLC35D1   | 0.71656  | 0.71656 | 3.2726  | 1.777   | 0.09773  | 0.27628 | -4.8022 | 23169    |
| AHR       | 7.8956   | 7.8956  | 16.833  | 1.777   | 0.097743 | 0.27628 | -4.8023 | 196      |
| SMO       | -2.1008  | 2.1008  | 4.1379  | -1.7767 | 0.097785 | 0.27635 | -4.8027 | 6608     |
| VDAC3     | 5.4124   | 5.4124  | 15.485  | 1.7766  | 0.097807 | 0.27636 | -4.8029 | 7419     |
| SFXN3     | 2.8404   | 2.8404  | 9.236   | 1.7762  | 0.097877 | 0.27651 | -4.8035 | 81855    |
| FAM181B   | 1.1564   | 1.1564  | 1.0532  | 1.776   | 0.097914 | 0.27657 | -4.8038 | 220382   |
| ZNF33BP1  | -0.30249 | 0.30249 | 0.35634 | -1.7755 | 0.097996 | 0.27671 | -4.8045 | 1E+08    |
| THAP1     | 0.59131  | 0.59131 | 1.2244  | 1.7754  | 0.098002 | 0.27671 | -4.8046 | 55145    |
| RNF38     | -0.86084 | 0.86084 | 3.556   | -1.7754 | 0.09801  | 0.27671 | -4.8046 | 152006   |
| ZNF815P   | -0.17318 | 0.17318 | 0.29202 | -1.7752 | 0.098041 | 0.27672 | -4.8049 | 401303   |
| RMDN3     | -1.267   | 1.267   | 4.0341  | -1.7752 | 0.098047 | 0.27672 | -4.805  | 55177    |
| COTL1     | 10.453   | 10.453  | 14.012  | 1.775   | 0.098071 | 0.27674 | -4.8052 | 23406    |
| RWDD1     | 2.8799   | 2.8799  | 7.2812  | 1.7749  | 0.098103 | 0.27678 | -4.8055 | 51389    |
| SLC25A36  | -1.3012  | 1.3012  | 3.2677  | -1.7748 | 0.098121 | 0.27679 | -4.8056 | 55186    |
| PHTF1     | 0.55885  | 0.55885 | 1.038   | 1.7743  | 0.098193 | 0.27688 | -4.8062 | 10745    |
| TMEM100   | -0.52032 | 0.52032 | 0.56797 | -1.7743 | 0.098201 | 0.27688 | -4.8063 | 55273    |
| ALDH7A1   | -2.9136  | 2.9136  | 5.8395  | -1.7743 | 0.098201 | 0.27688 | -4.8063 | 501      |
| OR2A1-AS1 | -0.11734 | 0.11734 | 0.14622 | -1.774  | 0.098255 | 0.27694 | -4.8068 | 1.02E+08 |
| LEMD3     | 0.87947  | 0.87947 | 4.3613  | 1.774   | 0.098257 | 0.27694 | -4.8068 | 23592    |
| PPT2      | 0.16239  | 0.16239 | 0.62806 | 1.7735  | 0.098327 | 0.27699 | -4.8074 | 9374     |
| GOLGA7B   | 3.213    | 3.213   | 4.5822  | 1.7734  | 0.098347 | 0.27699 | -4.8076 | 401647   |
| PTOV1-AS2 | -1.2938  | 1.2938  | 2.6202  | -1.7733 | 0.098368 | 0.27699 | -4.8077 | 1.02E+08 |
| PINX1     | 1.214    | 1.214   | 3.3675  | 1.7733  | 0.098369 | 0.27699 | -4.8077 | 54984    |
| OST4      | 38.99    | 38.99   | 63.961  | 1.7733  | 0.098373 | 0.27699 | -4.8078 | 1E+08    |
| SAMSN1    | 1.5099   | 1.5099  | 1.6506  | 1.7733  | 0.098373 | 0.27699 | -4.8078 | 64092    |
| PAQR6     | -0.59972 | 0.59972 | 1.6654  | -1.7731 | 0.098398 | 0.27701 | -4.808  | 79957    |

|              |          |         |         |         |          |         |         |          |
|--------------|----------|---------|---------|---------|----------|---------|---------|----------|
| DGKG         | -0.21413 | 0.21413 | 0.31923 | -1.7727 | 0.09848  | 0.27715 | -4.8087 | 1608     |
| SIGLEC1      | -2.1737  | 2.1737  | 1.9019  | -1.7727 | 0.09848  | 0.27715 | -4.8087 | 6614     |
| CASK         | 1.1579   | 1.1579  | 3.7556  | 1.7716  | 0.098667 | 0.27763 | -4.8103 | 8573     |
| LOC105379183 | -0.13471 | 0.13471 | 0.15552 | -1.7714 | 0.098688 | 0.27764 | -4.8105 | 1.05E+08 |
| B4GALT1      | 9.3945   | 9.3945  | 21.267  | 1.7709  | 0.098779 | 0.27786 | -4.8113 | 2683     |
| LINC02323    | 1.3132   | 1.3132  | 0.83383 | 1.7708  | 0.098803 | 0.27788 | -4.8115 | 1.05E+08 |
| ADAM8        | 3.1006   | 3.1006  | 3.0322  | 1.7705  | 0.098844 | 0.27794 | -4.8118 | 101      |
| IPO9         | -0.66376 | 0.66376 | 3.2293  | -1.7701 | 0.098913 | 0.27804 | -4.8124 | 55705    |
| UTP11        | 2.0962   | 2.0962  | 8.5127  | 1.7701  | 0.098917 | 0.27804 | -4.8125 | 51118    |
| STXBP3       | 1.8081   | 1.8081  | 5.6882  | 1.77    | 0.098929 | 0.27804 | -4.8126 | 6814     |
| ANXA2        | 148.3    | 148.3   | 281.86  | 1.7697  | 0.098982 | 0.27814 | -4.813  | 302      |
| DNAJC5       | 7.6715   | 7.6715  | 17.378  | 1.7696  | 0.099011 | 0.27814 | -4.8133 | 80331    |
| KCTD5        | 3.1267   | 3.1267  | 7.8393  | 1.7696  | 0.099012 | 0.27814 | -4.8133 | 54442    |
| BROX         | 1.6326   | 1.6326  | 5.7015  | 1.7694  | 0.099039 | 0.27817 | -4.8135 | 148362   |
| MLIP         | 0.14446  | 0.14446 | 0.22293 | 1.7693  | 0.099056 | 0.27817 | -4.8137 | 90523    |
| ESRP1        | 9.2893   | 9.2893  | 21.434  | 1.7688  | 0.099151 | 0.27839 | -4.8145 | 54845    |
| PRG2         | -0.72943 | 0.72943 | 0.77612 | -1.7686 | 0.099179 | 0.27839 | -4.8147 | 5553     |
| NUP88        | 1.1145   | 1.1145  | 4.7181  | 1.7686  | 0.099184 | 0.27839 | -4.8148 | 4927     |
| MRPS33       | 3.516    | 3.516   | 6.8776  | 1.7684  | 0.099219 | 0.27844 | -4.8151 | 51650    |
| EEF1B2       | 67.324   | 67.324  | 150.34  | 1.7678  | 0.099321 | 0.27864 | -4.8159 | 1933     |
| PSMD9        | 2.7058   | 2.7058  | 7.0444  | 1.7678  | 0.099321 | 0.27864 | -4.8159 | 5715     |
| ZNF737       | -0.28079 | 0.28079 | 0.57754 | -1.7676 | 0.099353 | 0.27866 | -4.8162 | 1E+08    |
| KCTD21-AS1   | -0.12418 | 0.12418 | 0.1341  | -1.7675 | 0.099362 | 0.27866 | -4.8163 | 1E+08    |
| TP53AIP1     | -1.5099  | 1.5099  | 3.2806  | -1.7669 | 0.099474 | 0.27893 | -4.8172 | 63970    |
| SLC30A5      | 0.9347   | 0.9347  | 3.6653  | 1.7664  | 0.099552 | 0.2791  | -4.8179 | 64924    |
| LOC105375787 | -0.17471 | 0.17471 | 0.12228 | -1.7663 | 0.099573 | 0.27911 | -4.8181 | 1.05E+08 |

|           |          |         |         |         |          |         |         |        |
|-----------|----------|---------|---------|---------|----------|---------|---------|--------|
| SF3A2     | -6.1516  | 6.1516  | 18.21   | -1.7662 | 0.099597 | 0.27913 | -4.8183 | 8175   |
| UBE2M     | 4.6301   | 4.6301  | 12.061  | 1.7661  | 0.099612 | 0.27913 | -4.8184 | 9040   |
| USP3-AS1  | -0.33236 | 0.33236 | 0.63059 | -1.7659 | 0.099639 | 0.27916 | -4.8186 | 1E+08  |
| TMSB10    | 346.53   | 346.53  | 526.51  | 1.7653  | 0.099747 | 0.27933 | -4.8196 | 9168   |
| NT5C2     | 2.3421   | 2.3421  | 6.797   | 1.7653  | 0.099749 | 0.27933 | -4.8196 | 22978  |
| ZNF620    | -0.15048 | 0.15048 | 0.29496 | -1.7652 | 0.099765 | 0.27933 | -4.8197 | 253639 |
| NDUFV1    | -6.6827  | 6.6827  | 21.286  | -1.7652 | 0.099776 | 0.27933 | -4.8198 | 4723   |
| GABARAP   | 43.318   | 43.318  | 93.925  | 1.7651  | 0.099782 | 0.27933 | -4.8199 | 11337  |
| TTC39B    | 5.3767   | 5.3767  | 9.0825  | 1.7646  | 0.099864 | 0.2795  | -4.8206 | 158219 |
| ATF4      | 22.258   | 22.258  | 57.242  | 1.7646  | 0.099876 | 0.2795  | -4.8207 | 468    |
| ATP1A1    | -37.283  | 37.283  | 75.613  | -1.7645 | 0.099892 | 0.2795  | -4.8208 | 476    |
| FLJ42393  | -0.47717 | 0.47717 | 0.91638 | -1.7642 | 0.099948 | 0.27958 | -4.8213 | 401105 |
| DUSP3     | 3.4568   | 3.4568  | 10.44   | 1.7641  | 0.099957 | 0.27958 | -4.8213 | 1845   |
| PCMT1     | 3.6639   | 3.6639  | 9.3994  | 1.7638  | 0.10001  | 0.2797  | -4.8218 | 5110   |
| POMP      | 7.4184   | 7.4184  | 13.033  | 1.7636  | 0.10005  | 0.27975 | -4.8221 | 51371  |
| ANKLE2    | 2.1565   | 2.1565  | 11.124  | 1.7634  | 0.10007  | 0.27977 | -4.8223 | 23141  |
| PHKA1     | -0.39898 | 0.39898 | 1.4545  | -1.7633 | 0.10009  | 0.27978 | -4.8225 | 5255   |
| CCDC188   | -0.16807 | 0.16807 | 0.20761 | -1.7625 | 0.10024  | 0.28006 | -4.8238 | 388849 |
| TP53BP2   | 1.9926   | 1.9926  | 5.8257  | 1.7624  | 0.10025  | 0.28006 | -4.8238 | 7159   |
| EXOC3-AS1 | -0.4986  | 0.4986  | 0.95139 | -1.7624 | 0.10026  | 0.28006 | -4.8239 | 116349 |
| ADM2      | 0.53384  | 0.53384 | 0.47584 | 1.7624  | 0.10026  | 0.28006 | -4.8239 | 79924  |
| MSMO1     | 9.0306   | 9.0306  | 14.592  | 1.7622  | 0.10028  | 0.28008 | -4.8241 | 6307   |
| SEC61B    | 20.289   | 20.289  | 37.216  | 1.762   | 0.10033  | 0.28015 | -4.8245 | 10952  |
| HOXA10    | -0.34254 | 0.34254 | 0.92149 | -1.7619 | 0.10034  | 0.28015 | -4.8246 | 3206   |
| LARP7     | 1.683    | 1.683   | 4.2016  | 1.7618  | 0.10037  | 0.28018 | -4.8248 | 51574  |
| CERS5     | -0.70751 | 0.70751 | 2.8784  | -1.7615 | 0.10041  | 0.28026 | -4.8252 | 91012  |

|             |          |         |         |         |         |         |         |          |
|-------------|----------|---------|---------|---------|---------|---------|---------|----------|
| ATP5F1E     | 51.561   | 51.561  | 71.361  | 1.7613  | 0.10045 | 0.2803  | -4.8255 | 514      |
| PRKAG1      | 2.9087   | 2.9087  | 9.1111  | 1.7611  | 0.10048 | 0.28036 | -4.8258 | 5571     |
| PHF5A       | 3.8637   | 3.8637  | 8.365   | 1.7608  | 0.10054 | 0.28047 | -4.8263 | 84844    |
| DCTN5       | 1.4718   | 1.4718  | 5.7624  | 1.7607  | 0.10056 | 0.28047 | -4.8264 | 84516    |
| ZBTB1       | 0.6969   | 0.6969  | 3.3994  | 1.7604  | 0.1006  | 0.28054 | -4.8268 | 22890    |
| GBP4        | -0.72827 | 0.72827 | 1.3654  | -1.7601 | 0.10066 | 0.28067 | -4.8273 | 115361   |
| OTUB1       | 5.5904   | 5.5904  | 16.212  | 1.7597  | 0.10072 | 0.28079 | -4.8278 | 55611    |
| FAM180A     | -0.4597  | 0.4597  | 1.0617  | -1.7594 | 0.10078 | 0.28088 | -4.8283 | 389558   |
| C1orf54     | 3.6603   | 3.6603  | 3.3176  | 1.7594  | 0.10078 | 0.28088 | -4.8283 | 79630    |
| WARS2       | -0.46485 | 0.46485 | 1.8296  | -1.7588 | 0.10088 | 0.28109 | -4.8291 | 10352    |
| ZDHHC11B    | -0.64764 | 0.64764 | 0.71963 | -1.7583 | 0.10098 | 0.2813  | -4.8299 | 653082   |
| ECSIT       | -1.3389  | 1.3389  | 4.4927  | -1.7582 | 0.10099 | 0.2813  | -4.83   | 51295    |
| ARHGAP11A   | 0.62513  | 0.62513 | 1.2612  | 1.758   | 0.10103 | 0.28133 | -4.8304 | 9824     |
| LINC01355   | -0.42215 | 0.42215 | 0.82957 | -1.758  | 0.10103 | 0.28133 | -4.8304 | 1.01E+08 |
| ANKRD13B    | -0.61815 | 0.61815 | 1.1891  | -1.7571 | 0.10118 | 0.28164 | -4.8316 | 124930   |
| TM4SF19-AS1 | 0.51044  | 0.51044 | 0.54832 | 1.7571  | 0.10118 | 0.28164 | -4.8317 | 1.01E+08 |
| DUXB        | -0.14043 | 0.14043 | 0.13535 | -1.757  | 0.1012  | 0.28164 | -4.8318 | 1E+08    |
| ADAMTS2     | 6.6097   | 6.6097  | 7.6346  | 1.757   | 0.10121 | 0.28164 | -4.8319 | 9509     |
| LINC00507   | -0.14887 | 0.14887 | 0.21994 | -1.756  | 0.10137 | 0.28196 | -4.8333 | 1.01E+08 |
| BIN3-IT1    | -0.31291 | 0.31291 | 0.61405 | -1.756  | 0.10138 | 0.28196 | -4.8333 | 80094    |
| PLRG1       | 1.8133   | 1.8133  | 5.0968  | 1.756   | 0.10138 | 0.28196 | -4.8333 | 5356     |
| PEX6        | -2.0067  | 2.0067  | 2.4093  | -1.7559 | 0.1014  | 0.28196 | -4.8335 | 5190     |
| CNNM3-DT    | -0.20141 | 0.20141 | 0.21054 | -1.7558 | 0.10141 | 0.28196 | -4.8336 | 1.01E+08 |
| CCDC122     | -0.23796 | 0.23796 | 0.92912 | -1.7557 | 0.10144 | 0.28197 | -4.8338 | 160857   |
| STAT5B      | -1.6453  | 1.6453  | 6.9809  | -1.7556 | 0.10144 | 0.28197 | -4.8338 | 6777     |
| PDE2A       | -1.1594  | 1.1594  | 2.6024  | -1.7555 | 0.10147 | 0.28199 | -4.834  | 5138     |



|             |          |         |         |         |         |         |         |          |
|-------------|----------|---------|---------|---------|---------|---------|---------|----------|
| DLX4        | -0.30453 | 0.30453 | 0.49693 | -1.7553 | 0.1015  | 0.28201 | -4.8343 | 1748     |
| GSN-AS1     | -0.83544 | 0.83544 | 1.4583  | -1.7552 | 0.10151 | 0.28201 | -4.8344 | 57000    |
| KCNQ1       | -0.36576 | 0.36576 | 0.64923 | -1.7551 | 0.10153 | 0.28202 | -4.8346 | 3784     |
| PLA2G4E-AS1 | -2.1483  | 2.1483  | 4.2501  | -1.7548 | 0.10159 | 0.28212 | -4.8351 | 1.02E+08 |
| ENPP1       | 0.52767  | 0.52767 | 0.72937 | 1.7547  | 0.1016  | 0.28212 | -4.8351 | 5167     |
| PACSIN2     | -1.4003  | 1.4003  | 6.1228  | -1.7543 | 0.10167 | 0.28225 | -4.8358 | 11252    |
| SPIRE1      | 2.5593   | 2.5593  | 5.1526  | 1.7543  | 0.10168 | 0.28225 | -4.8358 | 56907    |
| TAZ         | -1.3388  | 1.3388  | 3.4567  | -1.7535 | 0.10182 | 0.28259 | -4.837  | 6901     |
| CFI         | 1.4065   | 1.4065  | 2.2163  | 1.7532  | 0.10187 | 0.28264 | -4.8374 | 3426     |
| SNORA18     | 0.44612  | 0.44612 | 0.72723 | 1.7532  | 0.10188 | 0.28264 | -4.8375 | 677805   |
| PDCD5       | 7.5709   | 7.5709  | 15.76   | 1.7531  | 0.10188 | 0.28264 | -4.8375 | 9141     |
| ARID3B      | 0.26091  | 0.26091 | 1.225   | 1.7518  | 0.10212 | 0.28325 | -4.8395 | 10620    |
| PARN        | -0.95647 | 0.95647 | 4.9266  | -1.751  | 0.10226 | 0.28357 | -4.8406 | 5073     |
| GPR146      | -0.84643 | 0.84643 | 1.4931  | -1.7508 | 0.1023  | 0.28366 | -4.841  | 115330   |
| TBC1D10C    | -0.55523 | 0.55523 | 0.95981 | -1.7506 | 0.10233 | 0.28367 | -4.8412 | 374403   |
| LOC221946   | 0.82463  | 0.82463 | 1.0519  | 1.7505  | 0.10234 | 0.28367 | -4.8413 | 221946   |
| SARNP       | 4.7966   | 4.7966  | 9.3997  | 1.7504  | 0.10236 | 0.28368 | -4.8415 | 84324    |
| CCL23       | -0.53253 | 0.53253 | 0.47448 | -1.7502 | 0.1024  | 0.28373 | -4.8418 | 6368     |
| DSP         | 225.79   | 225.79  | 549.85  | 1.7497  | 0.10249 | 0.28394 | -4.8426 | 1832     |
| SETDB2      | -0.30687 | 0.30687 | 0.80571 | -1.7496 | 0.10251 | 0.28394 | -4.8427 | 83852    |
| APBB1       | -0.89682 | 0.89682 | 1.8831  | -1.7493 | 0.10256 | 0.28403 | -4.8431 | 322      |
| DNAJC4      | -1.9794  | 1.9794  | 6.519   | -1.7492 | 0.10259 | 0.28407 | -4.8434 | 3338     |
| NLRC3       | -0.22296 | 0.22296 | 0.3875  | -1.7489 | 0.10264 | 0.28414 | -4.8438 | 197358   |
| ZNF19       | -0.20368 | 0.20368 | 0.47534 | -1.7488 | 0.10264 | 0.28414 | -4.8438 | 7567     |
| GJA3        | 0.14102  | 0.14102 | 0.20794 | 1.7487  | 0.10267 | 0.28415 | -4.844  | 2700     |
| COPS3       | 2.5339   | 2.5339  | 7.834   | 1.7486  | 0.10268 | 0.28415 | -4.8441 | 8533     |

|           |          |         |         |         |         |         |         |        |
|-----------|----------|---------|---------|---------|---------|---------|---------|--------|
| ARL17A    | -0.25507 | 0.25507 | 0.58868 | -1.7484 | 0.10273 | 0.28422 | -4.8445 | 51326  |
| PML       | -3.1024  | 3.1024  | 5.247   | -1.7482 | 0.10276 | 0.28422 | -4.8447 | 5371   |
| EIF4E2    | 1.8215   | 1.8215  | 6.584   | 1.7482  | 0.10276 | 0.28422 | -4.8448 | 9470   |
| PURB      | 1.4868   | 1.4868  | 6.6634  | 1.748   | 0.1028  | 0.2843  | -4.8451 | 5814   |
| NUDT15    | 0.76559  | 0.76559 | 2.2306  | 1.7477  | 0.10286 | 0.2843  | -4.8456 | 55270  |
| ZNF836    | -0.31735 | 0.31735 | 1.4419  | -1.7476 | 0.10287 | 0.2843  | -4.8456 | 162962 |
| LOXL1-AS1 | -0.20012 | 0.20012 | 0.41572 | -1.7473 | 0.10291 | 0.2843  | -4.846  | 1E+08  |
| ZNF778    | -0.36383 | 0.36383 | 1.6469  | -1.7472 | 0.10295 | 0.2843  | -4.8463 | 197320 |
| TTK       | 0.51075  | 0.51075 | 0.78873 | 1.7471  | 0.10295 | 0.2843  | -4.8463 | 7272   |
| SRSF9     | 11.312   | 11.312  | 31.113  | 1.7471  | 0.10296 | 0.2843  | -4.8464 | 8683   |
| NAT1      | 0.29139  | 0.29139 | 0.47819 | 1.747   | 0.10297 | 0.2843  | -4.8465 | 9      |
| TCP11L1   | 0.55613  | 0.55613 | 2.9971  | 1.747   | 0.10297 | 0.2843  | -4.8465 | 55346  |
| SLC26A11  | -0.5212  | 0.5212  | 1.8341  | -1.747  | 0.10298 | 0.2843  | -4.8465 | 284129 |
| POLR1A    | -1.1375  | 1.1375  | 3.5726  | -1.7468 | 0.103   | 0.2843  | -4.8468 | 25885  |
| ZNF142    | -0.65916 | 0.65916 | 2.6579  | -1.7468 | 0.10301 | 0.2843  | -4.8469 | 7701   |
| TLE2      | -2.1857  | 2.1857  | 2.6411  | -1.7468 | 0.10302 | 0.2843  | -4.8469 | 7089   |
| TK2       | -0.8805  | 0.8805  | 2.577   | -1.7467 | 0.10304 | 0.2843  | -4.847  | 7084   |
| TAF1D     | 2.0492   | 2.0492  | 6.4363  | 1.7466  | 0.10304 | 0.2843  | -4.8471 | 79101  |
| CHST15    | 1.3687   | 1.3687  | 3.5873  | 1.7465  | 0.10307 | 0.28433 | -4.8473 | 51363  |
| WDR37     | 0.79908  | 0.79908 | 4.2017  | 1.7463  | 0.10311 | 0.28439 | -4.8476 | 22884  |
| ATP5PD    | 27.82    | 27.82   | 61.824  | 1.7461  | 0.10313 | 0.28439 | -4.8478 | 10476  |
| CRTC3     | -1.5198  | 1.5198  | 4.7983  | -1.7461 | 0.10314 | 0.28439 | -4.8479 | 64784  |
| F8A1      | -0.66363 | 0.66363 | 1.8451  | -1.7458 | 0.10319 | 0.28448 | -4.8483 | 8263   |
| ARSF      | -0.31267 | 0.31267 | 0.32758 | -1.7455 | 0.10324 | 0.28458 | -4.8487 | 416    |
| DTD1      | 1.0475   | 1.0475  | 4.4541  | 1.7453  | 0.10327 | 0.28461 | -4.849  | 92675  |
| ZNF780B   | -0.29146 | 0.29146 | 0.80724 | -1.7451 | 0.10331 | 0.28463 | -4.8493 | 163131 |

|           |          |         |         |         |         |         |         |          |
|-----------|----------|---------|---------|---------|---------|---------|---------|----------|
| RUFY3     | -0.75405 | 0.75405 | 4.2583  | -1.7451 | 0.10331 | 0.28463 | -4.8493 | 22902    |
| HERC6     | -3.0287  | 3.0287  | 2.8052  | -1.7447 | 0.10338 | 0.28477 | -4.8498 | 55008    |
| ZNF429    | -0.23048 | 0.23048 | 0.60308 | -1.7444 | 0.10345 | 0.28491 | -4.8504 | 353088   |
| HBA1      | 7.6309   | 7.6309  | 5.4286  | 1.7437  | 0.10357 | 0.28518 | -4.8514 | 3039     |
| INSIG2    | 1.1836   | 1.1836  | 3.0326  | 1.7436  | 0.10358 | 0.28518 | -4.8515 | 51141    |
| GUCY1B2   | -0.24648 | 0.24648 | 0.15744 | -1.7432 | 0.10365 | 0.28531 | -4.8521 | 2974     |
| CHI3L2    | -14.215  | 14.215  | 10.24   | -1.7432 | 0.10366 | 0.28531 | -4.8521 | 1117     |
| SERINC4   | -0.15895 | 0.15895 | 0.20313 | -1.743  | 0.10369 | 0.28531 | -4.8524 | 619189   |
| SOX5-AS1  | -0.19803 | 0.19803 | 0.13496 | -1.743  | 0.10369 | 0.28531 | -4.8524 | 1.02E+08 |
| RTCA-AS1  | -0.20505 | 0.20505 | 0.33634 | -1.7427 | 0.10374 | 0.28535 | -4.8528 | 1.01E+08 |
| COG8      | -0.88116 | 0.88116 | 4.46    | -1.7427 | 0.10375 | 0.28535 | -4.8528 | 84342    |
| CYP4F11   | 0.52336  | 0.52336 | 0.63146 | 1.7426  | 0.10376 | 0.28535 | -4.853  | 57834    |
| TBC1D13   | -1.2421  | 1.2421  | 3.7313  | -1.7424 | 0.10379 | 0.28538 | -4.8532 | 54662    |
| CCDC152   | -0.25359 | 0.25359 | 0.47923 | -1.7424 | 0.10381 | 0.28538 | -4.8533 | 1E+08    |
| SLC25A34  | -0.17196 | 0.17196 | 0.39021 | -1.7421 | 0.10385 | 0.28541 | -4.8537 | 284723   |
| LINC02018 | -0.1379  | 0.1379  | 0.15804 | -1.7421 | 0.10385 | 0.28541 | -4.8537 | 1.08E+08 |
| LINC01447 | -0.11606 | 0.11606 | 0.14291 | -1.742  | 0.10387 | 0.28542 | -4.8538 | 1.02E+08 |
| ZNF324    | -0.67734 | 0.67734 | 2.5613  | -1.7419 | 0.10389 | 0.28543 | -4.854  | 25799    |
| ZFPM1     | -0.64914 | 0.64914 | 1.531   | -1.7417 | 0.10392 | 0.28547 | -4.8543 | 161882   |
| VBP1      | 2.2508   | 2.2508  | 4.3191  | 1.7414  | 0.10399 | 0.28552 | -4.8548 | 7411     |
| FOXD4L5   | -0.12523 | 0.12523 | 0.1307  | -1.7413 | 0.10399 | 0.28552 | -4.8548 | 653427   |
| MRPS10    | 2.8061   | 2.8061  | 7.0712  | 1.7413  | 0.104   | 0.28552 | -4.8549 | 55173    |
| MRPS18C   | 2.5955   | 2.5955  | 5.9196  | 1.7413  | 0.10401 | 0.28552 | -4.855  | 51023    |
| B4GAT1    | -0.82895 | 0.82895 | 2.3819  | -1.741  | 0.10405 | 0.28558 | -4.8553 | 11041    |
| PIGP      | 0.7587   | 0.7587  | 1.5505  | 1.7408  | 0.10408 | 0.28558 | -4.8555 | 51227    |
| BUB3      | 3.2201   | 3.2201  | 9.8951  | 1.7408  | 0.10409 | 0.28558 | -4.8556 | 9184     |

|              |          |         |         |         |         |         |         |          |
|--------------|----------|---------|---------|---------|---------|---------|---------|----------|
| SLC10A6      | 4.8073   | 4.8073  | 10.785  | 1.7408  | 0.1041  | 0.28558 | -4.8557 | 345274   |
| PON3         | -0.54616 | 0.54616 | 0.63194 | -1.7406 | 0.10412 | 0.28559 | -4.8558 | 5446     |
| IQGAP1       | 17.051   | 17.051  | 43.011  | 1.7403  | 0.10417 | 0.28568 | -4.8563 | 8826     |
| ITPRIPL2     | -2.6606  | 2.6606  | 8.102   | -1.7403 | 0.10418 | 0.28568 | -4.8564 | 162073   |
| TPM3         | 4.8834   | 4.8834  | 10.333  | 1.7402  | 0.1042  | 0.28569 | -4.8566 | 7170     |
| LINC00842    | -0.50723 | 0.50723 | 0.932   | -1.7397 | 0.10429 | 0.28578 | -4.8573 | 643650   |
| MAK          | -0.1596  | 0.1596  | 0.23267 | -1.7396 | 0.1043  | 0.28578 | -4.8573 | 4117     |
| HAVCR1P1     | -0.27932 | 0.27932 | 0.41514 | -1.7396 | 0.10431 | 0.28578 | -4.8574 | 1E+08    |
| RGCC         | 2.9646   | 2.9646  | 4.887   | 1.7395  | 0.10431 | 0.28578 | -4.8575 | 28984    |
| MIDN         | 8.465    | 8.465   | 22.684  | 1.7395  | 0.10432 | 0.28578 | -4.8575 | 90007    |
| SPATA1       | -0.16596 | 0.16596 | 0.27316 | -1.7392 | 0.10437 | 0.28583 | -4.8579 | 1.01E+08 |
| CUX1         | 1.8552   | 1.8552  | 6.4908  | 1.7392  | 0.10438 | 0.28583 | -4.858  | 1523     |
| KIF1B        | 1.8979   | 1.8979  | 7.1435  | 1.7391  | 0.10439 | 0.28583 | -4.8581 | 23095    |
| ATP13A3      | 4.0097   | 4.0097  | 6.6379  | 1.7388  | 0.10445 | 0.28591 | -4.8585 | 79572    |
| ZBTB43       | 1.8185   | 1.8185  | 5.6509  | 1.7388  | 0.10446 | 0.28591 | -4.8586 | 23099    |
| PAPSS2       | 1.5846   | 1.5846  | 2.1645  | 1.7386  | 0.10448 | 0.28594 | -4.8588 | 9060     |
| DMGDH        | -0.13368 | 0.13368 | 0.18042 | -1.7384 | 0.10453 | 0.28602 | -4.8592 | 29958    |
| NUCKS1       | -4.7743  | 4.7743  | 16.866  | -1.7379 | 0.1046  | 0.28618 | -4.8598 | 64710    |
| TRAPPC2B     | 0.71585  | 0.71585 | 1.7951  | 1.7372  | 0.10475 | 0.28652 | -4.8609 | 10597    |
| LOC101929057 | -0.14467 | 0.14467 | 0.25296 | -1.7369 | 0.1048  | 0.28659 | -4.8614 | 1.02E+08 |
| LOC101929431 | -0.12654 | 0.12654 | 0.16736 | -1.7368 | 0.1048  | 0.28659 | -4.8614 | 1.02E+08 |
| LINC01615    | 0.28657  | 0.28657 | 0.35721 | 1.7362  | 0.10493 | 0.28688 | -4.8624 | 1.02E+08 |
| LGALS1       | 149.65   | 149.65  | 136.63  | 1.7353  | 0.10508 | 0.28726 | -4.8637 | 3956     |
| SLC2A4RG     | -7.4436  | 7.4436  | 17.004  | -1.7352 | 0.10511 | 0.28729 | -4.8639 | 56731    |
| PFN1P2       | -1.3683  | 1.3683  | 3.1811  | -1.7351 | 0.10513 | 0.28729 | -4.864  | 767846   |
| XKR6         | -0.20531 | 0.20531 | 0.37962 | -1.7346 | 0.10521 | 0.28733 | -4.8646 | 286046   |

|              |          |         |         |         |         |         |         |          |
|--------------|----------|---------|---------|---------|---------|---------|---------|----------|
| BORCS8-MEF2B | -0.16619 | 0.16619 | 0.19805 | -1.7345 | 0.10522 | 0.28733 | -4.8648 | 4207     |
| RUNX1T1      | -0.50478 | 0.50478 | 0.95515 | -1.7345 | 0.10522 | 0.28733 | -4.8648 | 862      |
| PLK3         | 5.197    | 5.197   | 8.2833  | 1.7345  | 0.10523 | 0.28733 | -4.8649 | 1263     |
| EIF3CL       | -5.6726  | 5.6726  | 15.08   | -1.7344 | 0.10525 | 0.28733 | -4.865  | 728689   |
| CHAMP1       | -0.82346 | 0.82346 | 3.0584  | -1.7343 | 0.10526 | 0.28733 | -4.8651 | 283489   |
| DHPS         | -1.4146  | 1.4146  | 7.2641  | -1.7342 | 0.10528 | 0.28733 | -4.8652 | 1725     |
| RASGRP3      | 0.64088  | 0.64088 | 1.1679  | 1.7342  | 0.10528 | 0.28733 | -4.8652 | 25780    |
| PCCA-AS1     | -0.12761 | 0.12761 | 0.10402 | -1.7339 | 0.10533 | 0.28741 | -4.8657 | 1.01E+08 |
| RGMA         | -1.1193  | 1.1193  | 1.8     | -1.7339 | 0.10534 | 0.28741 | -4.8658 | 56963    |
| AGBL3        | -0.11563 | 0.11563 | 0.12113 | -1.7338 | 0.10536 | 0.28741 | -4.8659 | 340351   |
| KLHDC9       | -0.12164 | 0.12164 | 0.19802 | -1.7334 | 0.10543 | 0.28752 | -4.8664 | 126823   |
| HSP90AA1     | 30.459   | 30.459  | 58.14   | 1.7333  | 0.10545 | 0.28752 | -4.8666 | 3320     |
| UBE2K        | 2.4658   | 2.4658  | 8.3306  | 1.7333  | 0.10546 | 0.28752 | -4.8666 | 3093     |
| PYCR1        | 1.9425   | 1.9425  | 2.948   | 1.7332  | 0.10547 | 0.28752 | -4.8668 | 5831     |
| MRPS18B      | -0.46562 | 0.46562 | 1.3801  | -1.7331 | 0.10548 | 0.28752 | -4.8669 | 28973    |
| SH2D4A       | 1.2828   | 1.2828  | 3.1799  | 1.7327  | 0.10555 | 0.28765 | -4.8674 | 63898    |
| SORBS1       | -2.2107  | 2.2107  | 2.9787  | -1.7322 | 0.10565 | 0.28787 | -4.8682 | 10580    |
| DGKD         | -0.60247 | 0.60247 | 1.3744  | -1.7319 | 0.1057  | 0.28791 | -4.8686 | 8527     |
| CREM         | 0.49719  | 0.49719 | 0.83491 | 1.7319  | 0.10571 | 0.28791 | -4.8687 | 1390     |
| PCYT1A       | 5.6602   | 5.6602  | 16.557  | 1.7319  | 0.10571 | 0.28791 | -4.8687 | 5130     |
| MAMLD1       | -0.27406 | 0.27406 | 0.63153 | -1.7316 | 0.10575 | 0.28798 | -4.869  | 10046    |
| ARHGAP17     | 1.7058   | 1.7058  | 7.4331  | 1.7314  | 0.10579 | 0.28803 | -4.8693 | 55114    |
| RPN2         | 10.449   | 10.449  | 29.199  | 1.7308  | 0.10591 | 0.28828 | -4.8703 | 6185     |
| MIRLET7BHG   | -6.6043  | 6.6043  | 8.6629  | -1.7306 | 0.10593 | 0.28828 | -4.8705 | 400931   |
| ZNF843       | -0.12721 | 0.12721 | 0.22394 | -1.7306 | 0.10593 | 0.28828 | -4.8705 | 283933   |
| HSP90B1      | 25.958   | 25.958  | 53.179  | 1.7304  | 0.10597 | 0.28834 | -4.8708 | 7184     |

|              |          |         |         |         |         |         |         |          |
|--------------|----------|---------|---------|---------|---------|---------|---------|----------|
| COX7A2       | 19.357   | 19.357  | 34.928  | 1.7301  | 0.10603 | 0.28844 | -4.8712 | 1347     |
| ZPR1         | 2.47     | 2.47    | 7.1916  | 1.7295  | 0.10614 | 0.28869 | -4.8721 | 8882     |
| FAM90A25P    | -0.22927 | 0.22927 | 0.19248 | -1.7294 | 0.10615 | 0.28869 | -4.8722 | 389633   |
| TMEM52       | -0.31795 | 0.31795 | 0.43601 | -1.7293 | 0.10618 | 0.28871 | -4.8724 | 339456   |
| LINC00562    | -0.18808 | 0.18808 | 0.37718 | -1.7289 | 0.10625 | 0.28883 | -4.873  | 1.01E+08 |
| CDKN2AIP     | 0.70877  | 0.70877 | 2.3619  | 1.7289  | 0.10626 | 0.28883 | -4.873  | 55602    |
| OSBPL1A      | 1.785    | 1.785   | 5.0144  | 1.7287  | 0.10629 | 0.28883 | -4.8733 | 114876   |
| C4orf47      | 0.15125  | 0.15125 | 0.25126 | 1.7287  | 0.10629 | 0.28883 | -4.8733 | 441054   |
| PSMC2        | 3.1347   | 3.1347  | 9.9714  | 1.7286  | 0.10631 | 0.28883 | -4.8734 | 5701     |
| MRRF         | -0.80438 | 0.80438 | 3.4281  | -1.7284 | 0.10634 | 0.28883 | -4.8737 | 92399    |
| ATP6V1G1     | 7.4071   | 7.4071  | 18.175  | 1.7284  | 0.10634 | 0.28883 | -4.8737 | 9550     |
| BCDIN3D      | -0.30592 | 0.30592 | 1.3166  | -1.7281 | 0.1064  | 0.2889  | -4.8742 | 144233   |
| PWWP2A       | -0.34541 | 0.34541 | 2.1638  | -1.728  | 0.10642 | 0.2889  | -4.8743 | 114825   |
| PSPN         | -0.1734  | 0.1734  | 0.2256  | -1.728  | 0.10643 | 0.2889  | -4.8744 | 5623     |
| SGF29        | -0.98704 | 0.98704 | 3.0678  | -1.7279 | 0.10644 | 0.2889  | -4.8745 | 112869   |
| ZNF668       | 0.71935  | 0.71935 | 2.1143  | 1.7278  | 0.10645 | 0.2889  | -4.8746 | 79759    |
| LOC101926915 | -0.21861 | 0.21861 | 0.22611 | -1.7276 | 0.1065  | 0.28898 | -4.875  | 1.02E+08 |
| POU5F1P4     | -0.32936 | 0.32936 | 0.59716 | -1.7272 | 0.10656 | 0.28904 | -4.8754 | 645682   |
| ERCC6L2      | -0.39935 | 0.39935 | 1.5474  | -1.7271 | 0.10659 | 0.28904 | -4.8757 | 375748   |
| ANAPC13      | 2.1252   | 2.1252  | 5.2666  | 1.7269  | 0.10662 | 0.28904 | -4.8759 | 25847    |
| SRGN         | 23.499   | 23.499  | 19.716  | 1.7269  | 0.10663 | 0.28904 | -4.876  | 5552     |
| AFAP1L1      | 1.2308   | 1.2308  | 2.563   | 1.7268  | 0.10665 | 0.28904 | -4.8761 | 134265   |
| TNFRSF25     | -2.1704  | 2.1704  | 4.5767  | -1.7267 | 0.10665 | 0.28904 | -4.8762 | 8718     |
| PIKFYVE      | -0.69049 | 0.69049 | 3.4464  | -1.7267 | 0.10666 | 0.28904 | -4.8762 | 200576   |
| P4HTM        | -0.92462 | 0.92462 | 2.3754  | -1.7266 | 0.10667 | 0.28904 | -4.8763 | 54681    |
| AGO3         | -0.67133 | 0.67133 | 3.5966  | -1.7265 | 0.10669 | 0.28904 | -4.8765 | 192669   |

|               |          |         |         |         |         |         |         |          |
|---------------|----------|---------|---------|---------|---------|---------|---------|----------|
| WWTR1         | 3.5532   | 3.5532  | 11.985  | 1.7265  | 0.10669 | 0.28904 | -4.8765 | 25937    |
| PRR3          | -0.10529 | 0.10529 | 0.16947 | -1.7263 | 0.10674 | 0.28905 | -4.8769 | 80742    |
| LOC102723885  | -0.12509 | 0.12509 | 0.14058 | -1.7261 | 0.10677 | 0.28905 | -4.8771 | 1.03E+08 |
| LINC02273     | 0.30003  | 0.30003 | 0.2397  | 1.7261  | 0.10677 | 0.28905 | -4.8771 | 1.01E+08 |
| NFS1          | -0.57362 | 0.57362 | 2.6699  | -1.726  | 0.10678 | 0.28905 | -4.8772 | 9054     |
| GOLGA8O       | -0.23096 | 0.23096 | 0.52227 | -1.726  | 0.10678 | 0.28905 | -4.8772 | 728047   |
| ZNF420        | -0.15115 | 0.15115 | 0.45432 | -1.7256 | 0.10686 | 0.28922 | -4.8778 | 147923   |
| C1QTNF3-AMACR | -0.27321 | 0.27321 | 0.52328 | -1.7255 | 0.10688 | 0.28923 | -4.878  | 1.01E+08 |
| HYAL2         | 5.6023   | 5.6023  | 11.956  | 1.7254  | 0.1069  | 0.28923 | -4.8781 | 8692     |
| ABHD17C       | 2.3968   | 2.3968  | 5.8294  | 1.725   | 0.10697 | 0.28925 | -4.8787 | 58489    |
| AGPAT5        | 0.63497  | 0.63497 | 1.6152  | 1.7249  | 0.10699 | 0.28925 | -4.8788 | 55326    |
| NBPF9         | -1.1156  | 1.1156  | 6.879   | -1.7249 | 0.107   | 0.28925 | -4.8789 | 400818   |
| SKAP2         | 0.73888  | 0.73888 | 2.5843  | 1.7248  | 0.107   | 0.28925 | -4.8789 | 8935     |
| NCOA3         | -1.295   | 1.295   | 6.4456  | -1.7247 | 0.10702 | 0.28925 | -4.8791 | 8202     |
| ZNF630-AS1    | -0.13093 | 0.13093 | 0.12905 | -1.7246 | 0.10704 | 0.28925 | -4.8792 | 1.01E+08 |
| FAM136A       | 1.3469   | 1.3469  | 4.4074  | 1.7246  | 0.10705 | 0.28925 | -4.8793 | 84908    |
| LINC01589     | -0.17885 | 0.17885 | 0.24802 | -1.7246 | 0.10705 | 0.28925 | -4.8793 | 1.01E+08 |
| STEAP1        | 3.6237   | 3.6237  | 4.02    | 1.7245  | 0.10706 | 0.28925 | -4.8794 | 26872    |
| HS3ST3B1      | 0.59277  | 0.59277 | 1.0119  | 1.724   | 0.10716 | 0.28944 | -4.8801 | 9953     |
| ZNF32-AS2     | -0.19295 | 0.19295 | 0.27765 | -1.7238 | 0.10719 | 0.28944 | -4.8804 | 414208   |
| SRP72         | 4.0497   | 4.0497  | 12.657  | 1.7238  | 0.1072  | 0.28944 | -4.8805 | 6731     |
| CD68          | 14.964   | 14.964  | 19.994  | 1.7238  | 0.1072  | 0.28944 | -4.8805 | 968      |
| SIAH1         | 2.2143   | 2.2143  | 6.0865  | 1.7237  | 0.10722 | 0.28945 | -4.8806 | 6477     |
| ACKR1         | -6.4208  | 6.4208  | 9.2775  | -1.7236 | 0.10724 | 0.28945 | -4.8808 | 2532     |
| PCDHB12       | -0.19448 | 0.19448 | 0.44387 | -1.7233 | 0.10729 | 0.28953 | -4.8812 | 56124    |
| KRIT1         | -0.65333 | 0.65333 | 3.029   | -1.7231 | 0.10732 | 0.28955 | -4.8815 | 889      |

|             |          |         |         |         |         |         |         |          |
|-------------|----------|---------|---------|---------|---------|---------|---------|----------|
| NPAS2       | -1.2023  | 1.2023  | 4.2092  | -1.7231 | 0.10733 | 0.28955 | -4.8815 | 4862     |
| MRPS22      | 2.5781   | 2.5781  | 6.9163  | 1.7229  | 0.10735 | 0.28957 | -4.8817 | 56945    |
| PRPF8       | -6.7529  | 6.7529  | 26.586  | -1.7227 | 0.10739 | 0.28962 | -4.882  | 10594    |
| ZNF419      | -0.32847 | 0.32847 | 1.259   | -1.7227 | 0.1074  | 0.28962 | -4.8821 | 79744    |
| FPR1        | 7.4032   | 7.4032  | 6.05    | 1.7224  | 0.10746 | 0.28968 | -4.8825 | 2357     |
| C11orf54    | -0.33697 | 0.33697 | 1.5686  | -1.7224 | 0.10746 | 0.28968 | -4.8825 | 28970    |
| ITGA6       | 21.136   | 21.136  | 32.51   | 1.7221  | 0.1075  | 0.28975 | -4.8829 | 3655     |
| GRIPAP1     | -1.3339  | 1.3339  | 4.6487  | -1.722  | 0.10752 | 0.28976 | -4.883  | 56850    |
| NRROS       | -0.65844 | 0.65844 | 1.3109  | -1.7213 | 0.10765 | 0.29004 | -4.884  | 375387   |
| IL13RA1     | 11.554   | 11.554  | 19.654  | 1.7212  | 0.10768 | 0.29004 | -4.8843 | 3597     |
| PCDHGA11    | -0.28042 | 0.28042 | 1.0536  | -1.7211 | 0.10769 | 0.29004 | -4.8843 | 56105    |
| IL7R        | 2.8675   | 2.8675  | 3.5332  | 1.721   | 0.10771 | 0.29004 | -4.8845 | 3575     |
| POU3F1      | -3.1793  | 3.1793  | 8.2143  | -1.7208 | 0.10775 | 0.29004 | -4.8848 | 5453     |
| LINC01715   | 0.69271  | 0.69271 | 0.91313 | 1.7207  | 0.10777 | 0.29004 | -4.8849 | 1.05E+08 |
| FAR1        | 1.5003   | 1.5003  | 3.8208  | 1.7206  | 0.10778 | 0.29004 | -4.885  | 84188    |
| MIR205      | -0.54898 | 0.54898 | 0.39965 | -1.7206 | 0.10778 | 0.29004 | -4.8851 | 406988   |
| MYCBP       | 0.98908  | 0.98908 | 2.484   | 1.7206  | 0.10778 | 0.29004 | -4.8851 | 26292    |
| GPR176      | 2.3839   | 2.3839  | 2.9406  | 1.7205  | 0.10781 | 0.29006 | -4.8853 | 11245    |
| ALKBH4      | -0.6265  | 0.6265  | 1.87    | -1.7192 | 0.10805 | 0.29065 | -4.8871 | 54784    |
| RELA        | 5.4197   | 5.4197  | 18.033  | 1.7184  | 0.10819 | 0.29099 | -4.8882 | 5970     |
| NDUFS4      | 6.0838   | 6.0838  | 11.421  | 1.7179  | 0.10828 | 0.29108 | -4.889  | 4724     |
| TIAF1       | -0.41707 | 0.41707 | 0.94423 | -1.7178 | 0.10831 | 0.29108 | -4.8892 | 9220     |
| SLC25A5-AS1 | -0.13515 | 0.13515 | 0.29468 | -1.7178 | 0.10831 | 0.29108 | -4.8892 | 1E+08    |
| DNASE1      | -0.27003 | 0.27003 | 0.5688  | -1.7178 | 0.10831 | 0.29108 | -4.8892 | 1773     |
| SEC11A      | 5.9372   | 5.9372  | 14.695  | 1.7177  | 0.10832 | 0.29108 | -4.8893 | 23478    |
| FKBP3       | 3.1599   | 3.1599  | 7.778   | 1.7177  | 0.10834 | 0.29108 | -4.8894 | 2287     |



|              |          |         |         |         |         |         |         |          |
|--------------|----------|---------|---------|---------|---------|---------|---------|----------|
| KLK1         | -2.2201  | 2.2201  | 1.9042  | -1.7176 | 0.10834 | 0.29108 | -4.8894 | 3816     |
| KMT2E        | -2.0076  | 2.0076  | 9.8001  | -1.7174 | 0.10838 | 0.29113 | -4.8897 | 55904    |
| SLC2A3       | 4.1494   | 4.1494  | 5.6882  | 1.717   | 0.10847 | 0.29132 | -4.8904 | 6515     |
| LRRC42       | 1.4894   | 1.4894  | 4.7295  | 1.7166  | 0.10853 | 0.29142 | -4.8909 | 115353   |
| SLC27A4      | 8.7195   | 8.7195  | 15.861  | 1.7165  | 0.10854 | 0.29142 | -4.891  | 10999    |
| GRAMD2B      | 2.5116   | 2.5116  | 4.8619  | 1.7165  | 0.10855 | 0.29142 | -4.8911 | 65983    |
| IPPK         | 3.1347   | 3.1347  | 10.414  | 1.7163  | 0.1086  | 0.29145 | -4.8914 | 64768    |
| PSMC1        | 7.4383   | 7.4383  | 22.605  | 1.7161  | 0.10863 | 0.29145 | -4.8916 | 5700     |
| ZNF526       | -0.6606  | 0.6606  | 2.3128  | -1.716  | 0.10864 | 0.29145 | -4.8917 | 116115   |
| EFCAB13      | -0.25898 | 0.25898 | 0.50854 | -1.716  | 0.10864 | 0.29145 | -4.8918 | 124989   |
| ARHGAP21     | 3.1891   | 3.1891  | 7.7023  | 1.7159  | 0.10866 | 0.29145 | -4.8919 | 57584    |
| ZRSR2        | -0.41104 | 0.41104 | 1.532   | -1.7159 | 0.10867 | 0.29145 | -4.892  | 8233     |
| MALINC1      | -0.1271  | 0.1271  | 0.24871 | -1.7157 | 0.1087  | 0.29147 | -4.8922 | 1.01E+08 |
| NCOA2        | -1.1867  | 1.1867  | 4.949   | -1.7156 | 0.10871 | 0.29147 | -4.8923 | 10499    |
| LOC728392    | -1.4885  | 1.4885  | 2.6984  | -1.7153 | 0.10877 | 0.29157 | -4.8927 | 728392   |
| RNASEH2B-AS1 | -0.11177 | 0.11177 | 0.11728 | -1.7148 | 0.10887 | 0.29168 | -4.8935 | 1.01E+08 |
| SRA1         | 1.6112   | 1.6112  | 5.1342  | 1.7148  | 0.10887 | 0.29168 | -4.8935 | 10011    |
| CBFB         | 1.6699   | 1.6699  | 5.5566  | 1.7148  | 0.10888 | 0.29168 | -4.8936 | 865      |
| ZNF891       | -0.27472 | 0.27472 | 0.79077 | -1.7147 | 0.10889 | 0.29168 | -4.8936 | 1.01E+08 |
| KCNRG        | -0.2278  | 0.2278  | 0.65361 | -1.7146 | 0.10891 | 0.29168 | -4.8938 | 283518   |
| PDE7B        | 0.8117   | 0.8117  | 0.90901 | 1.7146  | 0.10892 | 0.29168 | -4.8939 | 27115    |
| MCEE         | 2.284    | 2.284   | 4.5014  | 1.7145  | 0.10893 | 0.29168 | -4.894  | 84693    |
| TMED3        | 2.953    | 2.953   | 7.3496  | 1.7143  | 0.10896 | 0.29168 | -4.8942 | 23423    |
| TAF11        | 1.6754   | 1.6754  | 6.3049  | 1.7143  | 0.10896 | 0.29168 | -4.8942 | 6882     |
| MAPK7        | 2.2268   | 2.2268  | 6.4168  | 1.7138  | 0.10907 | 0.29188 | -4.895  | 5598     |
| TRPC4AP      | 3.1046   | 3.1046  | 14.173  | 1.7137  | 0.10907 | 0.29188 | -4.8951 | 26133    |

|           |          |         |         |         |         |         |         |          |
|-----------|----------|---------|---------|---------|---------|---------|---------|----------|
| CD59      | 16.423   | 16.423  | 31.885  | 1.7136  | 0.10909 | 0.29188 | -4.8952 | 966      |
| DYNLT1    | 10.079   | 10.079  | 17.669  | 1.7135  | 0.10911 | 0.29188 | -4.8954 | 6993     |
| SLC16A9   | 1.0522   | 1.0522  | 1.5572  | 1.7134  | 0.10912 | 0.29188 | -4.8955 | 220963   |
| UCP3      | -0.13314 | 0.13314 | 0.23454 | -1.7132 | 0.10917 | 0.29196 | -4.8958 | 7352     |
| SNORA64   | -0.69605 | 0.69605 | 0.88786 | -1.713  | 0.10921 | 0.29197 | -4.8962 | 26784    |
| GSTT2     | -0.13586 | 0.13586 | 0.15275 | -1.713  | 0.10921 | 0.29197 | -4.8962 | 2953     |
| CAPN10-DT | -0.18132 | 0.18132 | 0.55125 | -1.7129 | 0.10923 | 0.29197 | -4.8963 | 1.02E+08 |
| AKAP8L    | -1.5523  | 1.5523  | 7.0108  | -1.7127 | 0.10927 | 0.29203 | -4.8966 | 26993    |
| TBX4      | -0.42163 | 0.42163 | 0.58945 | -1.7123 | 0.10934 | 0.29217 | -4.8971 | 9496     |
| TPD52L2   | 10.623   | 10.623  | 24.584  | 1.7117  | 0.10945 | 0.29239 | -4.898  | 7165     |
| EMILIN3   | -0.24689 | 0.24689 | 0.61262 | -1.7116 | 0.10947 | 0.29239 | -4.8981 | 90187    |
| NSMCE2    | 1.0587   | 1.0587  | 3.4047  | 1.7116  | 0.10948 | 0.29239 | -4.8982 | 286053   |
| SNORA12   | -2.4781  | 2.4781  | 1.9144  | -1.7115 | 0.10949 | 0.29239 | -4.8983 | 677800   |
| HAND2-AS1 | -0.12205 | 0.12205 | 0.11206 | -1.7112 | 0.10954 | 0.29245 | -4.8987 | 79804    |
| NTN4      | -0.80905 | 0.80905 | 2.1659  | -1.7111 | 0.10957 | 0.29245 | -4.8989 | 59277    |
| RAB40C    | -3.0061  | 3.0061  | 7.4991  | -1.711  | 0.10958 | 0.29245 | -4.899  | 57799    |
| TRPA1     | 0.3436   | 0.3436  | 0.21049 | 1.7108  | 0.10961 | 0.29245 | -4.8992 | 8989     |
| RBMS3     | -0.85105 | 0.85105 | 1.4797  | -1.7108 | 0.10963 | 0.29245 | -4.8993 | 27303    |
| DDX39A    | 3.7688   | 3.7688  | 9.5314  | 1.7106  | 0.10967 | 0.29245 | -4.8996 | 10212    |
| SGCG      | -0.18638 | 0.18638 | 0.17086 | -1.7105 | 0.10967 | 0.29245 | -4.8997 | 6445     |
| PIAS1     | -1.2118  | 1.2118  | 4.2979  | -1.7105 | 0.10968 | 0.29245 | -4.8997 | 8554     |
| SPDYE2    | -0.43005 | 0.43005 | 0.78749 | -1.7103 | 0.10971 | 0.29245 | -4.9    | 441273   |
| SPDYE2B   | -0.43005 | 0.43005 | 0.78749 | -1.7103 | 0.10971 | 0.29245 | -4.9    | 1E+08    |
| BCL2A1    | 4.2629   | 4.2629  | 3.1813  | 1.7103  | 0.10971 | 0.29245 | -4.9    | 597      |
| C19orf54  | -0.37558 | 0.37558 | 1.3838  | -1.7103 | 0.10972 | 0.29245 | -4.9    | 284325   |
| SFXN1     | 1.4989   | 1.4989  | 3.448   | 1.7097  | 0.10983 | 0.29252 | -4.9009 | 94081    |

|            |          |         |          |         |         |         |         |          |
|------------|----------|---------|----------|---------|---------|---------|---------|----------|
| CNTN4      | -0.1607  | 0.1607  | 0.18633  | -1.7097 | 0.10983 | 0.29252 | -4.9009 | 152330   |
| LARP1B     | 0.26108  | 0.26108 | 1.2534   | 1.7095  | 0.10988 | 0.29252 | -4.9012 | 55132    |
| TMEM170A   | 0.3569   | 0.3569  | 1.5552   | 1.7095  | 0.10988 | 0.29252 | -4.9012 | 124491   |
| YTHDC1     | -0.48348 | 0.48348 | 2.2876   | -1.7095 | 0.10988 | 0.29252 | -4.9013 | 91746    |
| PIK3CD     | 1.2196   | 1.2196  | 2.6143   | 1.7095  | 0.10988 | 0.29252 | -4.9013 | 5293     |
| MAN1B1-DT  | -0.33035 | 0.33035 | 0.72678  | -1.7094 | 0.10989 | 0.29252 | -4.9013 | 1E+08    |
| LAS1L      | -1.6272  | 1.6272  | 5.703    | -1.7094 | 0.10989 | 0.29252 | -4.9014 | 81887    |
| PCOLCE-AS1 | -0.10807 | 0.10807 | 0.090528 | -1.7093 | 0.1099  | 0.29252 | -4.9014 | 1E+08    |
| ATP5MF     | 18.936   | 18.936  | 39.599   | 1.7092  | 0.10993 | 0.29256 | -4.9017 | 9551     |
| RGS10      | 2.5891   | 2.5891  | 5.6365   | 1.7089  | 0.10998 | 0.29265 | -4.9021 | 6001     |
| FERMT2     | 3.1336   | 3.1336  | 4.9524   | 1.7088  | 0.11001 | 0.29267 | -4.9023 | 10979    |
| RPL13AP6   | -0.37025 | 0.37025 | 0.88957  | -1.7085 | 0.11005 | 0.29271 | -4.9026 | 644511   |
| LRRC75A    | -0.4577  | 0.4577  | 1.3101   | -1.7085 | 0.11006 | 0.29271 | -4.9027 | 388341   |
| PSMB7      | 13.242   | 13.242  | 35.535   | 1.7076  | 0.11023 | 0.29311 | -4.9039 | 5695     |
| GNG12-AS1  | -0.22145 | 0.22145 | 0.28587  | -1.7073 | 0.11029 | 0.29324 | -4.9044 | 1E+08    |
| NEK5       | -0.14554 | 0.14554 | 0.26837  | -1.707  | 0.11035 | 0.2933  | -4.9049 | 341676   |
| PEX12      | -0.29872 | 0.29872 | 0.97956  | -1.7069 | 0.11036 | 0.2933  | -4.905  | 5193     |
| LRR1       | 0.57564  | 0.57564 | 1.3022   | 1.7069  | 0.11037 | 0.2933  | -4.905  | 122769   |
| NUDCD1     | 0.72409  | 0.72409 | 1.658    | 1.7067  | 0.1104  | 0.29335 | -4.9053 | 84955    |
| CDK1       | 1.1903   | 1.1903  | 1.557    | 1.7065  | 0.11045 | 0.29342 | -4.9056 | 983      |
| GNG14      | -0.18774 | 0.18774 | 0.23485  | -1.7063 | 0.11049 | 0.29347 | -4.9059 | 1.05E+08 |
| TTLL7      | 0.21244  | 0.21244 | 0.4848   | 1.7061  | 0.11051 | 0.29348 | -4.9061 | 79739    |
| PAN3-AS1   | -0.57953 | 0.57953 | 0.65225  | -1.7059 | 0.11054 | 0.2935  | -4.9063 | 1E+08    |
| YAP1       | 3.9133   | 3.9133  | 15.687   | 1.7059  | 0.11055 | 0.2935  | -4.9064 | 10413    |
| ZNF85      | 0.30802  | 0.30802 | 0.70321  | 1.7058  | 0.11058 | 0.29351 | -4.9066 | 7639     |
| RTL5       | -0.44668 | 0.44668 | 0.82015  | -1.7057 | 0.11059 | 0.29351 | -4.9067 | 340526   |

|                |          |         |         |         |         |         |         |          |
|----------------|----------|---------|---------|---------|---------|---------|---------|----------|
| KLHL7          | 0.55293  | 0.55293 | 2.4879  | 1.7053  | 0.11067 | 0.29369 | -4.9073 | 55975    |
| RNF19B         | 4.4098   | 4.4098  | 10.863  | 1.7046  | 0.1108  | 0.29398 | -4.9083 | 127544   |
| CRKL           | 2.769    | 2.769   | 11.71   | 1.7044  | 0.11084 | 0.29399 | -4.9086 | 1399     |
| FAM83G         | 16.85    | 16.85   | 32.064  | 1.7043  | 0.11086 | 0.29399 | -4.9087 | 644815   |
| LIMA1          | 13.335   | 13.335  | 25.14   | 1.7043  | 0.11086 | 0.29399 | -4.9088 | 51474    |
| GDPD5          | -0.37114 | 0.37114 | 0.73269 | -1.7042 | 0.11087 | 0.29399 | -4.9088 | 81544    |
| AOC4P          | -0.18948 | 0.18948 | 0.18895 | -1.7041 | 0.11089 | 0.29399 | -4.909  | 90586    |
| OGG1           | -0.53959 | 0.53959 | 1.8473  | -1.7038 | 0.11094 | 0.29403 | -4.9094 | 4968     |
| EEF1E1-BLOC1S5 | 0.4724   | 0.4724  | 0.94394 | 1.7038  | 0.11095 | 0.29403 | -4.9094 | 1.01E+08 |
| CENPQ          | 0.5789   | 0.5789  | 0.86618 | 1.7038  | 0.11095 | 0.29403 | -4.9095 | 55166    |
| UGDH           | 3.3305   | 3.3305  | 7.6074  | 1.7036  | 0.11099 | 0.29407 | -4.9097 | 7358     |
| TAF7L          | -0.13825 | 0.13825 | 0.18649 | -1.7034 | 0.11104 | 0.29412 | -4.9101 | 54457    |
| TBCB           | 3.6126   | 3.6126  | 8.6191  | 1.7033  | 0.11104 | 0.29412 | -4.9101 | 1155     |
| FAM102B        | 0.90721  | 0.90721 | 2.2191  | 1.7032  | 0.11106 | 0.29413 | -4.9103 | 284611   |
| TFPI2          | 0.35755  | 0.35755 | 0.32425 | 1.703   | 0.11111 | 0.29418 | -4.9105 | 7980     |
| BICD2          | 15.896   | 15.896  | 33.103  | 1.7027  | 0.11116 | 0.29426 | -4.911  | 23299    |
| BVES           | 0.29162  | 0.29162 | 0.43885 | 1.7026  | 0.11118 | 0.29426 | -4.9112 | 11149    |
| LRRC46         | -0.12539 | 0.12539 | 0.15868 | -1.7026 | 0.11118 | 0.29426 | -4.9112 | 90506    |
| ZNF785         | -0.73054 | 0.73054 | 1.5905  | -1.7024 | 0.11123 | 0.29431 | -4.9115 | 146540   |
| HSD17B7        | -0.64202 | 0.64202 | 1.5952  | -1.7021 | 0.11128 | 0.29431 | -4.9119 | 51478    |
| UBIAD1         | -0.34885 | 0.34885 | 1.1514  | -1.702  | 0.11129 | 0.29431 | -4.912  | 29914    |
| ANO2           | -0.25975 | 0.25975 | 0.54681 | -1.702  | 0.1113  | 0.29431 | -4.912  | 57101    |
| SRRD           | 1.3232   | 1.3232  | 3.7027  | 1.702   | 0.1113  | 0.29431 | -4.9121 | 402055   |
| PRH1           | -0.24056 | 0.24056 | 0.58541 | -1.7019 | 0.11132 | 0.29431 | -4.9122 | 5554     |
| HSPA4          | 5.2382   | 5.2382  | 14.627  | 1.7019  | 0.11132 | 0.29431 | -4.9122 | 3308     |
| TAP1           | -0.69364 | 0.69364 | 1.5069  | -1.7017 | 0.11135 | 0.29433 | -4.9124 | 6890     |

|              |          |         |         |         |         |         |         |          |
|--------------|----------|---------|---------|---------|---------|---------|---------|----------|
| PRORS1P      | -0.20193 | 0.20193 | 0.33565 | -1.7015 | 0.1114  | 0.29442 | -4.9128 | 344405   |
| CCT4         | 9.8558   | 9.8558  | 24.831  | 1.701   | 0.11149 | 0.2946  | -4.9135 | 10575    |
| HBA2         | 14.782   | 14.782  | 11.025  | 1.7007  | 0.11154 | 0.2947  | -4.9139 | 3040     |
| ABHD5        | 3.7636   | 3.7636  | 5.8272  | 1.7004  | 0.11159 | 0.2948  | -4.9143 | 51099    |
| SLC25A40     | -0.49523 | 0.49523 | 1.5302  | -1.6998 | 0.11172 | 0.29508 | -4.9152 | 55972    |
| LOC100507516 | -0.34306 | 0.34306 | 0.49872 | -1.6997 | 0.11174 | 0.29508 | -4.9154 | 1.01E+08 |
| COX6B2       | -0.15378 | 0.15378 | 0.20998 | -1.6987 | 0.11193 | 0.29554 | -4.9168 | 125965   |
| APOBEC3F     | -0.27022 | 0.27022 | 0.40603 | -1.6986 | 0.11195 | 0.29555 | -4.9169 | 200316   |
| IGLL5        | -4.4714  | 4.4714  | 4.8779  | -1.6982 | 0.11203 | 0.29568 | -4.9176 | 1E+08    |
| SNTG2        | -0.27966 | 0.27966 | 0.58566 | -1.6982 | 0.11203 | 0.29568 | -4.9176 | 54221    |
| ATAD2B       | -0.72063 | 0.72063 | 3.646   | -1.698  | 0.11205 | 0.29569 | -4.9177 | 54454    |
| HPDL         | -0.24035 | 0.24035 | 0.61075 | -1.6979 | 0.11209 | 0.29574 | -4.918  | 84842    |
| ZFAND2A      | 2.8161   | 2.8161  | 5.0003  | 1.6974  | 0.11218 | 0.29594 | -4.9187 | 90637    |
| ABLIM2       | -0.55031 | 0.55031 | 1.3735  | -1.6971 | 0.11224 | 0.29601 | -4.9191 | 84448    |
| SELL         | 1.5432   | 1.5432  | 1.5944  | 1.697   | 0.11225 | 0.29601 | -4.9192 | 6402     |
| RGL1         | -1.2914  | 1.2914  | 3.6883  | -1.697  | 0.11226 | 0.29601 | -4.9193 | 23179    |
| FEZ1         | 1.0151   | 1.0151  | 1.7756  | 1.6967  | 0.11231 | 0.2961  | -4.9197 | 9638     |
| RBM14        | -1.1553  | 1.1553  | 5.1147  | -1.6959 | 0.11248 | 0.29648 | -4.9209 | 10432    |
| SLC48A1      | -1.0333  | 1.0333  | 5.3106  | -1.6949 | 0.11266 | 0.29691 | -4.9222 | 55652    |
| SOX13        | -1.3954  | 1.3954  | 2.6789  | -1.6944 | 0.11276 | 0.29711 | -4.923  | 9580     |
| GTF2H1       | 1.4375   | 1.4375  | 4.8558  | 1.6943  | 0.11277 | 0.29711 | -4.9231 | 2965     |
| NDUFA12      | 7.1326   | 7.1326  | 17.88   | 1.6942  | 0.11279 | 0.29711 | -4.9232 | 55967    |
| ATP5MG       | 10.494   | 10.494  | 24.436  | 1.6941  | 0.11283 | 0.29717 | -4.9235 | 10632    |
| ALS2         | -0.28101 | 0.28101 | 1.9469  | -1.6938 | 0.11287 | 0.29723 | -4.9238 | 57679    |
| SLC25A37     | -0.43907 | 0.43907 | 2.6539  | -1.6935 | 0.11293 | 0.29734 | -4.9242 | 51312    |
| HBB          | 24.937   | 24.937  | 14.347  | 1.6929  | 0.11304 | 0.2976  | -4.9251 | 3043     |

|                |          |         |         |         |         |         |         |          |
|----------------|----------|---------|---------|---------|---------|---------|---------|----------|
| PEMT           | -1.4063  | 1.4063  | 4.1817  | -1.6925 | 0.11312 | 0.29777 | -4.9257 | 10400    |
| SEC23B         | 1.8983   | 1.8983  | 6.1495  | 1.6924  | 0.11315 | 0.29778 | -4.9259 | 10483    |
| CPLX3          | 0.76549  | 0.76549 | 0.5433  | 1.6923  | 0.11317 | 0.29779 | -4.9261 | 594855   |
| CERS3          | 7.7421   | 7.7421  | 16.783  | 1.6921  | 0.1132  | 0.29779 | -4.9263 | 204219   |
| ARL4D          | 9.8262   | 9.8262  | 18.406  | 1.6921  | 0.1132  | 0.29779 | -4.9263 | 379      |
| RTL8C          | 9.8547   | 9.8547  | 25.508  | 1.6919  | 0.11325 | 0.29786 | -4.9266 | 8933     |
| MUSTN1         | -4.5199  | 4.5199  | 3.3837  | -1.6912 | 0.11337 | 0.298   | -4.9276 | 389125   |
| TMBIM6         | 18.811   | 18.811  | 63.554  | 1.6912  | 0.11338 | 0.298   | -4.9276 | 7009     |
| SMS            | 4.889    | 4.889   | 7.9878  | 1.691   | 0.11341 | 0.298   | -4.9278 | 6611     |
| TANGO6         | -0.44038 | 0.44038 | 2.359   | -1.691  | 0.11342 | 0.298   | -4.9279 | 79613    |
| ACP7           | 12.152   | 12.152  | 12.295  | 1.691   | 0.11342 | 0.298   | -4.9279 | 390928   |
| TCERG1         | -1.3375  | 1.3375  | 6.9912  | -1.691  | 0.11342 | 0.298   | -4.9279 | 10915    |
| ADAR           | -7.7763  | 7.7763  | 19.483  | -1.6909 | 0.11344 | 0.298   | -4.928  | 103      |
| PTPN11         | 4.0792   | 4.0792  | 14.163  | 1.6905  | 0.11351 | 0.298   | -4.9285 | 5781     |
| RET            | 0.33218  | 0.33218 | 0.40413 | 1.6905  | 0.11351 | 0.298   | -4.9286 | 5979     |
| FSTL1          | 33.947   | 33.947  | 54.63   | 1.6905  | 0.11351 | 0.298   | -4.9286 | 11167    |
| RPL36A-HNRNPH2 | 3.4365   | 3.4365  | 10.7    | 1.6905  | 0.11351 | 0.298   | -4.9286 | 1.01E+08 |
| LETM2          | 0.16243  | 0.16243 | 0.2798  | 1.6904  | 0.11354 | 0.298   | -4.9288 | 137994   |
| FZD1           | -2.5307  | 2.5307  | 8.1929  | -1.6904 | 0.11354 | 0.298   | -4.9288 | 8321     |
| LDB3           | -0.43037 | 0.43037 | 0.50897 | -1.6903 | 0.11355 | 0.298   | -4.9289 | 11155    |
| ISOC1          | -1.1852  | 1.1852  | 4.0011  | -1.6902 | 0.11356 | 0.298   | -4.929  | 51015    |
| LINC01698      | -0.32011 | 0.32011 | 0.21019 | -1.69   | 0.11361 | 0.29806 | -4.9293 | 1.02E+08 |
| INO80D         | -0.76942 | 0.76942 | 3.7512  | -1.6899 | 0.11363 | 0.29809 | -4.9295 | 54891    |
| NAA40          | -0.56262 | 0.56262 | 1.7393  | -1.6896 | 0.1137  | 0.29814 | -4.9299 | 79829    |
| SDCBP2-AS1     | -0.53905 | 0.53905 | 1.4175  | -1.6895 | 0.1137  | 0.29814 | -4.93   | 1.01E+08 |
| TMEM263        | 1.3946   | 1.3946  | 2.3213  | 1.6895  | 0.11371 | 0.29814 | -4.93   | 90488    |

|              |          |         |         |         |         |         |         |          |
|--------------|----------|---------|---------|---------|---------|---------|---------|----------|
| OR10AD1      | -0.11364 | 0.11364 | 0.1265  | -1.6892 | 0.11377 | 0.29826 | -4.9305 | 121275   |
| IDUA         | -1.0809  | 1.0809  | 1.9949  | -1.689  | 0.11381 | 0.2983  | -4.9307 | 3425     |
| ATP5PF       | 3.4967   | 3.4967  | 7.7946  | 1.6888  | 0.11385 | 0.29834 | -4.931  | 522      |
| SGCA         | -0.89701 | 0.89701 | 0.85314 | -1.6888 | 0.11386 | 0.29834 | -4.9311 | 6442     |
| GPR183       | 1.4103   | 1.4103  | 3.0681  | 1.6886  | 0.11389 | 0.29839 | -4.9314 | 1880     |
| GDI2         | 14.96    | 14.96   | 43.268  | 1.6882  | 0.11397 | 0.29854 | -4.9319 | 2665     |
| NPLOC4       | 4.2506   | 4.2506  | 15.467  | 1.6879  | 0.11402 | 0.29862 | -4.9323 | 55666    |
| CDKN3        | 1.2883   | 1.2883  | 1.5081  | 1.6875  | 0.1141  | 0.29878 | -4.9329 | 1033     |
| AURKA        | 0.88086  | 0.88086 | 1.2576  | 1.6874  | 0.11412 | 0.29878 | -4.933  | 6790     |
| LOC101928510 | -0.17205 | 0.17205 | 0.34863 | -1.6874 | 0.11413 | 0.29878 | -4.9331 | 1.02E+08 |
| RBM27        | -0.72255 | 0.72255 | 3.9793  | -1.6872 | 0.11416 | 0.29881 | -4.9334 | 54439    |
| ZNF579       | -1.1342  | 1.1342  | 2.1637  | -1.6871 | 0.11417 | 0.29881 | -4.9335 | 163033   |
| ZNF74        | -0.39278 | 0.39278 | 0.98444 | -1.6867 | 0.11425 | 0.29895 | -4.934  | 7625     |
| FSBP         | -0.13984 | 0.13984 | 0.32393 | -1.6864 | 0.11431 | 0.29903 | -4.9345 | 1.01E+08 |
| PAK1         | 1.3024   | 1.3024  | 4.9771  | 1.6864  | 0.11431 | 0.29903 | -4.9345 | 5058     |
| XXYLT1       | 0.92444  | 0.92444 | 3.4568  | 1.6863  | 0.11434 | 0.29904 | -4.9346 | 152002   |
| KIF2A        | 1.0377   | 1.0377  | 4.0053  | 1.6855  | 0.1145  | 0.29942 | -4.9358 | 3796     |
| TDRD3        | -0.72362 | 0.72362 | 3.255   | -1.6851 | 0.11457 | 0.29957 | -4.9364 | 81550    |
| FGGY         | -0.23155 | 0.23155 | 1.0997  | -1.6849 | 0.11461 | 0.29962 | -4.9366 | 55277    |
| RAB38        | 10.274   | 10.274  | 20.318  | 1.6847  | 0.11464 | 0.29966 | -4.9369 | 23682    |
| SLC10A7      | 0.19306  | 0.19306 | 0.76189 | 1.6842  | 0.11474 | 0.29982 | -4.9376 | 84068    |
| NEDD8        | 21.844   | 21.844  | 46.261  | 1.6842  | 0.11475 | 0.29982 | -4.9377 | 4738     |
| VPS35L       | 1.1178   | 1.1178  | 5.9917  | 1.6841  | 0.11477 | 0.29982 | -4.9378 | 57020    |
| ZNF821       | -0.31239 | 0.31239 | 1.0805  | -1.6841 | 0.11477 | 0.29982 | -4.9379 | 55565    |
| TULP1        | -0.15463 | 0.15463 | 0.20903 | -1.6839 | 0.1148  | 0.29985 | -4.9381 | 7287     |
| NAGK         | 6.6396   | 6.6396  | 16.676  | 1.6835  | 0.11488 | 0.3     | -4.9386 | 55577    |

|              |          |         |         |         |         |         |         |          |
|--------------|----------|---------|---------|---------|---------|---------|---------|----------|
| ZNF391       | -0.11746 | 0.11746 | 0.3372  | -1.683  | 0.11499 | 0.30023 | -4.9394 | 346157   |
| LOC101927539 | -0.12539 | 0.12539 | 0.14002 | -1.6827 | 0.11504 | 0.30029 | -4.9398 | 1.02E+08 |
| H1FX-AS1     | -0.29828 | 0.29828 | 0.50576 | -1.6827 | 0.11504 | 0.30029 | -4.9398 | 339942   |
| C1D          | 1.1606   | 1.1606  | 2.9156  | 1.6823  | 0.11511 | 0.30042 | -4.9403 | 10438    |
| FAM183A      | -0.29417 | 0.29417 | 0.37077 | -1.682  | 0.11519 | 0.30052 | -4.9409 | 440585   |
| CRCP         | -1.0003  | 1.0003  | 5.7548  | -1.6818 | 0.11522 | 0.30052 | -4.9411 | 27297    |
| ARAP2        | 2.9453   | 2.9453  | 8.0514  | 1.6818  | 0.11522 | 0.30052 | -4.9411 | 116984   |
| AP5Z1        | -1.2909  | 1.2909  | 4.1869  | -1.6817 | 0.11524 | 0.30052 | -4.9413 | 9907     |
| AGPAT4-IT1   | 0.74449  | 0.74449 | 0.76643 | 1.6816  | 0.11525 | 0.30052 | -4.9413 | 79992    |
| VPS9D1-AS1   | -0.6546  | 0.6546  | 1.4249  | -1.6816 | 0.11526 | 0.30052 | -4.9414 | 1E+08    |
| GNG10        | 5.1205   | 5.1205  | 6.5793  | 1.6815  | 0.11527 | 0.30052 | -4.9415 | 2790     |
| ANGEL2       | -0.58091 | 0.58091 | 2.1756  | -1.6812 | 0.11533 | 0.30056 | -4.9419 | 90806    |
| NT5DC1       | -1.0145  | 1.0145  | 3.5378  | -1.6812 | 0.11533 | 0.30056 | -4.9419 | 221294   |
| WDR43        | 2.6936   | 2.6936  | 8.0296  | 1.6812  | 0.11534 | 0.30056 | -4.942  | 23160    |
| NWD2         | 0.20688  | 0.20688 | 0.25954 | 1.6807  | 0.11544 | 0.30071 | -4.9427 | 57495    |
| COG7         | -0.5691  | 0.5691  | 3.2397  | -1.6806 | 0.11545 | 0.30071 | -4.9428 | 91949    |
| MFAP2        | 10.821   | 10.821  | 13.024  | 1.6805  | 0.11548 | 0.30071 | -4.943  | 4237     |
| SLC9A1       | 3.5442   | 3.5442  | 7.7554  | 1.6804  | 0.1155  | 0.30071 | -4.9431 | 6548     |
| ZNF205-AS1   | -0.12428 | 0.12428 | 0.15514 | -1.6804 | 0.1155  | 0.30071 | -4.9431 | 81854    |
| GSG1         | -0.11286 | 0.11286 | 0.11806 | -1.6804 | 0.11551 | 0.30071 | -4.9432 | 83445    |
| IGSF8        | 5.0297   | 5.0297  | 13.213  | 1.6801  | 0.11555 | 0.30075 | -4.9435 | 93185    |
| SDHB         | 5.1386   | 5.1386  | 13.041  | 1.68    | 0.11557 | 0.30075 | -4.9436 | 6390     |
| GTF2H2B      | -0.75171 | 0.75171 | 1.9175  | -1.68   | 0.11557 | 0.30075 | -4.9437 | 653238   |
| FAM238C      | -0.36412 | 0.36412 | 0.80486 | -1.6797 | 0.11564 | 0.30082 | -4.9441 | 387644   |
| RPTN         | 5.1997   | 5.1997  | 5.6008  | 1.6796  | 0.11565 | 0.30082 | -4.9442 | 126638   |
| DDX42        | -2.7359  | 2.7359  | 12.63   | -1.6796 | 0.11566 | 0.30082 | -4.9443 | 11325    |



|              |          |         |         |         |         |         |         |          |
|--------------|----------|---------|---------|---------|---------|---------|---------|----------|
| P4HA3        | 1.8246   | 1.8246  | 1.6795  | 1.6792  | 0.11574 | 0.30096 | -4.9449 | 283208   |
| GLA          | 1.2441   | 1.2441  | 3.3173  | 1.6791  | 0.11574 | 0.30096 | -4.9449 | 2717     |
| TNKS2        | 1.4161   | 1.4161  | 9.4266  | 1.6788  | 0.11582 | 0.30111 | -4.9455 | 80351    |
| BORCS7       | 0.91157  | 0.91157 | 3.126   | 1.6786  | 0.11585 | 0.30114 | -4.9457 | 119032   |
| SLC30A6      | 0.65112  | 0.65112 | 2.5681  | 1.6785  | 0.11587 | 0.30114 | -4.9458 | 55676    |
| LTN1         | 0.87422  | 0.87422 | 3.7614  | 1.6778  | 0.11602 | 0.30148 | -4.9469 | 26046    |
| PRCP         | 5.0244   | 5.0244  | 13.01   | 1.6766  | 0.11625 | 0.30204 | -4.9485 | 5547     |
| STOML1       | -0.65394 | 0.65394 | 1.4775  | -1.6763 | 0.1163  | 0.3021  | -4.9489 | 9399     |
| LNCTAM34A    | -0.18041 | 0.18041 | 0.30807 | -1.6763 | 0.11631 | 0.3021  | -4.949  | 1.03E+08 |
| THBS1        | 46.181   | 46.181  | 51.364  | 1.6762  | 0.11634 | 0.30211 | -4.9492 | 7057     |
| LOC105376114 | 0.16651  | 0.16651 | 0.27999 | 1.6761  | 0.11636 | 0.30211 | -4.9493 | 1.05E+08 |
| ZNF70        | -0.49315 | 0.49315 | 1.1454  | -1.676  | 0.11637 | 0.30211 | -4.9494 | 7621     |
| FAM24B       | -0.19388 | 0.19388 | 0.40477 | -1.6759 | 0.11639 | 0.30213 | -4.9496 | 196792   |
| LINC00235    | -0.38615 | 0.38615 | 0.57548 | -1.6757 | 0.11642 | 0.30215 | -4.9498 | 64493    |
| ARMC2        | -0.16798 | 0.16798 | 0.41756 | -1.6757 | 0.11644 | 0.30215 | -4.9499 | 84071    |
| CALM2        | 7.5272   | 7.5272  | 17.281  | 1.6753  | 0.1165  | 0.30228 | -4.9504 | 805      |
| FSCN2        | -0.25166 | 0.25166 | 0.47338 | -1.6748 | 0.11662 | 0.30252 | -4.9512 | 25794    |
| DYSF         | 3.1492   | 3.1492  | 4.5777  | 1.6745  | 0.11667 | 0.30263 | -4.9516 | 8291     |
| PDPR         | -1.0977  | 1.0977  | 3.7586  | -1.6742 | 0.11672 | 0.30271 | -4.9519 | 55066    |
| NHS          | -0.30059 | 0.30059 | 0.84531 | -1.6741 | 0.11675 | 0.30272 | -4.9521 | 4810     |
| GPR17        | -0.71764 | 0.71764 | 0.96793 | -1.674  | 0.11676 | 0.30272 | -4.9522 | 2840     |
| CCDC59       | 0.84614  | 0.84614 | 2.9342  | 1.6737  | 0.11682 | 0.30277 | -4.9526 | 29080    |
| LILRA1       | 0.23121  | 0.23121 | 0.21692 | 1.6737  | 0.11683 | 0.30277 | -4.9527 | 11024    |
| CRYBG3       | 1.3858   | 1.3858  | 7.1414  | 1.6736  | 0.11684 | 0.30277 | -4.9528 | 131544   |
| UBE2Q2P1     | -1.2732  | 1.2732  | 3.0818  | -1.6734 | 0.11689 | 0.30284 | -4.9531 | 388165   |
| EHD1         | 3.8626   | 3.8626  | 9.5535  | 1.6733  | 0.1169  | 0.30284 | -4.9532 | 10938    |

|              |          |         |         |         |         |         |         |          |
|--------------|----------|---------|---------|---------|---------|---------|---------|----------|
| OVCH2        | -0.3903  | 0.3903  | 0.51917 | -1.6728 | 0.11701 | 0.30306 | -4.954  | 341277   |
| NXN          | 4.618    | 4.618   | 12.221  | 1.6727  | 0.11704 | 0.30306 | -4.9542 | 64359    |
| MGMT         | -1.576   | 1.576   | 4.2745  | -1.6726 | 0.11704 | 0.30306 | -4.9542 | 4255     |
| UHRF1BP1L    | 0.90421  | 0.90421 | 3.4487  | 1.6726  | 0.11706 | 0.30306 | -4.9543 | 23074    |
| PCLAF        | 1.6624   | 1.6624  | 2.7504  | 1.6722  | 0.11713 | 0.30321 | -4.9549 | 9768     |
| CACTIN       | -1.1855  | 1.1855  | 3.2046  | -1.6719 | 0.11718 | 0.30327 | -4.9552 | 58509    |
| ATP5MPL      | 9.7651   | 9.7651  | 17.185  | 1.6719  | 0.11719 | 0.30327 | -4.9553 | 9556     |
| PPID         | 1.2097   | 1.2097  | 4.3815  | 1.6716  | 0.11725 | 0.30337 | -4.9557 | 5481     |
| UQCC1        | -0.89866 | 0.89866 | 3.6274  | -1.6715 | 0.11727 | 0.30337 | -4.9558 | 55245    |
| UBA3         | 2.8254   | 2.8254  | 8.0584  | 1.6713  | 0.11731 | 0.30344 | -4.9561 | 9039     |
| SLURP2       | 76.943   | 76.943  | 115.35  | 1.6706  | 0.11744 | 0.30373 | -4.9571 | 432355   |
| CUL2         | 0.92353  | 0.92353 | 3.1578  | 1.6705  | 0.11746 | 0.30374 | -4.9572 | 8453     |
| ADRA2A       | -3.7905  | 3.7905  | 3.1365  | -1.6703 | 0.11751 | 0.30378 | -4.9576 | 150      |
| ARRB1        | -1.1397  | 1.1397  | 4.5218  | -1.6703 | 0.11751 | 0.30378 | -4.9576 | 408      |
| ADGRL4       | 2.2268   | 2.2268  | 3.5325  | 1.6701  | 0.11755 | 0.30383 | -4.9578 | 64123    |
| MDFI         | 7.9733   | 7.9733  | 12.234  | 1.6696  | 0.11765 | 0.304   | -4.9586 | 4188     |
| PLIN3        | 14.109   | 14.109  | 29.768  | 1.6696  | 0.11766 | 0.304   | -4.9586 | 10226    |
| ENPP3        | -0.1417  | 0.1417  | 0.17263 | -1.6695 | 0.11767 | 0.304   | -4.9587 | 5169     |
| CPA3         | 3.7409   | 3.7409  | 7.5548  | 1.6691  | 0.11776 | 0.30416 | -4.9593 | 1359     |
| FBRSL1       | -1.3413  | 1.3413  | 4.4917  | -1.6688 | 0.11781 | 0.30416 | -4.9597 | 57666    |
| CTB-178M22.2 | 0.15581  | 0.15581 | 0.26673 | 1.6688  | 0.11781 | 0.30416 | -4.9597 | 1.02E+08 |
| SEN3-EIF4A1  | -0.32944 | 0.32944 | 0.54877 | -1.6688 | 0.11781 | 0.30416 | -4.9597 | 1.01E+08 |
| SPIN3        | -0.19046 | 0.19046 | 0.58826 | -1.6687 | 0.11782 | 0.30416 | -4.9598 | 169981   |
| SLC35B3      | 0.6067   | 0.6067  | 2.1443  | 1.6684  | 0.1179  | 0.30427 | -4.9603 | 51000    |
| FBXO48       | 0.17184  | 0.17184 | 0.44628 | 1.6683  | 0.1179  | 0.30427 | -4.9603 | 554251   |
| VTN          | -0.15994 | 0.15994 | 0.2251  | -1.6681 | 0.11795 | 0.30434 | -4.9607 | 7448     |

|              |          |         |         |         |         |         |         |        |
|--------------|----------|---------|---------|---------|---------|---------|---------|--------|
| SMCR5        | -0.26095 | 0.26095 | 0.52924 | -1.668  | 0.11797 | 0.30436 | -4.9608 | 140771 |
| PTCSC1       | -0.2477  | 0.2477  | 0.36972 | -1.6678 | 0.11802 | 0.30443 | -4.9612 | 1E+08  |
| MFSD2A       | -3.9769  | 3.9769  | 8.815   | -1.6676 | 0.11805 | 0.30447 | -4.9614 | 84879  |
| PLAC9        | -3.9432  | 3.9432  | 5.8441  | -1.6675 | 0.11807 | 0.30447 | -4.9615 | 219348 |
| SNRPB2       | 2.8403   | 2.8403  | 6.2235  | 1.6671  | 0.11815 | 0.30463 | -4.9621 | 6629   |
| PDHB         | 3.8459   | 3.8459  | 10.878  | 1.6668  | 0.1182  | 0.30472 | -4.9625 | 5162   |
| WDR35        | -0.37371 | 0.37371 | 1.0605  | -1.6666 | 0.11825 | 0.30473 | -4.9628 | 57539  |
| LOC100126784 | -0.31269 | 0.31269 | 0.60684 | -1.6666 | 0.11825 | 0.30473 | -4.9628 | 1E+08  |
| KIF11        | 0.82108  | 0.82108 | 1.6297  | 1.6665  | 0.11826 | 0.30473 | -4.9629 | 3832   |
| PKP1         | 132.98   | 132.98  | 326.14  | 1.6663  | 0.1183  | 0.30479 | -4.9632 | 5317   |
| ADAMTS10     | -1.3996  | 1.3996  | 2.3343  | -1.666  | 0.11838 | 0.30494 | -4.9637 | 81794  |
| ETV5         | -1.1953  | 1.1953  | 2.4444  | -1.6658 | 0.11842 | 0.30498 | -4.964  | 2119   |
| DTNBP1       | -0.5093  | 0.5093  | 1.8327  | -1.6657 | 0.11843 | 0.30498 | -4.9641 | 84062  |
| MBD2         | 2.7565   | 2.7565  | 9.7522  | 1.6656  | 0.11845 | 0.30498 | -4.9642 | 8932   |
| FAM3C        | 1.8956   | 1.8956  | 7.1028  | 1.6653  | 0.11852 | 0.3051  | -4.9647 | 10447  |
| LINC02159    | 0.39821  | 0.39821 | 0.44333 | 1.6652  | 0.11853 | 0.3051  | -4.9648 | 285629 |
| MS4A2        | -0.40894 | 0.40894 | 0.7076  | -1.6645 | 0.11867 | 0.30542 | -4.9658 | 2206   |
| BOLA2B       | 5.4358   | 5.4358  | 9.2851  | 1.6643  | 0.11872 | 0.3055  | -4.9661 | 654483 |
| METTL7A      | -4.2076  | 4.2076  | 9.0975  | -1.6641 | 0.11876 | 0.30554 | -4.9664 | 25840  |
| MYBBP1A      | -2.7774  | 2.7774  | 7.3199  | -1.6639 | 0.11879 | 0.30554 | -4.9666 | 10514  |
| CNTD1        | -0.1804  | 0.1804  | 0.33075 | -1.6639 | 0.11879 | 0.30554 | -4.9666 | 124817 |
| BBS4         | -0.52816 | 0.52816 | 1.5263  | -1.6637 | 0.11884 | 0.30561 | -4.9669 | 585    |
| DBP          | -2.9013  | 2.9013  | 4.5762  | -1.6632 | 0.11894 | 0.30583 | -4.9677 | 1628   |
| CDK20        | -0.24347 | 0.24347 | 0.56046 | -1.6627 | 0.11903 | 0.30593 | -4.9683 | 23552  |
| ITGA5        | 10.079   | 10.079  | 16.114  | 1.6627  | 0.11903 | 0.30593 | -4.9683 | 3678   |
| ZSCAN21      | -0.33515 | 0.33515 | 1.5117  | -1.6626 | 0.11906 | 0.30593 | -4.9685 | 7589   |

|              |          |         |         |         |         |         |         |          |
|--------------|----------|---------|---------|---------|---------|---------|---------|----------|
| IFRD2        | 3.7823   | 3.7823  | 8.8118  | 1.6625  | 0.11908 | 0.30593 | -4.9686 | 7866     |
| CFLAR-AS1    | -0.44505 | 0.44505 | 0.90298 | -1.6625 | 0.11908 | 0.30593 | -4.9686 | 65072    |
| SLC35F3      | 0.25313  | 0.25313 | 0.44632 | 1.6625  | 0.11909 | 0.30593 | -4.9687 | 148641   |
| SERPINB1     | 52.204   | 52.204  | 38.144  | 1.6621  | 0.11915 | 0.30599 | -4.9691 | 1992     |
| MBD6         | -1.9788  | 1.9788  | 8.6769  | -1.6621 | 0.11915 | 0.30599 | -4.9691 | 114785   |
| LOC105371267 | -0.30596 | 0.30596 | 0.42179 | -1.6621 | 0.11917 | 0.30599 | -4.9692 | 1.05E+08 |
| RPS14P3      | -0.38589 | 0.38589 | 0.84291 | -1.6618 | 0.11922 | 0.30608 | -4.9696 | 644068   |
| UBE3D        | -0.14117 | 0.14117 | 0.49539 | -1.6616 | 0.11925 | 0.30612 | -4.9699 | 90025    |
| ANKRD18B     | -0.32808 | 0.32808 | 0.59196 | -1.661  | 0.11938 | 0.30641 | -4.9708 | 441459   |
| SUZ12        | 0.76367  | 0.76367 | 3.1444  | 1.6607  | 0.11944 | 0.3065  | -4.9712 | 23512    |
| NPEPL1       | -1.9593  | 1.9593  | 6.0248  | -1.6605 | 0.11949 | 0.3065  | -4.9715 | 79716    |
| IQCB1        | -0.609   | 0.609   | 2.0984  | -1.6605 | 0.11949 | 0.3065  | -4.9715 | 9657     |
| PTMA         | -66.668  | 66.668  | 262.99  | -1.6605 | 0.11949 | 0.3065  | -4.9715 | 5757     |
| SIDT2        | -2.2496  | 2.2496  | 7.748   | -1.6604 | 0.11951 | 0.3065  | -4.9717 | 51092    |
| PBK          | 0.71156  | 0.71156 | 0.92015 | 1.6602  | 0.11954 | 0.30653 | -4.9718 | 55872    |
| RARB         | -0.18931 | 0.18931 | 0.36218 | -1.6601 | 0.11958 | 0.30657 | -4.9721 | 5915     |
| VSIG4        | -2.8403  | 2.8403  | 3.2355  | -1.66   | 0.11959 | 0.30657 | -4.9722 | 11326    |
| PLEKHM1P1    | -2.5094  | 2.5094  | 8.0118  | -1.6598 | 0.11964 | 0.30658 | -4.9725 | 440456   |
| TIMMDC1      | 4.298    | 4.298   | 12.238  | 1.6597  | 0.11965 | 0.30658 | -4.9726 | 51300    |
| TNIK         | -0.17675 | 0.17675 | 0.38451 | -1.6596 | 0.11966 | 0.30658 | -4.9727 | 23043    |
| PRKCH        | 2.2364   | 2.2364  | 9.1845  | 1.6596  | 0.11967 | 0.30658 | -4.9727 | 5583     |
| ARHGAP35     | -1.5003  | 1.5003  | 8.2574  | -1.6591 | 0.11977 | 0.30679 | -4.9734 | 2909     |
| TMEM177      | -0.24271 | 0.24271 | 0.62831 | -1.659  | 0.1198  | 0.30681 | -4.9737 | 80775    |
| SERPINB3     | 126.44   | 126.44  | 129.13  | 1.6589  | 0.11982 | 0.30681 | -4.9738 | 6317     |
| CTDSP2       | -6.1342  | 6.1342  | 26.322  | -1.6588 | 0.11983 | 0.30681 | -4.9739 | 10106    |
| LY96         | 1.5678   | 1.5678  | 1.8713  | 1.6587  | 0.11985 | 0.30681 | -4.974  | 23643    |

|              |          |         |         |         |         |         |         |          |
|--------------|----------|---------|---------|---------|---------|---------|---------|----------|
| STK17B       | 1.7527   | 1.7527  | 4.6239  | 1.6582  | 0.11996 | 0.30705 | -4.9748 | 9262     |
| COA1         | -0.43723 | 0.43723 | 2.4118  | -1.6581 | 0.11999 | 0.30707 | -4.975  | 55744    |
| SPC24        | 0.49018  | 0.49018 | 0.8278  | 1.6578  | 0.12004 | 0.30716 | -4.9753 | 147841   |
| POLR3GL      | -1.8853  | 1.8853  | 4.2408  | -1.6576 | 0.12007 | 0.30719 | -4.9756 | 84265    |
| HNRNPUL2     | -2.5773  | 2.5773  | 9.3792  | -1.6575 | 0.12009 | 0.30719 | -4.9757 | 221092   |
| CPED1        | -0.60754 | 0.60754 | 1.0596  | -1.6575 | 0.1201  | 0.30719 | -4.9758 | 79974    |
| GID8         | 3.3593   | 3.3593  | 11.517  | 1.657   | 0.1202  | 0.30739 | -4.9765 | 54994    |
| SLC25A32     | 1.0979   | 1.0979  | 3.263   | 1.6567  | 0.12027 | 0.30751 | -4.9769 | 81034    |
| GNA11        | -2.7962  | 2.7962  | 9.6238  | -1.6566 | 0.12029 | 0.30752 | -4.9771 | 2767     |
| CIC          | -3.9663  | 3.9663  | 8.874   | -1.6563 | 0.12034 | 0.3076  | -4.9774 | 23152    |
| NPY4R2       | -0.13557 | 0.13557 | 0.21767 | -1.6561 | 0.12039 | 0.30767 | -4.9777 | 1.01E+08 |
| PCDHB18P     | -0.21375 | 0.21375 | 0.4392  | -1.656  | 0.12042 | 0.3077  | -4.9779 | 54660    |
| RBBP8NL      | -0.75875 | 0.75875 | 0.98098 | -1.6557 | 0.12046 | 0.30772 | -4.9783 | 140893   |
| ENKD1        | -0.67721 | 0.67721 | 1.848   | -1.6557 | 0.12048 | 0.30772 | -4.9784 | 84080    |
| EIF4H        | 42.809   | 42.809  | 89.941  | 1.6556  | 0.12049 | 0.30772 | -4.9785 | 7458     |
| UQCRQ        | 10.109   | 10.109  | 17.124  | 1.6554  | 0.12052 | 0.30772 | -4.9787 | 27089    |
| EVA1B        | 3.8927   | 3.8927  | 8.7973  | 1.6554  | 0.12054 | 0.30772 | -4.9788 | 55194    |
| WHAMMP2      | -0.14702 | 0.14702 | 0.35027 | -1.6553 | 0.12055 | 0.30772 | -4.9789 | 440253   |
| DMTF1        | -1.1398  | 1.1398  | 4.3982  | -1.6552 | 0.12057 | 0.30772 | -4.979  | 9988     |
| MIR6809      | -0.2643  | 0.2643  | 0.27286 | -1.6552 | 0.12058 | 0.30772 | -4.9791 | 1.02E+08 |
| FCGR3B       | 3.8258   | 3.8258  | 2.706   | 1.6551  | 0.12059 | 0.30772 | -4.9791 | 2215     |
| LOC105369507 | -0.1164  | 0.1164  | 0.12489 | -1.6549 | 0.12063 | 0.30778 | -4.9794 | 1.05E+08 |
| KCNAB2       | -0.60572 | 0.60572 | 1.3242  | -1.6545 | 0.12072 | 0.30797 | -4.9801 | 8514     |
| NIPIA8       | -0.35083 | 0.35083 | 0.73085 | -1.6542 | 0.12077 | 0.30804 | -4.9804 | 1.01E+08 |
| EMC7         | 3.987    | 3.987   | 13.416  | 1.6537  | 0.12087 | 0.30823 | -4.9811 | 56851    |
| MIEF2        | -0.66564 | 0.66564 | 2.1287  | -1.6537 | 0.12088 | 0.30823 | -4.9811 | 125170   |

|               |          |         |         |         |         |         |         |          |
|---------------|----------|---------|---------|---------|---------|---------|---------|----------|
| PIGB          | 0.36592  | 0.36592 | 1.3867  | 1.6533  | 0.12096 | 0.30837 | -4.9817 | 9488     |
| MYCBP2-AS1    | -0.16216 | 0.16216 | 0.24133 | -1.6533 | 0.12097 | 0.30837 | -4.9818 | 1.01E+08 |
| FZD4          | -1.768   | 1.768   | 3.1201  | -1.6532 | 0.12099 | 0.30838 | -4.9819 | 8322     |
| KDELR3        | 3.5242   | 3.5242  | 4.3539  | 1.6526  | 0.12111 | 0.30863 | -4.9827 | 11015    |
| NAA30         | 0.75672  | 0.75672 | 2.9512  | 1.6522  | 0.12118 | 0.30871 | -4.9832 | 122830   |
| RIOK2         | 0.54163  | 0.54163 | 1.5961  | 1.6522  | 0.12118 | 0.30871 | -4.9832 | 55781    |
| BCO2          | -0.16257 | 0.16257 | 0.28377 | -1.6522 | 0.12119 | 0.30871 | -4.9833 | 83875    |
| COL15A1       | 19.079   | 19.079  | 26.125  | 1.6519  | 0.12125 | 0.3088  | -4.9837 | 1306     |
| KPNA5         | -0.45233 | 0.45233 | 1.392   | -1.6516 | 0.1213  | 0.30889 | -4.984  | 3841     |
| LOC101929532  | 0.13004  | 0.13004 | 0.1128  | 1.6515  | 0.12134 | 0.30894 | -4.9843 | 1.02E+08 |
| TCAP          | -0.12151 | 0.12151 | 0.1313  | -1.6512 | 0.12139 | 0.30903 | -4.9847 | 8557     |
| CLEC2D        | -0.32778 | 0.32778 | 0.69853 | -1.6509 | 0.12146 | 0.30916 | -4.9852 | 29121    |
| TSNAX-DISC1   | -0.13364 | 0.13364 | 0.22561 | -1.6508 | 0.12149 | 0.30917 | -4.9853 | 1E+08    |
| TSTD3         | -0.19679 | 0.19679 | 0.63041 | -1.6505 | 0.12153 | 0.30921 | -4.9856 | 1E+08    |
| PIK3CB        | -1.0169  | 1.0169  | 3.4449  | -1.6505 | 0.12154 | 0.30921 | -4.9857 | 5291     |
| COL4A3        | -0.15184 | 0.15184 | 0.14158 | -1.65   | 0.12164 | 0.30942 | -4.9864 | 1285     |
| MMP11         | 15.342   | 15.342  | 10.295  | 1.6495  | 0.12175 | 0.30964 | -4.9871 | 4320     |
| CCZ1P-OR7E38P | 1.2668   | 1.2668  | 3.4868  | 1.6494  | 0.12177 | 0.30964 | -4.9873 | 389538   |
| ARPC4         | 10.252   | 10.252  | 26.698  | 1.6493  | 0.12178 | 0.30964 | -4.9873 | 10093    |
| CCER2         | -1.036   | 1.036   | 0.72177 | -1.6491 | 0.12182 | 0.3097  | -4.9876 | 643669   |
| UQCRB         | 3.0164   | 3.0164  | 6.0019  | 1.6489  | 0.12186 | 0.30973 | -4.9879 | 7381     |
| ABHD3         | 0.62749  | 0.62749 | 1.3248  | 1.6489  | 0.12187 | 0.30973 | -4.9879 | 171586   |
| NR4A1         | 3.2794   | 3.2794  | 4.5959  | 1.6485  | 0.12195 | 0.30987 | -4.9885 | 3164     |
| USP18         | -1.0571  | 1.0571  | 0.99002 | -1.6483 | 0.12198 | 0.30987 | -4.9887 | 11274    |
| LOC100507291  | -0.23707 | 0.23707 | 0.43534 | -1.6483 | 0.12198 | 0.30987 | -4.9887 | 1.01E+08 |
| SP140         | -0.13026 | 0.13026 | 0.21048 | -1.6483 | 0.122   | 0.30987 | -4.9888 | 11262    |

|           |          |         |          |         |         |         |         |          |
|-----------|----------|---------|----------|---------|---------|---------|---------|----------|
| ADAMTS3   | 0.18667  | 0.18667 | 0.32603  | 1.648   | 0.12205 | 0.30995 | -4.9892 | 9508     |
| ZCCHC10   | 0.52001  | 0.52001 | 1.2959   | 1.6479  | 0.12209 | 0.31    | -4.9894 | 54819    |
| STAU2     | 0.74838  | 0.74838 | 2.9379   | 1.6474  | 0.12219 | 0.3101  | -4.9901 | 27067    |
| KIZ       | -0.78746 | 0.78746 | 2.661    | -1.6474 | 0.12219 | 0.3101  | -4.9901 | 55857    |
| RGS18     | 0.37978  | 0.37978 | 0.34251  | 1.6473  | 0.1222  | 0.3101  | -4.9902 | 64407    |
| RPL26L1   | 3.8089   | 3.8089  | 5.5853   | 1.6472  | 0.12222 | 0.3101  | -4.9903 | 51121    |
| ANKH      | -1.6384  | 1.6384  | 6.2106   | -1.6471 | 0.12224 | 0.3101  | -4.9904 | 56172    |
| IGFBP3    | 6.8952   | 6.8952  | 11.29    | 1.6471  | 0.12224 | 0.3101  | -4.9904 | 3486     |
| HSD17B2   | -0.48215 | 0.48215 | 0.50908  | -1.647  | 0.12226 | 0.31011 | -4.9906 | 3294     |
| UGT1A5    | -0.13951 | 0.13951 | 0.096168 | -1.6468 | 0.1223  | 0.31016 | -4.9909 | 54579    |
| RDH5      | -0.58465 | 0.58465 | 1.2132   | -1.6467 | 0.12232 | 0.31017 | -4.991  | 5959     |
| SRP9      | 7.6812   | 7.6812  | 20.811   | 1.6465  | 0.12236 | 0.31024 | -4.9913 | 6726     |
| MVK       | 4.5302   | 4.5302  | 9.3333   | 1.6461  | 0.12244 | 0.31029 | -4.9918 | 4598     |
| SAR1A     | 4.7039   | 4.7039  | 14.537   | 1.6461  | 0.12245 | 0.31029 | -4.9919 | 56681    |
| CETN2     | 3.266    | 3.266   | 8.2143   | 1.6461  | 0.12245 | 0.31029 | -4.9919 | 1069     |
| MYOSLID   | 0.22468  | 0.22468 | 0.3007   | 1.6461  | 0.12246 | 0.31029 | -4.992  | 1.05E+08 |
| SMG1P6    | -0.14234 | 0.14234 | 0.21073  | -1.6456 | 0.12255 | 0.31042 | -4.9926 | 1E+08    |
| MIR193BHG | 0.55701  | 0.55701 | 1.6699   | 1.6455  | 0.12257 | 0.31042 | -4.9927 | 1E+08    |
| OAT       | 4.3675   | 4.3675  | 14.005   | 1.6455  | 0.12258 | 0.31042 | -4.9928 | 4942     |
| KCND3-IT1 | -0.12652 | 0.12652 | 0.15226  | -1.6455 | 0.12258 | 0.31042 | -4.9928 | 1.01E+08 |
| PAEP      | 1.7539   | 1.7539  | 0.96467  | 1.6453  | 0.12262 | 0.31047 | -4.993  | 5047     |
| PCDHGC5   | 0.35094  | 0.35094 | 0.73728  | 1.6451  | 0.12265 | 0.31047 | -4.9933 | 56097    |
| TPPP3     | 18.56    | 18.56   | 29.612   | 1.6451  | 0.12266 | 0.31047 | -4.9933 | 51673    |
| DCAF11    | -1.3935  | 1.3935  | 5.5905   | -1.6446 | 0.12276 | 0.31069 | -4.994  | 80344    |
| MTHFR     | -1.2337  | 1.2337  | 3.9125   | -1.644  | 0.12288 | 0.31087 | -4.9948 | 4524     |
| VPS37D    | -0.23035 | 0.23035 | 0.36332  | -1.644  | 0.12289 | 0.31087 | -4.9948 | 155382   |

|          |          |         |         |         |         |         |         |          |
|----------|----------|---------|---------|---------|---------|---------|---------|----------|
| GNAS     | 7.2997   | 7.2997  | 24.274  | 1.644   | 0.12289 | 0.31087 | -4.9949 | 2778     |
| GUSBP5   | -0.18954 | 0.18954 | 0.36227 | -1.6438 | 0.12292 | 0.3109  | -4.9951 | 441046   |
| SPINK9   | 22.521   | 22.521  | 12.118  | 1.6436  | 0.12297 | 0.31098 | -4.9954 | 643394   |
| HEXB     | 6.443    | 6.443   | 14.582  | 1.6435  | 0.12299 | 0.31098 | -4.9956 | 3074     |
| SCML4    | -0.12207 | 0.12207 | 0.12494 | -1.6431 | 0.12307 | 0.31115 | -4.9961 | 256380   |
| WDR24    | -1.0916  | 1.0916  | 3.0452  | -1.6428 | 0.12314 | 0.31128 | -4.9966 | 84219    |
| EP300    | -1.7161  | 1.7161  | 11.733  | -1.6424 | 0.12322 | 0.31142 | -4.9971 | 2033     |
| COX7C    | 41.09    | 41.09   | 83.75   | 1.6419  | 0.12332 | 0.3116  | -4.9978 | 1350     |
| AP1S2    | 0.90432  | 0.90432 | 2.1275  | 1.6419  | 0.12333 | 0.3116  | -4.9978 | 8905     |
| SHANK2   | 0.54077  | 0.54077 | 1.204   | 1.6417  | 0.12336 | 0.31164 | -4.998  | 22941    |
| C15orf65 | 0.18669  | 0.18669 | 0.35409 | 1.641   | 0.12352 | 0.3119  | -4.9991 | 145788   |
| TMEM30B  | 2.0845   | 2.0845  | 5.116   | 1.641   | 0.12352 | 0.3119  | -4.9991 | 161291   |
| PSMD10   | 2.3719   | 2.3719  | 6.4544  | 1.6409  | 0.12354 | 0.3119  | -4.9993 | 5716     |
| CWC15    | 2.7787   | 2.7787  | 6.9675  | 1.6407  | 0.12357 | 0.3119  | -4.9995 | 51503    |
| NRP2     | 3.0282   | 3.0282  | 5.1764  | 1.6407  | 0.12357 | 0.3119  | -4.9995 | 8828     |
| OPN3     | 0.79386  | 0.79386 | 2.1135  | 1.6407  | 0.12358 | 0.3119  | -4.9995 | 23596    |
| PRKD3    | -1.1627  | 1.1627  | 3.5261  | -1.6405 | 0.12361 | 0.31194 | -4.9997 | 23683    |
| BBC3     | -0.65327 | 0.65327 | 1.1985  | -1.6402 | 0.12368 | 0.31208 | -5.0002 | 27113    |
| TFEB     | -0.53781 | 0.53781 | 2.0269  | -1.6395 | 0.12384 | 0.31234 | -5.0013 | 7942     |
| FCN1     | 0.37043  | 0.37043 | 0.44263 | 1.6393  | 0.12386 | 0.31234 | -5.0014 | 2219     |
| USP32P1  | -1.419   | 1.419   | 1.5279  | -1.6393 | 0.12387 | 0.31234 | -5.0015 | 162632   |
| RTRAF    | 10.091   | 10.091  | 23.615  | 1.6393  | 0.12387 | 0.31234 | -5.0015 | 51637    |
| GJB5     | 7.391    | 7.391   | 14.762  | 1.6393  | 0.12388 | 0.31234 | -5.0015 | 2709     |
| RPS6KA3  | 1.1704   | 1.1704  | 5.1665  | 1.6392  | 0.1239  | 0.31234 | -5.0017 | 6197     |
| EHD4     | 4.7892   | 4.7892  | 11.925  | 1.639   | 0.12393 | 0.31234 | -5.0019 | 30844    |
| P3H2-AS1 | -0.37739 | 0.37739 | 0.76311 | -1.639  | 0.12393 | 0.31234 | -5.0019 | 1.02E+08 |



|            |          |         |         |         |         |         |         |          |
|------------|----------|---------|---------|---------|---------|---------|---------|----------|
| BOK        | 5.491    | 5.491   | 11.927  | 1.6389  | 0.12396 | 0.31235 | -5.0021 | 666      |
| LIMS2      | -1.8648  | 1.8648  | 3.6907  | -1.6388 | 0.12397 | 0.31235 | -5.0022 | 55679    |
| MEA1       | 3.783    | 3.783   | 9.0742  | 1.6381  | 0.12412 | 0.31266 | -5.0031 | 4201     |
| ZNF721     | -1.1568  | 1.1568  | 2.9707  | -1.6379 | 0.12417 | 0.31274 | -5.0035 | 170960   |
| CLEC5A     | 0.84759  | 0.84759 | 0.90873 | 1.6378  | 0.12418 | 0.31274 | -5.0036 | 23601    |
| AKAP5      | -0.16601 | 0.16601 | 0.25312 | -1.6376 | 0.12424 | 0.31283 | -5.0039 | 9495     |
| INSYN1     | -0.22387 | 0.22387 | 0.42875 | -1.6374 | 0.12428 | 0.31288 | -5.0042 | 388135   |
| SEM1       | 1.8735   | 1.8735  | 3.7425  | 1.6372  | 0.12431 | 0.31292 | -5.0044 | 7979     |
| SEC24B-AS1 | -0.1814  | 0.1814  | 0.29725 | -1.6369 | 0.12438 | 0.31303 | -5.0049 | 1.01E+08 |
| SPATA25    | -0.26575 | 0.26575 | 0.40154 | -1.6368 | 0.12439 | 0.31303 | -5.005  | 128497   |
| CTH        | 0.48551  | 0.48551 | 0.55752 | 1.6366  | 0.12444 | 0.31306 | -5.0053 | 1491     |
| SNORD136   | -0.15932 | 0.15932 | 0.10106 | -1.6366 | 0.12444 | 0.31306 | -5.0053 | 1.07E+08 |
| KIAA0825   | -0.21762 | 0.21762 | 0.46037 | -1.6365 | 0.12447 | 0.31308 | -5.0055 | 285600   |
| FAM43A     | 7.8643   | 7.8643  | 13.51   | 1.6363  | 0.12451 | 0.31315 | -5.0058 | 131583   |
| ZCCHC17    | 1.6964   | 1.6964  | 5.4031  | 1.6361  | 0.12454 | 0.31316 | -5.0059 | 51538    |
| REL        | -2.1794  | 2.1794  | 5.0912  | -1.6359 | 0.12458 | 0.31321 | -5.0062 | 5966     |
| ZCCHC8     | 0.36635  | 0.36635 | 2.3805  | 1.6356  | 0.12465 | 0.31331 | -5.0067 | 55596    |
| PADI1      | -1.0622  | 1.0622  | 0.92268 | -1.6356 | 0.12465 | 0.31331 | -5.0067 | 29943    |
| SRRM5      | -0.18197 | 0.18197 | 0.27204 | -1.6355 | 0.12467 | 0.31331 | -5.0068 | 1E+08    |
| KIAA0753   | -0.30827 | 0.30827 | 1.511   | -1.6351 | 0.12477 | 0.31335 | -5.0075 | 9851     |
| CNST       | 2.3625   | 2.3625  | 4.9656  | 1.6349  | 0.12481 | 0.31335 | -5.0077 | 163882   |
| BICD1      | 0.25748  | 0.25748 | 0.7236  | 1.6348  | 0.12482 | 0.31335 | -5.0078 | 636      |
| CAMK2N2    | 0.14126  | 0.14126 | 0.30788 | 1.6348  | 0.12482 | 0.31335 | -5.0079 | 94032    |
| JPH1       | 0.29355  | 0.29355 | 0.37177 | 1.6347  | 0.12485 | 0.31335 | -5.008  | 56704    |
| SGCB       | 1.4434   | 1.4434  | 2.8905  | 1.6346  | 0.12486 | 0.31335 | -5.0081 | 6443     |
| PCDHB15    | -0.21726 | 0.21726 | 0.75486 | -1.6346 | 0.12486 | 0.31335 | -5.0081 | 56121    |

|           |          |         |         |         |         |         |         |          |
|-----------|----------|---------|---------|---------|---------|---------|---------|----------|
| RGS3      | 1.664    | 1.664   | 3.1457  | 1.6345  | 0.12489 | 0.31335 | -5.0083 | 5998     |
| ERC1      | 2.173    | 2.173   | 9.1966  | 1.6344  | 0.1249  | 0.31335 | -5.0084 | 23085    |
| SLAIN2    | 3.5584   | 3.5584  | 9.1138  | 1.6344  | 0.12491 | 0.31335 | -5.0084 | 57606    |
| FASTKD5   | 0.84246  | 0.84246 | 3.4832  | 1.6344  | 0.12491 | 0.31335 | -5.0084 | 60493    |
| DES       | -13.969  | 13.969  | 9.8503  | -1.6344 | 0.12491 | 0.31335 | -5.0084 | 1674     |
| LOC729603 | -0.5091  | 0.5091  | 1.2975  | -1.6343 | 0.12493 | 0.31335 | -5.0085 | 729603   |
| CHD8      | -1.587   | 1.587   | 8.8637  | -1.634  | 0.12499 | 0.31345 | -5.0089 | 57680    |
| INTS12    | 1.2248   | 1.2248  | 3.8034  | 1.6338  | 0.12502 | 0.31349 | -5.0092 | 57117    |
| PPM1D     | 0.50305  | 0.50305 | 1.7566  | 1.6335  | 0.12509 | 0.31361 | -5.0096 | 8493     |
| KLHL5     | 1.0127   | 1.0127  | 2.3362  | 1.6334  | 0.12512 | 0.31366 | -5.0098 | 51088    |
| MKNK1-AS1 | -0.13964 | 0.13964 | 0.28837 | -1.6332 | 0.12515 | 0.31367 | -5.01   | 1.01E+08 |
| SART1     | -2.2519  | 2.2519  | 5.863   | -1.6327 | 0.12527 | 0.31392 | -5.0108 | 9092     |
| HECTD1    | 5.8028   | 5.8028  | 20.121  | 1.6325  | 0.1253  | 0.31395 | -5.011  | 25831    |
| PSMA3-AS1 | -1.408   | 1.408   | 4.3556  | -1.6318 | 0.12545 | 0.31426 | -5.012  | 379025   |
| PTCD3     | -0.5648  | 0.5648  | 3.0493  | -1.6318 | 0.12546 | 0.31426 | -5.0121 | 55037    |
| RAI1-AS1  | -0.40302 | 0.40302 | 0.56335 | -1.6315 | 0.12552 | 0.31438 | -5.0125 | 1.01E+08 |
| NSDHL     | 3.1666   | 3.1666  | 7.7985  | 1.6314  | 0.12555 | 0.31438 | -5.0126 | 50814    |
| PPP4C     | 8.9771   | 8.9771  | 25.487  | 1.6307  | 0.12569 | 0.3147  | -5.0136 | 5531     |
| CHST12    | -1.0142  | 1.0142  | 2.9701  | -1.6304 | 0.12575 | 0.31481 | -5.014  | 55501    |
| FAM21EP   | -0.11585 | 0.11585 | 0.2709  | -1.6302 | 0.12579 | 0.31485 | -5.0142 | 1E+08    |
| ZNF79     | -0.37706 | 0.37706 | 1.7284  | -1.6301 | 0.12582 | 0.31489 | -5.0145 | 7633     |
| SMIM26    | 4.4361   | 4.4361  | 11.673  | 1.6298  | 0.12587 | 0.31494 | -5.0148 | 388789   |
| SCML2     | -0.11133 | 0.11133 | 0.19358 | -1.6298 | 0.12588 | 0.31494 | -5.0149 | 10389    |
| DR1       | 2.3305   | 2.3305  | 9.8463  | 1.6297  | 0.1259  | 0.31494 | -5.015  | 1810     |
| AFG3L2    | -2.0792  | 2.0792  | 10.309  | -1.6294 | 0.12596 | 0.31505 | -5.0154 | 10939    |
| ARHGEF37  | -3.3238  | 3.3238  | 10.528  | -1.6293 | 0.12598 | 0.31505 | -5.0155 | 389337   |

|            |          |         |         |         |         |         |         |          |
|------------|----------|---------|---------|---------|---------|---------|---------|----------|
| PCDHGA10   | -0.5205  | 0.5205  | 1.6044  | -1.629  | 0.12605 | 0.31517 | -5.0159 | 56106    |
| SELENOW    | 20.725   | 20.725  | 58.46   | 1.6288  | 0.12609 | 0.31522 | -5.0162 | 6415     |
| PWAR6      | -0.21323 | 0.21323 | 0.34501 | -1.6287 | 0.12612 | 0.31524 | -5.0164 | 1.01E+08 |
| ADIPOR2    | 6.2482   | 6.2482  | 14.181  | 1.6285  | 0.12615 | 0.31524 | -5.0166 | 79602    |
| GOLGA7     | 2.8236   | 2.8236  | 9.0368  | 1.6285  | 0.12616 | 0.31524 | -5.0167 | 51125    |
| ARMC2-AS1  | -0.10418 | 0.10418 | 0.10717 | -1.6284 | 0.12618 | 0.31524 | -5.0168 | 1.02E+08 |
| SEMA6A-AS1 | -0.29151 | 0.29151 | 0.57501 | -1.6284 | 0.12619 | 0.31524 | -5.0169 | 1.02E+08 |
| NUP50-DT   | 0.53526  | 0.53526 | 2.2945  | 1.6274  | 0.1264  | 0.31572 | -5.0182 | 1.01E+08 |
| LRRC37A2   | -0.48897 | 0.48897 | 1.4459  | -1.6271 | 0.12645 | 0.3158  | -5.0186 | 474170   |
| CHMP4C     | 6.4831   | 6.4831  | 8.7595  | 1.6269  | 0.12649 | 0.31586 | -5.0189 | 92421    |
| ACP4       | -0.11684 | 0.11684 | 0.12903 | -1.6267 | 0.12655 | 0.31595 | -5.0192 | 93650    |
| NXPH4      | 2.8619   | 2.8619  | 6.1128  | 1.6266  | 0.12657 | 0.31597 | -5.0194 | 11247    |
| SIRT2      | 3.053    | 3.053   | 10.89   | 1.6265  | 0.12659 | 0.31598 | -5.0195 | 22933    |
| GRAP       | 0.65573  | 0.65573 | 1.5345  | 1.6262  | 0.12665 | 0.31608 | -5.0199 | 10750    |
| JPH4       | -0.12597 | 0.12597 | 0.18405 | -1.626  | 0.12669 | 0.31614 | -5.0202 | 84502    |
| PTTG1IP    | 9.6375   | 9.6375  | 26.333  | 1.6258  | 0.12674 | 0.3162  | -5.0205 | 754      |
| TNS4       | -8.3729  | 8.3729  | 31.751  | -1.6257 | 0.12676 | 0.3162  | -5.0206 | 84951    |
| PDK4       | -4.3556  | 4.3556  | 3.1612  | -1.6253 | 0.12684 | 0.31634 | -5.0211 | 5166     |
| MRPL51     | 17.652   | 17.652  | 33.831  | 1.6253  | 0.12685 | 0.31634 | -5.0212 | 51258    |
| STMP1      | 2.811    | 2.811   | 7.7372  | 1.6251  | 0.12688 | 0.31636 | -5.0214 | 647087   |
| CD200      | 0.88868  | 0.88868 | 1.3869  | 1.6247  | 0.12697 | 0.31654 | -5.022  | 4345     |
| HSPB6      | -6.2267  | 6.2267  | 6.2184  | -1.6246 | 0.12699 | 0.31656 | -5.0221 | 126393   |
| DOCK1      | -1.7169  | 1.7169  | 14.59   | -1.6243 | 0.12706 | 0.31665 | -5.0226 | 1793     |
| ISY1       | -0.55206 | 0.55206 | 2.4258  | -1.6242 | 0.12707 | 0.31665 | -5.0226 | 57461    |
| PBDC1      | 1.5688   | 1.5688  | 5.3189  | 1.624   | 0.12713 | 0.31667 | -5.023  | 51260    |
| ZNF750     | 17.088   | 17.088  | 35.93   | 1.624   | 0.12713 | 0.31667 | -5.023  | 79755    |

|            |          |         |          |         |         |         |         |          |
|------------|----------|---------|----------|---------|---------|---------|---------|----------|
| MORC3      | 2.0462   | 2.0462  | 7.0067   | 1.6239  | 0.12713 | 0.31667 | -5.0231 | 23515    |
| LOC729737  | -2.3493  | 2.3493  | 4.6924   | -1.6238 | 0.12717 | 0.3167  | -5.0233 | 729737   |
| ASCL2      | -0.9896  | 0.9896  | 1.9175   | -1.6237 | 0.12719 | 0.3167  | -5.0234 | 430      |
| IPW        | -0.12568 | 0.12568 | 0.22839  | -1.6236 | 0.1272  | 0.3167  | -5.0235 | 3653     |
| LOC644285  | -0.30344 | 0.30344 | 0.69057  | -1.6233 | 0.12726 | 0.31681 | -5.0239 | 644285   |
| NEMP2      | -0.3584  | 0.3584  | 1.2299   | -1.6233 | 0.12728 | 0.31681 | -5.024  | 1E+08    |
| MAATS1     | -0.10359 | 0.10359 | 0.089131 | -1.6231 | 0.12732 | 0.31686 | -5.0243 | 89876    |
| TBC1D3E    | 0.15678  | 0.15678 | 0.30665  | 1.6229  | 0.12735 | 0.31686 | -5.0245 | 1.03E+08 |
| STBD1      | 0.56755  | 0.56755 | 1.0606   | 1.6229  | 0.12736 | 0.31686 | -5.0245 | 8987     |
| REV3L      | -1.8543  | 1.8543  | 4.674    | -1.622  | 0.12756 | 0.31723 | -5.0258 | 5980     |
| EIF3C      | -3.4282  | 3.4282  | 10.318   | -1.6219 | 0.12756 | 0.31723 | -5.0259 | 8663     |
| NSMAF      | -0.91093 | 0.91093 | 5.0138   | -1.6219 | 0.12758 | 0.31723 | -5.026  | 8439     |
| LINC00582  | -0.11979 | 0.11979 | 0.10669  | -1.6217 | 0.12761 | 0.31723 | -5.0261 | 1E+08    |
| PRIMPOL    | -0.30303 | 0.30303 | 1.1866   | -1.6217 | 0.12762 | 0.31723 | -5.0262 | 201973   |
| MYO1H      | 0.30111  | 0.30111 | 0.52471  | 1.6217  | 0.12762 | 0.31723 | -5.0262 | 283446   |
| POM121L10P | -0.10606 | 0.10606 | 0.1465   | -1.6216 | 0.12764 | 0.31723 | -5.0264 | 646074   |
| CLCN1      | 0.1418   | 0.1418  | 0.1289   | 1.6215  | 0.12766 | 0.31723 | -5.0265 | 1180     |
| LOC143666  | -0.32684 | 0.32684 | 0.73569  | -1.6214 | 0.12768 | 0.31724 | -5.0266 | 143666   |
| MIR4524B   | -0.27201 | 0.27201 | 0.19015  | -1.621  | 0.12777 | 0.31739 | -5.0272 | 1.01E+08 |
| CAPN7      | -1.1684  | 1.1684  | 5.0673   | -1.6209 | 0.12778 | 0.31739 | -5.0273 | 23473    |
| CALML6     | -0.11379 | 0.11379 | 0.13201  | -1.6209 | 0.1278  | 0.31739 | -5.0274 | 163688   |
| PAX8-AS1   | 1.5554   | 1.5554  | 3.0919   | 1.6206  | 0.12785 | 0.31746 | -5.0277 | 654433   |
| LAMA5-AS1  | -0.33153 | 0.33153 | 0.50049  | -1.6205 | 0.12788 | 0.31746 | -5.0279 | 1.02E+08 |
| DUSP7      | 9.6107   | 9.6107  | 23.124   | 1.6204  | 0.1279  | 0.31746 | -5.028  | 1849     |
| TXNRD1     | 1.9525   | 1.9525  | 5.4235   | 1.6204  | 0.1279  | 0.31746 | -5.028  | 7296     |
| TNFRSF10C  | 1.8923   | 1.8923  | 1.5744   | 1.6199  | 0.128   | 0.31765 | -5.0287 | 8794     |

|              |          |         |          |         |         |         |         |          |
|--------------|----------|---------|----------|---------|---------|---------|---------|----------|
| SAFB         | -2.8046  | 2.8046  | 10.435   | -1.6198 | 0.12803 | 0.31768 | -5.0289 | 6294     |
| CHL1-AS2     | -0.31489 | 0.31489 | 0.1963   | -1.6196 | 0.12807 | 0.31774 | -5.0291 | 1.02E+08 |
| PITPNM3      | -1.6166  | 1.6166  | 4.411    | -1.6194 | 0.12812 | 0.31777 | -5.0295 | 83394    |
| LRRC39       | -0.14441 | 0.14441 | 0.20908  | -1.6193 | 0.12812 | 0.31777 | -5.0295 | 127495   |
| ELP2         | -0.74096 | 0.74096 | 4.1754   | -1.6193 | 0.12814 | 0.31777 | -5.0296 | 55250    |
| SF3A1        | -2.9897  | 2.9897  | 12.071   | -1.6192 | 0.12816 | 0.31777 | -5.0297 | 10291    |
| PARD3        | -3.4875  | 3.4875  | 10.048   | -1.6189 | 0.12821 | 0.31786 | -5.0301 | 56288    |
| NIP7         | 2.5101   | 2.5101  | 6.0419   | 1.6186  | 0.12829 | 0.31796 | -5.0305 | 51388    |
| LOC100130691 | -0.36576 | 0.36576 | 0.73676  | -1.6186 | 0.12829 | 0.31796 | -5.0306 | 1E+08    |
| RAB8B        | 1.0849   | 1.0849  | 2.3849   | 1.6184  | 0.12833 | 0.31801 | -5.0308 | 51762    |
| CNN3         | 14.353   | 14.353  | 26.508   | 1.6182  | 0.12836 | 0.31803 | -5.031  | 1266     |
| TNNI1        | -0.11658 | 0.11658 | 0.20463  | -1.6182 | 0.12838 | 0.31803 | -5.0311 | 7135     |
| C3orf80      | 0.51225  | 0.51225 | 0.37611  | 1.618   | 0.12842 | 0.31809 | -5.0314 | 401097   |
| LOC100133091 | -1.421   | 1.421   | 2.4164   | -1.6175 | 0.12852 | 0.31825 | -5.032  | 1E+08    |
| DCAF12       | 1.9596   | 1.9596  | 7.4109   | 1.6175  | 0.12852 | 0.31825 | -5.032  | 25853    |
| HOGA1        | -0.13385 | 0.13385 | 0.19948  | -1.6174 | 0.12855 | 0.31828 | -5.0323 | 112817   |
| FAIM         | 0.60695  | 0.60695 | 1.7576   | 1.6173  | 0.12857 | 0.31828 | -5.0324 | 55179    |
| PPIL2        | -0.84905 | 0.84905 | 4.4305   | -1.6169 | 0.12865 | 0.3184  | -5.0328 | 23759    |
| CREG1        | 24.006   | 24.006  | 38.422   | 1.6169  | 0.12866 | 0.3184  | -5.0329 | 8804     |
| NPY4R        | -0.1603  | 0.1603  | 0.19959  | -1.6167 | 0.1287  | 0.31847 | -5.0332 | 5540     |
| NEFM         | 0.61303  | 0.61303 | 0.84473  | 1.6163  | 0.12877 | 0.3186  | -5.0337 | 4741     |
| LOC100128325 | -0.10783 | 0.10783 | 0.078544 | -1.6161 | 0.12883 | 0.31866 | -5.034  | 1E+08    |
| CLDN5        | -4.2698  | 4.2698  | 5.3557   | -1.6161 | 0.12884 | 0.31866 | -5.0341 | 7122     |
| PLGLB1       | -0.12706 | 0.12706 | 0.1813   | -1.6159 | 0.12888 | 0.31872 | -5.0344 | 5343     |
| LAMP1        | 16.545   | 16.545  | 60.415   | 1.6157  | 0.12891 | 0.31875 | -5.0346 | 3916     |
| LRRC23       | -0.26854 | 0.26854 | 0.7666   | -1.6154 | 0.12898 | 0.31886 | -5.035  | 10233    |

|            |          |         |         |         |         |         |         |        |
|------------|----------|---------|---------|---------|---------|---------|---------|--------|
| ELK4       | -1.2329  | 1.2329  | 5.7749  | -1.6153 | 0.129   | 0.31886 | -5.0351 | 2005   |
| GFOD1      | 1.3815   | 1.3815  | 3.8729  | 1.6152  | 0.12902 | 0.31886 | -5.0353 | 54438  |
| ARHGEF28   | -0.83114 | 0.83114 | 3.5941  | -1.6152 | 0.12903 | 0.31886 | -5.0353 | 64283  |
| PLOD1      | 4.8128   | 4.8128  | 10.702  | 1.6151  | 0.12906 | 0.31887 | -5.0355 | 5351   |
| MR1        | -0.48634 | 0.48634 | 1.7387  | -1.6149 | 0.12909 | 0.3189  | -5.0357 | 3140   |
| KIF20B     | 0.40719  | 0.40719 | 0.93396 | 1.6148  | 0.12911 | 0.3189  | -5.0358 | 9585   |
| MMP1       | 68.654   | 68.654  | 44.306  | 1.6145  | 0.12917 | 0.31902 | -5.0362 | 4312   |
| SPRTN      | 0.31588  | 0.31588 | 1.841   | 1.6144  | 0.12921 | 0.31906 | -5.0364 | 83932  |
| COL10A1    | 4.9417   | 4.9417  | 3.4218  | 1.6142  | 0.12923 | 0.31907 | -5.0366 | 1300   |
| C15orf41   | 0.50219  | 0.50219 | 1.7046  | 1.6139  | 0.12931 | 0.31922 | -5.0371 | 84529  |
| BUB1       | 0.74178  | 0.74178 | 1.1756  | 1.6137  | 0.12935 | 0.31927 | -5.0374 | 699    |
| RIN1       | -4.4153  | 4.4153  | 7.7812  | -1.6133 | 0.12945 | 0.31942 | -5.038  | 9610   |
| ZNF878     | 0.49508  | 0.49508 | 0.55366 | 1.6133  | 0.12945 | 0.31942 | -5.038  | 729747 |
| SLC35A2    | 1.081    | 1.081   | 3.341   | 1.6129  | 0.12952 | 0.31955 | -5.0384 | 7355   |
| PPP1R3G    | -0.23838 | 0.23838 | 0.39686 | -1.6128 | 0.12955 | 0.31957 | -5.0386 | 648791 |
| IPO7       | 4.2655   | 4.2655  | 11.697  | 1.6125  | 0.12961 | 0.31967 | -5.0391 | 10527  |
| BMP8A      | 0.45956  | 0.45956 | 0.90051 | 1.6124  | 0.12964 | 0.31967 | -5.0392 | 353500 |
| FRMD4A     | -1.0375  | 1.0375  | 3.1071  | -1.6124 | 0.12964 | 0.31967 | -5.0392 | 55691  |
| CTSV       | 3.6036   | 3.6036  | 4.5977  | 1.6119  | 0.12975 | 0.31988 | -5.0399 | 1515   |
| MIEN1      | 3.3707   | 3.3707  | 8.1063  | 1.6118  | 0.12977 | 0.3199  | -5.0401 | 84299  |
| VPS50      | 0.4586   | 0.4586  | 1.6641  | 1.6115  | 0.12983 | 0.31995 | -5.0405 | 55610  |
| ENTPD3-AS1 | -0.13378 | 0.13378 | 0.23927 | -1.6115 | 0.12983 | 0.31995 | -5.0405 | 285266 |
| AP1G2      | -2.6453  | 2.6453  | 7.9232  | -1.6112 | 0.1299  | 0.32006 | -5.0409 | 8906   |
| SCT        | -0.14532 | 0.14532 | 0.16565 | -1.6107 | 0.13    | 0.32024 | -5.0415 | 6343   |
| GSTO1      | 10.602   | 10.602  | 16.862  | 1.6107  | 0.13001 | 0.32024 | -5.0416 | 9446   |
| ROR2       | 1.0754   | 1.0754  | 1.4551  | 1.6106  | 0.13003 | 0.32025 | -5.0417 | 4920   |

|              |          |         |         |         |         |         |         |          |
|--------------|----------|---------|---------|---------|---------|---------|---------|----------|
| SUGCT        | 0.46865  | 0.46865 | 0.78063 | 1.6103  | 0.13009 | 0.32034 | -5.0421 | 79783    |
| GJD3         | -0.80136 | 0.80136 | 1.3139  | -1.6097 | 0.13022 | 0.32063 | -5.0429 | 125111   |
| LOC100506123 | -0.19906 | 0.19906 | 0.32039 | -1.6093 | 0.13032 | 0.32081 | -5.0435 | 1.01E+08 |
| ID2-AS1      | -0.13061 | 0.13061 | 0.29171 | -1.6091 | 0.13037 | 0.32088 | -5.0438 | 1.01E+08 |
| SSBP3        | -2.0944  | 2.0944  | 7.9621  | -1.609  | 0.13038 | 0.32088 | -5.0439 | 23648    |
| LOC100507642 | -0.15689 | 0.15689 | 0.2245  | -1.6088 | 0.13043 | 0.32095 | -5.0442 | 1.01E+08 |
| ARFIP1       | 0.95104  | 0.95104 | 4.0889  | 1.6083  | 0.13053 | 0.32113 | -5.0449 | 27236    |
| RGS9         | -0.11733 | 0.11733 | 0.16307 | -1.6083 | 0.13054 | 0.32113 | -5.0449 | 8787     |
| IL1RL2       | 0.71074  | 0.71074 | 2.2243  | 1.6078  | 0.13065 | 0.3213  | -5.0456 | 8808     |
| CCR6         | -0.18691 | 0.18691 | 0.35071 | -1.6078 | 0.13065 | 0.3213  | -5.0456 | 1235     |
| POLR2L       | 12.133   | 12.133  | 31.879  | 1.6074  | 0.13074 | 0.32148 | -5.0462 | 5441     |
| COPS6        | 4.8894   | 4.8894  | 14.772  | 1.6072  | 0.13077 | 0.3215  | -5.0464 | 10980    |
| ZNF512       | -0.56771 | 0.56771 | 2.1116  | -1.6071 | 0.13079 | 0.3215  | -5.0465 | 84450    |
| ANXA5        | 23.612   | 23.612  | 49.98   | 1.6069  | 0.13083 | 0.32154 | -5.0468 | 308      |
| DBNL         | 9.3057   | 9.3057  | 25.797  | 1.6069  | 0.13084 | 0.32154 | -5.0468 | 28988    |
| TDRKH        | -0.30959 | 0.30959 | 0.71179 | -1.6068 | 0.13086 | 0.32154 | -5.047  | 11022    |
| GUK1         | 20.89    | 20.89   | 53.588  | 1.6067  | 0.13088 | 0.32154 | -5.0471 | 2987     |
| LOC105370943 | -0.12217 | 0.12217 | 0.12735 | -1.6065 | 0.13094 | 0.32164 | -5.0475 | 1.05E+08 |
| PDLIM3       | 1.9422   | 1.9422  | 2.721   | 1.6059  | 0.13107 | 0.32188 | -5.0483 | 27295    |
| NR1H3        | -0.45086 | 0.45086 | 0.95401 | -1.6057 | 0.13111 | 0.32188 | -5.0485 | 10062    |
| RPA2         | -1.6728  | 1.6728  | 5.6783  | -1.6057 | 0.13111 | 0.32188 | -5.0485 | 6118     |
| PODN         | -4.6222  | 4.6222  | 6.9544  | -1.6057 | 0.13111 | 0.32188 | -5.0486 | 127435   |
| FAM8A1       | 1.2297   | 1.2297  | 4.6134  | 1.6053  | 0.13119 | 0.32199 | -5.049  | 51439    |
| SLC18B1      | -0.79642 | 0.79642 | 3.0986  | -1.6053 | 0.1312  | 0.32199 | -5.0491 | 116843   |
| F8           | -0.60706 | 0.60706 | 0.64674 | -1.6051 | 0.13124 | 0.322   | -5.0493 | 2157     |
| TNNT1        | 2.4325   | 2.4325  | 4.1225  | 1.6051  | 0.13124 | 0.322   | -5.0493 | 7138     |

|              |          |         |          |         |         |         |         |          |
|--------------|----------|---------|----------|---------|---------|---------|---------|----------|
| BRD4         | -2.1191  | 2.1191  | 9.2172   | -1.605  | 0.13127 | 0.32202 | -5.0495 | 23476    |
| CBX5         | -2.4121  | 2.4121  | 9.2732   | -1.6049 | 0.13129 | 0.32204 | -5.0497 | 23468    |
| PSMC3        | 7.8258   | 7.8258  | 24.921   | 1.6047  | 0.13133 | 0.32208 | -5.0499 | 5702     |
| TREML2       | 0.16106  | 0.16106 | 0.13691  | 1.6045  | 0.13138 | 0.32215 | -5.0502 | 79865    |
| NBPF8        | -0.37641 | 0.37641 | 1.0565   | -1.6037 | 0.13154 | 0.3225  | -5.0512 | 728841   |
| MAFTRR       | -0.19062 | 0.19062 | 0.28032  | -1.6035 | 0.13159 | 0.32259 | -5.0516 | 1.02E+08 |
| RPS24        | 48.873   | 48.873  | 94.663   | 1.6033  | 0.13163 | 0.32264 | -5.0518 | 6229     |
| LOC100128340 | -0.19709 | 0.19709 | 0.36147  | -1.6032 | 0.13167 | 0.32267 | -5.052  | 1E+08    |
| PRXL2A       | 9.9324   | 9.9324  | 23.026   | 1.6024  | 0.13183 | 0.32295 | -5.0531 | 84293    |
| TMCO3        | 2.2161   | 2.2161  | 6.3221   | 1.6024  | 0.13184 | 0.32295 | -5.0531 | 55002    |
| LOC100289333 | -0.12213 | 0.12213 | 0.091691 | -1.6023 | 0.13185 | 0.32295 | -5.0532 | 1E+08    |
| CELSR3       | -0.12963 | 0.12963 | 0.3069   | -1.6023 | 0.13185 | 0.32295 | -5.0532 | 1951     |
| FASTKD1      | 0.33488  | 0.33488 | 1.3395   | 1.6021  | 0.13189 | 0.323   | -5.0535 | 79675    |
| GALK1        | 3.5946   | 3.5946  | 6.5331   | 1.602   | 0.13192 | 0.32303 | -5.0537 | 2584     |
| DGCR2        | -4.1692  | 4.1692  | 15.347   | -1.6019 | 0.13195 | 0.32305 | -5.0538 | 9993     |
| FAM228B      | -0.36291 | 0.36291 | 0.82223  | -1.6015 | 0.13203 | 0.32318 | -5.0543 | 375190   |
| C4orf36      | -0.1577  | 0.1577  | 0.49268  | -1.6015 | 0.13204 | 0.32318 | -5.0544 | 132989   |
| CAHM         | -0.15358 | 0.15358 | 0.28795  | -1.6012 | 0.13209 | 0.32322 | -5.0547 | 1.01E+08 |
| PLAU         | 7.8366   | 7.8366  | 13.794   | 1.6012  | 0.1321  | 0.32322 | -5.0547 | 5328     |
| SGIP1        | 0.36842  | 0.36842 | 0.45471  | 1.6009  | 0.13217 | 0.32333 | -5.0552 | 84251    |
| MDM1         | -0.16013 | 0.16013 | 0.49129  | -1.6008 | 0.13218 | 0.32333 | -5.0553 | 56890    |
| S100A10      | 68.707   | 68.707  | 118.77   | 1.6007  | 0.13221 | 0.32334 | -5.0554 | 6281     |
| IER5         | 7.9979   | 7.9979  | 17.28    | 1.6007  | 0.13222 | 0.32334 | -5.0555 | 51278    |
| DEFB1        | 20.029   | 20.029  | 34.957   | 1.6005  | 0.13226 | 0.32338 | -5.0557 | 1672     |
| SRCAP        | -3.0249  | 3.0249  | 10.082   | -1.6002 | 0.13233 | 0.32345 | -5.0562 | 10847    |
| C4orf46      | 0.31998  | 0.31998 | 0.68831  | 1.6002  | 0.13233 | 0.32345 | -5.0562 | 201725   |



|              |          |         |         |         |         |         |         |        |
|--------------|----------|---------|---------|---------|---------|---------|---------|--------|
| RFX3         | -0.21565 | 0.21565 | 0.60674 | -1.5995 | 0.13248 | 0.32377 | -5.0571 | 5991   |
| PYGM         | -0.20168 | 0.20168 | 0.28689 | -1.5994 | 0.1325  | 0.32378 | -5.0573 | 5837   |
| ARMC7        | -0.52907 | 0.52907 | 1.8084  | -1.5991 | 0.13256 | 0.32388 | -5.0576 | 79637  |
| MAPKAPK5     | -0.78044 | 0.78044 | 4.5712  | -1.599  | 0.13258 | 0.32388 | -5.0578 | 8550   |
| ADIRF        | 29.782   | 29.782  | 52.602  | 1.5987  | 0.13265 | 0.324   | -5.0582 | 10974  |
| ZC3H12B      | -0.11097 | 0.11097 | 0.15762 | -1.5983 | 0.13276 | 0.32414 | -5.0588 | 340554 |
| RNASE7       | 23.741   | 23.741  | 29.112  | 1.5982  | 0.13276 | 0.32414 | -5.0588 | 84659  |
| OLFML2B      | 10.482   | 10.482  | 11.34   | 1.5982  | 0.13276 | 0.32414 | -5.0589 | 25903  |
| CD151        | 14.616   | 14.616  | 32.352  | 1.5979  | 0.13283 | 0.32425 | -5.0593 | 977    |
| HIVEP2       | 1.1489   | 1.1489  | 6.3819  | 1.5978  | 0.13285 | 0.32425 | -5.0594 | 3097   |
| CES4A        | -2.4127  | 2.4127  | 3.6804  | -1.5977 | 0.13289 | 0.32429 | -5.0597 | 283848 |
| ARHGEF11     | -1.6694  | 1.6694  | 4.9686  | -1.5975 | 0.13294 | 0.32429 | -5.0599 | 9826   |
| PITRM1       | 2.119    | 2.119   | 8.054   | 1.5973  | 0.13297 | 0.32429 | -5.0601 | 10531  |
| DHX34        | -0.76088 | 0.76088 | 2.3384  | -1.5973 | 0.13298 | 0.32429 | -5.0602 | 9704   |
| GNB1         | 12.852   | 12.852  | 42.016  | 1.5972  | 0.13298 | 0.32429 | -5.0602 | 2782   |
| ZNF609       | -1.1189  | 1.1189  | 5.6364  | -1.5972 | 0.13299 | 0.32429 | -5.0603 | 23060  |
| ARC          | 0.73871  | 0.73871 | 0.59171 | 1.5972  | 0.133   | 0.32429 | -5.0603 | 23237  |
| PRKCSH       | -6.8108  | 6.8108  | 21.574  | -1.5969 | 0.13306 | 0.32438 | -5.0607 | 5589   |
| LOC100335030 | -0.21142 | 0.21142 | 0.35904 | -1.5968 | 0.13307 | 0.32438 | -5.0608 | 1E+08  |
| CSDE1        | 15.265   | 15.265  | 60.381  | 1.5964  | 0.13317 | 0.32453 | -5.0614 | 7812   |
| HSPA5        | 15.431   | 15.431  | 37.727  | 1.5963  | 0.13318 | 0.32453 | -5.0615 | 3309   |
| IMPDH2       | -10.521  | 10.521  | 36.943  | -1.5962 | 0.1332  | 0.32453 | -5.0616 | 3615   |
| OBSL1        | -1.4782  | 1.4782  | 2.9703  | -1.5962 | 0.13321 | 0.32453 | -5.0617 | 23363  |
| UBE2T        | 0.96831  | 0.96831 | 1.4469  | 1.5961  | 0.13323 | 0.32453 | -5.0618 | 29089  |
| FOSB         | 14.542   | 14.542  | 17.557  | 1.596   | 0.13326 | 0.32455 | -5.0619 | 2354   |
| CBX3P2       | -0.21122 | 0.21122 | 0.33849 | -1.5959 | 0.13329 | 0.32458 | -5.0621 | 645158 |

|              |          |         |         |         |         |         |         |          |
|--------------|----------|---------|---------|---------|---------|---------|---------|----------|
| COMMD1       | 3.412    | 3.412   | 8.8881  | 1.5957  | 0.13333 | 0.32461 | -5.0624 | 150684   |
| NGG5         | 8.4919   | 8.4919  | 19.569  | 1.5954  | 0.13338 | 0.32461 | -5.0627 | 2787     |
| TBC1D3D      | 0.14937  | 0.14937 | 0.29214 | 1.5953  | 0.13341 | 0.32461 | -5.0629 | 1.01E+08 |
| TBC1D3I      | 0.14937  | 0.14937 | 0.29214 | 1.5953  | 0.13341 | 0.32461 | -5.0629 | 1.03E+08 |
| TBC1D3K      | 0.14937  | 0.14937 | 0.29214 | 1.5953  | 0.13341 | 0.32461 | -5.0629 | 1.01E+08 |
| NAA50        | 3.0554   | 3.0554  | 8.9855  | 1.5953  | 0.13342 | 0.32461 | -5.0629 | 80218    |
| SIK2         | -1.0128  | 1.0128  | 4.5825  | -1.595  | 0.13349 | 0.32462 | -5.0634 | 23235    |
| CELSR1       | -3.1887  | 3.1887  | 9.216   | -1.595  | 0.13349 | 0.32462 | -5.0634 | 9620     |
| RAB21        | 1.1056   | 1.1056  | 4.6069  | 1.595   | 0.13349 | 0.32462 | -5.0634 | 23011    |
| CXXC5-AS1    | -0.13431 | 0.13431 | 0.25491 | -1.5949 | 0.1335  | 0.32462 | -5.0634 | 1.11E+08 |
| RASSF10      | -1.6425  | 1.6425  | 3.0247  | -1.5945 | 0.1336  | 0.32483 | -5.0641 | 644943   |
| PRDX5        | 28.17    | 28.17   | 60.066  | 1.5942  | 0.13365 | 0.3249  | -5.0644 | 25824    |
| PPP2R2D      | -0.50068 | 0.50068 | 2.7612  | -1.5939 | 0.13372 | 0.32501 | -5.0648 | 55844    |
| LOC100288798 | -0.24881 | 0.24881 | 0.5422  | -1.5939 | 0.13373 | 0.32501 | -5.0649 | 1E+08    |
| EIF4A3       | 7.6945   | 7.6945  | 21.469  | 1.5937  | 0.13376 | 0.32503 | -5.0651 | 9775     |
| CLTA         | 13.846   | 13.846  | 35.861  | 1.5935  | 0.13382 | 0.32511 | -5.0654 | 1211     |
| DNAJB4       | 1.0852   | 1.0852  | 2.6769  | 1.5934  | 0.13385 | 0.32511 | -5.0656 | 11080    |
| YTHDF1       | 1.8212   | 1.8212  | 8.6306  | 1.5933  | 0.13387 | 0.32511 | -5.0657 | 54915    |
| FAM32A       | 4.6451   | 4.6451  | 14.614  | 1.5933  | 0.13387 | 0.32511 | -5.0657 | 26017    |
| OGT          | -3.0354  | 3.0354  | 13.257  | -1.5931 | 0.1339  | 0.32513 | -5.0659 | 8473     |
| TWIST2       | 4.1183   | 4.1183  | 6.8482  | 1.5928  | 0.13398 | 0.32521 | -5.0664 | 117581   |
| PPA1         | 10.01    | 10.01   | 26.151  | 1.5927  | 0.13399 | 0.32521 | -5.0665 | 5464     |
| RPS6KA5      | -0.40554 | 0.40554 | 1.3595  | -1.5927 | 0.13399 | 0.32521 | -5.0665 | 9252     |
| TRAK1        | -0.78082 | 0.78082 | 6.1567  | -1.5925 | 0.13405 | 0.32531 | -5.0668 | 22906    |
| VASP         | 8.8603   | 8.8603  | 20.53   | 1.5923  | 0.13408 | 0.32534 | -5.067  | 7408     |
| MEPCE        | -2.4458  | 2.4458  | 6.6621  | -1.5921 | 0.13413 | 0.32542 | -5.0674 | 56257    |

|          |          |         |         |         |         |         |         |          |
|----------|----------|---------|---------|---------|---------|---------|---------|----------|
| GSDME    | 1.4148   | 1.4148  | 2.4911  | 1.5913  | 0.13431 | 0.3258  | -5.0684 | 1687     |
| MGP      | -7.9662  | 7.9662  | 14.249  | -1.5911 | 0.13435 | 0.32582 | -5.0687 | 4256     |
| ZRANB3   | -0.1538  | 0.1538  | 0.42067 | -1.5911 | 0.13436 | 0.32582 | -5.0687 | 84083    |
| HMGB3    | 1.0062   | 1.0062  | 2.1816  | 1.5906  | 0.13448 | 0.32599 | -5.0694 | 3149     |
| CYB561A3 | -1.4974  | 1.4974  | 5.8245  | -1.5906 | 0.13448 | 0.32599 | -5.0694 | 220002   |
| FAM114A2 | 0.65081  | 0.65081 | 2.1126  | 1.5905  | 0.13448 | 0.32599 | -5.0695 | 10827    |
| C1orf210 | 1.8752   | 1.8752  | 3.5319  | 1.5903  | 0.13454 | 0.32607 | -5.0698 | 149466   |
| MAP4K5   | 1.3654   | 1.3654  | 7.2447  | 1.5901  | 0.13458 | 0.32607 | -5.0701 | 11183    |
| CCNA2    | 1.0422   | 1.0422  | 1.6767  | 1.59    | 0.1346  | 0.32607 | -5.0702 | 890      |
| SNORD17  | -82.019  | 82.019  | 152.17  | -1.59   | 0.13461 | 0.32607 | -5.0703 | 692086   |
| SLC2A4   | -0.31948 | 0.31948 | 0.44633 | -1.5899 | 0.13464 | 0.32607 | -5.0704 | 6517     |
| SDF2     | 2.7285   | 2.7285  | 7.0247  | 1.5898  | 0.13464 | 0.32607 | -5.0705 | 6388     |
| CENPW    | 0.31892  | 0.31892 | 0.51027 | 1.5898  | 0.13465 | 0.32607 | -5.0705 | 387103   |
| CRTAP    | -4.1854  | 4.1854  | 11.734  | -1.5895 | 0.13473 | 0.32618 | -5.071  | 10491    |
| GDI1     | 5.3246   | 5.3246  | 19.433  | 1.5894  | 0.13474 | 0.32618 | -5.071  | 2664     |
| KCNIP3   | -0.57507 | 0.57507 | 1.1262  | -1.5892 | 0.13478 | 0.32624 | -5.0713 | 30818    |
| ANXA4    | -1.2707  | 1.2707  | 6.5205  | -1.5889 | 0.13486 | 0.32639 | -5.0718 | 307      |
| NAV2-AS2 | -0.12966 | 0.12966 | 0.18543 | -1.5886 | 0.13492 | 0.32648 | -5.0722 | 1.01E+08 |
| MAT1A    | -0.53903 | 0.53903 | 0.36166 | -1.5884 | 0.13497 | 0.32656 | -5.0725 | 4143     |
| CD96     | -0.17293 | 0.17293 | 0.37878 | -1.588  | 0.13507 | 0.32675 | -5.0731 | 10225    |
| ASB7     | 0.34159  | 0.34159 | 1.8773  | 1.5879  | 0.13509 | 0.32675 | -5.0732 | 140460   |
| TAF4     | -0.43353 | 0.43353 | 2.0189  | -1.5878 | 0.13511 | 0.32676 | -5.0733 | 6874     |
| CDKN1C   | 2.0381   | 2.0381  | 4.2009  | 1.5877  | 0.13513 | 0.32676 | -5.0735 | 1028     |
| HRC      | -0.1269  | 0.1269  | 0.17716 | -1.5874 | 0.1352  | 0.32688 | -5.0739 | 3270     |
| SYMPK    | -1.9219  | 1.9219  | 7.2676  | -1.5871 | 0.13526 | 0.32698 | -5.0743 | 8189     |
| C7orf25  | 0.67602  | 0.67602 | 1.8611  | 1.5869  | 0.13531 | 0.32706 | -5.0746 | 79020    |

|              |          |         |          |         |         |         |         |          |
|--------------|----------|---------|----------|---------|---------|---------|---------|----------|
| TTL          | 1.7019   | 1.7019  | 5.592    | 1.5865  | 0.1354  | 0.32722 | -5.0751 | 150465   |
| ATP6AP1      | 7.9076   | 7.9076  | 22.844   | 1.5859  | 0.13555 | 0.32734 | -5.076  | 537      |
| PSMD11       | 2.7549   | 2.7549  | 11.079   | 1.5858  | 0.13555 | 0.32734 | -5.076  | 5717     |
| GIMAP1       | -0.48707 | 0.48707 | 0.92027  | -1.5858 | 0.13557 | 0.32734 | -5.0761 | 170575   |
| GNL2         | 2.9238   | 2.9238  | 8.4544   | 1.5857  | 0.13558 | 0.32734 | -5.0762 | 29889    |
| YWHAE        | 29.973   | 29.973  | 82.043   | 1.5857  | 0.13559 | 0.32734 | -5.0763 | 7531     |
| EMX2         | -0.36999 | 0.36999 | 1.0325   | -1.5856 | 0.13559 | 0.32734 | -5.0763 | 2018     |
| WDR12        | 1.1847   | 1.1847  | 3.6379   | 1.5856  | 0.1356  | 0.32734 | -5.0763 | 55759    |
| RPS7         | 191.86   | 191.86  | 360.5    | 1.5856  | 0.13561 | 0.32734 | -5.0763 | 6201     |
| TM2D2        | 1.1074   | 1.1074  | 2.9814   | 1.5854  | 0.13565 | 0.32741 | -5.0766 | 83877    |
| FRAS1        | -0.46555 | 0.46555 | 0.5876   | -1.5853 | 0.13567 | 0.32741 | -5.0767 | 80144    |
| N4BP2L2      | -1.7183  | 1.7183  | 6.106    | -1.5852 | 0.1357  | 0.32742 | -5.0769 | 10443    |
| SCP2         | 3.1534   | 3.1534  | 10.517   | 1.5851  | 0.13571 | 0.32742 | -5.077  | 6342     |
| AGFG1        | 1.1663   | 1.1663  | 4.389    | 1.5849  | 0.13576 | 0.32744 | -5.0773 | 3267     |
| PSMA3        | 8.4642   | 8.4642  | 16.228   | 1.5849  | 0.13576 | 0.32744 | -5.0773 | 5684     |
| MAPK8IP3     | -1.9269  | 1.9269  | 5.6578   | -1.5845 | 0.13585 | 0.32757 | -5.0778 | 23162    |
| POLR3F       | 0.5823   | 0.5823  | 2.0058   | 1.5845  | 0.13586 | 0.32757 | -5.0779 | 10621    |
| ZNF497       | -0.22294 | 0.22294 | 0.42217  | -1.584  | 0.13597 | 0.32781 | -5.0786 | 162968   |
| LOC101929524 | -0.09735 | 0.09735 | 0.091318 | -1.5838 | 0.13601 | 0.32784 | -5.0788 | 1.02E+08 |
| NFIA-AS1     | -0.13019 | 0.13019 | 0.12822  | -1.5836 | 0.13606 | 0.32793 | -5.0791 | 645030   |
| LINC02175    | -0.24815 | 0.24815 | 0.60363  | -1.5829 | 0.13622 | 0.32827 | -5.0801 | 283887   |
| C18orf54     | 0.1428   | 0.1428  | 0.25775  | 1.5828  | 0.13625 | 0.32829 | -5.0802 | 162681   |
| CFLAR        | -1.0008  | 1.0008  | 8.0971   | -1.5824 | 0.13633 | 0.32838 | -5.0807 | 8837     |
| PSME3        | 4.9602   | 4.9602  | 15.617   | 1.5824  | 0.13633 | 0.32838 | -5.0807 | 10197    |
| PTDSS2       | 1.4608   | 1.4608  | 4.0954   | 1.5822  | 0.13638 | 0.32842 | -5.081  | 81490    |
| IGFN1        | 0.16107  | 0.16107 | 0.1918   | 1.5822  | 0.13638 | 0.32842 | -5.081  | 91156    |

|              |          |          |          |         |         |         |         |          |
|--------------|----------|----------|----------|---------|---------|---------|---------|----------|
| MYSM1        | -0.86261 | 0.86261  | 3.5969   | -1.5819 | 0.13645 | 0.32851 | -5.0814 | 114803   |
| SEC24C       | 3.7335   | 3.7335   | 14.563   | 1.5818  | 0.13646 | 0.32851 | -5.0815 | 9632     |
| LOC101927365 | -0.50686 | 0.50686  | 1.1266   | -1.5815 | 0.13655 | 0.32867 | -5.082  | 1.02E+08 |
| GPC4         | -1.1301  | 1.1301   | 1.2334   | -1.5812 | 0.13661 | 0.32875 | -5.0824 | 2239     |
| CCDC71       | -0.97208 | 0.97208  | 4.7395   | -1.5812 | 0.13662 | 0.32875 | -5.0825 | 64925    |
| TENT4A       | -0.55522 | 0.55522  | 4.1359   | -1.5807 | 0.13671 | 0.32894 | -5.083  | 11044    |
| CLPTM1       | 6.9967   | 6.9967   | 22.657   | 1.5805  | 0.13677 | 0.32899 | -5.0834 | 1209     |
| NSA2         | 4.9573   | 4.9573   | 14.83    | 1.5805  | 0.13678 | 0.32899 | -5.0834 | 10412    |
| CDH12        | -0.11559 | 0.11559  | 0.15865  | -1.5803 | 0.13682 | 0.32906 | -5.0837 | 1010     |
| STARD3NL     | 1.7971   | 1.7971   | 2.8078   | 1.5799  | 0.13691 | 0.32923 | -5.0842 | 83930    |
| HSPA7        | -1.09    | 1.09     | 1.8202   | -1.5797 | 0.13695 | 0.32924 | -5.0845 | 3311     |
| HAS2         | 1.6333   | 1.6333   | 1.9213   | 1.5796  | 0.13697 | 0.32924 | -5.0846 | 3037     |
| UBA1         | 12.461   | 12.461   | 35.405   | 1.5796  | 0.13698 | 0.32924 | -5.0846 | 7317     |
| N4BP3        | -0.56867 | 0.56867  | 1.6504   | -1.5794 | 0.13702 | 0.3293  | -5.0849 | 23138    |
| CERCAM       | 5.6689   | 5.6689   | 7.8179   | 1.5792  | 0.13705 | 0.32933 | -5.0851 | 51148    |
| CCDC114      | -0.0955  | 0.095495 | 0.065724 | -1.5791 | 0.1371  | 0.32933 | -5.0853 | 93233    |
| ZNF800       | 1.3258   | 1.3258   | 5.2023   | 1.5789  | 0.13712 | 0.32933 | -5.0855 | 168850   |
| LY6E-DT      | -0.13267 | 0.13267  | 0.11682  | -1.5789 | 0.13713 | 0.32933 | -5.0856 | 1E+08    |
| SRP19        | 0.61981  | 0.61981  | 2.6801   | 1.5788  | 0.13715 | 0.32933 | -5.0857 | 6728     |
| HOXA13       | -0.30756 | 0.30756  | 0.52613  | -1.5788 | 0.13716 | 0.32933 | -5.0857 | 3209     |
| CCDC92       | 2.0714   | 2.0714   | 5.083    | 1.5787  | 0.13717 | 0.32933 | -5.0858 | 80212    |
| SLITRK4      | -0.16217 | 0.16217  | 0.20713  | -1.5784 | 0.13725 | 0.32947 | -5.0862 | 139065   |
| PAX9         | 0.34721  | 0.34721  | 0.35498  | 1.5781  | 0.13731 | 0.32957 | -5.0866 | 5083     |
| NMNAT2       | -0.32121 | 0.32121  | 0.61126  | -1.5776 | 0.13743 | 0.32981 | -5.0873 | 23057    |
| RHD          | -0.13535 | 0.13535  | 0.21198  | -1.5774 | 0.13747 | 0.32981 | -5.0875 | 6007     |
| TPTEP1       | 1.1414   | 1.1414   | 3.5031   | 1.5774  | 0.13747 | 0.32981 | -5.0876 | 387590   |

|           |          |         |         |         |         |         |         |          |
|-----------|----------|---------|---------|---------|---------|---------|---------|----------|
| TERC      | -14.078  | 14.078  | 33.535  | -1.5773 | 0.1375  | 0.32981 | -5.0877 | 7012     |
| FZD7      | -1.6     | 1.6     | 3.654   | -1.5772 | 0.13752 | 0.32981 | -5.0879 | 8324     |
| RPS6KA6   | -0.14611 | 0.14611 | 0.20197 | -1.5772 | 0.13753 | 0.32981 | -5.0879 | 27330    |
| DNAJC15   | 1.6515   | 1.6515  | 3.403   | 1.577   | 0.13757 | 0.32985 | -5.0882 | 29103    |
| KANSL1    | -0.4555  | 0.4555  | 3.9458  | -1.5769 | 0.13758 | 0.32985 | -5.0882 | 284058   |
| ANKS3     | -0.58986 | 0.58986 | 1.4439  | -1.5766 | 0.13766 | 0.32997 | -5.0887 | 124401   |
| LINC01441 | -0.15332 | 0.15332 | 0.29635 | -1.5765 | 0.13767 | 0.32997 | -5.0888 | 1.02E+08 |
| CYB5R1    | 11.193   | 11.193  | 25.381  | 1.5762  | 0.13774 | 0.33005 | -5.0892 | 51706    |
| SMG1P2    | -0.7639  | 0.7639  | 2.6498  | -1.5762 | 0.13776 | 0.33005 | -5.0893 | 440354   |
| EIF5A     | 39.875   | 39.875  | 104.35  | 1.5762  | 0.13776 | 0.33005 | -5.0893 | 1984     |
| NLK       | 0.36427  | 0.36427 | 1.7761  | 1.576   | 0.13779 | 0.33008 | -5.0895 | 51701    |
| EMB       | -1.858   | 1.858   | 3.9724  | -1.5758 | 0.13784 | 0.33013 | -5.0898 | 133418   |
| ZSCAN26   | -0.35698 | 0.35698 | 1.3474  | -1.5757 | 0.13786 | 0.33013 | -5.0899 | 7741     |
| BPNT1     | 1.1482   | 1.1482  | 2.864   | 1.5757  | 0.13788 | 0.33014 | -5.09   | 10380    |
| NKX3-1    | -0.2239  | 0.2239  | 0.29425 | -1.5754 | 0.13795 | 0.33025 | -5.0904 | 4824     |
| SPRR2A    | 380.99   | 380.99  | 435.22  | 1.5753  | 0.13797 | 0.33026 | -5.0905 | 6700     |
| MRPS7     | 3.8048   | 3.8048  | 9.9736  | 1.5749  | 0.13804 | 0.33039 | -5.091  | 51081    |
| GSDMA     | 34.406   | 34.406  | 37.107  | 1.5747  | 0.13809 | 0.33046 | -5.0913 | 284110   |
| COG5      | -0.57472 | 0.57472 | 3.0897  | -1.5745 | 0.13814 | 0.33053 | -5.0916 | 10466    |
| PPP1CC    | 7.2564   | 7.2564  | 19.001  | 1.574   | 0.13825 | 0.33066 | -5.0922 | 5501     |
| PLA2G4F   | -8.506   | 8.506   | 17.888  | -1.5739 | 0.13828 | 0.33066 | -5.0924 | 255189   |
| GCSHP3    | -0.40352 | 0.40352 | 1.6462  | -1.5739 | 0.13829 | 0.33066 | -5.0924 | 1E+08    |
| IGFL2-AS1 | -0.41945 | 0.41945 | 0.67139 | -1.5739 | 0.13829 | 0.33066 | -5.0924 | 645553   |
| GTF2IP4   | 0.86343  | 0.86343 | 2.0345  | 1.5738  | 0.1383  | 0.33066 | -5.0925 | 1E+08    |
| TCN1      | 4.0583   | 4.0583  | 2.3648  | 1.5738  | 0.13831 | 0.33066 | -5.0926 | 6947     |
| E2F7      | 0.27483  | 0.27483 | 0.47207 | 1.5736  | 0.13835 | 0.3307  | -5.0928 | 144455   |

|              |          |         |          |         |         |         |         |          |
|--------------|----------|---------|----------|---------|---------|---------|---------|----------|
| PRRC1        | 1.5554   | 1.5554  | 7.4479   | 1.5734  | 0.13841 | 0.33079 | -5.0931 | 133619   |
| DLX6         | -0.36941 | 0.36941 | 0.69034  | -1.5732 | 0.13844 | 0.33082 | -5.0934 | 1750     |
| LOC102724784 | -0.25222 | 0.25222 | 0.4664   | -1.5731 | 0.13846 | 0.33082 | -5.0934 | 1.03E+08 |
| HSD17B12     | 3.0703   | 3.0703  | 10.396   | 1.573   | 0.13849 | 0.33086 | -5.0937 | 51144    |
| FCER1A       | -1.6976  | 1.6976  | 3.1615   | -1.5727 | 0.13856 | 0.33096 | -5.094  | 2205     |
| CLEC12A-AS1  | -0.20728 | 0.20728 | 0.35993  | -1.5724 | 0.13864 | 0.33108 | -5.0945 | 400002   |
| CCNQ         | 1.4318   | 1.4318  | 4.1466   | 1.5723  | 0.13864 | 0.33108 | -5.0945 | 92002    |
| KCNJ9        | -0.29832 | 0.29832 | 0.48296  | -1.5715 | 0.13884 | 0.33148 | -5.0957 | 3765     |
| TSTD1        | 6.1171   | 6.1171  | 12.15    | 1.5714  | 0.13885 | 0.33148 | -5.0958 | 1E+08    |
| CTAGE7P      | -0.10679 | 0.10679 | 0.14861  | -1.5713 | 0.13889 | 0.33152 | -5.096  | 119437   |
| LOC100505736 | -0.25273 | 0.25273 | 0.52503  | -1.5711 | 0.13893 | 0.33152 | -5.0963 | 1.01E+08 |
| PLAGL2       | -0.47291 | 0.47291 | 3.2181   | -1.5711 | 0.13894 | 0.33152 | -5.0963 | 5326     |
| TTYH2        | -0.36251 | 0.36251 | 0.86762  | -1.5709 | 0.13897 | 0.33152 | -5.0965 | 94015    |
| WDR20        | -0.27288 | 0.27288 | 2.2795   | -1.5709 | 0.13898 | 0.33152 | -5.0965 | 91833    |
| C8orf82      | -1.668   | 1.668   | 4.0609   | -1.5709 | 0.13899 | 0.33152 | -5.0966 | 414919   |
| FBXW11       | 1.8205   | 1.8205  | 7.116    | 1.5706  | 0.13904 | 0.33161 | -5.0969 | 23291    |
| RAB30        | -0.34897 | 0.34897 | 1.0849   | -1.5702 | 0.13915 | 0.33182 | -5.0975 | 27314    |
| USP45        | -0.28553 | 0.28553 | 0.73182  | -1.5698 | 0.13923 | 0.33194 | -5.098  | 85015    |
| C1orf53      | 0.30877  | 0.30877 | 0.47322  | 1.5697  | 0.13926 | 0.33194 | -5.0982 | 388722   |
| USP17L1      | -0.10637 | 0.10637 | 0.070266 | -1.5695 | 0.1393  | 0.33194 | -5.0984 | 401447   |
| THRB-AS1     | -0.68121 | 0.68121 | 0.56133  | -1.5695 | 0.1393  | 0.33194 | -5.0984 | 644990   |
| TNS2         | -4.0923  | 4.0923  | 7.3375   | -1.5694 | 0.13932 | 0.33194 | -5.0985 | 23371    |
| ASAH1        | 4.0447   | 4.0447  | 12.516   | 1.5694  | 0.13932 | 0.33194 | -5.0985 | 427      |
| KDM4D        | -0.11422 | 0.11422 | 0.19815  | -1.5688 | 0.13947 | 0.33225 | -5.0994 | 55693    |
| USP51        | -0.13886 | 0.13886 | 0.28646  | -1.5686 | 0.1395  | 0.33229 | -5.0996 | 158880   |
| THY1         | 10.418   | 10.418  | 12.489   | 1.5681  | 0.13962 | 0.33251 | -5.1003 | 7070     |

|              |          |         |         |         |         |         |         |        |
|--------------|----------|---------|---------|---------|---------|---------|---------|--------|
| CD109        | 3.2796   | 3.2796  | 10.351  | 1.568   | 0.13965 | 0.33254 | -5.1005 | 135228 |
| REC114       | -0.12787 | 0.12787 | 0.14676 | -1.5676 | 0.13974 | 0.3327  | -5.101  | 283677 |
| CCDC7        | -0.17791 | 0.17791 | 0.37421 | -1.5674 | 0.13978 | 0.33274 | -5.1013 | 79741  |
| CD99P1       | -0.14902 | 0.14902 | 0.66879 | -1.5672 | 0.13983 | 0.33274 | -5.1016 | 401577 |
| MAP7         | 3.7377   | 3.7377  | 8.57    | 1.5672  | 0.13984 | 0.33274 | -5.1016 | 9053   |
| CDR2L        | 0.83919  | 0.83919 | 2.2883  | 1.5672  | 0.13984 | 0.33274 | -5.1016 | 30850  |
| LOC100287036 | -0.33242 | 0.33242 | 0.71298 | -1.5671 | 0.13985 | 0.33274 | -5.1017 | 1E+08  |
| MEGF8        | -1.2452  | 1.2452  | 2.8488  | -1.5669 | 0.13992 | 0.33284 | -5.102  | 1954   |
| ATE1         | 0.57774  | 0.57774 | 3.2518  | 1.5667  | 0.13995 | 0.33288 | -5.1022 | 11101  |
| CPSF7        | -1.5221  | 1.5221  | 11.372  | -1.5665 | 0.14    | 0.33295 | -5.1025 | 79869  |
| SLC13A3      | -0.14759 | 0.14759 | 0.28578 | -1.5664 | 0.14003 | 0.33296 | -5.1027 | 64849  |
| CPTP         | 4.3311   | 4.3311  | 9.7379  | 1.5663  | 0.14006 | 0.33296 | -5.1029 | 80772  |
| KIAA1755     | -0.18281 | 0.18281 | 0.22957 | -1.5662 | 0.14008 | 0.33296 | -5.103  | 85449  |
| MARCO        | -2.8946  | 2.8946  | 1.9759  | -1.5659 | 0.14014 | 0.33296 | -5.1033 | 8685   |
| PLK1         | 1.5898   | 1.5898  | 2.441   | 1.5659  | 0.14014 | 0.33296 | -5.1033 | 5347   |
| SPAAR        | -0.16172 | 0.16172 | 0.2099  | -1.5659 | 0.14015 | 0.33296 | -5.1034 | 158376 |
| USP9X        | 1.658    | 1.658   | 9.4382  | 1.5659  | 0.14015 | 0.33296 | -5.1034 | 8239   |
| KATNA1       | 0.7107   | 0.7107  | 3.371   | 1.5658  | 0.14016 | 0.33296 | -5.1035 | 11104  |
| PSMD7        | 5.2917   | 5.2917  | 18.968  | 1.5655  | 0.14024 | 0.33303 | -5.104  | 5713   |
| PGAP2        | -1.4491  | 1.4491  | 5.7306  | -1.5654 | 0.14026 | 0.33303 | -5.104  | 27315  |
| LOC100131107 | -0.20288 | 0.20288 | 0.4329  | -1.5654 | 0.14026 | 0.33303 | -5.1041 | 1E+08  |
| CBWD5        | -0.58854 | 0.58854 | 3.5963  | -1.5653 | 0.14027 | 0.33303 | -5.1041 | 220869 |
| MAPK1IP1L    | 2.1832   | 2.1832  | 7.2623  | 1.565   | 0.14036 | 0.33319 | -5.1046 | 93487  |
| BPTF         | -1.1156  | 1.1156  | 7.1708  | -1.5648 | 0.1404  | 0.3332  | -5.1049 | 2186   |
| HAUS2        | 0.88838  | 0.88838 | 2.412   | 1.5647  | 0.14042 | 0.3332  | -5.105  | 55142  |
| VGF          | -0.14299 | 0.14299 | 0.16125 | -1.5645 | 0.14048 | 0.3332  | -5.1053 | 7425   |



|          |          |         |          |         |         |         |         |          |
|----------|----------|---------|----------|---------|---------|---------|---------|----------|
| IFI44L   | -3.2415  | 3.2415  | 2.0711   | -1.5644 | 0.14049 | 0.3332  | -5.1054 | 10964    |
| TUFT1    | 9.0237   | 9.0237  | 17.799   | 1.5644  | 0.14049 | 0.3332  | -5.1054 | 7286     |
| GFRA3    | -0.18278 | 0.18278 | 0.14707  | -1.5644 | 0.1405  | 0.3332  | -5.1055 | 2676     |
| MIR7-1   | -0.13738 | 0.13738 | 0.088977 | -1.5643 | 0.14051 | 0.3332  | -5.1055 | 407043   |
| SNORD133 | -47.208  | 47.208  | 31.945   | -1.5643 | 0.14052 | 0.3332  | -5.1056 | 1.07E+08 |
| OR5E1P   | -0.30789 | 0.30789 | 0.49954  | -1.564  | 0.14058 | 0.33329 | -5.1059 | 26343    |
| DDAH1    | 0.55422  | 0.55422 | 1.2268   | 1.5638  | 0.14063 | 0.33332 | -5.1062 | 23576    |
| TSTD2    | -0.32689 | 0.32689 | 2.0574   | -1.5638 | 0.14063 | 0.33332 | -5.1062 | 158427   |
| CAMKK1   | -0.78386 | 0.78386 | 2.1474   | -1.5636 | 0.14068 | 0.33337 | -5.1065 | 84254    |
| CEMIP2   | 3.463    | 3.463   | 5.7216   | 1.5636  | 0.14069 | 0.33337 | -5.1066 | 23670    |
| MKLN1    | -1.0817  | 1.0817  | 4.216    | -1.5633 | 0.14074 | 0.33339 | -5.1068 | 4289     |
| FAM155B  | 0.92561  | 0.92561 | 0.52284  | 1.5633  | 0.14074 | 0.33339 | -5.1069 | 27112    |
| CFAP73   | -0.14226 | 0.14226 | 0.21902  | -1.5632 | 0.14076 | 0.33339 | -5.107  | 387885   |
| DENR     | 2.7522   | 2.7522  | 8.4916   | 1.5631  | 0.1408  | 0.33339 | -5.1072 | 8562     |
| RPF2     | 0.76318  | 0.76318 | 2.2373   | 1.563   | 0.14082 | 0.33339 | -5.1073 | 84154    |
| BICRA    | -0.83094 | 0.83094 | 2.5173   | -1.563  | 0.14082 | 0.33339 | -5.1073 | 29998    |
| SPATA20  | -2.1582  | 2.1582  | 4.8035   | -1.5629 | 0.14083 | 0.33339 | -5.1074 | 64847    |
| LMNTD2   | -0.43452 | 0.43452 | 0.87129  | -1.5626 | 0.14092 | 0.33355 | -5.1079 | 256329   |
| BUD23    | -1.7457  | 1.7457  | 6.5996   | -1.5621 | 0.14103 | 0.33375 | -5.1085 | 114049   |
| KIFC3    | 3.6777   | 3.6777  | 9.7093   | 1.5617  | 0.14113 | 0.33395 | -5.1091 | 3801     |
| CA6      | -1.6489  | 1.6489  | 1.822    | -1.5615 | 0.14118 | 0.33402 | -5.1094 | 765      |
| FAM41C   | -0.28182 | 0.28182 | 0.57132  | -1.5606 | 0.14139 | 0.33446 | -5.1106 | 284593   |
| ZNF33A   | -0.55822 | 0.55822 | 2.227    | -1.56   | 0.14153 | 0.33476 | -5.1115 | 7581     |
| CLDN34   | -0.16001 | 0.16001 | 0.20177  | -1.5597 | 0.14159 | 0.33477 | -5.1118 | 1E+08    |
| KCNB1    | -0.10329 | 0.10329 | 0.10637  | -1.5597 | 0.1416  | 0.33477 | -5.1118 | 3745     |
| SMIM3    | 2.2466   | 2.2466  | 3.5974   | 1.5596  | 0.14161 | 0.33477 | -5.1119 | 85027    |

|              |          |         |         |         |         |         |         |          |
|--------------|----------|---------|---------|---------|---------|---------|---------|----------|
| CXCL6        | 1.3833   | 1.3833  | 0.90189 | 1.5596  | 0.14162 | 0.33477 | -5.112  | 6372     |
| PLGLB2       | -0.1189  | 0.1189  | 0.16966 | -1.5595 | 0.14164 | 0.33477 | -5.1121 | 5342     |
| ASPDH        | -0.11075 | 0.11075 | 0.13611 | -1.5592 | 0.14172 | 0.33487 | -5.1125 | 554235   |
| IDH2-DT      | -0.19482 | 0.19482 | 0.1828  | -1.5592 | 0.14172 | 0.33487 | -5.1125 | 1.05E+08 |
| LOC100131289 | -0.23817 | 0.23817 | 0.18635 | -1.5588 | 0.14182 | 0.33506 | -5.1131 | 1E+08    |
| WNT5B        | -0.42019 | 0.42019 | 0.97039 | -1.5586 | 0.14185 | 0.33509 | -5.1133 | 81029    |
| RBM18        | 0.68612  | 0.68612 | 2.5182  | 1.5584  | 0.14189 | 0.33509 | -5.1135 | 92400    |
| SERBP1       | 9.0034   | 9.0034  | 31.646  | 1.5584  | 0.1419  | 0.33509 | -5.1136 | 26135    |
| PIGF         | 1.0395   | 1.0395  | 2.6969  | 1.5584  | 0.14191 | 0.33509 | -5.1137 | 5281     |
| AMACR        | 2.4309   | 2.4309  | 2.6057  | 1.5581  | 0.14197 | 0.33518 | -5.114  | 23600    |
| LRR6         | -0.11063 | 0.11063 | 0.22768 | -1.5578 | 0.14203 | 0.33525 | -5.1144 | 23639    |
| COA5         | -0.71826 | 0.71826 | 2.8707  | -1.5578 | 0.14204 | 0.33525 | -5.1144 | 493753   |
| FOXO4        | -1.0776  | 1.0776  | 2.9563  | -1.5575 | 0.14211 | 0.33537 | -5.1148 | 4303     |
| TNFAIP6      | 4.6868   | 4.6868  | 5.0912  | 1.5573  | 0.14216 | 0.33545 | -5.1151 | 7130     |
| THAP6        | -0.28972 | 0.28972 | 1.0181  | -1.5569 | 0.14226 | 0.3356  | -5.1157 | 152815   |
| NAV3         | 0.6866   | 0.6866  | 1.6603  | 1.5569  | 0.14227 | 0.3356  | -5.1157 | 89795    |
| TMSB4X       | 255      | 255     | 416.98  | 1.5566  | 0.14233 | 0.33569 | -5.116  | 7114     |
| WBP1         | -2.8765  | 2.8765  | 8.4899  | -1.5562 | 0.14243 | 0.3359  | -5.1166 | 23559    |
| HOXB6        | -0.17832 | 0.17832 | 0.27789 | -1.556  | 0.14247 | 0.33595 | -5.1169 | 3216     |
| MRPL38       | -2.59    | 2.59    | 8.2118  | -1.5553 | 0.14263 | 0.33624 | -5.1178 | 64978    |
| DSEL         | 1.0521   | 1.0521  | 1.7286  | 1.5553  | 0.14264 | 0.33624 | -5.1178 | 92126    |
| TMEM109      | -4.5491  | 4.5491  | 14.147  | -1.5552 | 0.14267 | 0.33624 | -5.118  | 79073    |
| C16orf86     | -0.28395 | 0.28395 | 0.51191 | -1.5551 | 0.14269 | 0.33624 | -5.1181 | 388284   |
| CNNM2        | -0.39474 | 0.39474 | 1.5011  | -1.555  | 0.1427  | 0.33624 | -5.1182 | 54805    |
| HTR1B        | 0.17169  | 0.17169 | 0.1959  | 1.5546  | 0.1428  | 0.33637 | -5.1188 | 3351     |
| ARHGEF5      | -3.9069  | 3.9069  | 10.702  | -1.5546 | 0.14281 | 0.33637 | -5.1188 | 7984     |

|           |          |         |         |         |         |         |         |          |
|-----------|----------|---------|---------|---------|---------|---------|---------|----------|
| MYO1C     | 7.4277   | 7.4277  | 24.418  | 1.5546  | 0.14281 | 0.33637 | -5.1188 | 4641     |
| HEPH      | 1.2962   | 1.2962  | 2.5456  | 1.5545  | 0.14283 | 0.33637 | -5.1189 | 9843     |
| GTPBP4    | 2.8722   | 2.8722  | 7.4097  | 1.5542  | 0.1429  | 0.33638 | -5.1193 | 23560    |
| UTP25     | -0.30806 | 0.30806 | 1.8251  | -1.5541 | 0.14291 | 0.33638 | -5.1194 | 27042    |
| ADCY6     | -1.5281  | 1.5281  | 3.3434  | -1.5541 | 0.14292 | 0.33638 | -5.1194 | 112      |
| ZNF175    | -0.2215  | 0.2215  | 0.82457 | -1.5541 | 0.14292 | 0.33638 | -5.1194 | 7728     |
| DUSP8     | 0.62331  | 0.62331 | 1.3175  | 1.5539  | 0.14297 | 0.3364  | -5.1197 | 1850     |
| SON       | -2.3802  | 2.3802  | 19.946  | -1.5538 | 0.14299 | 0.3364  | -5.1199 | 6651     |
| COMMD7    | 2.5936   | 2.5936  | 7.3097  | 1.5538  | 0.143   | 0.3364  | -5.1199 | 149951   |
| HMMR      | 0.33536  | 0.33536 | 0.50684 | 1.5537  | 0.14301 | 0.3364  | -5.1199 | 3161     |
| CCRL2     | 0.29814  | 0.29814 | 0.47023 | 1.5536  | 0.14305 | 0.33645 | -5.1202 | 9034     |
| HLX-AS1   | -0.14614 | 0.14614 | 0.10898 | -1.553  | 0.14318 | 0.33672 | -5.1209 | 1.01E+08 |
| CD300C    | 0.32454  | 0.32454 | 0.41158 | 1.5527  | 0.14325 | 0.33682 | -5.1213 | 10871    |
| CCDC91    | 0.5636   | 0.5636  | 2.5992  | 1.5527  | 0.14326 | 0.33682 | -5.1214 | 55297    |
| OGFRP1    | -0.15267 | 0.15267 | 0.30384 | -1.5523 | 0.14336 | 0.33695 | -5.1219 | 388906   |
| TNRC17    | -0.47186 | 0.47186 | 0.99163 | -1.5523 | 0.14336 | 0.33695 | -5.1219 | 27321    |
| MPZ       | -0.25959 | 0.25959 | 0.33505 | -1.5519 | 0.14343 | 0.33707 | -5.1224 | 4359     |
| BCL2L13   | -0.82254 | 0.82254 | 4.5461  | -1.5519 | 0.14345 | 0.33707 | -5.1224 | 23786    |
| SPRY4-IT1 | 0.37665  | 0.37665 | 0.46722 | 1.5515  | 0.14353 | 0.33721 | -5.1229 | 1.01E+08 |
| MAPKAP1   | 2.8486   | 2.8486  | 10.277  | 1.5513  | 0.14359 | 0.3373  | -5.1232 | 79109    |
| TMEM63C   | -0.26719 | 0.26719 | 0.36296 | -1.5509 | 0.14368 | 0.33746 | -5.1238 | 57156    |
| SGO1      | 0.21522  | 0.21522 | 0.36384 | 1.5508  | 0.1437  | 0.33746 | -5.1239 | 151648   |
| RPL26     | 140.46   | 140.46  | 242.09  | 1.5507  | 0.14372 | 0.33748 | -5.124  | 6154     |
| GTSE1     | 0.49528  | 0.49528 | 0.85036 | 1.5505  | 0.14377 | 0.33754 | -5.1243 | 51512    |
| GTF2A1    | 0.7254   | 0.7254  | 3.05    | 1.5504  | 0.14381 | 0.3376  | -5.1245 | 2957     |
| CDCA2     | 0.52546  | 0.52546 | 0.90797 | 1.5501  | 0.14387 | 0.33766 | -5.1248 | 157313   |

|              |          |         |         |         |         |         |         |          |
|--------------|----------|---------|---------|---------|---------|---------|---------|----------|
| BISPR        | -0.18195 | 0.18195 | 0.28439 | -1.5501 | 0.14388 | 0.33766 | -5.1249 | 1.05E+08 |
| TTI1         | -0.49541 | 0.49541 | 2.5069  | -1.5499 | 0.14391 | 0.33769 | -5.1251 | 9675     |
| CAD          | -1.653   | 1.653   | 5.0267  | -1.5495 | 0.14401 | 0.33787 | -5.1256 | 790      |
| KLHDC8B      | -2.203   | 2.203   | 6.3288  | -1.5489 | 0.14417 | 0.3382  | -5.1266 | 200942   |
| LINP1        | 0.31232  | 0.31232 | 0.2507  | 1.5481  | 0.14434 | 0.33856 | -5.1275 | 1.09E+08 |
| ZNF81        | -0.19662 | 0.19662 | 1.0913  | -1.548  | 0.14438 | 0.33859 | -5.1277 | 347344   |
| SLC35D2      | 0.48561  | 0.48561 | 1.8062  | 1.5474  | 0.14452 | 0.33889 | -5.1285 | 11046    |
| NAP1L4       | 4.9602   | 4.9602  | 17.462  | 1.5472  | 0.14456 | 0.33894 | -5.1288 | 4676     |
| LATS2        | 1.2029   | 1.2029  | 4.125   | 1.5471  | 0.14459 | 0.33895 | -5.1289 | 26524    |
| BAZ1A        | 1.818    | 1.818   | 7.0982  | 1.5469  | 0.14465 | 0.33903 | -5.1292 | 11177    |
| SMAD1-AS1    | -1.2191  | 1.2191  | 0.76396 | -1.5464 | 0.14476 | 0.33925 | -5.1299 | 1.04E+08 |
| ASS1         | -3.7813  | 3.7813  | 9.6105  | -1.5461 | 0.14484 | 0.33939 | -5.1303 | 445      |
| ZNF726       | -0.1087  | 0.1087  | 0.23531 | -1.546  | 0.14486 | 0.3394  | -5.1305 | 730087   |
| ARHGAP39     | -0.37309 | 0.37309 | 0.96127 | -1.5453 | 0.14503 | 0.33975 | -5.1314 | 80728    |
| EZR          | 19.903   | 19.903  | 51.756  | 1.5452  | 0.14505 | 0.33975 | -5.1315 | 7430     |
| C6orf132     | 10.835   | 10.835  | 23.962  | 1.545   | 0.14509 | 0.33979 | -5.1317 | 647024   |
| LOC101927793 | -0.17825 | 0.17825 | 0.25346 | -1.5448 | 0.14513 | 0.33983 | -5.132  | 1.02E+08 |
| RAI1         | -1.6258  | 1.6258  | 5.3642  | -1.5448 | 0.14515 | 0.33983 | -5.1321 | 10743    |
| TPSD1        | -0.25398 | 0.25398 | 0.28251 | -1.5445 | 0.14521 | 0.33994 | -5.1324 | 23430    |
| C12orf65     | -0.33275 | 0.33275 | 1.2757  | -1.5441 | 0.14533 | 0.34015 | -5.1331 | 91574    |
| SNORA47      | -0.54952 | 0.54952 | 0.78357 | -1.544  | 0.14534 | 0.34015 | -5.1332 | 677828   |
| MNAT1        | 1.3076   | 1.3076  | 3.6425  | 1.5436  | 0.14542 | 0.34027 | -5.1336 | 4331     |
| PIK3R4       | -0.62095 | 0.62095 | 3.999   | -1.5436 | 0.14544 | 0.34027 | -5.1337 | 30849    |
| SLC16A5      | -0.64764 | 0.64764 | 2.5208  | -1.5435 | 0.14546 | 0.34029 | -5.1338 | 9121     |
| ZNF136       | -0.34809 | 0.34809 | 1.1896  | -1.5432 | 0.14553 | 0.34031 | -5.1342 | 7695     |
| SQOR         | 8.1071   | 8.1071  | 16.025  | 1.5432  | 0.14554 | 0.34031 | -5.1343 | 58472    |

|              |          |         |         |         |         |         |         |          |
|--------------|----------|---------|---------|---------|---------|---------|---------|----------|
| GIN1         | 0.19711  | 0.19711 | 0.53857 | 1.5431  | 0.14555 | 0.34031 | -5.1343 | 54826    |
| TMEM189      | -1.6115  | 1.6115  | 8.0458  | -1.5431 | 0.14556 | 0.34031 | -5.1344 | 387521   |
| HSPA12A      | -0.30036 | 0.30036 | 1.0282  | -1.543  | 0.14559 | 0.34031 | -5.1345 | 259217   |
| HOMER3       | 2.9189   | 2.9189  | 7.0984  | 1.5429  | 0.14559 | 0.34031 | -5.1346 | 9454     |
| CIP2A        | 0.26058  | 0.26058 | 0.65925 | 1.5427  | 0.14565 | 0.34039 | -5.1349 | 57650    |
| DAGLA        | -0.20442 | 0.20442 | 0.40891 | -1.5426 | 0.14568 | 0.34042 | -5.1351 | 747      |
| EOGT         | 1.1784   | 1.1784  | 3.1246  | 1.5424  | 0.14572 | 0.34047 | -5.1353 | 285203   |
| BICDL1       | -2.4012  | 2.4012  | 3.8712  | -1.5422 | 0.14577 | 0.34053 | -5.1356 | 92558    |
| SUV39H1      | -0.3505  | 0.3505  | 1.3854  | -1.5421 | 0.14579 | 0.34054 | -5.1357 | 6839     |
| RFX3-AS1     | -0.18178 | 0.18178 | 0.35883 | -1.5419 | 0.14583 | 0.34056 | -5.1359 | 1.02E+08 |
| LINC00324    | -0.23036 | 0.23036 | 0.54243 | -1.5419 | 0.14584 | 0.34056 | -5.136  | 284029   |
| EMC2         | 0.96921  | 0.96921 | 2.8651  | 1.5415  | 0.14594 | 0.34073 | -5.1365 | 9694     |
| ROCK2        | 1.769    | 1.769   | 5.4746  | 1.5413  | 0.14599 | 0.34081 | -5.1368 | 9475     |
| BLVRA        | 5.4313   | 5.4313  | 12.577  | 1.5412  | 0.14602 | 0.34083 | -5.1369 | 644      |
| ZNF10        | -0.25898 | 0.25898 | 0.64527 | -1.5409 | 0.14608 | 0.3409  | -5.1373 | 7556     |
| ZNF14        | -0.41042 | 0.41042 | 0.96348 | -1.5409 | 0.14609 | 0.3409  | -5.1373 | 7561     |
| ATF1         | 0.73821  | 0.73821 | 2.4711  | 1.5408  | 0.14612 | 0.34093 | -5.1375 | 466      |
| ALDH1A2      | -0.35351 | 0.35351 | 0.44989 | -1.5404 | 0.14621 | 0.34107 | -5.138  | 8854     |
| ASMTL-AS1    | -0.22903 | 0.22903 | 0.42574 | -1.5403 | 0.14622 | 0.34107 | -5.1381 | 80161    |
| BSN          | -0.10192 | 0.10192 | 0.10717 | -1.5399 | 0.14632 | 0.34122 | -5.1386 | 8927     |
| LOC105375218 | -0.10787 | 0.10787 | 0.12067 | -1.5399 | 0.14634 | 0.34122 | -5.1387 | 1.05E+08 |
| PRB4         | -0.20702 | 0.20702 | 0.15433 | -1.5398 | 0.14635 | 0.34122 | -5.1388 | 5545     |
| NME6         | 0.37147  | 0.37147 | 2.1508  | 1.5393  | 0.14647 | 0.34147 | -5.1395 | 10201    |
| BNIP1        | 0.55812  | 0.55812 | 1.7306  | 1.5392  | 0.1465  | 0.34148 | -5.1396 | 662      |
| INPP5B       | -0.45826 | 0.45826 | 2.4867  | -1.5382 | 0.14674 | 0.34192 | -5.141  | 3633     |
| SLC35G1      | -0.13753 | 0.13753 | 0.27926 | -1.5381 | 0.14677 | 0.34192 | -5.1411 | 159371   |

|              |          |         |          |         |         |         |         |          |
|--------------|----------|---------|----------|---------|---------|---------|---------|----------|
| SLCO3A1      | -0.86991 | 0.86991 | 3.8492   | -1.538  | 0.1468  | 0.34192 | -5.1413 | 28232    |
| C1QTNF9      | -0.11328 | 0.11328 | 0.087184 | -1.5379 | 0.14681 | 0.34192 | -5.1414 | 338872   |
| DCLK1        | -0.45205 | 0.45205 | 0.70154  | -1.5379 | 0.14682 | 0.34192 | -5.1414 | 9201     |
| NLRP1        | -2.2707  | 2.2707  | 8.1741   | -1.5378 | 0.14683 | 0.34192 | -5.1415 | 22861    |
| RPN1         | 11.981   | 11.981  | 32.635   | 1.5378  | 0.14685 | 0.34192 | -5.1416 | 6184     |
| WDR4         | -0.81873 | 0.81873 | 2.8124   | -1.5377 | 0.14685 | 0.34192 | -5.1416 | 10785    |
| FRMD4B       | 1.4892   | 1.4892  | 6.5599   | 1.5375  | 0.14691 | 0.342   | -5.1419 | 23150    |
| PKP4-AS1     | -0.21885 | 0.21885 | 0.44325  | -1.5374 | 0.14693 | 0.34201 | -5.142  | 1E+08    |
| MAF          | -4.854   | 4.854   | 18.504   | -1.5364 | 0.14718 | 0.34248 | -5.1434 | 4094     |
| HDHD2        | -0.68958 | 0.68958 | 3.2523   | -1.5364 | 0.14718 | 0.34248 | -5.1434 | 84064    |
| AGER         | -0.10971 | 0.10971 | 0.17561  | -1.5364 | 0.14719 | 0.34248 | -5.1435 | 177      |
| CASQ2        | -0.82743 | 0.82743 | 0.68954  | -1.5361 | 0.14724 | 0.34256 | -5.1438 | 845      |
| FGFR4        | -0.1625  | 0.1625  | 0.2654   | -1.5356 | 0.14737 | 0.34278 | -5.1445 | 2264     |
| FAF2         | 1.7849   | 1.7849  | 7.5313   | 1.5356  | 0.14738 | 0.34278 | -5.1445 | 23197    |
| HERPUD2      | 1.1202   | 1.1202  | 6.3677   | 1.535   | 0.14752 | 0.34305 | -5.1453 | 64224    |
| NIPBL-DT     | -0.43743 | 0.43743 | 1.5335   | -1.5348 | 0.14757 | 0.34313 | -5.1456 | 646719   |
| LOC101929130 | 0.29188  | 0.29188 | 0.39356  | 1.5346  | 0.14762 | 0.34319 | -5.1458 | 1.02E+08 |
| SNORA21B     | -0.24545 | 0.24545 | 0.3461   | -1.5344 | 0.14767 | 0.34322 | -5.1461 | 1.1E+08  |
| CENPF        | 0.91912  | 0.91912 | 1.673    | 1.5344  | 0.14767 | 0.34322 | -5.1461 | 1063     |
| CDS2         | -1.0845  | 1.0845  | 3.9536   | -1.5343 | 0.1477  | 0.34322 | -5.1463 | 8760     |
| ANO1         | -1.5892  | 1.5892  | 5.1527   | -1.5342 | 0.14771 | 0.34322 | -5.1464 | 55107    |
| ARHGAP44     | -0.22263 | 0.22263 | 0.46616  | -1.5339 | 0.14778 | 0.34327 | -5.1467 | 9912     |
| BBOX1-AS1    | -0.25447 | 0.25447 | 0.4607   | -1.5339 | 0.14779 | 0.34327 | -5.1468 | 1.04E+08 |
| FANCG        | -0.4468  | 0.4468  | 1.87     | -1.5339 | 0.14779 | 0.34327 | -5.1468 | 2189     |
| MEIS1-AS2    | -0.68481 | 0.68481 | 0.86274  | -1.533  | 0.14801 | 0.34373 | -5.148  | 1.01E+08 |
| ELOA-AS1     | -0.12602 | 0.12602 | 0.18664  | -1.5328 | 0.14806 | 0.3438  | -5.1483 | 1.01E+08 |

|              |          |         |         |         |         |         |         |        |
|--------------|----------|---------|---------|---------|---------|---------|---------|--------|
| C17orf75     | -0.1667  | 0.1667  | 0.87068 | -1.5326 | 0.1481  | 0.34384 | -5.1485 | 64149  |
| DNER         | -1.05    | 1.05    | 1.9033  | -1.532  | 0.14824 | 0.34412 | -5.1493 | 92737  |
| LOC100132057 | -0.11299 | 0.11299 | 0.1636  | -1.5319 | 0.14827 | 0.34413 | -5.1494 | 1E+08  |
| CORO2A       | -0.66879 | 0.66879 | 3.0483  | -1.5318 | 0.14829 | 0.34414 | -5.1496 | 7464   |
| ATP10A       | -0.40455 | 0.40455 | 0.86877 | -1.5317 | 0.14832 | 0.34416 | -5.1497 | 57194  |
| TMEM141      | 5.8672   | 5.8672  | 13.954  | 1.5315  | 0.14838 | 0.34422 | -5.15   | 85014  |
| MXD4         | -3.325   | 3.325   | 10.132  | -1.5314 | 0.14839 | 0.34422 | -5.1501 | 10608  |
| RFESD        | -0.11349 | 0.11349 | 0.20273 | -1.5313 | 0.14842 | 0.34422 | -5.1502 | 317671 |
| TMEM119      | 6.7212   | 6.7212  | 8.3513  | 1.5312  | 0.14846 | 0.34422 | -5.1505 | 338773 |
| CD300H       | 0.32878  | 0.32878 | 0.22116 | 1.5311  | 0.14846 | 0.34422 | -5.1505 | 1E+08  |
| ARHGAP23     | -4.7667  | 4.7667  | 14.632  | -1.5311 | 0.14848 | 0.34422 | -5.1506 | 57636  |
| DRICH1       | -0.12596 | 0.12596 | 0.14865 | -1.531  | 0.1485  | 0.34422 | -5.1507 | 51233  |
| LDLR         | 9.8783   | 9.8783  | 18.987  | 1.5309  | 0.14853 | 0.34422 | -5.1509 | 3949   |
| ALOX12B      | 25.068   | 25.068  | 40.348  | 1.5308  | 0.14855 | 0.34422 | -5.151  | 242    |
| WIPI2        | 4.0835   | 4.0835  | 9.9687  | 1.5307  | 0.14857 | 0.34422 | -5.1511 | 26100  |
| MAN2B2       | -1.8548  | 1.8548  | 5.0493  | -1.5306 | 0.14859 | 0.34422 | -5.1512 | 23324  |
| TBCD         | -1.6222  | 1.6222  | 5.9076  | -1.5305 | 0.14862 | 0.34422 | -5.1513 | 6904   |
| AUNIP        | 0.18204  | 0.18204 | 0.39726 | 1.5305  | 0.14862 | 0.34422 | -5.1514 | 79000  |
| BCL2L1       | 5.7969   | 5.7969  | 13.911  | 1.5304  | 0.14863 | 0.34422 | -5.1514 | 598    |
| MUCL1        | -19.649  | 19.649  | 30.562  | -1.5303 | 0.14867 | 0.34425 | -5.1516 | 118430 |
| C1orf35      | -1.3034  | 1.3034  | 4.0021  | -1.5301 | 0.14872 | 0.34434 | -5.1519 | 79169  |
| GBP3         | -0.81896 | 0.81896 | 2.0935  | -1.5299 | 0.14877 | 0.3444  | -5.1522 | 2635   |
| NCK2         | 2.6337   | 2.6337  | 9.5695  | 1.5296  | 0.14883 | 0.34448 | -5.1525 | 8440   |
| MRPS21       | 4.7557   | 4.7557  | 12.336  | 1.5296  | 0.14885 | 0.34448 | -5.1526 | 54460  |
| RBM39        | 3.0926   | 3.0926  | 18.633  | 1.5295  | 0.14887 | 0.34448 | -5.1527 | 9584   |
| CCDC88A      | 0.9105   | 0.9105  | 2.239   | 1.5292  | 0.14893 | 0.34458 | -5.153  | 55704  |

|                               |          |         |         |         |         |         |         |          |
|-------------------------------|----------|---------|---------|---------|---------|---------|---------|----------|
| EFCC1                         | -0.20791 | 0.20791 | 0.42165 | -1.5291 | 0.14896 | 0.34461 | -5.1532 | 79825    |
| CCL18                         | 21.578   | 21.578  | 19.012  | 1.529   | 0.149   | 0.34465 | -5.1534 | 6362     |
| NBAS                          | -0.54982 | 0.54982 | 5.4832  | -1.5284 | 0.14913 | 0.3449  | -5.1541 | 51594    |
| AIDA                          | 2.4178   | 2.4178  | 9.9879  | 1.5283  | 0.14917 | 0.34495 | -5.1544 | 64853    |
| FSIP2-AS1                     | -0.17727 | 0.17727 | 0.19893 | -1.5276 | 0.14934 | 0.3453  | -5.1553 | 1.08E+08 |
| GMDS                          | -1.0595  | 1.0595  | 2.7859  | -1.5274 | 0.14937 | 0.34532 | -5.1555 | 2762     |
| RBBP4                         | -1.4274  | 1.4274  | 7.2718  | -1.5273 | 0.14941 | 0.34536 | -5.1557 | 5928     |
| ZNF320                        | -0.17104 | 0.17104 | 0.5564  | -1.527  | 0.14947 | 0.34546 | -5.156  | 162967   |
| DNAJC17                       | -0.84227 | 0.84227 | 3.7342  | -1.5268 | 0.14953 | 0.34554 | -5.1563 | 55192    |
| CIAPIN1                       | 1.9313   | 1.9313  | 7.0888  | 1.5267  | 0.14955 | 0.34555 | -5.1564 | 57019    |
| STON2                         | 3.1778   | 3.1778  | 8.74    | 1.5265  | 0.14961 | 0.34563 | -5.1567 | 85439    |
| PAK1IP1                       | 1.1541   | 1.1541  | 3.9531  | 1.5264  | 0.14963 | 0.34563 | -5.1569 | 55003    |
| ZNF329                        | -0.26343 | 0.26343 | 1.273   | -1.5261 | 0.14972 | 0.34578 | -5.1573 | 79673    |
| RNASEK                        | 9.5185   | 9.5185  | 28.726  | 1.526   | 0.14974 | 0.34578 | -5.1574 | 440400   |
| FDPS                          | 9.4177   | 9.4177  | 26.023  | 1.5257  | 0.14981 | 0.3459  | -5.1578 | 2224     |
| EXOC6                         | 0.35974  | 0.35974 | 1.387   | 1.5255  | 0.14984 | 0.34593 | -5.158  | 54536    |
| HERC5                         | -0.99978 | 0.99978 | 1.0363  | -1.5253 | 0.1499  | 0.34599 | -5.1583 | 51191    |
| RPP14                         | 0.52697  | 0.52697 | 1.8251  | 1.5253  | 0.14991 | 0.34599 | -5.1584 | 11102    |
| POLD4                         | 3.7975   | 3.7975  | 9.5458  | 1.5252  | 0.14993 | 0.34599 | -5.1585 | 57804    |
| DAD1                          | 15.309   | 15.309  | 31.786  | 1.5249  | 0.14999 | 0.34609 | -5.1588 | 1603     |
| OPN1SW                        | -0.10024 | 0.10024 | 0.12798 | -1.5248 | 0.15002 | 0.3461  | -5.159  | 611      |
| SRI                           | 2.0268   | 2.0268  | 5.6873  | 1.524   | 0.15022 | 0.34651 | -5.16   | 6717     |
| ARHGAP27P1-BPTFP1-<br>KPNA2P3 | -1.0413  | 1.0413  | 4.7226  | -1.5234 | 0.15037 | 0.34671 | -5.1608 | 1.09E+08 |
| GPR1                          | 2.796    | 2.796   | 3.035   | 1.5234  | 0.15037 | 0.34671 | -5.1609 | 2825     |
| CCL17                         | 0.21348  | 0.21348 | 0.18561 | 1.5234  | 0.15038 | 0.34671 | -5.1609 | 6361     |



|              |          |         |         |         |         |         |         |        |
|--------------|----------|---------|---------|---------|---------|---------|---------|--------|
| ATXN7L3B     | -2.0156  | 2.0156  | 10.748  | -1.5233 | 0.15039 | 0.34671 | -5.161  | 552889 |
| LOC100134040 | -0.1161  | 0.1161  | 0.10884 | -1.5231 | 0.15045 | 0.34681 | -5.1613 | 1E+08  |
| PCDHB5       | -0.1843  | 0.1843  | 0.36608 | -1.5228 | 0.15052 | 0.34692 | -5.1617 | 26167  |
| CSF3         | 1.8299   | 1.8299  | 1.7685  | 1.5227  | 0.15056 | 0.34697 | -5.1619 | 1440   |
| SDR16C5      | 7.5566   | 7.5566  | 10.094  | 1.5224  | 0.15063 | 0.34709 | -5.1623 | 195814 |
| NAALAD2      | -0.13927 | 0.13927 | 0.22221 | -1.5218 | 0.15078 | 0.34738 | -5.1631 | 10003  |
| TBC1D9       | 0.94344  | 0.94344 | 3.3096  | 1.521   | 0.15097 | 0.34773 | -5.1641 | 23158  |
| SPP1         | 14.182   | 14.182  | 7.6032  | 1.521   | 0.15098 | 0.34773 | -5.1642 | 6696   |
| COL8A2       | 2.1014   | 2.1014  | 3.6223  | 1.5209  | 0.15099 | 0.34773 | -5.1642 | 1296   |
| OGFOD2       | -0.56411 | 0.56411 | 1.868   | -1.5208 | 0.15102 | 0.34774 | -5.1643 | 79676  |
| SLC35E2A     | -1.3961  | 1.3961  | 2.812   | -1.5207 | 0.15105 | 0.34777 | -5.1645 | 9906   |
| XAF1         | -2.2432  | 2.2432  | 3.0773  | -1.5202 | 0.15118 | 0.348   | -5.1652 | 54739  |
| CYP1B1-AS1   | -0.12991 | 0.12991 | 0.11468 | -1.52   | 0.15122 | 0.348   | -5.1655 | 285154 |
| PLEKHM2      | 5.3939   | 5.3939  | 17.531  | 1.5199  | 0.15124 | 0.348   | -5.1656 | 23207  |
| LAX1         | -0.12428 | 0.12428 | 0.25349 | -1.5199 | 0.15125 | 0.348   | -5.1656 | 54900  |
| LOC643327    | -1.4698  | 1.4698  | 1.8969  | -1.5198 | 0.15127 | 0.348   | -5.1657 | 643327 |
| C1GALT1C1    | 0.83016  | 0.83016 | 2.0157  | 1.5198  | 0.15127 | 0.348   | -5.1657 | 29071  |
| PLCB3        | 3.3867   | 3.3867  | 8.339   | 1.5191  | 0.15144 | 0.34832 | -5.1666 | 5331   |
| NOTCH2NLA    | -0.7527  | 0.7527  | 0.69555 | -1.519  | 0.15147 | 0.34835 | -5.1668 | 388677 |
| RHCE         | 0.23162  | 0.23162 | 0.23679 | 1.5188  | 0.15151 | 0.34841 | -5.167  | 6006   |
| TNMD         | -0.2323  | 0.2323  | 0.14841 | -1.5186 | 0.15158 | 0.34849 | -5.1674 | 64102  |
| MIR181A1HG   | 0.24242  | 0.24242 | 0.35685 | 1.5185  | 0.1516  | 0.34849 | -5.1675 | 1E+08  |
| GLIPR2       | 1.6714   | 1.6714  | 3.1161  | 1.5184  | 0.15161 | 0.34849 | -5.1676 | 152007 |
| MFSD10       | 3.2524   | 3.2524  | 7.6171  | 1.5183  | 0.15165 | 0.34853 | -5.1678 | 10227  |
| UFSP2        | 1.0903   | 1.0903  | 4.6761  | 1.5181  | 0.1517  | 0.34861 | -5.168  | 55325  |
| CLCN2        | -0.17502 | 0.17502 | 0.6272  | -1.5177 | 0.1518  | 0.34875 | -5.1685 | 1181   |

|           |          |         |         |         |         |         |         |        |
|-----------|----------|---------|---------|---------|---------|---------|---------|--------|
| PRMT5     | 3.553    | 3.553   | 9.8644  | 1.5176  | 0.15181 | 0.34875 | -5.1686 | 10419  |
| RPGR      | 0.30959  | 0.30959 | 1.0832  | 1.5176  | 0.15183 | 0.34875 | -5.1687 | 6103   |
| ETNK1     | 0.56254  | 0.56254 | 2.8851  | 1.5172  | 0.15192 | 0.3489  | -5.1692 | 55500  |
| LRRC17    | 1.0078   | 1.0078  | 0.94741 | 1.5171  | 0.15195 | 0.34893 | -5.1693 | 10234  |
| MRPS23    | 2.2186   | 2.2186  | 5.0897  | 1.5169  | 0.152   | 0.349   | -5.1696 | 51649  |
| BMX       | -0.36624 | 0.36624 | 0.59414 | -1.5168 | 0.15202 | 0.349   | -5.1697 | 660    |
| RXRБ      | -0.21533 | 0.21533 | 1.0221  | -1.5164 | 0.15211 | 0.34916 | -5.1702 | 6257   |
| TNFSF9    | 1.3423   | 1.3423  | 1.4765  | 1.5161  | 0.1522  | 0.34931 | -5.1707 | 8744   |
| QRICH1    | -0.86803 | 0.86803 | 8.0693  | -1.5157 | 0.15229 | 0.34944 | -5.1712 | 54870  |
| C19orf44  | -0.23545 | 0.23545 | 0.63176 | -1.5157 | 0.15229 | 0.34944 | -5.1712 | 84167  |
| INE1      | -0.55019 | 0.55019 | 1.517   | -1.5155 | 0.15234 | 0.3495  | -5.1715 | 8552   |
| GALNT18   | 1.3992   | 1.3992  | 5.4245  | 1.5154  | 0.15238 | 0.34954 | -5.1716 | 374378 |
| PCDHGA3   | -0.11871 | 0.11871 | 0.23726 | -1.5152 | 0.15242 | 0.34959 | -5.1719 | 56112  |
| WDFY3-AS2 | -0.11008 | 0.11008 | 0.27444 | -1.515  | 0.15246 | 0.34963 | -5.1721 | 404201 |
| MRPL33    | 4.1634   | 4.1634  | 10.344  | 1.5148  | 0.15252 | 0.34971 | -5.1724 | 9553   |
| PARL      | -1.7975  | 1.7975  | 7.7158  | -1.5147 | 0.15254 | 0.34972 | -5.1725 | 55486  |
| TBCE      | 0.35679  | 0.35679 | 2.1696  | 1.5145  | 0.15258 | 0.34977 | -5.1727 | 6905   |
| ASNS      | 1.33     | 1.33    | 2.5567  | 1.5144  | 0.15262 | 0.3498  | -5.1729 | 440    |
| SLC6A14   | 5.1534   | 5.1534  | 6.4626  | 1.5143  | 0.15264 | 0.3498  | -5.173  | 11254  |
| SLC7A2    | -1.8415  | 1.8415  | 3.0382  | -1.5142 | 0.15267 | 0.3498  | -5.1732 | 6542   |
| AHCYL1    | 1.6361   | 1.6361  | 8.7988  | 1.5141  | 0.15269 | 0.3498  | -5.1733 | 10768  |
| MAP9      | 0.21831  | 0.21831 | 0.33554 | 1.5141  | 0.1527  | 0.3498  | -5.1733 | 79884  |
| TVP23A    | -0.10676 | 0.10676 | 0.16772 | -1.513  | 0.15296 | 0.35035 | -5.1747 | 780776 |
| SOX15     | 6.9808   | 6.9808  | 14.833  | 1.5128  | 0.15303 | 0.35043 | -5.1751 | 6665   |
| TMEM50B   | -1.0194  | 1.0194  | 3.9778  | -1.5127 | 0.15304 | 0.35043 | -5.1751 | 757    |
| MX1       | -14.013  | 14.013  | 9.1847  | -1.5124 | 0.15312 | 0.35058 | -5.1756 | 4599   |

|              |          |         |         |         |         |         |         |          |
|--------------|----------|---------|---------|---------|---------|---------|---------|----------|
| GTPBP3       | -0.7959  | 0.7959  | 2.5333  | -1.5122 | 0.15318 | 0.35067 | -5.1759 | 84705    |
| LRCH4        | -1.496   | 1.496   | 5.191   | -1.5119 | 0.15326 | 0.3508  | -5.1763 | 4034     |
| LOC107985544 | -0.12763 | 0.12763 | 0.38652 | -1.5116 | 0.15332 | 0.35089 | -5.1766 | 1.08E+08 |
| KIF4A        | 0.53321  | 0.53321 | 0.88214 | 1.511   | 0.15349 | 0.35119 | -5.1775 | 24137    |
| FOXJ3        | -0.89626 | 0.89626 | 5.236   | -1.5109 | 0.15351 | 0.35119 | -5.1776 | 22887    |
| PSPH         | 0.67052  | 0.67052 | 1.7812  | 1.5108  | 0.15351 | 0.35119 | -5.1777 | 5723     |
| ATXN1L       | -1.1399  | 1.1399  | 6.0634  | -1.5107 | 0.15355 | 0.35123 | -5.1779 | 342371   |
| YY2          | -0.16613 | 0.16613 | 0.51053 | -1.5103 | 0.15365 | 0.35141 | -5.1784 | 404281   |
| MAN1A1       | 3.1504   | 3.1504  | 8.9258  | 1.5101  | 0.15371 | 0.35149 | -5.1787 | 4121     |
| IFT43        | 0.80703  | 0.80703 | 2.4226  | 1.5099  | 0.15375 | 0.35152 | -5.1789 | 112752   |
| SRPK1        | 11.596   | 11.596  | 14.119  | 1.5098  | 0.15378 | 0.35152 | -5.179  | 6732     |
| ANKDD1A      | -0.31265 | 0.31265 | 0.72712 | -1.5098 | 0.15378 | 0.35152 | -5.1791 | 348094   |
| PKDCC        | -1.403   | 1.403   | 1.6735  | -1.5095 | 0.15385 | 0.35162 | -5.1794 | 91461    |
| ZNF763       | -0.16372 | 0.16372 | 0.37477 | -1.5094 | 0.15389 | 0.35166 | -5.1796 | 284390   |
| RAB11A       | 5.8878   | 5.8878  | 19.433  | 1.5091  | 0.15396 | 0.35177 | -5.18   | 8766     |
| GOLGA4       | 4.7323   | 4.7323  | 14.006  | 1.5087  | 0.15405 | 0.35192 | -5.1805 | 2803     |
| LCE3A        | 31.751   | 31.751  | 26.66   | 1.5087  | 0.15406 | 0.35192 | -5.1806 | 353142   |
| TMEM164      | -1.1592  | 1.1592  | 4.4478  | -1.5083 | 0.15416 | 0.35209 | -5.1811 | 84187    |
| PTP4A1       | 4.5994   | 4.5994  | 12.918  | 1.5079  | 0.15426 | 0.35228 | -5.1816 | 7803     |
| CENPA        | 0.6477   | 0.6477  | 1.096   | 1.5073  | 0.15441 | 0.35256 | -5.1824 | 1058     |
| MYCBP2       | -7.0163  | 7.0163  | 19.098  | -1.5069 | 0.15451 | 0.35275 | -5.1829 | 23077    |
| CLEC12A      | 0.30073  | 0.30073 | 0.30627 | 1.5068  | 0.15454 | 0.35277 | -5.1831 | 160364   |
| RGS13        | -0.16504 | 0.16504 | 0.2204  | -1.5065 | 0.15462 | 0.3529  | -5.1835 | 6003     |
| NDUF5        | -0.25517 | 0.25517 | 1.2456  | -1.5061 | 0.15472 | 0.35304 | -5.184  | 79133    |
| FCF1         | 1.3794   | 1.3794  | 4.8336  | 1.5061  | 0.15472 | 0.35304 | -5.184  | 51077    |
| KIAA1614     | -0.53156 | 0.53156 | 1.0211  | -1.506  | 0.15475 | 0.35307 | -5.1842 | 57710    |

|           |          |         |         |         |         |         |         |          |
|-----------|----------|---------|---------|---------|---------|---------|---------|----------|
| ZNF618    | -0.55931 | 0.55931 | 1.4074  | -1.5055 | 0.15488 | 0.35331 | -5.1848 | 114991   |
| PTGR2     | -0.35104 | 0.35104 | 1.1971  | -1.5052 | 0.15496 | 0.35341 | -5.1852 | 145482   |
| CAMSAP1   | 1.5212   | 1.5212  | 6.3337  | 1.5051  | 0.15497 | 0.35341 | -5.1853 | 157922   |
| MAP4K4    | 4.6663   | 4.6663  | 12.321  | 1.5048  | 0.15506 | 0.35356 | -5.1858 | 9448     |
| C2orf69   | 0.47534  | 0.47534 | 2.4239  | 1.5046  | 0.1551  | 0.35356 | -5.186  | 205327   |
| OGDH      | 5.1898   | 5.1898  | 17.832  | 1.5046  | 0.15511 | 0.35356 | -5.186  | 4967     |
| ERVH48-1  | -0.15556 | 0.15556 | 0.30758 | -1.5045 | 0.15512 | 0.35356 | -5.1861 | 90625    |
| SAP30BP   | 1.5109   | 1.5109  | 6.9331  | 1.5044  | 0.15516 | 0.35361 | -5.1863 | 29115    |
| TMEM154   | 7.9569   | 7.9569  | 20.753  | 1.5038  | 0.15529 | 0.35383 | -5.187  | 201799   |
| PWWP2B    | -1.0975  | 1.0975  | 3.4324  | -1.5038 | 0.1553  | 0.35383 | -5.187  | 170394   |
| REXO1     | -1.546   | 1.546   | 6.2237  | -1.5035 | 0.15537 | 0.35395 | -5.1874 | 57455    |
| SMCR8     | -0.7555  | 0.7555  | 3.7574  | -1.5033 | 0.15542 | 0.35398 | -5.1877 | 140775   |
| PLD2      | 7.9786   | 7.9786  | 18.309  | 1.5033  | 0.15543 | 0.35398 | -5.1877 | 5338     |
| MED14     | 1.1815   | 1.1815  | 5.775   | 1.5032  | 0.15545 | 0.35398 | -5.1878 | 9282     |
| ABI2      | -0.65505 | 0.65505 | 2.4922  | -1.503  | 0.1555  | 0.35398 | -5.1881 | 10152    |
| PRRT4     | -0.14837 | 0.14837 | 0.25787 | -1.503  | 0.1555  | 0.35398 | -5.1881 | 401399   |
| TRIM4     | -1.2588  | 1.2588  | 5.2844  | -1.503  | 0.15551 | 0.35398 | -5.1881 | 89122    |
| MAP1A     | -1.4636  | 1.4636  | 2.6047  | -1.5026 | 0.15562 | 0.35417 | -5.1887 | 4130     |
| LINC01133 | -0.65157 | 0.65157 | 1.447   | -1.5024 | 0.15566 | 0.35423 | -5.1889 | 1.01E+08 |
| SH3GL1P1  | -0.36301 | 0.36301 | 0.91255 | -1.502  | 0.15577 | 0.35432 | -5.1895 | 6458     |
| MRPL27    | 6.3298   | 6.3298  | 14.867  | 1.5019  | 0.15579 | 0.35432 | -5.1896 | 51264    |
| LEO1      | 1.1107   | 1.1107  | 4.5643  | 1.5019  | 0.15579 | 0.35432 | -5.1896 | 123169   |
| NDUFS1    | 1.9355   | 1.9355  | 10.237  | 1.5018  | 0.15581 | 0.35432 | -5.1897 | 4719     |
| DCANP1    | -0.11844 | 0.11844 | 0.17019 | -1.5018 | 0.15581 | 0.35432 | -5.1897 | 140947   |
| LDHD      | -0.40923 | 0.40923 | 0.87029 | -1.5017 | 0.15583 | 0.35432 | -5.1898 | 197257   |
| CORO6     | -0.82157 | 0.82157 | 1.1364  | -1.5017 | 0.15585 | 0.35432 | -5.1899 | 84940    |

|           |          |         |         |         |         |         |         |          |
|-----------|----------|---------|---------|---------|---------|---------|---------|----------|
| CKMT1B    | 2.4615   | 2.4615  | 8.0151  | 1.5015  | 0.15588 | 0.35434 | -5.19   | 1159     |
| SNX9      | 3.5598   | 3.5598  | 14.527  | 1.5009  | 0.15604 | 0.35463 | -5.1909 | 51429    |
| KAZN-AS1  | -0.21869 | 0.21869 | 0.37109 | -1.5009 | 0.15605 | 0.35463 | -5.1909 | 1.05E+08 |
| ARMC1     | 0.84107  | 0.84107 | 3.424   | 1.5008  | 0.15608 | 0.35465 | -5.1911 | 55156    |
| TGOLN2    | -2.6486  | 2.6486  | 14.105  | -1.5006 | 0.15611 | 0.35466 | -5.1912 | 10618    |
| DDX21     | 5.7585   | 5.7585  | 14.596  | 1.5006  | 0.15612 | 0.35466 | -5.1913 | 9188     |
| COX6A1    | 40.144   | 40.144  | 90.751  | 1.5     | 0.15627 | 0.35495 | -5.1921 | 1337     |
| NUP85     | -1.0907  | 1.0907  | 5.17    | -1.4998 | 0.15632 | 0.35501 | -5.1923 | 79902    |
| LTB4R     | -6.1502  | 6.1502  | 21.616  | -1.4996 | 0.15638 | 0.35511 | -5.1927 | 1241     |
| LOC645967 | -0.17929 | 0.17929 | 0.37016 | -1.4989 | 0.15656 | 0.35541 | -5.1936 | 645967   |
| GOLGA2P7  | -2.2536  | 2.2536  | 4.8816  | -1.4988 | 0.15658 | 0.35541 | -5.1936 | 388152   |
| CYP51A1   | 5.6634   | 5.6634  | 13.114  | 1.4987  | 0.15661 | 0.35541 | -5.1938 | 1595     |
| CSNK2A1   | 1.9141   | 1.9141  | 9.0864  | 1.4987  | 0.15661 | 0.35541 | -5.1938 | 1457     |
| C5orf34   | -0.16251 | 0.16251 | 0.36469 | -1.4986 | 0.15662 | 0.35541 | -5.1939 | 375444   |
| PANK3     | 3.4114   | 3.4114  | 13.439  | 1.4985  | 0.15665 | 0.35541 | -5.194  | 79646    |
| SORBS2    | -0.42246 | 0.42246 | 0.69643 | -1.4985 | 0.15666 | 0.35541 | -5.1941 | 8470     |
| ATG9A     | 2.9177   | 2.9177  | 11.011  | 1.4983  | 0.15671 | 0.35546 | -5.1944 | 79065    |
| LRP10     | 11.096   | 11.096  | 28.638  | 1.4982  | 0.15673 | 0.35546 | -5.1944 | 26020    |
| SEC62     | 1.3058   | 1.3058  | 4.7869  | 1.4981  | 0.15677 | 0.3555  | -5.1946 | 7095     |
| ABHD1     | -0.10258 | 0.10258 | 0.11393 | -1.4977 | 0.15686 | 0.35566 | -5.1951 | 84696    |
| DYNC2H1   | -0.50171 | 0.50171 | 1.6863  | -1.4976 | 0.15688 | 0.35566 | -5.1952 | 79659    |
| ZNF776    | -0.40434 | 0.40434 | 2.2091  | -1.4972 | 0.15699 | 0.35587 | -5.1958 | 284309   |
| ATG13     | 1.5647   | 1.5647  | 6.0744  | 1.4967  | 0.15712 | 0.35601 | -5.1965 | 9776     |
| FXD5      | 4.4689   | 4.4689  | 9.2298  | 1.4966  | 0.15714 | 0.35601 | -5.1966 | 53827    |
| TTC23     | -0.25482 | 0.25482 | 1.8464  | -1.4964 | 0.1572  | 0.35601 | -5.1969 | 64927    |
| LINC00260 | -0.61176 | 0.61176 | 1.2887  | -1.4964 | 0.1572  | 0.35601 | -5.1969 | 84719    |

|           |          |          |          |         |         |         |         |        |
|-----------|----------|----------|----------|---------|---------|---------|---------|--------|
| PPP6R3    | 1.3095   | 1.3095   | 8.0632   | 1.4963  | 0.15723 | 0.35601 | -5.197  | 55291  |
| LINC01697 | -0.14509 | 0.14509  | 0.1395   | -1.4963 | 0.15723 | 0.35601 | -5.197  | 284825 |
| CHRNA3    | 0.29091  | 0.29091  | 0.34681  | 1.4962  | 0.15724 | 0.35601 | -5.1971 | 1136   |
| ZHX1      | 1.6365   | 1.6365   | 5.8531   | 1.4961  | 0.15728 | 0.35601 | -5.1973 | 11244  |
| IFIT1     | -2.2181  | 2.2181   | 1.7981   | -1.496  | 0.1573  | 0.35601 | -5.1974 | 3434   |
| SERPINA3  | -10.451  | 10.451   | 8.1852   | -1.496  | 0.15731 | 0.35601 | -5.1974 | 12     |
| SMC4      | 1.1064   | 1.1064   | 2.9424   | 1.496   | 0.15731 | 0.35601 | -5.1974 | 10051  |
| KLK14     | -0.68858 | 0.68858  | 1.6002   | -1.496  | 0.15731 | 0.35601 | -5.1974 | 43847  |
| TMEM126A  | 1.9829   | 1.9829   | 4.5393   | 1.4956  | 0.15741 | 0.35619 | -5.1979 | 84233  |
| CRYZL2P   | -0.32297 | 0.32297  | 1.1335   | -1.4953 | 0.15747 | 0.35629 | -5.1983 | 730102 |
| FAM76A    | -0.4271  | 0.4271   | 2.3047   | -1.4948 | 0.15761 | 0.35655 | -5.199  | 199870 |
| ENTPD8    | -0.09879 | 0.098792 | 0.098097 | -1.4944 | 0.15772 | 0.35672 | -5.1995 | 377841 |
| AHNAK2    | -15.235  | 15.235   | 52.826   | -1.4943 | 0.15774 | 0.35672 | -5.1996 | 113146 |
| UBR2      | -0.64095 | 0.64095  | 4.5713   | -1.4943 | 0.15775 | 0.35672 | -5.1997 | 23304  |
| GBP1P1    | -0.20339 | 0.20339  | 0.28395  | -1.4939 | 0.15784 | 0.35687 | -5.2001 | 400759 |
| TBC1D19   | -0.2665  | 0.2665   | 1.0779   | -1.4938 | 0.15788 | 0.35691 | -5.2003 | 55296  |
| ZNF563    | -0.27577 | 0.27577  | 0.76544  | -1.4937 | 0.1579  | 0.35691 | -5.2005 | 147837 |
| HNRNPA1   | -22.499  | 22.499   | 86.181   | -1.4936 | 0.15793 | 0.35691 | -5.2006 | 3178   |
| B3GAT3    | -1.4979  | 1.4979   | 4.1108   | -1.4935 | 0.15794 | 0.35691 | -5.2006 | 26229  |
| ALMS1     | -0.76361 | 0.76361  | 2.6748   | -1.4932 | 0.15803 | 0.35703 | -5.2011 | 7840   |
| NOX1      | -0.09379 | 0.093786 | 0.072053 | -1.4932 | 0.15804 | 0.35703 | -5.2011 | 27035  |
| CLK3      | 1.2637   | 1.2637   | 5.4256   | 1.4928  | 0.15812 | 0.35717 | -5.2016 | 1198   |
| WDR83     | -0.52044 | 0.52044  | 1.6854   | -1.4923 | 0.15826 | 0.35743 | -5.2023 | 84292  |
| LARGE2    | -1.8404  | 1.8404   | 5.3153   | -1.4922 | 0.15827 | 0.35743 | -5.2024 | 120071 |
| MED10     | 2.9867   | 2.9867   | 8.7277   | 1.4916  | 0.15845 | 0.35774 | -5.2032 | 84246  |
| NT5C3B    | 2.1426   | 2.1426   | 6.2836   | 1.4915  | 0.15847 | 0.35774 | -5.2034 | 115024 |

|           |          |         |          |         |         |         |         |        |
|-----------|----------|---------|----------|---------|---------|---------|---------|--------|
| ATP1B1    | -5.4026  | 5.4026  | 10.829   | -1.4915 | 0.15847 | 0.35774 | -5.2034 | 481    |
| NDUFAF2   | 2.4025   | 2.4025  | 6.1389   | 1.4913  | 0.15852 | 0.3578  | -5.2036 | 91942  |
| TMED11P   | -0.12071 | 0.12071 | 0.094754 | -1.4908 | 0.15864 | 0.35803 | -5.2043 | 1E+08  |
| KCNN3     | 0.18954  | 0.18954 | 0.33968  | 1.4907  | 0.15867 | 0.35805 | -5.2044 | 3782   |
| RAB12     | 2.0118   | 2.0118  | 9.2018   | 1.4904  | 0.15874 | 0.35815 | -5.2048 | 201475 |
| HEBP2     | 11.662   | 11.662  | 27.449   | 1.4902  | 0.15879 | 0.3582  | -5.205  | 23593  |
| EXOSC5    | -1.4822  | 1.4822  | 4.0678   | -1.4901 | 0.15883 | 0.3582  | -5.2052 | 56915  |
| SORBS3    | -6.3957  | 6.3957  | 14.076   | -1.4901 | 0.15883 | 0.3582  | -5.2052 | 10174  |
| ERP27     | 0.47845  | 0.47845 | 0.62846  | 1.4897  | 0.15892 | 0.3583  | -5.2057 | 121506 |
| COA6      | 1.0649   | 1.0649  | 2.5942   | 1.4897  | 0.15894 | 0.3583  | -5.2058 | 388753 |
| CMPK1     | 3.4566   | 3.4566  | 13.65    | 1.4897  | 0.15894 | 0.3583  | -5.2058 | 51727  |
| RPS27L    | 7.2841   | 7.2841  | 11.027   | 1.4896  | 0.15896 | 0.3583  | -5.2058 | 51065  |
| TXNRD3    | -0.47958 | 0.47958 | 2.3245   | -1.4892 | 0.15905 | 0.35841 | -5.2063 | 114112 |
| ARG1      | 70.643   | 70.643  | 53.926   | 1.4892  | 0.15907 | 0.35841 | -5.2064 | 383    |
| GREB1     | -0.18541 | 0.18541 | 0.4843   | -1.4892 | 0.15907 | 0.35841 | -5.2064 | 9687   |
| MZF1      | -0.96874 | 0.96874 | 2.4839   | -1.489  | 0.15911 | 0.35844 | -5.2066 | 7593   |
| TRAF2     | -0.88836 | 0.88836 | 2.6803   | -1.489  | 0.15912 | 0.35844 | -5.2067 | 7186   |
| TOP1MT    | -1.0453  | 1.0453  | 3.1642   | -1.4886 | 0.15921 | 0.35859 | -5.2071 | 116447 |
| GRIN3B    | 0.25343  | 0.25343 | 0.41208  | 1.4884  | 0.15927 | 0.35863 | -5.2074 | 116444 |
| WDR77     | 1.1219   | 1.1219  | 5.2872   | 1.4884  | 0.15927 | 0.35863 | -5.2075 | 79084  |
| LINC00473 | 0.44925  | 0.44925 | 0.45616  | 1.488   | 0.15936 | 0.35878 | -5.2079 | 90632  |
| CCZ1B     | -1.527   | 1.527   | 3.8692   | -1.4876 | 0.15948 | 0.3589  | -5.2085 | 221960 |
| IL2RB     | -0.48223 | 0.48223 | 1.0978   | -1.4876 | 0.15949 | 0.3589  | -5.2085 | 3560   |
| CXCL2     | 1.9296   | 1.9296  | 2.3899   | 1.4876  | 0.15949 | 0.3589  | -5.2085 | 2920   |
| DNMT3B    | 0.78297  | 0.78297 | 1.6236   | 1.4875  | 0.15951 | 0.3589  | -5.2087 | 1789   |
| NDUFC1    | 2.8089   | 2.8089  | 7.1306   | 1.4874  | 0.15952 | 0.3589  | -5.2087 | 4717   |

|              |          |         |         |         |         |         |         |          |
|--------------|----------|---------|---------|---------|---------|---------|---------|----------|
| PPP2R3B      | -0.56308 | 0.56308 | 1.2878  | -1.4873 | 0.15954 | 0.35891 | -5.2088 | 28227    |
| SCARNA11     | -0.14543 | 0.14543 | 0.11742 | -1.4872 | 0.15957 | 0.35892 | -5.209  | 677780   |
| FHL1         | -3.9634  | 3.9634  | 6.9497  | -1.4866 | 0.15975 | 0.35927 | -5.2099 | 2273     |
| PEX11G       | -0.55697 | 0.55697 | 1.2179  | -1.4863 | 0.15981 | 0.35936 | -5.2102 | 92960    |
| LOC101927190 | -0.11454 | 0.11454 | 0.16707 | -1.4861 | 0.15988 | 0.35947 | -5.2105 | 1.02E+08 |
| TMSB4Y       | -0.16562 | 0.16562 | 0.39234 | -1.4858 | 0.15995 | 0.35957 | -5.2108 | 9087     |
| CWC27        | 0.35178  | 0.35178 | 1.5037  | 1.4854  | 0.16005 | 0.35974 | -5.2114 | 10283    |
| GPR65        | 0.22887  | 0.22887 | 0.31504 | 1.4854  | 0.16007 | 0.35974 | -5.2114 | 8477     |
| SLC25A33     | 0.45059  | 0.45059 | 1.5564  | 1.4852  | 0.16011 | 0.35979 | -5.2117 | 84275    |
| COL6A3       | 59.432   | 59.432  | 75.959  | 1.4847  | 0.16024 | 0.36    | -5.2123 | 1293     |
| FOXO1        | -1.2784  | 1.2784  | 6.2261  | -1.4847 | 0.16024 | 0.36    | -5.2123 | 2308     |
| SGCE         | 1.9853   | 1.9853  | 2.717   | 1.4844  | 0.16032 | 0.36013 | -5.2128 | 8910     |
| SPHK2        | -0.53451 | 0.53451 | 1.5152  | -1.484  | 0.16041 | 0.36028 | -5.2132 | 56848    |
| IL13RA2      | 0.20761  | 0.20761 | 0.22772 | 1.4839  | 0.16043 | 0.36028 | -5.2133 | 3598     |
| PEBP1        | -9.7586  | 9.7586  | 38.575  | -1.4839 | 0.16045 | 0.36028 | -5.2134 | 5037     |
| LOC102723439 | -0.19794 | 0.19794 | 0.37352 | -1.4837 | 0.16051 | 0.36035 | -5.2137 | 1.03E+08 |
| JCHAIN       | -2.1605  | 2.1605  | 2.7195  | -1.4832 | 0.16063 | 0.36054 | -5.2143 | 3512     |
| PABPC1       | 84.462   | 84.462  | 248.78  | 1.4832  | 0.16063 | 0.36054 | -5.2143 | 26986    |
| HMGN3-AS1    | -0.11536 | 0.11536 | 0.51332 | -1.483  | 0.16067 | 0.36057 | -5.2145 | 1E+08    |
| RNF8         | 0.33672  | 0.33672 | 1.6523  | 1.4829  | 0.1607  | 0.36058 | -5.2146 | 9025     |
| ZC3H8        | -0.40987 | 0.40987 | 1.7616  | -1.4821 | 0.16091 | 0.36101 | -5.2157 | 84524    |
| GATD3A       | -0.80609 | 0.80609 | 2.1794  | -1.482  | 0.16095 | 0.36105 | -5.2159 | 8209     |
| C14orf119    | 1.8819   | 1.8819  | 4.5362  | 1.4818  | 0.16101 | 0.36113 | -5.2162 | 55017    |
| RRM2         | 2.6657   | 2.6657  | 3.7289  | 1.4814  | 0.1611  | 0.36129 | -5.2166 | 6241     |
| CTSS         | 5.9545   | 5.9545  | 7.3106  | 1.4812  | 0.16116 | 0.36138 | -5.2169 | 1520     |
| MED4         | 1.2814   | 1.2814  | 5.0923  | 1.4808  | 0.16126 | 0.36156 | -5.2174 | 29079    |



|              |          |         |         |         |         |         |         |          |
|--------------|----------|---------|---------|---------|---------|---------|---------|----------|
| KLC3         | 7.609    | 7.609   | 17.992  | 1.4805  | 0.16133 | 0.36166 | -5.2178 | 147700   |
| POR          | 6.037    | 6.037   | 16.894  | 1.4803  | 0.16138 | 0.36173 | -5.218  | 5447     |
| TFB2M        | 1.0908   | 1.0908  | 3.2693  | 1.4802  | 0.16142 | 0.36175 | -5.2182 | 64216    |
| SLC25A19     | 0.43467  | 0.43467 | 1.0354  | 1.4802  | 0.16143 | 0.36175 | -5.2183 | 60386    |
| PISD         | -0.58393 | 0.58393 | 3.3217  | -1.48   | 0.16146 | 0.36176 | -5.2184 | 23761    |
| MPDU1        | 2.6753   | 2.6753  | 7.6473  | 1.4796  | 0.16156 | 0.36195 | -5.2189 | 9526     |
| AHSA1        | 3.8857   | 3.8857  | 13.269  | 1.4795  | 0.1616  | 0.36197 | -5.2191 | 10598    |
| MKKS         | 0.8435   | 0.8435  | 2.9186  | 1.4795  | 0.16161 | 0.36197 | -5.2192 | 8195     |
| ZNF460       | 1.9181   | 1.9181  | 13.883  | 1.4791  | 0.1617  | 0.36211 | -5.2196 | 10794    |
| SNCG         | -1.4909  | 1.4909  | 2.5841  | -1.4783 | 0.16192 | 0.36252 | -5.2207 | 6623     |
| TCEAL3       | -1.8025  | 1.8025  | 3.6251  | -1.4782 | 0.16196 | 0.36252 | -5.2209 | 85012    |
| PROK1        | -0.71078 | 0.71078 | 0.43057 | -1.4781 | 0.16197 | 0.36252 | -5.221  | 84432    |
| FAM169A      | 0.12894  | 0.12894 | 0.24395 | 1.478   | 0.16199 | 0.36252 | -5.2211 | 26049    |
| CYLD         | -0.80623 | 0.80623 | 4.1442  | -1.478  | 0.162   | 0.36252 | -5.2211 | 1540     |
| LAMTOR2      | 5.2769   | 5.2769  | 12.583  | 1.478   | 0.16201 | 0.36252 | -5.2212 | 28956    |
| KCP          | 0.16265  | 0.16265 | 0.25537 | 1.4777  | 0.16208 | 0.36257 | -5.2215 | 375616   |
| ACSM3        | -0.15155 | 0.15155 | 0.28863 | -1.4776 | 0.16209 | 0.36257 | -5.2216 | 6296     |
| CHAC1        | 3.8731   | 3.8731  | 4.1792  | 1.4776  | 0.1621  | 0.36257 | -5.2216 | 79094    |
| HNRNPUL1     | -5.9044  | 5.9044  | 26.83   | -1.4772 | 0.16222 | 0.3628  | -5.2222 | 11100    |
| CPPED1       | 0.75773  | 0.75773 | 2.3675  | 1.4768  | 0.16231 | 0.36293 | -5.2227 | 55313    |
| SYS1-DBNDD2  | -0.31575 | 0.31575 | 0.30929 | -1.4767 | 0.16233 | 0.36293 | -5.2228 | 767557   |
| MIR54811     | -0.14185 | 0.14185 | 0.14558 | -1.4766 | 0.16236 | 0.36293 | -5.2229 | 1E+08    |
| LOC101927164 | -1.0258  | 1.0258  | 1.4205  | -1.4765 | 0.16238 | 0.36293 | -5.223  | 1.02E+08 |
| NDUFA4       | 8.9201   | 8.9201  | 15.558  | 1.4765  | 0.16239 | 0.36293 | -5.223  | 4697     |
| LCA5L        | -0.11112 | 0.11112 | 0.17178 | -1.4764 | 0.16242 | 0.36293 | -5.2232 | 150082   |
| ELF3-AS1     | -0.12481 | 0.12481 | 0.42528 | -1.4763 | 0.16244 | 0.36293 | -5.2233 | 1.03E+08 |

|              |          |         |         |         |         |         |         |          |
|--------------|----------|---------|---------|---------|---------|---------|---------|----------|
| DHX38        | -2.0759  | 2.0759  | 7.752   | -1.4762 | 0.16246 | 0.36293 | -5.2234 | 9785     |
| GCN1         | -2.5327  | 2.5327  | 9.7781  | -1.4761 | 0.16249 | 0.36293 | -5.2236 | 10985    |
| R3HCC1L      | 0.6944   | 0.6944  | 2.6831  | 1.4761  | 0.16249 | 0.36293 | -5.2236 | 27291    |
| LINC01504    | -0.10235 | 0.10235 | 0.12646 | -1.476  | 0.16254 | 0.36296 | -5.2238 | 1.01E+08 |
| PCM1         | -1.4385  | 1.4385  | 6.3103  | -1.4759 | 0.16255 | 0.36296 | -5.2239 | 5108     |
| LOC101927543 | -0.17184 | 0.17184 | 0.25743 | -1.4757 | 0.16259 | 0.36301 | -5.2241 | 1.02E+08 |
| NADSYN1      | 4.7555   | 4.7555  | 13.401  | 1.4755  | 0.16265 | 0.36308 | -5.2243 | 55191    |
| DPYSL3       | 5.9729   | 5.9729  | 12.181  | 1.4754  | 0.16268 | 0.3631  | -5.2245 | 1809     |
| KLF7         | 1.202    | 1.202   | 4.1453  | 1.4753  | 0.16271 | 0.36312 | -5.2246 | 8609     |
| SDHAF3       | 0.3478   | 0.3478  | 1.0585  | 1.4752  | 0.16273 | 0.36312 | -5.2247 | 57001    |
| IMPDH1       | 4.9448   | 4.9448  | 12.577  | 1.475   | 0.16278 | 0.36319 | -5.225  | 3614     |
| SLC35B4      | 0.55653  | 0.55653 | 1.5726  | 1.4746  | 0.16289 | 0.36339 | -5.2256 | 84912    |
| CASP3        | 1.5874   | 1.5874  | 3.8823  | 1.4745  | 0.16292 | 0.3634  | -5.2257 | 836      |
| MID1IP1      | 1.566    | 1.566   | 4.549   | 1.4743  | 0.16297 | 0.36346 | -5.2259 | 58526    |
| LOC100507006 | -0.13901 | 0.13901 | 0.29431 | -1.474  | 0.16306 | 0.3636  | -5.2264 | 1.01E+08 |
| LXN          | 1.5452   | 1.5452  | 2.8266  | 1.4739  | 0.16308 | 0.3636  | -5.2265 | 56925    |
| TRDMT1       | -0.18435 | 0.18435 | 0.38985 | -1.4735 | 0.16319 | 0.3638  | -5.227  | 1787     |
| DNMT3A       | -0.63521 | 0.63521 | 2.1478  | -1.4734 | 0.16321 | 0.3638  | -5.2271 | 1788     |
| ARL2BP       | 2.948    | 2.948   | 11.122  | 1.4729  | 0.16334 | 0.36405 | -5.2278 | 23568    |
| ELOVL5       | 1.853    | 1.853   | 4.6068  | 1.4728  | 0.16338 | 0.36408 | -5.2279 | 60481    |
| SLC31A1      | 3.5764   | 3.5764  | 7.919   | 1.4725  | 0.16346 | 0.36423 | -5.2284 | 1317     |
| STXBP6       | -0.2703  | 0.2703  | 0.48649 | -1.4724 | 0.16349 | 0.36424 | -5.2285 | 29091    |
| URAHP        | -0.13995 | 0.13995 | 0.33592 | -1.4723 | 0.16351 | 0.36424 | -5.2286 | 1E+08    |
| APCDD1L      | 0.24206  | 0.24206 | 0.45287 | 1.4721  | 0.16356 | 0.36426 | -5.2288 | 164284   |
| ZCCHC3       | -0.67168 | 0.67168 | 2.5706  | -1.4721 | 0.16357 | 0.36426 | -5.2289 | 85364    |
| MYBL2        | 1.481    | 1.481   | 2.4121  | 1.472   | 0.16359 | 0.36426 | -5.229  | 4605     |

|          |          |         |         |         |         |         |         |         |
|----------|----------|---------|---------|---------|---------|---------|---------|---------|
| TFEC     | 0.17256  | 0.17256 | 0.25081 | 1.4719  | 0.16361 | 0.36426 | -5.2291 | 22797   |
| KIAA1841 | 0.18397  | 0.18397 | 0.84645 | 1.4718  | 0.16365 | 0.36431 | -5.2293 | 84542   |
| SYCP2L   | -0.10919 | 0.10919 | 0.12106 | -1.4715 | 0.16372 | 0.36441 | -5.2296 | 221711  |
| PAGR1    | -1.2083  | 1.2083  | 3.9626  | -1.4713 | 0.16377 | 0.36443 | -5.2299 | 79447   |
| SNORA79B | -3.4709  | 3.4709  | 3.4961  | -1.4713 | 0.16377 | 0.36443 | -5.2299 | 1.1E+08 |
| SLC44A5  | -0.46906 | 0.46906 | 0.65582 | -1.4712 | 0.1638  | 0.36445 | -5.23   | 204962  |
| RUSC1    | 1.4792   | 1.4792  | 5.5299  | 1.4708  | 0.16391 | 0.36463 | -5.2305 | 23623   |
| DHX37    | -0.96581 | 0.96581 | 2.9064  | -1.4707 | 0.16393 | 0.36463 | -5.2306 | 57647   |
| CCNDBP1  | 0.95185  | 0.95185 | 3.6545  | 1.4701  | 0.16409 | 0.36487 | -5.2314 | 23582   |
| TMEM70   | 1.0299   | 1.0299  | 2.8625  | 1.4701  | 0.16409 | 0.36487 | -5.2315 | 54968   |
| SOS2     | -0.96362 | 0.96362 | 4.3515  | -1.4701 | 0.1641  | 0.36487 | -5.2315 | 6655    |
| TTC31    | -0.52081 | 0.52081 | 3.3905  | -1.4695 | 0.16425 | 0.36515 | -5.2322 | 64427   |
| EDEM1    | 2.0505   | 2.0505  | 9.0429  | 1.4693  | 0.16431 | 0.36525 | -5.2325 | 9695    |
| DKK1     | -1.2649  | 1.2649  | 0.73298 | -1.469  | 0.16439 | 0.36537 | -5.2329 | 22943   |
| TCTN1    | -0.32957 | 0.32957 | 1.2261  | -1.4688 | 0.16443 | 0.3654  | -5.2331 | 79600   |
| BIRC3    | -0.52645 | 0.52645 | 0.9398  | -1.4688 | 0.16445 | 0.3654  | -5.2332 | 330     |
| SLC9A3R1 | 5.5391   | 5.5391  | 18.128  | 1.4687  | 0.16448 | 0.3654  | -5.2333 | 9368    |
| UNC5B    | 4.0865   | 4.0865  | 8.9861  | 1.4686  | 0.16449 | 0.3654  | -5.2334 | 219699  |
| CNTNAP3  | -1.7877  | 1.7877  | 3.41    | -1.4684 | 0.16454 | 0.36547 | -5.2336 | 79937   |
| CCDC97   | -1.3492  | 1.3492  | 5.3351  | -1.4682 | 0.16461 | 0.36547 | -5.234  | 90324   |
| MESP1    | -0.16947 | 0.16947 | 0.20338 | -1.468  | 0.16466 | 0.36547 | -5.2342 | 55897   |
| LARP4    | 0.68003  | 0.68003 | 3.3572  | 1.468   | 0.16466 | 0.36547 | -5.2342 | 113251  |
| ILF2     | 7.5581   | 7.5581  | 24.192  | 1.4679  | 0.16467 | 0.36547 | -5.2343 | 3608    |
| IRF6     | 8.4813   | 8.4813  | 27.546  | 1.4679  | 0.16468 | 0.36547 | -5.2343 | 3664    |
| NOSIP    | 3.4781   | 3.4781  | 9.0791  | 1.4679  | 0.16469 | 0.36547 | -5.2344 | 51070   |
| TUSC3    | 0.71021  | 0.71021 | 1.7477  | 1.4678  | 0.16471 | 0.36547 | -5.2345 | 7991    |

|           |          |         |         |         |         |         |         |        |
|-----------|----------|---------|---------|---------|---------|---------|---------|--------|
| SELP      | 1.5193   | 1.5193  | 2.7751  | 1.4678  | 0.16471 | 0.36547 | -5.2345 | 6403   |
| HAT1      | 2.842    | 2.842   | 7.5698  | 1.4674  | 0.16482 | 0.36565 | -5.235  | 8520   |
| IFIH1     | -1.6066  | 1.6066  | 2.6502  | -1.4671 | 0.16489 | 0.36576 | -5.2353 | 64135  |
| RPL31     | 65.185   | 65.185  | 126.28  | 1.4668  | 0.16497 | 0.36584 | -5.2357 | 6160   |
| MLF1      | 0.30625  | 0.30625 | 0.83788 | 1.4668  | 0.16497 | 0.36584 | -5.2357 | 4291   |
| CCR1      | 2.2359   | 2.2359  | 2.8654  | 1.4666  | 0.16504 | 0.36594 | -5.236  | 1230   |
| GIMAP5    | -1.5047  | 1.5047  | 2.4235  | -1.4663 | 0.16512 | 0.36609 | -5.2365 | 55340  |
| CLUH      | -4.2007  | 4.2007  | 12.812  | -1.4661 | 0.16517 | 0.3661  | -5.2367 | 23277  |
| NPTX2     | 0.76769  | 0.76769 | 1.3005  | 1.4661  | 0.16517 | 0.3661  | -5.2367 | 4885   |
| PPP1R11   | 0.61587  | 0.61587 | 1.9633  | 1.466   | 0.16519 | 0.3661  | -5.2368 | 6992   |
| OXSM      | 0.51296  | 0.51296 | 1.6569  | 1.4658  | 0.16524 | 0.36615 | -5.237  | 54995  |
| MGAM      | 0.22928  | 0.22928 | 0.2228  | 1.4655  | 0.16534 | 0.3663  | -5.2375 | 8972   |
| CTR9      | 1.6326   | 1.6326  | 5.7273  | 1.4654  | 0.16535 | 0.3663  | -5.2376 | 9646   |
| VPS37A    | 0.36634  | 0.36634 | 2.1972  | 1.4653  | 0.16539 | 0.36635 | -5.2378 | 137492 |
| DMRT3     | 0.18298  | 0.18298 | 0.19671 | 1.4651  | 0.16543 | 0.36638 | -5.2379 | 58524  |
| GSTM4     | -1.7364  | 1.7364  | 3.2187  | -1.465  | 0.16547 | 0.36643 | -5.2382 | 2948   |
| LINC01521 | -0.19797 | 0.19797 | 0.32034 | -1.4649 | 0.16549 | 0.36643 | -5.2383 | 54944  |
| MDH1      | 5.8223   | 5.8223  | 14.668  | 1.4648  | 0.16552 | 0.36644 | -5.2384 | 4190   |
| PGM5      | -1.2079  | 1.2079  | 2.3867  | -1.4639 | 0.16576 | 0.36691 | -5.2395 | 5239   |
| RUSC1-AS1 | -0.28494 | 0.28494 | 0.89932 | -1.4636 | 0.16583 | 0.36702 | -5.2399 | 284618 |
| PHIP      | -0.75954 | 0.75954 | 3.7218  | -1.4635 | 0.16587 | 0.36707 | -5.2401 | 55023  |
| CA12      | -6.0674  | 6.0674  | 21.286  | -1.4628 | 0.16605 | 0.36743 | -5.241  | 771    |
| TSPAN31   | 1.9592   | 1.9592  | 6.0169  | 1.4626  | 0.16612 | 0.36752 | -5.2413 | 6302   |
| CDH11     | 4.0925   | 4.0925  | 5.7711  | 1.462   | 0.16626 | 0.36776 | -5.242  | 1009   |
| L3MBTL2   | -0.90348 | 0.90348 | 3.9549  | -1.462  | 0.16627 | 0.36776 | -5.242  | 83746  |
| TRAPPC6B  | 0.69029  | 0.69029 | 3.6141  | 1.4618  | 0.16632 | 0.36783 | -5.2423 | 122553 |

|            |          |          |          |         |         |         |         |        |
|------------|----------|----------|----------|---------|---------|---------|---------|--------|
| ZNRD1      | 0.28753  | 0.28753  | 0.78199  | 1.4617  | 0.16635 | 0.36784 | -5.2424 | 30834  |
| DGAT2L6    | -0.09895 | 0.098945 | 0.086622 | -1.4606 | 0.16665 | 0.36847 | -5.2439 | 347516 |
| SCAMP1-AS1 | -0.34576 | 0.34576  | 0.9625   | -1.4604 | 0.1667  | 0.36853 | -5.2441 | 728769 |
| UQCR11     | 8.7868   | 8.7868   | 18.915   | 1.4601  | 0.16678 | 0.36865 | -5.2445 | 10975  |
| CRTC2      | -1.1342  | 1.1342   | 6.2501   | -1.46   | 0.1668  | 0.36865 | -5.2446 | 200186 |
| GDPD2      | -0.70638 | 0.70638  | 2.1762   | -1.4599 | 0.16683 | 0.36867 | -5.2447 | 54857  |
| SNAP23     | 1.8082   | 1.8082   | 6.1284   | 1.4589  | 0.16709 | 0.36913 | -5.246  | 8773   |
| PCDH20     | -0.16484 | 0.16484  | 0.14615  | -1.4588 | 0.16713 | 0.36913 | -5.2462 | 64881  |
| ATP5F1C    | 12.177   | 12.177   | 30.999   | 1.4588  | 0.16714 | 0.36913 | -5.2462 | 509    |
| FCGR2A     | 8.0471   | 8.0471   | 9.4318   | 1.4588  | 0.16714 | 0.36913 | -5.2462 | 2212   |
| SOAT1      | 0.78914  | 0.78914  | 1.7438   | 1.4587  | 0.16717 | 0.36913 | -5.2463 | 6646   |
| HSDL2      | 4.996    | 4.996    | 8.696    | 1.4586  | 0.16719 | 0.36913 | -5.2465 | 84263  |
| CIAO3      | -0.9872  | 0.9872   | 3.2136   | -1.4585 | 0.16721 | 0.36913 | -5.2465 | 64428  |
| ZNF407     | -0.47249 | 0.47249  | 2.3974   | -1.4584 | 0.16723 | 0.36913 | -5.2467 | 55628  |
| RNF113B    | -0.16786 | 0.16786  | 0.25907  | -1.4584 | 0.16724 | 0.36913 | -5.2467 | 140432 |
| PRKAR1A    | 5.2271   | 5.2271   | 21.105   | 1.4582  | 0.16729 | 0.3692  | -5.2469 | 5573   |
| OAS3       | -5.2197  | 5.2197   | 6.6179   | -1.4579 | 0.16737 | 0.36931 | -5.2473 | 4940   |
| NUF2       | 0.41664  | 0.41664  | 0.65871  | 1.4577  | 0.16743 | 0.3694  | -5.2476 | 83540  |
| CD53       | 3.4674   | 3.4674   | 5.259    | 1.4576  | 0.16747 | 0.3694  | -5.2478 | 963    |
| TMEM131    | 1.3177   | 1.3177   | 9.2737   | 1.4576  | 0.16747 | 0.3694  | -5.2478 | 23505  |
| BMP1       | 3.5624   | 3.5624   | 6.0908   | 1.4574  | 0.16751 | 0.36941 | -5.248  | 649    |
| PARP14     | -3.1234  | 3.1234   | 5.5145   | -1.4574 | 0.16752 | 0.36941 | -5.248  | 54625  |
| VPS72      | 2.2384   | 2.2384   | 7.7878   | 1.4572  | 0.16756 | 0.36945 | -5.2482 | 6944   |
| ALDH3B2    | 19.129   | 19.129   | 38.131   | 1.4571  | 0.1676  | 0.36947 | -5.2484 | 222    |
| KLHL6      | 0.22369  | 0.22369  | 0.42708  | 1.457   | 0.16761 | 0.36947 | -5.2485 | 89857  |
| EXTL2      | 0.53526  | 0.53526  | 1.0283   | 1.457   | 0.16763 | 0.36947 | -5.2486 | 2135   |

|              |          |         |         |         |         |         |         |          |
|--------------|----------|---------|---------|---------|---------|---------|---------|----------|
| PLEKHA2      | 1.0127   | 1.0127  | 4.5032  | 1.4569  | 0.16766 | 0.36948 | -5.2487 | 59339    |
| MRI1         | -1.2474  | 1.2474  | 4.0737  | -1.4566 | 0.16774 | 0.3696  | -5.2491 | 84245    |
| FKBP10       | 7.29     | 7.29    | 12.165  | 1.4564  | 0.16779 | 0.3696  | -5.2493 | 60681    |
| LOC101927318 | -0.35589 | 0.35589 | 0.37053 | -1.4563 | 0.16781 | 0.3696  | -5.2494 | 1.02E+08 |
| SVIP         | -0.29419 | 0.29419 | 0.72131 | -1.4563 | 0.16782 | 0.3696  | -5.2495 | 258010   |
| TEKT4P2      | 0.82369  | 0.82369 | 2.1903  | 1.4562  | 0.16784 | 0.3696  | -5.2496 | 1E+08    |
| LRIF1        | 0.43345  | 0.43345 | 1.4332  | 1.4562  | 0.16784 | 0.3696  | -5.2496 | 55791    |
| MED13        | 1.1682   | 1.1682  | 7.7678  | 1.4556  | 0.168   | 0.36986 | -5.2503 | 9969     |
| GBE1         | 2.3807   | 2.3807  | 7.7911  | 1.4556  | 0.16801 | 0.36986 | -5.2504 | 2632     |
| NAIP         | -1.1351  | 1.1351  | 3.2422  | -1.4552 | 0.1681  | 0.37003 | -5.2508 | 4671     |
| ZNF442       | -0.15871 | 0.15871 | 0.41546 | -1.4551 | 0.16813 | 0.37003 | -5.2509 | 79973    |
| ANAPC2       | -2.1191  | 2.1191  | 6.0334  | -1.4549 | 0.16818 | 0.3701  | -5.2512 | 29882    |
| GYS1         | 3.2785   | 3.2785  | 10.425  | 1.4548  | 0.16821 | 0.37012 | -5.2513 | 2997     |
| NUDT22       | 3.1698   | 3.1698  | 9.4448  | 1.4545  | 0.1683  | 0.37024 | -5.2518 | 84304    |
| ARIH2OS      | -0.16901 | 0.16901 | 0.54895 | -1.4545 | 0.16831 | 0.37024 | -5.2518 | 646450   |
| PWP1         | 2.0391   | 2.0391  | 7.338   | 1.4537  | 0.16853 | 0.37062 | -5.2528 | 11137    |
| PLEKHG5      | -2.8061  | 2.8061  | 8.6849  | -1.4537 | 0.16853 | 0.37062 | -5.2529 | 57449    |
| ALG14        | 1.1273   | 1.1273  | 2.8589  | 1.4536  | 0.16855 | 0.37062 | -5.2529 | 199857   |
| METTL5       | 2.0523   | 2.0523  | 5.5158  | 1.4535  | 0.16858 | 0.37063 | -5.2531 | 29081    |
| UBE2C        | 2.3099   | 2.3099  | 3.411   | 1.4534  | 0.16862 | 0.37067 | -5.2533 | 11065    |
| CRNN         | -0.19502 | 0.19502 | 0.2667  | -1.4529 | 0.16874 | 0.37086 | -5.2538 | 49860    |
| RWDD2B       | 0.75839  | 0.75839 | 2.5769  | 1.4528  | 0.16876 | 0.37086 | -5.2539 | 10069    |
| NCK1-DT      | -0.16409 | 0.16409 | 0.56579 | -1.4528 | 0.16877 | 0.37086 | -5.254  | 1.02E+08 |
| ENTPD6       | -1.0149  | 1.0149  | 2.7092  | -1.4526 | 0.16882 | 0.37088 | -5.2542 | 955      |
| EPHX1        | -3.0718  | 3.0718  | 10.231  | -1.4525 | 0.16886 | 0.37088 | -5.2544 | 2052     |
| OCRL         | -0.63683 | 0.63683 | 3.7847  | -1.4525 | 0.16886 | 0.37088 | -5.2544 | 4952     |

|              |          |          |          |         |         |         |         |          |
|--------------|----------|----------|----------|---------|---------|---------|---------|----------|
| AIMP1        | 1.0506   | 1.0506   | 3.8762   | 1.4524  | 0.16886 | 0.37088 | -5.2544 | 9255     |
| DOCK6        | 2.8427   | 2.8427   | 10.312   | 1.4521  | 0.16895 | 0.37098 | -5.2549 | 57572    |
| C1orf122     | 4.5961   | 4.5961   | 9.9169   | 1.4521  | 0.16896 | 0.37098 | -5.2549 | 127687   |
| RAB27A       | 0.85219  | 0.85219  | 2.4334   | 1.4519  | 0.16902 | 0.37103 | -5.2552 | 5873     |
| TCF7L1       | -1.341   | 1.341    | 3.4304   | -1.4518 | 0.16904 | 0.37103 | -5.2553 | 83439    |
| LOC101927391 | -0.14518 | 0.14518  | 0.20793  | -1.4517 | 0.16906 | 0.37103 | -5.2554 | 1.02E+08 |
| NAV2         | -0.72125 | 0.72125  | 2.822    | -1.4516 | 0.16909 | 0.37103 | -5.2555 | 89797    |
| SLC9A6       | 0.5371   | 0.5371   | 2.4409   | 1.4516  | 0.16909 | 0.37103 | -5.2555 | 10479    |
| PARP2        | -0.69952 | 0.69952  | 2.9096   | -1.451  | 0.16926 | 0.37135 | -5.2563 | 10038    |
| NFE2L1       | -7.1933  | 7.1933   | 26.729   | -1.4509 | 0.16928 | 0.37135 | -5.2564 | 4779     |
| SEMA6D       | -0.43373 | 0.43373  | 1.3239   | -1.4508 | 0.16931 | 0.37138 | -5.2566 | 80031    |
| CEACAM6      | 10.853   | 10.853   | 8.8765   | 1.4506  | 0.16937 | 0.37145 | -5.2568 | 4680     |
| LCP2         | 1.2248   | 1.2248   | 2.3028   | 1.4501  | 0.16951 | 0.37166 | -5.2575 | 3937     |
| FAM86B3P     | -0.13524 | 0.13524  | 0.36712  | -1.4499 | 0.16956 | 0.37166 | -5.2577 | 286042   |
| RNF41        | 0.56159  | 0.56159  | 2.9899   | 1.4499  | 0.16956 | 0.37166 | -5.2577 | 10193    |
| SF1          | -5.0157  | 5.0157   | 23.147   | -1.4499 | 0.16956 | 0.37166 | -5.2577 | 7536     |
| PGM1         | -1.414   | 1.414    | 5.5403   | -1.4499 | 0.16957 | 0.37166 | -5.2578 | 5236     |
| LOC101927630 | 0.12134  | 0.12134  | 0.11363  | 1.4494  | 0.1697  | 0.37189 | -5.2584 | 1.02E+08 |
| C11orf58     | 2.5665   | 2.5665   | 11.396   | 1.4492  | 0.16976 | 0.37195 | -5.2587 | 10944    |
| KCNS1        | 0.48251  | 0.48251  | 0.52214  | 1.4491  | 0.16979 | 0.37195 | -5.2588 | 3787     |
| NR1D1        | -7.7598  | 7.7598   | 12.679   | -1.4491 | 0.16979 | 0.37195 | -5.2588 | 9572     |
| UPK3BL1      | 4.7516   | 4.7516   | 9.6495   | 1.4486  | 0.16992 | 0.37218 | -5.2594 | 1E+08    |
| ZNF705E      | -0.09456 | 0.094558 | 0.089766 | -1.448  | 0.17008 | 0.37247 | -5.2602 | 1E+08    |
| TRPM7        | -0.81667 | 0.81667  | 4.1779   | -1.4478 | 0.17015 | 0.37247 | -5.2605 | 54822    |
| NPC2         | 13.305   | 13.305   | 32.461   | 1.4477  | 0.17016 | 0.37247 | -5.2605 | 10577    |
| S100A6       | 106.26   | 106.26   | 193.63   | 1.4477  | 0.17017 | 0.37247 | -5.2606 | 6277     |

|              |          |         |         |         |         |         |         |          |
|--------------|----------|---------|---------|---------|---------|---------|---------|----------|
| RINT1        | 0.58391  | 0.58391 | 3.4144  | 1.4477  | 0.17017 | 0.37247 | -5.2606 | 60561    |
| AHI1         | -0.7031  | 0.7031  | 2.1036  | -1.4476 | 0.17019 | 0.37247 | -5.2607 | 54806    |
| TOP3A        | -0.43571 | 0.43571 | 2.2962  | -1.4475 | 0.17023 | 0.37253 | -5.2609 | 7156     |
| ATP1A2       | -0.39219 | 0.39219 | 0.47519 | -1.4462 | 0.17058 | 0.37324 | -5.2625 | 477      |
| LINC00639    | -0.17426 | 0.17426 | 0.1872  | -1.4461 | 0.17061 | 0.37326 | -5.2627 | 283547   |
| CHCHD6       | -0.7615  | 0.7615  | 2.3975  | -1.446  | 0.17063 | 0.37326 | -5.2628 | 84303    |
| SLC35A5      | 0.46958  | 0.46958 | 1.7892  | 1.4457  | 0.17073 | 0.37334 | -5.2632 | 55032    |
| YIF1A        | 4.7101   | 4.7101  | 14.032  | 1.4456  | 0.17074 | 0.37334 | -5.2633 | 10897    |
| CCDC102A     | -0.54592 | 0.54592 | 1.272   | -1.4456 | 0.17075 | 0.37334 | -5.2633 | 92922    |
| TSGA10       | -0.14661 | 0.14661 | 0.32858 | -1.4456 | 0.17076 | 0.37334 | -5.2634 | 80705    |
| WNT4         | -1.9023  | 1.9023  | 3.7755  | -1.4454 | 0.17079 | 0.37336 | -5.2635 | 54361    |
| ZBED1        | -0.96588 | 0.96588 | 3.8772  | -1.4449 | 0.17093 | 0.37361 | -5.2641 | 9189     |
| SLC37A4      | -0.71529 | 0.71529 | 2.1049  | -1.4447 | 0.17099 | 0.37369 | -5.2644 | 2542     |
| GSK3A        | 3.9084   | 3.9084  | 13.986  | 1.4445  | 0.17104 | 0.37372 | -5.2647 | 2931     |
| LOC101927178 | -0.12706 | 0.12706 | 0.24651 | -1.4445 | 0.17105 | 0.37372 | -5.2647 | 1.02E+08 |
| RFFL         | 0.64504  | 0.64504 | 3.9006  | 1.444   | 0.17119 | 0.374   | -5.2654 | 117584   |
| GMEB1        | 0.70622  | 0.70622 | 2.7608  | 1.4439  | 0.17122 | 0.374   | -5.2655 | 10691    |
| SDR39U1      | -0.92416 | 0.92416 | 3.5318  | -1.4429 | 0.17149 | 0.37454 | -5.2667 | 56948    |
| CCDC15       | -0.19524 | 0.19524 | 0.63504 | -1.4425 | 0.17161 | 0.3747  | -5.2673 | 80071    |
| AKR1C1       | 4.5813   | 4.5813  | 12.97   | 1.4424  | 0.17163 | 0.3747  | -5.2674 | 1645     |
| TAS2R20      | -0.16665 | 0.16665 | 0.34441 | -1.4424 | 0.17163 | 0.3747  | -5.2674 | 259295   |
| DBF4         | 0.24864  | 0.24864 | 0.78573 | 1.4423  | 0.17165 | 0.3747  | -5.2675 | 10926    |
| CENPL        | 0.3204   | 0.3204  | 0.84203 | 1.4422  | 0.1717  | 0.37473 | -5.2677 | 91687    |
| TCEAL8       | 3.668    | 3.668   | 8.767   | 1.4421  | 0.1717  | 0.37473 | -5.2678 | 90843    |
| GNG11        | 6.6768   | 6.6768  | 10.68   | 1.4411  | 0.17199 | 0.37525 | -5.2691 | 2791     |
| SNORA116     | -0.19539 | 0.19539 | 0.23911 | -1.4411 | 0.172   | 0.37525 | -5.2692 | 1.1E+08  |



|              |          |         |         |         |         |         |         |          |
|--------------|----------|---------|---------|---------|---------|---------|---------|----------|
| ADGRG2       | -0.11035 | 0.11035 | 0.14832 | -1.441  | 0.17201 | 0.37525 | -5.2692 | 10149    |
| KTN1-AS1     | -0.18547 | 0.18547 | 0.52826 | -1.4407 | 0.17209 | 0.37537 | -5.2696 | 1E+08    |
| LPGAT1       | 0.91193  | 0.91193 | 3.1221  | 1.4405  | 0.17216 | 0.37545 | -5.2699 | 9926     |
| RSRC2        | 1.2675   | 1.2675  | 6.2476  | 1.4405  | 0.17217 | 0.37545 | -5.2699 | 65117    |
| NTN1         | 2.7402   | 2.7402  | 3.8141  | 1.4402  | 0.17224 | 0.37555 | -5.2702 | 9423     |
| FKBP7        | 0.82717  | 0.82717 | 1.2538  | 1.44    | 0.1723  | 0.37556 | -5.2705 | 51661    |
| AASDH        | -0.33715 | 0.33715 | 1.5234  | -1.44   | 0.17231 | 0.37556 | -5.2706 | 132949   |
| REPS1        | -0.83053 | 0.83053 | 5.2119  | -1.44   | 0.17231 | 0.37556 | -5.2706 | 85021    |
| FNDC5        | -0.11753 | 0.11753 | 0.17508 | -1.4396 | 0.17242 | 0.37574 | -5.2711 | 252995   |
| SNHG3        | 2.9914   | 2.9914  | 6.5204  | 1.4393  | 0.17249 | 0.37586 | -5.2714 | 8420     |
| LOC101929512 | -0.12154 | 0.12154 | 0.17171 | -1.4392 | 0.17252 | 0.37586 | -5.2715 | 1.02E+08 |
| MNS1         | -0.21909 | 0.21909 | 0.4388  | -1.4391 | 0.17254 | 0.37586 | -5.2716 | 55329    |
| NCAPH        | 0.2735   | 0.2735  | 0.52409 | 1.4391  | 0.17256 | 0.37586 | -5.2717 | 23397    |
| CEP63        | -0.2642  | 0.2642  | 1.341   | -1.4389 | 0.1726  | 0.3759  | -5.2719 | 80254    |
| LINC01960    | 0.17717  | 0.17717 | 0.26663 | 1.4387  | 0.17265 | 0.37591 | -5.2722 | 1E+08    |
| GBP1         | 5.4579   | 5.4579  | 9.1151  | 1.4387  | 0.17266 | 0.37591 | -5.2722 | 2633     |
| MCM10        | 0.42898  | 0.42898 | 0.57683 | 1.4386  | 0.17269 | 0.37591 | -5.2723 | 55388    |
| PSTPIP2      | -0.8424  | 0.8424  | 2.4108  | -1.4386 | 0.17269 | 0.37591 | -5.2723 | 9050     |
| HPGD         | 9.2029   | 9.2029  | 8.4712  | 1.4384  | 0.17275 | 0.37594 | -5.2726 | 3248     |
| SEC13        | 4.0215   | 4.0215  | 13.685  | 1.4384  | 0.17275 | 0.37594 | -5.2726 | 6396     |
| ZNF630       | -0.15326 | 0.15326 | 0.59787 | -1.4382 | 0.1728  | 0.376   | -5.2728 | 57232    |
| NCOA6        | -0.52335 | 0.52335 | 4.5712  | -1.4376 | 0.17297 | 0.37628 | -5.2736 | 23054    |
| PRSS48       | -0.38111 | 0.38111 | 0.88705 | -1.4374 | 0.17303 | 0.37628 | -5.2739 | 345062   |
| PLAA         | 0.65141  | 0.65141 | 3.5289  | 1.4373  | 0.17304 | 0.37628 | -5.274  | 9373     |
| COLGALT1     | 4.3821   | 4.3821  | 13.176  | 1.4373  | 0.17306 | 0.37628 | -5.274  | 79709    |
| SNORA63B     | -0.48361 | 0.48361 | 0.95135 | -1.4372 | 0.17308 | 0.37628 | -5.2741 | 1.1E+08  |

|            |          |         |         |         |         |         |         |        |
|------------|----------|---------|---------|---------|---------|---------|---------|--------|
| SLC8A2     | 0.10777  | 0.10777 | 0.13631 | 1.4372  | 0.17309 | 0.37628 | -5.2742 | 6543   |
| PIK3R2     | -3.9543  | 3.9543  | 11.193  | -1.4371 | 0.17309 | 0.37628 | -5.2742 | 5296   |
| FBXO27     | 3.2681   | 3.2681  | 8.4246  | 1.4371  | 0.17311 | 0.37628 | -5.2743 | 126433 |
| CCDC106    | -0.6542  | 0.6542  | 1.5165  | -1.4366 | 0.17324 | 0.37649 | -5.2749 | 29903  |
| SRP14      | 10.055   | 10.055  | 25.54   | 1.4366  | 0.17325 | 0.37649 | -5.2749 | 6727   |
| ATP5IF1    | 2.8689   | 2.8689  | 9.9061  | 1.4365  | 0.17328 | 0.37652 | -5.2751 | 93974  |
| STX6       | 1.4567   | 1.4567  | 6.5479  | 1.436   | 0.17342 | 0.37678 | -5.2757 | 10228  |
| MORC4      | -0.83154 | 0.83154 | 4.1331  | -1.4358 | 0.17347 | 0.3768  | -5.2759 | 79710  |
| CALML3     | 467.08   | 467.08  | 527.14  | 1.4358  | 0.17348 | 0.3768  | -5.276  | 810    |
| HADHA      | 6.1545   | 6.1545  | 28.891  | 1.4356  | 0.17352 | 0.37684 | -5.2762 | 3030   |
| CHTF18     | -0.73938 | 0.73938 | 1.6974  | -1.4355 | 0.17355 | 0.37685 | -5.2763 | 63922  |
| RTKL1      | -0.8279  | 0.8279  | 1.8907  | -1.4352 | 0.17364 | 0.377   | -5.2767 | 51750  |
| STT3A      | 2.3955   | 2.3955  | 8.3522  | 1.435   | 0.1737  | 0.37707 | -5.277  | 3703   |
| FMO5       | -0.7225  | 0.7225  | 1.3128  | -1.4348 | 0.17374 | 0.37713 | -5.2772 | 2330   |
| OSBPL3     | 0.45218  | 0.45218 | 3.4735  | 1.4346  | 0.17381 | 0.37722 | -5.2775 | 26031  |
| TMX1       | 1.361    | 1.361   | 4.7371  | 1.4343  | 0.17388 | 0.37733 | -5.2778 | 81542  |
| OSBPL8     | 1.8865   | 1.8865  | 8.0435  | 1.434   | 0.17397 | 0.37748 | -5.2782 | 114882 |
| ADGRB1     | -0.33179 | 0.33179 | 0.6097  | -1.4336 | 0.17409 | 0.37768 | -5.2788 | 575    |
| HSD11B1    | -1.0389  | 1.0389  | 1.7001  | -1.4334 | 0.17413 | 0.37772 | -5.2789 | 3290   |
| SLIT3      | -5.2666  | 5.2666  | 8.9666  | -1.4329 | 0.17427 | 0.37795 | -5.2796 | 6586   |
| SNORA26    | -0.4214  | 0.4214  | 0.73946 | -1.4329 | 0.17428 | 0.37795 | -5.2796 | 677810 |
| TSPAN32    | -0.11384 | 0.11384 | 0.13935 | -1.4328 | 0.1743  | 0.37796 | -5.2797 | 10077  |
| KDM5D      | -1.2886  | 1.2886  | 4.485   | -1.4327 | 0.17435 | 0.378   | -5.2799 | 8284   |
| ETV1       | 0.31666  | 0.31666 | 0.53421 | 1.4322  | 0.17449 | 0.37822 | -5.2806 | 2115   |
| CACNA1H    | -0.96877 | 0.96877 | 1.1282  | -1.432  | 0.17453 | 0.37822 | -5.2808 | 8912   |
| ZNF295-AS1 | 0.12193  | 0.12193 | 0.25536 | 1.432   | 0.17454 | 0.37822 | -5.2808 | 150142 |

|              |          |         |         |         |         |         |         |          |
|--------------|----------|---------|---------|---------|---------|---------|---------|----------|
| INO80B       | -1.6458  | 1.6458  | 5.5993  | -1.432  | 0.17454 | 0.37822 | -5.2808 | 83444    |
| C18orf32     | 1.2736   | 1.2736  | 3.6647  | 1.4319  | 0.17456 | 0.37822 | -5.2809 | 497661   |
| NOTCH2NLB    | -3.0035  | 3.0035  | 12.025  | -1.4313 | 0.17474 | 0.37856 | -5.2817 | 1.01E+08 |
| SAP30L-AS1   | -0.2846  | 0.2846  | 0.7076  | -1.431  | 0.1748  | 0.37865 | -5.282  | 386627   |
| TFDP1        | 4.4168   | 4.4168  | 14.791  | 1.4309  | 0.17485 | 0.37867 | -5.2822 | 7027     |
| ACAP2        | 1.3785   | 1.3785  | 6.545   | 1.4308  | 0.17486 | 0.37867 | -5.2823 | 23527    |
| DUXAP9       | 0.33565  | 0.33565 | 0.58244 | 1.4307  | 0.17491 | 0.3787  | -5.2825 | 503638   |
| CXorf38      | -0.34136 | 0.34136 | 1.6213  | -1.4306 | 0.17492 | 0.3787  | -5.2825 | 159013   |
| SRRT         | -2.9603  | 2.9603  | 11.094  | -1.4304 | 0.17498 | 0.3788  | -5.2828 | 51593    |
| KDM8         | -0.21237 | 0.21237 | 0.58274 | -1.4299 | 0.17513 | 0.37907 | -5.2835 | 79831    |
| EVL          | -6.1206  | 6.1206  | 10.139  | -1.4297 | 0.17519 | 0.37912 | -5.2838 | 51466    |
| GTDC1        | 0.29592  | 0.29592 | 1.2537  | 1.4296  | 0.1752  | 0.37912 | -5.2838 | 79712    |
| NXT1         | 1.2359   | 1.2359  | 4.6568  | 1.4295  | 0.17524 | 0.37915 | -5.284  | 29107    |
| OVOL1-AS1    | 0.85958  | 0.85958 | 1.3271  | 1.4292  | 0.17532 | 0.37929 | -5.2844 | 1.02E+08 |
| SLC25A6      | -12.635  | 12.635  | 49.654  | -1.4286 | 0.17548 | 0.37958 | -5.2851 | 293      |
| MTX2         | 1.7493   | 1.7493  | 5.4728  | 1.4284  | 0.17556 | 0.3797  | -5.2855 | 10651    |
| SUPT4H1      | 3.4377   | 3.4377  | 10.68   | 1.4281  | 0.17563 | 0.3798  | -5.2858 | 6827     |
| SLAMF6       | -0.11696 | 0.11696 | 0.22724 | -1.4279 | 0.1757  | 0.37991 | -5.2861 | 114836   |
| LOC100507071 | -0.25032 | 0.25032 | 0.55422 | -1.4275 | 0.17581 | 0.3801  | -5.2866 | 1.01E+08 |
| C10orf143    | -0.12749 | 0.12749 | 0.35003 | -1.4274 | 0.17584 | 0.3801  | -5.2867 | 387723   |
| ZNF267       | 0.72523  | 0.72523 | 2.1588  | 1.4273  | 0.17585 | 0.3801  | -5.2868 | 10308    |
| MYO15B       | -1.2883  | 1.2883  | 2.2189  | -1.4271 | 0.17591 | 0.38018 | -5.2871 | 80022    |
| NOXA1        | -1.0803  | 1.0803  | 1.9757  | -1.4266 | 0.17605 | 0.38042 | -5.2877 | 10811    |
| MMS22L       | -0.20074 | 0.20074 | 0.7593  | -1.4263 | 0.17614 | 0.38055 | -5.2881 | 253714   |
| SMOC2        | -3.1056  | 3.1056  | 4.8971  | -1.4262 | 0.17618 | 0.38055 | -5.2883 | 64094    |
| BRF2         | -0.53909 | 0.53909 | 1.994   | -1.4262 | 0.17618 | 0.38055 | -5.2883 | 55290    |

|           |          |         |         |         |         |         |         |          |
|-----------|----------|---------|---------|---------|---------|---------|---------|----------|
| MIS12     | 0.47053  | 0.47053 | 1.9279  | 1.4261  | 0.1762  | 0.38055 | -5.2884 | 79003    |
| AGK       | -0.46751 | 0.46751 | 2.6176  | -1.426  | 0.17623 | 0.38055 | -5.2885 | 55750    |
| SPATA2    | -0.27947 | 0.27947 | 1.7094  | -1.4259 | 0.17624 | 0.38055 | -5.2886 | 9825     |
| TPCN1     | -1.167   | 1.167   | 4.7951  | -1.4258 | 0.17627 | 0.38056 | -5.2887 | 53373    |
| CEP135    | 0.23869  | 0.23869 | 0.85923 | 1.4257  | 0.17631 | 0.3806  | -5.2889 | 9662     |
| DCAF15    | -1.1805  | 1.1805  | 6.9751  | -1.4255 | 0.17635 | 0.38064 | -5.2891 | 90379    |
| GPR135    | -0.26063 | 0.26063 | 0.56605 | -1.4254 | 0.17639 | 0.38066 | -5.2892 | 64582    |
| OAZ1      | 49.338   | 49.338  | 130.63  | 1.4253  | 0.17643 | 0.38071 | -5.2894 | 4946     |
| LINC01554 | -0.47185 | 0.47185 | 0.85036 | -1.4248 | 0.17655 | 0.38093 | -5.29   | 202299   |
| ANP32B    | -5.5378  | 5.5378  | 23.44   | -1.4245 | 0.17664 | 0.38105 | -5.2904 | 10541    |
| ATP13A4   | -1.3632  | 1.3632  | 2.4539  | -1.4245 | 0.17666 | 0.38105 | -5.2904 | 84239    |
| TMEM230   | 1.9525   | 1.9525  | 5.8362  | 1.4243  | 0.1767  | 0.38109 | -5.2906 | 29058    |
| ZKSCAN4   | -0.15944 | 0.15944 | 0.67375 | -1.4242 | 0.17674 | 0.38113 | -5.2908 | 387032   |
| ZFP30     | -0.21097 | 0.21097 | 0.88411 | -1.424  | 0.17678 | 0.38117 | -5.291  | 22835    |
| LINC00216 | -0.44836 | 0.44836 | 0.91156 | -1.4239 | 0.17681 | 0.38117 | -5.2911 | 55451    |
| PLAGL1    | -1.0494  | 1.0494  | 4.0931  | -1.4239 | 0.17683 | 0.38117 | -5.2912 | 5325     |
| GAS5      | -12.655  | 12.655  | 32.771  | -1.4238 | 0.17686 | 0.38119 | -5.2913 | 60674    |
| PPM1M     | -0.75558 | 0.75558 | 2.6598  | -1.4235 | 0.17693 | 0.38131 | -5.2917 | 132160   |
| CD86      | 0.70553  | 0.70553 | 1.0696  | 1.4233  | 0.17699 | 0.38137 | -5.2919 | 942      |
| UBXN7-AS1 | -0.11933 | 0.11933 | 0.17035 | -1.4232 | 0.17701 | 0.38137 | -5.292  | 1.01E+08 |
| ARID4A    | -0.59103 | 0.59103 | 2.4505  | -1.4231 | 0.17705 | 0.38142 | -5.2922 | 5926     |
| NDUFB8    | 8.2767   | 8.2767  | 26.969  | 1.4229  | 0.17711 | 0.38148 | -5.2925 | 4714     |
| CEND1     | -0.24048 | 0.24048 | 0.42805 | -1.4228 | 0.17712 | 0.38148 | -5.2925 | 51286    |
| LOC440300 | -1.4247  | 1.4247  | 3.238   | -1.4225 | 0.17723 | 0.38165 | -5.293  | 440300   |
| COL3A1    | 432.19   | 432.19  | 522.22  | 1.4223  | 0.17727 | 0.38169 | -5.2932 | 1281     |
| MNDA      | 2.2188   | 2.2188  | 2.8212  | 1.4218  | 0.17742 | 0.38192 | -5.2939 | 4332     |

|            |          |         |         |         |         |         |         |          |
|------------|----------|---------|---------|---------|---------|---------|---------|----------|
| DEPDC1B    | 0.35813  | 0.35813 | 0.63606 | 1.4217  | 0.17744 | 0.38192 | -5.2939 | 55789    |
| LYAR       | 1.1893   | 1.1893  | 2.5994  | 1.4217  | 0.17745 | 0.38192 | -5.294  | 55646    |
| APLNR      | 4.3031   | 4.3031  | 6.4147  | 1.4215  | 0.17749 | 0.38198 | -5.2942 | 187      |
| TREM2      | 0.87668  | 0.87668 | 0.76826 | 1.4214  | 0.17753 | 0.38201 | -5.2944 | 54209    |
| LY6K       | 0.52261  | 0.52261 | 0.8002  | 1.421   | 0.17764 | 0.38219 | -5.2948 | 54742    |
| SLC4A1AP   | 0.89509  | 0.89509 | 4.5043  | 1.4209  | 0.17767 | 0.38222 | -5.295  | 22950    |
| CCL3L3     | 0.26015  | 0.26015 | 0.19692 | 1.4206  | 0.17777 | 0.38239 | -5.2954 | 414062   |
| GID4       | 1.2764   | 1.2764  | 4.0993  | 1.4204  | 0.17782 | 0.38243 | -5.2956 | 79018    |
| MIAT       | -0.28855 | 0.28855 | 0.62256 | -1.4203 | 0.17786 | 0.38246 | -5.2958 | 440823   |
| LINC01088  | -0.2263  | 0.2263  | 0.20161 | -1.42   | 0.17792 | 0.38256 | -5.2961 | 1.01E+08 |
| PTPMT1     | 1.2626   | 1.2626  | 4.1012  | 1.4198  | 0.178   | 0.38262 | -5.2965 | 114971   |
| SLC26A2    | -1.0113  | 1.0113  | 2.6313  | -1.4196 | 0.17803 | 0.38262 | -5.2966 | 1836     |
| FAM83H-AS1 | -1.3289  | 1.3289  | 5.1887  | -1.4196 | 0.17804 | 0.38262 | -5.2966 | 1E+08    |
| ARFGEF1    | 1.2072   | 1.2072  | 8.1013  | 1.4196  | 0.17804 | 0.38262 | -5.2966 | 10565    |
| SETD2      | -1.0031  | 1.0031  | 7.2835  | -1.4193 | 0.17813 | 0.38274 | -5.297  | 29072    |
| PTPN13     | -3.1606  | 3.1606  | 13.5    | -1.4193 | 0.17814 | 0.38274 | -5.2971 | 5783     |
| HADH       | -0.90154 | 0.90154 | 4.0607  | -1.4189 | 0.17826 | 0.38294 | -5.2976 | 3033     |
| THOC7      | 2.5079   | 2.5079  | 8.8077  | 1.4187  | 0.17831 | 0.38301 | -5.2978 | 80145    |
| MAGED1     | 6.6519   | 6.6519  | 15.23   | 1.4186  | 0.17834 | 0.38302 | -5.298  | 9500     |
| HPR        | -0.10398 | 0.10398 | 0.13951 | -1.4183 | 0.17841 | 0.38307 | -5.2983 | 3250     |
| TBC1D20    | 1.5059   | 1.5059  | 8.1471  | 1.4183  | 0.17842 | 0.38307 | -5.2983 | 128637   |
| RAC2       | 2.641    | 2.641   | 4.7047  | 1.4183  | 0.17843 | 0.38307 | -5.2984 | 5880     |
| MREG       | 3.496    | 3.496   | 6.9408  | 1.4181  | 0.17849 | 0.38313 | -5.2986 | 55686    |
| STAT6      | -5.3661  | 5.3661  | 22.777  | -1.418  | 0.1785  | 0.38313 | -5.2987 | 6778     |
| PRRG1      | 0.32523  | 0.32523 | 0.88104 | 1.4176  | 0.17861 | 0.38321 | -5.2992 | 5638     |
| F12        | 0.89726  | 0.89726 | 2.2393  | 1.4176  | 0.17862 | 0.38321 | -5.2992 | 2161     |

|            |          |         |         |         |         |         |         |         |
|------------|----------|---------|---------|---------|---------|---------|---------|---------|
| PLBD1      | 29.208   | 29.208  | 32.661  | 1.4175  | 0.17865 | 0.38321 | -5.2994 | 79887   |
| AP5M1      | 0.77438  | 0.77438 | 3.9316  | 1.4175  | 0.17866 | 0.38321 | -5.2994 | 55745   |
| FAM83D     | 0.83188  | 0.83188 | 1.6851  | 1.4174  | 0.17867 | 0.38321 | -5.2994 | 81610   |
| BRWD3      | -0.40773 | 0.40773 | 2.3817  | -1.4174 | 0.17868 | 0.38321 | -5.2995 | 254065  |
| VANGL1     | 0.7257   | 0.7257  | 2.8822  | 1.4168  | 0.17884 | 0.38345 | -5.3002 | 81839   |
| TRPT1      | 2.4694   | 2.4694  | 6.5     | 1.4168  | 0.17885 | 0.38345 | -5.3002 | 83707   |
| GPN1       | 1.5405   | 1.5405  | 5.5335  | 1.4167  | 0.17887 | 0.38345 | -5.3003 | 11321   |
| UPF3A      | -0.83567 | 0.83567 | 3.965   | -1.4166 | 0.17889 | 0.38345 | -5.3004 | 65110   |
| EDF1       | 13.326   | 13.326  | 44.255  | 1.4166  | 0.1789  | 0.38345 | -5.3005 | 8721    |
| VPS52      | -0.19772 | 0.19772 | 1.1055  | -1.4163 | 0.17898 | 0.38348 | -5.3008 | 6293    |
| GPCPD1     | 1.0418   | 1.0418  | 5.7258  | 1.4163  | 0.17898 | 0.38348 | -5.3008 | 56261   |
| TAS2R41    | -0.10112 | 0.10112 | 0.11836 | -1.4163 | 0.17899 | 0.38348 | -5.3008 | 259287  |
| FBXL13     | -0.10839 | 0.10839 | 0.24878 | -1.4162 | 0.17901 | 0.38348 | -5.3009 | 222235  |
| OSBPL11    | 0.54433  | 0.54433 | 3.283   | 1.4158  | 0.17913 | 0.38361 | -5.3015 | 114885  |
| USP47      | 1.1338   | 1.1338  | 5.6127  | 1.4158  | 0.17913 | 0.38361 | -5.3015 | 55031   |
| TSC22D1    | 2.0196   | 2.0196  | 6.3544  | 1.4158  | 0.17914 | 0.38361 | -5.3015 | 8848    |
| FAM133DP   | 0.50291  | 0.50291 | 1.867   | 1.4153  | 0.17928 | 0.38386 | -5.3021 | 728066  |
| CD72       | -0.37697 | 0.37697 | 0.45256 | -1.4151 | 0.17934 | 0.38394 | -5.3024 | 971     |
| SNORA50B   | -0.28157 | 0.28157 | 0.42092 | -1.4148 | 0.17942 | 0.38407 | -5.3028 | 1.1E+08 |
| SS18       | 1.8405   | 1.8405  | 9.5835  | 1.4144  | 0.17954 | 0.38421 | -5.3033 | 6760    |
| ZC3HAV1L   | -0.6015  | 0.6015  | 2.5332  | -1.4144 | 0.17955 | 0.38421 | -5.3033 | 92092   |
| CDKN2D     | 1.0667   | 1.0667  | 3.1534  | 1.4142  | 0.1796  | 0.38421 | -5.3035 | 1032    |
| SLC2A1-AS1 | -0.30537 | 0.30537 | 0.87106 | -1.4142 | 0.17961 | 0.38421 | -5.3036 | 440584  |
| HBP1       | 4.0805   | 4.0805  | 13.625  | 1.4141  | 0.17962 | 0.38421 | -5.3036 | 26959   |
| ABTB2      | -0.43966 | 0.43966 | 1.5647  | -1.4141 | 0.17962 | 0.38421 | -5.3036 | 25841   |
| SLC30A7    | 0.76772  | 0.76772 | 2.9545  | 1.4139  | 0.17968 | 0.38421 | -5.3039 | 148867  |

|           |          |          |         |         |         |         |         |          |
|-----------|----------|----------|---------|---------|---------|---------|---------|----------|
| PRDX4     | 8.476    | 8.476    | 16.626  | 1.4139  | 0.17969 | 0.38421 | -5.3039 | 10549    |
| ADCY3     | -3.3994  | 3.3994   | 7.8774  | -1.4138 | 0.17972 | 0.38421 | -5.3041 | 109      |
| RNF25     | 1.1496   | 1.1496   | 4.0013  | 1.4137  | 0.17975 | 0.38421 | -5.3042 | 64320    |
| UBE2H     | 2.9385   | 2.9385   | 11.717  | 1.4135  | 0.1798  | 0.38421 | -5.3044 | 7328     |
| MMP9      | 8.3424   | 8.3424   | 7.4342  | 1.4135  | 0.17981 | 0.38421 | -5.3045 | 4318     |
| SLIRP     | 6.3904   | 6.3904   | 13.639  | 1.4134  | 0.17982 | 0.38421 | -5.3045 | 81892    |
| ZNF211    | -0.24026 | 0.24026  | 1.2628  | -1.4134 | 0.17982 | 0.38421 | -5.3045 | 10520    |
| ACAP3     | -4.2444  | 4.2444   | 9.999   | -1.4134 | 0.17983 | 0.38421 | -5.3045 | 116983   |
| CD93      | 7.0133   | 7.0133   | 14.065  | 1.4131  | 0.17991 | 0.38431 | -5.3049 | 22918    |
| LINC00539 | -0.12933 | 0.12933  | 0.20397 | -1.413  | 0.17994 | 0.38431 | -5.305  | 1.01E+08 |
| CDK12     | -0.97379 | 0.97379  | 6.6442  | -1.413  | 0.17994 | 0.38431 | -5.3051 | 51755    |
| CDRT4     | -0.32778 | 0.32778  | 0.28854 | -1.4129 | 0.17998 | 0.38433 | -5.3052 | 284040   |
| NSUN3     | -0.22363 | 0.22363  | 0.84272 | -1.4128 | 0.18    | 0.38433 | -5.3053 | 63899    |
| C22orf46  | -0.65006 | 0.65006  | 1.2319  | -1.4127 | 0.18003 | 0.38435 | -5.3054 | 79640    |
| BMT2      | 0.48997  | 0.48997  | 1.5376  | 1.4126  | 0.18007 | 0.38437 | -5.3056 | 154743   |
| SHLD2P3   | -0.15474 | 0.15474  | 0.22103 | -1.4125 | 0.18008 | 0.38437 | -5.3057 | 439965   |
| CRABP2    | 49.271   | 49.271   | 96.74   | 1.4122  | 0.18017 | 0.3845  | -5.3061 | 1382     |
| SLC39A10  | 0.4668   | 0.4668   | 1.885   | 1.4121  | 0.18019 | 0.3845  | -5.3062 | 57181    |
| LINC01424 | -0.11765 | 0.11765  | 0.14919 | -1.412  | 0.18022 | 0.38452 | -5.3063 | 1.02E+08 |
| SLC44A3   | -0.20181 | 0.20181  | 1.0627  | -1.4115 | 0.18036 | 0.38477 | -5.3069 | 126969   |
| COX6C     | 14.994   | 14.994   | 29.127  | 1.4111  | 0.18049 | 0.38497 | -5.3075 | 1345     |
| PLS1      | -0.12705 | 0.12705  | 0.29422 | -1.411  | 0.1805  | 0.38497 | -5.3075 | 5357     |
| SLC4A8    | 0.09545  | 0.09545  | 0.17665 | 1.4108  | 0.18056 | 0.38505 | -5.3078 | 9498     |
| SLC28A2   | -0.09808 | 0.098076 | 0.16024 | -1.4106 | 0.18064 | 0.38514 | -5.3081 | 9153     |
| SNAPC3    | 0.56389  | 0.56389  | 3.4112  | 1.4105  | 0.18065 | 0.38514 | -5.3082 | 6619     |
| IFI27L2   | 8.6364   | 8.6364   | 14.104  | 1.4104  | 0.18068 | 0.38516 | -5.3083 | 83982    |

|             |          |          |         |         |         |         |         |          |
|-------------|----------|----------|---------|---------|---------|---------|---------|----------|
| FKBP15      | 1.0842   | 1.0842   | 6.9473  | 1.41    | 0.1808  | 0.38537 | -5.3088 | 23307    |
| PKM         | 74.37    | 74.37    | 165.92  | 1.4098  | 0.18086 | 0.38544 | -5.3091 | 5315     |
| LITAF       | 5.6567   | 5.6567   | 16.858  | 1.4095  | 0.18095 | 0.38554 | -5.3095 | 9516     |
| UBA2        | 3.1509   | 3.1509   | 13.019  | 1.4095  | 0.18096 | 0.38554 | -5.3095 | 10054    |
| BTBD9-AS1   | -0.20978 | 0.20978  | 0.51929 | -1.4094 | 0.18097 | 0.38554 | -5.3096 | 1.02E+08 |
| GTSE1-DT    | -0.09212 | 0.092118 | 0.13808 | -1.4091 | 0.18107 | 0.38568 | -5.31   | 150384   |
| LRRC15      | 5.4209   | 5.4209   | 5.7359  | 1.4088  | 0.18114 | 0.38576 | -5.3103 | 131578   |
| ARHGAP5-AS1 | 0.43746  | 0.43746  | 1.466   | 1.4088  | 0.18115 | 0.38576 | -5.3103 | 84837    |
| EPHA1-AS1   | -0.11637 | 0.11637  | 0.27033 | -1.4085 | 0.18123 | 0.38589 | -5.3107 | 285965   |
| NSD3        | -0.51231 | 0.51231  | 5.4048  | -1.4084 | 0.18128 | 0.38595 | -5.3109 | 54904    |
| YTHDC2      | -0.65298 | 0.65298  | 4.5767  | -1.4078 | 0.18146 | 0.38627 | -5.3117 | 64848    |
| EIF4A2      | -5.1848  | 5.1848   | 27.275  | -1.4074 | 0.18155 | 0.38635 | -5.3121 | 1974     |
| CCNA1       | 0.27533  | 0.27533  | 0.19173 | 1.4072  | 0.18161 | 0.38635 | -5.3124 | 8900     |
| GLS         | 1.1392   | 1.1392   | 5.6205  | 1.4072  | 0.18163 | 0.38635 | -5.3124 | 2744     |
| GDE1        | 4.2276   | 4.2276   | 11.119  | 1.4072  | 0.18163 | 0.38635 | -5.3124 | 51573    |
| EIF4B       | -9.5469  | 9.5469   | 60.986  | -1.4071 | 0.18163 | 0.38635 | -5.3125 | 1975     |
| SRPK2       | 1.2566   | 1.2566   | 7.2532  | 1.4071  | 0.18164 | 0.38635 | -5.3125 | 6733     |
| ADGRF4      | 1.9201   | 1.9201   | 6.4459  | 1.4071  | 0.18165 | 0.38635 | -5.3125 | 221393   |
| ISX-AS1     | -0.15494 | 0.15494  | 0.16404 | -1.407  | 0.18168 | 0.38636 | -5.3127 | 1.02E+08 |
| TUBBP5      | -0.32546 | 0.32546  | 0.57147 | -1.4067 | 0.18177 | 0.3865  | -5.3131 | 643224   |
| GMPPB       | 1.3582   | 1.3582   | 4.8808  | 1.4064  | 0.18184 | 0.38658 | -5.3134 | 29925    |
| ZNF225      | -0.13324 | 0.13324  | 0.51583 | -1.4064 | 0.18185 | 0.38658 | -5.3134 | 7768     |
| PARP8       | -0.39176 | 0.39176  | 1.3677  | -1.4062 | 0.18191 | 0.38665 | -5.3137 | 79668    |
| PXYLP1      | -0.31132 | 0.31132  | 0.99944 | -1.406  | 0.18196 | 0.38671 | -5.3139 | 92370    |
| TTC14       | -0.67935 | 0.67935  | 2.4672  | -1.4058 | 0.18202 | 0.38678 | -5.3141 | 151613   |
| IZUMO1      | 0.17138  | 0.17138  | 0.2148  | 1.4056  | 0.18208 | 0.38688 | -5.3144 | 284359   |



|              |          |         |         |         |         |         |         |        |
|--------------|----------|---------|---------|---------|---------|---------|---------|--------|
| ESR1         | -0.10269 | 0.10269 | 0.21986 | -1.4054 | 0.18213 | 0.38689 | -5.3146 | 2099   |
| CA4          | -0.12492 | 0.12492 | 0.15656 | -1.4054 | 0.18214 | 0.38689 | -5.3147 | 762    |
| LOC100303749 | -0.29639 | 0.29639 | 0.62078 | -1.4052 | 0.1822  | 0.38698 | -5.3149 | 1E+08  |
| CACYBP       | 1.25     | 1.25    | 4.2553  | 1.405   | 0.18226 | 0.38706 | -5.3152 | 27101  |
| CYB5R3       | -6.8045  | 6.8045  | 37.165  | -1.4046 | 0.18238 | 0.38718 | -5.3157 | 1727   |
| PRICKLE3     | 0.69852  | 0.69852 | 3.4788  | 1.4046  | 0.18239 | 0.38718 | -5.3158 | 4007   |
| PNO1         | 0.65355  | 0.65355 | 2.4752  | 1.4045  | 0.18239 | 0.38718 | -5.3158 | 56902  |
| EIF2S3       | 6.0668   | 6.0668  | 24.483  | 1.4044  | 0.18243 | 0.38718 | -5.3159 | 1968   |
| ABHD14A      | -0.42871 | 0.42871 | 1.5024  | -1.4044 | 0.18243 | 0.38718 | -5.3159 | 25864  |
| UNC93B1      | -1.8874  | 1.8874  | 5.1387  | -1.4042 | 0.1825  | 0.38728 | -5.3162 | 81622  |
| FNDC3B       | 3.1194   | 3.1194  | 7.8885  | 1.4039  | 0.18257 | 0.38737 | -5.3165 | 64778  |
| TOM1         | 5.9605   | 5.9605  | 18.206  | 1.4038  | 0.1826  | 0.3874  | -5.3167 | 10043  |
| IER3IP1      | 2.5191   | 2.5191  | 7.4316  | 1.4037  | 0.18264 | 0.38742 | -5.3168 | 51124  |
| BORCS8       | 0.43527  | 0.43527 | 2.0135  | 1.4036  | 0.18268 | 0.38745 | -5.317  | 729991 |
| PRKACB       | 0.62693  | 0.62693 | 1.6052  | 1.4035  | 0.1827  | 0.38745 | -5.3171 | 5567   |
| IAH1         | 2.4962   | 2.4962  | 6.0012  | 1.403   | 0.18285 | 0.38767 | -5.3177 | 285148 |
| SETD5        | -0.97773 | 0.97773 | 10.995  | -1.4029 | 0.18286 | 0.38767 | -5.3178 | 55209  |
| MCM3AP       | -1.4225  | 1.4225  | 7.9797  | -1.4029 | 0.18288 | 0.38767 | -5.3179 | 8888   |
| TDRD6        | -0.10632 | 0.10632 | 0.1939  | -1.4027 | 0.18293 | 0.38767 | -5.3181 | 221400 |
| RPRD1A       | 0.89293  | 0.89293 | 4.1234  | 1.4025  | 0.18298 | 0.38767 | -5.3183 | 55197  |
| BEAN1        | 0.28194  | 0.28194 | 0.72906 | 1.4025  | 0.183   | 0.38767 | -5.3184 | 146227 |
| BIRC2        | 1.0023   | 1.0023  | 4.81    | 1.4024  | 0.18303 | 0.38767 | -5.3185 | 329    |
| PHOSPHO1     | 0.26974  | 0.26974 | 0.51893 | 1.4023  | 0.18304 | 0.38767 | -5.3186 | 162466 |
| KLHL22       | -0.4624  | 0.4624  | 2.2376  | -1.4023 | 0.18304 | 0.38767 | -5.3186 | 84861  |
| SCN3A        | -0.09872 | 0.09872 | 0.16056 | -1.4023 | 0.18305 | 0.38767 | -5.3186 | 6328   |
| ZNF440       | -1.3907  | 1.3907  | 4.0289  | -1.4022 | 0.18307 | 0.38767 | -5.3187 | 126070 |

|               |          |          |          |         |         |         |         |          |
|---------------|----------|----------|----------|---------|---------|---------|---------|----------|
| RBM25         | -1.717   | 1.717    | 8.4581   | -1.4022 | 0.18308 | 0.38767 | -5.3187 | 58517    |
| SUGT1P1       | -0.14161 | 0.14161  | 0.48012  | -1.402  | 0.18313 | 0.38768 | -5.3189 | 441394   |
| CTNNB1        | 14.105   | 14.105   | 48.003   | 1.402   | 0.18313 | 0.38768 | -5.319  | 1499     |
| UQCRFS1       | 6.1898   | 6.1898   | 21.781   | 1.4018  | 0.18319 | 0.38775 | -5.3192 | 7386     |
| LOC100128253  | -0.0994  | 0.099402 | 0.095777 | -1.4018 | 0.18321 | 0.38775 | -5.3193 | 1E+08    |
| TC2N          | -1.3327  | 1.3327   | 4.1078   | -1.4013 | 0.18334 | 0.38798 | -5.3199 | 123036   |
| CXorf21       | 0.21428  | 0.21428  | 0.36744  | 1.4011  | 0.1834  | 0.38807 | -5.3201 | 80231    |
| TOP3B         | -0.40453 | 0.40453  | 2.1023   | -1.401  | 0.18343 | 0.38809 | -5.3203 | 8940     |
| CTSL          | 21.29    | 21.29    | 31.081   | 1.4008  | 0.18348 | 0.38813 | -5.3205 | 1514     |
| NPIPA5        | -0.77287 | 0.77287  | 1.6665   | -1.4007 | 0.18352 | 0.38813 | -5.3206 | 1E+08    |
| NEK11         | -0.14153 | 0.14153  | 0.65174  | -1.4007 | 0.18352 | 0.38813 | -5.3207 | 79858    |
| LINC00888     | 0.25579  | 0.25579  | 0.40813  | 1.4004  | 0.1836  | 0.38823 | -5.321  | 1.01E+08 |
| SMIM14        | 4.1123   | 4.1123   | 9.1175   | 1.4003  | 0.18364 | 0.38826 | -5.3212 | 201895   |
| WHAMMP3       | -0.21036 | 0.21036  | 0.69738  | -1.4002 | 0.18366 | 0.38826 | -5.3212 | 339005   |
| TCTEX1D2      | 0.9276   | 0.9276   | 2.5169   | 1.4001  | 0.18368 | 0.38827 | -5.3213 | 255758   |
| MAEA          | 3.2989   | 3.2989   | 11.702   | 1.4     | 0.18372 | 0.38828 | -5.3215 | 10296    |
| STAC3         | -0.23385 | 0.23385  | 0.48073  | -1.4    | 0.18373 | 0.38828 | -5.3216 | 246329   |
| TMBIM4        | 2.4758   | 2.4758   | 7.1237   | 1.3999  | 0.18376 | 0.38828 | -5.3217 | 51643    |
| MEAF6         | 0.59557  | 0.59557  | 3.5599   | 1.3995  | 0.18385 | 0.38844 | -5.3221 | 64769    |
| DUOX2         | 0.4729   | 0.4729   | 1.2509   | 1.3993  | 0.18392 | 0.38848 | -5.3224 | 50506    |
| CD6           | -0.26631 | 0.26631  | 0.52136  | -1.3993 | 0.18394 | 0.38848 | -5.3224 | 923      |
| USP11         | -1.7837  | 1.7837   | 4.505    | -1.3992 | 0.18394 | 0.38848 | -5.3225 | 8237     |
| PRPS1         | 0.98778  | 0.98778  | 4.6843   | 1.3989  | 0.18404 | 0.38856 | -5.3229 | 5631     |
| SLX1A-SULT1A3 | -0.26791 | 0.26791  | 0.47829  | -1.3988 | 0.18406 | 0.38856 | -5.323  | 1.01E+08 |
| SLX1B-SULT1A4 | -0.26791 | 0.26791  | 0.47829  | -1.3988 | 0.18406 | 0.38856 | -5.323  | 1.01E+08 |
| DICER1        | 1.4153   | 1.4153   | 8.0761   | 1.3988  | 0.18407 | 0.38856 | -5.323  | 23405    |

|         |          |          |          |         |         |         |         |        |
|---------|----------|----------|----------|---------|---------|---------|---------|--------|
| NAPA    | 13.113   | 13.113   | 37.584   | 1.3987  | 0.18411 | 0.38859 | -5.3232 | 8775   |
| COA3    | 4.8665   | 4.8665   | 13.678   | 1.3985  | 0.18417 | 0.3886  | -5.3234 | 28958  |
| WDR62   | 0.39627  | 0.39627  | 1.259    | 1.3984  | 0.18419 | 0.3886  | -5.3235 | 284403 |
| TMEM14A | 1.6209   | 1.6209   | 3.2717   | 1.3984  | 0.1842  | 0.3886  | -5.3236 | 28978  |
| TMED6   | -0.10626 | 0.10626  | 0.26316  | -1.3983 | 0.18421 | 0.3886  | -5.3236 | 146456 |
| TRIM9   | -0.1442  | 0.1442   | 0.27596  | -1.3982 | 0.18426 | 0.38866 | -5.3238 | 114088 |
| PNMT    | -0.10078 | 0.10078  | 0.10226  | -1.3981 | 0.18429 | 0.38868 | -5.324  | 5409   |
| ZNF232  | -0.19869 | 0.19869  | 0.79872  | -1.3979 | 0.18433 | 0.38868 | -5.3241 | 7775   |
| ANO10   | 1.3421   | 1.3421   | 5.9166   | 1.3979  | 0.18434 | 0.38868 | -5.3242 | 55129  |
| KIF1C   | 9.4885   | 9.4885   | 21.816   | 1.3976  | 0.18444 | 0.38885 | -5.3246 | 10749  |
| CCDC186 | 0.87268  | 0.87268  | 3.0452   | 1.3957  | 0.18499 | 0.38992 | -5.3269 | 55088  |
| ZNF644  | 0.93725  | 0.93725  | 4.376    | 1.3956  | 0.18502 | 0.38992 | -5.3271 | 84146  |
| CXCL1   | 8.1416   | 8.1416   | 7.7986   | 1.3956  | 0.18503 | 0.38992 | -5.3271 | 2919   |
| ZNF35   | 0.29308  | 0.29308  | 2.1685   | 1.3955  | 0.18504 | 0.38992 | -5.3272 | 7584   |
| MKNK2   | 14.111   | 14.111   | 40.64    | 1.3954  | 0.18506 | 0.38992 | -5.3273 | 2872   |
| RECQL5  | -0.95011 | 0.95011  | 2.594    | -1.3953 | 0.1851  | 0.38994 | -5.3274 | 9400   |
| PMM2    | 2.2908   | 2.2908   | 8.5094   | 1.3953  | 0.18512 | 0.38994 | -5.3275 | 5373   |
| ELMO2   | -0.56505 | 0.56505  | 4.1798   | -1.3951 | 0.18515 | 0.38996 | -5.3276 | 63916  |
| PTCH2   | -0.17397 | 0.17397  | 0.29667  | -1.395  | 0.1852  | 0.39001 | -5.3279 | 8643   |
| HAMP    | -0.09765 | 0.097654 | 0.087731 | -1.3949 | 0.18523 | 0.39001 | -5.328  | 57817  |
| JMY     | 3.9719   | 3.9719   | 6.4616   | 1.3947  | 0.18528 | 0.39001 | -5.3282 | 133746 |
| LIN7A   | 0.15177  | 0.15177  | 0.23575  | 1.3947  | 0.18529 | 0.39001 | -5.3282 | 8825   |
| FUCA2   | 3.2284   | 3.2284   | 6.8862   | 1.3947  | 0.18529 | 0.39001 | -5.3282 | 2519   |
| SIGLEC6 | -0.15205 | 0.15205  | 0.40477  | -1.3944 | 0.18536 | 0.39002 | -5.3285 | 946    |
| ZNF207  | 5.4544   | 5.4544   | 29.171   | 1.3944  | 0.18536 | 0.39002 | -5.3285 | 7756   |
| NUP37   | 1.4375   | 1.4375   | 3.7913   | 1.3944  | 0.18537 | 0.39002 | -5.3285 | 79023  |

|            |          |         |         |         |         |         |         |        |
|------------|----------|---------|---------|---------|---------|---------|---------|--------|
| HAUS1      | 1.5804   | 1.5804  | 3.1685  | 1.3943  | 0.18539 | 0.39003 | -5.3287 | 115106 |
| SCG5       | 0.64666  | 0.64666 | 0.68919 | 1.3941  | 0.18546 | 0.39008 | -5.3289 | 6447   |
| MB21D2     | 0.38013  | 0.38013 | 1.3733  | 1.3941  | 0.18546 | 0.39008 | -5.329  | 151963 |
| PHRF1      | -2.522   | 2.522   | 8.7088  | -1.3936 | 0.1856  | 0.39032 | -5.3295 | 57661  |
| U2AF1L4    | -0.58616 | 0.58616 | 1.6539  | -1.3934 | 0.18566 | 0.39039 | -5.3298 | 199746 |
| FUNDC2     | 1.5934   | 1.5934  | 4.4731  | 1.3933  | 0.18568 | 0.39039 | -5.3299 | 65991  |
| ANKRD9     | 0.85058  | 0.85058 | 3.444   | 1.3933  | 0.18571 | 0.3904  | -5.33   | 122416 |
| ING4       | -1.2664  | 1.2664  | 5.5862  | -1.3931 | 0.18576 | 0.39045 | -5.3302 | 51147  |
| RAD51AP1   | 0.31676  | 0.31676 | 0.5945  | 1.3922  | 0.18601 | 0.39095 | -5.3313 | 10635  |
| NIPSNAP3A  | 1.9136   | 1.9136  | 5.1253  | 1.3919  | 0.18611 | 0.39111 | -5.3317 | 25934  |
| LINC01139  | -0.38082 | 0.38082 | 0.73068 | -1.3916 | 0.18621 | 0.39127 | -5.3321 | 339535 |
| ZNHIT6     | -0.33101 | 0.33101 | 1.5518  | -1.3914 | 0.18624 | 0.39128 | -5.3323 | 54680  |
| FRMD5      | -0.10433 | 0.10433 | 0.17044 | -1.3913 | 0.18628 | 0.39131 | -5.3324 | 84978  |
| SIX5       | -1.3055  | 1.3055  | 2.9055  | -1.391  | 0.18638 | 0.39143 | -5.3329 | 147912 |
| ERVMER34-1 | 0.41732  | 0.41732 | 0.80534 | 1.391   | 0.18638 | 0.39143 | -5.3329 | 1E+08  |
| CNGA1      | -0.15833 | 0.15833 | 0.42134 | -1.3909 | 0.18641 | 0.39143 | -5.333  | 1259   |
| TMEM125    | 1.8097   | 1.8097  | 2.6399  | 1.3907  | 0.18648 | 0.39153 | -5.3333 | 128218 |
| KLF5       | -8.6293  | 8.6293  | 36.268  | -1.3905 | 0.18652 | 0.39157 | -5.3334 | 688    |
| PROSER2    | 0.37168  | 0.37168 | 1.2832  | 1.3904  | 0.18655 | 0.39158 | -5.3336 | 254427 |
| ETHE1      | 5.5067   | 5.5067  | 12.125  | 1.3903  | 0.18659 | 0.39162 | -5.3337 | 23474  |
| CDR2       | 0.70083  | 0.70083 | 2.3592  | 1.3897  | 0.18677 | 0.39176 | -5.3345 | 1039   |
| PCGF5      | -0.5323  | 0.5323  | 2.2024  | -1.3897 | 0.18677 | 0.39176 | -5.3345 | 84333  |
| MAPKBP1    | -1.7153  | 1.7153  | 7.4266  | -1.3897 | 0.18677 | 0.39176 | -5.3345 | 23005  |
| ERI2       | 0.30409  | 0.30409 | 1.0952  | 1.3896  | 0.18678 | 0.39176 | -5.3345 | 112479 |
| FNTA       | 3.1475   | 3.1475  | 12.536  | 1.3896  | 0.18679 | 0.39176 | -5.3346 | 2339   |
| PTPRC      | 1.5819   | 1.5819  | 2.9914  | 1.3896  | 0.1868  | 0.39176 | -5.3346 | 5788   |

|              |          |          |         |         |         |         |         |          |
|--------------|----------|----------|---------|---------|---------|---------|---------|----------|
| VAPA         | 2.3148   | 2.3148   | 8.85    | 1.3894  | 0.18684 | 0.3918  | -5.3348 | 9218     |
| GPAM         | -0.23727 | 0.23727  | 0.9996  | -1.3893 | 0.18689 | 0.39185 | -5.335  | 57678    |
| LOC100129034 | -1.2129  | 1.2129   | 3.8387  | -1.3892 | 0.18691 | 0.39185 | -5.3351 | 1E+08    |
| ENO1         | 69.168   | 69.168   | 153.51  | 1.389   | 0.18696 | 0.39191 | -5.3353 | 2023     |
| CD300E       | 1.285    | 1.285    | 1.6509  | 1.3888  | 0.18703 | 0.39197 | -5.3356 | 342510   |
| MT1M         | -2.5397  | 2.5397   | 2.4258  | -1.3888 | 0.18703 | 0.39197 | -5.3356 | 4499     |
| BRPF1        | -0.67621 | 0.67621  | 3.3775  | -1.3887 | 0.18706 | 0.39197 | -5.3357 | 7862     |
| IL1RL1       | 2.9574   | 2.9574   | 2.6898  | 1.3886  | 0.1871  | 0.392   | -5.3359 | 9173     |
| LINC00678    | -0.13542 | 0.13542  | 0.18732 | -1.3884 | 0.18715 | 0.39206 | -5.3361 | 1.01E+08 |
| CDH6         | 0.24015  | 0.24015  | 0.48418 | 1.3878  | 0.18733 | 0.39239 | -5.3369 | 1004     |
| CD1C         | -0.17522 | 0.17522  | 0.35543 | -1.3874 | 0.18744 | 0.39257 | -5.3373 | 911      |
| GPR161       | 0.39505  | 0.39505  | 1.2683  | 1.3872  | 0.1875  | 0.3926  | -5.3376 | 23432    |
| C2orf49      | -0.38848 | 0.38848  | 2.2725  | -1.3872 | 0.1875  | 0.3926  | -5.3376 | 79074    |
| VPS54        | 0.73461  | 0.73461  | 3.8976  | 1.387   | 0.18757 | 0.39269 | -5.3379 | 51542    |
| LDLRAD4      | -0.35335 | 0.35335  | 1.1442  | -1.3861 | 0.18782 | 0.39318 | -5.3389 | 753      |
| ZNF658B      | -0.1031  | 0.1031   | 0.36516 | -1.3855 | 0.188   | 0.39346 | -5.3397 | 401509   |
| ZNF205       | -0.68864 | 0.68864  | 2.2696  | -1.3855 | 0.188   | 0.39346 | -5.3397 | 7755     |
| LRRC69       | -0.09559 | 0.095589 | 0.12808 | -1.385  | 0.18816 | 0.39375 | -5.3404 | 1E+08    |
| ROMO1        | 13.676   | 13.676   | 30.713  | 1.3848  | 0.18822 | 0.39381 | -5.3406 | 140823   |
| AP1M2        | 2.5516   | 2.5516   | 8.1393  | 1.3846  | 0.18828 | 0.3939  | -5.3409 | 10053    |
| MT4          | -0.8558  | 0.8558   | 0.65144 | -1.3845 | 0.18833 | 0.39394 | -5.341  | 84560    |
| PGM5-AS1     | -0.10506 | 0.10506  | 0.13567 | -1.3842 | 0.1884  | 0.39405 | -5.3414 | 572558   |
| SLED1        | -0.31119 | 0.31119  | 0.87017 | -1.3837 | 0.18856 | 0.39433 | -5.342  | 643036   |
| RAB27B       | 2.1376   | 2.1376   | 4.6914  | 1.3835  | 0.18862 | 0.39439 | -5.3423 | 5874     |
| PYGO2        | -1.5929  | 1.5929   | 6.8647  | -1.3834 | 0.18863 | 0.39439 | -5.3423 | 90780    |
| ZNF90        | -0.11686 | 0.11686  | 0.20775 | -1.3832 | 0.1887  | 0.39444 | -5.3426 | 7643     |

|             |          |          |         |         |         |         |         |          |
|-------------|----------|----------|---------|---------|---------|---------|---------|----------|
| WNT3        | -1.5952  | 1.5952   | 3.5622  | -1.3832 | 0.1887  | 0.39444 | -5.3426 | 7473     |
| FZD5        | 1.1023   | 1.1023   | 1.8825  | 1.3831  | 0.18874 | 0.39445 | -5.3428 | 7855     |
| CD3E        | -0.45872 | 0.45872  | 1.3708  | -1.3829 | 0.18879 | 0.39445 | -5.343  | 916      |
| SUCNR1      | -0.20332 | 0.20332  | 0.28377 | -1.3829 | 0.18879 | 0.39445 | -5.343  | 56670    |
| DOCK9-DT    | -0.65865 | 0.65865  | 1.8306  | -1.3829 | 0.1888  | 0.39445 | -5.343  | 1.01E+08 |
| HSD3B7      | 2.8268   | 2.8268   | 7.8401  | 1.3826  | 0.18887 | 0.39454 | -5.3433 | 80270    |
| STIL        | 0.37599  | 0.37599  | 0.8727  | 1.3824  | 0.18893 | 0.39459 | -5.3436 | 6491     |
| LINC01305   | -0.0924  | 0.092398 | 0.1148  | -1.3824 | 0.18894 | 0.39459 | -5.3436 | 285084   |
| MIB1        | 0.86095  | 0.86095  | 4.7512  | 1.3823  | 0.18897 | 0.3946  | -5.3437 | 57534    |
| PLXNC1      | 1.4311   | 1.4311   | 3.0079  | 1.3821  | 0.18903 | 0.39469 | -5.344  | 10154    |
| RPA3        | 0.68971  | 0.68971  | 1.5252  | 1.3819  | 0.18909 | 0.39476 | -5.3442 | 6119     |
| NDUFA8      | 2.3481   | 2.3481   | 6.3826  | 1.3816  | 0.18919 | 0.39492 | -5.3446 | 4702     |
| TTC27       | -0.70261 | 0.70261  | 3.1563  | -1.3815 | 0.18921 | 0.39492 | -5.3447 | 55622    |
| ZNF565      | -0.18108 | 0.18108  | 0.87696 | -1.3814 | 0.18925 | 0.39495 | -5.3449 | 147929   |
| ARID2       | -0.7638  | 0.7638   | 4.1977  | -1.3808 | 0.18941 | 0.39524 | -5.3456 | 196528   |
| SCAP        | -3.0269  | 3.0269   | 12.012  | -1.3805 | 0.18952 | 0.39541 | -5.346  | 22937    |
| TBC1D22B    | 0.60251  | 0.60251  | 3.5156  | 1.3803  | 0.18957 | 0.39547 | -5.3462 | 55633    |
| GOLGA6L4    | -0.18429 | 0.18429  | 0.55277 | -1.3802 | 0.18961 | 0.39549 | -5.3464 | 643707   |
| PLCXD1      | 3.1317   | 3.1317   | 5.2019  | 1.3801  | 0.18964 | 0.39551 | -5.3465 | 55344    |
| PRAP1       | -0.1327  | 0.1327   | 0.16183 | -1.3796 | 0.18978 | 0.39571 | -5.3471 | 118471   |
| B4GALT4-AS1 | -0.15617 | 0.15617  | 0.20689 | -1.3796 | 0.18979 | 0.39571 | -5.3471 | 1.01E+08 |
| FFAR2       | 0.61393  | 0.61393  | 0.8625  | 1.3795  | 0.18983 | 0.39571 | -5.3473 | 2867     |
| VWCE        | -0.22464 | 0.22464  | 0.33358 | -1.3794 | 0.18983 | 0.39571 | -5.3473 | 220001   |
| LPP-AS2     | -0.23761 | 0.23761  | 0.60518 | -1.3793 | 0.18986 | 0.39573 | -5.3474 | 339929   |
| NOL11       | 1.8151   | 1.8151   | 5.7887  | 1.379   | 0.18995 | 0.39588 | -5.3478 | 25926    |
| PIK3C2A     | 0.94344  | 0.94344  | 5.5009  | 1.3786  | 0.19007 | 0.39608 | -5.3483 | 5286     |

|              |          |         |         |         |         |         |         |          |
|--------------|----------|---------|---------|---------|---------|---------|---------|----------|
| ZDHHC16      | 1.1879   | 1.1879  | 4.5065  | 1.3779  | 0.19029 | 0.39647 | -5.3492 | 84287    |
| CCL11        | 2.0966   | 2.0966  | 1.0953  | 1.3778  | 0.19031 | 0.39647 | -5.3493 | 6356     |
| LEPR         | -0.52988 | 0.52988 | 1.1624  | -1.3778 | 0.19033 | 0.39647 | -5.3494 | 3953     |
| TMEM69       | 1.564    | 1.564   | 5.2632  | 1.3774  | 0.19044 | 0.39665 | -5.3498 | 51249    |
| GALNS        | 0.86317  | 0.86317 | 3.4992  | 1.3773  | 0.19049 | 0.39666 | -5.35   | 2588     |
| ZNF143       | 0.80039  | 0.80039 | 2.5293  | 1.3772  | 0.19049 | 0.39666 | -5.35   | 7702     |
| PLEKHA4      | -4.2916  | 4.2916  | 4.5895  | -1.3771 | 0.19053 | 0.39669 | -5.3502 | 57664    |
| LOC100506023 | -0.10012 | 0.10012 | 0.1675  | -1.377  | 0.19056 | 0.39669 | -5.3503 | 1.01E+08 |
| CCDC61       | -0.8903  | 0.8903  | 2.1984  | -1.3769 | 0.1906  | 0.39669 | -5.3505 | 729440   |
| PTRHD1       | 4.1062   | 4.1062  | 9.6539  | 1.3769  | 0.1906  | 0.39669 | -5.3505 | 391356   |
| ENTPD1-AS1   | -0.11931 | 0.11931 | 0.19443 | -1.3768 | 0.19064 | 0.39671 | -5.3506 | 728558   |
| NPIPB12      | -0.3229  | 0.3229  | 0.7084  | -1.3766 | 0.1907  | 0.39671 | -5.3509 | 440353   |
| AP1G1        | 1.6837   | 1.6837  | 9.4381  | 1.3766  | 0.1907  | 0.39671 | -5.3509 | 164      |
| TCEAL4       | -1.5919  | 1.5919  | 4.7977  | -1.3765 | 0.19071 | 0.39671 | -5.3509 | 79921    |
| SFT2D1       | 1.4511   | 1.4511  | 5.0954  | 1.376   | 0.19088 | 0.39695 | -5.3516 | 113402   |
| SEBOX        | -0.15569 | 0.15569 | 0.2512  | -1.3759 | 0.19089 | 0.39695 | -5.3517 | 645832   |
| TRMT2A       | -1.1205  | 1.1205  | 3.9277  | -1.3759 | 0.19089 | 0.39695 | -5.3517 | 27037    |
| INPP5E       | -0.67416 | 0.67416 | 2.6531  | -1.3758 | 0.19092 | 0.39695 | -5.3518 | 56623    |
| TEFM         | 0.60126  | 0.60126 | 2.1035  | 1.3758  | 0.19094 | 0.39695 | -5.3519 | 79736    |
| HNRNPD       | -4.7337  | 4.7337  | 19.907  | -1.3756 | 0.19099 | 0.39701 | -5.3521 | 3184     |
| TM9SF1       | 1.4162   | 1.4162  | 7.7536  | 1.3754  | 0.19105 | 0.39707 | -5.3523 | 10548    |
| GPR137B      | 2.1066   | 2.1066  | 7.0711  | 1.3753  | 0.19107 | 0.39707 | -5.3524 | 7107     |
| MRPS28       | 2.4244   | 2.4244  | 6.7939  | 1.3753  | 0.19109 | 0.39707 | -5.3525 | 28957    |
| MKI67        | 1.658    | 1.658   | 3.0352  | 1.3751  | 0.19114 | 0.39713 | -5.3527 | 4288     |
| EBLN2        | -0.34514 | 0.34514 | 1.1261  | -1.3748 | 0.19124 | 0.39729 | -5.3531 | 55096    |
| DYRK1B       | -0.98718 | 0.98718 | 3.5201  | -1.3744 | 0.19135 | 0.39745 | -5.3536 | 9149     |

|           |          |         |         |         |         |         |         |          |
|-----------|----------|---------|---------|---------|---------|---------|---------|----------|
| FAM242F   | -0.12357 | 0.12357 | 0.09872 | -1.3743 | 0.19139 | 0.39745 | -5.3537 | 1.05E+08 |
| HP09053   | -0.10659 | 0.10659 | 0.27314 | -1.3742 | 0.19141 | 0.39745 | -5.3538 | 1.02E+08 |
| IFI6      | -50.278  | 50.278  | 37.302  | -1.3742 | 0.19142 | 0.39745 | -5.3538 | 2537     |
| SRSF5     | -8.1681  | 8.1681  | 48.81   | -1.374  | 0.19146 | 0.3975  | -5.354  | 6430     |
| NFKBID    | -0.289   | 0.289   | 1.2379  | -1.3739 | 0.19149 | 0.39751 | -5.3541 | 84807    |
| ITCH      | 1.0603   | 1.0603  | 6.1799  | 1.3738  | 0.19153 | 0.39755 | -5.3543 | 83737    |
| TMEM231   | -0.34536 | 0.34536 | 1.4073  | -1.3734 | 0.19166 | 0.39773 | -5.3548 | 79583    |
| PDPN      | 4.7704   | 4.7704  | 7.3908  | 1.3734  | 0.19167 | 0.39773 | -5.3549 | 10630    |
| CLBA1     | -0.3906  | 0.3906  | 1.2801  | -1.3731 | 0.19174 | 0.39784 | -5.3552 | 122616   |
| RNFT1-DT  | -0.16372 | 0.16372 | 0.31558 | -1.3727 | 0.19187 | 0.39805 | -5.3557 | 1.02E+08 |
| IRS1      | 0.80814  | 0.80814 | 1.9603  | 1.3721  | 0.19206 | 0.3984  | -5.3565 | 3667     |
| ITPR1     | -0.8912  | 0.8912  | 2.2761  | -1.3719 | 0.1921  | 0.39843 | -5.3566 | 3708     |
| TMED10    | 5.3557   | 5.3557  | 23.308  | 1.3713  | 0.1923  | 0.39873 | -5.3575 | 10972    |
| RPTOR     | -0.92408 | 0.92408 | 4.4815  | -1.3712 | 0.19232 | 0.39873 | -5.3575 | 57521    |
| TMEM150C  | -0.42371 | 0.42371 | 0.8046  | -1.3712 | 0.19232 | 0.39873 | -5.3575 | 441027   |
| CUL7      | -0.91399 | 0.91399 | 2.9288  | -1.3711 | 0.19237 | 0.39879 | -5.3577 | 9820     |
| ACTG2     | -13.756  | 13.756  | 13.792  | -1.3708 | 0.19244 | 0.39887 | -5.358  | 72       |
| LOC729609 | -0.10048 | 0.10048 | 0.11456 | -1.3707 | 0.19247 | 0.39887 | -5.3581 | 729609   |
| NTN5      | -0.18326 | 0.18326 | 0.21766 | -1.3707 | 0.19248 | 0.39887 | -5.3582 | 126147   |
| ZYX       | 18.649   | 18.649  | 43.751  | 1.3706  | 0.1925  | 0.39887 | -5.3583 | 7791     |
| FEZ2      | 1.6266   | 1.6266  | 5.602   | 1.3705  | 0.19254 | 0.3989  | -5.3584 | 9637     |
| TOB1      | 8.4832   | 8.4832  | 21.655  | 1.3702  | 0.19263 | 0.39901 | -5.3588 | 10140    |
| OR5C1     | -0.10453 | 0.10453 | 0.14732 | -1.3701 | 0.19265 | 0.39901 | -5.3589 | 392391   |
| NME7      | 0.48114  | 0.48114 | 1.5657  | 1.3701  | 0.19266 | 0.39901 | -5.3589 | 29922    |
| STX7      | 0.98293  | 0.98293 | 5.1673  | 1.3698  | 0.19277 | 0.39913 | -5.3594 | 8417     |
| GNL3      | 3.3829   | 3.3829  | 13.235  | 1.3697  | 0.19279 | 0.39913 | -5.3594 | 26354    |



|           |          |         |         |         |         |         |         |        |
|-----------|----------|---------|---------|---------|---------|---------|---------|--------|
| NDUFS5    | 25.324   | 25.324  | 47.628  | 1.3697  | 0.19279 | 0.39913 | -5.3595 | 4725   |
| LINC01191 | 0.11216  | 0.11216 | 0.29622 | 1.3694  | 0.19289 | 0.39924 | -5.3598 | 440900 |
| RSPH1     | -0.12078 | 0.12078 | 0.14326 | -1.3693 | 0.19289 | 0.39924 | -5.3599 | 89765  |
| UBA52     | 12.66    | 12.66   | 39.116  | 1.369   | 0.193   | 0.39941 | -5.3603 | 7311   |
| CLPX      | 2.4762   | 2.4762  | 8.541   | 1.3689  | 0.19304 | 0.39944 | -5.3605 | 10845  |
| NCF2      | 1.8196   | 1.8196  | 4.0588  | 1.3683  | 0.1932  | 0.39973 | -5.3611 | 4688   |
| MILR1     | 0.28306  | 0.28306 | 0.52444 | 1.3675  | 0.19344 | 0.40018 | -5.3621 | 284021 |
| BAIAP2-DT | -0.44567 | 0.44567 | 1.0126  | -1.3674 | 0.19349 | 0.4002  | -5.3623 | 440465 |
| EZH2      | 0.8819   | 0.8819  | 3.1939  | 1.3674  | 0.1935  | 0.4002  | -5.3623 | 2146   |
| POLA2     | -0.47741 | 0.47741 | 1.8428  | -1.3672 | 0.19356 | 0.40026 | -5.3626 | 23649  |
| ANKRD44   | -0.33353 | 0.33353 | 1.2764  | -1.3671 | 0.19359 | 0.40026 | -5.3627 | 91526  |
| AVPR2     | -0.25096 | 0.25096 | 0.43951 | -1.367  | 0.1936  | 0.40026 | -5.3627 | 554    |
| ZNF438    | -0.35934 | 0.35934 | 1.4266  | -1.367  | 0.19362 | 0.40026 | -5.3628 | 220929 |
| PCDHB4    | -0.27374 | 0.27374 | 0.5307  | -1.3669 | 0.19364 | 0.40026 | -5.3629 | 56131  |
| SLTM      | 2.1426   | 2.1426  | 9.0869  | 1.3668  | 0.19367 | 0.40027 | -5.363  | 79811  |
| SMIM27    | -0.15499 | 0.15499 | 0.72674 | -1.3667 | 0.19371 | 0.4003  | -5.3632 | 1E+08  |
| COL5A1    | 28.329   | 28.329  | 37.247  | 1.3666  | 0.19374 | 0.40031 | -5.3633 | 1289   |
| CBR4      | -0.47525 | 0.47525 | 2.389   | -1.3664 | 0.19381 | 0.40039 | -5.3636 | 84869  |
| HOOK2     | -2.005   | 2.005   | 5.6672  | -1.3662 | 0.19386 | 0.4004  | -5.3638 | 29911  |
| PKD1L1    | 0.1327   | 0.1327  | 0.24176 | 1.3661  | 0.19387 | 0.4004  | -5.3638 | 168507 |
| KBTBD4    | -0.37821 | 0.37821 | 2.1798  | -1.3661 | 0.19388 | 0.4004  | -5.3639 | 55709  |
| LSP1P5    | 0.64709  | 0.64709 | 1.7639  | 1.3657  | 0.19402 | 0.40061 | -5.3644 | 645166 |
| TEF       | -2.275   | 2.275   | 6.0813  | -1.3656 | 0.19405 | 0.40061 | -5.3646 | 7008   |
| MSC       | 1.931    | 1.931   | 2.641   | 1.3655  | 0.19408 | 0.40061 | -5.3647 | 9242   |
| DEDD      | 1.1343   | 1.1343  | 6.9662  | 1.3654  | 0.19409 | 0.40061 | -5.3647 | 9191   |
| ZNF335    | -0.73404 | 0.73404 | 4.4353  | -1.3654 | 0.1941  | 0.40061 | -5.3648 | 63925  |

|            |          |         |         |         |         |         |         |          |
|------------|----------|---------|---------|---------|---------|---------|---------|----------|
| PGAM2      | -1.1899  | 1.1899  | 3.8127  | -1.3651 | 0.19418 | 0.40072 | -5.3651 | 5224     |
| DDX54      | -1.8965  | 1.8965  | 6.1765  | -1.3648 | 0.19428 | 0.40088 | -5.3655 | 79039    |
| ITIH3      | -0.40349 | 0.40349 | 0.40072 | -1.3646 | 0.19433 | 0.40094 | -5.3657 | 3699     |
| KPNA1      | 0.87566  | 0.87566 | 5.2286  | 1.3646  | 0.19436 | 0.40094 | -5.3658 | 3836     |
| BTF3       | 33.365   | 33.365  | 116.56  | 1.3645  | 0.19439 | 0.40096 | -5.3659 | 689      |
| MORF4L1    | 8.8506   | 8.8506  | 31.55   | 1.3643  | 0.19443 | 0.401   | -5.3661 | 10933    |
| ZSWIM1     | -0.36309 | 0.36309 | 2.0385  | -1.3641 | 0.1945  | 0.40107 | -5.3664 | 90204    |
| RPL39      | 202.11   | 202.11  | 429.42  | 1.364   | 0.19454 | 0.40107 | -5.3665 | 6170     |
| FOXC1      | -1.145   | 1.145   | 2.7126  | -1.364  | 0.19454 | 0.40107 | -5.3665 | 2296     |
| PIF1       | 0.20804  | 0.20804 | 0.35623 | 1.3638  | 0.19458 | 0.40107 | -5.3667 | 80119    |
| SEMA4C     | -2.3365  | 2.3365  | 6.6525  | -1.3638 | 0.19458 | 0.40107 | -5.3667 | 54910    |
| ZNF350     | -0.52634 | 0.52634 | 1.8646  | -1.3637 | 0.19462 | 0.40109 | -5.3668 | 59348    |
| C5AR2      | 0.32194  | 0.32194 | 0.79065 | 1.3632  | 0.19478 | 0.40133 | -5.3675 | 27202    |
| TPRXL      | 0.42027  | 0.42027 | 1.0136  | 1.3632  | 0.19478 | 0.40133 | -5.3675 | 348825   |
| MRPL14     | 2.3985   | 2.3985  | 7.9341  | 1.363   | 0.19483 | 0.40135 | -5.3677 | 64928    |
| TMEM92-AS1 | 0.1278   | 0.1278  | 0.15412 | 1.363   | 0.19485 | 0.40135 | -5.3678 | 1.04E+08 |
| OAS1       | -4.1994  | 4.1994  | 4.3514  | -1.3629 | 0.19486 | 0.40135 | -5.3678 | 4938     |
| LRRC19     | -0.10313 | 0.10313 | 0.12362 | -1.3627 | 0.19494 | 0.40143 | -5.3681 | 64922    |
| RPL6       | 67.871   | 67.871  | 196.92  | 1.3626  | 0.19495 | 0.40143 | -5.3682 | 6128     |
| KDR        | 2.2419   | 2.2419  | 5.7168  | 1.3624  | 0.19503 | 0.40154 | -5.3685 | 3791     |
| EFCAB7     | -0.26907 | 0.26907 | 0.81303 | -1.3621 | 0.19511 | 0.40165 | -5.3688 | 84455    |
| MFS13B     | -0.09681 | 0.09681 | 0.09824 | -1.3619 | 0.19518 | 0.40173 | -5.3691 | 1.05E+08 |
| AVPI1      | 7.6332   | 7.6332  | 12.257  | 1.3618  | 0.19519 | 0.40173 | -5.3691 | 60370    |
| XRR1       | -0.4024  | 0.4024  | 1.5954  | -1.3615 | 0.19529 | 0.40182 | -5.3695 | 143570   |
| RAB31L1    | -1.8416  | 1.8416  | 2.9455  | -1.3615 | 0.1953  | 0.40182 | -5.3696 | 5866     |
| IL10       | 0.35709  | 0.35709 | 0.35544 | 1.3615  | 0.1953  | 0.40182 | -5.3696 | 3586     |

|              |          |         |         |         |         |         |         |          |
|--------------|----------|---------|---------|---------|---------|---------|---------|----------|
| LINC01695    | -0.12508 | 0.12508 | 0.12606 | -1.3612 | 0.19539 | 0.40191 | -5.3699 | 1.02E+08 |
| LOC100287837 | -0.45949 | 0.45949 | 0.5321  | -1.3611 | 0.19541 | 0.40191 | -5.37   | 1E+08    |
| ZNFX1        | -1.9394  | 1.9394  | 7.3537  | -1.3611 | 0.19542 | 0.40191 | -5.3701 | 57169    |
| RAB8A        | 3.9699   | 3.9699  | 16.159  | 1.3608  | 0.19553 | 0.40208 | -5.3705 | 4218     |
| RARS2        | 1.0412   | 1.0412  | 4.4096  | 1.3606  | 0.19558 | 0.40213 | -5.3707 | 57038    |
| TMEM184C     | 0.6913   | 0.6913  | 3.7062  | 1.3605  | 0.19561 | 0.40216 | -5.3708 | 55751    |
| STARD13      | 0.94877  | 0.94877 | 2.0765  | 1.3604  | 0.19564 | 0.40217 | -5.371  | 90627    |
| PRR16        | 0.40987  | 0.40987 | 0.64936 | 1.3603  | 0.19566 | 0.40217 | -5.371  | 51334    |
| CHD4         | -4.3725  | 4.3725  | 20.14   | -1.3602 | 0.19569 | 0.40217 | -5.3711 | 1108     |
| P3H1         | 2.6842   | 2.6842  | 5.3046  | 1.3601  | 0.19573 | 0.40221 | -5.3713 | 64175    |
| CLCA4        | -0.36158 | 0.36158 | 0.67087 | -1.3594 | 0.19595 | 0.4026  | -5.3722 | 22802    |
| SLC22A18     | -1.1772  | 1.1772  | 2.8315  | -1.3592 | 0.19601 | 0.40262 | -5.3724 | 5002     |
| LINC00640    | -0.32972 | 0.32972 | 0.67218 | -1.3592 | 0.19602 | 0.40262 | -5.3725 | 283553   |
| PAFAH2       | -0.45152 | 0.45152 | 2.2562  | -1.3591 | 0.19603 | 0.40262 | -5.3725 | 5051     |
| CKB          | -4.2905  | 4.2905  | 14.085  | -1.3591 | 0.19605 | 0.40262 | -5.3726 | 1152     |
| PDLIM4       | 1.8542   | 1.8542  | 6.4771  | 1.3589  | 0.1961  | 0.40266 | -5.3728 | 8572     |
| SERTAD2      | 1.7015   | 1.7015  | 7.5758  | 1.3586  | 0.19621 | 0.40284 | -5.3732 | 9792     |
| TIPRL        | 0.98516  | 0.98516 | 3.6999  | 1.3583  | 0.19629 | 0.40296 | -5.3735 | 261726   |
| IL17B        | -0.12399 | 0.12399 | 0.20327 | -1.358  | 0.19639 | 0.40312 | -5.3739 | 27190    |
| ZBED4        | 0.5879   | 0.5879  | 3.7673  | 1.3578  | 0.19643 | 0.40316 | -5.3741 | 9889     |
| TMOD2        | 0.32735  | 0.32735 | 1.6029  | 1.3576  | 0.1965  | 0.40324 | -5.3744 | 29767    |
| TPX2         | 1.5401   | 1.5401  | 3.6273  | 1.3575  | 0.19653 | 0.40325 | -5.3745 | 22974    |
| CLN6         | -1.7138  | 1.7138  | 5.9706  | -1.357  | 0.19669 | 0.40354 | -5.3751 | 54982    |
| KIRREL1-IT1  | -0.21971 | 0.21971 | 0.51124 | -1.3564 | 0.19687 | 0.40386 | -5.3759 | 1.01E+08 |
| HECTD2       | 0.22385  | 0.22385 | 0.8187  | 1.3563  | 0.19692 | 0.40391 | -5.376  | 143279   |
| HMCN1        | 2.3913   | 2.3913  | 4.2686  | 1.3561  | 0.19696 | 0.40392 | -5.3762 | 83872    |

|              |          |         |         |         |         |         |         |          |
|--------------|----------|---------|---------|---------|---------|---------|---------|----------|
| PSMD13       | 4.0891   | 4.0891  | 16.632  | 1.3561  | 0.19697 | 0.40392 | -5.3762 | 5719     |
| RBP5         | -0.52594 | 0.52594 | 1.1843  | -1.3558 | 0.19706 | 0.40405 | -5.3766 | 83758    |
| LINC00886    | -0.1466  | 0.1466  | 0.27631 | -1.3557 | 0.1971  | 0.40408 | -5.3768 | 730091   |
| SFT2D2       | 3.4929   | 3.4929  | 16.955  | 1.3555  | 0.19716 | 0.40417 | -5.377  | 375035   |
| SERHL        | -0.1494  | 0.1494  | 0.17336 | -1.3553 | 0.19721 | 0.40419 | -5.3772 | 94009    |
| RALB         | 5.4825   | 5.4825  | 13.8    | 1.3553  | 0.19722 | 0.40419 | -5.3772 | 5899     |
| SHC1         | 10.129   | 10.129  | 25.741  | 1.355   | 0.19733 | 0.40435 | -5.3777 | 6464     |
| ZNRF2P1      | -0.35803 | 0.35803 | 0.88431 | -1.3548 | 0.19737 | 0.40439 | -5.3778 | 441208   |
| RMDN1        | -1.0318  | 1.0318  | 4.1497  | -1.3545 | 0.19746 | 0.40452 | -5.3782 | 51115    |
| COPG1        | 4.2818   | 4.2818  | 17.894  | 1.3542  | 0.19756 | 0.40458 | -5.3786 | 22820    |
| MARCKSL1     | 8.2607   | 8.2607  | 16.164  | 1.3542  | 0.19757 | 0.40458 | -5.3786 | 65108    |
| LDAH         | 0.28479  | 0.28479 | 1.4999  | 1.3541  | 0.19759 | 0.40458 | -5.3787 | 60526    |
| TRMT6        | 1.0078   | 1.0078  | 3.0618  | 1.3541  | 0.1976  | 0.40458 | -5.3787 | 51605    |
| CDC25A       | 0.44826  | 0.44826 | 0.60759 | 1.3541  | 0.1976  | 0.40458 | -5.3788 | 993      |
| LOC102724532 | 1.0343   | 1.0343  | 1.9809  | 1.354   | 0.19763 | 0.40459 | -5.3789 | 1.03E+08 |
| TM7SF2       | 18.804   | 18.804  | 19.834  | 1.3532  | 0.19786 | 0.405   | -5.3798 | 7108     |
| TMEM140      | -1.6708  | 1.6708  | 4.6292  | -1.3531 | 0.19791 | 0.40503 | -5.38   | 55281    |
| EI24         | 5.005    | 5.005   | 21.597  | 1.353   | 0.19793 | 0.40503 | -5.38   | 9538     |
| PTCSC3       | -0.10546 | 0.10546 | 0.2182  | -1.3529 | 0.19795 | 0.40503 | -5.3801 | 1.01E+08 |
| AADA2L2-AS1  | -0.48648 | 0.48648 | 0.31357 | -1.3529 | 0.19797 | 0.40503 | -5.3802 | 1.02E+08 |
| LOC153684    | -0.34852 | 0.34852 | 0.91199 | -1.3528 | 0.19801 | 0.40503 | -5.3803 | 153684   |
| ZDHHC11      | -0.37458 | 0.37458 | 0.70356 | -1.3527 | 0.19802 | 0.40503 | -5.3804 | 79844    |
| OAS2         | -4.7002  | 4.7002  | 4.3045  | -1.3524 | 0.19811 | 0.40518 | -5.3808 | 4939     |
| CD274        | 0.59304  | 0.59304 | 0.7672  | 1.352   | 0.19826 | 0.40542 | -5.3813 | 29126    |
| GEMIN6       | 1.3339   | 1.3339  | 2.8119  | 1.3517  | 0.19835 | 0.40556 | -5.3817 | 79833    |
| C16orf74     | 1.4281   | 1.4281  | 2.4932  | 1.3515  | 0.19841 | 0.40564 | -5.3819 | 404550   |

|              |          |         |         |         |         |         |         |          |
|--------------|----------|---------|---------|---------|---------|---------|---------|----------|
| ANKRD44-IT1  | -0.18879 | 0.18879 | 0.31306 | -1.3513 | 0.19846 | 0.40568 | -5.3821 | 1.02E+08 |
| TGM5         | 9.4712   | 9.4712  | 10.659  | 1.3511  | 0.19853 | 0.40579 | -5.3824 | 9333     |
| EEFSEC       | -0.85451 | 0.85451 | 3.7905  | -1.3505 | 0.1987  | 0.40602 | -5.3831 | 60678    |
| ASXL1        | -1.0579  | 1.0579  | 5.0799  | -1.3505 | 0.19871 | 0.40602 | -5.3831 | 171023   |
| MEGF10       | 0.21624  | 0.21624 | 0.30434 | 1.3505  | 0.19872 | 0.40602 | -5.3831 | 84466    |
| SLC26A6      | 0.82462  | 0.82462 | 2.1983  | 1.3504  | 0.19874 | 0.40602 | -5.3832 | 65010    |
| TRIM22       | -3.6033  | 3.6033  | 6.2243  | -1.3502 | 0.1988  | 0.40609 | -5.3835 | 10346    |
| ZNF75A       | -0.25181 | 0.25181 | 1.1506  | -1.3501 | 0.19883 | 0.4061  | -5.3836 | 7627     |
| ZNF653       | -0.32    | 0.32    | 0.9785  | -1.3496 | 0.19898 | 0.40627 | -5.3842 | 115950   |
| TMEM184A     | 3.468    | 3.468   | 8.817   | 1.3496  | 0.19898 | 0.40627 | -5.3842 | 202915   |
| SERINC3      | 3.3708   | 3.3708  | 18.337  | 1.3496  | 0.19899 | 0.40627 | -5.3842 | 10955    |
| LAT          | -0.44324 | 0.44324 | 1.2412  | -1.3494 | 0.19904 | 0.40628 | -5.3844 | 27040    |
| PDZD7        | -0.13889 | 0.13889 | 0.18544 | -1.3494 | 0.19905 | 0.40628 | -5.3844 | 79955    |
| GCH1         | 0.81998  | 0.81998 | 2.2775  | 1.3494  | 0.19906 | 0.40628 | -5.3845 | 2643     |
| ZMYM4-AS1    | -0.14458 | 0.14458 | 0.24083 | -1.3492 | 0.19912 | 0.40635 | -5.3847 | 1.01E+08 |
| LOC101930085 | 0.40093  | 0.40093 | 1.827   | 1.3488  | 0.19925 | 0.40656 | -5.3852 | 1.02E+08 |
| SIRT4        | -0.14884 | 0.14884 | 0.23513 | -1.3485 | 0.19936 | 0.40673 | -5.3856 | 23409    |
| ACTN1        | 22.299   | 22.299  | 43.608  | 1.3483  | 0.1994  | 0.40677 | -5.3858 | 87       |
| TRIM6-TRIM34 | -0.14889 | 0.14889 | 0.24483 | -1.3475 | 0.19966 | 0.40723 | -5.3868 | 445372   |
| CTAGE6       | -0.12529 | 0.12529 | 0.252   | -1.3474 | 0.19969 | 0.40723 | -5.3869 | 340307   |
| FAM157C      | -0.27168 | 0.27168 | 0.49611 | -1.3474 | 0.1997  | 0.40723 | -5.387  | 1.01E+08 |
| BPIFC        | 4.8683   | 4.8683  | 7.7765  | 1.3469  | 0.19985 | 0.40749 | -5.3876 | 254240   |
| SUMO1        | 3.8862   | 3.8862  | 12.591  | 1.3466  | 0.19994 | 0.40763 | -5.3879 | 7341     |
| VWA1         | 2.7045   | 2.7045  | 6.6411  | 1.3463  | 0.20002 | 0.40772 | -5.3882 | 64856    |
| SNORA20      | -0.36178 | 0.36178 | 0.33748 | -1.3462 | 0.20005 | 0.40772 | -5.3884 | 677806   |
| EIF2D        | -1.2037  | 1.2037  | 7.3764  | -1.3462 | 0.20007 | 0.40772 | -5.3884 | 1939     |

|           |          |          |          |         |         |         |         |          |
|-----------|----------|----------|----------|---------|---------|---------|---------|----------|
| LRR8C-DT  | -0.11548 | 0.11548  | 0.22015  | -1.3461 | 0.20008 | 0.40772 | -5.3885 | 400761   |
| FTSJ1     | 1.8658   | 1.8658   | 6.9111   | 1.346   | 0.20013 | 0.40772 | -5.3887 | 24140    |
| PRDM16    | -0.16035 | 0.16035  | 0.19997  | -1.3459 | 0.20015 | 0.40772 | -5.3887 | 63976    |
| HLA-DQB1  | -1.5572  | 1.5572   | 2.3891   | -1.3459 | 0.20015 | 0.40772 | -5.3888 | 3119     |
| SNX2      | 0.69694  | 0.69694  | 2.9618   | 1.3454  | 0.20032 | 0.40797 | -5.3894 | 6643     |
| FANCL     | -0.40502 | 0.40502  | 1.649    | -1.3454 | 0.20032 | 0.40797 | -5.3894 | 55120    |
| PORCN     | 0.96648  | 0.96648  | 2.9479   | 1.3453  | 0.20035 | 0.40798 | -5.3895 | 64840    |
| TAF7      | 2.5517   | 2.5517   | 11.595   | 1.3449  | 0.20046 | 0.40814 | -5.3899 | 6879     |
| RAPGEFL1  | -9.8916  | 9.8916   | 22.127   | -1.3448 | 0.2005  | 0.40817 | -5.3901 | 51195    |
| WDFY1     | 1.0169   | 1.0169   | 5.6377   | 1.3445  | 0.2006  | 0.40827 | -5.3905 | 57590    |
| CRIP1     | 24.321   | 24.321   | 61.755   | 1.3445  | 0.2006  | 0.40827 | -5.3905 | 1396     |
| MEP1B     | -0.09221 | 0.092208 | 0.080421 | -1.3444 | 0.20062 | 0.40827 | -5.3906 | 4225     |
| TM9SF3    | 2.773    | 2.773    | 13.31    | 1.3443  | 0.20067 | 0.40829 | -5.3908 | 56889    |
| SNHG6     | -2.2606  | 2.2606   | 7.4744   | -1.3443 | 0.20067 | 0.40829 | -5.3908 | 641638   |
| HEPHL1    | 17.24    | 17.24    | 16.955   | 1.3441  | 0.20072 | 0.40834 | -5.391  | 341208   |
| ALDH1A3   | 6.7179   | 6.7179   | 6.7252   | 1.3438  | 0.20082 | 0.40849 | -5.3913 | 220      |
| WHAMM     | -0.41702 | 0.41702  | 2.873    | -1.3437 | 0.20084 | 0.40849 | -5.3914 | 123720   |
| PSTK      | -0.1421  | 0.1421   | 0.48427  | -1.3432 | 0.201   | 0.40868 | -5.3921 | 118672   |
| ARL6IP6   | -0.43808 | 0.43808  | 2.3544   | -1.3432 | 0.20101 | 0.40868 | -5.3921 | 151188   |
| C10orf95  | -0.24201 | 0.24201  | 0.65855  | -1.3431 | 0.20103 | 0.40868 | -5.3921 | 79946    |
| PGBD5     | 1.6393   | 1.6393   | 1.977    | 1.3431  | 0.20104 | 0.40868 | -5.3922 | 79605    |
| COL11A1   | 2.5894   | 2.5894   | 1.6882   | 1.3429  | 0.2011  | 0.40873 | -5.3924 | 1301     |
| PLK4      | 0.33431  | 0.33431  | 0.81552  | 1.3429  | 0.20111 | 0.40873 | -5.3925 | 10733    |
| SLC11A1   | 1.0335   | 1.0335   | 1.4086   | 1.3428  | 0.20114 | 0.40874 | -5.3926 | 6556     |
| OCLNP1    | -0.61112 | 0.61112  | 1.6648   | -1.3425 | 0.20123 | 0.40884 | -5.3929 | 647859   |
| USP12-AS1 | -0.12235 | 0.12235  | 0.25077  | -1.3425 | 0.20123 | 0.40884 | -5.393  | 1.01E+08 |

|           |          |         |         |         |         |         |         |        |
|-----------|----------|---------|---------|---------|---------|---------|---------|--------|
| CENPB     | -6.9806  | 6.9806  | 21.519  | -1.3417 | 0.20147 | 0.40926 | -5.3939 | 1059   |
| AKAP8     | -0.83979 | 0.83979 | 5.1835  | -1.3411 | 0.20167 | 0.40961 | -5.3946 | 10270  |
| DCTN4     | 1.4578   | 1.4578  | 8.16    | 1.341   | 0.20169 | 0.40961 | -5.3947 | 51164  |
| SLC1A7    | -0.14443 | 0.14443 | 0.18061 | -1.341  | 0.20172 | 0.40962 | -5.3948 | 6512   |
| DNAJC28   | 0.1154   | 0.1154  | 0.22706 | 1.3406  | 0.20182 | 0.40975 | -5.3952 | 54943  |
| LOC339192 | -0.14134 | 0.14134 | 0.19467 | -1.3405 | 0.20186 | 0.40975 | -5.3954 | 339192 |
| SERPINB8  | 3.9255   | 3.9255  | 8.7843  | 1.3404  | 0.20188 | 0.40975 | -5.3955 | 5271   |
| ADK       | 1.645    | 1.645   | 7.4232  | 1.3404  | 0.2019  | 0.40975 | -5.3955 | 132    |
| CD248     | -9.7696  | 9.7696  | 20.482  | -1.3404 | 0.2019  | 0.40975 | -5.3955 | 57124  |
| SOCS2     | 0.59297  | 0.59297 | 1.3667  | 1.3403  | 0.20193 | 0.40975 | -5.3956 | 8835   |
| MYCT1     | 0.95475  | 0.95475 | 2.2119  | 1.3401  | 0.20198 | 0.40982 | -5.3958 | 80177  |
| PIAS3     | -1.3794  | 1.3794  | 8.5504  | -1.3386 | 0.20246 | 0.41072 | -5.3977 | 10401  |
| SGPP2     | 4.2164   | 4.2164  | 11.455  | 1.3385  | 0.20251 | 0.41073 | -5.3979 | 130367 |
| NPIPB15   | -1.0876  | 1.0876  | 1.4361  | -1.3384 | 0.20251 | 0.41073 | -5.3979 | 440348 |
| ANKRD13C  | 1.0222   | 1.0222  | 3.541   | 1.3383  | 0.20255 | 0.41073 | -5.398  | 81573  |
| SGTB      | 0.2648   | 0.2648  | 0.96473 | 1.3382  | 0.20258 | 0.41073 | -5.3981 | 54557  |
| ZC3H18    | -1.6001  | 1.6001  | 5.2555  | -1.3382 | 0.20258 | 0.41073 | -5.3981 | 124245 |
| RGS16     | 1.0618   | 1.0618  | 1.8619  | 1.338   | 0.20267 | 0.41086 | -5.3985 | 6004   |
| IRF2      | -1.4994  | 1.4994  | 4.9173  | -1.3378 | 0.20271 | 0.41087 | -5.3986 | 3660   |
| ANGPTL7   | -4.0146  | 4.0146  | 2.6435  | -1.3378 | 0.20272 | 0.41087 | -5.3987 | 10218  |
| ZNF680    | -0.23264 | 0.23264 | 0.70137 | -1.3376 | 0.20278 | 0.41094 | -5.3989 | 340252 |
| TGM6      | -0.21482 | 0.21482 | 0.17065 | -1.3374 | 0.20283 | 0.41099 | -5.3991 | 343641 |
| SNORA63   | -22.256  | 22.256  | 14.707  | -1.3372 | 0.20292 | 0.41113 | -5.3995 | 6043   |
| CSRNP3    | -0.17367 | 0.17367 | 0.37728 | -1.3369 | 0.203   | 0.41114 | -5.3998 | 80034  |
| DNM1L     | 1.7098   | 1.7098  | 6.3758  | 1.3369  | 0.20302 | 0.41114 | -5.3998 | 10059  |
| HPS1      | -1.5365  | 1.5365  | 5.572   | -1.3369 | 0.20302 | 0.41114 | -5.3998 | 3257   |

|              |          |          |         |         |         |         |         |          |
|--------------|----------|----------|---------|---------|---------|---------|---------|----------|
| NBPF3        | -0.28519 | 0.28519  | 1.0181  | -1.3368 | 0.20302 | 0.41114 | -5.3998 | 84224    |
| SIRT3        | -0.59522 | 0.59522  | 2.4089  | -1.3366 | 0.20309 | 0.41123 | -5.4001 | 23410    |
| OTOP3        | 2.0198   | 2.0198   | 2.3259  | 1.3357  | 0.20339 | 0.41178 | -5.4012 | 347741   |
| KLHL24       | -0.64344 | 0.64344  | 2.4917  | -1.3352 | 0.20355 | 0.41206 | -5.4019 | 54800    |
| LOC101927069 | 0.11541  | 0.11541  | 0.24906 | 1.335   | 0.20362 | 0.41214 | -5.4021 | 1.02E+08 |
| PCBP2-OT1    | -0.69325 | 0.69325  | 1.7885  | -1.3347 | 0.2037  | 0.41223 | -5.4024 | 1.02E+08 |
| TNFRSF1A     | 8.2387   | 8.2387   | 29.898  | 1.3347  | 0.20371 | 0.41223 | -5.4025 | 7132     |
| VAR52        | -0.13742 | 0.13742  | 0.47403 | -1.3345 | 0.20375 | 0.41227 | -5.4026 | 57176    |
| HMG3         | 1.8614   | 1.8614   | 6.4501  | 1.3343  | 0.20382 | 0.41229 | -5.4029 | 9324     |
| LOC730183    | -0.63012 | 0.63012  | 1.4366  | -1.3343 | 0.20382 | 0.41229 | -5.4029 | 730183   |
| HCN3         | -0.31221 | 0.31221  | 1.0928  | -1.3343 | 0.20384 | 0.41229 | -5.403  | 57657    |
| CALR         | 43.337   | 43.337   | 124.27  | 1.3339  | 0.20396 | 0.41248 | -5.4034 | 811      |
| USP48        | -0.53474 | 0.53474  | 4.5564  | -1.3335 | 0.20408 | 0.41267 | -5.4039 | 84196    |
| AEBP2        | -0.53846 | 0.53846  | 3.5441  | -1.3328 | 0.20432 | 0.41311 | -5.4048 | 121536   |
| CHID1        | -1.062   | 1.062    | 4.5496  | -1.3326 | 0.20438 | 0.41319 | -5.405  | 66005    |
| RTN4         | 7.7563   | 7.7563   | 29.977  | 1.3325  | 0.2044  | 0.41319 | -5.4051 | 57142    |
| MIG7         | -0.09899 | 0.098986 | 0.10042 | -1.3324 | 0.20443 | 0.41319 | -5.4052 | 723788   |
| ACAN         | 1.5835   | 1.5835   | 1.0772  | 1.3323  | 0.20447 | 0.41322 | -5.4054 | 176      |
| SLC51A       | -0.1643  | 0.1643   | 0.41305 | -1.3321 | 0.20453 | 0.41329 | -5.4056 | 200931   |
| ENG          | 10.417   | 10.417   | 22.797  | 1.3319  | 0.20461 | 0.41342 | -5.4059 | 2022     |
| UBE2W        | 0.3591   | 0.3591   | 1.4972  | 1.3317  | 0.20466 | 0.41342 | -5.4061 | 55284    |
| WDTC1        | -2.0512  | 2.0512   | 9.617   | -1.3317 | 0.20466 | 0.41342 | -5.4061 | 23038    |
| VAC14-AS1    | -0.11866 | 0.11866  | 0.24063 | -1.3316 | 0.20469 | 0.41343 | -5.4062 | 1E+08    |
| TNPO1        | 1.3461   | 1.3461   | 5.6283  | 1.3309  | 0.20491 | 0.41381 | -5.407  | 3842     |
| MAP3K12      | -0.76318 | 0.76318  | 2.096   | -1.3304 | 0.20507 | 0.41405 | -5.4076 | 7786     |
| SSBP1        | 3.7725   | 3.7725   | 11.827  | 1.3304  | 0.20508 | 0.41405 | -5.4077 | 6742     |



|              |          |         |         |         |         |         |         |          |
|--------------|----------|---------|---------|---------|---------|---------|---------|----------|
| RPL7         | 100.56   | 100.56  | 257.43  | 1.3303  | 0.20511 | 0.41405 | -5.4078 | 6129     |
| NT5C3A       | 5.052    | 5.052   | 7.3802  | 1.3303  | 0.20512 | 0.41405 | -5.4078 | 51251    |
| C1orf131     | 0.56041  | 0.56041 | 2.3799  | 1.3301  | 0.20519 | 0.41413 | -5.4081 | 128061   |
| RFXAP        | -0.16055 | 0.16055 | 0.44854 | -1.3297 | 0.2053  | 0.41423 | -5.4085 | 5994     |
| GLOD4        | -1.6541  | 1.6541  | 9.0677  | -1.3297 | 0.20531 | 0.41423 | -5.4085 | 51031    |
| PPFIA3       | -1.4388  | 1.4388  | 3.8503  | -1.3297 | 0.20531 | 0.41423 | -5.4086 | 8541     |
| IFI44        | -3.4489  | 3.4489  | 4.2682  | -1.3295 | 0.20538 | 0.41427 | -5.4088 | 10561    |
| ZMYM2        | -0.81323 | 0.81323 | 4.2985  | -1.3294 | 0.2054  | 0.41427 | -5.4089 | 7750     |
| CUL4A        | -0.63842 | 0.63842 | 6.0159  | -1.3294 | 0.2054  | 0.41427 | -5.4089 | 8451     |
| CYFIP2       | 0.87742  | 0.87742 | 1.3265  | 1.3291  | 0.20549 | 0.41436 | -5.4092 | 26999    |
| NANS         | 2.9183   | 2.9183  | 8.6361  | 1.3291  | 0.2055  | 0.41436 | -5.4093 | 54187    |
| CTSB         | 53.924   | 53.924  | 109.2   | 1.3288  | 0.20559 | 0.41449 | -5.4096 | 1508     |
| LOC100996437 | -0.53213 | 0.53213 | 1.3278  | -1.3286 | 0.20565 | 0.41456 | -5.4098 | 1.01E+08 |
| DLX5         | 3.669    | 3.669   | 9.7668  | 1.3283  | 0.20574 | 0.4147  | -5.4102 | 1749     |
| TMEM147      | 7.0452   | 7.0452  | 22.523  | 1.328   | 0.20585 | 0.4148  | -5.4106 | 10430    |
| MRPL17       | 1.7479   | 1.7479  | 4.6639  | 1.3278  | 0.2059  | 0.4148  | -5.4108 | 63875    |
| NDUFB6       | 2.9502   | 2.9502  | 7.7756  | 1.3277  | 0.20593 | 0.4148  | -5.4109 | 4712     |
| ANGPT1       | 0.46625  | 0.46625 | 0.83286 | 1.3277  | 0.20594 | 0.4148  | -5.4109 | 284      |
| C9orf40      | 0.24437  | 0.24437 | 0.87614 | 1.3277  | 0.20595 | 0.4148  | -5.411  | 55071    |
| LOC100287467 | -0.18247 | 0.18247 | 0.83767 | -1.3276 | 0.20597 | 0.4148  | -5.411  | 1E+08    |
| MRPS6        | 2.4858   | 2.4858  | 9.1121  | 1.3275  | 0.206   | 0.4148  | -5.4111 | 64968    |
| FGF14        | -0.1265  | 0.1265  | 0.16192 | -1.3275 | 0.206   | 0.4148  | -5.4112 | 2259     |
| LOC105371046 | -0.11448 | 0.11448 | 0.11229 | -1.3275 | 0.20601 | 0.4148  | -5.4112 | 1.05E+08 |
| MED22        | -1.0118  | 1.0118  | 3.3038  | -1.3274 | 0.20604 | 0.4148  | -5.4113 | 6837     |
| SNPH         | 0.34211  | 0.34211 | 0.92213 | 1.3273  | 0.20608 | 0.41481 | -5.4115 | 9751     |
| ANKRD46      | 0.25036  | 0.25036 | 1.5329  | 1.3271  | 0.20613 | 0.41481 | -5.4116 | 157567   |

|                |          |          |          |         |         |         |         |          |
|----------------|----------|----------|----------|---------|---------|---------|---------|----------|
| CENPI          | 0.16275  | 0.16275  | 0.40246  | 1.3271  | 0.20614 | 0.41481 | -5.4117 | 2491     |
| HNRNPH2        | 2.0061   | 2.0061   | 6.6437   | 1.3271  | 0.20614 | 0.41481 | -5.4117 | 3188     |
| GNPAT          | 1.1677   | 1.1677   | 5.8885   | 1.327   | 0.20618 | 0.41482 | -5.4118 | 8443     |
| ECHDC3         | -0.99457 | 0.99457  | 3.7263   | -1.3269 | 0.20619 | 0.41482 | -5.4119 | 79746    |
| CCDC28B        | -0.33148 | 0.33148  | 1.0399   | -1.3268 | 0.20625 | 0.41486 | -5.4121 | 79140    |
| LOC105377924   | 1.0278   | 1.0278   | 1.2695   | 1.3267  | 0.20627 | 0.41486 | -5.4121 | 1.05E+08 |
| TRIB3          | 0.70242  | 0.70242  | 1.6875   | 1.3266  | 0.20629 | 0.41486 | -5.4122 | 57761    |
| BTBD8          | -0.11225 | 0.11225  | 0.22426  | -1.3265 | 0.20635 | 0.41493 | -5.4125 | 284697   |
| KLHL35         | -0.15699 | 0.15699  | 0.30957  | -1.3264 | 0.20638 | 0.41494 | -5.4126 | 283212   |
| EIF3M          | 5.0845   | 5.0845   | 20.644   | 1.326   | 0.2065  | 0.41514 | -5.413  | 10480    |
| SERF2-C15ORF63 | -0.08982 | 0.089823 | 0.074411 | -1.3255 | 0.20667 | 0.41542 | -5.4136 | 1.01E+08 |
| SWT1           | -0.26497 | 0.26497  | 0.97734  | -1.3248 | 0.20687 | 0.41578 | -5.4144 | 54823    |
| KCNMB4         | -0.22557 | 0.22557  | 0.39375  | -1.3247 | 0.2069  | 0.41578 | -5.4145 | 27345    |
| DDX39B         | -0.71275 | 0.71275  | 3.9342   | -1.3247 | 0.20692 | 0.41578 | -5.4146 | 7919     |
| NTF3           | -0.18247 | 0.18247  | 0.43184  | -1.3246 | 0.20694 | 0.41579 | -5.4147 | 4908     |
| SELENOO        | -1.1612  | 1.1612   | 4.2683   | -1.3241 | 0.2071  | 0.41601 | -5.4153 | 83642    |
| RAD23B         | 3.8049   | 3.8049   | 18.131   | 1.3241  | 0.20711 | 0.41601 | -5.4153 | 5887     |
| PPIL1          | 1.8164   | 1.8164   | 4.7807   | 1.324   | 0.20714 | 0.41604 | -5.4154 | 51645    |
| CHRNA5         | 0.094545 | 0.094545 | 0.16445  | 1.3234  | 0.20733 | 0.41635 | -5.4161 | 1138     |
| WDR45          | 2.3925   | 2.3925   | 8.5257   | 1.3233  | 0.20737 | 0.41639 | -5.4163 | 11152    |
| DLEU1          | -0.21396 | 0.21396  | 0.96491  | -1.3231 | 0.20743 | 0.41647 | -5.4165 | 10301    |
| HMGA1          | 9.2533   | 9.2533   | 33.376   | 1.3229  | 0.20748 | 0.41652 | -5.4167 | 3159     |
| ADAM20P1       | -0.12289 | 0.12289  | 0.31116  | -1.3228 | 0.20751 | 0.41653 | -5.4168 | 317760   |
| FLT3           | -0.10688 | 0.10688  | 0.13438  | -1.3228 | 0.20754 | 0.41653 | -5.4169 | 2322     |
| CPLANE2        | -0.3903  | 0.3903   | 0.98855  | -1.3224 | 0.20765 | 0.4167  | -5.4173 | 79363    |
| GAS5-AS1       | -0.58419 | 0.58419  | 1.4403   | -1.3223 | 0.20769 | 0.41673 | -5.4175 | 1.01E+08 |

|           |          |          |          |         |         |         |         |        |
|-----------|----------|----------|----------|---------|---------|---------|---------|--------|
| HOXD3     | -0.15381 | 0.15381  | 0.31481  | -1.3222 | 0.20772 | 0.41674 | -5.4176 | 3232   |
| SV2A      | 0.2745   | 0.2745   | 0.48486  | 1.322   | 0.20777 | 0.41674 | -5.4178 | 9900   |
| DDX24     | -2.8089  | 2.8089   | 14.643   | -1.322  | 0.20778 | 0.41674 | -5.4178 | 57062  |
| TMEM256   | 3.2851   | 3.2851   | 6.3702   | 1.322   | 0.2078  | 0.41674 | -5.4179 | 254863 |
| FLNB      | 16.83    | 16.83    | 47.733   | 1.3219  | 0.20782 | 0.41674 | -5.4179 | 2317   |
| ITM2B     | 30.046   | 30.046   | 133.17   | 1.3217  | 0.20788 | 0.41681 | -5.4182 | 9445   |
| GNAI2     | 12.353   | 12.353   | 35.092   | 1.3212  | 0.20804 | 0.41708 | -5.4188 | 2771   |
| B4GALNT1  | 0.2447   | 0.2447   | 0.30769  | 1.321   | 0.20811 | 0.41719 | -5.4191 | 2583   |
| UNC5C     | -0.10224 | 0.10224  | 0.18243  | -1.3208 | 0.20818 | 0.41719 | -5.4193 | 8633   |
| USF3      | -0.42864 | 0.42864  | 2.6403   | -1.3208 | 0.20819 | 0.41719 | -5.4193 | 205717 |
| CISD1     | 0.64727  | 0.64727  | 1.6762   | 1.3207  | 0.2082  | 0.41719 | -5.4194 | 55847  |
| BRD8      | -0.67576 | 0.67576  | 2.8028   | -1.3206 | 0.20824 | 0.41719 | -5.4195 | 10902  |
| GNA13     | 1.1194   | 1.1194   | 5.2259   | 1.3206  | 0.20825 | 0.41719 | -5.4196 | 10672  |
| NUB1      | -0.94056 | 0.94056  | 5.601    | -1.3205 | 0.20826 | 0.41719 | -5.4196 | 51667  |
| YPEL4     | -0.16163 | 0.16163  | 0.49062  | -1.3199 | 0.20847 | 0.4175  | -5.4204 | 219539 |
| ARL5A     | 8.3373   | 8.3373   | 13.237   | 1.3199  | 0.20847 | 0.4175  | -5.4204 | 26225  |
| IL20      | 0.37613  | 0.37613  | 0.41169  | 1.3194  | 0.20862 | 0.41776 | -5.4209 | 50604  |
| CYHR1     | -1.0615  | 1.0615   | 2.9867   | -1.3193 | 0.20866 | 0.41779 | -5.4211 | 50626  |
| GLIS3-AS1 | 0.098681 | 0.098681 | 0.075951 | 1.3191  | 0.20872 | 0.41785 | -5.4213 | 84850  |
| TCEAL7    | 0.64602  | 0.64602  | 0.56209  | 1.3191  | 0.20874 | 0.41785 | -5.4214 | 56849  |
| MPHOSPH10 | 0.99942  | 0.99942  | 4.6516   | 1.3189  | 0.20879 | 0.4179  | -5.4216 | 10199  |
| RHOT2     | -2.8953  | 2.8953   | 9.2473   | -1.3187 | 0.20886 | 0.418   | -5.4218 | 89941  |
| ASB6      | -0.6638  | 0.6638   | 3.548    | -1.3182 | 0.20901 | 0.41824 | -5.4224 | 140459 |
| CLN8      | 1.6496   | 1.6496   | 4.8238   | 1.3181  | 0.20907 | 0.41831 | -5.4226 | 2055   |
| NECTIN4   | 9.6709   | 9.6709   | 30.75    | 1.318   | 0.20909 | 0.41831 | -5.4227 | 81607  |
| CTLA4     | 0.12899  | 0.12899  | 0.21999  | 1.3177  | 0.20918 | 0.41836 | -5.423  | 1493   |

|           |          |         |         |         |         |         |         |          |
|-----------|----------|---------|---------|---------|---------|---------|---------|----------|
| CTRL      | -0.19014 | 0.19014 | 0.71107 | -1.3177 | 0.20919 | 0.41836 | -5.423  | 1506     |
| NPR1      | -0.70061 | 0.70061 | 1.6083  | -1.3177 | 0.20919 | 0.41836 | -5.4231 | 4881     |
| RASA1     | 0.8368   | 0.8368  | 5.2572  | 1.3175  | 0.20924 | 0.41837 | -5.4232 | 5921     |
| SRSF3     | 3.4002   | 3.4002  | 17.216  | 1.3175  | 0.20925 | 0.41837 | -5.4233 | 6428     |
| ENO2      | 1.3858   | 1.3858  | 3.3977  | 1.3172  | 0.20936 | 0.41855 | -5.4237 | 2026     |
| PSMB2     | 1.9984   | 1.9984  | 8.367   | 1.3171  | 0.20938 | 0.41855 | -5.4238 | 5690     |
| RDH13     | 1.9197   | 1.9197  | 7.1441  | 1.3169  | 0.20943 | 0.4186  | -5.424  | 112724   |
| COG3      | 0.47598  | 0.47598 | 4.0153  | 1.3165  | 0.20956 | 0.4188  | -5.4244 | 83548    |
| NUSAP1    | 1.2276   | 1.2276  | 2.5386  | 1.3163  | 0.20965 | 0.41886 | -5.4247 | 51203    |
| VWF       | -8.9202  | 8.9202  | 20.05   | -1.3162 | 0.20966 | 0.41886 | -5.4248 | 7450     |
| METTL18   | 0.35789  | 0.35789 | 1.0848  | 1.3162  | 0.20967 | 0.41886 | -5.4248 | 92342    |
| PIRT      | 0.11199  | 0.11199 | 0.17859 | 1.3161  | 0.20971 | 0.4189  | -5.425  | 644139   |
| ZUP1      | 0.30484  | 0.30484 | 1.6432  | 1.3158  | 0.2098  | 0.41902 | -5.4253 | 221302   |
| CCNB1IP1  | -1.3939  | 1.3939  | 4.7879  | -1.3154 | 0.20993 | 0.41923 | -5.4258 | 57820    |
| DCP1B     | -0.24573 | 0.24573 | 0.94148 | -1.3152 | 0.21001 | 0.41935 | -5.4261 | 196513   |
| ATP9A     | 1.4833   | 1.4833  | 6.0708  | 1.3151  | 0.21004 | 0.41936 | -5.4262 | 10079    |
| SNORA5B   | -0.18431 | 0.18431 | 0.21053 | -1.3144 | 0.21026 | 0.41974 | -5.427  | 677795   |
| WFDC5     | 15.651   | 15.651  | 30.198  | 1.3143  | 0.2103  | 0.41977 | -5.4271 | 149708   |
| PTPN18    | -1.2048  | 1.2048  | 3.7754  | -1.314  | 0.21038 | 0.41986 | -5.4274 | 26469    |
| MMP24     | -0.23099 | 0.23099 | 0.80216 | -1.314  | 0.21039 | 0.41986 | -5.4275 | 10893    |
| EEF1AKMT4 | 0.61281  | 0.61281 | 2.1369  | 1.3136  | 0.21052 | 0.42008 | -5.428  | 1.11E+08 |
| SMG9      | -0.37993 | 0.37993 | 1.667   | -1.3134 | 0.21058 | 0.42013 | -5.4282 | 56006    |
| SAA1      | -22.227  | 22.227  | 12.394  | -1.3133 | 0.21062 | 0.42016 | -5.4283 | 6288     |
| LINC01840 | -0.10111 | 0.10111 | 0.11308 | -1.3132 | 0.21067 | 0.42016 | -5.4285 | 1.01E+08 |
| RTL10     | -1.5198  | 1.5198  | 4.9853  | -1.3131 | 0.2107  | 0.42016 | -5.4286 | 79680    |
| UNC5B-AS1 | 8.5766   | 8.5766  | 5.2446  | 1.313   | 0.21071 | 0.42016 | -5.4286 | 728978   |

|              |          |         |         |         |         |         |         |          |
|--------------|----------|---------|---------|---------|---------|---------|---------|----------|
| YTHDF3-AS1   | -0.14205 | 0.14205 | 0.46966 | -1.313  | 0.21073 | 0.42016 | -5.4287 | 1.01E+08 |
| LINC01621    | 0.13368  | 0.13368 | 0.20658 | 1.3129  | 0.21074 | 0.42016 | -5.4288 | 89758    |
| OLA1         | 1.3348   | 1.3348  | 5.835   | 1.3129  | 0.21077 | 0.42017 | -5.4289 | 29789    |
| HSPE1        | 5.9348   | 5.9348  | 13.598  | 1.3128  | 0.21079 | 0.42017 | -5.4289 | 3336     |
| NPM1         | 30.546   | 30.546  | 88.704  | 1.3126  | 0.21085 | 0.42022 | -5.4292 | 4869     |
| MSANTD2      | -0.34921 | 0.34921 | 1.2704  | -1.3126 | 0.21087 | 0.42022 | -5.4292 | 79684    |
| CLCN4        | -0.24898 | 0.24898 | 0.53485 | -1.3124 | 0.21091 | 0.42025 | -5.4294 | 1183     |
| COQ8B        | -1.0981  | 1.0981  | 3.542   | -1.3121 | 0.21102 | 0.42041 | -5.4298 | 79934    |
| RANBP9       | 4.8627   | 4.8627  | 12.603  | 1.312   | 0.21104 | 0.42041 | -5.4299 | 10048    |
| JTB          | 4.7329   | 4.7329  | 17.284  | 1.3118  | 0.21113 | 0.42054 | -5.4302 | 10899    |
| TMED7-TICAM2 | 0.51021  | 0.51021 | 1.1554  | 1.3115  | 0.21123 | 0.42069 | -5.4305 | 1E+08    |
| PGAM1P5      | -0.12134 | 0.12134 | 0.15786 | -1.3111 | 0.21134 | 0.42087 | -5.431  | 1E+08    |
| PPDPF        | 49.799   | 49.799  | 159.78  | 1.311   | 0.21137 | 0.42087 | -5.4311 | 79144    |
| LSM3         | 5.8122   | 5.8122  | 13.197  | 1.3108  | 0.21144 | 0.42095 | -5.4313 | 27258    |
| CIAO2A       | 0.77932  | 0.77932 | 1.8496  | 1.3107  | 0.21147 | 0.42095 | -5.4314 | 84191    |
| USP1         | 0.88185  | 0.88185 | 4.3121  | 1.3107  | 0.21149 | 0.42095 | -5.4315 | 7398     |
| SALL1        | 0.16825  | 0.16825 | 0.31809 | 1.3104  | 0.21157 | 0.42108 | -5.4318 | 6299     |
| TTC37        | 1.5436   | 1.5436  | 9.3982  | 1.3101  | 0.21168 | 0.42123 | -5.4322 | 9652     |
| ATP6V0A2     | -0.40516 | 0.40516 | 2.5731  | -1.3097 | 0.2118  | 0.42143 | -5.4326 | 23545    |
| CARD16       | 1.5088   | 1.5088  | 2.1211  | 1.3096  | 0.21184 | 0.42147 | -5.4328 | 114769   |
| YME1L1       | 3.3839   | 3.3839  | 14.858  | 1.3094  | 0.21192 | 0.42154 | -5.433  | 10730    |
| SLC38A10     | -2.7406  | 2.7406  | 7.1288  | -1.3092 | 0.21197 | 0.42154 | -5.4332 | 124565   |
| AP3M2        | -0.47439 | 0.47439 | 1.9226  | -1.3092 | 0.21199 | 0.42154 | -5.4333 | 10947    |
| PRMT3        | 0.86306  | 0.86306 | 3.2169  | 1.3091  | 0.212   | 0.42154 | -5.4334 | 10196    |
| MTBP         | -0.19799 | 0.19799 | 0.64478 | -1.3091 | 0.21201 | 0.42154 | -5.4334 | 27085    |
| UFM1         | 1.2965   | 1.2965  | 5.0726  | 1.3089  | 0.21208 | 0.42165 | -5.4337 | 51569    |

|             |          |         |         |         |         |         |         |          |
|-------------|----------|---------|---------|---------|---------|---------|---------|----------|
| TSPYL5      | -0.59196 | 0.59196 | 1.4639  | -1.3086 | 0.21218 | 0.42176 | -5.434  | 85453    |
| SLC25A44    | 0.88185  | 0.88185 | 4.5351  | 1.3085  | 0.21219 | 0.42176 | -5.4341 | 9673     |
| HRNR        | 437.15   | 437.15  | 271.53  | 1.308   | 0.21238 | 0.42208 | -5.4347 | 388697   |
| KDM3A       | -2.0556  | 2.0556  | 10.283  | -1.3079 | 0.2124  | 0.42208 | -5.4348 | 55818    |
| TBP         | -0.31531 | 0.31531 | 2.4025  | -1.3077 | 0.21245 | 0.42209 | -5.435  | 6908     |
| BSDC1       | -1.0632  | 1.0632  | 7.5816  | -1.3077 | 0.21246 | 0.42209 | -5.435  | 55108    |
| HLA-B       | -9.772   | 9.772   | 27.024  | -1.3076 | 0.21252 | 0.42216 | -5.4352 | 3106     |
| SELENOF     | 4.0259   | 4.0259  | 12.553  | 1.3071  | 0.21267 | 0.42228 | -5.4358 | 9403     |
| KCNJ5       | -0.11229 | 0.11229 | 0.21247 | -1.307  | 0.21268 | 0.42228 | -5.4358 | 3762     |
| USB1        | 1.7263   | 1.7263  | 4.3151  | 1.307   | 0.21269 | 0.42228 | -5.4359 | 79650    |
| SPNS2       | 8.4487   | 8.4487  | 16.302  | 1.307   | 0.2127  | 0.42228 | -5.4359 | 124976   |
| IFFO2       | 35.86    | 35.86   | 65.265  | 1.307   | 0.2127  | 0.42228 | -5.4359 | 126917   |
| TRIM34      | -0.26128 | 0.26128 | 1.0213  | -1.3063 | 0.21294 | 0.42271 | -5.4368 | 53840    |
| CFH         | -5.3575  | 5.3575  | 12.443  | -1.3059 | 0.21305 | 0.42287 | -5.4372 | 3075     |
| CYFIP1      | 2.7934   | 2.7934  | 11.434  | 1.3056  | 0.21317 | 0.42306 | -5.4376 | 23191    |
| ATRIP-TREX1 | -0.24514 | 0.24514 | 0.8214  | -1.3054 | 0.21324 | 0.42315 | -5.4379 | 1.12E+08 |
| MAP4K1      | -0.23094 | 0.23094 | 0.56761 | -1.3052 | 0.21329 | 0.4232  | -5.438  | 11184    |
| ECHDC2      | -1.817   | 1.817   | 5.3615  | -1.3051 | 0.21333 | 0.42323 | -5.4382 | 55268    |
| ANAPC11     | 3.7998   | 3.7998  | 9.4268  | 1.3048  | 0.21343 | 0.42337 | -5.4385 | 51529    |
| NECTIN3     | 0.24879  | 0.24879 | 0.5764  | 1.3047  | 0.21346 | 0.42338 | -5.4386 | 25945    |
| MAD2L1      | 1.1394   | 1.1394  | 1.8807  | 1.3046  | 0.21349 | 0.42339 | -5.4388 | 4085     |
| UBAP2L      | -2.6563  | 2.6563  | 12.987  | -1.3045 | 0.21352 | 0.42339 | -5.4389 | 9898     |
| ADARB1      | -0.82272 | 0.82272 | 3.0415  | -1.3043 | 0.21358 | 0.42339 | -5.4391 | 104      |
| NIFK-AS1    | -0.13135 | 0.13135 | 0.46344 | -1.3043 | 0.21358 | 0.42339 | -5.4391 | 254128   |
| ITGB2-AS1   | -0.13082 | 0.13082 | 0.28142 | -1.3042 | 0.21361 | 0.42339 | -5.4392 | 1.01E+08 |
| YDJC        | -1.1631  | 1.1631  | 3.4859  | -1.3042 | 0.21361 | 0.42339 | -5.4392 | 150223   |

|           |          |         |         |         |         |         |         |          |
|-----------|----------|---------|---------|---------|---------|---------|---------|----------|
| PRAC1     | -0.2056  | 0.2056  | 0.24996 | -1.3037 | 0.2138  | 0.42371 | -5.4399 | 84366    |
| TMA7      | 18.423   | 18.423  | 51.143  | 1.3036  | 0.21382 | 0.42371 | -5.44   | 51372    |
| SCARNA1   | -0.19926 | 0.19926 | 0.20208 | -1.303  | 0.21402 | 0.42399 | -5.4407 | 677774   |
| ACAT2     | 1.8967   | 1.8967  | 5.3905  | 1.303   | 0.21403 | 0.42399 | -5.4407 | 39       |
| OAF       | 2.7162   | 2.7162  | 6.6128  | 1.3029  | 0.21404 | 0.42399 | -5.4408 | 220323   |
| TRANK1    | -0.72012 | 0.72012 | 1.5725  | -1.3025 | 0.2142  | 0.42423 | -5.4413 | 9881     |
| DHX30     | -0.97358 | 0.97358 | 5.0852  | -1.3023 | 0.21424 | 0.42423 | -5.4415 | 22907    |
| GPR132    | -0.24926 | 0.24926 | 0.89097 | -1.3023 | 0.21426 | 0.42423 | -5.4415 | 29933    |
| SLC39A14  | 3.0675   | 3.0675  | 5.1786  | 1.3023  | 0.21426 | 0.42423 | -5.4415 | 23516    |
| SOCS5     | 0.86233  | 0.86233 | 3.4973  | 1.302   | 0.21435 | 0.42431 | -5.4419 | 9655     |
| GPC6      | 0.66128  | 0.66128 | 0.99215 | 1.302   | 0.21435 | 0.42431 | -5.4419 | 10082    |
| MIR1302-5 | 0.13093  | 0.13093 | 0.13181 | 1.3017  | 0.21445 | 0.42445 | -5.4422 | 1E+08    |
| PAXIP1    | -0.31406 | 0.31406 | 1.9132  | -1.3013 | 0.2146  | 0.42463 | -5.4428 | 22976    |
| SIAE      | 0.64437  | 0.64437 | 2.4961  | 1.3012  | 0.21463 | 0.42463 | -5.4428 | 54414    |
| PIGY      | 3.1908   | 3.1908  | 10.485  | 1.3011  | 0.21464 | 0.42463 | -5.4429 | 84992    |
| PYURF     | 3.1908   | 3.1908  | 10.485  | 1.3011  | 0.21464 | 0.42463 | -5.4429 | 1.01E+08 |
| NME1      | 8.8232   | 8.8232  | 21.811  | 1.301   | 0.21467 | 0.42464 | -5.443  | 4830     |
| RSL24D1   | 4.1145   | 4.1145  | 14.171  | 1.3009  | 0.21472 | 0.42465 | -5.4432 | 51187    |
| HUS1B     | -0.14216 | 0.14216 | 0.31285 | -1.3009 | 0.21473 | 0.42465 | -5.4432 | 135458   |
| PECAM1    | 4.8152   | 4.8152  | 11.093  | 1.3006  | 0.21482 | 0.42478 | -5.4435 | 5175     |
| JPX       | -0.29206 | 0.29206 | 0.84773 | -1.3005 | 0.21486 | 0.42482 | -5.4437 | 554203   |
| STMN2     | -1.0552  | 1.0552  | 1.3707  | -1.3004 | 0.21489 | 0.42482 | -5.4438 | 11075    |
| TEDC1     | -0.53984 | 0.53984 | 1.7714  | -1.3002 | 0.21497 | 0.42489 | -5.4441 | 283643   |
| TBC1D8B   | 0.27573  | 0.27573 | 0.68189 | 1.2998  | 0.21507 | 0.42489 | -5.4445 | 54885    |
| RUNX3     | -0.85633 | 0.85633 | 2.6997  | -1.2998 | 0.2151  | 0.42489 | -5.4445 | 864      |
| CCDC167   | 1.7828   | 1.7828  | 4.0125  | 1.2997  | 0.21511 | 0.42489 | -5.4446 | 154467   |

|               |          |         |         |         |         |         |         |          |
|---------------|----------|---------|---------|---------|---------|---------|---------|----------|
| TMEM120B      | -0.32192 | 0.32192 | 1.4767  | -1.2997 | 0.21512 | 0.42489 | -5.4446 | 144404   |
| GLUL          | -10.308  | 10.308  | 19.975  | -1.2997 | 0.21513 | 0.42489 | -5.4447 | 2752     |
| A2M-AS1       | -0.21846 | 0.21846 | 0.42565 | -1.2996 | 0.21514 | 0.42489 | -5.4447 | 144571   |
| THBS2         | 21.326   | 21.326  | 38.163  | 1.2996  | 0.21516 | 0.42489 | -5.4448 | 7058     |
| GAPLINC       | 0.41163  | 0.41163 | 0.31845 | 1.2995  | 0.21517 | 0.42489 | -5.4448 | 1.01E+08 |
| LOC100133286  | -0.10606 | 0.10606 | 0.13577 | -1.2995 | 0.21518 | 0.42489 | -5.4448 | 1E+08    |
| BYSL          | 1.0634   | 1.0634  | 3.4949  | 1.2995  | 0.2152  | 0.42489 | -5.4449 | 705      |
| SEC61A1       | 8.3398   | 8.3398  | 31.213  | 1.2992  | 0.21528 | 0.42498 | -5.4452 | 29927    |
| SNAP47        | -0.31945 | 0.31945 | 1.5587  | -1.2992 | 0.2153  | 0.42498 | -5.4453 | 116841   |
| ACAD9         | -2.5836  | 2.5836  | 9.7667  | -1.299  | 0.21535 | 0.42498 | -5.4454 | 28976    |
| KCNMA1        | -0.15137 | 0.15137 | 0.30605 | -1.299  | 0.21535 | 0.42498 | -5.4454 | 3778     |
| SETDB2-PHF11  | -0.24067 | 0.24067 | 1.0967  | -1.2989 | 0.21537 | 0.42498 | -5.4455 | 1.07E+08 |
| SUGP2         | -1.0255  | 1.0255  | 4.9292  | -1.2985 | 0.21552 | 0.42522 | -5.446  | 10147    |
| TPSG1         | -0.17912 | 0.17912 | 0.25893 | -1.2984 | 0.21554 | 0.42522 | -5.4461 | 25823    |
| ADRM1         | 6.0377   | 6.0377  | 22.861  | 1.2981  | 0.21565 | 0.42538 | -5.4465 | 11047    |
| LSMEM2        | -0.12536 | 0.12536 | 0.33433 | -1.298  | 0.21568 | 0.42538 | -5.4466 | 132228   |
| ADGRE2        | 0.73135  | 0.73135 | 1.5027  | 1.298   | 0.2157  | 0.42538 | -5.4467 | 30817    |
| PCGF2         | -1.3122  | 1.3122  | 4.0747  | -1.2977 | 0.21577 | 0.42547 | -5.4469 | 7703     |
| PSAPL1        | -6.2594  | 6.2594  | 8.4171  | -1.2977 | 0.2158  | 0.42548 | -5.447  | 768239   |
| TIGIT         | -0.12645 | 0.12645 | 0.25815 | -1.2971 | 0.216   | 0.42582 | -5.4478 | 201633   |
| ZNF784        | -0.47152 | 0.47152 | 1.575   | -1.297  | 0.21603 | 0.42582 | -5.4478 | 147808   |
| FKBP1A-SDCBP2 | 0.22068  | 0.22068 | 0.34009 | 1.2967  | 0.21613 | 0.42597 | -5.4482 | 1.01E+08 |
| GFM2          | 0.42482  | 0.42482 | 2.3707  | 1.2962  | 0.21628 | 0.42623 | -5.4488 | 84340    |
| PRAM1         | -0.13458 | 0.13458 | 0.32596 | -1.2961 | 0.21631 | 0.42623 | -5.4489 | 84106    |
| FANCM         | -0.16657 | 0.16657 | 0.69454 | -1.2959 | 0.21638 | 0.42632 | -5.4491 | 57697    |
| LY6G6C        | 13.31    | 13.31   | 15.254  | 1.2958  | 0.21641 | 0.42633 | -5.4492 | 80740    |



|         |          |         |         |         |         |         |         |        |
|---------|----------|---------|---------|---------|---------|---------|---------|--------|
| E2F5    | -0.10427 | 0.10427 | 0.253   | -1.2957 | 0.21645 | 0.42635 | -5.4494 | 1875   |
| EIF3E   | 15.484   | 15.484  | 53.355  | 1.2956  | 0.21648 | 0.42635 | -5.4495 | 3646   |
| STXBP1  | 1.0169   | 1.0169  | 4.3276  | 1.2955  | 0.21652 | 0.42635 | -5.4496 | 6812   |
| ZNF91   | -1.5247  | 1.5247  | 4.8098  | -1.2955 | 0.21654 | 0.42635 | -5.4497 | 7644   |
| IL18R1  | -0.22218 | 0.22218 | 0.85613 | -1.2954 | 0.21654 | 0.42635 | -5.4497 | 8809   |
| GDF11   | -0.30035 | 0.30035 | 0.99135 | -1.2954 | 0.21657 | 0.42635 | -5.4498 | 10220  |
| NLGN3   | -0.10216 | 0.10216 | 0.17685 | -1.2951 | 0.21666 | 0.42647 | -5.4501 | 54413  |
| CYP27A1 | -1.1878  | 1.1878  | 3.0528  | -1.295  | 0.21668 | 0.42647 | -5.4502 | 1593   |
| DDX19A  | -1.1245  | 1.1245  | 5.8639  | -1.2949 | 0.21673 | 0.42647 | -5.4504 | 55308  |
| PRPF38A | -0.90425 | 0.90425 | 5.5603  | -1.2948 | 0.21675 | 0.42647 | -5.4504 | 84950  |
| LGALS4  | -0.14625 | 0.14625 | 0.22432 | -1.2947 | 0.2168  | 0.42647 | -5.4506 | 3960   |
| NAA15   | 1.3152   | 1.3152  | 5.1069  | 1.2947  | 0.2168  | 0.42647 | -5.4506 | 80155  |
| HDAC7   | -3.5058  | 3.5058  | 12.544  | -1.2947 | 0.21681 | 0.42647 | -5.4506 | 51564  |
| ALG2    | 0.83264  | 0.83264 | 4.135   | 1.2942  | 0.21697 | 0.42668 | -5.4512 | 85365  |
| CHRNA9  | 0.71392  | 0.71392 | 0.62827 | 1.2941  | 0.21701 | 0.42668 | -5.4513 | 55584  |
| MZT1    | 0.42151  | 0.42151 | 1.1903  | 1.294   | 0.21701 | 0.42668 | -5.4514 | 440145 |
| TAS2R46 | -0.16819 | 0.16819 | 0.31833 | -1.294  | 0.21702 | 0.42668 | -5.4514 | 259292 |
| CEP170  | 0.90363  | 0.90363 | 3.1337  | 1.2938  | 0.21709 | 0.42675 | -5.4516 | 9859   |
| EIF1AX  | 1.8149   | 1.8149  | 8.2818  | 1.2937  | 0.21713 | 0.42675 | -5.4518 | 1964   |
| SIPA1L1 | 0.60824  | 0.60824 | 3.7036  | 1.2937  | 0.21713 | 0.42675 | -5.4518 | 26037  |
| ARSB    | 1.0184   | 1.0184  | 2.1635  | 1.2933  | 0.21727 | 0.42697 | -5.4522 | 411    |
| THRB    | -0.60451 | 0.60451 | 1.8328  | -1.2926 | 0.21749 | 0.42729 | -5.453  | 7068   |
| SYNE1   | -0.99579 | 0.99579 | 2.9276  | -1.2926 | 0.2175  | 0.42729 | -5.4531 | 23345  |
| WASHC1  | -1.1865  | 1.1865  | 3.7561  | -1.2925 | 0.21752 | 0.42729 | -5.4531 | 1E+08  |
| NDST2   | -0.79085 | 0.79085 | 6.4075  | -1.2925 | 0.21753 | 0.42729 | -5.4532 | 8509   |
| COX7A2L | 1.6888   | 1.6888  | 6.0033  | 1.2924  | 0.21755 | 0.42729 | -5.4533 | 9167   |

|            |          |          |         |         |         |         |         |          |
|------------|----------|----------|---------|---------|---------|---------|---------|----------|
| ELOF1      | 2.9583   | 2.9583   | 9.9447  | 1.2922  | 0.21763 | 0.42739 | -5.4535 | 84337    |
| DISC1      | -0.17814 | 0.17814  | 0.43649 | -1.2919 | 0.21772 | 0.42739 | -5.4539 | 27185    |
| LOC401021  | -0.18101 | 0.18101  | 0.40026 | -1.2919 | 0.21774 | 0.42739 | -5.4539 | 401021   |
| RPL19P12   | -0.12167 | 0.12167  | 0.2183  | -1.2919 | 0.21775 | 0.42739 | -5.4539 | 1E+08    |
| SOD2-OT1   | -0.09347 | 0.093468 | 0.17347 | -1.2918 | 0.21776 | 0.42739 | -5.454  | 1E+08    |
| LINC02021  | -0.10208 | 0.10208  | 0.15748 | -1.2918 | 0.21776 | 0.42739 | -5.454  | 1.05E+08 |
| ZNF503-AS1 | -0.11871 | 0.11871  | 0.28399 | -1.2917 | 0.21779 | 0.42741 | -5.4541 | 253264   |
| INTS1      | -2.6745  | 2.6745   | 9.107   | -1.291  | 0.21805 | 0.42775 | -5.455  | 26173    |
| ODF3L1     | -0.11441 | 0.11441  | 0.17402 | -1.291  | 0.21805 | 0.42775 | -5.455  | 161753   |
| TELO2      | -1.4827  | 1.4827   | 4.2671  | -1.2909 | 0.21805 | 0.42775 | -5.455  | 9894     |
| MCTP2      | 0.43294  | 0.43294  | 2.0136  | 1.2909  | 0.21807 | 0.42775 | -5.4551 | 55784    |
| TRA2A      | 1.6504   | 1.6504   | 8.687   | 1.2904  | 0.21822 | 0.428   | -5.4556 | 29896    |
| SNORA16A   | -0.38586 | 0.38586  | 0.97262 | -1.2902 | 0.21831 | 0.42812 | -5.4559 | 692073   |
| WDR26      | 5.0028   | 5.0028   | 15.865  | 1.2898  | 0.21842 | 0.4283  | -5.4563 | 80232    |
| TOX2       | 0.20455  | 0.20455  | 0.57767 | 1.2896  | 0.2185  | 0.4284  | -5.4566 | 84969    |
| ELOA3B     | -0.09721 | 0.097213 | 0.11628 | -1.2895 | 0.21854 | 0.42842 | -5.4567 | 728929   |
| APC2       | -0.16644 | 0.16644  | 0.28451 | -1.2894 | 0.21856 | 0.42842 | -5.4568 | 10297    |
| SCNM1      | 0.84289  | 0.84289  | 3.5175  | 1.2893  | 0.21861 | 0.42845 | -5.457  | 79005    |
| FRRS1      | -0.4064  | 0.4064   | 2.6754  | -1.2892 | 0.21865 | 0.42845 | -5.4571 | 391059   |
| HARS2      | -0.63396 | 0.63396  | 3.7862  | -1.2892 | 0.21865 | 0.42845 | -5.4571 | 23438    |
| AFDN       | 2.1219   | 2.1219   | 10.447  | 1.289   | 0.21872 | 0.42854 | -5.4574 | 4301     |
| E2F3       | 0.56881  | 0.56881  | 1.6903  | 1.2887  | 0.21882 | 0.42865 | -5.4577 | 1871     |
| PTPRD      | 0.55122  | 0.55122  | 0.90214 | 1.2886  | 0.21883 | 0.42865 | -5.4578 | 5789     |
| RPS15A     | 166.86   | 166.86   | 372.79  | 1.2885  | 0.21888 | 0.42869 | -5.4579 | 6210     |
| HUWE1      | -3.2432  | 3.2432   | 19.649  | -1.2883 | 0.21893 | 0.42873 | -5.4581 | 10075    |
| PSPC1      | -0.4073  | 0.4073   | 3.0985  | -1.2882 | 0.21897 | 0.42873 | -5.4582 | 55269    |

|           |          |         |         |         |         |         |         |          |
|-----------|----------|---------|---------|---------|---------|---------|---------|----------|
| WBP11     | -1.8562  | 1.8562  | 9.1057  | -1.2882 | 0.21898 | 0.42873 | -5.4583 | 51729    |
| SRRM3     | 0.87424  | 0.87424 | 1.557   | 1.2881  | 0.21902 | 0.42873 | -5.4584 | 222183   |
| HCAR2     | 3.0501   | 3.0501  | 5.885   | 1.2881  | 0.21902 | 0.42873 | -5.4584 | 338442   |
| SORL1     | 1.1668   | 1.1668  | 3.0693  | 1.288   | 0.21906 | 0.42874 | -5.4585 | 6653     |
| GYG2      | -0.15096 | 0.15096 | 0.29702 | -1.2878 | 0.21912 | 0.42883 | -5.4588 | 8908     |
| ZNF860    | 0.14403  | 0.14403 | 0.60965 | 1.2875  | 0.2192  | 0.42893 | -5.4591 | 344787   |
| LRP3      | -1.2412  | 1.2412  | 3.4169  | -1.2872 | 0.21933 | 0.42908 | -5.4595 | 4037     |
| RINL      | 0.28369  | 0.28369 | 0.78552 | 1.2872  | 0.21933 | 0.42908 | -5.4595 | 126432   |
| LARS2     | -0.52079 | 0.52079 | 2.2566  | -1.2871 | 0.21936 | 0.42908 | -5.4596 | 23395    |
| BNC1      | 4.8752   | 4.8752  | 10.679  | 1.287   | 0.21938 | 0.42908 | -5.4597 | 646      |
| ALMS1-IT1 | -0.14402 | 0.14402 | 0.26745 | -1.2869 | 0.21943 | 0.42912 | -5.4598 | 1.01E+08 |
| STAG2     | 1.3134   | 1.3134  | 7.3211  | 1.2866  | 0.21952 | 0.42926 | -5.4602 | 10735    |
| PSMD3     | 6.9247   | 6.9247  | 22.734  | 1.2864  | 0.2196  | 0.42935 | -5.4604 | 5709     |
| DDX50     | 1.2394   | 1.2394  | 5.9047  | 1.2861  | 0.21968 | 0.4294  | -5.4607 | 79009    |
| SCARNA10  | -125.87  | 125.87  | 365.1   | -1.2861 | 0.2197  | 0.4294  | -5.4608 | 692148   |
| MYO7A     | -0.20306 | 0.20306 | 0.33346 | -1.2861 | 0.2197  | 0.4294  | -5.4608 | 4647     |
| GATC      | -0.45394 | 0.45394 | 4.1402  | -1.286  | 0.21973 | 0.4294  | -5.4609 | 283459   |
| ATG4B     | -1.2729  | 1.2729  | 5.7031  | -1.2859 | 0.21975 | 0.4294  | -5.461  | 23192    |
| TEAD1     | 1.0261   | 1.0261  | 5.5555  | 1.2853  | 0.21997 | 0.42979 | -5.4617 | 7003     |
| GIMAP8    | -1.0756  | 1.0756  | 2.4845  | -1.2851 | 0.22004 | 0.42987 | -5.462  | 155038   |
| CNPY3     | -0.8505  | 0.8505  | 2.6867  | -1.2849 | 0.2201  | 0.42992 | -5.4622 | 10695    |
| NR4A3     | 0.83304  | 0.83304 | 1.0697  | 1.2848  | 0.22012 | 0.42992 | -5.4623 | 8013     |
| MUC5B     | -0.11024 | 0.11024 | 0.17239 | -1.2847 | 0.22017 | 0.42992 | -5.4624 | 727897   |
| PTCD2     | -0.18401 | 0.18401 | 1.2087  | -1.2847 | 0.22017 | 0.42992 | -5.4624 | 79810    |
| TMEM63B   | 2.3639   | 2.3639  | 10.403  | 1.2843  | 0.22032 | 0.43015 | -5.463  | 55362    |
| ZNF469    | 1.3472   | 1.3472  | 1.7489  | 1.2842  | 0.22035 | 0.43015 | -5.463  | 84627    |

|             |          |          |          |         |         |         |         |          |
|-------------|----------|----------|----------|---------|---------|---------|---------|----------|
| HEATR1      | -0.94609 | 0.94609  | 4.6073   | -1.2841 | 0.22036 | 0.43015 | -5.4631 | 55127    |
| ADI1        | 0.93965  | 0.93965  | 4.5777   | 1.2837  | 0.2205  | 0.43037 | -5.4636 | 55256    |
| TBL1X       | 0.85005  | 0.85005  | 4.3151   | 1.2833  | 0.22065 | 0.43042 | -5.4641 | 6907     |
| RABGGTB     | 1.4274   | 1.4274   | 6.3605   | 1.2832  | 0.22067 | 0.43042 | -5.4642 | 5876     |
| LINC00941   | 0.088881 | 0.088881 | 0.10704  | 1.2832  | 0.22068 | 0.43042 | -5.4642 | 1E+08    |
| GFRA2       | -0.32284 | 0.32284  | 0.58666  | -1.2831 | 0.22069 | 0.43042 | -5.4643 | 2675     |
| PBX2        | -0.18946 | 0.18946  | 1.4008   | -1.283  | 0.22073 | 0.43042 | -5.4644 | 5089     |
| ARHGAP31    | -1.0599  | 1.0599   | 4.8133   | -1.283  | 0.22074 | 0.43042 | -5.4644 | 57514    |
| SRD5A1      | -1.0906  | 1.0906   | 5.4009   | -1.283  | 0.22076 | 0.43042 | -5.4645 | 6715     |
| SLC35F6     | 2.765    | 2.765    | 14.115   | 1.2829  | 0.22077 | 0.43042 | -5.4645 | 54978    |
| NAA35       | -0.36027 | 0.36027  | 2.7615   | -1.2829 | 0.22079 | 0.43042 | -5.4646 | 60560    |
| CADPS2      | -0.48885 | 0.48885  | 1.4641   | -1.2829 | 0.22079 | 0.43042 | -5.4646 | 93664    |
| CASC21      | -0.08766 | 0.087663 | 0.078739 | -1.2828 | 0.2208  | 0.43042 | -5.4646 | 1.03E+08 |
| YIPF1       | 1.1901   | 1.1901   | 5.0532   | 1.2827  | 0.22085 | 0.43042 | -5.4648 | 54432    |
| PRDX3       | 4.4234   | 4.4234   | 10.678   | 1.2827  | 0.22086 | 0.43042 | -5.4648 | 10935    |
| SNHG26      | -0.66473 | 0.66473  | 1.2696   | -1.2826 | 0.22088 | 0.43042 | -5.4649 | 1.1E+08  |
| TMX2-CTNND1 | -0.23379 | 0.23379  | 0.69529  | -1.2825 | 0.22093 | 0.43042 | -5.4651 | 1.01E+08 |
| STAG1       | -1.1003  | 1.1003   | 6.8096   | -1.2824 | 0.22094 | 0.43042 | -5.4651 | 10274    |
| SPTBN2      | -7.001   | 7.001    | 21.166   | -1.2824 | 0.22096 | 0.43042 | -5.4652 | 6712     |
| DHRS1       | 4.5951   | 4.5951   | 15.417   | 1.281   | 0.22141 | 0.43125 | -5.4667 | 115817   |
| ATP5PO      | 14.364   | 14.364   | 40.756   | 1.2802  | 0.2217  | 0.43176 | -5.4677 | 539      |
| CIITA       | -1.0833  | 1.0833   | 3.029    | -1.2799 | 0.2218  | 0.43188 | -5.4681 | 4261     |
| VPS8        | 0.41966  | 0.41966  | 3.4079   | 1.2799  | 0.22181 | 0.43188 | -5.4681 | 23355    |
| SNORD9      | -0.12332 | 0.12332  | 0.088739 | -1.2797 | 0.22187 | 0.43194 | -5.4683 | 692053   |
| PGRMC1      | 3.8687   | 3.8687   | 12.878   | 1.2794  | 0.22197 | 0.43208 | -5.4687 | 10857    |
| AIM2        | 0.32953  | 0.32953  | 0.4415   | 1.2792  | 0.22205 | 0.43219 | -5.4689 | 9447     |

|          |          |          |         |         |         |         |         |        |
|----------|----------|----------|---------|---------|---------|---------|---------|--------|
| SPATA6L  | -0.14083 | 0.14083  | 0.3676  | -1.2791 | 0.22208 | 0.43221 | -5.4691 | 55064  |
| STAT2    | -3.8024  | 3.8024   | 10.912  | -1.2787 | 0.22221 | 0.43234 | -5.4695 | 6773   |
| TRIM8    | -3.6117  | 3.6117   | 12.333  | -1.2787 | 0.22222 | 0.43234 | -5.4695 | 81603  |
| IL23A    | -0.09124 | 0.091235 | 0.19285 | -1.2787 | 0.22223 | 0.43234 | -5.4696 | 51561  |
| SLC16A10 | -0.72011 | 0.72011  | 1.7662  | -1.2786 | 0.22226 | 0.43235 | -5.4697 | 117247 |
| MSTO1    | -0.59012 | 0.59012  | 2.5469  | -1.2784 | 0.22232 | 0.4324  | -5.4699 | 55154  |
| SHPK     | 0.93161  | 0.93161  | 4.0546  | 1.2783  | 0.22234 | 0.4324  | -5.4699 | 23729  |
| DENND4A  | -0.56468 | 0.56468  | 2.5473  | -1.2782 | 0.22237 | 0.43242 | -5.47   | 10260  |
| CDO1     | -0.17226 | 0.17226  | 0.19833 | -1.2777 | 0.22255 | 0.43268 | -5.4707 | 1036   |
| ADORA2B  | -0.76299 | 0.76299  | 2.5002  | -1.2776 | 0.2226  | 0.43268 | -5.4708 | 136    |
| COX20    | -0.94559 | 0.94559  | 4.7759  | -1.2775 | 0.22263 | 0.43268 | -5.4709 | 116228 |
| IL6      | 8.8799   | 8.8799   | 9.5241  | 1.2775  | 0.22264 | 0.43268 | -5.471  | 3569   |
| SERPING1 | -29.61   | 29.61    | 35.336  | -1.2774 | 0.22266 | 0.43268 | -5.4711 | 710    |
| FAM225B  | 0.1604   | 0.1604   | 0.21512 | 1.2773  | 0.22269 | 0.43268 | -5.4712 | 1E+08  |
| FAM204A  | 0.97841  | 0.97841  | 4.1727  | 1.2773  | 0.22269 | 0.43268 | -5.4712 | 63877  |
| GABRQ    | 0.1697   | 0.1697   | 0.35885 | 1.2772  | 0.22271 | 0.43268 | -5.4712 | 55879  |
| CDCA5    | 0.83539  | 0.83539  | 1.5467  | 1.277   | 0.22281 | 0.43282 | -5.4715 | 113130 |
| TRPV4    | -0.3166  | 0.3166   | 1.5684  | -1.2765 | 0.22296 | 0.43306 | -5.4721 | 59341  |
| GLRX     | 11.14    | 11.14    | 11.338  | 1.2764  | 0.22299 | 0.43306 | -5.4722 | 2745   |
| NINJ2    | -0.39614 | 0.39614  | 1.1428  | -1.2764 | 0.22301 | 0.43306 | -5.4722 | 4815   |
| DDIAS    | 0.24398  | 0.24398  | 0.48467 | 1.2763  | 0.22304 | 0.43307 | -5.4723 | 220042 |
| MYL5     | -0.53259 | 0.53259  | 2.3383  | -1.276  | 0.22315 | 0.43313 | -5.4727 | 4636   |
| ADAMTS18 | 0.14486  | 0.14486  | 0.19622 | 1.2758  | 0.22319 | 0.43313 | -5.4729 | 170692 |
| BRI3BP   | 0.76589  | 0.76589  | 2.7533  | 1.2758  | 0.22319 | 0.43313 | -5.4729 | 140707 |
| MSN      | 30.574   | 30.574   | 73.969  | 1.2758  | 0.22322 | 0.43313 | -5.473  | 4478   |
| SEMA3A   | 0.24398  | 0.24398  | 0.58491 | 1.2758  | 0.22322 | 0.43313 | -5.473  | 10371  |

|              |          |         |         |         |         |         |         |          |
|--------------|----------|---------|---------|---------|---------|---------|---------|----------|
| LOC106660606 | -0.13145 | 0.13145 | 0.15679 | -1.2757 | 0.22324 | 0.43313 | -5.473  | 1.07E+08 |
| RSAD1        | -0.90894 | 0.90894 | 3.876   | -1.2756 | 0.22326 | 0.43313 | -5.4731 | 55316    |
| CYTH3        | 0.86896  | 0.86896 | 5.8072  | 1.2756  | 0.22328 | 0.43313 | -5.4732 | 9265     |
| TRMT1        | -1.1645  | 1.1645  | 4.6479  | -1.2755 | 0.2233  | 0.43313 | -5.4732 | 55621    |
| BRIX1        | 1.755    | 1.755   | 5.7687  | 1.2754  | 0.22336 | 0.43313 | -5.4734 | 55299    |
| EPC1         | -0.44752 | 0.44752 | 3.6241  | -1.2752 | 0.22339 | 0.43313 | -5.4736 | 80314    |
| VCAN         | 12.232   | 12.232  | 16.794  | 1.2752  | 0.22342 | 0.43313 | -5.4737 | 1462     |
| FAM174A      | 2.7264   | 2.7264  | 8.6577  | 1.275   | 0.22347 | 0.43313 | -5.4738 | 345757   |
| NLRC4        | 0.17986  | 0.17986 | 0.29924 | 1.2748  | 0.22353 | 0.43313 | -5.474  | 58484    |
| PRRX2        | 1.6227   | 1.6227  | 7.0291  | 1.2748  | 0.22355 | 0.43313 | -5.4741 | 51450    |
| ATXN10       | 1.3507   | 1.3507  | 6.6323  | 1.2748  | 0.22356 | 0.43313 | -5.4741 | 25814    |
| SCNN1G       | 1.0213   | 1.0213  | 2.3554  | 1.2747  | 0.22359 | 0.43313 | -5.4742 | 6340     |
| RPP30        | -0.33985 | 0.33985 | 1.3559  | -1.2747 | 0.2236  | 0.43313 | -5.4743 | 10556    |
| PIGW         | 0.48377  | 0.48377 | 1.9496  | 1.2746  | 0.22361 | 0.43313 | -5.4743 | 284098   |
| EPHX3        | 10.089   | 10.089  | 18.32   | 1.2746  | 0.22361 | 0.43313 | -5.4743 | 79852    |
| POLR1D       | 2.5435   | 2.5435  | 10.002  | 1.2746  | 0.22361 | 0.43313 | -5.4743 | 51082    |
| SAMD5        | 0.24591  | 0.24591 | 0.53647 | 1.2746  | 0.22363 | 0.43313 | -5.4744 | 389432   |
| LATS1        | -0.57744 | 0.57744 | 3.3569  | -1.2742 | 0.22374 | 0.43328 | -5.4747 | 9113     |
| SPA17        | 0.39955  | 0.39955 | 1.0081  | 1.2741  | 0.22377 | 0.43331 | -5.4749 | 53340    |
| HIPK2        | 1.6353   | 1.6353  | 6.6281  | 1.2741  | 0.2238  | 0.43331 | -5.475  | 28996    |
| RMRP         | -887.58  | 887.58  | 2172.9  | -1.2738 | 0.22391 | 0.43342 | -5.4753 | 6023     |
| RAB11FIP3    | -1.2568  | 1.2568  | 3.7721  | -1.2737 | 0.22391 | 0.43342 | -5.4753 | 9727     |
| CLP1         | 0.5982   | 0.5982  | 2.8462  | 1.2734  | 0.22402 | 0.43357 | -5.4757 | 10978    |
| LOC101927972 | 0.51236  | 0.51236 | 1.1997  | 1.2732  | 0.22412 | 0.43372 | -5.476  | 1.02E+08 |
| GFPT1        | 0.87388  | 0.87388 | 3.3283  | 1.2731  | 0.22415 | 0.43373 | -5.4761 | 2673     |
| SNRPA1       | 1.9308   | 1.9308  | 7.63    | 1.2729  | 0.22419 | 0.43373 | -5.4763 | 6627     |

|                |          |          |         |         |         |         |         |          |
|----------------|----------|----------|---------|---------|---------|---------|---------|----------|
| SIGLEC17P      | -0.14349 | 0.14349  | 0.2976  | -1.2729 | 0.2242  | 0.43373 | -5.4763 | 284367   |
| RPL24          | 91.918   | 91.918   | 263.78  | 1.2728  | 0.22424 | 0.43376 | -5.4764 | 6152     |
| ABCB10         | 0.49319  | 0.49319  | 2.4879  | 1.2724  | 0.22439 | 0.43399 | -5.4769 | 23456    |
| HNRNPH3        | -1.2745  | 1.2745   | 6.8097  | -1.2722 | 0.22444 | 0.43404 | -5.4771 | 3189     |
| SAA2           | -2.4597  | 2.4597   | 1.4059  | -1.2718 | 0.22458 | 0.43423 | -5.4776 | 6289     |
| P2RY1          | 1.6666   | 1.6666   | 5.3985  | 1.2717  | 0.22461 | 0.43423 | -5.4777 | 5028     |
| CXCL13         | 2.6277   | 2.6277   | 2.2492  | 1.2716  | 0.22464 | 0.43423 | -5.4778 | 10563    |
| ZSWIM7         | -0.37979 | 0.37979  | 2.0554  | -1.2716 | 0.22465 | 0.43423 | -5.4779 | 125150   |
| EFNB1          | 4.4486   | 4.4486   | 16.576  | 1.2716  | 0.22467 | 0.43423 | -5.4779 | 1947     |
| MOCS3          | 0.3733   | 0.3733   | 1.7201  | 1.2713  | 0.22476 | 0.43434 | -5.4782 | 27304    |
| HOPX           | 33.719   | 33.719   | 69.501  | 1.2712  | 0.22479 | 0.43434 | -5.4783 | 84525    |
| DNM1P41        | -0.54923 | 0.54923  | 1.5495  | -1.2711 | 0.22484 | 0.43434 | -5.4785 | 440299   |
| TSPAN13        | 0.85293  | 0.85293  | 3.1482  | 1.271   | 0.22487 | 0.43434 | -5.4786 | 27075    |
| LYPLAL1        | -0.40362 | 0.40362  | 1.681   | -1.271  | 0.22487 | 0.43434 | -5.4786 | 127018   |
| MAP2K2         | 7.5457   | 7.5457   | 27.876  | 1.271   | 0.22487 | 0.43434 | -5.4786 | 5605     |
| HNRNPUL2-BSCL2 | -2.5333  | 2.5333   | 9.0214  | -1.2708 | 0.22494 | 0.43442 | -5.4788 | 1.01E+08 |
| KCNG3          | -0.08804 | 0.088035 | 0.19092 | -1.2704 | 0.22506 | 0.4346  | -5.4792 | 170850   |
| TPM1           | 4.3332   | 4.3332   | 9.1873  | 1.2701  | 0.22515 | 0.43462 | -5.4795 | 7168     |
| LINC02315      | -0.28942 | 0.28942  | 0.76601 | -1.2701 | 0.22516 | 0.43462 | -5.4796 | 644919   |
| ZNF596         | -0.15066 | 0.15066  | 0.5489  | -1.2701 | 0.22516 | 0.43462 | -5.4796 | 169270   |
| CHEK1          | 0.4026   | 0.4026   | 1.0284  | 1.2701  | 0.22517 | 0.43462 | -5.4796 | 1111     |
| RIC8A          | 3.143    | 3.143    | 11.613  | 1.2697  | 0.22532 | 0.43484 | -5.4801 | 60626    |
| MAP2K7         | -1.4663  | 1.4663   | 6.7248  | -1.2694 | 0.2254  | 0.43495 | -5.4804 | 5609     |
| DCN            | -31.142  | 31.142   | 87.911  | -1.2689 | 0.2256  | 0.43529 | -5.4811 | 1634     |
| ZNF823         | 0.44785  | 0.44785  | 1.9888  | 1.2686  | 0.22568 | 0.4354  | -5.4813 | 55552    |
| SOD3           | -19.297  | 19.297   | 20.822  | -1.2683 | 0.2258  | 0.43558 | -5.4817 | 6649     |

|              |          |         |         |         |         |         |         |          |
|--------------|----------|---------|---------|---------|---------|---------|---------|----------|
| CBLN3        | -0.29767 | 0.29767 | 0.48622 | -1.2682 | 0.22584 | 0.4356  | -5.4819 | 643866   |
| ARFGAP2      | -2.9394  | 2.9394  | 13.673  | -1.2681 | 0.22588 | 0.43563 | -5.482  | 84364    |
| SNORA101B    | -0.25666 | 0.25666 | 0.30615 | -1.2679 | 0.22592 | 0.43565 | -5.4821 | 1.07E+08 |
| NDUFV2-AS1   | -0.1335  | 0.1335  | 0.38286 | -1.2676 | 0.22603 | 0.43583 | -5.4825 | 1.02E+08 |
| TXNRD2       | -0.33741 | 0.33741 | 1.3512  | -1.2673 | 0.22612 | 0.43595 | -5.4828 | 10587    |
| TBL2         | 0.61065  | 0.61065 | 3.3616  | 1.267   | 0.22623 | 0.4361  | -5.4832 | 26608    |
| GAS8         | -0.32956 | 0.32956 | 1.5364  | -1.2667 | 0.22634 | 0.43628 | -5.4836 | 2622     |
| TGIF2-RAB5IF | -0.10679 | 0.10679 | 0.116   | -1.2666 | 0.22638 | 0.43629 | -5.4837 | 1.01E+08 |
| BMS1         | -0.75562 | 0.75562 | 3.8385  | -1.2664 | 0.22645 | 0.43639 | -5.4839 | 9790     |
| ACOT1        | -0.58539 | 0.58539 | 0.71542 | -1.2663 | 0.22649 | 0.43641 | -5.4841 | 641371   |
| ARAF         | -1.4079  | 1.4079  | 7.6168  | -1.2659 | 0.22662 | 0.43662 | -5.4845 | 369      |
| MPLKIP       | 1.4346   | 1.4346  | 5.8173  | 1.2657  | 0.2267  | 0.43672 | -5.4848 | 136647   |
| MED9         | -0.57974 | 0.57974 | 2.6489  | -1.2651 | 0.22691 | 0.43706 | -5.4855 | 55090    |
| C3orf49      | -0.10127 | 0.10127 | 0.1543  | -1.265  | 0.22695 | 0.43711 | -5.4856 | 132200   |
| FAM98B       | -0.51519 | 0.51519 | 2.0661  | -1.2643 | 0.22719 | 0.43752 | -5.4864 | 283742   |
| NFKBIL1      | -0.17054 | 0.17054 | 0.51518 | -1.264  | 0.2273  | 0.43762 | -5.4868 | 4795     |
| ZNF625-ZNF20 | -0.10431 | 0.10431 | 0.14049 | -1.2639 | 0.22733 | 0.43762 | -5.4869 | 1.01E+08 |
| SLC30A1      | 4.502    | 4.502   | 12.051  | 1.2639  | 0.22733 | 0.43762 | -5.4869 | 7779     |
| TSKS         | -0.27334 | 0.27334 | 0.37546 | -1.2637 | 0.22737 | 0.43762 | -5.487  | 60385    |
| TLR8         | 0.38044  | 0.38044 | 0.57728 | 1.2636  | 0.22744 | 0.43762 | -5.4872 | 51311    |
| HOTS         | -0.19665 | 0.19665 | 0.25047 | -1.2634 | 0.22749 | 0.43762 | -5.4874 | 1.03E+08 |
| RUBCN        | 0.52453  | 0.52453 | 2.8321  | 1.2634  | 0.22749 | 0.43762 | -5.4874 | 9711     |
| LRPAP1       | -0.6527  | 0.6527  | 2.8489  | -1.2634 | 0.22751 | 0.43762 | -5.4875 | 4043     |
| LRR8E        | 1.0714   | 1.0714  | 3.6477  | 1.2633  | 0.22754 | 0.43762 | -5.4876 | 80131    |
| OGFR         | -2.369   | 2.369   | 6.6806  | -1.2632 | 0.22755 | 0.43762 | -5.4876 | 11054    |
| ZNF701       | -0.20683 | 0.20683 | 0.83564 | -1.2632 | 0.22755 | 0.43762 | -5.4876 | 55762    |



|              |          |          |         |         |         |         |         |          |
|--------------|----------|----------|---------|---------|---------|---------|---------|----------|
| LOC105373656 | -0.11116 | 0.11116  | 0.17807 | -1.2632 | 0.22756 | 0.43762 | -5.4877 | 1.05E+08 |
| ABCG2        | -0.10279 | 0.10279  | 0.26434 | -1.2631 | 0.2276  | 0.43766 | -5.4878 | 9429     |
| RPL13        | -30.405  | 30.405   | 129.42  | -1.263  | 0.22763 | 0.43766 | -5.4879 | 6137     |
| ZNF286A      | 0.22181  | 0.22181  | 1.2919  | 1.2629  | 0.22768 | 0.43771 | -5.4881 | 57335    |
| FAM171A1     | -0.76627 | 0.76627  | 2.5144  | -1.2626 | 0.22778 | 0.43782 | -5.4884 | 221061   |
| YIPF6        | 0.56302  | 0.56302  | 3.0935  | 1.2625  | 0.22779 | 0.43782 | -5.4884 | 286451   |
| PRICKLE1     | -0.59366 | 0.59366  | 2.3391  | -1.2624 | 0.22785 | 0.43789 | -5.4886 | 144165   |
| UBE2Q1-AS1   | -0.10771 | 0.10771  | 0.13945 | -1.2623 | 0.22789 | 0.43791 | -5.4888 | 1.01E+08 |
| LYST         | 0.97186  | 0.97186  | 5.499   | 1.2621  | 0.22794 | 0.43796 | -5.4889 | 1130     |
| SHF          | -0.39401 | 0.39401  | 1.2839  | -1.2619 | 0.22802 | 0.43806 | -5.4892 | 90525    |
| SMC5-AS1     | -0.17688 | 0.17688  | 0.38691 | -1.2618 | 0.22806 | 0.43808 | -5.4893 | 1.01E+08 |
| REXO5        | -0.11055 | 0.11055  | 0.39984 | -1.2617 | 0.22808 | 0.43808 | -5.4894 | 81691    |
| NIPSNAP1     | -0.81149 | 0.81149  | 4.1339  | -1.2611 | 0.22829 | 0.43842 | -5.4901 | 8508     |
| MICA         | -0.09501 | 0.095013 | 0.37949 | -1.2611 | 0.22831 | 0.43842 | -5.4902 | 1.01E+08 |
| KIF20A       | 0.75062  | 0.75062  | 1.3265  | 1.2607  | 0.22845 | 0.43864 | -5.4906 | 10112    |
| C5orf51      | 0.64165  | 0.64165  | 3.5141  | 1.2602  | 0.22862 | 0.43892 | -5.4912 | 285636   |
| ATP1B3       | 10.872   | 10.872   | 57.028  | 1.26    | 0.22867 | 0.43895 | -5.4914 | 483      |
| AMDHD2       | -1.2352  | 1.2352   | 3.0806  | -1.2598 | 0.22874 | 0.43905 | -5.4916 | 51005    |
| SNORA68      | -6.7865  | 6.7865   | 21.457  | -1.2597 | 0.22878 | 0.43906 | -5.4917 | 26780    |
| KIF9-AS1     | -0.09367 | 0.093671 | 0.23339 | -1.2595 | 0.22885 | 0.43906 | -5.4919 | 285352   |
| MTRF1        | 0.13445  | 0.13445  | 0.83986 | 1.2595  | 0.22885 | 0.43906 | -5.492  | 9617     |
| LOC101927571 | -0.09988 | 0.099878 | 0.09697 | -1.2595 | 0.22885 | 0.43906 | -5.492  | 1.02E+08 |
| MAST1        | -0.11252 | 0.11252  | 0.22681 | -1.2594 | 0.22891 | 0.43912 | -5.4921 | 22983    |
| NPHP3-ACAD11 | -0.19881 | 0.19881  | 0.65515 | -1.2592 | 0.22898 | 0.43915 | -5.4924 | 1.01E+08 |
| PARD6B       | 0.50011  | 0.50011  | 1.2547  | 1.2591  | 0.229   | 0.43915 | -5.4924 | 84612    |
| PCNX2        | -0.50962 | 0.50962  | 2.13    | -1.2591 | 0.229   | 0.43915 | -5.4925 | 80003    |

|              |          |          |          |         |         |         |         |          |
|--------------|----------|----------|----------|---------|---------|---------|---------|----------|
| COX16        | 1.7084   | 1.7084   | 5.3293   | 1.259   | 0.22905 | 0.43917 | -5.4926 | 51241    |
| WDR61        | 1.9359   | 1.9359   | 9.3654   | 1.2589  | 0.22906 | 0.43917 | -5.4927 | 80349    |
| OSMR         | 3.2112   | 3.2112   | 9.2593   | 1.2588  | 0.22911 | 0.43921 | -5.4928 | 9180     |
| FAM122B      | -0.37133 | 0.37133  | 2.2017   | -1.2586 | 0.22918 | 0.43929 | -5.4931 | 159090   |
| ZNF549       | -0.18156 | 0.18156  | 0.88632  | -1.2583 | 0.22927 | 0.43941 | -5.4933 | 256051   |
| TNFAIP8      | 0.90009  | 0.90009  | 3.297    | 1.2581  | 0.22934 | 0.4395  | -5.4936 | 25816    |
| SLITRK6      | -0.24258 | 0.24258  | 0.8488   | -1.258  | 0.22937 | 0.43951 | -5.4937 | 84189    |
| IFI30        | 15.536   | 15.536   | 28.626   | 1.2579  | 0.22943 | 0.43954 | -5.4939 | 10437    |
| ARFGAP3      | 1.8465   | 1.8465   | 6.43     | 1.2578  | 0.22944 | 0.43954 | -5.4939 | 26286    |
| SLC25A46     | 0.78748  | 0.78748  | 4.1377   | 1.2575  | 0.22956 | 0.43968 | -5.4943 | 91137    |
| BID          | 1.0622   | 1.0622   | 2.2471   | 1.2575  | 0.22957 | 0.43968 | -5.4943 | 637      |
| MFAP5        | -3.3956  | 3.3956   | 5.5955   | -1.2573 | 0.22962 | 0.43974 | -5.4945 | 8076     |
| LOC102724450 | -0.09718 | 0.097177 | 0.071575 | -1.2569 | 0.22975 | 0.43994 | -5.495  | 1.03E+08 |
| ZFAT-AS1     | -0.12361 | 0.12361  | 0.23264  | -1.2567 | 0.22983 | 0.44002 | -5.4952 | 594840   |
| REN          | 0.36147  | 0.36147  | 0.34829  | 1.2565  | 0.2299  | 0.44011 | -5.4954 | 5972     |
| LINC02261    | -0.1019  | 0.1019   | 0.24055  | -1.2564 | 0.22996 | 0.44016 | -5.4956 | 1.02E+08 |
| RNASEL       | -0.35812 | 0.35812  | 1.2003   | -1.2563 | 0.22999 | 0.44016 | -5.4957 | 6041     |
| TDO2         | 1.3744   | 1.3744   | 1.086    | 1.2562  | 0.23002 | 0.44016 | -5.4958 | 6999     |
| ARHGAP8      | 0.46511  | 0.46511  | 1.1069   | 1.2561  | 0.23005 | 0.44016 | -5.4959 | 23779    |
| C13orf42     | -0.08905 | 0.089046 | 0.10763  | -1.2561 | 0.23005 | 0.44016 | -5.4959 | 647166   |
| AGAP7P       | -0.13595 | 0.13595  | 0.33439  | -1.256  | 0.23008 | 0.44017 | -5.496  | 653268   |
| SP100        | -1.3362  | 1.3362   | 3.7463   | -1.2559 | 0.23013 | 0.44021 | -5.4962 | 6672     |
| FAHD1        | 1.128    | 1.128    | 3.624    | 1.2557  | 0.23018 | 0.44021 | -5.4964 | 81889    |
| PIGM         | -0.18154 | 0.18154  | 1.42     | -1.2557 | 0.23018 | 0.44021 | -5.4964 | 93183    |
| ZNF714       | -0.1888  | 0.1888   | 0.66891  | -1.2554 | 0.23028 | 0.44034 | -5.4967 | 148206   |
| SMARCA5      | 1.231    | 1.231    | 4.9288   | 1.2547  | 0.23053 | 0.44077 | -5.4975 | 8467     |

|              |          |          |          |         |         |         |         |          |
|--------------|----------|----------|----------|---------|---------|---------|---------|----------|
| CHCHD3       | 0.89576  | 0.89576  | 4.1845   | 1.2543  | 0.23069 | 0.44102 | -5.498  | 54927    |
| NFASC        | -0.49138 | 0.49138  | 1.3898   | -1.254  | 0.23078 | 0.44115 | -5.4983 | 23114    |
| P4HA1        | 2.0287   | 2.0287   | 5.4627   | 1.2535  | 0.23098 | 0.44149 | -5.499  | 5033     |
| CCND3        | -1.3378  | 1.3378   | 4.7617   | -1.2531 | 0.2311  | 0.44167 | -5.4994 | 896      |
| PCED1B-AS1   | -0.11369 | 0.11369  | 0.26998  | -1.253  | 0.23114 | 0.44169 | -5.4995 | 1E+08    |
| LOC100505938 | -0.08402 | 0.084017 | 0.091086 | -1.2525 | 0.23131 | 0.44197 | -5.5001 | 1.01E+08 |
| RFTN2        | 0.48844  | 0.48844  | 0.96234  | 1.2522  | 0.23144 | 0.44213 | -5.5005 | 130132   |
| PDE12        | 0.35066  | 0.35066  | 2.4046   | 1.2521  | 0.23145 | 0.44213 | -5.5005 | 201626   |
| HMGN5        | -0.19594 | 0.19594  | 0.46056  | -1.2518 | 0.23155 | 0.44228 | -5.5009 | 79366    |
| ANO9         | -2.6301  | 2.6301   | 7.273    | -1.2517 | 0.23159 | 0.44231 | -5.501  | 338440   |
| THEMIS       | -0.09158 | 0.091579 | 0.16355  | -1.2511 | 0.2318  | 0.44265 | -5.5017 | 387357   |
| GUSBP9       | -1.6505  | 1.6505   | 4.0527   | -1.2511 | 0.23183 | 0.44265 | -5.5018 | 1E+08    |
| EIF1AD       | 0.79008  | 0.79008  | 5.3047   | 1.2504  | 0.23205 | 0.44302 | -5.5025 | 84285    |
| RPL36AL      | 15.476   | 15.476   | 49.141   | 1.2489  | 0.2326  | 0.44402 | -5.5043 | 6166     |
| SIT1         | -0.1674  | 0.1674   | 0.36345  | -1.2487 | 0.23266 | 0.44406 | -5.5045 | 27240    |
| JPT2         | 3.275    | 3.275    | 10.487   | 1.2487  | 0.23267 | 0.44406 | -5.5045 | 90861    |
| KRT80        | 38.177   | 38.177   | 73.663   | 1.2486  | 0.2327  | 0.44406 | -5.5046 | 144501   |
| MRPL22       | 0.54571  | 0.54571  | 1.9318   | 1.2485  | 0.23272 | 0.44406 | -5.5047 | 29093    |
| DDA1         | 0.98543  | 0.98543  | 4.9487   | 1.2484  | 0.23277 | 0.44411 | -5.5049 | 79016    |
| ANKRD65      | -0.51276 | 0.51276  | 1.0146   | -1.2483 | 0.23282 | 0.44415 | -5.505  | 441869   |
| NAXE         | 3.4065   | 3.4065   | 13.458   | 1.2477  | 0.23301 | 0.44446 | -5.5056 | 128240   |
| CCDC184      | 0.12698  | 0.12698  | 0.23486  | 1.2473  | 0.23316 | 0.44465 | -5.5061 | 387856   |
| EIF2B4       | 1.3892   | 1.3892   | 6.2419   | 1.2473  | 0.23316 | 0.44465 | -5.5061 | 8890     |
| GOT2         | 4.0465   | 4.0465   | 14.867   | 1.247   | 0.23326 | 0.44478 | -5.5065 | 2806     |
| SHKBP1       | 2.4927   | 2.4927   | 9.2834   | 1.247   | 0.23328 | 0.44478 | -5.5065 | 92799    |
| PLPP7        | 0.37115  | 0.37115  | 0.58735  | 1.2465  | 0.23344 | 0.44497 | -5.507  | 84814    |

|                    |          |          |          |         |         |         |         |          |
|--------------------|----------|----------|----------|---------|---------|---------|---------|----------|
| ACTA2-AS1          | -0.48523 | 0.48523  | 0.77105  | -1.2465 | 0.23346 | 0.44497 | -5.5071 | 1E+08    |
| KLC1               | 2.5343   | 2.5343   | 16.534   | 1.2465  | 0.23346 | 0.44497 | -5.5071 | 3831     |
| LINC01397          | -0.28775 | 0.28775  | 0.4169   | -1.246  | 0.23363 | 0.44514 | -5.5076 | 1.04E+08 |
| CTTN               | 10.357   | 10.357   | 40.145   | 1.246   | 0.23363 | 0.44514 | -5.5076 | 2017     |
| SELENOP            | -10.076  | 10.076   | 29.902   | -1.246  | 0.23363 | 0.44514 | -5.5076 | 6414     |
| CSF3R              | 1.663    | 1.663    | 2.0989   | 1.2459  | 0.23367 | 0.44516 | -5.5078 | 1441     |
| LOC100130283       | 0.30798  | 0.30798  | 1.0196   | 1.2458  | 0.23369 | 0.44516 | -5.5078 | 1E+08    |
| LRRCC1             | -0.20488 | 0.20488  | 0.6343   | -1.2456 | 0.23375 | 0.44522 | -5.508  | 85444    |
| MAP2K1             | 2.2257   | 2.2257   | 7.7373   | 1.2455  | 0.2338  | 0.44527 | -5.5082 | 5604     |
| CCDC192            | -0.08723 | 0.087228 | 0.089168 | -1.2453 | 0.23388 | 0.44537 | -5.5085 | 728586   |
| SPATA13-AS1        | -0.14448 | 0.14448  | 0.16679  | -1.245  | 0.23396 | 0.44547 | -5.5087 | 1.01E+08 |
| CAPN6              | -0.26368 | 0.26368  | 0.28449  | -1.2446 | 0.23413 | 0.44574 | -5.5093 | 827      |
| TMEM241            | 0.42558  | 0.42558  | 1.9793   | 1.2443  | 0.23422 | 0.44585 | -5.5096 | 85019    |
| SMURF2P1-LRRC37BP1 | -0.29669 | 0.29669  | 1.8212   | -1.2443 | 0.23424 | 0.44585 | -5.5096 | 1.07E+08 |
| ODF3               | -0.08135 | 0.081354 | 0.075369 | -1.244  | 0.23432 | 0.44593 | -5.5099 | 113746   |
| ETFRF1             | 0.97854  | 0.97854  | 2.7011   | 1.2439  | 0.23438 | 0.44593 | -5.5101 | 144363   |
| EVI2A              | 0.76464  | 0.76464  | 1.3575   | 1.2438  | 0.23439 | 0.44593 | -5.5101 | 2123     |
| HS6ST1             | -3.211   | 3.211    | 9.829    | -1.2438 | 0.2344  | 0.44593 | -5.5101 | 9394     |
| KCNMB3             | -0.10698 | 0.10698  | 0.23307  | -1.2438 | 0.23441 | 0.44593 | -5.5102 | 27094    |
| PAIP1              | 1.9182   | 1.9182   | 7.6997   | 1.2434  | 0.23453 | 0.44604 | -5.5106 | 10605    |
| BTN3A3             | -0.85483 | 0.85483  | 2.1594   | -1.2434 | 0.23454 | 0.44604 | -5.5106 | 10384    |
| PEX26              | -0.98802 | 0.98802  | 4.6133   | -1.2434 | 0.23455 | 0.44604 | -5.5106 | 55670    |
| BAIAP2L2           | 0.27886  | 0.27886  | 0.62598  | 1.2428  | 0.23477 | 0.4464  | -5.5113 | 80115    |
| C1QTNF12           | -0.14011 | 0.14011  | 0.39825  | -1.2427 | 0.2348  | 0.44641 | -5.5114 | 388581   |
| KLC2               | 1.1438   | 1.1438   | 4.4767   | 1.2424  | 0.2349  | 0.44651 | -5.5117 | 64837    |
| CLASP1             | 1.1906   | 1.1906   | 7.6564   | 1.2424  | 0.23491 | 0.44651 | -5.5118 | 23332    |

|            |          |          |         |         |         |         |         |          |
|------------|----------|----------|---------|---------|---------|---------|---------|----------|
| FST        | 0.93961  | 0.93961  | 1.7807  | 1.2419  | 0.23508 | 0.44679 | -5.5123 | 10468    |
| JMJD4      | -0.90123 | 0.90123  | 3.0474  | -1.2415 | 0.23523 | 0.44702 | -5.5128 | 65094    |
| RECQL4     | -0.39263 | 0.39263  | 1.1258  | -1.2414 | 0.23527 | 0.44705 | -5.5129 | 9401     |
| HELQ       | -0.17842 | 0.17842  | 1.2552  | -1.241  | 0.23539 | 0.44723 | -5.5133 | 113510   |
| SLC25A5    | 19.519   | 19.519   | 69.396  | 1.2409  | 0.23543 | 0.44725 | -5.5134 | 292      |
| PCDH18     | 1.8122   | 1.8122   | 3.4398  | 1.2409  | 0.23545 | 0.44725 | -5.5135 | 54510    |
| ZFH3       | -0.91679 | 0.91679  | 3.0158  | -1.2407 | 0.23552 | 0.44728 | -5.5137 | 463      |
| ZNF568     | -0.13109 | 0.13109  | 0.46103 | -1.2407 | 0.23552 | 0.44728 | -5.5138 | 374900   |
| FBXL19-AS1 | 0.16096  | 0.16096  | 0.38172 | 1.2405  | 0.23559 | 0.44735 | -5.514  | 283932   |
| DDX41      | 2.0595   | 2.0595   | 10.184  | 1.2404  | 0.23561 | 0.44735 | -5.514  | 51428    |
| LOC729291  | -0.08887 | 0.088866 | 0.19689 | -1.2403 | 0.23565 | 0.44737 | -5.5142 | 729291   |
| BBX        | -0.54436 | 0.54436  | 3.0822  | -1.2402 | 0.23571 | 0.44743 | -5.5143 | 56987    |
| PJA2       | 2.4564   | 2.4564   | 13.911  | 1.24    | 0.23577 | 0.44743 | -5.5145 | 9867     |
| CWC22      | 0.69687  | 0.69687  | 3.3487  | 1.2399  | 0.23579 | 0.44743 | -5.5146 | 57703    |
| PAPOLA     | 1.7745   | 1.7745   | 8.1194  | 1.2399  | 0.23581 | 0.44743 | -5.5147 | 10914    |
| ZNF300P1   | 0.10079  | 0.10079  | 0.28839 | 1.2398  | 0.23583 | 0.44743 | -5.5147 | 134466   |
| TPM1-AS    | -0.76132 | 0.76132  | 1.4556  | -1.2398 | 0.23584 | 0.44743 | -5.5148 | 1.11E+08 |
| PA2G4      | 7.685    | 7.685    | 29.554  | 1.2396  | 0.23591 | 0.4475  | -5.515  | 5036     |
| IFIT3      | -4.2838  | 4.2838   | 4.1727  | -1.2388 | 0.23621 | 0.44803 | -5.5159 | 3437     |
| PRC1       | 1.3388   | 1.3388   | 4.0622  | 1.2378  | 0.23655 | 0.44863 | -5.517  | 9055     |
| ZNF234     | -0.19774 | 0.19774  | 1.0574  | -1.2375 | 0.23668 | 0.44882 | -5.5174 | 10780    |
| JUND       | 6.059    | 6.059    | 31.954  | 1.2372  | 0.23678 | 0.44896 | -5.5178 | 3727     |
| TDRD10     | -0.1763  | 0.1763   | 0.35711 | -1.237  | 0.23684 | 0.44902 | -5.518  | 126668   |
| NRSN2-AS1  | -0.12194 | 0.12194  | 0.38151 | -1.2369 | 0.23687 | 0.44904 | -5.5181 | 1.01E+08 |
| LINC02560  | 6.1821   | 6.1821   | 10.949  | 1.2364  | 0.23705 | 0.44933 | -5.5186 | 1.11E+08 |
| DTNA       | -0.18368 | 0.18368  | 0.35134 | -1.2363 | 0.23711 | 0.44939 | -5.5188 | 1837     |

|              |          |          |         |         |         |         |         |          |
|--------------|----------|----------|---------|---------|---------|---------|---------|----------|
| CCR5         | 0.23213  | 0.23213  | 0.43108 | 1.2359  | 0.23725 | 0.44961 | -5.5193 | 1234     |
| LOC105379194 | -0.18964 | 0.18964  | 0.47795 | -1.2354 | 0.23741 | 0.44986 | -5.5198 | 1.05E+08 |
| SLC39A7      | 0.64202  | 0.64202  | 2.2656  | 1.2352  | 0.23749 | 0.44996 | -5.52   | 7922     |
| DSCC1        | 0.25406  | 0.25406  | 0.59133 | 1.235   | 0.23756 | 0.45004 | -5.5203 | 79075    |
| BCAP29       | 0.63072  | 0.63072  | 2.3181  | 1.2348  | 0.23762 | 0.4501  | -5.5204 | 55973    |
| TEK          | 0.87332  | 0.87332  | 2.3074  | 1.2346  | 0.23771 | 0.45022 | -5.5207 | 7010     |
| RNF139       | 0.82168  | 0.82168  | 4.3109  | 1.2345  | 0.23776 | 0.45026 | -5.5209 | 11236    |
| TMUB2        | -0.61194 | 0.61194  | 4.3076  | -1.2342 | 0.23786 | 0.45033 | -5.5212 | 79089    |
| PIP4K2C      | 1.8394   | 1.8394   | 7.4655  | 1.2342  | 0.23786 | 0.45033 | -5.5212 | 79837    |
| CENPX        | 2.1241   | 2.1241   | 7.7192  | 1.2341  | 0.23787 | 0.45033 | -5.5213 | 201254   |
| OSBPL9       | 0.92881  | 0.92881  | 4.5387  | 1.2337  | 0.23802 | 0.45051 | -5.5217 | 114883   |
| LBHD1        | -0.21516 | 0.21516  | 0.75319 | -1.2337 | 0.23803 | 0.45051 | -5.5217 | 79081    |
| MSR1         | 1.5722   | 1.5722   | 1.9622  | 1.2335  | 0.2381  | 0.4506  | -5.522  | 4481     |
| TRAT1        | -0.0833  | 0.083297 | 0.13282 | -1.2333 | 0.23817 | 0.45068 | -5.5222 | 50852    |
| ACSS3        | -0.51015 | 0.51015  | 0.80816 | -1.2329 | 0.23834 | 0.45094 | -5.5227 | 79611    |
| RCN1         | 6.7751   | 6.7751   | 14.612  | 1.2327  | 0.2384  | 0.45094 | -5.5229 | 5954     |
| IFI27        | -43.733  | 43.733   | 52.739  | -1.2327 | 0.23841 | 0.45094 | -5.5229 | 3429     |
| SNHG22       | 0.17522  | 0.17522  | 0.42231 | 1.2326  | 0.23844 | 0.45094 | -5.5231 | 1.03E+08 |
| LOC101928120 | -0.24096 | 0.24096  | 0.92447 | -1.2325 | 0.23845 | 0.45094 | -5.5231 | 1.02E+08 |
| CTBP1-DT     | -0.52505 | 0.52505  | 2.0108  | -1.2325 | 0.23847 | 0.45094 | -5.5231 | 92070    |
| ARHGAP6      | -0.281   | 0.281    | 0.60999 | -1.2323 | 0.23855 | 0.45104 | -5.5234 | 395      |
| NUDT4B       | 0.92595  | 0.92595  | 2.7986  | 1.2321  | 0.23863 | 0.45115 | -5.5236 | 440672   |
| C19orf53     | 4.0685   | 4.0685   | 14.069  | 1.232   | 0.23866 | 0.45116 | -5.5237 | 28974    |
| LOC643072    | -0.18207 | 0.18207  | 0.61151 | -1.2317 | 0.23875 | 0.45123 | -5.524  | 643072   |
| PIP4P1       | 1.5415   | 1.5415   | 6.6439  | 1.2317  | 0.23875 | 0.45123 | -5.524  | 90809    |
| CDR1         | -30.335  | 30.335   | 75.386  | -1.2315 | 0.23883 | 0.45132 | -5.5243 | 1038     |

|           |          |         |         |         |         |         |         |          |
|-----------|----------|---------|---------|---------|---------|---------|---------|----------|
| NME2      | 30.043   | 30.043  | 79.197  | 1.2311  | 0.23898 | 0.45155 | -5.5247 | 4831     |
| FETUB     | 5.6932   | 5.6932  | 3.7383  | 1.2308  | 0.23907 | 0.45168 | -5.525  | 26998    |
| SNORA74B  | -2.0278  | 2.0278  | 2.7772  | -1.2305 | 0.23919 | 0.45185 | -5.5254 | 677841   |
| ZNF700    | -0.69293 | 0.69293 | 3.1865  | -1.2304 | 0.23923 | 0.45188 | -5.5255 | 90592    |
| AMFR      | 2.7147   | 2.7147  | 14.103  | 1.2303  | 0.23927 | 0.45191 | -5.5257 | 267      |
| ACAP1     | -0.31566 | 0.31566 | 1.2568  | -1.2302 | 0.23931 | 0.45193 | -5.5258 | 9744     |
| SUSD3     | -0.1377  | 0.1377  | 0.30287 | -1.2299 | 0.2394  | 0.45204 | -5.5261 | 203328   |
| RNF128    | -0.34955 | 0.34955 | 0.89761 | -1.2295 | 0.23955 | 0.45228 | -5.5265 | 79589    |
| ARPC1B    | 12.947   | 12.947  | 26.986  | 1.229   | 0.23973 | 0.45245 | -5.5271 | 10095    |
| CD47      | 2.664    | 2.664   | 10.822  | 1.229   | 0.23975 | 0.45245 | -5.5272 | 961      |
| GOT1      | 1.4215   | 1.4215  | 5.3997  | 1.2289  | 0.23978 | 0.45245 | -5.5273 | 2805     |
| DENND2D   | 1.9914   | 1.9914  | 5.1011  | 1.2289  | 0.23978 | 0.45245 | -5.5273 | 79961    |
| STK24     | 5.4856   | 5.4856  | 21.763  | 1.2288  | 0.2398  | 0.45245 | -5.5273 | 8428     |
| RNF148    | -0.11905 | 0.11905 | 0.2018  | -1.2286 | 0.23986 | 0.45245 | -5.5275 | 378925   |
| WBP2      | 4.7523   | 4.7523  | 20.822  | 1.2286  | 0.23987 | 0.45245 | -5.5276 | 23558    |
| MINDY4    | -0.26578 | 0.26578 | 1.2022  | -1.2286 | 0.23987 | 0.45245 | -5.5276 | 84182    |
| GPSM2     | -1.4566  | 1.4566  | 7.2688  | -1.2286 | 0.23988 | 0.45245 | -5.5276 | 29899    |
| CSE1L     | 2.6267   | 2.6267  | 10.215  | 1.2283  | 0.24    | 0.45262 | -5.528  | 1434     |
| LOC283299 | -0.3136  | 0.3136  | 0.65314 | -1.2281 | 0.24005 | 0.45262 | -5.5281 | 283299   |
| SSU72     | 5.5152   | 5.5152  | 21.347  | 1.2281  | 0.24005 | 0.45262 | -5.5281 | 29101    |
| SRC       | 2.0207   | 2.0207  | 6.9609  | 1.2281  | 0.24007 | 0.45262 | -5.5282 | 6714     |
| TCEANC2   | -0.15284 | 0.15284 | 0.78188 | -1.2277 | 0.24021 | 0.45273 | -5.5286 | 127428   |
| CERS3-AS1 | -0.17047 | 0.17047 | 0.43435 | -1.2277 | 0.24023 | 0.45273 | -5.5287 | 1.03E+08 |
| ROCK1     | 1.4243   | 1.4243  | 6.4401  | 1.2276  | 0.24023 | 0.45273 | -5.5287 | 6093     |
| CMTM6     | 3.2851   | 3.2851  | 13.304  | 1.2275  | 0.2403  | 0.45273 | -5.5289 | 54918    |
| POLR2J3   | 1.3442   | 1.3442  | 5.3652  | 1.2273  | 0.24034 | 0.45273 | -5.529  | 548644   |

|              |          |          |         |         |         |         |         |          |
|--------------|----------|----------|---------|---------|---------|---------|---------|----------|
| LOC100131626 | -0.09491 | 0.094911 | 0.24617 | -1.2272 | 0.24038 | 0.45273 | -5.5291 | 1E+08    |
| SNX15        | 1.524    | 1.524    | 6.7706  | 1.2272  | 0.24039 | 0.45273 | -5.5292 | 29907    |
| STIM2        | 0.56682  | 0.56682  | 3.4432  | 1.2272  | 0.2404  | 0.45273 | -5.5292 | 57620    |
| PIFO         | -0.08824 | 0.088241 | 0.1462  | -1.2271 | 0.24042 | 0.45273 | -5.5293 | 128344   |
| BHLHE40      | 11.556   | 11.556   | 45.415  | 1.2271  | 0.24043 | 0.45273 | -5.5293 | 8553     |
| TAPT1        | -0.21105 | 0.21105  | 1.3896  | -1.2271 | 0.24043 | 0.45273 | -5.5293 | 202018   |
| RPS6KA2-IT1  | -0.11019 | 0.11019  | 0.1668  | -1.227  | 0.24047 | 0.45276 | -5.5294 | 1.01E+08 |
| SERPINA12    | -14.178  | 14.178   | 20.922  | -1.2267 | 0.24059 | 0.45292 | -5.5298 | 145264   |
| R3HCC1       | -1.2663  | 1.2663   | 5.0538  | -1.2265 | 0.24063 | 0.45292 | -5.5299 | 203069   |
| ZBTB26       | -0.18037 | 0.18037  | 0.86199 | -1.2265 | 0.24064 | 0.45292 | -5.53   | 57684    |
| SENP6        | -0.66178 | 0.66178  | 4.7255  | -1.2263 | 0.24071 | 0.45298 | -5.5302 | 26054    |
| ACTR3C       | -0.14227 | 0.14227  | 0.43949 | -1.2263 | 0.24072 | 0.45298 | -5.5302 | 653857   |
| IQCE         | -0.39432 | 0.39432  | 1.5785  | -1.226  | 0.24084 | 0.45315 | -5.5306 | 23288    |
| KANK2        | -3.1119  | 3.1119   | 7.8586  | -1.2259 | 0.24088 | 0.45317 | -5.5307 | 25959    |
| SNORD97      | -6.9119  | 6.9119   | 4.1954  | -1.2257 | 0.24092 | 0.4532  | -5.5308 | 692223   |
| FLRT2        | 0.89442  | 0.89442  | 2.6481  | 1.2255  | 0.24101 | 0.45332 | -5.5311 | 23768    |
| SAYSD1       | -0.23904 | 0.23904  | 1.1491  | -1.2254 | 0.24106 | 0.45337 | -5.5313 | 55776    |
| ATXN2        | -0.41814 | 0.41814  | 3.3761  | -1.2251 | 0.24117 | 0.45352 | -5.5316 | 6311     |
| LIN52        | -0.23476 | 0.23476  | 1.2879  | -1.2249 | 0.24124 | 0.45355 | -5.5318 | 91750    |
| FER          | 0.49162  | 0.49162  | 2.2789  | 1.2248  | 0.24126 | 0.45355 | -5.5319 | 2241     |
| ABALON       | -0.15656 | 0.15656  | 0.93974 | -1.2248 | 0.24127 | 0.45355 | -5.5319 | 1.03E+08 |
| LOC101927817 | -0.28719 | 0.28719  | 0.79747 | -1.2245 | 0.24139 | 0.45373 | -5.5323 | 1.02E+08 |
| BCS1L        | -0.75841 | 0.75841  | 3.4612  | -1.2242 | 0.2415  | 0.45388 | -5.5326 | 617      |
| CEP152       | 0.1644   | 0.1644   | 0.67111 | 1.224   | 0.24154 | 0.45391 | -5.5328 | 22995    |
| NOP16        | 1.6702   | 1.6702   | 6.7014  | 1.2236  | 0.24171 | 0.45418 | -5.5333 | 51491    |
| SF3B5        | 10.741   | 10.741   | 29.847  | 1.2234  | 0.24177 | 0.45421 | -5.5335 | 83443    |



|           |          |         |         |         |         |         |         |        |
|-----------|----------|---------|---------|---------|---------|---------|---------|--------|
| TMBIM1    | 13.487   | 13.487  | 43.179  | 1.2234  | 0.24178 | 0.45421 | -5.5335 | 64114  |
| SMAD7     | 0.5926   | 0.5926  | 3.2707  | 1.2232  | 0.24184 | 0.45426 | -5.5337 | 4092   |
| OARD1     | -0.54125 | 0.54125 | 2.0676  | -1.2229 | 0.24195 | 0.45443 | -5.534  | 221443 |
| LAYN      | 0.49328  | 0.49328 | 1.0354  | 1.2228  | 0.24198 | 0.45443 | -5.5342 | 143903 |
| ENTPD2    | -0.27618 | 0.27618 | 1.236   | -1.2228 | 0.242   | 0.45443 | -5.5342 | 954    |
| HAX1      | 4.5385   | 4.5385  | 15.319  | 1.2225  | 0.2421  | 0.45454 | -5.5345 | 10456  |
| C2orf81   | -0.17878 | 0.17878 | 0.42585 | -1.2225 | 0.24212 | 0.45454 | -5.5346 | 388963 |
| PANK2     | -0.27869 | 0.27869 | 2.4812  | -1.2224 | 0.24215 | 0.45454 | -5.5347 | 80025  |
| TRIB2     | -1.2597  | 1.2597  | 3.8299  | -1.2223 | 0.24219 | 0.45457 | -5.5348 | 28951  |
| FAM71F2   | -0.10549 | 0.10549 | 0.26404 | -1.2222 | 0.24222 | 0.45457 | -5.5349 | 346653 |
| PITPNB    | 2.481    | 2.481   | 10.249  | 1.2221  | 0.24224 | 0.45457 | -5.535  | 23760  |
| ZNF491    | -0.13052 | 0.13052 | 0.35104 | -1.222  | 0.24231 | 0.4546  | -5.5352 | 126069 |
| ATP5ME    | 13.962   | 13.962  | 37.824  | 1.2219  | 0.24231 | 0.4546  | -5.5352 | 521    |
| LUZP1     | 1.1414   | 1.1414  | 6.6249  | 1.2218  | 0.24235 | 0.45462 | -5.5353 | 7798   |
| VSIG10    | -0.32972 | 0.32972 | 1.3564  | -1.2217 | 0.2424  | 0.45466 | -5.5354 | 54621  |
| MMP19     | 1.4201   | 1.4201  | 3.0955  | 1.2216  | 0.24242 | 0.45466 | -5.5355 | 4327   |
| EXD2      | -0.25974 | 0.25974 | 1.918   | -1.2213 | 0.24256 | 0.45487 | -5.536  | 55218  |
| LINC02158 | -0.1546  | 0.1546  | 0.36831 | -1.2202 | 0.24293 | 0.45547 | -5.5371 | 729083 |
| ERCC6     | -0.28902 | 0.28902 | 2.1161  | -1.2202 | 0.24294 | 0.45547 | -5.5371 | 2074   |
| RPL18     | -58.052  | 58.052  | 274.58  | -1.2201 | 0.243   | 0.45554 | -5.5373 | 6141   |
| TUBA4B    | 0.10779  | 0.10779 | 0.14664 | 1.2197  | 0.24314 | 0.45576 | -5.5378 | 80086  |
| CD276     | 5.5532   | 5.5532  | 14.317  | 1.2195  | 0.24322 | 0.45585 | -5.538  | 80381  |
| CD80      | 0.16942  | 0.16942 | 0.30766 | 1.2188  | 0.24346 | 0.45626 | -5.5387 | 941    |
| SPEG      | -0.60263 | 0.60263 | 0.88915 | -1.2187 | 0.24351 | 0.45627 | -5.5389 | 10290  |
| JDP2      | -0.61522 | 0.61522 | 2.6846  | -1.2186 | 0.24353 | 0.45627 | -5.5389 | 122953 |
| HMGXB4    | 0.53497  | 0.53497 | 3.3306  | 1.2186  | 0.24355 | 0.45627 | -5.539  | 10042  |

|                   |          |          |          |         |         |         |         |          |
|-------------------|----------|----------|----------|---------|---------|---------|---------|----------|
| AGPAT2            | 4.1024   | 4.1024   | 13.497   | 1.2184  | 0.24362 | 0.45635 | -5.5392 | 10555    |
| TMEM37            | -0.65599 | 0.65599  | 2.0104   | -1.2182 | 0.2437  | 0.45641 | -5.5395 | 140738   |
| LOC101928626      | -0.07744 | 0.077441 | 0.078468 | -1.2181 | 0.24371 | 0.45641 | -5.5395 | 1.02E+08 |
| TMEM47            | 0.80782  | 0.80782  | 1.8045   | 1.2178  | 0.24382 | 0.45657 | -5.5398 | 83604    |
| SNX8              | -0.86519 | 0.86519  | 2.2823   | -1.2175 | 0.24393 | 0.45673 | -5.5402 | 29886    |
| VPS25             | 4.7135   | 4.7135   | 13.948   | 1.2174  | 0.24397 | 0.45674 | -5.5403 | 84313    |
| C2orf27A          | 0.20457  | 0.20457  | 0.62533  | 1.2172  | 0.24406 | 0.45686 | -5.5406 | 29798    |
| TEX2              | 2.3955   | 2.3955   | 8.7933   | 1.2171  | 0.24409 | 0.45686 | -5.5407 | 55852    |
| UPF3B             | -0.30764 | 0.30764  | 1.5435   | -1.2168 | 0.24419 | 0.45696 | -5.541  | 65109    |
| NATD1             | -0.58637 | 0.58637  | 2.6455   | -1.2168 | 0.2442  | 0.45696 | -5.541  | 256302   |
| ZNF605            | -0.20499 | 0.20499  | 0.93214  | -1.2166 | 0.24427 | 0.45696 | -5.5412 | 1E+08    |
| ANKRD62P1-PARP4P3 | -0.09504 | 0.095043 | 0.12736  | -1.2166 | 0.24428 | 0.45696 | -5.5413 | 23783    |
| EIF5A2            | 0.17481  | 0.17481  | 0.45859  | 1.2166  | 0.24429 | 0.45696 | -5.5413 | 56648    |
| GPD2              | -0.84658 | 0.84658  | 3.3246   | -1.2165 | 0.2443  | 0.45696 | -5.5413 | 2820     |
| UBAC2             | 1.9062   | 1.9062   | 8.7589   | 1.2162  | 0.24443 | 0.45714 | -5.5417 | 337867   |
| EMD               | 3.514    | 3.514    | 15.245   | 1.2157  | 0.24461 | 0.45744 | -5.5423 | 2010     |
| CIZ1              | -2.469   | 2.469    | 11.327   | -1.2153 | 0.24474 | 0.45763 | -5.5427 | 25792    |
| FCHSD1            | 8.8964   | 8.8964   | 16.902   | 1.2152  | 0.24478 | 0.45766 | -5.5428 | 89848    |
| GPR4              | 0.95297  | 0.95297  | 1.6834   | 1.2148  | 0.24495 | 0.45791 | -5.5433 | 2828     |
| SLC12A9           | -1.0138  | 1.0138   | 3.8388   | -1.2146 | 0.24499 | 0.45795 | -5.5434 | 56996    |
| PLXNB1            | -3.5073  | 3.5073   | 12.145   | -1.2142 | 0.24517 | 0.45823 | -5.544  | 5364     |
| CEP295NL          | -0.31541 | 0.31541  | 0.57039  | -1.214  | 0.24525 | 0.45832 | -5.5442 | 1.01E+08 |
| APPL2             | 5.7566   | 5.7566   | 15.153   | 1.2138  | 0.2453  | 0.45838 | -5.5444 | 55198    |
| PRF1              | -0.34971 | 0.34971  | 0.54797  | -1.2136 | 0.24537 | 0.45843 | -5.5446 | 5551     |
| ASB2              | 0.23688  | 0.23688  | 0.40452  | 1.2136  | 0.24539 | 0.45843 | -5.5446 | 51676    |
| FADS1             | 1.4768   | 1.4768   | 2.8952   | 1.2135  | 0.24542 | 0.45844 | -5.5447 | 3992     |

|          |          |          |         |         |         |         |         |          |
|----------|----------|----------|---------|---------|---------|---------|---------|----------|
| HR       | -4.9677  | 4.9677   | 15.947  | -1.2133 | 0.24551 | 0.45856 | -5.545  | 55806    |
| ERI3     | -2.1586  | 2.1586   | 8.1799  | -1.2131 | 0.24556 | 0.45861 | -5.5452 | 79033    |
| MFSD6    | 3.7041   | 3.7041   | 11.578  | 1.213   | 0.2456  | 0.45862 | -5.5453 | 54842    |
| LDHAL6A  | -0.08167 | 0.081668 | 0.11502 | -1.2127 | 0.2457  | 0.45872 | -5.5456 | 160287   |
| SCYL1    | 2.9573   | 2.9573   | 12.525  | 1.2127  | 0.2457  | 0.45872 | -5.5456 | 57410    |
| ADAT1    | -0.29961 | 0.29961  | 2.4072  | -1.2126 | 0.24574 | 0.45874 | -5.5457 | 23536    |
| TMEM168  | -0.4148  | 0.4148   | 2.3975  | -1.2123 | 0.24587 | 0.45884 | -5.5461 | 64418    |
| DCBLD2   | 0.62857  | 0.62857  | 2.645   | 1.2123  | 0.24587 | 0.45884 | -5.5461 | 131566   |
| MRPL44   | 0.96588  | 0.96588  | 4.2753  | 1.2123  | 0.24587 | 0.45884 | -5.5461 | 65080    |
| FNDC1    | 6.2165   | 6.2165   | 8.0179  | 1.2121  | 0.24593 | 0.45889 | -5.5463 | 84624    |
| TOMM6    | 6.8525   | 6.8525   | 22.495  | 1.2118  | 0.24604 | 0.45903 | -5.5466 | 1E+08    |
| FAM86JP  | -0.12031 | 0.12031  | 0.45879 | -1.2118 | 0.24606 | 0.45903 | -5.5467 | 1E+08    |
| KNOP1    | -0.49485 | 0.49485  | 3.0703  | -1.2115 | 0.24616 | 0.45918 | -5.547  | 400506   |
| LNX1-AS1 | -0.0959  | 0.095897 | 0.13093 | -1.2113 | 0.24622 | 0.45922 | -5.5472 | 1.01E+08 |
| CAVIN2   | -0.65824 | 0.65824  | 2.3699  | -1.2109 | 0.24637 | 0.45945 | -5.5476 | 8436     |
| AKNA     | -1.0784  | 1.0784   | 3.3434  | -1.2106 | 0.24649 | 0.45963 | -5.548  | 80709    |
| LRRC45   | -0.65329 | 0.65329  | 1.6445  | -1.2105 | 0.24652 | 0.45963 | -5.5481 | 201255   |
| STPG1    | 0.28593  | 0.28593  | 1.339   | 1.2102  | 0.24665 | 0.45983 | -5.5485 | 90529    |
| INPP5D   | -0.62151 | 0.62151  | 1.9753  | -1.21   | 0.2467  | 0.45987 | -5.5486 | 3635     |
| NOX5     | 0.087102 | 0.087102 | 0.18267 | 1.2097  | 0.24684 | 0.46009 | -5.5491 | 79400    |
| TOX4     | 2.0695   | 2.0695   | 10.618  | 1.2096  | 0.24687 | 0.46009 | -5.5492 | 9878     |
| SHOX2    | 0.43105  | 0.43105  | 0.80822 | 1.2091  | 0.24706 | 0.4604  | -5.5497 | 6474     |
| SNORA13  | -0.2412  | 0.2412   | 0.21517 | -1.209  | 0.2471  | 0.46041 | -5.5499 | 654322   |
| TMEM59   | 2.6294   | 2.6294   | 10.378  | 1.2087  | 0.2472  | 0.46055 | -5.5502 | 9528     |
| LRRC40   | 0.57035  | 0.57035  | 2.0182  | 1.2085  | 0.24726 | 0.4606  | -5.5503 | 55631    |
| SNORA58  | -0.10898 | 0.10898  | 0.16688 | -1.2082 | 0.24737 | 0.46076 | -5.5507 | 677836   |

|             |          |         |         |         |         |         |         |        |
|-------------|----------|---------|---------|---------|---------|---------|---------|--------|
| SEMA6C      | -0.79414 | 0.79414 | 1.7337  | -1.208  | 0.24748 | 0.4609  | -5.551  | 10500  |
| ABCC1       | 1.8151   | 1.8151  | 8.5978  | 1.2078  | 0.24752 | 0.4609  | -5.5511 | 4363   |
| FAM104B     | 0.35761  | 0.35761 | 1.33    | 1.2078  | 0.24753 | 0.4609  | -5.5511 | 90736  |
| SNORA11B    | -0.11573 | 0.11573 | 0.14482 | -1.2077 | 0.24756 | 0.46091 | -5.5512 | 1E+08  |
| TRMT13      | -0.23502 | 0.23502 | 1.2593  | -1.2076 | 0.2476  | 0.46093 | -5.5514 | 54482  |
| MEX3C       | 0.78965  | 0.78965 | 4.8455  | 1.2073  | 0.24774 | 0.46114 | -5.5518 | 51320  |
| NDUFAF4     | 0.34043  | 0.34043 | 1.0463  | 1.2071  | 0.24779 | 0.46118 | -5.5519 | 29078  |
| SPRR2E      | 250.1    | 250.1   | 476.29  | 1.2071  | 0.24781 | 0.46118 | -5.552  | 6704   |
| MED29       | 1.1665   | 1.1665  | 6.0786  | 1.2069  | 0.24785 | 0.4612  | -5.5521 | 55588  |
| NCF1        | 0.87298  | 0.87298 | 1.3467  | 1.2069  | 0.24789 | 0.46122 | -5.5522 | 653361 |
| THYN1       | -1.0671  | 1.0671  | 3.6375  | -1.2066 | 0.24797 | 0.46133 | -5.5525 | 29087  |
| CEP97       | 0.14576  | 0.14576 | 0.84239 | 1.2064  | 0.24807 | 0.46145 | -5.5528 | 79598  |
| EPB41L4A-DT | -0.23088 | 0.23088 | 0.76182 | -1.2063 | 0.2481  | 0.46146 | -5.5529 | 54508  |
| NAA60       | 1.0348   | 1.0348  | 5.337   | 1.206   | 0.24821 | 0.46161 | -5.5532 | 79903  |
| CDK11B      | -1.3149  | 1.3149  | 6.104   | -1.2052 | 0.24849 | 0.46209 | -5.5541 | 984    |
| RAB1B       | 11.218   | 11.218  | 45.357  | 1.205   | 0.24857 | 0.46218 | -5.5543 | 81876  |
| LIPN        | 2.7652   | 2.7652  | 3.6282  | 1.2049  | 0.24862 | 0.46222 | -5.5544 | 643418 |
| RNU6ATAC    | -0.25606 | 0.25606 | 0.40593 | -1.2048 | 0.24864 | 0.46222 | -5.5545 | 1E+08  |
| RPP25L      | -0.91971 | 0.91971 | 2.656   | -1.2044 | 0.24879 | 0.46239 | -5.5549 | 138716 |
| ATXN3       | -0.3632  | 0.3632  | 2.513   | -1.2044 | 0.2488  | 0.46239 | -5.555  | 4287   |
| ABHD4       | -1.6819  | 1.6819  | 5.3858  | -1.2043 | 0.24885 | 0.46239 | -5.5551 | 63874  |
| RNF225      | 4.4708   | 4.4708  | 7.6935  | 1.2043  | 0.24885 | 0.46239 | -5.5551 | 646862 |
| MT1E        | -7.2743  | 7.2743  | 13.782  | -1.2042 | 0.24888 | 0.46239 | -5.5552 | 4493   |
| CRYGS       | -0.19664 | 0.19664 | 0.5437  | -1.2041 | 0.24891 | 0.46241 | -5.5553 | 1427   |
| RASA4B      | -1.0479  | 1.0479  | 2.0098  | -1.2037 | 0.24906 | 0.46252 | -5.5558 | 1E+08  |
| P2RY14      | -0.24929 | 0.24929 | 0.64769 | -1.2037 | 0.24906 | 0.46252 | -5.5558 | 9934   |

|            |          |          |         |         |         |         |         |        |
|------------|----------|----------|---------|---------|---------|---------|---------|--------|
| COX6B1     | 25.845   | 25.845   | 83.825  | 1.2037  | 0.24908 | 0.46252 | -5.5558 | 1340   |
| CCDC58     | 0.78399  | 0.78399  | 2.4046  | 1.2037  | 0.24908 | 0.46252 | -5.5558 | 131076 |
| LGALS8     | 1.0678   | 1.0678   | 5.1991  | 1.2036  | 0.24912 | 0.46252 | -5.5559 | 3964   |
| FUZ        | -0.58124 | 0.58124  | 1.8051  | -1.2035 | 0.24914 | 0.46252 | -5.556  | 80199  |
| S1PR3      | 0.78194  | 0.78194  | 1.6091  | 1.2034  | 0.24917 | 0.46253 | -5.5561 | 1903   |
| UBB        | 23.361   | 23.361   | 82.468  | 1.2033  | 0.24923 | 0.46259 | -5.5563 | 7314   |
| TRAF3IP1   | -0.35675 | 0.35675  | 1.596   | -1.203  | 0.24934 | 0.46274 | -5.5566 | 26146  |
| MAB21L4    | -4.7097  | 4.7097   | 9.3376  | -1.2029 | 0.24937 | 0.46275 | -5.5567 | 79919  |
| B3GALNT2   | 0.63293  | 0.63293  | 4.6524  | 1.2026  | 0.24948 | 0.46291 | -5.557  | 148789 |
| RAB24      | 4.0353   | 4.0353   | 12.497  | 1.2023  | 0.24961 | 0.46309 | -5.5574 | 53917  |
| TMEM192    | -0.30483 | 0.30483  | 1.5641  | -1.2022 | 0.24964 | 0.4631  | -5.5575 | 201931 |
| KIAA1586   | 0.26463  | 0.26463  | 0.94559 | 1.2018  | 0.24977 | 0.4633  | -5.5579 | 57691  |
| GOLGA8K    | -0.09091 | 0.090906 | 0.11913 | -1.2017 | 0.2498  | 0.4633  | -5.558  | 653125 |
| PELI2      | -0.41497 | 0.41497  | 1.2073  | -1.2016 | 0.24984 | 0.46331 | -5.5581 | 57161  |
| TRAPPC8    | 0.79886  | 0.79886  | 5.2151  | 1.2015  | 0.2499  | 0.46331 | -5.5583 | 22878  |
| PTTG3P     | -0.11464 | 0.11464  | 0.15022 | -1.2014 | 0.24991 | 0.46331 | -5.5583 | 26255  |
| HDAC3      | 2.0472   | 2.0472   | 10.166  | 1.2014  | 0.24992 | 0.46331 | -5.5583 | 8841   |
| CANT1      | 2.7041   | 2.7041   | 8.3837  | 1.2013  | 0.24997 | 0.46335 | -5.5585 | 124583 |
| DGCR11     | -0.27485 | 0.27485  | 1.3611  | -1.201  | 0.25009 | 0.46353 | -5.5589 | 25786  |
| AAK1       | 0.21162  | 0.21162  | 2.231   | 1.2006  | 0.25022 | 0.46368 | -5.5592 | 22848  |
| GOLGA6L17P | -0.10434 | 0.10434  | 0.1473  | -1.2006 | 0.25023 | 0.46368 | -5.5593 | 642402 |
| NSUN5      | -0.78078 | 0.78078  | 3.1381  | -1.2005 | 0.25027 | 0.46371 | -5.5594 | 55695  |
| UBE2L6     | -3.0352  | 3.0352   | 6.8296  | -1.2004 | 0.2503  | 0.46371 | -5.5595 | 9246   |
| TYW5       | -0.17668 | 0.17668  | 0.80442 | -1.2003 | 0.25033 | 0.46371 | -5.5595 | 129450 |
| CLSTN3     | -1.3778  | 1.3778   | 3.7747  | -1.2001 | 0.25041 | 0.46381 | -5.5598 | 9746   |
| SHLD1      | 0.17241  | 0.17241  | 0.52296 | 1.2     | 0.25045 | 0.46382 | -5.5599 | 149840 |

|              |          |          |          |         |         |         |         |          |
|--------------|----------|----------|----------|---------|---------|---------|---------|----------|
| FBXO28       | 1.7874   | 1.7874   | 6.1669   | 1.2     | 0.25047 | 0.46382 | -5.56   | 23219    |
| FAM161A      | -0.08813 | 0.088129 | 0.29676  | -1.1993 | 0.25072 | 0.46423 | -5.5607 | 84140    |
| RASSF1       | 1.2104   | 1.2104   | 5.3991   | 1.1991  | 0.2508  | 0.4643  | -5.561  | 11186    |
| KIAA0754     | -0.89185 | 0.89185  | 4.2627   | -1.1991 | 0.25081 | 0.4643  | -5.561  | 643314   |
| CRYZL1       | -0.52027 | 0.52027  | 2.5663   | -1.199  | 0.25084 | 0.4643  | -5.5611 | 9946     |
| ALG5         | 1.6426   | 1.6426   | 5.7623   | 1.1989  | 0.25086 | 0.4643  | -5.5611 | 29880    |
| ARL14        | 0.086519 | 0.086519 | 0.098792 | 1.1987  | 0.25093 | 0.46437 | -5.5613 | 80117    |
| TFAP2A       | -2.7121  | 2.7121   | 14.641   | -1.1984 | 0.25105 | 0.46449 | -5.5617 | 7020     |
| PLEKHM3      | -0.22289 | 0.22289  | 2.1498   | -1.1984 | 0.25107 | 0.46449 | -5.5618 | 389072   |
| DGKI         | 0.10788  | 0.10788  | 0.21501  | 1.1983  | 0.25108 | 0.46449 | -5.5618 | 9162     |
| LOC101927100 | -0.14835 | 0.14835  | 0.34957  | -1.1982 | 0.25112 | 0.46451 | -5.5619 | 1.02E+08 |
| LY6E         | -28.004  | 28.004   | 35.996   | -1.1977 | 0.25133 | 0.4648  | -5.5625 | 4061     |
| CD36         | 17.84    | 17.84    | 17.365   | 1.1976  | 0.25135 | 0.4648  | -5.5626 | 948      |
| PSMD5        | 1.1787   | 1.1787   | 5.994    | 1.1975  | 0.25138 | 0.4648  | -5.5627 | 5711     |
| ATF6         | 1.001    | 1.001    | 6.1681   | 1.1974  | 0.25142 | 0.4648  | -5.5628 | 22926    |
| C8orf34-AS1  | 0.13793  | 0.13793  | 0.24685  | 1.1974  | 0.25143 | 0.4648  | -5.5628 | 286189   |
| SRGAP2C      | -0.43473 | 0.43473  | 1.735    | -1.1974 | 0.25144 | 0.4648  | -5.5629 | 653464   |
| PVT1         | -0.53183 | 0.53183  | 1.4791   | -1.1973 | 0.25148 | 0.46483 | -5.563  | 5820     |
| BBOX1        | 3.3926   | 3.3926   | 6.9048   | 1.1968  | 0.25166 | 0.46511 | -5.5635 | 8424     |
| ZBTB49       | -0.13109 | 0.13109  | 0.74547  | -1.1965 | 0.25175 | 0.46523 | -5.5638 | 166793   |
| THAP7        | -0.88595 | 0.88595  | 3.8184   | -1.1963 | 0.25186 | 0.46537 | -5.5641 | 80764    |
| NUDT6        | -0.19307 | 0.19307  | 0.568    | -1.1961 | 0.25193 | 0.46545 | -5.5643 | 11162    |
| LRRC37B      | -0.35143 | 0.35143  | 1.8294   | -1.1958 | 0.25203 | 0.46555 | -5.5646 | 114659   |
| ZNF439       | -0.3469  | 0.3469   | 1.2372   | -1.1958 | 0.25204 | 0.46555 | -5.5646 | 90594    |
| LIN9         | 0.12533  | 0.12533  | 0.60557  | 1.1955  | 0.25215 | 0.46571 | -5.565  | 286826   |
| RPP38        | 0.59751  | 0.59751  | 3.17     | 1.1954  | 0.2522  | 0.46574 | -5.5651 | 10557    |

|              |          |          |         |         |         |         |         |          |
|--------------|----------|----------|---------|---------|---------|---------|---------|----------|
| TECPR1       | -0.87975 | 0.87975  | 2.6489  | -1.1953 | 0.25224 | 0.46578 | -5.5652 | 25851    |
| ZNF24        | 0.75443  | 0.75443  | 5.4402  | 1.1951  | 0.25232 | 0.46585 | -5.5655 | 7572     |
| AP1B1        | 4.7668   | 4.7668   | 18.654  | 1.195   | 0.25235 | 0.46585 | -5.5656 | 162      |
| LAPTM5       | 11.112   | 11.112   | 19.221  | 1.1949  | 0.25236 | 0.46585 | -5.5656 | 7805     |
| COMMD6       | 2.2789   | 2.2789   | 5.6688  | 1.1946  | 0.25249 | 0.46599 | -5.566  | 170622   |
| CYP7B1       | 0.709    | 0.709    | 2.9622  | 1.1946  | 0.2525  | 0.46599 | -5.566  | 9420     |
| STEAP3       | -0.79382 | 0.79382  | 2.4157  | -1.1944 | 0.25256 | 0.46606 | -5.5662 | 55240    |
| SLC39A9      | 1.0788   | 1.0788   | 7.2471  | 1.1942  | 0.25263 | 0.46615 | -5.5664 | 55334    |
| SLC25A26     | -0.36609 | 0.36609  | 2.0685  | -1.1941 | 0.25267 | 0.46616 | -5.5665 | 115286   |
| MOB3B        | -0.50365 | 0.50365  | 2.6458  | -1.1938 | 0.25279 | 0.4663  | -5.5668 | 79817    |
| PHETA2       | 0.9955   | 0.9955   | 3.0649  | 1.1937  | 0.25284 | 0.4663  | -5.567  | 150368   |
| AURKAIP1     | 5.6975   | 5.6975   | 18.818  | 1.1936  | 0.25285 | 0.4663  | -5.567  | 54998    |
| C15orf61     | -0.39077 | 0.39077  | 1.7546  | -1.1936 | 0.25286 | 0.4663  | -5.567  | 145853   |
| SLC25A3      | 15.828   | 15.828   | 59.061  | 1.1935  | 0.25289 | 0.46632 | -5.5672 | 5250     |
| PRKCQ-AS1    | 0.099393 | 0.099393 | 0.22617 | 1.1933  | 0.25297 | 0.46641 | -5.5674 | 439949   |
| FUOM         | 0.728    | 0.728    | 1.9001  | 1.1931  | 0.25304 | 0.46649 | -5.5676 | 282969   |
| ATL3         | 3.1468   | 3.1468   | 14.841  | 1.1927  | 0.2532  | 0.46672 | -5.568  | 25923    |
| TOMM34       | 0.65923  | 0.65923  | 2.8514  | 1.1926  | 0.25326 | 0.46679 | -5.5682 | 10953    |
| EPHB6        | -10.5    | 10.5     | 17.269  | -1.1923 | 0.25336 | 0.46693 | -5.5685 | 2051     |
| LOC102723566 | -0.40553 | 0.40553  | 0.89604 | -1.1916 | 0.25362 | 0.46735 | -5.5693 | 1.03E+08 |
| PSMB1        | 10.69    | 10.69    | 36.013  | 1.1915  | 0.25367 | 0.4674  | -5.5695 | 5689     |
| NUP153       | 1.3859   | 1.3859   | 8.4043  | 1.1913  | 0.25372 | 0.46744 | -5.5696 | 9972     |
| ZNF649       | -0.29916 | 0.29916  | 1.6529  | -1.1909 | 0.25388 | 0.46764 | -5.5701 | 65251    |
| IFT27        | -1.0675  | 1.0675   | 3.1462  | -1.1909 | 0.25389 | 0.46764 | -5.5701 | 11020    |
| RBPMS2       | -0.40244 | 0.40244  | 0.66663 | -1.1906 | 0.25402 | 0.46782 | -5.5705 | 348093   |
| SNHG1        | 1.6174   | 1.6174   | 7.8593  | 1.1905  | 0.25404 | 0.46782 | -5.5705 | 23642    |

|              |          |          |         |         |         |         |         |          |
|--------------|----------|----------|---------|---------|---------|---------|---------|----------|
| SNX13        | 0.37815  | 0.37815  | 2.5276  | 1.1904  | 0.25408 | 0.46783 | -5.5706 | 23161    |
| RAB4B        | 1.569    | 1.569    | 4.9522  | 1.1902  | 0.25417 | 0.46792 | -5.5709 | 53916    |
| SMC1A        | -0.952   | 0.952    | 4.7047  | -1.1901 | 0.25418 | 0.46792 | -5.5709 | 8243     |
| DYM          | -0.60416 | 0.60416  | 4.4766  | -1.19   | 0.25424 | 0.46799 | -5.5711 | 54808    |
| HSPB9        | -0.11878 | 0.11878  | 0.15843 | -1.1899 | 0.25428 | 0.46801 | -5.5712 | 94086    |
| PABPC1L      | -0.21646 | 0.21646  | 0.78283 | -1.1895 | 0.25441 | 0.4682  | -5.5716 | 80336    |
| GLUD1P2      | -0.08765 | 0.08765  | 0.10725 | -1.1894 | 0.25445 | 0.46822 | -5.5717 | 414212   |
| ALOX15       | -0.09113 | 0.091129 | 0.12758 | -1.1893 | 0.2545  | 0.46824 | -5.5719 | 246      |
| PEBP4        | -0.11805 | 0.11805  | 0.11469 | -1.1892 | 0.25452 | 0.46824 | -5.5719 | 157310   |
| ERO1B        | -0.20464 | 0.20464  | 0.7463  | -1.189  | 0.25461 | 0.46836 | -5.5722 | 56605    |
| TMED8        | -0.25222 | 0.25222  | 1.7762  | -1.1889 | 0.25465 | 0.46838 | -5.5723 | 283578   |
| RNASET2      | -2.5708  | 2.5708   | 6.5566  | -1.1882 | 0.25493 | 0.46882 | -5.5731 | 8635     |
| TRA2B        | 1.9425   | 1.9425   | 8.8594  | 1.188   | 0.25498 | 0.46882 | -5.5733 | 6434     |
| SLC22A1      | -0.09011 | 0.090108 | 0.17704 | -1.188  | 0.25499 | 0.46882 | -5.5733 | 6580     |
| KDELR1       | 9.4553   | 9.4553   | 36.646  | 1.188   | 0.255   | 0.46882 | -5.5733 | 10945    |
| TMEM202-AS1  | -0.10673 | 0.10673  | 0.25211 | -1.1879 | 0.25503 | 0.46882 | -5.5734 | 1.05E+08 |
| NEDD1        | 0.43274  | 0.43274  | 2.138   | 1.1877  | 0.25512 | 0.46894 | -5.5737 | 121441   |
| TBC1D3L      | 0.095507 | 0.095507 | 0.21427 | 1.1876  | 0.25515 | 0.46894 | -5.5738 | 1.01E+08 |
| SRGAP1       | 0.43604  | 0.43604  | 1.6409  | 1.1874  | 0.25521 | 0.469   | -5.5739 | 57522    |
| MED11        | 1.3699   | 1.3699   | 4.9776  | 1.1873  | 0.25525 | 0.46902 | -5.5741 | 400569   |
| LOC101929897 | 0.21718  | 0.21718  | 0.32415 | 1.1871  | 0.25534 | 0.46905 | -5.5743 | 1.02E+08 |
| NMRAL2P      | -0.38888 | 0.38888  | 1.2811  | -1.187  | 0.25538 | 0.46905 | -5.5744 | 344887   |
| TSPAN5       | 1.6062   | 1.6062   | 5.0508  | 1.187   | 0.25538 | 0.46905 | -5.5744 | 10098    |
| INCA1        | -0.13928 | 0.13928  | 0.41114 | -1.1869 | 0.25542 | 0.46905 | -5.5745 | 388324   |
| PTPRZ1       | -1.8624  | 1.8624   | 9.188   | -1.1869 | 0.25542 | 0.46905 | -5.5745 | 5803     |
| LOC100507564 | -0.08353 | 0.083526 | 0.18338 | -1.1868 | 0.25544 | 0.46905 | -5.5746 | 1.01E+08 |



|          |          |          |         |         |         |         |         |        |
|----------|----------|----------|---------|---------|---------|---------|---------|--------|
| TMEM126B | 0.63027  | 0.63027  | 2.1073  | 1.1868  | 0.25546 | 0.46905 | -5.5747 | 55863  |
| TSPAN2   | 0.25084  | 0.25084  | 0.65426 | 1.1862  | 0.2557  | 0.46937 | -5.5754 | 10100  |
| TESPA1   | -0.08564 | 0.085644 | 0.21162 | -1.1861 | 0.25571 | 0.46937 | -5.5754 | 9840   |
| RHBDF1   | -0.96119 | 0.96119  | 6.5485  | -1.1861 | 0.25572 | 0.46937 | -5.5754 | 64285  |
| ITPRID2  | 6.6917   | 6.6917   | 20.674  | 1.186   | 0.25574 | 0.46937 | -5.5755 | 6744   |
| MRPL37   | 3.3569   | 3.3569   | 14.803  | 1.1859  | 0.25581 | 0.46944 | -5.5757 | 51253  |
| FGD5     | -1.4259  | 1.4259   | 4.0372  | -1.1854 | 0.25598 | 0.4697  | -5.5762 | 152273 |
| DOLPP1   | 0.77867  | 0.77867  | 3.2931  | 1.1852  | 0.25605 | 0.46977 | -5.5764 | 57171  |
| BST2     | -4.0945  | 4.0945   | 5.2197  | -1.1851 | 0.25609 | 0.46981 | -5.5765 | 684    |
| MRS2     | 0.34513  | 0.34513  | 2.5757  | 1.185   | 0.25616 | 0.46987 | -5.5767 | 57380  |
| ARNT     | -0.926   | 0.926    | 7.1639  | -1.1845 | 0.25633 | 0.47015 | -5.5772 | 405    |
| CMPK2    | -1.1849  | 1.1849   | 1.0369  | -1.1843 | 0.25641 | 0.47023 | -5.5774 | 129607 |
| FARP2    | -0.46947 | 0.46947  | 4.118   | -1.1841 | 0.2565  | 0.47028 | -5.5777 | 9855   |
| MEF2D    | -1.3202  | 1.3202   | 7.1518  | -1.184  | 0.25651 | 0.47028 | -5.5777 | 4209   |
| SDS      | 0.40552  | 0.40552  | 0.48001 | 1.184   | 0.25653 | 0.47028 | -5.5778 | 10993  |
| STX5     | 2.2308   | 2.2308   | 10.972  | 1.1839  | 0.25654 | 0.47028 | -5.5778 | 6811   |
| IWS1     | 1.0756   | 1.0756   | 6.0072  | 1.1838  | 0.25659 | 0.47032 | -5.578  | 55677  |
| E2F6     | 0.25337  | 0.25337  | 1.6442  | 1.1836  | 0.25666 | 0.47035 | -5.5781 | 1876   |
| CNN1     | -3.1292  | 3.1292   | 5.1257  | -1.1836 | 0.25669 | 0.47035 | -5.5782 | 1264   |
| GON7     | 0.60799  | 0.60799  | 1.5428  | 1.1835  | 0.25671 | 0.47035 | -5.5783 | 84520  |
| KIAA1217 | 2.0537   | 2.0537   | 9.2282  | 1.1835  | 0.25672 | 0.47035 | -5.5783 | 56243  |
| JMJD7    | -1.785   | 1.785    | 7.2574  | -1.1834 | 0.25677 | 0.47038 | -5.5785 | 1E+08  |
| DIO1     | -0.07716 | 0.077159 | 0.11279 | -1.1832 | 0.25682 | 0.47041 | -5.5786 | 1733   |
| FCGRT    | -6.6399  | 6.6399   | 17.048  | -1.1829 | 0.25696 | 0.47063 | -5.579  | 2217   |
| OR2AE1   | -0.12698 | 0.12698  | 0.19684 | -1.1827 | 0.25701 | 0.47066 | -5.5791 | 81392  |
| TEPP     | 0.14891  | 0.14891  | 0.2714  | 1.1827  | 0.25703 | 0.47066 | -5.5792 | 374739 |

|              |          |          |         |         |         |         |         |          |
|--------------|----------|----------|---------|---------|---------|---------|---------|----------|
| TENT5C       | -0.23411 | 0.23411  | 0.56329 | -1.1826 | 0.25706 | 0.47066 | -5.5793 | 54855    |
| AQP1         | -18.101  | 18.101   | 49.669  | -1.1824 | 0.25713 | 0.47071 | -5.5795 | 358      |
| LINC00266-1  | -0.29578 | 0.29578  | 0.60458 | -1.1823 | 0.25716 | 0.47071 | -5.5796 | 140849   |
| MYL3         | -0.15886 | 0.15886  | 0.30968 | -1.1823 | 0.25717 | 0.47071 | -5.5796 | 4634     |
| CDKN1B       | -1.3006  | 1.3006   | 7.9329  | -1.1822 | 0.25722 | 0.47075 | -5.5798 | 1027     |
| DONSON       | 0.30963  | 0.30963  | 1.8615  | 1.1818  | 0.25735 | 0.47089 | -5.5801 | 29980    |
| SIGLEC9      | 0.43388  | 0.43388  | 0.69726 | 1.1818  | 0.25738 | 0.47089 | -5.5802 | 27180    |
| ACTG1P20     | -0.17551 | 0.17551  | 0.66113 | -1.1818 | 0.25738 | 0.47089 | -5.5802 | 644961   |
| DNA2         | 0.15386  | 0.15386  | 0.51003 | 1.1816  | 0.25743 | 0.47092 | -5.5804 | 1763     |
| DND1         | -0.27667 | 0.27667  | 1.3914  | -1.1816 | 0.25745 | 0.47092 | -5.5804 | 373863   |
| BIRC6-AS2    | -0.22941 | 0.22941  | 0.65352 | -1.1813 | 0.25754 | 0.47103 | -5.5807 | 1.04E+08 |
| RASAL2       | 0.35087  | 0.35087  | 3.8581  | 1.1811  | 0.25763 | 0.47115 | -5.581  | 9462     |
| KLB          | -0.09315 | 0.093153 | 0.24904 | -1.1808 | 0.25773 | 0.47128 | -5.5812 | 152831   |
| CKAP5        | 1.7026   | 1.7026   | 8.2334  | 1.1805  | 0.25787 | 0.47138 | -5.5816 | 9793     |
| SUMF1        | 1.6662   | 1.6662   | 8.0156  | 1.1804  | 0.25791 | 0.47138 | -5.5817 | 285362   |
| CCDC130      | -0.78441 | 0.78441  | 4.6032  | -1.1803 | 0.25794 | 0.47138 | -5.5818 | 81576    |
| LINC00106    | -0.26634 | 0.26634  | 0.41719 | -1.1802 | 0.25797 | 0.47138 | -5.5819 | 751580   |
| CERS2        | 4.3312   | 4.3312   | 14.067  | 1.1802  | 0.25797 | 0.47138 | -5.5819 | 29956    |
| SARAF        | 3.3094   | 3.3094   | 24.628  | 1.1801  | 0.25802 | 0.47138 | -5.5821 | 51669    |
| ANO6         | 1.6995   | 1.6995   | 6.8813  | 1.1801  | 0.25803 | 0.47138 | -5.5821 | 196527   |
| FOXD2-AS1    | -0.15199 | 0.15199  | 0.26131 | -1.18   | 0.25807 | 0.47138 | -5.5822 | 84793    |
| RPL27        | 58.27    | 58.27    | 184.41  | 1.18    | 0.25808 | 0.47138 | -5.5822 | 6155     |
| CDC6         | 0.59436  | 0.59436  | 1.1573  | 1.1799  | 0.25809 | 0.47138 | -5.5823 | 990      |
| LOC101927969 | -0.1597  | 0.1597   | 0.22751 | -1.1799 | 0.2581  | 0.47138 | -5.5823 | 1.02E+08 |
| CAPNS2       | 8.2086   | 8.2086   | 19.401  | 1.1796  | 0.2582  | 0.47152 | -5.5826 | 84290    |
| MIA3         | -0.69754 | 0.69754  | 3.713   | -1.1795 | 0.25826 | 0.47156 | -5.5828 | 375056   |

|           |          |          |         |         |         |         |         |        |
|-----------|----------|----------|---------|---------|---------|---------|---------|--------|
| YIPF2     | 2.1478   | 2.1478   | 8.258   | 1.1792  | 0.25835 | 0.47156 | -5.583  | 78992  |
| DIAPH1    | 6.7991   | 6.7991   | 21.559  | 1.1792  | 0.25835 | 0.47156 | -5.583  | 1729   |
| NOL9      | -0.58721 | 0.58721  | 3.4985  | -1.1792 | 0.25836 | 0.47156 | -5.583  | 79707  |
| KRT16P2   | 0.92071  | 0.92071  | 1.2988  | 1.1791  | 0.25839 | 0.47156 | -5.5831 | 400578 |
| CCL2      | 14.706   | 14.706   | 21.782  | 1.179   | 0.25843 | 0.47156 | -5.5833 | 6347   |
| MID2      | 1.2324   | 1.2324   | 3.9205  | 1.179   | 0.25844 | 0.47156 | -5.5833 | 11043  |
| NDUFC2    | 1.7799   | 1.7799   | 5.7875  | 1.179   | 0.25844 | 0.47156 | -5.5833 | 4718   |
| CHIC2     | 2.5234   | 2.5234   | 8.7773  | 1.1788  | 0.25853 | 0.47163 | -5.5835 | 26511  |
| LMO3      | -0.0948  | 0.094796 | 0.12357 | -1.1785 | 0.25863 | 0.47163 | -5.5838 | 55885  |
| TRIM65    | -0.59751 | 0.59751  | 3.4623  | -1.1785 | 0.25864 | 0.47163 | -5.5839 | 201292 |
| FOXJ2     | -0.75921 | 0.75921  | 5.0265  | -1.1784 | 0.25867 | 0.47163 | -5.5839 | 55810  |
| TPRN      | -0.88573 | 0.88573  | 3.0075  | -1.1783 | 0.2587  | 0.47163 | -5.584  | 286262 |
| BIRC5     | 1.0614   | 1.0614   | 2.1048  | 1.1783  | 0.25872 | 0.47163 | -5.5841 | 332    |
| CTSZ      | 10.385   | 10.385   | 24.378  | 1.1783  | 0.25872 | 0.47163 | -5.5841 | 1522   |
| SNRPN     | -0.40964 | 0.40964  | 1.6086  | -1.1783 | 0.25872 | 0.47163 | -5.5841 | 6638   |
| PLA2G4D   | 15.384   | 15.384   | 19.597  | 1.1782  | 0.25873 | 0.47163 | -5.5841 | 283748 |
| SUCLG2    | -1.4004  | 1.4004   | 6.4537  | -1.178  | 0.25883 | 0.47175 | -5.5844 | 8801   |
| ARHGEF10L | -1.7985  | 1.7985   | 7.841   | -1.1776 | 0.25897 | 0.47195 | -5.5848 | 55160  |
| ARID1A    | -1.3961  | 1.3961   | 9.9129  | -1.1773 | 0.25909 | 0.47213 | -5.5851 | 8289   |
| SH3BGRL   | 2.4677   | 2.4677   | 9.1328  | 1.1772  | 0.25915 | 0.47214 | -5.5853 | 6451   |
| RABAC1    | 12.21    | 12.21    | 30.461  | 1.1771  | 0.25916 | 0.47214 | -5.5853 | 10567  |
| FAAP100   | -1.3916  | 1.3916   | 4.5951  | -1.177  | 0.25921 | 0.4722  | -5.5855 | 80233  |
| NEU2      | 4.4383   | 4.4383   | 6.8222  | 1.1769  | 0.25926 | 0.47223 | -5.5856 | 4759   |
| MRM1      | -0.34999 | 0.34999  | 0.82131 | -1.1766 | 0.25936 | 0.47235 | -5.5859 | 79922  |
| PCBP4     | 1.2614   | 1.2614   | 5.4727  | 1.1765  | 0.2594  | 0.47237 | -5.586  | 57060  |
| ING3      | 0.27592  | 0.27592  | 1.3184  | 1.1764  | 0.25945 | 0.47237 | -5.5862 | 54556  |

|              |          |          |          |         |         |         |         |          |
|--------------|----------|----------|----------|---------|---------|---------|---------|----------|
| RPL17        | 72.787   | 72.787   | 210.8    | 1.1763  | 0.25947 | 0.47237 | -5.5862 | 6139     |
| TTC4         | 0.79208  | 0.79208  | 3.4622   | 1.1763  | 0.25948 | 0.47237 | -5.5862 | 7268     |
| CAMK1G       | 0.081684 | 0.081684 | 0.13111  | 1.1759  | 0.25965 | 0.47264 | -5.5867 | 57172    |
| KLHL17       | -0.32708 | 0.32708  | 1.0319   | -1.1756 | 0.25976 | 0.47277 | -5.587  | 339451   |
| ASGR2        | -0.15111 | 0.15111  | 0.3199   | -1.1754 | 0.25984 | 0.47284 | -5.5873 | 433      |
| LINC00482    | 0.093063 | 0.093063 | 0.21004  | 1.1754  | 0.25985 | 0.47284 | -5.5873 | 284185   |
| CASC1        | -0.07892 | 0.078918 | 0.078732 | -1.1752 | 0.25991 | 0.47289 | -5.5875 | 55259    |
| TYMS         | 1.9519   | 1.9519   | 4.2166   | 1.175   | 0.25997 | 0.47291 | -5.5876 | 7298     |
| DYNLRB1      | 2.7111   | 2.7111   | 12.95    | 1.175   | 0.25998 | 0.47291 | -5.5877 | 83658    |
| LOC100506804 | -0.08718 | 0.087178 | 0.13628  | -1.1749 | 0.26002 | 0.47291 | -5.5878 | 1.01E+08 |
| BACH1        | 1.4852   | 1.4852   | 9.4167   | 1.1749  | 0.26003 | 0.47291 | -5.5878 | 571      |
| OXCT1        | 2.7887   | 2.7887   | 7.0389   | 1.1745  | 0.26018 | 0.47309 | -5.5882 | 5019     |
| SNORA14B     | -0.39889 | 0.39889  | 0.53485  | -1.1745 | 0.2602  | 0.47309 | -5.5883 | 677802   |
| CTDNEP1      | 5.7728   | 5.7728   | 27.284   | 1.1744  | 0.26021 | 0.47309 | -5.5883 | 23399    |
| NPR3         | -0.79268 | 0.79268  | 2.547    | -1.1743 | 0.26025 | 0.47312 | -5.5884 | 4883     |
| LOC340090    | -0.08536 | 0.085361 | 0.089203 | -1.1741 | 0.26033 | 0.47316 | -5.5887 | 340090   |
| GRAPL        | -0.11247 | 0.11247  | 0.27501  | -1.174  | 0.26038 | 0.47316 | -5.5888 | 400581   |
| DENND4B      | -1.0198  | 1.0198   | 3.5487   | -1.174  | 0.26039 | 0.47316 | -5.5888 | 9909     |
| RHPN1        | -0.51438 | 0.51438  | 0.7386   | -1.1739 | 0.26042 | 0.47316 | -5.5889 | 114822   |
| LINC01679    | -0.24939 | 0.24939  | 0.68296  | -1.1739 | 0.26042 | 0.47316 | -5.5889 | 1.02E+08 |
| PHLDA3       | 3.3782   | 3.3782   | 10.736   | 1.1738  | 0.26045 | 0.47316 | -5.589  | 23612    |
| SCEL         | 8.425    | 8.425    | 20.289   | 1.1735  | 0.26056 | 0.47331 | -5.5893 | 8796     |
| NUTF2        | 1.912    | 1.912    | 7.3626   | 1.1733  | 0.26064 | 0.47337 | -5.5896 | 10204    |
| ASDURF       | 0.22849  | 0.22849  | 0.27569  | 1.1733  | 0.26064 | 0.47337 | -5.5896 | 1.11E+08 |
| FBXO10       | 0.72906  | 0.72906  | 2.1163   | 1.173   | 0.26076 | 0.47353 | -5.5899 | 26267    |
| GBA2         | 3.7509   | 3.7509   | 10.653   | 1.1729  | 0.26079 | 0.47353 | -5.59   | 57704    |

|              |          |          |          |         |         |         |         |          |
|--------------|----------|----------|----------|---------|---------|---------|---------|----------|
| COL8A1       | 1.4314   | 1.4314   | 2.5395   | 1.1726  | 0.2609  | 0.47368 | -5.5903 | 1295     |
| LOC104054148 | -0.07992 | 0.079922 | 0.090552 | -1.1726 | 0.26093 | 0.47369 | -5.5904 | 1.04E+08 |
| EPN3         | 9.023    | 9.023    | 14.383   | 1.1724  | 0.26098 | 0.47372 | -5.5905 | 55040    |
| CCT7         | 8.2471   | 8.2471   | 29.839   | 1.1723  | 0.26103 | 0.47376 | -5.5906 | 10574    |
| LOC100652758 | -0.14023 | 0.14023  | 0.42573  | -1.1721 | 0.26112 | 0.47387 | -5.5909 | 1.01E+08 |
| ZNF100       | -0.23605 | 0.23605  | 0.83451  | -1.172  | 0.26115 | 0.47387 | -5.591  | 163227   |
| GGCX         | 0.26429  | 0.26429  | 2.5897   | 1.1718  | 0.26121 | 0.47394 | -5.5912 | 2677     |
| USP46-AS1    | -0.29535 | 0.29535  | 0.95127  | -1.1714 | 0.26139 | 0.47422 | -5.5917 | 643783   |
| EDC3         | -0.47359 | 0.47359  | 4.1459   | -1.1713 | 0.26143 | 0.47422 | -5.5918 | 80153    |
| GGTA1P       | -0.99492 | 0.99492  | 2.5823   | -1.1711 | 0.26148 | 0.47422 | -5.5919 | 2681     |
| EML6         | 0.23532  | 0.23532  | 1.0804   | 1.1711  | 0.2615  | 0.47422 | -5.592  | 400954   |
| IGLON5       | 0.18577  | 0.18577  | 0.52355  | 1.1711  | 0.2615  | 0.47422 | -5.592  | 402665   |
| MAGEF1       | -1.1608  | 1.1608   | 4.7715   | -1.1708 | 0.2616  | 0.47435 | -5.5923 | 64110    |
| GMNN         | 0.95009  | 0.95009  | 2.4613   | 1.1706  | 0.26168 | 0.47444 | -5.5925 | 51053    |
| ARHGEF3-AS1  | -0.09863 | 0.098625 | 0.15607  | -1.1704 | 0.26176 | 0.47453 | -5.5927 | 1.01E+08 |
| SYNGAP1      | -0.37089 | 0.37089  | 1.1055   | -1.1703 | 0.26182 | 0.47456 | -5.5929 | 8831     |
| HTR2A        | 0.12664  | 0.12664  | 0.17168  | 1.1702  | 0.26183 | 0.47456 | -5.5929 | 3356     |
| MRPL1        | 0.83333  | 0.83333  | 2.7887   | 1.1697  | 0.26206 | 0.47491 | -5.5935 | 65008    |
| LINC01117    | -0.13754 | 0.13754  | 0.19405  | -1.1695 | 0.26213 | 0.47497 | -5.5938 | 1.03E+08 |
| MAX          | -1.2411  | 1.2411   | 8.4502   | -1.1694 | 0.26214 | 0.47497 | -5.5938 | 4149     |
| THEM6        | -0.7879  | 0.7879   | 2.6989   | -1.1691 | 0.26226 | 0.47512 | -5.5941 | 51337    |
| APOL2        | -1.8048  | 1.8048   | 3.4272   | -1.1691 | 0.26229 | 0.47512 | -5.5942 | 23780    |
| SUGP1        | -0.85931 | 0.85931  | 4.1021   | -1.1688 | 0.2624  | 0.47528 | -5.5945 | 57794    |
| NADK2        | -0.37237 | 0.37237  | 1.8613   | -1.1686 | 0.26247 | 0.47535 | -5.5947 | 133686   |
| NDUFA1       | 12.244   | 12.244   | 32.169   | 1.1682  | 0.26264 | 0.47561 | -5.5952 | 4694     |
| IFNK         | -0.19113 | 0.19113  | 0.51914  | -1.168  | 0.26271 | 0.47564 | -5.5954 | 56832    |

|            |          |         |         |         |         |         |         |        |
|------------|----------|---------|---------|---------|---------|---------|---------|--------|
| TAS1R3     | -0.21415 | 0.21415 | 0.49291 | -1.168  | 0.26271 | 0.47564 | -5.5954 | 83756  |
| HJURP      | 0.44453  | 0.44453 | 0.87176 | 1.1678  | 0.26277 | 0.47566 | -5.5956 | 55355  |
| DEGS1      | -20.376  | 20.376  | 53.079  | -1.1678 | 0.26278 | 0.47566 | -5.5956 | 8560   |
| SCARNA8    | -0.12044 | 0.12044 | 0.10901 | -1.1677 | 0.26282 | 0.47568 | -5.5957 | 677776 |
| ST6GALNAC1 | 0.21458  | 0.21458 | 0.57176 | 1.1674  | 0.26292 | 0.47582 | -5.596  | 55808  |
| AGL        | -0.36313 | 0.36313 | 2.4023  | -1.1672 | 0.26301 | 0.47593 | -5.5962 | 178    |
| ZNF416     | 0.3719   | 0.3719  | 1.9971  | 1.1669  | 0.26314 | 0.47611 | -5.5966 | 55659  |
| PPP2R5E    | 0.58684  | 0.58684 | 3.5614  | 1.1665  | 0.26328 | 0.47631 | -5.597  | 5529   |
| RPL7L1     | 1.8305   | 1.8305  | 8.5343  | 1.1662  | 0.26339 | 0.47647 | -5.5973 | 285855 |
| RAB2B      | 0.56935  | 0.56935 | 3.1805  | 1.1656  | 0.26363 | 0.47683 | -5.598  | 84932  |
| OTUB2      | 5.2464   | 5.2464  | 6.087   | 1.1656  | 0.26365 | 0.47683 | -5.598  | 78990  |
| KCNQ1OT1   | -0.56888 | 0.56888 | 1.8841  | -1.1653 | 0.26374 | 0.47691 | -5.5983 | 10984  |
| EMCN       | 0.82526  | 0.82526 | 2.043   | 1.1653  | 0.26375 | 0.47691 | -5.5983 | 51705  |
| YJU2       | -0.86299 | 0.86299 | 4.5687  | -1.1651 | 0.26382 | 0.47695 | -5.5985 | 55702  |
| NKIRAS2    | 2.174    | 2.174   | 9.3196  | 1.1651  | 0.26383 | 0.47695 | -5.5985 | 28511  |
| METTL27    | -0.19379 | 0.19379 | 0.43397 | -1.1649 | 0.2639  | 0.47702 | -5.5987 | 155368 |
| AKR1B1     | 2.402    | 2.402   | 6.6249  | 1.1647  | 0.26399 | 0.47713 | -5.599  | 231    |
| CCL14      | -7.1167  | 7.1167  | 13.779  | -1.1646 | 0.26405 | 0.4772  | -5.5992 | 6358   |
| CSTF2T     | -0.9126  | 0.9126  | 3.1165  | -1.1644 | 0.26413 | 0.47729 | -5.5994 | 23283  |
| LINC00526  | -0.15725 | 0.15725 | 0.412   | -1.1643 | 0.26416 | 0.47729 | -5.5994 | 147525 |
| PIGQ       | -1.2894  | 1.2894  | 4.5648  | -1.164  | 0.26428 | 0.47747 | -5.5998 | 9091   |
| ZNF384     | -0.52319 | 0.52319 | 4.7977  | -1.1637 | 0.26439 | 0.47755 | -5.6001 | 171017 |
| C20orf194  | -0.28921 | 0.28921 | 3.0242  | -1.1637 | 0.26439 | 0.47755 | -5.6001 | 25943  |
| SERGEF     | -0.64678 | 0.64678 | 3.462   | -1.1636 | 0.26444 | 0.4776  | -5.6002 | 26297  |
| LINC00926  | -0.13435 | 0.13435 | 0.32992 | -1.1633 | 0.26454 | 0.47772 | -5.6005 | 283663 |
| HYAL4      | 0.9658   | 0.9658  | 0.80599 | 1.1632  | 0.26458 | 0.47774 | -5.6006 | 23553  |

|              |          |         |         |         |         |         |         |          |
|--------------|----------|---------|---------|---------|---------|---------|---------|----------|
| PDP1         | 1.2066   | 1.2066  | 3.7924  | 1.1631  | 0.26462 | 0.47776 | -5.6007 | 54704    |
| SMIM29       | -1.6149  | 1.6149  | 7.1377  | -1.1628 | 0.26476 | 0.47796 | -5.6011 | 221491   |
| ARHGAP26     | -0.2689  | 0.2689  | 1.6204  | -1.1627 | 0.26479 | 0.47797 | -5.6012 | 23092    |
| ZDHHC5       | 4.2951   | 4.2951  | 22.684  | 1.1626  | 0.26483 | 0.47799 | -5.6013 | 25921    |
| SNX30        | -0.31973 | 0.31973 | 2.497   | -1.162  | 0.26507 | 0.47837 | -5.602  | 401548   |
| CCT6P3       | -0.26605 | 0.26605 | 1.2325  | -1.1617 | 0.26518 | 0.47852 | -5.6023 | 643180   |
| LTF          | -18.923  | 18.923  | 10.575  | -1.1613 | 0.26531 | 0.47867 | -5.6027 | 4057     |
| CDH3         | 24.697   | 24.697  | 45.686  | 1.1613  | 0.26532 | 0.47867 | -5.6027 | 1001     |
| LOC105375800 | -0.11604 | 0.11604 | 0.30905 | -1.1611 | 0.26542 | 0.47881 | -5.603  | 1.05E+08 |
| ZC3H13       | -0.62826 | 0.62826 | 3.5398  | -1.161  | 0.26546 | 0.47882 | -5.6031 | 23091    |
| ACOT2        | -0.85172 | 0.85172 | 2.6783  | -1.1608 | 0.26553 | 0.47885 | -5.6033 | 10965    |
| ZDHHC1       | -0.68301 | 0.68301 | 3.0752  | -1.1608 | 0.26554 | 0.47885 | -5.6033 | 29800    |
| TNFSF10      | 2.7312   | 2.7312  | 10.259  | 1.1606  | 0.26559 | 0.47885 | -5.6034 | 8743     |
| COL5A1-AS1   | 0.30672  | 0.30672 | 0.32237 | 1.1606  | 0.2656  | 0.47885 | -5.6035 | 414316   |
| IDI2         | 0.1866   | 0.1866  | 0.70478 | 1.1605  | 0.26565 | 0.47885 | -5.6036 | 91734    |
| RRN3P1       | -0.21462 | 0.21462 | 0.59088 | -1.1605 | 0.26566 | 0.47885 | -5.6036 | 730092   |
| GBA          | 8.1282   | 8.1282  | 15.206  | 1.1604  | 0.26568 | 0.47885 | -5.6037 | 2629     |
| RDH10-AS1    | -0.10038 | 0.10038 | 0.23603 | -1.1601 | 0.26579 | 0.47895 | -5.604  | 1.02E+08 |
| TBC1D3C      | -0.47729 | 0.47729 | 1.2729  | -1.1601 | 0.26581 | 0.47895 | -5.604  | 414060   |
| RBMXL1       | -0.3328  | 0.3328  | 2.4842  | -1.16   | 0.26583 | 0.47895 | -5.6041 | 494115   |
| GEMIN5       | -0.53808 | 0.53808 | 2.6076  | -1.1598 | 0.2659  | 0.47895 | -5.6043 | 25929    |
| BAK1         | 2.9781   | 2.9781  | 8.5868  | 1.1598  | 0.26591 | 0.47895 | -5.6043 | 578      |
| COMMD2       | 0.70469  | 0.70469 | 3.2208  | 1.1598  | 0.26592 | 0.47895 | -5.6043 | 51122    |
| SNX19        | -0.84256 | 0.84256 | 7.178   | -1.1598 | 0.26593 | 0.47895 | -5.6044 | 399979   |
| ITPKC        | 3.9886   | 3.9886  | 12.287  | 1.1596  | 0.26598 | 0.479   | -5.6045 | 80271    |
| GADD45B      | 4.2513   | 4.2513  | 12.583  | 1.1594  | 0.26606 | 0.47901 | -5.6047 | 4616     |

|           |          |          |          |         |         |         |         |          |
|-----------|----------|----------|----------|---------|---------|---------|---------|----------|
| RPS3A     | 65.476   | 65.476   | 208.36   | 1.1594  | 0.26606 | 0.47901 | -5.6047 | 6189     |
| E4F1      | -0.86075 | 0.86075  | 3.836    | -1.1594 | 0.26608 | 0.47901 | -5.6048 | 1877     |
| RNF40     | -1.3095  | 1.3095   | 6.3157   | -1.1593 | 0.2661  | 0.47901 | -5.6048 | 9810     |
| PDIK1L    | -0.24594 | 0.24594  | 1.3692   | -1.1592 | 0.26614 | 0.47902 | -5.6049 | 149420   |
| HOXD8     | 0.25576  | 0.25576  | 0.77003  | 1.1589  | 0.26625 | 0.47918 | -5.6053 | 3234     |
| MANEA     | 0.29874  | 0.29874  | 1.2302   | 1.1587  | 0.26634 | 0.47928 | -5.6055 | 79694    |
| LINC01535 | -0.08121 | 0.081205 | 0.12069  | -1.1586 | 0.26638 | 0.4793  | -5.6056 | 1.02E+08 |
| INTS2     | -0.24944 | 0.24944  | 1.6773   | -1.1584 | 0.26647 | 0.47941 | -5.6059 | 57508    |
| VKORC1    | 8.4703   | 8.4703   | 22.353   | 1.1583  | 0.2665  | 0.47941 | -5.6059 | 79001    |
| PRKCQ     | 0.10193  | 0.10193  | 0.34989  | 1.1582  | 0.26655 | 0.47944 | -5.6061 | 5588     |
| RC3H1     | -0.61045 | 0.61045  | 5.1399   | -1.1581 | 0.26657 | 0.47944 | -5.6061 | 149041   |
| FAM224B   | -0.07894 | 0.078935 | 0.082677 | -1.1579 | 0.26667 | 0.4795  | -5.6064 | 401629   |
| MCEMP1    | 0.49822  | 0.49822  | 0.53017  | 1.1579  | 0.26668 | 0.4795  | -5.6064 | 199675   |
| NR1D2     | 1.3153   | 1.3153   | 5.389    | 1.1579  | 0.26669 | 0.4795  | -5.6065 | 9975     |
| EIF2AK2   | -1.6559  | 1.6559   | 4.1279   | -1.1577 | 0.26676 | 0.47957 | -5.6067 | 5610     |
| MED27     | 0.55478  | 0.55478  | 3.7444   | 1.1575  | 0.26681 | 0.47957 | -5.6068 | 9442     |
| SCGB3A1   | -0.07686 | 0.076859 | 0.067163 | -1.1575 | 0.26681 | 0.47957 | -5.6068 | 92304    |
| FAM214A   | 1.5253   | 1.5253   | 5.1785   | 1.1572  | 0.26692 | 0.47969 | -5.6071 | 56204    |
| TP53I13   | 1.6704   | 1.6704   | 5.6094   | 1.1571  | 0.26698 | 0.47969 | -5.6073 | 90313    |
| SRGAP2B   | -0.54388 | 0.54388  | 2.4403   | -1.1571 | 0.26699 | 0.47969 | -5.6073 | 647135   |
| WASF3     | -0.35642 | 0.35642  | 1.537    | -1.1571 | 0.26699 | 0.47969 | -5.6073 | 10810    |
| PPARG     | -0.22023 | 0.22023  | 0.47105  | -1.1567 | 0.26716 | 0.47993 | -5.6078 | 5468     |
| KCTD20    | 1.439    | 1.439    | 9.8199   | 1.1565  | 0.26723 | 0.48001 | -5.608  | 222658   |
| TUBA1A    | 7.6069   | 7.6069   | 25.934   | 1.1564  | 0.26728 | 0.48004 | -5.6081 | 7846     |
| WDR74     | -1.4965  | 1.4965   | 6.5127   | -1.1563 | 0.2673  | 0.48004 | -5.6082 | 54663    |
| PDS5A     | 1.5299   | 1.5299   | 9.3438   | 1.156   | 0.2674  | 0.48017 | -5.6084 | 23244    |



|              |          |          |          |         |         |         |         |          |
|--------------|----------|----------|----------|---------|---------|---------|---------|----------|
| RPS29        | 5.101    | 5.101    | 15.545   | 1.1557  | 0.26755 | 0.48038 | -5.6088 | 6235     |
| PECR         | -0.17453 | 0.17453  | 0.6561   | -1.1555 | 0.26762 | 0.48043 | -5.609  | 55825    |
| UPF1         | -2.1984  | 2.1984   | 9.159    | -1.1554 | 0.26766 | 0.48043 | -5.6091 | 5976     |
| BACH1-IT2    | -0.29863 | 0.29863  | 0.97559  | -1.1554 | 0.26766 | 0.48043 | -5.6091 | 1.01E+08 |
| TRIP13       | 0.51848  | 0.51848  | 1.031    | 1.1548  | 0.2679  | 0.48082 | -5.6098 | 9319     |
| SLC22A17     | -0.66586 | 0.66586  | 2.0225   | -1.1545 | 0.26802 | 0.48098 | -5.6101 | 51310    |
| LOC101927770 | -0.14497 | 0.14497  | 0.51483  | -1.1544 | 0.26806 | 0.48099 | -5.6102 | 1.02E+08 |
| PLA2R1       | -1.4987  | 1.4987   | 7.0016   | -1.1542 | 0.26812 | 0.48104 | -5.6104 | 22925    |
| FBLN7        | -0.68937 | 0.68937  | 1.911    | -1.1541 | 0.26817 | 0.4811  | -5.6105 | 129804   |
| ANKRD36BP2   | 0.1942   | 0.1942   | 0.51778  | 1.1539  | 0.26823 | 0.48112 | -5.6107 | 645784   |
| WARS2-IT1    | -0.12302 | 0.12302  | 0.25404  | -1.1539 | 0.26826 | 0.48112 | -5.6108 | 1.04E+08 |
| RPL3         | -121.51  | 121.51   | 618.25   | -1.1538 | 0.26827 | 0.48112 | -5.6108 | 6122     |
| RPL36A       | 16.274   | 16.274   | 42.996   | 1.1537  | 0.26834 | 0.48118 | -5.611  | 6173     |
| RAPH1        | -0.83303 | 0.83303  | 5.6382   | -1.1535 | 0.26842 | 0.4812  | -5.6112 | 65059    |
| MRPL54       | 3.9284   | 3.9284   | 12.589   | 1.1535  | 0.26842 | 0.4812  | -5.6112 | 116541   |
| FKTN         | -0.23641 | 0.23641  | 1.2607   | -1.1533 | 0.26849 | 0.4812  | -5.6114 | 2218     |
| CCDC43       | 0.72092  | 0.72092  | 3.181    | 1.1533  | 0.2685  | 0.4812  | -5.6114 | 124808   |
| TBC1D2       | 2.4688   | 2.4688   | 8.5549   | 1.1532  | 0.26853 | 0.4812  | -5.6115 | 55357    |
| NAV1         | 1.6787   | 1.6787   | 7.4706   | 1.1531  | 0.26857 | 0.4812  | -5.6116 | 89796    |
| DDX43        | 0.16813  | 0.16813  | 0.41956  | 1.1531  | 0.26858 | 0.4812  | -5.6117 | 55510    |
| LOC105371038 | -0.15268 | 0.15268  | 0.2723   | -1.153  | 0.2686  | 0.4812  | -5.6117 | 1.05E+08 |
| LINC02586    | -0.07858 | 0.078581 | 0.078058 | -1.153  | 0.2686  | 0.4812  | -5.6117 | 1.01E+08 |
| ANAPC1       | -0.60683 | 0.60683  | 3.6012   | -1.1529 | 0.26865 | 0.48123 | -5.6118 | 64682    |
| SNORA29      | -0.09176 | 0.091758 | 0.073623 | -1.1526 | 0.26875 | 0.48136 | -5.6121 | 677812   |
| INPP4B       | 0.26744  | 0.26744  | 1.1908   | 1.1525  | 0.26879 | 0.48139 | -5.6122 | 8821     |
| LOC101929709 | -0.3779  | 0.3779   | 1.4335   | -1.1519 | 0.26904 | 0.48177 | -5.6129 | 1.02E+08 |

|              |          |          |          |         |         |         |         |          |
|--------------|----------|----------|----------|---------|---------|---------|---------|----------|
| GJB3         | 5.5217   | 5.5217   | 17.968   | 1.1516  | 0.26917 | 0.48196 | -5.6133 | 2707     |
| HOMEZ        | -0.41095 | 0.41095  | 1.8671   | -1.1514 | 0.26923 | 0.48201 | -5.6134 | 57594    |
| MYO10        | -0.88727 | 0.88727  | 4.8246   | -1.1513 | 0.26928 | 0.48205 | -5.6136 | 4651     |
| IER5L        | 1.7019   | 1.7019   | 4.4152   | 1.1511  | 0.26934 | 0.48211 | -5.6137 | 389792   |
| RHOBTB2      | -0.76179 | 0.76179  | 1.7441   | -1.1507 | 0.26952 | 0.48238 | -5.6142 | 23221    |
| TONSL        | -0.34854 | 0.34854  | 1.0015   | -1.1505 | 0.26958 | 0.48244 | -5.6144 | 4796     |
| UTP20        | -0.58924 | 0.58924  | 2.6919   | -1.1501 | 0.26975 | 0.48267 | -5.6149 | 27340    |
| CETN3        | 0.54991  | 0.54991  | 1.9026   | 1.15    | 0.26981 | 0.48267 | -5.615  | 1070     |
| ZFAT         | -0.13528 | 0.13528  | 1.0718   | -1.1499 | 0.26982 | 0.48267 | -5.615  | 57623    |
| RNASE4       | -1.0343  | 1.0343   | 3.7007   | -1.1499 | 0.26982 | 0.48267 | -5.615  | 6038     |
| NUDT11       | 0.10847  | 0.10847  | 0.23442  | 1.1499  | 0.26985 | 0.48267 | -5.6151 | 55190    |
| HCN2         | 0.14672  | 0.14672  | 0.42397  | 1.1497  | 0.26993 | 0.48276 | -5.6153 | 610      |
| SLC17A5      | 0.94213  | 0.94213  | 2.9142   | 1.1494  | 0.27003 | 0.48288 | -5.6156 | 26503    |
| EMP1         | 20.213   | 20.213   | 60.083   | 1.1493  | 0.27009 | 0.48294 | -5.6158 | 2012     |
| IKZF3        | -0.14369 | 0.14369  | 0.37697  | -1.1491 | 0.27016 | 0.48294 | -5.616  | 22806    |
| LRP2BP       | -0.14856 | 0.14856  | 0.41111  | -1.149  | 0.27018 | 0.48294 | -5.616  | 55805    |
| CERNA2       | 0.86079  | 0.86079  | 1.6112   | 1.149   | 0.27019 | 0.48294 | -5.6161 | 642934   |
| RCN3         | 4.6437   | 4.6437   | 9.1308   | 1.1489  | 0.27023 | 0.48294 | -5.6162 | 57333    |
| DDX11L10     | -0.08048 | 0.080476 | 0.060281 | -1.1489 | 0.27023 | 0.48294 | -5.6162 | 1E+08    |
| ORC6         | 0.28597  | 0.28597  | 0.84545  | 1.1488  | 0.27029 | 0.48294 | -5.6163 | 23594    |
| UBE2E3       | 2.1996   | 2.1996   | 11.322   | 1.1487  | 0.27031 | 0.48294 | -5.6164 | 10477    |
| SNUPN        | -0.6598  | 0.6598   | 2.5696   | -1.1486 | 0.27037 | 0.48294 | -5.6165 | 10073    |
| TGIF1        | 0.93767  | 0.93767  | 4.4182   | 1.1485  | 0.2704  | 0.48294 | -5.6166 | 7050     |
| LOC101928126 | -0.08188 | 0.081884 | 0.15824  | -1.1485 | 0.27041 | 0.48294 | -5.6166 | 1.02E+08 |
| MTX3         | -0.33219 | 0.33219  | 2.1283   | -1.1484 | 0.27042 | 0.48294 | -5.6167 | 345778   |
| PGD          | 4.8031   | 4.8031   | 16.562   | 1.1484  | 0.27044 | 0.48294 | -5.6167 | 5226     |

|              |          |          |         |         |         |         |         |          |
|--------------|----------|----------|---------|---------|---------|---------|---------|----------|
| SMNDC1       | 0.5901   | 0.5901   | 4.1281  | 1.1483  | 0.27046 | 0.48294 | -5.6168 | 10285    |
| FUT8-AS1     | -0.0756  | 0.075602 | 0.1152  | -1.148  | 0.27061 | 0.4831  | -5.6172 | 645431   |
| TBC1D9B      | -3.1757  | 3.1757   | 16.204  | -1.148  | 0.27061 | 0.4831  | -5.6172 | 23061    |
| CSPP1        | -0.25181 | 0.25181  | 1.4826  | -1.1476 | 0.27076 | 0.48329 | -5.6176 | 79848    |
| HEYL         | 0.71989  | 0.71989  | 1.7354  | 1.1475  | 0.27077 | 0.48329 | -5.6176 | 26508    |
| MYOCD        | -0.27817 | 0.27817  | 0.38546 | -1.1474 | 0.27084 | 0.48334 | -5.6178 | 93649    |
| MEG8         | 0.26642  | 0.26642  | 0.43205 | 1.1473  | 0.27087 | 0.48334 | -5.6179 | 79104    |
| VPS26C       | 0.96462  | 0.96462  | 5.0126  | 1.1472  | 0.2709  | 0.48334 | -5.618  | 10311    |
| HOXB3        | -0.15945 | 0.15945  | 0.36436 | -1.1472 | 0.27093 | 0.48334 | -5.6181 | 3213     |
| GRINA        | -7.8867  | 7.8867   | 22.058  | -1.1471 | 0.27094 | 0.48334 | -5.6181 | 2907     |
| ARSA         | 0.93413  | 0.93413  | 4.1684  | 1.1469  | 0.27102 | 0.4834  | -5.6183 | 410      |
| TMEM161B-AS1 | -0.1046  | 0.1046   | 0.28438 | -1.1469 | 0.27105 | 0.4834  | -5.6184 | 1.01E+08 |
| CCDC142      | -0.42209 | 0.42209  | 1.305   | -1.1468 | 0.27106 | 0.4834  | -5.6184 | 84865    |
| LILRA2       | 0.22322  | 0.22322  | 0.31965 | 1.1467  | 0.27111 | 0.48342 | -5.6185 | 11027    |
| SMIM25       | 0.45465  | 0.45465  | 0.69921 | 1.1466  | 0.27115 | 0.48342 | -5.6187 | 1.01E+08 |
| TMEM64       | -0.56882 | 0.56882  | 2.9282  | -1.1466 | 0.27116 | 0.48342 | -5.6187 | 169200   |
| R3HDM4       | 6.4883   | 6.4883   | 19.891  | 1.1464  | 0.27125 | 0.48348 | -5.6189 | 91300    |
| TCTEX1D4     | 0.53704  | 0.53704  | 1.1928  | 1.1464  | 0.27125 | 0.48348 | -5.6189 | 343521   |
| TBCK         | -0.33766 | 0.33766  | 1.9254  | -1.1462 | 0.27132 | 0.48348 | -5.6191 | 93627    |
| APOLD1       | 0.84044  | 0.84044  | 2.4948  | 1.1461  | 0.27133 | 0.48348 | -5.6191 | 81575    |
| NUMB         | 1.649    | 1.649    | 9.6739  | 1.1461  | 0.27133 | 0.48348 | -5.6191 | 8650     |
| ZNF613       | 0.25774  | 0.25774  | 0.86088 | 1.146   | 0.27139 | 0.48352 | -5.6193 | 79898    |
| MPDZ         | -0.47468 | 0.47468  | 1.7766  | -1.1457 | 0.27149 | 0.48365 | -5.6196 | 8777     |
| CAMKK2       | -0.87504 | 0.87504  | 4.529   | -1.1457 | 0.27152 | 0.48365 | -5.6197 | 10645    |
| C6orf120     | 0.77467  | 0.77467  | 3.5538  | 1.1456  | 0.27155 | 0.48365 | -5.6197 | 387263   |
| GBP2         | -2.5626  | 2.5626   | 8.4545  | -1.1455 | 0.2716  | 0.48369 | -5.6199 | 2634     |

|           |          |          |         |         |         |         |         |          |
|-----------|----------|----------|---------|---------|---------|---------|---------|----------|
| FAM219A   | 0.68002  | 0.68002  | 4.9314  | 1.1454  | 0.27163 | 0.48369 | -5.6199 | 203259   |
| YBX1      | 12.512   | 12.512   | 47.788  | 1.1452  | 0.27171 | 0.48377 | -5.6202 | 4904     |
| ACKR4     | 1.3725   | 1.3725   | 3.2327  | 1.1451  | 0.27176 | 0.48377 | -5.6203 | 51554    |
| PPAN      | -1.0714  | 1.0714   | 4.455   | -1.145  | 0.27178 | 0.48377 | -5.6203 | 56342    |
| TLL11     | -0.2016  | 0.2016   | 0.90083 | -1.145  | 0.27179 | 0.48377 | -5.6204 | 158135   |
| PAG1      | 0.38997  | 0.38997  | 2.059   | 1.1448  | 0.27187 | 0.48387 | -5.6206 | 55824    |
| MINPP1    | 0.71682  | 0.71682  | 1.8865  | 1.1447  | 0.27193 | 0.4839  | -5.6207 | 9562     |
| MSRB3     | 1.456    | 1.456    | 3.8259  | 1.1446  | 0.27195 | 0.4839  | -5.6208 | 253827   |
| SNORA93   | -0.2551  | 0.2551   | 0.2759  | -1.1445 | 0.27198 | 0.4839  | -5.6209 | 1.07E+08 |
| FSCN1     | 30.451   | 30.451   | 66.925  | 1.1441  | 0.27214 | 0.48414 | -5.6213 | 6624     |
| GALE      | 1.1253   | 1.1253   | 3.1373  | 1.144   | 0.27218 | 0.48414 | -5.6214 | 2582     |
| C1orf198  | 2.2331   | 2.2331   | 12.133  | 1.144   | 0.27219 | 0.48414 | -5.6215 | 84886    |
| POLE2     | 0.20835  | 0.20835  | 0.83586 | 1.1438  | 0.27228 | 0.48424 | -5.6217 | 5427     |
| CD3G      | -0.1365  | 0.1365   | 0.39688 | -1.1437 | 0.27232 | 0.48426 | -5.6218 | 917      |
| TWINK     | -0.3196  | 0.3196   | 1.3315  | -1.1434 | 0.27242 | 0.48435 | -5.6221 | 56652    |
| LINC02202 | -0.11018 | 0.11018  | 0.24566 | -1.1434 | 0.27243 | 0.48435 | -5.6221 | 1.02E+08 |
| IRS2      | -0.76286 | 0.76286  | 3.9256  | -1.1431 | 0.27254 | 0.48449 | -5.6224 | 8660     |
| C1RL      | -2.4325  | 2.4325   | 5.5039  | -1.143  | 0.27258 | 0.48451 | -5.6225 | 51279    |
| PARM1     | -1.0858  | 1.0858   | 2.9434  | -1.1429 | 0.27263 | 0.48452 | -5.6226 | 25849    |
| LIMS1-AS1 | -0.08581 | 0.085813 | 0.21943 | -1.1428 | 0.27266 | 0.48452 | -5.6227 | 1.06E+08 |
| CTHRC1    | 9.6585   | 9.6585   | 14.37   | 1.1428  | 0.27266 | 0.48452 | -5.6227 | 115908   |
| HMBS      | 1.1079   | 1.1079   | 3.1074  | 1.1425  | 0.27281 | 0.4846  | -5.6231 | 3145     |
| A1BG-AS1  | 0.15667  | 0.15667  | 0.36888 | 1.1424  | 0.27283 | 0.4846  | -5.6232 | 503538   |
| TROAP     | 0.34133  | 0.34133  | 0.86218 | 1.1424  | 0.27283 | 0.4846  | -5.6232 | 10024    |
| MZB1      | -0.26064 | 0.26064  | 0.33216 | -1.1424 | 0.27285 | 0.4846  | -5.6232 | 51237    |
| DNASE2    | -1.2583  | 1.2583   | 5.3365  | -1.1423 | 0.27286 | 0.4846  | -5.6232 | 1777     |

|             |          |          |         |         |         |         |         |          |
|-------------|----------|----------|---------|---------|---------|---------|---------|----------|
| SNORA46     | -0.12684 | 0.12684  | 0.16539 | -1.1419 | 0.27304 | 0.48487 | -5.6237 | 677827   |
| WSCD1       | -0.20935 | 0.20935  | 0.33901 | -1.1417 | 0.2731  | 0.48491 | -5.6239 | 23302    |
| FGF5        | -0.15053 | 0.15053  | 0.42113 | -1.1417 | 0.27311 | 0.48491 | -5.6239 | 2250     |
| LINC01181   | 0.95429  | 0.95429  | 0.84364 | 1.1416  | 0.27314 | 0.48491 | -5.624  | 379034   |
| APOBEC3D    | -0.19946 | 0.19946  | 0.463   | -1.1411 | 0.27335 | 0.48523 | -5.6246 | 140564   |
| OR4F21      | -0.13407 | 0.13407  | 0.15296 | -1.141  | 0.2734  | 0.48523 | -5.6247 | 441308   |
| LSP1        | -2.2768  | 2.2768   | 7.3584  | -1.141  | 0.27341 | 0.48523 | -5.6247 | 4046     |
| LRRC1       | -0.80021 | 0.80021  | 4.3458  | -1.1406 | 0.27357 | 0.48541 | -5.6251 | 55227    |
| HYLS1       | 0.23633  | 0.23633  | 0.75697 | 1.1406  | 0.27357 | 0.48541 | -5.6251 | 219844   |
| MED24       | -1.2737  | 1.2737   | 6.0201  | -1.14   | 0.27378 | 0.48574 | -5.6257 | 9862     |
| ZNF451-AS1  | -0.09956 | 0.099562 | 0.25696 | -1.1396 | 0.27394 | 0.48596 | -5.6261 | 1.02E+08 |
| CAST        | 7.4359   | 7.4359   | 35.616  | 1.1396  | 0.27397 | 0.48596 | -5.6262 | 831      |
| CRISPLD1    | -0.2847  | 0.2847   | 0.76177 | -1.1395 | 0.274   | 0.48596 | -5.6263 | 83690    |
| SLCO4A1-AS1 | -0.20935 | 0.20935  | 0.62582 | -1.1384 | 0.27443 | 0.4866  | -5.6274 | 1E+08    |
| C3orf18     | -0.18885 | 0.18885  | 0.50748 | -1.1384 | 0.27444 | 0.4866  | -5.6275 | 51161    |
| ANPEP       | 4.5977   | 4.5977   | 11.233  | 1.1384  | 0.27444 | 0.4866  | -5.6275 | 290      |
| EXOSC8      | 1.0023   | 1.0023   | 3.9404  | 1.1383  | 0.27449 | 0.48663 | -5.6276 | 11340    |
| EXT2        | 1.6848   | 1.6848   | 9.5688  | 1.1382  | 0.27451 | 0.48663 | -5.6277 | 2132     |
| PBLD        | -0.1849  | 0.1849   | 0.65438 | -1.1381 | 0.27456 | 0.48666 | -5.6278 | 64081    |
| DHX16       | -0.11157 | 0.11157  | 0.52043 | -1.1379 | 0.27465 | 0.48673 | -5.628  | 8449     |
| FBXL16      | -1.0008  | 1.0008   | 2.7358  | -1.1379 | 0.27466 | 0.48673 | -5.628  | 146330   |
| NT5DC3      | 0.21328  | 0.21328  | 0.83787 | 1.1377  | 0.27473 | 0.48681 | -5.6282 | 51559    |
| ACLY        | 4.3169   | 4.3169   | 16.596  | 1.1369  | 0.27507 | 0.48727 | -5.6291 | 47       |
| NELFA       | -0.86885 | 0.86885  | 5.7605  | -1.1368 | 0.27508 | 0.48727 | -5.6292 | 7469     |
| FKBPL       | 0.41638  | 0.41638  | 0.7523  | 1.1368  | 0.27508 | 0.48727 | -5.6292 | 63943    |
| RPUSD2      | -0.41803 | 0.41803  | 1.8254  | -1.1368 | 0.27511 | 0.48727 | -5.6292 | 27079    |

|             |          |          |         |         |         |         |         |          |
|-------------|----------|----------|---------|---------|---------|---------|---------|----------|
| ENOX2       | 0.4252   | 0.4252   | 2.043   | 1.1366  | 0.27515 | 0.4873  | -5.6294 | 10495    |
| MSRB2       | 0.96441  | 0.96441  | 2.7814  | 1.1365  | 0.27521 | 0.48735 | -5.6295 | 22921    |
| MYLK4       | -0.08422 | 0.084224 | 0.24526 | -1.1362 | 0.27533 | 0.48742 | -5.6298 | 340156   |
| ADAMTS9-AS1 | 0.17965  | 0.17965  | 0.2494  | 1.1362  | 0.27533 | 0.48742 | -5.6298 | 1.02E+08 |
| MRPL3       | 3.8685   | 3.8685   | 14.204  | 1.1362  | 0.27534 | 0.48742 | -5.6299 | 11222    |
| FGF7        | 3.0334   | 3.0334   | 4.4274  | 1.1361  | 0.27539 | 0.48746 | -5.63   | 2252     |
| EFNB2       | 1.7407   | 1.7407   | 7.1427  | 1.1359  | 0.27546 | 0.48754 | -5.6302 | 1948     |
| CSK         | 3.0289   | 3.0289   | 11.65   | 1.1357  | 0.27552 | 0.4876  | -5.6303 | 1445     |
| SUSD5       | -0.25265 | 0.25265  | 0.67549 | -1.1357 | 0.27555 | 0.4876  | -5.6304 | 26032    |
| GLYCTK-AS1  | -0.10008 | 0.10008  | 0.33004 | -1.1355 | 0.2756  | 0.48762 | -5.6305 | 1.01E+08 |
| MCAM        | 10.318   | 10.318   | 26.055  | 1.1353  | 0.2757  | 0.48775 | -5.6308 | 4162     |
| FASN        | -7.4563  | 7.4563   | 24.69   | -1.1351 | 0.27578 | 0.48785 | -5.631  | 2194     |
| ATG16L2     | -2.5151  | 2.5151   | 6.2304  | -1.135  | 0.27581 | 0.48785 | -5.6311 | 89849    |
| ALOX5AP     | 1.1647   | 1.1647   | 2.1861  | 1.1347  | 0.27593 | 0.48801 | -5.6314 | 241      |
| PLTP        | -24.843  | 24.843   | 31.199  | -1.1346 | 0.27597 | 0.48804 | -5.6315 | 5360     |
| RPL23       | 137.89   | 137.89   | 390.26  | 1.1345  | 0.27603 | 0.48808 | -5.6317 | 9349     |
| BAG3        | 6.8353   | 6.8353   | 22.552  | 1.1338  | 0.27629 | 0.48849 | -5.6324 | 9531     |
| LRCH3       | -0.35667 | 0.35667  | 2.185   | -1.1337 | 0.27633 | 0.48851 | -5.6325 | 84859    |
| IZUMO4      | 0.28317  | 0.28317  | 0.71961 | 1.1335  | 0.27641 | 0.48857 | -5.6327 | 113177   |
| SLC46A3     | -0.31367 | 0.31367  | 0.96421 | -1.1335 | 0.27644 | 0.48857 | -5.6328 | 283537   |
| LAMTOR4     | -5.4531  | 5.4531   | 19.351  | -1.1334 | 0.27645 | 0.48857 | -5.6328 | 389541   |
| ZNF2        | -0.10482 | 0.10482  | 0.75761 | -1.1331 | 0.27661 | 0.4888  | -5.6332 | 7549     |
| AQP5        | 41.803   | 41.803   | 47.572  | 1.1329  | 0.27666 | 0.48883 | -5.6333 | 362      |
| TUBGCP2     | 0.84433  | 0.84433  | 5.7264  | 1.1326  | 0.27678 | 0.48899 | -5.6336 | 10844    |
| SMURF1      | 1.0429   | 1.0429   | 7.1327  | 1.1324  | 0.27688 | 0.48913 | -5.6339 | 57154    |
| SEC14L1     | 1.0556   | 1.0556   | 6.1886  | 1.1321  | 0.277   | 0.48929 | -5.6342 | 6397     |

|           |          |          |         |         |         |         |         |          |
|-----------|----------|----------|---------|---------|---------|---------|---------|----------|
| TRAPPC2   | 0.26446  | 0.26446  | 1.699   | 1.132   | 0.27704 | 0.4893  | -5.6343 | 6399     |
| NBPF7     | -0.13175 | 0.13175  | 0.41871 | -1.1319 | 0.27707 | 0.4893  | -5.6344 | 343505   |
| DDX58     | -1.3953  | 1.3953   | 3.7927  | -1.1318 | 0.27712 | 0.4893  | -5.6346 | 23586    |
| VLDLR     | 0.91717  | 0.91717  | 2.8833  | 1.1318  | 0.27713 | 0.4893  | -5.6346 | 7436     |
| SERINC1   | 5.1604   | 5.1604   | 23.235  | 1.1316  | 0.27721 | 0.4894  | -5.6348 | 57515    |
| ZNF513    | -0.78232 | 0.78232  | 3.3446  | -1.1314 | 0.27728 | 0.48945 | -5.635  | 130557   |
| GALNT11   | -0.92085 | 0.92085  | 6.3496  | -1.1314 | 0.27729 | 0.48945 | -5.635  | 63917    |
| STAU1     | 2.6049   | 2.6049   | 13.583  | 1.1312  | 0.27738 | 0.48954 | -5.6352 | 6780     |
| DEPP1     | -12.213  | 12.213   | 13.623  | -1.131  | 0.27743 | 0.48958 | -5.6354 | 11067    |
| NAA16     | -0.23807 | 0.23807  | 1.5115  | -1.1306 | 0.27761 | 0.48985 | -5.6358 | 79612    |
| APBB2     | -0.53666 | 0.53666  | 3.3181  | -1.1304 | 0.27769 | 0.48994 | -5.6361 | 323      |
| HPRT1     | 1.3504   | 1.3504   | 4.5472  | 1.1303  | 0.27774 | 0.48996 | -5.6362 | 3251     |
| ERCC2     | -0.50314 | 0.50314  | 2.2895  | -1.1302 | 0.27776 | 0.48996 | -5.6362 | 2068     |
| FCGR1A    | 0.93889  | 0.93889  | 1.1859  | 1.13    | 0.27784 | 0.49    | -5.6364 | 2209     |
| ZNF131    | 0.33227  | 0.33227  | 2.7692  | 1.13    | 0.27784 | 0.49    | -5.6364 | 7690     |
| GIMAP6    | -1.1402  | 1.1402   | 3.5734  | -1.1295 | 0.27806 | 0.49033 | -5.637  | 474344   |
| NDUFA3    | 5.9343   | 5.9343   | 21.934  | 1.1294  | 0.27809 | 0.49034 | -5.6371 | 4696     |
| NUDT3     | -1.6768  | 1.6768   | 9.3971  | -1.1293 | 0.27814 | 0.49037 | -5.6372 | 11165    |
| RSAD2     | -1.5353  | 1.5353   | 1.3016  | -1.1291 | 0.27819 | 0.49037 | -5.6374 | 91543    |
| NUCB1-AS1 | -0.09422 | 0.094215 | 0.16297 | -1.1291 | 0.27822 | 0.49037 | -5.6374 | 1.01E+08 |
| CHMP4B    | 5.5362   | 5.5362   | 25.164  | 1.129   | 0.27824 | 0.49037 | -5.6375 | 128866   |
| CELF1     | -0.88939 | 0.88939  | 7.0589  | -1.129  | 0.27825 | 0.49037 | -5.6375 | 10658    |
| KCTD4     | 1.7375   | 1.7375   | 1.87    | 1.1283  | 0.27854 | 0.49083 | -5.6383 | 386618   |
| SLC35C1   | 0.78889  | 0.78889  | 3.0546  | 1.1276  | 0.27884 | 0.4913  | -5.6391 | 55343    |
| PTPN3     | -1.901   | 1.901    | 5.4997  | -1.1275 | 0.27887 | 0.49131 | -5.6391 | 5774     |
| INKA2     | -0.46745 | 0.46745  | 1.8307  | -1.1271 | 0.27903 | 0.49152 | -5.6396 | 55924    |

|              |          |          |         |         |         |         |         |          |
|--------------|----------|----------|---------|---------|---------|---------|---------|----------|
| TIGD5        | -0.74925 | 0.74925  | 2.5423  | -1.127  | 0.27905 | 0.49152 | -5.6396 | 84948    |
| RTL8B        | -0.68349 | 0.68349  | 4.1924  | -1.1269 | 0.2791  | 0.49155 | -5.6397 | 441518   |
| SDSL         | 0.39874  | 0.39874  | 0.56148 | 1.1267  | 0.27919 | 0.49166 | -5.64   | 113675   |
| SLC10A3      | 2.8503   | 2.8503   | 9.5127  | 1.1266  | 0.27923 | 0.49167 | -5.6401 | 8273     |
| VIM          | 106.14   | 106.14   | 247.58  | 1.1265  | 0.27927 | 0.4917  | -5.6402 | 7431     |
| AKAP12       | -0.67682 | 0.67682  | 1.9129  | -1.1264 | 0.27933 | 0.49171 | -5.6403 | 9590     |
| ABCD1        | -0.46363 | 0.46363  | 1.163   | -1.1264 | 0.27933 | 0.49171 | -5.6403 | 215      |
| STIM1        | 3.463    | 3.463    | 15.891  | 1.1263  | 0.27937 | 0.49172 | -5.6404 | 6786     |
| NIN          | 0.49717  | 0.49717  | 4.3237  | 1.126   | 0.27946 | 0.49182 | -5.6407 | 51199    |
| LOC100128770 | -0.60028 | 0.60028  | 1.2868  | -1.1259 | 0.27954 | 0.49182 | -5.6409 | 1E+08    |
| RHBDD1       | -0.27513 | 0.27513  | 2.4137  | -1.1258 | 0.27955 | 0.49182 | -5.6409 | 84236    |
| PDE4DIP      | -0.52647 | 0.52647  | 1.9772  | -1.1258 | 0.27958 | 0.49182 | -5.641  | 9659     |
| FALEC        | 0.30289  | 0.30289  | 0.50362 | 1.1257  | 0.27958 | 0.49182 | -5.641  | 1.01E+08 |
| EXOC3L2      | 0.56187  | 0.56187  | 1.3241  | 1.1257  | 0.2796  | 0.49182 | -5.641  | 90332    |
| ACOX2        | -0.27415 | 0.27415  | 0.57382 | -1.1253 | 0.27977 | 0.49201 | -5.6415 | 8309     |
| MUC1         | -2.3002  | 2.3002   | 2.2559  | -1.1252 | 0.27979 | 0.49201 | -5.6415 | 4582     |
| IL20RB       | -8.1855  | 8.1855   | 25.903  | -1.1252 | 0.2798  | 0.49201 | -5.6415 | 53833    |
| TIFA         | 1.3552   | 1.3552   | 2.8323  | 1.1249  | 0.27992 | 0.49212 | -5.6419 | 92610    |
| A1BG         | 0.508    | 0.508    | 0.87941 | 1.1249  | 0.27995 | 0.49212 | -5.6419 | 1        |
| PRRX1        | 7.8328   | 7.8328   | 17.831  | 1.1249  | 0.27995 | 0.49212 | -5.6419 | 5396     |
| FAM168A      | -0.73245 | 0.73245  | 4.2484  | -1.1248 | 0.27998 | 0.49213 | -5.642  | 23201    |
| CAPNS1       | 16.64    | 16.64    | 45.464  | 1.1245  | 0.2801  | 0.49222 | -5.6423 | 826      |
| RUNDC3B      | -0.08752 | 0.087523 | 0.23848 | -1.1244 | 0.28012 | 0.49222 | -5.6424 | 154661   |
| TK1          | 1.8995   | 1.8995   | 4.8172  | 1.1243  | 0.28017 | 0.49222 | -5.6425 | 7083     |
| CYP4F3       | 0.22475  | 0.22475  | 0.87197 | 1.1243  | 0.28017 | 0.49222 | -5.6425 | 4051     |
| CCDC51       | 1.3242   | 1.3242   | 3.6612  | 1.1243  | 0.28019 | 0.49222 | -5.6426 | 79714    |



|            |          |          |          |         |         |         |         |          |
|------------|----------|----------|----------|---------|---------|---------|---------|----------|
| STAT4      | 0.49895  | 0.49895  | 0.78818  | 1.1242  | 0.28021 | 0.49222 | -5.6426 | 6775     |
| EYA3       | 0.48352  | 0.48352  | 3.6187   | 1.1239  | 0.28034 | 0.49241 | -5.643  | 2140     |
| POLI       | -0.22142 | 0.22142  | 0.91206  | -1.1238 | 0.28039 | 0.49243 | -5.6431 | 11201    |
| RNF216-IT1 | -0.08235 | 0.082351 | 0.094401 | -1.1236 | 0.28047 | 0.49252 | -5.6433 | 1.01E+08 |
| ST6GALNAC2 | 2.5062   | 2.5062   | 10.248   | 1.1235  | 0.2805  | 0.49253 | -5.6434 | 10610    |
| CSPG4      | 1.5093   | 1.5093   | 5.6711   | 1.1234  | 0.28055 | 0.49256 | -5.6435 | 1464     |
| TSPAN6     | 0.39728  | 0.39728  | 1.4616   | 1.1233  | 0.28058 | 0.49257 | -5.6436 | 7105     |
| SSX2IP     | 0.24117  | 0.24117  | 0.95907  | 1.1231  | 0.28067 | 0.49268 | -5.6438 | 117178   |
| HSPA12B    | -0.89315 | 0.89315  | 2.2484   | -1.1228 | 0.28078 | 0.49282 | -5.6441 | 116835   |
| SLC16A1    | 4.05     | 4.05     | 9.2437   | 1.1227  | 0.28084 | 0.49286 | -5.6442 | 6566     |
| CEP131     | -0.42366 | 0.42366  | 1.3627   | -1.1225 | 0.28091 | 0.49294 | -5.6444 | 22994    |
| DNAJC14    | -0.74742 | 0.74742  | 4.9232   | -1.1223 | 0.28097 | 0.49301 | -5.6446 | 85406    |
| KHDC4      | -0.67576 | 0.67576  | 5.102    | -1.1222 | 0.28102 | 0.49304 | -5.6447 | 22889    |
| MEOX1      | 0.82228  | 0.82228  | 2.6774   | 1.1214  | 0.28135 | 0.49353 | -5.6456 | 4222     |
| FAM83C     | 6.5568   | 6.5568   | 18.763   | 1.1214  | 0.28136 | 0.49353 | -5.6456 | 128876   |
| LSM10      | 1.9088   | 1.9088   | 6.1265   | 1.1212  | 0.28146 | 0.4936  | -5.6458 | 84967    |
| SEC22A     | 0.41728  | 0.41728  | 2.116    | 1.121   | 0.28152 | 0.4936  | -5.646  | 26984    |
| RASGEF1A   | 0.13704  | 0.13704  | 0.44614  | 1.121   | 0.28153 | 0.4936  | -5.646  | 221002   |
| GPR89B     | -0.34474 | 0.34474  | 1.9372   | -1.121  | 0.28153 | 0.4936  | -5.646  | 51463    |
| HLA-DRA    | 7.7683   | 7.7683   | 16.879   | 1.121   | 0.28155 | 0.4936  | -5.6461 | 3122     |
| ROM1       | -0.23975 | 0.23975  | 0.63925  | -1.1207 | 0.28163 | 0.49369 | -5.6463 | 6094     |
| BRCA2      | 0.17047  | 0.17047  | 0.49507  | 1.1207  | 0.28166 | 0.49369 | -5.6464 | 675      |
| BIN1       | 0.77247  | 0.77247  | 2.5817   | 1.1205  | 0.28172 | 0.49373 | -5.6465 | 274      |
| RNU4ATAC   | -0.15585 | 0.15585  | 0.2391   | -1.1205 | 0.28174 | 0.49373 | -5.6466 | 1E+08    |
| PARP9      | -1.3232  | 1.3232   | 2.8931   | -1.1203 | 0.28181 | 0.4938  | -5.6468 | 83666    |
| ENOPH1     | 0.76481  | 0.76481  | 5.0925   | 1.1201  | 0.2819  | 0.49387 | -5.647  | 58478    |

|           |          |          |         |         |         |         |         |          |
|-----------|----------|----------|---------|---------|---------|---------|---------|----------|
| SIPA1     | 1.0049   | 1.0049   | 3.5331  | 1.1201  | 0.2819  | 0.49387 | -5.647  | 6494     |
| PLEK      | 1.8501   | 1.8501   | 3.6636  | 1.1199  | 0.28196 | 0.4939  | -5.6471 | 5341     |
| TMEM106A  | -0.33482 | 0.33482  | 1.1039  | -1.1198 | 0.28201 | 0.4939  | -5.6473 | 113277   |
| SNX12     | 1.7542   | 1.7542   | 10.643  | 1.1198  | 0.28204 | 0.4939  | -5.6474 | 29934    |
| ZDHHC2    | -0.25304 | 0.25304  | 0.7923  | -1.1197 | 0.28204 | 0.4939  | -5.6474 | 51201    |
| KLHL30    | -0.09985 | 0.099852 | 0.2119  | -1.1197 | 0.28208 | 0.49392 | -5.6475 | 377007   |
| TALAM1    | 110.04   | 110.04   | 538.7   | 1.1195  | 0.28213 | 0.49394 | -5.6476 | 1.09E+08 |
| BAHCC1    | -0.91939 | 0.91939  | 2.1704  | -1.1195 | 0.28215 | 0.49394 | -5.6476 | 57597    |
| ANKS6     | -0.42932 | 0.42932  | 1.9227  | -1.1194 | 0.28218 | 0.49394 | -5.6477 | 203286   |
| FUCA1     | -1.3835  | 1.3835   | 4.0267  | -1.1186 | 0.28252 | 0.49445 | -5.6486 | 2517     |
| FAM225A   | 0.14501  | 0.14501  | 0.2919  | 1.1186  | 0.28253 | 0.49445 | -5.6486 | 286333   |
| SLC16A6   | 0.47718  | 0.47718  | 1.5336  | 1.1184  | 0.2826  | 0.49452 | -5.6488 | 9120     |
| AKAP17A   | -0.69623 | 0.69623  | 2.7919  | -1.1183 | 0.28264 | 0.49455 | -5.6489 | 8227     |
| LINC02210 | 0.19124  | 0.19124  | 0.86697 | 1.1181  | 0.28271 | 0.49457 | -5.6491 | 147081   |
| TMEM87B   | 0.80347  | 0.80347  | 4.4011  | 1.1181  | 0.28272 | 0.49457 | -5.6491 | 84910    |
| NFATC2    | 0.69647  | 0.69647  | 2.2753  | 1.1179  | 0.28281 | 0.49465 | -5.6493 | 4773     |
| HCK       | 1.955    | 1.955    | 4.0747  | 1.1179  | 0.28282 | 0.49465 | -5.6493 | 3055     |
| TMEM80    | 0.79417  | 0.79417  | 3.6897  | 1.1177  | 0.28289 | 0.49471 | -5.6495 | 283232   |
| IFIT2     | -1.4781  | 1.4781   | 1.862   | -1.1176 | 0.28291 | 0.49471 | -5.6496 | 3433     |
| HOXD9     | -0.35881 | 0.35881  | 1.2438  | -1.1174 | 0.28302 | 0.49482 | -5.6499 | 3235     |
| MFF       | 1.2662   | 1.2662   | 6.5876  | 1.1173  | 0.28304 | 0.49482 | -5.6499 | 56947    |
| PHLDB2    | 1.2607   | 1.2607   | 5.2453  | 1.117   | 0.28316 | 0.49495 | -5.6502 | 90102    |
| BLM       | 0.17235  | 0.17235  | 0.38232 | 1.117   | 0.28317 | 0.49495 | -5.6502 | 641      |
| KIF17     | 0.11119  | 0.11119  | 0.26464 | 1.1169  | 0.28324 | 0.49502 | -5.6504 | 57576    |
| RSRP1     | -0.64053 | 0.64053  | 4.0684  | -1.1168 | 0.28327 | 0.49503 | -5.6505 | 57035    |
| DDIT4L    | -0.18459 | 0.18459  | 0.2962  | -1.1166 | 0.28334 | 0.49505 | -5.6507 | 115265   |

|              |          |          |         |         |         |         |         |          |
|--------------|----------|----------|---------|---------|---------|---------|---------|----------|
| TRMT11       | -0.17055 | 0.17055  | 0.86066 | -1.1166 | 0.28336 | 0.49505 | -5.6507 | 60487    |
| SQLE         | 5.0348   | 5.0348   | 17.182  | 1.1165  | 0.28338 | 0.49505 | -5.6508 | 6713     |
| DPEP2        | 0.17374  | 0.17374  | 0.36435 | 1.1164  | 0.28343 | 0.49505 | -5.6509 | 64174    |
| DLEU2L       | -0.11203 | 0.11203  | 0.32553 | -1.1163 | 0.28345 | 0.49505 | -5.651  | 79469    |
| ZNF566       | -0.14306 | 0.14306  | 0.59484 | -1.1162 | 0.28349 | 0.49505 | -5.6511 | 84924    |
| ITGA8        | -0.27404 | 0.27404  | 0.63919 | -1.1162 | 0.28351 | 0.49505 | -5.6511 | 8516     |
| PABPN1       | -1.8956  | 1.8956   | 11.04   | -1.1162 | 0.28352 | 0.49505 | -5.6511 | 8106     |
| DRAM2        | 0.74178  | 0.74178  | 3.5737  | 1.116   | 0.28359 | 0.49507 | -5.6513 | 128338   |
| KLK9         | 19.135   | 19.135   | 25.147  | 1.116   | 0.28359 | 0.49507 | -5.6513 | 284366   |
| ZNF574       | -0.52959 | 0.52959  | 3.0836  | -1.1159 | 0.28363 | 0.49509 | -5.6514 | 64763    |
| DIAPH2       | -0.52248 | 0.52248  | 3.1605  | -1.1158 | 0.28366 | 0.4951  | -5.6515 | 1730     |
| PLA2G15      | -0.64416 | 0.64416  | 2.7015  | -1.1157 | 0.28369 | 0.4951  | -5.6516 | 23659    |
| PHLDB1       | -2.2339  | 2.2339   | 7.1009  | -1.1154 | 0.28382 | 0.49527 | -5.6519 | 23187    |
| C7orf26      | -1.0159  | 1.0159   | 5.0323  | -1.1147 | 0.28412 | 0.49574 | -5.6527 | 79034    |
| SOX2         | -0.09439 | 0.09439  | 0.13961 | -1.1146 | 0.28418 | 0.49579 | -5.6528 | 6657     |
| OPTN         | 2.5626   | 2.5626   | 12.294  | 1.1143  | 0.28429 | 0.49589 | -5.6531 | 10133    |
| SIGLEC7      | 0.17338  | 0.17338  | 0.25397 | 1.1143  | 0.28429 | 0.49589 | -5.6531 | 27036    |
| SNORD15A     | -0.25047 | 0.25047  | 0.754   | -1.1142 | 0.28433 | 0.49591 | -5.6532 | 6079     |
| NEIL3        | 0.20509  | 0.20509  | 0.43204 | 1.114   | 0.28444 | 0.49603 | -5.6535 | 55247    |
| PAPPA        | 0.60519  | 0.60519  | 1.3933  | 1.1139  | 0.28446 | 0.49603 | -5.6535 | 5069     |
| LINC02247    | -0.125   | 0.125    | 0.16621 | -1.1137 | 0.28453 | 0.49606 | -5.6537 | 1.05E+08 |
| LOC105373553 | -0.09401 | 0.094008 | 0.17956 | -1.1137 | 0.28454 | 0.49606 | -5.6537 | 1.05E+08 |
| B4GALNT4     | -0.40204 | 0.40204  | 0.85665 | -1.1136 | 0.28459 | 0.4961  | -5.6539 | 338707   |
| NEK3         | -0.31469 | 0.31469  | 1.2229  | -1.1133 | 0.2847  | 0.49619 | -5.6542 | 4752     |
| RAB3GAP2     | 0.58568  | 0.58568  | 3.9087  | 1.1132  | 0.28473 | 0.49619 | -5.6542 | 25782    |
| EXT1         | -1.8607  | 1.8607   | 11.808  | -1.1132 | 0.28475 | 0.49619 | -5.6543 | 2131     |

|              |          |          |         |         |         |         |         |          |
|--------------|----------|----------|---------|---------|---------|---------|---------|----------|
| MAGI2        | -0.14298 | 0.14298  | 0.36762 | -1.1132 | 0.28477 | 0.49619 | -5.6543 | 9863     |
| CEP164       | -0.60598 | 0.60598  | 2.862   | -1.1131 | 0.28479 | 0.49619 | -5.6544 | 22897    |
| FXVD7        | -0.09909 | 0.09909  | 0.12204 | -1.113  | 0.28483 | 0.49621 | -5.6545 | 53822    |
| SNAI3        | -0.15439 | 0.15439  | 0.39697 | -1.1128 | 0.2849  | 0.49628 | -5.6547 | 333929   |
| NACA         | 13.322   | 13.322   | 51.292  | 1.1126  | 0.28501 | 0.49634 | -5.6549 | 4666     |
| ZEB2-AS1     | -0.10854 | 0.10854  | 0.13401 | -1.1126 | 0.28501 | 0.49634 | -5.6549 | 1E+08    |
| TMEM186      | -0.41151 | 0.41151  | 1.9011  | -1.1125 | 0.28502 | 0.49634 | -5.655  | 25880    |
| LOC100507507 | 0.37897  | 0.37897  | 0.89904 | 1.1123  | 0.28512 | 0.49645 | -5.6552 | 1.01E+08 |
| CPNE5        | 0.20997  | 0.20997  | 0.52809 | 1.1118  | 0.28531 | 0.49674 | -5.6557 | 57699    |
| ABRAXAS2     | 0.56914  | 0.56914  | 3.1484  | 1.1116  | 0.2854  | 0.49674 | -5.6559 | 23172    |
| ARL10        | -0.5112  | 0.5112   | 1.6616  | -1.1116 | 0.28542 | 0.49674 | -5.656  | 285598   |
| PIN4         | 0.27824  | 0.27824  | 1.0472  | 1.1116  | 0.28542 | 0.49674 | -5.656  | 5303     |
| UBR3         | -0.6874  | 0.6874   | 5.4805  | -1.1115 | 0.28545 | 0.49674 | -5.6561 | 130507   |
| ERMP1        | 0.50895  | 0.50895  | 4.6277  | 1.1115  | 0.28546 | 0.49674 | -5.6561 | 79956    |
| ACTR1B       | -1.0669  | 1.0669   | 8.9035  | -1.1114 | 0.28551 | 0.49675 | -5.6562 | 10120    |
| PCSK5        | -0.37803 | 0.37803  | 0.84799 | -1.1113 | 0.28552 | 0.49675 | -5.6562 | 5125     |
| RDM1P5       | -0.09972 | 0.099722 | 0.15181 | -1.1112 | 0.28559 | 0.49681 | -5.6564 | 1E+08    |
| MRPS16       | 2.0213   | 2.0213   | 10.396  | 1.1109  | 0.28569 | 0.49693 | -5.6566 | 51021    |
| OXA1L        | -3.705   | 3.705    | 16.783  | -1.1108 | 0.28573 | 0.49696 | -5.6568 | 5018     |
| MIR2117HG    | -0.53879 | 0.53879  | 0.41678 | -1.1104 | 0.28592 | 0.49724 | -5.6572 | 1.07E+08 |
| MIR548XHG    | -0.09092 | 0.090917 | 0.10429 | -1.1102 | 0.28598 | 0.4973  | -5.6574 | 1.02E+08 |
| WASHC2A      | -1.0975  | 1.0975   | 6.9334  | -1.1098 | 0.28617 | 0.49756 | -5.6579 | 387680   |
| SRSF6        | 2.2701   | 2.2701   | 18.248  | 1.1094  | 0.28634 | 0.49776 | -5.6583 | 6431     |
| LOC100506100 | 0.41053  | 0.41053  | 0.92501 | 1.1094  | 0.28634 | 0.49776 | -5.6583 | 1.01E+08 |
| TTLL5        | -0.45011 | 0.45011  | 3.2521  | -1.1092 | 0.28641 | 0.4978  | -5.6585 | 23093    |
| S1PR4        | 0.36836  | 0.36836  | 0.72962 | 1.1092  | 0.28642 | 0.4978  | -5.6585 | 8698     |

|          |          |          |         |         |         |         |         |          |
|----------|----------|----------|---------|---------|---------|---------|---------|----------|
| DNAJC2   | 0.71541  | 0.71541  | 3.1777  | 1.1088  | 0.28656 | 0.49799 | -5.6589 | 27000    |
| NLRP3    | 0.25463  | 0.25463  | 0.58746 | 1.1088  | 0.28659 | 0.49799 | -5.6589 | 114548   |
| TAF6L    | -0.62926 | 0.62926  | 3.1156  | -1.1086 | 0.28668 | 0.49801 | -5.6592 | 10629    |
| PLPPR3   | -0.15225 | 0.15225  | 0.255   | -1.1085 | 0.28668 | 0.49801 | -5.6592 | 79948    |
| BRSK1    | 0.13693  | 0.13693  | 0.33128 | 1.1085  | 0.2867  | 0.49801 | -5.6592 | 84446    |
| C12orf43 | -0.32387 | 0.32387  | 1.758   | -1.1085 | 0.28672 | 0.49801 | -5.6593 | 64897    |
| ZNF432   | 0.50509  | 0.50509  | 1.8268  | 1.1082  | 0.28681 | 0.49802 | -5.6595 | 9668     |
| SEMA3G   | -0.84936 | 0.84936  | 1.9466  | -1.1081 | 0.28688 | 0.49802 | -5.6597 | 56920    |
| CEBPB    | 13.488   | 13.488   | 38.073  | 1.1081  | 0.28688 | 0.49802 | -5.6597 | 1051     |
| CASC4    | 2.0122   | 2.0122   | 7.3767  | 1.108   | 0.2869  | 0.49802 | -5.6597 | 113201   |
| TOP2A    | 1.6286   | 1.6286   | 3.7611  | 1.108   | 0.2869  | 0.49802 | -5.6597 | 7153     |
| C4orf48  | 1.0794   | 1.0794   | 1.7538  | 1.108   | 0.2869  | 0.49802 | -5.6597 | 401115   |
| MTMR10   | -0.38503 | 0.38503  | 3.9155  | -1.1079 | 0.28695 | 0.49804 | -5.6598 | 54893    |
| NT5DC2   | 2.5711   | 2.5711   | 9.352   | 1.1078  | 0.28698 | 0.49804 | -5.6599 | 64943    |
| ID2      | -1.1823  | 1.1823   | 9.3641  | -1.1078 | 0.287   | 0.49804 | -5.66   | 3398     |
| FIZ1     | -0.51942 | 0.51942  | 1.8896  | -1.1075 | 0.28711 | 0.49818 | -5.6602 | 84922    |
| ZNF43    | -0.24878 | 0.24878  | 0.887   | -1.1072 | 0.28723 | 0.49833 | -5.6605 | 7594     |
| DUSP4    | 0.40401  | 0.40401  | 1.4373  | 1.107   | 0.28734 | 0.49848 | -5.6608 | 1846     |
| MXI1     | 2.2964   | 2.2964   | 6.7744  | 1.1065  | 0.28753 | 0.49869 | -5.6613 | 4601     |
| DHRS4L1  | -0.10845 | 0.10845  | 0.36123 | -1.1065 | 0.28755 | 0.49869 | -5.6613 | 728635   |
| MAD2L1BP | 1.194    | 1.194    | 3.662   | 1.1065  | 0.28755 | 0.49869 | -5.6613 | 9587     |
| TOX      | -0.07929 | 0.079289 | 0.18732 | -1.1063 | 0.28762 | 0.49876 | -5.6615 | 9760     |
| RADIL    | -0.18711 | 0.18711  | 0.46373 | -1.1061 | 0.28769 | 0.49882 | -5.6617 | 55698    |
| ZC3H11A  | 1.8504   | 1.8504   | 16.839  | 1.106   | 0.28774 | 0.49887 | -5.6618 | 9877     |
| STK36    | -0.29034 | 0.29034  | 1.2434  | -1.1058 | 0.28784 | 0.49895 | -5.6621 | 27148    |
| CBR3-AS1 | 0.29631  | 0.29631  | 1.181   | 1.1057  | 0.28786 | 0.49895 | -5.6621 | 1.01E+08 |

|               |          |          |          |         |         |         |         |          |
|---------------|----------|----------|----------|---------|---------|---------|---------|----------|
| STK25         | 1.9685   | 1.9685   | 10.609   | 1.1056  | 0.2879  | 0.49895 | -5.6622 | 10494    |
| PANO1         | -0.11372 | 0.11372  | 0.32043  | -1.1055 | 0.28794 | 0.49895 | -5.6623 | 1.02E+08 |
| C5orf15       | 1.3706   | 1.3706   | 5.8427   | 1.1055  | 0.28795 | 0.49895 | -5.6623 | 56951    |
| CPA4          | 22.75    | 22.75    | 27.895   | 1.1055  | 0.28797 | 0.49895 | -5.6624 | 51200    |
| PDGFA         | 1.3226   | 1.3226   | 4.3636   | 1.1054  | 0.28801 | 0.49898 | -5.6625 | 5154     |
| GFER          | -0.4581  | 0.4581   | 1.6993   | -1.105  | 0.28816 | 0.49918 | -5.6629 | 2671     |
| ZHX2          | -0.72497 | 0.72497  | 3.5838   | -1.1048 | 0.28823 | 0.49925 | -5.6631 | 22882    |
| ZNF200        | 0.24414  | 0.24414  | 1.0746   | 1.1046  | 0.28832 | 0.49936 | -5.6633 | 7752     |
| CERS6         | -0.54061 | 0.54061  | 3.2721   | -1.1045 | 0.28837 | 0.49938 | -5.6634 | 253782   |
| GIMAP1-GIMAP5 | -0.8845  | 0.8845   | 2.1774   | -1.1044 | 0.2884  | 0.4994  | -5.6635 | 1.01E+08 |
| CDC34         | 5.9812   | 5.9812   | 15.81    | 1.1043  | 0.28844 | 0.49941 | -5.6636 | 997      |
| SERF2         | 8.2968   | 8.2968   | 26.765   | 1.1042  | 0.28851 | 0.49947 | -5.6637 | 10169    |
| ST3GAL3       | -0.26123 | 0.26123  | 1.093    | -1.1039 | 0.28864 | 0.49963 | -5.6641 | 6487     |
| CHN2          | -0.0892  | 0.089202 | 0.2976   | -1.1038 | 0.28866 | 0.49963 | -5.6641 | 1124     |
| SEC11C        | 1.8946   | 1.8946   | 7.3112   | 1.1037  | 0.2887  | 0.49965 | -5.6642 | 90701    |
| CD1B          | -0.08655 | 0.08655  | 0.099882 | -1.1032 | 0.28892 | 0.49999 | -5.6648 | 910      |
| HCFC1-AS1     | -0.08766 | 0.087659 | 0.20304  | -1.1029 | 0.28902 | 0.50011 | -5.665  | 1.01E+08 |
| LDLRAD2       | -0.16316 | 0.16316  | 0.32406  | -1.1027 | 0.28914 | 0.50025 | -5.6653 | 401944   |
| GMFG          | 3.545    | 3.545    | 5.8302   | 1.1026  | 0.28916 | 0.50025 | -5.6654 | 9535     |
| ETFDH         | 1.6694   | 1.6694   | 4.868    | 1.1023  | 0.2893  | 0.50041 | -5.6657 | 2110     |
| GDPGP1        | -0.21154 | 0.21154  | 0.55545  | -1.1023 | 0.28931 | 0.50041 | -5.6658 | 390637   |
| CCDC65        | -0.08703 | 0.087027 | 0.20613  | -1.102  | 0.28943 | 0.50056 | -5.666  | 85478    |
| RRP1B         | -0.90927 | 0.90927  | 4.4286   | -1.1019 | 0.28946 | 0.50056 | -5.6661 | 23076    |
| PNPLA3        | -0.63596 | 0.63596  | 1.4085   | -1.1014 | 0.28966 | 0.50085 | -5.6666 | 80339    |
| IPP           | -0.21157 | 0.21157  | 1.823    | -1.1011 | 0.2898  | 0.50097 | -5.667  | 3652     |
| WDR5          | -1.2076  | 1.2076   | 6.2191   | -1.1011 | 0.28982 | 0.50097 | -5.667  | 11091    |

|              |          |          |          |         |         |         |         |          |
|--------------|----------|----------|----------|---------|---------|---------|---------|----------|
| NLRX1        | 2.8168   | 2.8168   | 9.3855   | 1.101   | 0.28983 | 0.50097 | -5.667  | 79671    |
| TUBA1B       | 44.053   | 44.053   | 124.59   | 1.101   | 0.28985 | 0.50097 | -5.6671 | 10376    |
| CDC42EP2     | 1.1113   | 1.1113   | 3.5787   | 1.1009  | 0.28989 | 0.501   | -5.6672 | 10435    |
| SNORD142     | -0.12889 | 0.12889  | 0.21073  | -1.1007 | 0.28999 | 0.50111 | -5.6674 | 1.07E+08 |
| CDH5         | 3.3091   | 3.3091   | 9.1082   | 1.1004  | 0.29008 | 0.50123 | -5.6677 | 1003     |
| NEDD8-MDP1   | 0.18796  | 0.18796  | 0.63441  | 1.0999  | 0.29032 | 0.50155 | -5.6683 | 1.01E+08 |
| SLC8A1       | -0.42794 | 0.42794  | 1.5537   | -1.0998 | 0.29036 | 0.50155 | -5.6683 | 6546     |
| AP5B1        | -0.84601 | 0.84601  | 4.3516   | -1.0998 | 0.29036 | 0.50155 | -5.6684 | 91056    |
| LOC100506178 | 0.14107  | 0.14107  | 0.21244  | 1.0995  | 0.29047 | 0.50164 | -5.6686 | 1.01E+08 |
| EXOSC4       | 1.7067   | 1.7067   | 6.0921   | 1.0995  | 0.29047 | 0.50164 | -5.6686 | 54512    |
| UBA6         | 1.2852   | 1.2852   | 4.2721   | 1.0993  | 0.29057 | 0.50176 | -5.6689 | 55236    |
| C18orf21     | 0.77372  | 0.77372  | 3.2909   | 1.0991  | 0.29065 | 0.50184 | -5.6691 | 83608    |
| TEX38        | -0.09416 | 0.094155 | 0.15944  | -1.0989 | 0.29072 | 0.50191 | -5.6692 | 374973   |
| LINC01269    | 0.74333  | 0.74333  | 0.76283  | 1.0986  | 0.29083 | 0.50206 | -5.6695 | 1.04E+08 |
| KHNYN        | -1.3707  | 1.3707   | 9.1999   | -1.0985 | 0.29091 | 0.50211 | -5.6697 | 23351    |
| C17orf78     | -0.08144 | 0.081443 | 0.15666  | -1.0984 | 0.29094 | 0.50211 | -5.6698 | 284099   |
| KCNC3        | -0.18695 | 0.18695  | 0.73529  | -1.0984 | 0.29095 | 0.50211 | -5.6698 | 3748     |
| MSL3P1       | 0.12631  | 0.12631  | 0.33075  | 1.0979  | 0.29115 | 0.50238 | -5.6703 | 151507   |
| ZNF57        | 1.0824   | 1.0824   | 3.2788   | 1.0978  | 0.29117 | 0.50238 | -5.6704 | 126295   |
| ZNF322       | 0.51739  | 0.51739  | 2.2573   | 1.0977  | 0.29122 | 0.50242 | -5.6705 | 79692    |
| FBXO8        | 0.68448  | 0.68448  | 3.7167   | 1.0971  | 0.29148 | 0.50282 | -5.6711 | 26269    |
| SEMA5A       | 0.75677  | 0.75677  | 3.4861   | 1.0967  | 0.29167 | 0.50307 | -5.6716 | 9037     |
| LOC100134317 | -0.07355 | 0.073548 | 0.070109 | -1.0966 | 0.29169 | 0.50307 | -5.6716 | 1E+08    |
| RELCH        | 0.77475  | 0.77475  | 5.9946   | 1.0965  | 0.29173 | 0.5031  | -5.6717 | 57614    |
| RARRES2      | 9.6877   | 9.6877   | 16.143   | 1.0962  | 0.29185 | 0.50325 | -5.672  | 5919     |
| MND1         | 0.18786  | 0.18786  | 0.41686  | 1.0957  | 0.29206 | 0.50356 | -5.6725 | 84057    |

|           |          |         |         |         |         |         |         |          |
|-----------|----------|---------|---------|---------|---------|---------|---------|----------|
| INPP5A    | -0.54677 | 0.54677 | 3.1858  | -1.0955 | 0.29214 | 0.50365 | -5.6728 | 3632     |
| COL6A1    | 65.126   | 65.126  | 134.07  | 1.0947  | 0.2925  | 0.50415 | -5.6736 | 1291     |
| BZW2      | -1.6084  | 1.6084  | 9.3139  | -1.0946 | 0.29253 | 0.50415 | -5.6737 | 28969    |
| PI15      | 1.9103   | 1.9103  | 2.9941  | 1.0946  | 0.29255 | 0.50415 | -5.6737 | 51050    |
| SLC4A3    | 0.34917  | 0.34917 | 0.94756 | 1.0945  | 0.29258 | 0.50415 | -5.6738 | 6508     |
| PSG7      | 0.12811  | 0.12811 | 0.27022 | 1.0945  | 0.29258 | 0.50415 | -5.6738 | 5676     |
| UQCRBP1   | -0.26407 | 0.26407 | 0.77541 | -1.094  | 0.2928  | 0.50447 | -5.6744 | 442454   |
| SENP5     | 0.44956  | 0.44956 | 5.0429  | 1.0938  | 0.29286 | 0.50453 | -5.6745 | 205564   |
| SLC18A2   | 0.42574  | 0.42574 | 1.7894  | 1.0937  | 0.29291 | 0.50455 | -5.6746 | 6571     |
| NCEH1     | 0.34669  | 0.34669 | 0.99194 | 1.0936  | 0.29295 | 0.50455 | -5.6747 | 57552    |
| CCNB1     | 2.0921   | 2.0921  | 4.0332  | 1.0935  | 0.29299 | 0.50455 | -5.6748 | 891      |
| GABARAPL1 | -1.968   | 1.968   | 6.4993  | -1.0935 | 0.293   | 0.50455 | -5.6748 | 23710    |
| POM121C   | -1.253   | 1.253   | 7.6086  | -1.0933 | 0.2931  | 0.50468 | -5.6751 | 1E+08    |
| RFX5      | -0.86908 | 0.86908 | 4.0007  | -1.0928 | 0.29331 | 0.505   | -5.6756 | 5993     |
| GTF3A     | 3.8894   | 3.8894  | 13.409  | 1.0927  | 0.29335 | 0.50501 | -5.6757 | 2971     |
| RPL9      | 111.24   | 111.24  | 394.03  | 1.0926  | 0.2934  | 0.50504 | -5.6758 | 6133     |
| RASIP1    | 0.78885  | 0.78885 | 2.9245  | 1.092   | 0.29362 | 0.50537 | -5.6764 | 54922    |
| PIK3C3    | -0.59925 | 0.59925 | 5.2589  | -1.0917 | 0.29377 | 0.50557 | -5.6767 | 5289     |
| PDE3A     | 0.84531  | 0.84531 | 1.8651  | 1.0915  | 0.29384 | 0.50564 | -5.6769 | 5139     |
| FDCSP     | -0.59791 | 0.59791 | 0.39258 | -1.0914 | 0.29391 | 0.50572 | -5.6771 | 260436   |
| HM13-AS1  | -0.21079 | 0.21079 | 0.62468 | -1.0913 | 0.29394 | 0.50572 | -5.6772 | 1.01E+08 |
| FAM111A   | -0.39194 | 0.39194 | 2.3614  | -1.091  | 0.29405 | 0.50585 | -5.6774 | 63901    |
| TRIM38    | -0.75162 | 0.75162 | 4.1638  | -1.0908 | 0.29415 | 0.50592 | -5.6777 | 10475    |
| BRIP1     | 0.11938  | 0.11938 | 0.7502  | 1.0908  | 0.29416 | 0.50592 | -5.6777 | 83990    |
| CARD11    | 0.21618  | 0.21618 | 0.38208 | 1.0907  | 0.29418 | 0.50592 | -5.6777 | 84433    |
| MZT2B     | 7.7958   | 7.7958  | 25.955  | 1.0906  | 0.29423 | 0.50596 | -5.6779 | 80097    |



|              |          |         |         |         |         |         |         |          |
|--------------|----------|---------|---------|---------|---------|---------|---------|----------|
| CA11         | -0.51887 | 0.51887 | 1.1739  | -1.0903 | 0.29435 | 0.50607 | -5.6782 | 770      |
| GATA6        | -0.20426 | 0.20426 | 0.30874 | -1.0903 | 0.29438 | 0.50607 | -5.6782 | 2627     |
| RPS17        | 38.659   | 38.659  | 127.29  | 1.0902  | 0.29439 | 0.50607 | -5.6782 | 6218     |
| LOC105747689 | -0.15095 | 0.15095 | 0.43665 | -1.0898 | 0.29457 | 0.50633 | -5.6787 | 1.06E+08 |
| UBE2R2       | 2.5615   | 2.5615  | 12.248  | 1.0897  | 0.2946  | 0.50633 | -5.6788 | 54926    |
| VPS13B       | -0.73279 | 0.73279 | 4.8112  | -1.0897 | 0.29463 | 0.50634 | -5.6788 | 157680   |
| FYCO1        | -1.2664  | 1.2664  | 7.0103  | -1.0894 | 0.29473 | 0.50645 | -5.6791 | 79443    |
| SLFNL1       | -0.16247 | 0.16247 | 0.39189 | -1.0891 | 0.29485 | 0.50662 | -5.6794 | 200172   |
| C14orf28     | -0.12948 | 0.12948 | 0.62917 | -1.089  | 0.29493 | 0.5067  | -5.6796 | 122525   |
| DOCK4        | 0.7164   | 0.7164  | 2.662   | 1.0886  | 0.29508 | 0.50691 | -5.6799 | 9732     |
| HLA-C        | -4.9487  | 4.9487  | 10.795  | -1.0883 | 0.2952  | 0.50703 | -5.6802 | 3107     |
| KLF3         | 3.643    | 3.643   | 17.043  | 1.0883  | 0.29521 | 0.50703 | -5.6803 | 51274    |
| FRMD6        | 1.6991   | 1.6991  | 13.698  | 1.0878  | 0.29543 | 0.50734 | -5.6808 | 122786   |
| DIMT1        | 0.64073  | 0.64073 | 3.0503  | 1.0874  | 0.29561 | 0.50756 | -5.6812 | 27292    |
| LINC00312    | -0.28481 | 0.28481 | 0.64017 | -1.0874 | 0.29561 | 0.50756 | -5.6812 | 29931    |
| TNFRSF10B    | 1.3206   | 1.3206  | 4.6004  | 1.0872  | 0.29566 | 0.50756 | -5.6813 | 8795     |
| POLG         | -1.1303  | 1.1303  | 6.4946  | -1.0872 | 0.29567 | 0.50756 | -5.6814 | 5428     |
| RANBP3       | -1.0909  | 1.0909  | 6.231   | -1.087  | 0.29578 | 0.50769 | -5.6816 | 8498     |
| SHB          | 1.9665   | 1.9665  | 6.5852  | 1.0868  | 0.29586 | 0.50779 | -5.6818 | 6461     |
| DCUN1D1      | 0.43137  | 0.43137 | 2.4868  | 1.0864  | 0.29602 | 0.50798 | -5.6822 | 54165    |
| MIR320B2     | -0.11793 | 0.11793 | 0.13159 | -1.0864 | 0.29604 | 0.50798 | -5.6823 | 1E+08    |
| CGAS         | 0.57937  | 0.57937 | 1.4328  | 1.0859  | 0.29623 | 0.50823 | -5.6827 | 115004   |
| DLX1         | 0.1258   | 0.1258  | 0.31288 | 1.0859  | 0.29624 | 0.50823 | -5.6827 | 1745     |
| RHOT1        | -0.86755 | 0.86755 | 4.895   | -1.0858 | 0.2963  | 0.50827 | -5.6829 | 55288    |
| ZNF622       | 2.3369   | 2.3369  | 7.3582  | 1.0856  | 0.29637 | 0.50832 | -5.6831 | 90441    |
| ADSL         | 1.4967   | 1.4967  | 5.7729  | 1.0855  | 0.29642 | 0.50832 | -5.6832 | 158      |

|            |          |          |          |         |         |         |         |          |
|------------|----------|----------|----------|---------|---------|---------|---------|----------|
| PCA3       | -0.07944 | 0.079438 | 0.12578  | -1.0854 | 0.29644 | 0.50832 | -5.6832 | 50652    |
| NUFIP2     | 0.92671  | 0.92671  | 6.3683   | 1.0854  | 0.29645 | 0.50832 | -5.6832 | 57532    |
| BTRC       | 0.66355  | 0.66355  | 3.458    | 1.0852  | 0.29655 | 0.50845 | -5.6835 | 8945     |
| LINC01671  | -0.11364 | 0.11364  | 0.19537  | -1.085  | 0.29664 | 0.50854 | -5.6837 | 1.02E+08 |
| CLSPN      | 0.23179  | 0.23179  | 0.44216  | 1.0848  | 0.29673 | 0.50864 | -5.6839 | 63967    |
| PAX8       | 0.20206  | 0.20206  | 0.80002  | 1.0846  | 0.2968  | 0.50872 | -5.6841 | 7849     |
| CCDC85B    | 3.9629   | 3.9629   | 11.807   | 1.0845  | 0.29685 | 0.50872 | -5.6842 | 11007    |
| ABRACL     | 1.9072   | 1.9072   | 5.7145   | 1.0844  | 0.29686 | 0.50872 | -5.6842 | 58527    |
| PJA1       | 0.57575  | 0.57575  | 2.7488   | 1.0842  | 0.29696 | 0.50879 | -5.6845 | 64219    |
| SHC2       | -0.95564 | 0.95564  | 2.0436   | -1.0842 | 0.29698 | 0.50879 | -5.6845 | 25759    |
| BOLA1      | -0.83094 | 0.83094  | 2.6888   | -1.0841 | 0.29699 | 0.50879 | -5.6846 | 51027    |
| ZNF792     | -0.28669 | 0.28669  | 1.177    | -1.0837 | 0.29718 | 0.50889 | -5.685  | 126375   |
| ATAD5      | -0.16571 | 0.16571  | 0.72456  | -1.0837 | 0.29719 | 0.50889 | -5.685  | 79915    |
| TRAF3      | -0.54841 | 0.54841  | 2.9575   | -1.0836 | 0.29722 | 0.50889 | -5.6851 | 7187     |
| ANXA2R     | -0.18198 | 0.18198  | 0.76864  | -1.0836 | 0.29722 | 0.50889 | -5.6851 | 389289   |
| BMPRI1A    | -0.61974 | 0.61974  | 5.0094   | -1.0835 | 0.29725 | 0.50889 | -5.6852 | 657      |
| NAT9       | -0.78084 | 0.78084  | 3.5169   | -1.0835 | 0.29727 | 0.50889 | -5.6852 | 26151    |
| TRIAP1     | 1.3888   | 1.3888   | 5.2994   | 1.0834  | 0.29729 | 0.50889 | -5.6853 | 51499    |
| SHMT2      | 2.5759   | 2.5759   | 8.692    | 1.0834  | 0.29729 | 0.50889 | -5.6853 | 6472     |
| LRRC27     | -0.08608 | 0.086078 | 0.22779  | -1.0833 | 0.29735 | 0.50894 | -5.6854 | 80313    |
| JMJD1C-AS1 | -0.57838 | 0.57838  | 1.2209   | -1.0829 | 0.2975  | 0.50915 | -5.6858 | 84989    |
| ELOA       | 1.5513   | 1.5513   | 8.2486   | 1.0828  | 0.29756 | 0.50919 | -5.6859 | 6924     |
| KIF3A      | 0.14799  | 0.14799  | 1.2243   | 1.0826  | 0.29766 | 0.5093  | -5.6862 | 11127    |
| RBP2       | -0.08767 | 0.087665 | 0.080366 | -1.0825 | 0.29771 | 0.5093  | -5.6863 | 5948     |
| AP1S1      | 4.1213   | 4.1213   | 14.93    | 1.0824  | 0.29771 | 0.5093  | -5.6863 | 1174     |
| LIMCH1     | -1.0407  | 1.0407   | 4.1664   | -1.0823 | 0.29777 | 0.50932 | -5.6864 | 22998    |

|              |          |         |         |         |         |         |         |          |
|--------------|----------|---------|---------|---------|---------|---------|---------|----------|
| SLA2         | -0.10337 | 0.10337 | 0.32973 | -1.0823 | 0.29779 | 0.50932 | -5.6865 | 84174    |
| PCNX4        | 0.53601  | 0.53601 | 3.6572  | 1.0822  | 0.29781 | 0.50932 | -5.6865 | 64430    |
| ROBO2        | -0.12566 | 0.12566 | 0.50689 | -1.082  | 0.2979  | 0.5094  | -5.6867 | 6092     |
| USP8         | 0.78324  | 0.78324 | 5.3341  | 1.082   | 0.29792 | 0.5094  | -5.6868 | 9101     |
| SIX1         | 0.17955  | 0.17955 | 0.31073 | 1.0817  | 0.29805 | 0.50956 | -5.6871 | 6495     |
| TSPAN15      | 1.1895   | 1.1895  | 3.3419  | 1.0816  | 0.29809 | 0.50958 | -5.6872 | 23555    |
| PLEC         | -11.058  | 11.058  | 38.783  | -1.0815 | 0.29813 | 0.50959 | -5.6873 | 5339     |
| KIAA0895     | 0.15845  | 0.15845 | 0.51756 | 1.0811  | 0.29831 | 0.50975 | -5.6877 | 23366    |
| LOC101928855 | -0.15802 | 0.15802 | 0.35536 | -1.081  | 0.29832 | 0.50975 | -5.6877 | 1.02E+08 |
| GALNT4       | 0.27594  | 0.27594 | 1.0373  | 1.081   | 0.29835 | 0.50975 | -5.6878 | 8693     |
| LARGE1       | -0.66197 | 0.66197 | 2.7892  | -1.0809 | 0.29836 | 0.50975 | -5.6878 | 9215     |
| LINC00302    | 16.401   | 16.401  | 20.132  | 1.0809  | 0.29838 | 0.50975 | -5.6879 | 388699   |
| NMRK1        | 0.75176  | 0.75176 | 3.5158  | 1.0809  | 0.2984  | 0.50975 | -5.6879 | 54981    |
| BMP6         | -0.32481 | 0.32481 | 1.2164  | -1.0805 | 0.29856 | 0.50992 | -5.6883 | 654      |
| WDFY2        | 1.2348   | 1.2348  | 9.5789  | 1.0805  | 0.29857 | 0.50992 | -5.6883 | 115825   |
| IFITM1       | -58.043  | 58.043  | 72.137  | -1.0804 | 0.2986  | 0.50992 | -5.6884 | 8519     |
| KCNAB3       | -0.10499 | 0.10499 | 0.32387 | -1.0803 | 0.29862 | 0.50992 | -5.6885 | 9196     |
| TOM1L2       | -2.2017  | 2.2017  | 13.266  | -1.0802 | 0.29867 | 0.50996 | -5.6886 | 146691   |
| ZNF689       | -0.32423 | 0.32423 | 1.2262  | -1.0799 | 0.2988  | 0.51013 | -5.6889 | 115509   |
| EN1          | -1.4615  | 1.4615  | 4.9602  | -1.0798 | 0.29883 | 0.51013 | -5.689  | 2019     |
| YAE1         | 0.17503  | 0.17503 | 0.7839  | 1.0796  | 0.29892 | 0.51022 | -5.6892 | 57002    |
| OIP5         | 0.21869  | 0.21869 | 0.65669 | 1.0796  | 0.29894 | 0.51022 | -5.6892 | 11339    |
| KRT10        | -1558.3  | 1558.3  | 2441    | -1.0793 | 0.29906 | 0.51035 | -5.6895 | 3858     |
| LOC100130264 | -0.13271 | 0.13271 | 0.38524 | -1.0793 | 0.29908 | 0.51035 | -5.6896 | 1E+08    |
| UNC119       | -0.77587 | 0.77587 | 4.3207  | -1.0791 | 0.29913 | 0.51038 | -5.6897 | 9094     |
| GACAT2       | -0.16729 | 0.16729 | 0.26255 | -1.0785 | 0.2994  | 0.51078 | -5.6903 | 1E+08    |

|            |          |         |         |         |         |         |         |          |
|------------|----------|---------|---------|---------|---------|---------|---------|----------|
| PIMREG     | 0.42367  | 0.42367 | 0.7999  | 1.0782  | 0.29954 | 0.51092 | -5.6907 | 54478    |
| PMVK       | 6.2384   | 6.2384  | 17.853  | 1.0782  | 0.29955 | 0.51092 | -5.6907 | 10654    |
| HEG1       | 2.4472   | 2.4472  | 7.139   | 1.0781  | 0.29957 | 0.51092 | -5.6907 | 57493    |
| PIN1       | 2.6733   | 2.6733  | 11.253  | 1.078   | 0.29963 | 0.51098 | -5.6909 | 5300     |
| GPR22      | -0.11705 | 0.11705 | 0.30325 | -1.0778 | 0.29971 | 0.51106 | -5.6911 | 2845     |
| BBIP1      | 0.27977  | 0.27977 | 0.95792 | 1.0777  | 0.29975 | 0.51107 | -5.6911 | 92482    |
| RPL41      | 320.14   | 320.14  | 978.41  | 1.0774  | 0.29989 | 0.51121 | -5.6915 | 6171     |
| SP110      | -1.0704  | 1.0704  | 3.3233  | -1.0774 | 0.29989 | 0.51121 | -5.6915 | 3431     |
| RPS6KA4    | 4.1426   | 4.1426  | 11.191  | 1.0769  | 0.30008 | 0.51149 | -5.6919 | 8986     |
| GRPEL2-AS1 | 0.15234  | 0.15234 | 0.26729 | 1.0767  | 0.3002  | 0.51163 | -5.6922 | 1.06E+08 |
| INF2       | -1.6011  | 1.6011  | 7.7828  | -1.0766 | 0.30023 | 0.51163 | -5.6923 | 64423    |
| BGN        | 27.04    | 27.04   | 52.174  | 1.0765  | 0.30026 | 0.51163 | -5.6924 | 633      |
| NAB1       | 1.234    | 1.234   | 11.028  | 1.0764  | 0.3003  | 0.51166 | -5.6925 | 4664     |
| ARRB2      | 2.3614   | 2.3614  | 6.9054  | 1.0758  | 0.30056 | 0.51204 | -5.6931 | 409      |
| SLFNL1-AS1 | -0.2407  | 0.2407  | 0.75584 | -1.0757 | 0.30061 | 0.51207 | -5.6932 | 1.01E+08 |
| MYO9A      | -0.47718 | 0.47718 | 4.6855  | -1.0754 | 0.30073 | 0.51223 | -5.6935 | 4649     |
| AAAS       | -1.1393  | 1.1393  | 5.6592  | -1.0753 | 0.30079 | 0.51228 | -5.6936 | 8086     |
| TRNAU1AP   | 0.71563  | 0.71563 | 3.4408  | 1.0746  | 0.30109 | 0.51274 | -5.6943 | 54952    |
| PRKG1      | 0.4617   | 0.4617  | 1.0302  | 1.0744  | 0.30116 | 0.51279 | -5.6945 | 5592     |
| HTRA1      | 15.234   | 15.234  | 32.758  | 1.0744  | 0.30118 | 0.51279 | -5.6946 | 5654     |
| ESYT1      | 3.992    | 3.992   | 14.842  | 1.0743  | 0.30124 | 0.5128  | -5.6947 | 23344    |
| KLHL41     | -0.10299 | 0.10299 | 0.18447 | -1.0741 | 0.30129 | 0.5128  | -5.6948 | 10324    |
| ESYT2      | 2.1582   | 2.1582  | 13.791  | 1.0741  | 0.30131 | 0.5128  | -5.6948 | 57488    |
| NUPR1      | -8.8883  | 8.8883  | 25.676  | -1.0741 | 0.30131 | 0.5128  | -5.6949 | 26471    |
| BEAN1-AS1  | 0.15381  | 0.15381 | 0.35008 | 1.0739  | 0.30139 | 0.5129  | -5.6951 | 1.02E+08 |
| IRF3       | -1.7038  | 1.7038  | 7.431   | -1.0737 | 0.30148 | 0.51292 | -5.6953 | 3661     |

|              |          |          |         |         |         |         |         |          |
|--------------|----------|----------|---------|---------|---------|---------|---------|----------|
| CUTC         | -0.49594 | 0.49594  | 3.0704  | -1.0737 | 0.30148 | 0.51292 | -5.6953 | 51076    |
| POLL         | -0.466   | 0.466    | 2.4501  | -1.0737 | 0.3015  | 0.51292 | -5.6953 | 27343    |
| RAD17        | 0.29472  | 0.29472  | 1.8956  | 1.0735  | 0.30156 | 0.51296 | -5.6954 | 5884     |
| MTCP1        | -0.0884  | 0.088395 | 0.3814  | -1.0735 | 0.30159 | 0.51296 | -5.6955 | 4515     |
| NOP14        | -1.3024  | 1.3024   | 6.9336  | -1.0734 | 0.30162 | 0.51297 | -5.6956 | 8602     |
| TRAPPC5      | 5.7419   | 5.7419   | 16.712  | 1.0732  | 0.30169 | 0.51304 | -5.6958 | 126003   |
| MIR499A      | -0.13983 | 0.13983  | 0.12752 | -1.0727 | 0.30189 | 0.51329 | -5.6962 | 574501   |
| METTL4       | 0.19572  | 0.19572  | 0.85534 | 1.0726  | 0.30196 | 0.51329 | -5.6964 | 64863    |
| DLC1         | 1.0674   | 1.0674   | 3.4813  | 1.0726  | 0.30197 | 0.51329 | -5.6964 | 10395    |
| FKBP9P1      | -0.15316 | 0.15316  | 0.49576 | -1.0726 | 0.30197 | 0.51329 | -5.6964 | 360132   |
| FGR          | 0.62829  | 0.62829  | 1.4248  | 1.0725  | 0.30201 | 0.51329 | -5.6965 | 2268     |
| CCNF         | 0.55563  | 0.55563  | 1.8879  | 1.0725  | 0.30202 | 0.51329 | -5.6965 | 899      |
| LOC101928140 | -0.08947 | 0.089469 | 0.2306  | -1.0722 | 0.30215 | 0.51341 | -5.6968 | 1.02E+08 |
| NACC1        | 2.1866   | 2.1866   | 9.1458  | 1.0721  | 0.30217 | 0.51341 | -5.6969 | 112939   |
| PRPF40A      | 0.91664  | 0.91664  | 5.6503  | 1.072   | 0.30223 | 0.51341 | -5.697  | 55660    |
| MX2          | -2.8081  | 2.8081   | 3.4914  | -1.0719 | 0.30225 | 0.51341 | -5.6971 | 4600     |
| LINC00313    | 0.08947  | 0.08947  | 0.14528 | 1.0719  | 0.30226 | 0.51341 | -5.6971 | 114038   |
| TCP11L2      | 1.9667   | 1.9667   | 7.8281  | 1.0717  | 0.30234 | 0.51341 | -5.6973 | 255394   |
| GCLM         | 0.3155   | 0.3155   | 1.1434  | 1.0717  | 0.30234 | 0.51341 | -5.6973 | 2730     |
| LPAL2        | -0.09752 | 0.097515 | 0.2653  | -1.0717 | 0.30235 | 0.51341 | -5.6973 | 80350    |
| PC           | 1.1528   | 1.1528   | 2.7469  | 1.0717  | 0.30237 | 0.51341 | -5.6974 | 5091     |
| PVRIG2P      | -1.7024  | 1.7024   | 1.863   | -1.0713 | 0.30252 | 0.51362 | -5.6977 | 1.02E+08 |
| TUT7         | 2.3403   | 2.3403   | 11.327  | 1.0712  | 0.30257 | 0.51362 | -5.6978 | 79670    |
| PSMB8        | -0.45534 | 0.45534  | 1.2072  | -1.0712 | 0.30258 | 0.51362 | -5.6979 | 5696     |
| PRR5L        | 0.21962  | 0.21962  | 0.6256  | 1.071   | 0.30264 | 0.51367 | -5.698  | 79899    |
| EDDM13       | -0.30522 | 0.30522  | 1.1136  | -1.0709 | 0.30271 | 0.51371 | -5.6982 | 1.01E+08 |

|           |          |          |         |         |         |         |         |          |
|-----------|----------|----------|---------|---------|---------|---------|---------|----------|
| ZNF600    | -0.18287 | 0.18287  | 1.0003  | -1.0708 | 0.30273 | 0.51371 | -5.6982 | 162966   |
| COPZ1     | 3.7835   | 3.7835   | 17.117  | 1.0708  | 0.30276 | 0.51371 | -5.6983 | 22818    |
| ELP3      | -0.67589 | 0.67589  | 3.278   | -1.0705 | 0.30286 | 0.51384 | -5.6985 | 55140    |
| CATSPERZ  | 0.15682  | 0.15682  | 0.3471  | 1.0704  | 0.30292 | 0.51384 | -5.6987 | 25858    |
| CLEC7A    | 1.5289   | 1.5289   | 4.7667  | 1.0703  | 0.30295 | 0.51384 | -5.6987 | 64581    |
| LINC00513 | -0.5219  | 0.5219   | 1.5268  | -1.0703 | 0.30298 | 0.51384 | -5.6988 | 1.01E+08 |
| CYYR1-AS1 | -0.11803 | 0.11803  | 0.22823 | -1.0702 | 0.30298 | 0.51384 | -5.6988 | 1.01E+08 |
| DARS2     | 0.42181  | 0.42181  | 2.5147  | 1.07    | 0.30307 | 0.51393 | -5.699  | 55157    |
| NLGN4X    | 0.34552  | 0.34552  | 0.9123  | 1.0698  | 0.30315 | 0.51401 | -5.6992 | 57502    |
| C22orf34  | -0.10917 | 0.10917  | 0.27131 | -1.0698 | 0.30318 | 0.51401 | -5.6993 | 348645   |
| EDRF1-AS1 | -0.09992 | 0.09992  | 0.1838  | -1.0697 | 0.30323 | 0.51405 | -5.6994 | 1.02E+08 |
| WTIP      | -0.94121 | 0.94121  | 2.7514  | -1.0694 | 0.30335 | 0.5142  | -5.6997 | 126374   |
| DCUN1D4   | 0.4148   | 0.4148   | 1.9685  | 1.0692  | 0.30341 | 0.51425 | -5.6998 | 23142    |
| CRELD1    | -0.40713 | 0.40713  | 1.9398  | -1.0687 | 0.30366 | 0.51463 | -5.7004 | 78987    |
| CHML      | 0.23382  | 0.23382  | 1.356   | 1.0684  | 0.30376 | 0.51475 | -5.7006 | 1122     |
| C14orf178 | -0.08047 | 0.080471 | 0.15843 | -1.0682 | 0.30387 | 0.51486 | -5.7009 | 283579   |
| FBXW5     | 4.0733   | 4.0733   | 18.133  | 1.0681  | 0.30389 | 0.51486 | -5.7009 | 54461    |
| C19orf48  | -1.3565  | 1.3565   | 5.5903  | -1.0678 | 0.30405 | 0.51508 | -5.7013 | 84798    |
| LINC02482 | -0.25729 | 0.25729  | 0.44035 | -1.0677 | 0.30408 | 0.51508 | -5.7014 | 1.05E+08 |
| CMC1      | 0.51554  | 0.51554  | 2.139   | 1.0676  | 0.30415 | 0.5151  | -5.7015 | 152100   |
| TDRD7     | 0.45896  | 0.45896  | 2.1071  | 1.0675  | 0.30415 | 0.5151  | -5.7015 | 23424    |
| CXCR6     | -0.17751 | 0.17751  | 0.90623 | -1.0675 | 0.30419 | 0.51511 | -5.7016 | 10663    |
| SPRR2D    | 127.55   | 127.55   | 180     | 1.0671  | 0.30434 | 0.51531 | -5.702  | 6703     |
| LINC00102 | -0.22638 | 0.22638  | 0.60887 | -1.067  | 0.30441 | 0.51534 | -5.7021 | 1E+08    |
| ME2       | 0.66594  | 0.66594  | 2.3767  | 1.0669  | 0.30444 | 0.51534 | -5.7022 | 4200     |
| CSNK2B    | 1.8593   | 1.8593   | 6.771   | 1.0668  | 0.30446 | 0.51534 | -5.7023 | 1460     |

|              |          |          |         |         |         |         |         |          |
|--------------|----------|----------|---------|---------|---------|---------|---------|----------|
| ACBD6        | -1.1391  | 1.1391   | 6.3046  | -1.0667 | 0.3045  | 0.51534 | -5.7024 | 84320    |
| CD300A       | 0.44656  | 0.44656  | 0.97762 | 1.0667  | 0.30451 | 0.51534 | -5.7024 | 11314    |
| PTK2         | 0.97136  | 0.97136  | 6.0221  | 1.0665  | 0.3046  | 0.51538 | -5.7026 | 5747     |
| TECPR2       | -0.28753 | 0.28753  | 2.0604  | -1.0665 | 0.30462 | 0.51538 | -5.7026 | 9895     |
| LAMC3        | -0.78574 | 0.78574  | 2.3333  | -1.0663 | 0.30467 | 0.51538 | -5.7028 | 10319    |
| PPP1R12A     | 0.68836  | 0.68836  | 5.8654  | 1.0663  | 0.30468 | 0.51538 | -5.7028 | 4659     |
| TBC1D3       | 0.33294  | 0.33294  | 0.72407 | 1.0663  | 0.30469 | 0.51538 | -5.7028 | 729873   |
| CC2D1B       | -0.56998 | 0.56998  | 3.5773  | -1.0662 | 0.30475 | 0.51538 | -5.7029 | 200014   |
| ASCC2        | 1.4601   | 1.4601   | 9.3452  | 1.0661  | 0.30476 | 0.51538 | -5.703  | 84164    |
| LPXN         | 0.65031  | 0.65031  | 1.8331  | 1.0661  | 0.30478 | 0.51538 | -5.703  | 9404     |
| MPP3         | -0.12534 | 0.12534  | 0.65357 | -1.0658 | 0.30491 | 0.51555 | -5.7033 | 4356     |
| PCNA         | 4.5345   | 4.5345   | 12.661  | 1.0656  | 0.305   | 0.51563 | -5.7035 | 5111     |
| MICU1        | 1.1008   | 1.1008   | 6.2453  | 1.0656  | 0.30502 | 0.51563 | -5.7036 | 10367    |
| CYP1B1       | -1.1738  | 1.1738   | 1.9218  | -1.0649 | 0.30533 | 0.51608 | -5.7043 | 1545     |
| ZEB1-AS1     | -0.1612  | 0.1612   | 0.53852 | -1.0648 | 0.30535 | 0.51608 | -5.7043 | 220930   |
| DPY19L1P1    | -0.12574 | 0.12574  | 0.32753 | -1.0646 | 0.30544 | 0.5162  | -5.7045 | 1E+08    |
| RFLNB        | 1.2775   | 1.2775   | 3.4436  | 1.0645  | 0.30548 | 0.51621 | -5.7046 | 359845   |
| LINC01003    | -0.3457  | 0.3457   | 1.1314  | -1.0642 | 0.30562 | 0.51625 | -5.7049 | 1E+08    |
| PI4KAP2      | -0.29137 | 0.29137  | 1.4066  | -1.0641 | 0.30564 | 0.51625 | -5.705  | 375133   |
| FCHSD2       | -0.72849 | 0.72849  | 4.267   | -1.0641 | 0.30565 | 0.51625 | -5.705  | 9873     |
| RPL21        | 83.009   | 83.009   | 292.24  | 1.064   | 0.30572 | 0.51625 | -5.7052 | 6144     |
| SFRP2        | -8.9146  | 8.9146   | 22.632  | -1.0639 | 0.30574 | 0.51625 | -5.7052 | 6423     |
| ICAM3        | 0.60789  | 0.60789  | 1.6209  | 1.0639  | 0.30575 | 0.51625 | -5.7053 | 3385     |
| MLF2         | 8.4549   | 8.4549   | 35.011  | 1.0639  | 0.30575 | 0.51625 | -5.7053 | 8079     |
| HMG2         | -11.881  | 11.881   | 38.817  | -1.0638 | 0.30578 | 0.51625 | -5.7053 | 3151     |
| LOC101929089 | -0.08112 | 0.081121 | 0.20105 | -1.0638 | 0.3058  | 0.51625 | -5.7054 | 1.02E+08 |

|           |          |          |         |         |         |         |         |        |
|-----------|----------|----------|---------|---------|---------|---------|---------|--------|
| ITGB3     | 0.87592  | 0.87592  | 2.7666  | 1.0637  | 0.30584 | 0.51625 | -5.7055 | 3690   |
| LSM5      | 0.348    | 0.348    | 1.4995  | 1.0637  | 0.30584 | 0.51625 | -5.7055 | 23658  |
| NEK2      | 0.21211  | 0.21211  | 0.45246 | 1.0636  | 0.30588 | 0.51625 | -5.7056 | 4751   |
| ZNF222    | 0.15576  | 0.15576  | 0.51913 | 1.0635  | 0.3059  | 0.51625 | -5.7056 | 7673   |
| BEST1     | -0.17849 | 0.17849  | 0.62295 | -1.0633 | 0.306   | 0.51637 | -5.7058 | 7439   |
| LILRB3    | 0.66104  | 0.66104  | 1.2757  | 1.0632  | 0.30605 | 0.5164  | -5.706  | 11025  |
| CFDP1     | 0.90632  | 0.90632  | 6.1549  | 1.063   | 0.30612 | 0.51646 | -5.7061 | 10428  |
| HNRNP11   | 0.74834  | 0.74834  | 3.8867  | 1.0625  | 0.30635 | 0.51681 | -5.7067 | 92906  |
| CABLES2   | -0.16362 | 0.16362  | 0.98808 | -1.0622 | 0.30647 | 0.51695 | -5.7069 | 81928  |
| ASAP1     | 1.0361   | 1.0361   | 6.4352  | 1.0621  | 0.30653 | 0.517   | -5.7071 | 50807  |
| MKRN1     | -1.282   | 1.282    | 9.8271  | -1.0618 | 0.30665 | 0.51701 | -5.7073 | 23608  |
| ANGPTL4   | 3.1671   | 3.1671   | 8.3335  | 1.0618  | 0.30666 | 0.51701 | -5.7074 | 51129  |
| ACTC1     | -0.57605 | 0.57605  | 0.56588 | -1.0618 | 0.30667 | 0.51701 | -5.7074 | 70     |
| PUM1      | -1.1894  | 1.1894   | 12.684  | -1.0617 | 0.30671 | 0.51701 | -5.7075 | 9698   |
| TIMM21    | 0.62215  | 0.62215  | 2.9018  | 1.0617  | 0.30672 | 0.51701 | -5.7075 | 29090  |
| SNAI2     | 4.1448   | 4.1448   | 13.058  | 1.0617  | 0.30673 | 0.51701 | -5.7075 | 6591   |
| CCDC149   | -0.46738 | 0.46738  | 1.4285  | -1.0615 | 0.30679 | 0.51701 | -5.7077 | 91050  |
| BDNF      | 0.13059  | 0.13059  | 0.31028 | 1.0615  | 0.30679 | 0.51701 | -5.7077 | 627    |
| CRYBB2    | -0.20491 | 0.20491  | 0.41133 | -1.0615 | 0.30681 | 0.51701 | -5.7077 | 1415   |
| NEMF      | 0.64379  | 0.64379  | 4.6465  | 1.0613  | 0.30689 | 0.51709 | -5.7079 | 9147   |
| PTGS1     | -2.8639  | 2.8639   | 15.795  | -1.0609 | 0.30705 | 0.5173  | -5.7083 | 5742   |
| GAB3      | -0.1795  | 0.1795   | 0.65352 | -1.0607 | 0.30716 | 0.51741 | -5.7085 | 139716 |
| LOC284454 | 2.872    | 2.872    | 7.4341  | 1.0606  | 0.30719 | 0.51741 | -5.7086 | 284454 |
| PLA2G4C   | -0.24519 | 0.24519  | 0.87935 | -1.0605 | 0.30723 | 0.51741 | -5.7087 | 8605   |
| B3GALT6   | -0.97263 | 0.97263  | 3.3006  | -1.0605 | 0.30725 | 0.51741 | -5.7087 | 126792 |
| TNN       | 0.077454 | 0.077454 | 0.12757 | 1.0604  | 0.30727 | 0.51741 | -5.7088 | 63923  |



|              |          |         |         |         |         |         |         |          |
|--------------|----------|---------|---------|---------|---------|---------|---------|----------|
| SLC39A8      | -1.6353  | 1.6353  | 2.6996  | -1.0602 | 0.30734 | 0.51749 | -5.7089 | 64116    |
| CDC5L        | 0.62808  | 0.62808 | 3.6196  | 1.0601  | 0.3074  | 0.51753 | -5.7091 | 988      |
| SRSF7        | 1.9526   | 1.9526  | 10.158  | 1.06    | 0.30743 | 0.51753 | -5.7091 | 6432     |
| RETN         | -0.31196 | 0.31196 | 0.27042 | -1.0598 | 0.30754 | 0.51753 | -5.7094 | 56729    |
| PCDH1        | 3.5917   | 3.5917  | 14.167  | 1.0598  | 0.30754 | 0.51753 | -5.7094 | 5097     |
| QDPR         | -0.94851 | 0.94851 | 4.0338  | -1.0598 | 0.30755 | 0.51753 | -5.7094 | 5860     |
| TASP1        | -0.33365 | 0.33365 | 2.0142  | -1.0597 | 0.30758 | 0.51753 | -5.7095 | 55617    |
| NDUFAB1      | 4.1353   | 4.1353  | 15.061  | 1.0597  | 0.30758 | 0.51753 | -5.7095 | 4706     |
| LOC100132062 | -0.25168 | 0.25168 | 0.80705 | -1.0595 | 0.30765 | 0.51755 | -5.7097 | 1E+08    |
| LOC100132287 | -0.25168 | 0.25168 | 0.80705 | -1.0595 | 0.30765 | 0.51755 | -5.7097 | 1E+08    |
| DNAL4        | -0.82186 | 0.82186 | 3.3814  | -1.0593 | 0.30775 | 0.51763 | -5.7099 | 10126    |
| TMEM33       | 0.93509  | 0.93509 | 4.9877  | 1.0593  | 0.30776 | 0.51763 | -5.7099 | 55161    |
| PTCD1        | -0.22799 | 0.22799 | 1.2292  | -1.0591 | 0.30783 | 0.5177  | -5.7101 | 26024    |
| DPAGT1       | 0.97839  | 0.97839 | 3.9517  | 1.0589  | 0.30793 | 0.51774 | -5.7103 | 1798     |
| LRRTM2       | -0.26231 | 0.26231 | 0.89153 | -1.0589 | 0.30794 | 0.51774 | -5.7103 | 26045    |
| PTGER2       | -0.16958 | 0.16958 | 0.37245 | -1.0588 | 0.30796 | 0.51774 | -5.7104 | 5732     |
| MIA-RAB4B    | -0.3342  | 0.3342  | 0.44307 | -1.0588 | 0.30798 | 0.51774 | -5.7104 | 1.01E+08 |
| ABCF3        | -1.2455  | 1.2455  | 7.1743  | -1.0586 | 0.30807 | 0.5178  | -5.7106 | 55324    |
| PAFAH1B2     | 1.482    | 1.482   | 6.6488  | 1.0586  | 0.30808 | 0.5178  | -5.7106 | 5049     |
| PLP2         | 22.434   | 22.434  | 108.09  | 1.0585  | 0.30811 | 0.5178  | -5.7107 | 5355     |
| ULK1         | 2.5475   | 2.5475  | 11.427  | 1.0584  | 0.30816 | 0.51783 | -5.7108 | 8408     |
| HAUS3        | -0.27984 | 0.27984 | 1.8661  | -1.0581 | 0.30829 | 0.51801 | -5.7111 | 79441    |
| OIP5-AS1     | 0.89863  | 0.89863 | 7.0807  | 1.0578  | 0.30843 | 0.51815 | -5.7114 | 729082   |
| CDCA7        | -0.90841 | 0.90841 | 2.5594  | -1.0577 | 0.30844 | 0.51815 | -5.7115 | 83879    |
| C1RL-AS1     | -0.42847 | 0.42847 | 1.3794  | -1.0576 | 0.30849 | 0.51817 | -5.7116 | 283314   |
| SLC44A3-AS1  | 0.7634   | 0.7634  | 2.5839  | 1.0575  | 0.30855 | 0.51823 | -5.7117 | 1.02E+08 |

|              |          |          |         |         |         |         |         |          |
|--------------|----------|----------|---------|---------|---------|---------|---------|----------|
| VPS35        | 1.7952   | 1.7952   | 10.464  | 1.0573  | 0.30862 | 0.5183  | -5.7119 | 55737    |
| HDDC3        | -0.6105  | 0.6105   | 2.5229  | -1.0571 | 0.30873 | 0.51835 | -5.7121 | 374659   |
| STX10        | 2.219    | 2.219    | 9.5385  | 1.0571  | 0.30873 | 0.51835 | -5.7121 | 8677     |
| CKMT1A       | 2.7036   | 2.7036   | 10.228  | 1.0571  | 0.30874 | 0.51835 | -5.7122 | 548596   |
| TRPM2        | -0.18902 | 0.18902  | 0.42186 | -1.0569 | 0.3088  | 0.51839 | -5.7123 | 7226     |
| OMA1         | -0.53674 | 0.53674  | 2.2605  | -1.0567 | 0.30891 | 0.51853 | -5.7125 | 115209   |
| DCAF13P3     | -0.15459 | 0.15459  | 0.48159 | -1.0564 | 0.30903 | 0.51868 | -5.7128 | 1E+08    |
| GLG1         | -1.4323  | 1.4323   | 10.846  | -1.0563 | 0.30906 | 0.51868 | -5.7129 | 2734     |
| COBL         | -0.72212 | 0.72212  | 3.0043  | -1.0562 | 0.30911 | 0.5187  | -5.713  | 23242    |
| FZR1         | 1.2779   | 1.2779   | 6.7522  | 1.0558  | 0.30929 | 0.51887 | -5.7134 | 51343    |
| MAGEH1       | 1.4101   | 1.4101   | 2.9917  | 1.0557  | 0.30932 | 0.51887 | -5.7135 | 28986    |
| DTYMK        | 1.4965   | 1.4965   | 4.525   | 1.0557  | 0.30933 | 0.51887 | -5.7135 | 1841     |
| LOC105369595 | -0.08869 | 0.088687 | 0.11042 | -1.0557 | 0.30933 | 0.51887 | -5.7135 | 1.05E+08 |
| URGCP        | -0.60562 | 0.60562  | 3.4553  | -1.0556 | 0.30938 | 0.51887 | -5.7136 | 55665    |
| INPP5F       | -0.31737 | 0.31737  | 2.5653  | -1.0556 | 0.30939 | 0.51887 | -5.7136 | 22876    |
| GRB2         | 2.9598   | 2.9598   | 13.864  | 1.0555  | 0.30944 | 0.5189  | -5.7137 | 2885     |
| COA4         | 2.5735   | 2.5735   | 9.7708  | 1.0553  | 0.30952 | 0.51898 | -5.7139 | 51287    |
| WDR47        | 1.1335   | 1.1335   | 5.8544  | 1.0552  | 0.30955 | 0.51898 | -5.714  | 22911    |
| SRY          | -0.64138 | 0.64138  | 1.8123  | -1.055  | 0.30965 | 0.51909 | -5.7142 | 6736     |
| CCDC117      | 0.41233  | 0.41233  | 2.9142  | 1.0549  | 0.30968 | 0.51909 | -5.7143 | 150275   |
| CEP57L1      | -0.10248 | 0.10248  | 0.47835 | -1.0549 | 0.30972 | 0.5191  | -5.7144 | 285753   |
| FOXRED2      | -0.87204 | 0.87204  | 2.8345  | -1.0547 | 0.30979 | 0.51917 | -5.7145 | 80020    |
| XRCC1        | -0.6696  | 0.6696   | 4.2618  | -1.0546 | 0.30985 | 0.51922 | -5.7147 | 7515     |
| ZBTB9        | -0.22858 | 0.22858  | 0.97598 | -1.0543 | 0.30994 | 0.51928 | -5.7149 | 221504   |
| LINC00909    | -0.1402  | 0.1402   | 0.82373 | -1.0543 | 0.30994 | 0.51928 | -5.7149 | 400657   |
| CSF2RA       | 0.23218  | 0.23218  | 0.61784 | 1.054   | 0.31011 | 0.5195  | -5.7153 | 1438     |

|           |          |         |         |         |         |         |         |          |
|-----------|----------|---------|---------|---------|---------|---------|---------|----------|
| PEX16     | -0.67642 | 0.67642 | 3.3661  | -1.0533 | 0.31041 | 0.51996 | -5.716  | 9409     |
| USP4      | -0.77803 | 0.77803 | 7.5303  | -1.0532 | 0.31044 | 0.51996 | -5.716  | 7375     |
| PPM1L     | -0.65683 | 0.65683 | 2.5153  | -1.0526 | 0.31073 | 0.52038 | -5.7167 | 151742   |
| SLC25A17  | 0.52818  | 0.52818 | 2.5617  | 1.0524  | 0.31078 | 0.52038 | -5.7168 | 10478    |
| TNFRSF10A | 0.92763  | 0.92763 | 3.6611  | 1.0524  | 0.31081 | 0.52038 | -5.7169 | 8797     |
| MCM7      | -1.7826  | 1.7826  | 7.3953  | -1.0524 | 0.31082 | 0.52038 | -5.7169 | 4176     |
| LRRC57    | 0.4663   | 0.4663  | 3.4718  | 1.0522  | 0.31088 | 0.52042 | -5.717  | 255252   |
| TBXAS1    | 0.56829  | 0.56829 | 1.3143  | 1.052   | 0.31096 | 0.52042 | -5.7172 | 6916     |
| DPP4      | -1.1141  | 1.1141  | 3.2348  | -1.052  | 0.31097 | 0.52042 | -5.7172 | 1803     |
| HSPD1     | 6.4137   | 6.4137  | 21.846  | 1.052   | 0.31099 | 0.52042 | -5.7173 | 3329     |
| CNP       | -1.9502  | 1.9502  | 8.2221  | -1.052  | 0.31099 | 0.52042 | -5.7173 | 1267     |
| MRFAP1    | 5.9053   | 5.9053  | 31.218  | 1.0517  | 0.3111  | 0.52054 | -5.7175 | 93621    |
| TMEM39A   | 0.58588  | 0.58588 | 2.7576  | 1.0516  | 0.31115 | 0.52058 | -5.7176 | 55254    |
| CNOT9     | 1.2243   | 1.2243  | 6.9693  | 1.0515  | 0.31119 | 0.52059 | -5.7177 | 9125     |
| TRIP12    | 1.5485   | 1.5485  | 10.207  | 1.0509  | 0.31148 | 0.52095 | -5.7184 | 9320     |
| GOLGA6L3  | -0.24269 | 0.24269 | 0.47902 | -1.0509 | 0.31148 | 0.52095 | -5.7184 | 1E+08    |
| PXN-AS1   | -0.20588 | 0.20588 | 0.90535 | -1.0508 | 0.3115  | 0.52095 | -5.7184 | 1.01E+08 |
| THAP5     | 0.36794  | 0.36794 | 1.691   | 1.0506  | 0.3116  | 0.52108 | -5.7187 | 168451   |
| ZNF780A   | -0.17727 | 0.17727 | 0.97463 | -1.0505 | 0.31165 | 0.52111 | -5.7188 | 284323   |
| ALOXE3    | 4.1302   | 4.1302  | 10.195  | 1.0501  | 0.31181 | 0.52131 | -5.7191 | 59344    |
| LCORL     | 0.1448   | 0.1448  | 0.74992 | 1.0497  | 0.31198 | 0.52148 | -5.7195 | 254251   |
| HECA      | 1.6591   | 1.6591  | 10.666  | 1.0496  | 0.31203 | 0.52148 | -5.7196 | 51696    |
| ZFAND5    | 1.7327   | 1.7327  | 8.876   | 1.0496  | 0.31204 | 0.52148 | -5.7197 | 7763     |
| TRAF3IP3  | 0.14396  | 0.14396 | 0.47702 | 1.0496  | 0.31205 | 0.52148 | -5.7197 | 80342    |
| OR5P2     | -0.17729 | 0.17729 | 0.38934 | -1.0496 | 0.31206 | 0.52148 | -5.7197 | 120065   |
| NKIRAS1   | 0.21944  | 0.21944 | 1.878   | 1.0493  | 0.31217 | 0.52157 | -5.7199 | 28512    |

|              |          |          |          |         |         |         |         |        |
|--------------|----------|----------|----------|---------|---------|---------|---------|--------|
| RGP1         | 1.4441   | 1.4441   | 7.6556   | 1.0492  | 0.3122  | 0.52157 | -5.72   | 9827   |
| SYNJ2        | 0.78883  | 0.78883  | 2.912    | 1.0492  | 0.3122  | 0.52157 | -5.72   | 8871   |
| CDK13        | -0.45624 | 0.45624  | 6.1489   | -1.0491 | 0.31226 | 0.52161 | -5.7202 | 8621   |
| TMEM67       | -0.12539 | 0.12539  | 0.53446  | -1.0489 | 0.31234 | 0.52169 | -5.7203 | 91147  |
| NCF1B        | -0.16431 | 0.16431  | 0.37859  | -1.0485 | 0.31251 | 0.52193 | -5.7207 | 654816 |
| HASPIN       | 0.1947   | 0.1947   | 0.49691  | 1.0484  | 0.31256 | 0.52196 | -5.7208 | 83903  |
| CENPT        | 3.1334   | 3.1334   | 12.806   | 1.0483  | 0.31261 | 0.52196 | -5.721  | 80152  |
| CAV2         | 2.1028   | 2.1028   | 9.5131   | 1.0483  | 0.31262 | 0.52196 | -5.721  | 858    |
| C12orf76     | -0.10439 | 0.10439  | 0.50707  | -1.0478 | 0.31283 | 0.52225 | -5.7214 | 400073 |
| ERG          | 0.51768  | 0.51768  | 1.8339   | 1.0472  | 0.3131  | 0.52264 | -5.722  | 2078   |
| KPRP         | 145.99   | 145.99   | 175.83   | 1.0466  | 0.31335 | 0.52302 | -5.7226 | 448834 |
| DERL2        | 0.57015  | 0.57015  | 2.7335   | 1.0465  | 0.31342 | 0.52308 | -5.7228 | 51009  |
| RTP4         | -0.47975 | 0.47975  | 0.88781  | -1.0463 | 0.31351 | 0.52317 | -5.723  | 64108  |
| LOC100287049 | -0.2336  | 0.2336   | 0.80486  | -1.0461 | 0.31361 | 0.52325 | -5.7232 | 1E+08  |
| FKBP9        | -4.769   | 4.769    | 24.909   | -1.0461 | 0.31361 | 0.52325 | -5.7232 | 11328  |
| C8orf37      | -0.1113  | 0.1113   | 0.46384  | -1.0459 | 0.31367 | 0.52329 | -5.7233 | 157657 |
| PGA4         | -0.08212 | 0.082118 | 0.090322 | -1.0459 | 0.3137  | 0.52329 | -5.7234 | 643847 |
| SHROOM2      | -0.42228 | 0.42228  | 1.66     | -1.0458 | 0.31375 | 0.52332 | -5.7235 | 357    |
| MIPEPP3      | -0.11773 | 0.11773  | 0.43792  | -1.0457 | 0.3138  | 0.52332 | -5.7236 | 650794 |
| FOXP2        | -0.15315 | 0.15315  | 0.80089  | -1.0456 | 0.31381 | 0.52332 | -5.7236 | 93986  |
| RPLP0        | 180.61   | 180.61   | 708.55   | 1.0449  | 0.31412 | 0.52376 | -5.7243 | 6175   |
| NKRF         | 0.24172  | 0.24172  | 1.5591   | 1.0449  | 0.31414 | 0.52376 | -5.7244 | 55922  |
| DNAJC11      | -1.0793  | 1.0793   | 5.9323   | -1.0448 | 0.3142  | 0.52381 | -5.7245 | 55735  |
| FRMPD1       | 2.1217   | 2.1217   | 2.1652   | 1.0447  | 0.31424 | 0.52382 | -5.7246 | 22844  |
| MIB2         | -1.7611  | 1.7611   | 6.2443   | -1.0445 | 0.31433 | 0.5239  | -5.7248 | 142678 |
| NSL1         | -0.15946 | 0.15946  | 0.67212  | -1.0444 | 0.31435 | 0.5239  | -5.7248 | 25936  |

|              |          |          |          |         |         |         |         |          |
|--------------|----------|----------|----------|---------|---------|---------|---------|----------|
| PRICKLE2-AS2 | -0.06939 | 0.069391 | 0.095196 | -1.0443 | 0.31438 | 0.5239  | -5.7249 | 1.01E+08 |
| MZT2A        | 7.664    | 7.664    | 18.512   | 1.0443  | 0.31441 | 0.52391 | -5.725  | 653784   |
| WEE1         | -1.3777  | 1.3777   | 5.0493   | -1.0441 | 0.31448 | 0.52395 | -5.7251 | 7465     |
| PPFIBP2      | 0.67673  | 0.67673  | 4.4463   | 1.044   | 0.31452 | 0.52395 | -5.7252 | 8495     |
| TBKBP1       | -0.44007 | 0.44007  | 1.5087   | -1.044  | 0.31453 | 0.52395 | -5.7253 | 9755     |
| SPAG5-AS1    | -0.16267 | 0.16267  | 0.564    | -1.0438 | 0.31461 | 0.52404 | -5.7254 | 1.01E+08 |
| MMP3         | 12.627   | 12.627   | 14.015   | 1.0437  | 0.31466 | 0.52405 | -5.7255 | 4314     |
| PTPN6        | -0.72065 | 0.72065  | 3.8021   | -1.0436 | 0.3147  | 0.52408 | -5.7256 | 5777     |
| PLPP1        | 2.6246   | 2.6246   | 9.8404   | 1.0435  | 0.31478 | 0.52416 | -5.7258 | 8611     |
| SERPINA1     | 1.5003   | 1.5003   | 2.331    | 1.0433  | 0.31486 | 0.52423 | -5.726  | 5265     |
| PRICKLE4     | -0.38378 | 0.38378  | 1.4321   | -1.0431 | 0.31492 | 0.52429 | -5.7261 | 29964    |
| ZNF25        | -0.27761 | 0.27761  | 1.1593   | -1.043  | 0.31496 | 0.52429 | -5.7262 | 219749   |
| SLC16A2      | 0.39323  | 0.39323  | 1.6847   | 1.0429  | 0.31501 | 0.52429 | -5.7263 | 6567     |
| ZNF771       | -0.23693 | 0.23693  | 0.64181  | -1.0429 | 0.31504 | 0.52429 | -5.7264 | 51333    |
| TUSC8        | -0.08423 | 0.084228 | 0.091204 | -1.0428 | 0.31507 | 0.52429 | -5.7265 | 400128   |
| RHEB         | 1.8454   | 1.8454   | 8.8762   | 1.0427  | 0.3151  | 0.52429 | -5.7265 | 6009     |
| SNHG12       | 0.61693  | 0.61693  | 3.3538   | 1.0427  | 0.31511 | 0.52429 | -5.7266 | 85028    |
| NAGPA        | -0.47734 | 0.47734  | 2.0035   | -1.0426 | 0.31514 | 0.5243  | -5.7266 | 51172    |
| KLHL8        | -0.20155 | 0.20155  | 1.2097   | -1.042  | 0.31545 | 0.52475 | -5.7273 | 57563    |
| ASAP1-IT1    | -0.29526 | 0.29526  | 1.0131   | -1.0415 | 0.31565 | 0.52504 | -5.7278 | 29065    |
| TATDN3       | -0.28553 | 0.28553  | 1.5778   | -1.0412 | 0.3158  | 0.52524 | -5.7281 | 128387   |
| C11orf1      | -0.50112 | 0.50112  | 2.5441   | -1.0401 | 0.31626 | 0.52595 | -5.7291 | 64776    |
| DSE          | 0.96966  | 0.96966  | 3.9279   | 1.04    | 0.31631 | 0.52596 | -5.7292 | 29940    |
| LOC100996447 | -0.09918 | 0.099184 | 0.28837  | -1.04   | 0.31633 | 0.52596 | -5.7293 | 1.01E+08 |
| LOC105373383 | -0.13256 | 0.13256  | 0.29896  | -1.0399 | 0.31639 | 0.52596 | -5.7294 | 1.05E+08 |
| UPK3BL2      | -1.1534  | 1.1534   | 3.416    | -1.0398 | 0.3164  | 0.52596 | -5.7294 | 1.08E+08 |

|              |          |          |         |         |         |         |         |          |
|--------------|----------|----------|---------|---------|---------|---------|---------|----------|
| PCK2         | 1.4456   | 1.4456   | 3.8033  | 1.0398  | 0.31643 | 0.52596 | -5.7295 | 5106     |
| CPD          | 1.4676   | 1.4676   | 6.0644  | 1.0396  | 0.31649 | 0.52596 | -5.7296 | 1362     |
| HOXB5        | -0.09125 | 0.091253 | 0.14958 | -1.0396 | 0.31649 | 0.52596 | -5.7296 | 3215     |
| CAPN10       | -0.59542 | 0.59542  | 2.249   | -1.0396 | 0.31652 | 0.52596 | -5.7297 | 11132    |
| ATP8A1       | -0.19408 | 0.19408  | 0.5384  | -1.0395 | 0.31656 | 0.52599 | -5.7298 | 10396    |
| SMARCA5-AS1  | -0.54129 | 0.54129  | 0.65537 | -1.0392 | 0.31667 | 0.52606 | -5.73   | 1E+08    |
| SLC35G2      | 0.30899  | 0.30899  | 1.0303  | 1.0392  | 0.31667 | 0.52606 | -5.73   | 80723    |
| RFC1         | -0.79768 | 0.79768  | 4.7112  | -1.0391 | 0.31674 | 0.52612 | -5.7302 | 5981     |
| REP15        | 0.14718  | 0.14718  | 0.49126 | 1.039   | 0.31678 | 0.52614 | -5.7303 | 387849   |
| ASPRV1       | 165.12   | 165.12   | 162.43  | 1.0389  | 0.31683 | 0.52618 | -5.7304 | 151516   |
| ZNF358       | -2.5707  | 2.5707   | 7.1245  | -1.0384 | 0.31702 | 0.52639 | -5.7308 | 140467   |
| LOC105447645 | -0.11581 | 0.11581  | 0.40148 | -1.0384 | 0.31703 | 0.52639 | -5.7308 | 1.05E+08 |
| ZNF202       | -0.1739  | 0.1739   | 1.2421  | -1.0383 | 0.31707 | 0.52641 | -5.7309 | 7753     |
| BTBD19       | 0.60155  | 0.60155  | 1.8817  | 1.0383  | 0.3171  | 0.52641 | -5.731  | 149478   |
| CDC26        | 1.4665   | 1.4665   | 6.1694  | 1.0381  | 0.31716 | 0.52642 | -5.7311 | 246184   |
| CNNM4        | 5.3071   | 5.3071   | 5.8853  | 1.0381  | 0.31717 | 0.52642 | -5.7311 | 26504    |
| BET1         | 0.28036  | 0.28036  | 1.0369  | 1.0379  | 0.31726 | 0.52652 | -5.7313 | 10282    |
| LOC101928008 | -0.11071 | 0.11071  | 0.25721 | -1.0376 | 0.31739 | 0.52669 | -5.7316 | 1.02E+08 |
| ARV1         | 0.71641  | 0.71641  | 3.2084  | 1.0375  | 0.31744 | 0.52672 | -5.7317 | 64801    |
| OSTCP1       | -0.08802 | 0.088016 | 0.205   | -1.037  | 0.31765 | 0.52701 | -5.7322 | 202459   |
| FBXO46       | 1.4769   | 1.4769   | 5.7193  | 1.0367  | 0.3178  | 0.52707 | -5.7325 | 23403    |
| SCLT1        | 0.20052  | 0.20052  | 1.2523  | 1.0367  | 0.31781 | 0.52707 | -5.7326 | 132320   |
| RUBCNL       | 0.39117  | 0.39117  | 0.79747 | 1.0367  | 0.31782 | 0.52707 | -5.7326 | 80183    |
| RAD21        | 2.3952   | 2.3952   | 13.748  | 1.0367  | 0.31782 | 0.52707 | -5.7326 | 5885     |
| CTSG         | -1.6907  | 1.6907   | 6.9164  | -1.0366 | 0.31784 | 0.52707 | -5.7326 | 1511     |
| DLGAP1-AS1   | -0.28883 | 0.28883  | 0.79261 | -1.0364 | 0.31794 | 0.52719 | -5.7328 | 649446   |

|            |          |          |         |         |         |         |         |          |
|------------|----------|----------|---------|---------|---------|---------|---------|----------|
| ZNF319     | 0.50652  | 0.50652  | 2.2238  | 1.0362  | 0.31801 | 0.52722 | -5.733  | 57567    |
| SLC35A1    | 0.55098  | 0.55098  | 3.4298  | 1.0362  | 0.31802 | 0.52722 | -5.733  | 10559    |
| C3orf33    | -0.08024 | 0.08024  | 0.31635 | -1.0356 | 0.31831 | 0.52765 | -5.7337 | 285315   |
| ZNF84      | -0.15359 | 0.15359  | 0.66204 | -1.0352 | 0.31846 | 0.52784 | -5.734  | 7637     |
| ACTL10     | -0.26413 | 0.26413  | 0.67105 | -1.0351 | 0.31853 | 0.52789 | -5.7341 | 170487   |
| ZNF697     | 0.22205  | 0.22205  | 0.95347 | 1.0349  | 0.31863 | 0.52802 | -5.7343 | 90874    |
| TCFL5      | -0.30061 | 0.30061  | 1.9753  | -1.0347 | 0.31872 | 0.52811 | -5.7345 | 10732    |
| CCDC50     | -0.77084 | 0.77084  | 3.6162  | -1.0345 | 0.31879 | 0.52819 | -5.7347 | 152137   |
| COMMD3     | 2.1192   | 2.1192   | 8.0779  | 1.0343  | 0.31887 | 0.52826 | -5.7349 | 23412    |
| ESAM       | 2.7696   | 2.7696   | 8.9058  | 1.0339  | 0.31908 | 0.52851 | -5.7353 | 90952    |
| WASHC3     | 1.8855   | 1.8855   | 5.8483  | 1.0339  | 0.31908 | 0.52851 | -5.7353 | 51019    |
| SRD5A3-AS1 | -0.09087 | 0.090867 | 0.23901 | -1.0337 | 0.31914 | 0.52855 | -5.7355 | 1.01E+08 |
| ADAMTS9    | 2.1721   | 2.1721   | 4.0847  | 1.0334  | 0.3193  | 0.52873 | -5.7358 | 56999    |
| TMEM223    | -0.65786 | 0.65786  | 2.9019  | -1.0333 | 0.31935 | 0.52873 | -5.7359 | 79064    |
| MCPH1-AS1  | -0.07169 | 0.071694 | 0.15042 | -1.0332 | 0.31936 | 0.52873 | -5.736  | 1.01E+08 |
| LHPP       | -0.79897 | 0.79897  | 3.3647  | -1.0332 | 0.31937 | 0.52873 | -5.736  | 64077    |
| MAK16      | 0.62776  | 0.62776  | 2.7777  | 1.0331  | 0.31942 | 0.52876 | -5.7361 | 84549    |
| ASRGL1     | -0.30379 | 0.30379  | 0.52571 | -1.033  | 0.31947 | 0.52879 | -5.7362 | 80150    |
| SLC2A5     | -0.8121  | 0.8121   | 1.0659  | -1.0329 | 0.31952 | 0.52881 | -5.7363 | 6518     |
| SBF2-AS1   | -0.20323 | 0.20323  | 0.96648 | -1.0325 | 0.31971 | 0.52905 | -5.7367 | 283104   |
| SMC2       | 0.44062  | 0.44062  | 1.9644  | 1.0324  | 0.31975 | 0.52905 | -5.7368 | 10592    |
| FAM98C     | -1.0255  | 1.0255   | 4.4132  | -1.0324 | 0.31976 | 0.52905 | -5.7368 | 147965   |
| SLC51B     | -0.0826  | 0.082599 | 0.13306 | -1.0322 | 0.31984 | 0.52911 | -5.737  | 123264   |
| PRR7       | -0.1945  | 0.1945   | 1.0202  | -1.0321 | 0.31986 | 0.52911 | -5.737  | 80758    |
| RBBP8      | 1.3797   | 1.3797   | 5.545   | 1.0321  | 0.31989 | 0.52911 | -5.7371 | 5932     |
| GPALPP1    | -0.33111 | 0.33111  | 2.1356  | -1.032  | 0.31992 | 0.52912 | -5.7372 | 55425    |

|             |          |          |         |         |         |         |         |          |
|-------------|----------|----------|---------|---------|---------|---------|---------|----------|
| TBCCD1      | -0.23236 | 0.23236  | 2.0371  | -1.0319 | 0.31998 | 0.52916 | -5.7373 | 55171    |
| KAZALD1     | 0.34893  | 0.34893  | 0.78904 | 1.0314  | 0.32018 | 0.52944 | -5.7377 | 81621    |
| APIP        | 0.67707  | 0.67707  | 2.7467  | 1.0313  | 0.32023 | 0.52947 | -5.7379 | 51074    |
| AXIN1       | -0.89719 | 0.89719  | 4.6913  | -1.0312 | 0.32029 | 0.52951 | -5.738  | 8312     |
| SP6         | 1.1865   | 1.1865   | 2.8011  | 1.031   | 0.32037 | 0.52961 | -5.7382 | 80320    |
| SULT1B1     | 0.092409 | 0.092409 | 0.10055 | 1.0302  | 0.32073 | 0.53014 | -5.7389 | 27284    |
| CKLF        | 1.6689   | 1.6689   | 3.7556  | 1.0301  | 0.32076 | 0.53014 | -5.739  | 51192    |
| TUSC2       | 1.032    | 1.032    | 4.6203  | 1.0296  | 0.32099 | 0.53047 | -5.7395 | 11334    |
| MEIS3       | 0.93174  | 0.93174  | 1.8973  | 1.0293  | 0.32116 | 0.5305  | -5.7399 | 56917    |
| ESYT3       | 1.803    | 1.803    | 3.977   | 1.0292  | 0.32118 | 0.5305  | -5.7399 | 83850    |
| ACACA       | 1.6848   | 1.6848   | 7.7745  | 1.0292  | 0.32118 | 0.5305  | -5.7399 | 31       |
| ZNF624      | 0.13394  | 0.13394  | 0.88573 | 1.0292  | 0.32119 | 0.5305  | -5.7399 | 57547    |
| DCXR        | -3.2296  | 3.2296   | 12.314  | -1.0292 | 0.32119 | 0.5305  | -5.74   | 51181    |
| LINC00957   | -0.42228 | 0.42228  | 1.365   | -1.0292 | 0.3212  | 0.5305  | -5.74   | 255031   |
| SOCS1       | 0.61461  | 0.61461  | 1.5873  | 1.0285  | 0.32151 | 0.53097 | -5.7406 | 8651     |
| SPG21       | 2.4738   | 2.4738   | 13.697  | 1.0282  | 0.32162 | 0.531   | -5.7409 | 51324    |
| ODF3B       | -2.3324  | 2.3324   | 6.6703  | -1.0282 | 0.32163 | 0.531   | -5.7409 | 440836   |
| TAF1B       | 0.85136  | 0.85136  | 3.2111  | 1.0282  | 0.32165 | 0.531   | -5.741  | 9014     |
| MEIS1       | -0.41571 | 0.41571  | 2.6754  | -1.0282 | 0.32166 | 0.531   | -5.741  | 4211     |
| ALOX12-AS1  | -0.09955 | 0.099553 | 0.34309 | -1.0281 | 0.32169 | 0.531   | -5.741  | 1.01E+08 |
| GRK3        | -0.19045 | 0.19045  | 1.2888  | -1.028  | 0.32176 | 0.53104 | -5.7412 | 157      |
| NPBWR1      | 0.10058  | 0.10058  | 0.14291 | 1.0279  | 0.32178 | 0.53104 | -5.7412 | 2831     |
| FOXP1       | 0.74422  | 0.74422  | 5.5738  | 1.0278  | 0.32181 | 0.53105 | -5.7413 | 27086    |
| AHCY        | 2.5485   | 2.5485   | 10.109  | 1.0276  | 0.32191 | 0.53113 | -5.7415 | 191      |
| CORO7-PAM16 | -0.23684 | 0.23684  | 0.71797 | -1.0276 | 0.32192 | 0.53113 | -5.7415 | 1.01E+08 |
| SH3RF3-AS1  | -0.58847 | 0.58847  | 1.2807  | -1.0273 | 0.32206 | 0.53127 | -5.7418 | 1E+08    |



|             |          |          |          |         |         |         |         |          |
|-------------|----------|----------|----------|---------|---------|---------|---------|----------|
| LGALS3BP    | -6.582   | 6.582    | 16.784   | -1.0272 | 0.32209 | 0.53127 | -5.7419 | 3959     |
| ATP2C1      | 1.47     | 1.47     | 8.934    | 1.0272  | 0.32211 | 0.53127 | -5.7419 | 27032    |
| UBTD1       | 1.7707   | 1.7707   | 6.7964   | 1.0271  | 0.32213 | 0.53127 | -5.742  | 80019    |
| ATAD2       | 0.44967  | 0.44967  | 2.0235   | 1.027   | 0.32217 | 0.53128 | -5.7421 | 29028    |
| TTI2        | 0.35677  | 0.35677  | 1.8358   | 1.0269  | 0.32225 | 0.53135 | -5.7422 | 80185    |
| CERS6-AS1   | 0.082345 | 0.082345 | 0.15883  | 1.0268  | 0.32229 | 0.53137 | -5.7423 | 1.01E+08 |
| GEMIN7      | 0.40341  | 0.40341  | 2.2388   | 1.0267  | 0.32233 | 0.53138 | -5.7424 | 79760    |
| KBTBD2      | 0.82104  | 0.82104  | 4.8509   | 1.0266  | 0.32238 | 0.53141 | -5.7425 | 25948    |
| TMEM14EP    | -0.87861 | 0.87861  | 2.9593   | -1.0261 | 0.3226  | 0.53173 | -5.743  | 645843   |
| GJA9-MYCBP  | -0.13518 | 0.13518  | 0.7133   | -1.026  | 0.32264 | 0.53173 | -5.7431 | 1.01E+08 |
| COQ7        | -0.37455 | 0.37455  | 2.1805   | -1.0258 | 0.32274 | 0.53183 | -5.7433 | 10229    |
| YTHDF2      | 2.45     | 2.45     | 13.361   | 1.0258  | 0.32276 | 0.53183 | -5.7433 | 51441    |
| PDIA3       | 8.146    | 8.146    | 37.47    | 1.0252  | 0.32302 | 0.53221 | -5.7439 | 2923     |
| GIPC2       | -0.16826 | 0.16826  | 0.78758  | -1.0247 | 0.32322 | 0.53246 | -5.7443 | 54810    |
| ITPKB-IT1   | -0.11722 | 0.11722  | 0.27432  | -1.0247 | 0.32324 | 0.53246 | -5.7444 | 1.01E+08 |
| LINC01752   | -0.09482 | 0.094822 | 0.42488  | -1.0245 | 0.3233  | 0.53252 | -5.7445 | 1.02E+08 |
| FCMR        | 0.31225  | 0.31225  | 0.74447  | 1.0245  | 0.32335 | 0.53252 | -5.7446 | 9214     |
| SLC37A2     | 8.9627   | 8.9627   | 11.512   | 1.0244  | 0.32337 | 0.53252 | -5.7447 | 219855   |
| ARHGEF9-IT1 | -0.07014 | 0.070138 | 0.068389 | -1.0243 | 0.3234  | 0.53253 | -5.7447 | 1.01E+08 |
| GMPPA       | 1.1199   | 1.1199   | 4.8138   | 1.0242  | 0.32348 | 0.5326  | -5.7449 | 29926    |
| MMP23A      | 0.17391  | 0.17391  | 0.17206  | 1.0238  | 0.32367 | 0.53286 | -5.7453 | 8511     |
| SACM1L      | 0.63347  | 0.63347  | 3.7582   | 1.0235  | 0.32377 | 0.53297 | -5.7455 | 22908    |
| PTX3        | -6.1927  | 6.1927   | 3.9877   | -1.0234 | 0.32381 | 0.53299 | -5.7456 | 5806     |
| ST3GAL6     | -0.17904 | 0.17904  | 1.2086   | -1.0234 | 0.32384 | 0.53299 | -5.7457 | 10402    |
| ARHGEF35    | -1.2182  | 1.2182   | 6.3902   | -1.0232 | 0.32394 | 0.5331  | -5.7459 | 445328   |
| IRF2BP2     | -2.2289  | 2.2289   | 22.341   | -1.023  | 0.32402 | 0.53318 | -5.7461 | 359948   |

|            |          |          |         |         |         |         |         |          |
|------------|----------|----------|---------|---------|---------|---------|---------|----------|
| FAM234A    | -1.2822  | 1.2822   | 6.5333  | -1.0228 | 0.32409 | 0.53324 | -5.7462 | 83986    |
| PRKCD      | 1.0104   | 1.0104   | 6.3286  | 1.0226  | 0.32421 | 0.53333 | -5.7465 | 5580     |
| SYCE2      | -0.08381 | 0.083806 | 0.2061  | -1.0225 | 0.32422 | 0.53333 | -5.7465 | 256126   |
| FBLN1      | -9.5623  | 9.5623   | 22.213  | -1.0225 | 0.32424 | 0.53333 | -5.7465 | 2192     |
| MIR4453HG  | -0.08695 | 0.086945 | 0.57459 | -1.022  | 0.32446 | 0.5336  | -5.747  | 54553    |
| KCTD7      | -0.24566 | 0.24566  | 1.2717  | -1.022  | 0.32447 | 0.5336  | -5.747  | 154881   |
| CFAP157    | -0.08903 | 0.089029 | 0.24618 | -1.0218 | 0.32455 | 0.53364 | -5.7472 | 286207   |
| SEC22B     | 2.3905   | 2.3905   | 9.9712  | 1.0218  | 0.32455 | 0.53364 | -5.7472 | 9554     |
| TMCC2      | 0.17807  | 0.17807  | 0.64229 | 1.0217  | 0.32459 | 0.53365 | -5.7473 | 9911     |
| SPINT1-AS1 | -0.9074  | 0.9074   | 2.8528  | -1.0217 | 0.32462 | 0.53365 | -5.7474 | 1.03E+08 |
| COPE       | 7.1215   | 7.1215   | 28.394  | 1.0214  | 0.32472 | 0.53376 | -5.7476 | 11316    |
| AP2A2      | -1.1669  | 1.1669   | 6.3424  | -1.0211 | 0.32486 | 0.53392 | -5.7479 | 161      |
| GLE1       | -0.63012 | 0.63012  | 4.7431  | -1.0211 | 0.32488 | 0.53392 | -5.7479 | 2733     |
| MBNL3      | -0.3073  | 0.3073   | 1.7989  | -1.0209 | 0.32498 | 0.53403 | -5.7481 | 55796    |
| TENT2      | -0.52317 | 0.52317  | 3.9888  | -1.0207 | 0.32508 | 0.53414 | -5.7483 | 167153   |
| ADNP-AS1   | -0.14657 | 0.14657  | 0.53207 | -1.0204 | 0.32521 | 0.5343  | -5.7486 | 1.02E+08 |
| CLPP       | 2.635    | 2.635    | 10.117  | 1.02    | 0.3254  | 0.53456 | -5.749  | 8192     |
| INPP4A     | -0.34323 | 0.34323  | 1.9928  | -1.0198 | 0.32549 | 0.53466 | -5.7492 | 3631     |
| GNB2       | 15.92    | 15.92    | 70.163  | 1.0196  | 0.32555 | 0.53471 | -5.7494 | 2783     |
| NOL7       | 1.4703   | 1.4703   | 7.1115  | 1.0195  | 0.32562 | 0.53475 | -5.7495 | 51406    |
| LPAR6      | 1.105    | 1.105    | 5.0916  | 1.0194  | 0.32564 | 0.53475 | -5.7495 | 10161    |
| GHDC       | -0.71816 | 0.71816  | 2.3381  | -1.019  | 0.32583 | 0.535   | -5.7499 | 84514    |
| DHCR7      | 4.6753   | 4.6753   | 15.298  | 1.0177  | 0.32644 | 0.53596 | -5.7512 | 1717     |
| PTPN23     | -1.5193  | 1.5193   | 8.2019  | -1.0176 | 0.32648 | 0.53598 | -5.7513 | 25930    |
| PILRA      | 1.2568   | 1.2568   | 2.5298  | 1.0175  | 0.32652 | 0.53598 | -5.7514 | 29992    |
| SLC9B1     | -0.06853 | 0.068527 | 0.12353 | -1.0174 | 0.32657 | 0.53599 | -5.7515 | 150159   |

|          |          |          |         |         |         |         |         |          |
|----------|----------|----------|---------|---------|---------|---------|---------|----------|
| ALG8     | 0.77485  | 0.77485  | 3.2019  | 1.0174  | 0.32659 | 0.53599 | -5.7516 | 79053    |
| RPS23    | 26.61    | 26.61    | 85.623  | 1.0171  | 0.32672 | 0.53616 | -5.7519 | 6228     |
| ZNF626   | -0.15976 | 0.15976  | 0.60365 | -1.0167 | 0.32689 | 0.53639 | -5.7522 | 199777   |
| ARHGAP4  | -0.82813 | 0.82813  | 2.1998  | -1.0166 | 0.32693 | 0.5364  | -5.7523 | 393      |
| CGREF1   | -0.16321 | 0.16321  | 0.42918 | -1.0163 | 0.32708 | 0.53659 | -5.7526 | 10669    |
| ZNF546   | -0.07966 | 0.07966  | 0.20723 | -1.016  | 0.3272  | 0.53663 | -5.7529 | 339327   |
| MCTP1    | 0.88344  | 0.88344  | 2.6675  | 1.016   | 0.32721 | 0.53663 | -5.7529 | 79772    |
| TLNRD1   | 1.6468   | 1.6468   | 5.4496  | 1.016   | 0.32721 | 0.53663 | -5.7529 | 59274    |
| ZNF592   | -0.54466 | 0.54466  | 5.0572  | -1.0159 | 0.32726 | 0.53663 | -5.753  | 9640     |
| MRPL46   | 1.0589   | 1.0589   | 4.7264  | 1.0159  | 0.32726 | 0.53663 | -5.753  | 26589    |
| BEX4     | -1.0047  | 1.0047   | 3.3693  | -1.0158 | 0.32729 | 0.53663 | -5.7531 | 56271    |
| LAMC1    | 5.5141   | 5.5141   | 19.881  | 1.0155  | 0.32744 | 0.53669 | -5.7534 | 3915     |
| ZNF398   | -0.2983  | 0.2983   | 3.3535  | -1.0155 | 0.32745 | 0.53669 | -5.7534 | 57541    |
| CYP19A1  | -3.2082  | 3.2082   | 1.8483  | -1.0154 | 0.32747 | 0.53669 | -5.7534 | 1588     |
| VNN2     | 0.96014  | 0.96014  | 1.0973  | 1.0152  | 0.32756 | 0.53669 | -5.7536 | 8875     |
| SNRPE    | 1.5543   | 1.5543   | 4.6069  | 1.0152  | 0.32757 | 0.53669 | -5.7536 | 6635     |
| MRPL2    | -1.0933  | 1.0933   | 4.652   | -1.0152 | 0.32758 | 0.53669 | -5.7537 | 51069    |
| CDC45    | 0.43061  | 0.43061  | 0.97732 | 1.0151  | 0.32761 | 0.53669 | -5.7537 | 8318     |
| BTN2A1   | -0.43018 | 0.43018  | 2.7456  | -1.0151 | 0.32763 | 0.53669 | -5.7538 | 11120    |
| UBXN7    | -0.44276 | 0.44276  | 5.5147  | -1.0151 | 0.32763 | 0.53669 | -5.7538 | 26043    |
| BCORL1   | -0.27031 | 0.27031  | 1.3599  | -1.0151 | 0.32764 | 0.53669 | -5.7538 | 63035    |
| LMO7-AS1 | -0.13658 | 0.13658  | 0.31683 | -1.0149 | 0.32772 | 0.53676 | -5.754  | 1.02E+08 |
| AAMDC    | -0.45065 | 0.45065  | 1.7359  | -1.0148 | 0.32776 | 0.53677 | -5.7541 | 28971    |
| RFX8     | -0.16222 | 0.16222  | 0.37291 | -1.0147 | 0.32781 | 0.53677 | -5.7542 | 731220   |
| NAAA     | -0.42544 | 0.42544  | 2.0553  | -1.0147 | 0.32782 | 0.53677 | -5.7542 | 27163    |
| PIH1D2   | 0.071239 | 0.071239 | 0.21175 | 1.0146  | 0.32786 | 0.53677 | -5.7543 | 120379   |

|              |          |          |         |         |         |         |         |          |
|--------------|----------|----------|---------|---------|---------|---------|---------|----------|
| ADAMTSL1     | 0.36633  | 0.36633  | 0.58811 | 1.0145  | 0.32789 | 0.53677 | -5.7543 | 92949    |
| ZNF177       | -0.09144 | 0.09144  | 0.14745 | -1.0144 | 0.32793 | 0.5368  | -5.7544 | 7730     |
| PTOV1-AS1    | -0.19699 | 0.19699  | 1.532   | -1.014  | 0.32812 | 0.53705 | -5.7548 | 1.01E+08 |
| CBR3         | 3.6026   | 3.6026   | 12.324  | 1.0139  | 0.32818 | 0.5371  | -5.755  | 874      |
| ZFYVE21      | -1.9946  | 1.9946   | 12.586  | -1.0135 | 0.32838 | 0.53735 | -5.7554 | 79038    |
| PGBD1        | 0.14396  | 0.14396  | 0.58362 | 1.0134  | 0.3284  | 0.53735 | -5.7554 | 84547    |
| PICK1        | -0.68997 | 0.68997  | 3.5728  | -1.0131 | 0.32853 | 0.53743 | -5.7557 | 9463     |
| CIR1         | 1.0366   | 1.0366   | 5.3878  | 1.0131  | 0.32854 | 0.53743 | -5.7557 | 9541     |
| ULK4P3       | -0.06871 | 0.068706 | 0.12577 | -1.0131 | 0.32854 | 0.53743 | -5.7557 | 89837    |
| AKIP1        | 0.9173   | 0.9173   | 2.8025  | 1.0129  | 0.32862 | 0.53748 | -5.7559 | 56672    |
| DHX8         | -0.6322  | 0.6322   | 4.743   | -1.0129 | 0.32864 | 0.53748 | -5.7559 | 1659     |
| STAB2        | 0.16797  | 0.16797  | 0.36884 | 1.0125  | 0.32881 | 0.5377  | -5.7563 | 55576    |
| ATR          | -0.40121 | 0.40121  | 2.5823  | -1.0123 | 0.32892 | 0.53781 | -5.7565 | 545      |
| UQCC2        | 1.4566   | 1.4566   | 5.1658  | 1.0123  | 0.32894 | 0.53781 | -5.7565 | 84300    |
| LOC100287896 | -0.12465 | 0.12465  | 0.47588 | -1.0122 | 0.32897 | 0.53782 | -5.7566 | 1E+08    |
| CD160        | -0.14406 | 0.14406  | 0.35884 | -1.012  | 0.32907 | 0.53793 | -5.7568 | 11126    |
| FAM13B       | -0.57303 | 0.57303  | 3.3854  | -1.0119 | 0.32911 | 0.53795 | -5.7569 | 51306    |
| CGGBP1       | 0.79191  | 0.79191  | 5.4453  | 1.0115  | 0.32927 | 0.53813 | -5.7572 | 8545     |
| FGF10        | -0.50351 | 0.50351  | 0.74722 | -1.0115 | 0.32929 | 0.53813 | -5.7573 | 2255     |
| LINC01140    | 0.16444  | 0.16444  | 0.36523 | 1.0114  | 0.32935 | 0.53818 | -5.7574 | 339524   |
| UNC119B      | -0.79786 | 0.79786  | 4.5243  | -1.0113 | 0.32939 | 0.53819 | -5.7575 | 84747    |
| ITPK1        | -0.98545 | 0.98545  | 3.6735  | -1.0107 | 0.32963 | 0.53853 | -5.758  | 3705     |
| VIM-AS1      | 0.12487  | 0.12487  | 0.31112 | 1.0105  | 0.32974 | 0.53861 | -5.7582 | 1.01E+08 |
| FBXO36       | -0.18229 | 0.18229  | 1.0399  | -1.0105 | 0.32976 | 0.53861 | -5.7583 | 130888   |
| SPATA13      | -0.583   | 0.583    | 1.8801  | -1.0104 | 0.32977 | 0.53861 | -5.7583 | 221178   |
| HYPK         | -0.83283 | 0.83283  | 3.8731  | -1.0102 | 0.32989 | 0.53874 | -5.7585 | 25764    |

|              |          |          |         |         |         |         |         |          |
|--------------|----------|----------|---------|---------|---------|---------|---------|----------|
| LINC00673    | 0.53607  | 0.53607  | 4.0221  | 1.0099  | 0.33001 | 0.53888 | -5.7588 | 1E+08    |
| STK4         | 0.68952  | 0.68952  | 4.1961  | 1.0099  | 0.33004 | 0.53888 | -5.7589 | 6789     |
| SPPL2A       | 1.8236   | 1.8236   | 10.365  | 1.0097  | 0.33013 | 0.53898 | -5.7591 | 84888    |
| AKR1B10      | 17.64    | 17.64    | 37.43   | 1.0094  | 0.33027 | 0.53916 | -5.7593 | 57016    |
| MRPL58       | 1.4889   | 1.4889   | 6.7762  | 1.0089  | 0.33049 | 0.53943 | -5.7598 | 3396     |
| POLB         | 2.0945   | 2.0945   | 5.4355  | 1.0089  | 0.3305  | 0.53943 | -5.7598 | 5423     |
| ZFHX4        | -0.48227 | 0.48227  | 1.1477  | -1.0084 | 0.3307  | 0.5397  | -5.7602 | 79776    |
| GAMT         | -1.4461  | 1.4461   | 3.2889  | -1.0083 | 0.33075 | 0.53973 | -5.7604 | 2593     |
| FAM76B       | -0.28671 | 0.28671  | 1.3602  | -1.0083 | 0.33079 | 0.53974 | -5.7604 | 143684   |
| SLC38A1      | 2.1045   | 2.1045   | 9.9852  | 1.0079  | 0.33095 | 0.53995 | -5.7608 | 81539    |
| HPS3         | -0.33419 | 0.33419  | 1.6687  | -1.0078 | 0.33099 | 0.53996 | -5.7609 | 84343    |
| ZNF22        | 1.0927   | 1.0927   | 3.3423  | 1.0077  | 0.33103 | 0.53997 | -5.7609 | 7570     |
| PDE4B        | 1.0991   | 1.0991   | 2.8225  | 1.0077  | 0.33106 | 0.53997 | -5.761  | 5142     |
| LOC102606465 | 0.1296   | 0.1296   | 0.49627 | 1.0073  | 0.33124 | 0.54021 | -5.7614 | 1.03E+08 |
| BAG4         | -0.38929 | 0.38929  | 2.8288  | -1.0072 | 0.33128 | 0.54023 | -5.7615 | 9530     |
| PKIG         | 2.6529   | 2.6529   | 7.0671  | 1.007   | 0.33138 | 0.54025 | -5.7617 | 11142    |
| LAMB1        | 6.719    | 6.719    | 21.561  | 1.007   | 0.33139 | 0.54025 | -5.7617 | 3912     |
| KIF26B       | 0.43948  | 0.43948  | 1.3424  | 1.007   | 0.33139 | 0.54025 | -5.7617 | 55083    |
| LINC01514    | -0.08861 | 0.088605 | 0.12656 | -1.0068 | 0.33146 | 0.54027 | -5.7618 | 1.02E+08 |
| RAPGEF4      | 0.7704   | 0.7704   | 3.0694  | 1.0068  | 0.33148 | 0.54027 | -5.7619 | 11069    |
| STUB1        | 3.7128   | 3.7128   | 16.267  | 1.0066  | 0.33154 | 0.54027 | -5.762  | 10273    |
| COL6A2       | 56.916   | 56.916   | 139.6   | 1.0066  | 0.33156 | 0.54027 | -5.762  | 1292     |
| FEM1A        | -1.2347  | 1.2347   | 8.3582  | -1.0066 | 0.33156 | 0.54027 | -5.7621 | 55527    |
| SF3A3        | -1.3951  | 1.3951   | 8.8059  | -1.0065 | 0.33161 | 0.5403  | -5.7621 | 10946    |
| CHIC1        | -0.15926 | 0.15926  | 0.65391 | -1.0062 | 0.33172 | 0.54042 | -5.7624 | 53344    |
| RN7SL3       | 3711.4   | 3711.4   | 12297   | 1.0061  | 0.33178 | 0.54047 | -5.7625 | 378707   |

|           |          |          |          |         |         |         |         |        |
|-----------|----------|----------|----------|---------|---------|---------|---------|--------|
| RAB6B     | -0.27902 | 0.27902  | 0.6448   | -1.0057 | 0.33199 | 0.54077 | -5.7629 | 51560  |
| DPM3      | -1.5392  | 1.5392   | 6.7525   | -1.0054 | 0.3321  | 0.54085 | -5.7632 | 54344  |
| SNAPIN    | 2.2294   | 2.2294   | 7.6273   | 1.0054  | 0.33211 | 0.54085 | -5.7632 | 23557  |
| CST6      | 16.066   | 16.066   | 39.369   | 1.0053  | 0.33215 | 0.54087 | -5.7633 | 1474   |
| ATG12     | 0.59509  | 0.59509  | 2.628    | 1.005   | 0.33229 | 0.54105 | -5.7636 | 9140   |
| ESRP2     | 3.2772   | 3.2772   | 14.785   | 1.0047  | 0.33244 | 0.54119 | -5.7639 | 80004  |
| RNF126    | 3.2603   | 3.2603   | 17.039   | 1.0047  | 0.33245 | 0.54119 | -5.7639 | 55658  |
| FABP6     | -0.08865 | 0.088651 | 0.13295  | -1.0041 | 0.33269 | 0.54154 | -5.7644 | 2172   |
| CDK3      | 0.15887  | 0.15887  | 0.32928  | 1.004   | 0.33276 | 0.54159 | -5.7645 | 1018   |
| HNRNPA3   | -2.5671  | 2.5671   | 17.004   | -1.0039 | 0.33281 | 0.54162 | -5.7646 | 220988 |
| MLLT10P1  | -0.1994  | 0.1994   | 0.32223  | -1.0038 | 0.33284 | 0.54162 | -5.7647 | 140678 |
| SMIM12    | 0.52688  | 0.52688  | 3.2615   | 1.0035  | 0.33298 | 0.5418  | -5.765  | 113444 |
| ERAP2     | -0.57977 | 0.57977  | 1.6995   | -1.0034 | 0.33303 | 0.54183 | -5.7651 | 64167  |
| BSG       | 11.975   | 11.975   | 49.849   | 1.0032  | 0.33315 | 0.54194 | -5.7653 | 682    |
| LEF1      | 0.22985  | 0.22985  | 1.1654   | 1.0031  | 0.33316 | 0.54194 | -5.7654 | 51176  |
| LINC00113 | -0.07715 | 0.077151 | 0.071628 | -1.003  | 0.33323 | 0.542   | -5.7655 | 54088  |
| BIRC6     | -0.92939 | 0.92939  | 9.9386   | -1.0029 | 0.33327 | 0.54202 | -5.7656 | 57448  |
| SLC6A15   | 0.20835  | 0.20835  | 0.48963  | 1.0025  | 0.33347 | 0.54229 | -5.766  | 55117  |
| XKR8      | 0.32166  | 0.32166  | 1.4426   | 1.0019  | 0.33375 | 0.54268 | -5.7666 | 55113  |
| TBX1      | -0.9968  | 0.9968   | 4.078    | -1.0018 | 0.33378 | 0.54269 | -5.7667 | 6899   |
| LINGO1    | 0.25293  | 0.25293  | 0.59114  | 1.0017  | 0.33383 | 0.54269 | -5.7668 | 84894  |
| CNOT2     | 1.066    | 1.066    | 7.5993   | 1.0017  | 0.33385 | 0.54269 | -5.7668 | 4848   |
| CYP24A1   | 0.38404  | 0.38404  | 0.84719  | 1.0015  | 0.33393 | 0.54276 | -5.767  | 1591   |
| PTPN2     | 0.5798   | 0.5798   | 3.1723   | 1.0013  | 0.33402 | 0.54286 | -5.7671 | 5771   |
| COPS8     | 1.4283   | 1.4283   | 5.6704   | 1.0012  | 0.33405 | 0.54286 | -5.7672 | 10920  |
| EHD3      | 0.45234  | 0.45234  | 1.8478   | 1.001   | 0.33417 | 0.54297 | -5.7675 | 30845  |

|          |          |          |         |          |         |         |         |          |
|----------|----------|----------|---------|----------|---------|---------|---------|----------|
| DCP1A    | -0.37207 | 0.37207  | 2.9877  | -1.0009  | 0.33418 | 0.54297 | -5.7675 | 55802    |
| HADHB    | 2.9757   | 2.9757   | 15.84   | 1.0008   | 0.33424 | 0.54297 | -5.7676 | 3032     |
| ERH      | 4.6102   | 4.6102   | 17.537  | 1.0008   | 0.33425 | 0.54297 | -5.7676 | 2079     |
| TRIQK    | 0.30596  | 0.30596  | 1.2963  | 1.0004   | 0.33442 | 0.5432  | -5.768  | 286144   |
| UBE2G2   | -0.80951 | 0.80951  | 8.1374  | -1.0002  | 0.33451 | 0.54327 | -5.7682 | 7327     |
| ADGRG1   | 3.8558   | 3.8558   | 17.577  | 1.0002   | 0.33453 | 0.54327 | -5.7682 | 9289     |
| NPDC1    | -2.8983  | 2.8983   | 8.3515  | -1.0001  | 0.33456 | 0.54327 | -5.7683 | 56654    |
| ALOX12P2 | -0.1761  | 0.1761   | 0.58167 | -1.0001  | 0.33459 | 0.54327 | -5.7683 | 245      |
| FAM92A   | 0.27021  | 0.27021  | 0.90904 | 0.99961  | 0.3348  | 0.54356 | -5.7688 | 137392   |
| APOL1    | -1.0675  | 1.0675   | 2.5697  | -0.99934 | 0.33493 | 0.54372 | -5.769  | 8542     |
| PACERR   | 0.075164 | 0.075164 | 0.14162 | 0.9992   | 0.335   | 0.54377 | -5.7692 | 1.04E+08 |
| VAC14    | -0.91576 | 0.91576  | 5.7488  | -0.99859 | 0.33528 | 0.54416 | -5.7698 | 55697    |
| ZBTB11   | 0.39527  | 0.39527  | 3.2533  | 0.99854  | 0.3353  | 0.54416 | -5.7698 | 27107    |
| RPS27A   | 44.658   | 44.658   | 178.74  | 0.99838  | 0.33538 | 0.54423 | -5.77   | 6233     |
| FXYD3    | 8.0639   | 8.0639   | 31.514  | 0.99797  | 0.33557 | 0.54448 | -5.7704 | 5349     |
| SNRPB    | 10.153   | 10.153   | 39.568  | 0.99792  | 0.3356  | 0.54448 | -5.7704 | 6628     |
| CARS2    | -0.38389 | 0.38389  | 3.6613  | -0.99766 | 0.33572 | 0.54449 | -5.7706 | 79587    |
| TPRKB    | 0.65137  | 0.65137  | 2.4846  | 0.99765  | 0.33572 | 0.54449 | -5.7707 | 51002    |
| TIMM10   | 2.611    | 2.611    | 7.7596  | 0.99764  | 0.33573 | 0.54449 | -5.7707 | 26519    |
| AS-PTPRE | 0.30663  | 0.30663  | 0.99541 | 0.99762  | 0.33573 | 0.54449 | -5.7707 | 1.05E+08 |
| ADAMTS5  | -0.48806 | 0.48806  | 2.0706  | -0.99742 | 0.33583 | 0.5446  | -5.7709 | 11096    |
| MSH2     | -0.53054 | 0.53054  | 2.9896  | -0.99696 | 0.33605 | 0.5449  | -5.7713 | 4436     |
| DNAJC8   | 3.0458   | 3.0458   | 14.149  | 0.99671  | 0.33616 | 0.54503 | -5.7716 | 22826    |
| DNAJB14  | 0.38993  | 0.38993  | 2.4851  | 0.99651  | 0.33625 | 0.54513 | -5.7717 | 79982    |
| ARHGEF39 | -0.10445 | 0.10445  | 0.45037 | -0.99604 | 0.33647 | 0.54543 | -5.7722 | 84904    |
| SKIV2L   | -0.17058 | 0.17058  | 0.80835 | -0.99571 | 0.33663 | 0.54564 | -5.7725 | 6499     |

|           |          |          |          |          |         |         |         |          |
|-----------|----------|----------|----------|----------|---------|---------|---------|----------|
| LINC02443 | -0.06884 | 0.068838 | 0.069313 | -0.995   | 0.33696 | 0.54611 | -5.7732 | 1.02E+08 |
| EFNA5     | -0.59709 | 0.59709  | 4.7647   | -0.99495 | 0.33699 | 0.54611 | -5.7732 | 1946     |
| SPINT2    | 13.811   | 13.811   | 59.73    | 0.99488  | 0.33702 | 0.54611 | -5.7733 | 10653    |
| PRMT5-AS1 | -0.07305 | 0.073046 | 0.13737  | -0.99474 | 0.33708 | 0.54616 | -5.7734 | 1.01E+08 |
| SYNGR2    | 7.9923   | 7.9923   | 41.011   | 0.99457  | 0.33716 | 0.54619 | -5.7736 | 9144     |
| PDCD6     | 1.903    | 1.903    | 9.4386   | 0.99456  | 0.33717 | 0.54619 | -5.7736 | 10016    |
| LRRK2     | -0.23957 | 0.23957  | 1.5934   | -0.99448 | 0.33721 | 0.54621 | -5.7737 | 120892   |
| ZNF518B   | 0.34122  | 0.34122  | 1.8544   | 0.99427  | 0.33731 | 0.54631 | -5.7739 | 85460    |
| INTS9     | -0.3719  | 0.3719   | 2.4725   | -0.99402 | 0.33742 | 0.5464  | -5.7741 | 55756    |
| CAPN5     | -0.69944 | 0.69944  | 1.4518   | -0.99401 | 0.33743 | 0.5464  | -5.7741 | 726      |
| MRPL45    | 1.1263   | 1.1263   | 6.3079   | 0.9936   | 0.33762 | 0.54666 | -5.7745 | 84311    |
| GLIS2     | -0.74844 | 0.74844  | 2.3591   | -0.99339 | 0.33772 | 0.54677 | -5.7747 | 84662    |
| TAF9B     | -0.52758 | 0.52758  | 2.7665   | -0.99307 | 0.33787 | 0.54696 | -5.775  | 51616    |
| TLE4      | -0.3303  | 0.3303   | 3.1346   | -0.993   | 0.3379  | 0.54696 | -5.7751 | 7091     |
| MRPL39    | 1.0232   | 1.0232   | 5.1227   | 0.99285  | 0.33797 | 0.54701 | -5.7753 | 54148    |
| TLR1      | 0.63002  | 0.63002  | 1.5466   | 0.9928   | 0.338   | 0.54701 | -5.7753 | 7096     |
| USF1      | 1.0748   | 1.0748   | 6.8877   | 0.99262  | 0.33808 | 0.54709 | -5.7755 | 7391     |
| NAB2      | -1.4857  | 1.4857   | 6.7416   | -0.99244 | 0.33817 | 0.54718 | -5.7757 | 4665     |
| DAB2IP    | -1.8762  | 1.8762   | 9.4462   | -0.99192 | 0.33841 | 0.54752 | -5.7761 | 153090   |
| TXNDC15   | 1.0625   | 1.0625   | 4.3753   | 0.99171  | 0.33851 | 0.54763 | -5.7764 | 79770    |
| MICAL1    | 1.219    | 1.219    | 5.5409   | 0.99155  | 0.33858 | 0.54765 | -5.7765 | 64780    |
| PREPL     | -0.33396 | 0.33396  | 2.8707   | -0.99155 | 0.33859 | 0.54765 | -5.7765 | 9581     |
| CPLX1     | -0.27932 | 0.27932  | 0.84116  | -0.99137 | 0.33867 | 0.54771 | -5.7767 | 10815    |
| ERBB3     | -2.8251  | 2.8251   | 12.087   | -0.99132 | 0.33869 | 0.54771 | -5.7767 | 2065     |
| SLFN12L   | -0.11489 | 0.11489  | 0.27381  | -0.99112 | 0.33879 | 0.54779 | -5.7769 | 1.01E+08 |
| LRRN3     | -0.19205 | 0.19205  | 0.5147   | -0.99109 | 0.3388  | 0.54779 | -5.7769 | 54674    |



|           |          |          |          |          |         |         |         |         |
|-----------|----------|----------|----------|----------|---------|---------|---------|---------|
| ZNF45     | -0.18401 | 0.18401  | 1.5001   | -0.99086 | 0.33891 | 0.54791 | -5.7772 | 7596    |
| RANBP1    | 2.9907   | 2.9907   | 9.5363   | 0.99055  | 0.33906 | 0.54809 | -5.7775 | 5902    |
| IBTK      | 0.67232  | 0.67232  | 4.1911   | 0.99041  | 0.33912 | 0.54815 | -5.7776 | 25998   |
| SYTL4     | 0.27488  | 0.27488  | 0.83558  | 0.9902   | 0.33922 | 0.54826 | -5.7778 | 94121   |
| SH3RF2    | -5.6463  | 5.6463   | 20.056   | -0.98994 | 0.33934 | 0.54838 | -5.778  | 153769  |
| GLYCTK    | -0.25806 | 0.25806  | 1.2724   | -0.9899  | 0.33936 | 0.54838 | -5.7781 | 132158  |
| MSANTD4   | -0.23934 | 0.23934  | 1.3437   | -0.98979 | 0.33941 | 0.54841 | -5.7782 | 84437   |
| MACF1     | 5.7463   | 5.7463   | 44.01    | 0.98954  | 0.33953 | 0.54854 | -5.7784 | 23499   |
| CFAP45    | -0.09283 | 0.092829 | 0.29424  | -0.98948 | 0.33956 | 0.54854 | -5.7785 | 25790   |
| FGF1      | 0.091441 | 0.091441 | 0.20732  | 0.98936  | 0.33962 | 0.54858 | -5.7786 | 2246    |
| LRCH1     | -0.55378 | 0.55378  | 3.351    | -0.98923 | 0.33968 | 0.54863 | -5.7787 | 23143   |
| ACP1      | 1.9432   | 1.9432   | 9.285    | 0.98914  | 0.33972 | 0.54864 | -5.7788 | 52      |
| DM1-AS    | -0.22697 | 0.22697  | 0.39735  | -0.98893 | 0.33982 | 0.54875 | -5.779  | 1.1E+08 |
| NOC3L     | 0.4666   | 0.4666   | 2.6398   | 0.98883  | 0.33987 | 0.54876 | -5.7791 | 64318   |
| THOC6     | -1.1546  | 1.1546   | 5.2761   | -0.98878 | 0.33989 | 0.54876 | -5.7791 | 79228   |
| SYCP3     | -0.07172 | 0.071723 | 0.097222 | -0.98855 | 0.34    | 0.54888 | -5.7794 | 50511   |
| CCDC93    | -0.4026  | 0.4026   | 3.3619   | -0.98827 | 0.34013 | 0.54904 | -5.7796 | 54520   |
| OPN4      | -0.09133 | 0.091334 | 0.17894  | -0.98813 | 0.3402  | 0.5491  | -5.7798 | 94233   |
| ADGRL3    | -0.24338 | 0.24338  | 0.70737  | -0.98801 | 0.34025 | 0.54914 | -5.7799 | 23284   |
| NOL6      | -1.3316  | 1.3316   | 6.5878   | -0.98765 | 0.34043 | 0.54936 | -5.7802 | 65083   |
| EID3      | -0.16761 | 0.16761  | 1.2065   | -0.98727 | 0.3406  | 0.54959 | -5.7806 | 493861  |
| FOPNL     | 0.82636  | 0.82636  | 4.6204   | 0.98671  | 0.34087 | 0.54997 | -5.7811 | 123811  |
| PANK1     | -0.19711 | 0.19711  | 0.73283  | -0.98652 | 0.34096 | 0.55005 | -5.7813 | 53354   |
| SECISBP2L | 0.86447  | 0.86447  | 5.2061   | 0.9863   | 0.34106 | 0.55005 | -5.7815 | 9728    |
| FMNL3     | 1.081    | 1.081    | 3.37     | 0.98628  | 0.34107 | 0.55005 | -5.7815 | 91010   |
| RPL35A    | 31.29    | 31.29    | 119.26   | 0.98627  | 0.34108 | 0.55005 | -5.7815 | 6165    |

|           |          |         |         |          |         |         |         |          |
|-----------|----------|---------|---------|----------|---------|---------|---------|----------|
| POLR3H    | -1.0398  | 1.0398  | 5.302   | -0.98624 | 0.34109 | 0.55005 | -5.7816 | 171568   |
| ZNF341    | -0.1443  | 0.1443  | 0.86378 | -0.98619 | 0.34112 | 0.55005 | -5.7816 | 84905    |
| SGCD      | 0.46233  | 0.46233 | 1.0212  | 0.98597  | 0.34122 | 0.55015 | -5.7818 | 6444     |
| DDIT4     | 12.521   | 12.521  | 36.593  | 0.98587  | 0.34126 | 0.55015 | -5.7819 | 54541    |
| KATNB1    | -1.4067  | 1.4067  | 6.3697  | -0.98578 | 0.34131 | 0.55015 | -5.782  | 10300    |
| CCDC144B  | -0.81463 | 0.81463 | 1.908   | -0.98564 | 0.34138 | 0.55015 | -5.7821 | 284047   |
| ELOVL7    | 4.4107   | 4.4107  | 8.3586  | 0.98562  | 0.34138 | 0.55015 | -5.7821 | 79993    |
| GLT8D1    | 0.93607  | 0.93607 | 3.8666  | 0.98547  | 0.34146 | 0.55015 | -5.7823 | 55830    |
| SENP7     | -0.37936 | 0.37936 | 2.098   | -0.98546 | 0.34146 | 0.55015 | -5.7823 | 57337    |
| RPAP2     | 0.32714  | 0.32714 | 2.7648  | 0.98535  | 0.34151 | 0.55015 | -5.7824 | 79871    |
| ZNF236-DT | -0.10257 | 0.10257 | 0.24144 | -0.98524 | 0.34156 | 0.55015 | -5.7825 | 1E+08    |
| MSC-AS1   | 0.22455  | 0.22455 | 0.45887 | 0.98524  | 0.34157 | 0.55015 | -5.7825 | 1E+08    |
| SLC29A4   | 0.2814   | 0.2814  | 0.70012 | 0.98523  | 0.34157 | 0.55015 | -5.7825 | 222962   |
| ABCA7     | -0.95508 | 0.95508 | 2.306   | -0.98519 | 0.34159 | 0.55015 | -5.7826 | 10347    |
| USP12     | 0.6926   | 0.6926  | 4.8392  | 0.98517  | 0.3416  | 0.55015 | -5.7826 | 219333   |
| RBMS2     | -0.90692 | 0.90692 | 4.9618  | -0.98459 | 0.34187 | 0.55054 | -5.7831 | 5939     |
| MRPS12    | 1.6792   | 1.6792  | 6.1399  | 0.98452  | 0.34191 | 0.55054 | -5.7832 | 6183     |
| UTP18     | 0.83543  | 0.83543 | 6.8677  | 0.98406  | 0.34212 | 0.55076 | -5.7836 | 51096    |
| SLC12A4   | -1.6694  | 1.6694  | 7.2783  | -0.98405 | 0.34213 | 0.55076 | -5.7836 | 6560     |
| NTSR1     | 0.20798  | 0.20798 | 0.31667 | 0.98401  | 0.34215 | 0.55076 | -5.7837 | 4923     |
| MRPS27    | -0.908   | 0.908   | 6.5008  | -0.98395 | 0.34218 | 0.55076 | -5.7837 | 23107    |
| LZIC      | 0.35403  | 0.35403 | 3.3114  | 0.98388  | 0.34221 | 0.55077 | -5.7838 | 84328    |
| CPNE8     | 0.48311  | 0.48311 | 1.8785  | 0.98318  | 0.34254 | 0.55124 | -5.7845 | 144402   |
| UPK1A     | 3.7235   | 3.7235  | 3.739   | 0.98305  | 0.34261 | 0.55124 | -5.7846 | 11045    |
| SNORD134  | -0.18451 | 0.18451 | 0.48327 | -0.98304 | 0.34261 | 0.55124 | -5.7846 | 1.07E+08 |
| OGFOD1    | 0.75844  | 0.75844 | 4.5606  | 0.98296  | 0.34265 | 0.55124 | -5.7847 | 55239    |

|              |          |          |         |          |         |         |         |        |
|--------------|----------|----------|---------|----------|---------|---------|---------|--------|
| CERS4        | 7.0895   | 7.0895   | 18.115  | 0.98287  | 0.34269 | 0.55124 | -5.7848 | 79603  |
| VSIG1        | 0.074045 | 0.074045 | 0.16019 | 0.98285  | 0.3427  | 0.55124 | -5.7848 | 340547 |
| TXLNGY       | -0.36345 | 0.36345  | 1.38    | -0.98273 | 0.34275 | 0.55127 | -5.7849 | 246126 |
| SNORA24      | 1.1724   | 1.1724   | 5.7565  | 0.98236  | 0.34293 | 0.55148 | -5.7852 | 677809 |
| RAD1         | -0.2     | 0.2      | 1.8928  | -0.98229 | 0.34296 | 0.55148 | -5.7853 | 5810   |
| ENDOG        | 0.82665  | 0.82665  | 3.2681  | 0.98226  | 0.34298 | 0.55148 | -5.7853 | 2021   |
| TMEM200A     | 0.32312  | 0.32312  | 0.7939  | 0.98209  | 0.34306 | 0.5515  | -5.7855 | 114801 |
| ZNF777       | -0.50605 | 0.50605  | 2.7611  | -0.98203 | 0.34309 | 0.5515  | -5.7856 | 27153  |
| ATP5MC3      | 2.3532   | 2.3532   | 9.1679  | 0.98197  | 0.34312 | 0.5515  | -5.7856 | 518    |
| ERCC3        | -0.48134 | 0.48134  | 5.6497  | -0.98191 | 0.34314 | 0.5515  | -5.7857 | 2071   |
| AK8          | -0.128   | 0.128    | 0.46275 | -0.98184 | 0.34318 | 0.5515  | -5.7857 | 158067 |
| TBC1D2B      | -1.5923  | 1.5923   | 7.5191  | -0.98181 | 0.34319 | 0.5515  | -5.7858 | 23102  |
| CLDN7        | 1.223    | 1.223    | 1.9231  | 0.98171  | 0.34324 | 0.55153 | -5.7859 | 1366   |
| BBOF1        | 0.1636   | 0.1636   | 0.62781 | 0.98159  | 0.3433  | 0.55157 | -5.786  | 80127  |
| LOC100128568 | -0.23475 | 0.23475  | 0.38118 | -0.9814  | 0.34339 | 0.55166 | -5.7862 | 1E+08  |
| RNF208       | 0.77555  | 0.77555  | 2.6555  | 0.98117  | 0.3435  | 0.55178 | -5.7864 | 727800 |
| IL1RAP       | 0.81598  | 0.81598  | 2.956   | 0.98109  | 0.34354 | 0.5518  | -5.7865 | 3556   |
| PUS3         | 0.46996  | 0.46996  | 2.0335  | 0.98092  | 0.34362 | 0.55187 | -5.7866 | 83480  |
| ADAM28       | -0.10535 | 0.10535  | 0.28438 | -0.98078 | 0.34368 | 0.55192 | -5.7867 | 10863  |
| ZNF580       | -1.1475  | 1.1475   | 4.6059  | -0.9804  | 0.34386 | 0.55216 | -5.7871 | 51157  |
| WASHC2C      | -0.70253 | 0.70253  | 5.3319  | -0.98018 | 0.34397 | 0.55227 | -5.7873 | 253725 |
| PRDX6        | 8.5355   | 8.5355   | 36.204  | 0.9801   | 0.344   | 0.55227 | -5.7874 | 9588   |
| MPV17        | 2.067    | 2.067    | 8.7056  | 0.98006  | 0.34403 | 0.55227 | -5.7874 | 4358   |
| KMT5A        | 1.8259   | 1.8259   | 11.165  | 0.97982  | 0.34414 | 0.55239 | -5.7877 | 387893 |
| CITED2       | 6.1945   | 6.1945   | 18.894  | 0.97975  | 0.34417 | 0.55239 | -5.7877 | 10370  |
| RAP1GAP2     | -0.36286 | 0.36286  | 1.9494  | -0.97966 | 0.34421 | 0.55241 | -5.7878 | 23108  |

|         |          |          |         |          |         |         |         |          |
|---------|----------|----------|---------|----------|---------|---------|---------|----------|
| HNRNPDL | -1.8745  | 1.8745   | 13.451  | -0.97954 | 0.34427 | 0.55245 | -5.7879 | 9987     |
| TLR6    | 0.15964  | 0.15964  | 0.56747 | 0.97946  | 0.34431 | 0.55246 | -5.788  | 10333    |
| NSFP1   | 0.23848  | 0.23848  | 0.32577 | 0.97898  | 0.34454 | 0.55276 | -5.7884 | 728806   |
| ETS2    | 5.7682   | 5.7682   | 30.767  | 0.97893  | 0.34456 | 0.55276 | -5.7885 | 2114     |
| TGFB3   | 1.9183   | 1.9183   | 4.3863  | 0.97877  | 0.34464 | 0.55283 | -5.7886 | 7043     |
| STEAP2  | 0.71884  | 0.71884  | 1.6752  | 0.97859  | 0.34473 | 0.5529  | -5.7888 | 261729   |
| TBPL1   | 0.31962  | 0.31962  | 1.5899  | 0.97853  | 0.34475 | 0.5529  | -5.7889 | 9519     |
| LMTK2   | 1.0027   | 1.0027   | 5.8737  | 0.97848  | 0.34478 | 0.5529  | -5.7889 | 22853    |
| TRPV2   | 0.54862  | 0.54862  | 1.8477  | 0.97839  | 0.34482 | 0.55291 | -5.789  | 51393    |
| GRIN2C  | -0.10128 | 0.10128  | 0.16986 | -0.97819 | 0.34491 | 0.55301 | -5.7892 | 2905     |
| PRSS53  | -1.8676  | 1.8676   | 3.294   | -0.97809 | 0.34496 | 0.55304 | -5.7893 | 339105   |
| AATF    | -1.3759  | 1.3759   | 8.0191  | -0.9777  | 0.34515 | 0.55328 | -5.7897 | 26574    |
| GXYLT2  | 1.343    | 1.343    | 2.6394  | 0.97752  | 0.34524 | 0.55337 | -5.7898 | 727936   |
| DOCK9   | -2.113   | 2.113    | 13.194  | -0.97737 | 0.34531 | 0.55343 | -5.79   | 23348    |
| MIR5010 | -0.09068 | 0.090682 | 0.12237 | -0.97724 | 0.34537 | 0.55343 | -5.7901 | 1.01E+08 |
| POLDIP2 | 3.5699   | 3.5699   | 16.843  | 0.97723  | 0.34537 | 0.55343 | -5.7901 | 26073    |
| B3GNT9  | 0.81285  | 0.81285  | 3.6722  | 0.97686  | 0.34555 | 0.55363 | -5.7904 | 84752    |
| QPCT    | -1.9352  | 1.9352   | 5.3291  | -0.97684 | 0.34556 | 0.55363 | -5.7905 | 25797    |
| STMN1   | 1.453    | 1.453    | 4.4748  | 0.97674  | 0.34561 | 0.55365 | -5.7906 | 3925     |
| ARMH3   | 0.40156  | 0.40156  | 4.8127  | 0.97661  | 0.34567 | 0.55368 | -5.7907 | 79591    |
| LY6D    | 78.276   | 78.276   | 234.46  | 0.97656  | 0.34569 | 0.55368 | -5.7907 | 8581     |
| THAP3   | -0.22183 | 0.22183  | 0.96542 | -0.97623 | 0.34585 | 0.55388 | -5.791  | 90326    |
| CUBN    | -0.10545 | 0.10545  | 0.33922 | -0.97611 | 0.34591 | 0.55392 | -5.7912 | 8029     |
| SELPLG  | 0.69536  | 0.69536  | 1.9414  | 0.976    | 0.34596 | 0.55395 | -5.7913 | 6404     |
| TRAPPC4 | 1.7769   | 1.7769   | 6.028   | 0.97521  | 0.34634 | 0.55441 | -5.792  | 51399    |
| SPATA7  | -0.26178 | 0.26178  | 1.1881  | -0.97514 | 0.34637 | 0.55441 | -5.7921 | 55812    |

|           |          |          |          |          |         |         |         |        |
|-----------|----------|----------|----------|----------|---------|---------|---------|--------|
| HDDC2     | 1.413    | 1.413    | 5.3898   | 0.9751   | 0.34639 | 0.55441 | -5.7921 | 51020  |
| RPS12     | 157.57   | 157.57   | 574.06   | 0.97503  | 0.34643 | 0.55441 | -5.7922 | 6206   |
| CCNB2     | 0.96305  | 0.96305  | 2.5273   | 0.97492  | 0.34648 | 0.55441 | -5.7923 | 9133   |
| CYTIP     | 0.51017  | 0.51017  | 1.5034   | 0.97485  | 0.34651 | 0.55441 | -5.7923 | 9595   |
| LINC02595 | -0.54034 | 0.54034  | 1.8643   | -0.97481 | 0.34653 | 0.55441 | -5.7924 | 401585 |
| XPO6      | 1.6901   | 1.6901   | 11.755   | 0.9748   | 0.34654 | 0.55441 | -5.7924 | 23214  |
| NUDT21    | -1.1083  | 1.1083   | 6.8581   | -0.97478 | 0.34655 | 0.55441 | -5.7924 | 11051  |
| PIWIL4    | -0.08128 | 0.081284 | 0.22061  | -0.97427 | 0.34679 | 0.55475 | -5.7929 | 143689 |
| PLCD4     | 0.259    | 0.259    | 1.3127   | 0.97415  | 0.34685 | 0.55479 | -5.793  | 84812  |
| RUSC2     | -0.77091 | 0.77091  | 3.9453   | -0.97403 | 0.3469  | 0.55481 | -5.7931 | 9853   |
| ATP12A    | 1.6081   | 1.6081   | 2.3419   | 0.97399  | 0.34692 | 0.55481 | -5.7931 | 479    |
| TYMP      | 24.576   | 24.576   | 55.626   | 0.97383  | 0.347   | 0.55488 | -5.7933 | 1890   |
| FABP4     | -3.0722  | 3.0722   | 6.198    | -0.97375 | 0.34704 | 0.55489 | -5.7934 | 2167   |
| SLC25A45  | -0.17238 | 0.17238  | 0.61335  | -0.97362 | 0.3471  | 0.5549  | -5.7935 | 283130 |
| VHL       | -0.74506 | 0.74506  | 5.0735   | -0.97354 | 0.34714 | 0.5549  | -5.7936 | 7428   |
| ROGDI     | 0.6713   | 0.6713   | 2.3499   | 0.97352  | 0.34715 | 0.5549  | -5.7936 | 79641  |
| SNORA72   | -0.0834  | 0.083401 | 0.090676 | -0.97329 | 0.34726 | 0.55496 | -5.7938 | 26775  |
| PPP4R3A   | 1.1999   | 1.1999   | 8.8524   | 0.97326  | 0.34727 | 0.55496 | -5.7938 | 55671  |
| TOMM20    | -2.9834  | 2.9834   | 19.451   | -0.97321 | 0.3473  | 0.55496 | -5.7939 | 9804   |
| GSR       | -0.74593 | 0.74593  | 3.6751   | -0.97317 | 0.34732 | 0.55496 | -5.7939 | 2936   |
| VRK3      | 0.41325  | 0.41325  | 3.1147   | 0.97307  | 0.34736 | 0.55499 | -5.794  | 51231  |
| PPAT      | 0.23402  | 0.23402  | 1.3013   | 0.97267  | 0.34756 | 0.55524 | -5.7944 | 5471   |
| CCDC90B   | 0.32234  | 0.32234  | 1.8158   | 0.97251  | 0.34763 | 0.55531 | -5.7945 | 60492  |
| EMC8      | 0.84694  | 0.84694  | 4.0578   | 0.97244  | 0.34767 | 0.55531 | -5.7946 | 10328  |
| ZNF408    | 0.41304  | 0.41304  | 2.1175   | 0.97237  | 0.3477  | 0.55531 | -5.7947 | 79797  |
| PAOX      | -0.45851 | 0.45851  | 1.7053   | -0.97213 | 0.34781 | 0.55541 | -5.7949 | 196743 |

|              |          |          |         |          |         |         |         |          |
|--------------|----------|----------|---------|----------|---------|---------|---------|----------|
| SLC3A2       | 5.7515   | 5.7515   | 24.568  | 0.9721   | 0.34783 | 0.55541 | -5.7949 | 6520     |
| SCRG1        | -0.08609 | 0.086085 | 0.14667 | -0.97197 | 0.34789 | 0.55546 | -5.795  | 11341    |
| GATD3B       | -1.4085  | 1.4085   | 6.3946  | -0.97175 | 0.348   | 0.55553 | -5.7952 | 1.03E+08 |
| KDM2B        | -0.61739 | 0.61739  | 4.7265  | -0.97169 | 0.34802 | 0.55553 | -5.7953 | 84678    |
| PIIB         | 25.33    | 25.33    | 84.645  | 0.97168  | 0.34803 | 0.55553 | -5.7953 | 5479     |
| KDM4B        | -0.9318  | 0.9318   | 5.8694  | -0.97112 | 0.3483  | 0.5559  | -5.7958 | 23030    |
| LOC100289473 | -0.10443 | 0.10443  | 0.22337 | -0.97088 | 0.34842 | 0.55596 | -5.7961 | 1E+08    |
| ZNF805       | -0.20305 | 0.20305  | 1.8572  | -0.97087 | 0.34842 | 0.55596 | -5.7961 | 390980   |
| LOC100507351 | -0.0908  | 0.090799 | 0.1774  | -0.97075 | 0.34848 | 0.55596 | -5.7962 | 1.01E+08 |
| CCDC107      | 0.65805  | 0.65805  | 3.2259  | 0.97071  | 0.3485  | 0.55596 | -5.7962 | 203260   |
| FAM200A      | 0.20254  | 0.20254  | 0.84096 | 0.9707   | 0.3485  | 0.55596 | -5.7962 | 221786   |
| MMAA         | -0.11342 | 0.11342  | 0.72291 | -0.97057 | 0.34857 | 0.55599 | -5.7964 | 166785   |
| C11orf68     | 1.7028   | 1.7028   | 7.7188  | 0.97047  | 0.34861 | 0.55599 | -5.7964 | 83638    |
| RPS6KA1      | -1.4218  | 1.4218   | 5.0852  | -0.97039 | 0.34865 | 0.55599 | -5.7965 | 6195     |
| TBC1D1       | 0.89177  | 0.89177  | 2.9364  | 0.97039  | 0.34865 | 0.55599 | -5.7965 | 23216    |
| MIF          | 41.665   | 41.665   | 137.65  | 0.97027  | 0.34871 | 0.55603 | -5.7966 | 4282     |
| TNFSF8       | 0.18024  | 0.18024  | 0.44607 | 0.96995  | 0.34886 | 0.55617 | -5.7969 | 944      |
| DPYSL2       | -3.8571  | 3.8571   | 16.067  | -0.96994 | 0.34886 | 0.55617 | -5.7969 | 1808     |
| ZNF77        | -0.10744 | 0.10744  | 1.0288  | -0.96977 | 0.34895 | 0.55625 | -5.7971 | 58492    |
| RHOC         | 8.3187   | 8.3187   | 28.877  | 0.96951  | 0.34908 | 0.55641 | -5.7974 | 389      |
| GPRIN3       | 0.34967  | 0.34967  | 0.94877 | 0.96941  | 0.34912 | 0.55642 | -5.7974 | 285513   |
| PODXL        | 2.5157   | 2.5157   | 8.0464  | 0.96925  | 0.3492  | 0.55649 | -5.7976 | 5420     |
| TMEM71       | 0.19487  | 0.19487  | 0.45563 | 0.96882  | 0.34941 | 0.55678 | -5.798  | 137835   |
| KIF2C        | 0.49026  | 0.49026  | 1.2684  | 0.96871  | 0.34946 | 0.55681 | -5.7981 | 11004    |
| ACYP1        | 0.2341   | 0.2341   | 1.2826  | 0.96857  | 0.34953 | 0.55686 | -5.7982 | 97       |
| COX8A        | 20.104   | 20.104   | 77.128  | 0.96788  | 0.34986 | 0.55731 | -5.7989 | 1351     |

|              |          |          |         |          |         |         |         |        |
|--------------|----------|----------|---------|----------|---------|---------|---------|--------|
| TONSL-AS1    | 0.066622 | 0.066622 | 0.16301 | 0.96785  | 0.34987 | 0.55731 | -5.7989 | 1E+08  |
| OTOP2        | 0.42085  | 0.42085  | 0.85178 | 0.96757  | 0.35001 | 0.55747 | -5.7992 | 92736  |
| RBM3         | 8.3142   | 8.3142   | 33.578  | 0.96747  | 0.35006 | 0.5575  | -5.7993 | 5935   |
| LOC100126584 | -0.08933 | 0.089327 | 0.20514 | -0.96732 | 0.35013 | 0.55755 | -5.7994 | 1E+08  |
| CNTNAP3P2    | -0.25019 | 0.25019  | 0.67928 | -0.96709 | 0.35024 | 0.55768 | -5.7996 | 643827 |
| C1GALT1      | 0.36697  | 0.36697  | 1.6601  | 0.96675  | 0.3504  | 0.55789 | -5.7999 | 56913  |
| MBTPS1       | -1.1774  | 1.1774   | 10.995  | -0.96659 | 0.35048 | 0.55793 | -5.8001 | 8720   |
| ZNF511       | 1.6315   | 1.6315   | 5.4766  | 0.96656  | 0.3505  | 0.55793 | -5.8001 | 118472 |
| ALYREF       | 2.7373   | 2.7373   | 13.465  | 0.96642  | 0.35056 | 0.55798 | -5.8002 | 10189  |
| PTGES3       | 3.3936   | 3.3936   | 17.687  | 0.96636  | 0.35059 | 0.55798 | -5.8003 | 10728  |
| MRPL35       | 0.59838  | 0.59838  | 2.6998  | 0.96601  | 0.35076 | 0.5582  | -5.8006 | 51318  |
| SNORA17B     | -3.5879  | 3.5879   | 14.17   | -0.96569 | 0.35091 | 0.55839 | -5.8009 | 677824 |
| GNPTAB       | -0.69787 | 0.69787  | 5.7346  | -0.96549 | 0.35101 | 0.55849 | -5.8011 | 79158  |
| MTCL1        | -1.4569  | 1.4569   | 3.939   | -0.96543 | 0.35104 | 0.55849 | -5.8012 | 23255  |
| PARS2        | -0.14553 | 0.14553  | 0.81495 | -0.96527 | 0.35112 | 0.55855 | -5.8013 | 25973  |
| PDPK1        | -0.66586 | 0.66586  | 6.4321  | -0.96497 | 0.35126 | 0.55867 | -5.8016 | 5170   |
| CCDC85C      | 2.2394   | 2.2394   | 8.5118  | 0.96493  | 0.35128 | 0.55867 | -5.8016 | 317762 |
| ICE2         | -0.21683 | 0.21683  | 1.5632  | -0.96492 | 0.35129 | 0.55867 | -5.8016 | 79664  |
| ZWINT        | 0.71977  | 0.71977  | 2.1683  | 0.9647   | 0.3514  | 0.55878 | -5.8019 | 11130  |
| ADAMDEC1     | -1.0326  | 1.0326   | 0.93361 | -0.96441 | 0.35153 | 0.55884 | -5.8021 | 27299  |
| KANK3        | -0.59455 | 0.59455  | 2.0647  | -0.9644  | 0.35154 | 0.55884 | -5.8021 | 256949 |
| TPTEP2       | -0.12528 | 0.12528  | 0.54148 | -0.96438 | 0.35155 | 0.55884 | -5.8021 | 400927 |
| TTC25        | -0.06753 | 0.067527 | 0.14843 | -0.96434 | 0.35157 | 0.55884 | -5.8022 | 83538  |
| ASB13        | -0.70316 | 0.70316  | 3.405   | -0.96428 | 0.3516  | 0.55884 | -5.8022 | 79754  |
| CLK4         | 0.33902  | 0.33902  | 2.7942  | 0.96404  | 0.35171 | 0.55888 | -5.8025 | 57396  |
| TMEM179B     | -1.8393  | 1.8393   | 10.298  | -0.96403 | 0.35172 | 0.55888 | -5.8025 | 374395 |

|              |          |          |         |          |         |         |         |          |
|--------------|----------|----------|---------|----------|---------|---------|---------|----------|
| MRPL52       | 1.0828   | 1.0828   | 4.5223  | 0.96401  | 0.35173 | 0.55888 | -5.8025 | 122704   |
| TFCP2        | -0.45554 | 0.45554  | 3.9205  | -0.96395 | 0.35175 | 0.55888 | -5.8025 | 7024     |
| RIBC2        | -0.07794 | 0.077936 | 0.20283 | -0.96374 | 0.35186 | 0.55891 | -5.8027 | 26150    |
| COL9A3       | -0.36269 | 0.36269  | 0.87931 | -0.96372 | 0.35187 | 0.55891 | -5.8028 | 1299     |
| ITM2A        | -1.1809  | 1.1809   | 4.8091  | -0.96371 | 0.35187 | 0.55891 | -5.8028 | 9452     |
| LCE1F        | 72.75    | 72.75    | 87.167  | 0.96363  | 0.35191 | 0.55891 | -5.8028 | 353137   |
| MTHFD2L      | 0.19699  | 0.19699  | 0.8953  | 0.96353  | 0.35196 | 0.55891 | -5.8029 | 441024   |
| LOC105373100 | -0.09566 | 0.095659 | 0.16639 | -0.96345 | 0.352   | 0.55891 | -5.803  | 1.05E+08 |
| C2CD4C       | 0.083149 | 0.083149 | 0.21281 | 0.96343  | 0.35201 | 0.55891 | -5.803  | 126567   |
| QKI          | 0.60595  | 0.60595  | 4.2299  | 0.96313  | 0.35215 | 0.55899 | -5.8033 | 9444     |
| GZMH         | 0.1786   | 0.1786   | 0.34377 | 0.96303  | 0.3522  | 0.55899 | -5.8034 | 2999     |
| LBP          | -1.13    | 1.13     | 1.0686  | -0.96293 | 0.35225 | 0.55899 | -5.8035 | 3929     |
| ISYNA1       | -0.53065 | 0.53065  | 1.636   | -0.96293 | 0.35225 | 0.55899 | -5.8035 | 51477    |
| TCF25        | -2.4357  | 2.4357   | 16.874  | -0.96289 | 0.35227 | 0.55899 | -5.8035 | 22980    |
| CD163        | -5.4372  | 5.4372   | 11.047  | -0.96285 | 0.35229 | 0.55899 | -5.8036 | 9332     |
| PARP1        | -2.3636  | 2.3636   | 8.6667  | -0.96283 | 0.3523  | 0.55899 | -5.8036 | 142      |
| FUS          | -1.8299  | 1.8299   | 10.783  | -0.96278 | 0.35232 | 0.55899 | -5.8036 | 2521     |
| SWI5         | 0.93523  | 0.93523  | 3.4021  | 0.96264  | 0.35239 | 0.55905 | -5.8038 | 375757   |
| NEGR1        | -0.56053 | 0.56053  | 1.1895  | -0.9624  | 0.35251 | 0.55918 | -5.804  | 257194   |
| SLC52A2      | 1.7671   | 1.7671   | 6.7937  | 0.9623   | 0.35255 | 0.55921 | -5.8041 | 79581    |
| MUL1         | 1.0277   | 1.0277   | 5.8026  | 0.96222  | 0.3526  | 0.55922 | -5.8042 | 79594    |
| EMC3         | 0.79679  | 0.79679  | 4.6714  | 0.96202  | 0.35269 | 0.55931 | -5.8043 | 55831    |
| TUBG2        | -0.50163 | 0.50163  | 2.9724  | -0.96186 | 0.35277 | 0.55939 | -5.8045 | 27175    |
| MAP7D3       | 0.25782  | 0.25782  | 1.0251  | 0.96174  | 0.35282 | 0.55942 | -5.8046 | 79649    |
| DENND1C      | -0.34978 | 0.34978  | 1.5343  | -0.9616  | 0.35289 | 0.55948 | -5.8047 | 79958    |
| ARHGDI1A     | 16.136   | 16.136   | 63.259  | 0.96123  | 0.35307 | 0.55971 | -5.8051 | 396      |



|                 |          |          |          |          |         |         |         |          |
|-----------------|----------|----------|----------|----------|---------|---------|---------|----------|
| CIDEA           | 1.6647   | 1.6647   | 2.2386   | 0.96106  | 0.35316 | 0.55979 | -5.8052 | 1149     |
| EIF5B           | 1.9671   | 1.9671   | 8.4854   | 0.96075  | 0.35331 | 0.5598  | -5.8055 | 9669     |
| ANKHD1-EIF4EBP3 | -0.8173  | 0.8173   | 6.6226   | -0.96055 | 0.3534  | 0.5598  | -5.8057 | 404734   |
| SLC15A4         | 0.63736  | 0.63736  | 4.0669   | 0.96053  | 0.35341 | 0.5598  | -5.8057 | 121260   |
| TPGS1           | 1.071    | 1.071    | 3.7671   | 0.96044  | 0.35346 | 0.5598  | -5.8058 | 91978    |
| MYLK-AS2        | -0.07808 | 0.07808  | 0.099424 | -0.96042 | 0.35347 | 0.5598  | -5.8058 | 1.01E+08 |
| BOD1L1          | -0.73736 | 0.73736  | 5.0657   | -0.96041 | 0.35347 | 0.5598  | -5.8058 | 259282   |
| SPIN1           | 0.96903  | 0.96903  | 8.2675   | 0.96038  | 0.35348 | 0.5598  | -5.8059 | 10927    |
| CBS             | -0.08718 | 0.087184 | 0.17248  | -0.96038 | 0.35349 | 0.5598  | -5.8059 | 875      |
| CIDEB           | -1.0674  | 1.0674   | 4.3644   | -0.96034 | 0.3535  | 0.5598  | -5.8059 | 27141    |
| DIAPH3          | 0.17976  | 0.17976  | 0.54857  | 0.96033  | 0.35351 | 0.5598  | -5.8059 | 81624    |
| FOXO3           | -1.0337  | 1.0337   | 9.9693   | -0.96023 | 0.35356 | 0.5598  | -5.806  | 2309     |
| WHAMMP1         | -0.65248 | 0.65248  | 4.1539   | -0.96023 | 0.35356 | 0.5598  | -5.806  | 1E+08    |
| RAB3B           | -0.13934 | 0.13934  | 0.34059  | -0.96012 | 0.35361 | 0.55983 | -5.8061 | 5865     |
| DMTN            | -0.47704 | 0.47704  | 2.7047   | -0.95993 | 0.3537  | 0.55992 | -5.8063 | 2039     |
| DDRKG1          | -2.214   | 2.214    | 10.264   | -0.95945 | 0.35394 | 0.56024 | -5.8067 | 65992    |
| JAML            | 0.50248  | 0.50248  | 1.5386   | 0.95933  | 0.35399 | 0.56026 | -5.8068 | 120425   |
| FAT4            | 1.6756   | 1.6756   | 4.102    | 0.95929  | 0.35401 | 0.56026 | -5.8069 | 79633    |
| SP140L          | -0.23281 | 0.23281  | 1.1523   | -0.95891 | 0.3542  | 0.5605  | -5.8072 | 93349    |
| MIR17HG         | -0.12918 | 0.12918  | 0.50723  | -0.95876 | 0.35427 | 0.56056 | -5.8074 | 407975   |
| CHD9            | -0.83584 | 0.83584  | 5.9057   | -0.95861 | 0.35435 | 0.56063 | -5.8075 | 80205    |
| TEPSIN          | -0.70023 | 0.70023  | 3.2902   | -0.95844 | 0.35443 | 0.5607  | -5.8077 | 146705   |
| TRAPPC1         | 4.8548   | 4.8548   | 22.018   | 0.95838  | 0.35446 | 0.5607  | -5.8077 | 58485    |
| RRAD            | 1.4928   | 1.4928   | 2.0329   | 0.95825  | 0.35452 | 0.56073 | -5.8079 | 6236     |
| PNOC            | -0.06265 | 0.062647 | 0.070421 | -0.9582  | 0.35454 | 0.56073 | -5.8079 | 5368     |
| TMEM91          | -0.57321 | 0.57321  | 2.6666   | -0.95787 | 0.35471 | 0.56093 | -5.8082 | 641649   |

|            |          |          |         |          |         |         |         |          |
|------------|----------|----------|---------|----------|---------|---------|---------|----------|
| UTY        | -0.51636 | 0.51636  | 2.9161  | -0.95774 | 0.35477 | 0.56097 | -5.8083 | 7404     |
| TOP2B      | -1.3246  | 1.3246   | 10.261  | -0.95769 | 0.35479 | 0.56097 | -5.8084 | 7155     |
| ALDH16A1   | -1.8271  | 1.8271   | 6.2849  | -0.95751 | 0.35488 | 0.56105 | -5.8085 | 126133   |
| ANKRD17    | -0.91006 | 0.91006  | 9.8072  | -0.95714 | 0.35506 | 0.56129 | -5.8089 | 26057    |
| CD177      | 0.51452  | 0.51452  | 0.79433 | 0.95681  | 0.35522 | 0.56143 | -5.8092 | 57126    |
| ZNF542P    | 0.2131   | 0.2131   | 0.98796 | 0.95674  | 0.35526 | 0.56143 | -5.8092 | 147947   |
| GTF2IP1    | 0.54678  | 0.54678  | 2.3611  | 0.95671  | 0.35527 | 0.56143 | -5.8093 | 2970     |
| DBIL5P     | -0.0836  | 0.0836   | 0.21031 | -0.95667 | 0.35529 | 0.56143 | -5.8093 | 1E+08    |
| IGFBP7     | 39.033   | 39.033   | 88.828  | 0.95658  | 0.35534 | 0.56145 | -5.8094 | 3490     |
| NOTCH2NLR  | 3.3741   | 3.3741   | 10.469  | 0.95651  | 0.35537 | 0.56145 | -5.8095 | 1.02E+08 |
| BUB1B      | 0.35913  | 0.35913  | 1.0472  | 0.95628  | 0.35548 | 0.56157 | -5.8097 | 701      |
| LOC400627  | -0.12209 | 0.12209  | 0.31292 | -0.95616 | 0.35554 | 0.56158 | -5.8098 | 400627   |
| TMEM258    | 7.587    | 7.587    | 24.176  | 0.95614  | 0.35555 | 0.56158 | -5.8098 | 746      |
| NUDCD2     | -0.13763 | 0.13763  | 0.97645 | -0.95574 | 0.35575 | 0.56184 | -5.8102 | 134492   |
| PROX1      | 0.21655  | 0.21655  | 0.7702  | 0.95565  | 0.35579 | 0.56185 | -5.8103 | 5629     |
| MAP1B      | -1.6825  | 1.6825   | 6.2385  | -0.95557 | 0.35583 | 0.56186 | -5.8103 | 4131     |
| ARHGEF6    | -0.5785  | 0.5785   | 2.3876  | -0.95518 | 0.35601 | 0.5621  | -5.8107 | 9459     |
| GADD45GIP1 | 4.2893   | 4.2893   | 14.074  | 0.95504  | 0.35609 | 0.56213 | -5.8108 | 90480    |
| SNORA120   | -0.15768 | 0.15768  | 0.21329 | -0.95496 | 0.35612 | 0.56213 | -5.8109 | 1.1E+08  |
| ST7-AS2    | -0.07587 | 0.075874 | 0.20783 | -0.95488 | 0.35616 | 0.56213 | -5.811  | 93654    |
| RAPGEF1    | -1.4693  | 1.4693   | 7.1788  | -0.95488 | 0.35616 | 0.56213 | -5.811  | 2889     |
| RNF20      | -0.83843 | 0.83843  | 5.0913  | -0.95464 | 0.35628 | 0.56226 | -5.8112 | 56254    |
| KCTD15     | -1.6391  | 1.6391   | 10.067  | -0.95451 | 0.35634 | 0.56231 | -5.8113 | 79047    |
| SNORA9     | 0.41487  | 0.41487  | 1.4576  | 0.95428  | 0.35646 | 0.56244 | -5.8115 | 677798   |
| DVL1       | 2.8711   | 2.8711   | 13.69   | 0.95414  | 0.35652 | 0.56249 | -5.8116 | 1855     |
| SLC38A5    | 2.1871   | 2.1871   | 7.0256  | 0.95371  | 0.35674 | 0.56277 | -5.8121 | 92745    |

|              |          |          |         |          |         |         |         |          |
|--------------|----------|----------|---------|----------|---------|---------|---------|----------|
| VN1R1        | -0.11029 | 0.11029  | 0.26267 | -0.95356 | 0.3568  | 0.56283 | -5.8122 | 57191    |
| ZBED5-AS1    | 0.58183  | 0.58183  | 2.0934  | 0.95338  | 0.35689 | 0.56287 | -5.8124 | 729013   |
| SNHG18       | 0.60104  | 0.60104  | 1.7263  | 0.95332  | 0.35693 | 0.56287 | -5.8124 | 1.01E+08 |
| GTF2I        | -3.2152  | 3.2152   | 28.178  | -0.95324 | 0.35696 | 0.56287 | -5.8125 | 2969     |
| PMM1         | 1.3156   | 1.3156   | 5.877   | 0.95324  | 0.35697 | 0.56287 | -5.8125 | 5372     |
| KLK13        | 3.8699   | 3.8699   | 7.2739  | 0.95294  | 0.35711 | 0.56302 | -5.8128 | 26085    |
| SLC1A4       | -1.1761  | 1.1761   | 6.1048  | -0.9529  | 0.35713 | 0.56302 | -5.8128 | 6509     |
| CDKN2B       | 3.6209   | 3.6209   | 11.709  | 0.95274  | 0.35721 | 0.56309 | -5.8129 | 1030     |
| CRYL1        | 1.252    | 1.252    | 4.5439  | 0.95237  | 0.35739 | 0.56333 | -5.8133 | 51084    |
| MFSD5        | 2.8345   | 2.8345   | 10.421  | 0.95227  | 0.35744 | 0.56335 | -5.8134 | 84975    |
| GINM1        | 1.3025   | 1.3025   | 10.432  | 0.952    | 0.35757 | 0.56351 | -5.8136 | 116254   |
| ARNT2        | -0.39716 | 0.39716  | 0.72603 | -0.95182 | 0.35766 | 0.56353 | -5.8138 | 9915     |
| ITSN1        | -0.38278 | 0.38278  | 2.0541  | -0.9518  | 0.35767 | 0.56353 | -5.8138 | 6453     |
| EIF3H        | 6.5808   | 6.5808   | 41.364  | 0.95176  | 0.35769 | 0.56353 | -5.8138 | 8667     |
| BCAM         | -3.0432  | 3.0432   | 10.683  | -0.9516  | 0.35777 | 0.56361 | -5.814  | 4059     |
| VCAM1        | 1.4885   | 1.4885   | 3.0513  | 0.9509   | 0.35811 | 0.56409 | -5.8146 | 7412     |
| GPATCH11     | 0.27068  | 0.27068  | 1.6875  | 0.95073  | 0.35819 | 0.56417 | -5.8148 | 253635   |
| GCC1         | -0.38023 | 0.38023  | 3.0845  | -0.95041 | 0.35835 | 0.56436 | -5.8151 | 79571    |
| LOC108783654 | -0.57161 | 0.57161  | 3.0221  | -0.95031 | 0.3584  | 0.56436 | -5.8152 | 1.09E+08 |
| CHCHD2       | 13.229   | 13.229   | 53.135  | 0.95028  | 0.35841 | 0.56436 | -5.8152 | 51142    |
| LOC101928335 | -0.06784 | 0.067835 | 0.15117 | -0.94985 | 0.35862 | 0.56461 | -5.8156 | 1.02E+08 |
| NUP54        | 0.90007  | 0.90007  | 4.6103  | 0.94977  | 0.35866 | 0.56461 | -5.8157 | 53371    |
| DDX11        | -0.65681 | 0.65681  | 2.2564  | -0.94976 | 0.35867 | 0.56461 | -5.8157 | 1663     |
| FGF13        | -0.13276 | 0.13276  | 0.30804 | -0.94967 | 0.35871 | 0.56462 | -5.8158 | 2258     |
| PERM1        | -0.46369 | 0.46369  | 1.8344  | -0.94943 | 0.35883 | 0.56472 | -5.816  | 84808    |
| POMGNT2      | -0.47478 | 0.47478  | 2.2148  | -0.9494  | 0.35884 | 0.56472 | -5.816  | 84892    |

|              |          |          |         |          |         |         |         |          |
|--------------|----------|----------|---------|----------|---------|---------|---------|----------|
| SNORA84      | -0.38628 | 0.38628  | 0.7321  | -0.94903 | 0.35903 | 0.56496 | -5.8164 | 1E+08    |
| TNC          | 35.887   | 35.887   | 71.387  | 0.94862  | 0.35923 | 0.56522 | -5.8167 | 3371     |
| PIEZO2       | 0.18031  | 0.18031  | 0.53845 | 0.94833  | 0.35937 | 0.56539 | -5.817  | 63895    |
| MTLN         | 0.55266  | 0.55266  | 2.1033  | 0.94807  | 0.35949 | 0.56554 | -5.8172 | 205251   |
| ECSCR        | 2.1927   | 2.1927   | 5.6155  | 0.94798  | 0.35954 | 0.56556 | -5.8173 | 641700   |
| C7orf31      | -0.12359 | 0.12359  | 0.43337 | -0.94738 | 0.35984 | 0.56597 | -5.8179 | 136895   |
| SPSB3        | -2.8598  | 2.8598   | 12.133  | -0.94719 | 0.35993 | 0.56606 | -5.8181 | 90864    |
| SPAST        | 0.21684  | 0.21684  | 2.192   | 0.94685  | 0.3601  | 0.56626 | -5.8184 | 6683     |
| CD79B        | -0.24255 | 0.24255  | 0.58799 | -0.94676 | 0.36014 | 0.56626 | -5.8184 | 974      |
| PPFIBP1      | 1.6297   | 1.6297   | 8.527   | 0.94671  | 0.36017 | 0.56626 | -5.8185 | 8496     |
| UBA5         | 0.29823  | 0.29823  | 2.8334  | 0.94665  | 0.36019 | 0.56626 | -5.8185 | 79876    |
| IQCA1        | 0.10051  | 0.10051  | 0.23434 | 0.94659  | 0.36022 | 0.56626 | -5.8186 | 79781    |
| IGF2         | 4.9215   | 4.9215   | 8.3937  | 0.94645  | 0.36029 | 0.56632 | -5.8187 | 3481     |
| BNIP2        | 0.82964  | 0.82964  | 5.6323  | 0.94636  | 0.36034 | 0.56633 | -5.8188 | 663      |
| FUNDC1       | 0.56702  | 0.56702  | 2.5013  | 0.9462   | 0.36041 | 0.5664  | -5.819  | 139341   |
| ALDH9A1      | -2.9948  | 2.9948   | 17.645  | -0.94581 | 0.36061 | 0.56665 | -5.8193 | 223      |
| CCNG2        | -0.62415 | 0.62415  | 3.2918  | -0.94566 | 0.36068 | 0.56671 | -5.8195 | 901      |
| DCAF17       | -0.17979 | 0.17979  | 1.6045  | -0.94561 | 0.36071 | 0.56671 | -5.8195 | 80067    |
| PRKCZ        | -0.42008 | 0.42008  | 2.3833  | -0.94534 | 0.36084 | 0.56681 | -5.8197 | 5590     |
| DMPK         | -1.0362  | 1.0362   | 4.1042  | -0.94531 | 0.36085 | 0.56681 | -5.8198 | 1760     |
| DNAAF4-CCPG1 | -0.06998 | 0.069979 | 0.17627 | -0.94527 | 0.36087 | 0.56681 | -5.8198 | 1.01E+08 |
| AKT1S1       | 1.8821   | 1.8821   | 10.432  | 0.94517  | 0.36092 | 0.56683 | -5.8199 | 84335    |
| PARP12       | -0.79285 | 0.79285  | 3.7638  | -0.94504 | 0.36098 | 0.56688 | -5.82   | 64761    |
| TRAPPC13     | 0.22625  | 0.22625  | 1.4065  | 0.94489  | 0.36106 | 0.56691 | -5.8202 | 80006    |
| CD164L2      | 1.3847   | 1.3847   | 3.7079  | 0.94487  | 0.36107 | 0.56691 | -5.8202 | 388611   |
| CCDC144A     | -0.31166 | 0.31166  | 0.60466 | -0.94456 | 0.36122 | 0.56702 | -5.8205 | 9720     |

|          |          |         |         |          |         |         |         |          |
|----------|----------|---------|---------|----------|---------|---------|---------|----------|
| ECI1     | -1.5055  | 1.5055  | 7.6724  | -0.94452 | 0.36124 | 0.56702 | -5.8205 | 1632     |
| TAOK3    | 0.39208  | 0.39208 | 3.4177  | 0.94445  | 0.36128 | 0.56702 | -5.8206 | 51347    |
| MBD4     | 0.51232  | 0.51232 | 3.8135  | 0.94445  | 0.36128 | 0.56702 | -5.8206 | 8930     |
| MAN1A2   | 0.57892  | 0.57892 | 5.2831  | 0.9443   | 0.36135 | 0.56709 | -5.8207 | 10905    |
| OLFML2A  | 1.6299   | 1.6299  | 6.9633  | 0.94411  | 0.36145 | 0.56715 | -5.8209 | 169611   |
| HAGLROS  | 0.1104   | 0.1104  | 0.26493 | 0.94408  | 0.36146 | 0.56715 | -5.8209 | 1.03E+08 |
| IGSF9    | -0.801   | 0.801   | 3.0962  | -0.94384 | 0.36158 | 0.56728 | -5.8211 | 57549    |
| TMEM97   | -0.54234 | 0.54234 | 1.9987  | -0.94371 | 0.36164 | 0.56733 | -5.8212 | 27346    |
| RBM48    | -0.12525 | 0.12525 | 0.93277 | -0.94335 | 0.36182 | 0.56755 | -5.8216 | 84060    |
| SNRPD2   | 10.452   | 10.452  | 34.322  | 0.94314  | 0.36192 | 0.56767 | -5.8218 | 6633     |
| ADAM17   | 0.90729  | 0.90729 | 6.1922  | 0.94298  | 0.362   | 0.56774 | -5.8219 | 6868     |
| BOLA3    | 1.6579   | 1.6579  | 4.1984  | 0.94283  | 0.36208 | 0.5678  | -5.822  | 388962   |
| SCAF1    | -2.5336  | 2.5336  | 10.255  | -0.94233 | 0.36232 | 0.56808 | -5.8225 | 58506    |
| FUT8     | 0.51051  | 0.51051 | 1.8719  | 0.94227  | 0.36235 | 0.56808 | -5.8226 | 2530     |
| MAP3K3   | -0.76057 | 0.76057 | 5.3119  | -0.94226 | 0.36236 | 0.56808 | -5.8226 | 4215     |
| WAC-AS1  | 0.67858  | 0.67858 | 4.9053  | 0.94205  | 0.36246 | 0.56814 | -5.8228 | 220906   |
| MYNN     | 0.28413  | 0.28413 | 1.8109  | 0.94202  | 0.36247 | 0.56814 | -5.8228 | 55892    |
| PPP6R2   | -1.1323  | 1.1323  | 7.5098  | -0.94198 | 0.3625  | 0.56814 | -5.8228 | 9701     |
| CEP192   | -0.38647 | 0.38647 | 3.2737  | -0.9418  | 0.36259 | 0.56819 | -5.823  | 55125    |
| SH3GLB1  | 1.3924   | 1.3924  | 9.5651  | 0.94176  | 0.36261 | 0.56819 | -5.823  | 51100    |
| HNRNPA0  | -3.2344  | 3.2344  | 17.964  | -0.94171 | 0.36263 | 0.56819 | -5.8231 | 10949    |
| RASAL1   | 2.0818   | 2.0818  | 4.5561  | 0.94119  | 0.36288 | 0.56854 | -5.8235 | 8437     |
| PSMC3IP  | -0.13587 | 0.13587 | 0.80762 | -0.94094 | 0.36301 | 0.56868 | -5.8238 | 29893    |
| WDR45B   | 2.4608   | 2.4608  | 15.149  | 0.94088  | 0.36304 | 0.56868 | -5.8238 | 56270    |
| BNC2-AS1 | -0.1073  | 0.1073  | 0.26756 | -0.94043 | 0.36326 | 0.56895 | -5.8242 | 1.11E+08 |
| UHRF1BP1 | -0.29996 | 0.29996 | 2.0111  | -0.9404  | 0.36328 | 0.56895 | -5.8243 | 54887    |

|           |          |          |         |          |         |         |         |          |
|-----------|----------|----------|---------|----------|---------|---------|---------|----------|
| FOXH1     | -0.08681 | 0.086809 | 0.17579 | -0.94007 | 0.36344 | 0.56908 | -5.8246 | 8928     |
| SNORA2B   | -0.09984 | 0.099841 | 0.11631 | -0.94005 | 0.36345 | 0.56908 | -5.8246 | 677794   |
| GPT2      | -2.1874  | 2.1874   | 7.9557  | -0.94002 | 0.36347 | 0.56908 | -5.8246 | 84706    |
| ACSL4     | 1.9809   | 1.9809   | 6.2562  | 0.9396   | 0.36367 | 0.56932 | -5.825  | 2182     |
| TRIM21    | -1.0317  | 1.0317   | 3.171   | -0.93958 | 0.36368 | 0.56932 | -5.825  | 6737     |
| POFUT1    | -0.73771 | 0.73771  | 4.2686  | -0.93938 | 0.36378 | 0.56942 | -5.8252 | 23509    |
| NOL12     | -0.43126 | 0.43126  | 2.6676  | -0.93925 | 0.36385 | 0.56947 | -5.8253 | 79159    |
| NINL      | -0.24924 | 0.24924  | 0.7477  | -0.93892 | 0.36401 | 0.56967 | -5.8256 | 22981    |
| ALS2CL    | -3.4233  | 3.4233   | 12.074  | -0.93828 | 0.36433 | 0.57011 | -5.8262 | 259173   |
| SNHG9     | 1.5001   | 1.5001   | 5.0271  | 0.93812  | 0.3644  | 0.57015 | -5.8263 | 735301   |
| AOC2      | -0.09621 | 0.096212 | 0.46253 | -0.93806 | 0.36444 | 0.57015 | -5.8264 | 314      |
| ZC3H12A   | 5.8819   | 5.8819   | 13.32   | 0.93802  | 0.36445 | 0.57015 | -5.8264 | 80149    |
| TUBGCP4   | -0.26999 | 0.26999  | 1.7971  | -0.93788 | 0.36453 | 0.57021 | -5.8266 | 27229    |
| ARMCX6    | -0.60921 | 0.60921  | 2.5753  | -0.93776 | 0.36459 | 0.57025 | -5.8267 | 54470    |
| MCMBP     | 1.0218   | 1.0218   | 7.2018  | 0.93734  | 0.36479 | 0.57052 | -5.8271 | 79892    |
| AGGF1     | 0.44565  | 0.44565  | 3.5481  | 0.93702  | 0.36495 | 0.57067 | -5.8274 | 55109    |
| CLIP1-AS1 | 0.4004   | 0.4004   | 1.1959  | 0.937    | 0.36496 | 0.57067 | -5.8274 | 1.01E+08 |
| GNMT      | -0.09933 | 0.099325 | 0.19801 | -0.93695 | 0.36499 | 0.57067 | -5.8274 | 27232    |
| TGFB111   | 2.5604   | 2.5604   | 7.5736  | 0.93683  | 0.36505 | 0.57071 | -5.8275 | 7041     |
| AZGP1     | 74.304   | 74.304   | 97.85   | 0.93651  | 0.3652  | 0.5709  | -5.8278 | 563      |
| IL3RA     | 0.33456  | 0.33456  | 1.29    | 0.93638  | 0.36527 | 0.57095 | -5.8279 | 3563     |
| PFDN5     | 22.727   | 22.727   | 72.627  | 0.93627  | 0.36532 | 0.57098 | -5.828  | 5204     |
| TDP1      | 0.34106  | 0.34106  | 2.0969  | 0.93587  | 0.36552 | 0.57121 | -5.8284 | 55775    |
| GALNT2    | 2.1557   | 2.1557   | 8.194   | 0.93583  | 0.36554 | 0.57121 | -5.8284 | 2590     |
| KRT5      | 952.34   | 952.34   | 2751.1  | 0.93577  | 0.36557 | 0.57121 | -5.8285 | 3852     |
| MYORG     | 0.34923  | 0.34923  | 1.5727  | 0.93543  | 0.36574 | 0.57142 | -5.8288 | 57462    |

|              |          |          |          |          |         |         |         |          |
|--------------|----------|----------|----------|----------|---------|---------|---------|----------|
| DEPDC7       | 0.25332  | 0.25332  | 1.019    | 0.93525  | 0.36583 | 0.57151 | -5.829  | 91614    |
| SLFN11       | 0.84307  | 0.84307  | 2.1805   | 0.93494  | 0.36598 | 0.57152 | -5.8292 | 91607    |
| FNDC4        | 0.80825  | 0.80825  | 1.9186   | 0.93494  | 0.36599 | 0.57152 | -5.8292 | 64838    |
| PGLYRP3      | 3.6415   | 3.6415   | 12.476   | 0.93492  | 0.366   | 0.57152 | -5.8293 | 114771   |
| PPIH         | -1.1384  | 1.1384   | 5.7981   | -0.93488 | 0.36602 | 0.57152 | -5.8293 | 10465    |
| RNF7         | 1.8244   | 1.8244   | 7.5903   | 0.93486  | 0.36602 | 0.57152 | -5.8293 | 9616     |
| RAB4A        | 0.89664  | 0.89664  | 6.2739   | 0.93484  | 0.36604 | 0.57152 | -5.8293 | 5867     |
| C1QTNF5      | 2.4047   | 2.4047   | 4.4907   | 0.93459  | 0.36616 | 0.57161 | -5.8296 | 114902   |
| NOMO2        | 1.795    | 1.795    | 10.169   | 0.93458  | 0.36617 | 0.57161 | -5.8296 | 283820   |
| APBB3        | -0.50923 | 0.50923  | 2.841    | -0.93447 | 0.36622 | 0.57164 | -5.8297 | 10307    |
| C1QBP        | 6.9341   | 6.9341   | 26.77    | 0.93393  | 0.36649 | 0.57201 | -5.8302 | 708      |
| MMP7         | -3.448   | 3.448    | 5.1191   | -0.93386 | 0.36652 | 0.57201 | -5.8302 | 4316     |
| ZCRB1        | 1.1541   | 1.1541   | 5.3778   | 0.93372  | 0.36659 | 0.57202 | -5.8303 | 85437    |
| LYRM4-AS1    | -0.07127 | 0.071271 | 0.34341  | -0.93368 | 0.36661 | 0.57202 | -5.8304 | 1E+08    |
| CHST13       | 0.10639  | 0.10639  | 0.1342   | 0.93359  | 0.36666 | 0.57202 | -5.8305 | 166012   |
| ATP6V0A1     | 1.8305   | 1.8305   | 12.963   | 0.93353  | 0.36669 | 0.57202 | -5.8305 | 535      |
| ADCK5        | -0.5477  | 0.5477   | 2.0517   | -0.9335  | 0.3667  | 0.57202 | -5.8305 | 203054   |
| HOXD-AS2     | -0.32312 | 0.32312  | 0.46104  | -0.93344 | 0.36673 | 0.57202 | -5.8306 | 1.01E+08 |
| FAM110D      | -0.50926 | 0.50926  | 1.5499   | -0.93325 | 0.36683 | 0.57211 | -5.8308 | 79927    |
| SNORD12B     | -0.09661 | 0.096613 | 0.15892  | -0.93292 | 0.36699 | 0.57232 | -5.8311 | 1E+08    |
| JAG1         | 4.04     | 4.04     | 30.6     | 0.93278  | 0.36706 | 0.57238 | -5.8312 | 182      |
| BIN2         | 0.32178  | 0.32178  | 0.95273  | 0.93253  | 0.36718 | 0.5725  | -5.8314 | 51411    |
| TMEFF1       | 0.069577 | 0.069577 | 0.072805 | 0.93248  | 0.36721 | 0.5725  | -5.8315 | 8577     |
| CARMIL3      | -0.36426 | 0.36426  | 1.0834   | -0.93236 | 0.36727 | 0.57254 | -5.8316 | 90668    |
| LOC103021295 | 0.66806  | 0.66806  | 1.7654   | 0.9321   | 0.3674  | 0.57269 | -5.8318 | 1.03E+08 |
| CLOCK        | 0.53101  | 0.53101  | 3.8093   | 0.93191  | 0.36749 | 0.57278 | -5.832  | 9575     |

|            |          |          |         |          |         |         |         |          |
|------------|----------|----------|---------|----------|---------|---------|---------|----------|
| KLHL4      | 0.066898 | 0.066898 | 0.14125 | 0.93174  | 0.36758 | 0.57286 | -5.8321 | 56062    |
| MYDGF      | 3.3065   | 3.3065   | 13.838  | 0.93144  | 0.36773 | 0.57305 | -5.8324 | 56005    |
| LINC02003  | -0.08711 | 0.087112 | 0.13941 | -0.93101 | 0.36794 | 0.57326 | -5.8328 | 146795   |
| PRC1-AS1   | -0.07805 | 0.078052 | 0.16246 | -0.93097 | 0.36796 | 0.57326 | -5.8328 | 1.01E+08 |
| TRMT112    | 4.1684   | 4.1684   | 19.205  | 0.93096  | 0.36797 | 0.57326 | -5.8328 | 51504    |
| CREB3L2    | 0.96242  | 0.96242  | 6.6044  | 0.93066  | 0.36812 | 0.57341 | -5.8331 | 64764    |
| FLT1       | 0.77155  | 0.77155  | 2.3531  | 0.93063  | 0.36813 | 0.57341 | -5.8331 | 2321     |
| FBXO11     | 1.0033   | 1.0033   | 7.2074  | 0.93049  | 0.3682  | 0.57347 | -5.8333 | 80204    |
| ZBTB34     | 0.39847  | 0.39847  | 2.4668  | 0.93015  | 0.36837 | 0.57368 | -5.8336 | 403341   |
| SNORA14A   | 0.089204 | 0.089204 | 0.15823 | 0.92959  | 0.36865 | 0.57406 | -5.8341 | 677801   |
| ZNF69      | -0.10664 | 0.10664  | 0.36596 | -0.92953 | 0.36868 | 0.57406 | -5.8341 | 7620     |
| RNF138P1   | -0.31916 | 0.31916  | 0.86881 | -0.92931 | 0.36879 | 0.57417 | -5.8343 | 379013   |
| AK2        | -1.366   | 1.366    | 8.9614  | -0.92877 | 0.36906 | 0.57451 | -5.8348 | 204      |
| MGC16025   | 0.23463  | 0.23463  | 0.64137 | 0.92874  | 0.36908 | 0.57451 | -5.8348 | 85009    |
| IGF1       | -1.8518  | 1.8518   | 2.7134  | -0.92847 | 0.36921 | 0.5746  | -5.8351 | 3479     |
| LRRC8C     | 0.47807  | 0.47807  | 1.9984  | 0.92846  | 0.36922 | 0.5746  | -5.8351 | 84230    |
| ABHD17A    | 7.269    | 7.269    | 28.626  | 0.92843  | 0.36923 | 0.5746  | -5.8351 | 81926    |
| ZBED6CL    | 0.28153  | 0.28153  | 1.2601  | 0.92792  | 0.36949 | 0.57486 | -5.8356 | 113763   |
| CDCA8      | 0.49986  | 0.49986  | 1.3839  | 0.92789  | 0.3695  | 0.57486 | -5.8356 | 55143    |
| PNPLA4     | -0.25556 | 0.25556  | 1.4883  | -0.92784 | 0.36953 | 0.57486 | -5.8357 | 8228     |
| HS1BP3     | -0.84107 | 0.84107  | 4.1645  | -0.92775 | 0.36957 | 0.57486 | -5.8357 | 64342    |
| ARHGAP27P1 | -1.3443  | 1.3443   | 5.755   | -0.92775 | 0.36958 | 0.57486 | -5.8357 | 146880   |
| RNF144B    | -1.0691  | 1.0691   | 7.3184  | -0.92755 | 0.36967 | 0.57496 | -5.8359 | 255488   |
| PSMC5      | 3.7999   | 3.7999   | 24.327  | 0.92749  | 0.3697  | 0.57496 | -5.836  | 5705     |
| TMPRSS11F  | -0.28303 | 0.28303  | 0.6905  | -0.92732 | 0.36979 | 0.57502 | -5.8361 | 389208   |
| HTATSF1    | -0.78218 | 0.78218  | 5.6063  | -0.92728 | 0.36981 | 0.57502 | -5.8362 | 27336    |



|          |          |          |         |          |         |         |         |        |
|----------|----------|----------|---------|----------|---------|---------|---------|--------|
| CES2     | 2.684    | 2.684    | 11.957  | 0.92718  | 0.36986 | 0.57503 | -5.8363 | 8824   |
| DNAJC30  | -0.40259 | 0.40259  | 2.5526  | -0.92712 | 0.36989 | 0.57503 | -5.8363 | 84277  |
| TYROBP   | 9.5127   | 9.5127   | 17.032  | 0.92683  | 0.37003 | 0.5752  | -5.8366 | 7305   |
| DSN1     | 0.30496  | 0.30496  | 1.9512  | 0.92625  | 0.37032 | 0.57548 | -5.8371 | 79980  |
| PM20D1   | -0.07696 | 0.076957 | 0.18073 | -0.92622 | 0.37034 | 0.57548 | -5.8371 | 148811 |
| IFITM10  | -0.63512 | 0.63512  | 1.8242  | -0.92622 | 0.37034 | 0.57548 | -5.8371 | 402778 |
| NOSTRIN  | -0.39429 | 0.39429  | 1.2194  | -0.92615 | 0.37037 | 0.57548 | -5.8372 | 115677 |
| DAZAP1   | 3.898    | 3.898    | 19.797  | 0.92614  | 0.37038 | 0.57548 | -5.8372 | 26528  |
| SNORA73B | -25.192  | 25.192   | 87.562  | -0.92581 | 0.37055 | 0.57568 | -5.8375 | 26768  |
| HIGD1B   | 0.12233  | 0.12233  | 0.42943 | 0.92548  | 0.37071 | 0.57584 | -5.8378 | 51751  |
| SYT8     | -3.4094  | 3.4094   | 5.237   | -0.92543 | 0.37074 | 0.57584 | -5.8378 | 90019  |
| SASH1    | -1.2344  | 1.2344   | 10.595  | -0.9254  | 0.37075 | 0.57584 | -5.8379 | 23328  |
| CCPG1    | 0.46795  | 0.46795  | 2.6399  | 0.92529  | 0.37081 | 0.57587 | -5.838  | 9236   |
| INSR     | -0.90956 | 0.90956  | 5.3453  | -0.92523 | 0.37084 | 0.57587 | -5.838  | 3643   |
| ZNF287   | -0.08675 | 0.086745 | 0.39029 | -0.92509 | 0.37091 | 0.57592 | -5.8381 | 57336  |
| CBX3     | 3.0654   | 3.0654   | 11.546  | 0.92491  | 0.371   | 0.57601 | -5.8383 | 11335  |
| MTUS1    | -0.81968 | 0.81968  | 5.4747  | -0.92478 | 0.37106 | 0.57606 | -5.8384 | 57509  |
| VMO1     | 0.4621   | 0.4621   | 1.1282  | 0.92464  | 0.37113 | 0.57606 | -5.8385 | 284013 |
| PPP3CA   | -0.98133 | 0.98133  | 7.1205  | -0.92464 | 0.37113 | 0.57606 | -5.8385 | 5530   |
| REXO4    | -0.76181 | 0.76181  | 3.6552  | -0.92426 | 0.37132 | 0.57625 | -5.8389 | 57109  |
| FBXO41   | -0.12931 | 0.12931  | 0.61991 | -0.92426 | 0.37132 | 0.57625 | -5.8389 | 150726 |
| SDE2     | 0.45526  | 0.45526  | 4.0519  | 0.92407  | 0.37142 | 0.57634 | -5.839  | 163859 |
| KCNG1    | 0.18446  | 0.18446  | 0.47602 | 0.92397  | 0.37147 | 0.57637 | -5.8391 | 3755   |
| TMEM238  | -0.90567 | 0.90567  | 2.1929  | -0.92374 | 0.37159 | 0.57644 | -5.8394 | 388564 |
| DIS3     | 0.46264  | 0.46264  | 3.1441  | 0.9237   | 0.3716  | 0.57644 | -5.8394 | 22894  |
| SLC25A51 | 0.20692  | 0.20692  | 1.7986  | 0.92368  | 0.37162 | 0.57644 | -5.8394 | 92014  |

|             |          |          |         |          |         |         |         |          |
|-------------|----------|----------|---------|----------|---------|---------|---------|----------|
| IDE         | 12.151   | 12.151   | 20.218  | 0.92356  | 0.37168 | 0.57648 | -5.8395 | 3416     |
| ADAM33      | -1.4681  | 1.4681   | 3.726   | -0.92333 | 0.37179 | 0.57655 | -5.8397 | 80332    |
| TMEM208     | 2.273    | 2.273    | 7.895   | 0.92331  | 0.3718  | 0.57655 | -5.8397 | 29100    |
| LOC642361   | -0.38863 | 0.38863  | 1.465   | -0.92327 | 0.37182 | 0.57655 | -5.8398 | 642361   |
| KPNB1       | 4.1569   | 4.1569   | 22.343  | 0.92313  | 0.37189 | 0.57661 | -5.8399 | 3837     |
| RHBG        | -0.24726 | 0.24726  | 0.50564 | -0.92278 | 0.37207 | 0.57682 | -5.8402 | 57127    |
| ESF1        | 0.47064  | 0.47064  | 2.8437  | 0.92256  | 0.37218 | 0.57694 | -5.8404 | 51575    |
| CACNA1C-IT3 | -0.07822 | 0.078215 | 0.14174 | -0.92228 | 0.37232 | 0.57711 | -5.8407 | 1.01E+08 |
| DDX27       | -1.14    | 1.14     | 6.428   | -0.92205 | 0.37243 | 0.57723 | -5.8409 | 55661    |
| DUS1L       | -2.8653  | 2.8653   | 14.513  | -0.92176 | 0.37258 | 0.57741 | -5.8411 | 64118    |
| RASSF4      | -0.76205 | 0.76205  | 2.2211  | -0.92156 | 0.37268 | 0.57745 | -5.8413 | 83937    |
| TRAF3IP2    | 1.0365   | 1.0365   | 5.3412  | 0.92149  | 0.37272 | 0.57745 | -5.8414 | 10758    |
| TBC1D14     | 2.1345   | 2.1345   | 13.912  | 0.92145  | 0.37273 | 0.57745 | -5.8414 | 57533    |
| TNNT2       | -0.53472 | 0.53472  | 1.9198  | -0.92143 | 0.37274 | 0.57745 | -5.8414 | 7139     |
| ICAM1       | 2.5428   | 2.5428   | 6.4928  | 0.9212   | 0.37286 | 0.57752 | -5.8416 | 3383     |
| MT2A        | -71.146  | 71.146   | 112.44  | -0.92118 | 0.37287 | 0.57752 | -5.8416 | 4502     |
| SVBP        | 0.90948  | 0.90948  | 3.3805  | 0.92107  | 0.37293 | 0.57752 | -5.8417 | 374969   |
| ANK1        | 0.1189   | 0.1189   | 0.23821 | 0.92104  | 0.37294 | 0.57752 | -5.8418 | 286      |
| CTBP2       | 0.56651  | 0.56651  | 3.2387  | 0.92097  | 0.37298 | 0.57752 | -5.8418 | 1488     |
| FTSJ3       | -1.1081  | 1.1081   | 5.4421  | -0.92093 | 0.373   | 0.57752 | -5.8419 | 117246   |
| CTXN1       | 0.98912  | 0.98912  | 2.5673  | 0.92075  | 0.37309 | 0.57761 | -5.842  | 404217   |
| TRMT10A     | 0.098849 | 0.098849 | 0.45708 | 0.92051  | 0.37321 | 0.57774 | -5.8422 | 93587    |
| TNK2        | -2.5279  | 2.5279   | 8.6932  | -0.92033 | 0.3733  | 0.57779 | -5.8424 | 10188    |
| ZNF775      | -0.25394 | 0.25394  | 0.68791 | -0.9203  | 0.37332 | 0.57779 | -5.8424 | 285971   |
| LBR         | 0.73438  | 0.73438  | 4.1904  | 0.92023  | 0.37335 | 0.57779 | -5.8425 | 3930     |
| ZNF761      | -0.19518 | 0.19518  | 1.1325  | -0.92018 | 0.37338 | 0.57779 | -5.8425 | 388561   |

|             |          |          |         |          |         |         |         |          |
|-------------|----------|----------|---------|----------|---------|---------|---------|----------|
| TMEM267     | 0.21113  | 0.21113  | 1.0545  | 0.91984  | 0.37355 | 0.578   | -5.8428 | 64417    |
| MARK1       | 0.24112  | 0.24112  | 1.4923  | 0.91971  | 0.37361 | 0.57805 | -5.843  | 4139     |
| TADA2A      | -0.27336 | 0.27336  | 2.455   | -0.91951 | 0.37371 | 0.57816 | -5.8431 | 6871     |
| ANKRD40     | -0.90825 | 0.90825  | 4.658   | -0.91912 | 0.37391 | 0.57838 | -5.8435 | 91369    |
| SDC3        | -1.797   | 1.797    | 5.3159  | -0.91909 | 0.37393 | 0.57838 | -5.8435 | 9672     |
| RAB35       | 1.6797   | 1.6797   | 11.041  | 0.91867  | 0.37414 | 0.57865 | -5.8439 | 11021    |
| DYRK4       | 0.39721  | 0.39721  | 1.3736  | 0.91851  | 0.37422 | 0.57868 | -5.844  | 8798     |
| HLA-DQA1    | -4.8263  | 4.8263   | 10.268  | -0.91842 | 0.37427 | 0.57868 | -5.8441 | 3117     |
| LINC01436   | -0.28961 | 0.28961  | 0.37405 | -0.91841 | 0.37427 | 0.57868 | -5.8441 | 1.01E+08 |
| MYLK        | 1.6003   | 1.6003   | 7.0841  | 0.91836  | 0.37429 | 0.57868 | -5.8442 | 4638     |
| MS4A4A      | 1.9946   | 1.9946   | 3.0541  | 0.91827  | 0.37434 | 0.5787  | -5.8442 | 51338    |
| RASGRP1     | -0.53522 | 0.53522  | 2.5779  | -0.91802 | 0.37447 | 0.57884 | -5.8445 | 10125    |
| RAB33B      | 0.264    | 0.264    | 1.548   | 0.91772  | 0.37462 | 0.57902 | -5.8447 | 83452    |
| TMEM86A     | 4.687    | 4.687    | 9.0283  | 0.91749  | 0.37474 | 0.57914 | -5.8449 | 144110   |
| SERTAD4-AS1 | -0.16149 | 0.16149  | 0.68093 | -0.91744 | 0.37476 | 0.57914 | -5.845  | 574036   |
| MRPL48      | 0.45079  | 0.45079  | 2.2448  | 0.91731  | 0.37482 | 0.57918 | -5.8451 | 51642    |
| PEX10       | -0.60377 | 0.60377  | 3.4822  | -0.9172  | 0.37488 | 0.57919 | -5.8452 | 5192     |
| DACT1       | 0.41171  | 0.41171  | 0.95419 | 0.91716  | 0.3749  | 0.57919 | -5.8452 | 51339    |
| CAT         | 7.3714   | 7.3714   | 19.136  | 0.91706  | 0.37495 | 0.57922 | -5.8453 | 847      |
| IFFO1       | -0.56682 | 0.56682  | 1.857   | -0.9169  | 0.37503 | 0.57929 | -5.8455 | 25900    |
| LINC01686   | -0.06632 | 0.066318 | 0.11657 | -0.91663 | 0.37517 | 0.57945 | -5.8457 | 284648   |
| CTNNA1      | 6.2072   | 6.2072   | 31.952  | 0.91614  | 0.37542 | 0.57976 | -5.8461 | 1495     |
| RASL12      | -1.0188  | 1.0188   | 2.1339  | -0.91605 | 0.37546 | 0.57976 | -5.8462 | 51285    |
| TIFAB       | -0.09407 | 0.094071 | 0.22073 | -0.91603 | 0.37547 | 0.57976 | -5.8462 | 497189   |
| MGAT2       | 1.2997   | 1.2997   | 4.9535  | 0.9159   | 0.37554 | 0.57978 | -5.8464 | 4247     |
| MYH9        | 30.783   | 30.783   | 111.45  | 0.91587  | 0.37555 | 0.57978 | -5.8464 | 4627     |

|           |          |          |          |          |         |         |         |          |
|-----------|----------|----------|----------|----------|---------|---------|---------|----------|
| CSF1R     | -1.9487  | 1.9487   | 7.2539   | -0.91564 | 0.37567 | 0.57991 | -5.8466 | 1436     |
| MAP1LC3A  | 4.8684   | 4.8684   | 11.019   | 0.91528  | 0.37585 | 0.58008 | -5.8469 | 84557    |
| GPR85     | 0.067283 | 0.067283 | 0.098316 | 0.91525  | 0.37587 | 0.58008 | -5.8469 | 54329    |
| HAVCR2    | 0.56808  | 0.56808  | 1.4445   | 0.91522  | 0.37589 | 0.58008 | -5.847  | 84868    |
| MBOAT7    | 1.4786   | 1.4786   | 7.5877   | 0.9151   | 0.37594 | 0.58011 | -5.8471 | 79143    |
| COL18A1   | 10.494   | 10.494   | 32.376   | 0.91475  | 0.37612 | 0.58031 | -5.8474 | 80781    |
| ZNF816    | -0.18116 | 0.18116  | 0.84569  | -0.91471 | 0.37614 | 0.58031 | -5.8474 | 125893   |
| CANX      | 7.0501   | 7.0501   | 40.918   | 0.91459  | 0.3762  | 0.58036 | -5.8475 | 821      |
| COL1A2    | 269.83   | 269.83   | 453.88   | 0.91406  | 0.37647 | 0.58072 | -5.848  | 1278     |
| DNAAF2    | 0.23687  | 0.23687  | 1.4833   | 0.91363  | 0.37669 | 0.581   | -5.8484 | 55172    |
| PPP1R13B  | -0.80593 | 0.80593  | 4.821    | -0.91316 | 0.37693 | 0.58129 | -5.8488 | 23368    |
| FSTL3     | 1.7009   | 1.7009   | 5.2214   | 0.91312  | 0.37695 | 0.58129 | -5.8488 | 10272    |
| CDKN2A    | -0.17584 | 0.17584  | 0.33775  | -0.91304 | 0.37699 | 0.58129 | -5.8489 | 1029     |
| LIPE-AS1  | 0.13566  | 0.13566  | 0.46244  | 0.91296  | 0.37703 | 0.58129 | -5.849  | 1.01E+08 |
| NHSL1     | -0.8774  | 0.8774   | 6.7195   | -0.91292 | 0.37705 | 0.58129 | -5.849  | 57224    |
| LOC339059 | -0.27617 | 0.27617  | 0.73245  | -0.91278 | 0.37712 | 0.58135 | -5.8491 | 339059   |
| ITGBL1    | -0.65877 | 0.65877  | 1.6367   | -0.9126  | 0.37721 | 0.58144 | -5.8493 | 9358     |
| ZNF799    | -0.12725 | 0.12725  | 0.82626  | -0.91245 | 0.37729 | 0.5815  | -5.8494 | 90576    |
| MTA3      | -0.28181 | 0.28181  | 2.79     | -0.9123  | 0.37736 | 0.58154 | -5.8496 | 57504    |
| CXCL16    | 3.0822   | 3.0822   | 10.631   | 0.91219  | 0.37742 | 0.58154 | -5.8497 | 58191    |
| HIRA      | -0.5273  | 0.5273   | 4.2001   | -0.91215 | 0.37744 | 0.58154 | -5.8497 | 7290     |
| COL26A1   | -0.11322 | 0.11322  | 0.14122  | -0.91208 | 0.37748 | 0.58154 | -5.8498 | 136227   |
| ZNF394    | -0.57899 | 0.57899  | 5.0499   | -0.91206 | 0.37748 | 0.58154 | -5.8498 | 84124    |
| NUP107    | -0.38034 | 0.38034  | 2.3655   | -0.91197 | 0.37753 | 0.58156 | -5.8499 | 57122    |
| ELF3      | 1.366    | 1.366    | 3.197    | 0.91179  | 0.37762 | 0.58164 | -5.85   | 1999     |
| LYRM2     | 0.34027  | 0.34027  | 1.8787   | 0.91168  | 0.37768 | 0.58168 | -5.8501 | 57226    |

|             |          |          |         |          |         |         |         |        |
|-------------|----------|----------|---------|----------|---------|---------|---------|--------|
| UEVLD       | 0.42421  | 0.42421  | 2.7284  | 0.91142  | 0.37781 | 0.58183 | -5.8503 | 55293  |
| C11orf96    | -8.3042  | 8.3042   | 11.079  | -0.91123 | 0.37791 | 0.58187 | -5.8505 | 387763 |
| TTY15       | -0.19296 | 0.19296  | 1.0213  | -0.91123 | 0.37791 | 0.58187 | -5.8505 | 64595  |
| PLCG2       | -24.98   | 24.98    | 105.18  | -0.91095 | 0.37805 | 0.58204 | -5.8508 | 5336   |
| S1PR1       | 1.726    | 1.726    | 5.9196  | 0.91077  | 0.37814 | 0.58213 | -5.8509 | 1901   |
| ITPA        | 1.3008   | 1.3008   | 6.1763  | 0.91068  | 0.37819 | 0.58214 | -5.851  | 3704   |
| GCDH        | -0.39152 | 0.39152  | 1.9617  | -0.91039 | 0.37833 | 0.58232 | -5.8513 | 2639   |
| SERPINB9    | 1.4387   | 1.4387   | 6.4598  | 0.91021  | 0.37843 | 0.58239 | -5.8514 | 5272   |
| SRBD1       | 0.31669  | 0.31669  | 1.9853  | 0.91016  | 0.37845 | 0.58239 | -5.8515 | 55133  |
| KLHL11      | 0.19975  | 0.19975  | 2.1742  | 0.91004  | 0.37851 | 0.58243 | -5.8516 | 55175  |
| SERP2       | -0.08766 | 0.087656 | 0.19198 | -0.90982 | 0.37862 | 0.58248 | -5.8518 | 387923 |
| EMSY        | -0.20485 | 0.20485  | 1.595   | -0.90981 | 0.37863 | 0.58248 | -5.8518 | 56946  |
| PRH2        | -0.09918 | 0.099182 | 0.25555 | -0.90977 | 0.37865 | 0.58248 | -5.8518 | 5555   |
| PRUNE1      | -0.42572 | 0.42572  | 2.6248  | -0.90946 | 0.37881 | 0.58263 | -5.8521 | 58497  |
| CARM1       | 2.2994   | 2.2994   | 11.058  | 0.90945  | 0.37881 | 0.58263 | -5.8521 | 10498  |
| ZNF280D     | -0.33089 | 0.33089  | 1.8405  | -0.90916 | 0.37896 | 0.58277 | -5.8523 | 54816  |
| CCDC74B     | 0.084655 | 0.084655 | 0.14991 | 0.90913  | 0.37898 | 0.58277 | -5.8524 | 91409  |
| OSCP1       | -0.17745 | 0.17745  | 0.86985 | -0.90899 | 0.37905 | 0.58278 | -5.8525 | 127700 |
| PITPNM1     | 1.5363   | 1.5363   | 4.3951  | 0.90888  | 0.3791  | 0.58278 | -5.8526 | 9600   |
| RPL34       | 34.287   | 34.287   | 108.31  | 0.90885  | 0.37912 | 0.58278 | -5.8526 | 6164   |
| THUMPD3-AS1 | -0.21186 | 0.21186  | 1.0963  | -0.90884 | 0.37913 | 0.58278 | -5.8526 | 440944 |
| TSHZ3       | 0.40549  | 0.40549  | 1.3855  | 0.90878  | 0.37915 | 0.58278 | -5.8527 | 57616  |
| RPF1        | 0.79426  | 0.79426  | 4.3437  | 0.90852  | 0.37929 | 0.58293 | -5.8529 | 80135  |
| XPO4        | -0.36731 | 0.36731  | 2.5237  | -0.90813 | 0.37949 | 0.58319 | -5.8533 | 64328  |
| CPNE1       | 1.6142   | 1.6142   | 10.552  | 0.90799  | 0.37956 | 0.58319 | -5.8534 | 8904   |
| VKORC1L1    | 0.36723  | 0.36723  | 3.6785  | 0.90791  | 0.3796  | 0.58319 | -5.8535 | 154807 |

|           |          |          |         |          |         |         |         |        |
|-----------|----------|----------|---------|----------|---------|---------|---------|--------|
| SNX5      | 1.4423   | 1.4423   | 8.1445  | 0.90786  | 0.37962 | 0.58319 | -5.8535 | 27131  |
| CRLS1     | 0.35372  | 0.35372  | 1.8666  | 0.90785  | 0.37963 | 0.58319 | -5.8535 | 54675  |
| EYA1      | 0.088559 | 0.088559 | 0.12229 | 0.90721  | 0.37995 | 0.58364 | -5.8541 | 2138   |
| SIKE1     | 0.44704  | 0.44704  | 3.3112  | 0.90711  | 0.38    | 0.58366 | -5.8542 | 80143  |
| GNB4      | -1.2001  | 1.2001   | 6.2271  | -0.90688 | 0.38012 | 0.58366 | -5.8544 | 59345  |
| SLC6A1    | -0.22104 | 0.22104  | 0.39    | -0.90687 | 0.38013 | 0.58366 | -5.8544 | 6529   |
| FAHD2A    | -0.39671 | 0.39671  | 2.777   | -0.90683 | 0.38015 | 0.58366 | -5.8544 | 51011  |
| PSMG3     | 1.0681   | 1.0681   | 6.8437  | 0.90681  | 0.38016 | 0.58366 | -5.8544 | 84262  |
| NAA38     | 1.7887   | 1.7887   | 6.66    | 0.90678  | 0.38017 | 0.58366 | -5.8545 | 84316  |
| DIABLO    | 0.34373  | 0.34373  | 2.5904  | 0.90639  | 0.38037 | 0.58386 | -5.8548 | 56616  |
| PHYKPL    | -0.47513 | 0.47513  | 3.2382  | -0.90639 | 0.38038 | 0.58386 | -5.8548 | 85007  |
| RTN4IP1   | -0.09816 | 0.098162 | 0.74407 | -0.90618 | 0.38048 | 0.58393 | -5.855  | 84816  |
| TMEM14C   | 3.6181   | 3.6181   | 14.378  | 0.90616  | 0.38049 | 0.58393 | -5.855  | 51522  |
| PLVAP     | 5.9549   | 5.9549   | 21.002  | 0.90592  | 0.38061 | 0.58407 | -5.8552 | 83483  |
| SRD5A3    | 0.81528  | 0.81528  | 3.4761  | 0.90579  | 0.38068 | 0.58412 | -5.8553 | 79644  |
| NEB       | -0.2184  | 0.2184   | 0.54585 | -0.90492 | 0.38112 | 0.58469 | -5.8561 | 4703   |
| MED31     | 0.26867  | 0.26867  | 1.3614  | 0.90491  | 0.38113 | 0.58469 | -5.8561 | 51003  |
| RBPMS-AS1 | -0.1267  | 0.1267   | 0.36296 | -0.90483 | 0.38117 | 0.58469 | -5.8562 | 1E+08  |
| RBCK1     | -1.2547  | 1.2547   | 6.2974  | -0.90479 | 0.38119 | 0.58469 | -5.8562 | 10616  |
| PRKAB2    | 0.36043  | 0.36043  | 3.5476  | 0.90464  | 0.38127 | 0.58473 | -5.8563 | 5565   |
| NDUFA13   | 15.705   | 15.705   | 58.068  | 0.90455  | 0.38132 | 0.58473 | -5.8564 | 51079  |
| RAB40A    | -0.08174 | 0.081739 | 0.18883 | -0.90453 | 0.38133 | 0.58473 | -5.8564 | 142684 |
| JOSD2     | 2.0883   | 2.0883   | 6.8478  | 0.90433  | 0.38143 | 0.58482 | -5.8566 | 126119 |
| C1R       | -25.921  | 25.921   | 59.032  | -0.90429 | 0.38145 | 0.58482 | -5.8567 | 715    |
| HELZ      | -0.40935 | 0.40935  | 2.7778  | -0.90396 | 0.38161 | 0.58502 | -5.8569 | 9931   |
| RGS11     | -0.32562 | 0.32562  | 0.58139 | -0.90377 | 0.38171 | 0.58511 | -5.8571 | 8786   |

|          |          |          |         |          |         |         |         |          |
|----------|----------|----------|---------|----------|---------|---------|---------|----------|
| PLXNA2   | -0.60143 | 0.60143  | 3.9515  | -0.90367 | 0.38176 | 0.58514 | -5.8572 | 5362     |
| CCL22    | -0.52098 | 0.52098  | 1.5778  | -0.90359 | 0.38181 | 0.58514 | -5.8573 | 6367     |
| HINT3    | 0.66376  | 0.66376  | 3.6768  | 0.90354  | 0.38183 | 0.58514 | -5.8573 | 135114   |
| SKA3     | 0.23223  | 0.23223  | 0.59278 | 0.90332  | 0.38195 | 0.58521 | -5.8575 | 221150   |
| FAM222A  | -0.13317 | 0.13317  | 0.57394 | -0.90331 | 0.38195 | 0.58521 | -5.8575 | 84915    |
| ACKR3    | 2.8207   | 2.8207   | 9.4857  | 0.90322  | 0.382   | 0.58523 | -5.8576 | 57007    |
| KRT79    | 1.1202   | 1.1202   | 0.84097 | 0.90285  | 0.38218 | 0.58541 | -5.8579 | 338785   |
| STAM2    | 0.44088  | 0.44088  | 3.4943  | 0.9028   | 0.38221 | 0.58541 | -5.858  | 10254    |
| AMOTL1   | 1.3737   | 1.3737   | 11.457  | 0.90279  | 0.38222 | 0.58541 | -5.858  | 154810   |
| CHST7    | -0.20053 | 0.20053  | 0.74669 | -0.9027  | 0.38226 | 0.58543 | -5.8581 | 56548    |
| EME2     | -0.71618 | 0.71618  | 1.9623  | -0.90257 | 0.38233 | 0.58546 | -5.8582 | 197342   |
| SSR4     | 5.2957   | 5.2957   | 23.537  | 0.90251  | 0.38236 | 0.58546 | -5.8582 | 6748     |
| NMU      | 2.2618   | 2.2618   | 5.0361  | 0.90238  | 0.38242 | 0.58551 | -5.8583 | 10874    |
| PDAP1    | 2.394    | 2.394    | 13.55   | 0.90218  | 0.38253 | 0.58562 | -5.8585 | 11333    |
| TCN2     | -1.3691  | 1.3691   | 3.0126  | -0.90201 | 0.38262 | 0.58569 | -5.8587 | 6948     |
| GULP1    | -0.16997 | 0.16997  | 0.60725 | -0.90195 | 0.38264 | 0.58569 | -5.8587 | 51454    |
| MALAT1   | 82.566   | 82.566   | 442.81  | 0.90172  | 0.38276 | 0.58576 | -5.8589 | 378938   |
| PIEZO1   | 3.8043   | 3.8043   | 15.996  | 0.90166  | 0.3828  | 0.58576 | -5.859  | 9780     |
| PRRG3    | -0.16628 | 0.16628  | 0.4208  | -0.90164 | 0.3828  | 0.58576 | -5.859  | 79057    |
| RAB13    | 4.599    | 4.599    | 17.326  | 0.9016   | 0.38282 | 0.58576 | -5.859  | 5872     |
| BRAF     | -0.28926 | 0.28926  | 2.9127  | -0.90125 | 0.383   | 0.58592 | -5.8593 | 673      |
| IPMK     | 0.21945  | 0.21945  | 1.5234  | 0.90123  | 0.38301 | 0.58592 | -5.8593 | 253430   |
| TBC1D3G  | 0.068156 | 0.068156 | 0.17334 | 0.90119  | 0.38304 | 0.58592 | -5.8594 | 1.01E+08 |
| ST7-OT4  | -0.119   | 0.119    | 0.50539 | -0.90086 | 0.38321 | 0.58613 | -5.8597 | 338069   |
| TNRC18P1 | -0.10764 | 0.10764  | 0.35613 | -0.90058 | 0.38335 | 0.58629 | -5.8599 | 644962   |
| NPAT     | -0.29416 | 0.29416  | 2.1808  | -0.90039 | 0.38344 | 0.58635 | -5.8601 | 4863     |

|              |          |          |         |          |         |         |         |          |
|--------------|----------|----------|---------|----------|---------|---------|---------|----------|
| ENDOU        | 1.148    | 1.148    | 5.5147  | 0.90034  | 0.38347 | 0.58635 | -5.8601 | 8909     |
| VPS13C       | -0.84417 | 0.84417  | 4.9594  | -0.9003  | 0.38349 | 0.58635 | -5.8602 | 54832    |
| DLD          | 1.0159   | 1.0159   | 6.0066  | 0.90019  | 0.38355 | 0.58639 | -5.8603 | 1738     |
| ZGRF1        | -0.10116 | 0.10116  | 0.50706 | -0.89998 | 0.38366 | 0.5865  | -5.8604 | 55345    |
| DEGS2        | 7.7931   | 7.7931   | 17.911  | 0.89972  | 0.38379 | 0.58661 | -5.8607 | 123099   |
| UBXN2B       | -0.26762 | 0.26762  | 1.6785  | -0.89971 | 0.3838  | 0.58661 | -5.8607 | 137886   |
| FGF22        | -0.75113 | 0.75113  | 1.1489  | -0.89957 | 0.38387 | 0.58665 | -5.8608 | 27006    |
| CNPPD1       | 2.7485   | 2.7485   | 14.042  | 0.89952  | 0.38389 | 0.58665 | -5.8609 | 27013    |
| PITPNA-AS1   | -0.38452 | 0.38452  | 2.137   | -0.89937 | 0.38397 | 0.58672 | -5.861  | 1E+08    |
| GIN51        | 0.3438   | 0.3438   | 1.062   | 0.89916  | 0.38408 | 0.58682 | -5.8612 | 9837     |
| CEBPZ        | 1.1355   | 1.1355   | 6.1859  | 0.89886  | 0.38423 | 0.587   | -5.8614 | 10153    |
| TIGD2        | -0.21561 | 0.21561  | 1.0215  | -0.89843 | 0.38445 | 0.58726 | -5.8618 | 166815   |
| SMCO2        | 0.069423 | 0.069423 | 0.15293 | 0.89835  | 0.3845  | 0.58726 | -5.8619 | 341346   |
| FMO3         | 0.65291  | 0.65291  | 1.572   | 0.89834  | 0.3845  | 0.58726 | -5.8619 | 2328     |
| PCDHGC3      | 3.0055   | 3.0055   | 15.027  | 0.89813  | 0.38461 | 0.58732 | -5.8621 | 5098     |
| FIGNL1       | -0.17674 | 0.17674  | 0.98499 | -0.89806 | 0.38464 | 0.58732 | -5.8621 | 63979    |
| RAD23A       | -2.6795  | 2.6795   | 19.354  | -0.89805 | 0.38465 | 0.58732 | -5.8621 | 5886     |
| APLP1        | 0.08105  | 0.08105  | 0.22109 | 0.89791  | 0.38472 | 0.58738 | -5.8623 | 333      |
| PCGF6        | 0.31465  | 0.31465  | 1.6568  | 0.89746  | 0.38495 | 0.58763 | -5.8627 | 84108    |
| GPR82        | -0.11021 | 0.11021  | 0.42883 | -0.89742 | 0.38497 | 0.58763 | -5.8627 | 27197    |
| CDK10        | -1.3035  | 1.3035   | 5.5202  | -0.8974  | 0.38499 | 0.58763 | -5.8627 | 8558     |
| PSD4         | 2.2756   | 2.2756   | 10.196  | 0.89689  | 0.38525 | 0.58792 | -5.8632 | 23550    |
| STXBP5-AS1   | 0.17231  | 0.17231  | 0.53482 | 0.89688  | 0.38525 | 0.58792 | -5.8632 | 729178   |
| LOC105378330 | -0.14864 | 0.14864  | 0.47885 | -0.8964  | 0.3855  | 0.58825 | -5.8636 | 1.05E+08 |
| ARAP1        | -1.8821  | 1.8821   | 8.9113  | -0.89606 | 0.38567 | 0.58844 | -5.8639 | 116985   |
| PFDN1        | 2.278    | 2.278    | 10.93   | 0.89602  | 0.3857  | 0.58844 | -5.8639 | 5201     |



|           |          |          |          |          |         |         |         |          |
|-----------|----------|----------|----------|----------|---------|---------|---------|----------|
| LINC01213 | 0.066255 | 0.066255 | 0.077869 | 0.89573  | 0.38585 | 0.58857 | -5.8642 | 1.02E+08 |
| NCKAP5    | -0.20645 | 0.20645  | 1.8218   | -0.89565 | 0.38589 | 0.58857 | -5.8642 | 344148   |
| DUSP12    | 0.72948  | 0.72948  | 3.6206   | 0.8956   | 0.38591 | 0.58857 | -5.8643 | 11266    |
| ALG6      | -0.22415 | 0.22415  | 1.2828   | -0.89558 | 0.38592 | 0.58857 | -5.8643 | 29929    |
| PKNOX1    | 0.22471  | 0.22471  | 1.9351   | 0.89536  | 0.38603 | 0.58869 | -5.8645 | 5316     |
| RAD9A     | -0.53893 | 0.53893  | 2.6993   | -0.89518 | 0.38613 | 0.58871 | -5.8647 | 5883     |
| SNAPC5    | -0.26347 | 0.26347  | 1.3941   | -0.89517 | 0.38613 | 0.58871 | -5.8647 | 10302    |
| PPFIA1    | 0.52325  | 0.52325  | 5.499    | 0.89513  | 0.38615 | 0.58871 | -5.8647 | 8500     |
| LRRC41    | 1.5696   | 1.5696   | 11.889   | 0.89491  | 0.38627 | 0.58884 | -5.8649 | 10489    |
| DUS2      | 0.44903  | 0.44903  | 2.5927   | 0.89452  | 0.38647 | 0.58909 | -5.8652 | 54920    |
| DDX10     | -0.34278 | 0.34278  | 2.8657   | -0.89438 | 0.38654 | 0.58913 | -5.8653 | 1662     |
| SMAD5     | -0.78313 | 0.78313  | 5.861    | -0.8943  | 0.38658 | 0.58913 | -5.8654 | 4090     |
| GIPC3     | 0.15763  | 0.15763  | 0.4731   | 0.89427  | 0.3866  | 0.58913 | -5.8654 | 126326   |
| KCND1     | -0.09388 | 0.093877 | 0.28467  | -0.8942  | 0.38663 | 0.58913 | -5.8655 | 3750     |
| MAN1B1    | -1.135   | 1.135    | 8.3753   | -0.89397 | 0.38675 | 0.58925 | -5.8657 | 11253    |
| FAIM2     | 1.515    | 1.515    | 2.1116   | 0.89384  | 0.38682 | 0.58928 | -5.8658 | 23017    |
| SLC15A1   | 4.3186   | 4.3186   | 6.9699   | 0.8938   | 0.38684 | 0.58928 | -5.8659 | 6564     |
| DNAJC18   | -0.20408 | 0.20408  | 0.78019  | -0.8936  | 0.38695 | 0.58938 | -5.866  | 202052   |
| RPS6KB1   | 0.48154  | 0.48154  | 3.4966   | 0.89354  | 0.38698 | 0.58938 | -5.8661 | 6198     |
| PRRG2     | 0.59733  | 0.59733  | 3.0323   | 0.89329  | 0.3871  | 0.58952 | -5.8663 | 5639     |
| NCAPH2    | -0.83618 | 0.83618  | 5.3995   | -0.89314 | 0.38718 | 0.58959 | -5.8664 | 29781    |
| GPN3      | 0.39584  | 0.39584  | 1.7623   | 0.89293  | 0.38729 | 0.58965 | -5.8666 | 51184    |
| RPL27A    | 12.646   | 12.646   | 63.248   | 0.89293  | 0.38729 | 0.58965 | -5.8666 | 6157     |
| REEP6     | -0.40055 | 0.40055  | 1.7698   | -0.89251 | 0.38751 | 0.58992 | -5.867  | 92840    |
| MAGI1-AS1 | -0.15307 | 0.15307  | 0.5592   | -0.89245 | 0.38754 | 0.58992 | -5.867  | 1.01E+08 |
| STEAP4    | 4.8784   | 4.8784   | 15.968   | 0.89225  | 0.38764 | 0.59    | -5.8672 | 79689    |

|              |          |          |         |          |         |         |         |          |
|--------------|----------|----------|---------|----------|---------|---------|---------|----------|
| NMT1         | -1.2136  | 1.2136   | 8.553   | -0.89219 | 0.38767 | 0.59    | -5.8673 | 4836     |
| RALY-AS1     | 0.17753  | 0.17753  | 0.70113 | 0.89214  | 0.3877  | 0.59    | -5.8673 | 1.02E+08 |
| HEATR6       | -0.2386  | 0.2386   | 2.295   | -0.89202 | 0.38776 | 0.59005 | -5.8674 | 63897    |
| AP1AR        | 0.19256  | 0.19256  | 1.4068  | 0.8919   | 0.38782 | 0.59007 | -5.8675 | 55435    |
| ZBTB10       | -0.23297 | 0.23297  | 0.93628 | -0.89185 | 0.38785 | 0.59007 | -5.8676 | 65986    |
| PHGDH        | -13.953  | 13.953   | 31.74   | -0.89164 | 0.38796 | 0.59019 | -5.8677 | 26227    |
| CABYR        | -0.07179 | 0.07179  | 0.40485 | -0.89154 | 0.38801 | 0.59021 | -5.8678 | 26256    |
| EMG1         | 0.93315  | 0.93315  | 5.0221  | 0.89118  | 0.38819 | 0.59042 | -5.8681 | 10436    |
| KLF9         | -1.6671  | 1.6671   | 6.418   | -0.89106 | 0.38826 | 0.59042 | -5.8682 | 687      |
| LOC101927974 | 0.085524 | 0.085524 | 0.25837 | 0.89106  | 0.38826 | 0.59042 | -5.8682 | 1.02E+08 |
| SIRT1        | 0.37011  | 0.37011  | 2.6455  | 0.89096  | 0.38831 | 0.59042 | -5.8683 | 23411    |
| BTN2A3P      | -0.11245 | 0.11245  | 0.47285 | -0.89094 | 0.38832 | 0.59042 | -5.8683 | 54718    |
| NEDD4L       | 0.54921  | 0.54921  | 1.6834  | 0.8908   | 0.38839 | 0.59048 | -5.8685 | 23327    |
| DIP2B        | 1.5525   | 1.5525   | 12.177  | 0.89071  | 0.38844 | 0.59049 | -5.8685 | 57609    |
| PRPF31       | -1.3238  | 1.3238   | 8.1554  | -0.89065 | 0.38847 | 0.59049 | -5.8686 | 26121    |
| KIFC2        | -5.0141  | 5.0141   | 11.464  | -0.89017 | 0.38872 | 0.59082 | -5.869  | 90990    |
| INPPL1       | -1.2461  | 1.2461   | 5.4153  | -0.88995 | 0.38883 | 0.59091 | -5.8692 | 3636     |
| GRIN1        | -0.10443 | 0.10443  | 0.17739 | -0.88992 | 0.38885 | 0.59091 | -5.8692 | 2902     |
| SNHG11       | -0.43754 | 0.43754  | 2.3571  | -0.88951 | 0.38906 | 0.59117 | -5.8696 | 128439   |
| NDUFA5       | 0.28575  | 0.28575  | 1.5952  | 0.88928  | 0.38918 | 0.5913  | -5.8698 | 4698     |
| ZBTB7C       | -3.3035  | 3.3035   | 8.5518  | -0.88911 | 0.38927 | 0.59134 | -5.8699 | 201501   |
| SWAP70       | 1.008    | 1.008    | 7.4215  | 0.88909  | 0.38928 | 0.59134 | -5.87   | 23075    |
| LOC399975    | 0.35067  | 0.35067  | 1.9642  | 0.88902  | 0.38932 | 0.59135 | -5.87   | 399975   |
| LYRM7        | -0.1553  | 0.1553   | 1.2228  | -0.88884 | 0.38941 | 0.59144 | -5.8702 | 90624    |
| IFI35        | -2.0781  | 2.0781   | 4.422   | -0.88856 | 0.38955 | 0.5916  | -5.8704 | 3430     |
| ASH2L        | -0.71513 | 0.71513  | 5.7159  | -0.88824 | 0.38972 | 0.5918  | -5.8707 | 9070     |

|              |          |          |         |          |         |         |         |          |
|--------------|----------|----------|---------|----------|---------|---------|---------|----------|
| ZMYND11      | -0.54925 | 0.54925  | 5.5198  | -0.88809 | 0.3898  | 0.59186 | -5.8708 | 10771    |
| TUG1         | 0.99977  | 0.99977  | 11.232  | 0.88803  | 0.38983 | 0.59186 | -5.8709 | 55000    |
| SLC6A2       | 0.087624 | 0.087624 | 0.2012  | 0.88782  | 0.38994 | 0.59192 | -5.8711 | 6530     |
| TMEM38A      | -0.10234 | 0.10234  | 0.23983 | -0.88772 | 0.38999 | 0.59192 | -5.8711 | 79041    |
| IKBKG        | -0.87227 | 0.87227  | 4.3537  | -0.88768 | 0.39001 | 0.59192 | -5.8712 | 8517     |
| CLMN         | -0.29012 | 0.29012  | 1.2314  | -0.88768 | 0.39001 | 0.59192 | -5.8712 | 79789    |
| LOC101927045 | -0.0737  | 0.073697 | 0.47842 | -0.88758 | 0.39006 | 0.59195 | -5.8713 | 1.02E+08 |
| IFNAR2       | 0.67199  | 0.67199  | 2.5916  | 0.88731  | 0.3902  | 0.59211 | -5.8715 | 3455     |
| MRPL18       | 1.7141   | 1.7141   | 8.1096  | 0.88701  | 0.39036 | 0.59229 | -5.8718 | 29074    |
| RBP7         | 0.76618  | 0.76618  | 3.124   | 0.88691  | 0.39041 | 0.59232 | -5.8718 | 116362   |
| TCAIM        | 0.18876  | 0.18876  | 1.509   | 0.88663  | 0.39056 | 0.59248 | -5.8721 | 285343   |
| RAB11B-AS1   | -0.4358  | 0.4358   | 2.2893  | -0.88635 | 0.3907  | 0.59264 | -5.8723 | 1.01E+08 |
| MAPK12       | 0.41153  | 0.41153  | 1.1879  | 0.8863   | 0.39073 | 0.59264 | -5.8724 | 6300     |
| DSC1         | 101.51   | 101.51   | 162.93  | 0.88581  | 0.39098 | 0.59297 | -5.8728 | 1823     |
| NAMPT        | 7.5474   | 7.5474   | 20.424  | 0.8856   | 0.39109 | 0.59308 | -5.873  | 10135    |
| HIBADH       | -0.59258 | 0.59258  | 3.2809  | -0.88517 | 0.39131 | 0.59337 | -5.8733 | 11112    |
| CLEC11A      | 2.3486   | 2.3486   | 5.491   | 0.88501  | 0.3914  | 0.59343 | -5.8735 | 6320     |
| BICC1        | 1.1635   | 1.1635   | 3.1102  | 0.88495  | 0.39143 | 0.59343 | -5.8735 | 80114    |
| PITPNM2-AS1  | -0.08831 | 0.088313 | 0.27268 | -0.88435 | 0.39174 | 0.59386 | -5.8741 | 1.01E+08 |
| ABHD12       | 2.0576   | 2.0576   | 7.7352  | 0.88417  | 0.39184 | 0.59395 | -5.8742 | 26090    |
| RNLS         | -0.10676 | 0.10676  | 0.66976 | -0.88408 | 0.39188 | 0.59396 | -5.8743 | 55328    |
| STAP2        | 3.9253   | 3.9253   | 17.99   | 0.88402  | 0.39192 | 0.59396 | -5.8743 | 55620    |
| TSPAN12      | 0.28451  | 0.28451  | 0.89829 | 0.88387  | 0.392   | 0.594   | -5.8745 | 23554    |
| DOCK9-AS1    | -0.13154 | 0.13154  | 0.22586 | -0.88383 | 0.39201 | 0.594   | -5.8745 | 1.01E+08 |
| MANCR        | 0.24244  | 0.24244  | 0.3577  | 0.88357  | 0.39215 | 0.59415 | -5.8747 | 1E+08    |
| ZNF654       | 0.29282  | 0.29282  | 2.2244  | 0.8835   | 0.39219 | 0.59416 | -5.8748 | 55279    |

|              |          |         |         |          |         |         |         |          |
|--------------|----------|---------|---------|----------|---------|---------|---------|----------|
| CDC37L1      | 0.30155  | 0.30155 | 2.1266  | 0.8832   | 0.39234 | 0.59426 | -5.8751 | 55664    |
| PRUNE2       | -0.84695 | 0.84695 | 1.8797  | -0.88319 | 0.39235 | 0.59426 | -5.8751 | 158471   |
| ZDHHC8       | -0.80047 | 0.80047 | 4.4388  | -0.88313 | 0.39238 | 0.59426 | -5.8751 | 29801    |
| SNRPA        | -1.5207  | 1.5207  | 8.2393  | -0.88303 | 0.39243 | 0.59426 | -5.8752 | 6626     |
| RPL21P28     | 20.767   | 20.767  | 99.425  | 0.88303  | 0.39243 | 0.59426 | -5.8752 | 1E+08    |
| LOC102724153 | -0.17153 | 0.17153 | 0.30939 | -0.88259 | 0.39266 | 0.5945  | -5.8756 | 1.03E+08 |
| SGK3         | -0.25979 | 0.25979 | 1.3551  | -0.88258 | 0.39267 | 0.5945  | -5.8756 | 23678    |
| IKZF1        | -0.19262 | 0.19262 | 0.82812 | -0.88252 | 0.3927  | 0.5945  | -5.8756 | 10320    |
| FAM222B      | 0.32542  | 0.32542 | 2.6314  | 0.88243  | 0.39275 | 0.59452 | -5.8757 | 55731    |
| PARP4        | -1.6023  | 1.6023  | 7.5655  | -0.88205 | 0.39294 | 0.59473 | -5.876  | 143      |
| CHERP        | -0.94437 | 0.94437 | 5.4519  | -0.88199 | 0.39297 | 0.59473 | -5.8761 | 10523    |
| CD164        | 2.8519   | 2.8519  | 18.552  | 0.88195  | 0.393   | 0.59473 | -5.8761 | 8763     |
| GPR157       | 2.2614   | 2.2614  | 8.7756  | 0.88179  | 0.39308 | 0.59473 | -5.8763 | 80045    |
| RPS16        | 46.975   | 46.975  | 273.87  | 0.88177  | 0.39309 | 0.59473 | -5.8763 | 6217     |
| TAF2         | 0.44082  | 0.44082 | 3.7883  | 0.88164  | 0.39316 | 0.59473 | -5.8764 | 6873     |
| HLA-A        | -5.0667  | 5.0667  | 16.535  | -0.88158 | 0.39319 | 0.59473 | -5.8765 | 3105     |
| SNORA78      | -0.13186 | 0.13186 | 0.29377 | -0.88157 | 0.39319 | 0.59473 | -5.8765 | 677844   |
| PLD1         | 0.98226  | 0.98226 | 7.6498  | 0.88155  | 0.3932  | 0.59473 | -5.8765 | 5337     |
| NOP9         | -0.93209 | 0.93209 | 6.7667  | -0.88117 | 0.3934  | 0.59498 | -5.8768 | 161424   |
| YAF2         | -0.11291 | 0.11291 | 0.85269 | -0.88107 | 0.39345 | 0.59501 | -5.8769 | 10138    |
| XPR1         | 0.35217  | 0.35217 | 2.0362  | 0.88024  | 0.39389 | 0.59561 | -5.8776 | 9213     |
| CHKB         | -1.0878  | 1.0878  | 6.48    | -0.87967 | 0.39419 | 0.59601 | -5.8781 | 1120     |
| RPS10        | 77.376   | 77.376  | 282.67  | 0.87953  | 0.39426 | 0.59607 | -5.8782 | 6204     |
| C1QA         | -7.9449  | 7.9449  | 17.298  | -0.87939 | 0.39434 | 0.59613 | -5.8783 | 712      |
| CCS          | -1.3611  | 1.3611  | 5.8194  | -0.87914 | 0.39446 | 0.59627 | -5.8786 | 9973     |
| FMO2         | 1.6397   | 1.6397  | 1.9919  | 0.87906  | 0.39451 | 0.59628 | -5.8786 | 2327     |

|                 |          |          |         |          |         |         |         |          |
|-----------------|----------|----------|---------|----------|---------|---------|---------|----------|
| YIPF3           | 3.0913   | 3.0913   | 18.201  | 0.87881  | 0.39464 | 0.5964  | -5.8788 | 25844    |
| SLC41A3         | -0.51661 | 0.51661  | 3.6926  | -0.87877 | 0.39466 | 0.5964  | -5.8789 | 54946    |
| CCNT2-AS1       | -0.08586 | 0.085864 | 0.36404 | -0.8787  | 0.39469 | 0.5964  | -5.8789 | 1E+08    |
| RAB33A          | -0.09155 | 0.091554 | 0.17923 | -0.87852 | 0.39479 | 0.59649 | -5.8791 | 9363     |
| RAD9B           | -0.0702  | 0.070201 | 0.18267 | -0.87833 | 0.39489 | 0.59659 | -5.8792 | 144715   |
| LIMK1           | 1.5924   | 1.5924   | 6.8026  | 0.87815  | 0.39498 | 0.59668 | -5.8794 | 3984     |
| SLC15A3         | -1.2569  | 1.2569   | 2.7787  | -0.87807 | 0.39502 | 0.59669 | -5.8795 | 51296    |
| MRPS26          | -1.5356  | 1.5356   | 7.5825  | -0.87791 | 0.39511 | 0.59671 | -5.8796 | 64949    |
| CD9             | 15.313   | 15.313   | 80.775  | 0.87789  | 0.39512 | 0.59671 | -5.8796 | 928      |
| SPRED3          | 0.15083  | 0.15083  | 0.65796 | 0.87784  | 0.39514 | 0.59671 | -5.8797 | 399473   |
| APPBP2          | 0.30273  | 0.30273  | 2.8123  | 0.87733  | 0.39541 | 0.59706 | -5.8801 | 10513    |
| TAB3-AS1        | -0.08538 | 0.085379 | 0.18576 | -0.87713 | 0.39551 | 0.59716 | -5.8803 | 727682   |
| DPY19L3         | 0.33513  | 0.33513  | 1.9241  | 0.87689  | 0.39564 | 0.5973  | -5.8805 | 147991   |
| MMP24-AS1-EDEM2 | -0.12313 | 0.12313  | 0.5165  | -0.87661 | 0.39579 | 0.59746 | -5.8807 | 1.11E+08 |
| INTS7           | 0.28575  | 0.28575  | 2.4004  | 0.87644  | 0.39588 | 0.59746 | -5.8809 | 25896    |
| TMEM214         | 1.5572   | 1.5572   | 10.683  | 0.87637  | 0.39592 | 0.59746 | -5.8809 | 54867    |
| RPS2P32         | -0.08548 | 0.085479 | 0.32985 | -0.8763  | 0.39595 | 0.59746 | -5.881  | 256355   |
| PGLS            | 5.3895   | 5.3895   | 23.306  | 0.87628  | 0.39596 | 0.59746 | -5.881  | 25796    |
| IFIT5           | -0.66759 | 0.66759  | 2.1608  | -0.8762  | 0.39601 | 0.59746 | -5.8811 | 24138    |
| ARID3A          | 0.32211  | 0.32211  | 1.6575  | 0.87616  | 0.39602 | 0.59746 | -5.8811 | 1820     |
| PLCXD2          | -0.11927 | 0.11927  | 0.33577 | -0.87615 | 0.39603 | 0.59746 | -5.8811 | 257068   |
| GAPVD1          | 0.59424  | 0.59424  | 4.5698  | 0.8759   | 0.39616 | 0.5976  | -5.8813 | 26130    |
| TLK2            | -0.32946 | 0.32946  | 3.8772  | -0.87584 | 0.3962  | 0.5976  | -5.8814 | 11011    |
| INPP5J          | -0.38958 | 0.38958  | 1.0104  | -0.87561 | 0.39632 | 0.59773 | -5.8816 | 27124    |
| AK3             | 0.84135  | 0.84135  | 6.8307  | 0.87527  | 0.39649 | 0.59795 | -5.8819 | 50808    |
| TRIM28          | -4.3619  | 4.3619   | 26.446  | -0.87515 | 0.39655 | 0.59798 | -5.882  | 10155    |

|             |          |          |         |          |         |         |         |          |
|-------------|----------|----------|---------|----------|---------|---------|---------|----------|
| CCDC74A     | 0.20832  | 0.20832  | 0.62333 | 0.87501  | 0.39663 | 0.59804 | -5.8821 | 90557    |
| GNB3        | -0.14451 | 0.14451  | 0.37995 | -0.87484 | 0.39672 | 0.59812 | -5.8822 | 2784     |
| PNRC2       | 2.5665   | 2.5665   | 13.331  | 0.87477  | 0.39676 | 0.59813 | -5.8823 | 55629    |
| UBE4A       | 0.82256  | 0.82256  | 8.2013  | 0.87441  | 0.39694 | 0.59831 | -5.8826 | 9354     |
| EXOC7       | -1.6956  | 1.6956   | 10.068  | -0.8744  | 0.39695 | 0.59831 | -5.8826 | 23265    |
| ELOVL3      | 0.18068  | 0.18068  | 0.3528  | 0.87414  | 0.39709 | 0.59847 | -5.8828 | 83401    |
| RPS10-NUDT3 | -0.19292 | 0.19292  | 0.53177 | -0.87387 | 0.39723 | 0.59862 | -5.8831 | 1.01E+08 |
| TBL3        | -0.95233 | 0.95233  | 6.2402  | -0.87376 | 0.39728 | 0.59866 | -5.8832 | 10607    |
| VPS18       | -0.70227 | 0.70227  | 3.8157  | -0.87369 | 0.39732 | 0.59866 | -5.8832 | 57617    |
| TMEM127     | 2.2832   | 2.2832   | 13.771  | 0.87328  | 0.39754 | 0.59893 | -5.8836 | 55654    |
| SNAI3-AS1   | -0.11825 | 0.11825  | 0.31642 | -0.87291 | 0.39773 | 0.59917 | -5.8839 | 197187   |
| HFE         | -0.21228 | 0.21228  | 1.047   | -0.87247 | 0.39796 | 0.59933 | -5.8843 | 3077     |
| STAMBPL1    | 0.29447  | 0.29447  | 1.1599  | 0.87244  | 0.39798 | 0.59933 | -5.8843 | 57559    |
| PRKXP1      | -0.28091 | 0.28091  | 0.99144 | -0.87238 | 0.39801 | 0.59933 | -5.8843 | 441733   |
| PCAT19      | 0.22515  | 0.22515  | 0.7645  | 0.87236  | 0.39802 | 0.59933 | -5.8844 | 1.01E+08 |
| ALPK3       | 0.15803  | 0.15803  | 0.53739 | 0.87232  | 0.39805 | 0.59933 | -5.8844 | 57538    |
| NDUFAF3     | 1.5757   | 1.5757   | 6.6406  | 0.87231  | 0.39805 | 0.59933 | -5.8844 | 25915    |
| HOXD11      | -0.07278 | 0.072782 | 0.13188 | -0.87219 | 0.39811 | 0.59937 | -5.8845 | 3237     |
| PPP1R14C    | 1.7968   | 1.7968   | 12.399  | 0.87202  | 0.3982  | 0.59945 | -5.8846 | 81706    |
| KIAA0040    | 0.76519  | 0.76519  | 2.9928  | 0.87165  | 0.3984  | 0.59962 | -5.885  | 9674     |
| CHMP6       | 1.172    | 1.172    | 6.2266  | 0.87161  | 0.39842 | 0.59962 | -5.885  | 79643    |
| GATD1       | -1.0005  | 1.0005   | 5.1906  | -0.87158 | 0.39843 | 0.59962 | -5.885  | 347862   |
| ERBB2       | -5.0784  | 5.0784   | 20.846  | -0.87154 | 0.39846 | 0.59962 | -5.8851 | 2064     |
| KIAA0895L   | -0.53742 | 0.53742  | 2.2661  | -0.87144 | 0.39851 | 0.59963 | -5.8851 | 653319   |
| TSPAN1      | -0.2225  | 0.2225   | 0.65164 | -0.87139 | 0.39854 | 0.59963 | -5.8852 | 10103    |
| MARCKS      | 4.0919   | 4.0919   | 17.843  | 0.87093  | 0.39878 | 0.59994 | -5.8856 | 4082     |

|           |          |          |         |          |         |         |         |          |
|-----------|----------|----------|---------|----------|---------|---------|---------|----------|
| F11R      | 3.9846   | 3.9846   | 21.769  | 0.87079  | 0.39885 | 0.59996 | -5.8857 | 50848    |
| ING1      | 0.16206  | 0.16206  | 1.0514  | 0.87074  | 0.39888 | 0.59996 | -5.8857 | 3621     |
| MIER1     | 0.37041  | 0.37041  | 2.8834  | 0.8707   | 0.3989  | 0.59996 | -5.8858 | 57708    |
| PRADC1    | 1.0706   | 1.0706   | 4.6614  | 0.87051  | 0.399   | 0.60006 | -5.8859 | 84279    |
| POLR2J    | 2.0157   | 2.0157   | 9.6356  | 0.87035  | 0.39908 | 0.60013 | -5.8861 | 5439     |
| PSIP1     | -0.41607 | 0.41607  | 2.4122  | -0.86977 | 0.39939 | 0.60054 | -5.8866 | 11168    |
| ZNF692    | -0.62275 | 0.62275  | 2.2047  | -0.86962 | 0.39947 | 0.60061 | -5.8867 | 55657    |
| PPP1R14B  | 8.7735   | 8.7735   | 44.197  | 0.86948  | 0.39954 | 0.60067 | -5.8868 | 26472    |
| PROK2     | 0.4377   | 0.4377   | 0.60628 | 0.86939  | 0.39959 | 0.60069 | -5.8869 | 60675    |
| ANAPC16   | -0.92374 | 0.92374  | 6.0801  | -0.86926 | 0.39966 | 0.60074 | -5.887  | 119504   |
| FOSL2     | -7.9867  | 7.9867   | 46.655  | -0.86898 | 0.39981 | 0.6009  | -5.8872 | 2355     |
| HOXC13-AS | -0.39454 | 0.39454  | 1.2882  | -0.86875 | 0.39993 | 0.601   | -5.8874 | 1.01E+08 |
| PCDHGC4   | -0.11458 | 0.11458  | 0.50391 | -0.86872 | 0.39995 | 0.601   | -5.8875 | 56098    |
| CRYAB     | 2.5267   | 2.5267   | 16.122  | 0.86855  | 0.40003 | 0.60108 | -5.8876 | 1410     |
| CAVIN3    | 7.7756   | 7.7756   | 17.498  | 0.86835  | 0.40014 | 0.60119 | -5.8878 | 112464   |
| TMEM60    | 0.66969  | 0.66969  | 3.2182  | 0.86798  | 0.40033 | 0.60141 | -5.8881 | 85025    |
| ECM2      | 0.83337  | 0.83337  | 2.4732  | 0.86794  | 0.40036 | 0.60141 | -5.8881 | 1842     |
| RP9       | -0.26832 | 0.26832  | 1.7811  | -0.86774 | 0.40046 | 0.60151 | -5.8883 | 6100     |
| HOXB4     | -0.11844 | 0.11844  | 0.3398  | -0.86747 | 0.4006  | 0.60167 | -5.8885 | 3214     |
| PPP2R2B   | -0.11739 | 0.11739  | 0.40962 | -0.86728 | 0.4007  | 0.60171 | -5.8887 | 5521     |
| PTGER3    | 2.0019   | 2.0019   | 2.8959  | 0.86725  | 0.40072 | 0.60171 | -5.8887 | 5733     |
| CSMD2     | 0.1849   | 0.1849   | 0.36732 | 0.86722  | 0.40074 | 0.60171 | -5.8887 | 114784   |
| RPL37A    | 185.14   | 185.14   | 804.18  | 0.86681  | 0.40096 | 0.60194 | -5.8891 | 6168     |
| RCC1L     | -0.65684 | 0.65684  | 3.4973  | -0.86679 | 0.40096 | 0.60194 | -5.8891 | 81554    |
| LRRC49    | -0.09054 | 0.090536 | 0.42053 | -0.86641 | 0.40116 | 0.60219 | -5.8894 | 54839    |
| AZIN2     | -0.16273 | 0.16273  | 0.66915 | -0.86598 | 0.40139 | 0.60248 | -5.8898 | 113451   |

|            |          |          |         |          |         |         |         |          |
|------------|----------|----------|---------|----------|---------|---------|---------|----------|
| CTSH       | -1.9272  | 1.9272   | 10.76   | -0.86585 | 0.40146 | 0.60253 | -5.8899 | 1512     |
| HHEX       | 0.55776  | 0.55776  | 1.8181  | 0.86546  | 0.40167 | 0.60279 | -5.8902 | 3087     |
| MT1F       | -0.71546 | 0.71546  | 1.3656  | -0.865   | 0.40191 | 0.60309 | -5.8906 | 4494     |
| OTUD6B-AS1 | 0.21246  | 0.21246  | 0.97981 | 0.86495  | 0.40194 | 0.60309 | -5.8907 | 1.01E+08 |
| MMP14      | 17.736   | 17.736   | 60.309  | 0.86428  | 0.40229 | 0.60346 | -5.8912 | 4323     |
| KIAA2013   | -1.1437  | 1.1437   | 9.0475  | -0.86426 | 0.4023  | 0.60346 | -5.8912 | 90231    |
| TEX10      | 0.35111  | 0.35111  | 3.3123  | 0.86415  | 0.40236 | 0.60346 | -5.8913 | 54881    |
| FBXO7      | 1.7791   | 1.7791   | 12.671  | 0.86413  | 0.40237 | 0.60346 | -5.8914 | 25793    |
| TEAD4      | 0.9678   | 0.9678   | 3.7434  | 0.86411  | 0.40238 | 0.60346 | -5.8914 | 7004     |
| MRPL20     | 2.9379   | 2.9379   | 14.086  | 0.86402  | 0.40243 | 0.60346 | -5.8914 | 55052    |
| PLN        | 0.49511  | 0.49511  | 1.0984  | 0.86401  | 0.40244 | 0.60346 | -5.8915 | 5350     |
| LZTFL1     | -0.21838 | 0.21838  | 1.2223  | -0.86378 | 0.40256 | 0.60358 | -5.8916 | 54585    |
| GABRD      | -0.06399 | 0.063991 | 0.10688 | -0.86318 | 0.40288 | 0.60401 | -5.8922 | 2563     |
| MALSU1     | 1.1279   | 1.1279   | 6.2024  | 0.86298  | 0.40298 | 0.60411 | -5.8923 | 115416   |
| XKRX       | 3.7907   | 3.7907   | 6.7555  | 0.86291  | 0.40302 | 0.60412 | -5.8924 | 402415   |
| POF1B      | -5.9867  | 5.9867   | 19.334  | -0.86282 | 0.40307 | 0.60414 | -5.8925 | 79983    |
| SAP30      | -0.55878 | 0.55878  | 1.8535  | -0.86267 | 0.40315 | 0.6042  | -5.8926 | 8819     |
| SMPD3      | 3.9846   | 3.9846   | 6.3563  | 0.86246  | 0.40326 | 0.60432 | -5.8928 | 55512    |
| SEMA4G     | -0.62306 | 0.62306  | 1.6641  | -0.86233 | 0.40333 | 0.60435 | -5.8929 | 57715    |
| ATP5F1B    | 15.821   | 15.821   | 98.049  | 0.86226  | 0.40336 | 0.60435 | -5.8929 | 506      |
| ZDHHC6     | 0.35055  | 0.35055  | 2.8604  | 0.86217  | 0.40341 | 0.60435 | -5.893  | 64429    |
| LMNA       | 12.856   | 12.856   | 79.856  | 0.86215  | 0.40343 | 0.60435 | -5.893  | 4000     |
| TTC33      | 0.15699  | 0.15699  | 0.89177 | 0.86181  | 0.40361 | 0.60457 | -5.8933 | 23548    |
| MRPS18A    | 1.2075   | 1.2075   | 7.1793  | 0.86155  | 0.40374 | 0.60472 | -5.8935 | 55168    |
| MED21      | 0.71833  | 0.71833  | 4.1858  | 0.86138  | 0.40383 | 0.6048  | -5.8937 | 9412     |
| PAXX       | -1.4738  | 1.4738   | 7.2318  | -0.86128 | 0.40389 | 0.60482 | -5.8938 | 286257   |



|              |          |          |          |          |         |         |         |          |
|--------------|----------|----------|----------|----------|---------|---------|---------|----------|
| LINC01599    | 0.067265 | 0.067265 | 0.23151  | 0.86121  | 0.40393 | 0.60482 | -5.8938 | 196913   |
| PI4KB        | 1.1831   | 1.1831   | 10.676   | 0.86115  | 0.40396 | 0.60482 | -5.8939 | 5298     |
| SIK3         | 0.4221   | 0.4221   | 5.2502   | 0.86097  | 0.40405 | 0.60487 | -5.894  | 23387    |
| HAGH         | 1.0346   | 1.0346   | 5.755    | 0.86096  | 0.40406 | 0.60487 | -5.894  | 3029     |
| CDC42BPA     | 0.64934  | 0.64934  | 3.2506   | 0.86037  | 0.40437 | 0.60528 | -5.8945 | 8476     |
| HAL          | 11.381   | 11.381   | 14.743   | 0.86023  | 0.40445 | 0.60528 | -5.8947 | 3034     |
| RNF166       | -0.47472 | 0.47472  | 2.0171   | -0.86018 | 0.40447 | 0.60528 | -5.8947 | 115992   |
| MYOF         | -3.286   | 3.286    | 25.167   | -0.86014 | 0.40449 | 0.60528 | -5.8947 | 26509    |
| CLK2         | -0.49337 | 0.49337  | 5.6704   | -0.86011 | 0.40451 | 0.60528 | -5.8948 | 1196     |
| LOC101927124 | -0.06187 | 0.061865 | 0.12901  | -0.85997 | 0.40458 | 0.60533 | -5.8949 | 1.02E+08 |
| MRPS35       | 1.1539   | 1.1539   | 6.1683   | 0.8598   | 0.40467 | 0.60538 | -5.895  | 60488    |
| RASL10B      | 0.11171  | 0.11171  | 0.27194  | 0.85976  | 0.4047  | 0.60538 | -5.895  | 91608    |
| UBL3         | 2.644    | 2.644    | 8.4756   | 0.85971  | 0.40472 | 0.60538 | -5.8951 | 5412     |
| BTG1         | 5.1698   | 5.1698   | 29.761   | 0.85942  | 0.40488 | 0.60556 | -5.8953 | 694      |
| INAFM1       | -2.5332  | 2.5332   | 9.1062   | -0.85931 | 0.40493 | 0.60559 | -5.8954 | 255783   |
| PHF13        | 0.54163  | 0.54163  | 3.5483   | 0.85912  | 0.40504 | 0.60566 | -5.8956 | 148479   |
| CD247        | -0.0849  | 0.084896 | 0.34448  | -0.85902 | 0.40509 | 0.60566 | -5.8957 | 919      |
| NBEAL2       | 2.9161   | 2.9161   | 15.611   | 0.85902  | 0.40509 | 0.60566 | -5.8957 | 23218    |
| NCL          | -13.401  | 13.401   | 56.703   | -0.8589  | 0.40516 | 0.60571 | -5.8958 | 4691     |
| GNRH2        | -0.06006 | 0.060062 | 0.082824 | -0.85877 | 0.40522 | 0.60575 | -5.8959 | 2797     |
| ARL1         | 1.086    | 1.086    | 6.9868   | 0.85859  | 0.40532 | 0.60584 | -5.896  | 400      |
| SHC3         | 0.21898  | 0.21898  | 0.79088  | 0.85851  | 0.40536 | 0.60586 | -5.8961 | 53358    |
| LOC101927809 | 0.16702  | 0.16702  | 0.47249  | 0.85843  | 0.4054  | 0.60586 | -5.8962 | 1.02E+08 |
| SNORA113     | -0.0776  | 0.077597 | 0.11699  | -0.85799 | 0.40564 | 0.60616 | -5.8965 | 1.1E+08  |
| LCE6A        | 34.569   | 34.569   | 39.762   | 0.85765  | 0.40582 | 0.60633 | -5.8968 | 448835   |
| APOL6        | -1.0576  | 1.0576   | 2.8337   | -0.85764 | 0.40583 | 0.60633 | -5.8968 | 80830    |

|           |          |          |         |          |         |         |         |        |
|-----------|----------|----------|---------|----------|---------|---------|---------|--------|
| HORMAD1   | -0.6464  | 0.6464   | 0.98475 | -0.85744 | 0.40593 | 0.60644 | -5.897  | 84072  |
| BMF       | -0.32924 | 0.32924  | 1.4894  | -0.85728 | 0.40602 | 0.60651 | -5.8971 | 90427  |
| SNORA27   | 0.54622  | 0.54622  | 1.6023  | 0.8572   | 0.40606 | 0.60652 | -5.8972 | 619499 |
| TTC32     | -0.24228 | 0.24228  | 1.0845  | -0.85691 | 0.40621 | 0.6067  | -5.8974 | 130502 |
| NUDT2     | 0.82111  | 0.82111  | 4.4265  | 0.85667  | 0.40634 | 0.60681 | -5.8976 | 318    |
| SIX2      | 0.26059  | 0.26059  | 0.55844 | 0.8566   | 0.40638 | 0.60681 | -5.8977 | 10736  |
| TGDS      | 0.19661  | 0.19661  | 1.133   | 0.85657  | 0.40639 | 0.60681 | -5.8977 | 23483  |
| ZNF182    | -0.12061 | 0.12061  | 0.71864 | -0.85642 | 0.40648 | 0.60688 | -5.8979 | 7569   |
| EBNA1BP2  | 2.6203   | 2.6203   | 11.334  | 0.85623  | 0.40658 | 0.60697 | -5.898  | 10969  |
| RAB14     | 1.3943   | 1.3943   | 12.013  | 0.85584  | 0.40679 | 0.60718 | -5.8983 | 51552  |
| APEX1     | -3.8839  | 3.8839   | 19.917  | -0.85583 | 0.40679 | 0.60718 | -5.8984 | 328    |
| TYW3      | 0.32692  | 0.32692  | 2.0925  | 0.85561  | 0.40691 | 0.6073  | -5.8985 | 127253 |
| KRT23     | 13.424   | 13.424   | 23.098  | 0.85552  | 0.40696 | 0.60733 | -5.8986 | 25984  |
| FBXO34    | 0.3637   | 0.3637   | 4.3577  | 0.85536  | 0.40704 | 0.6074  | -5.8988 | 55030  |
| JAK1      | 2.1003   | 2.1003   | 20.547  | 0.85514  | 0.40716 | 0.60752 | -5.8989 | 3716   |
| RNF175    | -0.06312 | 0.063117 | 0.1381  | -0.85506 | 0.4072  | 0.60753 | -5.899  | 285533 |
| LOC729970 | -0.31403 | 0.31403  | 0.68488 | -0.85487 | 0.40731 | 0.60763 | -5.8992 | 729970 |
| LRSAM1    | -1.0088  | 1.0088   | 4.6861  | -0.85471 | 0.40739 | 0.6077  | -5.8993 | 90678  |
| TSEN15    | 0.29802  | 0.29802  | 1.6763  | 0.85418  | 0.40768 | 0.608   | -5.8997 | 116461 |
| LSM14B    | -0.82068 | 0.82068  | 6.8087  | -0.85416 | 0.40768 | 0.608   | -5.8998 | 149986 |
| AZGP1P1   | 1.2781   | 1.2781   | 2.6253  | 0.85413  | 0.4077  | 0.608   | -5.8998 | 646282 |
| NDUFA9    | 1.7566   | 1.7566   | 10.568  | 0.8539   | 0.40782 | 0.60813 | -5.9    | 4704   |
| PHF20     | 0.30888  | 0.30888  | 4.0435  | 0.85364  | 0.40796 | 0.60829 | -5.9002 | 51230  |
| TMEM243   | -0.46657 | 0.46657  | 2.3285  | -0.85354 | 0.40802 | 0.60829 | -5.9003 | 79161  |
| HNRNPU    | -3.5005  | 3.5005   | 22.599  | -0.85351 | 0.40803 | 0.60829 | -5.9003 | 3192   |
| SLC2A6    | 0.2523   | 0.2523   | 0.77537 | 0.85315  | 0.40822 | 0.60852 | -5.9006 | 11182  |

|           |          |          |         |          |         |         |         |        |
|-----------|----------|----------|---------|----------|---------|---------|---------|--------|
| WTAP      | 1.5705   | 1.5705   | 10.382  | 0.85285  | 0.40839 | 0.60867 | -5.9009 | 9589   |
| NR2F2-AS1 | -0.16054 | 0.16054  | 0.39521 | -0.85281 | 0.40841 | 0.60867 | -5.9009 | 644192 |
| TUBE1     | -0.19075 | 0.19075  | 1.2589  | -0.85276 | 0.40844 | 0.60867 | -5.9009 | 51175  |
| TPD52     | 0.58774  | 0.58774  | 4.0104  | 0.85251  | 0.40857 | 0.60882 | -5.9011 | 7163   |
| NFAT5     | -0.98658 | 0.98658  | 8.2497  | -0.85233 | 0.40866 | 0.6089  | -5.9013 | 10725  |
| LINC01123 | -0.1085  | 0.1085   | 0.63294 | -0.85224 | 0.40871 | 0.60892 | -5.9014 | 440894 |
| ADA       | 0.65445  | 0.65445  | 2.439   | 0.8521   | 0.40879 | 0.60893 | -5.9015 | 100    |
| MITD1     | 0.47367  | 0.47367  | 2.7047  | 0.85205  | 0.40882 | 0.60893 | -5.9015 | 129531 |
| RCC2      | 2.7059   | 2.7059   | 19.699  | 0.85198  | 0.40885 | 0.60893 | -5.9016 | 55920  |
| LGI2      | 0.11404  | 0.11404  | 0.3217  | 0.85196  | 0.40886 | 0.60893 | -5.9016 | 55203  |
| ITGAE     | 0.16923  | 0.16923  | 0.70447 | 0.85187  | 0.40891 | 0.60895 | -5.9017 | 3682   |
| CDK18     | -0.61089 | 0.61089  | 2.0978  | -0.85167 | 0.40902 | 0.60905 | -5.9018 | 5129   |
| STXBP2    | 1.6673   | 1.6673   | 9.3971  | 0.85125  | 0.40924 | 0.60934 | -5.9022 | 6813   |
| RNF157    | -0.10743 | 0.10743  | 0.27608 | -0.85111 | 0.40932 | 0.60939 | -5.9023 | 114804 |
| CTAGE9    | -0.0865  | 0.086502 | 0.2063  | -0.85084 | 0.40946 | 0.60952 | -5.9025 | 643854 |
| ARF5      | 6.88     | 6.88     | 37.455  | 0.85081  | 0.40948 | 0.60952 | -5.9026 | 381    |
| KIF16B    | -0.38905 | 0.38905  | 3.7076  | -0.85065 | 0.40956 | 0.60957 | -5.9027 | 55614  |
| POMGNT1   | -0.82999 | 0.82999  | 4.9767  | -0.85062 | 0.40958 | 0.60957 | -5.9027 | 55624  |
| DAGLB     | -0.38689 | 0.38689  | 4.3231  | -0.85048 | 0.40966 | 0.60963 | -5.9028 | 221955 |
| CD8A      | -0.1266  | 0.1266   | 0.36991 | -0.85036 | 0.40972 | 0.60967 | -5.9029 | 925    |
| ADGRB2    | 0.11861  | 0.11861  | 0.25664 | 0.85025  | 0.40978 | 0.6097  | -5.903  | 576    |
| OTUD1     | 0.50565  | 0.50565  | 4.3235  | 0.85015  | 0.40983 | 0.60971 | -5.9031 | 220213 |
| HERC2P2   | -0.87144 | 0.87144  | 4.8026  | -0.85011 | 0.40986 | 0.60971 | -5.9031 | 400322 |
| CCDC22    | -0.48965 | 0.48965  | 3.0654  | -0.84994 | 0.40995 | 0.60975 | -5.9033 | 28952  |
| VAMP8     | 8.7065   | 8.7065   | 41.392  | 0.84985  | 0.41    | 0.60975 | -5.9034 | 8673   |
| GEMIN8P4  | -0.06942 | 0.069415 | 0.21744 | -0.84981 | 0.41002 | 0.60975 | -5.9034 | 492303 |

|              |          |          |         |          |         |         |         |          |
|--------------|----------|----------|---------|----------|---------|---------|---------|----------|
| LIMK2        | 3.7707   | 3.7707   | 16.777  | 0.84978  | 0.41004 | 0.60975 | -5.9034 | 3985     |
| CEPT1        | 0.44373  | 0.44373  | 3.6848  | 0.84973  | 0.41006 | 0.60975 | -5.9035 | 10390    |
| LOC100287015 | 0.13113  | 0.13113  | 0.44189 | 0.84966  | 0.4101  | 0.60975 | -5.9035 | 1E+08    |
| DOCK11       | 0.64034  | 0.64034  | 2.8037  | 0.84949  | 0.41019 | 0.60982 | -5.9037 | 139818   |
| BRWD1        | -0.43446 | 0.43446  | 3.8224  | -0.84943 | 0.41022 | 0.60982 | -5.9037 | 54014    |
| MTMR3        | -0.70721 | 0.70721  | 6.7589  | -0.84923 | 0.41033 | 0.60991 | -5.9039 | 8897     |
| RAB5B        | 2.4791   | 2.4791   | 20.202  | 0.84919  | 0.41035 | 0.60991 | -5.9039 | 5869     |
| LINC00989    | -0.08854 | 0.088542 | 0.2049  | -0.8491  | 0.4104  | 0.60992 | -5.904  | 1.01E+08 |
| ATG10        | 0.20351  | 0.20351  | 1.4023  | 0.84864  | 0.41065 | 0.61024 | -5.9044 | 83734    |
| IFT88        | -0.15891 | 0.15891  | 0.94587 | -0.8485  | 0.41072 | 0.6103  | -5.9045 | 8100     |
| IFT57        | 0.85289  | 0.85289  | 4.0339  | 0.84767  | 0.41117 | 0.61089 | -5.9052 | 55081    |
| ZNF611       | -0.16787 | 0.16787  | 1.2924  | -0.84762 | 0.41119 | 0.61089 | -5.9052 | 81856    |
| BCYRN1       | 1.7059   | 1.7059   | 7.0845  | 0.84745  | 0.41129 | 0.61098 | -5.9054 | 618      |
| CDC123       | 1.846    | 1.846    | 10.873  | 0.84734  | 0.41135 | 0.61101 | -5.9054 | 8872     |
| SRSF8        | 0.80583  | 0.80583  | 6.0418  | 0.84717  | 0.41143 | 0.61104 | -5.9056 | 10929    |
| GBAP1        | 0.68601  | 0.68601  | 1.3551  | 0.84713  | 0.41146 | 0.61104 | -5.9056 | 2630     |
| SPOP         | -0.6514  | 0.6514   | 5.1707  | -0.8471  | 0.41147 | 0.61104 | -5.9056 | 8405     |
| IVNS1ABP     | -1.5738  | 1.5738   | 15.649  | -0.84695 | 0.41155 | 0.6111  | -5.9058 | 10625    |
| DOK5         | 0.10796  | 0.10796  | 0.24792 | 0.8467   | 0.41169 | 0.61125 | -5.906  | 55816    |
| PTPRK        | -0.5107  | 0.5107   | 6.7124  | -0.84663 | 0.41173 | 0.61126 | -5.906  | 5796     |
| EIPR1        | 0.65727  | 0.65727  | 3.4401  | 0.84654  | 0.41177 | 0.61127 | -5.9061 | 7260     |
| ARHGEF40     | -0.87286 | 0.87286  | 3.3919  | -0.8464  | 0.41185 | 0.61133 | -5.9062 | 55701    |
| MRPL42       | 0.49352  | 0.49352  | 3.4713  | 0.84627  | 0.41192 | 0.61138 | -5.9063 | 28977    |
| GZMM         | -0.11092 | 0.11092  | 0.29055 | -0.84582 | 0.41216 | 0.6116  | -5.9067 | 3004     |
| LGMN         | 5.5344   | 5.5344   | 20.548  | 0.84579  | 0.41218 | 0.6116  | -5.9067 | 5641     |
| SNORA44      | 0.096738 | 0.096738 | 0.18463 | 0.84579  | 0.41218 | 0.6116  | -5.9067 | 677825   |

|           |          |          |         |          |         |         |         |          |
|-----------|----------|----------|---------|----------|---------|---------|---------|----------|
| SNORA63D  | -0.21091 | 0.21091  | 0.4168  | -0.8457  | 0.41223 | 0.61162 | -5.9068 | 1.1E+08  |
| NDUFA2    | 2.5178   | 2.5178   | 10.643  | 0.84562  | 0.41227 | 0.61163 | -5.9069 | 4695     |
| GAS1      | -1.9963  | 1.9963   | 10.611  | -0.84553 | 0.41232 | 0.61165 | -5.907  | 2619     |
| GCFC2     | -0.1737  | 0.1737   | 1.5184  | -0.84544 | 0.41237 | 0.61165 | -5.907  | 6936     |
| ARHGEF3   | 0.4938   | 0.4938   | 3.8974  | 0.84534  | 0.41242 | 0.61165 | -5.9071 | 50650    |
| LYPD1     | 0.076072 | 0.076072 | 0.16511 | 0.84533  | 0.41243 | 0.61165 | -5.9071 | 116372   |
| COQ5      | 0.64427  | 0.64427  | 3.0827  | 0.84504  | 0.41258 | 0.61182 | -5.9074 | 84274    |
| CSF2RB    | 1.3058   | 1.3058   | 4.1831  | 0.84484  | 0.41269 | 0.61193 | -5.9075 | 1439     |
| TARS2     | -0.52171 | 0.52171  | 3.1217  | -0.84472 | 0.41276 | 0.61198 | -5.9076 | 80222    |
| FIP1L1    | -0.65247 | 0.65247  | 6.6219  | -0.84456 | 0.41284 | 0.61205 | -5.9078 | 81608    |
| GPR141    | -0.0663  | 0.0663   | 0.21362 | -0.8442  | 0.41304 | 0.61225 | -5.9081 | 353345   |
| JAGN1     | 0.69798  | 0.69798  | 5.1953  | 0.84418  | 0.41305 | 0.61225 | -5.9081 | 84522    |
| SLC9C1    | -0.0651  | 0.065099 | 0.12297 | -0.84393 | 0.41318 | 0.61239 | -5.9083 | 285335   |
| ZNF485    | -0.13199 | 0.13199  | 0.69392 | -0.84377 | 0.41327 | 0.61244 | -5.9084 | 220992   |
| DLG5-AS1  | -0.06709 | 0.067087 | 0.23791 | -0.84373 | 0.41329 | 0.61244 | -5.9084 | 1E+08    |
| CASP14    | 89.925   | 89.925   | 129.28  | 0.84333  | 0.41351 | 0.61268 | -5.9088 | 23581    |
| TCOF1     | -0.9171  | 0.9171   | 3.6418  | -0.8433  | 0.41353 | 0.61268 | -5.9088 | 6949     |
| IQGAP2    | -0.36942 | 0.36942  | 1.4505  | -0.84277 | 0.41381 | 0.613   | -5.9092 | 10788    |
| RHOBTB1   | 0.3181   | 0.3181   | 1.3437  | 0.84276  | 0.41381 | 0.613   | -5.9092 | 9886     |
| CYP26B1   | 1.6714   | 1.6714   | 7.4018  | 0.84261  | 0.4139  | 0.61305 | -5.9094 | 56603    |
| ZBTB45    | -0.37896 | 0.37896  | 2.4229  | -0.84257 | 0.41392 | 0.61305 | -5.9094 | 84878    |
| SPOCK1    | -1.9795  | 1.9795   | 3.3166  | -0.84234 | 0.41404 | 0.61318 | -5.9096 | 6695     |
| RRP12     | 0.78303  | 0.78303  | 4.6181  | 0.84207  | 0.41419 | 0.61334 | -5.9098 | 23223    |
| LINC00958 | 0.53066  | 0.53066  | 1.3398  | 0.84195  | 0.41425 | 0.61337 | -5.9099 | 1.01E+08 |
| CNPY4     | 0.68628  | 0.68628  | 2.5173  | 0.84191  | 0.41428 | 0.61337 | -5.91   | 245812   |
| CHSY1     | 2.0594   | 2.0594   | 8.4652  | 0.84182  | 0.41432 | 0.61338 | -5.91   | 22856    |

|              |          |          |         |          |         |         |         |          |
|--------------|----------|----------|---------|----------|---------|---------|---------|----------|
| PLXDC1       | 1.1331   | 1.1331   | 2.8551  | 0.84168  | 0.4144  | 0.61344 | -5.9101 | 57125    |
| STAT1        | -4.7082  | 4.7082   | 13.945  | -0.84124 | 0.41464 | 0.61374 | -5.9105 | 6772     |
| SLC6A6       | 1.7096   | 1.7096   | 6.4635  | 0.8406   | 0.41498 | 0.61417 | -5.911  | 6533     |
| ACSL3        | 0.87171  | 0.87171  | 4.9075  | 0.84057  | 0.415   | 0.61417 | -5.9111 | 2181     |
| SMARCA4      | -1.9615  | 1.9615   | 12.363  | -0.84028 | 0.41516 | 0.61427 | -5.9113 | 6597     |
| PLXNB3       | -0.40575 | 0.40575  | 1.4324  | -0.84026 | 0.41517 | 0.61427 | -5.9113 | 5365     |
| POC1B-GALNT4 | -0.08443 | 0.084429 | 0.2405  | -0.84019 | 0.41521 | 0.61427 | -5.9114 | 1.01E+08 |
| CHD1L        | 0.39378  | 0.39378  | 3.9554  | 0.84018  | 0.41521 | 0.61427 | -5.9114 | 9557     |
| IL36B        | 0.49216  | 0.49216  | 0.93229 | 0.8401   | 0.41525 | 0.61427 | -5.9114 | 27177    |
| NOTCH2NLC    | 0.8812   | 0.8812   | 4.4261  | 0.83989  | 0.41537 | 0.61439 | -5.9116 | 1.01E+08 |
| USP28        | -0.23532 | 0.23532  | 1.624   | -0.83971 | 0.41547 | 0.61448 | -5.9118 | 57646    |
| MRPL12       | 3.4641   | 3.4641   | 14.419  | 0.83957  | 0.41554 | 0.61452 | -5.9119 | 6182     |
| TNFSF12      | -1.2514  | 1.2514   | 4.5893  | -0.83952 | 0.41557 | 0.61452 | -5.9119 | 8742     |
| ARHGAP10     | -0.40981 | 0.40981  | 3.7718  | -0.8394  | 0.41563 | 0.61456 | -5.912  | 79658    |
| PTK6         | 3.4923   | 3.4923   | 15.521  | 0.83934  | 0.41566 | 0.61456 | -5.9121 | 5753     |
| LINC00662    | -0.11552 | 0.11552  | 0.69932 | -0.83909 | 0.4158  | 0.61471 | -5.9123 | 148189   |
| WDR63        | -0.0676  | 0.067598 | 0.20941 | -0.8389  | 0.41591 | 0.61472 | -5.9124 | 126820   |
| MED17        | 0.35881  | 0.35881  | 2.85    | 0.83887  | 0.41592 | 0.61472 | -5.9125 | 9440     |
| REX1BD       | -2.1476  | 2.1476   | 8.0876  | -0.83882 | 0.41595 | 0.61472 | -5.9125 | 55049    |
| SPIN2B       | -0.17368 | 0.17368  | 1.2047  | -0.8388  | 0.41596 | 0.61472 | -5.9125 | 474343   |
| APELA        | 0.45172  | 0.45172  | 0.59048 | 0.83872  | 0.416   | 0.61473 | -5.9126 | 1.01E+08 |
| PTP4A2       | 2.4802   | 2.4802   | 11.057  | 0.83835  | 0.4162  | 0.61498 | -5.9129 | 8073     |
| CXCL9        | 0.87466  | 0.87466  | 1.6006  | 0.83819  | 0.41629 | 0.61502 | -5.913  | 4283     |
| ASAP2        | 0.88719  | 0.88719  | 4.5225  | 0.83816  | 0.4163  | 0.61502 | -5.913  | 8853     |
| RALGDS       | -1.092   | 1.092    | 11.486  | -0.83804 | 0.41637 | 0.61506 | -5.9131 | 5900     |
| OS9          | -5.5578  | 5.5578   | 34.362  | -0.83774 | 0.41653 | 0.6152  | -5.9134 | 10956    |

|           |          |          |         |          |         |         |         |          |
|-----------|----------|----------|---------|----------|---------|---------|---------|----------|
| ALDH1B1   | -0.89611 | 0.89611  | 2.031   | -0.83774 | 0.41654 | 0.6152  | -5.9134 | 219      |
| ZNF584    | -0.24315 | 0.24315  | 2.2089  | -0.83765 | 0.41658 | 0.61522 | -5.9135 | 201514   |
| SLC5A4    | 0.10166  | 0.10166  | 0.24793 | 0.83735  | 0.41675 | 0.61537 | -5.9137 | 6527     |
| IL10RB    | 1.0198   | 1.0198   | 6.2887  | 0.83731  | 0.41677 | 0.61537 | -5.9137 | 3588     |
| INTS4P2   | -0.062   | 0.061999 | 0.14769 | -0.83726 | 0.4168  | 0.61537 | -5.9138 | 644619   |
| SYTL2     | 0.61999  | 0.61999  | 2.2121  | 0.83717  | 0.41684 | 0.61539 | -5.9139 | 54843    |
| ZYG11B    | 0.38665  | 0.38665  | 3.4399  | 0.83682  | 0.41703 | 0.61561 | -5.9142 | 79699    |
| HSPB11    | 0.75748  | 0.75748  | 3.1288  | 0.83666  | 0.41712 | 0.61569 | -5.9143 | 51668    |
| CUEDC1    | -0.60625 | 0.60625  | 2.7571  | -0.83615 | 0.4174  | 0.61603 | -5.9147 | 404093   |
| SURF1     | -1.4413  | 1.4413   | 8.1239  | -0.8361  | 0.41743 | 0.61603 | -5.9147 | 6834     |
| QTRT2     | -0.29368 | 0.29368  | 2.3513  | -0.83582 | 0.41758 | 0.6162  | -5.915  | 79691    |
| SNX22     | -0.26469 | 0.26469  | 0.71018 | -0.83574 | 0.41762 | 0.6162  | -5.915  | 79856    |
| NRDC      | 2.759    | 2.759    | 19.096  | 0.83569  | 0.41765 | 0.6162  | -5.9151 | 4898     |
| ZMIZ1     | -1.9286  | 1.9286   | 14.703  | -0.83556 | 0.41772 | 0.61625 | -5.9152 | 57178    |
| C9orf72   | 0.24278  | 0.24278  | 1.3075  | 0.83537  | 0.41782 | 0.6163  | -5.9153 | 203228   |
| CTF1      | -0.13852 | 0.13852  | 0.46931 | -0.83536 | 0.41783 | 0.6163  | -5.9154 | 1489     |
| MLKL      | 0.44818  | 0.44818  | 1.9348  | 0.83521  | 0.41791 | 0.61637 | -5.9155 | 197259   |
| ACBD3-AS1 | -0.24592 | 0.24592  | 0.93089 | -0.83458 | 0.41825 | 0.61682 | -5.916  | 1.08E+08 |
| HMG20A    | -0.33299 | 0.33299  | 3.1343  | -0.834   | 0.41857 | 0.61719 | -5.9165 | 10363    |
| TMEM191A  | 0.090807 | 0.090807 | 0.33599 | 0.83395  | 0.41859 | 0.61719 | -5.9165 | 84222    |
| UBXN4     | 1.2643   | 1.2643   | 13.292  | 0.83391  | 0.41862 | 0.61719 | -5.9165 | 23190    |
| CMKLR1    | -0.57552 | 0.57552  | 1.8806  | -0.83359 | 0.41879 | 0.6174  | -5.9168 | 1240     |
| LIVAR     | -0.06817 | 0.068165 | 0.22388 | -0.83337 | 0.41891 | 0.61748 | -5.917  | 1.03E+08 |
| DCAF7     | -1.1648  | 1.1648   | 6.4579  | -0.83331 | 0.41894 | 0.61748 | -5.917  | 10238    |
| RAB5C     | 4.8573   | 4.8573   | 23.181  | 0.83329  | 0.41896 | 0.61748 | -5.9171 | 5878     |
| PCSK9     | -0.39461 | 0.39461  | 0.97058 | -0.83296 | 0.41913 | 0.61768 | -5.9173 | 255738   |

|              |          |          |         |          |         |         |         |          |
|--------------|----------|----------|---------|----------|---------|---------|---------|----------|
| UHRF1        | 0.91261  | 0.91261  | 2.172   | 0.83283  | 0.4192  | 0.61773 | -5.9174 | 29128    |
| CCL20        | 1.0371   | 1.0371   | 1.6534  | 0.83254  | 0.41936 | 0.61789 | -5.9177 | 6364     |
| NKILA        | 0.062345 | 0.062345 | 0.19746 | 0.83251  | 0.41938 | 0.61789 | -5.9177 | 1.05E+08 |
| CBX4         | 1.2188   | 1.2188   | 6.6123  | 0.83237  | 0.41945 | 0.61792 | -5.9178 | 8535     |
| TEN1         | 1.2079   | 1.2079   | 5.3107  | 0.83227  | 0.41951 | 0.61792 | -5.9179 | 1E+08    |
| UCK1         | -0.88483 | 0.88483  | 4.4288  | -0.83223 | 0.41953 | 0.61792 | -5.9179 | 83549    |
| PLXNB2       | -4.2162  | 4.2162   | 22.158  | -0.83215 | 0.41958 | 0.61792 | -5.918  | 23654    |
| LEXM         | 0.093873 | 0.093873 | 0.38378 | 0.83213  | 0.41959 | 0.61792 | -5.918  | 163747   |
| SUDS3        | -0.39239 | 0.39239  | 6.3997  | -0.83182 | 0.41975 | 0.61812 | -5.9183 | 64426    |
| ZBTB24       | -0.20978 | 0.20978  | 1.746   | -0.83167 | 0.41984 | 0.61816 | -5.9184 | 9841     |
| FNIP1        | 0.53361  | 0.53361  | 3.8789  | 0.83157  | 0.41989 | 0.61816 | -5.9185 | 96459    |
| MRC1         | 2.0188   | 2.0188   | 6.3981  | 0.8315   | 0.41993 | 0.61816 | -5.9185 | 4360     |
| PUDP         | 0.20313  | 0.20313  | 1.28    | 0.83138  | 0.41999 | 0.61816 | -5.9186 | 8226     |
| TICAM2       | 0.13857  | 0.13857  | 0.41879 | 0.83138  | 0.41999 | 0.61816 | -5.9186 | 353376   |
| KLF3-AS1     | -0.11774 | 0.11774  | 0.52828 | -0.83137 | 0.42    | 0.61816 | -5.9186 | 79667    |
| RAB11FIP5    | 1.4197   | 1.4197   | 7.5668  | 0.83125  | 0.42006 | 0.61819 | -5.9187 | 26056    |
| CEP89        | -0.22186 | 0.22186  | 1.8733  | -0.83119 | 0.4201  | 0.61819 | -5.9188 | 84902    |
| DCAF10       | 0.24298  | 0.24298  | 3.4468  | 0.83067  | 0.42038 | 0.61856 | -5.9192 | 79269    |
| IL2RA        | 0.12638  | 0.12638  | 0.32746 | 0.83047  | 0.42049 | 0.61866 | -5.9194 | 3559     |
| CYP2U1       | -0.18769 | 0.18769  | 0.72931 | -0.83001 | 0.42074 | 0.61896 | -5.9197 | 113612   |
| EID2B        | -0.10959 | 0.10959  | 0.34298 | -0.82997 | 0.42076 | 0.61896 | -5.9198 | 126272   |
| ENPP2        | -1.4104  | 1.4104   | 3.6556  | -0.82973 | 0.4209  | 0.6191  | -5.92   | 5168     |
| MGAT4B       | 1.8525   | 1.8525   | 11.311  | 0.82946  | 0.42104 | 0.61926 | -5.9202 | 11282    |
| MSRB1        | 2.9382   | 2.9382   | 9.821   | 0.82927  | 0.42115 | 0.61936 | -5.9203 | 51734    |
| KIF7         | -0.2274  | 0.2274   | 0.77937 | -0.82895 | 0.42132 | 0.61956 | -5.9206 | 374654   |
| LOC105369332 | -0.09076 | 0.090758 | 0.34229 | -0.82865 | 0.42149 | 0.61975 | -5.9208 | 1.05E+08 |



|            |          |          |         |          |         |         |         |          |
|------------|----------|----------|---------|----------|---------|---------|---------|----------|
| HDHD5      | -0.99357 | 0.99357  | 5.1159  | -0.82857 | 0.42153 | 0.61976 | -5.9209 | 27440    |
| APLF       | 0.35495  | 0.35495  | 1.9194  | 0.82832  | 0.42166 | 0.6199  | -5.9211 | 200558   |
| CD27       | -0.09173 | 0.091726 | 0.34052 | -0.82809 | 0.42179 | 0.62003 | -5.9213 | 939      |
| LRRC8B     | 0.47303  | 0.47303  | 2.6962  | 0.82802  | 0.42183 | 0.62004 | -5.9214 | 23507    |
| TMEM219    | -3.5591  | 3.5591   | 18.5    | -0.82717 | 0.4223  | 0.62065 | -5.922  | 124446   |
| HMGXB3     | -0.72527 | 0.72527  | 5.3337  | -0.82712 | 0.42232 | 0.62065 | -5.9221 | 22993    |
| PUM3       | 1.2406   | 1.2406   | 7.2316  | 0.82703  | 0.42237 | 0.62067 | -5.9222 | 9933     |
| UBXN8      | 0.31552  | 0.31552  | 1.5531  | 0.82696  | 0.42241 | 0.62067 | -5.9222 | 7993     |
| UTP15      | 0.30216  | 0.30216  | 1.841   | 0.82686  | 0.42247 | 0.62071 | -5.9223 | 84135    |
| SSNA1      | 2.9104   | 2.9104   | 13.587  | 0.82603  | 0.42292 | 0.62132 | -5.923  | 8636     |
| SCARNA9L   | -0.49916 | 0.49916  | 2.4272  | -0.82593 | 0.42298 | 0.62133 | -5.9231 | 1E+08    |
| LAMB2      | -4.6263  | 4.6263   | 17.574  | -0.82588 | 0.423   | 0.62133 | -5.9231 | 3913     |
| AARSD1     | -0.73585 | 0.73585  | 3.895   | -0.82578 | 0.42306 | 0.62135 | -5.9232 | 80755    |
| FAM20B     | 0.40163  | 0.40163  | 4.398   | 0.82552  | 0.4232  | 0.62148 | -5.9234 | 9917     |
| BAZ2B      | -0.46412 | 0.46412  | 4.2452  | -0.82541 | 0.42326 | 0.62148 | -5.9235 | 29994    |
| CNOT1      | -1.5052  | 1.5052   | 15.096  | -0.82541 | 0.42326 | 0.62148 | -5.9235 | 23019    |
| TMEM150B   | -0.08662 | 0.086616 | 0.22841 | -0.82536 | 0.42329 | 0.62148 | -5.9235 | 284417   |
| FGFRL1     | -0.32356 | 0.32356  | 1.5522  | -0.82492 | 0.42353 | 0.62178 | -5.9239 | 53834    |
| SEMA3B-AS1 | 0.097783 | 0.097783 | 0.18599 | 0.82484  | 0.42357 | 0.62178 | -5.9239 | 1.02E+08 |
| GGN        | -0.07296 | 0.072964 | 0.43304 | -0.82461 | 0.4237  | 0.62188 | -5.9241 | 199720   |
| DOCK8      | 0.4972   | 0.4972   | 2.9093  | 0.82459  | 0.42371 | 0.62188 | -5.9241 | 81704    |
| CCDC18     | 0.08997  | 0.08997  | 0.43316 | 0.82448  | 0.42377 | 0.62192 | -5.9242 | 343099   |
| POP4       | 0.70613  | 0.70613  | 3.4116  | 0.82411  | 0.42398 | 0.62211 | -5.9245 | 10775    |
| ALDH2      | -7.3842  | 7.3842   | 41.43   | -0.82411 | 0.42398 | 0.62211 | -5.9245 | 217      |
| CALML5     | 878.96   | 878.96   | 1166.4  | 0.82387  | 0.42411 | 0.62225 | -5.9247 | 51806    |
| SUPT7L     | 0.24955  | 0.24955  | 3.0575  | 0.82301  | 0.42458 | 0.62289 | -5.9254 | 9913     |

|              |          |          |          |          |         |         |         |          |
|--------------|----------|----------|----------|----------|---------|---------|---------|----------|
| NAP1L1       | 1.5098   | 1.5098   | 10.015   | 0.82288  | 0.42465 | 0.62294 | -5.9255 | 4673     |
| CASP1P2      | -0.11555 | 0.11555  | 0.35755  | -0.82267 | 0.42477 | 0.62305 | -5.9257 | 440067   |
| CC2D2A       | -0.2177  | 0.2177   | 1.1442   | -0.82254 | 0.42484 | 0.62305 | -5.9258 | 57545    |
| CNPY2        | 1.5366   | 1.5366   | 6.4495   | 0.82254  | 0.42484 | 0.62305 | -5.9258 | 10330    |
| LOC101927018 | -0.18395 | 0.18395  | 0.53156  | -0.82226 | 0.42499 | 0.62311 | -5.926  | 1.02E+08 |
| GGT5         | -2.6513  | 2.6513   | 6.0856   | -0.82222 | 0.42501 | 0.62311 | -5.9261 | 2687     |
| PRR29        | -0.12552 | 0.12552  | 0.31102  | -0.8222  | 0.42503 | 0.62311 | -5.9261 | 92340    |
| EHD2         | 4.7235   | 4.7235   | 23.427   | 0.8221   | 0.42508 | 0.62311 | -5.9262 | 30846    |
| PNKP         | 1.0545   | 1.0545   | 6.5887   | 0.82207  | 0.42509 | 0.62311 | -5.9262 | 11284    |
| KLHL15       | -0.1411  | 0.1411   | 0.96039  | -0.82206 | 0.4251  | 0.62311 | -5.9262 | 80311    |
| POLD1        | -0.57788 | 0.57788  | 2.6448   | -0.82194 | 0.42516 | 0.62315 | -5.9263 | 5424     |
| RAB28        | 0.31676  | 0.31676  | 2.7101   | 0.82175  | 0.42527 | 0.62325 | -5.9264 | 9364     |
| RPS6KA2      | -0.70513 | 0.70513  | 4.3205   | -0.82147 | 0.42542 | 0.62342 | -5.9267 | 6196     |
| ACTR5        | -0.19274 | 0.19274  | 1.9099   | -0.82128 | 0.42553 | 0.62352 | -5.9268 | 79913    |
| PGAM5        | 1.4474   | 1.4474   | 7.6475   | 0.8212   | 0.42558 | 0.62353 | -5.9269 | 192111   |
| SIRT7        | 1.1029   | 1.1029   | 5.9905   | 0.82049  | 0.42597 | 0.62403 | -5.9275 | 51547    |
| NCAPD2       | -0.83106 | 0.83106  | 4.5883   | -0.82044 | 0.42599 | 0.62403 | -5.9275 | 9918     |
| MMAB         | -0.35286 | 0.35286  | 2.0903   | -0.82038 | 0.42602 | 0.62403 | -5.9276 | 326625   |
| LOC729870    | 0.15197  | 0.15197  | 0.41569  | 0.8202   | 0.42612 | 0.62412 | -5.9277 | 729870   |
| FIG4         | -0.30102 | 0.30102  | 2.3156   | -0.81999 | 0.42624 | 0.62424 | -5.9279 | 9896     |
| DENND6A      | 0.35471  | 0.35471  | 3.5193   | 0.81969  | 0.42641 | 0.62443 | -5.9281 | 201627   |
| AAMP         | -2.9381  | 2.9381   | 17.779   | -0.81958 | 0.42647 | 0.62446 | -5.9282 | 14       |
| DLAT         | 0.54028  | 0.54028  | 3.6652   | 0.8195   | 0.42651 | 0.62447 | -5.9283 | 1737     |
| SAPCD2       | -0.3336  | 0.3336   | 1.4887   | -0.81925 | 0.42665 | 0.62462 | -5.9285 | 89958    |
| DDX11L5      | -0.05702 | 0.057015 | 0.082674 | -0.81913 | 0.42671 | 0.62466 | -5.9286 | 1E+08    |
| CCDC14       | -0.3685  | 0.3685   | 2.5105   | -0.81854 | 0.42704 | 0.62508 | -5.929  | 64770    |

|                     |          |          |         |          |         |         |         |          |
|---------------------|----------|----------|---------|----------|---------|---------|---------|----------|
| FLOT2               | -5.7066  | 5.7066   | 17.268  | -0.81841 | 0.42711 | 0.62513 | -5.9291 | 2319     |
| BCL9L               | -2.0567  | 2.0567   | 12.189  | -0.81796 | 0.42736 | 0.62544 | -5.9295 | 283149   |
| TPD52L1             | 1.2777   | 1.2777   | 6.3533  | 0.8178   | 0.42745 | 0.62552 | -5.9296 | 7164     |
| WDR91               | -0.55088 | 0.55088  | 3.8118  | -0.81761 | 0.42755 | 0.62557 | -5.9298 | 29062    |
| ADCY1               | -0.10965 | 0.10965  | 0.2904  | -0.81761 | 0.42755 | 0.62557 | -5.9298 | 107      |
| EXTL3-AS1           | -0.06812 | 0.068117 | 0.16088 | -0.81706 | 0.42786 | 0.62594 | -5.9302 | 1.02E+08 |
| CHMP1A              | 3.0526   | 3.0526   | 17.816  | 0.81701  | 0.42788 | 0.62594 | -5.9303 | 5119     |
| ITGAM               | 0.38603  | 0.38603  | 1.4788  | 0.81674  | 0.42803 | 0.62605 | -5.9305 | 3684     |
| CS                  | 3.5048   | 3.5048   | 27.316  | 0.81673  | 0.42804 | 0.62605 | -5.9305 | 1431     |
| ADORA2A             | -0.08749 | 0.087486 | 0.11284 | -0.81655 | 0.42814 | 0.62611 | -5.9306 | 135      |
| INSIG1              | 0.98667  | 0.98667  | 5.144   | 0.81653  | 0.42815 | 0.62611 | -5.9307 | 3638     |
| CLEC16A             | -0.39544 | 0.39544  | 3.9795  | -0.81636 | 0.42824 | 0.62615 | -5.9308 | 23274    |
| ZNF260              | 0.2426   | 0.2426   | 1.5639  | 0.81635  | 0.42825 | 0.62615 | -5.9308 | 339324   |
| POU5F1P5            | -0.29709 | 0.29709  | 1.2626  | -0.81623 | 0.42831 | 0.62619 | -5.9309 | 1E+08    |
| TAX1BP3             | 10.969   | 10.969   | 45.259  | 0.81608  | 0.4284  | 0.62622 | -5.931  | 30851    |
| CLIP2               | -0.76663 | 0.76663  | 3.4761  | -0.81606 | 0.42841 | 0.62622 | -5.931  | 7461     |
| NOB1                | -1.5088  | 1.5088   | 9.5753  | -0.81553 | 0.4287  | 0.62654 | -5.9315 | 28987    |
| LINC01002           | -0.73525 | 0.73525  | 1.9182  | -0.81553 | 0.4287  | 0.62654 | -5.9315 | 399844   |
| NELFCD              | -1.2046  | 1.2046   | 8.8377  | -0.81521 | 0.42888 | 0.62674 | -5.9317 | 51497    |
| CBX6                | -1.6813  | 1.6813   | 6.5865  | -0.81513 | 0.42892 | 0.62675 | -5.9318 | 23466    |
| APOA1-AS            | -0.12625 | 0.12625  | 0.36167 | -0.81471 | 0.42915 | 0.62704 | -5.9321 | 1.04E+08 |
| PKD1P5-LOC105376752 | -0.28613 | 0.28613  | 0.49557 | -0.81456 | 0.42924 | 0.6271  | -5.9322 | 1.1E+08  |
| ANGPTL2             | 8.0106   | 8.0106   | 22.533  | 0.8137   | 0.42971 | 0.62773 | -5.9329 | 23452    |
| ACOT13              | 0.31174  | 0.31174  | 2.2001  | 0.81365  | 0.42974 | 0.62773 | -5.933  | 55856    |
| PLEKHO1             | 1.3305   | 1.3305   | 4.3042  | 0.81336  | 0.4299  | 0.62786 | -5.9332 | 51177    |
| KRR1                | 0.54781  | 0.54781  | 4.0937  | 0.81336  | 0.4299  | 0.62786 | -5.9332 | 11103    |

|          |          |          |          |          |         |         |         |          |
|----------|----------|----------|----------|----------|---------|---------|---------|----------|
| TAB3     | 0.45777  | 0.45777  | 3.4225   | 0.81323  | 0.42998 | 0.62791 | -5.9333 | 257397   |
| SHROOM1  | -0.28145 | 0.28145  | 1.0798   | -0.81295 | 0.43013 | 0.62808 | -5.9335 | 134549   |
| ADAT3    | -0.42651 | 0.42651  | 2.0453   | -0.81278 | 0.43022 | 0.62816 | -5.9337 | 113179   |
| C1QTNF1  | -2.764   | 2.764    | 6.5839   | -0.81255 | 0.43035 | 0.62829 | -5.9339 | 114897   |
| RTF1     | -0.61369 | 0.61369  | 6.2693   | -0.81239 | 0.43044 | 0.62837 | -5.934  | 23168    |
| DDX19B   | -0.46147 | 0.46147  | 3.7877   | -0.81228 | 0.4305  | 0.6284  | -5.9341 | 11269    |
| PSMB9    | -0.25096 | 0.25096  | 0.73516  | -0.8121  | 0.4306  | 0.6285  | -5.9342 | 5698     |
| SAE1     | 1.713    | 1.713    | 9.7799   | 0.81182  | 0.43075 | 0.62862 | -5.9344 | 10055    |
| ALDOA    | 27.058   | 27.058   | 115.47   | 0.81181  | 0.43076 | 0.62862 | -5.9344 | 226      |
| LCK      | -0.17046 | 0.17046  | 0.62548  | -0.81157 | 0.43089 | 0.62876 | -5.9346 | 3932     |
| EDEM2    | 0.57241  | 0.57241  | 3.3047   | 0.81133  | 0.43103 | 0.6289  | -5.9348 | 55741    |
| LIAS     | -0.24577 | 0.24577  | 1.8059   | -0.81103 | 0.4312  | 0.62909 | -5.9351 | 11019    |
| NUBP1    | 0.96625  | 0.96625  | 5.3186   | 0.81061  | 0.43143 | 0.62931 | -5.9354 | 4682     |
| CD163L1  | 0.40105  | 0.40105  | 1.3393   | 0.81058  | 0.43144 | 0.62931 | -5.9354 | 283316   |
| LCE1E    | 24.625   | 24.625   | 28.188   | 0.81056  | 0.43145 | 0.62931 | -5.9354 | 353135   |
| LOC93429 | -0.26303 | 0.26303  | 0.90968  | -0.8102  | 0.43165 | 0.62952 | -5.9357 | 93429    |
| RHOU     | -0.45764 | 0.45764  | 1.3741   | -0.81016 | 0.43168 | 0.62952 | -5.9358 | 58480    |
| PARK7    | 7.4185   | 7.4185   | 30.423   | 0.80993  | 0.43181 | 0.62966 | -5.936  | 11315    |
| TNS3     | -1.2038  | 1.2038   | 5.2642   | -0.80958 | 0.432   | 0.62989 | -5.9362 | 64759    |
| PFDN6    | 0.29484  | 0.29484  | 1.4236   | 0.80947  | 0.43206 | 0.62992 | -5.9363 | 10471    |
| C3orf86  | 0.059553 | 0.059553 | 0.095519 | 0.80928  | 0.43217 | 0.62996 | -5.9365 | 1.03E+08 |
| EIF4G1   | 8.3304   | 8.3304   | 49.039   | 0.80926  | 0.43218 | 0.62996 | -5.9365 | 1981     |
| SLC5A1   | 1.2849   | 1.2849   | 4.1125   | 0.80923  | 0.4322  | 0.62996 | -5.9365 | 6523     |
| SFXN5    | -0.43626 | 0.43626  | 2.1188   | -0.80908 | 0.43228 | 0.63002 | -5.9366 | 94097    |
| SIRPB2   | -0.15008 | 0.15008  | 0.48586  | -0.80893 | 0.43236 | 0.63008 | -5.9367 | 284759   |
| RBM47    | 0.58291  | 0.58291  | 3.843    | 0.80884  | 0.43241 | 0.63008 | -5.9368 | 54502    |

|           |          |          |         |          |         |         |         |          |
|-----------|----------|----------|---------|----------|---------|---------|---------|----------|
| TRAM2-AS1 | -0.15313 | 0.15313  | 0.53935 | -0.80876 | 0.43245 | 0.63008 | -5.9369 | 401264   |
| EEPD1     | -0.38004 | 0.38004  | 1.878   | -0.80868 | 0.4325  | 0.63008 | -5.9369 | 80820    |
| SELENOI   | 0.70877  | 0.70877  | 5.4827  | 0.80867  | 0.43251 | 0.63008 | -5.937  | 85465    |
| COL1A1    | 452.32   | 452.32   | 753.42  | 0.8085   | 0.4326  | 0.63016 | -5.9371 | 1277     |
| FAM199X   | 0.27519  | 0.27519  | 2.6499  | 0.80787  | 0.43295 | 0.63059 | -5.9376 | 139231   |
| LINC01948 | -0.13738 | 0.13738  | 0.35267 | -0.80784 | 0.43297 | 0.63059 | -5.9376 | 1.02E+08 |
| PYM1      | 1.1851   | 1.1851   | 7.2813  | 0.80774  | 0.43303 | 0.63062 | -5.9377 | 84305    |
| SLC35B1   | 1.4988   | 1.4988   | 7.5512  | 0.80755  | 0.43313 | 0.63072 | -5.9379 | 10237    |
| MAPKAPK3  | 1.5385   | 1.5385   | 11.163  | 0.80735  | 0.43324 | 0.63075 | -5.938  | 7867     |
| PPIG      | 0.8661   | 0.8661   | 5.7727  | 0.80731  | 0.43326 | 0.63075 | -5.938  | 9360     |
| WASHC5    | 0.82926  | 0.82926  | 6.5143  | 0.80731  | 0.43326 | 0.63075 | -5.938  | 9897     |
| TCEANC    | -0.07695 | 0.076947 | 0.34596 | -0.80685 | 0.43352 | 0.63102 | -5.9384 | 170082   |
| ZNF585B   | -0.18529 | 0.18529  | 1.1438  | -0.80684 | 0.43353 | 0.63102 | -5.9384 | 92285    |
| SEPHS1    | 0.64532  | 0.64532  | 4.6459  | 0.80659  | 0.43366 | 0.63113 | -5.9386 | 22929    |
| PTP4A3    | -1.998   | 1.998    | 3.7221  | -0.80657 | 0.43367 | 0.63113 | -5.9386 | 11156    |
| ABCC5-AS1 | -0.06853 | 0.06853  | 0.12038 | -0.80648 | 0.43373 | 0.63115 | -5.9387 | 1.01E+08 |
| OSBPL6    | -0.19652 | 0.19652  | 1.5922  | -0.80632 | 0.43382 | 0.63117 | -5.9388 | 114880   |
| DNLZ      | 1.3739   | 1.3739   | 4.9334  | 0.80631  | 0.43382 | 0.63117 | -5.9388 | 728489   |
| AXL       | -1.8475  | 1.8475   | 7.2942  | -0.80625 | 0.43385 | 0.63117 | -5.9389 | 558      |
| FOLR2     | -1.8805  | 1.8805   | 5.1718  | -0.80599 | 0.434   | 0.63133 | -5.9391 | 2350     |
| POLR3C    | -0.31858 | 0.31858  | 2.6762  | -0.80589 | 0.43405 | 0.63135 | -5.9392 | 10623    |
| MAP6D1    | 0.15461  | 0.15461  | 1.0074  | 0.80571  | 0.43415 | 0.63144 | -5.9393 | 79929    |
| ANKRA2    | -0.34977 | 0.34977  | 2.1276  | -0.80562 | 0.4342  | 0.63146 | -5.9394 | 57763    |
| RPSA      | 60.518   | 60.518   | 271.77  | 0.80525  | 0.43441 | 0.63171 | -5.9397 | 3921     |
| PNPLA2    | -2.4951  | 2.4951   | 12.684  | -0.80498 | 0.43456 | 0.63187 | -5.9399 | 57104    |
| RAPGEF5   | 0.63654  | 0.63654  | 4.3326  | 0.80491  | 0.4346  | 0.63187 | -5.9399 | 9771     |

|           |          |          |         |          |         |         |         |          |
|-----------|----------|----------|---------|----------|---------|---------|---------|----------|
| PLA2G2F   | -0.78541 | 0.78541  | 2.4778  | -0.80482 | 0.43465 | 0.63187 | -5.94   | 64600    |
| USP53     | 0.53409  | 0.53409  | 3.6158  | 0.80477  | 0.43468 | 0.63187 | -5.9401 | 54532    |
| KIFC1     | 0.17834  | 0.17834  | 0.59327 | 0.80471  | 0.43471 | 0.63187 | -5.9401 | 3833     |
| CPT2      | 0.43939  | 0.43939  | 3.1174  | 0.80462  | 0.43476 | 0.6319  | -5.9402 | 1376     |
| COPRS     | 0.91693  | 0.91693  | 5.6385  | 0.80454  | 0.43481 | 0.63191 | -5.9402 | 55352    |
| B4GALT7   | -0.74591 | 0.74591  | 4.3285  | -0.8044  | 0.43489 | 0.63197 | -5.9404 | 11285    |
| AKAP13    | -0.89434 | 0.89434  | 11.211  | -0.80405 | 0.43508 | 0.63219 | -5.9406 | 11214    |
| ORC5      | 0.39196  | 0.39196  | 2.3947  | 0.80399  | 0.43512 | 0.63219 | -5.9407 | 5001     |
| FER1L4    | -0.05729 | 0.05729  | 0.13265 | -0.80389 | 0.43517 | 0.63221 | -5.9408 | 80307    |
| ADPRH     | 0.27711  | 0.27711  | 1.1184  | 0.8036   | 0.43533 | 0.63239 | -5.941  | 141      |
| HEXIM1    | -0.89162 | 0.89162  | 7.0522  | -0.80354 | 0.43536 | 0.63239 | -5.941  | 10614    |
| SFRP4     | 3.2649   | 3.2649   | 4.678   | 0.80269  | 0.43584 | 0.63303 | -5.9417 | 6424     |
| JAZF1     | -0.36053 | 0.36053  | 2.0159  | -0.80258 | 0.4359  | 0.63306 | -5.9418 | 221895   |
| RDH14     | 0.62321  | 0.62321  | 3.5346  | 0.80239  | 0.43601 | 0.63316 | -5.9419 | 57665    |
| KRBOX4    | -0.20477 | 0.20477  | 1.0761  | -0.80163 | 0.43643 | 0.63372 | -5.9426 | 55634    |
| POU2AF1   | -0.08149 | 0.08149  | 0.2094  | -0.80089 | 0.43684 | 0.63427 | -5.9431 | 5450     |
| NECAB1    | -0.07469 | 0.074692 | 0.20266 | -0.80066 | 0.43698 | 0.63439 | -5.9433 | 64168    |
| PRRX2-AS1 | -0.07526 | 0.075255 | 0.17688 | -0.80059 | 0.43701 | 0.63439 | -5.9434 | 1.02E+08 |
| EPST11    | -0.96495 | 0.96495  | 1.8494  | -0.80054 | 0.43704 | 0.63439 | -5.9434 | 94240    |
| SCRIB     | -3.8744  | 3.8744   | 13.749  | -0.80021 | 0.43722 | 0.6346  | -5.9437 | 23513    |
| FRS2      | 0.36249  | 0.36249  | 2.774   | 0.7991   | 0.43785 | 0.63545 | -5.9445 | 10818    |
| SZRD1     | 2.5618   | 2.5618   | 16.838  | 0.79882  | 0.43801 | 0.63561 | -5.9448 | 26099    |
| ABCE1     | 1.1121   | 1.1121   | 6.6635  | 0.79878  | 0.43803 | 0.63561 | -5.9448 | 6059     |
| DLEU2     | 0.1443   | 0.1443   | 0.51671 | 0.79863  | 0.43811 | 0.63564 | -5.9449 | 8847     |
| ERF       | -1.4633  | 1.4633   | 8.8545  | -0.79859 | 0.43813 | 0.63564 | -5.9449 | 2077     |
| TGM3      | 13.605   | 13.605   | 26.349  | 0.79845  | 0.43821 | 0.63566 | -5.9451 | 7053     |

|          |          |          |         |          |         |         |         |        |
|----------|----------|----------|---------|----------|---------|---------|---------|--------|
| C6orf52  | -0.06013 | 0.060125 | 0.11095 | -0.79844 | 0.43822 | 0.63566 | -5.9451 | 347744 |
| ARL4A    | -0.91289 | 0.91289  | 4.5858  | -0.79824 | 0.43833 | 0.63576 | -5.9452 | 10124  |
| BMS1P21  | -0.0833  | 0.0833   | 0.21871 | -0.7981  | 0.43841 | 0.63576 | -5.9453 | 1E+08  |
| CHCHD5   | 1.237    | 1.237    | 6.0639  | 0.79807  | 0.43842 | 0.63576 | -5.9454 | 84269  |
| SFR1     | 0.18574  | 0.18574  | 1.0941  | 0.79805  | 0.43844 | 0.63576 | -5.9454 | 119392 |
| LCN6     | -0.12686 | 0.12686  | 0.25234 | -0.79785 | 0.43855 | 0.63587 | -5.9455 | 158062 |
| TAOK2    | -0.91149 | 0.91149  | 5.3307  | -0.79749 | 0.43875 | 0.6361  | -5.9458 | 9344   |
| VCPKMT   | 0.1422   | 0.1422   | 1.6957  | 0.79705  | 0.439   | 0.63641 | -5.9462 | 79609  |
| CCSER2   | 0.92115  | 0.92115  | 5.7418  | 0.79699  | 0.43903 | 0.63641 | -5.9462 | 54462  |
| SLC5A3   | 0.38405  | 0.38405  | 3.1524  | 0.79668  | 0.43921 | 0.63652 | -5.9465 | 6526   |
| S100A13  | 2.3479   | 2.3479   | 7.849   | 0.79661  | 0.43925 | 0.63652 | -5.9465 | 6284   |
| SLC35C2  | -0.92458 | 0.92458  | 6.8683  | -0.79661 | 0.43925 | 0.63652 | -5.9465 | 51006  |
| CCL3     | 1.0561   | 1.0561   | 1.996   | 0.79657  | 0.43927 | 0.63652 | -5.9465 | 6348   |
| ATPAF1   | 0.51035  | 0.51035  | 4.0131  | 0.7963   | 0.43942 | 0.63669 | -5.9468 | 64756  |
| PHLDB3   | 1.1323   | 1.1323   | 5.6043  | 0.79611  | 0.43953 | 0.63672 | -5.9469 | 653583 |
| DMKN     | 137.86   | 137.86   | 336.28  | 0.79608  | 0.43954 | 0.63672 | -5.9469 | 93099  |
| DSTNP2   | 0.10116  | 0.10116  | 0.72036 | 0.79605  | 0.43956 | 0.63672 | -5.947  | 171220 |
| PCDHGA12 | -0.2428  | 0.2428   | 1.4135  | -0.796   | 0.43959 | 0.63672 | -5.947  | 26025  |
| CTDP1    | -0.67148 | 0.67148  | 5.193   | -0.79586 | 0.43967 | 0.63678 | -5.9471 | 9150   |
| USHBP1   | -0.16687 | 0.16687  | 0.55553 | -0.79563 | 0.4398  | 0.63682 | -5.9473 | 83878  |
| SH2B3    | 1.071    | 1.071    | 4.5099  | 0.79561  | 0.43981 | 0.63682 | -5.9473 | 10019  |
| ACTRT3   | 0.14735  | 0.14735  | 0.52247 | 0.79555  | 0.43984 | 0.63682 | -5.9473 | 84517  |
| MCHR1    | -0.18375 | 0.18375  | 0.29043 | -0.79542 | 0.43992 | 0.63682 | -5.9474 | 2847   |
| ACSS2    | -0.7299  | 0.7299   | 5.6518  | -0.7954  | 0.43992 | 0.63682 | -5.9475 | 55902  |
| KMT5B    | 0.34299  | 0.34299  | 3.3813  | 0.7954   | 0.43993 | 0.63682 | -5.9475 | 51111  |
| RUFY2    | 0.19009  | 0.19009  | 1.8838  | 0.79529  | 0.43999 | 0.63682 | -5.9475 | 55680  |

|             |          |          |         |          |         |         |         |          |
|-------------|----------|----------|---------|----------|---------|---------|---------|----------|
| SPRYD4      | -0.24957 | 0.24957  | 2.4775  | -0.79521 | 0.44003 | 0.63682 | -5.9476 | 283377   |
| TST         | 2.1884   | 2.1884   | 8.1223  | 0.79519  | 0.44004 | 0.63682 | -5.9476 | 7263     |
| POLR1E      | -0.68114 | 0.68114  | 4.7362  | -0.79513 | 0.44008 | 0.63682 | -5.9477 | 64425    |
| RYR3        | -0.34828 | 0.34828  | 0.82146 | -0.79494 | 0.44019 | 0.63689 | -5.9478 | 6263     |
| SMOC1       | 0.18167  | 0.18167  | 0.55342 | 0.79474  | 0.4403  | 0.63689 | -5.948  | 64093    |
| DSG2        | -0.6008  | 0.6008   | 2.6752  | -0.79468 | 0.44033 | 0.63689 | -5.948  | 1829     |
| EPAS1       | 9.7306   | 9.7306   | 38.841  | 0.79467  | 0.44034 | 0.63689 | -5.948  | 2034     |
| ST6GALNAC3  | 0.064961 | 0.064961 | 0.18593 | 0.79464  | 0.44035 | 0.63689 | -5.9481 | 256435   |
| SPTSSB      | 2.9738   | 2.9738   | 4.9417  | 0.79458  | 0.44039 | 0.63689 | -5.9481 | 165679   |
| DENND5B-AS1 | -0.0689  | 0.0689   | 0.1296  | -0.79458 | 0.44039 | 0.63689 | -5.9481 | 1.01E+08 |
| RUVBL1      | 0.69821  | 0.69821  | 3.8198  | 0.79442  | 0.44048 | 0.63697 | -5.9482 | 8607     |
| ANKRD26     | -0.16953 | 0.16953  | 1.0509  | -0.79403 | 0.4407  | 0.63718 | -5.9485 | 22852    |
| LAMB3       | 4.3387   | 4.3387   | 15.944  | 0.79403  | 0.4407  | 0.63718 | -5.9485 | 3914     |
| PON2        | 1.5531   | 1.5531   | 9.2878  | 0.79391  | 0.44076 | 0.63721 | -5.9486 | 5445     |
| VEGFB       | 2.0743   | 2.0743   | 10.732  | 0.7936   | 0.44094 | 0.6374  | -5.9489 | 7423     |
| F13A1       | -4.7605  | 4.7605   | 13.784  | -0.79356 | 0.44096 | 0.6374  | -5.9489 | 2162     |
| PDE6D       | 0.50477  | 0.50477  | 2.8749  | 0.79326  | 0.44113 | 0.63754 | -5.9491 | 5147     |
| MFSD3       | -1.3516  | 1.3516   | 3.7292  | -0.79325 | 0.44114 | 0.63754 | -5.9491 | 113655   |
| YIF1B       | 0.67105  | 0.67105  | 3.4873  | 0.793    | 0.44128 | 0.63769 | -5.9493 | 90522    |
| WDFY3       | -0.38415 | 0.38415  | 6.7091  | -0.79292 | 0.44132 | 0.6377  | -5.9494 | 23001    |
| FTO-IT1     | -0.2111  | 0.2111   | 0.62661 | -0.79277 | 0.44141 | 0.63776 | -5.9495 | 1.01E+08 |
| SLC43A3     | -2.5918  | 2.5918   | 9.294   | -0.79264 | 0.44148 | 0.63777 | -5.9496 | 29015    |
| CKAP2       | 0.64627  | 0.64627  | 3.1128  | 0.79255  | 0.44153 | 0.63777 | -5.9497 | 26586    |
| NELFB       | -1.6543  | 1.6543   | 9.4531  | -0.79241 | 0.44161 | 0.63777 | -5.9498 | 25920    |
| ODF2        | -0.45439 | 0.45439  | 2.7936  | -0.79241 | 0.44161 | 0.63777 | -5.9498 | 4957     |
| CHD3        | -1.7697  | 1.7697   | 11.043  | -0.79238 | 0.44162 | 0.63777 | -5.9498 | 1107     |



|          |          |          |         |          |         |         |         |        |
|----------|----------|----------|---------|----------|---------|---------|---------|--------|
| ISG15    | -6.3808  | 6.3808   | 10.151  | -0.79234 | 0.44165 | 0.63777 | -5.9499 | 9636   |
| NIPAL2   | 2.5625   | 2.5625   | 10.046  | 0.7923   | 0.44167 | 0.63777 | -5.9499 | 79815  |
| PP2D1    | -0.08229 | 0.082289 | 0.31264 | -0.79198 | 0.44185 | 0.63797 | -5.9501 | 151649 |
| RMND5B   | -1.1245  | 1.1245   | 6.2923  | -0.79175 | 0.44198 | 0.6381  | -5.9503 | 64777  |
| PPRC1    | 0.97345  | 0.97345  | 6.6664  | 0.79141  | 0.44217 | 0.63829 | -5.9506 | 23082  |
| RTL6     | 0.5295   | 0.5295   | 3.0863  | 0.79138  | 0.44219 | 0.63829 | -5.9506 | 84247  |
| CBLL1    | -0.3167  | 0.3167   | 2.4462  | -0.79105 | 0.44238 | 0.63851 | -5.9509 | 79872  |
| TJP3     | -0.54347 | 0.54347  | 1.2004  | -0.79097 | 0.44242 | 0.63852 | -5.9509 | 27134  |
| SPPL3    | -1.0855  | 1.0855   | 12.586  | -0.79086 | 0.44248 | 0.63855 | -5.951  | 121665 |
| RASSF5   | 1.4631   | 1.4631   | 9.2217  | 0.79063  | 0.44261 | 0.63869 | -5.9512 | 83593  |
| MSX1     | -0.41753 | 0.41753  | 1.087   | -0.79032 | 0.44279 | 0.63886 | -5.9514 | 4487   |
| CHTF8    | 2.4344   | 2.4344   | 16.127  | 0.79029  | 0.44281 | 0.63886 | -5.9515 | 54921  |
| DCLRE1A  | -0.11467 | 0.11467  | 0.81797 | -0.79014 | 0.44289 | 0.63892 | -5.9516 | 9937   |
| RPL30    | 77.753   | 77.753   | 325.08  | 0.78992  | 0.44302 | 0.63894 | -5.9518 | 6156   |
| ATM      | -0.43376 | 0.43376  | 2.8279  | -0.78987 | 0.44304 | 0.63894 | -5.9518 | 472    |
| POLE4    | 2.2591   | 2.2591   | 9.3292  | 0.78986  | 0.44305 | 0.63894 | -5.9518 | 56655  |
| POC1A    | 0.28441  | 0.28441  | 0.93029 | 0.78985  | 0.44305 | 0.63894 | -5.9518 | 25886  |
| CENPJ    | 0.1386   | 0.1386   | 0.84518 | 0.78964  | 0.44317 | 0.63905 | -5.952  | 55835  |
| USP35    | 0.2114   | 0.2114   | 1.2881  | 0.78942  | 0.4433  | 0.63918 | -5.9521 | 57558  |
| NCK1     | 1.0386   | 1.0386   | 4.2101  | 0.78925  | 0.44339 | 0.63927 | -5.9523 | 4690   |
| DHX33    | -0.26955 | 0.26955  | 2.2558  | -0.78904 | 0.44351 | 0.63933 | -5.9524 | 56919  |
| LNPEP    | -0.76516 | 0.76516  | 9.3277  | -0.78894 | 0.44357 | 0.63933 | -5.9525 | 4012   |
| RAPGEF3  | -0.36129 | 0.36129  | 1.6164  | -0.78893 | 0.44357 | 0.63933 | -5.9525 | 10411  |
| SPATA24  | 0.084455 | 0.084455 | 0.41723 | 0.78887  | 0.44361 | 0.63933 | -5.9526 | 202051 |
| ARHGAP28 | 0.35092  | 0.35092  | 0.95588 | 0.78883  | 0.44363 | 0.63933 | -5.9526 | 79822  |
| FAM131C  | 0.11847  | 0.11847  | 0.3852  | 0.78865  | 0.44373 | 0.63938 | -5.9527 | 348487 |

|              |          |          |          |          |         |         |         |        |
|--------------|----------|----------|----------|----------|---------|---------|---------|--------|
| DTX3L        | -1.8222  | 1.8222   | 5.5145   | -0.78864 | 0.44374 | 0.63938 | -5.9527 | 151636 |
| HEY1         | 0.2314   | 0.2314   | 0.97874  | 0.78834  | 0.44391 | 0.63957 | -5.953  | 23462  |
| PRSS12       | -0.27147 | 0.27147  | 2.2639   | -0.78822 | 0.44397 | 0.63961 | -5.9531 | 8492   |
| HNRNPC       | 5.2406   | 5.2406   | 31.568   | 0.7879   | 0.44416 | 0.63982 | -5.9533 | 3183   |
| SSB          | 1.4297   | 1.4297   | 7.2184   | 0.78776  | 0.44424 | 0.63984 | -5.9534 | 6741   |
| HINFP        | -0.20615 | 0.20615  | 2.0727   | -0.78774 | 0.44425 | 0.63984 | -5.9535 | 25988  |
| GSPT2        | -0.15706 | 0.15706  | 0.74436  | -0.78762 | 0.44431 | 0.63988 | -5.9535 | 23708  |
| EHBP1L1      | 3.493    | 3.493    | 14.082   | 0.78752  | 0.44437 | 0.63991 | -5.9536 | 254102 |
| TMEM88       | -0.15196 | 0.15196  | 0.78823  | -0.78729 | 0.4445  | 0.64004 | -5.9538 | 92162  |
| SRSF1        | 1.9321   | 1.9321   | 14.73    | 0.78715  | 0.44458 | 0.64006 | -5.9539 | 6426   |
| NP1PB2       | -0.05438 | 0.054376 | 0.081634 | -0.78709 | 0.44461 | 0.64006 | -5.954  | 729978 |
| KLHDC10      | 0.38095  | 0.38095  | 4.3702   | 0.78707  | 0.44463 | 0.64006 | -5.954  | 23008  |
| PFKL         | -3.1746  | 3.1746   | 19.186   | -0.78692 | 0.44471 | 0.64012 | -5.9541 | 5211   |
| COPG2        | -0.6484  | 0.6484   | 3.7406   | -0.78686 | 0.44475 | 0.64012 | -5.9541 | 26958  |
| TRIM61       | -0.0773  | 0.077296 | 0.36667  | -0.78679 | 0.44478 | 0.64012 | -5.9542 | 391712 |
| PLPBP        | -0.52107 | 0.52107  | 2.8234   | -0.78671 | 0.44483 | 0.64014 | -5.9543 | 11212  |
| METTL22      | -0.23486 | 0.23486  | 2.7034   | -0.78606 | 0.4452  | 0.64061 | -5.9548 | 79091  |
| CORO1B       | 2.494    | 2.494    | 14.338   | 0.78591  | 0.44528 | 0.64061 | -5.9549 | 57175  |
| ICOSLG       | -0.29749 | 0.29749  | 1.3574   | -0.78587 | 0.4453  | 0.64061 | -5.9549 | 23308  |
| ZNF83        | -0.63191 | 0.63191  | 3.052    | -0.78586 | 0.44531 | 0.64061 | -5.9549 | 55769  |
| ZFR          | 0.833    | 0.833    | 7.1458   | 0.78564  | 0.44544 | 0.64074 | -5.9551 | 51663  |
| AP2M1        | 7.5237   | 7.5237   | 40.291   | 0.78542  | 0.44556 | 0.64086 | -5.9553 | 1173   |
| LOC100499489 | -0.12744 | 0.12744  | 0.41502  | -0.78524 | 0.44566 | 0.64095 | -5.9554 | 1E+08  |
| TGFBR2       | -3.9824  | 3.9824   | 18.597   | -0.78472 | 0.44596 | 0.64125 | -5.9558 | 7048   |
| C8orf33      | -0.77388 | 0.77388  | 5.6296   | -0.78468 | 0.44598 | 0.64125 | -5.9558 | 65265  |
| ZBED5        | -0.51901 | 0.51901  | 4.1884   | -0.78467 | 0.44599 | 0.64125 | -5.9558 | 58486  |

|              |          |          |         |          |         |         |         |          |
|--------------|----------|----------|---------|----------|---------|---------|---------|----------|
| MIR34AHG     | -0.19939 | 0.19939  | 0.87264 | -0.78448 | 0.44609 | 0.64135 | -5.956  | 1.07E+08 |
| EPS15L1      | 0.61378  | 0.61378  | 5.2874  | 0.78438  | 0.44615 | 0.64138 | -5.9561 | 58513    |
| INTS11       | -0.94763 | 0.94763  | 8.546   | -0.78405 | 0.44634 | 0.64155 | -5.9563 | 54973    |
| KIAA0319     | -0.06886 | 0.068858 | 0.17028 | -0.78401 | 0.44636 | 0.64155 | -5.9563 | 9856     |
| FBXW4P1      | -0.17888 | 0.17888  | 0.89002 | -0.78397 | 0.44638 | 0.64155 | -5.9564 | 26226    |
| NIPAL1       | 0.97248  | 0.97248  | 5.3025  | 0.78334  | 0.44674 | 0.64201 | -5.9569 | 152519   |
| RPS25        | 68.556   | 68.556   | 338.51  | 0.78327  | 0.44678 | 0.64201 | -5.9569 | 6230     |
| TAF5L        | 0.24675  | 0.24675  | 1.8516  | 0.78301  | 0.44693 | 0.64217 | -5.9571 | 27097    |
| APC          | 0.36684  | 0.36684  | 3.5032  | 0.78294  | 0.44697 | 0.64217 | -5.9572 | 324      |
| SNORA119     | -0.09023 | 0.09023  | 0.11737 | -0.78278 | 0.44706 | 0.64225 | -5.9573 | 1.1E+08  |
| NRGN         | 0.70862  | 0.70862  | 2.0483  | 0.78239  | 0.44728 | 0.64246 | -5.9576 | 4900     |
| ZSWIM8       | -1.5256  | 1.5256   | 11.394  | -0.78239 | 0.44728 | 0.64246 | -5.9576 | 23053    |
| THUMPD1      | -0.43337 | 0.43337  | 3.9416  | -0.78187 | 0.44758 | 0.6428  | -5.958  | 55623    |
| NAA10        | 2.3271   | 2.3271   | 12.216  | 0.78184  | 0.44759 | 0.6428  | -5.958  | 8260     |
| SAMD9L       | -0.35703 | 0.35703  | 1.239   | -0.78158 | 0.44774 | 0.64295 | -5.9582 | 219285   |
| LPIN2        | 0.51852  | 0.51852  | 2.7701  | 0.7813   | 0.4479  | 0.64307 | -5.9584 | 9663     |
| PPP2R5A      | 0.80994  | 0.80994  | 8.0577  | 0.78129  | 0.4479  | 0.64307 | -5.9585 | 5525     |
| MORC2-AS1    | -0.06329 | 0.06329  | 0.15992 | -0.78122 | 0.44795 | 0.64307 | -5.9585 | 150291   |
| LTB4R2       | -6.4008  | 6.4008   | 30.298  | -0.78116 | 0.44798 | 0.64307 | -5.9586 | 56413    |
| LOC100130987 | -0.30837 | 0.30837  | 1.2375  | -0.78092 | 0.44812 | 0.64319 | -5.9587 | 1E+08    |
| SMTNL2       | -0.23306 | 0.23306  | 0.27509 | -0.78077 | 0.4482  | 0.64319 | -5.9589 | 342527   |
| SIL1         | -0.83371 | 0.83371  | 5.6435  | -0.78072 | 0.44823 | 0.64319 | -5.9589 | 64374    |
| RIOK1        | 0.62281  | 0.62281  | 3.933   | 0.78071  | 0.44823 | 0.64319 | -5.9589 | 83732    |
| DLG3-AS1     | -0.06627 | 0.066267 | 0.15273 | -0.78063 | 0.44828 | 0.64319 | -5.959  | 1.01E+08 |
| MON1B        | -0.85323 | 0.85323  | 5.5081  | -0.78062 | 0.44829 | 0.64319 | -5.959  | 22879    |
| SHANK2-AS1   | 0.075758 | 0.075758 | 0.21142 | 0.78038  | 0.44842 | 0.64329 | -5.9592 | 1.01E+08 |

|            |          |          |         |          |         |         |         |         |
|------------|----------|----------|---------|----------|---------|---------|---------|---------|
| SNORA115   | -0.06928 | 0.069275 | 0.10449 | -0.78036 | 0.44843 | 0.64329 | -5.9592 | 1.1E+08 |
| DEK        | 1.9427   | 1.9427   | 11.074  | 0.77995  | 0.44867 | 0.64358 | -5.9595 | 7913    |
| GABBR1     | -0.11487 | 0.11487  | 0.41678 | -0.77981 | 0.44875 | 0.64364 | -5.9596 | 2550    |
| MANSC1     | 1.2715   | 1.2715   | 5.0815  | 0.77968  | 0.44882 | 0.64369 | -5.9597 | 54682   |
| CCDC71L    | 0.55706  | 0.55706  | 1.7329  | 0.77956  | 0.44889 | 0.64373 | -5.9598 | 168455  |
| ST6GALNAC4 | 0.64932  | 0.64932  | 2.849   | 0.77881  | 0.44932 | 0.64427 | -5.9604 | 27090   |
| TXNDC12    | 0.80034  | 0.80034  | 3.7608  | 0.77876  | 0.44935 | 0.64427 | -5.9604 | 51060   |
| PLA2G12A   | 0.32293  | 0.32293  | 3.076   | 0.77847  | 0.44951 | 0.64446 | -5.9606 | 81579   |
| INTS6L     | -0.18383 | 0.18383  | 1.7669  | -0.77818 | 0.44968 | 0.64463 | -5.9609 | 203522  |
| MRPL57     | 0.71999  | 0.71999  | 3.8044  | 0.77808  | 0.44973 | 0.64466 | -5.9609 | 78988   |
| PTOV1      | 1.5561   | 1.5561   | 11.772  | 0.77789  | 0.44984 | 0.64471 | -5.9611 | 53635   |
| DOCK3      | -0.14044 | 0.14044  | 0.57734 | -0.77789 | 0.44984 | 0.64471 | -5.9611 | 1795    |
| LAIR2      | -0.66125 | 0.66125  | 0.51446 | -0.77778 | 0.44991 | 0.64475 | -5.9612 | 3904    |
| RMND1      | -0.28436 | 0.28436  | 1.9204  | -0.77769 | 0.44996 | 0.64477 | -5.9612 | 55005   |
| CREB1      | 0.28457  | 0.28457  | 2.6942  | 0.77756  | 0.45003 | 0.64481 | -5.9613 | 1385    |
| MPHOSPH9   | 0.19169  | 0.19169  | 1.1589  | 0.77743  | 0.4501  | 0.64487 | -5.9614 | 10198   |
| POLG2      | -0.23207 | 0.23207  | 1.5559  | -0.77729 | 0.45019 | 0.64493 | -5.9615 | 11232   |
| LGALS2     | -0.32379 | 0.32379  | 1.6059  | -0.77722 | 0.45022 | 0.64493 | -5.9616 | 3957    |
| AKT3       | 0.75795  | 0.75795  | 3.1901  | 0.77713  | 0.45027 | 0.64495 | -5.9617 | 10000   |
| BTK        | -0.12816 | 0.12816  | 0.74576 | -0.77687 | 0.45042 | 0.64511 | -5.9619 | 695     |
| ABCB7      | -0.21418 | 0.21418  | 1.9434  | -0.77666 | 0.45055 | 0.64523 | -5.962  | 22      |
| CPLANE1    | -0.31564 | 0.31564  | 2.2703  | -0.77653 | 0.45062 | 0.64527 | -5.9621 | 65250   |
| CD180      | 0.086927 | 0.086927 | 0.22955 | 0.77625  | 0.45078 | 0.6454  | -5.9623 | 4064    |
| ZNF112     | -0.11145 | 0.11145  | 0.69057 | -0.77617 | 0.45082 | 0.6454  | -5.9624 | 7771    |
| CFAP36     | 0.61594  | 0.61594  | 3.9692  | 0.77614  | 0.45084 | 0.6454  | -5.9624 | 112942  |
| LPAR1      | 1.1829   | 1.1829   | 4.4552  | 0.77611  | 0.45086 | 0.6454  | -5.9624 | 1902    |

|           |          |          |         |          |         |         |         |          |
|-----------|----------|----------|---------|----------|---------|---------|---------|----------|
| SLC7A5    | 9.9893   | 9.9893   | 29.634  | 0.77597  | 0.45094 | 0.64546 | -5.9626 | 8140     |
| TXLNA     | -1.5438  | 1.5438   | 12.441  | -0.77585 | 0.45101 | 0.6455  | -5.9626 | 200081   |
| SRSF2     | 3.0028   | 3.0028   | 26.34   | 0.77556  | 0.45117 | 0.64569 | -5.9629 | 6427     |
| LTBR      | 4.0549   | 4.0549   | 19.738  | 0.77543  | 0.45125 | 0.64574 | -5.963  | 4055     |
| ADAM11    | -0.07096 | 0.070957 | 0.23276 | -0.77531 | 0.45132 | 0.64575 | -5.9631 | 4185     |
| TPSAB1    | -4.5213  | 4.5213   | 19.587  | -0.77522 | 0.45137 | 0.64575 | -5.9631 | 7177     |
| GSTK1     | -3.9529  | 3.9529   | 24.609  | -0.77521 | 0.45137 | 0.64575 | -5.9631 | 373156   |
| MBNL1     | 1.7469   | 1.7469   | 15.8    | 0.77504  | 0.45147 | 0.64578 | -5.9633 | 4154     |
| TMEM88B   | -0.18155 | 0.18155  | 0.38765 | -0.775   | 0.45149 | 0.64578 | -5.9633 | 643965   |
| LINC00933 | -0.08705 | 0.087051 | 0.28621 | -0.77496 | 0.45151 | 0.64578 | -5.9633 | 1.01E+08 |
| IFITM3    | -137.46  | 137.46   | 265.16  | -0.77491 | 0.45155 | 0.64578 | -5.9634 | 10410    |
| NDUFA11   | 1.3097   | 1.3097   | 7.3431  | 0.77477  | 0.45162 | 0.64584 | -5.9635 | 126328   |
| VTCN1     | -0.13579 | 0.13579  | 0.48212 | -0.77465 | 0.45169 | 0.64587 | -5.9636 | 79679    |
| SMARCC1   | -1.1406  | 1.1406   | 11.574  | -0.7746  | 0.45172 | 0.64587 | -5.9636 | 6599     |
| CUL5      | 0.32558  | 0.32558  | 3.7724  | 0.77443  | 0.45182 | 0.64595 | -5.9637 | 8065     |
| DDHD2     | -0.44285 | 0.44285  | 3.3785  | -0.77433 | 0.45188 | 0.64598 | -5.9638 | 23259    |
| KNTC1     | -0.23895 | 0.23895  | 1.7707  | -0.77389 | 0.45213 | 0.64629 | -5.9642 | 9735     |
| DALRD3    | -0.59286 | 0.59286  | 3.9168  | -0.77344 | 0.45238 | 0.6466  | -5.9645 | 55152    |
| KRT78     | 9.9917   | 9.9917   | 19.501  | 0.77297  | 0.45265 | 0.64692 | -5.9649 | 196374   |
| ZFP91     | 0.85141  | 0.85141  | 9.946   | 0.77281  | 0.45275 | 0.64701 | -5.965  | 80829    |
| LMO4      | 0.90548  | 0.90548  | 5.631   | 0.77266  | 0.45283 | 0.64707 | -5.9651 | 8543     |
| PCOLCE    | 13.451   | 13.451   | 34.216  | 0.77255  | 0.45289 | 0.6471  | -5.9652 | 5118     |
| ZDHHC9    | -0.83516 | 0.83516  | 5.9538  | -0.77231 | 0.45303 | 0.64724 | -5.9654 | 51114    |
| TMLHE     | -0.21062 | 0.21062  | 1.7119  | -0.77223 | 0.45308 | 0.64726 | -5.9654 | 55217    |
| LILRA5    | 0.54088  | 0.54088  | 1.1     | 0.77216  | 0.45312 | 0.64726 | -5.9655 | 353514   |
| RPS19BP1  | 2.8118   | 2.8118   | 11.962  | 0.77182  | 0.45331 | 0.64749 | -5.9657 | 91582    |

|          |          |          |         |          |         |         |         |         |
|----------|----------|----------|---------|----------|---------|---------|---------|---------|
| TLN1     | -4.4886  | 4.4886   | 22.839  | -0.77164 | 0.45341 | 0.64756 | -5.9659 | 7094    |
| SNORA74D | 0.10937  | 0.10937  | 0.28441 | 0.7716   | 0.45344 | 0.64756 | -5.9659 | 1.1E+08 |
| STYK1    | 0.13785  | 0.13785  | 0.55369 | 0.7714   | 0.45355 | 0.64761 | -5.9661 | 55359   |
| PARPBP   | 0.089693 | 0.089693 | 0.34078 | 0.77137  | 0.45357 | 0.64761 | -5.9661 | 55010   |
| DOLK     | 0.4697   | 0.4697   | 2.9817  | 0.77134  | 0.45359 | 0.64761 | -5.9661 | 22845   |
| ATG101   | 1.5269   | 1.5269   | 8.3044  | 0.77122  | 0.45366 | 0.64763 | -5.9662 | 60673   |
| DBF4B    | -0.08978 | 0.089782 | 0.42361 | -0.77116 | 0.45369 | 0.64763 | -5.9662 | 80174   |
| RPS4Y1   | 10.638   | 10.638   | 57.58   | 0.77109  | 0.45373 | 0.64763 | -5.9663 | 6192    |
| ZNF449   | 0.15107  | 0.15107  | 0.77081 | 0.77097  | 0.4538  | 0.64763 | -5.9664 | 203523  |
| GLIS1    | 0.28633  | 0.28633  | 0.92456 | 0.77095  | 0.45381 | 0.64763 | -5.9664 | 148979  |
| SLC19A3  | 0.20666  | 0.20666  | 0.52141 | 0.77091  | 0.45384 | 0.64763 | -5.9664 | 80704   |
| DLX6-AS1 | -0.09523 | 0.095229 | 0.36406 | -0.77079 | 0.4539  | 0.64767 | -5.9665 | 285987  |
| WDR78    | -0.07413 | 0.074131 | 0.30655 | -0.77072 | 0.45394 | 0.64767 | -5.9666 | 79819   |
| EIF2A    | 0.95543  | 0.95543  | 7.7034  | 0.77057  | 0.45403 | 0.64774 | -5.9667 | 83939   |
| CILP2    | 0.73387  | 0.73387  | 0.68387 | 0.77014  | 0.45427 | 0.64804 | -5.967  | 148113  |
| MED1     | -0.41947 | 0.41947  | 4.425   | -0.77007 | 0.45431 | 0.64804 | -5.9671 | 5469    |
| IL36A    | -3.0656  | 3.0656   | 2.6418  | -0.7696  | 0.45459 | 0.64837 | -5.9674 | 27179   |
| RPL29    | 84.138   | 84.138   | 387.54  | 0.76932  | 0.45475 | 0.64855 | -5.9676 | 6159    |
| HSD17B4  | -1.2615  | 1.2615   | 12.328  | -0.76923 | 0.4548  | 0.64856 | -5.9677 | 3295    |
| DPP8     | -0.39725 | 0.39725  | 3.5525  | -0.76906 | 0.4549  | 0.6486  | -5.9678 | 54878   |
| METTL2A  | 0.26042  | 0.26042  | 2.6629  | 0.76905  | 0.4549  | 0.6486  | -5.9679 | 339175  |
| SERINC5  | 1.1152   | 1.1152   | 12.408  | 0.76882  | 0.45503 | 0.64866 | -5.968  | 256987  |
| PRRC2A   | -0.49565 | 0.49565  | 3.0785  | -0.76878 | 0.45505 | 0.64866 | -5.9681 | 7916    |
| EXOSC10  | -0.99026 | 0.99026  | 9.3792  | -0.76873 | 0.45508 | 0.64866 | -5.9681 | 5394    |
| MYC      | 2.5679   | 2.5679   | 14.63   | 0.76871  | 0.4551  | 0.64866 | -5.9681 | 4609    |
| DNAJB12  | -0.46019 | 0.46019  | 5.6925  | -0.76864 | 0.45513 | 0.64866 | -5.9682 | 54788   |

|              |          |          |         |          |         |         |         |          |
|--------------|----------|----------|---------|----------|---------|---------|---------|----------|
| NNT          | -0.57088 | 0.57088  | 4.1365  | -0.76856 | 0.45518 | 0.64867 | -5.9682 | 23530    |
| CD200R1      | -0.08185 | 0.081854 | 0.34661 | -0.76843 | 0.45525 | 0.6487  | -5.9683 | 131450   |
| ACBD5        | 0.2087   | 0.2087   | 2.4549  | 0.76839  | 0.45528 | 0.6487  | -5.9684 | 91452    |
| IMPA2        | 7.822    | 7.822    | 51.636  | 0.7682   | 0.45539 | 0.6488  | -5.9685 | 3613     |
| LINC01578    | -0.85459 | 0.85459  | 6.8297  | -0.76808 | 0.45546 | 0.64883 | -5.9686 | 1.01E+08 |
| RNF19A       | 0.94129  | 0.94129  | 6.9864  | 0.76803  | 0.45548 | 0.64883 | -5.9686 | 25897    |
| EXTL3        | 1.0432   | 1.0432   | 7.1792  | 0.76787  | 0.45558 | 0.64887 | -5.9688 | 2137     |
| GYPE         | -0.07443 | 0.074432 | 0.18171 | -0.76786 | 0.45559 | 0.64887 | -5.9688 | 2996     |
| RIDA         | 0.55175  | 0.55175  | 1.9601  | 0.76777  | 0.45563 | 0.64888 | -5.9688 | 10247    |
| PTPRJ        | -0.36499 | 0.36499  | 1.8673  | -0.76764 | 0.45571 | 0.64894 | -5.9689 | 5795     |
| INKA1        | -1.0347  | 1.0347   | 5.9342  | -0.76721 | 0.45596 | 0.64923 | -5.9693 | 389119   |
| LOC101927751 | 0.11509  | 0.11509  | 0.57036 | 0.76707  | 0.45604 | 0.64927 | -5.9694 | 1.02E+08 |
| C11orf80     | -0.55873 | 0.55873  | 4.3992  | -0.76703 | 0.45606 | 0.64927 | -5.9694 | 79703    |
| MARS2        | -0.18596 | 0.18596  | 1.4605  | -0.76694 | 0.45611 | 0.64929 | -5.9695 | 92935    |
| PSEN1        | 0.6014   | 0.6014   | 6.1952  | 0.76687  | 0.45616 | 0.64929 | -5.9695 | 5663     |
| HSPA1A       | -2.1091  | 2.1091   | 10.215  | -0.7667  | 0.45625 | 0.64938 | -5.9696 | 3303     |
| NFATC2IP     | -0.41555 | 0.41555  | 4.7702  | -0.76644 | 0.4564  | 0.64948 | -5.9698 | 84901    |
| HLA-DRB6     | 0.1976   | 0.1976   | 0.58097 | 0.76641  | 0.45642 | 0.64948 | -5.9699 | 3128     |
| GGA1         | 1.0397   | 1.0397   | 7.0316  | 0.76623  | 0.45652 | 0.64948 | -5.97   | 26088    |
| CSTF1        | 0.40765  | 0.40765  | 3.5077  | 0.7662   | 0.45654 | 0.64948 | -5.97   | 1477     |
| RABEP2       | -1.3802  | 1.3802   | 4.9073  | -0.76618 | 0.45655 | 0.64948 | -5.97   | 79874    |
| LOC101928389 | -0.08504 | 0.085038 | 0.25579 | -0.76617 | 0.45656 | 0.64948 | -5.97   | 1.02E+08 |
| ZZZ3         | -0.3854  | 0.3854   | 3.6732  | -0.76597 | 0.45667 | 0.64959 | -5.9702 | 26009    |
| C21orf91-OT1 | -0.07101 | 0.071007 | 0.12689 | -0.76551 | 0.45694 | 0.6499  | -5.9705 | 246312   |
| BACH1-IT3    | -0.09484 | 0.094836 | 0.37134 | -0.76546 | 0.45697 | 0.6499  | -5.9706 | 54147    |
| DDI1         | -0.08267 | 0.082666 | 0.16031 | -0.76509 | 0.45718 | 0.65015 | -5.9709 | 414301   |

|                |          |          |         |          |         |         |         |          |
|----------------|----------|----------|---------|----------|---------|---------|---------|----------|
| DDI2           | -0.64744 | 0.64744  | 6.4098  | -0.76494 | 0.45727 | 0.6502  | -5.971  | 84301    |
| KLHL25         | -0.45793 | 0.45793  | 2.2866  | -0.76485 | 0.45732 | 0.6502  | -5.971  | 64410    |
| CEACAM4        | 0.12007  | 0.12007  | 0.23083 | 0.76478  | 0.45736 | 0.6502  | -5.9711 | 1089     |
| CCDC136        | -0.07255 | 0.072552 | 0.19987 | -0.76475 | 0.45737 | 0.6502  | -5.9711 | 64753    |
| GYG1           | 1.2739   | 1.2739   | 5.7536  | 0.76445  | 0.45755 | 0.65038 | -5.9713 | 2992     |
| ARNTL2-AS1     | 0.11722  | 0.11722  | 0.25037 | 0.7644   | 0.45758 | 0.65038 | -5.9714 | 1.02E+08 |
| NAGLU          | -0.58884 | 0.58884  | 3.587   | -0.76424 | 0.45767 | 0.65046 | -5.9715 | 4669     |
| CSTF3          | -0.3817  | 0.3817   | 2.699   | -0.76405 | 0.45778 | 0.65056 | -5.9717 | 1479     |
| LZTS3          | -0.17198 | 0.17198  | 0.91136 | -0.76398 | 0.45782 | 0.65057 | -5.9717 | 9762     |
| GUCY2C         | -0.11079 | 0.11079  | 0.45941 | -0.76388 | 0.45788 | 0.65059 | -5.9718 | 2984     |
| ARHGAP19-SLIT1 | -0.08296 | 0.08296  | 0.16503 | -0.76381 | 0.45792 | 0.65059 | -5.9718 | 1.01E+08 |
| DYNC2LI1       | 0.18789  | 0.18789  | 1.3109  | 0.76373  | 0.45796 | 0.6506  | -5.9719 | 51626    |
| SNURF          | -0.45767 | 0.45767  | 2.5043  | -0.76365 | 0.45801 | 0.65062 | -5.972  | 8926     |
| NES            | -0.83305 | 0.83305  | 3.3914  | -0.76356 | 0.45806 | 0.65063 | -5.972  | 10763    |
| IFNGR1         | 3.8218   | 3.8218   | 17.82   | 0.76338  | 0.45816 | 0.65072 | -5.9722 | 3459     |
| NONO           | -3.1359  | 3.1359   | 26.677  | -0.76301 | 0.45838 | 0.65098 | -5.9724 | 4841     |
| BAMBI          | 0.27884  | 0.27884  | 1.2679  | 0.76277  | 0.45851 | 0.65111 | -5.9726 | 25805    |
| CLEC4D         | 0.089009 | 0.089009 | 0.15312 | 0.76255  | 0.45864 | 0.65124 | -5.9728 | 338339   |
| TM6SF1         | 0.1846   | 0.1846   | 0.79571 | 0.76209  | 0.45891 | 0.65156 | -5.9731 | 53346    |
| ANP32A         | -1.277   | 1.277    | 8.1392  | -0.76198 | 0.45897 | 0.6516  | -5.9732 | 8125     |
| TMA16          | -0.35095 | 0.35095  | 2.7943  | -0.76186 | 0.45904 | 0.65164 | -5.9733 | 55319    |
| RPS21          | 58.098   | 58.098   | 261.01  | 0.76179  | 0.45908 | 0.65165 | -5.9734 | 6227     |
| LHX2           | 0.095166 | 0.095166 | 0.24131 | 0.76154  | 0.45923 | 0.6518  | -5.9735 | 9355     |
| AP1M1          | 1.3285   | 1.3285   | 7.7919  | 0.7611   | 0.45948 | 0.6521  | -5.9739 | 8907     |
| ANAPC10        | 0.27393  | 0.27393  | 1.2835  | 0.76075  | 0.45968 | 0.65233 | -5.9741 | 10393    |
| NDUFS2         | -1.834   | 1.834    | 12.876  | -0.76043 | 0.45987 | 0.65255 | -5.9744 | 4720     |



|              |          |          |         |          |         |         |         |        |
|--------------|----------|----------|---------|----------|---------|---------|---------|--------|
| ZNF487       | -0.09281 | 0.092807 | 0.48835 | -0.76025 | 0.45997 | 0.65264 | -5.9745 | 642819 |
| LOC100128108 | -0.10443 | 0.10443  | 0.313   | -0.7598  | 0.46023 | 0.65295 | -5.9749 | 1E+08  |
| BET1L        | -1.1813  | 1.1813   | 8.6345  | -0.75961 | 0.46034 | 0.653   | -5.975  | 51272  |
| EPS15        | -0.84752 | 0.84752  | 8.7967  | -0.7595  | 0.4604  | 0.653   | -5.9751 | 2060   |
| UBFD1        | -0.46076 | 0.46076  | 3.5899  | -0.7595  | 0.46041 | 0.653   | -5.9751 | 56061  |
| ANKRD27      | 0.44139  | 0.44139  | 4.1061  | 0.75947  | 0.46042 | 0.653   | -5.9751 | 84079  |
| GGCT         | 4.0651   | 4.0651   | 13.636  | 0.7593   | 0.46052 | 0.65305 | -5.9752 | 79017  |
| USP14        | 0.68235  | 0.68235  | 6.2108  | 0.75928  | 0.46053 | 0.65305 | -5.9753 | 9097   |
| ANKRD19P     | -0.07258 | 0.072575 | 0.30437 | -0.75902 | 0.46069 | 0.65321 | -5.9755 | 138649 |
| GK5          | -0.27421 | 0.27421  | 2.5498  | -0.75893 | 0.46074 | 0.65323 | -5.9755 | 256356 |
| SGTA         | 1.5962   | 1.5962   | 9.1655  | 0.75866  | 0.46089 | 0.65331 | -5.9757 | 6449   |
| FADS2        | 1.3352   | 1.3352   | 3.8071  | 0.75864  | 0.4609  | 0.65331 | -5.9757 | 9415   |
| MTMR9LP      | -0.44855 | 0.44855  | 1.2949  | -0.7586  | 0.46092 | 0.65331 | -5.9758 | 339483 |
| VPS33B       | -0.242   | 0.242    | 2.5836  | -0.75856 | 0.46095 | 0.65331 | -5.9758 | 26276  |
| C1GALT1C1L   | -0.05818 | 0.058175 | 0.15065 | -0.7583  | 0.4611  | 0.65338 | -5.976  | 728819 |
| MEGF9        | 1.5161   | 1.5161   | 7.8329  | 0.7582   | 0.46116 | 0.65338 | -5.9761 | 1955   |
| TSTA3        | 3.3882   | 3.3882   | 23.486  | 0.75819  | 0.46117 | 0.65338 | -5.9761 | 7264   |
| GNGT2        | -0.07385 | 0.073849 | 0.22042 | -0.75816 | 0.46118 | 0.65338 | -5.9761 | 2793   |
| TIPIN        | 0.25439  | 0.25439  | 1.1308  | 0.75813  | 0.4612  | 0.65338 | -5.9761 | 54962  |
| CPSF3        | 0.56096  | 0.56096  | 3.8367  | 0.75786  | 0.46135 | 0.65355 | -5.9763 | 51692  |
| FOXM1        | 0.66362  | 0.66362  | 2.6006  | 0.75754  | 0.46154 | 0.65366 | -5.9766 | 2305   |
| CORT         | -0.05227 | 0.052267 | 0.13255 | -0.75754 | 0.46154 | 0.65366 | -5.9766 | 1325   |
| ZHX3         | -0.57248 | 0.57248  | 4.8389  | -0.75753 | 0.46155 | 0.65366 | -5.9766 | 23051  |
| CYP39A1      | -0.24995 | 0.24995  | 1.3857  | -0.75737 | 0.46164 | 0.65374 | -5.9767 | 51302  |
| FRG1         | 1.2768   | 1.2768   | 8.2236  | 0.75724  | 0.46172 | 0.65375 | -5.9768 | 2483   |
| PIGK         | 0.34198  | 0.34198  | 1.7847  | 0.75722  | 0.46173 | 0.65375 | -5.9768 | 10026  |

|           |          |          |         |          |         |         |         |        |
|-----------|----------|----------|---------|----------|---------|---------|---------|--------|
| TCTA      | -0.43713 | 0.43713  | 4.1291  | -0.75712 | 0.46179 | 0.65375 | -5.9769 | 6988   |
| SAT1      | 22.887   | 22.887   | 73.933  | 0.75706  | 0.46182 | 0.65375 | -5.9769 | 6303   |
| DNAJC3-DT | -0.06901 | 0.069005 | 0.29426 | -0.75702 | 0.46184 | 0.65375 | -5.977  | 1E+08  |
| C6orf226  | -0.63089 | 0.63089  | 3.3553  | -0.75694 | 0.46189 | 0.65376 | -5.977  | 441150 |
| CRBN      | -0.60819 | 0.60819  | 4.5162  | -0.75662 | 0.46208 | 0.65397 | -5.9773 | 51185  |
| GLMN      | 0.16583  | 0.16583  | 1.3443  | 0.75645  | 0.46217 | 0.65405 | -5.9774 | 11146  |
| CENPH     | -0.44018 | 0.44018  | 1.7618  | -0.75634 | 0.46224 | 0.65406 | -5.9775 | 64946  |
| TMEM161A  | -0.60669 | 0.60669  | 3.2802  | -0.7563  | 0.46226 | 0.65406 | -5.9775 | 54929  |
| CYB5B     | 0.85633  | 0.85633  | 5.246   | 0.75619  | 0.46232 | 0.6541  | -5.9776 | 80777  |
| DSC3      | 17.308   | 17.308   | 112.94  | 0.75582  | 0.46254 | 0.65429 | -5.9779 | 1825   |
| GTF2IRD1  | 0.82273  | 0.82273  | 6.1599  | 0.75578  | 0.46256 | 0.65429 | -5.9779 | 9569   |
| IL27RA    | -0.2001  | 0.2001   | 0.96356 | -0.75572 | 0.46259 | 0.65429 | -5.9779 | 9466   |
| MRPL55    | 0.93986  | 0.93986  | 5.4241  | 0.75567  | 0.46263 | 0.65429 | -5.978  | 128308 |
| RSBN1L    | -0.2083  | 0.2083   | 2.6862  | -0.75563 | 0.46265 | 0.65429 | -5.978  | 222194 |
| LUC7L     | -0.43404 | 0.43404  | 4.2314  | -0.75529 | 0.46285 | 0.65451 | -5.9782 | 55692  |
| NEDD9     | -0.57337 | 0.57337  | 2.5274  | -0.75484 | 0.46311 | 0.65483 | -5.9786 | 4739   |
| DOK3      | 0.32643  | 0.32643  | 1.284   | 0.7546   | 0.46325 | 0.65497 | -5.9788 | 79930  |
| BCAR1     | 1.0477   | 1.0477   | 5.2142  | 0.75421  | 0.46348 | 0.6552  | -5.9791 | 9564   |
| PDSS1     | 0.23658  | 0.23658  | 1.098   | 0.75418  | 0.46349 | 0.6552  | -5.9791 | 23590  |
| LOC728095 | -0.14865 | 0.14865  | 0.32038 | -0.75412 | 0.46353 | 0.6552  | -5.9791 | 728095 |
| HECTD3    | -0.84377 | 0.84377  | 6.8553  | -0.75382 | 0.4637  | 0.65537 | -5.9794 | 79654  |
| ZKSCAN2   | -0.08681 | 0.086808 | 0.58323 | -0.75372 | 0.46376 | 0.65537 | -5.9794 | 342357 |
| MON1A     | 0.36327  | 0.36327  | 2.0874  | 0.75366  | 0.46379 | 0.65537 | -5.9795 | 84315  |
| OMD       | -0.29283 | 0.29283  | 0.98716 | -0.75365 | 0.4638  | 0.65537 | -5.9795 | 4958   |
| HIP1R     | 2.3076   | 2.3076   | 10.549  | 0.75337  | 0.46396 | 0.65554 | -5.9797 | 9026   |
| MASTL     | -0.20355 | 0.20355  | 1.7277  | -0.7532  | 0.46406 | 0.65562 | -5.9798 | 84930  |

|         |          |          |         |          |         |         |         |          |
|---------|----------|----------|---------|----------|---------|---------|---------|----------|
| POMK    | -0.54973 | 0.54973  | 4.369   | -0.75306 | 0.46414 | 0.65569 | -5.9799 | 84197    |
| FAM86DP | -0.13925 | 0.13925  | 1.2421  | -0.75292 | 0.46422 | 0.65575 | -5.98   | 692099   |
| PCNP    | 0.96626  | 0.96626  | 7.8504  | 0.75263  | 0.46439 | 0.65593 | -5.9802 | 57092    |
| FAM86C1 | 0.25568  | 0.25568  | 1.5347  | 0.75242  | 0.46451 | 0.65604 | -5.9804 | 55199    |
| SPAG7   | 2.035    | 2.035    | 10.735  | 0.75236  | 0.46455 | 0.65604 | -5.9804 | 9552     |
| RNF181  | 3.4864   | 3.4864   | 15.648  | 0.75218  | 0.46465 | 0.65613 | -5.9806 | 51255    |
| FAT3    | -0.05612 | 0.056117 | 0.11482 | -0.75211 | 0.4647  | 0.65614 | -5.9806 | 120114   |
| ACADS   | -0.50433 | 0.50433  | 2.4155  | -0.75197 | 0.46477 | 0.6562  | -5.9807 | 35       |
| TUBGCP5 | -0.27044 | 0.27044  | 2.3491  | -0.75125 | 0.46519 | 0.65666 | -5.9813 | 114791   |
| ANK3    | 0.48026  | 0.48026  | 3.5829  | 0.75115  | 0.46525 | 0.65666 | -5.9813 | 288      |
| NT5E    | 1.1929   | 1.1929   | 3.7076  | 0.75111  | 0.46527 | 0.65666 | -5.9814 | 4907     |
| UC.134  | -0.05935 | 0.05935  | 0.15862 | -0.75111 | 0.46528 | 0.65666 | -5.9814 | 1.11E+08 |
| GCSAML  | -0.06688 | 0.066875 | 0.16302 | -0.75108 | 0.4653  | 0.65666 | -5.9814 | 148823   |
| MGAT4A  | -0.22794 | 0.22794  | 1.284   | -0.75092 | 0.46539 | 0.65673 | -5.9815 | 11320    |
| VAV1    | -0.2628  | 0.2628   | 1.0253  | -0.7508  | 0.46546 | 0.65678 | -5.9816 | 7409     |
| GDAP2   | -0.20141 | 0.20141  | 2.0203  | -0.7505  | 0.46563 | 0.65697 | -5.9818 | 54834    |
| CD4     | -1.2561  | 1.2561   | 4.9568  | -0.75034 | 0.46573 | 0.65701 | -5.9819 | 920      |
| HAP1    | 0.10721  | 0.10721  | 0.23602 | 0.75031  | 0.46574 | 0.65701 | -5.982  | 9001     |
| SNIP1   | 0.186    | 0.186    | 1.9829  | 0.74992  | 0.46597 | 0.65728 | -5.9823 | 79753    |
| RPS19   | -44.815  | 44.815   | 246.51  | -0.74981 | 0.46604 | 0.65732 | -5.9823 | 6223     |
| POLR2I  | 1.5592   | 1.5592   | 8.7747  | 0.74943  | 0.46626 | 0.65758 | -5.9826 | 5438     |
| AKAP11  | 0.43646  | 0.43646  | 4.8519  | 0.7493   | 0.46633 | 0.65762 | -5.9827 | 11215    |
| ADO     | 0.36164  | 0.36164  | 2.9041  | 0.74923  | 0.46637 | 0.65762 | -5.9828 | 84890    |
| BTBD11  | 1.0066   | 1.0066   | 4.7853  | 0.74899  | 0.46652 | 0.65773 | -5.983  | 121551   |
| FBXL18  | -0.27381 | 0.27381  | 2.077   | -0.74896 | 0.46653 | 0.65773 | -5.983  | 80028    |
| L1CAM   | 0.3056   | 0.3056   | 1.459   | 0.74889  | 0.46657 | 0.65773 | -5.983  | 3897     |

|              |          |          |          |          |         |         |         |          |
|--------------|----------|----------|----------|----------|---------|---------|---------|----------|
| GNL3L        | -0.39178 | 0.39178  | 4.4008   | -0.74884 | 0.4666  | 0.65773 | -5.9831 | 54552    |
| MAPK8        | 0.25375  | 0.25375  | 2.249    | 0.74863  | 0.46672 | 0.65785 | -5.9832 | 5599     |
| LINC01291    | 0.055436 | 0.055436 | 0.099463 | 0.74838  | 0.46687 | 0.65799 | -5.9834 | 1.03E+08 |
| MICALL1      | 5.6586   | 5.6586   | 25.419   | 0.74829  | 0.46692 | 0.65802 | -5.9835 | 85377    |
| MYBL1        | 0.061218 | 0.061218 | 0.21287  | 0.74821  | 0.46697 | 0.65802 | -5.9835 | 4603     |
| ZNF189       | -0.29157 | 0.29157  | 2.0362   | -0.74798 | 0.4671  | 0.65812 | -5.9837 | 7743     |
| URM1         | -0.62398 | 0.62398  | 3.7439   | -0.74796 | 0.46711 | 0.65812 | -5.9837 | 81605    |
| SMIM11B      | 0.22237  | 0.22237  | 1.4515   | 0.7477   | 0.46726 | 0.65828 | -5.9839 | 1.03E+08 |
| SNORA91      | 0.093563 | 0.093563 | 0.229    | 0.74755  | 0.46735 | 0.65835 | -5.984  | 1.07E+08 |
| LOC101928429 | -0.19038 | 0.19038  | 0.93986  | -0.74749 | 0.46739 | 0.65835 | -5.9841 | 1.02E+08 |
| RRN3P2       | -0.18717 | 0.18717  | 0.68261  | -0.7473  | 0.4675  | 0.65838 | -5.9842 | 653390   |
| WDR75        | 0.7165   | 0.7165   | 5.2298   | 0.74728  | 0.46751 | 0.65838 | -5.9842 | 84128    |
| PRKDC        | -1.8303  | 1.8303   | 14.028   | -0.7472  | 0.46756 | 0.65838 | -5.9843 | 5591     |
| PPTC7        | -0.59513 | 0.59513  | 4.1392   | -0.74716 | 0.46758 | 0.65838 | -5.9843 | 160760   |
| COQ10A       | -0.10442 | 0.10442  | 0.98089  | -0.74707 | 0.46763 | 0.65838 | -5.9844 | 93058    |
| RNF111       | 0.21034  | 0.21034  | 3.1687   | 0.74695  | 0.4677  | 0.65838 | -5.9845 | 54778    |
| MROH6        | 0.65821  | 0.65821  | 3.2706   | 0.74692  | 0.46772 | 0.65838 | -5.9845 | 642475   |
| LRRC70       | 0.14273  | 0.14273  | 0.61803  | 0.74692  | 0.46772 | 0.65838 | -5.9845 | 1E+08    |
| SLU7         | 0.65849  | 0.65849  | 4.7547   | 0.74665  | 0.46788 | 0.65854 | -5.9847 | 10569    |
| RPL37        | 17.854   | 17.854   | 82.615   | 0.74652  | 0.46796 | 0.65859 | -5.9848 | 6167     |
| CTDSPL2      | -0.46866 | 0.46866  | 3.0703   | -0.74644 | 0.468   | 0.6586  | -5.9848 | 51496    |
| USP10        | -0.82764 | 0.82764  | 7.5429   | -0.74607 | 0.46822 | 0.65882 | -5.9851 | 9100     |
| DKC1         | -0.77425 | 0.77425  | 4.8659   | -0.74593 | 0.4683  | 0.65882 | -5.9852 | 1736     |
| ZNF845       | 0.15446  | 0.15446  | 1.1329   | 0.74593  | 0.4683  | 0.65882 | -5.9852 | 91664    |
| SMC6         | 0.36839  | 0.36839  | 2.7197   | 0.7459   | 0.46831 | 0.65882 | -5.9852 | 79677    |
| SPTLC3       | 2.0698   | 2.0698   | 5.8149   | 0.74531  | 0.46866 | 0.6592  | -5.9857 | 55304    |

|          |          |          |         |          |         |         |         |        |
|----------|----------|----------|---------|----------|---------|---------|---------|--------|
| ABCB8    | -0.29466 | 0.29466  | 2.6101  | -0.74526 | 0.46869 | 0.6592  | -5.9857 | 11194  |
| PAWR     | 0.71978  | 0.71978  | 4.1228  | 0.74524  | 0.4687  | 0.6592  | -5.9857 | 5074   |
| EPB41    | -0.65858 | 0.65858  | 5.1421  | -0.7451  | 0.46878 | 0.65921 | -5.9858 | 2035   |
| UCHL1    | 0.8327   | 0.8327   | 1.616   | 0.7451   | 0.46878 | 0.65921 | -5.9858 | 7345   |
| GPR174   | -0.06233 | 0.062333 | 0.14454 | -0.74497 | 0.46886 | 0.65927 | -5.9859 | 84636  |
| BMS1P20  | -0.16854 | 0.16854  | 2.5472  | -0.74473 | 0.469   | 0.6594  | -5.9861 | 96610  |
| USP5     | -1.5004  | 1.5004   | 13.37   | -0.74463 | 0.46906 | 0.65942 | -5.9862 | 8078   |
| TMEM150A | -0.3693  | 0.3693   | 2.4342  | -0.74458 | 0.46909 | 0.65942 | -5.9862 | 129303 |
| NGEF     | -0.64765 | 0.64765  | 3.8046  | -0.74451 | 0.46913 | 0.65942 | -5.9863 | 25791  |
| SLC41A1  | 0.42106  | 0.42106  | 3.3144  | 0.74426  | 0.46928 | 0.65958 | -5.9865 | 254428 |
| PKN1     | -1.4002  | 1.4002   | 5.6744  | -0.74415 | 0.46934 | 0.65961 | -5.9865 | 5585   |
| CPNE3    | 1.3604   | 1.3604   | 10.829  | 0.74404  | 0.46941 | 0.65964 | -5.9866 | 8895   |
| PINLYP   | 0.15718  | 0.15718  | 1.0053  | 0.74398  | 0.46944 | 0.65964 | -5.9867 | 390940 |
| ZCCHC14  | -0.60008 | 0.60008  | 5.5299  | -0.74383 | 0.46953 | 0.6597  | -5.9868 | 23174  |
| PAM      | 1.4809   | 1.4809   | 10.798  | 0.74359  | 0.46967 | 0.65985 | -5.987  | 5066   |
| FLCN     | -0.52287 | 0.52287  | 3.5646  | -0.74345 | 0.46975 | 0.65991 | -5.9871 | 201163 |
| GDAP1    | 0.15782  | 0.15782  | 0.99679 | 0.74323  | 0.46988 | 0.66004 | -5.9872 | 54332  |
| NT5C     | 1.3812   | 1.3812   | 7.2396  | 0.74296  | 0.47004 | 0.66021 | -5.9874 | 30833  |
| TRIM47   | -1.8585  | 1.8585   | 9.7792  | -0.74279 | 0.47014 | 0.66024 | -5.9876 | 91107  |
| CDT1     | -0.53783 | 0.53783  | 1.9435  | -0.74278 | 0.47014 | 0.66024 | -5.9876 | 81620  |
| ZNF527   | -0.06974 | 0.069741 | 0.5     | -0.74254 | 0.47028 | 0.66038 | -5.9877 | 84503  |
| AMN1     | 0.10228  | 0.10228  | 0.76925 | 0.74242  | 0.47036 | 0.66043 | -5.9878 | 196394 |
| UFL1     | 0.52567  | 0.52567  | 4.8263  | 0.74213  | 0.47052 | 0.66061 | -5.988  | 23376  |
| SNORA25  | -0.3907  | 0.3907   | 0.68062 | -0.74201 | 0.4706  | 0.66066 | -5.9881 | 684959 |
| SNX33    | -1.0739  | 1.0739   | 9.9714  | -0.74175 | 0.47075 | 0.66081 | -5.9883 | 257364 |
| EPPK1    | 17.008   | 17.008   | 53.964  | 0.74158  | 0.47085 | 0.66086 | -5.9884 | 83481  |

|          |          |          |         |          |         |         |         |          |
|----------|----------|----------|---------|----------|---------|---------|---------|----------|
| SMIM20   | 0.81084  | 0.81084  | 3.3073  | 0.74156  | 0.47086 | 0.66086 | -5.9885 | 389203   |
| PCBD1    | -0.77401 | 0.77401  | 3.7561  | -0.7415  | 0.4709  | 0.66086 | -5.9885 | 5092     |
| GTF3C5   | -0.77496 | 0.77496  | 6.9632  | -0.74108 | 0.47114 | 0.66111 | -5.9888 | 9328     |
| MOB1B    | -0.24465 | 0.24465  | 1.9961  | -0.74105 | 0.47116 | 0.66111 | -5.9888 | 92597    |
| SDHA     | -1.3693  | 1.3693   | 8.7224  | -0.74099 | 0.47119 | 0.66111 | -5.9889 | 6389     |
| ZNF233   | -0.05822 | 0.058223 | 0.26848 | -0.7407  | 0.47137 | 0.66125 | -5.9891 | 353355   |
| ITK      | -0.12734 | 0.12734  | 0.44024 | -0.74064 | 0.4714  | 0.66125 | -5.9891 | 3702     |
| BACH2    | -0.14179 | 0.14179  | 0.73184 | -0.74062 | 0.47141 | 0.66125 | -5.9891 | 60468    |
| FAM110A  | -2.7408  | 2.7408   | 10.107  | -0.74047 | 0.4715  | 0.66128 | -5.9893 | 83541    |
| SH3PXD2A | 3.5626   | 3.5626   | 22.759  | 0.74045  | 0.47151 | 0.66128 | -5.9893 | 9644     |
| TIE1     | 1.2058   | 1.2058   | 4.5534  | 0.74004  | 0.47175 | 0.66156 | -5.9896 | 7075     |
| FZD3     | -0.07071 | 0.070705 | 0.44083 | -0.73997 | 0.4718  | 0.66157 | -5.9896 | 7976     |
| DNM3OS   | 0.34766  | 0.34766  | 1.0625  | 0.73981  | 0.47189 | 0.66164 | -5.9897 | 1.01E+08 |
| SNORA90  | 0.060648 | 0.060648 | 0.07656 | 0.73951  | 0.47206 | 0.66183 | -5.99   | 1.07E+08 |
| IQCK     | -0.17892 | 0.17892  | 1.2993  | -0.73937 | 0.47215 | 0.6619  | -5.9901 | 124152   |
| GAS7     | -1.5939  | 1.5939   | 9.5603  | -0.73861 | 0.47259 | 0.66244 | -5.9906 | 8522     |
| EHBP1    | -0.6089  | 0.6089   | 4.2763  | -0.73858 | 0.47261 | 0.66244 | -5.9906 | 23301    |
| SMC3     | 0.92993  | 0.92993  | 5.5819  | 0.73831  | 0.47277 | 0.6626  | -5.9908 | 9126     |
| TNNI2    | -0.79557 | 0.79557  | 1.6216  | -0.73788 | 0.47302 | 0.66291 | -5.9912 | 7136     |
| CITED4   | 6.9009   | 6.9009   | 30.347  | 0.73754  | 0.47322 | 0.66313 | -5.9914 | 163732   |
| RILPL2   | -0.43542 | 0.43542  | 2.1589  | -0.73707 | 0.4735  | 0.66345 | -5.9918 | 196383   |
| EFNA1    | -1.5683  | 1.5683   | 12.642  | -0.737   | 0.47354 | 0.66345 | -5.9918 | 1942     |
| APH1B    | -0.19699 | 0.19699  | 1.2438  | -0.73696 | 0.47356 | 0.66345 | -5.9918 | 83464    |
| CD74     | -36.528  | 36.528   | 159.88  | -0.73657 | 0.47379 | 0.66371 | -5.9921 | 972      |
| LAMP3    | -0.52063 | 0.52063  | 1.4625  | -0.73643 | 0.47387 | 0.66375 | -5.9922 | 27074    |
| ST3GAL4  | -0.4886  | 0.4886   | 2.2446  | -0.73639 | 0.4739  | 0.66375 | -5.9922 | 6484     |

|              |          |          |         |          |         |         |         |          |
|--------------|----------|----------|---------|----------|---------|---------|---------|----------|
| ZNF688       | -0.5631  | 0.5631   | 2.4528  | -0.73623 | 0.47399 | 0.66379 | -5.9924 | 146542   |
| ZNF124       | -0.16174 | 0.16174  | 1.2471  | -0.7362  | 0.47401 | 0.66379 | -5.9924 | 7678     |
| TACC3        | 0.71165  | 0.71165  | 2.7946  | 0.73612  | 0.47406 | 0.66381 | -5.9925 | 10460    |
| RPS15AP10    | -0.25322 | 0.25322  | 1.1966  | -0.73591 | 0.47418 | 0.66393 | -5.9926 | 728963   |
| PKMYT1       | 0.46587  | 0.46587  | 1.5377  | 0.73577  | 0.47426 | 0.66399 | -5.9927 | 9088     |
| LOC101929162 | -0.09682 | 0.096824 | 0.49917 | -0.7354  | 0.47448 | 0.66423 | -5.993  | 1.02E+08 |
| NME3         | -1.3363  | 1.3363   | 6.8309  | -0.73513 | 0.47464 | 0.66441 | -5.9932 | 4832     |
| SMAP2        | 2.109    | 2.109    | 10.327  | 0.73485  | 0.47481 | 0.66458 | -5.9934 | 64744    |
| PDCD11       | -0.7615  | 0.7615   | 6.3542  | -0.7347  | 0.47489 | 0.66465 | -5.9935 | 22984    |
| GOPC         | 0.36469  | 0.36469  | 3.8946  | 0.73373  | 0.47547 | 0.66539 | -5.9942 | 57120    |
| SNN          | 1.4124   | 1.4124   | 7.6327  | 0.73327  | 0.47574 | 0.66563 | -5.9945 | 8303     |
| AP3M1        | 0.429    | 0.429    | 3.7132  | 0.7332   | 0.47578 | 0.66563 | -5.9946 | 26985    |
| ELP6         | 0.55128  | 0.55128  | 2.8975  | 0.7332   | 0.47578 | 0.66563 | -5.9946 | 54859    |
| DFFA         | 0.43031  | 0.43031  | 3.6372  | 0.73317  | 0.4758  | 0.66563 | -5.9946 | 1676     |
| CENPM        | 0.32639  | 0.32639  | 1.0104  | 0.73293  | 0.47594 | 0.66576 | -5.9948 | 79019    |
| CCDC28A      | -0.40987 | 0.40987  | 2.0415  | -0.73288 | 0.47597 | 0.66576 | -5.9948 | 25901    |
| CEP170B      | -2.4904  | 2.4904   | 15.904  | -0.73264 | 0.47611 | 0.66591 | -5.995  | 283638   |
| BCRP2        | -0.06796 | 0.067961 | 0.37236 | -0.73237 | 0.47627 | 0.66607 | -5.9952 | 400892   |
| IGFL3        | 2.2228   | 2.2228   | 4.1344  | 0.73222  | 0.47636 | 0.66615 | -5.9953 | 388555   |
| PRAG1        | 1.1376   | 1.1376   | 5.4906  | 0.732    | 0.47649 | 0.66627 | -5.9955 | 157285   |
| TTC17        | -0.44208 | 0.44208  | 6.4074  | -0.73167 | 0.47668 | 0.66649 | -5.9957 | 55761    |
| DFFB         | -0.07328 | 0.073284 | 0.4228  | -0.73123 | 0.47694 | 0.6668  | -5.996  | 1677     |
| ZGPAT        | -0.86649 | 0.86649  | 4.5881  | -0.73114 | 0.477   | 0.66682 | -5.9961 | 84619    |
| GBGT1        | 0.24856  | 0.24856  | 1.2301  | 0.73083  | 0.47718 | 0.66702 | -5.9963 | 26301    |
| LRRC32       | -2.4657  | 2.4657   | 6.9747  | -0.73053 | 0.47736 | 0.66721 | -5.9965 | 2615     |
| ALOX15P1     | -0.06761 | 0.067612 | 0.15395 | -0.73036 | 0.47746 | 0.66729 | -5.9966 | 1.01E+08 |

|                 |          |          |          |          |         |         |         |          |
|-----------------|----------|----------|----------|----------|---------|---------|---------|----------|
| PACS1           | -2.1643  | 2.1643   | 12.585   | -0.7303  | 0.47749 | 0.66729 | -5.9967 | 55690    |
| DNM1            | -0.98159 | 0.98159  | 3.3776   | -0.72984 | 0.47776 | 0.66759 | -5.997  | 1759     |
| PAK2            | 1.4657   | 1.4657   | 8.8635   | 0.72971  | 0.47784 | 0.66759 | -5.9971 | 5062     |
| TSPAN10         | 0.23872  | 0.23872  | 0.71966  | 0.72969  | 0.47785 | 0.66759 | -5.9971 | 83882    |
| C6orf89         | -0.67801 | 0.67801  | 6.9942   | -0.72966 | 0.47787 | 0.66759 | -5.9972 | 221477   |
| GAA             | -1.2851  | 1.2851   | 6.7107   | -0.72947 | 0.47799 | 0.6677  | -5.9973 | 2548     |
| NGLY1           | 0.3621   | 0.3621   | 3.1106   | 0.72937  | 0.47804 | 0.66773 | -5.9974 | 55768    |
| TMX4            | -0.61621 | 0.61621  | 4.1108   | -0.72918 | 0.47816 | 0.66783 | -5.9975 | 56255    |
| PITPNA          | 2.0358   | 2.0358   | 20.36    | 0.729    | 0.47826 | 0.66792 | -5.9976 | 5306     |
| CLYBL-AS2       | -0.05846 | 0.05846  | 0.10596  | -0.72871 | 0.47844 | 0.66811 | -5.9978 | 1.01E+08 |
| ADD1            | -1.9241  | 1.9241   | 18.064   | -0.72837 | 0.47863 | 0.66833 | -5.9981 | 118      |
| AMOTL2          | 1.034    | 1.034    | 8.2159   | 0.72829  | 0.47868 | 0.66834 | -5.9982 | 51421    |
| HOXB-AS3        | -0.0564  | 0.056396 | 0.095892 | -0.72813 | 0.47878 | 0.66842 | -5.9983 | 404266   |
| ARAP3           | 0.45713  | 0.45713  | 2.0796   | 0.72793  | 0.47889 | 0.66853 | -5.9984 | 64411    |
| CLDN23          | -0.35162 | 0.35162  | 1.4906   | -0.72787 | 0.47893 | 0.66853 | -5.9985 | 137075   |
| TAF1A           | -0.07903 | 0.079026 | 0.5019   | -0.72768 | 0.47904 | 0.66862 | -5.9986 | 9015     |
| RPS3            | -18.863  | 18.863   | 144.02   | -0.72761 | 0.47909 | 0.66863 | -5.9986 | 6188     |
| JAKMIP3         | -0.05261 | 0.052609 | 0.11545  | -0.72752 | 0.47914 | 0.66865 | -5.9987 | 282973   |
| PNMA1           | 0.86154  | 0.86154  | 5.4372   | 0.72733  | 0.47925 | 0.66872 | -5.9988 | 9240     |
| EBI3            | -0.10974 | 0.10974  | 0.24329  | -0.7273  | 0.47927 | 0.66872 | -5.9989 | 10148    |
| TARDBP          | -1.0299  | 1.0299   | 12.391   | -0.727   | 0.47945 | 0.66891 | -5.9991 | 23435    |
| NOC2L           | -1.959   | 1.959    | 11.5     | -0.72661 | 0.47968 | 0.66918 | -5.9994 | 26155    |
| ENTPD4          | -0.36998 | 0.36998  | 4.1694   | -0.72623 | 0.4799  | 0.66941 | -5.9996 | 9583     |
| ATP1B2          | -0.29593 | 0.29593  | 0.79229  | -0.72619 | 0.47993 | 0.66941 | -5.9997 | 482      |
| CRELD2          | 1.1008   | 1.1008   | 6.0927   | 0.72609  | 0.47999 | 0.66941 | -5.9997 | 79174    |
| LIMS3-LOC440895 | -0.05875 | 0.058748 | 0.15292  | -0.72607 | 0.48    | 0.66941 | -5.9998 | 1E+08    |



|           |          |          |         |          |         |         |         |          |
|-----------|----------|----------|---------|----------|---------|---------|---------|----------|
| LINC00310 | -0.05229 | 0.052291 | 0.17259 | -0.72575 | 0.48019 | 0.66962 | -6      | 114036   |
| ZNF296    | -0.42627 | 0.42627  | 1.8096  | -0.72567 | 0.48024 | 0.66963 | -6      | 162979   |
| AOC3      | -1.6109  | 1.6109   | 5.0819  | -0.7256  | 0.48028 | 0.66963 | -6.0001 | 8639     |
| FAM178B   | 0.082503 | 0.082503 | 0.1939  | 0.72514  | 0.48055 | 0.66996 | -6.0004 | 51252    |
| SNRPD1    | 1.2399   | 1.2399   | 5.9667  | 0.72503  | 0.48062 | 0.66999 | -6.0005 | 6632     |
| TBX2      | 0.96192  | 0.96192  | 3.0139  | 0.72485  | 0.48073 | 0.67009 | -6.0006 | 6909     |
| EBF1      | -0.73122 | 0.73122  | 2.9499  | -0.7247  | 0.48081 | 0.67011 | -6.0007 | 1879     |
| MBD3      | -2.5587  | 2.5587   | 11.96   | -0.72468 | 0.48083 | 0.67011 | -6.0008 | 53615    |
| MCRS1     | 1.0817   | 1.0817   | 8.094   | 0.72463  | 0.48086 | 0.67011 | -6.0008 | 10445    |
| IL4R      | 4.5185   | 4.5185   | 15.555  | 0.72424  | 0.48109 | 0.67037 | -6.0011 | 3566     |
| VPS41     | -0.29033 | 0.29033  | 4.7021  | -0.72404 | 0.48121 | 0.67048 | -6.0012 | 27072    |
| TFE3      | 1.4116   | 1.4116   | 9.5072  | 0.72384  | 0.48133 | 0.67055 | -6.0014 | 7030     |
| SRP68     | 1.3525   | 1.3525   | 11.384  | 0.72379  | 0.48136 | 0.67055 | -6.0014 | 6730     |
| KIF5C     | -0.08684 | 0.08684  | 0.22212 | -0.72376 | 0.48138 | 0.67055 | -6.0014 | 3800     |
| SNORA81   | -0.33975 | 0.33975  | 1.5352  | -0.72361 | 0.48146 | 0.67062 | -6.0015 | 677847   |
| LGALS9    | -2.3505  | 2.3505   | 5.3925  | -0.72353 | 0.48151 | 0.67063 | -6.0016 | 3965     |
| TANGO2    | -0.19364 | 0.19364  | 1.8975  | -0.72326 | 0.48167 | 0.6708  | -6.0018 | 128989   |
| LINC00565 | 0.068644 | 0.068644 | 0.15628 | 0.72316  | 0.48173 | 0.67081 | -6.0019 | 1.01E+08 |
| GAS2L3    | 0.10739  | 0.10739  | 0.60672 | 0.723    | 0.48182 | 0.67081 | -6.002  | 283431   |
| KLHL28    | 0.17178  | 0.17178  | 1.561   | 0.72296  | 0.48185 | 0.67081 | -6.002  | 54813    |
| CLVS1     | 0.12523  | 0.12523  | 0.27973 | 0.72293  | 0.48187 | 0.67081 | -6.002  | 157807   |
| TMEM222   | 1.1334   | 1.1334   | 7.1227  | 0.72285  | 0.48192 | 0.67081 | -6.0021 | 84065    |
| SLC16A4   | -0.12896 | 0.12896  | 0.62187 | -0.72277 | 0.48196 | 0.67081 | -6.0021 | 9122     |
| HECW2     | -0.13938 | 0.13938  | 1.69    | -0.72267 | 0.48202 | 0.67081 | -6.0022 | 57520    |
| SCARNA7   | -51.936  | 51.936   | 208.18  | -0.72264 | 0.48204 | 0.67081 | -6.0022 | 677767   |
| XCR1      | -0.09446 | 0.09446  | 0.32309 | -0.72263 | 0.48205 | 0.67081 | -6.0022 | 2829     |

|              |          |          |         |          |         |         |         |          |
|--------------|----------|----------|---------|----------|---------|---------|---------|----------|
| LOC101927954 | 0.093064 | 0.093064 | 0.36618 | 0.72257  | 0.48208 | 0.67081 | -6.0023 | 1.02E+08 |
| LOC101927839 | -0.13631 | 0.13631  | 0.51111 | -0.72226 | 0.48226 | 0.67099 | -6.0025 | 1.02E+08 |
| NME4         | 1.6276   | 1.6276   | 5.4236  | 0.72223  | 0.48228 | 0.67099 | -6.0025 | 4833     |
| TCAF2        | 0.4879   | 0.4879   | 3.2552  | 0.72175  | 0.48257 | 0.67132 | -6.0029 | 285966   |
| SREBF2       | -2.7098  | 2.7098   | 20.499  | -0.72157 | 0.48267 | 0.67136 | -6.003  | 6721     |
| CCDC77       | 0.11722  | 0.11722  | 1.2367  | 0.72157  | 0.48268 | 0.67136 | -6.003  | 84318    |
| CAMTA2       | -0.69768 | 0.69768  | 6.4642  | -0.72151 | 0.48271 | 0.67136 | -6.003  | 23125    |
| CARS-AS1     | -0.0724  | 0.072395 | 0.26178 | -0.72141 | 0.48277 | 0.67138 | -6.0031 | 1.01E+08 |
| RAB11B       | -2.4139  | 2.4139   | 20.095  | -0.72118 | 0.48291 | 0.67153 | -6.0033 | 9230     |
| MFSD14A      | 0.87243  | 0.87243  | 7.9222  | 0.72096  | 0.48304 | 0.67155 | -6.0034 | 64645    |
| NMI          | 1.042    | 1.042    | 4.1692  | 0.7209   | 0.48308 | 0.67155 | -6.0035 | 9111     |
| FAM149B1     | 0.17269  | 0.17269  | 1.9946  | 0.72086  | 0.4831  | 0.67155 | -6.0035 | 317662   |
| ASAP1-IT2    | -0.13417 | 0.13417  | 0.54029 | -0.72082 | 0.48312 | 0.67155 | -6.0035 | 1.01E+08 |
| RPRD1B       | -0.29207 | 0.29207  | 4.4757  | -0.72081 | 0.48313 | 0.67155 | -6.0035 | 58490    |
| SLBP         | 0.89085  | 0.89085  | 6.9279  | 0.72032  | 0.48342 | 0.67179 | -6.0039 | 7884     |
| MLIP-IT1     | 0.15047  | 0.15047  | 0.63499 | 0.7203   | 0.48343 | 0.67179 | -6.0039 | 1.01E+08 |
| ZNF879       | -0.07238 | 0.07238  | 0.51302 | -0.72026 | 0.48346 | 0.67179 | -6.0039 | 345462   |
| PIC SAR      | -0.18787 | 0.18787  | 0.74605 | -0.72025 | 0.48346 | 0.67179 | -6.0039 | 378825   |
| MUS81        | 0.49684  | 0.49684  | 3.7931  | 0.71996  | 0.48363 | 0.67194 | -6.0042 | 80198    |
| FBXW9        | -0.37207 | 0.37207  | 2.4203  | -0.71995 | 0.48364 | 0.67194 | -6.0042 | 84261    |
| CNIH3        | 0.077175 | 0.077175 | 0.31644 | 0.71978  | 0.48374 | 0.67197 | -6.0043 | 149111   |
| LOC101928557 | 0.094313 | 0.094313 | 0.14576 | 0.71977  | 0.48375 | 0.67197 | -6.0043 | 1.02E+08 |
| TTC30B       | -0.1289  | 0.1289   | 0.87655 | -0.71969 | 0.4838  | 0.67199 | -6.0044 | 150737   |
| FAM110B      | 0.40699  | 0.40699  | 1.1051  | 0.7194   | 0.48397 | 0.67217 | -6.0046 | 90362    |
| TARP         | -0.08784 | 0.087838 | 0.26388 | -0.71931 | 0.48402 | 0.67219 | -6.0046 | 445347   |
| RNF114       | -0.92582 | 0.92582  | 7.0124  | -0.71918 | 0.4841  | 0.67224 | -6.0047 | 55905    |

|                 |          |          |         |          |         |         |         |          |
|-----------------|----------|----------|---------|----------|---------|---------|---------|----------|
| TSPYL4          | -0.30017 | 0.30017  | 3.1352  | -0.71893 | 0.48425 | 0.67233 | -6.0049 | 23270    |
| TNFSF12-TNFSF13 | 0.22519  | 0.22519  | 0.54892 | 0.71889  | 0.48427 | 0.67233 | -6.0049 | 407977   |
| GCC2            | 0.27226  | 0.27226  | 2.0702  | 0.71887  | 0.48429 | 0.67233 | -6.0049 | 9648     |
| SMC5            | -0.37699 | 0.37699  | 3.4842  | -0.71875 | 0.48436 | 0.67236 | -6.005  | 23137    |
| ADAP1           | 0.22317  | 0.22317  | 0.92817 | 0.71867  | 0.48441 | 0.67236 | -6.0051 | 11033    |
| USP9Y           | -0.35662 | 0.35662  | 2.1051  | -0.71864 | 0.48443 | 0.67236 | -6.0051 | 8287     |
| S1PR2           | -0.45861 | 0.45861  | 2.5663  | -0.71805 | 0.48478 | 0.67279 | -6.0055 | 9294     |
| HNMT            | 0.44672  | 0.44672  | 1.3905  | 0.71785  | 0.4849  | 0.6729  | -6.0057 | 3176     |
| UBE2Z           | 1.9648   | 1.9648   | 16.327  | 0.71776  | 0.48495 | 0.67292 | -6.0057 | 65264    |
| MTERF1          | -0.16768 | 0.16768  | 1.3404  | -0.71762 | 0.48503 | 0.67294 | -6.0058 | 7978     |
| KIF18B          | 0.2396   | 0.2396   | 0.96276 | 0.71758  | 0.48505 | 0.67294 | -6.0059 | 146909   |
| DAPK1-IT1       | -0.05633 | 0.056331 | 0.11573 | -0.71753 | 0.48508 | 0.67294 | -6.0059 | 1.01E+08 |
| F2RL3           | 0.15193  | 0.15193  | 0.59584 | 0.71739  | 0.48517 | 0.67298 | -6.006  | 9002     |
| OLFM2           | -2.0118  | 2.0118   | 15.321  | -0.71731 | 0.48522 | 0.67298 | -6.0061 | 93145    |
| TTC30A          | 0.082721 | 0.082721 | 0.72417 | 0.71722  | 0.48527 | 0.67298 | -6.0061 | 92104    |
| ISOC2           | 1.7193   | 1.7193   | 8.4443  | 0.71722  | 0.48527 | 0.67298 | -6.0061 | 79763    |
| MRPS14          | -0.39014 | 0.39014  | 2.6549  | -0.7171  | 0.48534 | 0.67302 | -6.0062 | 63931    |
| WWP1            | -0.97968 | 0.97968  | 8.8897  | -0.71703 | 0.48538 | 0.67302 | -6.0063 | 11059    |
| SIRPA           | 2.9388   | 2.9388   | 14.865  | 0.71683  | 0.4855  | 0.67311 | -6.0064 | 140885   |
| MLXIP           | -1.0349  | 1.0349   | 6.7667  | -0.7168  | 0.48552 | 0.67311 | -6.0064 | 22877    |
| VNN3            | 0.23666  | 0.23666  | 0.52519 | 0.71634  | 0.4858  | 0.67343 | -6.0067 | 55350    |
| WBP1L           | 2.6023   | 2.6023   | 14.455  | 0.71625  | 0.48585 | 0.67344 | -6.0068 | 54838    |
| MYO1F           | 0.5788   | 0.5788   | 2.2085  | 0.71614  | 0.48591 | 0.67344 | -6.0069 | 4542     |
| B4GALT3         | 0.5824   | 0.5824   | 5.1171  | 0.71613  | 0.48592 | 0.67344 | -6.0069 | 8703     |
| MAPK9           | -0.22489 | 0.22489  | 2.029   | -0.71593 | 0.48604 | 0.67355 | -6.007  | 5601     |
| GZMA            | 0.17013  | 0.17013  | 0.64349 | 0.71568  | 0.48619 | 0.6736  | -6.0072 | 3001     |

|               |          |          |         |          |         |         |         |          |
|---------------|----------|----------|---------|----------|---------|---------|---------|----------|
| TAF10         | 3.1136   | 3.1136   | 17.318  | 0.71567  | 0.4862  | 0.6736  | -6.0072 | 6881     |
| NFYC          | -0.56435 | 0.56435  | 5.4148  | -0.71559 | 0.48625 | 0.6736  | -6.0073 | 4802     |
| KCNJ8         | 0.65857  | 0.65857  | 1.9278  | 0.71548  | 0.48631 | 0.6736  | -6.0074 | 3764     |
| ASPG          | 0.23639  | 0.23639  | 1.2309  | 0.71547  | 0.48632 | 0.6736  | -6.0074 | 374569   |
| TNFSF13B      | 0.2797   | 0.2797   | 0.81499 | 0.71546  | 0.48632 | 0.6736  | -6.0074 | 10673    |
| IL33          | -1.5442  | 1.5442   | 5.7025  | -0.71526 | 0.48645 | 0.67367 | -6.0075 | 90865    |
| BCL2L2-PABPN1 | 0.70545  | 0.70545  | 2.3166  | 0.71525  | 0.48645 | 0.67367 | -6.0075 | 1.01E+08 |
| P2RY6         | 0.21777  | 0.21777  | 0.65124 | 0.71519  | 0.48649 | 0.67367 | -6.0076 | 5031     |
| CDADC1        | -0.07422 | 0.074224 | 0.59602 | -0.71502 | 0.48659 | 0.67373 | -6.0077 | 81602    |
| ETAA1         | 0.17545  | 0.17545  | 1.6758  | 0.71499  | 0.48661 | 0.67373 | -6.0077 | 54465    |
| PRMT9         | -0.13003 | 0.13003  | 1.3095  | -0.7148  | 0.48672 | 0.67383 | -6.0078 | 90826    |
| LOC100507002  | -0.09021 | 0.090206 | 0.30139 | -0.71389 | 0.48726 | 0.67452 | -6.0085 | 1.01E+08 |
| DOCK10        | 0.31845  | 0.31845  | 1.7925  | 0.71367  | 0.4874  | 0.67465 | -6.0086 | 55619    |
| TULP3         | 0.44494  | 0.44494  | 4.2578  | 0.71352  | 0.48748 | 0.67471 | -6.0088 | 7289     |
| OSGIN1        | 0.21731  | 0.21731  | 0.77996 | 0.71344  | 0.48753 | 0.67471 | -6.0088 | 29948    |
| B3GALT2       | -0.08741 | 0.087406 | 0.4957  | -0.7134  | 0.48756 | 0.67471 | -6.0088 | 8707     |
| UHMK1         | 0.7542   | 0.7542   | 5.4197  | 0.7132   | 0.48768 | 0.67479 | -6.009  | 127933   |
| EDN2          | -0.20866 | 0.20866  | 0.60285 | -0.71317 | 0.4877  | 0.67479 | -6.009  | 1907     |
| SAMM50        | -0.98859 | 0.98859  | 8.6     | -0.71297 | 0.48781 | 0.67489 | -6.0091 | 25813    |
| PPP2R1A       | 4.5759   | 4.5759   | 30.703  | 0.71282  | 0.48791 | 0.67497 | -6.0093 | 5518     |
| DUS4L         | -0.10326 | 0.10326  | 0.77839 | -0.71257 | 0.48806 | 0.67511 | -6.0094 | 11062    |
| TFAP2C        | -1.9577  | 1.9577   | 18.347  | -0.71251 | 0.48809 | 0.67511 | -6.0095 | 7022     |
| CIT           | -0.2082  | 0.2082   | 1.1096  | -0.71237 | 0.48817 | 0.67514 | -6.0096 | 11113    |
| TMEM190       | -0.06    | 0.060001 | 0.18459 | -0.71234 | 0.48819 | 0.67514 | -6.0096 | 147744   |
| PPCS          | 0.50963  | 0.50963  | 4.7379  | 0.71195  | 0.48843 | 0.67541 | -6.0099 | 79717    |
| UBAC1         | -0.94971 | 0.94971  | 10.048  | -0.71167 | 0.4886  | 0.67559 | -6.0101 | 10422    |

|              |          |         |         |          |         |         |         |          |
|--------------|----------|---------|---------|----------|---------|---------|---------|----------|
| BCLAF1       | -0.9113  | 0.9113  | 9.1409  | -0.71102 | 0.48898 | 0.67606 | -6.0105 | 9774     |
| NCOA5        | -0.59909 | 0.59909 | 5.2655  | -0.7109  | 0.48905 | 0.67606 | -6.0106 | 57727    |
| ATG5         | 0.40643  | 0.40643 | 2.696   | 0.7109   | 0.48906 | 0.67606 | -6.0106 | 9474     |
| CMTM1        | -0.14146 | 0.14146 | 0.59324 | -0.71068 | 0.48919 | 0.67619 | -6.0108 | 113540   |
| AGRN         | -2.8071  | 2.8071  | 11.52   | -0.70993 | 0.48964 | 0.67676 | -6.0113 | 375790   |
| PSMB4        | 8.3012   | 8.3012  | 46.858  | 0.7098   | 0.48972 | 0.67681 | -6.0114 | 5692     |
| LOC101930071 | 0.76682  | 0.76682 | 2.1126  | 0.70954  | 0.48987 | 0.67697 | -6.0116 | 1.02E+08 |
| AIMP2        | 0.6132   | 0.6132  | 3.6239  | 0.70943  | 0.48994 | 0.677   | -6.0117 | 7965     |
| SPOCK2       | -0.20116 | 0.20116 | 0.79879 | -0.70936 | 0.48998 | 0.67701 | -6.0117 | 9806     |
| CARMN        | -1.0656  | 1.0656  | 3.3586  | -0.7092  | 0.49008 | 0.67701 | -6.0118 | 728264   |
| DBN1         | -1.4773  | 1.4773  | 7.6818  | -0.70917 | 0.4901  | 0.67701 | -6.0118 | 1627     |
| ARHGAP42     | 0.25452  | 0.25452 | 1.4404  | 0.70916  | 0.4901  | 0.67701 | -6.0118 | 143872   |
| SRFBP1       | 0.28652  | 0.28652 | 2.2647  | 0.70897  | 0.49022 | 0.67711 | -6.012  | 153443   |
| HGS          | 2.4596   | 2.4596  | 17.205  | 0.70886  | 0.49028 | 0.67713 | -6.0121 | 9146     |
| ADORA3       | -0.11579 | 0.11579 | 0.29084 | -0.70881 | 0.49031 | 0.67713 | -6.0121 | 140      |
| RALGPS2      | 0.57412  | 0.57412 | 3.9198  | 0.70867  | 0.4904  | 0.67719 | -6.0122 | 55103    |
| ZSCAN30      | -0.13604 | 0.13604 | 1.2547  | -0.7084  | 0.49056 | 0.67733 | -6.0124 | 1E+08    |
| MANBAL       | 1.5195   | 1.5195  | 11.053  | 0.70838  | 0.49057 | 0.67733 | -6.0124 | 63905    |
| DNAAF5       | -0.53611 | 0.53611 | 3.671   | -0.708   | 0.4908  | 0.67753 | -6.0127 | 54919    |
| VTI1B        | 1.5478   | 1.5478  | 12.604  | 0.7079   | 0.49086 | 0.67753 | -6.0127 | 10490    |
| CXCR4        | 0.76189  | 0.76189 | 2.573   | 0.70788  | 0.49087 | 0.67753 | -6.0128 | 7852     |
| DDX23        | -1.3743  | 1.3743  | 9.7757  | -0.70787 | 0.49088 | 0.67753 | -6.0128 | 9416     |
| NAE1         | 0.83335  | 0.83335 | 5.6529  | 0.70776  | 0.49094 | 0.67756 | -6.0128 | 8883     |
| MIR100HG     | 0.21349  | 0.21349 | 0.73114 | 0.70758  | 0.49105 | 0.6776  | -6.013  | 399959   |
| TFAP2E       | -0.21286 | 0.21286 | 1.3975  | -0.70758 | 0.49105 | 0.6776  | -6.013  | 339488   |
| TSC2         | -0.89083 | 0.89083 | 7.6679  | -0.7075  | 0.4911  | 0.67762 | -6.013  | 7249     |

|              |          |          |         |          |         |         |         |          |
|--------------|----------|----------|---------|----------|---------|---------|---------|----------|
| PDGFB        | 0.69902  | 0.69902  | 3.6694  | 0.70742  | 0.49115 | 0.67762 | -6.0131 | 5155     |
| NPHP1        | -0.06757 | 0.067569 | 0.28468 | -0.70706 | 0.49137 | 0.67782 | -6.0133 | 4867     |
| DISP2        | 0.062005 | 0.062005 | 0.12525 | 0.70697  | 0.49142 | 0.67782 | -6.0134 | 85455    |
| MYO9B        | 1.2278   | 1.2278   | 7.9101  | 0.70695  | 0.49143 | 0.67782 | -6.0134 | 4650     |
| TRAPPC11     | 0.40441  | 0.40441  | 5.0681  | 0.70691  | 0.49145 | 0.67782 | -6.0134 | 60684    |
| PPM1G        | 2.2465   | 2.2465   | 12.749  | 0.70675  | 0.49155 | 0.6779  | -6.0136 | 5496     |
| SLC24A3      | -0.79618 | 0.79618  | 4.3728  | -0.70661 | 0.49164 | 0.67796 | -6.0136 | 57419    |
| SF3B2        | -3.0693  | 3.0693   | 24.221  | -0.70653 | 0.49169 | 0.67798 | -6.0137 | 10992    |
| ACTN4        | 8.3376   | 8.3376   | 63.599  | 0.70631  | 0.49182 | 0.67811 | -6.0139 | 81       |
| MAMSTR       | -0.08223 | 0.08223  | 0.30853 | -0.70609 | 0.49195 | 0.67823 | -6.014  | 284358   |
| C1QC         | -7.4695  | 7.4695   | 20.488  | -0.70501 | 0.4926  | 0.67905 | -6.0148 | 714      |
| ZNF354B      | -0.17905 | 0.17905  | 1.7862  | -0.70497 | 0.49263 | 0.67905 | -6.0148 | 117608   |
| ULK2         | -0.15279 | 0.15279  | 1.8151  | -0.70469 | 0.4928  | 0.67923 | -6.015  | 9706     |
| ST7          | 0.20428  | 0.20428  | 2.2932  | 0.70453  | 0.49289 | 0.6793  | -6.0151 | 7982     |
| TOMM70       | -0.59517 | 0.59517  | 6.1504  | -0.7043  | 0.49303 | 0.67944 | -6.0153 | 9868     |
| CLDN1        | 8.4834   | 8.4834   | 31.454  | 0.70411  | 0.49315 | 0.67954 | -6.0154 | 9076     |
| IRF1         | -0.85878 | 0.85878  | 3.9169  | -0.70396 | 0.49323 | 0.67961 | -6.0155 | 3659     |
| ZNF121       | 0.78857  | 0.78857  | 6.155   | 0.70351  | 0.4935  | 0.67988 | -6.0158 | 7675     |
| FAM216A      | 0.096041 | 0.096041 | 0.61256 | 0.7035   | 0.49351 | 0.67988 | -6.0158 | 29902    |
| FNTB         | -0.34276 | 0.34276  | 2.6414  | -0.70344 | 0.49355 | 0.67988 | -6.0159 | 2342     |
| LOC100130872 | -0.06988 | 0.069877 | 0.17658 | -0.70321 | 0.49369 | 0.67996 | -6.016  | 1E+08    |
| SLC1A3       | -0.30588 | 0.30588  | 1.7318  | -0.7032  | 0.49369 | 0.67996 | -6.016  | 6507     |
| COG6         | 0.24054  | 0.24054  | 1.5336  | 0.70292  | 0.49386 | 0.6801  | -6.0162 | 57511    |
| LOC105377590 | 0.088156 | 0.088156 | 0.18276 | 0.70281  | 0.49393 | 0.6801  | -6.0163 | 1.05E+08 |
| GTPBP1       | -0.63431 | 0.63431  | 7.5916  | -0.7028  | 0.49394 | 0.6801  | -6.0163 | 9567     |
| C10orf88     | 0.10351  | 0.10351  | 0.91622 | 0.70276  | 0.49396 | 0.6801  | -6.0164 | 80007    |

|              |          |          |          |          |         |         |         |          |
|--------------|----------|----------|----------|----------|---------|---------|---------|----------|
| RICTOR       | -0.39794 | 0.39794  | 3.194    | -0.70265 | 0.49403 | 0.6801  | -6.0164 | 253260   |
| COL14A1      | 5.2281   | 5.2281   | 12.484   | 0.70264  | 0.49403 | 0.6801  | -6.0164 | 7373     |
| HLA-DMB      | 0.25776  | 0.25776  | 0.90985  | 0.70238  | 0.49419 | 0.68026 | -6.0166 | 3109     |
| TSPAN3       | 1.0423   | 1.0423   | 8.5502   | 0.70196  | 0.49444 | 0.68046 | -6.0169 | 10099    |
| DHFR         | 0.67997  | 0.67997  | 3.1084   | 0.70194  | 0.49445 | 0.68046 | -6.0169 | 1719     |
| LOC101929415 | -0.05358 | 0.05358  | 0.16184  | -0.70191 | 0.49447 | 0.68046 | -6.017  | 1.02E+08 |
| ZNF662       | 0.94486  | 0.94486  | 2.8754   | 0.70183  | 0.49452 | 0.68046 | -6.017  | 389114   |
| MRV1         | -0.81927 | 0.81927  | 2.7977   | -0.70181 | 0.49453 | 0.68046 | -6.017  | 10335    |
| HSPA9        | 3.189    | 3.189    | 23.248   | 0.70161  | 0.49465 | 0.68056 | -6.0172 | 3313     |
| HERPUD1      | 1.8835   | 1.8835   | 15.874   | 0.70155  | 0.49469 | 0.68056 | -6.0172 | 9709     |
| IGF2R        | 0.72783  | 0.72783  | 10.736   | 0.70143  | 0.49476 | 0.68059 | -6.0173 | 3482     |
| LMLN         | -0.08743 | 0.08743  | 0.8289   | -0.70138 | 0.49479 | 0.68059 | -6.0173 | 89782    |
| KLHDC3       | 1.7808   | 1.7808   | 12.948   | 0.70125  | 0.49487 | 0.68064 | -6.0174 | 116138   |
| UNG          | -0.57064 | 0.57064  | 5.7014   | -0.70114 | 0.49494 | 0.68064 | -6.0175 | 7374     |
| FAM131A      | 0.61719  | 0.61719  | 4.0672   | 0.70112  | 0.49495 | 0.68064 | -6.0175 | 131408   |
| ZFC3H1       | -0.46298 | 0.46298  | 4.7382   | -0.70081 | 0.49514 | 0.68076 | -6.0177 | 196441   |
| VCAN-AS1     | 0.052562 | 0.052562 | 0.077455 | 0.70079  | 0.49515 | 0.68076 | -6.0177 | 1.05E+08 |
| SCN4B        | -0.21002 | 0.21002  | 1.0634   | -0.70078 | 0.49515 | 0.68076 | -6.0177 | 6330     |
| TMC8         | -0.22991 | 0.22991  | 1.3348   | -0.7006  | 0.49526 | 0.68085 | -6.0179 | 147138   |
| CLCN5        | 0.13085  | 0.13085  | 1.5124   | 0.70052  | 0.49531 | 0.68087 | -6.0179 | 1184     |
| PPP4R3B      | 0.656    | 0.656    | 8.8336   | 0.69995  | 0.49566 | 0.68128 | -6.0183 | 57223    |
| CADM4        | 0.74501  | 0.74501  | 4.6069   | 0.69972  | 0.49579 | 0.68141 | -6.0185 | 199731   |
| XRN1         | -0.43844 | 0.43844  | 4.6932   | -0.69948 | 0.49594 | 0.68156 | -6.0187 | 54464    |
| MCUR1        | 0.75083  | 0.75083  | 4.3736   | 0.69939  | 0.496   | 0.68156 | -6.0187 | 63933    |
| IRAK2        | 0.29662  | 0.29662  | 1.8044   | 0.69934  | 0.49602 | 0.68156 | -6.0187 | 3656     |
| NME1-NME2    | -0.44681 | 0.44681  | 1.3382   | -0.69908 | 0.49618 | 0.68173 | -6.0189 | 654364   |

|              |          |          |         |          |         |         |         |          |
|--------------|----------|----------|---------|----------|---------|---------|---------|----------|
| RRAGD        | -0.40923 | 0.40923  | 3.2441  | -0.69878 | 0.49636 | 0.68192 | -6.0191 | 58528    |
| GPR37        | 0.26895  | 0.26895  | 0.90278 | 0.69851  | 0.49653 | 0.68208 | -6.0193 | 2861     |
| PSMB10       | 2.641    | 2.641    | 10.063  | 0.69846  | 0.49656 | 0.68208 | -6.0194 | 5699     |
| BLOC1S4      | 0.36369  | 0.36369  | 2.247   | 0.6983   | 0.49666 | 0.68211 | -6.0195 | 55330    |
| LOC100505549 | -0.11918 | 0.11918  | 0.69255 | -0.69826 | 0.49668 | 0.68211 | -6.0195 | 1.01E+08 |
| AGAP2        | -0.29994 | 0.29994  | 0.91829 | -0.69822 | 0.4967  | 0.68211 | -6.0195 | 116986   |
| QRFP         | -0.05203 | 0.052027 | 0.15089 | -0.69791 | 0.4969  | 0.68232 | -6.0197 | 347148   |
| SYT11        | 0.35228  | 0.35228  | 1.4306  | 0.69747  | 0.49716 | 0.68262 | -6.02   | 23208    |
| DGKA         | 1.2798   | 1.2798   | 10.82   | 0.69734  | 0.49724 | 0.68268 | -6.0201 | 1606     |
| ZNF614       | 0.1251   | 0.1251   | 0.85186 | 0.69702  | 0.49743 | 0.68289 | -6.0204 | 80110    |
| TSPAN4       | -1.4565  | 1.4565   | 7.0962  | -0.69695 | 0.49747 | 0.68289 | -6.0204 | 7106     |
| ZNF570       | -0.0889  | 0.088895 | 0.63036 | -0.69686 | 0.49753 | 0.68291 | -6.0205 | 148268   |
| NTPCR        | 0.74995  | 0.74995  | 4.0129  | 0.69663  | 0.49767 | 0.68298 | -6.0206 | 84284    |
| SSH2         | -0.26595 | 0.26595  | 2.7991  | -0.69663 | 0.49767 | 0.68298 | -6.0206 | 85464    |
| ATG9B        | -1.2121  | 1.2121   | 4.9739  | -0.69651 | 0.49774 | 0.68298 | -6.0207 | 285973   |
| ABI3         | 0.4315   | 0.4315   | 1.9554  | 0.6965   | 0.49775 | 0.68298 | -6.0207 | 51225    |
| EIF1B        | 0.94634  | 0.94634  | 6.9216  | 0.6963   | 0.49787 | 0.6831  | -6.0209 | 10289    |
| KIAA1671     | -0.92584 | 0.92584  | 9.2113  | -0.69601 | 0.49805 | 0.68329 | -6.0211 | 85379    |
| MINDY1       | 0.52986  | 0.52986  | 4.2764  | 0.69585  | 0.49814 | 0.68336 | -6.0212 | 55793    |
| TMEM187      | -0.28707 | 0.28707  | 1.6483  | -0.6957  | 0.49823 | 0.68343 | -6.0213 | 8269     |
| MRGBP        | 0.36178  | 0.36178  | 2.138   | 0.69531  | 0.49847 | 0.68361 | -6.0216 | 55257    |
| CELF2-AS2    | -0.12117 | 0.12117  | 0.4836  | -0.69529 | 0.49848 | 0.68361 | -6.0216 | 439950   |
| ZNF597       | -0.0714  | 0.0714   | 0.47593 | -0.69515 | 0.49857 | 0.68361 | -6.0217 | 146434   |
| NDUFB10      | 3.6508   | 3.6508   | 22.524  | 0.69515  | 0.49857 | 0.68361 | -6.0217 | 4716     |
| RAB29        | 0.37313  | 0.37313  | 1.9604  | 0.69513  | 0.49858 | 0.68361 | -6.0217 | 8934     |
| BTBD1        | 1.0814   | 1.0814   | 6.9449  | 0.69509  | 0.49861 | 0.68361 | -6.0217 | 53339    |



|            |          |          |         |          |         |         |         |          |
|------------|----------|----------|---------|----------|---------|---------|---------|----------|
| TIMP2      | 19.283   | 19.283   | 69.651  | 0.6949   | 0.49872 | 0.68371 | -6.0218 | 7077     |
| GSEC       | 0.14543  | 0.14543  | 0.49759 | 0.69484  | 0.49876 | 0.68371 | -6.0219 | 399972   |
| TTC21A     | -0.07099 | 0.070987 | 0.34607 | -0.69457 | 0.49892 | 0.68382 | -6.0221 | 199223   |
| OSBPL10    | 0.34873  | 0.34873  | 3.216   | 0.69457  | 0.49892 | 0.68382 | -6.0221 | 114884   |
| PMF1-BGLAP | 0.12075  | 0.12075  | 0.52768 | 0.69382  | 0.49938 | 0.68434 | -6.0226 | 1.01E+08 |
| TEDC2      | 0.15547  | 0.15547  | 0.45747 | 0.69381  | 0.49938 | 0.68434 | -6.0226 | 80178    |
| TBC1D12    | 0.22138  | 0.22138  | 2.2056  | 0.69368  | 0.49946 | 0.68439 | -6.0227 | 23232    |
| CTCF       | -0.56301 | 0.56301  | 6.3818  | -0.69317 | 0.49977 | 0.68476 | -6.023  | 10664    |
| PLXNA1     | -1.3848  | 1.3848   | 8.4059  | -0.69293 | 0.49992 | 0.68487 | -6.0232 | 5361     |
| COL4A4     | -0.17073 | 0.17073  | 0.44244 | -0.69289 | 0.49994 | 0.68487 | -6.0232 | 1286     |
| RNF121     | -0.18922 | 0.18922  | 2.5896  | -0.69283 | 0.49997 | 0.68487 | -6.0233 | 55298    |
| DOK1       | 0.29024  | 0.29024  | 1.1821  | 0.69261  | 0.50011 | 0.68501 | -6.0234 | 1796     |
| PFKM       | -0.39736 | 0.39736  | 2.9759  | -0.69235 | 0.50027 | 0.68517 | -6.0236 | 5213     |
| MED7       | 0.26587  | 0.26587  | 1.8016  | 0.69222  | 0.50035 | 0.68522 | -6.0237 | 9443     |
| BLVRB      | 2.8933   | 2.8933   | 15.893  | 0.69208  | 0.50043 | 0.68528 | -6.0238 | 645      |
| BORA       | 0.11877  | 0.11877  | 0.7262  | 0.69195  | 0.50051 | 0.68533 | -6.0239 | 79866    |
| DCTD       | 1.4344   | 1.4344   | 8.983   | 0.69177  | 0.50062 | 0.68543 | -6.024  | 1635     |
| ZFAS1      | 4.3809   | 4.3809   | 20.286  | 0.691    | 0.50109 | 0.68601 | -6.0245 | 441951   |
| UTP6       | 0.68216  | 0.68216  | 6.2676  | 0.69073  | 0.50126 | 0.6861  | -6.0247 | 55813    |
| FLI1       | 0.64888  | 0.64888  | 3.2684  | 0.6907   | 0.50127 | 0.6861  | -6.0247 | 2313     |
| VPS4A      | -1.7332  | 1.7332   | 15.708  | -0.6906  | 0.50133 | 0.6861  | -6.0248 | 27183    |
| DDB1       | -2.1168  | 2.1168   | 22.11   | -0.69051 | 0.50139 | 0.6861  | -6.0249 | 1642     |
| FAAP20     | -0.32848 | 0.32848  | 1.7381  | -0.6905  | 0.50139 | 0.6861  | -6.0249 | 199990   |
| NTMT1      | 0.31981  | 0.31981  | 2.4031  | 0.69011  | 0.50163 | 0.6861  | -6.0251 | 28989    |
| ZNF830     | -0.23162 | 0.23162  | 3.069   | -0.68993 | 0.50174 | 0.6861  | -6.0253 | 91603    |
| HIP1       | -0.49807 | 0.49807  | 3.1562  | -0.68987 | 0.50178 | 0.6861  | -6.0253 | 3092     |

|              |          |          |          |          |         |         |         |        |
|--------------|----------|----------|----------|----------|---------|---------|---------|--------|
| RASGRP2      | -0.19204 | 0.19204  | 0.79248  | -0.68976 | 0.50185 | 0.6861  | -6.0254 | 10235  |
| CDCA3        | 0.2106   | 0.2106   | 0.81357  | 0.68975  | 0.50185 | 0.6861  | -6.0254 | 83461  |
| TP53INP1     | 0.64244  | 0.64244  | 4.3689   | 0.68965  | 0.50191 | 0.6861  | -6.0255 | 94241  |
| EBPL         | 1.4129   | 1.4129   | 7.7393   | 0.68963  | 0.50192 | 0.6861  | -6.0255 | 84650  |
| LOC100289580 | -0.21735 | 0.21735  | 0.9005   | -0.68962 | 0.50193 | 0.6861  | -6.0255 | 1E+08  |
| CTNBL1       | -0.72419 | 0.72419  | 5.8806   | -0.68954 | 0.50198 | 0.6861  | -6.0255 | 56259  |
| MRPL28       | 1.8102   | 1.8102   | 9.362    | 0.68952  | 0.50199 | 0.6861  | -6.0256 | 10573  |
| STOML2       | 2.8331   | 2.8331   | 16.694   | 0.68952  | 0.502   | 0.6861  | -6.0256 | 30968  |
| CA2          | 6.3328   | 6.3328   | 19.537   | 0.6895   | 0.50201 | 0.6861  | -6.0256 | 760    |
| OSBPL7       | -0.14272 | 0.14272  | 0.53136  | -0.68949 | 0.50201 | 0.6861  | -6.0256 | 114881 |
| PDGFC        | 0.5496   | 0.5496   | 3.2947   | 0.68948  | 0.50202 | 0.6861  | -6.0256 | 56034  |
| ZDHH17       | -0.31226 | 0.31226  | 2.2851   | -0.68945 | 0.50204 | 0.6861  | -6.0256 | 23390  |
| KHDRBS3      | 0.33376  | 0.33376  | 1.4582   | 0.68944  | 0.50204 | 0.6861  | -6.0256 | 10656  |
| FCRLB        | 0.072403 | 0.072403 | 0.27049  | 0.68934  | 0.50211 | 0.6861  | -6.0257 | 127943 |
| LINC01137    | 0.40875  | 0.40875  | 2.1881   | 0.68932  | 0.50212 | 0.6861  | -6.0257 | 728431 |
| ZNF598       | 1.824    | 1.824    | 11.165   | 0.6893   | 0.50213 | 0.6861  | -6.0257 | 90850  |
| SPRR2F       | -15.129  | 15.129   | 16.026   | -0.68917 | 0.50221 | 0.68615 | -6.0258 | 6705   |
| EML3         | -1.7158  | 1.7158   | 9.4394   | -0.68874 | 0.50247 | 0.68638 | -6.0261 | 256364 |
| CCDC26       | 0.054307 | 0.054307 | 0.090773 | 0.68866  | 0.50252 | 0.68638 | -6.0262 | 137196 |
| MAT2A        | 3.0168   | 3.0168   | 27.761   | 0.68863  | 0.50254 | 0.68638 | -6.0262 | 4144   |
| TRAF4        | 0.77447  | 0.77447  | 4.2158   | 0.68862  | 0.50254 | 0.68638 | -6.0262 | 9618   |
| PGBD4        | 0.080581 | 0.080581 | 0.58853  | 0.68832  | 0.50272 | 0.68658 | -6.0264 | 161779 |
| PIGX         | -0.57728 | 0.57728  | 3.0316   | -0.68777 | 0.50306 | 0.68698 | -6.0268 | 54965  |
| SEN2         | -0.36674 | 0.36674  | 4.6415   | -0.68764 | 0.50314 | 0.68704 | -6.0269 | 59343  |
| C17orf97     | -0.31086 | 0.31086  | 0.81235  | -0.68745 | 0.50326 | 0.68712 | -6.027  | 400566 |
| LCE2A        | 30.387   | 30.387   | 63.55    | 0.6874   | 0.50329 | 0.68712 | -6.027  | 353139 |

|          |          |         |         |          |         |         |         |          |
|----------|----------|---------|---------|----------|---------|---------|---------|----------|
| FCF1P2   | 0.13041  | 0.13041 | 1.0635  | 0.68726  | 0.50337 | 0.68719 | -6.0271 | 1.01E+08 |
| URI1     | -0.67904 | 0.67904 | 7.8465  | -0.68694 | 0.50357 | 0.68735 | -6.0273 | 8725     |
| ADGRG6   | -0.36431 | 0.36431 | 2.351   | -0.68693 | 0.50357 | 0.68735 | -6.0273 | 57211    |
| CD40LG   | -0.05447 | 0.05447 | 0.16528 | -0.68682 | 0.50364 | 0.68738 | -6.0274 | 959      |
| PPP1R3D  | 0.50278  | 0.50278 | 2.3513  | 0.68675  | 0.50368 | 0.68739 | -6.0275 | 5509     |
| GTF3C1   | -1.5569  | 1.5569  | 13.06   | -0.68666 | 0.50374 | 0.68739 | -6.0275 | 2975     |
| SDCBP    | 2.9549   | 2.9549  | 13.149  | 0.68661  | 0.50377 | 0.68739 | -6.0276 | 6386     |
| MYO19    | -0.59891 | 0.59891 | 8.6598  | -0.6865  | 0.50384 | 0.68743 | -6.0276 | 80179    |
| NAXD     | -0.51696 | 0.51696 | 5.7107  | -0.68634 | 0.50393 | 0.68751 | -6.0277 | 55739    |
| PLEKHN1  | -1.4227  | 1.4227  | 7.1502  | -0.68601 | 0.50414 | 0.68773 | -6.028  | 84069    |
| EBP      | 2.1717   | 2.1717  | 12.792  | 0.68583  | 0.50425 | 0.68783 | -6.0281 | 10682    |
| LARP4B   | 0.52566  | 0.52566 | 6.6922  | 0.68544  | 0.50449 | 0.68809 | -6.0284 | 23185    |
| GRB7     | 1.235    | 1.235   | 5.4112  | 0.68526  | 0.5046  | 0.68817 | -6.0285 | 2886     |
| PIK3R5   | 0.22624  | 0.22624 | 1.0382  | 0.68512  | 0.50468 | 0.68817 | -6.0286 | 23533    |
| RPL35    | 69.541   | 69.541  | 355.85  | 0.68507  | 0.50471 | 0.68817 | -6.0286 | 11224    |
| MS4A6A   | 1.5735   | 1.5735  | 4.2353  | 0.68504  | 0.50473 | 0.68817 | -6.0286 | 64231    |
| FLNA     | 19.228   | 19.228  | 101.9   | 0.68502  | 0.50474 | 0.68817 | -6.0286 | 2316     |
| PIK3CA   | 0.23657  | 0.23657 | 2.3239  | 0.6843   | 0.50518 | 0.68871 | -6.0291 | 5290     |
| USP22    | -2.6379  | 2.6379  | 20.726  | -0.68422 | 0.50523 | 0.68872 | -6.0292 | 23326    |
| UBAP2    | 0.58768  | 0.58768 | 6.6218  | 0.68401  | 0.50536 | 0.68884 | -6.0293 | 55833    |
| ATP5F1A  | 5.6116   | 5.6116  | 54.812  | 0.68342  | 0.50572 | 0.68928 | -6.0297 | 498      |
| PPP6C    | 0.60019  | 0.60019 | 5.5235  | 0.68318  | 0.50587 | 0.68942 | -6.0299 | 5537     |
| MARVELD1 | -2.5354  | 2.5354  | 11.312  | -0.68303 | 0.50596 | 0.68949 | -6.03   | 83742    |
| PYGO1    | 0.10583  | 0.10583 | 0.45414 | 0.68275  | 0.50613 | 0.68963 | -6.0302 | 26108    |
| SPR      | 0.52837  | 0.52837 | 2.5639  | 0.68267  | 0.50618 | 0.68963 | -6.0303 | 6697     |
| RIF1     | -0.45809 | 0.45809 | 4.5341  | -0.68264 | 0.5062  | 0.68963 | -6.0303 | 55183    |

|              |          |          |         |          |         |         |         |          |
|--------------|----------|----------|---------|----------|---------|---------|---------|----------|
| GLMP         | 1.5454   | 1.5454   | 7.756   | 0.6826   | 0.50622 | 0.68963 | -6.0303 | 112770   |
| C12orf75     | 3.1997   | 3.1997   | 10.575  | 0.68246  | 0.50631 | 0.68969 | -6.0304 | 387882   |
| ADCY9        | -0.35976 | 0.35976  | 2.8505  | -0.68231 | 0.5064  | 0.68976 | -6.0305 | 115      |
| CLN5         | 0.42864  | 0.42864  | 3.381   | 0.68194  | 0.50663 | 0.68999 | -6.0308 | 1203     |
| OR1L4        | -0.06261 | 0.062607 | 0.12072 | -0.6819  | 0.50665 | 0.68999 | -6.0308 | 254973   |
| TCTN3        | -0.63625 | 0.63625  | 5.1503  | -0.68149 | 0.50691 | 0.69028 | -6.0311 | 26123    |
| LOC102723345 | -0.08261 | 0.082607 | 0.13596 | -0.68139 | 0.50696 | 0.69029 | -6.0311 | 1.03E+08 |
| GPR3         | 0.06521  | 0.06521  | 0.21746 | 0.68134  | 0.507   | 0.69029 | -6.0312 | 2827     |
| GRAMD1C      | 0.71213  | 0.71213  | 2.25    | 0.68118  | 0.5071  | 0.69033 | -6.0313 | 54762    |
| NFKBIB       | 0.73512  | 0.73512  | 4.0813  | 0.68116  | 0.5071  | 0.69033 | -6.0313 | 4793     |
| ZNF428       | -0.91493 | 0.91493  | 4.2575  | -0.68103 | 0.50719 | 0.69038 | -6.0314 | 126299   |
| FLOT1        | 0.43739  | 0.43739  | 2.3183  | 0.6808   | 0.50733 | 0.69052 | -6.0315 | 10211    |
| ABHD16A      | 0.10044  | 0.10044  | 0.7151  | 0.68045  | 0.50754 | 0.69075 | -6.0318 | 7920     |
| CD38         | -0.084   | 0.084001 | 0.16399 | -0.68036 | 0.50759 | 0.69077 | -6.0318 | 952      |
| PSKH1        | -0.70297 | 0.70297  | 6.3771  | -0.67946 | 0.50815 | 0.69147 | -6.0324 | 5681     |
| PRKD1        | 0.14357  | 0.14357  | 0.61299 | 0.67926  | 0.50827 | 0.69159 | -6.0326 | 5587     |
| SAV1         | -0.64395 | 0.64395  | 5.5834  | -0.67915 | 0.50834 | 0.69162 | -6.0327 | 60485    |
| GSTZ1        | -0.62767 | 0.62767  | 3.4881  | -0.67907 | 0.50839 | 0.69162 | -6.0327 | 2954     |
| TESK1        | -0.66336 | 0.66336  | 5.6563  | -0.67901 | 0.50842 | 0.69162 | -6.0327 | 7016     |
| HMGN1        | 5.2452   | 5.2452   | 34.004  | 0.67879  | 0.50856 | 0.69175 | -6.0329 | 3150     |
| SPDL1        | 0.1112   | 0.1112   | 0.59163 | 0.67818  | 0.50893 | 0.6922  | -6.0333 | 54908    |
| RETREG3      | -1.013   | 1.013    | 11.524  | -0.67802 | 0.50903 | 0.69227 | -6.0334 | 162427   |
| JARID2       | 0.74136  | 0.74136  | 6.5092  | 0.67797  | 0.50907 | 0.69227 | -6.0335 | 3720     |
| INIP         | 0.23214  | 0.23214  | 2.0632  | 0.67705  | 0.50963 | 0.69286 | -6.0341 | 58493    |
| C1orf195     | -0.10606 | 0.10606  | 0.38487 | -0.67701 | 0.50965 | 0.69286 | -6.0341 | 727684   |
| RNASEH1      | -0.26113 | 0.26113  | 2.6997  | -0.67695 | 0.50969 | 0.69286 | -6.0341 | 246243   |

|           |          |          |         |          |         |         |         |        |
|-----------|----------|----------|---------|----------|---------|---------|---------|--------|
| SYNPO2L   | 0.14756  | 0.14756  | 0.3373  | 0.67694  | 0.5097  | 0.69286 | -6.0341 | 79933  |
| PREB      | 1.0865   | 1.0865   | 7.1271  | 0.67694  | 0.5097  | 0.69286 | -6.0342 | 10113  |
| MTFR2     | 0.10195  | 0.10195  | 0.35715 | 0.67666  | 0.50987 | 0.69293 | -6.0343 | 113115 |
| TEX264    | 2.3802   | 2.3802   | 11.01   | 0.6766   | 0.50991 | 0.69293 | -6.0344 | 51368  |
| PPM1F     | -1.1175  | 1.1175   | 6.7416  | -0.67646 | 0.51    | 0.69293 | -6.0345 | 9647   |
| HPS5      | -0.17091 | 0.17091  | 2.3806  | -0.67642 | 0.51002 | 0.69293 | -6.0345 | 11234  |
| SNRNP48   | -0.11002 | 0.11002  | 1.4458  | -0.67635 | 0.51006 | 0.69293 | -6.0346 | 154007 |
| KXD1      | 1.9987   | 1.9987   | 12.653  | 0.67625  | 0.51013 | 0.69293 | -6.0346 | 79036  |
| NUDT19    | 0.39313  | 0.39313  | 3.2653  | 0.6762   | 0.51015 | 0.69293 | -6.0347 | 390916 |
| WIPF1     | 1.3185   | 1.3185   | 5.8222  | 0.67618  | 0.51016 | 0.69293 | -6.0347 | 7456   |
| BRAP      | -0.24404 | 0.24404  | 3.0236  | -0.67615 | 0.51018 | 0.69293 | -6.0347 | 8315   |
| SNX24     | 0.21895  | 0.21895  | 3.1773  | 0.67605  | 0.51025 | 0.69293 | -6.0348 | 28966  |
| ZSCAN32   | -0.18729 | 0.18729  | 1.7574  | -0.67599 | 0.51028 | 0.69293 | -6.0348 | 54925  |
| LINC01001 | -0.16233 | 0.16233  | 0.81765 | -0.67597 | 0.51029 | 0.69293 | -6.0348 | 1E+08  |
| C19orf57  | -0.09144 | 0.091435 | 0.53007 | -0.67594 | 0.51031 | 0.69293 | -6.0348 | 79173  |
| VIPAS39   | -0.24845 | 0.24845  | 2.9113  | -0.67589 | 0.51034 | 0.69293 | -6.0349 | 63894  |
| ZNF146    | 0.62122  | 0.62122  | 5.7561  | 0.67585  | 0.51037 | 0.69293 | -6.0349 | 7705   |
| DNAJC21   | -0.32677 | 0.32677  | 3.2274  | -0.67565 | 0.51049 | 0.69298 | -6.035  | 134218 |
| R3HDM1    | 0.28092  | 0.28092  | 2.4645  | 0.67563  | 0.51051 | 0.69298 | -6.035  | 23518  |
| SERPINB4  | -23.157  | 23.157   | 25.931  | -0.67559 | 0.51053 | 0.69298 | -6.0351 | 6318   |
| TUFM      | 3.0056   | 3.0056   | 22.696  | 0.6754   | 0.51065 | 0.69298 | -6.0352 | 7284   |
| PATL1     | -0.72676 | 0.72676  | 6.0586  | -0.67538 | 0.51066 | 0.69298 | -6.0352 | 219988 |
| ACD       | -0.55591 | 0.55591  | 2.7514  | -0.67535 | 0.51068 | 0.69298 | -6.0352 | 65057  |
| IRF5      | 0.32028  | 0.32028  | 2.0457  | 0.67533  | 0.51069 | 0.69298 | -6.0352 | 3663   |
| LMTK3     | 0.29733  | 0.29733  | 1.2832  | 0.67514  | 0.5108  | 0.69307 | -6.0354 | 114783 |
| EMC1      | -0.41034 | 0.41034  | 4.5636  | -0.67499 | 0.5109  | 0.69314 | -6.0355 | 23065  |

|            |          |          |         |          |         |         |         |          |
|------------|----------|----------|---------|----------|---------|---------|---------|----------|
| PCSK1      | 0.73108  | 0.73108  | 1.9494  | 0.67493  | 0.51094 | 0.69314 | -6.0355 | 5122     |
| ZNF561-AS1 | 0.17175  | 0.17175  | 1.0374  | 0.67479  | 0.51102 | 0.6932  | -6.0356 | 284385   |
| PTGER4     | 0.35505  | 0.35505  | 2.0706  | 0.67428  | 0.51134 | 0.69354 | -6.036  | 5734     |
| ANKS1A     | -0.52318 | 0.52318  | 6.0717  | -0.67423 | 0.51136 | 0.69354 | -6.036  | 23294    |
| FZD10      | 0.54123  | 0.54123  | 2.2895  | 0.67419  | 0.51139 | 0.69354 | -6.036  | 11211    |
| APP        | 8.9269   | 8.9269   | 66.574  | 0.67411  | 0.51144 | 0.69354 | -6.0361 | 351      |
| GEMIN2     | 0.30197  | 0.30197  | 1.6286  | 0.67366  | 0.51172 | 0.69377 | -6.0364 | 8487     |
| KCNK3      | -0.37107 | 0.37107  | 0.60801 | -0.67359 | 0.51176 | 0.69377 | -6.0364 | 3777     |
| RTCB       | 1.6643   | 1.6643   | 16.725  | 0.67349  | 0.51182 | 0.69377 | -6.0365 | 51493    |
| SNORA71A   | -1.1232  | 1.1232   | 4.5902  | -0.67349 | 0.51182 | 0.69377 | -6.0365 | 26777    |
| TTC1       | 1.2603   | 1.2603   | 9.6682  | 0.67345  | 0.51185 | 0.69377 | -6.0365 | 7265     |
| MARK2      | -1.2309  | 1.2309   | 10.27   | -0.67344 | 0.51185 | 0.69377 | -6.0365 | 2011     |
| ZNF558     | -0.15023 | 0.15023  | 1.9403  | -0.67332 | 0.51193 | 0.69382 | -6.0366 | 148156   |
| WIZ        | -0.92043 | 0.92043  | 6.8322  | -0.67264 | 0.51235 | 0.69431 | -6.0371 | 58525    |
| CFAP20     | 0.66499  | 0.66499  | 4.5192  | 0.67259  | 0.51238 | 0.69431 | -6.0371 | 29105    |
| TOMM40     | 2.3085   | 2.3085   | 12.379  | 0.67254  | 0.51241 | 0.69431 | -6.0371 | 10452    |
| GFM1       | 0.68169  | 0.68169  | 5.5171  | 0.67239  | 0.5125  | 0.69435 | -6.0372 | 85476    |
| SLURP1     | 85.723   | 85.723   | 162.04  | 0.67235  | 0.51253 | 0.69435 | -6.0373 | 57152    |
| SUN2       | -2.1628  | 2.1628   | 16.332  | -0.67218 | 0.51263 | 0.69443 | -6.0374 | 25777    |
| CDK9       | 1.1076   | 1.1076   | 10.465  | 0.67193  | 0.51279 | 0.69459 | -6.0375 | 1025     |
| VPS28      | 2.3015   | 2.3015   | 21.535  | 0.67186  | 0.51283 | 0.69459 | -6.0376 | 51160    |
| OSMR-AS1   | -0.0946  | 0.094597 | 0.28704 | -0.67167 | 0.51295 | 0.6947  | -6.0377 | 1.02E+08 |
| ACOT8      | -0.45138 | 0.45138  | 3.536   | -0.67139 | 0.51312 | 0.69485 | -6.0379 | 10005    |
| RANGRF     | 0.46227  | 0.46227  | 3.394   | 0.67135  | 0.51314 | 0.69485 | -6.0379 | 29098    |
| ZNF788P    | -0.2512  | 0.2512   | 1.1453  | -0.67118 | 0.51325 | 0.69493 | -6.038  | 388507   |
| MIOS       | 0.62222  | 0.62222  | 6.042   | 0.67104  | 0.51334 | 0.695   | -6.0381 | 54468    |

|              |          |          |         |          |         |         |         |          |
|--------------|----------|----------|---------|----------|---------|---------|---------|----------|
| OPA3         | -0.18044 | 0.18044  | 1.847   | -0.67076 | 0.51351 | 0.69518 | -6.0383 | 80207    |
| GPR162       | 0.1139   | 0.1139   | 0.39136 | 0.67057  | 0.51363 | 0.69523 | -6.0384 | 27239    |
| LAPTM4A      | 6.0902   | 6.0902   | 46.453  | 0.67054  | 0.51365 | 0.69523 | -6.0385 | 9741     |
| RPL23AP53    | -0.14027 | 0.14027  | 1.8337  | -0.6705  | 0.51367 | 0.69523 | -6.0385 | 644128   |
| POFUT2       | -0.35803 | 0.35803  | 1.8164  | -0.67031 | 0.51378 | 0.69533 | -6.0386 | 23275    |
| RASGEF1B     | 0.75424  | 0.75424  | 5.383   | 0.67014  | 0.51389 | 0.69542 | -6.0387 | 153020   |
| NBN          | 0.42534  | 0.42534  | 3.4836  | 0.66986  | 0.51407 | 0.6956  | -6.0389 | 4683     |
| LOC102723692 | -0.06294 | 0.062942 | 0.20431 | -0.66967 | 0.51418 | 0.6957  | -6.0391 | 1.03E+08 |
| SLX4IP       | -0.10489 | 0.10489  | 1.3226  | -0.66952 | 0.51427 | 0.69575 | -6.0391 | 128710   |
| PLIN2        | -3.2625  | 3.2625   | 8.1349  | -0.66948 | 0.5143  | 0.69575 | -6.0392 | 123      |
| SEC23IP      | 0.25027  | 0.25027  | 3.3231  | 0.66912  | 0.51452 | 0.69599 | -6.0394 | 11196    |
| MTFP1        | 0.54347  | 0.54347  | 1.9414  | 0.66855  | 0.51488 | 0.69642 | -6.0398 | 51537    |
| TIAM1        | 1.6656   | 1.6656   | 10.306  | 0.66846  | 0.51493 | 0.69643 | -6.0399 | 7074     |
| PACSIN3      | -1.5968  | 1.5968   | 7.0411  | -0.66821 | 0.51509 | 0.69645 | -6.04   | 29763    |
| ZRANB2       | -0.59667 | 0.59667  | 7.2929  | -0.66819 | 0.5151  | 0.69645 | -6.04   | 9406     |
| ASB3         | -0.15155 | 0.15155  | 1.2274  | -0.66816 | 0.51512 | 0.69645 | -6.0401 | 51130    |
| NR2C2AP      | -0.56351 | 0.56351  | 3.6601  | -0.66805 | 0.51518 | 0.69645 | -6.0401 | 126382   |
| PNMA6A       | -0.05667 | 0.056671 | 0.15413 | -0.66802 | 0.5152  | 0.69645 | -6.0402 | 84968    |
| STARD13-AS   | -0.09648 | 0.096481 | 0.38486 | -0.66799 | 0.51522 | 0.69645 | -6.0402 | 1.01E+08 |
| SNORA5A      | 0.92615  | 0.92615  | 5.0387  | 0.66794  | 0.51525 | 0.69645 | -6.0402 | 654319   |
| SLC40A1      | 1.3822   | 1.3822   | 7.8194  | 0.66791  | 0.51527 | 0.69645 | -6.0402 | 30061    |
| EHF          | 3.7573   | 3.7573   | 18.984  | 0.66771  | 0.51539 | 0.69656 | -6.0404 | 26298    |
| SRPX         | -1.5115  | 1.5115   | 4.6293  | -0.6675  | 0.51553 | 0.69662 | -6.0405 | 8406     |
| ARRDC1       | 1.0179   | 1.0179   | 8.8296  | 0.66747  | 0.51555 | 0.69662 | -6.0405 | 92714    |
| SIK1         | 2.3794   | 2.3794   | 14.559  | 0.66741  | 0.51558 | 0.69662 | -6.0406 | 150094   |
| MMGT1        | 0.33658  | 0.33658  | 2.86    | 0.66734  | 0.51562 | 0.69662 | -6.0406 | 93380    |

|           |          |          |         |          |         |         |         |          |
|-----------|----------|----------|---------|----------|---------|---------|---------|----------|
| RANBP6    | 0.38572  | 0.38572  | 3.3419  | 0.6673   | 0.51565 | 0.69662 | -6.0406 | 26953    |
| C22orf23  | -0.83999 | 0.83999  | 5.9109  | -0.66714 | 0.51575 | 0.69668 | -6.0407 | 84645    |
| TLE3      | -2.4138  | 2.4138   | 14.351  | -0.6671  | 0.51577 | 0.69668 | -6.0408 | 7090     |
| FRAT1     | -0.1325  | 0.1325   | 0.88026 | -0.66702 | 0.51582 | 0.69669 | -6.0408 | 10023    |
| TPP1      | 1.9165   | 1.9165   | 12.75   | 0.66684  | 0.51594 | 0.69669 | -6.0409 | 1200     |
| LINC01395 | -0.06018 | 0.060176 | 0.13757 | -0.6668  | 0.51596 | 0.69669 | -6.041  | 1.02E+08 |
| MASP1     | 0.91916  | 0.91916  | 3.0312  | 0.66678  | 0.51597 | 0.69669 | -6.041  | 5648     |
| BCAP31    | 3.1747   | 3.1747   | 23.393  | 0.66675  | 0.51599 | 0.69669 | -6.041  | 10134    |
| PINK1     | 2.4281   | 2.4281   | 16.189  | 0.66667  | 0.51604 | 0.6967  | -6.0411 | 65018    |
| RPL13A    | -26.091  | 26.091   | 186.24  | -0.66655 | 0.51611 | 0.69675 | -6.0411 | 23521    |
| KDM2A     | -0.95359 | 0.95359  | 13.004  | -0.66635 | 0.51624 | 0.69686 | -6.0413 | 22992    |
| SPINDOC   | 0.42751  | 0.42751  | 2.022   | 0.666    | 0.51645 | 0.69698 | -6.0415 | 144097   |
| TMEM17    | 0.1404   | 0.1404   | 0.78411 | 0.66599  | 0.51646 | 0.69698 | -6.0415 | 200728   |
| TCIRG1    | 1.0985   | 1.0985   | 5.4944  | 0.66595  | 0.51649 | 0.69698 | -6.0415 | 10312    |
| TSPYL1    | 1.1455   | 1.1455   | 11.014  | 0.66592  | 0.5165  | 0.69698 | -6.0416 | 7259     |
| CREB3L1   | 1.4237   | 1.4237   | 4.2689  | 0.66587  | 0.51653 | 0.69698 | -6.0416 | 90993    |
| PDCD2     | 0.35491  | 0.35491  | 3.4984  | 0.66562  | 0.51669 | 0.69714 | -6.0418 | 5134     |
| SAP18     | 1.7403   | 1.7403   | 13.414  | 0.66555  | 0.51673 | 0.69714 | -6.0418 | 10284    |
| TOB1-AS1  | -0.05559 | 0.055594 | 0.20958 | -0.66537 | 0.51685 | 0.69724 | -6.0419 | 400604   |
| NR2F2     | -1.0243  | 1.0243   | 4.4435  | -0.6653  | 0.51689 | 0.69724 | -6.042  | 7026     |
| LINC01503 | -0.526   | 0.526    | 2.4814  | -0.66522 | 0.51694 | 0.69725 | -6.042  | 1.01E+08 |
| IRF9      | -2.6172  | 2.6172   | 11.823  | -0.66485 | 0.51717 | 0.69745 | -6.0423 | 10379    |
| SNORA1    | -0.10092 | 0.10092  | 0.15333 | -0.66485 | 0.51717 | 0.69745 | -6.0423 | 677792   |
| SPATA5L1  | -0.37748 | 0.37748  | 2.4038  | -0.66468 | 0.51728 | 0.6975  | -6.0424 | 79029    |
| DHRS9     | 0.75478  | 0.75478  | 1.6689  | 0.66463  | 0.51731 | 0.6975  | -6.0424 | 10170    |
| MTX1      | 0.87163  | 0.87163  | 6.4213  | 0.66458  | 0.51733 | 0.6975  | -6.0424 | 4580     |



|              |          |          |         |          |         |         |         |          |
|--------------|----------|----------|---------|----------|---------|---------|---------|----------|
| RPGRIP1L     | -0.07049 | 0.070487 | 0.41645 | -0.66442 | 0.51743 | 0.69758 | -6.0426 | 23322    |
| DMXL2        | 0.33284  | 0.33284  | 1.9282  | 0.66431  | 0.5175  | 0.6976  | -6.0426 | 23312    |
| GIMAP2       | 0.38583  | 0.38583  | 1.4937  | 0.66427  | 0.51753 | 0.6976  | -6.0427 | 26157    |
| MRAS         | -0.40096 | 0.40096  | 1.8459  | -0.66401 | 0.51769 | 0.69776 | -6.0428 | 22808    |
| BLOC1S1      | 2.1406   | 2.1406   | 11.892  | 0.66371  | 0.51788 | 0.69796 | -6.043  | 2647     |
| PRXL2B       | -0.40527 | 0.40527  | 2.0599  | -0.66337 | 0.51809 | 0.69818 | -6.0433 | 127281   |
| SKP2         | 0.41854  | 0.41854  | 2.5454  | 0.66321  | 0.51819 | 0.69827 | -6.0434 | 6502     |
| LOC101060553 | -0.04774 | 0.04774  | 0.14275 | -0.66307 | 0.51827 | 0.69833 | -6.0435 | 1.01E+08 |
| FANCI        | 0.4661   | 0.4661   | 2.2672  | 0.66296  | 0.51834 | 0.69836 | -6.0435 | 55215    |
| RPS26P11     | -0.06712 | 0.067118 | 0.29796 | -0.66258 | 0.51858 | 0.69862 | -6.0438 | 441502   |
| SETBP1       | -0.4182  | 0.4182   | 3.6633  | -0.66249 | 0.51864 | 0.69865 | -6.0438 | 26040    |
| CDC23        | -0.40311 | 0.40311  | 3.7628  | -0.66224 | 0.51879 | 0.69879 | -6.044  | 8697     |
| ST14         | 5.1532   | 5.1532   | 28.851  | 0.66198  | 0.51895 | 0.69892 | -6.0442 | 6768     |
| WBP4         | 0.2882   | 0.2882   | 2.4853  | 0.66192  | 0.51899 | 0.69892 | -6.0442 | 11193    |
| MIR133A1HG   | -0.05994 | 0.059944 | 0.21277 | -0.66185 | 0.51903 | 0.69892 | -6.0443 | 1.03E+08 |
| ZNF137P      | -0.05993 | 0.059931 | 0.30179 | -0.66182 | 0.51905 | 0.69892 | -6.0443 | 7696     |
| SH3RF1       | 0.23537  | 0.23537  | 2.901   | 0.66159  | 0.51919 | 0.69904 | -6.0444 | 57630    |
| LINC00484    | -0.05645 | 0.056451 | 0.15708 | -0.66155 | 0.51922 | 0.69904 | -6.0445 | 1E+08    |
| MTRNR2L8     | -0.60885 | 0.60885  | 1.9122  | -0.66117 | 0.51945 | 0.6993  | -6.0447 | 1E+08    |
| RPL23A       | 36.76    | 36.76    | 234.85  | 0.66091  | 0.51961 | 0.69946 | -6.0449 | 6147     |
| ZNF888       | -0.13427 | 0.13427  | 1.1185  | -0.6608  | 0.51968 | 0.6995  | -6.045  | 388559   |
| ZFP36L1      | -4.095   | 4.095    | 51.94   | -0.66029 | 0.52    | 0.69979 | -6.0453 | 677      |
| MDGA1        | 0.40688  | 0.40688  | 1.0711  | 0.66026  | 0.52002 | 0.69979 | -6.0453 | 266727   |
| LINC00937    | -0.15807 | 0.15807  | 0.40176 | -0.66025 | 0.52002 | 0.69979 | -6.0453 | 389634   |
| PEX14        | -0.46248 | 0.46248  | 4.1617  | -0.66013 | 0.5201  | 0.69983 | -6.0454 | 5195     |
| LRP1-AS      | -0.09855 | 0.098548 | 0.3927  | -0.65946 | 0.52052 | 0.70035 | -6.0458 | 1.06E+08 |

|              |          |          |         |          |         |         |         |          |
|--------------|----------|----------|---------|----------|---------|---------|---------|----------|
| RPL15        | 8.9898   | 8.9898   | 60.139  | 0.65927  | 0.52063 | 0.70038 | -6.046  | 6138     |
| UCHL5        | -0.20174 | 0.20174  | 1.8858  | -0.65925 | 0.52065 | 0.70038 | -6.046  | 51377    |
| LINC01448    | -0.05351 | 0.053508 | 0.22871 | -0.65922 | 0.52067 | 0.70038 | -6.046  | 1.02E+08 |
| THEMIS2      | 0.85235  | 0.85235  | 2.956   | 0.65879  | 0.52093 | 0.70063 | -6.0463 | 9473     |
| SYTL1        | -5.1751  | 5.1751   | 18.066  | -0.65876 | 0.52095 | 0.70063 | -6.0463 | 84958    |
| IMP3         | 1.6842   | 1.6842   | 15.645  | 0.65871  | 0.52098 | 0.70063 | -6.0463 | 55272    |
| VPS13A-AS1   | -0.12502 | 0.12502  | 0.19749 | -0.65857 | 0.52107 | 0.7007  | -6.0464 | 1E+08    |
| NDUFA7       | 1.3832   | 1.3832   | 7.8457  | 0.65831  | 0.52123 | 0.70086 | -6.0466 | 4701     |
| SQSTM1       | -4.0323  | 4.0323   | 27.583  | -0.65823 | 0.52129 | 0.70086 | -6.0467 | 8878     |
| AGR2         | -0.06688 | 0.066884 | 0.24163 | -0.65817 | 0.52132 | 0.70086 | -6.0467 | 10551    |
| ZBTB6        | 0.18028  | 0.18028  | 1.4707  | 0.65771  | 0.52161 | 0.7012  | -6.047  | 10773    |
| NRP1         | 2.3891   | 2.3891   | 11.527  | 0.6575   | 0.52174 | 0.70121 | -6.0471 | 8829     |
| QPCTL        | -0.16527 | 0.16527  | 1.2471  | -0.65747 | 0.52176 | 0.70121 | -6.0472 | 54814    |
| SPSB1        | -0.75371 | 0.75371  | 7.5142  | -0.65744 | 0.52178 | 0.70121 | -6.0472 | 80176    |
| TAPBP        | -0.64408 | 0.64408  | 5.1941  | -0.6574  | 0.5218  | 0.70121 | -6.0472 | 6892     |
| SLC41A2      | 0.14861  | 0.14861  | 0.69705 | 0.65736  | 0.52182 | 0.70121 | -6.0472 | 84102    |
| LOC101928489 | 0.085029 | 0.085029 | 0.43309 | 0.65686  | 0.52214 | 0.70157 | -6.0476 | 1.02E+08 |
| EPHB2        | 0.13336  | 0.13336  | 0.5471  | 0.65674  | 0.52221 | 0.70162 | -6.0476 | 2048     |
| LAMA1        | 0.29242  | 0.29242  | 0.94167 | 0.65657  | 0.52232 | 0.7017  | -6.0477 | 284217   |
| HCFC1        | -1.1948  | 1.1948   | 8.5947  | -0.65642 | 0.52241 | 0.70177 | -6.0478 | 3054     |
| MECOM        | 0.2456   | 0.2456   | 1.0848  | 0.65624  | 0.52252 | 0.70178 | -6.048  | 2122     |
| MYCBPAP      | 0.074368 | 0.074368 | 0.17025 | 0.65622  | 0.52254 | 0.70178 | -6.048  | 84073    |
| PLEKHG6      | 0.44739  | 0.44739  | 3.0047  | 0.65621  | 0.52254 | 0.70178 | -6.048  | 55200    |
| EXOC3        | -1.1411  | 1.1411   | 11.97   | -0.65615 | 0.52258 | 0.70178 | -6.048  | 11336    |
| ALG13        | -0.18921 | 0.18921  | 2.3366  | -0.65598 | 0.52268 | 0.70186 | -6.0481 | 79868    |
| CTBS         | -0.31006 | 0.31006  | 2.3138  | -0.6559  | 0.52274 | 0.70188 | -6.0482 | 1486     |

|         |          |          |         |          |         |         |         |        |
|---------|----------|----------|---------|----------|---------|---------|---------|--------|
| GTPBP8  | 0.24219  | 0.24219  | 1.6747  | 0.65569  | 0.52287 | 0.70199 | -6.0483 | 29083  |
| PGS1    | -0.62737 | 0.62737  | 4.2333  | -0.65546 | 0.52301 | 0.70213 | -6.0485 | 9489   |
| MCOLN1  | 0.72799  | 0.72799  | 5.5242  | 0.65526  | 0.52314 | 0.70225 | -6.0486 | 57192  |
| THOC3   | 1.4019   | 1.4019   | 8.5249  | 0.65515  | 0.52321 | 0.70228 | -6.0487 | 84321  |
| TP53I11 | -1.4726  | 1.4726   | 6.2331  | -0.65487 | 0.52338 | 0.70242 | -6.0489 | 9537   |
| FECH    | -0.16135 | 0.16135  | 1.4845  | -0.65476 | 0.52345 | 0.70242 | -6.0489 | 2235   |
| TXNDC11 | 0.40283  | 0.40283  | 4.1869  | 0.65474  | 0.52346 | 0.70242 | -6.049  | 51061  |
| FLII    | 2.6687   | 2.6687   | 17.197  | 0.65465  | 0.52352 | 0.70242 | -6.049  | 2314   |
| ZFAND2B | 1.1546   | 1.1546   | 7.3688  | 0.65465  | 0.52352 | 0.70242 | -6.049  | 130617 |
| SH2D3C  | 0.39821  | 0.39821  | 1.7711  | 0.65443  | 0.52366 | 0.70252 | -6.0492 | 10044  |
| DNAJC9  | 0.74131  | 0.74131  | 5.8793  | 0.6544   | 0.52368 | 0.70252 | -6.0492 | 23234  |
| SUPT16H | -1.3541  | 1.3541   | 10.942  | -0.65418 | 0.52381 | 0.70256 | -6.0493 | 11198  |
| MOCS1   | -0.54494 | 0.54494  | 1.8235  | -0.65417 | 0.52382 | 0.70256 | -6.0493 | 4337   |
| IST1    | -0.68679 | 0.68679  | 10.297  | -0.65413 | 0.52384 | 0.70256 | -6.0494 | 9798   |
| LCE1B   | 33.841   | 33.841   | 56.833  | 0.65408  | 0.52387 | 0.70256 | -6.0494 | 353132 |
| SH3BP5L | 1.2916   | 1.2916   | 6.3037  | 0.65396  | 0.52395 | 0.70261 | -6.0495 | 80851  |
| STK32B  | -0.12779 | 0.12779  | 0.69337 | -0.6533  | 0.52436 | 0.7031  | -6.0499 | 55351  |
| ADGRA3  | 0.40632  | 0.40632  | 2.5689  | 0.65306  | 0.52451 | 0.70325 | -6.0501 | 166647 |
| FIS1    | 5.8559   | 5.8559   | 31.727  | 0.65296  | 0.52458 | 0.70326 | -6.0501 | 51024  |
| ATAD3B  | 0.55509  | 0.55509  | 4.4239  | 0.65291  | 0.5246  | 0.70326 | -6.0502 | 83858  |
| SMAD6   | 0.34977  | 0.34977  | 1.5079  | 0.65283  | 0.52465 | 0.70327 | -6.0502 | 4091   |
| AKR1C2  | 0.67021  | 0.67021  | 3.6349  | 0.65276  | 0.5247  | 0.70328 | -6.0503 | 1646   |
| DHDDS   | -0.41672 | 0.41672  | 6.1133  | -0.65264 | 0.52477 | 0.70332 | -6.0503 | 79947  |
| RAB39A  | 0.078253 | 0.078253 | 0.17086 | 0.65236  | 0.52495 | 0.70337 | -6.0505 | 54734  |
| ZNF277  | 0.29698  | 0.29698  | 2.4206  | 0.6522   | 0.52505 | 0.70337 | -6.0506 | 11179  |
| MOCS2   | 0.26744  | 0.26744  | 2.19    | 0.65216  | 0.52508 | 0.70337 | -6.0506 | 4338   |

|           |          |          |         |          |         |         |         |        |
|-----------|----------|----------|---------|----------|---------|---------|---------|--------|
| IFNLR1    | 0.27111  | 0.27111  | 2.1043  | 0.65212  | 0.5251  | 0.70337 | -6.0507 | 163702 |
| HELZ2     | -1.484   | 1.484    | 5.2076  | -0.65207 | 0.52513 | 0.70337 | -6.0507 | 85441  |
| LINC00938 | -0.25346 | 0.25346  | 2.4467  | -0.65197 | 0.52519 | 0.70337 | -6.0508 | 400027 |
| LYPLA2    | 2.0302   | 2.0302   | 13.226  | 0.65197  | 0.5252  | 0.70337 | -6.0508 | 11313  |
| EEF1AKMT1 | -0.22671 | 0.22671  | 1.3896  | -0.65193 | 0.52522 | 0.70337 | -6.0508 | 221143 |
| NELFE     | 0.29102  | 0.29102  | 2.1667  | 0.65184  | 0.52528 | 0.70337 | -6.0509 | 7936   |
| TSSC4     | 0.77923  | 0.77923  | 5.2208  | 0.65177  | 0.52532 | 0.70337 | -6.0509 | 10078  |
| MPZL1     | 2.2296   | 2.2296   | 13.682  | 0.65169  | 0.52537 | 0.70337 | -6.051  | 9019   |
| MAGED2    | 2.5629   | 2.5629   | 14.749  | 0.65168  | 0.52538 | 0.70337 | -6.051  | 10916  |
| RAD18     | -0.13907 | 0.13907  | 1.1583  | -0.65166 | 0.52539 | 0.70337 | -6.051  | 56852  |
| TOMM7     | 11.522   | 11.522   | 54.616  | 0.65161  | 0.52542 | 0.70337 | -6.051  | 54543  |
| RTN4RL2   | -0.21953 | 0.21953  | 0.96463 | -0.65159 | 0.52543 | 0.70337 | -6.051  | 349667 |
| AGTRAP    | 2.5899   | 2.5899   | 10.936  | 0.65145  | 0.52552 | 0.70342 | -6.0511 | 57085  |
| SRR       | 0.18087  | 0.18087  | 1.4432  | 0.65124  | 0.52565 | 0.70355 | -6.0512 | 63826  |
| DPCD      | 0.18058  | 0.18058  | 1.3591  | 0.65053  | 0.52609 | 0.70401 | -6.0517 | 25911  |
| CCL26     | -0.06324 | 0.063237 | 0.24763 | -0.65052 | 0.5261  | 0.70401 | -6.0517 | 10344  |
| EXOC8     | 0.34307  | 0.34307  | 3.5274  | 0.65043  | 0.52616 | 0.70401 | -6.0518 | 149371 |
| MKX       | 0.18811  | 0.18811  | 0.3857  | 0.65039  | 0.52618 | 0.70401 | -6.0518 | 283078 |
| HSD17B6   | -0.0807  | 0.080698 | 0.20206 | -0.65036 | 0.5262  | 0.70401 | -6.0518 | 8630   |
| SPSB2     | 0.38878  | 0.38878  | 2.4052  | 0.65018  | 0.52632 | 0.70406 | -6.0519 | 84727  |
| GPNMB     | -6.4804  | 6.4804   | 63.65   | -0.65014 | 0.52634 | 0.70406 | -6.052  | 10457  |
| AFAP1-AS1 | -0.05163 | 0.051633 | 0.17702 | -0.65009 | 0.52637 | 0.70406 | -6.052  | 84740  |
| BRCA1     | 0.19908  | 0.19908  | 0.95601 | 0.64997  | 0.52645 | 0.70411 | -6.0521 | 672    |
| TMEM75    | -0.16411 | 0.16411  | 0.66937 | -0.64967 | 0.52663 | 0.70431 | -6.0523 | 641384 |
| AZIN1     | 0.9014   | 0.9014   | 12.034  | 0.64933  | 0.52685 | 0.70449 | -6.0525 | 51582  |
| ISG20L2   | 0.69783  | 0.69783  | 6.8979  | 0.64928  | 0.52688 | 0.70449 | -6.0525 | 81875  |

|           |          |          |         |          |         |         |         |          |
|-----------|----------|----------|---------|----------|---------|---------|---------|----------|
| SLC6A9    | 2.4216   | 2.4216   | 12.152  | 0.64926  | 0.52689 | 0.70449 | -6.0525 | 6536     |
| CARMIL1   | -0.2701  | 0.2701   | 3.7217  | -0.64871 | 0.52723 | 0.70489 | -6.0529 | 55604    |
| LINC01068 | -0.0547  | 0.054697 | 0.10592 | -0.64858 | 0.52732 | 0.70492 | -6.053  | 1.04E+08 |
| PET100    | 4.7289   | 4.7289   | 24.682  | 0.64854  | 0.52735 | 0.70492 | -6.053  | 1E+08    |
| ZNF285    | 0.055845 | 0.055845 | 0.20674 | 0.64822  | 0.52754 | 0.70513 | -6.0532 | 26974    |
| PDSS2     | -0.1411  | 0.1411   | 1.6479  | -0.64792 | 0.52773 | 0.70533 | -6.0534 | 57107    |
| DENND3    | -0.26415 | 0.26415  | 1.3295  | -0.6477  | 0.52787 | 0.70545 | -6.0536 | 22898    |
| ZNF486    | 0.10857  | 0.10857  | 0.60791 | 0.64764  | 0.52791 | 0.70545 | -6.0536 | 90649    |
| ABRAXAS1  | -0.18577 | 0.18577  | 1.3048  | -0.6475  | 0.52799 | 0.70551 | -6.0537 | 84142    |
| EXO1      | 0.12384  | 0.12384  | 0.4907  | 0.64706  | 0.52827 | 0.70582 | -6.054  | 9156     |
| CAPN12    | 0.12857  | 0.12857  | 0.60851 | 0.64701  | 0.52831 | 0.70582 | -6.054  | 147968   |
| SCAF11    | 0.87387  | 0.87387  | 9.9898  | 0.64644  | 0.52866 | 0.70624 | -6.0544 | 9169     |
| SH2D3A    | 0.92178  | 0.92178  | 5.364   | 0.64635  | 0.52872 | 0.70625 | -6.0544 | 10045    |
| SIK1B     | 0.90248  | 0.90248  | 5.5929  | 0.6461   | 0.52888 | 0.70625 | -6.0546 | 1.03E+08 |
| LINC01963 | -0.11497 | 0.11497  | 1.1128  | -0.64607 | 0.52889 | 0.70625 | -6.0546 | 150967   |
| CRAT      | 1.5476   | 1.5476   | 5.53    | 0.64607  | 0.5289  | 0.70625 | -6.0546 | 1384     |
| ZNF638    | -0.59323 | 0.59323  | 7.6943  | -0.64603 | 0.52892 | 0.70625 | -6.0546 | 27332    |
| CPM       | 0.90978  | 0.90978  | 3.8609  | 0.64602  | 0.52892 | 0.70625 | -6.0546 | 1368     |
| NARF      | 0.79466  | 0.79466  | 6.9836  | 0.64549  | 0.52926 | 0.70655 | -6.055  | 26502    |
| UBE3A     | 0.56888  | 0.56888  | 7.7497  | 0.64546  | 0.52928 | 0.70655 | -6.055  | 7337     |
| NECTIN1   | 9.8888   | 9.8888   | 61.181  | 0.64545  | 0.52929 | 0.70655 | -6.055  | 5818     |
| PIH1D1    | 1.5871   | 1.5871   | 10.795  | 0.6454   | 0.52931 | 0.70655 | -6.055  | 55011    |
| EMP3      | 3.96     | 3.96     | 14.003  | 0.64525  | 0.52941 | 0.70656 | -6.0551 | 2014     |
| L3HYPDH   | -0.23321 | 0.23321  | 1.683   | -0.64525 | 0.52941 | 0.70656 | -6.0551 | 112849   |
| CREBL2    | -0.58395 | 0.58395  | 5.2448  | -0.64504 | 0.52954 | 0.70668 | -6.0553 | 1389     |
| PLEK2     | 0.82155  | 0.82155  | 4.9012  | 0.64475  | 0.52972 | 0.70675 | -6.0555 | 26499    |

|              |          |          |         |          |         |         |         |          |
|--------------|----------|----------|---------|----------|---------|---------|---------|----------|
| LOC100379224 | 0.058627 | 0.058627 | 0.23251 | 0.64475  | 0.52973 | 0.70675 | -6.0555 | 1E+08    |
| EPS8L2       | 3.2748   | 3.2748   | 20.892  | 0.64472  | 0.52975 | 0.70675 | -6.0555 | 64787    |
| SYPL1        | 2.1123   | 2.1123   | 16.262  | 0.64469  | 0.52976 | 0.70675 | -6.0555 | 6856     |
| CPOX         | 0.26592  | 0.26592  | 2.0785  | 0.64428  | 0.53002 | 0.70695 | -6.0558 | 1371     |
| SMARCAL1     | -0.21631 | 0.21631  | 2.6069  | -0.64427 | 0.53002 | 0.70695 | -6.0558 | 50485    |
| MAST3        | -0.56533 | 0.56533  | 3.0279  | -0.64426 | 0.53003 | 0.70695 | -6.0558 | 23031    |
| FAM133CP     | 0.17701  | 0.17701  | 0.41813 | 0.64418  | 0.53008 | 0.70696 | -6.0558 | 728640   |
| CA3-AS1      | -0.04575 | 0.045752 | 0.18852 | -0.64371 | 0.53038 | 0.70729 | -6.0561 | 1.01E+08 |
| STX17-AS1    | -0.12629 | 0.12629  | 0.61256 | -0.64352 | 0.5305  | 0.70736 | -6.0563 | 441461   |
| ITPR3        | 2.2984   | 2.2984   | 15.829  | 0.6435   | 0.53051 | 0.70736 | -6.0563 | 3710     |
| SAMHD1       | -1.2956  | 1.2956   | 6.3083  | -0.64329 | 0.53064 | 0.70747 | -6.0564 | 25939    |
| LIPC         | -0.05265 | 0.052645 | 0.17438 | -0.64324 | 0.53067 | 0.70747 | -6.0564 | 3990     |
| NSFL1C       | 1.3323   | 1.3323   | 11.934  | 0.64309  | 0.53077 | 0.70753 | -6.0565 | 55968    |
| PDCD1LG2     | 0.32225  | 0.32225  | 1.235   | 0.64285  | 0.53092 | 0.70765 | -6.0567 | 80380    |
| C1QTNF3      | -0.255   | 0.255    | 0.79781 | -0.64274 | 0.53099 | 0.70765 | -6.0568 | 114899   |
| CARD18       | 0.60075  | 0.60075  | 1.4923  | 0.64268  | 0.53103 | 0.70765 | -6.0568 | 59082    |
| FOXP4        | -0.36788 | 0.36788  | 2.6113  | -0.64267 | 0.53103 | 0.70765 | -6.0568 | 116113   |
| YY1          | 0.77854  | 0.77854  | 10.23   | 0.64262  | 0.53107 | 0.70765 | -6.0568 | 7528     |
| BRMS1L       | 0.1606   | 0.1606   | 1.5082  | 0.64215  | 0.53136 | 0.70799 | -6.0571 | 84312    |
| CPE          | 2.2176   | 2.2176   | 11.879  | 0.64201  | 0.53145 | 0.70805 | -6.0572 | 1363     |
| MPIG6B       | -0.04292 | 0.042923 | 0.12494 | -0.64189 | 0.53152 | 0.7081  | -6.0573 | 80739    |
| LINC00519    | -0.05996 | 0.059963 | 0.13292 | -0.64148 | 0.53178 | 0.70832 | -6.0576 | 161342   |
| DDX3Y        | 0.74411  | 0.74411  | 5.3231  | 0.64141  | 0.53183 | 0.70832 | -6.0576 | 8653     |
| BAHD1        | -0.45852 | 0.45852  | 3.4926  | -0.6414  | 0.53184 | 0.70832 | -6.0576 | 22893    |
| SDHAF2       | 0.89102  | 0.89102  | 7.3141  | 0.64137  | 0.53186 | 0.70832 | -6.0576 | 54949    |
| SSPN         | 0.43513  | 0.43513  | 1.5116  | 0.64092  | 0.53214 | 0.70864 | -6.0579 | 8082     |

|            |          |          |          |          |         |         |         |          |
|------------|----------|----------|----------|----------|---------|---------|---------|----------|
| ZNF581     | -0.7559  | 0.7559   | 5.5584   | -0.6407  | 0.53228 | 0.70874 | -6.0581 | 51545    |
| KIF15      | 0.11994  | 0.11994  | 0.50771  | 0.64065  | 0.5323  | 0.70874 | -6.0581 | 56992    |
| IMMP1L     | -0.15323 | 0.15323  | 1.1215   | -0.64012 | 0.53264 | 0.70911 | -6.0584 | 196294   |
| ANP32E     | -0.41417 | 0.41417  | 3.7158   | -0.64008 | 0.53266 | 0.70911 | -6.0585 | 81611    |
| C16orf54   | 0.13424  | 0.13424  | 0.61123  | 0.63989  | 0.53278 | 0.70922 | -6.0586 | 283897   |
| PCNX3      | -0.90774 | 0.90774  | 7.5067   | -0.63971 | 0.5329  | 0.70924 | -6.0587 | 399909   |
| PPP1R12C   | -1.8191  | 1.8191   | 11.271   | -0.63966 | 0.53293 | 0.70924 | -6.0587 | 54776    |
| PDCL       | 0.25858  | 0.25858  | 2.7222   | 0.63966  | 0.53293 | 0.70924 | -6.0587 | 5082     |
| ZNF382     | 0.05819  | 0.05819  | 0.18097  | 0.63952  | 0.53302 | 0.70931 | -6.0588 | 84911    |
| TMEM262    | -0.04806 | 0.048056 | 0.089201 | -0.63926 | 0.53319 | 0.70947 | -6.059  | 1E+08    |
| SYT7       | -0.16866 | 0.16866  | 0.97469  | -0.63881 | 0.53347 | 0.70979 | -6.0593 | 9066     |
| NFKBIA     | 3.7058   | 3.7058   | 40.693   | 0.63864  | 0.53357 | 0.70988 | -6.0594 | 4792     |
| C12orf73   | 0.10975  | 0.10975  | 0.79404  | 0.63826  | 0.53382 | 0.71014 | -6.0596 | 728568   |
| BCL2L11    | -0.24659 | 0.24659  | 1.8942   | -0.63795 | 0.53401 | 0.71034 | -6.0598 | 10018    |
| MICU3      | -0.07365 | 0.073646 | 0.3717   | -0.63767 | 0.53419 | 0.71052 | -6.06   | 286097   |
| RPL5       | 31.673   | 31.673   | 229.14   | 0.63729  | 0.53442 | 0.71078 | -6.0603 | 6125     |
| STC2       | -0.42496 | 0.42496  | 0.74089  | -0.63711 | 0.53454 | 0.71088 | -6.0604 | 8614     |
| ST20-AS1   | -0.15769 | 0.15769  | 1.0726   | -0.63697 | 0.53463 | 0.71089 | -6.0605 | 283687   |
| KIF26B-AS1 | 0.05717  | 0.05717  | 0.14508  | 0.63697  | 0.53463 | 0.71089 | -6.0605 | 1.11E+08 |
| CLHC1      | -0.06103 | 0.061028 | 0.28118  | -0.63681 | 0.53473 | 0.71097 | -6.0606 | 130162   |
| MYO1G      | 0.35495  | 0.35495  | 1.614    | 0.63673  | 0.53478 | 0.71098 | -6.0606 | 64005    |
| HNRNPK     | 6.87     | 6.87     | 55.302   | 0.63648  | 0.53494 | 0.71113 | -6.0608 | 3190     |
| PAQR4      | 0.55203  | 0.55203  | 3.1128   | 0.63637  | 0.53501 | 0.71117 | -6.0609 | 124222   |
| ACO2       | -1.0375  | 1.0375   | 12.69    | -0.6363  | 0.53505 | 0.71117 | -6.0609 | 50       |
| TTC3-AS1   | -0.06517 | 0.065172 | 0.19469  | -0.63624 | 0.53509 | 0.71117 | -6.0609 | 1.01E+08 |
| APEX2      | 0.76197  | 0.76197  | 5.4376   | 0.63608  | 0.53519 | 0.71125 | -6.061  | 27301    |

|              |          |          |         |          |         |         |         |          |
|--------------|----------|----------|---------|----------|---------|---------|---------|----------|
| PSD3         | 0.25154  | 0.25154  | 2.3993  | 0.63595  | 0.53528 | 0.7113  | -6.0611 | 23362    |
| ADAL         | -0.07246 | 0.072464 | 0.46933 | -0.63566 | 0.53546 | 0.71149 | -6.0613 | 161823   |
| ELN          | -4.3007  | 4.3007   | 12.914  | -0.63559 | 0.5355  | 0.71149 | -6.0614 | 2006     |
| COG4         | 0.67272  | 0.67272  | 6.6556  | 0.63535  | 0.53565 | 0.71153 | -6.0615 | 25839    |
| LOC101927021 | -0.09561 | 0.095606 | 0.47401 | -0.63528 | 0.5357  | 0.71153 | -6.0615 | 1.02E+08 |
| MT1A         | -0.13681 | 0.13681  | 0.32263 | -0.63522 | 0.53574 | 0.71153 | -6.0616 | 4489     |
| KIDINS220    | -0.30533 | 0.30533  | 4.5796  | -0.63514 | 0.53579 | 0.71153 | -6.0616 | 57498    |
| DHH          | 0.079251 | 0.079251 | 0.21152 | 0.63506  | 0.53584 | 0.71153 | -6.0617 | 50846    |
| LOC101929188 | 0.092348 | 0.092348 | 0.55845 | 0.63505  | 0.53585 | 0.71153 | -6.0617 | 1.02E+08 |
| SLC43A2      | -0.47087 | 0.47087  | 2.242   | -0.63503 | 0.53586 | 0.71153 | -6.0617 | 124935   |
| ZBTB33       | -0.3496  | 0.3496   | 3.2239  | -0.63501 | 0.53587 | 0.71153 | -6.0617 | 10009    |
| LDHAL6B      | 0.17985  | 0.17985  | 0.62267 | 0.6343   | 0.53632 | 0.71207 | -6.0622 | 92483    |
| VPS9D1       | -0.43361 | 0.43361  | 3.1185  | -0.63418 | 0.5364  | 0.71207 | -6.0623 | 9605     |
| SEC24B       | 0.63628  | 0.63628  | 7.27    | 0.63416  | 0.53641 | 0.71207 | -6.0623 | 10427    |
| GMEB2        | -0.25478 | 0.25478  | 2.4214  | -0.63399 | 0.53651 | 0.71216 | -6.0624 | 26205    |
| ATRX         | -0.44484 | 0.44484  | 4.0795  | -0.63383 | 0.53661 | 0.7122  | -6.0625 | 546      |
| RPL11        | 41.511   | 41.511   | 226.96  | 0.63381  | 0.53663 | 0.7122  | -6.0625 | 6135     |
| SLX4         | -0.12859 | 0.12859  | 0.94248 | -0.63369 | 0.5367  | 0.71224 | -6.0626 | 84464    |
| SNORA71C     | -0.48137 | 0.48137  | 1.3782  | -0.63338 | 0.5369  | 0.71238 | -6.0628 | 677839   |
| LINC01537    | -0.05441 | 0.054407 | 0.23998 | -0.63332 | 0.53694 | 0.71238 | -6.0628 | 1.02E+08 |
| RPSAP58      | -0.2159  | 0.2159   | 1.3084  | -0.63331 | 0.53694 | 0.71238 | -6.0628 | 388524   |
| PKNOX2       | -0.11407 | 0.11407  | 0.3828  | -0.63327 | 0.53697 | 0.71238 | -6.0628 | 63876    |
| DHTKD1       | -0.23583 | 0.23583  | 2.5815  | -0.63298 | 0.53716 | 0.71256 | -6.063  | 55526    |
| MBP          | -0.38713 | 0.38713  | 4.0719  | -0.63292 | 0.5372  | 0.71256 | -6.0631 | 4155     |
| SMG7         | 0.68672  | 0.68672  | 7.0344  | 0.63261  | 0.53739 | 0.71273 | -6.0633 | 9887     |
| RAC3         | -0.4546  | 0.4546   | 2.0833  | -0.63246 | 0.53749 | 0.71273 | -6.0633 | 5881     |



|           |          |          |         |          |         |         |         |          |
|-----------|----------|----------|---------|----------|---------|---------|---------|----------|
| TXK       | -0.04974 | 0.049741 | 0.25737 | -0.6324  | 0.53752 | 0.71273 | -6.0634 | 7294     |
| RAB3GAP1  | 0.73511  | 0.73511  | 7.3374  | 0.63227  | 0.53761 | 0.71273 | -6.0635 | 22930    |
| HSPA2     | 6.3528   | 6.3528   | 20.037  | 0.63222  | 0.53764 | 0.71273 | -6.0635 | 3306     |
| RHBDL2    | 0.66186  | 0.66186  | 3.658   | 0.63218  | 0.53766 | 0.71273 | -6.0635 | 54933    |
| HBS1L     | 0.18442  | 0.18442  | 2.3006  | 0.63215  | 0.53768 | 0.71273 | -6.0635 | 10767    |
| SERPINB12 | 33.502   | 33.502   | 65.942  | 0.63214  | 0.53769 | 0.71273 | -6.0635 | 89777    |
| NECAB3    | -0.31066 | 0.31066  | 2.0255  | -0.63204 | 0.53775 | 0.71273 | -6.0636 | 63941    |
| TSPO      | 12.045   | 12.045   | 71.166  | 0.63196  | 0.5378  | 0.71273 | -6.0637 | 706      |
| APOC2     | -0.07208 | 0.072079 | 0.19766 | -0.63192 | 0.53783 | 0.71273 | -6.0637 | 344      |
| DKK3      | 2.7457   | 2.7457   | 11.289  | 0.63191  | 0.53783 | 0.71273 | -6.0637 | 27122    |
| ECEL1     | -0.21798 | 0.21798  | 0.29989 | -0.63184 | 0.53788 | 0.71274 | -6.0637 | 9427     |
| FGL2      | -0.70612 | 0.70612  | 3.8464  | -0.6317  | 0.53797 | 0.71276 | -6.0638 | 10875    |
| UNC13B    | 0.73788  | 0.73788  | 7.4954  | 0.63168  | 0.53798 | 0.71276 | -6.0638 | 10497    |
| LMO2      | -0.48385 | 0.48385  | 3.0371  | -0.63144 | 0.53813 | 0.7129  | -6.064  | 4005     |
| ST3GAL2   | 0.58097  | 0.58097  | 3.2345  | 0.63129  | 0.53823 | 0.71298 | -6.0641 | 6483     |
| CENPU     | 0.41196  | 0.41196  | 2.3919  | 0.63073  | 0.53858 | 0.71339 | -6.0644 | 79682    |
| CA5B      | -0.16045 | 0.16045  | 1.3453  | -0.63042 | 0.53878 | 0.7136  | -6.0646 | 11238    |
| TBX2-AS1  | -0.19754 | 0.19754  | 0.68706 | -0.63023 | 0.5389  | 0.7137  | -6.0648 | 1.04E+08 |
| MIR3142HG | -0.06038 | 0.060379 | 0.20395 | -0.63013 | 0.53897 | 0.71373 | -6.0648 | 1.07E+08 |
| PKIB      | -0.05713 | 0.057129 | 0.37417 | -0.63002 | 0.53903 | 0.71376 | -6.0649 | 5570     |
| SLC35E3   | -0.11801 | 0.11801  | 1.523   | -0.62992 | 0.5391  | 0.71379 | -6.065  | 55508    |
| EXOC1     | 0.49363  | 0.49363  | 6.21    | 0.62926  | 0.53952 | 0.7143  | -6.0654 | 55763    |
| SF3B4     | 1.5956   | 1.5956   | 13.743  | 0.62885  | 0.53978 | 0.71458 | -6.0656 | 10262    |
| ADNP      | -0.5595  | 0.5595   | 8.7163  | -0.62859 | 0.53995 | 0.71475 | -6.0658 | 23394    |
| C1orf56   | -0.1153  | 0.1153   | 1.3033  | -0.6281  | 0.54026 | 0.7151  | -6.0661 | 54964    |
| PTGDR     | -0.08324 | 0.083239 | 0.23842 | -0.62761 | 0.54056 | 0.71541 | -6.0664 | 5729     |

|              |          |          |         |          |         |         |         |          |
|--------------|----------|----------|---------|----------|---------|---------|---------|----------|
| HMSD         | -0.04816 | 0.048163 | 0.14329 | -0.62754 | 0.54061 | 0.71541 | -6.0665 | 284293   |
| RIOX2        | 0.33699  | 0.33699  | 3.2445  | 0.62754  | 0.54061 | 0.71541 | -6.0665 | 84864    |
| RAPGEF2      | 0.27619  | 0.27619  | 3.9565  | 0.62725  | 0.54079 | 0.71559 | -6.0666 | 9693     |
| HCST         | -0.70752 | 0.70752  | 2.8505  | -0.62716 | 0.54085 | 0.71561 | -6.0667 | 10870    |
| FBXO25       | 0.34898  | 0.34898  | 4.0887  | 0.62708  | 0.5409  | 0.71562 | -6.0667 | 26260    |
| SREK1        | -0.27007 | 0.27007  | 3.1575  | -0.62691 | 0.54101 | 0.71571 | -6.0669 | 140890   |
| LCA5         | 0.073042 | 0.073042 | 0.41465 | 0.62651  | 0.54127 | 0.71594 | -6.0671 | 167691   |
| JOSD1        | 0.68718  | 0.68718  | 6.9774  | 0.62641  | 0.54133 | 0.71594 | -6.0672 | 9929     |
| NDUF8        | 1.018    | 1.018    | 5.0882  | 0.6264   | 0.54134 | 0.71594 | -6.0672 | 284184   |
| RPS13        | 38.715   | 38.715   | 265.31  | 0.62637  | 0.54136 | 0.71594 | -6.0672 | 6207     |
| FAU          | 28.428   | 28.428   | 184.19  | 0.62625  | 0.54143 | 0.71594 | -6.0673 | 2197     |
| ZNF585A      | -0.07564 | 0.075635 | 0.62704 | -0.62621 | 0.54146 | 0.71594 | -6.0673 | 199704   |
| PER2         | -0.99784 | 0.99784  | 5.8761  | -0.62614 | 0.5415  | 0.71594 | -6.0673 | 8864     |
| ZNF117       | 0.17909  | 0.17909  | 1.1472  | 0.62611  | 0.54152 | 0.71594 | -6.0674 | 51351    |
| ARL16        | -0.34179 | 0.34179  | 3.4293  | -0.62588 | 0.54167 | 0.71599 | -6.0675 | 339231   |
| STK11IP      | -0.42157 | 0.42157  | 3.0118  | -0.62586 | 0.54168 | 0.71599 | -6.0675 | 114790   |
| LOC730202    | -0.06609 | 0.066086 | 0.22923 | -0.62574 | 0.54176 | 0.71599 | -6.0676 | 730202   |
| CHRNE        | -0.15388 | 0.15388  | 0.69892 | -0.62573 | 0.54176 | 0.71599 | -6.0676 | 1145     |
| MS4A7        | 1.0505   | 1.0505   | 3.136   | 0.62571  | 0.54177 | 0.71599 | -6.0676 | 58475    |
| GSAP         | -0.14963 | 0.14963  | 1.387   | -0.62561 | 0.54184 | 0.71602 | -6.0677 | 54103    |
| AMZ2         | 0.62308  | 0.62308  | 5.0966  | 0.62546  | 0.54193 | 0.71609 | -6.0678 | 51321    |
| TKT          | 3.9001   | 3.9001   | 20.851  | 0.62505  | 0.5422  | 0.71638 | -6.068  | 7086     |
| MIR378J      | -0.06358 | 0.06358  | 0.1368  | -0.62492 | 0.54228 | 0.71643 | -6.0681 | 1.02E+08 |
| LOC101927151 | 0.046082 | 0.046082 | 0.23601 | 0.62443  | 0.54259 | 0.71679 | -6.0684 | 1.02E+08 |
| CACTIN-AS1   | -0.05875 | 0.058752 | 0.17885 | -0.62433 | 0.54265 | 0.71679 | -6.0685 | 404665   |
| DGKQ         | -0.44559 | 0.44559  | 2.9278  | -0.62429 | 0.54268 | 0.71679 | -6.0685 | 1609     |

|              |          |          |         |          |         |         |         |          |
|--------------|----------|----------|---------|----------|---------|---------|---------|----------|
| C12orf45     | -0.40709 | 0.40709  | 3.2403  | -0.62415 | 0.54277 | 0.71686 | -6.0686 | 121053   |
| ZNF639       | 0.2435   | 0.2435   | 2.1382  | 0.62399  | 0.54287 | 0.71693 | -6.0687 | 51193    |
| CNTF         | 0.060241 | 0.060241 | 0.19116 | 0.62385  | 0.54296 | 0.717   | -6.0688 | 1270     |
| LOC101927752 | 0.40372  | 0.40372  | 2.4763  | 0.62368  | 0.54307 | 0.71708 | -6.0689 | 1.02E+08 |
| PRAF2        | 0.96348  | 0.96348  | 3.7604  | 0.62355  | 0.54315 | 0.71714 | -6.069  | 11230    |
| HNRNPL       | 4.6152   | 4.6152   | 42.436  | 0.62331  | 0.5433  | 0.71728 | -6.0691 | 3191     |
| F2R          | 0.8701   | 0.8701   | 6.6878  | 0.62324  | 0.54335 | 0.71729 | -6.0692 | 2149     |
| ADH7         | 0.33527  | 0.33527  | 0.75224 | 0.62306  | 0.54347 | 0.71738 | -6.0693 | 131      |
| RNASEH2C     | 0.63434  | 0.63434  | 3.5603  | 0.62295  | 0.54353 | 0.71742 | -6.0693 | 84153    |
| PRKAB1       | -0.33169 | 0.33169  | 3.3206  | -0.62276 | 0.54365 | 0.71747 | -6.0695 | 5564     |
| LRRC25       | 0.47298  | 0.47298  | 1.4487  | 0.62275  | 0.54366 | 0.71747 | -6.0695 | 126364   |
| CXXC5        | 0.42219  | 0.42219  | 3.7922  | 0.62258  | 0.54377 | 0.7175  | -6.0696 | 51523    |
| ZNF787       | -0.62936 | 0.62936  | 4.0659  | -0.62246 | 0.54385 | 0.7175  | -6.0697 | 126208   |
| LOC102723335 | -0.06273 | 0.062726 | 0.17709 | -0.62246 | 0.54385 | 0.7175  | -6.0697 | 1.03E+08 |
| GSTM3        | -0.38815 | 0.38815  | 2.6606  | -0.62245 | 0.54385 | 0.7175  | -6.0697 | 2947     |
| IDI2-AS1     | 0.15872  | 0.15872  | 0.6     | 0.62237  | 0.54391 | 0.71752 | -6.0697 | 55853    |
| ENTPD5       | -0.08888 | 0.088883 | 1.445   | -0.62197 | 0.54416 | 0.71779 | -6.07   | 957      |
| IPO5         | 1.2036   | 1.2036   | 10.086  | 0.62189  | 0.54421 | 0.71781 | -6.07   | 3843     |
| ASAP3        | -2.4206  | 2.4206   | 9.3843  | -0.62178 | 0.54428 | 0.71784 | -6.0701 | 55616    |
| PPP1R27      | -0.08705 | 0.087048 | 0.19949 | -0.62172 | 0.54432 | 0.71784 | -6.0701 | 116729   |
| THUMPD2      | -0.16101 | 0.16101  | 1.5582  | -0.62161 | 0.54439 | 0.71788 | -6.0702 | 80745    |
| ARL14EP      | 0.33766  | 0.33766  | 2.4876  | 0.62153  | 0.54444 | 0.71788 | -6.0702 | 120534   |
| KHSRP        | -2.1745  | 2.1745   | 17.868  | -0.62138 | 0.54454 | 0.71795 | -6.0703 | 8570     |
| BNC2         | 0.27883  | 0.27883  | 1.0676  | 0.62125  | 0.54462 | 0.71797 | -6.0704 | 54796    |
| GINS3        | 0.21053  | 0.21053  | 1.88    | 0.62123  | 0.54464 | 0.71797 | -6.0704 | 64785    |
| ANKRD49      | 0.19706  | 0.19706  | 1.67    | 0.6211   | 0.54471 | 0.71802 | -6.0705 | 54851    |

|               |          |          |         |          |         |         |         |          |
|---------------|----------|----------|---------|----------|---------|---------|---------|----------|
| TTC7A         | -0.56753 | 0.56753  | 4.2761  | -0.62086 | 0.54487 | 0.71815 | -6.0707 | 57217    |
| MAP3K7        | 0.32338  | 0.32338  | 4.1482  | 0.62079  | 0.54492 | 0.71815 | -6.0707 | 6885     |
| PDXP          | 0.25798  | 0.25798  | 1.3294  | 0.62075  | 0.54494 | 0.71815 | -6.0707 | 57026    |
| TMX2          | 1.2717   | 1.2717   | 12.404  | 0.62064  | 0.54501 | 0.71818 | -6.0708 | 51075    |
| NDUFC2-KCTD14 | -0.1783  | 0.1783   | 0.84833 | -0.62024 | 0.54526 | 0.71846 | -6.071  | 1.01E+08 |
| HHLA3         | -0.16499 | 0.16499  | 1.3055  | -0.62006 | 0.54538 | 0.71846 | -6.0712 | 11147    |
| FANCD2        | -0.13503 | 0.13503  | 0.97714 | -0.62    | 0.54542 | 0.71846 | -6.0712 | 2177     |
| PLOD3         | 1.0437   | 1.0437   | 5.4045  | 0.61996  | 0.54544 | 0.71846 | -6.0712 | 8985     |
| SNORA5C       | -0.09977 | 0.09977  | 0.37325 | -0.61996 | 0.54544 | 0.71846 | -6.0712 | 677796   |
| DAXX          | 0.19626  | 0.19626  | 1.6375  | 0.61991  | 0.54548 | 0.71846 | -6.0712 | 1616     |
| E2F1          | 0.1533   | 0.1533   | 1.2496  | 0.61974  | 0.54558 | 0.71855 | -6.0714 | 1869     |
| DLG4          | 0.24709  | 0.24709  | 1.1312  | 0.61961  | 0.54567 | 0.7186  | -6.0714 | 1742     |
| SZT2-AS1      | -0.0515  | 0.051504 | 0.16701 | -0.61911 | 0.54599 | 0.71897 | -6.0717 | 1.01E+08 |
| SPACA9        | 0.31051  | 0.31051  | 2.6007  | 0.61893  | 0.54611 | 0.71902 | -6.0719 | 11092    |
| NFATC1        | 0.36022  | 0.36022  | 2.565   | 0.61892  | 0.54611 | 0.71902 | -6.0719 | 4772     |
| SH3BP5        | -1.1412  | 1.1412   | 5.5046  | -0.61881 | 0.54618 | 0.71905 | -6.0719 | 9467     |
| SLC23A3       | -0.09506 | 0.095059 | 0.38048 | -0.61875 | 0.54622 | 0.71905 | -6.072  | 151295   |
| NCKIPSD       | 0.5532   | 0.5532   | 4.1001  | 0.61845  | 0.54641 | 0.71925 | -6.0722 | 51517    |
| CXCL11        | -0.11145 | 0.11145  | 0.20291 | -0.61788 | 0.54677 | 0.71967 | -6.0725 | 6373     |
| TNFRSF4       | 0.21483  | 0.21483  | 0.75859 | 0.61782  | 0.54681 | 0.71967 | -6.0725 | 7293     |
| PUS1          | -0.49744 | 0.49744  | 3.0892  | -0.61766 | 0.54691 | 0.71974 | -6.0726 | 80324    |
| CDH13         | -0.7267  | 0.7267   | 7.6928  | -0.61743 | 0.54707 | 0.71985 | -6.0728 | 1012     |
| SSR2          | 6.6189   | 6.6189   | 38.088  | 0.6174   | 0.54709 | 0.71985 | -6.0728 | 6746     |
| CEP85L        | -0.12729 | 0.12729  | 0.70898 | -0.6168  | 0.54747 | 0.7203  | -6.0732 | 387119   |
| SCAPER        | -0.40337 | 0.40337  | 3.4778  | -0.61667 | 0.54755 | 0.72035 | -6.0733 | 49855    |
| ERGIC1        | 1.4097   | 1.4097   | 14.303  | 0.61645  | 0.54769 | 0.72048 | -6.0734 | 57222    |

|            |          |          |         |          |         |         |         |        |
|------------|----------|----------|---------|----------|---------|---------|---------|--------|
| PLGRKT     | 0.76025  | 0.76025  | 4.1144  | 0.61621  | 0.54784 | 0.72059 | -6.0735 | 55848  |
| NQO2       | -0.72934 | 0.72934  | 5.2786  | -0.61619 | 0.54786 | 0.72059 | -6.0736 | 4835   |
| ZNF140     | -0.16442 | 0.16442  | 1.755   | -0.61608 | 0.54793 | 0.72062 | -6.0736 | 7699   |
| TRPM6      | 0.059317 | 0.059317 | 0.32706 | 0.61579  | 0.54812 | 0.72078 | -6.0738 | 140803 |
| CRNKL1     | 0.27462  | 0.27462  | 2.9387  | 0.61573  | 0.54815 | 0.72078 | -6.0738 | 51340  |
| PNKD       | -0.47337 | 0.47337  | 2.4621  | -0.61569 | 0.54818 | 0.72078 | -6.0739 | 25953  |
| CYBB       | 1.5301   | 1.5301   | 5.8414  | 0.6156   | 0.54823 | 0.72078 | -6.0739 | 1536   |
| ENTPD1     | 0.43369  | 0.43369  | 3.0044  | 0.61553  | 0.54828 | 0.72078 | -6.074  | 953    |
| SELENON    | -3.561   | 3.561    | 15.428  | -0.61549 | 0.54831 | 0.72078 | -6.074  | 57190  |
| PSMB3      | 6.3663   | 6.3663   | 34.91   | 0.61512  | 0.54854 | 0.72104 | -6.0742 | 5691   |
| TMEM161B   | -0.11178 | 0.11178  | 1.1345  | -0.61503 | 0.5486  | 0.72106 | -6.0743 | 153396 |
| DCP2       | 0.2233   | 0.2233   | 2.3624  | 0.61434  | 0.54905 | 0.72154 | -6.0747 | 167227 |
| ZDHHC23    | -0.15594 | 0.15594  | 0.92806 | -0.61432 | 0.54906 | 0.72154 | -6.0747 | 254887 |
| SAMD4A     | 0.69776  | 0.69776  | 3.0442  | 0.61426  | 0.54909 | 0.72154 | -6.0748 | 23034  |
| CRISP3     | -0.13966 | 0.13966  | 0.33705 | -0.61407 | 0.54921 | 0.72161 | -6.0749 | 10321  |
| LYN        | 1.0817   | 1.0817   | 4.3256  | 0.61405  | 0.54923 | 0.72161 | -6.0749 | 4067   |
| CCDC88B    | -0.13543 | 0.13543  | 0.70519 | -0.61396 | 0.54929 | 0.72163 | -6.0749 | 283234 |
| ZNF71      | -0.16543 | 0.16543  | 1.4513  | -0.61381 | 0.54938 | 0.72165 | -6.075  | 58491  |
| MCM5       | -1.083   | 1.083    | 6.1343  | -0.61377 | 0.54941 | 0.72165 | -6.0751 | 4174   |
| NIT2       | 1.2428   | 1.2428   | 9.0882  | 0.6137   | 0.54945 | 0.72165 | -6.0751 | 56954  |
| VSTM4      | 0.48674  | 0.48674  | 2.1621  | 0.61363  | 0.5495  | 0.72165 | -6.0751 | 196740 |
| COL4A2-AS2 | 0.14292  | 0.14292  | 0.32657 | 0.6136   | 0.54952 | 0.72165 | -6.0752 | 1E+08  |
| HYOU1      | 2.3541   | 2.3541   | 11.382  | 0.61344  | 0.54962 | 0.72172 | -6.0753 | 10525  |
| FUBP1      | -1.0525  | 1.0525   | 8.9427  | -0.61331 | 0.5497  | 0.72178 | -6.0753 | 8880   |
| MIER2      | -0.51761 | 0.51761  | 4.5773  | -0.61296 | 0.54993 | 0.72202 | -6.0756 | 54531  |
| DDX49      | -0.91985 | 0.91985  | 7.5084  | -0.61286 | 0.55    | 0.72205 | -6.0756 | 54555  |

|          |          |          |         |          |         |         |         |          |
|----------|----------|----------|---------|----------|---------|---------|---------|----------|
| SLC7A7   | 0.36864  | 0.36864  | 1.471   | 0.61271  | 0.55009 | 0.72212 | -6.0757 | 9056     |
| SCAMP5   | -0.50102 | 0.50102  | 1.0406  | -0.61262 | 0.55015 | 0.72214 | -6.0758 | 192683   |
| TMEM198  | -0.1153  | 0.1153   | 0.46781 | -0.61207 | 0.5505  | 0.72255 | -6.0761 | 130612   |
| POLQ     | 0.078726 | 0.078726 | 0.41859 | 0.61185  | 0.55064 | 0.72268 | -6.0762 | 10721    |
| CLEC4G   | -0.59664 | 0.59664  | 0.89346 | -0.61167 | 0.55076 | 0.72271 | -6.0763 | 339390   |
| TMED1    | 0.63997  | 0.63997  | 4.0138  | 0.61165  | 0.55077 | 0.72271 | -6.0764 | 11018    |
| SNORA62  | -0.10633 | 0.10633  | 0.42733 | -0.6116  | 0.55081 | 0.72271 | -6.0764 | 6044     |
| AGAP11   | -0.28854 | 0.28854  | 1.5264  | -0.61149 | 0.55087 | 0.72271 | -6.0765 | 119385   |
| ZNHIT1   | 2.1092   | 2.1092   | 13.164  | 0.61136  | 0.55096 | 0.72271 | -6.0765 | 10467    |
| THNSL2   | -0.46098 | 0.46098  | 1.67    | -0.61135 | 0.55096 | 0.72271 | -6.0765 | 55258    |
| STAG3L4  | 0.10876  | 0.10876  | 1.7277  | 0.61135  | 0.55097 | 0.72271 | -6.0766 | 64940    |
| UBALD2   | 2.2243   | 2.2243   | 14.157  | 0.61127  | 0.55102 | 0.72272 | -6.0766 | 283991   |
| CDK5     | 0.55535  | 0.55535  | 2.8625  | 0.61112  | 0.55112 | 0.72279 | -6.0767 | 1020     |
| DOK4     | 1.3679   | 1.3679   | 9.261   | 0.61087  | 0.55128 | 0.72289 | -6.0768 | 55715    |
| EHD4-AS1 | 0.12058  | 0.12058  | 0.44882 | 0.61083  | 0.5513  | 0.72289 | -6.0769 | 1.02E+08 |
| MID1     | 0.10957  | 0.10957  | 1.2042  | 0.61079  | 0.55132 | 0.72289 | -6.0769 | 4281     |
| ACAT1    | 0.55397  | 0.55397  | 5.3342  | 0.61051  | 0.5515  | 0.72307 | -6.0771 | 38       |
| RPS27    | 52.37    | 52.37    | 279.35  | 0.61044  | 0.55155 | 0.72307 | -6.0771 | 6232     |
| PDXDC1   | -0.6704  | 0.6704   | 6.8885  | -0.61039 | 0.55158 | 0.72307 | -6.0771 | 23042    |
| ZNF672   | 0.3269   | 0.3269   | 4.2187  | 0.61014  | 0.55174 | 0.72322 | -6.0773 | 79894    |
| PLA1A    | -0.1009  | 0.1009   | 0.21613 | -0.60989 | 0.5519  | 0.72332 | -6.0774 | 51365    |
| GAK      | -0.94453 | 0.94453  | 9.0549  | -0.60989 | 0.5519  | 0.72332 | -6.0774 | 2580     |
| DHRS11   | 0.38123  | 0.38123  | 2.777   | 0.60962  | 0.55207 | 0.72349 | -6.0776 | 79154    |
| KCTD17   | -0.2841  | 0.2841   | 2.003   | -0.60946 | 0.55218 | 0.72356 | -6.0777 | 79734    |
| NADK     | 0.70812  | 0.70812  | 6.4163  | 0.60935  | 0.55225 | 0.72356 | -6.0778 | 65220    |
| AIFM1    | -0.33828 | 0.33828  | 2.4861  | -0.60934 | 0.55226 | 0.72356 | -6.0778 | 9131     |

|             |          |          |         |          |         |         |         |          |
|-------------|----------|----------|---------|----------|---------|---------|---------|----------|
| COG2        | -0.32019 | 0.32019  | 3.4207  | -0.6089  | 0.55254 | 0.72383 | -6.0781 | 22796    |
| IL15        | -0.08914 | 0.089144 | 0.38597 | -0.60886 | 0.55257 | 0.72383 | -6.0781 | 3600     |
| CCDC170     | -0.04921 | 0.049211 | 0.20863 | -0.60876 | 0.55263 | 0.72383 | -6.0781 | 80129    |
| CRYBG1      | 6.3299   | 6.3299   | 30.228  | 0.60876  | 0.55263 | 0.72383 | -6.0781 | 202      |
| CHD7        | -0.20086 | 0.20086  | 3.6397  | -0.60834 | 0.5529  | 0.72406 | -6.0784 | 55636    |
| CD99L2      | -0.69963 | 0.69963  | 3.9108  | -0.60826 | 0.55296 | 0.72406 | -6.0784 | 83692    |
| KCNJ15      | 0.94108  | 0.94108  | 3.5307  | 0.60822  | 0.55298 | 0.72406 | -6.0785 | 3772     |
| MLST8       | -0.47001 | 0.47001  | 4.0415  | -0.60821 | 0.55298 | 0.72406 | -6.0785 | 64223    |
| LOC339666   | -0.06018 | 0.060178 | 0.16358 | -0.608   | 0.55312 | 0.72418 | -6.0786 | 339666   |
| CEBPA       | 3.7924   | 3.7924   | 18.744  | 0.60777  | 0.55327 | 0.72427 | -6.0787 | 1050     |
| CCDC137     | -0.75899 | 0.75899  | 5.4431  | -0.60777 | 0.55327 | 0.72427 | -6.0787 | 339230   |
| KTI12       | 0.30243  | 0.30243  | 2.2491  | 0.60762  | 0.55337 | 0.72434 | -6.0788 | 112970   |
| RARA        | -0.6456  | 0.6456   | 4.2206  | -0.60744 | 0.55348 | 0.72438 | -6.0789 | 5914     |
| GEM         | 0.86183  | 0.86183  | 3.64    | 0.60743  | 0.55349 | 0.72438 | -6.079  | 2669     |
| PLCB1       | 0.16564  | 0.16564  | 0.93427 | 0.60727  | 0.55359 | 0.72446 | -6.079  | 23236    |
| DDX47       | 0.72726  | 0.72726  | 7.4619  | 0.60704  | 0.55374 | 0.7246  | -6.0792 | 51202    |
| CSNK1G2-AS1 | -0.07972 | 0.079715 | 0.28874 | -0.60671 | 0.55395 | 0.72482 | -6.0794 | 255193   |
| BLOC1S3     | 0.82026  | 0.82026  | 4.0717  | 0.60645  | 0.55412 | 0.72486 | -6.0796 | 388552   |
| ISY1-RAB43  | -0.39325 | 0.39325  | 3.0286  | -0.60643 | 0.55413 | 0.72486 | -6.0796 | 1.01E+08 |
| FGD1        | 0.36812  | 0.36812  | 2.7234  | 0.60642  | 0.55414 | 0.72486 | -6.0796 | 2245     |
| TPO         | -0.17586 | 0.17586  | 0.4559  | -0.6064  | 0.55415 | 0.72486 | -6.0796 | 7173     |
| NKAP        | 0.36712  | 0.36712  | 2.7663  | 0.60589  | 0.55448 | 0.72523 | -6.0799 | 79576    |
| ACTA2       | 13.791   | 13.791   | 51.952  | 0.60578  | 0.55455 | 0.72527 | -6.08   | 59       |
| INTS10      | -0.6975  | 0.6975   | 7.4855  | -0.60538 | 0.55481 | 0.72555 | -6.0802 | 55174    |
| AMPD2       | 0.40571  | 0.40571  | 3.1118  | 0.60507  | 0.55501 | 0.7257  | -6.0804 | 271      |
| MIR5194     | -0.06674 | 0.066739 | 0.17589 | -0.60507 | 0.55501 | 0.7257  | -6.0804 | 1.01E+08 |

|            |          |          |         |          |         |         |         |        |
|------------|----------|----------|---------|----------|---------|---------|---------|--------|
| POP7       | 1.4771   | 1.4771   | 9.8316  | 0.60499  | 0.55506 | 0.72571 | -6.0804 | 10248  |
| KIAA0319L  | -0.55147 | 0.55147  | 6.8382  | -0.60437 | 0.55546 | 0.72618 | -6.0808 | 79932  |
| CCDC120    | 1.355    | 1.355    | 8.4619  | 0.60422  | 0.55556 | 0.72622 | -6.0809 | 90060  |
| NCS1       | 0.55799  | 0.55799  | 5.8651  | 0.60417  | 0.55559 | 0.72622 | -6.0809 | 23413  |
| CUEDC2     | -1.1436  | 1.1436   | 6.5787  | -0.60412 | 0.55562 | 0.72622 | -6.081  | 79004  |
| SHISA5     | -4.1102  | 4.1102   | 16.01   | -0.60378 | 0.55584 | 0.72645 | -6.0812 | 51246  |
| BNIPL      | 4.9839   | 4.9839   | 27.114  | 0.60362  | 0.55595 | 0.72653 | -6.0813 | 149428 |
| RFX1       | -0.23162 | 0.23162  | 2.2386  | -0.60334 | 0.55613 | 0.72666 | -6.0814 | 5989   |
| KLK6       | -5.444   | 5.444    | 7.2758  | -0.6033  | 0.55616 | 0.72666 | -6.0815 | 5653   |
| DAAM2      | -0.64166 | 0.64166  | 2.8915  | -0.60326 | 0.55618 | 0.72666 | -6.0815 | 23500  |
| KCNIP2-AS1 | -0.06273 | 0.062733 | 0.17414 | -0.6032  | 0.55622 | 0.72666 | -6.0815 | 1E+08  |
| SERF1B     | 0.089824 | 0.089824 | 0.5556  | 0.60302  | 0.55633 | 0.72669 | -6.0816 | 728492 |
| BLMH       | 6.5819   | 6.5819   | 17.446  | 0.60297  | 0.55637 | 0.72669 | -6.0817 | 642    |
| SCAMP4     | -1.298   | 1.298    | 10.348  | -0.60291 | 0.55641 | 0.72669 | -6.0817 | 113178 |
| SPRED2     | -0.40435 | 0.40435  | 3.6786  | -0.6029  | 0.55641 | 0.72669 | -6.0817 | 200734 |
| ANG        | -0.23534 | 0.23534  | 1.6273  | -0.60275 | 0.55651 | 0.72669 | -6.0818 | 283    |
| RNF215     | -0.29926 | 0.29926  | 1.5423  | -0.60262 | 0.5566  | 0.72669 | -6.0819 | 200312 |
| SDK1       | -0.53484 | 0.53484  | 2.4411  | -0.6026  | 0.55661 | 0.72669 | -6.0819 | 221935 |
| FZD6       | 0.87402  | 0.87402  | 7.787   | 0.60257  | 0.55662 | 0.72669 | -6.0819 | 8323   |
| CYP2R1     | 0.44366  | 0.44366  | 2.6691  | 0.60252  | 0.55666 | 0.72669 | -6.0819 | 120227 |
| RELN       | -0.11246 | 0.11246  | 0.63693 | -0.6025  | 0.55667 | 0.72669 | -6.082  | 5649   |
| HAPLN3     | 0.78125  | 0.78125  | 3.4937  | 0.60203  | 0.55697 | 0.727   | -6.0822 | 145864 |
| C20orf202  | 0.050437 | 0.050437 | 0.19277 | 0.60199  | 0.557   | 0.727   | -6.0823 | 400831 |
| TMIGD3     | -0.09652 | 0.096521 | 0.19322 | -0.60191 | 0.55705 | 0.727   | -6.0823 | 57413  |
| PPL        | 9.1424   | 9.1424   | 55.776  | 0.60187  | 0.55708 | 0.727   | -6.0823 | 5493   |
| CEACAM1    | 0.27248  | 0.27248  | 1.2557  | 0.60114  | 0.55755 | 0.72749 | -6.0828 | 634    |



|             |          |          |         |          |         |         |         |          |
|-------------|----------|----------|---------|----------|---------|---------|---------|----------|
| NCOA7-AS1   | -0.0486  | 0.0486   | 0.13691 | -0.60113 | 0.55755 | 0.72749 | -6.0828 | 1.04E+08 |
| ADGRE5      | 0.71622  | 0.71622  | 4.3914  | 0.60109  | 0.55758 | 0.72749 | -6.0828 | 976      |
| MIS18BP1    | 0.19518  | 0.19518  | 1.7629  | 0.60097  | 0.55766 | 0.72753 | -6.0829 | 55320    |
| KDM5C       | -1.0791  | 1.0791   | 10.396  | -0.60079 | 0.55778 | 0.72763 | -6.083  | 8242     |
| GANC        | -0.17521 | 0.17521  | 3.0047  | -0.60019 | 0.55816 | 0.72808 | -6.0834 | 2595     |
| OSGEP       | -0.43582 | 0.43582  | 3.4585  | -0.60008 | 0.55824 | 0.7281  | -6.0834 | 55644    |
| RPS16P5     | -0.10792 | 0.10792  | 0.52658 | -0.59997 | 0.55831 | 0.7281  | -6.0835 | 647190   |
| NECAP1      | -0.2731  | 0.2731   | 3.6024  | -0.59991 | 0.55834 | 0.7281  | -6.0835 | 25977    |
| FDX1        | -0.23103 | 0.23103  | 2.2113  | -0.59989 | 0.55836 | 0.7281  | -6.0835 | 2230     |
| SIGLEC10    | -0.29584 | 0.29584  | 0.63385 | -0.59953 | 0.55859 | 0.72835 | -6.0838 | 89790    |
| XBP1        | 2.9682   | 2.9682   | 28.927  | 0.5994   | 0.55868 | 0.72841 | -6.0838 | 7494     |
| NCR3LG1     | -0.10723 | 0.10723  | 0.64654 | -0.59929 | 0.55875 | 0.72844 | -6.0839 | 374383   |
| LRP1        | -6.8066  | 6.8066   | 37.802  | -0.59921 | 0.5588  | 0.72846 | -6.084  | 4035     |
| PYCARD      | 6.2438   | 6.2438   | 29.286  | 0.59913  | 0.55885 | 0.72846 | -6.084  | 29108    |
| CMTM2       | 0.20947  | 0.20947  | 0.45282 | 0.59894  | 0.55897 | 0.72857 | -6.0841 | 146225   |
| MAGEL2      | 0.053581 | 0.053581 | 0.11851 | 0.59888  | 0.55901 | 0.72857 | -6.0841 | 54551    |
| PTAR1       | -0.28331 | 0.28331  | 2.6509  | -0.59859 | 0.5592  | 0.72874 | -6.0843 | 375743   |
| RNASEH1-AS1 | 0.13475  | 0.13475  | 0.67299 | 0.59854  | 0.55923 | 0.72874 | -6.0844 | 1.01E+08 |
| EPHB4       | -2.1145  | 2.1145   | 14.687  | -0.59836 | 0.55935 | 0.72883 | -6.0845 | 2050     |
| IL17RB      | -0.05251 | 0.052513 | 0.40651 | -0.59817 | 0.55947 | 0.72894 | -6.0846 | 55540    |
| GNA14       | -0.1414  | 0.1414   | 0.64337 | -0.59803 | 0.55956 | 0.72895 | -6.0847 | 9630     |
| CLEC10A     | -0.20773 | 0.20773  | 1.3173  | -0.59802 | 0.55957 | 0.72895 | -6.0847 | 10462    |
| OLFML3      | 2.5946   | 2.5946   | 9.6097  | 0.59791  | 0.55964 | 0.72899 | -6.0847 | 56944    |
| ITM2C       | 1.3504   | 1.3504   | 6.1217  | 0.59737  | 0.55999 | 0.72934 | -6.0851 | 81618    |
| OAZ2        | 1.6936   | 1.6936   | 14.928  | 0.59736  | 0.56    | 0.72934 | -6.0851 | 4947     |
| COL13A1     | 0.40827  | 0.40827  | 1.7247  | 0.59713  | 0.56015 | 0.72948 | -6.0852 | 1305     |

|           |          |          |         |          |         |         |         |        |
|-----------|----------|----------|---------|----------|---------|---------|---------|--------|
| TMEM259   | -3.7259  | 3.7259   | 27.616  | -0.59681 | 0.56035 | 0.72969 | -6.0854 | 91304  |
| CCNH      | -0.1832  | 0.1832   | 2.2072  | -0.59665 | 0.56046 | 0.72977 | -6.0855 | 902    |
| IDO1      | -0.14176 | 0.14176  | 1.0395  | -0.59654 | 0.56053 | 0.7298  | -6.0856 | 3620   |
| TRIM29    | 31.046   | 31.046   | 220.83  | 0.59643  | 0.5606  | 0.7298  | -6.0856 | 23650  |
| PRMT6     | -0.21305 | 0.21305  | 2.1032  | -0.59641 | 0.56061 | 0.7298  | -6.0856 | 55170  |
| DTWD1     | -0.26687 | 0.26687  | 1.7983  | -0.59635 | 0.56065 | 0.7298  | -6.0857 | 56986  |
| SF3B3     | -0.80821 | 0.80821  | 8.5787  | -0.59615 | 0.56078 | 0.72991 | -6.0858 | 23450  |
| RNF34     | 0.45891  | 0.45891  | 4.8163  | 0.59577  | 0.56103 | 0.73018 | -6.086  | 80196  |
| SLC6A8    | -2.2306  | 2.2306   | 11.102  | -0.5957  | 0.56108 | 0.73018 | -6.0861 | 6535   |
| ZBTB41    | 0.13964  | 0.13964  | 1.1307  | 0.59539  | 0.56128 | 0.73039 | -6.0863 | 360023 |
| MATN3     | 0.05769  | 0.05769  | 0.24287 | 0.59528  | 0.56135 | 0.73042 | -6.0863 | 4148   |
| STRADB    | -0.2034  | 0.2034   | 1.4161  | -0.59493 | 0.56157 | 0.73066 | -6.0865 | 55437  |
| RBM8A     | -0.80342 | 0.80342  | 8.4223  | -0.59482 | 0.56165 | 0.7307  | -6.0866 | 9939   |
| SFT2D3    | -0.22319 | 0.22319  | 2.3365  | -0.5947  | 0.56172 | 0.73074 | -6.0867 | 84826  |
| C17orf107 | 0.13826  | 0.13826  | 1.1779  | 0.59437  | 0.56194 | 0.73086 | -6.0869 | 1E+08  |
| DHCR24    | -8.5747  | 8.5747   | 51.548  | -0.59428 | 0.562   | 0.73086 | -6.0869 | 1718   |
| C9orf116  | -0.08494 | 0.084943 | 0.31984 | -0.59424 | 0.56202 | 0.73086 | -6.0869 | 138162 |
| NUBP2     | -1.1678  | 1.1678   | 7.7181  | -0.59424 | 0.56203 | 0.73086 | -6.0869 | 10101  |
| DLX3      | 2.1938   | 2.1938   | 9.5081  | 0.59423  | 0.56203 | 0.73086 | -6.0869 | 1747   |
| BCKDHA    | 0.8575   | 0.8575   | 8.6613  | 0.59414  | 0.56209 | 0.73088 | -6.087  | 593    |
| ZNF501    | -0.09969 | 0.099687 | 0.56345 | -0.59408 | 0.56213 | 0.73088 | -6.087  | 115560 |
| CLIP3     | -0.46151 | 0.46151  | 1.8472  | -0.594   | 0.56218 | 0.73089 | -6.0871 | 25999  |
| TBRG4     | 0.69509  | 0.69509  | 6.9569  | 0.59384  | 0.56228 | 0.73096 | -6.0872 | 9238   |
| ATRIP     | 0.12155  | 0.12155  | 1.0771  | 0.59325  | 0.56267 | 0.73139 | -6.0875 | 84126  |
| TBC1D15   | -0.31445 | 0.31445  | 3.0084  | -0.59321 | 0.5627  | 0.73139 | -6.0876 | 64786  |
| TAP2      | -0.11593 | 0.11593  | 0.73469 | -0.59295 | 0.56286 | 0.73155 | -6.0877 | 6891   |

|             |          |          |         |          |         |         |         |          |
|-------------|----------|----------|---------|----------|---------|---------|---------|----------|
| UBE4B       | -0.69032 | 0.69032  | 9.0288  | -0.59271 | 0.56302 | 0.73167 | -6.0879 | 10277    |
| CD2         | 0.18529  | 0.18529  | 0.95318 | 0.59258  | 0.5631  | 0.73167 | -6.0879 | 914      |
| NFXL1       | -0.13808 | 0.13808  | 1.9844  | -0.59258 | 0.5631  | 0.73167 | -6.0879 | 152518   |
| SLAMF8      | 0.44354  | 0.44354  | 1.6705  | 0.59254  | 0.56313 | 0.73167 | -6.088  | 56833    |
| GM2A        | 9.8907   | 9.8907   | 46.463  | 0.59237  | 0.56324 | 0.7317  | -6.0881 | 2760     |
| RASGRF2     | 0.16864  | 0.16864  | 0.71975 | 0.59237  | 0.56324 | 0.7317  | -6.0881 | 5924     |
| ECH1        | 3.2659   | 3.2659   | 23.343  | 0.59115  | 0.56403 | 0.73264 | -6.0888 | 1891     |
| TRAIP       | -0.09538 | 0.095375 | 0.5847  | -0.59113 | 0.56405 | 0.73264 | -6.0888 | 10293    |
| NMRAL1      | 0.82998  | 0.82998  | 6.6539  | 0.59094  | 0.56417 | 0.73271 | -6.0889 | 57407    |
| SLC7A6      | -0.232   | 0.232    | 3.4963  | -0.59091 | 0.56419 | 0.73271 | -6.0889 | 9057     |
| SEPT5-GP1BB | -1.4337  | 1.4337   | 6.3265  | -0.59079 | 0.56427 | 0.73272 | -6.089  | 1.01E+08 |
| MRPL21      | 1.8068   | 1.8068   | 10.731  | 0.59077  | 0.56428 | 0.73272 | -6.089  | 219927   |
| LST1        | 0.077104 | 0.077104 | 0.28357 | 0.59058  | 0.56441 | 0.73282 | -6.0891 | 7940     |
| ZNF385D     | -0.22065 | 0.22065  | 1.1662  | -0.59016 | 0.56468 | 0.73311 | -6.0894 | 79750    |
| CYGB        | -1.1309  | 1.1309   | 4.5252  | -0.5901  | 0.56472 | 0.73311 | -6.0894 | 114757   |
| USPL1       | -0.13158 | 0.13158  | 1.4427  | -0.58988 | 0.56486 | 0.73315 | -6.0895 | 10208    |
| CD302       | 0.4729   | 0.4729   | 2.2143  | 0.58987  | 0.56487 | 0.73315 | -6.0895 | 9936     |
| CCNT1       | -0.2234  | 0.2234   | 3.1987  | -0.58986 | 0.56488 | 0.73315 | -6.0896 | 904      |
| FBXO4       | -0.265   | 0.265    | 1.7835  | -0.58975 | 0.56494 | 0.73318 | -6.0896 | 26272    |
| IDH1-AS1    | 0.048575 | 0.048575 | 0.134   | 0.58966  | 0.56501 | 0.73321 | -6.0897 | 1.01E+08 |
| TOLLIP      | 2.3832   | 2.3832   | 18.382  | 0.58952  | 0.5651  | 0.73327 | -6.0898 | 54472    |
| HP1BP3      | 1.2011   | 1.2011   | 18.071  | 0.58941  | 0.56517 | 0.7333  | -6.0898 | 50809    |
| SOS1        | 0.29158  | 0.29158  | 3.7652  | 0.58913  | 0.56535 | 0.73348 | -6.09   | 6654     |
| GLTPD2      | 0.16569  | 0.16569  | 1.2489  | 0.58895  | 0.56547 | 0.73358 | -6.0901 | 388323   |
| C15orf40    | -0.16712 | 0.16712  | 1.4081  | -0.58855 | 0.56573 | 0.73382 | -6.0903 | 123207   |
| PPP1R8      | 0.52489  | 0.52489  | 5.1473  | 0.58853  | 0.56574 | 0.73382 | -6.0903 | 5511     |

|          |          |          |         |          |         |         |         |        |
|----------|----------|----------|---------|----------|---------|---------|---------|--------|
| PDIA4    | 2.6842   | 2.6842   | 15.661  | 0.58823  | 0.56593 | 0.73401 | -6.0905 | 9601   |
| ANAPC4   | -0.28586 | 0.28586  | 3.2845  | -0.58786 | 0.56618 | 0.73423 | -6.0907 | 29945  |
| GOLIM4   | 0.60496  | 0.60496  | 4.6892  | 0.58785  | 0.56618 | 0.73423 | -6.0907 | 27333  |
| CRYBG2   | 1.3839   | 1.3839   | 9.1056  | 0.58774  | 0.56626 | 0.73426 | -6.0908 | 55057  |
| MUC15    | 1.721    | 1.721    | 4.6506  | 0.58749  | 0.56642 | 0.73442 | -6.091  | 143662 |
| TRIM58   | 0.053875 | 0.053875 | 0.17654 | 0.58685  | 0.56684 | 0.73484 | -6.0913 | 25893  |
| AIF1     | 0.45167  | 0.45167  | 1.3073  | 0.58681  | 0.56686 | 0.73484 | -6.0914 | 199    |
| WDR89    | -0.14009 | 0.14009  | 1.1259  | -0.58677 | 0.56689 | 0.73484 | -6.0914 | 112840 |
| ASB1     | -0.25678 | 0.25678  | 2.3274  | -0.58669 | 0.56694 | 0.73484 | -6.0914 | 51665  |
| ATP2B4   | -1.9207  | 1.9207   | 23.784  | -0.58658 | 0.56701 | 0.73484 | -6.0915 | 493    |
| LRRC3    | -0.12022 | 0.12022  | 0.69851 | -0.58653 | 0.56705 | 0.73484 | -6.0915 | 81543  |
| WDHD1    | 0.16408  | 0.16408  | 1.0576  | 0.58652  | 0.56705 | 0.73484 | -6.0915 | 11169  |
| ADAMTS7  | 0.48998  | 0.48998  | 1.8039  | 0.58626  | 0.56722 | 0.73498 | -6.0917 | 11173  |
| SETD3    | 0.58228  | 0.58228  | 8.2     | 0.5861   | 0.56733 | 0.73498 | -6.0918 | 84193  |
| QSOX2    | -0.17771 | 0.17771  | 1.8047  | -0.58604 | 0.56736 | 0.73498 | -6.0918 | 169714 |
| KCNMB1   | -0.32378 | 0.32378  | 1.4503  | -0.58603 | 0.56737 | 0.73498 | -6.0918 | 3779   |
| METTL6   | 0.14373  | 0.14373  | 1.4494  | 0.58598  | 0.5674  | 0.73498 | -6.0919 | 131965 |
| TOE1     | -0.161   | 0.161    | 1.6621  | -0.58596 | 0.56742 | 0.73498 | -6.0919 | 114034 |
| CASP8    | -0.28406 | 0.28406  | 2.4395  | -0.58575 | 0.56756 | 0.7351  | -6.092  | 841    |
| SSUH2    | 0.066097 | 0.066097 | 0.15351 | 0.58545  | 0.56775 | 0.7353  | -6.0922 | 51066  |
| FZD2     | 0.15409  | 0.15409  | 0.50396 | 0.58517  | 0.56794 | 0.73548 | -6.0923 | 2535   |
| MRPS2    | -0.53027 | 0.53027  | 4.8492  | -0.58492 | 0.56809 | 0.73563 | -6.0925 | 51116  |
| CAMTA1   | -0.07567 | 0.075671 | 0.81822 | -0.58483 | 0.56816 | 0.73565 | -6.0925 | 23261  |
| CDC25C   | 0.099482 | 0.099482 | 0.3075  | 0.58462  | 0.56829 | 0.73577 | -6.0927 | 995    |
| PRPS2    | 0.76425  | 0.76425  | 5.1274  | 0.58448  | 0.56838 | 0.73582 | -6.0927 | 5634   |
| TRAPPC2L | 0.46589  | 0.46589  | 2.9984  | 0.58437  | 0.56846 | 0.73582 | -6.0928 | 51693  |

|          |          |          |         |          |         |         |         |        |
|----------|----------|----------|---------|----------|---------|---------|---------|--------|
| TMEM92   | 0.077742 | 0.077742 | 0.30132 | 0.58437  | 0.56846 | 0.73582 | -6.0928 | 162461 |
| KDF1     | -0.35332 | 0.35332  | 3.5328  | -0.58413 | 0.56862 | 0.73597 | -6.0929 | 126695 |
| EPM2A    | -0.06361 | 0.063607 | 0.74439 | -0.58397 | 0.56872 | 0.73597 | -6.093  | 7957   |
| DGKH     | -0.18812 | 0.18812  | 2.0775  | -0.58388 | 0.56878 | 0.73597 | -6.0931 | 160851 |
| CTU1     | -0.27179 | 0.27179  | 1.3972  | -0.58384 | 0.56881 | 0.73597 | -6.0931 | 90353  |
| CDK11A   | -0.25648 | 0.25648  | 1.7548  | -0.58381 | 0.56882 | 0.73597 | -6.0931 | 728642 |
| ZNF593   | 1.3682   | 1.3682   | 7.3421  | 0.58372  | 0.56888 | 0.73597 | -6.0932 | 51042  |
| ZNF257   | -0.04286 | 0.042859 | 0.15813 | -0.58372 | 0.56888 | 0.73597 | -6.0932 | 113835 |
| SSRP1    | -2.2885  | 2.2885   | 17.773  | -0.58358 | 0.56898 | 0.73603 | -6.0933 | 6749   |
| NUDT12   | 0.17527  | 0.17527  | 1.446   | 0.58352  | 0.56902 | 0.73603 | -6.0933 | 83594  |
| DHX15    | 1.3481   | 1.3481   | 17.147  | 0.58331  | 0.56915 | 0.73611 | -6.0934 | 1665   |
| SLC25A16 | 0.17964  | 0.17964  | 2.1411  | 0.58329  | 0.56916 | 0.73611 | -6.0934 | 8034   |
| ZC4H2    | 0.11516  | 0.11516  | 0.90365 | 0.58319  | 0.56923 | 0.73614 | -6.0935 | 55906  |
| MARVELD3 | 0.13196  | 0.13196  | 0.73155 | 0.58309  | 0.5693  | 0.73617 | -6.0936 | 91862  |
| MGC12916 | 0.11463  | 0.11463  | 0.52659 | 0.58293  | 0.5694  | 0.73625 | -6.0937 | 84815  |
| NDNF     | -0.12142 | 0.12142  | 0.50604 | -0.58284 | 0.56946 | 0.73625 | -6.0937 | 79625  |
| BLID     | 0.088603 | 0.088603 | 0.19936 | 0.58273  | 0.56953 | 0.73625 | -6.0938 | 414899 |
| ILKAP    | -0.40642 | 0.40642  | 5.3516  | -0.58273 | 0.56953 | 0.73625 | -6.0938 | 80895  |
| SIX4     | 0.054054 | 0.054054 | 0.26108 | 0.58264  | 0.56959 | 0.73626 | -6.0938 | 51804  |
| NCOA1    | -0.54646 | 0.54646  | 6.4347  | -0.58243 | 0.56973 | 0.73639 | -6.0939 | 8648   |
| ZBTB2    | 0.14509  | 0.14509  | 2.0648  | 0.5822   | 0.56988 | 0.73653 | -6.0941 | 57621  |
| HIGD2A   | -2.3792  | 2.3792   | 17.88   | -0.58194 | 0.57005 | 0.73669 | -6.0942 | 192286 |
| TBC1D25  | -0.18333 | 0.18333  | 2.727   | -0.58184 | 0.57011 | 0.73671 | -6.0943 | 4943   |
| TPR      | 0.76159  | 0.76159  | 8.2197  | 0.58178  | 0.57015 | 0.73671 | -6.0943 | 7175   |
| SYTL5    | -0.11096 | 0.11096  | 0.26026 | -0.5817  | 0.5702  | 0.73672 | -6.0944 | 94122  |
| RPLP1    | -126.36  | 126.36   | 996.92  | -0.58153 | 0.57032 | 0.73681 | -6.0945 | 6176   |

|              |          |          |         |          |         |         |         |          |
|--------------|----------|----------|---------|----------|---------|---------|---------|----------|
| POLR2G       | 2.7599   | 2.7599   | 15.105  | 0.58135  | 0.57044 | 0.7369  | -6.0946 | 5436     |
| ARMC6        | 0.55908  | 0.55908  | 4.0556  | 0.58129  | 0.57048 | 0.7369  | -6.0946 | 93436    |
| SLC16A13     | 0.27979  | 0.27979  | 1.82    | 0.58114  | 0.57057 | 0.73697 | -6.0947 | 201232   |
| CYTH2        | 0.68294  | 0.68294  | 7.0346  | 0.58102  | 0.57065 | 0.73697 | -6.0948 | 9266     |
| CBX8         | -0.21921 | 0.21921  | 1.1042  | -0.581   | 0.57067 | 0.73697 | -6.0948 | 57332    |
| WDYHV1       | 0.16547  | 0.16547  | 1.9038  | 0.58094  | 0.5707  | 0.73697 | -6.0948 | 55093    |
| LOC100506691 | 0.050955 | 0.050955 | 0.15247 | 0.58068  | 0.57087 | 0.73709 | -6.095  | 1.01E+08 |
| PDIA6        | 2.3506   | 2.3506   | 16.353  | 0.58067  | 0.57088 | 0.73709 | -6.095  | 10130    |
| SETD7        | 0.51718  | 0.51718  | 7.7347  | 0.58044  | 0.57103 | 0.73723 | -6.0951 | 80854    |
| MRTO4        | 1.0001   | 1.0001   | 6.6357  | 0.58029  | 0.57113 | 0.73729 | -6.0952 | 51154    |
| PYCR2        | -1.0876  | 1.0876   | 6.1065  | -0.57999 | 0.57132 | 0.73749 | -6.0954 | 29920    |
| COX5B        | 10.976   | 10.976   | 60.887  | 0.57974  | 0.57149 | 0.73759 | -6.0955 | 1329     |
| HOMER3-AS1   | -0.10771 | 0.10771  | 0.38907 | -0.57974 | 0.57149 | 0.73759 | -6.0955 | 1.03E+08 |
| PXDC1        | 0.99384  | 0.99384  | 8.363   | 0.57953  | 0.57163 | 0.73772 | -6.0956 | 221749   |
| PTGES2       | -0.57276 | 0.57276  | 5.2802  | -0.57945 | 0.57168 | 0.73772 | -6.0957 | 80142    |
| LOXL1        | 1.542    | 1.542    | 6.0536  | 0.57936  | 0.57174 | 0.73775 | -6.0957 | 4016     |
| LPP-AS1      | 0.087349 | 0.087349 | 0.29449 | 0.57907  | 0.57193 | 0.73793 | -6.0959 | 1.01E+08 |
| CYBC1        | -1.1558  | 1.1558   | 6.3717  | -0.5788  | 0.5721  | 0.73807 | -6.0961 | 79415    |
| SLC38A7      | 0.3114   | 0.3114   | 2.3914  | 0.57878  | 0.57212 | 0.73807 | -6.0961 | 55238    |
| GK3P         | -0.11225 | 0.11225  | 0.68861 | -0.57866 | 0.5722  | 0.73809 | -6.0962 | 2713     |
| TMEM44-AS1   | -0.06901 | 0.069007 | 0.33548 | -0.57862 | 0.57222 | 0.73809 | -6.0962 | 1.01E+08 |
| RAB11FIP1    | 0.88641  | 0.88641  | 5.7598  | 0.57854  | 0.57228 | 0.7381  | -6.0962 | 80223    |
| LOC102724580 | -0.09263 | 0.092628 | 0.32485 | -0.57829 | 0.57244 | 0.73825 | -6.0964 | 1.03E+08 |
| NAALADL1     | 0.09496  | 0.09496  | 0.35535 | 0.5781   | 0.57256 | 0.73836 | -6.0965 | 10004    |
| NDUFB5       | 1.2532   | 1.2532   | 9.9191  | 0.5777   | 0.57283 | 0.73864 | -6.0967 | 4711     |
| STARD3       | -0.73503 | 0.73503  | 6.2878  | -0.57716 | 0.57318 | 0.73904 | -6.097  | 10948    |

|          |          |          |         |          |         |         |         |          |
|----------|----------|----------|---------|----------|---------|---------|---------|----------|
| RBM38    | 0.30972  | 0.30972  | 2.2741  | 0.57705  | 0.57325 | 0.73904 | -6.0971 | 55544    |
| SNORA70  | -1.352   | 1.352    | 10.534  | -0.57699 | 0.5733  | 0.73904 | -6.0971 | 26778    |
| SNORD89  | -0.18712 | 0.18712  | 0.75847 | -0.57696 | 0.57331 | 0.73904 | -6.0971 | 692205   |
| NOC4L    | -0.72743 | 0.72743  | 4.3505  | -0.57667 | 0.5735  | 0.73923 | -6.0973 | 79050    |
| SCRN3    | 0.15627  | 0.15627  | 1.6979  | 0.57625  | 0.57378 | 0.73953 | -6.0976 | 79634    |
| AADAT    | -0.07397 | 0.073966 | 0.42769 | -0.57602 | 0.57393 | 0.73962 | -6.0977 | 51166    |
| KCNT2    | -0.07296 | 0.07296  | 0.2421  | -0.57602 | 0.57393 | 0.73962 | -6.0977 | 343450   |
| TRIM11   | -0.47338 | 0.47338  | 3.9128  | -0.57527 | 0.57442 | 0.74019 | -6.0981 | 81559    |
| LCE1D    | 11.705   | 11.705   | 20.991  | 0.575    | 0.5746  | 0.74036 | -6.0983 | 353134   |
| EIF4E3   | -0.15905 | 0.15905  | 1.7833  | -0.57492 | 0.57465 | 0.74038 | -6.0983 | 317649   |
| CEP76    | 0.33461  | 0.33461  | 1.6015  | 0.57485  | 0.5747  | 0.74038 | -6.0984 | 79959    |
| DEXI     | -0.75888 | 0.75888  | 6.4582  | -0.57463 | 0.57485 | 0.74047 | -6.0985 | 28955    |
| FIBP     | 1.3842   | 1.3842   | 9.7826  | 0.57457  | 0.57488 | 0.74047 | -6.0985 | 9158     |
| PLEKHG4  | -0.2498  | 0.2498   | 1.9371  | -0.57454 | 0.5749  | 0.74047 | -6.0986 | 25894    |
| MAPRE3   | -0.39831 | 0.39831  | 3.8611  | -0.5743  | 0.57506 | 0.74057 | -6.0987 | 22924    |
| MAL2-AS1 | -0.18851 | 0.18851  | 1.0433  | -0.57429 | 0.57507 | 0.74057 | -6.0987 | 1.05E+08 |
| POLR2H   | 0.65716  | 0.65716  | 6.0847  | 0.57414  | 0.57517 | 0.74064 | -6.0988 | 5437     |
| UMAD1    | -0.07987 | 0.079867 | 0.87748 | -0.57405 | 0.57523 | 0.74064 | -6.0988 | 729852   |
| PARVB    | 0.66459  | 0.66459  | 3.7165  | 0.574    | 0.57526 | 0.74064 | -6.0989 | 29780    |
| MGAT5    | 0.35827  | 0.35827  | 4.2447  | 0.57386  | 0.57535 | 0.74071 | -6.0989 | 4249     |
| GLB1     | 0.67177  | 0.67177  | 5.3754  | 0.57366  | 0.57548 | 0.74082 | -6.0991 | 2720     |
| CD52     | 0.82326  | 0.82326  | 3.4349  | 0.57331  | 0.57571 | 0.74106 | -6.0993 | 1043     |
| MOB3A    | 1.1591   | 1.1591   | 9.4841  | 0.57323  | 0.57577 | 0.74108 | -6.0993 | 126308   |
| METTL21A | 0.074945 | 0.074945 | 0.69789 | 0.57246  | 0.57627 | 0.74164 | -6.0998 | 151194   |
| PTPN21   | -0.34132 | 0.34132  | 4.4127  | -0.57243 | 0.57629 | 0.74164 | -6.0998 | 11099    |
| NKG7     | -0.2473  | 0.2473   | 0.72955 | -0.57219 | 0.57645 | 0.74174 | -6.0999 | 4818     |

|              |          |          |         |          |         |         |         |          |
|--------------|----------|----------|---------|----------|---------|---------|---------|----------|
| WRAP73       | 0.2924   | 0.2924   | 2.6306  | 0.57218  | 0.57646 | 0.74174 | -6.0999 | 49856    |
| CDK16        | 0.81399  | 0.81399  | 7.3589  | 0.572    | 0.57658 | 0.74184 | -6.1    | 5127     |
| CCDC159      | -0.27691 | 0.27691  | 2.0221  | -0.57169 | 0.57678 | 0.74204 | -6.1002 | 126075   |
| RNF5P1       | -0.10818 | 0.10818  | 1.2388  | -0.57149 | 0.57691 | 0.74215 | -6.1003 | 286140   |
| DNAJC19      | 0.45563  | 0.45563  | 3.2099  | 0.5712   | 0.5771  | 0.74228 | -6.1005 | 131118   |
| ITGA3        | 4.4376   | 4.4376   | 20.692  | 0.57115  | 0.57714 | 0.74228 | -6.1005 | 3675     |
| MTERF3       | 0.26468  | 0.26468  | 2.1404  | 0.57098  | 0.57725 | 0.74228 | -6.1006 | 51001    |
| TMEM218      | 0.1233   | 0.1233   | 1.2286  | 0.57093  | 0.57728 | 0.74228 | -6.1006 | 219854   |
| UGGT2        | 0.25474  | 0.25474  | 1.9616  | 0.5709   | 0.5773  | 0.74228 | -6.1007 | 55757    |
| FAM50A       | 0.85219  | 0.85219  | 7.5704  | 0.57077  | 0.57739 | 0.74228 | -6.1007 | 9130     |
| PIGS         | -0.55412 | 0.55412  | 7.1924  | -0.5707  | 0.57743 | 0.74228 | -6.1008 | 94005    |
| BAALC-AS1    | -0.06375 | 0.063751 | 0.25182 | -0.57069 | 0.57744 | 0.74228 | -6.1008 | 1E+08    |
| RNASEH2B     | -0.3281  | 0.3281   | 2.4053  | -0.57065 | 0.57747 | 0.74228 | -6.1008 | 79621    |
| GXYLT1       | 0.11568  | 0.11568  | 1.3906  | 0.57061  | 0.57749 | 0.74228 | -6.1008 | 283464   |
| USF2         | -2.4346  | 2.4346   | 21.643  | -0.57061 | 0.57749 | 0.74228 | -6.1008 | 7392     |
| GAS6-DT      | -0.08552 | 0.085519 | 0.3782  | -0.57013 | 0.5778  | 0.74262 | -6.1011 | 1.01E+08 |
| TAGAP        | 0.15805  | 0.15805  | 0.89436 | 0.57003  | 0.57787 | 0.74264 | -6.1012 | 117289   |
| UQCRC2       | 1.6097   | 1.6097   | 18.991  | 0.56998  | 0.57791 | 0.74264 | -6.1012 | 7385     |
| GLYR1        | -0.78367 | 0.78367  | 9.4032  | -0.56983 | 0.578   | 0.74271 | -6.1013 | 84656    |
| LYVE1        | -1.2135  | 1.2135   | 5.4029  | -0.56953 | 0.57821 | 0.74288 | -6.1015 | 10894    |
| XPO7         | -0.51851 | 0.51851  | 7.187   | -0.56949 | 0.57823 | 0.74288 | -6.1015 | 23039    |
| ARHGEF18     | 0.54753  | 0.54753  | 4.6839  | 0.56926  | 0.57838 | 0.74302 | -6.1016 | 23370    |
| LOC101929331 | -0.11033 | 0.11033  | 0.42422 | -0.5691  | 0.57849 | 0.74306 | -6.1017 | 1.02E+08 |
| DMC1         | -0.04444 | 0.044437 | 0.20748 | -0.56908 | 0.5785  | 0.74306 | -6.1017 | 11144    |
| TPRA1        | 0.45342  | 0.45342  | 3.3329  | 0.56855  | 0.57885 | 0.74346 | -6.102  | 131601   |
| DDOST        | 3.5002   | 3.5002   | 28.214  | 0.56818  | 0.57909 | 0.74371 | -6.1022 | 1650     |



|              |          |          |         |          |         |         |         |          |
|--------------|----------|----------|---------|----------|---------|---------|---------|----------|
| GPR137       | -0.56276 | 0.56276  | 3.3255  | -0.56793 | 0.57926 | 0.74387 | -6.1024 | 56834    |
| STX8         | 0.69249  | 0.69249  | 5.6749  | 0.56776  | 0.57937 | 0.74395 | -6.1025 | 9482     |
| LINC02344    | -0.05714 | 0.057142 | 0.16261 | -0.56755 | 0.57951 | 0.74399 | -6.1026 | 1.05E+08 |
| IL20RA       | 1.5948   | 1.5948   | 4.085   | 0.5675   | 0.57954 | 0.74399 | -6.1026 | 53832    |
| HSD17B11     | 0.76523  | 0.76523  | 3.7151  | 0.56748  | 0.57955 | 0.74399 | -6.1026 | 51170    |
| APOOL        | 0.17512  | 0.17512  | 2.1072  | 0.56745  | 0.57958 | 0.74399 | -6.1026 | 139322   |
| XRCC5        | 3.5106   | 3.5106   | 32.375  | 0.5668   | 0.58    | 0.74443 | -6.103  | 7520     |
| MACC1        | -0.19757 | 0.19757  | 1.3243  | -0.5668  | 0.58001 | 0.74443 | -6.103  | 346389   |
| MCM8         | -0.11935 | 0.11935  | 1.1239  | -0.56656 | 0.58017 | 0.74453 | -6.1032 | 84515    |
| EIF2B1       | 0.93411  | 0.93411  | 10.469  | 0.56655  | 0.58017 | 0.74453 | -6.1032 | 1967     |
| PSMD4        | 2.3749   | 2.3749   | 21.65   | 0.56645  | 0.58024 | 0.74456 | -6.1032 | 5710     |
| ADAMTSL4-AS1 | -0.27218 | 0.27218  | 2.0201  | -0.5661  | 0.58047 | 0.7448  | -6.1034 | 574406   |
| ARHGAP26-IT1 | -0.04375 | 0.043752 | 0.14949 | -0.56591 | 0.58059 | 0.7449  | -6.1035 | 1.01E+08 |
| CD2BP2       | 0.90055  | 0.90055  | 7.7812  | 0.56576  | 0.58069 | 0.74495 | -6.1036 | 10421    |
| CDK2AP2      | 0.78445  | 0.78445  | 4.8325  | 0.56572  | 0.58072 | 0.74495 | -6.1036 | 10263    |
| PTPDC1       | -0.09617 | 0.096166 | 1.0288  | -0.5654  | 0.58093 | 0.74516 | -6.1038 | 138639   |
| EXPH5        | -2.0549  | 2.0549   | 13.343  | -0.56528 | 0.58101 | 0.74521 | -6.1039 | 23086    |
| MAPK8IP1     | -0.11875 | 0.11875  | 0.91157 | -0.56513 | 0.58111 | 0.74525 | -6.104  | 9479     |
| COMMD5       | 0.4078   | 0.4078   | 3.9543  | 0.5651   | 0.58113 | 0.74525 | -6.104  | 28991    |
| FBXL12       | 0.29641  | 0.29641  | 3.0333  | 0.56459  | 0.58147 | 0.74562 | -6.1043 | 54850    |
| ARL13B       | 0.1074   | 0.1074   | 1.1216  | 0.56438  | 0.5816  | 0.74572 | -6.1044 | 200894   |
| RING1        | -0.13204 | 0.13204  | 1.2831  | -0.5643  | 0.58166 | 0.74572 | -6.1044 | 6015     |
| RPP25        | -0.31023 | 0.31023  | 1.9394  | -0.56426 | 0.58169 | 0.74572 | -6.1045 | 54913    |
| NOP56        | 1.6659   | 1.6659   | 12.81   | 0.56421  | 0.58172 | 0.74572 | -6.1045 | 10528    |
| SERPINI1     | 0.15146  | 0.15146  | 0.68872 | 0.5641   | 0.58179 | 0.74576 | -6.1046 | 5274     |
| CTNNA1       | 0.34904  | 0.34904  | 3.0703  | 0.5639   | 0.58193 | 0.74587 | -6.1047 | 8727     |

|              |          |          |         |          |         |         |         |          |
|--------------|----------|----------|---------|----------|---------|---------|---------|----------|
| ZFP1         | 0.10776  | 0.10776  | 0.94182 | 0.56378  | 0.58201 | 0.74592 | -6.1047 | 162239   |
| TM2D3        | -0.33308 | 0.33308  | 3.5948  | -0.56362 | 0.58211 | 0.746   | -6.1048 | 80213    |
| PATJ         | -0.7069  | 0.7069   | 7.8899  | -0.56351 | 0.58218 | 0.746   | -6.1049 | 10207    |
| TBL1Y        | -0.06354 | 0.063535 | 0.28768 | -0.56331 | 0.58231 | 0.746   | -6.105  | 90665    |
| CCDC200      | -0.2082  | 0.2082   | 0.63515 | -0.56331 | 0.58232 | 0.746   | -6.105  | 1.01E+08 |
| THRIL        | 0.27377  | 0.27377  | 2.3107  | 0.56329  | 0.58233 | 0.746   | -6.105  | 1.03E+08 |
| PUS10        | -0.11733 | 0.11733  | 0.85588 | -0.56328 | 0.58233 | 0.746   | -6.105  | 150962   |
| LOC102723373 | -0.07022 | 0.07022  | 0.2226  | -0.56304 | 0.58249 | 0.74613 | -6.1052 | 1.03E+08 |
| TUBB1        | -0.05947 | 0.059474 | 0.2892  | -0.56299 | 0.58252 | 0.74613 | -6.1052 | 81027    |
| P4HA2-AS1    | 0.09421  | 0.09421  | 0.65949 | 0.56283  | 0.58263 | 0.7462  | -6.1053 | 1.01E+08 |
| HEXA         | -1.247   | 1.247    | 7.3309  | -0.56275 | 0.58268 | 0.7462  | -6.1053 | 3073     |
| HES2         | 1.4391   | 1.4391   | 8.4104  | 0.56271  | 0.58271 | 0.7462  | -6.1053 | 54626    |
| TMEM59L      | -0.15625 | 0.15625  | 0.26595 | -0.56228 | 0.583   | 0.74651 | -6.1056 | 25789    |
| ZFYVE19      | -0.33707 | 0.33707  | 2.5525  | -0.56195 | 0.58322 | 0.74673 | -6.1058 | 84936    |
| MAGOH        | 1.1804   | 1.1804   | 7.5878  | 0.56172  | 0.58337 | 0.74682 | -6.1059 | 4116     |
| RSL1D1       | -1.0043  | 1.0043   | 9.0161  | -0.56171 | 0.58337 | 0.74682 | -6.1059 | 26156    |
| MARVELD2     | 0.38819  | 0.38819  | 3.2571  | 0.5615   | 0.58351 | 0.74694 | -6.106  | 153562   |
| NOXO1        | -0.05794 | 0.057943 | 0.41052 | -0.56135 | 0.58361 | 0.74701 | -6.1061 | 124056   |
| CCL13        | -0.55537 | 0.55537  | 2.3618  | -0.56129 | 0.58365 | 0.74701 | -6.1062 | 6357     |
| SNHG16       | 2.8096   | 2.8096   | 25.087  | 0.5611   | 0.58378 | 0.74702 | -6.1063 | 1.01E+08 |
| RWDD3        | 0.24792  | 0.24792  | 1.5493  | 0.5611   | 0.58378 | 0.74702 | -6.1063 | 25950    |
| IFT22        | -0.28962 | 0.28962  | 1.8332  | -0.56097 | 0.58386 | 0.74702 | -6.1063 | 64792    |
| RAB3D        | 4.0085   | 4.0085   | 33.104  | 0.56096  | 0.58387 | 0.74702 | -6.1063 | 9545     |
| NUP155       | -0.44562 | 0.44562  | 4.4474  | -0.56088 | 0.58392 | 0.74702 | -6.1064 | 9631     |
| NXPE3        | -0.1094  | 0.1094   | 0.7671  | -0.56086 | 0.58394 | 0.74702 | -6.1064 | 91775    |
| MTRNR2L2     | -0.78055 | 0.78055  | 1.5298  | -0.56081 | 0.58397 | 0.74702 | -6.1064 | 1E+08    |

|            |          |          |         |          |         |         |         |          |
|------------|----------|----------|---------|----------|---------|---------|---------|----------|
| RRM1       | 1.2331   | 1.2331   | 11.318  | 0.56064  | 0.58409 | 0.74711 | -6.1065 | 6240     |
| ELP1       | -0.16111 | 0.16111  | 3.2235  | -0.56049 | 0.58418 | 0.74718 | -6.1066 | 8518     |
| BECN1      | 1.0569   | 1.0569   | 12.56   | 0.56009  | 0.58445 | 0.74739 | -6.1068 | 8678     |
| PHKG2      | 0.10639  | 0.10639  | 1.4678  | 0.56009  | 0.58445 | 0.74739 | -6.1068 | 5261     |
| POGLUT1    | 0.18434  | 0.18434  | 2.2933  | 0.56004  | 0.58448 | 0.74739 | -6.1069 | 56983    |
| RPS15      | -25.665  | 25.665   | 236.19  | -0.55963 | 0.58475 | 0.7476  | -6.1071 | 6209     |
| ME3        | -0.18544 | 0.18544  | 1.0611  | -0.5596  | 0.58477 | 0.7476  | -6.1071 | 10873    |
| GRN        | 10.775   | 10.775   | 79.792  | 0.55959  | 0.58478 | 0.7476  | -6.1071 | 2896     |
| RARA-AS1   | -0.09903 | 0.099026 | 0.72803 | -0.55952 | 0.58483 | 0.74761 | -6.1072 | 1.02E+08 |
| MBTPS2     | 0.15854  | 0.15854  | 1.9078  | 0.55894  | 0.58521 | 0.74804 | -6.1075 | 51360    |
| SLC29A3    | 0.12637  | 0.12637  | 0.82702 | 0.55857  | 0.58546 | 0.74829 | -6.1077 | 55315    |
| SNORA40    | -0.50042 | 0.50042  | 0.92054 | -0.55851 | 0.5855  | 0.74829 | -6.1077 | 677822   |
| AGO2       | -0.45252 | 0.45252  | 6.6165  | -0.55837 | 0.58559 | 0.7483  | -6.1078 | 27161    |
| PCNX1      | -0.39571 | 0.39571  | 4.1866  | -0.55836 | 0.5856  | 0.7483  | -6.1078 | 22990    |
| PRKRA      | 0.62826  | 0.62826  | 6.0718  | 0.55814  | 0.58574 | 0.7484  | -6.1079 | 8575     |
| TMEM38B    | 0.11835  | 0.11835  | 0.81456 | 0.55802  | 0.58582 | 0.7484  | -6.108  | 55151    |
| SLC2A8     | -0.42446 | 0.42446  | 2.7756  | -0.558   | 0.58584 | 0.7484  | -6.108  | 29988    |
| RPL23AP32  | -0.24488 | 0.24488  | 0.89851 | -0.55798 | 0.58585 | 0.7484  | -6.108  | 56969    |
| CRIM1      | -1.2217  | 1.2217   | 10.73   | -0.55781 | 0.58596 | 0.74849 | -6.1081 | 51232    |
| PPP1R9B    | -1.9932  | 1.9932   | 14.005  | -0.55765 | 0.58607 | 0.74857 | -6.1082 | 84687    |
| FGD4       | -0.20847 | 0.20847  | 2.6754  | -0.55748 | 0.58618 | 0.74866 | -6.1083 | 121512   |
| ADGRF2     | -0.10107 | 0.10107  | 0.54641 | -0.55697 | 0.58652 | 0.74903 | -6.1086 | 222611   |
| CIART      | -0.62504 | 0.62504  | 2.7451  | -0.55682 | 0.58662 | 0.74908 | -6.1087 | 148523   |
| COL4A2-AS1 | 0.082323 | 0.082323 | 0.29199 | 0.55678  | 0.58664 | 0.74908 | -6.1087 | 1.01E+08 |
| ACE        | -0.51095 | 0.51095  | 2.4244  | -0.5558  | 0.5873  | 0.74986 | -6.1093 | 1636     |
| RAVER1     | -0.6385  | 0.6385   | 5.1078  | -0.55531 | 0.58762 | 0.75021 | -6.1095 | 125950   |

|            |          |          |         |          |         |         |         |          |
|------------|----------|----------|---------|----------|---------|---------|---------|----------|
| LCN10      | -0.0956  | 0.095601 | 0.24126 | -0.55501 | 0.58783 | 0.75042 | -6.1097 | 414332   |
| SMG8       | 0.23738  | 0.23738  | 2.832   | 0.55468  | 0.58804 | 0.75064 | -6.1099 | 55181    |
| HLCS       | -0.10398 | 0.10398  | 0.98035 | -0.55457 | 0.58812 | 0.75068 | -6.11   | 3141     |
| LCE2C      | 31.715   | 31.715   | 83.019  | 0.55409  | 0.58844 | 0.75098 | -6.1102 | 353140   |
| SPTAN1     | -2.7759  | 2.7759   | 32.554  | -0.55404 | 0.58847 | 0.75098 | -6.1102 | 6709     |
| KIAA1143   | -0.42843 | 0.42843  | 4.195   | -0.55401 | 0.58849 | 0.75098 | -6.1103 | 57456    |
| TTC39A-AS1 | 0.051221 | 0.051221 | 0.2306  | 0.5536   | 0.58876 | 0.75127 | -6.1105 | 1.03E+08 |
| PHC1       | -0.34133 | 0.34133  | 2.837   | -0.55354 | 0.5888  | 0.75127 | -6.1105 | 1911     |
| SIGLEC14   | -0.2168  | 0.2168   | 0.63845 | -0.55304 | 0.58914 | 0.7516  | -6.1108 | 1E+08    |
| TMEM132A   | 0.75742  | 0.75742  | 3.2444  | 0.55302  | 0.58915 | 0.7516  | -6.1108 | 54972    |
| NID1       | 3.3161   | 3.3161   | 14.322  | 0.5527   | 0.58936 | 0.75172 | -6.111  | 4811     |
| FOCAD      | -0.15436 | 0.15436  | 2.9174  | -0.55267 | 0.58938 | 0.75172 | -6.111  | 54914    |
| PDK1       | -0.41251 | 0.41251  | 4.2319  | -0.55267 | 0.58938 | 0.75172 | -6.111  | 5163     |
| ZNF710     | 0.72542  | 0.72542  | 6.7842  | 0.55233  | 0.58961 | 0.7519  | -6.1112 | 374655   |
| MIF4GD     | -0.39562 | 0.39562  | 4.0459  | -0.55233 | 0.58961 | 0.7519  | -6.1112 | 57409    |
| MAGOHB     | -0.15081 | 0.15081  | 1.4145  | -0.55217 | 0.58972 | 0.75195 | -6.1113 | 55110    |
| C3orf70    | -0.13653 | 0.13653  | 0.81233 | -0.55214 | 0.58974 | 0.75195 | -6.1113 | 285382   |
| ZNF180     | 0.082496 | 0.082496 | 0.97646 | 0.55204  | 0.5898  | 0.75197 | -6.1114 | 7733     |
| FMNL1      | -0.48216 | 0.48216  | 2.9797  | -0.55195 | 0.58986 | 0.75199 | -6.1114 | 752      |
| NDRG3      | -0.31037 | 0.31037  | 3.9205  | -0.55149 | 0.59017 | 0.75232 | -6.1117 | 57446    |
| PPP6R1     | 1.3894   | 1.3894   | 11.245  | 0.55116  | 0.59039 | 0.75252 | -6.1119 | 22870    |
| DPP7       | -1.6593  | 1.6593   | 14.898  | -0.55098 | 0.59051 | 0.75252 | -6.112  | 29952    |
| FGF10-AS1  | -0.04752 | 0.047517 | 0.12106 | -0.55095 | 0.59053 | 0.75252 | -6.112  | 1.02E+08 |
| CAMP       | 0.073873 | 0.073873 | 0.13243 | 0.55094  | 0.59053 | 0.75252 | -6.112  | 820      |
| ZDHHC12    | 1.1023   | 1.1023   | 8.7087  | 0.55089  | 0.59057 | 0.75252 | -6.112  | 84885    |
| REEP5      | 1.2213   | 1.2213   | 13.14   | 0.55087  | 0.59058 | 0.75252 | -6.112  | 7905     |

|            |          |          |          |          |         |         |         |          |
|------------|----------|----------|----------|----------|---------|---------|---------|----------|
| LY86       | 0.18371  | 0.18371  | 0.72553  | 0.55063  | 0.59074 | 0.75266 | -6.1122 | 9450     |
| WDR46      | -0.15131 | 0.15131  | 1.4419   | -0.55001 | 0.59116 | 0.75313 | -6.1125 | 9277     |
| SNX21      | -1.4775  | 1.4775   | 9.3201   | -0.54992 | 0.59122 | 0.75315 | -6.1125 | 90203    |
| RBMS3-AS1  | -0.03864 | 0.038639 | 0.062651 | -0.54984 | 0.59127 | 0.75316 | -6.1126 | 1.01E+08 |
| NSRP1      | 0.41436  | 0.41436  | 3.8253   | 0.54932  | 0.59162 | 0.75352 | -6.1129 | 84081    |
| JADE3      | 0.095005 | 0.095005 | 1.2991   | 0.54924  | 0.59167 | 0.75352 | -6.1129 | 9767     |
| PABPC5-AS1 | 0.073422 | 0.073422 | 0.15469  | 0.54922  | 0.59168 | 0.75352 | -6.1129 | 1.03E+08 |
| STARD4-AS1 | 0.14765  | 0.14765  | 0.76301  | 0.54906  | 0.59179 | 0.75358 | -6.113  | 1.01E+08 |
| SNHG7      | -0.43123 | 0.43123  | 4.9316   | -0.54901 | 0.59182 | 0.75358 | -6.1131 | 84973    |
| STK32C     | -0.11226 | 0.11226  | 0.73333  | -0.5487  | 0.59203 | 0.75379 | -6.1132 | 282974   |
| HSPB2      | -0.61478 | 0.61478  | 2.8045   | -0.54829 | 0.5923  | 0.75408 | -6.1135 | 3316     |
| SCARNA12   | -7.9964  | 7.9964   | 77.25    | -0.5482  | 0.59236 | 0.7541  | -6.1135 | 677777   |
| FKBP11     | 0.6085   | 0.6085   | 3.5063   | 0.54811  | 0.59243 | 0.75412 | -6.1136 | 51303    |
| MOB2       | -0.88766 | 0.88766  | 9.2666   | -0.54792 | 0.59255 | 0.75423 | -6.1137 | 81532    |
| KCTD1      | -0.54281 | 0.54281  | 6.0132   | -0.54781 | 0.59263 | 0.75426 | -6.1137 | 284252   |
| RAD51      | 0.14649  | 0.14649  | 0.75803  | 0.54772  | 0.59269 | 0.75428 | -6.1138 | 5888     |
| SPON1      | 2.2911   | 2.2911   | 8.4595   | 0.54742  | 0.59289 | 0.75448 | -6.1139 | 10418    |
| RPL10      | 27.819   | 27.819   | 214.88   | 0.54729  | 0.59297 | 0.75454 | -6.114  | 6134     |
| WDR11      | -0.31823 | 0.31823  | 5.9506   | -0.54717 | 0.59305 | 0.75458 | -6.1141 | 55717    |
| SLC7A8     | 1.9829   | 1.9829   | 12.322   | 0.54707  | 0.59312 | 0.75461 | -6.1141 | 23428    |
| ALPL       | 0.72535  | 0.72535  | 3.0531   | 0.54696  | 0.59319 | 0.75461 | -6.1142 | 249      |
| MRPS30     | -0.27886 | 0.27886  | 4.8802   | -0.54693 | 0.59321 | 0.75461 | -6.1142 | 10884    |
| CCNJ       | 0.085746 | 0.085746 | 1.0617   | 0.5466   | 0.59343 | 0.75483 | -6.1144 | 54619    |
| CASP9      | 0.1124   | 0.1124   | 0.97754  | 0.54638  | 0.59358 | 0.75491 | -6.1145 | 842      |
| DCLRE1C    | -0.05429 | 0.054294 | 1.0439   | -0.54638 | 0.59358 | 0.75491 | -6.1145 | 64421    |
| SORD       | -0.47635 | 0.47635  | 4.5916   | -0.54597 | 0.59386 | 0.7552  | -6.1147 | 6652     |

|            |          |          |          |          |         |         |         |          |
|------------|----------|----------|----------|----------|---------|---------|---------|----------|
| TAF6       | -0.46696 | 0.46696  | 4.2798   | -0.54574 | 0.59401 | 0.75534 | -6.1149 | 6878     |
| NSD2       | -0.18026 | 0.18026  | 1.82     | -0.54567 | 0.59405 | 0.75534 | -6.1149 | 7468     |
| NR2C1      | -0.14493 | 0.14493  | 1.5348   | -0.54532 | 0.59429 | 0.75558 | -6.1151 | 7181     |
| MAL        | 1.1594   | 1.1594   | 4.3328   | 0.54507  | 0.59446 | 0.75574 | -6.1152 | 4118     |
| SNORA16B   | -0.04606 | 0.046061 | 0.076534 | -0.54499 | 0.59451 | 0.75575 | -6.1153 | 692157   |
| KREMEN1    | -1.0993  | 1.0993   | 11.592   | -0.54475 | 0.59467 | 0.7559  | -6.1154 | 83999    |
| LANCL2     | -0.1734  | 0.1734   | 2.2973   | -0.54457 | 0.59479 | 0.75594 | -6.1155 | 55915    |
| LINC00311  | -0.04734 | 0.047336 | 0.13362  | -0.54454 | 0.59481 | 0.75594 | -6.1155 | 197196   |
| LSM7       | 2.9937   | 2.9937   | 14.917   | 0.5445   | 0.59483 | 0.75594 | -6.1155 | 51690    |
| WDCP       | -0.11799 | 0.11799  | 0.96407  | -0.5444  | 0.59491 | 0.75597 | -6.1156 | 80304    |
| RASSF8-AS1 | 0.14499  | 0.14499  | 0.60758  | 0.54427  | 0.59499 | 0.75597 | -6.1157 | 1.01E+08 |
| NUP160     | -0.39093 | 0.39093  | 4.4318   | -0.54416 | 0.59506 | 0.75597 | -6.1157 | 23279    |
| HES6       | 0.10849  | 0.10849  | 0.56443  | 0.54416  | 0.59507 | 0.75597 | -6.1157 | 55502    |
| ZNF354C    | -0.08714 | 0.08714  | 0.82076  | -0.54392 | 0.59522 | 0.75597 | -6.1159 | 30832    |
| DPY19L4    | 0.20586  | 0.20586  | 1.8563   | 0.54391  | 0.59523 | 0.75597 | -6.1159 | 286148   |
| RCHY1      | -0.11103 | 0.11103  | 1.2979   | -0.54384 | 0.59528 | 0.75597 | -6.1159 | 25898    |
| SLC9A3-AS1 | -0.70626 | 0.70626  | 3.6318   | -0.54381 | 0.5953  | 0.75597 | -6.1159 | 1E+08    |
| SPAG4      | 0.055926 | 0.055926 | 0.28114  | 0.54378  | 0.59532 | 0.75597 | -6.1159 | 6676     |
| CDCA4      | 0.70262  | 0.70262  | 6.7815   | 0.54378  | 0.59532 | 0.75597 | -6.1159 | 55038    |
| ZNF93      | 0.11552  | 0.11552  | 0.58146  | 0.54373  | 0.59536 | 0.75597 | -6.116  | 81931    |
| ITGAL      | -0.16258 | 0.16258  | 0.78103  | -0.54321 | 0.5957  | 0.75628 | -6.1163 | 3683     |
| PHETA1     | 1.6653   | 1.6653   | 5.1693   | 0.5432   | 0.59571 | 0.75628 | -6.1163 | 144717   |
| C5orf46    | 1.595    | 1.595    | 3.1303   | 0.54309  | 0.59578 | 0.75628 | -6.1163 | 389336   |
| SNORA41    | -0.06551 | 0.065505 | 0.14005  | -0.54303 | 0.59582 | 0.75628 | -6.1164 | 619569   |
| GALM       | -0.13137 | 0.13137  | 1.0003   | -0.54303 | 0.59582 | 0.75628 | -6.1164 | 130589   |
| URB2       | 0.15217  | 0.15217  | 1.7616   | 0.54265  | 0.59608 | 0.75651 | -6.1166 | 9816     |

|           |          |          |         |          |         |         |         |        |
|-----------|----------|----------|---------|----------|---------|---------|---------|--------|
| CCDC103   | -0.05186 | 0.05186  | 0.19969 | -0.54256 | 0.59614 | 0.75651 | -6.1166 | 388389 |
| GGT6      | -1.2188  | 1.2188   | 8.5199  | -0.54252 | 0.59616 | 0.75651 | -6.1166 | 124975 |
| ADRA1D    | 0.058377 | 0.058377 | 0.24324 | 0.5425   | 0.59618 | 0.75651 | -6.1167 | 146    |
| NELL1     | 0.045105 | 0.045105 | 0.12813 | 0.54229  | 0.59632 | 0.7566  | -6.1168 | 4745   |
| FTL       | 153.49   | 153.49   | 503.45  | 0.54217  | 0.5964  | 0.7566  | -6.1168 | 2512   |
| DUOX2     | 0.19288  | 0.19288  | 0.97177 | 0.54211  | 0.59644 | 0.7566  | -6.1169 | 405753 |
| SLC9A3R2  | -1.3165  | 1.3165   | 7.2086  | -0.54205 | 0.59648 | 0.7566  | -6.1169 | 9351   |
| FMR1      | -0.33496 | 0.33496  | 3.8639  | -0.54205 | 0.59648 | 0.7566  | -6.1169 | 2332   |
| DPM2      | 0.63683  | 0.63683  | 6.3483  | 0.5419   | 0.59658 | 0.75662 | -6.117  | 8818   |
| FBXL15    | -0.42433 | 0.42433  | 2.4825  | -0.5419  | 0.59658 | 0.75662 | -6.117  | 79176  |
| LINC00467 | 0.17905  | 0.17905  | 1.0439  | 0.54178  | 0.59666 | 0.75662 | -6.117  | 84791  |
| HOXA11-AS | -0.07247 | 0.072465 | 0.34943 | -0.54175 | 0.59668 | 0.75662 | -6.1171 | 221883 |
| TMEM171   | 0.11862  | 0.11862  | 0.6299  | 0.5417   | 0.59672 | 0.75662 | -6.1171 | 134285 |
| KIAA0930  | -1.0287  | 1.0287   | 11.598  | -0.54154 | 0.59682 | 0.75669 | -6.1172 | 23313  |
| CBR1      | -2.2789  | 2.2789   | 18.94   | -0.54145 | 0.59688 | 0.75671 | -6.1172 | 873    |
| CHPF2     | 0.75837  | 0.75837  | 7.5066  | 0.54125  | 0.59702 | 0.75683 | -6.1173 | 54480  |
| ZNF300    | 0.083325 | 0.083325 | 0.6985  | 0.54102  | 0.59717 | 0.7569  | -6.1175 | 91975  |
| BAX       | 1.3101   | 1.3101   | 7.7666  | 0.54099  | 0.59719 | 0.7569  | -6.1175 | 581    |
| GRIP2     | -0.05712 | 0.057117 | 0.29706 | -0.54096 | 0.59721 | 0.7569  | -6.1175 | 80852  |
| ANXA6     | 2.1586   | 2.1586   | 11.98   | 0.54089  | 0.59726 | 0.75691 | -6.1175 | 309    |
| LTA4H     | 1.2736   | 1.2736   | 10.241  | 0.5406   | 0.59745 | 0.75704 | -6.1177 | 4048   |
| CPXM1     | 3.8065   | 3.8065   | 11.717  | 0.54059  | 0.59746 | 0.75704 | -6.1177 | 56265  |
| ADCY4     | -0.64009 | 0.64009  | 3.2275  | -0.54028 | 0.59767 | 0.75713 | -6.1179 | 196883 |
| TBC1D31   | 0.062471 | 0.062471 | 0.65596 | 0.54025  | 0.59769 | 0.75713 | -6.1179 | 93594  |
| E2F4      | 1.2631   | 1.2631   | 11.1    | 0.54021  | 0.59771 | 0.75713 | -6.1179 | 1874   |
| XYLT1     | 0.3123   | 0.3123   | 3.8163  | 0.54017  | 0.59774 | 0.75713 | -6.1179 | 64131  |

|             |          |          |         |          |         |         |         |          |
|-------------|----------|----------|---------|----------|---------|---------|---------|----------|
| PRDM10      | -0.07812 | 0.078122 | 1.443   | -0.54016 | 0.59775 | 0.75713 | -6.1179 | 56980    |
| PAICS       | 1.3889   | 1.3889   | 10.664  | 0.53988  | 0.59793 | 0.7573  | -6.1181 | 10606    |
| SH3KBP1     | -0.31267 | 0.31267  | 3.1082  | -0.53976 | 0.59802 | 0.7573  | -6.1182 | 30011    |
| HELB        | -0.08131 | 0.081305 | 0.67465 | -0.53975 | 0.59802 | 0.7573  | -6.1182 | 92797    |
| C10orf55    | -0.10549 | 0.10549  | 0.55023 | -0.5394  | 0.59826 | 0.75755 | -6.1183 | 414236   |
| TECR        | 5.1205   | 5.1205   | 50.795  | 0.53928  | 0.59834 | 0.75756 | -6.1184 | 9524     |
| DDAH2       | 0.25657  | 0.25657  | 1.6609  | 0.53925  | 0.59836 | 0.75756 | -6.1184 | 23564    |
| FOXN1       | -0.73639 | 0.73639  | 6.9031  | -0.53915 | 0.59843 | 0.75759 | -6.1185 | 8456     |
| CACNA1C-AS4 | 0.10345  | 0.10345  | 0.28051 | 0.53899  | 0.59853 | 0.75767 | -6.1186 | 1.01E+08 |
| LRP8        | 0.17356  | 0.17356  | 0.90032 | 0.53886  | 0.59862 | 0.75772 | -6.1186 | 7804     |
| SLC47A2     | -0.46063 | 0.46063  | 2.5079  | -0.53871 | 0.59872 | 0.75779 | -6.1187 | 146802   |
| MS4A14      | 0.060726 | 0.060726 | 0.1849  | 0.53844  | 0.5989  | 0.75797 | -6.1189 | 84689    |
| BATF        | -0.14927 | 0.14927  | 0.74405 | -0.53832 | 0.59898 | 0.75799 | -6.1189 | 10538    |
| FOXL1       | 0.072899 | 0.072899 | 0.32254 | 0.53822  | 0.59905 | 0.75799 | -6.119  | 2300     |
| TMEM200B    | -0.2095  | 0.2095   | 1.2478  | -0.5382  | 0.59907 | 0.75799 | -6.119  | 399474   |
| FLG         | 242.49   | 242.49   | 506.34  | 0.53814  | 0.5991  | 0.75799 | -6.119  | 2312     |
| C16orf91    | 0.35994  | 0.35994  | 3.5537  | 0.53789  | 0.59927 | 0.75806 | -6.1192 | 283951   |
| NUDC        | -1.0618  | 1.0618   | 10.405  | -0.53787 | 0.59929 | 0.75806 | -6.1192 | 10726    |
| STARD5      | -1.2774  | 1.2774   | 8.1287  | -0.53786 | 0.59929 | 0.75806 | -6.1192 | 80765    |
| KIF24       | 0.058481 | 0.058481 | 0.53057 | 0.53777  | 0.59935 | 0.75808 | -6.1192 | 347240   |
| APOO        | 0.29853  | 0.29853  | 1.8482  | 0.53765  | 0.59943 | 0.75813 | -6.1193 | 79135    |
| CARD17      | -0.0454  | 0.045396 | 0.13495 | -0.53746 | 0.59956 | 0.75823 | -6.1194 | 440068   |
| ARHGAP9     | 0.14989  | 0.14989  | 0.78429 | 0.53726  | 0.59969 | 0.75831 | -6.1195 | 64333    |
| EEF2        | -32.328  | 32.328   | 374.03  | -0.53723 | 0.59971 | 0.75831 | -6.1195 | 1938     |
| TXNL4B      | 0.12083  | 0.12083  | 1.4733  | 0.53715  | 0.59977 | 0.75833 | -6.1196 | 54957    |
| NF2         | -0.52514 | 0.52514  | 5.3719  | -0.53698 | 0.59988 | 0.75841 | -6.1197 | 4771     |



|          |          |          |         |          |         |         |         |          |
|----------|----------|----------|---------|----------|---------|---------|---------|----------|
| MFAP1    | 0.55808  | 0.55808  | 5.0774  | 0.53686  | 0.59997 | 0.75845 | -6.1197 | 4236     |
| ANGEL1   | -0.30888 | 0.30888  | 2.6764  | -0.5368  | 0.6     | 0.75845 | -6.1198 | 23357    |
| CYTL1    | 0.4836   | 0.4836   | 1.1403  | 0.53668  | 0.60009 | 0.7585  | -6.1198 | 54360    |
| CBWD3    | 0.1749   | 0.1749   | 1.4665  | 0.53639  | 0.60028 | 0.75865 | -6.12   | 445571   |
| RPPH1    | 1401.1   | 1401.1   | 9140.5  | 0.53633  | 0.60032 | 0.75865 | -6.12   | 85495    |
| LCP1     | 2.001    | 2.001    | 11.761  | 0.5362   | 0.60041 | 0.75865 | -6.1201 | 3936     |
| ERGIC3   | -2.9725  | 2.9725   | 32.503  | -0.5361  | 0.60047 | 0.75865 | -6.1201 | 51614    |
| PSG4     | 0.091905 | 0.091905 | 0.25959 | 0.53606  | 0.6005  | 0.75865 | -6.1202 | 5672     |
| MICALCL  | 0.69116  | 0.69116  | 3.8769  | 0.53605  | 0.60051 | 0.75865 | -6.1202 | 84953    |
| COLEC11  | 0.046781 | 0.046781 | 0.11089 | 0.53598  | 0.60055 | 0.75865 | -6.1202 | 78989    |
| PSMG2    | 1.1039   | 1.1039   | 9.6273  | 0.53597  | 0.60056 | 0.75865 | -6.1202 | 56984    |
| TWF2     | 1.5092   | 1.5092   | 9.8172  | 0.53557  | 0.60083 | 0.75892 | -6.1204 | 11344    |
| CARD19   | -0.3808  | 0.3808   | 2.9913  | -0.53551 | 0.60087 | 0.75892 | -6.1205 | 84270    |
| GSDMC    | 1.9491   | 1.9491   | 16.098  | 0.5353   | 0.60101 | 0.75905 | -6.1206 | 56169    |
| CRYZ     | 0.31428  | 0.31428  | 3.1877  | 0.53485  | 0.60132 | 0.75937 | -6.1208 | 1429     |
| IL37     | 4.9543   | 4.9543   | 10.211  | 0.53472  | 0.60141 | 0.75943 | -6.1209 | 27178    |
| MCM6     | 0.67906  | 0.67906  | 4.0951  | 0.53432  | 0.60167 | 0.75965 | -6.1211 | 4175     |
| NABP2    | 1.0111   | 1.0111   | 6.7735  | 0.53432  | 0.60167 | 0.75965 | -6.1211 | 79035    |
| DARS-AS1 | 0.086659 | 0.086659 | 0.73341 | 0.53414  | 0.6018  | 0.75975 | -6.1212 | 1.02E+08 |
| STARD7   | -1.0506  | 1.0506   | 14.089  | -0.53401 | 0.60188 | 0.75975 | -6.1213 | 56910    |
| FNDC10   | -0.863   | 0.863    | 4.934   | -0.53381 | 0.60202 | 0.75975 | -6.1214 | 643988   |
| PARD6G   | -0.60941 | 0.60941  | 8.2936  | -0.5338  | 0.60202 | 0.75975 | -6.1214 | 84552    |
| NEURL1B  | -0.85655 | 0.85655  | 5.3656  | -0.53378 | 0.60203 | 0.75975 | -6.1214 | 54492    |
| UQCRC1   | 3.911    | 3.911    | 31.881  | 0.53376  | 0.60205 | 0.75975 | -6.1214 | 7384     |
| LCE1A    | 33.036   | 33.036   | 80.56   | 0.53373  | 0.60207 | 0.75975 | -6.1214 | 353131   |
| NCKAP1L  | -0.48678 | 0.48678  | 2.6913  | -0.53324 | 0.6024  | 0.76011 | -6.1217 | 3071     |

|            |          |          |         |          |         |         |         |          |
|------------|----------|----------|---------|----------|---------|---------|---------|----------|
| COPZ2      | 1.7309   | 1.7309   | 9.6837  | 0.53306  | 0.60252 | 0.76021 | -6.1218 | 51226    |
| MIR181A2HG | -0.09955 | 0.09955  | 0.45536 | -0.53283 | 0.60267 | 0.76033 | -6.1219 | 1E+08    |
| S100A4     | 8.6046   | 8.6046   | 41.579  | 0.53278  | 0.60271 | 0.76033 | -6.1219 | 6275     |
| ODF2L      | 0.17786  | 0.17786  | 1.9545  | 0.53249  | 0.6029  | 0.76052 | -6.1221 | 57489    |
| SNORA70F   | -0.11109 | 0.11109  | 0.51981 | -0.53213 | 0.60315 | 0.76078 | -6.1223 | 1E+08    |
| HOTAIRM1   | -0.13757 | 0.13757  | 1.4877  | -0.53203 | 0.60321 | 0.7608  | -6.1223 | 1.01E+08 |
| APEH       | 1.2957   | 1.2957   | 10.655  | 0.53173  | 0.60341 | 0.76097 | -6.1225 | 327      |
| VASH1-AS1  | -0.1861  | 0.1861   | 1.314   | -0.5317  | 0.60344 | 0.76097 | -6.1225 | 1.01E+08 |
| NAIF1      | -0.07517 | 0.075169 | 1.0089  | -0.53145 | 0.60361 | 0.7611  | -6.1227 | 203245   |
| ZIK1       | -0.05612 | 0.056116 | 0.40035 | -0.53142 | 0.60363 | 0.7611  | -6.1227 | 284307   |
| PTN        | 0.45814  | 0.45814  | 1.2774  | 0.53134  | 0.60368 | 0.7611  | -6.1227 | 5764     |
| ZKSCAN5    | 0.11007  | 0.11007  | 1.3681  | 0.5312   | 0.60377 | 0.76116 | -6.1228 | 23660    |
| SH3BP1     | 1.2825   | 1.2825   | 9.6759  | 0.53082  | 0.60403 | 0.76138 | -6.123  | 23616    |
| CDKN2C     | 0.29845  | 0.29845  | 1.9559  | 0.53076  | 0.60407 | 0.76138 | -6.123  | 1031     |
| TMEM204    | 0.84107  | 0.84107  | 4.5984  | 0.53061  | 0.60417 | 0.76138 | -6.1231 | 79652    |
| PARVA      | 0.83458  | 0.83458  | 5.909   | 0.53058  | 0.60419 | 0.76138 | -6.1231 | 55742    |
| LMNB1      | 0.62474  | 0.62474  | 3.1286  | 0.53057  | 0.6042  | 0.76138 | -6.1231 | 4001     |
| GTF2E1     | 0.15655  | 0.15655  | 1.7251  | 0.53055  | 0.60421 | 0.76138 | -6.1231 | 2960     |
| NXT2       | 0.2037   | 0.2037   | 1.6458  | 0.53043  | 0.60429 | 0.76142 | -6.1232 | 55916    |
| TAF5       | -0.07089 | 0.070886 | 0.77532 | -0.53018 | 0.60446 | 0.76158 | -6.1233 | 6877     |
| ZBTB7B     | -3.7745  | 3.7745   | 28.674  | -0.53007 | 0.60454 | 0.76161 | -6.1234 | 51043    |
| LIPE       | -0.14292 | 0.14292  | 1.1622  | -0.52996 | 0.60461 | 0.76161 | -6.1235 | 3991     |
| GRK6       | -0.50206 | 0.50206  | 5.4151  | -0.52994 | 0.60462 | 0.76161 | -6.1235 | 2870     |
| OR1J2      | -0.04466 | 0.044655 | 0.12553 | -0.52981 | 0.60472 | 0.76167 | -6.1235 | 26740    |
| EXOG       | 0.11007  | 0.11007  | 0.79845 | 0.52945  | 0.60496 | 0.76192 | -6.1237 | 9941     |
| CBWD2      | 0.35629  | 0.35629  | 4.1697  | 0.52936  | 0.60501 | 0.76193 | -6.1238 | 150472   |

|             |          |          |         |          |         |         |         |          |
|-------------|----------|----------|---------|----------|---------|---------|---------|----------|
| RBAK-RBAKDN | -0.04525 | 0.04525  | 0.11011 | -0.52929 | 0.60506 | 0.76193 | -6.1238 | 1.01E+08 |
| SCML1       | -0.10836 | 0.10836  | 1.114   | -0.52882 | 0.60538 | 0.76224 | -6.1241 | 6322     |
| GLB1L       | 0.13138  | 0.13138  | 0.89801 | 0.5288   | 0.6054  | 0.76224 | -6.1241 | 79411    |
| PHF24       | 0.050496 | 0.050496 | 0.3177  | 0.52774  | 0.60611 | 0.76303 | -6.1247 | 23349    |
| DAG1        | -0.65759 | 0.65759  | 10.109  | -0.52771 | 0.60613 | 0.76303 | -6.1247 | 1605     |
| PRICKLE2    | 0.32888  | 0.32888  | 2.238   | 0.52767  | 0.60616 | 0.76303 | -6.1247 | 166336   |
| SEMA3F      | 1.4868   | 1.4868   | 15.829  | 0.52749  | 0.60628 | 0.76307 | -6.1248 | 6405     |
| SMUG1       | -0.21254 | 0.21254  | 2.1758  | -0.52748 | 0.60628 | 0.76307 | -6.1248 | 23583    |
| PCDHGA9     | -0.09842 | 0.09842  | 1.4611  | -0.52739 | 0.60635 | 0.7631  | -6.1248 | 56107    |
| ZNF746      | 0.3539   | 0.3539   | 3.4241  | 0.52708  | 0.60656 | 0.76331 | -6.125  | 155061   |
| PCDHGB5     | 0.081452 | 0.081452 | 1.7503  | 0.52656  | 0.60691 | 0.76368 | -6.1253 | 56101    |
| TFPI        | 0.53215  | 0.53215  | 2.9447  | 0.5265   | 0.60695 | 0.76368 | -6.1253 | 7035     |
| SMIM4       | 0.54679  | 0.54679  | 3.7198  | 0.52627  | 0.60711 | 0.76383 | -6.1254 | 440957   |
| AQR         | 0.48643  | 0.48643  | 5.9908  | 0.52589  | 0.60736 | 0.76409 | -6.1256 | 9716     |
| SCYL3       | -0.11713 | 0.11713  | 2.5862  | -0.52531 | 0.60775 | 0.76453 | -6.1259 | 57147    |
| VAV2        | 0.59273  | 0.59273  | 3.4974  | 0.52518  | 0.60784 | 0.76458 | -6.126  | 7410     |
| NFE2        | -0.27428 | 0.27428  | 1.2269  | -0.52499 | 0.60797 | 0.76468 | -6.1261 | 4778     |
| ZNF547      | -0.05011 | 0.050109 | 0.42942 | -0.52492 | 0.60802 | 0.76468 | -6.1262 | 284306   |
| PWP2        | -0.43723 | 0.43723  | 3.6261  | -0.5247  | 0.60817 | 0.76482 | -6.1263 | 5822     |
| MED16       | 0.82178  | 0.82178  | 7.0516  | 0.5244   | 0.60837 | 0.765   | -6.1264 | 10025    |
| IMP4        | -0.43934 | 0.43934  | 4.5331  | -0.52419 | 0.60851 | 0.765   | -6.1265 | 92856    |
| LPAR5       | -0.26391 | 0.26391  | 3.2407  | -0.52403 | 0.60862 | 0.765   | -6.1266 | 57121    |
| ARHGEF4     | 1.9353   | 1.9353   | 13.636  | 0.524    | 0.60864 | 0.765   | -6.1266 | 50649    |
| PRPF39      | -0.31659 | 0.31659  | 3.9068  | -0.524   | 0.60864 | 0.765   | -6.1266 | 55015    |
| ZMYND10     | -0.04099 | 0.040985 | 0.14418 | -0.52397 | 0.60866 | 0.765   | -6.1267 | 51364    |
| ZNF524      | -0.67676 | 0.67676  | 5.2785  | -0.52393 | 0.60869 | 0.765   | -6.1267 | 147807   |

|              |          |          |         |          |         |         |         |          |
|--------------|----------|----------|---------|----------|---------|---------|---------|----------|
| LIPK         | -0.41579 | 0.41579  | 2.16    | -0.52385 | 0.60874 | 0.765   | -6.1267 | 643414   |
| GART         | 0.78663  | 0.78663  | 6.1733  | 0.52381  | 0.60877 | 0.765   | -6.1267 | 2618     |
| LOC105370489 | -0.04079 | 0.040788 | 0.14108 | -0.52376 | 0.60881 | 0.765   | -6.1268 | 1.05E+08 |
| EXOC6B       | 0.91752  | 0.91752  | 10.733  | 0.52368  | 0.60886 | 0.765   | -6.1268 | 23233    |
| SMIM11A      | 0.040824 | 0.040824 | 0.26648 | 0.52368  | 0.60886 | 0.765   | -6.1268 | 54065    |
| CDH24        | -0.27442 | 0.27442  | 1.5483  | -0.52324 | 0.60915 | 0.76529 | -6.127  | 64403    |
| MCCC2        | -0.3719  | 0.3719   | 5.6691  | -0.52321 | 0.60917 | 0.76529 | -6.1271 | 64087    |
| PIGC         | 0.71414  | 0.71414  | 6.221   | 0.52289  | 0.60939 | 0.76545 | -6.1272 | 5279     |
| RAF1         | 0.85372  | 0.85372  | 13.346  | 0.52288  | 0.6094  | 0.76545 | -6.1272 | 5894     |
| PIGU         | 0.31114  | 0.31114  | 3.3823  | 0.52282  | 0.60944 | 0.76545 | -6.1273 | 128869   |
| ZNF221       | 0.078813 | 0.078813 | 0.50612 | 0.52272  | 0.60951 | 0.76548 | -6.1273 | 7638     |
| XG           | -0.62394 | 0.62394  | 4.9027  | -0.522   | 0.60999 | 0.76599 | -6.1277 | 7499     |
| SGSM3        | -0.79152 | 0.79152  | 6.5811  | -0.52198 | 0.61001 | 0.76599 | -6.1277 | 27352    |
| SDAD1        | 0.50438  | 0.50438  | 4.9123  | 0.52192  | 0.61005 | 0.76599 | -6.1277 | 55153    |
| LCE1C        | 57.126   | 57.126   | 132.9   | 0.52146  | 0.61036 | 0.7662  | -6.128  | 353133   |
| MIGA2        | -0.40736 | 0.40736  | 2.5417  | -0.52129 | 0.61047 | 0.7662  | -6.1281 | 84895    |
| HNRNPAB      | 3.9816   | 3.9816   | 35.897  | 0.52129  | 0.61048 | 0.7662  | -6.1281 | 3182     |
| SPTBN5       | -0.05819 | 0.05819  | 0.34729 | -0.52128 | 0.61048 | 0.7662  | -6.1281 | 51332    |
| C1QB         | -5.8545  | 5.8545   | 18.521  | -0.52127 | 0.61049 | 0.7662  | -6.1281 | 713      |
| CRISPLD2     | 3.4979   | 3.4979   | 16.503  | 0.52126  | 0.6105  | 0.7662  | -6.1281 | 83716    |
| OR1J1        | 0.055012 | 0.055012 | 0.14547 | 0.52119  | 0.61055 | 0.7662  | -6.1281 | 347168   |
| FYN          | -0.94634 | 0.94634  | 6.0068  | -0.52104 | 0.61065 | 0.7662  | -6.1282 | 2534     |
| AK5          | 0.094593 | 0.094593 | 0.32601 | 0.52102  | 0.61066 | 0.7662  | -6.1282 | 26289    |
| ZMYND15      | -0.08278 | 0.082782 | 0.55718 | -0.521   | 0.61067 | 0.7662  | -6.1282 | 84225    |
| SNRPD3       | 0.87422  | 0.87422  | 9.7182  | 0.52091  | 0.61074 | 0.76622 | -6.1283 | 6634     |
| EEF2KMT      | 0.19542  | 0.19542  | 1.8482  | 0.5205   | 0.61102 | 0.76651 | -6.1285 | 196483   |

|              |          |          |         |          |         |         |         |          |
|--------------|----------|----------|---------|----------|---------|---------|---------|----------|
| SND1         | 1.6632   | 1.6632   | 18.749  | 0.52038  | 0.61109 | 0.76651 | -6.1286 | 27044    |
| FUT7         | -0.04306 | 0.043061 | 0.16078 | -0.52037 | 0.6111  | 0.76651 | -6.1286 | 2529     |
| PCDHGB6      | -0.0943  | 0.094298 | 1.3834  | -0.51994 | 0.61139 | 0.76682 | -6.1288 | 56100    |
| TMEM216      | -0.25682 | 0.25682  | 1.7057  | -0.51974 | 0.61153 | 0.76693 | -6.1289 | 51259    |
| TMEM44       | 0.14717  | 0.14717  | 1.0357  | 0.51928  | 0.61184 | 0.76727 | -6.1291 | 93109    |
| ZFP90        | -0.14018 | 0.14018  | 2.112   | -0.51913 | 0.61194 | 0.76734 | -6.1292 | 146198   |
| LOC105370203 | 0.046507 | 0.046507 | 0.18366 | 0.51867  | 0.61226 | 0.76767 | -6.1295 | 1.05E+08 |
| RNF169       | -0.31273 | 0.31273  | 4.6415  | -0.51857 | 0.61233 | 0.7677  | -6.1295 | 254225   |
| BCL2L10      | 0.45782  | 0.45782  | 2.1198  | 0.51845  | 0.61241 | 0.76775 | -6.1296 | 10017    |
| TRAFD1       | -0.58685 | 0.58685  | 7.4296  | -0.51825 | 0.61254 | 0.76786 | -6.1297 | 10906    |
| MTMR12       | -0.43783 | 0.43783  | 6.0236  | -0.51801 | 0.61271 | 0.76801 | -6.1298 | 54545    |
| LSM14A       | 0.77564  | 0.77564  | 11.47   | 0.51778  | 0.61286 | 0.76809 | -6.1299 | 26065    |
| CEP112       | 0.18292  | 0.18292  | 1.1678  | 0.51776  | 0.61287 | 0.76809 | -6.1299 | 201134   |
| AP2B1        | -1.0792  | 1.0792   | 10.137  | -0.5177  | 0.61292 | 0.76809 | -6.13   | 163      |
| AADAC        | -0.25122 | 0.25122  | 0.84246 | -0.51761 | 0.61297 | 0.76809 | -6.13   | 13       |
| SPRYD3       | -1.0045  | 1.0045   | 8.9816  | -0.51758 | 0.613   | 0.76809 | -6.13   | 84926    |
| LHFPL6       | -1.5987  | 1.5987   | 9.6746  | -0.51747 | 0.61307 | 0.76809 | -6.1301 | 10186    |
| FOXN3-AS1    | 0.15318  | 0.15318  | 1.0251  | 0.51744  | 0.61309 | 0.76809 | -6.1301 | 400236   |
| PLCE1        | -0.0897  | 0.089698 | 0.46125 | -0.51732 | 0.61317 | 0.76813 | -6.1302 | 51196    |
| USP39        | -0.40271 | 0.40271  | 5.4474  | -0.51701 | 0.61338 | 0.76835 | -6.1303 | 10713    |
| IGSF22       | 0.085219 | 0.085219 | 0.29399 | 0.51675  | 0.61356 | 0.76851 | -6.1305 | 283284   |
| SYNJ1        | 0.089149 | 0.089149 | 1.3754  | 0.51664  | 0.61363 | 0.76854 | -6.1305 | 8867     |
| NHLRC2       | -0.1984  | 0.1984   | 2.9724  | -0.51622 | 0.61392 | 0.7688  | -6.1308 | 374354   |
| DPRXP4       | -0.20577 | 0.20577  | 1.5433  | -0.51619 | 0.61394 | 0.7688  | -6.1308 | 503645   |
| MRPL49       | 0.72845  | 0.72845  | 8.0594  | 0.51615  | 0.61397 | 0.7688  | -6.1308 | 740      |
| CAPN8        | 0.074267 | 0.074267 | 0.1838  | 0.51498  | 0.61476 | 0.76973 | -6.1314 | 388743   |

|         |          |          |         |          |         |         |         |        |
|---------|----------|----------|---------|----------|---------|---------|---------|--------|
| NAT14   | 0.3337   | 0.3337   | 1.4532  | 0.51436  | 0.61519 | 0.77016 | -6.1317 | 57106  |
| UROD    | 1.288    | 1.288    | 8.3581  | 0.51434  | 0.6152  | 0.77016 | -6.1317 | 7389   |
| RALBP1  | 1.7297   | 1.7297   | 18.858  | 0.51386  | 0.61552 | 0.77051 | -6.132  | 10928  |
| E2F8    | 0.11061  | 0.11061  | 0.62213 | 0.51351  | 0.61577 | 0.77073 | -6.1322 | 79733  |
| PPP1R7  | 0.57006  | 0.57006  | 5.9026  | 0.51348  | 0.61579 | 0.77073 | -6.1322 | 5510   |
| RGS19   | 0.58682  | 0.58682  | 3.2473  | 0.5133   | 0.61591 | 0.77074 | -6.1323 | 10287  |
| ZNF212  | 0.29768  | 0.29768  | 3.0054  | 0.5133   | 0.61591 | 0.77074 | -6.1323 | 7988   |
| SH3GLB2 | 3.8522   | 3.8522   | 24.423  | 0.51317  | 0.616   | 0.77074 | -6.1323 | 56904  |
| DNAJC10 | 0.508    | 0.508    | 4.275   | 0.51315  | 0.61601 | 0.77074 | -6.1324 | 54431  |
| MTG2    | -0.2858  | 0.2858   | 2.9717  | -0.51313 | 0.61602 | 0.77074 | -6.1324 | 26164  |
| DNAJC25 | 0.13506  | 0.13506  | 1.3746  | 0.51295  | 0.61615 | 0.7708  | -6.1325 | 548645 |
| TIMM13  | 1.3763   | 1.3763   | 10.853  | 0.5129   | 0.61618 | 0.7708  | -6.1325 | 26517  |
| ZNF101  | -0.10276 | 0.10276  | 1.2412  | -0.51279 | 0.61625 | 0.7708  | -6.1325 | 94039  |
| AGT     | -0.58984 | 0.58984  | 1.2563  | -0.51279 | 0.61626 | 0.7708  | -6.1325 | 183    |
| BCL2L2  | 1.1625   | 1.1625   | 13.315  | 0.51267  | 0.61634 | 0.77084 | -6.1326 | 599    |
| CBARP   | 0.18039  | 0.18039  | 1.1485  | 0.5125   | 0.61645 | 0.77085 | -6.1327 | 255057 |
| MEF2C   | 0.35089  | 0.35089  | 1.919   | 0.51242  | 0.61651 | 0.77085 | -6.1327 | 4208   |
| SLF1    | -0.09701 | 0.097006 | 0.79111 | -0.5124  | 0.61652 | 0.77085 | -6.1327 | 84250  |
| GMCL1   | 0.12967  | 0.12967  | 1.7385  | 0.51229  | 0.6166  | 0.77085 | -6.1328 | 64395  |
| GRSF1   | 0.33692  | 0.33692  | 4.5441  | 0.51228  | 0.6166  | 0.77085 | -6.1328 | 2926   |
| MCPH1   | -0.06242 | 0.062422 | 1.0572  | -0.51226 | 0.61661 | 0.77085 | -6.1328 | 79648  |
| POPDC2  | 0.090956 | 0.090956 | 0.55727 | 0.51207  | 0.61675 | 0.7709  | -6.1329 | 64091  |
| TTF1    | -0.14826 | 0.14826  | 1.8331  | -0.51207 | 0.61675 | 0.7709  | -6.1329 | 7270   |
| PTPA    | 2.0431   | 2.0431   | 18.127  | 0.51196  | 0.61682 | 0.77093 | -6.133  | 5524   |
| SUMO4   | -0.08409 | 0.084088 | 0.6083  | -0.51175 | 0.61696 | 0.77104 | -6.1331 | 387082 |
| MRPL24  | -1.4015  | 1.4015   | 11.181  | -0.5117  | 0.617   | 0.77104 | -6.1331 | 79590  |

|           |          |          |         |          |         |         |         |        |
|-----------|----------|----------|---------|----------|---------|---------|---------|--------|
| C1orf112  | 0.094366 | 0.094366 | 0.75488 | 0.51158  | 0.61708 | 0.77109 | -6.1332 | 55732  |
| LINC02120 | -0.07988 | 0.079884 | 0.23264 | -0.51127 | 0.61729 | 0.77124 | -6.1333 | 340113 |
| LDLRAP1   | -0.68316 | 0.68316  | 6.76    | -0.51126 | 0.6173  | 0.77124 | -6.1333 | 26119  |
| SCG2      | 0.61418  | 0.61418  | 1.5669  | 0.5111   | 0.61741 | 0.77132 | -6.1334 | 7857   |
| C1orf109  | -0.13357 | 0.13357  | 1.6415  | -0.51082 | 0.6176  | 0.7715  | -6.1336 | 54955  |
| C1orf216  | -0.21337 | 0.21337  | 1.6125  | -0.51051 | 0.61781 | 0.77171 | -6.1337 | 127703 |
| MSH3      | -0.17018 | 0.17018  | 2.7526  | -0.51042 | 0.61787 | 0.77172 | -6.1338 | 4437   |
| TULP4     | -0.44611 | 0.44611  | 7.1426  | -0.51037 | 0.61791 | 0.77172 | -6.1338 | 56995  |
| DDX46     | -0.35159 | 0.35159  | 5.3816  | -0.51016 | 0.61805 | 0.77184 | -6.1339 | 9879   |
| PLD3      | -3.2548  | 3.2548   | 21.263  | -0.50992 | 0.61821 | 0.77195 | -6.134  | 23646  |
| INAVA     | -1.0063  | 1.0063   | 11.385  | -0.50989 | 0.61823 | 0.77195 | -6.134  | 55765  |
| OGN       | 0.24317  | 0.24317  | 0.60292 | 0.50968  | 0.61838 | 0.772   | -6.1342 | 4969   |
| ZDHHC8P1  | -0.04893 | 0.048932 | 0.19341 | -0.50964 | 0.6184  | 0.772   | -6.1342 | 150244 |
| TCF3      | -0.64542 | 0.64542  | 5.7463  | -0.50964 | 0.61841 | 0.772   | -6.1342 | 6929   |
| ZNF92     | -0.10914 | 0.10914  | 0.7742  | -0.50955 | 0.61847 | 0.77201 | -6.1342 | 168374 |
| PSD       | 0.079817 | 0.079817 | 0.38754 | 0.50949  | 0.61851 | 0.77201 | -6.1343 | 5662   |
| FARP1     | 0.60128  | 0.60128  | 4.1657  | 0.50924  | 0.61868 | 0.77217 | -6.1344 | 10160  |
| RIPK1     | 0.43294  | 0.43294  | 6.0097  | 0.50905  | 0.61881 | 0.77228 | -6.1345 | 8737   |
| RCE1      | -0.44786 | 0.44786  | 4.2652  | -0.50888 | 0.61892 | 0.77236 | -6.1346 | 9986   |
| QRSL1     | 0.15178  | 0.15178  | 1.5677  | 0.50874  | 0.61901 | 0.77242 | -6.1346 | 55278  |
| CDC7      | 0.15859  | 0.15859  | 1.0411  | 0.50868  | 0.61906 | 0.77242 | -6.1347 | 8317   |
| MOSMO     | 0.09433  | 0.09433  | 1.1265  | 0.50824  | 0.61936 | 0.77273 | -6.1349 | 730094 |
| GLT1D1    | 0.073081 | 0.073081 | 0.31647 | 0.508    | 0.61952 | 0.77279 | -6.135  | 144423 |
| LLGL2     | 1.0265   | 1.0265   | 8.5307  | 0.50799  | 0.61953 | 0.77279 | -6.135  | 3993   |
| CBX1      | 0.41466  | 0.41466  | 5.676   | 0.50793  | 0.61957 | 0.77279 | -6.1351 | 10951  |
| STK19     | 0.056824 | 0.056824 | 0.61748 | 0.5079   | 0.61959 | 0.77279 | -6.1351 | 8859   |

|              |          |          |         |          |         |         |         |          |
|--------------|----------|----------|---------|----------|---------|---------|---------|----------|
| LEMD2        | -0.6657  | 0.6657   | 6.7606  | -0.50745 | 0.6199  | 0.77304 | -6.1353 | 221496   |
| NIF3L1       | 0.33318  | 0.33318  | 3.4341  | 0.50742  | 0.61992 | 0.77304 | -6.1353 | 60491    |
| RBM45        | 0.17797  | 0.17797  | 1.7516  | 0.50741  | 0.61992 | 0.77304 | -6.1353 | 129831   |
| CENPS        | 0.11551  | 0.11551  | 0.65678 | 0.50734  | 0.61997 | 0.77304 | -6.1354 | 378708   |
| STX19        | -0.11245 | 0.11245  | 0.7303  | -0.507   | 0.62021 | 0.77327 | -6.1355 | 415117   |
| C9orf78      | -0.70638 | 0.70638  | 8.8256  | -0.50695 | 0.62024 | 0.77327 | -6.1356 | 51759    |
| ZC3H3        | -0.42544 | 0.42544  | 4.7479  | -0.50688 | 0.62029 | 0.77327 | -6.1356 | 23144    |
| FAM83H       | 4.0211   | 4.0211   | 25.079  | 0.50648  | 0.62056 | 0.77336 | -6.1358 | 286077   |
| ARHGAP11B    | 0.065988 | 0.065988 | 0.42306 | 0.50636  | 0.62064 | 0.77336 | -6.1359 | 89839    |
| LOC101929574 | -0.04078 | 0.040782 | 0.15314 | -0.50634 | 0.62066 | 0.77336 | -6.1359 | 1.02E+08 |
| GPR171       | -0.0416  | 0.041602 | 0.14875 | -0.50631 | 0.62068 | 0.77336 | -6.1359 | 29909    |
| LOC101928977 | -0.03948 | 0.039484 | 0.11931 | -0.50622 | 0.62074 | 0.77336 | -6.1359 | 1.02E+08 |
| FCGR3A       | 1.6142   | 1.6142   | 4.6977  | 0.50621  | 0.62075 | 0.77336 | -6.1359 | 2214     |
| ERLIN1       | 0.41551  | 0.41551  | 4.9458  | 0.5062   | 0.62076 | 0.77336 | -6.136  | 10613    |
| ELOVL6       | 0.43859  | 0.43859  | 2.651   | 0.50616  | 0.62078 | 0.77336 | -6.136  | 79071    |
| ZBTB7A       | 1.4197   | 1.4197   | 13.612  | 0.50615  | 0.62078 | 0.77336 | -6.136  | 51341    |
| UQCC3        | -0.29646 | 0.29646  | 2.446   | -0.50609 | 0.62082 | 0.77336 | -6.136  | 790955   |
| CLDN15       | -0.23906 | 0.23906  | 1.4272  | -0.50591 | 0.62095 | 0.77346 | -6.1361 | 24146    |
| MTRNR2L3     | -0.06847 | 0.068469 | 0.38083 | -0.50575 | 0.62106 | 0.77355 | -6.1362 | 1E+08    |
| ASPH         | 0.39145  | 0.39145  | 4.9506  | 0.50562  | 0.62115 | 0.7736  | -6.1362 | 444      |
| GPR68        | 1.1651   | 1.1651   | 5.8674  | 0.50537  | 0.62132 | 0.7737  | -6.1364 | 8111     |
| DMAC1        | 0.71032  | 0.71032  | 4.1332  | 0.50537  | 0.62132 | 0.7737  | -6.1364 | 90871    |
| PTRH2        | 0.24568  | 0.24568  | 2.3913  | 0.50523  | 0.62142 | 0.77376 | -6.1364 | 51651    |
| GIMAP4       | -0.55222 | 0.55222  | 3.5288  | -0.50505 | 0.62154 | 0.77382 | -6.1365 | 55303    |
| AGAP3        | -0.69942 | 0.69942  | 6.2605  | -0.50502 | 0.62156 | 0.77382 | -6.1366 | 116988   |
| DOP1B        | 0.34587  | 0.34587  | 3.4858  | 0.50476  | 0.62174 | 0.77399 | -6.1367 | 9980     |



|              |          |          |         |          |         |         |         |        |
|--------------|----------|----------|---------|----------|---------|---------|---------|--------|
| ZNF148       | -0.16715 | 0.16715  | 2.2313  | -0.50419 | 0.62213 | 0.77442 | -6.137  | 7707   |
| U2SURP       | -0.38728 | 0.38728  | 4.6066  | -0.50408 | 0.6222  | 0.77445 | -6.137  | 23350  |
| B4GALT5      | 0.5607   | 0.5607   | 4.0996  | 0.5039   | 0.62232 | 0.77453 | -6.1371 | 9334   |
| LOC100288846 | -0.05159 | 0.051593 | 0.36772 | -0.50386 | 0.62235 | 0.77453 | -6.1371 | 1E+08  |
| SYNRG        | -0.12436 | 0.12436  | 3.2292  | -0.50355 | 0.62256 | 0.77468 | -6.1373 | 11276  |
| MDK          | -2.7041  | 2.7041   | 8.3637  | -0.50352 | 0.62259 | 0.77468 | -6.1373 | 4192   |
| ASB8         | -0.27499 | 0.27499  | 4.2958  | -0.50347 | 0.62262 | 0.77468 | -6.1373 | 140461 |
| GPBAR1       | -0.0436  | 0.043603 | 0.26457 | -0.50342 | 0.62266 | 0.77468 | -6.1374 | 151306 |
| CRADD        | 0.13673  | 0.13673  | 1.2013  | 0.50333  | 0.62272 | 0.77469 | -6.1374 | 8738   |
| LINC02593    | -0.04198 | 0.041982 | 0.13219 | -0.50316 | 0.62283 | 0.77474 | -6.1375 | 1E+08  |
| CARD14       | -0.55931 | 0.55931  | 3.6809  | -0.50314 | 0.62285 | 0.77474 | -6.1375 | 79092  |
| RAB34        | 1.416    | 1.416    | 8.5588  | 0.50295  | 0.62298 | 0.77484 | -6.1376 | 83871  |
| PIBF1        | -0.22529 | 0.22529  | 2.2817  | -0.50277 | 0.6231  | 0.77494 | -6.1377 | 10464  |
| MAP3K20-AS1  | 0.082592 | 0.082592 | 0.52491 | 0.50253  | 0.62327 | 0.77505 | -6.1378 | 339751 |
| HIBCH        | -0.53847 | 0.53847  | 5.9003  | -0.50249 | 0.62329 | 0.77505 | -6.1378 | 26275  |
| RALY         | -0.73807 | 0.73807  | 9.2034  | -0.50244 | 0.62333 | 0.77505 | -6.1379 | 22913  |
| DTL          | 0.16292  | 0.16292  | 0.84418 | 0.50216  | 0.62352 | 0.77522 | -6.138  | 51514  |
| DPH5         | -0.20634 | 0.20634  | 2.2747  | -0.50207 | 0.62358 | 0.77522 | -6.1381 | 51611  |
| IDH1         | 1.16     | 1.16     | 7.5373  | 0.502    | 0.62363 | 0.77522 | -6.1381 | 3417   |
| ETFBKMT      | -0.05785 | 0.057851 | 0.53491 | -0.50197 | 0.62365 | 0.77522 | -6.1381 | 254013 |
| NUCB1        | -2.8835  | 2.8835   | 25.841  | -0.50138 | 0.62405 | 0.77567 | -6.1384 | 4924   |
| LPL          | -0.37222 | 0.37222  | 1.281   | -0.50129 | 0.62411 | 0.77569 | -6.1385 | 4023   |
| DENND5B      | -0.0761  | 0.076097 | 0.52514 | -0.5011  | 0.62425 | 0.77575 | -6.1386 | 160518 |
| SLC35F2      | 0.2872   | 0.2872   | 3.9119  | 0.50108  | 0.62426 | 0.77575 | -6.1386 | 54733  |
| AKR1A1       | 1.8902   | 1.8902   | 15.217  | 0.50097  | 0.62433 | 0.77579 | -6.1386 | 10327  |
| INCENP       | -0.45808 | 0.45808  | 3.4859  | -0.5009  | 0.62438 | 0.77579 | -6.1387 | 3619   |

|          |          |          |         |          |         |         |         |          |
|----------|----------|----------|---------|----------|---------|---------|---------|----------|
| YPEL2    | -0.19657 | 0.19657  | 3.5374  | -0.50028 | 0.62481 | 0.77614 | -6.139  | 388403   |
| RANBP10  | 0.38943  | 0.38943  | 4.7203  | 0.50024  | 0.62484 | 0.77614 | -6.139  | 57610    |
| PYDC1    | -1.2627  | 1.2627   | 3.6663  | -0.50023 | 0.62484 | 0.77614 | -6.139  | 260434   |
| RIPOR2   | 0.17518  | 0.17518  | 1.0143  | 0.50005  | 0.62497 | 0.77614 | -6.1391 | 9750     |
| ZNF12    | -0.22305 | 0.22305  | 3.3476  | -0.50001 | 0.62499 | 0.77614 | -6.1391 | 7559     |
| NCLN     | 1.1108   | 1.1108   | 8.1246  | 0.5      | 0.625   | 0.77614 | -6.1391 | 56926    |
| ENTR1    | 0.53377  | 0.53377  | 4.6092  | 0.49995  | 0.62503 | 0.77614 | -6.1391 | 10807    |
| KRT9     | 471.69   | 471.69   | 829.33  | 0.49995  | 0.62503 | 0.77614 | -6.1391 | 3857     |
| NBPF25P  | -0.48437 | 0.48437  | 14.158  | -0.49977 | 0.62516 | 0.77624 | -6.1392 | 1.02E+08 |
| CACNB3   | -0.2858  | 0.2858   | 2.7686  | -0.49966 | 0.62523 | 0.77627 | -6.1393 | 784      |
| DQX1     | -0.08312 | 0.083119 | 0.51106 | -0.49954 | 0.62532 | 0.77631 | -6.1394 | 165545   |
| RPP21    | 0.097068 | 0.097068 | 0.8541  | 0.49944  | 0.62538 | 0.77631 | -6.1394 | 79897    |
| OFD1     | 0.15732  | 0.15732  | 3.2315  | 0.49942  | 0.6254  | 0.77631 | -6.1394 | 8481     |
| MIEF1    | -0.31832 | 0.31832  | 3.9259  | -0.4992  | 0.62555 | 0.77642 | -6.1395 | 54471    |
| CSNK2A2  | 3.8646   | 3.8646   | 17.999  | 0.49915  | 0.62559 | 0.77642 | -6.1396 | 1459     |
| SLC50A1  | 0.72062  | 0.72062  | 5.4729  | 0.49909  | 0.62562 | 0.77642 | -6.1396 | 55974    |
| FOXK2    | 0.55386  | 0.55386  | 7.0622  | 0.49866  | 0.62592 | 0.77673 | -6.1398 | 3607     |
| CHCHD7   | -0.25211 | 0.25211  | 2.2121  | -0.49849 | 0.62603 | 0.77681 | -6.1399 | 79145    |
| KAZN     | -0.25464 | 0.25464  | 3.0473  | -0.49819 | 0.62624 | 0.77701 | -6.14   | 23254    |
| FGD5-AS1 | -0.76036 | 0.76036  | 10.708  | -0.49781 | 0.6265  | 0.7772  | -6.1402 | 1.01E+08 |
| CYBA     | 5.691    | 5.691    | 23.198  | 0.49777  | 0.62653 | 0.7772  | -6.1402 | 1535     |
| BMS1P22  | 0.04835  | 0.04835  | 0.13782 | 0.49777  | 0.62653 | 0.7772  | -6.1402 | 1.06E+08 |
| SNTB2    | 0.2803   | 0.2803   | 5.0754  | 0.49729  | 0.62686 | 0.77755 | -6.1405 | 6645     |
| FAM160B2 | -0.66061 | 0.66061  | 7.2861  | -0.49719 | 0.62693 | 0.77758 | -6.1405 | 64760    |
| TATDN1   | -0.35464 | 0.35464  | 3.3424  | -0.49689 | 0.62713 | 0.77778 | -6.1407 | 83940    |
| DIRAS1   | -0.16954 | 0.16954  | 0.96031 | -0.49682 | 0.62718 | 0.77778 | -6.1407 | 148252   |

|           |          |          |         |          |         |         |         |          |
|-----------|----------|----------|---------|----------|---------|---------|---------|----------|
| PHYH      | -0.25292 | 0.25292  | 1.9269  | -0.49641 | 0.62747 | 0.77793 | -6.1409 | 5264     |
| FOXRED1   | -0.30139 | 0.30139  | 2.5611  | -0.49635 | 0.6275  | 0.77793 | -6.141  | 55572    |
| ZW10      | 0.32069  | 0.32069  | 3.687   | 0.49633  | 0.62752 | 0.77793 | -6.141  | 9183     |
| IQGAP3    | 0.1858   | 0.1858   | 1.062   | 0.49624  | 0.62758 | 0.77793 | -6.141  | 128239   |
| ZNF133    | -0.16893 | 0.16893  | 2.3674  | -0.49614 | 0.62765 | 0.77793 | -6.1411 | 7692     |
| KRT18     | -0.95731 | 0.95731  | 5.8778  | -0.49614 | 0.62765 | 0.77793 | -6.1411 | 3875     |
| N4BP1     | 0.98261  | 0.98261  | 10.168  | 0.49601  | 0.62774 | 0.77793 | -6.1411 | 9683     |
| PDP2      | -0.05691 | 0.05691  | 0.77047 | -0.49592 | 0.6278  | 0.77793 | -6.1412 | 57546    |
| LINC01006 | -0.07514 | 0.075135 | 0.41795 | -0.49587 | 0.62783 | 0.77793 | -6.1412 | 1.01E+08 |
| GTF2H2C   | -0.13107 | 0.13107  | 0.48722 | -0.49583 | 0.62786 | 0.77793 | -6.1412 | 728340   |
| IGDCC4    | 0.37991  | 0.37991  | 1.2025  | 0.49577  | 0.62791 | 0.77793 | -6.1413 | 57722    |
| GRB10     | 0.43662  | 0.43662  | 3.1208  | 0.49572  | 0.62794 | 0.77793 | -6.1413 | 2887     |
| ZFAND3    | 0.78992  | 0.78992  | 9.5433  | 0.49572  | 0.62794 | 0.77793 | -6.1413 | 60685    |
| OCLN      | 0.42137  | 0.42137  | 2.8975  | 0.49565  | 0.62799 | 0.77793 | -6.1413 | 1.01E+08 |
| C20orf27  | -0.72545 | 0.72545  | 5.0639  | -0.49563 | 0.628   | 0.77793 | -6.1413 | 54976    |
| SLC25A11  | 1.2768   | 1.2768   | 12.662  | 0.49546  | 0.62811 | 0.77802 | -6.1414 | 8402     |
| HSD17B3   | -0.03992 | 0.039919 | 0.13403 | -0.49468 | 0.62865 | 0.77863 | -6.1418 | 3293     |
| NDN       | 1.0224   | 1.0224   | 4.9553  | 0.49459  | 0.62871 | 0.77865 | -6.1419 | 4692     |
| NUP35     | 0.23357  | 0.23357  | 2.5493  | 0.49427  | 0.62894 | 0.77882 | -6.142  | 129401   |
| HTD2      | -0.15278 | 0.15278  | 1.2636  | -0.49426 | 0.62894 | 0.77882 | -6.142  | 1.1E+08  |
| G6PC3     | -0.79639 | 0.79639  | 4.5275  | -0.49419 | 0.62899 | 0.77882 | -6.1421 | 92579    |
| CCL8      | -0.74761 | 0.74761  | 1.6438  | -0.49396 | 0.62915 | 0.77896 | -6.1422 | 6355     |
| DLX2      | 0.094925 | 0.094925 | 0.38426 | 0.49384  | 0.62923 | 0.77898 | -6.1422 | 1746     |
| TGS1      | 0.29676  | 0.29676  | 3.0694  | 0.49376  | 0.62929 | 0.77898 | -6.1423 | 96764    |
| IRAK1     | 2.4168   | 2.4168   | 17.909  | 0.49374  | 0.6293  | 0.77898 | -6.1423 | 3654     |
| HSFX4     | -0.04792 | 0.047916 | 0.22961 | -0.49363 | 0.62937 | 0.77901 | -6.1423 | 1.02E+08 |

|              |          |          |         |          |         |         |         |          |
|--------------|----------|----------|---------|----------|---------|---------|---------|----------|
| SNORA3A      | -0.36378 | 0.36378  | 2.4457  | -0.49331 | 0.6296  | 0.77914 | -6.1425 | 619562   |
| THNSL1       | -0.05577 | 0.055765 | 0.46676 | -0.49329 | 0.62961 | 0.77914 | -6.1425 | 79896    |
| ZC3HAV1      | 0.53313  | 0.53313  | 5.2577  | 0.49328  | 0.62962 | 0.77914 | -6.1425 | 56829    |
| GNG2         | 0.28157  | 0.28157  | 1.727   | 0.49314  | 0.62972 | 0.77921 | -6.1426 | 54331    |
| LOC105374952 | -0.20882 | 0.20882  | 0.70541 | -0.49305 | 0.62978 | 0.77923 | -6.1426 | 1.05E+08 |
| CD28         | 0.058744 | 0.058744 | 0.35136 | 0.49254  | 0.63013 | 0.77955 | -6.1429 | 940      |
| BHLHE22      | 0.10302  | 0.10302  | 0.30598 | 0.49254  | 0.63013 | 0.77955 | -6.1429 | 27319    |
| KCNK15       | -0.07313 | 0.073126 | 0.28781 | -0.49224 | 0.63034 | 0.77975 | -6.143  | 60598    |
| LOC105371824 | 0.062908 | 0.062908 | 0.25402 | 0.49207  | 0.63045 | 0.77977 | -6.1431 | 1.05E+08 |
| CEACAM3      | 0.07457  | 0.07457  | 0.17913 | 0.49199  | 0.6305  | 0.77977 | -6.1432 | 1084     |
| GGT1         | 0.051598 | 0.051598 | 0.46229 | 0.49191  | 0.63056 | 0.77977 | -6.1432 | 2678     |
| PCED1B       | -0.05828 | 0.058277 | 0.71993 | -0.4919  | 0.63057 | 0.77977 | -6.1432 | 91523    |
| FBXO22       | -0.16211 | 0.16211  | 2.5408  | -0.49188 | 0.63058 | 0.77977 | -6.1432 | 26263    |
| NACAD        | 0.076554 | 0.076554 | 0.38535 | 0.4915   | 0.63084 | 0.78003 | -6.1434 | 23148    |
| HDGF         | 3.6951   | 3.6951   | 35.513  | 0.49137  | 0.63093 | 0.78004 | -6.1435 | 3068     |
| ELF2         | -0.26483 | 0.26483  | 4.6807  | -0.49135 | 0.63095 | 0.78004 | -6.1435 | 1998     |
| TNIP3        | -0.37125 | 0.37125  | 0.64236 | -0.49106 | 0.63115 | 0.78021 | -6.1436 | 79931    |
| ASF1B        | 0.37251  | 0.37251  | 1.7469  | 0.49102  | 0.63117 | 0.78021 | -6.1436 | 55723    |
| FAM53C       | 0.35767  | 0.35767  | 4.3425  | 0.49068  | 0.63141 | 0.78044 | -6.1438 | 51307    |
| KCNJ18       | -0.45757 | 0.45757  | 1.1186  | -0.49061 | 0.63146 | 0.78044 | -6.1438 | 1E+08    |
| LOC100129307 | -0.08686 | 0.086862 | 0.34294 | -0.49054 | 0.6315  | 0.78044 | -6.1439 | 1E+08    |
| FERMT1       | -0.59024 | 0.59024  | 6.1876  | -0.49032 | 0.63166 | 0.78056 | -6.144  | 55612    |
| STK11        | -1.2279  | 1.2279   | 9.2512  | -0.49027 | 0.63169 | 0.78056 | -6.144  | 6794     |
| EBLN3P       | 0.27273  | 0.27273  | 5.2615  | 0.49012  | 0.63179 | 0.78056 | -6.1441 | 1.01E+08 |
| GPX2         | -1.0674  | 1.0674   | 5.0609  | -0.49004 | 0.63185 | 0.78056 | -6.1441 | 2877     |
| ZCCHC24      | -1.2236  | 1.2236   | 6.3266  | -0.48992 | 0.63193 | 0.78056 | -6.1442 | 219654   |

|                 |          |          |         |          |         |         |         |          |
|-----------------|----------|----------|---------|----------|---------|---------|---------|----------|
| MAPK11          | -0.53499 | 0.53499  | 3.1802  | -0.4899  | 0.63194 | 0.78056 | -6.1442 | 5600     |
| CLDN24          | -0.04845 | 0.048446 | 0.22581 | -0.4899  | 0.63195 | 0.78056 | -6.1442 | 1E+08    |
| ANOS1           | -0.06533 | 0.06533  | 0.70773 | -0.48987 | 0.63197 | 0.78056 | -6.1442 | 3730     |
| CAPRIN2         | 0.11921  | 0.11921  | 2.1173  | 0.48973  | 0.63207 | 0.78058 | -6.1443 | 65981    |
| ARIH2           | 0.21191  | 0.21191  | 4.5775  | 0.48971  | 0.63208 | 0.78058 | -6.1443 | 10425    |
| ARID5B          | 1.3087   | 1.3087   | 11.215  | 0.48946  | 0.63225 | 0.78074 | -6.1444 | 84159    |
| HLA-DPA1        | 0.58409  | 0.58409  | 2.7485  | 0.48929  | 0.63237 | 0.78083 | -6.1445 | 3113     |
| RASA3           | 0.63255  | 0.63255  | 3.3005  | 0.48912  | 0.63249 | 0.78092 | -6.1446 | 22821    |
| PTPN22          | 0.11273  | 0.11273  | 0.60574 | 0.48898  | 0.63258 | 0.78093 | -6.1447 | 26191    |
| KPTN            | 0.19462  | 0.19462  | 1.4122  | 0.48896  | 0.6326  | 0.78093 | -6.1447 | 11133    |
| AP4M1           | 0.38099  | 0.38099  | 3.24    | 0.4889   | 0.63263 | 0.78093 | -6.1447 | 9179     |
| C2orf76         | 0.12363  | 0.12363  | 1.2868  | 0.48872  | 0.63276 | 0.78102 | -6.1448 | 130355   |
| ZFX             | 0.17478  | 0.17478  | 2.7271  | 0.4886   | 0.63284 | 0.78107 | -6.1448 | 7543     |
| GINS4           | 0.098879 | 0.098879 | 0.63552 | 0.48849  | 0.63292 | 0.78109 | -6.1449 | 84296    |
| SCLY            | 0.076318 | 0.076318 | 0.93617 | 0.48844  | 0.63295 | 0.78109 | -6.1449 | 51540    |
| GRWD1           | -0.76686 | 0.76686  | 6.5029  | -0.48836 | 0.63301 | 0.78111 | -6.145  | 83743    |
| SMIM5           | 0.22869  | 0.22869  | 1.6382  | 0.48823  | 0.6331  | 0.78112 | -6.145  | 643008   |
| ZNF367          | 0.091037 | 0.091037 | 0.70835 | 0.48821  | 0.63311 | 0.78112 | -6.145  | 195828   |
| TICRR           | 0.11059  | 0.11059  | 0.61744 | 0.48799  | 0.63327 | 0.78125 | -6.1451 | 90381    |
| SURF2           | 0.66009  | 0.66009  | 6.0221  | 0.48787  | 0.63334 | 0.78129 | -6.1452 | 6835     |
| PEAR1           | -0.2752  | 0.2752   | 1.8546  | -0.48778 | 0.63341 | 0.78132 | -6.1453 | 375033   |
| STRBP           | -0.09731 | 0.09731  | 1.4004  | -0.48761 | 0.63353 | 0.78138 | -6.1453 | 55342    |
| CCNI            | 4.2884   | 4.2884   | 53.227  | 0.48756  | 0.63356 | 0.78138 | -6.1454 | 10983    |
| MEFV            | 0.1884   | 0.1884   | 0.65956 | 0.48706  | 0.63391 | 0.78176 | -6.1456 | 4210     |
| IQCJ-SCHIP1-AS1 | 0.064664 | 0.064664 | 0.30581 | 0.48672  | 0.63414 | 0.78189 | -6.1458 | 1.01E+08 |
| LOC154761       | 0.72166  | 0.72166  | 5.1944  | 0.48668  | 0.63417 | 0.78189 | -6.1458 | 154761   |

|            |          |          |         |          |         |         |         |          |
|------------|----------|----------|---------|----------|---------|---------|---------|----------|
| ZNF813     | -0.07146 | 0.071459 | 0.69596 | -0.48665 | 0.63419 | 0.78189 | -6.1458 | 126017   |
| CHRD       | -0.29646 | 0.29646  | 1.329   | -0.48663 | 0.6342  | 0.78189 | -6.1458 | 8646     |
| ZDBF2      | -0.05592 | 0.055917 | 0.82837 | -0.48656 | 0.63425 | 0.78189 | -6.1459 | 57683    |
| PYCARD-AS1 | -0.11803 | 0.11803  | 0.76688 | -0.48641 | 0.63436 | 0.78197 | -6.1459 | 1.01E+08 |
| SMPDL3A    | 1.2706   | 1.2706   | 8.4602  | 0.48613  | 0.63455 | 0.78207 | -6.1461 | 10924    |
| WDR38      | -0.03618 | 0.03618  | 0.13041 | -0.48612 | 0.63455 | 0.78207 | -6.1461 | 401551   |
| COA7       | 0.3084   | 0.3084   | 3.1677  | 0.48609  | 0.63457 | 0.78207 | -6.1461 | 65260    |
| KCNK2      | 0.072272 | 0.072272 | 0.23383 | 0.48581  | 0.63477 | 0.78225 | -6.1462 | 3776     |
| RREB1      | -1.0176  | 1.0176   | 10.532  | -0.48519 | 0.63519 | 0.78272 | -6.1465 | 6239     |
| BCL6B      | 0.62539  | 0.62539  | 2.954   | 0.48495  | 0.63536 | 0.78287 | -6.1467 | 255877   |
| BEND3      | 0.10913  | 0.10913  | 0.72025 | 0.48479  | 0.63548 | 0.78295 | -6.1467 | 57673    |
| RMI2       | -0.18645 | 0.18645  | 1.0467  | -0.4846  | 0.6356  | 0.783   | -6.1468 | 116028   |
| RNF168     | 0.63133  | 0.63133  | 6.5609  | 0.4845   | 0.63567 | 0.783   | -6.1469 | 165918   |
| IARS2      | 0.986    | 0.986    | 12.293  | 0.48441  | 0.63573 | 0.783   | -6.1469 | 55699    |
| MERTK      | -0.22706 | 0.22706  | 1.4663  | -0.4844  | 0.63574 | 0.783   | -6.1469 | 10461    |
| LAMTOR1    | 2.6896   | 2.6896   | 21.573  | 0.4844   | 0.63575 | 0.783   | -6.1469 | 55004    |
| UBE2CP5    | -0.14681 | 0.14681  | 1.6162  | -0.48422 | 0.63587 | 0.78309 | -6.147  | 1.01E+08 |
| TLR4       | 0.40868  | 0.40868  | 2.273   | 0.48405  | 0.63598 | 0.78317 | -6.1471 | 7099     |
| IGFBP5     | -13.406  | 13.406   | 48.867  | -0.48389 | 0.63609 | 0.78321 | -6.1472 | 3488     |
| LRG1       | -0.37049 | 0.37049  | 1.4725  | -0.48385 | 0.63612 | 0.78321 | -6.1472 | 116844   |
| PBRM1      | 0.32616  | 0.32616  | 6.3956  | 0.48373  | 0.63621 | 0.78321 | -6.1473 | 55193    |
| ARHGAP32   | 0.65225  | 0.65225  | 9.8766  | 0.48368  | 0.63624 | 0.78321 | -6.1473 | 9743     |
| USP42      | -0.10067 | 0.10067  | 2.2661  | -0.48368 | 0.63624 | 0.78321 | -6.1473 | 84132    |
| KLHDC7B    | -0.07586 | 0.075862 | 0.24576 | -0.4835  | 0.63637 | 0.78327 | -6.1474 | 113730   |
| SCARNA26B  | -0.05071 | 0.050705 | 0.11461 | -0.48342 | 0.63642 | 0.78327 | -6.1474 | 1.07E+08 |
| ATP5MC2    | -1.927   | 1.927    | 17.787  | -0.4834  | 0.63643 | 0.78327 | -6.1474 | 517      |

|             |          |          |         |          |         |         |         |          |
|-------------|----------|----------|---------|----------|---------|---------|---------|----------|
| FAM20A      | -1.306   | 1.306    | 5.9025  | -0.4833  | 0.63651 | 0.7833  | -6.1475 | 54757    |
| C15orf48    | -1.0301  | 1.0301   | 3.5015  | -0.48307 | 0.63667 | 0.78344 | -6.1476 | 84419    |
| FLT4        | 0.26518  | 0.26518  | 1.7369  | 0.48298  | 0.63673 | 0.78346 | -6.1476 | 2324     |
| PRKCE       | -0.11275 | 0.11275  | 1.4647  | -0.48282 | 0.63684 | 0.78354 | -6.1477 | 5581     |
| CAPN15      | -0.92206 | 0.92206  | 7.8025  | -0.48266 | 0.63695 | 0.78362 | -6.1478 | 6650     |
| CFP         | 0.14536  | 0.14536  | 0.80454 | 0.48253  | 0.63704 | 0.78364 | -6.1478 | 5199     |
| TINAGL1     | 1.3157   | 1.3157   | 7.8963  | 0.4825   | 0.63706 | 0.78364 | -6.1479 | 64129    |
| RGS5        | 1.208    | 1.208    | 5.8566  | 0.48241  | 0.63712 | 0.78365 | -6.1479 | 8490     |
| GPR173      | -0.10985 | 0.10985  | 0.4502  | -0.48235 | 0.63716 | 0.78365 | -6.1479 | 54328    |
| APOBR       | -0.09938 | 0.09938  | 0.62083 | -0.48207 | 0.63736 | 0.78383 | -6.1481 | 55911    |
| CLPB        | -0.22005 | 0.22005  | 2.3182  | -0.48181 | 0.63754 | 0.78386 | -6.1482 | 81570    |
| ATIC        | -0.84645 | 0.84645  | 7.4524  | -0.4818  | 0.63754 | 0.78386 | -6.1482 | 471      |
| NXF1        | -0.71728 | 0.71728  | 12.656  | -0.4818  | 0.63755 | 0.78386 | -6.1482 | 10482    |
| VPS53       | -0.20386 | 0.20386  | 3.7473  | -0.48178 | 0.63756 | 0.78386 | -6.1482 | 55275    |
| GPN2        | 0.38782  | 0.38782  | 4.872   | 0.48135  | 0.63786 | 0.78413 | -6.1484 | 54707    |
| STS         | 0.45852  | 0.45852  | 1.9608  | 0.48133  | 0.63787 | 0.78413 | -6.1484 | 412      |
| GGACT       | -0.09615 | 0.096146 | 0.79673 | -0.48106 | 0.63806 | 0.78418 | -6.1486 | 87769    |
| CMTM3       | 0.95862  | 0.95862  | 5.6986  | 0.48093  | 0.63815 | 0.78418 | -6.1486 | 123920   |
| KCNS3       | -0.15612 | 0.15612  | 1.5362  | -0.4809  | 0.63816 | 0.78418 | -6.1486 | 3790     |
| RAB4B-EGLN2 | -0.13639 | 0.13639  | 0.788   | -0.48089 | 0.63817 | 0.78418 | -6.1486 | 1.01E+08 |
| TERF2IP     | 0.63724  | 0.63724  | 9.3618  | 0.48088  | 0.63818 | 0.78418 | -6.1487 | 54386    |
| MRTFA       | -0.45168 | 0.45168  | 5.6329  | -0.48086 | 0.63819 | 0.78418 | -6.1487 | 57591    |
| HSPA6       | 0.53978  | 0.53978  | 2.8524  | 0.48062  | 0.63836 | 0.78433 | -6.1488 | 3310     |
| MEST        | -0.08429 | 0.084288 | 0.79043 | -0.48046 | 0.63847 | 0.78441 | -6.1489 | 4232     |
| LAP3        | -2.412   | 2.412    | 12.663  | -0.47982 | 0.63891 | 0.78489 | -6.1492 | 51056    |
| GPBP1L1     | 0.86327  | 0.86327  | 15.772  | 0.47967  | 0.63902 | 0.78497 | -6.1492 | 60313    |

|                  |          |          |         |          |         |         |         |          |
|------------------|----------|----------|---------|----------|---------|---------|---------|----------|
| CACNA1G          | -0.12323 | 0.12323  | 0.51598 | -0.47938 | 0.63922 | 0.78516 | -6.1494 | 8913     |
| CD33             | -0.13822 | 0.13822  | 0.87956 | -0.47922 | 0.63933 | 0.78524 | -6.1495 | 945      |
| ALDH4A1          | -0.81746 | 0.81746  | 5.9641  | -0.47913 | 0.63939 | 0.78524 | -6.1495 | 8659     |
| STAT3            | -4.9402  | 4.9402   | 37.75   | -0.47908 | 0.63943 | 0.78524 | -6.1495 | 6774     |
| EGOT             | -0.05869 | 0.058687 | 0.25951 | -0.47898 | 0.6395  | 0.78527 | -6.1496 | 1E+08    |
| TET2             | 0.23024  | 0.23024  | 4.1421  | 0.47886  | 0.63958 | 0.78531 | -6.1496 | 54790    |
| CASP8AP2         | 0.13891  | 0.13891  | 1.8563  | 0.47875  | 0.63966 | 0.78535 | -6.1497 | 9994     |
| GYPC             | -1.0724  | 1.0724   | 4.6934  | -0.47803 | 0.64015 | 0.78578 | -6.15   | 2995     |
| TNKS1BP1         | -3.9766  | 3.9766   | 34.769  | -0.47789 | 0.64025 | 0.78578 | -6.1501 | 85456    |
| ZNF484           | -0.13205 | 0.13205  | 1.244   | -0.47789 | 0.64026 | 0.78578 | -6.1501 | 83744    |
| ITFG1            | 0.37936  | 0.37936  | 4.9994  | 0.47787  | 0.64027 | 0.78578 | -6.1501 | 81533    |
| IGFBP4           | -43.356  | 43.356   | 142.8   | -0.47785 | 0.64028 | 0.78578 | -6.1501 | 3487     |
| LOC100506281     | -0.05227 | 0.052268 | 0.21294 | -0.47779 | 0.64033 | 0.78578 | -6.1502 | 1.01E+08 |
| SMURF2           | -0.33857 | 0.33857  | 3.84    | -0.47778 | 0.64033 | 0.78578 | -6.1502 | 64750    |
| SNRK             | 0.64425  | 0.64425  | 7.2458  | 0.4775   | 0.64053 | 0.78587 | -6.1503 | 54861    |
| TBC1D3P1-DHX40P1 | 0.04338  | 0.04338  | 0.13045 | 0.47749  | 0.64053 | 0.78587 | -6.1503 | 653645   |
| PTGFR            | -0.39496 | 0.39496  | 2.2151  | -0.47734 | 0.64064 | 0.78587 | -6.1504 | 5737     |
| DNAJA4           | -0.50008 | 0.50008  | 5.166   | -0.47732 | 0.64065 | 0.78587 | -6.1504 | 55466    |
| APOBEC3C         | -1.0255  | 1.0255   | 5.6978  | -0.47729 | 0.64067 | 0.78587 | -6.1504 | 27350    |
| FAM71E1          | -0.04869 | 0.048693 | 0.29008 | -0.47727 | 0.64068 | 0.78587 | -6.1504 | 112703   |
| PTCHD4           | -0.04626 | 0.046262 | 0.45528 | -0.47704 | 0.64084 | 0.78598 | -6.1505 | 442213   |
| SPAG5            | 0.19812  | 0.19812  | 1.4136  | 0.47701  | 0.64087 | 0.78598 | -6.1505 | 10615    |
| SH3BGR           | 0.0435   | 0.0435   | 0.14105 | 0.47689  | 0.64094 | 0.78601 | -6.1506 | 6450     |
| OPA1             | 0.39242  | 0.39242  | 5.6531  | 0.47669  | 0.64109 | 0.78612 | -6.1507 | 4976     |
| TXLNG            | -0.09812 | 0.098122 | 1.6015  | -0.47664 | 0.64112 | 0.78612 | -6.1507 | 55787    |
| HLA-DRB1         | -0.35278 | 0.35278  | 2.9708  | -0.47639 | 0.6413  | 0.78628 | -6.1508 | 3123     |



|           |          |          |         |          |         |         |         |        |
|-----------|----------|----------|---------|----------|---------|---------|---------|--------|
| PDE1A     | 0.088929 | 0.088929 | 0.43084 | 0.47605  | 0.64153 | 0.7865  | -6.151  | 5136   |
| BFAR      | 0.38438  | 0.38438  | 3.7055  | 0.47591  | 0.64163 | 0.78657 | -6.1511 | 51283  |
| NANP      | 0.085314 | 0.085314 | 0.86354 | 0.4758   | 0.64171 | 0.7866  | -6.1511 | 140838 |
| NCKAP5L   | -0.33275 | 0.33275  | 2.9091  | -0.47567 | 0.64179 | 0.78666 | -6.1512 | 57701  |
| PSMG1     | 0.73721  | 0.73721  | 5.5236  | 0.4755   | 0.64191 | 0.78671 | -6.1513 | 8624   |
| ABCF2     | 0.52037  | 0.52037  | 5.4932  | 0.47547  | 0.64193 | 0.78671 | -6.1513 | 10061  |
| RPL39L    | 0.42505  | 0.42505  | 2.1099  | 0.4752   | 0.64212 | 0.78685 | -6.1514 | 116832 |
| PUF60     | -1.1611  | 1.1611   | 14.242  | -0.47517 | 0.64214 | 0.78685 | -6.1514 | 22827  |
| LOX       | 0.79711  | 0.79711  | 5.1705  | 0.47509  | 0.6422  | 0.78687 | -6.1515 | 4015   |
| HNRNPR    | -0.59002 | 0.59002  | 7.1412  | -0.4748  | 0.6424  | 0.78699 | -6.1516 | 10236  |
| SBDSP1    | 0.3478   | 0.3478   | 3.5533  | 0.47476  | 0.64243 | 0.78699 | -6.1516 | 155370 |
| HUNK      | 0.090061 | 0.090061 | 0.60596 | 0.47473  | 0.64245 | 0.78699 | -6.1516 | 30811  |
| CBWD6     | -0.08378 | 0.083781 | 0.90618 | -0.47464 | 0.64251 | 0.78699 | -6.1517 | 644019 |
| PPM1B     | -0.1543  | 0.1543   | 2.5486  | -0.47461 | 0.64253 | 0.78699 | -6.1517 | 5495   |
| BARD1     | -0.1473  | 0.1473   | 1.9576  | -0.47431 | 0.64274 | 0.78714 | -6.1518 | 580    |
| TP53TG1   | 0.5786   | 0.5786   | 4.4423  | 0.4743   | 0.64274 | 0.78714 | -6.1518 | 11257  |
| POC5      | -0.10287 | 0.10287  | 1.0221  | -0.47421 | 0.64281 | 0.78716 | -6.1519 | 134359 |
| CLSTN1    | -3.3986  | 3.3986   | 35.5    | -0.47405 | 0.64292 | 0.78719 | -6.152  | 22883  |
| TSPAN9    | -1.0124  | 1.0124   | 9.0098  | -0.47403 | 0.64293 | 0.78719 | -6.152  | 10867  |
| YARS2     | 0.25534  | 0.25534  | 2.938   | 0.47396  | 0.64298 | 0.7872  | -6.152  | 51067  |
| C2CD4A    | 0.077884 | 0.077884 | 0.30739 | 0.47379  | 0.6431  | 0.78725 | -6.1521 | 145741 |
| AKT2      | 0.79691  | 0.79691  | 10.902  | 0.47377  | 0.64312 | 0.78725 | -6.1521 | 208    |
| CEP120    | -0.17907 | 0.17907  | 1.787   | -0.47362 | 0.64322 | 0.78732 | -6.1522 | 153241 |
| LOC389641 | -0.04443 | 0.044431 | 0.42191 | -0.47348 | 0.64332 | 0.78738 | -6.1522 | 389641 |
| TRIM24    | -0.1429  | 0.1429   | 2.4863  | -0.4733  | 0.64344 | 0.78747 | -6.1523 | 8805   |
| KDM1A     | 0.82882  | 0.82882  | 10.652  | 0.47273  | 0.64384 | 0.78787 | -6.1526 | 23028  |

|              |          |          |         |          |         |         |         |          |
|--------------|----------|----------|---------|----------|---------|---------|---------|----------|
| AKR1C3       | 0.59842  | 0.59842  | 4.3448  | 0.4727   | 0.64386 | 0.78787 | -6.1526 | 8644     |
| SRPRB        | 0.55432  | 0.55432  | 5.8633  | 0.47261  | 0.64392 | 0.78789 | -6.1527 | 58477    |
| SNORA70G     | 0.11279  | 0.11279  | 0.68182 | 0.47237  | 0.64409 | 0.78804 | -6.1528 | 1E+08    |
| TMEM35B      | -0.35268 | 0.35268  | 2.7085  | -0.47225 | 0.64418 | 0.78809 | -6.1528 | 1.01E+08 |
| TMED4        | 0.28415  | 0.28415  | 6.9344  | 0.47196  | 0.64437 | 0.78827 | -6.153  | 222068   |
| THAP9-AS1    | -0.31363 | 0.31363  | 3.1058  | -0.47152 | 0.64468 | 0.78859 | -6.1532 | 1E+08    |
| TGFBR3L      | -0.07158 | 0.071583 | 0.2983  | -0.47137 | 0.64478 | 0.78866 | -6.1533 | 1.01E+08 |
| PPWD1        | -0.29098 | 0.29098  | 4.4043  | -0.47098 | 0.64505 | 0.78888 | -6.1534 | 23398    |
| EIF3L        | -4.1675  | 4.1675   | 57.369  | -0.47098 | 0.64505 | 0.78888 | -6.1534 | 51386    |
| CD209        | -0.87285 | 0.87285  | 2.9144  | -0.47068 | 0.64527 | 0.78902 | -6.1536 | 30835    |
| RNF138       | 0.21023  | 0.21023  | 2.339   | 0.47062  | 0.64531 | 0.78902 | -6.1536 | 51444    |
| DUT          | 0.82914  | 0.82914  | 7.0292  | 0.47052  | 0.64538 | 0.78902 | -6.1537 | 1854     |
| FAM72B       | 0.045241 | 0.045241 | 0.23062 | 0.47042  | 0.64545 | 0.78902 | -6.1537 | 653820   |
| LINC00654    | -0.04634 | 0.046342 | 0.25636 | -0.47035 | 0.64549 | 0.78902 | -6.1537 | 149837   |
| LDB2         | 0.41211  | 0.41211  | 3.056   | 0.47033  | 0.64551 | 0.78902 | -6.1538 | 9079     |
| CD63         | 9.0758   | 9.0758   | 48.853  | 0.47031  | 0.64552 | 0.78902 | -6.1538 | 967      |
| CALHM2       | 0.72011  | 0.72011  | 4.7291  | 0.47026  | 0.64556 | 0.78902 | -6.1538 | 51063    |
| CBY1         | -0.35432 | 0.35432  | 3.7579  | -0.47021 | 0.64559 | 0.78902 | -6.1538 | 25776    |
| ALDH3B1      | -0.23384 | 0.23384  | 1.3896  | -0.47009 | 0.64567 | 0.78902 | -6.1539 | 221      |
| IL2RG        | 0.36832  | 0.36832  | 2.4392  | 0.47008  | 0.64568 | 0.78902 | -6.1539 | 3561     |
| ABHD14A-ACY1 | -0.09746 | 0.097464 | 0.47592 | -0.47001 | 0.64573 | 0.78902 | -6.1539 | 1.01E+08 |
| MID1IP1-AS1  | -0.04669 | 0.046693 | 0.24407 | -0.46992 | 0.6458  | 0.78904 | -6.154  | 1.01E+08 |
| ARFIP2       | 0.30639  | 0.30639  | 4.6941  | 0.46983  | 0.64586 | 0.78906 | -6.154  | 23647    |
| POLD3        | -0.19381 | 0.19381  | 1.9137  | -0.46955 | 0.64605 | 0.78924 | -6.1541 | 10714    |
| NLRP10       | 1.3584   | 1.3584   | 3.5     | 0.46938  | 0.64617 | 0.78925 | -6.1542 | 338322   |
| GUSB         | -0.58087 | 0.58087  | 5.5925  | -0.46935 | 0.64619 | 0.78925 | -6.1542 | 2990     |

|         |          |          |         |          |         |         |         |        |
|---------|----------|----------|---------|----------|---------|---------|---------|--------|
| MEOX2   | -0.2884  | 0.2884   | 1.7998  | -0.46933 | 0.6462  | 0.78925 | -6.1542 | 4223   |
| CYREN   | -0.3666  | 0.3666   | 3.2313  | -0.46912 | 0.64635 | 0.78936 | -6.1543 | 78996  |
| TMEM209 | -0.20831 | 0.20831  | 2.2074  | -0.46907 | 0.64638 | 0.78936 | -6.1544 | 84928  |
| IL32    | 0.93498  | 0.93498  | 5.4652  | 0.46895  | 0.64647 | 0.7894  | -6.1544 | 9235   |
| COPS7A  | 0.80642  | 0.80642  | 9.2236  | 0.46883  | 0.64655 | 0.78941 | -6.1545 | 50813  |
| BCCIP   | 0.31183  | 0.31183  | 3.5175  | 0.46881  | 0.64657 | 0.78941 | -6.1545 | 56647  |
| PIK3R3  | -0.45753 | 0.45753  | 2.4262  | -0.46864 | 0.64669 | 0.78946 | -6.1546 | 8503   |
| RNASE6  | 0.50803  | 0.50803  | 2.1756  | 0.46859  | 0.64672 | 0.78946 | -6.1546 | 6039   |
| EGLN3   | 2.538    | 2.538    | 17.853  | 0.46856  | 0.64674 | 0.78946 | -6.1546 | 112399 |
| MESD    | 0.20303  | 0.20303  | 3.3592  | 0.46842  | 0.64684 | 0.78948 | -6.1547 | 23184  |
| KCNE3   | 0.12315  | 0.12315  | 0.61722 | 0.46839  | 0.64686 | 0.78948 | -6.1547 | 10008  |
| HENMT1  | 0.14184  | 0.14184  | 1.0439  | 0.46822  | 0.64698 | 0.78957 | -6.1548 | 113802 |
| FTH1P3  | 0.089862 | 0.089862 | 0.42669 | 0.46799  | 0.64714 | 0.78971 | -6.1549 | 2498   |
| MCM2    | -0.6085  | 0.6085   | 3.3291  | -0.46728 | 0.64764 | 0.79026 | -6.1552 | 4171   |
| C3orf62 | -0.0847  | 0.0847   | 1.1841  | -0.46714 | 0.64773 | 0.79032 | -6.1553 | 375341 |
| MRPL30  | 0.31967  | 0.31967  | 3.74    | 0.46634  | 0.64829 | 0.79088 | -6.1557 | 51263  |
| TRIM37  | 0.1182   | 0.1182   | 2.1616  | 0.46632  | 0.64831 | 0.79088 | -6.1557 | 4591   |
| FASTKD3 | 0.085533 | 0.085533 | 0.9736  | 0.46628  | 0.64833 | 0.79088 | -6.1557 | 79072  |
| CXCL17  | -0.15245 | 0.15245  | 0.55376 | -0.46608 | 0.64847 | 0.79099 | -6.1558 | 284340 |
| PTPRM   | -0.92173 | 0.92173  | 5.988   | -0.46592 | 0.64858 | 0.79107 | -6.1559 | 5797   |
| NUP188  | -0.51831 | 0.51831  | 6.842   | -0.46561 | 0.6488  | 0.79128 | -6.156  | 23511  |
| RETREG1 | 0.16058  | 0.16058  | 1.1044  | 0.46515  | 0.64912 | 0.79161 | -6.1562 | 54463  |
| ECPAS   | 0.49663  | 0.49663  | 11.086  | 0.46506  | 0.64919 | 0.79163 | -6.1563 | 23392  |
| PRIM1   | -0.16886 | 0.16886  | 1.6506  | -0.465   | 0.64923 | 0.79163 | -6.1563 | 5557   |
| TRPV1   | -0.08146 | 0.081455 | 0.97581 | -0.46487 | 0.64932 | 0.79168 | -6.1564 | 7442   |
| JAK3    | 0.43584  | 0.43584  | 1.9949  | 0.46455  | 0.64954 | 0.79181 | -6.1565 | 3718   |

|             |          |          |         |          |         |         |         |          |
|-------------|----------|----------|---------|----------|---------|---------|---------|----------|
| POP1        | 0.14789  | 0.14789  | 1.2286  | 0.46455  | 0.64954 | 0.79181 | -6.1565 | 10940    |
| DACT3       | -0.23503 | 0.23503  | 1.1123  | -0.46452 | 0.64956 | 0.79181 | -6.1565 | 147906   |
| FMOD        | 2.437    | 2.437    | 13.721  | 0.46425  | 0.64975 | 0.79193 | -6.1566 | 2331     |
| GNAO1       | -0.08367 | 0.083668 | 0.44809 | -0.46419 | 0.64979 | 0.79193 | -6.1567 | 2775     |
| RFLNA       | -0.10265 | 0.10265  | 0.29636 | -0.46412 | 0.64984 | 0.79193 | -6.1567 | 144347   |
| ANKRD28     | 0.31456  | 0.31456  | 3.7719  | 0.464    | 0.64992 | 0.79193 | -6.1568 | 23243    |
| MFAP3L      | 1.0724   | 1.0724   | 3.6085  | 0.464    | 0.64992 | 0.79193 | -6.1568 | 9848     |
| CHURC1-FNTB | 0.41496  | 0.41496  | 2.7357  | 0.46398  | 0.64994 | 0.79193 | -6.1568 | 1.01E+08 |
| CXCR3       | -0.05561 | 0.055609 | 0.27111 | -0.4638  | 0.65007 | 0.79203 | -6.1569 | 2833     |
| IGSF21      | -0.19888 | 0.19888  | 0.71054 | -0.46342 | 0.65033 | 0.79228 | -6.157  | 84966    |
| TYMSOS      | -0.08224 | 0.082242 | 0.2551  | -0.46336 | 0.65037 | 0.79228 | -6.1571 | 494514   |
| SMARCD1     | -0.21707 | 0.21707  | 3.2197  | -0.46316 | 0.65051 | 0.7924  | -6.1572 | 56916    |
| EPHA3       | -0.06833 | 0.06833  | 0.38946 | -0.46301 | 0.65062 | 0.79243 | -6.1572 | 2042     |
| SMYD3       | -0.29224 | 0.29224  | 2.3674  | -0.46299 | 0.65063 | 0.79243 | -6.1572 | 64754    |
| PPIL3       | 0.35786  | 0.35786  | 3.4306  | 0.46285  | 0.65073 | 0.79248 | -6.1573 | 53938    |
| MED4-AS1    | -0.05435 | 0.054346 | 0.24406 | -0.46274 | 0.6508  | 0.79248 | -6.1574 | 1.01E+08 |
| SMPD1       | 1.0276   | 1.0276   | 8.7293  | 0.46269  | 0.65084 | 0.79248 | -6.1574 | 6609     |
| SYNDIG1     | 0.044432 | 0.044432 | 0.12542 | 0.46266  | 0.65086 | 0.79248 | -6.1574 | 79953    |
| FDFT1       | 1.1215   | 1.1215   | 12.368  | 0.46259  | 0.65091 | 0.79248 | -6.1574 | 2222     |
| PAFAH1B3    | -0.48817 | 0.48817  | 3.2259  | -0.4621  | 0.65125 | 0.79267 | -6.1577 | 5050     |
| SPCS2       | 0.56905  | 0.56905  | 7.0176  | 0.46205  | 0.65129 | 0.79267 | -6.1577 | 9789     |
| FKBP4       | 1.2499   | 1.2499   | 11.993  | 0.46194  | 0.65136 | 0.79267 | -6.1577 | 2288     |
| MCRIP2      | -0.24677 | 0.24677  | 1.6689  | -0.46193 | 0.65137 | 0.79267 | -6.1577 | 84331    |
| PKD2        | 0.36366  | 0.36366  | 3.337   | 0.46186  | 0.65142 | 0.79267 | -6.1578 | 5311     |
| BMI1        | -0.23756 | 0.23756  | 3.051   | -0.46184 | 0.65143 | 0.79267 | -6.1578 | 648      |
| MBIP        | 0.28448  | 0.28448  | 3.2555  | 0.46177  | 0.65149 | 0.79267 | -6.1578 | 51562    |

|              |          |          |         |          |         |         |         |        |
|--------------|----------|----------|---------|----------|---------|---------|---------|--------|
| CD40         | -0.29327 | 0.29327  | 2.2053  | -0.46174 | 0.6515  | 0.79267 | -6.1578 | 958    |
| USP25        | -0.22905 | 0.22905  | 3.9806  | -0.46168 | 0.65155 | 0.79267 | -6.1579 | 29761  |
| HAGHL        | 0.13693  | 0.13693  | 0.67692 | 0.46164  | 0.65157 | 0.79267 | -6.1579 | 84264  |
| CFB          | -0.28751 | 0.28751  | 0.80272 | -0.46163 | 0.65158 | 0.79267 | -6.1579 | 629    |
| WNT10A       | -0.40069 | 0.40069  | 2.076   | -0.46145 | 0.65171 | 0.79269 | -6.158  | 80326  |
| GCNT1        | -0.0806  | 0.080604 | 0.597   | -0.46142 | 0.65173 | 0.79269 | -6.158  | 2650   |
| ARMCX1       | -0.3371  | 0.3371   | 2.6941  | -0.46134 | 0.65178 | 0.79269 | -6.158  | 51309  |
| NLRP2        | 0.35352  | 0.35352  | 0.8919  | 0.46124  | 0.65185 | 0.79269 | -6.1581 | 55655  |
| RECK         | -0.21669 | 0.21669  | 1.6328  | -0.46121 | 0.65187 | 0.79269 | -6.1581 | 8434   |
| ASGR1        | -0.09154 | 0.091543 | 0.53532 | -0.4612  | 0.65188 | 0.79269 | -6.1581 | 432    |
| GPR75-ASB3   | 0.12307  | 0.12307  | 1.1253  | 0.46092  | 0.65207 | 0.79287 | -6.1582 | 1E+08  |
| ITGB4        | -6.6113  | 6.6113   | 39.46   | -0.46079 | 0.65217 | 0.79293 | -6.1583 | 3691   |
| SLC2A10      | 0.31592  | 0.31592  | 1.7798  | 0.46066  | 0.65226 | 0.79298 | -6.1583 | 81031  |
| PAM16        | -0.4499  | 0.4499   | 3.3551  | -0.4599  | 0.65279 | 0.79357 | -6.1587 | 51025  |
| AURKB        | 0.30862  | 0.30862  | 1.5374  | 0.45972  | 0.65292 | 0.79357 | -6.1588 | 9212   |
| RNF4         | 0.47544  | 0.47544  | 7.9278  | 0.45962  | 0.65299 | 0.79357 | -6.1588 | 6047   |
| PCMTD1       | -0.40133 | 0.40133  | 5.2072  | -0.45959 | 0.65301 | 0.79357 | -6.1588 | 115294 |
| NUDT4        | -0.16405 | 0.16405  | 1.8316  | -0.45955 | 0.65304 | 0.79357 | -6.1589 | 11163  |
| KLF16        | 0.73576  | 0.73576  | 7.0435  | 0.45936  | 0.65317 | 0.79357 | -6.159  | 83855  |
| FHOD3        | -0.19452 | 0.19452  | 1.2029  | -0.45934 | 0.65318 | 0.79357 | -6.159  | 80206  |
| SNORA3B      | 0.06452  | 0.06452  | 0.31738 | 0.45923  | 0.65326 | 0.79357 | -6.159  | 677826 |
| PHLPP2       | 0.051152 | 0.051152 | 0.80844 | 0.4591   | 0.65335 | 0.79357 | -6.1591 | 23035  |
| UTP23        | 0.14366  | 0.14366  | 1.6866  | 0.4591   | 0.65335 | 0.79357 | -6.1591 | 84294  |
| LOC100128079 | -0.03573 | 0.035734 | 0.17666 | -0.45905 | 0.65339 | 0.79357 | -6.1591 | 1E+08  |
| TOMM22       | 1.1386   | 1.1386   | 11.251  | 0.45903  | 0.6534  | 0.79357 | -6.1591 | 56993  |
| MSRA         | -0.30894 | 0.30894  | 2.5729  | -0.45897 | 0.65345 | 0.79357 | -6.1591 | 4482   |

|              |          |          |         |          |         |         |         |          |
|--------------|----------|----------|---------|----------|---------|---------|---------|----------|
| RHOH         | 0.057598 | 0.057598 | 0.31969 | 0.45894  | 0.65346 | 0.79357 | -6.1591 | 399      |
| BIVM         | 0.11488  | 0.11488  | 1.311   | 0.4589   | 0.65349 | 0.79357 | -6.1592 | 54841    |
| PDE3B        | 0.11473  | 0.11473  | 0.67546 | 0.4589   | 0.65349 | 0.79357 | -6.1592 | 5140     |
| CSNK1G2      | -1.0621  | 1.0621   | 11.501  | -0.45871 | 0.65362 | 0.79367 | -6.1593 | 1455     |
| RTN3         | 0.75515  | 0.75515  | 10.881  | 0.45862  | 0.65369 | 0.79369 | -6.1593 | 10313    |
| THOC2        | -0.25988 | 0.25988  | 4.6902  | -0.45842 | 0.65383 | 0.7938  | -6.1594 | 57187    |
| AQP7P1       | -0.07583 | 0.075833 | 0.36448 | -0.45827 | 0.65394 | 0.79387 | -6.1595 | 375719   |
| NOL3         | -1.122   | 1.122    | 7.7904  | -0.45794 | 0.65416 | 0.79404 | -6.1596 | 8996     |
| P3H2         | 0.18774  | 0.18774  | 2.1569  | 0.45793  | 0.65417 | 0.79404 | -6.1596 | 55214    |
| PSAP         | 12.555   | 12.555   | 141.64  | 0.45776  | 0.65429 | 0.79413 | -6.1597 | 5660     |
| LINC01197    | 0.054392 | 0.054392 | 0.29536 | 0.45748  | 0.65449 | 0.79432 | -6.1598 | 400456   |
| MKRN2        | 0.34363  | 0.34363  | 5.4374  | 0.45731  | 0.6546  | 0.79437 | -6.1599 | 23609    |
| PIAS4        | -0.3588  | 0.3588   | 4.1648  | -0.45728 | 0.65463 | 0.79437 | -6.1599 | 51588    |
| PCBP3        | 0.10832  | 0.10832  | 0.50298 | 0.45717  | 0.65471 | 0.79441 | -6.16   | 54039    |
| SNORA74A     | -1.2873  | 1.2873   | 9.3571  | -0.45709 | 0.65476 | 0.79442 | -6.16   | 26821    |
| CCM2L        | -0.15212 | 0.15212  | 1.0082  | -0.45692 | 0.65488 | 0.79451 | -6.1601 | 140706   |
| HMGN4        | 0.71644  | 0.71644  | 6.8798  | 0.45674  | 0.655   | 0.7946  | -6.1602 | 10473    |
| NEK6         | -0.5507  | 0.5507   | 3.9098  | -0.4566  | 0.6551  | 0.79466 | -6.1602 | 10783    |
| RPE          | 0.29365  | 0.29365  | 4.1319  | 0.4564   | 0.65524 | 0.79478 | -6.1603 | 6120     |
| SEMA6B       | 0.55654  | 0.55654  | 3.0246  | 0.45603  | 0.65551 | 0.79504 | -6.1605 | 10501    |
| LOC101927402 | -0.04692 | 0.046921 | 0.30807 | -0.45572 | 0.65572 | 0.79524 | -6.1606 | 1.02E+08 |
| LGALS8-AS1   | -0.04138 | 0.041382 | 0.1787  | -0.45565 | 0.65577 | 0.79524 | -6.1607 | 1E+08    |
| KIF9         | -0.05391 | 0.053909 | 0.54729 | -0.45529 | 0.65602 | 0.79549 | -6.1608 | 64147    |
| ZNF827       | -0.13163 | 0.13163  | 1.605   | -0.45518 | 0.6561  | 0.79553 | -6.1609 | 152485   |
| EPHA1        | 0.72827  | 0.72827  | 7.1721  | 0.45502  | 0.65621 | 0.7956  | -6.161  | 2041     |
| CLPTM1L      | 0.8283   | 0.8283   | 11.246  | 0.45493  | 0.65627 | 0.79562 | -6.161  | 81037    |

|           |          |          |         |          |         |         |         |        |
|-----------|----------|----------|---------|----------|---------|---------|---------|--------|
| RPRM      | 0.076797 | 0.076797 | 0.34094 | 0.45482  | 0.65635 | 0.79563 | -6.1611 | 56475  |
| CCDC47    | 1.0884   | 1.0884   | 15.036  | 0.45473  | 0.65642 | 0.79563 | -6.1611 | 57003  |
| MCM3      | -0.94018 | 0.94018  | 6.8643  | -0.45469 | 0.65644 | 0.79563 | -6.1611 | 4172   |
| BST1      | 0.23389  | 0.23389  | 1.0253  | 0.45462  | 0.65649 | 0.79563 | -6.1612 | 683    |
| ERCC1     | -0.60315 | 0.60315  | 10.885  | -0.45459 | 0.65651 | 0.79563 | -6.1612 | 2067   |
| RBMX      | -0.88092 | 0.88092  | 13.304  | -0.45448 | 0.65659 | 0.79567 | -6.1612 | 27316  |
| TBC1D10A  | -0.96515 | 0.96515  | 9.5945  | -0.45436 | 0.65668 | 0.79571 | -6.1613 | 83874  |
| UTP3      | 0.56848  | 0.56848  | 5.6932  | 0.4543   | 0.65672 | 0.79571 | -6.1613 | 57050  |
| FAM3A     | 0.77426  | 0.77426  | 8.0117  | 0.45402  | 0.65691 | 0.79589 | -6.1614 | 60343  |
| SLC30A2   | 0.097052 | 0.097052 | 0.26286 | 0.45394  | 0.65697 | 0.7959  | -6.1615 | 7780   |
| DGKZ      | -0.66367 | 0.66367  | 6.2341  | -0.45385 | 0.65703 | 0.79592 | -6.1615 | 8525   |
| VSIR      | -0.77233 | 0.77233  | 8.6578  | -0.45357 | 0.65723 | 0.7961  | -6.1616 | 64115  |
| SDCCAG8   | -0.18374 | 0.18374  | 2.9058  | -0.45339 | 0.65736 | 0.7962  | -6.1617 | 10806  |
| PDE7A     | -0.1122  | 0.1122   | 1.3959  | -0.45315 | 0.65753 | 0.79634 | -6.1618 | 5150   |
| STK10     | 0.45725  | 0.45725  | 4.2433  | 0.45292  | 0.65769 | 0.79648 | -6.1619 | 6793   |
| DNAJC24   | 0.10379  | 0.10379  | 1.6387  | 0.45278  | 0.65779 | 0.79652 | -6.162  | 120526 |
| KDSR      | -0.50329 | 0.50329  | 7.3114  | -0.45269 | 0.65784 | 0.79652 | -6.162  | 2531   |
| LAIR1     | -0.45202 | 0.45202  | 2.411   | -0.45267 | 0.65786 | 0.79652 | -6.1621 | 3903   |
| PRR14L    | 0.27507  | 0.27507  | 5.3204  | 0.45254  | 0.65795 | 0.79658 | -6.1621 | 253143 |
| ATP2C2    | 0.70568  | 0.70568  | 5.8159  | 0.45244  | 0.65803 | 0.79661 | -6.1622 | 9914   |
| OXR1      | 0.53644  | 0.53644  | 5.0176  | 0.4522   | 0.65819 | 0.79674 | -6.1623 | 55074  |
| SPAG16    | -0.12355 | 0.12355  | 1.3479  | -0.45215 | 0.65823 | 0.79674 | -6.1623 | 79582  |
| LOC646626 | 0.038928 | 0.038928 | 0.16041 | 0.45203  | 0.65831 | 0.79678 | -6.1624 | 646626 |
| WDR82     | -0.74094 | 0.74094  | 12.737  | -0.45186 | 0.65843 | 0.79687 | -6.1624 | 80335  |
| EBF3      | -0.15588 | 0.15588  | 1.1125  | -0.45178 | 0.65849 | 0.79688 | -6.1625 | 253738 |
| DGAT1     | -0.24546 | 0.24546  | 3.4179  | -0.45139 | 0.65876 | 0.79715 | -6.1626 | 8694   |

|           |          |          |         |          |         |         |         |          |
|-----------|----------|----------|---------|----------|---------|---------|---------|----------|
| ABHD15    | 0.15499  | 0.15499  | 1.8531  | 0.45118  | 0.65891 | 0.79728 | -6.1627 | 116236   |
| CTBP1     | -1.5656  | 1.5656   | 18.177  | -0.45073 | 0.65922 | 0.79759 | -6.1629 | 1487     |
| ANKRD12   | -0.37047 | 0.37047  | 4.5312  | -0.45068 | 0.65926 | 0.79759 | -6.163  | 23253    |
| MEN1      | -0.35998 | 0.35998  | 3.7631  | -0.4506  | 0.65932 | 0.7976  | -6.163  | 4221     |
| IK        | 1.0418   | 1.0418   | 13.789  | 0.4503   | 0.65953 | 0.79775 | -6.1631 | 3550     |
| NFKB2     | -0.46919 | 0.46919  | 4.4822  | -0.45024 | 0.65957 | 0.79775 | -6.1632 | 4791     |
| USP37     | -0.09235 | 0.092354 | 1.6276  | -0.45016 | 0.65963 | 0.79775 | -6.1632 | 57695    |
| MATK      | -0.06051 | 0.06051  | 0.3341  | -0.45014 | 0.65964 | 0.79775 | -6.1632 | 4145     |
| IFI27L1   | -0.17507 | 0.17507  | 1.8174  | -0.45001 | 0.65973 | 0.79781 | -6.1633 | 122509   |
| SPARCL1   | 6.1978   | 6.1978   | 30.881  | 0.44978  | 0.65989 | 0.79795 | -6.1634 | 8404     |
| LINC00924 | 0.043692 | 0.043692 | 0.16454 | 0.44955  | 0.66005 | 0.79809 | -6.1635 | 145820   |
| FGF2      | -0.14094 | 0.14094  | 0.88478 | -0.44942 | 0.66014 | 0.79814 | -6.1636 | 2247     |
| KANSL2    | -0.15899 | 0.15899  | 4.2625  | -0.44934 | 0.6602  | 0.79815 | -6.1636 | 54934    |
| TIMELESS  | -0.26255 | 0.26255  | 1.6786  | -0.44913 | 0.66035 | 0.79828 | -6.1637 | 8914     |
| SLC5A6    | -0.32235 | 0.32235  | 3.0058  | -0.44892 | 0.6605  | 0.79837 | -6.1638 | 8884     |
| GSTT2B    | -0.27908 | 0.27908  | 1.0345  | -0.44889 | 0.66052 | 0.79837 | -6.1638 | 653689   |
| ORAI2     | 0.14488  | 0.14488  | 1.0042  | 0.4487   | 0.66065 | 0.79847 | -6.1639 | 80228    |
| EVPL      | -4.0793  | 4.0793   | 31.767  | -0.44851 | 0.66079 | 0.79857 | -6.164  | 2125     |
| NAA80     | -0.14614 | 0.14614  | 2.2936  | -0.44831 | 0.66093 | 0.79869 | -6.1641 | 24142    |
| NBEAL1    | -0.23109 | 0.23109  | 3.4053  | -0.44811 | 0.66107 | 0.79874 | -6.1642 | 65065    |
| DCTN3     | 1.3627   | 1.3627   | 16.171  | 0.44805  | 0.66111 | 0.79874 | -6.1642 | 11258    |
| ICE1      | -0.2534  | 0.2534   | 4.2247  | -0.44799 | 0.66115 | 0.79874 | -6.1642 | 23379    |
| MRPS24    | 1.9889   | 1.9889   | 16.039  | 0.44798  | 0.66116 | 0.79874 | -6.1642 | 64951    |
| NUP205    | -0.4772  | 0.4772   | 6.6702  | -0.4479  | 0.66122 | 0.79875 | -6.1642 | 23165    |
| SCCPDH    | -0.40001 | 0.40001  | 2.5773  | -0.44774 | 0.66133 | 0.79875 | -6.1643 | 51097    |
| FRMD6-AS2 | -0.04236 | 0.042357 | 0.24493 | -0.44768 | 0.66137 | 0.79875 | -6.1644 | 1.01E+08 |



|              |          |          |         |          |         |         |         |          |
|--------------|----------|----------|---------|----------|---------|---------|---------|----------|
| MRPL19       | 0.23267  | 0.23267  | 2.8796  | 0.44754  | 0.66147 | 0.79875 | -6.1644 | 9801     |
| VGLL4        | 0.72206  | 0.72206  | 8.4368  | 0.4474   | 0.66157 | 0.79875 | -6.1645 | 9686     |
| IP6K2        | -0.57532 | 0.57532  | 8.2913  | -0.44738 | 0.66158 | 0.79875 | -6.1645 | 51447    |
| PHPT1        | -0.88005 | 0.88005  | 9.3758  | -0.44735 | 0.6616  | 0.79875 | -6.1645 | 29085    |
| LOC100996842 | -0.12355 | 0.12355  | 1.3773  | -0.44735 | 0.6616  | 0.79875 | -6.1645 | 1.01E+08 |
| UBR4         | -0.6372  | 0.6372   | 13.888  | -0.44732 | 0.66163 | 0.79875 | -6.1645 | 23352    |
| RELL1        | 0.78044  | 0.78044  | 7.6775  | 0.44727  | 0.66166 | 0.79875 | -6.1645 | 768211   |
| FBXL2        | 0.062216 | 0.062216 | 0.74379 | 0.44714  | 0.66175 | 0.79875 | -6.1646 | 25827    |
| DNAJA3       | -0.43746 | 0.43746  | 5.3261  | -0.44709 | 0.66179 | 0.79875 | -6.1646 | 9093     |
| ARHGEF17     | -0.6527  | 0.6527   | 4.0802  | -0.44698 | 0.66187 | 0.79875 | -6.1647 | 9828     |
| SNORA4       | -0.14895 | 0.14895  | 1.1387  | -0.44697 | 0.66187 | 0.79875 | -6.1647 | 619568   |
| ATXN2L       | -1.0032  | 1.0032   | 14.841  | -0.4469  | 0.66192 | 0.79875 | -6.1647 | 11273    |
| APCDD1       | -2.3919  | 2.3919   | 32.487  | -0.4469  | 0.66192 | 0.79875 | -6.1647 | 147495   |
| SMAD9        | -0.07668 | 0.076683 | 0.7098  | -0.44664 | 0.66211 | 0.79891 | -6.1648 | 4093     |
| ADCK2        | -0.71351 | 0.71351  | 6.5414  | -0.44651 | 0.6622  | 0.79896 | -6.1649 | 90956    |
| ELAC1        | -0.12923 | 0.12923  | 1.0964  | -0.44606 | 0.66251 | 0.79924 | -6.1651 | 55520    |
| HYI          | -0.30305 | 0.30305  | 2.8212  | -0.44601 | 0.66255 | 0.79924 | -6.1651 | 81888    |
| DUSP9        | 0.058946 | 0.058946 | 0.18909 | 0.44598  | 0.66257 | 0.79924 | -6.1651 | 1852     |
| GTF3C2       | -0.39315 | 0.39315  | 8.0594  | -0.44584 | 0.66267 | 0.79925 | -6.1652 | 2976     |
| LINC00839    | 0.046243 | 0.046243 | 0.28263 | 0.44572  | 0.66275 | 0.79925 | -6.1652 | 84856    |
| ZNF444       | -0.48866 | 0.48866  | 3.1175  | -0.4457  | 0.66277 | 0.79925 | -6.1652 | 55311    |
| C8orf58      | 0.47845  | 0.47845  | 4.1978  | 0.4457   | 0.66277 | 0.79925 | -6.1653 | 541565   |
| CX3CR1       | -0.06142 | 0.06142  | 0.40638 | -0.44561 | 0.66283 | 0.79927 | -6.1653 | 1524     |
| TCF4         | 0.68327  | 0.68327  | 7.1873  | 0.44553  | 0.66289 | 0.79928 | -6.1653 | 6925     |
| AP5S1        | 0.20728  | 0.20728  | 2.3712  | 0.44535  | 0.66302 | 0.79938 | -6.1654 | 55317    |
| IFNGR2       | 2.3857   | 2.3857   | 17.28   | 0.44518  | 0.66313 | 0.79946 | -6.1655 | 3460     |

|            |          |          |          |          |         |         |         |          |
|------------|----------|----------|----------|----------|---------|---------|---------|----------|
| UTP14A     | 0.34526  | 0.34526  | 3.5257   | 0.44508  | 0.6632  | 0.79948 | -6.1655 | 10813    |
| EDNRB      | -0.40545 | 0.40545  | 2.4031   | -0.44503 | 0.66324 | 0.79948 | -6.1656 | 1910     |
| PTPN9      | 0.44767  | 0.44767  | 4.4375   | 0.44491  | 0.66333 | 0.79952 | -6.1656 | 5780     |
| SYNCRIP    | 0.90954  | 0.90954  | 11.702   | 0.4448   | 0.6634  | 0.79952 | -6.1657 | 10492    |
| SARS2      | -0.19643 | 0.19643  | 2.633    | -0.4447  | 0.66347 | 0.79952 | -6.1657 | 54938    |
| PMFBP1     | -0.04092 | 0.040919 | 0.2902   | -0.4447  | 0.66347 | 0.79952 | -6.1657 | 83449    |
| ATRN       | -0.32569 | 0.32569  | 5.8212   | -0.44463 | 0.66352 | 0.79952 | -6.1657 | 8455     |
| REEP4      | 1.4643   | 1.4643   | 15.059   | 0.44458  | 0.66356 | 0.79952 | -6.1658 | 80346    |
| FAM133B    | -0.16746 | 0.16746  | 1.9581   | -0.44417 | 0.66385 | 0.79981 | -6.1659 | 257415   |
| ZNF841     | 0.33772  | 0.33772  | 3.0738   | 0.44365  | 0.66421 | 0.80019 | -6.1662 | 284371   |
| NDUFV3     | -0.44492 | 0.44492  | 6.76     | -0.44346 | 0.66435 | 0.80023 | -6.1663 | 4731     |
| VAT1       | 8.2383   | 8.2383   | 51.344   | 0.4434   | 0.66439 | 0.80023 | -6.1663 | 10493    |
| CHKB-DT    | -0.06269 | 0.062689 | 0.38582  | -0.44332 | 0.66445 | 0.80023 | -6.1663 | 1E+08    |
| FAM219B    | 0.62316  | 0.62316  | 8.5979   | 0.4433   | 0.66446 | 0.80023 | -6.1663 | 57184    |
| NCAM1      | -0.0409  | 0.040895 | 0.12909  | -0.44327 | 0.66448 | 0.80023 | -6.1663 | 4684     |
| HTRA2      | 0.25414  | 0.25414  | 2.7281   | 0.44314  | 0.66457 | 0.80028 | -6.1664 | 27429    |
| MAST2      | -0.28841 | 0.28841  | 3.4272   | -0.44297 | 0.6647  | 0.80032 | -6.1665 | 23139    |
| FPGS       | -0.8258  | 0.8258   | 5.4287   | -0.44291 | 0.66474 | 0.80032 | -6.1665 | 2356     |
| IMPACT     | 0.2549   | 0.2549   | 3.6102   | 0.4429   | 0.66474 | 0.80032 | -6.1665 | 55364    |
| SMPD2      | 0.89691  | 0.89691  | 5.9003   | 0.44238  | 0.66511 | 0.8007  | -6.1668 | 6610     |
| PPP3CB     | 0.29945  | 0.29945  | 4.578    | 0.44212  | 0.66529 | 0.80087 | -6.1669 | 5532     |
| UBXN10-AS1 | -0.02989 | 0.029892 | 0.089988 | -0.44202 | 0.66536 | 0.80089 | -6.1669 | 1.02E+08 |
| LCE3C      | 5.5701   | 5.5701   | 14.789   | 0.44162  | 0.66565 | 0.80118 | -6.1671 | 353144   |
| LENG1      | -0.2511  | 0.2511   | 2.8487   | -0.44143 | 0.66578 | 0.80128 | -6.1672 | 79165    |
| ATAD1      | 0.27978  | 0.27978  | 4.1103   | 0.44136  | 0.66583 | 0.80128 | -6.1672 | 84896    |
| CXCL12     | -3.2413  | 3.2413   | 15.036   | -0.44122 | 0.66593 | 0.80134 | -6.1673 | 6387     |

|              |          |          |         |          |         |         |         |          |
|--------------|----------|----------|---------|----------|---------|---------|---------|----------|
| ZNF829       | -0.04494 | 0.044943 | 0.43045 | -0.44113 | 0.66599 | 0.80137 | -6.1673 | 374899   |
| IPO4         | -0.56493 | 0.56493  | 5.8744  | -0.4409  | 0.66615 | 0.8015  | -6.1674 | 79711    |
| C6orf47      | -0.07313 | 0.073131 | 0.78194 | -0.44076 | 0.66625 | 0.80151 | -6.1675 | 57827    |
| TMEM170B     | 0.071245 | 0.071245 | 0.47057 | 0.44076  | 0.66625 | 0.80151 | -6.1675 | 1E+08    |
| CD320        | -0.4449  | 0.4449   | 3.1764  | -0.44056 | 0.6664  | 0.80162 | -6.1676 | 51293    |
| EAF2         | 0.075813 | 0.075813 | 0.52239 | 0.44038  | 0.66652 | 0.8017  | -6.1677 | 55840    |
| KIF26A       | -0.19425 | 0.19425  | 1.1645  | -0.44028 | 0.66659 | 0.8017  | -6.1677 | 26153    |
| DLL4         | 0.32446  | 0.32446  | 1.9897  | 0.44027  | 0.6666  | 0.8017  | -6.1677 | 54567    |
| FBLL1        | 0.045795 | 0.045795 | 0.13297 | 0.44012  | 0.6667  | 0.80176 | -6.1678 | 345630   |
| LCE3B        | -0.18425 | 0.18425  | 0.31787 | -0.43996 | 0.66682 | 0.80177 | -6.1678 | 353143   |
| RPL7A        | -39.829  | 39.829   | 504.08  | -0.43995 | 0.66683 | 0.80177 | -6.1678 | 6130     |
| FAM110C      | 0.8881   | 0.8881   | 8.0747  | 0.43991  | 0.66685 | 0.80177 | -6.1679 | 642273   |
| N4BP2        | -0.12787 | 0.12787  | 1.9456  | -0.43975 | 0.66697 | 0.80183 | -6.1679 | 55728    |
| LTV1         | 0.35722  | 0.35722  | 4.7994  | 0.43968  | 0.66701 | 0.80183 | -6.168  | 84946    |
| TM7SF3       | -0.47391 | 0.47391  | 6.0596  | -0.43961 | 0.66706 | 0.80183 | -6.168  | 51768    |
| NAPSB        | 0.14051  | 0.14051  | 0.87241 | 0.43957  | 0.66709 | 0.80183 | -6.168  | 256236   |
| ACTL6A       | 0.61276  | 0.61276  | 6.4267  | 0.43947  | 0.66716 | 0.80186 | -6.1681 | 86       |
| NR2F6        | 1.3604   | 1.3604   | 11.362  | 0.43941  | 0.66721 | 0.80186 | -6.1681 | 2063     |
| RABEPK       | 0.28949  | 0.28949  | 3.7149  | 0.43925  | 0.66732 | 0.80193 | -6.1682 | 10244    |
| SASH3        | 0.26547  | 0.26547  | 1.5283  | 0.43915  | 0.66739 | 0.80195 | -6.1682 | 54440    |
| EFEMP1       | -1.2717  | 1.2717   | 9.9573  | -0.4391  | 0.66743 | 0.80195 | -6.1682 | 2202     |
| ASF1A        | 0.23647  | 0.23647  | 3.2396  | 0.43891  | 0.66756 | 0.80202 | -6.1683 | 25842    |
| THBS3        | -0.43652 | 0.43652  | 4.5542  | -0.43888 | 0.66758 | 0.80202 | -6.1683 | 7059     |
| ZNF330       | 0.38977  | 0.38977  | 4.5505  | 0.43879  | 0.66765 | 0.80204 | -6.1684 | 27309    |
| LINC00997    | 0.071764 | 0.071764 | 0.65529 | 0.43855  | 0.66781 | 0.80218 | -6.1685 | 401321   |
| LOC101927989 | -0.05884 | 0.05884  | 0.46342 | -0.43779 | 0.66835 | 0.80276 | -6.1688 | 1.02E+08 |

|                |          |          |          |          |         |         |         |          |
|----------------|----------|----------|----------|----------|---------|---------|---------|----------|
| ELMOD1         | 1.5332   | 1.5332   | 4.2307   | 0.43774  | 0.66839 | 0.80276 | -6.1688 | 55531    |
| CAPRIN1        | 1.2243   | 1.2243   | 15.82    | 0.43766  | 0.66844 | 0.80276 | -6.1689 | 4076     |
| PLCB2          | -0.13331 | 0.13331  | 0.76864  | -0.43761 | 0.66848 | 0.80276 | -6.1689 | 5330     |
| DVL3           | -0.52862 | 0.52862  | 10.92    | -0.43753 | 0.66853 | 0.80276 | -6.1689 | 1857     |
| FAM160B1       | -0.20875 | 0.20875  | 2.8712   | -0.43744 | 0.6686  | 0.80278 | -6.169  | 57700    |
| TRIM7          | -0.42001 | 0.42001  | 4.0407   | -0.43688 | 0.66899 | 0.8032  | -6.1692 | 81786    |
| BBS12          | 0.053832 | 0.053832 | 0.4217   | 0.43682  | 0.66904 | 0.8032  | -6.1692 | 166379   |
| DUSP2          | 0.10823  | 0.10823  | 1.1365   | 0.4367   | 0.66913 | 0.80322 | -6.1693 | 1844     |
| SERF1A         | 0.059211 | 0.059211 | 0.55437  | 0.43666  | 0.66915 | 0.80322 | -6.1693 | 8293     |
| GTPBP10        | -0.08221 | 0.082212 | 1.0261   | -0.43653 | 0.66925 | 0.80325 | -6.1694 | 85865    |
| VASH1          | 0.36386  | 0.36386  | 2.656    | 0.4365   | 0.66927 | 0.80325 | -6.1694 | 22846    |
| TBRG1          | -0.11918 | 0.11918  | 2.9431   | -0.43641 | 0.66933 | 0.80326 | -6.1694 | 84897    |
| BLOC1S5-TXNDC5 | -0.09049 | 0.090489 | 0.74923  | -0.43627 | 0.66943 | 0.80332 | -6.1695 | 1.01E+08 |
| COL16A1        | -3.3167  | 3.3167   | 15.592   | -0.43618 | 0.66949 | 0.80334 | -6.1695 | 1307     |
| ENY2           | 0.39942  | 0.39942  | 3.3383   | 0.43605  | 0.66959 | 0.8034  | -6.1696 | 56943    |
| GOLGA2P10      | -0.5035  | 0.5035   | 2.7285   | -0.43587 | 0.66971 | 0.80349 | -6.1697 | 80154    |
| NECAP2         | -0.90719 | 0.90719  | 11.656   | -0.43566 | 0.66986 | 0.80358 | -6.1698 | 55707    |
| THG1L          | -0.09889 | 0.098894 | 1.3864   | -0.43563 | 0.66988 | 0.80358 | -6.1698 | 54974    |
| PSTPIP1        | 0.14101  | 0.14101  | 0.95839  | 0.43554  | 0.66994 | 0.8036  | -6.1698 | 9051     |
| REV1           | -0.19208 | 0.19208  | 4.3257   | -0.43547 | 0.66999 | 0.8036  | -6.1698 | 51455    |
| ORC3           | -0.23629 | 0.23629  | 2.7587   | -0.43491 | 0.67039 | 0.80402 | -6.1701 | 23595    |
| SNHG25         | 0.037181 | 0.037181 | 0.079395 | 0.43474  | 0.67051 | 0.80411 | -6.1702 | 1.05E+08 |
| RIOX1          | -0.18089 | 0.18089  | 2.3963   | -0.43461 | 0.6706  | 0.80416 | -6.1702 | 79697    |
| C19orf12       | 0.14204  | 0.14204  | 1.8135   | 0.43435  | 0.67079 | 0.8043  | -6.1703 | 83636    |
| DOCK5          | 0.21191  | 0.21191  | 2.7097   | 0.43431  | 0.67082 | 0.8043  | -6.1704 | 80005    |
| RAMP2          | 1.7314   | 1.7314   | 11.295   | 0.43398  | 0.67105 | 0.80444 | -6.1705 | 10266    |

|            |          |          |         |          |         |         |         |          |
|------------|----------|----------|---------|----------|---------|---------|---------|----------|
| HOXB7      | -0.12684 | 0.12684  | 0.79952 | -0.43398 | 0.67105 | 0.80444 | -6.1705 | 3217     |
| CTU2       | -0.30362 | 0.30362  | 2.5027  | -0.43394 | 0.67108 | 0.80444 | -6.1705 | 348180   |
| KANSL1-AS1 | 0.10249  | 0.10249  | 0.50905 | 0.43368  | 0.67126 | 0.8045  | -6.1706 | 644246   |
| SNU13      | 1.1383   | 1.1383   | 14.769  | 0.43368  | 0.67126 | 0.8045  | -6.1706 | 4809     |
| PKN3       | -0.21725 | 0.21725  | 1.7314  | -0.43367 | 0.67127 | 0.8045  | -6.1706 | 29941    |
| EIF3G      | -2.4893  | 2.4893   | 35.328  | -0.43345 | 0.67143 | 0.80463 | -6.1707 | 8666     |
| GTF2H5     | 0.079649 | 0.079649 | 0.79373 | 0.43339  | 0.67147 | 0.80463 | -6.1708 | 404672   |
| ERCC8      | -0.09692 | 0.096915 | 1.202   | -0.43323 | 0.67158 | 0.80471 | -6.1708 | 1161     |
| EGLN2      | 0.80715  | 0.80715  | 7.8089  | 0.43289  | 0.67182 | 0.80494 | -6.171  | 112398   |
| PRELID3A   | -0.0794  | 0.079399 | 0.70706 | -0.43276 | 0.67192 | 0.80499 | -6.171  | 10650    |
| GTF2H2     | -0.05858 | 0.058583 | 0.45627 | -0.43232 | 0.67222 | 0.80526 | -6.1712 | 2966     |
| CREB5      | 0.12245  | 0.12245  | 1.0755  | 0.43231  | 0.67224 | 0.80526 | -6.1712 | 9586     |
| LZTS1-AS1  | -0.03568 | 0.03568  | 0.11334 | -0.43209 | 0.67239 | 0.80539 | -6.1713 | 1.01E+08 |
| CHMP2A     | 2.5695   | 2.5695   | 27.428  | 0.43185  | 0.67256 | 0.80554 | -6.1715 | 27243    |
| PRR5       | -0.24292 | 0.24292  | 2.2398  | -0.43174 | 0.67264 | 0.80557 | -6.1715 | 55615    |
| HYAL1      | -0.37029 | 0.37029  | 4.2585  | -0.43168 | 0.67268 | 0.80557 | -6.1715 | 3373     |
| PIIP5K2    | 0.18526  | 0.18526  | 2.6418  | 0.43146  | 0.67284 | 0.8057  | -6.1716 | 23262    |
| DOK6       | -0.042   | 0.041997 | 0.21503 | -0.43116 | 0.67305 | 0.80589 | -6.1718 | 220164   |
| ACTR6      | 0.15793  | 0.15793  | 1.5148  | 0.4311   | 0.67309 | 0.80589 | -6.1718 | 64431    |
| LINC00987  | -0.03629 | 0.036288 | 0.21554 | -0.43088 | 0.67325 | 0.80602 | -6.1719 | 1E+08    |
| FCGR2B     | -0.38717 | 0.38717  | 2.5348  | -0.43072 | 0.67336 | 0.80605 | -6.1719 | 2213     |
| RHBDF2     | -0.66785 | 0.66785  | 7.1554  | -0.43071 | 0.67337 | 0.80605 | -6.172  | 79651    |
| MAFK       | 0.49246  | 0.49246  | 5.5016  | 0.43039  | 0.6736  | 0.80626 | -6.1721 | 7975     |
| CRB3       | 0.60826  | 0.60826  | 4.7863  | 0.43033  | 0.67364 | 0.80626 | -6.1721 | 92359    |
| RFWD3      | -0.25336 | 0.25336  | 3.9751  | -0.43025 | 0.6737  | 0.80627 | -6.1722 | 55159    |
| TMEM102    | 0.21612  | 0.21612  | 2.4169  | 0.4301   | 0.6738  | 0.80634 | -6.1722 | 284114   |

|             |          |          |         |          |         |         |         |        |
|-------------|----------|----------|---------|----------|---------|---------|---------|--------|
| HMGB1       | 1.621    | 1.621    | 16.586  | 0.42985  | 0.67398 | 0.80649 | -6.1723 | 3146   |
| HOXB2       | -0.09656 | 0.096559 | 0.64857 | -0.42977 | 0.67404 | 0.8065  | -6.1724 | 3212   |
| COMMD9      | 0.28892  | 0.28892  | 3.5319  | 0.42962  | 0.67415 | 0.80658 | -6.1724 | 29099  |
| PLAC8       | 0.042782 | 0.042782 | 0.16734 | 0.42943  | 0.67428 | 0.80666 | -6.1725 | 51316  |
| TRPC1       | -0.08433 | 0.084326 | 0.63814 | -0.42938 | 0.67432 | 0.80666 | -6.1725 | 7220   |
| RPL14       | 15.586   | 15.586   | 159.23  | 0.42932  | 0.67436 | 0.80666 | -6.1726 | 9045   |
| ZNF132      | -0.03842 | 0.038423 | 0.73159 | -0.42906 | 0.67454 | 0.80682 | -6.1727 | 7691   |
| NOS3        | 0.42848  | 0.42848  | 2.2558  | 0.42898  | 0.6746  | 0.80683 | -6.1727 | 4846   |
| COQ9        | -0.397   | 0.397    | 5.8252  | -0.42882 | 0.67471 | 0.8069  | -6.1728 | 57017  |
| GPX4        | -3.7489  | 3.7489   | 32.171  | -0.42861 | 0.67486 | 0.8069  | -6.1729 | 2879   |
| MVP         | -3.1264  | 3.1264   | 22.991  | -0.42858 | 0.67488 | 0.8069  | -6.1729 | 9961   |
| TFR2        | 0.048407 | 0.048407 | 0.27263 | 0.42855  | 0.6749  | 0.8069  | -6.1729 | 7036   |
| GOLGA6L5P   | -0.10444 | 0.10444  | 0.72317 | -0.42849 | 0.67495 | 0.8069  | -6.1729 | 374650 |
| ADGRE1      | 0.044895 | 0.044895 | 0.14343 | 0.42833  | 0.67506 | 0.8069  | -6.173  | 2015   |
| RSC1A1      | 0.35896  | 0.35896  | 5.6294  | 0.42832  | 0.67507 | 0.8069  | -6.173  | 6248   |
| ISLR2       | -0.03646 | 0.036456 | 0.16084 | -0.42824 | 0.67512 | 0.8069  | -6.173  | 57611  |
| CTSK        | 11.682   | 11.682   | 56.219  | 0.42824  | 0.67512 | 0.8069  | -6.173  | 1513   |
| SHISA4      | -0.22992 | 0.22992  | 1.2436  | -0.42817 | 0.67517 | 0.8069  | -6.1731 | 149345 |
| POLR2C      | 0.73026  | 0.73026  | 9.5662  | 0.42816  | 0.67518 | 0.8069  | -6.1731 | 5432   |
| ELOB        | 3.5357   | 3.5357   | 29.381  | 0.4279   | 0.67536 | 0.80706 | -6.1732 | 6923   |
| APBA3       | 0.23363  | 0.23363  | 2.6839  | 0.42776  | 0.67546 | 0.80712 | -6.1732 | 9546   |
| CCDC183-AS1 | -0.12948 | 0.12948  | 1.0053  | -0.42702 | 0.67599 | 0.80768 | -6.1736 | 1E+08  |
| CMTM8       | 0.22785  | 0.22785  | 1.4494  | 0.42697  | 0.67603 | 0.80768 | -6.1736 | 152189 |
| HNRNPA1P33  | 0.54416  | 0.54416  | 5.2003  | 0.42678  | 0.67616 | 0.80776 | -6.1737 | 728643 |
| SUSD6       | -1.026   | 1.026    | 12.085  | -0.42675 | 0.67618 | 0.80776 | -6.1737 | 9766   |
| TEX101      | -0.05773 | 0.057733 | 0.25182 | -0.42644 | 0.6764  | 0.80796 | -6.1738 | 83639  |

|           |          |          |         |          |         |         |         |          |
|-----------|----------|----------|---------|----------|---------|---------|---------|----------|
| SLC25A10  | -0.55956 | 0.55956  | 4.8169  | -0.42608 | 0.67666 | 0.80812 | -6.174  | 1468     |
| MAGI2-AS3 | -0.08666 | 0.08666  | 0.60675 | -0.42608 | 0.67666 | 0.80812 | -6.174  | 1.01E+08 |
| RILP      | -0.19001 | 0.19001  | 1.4883  | -0.42605 | 0.67668 | 0.80812 | -6.174  | 83547    |
| ATXN7L2   | -0.06585 | 0.065847 | 0.84202 | -0.42598 | 0.67673 | 0.80813 | -6.174  | 127002   |
| CCDC8     | -0.21283 | 0.21283  | 1.2582  | -0.42562 | 0.67698 | 0.80837 | -6.1742 | 83987    |
| C9orf64   | 0.24487  | 0.24487  | 1.8008  | 0.42546  | 0.6771  | 0.80845 | -6.1742 | 84267    |
| YEATS4    | -0.21923 | 0.21923  | 1.9287  | -0.42519 | 0.67729 | 0.80862 | -6.1744 | 8089     |
| ASXL2     | 0.15008  | 0.15008  | 3.6591  | 0.42513  | 0.67734 | 0.80862 | -6.1744 | 55252    |
| WWC3      | -0.23957 | 0.23957  | 5.5257  | -0.42504 | 0.6774  | 0.80863 | -6.1744 | 55841    |
| MRPL43    | 0.34115  | 0.34115  | 4.6156  | 0.42494  | 0.67747 | 0.80866 | -6.1745 | 84545    |
| MYOM3     | 0.19176  | 0.19176  | 1.2521  | 0.42461  | 0.6777  | 0.80888 | -6.1746 | 127294   |
| DDHD1     | -0.13449 | 0.13449  | 1.5872  | -0.42452 | 0.67777 | 0.80891 | -6.1747 | 80821    |
| NOP58     | 0.74738  | 0.74738  | 8.8983  | 0.42445  | 0.67782 | 0.80891 | -6.1747 | 51602    |
| UXT       | 1.4023   | 1.4023   | 13.09   | 0.42388  | 0.67822 | 0.80929 | -6.1749 | 8409     |
| USP13     | -0.09818 | 0.098178 | 1.0637  | -0.42384 | 0.67825 | 0.80929 | -6.1749 | 8975     |
| EXOC3L1   | 0.061402 | 0.061402 | 0.48669 | 0.4238   | 0.67828 | 0.80929 | -6.175  | 283849   |
| LAMA3     | 0.59661  | 0.59661  | 7.8279  | 0.42369  | 0.67836 | 0.80932 | -6.175  | 3909     |
| CDPF1     | -0.15954 | 0.15954  | 1.2337  | -0.42339 | 0.67857 | 0.80952 | -6.1751 | 150383   |
| CEP104    | -0.15568 | 0.15568  | 2.8723  | -0.42316 | 0.67874 | 0.80966 | -6.1752 | 9731     |
| C5orf58   | 0.043831 | 0.043831 | 0.15848 | 0.42297  | 0.67888 | 0.80977 | -6.1753 | 133874   |
| FPGT      | 0.095348 | 0.095348 | 1.3492  | 0.42281  | 0.67898 | 0.80984 | -6.1754 | 8790     |
| TBX15     | -0.21459 | 0.21459  | 1.5685  | -0.42268 | 0.67908 | 0.8099  | -6.1755 | 6913     |
| SPACA6    | -0.1007  | 0.1007   | 0.65243 | -0.42261 | 0.67913 | 0.8099  | -6.1755 | 147650   |
| CARD8     | -0.10349 | 0.10349  | 1.1947  | -0.42216 | 0.67945 | 0.81022 | -6.1757 | 22900    |
| SEMA4D    | -0.57543 | 0.57543  | 5.6097  | -0.42201 | 0.67956 | 0.81028 | -6.1757 | 10507    |
| MOXD1     | -0.47706 | 0.47706  | 3.3423  | -0.42196 | 0.67959 | 0.81028 | -6.1758 | 26002    |

|           |          |          |          |          |         |         |         |          |
|-----------|----------|----------|----------|----------|---------|---------|---------|----------|
| CRNDE     | -0.2165  | 0.2165   | 2.2631   | -0.42102 | 0.68026 | 0.81102 | -6.1762 | 643911   |
| PPP2R5D   | -0.38167 | 0.38167  | 7.212    | -0.42086 | 0.68037 | 0.81103 | -6.1762 | 5528     |
| PES1      | -0.91727 | 0.91727  | 9.1066   | -0.42085 | 0.68038 | 0.81103 | -6.1762 | 23481    |
| CNOT7     | 0.37046  | 0.37046  | 5.2038   | 0.42079  | 0.68043 | 0.81103 | -6.1763 | 29883    |
| OLFM1     | -0.3591  | 0.3591   | 2.2756   | -0.42074 | 0.68046 | 0.81103 | -6.1763 | 10439    |
| SALRNA2   | -0.02846 | 0.028462 | 0.097296 | -0.42056 | 0.68059 | 0.81113 | -6.1764 | 1.05E+08 |
| MIR200CHG | -0.33648 | 0.33648  | 2.941    | -0.4201  | 0.68092 | 0.81146 | -6.1766 | 1.05E+08 |
| YY1AP1    | -0.39105 | 0.39105  | 8.8491   | -0.42003 | 0.68096 | 0.81146 | -6.1766 | 55249    |
| SUMO3     | 1.3942   | 1.3942   | 17.045   | 0.41934  | 0.68146 | 0.81199 | -6.1769 | 6612     |
| SLC13A4   | 0.039291 | 0.039291 | 0.3342   | 0.4191   | 0.68163 | 0.81209 | -6.177  | 26266    |
| SHCBP1    | -0.09537 | 0.095373 | 0.85086  | -0.41909 | 0.68164 | 0.81209 | -6.177  | 79801    |
| TUBB      | 1.0374   | 1.0374   | 10.103   | 0.41874  | 0.68189 | 0.81227 | -6.1771 | 203068   |
| LOC389199 | -0.06627 | 0.066273 | 0.22844  | -0.41869 | 0.68192 | 0.81227 | -6.1772 | 389199   |
| KIAA1958  | 0.065513 | 0.065513 | 0.87588  | 0.41867  | 0.68194 | 0.81227 | -6.1772 | 158405   |
| ADPGK     | 0.40874  | 0.40874  | 5.9809   | 0.41843  | 0.68211 | 0.81242 | -6.1773 | 83440    |
| MIGA1     | -0.10092 | 0.10092  | 1.6068   | -0.41826 | 0.68223 | 0.81242 | -6.1773 | 374986   |
| POP5      | 0.49537  | 0.49537  | 4.6963   | 0.41825  | 0.68224 | 0.81242 | -6.1774 | 51367    |
| SHANK3    | -1.1747  | 1.1747   | 6.474    | -0.41823 | 0.68225 | 0.81242 | -6.1774 | 85358    |
| ELMO1     | -0.23043 | 0.23043  | 2.1399   | -0.41804 | 0.68239 | 0.81253 | -6.1774 | 9844     |
| RNF133    | -0.0326  | 0.032601 | 0.14968  | -0.41774 | 0.6826  | 0.81272 | -6.1776 | 168433   |
| SOD2      | -9.445   | 9.445    | 37.182   | -0.41713 | 0.68304 | 0.81318 | -6.1778 | 6648     |
| OR5K2     | 0.033453 | 0.033453 | 0.104    | 0.41569  | 0.68406 | 0.81434 | -6.1784 | 402135   |
| RPL23AP82 | 0.14594  | 0.14594  | 1.2899   | 0.41562  | 0.68412 | 0.81435 | -6.1785 | 284942   |
| EFTUD2    | -0.7263  | 0.7263   | 8.6466   | -0.41512 | 0.68447 | 0.81472 | -6.1787 | 9343     |
| ZNF425    | 0.077462 | 0.077462 | 0.63813  | 0.41496  | 0.68459 | 0.81476 | -6.1788 | 155054   |
| OCEL1     | 0.20836  | 0.20836  | 1.944    | 0.41482  | 0.68469 | 0.81476 | -6.1788 | 79629    |



|          |          |          |         |          |         |         |         |        |
|----------|----------|----------|---------|----------|---------|---------|---------|--------|
| SNORA67  | 0.19761  | 0.19761  | 2.918   | 0.41481  | 0.6847  | 0.81476 | -6.1788 | 26781  |
| MPC1     | -0.32673 | 0.32673  | 4.2205  | -0.4148  | 0.6847  | 0.81476 | -6.1788 | 51660  |
| OXLD1    | -0.41938 | 0.41938  | 4.4025  | -0.41452 | 0.6849  | 0.81489 | -6.1789 | 339229 |
| TSEN34   | 0.47507  | 0.47507  | 4.9999  | 0.41451  | 0.68491 | 0.81489 | -6.1789 | 79042  |
| FAM120A  | 0.77549  | 0.77549  | 11.9    | 0.41431  | 0.68506 | 0.81501 | -6.179  | 23196  |
| PPP1R14A | -0.50971 | 0.50971  | 2.8479  | -0.41413 | 0.68518 | 0.81507 | -6.1791 | 94274  |
| ARF3     | 2.2057   | 2.2057   | 33.402  | 0.41407  | 0.68522 | 0.81507 | -6.1791 | 377    |
| NUDT8    | -1.0259  | 1.0259   | 7.8671  | -0.41396 | 0.6853  | 0.81507 | -6.1792 | 254552 |
| SYCE1L   | -0.08714 | 0.087135 | 0.79884 | -0.41395 | 0.68531 | 0.81507 | -6.1792 | 1E+08  |
| ZBTB46   | -0.11681 | 0.11681  | 1.1591  | -0.41377 | 0.68544 | 0.81507 | -6.1793 | 140685 |
| CENPBD1  | -0.09783 | 0.097832 | 1.2017  | -0.41376 | 0.68544 | 0.81507 | -6.1793 | 92806  |
| AFG1L    | -0.0357  | 0.035701 | 0.41831 | -0.41368 | 0.6855  | 0.81507 | -6.1793 | 246269 |
| RFC3     | -0.13562 | 0.13562  | 1.4416  | -0.41363 | 0.68554 | 0.81507 | -6.1793 | 5983   |
| C1orf50  | 0.17224  | 0.17224  | 2.6654  | 0.41363  | 0.68554 | 0.81507 | -6.1793 | 79078  |
| SPCS1    | 1.2282   | 1.2282   | 12.832  | 0.41353  | 0.68561 | 0.8151  | -6.1794 | 28972  |
| CDC40    | 0.21497  | 0.21497  | 3.2104  | 0.41339  | 0.68571 | 0.8151  | -6.1794 | 51362  |
| UNC5A    | 0.053289 | 0.053289 | 0.20503 | 0.41333  | 0.68575 | 0.8151  | -6.1794 | 90249  |
| RPL32    | 15.69    | 15.69    | 139.34  | 0.41327  | 0.6858  | 0.8151  | -6.1795 | 6161   |
| NDFIP1   | 0.7261   | 0.7261   | 10.567  | 0.4132   | 0.68585 | 0.8151  | -6.1795 | 80762  |
| LPCAT3   | -0.70321 | 0.70321  | 7.8236  | -0.41319 | 0.68585 | 0.8151  | -6.1795 | 10162  |
| GALK2    | -0.0846  | 0.084604 | 1.8663  | -0.41309 | 0.68592 | 0.8151  | -6.1795 | 2585   |
| ZMYM1    | 0.079308 | 0.079308 | 1.032   | 0.41298  | 0.68601 | 0.8151  | -6.1796 | 79830  |
| SDHD     | 1.1739   | 1.1739   | 12.265  | 0.41296  | 0.68602 | 0.8151  | -6.1796 | 6392   |
| MPI      | 0.22961  | 0.22961  | 2.7866  | 0.41283  | 0.68611 | 0.8151  | -6.1797 | 4351   |
| RBBP5    | 0.13166  | 0.13166  | 2.9363  | 0.4128   | 0.68614 | 0.8151  | -6.1797 | 5929   |
| SIGLEC5  | 0.070137 | 0.070137 | 0.2931  | 0.41278  | 0.68615 | 0.8151  | -6.1797 | 8778   |

|            |          |          |         |          |         |         |         |          |
|------------|----------|----------|---------|----------|---------|---------|---------|----------|
| IFT81      | 0.11722  | 0.11722  | 1.0813  | 0.41243  | 0.6864  | 0.81533 | -6.1798 | 28981    |
| ATP2C2-AS1 | -0.15905 | 0.15905  | 1.3128  | -0.4123  | 0.68649 | 0.81533 | -6.1799 | 1.05E+08 |
| ITGB1BP2   | -0.03342 | 0.033415 | 0.20877 | -0.41226 | 0.68652 | 0.81533 | -6.1799 | 26548    |
| ANKRD54    | -0.1338  | 0.1338   | 2.1754  | -0.41224 | 0.68653 | 0.81533 | -6.1799 | 129138   |
| NPM3       | 0.85487  | 0.85487  | 5.9056  | 0.41212  | 0.68662 | 0.81537 | -6.18   | 10360    |
| TPM2       | 4.0618   | 4.0618   | 21.845  | 0.41206  | 0.68666 | 0.81537 | -6.18   | 7169     |
| NSUN2      | 0.67412  | 0.67412  | 8.8849  | 0.41181  | 0.68684 | 0.81552 | -6.1801 | 54888    |
| LOC728989  | -0.04021 | 0.040212 | 0.15548 | -0.41171 | 0.68691 | 0.81555 | -6.1801 | 728989   |
| THAP9      | -0.04285 | 0.042851 | 0.48647 | -0.41139 | 0.68714 | 0.81577 | -6.1803 | 79725    |
| SRM        | 2.2126   | 2.2126   | 18.672  | 0.41096  | 0.68745 | 0.81607 | -6.1804 | 6723     |
| PHF6       | 0.13248  | 0.13248  | 1.8049  | 0.41082  | 0.68755 | 0.81607 | -6.1805 | 84295    |
| BAIAP2     | 0.76162  | 0.76162  | 8.719   | 0.41082  | 0.68755 | 0.81607 | -6.1805 | 10458    |
| NOP2       | 0.6497   | 0.6497   | 5.6445  | 0.41076  | 0.68759 | 0.81607 | -6.1805 | 4839     |
| EHHADH     | -0.09075 | 0.090745 | 1.0918  | -0.41056 | 0.68774 | 0.81619 | -6.1806 | 1962     |
| EGR3       | -1.1357  | 1.1357   | 5.8946  | -0.41012 | 0.68805 | 0.81648 | -6.1808 | 1960     |
| PPP3CC     | -0.25978 | 0.25978  | 2.9056  | -0.41008 | 0.68808 | 0.81648 | -6.1808 | 5533     |
| AHRR       | -0.12784 | 0.12784  | 1.0694  | -0.4098  | 0.68828 | 0.81665 | -6.1809 | 57491    |
| DNAL1      | 0.053133 | 0.053133 | 0.6912  | 0.40974  | 0.68832 | 0.81665 | -6.181  | 83544    |
| HIC1       | -0.39202 | 0.39202  | 3.3804  | -0.40963 | 0.6884  | 0.81669 | -6.181  | 3090     |
| JARID2-AS1 | -0.18151 | 0.18151  | 1.0406  | -0.40946 | 0.68852 | 0.81678 | -6.1811 | 1.01E+08 |
| LMO7       | 0.39859  | 0.39859  | 3.9981  | 0.40916  | 0.68874 | 0.81697 | -6.1812 | 4008     |
| SVIL-AS1   | -0.06856 | 0.06856  | 2.4821  | -0.40885 | 0.68896 | 0.81718 | -6.1813 | 1.03E+08 |
| EIF2AK4    | 0.33865  | 0.33865  | 4.8048  | 0.40864  | 0.68911 | 0.8173  | -6.1814 | 440275   |
| HACE1      | -0.0855  | 0.085504 | 1.6415  | -0.40857 | 0.68916 | 0.8173  | -6.1814 | 57531    |
| YPEL3      | 1.5766   | 1.5766   | 15.106  | 0.4082   | 0.68943 | 0.81751 | -6.1816 | 83719    |
| DDX20      | -0.15311 | 0.15311  | 2.0202  | -0.40819 | 0.68943 | 0.81751 | -6.1816 | 11218    |

|               |          |          |         |          |         |         |         |        |
|---------------|----------|----------|---------|----------|---------|---------|---------|--------|
| PTPRG         | 0.56249  | 0.56249  | 5.3748  | 0.40789  | 0.68965 | 0.81768 | -6.1817 | 5793   |
| LPAR2         | 0.17453  | 0.17453  | 2.503   | 0.40785  | 0.68967 | 0.81768 | -6.1817 | 9170   |
| KALRN         | 0.065536 | 0.065536 | 0.8476  | 0.40768  | 0.6898  | 0.81774 | -6.1818 | 8997   |
| NSMF          | 0.51457  | 0.51457  | 6.1702  | 0.40765  | 0.68982 | 0.81774 | -6.1818 | 26012  |
| BTD           | -0.08721 | 0.087206 | 1.6084  | -0.40758 | 0.68987 | 0.81774 | -6.1819 | 686    |
| PXK           | -0.15833 | 0.15833  | 2.7598  | -0.40743 | 0.68998 | 0.81782 | -6.1819 | 54899  |
| HRH2          | -0.3568  | 0.3568   | 1.4668  | -0.40724 | 0.69011 | 0.81782 | -6.182  | 3274   |
| PDRG1         | 0.31053  | 0.31053  | 3.0254  | 0.40724  | 0.69012 | 0.81782 | -6.182  | 81572  |
| CTSD          | 11.782   | 11.782   | 118.04  | 0.40716  | 0.69017 | 0.81782 | -6.182  | 1509   |
| NANOS1        | 0.14101  | 0.14101  | 0.9863  | 0.40716  | 0.69018 | 0.81782 | -6.182  | 340719 |
| NEBL          | -0.41723 | 0.41723  | 3.5426  | -0.40689 | 0.69036 | 0.81791 | -6.1821 | 10529  |
| CCDC69        | -0.97647 | 0.97647  | 5.8029  | -0.40685 | 0.6904  | 0.81791 | -6.1822 | 26112  |
| AKT1          | -1.4839  | 1.4839   | 15.967  | -0.40684 | 0.6904  | 0.81791 | -6.1822 | 207    |
| C12orf10      | -0.55256 | 0.55256  | 6.6191  | -0.40669 | 0.69051 | 0.81798 | -6.1822 | 60314  |
| TLCD1         | 0.33369  | 0.33369  | 2.4311  | 0.40656  | 0.6906  | 0.81801 | -6.1823 | 116238 |
| VTI1A         | -0.1015  | 0.1015   | 2.8119  | -0.40652 | 0.69063 | 0.81801 | -6.1823 | 143187 |
| PKP2          | 0.24378  | 0.24378  | 1.2843  | 0.40584  | 0.69112 | 0.8185  | -6.1826 | 5318   |
| ESD           | 1.6628   | 1.6628   | 15.701  | 0.4058   | 0.69114 | 0.8185  | -6.1826 | 2098   |
| NDUFS6        | 1.5941   | 1.5941   | 18.139  | 0.40567  | 0.69124 | 0.81856 | -6.1826 | 4726   |
| IPO8          | 0.25238  | 0.25238  | 4.5937  | 0.40539  | 0.69144 | 0.81874 | -6.1828 | 10526  |
| SLC12A8       | 0.05805  | 0.05805  | 0.62846 | 0.40531  | 0.6915  | 0.81875 | -6.1828 | 84561  |
| WFDC21P       | 1.806    | 1.806    | 6.7309  | 0.40508  | 0.69167 | 0.81889 | -6.1829 | 645638 |
| VMA21         | 0.30422  | 0.30422  | 4.1757  | 0.40488  | 0.69181 | 0.81901 | -6.183  | 203547 |
| ZNF274        | 0.23418  | 0.23418  | 3.5927  | 0.40466  | 0.69196 | 0.81913 | -6.1831 | 10782  |
| STON1-GTF2A1L | 0.05263  | 0.05263  | 0.31373 | 0.40454  | 0.69205 | 0.81917 | -6.1831 | 286749 |
| GSC           | 0.070732 | 0.070732 | 0.26077 | 0.40444  | 0.69212 | 0.8192  | -6.1832 | 145258 |

|              |          |          |         |          |         |         |         |          |
|--------------|----------|----------|---------|----------|---------|---------|---------|----------|
| EDA2R        | 0.073334 | 0.073334 | 0.32487 | 0.40429  | 0.69223 | 0.8192  | -6.1832 | 60401    |
| LOC105369391 | 0.042202 | 0.042202 | 0.12412 | 0.40428  | 0.69224 | 0.8192  | -6.1832 | 1.05E+08 |
| TMEM167B     | -0.36442 | 0.36442  | 5.0658  | -0.40424 | 0.69227 | 0.8192  | -6.1832 | 56900    |
| TEAD3        | -0.80282 | 0.80282  | 11.235  | -0.40415 | 0.69233 | 0.81922 | -6.1833 | 7005     |
| FRMD3        | -0.10722 | 0.10722  | 0.81086 | -0.40388 | 0.69252 | 0.81939 | -6.1834 | 257019   |
| RRP1         | -0.6591  | 0.6591   | 6.6585  | -0.40333 | 0.69292 | 0.8198  | -6.1836 | 8568     |
| C16orf70     | 0.70469  | 0.70469  | 5.9854  | 0.40317  | 0.69304 | 0.81988 | -6.1837 | 80262    |
| MPP7         | -0.78661 | 0.78661  | 7.4737  | -0.40292 | 0.69321 | 0.82003 | -6.1838 | 143098   |
| MED19        | -0.16672 | 0.16672  | 3.3373  | -0.40286 | 0.69326 | 0.82003 | -6.1838 | 219541   |
| NOTCH3       | -4.5921  | 4.5921   | 46.541  | -0.40253 | 0.6935  | 0.82026 | -6.1839 | 4854     |
| NNMT         | 5.2342   | 5.2342   | 23.46   | 0.40241  | 0.69358 | 0.82028 | -6.184  | 4837     |
| LILRA6       | 0.10573  | 0.10573  | 0.51451 | 0.40236  | 0.69362 | 0.82028 | -6.184  | 79168    |
| LOC105371328 | -0.03128 | 0.031278 | 0.10106 | -0.40218 | 0.69375 | 0.8203  | -6.1841 | 1.05E+08 |
| ITGB3BP      | 0.14738  | 0.14738  | 1.2371  | 0.40211  | 0.6938  | 0.8203  | -6.1841 | 23421    |
| CEP19        | -0.09185 | 0.091847 | 0.43798 | -0.40199 | 0.69388 | 0.8203  | -6.1842 | 84984    |
| SLC39A4      | -0.09317 | 0.093165 | 1.0238  | -0.40191 | 0.69394 | 0.8203  | -6.1842 | 55630    |
| COMP         | -6.7367  | 6.7367   | 29.636  | -0.4019  | 0.69395 | 0.8203  | -6.1842 | 1311     |
| NOMO1        | 1.0155   | 1.0155   | 12.778  | 0.40187  | 0.69397 | 0.8203  | -6.1842 | 23420    |
| BAD          | 1.0808   | 1.0808   | 9.765   | 0.40186  | 0.69398 | 0.8203  | -6.1842 | 572      |
| MESP2        | 0.039072 | 0.039072 | 0.21522 | 0.40154  | 0.6942  | 0.82052 | -6.1844 | 145873   |
| CHCHD4       | 0.23319  | 0.23319  | 2.5871  | 0.40115  | 0.69449 | 0.82079 | -6.1845 | 131474   |
| TLR7         | 0.042313 | 0.042313 | 0.24998 | 0.40108  | 0.69454 | 0.82079 | -6.1845 | 51284    |
| SYDE1        | 0.46909  | 0.46909  | 3.3517  | 0.40101  | 0.69459 | 0.8208  | -6.1846 | 85360    |
| NFKBIZ       | 1.2014   | 1.2014   | 15.273  | 0.40088  | 0.69468 | 0.82085 | -6.1846 | 64332    |
| HSP90AB4P    | -0.0529  | 0.052903 | 0.47898 | -0.40081 | 0.69473 | 0.82085 | -6.1847 | 664618   |
| KRTCAP2      | -1.9948  | 1.9948   | 20.568  | -0.40066 | 0.69484 | 0.82092 | -6.1847 | 200185   |

|           |          |          |         |          |         |         |         |          |
|-----------|----------|----------|---------|----------|---------|---------|---------|----------|
| MRPS5     | 0.2329   | 0.2329   | 2.9378  | 0.40052  | 0.69494 | 0.82098 | -6.1848 | 64969    |
| EVI2B     | -0.2489  | 0.2489   | 1.9855  | -0.40035 | 0.69506 | 0.82106 | -6.1848 | 2124     |
| HSCB      | 0.15365  | 0.15365  | 1.5924  | 0.4003   | 0.6951  | 0.82106 | -6.1849 | 150274   |
| MRPS31    | 0.24198  | 0.24198  | 3.711   | 0.40005  | 0.69528 | 0.82119 | -6.185  | 10240    |
| AHCTF1    | -0.25698 | 0.25698  | 4.7375  | -0.39999 | 0.69533 | 0.82119 | -6.185  | 25909    |
| MBNL1-AS1 | -0.07394 | 0.073937 | 0.88478 | -0.39994 | 0.69536 | 0.82119 | -6.185  | 401093   |
| COX14     | 0.72617  | 0.72617  | 5.8256  | 0.39966  | 0.69556 | 0.82137 | -6.1851 | 84987    |
| TRIM33    | -0.20776 | 0.20776  | 4.423   | -0.39951 | 0.69567 | 0.82144 | -6.1852 | 51592    |
| GATAD2A   | 0.91759  | 0.91759  | 12.877  | 0.39932  | 0.6958  | 0.82152 | -6.1853 | 54815    |
| SMAD1     | -0.2801  | 0.2801   | 5.1144  | -0.39929 | 0.69583 | 0.82152 | -6.1853 | 4086     |
| FBXW7-AS1 | -0.08161 | 0.081612 | 0.41373 | -0.39912 | 0.69595 | 0.8216  | -6.1853 | 1.02E+08 |
| RBM17     | -0.29291 | 0.29291  | 5.2936  | -0.39891 | 0.6961  | 0.82172 | -6.1854 | 84991    |
| EIF3D     | 2.7468   | 2.7468   | 37.118  | 0.39879  | 0.69619 | 0.82176 | -6.1855 | 8664     |
| ALKBH8    | -0.09475 | 0.094747 | 1.1561  | -0.39836 | 0.69649 | 0.82207 | -6.1857 | 91801    |
| PRKAR1B   | -0.27246 | 0.27246  | 2.0494  | -0.39798 | 0.69677 | 0.82234 | -6.1858 | 5575     |
| CELSR2    | 1.791    | 1.791    | 17.43   | 0.39773  | 0.69695 | 0.82246 | -6.1859 | 1952     |
| MTFMT     | 0.12887  | 0.12887  | 1.5313  | 0.3977   | 0.69697 | 0.82246 | -6.1859 | 123263   |
| ZNF254    | 0.11908  | 0.11908  | 1.8578  | 0.39757  | 0.69707 | 0.82252 | -6.186  | 9534     |
| UBL4A     | 0.55223  | 0.55223  | 7.2573  | 0.39746  | 0.69714 | 0.82255 | -6.186  | 8266     |
| GNA12     | 0.52567  | 0.52567  | 5.0842  | 0.39739  | 0.69719 | 0.82255 | -6.186  | 2768     |
| LMAN2L    | 0.143    | 0.143    | 2.3287  | 0.39724  | 0.6973  | 0.82258 | -6.1861 | 81562    |
| SNRNP27   | 0.38319  | 0.38319  | 4.7836  | 0.3972   | 0.69733 | 0.82258 | -6.1861 | 11017    |
| RPSAP9    | -0.03388 | 0.03388  | 0.35579 | -0.39709 | 0.69741 | 0.82258 | -6.1862 | 653162   |
| LRRC8D    | 0.18922  | 0.18922  | 2.2845  | 0.39709  | 0.69741 | 0.82258 | -6.1862 | 55144    |
| PTPRB     | 0.26033  | 0.26033  | 2.6751  | 0.39681  | 0.69761 | 0.82262 | -6.1863 | 5787     |
| STAB1     | -1.4561  | 1.4561   | 8.6166  | -0.39676 | 0.69765 | 0.82262 | -6.1863 | 23166    |

|              |          |          |         |          |         |         |         |          |
|--------------|----------|----------|---------|----------|---------|---------|---------|----------|
| SLC23A2      | -0.24636 | 0.24636  | 4.481   | -0.39674 | 0.69767 | 0.82262 | -6.1863 | 9962     |
| ID3          | 2.2253   | 2.2253   | 18.272  | 0.39673  | 0.69767 | 0.82262 | -6.1863 | 3399     |
| SFTPD        | -0.4165  | 0.4165   | 1.7923  | -0.3966  | 0.69776 | 0.82262 | -6.1864 | 6441     |
| KCTD2        | -0.54922 | 0.54922  | 5.8266  | -0.39654 | 0.69781 | 0.82262 | -6.1864 | 23510    |
| LINC00696    | -0.0763  | 0.076295 | 0.53786 | -0.39653 | 0.69781 | 0.82262 | -6.1864 | 1E+08    |
| SOX9         | -0.83163 | 0.83163  | 7.7672  | -0.3965  | 0.69783 | 0.82262 | -6.1864 | 6662     |
| MKNK1        | 0.33118  | 0.33118  | 4.7804  | 0.3961   | 0.69813 | 0.82279 | -6.1866 | 8569     |
| TTC3         | 0.44343  | 0.44343  | 9.0585  | 0.39602  | 0.69818 | 0.82279 | -6.1866 | 7267     |
| LILRB2       | 0.51324  | 0.51324  | 2.2432  | 0.39602  | 0.69818 | 0.82279 | -6.1866 | 10288    |
| RFX2         | -0.22158 | 0.22158  | 2.2512  | -0.39594 | 0.69824 | 0.82279 | -6.1866 | 5990     |
| MTMR1        | -0.28852 | 0.28852  | 4.8012  | -0.39594 | 0.69824 | 0.82279 | -6.1866 | 8776     |
| CALN1        | -0.05783 | 0.057828 | 0.39075 | -0.3959  | 0.69827 | 0.82279 | -6.1867 | 83698    |
| FBH1         | -0.31688 | 0.31688  | 7.4291  | -0.39577 | 0.69836 | 0.82279 | -6.1867 | 84893    |
| RNF135       | 0.50556  | 0.50556  | 7.8434  | 0.39576  | 0.69837 | 0.82279 | -6.1867 | 84282    |
| ZNF16        | -0.12467 | 0.12467  | 2.3347  | -0.39546 | 0.69858 | 0.82298 | -6.1868 | 7564     |
| NDUFB7       | 3.7505   | 3.7505   | 31.885  | 0.39516  | 0.6988  | 0.82319 | -6.187  | 4713     |
| MIR4458HG    | 0.072927 | 0.072927 | 0.74575 | 0.39508  | 0.69886 | 0.8232  | -6.187  | 1.01E+08 |
| STN1         | 0.13023  | 0.13023  | 2.1269  | 0.39497  | 0.69894 | 0.82323 | -6.187  | 79991    |
| SLC45A3      | -0.18047 | 0.18047  | 1.4922  | -0.3948  | 0.69906 | 0.82332 | -6.1871 | 85414    |
| LOC101929452 | -0.03501 | 0.03501  | 0.16368 | -0.39464 | 0.69918 | 0.82334 | -6.1872 | 1.02E+08 |
| LINC00920    | -0.05409 | 0.05409  | 0.38976 | -0.39458 | 0.69922 | 0.82334 | -6.1872 | 1.01E+08 |
| BARX2        | 0.58216  | 0.58216  | 6.7594  | 0.39448  | 0.69929 | 0.82334 | -6.1872 | 8538     |
| MARK4        | 0.50089  | 0.50089  | 6.881   | 0.39444  | 0.69932 | 0.82334 | -6.1872 | 57787    |
| TMSB15B      | 0.040339 | 0.040339 | 0.26029 | 0.39443  | 0.69933 | 0.82334 | -6.1872 | 286527   |
| TRIO         | 0.45123  | 0.45123  | 7.6735  | 0.39425  | 0.69945 | 0.82337 | -6.1873 | 7204     |
| HTR3A        | 0.24057  | 0.24057  | 0.60709 | 0.39423  | 0.69947 | 0.82337 | -6.1873 | 3359     |

|          |          |          |         |          |         |         |         |        |
|----------|----------|----------|---------|----------|---------|---------|---------|--------|
| FHDC1    | 0.43302  | 0.43302  | 4.4847  | 0.39419  | 0.6995  | 0.82337 | -6.1873 | 85462  |
| RAD50    | -0.28142 | 0.28142  | 4.8357  | -0.39413 | 0.69954 | 0.82337 | -6.1874 | 10111  |
| EIF4EBP2 | 0.80734  | 0.80734  | 16.13   | 0.39401  | 0.69963 | 0.82341 | -6.1874 | 1979   |
| ZNHIT3   | -0.21568 | 0.21568  | 3.2651  | -0.39392 | 0.69969 | 0.82343 | -6.1875 | 9326   |
| DBR1     | 0.17153  | 0.17153  | 2.3049  | 0.39374  | 0.69982 | 0.82347 | -6.1875 | 51163  |
| NBEAP1   | -0.04951 | 0.049511 | 0.1842  | -0.39374 | 0.69983 | 0.82347 | -6.1875 | 606    |
| XRCC2    | 0.052652 | 0.052652 | 0.39011 | 0.39353  | 0.69998 | 0.82359 | -6.1876 | 7516   |
| JRKL     | -0.08878 | 0.088775 | 1.3624  | -0.39339 | 0.70008 | 0.82366 | -6.1877 | 8690   |
| SND1-IT1 | -0.13258 | 0.13258  | 1.0082  | -0.39332 | 0.70013 | 0.82366 | -6.1877 | 27099  |
| CD84     | 0.17615  | 0.17615  | 1.1616  | 0.3931   | 0.70029 | 0.82378 | -6.1878 | 8832   |
| CPXM2    | 0.65358  | 0.65358  | 4.4722  | 0.39301  | 0.70035 | 0.82378 | -6.1878 | 119587 |
| RNMT     | -0.14211 | 0.14211  | 3.8156  | -0.39297 | 0.70038 | 0.82378 | -6.1878 | 8731   |
| SIGMAR1  | -0.72825 | 0.72825  | 10.489  | -0.39253 | 0.7007  | 0.8241  | -6.188  | 10280  |
| SLC35A4  | 1.2349   | 1.2349   | 14.741  | 0.39212  | 0.701   | 0.82421 | -6.1882 | 113829 |
| TMEM39B  | 0.1607   | 0.1607   | 2.4081  | 0.39202  | 0.70107 | 0.82421 | -6.1882 | 55116  |
| KLF12    | -0.09544 | 0.095443 | 0.82531 | -0.39201 | 0.70107 | 0.82421 | -6.1882 | 11278  |
| CDC73    | 0.18099  | 0.18099  | 3.7964  | 0.392    | 0.70108 | 0.82421 | -6.1882 | 79577  |
| WNK1     | 1.4554   | 1.4554   | 32.101  | 0.39196  | 0.70111 | 0.82421 | -6.1882 | 65125  |
| CLN3     | -0.41244 | 0.41244  | 5.2097  | -0.39195 | 0.70112 | 0.82421 | -6.1882 | 1201   |
| TMPRSS4  | 0.59448  | 0.59448  | 2.8262  | 0.39191  | 0.70114 | 0.82421 | -6.1883 | 56649  |
| UBE2Q1   | 0.46243  | 0.46243  | 6.6346  | 0.3918   | 0.70122 | 0.82421 | -6.1883 | 55585  |
| TNIP1    | 1.7349   | 1.7349   | 16.361  | 0.39174  | 0.70127 | 0.82421 | -6.1883 | 10318  |
| DDIT3    | -0.29908 | 0.29908  | 2.6848  | -0.39172 | 0.70128 | 0.82421 | -6.1883 | 1649   |
| SLC1A5   | -1.6008  | 1.6008   | 13.06   | -0.39146 | 0.70147 | 0.82434 | -6.1884 | 6510   |
| ARFRP1   | -0.623   | 0.623    | 5.8718  | -0.39137 | 0.70153 | 0.82434 | -6.1885 | 10139  |
| SYCN     | 0.13762  | 0.13762  | 0.56724 | 0.39136  | 0.70154 | 0.82434 | -6.1885 | 342898 |

|            |          |          |         |          |         |         |         |          |
|------------|----------|----------|---------|----------|---------|---------|---------|----------|
| TIMM17B    | 0.50218  | 0.50218  | 5.8425  | 0.39097  | 0.70183 | 0.82462 | -6.1886 | 10245    |
| TBCEL      | 0.18123  | 0.18123  | 2.1835  | 0.39064  | 0.70206 | 0.82484 | -6.1888 | 219899   |
| SIGIRR     | -0.26957 | 0.26957  | 2.5604  | -0.39051 | 0.70216 | 0.82489 | -6.1888 | 59307    |
| COL23A1    | 0.21258  | 0.21258  | 1.5055  | 0.39035  | 0.70227 | 0.82497 | -6.1889 | 91522    |
| CYS1       | 0.10512  | 0.10512  | 0.54908 | 0.38986  | 0.70262 | 0.82532 | -6.1891 | 192668   |
| SNCAIP     | -0.1318  | 0.1318   | 1.0843  | -0.38962 | 0.7028  | 0.82548 | -6.1892 | 9627     |
| DLGAP1-AS2 | 0.039972 | 0.039972 | 0.26902 | 0.38934  | 0.703   | 0.82561 | -6.1893 | 84777    |
| LRCH2      | -0.03182 | 0.031824 | 0.19678 | -0.38927 | 0.70305 | 0.82561 | -6.1893 | 57631    |
| SNX10      | 0.26027  | 0.26027  | 1.1482  | 0.38926  | 0.70306 | 0.82561 | -6.1893 | 29887    |
| CNGB1      | -0.56848 | 0.56848  | 1.4738  | -0.3891  | 0.70318 | 0.82569 | -6.1894 | 1258     |
| KLHL9      | 0.24061  | 0.24061  | 3.098   | 0.38892  | 0.70331 | 0.82578 | -6.1895 | 55958    |
| API5       | 0.77195  | 0.77195  | 11.255  | 0.38861  | 0.70353 | 0.82599 | -6.1896 | 8539     |
| ALOX15B    | -0.72843 | 0.72843  | 4.213   | -0.38823 | 0.7038  | 0.82625 | -6.1897 | 247      |
| HGH1       | -0.14085 | 0.14085  | 1.3101  | -0.3879  | 0.70404 | 0.82647 | -6.1899 | 51236    |
| PIK3CD-AS2 | 0.044954 | 0.044954 | 0.21936 | 0.38723  | 0.70453 | 0.82699 | -6.1901 | 1.02E+08 |
| FAM120AOS  | -0.2145  | 0.2145   | 3.6301  | -0.387   | 0.70469 | 0.82708 | -6.1902 | 158293   |
| PDE1B      | -0.1466  | 0.1466   | 0.76435 | -0.38699 | 0.7047  | 0.82708 | -6.1902 | 5153     |
| ARAP1-AS2  | -0.09002 | 0.090018 | 0.7073  | -0.38662 | 0.70497 | 0.82728 | -6.1904 | 1.01E+08 |
| CDC37      | 2.816    | 2.816    | 33.583  | 0.3866   | 0.70498 | 0.82728 | -6.1904 | 11140    |
| FCGR1CP    | 0.13034  | 0.13034  | 0.48229 | 0.38648  | 0.70507 | 0.82728 | -6.1904 | 1E+08    |
| RBM12      | -0.34605 | 0.34605  | 6.4861  | -0.38648 | 0.70507 | 0.82728 | -6.1904 | 10137    |
| AACS       | -0.55436 | 0.55436  | 9.4089  | -0.38635 | 0.70516 | 0.82733 | -6.1905 | 65985    |
| MAP3K7CL   | 0.063931 | 0.063931 | 0.60193 | 0.38626  | 0.70523 | 0.82735 | -6.1905 | 56911    |
| ANXA9      | 1.5511   | 1.5511   | 5.7742  | 0.38616  | 0.7053  | 0.82738 | -6.1906 | 8416     |
| TCAF2P1    | 0.051145 | 0.051145 | 0.67502 | 0.38608  | 0.70536 | 0.82739 | -6.1906 | 653691   |
| NASP       | -0.42496 | 0.42496  | 5.7305  | -0.38579 | 0.70557 | 0.82757 | -6.1907 | 4678     |



|             |          |          |         |          |         |         |         |          |
|-------------|----------|----------|---------|----------|---------|---------|---------|----------|
| NCAPG2      | -0.15495 | 0.15495  | 1.5458  | -0.38572 | 0.70562 | 0.82757 | -6.1907 | 54892    |
| APPL1       | -0.35809 | 0.35809  | 6.7424  | -0.38551 | 0.70577 | 0.8277  | -6.1908 | 26060    |
| COL18A1-AS2 | 0.13622  | 0.13622  | 0.47321 | 0.38532  | 0.70591 | 0.82776 | -6.1909 | 1.01E+08 |
| LIPA        | 1.1751   | 1.1751   | 9.2842  | 0.38531  | 0.70592 | 0.82776 | -6.1909 | 3988     |
| PROM2       | 2.4952   | 2.4952   | 24.795  | 0.38513  | 0.70605 | 0.82785 | -6.191  | 150696   |
| CDKN2AIPNL  | -0.26072 | 0.26072  | 3.0398  | -0.38504 | 0.70611 | 0.82787 | -6.191  | 91368    |
| SRSF10      | -0.11769 | 0.11769  | 1.7175  | -0.38489 | 0.70622 | 0.82793 | -6.1911 | 10772    |
| RNF26       | -0.43753 | 0.43753  | 5.6766  | -0.38483 | 0.70626 | 0.82793 | -6.1911 | 79102    |
| CCDC86      | 0.48075  | 0.48075  | 5.0233  | 0.38436  | 0.70661 | 0.82825 | -6.1913 | 79080    |
| GBF1        | -0.40939 | 0.40939  | 9.1335  | -0.38431 | 0.70664 | 0.82825 | -6.1913 | 8729     |
| HIPK1       | 0.40589  | 0.40589  | 9.4412  | 0.38421  | 0.70671 | 0.82828 | -6.1913 | 204851   |
| RGS14       | 0.39668  | 0.39668  | 4.8757  | 0.38408  | 0.70681 | 0.82834 | -6.1914 | 10636    |
| CACNA1B     | -0.03655 | 0.036548 | 0.12515 | -0.38357 | 0.70717 | 0.82871 | -6.1916 | 774      |
| MIIP        | -0.40794 | 0.40794  | 3.3894  | -0.38341 | 0.70729 | 0.82879 | -6.1916 | 60672    |
| RLF         | 0.22816  | 0.22816  | 4.1344  | 0.38328  | 0.70738 | 0.82884 | -6.1917 | 6018     |
| TMEM134     | -2.1214  | 2.1214   | 22.368  | -0.38322 | 0.70743 | 0.82884 | -6.1917 | 80194    |
| HAUS6       | -0.11528 | 0.11528  | 1.579   | -0.38287 | 0.70768 | 0.82906 | -6.1918 | 54801    |
| GPKOW       | -0.39013 | 0.39013  | 5.0329  | -0.38279 | 0.70774 | 0.82906 | -6.1919 | 27238    |
| TEX13B      | -0.03092 | 0.030919 | 0.13024 | -0.38274 | 0.70778 | 0.82906 | -6.1919 | 56156    |
| C12orf57    | -2.384   | 2.384    | 19.933  | -0.38266 | 0.70783 | 0.82906 | -6.1919 | 113246   |
| MPRIP       | -0.49934 | 0.49934  | 9.1664  | -0.38254 | 0.70792 | 0.82906 | -6.192  | 23164    |
| HPF1        | 0.31172  | 0.31172  | 3.4528  | 0.38243  | 0.708   | 0.82906 | -6.192  | 54969    |
| PPP1R37     | -0.70208 | 0.70208  | 6.5249  | -0.38233 | 0.70808 | 0.82906 | -6.1921 | 284352   |
| ZNHIT2      | 0.35981  | 0.35981  | 3.2726  | 0.38228  | 0.70811 | 0.82906 | -6.1921 | 741      |
| TMEM101     | -0.36483 | 0.36483  | 4.1108  | -0.38218 | 0.70819 | 0.82906 | -6.1921 | 84336    |
| LINC01298   | -0.0415  | 0.041501 | 0.15563 | -0.38211 | 0.70824 | 0.82906 | -6.1921 | 619344   |

|             |          |          |         |          |         |         |         |          |
|-------------|----------|----------|---------|----------|---------|---------|---------|----------|
| TRAF6       | -0.08293 | 0.082932 | 1.9738  | -0.38207 | 0.70826 | 0.82906 | -6.1922 | 7189     |
| BAIAP2L1    | 0.37864  | 0.37864  | 5.1707  | 0.38203  | 0.70829 | 0.82906 | -6.1922 | 55971    |
| HMCES       | -0.55075 | 0.55075  | 7.7148  | -0.38202 | 0.7083  | 0.82906 | -6.1922 | 56941    |
| FOXD1       | 0.085192 | 0.085192 | 0.5453  | 0.38201  | 0.70831 | 0.82906 | -6.1922 | 2297     |
| COMMD3-BMI1 | -0.07549 | 0.075491 | 0.47967 | -0.3818  | 0.70846 | 0.82918 | -6.1923 | 1.01E+08 |
| TRAPPC10    | 0.15604  | 0.15604  | 4.877   | 0.38163  | 0.70858 | 0.82927 | -6.1923 | 7109     |
| NFIL3       | 0.66571  | 0.66571  | 6.1007  | 0.38143  | 0.70873 | 0.8293  | -6.1924 | 4783     |
| ACOX3       | -0.55727 | 0.55727  | 5.8487  | -0.38132 | 0.70881 | 0.8293  | -6.1925 | 8310     |
| NPR2        | 0.34568  | 0.34568  | 3.3174  | 0.38125  | 0.70886 | 0.8293  | -6.1925 | 4882     |
| SPACA6P-AS  | -0.03723 | 0.037232 | 0.15779 | -0.38121 | 0.70888 | 0.8293  | -6.1925 | 1.02E+08 |
| ACSBG1      | -0.15426 | 0.15426  | 0.97338 | -0.3811  | 0.70896 | 0.8293  | -6.1925 | 23205    |
| RBM4        | -0.30648 | 0.30648  | 8.0248  | -0.38109 | 0.70898 | 0.8293  | -6.1925 | 5936     |
| SUPT5H      | -0.9943  | 0.9943   | 13.706  | -0.38102 | 0.70902 | 0.8293  | -6.1926 | 6829     |
| SEN3        | 0.46143  | 0.46143  | 7.3967  | 0.38098  | 0.70905 | 0.8293  | -6.1926 | 26168    |
| HRAS        | 1.8724   | 1.8724   | 21.27   | 0.38087  | 0.70913 | 0.8293  | -6.1926 | 3265     |
| JMJD8       | 0.79085  | 0.79085  | 11.551  | 0.38083  | 0.70916 | 0.8293  | -6.1926 | 339123   |
| ARL4C       | -0.62064 | 0.62064  | 8.4     | -0.38067 | 0.70928 | 0.8293  | -6.1927 | 10123    |
| C1S         | -12.641  | 12.641   | 62.97   | -0.38059 | 0.70934 | 0.8293  | -6.1927 | 716      |
| PEPD        | 0.71906  | 0.71906  | 8.9023  | 0.38056  | 0.70936 | 0.8293  | -6.1927 | 5184     |
| AGAP2-AS1   | 0.50186  | 0.50186  | 4.3694  | 0.38055  | 0.70936 | 0.8293  | -6.1927 | 1E+08    |
| INTS14      | -0.3127  | 0.3127   | 4.6145  | -0.38053 | 0.70938 | 0.8293  | -6.1928 | 81556    |
| SMARCA1     | 0.38024  | 0.38024  | 3.275   | 0.38038  | 0.70949 | 0.8293  | -6.1928 | 6594     |
| BRD7P3      | -0.03865 | 0.038653 | 0.19454 | -0.38033 | 0.70952 | 0.8293  | -6.1928 | 23629    |
| MAP3K5      | -0.46365 | 0.46365  | 5.1467  | -0.38033 | 0.70952 | 0.8293  | -6.1928 | 4217     |
| PARD6A      | -0.05769 | 0.05769  | 0.38861 | -0.3803  | 0.70955 | 0.8293  | -6.1929 | 50855    |
| UBR7        | 0.2563   | 0.2563   | 4.0557  | 0.38007  | 0.70971 | 0.82944 | -6.1929 | 55148    |

|            |          |          |         |          |         |         |         |        |
|------------|----------|----------|---------|----------|---------|---------|---------|--------|
| RPUSD1     | -0.39862 | 0.39862  | 4.1234  | -0.37965 | 0.71002 | 0.82974 | -6.1931 | 113000 |
| NOL4L      | 0.15487  | 0.15487  | 1.5695  | 0.37952  | 0.71012 | 0.82976 | -6.1932 | 140688 |
| DPH2       | -0.3003  | 0.3003   | 4.0012  | -0.37949 | 0.71013 | 0.82976 | -6.1932 | 1802   |
| POMC       | -0.24301 | 0.24301  | 1.3736  | -0.37942 | 0.71019 | 0.82976 | -6.1932 | 5443   |
| RNASE2     | 0.1599   | 0.1599   | 0.7159  | 0.37935  | 0.71023 | 0.82976 | -6.1932 | 6036   |
| SEC22C     | -0.12712 | 0.12712  | 2.2541  | -0.37926 | 0.7103  | 0.82978 | -6.1933 | 9117   |
| MAT2B      | -0.42709 | 0.42709  | 5.334   | -0.37907 | 0.71044 | 0.82985 | -6.1933 | 27430  |
| ACSL1      | -1.6888  | 1.6888   | 19.66   | -0.379   | 0.71049 | 0.82985 | -6.1934 | 2180   |
| PGP        | 0.14562  | 0.14562  | 2.0636  | 0.37898  | 0.7105  | 0.82985 | -6.1934 | 283871 |
| FRYL       | -0.21445 | 0.21445  | 4.9705  | -0.37876 | 0.71066 | 0.82997 | -6.1934 | 285527 |
| FCGR2C     | -0.17864 | 0.17864  | 1.2824  | -0.37806 | 0.71117 | 0.83051 | -6.1937 | 9103   |
| FAM106A    | -0.07154 | 0.07154  | 0.34583 | -0.3779  | 0.71128 | 0.83057 | -6.1938 | 80039  |
| ANAPC7     | 0.23601  | 0.23601  | 5.4071  | 0.37786  | 0.71132 | 0.83057 | -6.1938 | 51434  |
| SNRNP40    | -0.60206 | 0.60206  | 7.2741  | -0.37762 | 0.71149 | 0.83071 | -6.1939 | 9410   |
| MED15      | 0.63736  | 0.63736  | 8.7603  | 0.3775   | 0.71158 | 0.83076 | -6.1939 | 51586  |
| PEG10      | 0.073393 | 0.073393 | 0.41359 | 0.37743  | 0.71163 | 0.83076 | -6.194  | 23089  |
| SOX4       | -0.73268 | 0.73268  | 7.0032  | -0.37734 | 0.71169 | 0.83078 | -6.194  | 6659   |
| CCNJL      | 0.077394 | 0.077394 | 0.51987 | 0.37695  | 0.71198 | 0.83105 | -6.1941 | 79616  |
| C3AR1      | 0.2283   | 0.2283   | 1.3526  | 0.37663  | 0.71221 | 0.83127 | -6.1943 | 719    |
| ANKRD36BP1 | 0.60773  | 0.60773  | 8.1175  | 0.37629  | 0.71246 | 0.83141 | -6.1944 | 84832  |
| SCNN1A     | 1.5689   | 1.5689   | 12.772  | 0.37628  | 0.71247 | 0.83141 | -6.1944 | 6337   |
| DDX59      | -0.13043 | 0.13043  | 2.9421  | -0.37626 | 0.71248 | 0.83141 | -6.1944 | 83479  |
| ALKBH5     | -0.95953 | 0.95953  | 13.171  | -0.3759  | 0.71274 | 0.83162 | -6.1946 | 54890  |
| MEX3B      | 0.091946 | 0.091946 | 0.736   | 0.37584  | 0.71278 | 0.83162 | -6.1946 | 84206  |
| RBM22      | 0.41113  | 0.41113  | 7.3857  | 0.37581  | 0.71281 | 0.83162 | -6.1946 | 55696  |
| RPL4       | 28.724   | 28.724   | 416.91  | 0.37565  | 0.71292 | 0.83166 | -6.1946 | 6124   |

|            |          |          |         |          |         |         |         |          |
|------------|----------|----------|---------|----------|---------|---------|---------|----------|
| HNRNPA1P10 | -3.9922  | 3.9922   | 45.651  | -0.37562 | 0.71294 | 0.83166 | -6.1947 | 664709   |
| PIP4P2     | -0.12462 | 0.12462  | 1.3026  | -0.37541 | 0.7131  | 0.83178 | -6.1947 | 55529    |
| APLP2      | 3.8641   | 3.8641   | 44.944  | 0.37503  | 0.71337 | 0.83205 | -6.1949 | 334      |
| CD7        | 0.14072  | 0.14072  | 0.81987 | 0.3748   | 0.71354 | 0.83214 | -6.195  | 924      |
| C19orf33   | 3.7544   | 3.7544   | 48.293  | 0.37466  | 0.71364 | 0.83214 | -6.195  | 64073    |
| B4GALT2    | 0.90414  | 0.90414  | 12.135  | 0.37465  | 0.71365 | 0.83214 | -6.195  | 8704     |
| MMP25      | -0.32925 | 0.32925  | 1.3894  | -0.37461 | 0.71367 | 0.83214 | -6.195  | 64386    |
| PIP5K1C    | -0.42725 | 0.42725  | 4.9881  | -0.37457 | 0.71371 | 0.83214 | -6.1951 | 23396    |
| BIVM-ERCC5 | 0.10183  | 0.10183  | 1.552   | 0.37451  | 0.71375 | 0.83214 | -6.1951 | 1.01E+08 |
| SLC38A4    | 0.041163 | 0.041163 | 0.38282 | 0.37444  | 0.7138  | 0.83214 | -6.1951 | 55089    |
| UBL7       | 0.6982   | 0.6982   | 6.6507  | 0.37433  | 0.71388 | 0.83218 | -6.1952 | 84993    |
| CNRIP1     | 0.36057  | 0.36057  | 2.4362  | 0.37416  | 0.71401 | 0.83227 | -6.1952 | 25927    |
| CTNND1     | 2.2988   | 2.2988   | 50.683  | 0.37403  | 0.7141  | 0.83232 | -6.1953 | 1500     |
| DMAC2      | 0.45706  | 0.45706  | 6.2684  | 0.37387  | 0.71422 | 0.83239 | -6.1953 | 55101    |
| GNPDA1     | -0.50216 | 0.50216  | 5.1161  | -0.37378 | 0.71428 | 0.83239 | -6.1954 | 10007    |
| NPL        | 0.28042  | 0.28042  | 1.9656  | 0.37373  | 0.71432 | 0.83239 | -6.1954 | 80896    |
| ZFP91-CNTF | 0.057993 | 0.057993 | 0.57327 | 0.37368  | 0.71435 | 0.83239 | -6.1954 | 386607   |
| IGFLR1     | -0.1541  | 0.1541   | 1.3847  | -0.3736  | 0.71441 | 0.8324  | -6.1954 | 79713    |
| HDAC8      | -0.04458 | 0.044576 | 1.5212  | -0.37351 | 0.71448 | 0.83242 | -6.1955 | 55869    |
| PNPLA1     | 0.63267  | 0.63267  | 3.1378  | 0.37322  | 0.71469 | 0.8325  | -6.1956 | 285848   |
| PLBD1-AS1  | -0.19413 | 0.19413  | 1.617   | -0.37321 | 0.71469 | 0.8325  | -6.1956 | 1.02E+08 |
| SNORA38B   | -0.05078 | 0.050775 | 0.2484  | -0.37321 | 0.7147  | 0.8325  | -6.1956 | 1E+08    |
| BUB1B-PAK6 | 0.25918  | 0.25918  | 2.068   | 0.3729   | 0.71492 | 0.83265 | -6.1957 | 1.07E+08 |
| SCAMP3     | -0.74501 | 0.74501  | 10.565  | -0.37284 | 0.71497 | 0.83265 | -6.1957 | 10067    |
| PMF1       | 0.68914  | 0.68914  | 10.901  | 0.37283  | 0.71497 | 0.83265 | -6.1957 | 11243    |
| EGR2       | 0.06666  | 0.06666  | 0.67227 | 0.37255  | 0.71517 | 0.83277 | -6.1958 | 1959     |

|             |          |          |          |          |         |         |         |          |
|-------------|----------|----------|----------|----------|---------|---------|---------|----------|
| ZNF284      | -0.03718 | 0.037184 | 0.5255   | -0.37254 | 0.71518 | 0.83277 | -6.1958 | 342909   |
| PRPF38B     | -0.15389 | 0.15389  | 3.1684   | -0.3719  | 0.71565 | 0.83326 | -6.1961 | 55119    |
| DAPL1       | -4.8681  | 4.8681   | 32.837   | -0.37181 | 0.71571 | 0.83328 | -6.1961 | 92196    |
| GIMAP7      | -0.50796 | 0.50796  | 3.5643   | -0.37155 | 0.71591 | 0.83345 | -6.1962 | 168537   |
| RNF146      | 0.21626  | 0.21626  | 3.4448   | 0.37097  | 0.71632 | 0.83388 | -6.1964 | 81847    |
| CUTA        | -0.62841 | 0.62841  | 8.0101   | -0.3702  | 0.71689 | 0.83445 | -6.1967 | 51596    |
| MTF2        | -0.11192 | 0.11192  | 2.1301   | -0.37016 | 0.71692 | 0.83445 | -6.1967 | 22823    |
| DLGAP4-AS1  | 0.077517 | 0.077517 | 0.52739  | 0.36995  | 0.71707 | 0.83457 | -6.1968 | 1.02E+08 |
| HLTF        | 0.1397   | 0.1397   | 1.5464   | 0.36988  | 0.71712 | 0.83457 | -6.1969 | 6596     |
| MICALL2     | 0.28813  | 0.28813  | 3.5706   | 0.36971  | 0.71724 | 0.83466 | -6.1969 | 79778    |
| KCNE4       | 0.31176  | 0.31176  | 1.5445   | 0.36964  | 0.7173  | 0.83466 | -6.1969 | 23704    |
| TNK2-AS1    | -0.07444 | 0.07444  | 0.5939   | -0.36945 | 0.71743 | 0.83475 | -6.197  | 1E+08    |
| ACAD8       | -0.35912 | 0.35912  | 4.1653   | -0.36931 | 0.71753 | 0.83475 | -6.1971 | 27034    |
| PPP1R10     | 0.065871 | 0.065871 | 1.1213   | 0.3693   | 0.71754 | 0.83475 | -6.1971 | 5514     |
| DOK2        | -0.22744 | 0.22744  | 1.6062   | -0.36921 | 0.71761 | 0.83475 | -6.1971 | 9046     |
| SMIM19      | -0.14837 | 0.14837  | 1.8986   | -0.36916 | 0.71764 | 0.83475 | -6.1971 | 114926   |
| ZNF30       | -0.05043 | 0.050429 | 0.53383  | -0.36912 | 0.71767 | 0.83475 | -6.1971 | 90075    |
| ZNF217      | 0.3913   | 0.3913   | 7.125    | 0.36867  | 0.718   | 0.83507 | -6.1973 | 7764     |
| C15orf39    | -0.42678 | 0.42678  | 5.8269   | -0.36861 | 0.71804 | 0.83507 | -6.1973 | 56905    |
| IL10RA      | -0.41096 | 0.41096  | 3.1736   | -0.36812 | 0.7184  | 0.83539 | -6.1975 | 3587     |
| UBXN1       | -1.1171  | 1.1171   | 16.116   | -0.36796 | 0.71852 | 0.83539 | -6.1976 | 51035    |
| COMT        | -0.83287 | 0.83287  | 11.207   | -0.3679  | 0.71856 | 0.83539 | -6.1976 | 1312     |
| ABHD8       | 0.45024  | 0.45024  | 2.5668   | 0.36789  | 0.71857 | 0.83539 | -6.1976 | 79575    |
| VDR         | 0.76684  | 0.76684  | 7.5326   | 0.36783  | 0.71861 | 0.83539 | -6.1976 | 7421     |
| DYNC1LI2    | 0.50759  | 0.50759  | 12.576   | 0.36783  | 0.71861 | 0.83539 | -6.1976 | 1783     |
| OSBPL10-AS1 | -0.02836 | 0.028362 | 0.098836 | -0.36772 | 0.71869 | 0.83542 | -6.1977 | 1.01E+08 |

|            |          |          |         |          |         |         |         |          |
|------------|----------|----------|---------|----------|---------|---------|---------|----------|
| SMN2       | -0.16353 | 0.16353  | 2.1973  | -0.3673  | 0.719   | 0.83568 | -6.1978 | 6607     |
| GAREM1     | 0.22193  | 0.22193  | 3.4386  | 0.36729  | 0.71901 | 0.83568 | -6.1978 | 64762    |
| CYTH1      | 0.32013  | 0.32013  | 7.9454  | 0.36716  | 0.7191  | 0.83571 | -6.1979 | 9267     |
| SNORA11F   | -0.04292 | 0.042919 | 0.14517 | -0.36711 | 0.71914 | 0.83571 | -6.1979 | 1.1E+08  |
| RBM41      | 0.066967 | 0.066967 | 1.3414  | 0.36665  | 0.71947 | 0.83598 | -6.1981 | 55285    |
| PCAT6      | 0.14268  | 0.14268  | 1.827   | 0.36657  | 0.71953 | 0.83598 | -6.1981 | 1.01E+08 |
| SLC6A1-AS1 | -0.0491  | 0.049095 | 0.16293 | -0.36651 | 0.71957 | 0.83598 | -6.1981 | 1.01E+08 |
| ERCC4      | -0.05219 | 0.052191 | 0.94268 | -0.36635 | 0.71969 | 0.83598 | -6.1982 | 2072     |
| EEF1G      | -22.779  | 22.779   | 441.23  | -0.36628 | 0.71974 | 0.83598 | -6.1982 | 1937     |
| LOC613206  | 0.11792  | 0.11792  | 0.42222 | 0.36621  | 0.71979 | 0.83598 | -6.1982 | 613206   |
| MRPL41     | 1.9072   | 1.9072   | 20.283  | 0.36618  | 0.71981 | 0.83598 | -6.1982 | 64975    |
| TTC13      | 0.076479 | 0.076479 | 2.3278  | 0.36618  | 0.71982 | 0.83598 | -6.1982 | 79573    |
| ZNF684     | -0.04714 | 0.04714  | 0.41896 | -0.36618 | 0.71982 | 0.83598 | -6.1982 | 127396   |
| CDK2       | 0.42652  | 0.42652  | 5.3066  | 0.36605  | 0.71991 | 0.83603 | -6.1983 | 1017     |
| CNOT10     | -0.1069  | 0.1069   | 2.9935  | -0.36595 | 0.71999 | 0.83606 | -6.1983 | 25904    |
| C19orf38   | 0.082551 | 0.082551 | 0.42174 | 0.3658   | 0.72009 | 0.8361  | -6.1984 | 255809   |
| ZNF627     | 0.13907  | 0.13907  | 2.0464  | 0.36574  | 0.72013 | 0.8361  | -6.1984 | 199692   |
| ITPKB      | 0.42319  | 0.42319  | 6.5843  | 0.3657   | 0.72016 | 0.8361  | -6.1984 | 3707     |
| RGL3       | 0.069695 | 0.069695 | 0.38358 | 0.36546  | 0.72034 | 0.83624 | -6.1985 | 57139    |
| IFT46      | 0.23879  | 0.23879  | 3.3748  | 0.36531  | 0.72045 | 0.83632 | -6.1986 | 56912    |
| FAAP24     | -0.08005 | 0.080051 | 0.56631 | -0.36488 | 0.72076 | 0.83662 | -6.1987 | 91442    |
| FOXE1      | 0.15168  | 0.15168  | 1.3362  | 0.36403  | 0.72138 | 0.83709 | -6.1991 | 2304     |
| FMNL2      | 0.71446  | 0.71446  | 5.661   | 0.36397  | 0.72143 | 0.83709 | -6.1991 | 114793   |
| TWIST1     | 0.34766  | 0.34766  | 2.7963  | 0.36395  | 0.72144 | 0.83709 | -6.1991 | 7291     |
| GNPDA2     | 0.12895  | 0.12895  | 2.329   | 0.36394  | 0.72145 | 0.83709 | -6.1991 | 132789   |
| SLC35A3    | -0.10364 | 0.10364  | 1.9575  | -0.36393 | 0.72146 | 0.83709 | -6.1991 | 23443    |

|              |          |          |          |          |         |         |         |          |
|--------------|----------|----------|----------|----------|---------|---------|---------|----------|
| ZNF280C      | -0.06094 | 0.060937 | 0.87212  | -0.36392 | 0.72147 | 0.83709 | -6.1991 | 55609    |
| ZMAT2        | 0.65152  | 0.65152  | 11.482   | 0.36375  | 0.72159 | 0.83717 | -6.1992 | 153527   |
| RPAP3        | 0.12472  | 0.12472  | 1.7909   | 0.36353  | 0.72175 | 0.8373  | -6.1992 | 79657    |
| ISLR         | 1.4166   | 1.4166   | 11.307   | 0.36332  | 0.72191 | 0.83743 | -6.1993 | 3671     |
| LARGE-AS1    | -0.03242 | 0.032416 | 0.26062  | -0.36324 | 0.72196 | 0.83743 | -6.1993 | 1.01E+08 |
| MYCN         | -0.04352 | 0.043521 | 0.2962   | -0.36294 | 0.72218 | 0.83763 | -6.1995 | 4613     |
| SULT1A3      | -0.09516 | 0.09516  | 0.76451  | -0.36271 | 0.72235 | 0.83771 | -6.1995 | 6818     |
| SULT1A4      | -0.09516 | 0.09516  | 0.76451  | -0.36271 | 0.72235 | 0.83771 | -6.1995 | 445329   |
| LOC105375166 | -0.03154 | 0.031544 | 0.13604  | -0.36245 | 0.72254 | 0.83787 | -6.1996 | 1.05E+08 |
| ZNF576       | -0.11747 | 0.11747  | 1.5537   | -0.3623  | 0.72265 | 0.83795 | -6.1997 | 79177    |
| SHLD2P1      | -0.02542 | 0.025418 | 0.070125 | -0.36191 | 0.72294 | 0.83816 | -6.1998 | 414241   |
| LOC648987    | -0.04983 | 0.049828 | 0.68392  | -0.36183 | 0.72299 | 0.83816 | -6.1999 | 648987   |
| FNBP1L       | -0.2015  | 0.2015   | 2.787    | -0.36178 | 0.72303 | 0.83816 | -6.1999 | 54874    |
| SLC8A1-AS1   | -0.05283 | 0.052833 | 0.21678  | -0.36172 | 0.72307 | 0.83816 | -6.1999 | 1E+08    |
| CCNY         | 0.36888  | 0.36888  | 6.1381   | 0.3617   | 0.72308 | 0.83816 | -6.1999 | 219771   |
| IFITM2       | 8.5668   | 8.5668   | 52.431   | 0.36139  | 0.72332 | 0.83833 | -6.2    | 10581    |
| ABCC4        | 0.14299  | 0.14299  | 1.8104   | 0.36137  | 0.72332 | 0.83833 | -6.2    | 10257    |
| LINC01116    | 0.086817 | 0.086817 | 0.487    | 0.36095  | 0.72364 | 0.83863 | -6.2002 | 375295   |
| OVOL2        | -0.11859 | 0.11859  | 1.5016   | -0.36084 | 0.72372 | 0.83866 | -6.2002 | 58495    |
| GJA4         | 0.53067  | 0.53067  | 3.6691   | 0.36077  | 0.72376 | 0.83866 | -6.2003 | 2701     |
| GOLGA6L9     | -0.08769 | 0.087688 | 0.78699  | -0.3607  | 0.72382 | 0.83866 | -6.2003 | 440295   |
| GCA          | 0.14214  | 0.14214  | 0.95895  | 0.36055  | 0.72393 | 0.83874 | -6.2003 | 25801    |
| ZNF195       | 0.091683 | 0.091683 | 1.4212   | 0.36036  | 0.72407 | 0.83881 | -6.2004 | 7748     |
| EPB41L2      | -0.4718  | 0.4718   | 3.9234   | -0.36033 | 0.72409 | 0.83881 | -6.2004 | 2037     |
| DNP1         | 0.83096  | 0.83096  | 8.3777   | 0.3595   | 0.72469 | 0.83939 | -6.2007 | 10591    |
| GSTO2        | -0.20608 | 0.20608  | 3.1543   | -0.3595  | 0.72469 | 0.83939 | -6.2007 | 119391   |

|              |          |          |         |          |         |         |         |        |
|--------------|----------|----------|---------|----------|---------|---------|---------|--------|
| GRK5         | 0.4447   | 0.4447   | 4.2886  | 0.35938  | 0.72478 | 0.83941 | -6.2008 | 2869   |
| DUBR         | -0.04976 | 0.049756 | 0.57187 | -0.35934 | 0.72481 | 0.83941 | -6.2008 | 344595 |
| SNORA65      | 0.044361 | 0.044361 | 0.20643 | 0.35921  | 0.72491 | 0.83947 | -6.2008 | 26783  |
| PPP2R3A      | -0.31069 | 0.31069  | 6.7776  | -0.35832 | 0.72556 | 0.84012 | -6.2012 | 5523   |
| UTP4         | 0.56608  | 0.56608  | 7.2686  | 0.3583   | 0.72557 | 0.84012 | -6.2012 | 84916  |
| MRPS34       | 1.3269   | 1.3269   | 16.325  | 0.35808  | 0.72573 | 0.84025 | -6.2013 | 65993  |
| PMPCB        | -0.18935 | 0.18935  | 3.8609  | -0.35794 | 0.72584 | 0.84031 | -6.2013 | 9512   |
| SMIM10       | -0.12638 | 0.12638  | 0.92321 | -0.35786 | 0.72589 | 0.84032 | -6.2013 | 644538 |
| HAGLR        | 0.049026 | 0.049026 | 0.48767 | 0.35767  | 0.72603 | 0.8404  | -6.2014 | 401022 |
| MTMR14       | -0.29748 | 0.29748  | 5.3061  | -0.3576  | 0.72609 | 0.8404  | -6.2014 | 64419  |
| TOPBP1       | -0.20531 | 0.20531  | 3.893   | -0.35757 | 0.72611 | 0.8404  | -6.2014 | 11073  |
| ARMCX2       | 0.22102  | 0.22102  | 1.5916  | 0.35737  | 0.72625 | 0.84051 | -6.2015 | 9823   |
| PRPF18       | 0.23692  | 0.23692  | 5.0143  | 0.35696  | 0.72655 | 0.84077 | -6.2017 | 8559   |
| BGLAP        | 0.063949 | 0.063949 | 0.51608 | 0.35687  | 0.72662 | 0.84077 | -6.2017 | 632    |
| GNLY         | 0.08669  | 0.08669  | 0.61274 | 0.35684  | 0.72664 | 0.84077 | -6.2017 | 10578  |
| NUP62        | 0.54814  | 0.54814  | 7.3406  | 0.35679  | 0.72668 | 0.84077 | -6.2017 | 23636  |
| ZDHHC14      | -0.14368 | 0.14368  | 1.7936  | -0.35657 | 0.72684 | 0.84089 | -6.2018 | 79683  |
| TMEM45A      | 13.31    | 13.31    | 73.893  | 0.35642  | 0.72695 | 0.84097 | -6.2019 | 55076  |
| TRMU         | -0.14278 | 0.14278  | 2.958   | -0.35599 | 0.72726 | 0.84127 | -6.202  | 55687  |
| CFAP97       | 0.18539  | 0.18539  | 3.2205  | 0.35586  | 0.72736 | 0.84131 | -6.2021 | 57587  |
| CENPBD1P1    | 0.16715  | 0.16715  | 3.1766  | 0.35581  | 0.7274  | 0.84131 | -6.2021 | 65996  |
| SCARNA13     | -18.19   | 18.19    | 188.54  | -0.35545 | 0.72766 | 0.84156 | -6.2022 | 677768 |
| SEH1L        | 0.31626  | 0.31626  | 4.8128  | 0.35511  | 0.72791 | 0.84179 | -6.2023 | 81929  |
| LOC100310756 | -0.04327 | 0.04327  | 0.33908 | -0.35504 | 0.72796 | 0.84179 | -6.2024 | 1E+08  |
| KIF3B        | -0.27397 | 0.27397  | 4.6702  | -0.35474 | 0.72818 | 0.84191 | -6.2025 | 9371   |
| TBC1D3B      | -0.23534 | 0.23534  | 0.55689 | -0.3546  | 0.72828 | 0.84191 | -6.2025 | 414059 |



|              |          |          |         |          |         |         |         |          |
|--------------|----------|----------|---------|----------|---------|---------|---------|----------|
| LINC02541    | -0.07135 | 0.071354 | 0.50628 | -0.35454 | 0.72833 | 0.84191 | -6.2025 | 1.02E+08 |
| SUV39H2      | 0.068711 | 0.068711 | 1.103   | 0.35447  | 0.72837 | 0.84191 | -6.2026 | 79723    |
| XPO5         | 0.24149  | 0.24149  | 5.3209  | 0.35445  | 0.72839 | 0.84191 | -6.2026 | 57510    |
| CCDC153      | 0.061047 | 0.061047 | 0.52591 | 0.35445  | 0.72839 | 0.84191 | -6.2026 | 283152   |
| SLC39A1      | 1.1976   | 1.1976   | 12.576  | 0.35443  | 0.72841 | 0.84191 | -6.2026 | 27173    |
| EIF2AK1      | -0.39799 | 0.39799  | 8.8772  | -0.35427 | 0.72852 | 0.84198 | -6.2026 | 27102    |
| BRD2         | -0.15281 | 0.15281  | 2.9528  | -0.35417 | 0.7286  | 0.84201 | -6.2027 | 6046     |
| GRK2         | -1.0458  | 1.0458   | 16.308  | -0.35387 | 0.72881 | 0.8422  | -6.2028 | 156      |
| EZR-AS1      | 0.085606 | 0.085606 | 0.58021 | 0.35364  | 0.72899 | 0.84232 | -6.2029 | 1.01E+08 |
| DDT          | 1.1742   | 1.1742   | 13.9    | 0.35355  | 0.72905 | 0.84232 | -6.2029 | 1652     |
| ARID4B       | 0.13382  | 0.13382  | 3.3313  | 0.35349  | 0.72909 | 0.84232 | -6.2029 | 51742    |
| LOC101928034 | -0.07949 | 0.079486 | 0.79288 | -0.35346 | 0.72912 | 0.84232 | -6.2029 | 1.02E+08 |
| SELENOM      | 3.8896   | 3.8896   | 26.789  | 0.35336  | 0.72919 | 0.84235 | -6.203  | 140606   |
| ORC1         | 0.10557  | 0.10557  | 0.80962 | 0.35307  | 0.7294  | 0.84253 | -6.2031 | 4998     |
| CYB561D1     | -0.34572 | 0.34572  | 3.5277  | -0.353   | 0.72946 | 0.84254 | -6.2031 | 284613   |
| ATP8B1       | -0.14149 | 0.14149  | 4.2118  | -0.35261 | 0.72974 | 0.84276 | -6.2032 | 5205     |
| PPFIA2       | 0.042442 | 0.042442 | 0.23724 | 0.3526   | 0.72975 | 0.84276 | -6.2033 | 8499     |
| SDK2         | -0.13783 | 0.13783  | 1.4273  | -0.35227 | 0.72999 | 0.84293 | -6.2034 | 54549    |
| CLNS1A       | 0.86365  | 0.86365  | 11.738  | 0.35226  | 0.72999 | 0.84293 | -6.2034 | 1207     |
| RNF130       | 0.81808  | 0.81808  | 7.2505  | 0.35207  | 0.73014 | 0.84299 | -6.2034 | 55819    |
| ITGA11       | 0.6127   | 0.6127   | 2.6581  | 0.35206  | 0.73015 | 0.84299 | -6.2034 | 22801    |
| NLGN2        | -0.48091 | 0.48091  | 3.7988  | -0.35188 | 0.73028 | 0.84309 | -6.2035 | 57555    |
| KRBA1        | 0.30187  | 0.30187  | 2.6938  | 0.35177  | 0.73036 | 0.84312 | -6.2036 | 84626    |
| FBXL3        | 0.33676  | 0.33676  | 7.16    | 0.35166  | 0.73044 | 0.84316 | -6.2036 | 26224    |
| FUBP3        | 0.34824  | 0.34824  | 7.0676  | 0.35143  | 0.7306  | 0.8432  | -6.2037 | 8939     |
| PLPP5        | 0.106    | 0.106    | 2.0828  | 0.35142  | 0.73061 | 0.8432  | -6.2037 | 84513    |

|              |          |          |         |          |         |         |         |          |
|--------------|----------|----------|---------|----------|---------|---------|---------|----------|
| CAMLG        | 0.31336  | 0.31336  | 4.4771  | 0.3514   | 0.73063 | 0.8432  | -6.2037 | 819      |
| CEP41        | 0.031842 | 0.031842 | 0.26865 | 0.35059  | 0.73122 | 0.84371 | -6.204  | 95681    |
| PIM2         | -0.12372 | 0.12372  | 1.5575  | -0.35054 | 0.73126 | 0.84371 | -6.204  | 11040    |
| NUDT5        | 0.24236  | 0.24236  | 4.7265  | 0.35054  | 0.73126 | 0.84371 | -6.204  | 11164    |
| DPYSL4       | -0.22032 | 0.22032  | 0.90073 | -0.35049 | 0.73129 | 0.84371 | -6.204  | 10570    |
| TNFRSF11A    | 0.26518  | 0.26518  | 1.5718  | 0.35044  | 0.73133 | 0.84371 | -6.204  | 8792     |
| ABCA1        | -0.47376 | 0.47376  | 7.0027  | -0.35038 | 0.73137 | 0.84371 | -6.204  | 19       |
| LOC101929122 | 0.055346 | 0.055346 | 0.23477 | 0.35019  | 0.73152 | 0.84377 | -6.2041 | 1.02E+08 |
| BABAM1       | 0.73298  | 0.73298  | 11.048  | 0.35006  | 0.73161 | 0.84377 | -6.2042 | 29086    |
| MXRA7        | 0.61455  | 0.61455  | 6.7312  | 0.35005  | 0.73162 | 0.84377 | -6.2042 | 439921   |
| ATP2A1-AS1   | -0.03853 | 0.038527 | 0.18668 | -0.35004 | 0.73162 | 0.84377 | -6.2042 | 1E+08    |
| GLB1L3       | 0.22506  | 0.22506  | 0.89186 | 0.3498   | 0.7318  | 0.84392 | -6.2043 | 112937   |
| DIRAS3       | -0.08465 | 0.084652 | 0.69537 | -0.34949 | 0.73203 | 0.84406 | -6.2044 | 9077     |
| ARMH4        | -0.09607 | 0.096073 | 0.90627 | -0.34947 | 0.73204 | 0.84406 | -6.2044 | 145407   |
| FKRP         | 0.10584  | 0.10584  | 1.3718  | 0.34943  | 0.73207 | 0.84406 | -6.2044 | 79147    |
| CPSF4        | -0.21471 | 0.21471  | 4.0288  | -0.34926 | 0.73219 | 0.84412 | -6.2045 | 10898    |
| S100P        | 0.97247  | 0.97247  | 4.7412  | 0.34923  | 0.73222 | 0.84412 | -6.2045 | 6286     |
| SLC45A1      | -0.03737 | 0.037369 | 0.21972 | -0.34907 | 0.73234 | 0.84415 | -6.2045 | 50651    |
| SPATS2       | 0.11121  | 0.11121  | 2.7295  | 0.34903  | 0.73237 | 0.84415 | -6.2045 | 65244    |
| RBBP7        | 0.60387  | 0.60387  | 10.811  | 0.34898  | 0.7324  | 0.84415 | -6.2046 | 5931     |
| COIL         | -0.10639 | 0.10639  | 2.6783  | -0.34886 | 0.73249 | 0.8442  | -6.2046 | 8161     |
| N6AMT1       | -0.0676  | 0.067601 | 0.94235 | -0.34854 | 0.73273 | 0.84438 | -6.2047 | 29104    |
| FHL3         | 0.59638  | 0.59638  | 6.5099  | 0.3485   | 0.73275 | 0.84438 | -6.2047 | 2275     |
| HELLS        | 0.14704  | 0.14704  | 1.5768  | 0.34833  | 0.73288 | 0.84447 | -6.2048 | 3070     |
| PSMF1        | -0.27168 | 0.27168  | 5.2166  | -0.34825 | 0.73294 | 0.84449 | -6.2048 | 9491     |
| BRPF3        | -0.22351 | 0.22351  | 4.0958  | -0.34808 | 0.73306 | 0.84457 | -6.2049 | 27154    |

|              |          |          |         |          |         |         |         |          |
|--------------|----------|----------|---------|----------|---------|---------|---------|----------|
| ANAPC15      | 0.16137  | 0.16137  | 2.2035  | 0.34771  | 0.73333 | 0.84482 | -6.205  | 25906    |
| ELP5         | 0.24493  | 0.24493  | 3.5767  | 0.34751  | 0.73349 | 0.84483 | -6.2051 | 23587    |
| RNF224       | 0.097916 | 0.097916 | 0.53711 | 0.34745  | 0.73353 | 0.84483 | -6.2051 | 643596   |
| ARHGEF2      | 0.45813  | 0.45813  | 4.6787  | 0.34744  | 0.73354 | 0.84483 | -6.2051 | 9181     |
| UBE2Q2P2     | -0.06462 | 0.064617 | 0.68334 | -0.34743 | 0.73354 | 0.84483 | -6.2051 | 1E+08    |
| P3H3         | 0.48637  | 0.48637  | 3.0343  | 0.34716  | 0.73374 | 0.845   | -6.2052 | 10536    |
| CLTCL1       | -0.09334 | 0.093344 | 1.1674  | -0.34637 | 0.73432 | 0.84561 | -6.2055 | 8218     |
| PFN4         | -0.03092 | 0.030924 | 0.33368 | -0.34599 | 0.7346  | 0.84588 | -6.2056 | 375189   |
| RRP15        | -0.0729  | 0.072903 | 1.2099  | -0.34586 | 0.7347  | 0.84593 | -6.2057 | 51018    |
| LOC105377975 | 0.025505 | 0.025505 | 0.16894 | 0.34563  | 0.73486 | 0.84606 | -6.2057 | 1.05E+08 |
| ZBTB17       | 0.24913  | 0.24913  | 3.6564  | 0.34552  | 0.73494 | 0.8461  | -6.2058 | 7709     |
| SPINT1       | 2.1294   | 2.1294   | 26.058  | 0.34545  | 0.73499 | 0.8461  | -6.2058 | 6692     |
| DPP3         | 0.46184  | 0.46184  | 4.6339  | 0.34514  | 0.73522 | 0.84631 | -6.2059 | 10072    |
| RBM42        | -1.0265  | 1.0265   | 12.824  | -0.34497 | 0.73535 | 0.84639 | -6.206  | 79171    |
| FDXR         | -0.51922 | 0.51922  | 4.1307  | -0.34474 | 0.73552 | 0.84653 | -6.2061 | 2232     |
| DECR1        | -0.26667 | 0.26667  | 3.6848  | -0.34464 | 0.73559 | 0.84656 | -6.2061 | 1666     |
| FLNB-AS1     | 0.29474  | 0.29474  | 2.01    | 0.3445   | 0.73569 | 0.84662 | -6.2061 | 1.05E+08 |
| TOR3A        | -0.29913 | 0.29913  | 4.5063  | -0.34412 | 0.73597 | 0.84686 | -6.2063 | 64222    |
| MAF1         | 1.0809   | 1.0809   | 14.492  | 0.34407  | 0.73601 | 0.84686 | -6.2063 | 84232    |
| LRFN4        | 0.21181  | 0.21181  | 2.7509  | 0.34398  | 0.73607 | 0.84686 | -6.2063 | 78999    |
| TMEM176A     | 0.96505  | 0.96505  | 6.1036  | 0.34392  | 0.73612 | 0.84686 | -6.2063 | 55365    |
| DPF2         | -0.26758 | 0.26758  | 4.1916  | -0.34388 | 0.73615 | 0.84686 | -6.2064 | 5977     |
| FLNC         | -0.43111 | 0.43111  | 3.0592  | -0.34343 | 0.73648 | 0.84714 | -6.2065 | 2318     |
| PGGHG        | -0.38361 | 0.38361  | 2.3727  | -0.3434  | 0.7365  | 0.84714 | -6.2065 | 80162    |
| OLFML1       | -0.31033 | 0.31033  | 2.3503  | -0.34324 | 0.73662 | 0.84723 | -6.2066 | 283298   |
| PLEKHO2      | 0.66629  | 0.66629  | 5.3494  | 0.34302  | 0.73678 | 0.84735 | -6.2067 | 80301    |

|           |          |          |         |          |         |         |         |        |
|-----------|----------|----------|---------|----------|---------|---------|---------|--------|
| OR7E2P    | 0.042498 | 0.042498 | 0.25823 | 0.34281  | 0.73694 | 0.84747 | -6.2067 | 8587   |
| GSTM1     | -0.93967 | 0.93967  | 4.5924  | -0.34262 | 0.73708 | 0.84756 | -6.2068 | 2944   |
| TEC       | 0.066075 | 0.066075 | 1.1802  | 0.34257  | 0.73711 | 0.84756 | -6.2068 | 7006   |
| LINC01443 | -0.03763 | 0.037632 | 0.12771 | -0.34241 | 0.73723 | 0.84759 | -6.2069 | 400644 |
| FMO1      | -0.23337 | 0.23337  | 1.1217  | -0.34239 | 0.73724 | 0.84759 | -6.2069 | 2326   |
| RASSF2    | 0.31561  | 0.31561  | 3.4959  | 0.34225  | 0.73735 | 0.84766 | -6.2069 | 9770   |
| TMEM42    | -0.19386 | 0.19386  | 1.7922  | -0.34195 | 0.73757 | 0.84785 | -6.207  | 131616 |
| COMMD4    | -0.40579 | 0.40579  | 4.2222  | -0.34187 | 0.73763 | 0.84786 | -6.2071 | 54939  |
| KIF21B    | -0.04978 | 0.049777 | 0.42026 | -0.34174 | 0.73773 | 0.84792 | -6.2071 | 23046  |
| NOTCH2    | -0.97833 | 0.97833  | 21.443  | -0.3414  | 0.73797 | 0.84814 | -6.2072 | 4853   |
| ARL3      | 0.14947  | 0.14947  | 1.5727  | 0.34115  | 0.73816 | 0.84827 | -6.2073 | 403    |
| TLR5      | -0.07256 | 0.072564 | 0.8693  | -0.34111 | 0.73819 | 0.84827 | -6.2073 | 7100   |
| CBLB      | 0.23589  | 0.23589  | 2.197   | 0.34084  | 0.73839 | 0.84844 | -6.2074 | 868    |
| CNOT8     | 0.38063  | 0.38063  | 6.7314  | 0.34066  | 0.73852 | 0.84854 | -6.2075 | 9337   |
| APH1A     | 1.6852   | 1.6852   | 29.509  | 0.34058  | 0.73858 | 0.84855 | -6.2075 | 51107  |
| SAMD11    | -0.03195 | 0.031952 | 0.25685 | -0.34029 | 0.73879 | 0.84874 | -6.2076 | 148398 |
| L3MBTL3   | 0.078249 | 0.078249 | 0.8813  | 0.34009  | 0.73894 | 0.84885 | -6.2077 | 84456  |
| ERG28     | -0.73244 | 0.73244  | 9.4641  | -0.33994 | 0.73905 | 0.84888 | -6.2077 | 11161  |
| STX17     | -0.23301 | 0.23301  | 4.9801  | -0.33991 | 0.73907 | 0.84888 | -6.2078 | 55014  |
| CD46      | -0.67527 | 0.67527  | 13.182  | -0.33933 | 0.7395  | 0.84932 | -6.208  | 4179   |
| KLHL23    | -0.03076 | 0.03076  | 0.22876 | -0.33919 | 0.7396  | 0.84936 | -6.208  | 151230 |
| SH3PXD2B  | 0.97937  | 0.97937  | 9.4406  | 0.33914  | 0.73964 | 0.84936 | -6.208  | 285590 |
| MYO18A    | -0.95751 | 0.95751  | 12.975  | -0.33904 | 0.73972 | 0.84939 | -6.2081 | 399687 |
| NOS1      | -0.18831 | 0.18831  | 1.4971  | -0.33896 | 0.73977 | 0.8494  | -6.2081 | 4842   |
| SMPD4     | -0.31473 | 0.31473  | 5.9886  | -0.33872 | 0.73995 | 0.84952 | -6.2082 | 55627  |
| CTSO      | 0.40438  | 0.40438  | 3.7979  | 0.33848  | 0.74012 | 0.84952 | -6.2083 | 1519   |

|              |          |          |         |          |         |         |         |          |
|--------------|----------|----------|---------|----------|---------|---------|---------|----------|
| TMPO-AS1     | -0.03469 | 0.034693 | 0.24465 | -0.33845 | 0.74015 | 0.84952 | -6.2083 | 1E+08    |
| ARHGEF16     | 0.21434  | 0.21434  | 1.6647  | 0.33835  | 0.74022 | 0.84952 | -6.2083 | 27237    |
| INTS8        | 0.14459  | 0.14459  | 3.9485  | 0.33826  | 0.74029 | 0.84952 | -6.2083 | 55656    |
| TEX41        | -0.0415  | 0.041498 | 0.23486 | -0.33812 | 0.74039 | 0.84952 | -6.2084 | 401014   |
| TIMM29       | -0.24305 | 0.24305  | 3.5521  | -0.33812 | 0.74039 | 0.84952 | -6.2084 | 90580    |
| GET4         | 0.51992  | 0.51992  | 7.5767  | 0.33812  | 0.74039 | 0.84952 | -6.2084 | 51608    |
| LRMP         | 0.055517 | 0.055517 | 0.49328 | 0.33811  | 0.7404  | 0.84952 | -6.2084 | 4033     |
| LOC101928123 | 0.13169  | 0.13169  | 1.115   | 0.3381   | 0.7404  | 0.84952 | -6.2084 | 1.02E+08 |
| VPS33A       | 0.10055  | 0.10055  | 1.8157  | 0.33806  | 0.74043 | 0.84952 | -6.2084 | 65082    |
| MYL9         | 8.8229   | 8.8229   | 58.255  | 0.33783  | 0.74061 | 0.84965 | -6.2085 | 10398    |
| MTREX        | 0.33901  | 0.33901  | 6.3191  | 0.33777  | 0.74065 | 0.84965 | -6.2085 | 23517    |
| MGST3        | 1.3985   | 1.3985   | 11.045  | 0.33762  | 0.74076 | 0.84972 | -6.2086 | 4259     |
| HP           | -0.07956 | 0.079563 | 0.35065 | -0.33723 | 0.74105 | 0.84995 | -6.2087 | 3240     |
| TMEM181      | -0.19059 | 0.19059  | 5.1843  | -0.33722 | 0.74105 | 0.84995 | -6.2087 | 57583    |
| CD81         | -6.0719  | 6.0719   | 84.075  | -0.33694 | 0.74126 | 0.85005 | -6.2088 | 975      |
| SUMO1P3      | -0.08213 | 0.082127 | 0.60926 | -0.33692 | 0.74128 | 0.85005 | -6.2088 | 474338   |
| METTL25      | 0.088145 | 0.088145 | 1.2623  | 0.33686  | 0.74132 | 0.85005 | -6.2088 | 84190    |
| PHF19        | 0.15883  | 0.15883  | 1.9064  | 0.33677  | 0.74139 | 0.85005 | -6.2088 | 26147    |
| PDZK1IP1     | 5.6663   | 5.6663   | 41.566  | 0.33676  | 0.74139 | 0.85005 | -6.2089 | 10158    |
| NUDT1        | -0.4622  | 0.4622   | 4.8066  | -0.33666 | 0.74147 | 0.85007 | -6.2089 | 4521     |
| RPL13P5      | -0.05789 | 0.057885 | 0.73537 | -0.33657 | 0.74154 | 0.85007 | -6.2089 | 283345   |
| PRCC         | 0.72529  | 0.72529  | 12.834  | 0.33648  | 0.7416  | 0.85007 | -6.2089 | 5546     |
| CCDC9        | -0.62662 | 0.62662  | 7.229   | -0.33645 | 0.74162 | 0.85007 | -6.209  | 26093    |
| THOC5        | -0.2116  | 0.2116   | 4.3015  | -0.33634 | 0.74171 | 0.85007 | -6.209  | 8563     |
| MAPK8IP2     | -0.06182 | 0.06182  | 0.53087 | -0.33633 | 0.74171 | 0.85007 | -6.209  | 23542    |
| BORCS6       | 0.55313  | 0.55313  | 4.4521  | 0.33622  | 0.74179 | 0.8501  | -6.209  | 54785    |

|              |          |          |         |          |         |         |         |          |
|--------------|----------|----------|---------|----------|---------|---------|---------|----------|
| CASD1        | -0.08756 | 0.087563 | 1.288   | -0.33588 | 0.74204 | 0.85033 | -6.2092 | 64921    |
| CWF19L1      | 0.14028  | 0.14028  | 3.4123  | 0.33568  | 0.74219 | 0.85044 | -6.2092 | 55280    |
| LINC00597    | 0.078689 | 0.078689 | 0.494   | 0.33557  | 0.74227 | 0.85046 | -6.2093 | 81698    |
| CC2D1A       | -0.54817 | 0.54817  | 7.502   | -0.33545 | 0.74236 | 0.85046 | -6.2093 | 54862    |
| CNTNAP1      | 0.18682  | 0.18682  | 1.3895  | 0.33545  | 0.74236 | 0.85046 | -6.2093 | 8506     |
| GRID1        | 0.074237 | 0.074237 | 0.51126 | 0.33531  | 0.74246 | 0.85048 | -6.2093 | 2894     |
| LARP6        | -0.14619 | 0.14619  | 1.2586  | -0.33529 | 0.74248 | 0.85048 | -6.2094 | 55323    |
| RND1         | 0.12975  | 0.12975  | 0.54269 | 0.33497  | 0.74271 | 0.85066 | -6.2095 | 27289    |
| CETP         | 0.028658 | 0.028658 | 0.1575  | 0.33494  | 0.74274 | 0.85066 | -6.2095 | 1071     |
| SHARPIN      | 0.67129  | 0.67129  | 8.2363  | 0.3348   | 0.74284 | 0.85073 | -6.2095 | 81858    |
| RPS9         | -19.968  | 19.968   | 238.85  | -0.33453 | 0.74304 | 0.85088 | -6.2096 | 6203     |
| BAG6         | 0.19015  | 0.19015  | 3.3835  | 0.33448  | 0.74307 | 0.85088 | -6.2096 | 7917     |
| CAMK2N1      | 0.18605  | 0.18605  | 2.0057  | 0.33393  | 0.74349 | 0.85129 | -6.2098 | 55450    |
| SMARCE1      | 0.78008  | 0.78008  | 12.764  | 0.33352  | 0.74378 | 0.85154 | -6.21   | 6605     |
| NUP98        | -0.35025 | 0.35025  | 7.7179  | -0.33344 | 0.74385 | 0.85154 | -6.21   | 4928     |
| ZSCAN5A      | -0.02575 | 0.025748 | 0.45213 | -0.33332 | 0.74393 | 0.85154 | -6.21   | 79149    |
| LOC101926933 | -0.0336  | 0.033604 | 0.16676 | -0.33329 | 0.74395 | 0.85154 | -6.21   | 1.02E+08 |
| HGSNAT       | -0.36315 | 0.36315  | 9.2912  | -0.33329 | 0.74396 | 0.85154 | -6.21   | 138050   |
| RASD2        | -0.08126 | 0.081256 | 0.41699 | -0.33287 | 0.74426 | 0.85179 | -6.2102 | 23551    |
| STC1         | -0.92866 | 0.92866  | 2.8164  | -0.33284 | 0.74429 | 0.85179 | -6.2102 | 6781     |
| UROS         | 0.28963  | 0.28963  | 2.8838  | 0.33278  | 0.74433 | 0.85179 | -6.2102 | 7390     |
| MSH6         | -0.32992 | 0.32992  | 4.9992  | -0.33266 | 0.74442 | 0.85184 | -6.2103 | 2956     |
| TCTEX1D1     | 0.0463   | 0.0463   | 0.27338 | 0.33259  | 0.74447 | 0.85184 | -6.2103 | 200132   |
| HAUS8        | 0.085213 | 0.085213 | 0.92451 | 0.33233  | 0.74466 | 0.85195 | -6.2104 | 93323    |
| SULT1A1      | -0.09849 | 0.098493 | 0.89182 | -0.33233 | 0.74467 | 0.85195 | -6.2104 | 6817     |
| INTS5        | -0.27589 | 0.27589  | 4.3078  | -0.33212 | 0.74482 | 0.85205 | -6.2104 | 80789    |

|           |          |          |          |          |         |         |         |        |
|-----------|----------|----------|----------|----------|---------|---------|---------|--------|
| PDCD6IPP2 | 0.03158  | 0.03158  | 0.207    | 0.33207  | 0.74486 | 0.85205 | -6.2105 | 646278 |
| GINS2     | 0.25689  | 0.25689  | 1.9448   | 0.33178  | 0.74507 | 0.85224 | -6.2106 | 51659  |
| KCTD18    | -0.16085 | 0.16085  | 3.1113   | -0.33165 | 0.74516 | 0.85225 | -6.2106 | 130535 |
| IRGQ      | 0.18592  | 0.18592  | 3.096    | 0.33162  | 0.74518 | 0.85225 | -6.2106 | 126298 |
| NGRN      | -0.94357 | 0.94357  | 15.451   | -0.33139 | 0.74536 | 0.85239 | -6.2107 | 51335  |
| AKAP10    | 0.12253  | 0.12253  | 3.3585   | 0.33108  | 0.74559 | 0.8526  | -6.2108 | 11216  |
| NR2F1     | 0.040302 | 0.040302 | 0.33218  | 0.33084  | 0.74576 | 0.85274 | -6.2109 | 7025   |
| GALNT15   | -0.41233 | 0.41233  | 2.3107   | -0.33055 | 0.74598 | 0.85287 | -6.211  | 117248 |
| CHI3L1    | -5.0309  | 5.0309   | 17.571   | -0.33055 | 0.74598 | 0.85287 | -6.211  | 1116   |
| PCBP2     | -3.0138  | 3.0138   | 61.471   | -0.33031 | 0.74615 | 0.85299 | -6.2111 | 5094   |
| TBC1D7    | 0.086306 | 0.086306 | 1.3266   | 0.33027  | 0.74618 | 0.85299 | -6.2111 | 51256  |
| MME       | 0.9696   | 0.9696   | 4.1657   | 0.33011  | 0.7463  | 0.85299 | -6.2111 | 4311   |
| RFC2      | 0.49093  | 0.49093  | 6.3692   | 0.33004  | 0.74635 | 0.85299 | -6.2111 | 5982   |
| VRK1      | 0.22579  | 0.22579  | 2.7413   | 0.33001  | 0.74637 | 0.85299 | -6.2112 | 7443   |
| ARL11     | 0.035582 | 0.035582 | 0.2908   | 0.33     | 0.74639 | 0.85299 | -6.2112 | 115761 |
| SLC46A2   | -0.48432 | 0.48432  | 2.6119   | -0.32959 | 0.74669 | 0.8532  | -6.2113 | 57864  |
| NUDT16L1  | -0.41416 | 0.41416  | 4.8249   | -0.32957 | 0.7467  | 0.8532  | -6.2113 | 84309  |
| MFNG      | -0.2437  | 0.2437   | 2.0598   | -0.32955 | 0.74672 | 0.8532  | -6.2113 | 4242   |
| SNAPC1    | 0.13929  | 0.13929  | 1.6242   | 0.32933  | 0.74688 | 0.85333 | -6.2114 | 6617   |
| SPRED1    | -0.2575  | 0.2575   | 3.4373   | -0.32922 | 0.74696 | 0.85334 | -6.2114 | 161742 |
| SNORA51   | -0.02689 | 0.02689  | 0.072842 | -0.32913 | 0.74703 | 0.85334 | -6.2115 | 677831 |
| MMP17     | 0.17499  | 0.17499  | 1.6664   | 0.32911  | 0.74704 | 0.85334 | -6.2115 | 4326   |
| ZNF674    | 0.028407 | 0.028407 | 0.50633  | 0.32863  | 0.7474  | 0.85364 | -6.2116 | 641339 |
| RRP9      | -0.43146 | 0.43146  | 4.1894   | -0.32861 | 0.74741 | 0.85364 | -6.2116 | 9136   |
| TRIP6     | 1.4617   | 1.4617   | 21.826   | 0.32841  | 0.74756 | 0.85375 | -6.2117 | 7205   |
| SNORA77   | -0.06959 | 0.069587 | 0.2521   | -0.32822 | 0.7477  | 0.85386 | -6.2118 | 677843 |

|          |          |          |         |          |         |         |         |          |
|----------|----------|----------|---------|----------|---------|---------|---------|----------|
| SGK2     | 0.04202  | 0.04202  | 0.38536 | 0.32807  | 0.74781 | 0.85393 | -6.2118 | 10110    |
| MKLN1-AS | -0.02776 | 0.027757 | 0.39058 | -0.32784 | 0.74798 | 0.85406 | -6.2119 | 1.01E+08 |
| C2orf74  | 0.3509   | 0.3509   | 1.6529  | 0.32776  | 0.74804 | 0.85407 | -6.2119 | 339804   |
| UBP1     | -0.2761  | 0.2761   | 7.9767  | -0.32732 | 0.74837 | 0.85425 | -6.2121 | 7342     |
| FBXO6    | -0.23121 | 0.23121  | 2.5086  | -0.3273  | 0.74838 | 0.85425 | -6.2121 | 26270    |
| ZNF660   | -0.02993 | 0.029927 | 0.26773 | -0.32722 | 0.74844 | 0.85425 | -6.2121 | 285349   |
| ULK3     | 1.5394   | 1.5394   | 15.565  | 0.32718  | 0.74847 | 0.85425 | -6.2121 | 25989    |
| DLG3     | 0.15521  | 0.15521  | 2.4106  | 0.32714  | 0.7485  | 0.85425 | -6.2121 | 1741     |
| TNNI3    | -0.02945 | 0.029449 | 0.22108 | -0.32714 | 0.7485  | 0.85425 | -6.2121 | 7137     |
| SNRPC    | 0.86609  | 0.86609  | 9.2016  | 0.32691  | 0.74867 | 0.85439 | -6.2122 | 6631     |
| REST     | -0.20499 | 0.20499  | 4.6585  | -0.32678 | 0.74877 | 0.85444 | -6.2122 | 5978     |
| ZNF451   | 0.11713  | 0.11713  | 2.3837  | 0.32641  | 0.74904 | 0.85467 | -6.2124 | 26036    |
| LANCL1   | -0.49558 | 0.49558  | 9.523   | -0.32637 | 0.74907 | 0.85467 | -6.2124 | 10314    |
| RFC4     | 0.23008  | 0.23008  | 2.0909  | 0.32616  | 0.74923 | 0.85479 | -6.2125 | 5984     |
| MAP4K2   | -0.07425 | 0.074246 | 1.6907  | -0.32598 | 0.74936 | 0.85486 | -6.2125 | 5871     |
| FADS3    | 0.47313  | 0.47313  | 3.7704  | 0.32594  | 0.74939 | 0.85486 | -6.2125 | 3995     |
| FN3KRP   | 0.26853  | 0.26853  | 5.5766  | 0.32583  | 0.74947 | 0.85489 | -6.2126 | 79672    |
| FYB1     | 0.20377  | 0.20377  | 1.5286  | 0.32513  | 0.74999 | 0.85543 | -6.2128 | 2533     |
| DZIP1    | 0.088361 | 0.088361 | 0.81444 | 0.32482  | 0.75022 | 0.85563 | -6.2129 | 22873    |
| LPP      | -0.60201 | 0.60201  | 8.1414  | -0.32468 | 0.75032 | 0.85564 | -6.213  | 4026     |
| STK16    | 0.095909 | 0.095909 | 1.8362  | 0.32467  | 0.75033 | 0.85564 | -6.213  | 8576     |
| MYPOP    | -0.18631 | 0.18631  | 2.6241  | -0.32428 | 0.75062 | 0.85585 | -6.2131 | 339344   |
| KCND2    | 0.045175 | 0.045175 | 0.26827 | 0.32421  | 0.75067 | 0.85585 | -6.2131 | 3751     |
| RFNG     | 0.35277  | 0.35277  | 5.7009  | 0.3242   | 0.75068 | 0.85585 | -6.2131 | 5986     |
| CUL4B    | 0.22022  | 0.22022  | 4.8419  | 0.32415  | 0.75071 | 0.85585 | -6.2131 | 8450     |
| MANBA    | 0.13668  | 0.13668  | 2.3067  | 0.32404  | 0.7508  | 0.85589 | -6.2132 | 4126     |



|          |          |          |         |          |         |         |         |        |
|----------|----------|----------|---------|----------|---------|---------|---------|--------|
| TTC8     | -0.11167 | 0.11167  | 1.6482  | -0.32363 | 0.7511  | 0.85617 | -6.2133 | 123016 |
| WASF1    | 0.078374 | 0.078374 | 1.1197  | 0.32342  | 0.75126 | 0.8563  | -6.2134 | 8936   |
| ALDH18A1 | 0.41943  | 0.41943  | 7.5269  | 0.32307  | 0.75152 | 0.85653 | -6.2135 | 5832   |
| RBL1     | 0.078985 | 0.078985 | 1.064   | 0.3229   | 0.75164 | 0.85653 | -6.2135 | 5933   |
| SERTAD3  | 0.29391  | 0.29391  | 4.1197  | 0.32287  | 0.75166 | 0.85653 | -6.2136 | 29946  |
| HSP90AB1 | -7.2306  | 7.2306   | 100.7   | -0.32283 | 0.75169 | 0.85653 | -6.2136 | 3326   |
| FARSA    | 0.73433  | 0.73433  | 10.403  | 0.3228   | 0.75171 | 0.85653 | -6.2136 | 2193   |
| FADD     | 0.36943  | 0.36943  | 4.7259  | 0.32263  | 0.75184 | 0.85661 | -6.2136 | 8772   |
| ZBTB8A   | -0.06091 | 0.060913 | 0.87331 | -0.32252 | 0.75192 | 0.85665 | -6.2137 | 653121 |
| RAB42    | -0.07858 | 0.078582 | 0.53815 | -0.32232 | 0.75207 | 0.85676 | -6.2137 | 115273 |
| UBALD1   | 0.47973  | 0.47973  | 6.6414  | 0.3222   | 0.75216 | 0.8568  | -6.2138 | 124402 |
| INPP1    | 0.38668  | 0.38668  | 5.099   | 0.32186  | 0.75241 | 0.85703 | -6.2139 | 3628   |
| DCAF5    | 0.17754  | 0.17754  | 5.1947  | 0.32165  | 0.75257 | 0.85714 | -6.214  | 8816   |
| WDR48    | -0.14154 | 0.14154  | 3.5175  | -0.3216  | 0.7526  | 0.85714 | -6.214  | 57599  |
| WRAP53   | -0.09925 | 0.099251 | 1.2668  | -0.3215  | 0.75268 | 0.85716 | -6.214  | 55135  |
| ARHGEF12 | 0.61424  | 0.61424  | 20.504  | 0.32115  | 0.75293 | 0.85735 | -6.2141 | 23365  |
| FAM210B  | 1.0176   | 1.0176   | 13.436  | 0.32114  | 0.75294 | 0.85735 | -6.2141 | 116151 |
| ZMYM4    | 0.18741  | 0.18741  | 4.3504  | 0.32085  | 0.75316 | 0.85754 | -6.2142 | 9202   |
| CNKSR3   | 0.22023  | 0.22023  | 4.9686  | 0.32075  | 0.75324 | 0.85757 | -6.2143 | 154043 |
| ATG2A    | 0.63273  | 0.63273  | 5.956   | 0.32068  | 0.75329 | 0.85757 | -6.2143 | 23130  |
| CCNK     | -0.33861 | 0.33861  | 7.9824  | -0.32061 | 0.75334 | 0.85757 | -6.2143 | 8812   |
| NBPF15   | -0.24031 | 0.24031  | 7.8525  | -0.32042 | 0.75347 | 0.85764 | -6.2144 | 284565 |
| HS3ST2   | -0.07912 | 0.079122 | 0.37303 | -0.32039 | 0.7535  | 0.85764 | -6.2144 | 9956   |
| MAFG-DT  | -0.05709 | 0.057089 | 0.47622 | -0.32003 | 0.75377 | 0.85789 | -6.2145 | 92659  |
| METTL1   | -0.19321 | 0.19321  | 2.6364  | -0.31993 | 0.75384 | 0.85791 | -6.2145 | 4234   |
| FADS6    | 0.48282  | 0.48282  | 3.0018  | 0.3198   | 0.75394 | 0.85796 | -6.2146 | 283985 |

|          |          |          |         |          |         |         |         |          |
|----------|----------|----------|---------|----------|---------|---------|---------|----------|
| PCTP     | 0.1219   | 0.1219   | 1.1208  | 0.3195   | 0.75416 | 0.85812 | -6.2147 | 58488    |
| FAM135A  | 0.27719  | 0.27719  | 4.3297  | 0.3194   | 0.75423 | 0.85812 | -6.2147 | 57579    |
| MPG      | 0.89682  | 0.89682  | 9.0092  | 0.31938  | 0.75425 | 0.85812 | -6.2147 | 4350     |
| PRKAA1   | 0.22708  | 0.22708  | 4.2971  | 0.31934  | 0.75428 | 0.85812 | -6.2147 | 5562     |
| IFT80    | -0.05844 | 0.058435 | 0.92996 | -0.3192  | 0.75439 | 0.85818 | -6.2148 | 57560    |
| CORO1A   | 0.61437  | 0.61437  | 5.4663  | 0.31896  | 0.75456 | 0.85832 | -6.2148 | 11151    |
| NUMBL    | -0.1727  | 0.1727   | 2.7123  | -0.3189  | 0.75461 | 0.85832 | -6.2149 | 9253     |
| ABL1     | -0.80461 | 0.80461  | 9.5378  | -0.31843 | 0.75496 | 0.85866 | -6.215  | 25       |
| RMDN2    | -0.03078 | 0.030783 | 0.48595 | -0.31828 | 0.75506 | 0.85872 | -6.2151 | 151393   |
| LIN7B    | 0.26786  | 0.26786  | 2.5023  | 0.31781  | 0.75541 | 0.85906 | -6.2152 | 64130    |
| DTWD2    | -0.06049 | 0.060487 | 0.97025 | -0.3177  | 0.75549 | 0.85906 | -6.2153 | 285605   |
| RNF14    | -0.12836 | 0.12836  | 3.1054  | -0.31768 | 0.75551 | 0.85906 | -6.2153 | 9604     |
| GNB1L    | -0.11024 | 0.11024  | 1.5416  | -0.31723 | 0.75585 | 0.85928 | -6.2154 | 54584    |
| PPFIA4   | 0.059399 | 0.059399 | 0.70071 | 0.31721  | 0.75586 | 0.85928 | -6.2154 | 8497     |
| ARMC5    | -0.27257 | 0.27257  | 3.0323  | -0.31713 | 0.75592 | 0.85928 | -6.2154 | 79798    |
| TCF19    | 0.030671 | 0.030671 | 0.40529 | 0.31707  | 0.75596 | 0.85928 | -6.2155 | 6941     |
| FAM217B  | 0.069767 | 0.069767 | 1.3693  | 0.31694  | 0.75606 | 0.85928 | -6.2155 | 63939    |
| CYTH4    | 0.4012   | 0.4012   | 2.9068  | 0.31692  | 0.75607 | 0.85928 | -6.2155 | 27128    |
| NOA1     | -0.26159 | 0.26159  | 6.1488  | -0.31692 | 0.75607 | 0.85928 | -6.2155 | 84273    |
| SENCR    | 0.044745 | 0.044745 | 0.3716  | 0.31682  | 0.75615 | 0.85928 | -6.2155 | 1.01E+08 |
| RANBP2   | 0.44337  | 0.44337  | 10.629  | 0.3168   | 0.75617 | 0.85928 | -6.2155 | 5903     |
| THAP11   | -0.43051 | 0.43051  | 6.4154  | -0.31652 | 0.75638 | 0.85946 | -6.2156 | 57215    |
| KATNAL1  | 0.066713 | 0.066713 | 1.1732  | 0.31645  | 0.75643 | 0.85946 | -6.2157 | 84056    |
| CACNA2D3 | -0.05034 | 0.050342 | 0.58635 | -0.31633 | 0.75652 | 0.85951 | -6.2157 | 55799    |
| TSC22D4  | -0.88293 | 0.88293  | 12.257  | -0.31603 | 0.75674 | 0.8597  | -6.2158 | 81628    |
| DSCAS    | 0.58421  | 0.58421  | 3.2396  | 0.31586  | 0.75686 | 0.85975 | -6.2159 | 1.02E+08 |

|           |          |          |         |          |         |         |         |        |
|-----------|----------|----------|---------|----------|---------|---------|---------|--------|
| EWSR1     | -1.1253  | 1.1253   | 22.705  | -0.31583 | 0.75688 | 0.85975 | -6.2159 | 2130   |
| ABCB4     | 0.039535 | 0.039535 | 0.34305 | 0.31542  | 0.75719 | 0.86    | -6.216  | 5244   |
| ZNF32-AS1 | -0.0517  | 0.0517   | 0.27798 | -0.31539 | 0.75721 | 0.86    | -6.216  | 414197 |
| C17orf80  | 0.10013  | 0.10013  | 1.7126  | 0.3153   | 0.75728 | 0.86002 | -6.216  | 55028  |
| USP7      | 0.59859  | 0.59859  | 12.914  | 0.31468  | 0.75774 | 0.86049 | -6.2162 | 7874   |
| LSR       | -0.63395 | 0.63395  | 10.07   | -0.31419 | 0.7581  | 0.86079 | -6.2164 | 51599  |
| GNS       | 1.3404   | 1.3404   | 14.549  | 0.31411  | 0.75816 | 0.86079 | -6.2164 | 2799   |
| ZFP69     | 0.045953 | 0.045953 | 0.7047  | 0.31408  | 0.75819 | 0.86079 | -6.2164 | 339559 |
| RPS20     | 15.616   | 15.616   | 185.04  | 0.31405  | 0.75821 | 0.86079 | -6.2164 | 6224   |
| DEAF1     | 0.36918  | 0.36918  | 5.8925  | 0.31384  | 0.75836 | 0.86091 | -6.2165 | 10522  |
| BANP      | -0.11106 | 0.11106  | 2.1575  | -0.31349 | 0.75862 | 0.86114 | -6.2166 | 54971  |
| CPT1A     | 0.37312  | 0.37312  | 5.2856  | 0.31333  | 0.75874 | 0.86116 | -6.2167 | 1374   |
| DOCK2     | -0.12637 | 0.12637  | 1.5076  | -0.31329 | 0.75877 | 0.86116 | -6.2167 | 1794   |
| SOBP      | -0.07871 | 0.078707 | 0.6017  | -0.31324 | 0.75881 | 0.86116 | -6.2167 | 55084  |
| GUCD1     | 0.49671  | 0.49671  | 7.8231  | 0.31319  | 0.75885 | 0.86116 | -6.2167 | 83606  |
| HLA-DPB1  | 0.10103  | 0.10103  | 0.98986 | 0.31313  | 0.75889 | 0.86116 | -6.2167 | 3115   |
| XPO1      | -0.54427 | 0.54427  | 10.172  | -0.31284 | 0.75911 | 0.86135 | -6.2168 | 7514   |
| SMIM7     | -0.30535 | 0.30535  | 7.1586  | -0.31277 | 0.75916 | 0.86135 | -6.2168 | 79086  |
| EPO       | 0.031775 | 0.031775 | 0.14238 | 0.31249  | 0.75937 | 0.86153 | -6.2169 | 2056   |
| PET117    | -0.10786 | 0.10786  | 2.1123  | -0.31207 | 0.75968 | 0.86178 | -6.2171 | 1E+08  |
| KITLG     | 0.20661  | 0.20661  | 2.5368  | 0.31205  | 0.75969 | 0.86178 | -6.2171 | 4254   |
| NDUFB9    | 2.4927   | 2.4927   | 34.606  | 0.31193  | 0.75979 | 0.86181 | -6.2171 | 4715   |
| AMPH      | 0.079875 | 0.079875 | 0.43257 | 0.31185  | 0.75985 | 0.86181 | -6.2171 | 273    |
| DHX9      | 0.82461  | 0.82461  | 13.361  | 0.31181  | 0.75987 | 0.86181 | -6.2172 | 1660   |
| PDE4A     | -0.18546 | 0.18546  | 1.6897  | -0.31163 | 0.76001 | 0.86186 | -6.2172 | 5141   |
| FXR2      | 0.31418  | 0.31418  | 5.2046  | 0.31158  | 0.76004 | 0.86186 | -6.2172 | 9513   |

|              |          |          |         |          |         |         |         |          |
|--------------|----------|----------|---------|----------|---------|---------|---------|----------|
| B3GALT4      | 0.083607 | 0.083607 | 0.95289 | 0.31149  | 0.76011 | 0.86186 | -6.2173 | 8705     |
| MMRN2        | -0.61742 | 0.61742  | 6.9     | -0.31148 | 0.76012 | 0.86186 | -6.2173 | 79812    |
| PDZRN3       | -0.14959 | 0.14959  | 1.5819  | -0.31105 | 0.76044 | 0.86214 | -6.2174 | 23024    |
| GIT2         | -0.21426 | 0.21426  | 4.4921  | -0.31101 | 0.76047 | 0.86214 | -6.2174 | 9815     |
| MIR205HG     | -2.2435  | 2.2435   | 40.379  | -0.3109  | 0.76055 | 0.86217 | -6.2174 | 642587   |
| STK35        | 0.22631  | 0.22631  | 5.5615  | 0.31078  | 0.76064 | 0.86219 | -6.2175 | 140901   |
| LOC100289361 | -0.04391 | 0.043912 | 0.34313 | -0.31074 | 0.76067 | 0.86219 | -6.2175 | 1E+08    |
| SHROOM4      | 0.15163  | 0.15163  | 1.7928  | 0.31068  | 0.76071 | 0.86219 | -6.2175 | 57477    |
| GSTA4        | 1.253    | 1.253    | 14.428  | 0.31058  | 0.76079 | 0.86221 | -6.2176 | 2941     |
| GTF2IP12     | -0.03371 | 0.033707 | 0.47411 | -0.31047 | 0.76087 | 0.86221 | -6.2176 | 1.02E+08 |
| RPL8         | -21.909  | 21.909   | 386.35  | -0.31038 | 0.76093 | 0.86221 | -6.2176 | 6132     |
| KIAA0513     | 0.4743   | 0.4743   | 3.5462  | 0.31038  | 0.76094 | 0.86221 | -6.2176 | 9764     |
| ATAD3A       | 0.40488  | 0.40488  | 4.8407  | 0.3103   | 0.761   | 0.86222 | -6.2176 | 55210    |
| AQP9         | 0.44981  | 0.44981  | 3.8755  | 0.31021  | 0.76106 | 0.86223 | -6.2177 | 366      |
| DENND5A      | 0.5638   | 0.5638   | 6.0836  | 0.30997  | 0.76124 | 0.86234 | -6.2177 | 23258    |
| TMEM185B     | 0.25358  | 0.25358  | 4.4193  | 0.30992  | 0.76128 | 0.86234 | -6.2178 | 79134    |
| TLCD2        | -0.11864 | 0.11864  | 1.5972  | -0.30983 | 0.76135 | 0.86234 | -6.2178 | 727910   |
| CDC42SE2     | 0.28463  | 0.28463  | 4.6722  | 0.30982  | 0.76136 | 0.86234 | -6.2178 | 56990    |
| KCTD6        | 0.059303 | 0.059303 | 1.0883  | 0.30967  | 0.76146 | 0.8624  | -6.2178 | 200845   |
| FAM122A      | -0.10809 | 0.10809  | 2.5231  | -0.30953 | 0.76157 | 0.86245 | -6.2179 | 116224   |
| TACO1        | 0.22081  | 0.22081  | 3.7121  | 0.30944  | 0.76164 | 0.86245 | -6.2179 | 51204    |
| DTX3         | -0.24916 | 0.24916  | 2.2946  | -0.30941 | 0.76166 | 0.86245 | -6.2179 | 196403   |
| ST20         | 0.032829 | 0.032829 | 0.54748 | 0.30912  | 0.76187 | 0.86263 | -6.218  | 400410   |
| FAM189B      | -0.35426 | 0.35426  | 4.1677  | -0.30885 | 0.76208 | 0.86281 | -6.2181 | 10712    |
| ARHGEF15     | -0.28333 | 0.28333  | 2.5675  | -0.3087  | 0.76219 | 0.86283 | -6.2182 | 22899    |
| TPRG1        | -0.39518 | 0.39518  | 3.7396  | -0.3086  | 0.76226 | 0.86283 | -6.2182 | 285386   |

|              |          |          |         |          |         |         |         |          |
|--------------|----------|----------|---------|----------|---------|---------|---------|----------|
| PHB2         | -2.7349  | 2.7349   | 38.056  | -0.30858 | 0.76228 | 0.86283 | -6.2182 | 11331    |
| PI4KA        | -0.27756 | 0.27756  | 6.8442  | -0.30819 | 0.76257 | 0.86283 | -6.2183 | 5297     |
| SELENOH      | 1.1626   | 1.1626   | 12.554  | 0.30819  | 0.76257 | 0.86283 | -6.2183 | 280636   |
| SMU1         | 0.18552  | 0.18552  | 4.7763  | 0.30817  | 0.76258 | 0.86283 | -6.2183 | 55234    |
| KCNA3        | -0.02452 | 0.024516 | 0.19105 | -0.30809 | 0.76264 | 0.86283 | -6.2183 | 3738     |
| HES1         | -0.52879 | 0.52879  | 12.837  | -0.30806 | 0.76266 | 0.86283 | -6.2184 | 3280     |
| ECI2         | 0.35999  | 0.35999  | 4.5738  | 0.30802  | 0.76269 | 0.86283 | -6.2184 | 10455    |
| COX18        | -0.06403 | 0.064027 | 1.145   | -0.30799 | 0.76272 | 0.86283 | -6.2184 | 285521   |
| SDF2L1       | 0.47117  | 0.47117  | 3.9309  | 0.30785  | 0.76282 | 0.86283 | -6.2184 | 23753    |
| LINC01806    | -0.0502  | 0.050203 | 0.56791 | -0.30785 | 0.76282 | 0.86283 | -6.2184 | 1.01E+08 |
| UMPS         | -0.09585 | 0.095851 | 3.0591  | -0.30781 | 0.76285 | 0.86283 | -6.2184 | 7372     |
| HSPA1B       | -0.92697 | 0.92697  | 10.347  | -0.30775 | 0.7629  | 0.86283 | -6.2185 | 3304     |
| SLA          | -0.18404 | 0.18404  | 1.6001  | -0.30774 | 0.7629  | 0.86283 | -6.2185 | 6503     |
| IGSF3        | 0.67998  | 0.67998  | 12.147  | 0.30768  | 0.76295 | 0.86283 | -6.2185 | 3321     |
| EGFL7        | -0.79944 | 0.79944  | 6.9766  | -0.30765 | 0.76297 | 0.86283 | -6.2185 | 51162    |
| GPAA1        | 1.0009   | 1.0009   | 14.836  | 0.30747  | 0.7631  | 0.86284 | -6.2185 | 8733     |
| LOC100128653 | -0.10762 | 0.10762  | 1.1663  | -0.30745 | 0.76312 | 0.86284 | -6.2185 | 1E+08    |
| LOC644656    | -0.02799 | 0.027989 | 0.56592 | -0.3074  | 0.76315 | 0.86284 | -6.2186 | 644656   |
| SEMA4A       | -0.52531 | 0.52531  | 9.0434  | -0.30737 | 0.76318 | 0.86284 | -6.2186 | 64218    |
| ACTR8        | 0.11429  | 0.11429  | 2.8197  | 0.30719  | 0.76331 | 0.86293 | -6.2186 | 93973    |
| ARHGAP27     | -0.18522 | 0.18522  | 3.1983  | -0.30703 | 0.76343 | 0.863   | -6.2187 | 201176   |
| NFYB         | -0.15198 | 0.15198  | 2.1419  | -0.30694 | 0.7635  | 0.86303 | -6.2187 | 4801     |
| VNN1         | -0.07281 | 0.072807 | 0.29383 | -0.306   | 0.7642  | 0.86372 | -6.219  | 8876     |
| CCDC174      | -0.09207 | 0.092068 | 2.8231  | -0.30597 | 0.76422 | 0.86372 | -6.219  | 51244    |
| GPR89A       | -0.14178 | 0.14178  | 3.1433  | -0.30572 | 0.76441 | 0.86388 | -6.2191 | 653519   |
| GATB         | 0.36977  | 0.36977  | 4.8032  | 0.30553  | 0.76455 | 0.86398 | -6.2192 | 5188     |

|                 |          |          |         |          |         |         |         |          |
|-----------------|----------|----------|---------|----------|---------|---------|---------|----------|
| B4GALT6         | -0.03293 | 0.032927 | 0.33145 | -0.30528 | 0.76474 | 0.86413 | -6.2192 | 9331     |
| WRNIP1          | -0.41181 | 0.41181  | 7.2307  | -0.30473 | 0.76514 | 0.86451 | -6.2194 | 56897    |
| PPA2            | 0.41464  | 0.41464  | 7.0275  | 0.3047   | 0.76517 | 0.86451 | -6.2194 | 27068    |
| SP2             | -0.16055 | 0.16055  | 3.776   | -0.30453 | 0.7653  | 0.86457 | -6.2195 | 6668     |
| DCTN1           | 0.88625  | 0.88625  | 15.626  | 0.30449  | 0.76532 | 0.86457 | -6.2195 | 1639     |
| AKAP9           | -0.25297 | 0.25297  | 4.5673  | -0.30428 | 0.76548 | 0.86466 | -6.2195 | 10142    |
| ESRRA           | -0.52212 | 0.52212  | 7.0644  | -0.30424 | 0.76551 | 0.86466 | -6.2196 | 2101     |
| AURKC           | -0.0261  | 0.026095 | 0.33088 | -0.30406 | 0.76564 | 0.86475 | -6.2196 | 6795     |
| CPEB1           | -0.03369 | 0.033691 | 0.33947 | -0.30379 | 0.76584 | 0.86492 | -6.2197 | 64506    |
| GPBP1           | 0.22814  | 0.22814  | 5.7573  | 0.30327  | 0.76623 | 0.8653  | -6.2199 | 65056    |
| SIRT6           | 0.32545  | 0.32545  | 4.4301  | 0.30309  | 0.76637 | 0.86533 | -6.2199 | 51548    |
| APOC1           | 0.24452  | 0.24452  | 1.0855  | 0.30305  | 0.7664  | 0.86533 | -6.2199 | 341      |
| PTGR1           | 0.68753  | 0.68753  | 9.6408  | 0.30304  | 0.76641 | 0.86533 | -6.2199 | 22949    |
| C19orf25        | -0.21533 | 0.21533  | 2.6689  | -0.30297 | 0.76646 | 0.86533 | -6.22   | 148223   |
| MOSPD3          | -0.54336 | 0.54336  | 6.44    | -0.30265 | 0.76669 | 0.8655  | -6.2201 | 64598    |
| IL31RA          | 0.023925 | 0.023925 | 0.13254 | 0.30262  | 0.76672 | 0.8655  | -6.2201 | 133396   |
| MAN2B1          | -0.69752 | 0.69752  | 11.894  | -0.30245 | 0.76685 | 0.86556 | -6.2201 | 4125     |
| ZNF708          | -0.09303 | 0.093031 | 1.1373  | -0.30239 | 0.76689 | 0.86556 | -6.2201 | 7562     |
| OSCAR           | 0.074197 | 0.074197 | 0.60359 | 0.30229  | 0.76696 | 0.86556 | -6.2202 | 126014   |
| NOD2            | -0.38323 | 0.38323  | 5.0182  | -0.30228 | 0.76698 | 0.86556 | -6.2202 | 64127    |
| RNASEH2A        | -0.42193 | 0.42193  | 3.8822  | -0.30216 | 0.76706 | 0.8656  | -6.2202 | 10535    |
| ARL2            | -0.80638 | 0.80638  | 12.829  | -0.30193 | 0.76723 | 0.86574 | -6.2203 | 402      |
| PXN             | 1.3434   | 1.3434   | 14.736  | 0.30125  | 0.76774 | 0.8662  | -6.2205 | 5829     |
| PTPRG-AS1       | -0.02474 | 0.024737 | 0.17749 | -0.30117 | 0.7678  | 0.8662  | -6.2205 | 1.01E+08 |
| ZNF184          | -0.03952 | 0.039522 | 0.78176 | -0.30114 | 0.76782 | 0.8662  | -6.2205 | 7738     |
| SPECC1L-ADORA2A | 0.048139 | 0.048139 | 0.51568 | 0.30111  | 0.76784 | 0.8662  | -6.2205 | 1.02E+08 |

|          |          |          |         |          |         |         |         |        |
|----------|----------|----------|---------|----------|---------|---------|---------|--------|
| PHKB     | -0.16014 | 0.16014  | 3.9918  | -0.3009  | 0.768   | 0.86632 | -6.2206 | 5257   |
| RUVBL2   | -0.71962 | 0.71962  | 9.3867  | -0.30073 | 0.76813 | 0.86632 | -6.2206 | 10856  |
| MRM2     | -0.24392 | 0.24392  | 4.1214  | -0.30067 | 0.76818 | 0.86632 | -6.2207 | 29960  |
| PKN2     | 0.20411  | 0.20411  | 4.7999  | 0.30063  | 0.7682  | 0.86632 | -6.2207 | 5586   |
| SOX18    | 1.0195   | 1.0195   | 8.7395  | 0.30063  | 0.76821 | 0.86632 | -6.2207 | 54345  |
| PCSK7    | 0.31795  | 0.31795  | 6.0985  | 0.30046  | 0.76833 | 0.8664  | -6.2207 | 9159   |
| SLC25A20 | 0.153    | 0.153    | 2.221   | 0.2996   | 0.76898 | 0.86707 | -6.221  | 788    |
| ANKRD10  | 0.3955   | 0.3955   | 6.4854  | 0.29952  | 0.76903 | 0.86707 | -6.221  | 55608  |
| MVB12A   | 0.46631  | 0.46631  | 6.9395  | 0.29946  | 0.76908 | 0.86707 | -6.221  | 93343  |
| UGGT1    | 0.18674  | 0.18674  | 4.6103  | 0.29902  | 0.76941 | 0.86738 | -6.2212 | 56886  |
| EFCAB14  | 0.55825  | 0.55825  | 14.464  | 0.2988   | 0.76957 | 0.86751 | -6.2212 | 9813   |
| MCRIP1   | 1.148    | 1.148    | 10.005  | 0.29864  | 0.76969 | 0.86758 | -6.2213 | 348262 |
| FAM207A  | -0.38913 | 0.38913  | 4.8189  | -0.29845 | 0.76983 | 0.86758 | -6.2213 | 85395  |
| ZFAND1   | 0.20651  | 0.20651  | 3.8676  | 0.29842  | 0.76986 | 0.86758 | -6.2214 | 79752  |
| ATP6V1C1 | 0.2154   | 0.2154   | 3.5566  | 0.29831  | 0.76993 | 0.86758 | -6.2214 | 528    |
| CRLF1    | -0.81244 | 0.81244  | 6.7653  | -0.29831 | 0.76993 | 0.86758 | -6.2214 | 9244   |
| ARRDC3   | -0.70841 | 0.70841  | 12.923  | -0.2983  | 0.76994 | 0.86758 | -6.2214 | 57561  |
| LILRB4   | -0.15514 | 0.15514  | 0.79241 | -0.29821 | 0.77001 | 0.8676  | -6.2214 | 11006  |
| KLHDC2   | -0.40336 | 0.40336  | 8.7886  | -0.29785 | 0.77028 | 0.86784 | -6.2215 | 23588  |
| YBX3     | 7.5834   | 7.5834   | 108.51  | 0.29767  | 0.77041 | 0.86793 | -6.2216 | 8531   |
| ZC3H14   | 0.16283  | 0.16283  | 4.5245  | 0.2975   | 0.77054 | 0.86797 | -6.2216 | 79882  |
| RBKS     | 0.033282 | 0.033282 | 0.39614 | 0.2975   | 0.77054 | 0.86797 | -6.2216 | 64080  |
| DIO2     | 0.61056  | 0.61056  | 4.2012  | 0.29719  | 0.77078 | 0.86817 | -6.2217 | 1734   |
| CST3     | 8.1966   | 8.1966   | 88.059  | 0.29702  | 0.7709  | 0.86824 | -6.2218 | 1471   |
| MSMP     | -0.21454 | 0.21454  | 3.3761  | -0.29686 | 0.77102 | 0.86824 | -6.2218 | 692094 |
| CYSTM1   | 0.47421  | 0.47421  | 5.6371  | 0.29686  | 0.77102 | 0.86824 | -6.2218 | 84418  |

|              |          |          |         |          |         |         |         |          |
|--------------|----------|----------|---------|----------|---------|---------|---------|----------|
| NOTUM        | -0.03158 | 0.031576 | 0.30969 | -0.29682 | 0.77105 | 0.86824 | -6.2218 | 147111   |
| SCARB2       | 0.97149  | 0.97149  | 15.891  | 0.29666  | 0.77117 | 0.86833 | -6.2219 | 950      |
| DGCR6L       | -0.88111 | 0.88111  | 9.5357  | -0.29658 | 0.77123 | 0.86833 | -6.2219 | 85359    |
| PXMP2        | -0.22477 | 0.22477  | 2.9898  | -0.29649 | 0.7713  | 0.86835 | -6.2219 | 5827     |
| LOC105377623 | -0.04378 | 0.043777 | 0.25957 | -0.2964  | 0.77137 | 0.86837 | -6.222  | 1.05E+08 |
| FKBP8        | 3.6288   | 3.6288   | 49.241  | 0.29631  | 0.77143 | 0.86838 | -6.222  | 23770    |
| HOXA1        | -0.03137 | 0.031367 | 0.61455 | -0.29547 | 0.77206 | 0.86902 | -6.2223 | 3198     |
| B3GNT7       | -0.07208 | 0.072076 | 0.68193 | -0.29542 | 0.7721  | 0.86902 | -6.2223 | 93010    |
| CEP350       | 0.18531  | 0.18531  | 5.7192  | 0.29521  | 0.77225 | 0.86905 | -6.2223 | 9857     |
| ABHD6        | 0.23837  | 0.23837  | 3.1239  | 0.29519  | 0.77227 | 0.86905 | -6.2223 | 57406    |
| FCHO1        | -0.29662 | 0.29662  | 1.7783  | -0.29513 | 0.77231 | 0.86905 | -6.2224 | 23149    |
| RCSD1        | 0.076128 | 0.076128 | 0.81099 | 0.29508  | 0.77235 | 0.86905 | -6.2224 | 92241    |
| CAMKMT       | -0.03193 | 0.031926 | 1.2251  | -0.29504 | 0.77238 | 0.86905 | -6.2224 | 79823    |
| INKA2-AS1    | 0.024675 | 0.024675 | 0.15289 | 0.29481  | 0.77255 | 0.86918 | -6.2225 | 1.01E+08 |
| GALC         | -0.19994 | 0.19994  | 2.6309  | -0.29475 | 0.7726  | 0.86918 | -6.2225 | 2581     |
| IGBP1        | 0.47816  | 0.47816  | 10.358  | 0.29453  | 0.77276 | 0.86931 | -6.2225 | 3476     |
| ITGB5        | -0.88791 | 0.88791  | 19.717  | -0.29436 | 0.77289 | 0.86939 | -6.2226 | 3693     |
| AIP          | -0.39948 | 0.39948  | 5.2968  | -0.29421 | 0.773   | 0.86946 | -6.2226 | 9049     |
| DRAM1        | 0.49467  | 0.49467  | 3.3896  | 0.29397  | 0.77318 | 0.86959 | -6.2227 | 55332    |
| C1orf52      | -0.0654  | 0.065398 | 1.7922  | -0.29392 | 0.77322 | 0.86959 | -6.2227 | 148423   |
| RHOB         | 1.5742   | 1.5742   | 35.078  | 0.2938   | 0.77331 | 0.86963 | -6.2228 | 388      |
| PIM3         | 0.93348  | 0.93348  | 14.985  | 0.29358  | 0.77347 | 0.86972 | -6.2228 | 415116   |
| FAH          | -0.26251 | 0.26251  | 2.8033  | -0.29356 | 0.77349 | 0.86972 | -6.2228 | 2184     |
| WDR36        | 0.1764   | 0.1764   | 3.5955  | 0.29345  | 0.77357 | 0.86976 | -6.2229 | 134430   |
| MGLL         | -0.63196 | 0.63196  | 9.0975  | -0.2933  | 0.77369 | 0.86982 | -6.2229 | 11343    |
| ARL6         | 0.026969 | 0.026969 | 0.42933 | 0.29316  | 0.77378 | 0.86988 | -6.223  | 84100    |



|            |          |          |         |          |         |         |         |          |
|------------|----------|----------|---------|----------|---------|---------|---------|----------|
| LIMD2      | -0.18198 | 0.18198  | 1.7647  | -0.29306 | 0.77386 | 0.86991 | -6.223  | 80774    |
| SCARNA26A  | -0.36508 | 0.36508  | 5.1942  | -0.29287 | 0.77401 | 0.86991 | -6.223  | 1.07E+08 |
| NEU1       | 0.051278 | 0.051278 | 0.75226 | 0.29284  | 0.77402 | 0.86991 | -6.2231 | 4758     |
| ALDOC      | -0.52404 | 0.52404  | 8.085   | -0.29276 | 0.77409 | 0.86991 | -6.2231 | 230      |
| FANCA      | -0.06909 | 0.069085 | 0.90909 | -0.29275 | 0.77409 | 0.86991 | -6.2231 | 2175     |
| MPST       | -1.0298  | 1.0298   | 13.709  | -0.29271 | 0.77413 | 0.86991 | -6.2231 | 4357     |
| ITPRIPL1   | -0.03064 | 0.030637 | 0.35134 | -0.29261 | 0.7742  | 0.86994 | -6.2231 | 150771   |
| CALHM6     | 0.082979 | 0.082979 | 0.50188 | 0.29196  | 0.77469 | 0.87028 | -6.2233 | 441168   |
| SLC39A3    | 0.14647  | 0.14647  | 2.0522  | 0.29182  | 0.77479 | 0.87028 | -6.2234 | 29985    |
| TMEM121    | -0.0447  | 0.044698 | 0.3612  | -0.29178 | 0.77482 | 0.87028 | -6.2234 | 80757    |
| ZFP37      | 0.037679 | 0.037679 | 0.34393 | 0.29174  | 0.77485 | 0.87028 | -6.2234 | 7539     |
| ZNF793-AS1 | -0.0219  | 0.021899 | 0.21101 | -0.29173 | 0.77486 | 0.87028 | -6.2234 | 1.02E+08 |
| DNALI1     | -0.02591 | 0.025911 | 0.36788 | -0.29171 | 0.77487 | 0.87028 | -6.2234 | 7802     |
| CCAR1      | 0.23061  | 0.23061  | 6.1937  | 0.29171  | 0.77487 | 0.87028 | -6.2234 | 55749    |
| VAMP5      | 0.87948  | 0.87948  | 7.3939  | 0.29165  | 0.77492 | 0.87028 | -6.2234 | 10791    |
| LMNB2      | 0.79837  | 0.79837  | 7.0573  | 0.29156  | 0.77498 | 0.87029 | -6.2234 | 84823    |
| MLH1       | -0.16308 | 0.16308  | 3.5991  | -0.29151 | 0.77503 | 0.87029 | -6.2235 | 4292     |
| TNFAIP8L1  | 0.15377  | 0.15377  | 2.3252  | 0.29123  | 0.77523 | 0.87046 | -6.2235 | 126282   |
| HOXD1      | -0.03297 | 0.032974 | 0.22417 | -0.29113 | 0.77531 | 0.87049 | -6.2236 | 3231     |
| CIB1       | 1.2068   | 1.2068   | 13.005  | 0.291    | 0.7754  | 0.87051 | -6.2236 | 10519    |
| RPS4X      | -19.38   | 19.38    | 340.07  | -0.29097 | 0.77543 | 0.87051 | -6.2236 | 6191     |
| TRIR       | 2.3239   | 2.3239   | 35.649  | 0.29089  | 0.77549 | 0.87051 | -6.2236 | 79002    |
| SBNO1      | -0.16203 | 0.16203  | 4.5322  | -0.29083 | 0.77553 | 0.87051 | -6.2237 | 55206    |
| PSME2      | -1.9473  | 1.9473   | 22.393  | -0.2907  | 0.77563 | 0.87056 | -6.2237 | 5721     |
| A2M        | 9.9129   | 9.9129   | 65.384  | 0.29047  | 0.7758  | 0.87069 | -6.2238 | 2        |
| PCYT2      | 0.10542  | 0.10542  | 1.9761  | 0.29026  | 0.77596 | 0.87078 | -6.2238 | 5833     |

|         |          |          |         |          |         |         |         |          |
|---------|----------|----------|---------|----------|---------|---------|---------|----------|
| PDE4D   | 0.081833 | 0.081833 | 1.0236  | 0.29023  | 0.77598 | 0.87078 | -6.2238 | 5144     |
| XRCC6   | 2.3392   | 2.3392   | 40.042  | 0.28992  | 0.77621 | 0.87098 | -6.2239 | 2547     |
| RPIA    | -0.17294 | 0.17294  | 2.6234  | -0.28977 | 0.77633 | 0.87105 | -6.224  | 22934    |
| XRN2    | 0.57833  | 0.57833  | 9.481   | 0.28962  | 0.77644 | 0.87106 | -6.224  | 22803    |
| TPPP    | -0.28243 | 0.28243  | 2.5735  | -0.28957 | 0.77648 | 0.87106 | -6.224  | 11076    |
| HINT2   | -0.53581 | 0.53581  | 7.2787  | -0.28955 | 0.77649 | 0.87106 | -6.224  | 84681    |
| DENND2A | -0.06916 | 0.069161 | 0.77436 | -0.28941 | 0.7766  | 0.87106 | -6.2241 | 27147    |
| EPDR1   | 0.19146  | 0.19146  | 1.2782  | 0.28936  | 0.77663 | 0.87106 | -6.2241 | 54749    |
| ZNF385A | 1.8094   | 1.8094   | 31.942  | 0.28929  | 0.77669 | 0.87106 | -6.2241 | 25946    |
| PRSS36  | 0.056426 | 0.056426 | 0.5232  | 0.28927  | 0.7767  | 0.87106 | -6.2241 | 146547   |
| OSGIN2  | 0.074292 | 0.074292 | 1.3111  | 0.28912  | 0.77681 | 0.87107 | -6.2242 | 734      |
| ETFB    | -0.89253 | 0.89253  | 10.04   | -0.28906 | 0.77685 | 0.87107 | -6.2242 | 2109     |
| TMEM98  | -0.41258 | 0.41258  | 4.5973  | -0.28906 | 0.77686 | 0.87107 | -6.2242 | 26022    |
| USP33   | -0.20182 | 0.20182  | 4.7326  | -0.28878 | 0.77707 | 0.87125 | -6.2243 | 23032    |
| ACER1   | 1.6659   | 1.6659   | 9.0276  | 0.28842  | 0.77734 | 0.87149 | -6.2244 | 125981   |
| NEK1    | 0.063527 | 0.063527 | 1.4969  | 0.28835  | 0.77739 | 0.87149 | -6.2244 | 4750     |
| RPS5    | -16.276  | 16.276   | 266.14  | -0.28785 | 0.77776 | 0.87185 | -6.2245 | 6193     |
| GPR34   | 0.17809  | 0.17809  | 1.4634  | 0.28753  | 0.77801 | 0.87198 | -6.2246 | 2857     |
| TACC1   | -0.30569 | 0.30569  | 4.1983  | -0.28751 | 0.77802 | 0.87198 | -6.2246 | 6867     |
| NDRG4   | 2.127    | 2.127    | 12.96   | 0.28749  | 0.77804 | 0.87198 | -6.2247 | 65009    |
| PSRC1   | 0.081241 | 0.081241 | 0.77899 | 0.28704  | 0.77837 | 0.8723  | -6.2248 | 84722    |
| CCP110  | 0.063731 | 0.063731 | 1.4377  | 0.28695  | 0.77844 | 0.87232 | -6.2248 | 9738     |
| KRBOX1  | -0.08488 | 0.084883 | 0.7462  | -0.2864  | 0.77885 | 0.87269 | -6.225  | 1.01E+08 |
| CBWD1   | 0.49478  | 0.49478  | 6.6649  | 0.28637  | 0.77887 | 0.87269 | -6.225  | 55871    |
| TAGLN   | -3.6254  | 3.6254   | 27.417  | -0.28619 | 0.77901 | 0.87278 | -6.225  | 6876     |
| MLEC    | -0.48505 | 0.48505  | 9.6163  | -0.28609 | 0.77909 | 0.87281 | -6.2251 | 9761     |

|               |          |          |         |          |         |         |         |          |
|---------------|----------|----------|---------|----------|---------|---------|---------|----------|
| DEFB4A        | 35.435   | 35.435   | 116.96  | 0.28542  | 0.77959 | 0.87332 | -6.2253 | 1673     |
| LOC105372273  | -0.13285 | 0.13285  | 1.0247  | -0.28502 | 0.77988 | 0.87359 | -6.2254 | 1.05E+08 |
| TMEM260       | -0.06521 | 0.065207 | 1.5851  | -0.2849  | 0.77998 | 0.87364 | -6.2254 | 54916    |
| RABGAP1       | -0.20919 | 0.20919  | 8.3788  | -0.28466 | 0.78015 | 0.87373 | -6.2255 | 23637    |
| LASP1         | 1.2625   | 1.2625   | 17.827  | 0.28465  | 0.78016 | 0.87373 | -6.2255 | 3927     |
| LMBR1L        | 0.19853  | 0.19853  | 3.9412  | 0.28444  | 0.78032 | 0.87385 | -6.2255 | 55716    |
| PSMG4         | -0.21553 | 0.21553  | 3.301   | -0.2841  | 0.78058 | 0.87408 | -6.2256 | 389362   |
| ERV3-1-ZNF117 | 0.028564 | 0.028564 | 0.15704 | 0.28392  | 0.78071 | 0.8741  | -6.2257 | 1.1E+08  |
| FA2H          | 0.17214  | 0.17214  | 0.79998 | 0.2839   | 0.78073 | 0.8741  | -6.2257 | 79152    |
| FILIP1        | 0.050227 | 0.050227 | 0.45282 | 0.28386  | 0.78075 | 0.8741  | -6.2257 | 27145    |
| MRGPRF        | 0.55123  | 0.55123  | 5.4191  | 0.28324  | 0.78122 | 0.87457 | -6.2259 | 116535   |
| TUBD1         | 0.050756 | 0.050756 | 1.0431  | 0.28308  | 0.78134 | 0.87464 | -6.2259 | 51174    |
| BASP1         | 0.96129  | 0.96129  | 9.7595  | 0.2829   | 0.78148 | 0.87474 | -6.226  | 10409    |
| ZMYM5         | -0.06988 | 0.069879 | 1.457   | -0.28263 | 0.78168 | 0.87486 | -6.2261 | 9205     |
| LOC102724579  | 0.025907 | 0.025907 | 0.17365 | 0.28262  | 0.78169 | 0.87486 | -6.2261 | 1.03E+08 |
| CDX1          | 0.02086  | 0.02086  | 0.10298 | 0.28253  | 0.78176 | 0.87488 | -6.2261 | 1044     |
| FAM167B       | 0.080638 | 0.080638 | 0.57872 | 0.28242  | 0.78184 | 0.87491 | -6.2261 | 84734    |
| C5orf22       | 0.1054   | 0.1054   | 2.1252  | 0.28235  | 0.78189 | 0.87491 | -6.2262 | 55322    |
| PCYOX1        | 0.33282  | 0.33282  | 9.8874  | 0.28214  | 0.78205 | 0.87503 | -6.2262 | 51449    |
| RNU12         | 0.30464  | 0.30464  | 3.2229  | 0.28199  | 0.78216 | 0.87509 | -6.2263 | 267010   |
| FASTK         | -0.62673 | 0.62673  | 9.8546  | -0.2816  | 0.78245 | 0.87531 | -6.2264 | 10922    |
| METTL14       | -0.10577 | 0.10577  | 2.4984  | -0.2816  | 0.78246 | 0.87531 | -6.2264 | 57721    |
| JCAD          | 0.27546  | 0.27546  | 3.3586  | 0.28146  | 0.78256 | 0.87536 | -6.2264 | 57608    |
| UBN1          | -0.28076 | 0.28076  | 6.9845  | -0.28135 | 0.78264 | 0.87536 | -6.2264 | 29855    |
| DDX60L        | -0.13756 | 0.13756  | 1.6192  | -0.28133 | 0.78266 | 0.87536 | -6.2265 | 91351    |
| NAP1L3        | -0.03561 | 0.035606 | 0.31073 | -0.28126 | 0.78271 | 0.87536 | -6.2265 | 4675     |

|              |          |          |         |          |         |         |         |          |
|--------------|----------|----------|---------|----------|---------|---------|---------|----------|
| PLEKHA1      | -0.3377  | 0.3377   | 7.4032  | -0.28091 | 0.78297 | 0.87557 | -6.2266 | 59338    |
| SLC8B1       | 0.36231  | 0.36231  | 6.4671  | 0.28088  | 0.78299 | 0.87557 | -6.2266 | 80024    |
| MRTFA-AS1    | 0.11091  | 0.11091  | 1.086   | 0.28075  | 0.78309 | 0.87561 | -6.2266 | 1.02E+08 |
| UBR5-AS1     | -0.02509 | 0.025089 | 0.32806 | -0.28063 | 0.78318 | 0.87566 | -6.2267 | 1.02E+08 |
| DOCK4-AS1    | -0.04931 | 0.049309 | 0.47338 | -0.28049 | 0.78329 | 0.87572 | -6.2267 | 1.01E+08 |
| ANTXR2       | -0.22316 | 0.22316  | 2.5877  | -0.28012 | 0.78357 | 0.87597 | -6.2268 | 118429   |
| MAP3K2       | -0.20425 | 0.20425  | 4.7015  | -0.27983 | 0.78378 | 0.87616 | -6.2269 | 10746    |
| RDH12        | 1.5122   | 1.5122   | 10.312  | 0.2794   | 0.7841  | 0.87646 | -6.227  | 145226   |
| ZNF235       | 0.039508 | 0.039508 | 0.82371 | 0.2792   | 0.78425 | 0.87657 | -6.2271 | 9310     |
| ERCC6L       | 0.040489 | 0.040489 | 0.49934 | 0.27889  | 0.78449 | 0.87677 | -6.2272 | 54821    |
| EIF2AK3      | -0.09063 | 0.090629 | 2.3287  | -0.27882 | 0.78454 | 0.87677 | -6.2272 | 9451     |
| MTRNR2L9     | -0.55455 | 0.55455  | 2.2858  | -0.27826 | 0.78496 | 0.87719 | -6.2273 | 1E+08    |
| FAM160A1     | -0.48272 | 0.48272  | 8.6771  | -0.27801 | 0.78515 | 0.87725 | -6.2274 | 729830   |
| MAIP1        | 0.12347  | 0.12347  | 2.4387  | 0.27798  | 0.78518 | 0.87725 | -6.2274 | 79568    |
| WAS          | 0.27018  | 0.27018  | 2.2512  | 0.27797  | 0.78518 | 0.87725 | -6.2274 | 7454     |
| LOC284581    | 0.071003 | 0.071003 | 0.42297 | 0.27765  | 0.78542 | 0.87747 | -6.2275 | 284581   |
| POLR1C       | 0.13119  | 0.13119  | 2.9125  | 0.27717  | 0.78578 | 0.87781 | -6.2276 | 9533     |
| CCL7         | 0.060011 | 0.060011 | 0.2643  | 0.27709  | 0.78584 | 0.87782 | -6.2277 | 6354     |
| IQCG         | -0.04258 | 0.042578 | 0.77164 | -0.27679 | 0.78607 | 0.87801 | -6.2278 | 84223    |
| ATP11C       | 0.12207  | 0.12207  | 2.0231  | 0.27648  | 0.7863  | 0.87817 | -6.2278 | 286410   |
| ACOT4        | -0.03665 | 0.03665  | 0.31746 | -0.27647 | 0.78631 | 0.87817 | -6.2278 | 122970   |
| PEX11A       | 0.03897  | 0.03897  | 0.71717 | 0.27627  | 0.78646 | 0.87828 | -6.2279 | 8800     |
| EVADR        | -0.40555 | 0.40555  | 2.1729  | -0.27567 | 0.78691 | 0.87872 | -6.2281 | 1.02E+08 |
| GS1-124K5.11 | 0.071442 | 0.071442 | 2.5509  | 0.27534  | 0.78716 | 0.87891 | -6.2282 | 493754   |
| SMDT1        | 0.39238  | 0.39238  | 6.1148  | 0.27531  | 0.78718 | 0.87891 | -6.2282 | 91689    |
| PEX11B       | -0.17464 | 0.17464  | 4.164   | -0.27524 | 0.78723 | 0.87891 | -6.2282 | 8799     |

|               |          |          |         |          |         |         |         |         |
|---------------|----------|----------|---------|----------|---------|---------|---------|---------|
| ZNF567        | -0.04772 | 0.047722 | 0.91563 | -0.27508 | 0.78735 | 0.87898 | -6.2282 | 163081  |
| ZNF660-ZNF197 | -0.02484 | 0.024844 | 0.23055 | -0.27444 | 0.78784 | 0.87943 | -6.2284 | 1.1E+08 |
| MFSD8         | -0.06641 | 0.066407 | 1.5467  | -0.27441 | 0.78786 | 0.87943 | -6.2284 | 256471  |
| CAMK1         | -0.13896 | 0.13896  | 1.6107  | -0.2742  | 0.78802 | 0.87949 | -6.2285 | 8536    |
| SET           | 1.7067   | 1.7067   | 32.615  | 0.27409  | 0.7881  | 0.87949 | -6.2285 | 6418    |
| AFF2          | -0.02101 | 0.021011 | 0.18386 | -0.27409 | 0.7881  | 0.87949 | -6.2285 | 2334    |
| NKPD1         | -0.50132 | 0.50132  | 3.5809  | -0.27406 | 0.78812 | 0.87949 | -6.2285 | 284353  |
| NRXN2         | -0.04689 | 0.046892 | 0.35174 | -0.27341 | 0.78861 | 0.87979 | -6.2287 | 9379    |
| KAT5          | -0.27767 | 0.27767  | 7.5875  | -0.2734  | 0.78862 | 0.87979 | -6.2287 | 10524   |
| RRBP1         | 1.582    | 1.582    | 16.809  | 0.27339  | 0.78862 | 0.87979 | -6.2287 | 6238    |
| ARIH1         | -0.21704 | 0.21704  | 8.7019  | -0.27339 | 0.78863 | 0.87979 | -6.2287 | 25820   |
| GAP43         | -0.02757 | 0.027572 | 0.15766 | -0.2733  | 0.78869 | 0.87979 | -6.2287 | 2596    |
| ZNF615        | -0.04819 | 0.048191 | 0.90769 | -0.27329 | 0.7887  | 0.87979 | -6.2287 | 284370  |
| PTPRA         | 0.34218  | 0.34218  | 10.815  | 0.27308  | 0.78886 | 0.87991 | -6.2288 | 5786    |
| EID1          | 1.0733   | 1.0733   | 13.035  | 0.27287  | 0.78902 | 0.88002 | -6.2289 | 23741   |
| RNPEP         | 0.57702  | 0.57702  | 11.9    | 0.27281  | 0.78906 | 0.88002 | -6.2289 | 6051    |
| IPO11         | 0.12998  | 0.12998  | 2.5042  | 0.2726   | 0.78922 | 0.88014 | -6.2289 | 51194   |
| CSRP1         | -2.3155  | 2.3155   | 31.082  | -0.27222 | 0.78951 | 0.8804  | -6.229  | 1465    |
| TPK1          | -0.03364 | 0.03364  | 0.34426 | -0.27208 | 0.78961 | 0.88042 | -6.2291 | 27010   |
| FLJ44635      | 0.02256  | 0.02256  | 0.20056 | 0.27206  | 0.78963 | 0.88042 | -6.2291 | 392490  |
| CNTLN         | 0.04902  | 0.04902  | 0.59912 | 0.27197  | 0.78969 | 0.88043 | -6.2291 | 54875   |
| COQ6          | 0.081172 | 0.081172 | 1.7385  | 0.27156  | 0.79    | 0.88072 | -6.2292 | 51004   |
| EIF3A         | 1.1635   | 1.1635   | 22.994  | 0.27138  | 0.79014 | 0.88081 | -6.2293 | 8661    |
| TP63          | 1.7658   | 1.7658   | 30.835  | 0.2713   | 0.7902  | 0.88082 | -6.2293 | 8626    |
| GNPTG         | -0.63111 | 0.63111  | 11.367  | -0.27104 | 0.7904  | 0.88093 | -6.2294 | 84572   |
| RBPM5         | -0.4604  | 0.4604   | 5.2351  | -0.27097 | 0.79045 | 0.88093 | -6.2294 | 11030   |

|           |          |          |         |          |         |         |         |          |
|-----------|----------|----------|---------|----------|---------|---------|---------|----------|
| LOC389906 | -0.23478 | 0.23478  | 4.473   | -0.27097 | 0.79045 | 0.88093 | -6.2294 | 389906   |
| PUM2      | -0.34416 | 0.34416  | 10.935  | -0.27059 | 0.79074 | 0.88119 | -6.2295 | 23369    |
| LIF       | -0.17889 | 0.17889  | 1.2647  | -0.27023 | 0.79101 | 0.88143 | -6.2296 | 3976     |
| WDR86     | -0.03697 | 0.036967 | 0.23825 | -0.27003 | 0.79116 | 0.88154 | -6.2297 | 349136   |
| PSMB8-AS1 | -0.02425 | 0.024247 | 0.19212 | -0.26972 | 0.79139 | 0.88172 | -6.2297 | 1.01E+08 |
| LRRC10B   | -0.04479 | 0.044785 | 0.1974  | -0.26967 | 0.79143 | 0.88172 | -6.2298 | 390205   |
| GRAMD1A   | 0.61767  | 0.61767  | 5.5945  | 0.26951  | 0.79155 | 0.88178 | -6.2298 | 57655    |
| MOGS      | -0.38567 | 0.38567  | 8.5391  | -0.26947 | 0.79158 | 0.88178 | -6.2298 | 7841     |
| TMEM53    | 0.046822 | 0.046822 | 0.7816  | 0.26931  | 0.7917  | 0.88186 | -6.2299 | 79639    |
| AAR2      | -0.23781 | 0.23781  | 5.546   | -0.2692  | 0.79178 | 0.88188 | -6.2299 | 25980    |
| ADTRP     | -0.08337 | 0.083367 | 1.2122  | -0.26908 | 0.79187 | 0.8819  | -6.2299 | 84830    |
| SNORA110  | 0.038615 | 0.038615 | 0.20683 | 0.26895  | 0.79197 | 0.8819  | -6.23   | 1.07E+08 |
| INPP5K    | 0.32208  | 0.32208  | 6.0362  | 0.26892  | 0.79199 | 0.8819  | -6.23   | 51763    |
| CENPO     | -0.09898 | 0.098981 | 1.8313  | -0.26891 | 0.792   | 0.8819  | -6.23   | 79172    |
| SAAL1     | -0.10378 | 0.10378  | 2.1861  | -0.26868 | 0.79217 | 0.88203 | -6.23   | 113174   |
| IL17RA    | -0.21482 | 0.21482  | 3.2225  | -0.26828 | 0.79247 | 0.88229 | -6.2301 | 23765    |
| PARP11    | -0.04428 | 0.044276 | 0.87793 | -0.26824 | 0.79251 | 0.88229 | -6.2302 | 57097    |
| HERC3     | 0.26415  | 0.26415  | 5.5274  | 0.2681   | 0.79261 | 0.88235 | -6.2302 | 8916     |
| CHRAC1    | 0.20068  | 0.20068  | 3.9143  | 0.2678   | 0.79284 | 0.88251 | -6.2303 | 54108    |
| DHRS4     | 0.92545  | 0.92545  | 9.6586  | 0.26777  | 0.79286 | 0.88251 | -6.2303 | 10901    |
| RASSF7    | -0.32453 | 0.32453  | 4.8534  | -0.26752 | 0.79305 | 0.88261 | -6.2304 | 8045     |
| IL21R     | 0.037527 | 0.037527 | 0.30084 | 0.26743  | 0.79312 | 0.88261 | -6.2304 | 50615    |
| ZNF720    | 0.037961 | 0.037961 | 1.1922  | 0.26737  | 0.79316 | 0.88261 | -6.2304 | 124411   |
| EVPLL     | 0.13213  | 0.13213  | 1.0151  | 0.26737  | 0.79316 | 0.88261 | -6.2304 | 645027   |
| LBH       | -0.84407 | 0.84407  | 9.1904  | -0.2673  | 0.79321 | 0.88261 | -6.2304 | 81606    |
| PARVG     | 0.066319 | 0.066319 | 0.75558 | 0.26703  | 0.79342 | 0.88278 | -6.2305 | 64098    |

|              |          |          |         |          |         |         |         |          |
|--------------|----------|----------|---------|----------|---------|---------|---------|----------|
| LINC00319    | -0.05939 | 0.059385 | 0.49905 | -0.26696 | 0.79347 | 0.88278 | -6.2305 | 284836   |
| RACK1        | 19.602   | 19.602   | 367.37  | 0.26682  | 0.79358 | 0.88284 | -6.2305 | 10399    |
| RP9P         | -0.06011 | 0.060113 | 1.4935  | -0.26664 | 0.79371 | 0.88287 | -6.2306 | 441212   |
| SAP130       | -0.10244 | 0.10244  | 3.6111  | -0.26662 | 0.79373 | 0.88287 | -6.2306 | 79595    |
| PABPC4       | -0.80406 | 0.80406  | 13.947  | -0.26657 | 0.79376 | 0.88287 | -6.2306 | 8761     |
| RNASE1       | -6.0343  | 6.0343   | 43.177  | -0.26639 | 0.7939  | 0.88293 | -6.2307 | 6035     |
| TFF3         | -0.09485 | 0.094849 | 1.1189  | -0.26636 | 0.79392 | 0.88293 | -6.2307 | 7033     |
| CEBPZOS      | 0.13738  | 0.13738  | 2.6053  | 0.26624  | 0.79401 | 0.88297 | -6.2307 | 1.01E+08 |
| XDH          | -0.10115 | 0.10115  | 0.87296 | -0.26617 | 0.79407 | 0.88298 | -6.2307 | 7498     |
| LOC728554    | 0.41712  | 0.41712  | 4.4974  | 0.2661   | 0.79412 | 0.88298 | -6.2307 | 728554   |
| RANGAP1      | -1.1519  | 1.1519   | 14.42   | -0.26602 | 0.79418 | 0.88298 | -6.2308 | 5905     |
| PRMT1        | 1.292    | 1.292    | 17.761  | 0.26596  | 0.79423 | 0.88298 | -6.2308 | 3276     |
| FEN1         | 0.35443  | 0.35443  | 3.3588  | 0.26589  | 0.79428 | 0.88298 | -6.2308 | 2237     |
| LOC101928659 | -0.02145 | 0.021452 | 0.1505  | -0.26578 | 0.79436 | 0.88301 | -6.2308 | 1.02E+08 |
| RPL23AP7     | -0.08436 | 0.08436  | 1.349   | -0.26558 | 0.79451 | 0.88312 | -6.2309 | 118433   |
| LOC100129617 | 0.089925 | 0.089925 | 1.2982  | 0.26536  | 0.79468 | 0.88325 | -6.2309 | 1E+08    |
| LCMT2        | 0.082203 | 0.082203 | 1.8017  | 0.26523  | 0.79478 | 0.88326 | -6.231  | 9836     |
| PPM1A        | 0.11702  | 0.11702  | 3.2237  | 0.2652   | 0.7948  | 0.88326 | -6.231  | 5494     |
| TRAF7        | 0.90912  | 0.90912  | 17.807  | 0.26486  | 0.79505 | 0.88349 | -6.2311 | 84231    |
| CD101        | 0.021748 | 0.021748 | 0.55182 | 0.26479  | 0.79511 | 0.88349 | -6.2311 | 9398     |
| GSTCD        | -0.05987 | 0.059873 | 1.4251  | -0.26468 | 0.79519 | 0.88353 | -6.2311 | 79807    |
| CR1          | -0.10612 | 0.10612  | 0.57073 | -0.26447 | 0.79535 | 0.88363 | -6.2312 | 1378     |
| DRG1         | 0.5106   | 0.5106   | 11.585  | 0.26442  | 0.79539 | 0.88363 | -6.2312 | 4733     |
| GADD45A      | 0.72407  | 0.72407  | 8.6584  | 0.26435  | 0.79544 | 0.88363 | -6.2312 | 1647     |
| LOC101929295 | 0.049871 | 0.049871 | 0.46396 | 0.26414  | 0.7956  | 0.88365 | -6.2313 | 1.02E+08 |
| PLEKHF1      | 0.17044  | 0.17044  | 2.603   | 0.26408  | 0.79565 | 0.88365 | -6.2313 | 79156    |

|           |          |          |         |          |         |         |         |          |
|-----------|----------|----------|---------|----------|---------|---------|---------|----------|
| UCKL1     | 0.12347  | 0.12347  | 4.7236  | 0.264    | 0.79571 | 0.88365 | -6.2313 | 54963    |
| POLR3D    | 0.19678  | 0.19678  | 3.9018  | 0.26392  | 0.79577 | 0.88365 | -6.2313 | 661      |
| EIF2B3    | 0.15067  | 0.15067  | 3.4817  | 0.26391  | 0.79578 | 0.88365 | -6.2313 | 8891     |
| MEIS3P1   | 0.15866  | 0.15866  | 1.4947  | 0.26388  | 0.79579 | 0.88365 | -6.2313 | 4213     |
| BCR       | -0.42797 | 0.42797  | 8.222   | -0.26384 | 0.79583 | 0.88365 | -6.2314 | 613      |
| ITGB2     | -0.67484 | 0.67484  | 6.4218  | -0.26375 | 0.79589 | 0.88367 | -6.2314 | 3689     |
| TRIM45    | -0.06976 | 0.069763 | 0.85102 | -0.26364 | 0.79598 | 0.88371 | -6.2314 | 80263    |
| RPL19     | -15.466  | 15.466   | 299.85  | -0.26338 | 0.79617 | 0.88386 | -6.2315 | 6143     |
| OCIAD1    | 0.39098  | 0.39098  | 10.194  | 0.26328  | 0.79625 | 0.88389 | -6.2315 | 54940    |
| MIR3648-1 | -24.408  | 24.408   | 140.77  | -0.26297 | 0.79648 | 0.88398 | -6.2316 | 1.01E+08 |
| MIR3648-2 | -24.408  | 24.408   | 140.77  | -0.26297 | 0.79648 | 0.88398 | -6.2316 | 1.04E+08 |
| TNFRSF8   | -0.02117 | 0.021167 | 0.18801 | -0.26297 | 0.79648 | 0.88398 | -6.2316 | 943      |
| SINHCAF   | 0.26525  | 0.26525  | 5.4665  | 0.26289  | 0.79654 | 0.88398 | -6.2316 | 58516    |
| CXCL10    | 0.29922  | 0.29922  | 1.4092  | 0.26282  | 0.7966  | 0.88398 | -6.2316 | 3627     |
| ST13      | -0.77434 | 0.77434  | 19.17   | -0.26275 | 0.79665 | 0.88399 | -6.2317 | 6767     |
| STAMPB    | -0.06038 | 0.060382 | 2.6085  | -0.26244 | 0.79688 | 0.88413 | -6.2317 | 10617    |
| DHRS4-AS1 | 0.087078 | 0.087078 | 1.6806  | 0.2624   | 0.79691 | 0.88413 | -6.2317 | 55449    |
| MPP1      | 0.30179  | 0.30179  | 3.927   | 0.26237  | 0.79694 | 0.88413 | -6.2318 | 4354     |
| CDC42BPB  | -0.61497 | 0.61497  | 15.888  | -0.2622  | 0.79706 | 0.88421 | -6.2318 | 9578     |
| POLR2A    | 1.5632   | 1.5632   | 29.475  | 0.262    | 0.79721 | 0.88432 | -6.2319 | 5430     |
| GORASP1   | -0.1529  | 0.1529   | 5.064   | -0.26194 | 0.79726 | 0.88432 | -6.2319 | 64689    |
| RBBP9     | -0.14678 | 0.14678  | 4.0242  | -0.2614  | 0.79767 | 0.88465 | -6.232  | 10741    |
| NENF      | -0.98881 | 0.98881  | 12.755  | -0.26135 | 0.79771 | 0.88465 | -6.232  | 29937    |
| TTC26     | 0.033342 | 0.033342 | 0.58317 | 0.26133  | 0.79772 | 0.88465 | -6.232  | 79989    |
| TMEM191B  | 0.028387 | 0.028387 | 0.2902  | 0.26125  | 0.79778 | 0.88466 | -6.2321 | 728229   |
| VGLL3     | 0.20577  | 0.20577  | 2.0218  | 0.26105  | 0.79793 | 0.88472 | -6.2321 | 389136   |



|              |          |          |         |          |         |         |         |          |
|--------------|----------|----------|---------|----------|---------|---------|---------|----------|
| PAPSS1       | 0.30713  | 0.30713  | 10.356  | 0.26103  | 0.79794 | 0.88472 | -6.2321 | 9061     |
| GADD45G      | -0.2388  | 0.2388   | 1.9986  | -0.26095 | 0.79801 | 0.88472 | -6.2321 | 10912    |
| THAP12       | -0.22519 | 0.22519  | 4.898   | -0.2609  | 0.79805 | 0.88472 | -6.2322 | 5612     |
| LOC101927051 | -0.03072 | 0.030724 | 0.37411 | -0.26067 | 0.79822 | 0.88485 | -6.2322 | 1.02E+08 |
| GPSM3        | 0.053184 | 0.053184 | 0.46363 | 0.2606   | 0.79827 | 0.88485 | -6.2322 | 63940    |
| HEY2         | 0.1009   | 0.1009   | 1.0349  | 0.26053  | 0.79832 | 0.88485 | -6.2323 | 23493    |
| ELL          | 0.17573  | 0.17573  | 4.3688  | 0.2604   | 0.79842 | 0.8849  | -6.2323 | 8178     |
| ZCCHC7       | 0.089023 | 0.089023 | 3.6222  | 0.26012  | 0.79864 | 0.88491 | -6.2324 | 84186    |
| HOXA11       | 0.039943 | 0.039943 | 0.4185  | 0.26007  | 0.79867 | 0.88491 | -6.2324 | 3207     |
| GVINP1       | -0.03671 | 0.036709 | 0.34011 | -0.26001 | 0.79872 | 0.88491 | -6.2324 | 387751   |
| TRIM27       | 0.048204 | 0.048204 | 0.89368 | 0.25981  | 0.79887 | 0.88491 | -6.2324 | 5987     |
| KRT1         | 746.92   | 746.92   | 3303.4  | 0.25979  | 0.79888 | 0.88491 | -6.2325 | 3848     |
| SLX1A        | 0.15292  | 0.15292  | 2.3806  | 0.25978  | 0.79889 | 0.88491 | -6.2325 | 548593   |
| SLX1B        | 0.15292  | 0.15292  | 2.3806  | 0.25978  | 0.79889 | 0.88491 | -6.2325 | 79008    |
| GSK3B        | -0.17365 | 0.17365  | 7.6516  | -0.25972 | 0.79893 | 0.88491 | -6.2325 | 2932     |
| SCD5         | -0.05932 | 0.059316 | 0.88595 | -0.25972 | 0.79894 | 0.88491 | -6.2325 | 79966    |
| AFAP1L2      | -0.35506 | 0.35506  | 5.2499  | -0.25962 | 0.79902 | 0.88491 | -6.2325 | 84632    |
| NRSN2        | 0.23138  | 0.23138  | 2.3245  | 0.25958  | 0.79905 | 0.88491 | -6.2325 | 80023    |
| MTHFS        | -0.10889 | 0.10889  | 1.0191  | -0.25955 | 0.79907 | 0.88491 | -6.2325 | 10588    |
| LYSMD2       | 0.085904 | 0.085904 | 0.99745 | 0.25949  | 0.79911 | 0.88491 | -6.2325 | 256586   |
| ALG1         | 0.12024  | 0.12024  | 1.9658  | 0.25932  | 0.79924 | 0.88499 | -6.2326 | 56052    |
| BMS1P14      | 0.050191 | 0.050191 | 0.67958 | 0.25924  | 0.7993  | 0.88499 | -6.2326 | 728034   |
| LOC653712    | -0.03124 | 0.031236 | 0.21056 | -0.25919 | 0.79934 | 0.88499 | -6.2326 | 653712   |
| ARHGAP18     | 0.22104  | 0.22104  | 2.8848  | 0.25912  | 0.79939 | 0.88499 | -6.2326 | 93663    |
| THSD7A       | -0.05795 | 0.057946 | 0.76956 | -0.2588  | 0.79963 | 0.88507 | -6.2327 | 221981   |
| RNF115       | -0.21158 | 0.21158  | 4.4863  | -0.25877 | 0.79966 | 0.88507 | -6.2327 | 27246    |

|              |          |          |         |          |         |         |         |          |
|--------------|----------|----------|---------|----------|---------|---------|---------|----------|
| LZTR1        | -0.23091 | 0.23091  | 4.7756  | -0.25872 | 0.7997  | 0.88507 | -6.2327 | 8216     |
| LIPM         | 0.72998  | 0.72998  | 3.8879  | 0.25868  | 0.79972 | 0.88507 | -6.2327 | 340654   |
| DHRS4L2      | 0.31959  | 0.31959  | 4.441   | 0.25868  | 0.79972 | 0.88507 | -6.2327 | 317749   |
| STRN4        | -0.64367 | 0.64367  | 13.483  | -0.2585  | 0.79986 | 0.88516 | -6.2328 | 29888    |
| DHX57        | 0.078985 | 0.078985 | 2.5023  | 0.25828  | 0.80002 | 0.88529 | -6.2329 | 90957    |
| CACFD1       | 0.16553  | 0.16553  | 2.0507  | 0.25801  | 0.80023 | 0.88545 | -6.2329 | 11094    |
| USE1         | -0.24277 | 0.24277  | 4.5433  | -0.25737 | 0.80072 | 0.88594 | -6.2331 | 55850    |
| LOC104968399 | 0.018834 | 0.018834 | 0.16902 | 0.25711  | 0.80091 | 0.88609 | -6.2332 | 1.05E+08 |
| CASP1        | 0.34418  | 0.34418  | 4.3744  | 0.25698  | 0.80101 | 0.88615 | -6.2332 | 834      |
| DMWD         | -0.314   | 0.314    | 5.7673  | -0.25667 | 0.80124 | 0.88635 | -6.2333 | 1762     |
| BLOC1S1-RDH5 | -0.04422 | 0.044221 | 0.37735 | -0.25659 | 0.8013  | 0.88635 | -6.2333 | 1.01E+08 |
| IP6K1        | -0.22097 | 0.22097  | 6.5207  | -0.25646 | 0.8014  | 0.88641 | -6.2333 | 9807     |
| ATF2         | 0.15319  | 0.15319  | 2.9361  | 0.25632  | 0.80151 | 0.88641 | -6.2334 | 1386     |
| PRR14        | -0.21708 | 0.21708  | 5.9946  | -0.25631 | 0.80151 | 0.88641 | -6.2334 | 78994    |
| LMBRD2       | 0.08293  | 0.08293  | 2.447   | 0.25609  | 0.80168 | 0.8865  | -6.2334 | 92255    |
| FGFR1        | -0.52401 | 0.52401  | 6.5801  | -0.25606 | 0.8017  | 0.8865  | -6.2334 | 2260     |
| LRMDA        | 0.058884 | 0.058884 | 0.7386  | 0.25586  | 0.80185 | 0.8866  | -6.2335 | 83938    |
| PRIM2        | 0.065923 | 0.065923 | 1.2688  | 0.25575  | 0.80194 | 0.8866  | -6.2335 | 5558     |
| MPHOSPH6     | 0.42114  | 0.42114  | 5.5896  | 0.25573  | 0.80195 | 0.8866  | -6.2335 | 10200    |
| IL4I1        | -0.11408 | 0.11408  | 0.76142 | -0.25562 | 0.80203 | 0.8866  | -6.2336 | 259307   |
| CD44         | 3.4908   | 3.4908   | 82.803  | 0.2556   | 0.80205 | 0.8866  | -6.2336 | 960      |
| GTF2H4       | -0.02839 | 0.028389 | 0.46968 | -0.25544 | 0.80218 | 0.88668 | -6.2336 | 2968     |
| TPP2         | -0.12259 | 0.12259  | 4.2955  | -0.25506 | 0.80246 | 0.88688 | -6.2337 | 7174     |
| FAM104A      | 0.13197  | 0.13197  | 5.5162  | 0.25505  | 0.80246 | 0.88688 | -6.2337 | 84923    |
| LOC100133920 | -0.0263  | 0.026299 | 0.19252 | -0.25483 | 0.80264 | 0.88702 | -6.2338 | 1E+08    |
| G2E3         | -0.05297 | 0.052971 | 1.0282  | -0.25449 | 0.80289 | 0.88716 | -6.2339 | 55632    |

|          |          |          |         |          |         |         |         |        |
|----------|----------|----------|---------|----------|---------|---------|---------|--------|
| FBXL19   | -0.44336 | 0.44336  | 5.7712  | -0.25446 | 0.80292 | 0.88716 | -6.2339 | 54620  |
| ANO8     | 0.76013  | 0.76013  | 6.7798  | 0.25444  | 0.80293 | 0.88716 | -6.2339 | 57719  |
| MPEG1    | 0.67286  | 0.67286  | 6.4245  | 0.25437  | 0.80298 | 0.88716 | -6.2339 | 219972 |
| CACNA2D1 | -0.06033 | 0.060328 | 0.97334 | -0.2543  | 0.80303 | 0.88716 | -6.2339 | 781    |
| MTCH1    | -1.0309  | 1.0309   | 26.509  | -0.25418 | 0.80313 | 0.88721 | -6.2339 | 23787  |
| PCDH12   | -0.1096  | 0.1096   | 1.4565  | -0.25405 | 0.80322 | 0.88726 | -6.234  | 51294  |
| CKS1B    | 0.54507  | 0.54507  | 8.1528  | 0.25398  | 0.80328 | 0.88726 | -6.234  | 1163   |
| EBF2     | -0.07803 | 0.078027 | 0.61538 | -0.25388 | 0.80336 | 0.88729 | -6.234  | 64641  |
| GBP5     | 0.15566  | 0.15566  | 0.98128 | 0.25369  | 0.8035  | 0.88735 | -6.2341 | 115362 |
| TSNAX    | 0.29397  | 0.29397  | 6.0018  | 0.25356  | 0.8036  | 0.88735 | -6.2341 | 7257   |
| INO80E   | -0.28947 | 0.28947  | 6.6847  | -0.25354 | 0.80361 | 0.88735 | -6.2341 | 283899 |
| IDH3B    | 0.42805  | 0.42805  | 9.8001  | 0.25348  | 0.80366 | 0.88735 | -6.2341 | 3420   |
| RTL1     | 0.06689  | 0.06689  | 0.39846 | 0.25343  | 0.80369 | 0.88735 | -6.2341 | 388015 |
| CMTM7    | -0.13572 | 0.13572  | 1.4019  | -0.25337 | 0.80374 | 0.88735 | -6.2341 | 112616 |
| BRI3     | 1.1332   | 1.1332   | 17.588  | 0.25332  | 0.80378 | 0.88735 | -6.2342 | 25798  |
| NCF1C    | 0.0652   | 0.0652   | 0.50069 | 0.2532   | 0.80387 | 0.88739 | -6.2342 | 654817 |
| USP34    | 0.32908  | 0.32908  | 10.466  | 0.25287  | 0.80412 | 0.88751 | -6.2343 | 9736   |
| CCSAP    | -0.15846 | 0.15846  | 2.5116  | -0.25286 | 0.80413 | 0.88751 | -6.2343 | 126731 |
| ZFPL1    | 0.35436  | 0.35436  | 7.2082  | 0.25284  | 0.80414 | 0.88751 | -6.2343 | 7542   |
| PALB2    | 0.071051 | 0.071051 | 2.4165  | 0.2526   | 0.80433 | 0.88763 | -6.2344 | 79728  |
| DHRS7B   | 0.15829  | 0.15829  | 2.9194  | 0.25257  | 0.80435 | 0.88763 | -6.2344 | 25979  |
| CTAGE15  | 0.040447 | 0.040447 | 0.33196 | 0.25247  | 0.80442 | 0.88765 | -6.2344 | 441294 |
| MEX3A    | -0.0324  | 0.032395 | 0.40483 | -0.25229 | 0.80456 | 0.88769 | -6.2344 | 92312  |
| NEAT1    | 16.004   | 16.004   | 199.79  | 0.25223  | 0.8046  | 0.88769 | -6.2344 | 283131 |
| MFHAS1   | -0.25039 | 0.25039  | 4.9571  | -0.25222 | 0.80461 | 0.88769 | -6.2344 | 9258   |
| CACNA1C  | 0.14374  | 0.14374  | 1.2207  | 0.25207  | 0.80473 | 0.88775 | -6.2345 | 775    |

|              |          |          |         |          |         |         |         |        |
|--------------|----------|----------|---------|----------|---------|---------|---------|--------|
| HNRNPM       | -1.3475  | 1.3475   | 24.233  | -0.252   | 0.80478 | 0.88775 | -6.2345 | 4670   |
| SLC35B2      | -0.35462 | 0.35462  | 5.4302  | -0.25167 | 0.80502 | 0.88791 | -6.2346 | 347734 |
| TMC6         | -0.40716 | 0.40716  | 5.8312  | -0.25164 | 0.80505 | 0.88791 | -6.2346 | 11322  |
| LOC100422556 | -0.05462 | 0.054615 | 0.54475 | -0.25161 | 0.80507 | 0.88791 | -6.2346 | 1E+08  |
| ANKRD13D     | 0.3977   | 0.3977   | 6.6195  | 0.25151  | 0.80515 | 0.88793 | -6.2346 | 338692 |
| CFAP69       | 0.058392 | 0.058392 | 0.58552 | 0.25108  | 0.80547 | 0.88823 | -6.2347 | 79846  |
| TGM2         | -0.93104 | 0.93104  | 4.9324  | -0.25098 | 0.80555 | 0.88826 | -6.2348 | 7052   |
| CISH         | 0.17862  | 0.17862  | 2.7137  | 0.25088  | 0.80562 | 0.88827 | -6.2348 | 1154   |
| POLR3A       | -0.07253 | 0.072527 | 2.8171  | -0.2508  | 0.80569 | 0.88827 | -6.2348 | 11128  |
| ZBTB5        | 0.11962  | 0.11962  | 4.1458  | 0.25076  | 0.80572 | 0.88827 | -6.2348 | 9925   |
| SLC25A28     | -0.44843 | 0.44843  | 9.1285  | -0.25049 | 0.80592 | 0.88841 | -6.2349 | 81894  |
| DLST         | 0.5161   | 0.5161   | 11.614  | 0.25045  | 0.80595 | 0.88841 | -6.2349 | 1743   |
| SYNC         | 0.085183 | 0.085183 | 1.2378  | 0.25017  | 0.80616 | 0.88854 | -6.235  | 81493  |
| RHBDD2       | 0.62187  | 0.62187  | 11.508  | 0.25015  | 0.80618 | 0.88854 | -6.235  | 57414  |
| PIGV         | 0.08493  | 0.08493  | 2.2993  | 0.24999  | 0.8063  | 0.88862 | -6.235  | 55650  |
| BAALC-AS2    | 0.029162 | 0.029162 | 0.11652 | 0.24972  | 0.80651 | 0.88879 | -6.2351 | 157556 |
| ATRAID       | -0.82443 | 0.82443  | 14.184  | -0.24904 | 0.80702 | 0.8893  | -6.2353 | 51374  |
| ZNF616       | -0.03892 | 0.038924 | 0.91239 | -0.24897 | 0.80707 | 0.8893  | -6.2353 | 90317  |
| MIR203A      | 0.15578  | 0.15578  | 0.71084 | 0.24878  | 0.80722 | 0.8894  | -6.2353 | 406986 |
| C2CD2L       | -0.22695 | 0.22695  | 3.5015  | -0.24863 | 0.80733 | 0.88946 | -6.2354 | 9854   |
| PLCD3        | 0.84451  | 0.84451  | 9.2183  | 0.24822  | 0.80764 | 0.88975 | -6.2355 | 113026 |
| ISCU         | -0.27619 | 0.27619  | 4.8145  | -0.24732 | 0.80832 | 0.89044 | -6.2357 | 23479  |
| NFKBIE       | -0.10185 | 0.10185  | 1.4528  | -0.24726 | 0.80837 | 0.89044 | -6.2357 | 4794   |
| EDN1         | 0.17136  | 0.17136  | 3.3134  | 0.2471   | 0.80849 | 0.89051 | -6.2358 | 1906   |
| PDIA5        | 0.31902  | 0.31902  | 4.5106  | 0.24675  | 0.80876 | 0.89075 | -6.2359 | 10954  |
| GPS1         | 0.31652  | 0.31652  | 8.2196  | 0.24632  | 0.80908 | 0.89095 | -6.236  | 2873   |

|           |          |          |         |          |         |         |         |          |
|-----------|----------|----------|---------|----------|---------|---------|---------|----------|
| LINC00622 | 0.028433 | 0.028433 | 0.21739 | 0.24631  | 0.80909 | 0.89095 | -6.236  | 644242   |
| AAACL2    | 0.95865  | 0.95865  | 5.5773  | 0.24628  | 0.80911 | 0.89095 | -6.236  | 344752   |
| P2RX4     | 0.18274  | 0.18274  | 1.9694  | 0.24623  | 0.80915 | 0.89095 | -6.236  | 5025     |
| MET       | 0.17538  | 0.17538  | 2.8485  | 0.24602  | 0.80931 | 0.89098 | -6.236  | 4233     |
| EYA2      | -0.22554 | 0.22554  | 1.4562  | -0.24597 | 0.80934 | 0.89098 | -6.2361 | 2139     |
| GDF15     | -0.10888 | 0.10888  | 0.53036 | -0.24594 | 0.80937 | 0.89098 | -6.2361 | 9518     |
| GLB1L2    | -0.29167 | 0.29167  | 2.0214  | -0.24585 | 0.80944 | 0.89098 | -6.2361 | 89944    |
| BRCC3     | -0.1123  | 0.1123   | 2.4316  | -0.24581 | 0.80947 | 0.89098 | -6.2361 | 79184    |
| AKR7A2    | 0.29061  | 0.29061  | 6.3185  | 0.24578  | 0.8095  | 0.89098 | -6.2361 | 8574     |
| FBXL7     | 0.15596  | 0.15596  | 1.6259  | 0.2455   | 0.8097  | 0.89105 | -6.2362 | 23194    |
| COL27A1   | -0.49038 | 0.49038  | 5.4921  | -0.24548 | 0.80972 | 0.89105 | -6.2362 | 85301    |
| LINC01431 | -0.02594 | 0.025936 | 0.17926 | -0.24521 | 0.80992 | 0.89105 | -6.2362 | 1.01E+08 |
| QSER1     | -0.19409 | 0.19409  | 5.0533  | -0.2452  | 0.80993 | 0.89105 | -6.2362 | 79832    |
| PLEKHJ1   | 0.37438  | 0.37438  | 6.03    | 0.24516  | 0.80996 | 0.89105 | -6.2363 | 55111    |
| TFRC      | -0.78347 | 0.78347  | 7.9954  | -0.24504 | 0.81006 | 0.89105 | -6.2363 | 7037     |
| TSN       | 0.32069  | 0.32069  | 7.1391  | 0.24503  | 0.81006 | 0.89105 | -6.2363 | 7247     |
| FCN3      | 0.050688 | 0.050688 | 0.42538 | 0.245    | 0.81009 | 0.89105 | -6.2363 | 8547     |
| ZNF283    | 0.047839 | 0.047839 | 1.2255  | 0.24498  | 0.8101  | 0.89105 | -6.2363 | 284349   |
| BAG5      | -0.25683 | 0.25683  | 6.7133  | -0.24497 | 0.8101  | 0.89105 | -6.2363 | 9529     |
| PTGIR     | 0.13954  | 0.13954  | 1.2605  | 0.24487  | 0.81018 | 0.89105 | -6.2363 | 5739     |
| VAPB      | -0.13153 | 0.13153  | 4.0278  | -0.24485 | 0.8102  | 0.89105 | -6.2363 | 9217     |
| IL18      | -0.60898 | 0.60898  | 9.9128  | -0.24462 | 0.81037 | 0.89118 | -6.2364 | 3606     |
| SUMF2     | -0.83325 | 0.83325  | 17.443  | -0.24445 | 0.8105  | 0.89123 | -6.2364 | 25870    |
| EVI5L     | -0.22052 | 0.22052  | 4.1185  | -0.24443 | 0.81051 | 0.89123 | -6.2364 | 115704   |
| CCDC12    | -0.29522 | 0.29522  | 7.0828  | -0.24434 | 0.81059 | 0.89125 | -6.2365 | 151903   |
| VPS16     | 0.21477  | 0.21477  | 5.1358  | 0.24426  | 0.81064 | 0.89125 | -6.2365 | 64601    |

|              |          |          |          |          |         |         |         |          |
|--------------|----------|----------|----------|----------|---------|---------|---------|----------|
| SNHG8        | -1.6284  | 1.6284   | 28.106   | -0.24405 | 0.8108  | 0.89137 | -6.2365 | 1E+08    |
| LYG2         | -0.01834 | 0.018338 | 0.091908 | -0.24395 | 0.81088 | 0.8914  | -6.2366 | 254773   |
| SPATA33      | -0.04291 | 0.042908 | 0.80355  | -0.24383 | 0.81097 | 0.89144 | -6.2366 | 124045   |
| TEX261       | 0.48737  | 0.48737  | 9.5393   | 0.24317  | 0.81147 | 0.89191 | -6.2368 | 113419   |
| TTC22        | 0.6402   | 0.6402   | 6.042    | 0.24313  | 0.8115  | 0.89191 | -6.2368 | 55001    |
| CHURC1       | -0.2559  | 0.2559   | 5.798    | -0.24301 | 0.81159 | 0.89195 | -6.2368 | 91612    |
| LPCAT4       | -0.16824 | 0.16824  | 3.6927   | -0.24283 | 0.81173 | 0.89204 | -6.2368 | 254531   |
| PANK4        | -0.13175 | 0.13175  | 3.0988   | -0.24264 | 0.81188 | 0.89209 | -6.2369 | 55229    |
| MRC2         | 1.2888   | 1.2888   | 14.672   | 0.24257  | 0.81193 | 0.89209 | -6.2369 | 9902     |
| PRDM5        | -0.04254 | 0.042544 | 0.57704  | -0.24256 | 0.81193 | 0.89209 | -6.2369 | 11107    |
| DANCR        | 0.17452  | 0.17452  | 4.4847   | 0.24223  | 0.81218 | 0.89227 | -6.237  | 57291    |
| CCDC34       | -0.04246 | 0.042461 | 0.69817  | -0.24221 | 0.8122  | 0.89227 | -6.237  | 91057    |
| GGNBP2       | 0.30107  | 0.30107  | 8.8835   | 0.24199  | 0.81237 | 0.89235 | -6.2371 | 79893    |
| AFDN-DT      | 0.018952 | 0.018952 | 0.27851  | 0.24197  | 0.81238 | 0.89235 | -6.2371 | 653483   |
| CASP7        | 0.27163  | 0.27163  | 3.3542   | 0.24187  | 0.81246 | 0.89238 | -6.2371 | 840      |
| SH2B2        | 0.055476 | 0.055476 | 0.65918  | 0.24166  | 0.81262 | 0.89245 | -6.2371 | 10603    |
| LOC100419583 | -0.30334 | 0.30334  | 5.1055   | -0.24164 | 0.81263 | 0.89245 | -6.2371 | 1E+08    |
| ABCB1        | -0.03349 | 0.033491 | 0.52689  | -0.24142 | 0.8128  | 0.89257 | -6.2372 | 5243     |
| PLCG1-AS1    | -0.02814 | 0.028143 | 0.48824  | -0.24133 | 0.81287 | 0.89257 | -6.2372 | 1.02E+08 |
| S100A7A      | -5.7123  | 5.7123   | 24.911   | -0.24126 | 0.81292 | 0.89257 | -6.2372 | 338324   |
| SC5D         | 0.14922  | 0.14922  | 2.8823   | 0.24116  | 0.813   | 0.89257 | -6.2373 | 6309     |
| FAM168B      | 0.45602  | 0.45602  | 10.673   | 0.24115  | 0.81301 | 0.89257 | -6.2373 | 130074   |
| CDK4         | 1.0344   | 1.0344   | 14.666   | 0.24104  | 0.81309 | 0.89261 | -6.2373 | 1019     |
| RHNO1        | -0.10387 | 0.10387  | 2.0737   | -0.24073 | 0.81333 | 0.89265 | -6.2374 | 83695    |
| C11orf95     | -0.14716 | 0.14716  | 2.2422   | -0.2407  | 0.81335 | 0.89265 | -6.2374 | 65998    |
| CPA6         | 0.020284 | 0.020284 | 0.16252  | 0.2407   | 0.81335 | 0.89265 | -6.2374 | 57094    |

|              |          |          |         |          |         |         |         |          |
|--------------|----------|----------|---------|----------|---------|---------|---------|----------|
| POLR2F       | -0.14182 | 0.14182  | 2.63    | -0.24062 | 0.81341 | 0.89265 | -6.2374 | 5435     |
| LYNX1        | -0.48684 | 0.48684  | 4.7193  | -0.24061 | 0.81342 | 0.89265 | -6.2374 | 66004    |
| ELK1         | 0.23202  | 0.23202  | 4.9957  | 0.24057  | 0.81345 | 0.89265 | -6.2374 | 2002     |
| CCDC32       | -0.05793 | 0.05793  | 1.5063  | -0.24026 | 0.81368 | 0.89285 | -6.2375 | 90416    |
| PSORS1C2     | 0.68218  | 0.68218  | 3.4414  | 0.23999  | 0.81389 | 0.89302 | -6.2375 | 170680   |
| DDX28        | 0.11987  | 0.11987  | 2.6071  | 0.23985  | 0.81399 | 0.89307 | -6.2376 | 55794    |
| FAM13C       | -0.09095 | 0.090953 | 1.2284  | -0.23979 | 0.81404 | 0.89307 | -6.2376 | 220965   |
| LRWD1        | 0.18387  | 0.18387  | 2.5669  | 0.2397   | 0.8141  | 0.89308 | -6.2376 | 222229   |
| AATK         | -0.03302 | 0.033022 | 0.52467 | -0.2396  | 0.81418 | 0.89311 | -6.2376 | 9625     |
| S100PBP      | -0.06754 | 0.067542 | 2.0411  | -0.23872 | 0.81485 | 0.89374 | -6.2379 | 64766    |
| TCEA1        | 0.32688  | 0.32688  | 10.855  | 0.23871  | 0.81486 | 0.89374 | -6.2379 | 6917     |
| HOXC13       | 0.087341 | 0.087341 | 1.5708  | 0.23797  | 0.81542 | 0.89423 | -6.238  | 3229     |
| SOCS2-AS1    | 0.030223 | 0.030223 | 0.23698 | 0.23783  | 0.81553 | 0.89423 | -6.2381 | 144481   |
| RIPOR1       | 0.42909  | 0.42909  | 6.6055  | 0.2378   | 0.81555 | 0.89423 | -6.2381 | 79567    |
| CTNNBIP1     | 2.2421   | 2.2421   | 47.198  | 0.23779  | 0.81556 | 0.89423 | -6.2381 | 56998    |
| SULT1C4      | -0.01918 | 0.019182 | 0.20609 | -0.23775 | 0.81559 | 0.89423 | -6.2381 | 27233    |
| PPHLN1       | -0.13744 | 0.13744  | 3.1943  | -0.23766 | 0.81566 | 0.89423 | -6.2381 | 51535    |
| LOC101928000 | 0.034046 | 0.034046 | 0.46682 | 0.23762  | 0.81568 | 0.89423 | -6.2381 | 1.02E+08 |
| RAB20        | 0.13473  | 0.13473  | 1.1492  | 0.23725  | 0.81597 | 0.89449 | -6.2382 | 55647    |
| SH3BGRL2     | -0.23581 | 0.23581  | 2.1106  | -0.23705 | 0.81612 | 0.89454 | -6.2383 | 83699    |
| PABPC4L      | -0.02157 | 0.021569 | 0.24158 | -0.23699 | 0.81617 | 0.89454 | -6.2383 | 132430   |
| SOX7         | -0.99573 | 0.99573  | 12.662  | -0.23697 | 0.81618 | 0.89454 | -6.2383 | 83595    |
| SNTA1        | -0.19495 | 0.19495  | 3.0483  | -0.23646 | 0.81657 | 0.89491 | -6.2384 | 6640     |
| GRIN2D       | 0.02159  | 0.02159  | 0.25098 | 0.23622  | 0.81675 | 0.89506 | -6.2385 | 2906     |
| TIMP1        | 7.9227   | 7.9227   | 59.594  | 0.23573  | 0.81712 | 0.89535 | -6.2386 | 7076     |
| AFTPH        | 0.2396   | 0.2396   | 6.3726  | 0.23567  | 0.81717 | 0.89535 | -6.2386 | 54812    |

|              |          |          |          |          |         |         |         |          |
|--------------|----------|----------|----------|----------|---------|---------|---------|----------|
| CHMP4A       | 0.29336  | 0.29336  | 7.6863   | 0.23565  | 0.81718 | 0.89535 | -6.2386 | 29082    |
| FJX1         | -0.27115 | 0.27115  | 3.9175   | -0.23546 | 0.81733 | 0.89542 | -6.2387 | 24147    |
| WDR13        | 0.27058  | 0.27058  | 6.8578   | 0.23544  | 0.81735 | 0.89542 | -6.2387 | 64743    |
| UPB1         | -0.01783 | 0.017826 | 0.096236 | -0.23528 | 0.81746 | 0.89547 | -6.2387 | 51733    |
| CCR7         | -0.05215 | 0.052153 | 0.51896  | -0.23523 | 0.81751 | 0.89547 | -6.2387 | 1236     |
| RASD1        | -0.64021 | 0.64021  | 5.117    | -0.23509 | 0.81761 | 0.89553 | -6.2387 | 51655    |
| CPNE2        | 0.36617  | 0.36617  | 5.4342   | 0.23497  | 0.8177  | 0.89557 | -6.2388 | 221184   |
| NRCAM        | 0.12221  | 0.12221  | 0.86135  | 0.23475  | 0.81787 | 0.8957  | -6.2388 | 4897     |
| MIR155HG     | 0.019199 | 0.019199 | 0.18604  | 0.23458  | 0.818   | 0.89576 | -6.2389 | 114614   |
| IL22RA1      | -0.28552 | 0.28552  | 4.7701   | -0.23454 | 0.81803 | 0.89576 | -6.2389 | 58985    |
| INVS         | -0.04688 | 0.046884 | 1.887    | -0.23433 | 0.81819 | 0.89587 | -6.2389 | 27130    |
| PCOTH        | -0.07324 | 0.073242 | 0.80162  | -0.23414 | 0.81834 | 0.89598 | -6.239  | 542767   |
| CASTOR1      | -0.254   | 0.254    | 3.5492   | -0.23393 | 0.81849 | 0.89609 | -6.239  | 652968   |
| HS3ST6       | -1.2418  | 1.2418   | 8.6025   | -0.23359 | 0.81875 | 0.89612 | -6.2391 | 64711    |
| LOC101928304 | -0.02074 | 0.020744 | 0.18946  | -0.23359 | 0.81875 | 0.89612 | -6.2391 | 1.02E+08 |
| PPM1K        | -0.07896 | 0.078955 | 0.94299  | -0.23357 | 0.81877 | 0.89612 | -6.2391 | 152926   |
| EFNA3        | -1.3341  | 1.3341   | 20.713   | -0.23357 | 0.81877 | 0.89612 | -6.2391 | 1944     |
| NDUFS8       | 1.064    | 1.064    | 18.921   | 0.23354  | 0.81879 | 0.89612 | -6.2391 | 4728     |
| PDHX         | 0.095491 | 0.095491 | 3.0643   | 0.23338  | 0.81891 | 0.8962  | -6.2392 | 8050     |
| RASGRP4      | -0.04595 | 0.045954 | 0.65954  | -0.23307 | 0.81915 | 0.8964  | -6.2392 | 115727   |
| MT1L         | -0.10868 | 0.10868  | 0.89807  | -0.23293 | 0.81926 | 0.89646 | -6.2393 | 4500     |
| CCDC121      | 0.023664 | 0.023664 | 0.4157   | 0.23282  | 0.81934 | 0.89649 | -6.2393 | 79635    |
| SPATA2L      | 0.090611 | 0.090611 | 1.7002   | 0.23243  | 0.81964 | 0.89676 | -6.2394 | 124044   |
| PDCD2L       | -0.0655  | 0.065497 | 1.5367   | -0.23236 | 0.81969 | 0.89676 | -6.2394 | 84306    |
| BAG1         | -0.41792 | 0.41792  | 10.797   | -0.2321  | 0.81989 | 0.89692 | -6.2395 | 573      |
| IMMT         | 0.35217  | 0.35217  | 8.541    | 0.23198  | 0.81998 | 0.89696 | -6.2395 | 10989    |



|            |          |          |         |          |         |         |         |        |
|------------|----------|----------|---------|----------|---------|---------|---------|--------|
| ZNF846     | -0.06502 | 0.06502  | 1.8454  | -0.23162 | 0.82026 | 0.89721 | -6.2396 | 162993 |
| UNC93A     | 0.42585  | 0.42585  | 3.4036  | 0.23146  | 0.82037 | 0.89726 | -6.2396 | 54346  |
| CD3EAP     | 0.088201 | 0.088201 | 1.3779  | 0.23141  | 0.82041 | 0.89726 | -6.2396 | 10849  |
| ARHGAP24   | 0.068305 | 0.068305 | 1.3673  | 0.23115  | 0.82061 | 0.89737 | -6.2397 | 83478  |
| PEX19      | -0.20945 | 0.20945  | 5.9973  | -0.23114 | 0.82062 | 0.89737 | -6.2397 | 5824   |
| RWDD2A     | 0.034346 | 0.034346 | 0.52566 | 0.23098  | 0.82074 | 0.8974  | -6.2397 | 112611 |
| PRDM2      | 0.1623   | 0.1623   | 6.7288  | 0.23097  | 0.82075 | 0.8974  | -6.2397 | 7799   |
| CPVL       | 0.33739  | 0.33739  | 3.9147  | 0.23045  | 0.82114 | 0.89777 | -6.2399 | 54504  |
| CARD10     | -0.41732 | 0.41732  | 4.9175  | -0.23005 | 0.82145 | 0.89804 | -6.24   | 29775  |
| IGHMBP2    | -0.08543 | 0.085425 | 2.4615  | -0.22973 | 0.82169 | 0.8982  | -6.24   | 3508   |
| AREL1      | 0.10198  | 0.10198  | 4.7031  | 0.22966  | 0.82174 | 0.8982  | -6.24   | 9870   |
| CYB561     | -0.39236 | 0.39236  | 10.186  | -0.22966 | 0.82175 | 0.8982  | -6.2401 | 1534   |
| GZF1       | 0.036741 | 0.036741 | 1.5067  | 0.22956  | 0.82182 | 0.89822 | -6.2401 | 64412  |
| PLEKHA3    | 0.11765  | 0.11765  | 2.1902  | 0.22934  | 0.82199 | 0.89825 | -6.2401 | 65977  |
| ZNF503-AS2 | 0.050452 | 0.050452 | 0.74988 | 0.22933  | 0.822   | 0.89825 | -6.2401 | 1E+08  |
| LOC339803  | 0.056921 | 0.056921 | 0.63424 | 0.22913  | 0.82215 | 0.89825 | -6.2402 | 339803 |
| TOB2       | 0.5427   | 0.5427   | 11.478  | 0.22905  | 0.82221 | 0.89825 | -6.2402 | 10766  |
| CLASP2     | -0.10325 | 0.10325  | 4.2221  | -0.22904 | 0.82222 | 0.89825 | -6.2402 | 23122  |
| LINC00294  | -0.04698 | 0.046975 | 2.1422  | -0.22897 | 0.82227 | 0.89825 | -6.2402 | 283267 |
| LRRC28     | -0.0358  | 0.035799 | 1.2465  | -0.22897 | 0.82227 | 0.89825 | -6.2402 | 123355 |
| TRMT1L     | 0.064098 | 0.064098 | 1.3228  | 0.22897  | 0.82227 | 0.89825 | -6.2402 | 81627  |
| U2AF1      | 0.61556  | 0.61556  | 14.164  | 0.22883  | 0.82237 | 0.8983  | -6.2402 | 7307   |
| MAP3K10    | -0.15538 | 0.15538  | 2.3887  | -0.22861 | 0.82255 | 0.89843 | -6.2403 | 4294   |
| RBPJ       | -0.18987 | 0.18987  | 5.1075  | -0.2285  | 0.82263 | 0.89843 | -6.2403 | 3516   |
| QPRT       | 0.093216 | 0.093216 | 0.89758 | 0.22847  | 0.82265 | 0.89843 | -6.2403 | 23475  |
| TMEM128    | 0.1519   | 0.1519   | 2.6002  | 0.2284   | 0.8227  | 0.89843 | -6.2403 | 85013  |

|              |          |          |         |          |         |         |         |          |
|--------------|----------|----------|---------|----------|---------|---------|---------|----------|
| COX4I2       | 0.10572  | 0.10572  | 1.1441  | 0.22816  | 0.82289 | 0.89854 | -6.2404 | 84701    |
| ZNF699       | 0.036169 | 0.036169 | 0.92967 | 0.22808  | 0.82295 | 0.89854 | -6.2404 | 374879   |
| RPL10A       | 21.85    | 21.85    | 390.66  | 0.22806  | 0.82296 | 0.89854 | -6.2404 | 4736     |
| METTL15      | -0.04553 | 0.045533 | 1.5916  | -0.22777 | 0.82318 | 0.89867 | -6.2405 | 196074   |
| TM2D1        | -0.12256 | 0.12256  | 2.8296  | -0.22771 | 0.82323 | 0.89867 | -6.2405 | 83941    |
| PIR          | 0.097894 | 0.097894 | 1.9592  | 0.22769  | 0.82325 | 0.89867 | -6.2405 | 8544     |
| GLDC         | 0.11969  | 0.11969  | 0.81059 | 0.2276   | 0.82331 | 0.89868 | -6.2405 | 2731     |
| LINC01909    | 0.021463 | 0.021463 | 0.22732 | 0.22744  | 0.82343 | 0.89872 | -6.2406 | 1.02E+08 |
| SERPINE2     | 1.9418   | 1.9418   | 10.797  | 0.22742  | 0.82345 | 0.89872 | -6.2406 | 5270     |
| MOAP1        | -0.10824 | 0.10824  | 3.5526  | -0.22735 | 0.8235  | 0.89872 | -6.2406 | 64112    |
| CST7         | 0.12185  | 0.12185  | 1.3944  | 0.22706  | 0.82373 | 0.89885 | -6.2407 | 8530     |
| BHLHE40-AS1  | 0.020646 | 0.020646 | 0.28693 | 0.22706  | 0.82373 | 0.89885 | -6.2407 | 1.01E+08 |
| TOR2A        | -0.08276 | 0.082761 | 1.7518  | -0.22687 | 0.82387 | 0.89895 | -6.2407 | 27433    |
| MNT          | 0.20389  | 0.20389  | 5.4749  | 0.2268   | 0.82392 | 0.89895 | -6.2407 | 4335     |
| NOVA2        | 0.072245 | 0.072245 | 0.86533 | 0.22673  | 0.82398 | 0.89895 | -6.2407 | 4858     |
| ATP6V1C2     | -1.0297  | 1.0297   | 10.079  | -0.22652 | 0.82414 | 0.899   | -6.2408 | 245973   |
| TNFSF13      | -0.18093 | 0.18093  | 2.2839  | -0.22643 | 0.82421 | 0.899   | -6.2408 | 8741     |
| C5orf66      | -0.06114 | 0.061136 | 1.5988  | -0.22642 | 0.82421 | 0.899   | -6.2408 | 1.01E+08 |
| RBM23        | -0.17708 | 0.17708  | 6.4295  | -0.22637 | 0.82425 | 0.899   | -6.2408 | 55147    |
| ELK2AP       | 0.15008  | 0.15008  | 0.93843 | 0.22632  | 0.82429 | 0.899   | -6.2408 | 2003     |
| NUP93        | -0.18028 | 0.18028  | 3.7473  | -0.22595 | 0.82457 | 0.8992  | -6.2409 | 9688     |
| LOC100996351 | 0.021627 | 0.021627 | 0.23953 | 0.22594  | 0.82458 | 0.8992  | -6.2409 | 1.01E+08 |
| PDGFRB       | -2.3665  | 2.3665   | 24.932  | -0.22583 | 0.82467 | 0.89923 | -6.2409 | 5159     |
| RNF187       | 0.89953  | 0.89953  | 18.55   | 0.2257   | 0.82476 | 0.89928 | -6.241  | 149603   |
| CD37         | -0.17854 | 0.17854  | 2.8633  | -0.22536 | 0.82503 | 0.89951 | -6.2411 | 951      |
| ZNF366       | -0.06121 | 0.061211 | 0.94576 | -0.22497 | 0.82532 | 0.89977 | -6.2411 | 167465   |

|          |          |          |         |          |         |         |         |        |
|----------|----------|----------|---------|----------|---------|---------|---------|--------|
| DAP      | 0.67556  | 0.67556  | 11.979  | 0.22487  | 0.8254  | 0.8998  | -6.2412 | 1611   |
| RYK      | 0.25924  | 0.25924  | 7.2341  | 0.2248   | 0.82545 | 0.8998  | -6.2412 | 6259   |
| RMND5A   | 0.68584  | 0.68584  | 9.3199  | 0.22468  | 0.82554 | 0.89983 | -6.2412 | 64795  |
| BRD7     | 0.39676  | 0.39676  | 11.078  | 0.22457  | 0.82563 | 0.89983 | -6.2412 | 29117  |
| LPIN3    | -0.63956 | 0.63956  | 8.5326  | -0.2245  | 0.82568 | 0.89983 | -6.2413 | 64900  |
| PRKCA    | 0.081983 | 0.081983 | 1.6596  | 0.22448  | 0.82569 | 0.89983 | -6.2413 | 5578   |
| CYB561D2 | 0.077665 | 0.077665 | 1.7146  | 0.22423  | 0.82589 | 0.89998 | -6.2413 | 11068  |
| PRSS27   | 1.0495   | 1.0495   | 6.8811  | 0.22414  | 0.82595 | 0.89998 | -6.2413 | 83886  |
| IDH3G    | 0.2926   | 0.2926   | 9.2348  | 0.2241   | 0.82599 | 0.89998 | -6.2414 | 3421   |
| ARHGAP15 | 0.070257 | 0.070257 | 1.0249  | 0.22352  | 0.82642 | 0.9002  | -6.2415 | 55843  |
| IL12RB2  | 0.064942 | 0.064942 | 1.1594  | 0.22348  | 0.82645 | 0.9002  | -6.2415 | 3595   |
| SENP1    | 0.061322 | 0.061322 | 2.2246  | 0.22338  | 0.82653 | 0.9002  | -6.2415 | 29843  |
| ARL6IP5  | -0.63957 | 0.63957  | 11.585  | -0.22334 | 0.82656 | 0.9002  | -6.2415 | 10550  |
| ANKRD39  | -0.14232 | 0.14232  | 3.1026  | -0.22326 | 0.82663 | 0.9002  | -6.2415 | 51239  |
| C8orf48  | 0.027295 | 0.027295 | 0.28249 | 0.22326  | 0.82663 | 0.9002  | -6.2415 | 157773 |
| VOPP1    | 0.36208  | 0.36208  | 5.5539  | 0.22324  | 0.82664 | 0.9002  | -6.2415 | 81552  |
| MRPL11   | 0.31797  | 0.31797  | 5.1474  | 0.22319  | 0.82668 | 0.9002  | -6.2416 | 65003  |
| FBXO42   | -0.18545 | 0.18545  | 5.0251  | -0.22317 | 0.82669 | 0.9002  | -6.2416 | 54455  |
| MCTS1    | 0.044312 | 0.044312 | 1.2759  | 0.22313  | 0.82673 | 0.9002  | -6.2416 | 28985  |
| A4GALT   | -0.29917 | 0.29917  | 4.1946  | -0.22288 | 0.82691 | 0.90035 | -6.2416 | 53947  |
| POLR3K   | 0.19773  | 0.19773  | 3.0132  | 0.22278  | 0.82699 | 0.90037 | -6.2417 | 51728  |
| TFAM     | -0.08589 | 0.085889 | 1.8902  | -0.22246 | 0.82723 | 0.90058 | -6.2417 | 7019   |
| FARS2    | 0.10182  | 0.10182  | 2.9686  | 0.22234  | 0.82732 | 0.90062 | -6.2418 | 10667  |
| NUDT9    | 0.11317  | 0.11317  | 2.5922  | 0.22209  | 0.82751 | 0.90077 | -6.2418 | 53343  |
| ITGA10   | 0.038039 | 0.038039 | 0.45791 | 0.2218   | 0.82774 | 0.90095 | -6.2419 | 8515   |
| OTUD5    | -0.29745 | 0.29745  | 8.0012  | -0.22174 | 0.82779 | 0.90095 | -6.2419 | 55593  |

|              |          |          |         |          |         |         |         |          |
|--------------|----------|----------|---------|----------|---------|---------|---------|----------|
| CNOT3        | 0.26317  | 0.26317  | 7.3541  | 0.2211   | 0.82827 | 0.90142 | -6.242  | 4849     |
| DTX1         | 0.042534 | 0.042534 | 0.92965 | 0.22089  | 0.82843 | 0.90153 | -6.2421 | 1840     |
| ESCO1        | 0.08449  | 0.08449  | 2.0284  | 0.22082  | 0.82849 | 0.90154 | -6.2421 | 114799   |
| TRABD        | -0.41841 | 0.41841  | 8.2853  | -0.22074 | 0.82854 | 0.90154 | -6.2421 | 80305    |
| U2AF1L5      | 0.13593  | 0.13593  | 3.2349  | 0.22023  | 0.82893 | 0.90185 | -6.2422 | 1.03E+08 |
| HDAC9        | -0.02256 | 0.022557 | 0.29638 | -0.22023 | 0.82894 | 0.90185 | -6.2422 | 9734     |
| CMC4         | 0.18268  | 0.18268  | 2.7629  | 0.22007  | 0.82906 | 0.90189 | -6.2423 | 1E+08    |
| FRMD8        | 0.55933  | 0.55933  | 10.249  | 0.22004  | 0.82908 | 0.90189 | -6.2423 | 83786    |
| EIF1AX-AS1   | 0.031323 | 0.031323 | 0.39741 | 0.21997  | 0.82914 | 0.90189 | -6.2423 | 1.01E+08 |
| SNHG17       | -0.17709 | 0.17709  | 3.3386  | -0.21983 | 0.82924 | 0.90195 | -6.2423 | 388796   |
| PLXND1       | -0.87335 | 0.87335  | 11.224  | -0.21954 | 0.82946 | 0.90214 | -6.2424 | 23129    |
| AKR7A2P1     | 0.046129 | 0.046129 | 0.48506 | 0.21937  | 0.82959 | 0.90219 | -6.2424 | 246182   |
| WDR18        | -0.39289 | 0.39289  | 6.6781  | -0.21929 | 0.82965 | 0.90219 | -6.2425 | 57418    |
| GNAL         | -0.12707 | 0.12707  | 3.4625  | -0.21925 | 0.82968 | 0.90219 | -6.2425 | 2774     |
| LAPTM4B      | 0.75529  | 0.75529  | 15.044  | 0.2192   | 0.82972 | 0.90219 | -6.2425 | 55353    |
| EPC2         | -0.11409 | 0.11409  | 3.7704  | -0.21899 | 0.82988 | 0.90225 | -6.2425 | 26122    |
| MMP15        | 0.10773  | 0.10773  | 2.0722  | 0.21882  | 0.83001 | 0.90225 | -6.2426 | 4324     |
| ATG16L1      | -0.07104 | 0.071037 | 3.8713  | -0.21872 | 0.83009 | 0.90225 | -6.2426 | 55054    |
| RBMX2        | 0.10558  | 0.10558  | 3.1427  | 0.21871  | 0.8301  | 0.90225 | -6.2426 | 51634    |
| PHB          | 0.76265  | 0.76265  | 13.869  | 0.21866  | 0.83013 | 0.90225 | -6.2426 | 5245     |
| SFMBT2       | -0.05919 | 0.059192 | 0.88309 | -0.21864 | 0.83015 | 0.90225 | -6.2426 | 57713    |
| ELF4         | 0.19376  | 0.19376  | 4.5701  | 0.21863  | 0.83016 | 0.90225 | -6.2426 | 2000     |
| LOC103171574 | 0.035946 | 0.035946 | 0.39577 | 0.21839  | 0.83034 | 0.90226 | -6.2427 | 1.03E+08 |
| MRPL4        | -0.3082  | 0.3082   | 6.6677  | -0.21831 | 0.8304  | 0.90226 | -6.2427 | 51073    |
| GPR108       | 0.30642  | 0.30642  | 7.8902  | 0.21823  | 0.83046 | 0.90226 | -6.2427 | 56927    |
| EMILIN1      | -0.95006 | 0.95006  | 7.7348  | -0.21822 | 0.83047 | 0.90226 | -6.2427 | 11117    |

|              |          |          |         |          |         |         |         |          |
|--------------|----------|----------|---------|----------|---------|---------|---------|----------|
| GTF2F1       | -0.44653 | 0.44653  | 9.2581  | -0.21821 | 0.83048 | 0.90226 | -6.2427 | 2962     |
| FTH1         | 47.206   | 47.206   | 410.43  | 0.21818  | 0.8305  | 0.90226 | -6.2427 | 2495     |
| VENTX        | -0.05364 | 0.053636 | 0.42619 | -0.21806 | 0.83059 | 0.90226 | -6.2427 | 27287    |
| REM1         | 0.073096 | 0.073096 | 0.90135 | 0.21806  | 0.83059 | 0.90226 | -6.2427 | 28954    |
| TADA3        | 0.41124  | 0.41124  | 7.8556  | 0.2179   | 0.83071 | 0.90233 | -6.2428 | 10474    |
| GUF1         | -0.12878 | 0.12878  | 3.5689  | -0.21777 | 0.83082 | 0.90239 | -6.2428 | 60558    |
| SEMA4B       | -1.7014  | 1.7014   | 25.902  | -0.21763 | 0.83092 | 0.90244 | -6.2428 | 10509    |
| EXOSC9       | 0.17736  | 0.17736  | 3.5225  | 0.21742  | 0.83108 | 0.90256 | -6.2429 | 5393     |
| FAM102A      | -0.51579 | 0.51579  | 14.317  | -0.21692 | 0.83146 | 0.90291 | -6.243  | 399665   |
| TMEM41A      | 0.10079  | 0.10079  | 4.1139  | 0.21685  | 0.83152 | 0.90291 | -6.243  | 90407    |
| SGMS1        | -0.22154 | 0.22154  | 7.1511  | -0.21652 | 0.83177 | 0.90312 | -6.2431 | 259230   |
| SH3RF3       | -0.09749 | 0.097485 | 1.7901  | -0.21646 | 0.83182 | 0.90312 | -6.2431 | 344558   |
| AP3D1        | 0.63499  | 0.63499  | 13.315  | 0.21632  | 0.83192 | 0.90318 | -6.2431 | 8943     |
| STX18        | 0.10199  | 0.10199  | 3.333   | 0.21621  | 0.83201 | 0.90322 | -6.2431 | 53407    |
| MBLAC1       | -0.05027 | 0.05027  | 0.70674 | -0.21591 | 0.83224 | 0.90333 | -6.2432 | 255374   |
| POT1         | -0.05272 | 0.052722 | 1.2368  | -0.21589 | 0.83225 | 0.90333 | -6.2432 | 25913    |
| HSD11B1L     | 0.048522 | 0.048522 | 0.98554 | 0.21586  | 0.83227 | 0.90333 | -6.2432 | 374875   |
| SAMD14       | -0.03952 | 0.039522 | 0.56286 | -0.21547 | 0.83257 | 0.90359 | -6.2433 | 201191   |
| RPL36        | -10.651  | 10.651   | 219.19  | -0.21536 | 0.83266 | 0.90363 | -6.2433 | 25873    |
| SLC22A4      | 0.044753 | 0.044753 | 0.70172 | 0.21516  | 0.83281 | 0.90374 | -6.2434 | 6583     |
| GNE          | 0.058921 | 0.058921 | 1.7359  | 0.21487  | 0.83303 | 0.9038  | -6.2434 | 10020    |
| NLGN4Y       | 0.04652  | 0.04652  | 0.77004 | 0.21482  | 0.83307 | 0.9038  | -6.2434 | 22829    |
| C21orf91     | -0.10701 | 0.10701  | 2.8045  | -0.21479 | 0.83309 | 0.9038  | -6.2435 | 54149    |
| COQ3         | 0.068869 | 0.068869 | 1.6655  | 0.21479  | 0.83309 | 0.9038  | -6.2435 | 51805    |
| LOC101929595 | 0.020419 | 0.020419 | 0.2801  | 0.21472  | 0.83314 | 0.9038  | -6.2435 | 1.02E+08 |
| CCNG1        | -0.15708 | 0.15708  | 3.2762  | -0.21447 | 0.83333 | 0.90383 | -6.2435 | 900      |

|              |          |          |         |          |         |         |         |          |
|--------------|----------|----------|---------|----------|---------|---------|---------|----------|
| SSH3         | -0.36449 | 0.36449  | 9.021   | -0.21446 | 0.83334 | 0.90383 | -6.2435 | 54961    |
| GOLM1        | 0.28116  | 0.28116  | 4.0986  | 0.21443  | 0.83337 | 0.90383 | -6.2435 | 51280    |
| UNC50        | 0.19434  | 0.19434  | 5.7561  | 0.21441  | 0.83338 | 0.90383 | -6.2435 | 25972    |
| CHEK2        | -0.07274 | 0.072743 | 1.1614  | -0.21382 | 0.83383 | 0.90426 | -6.2437 | 11200    |
| MED20        | 0.097258 | 0.097258 | 2.5259  | 0.21364  | 0.83397 | 0.90431 | -6.2437 | 9477     |
| SLC25A30     | 0.070239 | 0.070239 | 2.3124  | 0.21363  | 0.83398 | 0.90431 | -6.2437 | 253512   |
| LILRB5       | -0.18714 | 0.18714  | 2.173   | -0.21345 | 0.83412 | 0.9044  | -6.2438 | 10990    |
| RANBP17      | -0.01965 | 0.019645 | 0.21042 | -0.21329 | 0.83424 | 0.90442 | -6.2438 | 64901    |
| BRD3OS       | -0.06266 | 0.062664 | 1.2303  | -0.21328 | 0.83425 | 0.90442 | -6.2438 | 266655   |
| SEMA5A-AS1   | -0.02773 | 0.027727 | 0.30827 | -0.21316 | 0.83434 | 0.90446 | -6.2438 | 1.02E+08 |
| ZC3H7A       | -0.13748 | 0.13748  | 4.0732  | -0.21298 | 0.83447 | 0.90452 | -6.2439 | 29066    |
| M6PR         | 0.58023  | 0.58023  | 13.46   | 0.21288  | 0.83455 | 0.90452 | -6.2439 | 4074     |
| KRT33B       | -0.03773 | 0.037734 | 0.17006 | -0.21288 | 0.83455 | 0.90452 | -6.2439 | 3884     |
| KIRREL1      | 0.38308  | 0.38308  | 6.2553  | 0.21267  | 0.83471 | 0.90464 | -6.2439 | 55243    |
| CDC42EP3     | 0.15752  | 0.15752  | 3.0462  | 0.21237  | 0.83494 | 0.90479 | -6.244  | 10602    |
| TRAM2        | -0.25111 | 0.25111  | 4.3345  | -0.21234 | 0.83496 | 0.90479 | -6.244  | 9697     |
| CBX2         | 0.10026  | 0.10026  | 1.6098  | 0.21226  | 0.83502 | 0.9048  | -6.244  | 84733    |
| LOC101929340 | -0.02904 | 0.029039 | 0.33944 | -0.21138 | 0.83569 | 0.90545 | -6.2442 | 1.02E+08 |
| ATP6V1FNB    | -0.02195 | 0.021952 | 0.39741 | -0.21133 | 0.83573 | 0.90545 | -6.2442 | 1E+08    |
| CDIPT        | -0.68278 | 0.68278  | 15.349  | -0.21094 | 0.83603 | 0.90572 | -6.2443 | 10423    |
| CYB5D2       | -0.13483 | 0.13483  | 3.1632  | -0.2105  | 0.83638 | 0.90603 | -6.2444 | 124936   |
| SMARCD1      | -0.3871  | 0.3871   | 8.019   | -0.21038 | 0.83646 | 0.90607 | -6.2444 | 6602     |
| PSME1        | -1.0805  | 1.0805   | 22.516  | -0.21025 | 0.83656 | 0.90612 | -6.2445 | 5720     |
| LYSMD1       | -0.04413 | 0.044129 | 1.5434  | -0.21014 | 0.83664 | 0.90615 | -6.2445 | 388695   |
| ZFYVE1       | 0.10773  | 0.10773  | 3.8686  | 0.20992  | 0.83681 | 0.90628 | -6.2445 | 53349    |
| TANC2        | 0.17503  | 0.17503  | 4.7655  | 0.20959  | 0.83707 | 0.90649 | -6.2446 | 26115    |

|              |          |          |         |          |         |         |         |          |
|--------------|----------|----------|---------|----------|---------|---------|---------|----------|
| MMP2         | 15.91    | 15.91    | 151     | 0.20939  | 0.83722 | 0.9066  | -6.2446 | 4313     |
| SFXN4        | -0.12636 | 0.12636  | 2.8792  | -0.20879 | 0.83768 | 0.90704 | -6.2448 | 119559   |
| MAD2L2       | -0.33289 | 0.33289  | 4.3213  | -0.20846 | 0.83794 | 0.90721 | -6.2448 | 10459    |
| ROBO3        | 0.037414 | 0.037414 | 0.55219 | 0.20845  | 0.83794 | 0.90721 | -6.2448 | 64221    |
| HK3          | -0.07496 | 0.074958 | 0.61574 | -0.20826 | 0.83808 | 0.9073  | -6.2449 | 3101     |
| HTR2B        | -0.03474 | 0.034735 | 0.67903 | -0.20816 | 0.83816 | 0.90733 | -6.2449 | 3357     |
| MTO1         | 0.0847   | 0.0847   | 2.907   | 0.20802  | 0.83827 | 0.90733 | -6.2449 | 25821    |
| HLA-DRB5     | 0.49661  | 0.49661  | 4.3216  | 0.20792  | 0.83835 | 0.90733 | -6.245  | 3127     |
| OCIAD1-AS1   | 0.026666 | 0.026666 | 0.27664 | 0.20787  | 0.83838 | 0.90733 | -6.245  | 1.01E+08 |
| PRR19        | -0.02008 | 0.020077 | 0.18453 | -0.20778 | 0.83845 | 0.90733 | -6.245  | 284338   |
| IL6R         | 0.13259  | 0.13259  | 3.4772  | 0.20775  | 0.83848 | 0.90733 | -6.245  | 3570     |
| RASA4CP      | -0.15675 | 0.15675  | 2.3295  | -0.20774 | 0.83849 | 0.90733 | -6.245  | 401331   |
| MED25        | 0.27279  | 0.27279  | 6.6757  | 0.20734  | 0.83879 | 0.9076  | -6.2451 | 81857    |
| DDX11L1      | -0.01824 | 0.018237 | 0.12962 | -0.20728 | 0.83884 | 0.9076  | -6.2451 | 1E+08    |
| RARG         | 1.0728   | 1.0728   | 23.973  | 0.20713  | 0.83895 | 0.90766 | -6.2451 | 5916     |
| GLUD1        | 0.59792  | 0.59792  | 20.17   | 0.20706  | 0.839   | 0.90766 | -6.2451 | 2746     |
| PAPLN        | -0.27506 | 0.27506  | 4.1581  | -0.2069  | 0.83913 | 0.90773 | -6.2452 | 89932    |
| ALKBH6       | -0.10529 | 0.10529  | 2.4654  | -0.20664 | 0.83932 | 0.90789 | -6.2452 | 84964    |
| SCN1B        | 0.091819 | 0.091819 | 0.72912 | 0.20651  | 0.83943 | 0.90794 | -6.2453 | 6324     |
| ADGRA2       | -0.41898 | 0.41898  | 7.4622  | -0.20627 | 0.83961 | 0.90808 | -6.2453 | 25960    |
| HNRNPH1      | 0.54066  | 0.54066  | 22.408  | 0.20591  | 0.83989 | 0.90826 | -6.2454 | 3187     |
| POLR2M       | -0.09616 | 0.096155 | 2.0487  | -0.20587 | 0.83991 | 0.90826 | -6.2454 | 81488    |
| LOC105371849 | -0.01955 | 0.019549 | 0.1925  | -0.20584 | 0.83994 | 0.90826 | -6.2454 | 1.05E+08 |
| CTIF         | -0.15374 | 0.15374  | 3.8906  | -0.20569 | 0.84006 | 0.90831 | -6.2454 | 9811     |
| LGALS7B      | -48.348  | 48.348   | 567.72  | -0.20564 | 0.84009 | 0.90831 | -6.2454 | 653499   |
| LPCAT1       | 0.38826  | 0.38826  | 5.4788  | 0.20552  | 0.84018 | 0.90831 | -6.2455 | 79888    |

|           |          |          |         |          |         |         |         |          |
|-----------|----------|----------|---------|----------|---------|---------|---------|----------|
| MVD       | 0.65622  | 0.65622  | 10.883  | 0.2055   | 0.8402  | 0.90831 | -6.2455 | 4597     |
| COX11     | -0.07367 | 0.073673 | 2.513   | -0.20502 | 0.84057 | 0.90865 | -6.2456 | 1353     |
| MAZ       | -1.0447  | 1.0447   | 21.034  | -0.2048  | 0.84074 | 0.90878 | -6.2456 | 4150     |
| MRFAP1L1  | 0.30767  | 0.30767  | 9.4715  | 0.20462  | 0.84088 | 0.90887 | -6.2457 | 114932   |
| ESPL1     | -0.03736 | 0.03736  | 0.86239 | -0.20397 | 0.84137 | 0.90934 | -6.2458 | 9700     |
| FXR1      | 0.10422  | 0.10422  | 3.2111  | 0.20332  | 0.84187 | 0.90979 | -6.2459 | 8087     |
| AFAP1     | 0.16386  | 0.16386  | 2.8277  | 0.20327  | 0.84191 | 0.90979 | -6.2459 | 60312    |
| RPL38     | 11.047   | 11.047   | 243.41  | 0.20323  | 0.84194 | 0.90979 | -6.246  | 6169     |
| DNAJC13   | -0.17538 | 0.17538  | 5.0504  | -0.20302 | 0.8421  | 0.9099  | -6.246  | 23317    |
| AOAH      | 0.11551  | 0.11551  | 1.2811  | 0.20286  | 0.84222 | 0.90992 | -6.246  | 313      |
| DUSP16    | -0.14585 | 0.14585  | 4.7261  | -0.20286 | 0.84222 | 0.90992 | -6.246  | 80824    |
| CDC25B    | 0.96689  | 0.96689  | 11.176  | 0.20271  | 0.84234 | 0.90998 | -6.2461 | 994      |
| ARHGAP22  | 0.033655 | 0.033655 | 0.46244 | 0.20249  | 0.8425  | 0.91005 | -6.2461 | 58504    |
| CCDC25    | -0.15809 | 0.15809  | 3.8143  | -0.20249 | 0.84251 | 0.91005 | -6.2461 | 55246    |
| WDR76     | -0.06543 | 0.065433 | 1.2355  | -0.20239 | 0.84258 | 0.91005 | -6.2461 | 79968    |
| SLC25A1   | 0.59858  | 0.59858  | 12.988  | 0.20214  | 0.84277 | 0.91005 | -6.2462 | 6576     |
| PITPNM2   | -0.09646 | 0.096457 | 2.1114  | -0.20213 | 0.84279 | 0.91005 | -6.2462 | 57605    |
| ANXA11    | -0.84234 | 0.84234  | 16.767  | -0.20212 | 0.84279 | 0.91005 | -6.2462 | 311      |
| ANTXR1    | 0.74673  | 0.74673  | 16.666  | 0.20206  | 0.84283 | 0.91005 | -6.2462 | 84168    |
| PNPO      | -0.19021 | 0.19021  | 5.0798  | -0.20202 | 0.84287 | 0.91005 | -6.2462 | 55163    |
| EP300-AS1 | 0.065489 | 0.065489 | 1.24    | 0.20199  | 0.84289 | 0.91005 | -6.2462 | 1.02E+08 |
| ZNF226    | -0.06286 | 0.062855 | 1.5125  | -0.2018  | 0.84303 | 0.91015 | -6.2462 | 7769     |
| DRG2      | -0.17511 | 0.17511  | 5.4757  | -0.20173 | 0.84309 | 0.91015 | -6.2463 | 1819     |
| ARMC8     | 0.059132 | 0.059132 | 2.7055  | 0.20158  | 0.8432  | 0.91021 | -6.2463 | 25852    |
| BANF1     | -0.91934 | 0.91934  | 18.412  | -0.20124 | 0.84346 | 0.91044 | -6.2464 | 8815     |
| EXOSC3    | 0.13047  | 0.13047  | 3.8287  | 0.20115  | 0.84353 | 0.91046 | -6.2464 | 51010    |



|              |          |          |         |          |         |         |         |          |
|--------------|----------|----------|---------|----------|---------|---------|---------|----------|
| RCC1         | 0.28899  | 0.28899  | 4.3453  | 0.20104  | 0.84362 | 0.91049 | -6.2464 | 1104     |
| PIK3AP1      | 0.13814  | 0.13814  | 1.5755  | 0.20073  | 0.84385 | 0.91063 | -6.2465 | 118788   |
| CHTOP        | -0.22532 | 0.22532  | 8.6398  | -0.20072 | 0.84386 | 0.91063 | -6.2465 | 26097    |
| HMG20B       | 0.66757  | 0.66757  | 15.386  | 0.20066  | 0.84391 | 0.91063 | -6.2465 | 10362    |
| COL18A1-AS1  | -0.08891 | 0.088905 | 0.81791 | -0.20052 | 0.84402 | 0.91065 | -6.2465 | 378832   |
| LLGL1        | -0.20251 | 0.20251  | 4.8627  | -0.20049 | 0.84404 | 0.91065 | -6.2465 | 3996     |
| ZNF521       | 0.21335  | 0.21335  | 3.7623  | 0.20016  | 0.84429 | 0.91087 | -6.2466 | 25925    |
| LINC00339    | 0.098661 | 0.098661 | 1.3966  | 0.20009  | 0.84435 | 0.91087 | -6.2466 | 29092    |
| P2RY2        | 0.22865  | 0.22865  | 3.5311  | 0.20001  | 0.84441 | 0.91088 | -6.2466 | 5029     |
| UBQLN4       | -0.29671 | 0.29671  | 7.8197  | -0.19994 | 0.84446 | 0.91088 | -6.2466 | 56893    |
| PTBP1        | 1.2565   | 1.2565   | 33.299  | 0.19958  | 0.84473 | 0.91111 | -6.2467 | 5725     |
| AGPAT3       | 0.25647  | 0.25647  | 7.1482  | 0.19946  | 0.84483 | 0.91115 | -6.2467 | 56894    |
| C3orf14      | -0.03951 | 0.039511 | 0.68126 | -0.19931 | 0.84494 | 0.91122 | -6.2468 | 57415    |
| SYPL2        | -0.02102 | 0.021015 | 0.15879 | -0.19903 | 0.84516 | 0.91139 | -6.2468 | 284612   |
| PMPCA        | -0.2396  | 0.2396   | 6.6293  | -0.19876 | 0.84537 | 0.91156 | -6.2469 | 23203    |
| DCHS1        | 0.26435  | 0.26435  | 3.4454  | 0.19869  | 0.84542 | 0.91156 | -6.2469 | 8642     |
| ZNF223       | -0.03143 | 0.031434 | 0.76504 | -0.19856 | 0.84552 | 0.9116  | -6.2469 | 7766     |
| TIPARP-AS1   | 0.043362 | 0.043362 | 0.8277  | 0.1985   | 0.84556 | 0.9116  | -6.2469 | 1E+08    |
| EFCAB3       | 0.016258 | 0.016258 | 0.16442 | 0.19806  | 0.8459  | 0.9119  | -6.247  | 146779   |
| CD99         | 0.62183  | 0.62183  | 11.673  | 0.19757  | 0.84628 | 0.91226 | -6.2471 | 4267     |
| FLYWCH2      | 0.28454  | 0.28454  | 5.5054  | 0.19745  | 0.84637 | 0.91228 | -6.2471 | 114984   |
| WDR55        | 0.14859  | 0.14859  | 4.8636  | 0.1974   | 0.84641 | 0.91228 | -6.2472 | 54853    |
| RNF227       | -1.0122  | 1.0122   | 8.0377  | -0.19725 | 0.84653 | 0.91235 | -6.2472 | 284023   |
| LOC101927884 | 0.016622 | 0.016622 | 0.15945 | 0.19682  | 0.84685 | 0.91264 | -6.2473 | 1.02E+08 |
| CHST14       | 0.16833  | 0.16833  | 2.8162  | 0.19654  | 0.84707 | 0.91281 | -6.2473 | 113189   |
| CASP17P      | 0.055302 | 0.055302 | 0.75214 | 0.1963   | 0.84726 | 0.91296 | -6.2474 | 643733   |

|           |          |          |         |          |         |         |         |        |
|-----------|----------|----------|---------|----------|---------|---------|---------|--------|
| HOXB13    | -0.03139 | 0.031389 | 0.19898 | -0.19598 | 0.8475  | 0.91316 | -6.2474 | 10481  |
| ABCA13    | -0.02128 | 0.021283 | 0.17718 | -0.19577 | 0.84766 | 0.91328 | -6.2475 | 154664 |
| CEBPD     | 2.0043   | 2.0043   | 31.617  | 0.1955   | 0.84787 | 0.91344 | -6.2475 | 1052   |
| HNRNPF    | 0.92036  | 0.92036  | 23.035  | 0.19524  | 0.84807 | 0.91356 | -6.2476 | 3185   |
| CYB5A     | 0.514    | 0.514    | 11.709  | 0.19521  | 0.84809 | 0.91356 | -6.2476 | 1528   |
| ZSWIM3    | 0.029192 | 0.029192 | 0.52231 | 0.19472  | 0.84847 | 0.91387 | -6.2477 | 140831 |
| RPA1      | -0.3298  | 0.3298   | 8.933   | -0.19465 | 0.84852 | 0.91387 | -6.2477 | 6117   |
| GPR160    | 0.039948 | 0.039948 | 0.55246 | 0.1946   | 0.84856 | 0.91387 | -6.2477 | 26996  |
| TRADD     | 0.43845  | 0.43845  | 7.2797  | 0.19437  | 0.84873 | 0.91387 | -6.2478 | 8717   |
| OTUD6B    | 0.033409 | 0.033409 | 1.8148  | 0.19436  | 0.84875 | 0.91387 | -6.2478 | 51633  |
| UBE2I     | 0.28951  | 0.28951  | 8.9119  | 0.19429  | 0.8488  | 0.91387 | -6.2478 | 7329   |
| PNPT1     | -0.10058 | 0.10058  | 2.5796  | -0.19426 | 0.84882 | 0.91387 | -6.2478 | 87178  |
| RAB11FIP2 | -0.06152 | 0.061522 | 1.8768  | -0.19424 | 0.84884 | 0.91387 | -6.2478 | 22841  |
| POLK      | -0.05073 | 0.050729 | 1.3084  | -0.19421 | 0.84886 | 0.91387 | -6.2478 | 51426  |
| GPATCH4   | -0.11296 | 0.11296  | 2.9149  | -0.19407 | 0.84897 | 0.91393 | -6.2478 | 54865  |
| TSEN54    | -0.177   | 0.177    | 4.1675  | -0.19376 | 0.8492  | 0.91405 | -6.2479 | 283989 |
| ZNF765    | -0.03239 | 0.032387 | 1.0726  | -0.19374 | 0.84922 | 0.91405 | -6.2479 | 91661  |
| G0S2      | 1.1441   | 1.1441   | 9.1164  | 0.19371  | 0.84924 | 0.91405 | -6.2479 | 50486  |
| C6orf15   | -0.04087 | 0.040867 | 0.42401 | -0.19342 | 0.84947 | 0.91423 | -6.248  | 29113  |
| USP32P2   | 0.041617 | 0.041617 | 0.54628 | 0.19331  | 0.84955 | 0.91426 | -6.248  | 220594 |
| CLIC2     | -0.1225  | 0.1225   | 1.9882  | -0.19322 | 0.84961 | 0.91427 | -6.248  | 1193   |
| FCER1G    | 1.4774   | 1.4774   | 14.36   | 0.19311  | 0.84971 | 0.91431 | -6.248  | 2207   |
| PPP1R18   | 0.074967 | 0.074967 | 1.4093  | 0.19281  | 0.84994 | 0.9145  | -6.2481 | 170954 |
| NCBP2     | 0.22613  | 0.22613  | 6.1117  | 0.19274  | 0.84999 | 0.9145  | -6.2481 | 22916  |
| IVD       | -0.0588  | 0.058797 | 1.2272  | -0.19236 | 0.85028 | 0.91468 | -6.2482 | 3712   |
| EIF3B     | 1.1619   | 1.1619   | 28.701  | 0.19226  | 0.85035 | 0.91468 | -6.2482 | 8662   |

|           |          |          |         |          |         |         |         |        |
|-----------|----------|----------|---------|----------|---------|---------|---------|--------|
| RIC8B     | 0.031606 | 0.031606 | 0.81035 | 0.19225  | 0.85036 | 0.91468 | -6.2482 | 55188  |
| EML2-AS1  | 0.016563 | 0.016563 | 0.16103 | 0.19224  | 0.85037 | 0.91468 | -6.2482 | 1E+08  |
| ACVRL1    | -0.27423 | 0.27423  | 4.6468  | -0.19168 | 0.8508  | 0.91508 | -6.2483 | 94     |
| NDUFS3    | 0.67049  | 0.67049  | 15.276  | 0.19155  | 0.8509  | 0.91513 | -6.2483 | 4722   |
| FCGR1B    | 0.023683 | 0.023683 | 0.21748 | 0.19126  | 0.85112 | 0.91531 | -6.2484 | 2210   |
| CSTF2     | 0.10314  | 0.10314  | 2.5485  | 0.19087  | 0.85143 | 0.91556 | -6.2485 | 1478   |
| VEZF1     | -0.15236 | 0.15236  | 4.1536  | -0.19082 | 0.85146 | 0.91556 | -6.2485 | 7716   |
| ACAD11    | 0.16981  | 0.16981  | 3.3762  | 0.19045  | 0.85174 | 0.91581 | -6.2485 | 84129  |
| TBXA2R    | 0.060571 | 0.060571 | 0.65337 | 0.19035  | 0.85182 | 0.91583 | -6.2486 | 6915   |
| STXBP4    | -0.03102 | 0.031021 | 0.80707 | -0.18981 | 0.85224 | 0.91622 | -6.2487 | 252983 |
| PLPP6     | 0.090844 | 0.090844 | 2.4231  | 0.18958  | 0.85241 | 0.91631 | -6.2487 | 403313 |
| RABEP1    | 0.15123  | 0.15123  | 4.4124  | 0.18956  | 0.85243 | 0.91631 | -6.2487 | 9135   |
| BACE1     | 0.20795  | 0.20795  | 5.6471  | 0.18949  | 0.85249 | 0.91631 | -6.2487 | 23621  |
| AVPR1A    | 0.049205 | 0.049205 | 0.61278 | 0.18883  | 0.85299 | 0.9168  | -6.2489 | 552    |
| WAPL      | -0.1711  | 0.1711   | 6.9774  | -0.18872 | 0.85308 | 0.91683 | -6.2489 | 23063  |
| TMTC1     | 0.12218  | 0.12218  | 1.8183  | 0.18858  | 0.85318 | 0.91688 | -6.2489 | 83857  |
| MCM4      | -0.34658 | 0.34658  | 8.5694  | -0.18838 | 0.85333 | 0.91691 | -6.2489 | 4173   |
| TARBP2    | 0.095919 | 0.095919 | 2.5645  | 0.18837  | 0.85335 | 0.91691 | -6.249  | 6895   |
| NPTXR     | 0.032654 | 0.032654 | 0.45234 | 0.18835  | 0.85336 | 0.91691 | -6.249  | 23467  |
| RPS14     | 19.047   | 19.047   | 408.1   | 0.18817  | 0.8535  | 0.91698 | -6.249  | 6208   |
| ALG11     | -0.05038 | 0.050383 | 1.6577  | -0.18811 | 0.85354 | 0.91698 | -6.249  | 440138 |
| SAC3D1    | 0.14611  | 0.14611  | 2.3333  | 0.18802  | 0.85361 | 0.917   | -6.249  | 29901  |
| CDC16     | 0.25411  | 0.25411  | 8.3698  | 0.1879   | 0.85371 | 0.91704 | -6.249  | 8881   |
| PROB1     | 0.098916 | 0.098916 | 1.4464  | 0.18774  | 0.85383 | 0.91708 | -6.2491 | 389333 |
| EBAG9     | -0.06253 | 0.062534 | 1.7535  | -0.18763 | 0.85391 | 0.91708 | -6.2491 | 9166   |
| RUNX1-IT1 | 0.075903 | 0.075903 | 0.63988 | 0.18759  | 0.85394 | 0.91708 | -6.2491 | 80215  |

|               |          |          |         |          |         |         |         |          |
|---------------|----------|----------|---------|----------|---------|---------|---------|----------|
| FNDC3A        | 0.20482  | 0.20482  | 4.6328  | 0.18757  | 0.85396 | 0.91708 | -6.2491 | 22862    |
| DHRX          | 0.038413 | 0.038413 | 1.0734  | 0.18731  | 0.85416 | 0.91723 | -6.2492 | 207063   |
| SPRR2B        | -8.8473  | 8.8473   | 60.105  | -0.18725 | 0.85421 | 0.91723 | -6.2492 | 6701     |
| NTNG2         | 0.019217 | 0.019217 | 0.17753 | 0.18701  | 0.85439 | 0.91735 | -6.2492 | 84628    |
| U2AF2         | -0.66682 | 0.66682  | 16.236  | -0.18696 | 0.85443 | 0.91735 | -6.2492 | 11338    |
| RIN2          | -0.65584 | 0.65584  | 15.398  | -0.1867  | 0.85463 | 0.91748 | -6.2493 | 54453    |
| DNAJC25-GNG10 | 0.0707   | 0.0707   | 0.67463 | 0.18666  | 0.85466 | 0.91748 | -6.2493 | 552891   |
| LTB           | -0.01441 | 0.014407 | 0.14266 | -0.18658 | 0.85472 | 0.91749 | -6.2493 | 4050     |
| TMEM199       | 0.076011 | 0.076011 | 2.9481  | 0.1865   | 0.85478 | 0.91749 | -6.2493 | 147007   |
| MTMR11        | 0.10261  | 0.10261  | 2.5455  | 0.18643  | 0.85483 | 0.91749 | -6.2493 | 10903    |
| DEF8          | 0.1731   | 0.1731   | 5.0879  | 0.18612  | 0.85508 | 0.9177  | -6.2494 | 54849    |
| TPST1         | 0.17054  | 0.17054  | 4.1128  | 0.18603  | 0.85515 | 0.91771 | -6.2494 | 8460     |
| CH17-340M24.3 | -0.04567 | 0.045672 | 0.51747 | -0.18557 | 0.8555  | 0.91803 | -6.2495 | 158960   |
| CEMIP         | -2.6434  | 2.6434   | 17.14   | -0.18545 | 0.85559 | 0.91807 | -6.2495 | 57214    |
| MMRN1         | 0.35259  | 0.35259  | 5.0262  | 0.18535  | 0.85567 | 0.91809 | -6.2495 | 22915    |
| METTL26       | -0.30229 | 0.30229  | 7.0359  | -0.18529 | 0.85571 | 0.91809 | -6.2495 | 84326    |
| LOC100499194  | 0.022753 | 0.022753 | 0.39117 | 0.18508  | 0.85587 | 0.9182  | -6.2496 | 1E+08    |
| MIS18A        | -0.06137 | 0.061372 | 1.619   | -0.18501 | 0.85593 | 0.9182  | -6.2496 | 54069    |
| ARHGEF1       | -0.50607 | 0.50607  | 10.799  | -0.18479 | 0.8561  | 0.91832 | -6.2496 | 9138     |
| SESTD1        | -0.07264 | 0.072635 | 1.6152  | -0.18472 | 0.85615 | 0.91832 | -6.2497 | 91404    |
| NR1H2         | 0.50795  | 0.50795  | 13.574  | 0.18465  | 0.8562  | 0.91832 | -6.2497 | 7376     |
| DAP3          | -0.27693 | 0.27693  | 11.015  | -0.18429 | 0.85648 | 0.91853 | -6.2497 | 7818     |
| RNF144A-AS1   | 0.022619 | 0.022619 | 0.49833 | 0.18426  | 0.85651 | 0.91853 | -6.2497 | 386597   |
| PRH1-TAS2R14  | 0.016733 | 0.016733 | 0.19299 | 0.18383  | 0.85684 | 0.91879 | -6.2498 | 1.07E+08 |
| LOC100505555  | 0.017833 | 0.017833 | 0.24445 | 0.18375  | 0.8569  | 0.91879 | -6.2498 | 1.01E+08 |
| C2CD4B        | 0.03798  | 0.03798  | 0.67177 | 0.18367  | 0.85696 | 0.91879 | -6.2499 | 388125   |

|                |          |          |         |          |         |         |         |          |
|----------------|----------|----------|---------|----------|---------|---------|---------|----------|
| ATP10B         | 0.27783  | 0.27783  | 3.0345  | 0.18366  | 0.85697 | 0.91879 | -6.2499 | 23120    |
| LOC101927023   | -0.02045 | 0.020446 | 0.23899 | -0.18352 | 0.85707 | 0.9188  | -6.2499 | 1.02E+08 |
| DDR2           | 0.3585   | 0.3585   | 5.5995  | 0.18341  | 0.85716 | 0.9188  | -6.2499 | 4921     |
| GLRX5          | 0.24102  | 0.24102  | 6.6893  | 0.18326  | 0.85728 | 0.9188  | -6.2499 | 51218    |
| RPAIN          | -0.05968 | 0.059677 | 2.9207  | -0.18323 | 0.8573  | 0.9188  | -6.2499 | 84268    |
| GZMB           | 0.056919 | 0.056919 | 0.58232 | 0.18317  | 0.85734 | 0.9188  | -6.2499 | 3002     |
| GAR1           | -0.09895 | 0.098951 | 2.6752  | -0.18307 | 0.85742 | 0.9188  | -6.25   | 54433    |
| MRPL40         | -0.14763 | 0.14763  | 3.2053  | -0.18305 | 0.85743 | 0.9188  | -6.25   | 64976    |
| PDLIM2         | 0.27254  | 0.27254  | 5.3017  | 0.18293  | 0.85753 | 0.9188  | -6.25   | 64236    |
| SCARF2         | -0.44682 | 0.44682  | 4.575   | -0.18292 | 0.85754 | 0.9188  | -6.25   | 91179    |
| ATG4D          | 0.31906  | 0.31906  | 7.3242  | 0.18291  | 0.85754 | 0.9188  | -6.25   | 84971    |
| SCAND1         | 0.3421   | 0.3421   | 8.0087  | 0.18287  | 0.85757 | 0.9188  | -6.25   | 51282    |
| IREB2          | 0.13153  | 0.13153  | 4.6881  | 0.18275  | 0.85767 | 0.91884 | -6.25   | 3658     |
| SYF2           | -0.22807 | 0.22807  | 5.869   | -0.18263 | 0.85776 | 0.91888 | -6.2501 | 25949    |
| CLEC1A         | -0.0369  | 0.036895 | 0.69992 | -0.18242 | 0.85792 | 0.91897 | -6.2501 | 51267    |
| PYCR3          | -0.05807 | 0.058072 | 1.2868  | -0.18225 | 0.85806 | 0.91897 | -6.2501 | 65263    |
| RPL17-C18orf32 | -0.06171 | 0.061705 | 1.2084  | -0.18209 | 0.85817 | 0.91897 | -6.2502 | 1.01E+08 |
| IRAK4          | -0.04535 | 0.045346 | 2.2849  | -0.18204 | 0.85821 | 0.91897 | -6.2502 | 51135    |
| CASP6          | 0.088276 | 0.088276 | 2.0738  | 0.18203  | 0.85822 | 0.91897 | -6.2502 | 839      |
| NCF4           | 0.17636  | 0.17636  | 2.3834  | 0.18198  | 0.85826 | 0.91897 | -6.2502 | 4689     |
| PREX2          | -0.06861 | 0.068614 | 1.4959  | -0.18197 | 0.85827 | 0.91897 | -6.2502 | 80243    |
| GOLGA3         | -0.26878 | 0.26878  | 9.5252  | -0.18195 | 0.85828 | 0.91897 | -6.2502 | 2802     |
| UBR5           | -0.14532 | 0.14532  | 10.026  | -0.18181 | 0.85839 | 0.91903 | -6.2502 | 51366    |
| SP3            | 0.23065  | 0.23065  | 8.0619  | 0.18147  | 0.85866 | 0.91926 | -6.2503 | 6670     |
| TNFAIP8L2      | 0.060414 | 0.060414 | 1.1389  | 0.18117  | 0.85889 | 0.91945 | -6.2503 | 79626    |
| SEMA5B         | 0.023303 | 0.023303 | 0.28186 | 0.18033  | 0.85953 | 0.92006 | -6.2505 | 54437    |

|             |          |          |          |          |         |         |         |          |
|-------------|----------|----------|----------|----------|---------|---------|---------|----------|
| FGD2        | -0.09977 | 0.099771 | 2.6143   | -0.18028 | 0.85957 | 0.92006 | -6.2505 | 221472   |
| RXYLT1      | 0.076046 | 0.076046 | 2.2296   | 0.17972  | 0.86    | 0.92045 | -6.2506 | 10329    |
| SMCHD1      | 0.11409  | 0.11409  | 4.3446   | 0.17963  | 0.86007 | 0.92045 | -6.2506 | 23347    |
| YEATS2      | 0.096706 | 0.096706 | 4.1256   | 0.17959  | 0.8601  | 0.92045 | -6.2506 | 55689    |
| HMGB2       | 0.60277  | 0.60277  | 8.95     | 0.1794   | 0.86024 | 0.92049 | -6.2507 | 3148     |
| SCARNA22    | -0.06167 | 0.061672 | 0.92818  | -0.17937 | 0.86027 | 0.92049 | -6.2507 | 677770   |
| ZNF385D-AS1 | 0.016072 | 0.016072 | 0.11276  | 0.17933  | 0.8603  | 0.92049 | -6.2507 | 1.01E+08 |
| CSNK2A3     | 0.015221 | 0.015221 | 0.22411  | 0.17913  | 0.86046 | 0.9206  | -6.2507 | 283106   |
| TRIM6       | 0.036752 | 0.036752 | 0.5457   | 0.17899  | 0.86056 | 0.92061 | -6.2507 | 117854   |
| POU2F2      | 0.027258 | 0.027258 | 0.41274  | 0.17897  | 0.86057 | 0.92061 | -6.2507 | 5452     |
| LINC00618   | -0.01705 | 0.017046 | 0.10429  | -0.17887 | 0.86066 | 0.92064 | -6.2508 | 145249   |
| SHQ1        | 0.073472 | 0.073472 | 2.6636   | 0.17872  | 0.86077 | 0.92067 | -6.2508 | 55164    |
| ZNF32       | 0.1781   | 0.1781   | 4.0857   | 0.17863  | 0.86084 | 0.92067 | -6.2508 | 7580     |
| SATB2       | 0.03549  | 0.03549  | 0.66304  | 0.17862  | 0.86085 | 0.92067 | -6.2508 | 23314    |
| CAAP1       | -0.03506 | 0.035056 | 1.6823   | -0.17811 | 0.86124 | 0.92103 | -6.2509 | 79886    |
| MPP6        | 0.024574 | 0.024574 | 0.83287  | 0.17748  | 0.86173 | 0.92148 | -6.251  | 51678    |
| CCR4        | -0.02524 | 0.025239 | 0.45862  | -0.17736 | 0.86181 | 0.92148 | -6.251  | 1233     |
| PAQR7       | 0.39785  | 0.39785  | 7.1083   | 0.17735  | 0.86183 | 0.92148 | -6.251  | 164091   |
| LINC02017   | -0.01284 | 0.012844 | 0.062419 | -0.17727 | 0.86188 | 0.92149 | -6.251  | 1.05E+08 |
| NGDN        | -0.11323 | 0.11323  | 4.1902   | -0.17706 | 0.86205 | 0.92161 | -6.2511 | 25983    |
| PEX3        | 0.13004  | 0.13004  | 3.0956   | 0.17692  | 0.86216 | 0.92166 | -6.2511 | 8504     |
| SNORA80D    | -0.0223  | 0.022299 | 0.17069  | -0.17662 | 0.86239 | 0.9218  | -6.2512 | 1.1E+08  |
| PRR13       | -0.80619 | 0.80619  | 18.421   | -0.17658 | 0.86242 | 0.9218  | -6.2512 | 54458    |
| PPP1R35     | -0.23299 | 0.23299  | 5.061    | -0.17654 | 0.86245 | 0.9218  | -6.2512 | 221908   |
| OSBPL2      | 0.32236  | 0.32236  | 10.127   | 0.17634  | 0.86261 | 0.92191 | -6.2512 | 9885     |
| RFXANK      | -0.19386 | 0.19386  | 5.2071   | -0.17587 | 0.86297 | 0.92223 | -6.2513 | 8625     |

|           |          |          |         |          |         |         |         |        |
|-----------|----------|----------|---------|----------|---------|---------|---------|--------|
| PGRMC2    | -0.30886 | 0.30886  | 8.1194  | -0.17554 | 0.86322 | 0.92245 | -6.2514 | 10424  |
| ABC6      | -0.18272 | 0.18272  | 3.7874  | -0.17474 | 0.86384 | 0.92305 | -6.2515 | 10058  |
| LMF2      | -0.46533 | 0.46533  | 10.672  | -0.17456 | 0.86398 | 0.92314 | -6.2515 | 91289  |
| GCSH      | -0.14408 | 0.14408  | 2.9897  | -0.17434 | 0.86415 | 0.92326 | -6.2516 | 2653   |
| RHBDD3    | -0.11047 | 0.11047  | 2.291   | -0.17373 | 0.86462 | 0.92365 | -6.2517 | 25807  |
| ARMCX3    | 0.18296  | 0.18296  | 3.3981  | 0.17372  | 0.86462 | 0.92365 | -6.2517 | 51566  |
| ELAVL1    | 0.11722  | 0.11722  | 4.2906  | 0.17334  | 0.86491 | 0.92388 | -6.2518 | 1994   |
| TNFRSF13C | -0.08782 | 0.08782  | 0.88871 | -0.1733  | 0.86495 | 0.92388 | -6.2518 | 115650 |
| GPC1      | -0.82144 | 0.82144  | 21.4    | -0.17311 | 0.86509 | 0.92398 | -6.2518 | 2817   |
| CD3D      | 0.052258 | 0.052258 | 0.9642  | 0.17288  | 0.86527 | 0.92411 | -6.2518 | 915    |
| RARRES1   | -0.11513 | 0.11513  | 0.94671 | -0.1724  | 0.86564 | 0.92435 | -6.2519 | 5918   |
| NDST1     | 0.59747  | 0.59747  | 19.769  | 0.17237  | 0.86566 | 0.92435 | -6.2519 | 3340   |
| CASKIN2   | -0.17466 | 0.17466  | 4.7287  | -0.17237 | 0.86566 | 0.92435 | -6.2519 | 57513  |
| METTL23   | 0.12177  | 0.12177  | 3.9019  | 0.1721   | 0.86587 | 0.92445 | -6.252  | 124512 |
| THAP4     | -0.2375  | 0.2375   | 8.3604  | -0.17208 | 0.86589 | 0.92445 | -6.252  | 51078  |
| NUDT14    | -0.16876 | 0.16876  | 3.0919  | -0.17204 | 0.86592 | 0.92445 | -6.252  | 256281 |
| HSD17B10  | -0.87913 | 0.87913  | 23.584  | -0.17183 | 0.86608 | 0.92456 | -6.252  | 3028   |
| USH1G     | 0.22208  | 0.22208  | 2.47    | 0.17177  | 0.86612 | 0.92456 | -6.252  | 124590 |
| ZC3HC1    | -0.07843 | 0.078426 | 1.9144  | -0.17168 | 0.86619 | 0.92457 | -6.2521 | 51530  |
| UPRT      | -0.03331 | 0.033307 | 1.0751  | -0.17162 | 0.86625 | 0.92457 | -6.2521 | 139596 |
| EPHB3     | 0.59127  | 0.59127  | 13.259  | 0.17147  | 0.86636 | 0.92463 | -6.2521 | 2049   |
| UBXN6     | -0.7991  | 0.7991   | 23.183  | -0.1711  | 0.86664 | 0.92488 | -6.2522 | 80700  |
| FHL5      | -0.10451 | 0.10451  | 1.3546  | -0.17081 | 0.86687 | 0.92506 | -6.2522 | 9457   |
| PPP3R1    | 0.22971  | 0.22971  | 11.822  | 0.17038  | 0.8672  | 0.92535 | -6.2523 | 5534   |
| IQSEC1    | 0.15512  | 0.15512  | 6.4166  | 0.17026  | 0.86729 | 0.92539 | -6.2523 | 9922   |
| RASAL3    | -0.04667 | 0.046672 | 0.80219 | -0.17009 | 0.86742 | 0.92547 | -6.2523 | 64926  |

|           |          |          |         |          |         |         |         |        |
|-----------|----------|----------|---------|----------|---------|---------|---------|--------|
| LOC286297 | -0.01412 | 0.014124 | 0.14126 | -0.17002 | 0.86748 | 0.92548 | -6.2523 | 286297 |
| C8orf88   | 0.072567 | 0.072567 | 1.4161  | 0.16983  | 0.86762 | 0.92552 | -6.2524 | 1E+08  |
| BOLA2     | -0.02155 | 0.021548 | 0.35291 | -0.16976 | 0.86768 | 0.92552 | -6.2524 | 552900 |
| TMEM160   | -0.56184 | 0.56184  | 9.1947  | -0.16975 | 0.86768 | 0.92552 | -6.2524 | 54958  |
| RSF1      | -0.10821 | 0.10821  | 4.4037  | -0.16945 | 0.86792 | 0.92568 | -6.2524 | 51773  |
| ADAMTS15  | -0.08157 | 0.081566 | 0.97499 | -0.16941 | 0.86794 | 0.92568 | -6.2525 | 170689 |
| KYAT3     | -0.12066 | 0.12066  | 3.6736  | -0.16915 | 0.86815 | 0.92584 | -6.2525 | 56267  |
| SNW1      | -0.29136 | 0.29136  | 10.001  | -0.16888 | 0.86836 | 0.92587 | -6.2525 | 22938  |
| RPL12     | -18.07   | 18.07    | 455.1   | -0.1688  | 0.86841 | 0.92587 | -6.2526 | 6136   |
| KIAA0100  | 0.31576  | 0.31576  | 16.438  | 0.1688   | 0.86842 | 0.92587 | -6.2526 | 9703   |
| BDP1      | -0.08402 | 0.084023 | 4.3283  | -0.16879 | 0.86843 | 0.92587 | -6.2526 | 55814  |
| ALKBH1    | -0.02863 | 0.028632 | 1.2397  | -0.16876 | 0.86845 | 0.92587 | -6.2526 | 8846   |
| ATP7B     | -0.01725 | 0.017253 | 0.52761 | -0.16868 | 0.86851 | 0.92587 | -6.2526 | 540    |
| TMEM240   | 0.016634 | 0.016634 | 0.26826 | 0.1686   | 0.86857 | 0.92588 | -6.2526 | 339453 |
| SLC4A2    | -0.27304 | 0.27304  | 6.0977  | -0.16819 | 0.86889 | 0.92615 | -6.2527 | 6522   |
| LOC728975 | -0.02284 | 0.022841 | 0.51909 | -0.16813 | 0.86894 | 0.92615 | -6.2527 | 728975 |
| SYK       | 0.15554  | 0.15554  | 5.5604  | 0.16792  | 0.8691  | 0.92625 | -6.2527 | 6850   |
| ACADM     | 0.125    | 0.125    | 2.9455  | 0.16786  | 0.86914 | 0.92625 | -6.2527 | 34     |
| DCUN1D5   | 0.032701 | 0.032701 | 1.3574  | 0.16767  | 0.86929 | 0.92636 | -6.2528 | 84259  |
| ZNF569    | 0.018059 | 0.018059 | 0.39347 | 0.16747  | 0.86944 | 0.92646 | -6.2528 | 148266 |
| PDGFRL    | 0.19688  | 0.19688  | 2.761   | 0.1673   | 0.86957 | 0.92654 | -6.2528 | 5157   |
| CEP70     | -0.03294 | 0.032937 | 0.89015 | -0.16711 | 0.86972 | 0.92657 | -6.2529 | 80321  |
| CLIP4     | -0.17408 | 0.17408  | 5.5555  | -0.16706 | 0.86976 | 0.92657 | -6.2529 | 79745  |
| FBXO9     | -0.15821 | 0.15821  | 5.0506  | -0.16705 | 0.86977 | 0.92657 | -6.2529 | 26268  |
| LRR61     | -0.07509 | 0.075087 | 1.2789  | -0.16656 | 0.87015 | 0.92675 | -6.2529 | 65999  |
| ABHD2     | 0.3182   | 0.3182   | 8.3005  | 0.16649  | 0.8702  | 0.92675 | -6.253  | 11057  |



|           |          |          |         |          |         |         |         |        |
|-----------|----------|----------|---------|----------|---------|---------|---------|--------|
| GAL       | -0.13299 | 0.13299  | 0.83992 | -0.16641 | 0.87026 | 0.92675 | -6.253  | 51083  |
| PRDX2     | -1.9547  | 1.9547   | 50.134  | -0.1664  | 0.87027 | 0.92675 | -6.253  | 7001   |
| EMILIN2   | -0.22591 | 0.22591  | 3.9272  | -0.1664  | 0.87027 | 0.92675 | -6.253  | 84034  |
| DNASE1L2  | -0.52076 | 0.52076  | 4.2683  | -0.16636 | 0.8703  | 0.92675 | -6.253  | 1775   |
| FLVCR1-DT | -0.01945 | 0.019453 | 0.22086 | -0.16629 | 0.87035 | 0.92675 | -6.253  | 642946 |
| ELP4      | -0.04578 | 0.045784 | 1.8447  | -0.16621 | 0.87041 | 0.92675 | -6.253  | 26610  |
| DOHH      | -0.12586 | 0.12586  | 2.4847  | -0.16613 | 0.87048 | 0.92675 | -6.253  | 83475  |
| PLSCR1    | -0.58146 | 0.58146  | 7.0267  | -0.16612 | 0.87049 | 0.92675 | -6.253  | 5359   |
| MTSS1     | -0.32224 | 0.32224  | 10.746  | -0.16589 | 0.87066 | 0.92688 | -6.2531 | 9788   |
| EPS8      | 0.34209  | 0.34209  | 5.4959  | 0.16578  | 0.87075 | 0.92691 | -6.2531 | 2059   |
| AURKAP1   | -0.03789 | 0.037894 | 0.7948  | -0.16563 | 0.87086 | 0.92698 | -6.2531 | 6791   |
| KLRB1     | 0.040048 | 0.040048 | 0.59375 | 0.16532  | 0.8711  | 0.92712 | -6.2532 | 3820   |
| KBTBD11   | 0.021408 | 0.021408 | 0.63156 | 0.16527  | 0.87114 | 0.92712 | -6.2532 | 9920   |
| UBE3B     | -0.1037  | 0.1037   | 4.9353  | -0.16525 | 0.87116 | 0.92712 | -6.2532 | 89910  |
| ADH5      | -0.64205 | 0.64205  | 12.817  | -0.16475 | 0.87154 | 0.92747 | -6.2533 | 128    |
| ARHGEF25  | -0.12334 | 0.12334  | 1.8987  | -0.16456 | 0.87169 | 0.92757 | -6.2533 | 115557 |
| CEP162    | -0.02969 | 0.029693 | 0.88834 | -0.16444 | 0.87179 | 0.92761 | -6.2533 | 22832  |
| PER3      | -0.35481 | 0.35481  | 6.3298  | -0.16418 | 0.87199 | 0.92768 | -6.2534 | 8863   |
| GOLGA2    | 0.30478  | 0.30478  | 11.764  | 0.16416  | 0.872   | 0.92768 | -6.2534 | 2801   |
| RPL28     | 1.7339   | 1.7339   | 44.875  | 0.16414  | 0.87201 | 0.92768 | -6.2534 | 6158   |
| CIPC      | 0.14986  | 0.14986  | 4.6292  | 0.16405  | 0.87209 | 0.92769 | -6.2534 | 85457  |
| LIX1L     | 0.20054  | 0.20054  | 4.0958  | 0.16391  | 0.8722  | 0.92771 | -6.2534 | 128077 |
| BTBD9     | 0.05484  | 0.05484  | 2.7157  | 0.16388  | 0.87222 | 0.92771 | -6.2534 | 114781 |
| ELMO3     | -0.23056 | 0.23056  | 6.2523  | -0.16355 | 0.87247 | 0.92791 | -6.2535 | 79767  |
| FKBP2     | 0.39074  | 0.39074  | 9.445   | 0.1635   | 0.87251 | 0.92791 | -6.2535 | 2286   |
| DNAJB2    | 0.4752   | 0.4752   | 12.702  | 0.16332  | 0.87264 | 0.92795 | -6.2535 | 3300   |

|                |          |          |         |          |         |         |         |          |
|----------------|----------|----------|---------|----------|---------|---------|---------|----------|
| TIAM2          | -0.02229 | 0.022285 | 0.24544 | -0.1633  | 0.87267 | 0.92795 | -6.2535 | 26230    |
| TSR1           | -0.18384 | 0.18384  | 7.0249  | -0.16324 | 0.87271 | 0.92795 | -6.2535 | 55720    |
| GPAT2          | 0.02753  | 0.02753  | 0.43612 | 0.16302  | 0.87288 | 0.92807 | -6.2536 | 150763   |
| GMIP           | 0.10797  | 0.10797  | 3.0249  | 0.16287  | 0.873   | 0.92814 | -6.2536 | 51291    |
| WDR3           | -0.12287 | 0.12287  | 3.7132  | -0.16278 | 0.87307 | 0.92815 | -6.2536 | 10885    |
| PIK3CG         | -0.02877 | 0.028768 | 0.68124 | -0.1622  | 0.87351 | 0.92854 | -6.2537 | 5294     |
| TMEM123        | 0.82067  | 0.82067  | 24.778  | 0.16217  | 0.87354 | 0.92854 | -6.2537 | 114908   |
| PDE6G          | -0.01348 | 0.013484 | 0.14023 | -0.16201 | 0.87366 | 0.92855 | -6.2537 | 5148     |
| SERPINF1       | -2.9339  | 2.9339   | 38.466  | -0.16201 | 0.87366 | 0.92855 | -6.2537 | 5176     |
| DCTPP1         | 0.28187  | 0.28187  | 5.6989  | 0.16189  | 0.87375 | 0.92859 | -6.2537 | 79077    |
| TAL1           | -0.03161 | 0.031608 | 0.67622 | -0.16176 | 0.87385 | 0.92864 | -6.2538 | 6886     |
| TSPAN18        | 0.15558  | 0.15558  | 2.6637  | 0.16159  | 0.87399 | 0.92866 | -6.2538 | 90139    |
| SNX17          | 0.43741  | 0.43741  | 12.344  | 0.16156  | 0.874   | 0.92866 | -6.2538 | 9784     |
| RPS6           | -18.557  | 18.557   | 584.86  | -0.16152 | 0.87404 | 0.92866 | -6.2538 | 6194     |
| IFI16          | -1.4758  | 1.4758   | 22.524  | -0.16127 | 0.87423 | 0.92879 | -6.2538 | 3428     |
| GEN1           | 0.033988 | 0.033988 | 0.9956  | 0.16122  | 0.87427 | 0.92879 | -6.2539 | 348654   |
| TMEM104        | 0.086499 | 0.086499 | 2.1659  | 0.1611   | 0.87436 | 0.92881 | -6.2539 | 54868    |
| TMEM250        | -0.34225 | 0.34225  | 8.3439  | -0.16101 | 0.87443 | 0.92881 | -6.2539 | 90120    |
| LENG9          | -0.07378 | 0.073778 | 1.855   | -0.16098 | 0.87446 | 0.92881 | -6.2539 | 94059    |
| LYRM4          | 0.06841  | 0.06841  | 1.8073  | 0.16047  | 0.87485 | 0.92917 | -6.254  | 57128    |
| ZNF675         | 0.060902 | 0.060902 | 1.7644  | 0.16023  | 0.87503 | 0.92931 | -6.254  | 171392   |
| ZSCAN20        | 0.030157 | 0.030157 | 0.7418  | 0.16009  | 0.87515 | 0.92937 | -6.254  | 7579     |
| BAALC          | -0.0443  | 0.044296 | 0.60928 | -0.15989 | 0.8753  | 0.92947 | -6.2541 | 79870    |
| RPS8           | 17.189   | 17.189   | 559.52  | 0.15952  | 0.87558 | 0.92971 | -6.2541 | 6202     |
| TBCC           | 0.12604  | 0.12604  | 5.0016  | 0.15933  | 0.87573 | 0.92981 | -6.2542 | 6903     |
| CRYZL2P-SEC16B | 0.014539 | 0.014539 | 0.14962 | 0.15915  | 0.87587 | 0.92985 | -6.2542 | 1.11E+08 |

|              |          |          |         |          |         |         |         |        |
|--------------|----------|----------|---------|----------|---------|---------|---------|--------|
| FAM20C       | 0.52159  | 0.52159  | 8.1215  | 0.15914  | 0.87588 | 0.92985 | -6.2542 | 56975  |
| SASS6        | -0.02198 | 0.021976 | 0.50525 | -0.15905 | 0.87595 | 0.92985 | -6.2542 | 163786 |
| DGUOK        | 0.26252  | 0.26252  | 7.8143  | 0.159    | 0.87598 | 0.92985 | -6.2542 | 1716   |
| WDR34        | -0.19527 | 0.19527  | 5.2322  | -0.15884 | 0.87611 | 0.92992 | -6.2542 | 89891  |
| KEAP1        | -0.33196 | 0.33196  | 10.678  | -0.15868 | 0.87624 | 0.93    | -6.2543 | 9817   |
| GPATCH3      | 0.099462 | 0.099462 | 3.0082  | 0.15819  | 0.87661 | 0.93034 | -6.2544 | 63906  |
| SRMS         | 0.032317 | 0.032317 | 0.42054 | 0.15812  | 0.87667 | 0.93034 | -6.2544 | 6725   |
| MORC2        | -0.08977 | 0.089774 | 3.6143  | -0.15804 | 0.87673 | 0.93035 | -6.2544 | 22880  |
| RUFY1        | 0.18548  | 0.18548  | 6.8226  | 0.15796  | 0.87679 | 0.93035 | -6.2544 | 80230  |
| BDNF-AS      | -0.02732 | 0.027323 | 0.47215 | -0.15787 | 0.87686 | 0.93037 | -6.2544 | 497258 |
| KLHL13       | 0.023306 | 0.023306 | 0.40686 | 0.15756  | 0.8771  | 0.93056 | -6.2545 | 90293  |
| GSS          | -0.17428 | 0.17428  | 5.4131  | -0.15709 | 0.87746 | 0.93089 | -6.2545 | 2937   |
| TOMM40L      | -0.06309 | 0.063092 | 2.0661  | -0.15689 | 0.87761 | 0.93099 | -6.2546 | 84134  |
| TRIM59-IFT80 | -0.01673 | 0.016732 | 0.46188 | -0.15672 | 0.87775 | 0.93107 | -6.2546 | 1E+08  |
| PTPN7        | 0.018724 | 0.018724 | 0.4356  | 0.15658  | 0.87786 | 0.93109 | -6.2546 | 5778   |
| EMX2OS       | -0.05222 | 0.052217 | 1.4494  | -0.15656 | 0.87787 | 0.93109 | -6.2546 | 196047 |
| FUT4         | -0.03229 | 0.03229  | 0.76965 | -0.15642 | 0.87798 | 0.93115 | -6.2546 | 2526   |
| MDH2         | 0.61145  | 0.61145  | 21.338  | 0.15631  | 0.87807 | 0.93118 | -6.2547 | 4191   |
| LONP1        | -0.29978 | 0.29978  | 7.9134  | -0.15601 | 0.8783  | 0.93137 | -6.2547 | 9361   |
| EPCAM        | 0.077984 | 0.077984 | 1.5116  | 0.15593  | 0.87836 | 0.93138 | -6.2547 | 4072   |
| RSPRY1       | 0.065635 | 0.065635 | 3.5615  | 0.15547  | 0.87872 | 0.93169 | -6.2548 | 89970  |
| SMIM10L1     | 0.042001 | 0.042001 | 1.2366  | 0.15538  | 0.87879 | 0.93171 | -6.2548 | 1E+08  |
| ANAPC5       | 0.29325  | 0.29325  | 15.975  | 0.15508  | 0.87902 | 0.9319  | -6.2549 | 51433  |
| LCN2         | -1.1106  | 1.1106   | 10.23   | -0.15498 | 0.8791  | 0.93192 | -6.2549 | 3934   |
| RTL8A        | 0.28965  | 0.28965  | 8.9111  | 0.15487  | 0.87918 | 0.93195 | -6.2549 | 26071  |
| MRPS9        | 0.12149  | 0.12149  | 3.8813  | 0.1548   | 0.87923 | 0.93195 | -6.2549 | 64965  |

|              |          |          |         |          |         |         |         |          |
|--------------|----------|----------|---------|----------|---------|---------|---------|----------|
| POLE3        | -0.24172 | 0.24172  | 7.9101  | -0.15466 | 0.87934 | 0.932   | -6.2549 | 54107    |
| CLEC4E       | 0.047836 | 0.047836 | 0.40453 | 0.15452  | 0.87945 | 0.93206 | -6.2549 | 26253    |
| CASTOR2      | -0.08929 | 0.089293 | 3.0966  | -0.15445 | 0.87951 | 0.93206 | -6.255  | 729438   |
| CASP5        | 0.021449 | 0.021449 | 0.17381 | 0.15367  | 0.88011 | 0.93257 | -6.2551 | 838      |
| LOC101928370 | 0.016888 | 0.016888 | 0.25373 | 0.15362  | 0.88014 | 0.93257 | -6.2551 | 1.02E+08 |
| RNF103       | 0.077394 | 0.077394 | 4.0482  | 0.15362  | 0.88015 | 0.93257 | -6.2551 | 7844     |
| TRUB2        | -0.11186 | 0.11186  | 3.8676  | -0.15333 | 0.88037 | 0.93274 | -6.2551 | 26995    |
| BOLA2-SMG1P6 | -0.03553 | 0.035525 | 1.082   | -0.15303 | 0.88061 | 0.93294 | -6.2552 | 1.07E+08 |
| TNPO3        | 0.13887  | 0.13887  | 6.4814  | 0.15282  | 0.88076 | 0.933   | -6.2552 | 23534    |
| SIM1         | 0.022235 | 0.022235 | 0.29129 | 0.15281  | 0.88078 | 0.933   | -6.2552 | 6492     |
| ZNF275       | 0.063205 | 0.063205 | 1.3245  | 0.15268  | 0.88087 | 0.93304 | -6.2552 | 10838    |
| LSM11        | 0.016254 | 0.016254 | 0.64866 | 0.15259  | 0.88094 | 0.93306 | -6.2553 | 134353   |
| RASSF6       | -0.01851 | 0.018507 | 0.51682 | -0.15252 | 0.881   | 0.93306 | -6.2553 | 166824   |
| BBS10        | 0.033028 | 0.033028 | 1.1223  | 0.15224  | 0.88121 | 0.93323 | -6.2553 | 79738    |
| AJUBA        | 0.32068  | 0.32068  | 8.6544  | 0.15205  | 0.88136 | 0.9333  | -6.2553 | 84962    |
| TLR2         | 0.16977  | 0.16977  | 2.0433  | 0.15201  | 0.88139 | 0.9333  | -6.2553 | 7097     |
| ACKR2        | -0.18631 | 0.18631  | 2.74    | -0.15191 | 0.88147 | 0.9333  | -6.2554 | 1238     |
| FOXP3        | 0.014604 | 0.014604 | 0.48315 | 0.15187  | 0.8815  | 0.9333  | -6.2554 | 50943    |
| PDE5A        | 0.12886  | 0.12886  | 2.1804  | 0.15164  | 0.88168 | 0.93343 | -6.2554 | 8654     |
| DMXL1        | 0.061471 | 0.061471 | 3.7948  | 0.15127  | 0.88197 | 0.93365 | -6.2555 | 1657     |
| TNFSF15      | -0.01292 | 0.012922 | 0.23551 | -0.15123 | 0.882   | 0.93365 | -6.2555 | 9966     |
| IRF8         | 0.069777 | 0.069777 | 1.4647  | 0.15116  | 0.88205 | 0.93365 | -6.2555 | 3394     |
| CCR10        | -0.01798 | 0.01798  | 0.30705 | -0.15104 | 0.88215 | 0.93369 | -6.2555 | 2826     |
| LBX2-AS1     | -0.02823 | 0.028234 | 0.55353 | -0.15078 | 0.88234 | 0.93378 | -6.2555 | 151534   |
| LYNX1-SLURP2 | -0.04    | 0.039999 | 0.41496 | -0.15078 | 0.88234 | 0.93378 | -6.2555 | 1.11E+08 |
| SLC39A13     | -0.2551  | 0.2551   | 6.7843  | -0.15066 | 0.88243 | 0.93382 | -6.2556 | 91252    |

|              |          |          |         |          |         |         |         |          |
|--------------|----------|----------|---------|----------|---------|---------|---------|----------|
| IL10RB-DT    | -0.02671 | 0.026706 | 0.60486 | -0.15046 | 0.88259 | 0.93393 | -6.2556 | 1E+08    |
| VPS36        | -0.12961 | 0.12961  | 7.1142  | -0.15027 | 0.88274 | 0.93402 | -6.2556 | 51028    |
| MAP1S        | 0.11948  | 0.11948  | 2.918   | 0.14999  | 0.88296 | 0.9342  | -6.2557 | 55201    |
| ATP8B2       | 0.25538  | 0.25538  | 4.4765  | 0.14976  | 0.88314 | 0.93428 | -6.2557 | 57198    |
| NDOR1        | 0.18145  | 0.18145  | 4.6685  | 0.14975  | 0.88314 | 0.93428 | -6.2557 | 27158    |
| B2M          | 12.883   | 12.883   | 257.84  | 0.14965  | 0.88322 | 0.93428 | -6.2557 | 567      |
| FAM167A      | -0.10098 | 0.10098  | 3.8656  | -0.1496  | 0.88326 | 0.93428 | -6.2557 | 83648    |
| MXRA8        | 1.0279   | 1.0279   | 16.518  | 0.14929  | 0.8835  | 0.93448 | -6.2558 | 54587    |
| LILRB1       | 0.074884 | 0.074884 | 0.82133 | 0.14912  | 0.88363 | 0.93456 | -6.2558 | 10859    |
| HCLS1        | -0.30192 | 0.30192  | 5.452   | -0.14893 | 0.88378 | 0.93465 | -6.2558 | 3059     |
| MRPS11       | 0.054342 | 0.054342 | 1.8449  | 0.14866  | 0.88398 | 0.93481 | -6.2559 | 64963    |
| VSIG8        | -0.07474 | 0.074741 | 1.1309  | -0.14853 | 0.88409 | 0.93486 | -6.2559 | 391123   |
| TRIT1        | -0.06685 | 0.066854 | 3.7956  | -0.14845 | 0.88415 | 0.93487 | -6.2559 | 54802    |
| NRADDP       | -0.01714 | 0.017143 | 0.3849  | -0.14831 | 0.88426 | 0.93492 | -6.2559 | 1E+08    |
| GNAQ         | 0.15136  | 0.15136  | 4.7433  | 0.14764  | 0.88478 | 0.93542 | -6.256  | 2776     |
| AQP7P3       | 0.015516 | 0.015516 | 0.2157  | 0.14728  | 0.88505 | 0.93553 | -6.2561 | 441432   |
| RAD51C       | 0.063069 | 0.063069 | 1.587   | 0.14724  | 0.88509 | 0.93553 | -6.2561 | 5889     |
| BIK          | -0.02401 | 0.024014 | 0.63164 | -0.14723 | 0.88509 | 0.93553 | -6.2561 | 638      |
| PALMD        | 0.32487  | 0.32487  | 12.685  | 0.14722  | 0.8851  | 0.93553 | -6.2561 | 54873    |
| UCK2         | -0.15681 | 0.15681  | 5.689   | -0.147   | 0.88527 | 0.93559 | -6.2561 | 7371     |
| TMEM203      | 0.21982  | 0.21982  | 7.3143  | 0.147    | 0.88527 | 0.93559 | -6.2561 | 94107    |
| ITGA9        | 0.16256  | 0.16256  | 3.7765  | 0.14679  | 0.88543 | 0.9357  | -6.2561 | 3680     |
| HERC2P4      | 0.015756 | 0.015756 | 0.18149 | 0.14649  | 0.88567 | 0.93577 | -6.2562 | 1E+08    |
| LOC101929243 | -0.02067 | 0.020672 | 0.51742 | -0.14645 | 0.8857  | 0.93577 | -6.2562 | 1.02E+08 |
| NFKB1        | 0.21022  | 0.21022  | 8.4535  | 0.14642  | 0.88572 | 0.93577 | -6.2562 | 4790     |
| LOC105378663 | 0.014959 | 0.014959 | 0.24499 | 0.14636  | 0.88577 | 0.93577 | -6.2562 | 1.05E+08 |

|                 |          |          |         |          |         |         |         |          |
|-----------------|----------|----------|---------|----------|---------|---------|---------|----------|
| PHOSPHO2-KLHL23 | -0.01325 | 0.013254 | 0.17082 | -0.14628 | 0.88582 | 0.93577 | -6.2562 | 1.01E+08 |
| FDX2            | -0.11893 | 0.11893  | 2.7792  | -0.14627 | 0.88583 | 0.93577 | -6.2562 | 112812   |
| SEC63           | 0.15817  | 0.15817  | 5.3642  | 0.14612  | 0.88595 | 0.9358  | -6.2562 | 11231    |
| BCAS4           | 0.023628 | 0.023628 | 0.52205 | 0.1461   | 0.88597 | 0.9358  | -6.2563 | 55653    |
| PPT1            | 0.46333  | 0.46333  | 12.43   | 0.14599  | 0.88605 | 0.93583 | -6.2563 | 5538     |
| GZMK            | 0.02795  | 0.02795  | 0.35276 | 0.14576  | 0.88623 | 0.93596 | -6.2563 | 3003     |
| LOC145474       | -0.02429 | 0.024291 | 0.42339 | -0.14568 | 0.88629 | 0.93596 | -6.2563 | 145474   |
| SMG5            | 0.24863  | 0.24863  | 10.039  | 0.14557  | 0.88638 | 0.936   | -6.2563 | 23381    |
| LOC105375713    | -0.01316 | 0.013162 | 0.145   | -0.14517 | 0.88669 | 0.93627 | -6.2564 | 1.05E+08 |
| PHF10           | 0.11279  | 0.11279  | 7.8764  | 0.1451   | 0.88675 | 0.93627 | -6.2564 | 55274    |
| ZBTB20-AS5      | -0.01622 | 0.016221 | 0.13638 | -0.14492 | 0.88688 | 0.93635 | -6.2564 | 1.02E+08 |
| NAGA            | 0.13602  | 0.13602  | 3.6627  | 0.14484  | 0.88694 | 0.93636 | -6.2564 | 4668     |
| RBM15B          | -0.17677 | 0.17677  | 8.2277  | -0.14473 | 0.88703 | 0.93639 | -6.2565 | 29890    |
| LAG3            | -0.02364 | 0.023635 | 0.30152 | -0.14457 | 0.88715 | 0.93643 | -6.2565 | 3902     |
| UXS1            | 0.075765 | 0.075765 | 2.6663  | 0.14454  | 0.88718 | 0.93643 | -6.2565 | 80146    |
| TXN2            | -0.46307 | 0.46307  | 13.791  | -0.14435 | 0.88733 | 0.93649 | -6.2565 | 25828    |
| RUNX1           | -0.28553 | 0.28553  | 6.3469  | -0.14433 | 0.88734 | 0.93649 | -6.2565 | 861      |
| TFIP11          | -0.11337 | 0.11337  | 5.017   | -0.14408 | 0.88753 | 0.93663 | -6.2566 | 24144    |
| THUMPD3         | -0.07386 | 0.073864 | 3.9932  | -0.14388 | 0.88768 | 0.93671 | -6.2566 | 25917    |
| EIF3F           | 1.5648   | 1.5648   | 57.151  | 0.14378  | 0.88777 | 0.93671 | -6.2566 | 8665     |
| CELF2           | 0.088551 | 0.088551 | 2.3341  | 0.14377  | 0.88777 | 0.93671 | -6.2566 | 10659    |
| SAMD10          | 0.070798 | 0.070798 | 2.0916  | 0.14364  | 0.88787 | 0.93673 | -6.2566 | 140700   |
| LOC100506142    | 0.04554  | 0.04554  | 0.74372 | 0.14357  | 0.88792 | 0.93673 | -6.2566 | 1.01E+08 |
| ZNF250          | 0.05848  | 0.05848  | 1.9602  | 0.14353  | 0.88796 | 0.93673 | -6.2566 | 58500    |
| EEF1D           | 1.0569   | 1.0569   | 36.651  | 0.14331  | 0.88813 | 0.93675 | -6.2567 | 1936     |
| NOMO3           | 0.14617  | 0.14617  | 5.5875  | 0.14329  | 0.88815 | 0.93675 | -6.2567 | 408050   |

|          |          |          |         |          |         |         |         |        |
|----------|----------|----------|---------|----------|---------|---------|---------|--------|
| C1orf162 | 0.11314  | 0.11314  | 1.6768  | 0.14317  | 0.88824 | 0.93675 | -6.2567 | 128346 |
| NCBP1    | -0.07155 | 0.071553 | 4.1158  | -0.14316 | 0.88824 | 0.93675 | -6.2567 | 4686   |
| SLFN5    | -0.22223 | 0.22223  | 3.9364  | -0.14308 | 0.88831 | 0.93675 | -6.2567 | 162394 |
| NLN      | 0.034748 | 0.034748 | 1.4336  | 0.14305  | 0.88833 | 0.93675 | -6.2567 | 57486  |
| HS2ST1   | 0.065786 | 0.065786 | 2.2528  | 0.14301  | 0.88836 | 0.93675 | -6.2567 | 9653   |
| ZNF282   | -0.26634 | 0.26634  | 6.7288  | -0.1429  | 0.88845 | 0.93678 | -6.2567 | 8427   |
| GORAB    | -0.02271 | 0.022706 | 0.82954 | -0.14259 | 0.88869 | 0.93697 | -6.2568 | 92344  |
| URB1-AS1 | 0.053049 | 0.053049 | 1.3599  | 0.14217  | 0.88901 | 0.93725 | -6.2568 | 84996  |
| LAGE3    | -0.18047 | 0.18047  | 4.5294  | -0.14198 | 0.88916 | 0.93735 | -6.2569 | 8270   |
| RPL22    | 1.5113   | 1.5113   | 57.063  | 0.14179  | 0.88931 | 0.93743 | -6.2569 | 6146   |
| HACD4    | 0.047587 | 0.047587 | 1.5629  | 0.14175  | 0.88934 | 0.93743 | -6.2569 | 401494 |
| RIPK4    | 0.31377  | 0.31377  | 8.3403  | 0.14141  | 0.8896  | 0.93764 | -6.257  | 54101  |
| MTRR     | -0.05268 | 0.052675 | 2.5186  | -0.14132 | 0.88967 | 0.93766 | -6.257  | 4552   |
| TRIM32   | -0.04953 | 0.049528 | 2.805   | -0.14109 | 0.88985 | 0.93778 | -6.257  | 22954  |
| CCDC96   | -0.02021 | 0.020206 | 0.52687 | -0.14094 | 0.88996 | 0.93785 | -6.257  | 257236 |
| AGPAT1   | 0.045855 | 0.045855 | 1.1773  | 0.14065  | 0.89019 | 0.93797 | -6.2571 | 10554  |
| BCL3     | 0.80971  | 0.80971  | 14.577  | 0.14057  | 0.89025 | 0.93797 | -6.2571 | 602    |
| ARMC10   | -0.12066 | 0.12066  | 5.7794  | -0.14057 | 0.89025 | 0.93797 | -6.2571 | 83787  |
| CMSS1    | 0.1518   | 0.1518   | 3.6846  | 0.14008  | 0.89063 | 0.93832 | -6.2571 | 84319  |
| MPV17L2  | 0.083481 | 0.083481 | 2.3029  | 0.13987  | 0.8908  | 0.93843 | -6.2572 | 84769  |
| SSC5D    | -0.26157 | 0.26157  | 3.132   | -0.13966 | 0.89096 | 0.93855 | -6.2572 | 284297 |
| BICDL2   | -0.58041 | 0.58041  | 10.519  | -0.13958 | 0.89102 | 0.93855 | -6.2572 | 146439 |
| SLN      | 0.034014 | 0.034014 | 0.28723 | 0.13941  | 0.89116 | 0.93861 | -6.2572 | 6588   |
| NDC1     | 0.062189 | 0.062189 | 2.1776  | 0.13935  | 0.8912  | 0.93861 | -6.2572 | 55706  |
| MAGI3    | 0.036169 | 0.036169 | 1.7341  | 0.13929  | 0.89125 | 0.93861 | -6.2573 | 260425 |
| GRHPR    | 0.46954  | 0.46954  | 18.926  | 0.13886  | 0.89158 | 0.9389  | -6.2573 | 9380   |

|              |          |          |         |          |         |         |         |          |
|--------------|----------|----------|---------|----------|---------|---------|---------|----------|
| B3GNT4       | -0.02661 | 0.026607 | 1.2646  | -0.1387  | 0.8917  | 0.93893 | -6.2573 | 79369    |
| SDF4         | -0.67443 | 0.67443  | 21.839  | -0.13868 | 0.89172 | 0.93893 | -6.2573 | 51150    |
| HNRNPA2B1    | -0.79657 | 0.79657  | 31.94   | -0.13841 | 0.89193 | 0.93904 | -6.2574 | 3181     |
| CPQ          | -0.26548 | 0.26548  | 5.7673  | -0.13841 | 0.89193 | 0.93904 | -6.2574 | 10404    |
| TMEM68       | -0.02596 | 0.025957 | 1.2596  | -0.13806 | 0.8922  | 0.93926 | -6.2574 | 137695   |
| PPIL4        | 0.098187 | 0.098187 | 4.2913  | 0.13799  | 0.89225 | 0.93926 | -6.2574 | 85313    |
| IL17RC       | 0.23617  | 0.23617  | 7.7719  | 0.13782  | 0.89238 | 0.93934 | -6.2575 | 84818    |
| CH25H        | 0.10299  | 0.10299  | 1.4557  | 0.13758  | 0.89257 | 0.93934 | -6.2575 | 9023     |
| LINC00702    | -0.01947 | 0.01947  | 0.17183 | -0.13756 | 0.89259 | 0.93934 | -6.2575 | 1.01E+08 |
| ACSL5        | 0.063365 | 0.063365 | 1.4213  | 0.13754  | 0.8926  | 0.93934 | -6.2575 | 51703    |
| EMC10        | 0.45341  | 0.45341  | 14.461  | 0.13754  | 0.89261 | 0.93934 | -6.2575 | 284361   |
| CYC1         | 0.60568  | 0.60568  | 21.622  | 0.1374   | 0.89271 | 0.93939 | -6.2575 | 1537     |
| ENO1-AS1     | -0.01682 | 0.016823 | 0.29202 | -0.1373  | 0.89279 | 0.93941 | -6.2575 | 1.01E+08 |
| TRMT5        | -0.03273 | 0.032733 | 1.3978  | -0.13716 | 0.8929  | 0.93943 | -6.2576 | 57570    |
| DPP9         | 0.20563  | 0.20563  | 7.1485  | 0.13713  | 0.89292 | 0.93943 | -6.2576 | 91039    |
| NCDN         | -0.16818 | 0.16818  | 4.1904  | -0.13707 | 0.89297 | 0.93943 | -6.2576 | 23154    |
| EED          | -0.04396 | 0.04396  | 1.918   | -0.13694 | 0.89307 | 0.93945 | -6.2576 | 8726     |
| C11orf71     | -0.08445 | 0.084448 | 1.8471  | -0.1369  | 0.8931  | 0.93945 | -6.2576 | 54494    |
| ZSCAN16-AS1  | -0.01647 | 0.016471 | 0.35028 | -0.1368  | 0.89317 | 0.93945 | -6.2576 | 1E+08    |
| HSPG2        | 1.6255   | 1.6255   | 33.388  | 0.13676  | 0.89321 | 0.93945 | -6.2576 | 3339     |
| LOC101448202 | 0.030428 | 0.030428 | 0.43608 | 0.13647  | 0.89343 | 0.93962 | -6.2577 | 1.01E+08 |
| ATF6B        | -0.07506 | 0.075061 | 3.904   | -0.13626 | 0.8936  | 0.93974 | -6.2577 | 1388     |
| NIPBL        | -0.12002 | 0.12002  | 7.3591  | -0.13611 | 0.89371 | 0.93981 | -6.2577 | 25836    |
| HVCN1        | 0.033181 | 0.033181 | 0.83648 | 0.13571  | 0.89403 | 0.94002 | -6.2578 | 84329    |
| GCAT         | 0.055046 | 0.055046 | 1.72    | 0.1357   | 0.89403 | 0.94002 | -6.2578 | 23464    |
| ALG12        | 0.1101   | 0.1101   | 4.4574  | 0.1356   | 0.89411 | 0.94005 | -6.2578 | 79087    |



|             |          |          |          |          |         |         |         |          |
|-------------|----------|----------|----------|----------|---------|---------|---------|----------|
| GPR84       | 0.047758 | 0.047758 | 0.60526  | 0.13504  | 0.89454 | 0.94039 | -6.2579 | 53831    |
| HSF2        | -0.03442 | 0.034415 | 1.8257   | -0.13502 | 0.89455 | 0.94039 | -6.2579 | 3298     |
| RNF113A     | -0.07951 | 0.079506 | 2.9909   | -0.13484 | 0.89469 | 0.94048 | -6.2579 | 7737     |
| EFEMP2      | 0.34416  | 0.34416  | 6.6095   | 0.13466  | 0.89484 | 0.94052 | -6.2579 | 30008    |
| MIR3973     | 0.011073 | 0.011073 | 0.095458 | 0.13465  | 0.89484 | 0.94052 | -6.2579 | 1.01E+08 |
| IL1R1       | -0.57145 | 0.57145  | 12.463   | -0.13456 | 0.89491 | 0.94054 | -6.2579 | 3554     |
| KLF2        | -0.2109  | 0.2109   | 7.2666   | -0.13444 | 0.89501 | 0.94055 | -6.2579 | 10365    |
| GS1-124K5.4 | -0.01521 | 0.015207 | 0.267    | -0.13441 | 0.89503 | 0.94055 | -6.2579 | 1E+08    |
| STON1       | 0.079031 | 0.079031 | 1.9702   | 0.13426  | 0.89515 | 0.94061 | -6.258  | 11037    |
| ADA2        | 0.12576  | 0.12576  | 2.4403   | 0.13413  | 0.89525 | 0.94066 | -6.258  | 51816    |
| COP1        | -0.09649 | 0.096489 | 8.253    | -0.13398 | 0.89536 | 0.94072 | -6.258  | 64326    |
| TMEM273     | 0.086174 | 0.086174 | 1.9337   | 0.1338   | 0.8955  | 0.94081 | -6.258  | 170371   |
| RRAS        | -0.31703 | 0.31703  | 9.3003   | -0.13344 | 0.89579 | 0.94105 | -6.2581 | 6237     |
| SLC34A3     | 0.014451 | 0.014451 | 0.20551  | 0.13273  | 0.89633 | 0.94147 | -6.2582 | 142680   |
| SBF1        | 0.40122  | 0.40122  | 12.286   | 0.13258  | 0.89645 | 0.94147 | -6.2582 | 6305     |
| ZFP69B      | 0.015951 | 0.015951 | 0.48513  | 0.13252  | 0.89649 | 0.94147 | -6.2582 | 65243    |
| PAK4        | 0.2316   | 0.2316   | 8.6278   | 0.13248  | 0.89653 | 0.94147 | -6.2582 | 10298    |
| MEDAG       | 0.3958   | 0.3958   | 5.7053   | 0.13241  | 0.89658 | 0.94147 | -6.2582 | 84935    |
| NHSL2       | -0.10548 | 0.10548  | 2.0925   | -0.13241 | 0.89658 | 0.94147 | -6.2582 | 340527   |
| ATP5F1D     | -1.0265  | 1.0265   | 29.86    | -0.1324  | 0.89659 | 0.94147 | -6.2582 | 513      |
| MIR210HG    | 0.15157  | 0.15157  | 5.4631   | 0.13231  | 0.89666 | 0.94147 | -6.2582 | 1.01E+08 |
| COLEC12     | -0.22934 | 0.22934  | 4.9382   | -0.13228 | 0.89669 | 0.94147 | -6.2582 | 81035    |
| CYYR1       | 0.085359 | 0.085359 | 2.3062   | 0.13216  | 0.89678 | 0.9415  | -6.2583 | 116159   |
| FARSB       | -0.2128  | 0.2128   | 6.9995   | -0.13199 | 0.89691 | 0.94153 | -6.2583 | 10056    |
| TIA1        | 0.070558 | 0.070558 | 3.3939   | 0.13193  | 0.89695 | 0.94153 | -6.2583 | 7072     |
| DUSP23      | -0.42328 | 0.42328  | 10.629   | -0.1318  | 0.89706 | 0.94153 | -6.2583 | 54935    |

|              |          |          |         |          |         |         |         |          |
|--------------|----------|----------|---------|----------|---------|---------|---------|----------|
| SEC16A       | -0.19476 | 0.19476  | 11.106  | -0.13178 | 0.89707 | 0.94153 | -6.2583 | 9919     |
| SSTR2        | -0.01951 | 0.019514 | 0.20254 | -0.13176 | 0.89709 | 0.94153 | -6.2583 | 6752     |
| ATPAF2       | 0.047297 | 0.047297 | 3.219   | 0.1315   | 0.89729 | 0.94169 | -6.2583 | 91647    |
| TFPT         | 0.094127 | 0.094127 | 3.2567  | 0.13132  | 0.89743 | 0.94174 | -6.2584 | 29844    |
| HLA-DMA      | 0.058459 | 0.058459 | 1.2694  | 0.1313   | 0.89745 | 0.94174 | -6.2584 | 3108     |
| MAPRE2       | 0.099649 | 0.099649 | 5.1481  | 0.13116  | 0.89755 | 0.94179 | -6.2584 | 10982    |
| LOC101927727 | 0.034064 | 0.034064 | 0.84382 | 0.13092  | 0.89774 | 0.94186 | -6.2584 | 1.02E+08 |
| DEFB124      | -0.01705 | 0.017046 | 0.13688 | -0.13075 | 0.89787 | 0.94186 | -6.2584 | 245937   |
| POLD2        | 0.31429  | 0.31429  | 11.488  | 0.13074  | 0.89788 | 0.94186 | -6.2585 | 5425     |
| PALD1        | -0.06836 | 0.068356 | 2.9079  | -0.13073 | 0.89789 | 0.94186 | -6.2585 | 27143    |
| QRICH2       | 0.017275 | 0.017275 | 0.50404 | 0.13071  | 0.8979  | 0.94186 | -6.2585 | 84074    |
| TMPO         | 0.096577 | 0.096577 | 3.4255  | 0.13052  | 0.89805 | 0.94196 | -6.2585 | 7112     |
| WASF2        | 0.64266  | 0.64266  | 32.311  | 0.13026  | 0.89825 | 0.94211 | -6.2585 | 10163    |
| TCEAL1       | 0.10341  | 0.10341  | 2.5817  | 0.1301   | 0.89838 | 0.94218 | -6.2585 | 9338     |
| ATP7A        | -0.15884 | 0.15884  | 3.5339  | -0.12983 | 0.89859 | 0.94235 | -6.2586 | 538      |
| SHTN1        | 0.074099 | 0.074099 | 3.6286  | 0.12936  | 0.89895 | 0.94267 | -6.2586 | 57698    |
| DNM2         | -0.44705 | 0.44705  | 22.525  | -0.12929 | 0.899   | 0.94267 | -6.2586 | 1785     |
| SHANK2-AS3   | 0.01257  | 0.01257  | 0.18289 | 0.12894  | 0.89927 | 0.94289 | -6.2587 | 220070   |
| ECHS1        | -0.48828 | 0.48828  | 16.213  | -0.12867 | 0.89948 | 0.94305 | -6.2587 | 1892     |
| IFNAR1       | -0.09228 | 0.092275 | 3.5888  | -0.12824 | 0.89982 | 0.94329 | -6.2588 | 3454     |
| ZNF583       | -0.01418 | 0.014178 | 0.41986 | -0.12823 | 0.89983 | 0.94329 | -6.2588 | 147949   |
| RTKN         | 0.10175  | 0.10175  | 4.4183  | 0.12816  | 0.89988 | 0.94329 | -6.2588 | 6242     |
| LARP1        | 0.50848  | 0.50848  | 22.802  | 0.12807  | 0.89995 | 0.94331 | -6.2588 | 23367    |
| MEG3         | -0.11306 | 0.11306  | 1.4161  | -0.12794 | 0.90005 | 0.94333 | -6.2588 | 55384    |
| THEM5        | 1.696    | 1.696    | 21.616  | 0.1279   | 0.90008 | 0.94333 | -6.2588 | 284486   |
| TPSB2        | 1.2661   | 1.2661   | 24.873  | 0.12777  | 0.90019 | 0.94338 | -6.2588 | 64499    |

|          |          |          |         |          |         |         |         |          |
|----------|----------|----------|---------|----------|---------|---------|---------|----------|
| RRN3     | -0.07861 | 0.078608 | 3.7535  | -0.1276  | 0.90032 | 0.94346 | -6.2589 | 54700    |
| PROSER3  | -0.03346 | 0.033456 | 1.7893  | -0.12728 | 0.90056 | 0.94359 | -6.2589 | 148137   |
| ZNF252P  | 0.032503 | 0.032503 | 1.6667  | 0.12718  | 0.90065 | 0.94359 | -6.2589 | 286101   |
| C2orf42  | -0.02237 | 0.02237  | 1.2362  | -0.12716 | 0.90066 | 0.94359 | -6.2589 | 54980    |
| FAM200B  | -0.02067 | 0.020667 | 0.86123 | -0.12715 | 0.90067 | 0.94359 | -6.2589 | 285550   |
| FLG2     | 18.806   | 18.806   | 185.46  | 0.12649  | 0.90118 | 0.94407 | -6.259  | 388698   |
| SMAD2    | 0.099076 | 0.099076 | 6.4008  | 0.12618  | 0.90142 | 0.94427 | -6.2591 | 4087     |
| ATF5     | -0.23133 | 0.23133  | 5.3497  | -0.12595 | 0.9016  | 0.94439 | -6.2591 | 22809    |
| SYS1     | 0.035959 | 0.035959 | 2.1158  | 0.1258   | 0.90172 | 0.94446 | -6.2591 | 90196    |
| ALCAM    | -0.12655 | 0.12655  | 2.2742  | -0.12535 | 0.90207 | 0.94472 | -6.2592 | 214      |
| SNHG21   | -0.0228  | 0.022802 | 0.8258  | -0.12533 | 0.90208 | 0.94472 | -6.2592 | 1.01E+08 |
| ZNF415   | 0.018871 | 0.018871 | 0.54177 | 0.12524  | 0.90215 | 0.94474 | -6.2592 | 55786    |
| BACE2    | -0.14601 | 0.14601  | 3.5322  | -0.12432 | 0.90286 | 0.94542 | -6.2593 | 25825    |
| PDF      | -0.05899 | 0.05899  | 2.4444  | -0.12417 | 0.90298 | 0.94549 | -6.2593 | 64146    |
| MROH1    | 0.12812  | 0.12812  | 5.0843  | 0.12408  | 0.90305 | 0.9455  | -6.2593 | 727957   |
| SHE      | -0.06087 | 0.060873 | 1.6394  | -0.12359 | 0.90344 | 0.94572 | -6.2594 | 126669   |
| MXRA5    | 0.55435  | 0.55435  | 11.195  | 0.12356  | 0.90345 | 0.94572 | -6.2594 | 25878    |
| ATP5MC1  | -0.53919 | 0.53919  | 18.61   | -0.12356 | 0.90345 | 0.94572 | -6.2594 | 516      |
| RLIM     | 0.068502 | 0.068502 | 3.9085  | 0.12352  | 0.90348 | 0.94572 | -6.2594 | 51132    |
| EPOP     | -0.04281 | 0.042805 | 1.1545  | -0.12339 | 0.90359 | 0.94577 | -6.2594 | 1E+08    |
| MRPL9    | -0.18858 | 0.18858  | 6.8526  | -0.12295 | 0.90393 | 0.94599 | -6.2595 | 65005    |
| IFT52    | 0.085016 | 0.085016 | 3.2465  | 0.12294  | 0.90394 | 0.94599 | -6.2595 | 51098    |
| RPS28    | -11.005  | 11.005   | 398.02  | -0.12291 | 0.90396 | 0.94599 | -6.2595 | 6234     |
| KIAA1257 | 0.019405 | 0.019405 | 0.34659 | 0.12258  | 0.90422 | 0.94619 | -6.2595 | 57501    |
| TRIM62   | 0.18703  | 0.18703  | 4.3964  | 0.1222   | 0.90451 | 0.94645 | -6.2596 | 55223    |
| CNOT4    | -0.03413 | 0.034126 | 2.881   | -0.12195 | 0.90471 | 0.94659 | -6.2596 | 4850     |

|                |          |          |         |          |         |         |         |          |
|----------------|----------|----------|---------|----------|---------|---------|---------|----------|
| KLHL20         | -0.04462 | 0.044623 | 3.0589  | -0.12185 | 0.90478 | 0.94661 | -6.2596 | 27252    |
| SLC38A6        | 0.029779 | 0.029779 | 0.87973 | 0.12172  | 0.90488 | 0.94666 | -6.2596 | 145389   |
| MIR381HG       | -0.01571 | 0.015709 | 0.14313 | -0.12154 | 0.90502 | 0.94671 | -6.2597 | 378881   |
| SETX           | 0.095386 | 0.095386 | 6.4315  | 0.12151  | 0.90505 | 0.94671 | -6.2597 | 23064    |
| ATL1           | 0.041218 | 0.041218 | 1.8342  | 0.12129  | 0.90522 | 0.94683 | -6.2597 | 51062    |
| DOT1L          | -0.11456 | 0.11456  | 5.1216  | -0.12091 | 0.90552 | 0.94708 | -6.2597 | 84444    |
| SDHAF4         | -0.09684 | 0.096836 | 2.4694  | -0.12073 | 0.90565 | 0.94717 | -6.2598 | 135154   |
| SLC7A1         | -0.54198 | 0.54198  | 21.891  | -0.12045 | 0.90587 | 0.94723 | -6.2598 | 6541     |
| NBL1           | -0.87507 | 0.87507  | 27.7    | -0.12044 | 0.90588 | 0.94723 | -6.2598 | 4681     |
| RPL18A         | 15.178   | 15.178   | 573.93  | 0.12032  | 0.90597 | 0.94723 | -6.2598 | 6142     |
| SPI1           | 0.4148   | 0.4148   | 7.8503  | 0.12031  | 0.90598 | 0.94723 | -6.2598 | 6688     |
| DPY19L2        | 0.025236 | 0.025236 | 0.40759 | 0.1203   | 0.90599 | 0.94723 | -6.2598 | 283417   |
| TMEM189-UBE2V1 | 0.11108  | 0.11108  | 3.5673  | 0.11975  | 0.90642 | 0.94761 | -6.2599 | 387522   |
| RPS2           | 23.45    | 23.45    | 789.33  | 0.11968  | 0.90647 | 0.94761 | -6.2599 | 6187     |
| PCDHB7         | -0.01883 | 0.018832 | 0.35589 | -0.11939 | 0.90669 | 0.94771 | -6.2599 | 56129    |
| DIXDC1         | 0.048131 | 0.048131 | 1.4874  | 0.11938  | 0.90671 | 0.94771 | -6.2599 | 85458    |
| CCDC138        | 0.014907 | 0.014907 | 0.5415  | 0.11934  | 0.90673 | 0.94771 | -6.2599 | 165055   |
| SAT2           | 0.24781  | 0.24781  | 7.8163  | 0.11892  | 0.90706 | 0.94796 | -6.26   | 112483   |
| APAF1          | -0.02949 | 0.029485 | 1.4403  | -0.1189  | 0.90708 | 0.94796 | -6.26   | 317      |
| DHX36          | -0.09623 | 0.096226 | 5.4395  | -0.11873 | 0.90721 | 0.94801 | -6.26   | 170506   |
| MED14OS        | 0.02815  | 0.02815  | 1.1772  | 0.11866  | 0.90726 | 0.94801 | -6.26   | 1.01E+08 |
| ABR            | 0.14428  | 0.14428  | 8.0188  | 0.11861  | 0.9073  | 0.94801 | -6.26   | 29       |
| CXXC1          | -0.20065 | 0.20065  | 7.6058  | -0.11835 | 0.9075  | 0.94816 | -6.26   | 30827    |
| DCAF6          | -0.14794 | 0.14794  | 6.9298  | -0.11811 | 0.90769 | 0.94826 | -6.2601 | 55827    |
| LOC100506175   | 0.012213 | 0.012213 | 0.12724 | 0.11809  | 0.90771 | 0.94826 | -6.2601 | 1.01E+08 |
| URGCP-MRPS24   | 0.02156  | 0.02156  | 0.29759 | 0.118    | 0.90778 | 0.94827 | -6.2601 | 1.01E+08 |

|              |          |          |         |          |         |         |         |          |
|--------------|----------|----------|---------|----------|---------|---------|---------|----------|
| PPP5C        | 0.16611  | 0.16611  | 7.7049  | 0.11786  | 0.90789 | 0.94833 | -6.2601 | 5536     |
| COL7A1       | 1.3231   | 1.3231   | 28.837  | 0.11759  | 0.9081  | 0.94849 | -6.2601 | 1294     |
| RNGTT        | 0.032496 | 0.032496 | 2.1004  | 0.1175   | 0.90817 | 0.94851 | -6.2602 | 8732     |
| PRSS22       | -1.0672  | 1.0672   | 9.3889  | -0.11705 | 0.90852 | 0.94877 | -6.2602 | 64063    |
| RBM24        | -0.01417 | 0.014174 | 0.23526 | -0.11702 | 0.90854 | 0.94877 | -6.2602 | 221662   |
| ZNF23        | -0.0238  | 0.023797 | 1.1448  | -0.11688 | 0.90865 | 0.94878 | -6.2602 | 7571     |
| FERMT3       | -0.11969 | 0.11969  | 2.8711  | -0.11688 | 0.90865 | 0.94878 | -6.2602 | 83706    |
| PDHA1        | -0.09687 | 0.096869 | 4.5081  | -0.11676 | 0.90874 | 0.94881 | -6.2602 | 5160     |
| SPART        | 0.05906  | 0.05906  | 3.2401  | 0.1165   | 0.90895 | 0.94897 | -6.2603 | 23111    |
| TSR3         | -0.37511 | 0.37511  | 11.051  | -0.11631 | 0.90909 | 0.94902 | -6.2603 | 115939   |
| NKAIN1       | 0.0175   | 0.0175   | 0.49387 | 0.11629  | 0.90911 | 0.94902 | -6.2603 | 79570    |
| LOC729683    | -0.01842 | 0.018421 | 0.46234 | -0.116   | 0.90933 | 0.94919 | -6.2603 | 729683   |
| DENND6B      | 0.028107 | 0.028107 | 0.99416 | 0.11584  | 0.90946 | 0.94927 | -6.2604 | 414918   |
| PIGBOS1      | 0.043845 | 0.043845 | 1.7942  | 0.11575  | 0.90953 | 0.94928 | -6.2604 | 1.02E+08 |
| SHLD2        | 0.088099 | 0.088099 | 4.3122  | 0.11549  | 0.90973 | 0.94938 | -6.2604 | 54537    |
| ATP2B1-AS1   | 0.014842 | 0.014842 | 0.43615 | 0.11543  | 0.90978 | 0.94938 | -6.2604 | 338758   |
| PLA2G5       | -0.01159 | 0.011585 | 0.15156 | -0.11541 | 0.90979 | 0.94938 | -6.2604 | 5322     |
| WDFY4        | 0.028832 | 0.028832 | 0.70252 | 0.11521  | 0.90994 | 0.94944 | -6.2604 | 57705    |
| SLC26A9      | -0.09201 | 0.092013 | 1.5218  | -0.11507 | 0.91006 | 0.94944 | -6.2604 | 115019   |
| FAM106B      | 0.010341 | 0.010341 | 0.16028 | 0.11506  | 0.91007 | 0.94944 | -6.2604 | 1.01E+08 |
| APOBEC3G     | 0.03411  | 0.03411  | 0.59541 | 0.11505  | 0.91008 | 0.94944 | -6.2604 | 60489    |
| LOC100506071 | -0.00992 | 0.009922 | 0.21531 | -0.11488 | 0.9102  | 0.94952 | -6.2605 | 1.01E+08 |
| ZRANB2-AS1   | 0.030007 | 0.030007 | 1.0642  | 0.11469  | 0.91036 | 0.94962 | -6.2605 | 1E+08    |
| PIGT         | -0.34872 | 0.34872  | 14.144  | -0.11414 | 0.91078 | 0.94999 | -6.2606 | 51604    |
| FBXW7        | -0.09378 | 0.093784 | 5.4807  | -0.11408 | 0.91083 | 0.94999 | -6.2606 | 55294    |
| CCNI2        | -0.00926 | 0.009264 | 0.20162 | -0.11385 | 0.91101 | 0.95007 | -6.2606 | 645121   |

|         |          |          |         |          |         |         |         |        |
|---------|----------|----------|---------|----------|---------|---------|---------|--------|
| SST     | 0.1065   | 0.1065   | 0.99077 | 0.11383  | 0.91102 | 0.95007 | -6.2606 | 6750   |
| NDUFS7  | -0.184   | 0.184    | 7.2774  | -0.11368 | 0.91114 | 0.95014 | -6.2606 | 374291 |
| ALKBH3  | 0.10011  | 0.10011  | 4.5972  | 0.11277  | 0.91185 | 0.95082 | -6.2607 | 221120 |
| LINS1   | 0.028179 | 0.028179 | 1.9102  | 0.11268  | 0.91192 | 0.95083 | -6.2607 | 55180  |
| STX4    | -0.18264 | 0.18264  | 8.5582  | -0.11202 | 0.91243 | 0.95125 | -6.2608 | 6810   |
| ECE1    | -0.42018 | 0.42018  | 11.625  | -0.112   | 0.91245 | 0.95125 | -6.2608 | 1889   |
| CHST1   | -0.05927 | 0.059267 | 1.0527  | -0.11195 | 0.91249 | 0.95125 | -6.2608 | 8534   |
| ZNF20   | 0.016023 | 0.016023 | 0.7498  | 0.11187  | 0.91255 | 0.95125 | -6.2608 | 7568   |
| ZMYND19 | 0.12268  | 0.12268  | 5.3441  | 0.11138  | 0.91293 | 0.95159 | -6.2609 | 116225 |
| RNF170  | 0.038204 | 0.038204 | 2.0454  | 0.11129  | 0.913   | 0.95161 | -6.2609 | 81790  |
| RHOV    | -0.42048 | 0.42048  | 16.142  | -0.11054 | 0.91358 | 0.95209 | -6.261  | 171177 |
| ZEB1    | -0.08943 | 0.089431 | 2.7078  | -0.11045 | 0.91365 | 0.95209 | -6.261  | 6935   |
| GPI     | 0.54594  | 0.54594  | 23.539  | 0.11041  | 0.91368 | 0.95209 | -6.261  | 2821   |
| ZSCAN12 | -0.01515 | 0.015154 | 0.65566 | -0.11037 | 0.91371 | 0.95209 | -6.261  | 9753   |
| SLC23A1 | -0.07242 | 0.072423 | 0.89265 | -0.11033 | 0.91374 | 0.95209 | -6.261  | 9963   |
| RBAK    | -0.036   | 0.036    | 2.1176  | -0.10999 | 0.91401 | 0.95231 | -6.261  | 57786  |
| SNX20   | 0.018293 | 0.018293 | 0.51166 | 0.10971  | 0.91423 | 0.95248 | -6.2611 | 124460 |
| ANKIB1  | -0.04312 | 0.043124 | 4.8553  | -0.10921 | 0.91462 | 0.95283 | -6.2611 | 54467  |
| MINK1   | 0.88241  | 0.88241  | 35.081  | 0.10912  | 0.91469 | 0.95284 | -6.2611 | 50488  |
| RITA1   | 0.077396 | 0.077396 | 3.5617  | 0.10878  | 0.91495 | 0.95306 | -6.2612 | 84934  |
| MRPL16  | -0.14168 | 0.14168  | 5.5878  | -0.10866 | 0.91504 | 0.95309 | -6.2612 | 54948  |
| BAP1    | -0.23109 | 0.23109  | 12.051  | -0.10844 | 0.91522 | 0.95321 | -6.2612 | 8314   |
| PTPN1   | 0.19598  | 0.19598  | 9.663   | 0.10837  | 0.91527 | 0.95321 | -6.2612 | 5770   |
| CD83    | 0.02985  | 0.02985  | 1.1228  | 0.108    | 0.91556 | 0.95345 | -6.2613 | 9308   |
| CSNK1D  | 0.22003  | 0.22003  | 10.385  | 0.10778  | 0.91573 | 0.95357 | -6.2613 | 1453   |
| EPG5    | -0.07191 | 0.07191  | 4.1583  | -0.10758 | 0.91589 | 0.95363 | -6.2613 | 57724  |

|           |          |          |         |          |         |         |         |        |
|-----------|----------|----------|---------|----------|---------|---------|---------|--------|
| BUD13     | -0.05838 | 0.058377 | 3.7378  | -0.10757 | 0.9159  | 0.95363 | -6.2613 | 84811  |
| GDA       | 0.062413 | 0.062413 | 1.0434  | 0.10699  | 0.91634 | 0.95404 | -6.2614 | 9615   |
| ZNF155    | -0.01389 | 0.013889 | 0.98685 | -0.10687 | 0.91644 | 0.95407 | -6.2614 | 7711   |
| THRAP3    | -0.32005 | 0.32005  | 17.773  | -0.10658 | 0.91666 | 0.95424 | -6.2614 | 9967   |
| FAM239B   | 0.01942  | 0.01942  | 0.37633 | 0.10652  | 0.91671 | 0.95424 | -6.2614 | 729162 |
| RNPEPL1   | 0.26498  | 0.26498  | 11.659  | 0.10624  | 0.91693 | 0.95429 | -6.2615 | 57140  |
| TMEM176B  | -0.27737 | 0.27737  | 6.4536  | -0.10619 | 0.91697 | 0.95429 | -6.2615 | 28959  |
| SNORA6    | 0.017033 | 0.017033 | 0.30805 | 0.10589  | 0.91721 | 0.95429 | -6.2615 | 574040 |
| EIF3K     | 1.0043   | 1.0043   | 50.515  | 0.10587  | 0.91722 | 0.95429 | -6.2615 | 27335  |
| GAB2      | -0.09535 | 0.09535  | 4.8567  | -0.10586 | 0.91722 | 0.95429 | -6.2615 | 9846   |
| NDUFB11   | -0.38086 | 0.38086  | 14.428  | -0.10578 | 0.91729 | 0.95429 | -6.2615 | 54539  |
| NTHL1     | 0.056726 | 0.056726 | 2.0107  | 0.10574  | 0.91732 | 0.95429 | -6.2615 | 4913   |
| ARFGAP1   | -0.14419 | 0.14419  | 5.4617  | -0.10564 | 0.9174  | 0.95429 | -6.2615 | 55738  |
| CAMK1D    | -0.15631 | 0.15631  | 5.4667  | -0.10564 | 0.9174  | 0.95429 | -6.2615 | 57118  |
| DNAJC16   | -0.02338 | 0.023378 | 2.5537  | -0.10563 | 0.9174  | 0.95429 | -6.2615 | 23341  |
| G3BP2     | -0.1507  | 0.1507   | 8.0962  | -0.10562 | 0.91742 | 0.95429 | -6.2615 | 9908   |
| DGAT2     | -1.0317  | 1.0317   | 19.588  | -0.10559 | 0.91743 | 0.95429 | -6.2615 | 84649  |
| WDR83OS   | -0.41336 | 0.41336  | 21.958  | -0.10536 | 0.91761 | 0.95441 | -6.2615 | 51398  |
| TMEM254   | -0.17361 | 0.17361  | 5.5484  | -0.10501 | 0.91788 | 0.95455 | -6.2616 | 80195  |
| DAB2      | -0.324   | 0.324    | 9.0525  | -0.10501 | 0.91789 | 0.95455 | -6.2616 | 1601   |
| B9D2      | 0.026922 | 0.026922 | 1.079   | 0.10481  | 0.91805 | 0.95455 | -6.2616 | 80776  |
| DNMBP-AS1 | 0.007594 | 0.007594 | 0.16387 | 0.10478  | 0.91806 | 0.95455 | -6.2616 | 1E+08  |
| ALKBH7    | -0.24842 | 0.24842  | 8.1858  | -0.10478 | 0.91807 | 0.95455 | -6.2616 | 84266  |
| SLC39A2   | 0.31767  | 0.31767  | 6.2741  | 0.10475  | 0.91809 | 0.95455 | -6.2616 | 29986  |
| S100A3    | 0.16446  | 0.16446  | 3.4918  | 0.10449  | 0.9183  | 0.95471 | -6.2616 | 6274   |
| CD79A     | 0.011216 | 0.011216 | 0.21877 | 0.10437  | 0.91839 | 0.95475 | -6.2617 | 973    |

|         |          |          |         |          |         |         |         |        |
|---------|----------|----------|---------|----------|---------|---------|---------|--------|
| SBNO2   | 0.58072  | 0.58072  | 16.267  | 0.10425  | 0.91848 | 0.95479 | -6.2617 | 22904  |
| CNKSR1  | -0.12338 | 0.12338  | 3.801   | -0.10396 | 0.91871 | 0.95488 | -6.2617 | 10256  |
| SF3B1   | 0.27653  | 0.27653  | 22.499  | 0.10394  | 0.91872 | 0.95488 | -6.2617 | 23451  |
| ARL6IP4 | 0.44909  | 0.44909  | 16.517  | 0.10386  | 0.91878 | 0.95488 | -6.2617 | 51329  |
| DDX56   | 0.099025 | 0.099025 | 6.9965  | 0.10383  | 0.9188  | 0.95488 | -6.2617 | 54606  |
| LSM2    | -0.03587 | 0.035869 | 1.1562  | -0.10377 | 0.91886 | 0.95488 | -6.2617 | 57819  |
| TRMT61B | 0.027694 | 0.027694 | 2.2157  | 0.1037   | 0.91891 | 0.95488 | -6.2617 | 55006  |
| TRNT1   | 0.031944 | 0.031944 | 2.209   | 0.10345  | 0.9191  | 0.95502 | -6.2618 | 51095  |
| PTCHD3  | -0.01092 | 0.010924 | 0.13858 | -0.10333 | 0.9192  | 0.95506 | -6.2618 | 374308 |
| ZNF41   | -0.01454 | 0.01454  | 1.2202  | -0.10258 | 0.91978 | 0.95561 | -6.2618 | 7592   |
| ARID5A  | 0.14204  | 0.14204  | 4.0076  | 0.10216  | 0.92011 | 0.95589 | -6.2619 | 10865  |
| CCNT2   | 0.049521 | 0.049521 | 3.0966  | 0.10187  | 0.92034 | 0.95599 | -6.2619 | 905    |
| C7orf50 | -0.05216 | 0.052157 | 1.7165  | -0.10185 | 0.92035 | 0.95599 | -6.2619 | 84310  |
| PID1    | -0.04838 | 0.048381 | 1.9164  | -0.10182 | 0.92037 | 0.95599 | -6.2619 | 55022  |
| NCOA7   | 0.082712 | 0.082712 | 2.7798  | 0.10149  | 0.92063 | 0.95619 | -6.262  | 135112 |
| TMUB1   | 0.13091  | 0.13091  | 5.5375  | 0.10123  | 0.92083 | 0.95634 | -6.262  | 83590  |
| NSMCE4A | 0.12188  | 0.12188  | 5.9613  | 0.10117  | 0.92088 | 0.95634 | -6.262  | 54780  |
| ZNF532  | 0.063943 | 0.063943 | 6.8762  | 0.10095  | 0.92105 | 0.95641 | -6.262  | 55205  |
| RASL11A | 0.070594 | 0.070594 | 2.1612  | 0.10094  | 0.92106 | 0.95641 | -6.262  | 387496 |
| LCE4A   | 0.034179 | 0.034179 | 0.48835 | 0.10074  | 0.92122 | 0.95651 | -6.262  | 199834 |
| GMPS    | -0.13435 | 0.13435  | 9.0111  | -0.10062 | 0.92131 | 0.95655 | -6.2621 | 8833   |
| RIPOR3  | 0.1251   | 0.1251   | 2.9701  | 0.10018  | 0.92165 | 0.95684 | -6.2621 | 140876 |
| AVL9    | 0.038144 | 0.038144 | 3.2698  | 0.10008  | 0.92173 | 0.95687 | -6.2621 | 23080  |
| TADA2B  | 0.064672 | 0.064672 | 3.9957  | 0.099816 | 0.92193 | 0.95702 | -6.2621 | 93624  |
| VPS45   | 0.048064 | 0.048064 | 4.0868  | 0.09955  | 0.92214 | 0.95718 | -6.2622 | 11311  |
| ILVBL   | -0.184   | 0.184    | 9.1823  | -0.09936 | 0.92229 | 0.95726 | -6.2622 | 10994  |



|            |          |          |         |          |         |         |         |        |
|------------|----------|----------|---------|----------|---------|---------|---------|--------|
| MYL6B      | 0.17381  | 0.17381  | 5.6593  | 0.099306 | 0.92233 | 0.95726 | -6.2622 | 140465 |
| ANGPTL8    | -0.01292 | 0.012915 | 0.31559 | -0.09895 | 0.92261 | 0.95739 | -6.2622 | 55908  |
| C19orf47   | 0.059258 | 0.059258 | 3.4385  | 0.098949 | 0.92261 | 0.95739 | -6.2622 | 126526 |
| DCK        | -0.03752 | 0.037521 | 2.4106  | -0.09893 | 0.92263 | 0.95739 | -6.2622 | 1633   |
| LETM1      | -0.1466  | 0.1466   | 7.8283  | -0.09881 | 0.92272 | 0.95742 | -6.2622 | 3954   |
| STK40      | 0.13948  | 0.13948  | 8.714   | 0.09852  | 0.92294 | 0.95758 | -6.2623 | 83931  |
| NHEJ1      | -0.02958 | 0.02958  | 2.2077  | -0.09848 | 0.92298 | 0.95758 | -6.2623 | 79840  |
| BTBD6      | -0.20602 | 0.20602  | 12.278  | -0.09827 | 0.92314 | 0.95762 | -6.2623 | 90135  |
| NAPRT      | 0.34275  | 0.34275  | 13.613  | 0.098221 | 0.92318 | 0.95762 | -6.2623 | 93100  |
| CEP57      | -0.05465 | 0.054651 | 2.9874  | -0.09821 | 0.92319 | 0.95762 | -6.2623 | 9702   |
| RMI1       | -0.02049 | 0.020485 | 0.84029 | -0.09812 | 0.92326 | 0.95763 | -6.2623 | 80010  |
| SWSAP1     | 0.017479 | 0.017479 | 0.87237 | 0.097866 | 0.92345 | 0.95778 | -6.2623 | 126074 |
| THAP8      | 0.031701 | 0.031701 | 1.0568  | 0.097788 | 0.92351 | 0.95778 | -6.2623 | 199745 |
| ST3GAL1    | 0.10222  | 0.10222  | 3.0165  | 0.097341 | 0.92386 | 0.95808 | -6.2624 | 6482   |
| CD226      | 0.009822 | 0.009822 | 0.24586 | 0.097187 | 0.92398 | 0.95814 | -6.2624 | 10666  |
| PANX2      | 0.015158 | 0.015158 | 0.267   | 0.097124 | 0.92403 | 0.95814 | -6.2624 | 56666  |
| PPP1R3C    | 0.092573 | 0.092573 | 3.9037  | 0.096818 | 0.92427 | 0.95833 | -6.2624 | 5507   |
| JAM3       | 0.1003   | 0.1003   | 3.6572  | 0.096469 | 0.92454 | 0.95852 | -6.2625 | 83700  |
| ZNF230     | -0.00938 | 0.009376 | 0.47098 | -0.09644 | 0.92456 | 0.95852 | -6.2625 | 7773   |
| LHX6       | -0.03241 | 0.032405 | 0.96426 | -0.09635 | 0.92464 | 0.95852 | -6.2625 | 26468  |
| C19orf73   | -0.01902 | 0.019021 | 0.51505 | -0.09629 | 0.92468 | 0.95852 | -6.2625 | 55150  |
| RIN3       | 0.072443 | 0.072443 | 3.3882  | 0.096139 | 0.9248  | 0.95858 | -6.2625 | 79890  |
| PEX7       | 0.050979 | 0.050979 | 2.4411  | 0.095662 | 0.92517 | 0.95889 | -6.2626 | 5191   |
| SLC1A1     | 0.017025 | 0.017025 | 0.62317 | 0.095614 | 0.92521 | 0.95889 | -6.2626 | 6505   |
| ARHGAP29   | 0.11123  | 0.11123  | 4.5166  | 0.09528  | 0.92547 | 0.9591  | -6.2626 | 9411   |
| NUTM2A-AS1 | 0.046583 | 0.046583 | 3.1512  | 0.09505  | 0.92565 | 0.95917 | -6.2626 | 728190 |

|              |          |          |         |          |         |         |         |          |
|--------------|----------|----------|---------|----------|---------|---------|---------|----------|
| CCL24        | -0.0459  | 0.045895 | 1.0428  | -0.09504 | 0.92565 | 0.95917 | -6.2626 | 6369     |
| BRMS1        | 0.25565  | 0.25565  | 10.911  | 0.094844 | 0.92581 | 0.95922 | -6.2626 | 25855    |
| PDE8B        | -0.01369 | 0.013689 | 0.3472  | -0.09484 | 0.92582 | 0.95922 | -6.2626 | 8622     |
| ZFYVE28      | 0.034198 | 0.034198 | 1.3531  | 0.094689 | 0.92593 | 0.95928 | -6.2627 | 57732    |
| FES          | -0.05641 | 0.056414 | 1.7164  | -0.09428 | 0.92625 | 0.95952 | -6.2627 | 2242     |
| SATB1        | 0.02142  | 0.02142  | 1.3482  | 0.094202 | 0.92631 | 0.95952 | -6.2627 | 6304     |
| PTPRN2       | 0.017236 | 0.017236 | 0.65647 | 0.09418  | 0.92633 | 0.95952 | -6.2627 | 5799     |
| TRIM5        | -0.04384 | 0.043837 | 2.1403  | -0.0941  | 0.92639 | 0.95953 | -6.2627 | 85363    |
| NIPSNAP2     | 0.15889  | 0.15889  | 6.2968  | 0.093624 | 0.92676 | 0.95985 | -6.2628 | 2631     |
| CASKIN1      | 0.012092 | 0.012092 | 0.40562 | 0.093325 | 0.92699 | 0.96003 | -6.2628 | 57524    |
| RABL6        | 0.26137  | 0.26137  | 12.43   | 0.093155 | 0.92713 | 0.96011 | -6.2628 | 55684    |
| IRF7         | -0.21903 | 0.21903  | 6.1255  | -0.09281 | 0.9274  | 0.96033 | -6.2628 | 3665     |
| CD82         | 0.71958  | 0.71958  | 27.049  | 0.092452 | 0.92768 | 0.9605  | -6.2629 | 3732     |
| SCARF1       | -0.06159 | 0.061588 | 2.1017  | -0.0924  | 0.92771 | 0.9605  | -6.2629 | 8578     |
| DUSP22       | -0.06313 | 0.063128 | 7.2967  | -0.09238 | 0.92773 | 0.9605  | -6.2629 | 56940    |
| ATXN2-AS     | 0.009642 | 0.009642 | 0.16105 | 0.092234 | 0.92785 | 0.96056 | -6.2629 | 1.03E+08 |
| FLAD1        | -0.05855 | 0.058553 | 4.0256  | -0.09182 | 0.92817 | 0.96084 | -6.2629 | 80308    |
| TRAF5        | 0.034946 | 0.034946 | 1.3811  | 0.091698 | 0.92826 | 0.96088 | -6.2629 | 7188     |
| CHRD2        | -0.14953 | 0.14953  | 1.8363  | -0.09159 | 0.92835 | 0.9609  | -6.263  | 25884    |
| EFHD2        | -0.3201  | 0.3201   | 10.812  | -0.09149 | 0.92842 | 0.96092 | -6.263  | 79180    |
| PRPF4        | -0.07428 | 0.074276 | 4.0834  | -0.09098 | 0.92882 | 0.96128 | -6.263  | 9128     |
| ELAC2        | 0.10926  | 0.10926  | 6.6211  | 0.090832 | 0.92894 | 0.96134 | -6.263  | 60528    |
| ADAMTS4      | 0.27037  | 0.27037  | 4.777   | 0.09075  | 0.929   | 0.96135 | -6.263  | 9507     |
| LOC101929523 | 0.034528 | 0.034528 | 0.88398 | 0.090205 | 0.92943 | 0.96161 | -6.2631 | 1.02E+08 |
| C17orf67     | 0.007662 | 0.007662 | 0.39617 | 0.090188 | 0.92944 | 0.96161 | -6.2631 | 339210   |
| ERAL1        | -0.10761 | 0.10761  | 6.5109  | -0.09018 | 0.92945 | 0.96161 | -6.2631 | 26284    |

|           |          |          |         |          |         |         |         |          |
|-----------|----------|----------|---------|----------|---------|---------|---------|----------|
| P2RY13    | -0.02336 | 0.023362 | 0.70769 | -0.09014 | 0.92948 | 0.96161 | -6.2631 | 53829    |
| OTUD4     | 0.050971 | 0.050971 | 4.7476  | 0.08989  | 0.92967 | 0.96174 | -6.2631 | 54726    |
| TMEM74B   | 0.051543 | 0.051543 | 1.5947  | 0.089391 | 0.93006 | 0.96208 | -6.2632 | 55321    |
| SIN3B     | 0.097209 | 0.097209 | 6.1793  | 0.089329 | 0.93011 | 0.96208 | -6.2632 | 23309    |
| SLFN12    | 0.024006 | 0.024006 | 0.99704 | 0.089035 | 0.93034 | 0.96226 | -6.2632 | 55106    |
| ZSCAN29   | -0.02058 | 0.020576 | 2.0376  | -0.08882 | 0.93051 | 0.96228 | -6.2632 | 146050   |
| MATR3     | -0.15829 | 0.15829  | 12.327  | -0.08881 | 0.93052 | 0.96228 | -6.2632 | 9782     |
| CORO7     | 0.048474 | 0.048474 | 2.2094  | 0.088738 | 0.93057 | 0.96228 | -6.2632 | 79585    |
| MRPL10    | -0.08611 | 0.086109 | 3.9341  | -0.08867 | 0.93063 | 0.96228 | -6.2632 | 124995   |
| GATA2-AS1 | 0.007947 | 0.007947 | 0.29277 | 0.08862  | 0.93066 | 0.96228 | -6.2632 | 1.02E+08 |
| BAZ1B     | 0.10246  | 0.10246  | 6.683   | 0.088568 | 0.93071 | 0.96228 | -6.2632 | 9031     |
| APMAP     | -0.1805  | 0.1805   | 8.7024  | -0.0882  | 0.931   | 0.96252 | -6.2633 | 57136    |
| CHMP7     | 0.056653 | 0.056653 | 3.8409  | 0.08801  | 0.93114 | 0.96261 | -6.2633 | 91782    |
| MED26     | -0.02572 | 0.025717 | 2.4683  | -0.08727 | 0.93172 | 0.96309 | -6.2634 | 9441     |
| FLJ46906  | 0.036849 | 0.036849 | 1.6016  | 0.087209 | 0.93177 | 0.96309 | -6.2634 | 441172   |
| PUS7      | 0.052511 | 0.052511 | 3.0525  | 0.087154 | 0.93181 | 0.96309 | -6.2634 | 54517    |
| KHDRBS1   | -0.21759 | 0.21759  | 14.753  | -0.08713 | 0.93183 | 0.96309 | -6.2634 | 10657    |
| ACOT11    | -0.05259 | 0.052587 | 1.8517  | -0.08694 | 0.93197 | 0.96318 | -6.2634 | 26027    |
| PAPOLG    | -0.01742 | 0.017415 | 1.3126  | -0.08672 | 0.93215 | 0.96328 | -6.2634 | 64895    |
| ATP13A1   | -0.12162 | 0.12162  | 7.1002  | -0.08667 | 0.93218 | 0.96328 | -6.2634 | 57130    |
| TWISTNB   | 0.032418 | 0.032418 | 1.985   | 0.086572 | 0.93226 | 0.9633  | -6.2634 | 221830   |
| AEBP1     | -2.2562  | 2.2562   | 51.582  | -0.08622 | 0.93253 | 0.96352 | -6.2634 | 165      |
| DDX18     | -0.12546 | 0.12546  | 7.7682  | -0.08577 | 0.93289 | 0.96378 | -6.2635 | 8886     |
| FLVCR2    | 0.040273 | 0.040273 | 1.9478  | 0.085765 | 0.93289 | 0.96378 | -6.2635 | 55640    |
| COMTD1    | 0.18304  | 0.18304  | 6.0573  | 0.08557  | 0.93304 | 0.96379 | -6.2635 | 118881   |
| LINC00896 | -0.01506 | 0.015064 | 0.31685 | -0.08549 | 0.9331  | 0.96379 | -6.2635 | 150197   |

|           |          |          |         |          |         |         |         |          |
|-----------|----------|----------|---------|----------|---------|---------|---------|----------|
| FNBP1     | -0.09334 | 0.093336 | 7.3337  | -0.08548 | 0.93311 | 0.96379 | -6.2635 | 23048    |
| ZNF468    | 0.019148 | 0.019148 | 1.1574  | 0.085425 | 0.93316 | 0.96379 | -6.2635 | 90333    |
| IBA57-DT  | -0.00707 | 0.007066 | 0.16652 | -0.08538 | 0.93319 | 0.96379 | -6.2635 | 574432   |
| FAM124A   | 0.012546 | 0.012546 | 0.41062 | 0.085147 | 0.93337 | 0.96392 | -6.2635 | 220108   |
| IL1R2     | -0.29917 | 0.29917  | 6.6732  | -0.08498 | 0.9335  | 0.96399 | -6.2636 | 7850     |
| CSKMT     | -0.01278 | 0.012784 | 0.82654 | -0.08484 | 0.93362 | 0.96405 | -6.2636 | 751071   |
| UNC45A    | -0.16669 | 0.16669  | 8.914   | -0.08473 | 0.9337  | 0.96408 | -6.2636 | 55898    |
| SECTM1    | 0.11972  | 0.11972  | 3.4422  | 0.084265 | 0.93406 | 0.96439 | -6.2636 | 6398     |
| TMEM106B  | -0.05381 | 0.053811 | 3.4363  | -0.08356 | 0.93461 | 0.9649  | -6.2637 | 54664    |
| ECD       | 0.058183 | 0.058183 | 5.7234  | 0.083424 | 0.93472 | 0.96496 | -6.2637 | 11319    |
| HK1       | 0.29939  | 0.29939  | 20.54   | 0.083064 | 0.935   | 0.9651  | -6.2637 | 3098     |
| NOLC1     | 0.20568  | 0.20568  | 8.7103  | 0.083024 | 0.93503 | 0.9651  | -6.2637 | 9221     |
| FMC1      | -0.03133 | 0.031327 | 1.0195  | -0.08299 | 0.93506 | 0.9651  | -6.2637 | 154791   |
| EYA4      | 0.012452 | 0.012452 | 0.22935 | 0.082926 | 0.93511 | 0.9651  | -6.2637 | 2070     |
| WDR54     | -0.03735 | 0.037354 | 1.6095  | -0.08288 | 0.93515 | 0.9651  | -6.2637 | 84058    |
| LTBP2     | 0.19446  | 0.19446  | 9.1027  | 0.082744 | 0.93525 | 0.96512 | -6.2637 | 4053     |
| ZNF518A   | 0.017975 | 0.017975 | 1.5454  | 0.082711 | 0.93528 | 0.96512 | -6.2638 | 9849     |
| NKAPD1    | -0.03873 | 0.038734 | 3.3257  | -0.08221 | 0.93567 | 0.96542 | -6.2638 | 55216    |
| BCL7C     | -0.1462  | 0.1462   | 7.1661  | -0.08215 | 0.93571 | 0.96542 | -6.2638 | 9274     |
| ACP2      | -0.09562 | 0.095623 | 4.3691  | -0.08211 | 0.93574 | 0.96542 | -6.2638 | 53       |
| MTA2      | -0.20641 | 0.20641  | 16.402  | -0.08171 | 0.93606 | 0.96569 | -6.2638 | 9219     |
| SNORA92   | -0.01824 | 0.018243 | 0.60232 | -0.08164 | 0.93612 | 0.96569 | -6.2638 | 1.07E+08 |
| SOD1      | 0.77348  | 0.77348  | 31.328  | 0.081501 | 0.93622 | 0.96574 | -6.2639 | 6647     |
| LINC01816 | -0.00693 | 0.006929 | 0.18477 | -0.08124 | 0.93643 | 0.96589 | -6.2639 | 1E+08    |
| SYNPO     | 0.2059   | 0.2059   | 6.5446  | 0.080881 | 0.9367  | 0.96606 | -6.2639 | 11346    |
| CISD3     | -0.07186 | 0.07186  | 3.4781  | -0.08088 | 0.93671 | 0.96606 | -6.2639 | 284106   |

|              |          |          |         |          |         |         |         |          |
|--------------|----------|----------|---------|----------|---------|---------|---------|----------|
| CA5BP1       | 0.024004 | 0.024004 | 1.7058  | 0.080762 | 0.9368  | 0.96607 | -6.2639 | 340591   |
| RGPD8        | -0.01201 | 0.012009 | 0.70833 | -0.08072 | 0.93683 | 0.96607 | -6.2639 | 727851   |
| ZNF724       | -0.00939 | 0.009389 | 0.3965  | -0.08059 | 0.93693 | 0.96612 | -6.2639 | 440519   |
| SLAMF1       | -0.00901 | 0.00901  | 0.22062 | -0.08042 | 0.93706 | 0.96619 | -6.2639 | 6504     |
| UFSP1        | -0.01984 | 0.019835 | 0.68207 | -0.08021 | 0.93723 | 0.96627 | -6.264  | 402682   |
| DOCK7        | -0.03217 | 0.032171 | 3.2582  | -0.08018 | 0.93725 | 0.96627 | -6.264  | 85440    |
| LCE2D        | 1.4737   | 1.4737   | 29.437  | 0.08     | 0.93739 | 0.96636 | -6.264  | 353141   |
| POLR2E       | 0.23817  | 0.23817  | 12.783  | 0.079705 | 0.93762 | 0.96653 | -6.264  | 5434     |
| LOC101927468 | -0.00764 | 0.007638 | 0.17676 | -0.07949 | 0.93779 | 0.96665 | -6.264  | 1.02E+08 |
| HSD17B14     | 0.041953 | 0.041953 | 1.2147  | 0.079345 | 0.9379  | 0.96671 | -6.264  | 51171    |
| SMN1         | -0.03851 | 0.038511 | 2.3995  | -0.07901 | 0.93816 | 0.96687 | -6.2641 | 6606     |
| UPF2         | -0.04014 | 0.040138 | 3.4949  | -0.07899 | 0.93818 | 0.96687 | -6.2641 | 26019    |
| PNPLA6       | -0.1113  | 0.1113   | 5.8621  | -0.07872 | 0.9384  | 0.96703 | -6.2641 | 10908    |
| LSM4         | 0.17677  | 0.17677  | 8.5917  | 0.078601 | 0.93848 | 0.96704 | -6.2641 | 25804    |
| IRAK3        | -0.05103 | 0.051029 | 1.9474  | -0.07849 | 0.93857 | 0.96704 | -6.2641 | 11213    |
| G3BP1        | -0.31953 | 0.31953  | 23.079  | -0.07841 | 0.93863 | 0.96704 | -6.2641 | 10146    |
| SLC25A22     | -0.05025 | 0.050247 | 3.1112  | -0.07841 | 0.93863 | 0.96704 | -6.2641 | 79751    |
| RSRC1        | 0.052781 | 0.052781 | 3.5013  | 0.078157 | 0.93883 | 0.96719 | -6.2641 | 51319    |
| CDK6         | -0.05475 | 0.054745 | 3.8857  | -0.07777 | 0.93913 | 0.96744 | -6.2642 | 1021     |
| PDGFRA       | 0.28893  | 0.28893  | 9.4198  | 0.077481 | 0.93936 | 0.96748 | -6.2642 | 5156     |
| FASTKD2      | -0.02453 | 0.024534 | 2.251   | -0.07746 | 0.93937 | 0.96748 | -6.2642 | 22868    |
| LOC105274304 | -0.00806 | 0.008064 | 0.25911 | -0.07745 | 0.93939 | 0.96748 | -6.2642 | 1.05E+08 |
| SLCO2B1      | 0.21342  | 0.21342  | 6.1934  | 0.077431 | 0.9394  | 0.96748 | -6.2642 | 11309    |
| KLHL6-AS1    | 0.009413 | 0.009413 | 0.30435 | 0.077302 | 0.9395  | 0.96752 | -6.2642 | 1.01E+08 |
| FLJ32255     | 0.022424 | 0.022424 | 1.1946  | 0.07714  | 0.93963 | 0.96759 | -6.2642 | 643977   |
| DYNC1H1      | -0.28433 | 0.28433  | 31.694  | -0.07696 | 0.93977 | 0.96768 | -6.2642 | 1778     |

|            |          |          |          |          |         |         |         |          |
|------------|----------|----------|----------|----------|---------|---------|---------|----------|
| MTOR       | 0.059538 | 0.059538 | 6.5188   | 0.076325 | 0.94026 | 0.96811 | -6.2643 | 2475     |
| DNASE1L3   | -0.033   | 0.033    | 1.611    | -0.07627 | 0.9403  | 0.96811 | -6.2643 | 1776     |
| GOLGB1     | 0.10085  | 0.10085  | 8.6888   | 0.076049 | 0.94048 | 0.96823 | -6.2643 | 2804     |
| RPS11      | 8.0588   | 8.0588   | 516.98   | 0.075976 | 0.94053 | 0.96823 | -6.2643 | 6205     |
| SNF8       | 0.1505   | 0.1505   | 8.4823   | 0.075764 | 0.9407  | 0.96835 | -6.2643 | 11267    |
| RPS26      | 2.2336   | 2.2336   | 82.29    | 0.075617 | 0.94082 | 0.96841 | -6.2643 | 6231     |
| SESN3      | 0.14217  | 0.14217  | 9.4594   | 0.075542 | 0.94087 | 0.96841 | -6.2643 | 143686   |
| ZBTB46-AS1 | 0.009024 | 0.009024 | 0.17896  | 0.075281 | 0.94108 | 0.96856 | -6.2644 | 1.02E+08 |
| SNORA55    | 0.007833 | 0.007833 | 0.13343  | 0.075197 | 0.94114 | 0.96857 | -6.2644 | 677834   |
| LOC375196  | -0.00524 | 0.005242 | 0.095242 | -0.07502 | 0.94129 | 0.9686  | -6.2644 | 375196   |
| RASSF9     | 0.025862 | 0.025862 | 1.4164   | 0.07488  | 0.94139 | 0.9686  | -6.2644 | 9182     |
| HIVEP1     | 0.048755 | 0.048755 | 4.0115   | 0.074867 | 0.9414  | 0.9686  | -6.2644 | 3096     |
| PLA2G4E    | -0.32749 | 0.32749  | 17.456   | -0.07486 | 0.94141 | 0.9686  | -6.2644 | 123745   |
| OR1Q1      | -0.0059  | 0.005903 | 0.1246   | -0.07467 | 0.94155 | 0.96869 | -6.2644 | 158131   |
| HMGCL      | -0.06128 | 0.061282 | 3.7477   | -0.07461 | 0.9416  | 0.96869 | -6.2644 | 3155     |
| SPRR2G     | -9.4934  | 9.4934   | 362.46   | -0.07418 | 0.94194 | 0.96896 | -6.2644 | 6706     |
| TEAD2      | 0.1138   | 0.1138   | 4.201    | 0.074118 | 0.94199 | 0.96896 | -6.2644 | 8463     |
| FAM124B    | -0.01261 | 0.012607 | 0.65155  | -0.074   | 0.94208 | 0.969   | -6.2645 | 79843    |
| RDH10      | -0.05631 | 0.056313 | 3.1261   | -0.07358 | 0.94241 | 0.96922 | -6.2645 | 157506   |
| NOL8       | -0.03265 | 0.032652 | 2.9966   | -0.07357 | 0.94241 | 0.96922 | -6.2645 | 55035    |
| SSH1       | -0.06226 | 0.062259 | 4.4975   | -0.07345 | 0.94251 | 0.96926 | -6.2645 | 54434    |
| RGL2       | -0.03155 | 0.031547 | 2.2283   | -0.07289 | 0.94295 | 0.96961 | -6.2645 | 5863     |
| VCPIP1     | -0.02558 | 0.025577 | 3.2257   | -0.07287 | 0.94296 | 0.96961 | -6.2645 | 80124    |
| ATP23      | 0.015466 | 0.015466 | 0.75128  | 0.072532 | 0.94323 | 0.9698  | -6.2646 | 91419    |
| ARMC9      | 0.017277 | 0.017277 | 0.65421  | 0.072446 | 0.94329 | 0.9698  | -6.2646 | 80210    |
| BOD1       | -0.08814 | 0.088138 | 5.7085   | -0.0723  | 0.94341 | 0.9698  | -6.2646 | 91272    |

|            |          |          |          |          |         |         |         |          |
|------------|----------|----------|----------|----------|---------|---------|---------|----------|
| BIN3       | -0.04454 | 0.044535 | 4.448    | -0.07225 | 0.94344 | 0.9698  | -6.2646 | 55909    |
| NRM        | -0.00706 | 0.007055 | 0.39489  | -0.07219 | 0.94349 | 0.9698  | -6.2646 | 11270    |
| PLBD2      | 0.23086  | 0.23086  | 10.985   | 0.072124 | 0.94354 | 0.9698  | -6.2646 | 196463   |
| HSF1       | -0.176   | 0.176    | 14.024   | -0.0721  | 0.94357 | 0.9698  | -6.2646 | 3297     |
| TM9SF4     | 0.093221 | 0.093221 | 10.201   | 0.07204  | 0.94361 | 0.9698  | -6.2646 | 9777     |
| MRPL34     | 0.10533  | 0.10533  | 8.0285   | 0.071787 | 0.94381 | 0.96995 | -6.2646 | 64981    |
| CALM3      | 0.35693  | 0.35693  | 22.029   | 0.071258 | 0.94422 | 0.97031 | -6.2647 | 808      |
| ABHD10     | -0.03446 | 0.034461 | 1.7249   | -0.07104 | 0.94439 | 0.97033 | -6.2647 | 55347    |
| KCCAT198   | 0.007682 | 0.007682 | 0.25281  | 0.070938 | 0.94447 | 0.97033 | -6.2647 | 1.05E+08 |
| UBE2F-SCLY | 0.006802 | 0.006802 | 0.12116  | 0.070885 | 0.94451 | 0.97033 | -6.2647 | 1.01E+08 |
| CCDC112    | 0.011111 | 0.011111 | 0.71342  | 0.070883 | 0.94451 | 0.97033 | -6.2647 | 153733   |
| TIMM8A     | 0.023775 | 0.023775 | 1.9652   | 0.070799 | 0.94458 | 0.97033 | -6.2647 | 1678     |
| MGAT1      | -0.1746  | 0.1746   | 10.362   | -0.07073 | 0.94464 | 0.97033 | -6.2647 | 4245     |
| CHAF1B     | -0.03131 | 0.031305 | 1.4343   | -0.07066 | 0.94469 | 0.97033 | -6.2647 | 8208     |
| CAPN1      | 0.69552  | 0.69552  | 38.582   | 0.070653 | 0.94469 | 0.97033 | -6.2647 | 823      |
| ASAH2B     | -0.01171 | 0.011709 | 0.71158  | -0.06996 | 0.94523 | 0.97067 | -6.2648 | 653308   |
| FAS        | 0.035512 | 0.035512 | 2.32     | 0.06995  | 0.94524 | 0.97067 | -6.2648 | 355      |
| EPOR       | -0.00956 | 0.009559 | 0.44336  | -0.06989 | 0.94529 | 0.97067 | -6.2648 | 2057     |
| PDZRN4     | -0.00706 | 0.007056 | 0.16024  | -0.06985 | 0.94532 | 0.97067 | -6.2648 | 29951    |
| ARHGEF7    | -0.02903 | 0.029031 | 4.402    | -0.0698  | 0.94536 | 0.97067 | -6.2648 | 8874     |
| TMEM9      | -0.10271 | 0.10271  | 5.2789   | -0.06979 | 0.94537 | 0.97067 | -6.2648 | 252839   |
| NCSTN      | 0.12424  | 0.12424  | 12.123   | 0.069703 | 0.94544 | 0.97068 | -6.2648 | 23385    |
| ZNF678     | -0.00871 | 0.008711 | 0.43917  | -0.0694  | 0.94567 | 0.97086 | -6.2648 | 339500   |
| CEP295     | 0.014452 | 0.014452 | 1.1726   | 0.069149 | 0.94587 | 0.971   | -6.2648 | 85459    |
| ABCF1      | -0.01777 | 0.017772 | 1.341    | -0.06902 | 0.94597 | 0.97104 | -6.2648 | 23       |
| OR1N1      | -0.0052  | 0.005197 | 0.081386 | -0.0688  | 0.94614 | 0.97116 | -6.2648 | 138883   |

|            |          |          |         |          |         |         |         |        |
|------------|----------|----------|---------|----------|---------|---------|---------|--------|
| OR2W3      | -0.00583 | 0.005827 | 0.12973 | -0.06861 | 0.94629 | 0.97126 | -6.2649 | 343171 |
| PTDSS1     | 0.12152  | 0.12152  | 11.538  | 0.068062 | 0.94672 | 0.97164 | -6.2649 | 9791   |
| RPS18      | 3.3573   | 3.3573   | 188.19  | 0.067765 | 0.94695 | 0.97182 | -6.2649 | 6222   |
| ANKRD52    | -0.06692 | 0.066922 | 5.858   | -0.06758 | 0.94709 | 0.97191 | -6.2649 | 283373 |
| LRFN3      | -0.04592 | 0.045921 | 2.7135  | -0.06751 | 0.94715 | 0.97191 | -6.2649 | 79414  |
| MRPL23     | 0.19002  | 0.19002  | 10.946  | 0.067174 | 0.94741 | 0.97211 | -6.265  | 6150   |
| ABT1       | 0.054959 | 0.054959 | 4.9767  | 0.066449 | 0.94798 | 0.97258 | -6.265  | 29777  |
| ODR4       | -0.02399 | 0.023994 | 2.2356  | -0.0664  | 0.94801 | 0.97258 | -6.265  | 54953  |
| GPX1       | -0.92569 | 0.92569  | 33.83   | -0.06638 | 0.94804 | 0.97258 | -6.265  | 2876   |
| RRM2B      | 0.048074 | 0.048074 | 2.8498  | 0.0662   | 0.94817 | 0.97266 | -6.265  | 50484  |
| NHLH2      | 0.006604 | 0.006604 | 0.20793 | 0.066113 | 0.94824 | 0.97267 | -6.265  | 4808   |
| XPNPEP1    | 0.087323 | 0.087323 | 7.0195  | 0.065958 | 0.94836 | 0.97273 | -6.265  | 7511   |
| NUDT4P2    | 0.058088 | 0.058088 | 4.0523  | 0.065764 | 0.94851 | 0.97283 | -6.2651 | 170688 |
| BOP1       | -0.14141 | 0.14141  | 7.2959  | -0.06555 | 0.94868 | 0.97294 | -6.2651 | 23246  |
| CALML3-AS1 | 0.035472 | 0.035472 | 2.1273  | 0.06544  | 0.94877 | 0.97297 | -6.2651 | 1E+08  |
| PCCB       | -0.04245 | 0.042448 | 4.6983  | -0.06535 | 0.94884 | 0.97299 | -6.2651 | 5096   |
| CTAGE8     | 0.045318 | 0.045318 | 3.1471  | 0.065104 | 0.94903 | 0.97312 | -6.2651 | 1E+08  |
| TNFRSF6B   | -0.20893 | 0.20893  | 5.5345  | -0.06503 | 0.94908 | 0.97312 | -6.2651 | 8771   |
| RPL13AP5   | -10.938  | 10.938   | 679.16  | -0.06452 | 0.94949 | 0.97347 | -6.2651 | 728658 |
| SERPINB9P1 | 0.012683 | 0.012683 | 0.48896 | 0.063997 | 0.9499  | 0.97383 | -6.2652 | 221756 |
| HLA-DQA2   | 0.015638 | 0.015638 | 0.55238 | 0.063476 | 0.9503  | 0.97419 | -6.2652 | 3118   |
| CDH23      | -0.01248 | 0.012477 | 0.50995 | -0.06334 | 0.95041 | 0.97424 | -6.2652 | 64072  |
| CCDC9B     | -0.06849 | 0.06849  | 3.5941  | -0.06269 | 0.95091 | 0.9747  | -6.2653 | 388115 |
| THOP1      | 0.0842   | 0.0842   | 4.6777  | 0.062501 | 0.95107 | 0.9748  | -6.2653 | 7064   |
| GRASP      | -0.05334 | 0.05334  | 2.9226  | -0.06214 | 0.95135 | 0.97503 | -6.2653 | 160622 |
| EMC9       | -0.04174 | 0.041738 | 2.5505  | -0.0619  | 0.95154 | 0.97508 | -6.2653 | 51016  |



|              |          |          |         |          |         |         |         |          |
|--------------|----------|----------|---------|----------|---------|---------|---------|----------|
| ATP8B4       | 0.02244  | 0.02244  | 0.8161  | 0.061898 | 0.95154 | 0.97508 | -6.2653 | 79895    |
| RNF24        | 0.053158 | 0.053158 | 3.4258  | 0.06185  | 0.95157 | 0.97508 | -6.2653 | 11237    |
| PTGES        | -0.17621 | 0.17621  | 9.654   | -0.06159 | 0.95178 | 0.97521 | -6.2653 | 9536     |
| CD14         | 0.54976  | 0.54976  | 16.233  | 0.061542 | 0.95182 | 0.97521 | -6.2653 | 929      |
| AMN          | -0.02755 | 0.027554 | 1.2788  | -0.06133 | 0.95198 | 0.97526 | -6.2653 | 81693    |
| ISCA2        | -0.04005 | 0.040051 | 2.9441  | -0.06133 | 0.95198 | 0.97526 | -6.2653 | 122961   |
| PEAK1        | 0.06714  | 0.06714  | 5.8129  | 0.061132 | 0.95214 | 0.97533 | -6.2654 | 79834    |
| FAR2         | -0.01846 | 0.018456 | 1.2373  | -0.06109 | 0.95217 | 0.97533 | -6.2654 | 55711    |
| PDS5B        | -0.02988 | 0.029878 | 2.6411  | -0.06045 | 0.95267 | 0.97574 | -6.2654 | 23047    |
| C1QTNF2      | 0.015024 | 0.015024 | 0.6847  | 0.060437 | 0.95268 | 0.97574 | -6.2654 | 114898   |
| MIR3945HG    | -0.05078 | 0.050781 | 0.95007 | -0.06035 | 0.95275 | 0.97574 | -6.2654 | 731424   |
| FBN1         | 0.42993  | 0.42993  | 19.221  | 0.060277 | 0.9528  | 0.97574 | -6.2654 | 2200     |
| MCAT         | -0.02411 | 0.024109 | 2.1174  | -0.06017 | 0.95289 | 0.97574 | -6.2654 | 27349    |
| KCTD3        | 0.050232 | 0.050232 | 5.9122  | 0.060086 | 0.95295 | 0.97574 | -6.2654 | 51133    |
| MTHFD1       | 0.11908  | 0.11908  | 7.4562  | 0.060064 | 0.95297 | 0.97574 | -6.2654 | 4522     |
| SAMD15       | 0.004353 | 0.004353 | 0.20686 | 0.059725 | 0.95324 | 0.97595 | -6.2654 | 161394   |
| PCSK6-AS1    | 0.0045   | 0.0045   | 0.13627 | 0.059067 | 0.95375 | 0.97627 | -6.2655 | 1.05E+08 |
| MPC2         | 0.057473 | 0.057473 | 4.0556  | 0.059008 | 0.9538  | 0.97627 | -6.2655 | 25874    |
| FBXL20       | -0.03213 | 0.032131 | 3.5055  | -0.05897 | 0.95383 | 0.97627 | -6.2655 | 84961    |
| RPUSD3       | -0.04298 | 0.042976 | 4.0208  | -0.05896 | 0.95384 | 0.97627 | -6.2655 | 285367   |
| SYNJ2BP      | -0.02285 | 0.022849 | 2.2827  | -0.0589  | 0.95388 | 0.97627 | -6.2655 | 55333    |
| TMEM115      | 0.10816  | 0.10816  | 10.317  | 0.058882 | 0.9539  | 0.97627 | -6.2655 | 11070    |
| CEP78        | -0.00773 | 0.007726 | 0.71798 | -0.05874 | 0.95401 | 0.97633 | -6.2655 | 84131    |
| LOC101927914 | 0.004458 | 0.004458 | 0.12859 | 0.058193 | 0.95443 | 0.97654 | -6.2655 | 1.02E+08 |
| MED30        | 0.012225 | 0.012225 | 0.91965 | 0.05815  | 0.95447 | 0.97654 | -6.2655 | 90390    |
| PQBP1        | -0.08554 | 0.085544 | 9.1925  | -0.05812 | 0.95449 | 0.97654 | -6.2655 | 10084    |

|           |          |          |         |          |         |         |         |        |
|-----------|----------|----------|---------|----------|---------|---------|---------|--------|
| EEF1A1    | 10.061   | 10.061   | 1163.4  | 0.058088 | 0.95452 | 0.97654 | -6.2655 | 1915   |
| GAS2L1    | -0.1363  | 0.1363   | 12.415  | -0.05796 | 0.95462 | 0.97654 | -6.2656 | 10634  |
| COASY     | 0.10895  | 0.10895  | 9.4611  | 0.057898 | 0.95466 | 0.97654 | -6.2656 | 80347  |
| B3GALNT1  | -0.01495 | 0.014946 | 0.94156 | -0.0579  | 0.95467 | 0.97654 | -6.2656 | 8706   |
| MGRN1     | -0.04109 | 0.041087 | 4.5114  | -0.05784 | 0.95471 | 0.97654 | -6.2656 | 23295  |
| CSNK1G1   | 0.020392 | 0.020392 | 3.1658  | 0.057803 | 0.95474 | 0.97654 | -6.2656 | 53944  |
| HDHD3     | -0.10844 | 0.10844  | 5.5119  | -0.05772 | 0.95481 | 0.97654 | -6.2656 | 81932  |
| C1orf68   | 2.8306   | 2.8306   | 70.074  | 0.057662 | 0.95485 | 0.97654 | -6.2656 | 1E+08  |
| HLX       | 0.03576  | 0.03576  | 1.6318  | 0.057592 | 0.9549  | 0.97654 | -6.2656 | 3142   |
| MFSD4B    | 0.015631 | 0.015631 | 2.8526  | 0.057478 | 0.95499 | 0.97657 | -6.2656 | 91749  |
| ZBED8     | -0.00609 | 0.006087 | 0.34935 | -0.05733 | 0.95511 | 0.97659 | -6.2656 | 63920  |
| AGTPBP1   | -0.0246  | 0.024601 | 2.4787  | -0.05726 | 0.95516 | 0.97659 | -6.2656 | 23287  |
| EPB41L5   | 0.013824 | 0.013824 | 1.4033  | 0.057233 | 0.95519 | 0.97659 | -6.2656 | 57669  |
| STOM      | -0.52507 | 0.52507  | 29.131  | -0.0571  | 0.95529 | 0.97663 | -6.2656 | 2040   |
| SAMD1     | -0.11545 | 0.11545  | 8.7945  | -0.05703 | 0.95535 | 0.97663 | -6.2656 | 90378  |
| KBTBD6    | 0.007648 | 0.007648 | 1.0505  | 0.05696  | 0.9554  | 0.97663 | -6.2656 | 89890  |
| BRINP1    | 0.008871 | 0.008871 | 0.28528 | 0.056412 | 0.95583 | 0.97698 | -6.2656 | 1620   |
| C4orf33   | -0.01867 | 0.018666 | 1.3517  | -0.05637 | 0.95586 | 0.97698 | -6.2656 | 132321 |
| TMEM14B   | 0.064491 | 0.064491 | 5.0442  | 0.056151 | 0.95603 | 0.9771  | -6.2657 | 81853  |
| TMPRSS11E | -0.01914 | 0.019141 | 0.46693 | -0.05594 | 0.9562  | 0.97721 | -6.2657 | 28983  |
| PAQR8     | 0.008773 | 0.008773 | 0.60695 | 0.055527 | 0.95652 | 0.97742 | -6.2657 | 85315  |
| CCDC82    | 0.017196 | 0.017196 | 1.4302  | 0.055347 | 0.95666 | 0.97742 | -6.2657 | 79780  |
| ABHD16B   | -0.02756 | 0.02756  | 1.8005  | -0.05533 | 0.95667 | 0.97742 | -6.2657 | 140701 |
| MAP3K4    | -0.01899 | 0.018989 | 4.8438  | -0.05529 | 0.9567  | 0.97742 | -6.2657 | 4216   |
| WIPF2     | 0.055133 | 0.055133 | 7.225   | 0.055162 | 0.9568  | 0.97742 | -6.2657 | 147179 |
| ITGA7     | -0.12444 | 0.12444  | 4.5799  | -0.05515 | 0.95681 | 0.97742 | -6.2657 | 3679   |

|              |          |          |         |          |         |         |         |        |
|--------------|----------|----------|---------|----------|---------|---------|---------|--------|
| TERF1        | 0.022416 | 0.022416 | 2.4617  | 0.055151 | 0.95681 | 0.97742 | -6.2657 | 7013   |
| TMEM242      | -0.01205 | 0.012046 | 1.3147  | -0.055   | 0.95693 | 0.97749 | -6.2657 | 729515 |
| LACTB2       | 0.023586 | 0.023586 | 1.7554  | 0.054597 | 0.95725 | 0.9777  | -6.2657 | 51110  |
| BABAM2       | 0.040578 | 0.040578 | 5.3571  | 0.054581 | 0.95726 | 0.9777  | -6.2657 | 9577   |
| HSH2D        | 0.005135 | 0.005135 | 0.28591 | 0.054436 | 0.95737 | 0.97775 | -6.2658 | 84941  |
| ENSA         | -0.14173 | 0.14173  | 18.633  | -0.05437 | 0.95743 | 0.97775 | -6.2658 | 2029   |
| ARHGDIB      | 0.22152  | 0.22152  | 15.027  | 0.05407  | 0.95766 | 0.97793 | -6.2658 | 397    |
| RRP7A        | -0.04851 | 0.048508 | 4.1602  | -0.05397 | 0.95774 | 0.97795 | -6.2658 | 27341  |
| ATG4C        | 0.009703 | 0.009703 | 0.91645 | 0.053886 | 0.9578  | 0.97796 | -6.2658 | 84938  |
| PHF11        | -0.03645 | 0.036448 | 2.7741  | -0.05356 | 0.95805 | 0.97803 | -6.2658 | 51131  |
| WNT7B        | 0.043548 | 0.043548 | 3.345   | 0.053519 | 0.95809 | 0.97803 | -6.2658 | 7477   |
| NUFIP1       | -0.01033 | 0.010334 | 1.0672  | -0.05351 | 0.95809 | 0.97803 | -6.2658 | 26747  |
| PRSS16       | 0.008642 | 0.008642 | 0.61376 | 0.053499 | 0.95811 | 0.97803 | -6.2658 | 10279  |
| CLCN7        | -0.11032 | 0.11032  | 9.9591  | -0.05342 | 0.95817 | 0.97804 | -6.2658 | 1186   |
| EBF4         | 0.015539 | 0.015539 | 0.87636 | 0.053278 | 0.95828 | 0.97809 | -6.2658 | 57593  |
| SLC9B2       | 0.017321 | 0.017321 | 1.3558  | 0.052845 | 0.95862 | 0.97833 | -6.2658 | 133308 |
| MEX3D        | -0.08641 | 0.086407 | 7.6211  | -0.05276 | 0.95868 | 0.97833 | -6.2659 | 399664 |
| SPNS1        | 0.10707  | 0.10707  | 9.3249  | 0.052756 | 0.95869 | 0.97833 | -6.2659 | 83985  |
| CHST10       | -0.01321 | 0.013211 | 0.81861 | -0.05258 | 0.95883 | 0.97838 | -6.2659 | 9486   |
| ETV4         | 0.031219 | 0.031219 | 1.8678  | 0.052546 | 0.95885 | 0.97838 | -6.2659 | 2118   |
| SLC2A13      | 0.011503 | 0.011503 | 0.84065 | 0.051846 | 0.9594  | 0.97874 | -6.2659 | 114134 |
| LCOR         | 0.010757 | 0.010757 | 1.6502  | 0.051744 | 0.95948 | 0.97874 | -6.2659 | 84458  |
| LOC100131315 | -0.01471 | 0.014712 | 0.2977  | -0.05174 | 0.95948 | 0.97874 | -6.2659 | 1E+08  |
| JAM2         | -0.03566 | 0.035664 | 2.2529  | -0.05174 | 0.95948 | 0.97874 | -6.2659 | 58494  |
| KLF4         | 0.90091  | 0.90091  | 66.4    | 0.051726 | 0.95949 | 0.97874 | -6.2659 | 9314   |
| ZKSCAN7      | 0.006292 | 0.006292 | 0.37124 | 0.051561 | 0.95962 | 0.97878 | -6.2659 | 55888  |

|           |          |          |         |          |         |         |         |        |
|-----------|----------|----------|---------|----------|---------|---------|---------|--------|
| C2        | -0.01479 | 0.014789 | 0.47196 | -0.05151 | 0.95966 | 0.97878 | -6.2659 | 717    |
| GTF3C3    | -0.01832 | 0.018324 | 2.8531  | -0.05145 | 0.95971 | 0.97878 | -6.2659 | 9330   |
| FBXO2     | 0.046224 | 0.046224 | 2.8675  | 0.051134 | 0.95996 | 0.97897 | -6.2659 | 26232  |
| RALGAPB   | 0.030121 | 0.030121 | 6.5997  | 0.050881 | 0.96015 | 0.97912 | -6.266  | 57148  |
| ZNF181    | -0.01254 | 0.012543 | 1.0143  | -0.05051 | 0.96045 | 0.97935 | -6.266  | 339318 |
| LINC02012 | -0.00441 | 0.004411 | 0.26126 | -0.05041 | 0.96052 | 0.97935 | -6.266  | 1E+08  |
| STARD8    | -0.02572 | 0.025721 | 1.3403  | -0.05037 | 0.96056 | 0.97935 | -6.266  | 9754   |
| SDHAF1    | -0.03968 | 0.039683 | 3.405   | -0.04997 | 0.96086 | 0.97957 | -6.266  | 644096 |
| CREB3     | 0.063105 | 0.063105 | 5.2046  | 0.049943 | 0.96089 | 0.97957 | -6.266  | 10488  |
| CHMP3     | 0.1214   | 0.1214   | 16.444  | 0.049796 | 0.961   | 0.97958 | -6.266  | 51652  |
| TTC38     | 0.046863 | 0.046863 | 2.7674  | 0.049784 | 0.96101 | 0.97958 | -6.266  | 55020  |
| OAZ3      | -0.01116 | 0.011164 | 0.52853 | -0.04958 | 0.96117 | 0.97968 | -6.266  | 51686  |
| ZNF669    | 0.012346 | 0.012346 | 1.2789  | 0.049367 | 0.96134 | 0.97978 | -6.266  | 79862  |
| DCLRE1B   | -0.01477 | 0.014768 | 1.5586  | -0.0493  | 0.96139 | 0.97978 | -6.266  | 64858  |
| FBRS      | -0.13183 | 0.13183  | 14.645  | -0.04924 | 0.96144 | 0.97978 | -6.266  | 64319  |
| ALOX5     | -0.03162 | 0.031617 | 2.1228  | -0.04916 | 0.9615  | 0.97979 | -6.266  | 240    |
| C1orf174  | 0.025985 | 0.025985 | 3.4726  | 0.048736 | 0.96183 | 0.98    | -6.2661 | 339448 |
| NSG1      | 0.19217  | 0.19217  | 14.253  | 0.04869  | 0.96187 | 0.98    | -6.2661 | 27065  |
| ARHGAP25  | 0.026602 | 0.026602 | 1.5848  | 0.048608 | 0.96193 | 0.98    | -6.2661 | 9938   |
| MZF1-AS1  | -0.00574 | 0.005735 | 0.3738  | -0.04858 | 0.96195 | 0.98    | -6.2661 | 1E+08  |
| SNRNP35   | -0.01257 | 0.012565 | 1.7325  | -0.04847 | 0.96204 | 0.98    | -6.2661 | 11066  |
| SNAPC2    | 0.053203 | 0.053203 | 4.1262  | 0.048444 | 0.96206 | 0.98    | -6.2661 | 6618   |
| NFYA      | 0.017462 | 0.017462 | 2.2283  | 0.048122 | 0.96231 | 0.98014 | -6.2661 | 4800   |
| DCLK2     | -0.01714 | 0.017142 | 0.80792 | -0.04811 | 0.96232 | 0.98014 | -6.2661 | 166614 |
| APBB1IP   | -0.02951 | 0.029512 | 1.7977  | -0.04793 | 0.96246 | 0.98019 | -6.2661 | 54518  |
| IL12RB1   | 0.004063 | 0.004063 | 0.19165 | 0.047889 | 0.96249 | 0.98019 | -6.2661 | 3594   |

|            |          |          |         |          |         |         |         |        |
|------------|----------|----------|---------|----------|---------|---------|---------|--------|
| SEPHS2     | -0.09195 | 0.09195  | 8.0081  | -0.04783 | 0.96254 | 0.98019 | -6.2661 | 22928  |
| PRPH2      | 0.00486  | 0.00486  | 0.30952 | 0.047532 | 0.96277 | 0.98034 | -6.2661 | 5961   |
| VIRMA      | -0.02542 | 0.025416 | 4.5559  | -0.04749 | 0.96281 | 0.98034 | -6.2661 | 25962  |
| HMGCS1     | 0.13106  | 0.13106  | 9.1151  | 0.04733  | 0.96293 | 0.98041 | -6.2661 | 3157   |
| THEM4      | -0.01146 | 0.011458 | 1.0496  | -0.04718 | 0.96305 | 0.98047 | -6.2661 | 117145 |
| ZEB2       | 0.070427 | 0.070427 | 4.8978  | 0.047021 | 0.96317 | 0.98054 | -6.2661 | 9839   |
| TIMM44     | -0.04188 | 0.041876 | 4.9985  | -0.04667 | 0.96345 | 0.98073 | -6.2662 | 10469  |
| AKR1B15    | -0.0622  | 0.062198 | 2.7886  | -0.04663 | 0.96348 | 0.98073 | -6.2662 | 441282 |
| PLCG1      | -0.05607 | 0.056066 | 9.544   | -0.0465  | 0.96358 | 0.98077 | -6.2662 | 5335   |
| NEXN       | 0.014424 | 0.014424 | 0.79489 | 0.046438 | 0.96363 | 0.98077 | -6.2662 | 91624  |
| ZNF480     | -0.01124 | 0.011237 | 1.162   | -0.04633 | 0.96372 | 0.9808  | -6.2662 | 147657 |
| RELB       | 0.04973  | 0.04973  | 4.0082  | 0.045697 | 0.96421 | 0.98123 | -6.2662 | 5971   |
| COX10      | -0.01627 | 0.016265 | 2.3804  | -0.04563 | 0.96426 | 0.98123 | -6.2662 | 1352   |
| HSPBP1     | -0.04838 | 0.048376 | 4.9724  | -0.04517 | 0.96462 | 0.98154 | -6.2662 | 23640  |
| LZTS1      | -0.02601 | 0.026012 | 1.3423  | -0.04502 | 0.96474 | 0.98155 | -6.2662 | 11178  |
| HSDL1      | 0.009897 | 0.009897 | 1.8182  | 0.04494  | 0.9648  | 0.98155 | -6.2662 | 83693  |
| TNIP2      | 0.069272 | 0.069272 | 5.8918  | 0.044931 | 0.96481 | 0.98155 | -6.2662 | 79155  |
| ERBIN      | -0.05974 | 0.059744 | 9.1207  | -0.04473 | 0.96497 | 0.98163 | -6.2663 | 55914  |
| RTN4R      | -0.01488 | 0.014876 | 1.239   | -0.04469 | 0.965   | 0.98163 | -6.2663 | 65078  |
| ST6GALNAC6 | 0.090994 | 0.090994 | 9.3172  | 0.044364 | 0.96525 | 0.98183 | -6.2663 | 30815  |
| FITM2      | -0.02064 | 0.020641 | 2.2034  | -0.04415 | 0.96542 | 0.98194 | -6.2663 | 128486 |
| METRN      | 0.019641 | 0.019641 | 1.406   | 0.043991 | 0.96555 | 0.982   | -6.2663 | 79006  |
| GANAB      | -0.21362 | 0.21362  | 23.822  | -0.04378 | 0.96571 | 0.982   | -6.2663 | 23193  |
| SLC19A1    | -0.01065 | 0.010651 | 0.64591 | -0.04361 | 0.96584 | 0.982   | -6.2663 | 6573   |
| SCO1       | 0.0351   | 0.0351   | 4.6033  | 0.043514 | 0.96592 | 0.982   | -6.2663 | 6341   |
| PIGH       | 0.023251 | 0.023251 | 3.4213  | 0.043495 | 0.96593 | 0.982   | -6.2663 | 5283   |

|              |          |          |         |          |         |         |         |          |
|--------------|----------|----------|---------|----------|---------|---------|---------|----------|
| EAPP         | -0.06223 | 0.062225 | 7.7026  | -0.04347 | 0.96595 | 0.982   | -6.2663 | 55837    |
| PMS1         | -0.0072  | 0.007203 | 1.033   | -0.04342 | 0.96599 | 0.982   | -6.2663 | 5378     |
| DPT          | 0.15644  | 0.15644  | 7.4201  | 0.043392 | 0.96601 | 0.982   | -6.2663 | 1805     |
| PPME1        | -0.04591 | 0.045909 | 8.1016  | -0.04329 | 0.9661  | 0.982   | -6.2663 | 51400    |
| RAMP3        | 0.12909  | 0.12909  | 6.5328  | 0.043244 | 0.96613 | 0.982   | -6.2663 | 10268    |
| POLR3B       | 0.013033 | 0.013033 | 2.4254  | 0.043068 | 0.96627 | 0.982   | -6.2663 | 55703    |
| RFC5         | -0.02096 | 0.020964 | 2.1152  | -0.04306 | 0.96628 | 0.982   | -6.2663 | 5985     |
| ATL2         | 0.04067  | 0.04067  | 6.146   | 0.043044 | 0.96629 | 0.982   | -6.2663 | 64225    |
| RABL3        | 0.018299 | 0.018299 | 2.5199  | 0.043038 | 0.96629 | 0.982   | -6.2663 | 285282   |
| ZMYM6        | -0.01146 | 0.011457 | 2.0841  | -0.04276 | 0.96651 | 0.98211 | -6.2663 | 9204     |
| FBXL6        | -0.03574 | 0.035736 | 3.5137  | -0.04255 | 0.96668 | 0.98211 | -6.2664 | 26233    |
| ZDHHC4       | -0.04352 | 0.043522 | 3.8382  | -0.04247 | 0.96674 | 0.98211 | -6.2664 | 55146    |
| SLC33A1      | -0.01863 | 0.018633 | 3.2755  | -0.04246 | 0.96674 | 0.98211 | -6.2664 | 9197     |
| RNF216P1     | -0.0128  | 0.012797 | 2.4708  | -0.04244 | 0.96676 | 0.98211 | -6.2664 | 441191   |
| CDC37L1-DT   | 0.0046   | 0.0046   | 0.19465 | 0.042342 | 0.96684 | 0.98211 | -6.2664 | 1.02E+08 |
| LCE2B        | -2.9544  | 2.9544   | 114.29  | -0.04233 | 0.96684 | 0.98211 | -6.2664 | 26239    |
| HACD3        | -0.05667 | 0.056672 | 5.7254  | -0.0423  | 0.96687 | 0.98211 | -6.2664 | 51495    |
| ROBO4        | -0.05214 | 0.052139 | 4.9686  | -0.04217 | 0.96697 | 0.98212 | -6.2664 | 54538    |
| NFAM1        | 0.012879 | 0.012879 | 0.75004 | 0.042102 | 0.96702 | 0.98212 | -6.2664 | 150372   |
| SPECC1L      | 0.024143 | 0.024143 | 3.8848  | 0.042011 | 0.9671  | 0.98212 | -6.2664 | 23384    |
| ELF1         | 0.06533  | 0.06533  | 11.331  | 0.041936 | 0.96715 | 0.98212 | -6.2664 | 1997     |
| ZNF674-AS1   | 0.005856 | 0.005856 | 0.58843 | 0.04191  | 0.96717 | 0.98212 | -6.2664 | 401588   |
| HOXD10       | 0.00619  | 0.00619  | 0.46619 | 0.041773 | 0.96728 | 0.98215 | -6.2664 | 3236     |
| LOC101928595 | 0.004171 | 0.004171 | 0.4226  | 0.041734 | 0.96731 | 0.98215 | -6.2664 | 1.02E+08 |
| HHIPL1       | -0.00626 | 0.006256 | 0.35522 | -0.04153 | 0.96747 | 0.98225 | -6.2664 | 84439    |
| BSCL2        | -0.02164 | 0.02164  | 1.29    | -0.04141 | 0.96756 | 0.98228 | -6.2664 | 26580    |

|              |          |          |         |          |         |         |         |          |
|--------------|----------|----------|---------|----------|---------|---------|---------|----------|
| OSBP2        | -0.01308 | 0.013083 | 1.157   | -0.04133 | 0.96763 | 0.98229 | -6.2664 | 23762    |
| UHRF2        | -0.02571 | 0.025714 | 4.2187  | -0.04125 | 0.96769 | 0.98229 | -6.2664 | 115426   |
| VASH2        | 0.004171 | 0.004171 | 0.21705 | 0.040804 | 0.96804 | 0.98259 | -6.2664 | 79805    |
| CCL4         | 0.029263 | 0.029263 | 1.0943  | 0.040705 | 0.96812 | 0.98261 | -6.2664 | 6351     |
| GMPR2        | 0.028173 | 0.028173 | 5.1115  | 0.040616 | 0.96819 | 0.98262 | -6.2664 | 51292    |
| RDH16        | -0.00968 | 0.009683 | 0.64441 | -0.04055 | 0.96824 | 0.98262 | -6.2664 | 8608     |
| SCX          | -0.00445 | 0.00445  | 0.33044 | -0.0402  | 0.96852 | 0.98284 | -6.2665 | 642658   |
| PTMS         | -0.70297 | 0.70297  | 64.38   | -0.04008 | 0.96861 | 0.98287 | -6.2665 | 5763     |
| ADAM15       | 0.23274  | 0.23274  | 34.325  | 0.03973  | 0.96888 | 0.98304 | -6.2665 | 8751     |
| ARL8A        | -0.0647  | 0.064701 | 10.955  | -0.03972 | 0.96889 | 0.98304 | -6.2665 | 127829   |
| CEP290       | 0.009329 | 0.009329 | 0.94561 | 0.039525 | 0.96904 | 0.98313 | -6.2665 | 80184    |
| PRKACA       | 0.092012 | 0.092012 | 11.484  | 0.039158 | 0.96933 | 0.98337 | -6.2665 | 5566     |
| TIMM9        | -0.02697 | 0.026971 | 3.6053  | -0.03897 | 0.96947 | 0.98342 | -6.2665 | 26520    |
| LOC100506585 | -0.00588 | 0.005884 | 0.33366 | -0.03894 | 0.9695  | 0.98342 | -6.2665 | 1.01E+08 |
| PLAT         | -0.05335 | 0.053349 | 2.8915  | -0.03886 | 0.96956 | 0.98343 | -6.2665 | 5327     |
| SRPRA        | 0.13704  | 0.13704  | 17.362  | 0.038504 | 0.96984 | 0.98361 | -6.2665 | 6734     |
| PLEKHA8P1    | 0.004221 | 0.004221 | 0.30343 | 0.03848  | 0.96986 | 0.98361 | -6.2665 | 51054    |
| LOC105374727 | 0.005082 | 0.005082 | 0.43847 | 0.03839  | 0.96993 | 0.98362 | -6.2665 | 1.05E+08 |
| CRMP1        | -0.0071  | 0.007102 | 0.76234 | -0.03805 | 0.97019 | 0.98383 | -6.2665 | 1400     |
| SOX17        | 0.022018 | 0.022018 | 1.378   | 0.037806 | 0.97039 | 0.98397 | -6.2666 | 64321    |
| TBC1D10B     | -0.06363 | 0.063626 | 7.838   | -0.03765 | 0.97051 | 0.98403 | -6.2666 | 26000    |
| COX4I1       | -0.5432  | 0.5432   | 66.547  | -0.03717 | 0.97088 | 0.98435 | -6.2666 | 1327     |
| TUSC1        | 0.039626 | 0.039626 | 3.7207  | 0.036908 | 0.97109 | 0.98446 | -6.2666 | 286319   |
| ACHE         | -0.00333 | 0.003325 | 0.19673 | -0.03688 | 0.97111 | 0.98446 | -6.2666 | 43       |
| CFAP298      | -0.01043 | 0.010432 | 1.974   | -0.03665 | 0.97129 | 0.98457 | -6.2666 | 56683    |
| TSFM         | -0.02212 | 0.022115 | 2.971   | -0.0366  | 0.97133 | 0.98457 | -6.2666 | 10102    |

|              |          |          |         |          |         |         |         |          |
|--------------|----------|----------|---------|----------|---------|---------|---------|----------|
| LOC100506282 | -0.00393 | 0.003935 | 0.33387 | -0.03646 | 0.97144 | 0.98462 | -6.2666 | 1.01E+08 |
| PPP1R13L     | -0.27623 | 0.27623  | 33.487  | -0.03626 | 0.9716  | 0.98472 | -6.2666 | 10848    |
| SNORD131     | -0.00488 | 0.004876 | 0.20086 | -0.03601 | 0.97179 | 0.98486 | -6.2666 | 1.07E+08 |
| LRPPRC       | -0.0481  | 0.048095 | 8.2873  | -0.03588 | 0.9719  | 0.9849  | -6.2666 | 10128    |
| MRPS30-DT    | -0.00334 | 0.003344 | 0.13233 | -0.03553 | 0.97217 | 0.985   | -6.2666 | 1.01E+08 |
| LMAN2        | -0.17514 | 0.17514  | 21.884  | -0.03545 | 0.97223 | 0.985   | -6.2666 | 10960    |
| GOSR2        | -0.0125  | 0.012503 | 4.3073  | -0.03545 | 0.97223 | 0.985   | -6.2666 | 9570     |
| FAM162B      | 0.006995 | 0.006995 | 0.48603 | 0.035408 | 0.97226 | 0.985   | -6.2666 | 221303   |
| TIMM50       | 0.017667 | 0.017667 | 2.4498  | 0.035382 | 0.97228 | 0.985   | -6.2666 | 92609    |
| LRRC58       | 0.021288 | 0.021288 | 4.2895  | 0.035144 | 0.97247 | 0.98513 | -6.2667 | 116064   |
| POLR2B       | -0.05774 | 0.057735 | 9.8454  | -0.03496 | 0.97262 | 0.98519 | -6.2667 | 5431     |
| ACY1         | -0.04444 | 0.044437 | 3.644   | -0.03492 | 0.97264 | 0.98519 | -6.2667 | 95       |
| ADAMTS1      | 0.17478  | 0.17478  | 8.2512  | 0.034771 | 0.97276 | 0.98525 | -6.2667 | 9510     |
| DNMT1        | 0.058082 | 0.058082 | 6.2136  | 0.034302 | 0.97313 | 0.98551 | -6.2667 | 1786     |
| TRO          | 0.007065 | 0.007065 | 0.52167 | 0.03428  | 0.97315 | 0.98551 | -6.2667 | 7216     |
| RHOBTB3      | -0.02925 | 0.02925  | 2.5604  | -0.03412 | 0.97327 | 0.98551 | -6.2667 | 22836    |
| DEFB4B       | -4.3099  | 4.3099   | 105.8   | -0.0341  | 0.97329 | 0.98551 | -6.2667 | 1E+08    |
| USP3         | -0.01459 | 0.014589 | 3.7704  | -0.03407 | 0.97331 | 0.98551 | -6.2667 | 9960     |
| PEF1         | 0.065564 | 0.065564 | 10.983  | 0.033942 | 0.97341 | 0.98555 | -6.2667 | 553115   |
| PSEN2        | 0.02131  | 0.02131  | 2.7243  | 0.033853 | 0.97348 | 0.98557 | -6.2667 | 5664     |
| PRPF40B      | 0.014567 | 0.014567 | 2.4672  | 0.033578 | 0.9737  | 0.98572 | -6.2667 | 25766    |
| PLB1         | -0.01228 | 0.012275 | 0.90929 | -0.03329 | 0.97392 | 0.98589 | -6.2667 | 151056   |
| RCAN3        | 0.028744 | 0.028744 | 4.7505  | 0.032906 | 0.97422 | 0.98614 | -6.2667 | 11123    |
| LYL1         | -0.01627 | 0.016271 | 1.4336  | -0.03274 | 0.97435 | 0.98616 | -6.2667 | 4066     |
| ZNF503       | 0.032386 | 0.032386 | 4.3111  | 0.032669 | 0.97441 | 0.98616 | -6.2667 | 84858    |
| MDP1         | -0.02446 | 0.024458 | 2.0819  | -0.03265 | 0.97442 | 0.98616 | -6.2667 | 145553   |



|              |          |          |         |          |         |         |         |          |
|--------------|----------|----------|---------|----------|---------|---------|---------|----------|
| ANKRD6       | -0.00608 | 0.006079 | 0.77637 | -0.03224 | 0.97475 | 0.98643 | -6.2668 | 22881    |
| LSM6         | 0.033716 | 0.033716 | 3.6599  | 0.032026 | 0.97491 | 0.98649 | -6.2668 | 11157    |
| NPW          | 0.006816 | 0.006816 | 0.39079 | 0.031899 | 0.97501 | 0.98649 | -6.2668 | 283869   |
| SRGAP2D      | 0.010999 | 0.010999 | 1.6962  | 0.031894 | 0.97502 | 0.98649 | -6.2668 | 1.01E+08 |
| BDH2         | -0.02221 | 0.022208 | 2.5635  | -0.03187 | 0.97503 | 0.98649 | -6.2668 | 56898    |
| ANKEF1       | 0.01238  | 0.01238  | 1.527   | 0.031723 | 0.97515 | 0.98654 | -6.2668 | 63926    |
| FAM229B      | -0.00881 | 0.008812 | 0.66218 | -0.03158 | 0.97526 | 0.9866  | -6.2668 | 619208   |
| LOC105376805 | -0.00893 | 0.00893  | 0.99506 | -0.03146 | 0.97536 | 0.98664 | -6.2668 | 1.05E+08 |
| ESS2         | 0.008752 | 0.008752 | 1.5921  | 0.031109 | 0.97563 | 0.98682 | -6.2668 | 8220     |
| RGS12        | 0.037908 | 0.037908 | 5.2788  | 0.031067 | 0.97566 | 0.98682 | -6.2668 | 6002     |
| CCDC127      | 0.016684 | 0.016684 | 2.3498  | 0.031007 | 0.97571 | 0.98682 | -6.2668 | 133957   |
| SCAANT1      | -0.00576 | 0.005763 | 0.51423 | -0.03077 | 0.9759  | 0.98695 | -6.2668 | 1.01E+08 |
| LOC400464    | 0.002965 | 0.002965 | 0.16743 | 0.030608 | 0.97602 | 0.98701 | -6.2668 | 400464   |
| PXMP4        | -0.0438  | 0.0438   | 3.0872  | -0.0304  | 0.97618 | 0.98701 | -6.2668 | 11264    |
| VPS13A       | 0.02093  | 0.02093  | 4.4508  | 0.030293 | 0.97627 | 0.98701 | -6.2668 | 23230    |
| RNPS1        | -0.09295 | 0.092949 | 14.767  | -0.03026 | 0.9763  | 0.98701 | -6.2668 | 10921    |
| RPLP2        | 2.7661   | 2.7661   | 434.31  | 0.030251 | 0.9763  | 0.98701 | -6.2668 | 6181     |
| ADNP2        | -0.01574 | 0.015738 | 4.9527  | -0.03024 | 0.97631 | 0.98701 | -6.2668 | 22850    |
| NOTCH4       | 0.004835 | 0.004835 | 0.33724 | 0.030137 | 0.97639 | 0.98703 | -6.2668 | 4855     |
| HEBP1        | 0.048582 | 0.048582 | 8.9443  | 0.030001 | 0.9765  | 0.98708 | -6.2668 | 50865    |
| KDM6B        | -0.03725 | 0.03725  | 7.4476  | -0.02991 | 0.97657 | 0.9871  | -6.2668 | 23135    |
| C9orf16      | 0.20848  | 0.20848  | 29.325  | 0.029704 | 0.97673 | 0.9872  | -6.2668 | 79095    |
| RRS1         | -0.02832 | 0.028319 | 3.9112  | -0.02951 | 0.97688 | 0.98722 | -6.2668 | 23212    |
| SNRPF        | 0.078196 | 0.078196 | 9.5004  | 0.029465 | 0.97692 | 0.98722 | -6.2668 | 6636     |
| NSMCE3       | -0.02819 | 0.028193 | 3.2877  | -0.02945 | 0.97693 | 0.98722 | -6.2668 | 56160    |
| GJC2         | 0.004159 | 0.004159 | 0.48978 | 0.029161 | 0.97716 | 0.98739 | -6.2669 | 57165    |

|          |          |          |         |          |         |         |         |          |
|----------|----------|----------|---------|----------|---------|---------|---------|----------|
| PREX1    | 0.027689 | 0.027689 | 3.1308  | 0.029005 | 0.97728 | 0.98746 | -6.2669 | 57580    |
| FANCE    | 0.027062 | 0.027062 | 3.3155  | 0.028591 | 0.9776  | 0.98772 | -6.2669 | 2178     |
| CALCOCO2 | -0.03462 | 0.034622 | 10.771  | -0.02841 | 0.97774 | 0.98781 | -6.2669 | 10241    |
| TTL12    | 0.098527 | 0.098527 | 13.844  | 0.028294 | 0.97783 | 0.98782 | -6.2669 | 23170    |
| CXorf56  | 0.01587  | 0.01587  | 2.9939  | 0.028234 | 0.97788 | 0.98782 | -6.2669 | 63932    |
| PEX2     | -0.01094 | 0.010941 | 2.3687  | -0.02817 | 0.97793 | 0.98782 | -6.2669 | 5828     |
| KCNH1    | -0.00513 | 0.005127 | 0.31737 | -0.02805 | 0.97803 | 0.98782 | -6.2669 | 3756     |
| SUPT20H  | 0.01692  | 0.01692  | 3.5905  | 0.028022 | 0.97805 | 0.98782 | -6.2669 | 55578    |
| ABO      | 0.008398 | 0.008398 | 0.73362 | 0.027809 | 0.97822 | 0.98793 | -6.2669 | 28       |
| IDH2     | 0.29506  | 0.29506  | 40.903  | 0.027514 | 0.97845 | 0.9881  | -6.2669 | 3418     |
| PNMA2    | -0.0039  | 0.0039   | 0.27814 | -0.0274  | 0.97854 | 0.98814 | -6.2669 | 10687    |
| C1orf159 | 0.011648 | 0.011648 | 2.4452  | 0.027002 | 0.97885 | 0.98839 | -6.2669 | 54991    |
| ALG3     | -0.03323 | 0.033232 | 5.857   | -0.02686 | 0.97896 | 0.98845 | -6.2669 | 10195    |
| SNHG19   | -0.06985 | 0.069852 | 10.246  | -0.02661 | 0.97916 | 0.98859 | -6.2669 | 1.01E+08 |
| RPS18P9  | 0.008295 | 0.008295 | 1.6423  | 0.026406 | 0.97931 | 0.98863 | -6.2669 | 645958   |
| TIMM22   | 0.015957 | 0.015957 | 3.64    | 0.026339 | 0.97937 | 0.98863 | -6.2669 | 29928    |
| PCDHB8   | 0.002015 | 0.002015 | 0.20687 | 0.02632  | 0.97938 | 0.98863 | -6.2669 | 56128    |
| NR5A2    | -0.00372 | 0.003723 | 0.4973  | -0.02603 | 0.97961 | 0.98876 | -6.2669 | 2494     |
| GPR107   | -0.02569 | 0.025691 | 7.9143  | -0.02602 | 0.97962 | 0.98876 | -6.2669 | 57720    |
| PDXK     | 0.048046 | 0.048046 | 9.0805  | 0.025159 | 0.98029 | 0.98937 | -6.267  | 8566     |
| ZNF28    | 0.005949 | 0.005949 | 1.1831  | 0.024869 | 0.98052 | 0.98952 | -6.267  | 7576     |
| ASCC1    | -0.01213 | 0.012127 | 2.3676  | -0.02482 | 0.98055 | 0.98952 | -6.267  | 51008    |
| USP46    | 0.006035 | 0.006035 | 1.7154  | 0.02453  | 0.98078 | 0.98969 | -6.267  | 64854    |
| TBL1XR1  | -0.02675 | 0.02675  | 6.947   | -0.0244  | 0.98089 | 0.98974 | -6.267  | 79718    |
| PIP4K2A  | -0.02192 | 0.02192  | 3.5891  | -0.02413 | 0.9811  | 0.98989 | -6.267  | 5305     |
| GALNT10  | 0.020213 | 0.020213 | 4.3954  | 0.02398  | 0.98121 | 0.98995 | -6.267  | 55568    |

|           |          |          |         |          |         |         |         |          |
|-----------|----------|----------|---------|----------|---------|---------|---------|----------|
| LINC01637 | -0.00318 | 0.003182 | 0.19368 | -0.02347 | 0.98161 | 0.99029 | -6.267  | 1.02E+08 |
| TRAK2     | 0.023714 | 0.023714 | 3.8746  | 0.023023 | 0.98196 | 0.99059 | -6.267  | 66008    |
| PMP22     | -0.12474 | 0.12474  | 18.031  | -0.02286 | 0.9821  | 0.99066 | -6.267  | 5376     |
| OXNAD1    | 0.003683 | 0.003683 | 1.1105  | 0.022769 | 0.98216 | 0.99067 | -6.267  | 92106    |
| NHP2      | 0.12319  | 0.12319  | 23.737  | 0.022618 | 0.98228 | 0.99072 | -6.267  | 55651    |
| FBP1      | 0.0075   | 0.0075   | 0.587   | 0.022562 | 0.98232 | 0.99072 | -6.267  | 2203     |
| ZNF268    | -0.006   | 0.006    | 1.3552  | -0.02236 | 0.98248 | 0.99082 | -6.267  | 10795    |
| BCAS2     | 0.022529 | 0.022529 | 5.4189  | 0.02216  | 0.98264 | 0.99086 | -6.267  | 10286    |
| LOC646938 | -0.00406 | 0.004065 | 0.28241 | -0.02216 | 0.98264 | 0.99086 | -6.267  | 646938   |
| BTF3L4    | 0.016454 | 0.016454 | 4.9804  | 0.021852 | 0.98288 | 0.99104 | -6.267  | 91408    |
| DNMTIP1   | 0.026939 | 0.026939 | 5.2687  | 0.021728 | 0.98298 | 0.99104 | -6.267  | 116092   |
| NBPF14    | -0.00315 | 0.003146 | 1.0436  | -0.02164 | 0.98305 | 0.99104 | -6.267  | 25832    |
| CLEC14A   | 0.052486 | 0.052486 | 6.5665  | 0.021632 | 0.98305 | 0.99104 | -6.267  | 161198   |
| APTX      | 0.010306 | 0.010306 | 4.151   | 0.0215   | 0.98316 | 0.99108 | -6.2671 | 54840    |
| VASN      | -0.04355 | 0.043547 | 9.3442  | -0.02099 | 0.98355 | 0.99142 | -6.2671 | 114990   |
| NFATC4    | 0.038457 | 0.038457 | 4.0587  | 0.020787 | 0.98371 | 0.99144 | -6.2671 | 4776     |
| TMEM138   | 0.011005 | 0.011005 | 3.4798  | 0.020728 | 0.98376 | 0.99144 | -6.2671 | 51524    |
| ACO1      | -0.0244  | 0.024402 | 4.4813  | -0.0207  | 0.98379 | 0.99144 | -6.2671 | 48       |
| FLJ20021  | 0.00728  | 0.00728  | 1.2154  | 0.020666 | 0.98381 | 0.99144 | -6.2671 | 90024    |
| COMMD10   | 0.002972 | 0.002972 | 0.93672 | 0.020331 | 0.98407 | 0.99165 | -6.2671 | 51397    |
| PTRH1     | -0.03208 | 0.032082 | 4.9569  | -0.02018 | 0.98419 | 0.99171 | -6.2671 | 138428   |
| MED6      | 0.009581 | 0.009581 | 3.8503  | 0.020089 | 0.98426 | 0.99172 | -6.2671 | 10001    |
| ZNRF2     | -0.01597 | 0.015965 | 5.3989  | -0.0199  | 0.98441 | 0.99181 | -6.2671 | 223082   |
| PLCL1     | 0.003484 | 0.003484 | 0.51472 | 0.01971  | 0.98456 | 0.99189 | -6.2671 | 5334     |
| PGBD2     | 0.003983 | 0.003983 | 1.1051  | 0.019653 | 0.9846  | 0.99189 | -6.2671 | 267002   |
| NOL10     | 0.011883 | 0.011883 | 3.6525  | 0.019121 | 0.98502 | 0.99225 | -6.2671 | 79954    |

|          |          |          |         |          |         |         |         |        |
|----------|----------|----------|---------|----------|---------|---------|---------|--------|
| PGAM4    | 0.012847 | 0.012847 | 0.8188  | 0.018954 | 0.98515 | 0.99232 | -6.2671 | 441531 |
| CD48     | -0.00775 | 0.007748 | 1.0185  | -0.01881 | 0.98526 | 0.99237 | -6.2671 | 962    |
| CEP83    | 0.003877 | 0.003877 | 1.1375  | 0.018722 | 0.98533 | 0.99239 | -6.2671 | 51134  |
| BTBD3    | 0.005644 | 0.005644 | 3.9697  | 0.018511 | 0.9855  | 0.99249 | -6.2671 | 22903  |
| COX7A1   | -0.02239 | 0.02239  | 3.4726  | -0.01841 | 0.98558 | 0.99249 | -6.2671 | 1346   |
| DECR2    | 0.015509 | 0.015509 | 3.0511  | 0.018345 | 0.98563 | 0.99249 | -6.2671 | 26063  |
| TCF12    | 0.016878 | 0.016878 | 6.8824  | 0.018289 | 0.98567 | 0.99249 | -6.2671 | 6938   |
| STXBP5   | 0.00917  | 0.00917  | 5.4005  | 0.018096 | 0.98582 | 0.99257 | -6.2671 | 134957 |
| HCFC1R1  | -0.04616 | 0.04616  | 9.7429  | -0.01803 | 0.98587 | 0.99257 | -6.2671 | 54985  |
| PCED1A   | -0.02287 | 0.022866 | 3.8318  | -0.01784 | 0.98602 | 0.9926  | -6.2671 | 64773  |
| RGPD1    | -0.00139 | 0.001391 | 0.16164 | -0.01777 | 0.98608 | 0.9926  | -6.2671 | 400966 |
| RSPO3    | 0.001569 | 0.001569 | 0.14284 | 0.017659 | 0.98617 | 0.9926  | -6.2671 | 84870  |
| PUS7L    | -0.00533 | 0.005334 | 1.6125  | -0.01756 | 0.98624 | 0.9926  | -6.2671 | 83448  |
| SRSF4    | 0.021361 | 0.021361 | 10.23   | 0.01753  | 0.98627 | 0.9926  | -6.2671 | 6429   |
| LGALS3   | -0.16368 | 0.16368  | 51.102  | -0.01742 | 0.98635 | 0.9926  | -6.2671 | 3958   |
| HPS6     | 0.018322 | 0.018322 | 4.6686  | 0.017395 | 0.98637 | 0.9926  | -6.2671 | 79803  |
| HDAC4    | -0.0103  | 0.010303 | 3.8891  | -0.01739 | 0.98637 | 0.9926  | -6.2671 | 9759   |
| POLR2D   | -0.01146 | 0.011456 | 3.8161  | -0.01701 | 0.98668 | 0.99284 | -6.2671 | 5433   |
| UBA6-AS1 | -0.00552 | 0.005516 | 1.3908  | -0.01695 | 0.98672 | 0.99284 | -6.2671 | 550112 |
| WWC1     | -0.01586 | 0.015863 | 3.8848  | -0.01677 | 0.98686 | 0.99289 | -6.2671 | 23286  |
| RBFOX2   | -0.02343 | 0.023434 | 8.3035  | -0.01673 | 0.98689 | 0.99289 | -6.2671 | 23543  |
| MOB3C    | 0.010651 | 0.010651 | 3.4134  | 0.016494 | 0.98708 | 0.99296 | -6.2672 | 148932 |
| ROBO1    | 0.030844 | 0.030844 | 10.352  | 0.016383 | 0.98716 | 0.99296 | -6.2672 | 6091   |
| CCDC66   | 0.003878 | 0.003878 | 1.279   | 0.01634  | 0.9872  | 0.99296 | -6.2672 | 285331 |
| PDCD1    | -0.00157 | 0.00157  | 0.20369 | -0.0162  | 0.98731 | 0.99296 | -6.2672 | 5133   |
| OTULINL  | 0.002696 | 0.002696 | 0.72381 | 0.016185 | 0.98732 | 0.99296 | -6.2672 | 54491  |

|              |          |          |         |          |         |         |         |          |
|--------------|----------|----------|---------|----------|---------|---------|---------|----------|
| ICAM2        | -0.01868 | 0.018676 | 3.0986  | -0.0161  | 0.98739 | 0.99296 | -6.2672 | 3384     |
| PHC2         | 0.057818 | 0.057818 | 10.08   | 0.016057 | 0.98742 | 0.99296 | -6.2672 | 1912     |
| DHX40        | 0.011868 | 0.011868 | 5.3152  | 0.016042 | 0.98743 | 0.99296 | -6.2672 | 79665    |
| LOC101927811 | 0.001802 | 0.001802 | 0.2222  | 0.015936 | 0.98752 | 0.99298 | -6.2672 | 1.02E+08 |
| ARRDC2       | 0.010886 | 0.010886 | 3.1354  | 0.015778 | 0.98764 | 0.99304 | -6.2672 | 27106    |
| POLR1B       | 0.006602 | 0.006602 | 2.5503  | 0.015714 | 0.98769 | 0.99304 | -6.2672 | 84172    |
| PTBP2        | -0.00629 | 0.006288 | 1.682   | -0.01541 | 0.98793 | 0.99318 | -6.2672 | 58155    |
| LOC100132215 | 0.001402 | 0.001402 | 0.53605 | 0.015393 | 0.98794 | 0.99318 | -6.2672 | 1E+08    |
| P2RY8        | -0.00132 | 0.001324 | 0.17556 | -0.01515 | 0.98813 | 0.99327 | -6.2672 | 286530   |
| RBM10        | 0.018684 | 0.018684 | 6.1151  | 0.015034 | 0.98822 | 0.99327 | -6.2672 | 8241     |
| HECTD2-AS1   | -0.00298 | 0.002981 | 0.64893 | -0.01499 | 0.98826 | 0.99327 | -6.2672 | 1E+08    |
| NUDT18       | -0.00742 | 0.007424 | 1.9312  | -0.01495 | 0.98829 | 0.99327 | -6.2672 | 79873    |
| PPP1R26      | 0.006928 | 0.006928 | 1.6902  | 0.014798 | 0.98841 | 0.99327 | -6.2672 | 9858     |
| FAM78A       | -0.00467 | 0.004671 | 0.85256 | -0.01478 | 0.98842 | 0.99327 | -6.2672 | 286336   |
| SPRR2C       | 0.049025 | 0.049025 | 3.1054  | 0.014748 | 0.98845 | 0.99327 | -6.2672 | 6702     |
| NORAD        | 0.06848  | 0.06848  | 38.896  | 0.014633 | 0.98854 | 0.99327 | -6.2672 | 647979   |
| DAZAP2       | -0.07607 | 0.076072 | 24.764  | -0.01457 | 0.98859 | 0.99327 | -6.2672 | 9802     |
| SNRNP25      | -0.01751 | 0.017514 | 3.6119  | -0.01452 | 0.98863 | 0.99327 | -6.2672 | 79622    |
| BCL2L12      | 0.008013 | 0.008013 | 2.1623  | 0.014295 | 0.9888  | 0.99339 | -6.2672 | 83596    |
| LINC01127    | -0.00216 | 0.002164 | 0.23889 | -0.01403 | 0.98901 | 0.99354 | -6.2672 | 1.01E+08 |
| UCP2         | -0.02169 | 0.021689 | 4.7115  | -0.0138  | 0.98919 | 0.99363 | -6.2672 | 7351     |
| ALG9         | -0.00251 | 0.00251  | 1.9136  | -0.01374 | 0.98923 | 0.99363 | -6.2672 | 79796    |
| ABCD3        | 0.015493 | 0.015493 | 6.0338  | 0.01362  | 0.98933 | 0.99363 | -6.2672 | 5825     |
| DST          | -0.06088 | 0.060884 | 21.444  | -0.01354 | 0.98939 | 0.99363 | -6.2672 | 667      |
| KIF3C        | 0.003672 | 0.003672 | 0.84823 | 0.013353 | 0.98954 | 0.99363 | -6.2672 | 3797     |
| MAP3K11      | 0.035063 | 0.035063 | 10.715  | 0.013311 | 0.98957 | 0.99363 | -6.2672 | 4296     |

|          |          |          |         |          |         |         |         |        |
|----------|----------|----------|---------|----------|---------|---------|---------|--------|
| GPAT4    | 0.009517 | 0.009517 | 4.6453  | 0.013299 | 0.98958 | 0.99363 | -6.2672 | 137964 |
| RORA     | -0.07252 | 0.072521 | 14.168  | -0.01324 | 0.98963 | 0.99363 | -6.2672 | 6095   |
| LIN37    | 0.007364 | 0.007364 | 2.8372  | 0.013229 | 0.98964 | 0.99363 | -6.2672 | 55957  |
| TNFRSF1B | 0.027569 | 0.027569 | 5.6452  | 0.013164 | 0.98969 | 0.99363 | -6.2672 | 7133   |
| ABTB1    | 0.013803 | 0.013803 | 4.6991  | 0.012796 | 0.98997 | 0.9938  | -6.2672 | 80325  |
| FDXACB1  | -0.00135 | 0.001346 | 0.54687 | -0.01279 | 0.98998 | 0.9938  | -6.2672 | 91893  |
| PNMA8A   | 0.002406 | 0.002406 | 0.46019 | 0.012226 | 0.99042 | 0.99419 | -6.2672 | 55228  |
| PRPF4B   | 0.007827 | 0.007827 | 5.2414  | 0.011865 | 0.9907  | 0.99442 | -6.2672 | 8899   |
| GSDMD    | 0.014246 | 0.014246 | 3.6734  | 0.011593 | 0.99092 | 0.99454 | -6.2672 | 79792  |
| NEK4     | 0.003034 | 0.003034 | 1.6644  | 0.011553 | 0.99095 | 0.99454 | -6.2672 | 6787   |
| CDC42EP1 | -0.06796 | 0.067963 | 24.533  | -0.01134 | 0.99111 | 0.99465 | -6.2672 | 11135  |
| RTF2     | -0.03061 | 0.030607 | 15.648  | -0.01091 | 0.99145 | 0.99493 | -6.2672 | 51507  |
| PLCL2    | -0.00438 | 0.004384 | 1.159   | -0.01046 | 0.99181 | 0.9952  | -6.2672 | 23228  |
| LMCD1    | -0.01581 | 0.015807 | 4.4043  | -0.01042 | 0.99184 | 0.9952  | -6.2672 | 29995  |
| ORMDL1   | 0.007087 | 0.007087 | 4.004   | 0.010213 | 0.992   | 0.99526 | -6.2672 | 94101  |
| RNF13    | -0.01219 | 0.012189 | 7.2536  | -0.01019 | 0.99202 | 0.99526 | -6.2672 | 11342  |
| APRT     | 0.080955 | 0.080955 | 39.414  | 0.009354 | 0.99267 | 0.99586 | -6.2672 | 353    |
| PRRC2C   | 0.023432 | 0.023432 | 17.06   | 0.009179 | 0.99281 | 0.99593 | -6.2672 | 23215  |
| PCDH7    | 0.009691 | 0.009691 | 4.9079  | 0.009102 | 0.99287 | 0.99593 | -6.2672 | 5099   |
| TM6SF2   | -0.00077 | 0.000774 | 0.11851 | -0.00904 | 0.99292 | 0.99593 | -6.2672 | 53345  |
| SNORA28  | -0.00115 | 0.001147 | 0.17749 | -0.00892 | 0.99301 | 0.99596 | -6.2673 | 677811 |
| ZNF655   | 0.005357 | 0.005357 | 5.8789  | 0.008702 | 0.99318 | 0.99607 | -6.2673 | 79027  |
| UTP14C   | 0.002242 | 0.002242 | 2.2692  | 0.008554 | 0.9933  | 0.99613 | -6.2673 | 9724   |
| LNX1     | 0.016159 | 0.016159 | 3.92    | 0.008418 | 0.9934  | 0.99618 | -6.2673 | 84708  |
| ZSCAN22  | -0.00143 | 0.00143  | 1.1257  | -0.00832 | 0.99348 | 0.99618 | -6.2673 | 342945 |
| THOC1    | -0.0037  | 0.003695 | 3.0135  | -0.00817 | 0.9936  | 0.99618 | -6.2673 | 9984   |

|          |          |          |         |          |         |         |         |        |
|----------|----------|----------|---------|----------|---------|---------|---------|--------|
| TMEM248  | 0.011727 | 0.011727 | 11.256  | 0.008153 | 0.99361 | 0.99618 | -6.2673 | 55069  |
| UAP1L1   | -0.00614 | 0.006136 | 3.0564  | -0.00812 | 0.99364 | 0.99618 | -6.2673 | 91373  |
| CCDC68   | -0.00064 | 0.000635 | 0.18135 | -0.00792 | 0.9938  | 0.99622 | -6.2673 | 80323  |
| POMT2    | 0.002787 | 0.002787 | 1.7568  | 0.007913 | 0.9938  | 0.99622 | -6.2673 | 29954  |
| CAVIN1   | -0.11064 | 0.11064  | 60.987  | -0.0074  | 0.9942  | 0.99652 | -6.2673 | 284119 |
| IL6ST    | 0.017924 | 0.017924 | 10.168  | 0.007385 | 0.99421 | 0.99652 | -6.2673 | 3572   |
| PLEKHH3  | 0.012347 | 0.012347 | 6.6691  | 0.006923 | 0.99458 | 0.99675 | -6.2673 | 79990  |
| NACC2    | -0.0061  | 0.006104 | 3.5588  | -0.00683 | 0.99465 | 0.99675 | -6.2673 | 138151 |
| C17orf58 | -0.0022  | 0.002202 | 1.5476  | -0.00677 | 0.9947  | 0.99675 | -6.2673 | 284018 |
| GPAT3    | -0.00785 | 0.007852 | 1.7278  | -0.00672 | 0.99474 | 0.99675 | -6.2673 | 84803  |
| EXO5     | -0.00165 | 0.001647 | 1.1363  | -0.00671 | 0.99475 | 0.99675 | -6.2673 | 64789  |
| CDC42EP5 | -0.01036 | 0.010363 | 4.5675  | -0.00604 | 0.99527 | 0.99713 | -6.2673 | 148170 |
| MSL3     | -0.00184 | 0.001835 | 2.717   | -0.00603 | 0.99528 | 0.99713 | -6.2673 | 10943  |
| SSBP4    | 0.011014 | 0.011014 | 6.3601  | 0.006002 | 0.9953  | 0.99713 | -6.2673 | 170463 |
| PRKRIP1  | 0.001708 | 0.001708 | 1.5848  | 0.005461 | 0.99572 | 0.99748 | -6.2673 | 79706  |
| C18orf25 | 0.002887 | 0.002887 | 4.1274  | 0.005407 | 0.99576 | 0.99748 | -6.2673 | 147339 |
| SIVA1    | -0.02181 | 0.021809 | 13.11   | -0.00515 | 0.99596 | 0.99758 | -6.2673 | 10572  |
| RAD54L   | 0.001069 | 0.001069 | 0.66169 | 0.005128 | 0.99598 | 0.99758 | -6.2673 | 8438   |
| C17orf49 | -0.01931 | 0.019306 | 13.986  | -0.00474 | 0.99629 | 0.99782 | -6.2673 | 124944 |
| FOLH1    | -0.00052 | 0.00052  | 0.31625 | -0.00463 | 0.99637 | 0.99785 | -6.2673 | 2346   |
| CPS1     | 0.00072  | 0.00072  | 0.88867 | 0.004532 | 0.99645 | 0.99787 | -6.2673 | 1373   |
| TMEM62   | -0.00136 | 0.001357 | 1.8391  | -0.00431 | 0.99662 | 0.99796 | -6.2673 | 80021  |
| SMARCB1  | 0.010972 | 0.010972 | 13.245  | 0.004261 | 0.99666 | 0.99796 | -6.2673 | 6598   |
| SYVN1    | 0.004818 | 0.004818 | 8.8166  | 0.003829 | 0.997   | 0.99819 | -6.2673 | 84447  |
| SPINK1   | -0.00038 | 0.000383 | 0.21511 | -0.00382 | 0.99701 | 0.99819 | -6.2673 | 6690   |
| OTUD3    | -0.00096 | 0.00096  | 1.7564  | -0.00363 | 0.99716 | 0.99828 | -6.2673 | 23252  |

|            |           |          |         |           |         |         |         |          |
|------------|-----------|----------|---------|-----------|---------|---------|---------|----------|
| C16orf95   | 0.00043   | 0.00043  | 0.4216  | 0.003177  | 0.99751 | 0.99848 | -6.2673 | 1.01E+08 |
| NSMCE1     | -0.00612  | 0.006125 | 8.0294  | -0.00315  | 0.99753 | 0.99848 | -6.2673 | 197370   |
| CAMSAP3    | -0.0076   | 0.0076   | 9.8925  | -0.00315  | 0.99753 | 0.99848 | -6.2673 | 57662    |
| TCF7L1-IT1 | 0.000312  | 0.000312 | 0.19962 | 0.002859  | 0.99776 | 0.99865 | -6.2673 | 1.01E+08 |
| KL         | -0.00038  | 0.000376 | 0.40331 | -0.00272  | 0.99787 | 0.99869 | -6.2673 | 9365     |
| CLMAT3     | -0.00055  | 0.000551 | 0.36622 | -0.0024   | 0.99812 | 0.99887 | -6.2673 | 1.02E+08 |
| MINDY3     | 0.000841  | 0.000841 | 3.9389  | 0.002352  | 0.99816 | 0.99887 | -6.2673 | 80013    |
| ZDHHC7     | 0.00183   | 0.00183  | 6.2077  | 0.002214  | 0.99827 | 0.99892 | -6.2673 | 55625    |
| MTIF2      | -0.00127  | 0.001271 | 3.4793  | -0.0021   | 0.99836 | 0.99895 | -6.2673 | 4528     |
| GTF2H3     | -0.00151  | 0.001509 | 3.7544  | -0.00189  | 0.99852 | 0.99905 | -6.2673 | 2967     |
| PARG       | -0.00031  | 0.00031  | 3.4515  | -0.00119  | 0.99907 | 0.99953 | -6.2673 | 8505     |
| HABP4      | -0.00054  | 0.000536 | 1.9303  | -0.00113  | 0.99912 | 0.99953 | -6.2673 | 22927    |
| TYRO3      | -0.00153  | 0.00153  | 5.4227  | -0.0007   | 0.99945 | 0.99981 | -6.2673 | 7301     |
| AMDHD1     | 4.52E-05  | 4.52E-05 | 0.12384 | 0.000572  | 0.99955 | 0.99985 | -6.2673 | 144193   |
| TMEM255B   | -0.00023  | 0.000229 | 1.744   | -0.00038  | 0.9997  | 0.99988 | -6.2673 | 348013   |
| MIR548K    | 3.28E-05  | 3.28E-05 | 0.08594 | 0.000345  | 0.99973 | 0.99988 | -6.2673 | 1E+08    |
| RNF123     | -0.00017  | 0.000169 | 3.7844  | -0.00025  | 0.9998  | 0.99988 | -6.2673 | 63891    |
| LMBRD1     | 0.000227  | 0.000227 | 6.0335  | 0.000232  | 0.99982 | 0.99988 | -6.2673 | 55788    |
| SUSD4      | -1.22E-05 | 1.22E-05 | 0.7633  | -6.99E-05 | 0.99995 | 0.99995 | -6.2673 | 55061    |

LogFC, logarithm of the fold change. abslogfc, absolute value of logFC. AveExpr, average expression. adj.P.Val, adjusted p-value.
